# Supplementary material
Source: PubMed Central journal article supplement (PMC3945317)
Supplement: supp_M113.517904_jbc.M113.517904-1.pdf [file supp_M113.517904_jbc.M113.517904-1.pdf]

Coagulation Factor XIIIa Substrates in Human Plasma. Identification and Incorporation Into the Clot

**Camilla Lund Nikolajsen, Thomas F. Dyrlund, Ebbe Toftgaard Poulsen, Jan J. Enghild and Carsten Scavenius**

## **Supplemental Material**

**Supplemental table S1:** Identified FXIIIa substrates at three different time points. Sheet 1 (Summary): List of proteins with indication of reactive residues and summed spectral counts. Sheet 2-4 (30 min, 60 min and 180 min): Detailed data set of the mass spectrometry data for each of the three incubation periods. Each sheet contains data for three technical replicates. Sheet 5 (180 min endogenous FXIII): Detailed data set for identified substrates using the endogenous FXIII. Sheet 6 (GO annotation): List of all proteins identified with GO annotations provided by swiss-prot. Sheet 7 (Consensus): Frequency information of the residues surrounding the reactive Gln residues.

**Supplemental table S2:** Complete list of all proteins identified in the insoluble plasma clot.

**Supplemental material S3-S11:** Assigned MS/MS spectra for all BPA modified peptides used for protein identification. All spectra are sorted alphabetically by protein name and query number can be found in supplementary material 1. Bookmarks based on protein names are provided for easy navigation through the spectra
