# Supplementary material
Source: PubMed Central journal article supplement (PMC3945317)
Supplement: supp_M113.517904_jbc.M113.517904-4.pdf [file supp_M113.517904_jbc.M113.517904-4.pdf]

# MASCOT Search Results

## Peptide View

MS/MS Fragmentation of **SYELPDGQVITIGNER**

Found in **ACTA\_HUMAN**, Actin, aortic smooth muscle OS=Homo sapiens GN=ACTA2 PE=1 SV=1

Match to Query 59545: 2101.062342 from(701.361390,3+) rtinseconds(2607) index(66818)

Title: Locus:1.1.1.2905.8 File:"2013-07-02 CLN FXIII 30 min 1st F 4.wiff"

Data file C:\Program Files (x86)\Matrix Science\Mascot Daemon\mgf1 FXIII 30 min 1st\mascot\_daemon\_merge.mgf

Click mouse within plot area to zoom in by factor of two about that point

Or, Plot from  to  Da

Label all possible matches  Label matches used for scoring

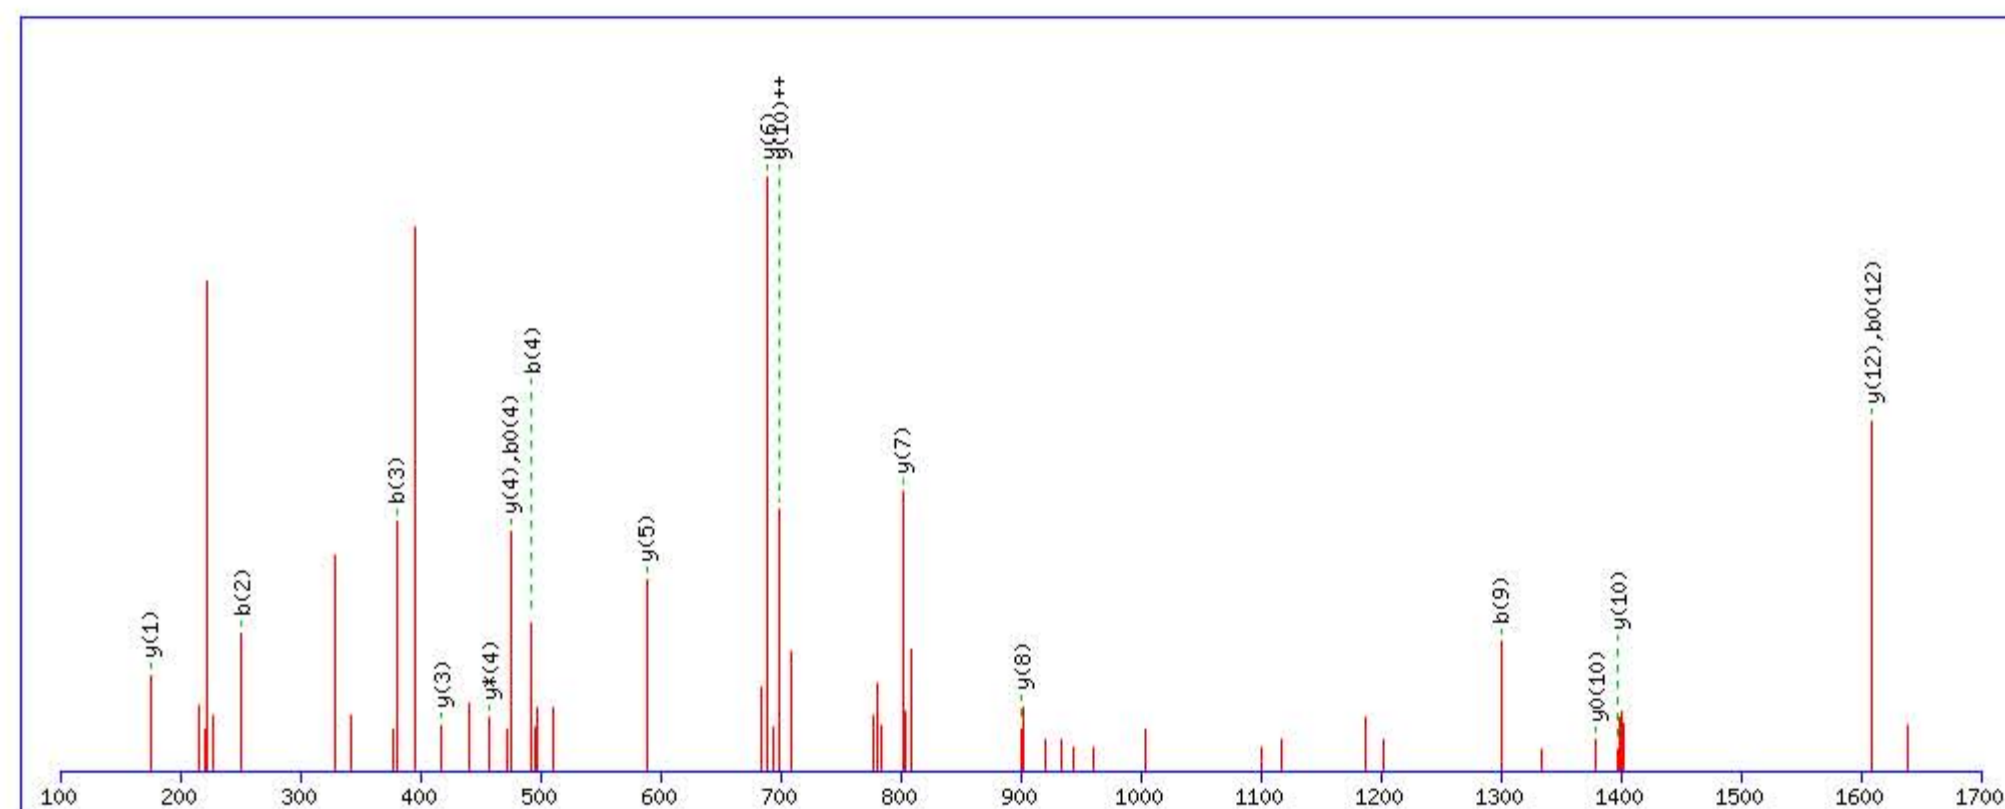

Monoisotopic mass of neutral peptide Mr(calc): 2101.051376

Fixed modifications: Carbamidomethyl (C) (apply to specified residues or termini only)

Variable modifications:

Q8 : Biotin:Thermo-21345 (Q)

Ions Score: 31 Expect: 0.0023

Matches : 18/164 fragment ions using 47 most intense peaks [\(help\)](#)

| #  | b                  | b <sup>++</sup> | b <sup>*</sup> | b <sup>*++</sup> | b <sup>0</sup>     | b <sup>0++</sup> | Seq. | y                  | y <sup>++</sup>   | y <sup>*</sup>    | y <sup>*++</sup> | y <sup>0</sup>     | y <sup>0++</sup> | #  |
|----|--------------------|-----------------|----------------|------------------|--------------------|------------------|------|--------------------|-------------------|-------------------|------------------|--------------------|------------------|----|
| 1  | 88.039304          | 44.523290       |                |                  | 70.028739          | 35.518008        | S    |                    |                   |                   |                  |                    |                  | 16 |
| 2  | <b>251.102633</b>  | 126.054954      |                |                  | 233.092068         | 117.049672       | Y    | 2015.026640        | 1008.016958       | 1998.000091       | 999.503683       | 1997.016075        | 999.011675       | 15 |
| 3  | <b>380.145226</b>  | 190.576251      |                |                  | 362.134661         | 181.570969       | E    | 1851.963311        | 926.485294        | 1834.936762       | 917.972019       | 1833.952746        | 917.480011       | 14 |
| 4  | <b>493.229290</b>  | 247.118283      |                |                  | <b>475.218725</b>  | 238.113001       | L    | 1722.920718        | 861.963997        | 1705.894169       | 853.450722       | 1704.910153        | 852.958714       | 13 |
| 5  | 590.282054         | 295.644665      |                |                  | 572.271489         | 286.639383       | P    | <b>1609.836654</b> | 805.421965        | 1592.810105       | 796.908691       | 1591.826089        | 796.416682       | 12 |
| 6  | 705.308997         | 353.158137      |                |                  | 687.298432         | 344.152854       | D    | 1512.783890        | 756.895583        | 1495.757341       | 748.382309       | 1494.773325        | 747.890300       | 11 |
| 7  | 762.330461         | 381.668869      |                |                  | 744.319896         | 372.663586       | G    | <b>1397.756947</b> | <b>699.382111</b> | 1380.730398       | 690.868837       | <b>1379.746382</b> | 690.376829       | 10 |
| 8  | 1201.555787        | 601.281532      | 1184.529238    | 592.768257       | 1183.545222        | 592.276249       | Q    | 1340.735483        | 670.871379        | 1323.708934       | 662.358105       | 1322.724918        | 661.866097       | 9  |
| 9  | <b>1300.624201</b> | 650.815739      | 1283.597652    | 642.302464       | 1282.613636        | 641.810456       | V    | <b>901.510157</b>  | 451.258716        | 884.483608        | 442.745442       | 883.499592         | 442.253434       | 8  |
| 10 | 1413.708265        | 707.357771      | 1396.681716    | 698.844496       | 1395.697700        | 698.352488       | I    | <b>802.441743</b>  | 401.724509        | 785.415194        | 393.211235       | 784.431178         | 392.719227       | 7  |
| 11 | 1514.755944        | 757.881610      | 1497.729395    | 749.368336       | 1496.745379        | 748.876328       | T    | <b>689.357679</b>  | 345.182478        | 672.331130        | 336.669203       | 671.347114         | 336.177195       | 6  |
| 12 | 1627.840008        | 814.423642      | 1610.813459    | 805.910368       | <b>1609.829443</b> | 805.418359       | I    | <b>588.310000</b>  | 294.658638        | 571.283451        | 286.145363       | 570.299435         | 285.653355       | 5  |
| 13 | 1684.861472        | 842.934374      | 1667.834923    | 834.421099       | 1666.850907        | 833.929091       | G    | <b>475.225936</b>  | 238.116606        | <b>458.199387</b> | 229.603331       | 457.215371         | 229.111323       | 4  |
| 14 | 1798.904399        | 899.955837      | 1781.877850    | 891.442563       | 1780.893834        | 890.950555       | N    | <b>418.204472</b>  | 209.605874        | 401.177923        | 201.092600       | 400.193907         | 200.600592       | 3  |
| 15 | 1927.946992        | 964.477134      | 1910.920443    | 955.963860       | 1909.936427        | 955.471851       | E    | 304.161545         | 152.584411        | 287.134996        | 144.071136       | 286.150980         | 143.579128       | 2  |
| 16 |                    |                 |                |                  |                    |                  | R    | <b>175.118952</b>  | 88.063114         | 158.092403        | 79.549839        |                    |                  | 1  |

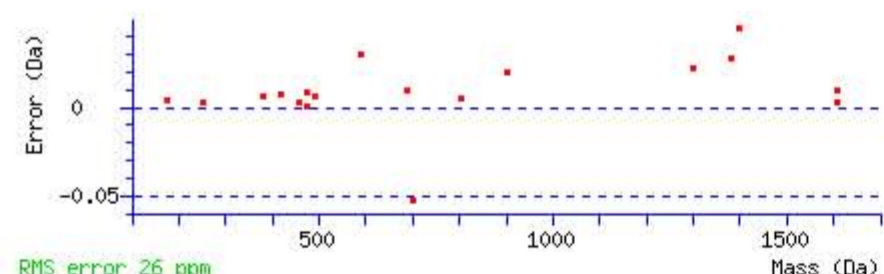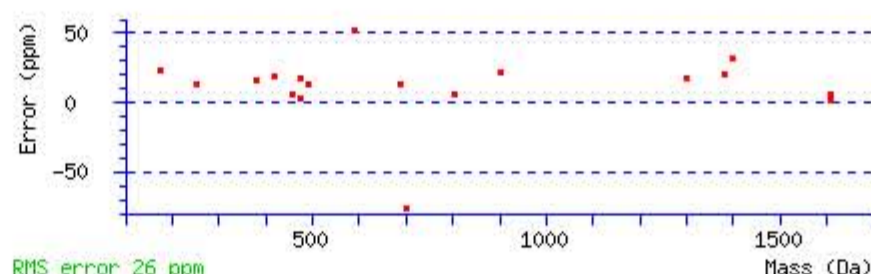

NCBI BLAST search of [SYELPDGQVITIGNER](#)

(Parameters: blastp, nr protein database, expect=20000, no filter, PAM30)

Other BLAST [web gateways](#)

## All matches to this query

| Score | Mr(calc):   | Delta     | Sequence                            |
|-------|-------------|-----------|-------------------------------------|
| 31.3  | 2101.051376 | 0.010966  | <a href="#">SYELPDGQVITIGNER</a>    |
| 3.1   | 2101.090240 | -0.027898 | <a href="#">SDDILEEGEKNLGNKIVTK</a> |

Mascot: <http://www.matrixscience.com/>



# MASCOT Search Results

## Peptide View

MS/MS Fragmentation of **VNCLQTR**

Found in **AFAM\_HUMAN**, Afamin OS=Homo sapiens GN=AFM PE=1 SV=1

Match to Query 31707: 1200.616748 from(601.315650,2+) rtinseconds(1456) index(3705)

Title: Locus:1.1.1.2227.12 File:"2013-07-02 CLN FXIII 30 min 1st F 1.wiff"

Data file C:\Program Files (x86)\Matrix Science\Mascot Daemon\mgf\1 FXIII 30 min 1st\mascot\_daemon\_merge.mgf

Click mouse within plot area to zoom in by factor of two about that point

Or, Plot from  to  Da

Label all possible matches  Label matches used for scoring

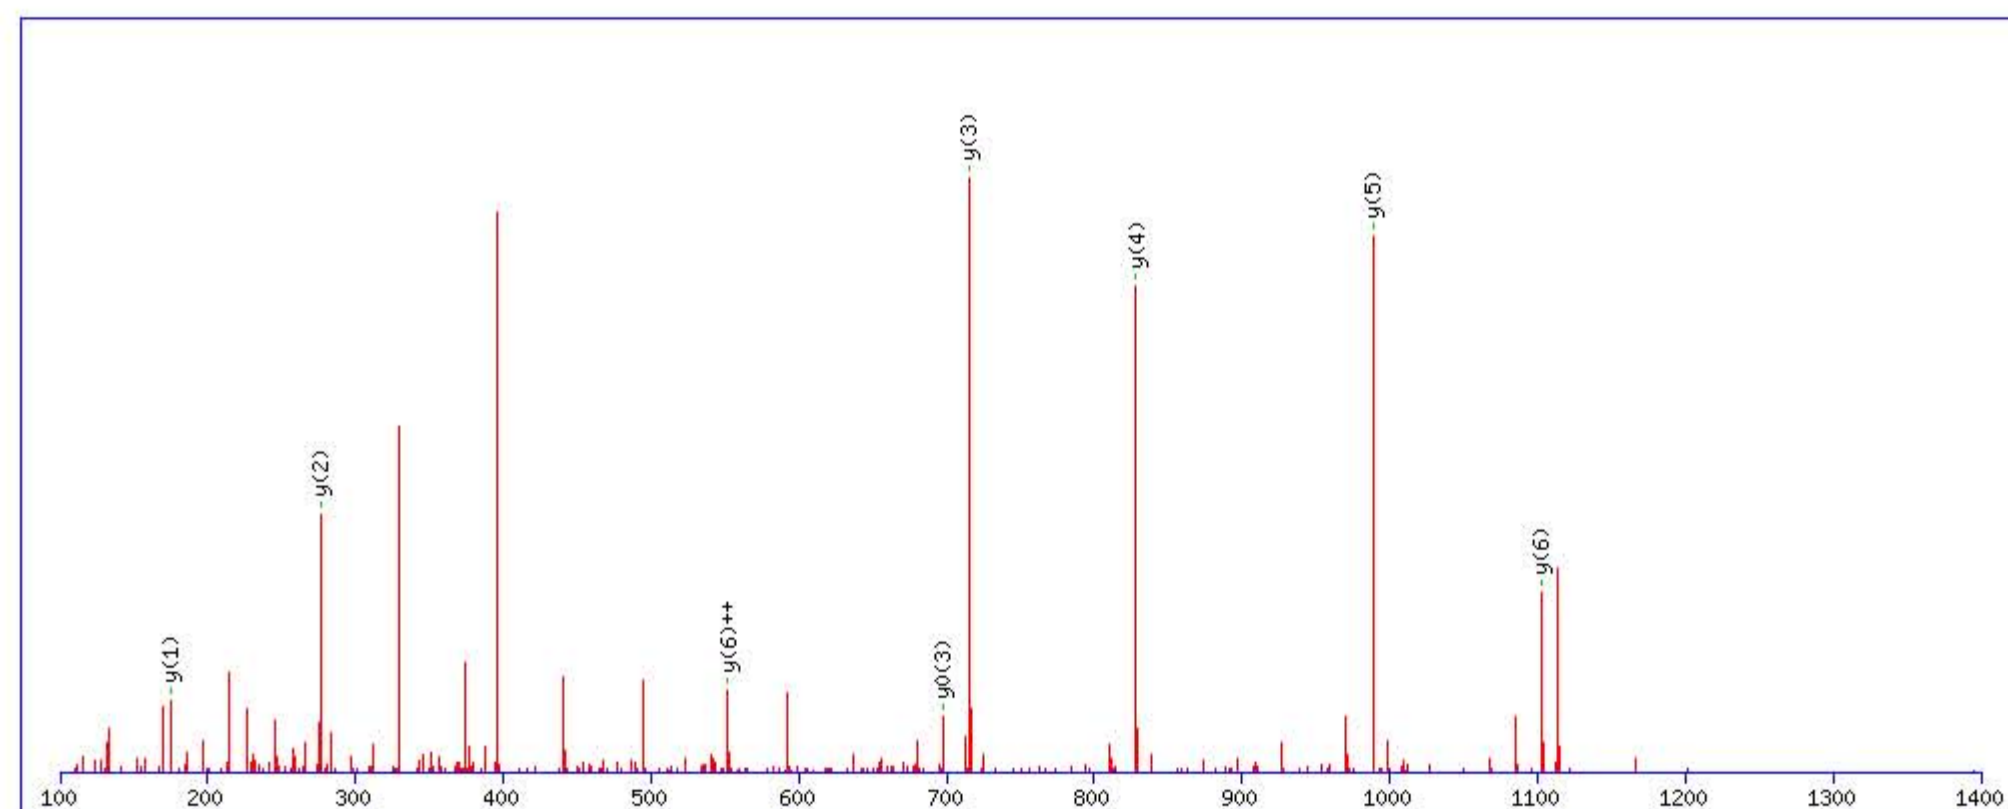

Monoisotopic mass of neutral peptide Mr(calc): 1200.610733

Fixed modifications: Carbamidomethyl (C) (apply to specified residues or termini only)

Variable modifications:

Q5 : Biotin:Thermo-21345 (Q)

Ions Score: 48 Expect: 0.00013

Matches : 8/58 fragment ions using 11 most intense peaks ([help](#))

| # | b           | b <sup>++</sup> | b <sup>*</sup> | b <sup>*++</sup> | b <sup>0</sup> | b <sup>0++</sup> | Seq. | y                  | y <sup>++</sup>   | y <sup>*</sup> | y <sup>*++</sup> | y <sup>0</sup>    | y <sup>0++</sup> | # |
|---|-------------|-----------------|----------------|------------------|----------------|------------------|------|--------------------|-------------------|----------------|------------------|-------------------|------------------|---|
| 1 | 100.075690  | 50.541483       |                |                  |                |                  | V    |                    |                   |                |                  |                   |                  | 7 |
| 2 | 214.118617  | 107.562947      | 197.092068     | 99.049672        |                |                  | N    | <b>1102.549597</b> | <b>551.778437</b> | 1085.523048    | 543.265162       | 1084.539032       | 542.773154       | 6 |
| 3 | 374.149266  | 187.578271      | 357.122717     | 179.064997       |                |                  | C    | <b>988.506670</b>  | 494.756973        | 971.480121     | 486.243698       | 970.496105        | 485.751691       | 5 |
| 4 | 487.233330  | 244.120303      | 470.206781     | 235.607029       |                |                  | L    | <b>828.476021</b>  | 414.741649        | 811.449472     | 406.228374       | 810.465456        | 405.736366       | 4 |
| 5 | 926.458656  | 463.732966      | 909.432107     | 455.219692       |                |                  | Q    | <b>715.391957</b>  | 358.199617        | 698.365408     | 349.686342       | <b>697.381392</b> | 349.194334       | 3 |
| 6 | 1027.506335 | 514.256806      | 1010.479786    | 505.743531       | 1009.495770    | 505.251523       | T    | <b>276.166631</b>  | 138.586953        | 259.140082     | 130.073679       | 258.156066        | 129.581671       | 2 |
| 7 |             |                 |                |                  |                |                  | R    | <b>175.118952</b>  | 88.063114         | 158.092403     | 79.549839        |                   |                  | 1 |

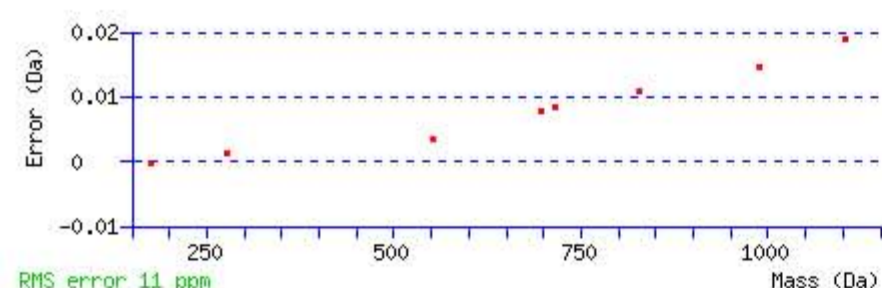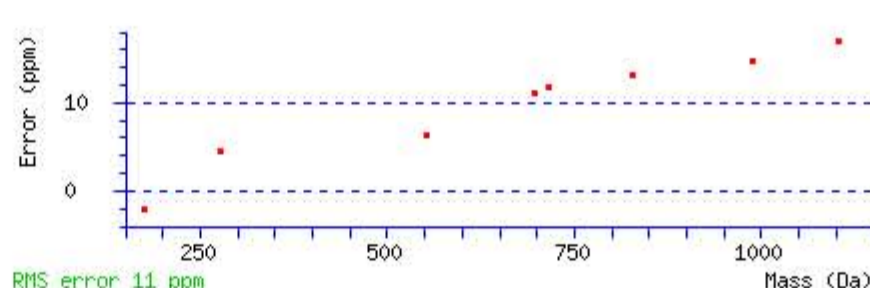

NCBI BLAST search of **VNCLQTR**

(Parameters: blastp, nr protein database, expect=20000, no filter, PAM30)

Other BLAST [web gateways](#)

## All matches to this query

| Score | Mr(calc):   | Delta     | Sequence                      |
|-------|-------------|-----------|-------------------------------|
| 48.0  | 1200.610733 | 0.006015  | <a href="#">VNCLQTR</a>       |
| 6.2   | 1200.621948 | -0.005200 | <a href="#">VNMLKHCKR</a>     |
| 5.9   | 1200.629822 | -0.013074 | <a href="#">VHHHGSKMLR</a>    |
| 4.3   | 1200.628479 | -0.011731 | <a href="#">MVAALLGGGGEAR</a> |
| 3.7   | 1200.603333 | 0.013415  | <a href="#">GRIAEPSVCGR</a>   |
| 2.6   | 1200.632324 | -0.015576 | <a href="#">SRERSGGPVTR</a>   |
| 1.3   | 1200.611191 | 0.005557  | <a href="#">HDSLAKHTR</a>     |



# MASCOT Search Results

## Peptide View

MS/MS Fragmentation of **GQCIINSNKDDRPK**

Found in **AFAM\_HUMAN**, Afamin OS=Homo sapiens GN=AFM PE=1 SV=1

Match to Query 55559: 1954.976096 from(489.751300,4+) rtinseconds(1326) index(2686)

Title: Locus:1.1.1.2182.14 File:"2013-07-02 CLN FXIII 30 min 1st F 1.wiff"

Data file C:\Program Files (x86)\Matrix Science\Mascot Daemon\mgf1 FXIII 30 min 1st\mascot\_daemon\_merge.mgf

Click mouse within plot area to zoom in by factor of two about that point

Or, Plot from  to  Da

Label all possible matches  Label matches used for scoring

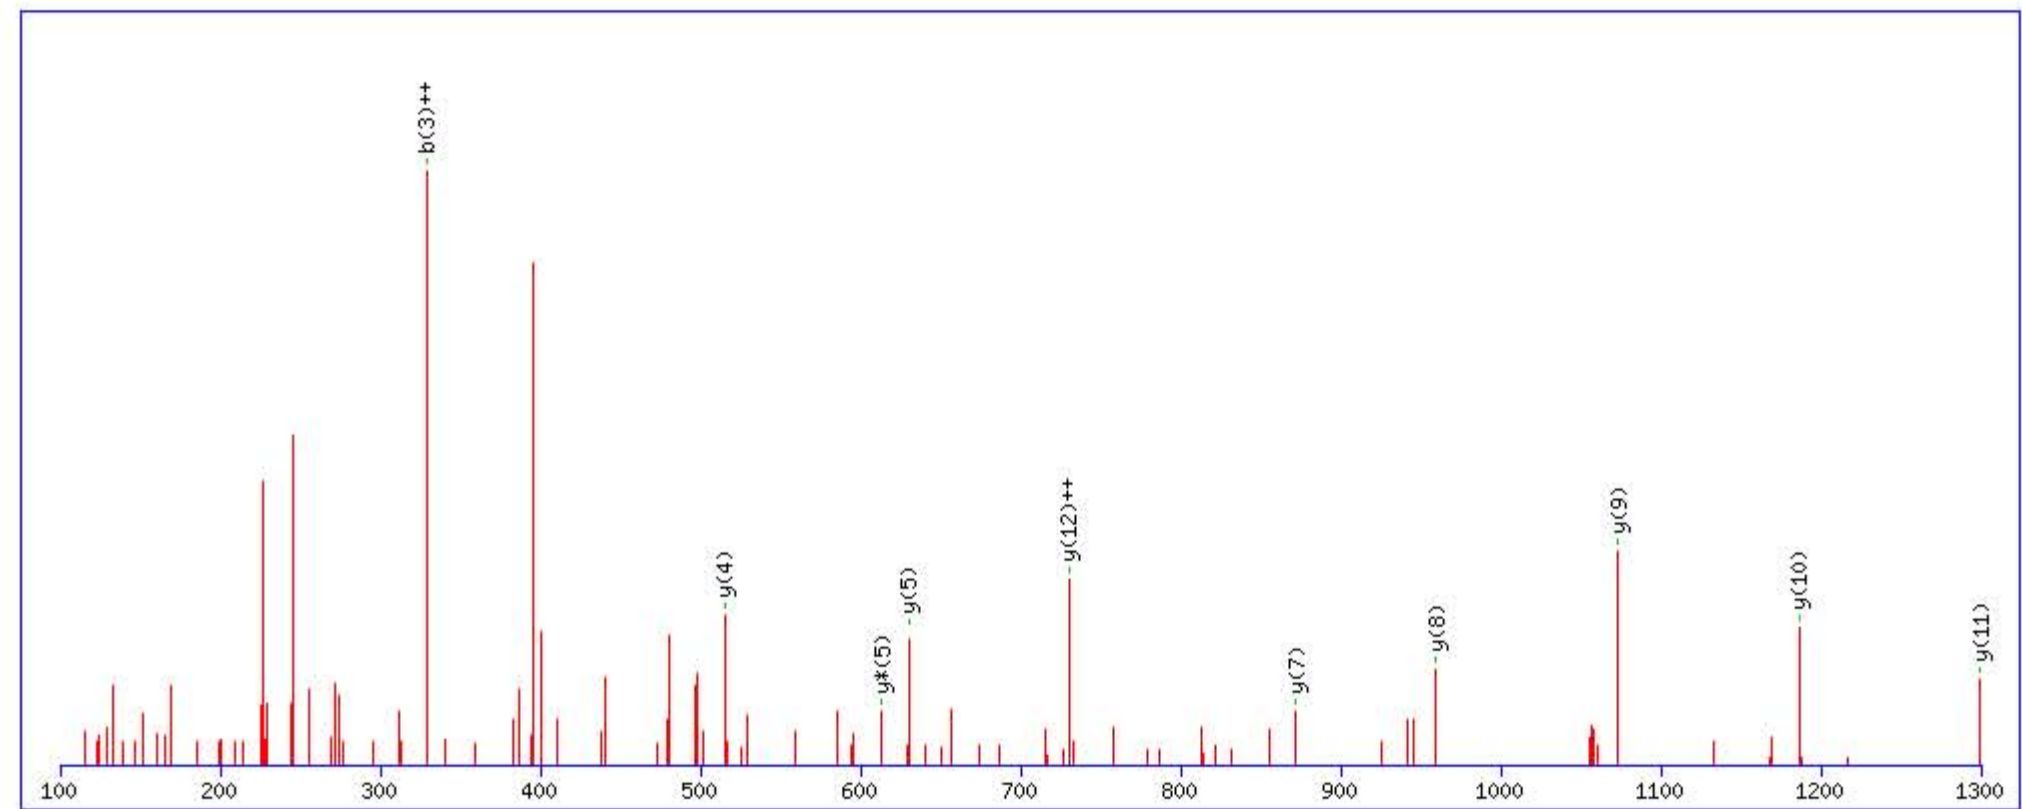

Monoisotopic mass of neutral peptide Mr(calc): 1954.971680

Fixed modifications: Carbamidomethyl (C) (apply to specified residues or termini only)

Variable modifications:

Q2 : Biotin:Thermo-21345 (Q)

Ions Score: 54 Expect: 8.7e-006

Matches : 10/136 fragment ions using 12 most intense peaks [\(help\)](#)

| #  | b           | b <sup>++</sup>   | b <sup>+</sup> | b <sup>+++</sup> | b <sup>0</sup> | b <sup>0++</sup> | Seq.     | y                  | y <sup>++</sup>   | y <sup>+</sup>    | y <sup>+++</sup> | y <sup>0</sup> | y <sup>0++</sup> | #  |
|----|-------------|-------------------|----------------|------------------|----------------|------------------|----------|--------------------|-------------------|-------------------|------------------|----------------|------------------|----|
| 1  | 58.028740   | 29.518008         |                |                  |                |                  | <b>G</b> |                    |                   |                   |                  |                |                  | 14 |
| 2  | 497.254066  | 249.130671        | 480.227517     | 240.617397       |                |                  | <b>Q</b> | 1898.957513        | 949.982395        | 1881.930964       | 941.469120       | 1880.946948    | 940.977112       | 13 |
| 3  | 657.284715  | <b>329.145996</b> | 640.258166     | 320.632721       |                |                  | <b>C</b> | 1459.732187        | <b>730.369732</b> | 1442.705638       | 721.856457       | 1441.721622    | 721.364449       | 12 |
| 4  | 770.368779  | 385.688028        | 753.342230     | 377.174753       |                |                  | <b>I</b> | <b>1299.701538</b> | 650.354407        | 1282.674989       | 641.841133       | 1281.690973    | 641.349125       | 11 |
| 5  | 883.452843  | 442.230060        | 866.426294     | 433.716785       |                |                  | <b>I</b> | <b>1186.617474</b> | 593.812375        | 1169.590925       | 585.299101       | 1168.606909    | 584.807093       | 10 |
| 6  | 997.495770  | 499.251523        | 980.469221     | 490.738249       |                |                  | <b>N</b> | <b>1073.533410</b> | 537.270343        | 1056.506861       | 528.757069       | 1055.522845    | 528.265061       | 9  |
| 7  | 1084.527798 | 542.767537        | 1067.501249    | 534.254263       | 1066.517233    | 533.762255       | <b>S</b> | <b>959.490483</b>  | 480.248880        | 942.463934        | 471.735605       | 941.479918     | 471.243597       | 8  |
| 8  | 1198.570725 | 599.789001        | 1181.544176    | 591.275726       | 1180.560160    | 590.783718       | <b>N</b> | <b>872.458455</b>  | 436.732866        | 855.431906        | 428.219591       | 854.447890     | 427.727583       | 7  |
| 9  | 1326.665688 | 663.836482        | 1309.639139    | 655.323208       | 1308.655123    | 654.831200       | <b>K</b> | 758.415528         | 379.711402        | 741.388979        | 371.198128       | 740.404963     | 370.706120       | 6  |
| 10 | 1441.692631 | 721.349954        | 1424.666082    | 712.836679       | 1423.682066    | 712.344671       | <b>D</b> | <b>630.320565</b>  | 315.663921        | <b>613.294016</b> | 307.150646       | 612.310000     | 306.658638       | 5  |
| 11 | 1556.719574 | 778.863425        | 1539.693025    | 770.350151       | 1538.709009    | 769.858143       | <b>D</b> | <b>515.293622</b>  | 258.150449        | 498.267073        | 249.637175       | 497.283057     | 249.145167       | 4  |
| 12 | 1712.820685 | 856.913981        | 1695.794136    | 848.400706       | 1694.810120    | 847.908698       | <b>R</b> | 400.266679         | 200.636977        | 383.240130        | 192.123703       |                |                  | 3  |
| 13 | 1809.873449 | 905.440363        | 1792.846900    | 896.927088       | 1791.862884    | 896.435080       | <b>P</b> | 244.165568         | 122.586422        | 227.139019        | 114.073148       |                |                  | 2  |
| 14 |             |                   |                |                  |                |                  | <b>K</b> | 147.112804         | 74.060040         | 130.086255        | 65.546765        |                |                  | 1  |

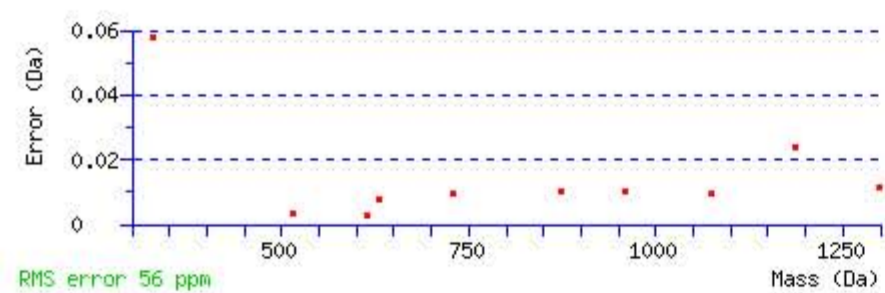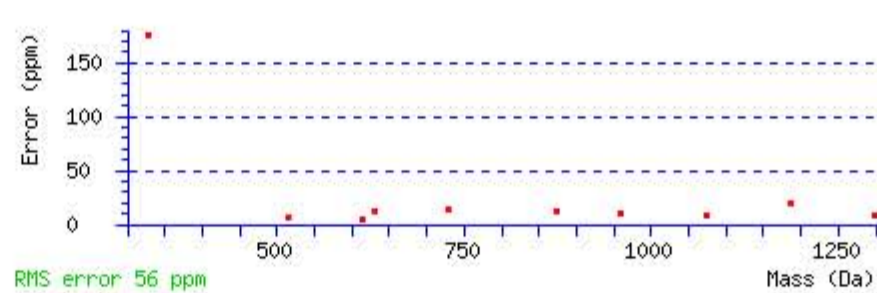

NCBI BLAST search of **GQCIINSNKDDRPK**

(Parameters: blastp, nr protein database, expect=20000, no filter, PAM30)

Other BLAST [web gateways](#)

All matches to this query

| Score | Mr(calc):   | Delta     | Sequence                       |
|-------|-------------|-----------|--------------------------------|
| 54.4  | 1954.971680 | 0.004416  | <a href="#">GQCIINSNKDDRPK</a> |
| 0.4   | 1955.004227 | -0.028131 | <a href="#">TVQEQMSALQAK</a>   |

Mascot: <http://www.matrixscience.com/>



# MASCOT Search Results

## Peptide View

MS/MS Fragmentation of **EQQDSPGNK**

Found in **A2AP\_HUMAN**, Alpha-2-antiplasmin OS=Homo sapiens GN=SERPINF2 PE=1 SV=3

Match to Query 35523: 1312.617668 from(657.316110,2+) rtinseconds(1132) index(1231)

Title: Locus:1.1.1.2114.25 File:"2013-07-02 CLN FXIII 30 min 1st F 1.wiff"

Data file C:\Program Files (x86)\Matrix Science\Mascot Daemon\mgf1 FXIII 30 min 1st\mascot\_daemon\_merge.mgf

Click mouse within plot area to zoom in by factor of two about that point

Or, Plot from  to  Da

Label all possible matches  Label matches used for scoring

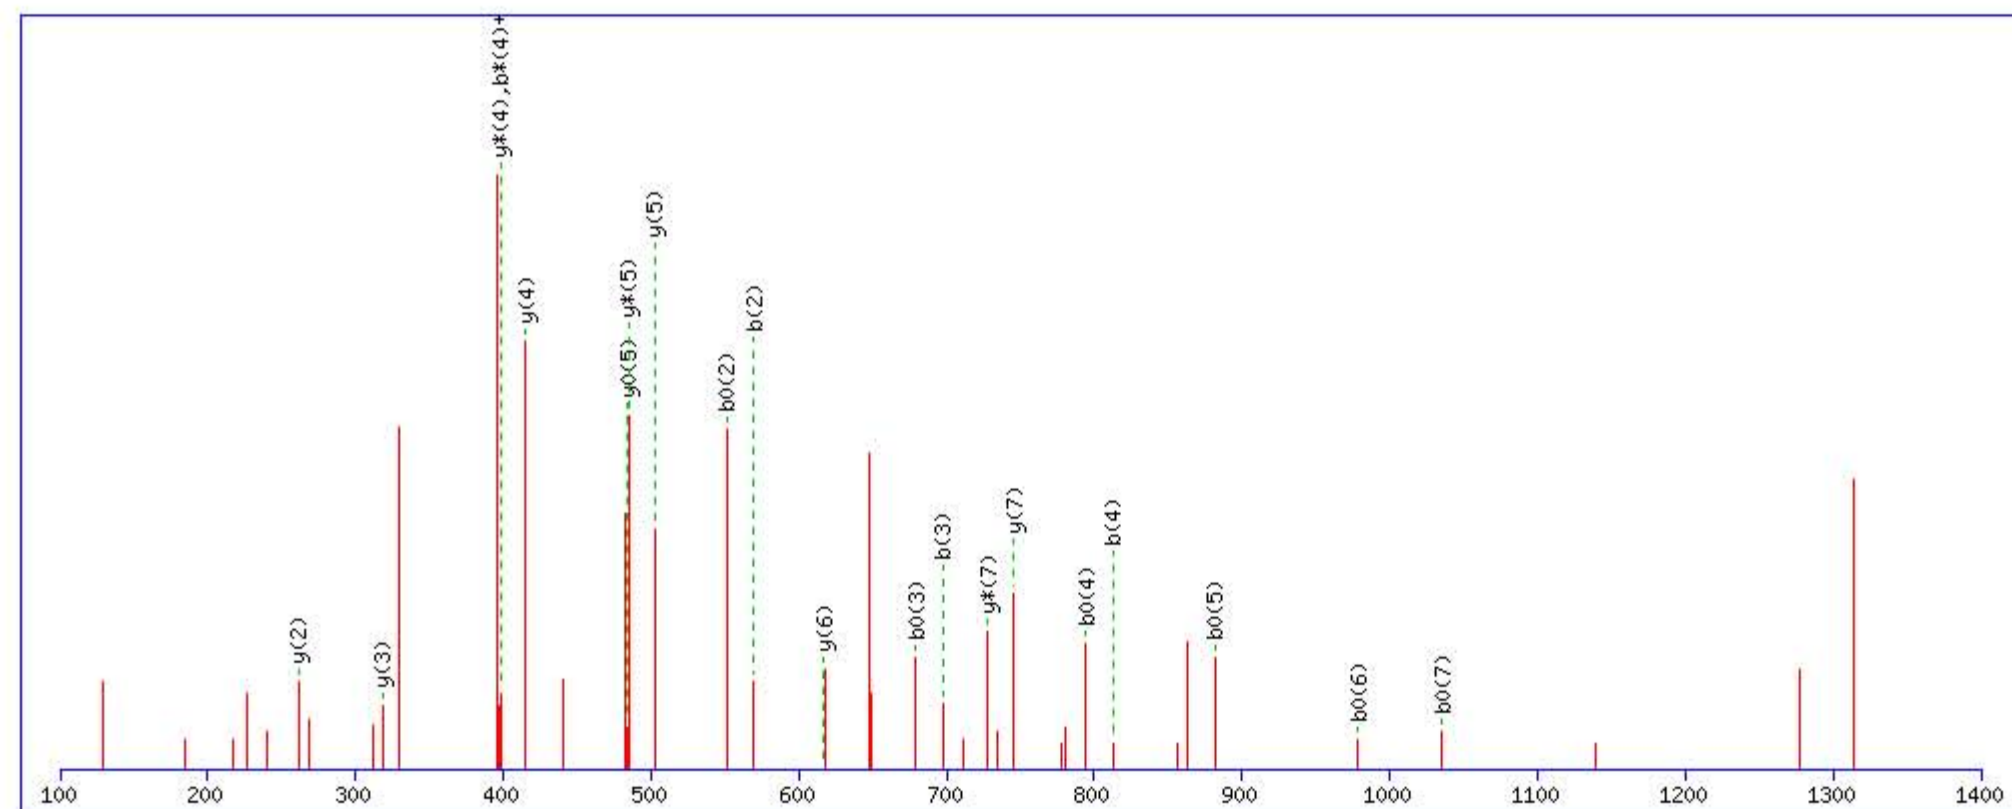

Monoisotopic mass of neutral peptide Mr(calc): 1312.608139

Fixed modifications: Carbamidomethyl (C) (apply to specified residues or termini only)

Variable modifications:

Q2 : Biotin:Thermo-21345 (Q)

Ions Score: 31 Expect: 0.0026

Matches : 20/86 fragment ions using 40 most intense peaks [\(help\)](#)

| # | b                 | b <sup>++</sup> | b <sup>*</sup> | b <sup>*++</sup>  | b <sup>0</sup>     | b <sup>0++</sup> | Seq. | y                 | y <sup>++</sup> | y <sup>*</sup>    | y <sup>*++</sup> | y <sup>0</sup>    | y <sup>0++</sup> | # |
|---|-------------------|-----------------|----------------|-------------------|--------------------|------------------|------|-------------------|-----------------|-------------------|------------------|-------------------|------------------|---|
| 1 | 130.049869        | 65.528572       |                |                   | 112.039304         | 56.523290        | E    |                   |                 |                   |                  |                   |                  | 9 |
| 2 | <b>569.275195</b> | 285.141236      | 552.248646     | 276.627961        | <b>551.264630</b>  | 276.135953       | Q    | 1184.572834       | 592.790055      | 1167.546285       | 584.276780       | 1166.562269       | 583.784772       | 8 |
| 3 | <b>697.333773</b> | 349.170525      | 680.307224     | 340.657250        | <b>679.323208</b>  | 340.165242       | Q    | <b>745.347508</b> | 373.177392      | <b>728.320959</b> | 364.664117       | 727.336943        | 364.172109       | 7 |
| 4 | <b>812.360716</b> | 406.683996      | 795.334167     | <b>398.170722</b> | <b>794.350151</b>  | 397.678714       | D    | <b>617.288930</b> | 309.148103      | 600.262381        | 300.634828       | 599.278365        | 300.142820       | 6 |
| 5 | 899.392744        | 450.200010      | 882.366195     | 441.686736        | <b>881.382179</b>  | 441.194728       | S    | <b>502.261987</b> | 251.634631      | <b>485.235438</b> | 243.121357       | <b>484.251422</b> | 242.629349       | 5 |
| 6 | 996.445508        | 498.726392      | 979.418959     | 490.213118        | <b>978.434943</b>  | 489.721110       | P    | <b>415.229959</b> | 208.118617      | <b>398.203410</b> | 199.605343       |                   |                  | 4 |
| 7 | 1053.466972       | 527.237124      | 1036.440423    | 518.723850        | <b>1035.456407</b> | 518.231841       | G    | <b>318.177195</b> | 159.592235      | 301.150646        | 151.078961       |                   |                  | 3 |
| 8 | 1167.509899       | 584.258587      | 1150.483350    | 575.745313        | 1149.499334        | 575.253305       | N    | <b>261.155731</b> | 131.081503      | 244.129182        | 122.568229       |                   |                  | 2 |
| 9 |                   |                 |                |                   |                    |                  | K    | 147.112804        | 74.060040       | 130.086255        | 65.546765        |                   |                  | 1 |

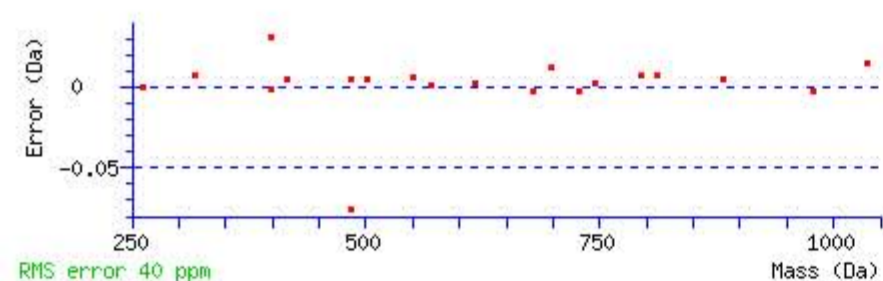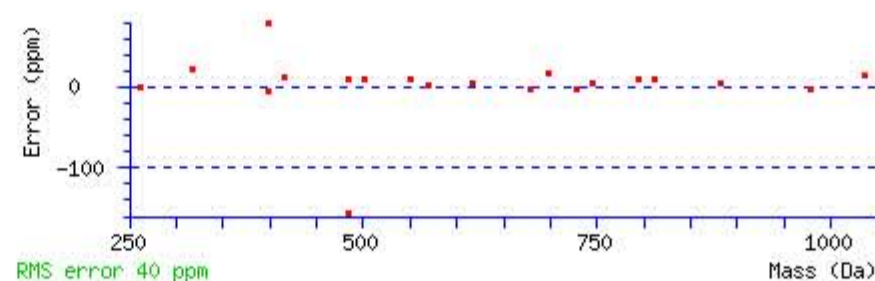

NCBI BLAST search of [EQQDSPGNK](#)

(Parameters: blastp, nr protein database, expect=20000, no filter, PAM30)

Other BLAST [web gateways](#)

All matches to this query

| Score | Mr(calc):   | Delta    | Sequence                    |
|-------|-------------|----------|-----------------------------|
| 30.8  | 1312.608139 | 0.009529 | <a href="#">EQQDSPGNK</a>   |
| 19.1  | 1312.608139 | 0.009529 | <a href="#">EQQDSPGNK</a>   |
| 3.2   | 1312.608154 | 0.009514 | <a href="#">KIGSFDETCTR</a> |

Mascot: <http://www.matrixscience.com/>



# MASCOT Search Results

## Peptide View

MS/MS Fragmentation of **LGNQEPGGQTALK**

Found in **A2AP\_HUMAN**, Alpha-2-antiplasmin OS=Homo sapiens GN=SERPINF2 PE=1 SV=3

Match to Query 47030: 1622.858448 from(812.436500,2+) rtinseconds(1565) index(4469)

Title: Locus:1.1.1.2265.13 File:"2013-07-02 CLN FXIII 30 min 1st F 1.wiff"

Data file C:\Program Files (x86)\Matrix Science\Mascot Daemon\mgf\1 FXIII 30 min 1st\mascot\_daemon\_merge.mgf

Click mouse within plot area to zoom in by factor of two about that point

Or, Plot from  to  Da

Label all possible matches  Label matches used for scoring

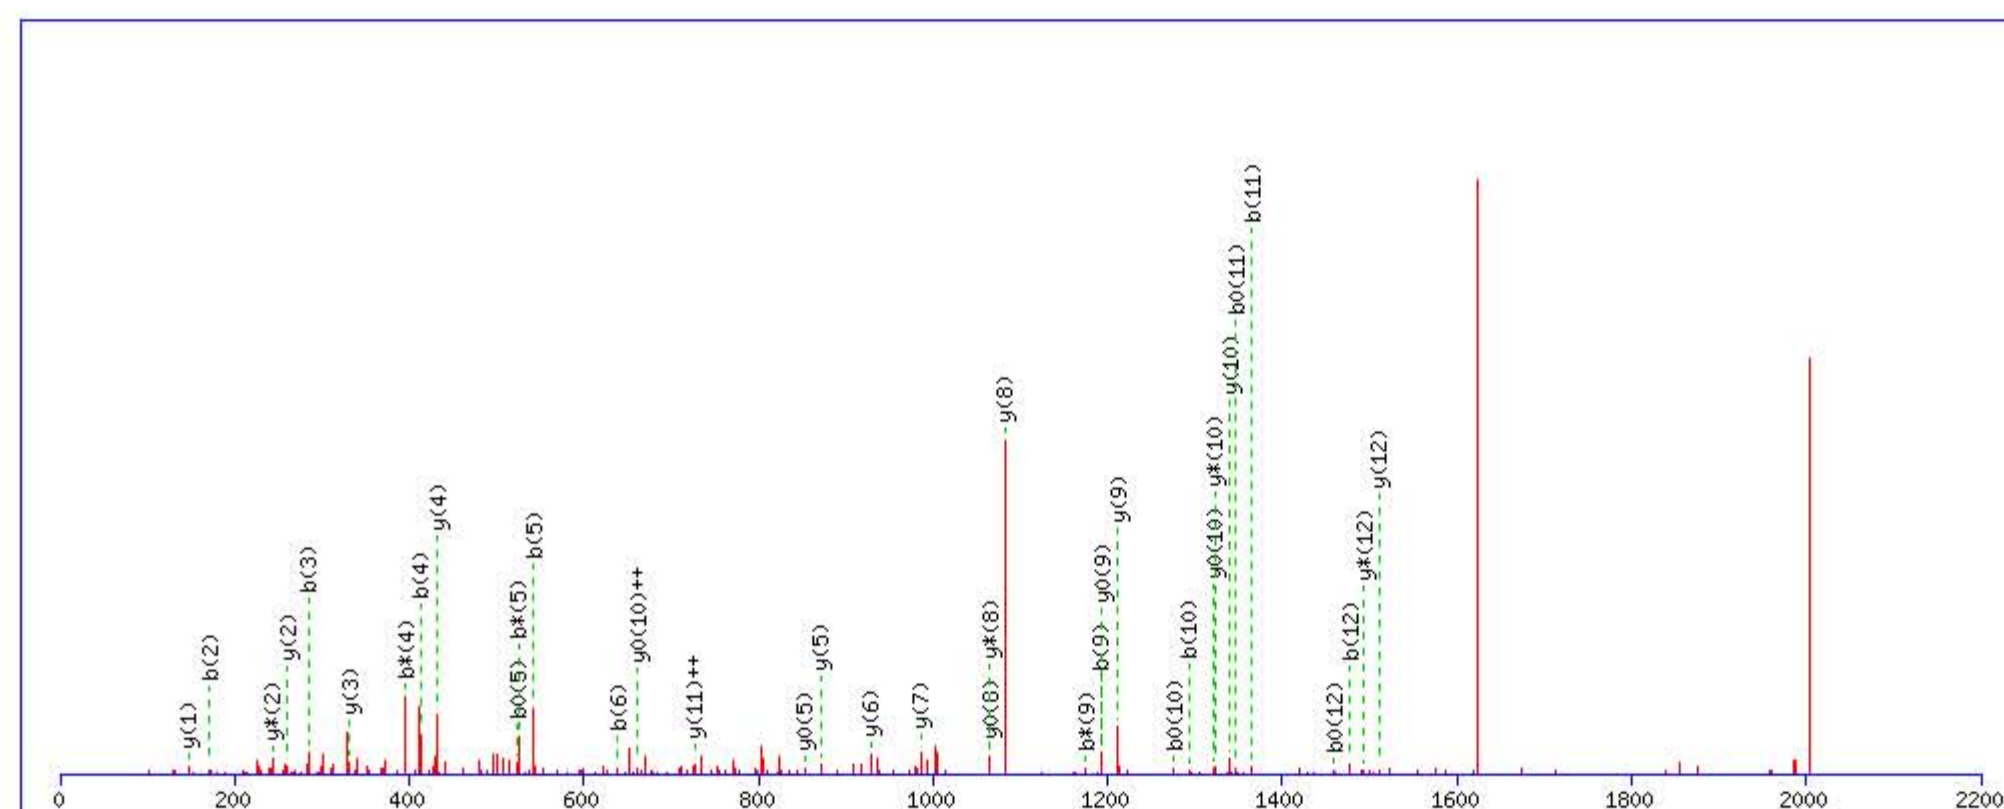

Monoisotopic mass of neutral peptide Mr(calc): 1622.845016

Fixed modifications: Carbamidomethyl (C) (apply to specified residues or termini only)

Variable modifications:

Q9 : Biotin:Thermo-21345 (Q)

Ions Score: 45 Expect: 0.00049

Matches : 37/126 fragment ions using 106 most intense peaks [\(help\)](#)

| #  | b                  | b <sup>++</sup> | b <sup>*</sup>     | b <sup>+++</sup> | b <sup>0</sup>     | b <sup>0++</sup> | Seq. | y                  | y <sup>++</sup>   | y <sup>*</sup>     | y <sup>+++</sup> | y <sup>0</sup>     | y <sup>0++</sup>  | #  |
|----|--------------------|-----------------|--------------------|------------------|--------------------|------------------|------|--------------------|-------------------|--------------------|------------------|--------------------|-------------------|----|
| 1  | 114.091340         | 57.549308       |                    |                  |                    |                  | L    |                    |                   |                    |                  |                    |                   | 13 |
| 2  | <b>171.112804</b>  | 86.060040       |                    |                  |                    |                  | G    | <b>1510.768241</b> | 755.887759        | <b>1493.741692</b> | 747.374484       | 1492.757676        | 746.882476        | 12 |
| 3  | <b>285.155731</b>  | 143.081504      | 268.129182         | 134.568229       |                    |                  | N    | 1453.746777        | <b>727.377027</b> | 1436.720228        | 718.863752       | 1435.736212        | 718.371744        | 11 |
| 4  | <b>413.214309</b>  | 207.110793      | <b>396.187760</b>  | 198.597518       |                    |                  | Q    | <b>1339.703850</b> | 670.355563        | <b>1322.677301</b> | 661.842289       | <b>1321.693285</b> | <b>661.350281</b> | 10 |
| 5  | <b>542.256902</b>  | 271.632089      | <b>525.230353</b>  | 263.118815       | <b>524.246337</b>  | 262.626807       | E    | <b>1211.645272</b> | 606.326274        | 1194.618723        | 597.813000       | <b>1193.634707</b> | 597.320991        | 9  |
| 6  | <b>639.309666</b>  | 320.158471      | 622.283117         | 311.645197       | 621.299101         | 311.153189       | P    | <b>1082.602679</b> | 541.804978        | <b>1065.576130</b> | 533.291703       | <b>1064.592114</b> | 532.799695        | 8  |
| 7  | 696.331130         | 348.669203      | 679.304581         | 340.155929       | 678.320565         | 339.663921       | G    | <b>985.549915</b>  | 493.278596        | 968.523366         | 484.765321       | 967.539350         | 484.273313        | 7  |
| 8  | 753.352594         | 377.179935      | 736.326045         | 368.666661       | 735.342029         | 368.174653       | G    | <b>928.528451</b>  | 464.767864        | 911.501902         | 456.254589       | 910.517886         | 455.762581        | 6  |
| 9  | <b>1192.577920</b> | 596.792598      | <b>1175.551371</b> | 588.279324       | 1174.567355        | 587.787316       | Q    | <b>871.506987</b>  | 436.257132        | 854.480438         | 427.743857       | <b>853.496422</b>  | 427.251849        | 5  |
| 10 | <b>1293.625599</b> | 647.316438      | 1276.599050        | 638.803163       | <b>1275.615034</b> | 638.311155       | T    | <b>432.281661</b>  | 216.644468        | 415.255112         | 208.131194       | 414.271096         | 207.639186        | 4  |
| 11 | <b>1364.662713</b> | 682.834995      | 1347.636164        | 674.321720       | <b>1346.652148</b> | 673.829712       | A    | <b>331.233982</b>  | 166.120629        | 314.207433         | 157.607354       |                    |                   | 3  |
| 12 | <b>1477.746777</b> | 739.377027      | 1460.720228        | 730.863752       | <b>1459.736212</b> | 730.371744       | L    | <b>260.196868</b>  | 130.602072        | <b>243.170319</b>  | 122.088797       |                    |                   | 2  |
| 13 |                    |                 |                    |                  |                    |                  | K    | <b>147.112804</b>  | 74.060040         | 130.086255         | 65.546765        |                    |                   | 1  |

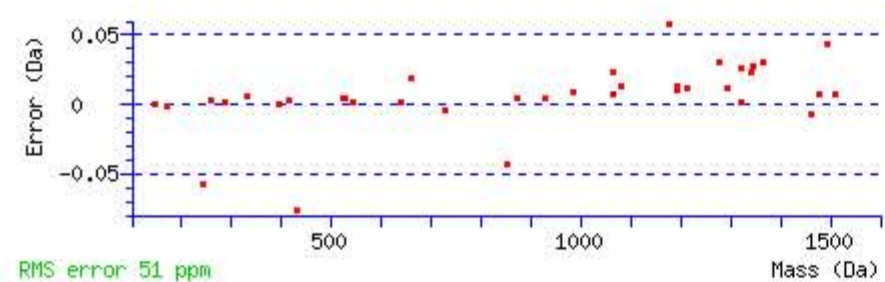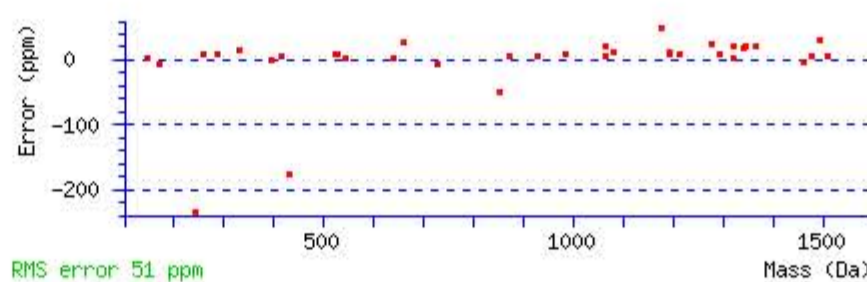

NCBI BLAST search of **LGNQEPGGQTALK**

(Parameters: blastp, nr protein database, expect=20000, no filter, PAM30)

Other BLAST [web gateways](#)

## All matches to this query

| Score | Mr(calc):   | Delta     | Sequence                       |
|-------|-------------|-----------|--------------------------------|
| 44.6  | 1622.845016 | 0.013432  | <a href="#">LGNQEPGGQTALK</a>  |
| 24.3  | 1622.845016 | 0.013432  | <a href="#">LGNQEPGGQTALK</a>  |
| 8.7   | 1622.881409 | -0.022961 | <a href="#">TVDPEQARGVLK</a>   |
| 2.3   | 1622.863632 | -0.005184 | <a href="#">KRMILSTISWMGGK</a> |
| 0.5   | 1622.860260 | -0.001812 | <a href="#">EHSAFQAPAVKK</a>   |
| 0.2   | 1622.878021 | -0.019573 | <a href="#">RLQPPDFIDPLANK</a> |
| 0.1   | 1622.864288 | -0.005840 | <a href="#">FPLPSMYRALVWK</a>  |
| 0.1   | 1622.849045 | 0.009403  | <a href="#">IPMPDFDLHLKGP</a>  |



# MASCOT Search Results

## Peptide View

MS/MS Fragmentation of **ELKEQQDSPGNKDFLQSLK**

Found in **A2AP\_HUMAN**, Alpha-2-antiplasmin OS=Homo sapiens GN=SERPINF2 PE=1 SV=3

Match to Query 68820: 2514.304456 from(629.583390,4+) rtinseconds(1869) index(6425)

Title: Locus:1.1.1.2371.19 File:"2013-07-02 CLN FXIII 30 min 1st F 1.wiff"

Data file C:\Program Files (x86)\Matrix Science\Mascot Daemon\mgf1 FXIII 30 min 1st\mascot\_daemon\_merge.mgf

Click mouse within plot area to zoom in by factor of two about that point

Or, Plot from  to  Da

Label all possible matches  Label matches used for scoring

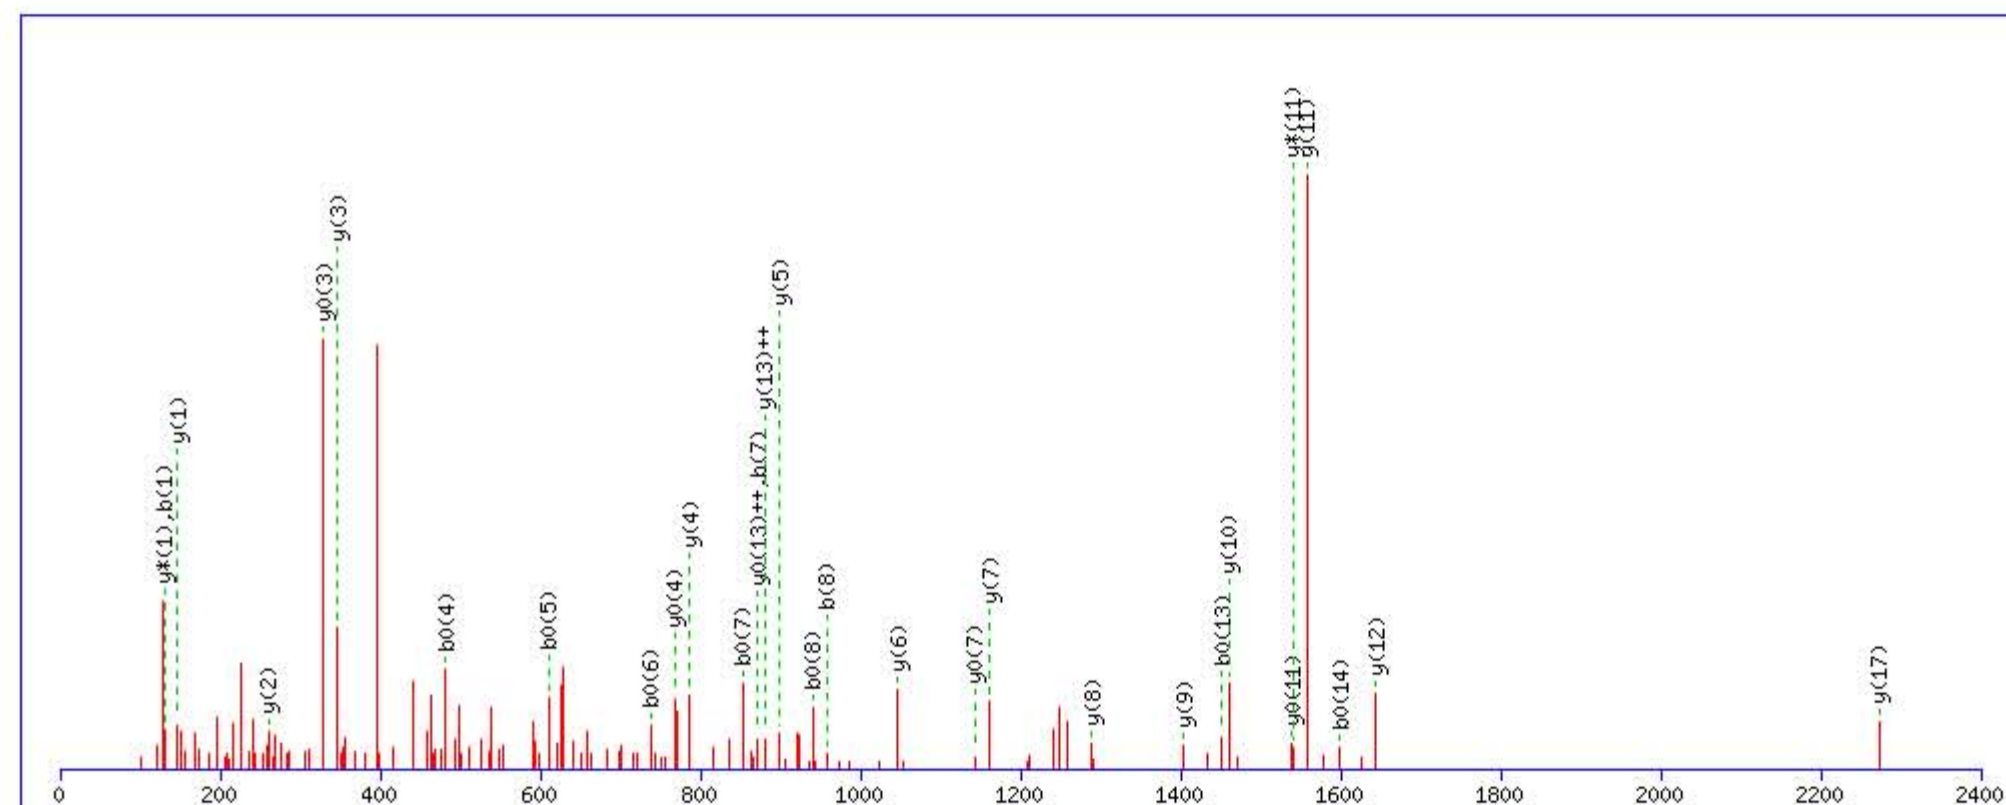

Monoisotopic mass of neutral peptide Mr(calc): 2514.278793

Fixed modifications: Carbamidomethyl (C) (apply to specified residues or termini only)

Variable modifications:

Q16 : Biotin:Thermo-21345 (Q)

Ions Score: 62 Expect: 1.5e-006

Matches : 31/208 fragment ions using 68 most intense peaks [\(help\)](#)

| #  | b                 | b <sup>++</sup> | b <sup>*</sup> | b <sup>*++</sup> | b <sup>0</sup>     | b <sup>0++</sup> | Seq. | y                  | y <sup>++</sup>   | y <sup>*</sup>     | y <sup>*++</sup> | y <sup>0</sup>     | y <sup>0++</sup>  | #  |
|----|-------------------|-----------------|----------------|------------------|--------------------|------------------|------|--------------------|-------------------|--------------------|------------------|--------------------|-------------------|----|
| 1  | <b>130.049869</b> | 65.528572       |                |                  | 112.039304         | 56.523290        | E    |                    |                   |                    |                  |                    |                   | 19 |
| 2  | 243.133933        | 122.070605      |                |                  | 225.123368         | 113.065322       | L    | 2386.243508        | 1193.625392       | 2369.216959        | 1185.112117      | 2368.232943        | 1184.620109       | 18 |
| 3  | 371.228896        | 186.118086      | 354.202347     | 177.604812       | 353.218331         | 177.112804       | K    | <b>2273.159444</b> | 1137.083360       | 2256.132895        | 1128.570085      | 2255.148879        | 1128.078077       | 17 |
| 4  | 500.271489        | 250.639383      | 483.244940     | 242.126108       | <b>482.260924</b>  | 241.634100       | E    | 2145.064481        | 1073.035878       | 2128.037932        | 1064.522604      | 2127.053916        | 1064.030596       | 16 |
| 5  | 628.330067        | 314.668672      | 611.303518     | 306.155397       | <b>610.319502</b>  | 305.663389       | Q    | 2016.021888        | 1008.514582       | 1998.995339        | 1000.001308      | 1998.011323        | 999.509300        | 15 |
| 6  | 756.388645        | 378.697961      | 739.362096     | 370.184686       | <b>738.378080</b>  | 369.692678       | Q    | 1887.963310        | 944.485293        | 1870.936761        | 935.972019       | 1869.952745        | 935.480011        | 14 |
| 7  | <b>871.415588</b> | 436.211432      | 854.389039     | 427.698158       | <b>853.405023</b>  | 427.206150       | D    | 1759.904732        | <b>880.456004</b> | 1742.878183        | 871.942730       | 1741.894167        | <b>871.450722</b> | 13 |
| 8  | <b>958.447616</b> | 479.727446      | 941.421067     | 471.214172       | <b>940.437051</b>  | 470.722164       | S    | <b>1644.877789</b> | 822.942533        | 1627.851240        | 814.429258       | 1626.867224        | 813.937250        | 12 |
| 9  | 1055.500380       | 528.253828      | 1038.473831    | 519.740554       | 1037.489815        | 519.248545       | P    | <b>1557.845761</b> | 779.426519        | <b>1540.819212</b> | 770.913244       | <b>1539.835196</b> | 770.421236        | 11 |
| 10 | 1112.521844       | 556.764560      | 1095.495295    | 548.251285       | 1094.511279        | 547.759277       | G    | <b>1460.792997</b> | 730.900137        | 1443.766448        | 722.386862       | 1442.782432        | 721.894854        | 10 |
| 11 | 1226.564771       | 613.786023      | 1209.538222    | 605.272749       | 1208.554206        | 604.780741       | N    | <b>1403.771533</b> | 702.389405        | 1386.744984        | 693.876130       | 1385.760968        | 693.384122        | 9  |
| 12 | 1354.659734       | 677.833505      | 1337.633185    | 669.320230       | 1336.649169        | 668.828222       | K    | <b>1289.728606</b> | 645.367941        | 1272.702057        | 636.854667       | 1271.718041        | 636.362659        | 8  |
| 13 | 1469.686677       | 735.346976      | 1452.660128    | 726.833702       | <b>1451.676112</b> | 726.341694       | D    | <b>1161.633643</b> | 581.320460        | 1144.607094        | 572.807185       | <b>1143.623078</b> | 572.315177        | 7  |
| 14 | 1616.755091       | 808.881184      | 1599.728542    | 800.367909       | <b>1598.744526</b> | 799.875901       | F    | <b>1046.606700</b> | 523.806988        | 1029.580151        | 515.293714       | 1028.596135        | 514.801706        | 6  |
| 15 | 1729.839155       | 865.423215      | 1712.812606    | 856.909941       | 1711.828590        | 856.417933       | L    | <b>899.538286</b>  | 450.272781        | 882.511737         | 441.759507       | 881.527721         | 441.267499        | 5  |
| 16 | 2169.064481       | 1085.035878     | 2152.037932    | 1076.522604      | 2151.053916        | 1076.030596      | Q    | <b>786.454222</b>  | 393.730749        | 769.427673         | 385.217475       | <b>768.443657</b>  | 384.725467        | 4  |
| 17 | 2256.096509       | 1128.551892     | 2239.069960    | 1120.038618      | 2238.085944        | 1119.546610      | S    | <b>347.228896</b>  | 174.118086        | 330.202347         | 165.604812       | <b>329.218331</b>  | 165.112804        | 3  |
| 18 | 2369.180573       | 1185.093925     | 2352.154024    | 1176.580650      | 2351.170008        | 1176.088642      | L    | <b>260.196868</b>  | 130.602072        | 243.170319         | 122.088798       |                    |                   | 2  |
| 19 |                   |                 |                |                  |                    |                  | K    | <b>147.112804</b>  | 74.060040         | <b>130.086255</b>  | 65.546765        |                    |                   | 1  |

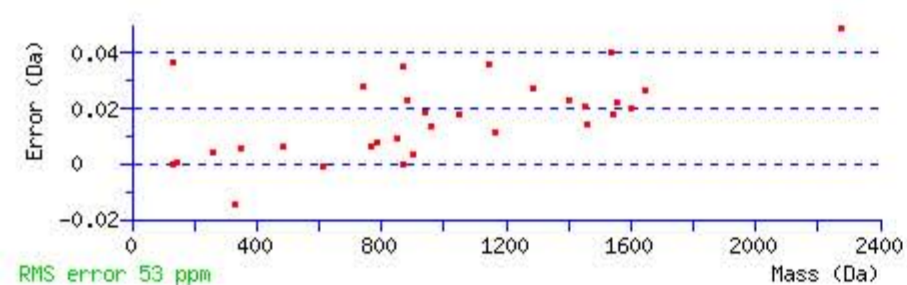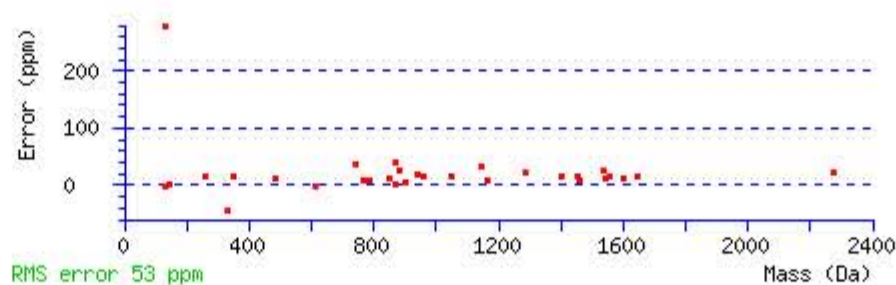

NCBI BLAST search of [ELKEQQDSPGNKDFLQSLK](#)

(Parameters: blastp, nr protein database, expect=20000, no filter, PAM30)

Other BLAST [web gateways](#)

All matches to this query

| Score | Mr(calc):   | Delta    | Sequence                               |
|-------|-------------|----------|----------------------------------------|
| 62.1  | 2514.278793 | 0.025663 | <a href="#">ELKEQQDSPGNKDFLQSLK</a>    |
| 0.0   | 2514.268951 | 0.035505 | <a href="#">GNSGPPGIVGQKGDYPGPAGPK</a> |



# MASCOT Search Results

## Peptide View

MS/MS Fragmentation of **EHAVEGDCDFQLLK**

Found in **FETUA\_HUMAN**, Alpha-2-HS-glycoprotein OS=Homo sapiens GN=AHSG PE=1 SV=1

Match to Query 56031: 1970.947228 from(986.480890,2+) rtinseconds(2044) index(7635)

Title: Locus:1.1.1.2432.15 File:"2013-07-02 CLN FXIII 30 min 1st F 1.wiff"

Data file C:\Program Files (x86)\Matrix Science\Mascot Daemon\mgf\1 FXIII 30 min 1st\mascot\_daemon\_merge.mgf

Click mouse within plot area to zoom in by factor of two about that point

Or, Plot from  to  Da

Label all possible matches  Label matches used for scoring

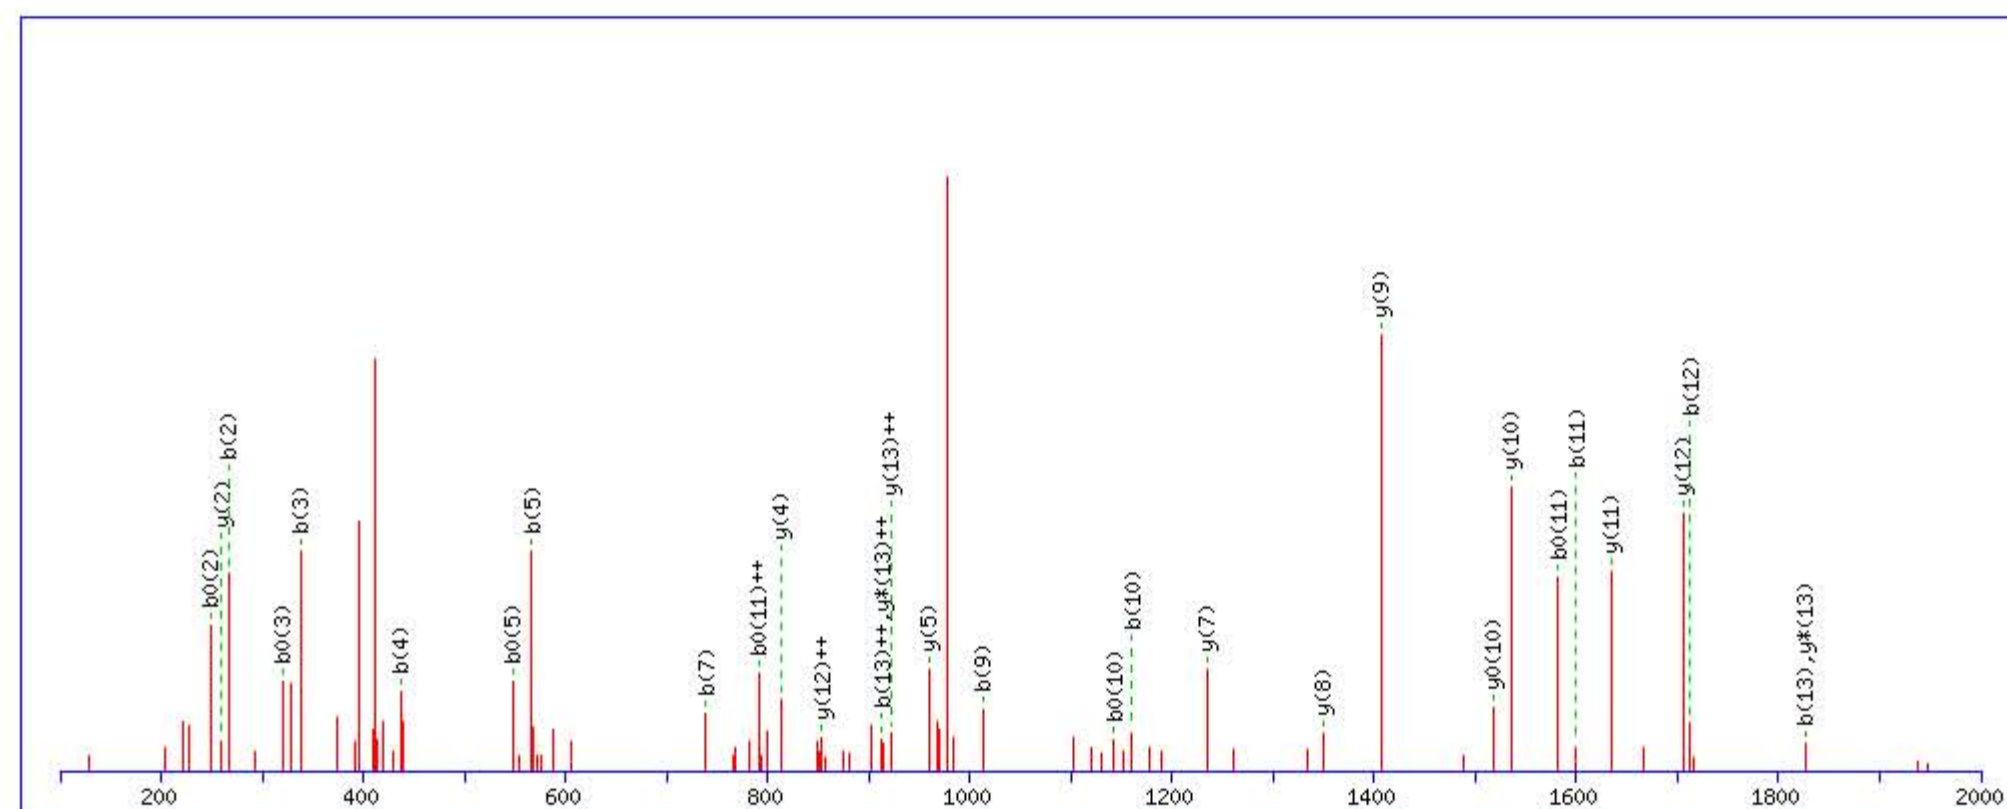

Monoisotopic mass of neutral peptide Mr(calc): 1970.923019

Fixed modifications: Carbamidomethyl (C) (apply to specified residues or termini only)

Variable modifications:

Q11 : Biotin:Thermo-21345 (Q)

Ions Score: 56 Expect: 2.5e-005

Matches : 31/126 fragment ions using 56 most intense peaks [\(help\)](#)

| #  | b                  | b <sup>++</sup>   | b <sup>*</sup> | b <sup>+++</sup> | b <sup>0</sup>     | b <sup>0++</sup>  | Seq. | y                  | y <sup>++</sup>   | y <sup>*</sup>     | y <sup>+++</sup>  | y <sup>0</sup>     | y <sup>0++</sup> | #  |
|----|--------------------|-------------------|----------------|------------------|--------------------|-------------------|------|--------------------|-------------------|--------------------|-------------------|--------------------|------------------|----|
| 1  | 130.049869         | 65.528572         |                |                  | 112.039304         | 56.523290         | E    |                    |                   |                    |                   |                    |                  | 14 |
| 2  | <b>267.108781</b>  | 134.058028        |                |                  | <b>249.098216</b>  | 125.052746        | H    | 1842.887704        | <b>921.947490</b> | <b>1825.861155</b> | <b>913.434216</b> | 1824.877139        | 912.942207       | 13 |
| 3  | <b>338.145895</b>  | 169.576585        |                |                  | <b>320.135330</b>  | 160.571303        | A    | <b>1705.828792</b> | <b>853.418034</b> | 1688.802243        | 844.904760        | 1687.818227        | 844.412752       | 12 |
| 4  | <b>437.214309</b>  | 219.110792        |                |                  | 419.203744         | 210.105510        | V    | <b>1634.791678</b> | 817.899477        | 1617.765129        | 809.386203        | 1616.781113        | 808.894195       | 11 |
| 5  | <b>566.256902</b>  | 283.632089        |                |                  | <b>548.246337</b>  | 274.626807        | E    | <b>1535.723264</b> | 768.365270        | 1518.696715        | 759.851996        | <b>1517.712699</b> | 759.359988       | 10 |
| 6  | 623.278366         | 312.142821        |                |                  | 605.267801         | 303.137539        | G    | <b>1406.680671</b> | 703.843974        | 1389.654122        | 695.330699        | 1388.670106        | 694.838691       | 9  |
| 7  | <b>738.305309</b>  | 369.656293        |                |                  | 720.294744         | 360.651010        | D    | <b>1349.659207</b> | 675.333241        | 1332.632658        | 666.819967        | 1331.648642        | 666.327959       | 8  |
| 8  | 898.335958         | 449.671617        |                |                  | 880.325393         | 440.666335        | C    | <b>1234.632264</b> | 617.819770        | 1217.605715        | 609.306496        | 1216.621699        | 608.814488       | 7  |
| 9  | <b>1013.362901</b> | 507.185089        |                |                  | 995.352336         | 498.179806        | D    | 1074.601615        | 537.804446        | 1057.575066        | 529.291171        | 1056.591050        | 528.799163       | 6  |
| 10 | <b>1160.431315</b> | 580.719296        |                |                  | <b>1142.420750</b> | 571.714013        | F    | <b>959.574672</b>  | 480.290974        | 942.548123         | 471.777700        |                    |                  | 5  |
| 11 | <b>1599.656641</b> | 800.331959        | 1582.630092    | 791.818684       | <b>1581.646076</b> | <b>791.326676</b> | Q    | <b>812.506258</b>  | 406.756767        | 795.479709         | 398.243493        |                    |                  | 4  |
| 12 | <b>1712.740705</b> | 856.873991        | 1695.714156    | 848.360716       | 1694.730140        | 847.868708        | L    | 373.280932         | 187.144104        | 356.254383         | 178.630829        |                    |                  | 3  |
| 13 | <b>1825.824769</b> | <b>913.416023</b> | 1808.798220    | 904.902748       | 1807.814204        | 904.410740        | L    | <b>260.196868</b>  | 130.602072        | 243.170319         | 122.088797        |                    |                  | 2  |
| 14 |                    |                   |                |                  |                    |                   | K    | 147.112804         | 74.060040         | 130.086255         | 65.546765         |                    |                  | 1  |

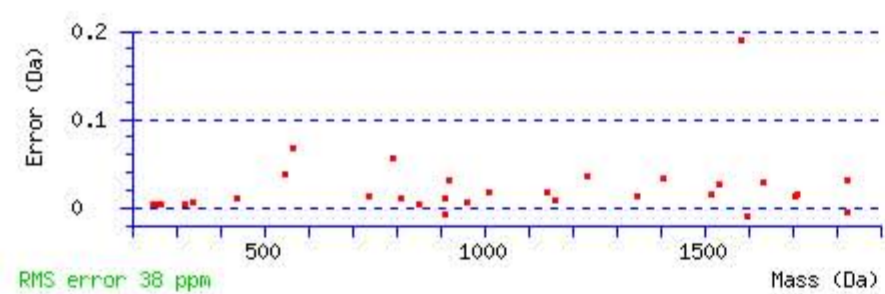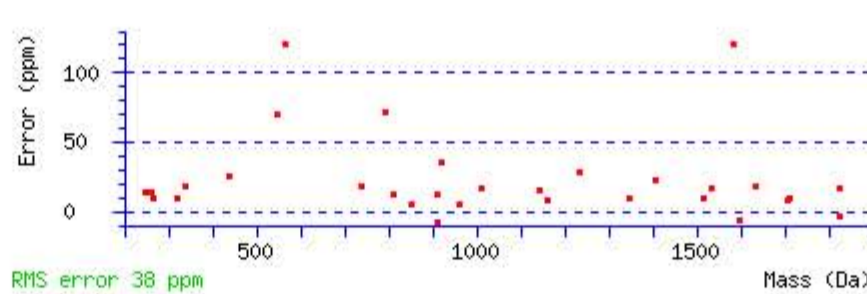

NCBI BLAST search of **EHAVEGDCDFQLLK**

(Parameters: blastp, nr protein database, expect=20000, no filter, PAM30)

Other BLAST [web gateways](#)

All matches to this query

| Score | Mr(calc):   | Delta     | Sequence                           |
|-------|-------------|-----------|------------------------------------|
| 56.5  | 1970.923019 | 0.024209  | <a href="#">EHAVEGDCDFQLLK</a>     |
| 7.0   | 1970.963882 | -0.016654 | <a href="#">EHWLYPQQITTNQWK</a>    |
| 6.7   | 1970.944138 | 0.003090  | <a href="#">STTMEHPSLGQLSEK</a>    |
| 3.4   | 1970.965729 | -0.018501 | <a href="#">EAINGQREDTGDQQGLLK</a> |
| 2.8   | 1970.965881 | -0.018653 | <a href="#">EDKDPQKMYATIYELK</a>   |



# MASCOT SCIENCE Mascot Search Results

## Peptide View

MS/MS Fragmentation of **MCPQLQQYEMHGPEGLR**

Found in **A2MG\_HUMAN**, Alpha-2-macroglobulin OS=Homo sapiens GN=A2M PE=1 SV=3

Match to Query 65421: 2384.096202 from(795.706010,3+) rtinseconds(2025) index(63247)

Title: Locus:1.1.1.2702.17 File:"2013-07-02 CLN FXIII 30 min 1st F 4.wiff"

Data file C:\Program Files (x86)\Matrix Science\Mascot Daemon\mgf\1 FXIII 30 min 1st\mascot\_daemon\_merge.mgf

Click mouse within plot area to zoom in by factor of two about that point

Or, Plot from  to  Da

Label all possible matches  Label matches used for scoring

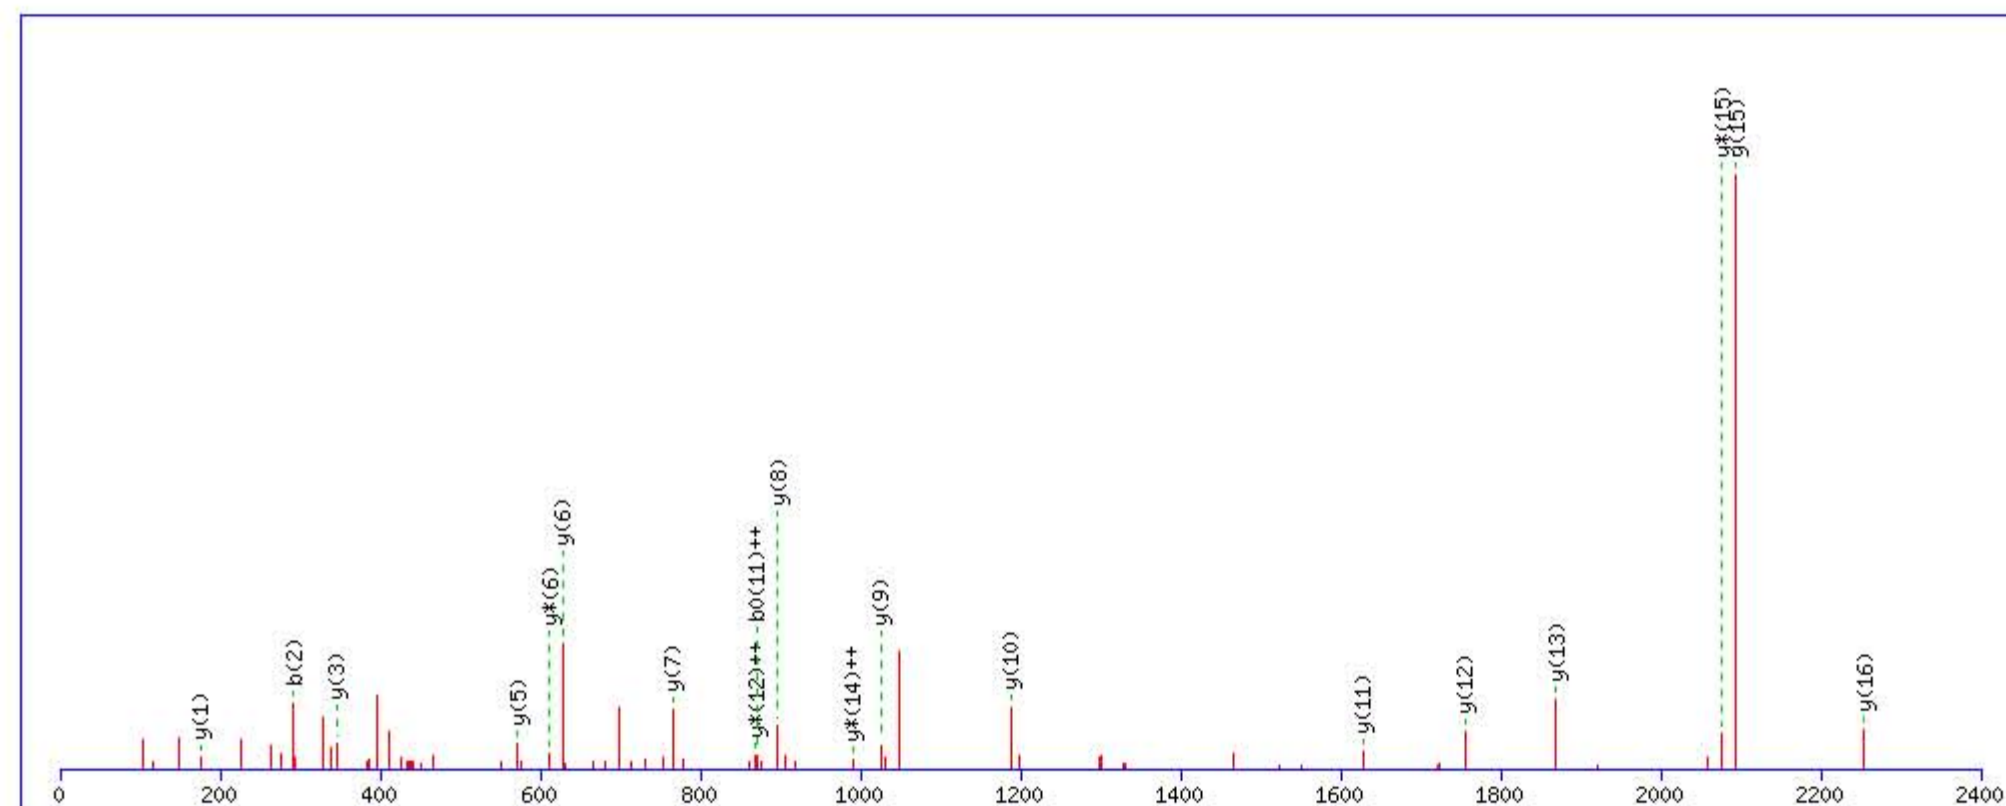

Monoisotopic mass of neutral peptide Mr(calc): 2384.089767

Fixed modifications: Carbamidomethyl (C) (apply to specified residues or termini only)

Variable modifications:

Q7 : Biotin:Thermo-21345 (Q)

Ions Score: 55 Expect: 3.8e-005

Matches : 19/164 fragment ions using 54 most intense peaks [\(help\)](#)

| #  | b           | b <sup>++</sup> | b <sup>+</sup> | b <sup>+++</sup> | b <sup>0</sup> | b <sup>0++</sup> | Seq. | y           | y <sup>++</sup> | y <sup>+</sup> | y <sup>+++</sup> | y <sup>0</sup> | y <sup>0++</sup> | #  |
|----|-------------|-----------------|----------------|------------------|----------------|------------------|------|-------------|-----------------|----------------|------------------|----------------|------------------|----|
| 1  | 132.047761  | 66.527518       |                |                  |                |                  | M    |             |                 |                |                  |                |                  | 17 |
| 2  | 292.078410  | 146.542843      |                |                  |                |                  | C    | 2254.056579 | 1127.531927     | 2237.030030    | 1119.018653      | 2236.046014    | 1118.526645      | 16 |
| 3  | 389.131174  | 195.069225      |                |                  |                |                  | P    | 2094.025930 | 1047.516603     | 2076.999381    | 1039.003328      | 2076.015365    | 1038.511320      | 15 |
| 4  | 517.189752  | 259.098514      | 500.163203     | 250.585240       |                |                  | Q    | 1996.973166 | 998.990221      | 1979.946617    | 990.476947       | 1978.962601    | 989.984939       | 14 |
| 5  | 630.273816  | 315.640546      | 613.247267     | 307.127272       |                |                  | L    | 1868.914588 | 934.960932      | 1851.888039    | 926.447658       | 1850.904023    | 925.955650       | 13 |
| 6  | 758.332394  | 379.669835      | 741.305845     | 371.156561       |                |                  | Q    | 1755.830524 | 878.418900      | 1738.803975    | 869.905626       | 1737.819959    | 869.413618       | 12 |
| 7  | 1197.557720 | 599.282498      | 1180.531171    | 590.769224       |                |                  | Q    | 1627.771946 | 814.389611      | 1610.745397    | 805.876337       | 1609.761381    | 805.384329       | 11 |
| 8  | 1360.621049 | 680.814163      | 1343.594500    | 672.300888       |                |                  | Y    | 1188.546620 | 594.776948      | 1171.520071    | 586.263674       | 1170.536055    | 585.771666       | 10 |
| 9  | 1489.663642 | 745.335459      | 1472.637093    | 736.822185       | 1471.653077    | 736.330177       | E    | 1025.483291 | 513.245284      | 1008.456742    | 504.732009       | 1007.472726    | 504.240001       | 9  |
| 10 | 1620.704127 | 810.855702      | 1603.677578    | 802.342427       | 1602.693562    | 801.850419       | M    | 896.440698  | 448.723987      | 879.414149     | 440.210713       | 878.430133     | 439.718705       | 8  |
| 11 | 1757.763039 | 879.385158      | 1740.736490    | 870.871883       | 1739.752474    | 870.379875       | H    | 765.400213  | 383.203745      | 748.373664     | 374.690470       | 747.389648     | 374.198462       | 7  |
| 12 | 1814.784503 | 907.895890      | 1797.757954    | 899.382615       | 1796.773938    | 898.890607       | G    | 628.341301  | 314.674289      | 611.314752     | 306.161014       | 610.330736     | 305.669006       | 6  |
| 13 | 1911.837267 | 956.422272      | 1894.810718    | 947.908997       | 1893.826702    | 947.416989       | P    | 571.319837  | 286.163557      | 554.293288     | 277.650282       | 553.309272     | 277.158274       | 5  |
| 14 | 2040.879860 | 1020.943568     | 2023.853311    | 1012.430294      | 2022.869295    | 1011.938286      | E    | 474.267073  | 237.637175      | 457.240524     | 229.123900       | 456.256508     | 228.631892       | 4  |
| 15 | 2097.901324 | 1049.454300     | 2080.874775    | 1040.941025      | 2079.890759    | 1040.449017      | G    | 345.224480  | 173.115878      | 328.197931     | 164.602603       |                |                  | 3  |
| 16 | 2210.985388 | 1105.996332     | 2193.958839    | 1097.483057      | 2192.974823    | 1096.991049      | L    | 288.203016  | 144.605146      | 271.176467     | 136.091872       |                |                  | 2  |
| 17 |             |                 |                |                  |                |                  | R    | 175.118952  | 88.063114       | 158.092403     | 79.549839        |                |                  | 1  |

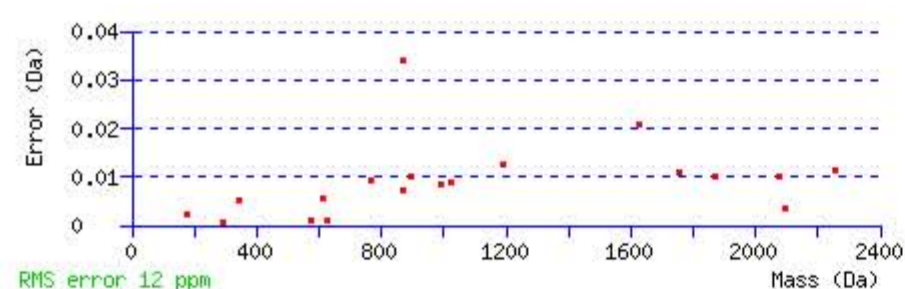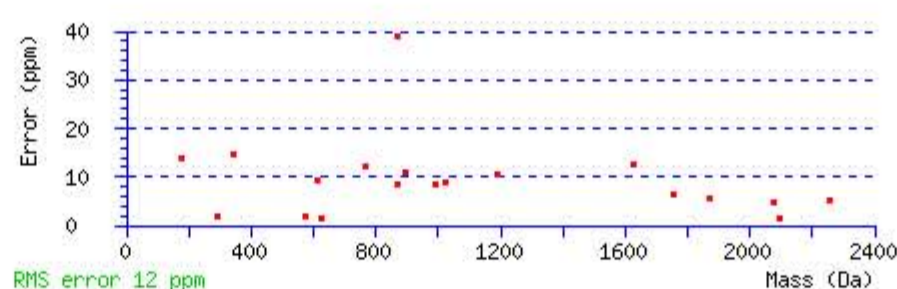

NCBI BLAST search of **MCPQLQQYEMHGPEGLR**

(Parameters: blastp, nr protein database, expect=20000, no filter, PAM30)

Other BLAST [web gateways](#)

## All matches to this query

| Score | Mr(calc):   | Delta    | Sequence                          |
|-------|-------------|----------|-----------------------------------|
| 55.2  | 2384.089767 | 0.006435 | <a href="#">MCPQLQQYEMHGPEGLR</a> |
| 47.4  | 2384.089767 | 0.006435 | <a href="#">MCPQLQQYEMHGPEGLR</a> |
| 28.7  | 2384.089767 | 0.006435 | <a href="#">MCPQLQQYEMHGPEGLR</a> |



# MASCOT Search Results

## Peptide View

MS/MS Fragmentation of **MCPQLQQYEMHGPEGLR**

Found in **A2MG\_HUMAN**, Alpha-2-macroglobulin OS=Homo sapiens GN=A2M PE=1 SV=3

Match to Query 65710: 2400.113696 from(601.035700,4+) rtinseconds(1993) index(25212)

Title: Locus:1.1.1.2546.8 File:"2013-07-02 CLN FXIII 30 min 1st F 2.wiff"

Data file C:\Program Files (x86)\Matrix Science\Mascot Daemon\mgf\1 FXIII 30 min 1st\mascot\_daemon\_merge.mgf

Click mouse within plot area to zoom in by factor of two about that point

Or, Plot from  to  Da

Label all possible matches  Label matches used for scoring

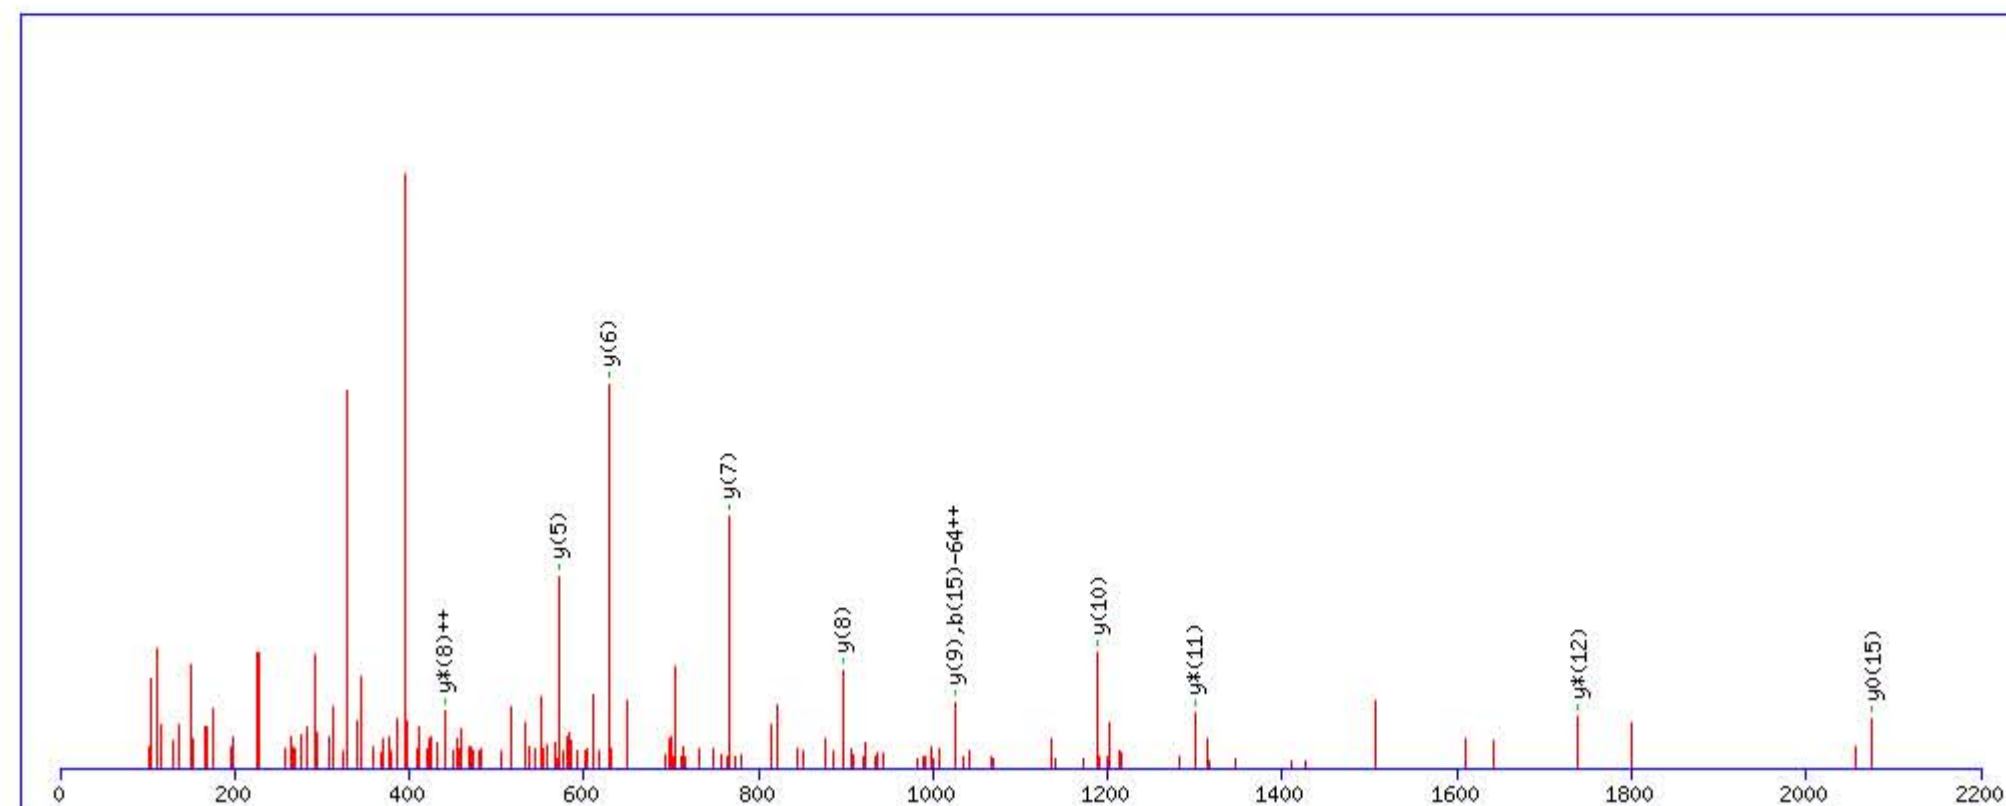

Monoisotopic mass of neutral peptide Mr(calc): 2400.084686

Fixed modifications: Carbamidomethyl (C) (apply to specified residues or termini only)

Variable modifications:

M1 : Oxidation (M), with neutral losses 0.000000 (shown in table), 63.998285

Q6 : Biotin:Thermo-21345 (Q)

Ions Score: 26 Expect: 0.038

Matches : 11/238 fragment ions using 18 most intense peaks [\(help\)](#)

| #  | b           | b <sup>++</sup> | b <sup>+</sup> | b <sup>+++</sup> | b <sup>0</sup> | b <sup>0++</sup> | Seq. | y           | y <sup>++</sup> | y <sup>+</sup> | y <sup>+++</sup> | y <sup>0</sup> | y <sup>0++</sup> | #  |
|----|-------------|-----------------|----------------|------------------|----------------|------------------|------|-------------|-----------------|----------------|------------------|----------------|------------------|----|
| 1  | 148.042676  | 74.524976       |                |                  |                |                  | M    |             |                 |                |                  |                |                  | 17 |
| 2  | 308.073325  | 154.540301      |                |                  |                |                  | C    | 2254.056579 | 1127.531927     | 2237.030030    | 1119.018653      | 2236.046014    | 1118.526645      | 16 |
| 3  | 405.126089  | 203.066683      |                |                  |                |                  | P    | 2094.025930 | 1047.516603     | 2076.999381    | 1039.003328      | 2076.015365    | 1038.511320      | 15 |
| 4  | 533.184667  | 267.095972      | 516.158118     | 258.582697       |                |                  | Q    | 1996.973166 | 998.990221      | 1979.946617    | 990.476947       | 1978.962601    | 989.984939       | 14 |
| 5  | 646.268731  | 323.638004      | 629.242182     | 315.124729       |                |                  | L    | 1868.914588 | 934.960932      | 1851.888039    | 926.447658       | 1850.904023    | 925.955650       | 13 |
| 6  | 1085.494057 | 543.250667      | 1068.467508    | 534.737392       |                |                  | Q    | 1755.830524 | 878.418900      | 1738.803975    | 869.905626       | 1737.819959    | 869.413618       | 12 |
| 7  | 1213.552635 | 607.279956      | 1196.526086    | 598.766681       |                |                  | Q    | 1316.605198 | 658.806237      | 1299.578649    | 650.292963       | 1298.594633    | 649.800955       | 11 |
| 8  | 1376.615964 | 688.811620      | 1359.589415    | 680.298346       |                |                  | Y    | 1188.546620 | 594.776948      | 1171.520071    | 586.263674       | 1170.536055    | 585.771666       | 10 |
| 9  | 1505.658557 | 753.332917      | 1488.632008    | 744.819642       | 1487.647992    | 744.327634       | E    | 1025.483291 | 513.245284      | 1008.456742    | 504.732009       | 1007.472726    | 504.240001       | 9  |
| 10 | 1636.699042 | 818.853159      | 1619.672493    | 810.339885       | 1618.688477    | 809.847877       | M    | 896.440698  | 448.723987      | 879.414149     | 440.210713       | 878.430133     | 439.718705       | 8  |
| 11 | 1773.757954 | 887.382615      | 1756.731405    | 878.869341       | 1755.747389    | 878.377333       | H    | 765.400213  | 383.203745      | 748.373664     | 374.690470       | 747.389648     | 374.198462       | 7  |
| 12 | 1830.779418 | 915.893347      | 1813.752869    | 907.380073       | 1812.768853    | 906.888065       | G    | 628.341301  | 314.674289      | 611.314752     | 306.161014       | 610.330736     | 305.669006       | 6  |
| 13 | 1927.832182 | 964.419729      | 1910.805633    | 955.906455       | 1909.821617    | 955.414447       | P    | 571.319837  | 286.163557      | 554.293288     | 277.650282       | 553.309272     | 277.158274       | 5  |
| 14 | 2056.874775 | 1028.941026     | 2039.848226    | 1020.427751      | 2038.864210    | 1019.935743      | E    | 474.267073  | 237.637175      | 457.240524     | 229.123900       | 456.256508     | 228.631892       | 4  |
| 15 | 2113.896239 | 1057.451758     | 2096.869690    | 1048.938483      | 2095.885674    | 1048.446475      | G    | 345.224480  | 173.115878      | 328.197931     | 164.602603       |                |                  | 3  |
| 16 | 2226.980303 | 1113.993790     | 2209.953754    | 1105.480515      | 2208.969738    | 1104.988507      | L    | 288.203016  | 144.605146      | 271.176467     | 136.091872       |                |                  | 2  |
| 17 |             |                 |                |                  |                |                  | R    | 175.118952  | 88.063114       | 158.092403     | 79.549839        |                |                  | 1  |

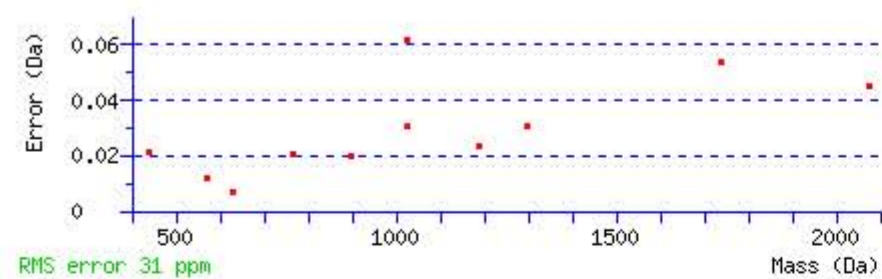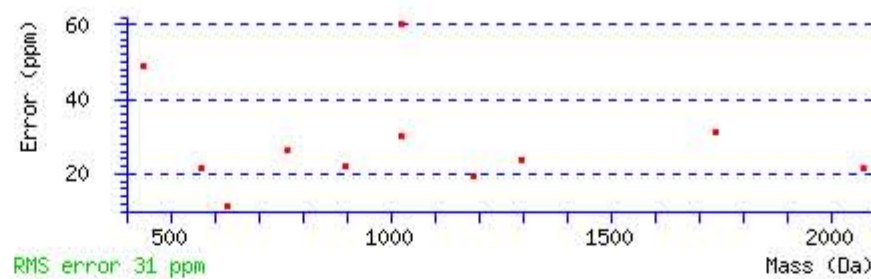

NCBI BLAST search of [MCPQLQQYEMHGPEGLR](#)

(Parameters: blastp, nr protein database, expect=20000, no filter, PAM30)

Other BLAST [web gateways](#)

## All matches to this query

| Score | Mr(calc):   | Delta    | Sequence                          |
|-------|-------------|----------|-----------------------------------|
| 26.2  | 2400.084686 | 0.029010 | <a href="#">MCPQLQQYEMHGPEGLR</a> |
| 26.1  | 2400.084686 | 0.029010 | <a href="#">MCPQLQQYEMHGPEGLR</a> |
| 24.0  | 2400.084686 | 0.029010 | <a href="#">MCPQLQQYEMHGPEGLR</a> |



# Mascot Search Results

## Peptide View

MS/MS Fragmentation of **KPKMCPQLQQYEMHGPEGLR**

Found in **A2MG\_HUMAN**, Alpha-2-macroglobulin OS=Homo sapiens GN=A2M PE=1 SV=3

Match to Query 74962: 3064.527936 from(767.139260,4+) rtinseconds(2099) index(44636)

Title: Locus:1.1.1.2759.16 File:"2013-07-02 CLN FXIII 30 min 1st F 3.wiff"

Data file C:\Program Files (x86)\Matrix Science\Mascot Daemon\mgf1 FXIII 30 min 1st\mascot\_daemon\_merge.mgf

Click mouse within plot area to zoom in by factor of two about that point

Or, Plot from  to  Da

Label all possible matches  Label matches used for scoring

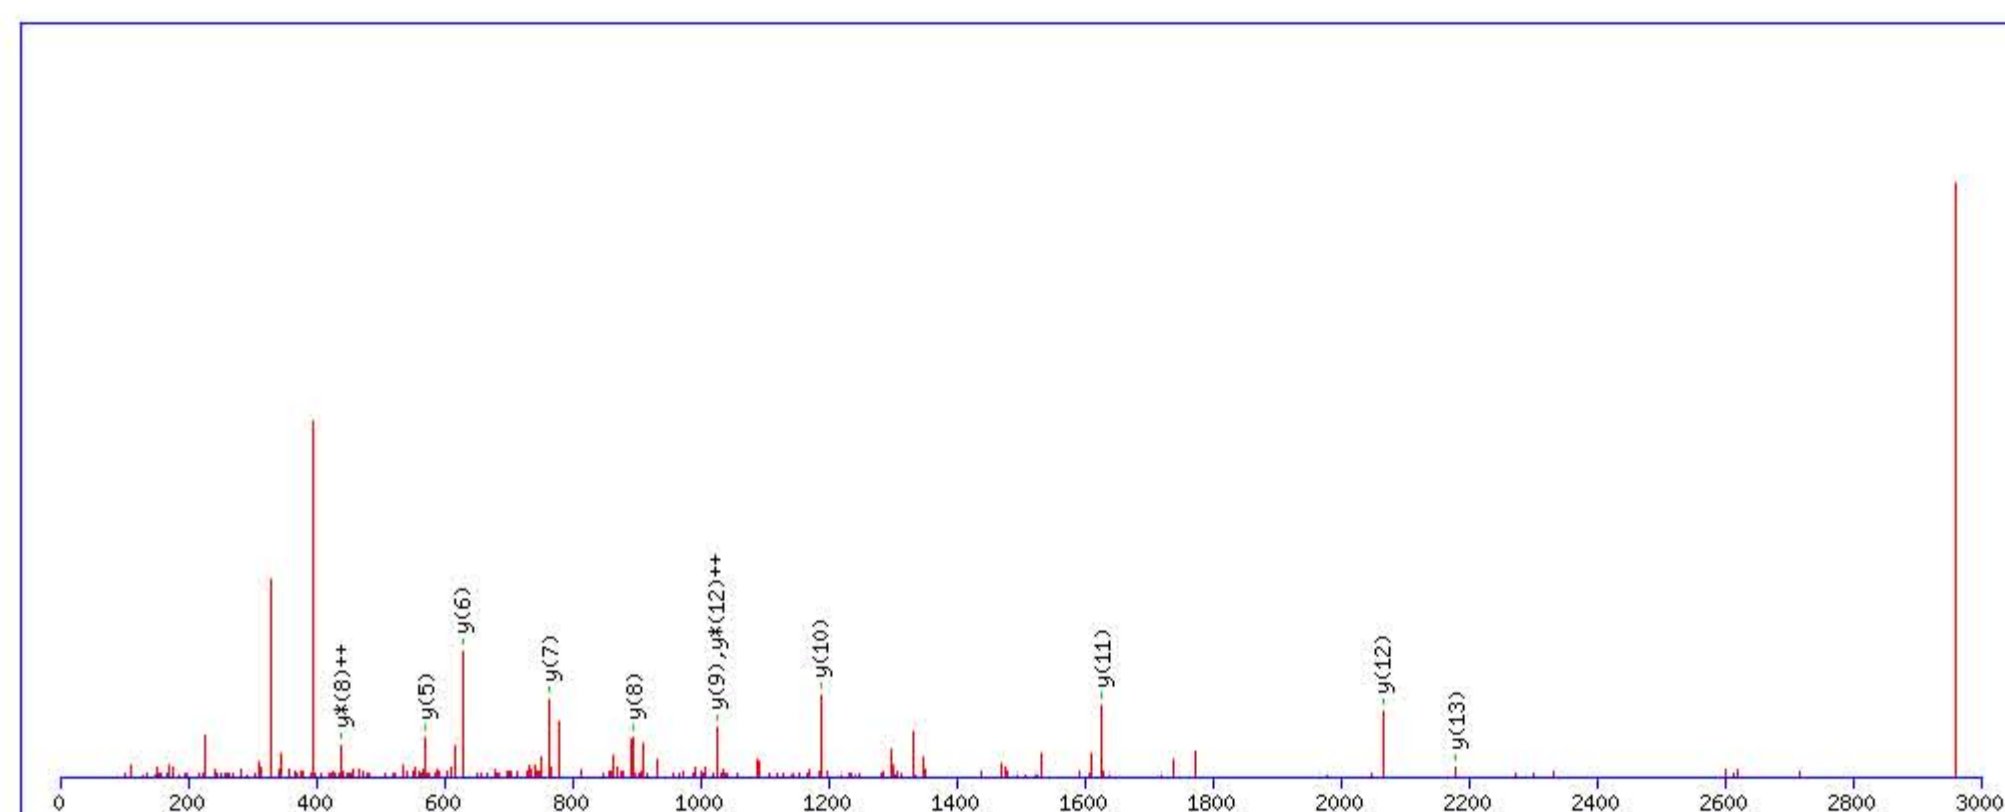

Monoisotopic mass of neutral peptide Mr(calc): 3064.494110

Fixed modifications: Carbamidomethyl (C) (apply to specified residues or termini only)

Variable modifications:

M4 : Oxidation (M), with neutral losses 0.000000 (shown in table), 63.998285

Q9 : Biotin:Thermo-21345 (Q)

Q10 : Biotin:Thermo-21345 (Q)

Ions Score: 35 Expect: 0.0099

Matches : 11/298 fragment ions using 25 most intense peaks [\(help\)](#)

| #  | b           | b <sup>++</sup> | b <sup>+</sup> | b <sup>*++</sup> | b <sup>0</sup> | b <sup>0++</sup> | Seq.     | y                  | y <sup>++</sup> | y <sup>+</sup> | y <sup>*++</sup>   | y <sup>0</sup> | y <sup>0++</sup> | #  |
|----|-------------|-----------------|----------------|------------------|----------------|------------------|----------|--------------------|-----------------|----------------|--------------------|----------------|------------------|----|
| 1  | 129.102239  | 65.054757       | 112.075690     | 56.541483        |                |                  | <b>K</b> |                    |                 |                |                    |                |                  | 20 |
| 2  | 226.155003  | 113.581139      | 209.128454     | 105.067865       |                |                  | <b>P</b> | 2937.406454        | 1469.206865     | 2920.379905    | 1460.693590        | 2919.395889    | 1460.201582      | 19 |
| 3  | 354.249966  | 177.628621      | 337.223417     | 169.115347       |                |                  | <b>K</b> | 2840.353690        | 1420.680483     | 2823.327141    | 1412.167208        | 2822.343125    | 1411.675200      | 18 |
| 4  | 501.285366  | 251.146321      | 484.258817     | 242.633047       |                |                  | <b>M</b> | 2712.258727        | 1356.633001     | 2695.232178    | 1348.119727        | 2694.248162    | 1347.627719      | 17 |
| 5  | 661.316015  | 331.161646      | 644.289466     | 322.648371       |                |                  | <b>C</b> | 2565.223327        | 1283.115302     | 2548.196778    | 1274.602027        | 2547.212762    | 1274.110019      | 16 |
| 6  | 758.368779  | 379.688028      | 741.342230     | 371.174753       |                |                  | <b>P</b> | 2405.192678        | 1203.099977     | 2388.166129    | 1194.586702        | 2387.182113    | 1194.094694      | 15 |
| 7  | 886.427357  | 443.717317      | 869.400808     | 435.204042       |                |                  | <b>Q</b> | 2308.139914        | 1154.573595     | 2291.113365    | 1146.060320        | 2290.129349    | 1145.568312      | 14 |
| 8  | 999.511421  | 500.259349      | 982.484872     | 491.746074       |                |                  | <b>L</b> | <b>2180.081336</b> | 1090.544306     | 2163.054787    | 1082.031031        | 2162.070771    | 1081.539023      | 13 |
| 9  | 1438.736747 | 719.872012      | 1421.710198    | 711.358737       |                |                  | <b>Q</b> | <b>2066.997272</b> | 1034.002274     | 2049.970723    | <b>1025.488999</b> | 2048.986707    | 1024.996991      | 12 |
| 10 | 1877.962073 | 939.484675      | 1860.935524    | 930.971400       |                |                  | <b>Q</b> | <b>1627.771946</b> | 814.389611      | 1610.745397    | 805.876337         | 1609.761381    | 805.384329       | 11 |
| 11 | 2041.025402 | 1021.016339     | 2023.998853    | 1012.503065      |                |                  | <b>Y</b> | <b>1188.546620</b> | 594.776948      | 1171.520071    | 586.263674         | 1170.536055    | 585.771666       | 10 |
| 12 | 2170.067995 | 1085.537636     | 2153.041446    | 1077.024361      | 2152.057430    | 1076.532353      | <b>E</b> | <b>1025.483291</b> | 513.245284      | 1008.456742    | 504.732009         | 1007.472726    | 504.240001       | 9  |
| 13 | 2301.108480 | 1151.057878     | 2284.081931    | 1142.544604      | 2283.097915    | 1142.052596      | <b>M</b> | <b>896.440698</b>  | 448.723987      | 879.414149     | <b>440.210713</b>  | 878.430133     | 439.718705       | 8  |
| 14 | 2438.167392 | 1219.587334     | 2421.140843    | 1211.074060      | 2420.156827    | 1210.582052      | <b>H</b> | <b>765.400213</b>  | 383.203745      | 748.373664     | 374.690470         | 747.389648     | 374.198462       | 7  |
| 15 | 2495.188856 | 1248.098066     | 2478.162307    | 1239.584791      | 2477.178291    | 1239.092784      | <b>G</b> | <b>628.341301</b>  | 314.674289      | 611.314752     | 306.161014         | 610.330736     | 305.669006       | 6  |
| 16 | 2592.241620 | 1296.624448     | 2575.215071    | 1288.111173      | 2574.231055    | 1287.619166      | <b>P</b> | <b>571.319837</b>  | 286.163557      | 554.293288     | 277.650282         | 553.309272     | 277.158274       | 5  |
| 17 | 2721.284213 | 1361.145745     | 2704.257664    | 1352.632470      | 2703.273648    | 1352.140462      | <b>E</b> | 474.267073         | 237.637175      | 457.240524     | 229.123900         | 456.256508     | 228.631892       | 4  |
| 18 | 2778.305677 | 1389.656477     | 2761.279128    | 1381.143202      | 2760.295112    | 1380.651194      | <b>G</b> | 345.224480         | 173.115878      | 328.197931     | 164.602603         |                |                  | 3  |
| 19 | 2891.389741 | 1446.198509     | 2874.363192    | 1437.685234      | 2873.379176    | 1437.193226      | <b>L</b> | 288.203016         | 144.605146      | 271.176467     | 136.091872         |                |                  | 2  |
| 20 |             |                 |                |                  |                |                  | <b>R</b> | 175.118952         | 88.063114       | 158.092403     | 79.549839          |                |                  | 1  |

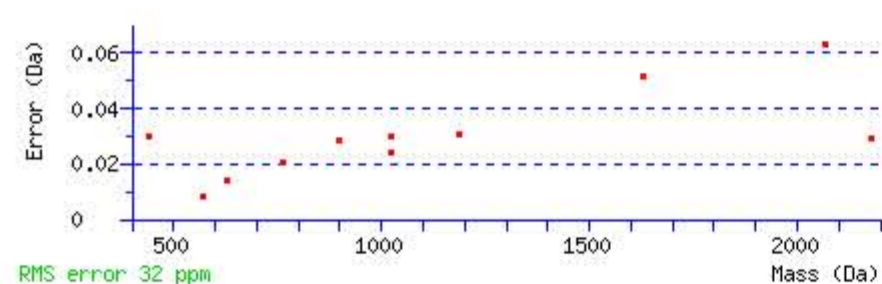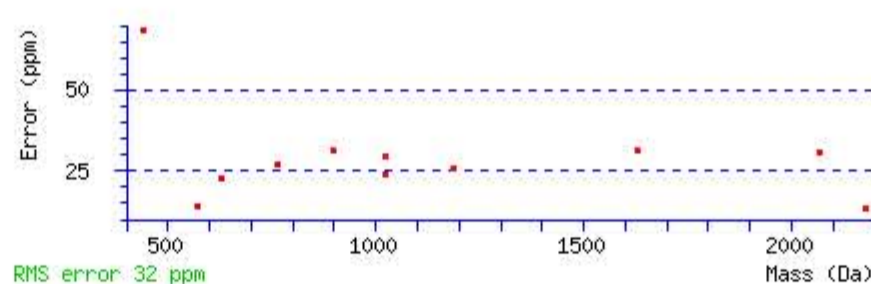

NCBI BLAST search of **KPKMCPQLQQYEMHGPEGLR**

(Parameters: blastp, nr protein database, expect=20000, no filter, PAM30)

Other BLAST [web gateways](#)

All matches to this query

| Score | Mr(calc):   | Delta    | Sequence                             |
|-------|-------------|----------|--------------------------------------|
| 34.5  | 3064.494110 | 0.033826 | <a href="#">KPKMCPQLQQYEMHGPEGLR</a> |
| 17.7  | 3064.494110 | 0.033826 | <a href="#">KPKMCPQLQQYEMHGPEGLR</a> |
| 12.4  | 3064.494110 | 0.033826 | <a href="#">KPKMCPQLQQYEMHGPEGLR</a> |
| 1.4   | 3064.494110 | 0.033826 | <a href="#">KPKMCPQLQQYEMHGPEGLR</a> |



# MASCOT Search Results

## Peptide View

MS/MS Fragmentation of **ENAEQSR**

Found in **ANT3\_HUMAN**, Antithrombin-III OS=Homo sapiens GN=SERPINC1 PE=1 SV=1

Match to Query 29310: 1143.545108 from(572.779830,2+) rtinseconds(1117) index(19082)

Title: Locus:1.1.1.2241.15 File:"2013-07-02 CLN FXIII 30 min 1st F 2.wiff"

Data file C:\Program Files (x86)\Matrix Science\Mascot Daemon\mgf1 FXIII 30 min 1st\mascot\_daemon\_merge.mgf

Click mouse within plot area to zoom in by factor of two about that point

Or, Plot from  to  Da

Label all possible matches  Label matches used for scoring

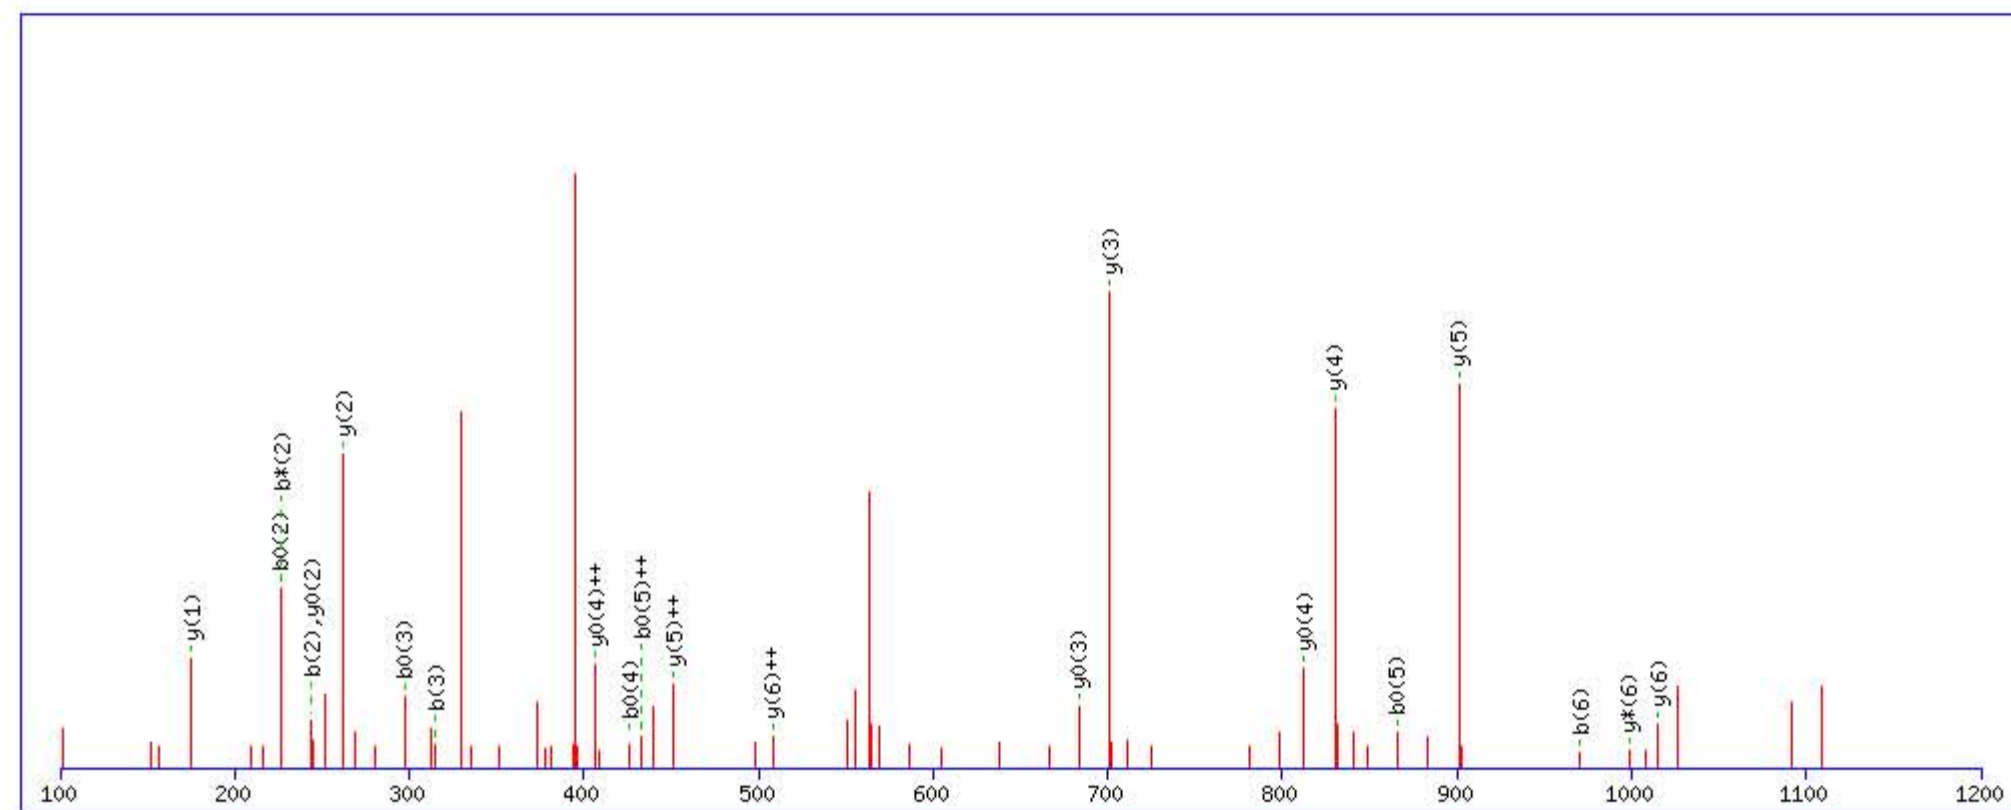

Monoisotopic mass of neutral peptide  $M_r(\text{calc})$ : 1143.534225

Fixed modifications: Carbamidomethyl (C) (apply to specified residues or termini only)

Variable modifications:

Q5 : Biotin:Thermo-21345 (Q)

Ions Score: 27 Expect: 0.026

Matches : 22/68 fragment ions using 52 most intense peaks [\(help\)](#)

| # | b                 | b <sup>++</sup> | b <sup>*</sup>    | b <sup>+++</sup> | b <sup>0</sup>    | b <sup>0++</sup>  | Seq. | y                  | y <sup>++</sup>   | y <sup>*</sup>    | y <sup>+++</sup> | y <sup>0</sup>    | y <sup>0++</sup>  | # |
|---|-------------------|-----------------|-------------------|------------------|-------------------|-------------------|------|--------------------|-------------------|-------------------|------------------|-------------------|-------------------|---|
| 1 | 130.049869        | 65.528572       |                   |                  | 112.039304        | 56.523290         | E    |                    |                   |                   |                  |                   |                   | 7 |
| 2 | <b>244.092796</b> | 122.550036      | <b>227.066247</b> | 114.036762       | <b>226.082231</b> | 113.544754        | N    | <b>1015.498940</b> | <b>508.253108</b> | <b>998.472391</b> | 499.739834       | 997.488375        | 499.247826        | 6 |
| 3 | <b>315.129910</b> | 158.068593      | 298.103361        | 149.555319       | <b>297.119345</b> | 149.063311        | A    | <b>901.456013</b>  | <b>451.231645</b> | 884.429464        | 442.718370       | 883.445448        | 442.226362        | 5 |
| 4 | 444.172503        | 222.589890      | 427.145954        | 214.076615       | <b>426.161938</b> | 213.584607        | E    | <b>830.418899</b>  | 415.713088        | 813.392350        | 407.199813       | <b>812.408334</b> | <b>406.707805</b> | 4 |
| 5 | 883.397829        | 442.202553      | 866.371280        | 433.689278       | <b>865.387264</b> | <b>433.197270</b> | Q    | <b>701.376306</b>  | 351.191791        | 684.349757        | 342.678517       | <b>683.365741</b> | 342.186509        | 3 |
| 6 | <b>970.429857</b> | 485.718567      | 953.403308        | 477.205292       | 952.419292        | 476.713284        | S    | <b>262.150980</b>  | 131.579128        | 245.124431        | 123.065853       | <b>244.140415</b> | 122.573845        | 2 |
| 7 |                   |                 |                   |                  |                   |                   | R    | <b>175.118952</b>  | 88.063114         | 158.092403        | 79.549839        |                   |                   | 1 |

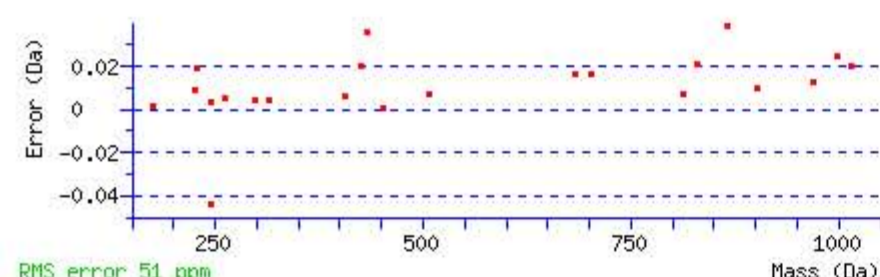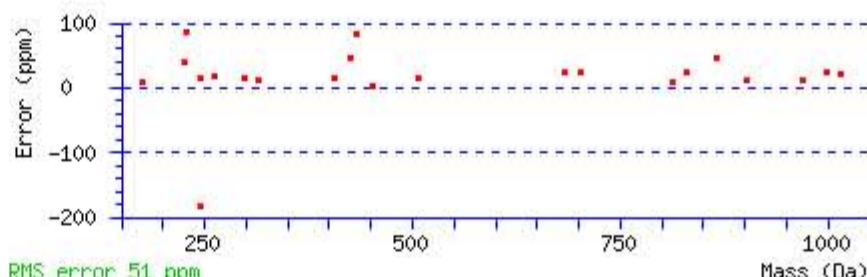

NCBI BLAST search of **ENAEQSR**

(Parameters: blastp, nr protein database, expect=20000, no filter, PAM30)

Other BLAST [web gateways](#)

### All matches to this query

| Score | $M_r(\text{calc})$ : | Delta     | Sequence                     |
|-------|----------------------|-----------|------------------------------|
| 26.8  | 1143.534225          | 0.010883  | <a href="#">ENAEQSR</a>      |
| 14.1  | 1143.552017          | -0.006909 | <a href="#">VDDGTGREAPK</a>  |
| 11.9  | 1143.549500          | -0.004392 | <a href="#">WQEQSR</a>       |
| 9.5   | 1143.552002          | -0.006894 | <a href="#">SSSALDSPAGPR</a> |
| 8.5   | 1143.551987          | -0.006879 | <a href="#">ELNGSEAATPR</a>  |
| 6.2   | 1143.549316          | -0.004208 | <a href="#">SRSRSHSGDR</a>   |
| 3.3   | 1143.556717          | -0.011609 | <a href="#">THLRCQSSR</a>    |
| 3.1   | 1143.544815          | 0.000293  | <a href="#">DPDPEFPTVK</a>   |
| 3.1   | 1143.552017          | -0.006909 | <a href="#">GREDGDAPVTK</a>  |
| 1.7   | 1143.530899          | 0.014209  | <a href="#">TPFPDSSTHR</a>   |



# MASCOT Search Results

## Peptide View

MS/MS Fragmentation of **QGLLPVLESFK**

Found in **APOA1\_HUMAN**, Apolipoprotein A-I OS=Homo sapiens GN=APOA1 PE=1 SV=1

Match to Query 43726: 1540.882188 from(771.448370,2+) rtinseconds(2811) index(85393)

Title: Locus:1.1.1.2857.14 File:"2013-07-02 CLN FXIII 30 min 1st FT.wiff"

Data file C:\Program Files (x86)\Matrix Science\Mascot Daemon\mgf\1 FXIII 30 min 1st\mascot\_daemon\_merge.mgf

Click mouse within plot area to zoom in by factor of two about that point

Or, Plot from  to  Da

Label all possible matches  Label matches used for scoring

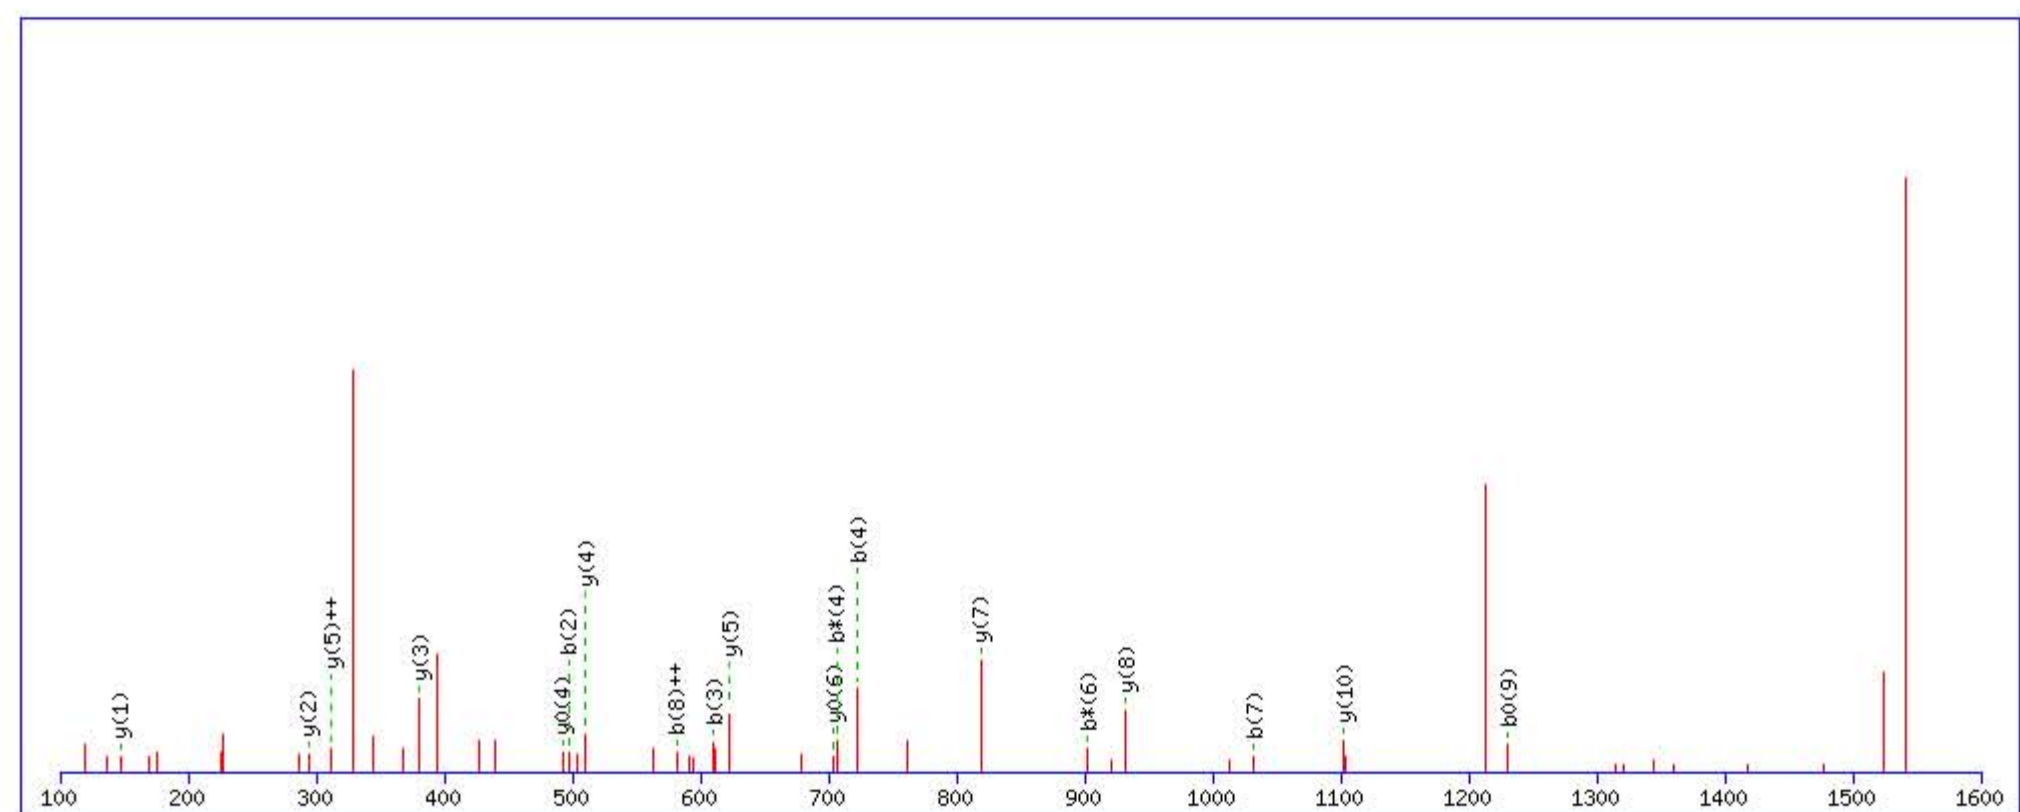

Monoisotopic mass of neutral peptide Mr(calc): 1540.868713

Fixed modifications: Carbamidomethyl (C) (apply to specified residues or termini only)

Variable modifications:

Q1 : Biotin:Thermo-21345 (Q)

Ions Score: 34 Expect: 0.0014

Matches : 19/102 fragment ions using 49 most intense peaks [\(help\)](#)

| #  | b                  | b <sup>++</sup>   | b <sup>*</sup>    | b <sup>*++</sup> | b <sup>0</sup>     | b <sup>0++</sup> | Seq. | y                  | y <sup>++</sup>   | y <sup>*</sup> | y <sup>*++</sup> | y <sup>0</sup>    | y <sup>0++</sup> | #  |
|----|--------------------|-------------------|-------------------|------------------|--------------------|------------------|------|--------------------|-------------------|----------------|------------------|-------------------|------------------|----|
| 1  | 440.232602         | 220.619939        | 423.206053        | 212.106664       |                    |                  | Q    |                    |                   |                |                  |                   |                  | 11 |
| 2  | <b>497.254066</b>  | 249.130671        | 480.227517        | 240.617396       |                    |                  | G    | <b>1102.650673</b> | 551.828975        | 1085.624124    | 543.315700       | 1084.640108       | 542.823692       | 10 |
| 3  | <b>610.338130</b>  | 305.672703        | 593.311581        | 297.159428       |                    |                  | L    | 1045.629209        | 523.318243        | 1028.602660    | 514.804968       | 1027.618644       | 514.312960       | 9  |
| 4  | <b>723.422194</b>  | 362.214735        | <b>706.395645</b> | 353.701461       |                    |                  | L    | <b>932.545145</b>  | 466.776211        | 915.518596     | 458.262936       | 914.534580        | 457.770928       | 8  |
| 5  | 820.474958         | 410.741117        | 803.448409        | 402.227843       |                    |                  | P    | <b>819.461081</b>  | 410.234179        | 802.434532     | 401.720904       | 801.450516        | 401.228896       | 7  |
| 6  | 919.543372         | 460.275324        | <b>902.516823</b> | 451.762049       |                    |                  | V    | 722.408317         | 361.707797        | 705.381768     | 353.194522       | <b>704.397752</b> | 352.702514       | 6  |
| 7  | <b>1032.627436</b> | 516.817356        | 1015.600887       | 508.304082       |                    |                  | L    | <b>623.339903</b>  | <b>312.173590</b> | 606.313354     | 303.660315       | 605.329338        | 303.168307       | 5  |
| 8  | 1161.670029        | <b>581.338653</b> | 1144.643480       | 572.825378       | 1143.659464        | 572.333370       | E    | <b>510.255839</b>  | 255.631558        | 493.229290     | 247.118283       | <b>492.245274</b> | 246.626275       | 4  |
| 9  | 1248.702057        | 624.854667        | 1231.675508       | 616.341392       | <b>1230.691492</b> | 615.849384       | S    | <b>381.213246</b>  | 191.110261        | 364.186697     | 182.596987       | 363.202681        | 182.104979       | 3  |
| 10 | 1395.770471        | 698.388874        | 1378.743922       | 689.875599       | 1377.759906        | 689.383591       | F    | <b>294.181218</b>  | 147.594247        | 277.154669     | 139.080973       |                   |                  | 2  |
| 11 |                    |                   |                   |                  |                    |                  | K    | <b>147.112804</b>  | 74.060040         | 130.086255     | 65.546765        |                   |                  | 1  |

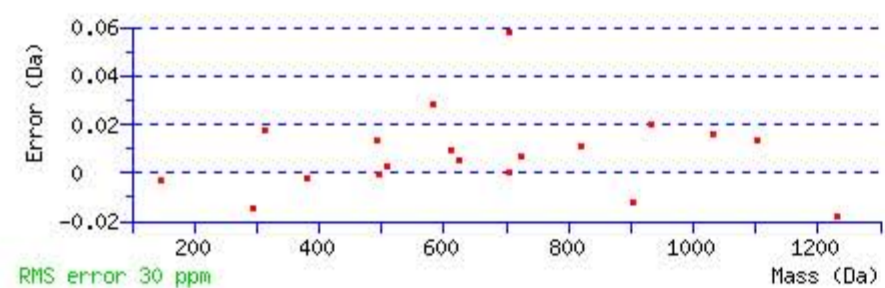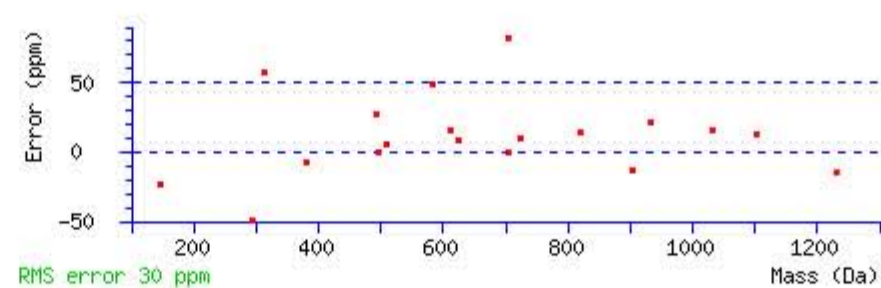

NCBI BLAST search of **QGLLPVLESFK**

(Parameters: blastp, nr protein database, expect=20000, no filter, PAM30)

Other BLAST [web gateways](#)

All matches to this query

| Score | Mr(calc):   | Delta     | Sequence                    |
|-------|-------------|-----------|-----------------------------|
| 34.2  | 1540.868713 | 0.013475  | <a href="#">QGLLPVLESFK</a> |
| 3.7   | 1540.894531 | -0.012343 | <a href="#">QAVLSMVRKAK</a> |
| 0.7   | 1540.891174 | -0.008986 | <a href="#">QVLALRIDFR</a>  |

Mascot: <http://www.matrixscience.com/>



# MASCOT Search Results

## Peptide View

MS/MS Fragmentation of **VQPYLDDDFQK**

Found in **APOA1\_HUMAN**, Apolipoprotein A-I OS=Homo sapiens GN=APOA1 PE=1 SV=1

Match to Query 44254: 1562.786548 from(782.400550,2+) rtinseconds(2200) index(81627)

Title: Locus:1.1.1.2645.22 File:"2013-07-02 CLN FXIII 30 min 1st FT.wiff"

Data file C:\Program Files (x86)\Matrix Science\Mascot Daemon\mgf\1 FXIII 30 min 1st\mascot\_daemon\_merge.mgf

Click mouse within plot area to zoom in by factor of two about that point

Or, Plot from  to  Da

Label all possible matches  Label matches used for scoring

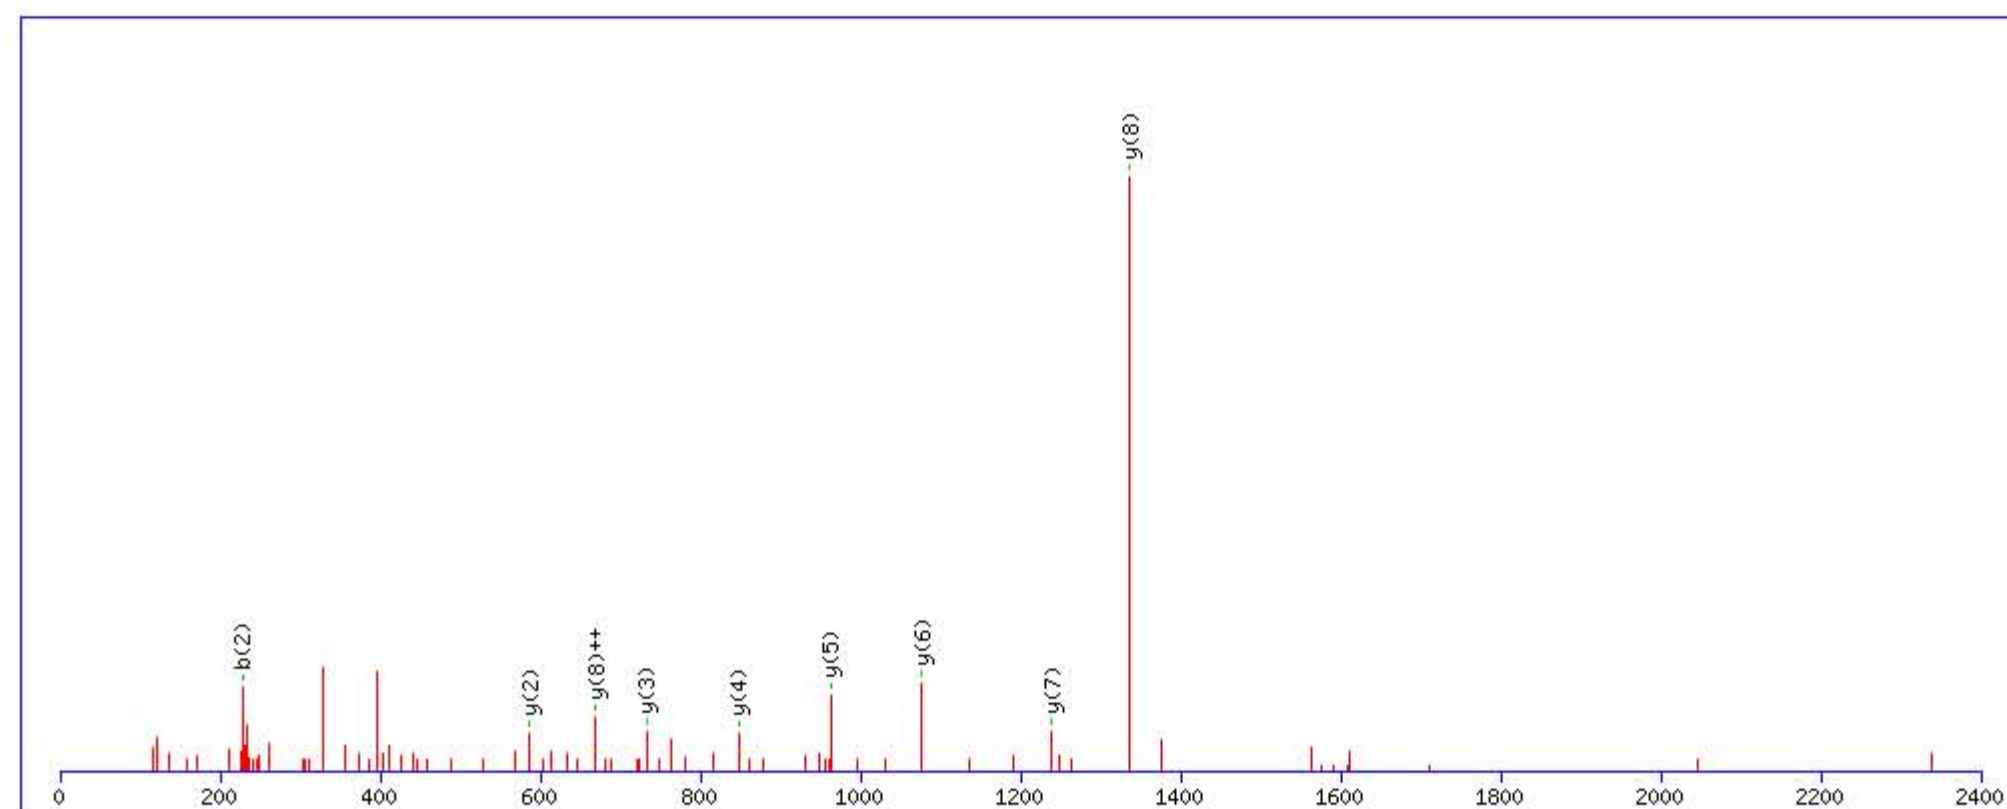

Monoisotopic mass of neutral peptide Mr(calc): 1562.780304

Fixed modifications: Carbamidomethyl (C) (apply to specified residues or termini only)

Variable modifications:

Q9 : Biotin:Thermo-21345 (Q)

Ions Score: 52 Expect: 0.0001

Matches : 9/90 fragment ions using 13 most intense peaks [\(help\)](#)

| #  | b                 | b <sup>++</sup> | b <sup>*</sup> | b <sup>*++</sup> | b <sup>0</sup> | b <sup>0++</sup> | Seq. | y                  | y <sup>++</sup>   | y <sup>*</sup> | y <sup>*++</sup> | y <sup>0</sup> | y <sup>0++</sup> | #  |
|----|-------------------|-----------------|----------------|------------------|----------------|------------------|------|--------------------|-------------------|----------------|------------------|----------------|------------------|----|
| 1  | 100.075690        | 50.541483       |                |                  |                |                  | V    |                    |                   |                |                  |                |                  | 10 |
| 2  | <b>228.134268</b> | 114.570772      | 211.107719     | 106.057498       |                |                  | Q    | 1464.719165        | 732.863221        | 1447.692616    | 724.349946       | 1446.708600    | 723.857938       | 9  |
| 3  | 325.187032        | 163.097154      | 308.160483     | 154.583879       |                |                  | P    | <b>1336.660587</b> | <b>668.833932</b> | 1319.634038    | 660.320657       | 1318.650022    | 659.828649       | 8  |
| 4  | 488.250361        | 244.628818      | 471.223812     | 236.115544       |                |                  | Y    | <b>1239.607823</b> | 620.307550        | 1222.581274    | 611.794275       | 1221.597258    | 611.302267       | 7  |
| 5  | 601.334425        | 301.170851      | 584.307876     | 292.657576       |                |                  | L    | <b>1076.544494</b> | 538.775885        | 1059.517945    | 530.262611       | 1058.533929    | 529.770603       | 6  |
| 6  | 716.361368        | 358.684322      | 699.334819     | 350.171047       | 698.350803     | 349.679039       | D    | <b>963.460430</b>  | 482.233853        | 946.433881     | 473.720579       | 945.449865     | 473.228571       | 5  |
| 7  | 831.388311        | 416.197793      | 814.361762     | 407.684519       | 813.377746     | 407.192511       | D    | <b>848.433487</b>  | 424.720382        | 831.406938     | 416.207107       | 830.422922     | 415.715099       | 4  |
| 8  | 978.456725        | 489.732000      | 961.430176     | 481.218726       | 960.446160     | 480.726718       | F    | <b>733.406544</b>  | 367.206910        | 716.379995     | 358.693636       |                |                  | 3  |
| 9  | 1417.682051       | 709.344664      | 1400.655502    | 700.831389       | 1399.671486    | 700.339381       | Q    | <b>586.338130</b>  | 293.672703        | 569.311581     | 285.159429       |                |                  | 2  |
| 10 |                   |                 |                |                  |                |                  | K    | 147.112804         | 74.060040         | 130.086255     | 65.546765        |                |                  | 1  |

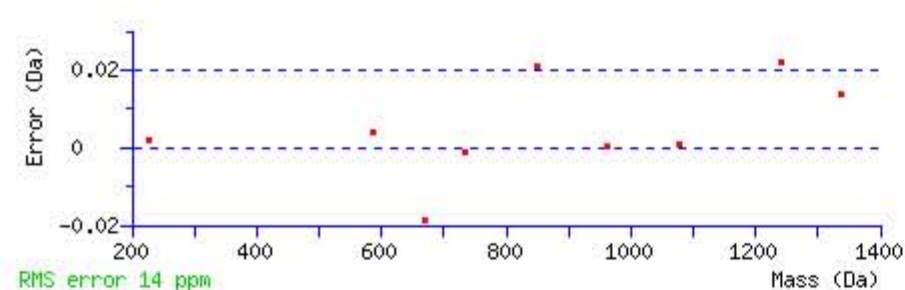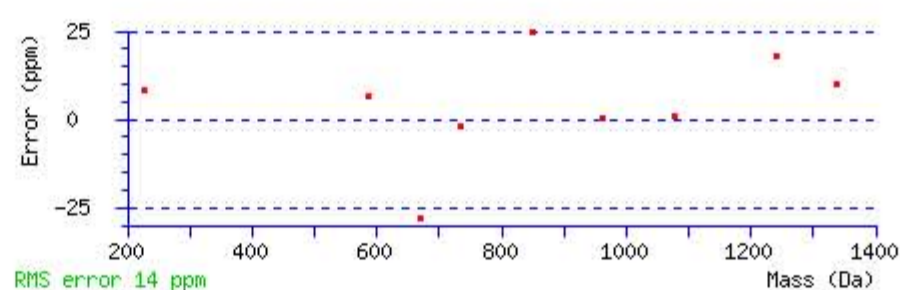

NCBI BLAST search of **VQPYLDDDFQK**

(Parameters: blastp, nr protein database, expect=20000, no filter, PAM30)

Other BLAST [web gateways](#)

## All matches to this query

| Score | Mr(calc):   | Delta     | Sequence                       |
|-------|-------------|-----------|--------------------------------|
| 52.5  | 1562.780304 | 0.006244  | <a href="#">VQPYLDDDFQK</a>    |
| 9.4   | 1562.808624 | -0.022076 | <a href="#">LNSPTTTSQIMARK</a> |
| 2.2   | 1562.804764 | -0.018216 | <a href="#">QVEELLMAMEKVK</a>  |
| 1.5   | 1562.768860 | 0.017688  | <a href="#">LNFGASLQQTAEER</a> |
| 1.3   | 1562.805252 | -0.018704 | <a href="#">RATIVSLEDFEQR</a>  |
| 0.8   | 1562.787521 | -0.000973 | <a href="#">VQLVDNVYCIGQR</a>  |
| 0.8   | 1562.804764 | -0.018216 | <a href="#">QVEELLMAMEKVK</a>  |
| 0.5   | 1562.769714 | 0.016834  | <a href="#">YAVMRAAEMHQLK</a>  |



# MASCOT Search Results

## Peptide View

MS/MS Fragmentation of **EPCVESLVSQYFQTVTDYGK**

Found in **APOA2\_HUMAN**, Apolipoprotein A-II OS=Homo sapiens GN=APOA2 PE=1 SV=1

Match to Query 70246: 2660.267862 from(887.763230,3+) rtinseconds(3095) index(69855)

Title: Locus:1.1.1.3071.13 File:"2013-07-02 CLN FXIII 30 min 1st F 4.wiff"

Data file C:\Program Files (x86)\Matrix Science\Mascot Daemon\mgf\1 FXIII 30 min 1st\mascot\_daemon\_merge.mgf

Click mouse within plot area to zoom in by factor of two about that point

Or, Plot from  to  Da

Label all possible matches  Label matches used for scoring

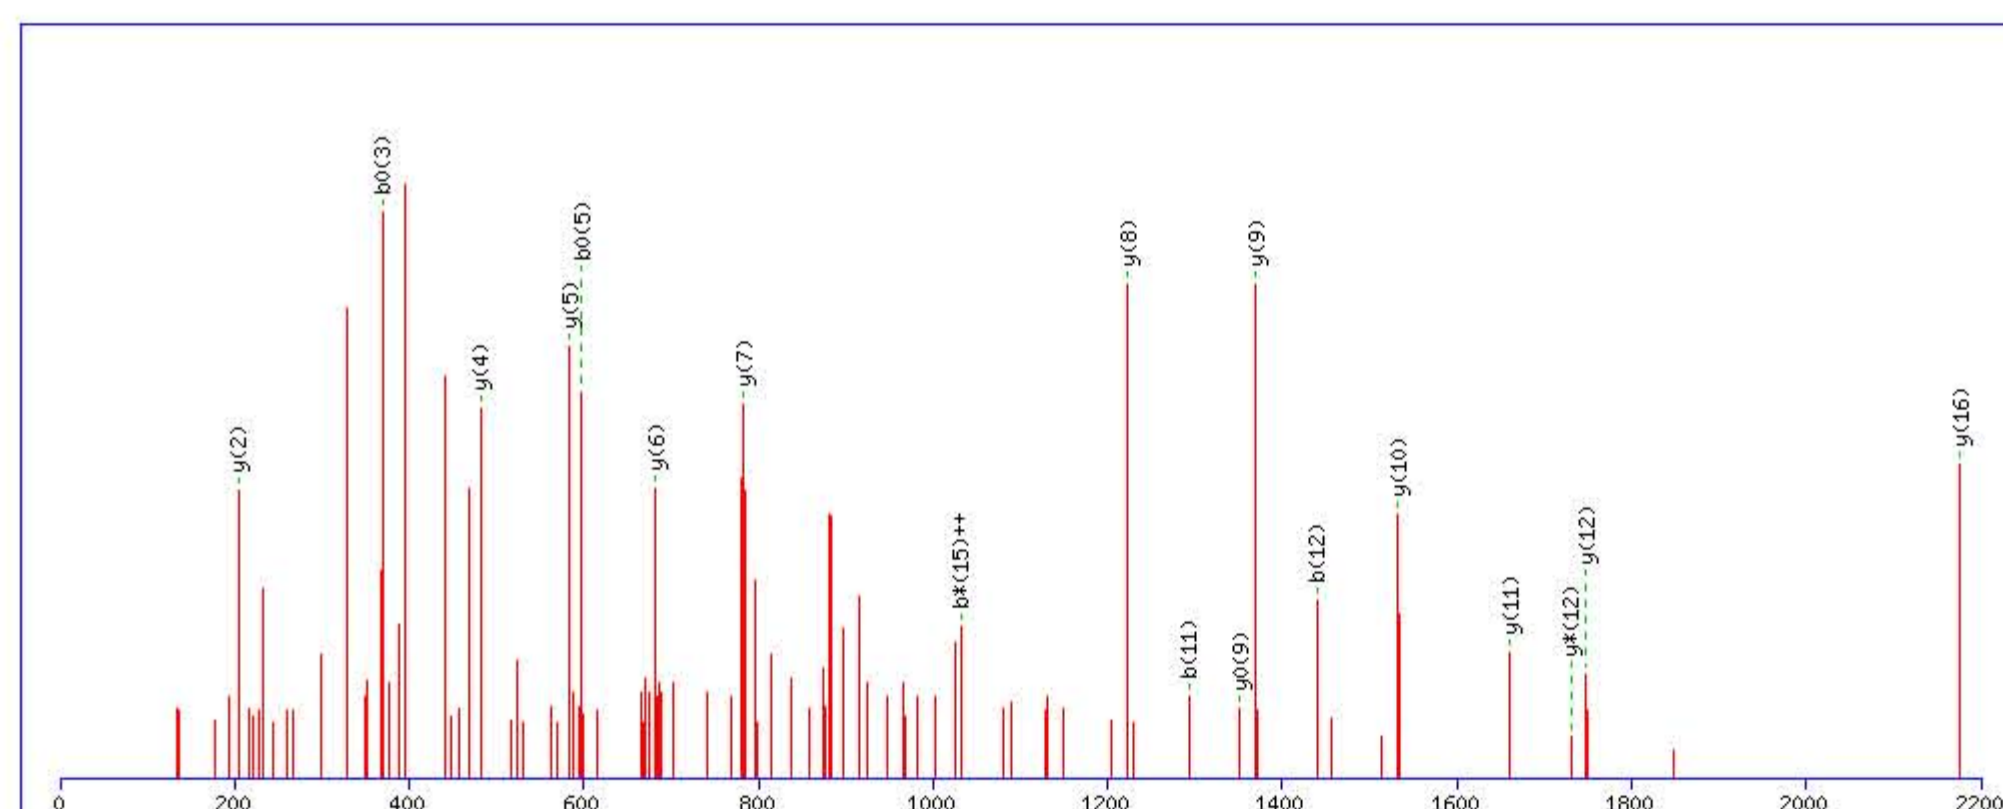

Monoisotopic mass of neutral peptide Mr(calc): 2660.250244

Fixed modifications: Carbamidomethyl (C) (apply to specified residues or termini only)

Variable modifications:

Q13 : Biotin:Thermo-21345 (Q)

Ions Score: 60 Expect: 2.5e-006

Matches : 18/204 fragment ions using 34 most intense peaks [\(help\)](#)

| #  | b                  | b <sup>++</sup> | b <sup>*</sup> | b <sup>*++</sup>   | b <sup>0</sup>    | b <sup>0++</sup> | Seq. | y                  | y <sup>++</sup> | y <sup>*</sup>     | y <sup>*++</sup> | y <sup>0</sup>     | y <sup>0++</sup> | #  |
|----|--------------------|-----------------|----------------|--------------------|-------------------|------------------|------|--------------------|-----------------|--------------------|------------------|--------------------|------------------|----|
| 1  | 130.049869         | 65.528572       |                |                    | 112.039304        | 56.523290        | E    |                    |                 |                    |                  |                    |                  | 20 |
| 2  | 227.102633         | 114.054954      |                |                    | 209.092068        | 105.049672       | P    | 2532.214913        | 1266.611094     | 2515.188364        | 1258.097820      | 2514.204348        | 1257.605812      | 19 |
| 3  | 387.133282         | 194.070279      |                |                    | <b>369.122717</b> | 185.064997       | C    | 2435.162149        | 1218.084712     | 2418.135600        | 1209.571438      | 2417.151584        | 1209.079430      | 18 |
| 4  | 486.201696         | 243.604486      |                |                    | 468.191131        | 234.599204       | V    | 2275.131500        | 1138.069388     | 2258.104951        | 1129.556113      | 2257.120935        | 1129.064105      | 17 |
| 5  | 615.244289         | 308.125783      |                |                    | <b>597.233724</b> | 299.120500       | E    | <b>2176.063086</b> | 1088.535181     | 2159.036537        | 1080.021906      | 2158.052521        | 1079.529898      | 16 |
| 6  | 702.276317         | 351.641797      |                |                    | 684.265752        | 342.636514       | S    | 2047.020493        | 1024.013885     | 2029.993944        | 1015.500610      | 2029.009928        | 1015.008602      | 15 |
| 7  | 815.360381         | 408.183829      |                |                    | 797.349816        | 399.178546       | L    | 1959.988465        | 980.497871      | 1942.961916        | 971.984596       | 1941.977900        | 971.492588       | 14 |
| 8  | 914.428795         | 457.718036      |                |                    | 896.418230        | 448.712753       | V    | 1846.904401        | 923.955839      | 1829.877852        | 915.442564       | 1828.893836        | 914.950556       | 13 |
| 9  | 1001.460823        | 501.234050      |                |                    | 983.450258        | 492.228767       | S    | <b>1747.835987</b> | 874.421632      | <b>1730.809438</b> | 865.908357       | 1729.825422        | 865.416349       | 12 |
| 10 | 1129.519401        | 565.263339      | 1112.492852    | 556.750064         | 1111.508836       | 556.258056       | Q    | <b>1660.803959</b> | 830.905618      | 1643.777410        | 822.392343       | 1642.793394        | 821.900335       | 11 |
| 11 | <b>1292.582730</b> | 646.795003      | 1275.556181    | 638.281729         | 1274.572165       | 637.789721       | Y    | <b>1532.745381</b> | 766.876329      | 1515.718832        | 758.363054       | 1514.734816        | 757.871046       | 10 |
| 12 | <b>1439.651144</b> | 720.329210      | 1422.624595    | 711.815936         | 1421.640579       | 711.323928       | F    | <b>1369.682052</b> | 685.344664      | 1352.655503        | 676.831390       | <b>1351.671487</b> | 676.339382       | 9  |
| 13 | 1878.876470        | 939.941873      | 1861.849921    | 931.428599         | 1860.865905       | 930.936591       | Q    | <b>1222.613638</b> | 611.810457      | 1205.587089        | 603.297183       | 1204.603073        | 602.805175       | 8  |
| 14 | 1979.924149        | 990.465713      | 1962.897600    | 981.952438         | 1961.913584       | 981.460430       | T    | <b>783.388312</b>  | 392.197794      | 766.361763         | 383.684519       | 765.377747         | 383.192511       | 7  |
| 15 | 2078.992563        | 1039.999920     | 2061.966014    | <b>1031.486645</b> | 2060.981998       | 1030.994637      | V    | <b>682.340633</b>  | 341.673954      | 665.314084         | 333.160680       | 664.330068         | 332.668672       | 6  |
| 16 | 2180.040242        | 1090.523759     | 2163.013693    | 1082.010484        | 2162.029677       | 1081.518476      | T    | <b>583.272219</b>  | 292.139747      | 566.245670         | 283.626473       | 565.261654         | 283.134465       | 5  |
| 17 | 2295.067185        | 1148.037230     | 2278.040636    | 1139.523956        | 2277.056620       | 1139.031948      | D    | <b>482.224540</b>  | 241.615908      | 465.197991         | 233.102633       | 464.213975         | 232.610625       | 4  |
| 18 | 2458.130514        | 1229.568895     | 2441.103965    | 1221.055620        | 2440.119949       | 1220.563612      | Y    | 367.197597         | 184.102436      | 350.171048         | 175.589162       |                    |                  | 3  |
| 19 | 2515.151978        | 1258.079627     | 2498.125429    | 1249.566352        | 2497.141413       | 1249.074344      | G    | <b>204.134268</b>  | 102.570772      | 187.107719         | 94.057497        |                    |                  | 2  |
| 20 |                    |                 |                |                    |                   |                  | K    | 147.112804         | 74.060040       | 130.086255         | 65.546765        |                    |                  | 1  |

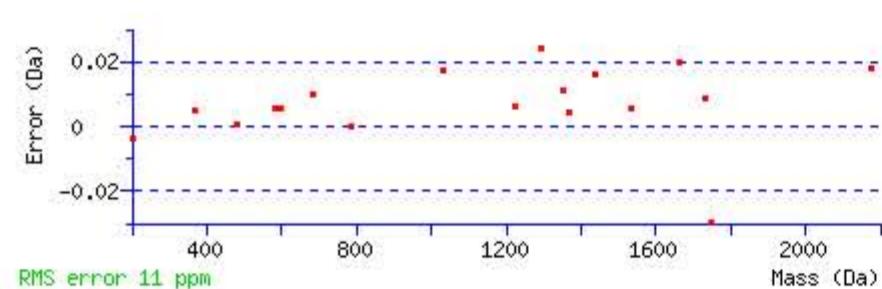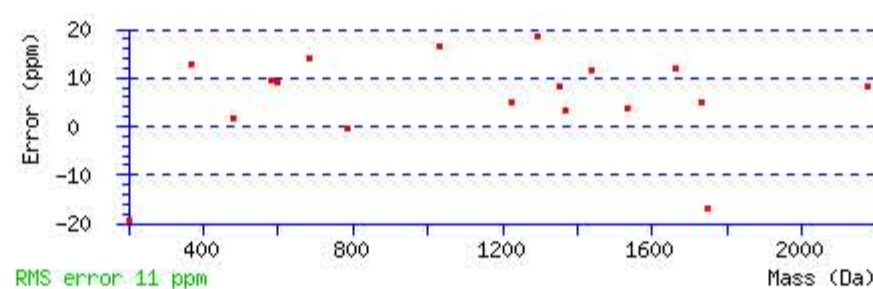

NCBI BLAST search of [EPCVESLVSQYFQTVTDYGK](#)

(Parameters: blastp, nr protein database, expect=20000, no filter, PAM30)

Other BLAST [web gateways](#)

All matches to this query

| Score | Mr(calc):   | Delta     | Sequence                               |
|-------|-------------|-----------|----------------------------------------|
| 60.2  | 2660.250244 | 0.017618  | <a href="#">EPCVESLVSQYFQTVTDYGK</a>   |
| 26.3  | 2660.250244 | 0.017618  | <a href="#">EPCVESLVSQYFQTVTDYGK</a>   |
| 0.4   | 2660.289917 | -0.022055 | <a href="#">EAKDMLYKMLSENFMSLQEIPK</a> |



# **MASCOT** Mascot Search Results

## Peptide View

MS/MS Fragmentation of **GNTEGLQK**

Found in **APOA4\_HUMAN**, Apolipoprotein A-IV OS=Homo sapiens GN=APOA4 PE=1 SV=3

Match to Query 29838: 1156.586588 from(579.300570,2+) rtinseconds(1451) index(76533)

Title: Locus:1.1.1.2384.24 File:"2013-07-02 CLN FXIII 30 min 1st FT.wiff"

Data file C:\Program Files (x86)\Matrix Science\Mascot Daemon\mgf\1 FXIII 30 min 1st\mascot\_daemon\_merge.mgf

Click mouse within plot area to zoom in by factor of two about that point

Or, Plot from  to  Da

Label all possible matches  Label matches used for scoring

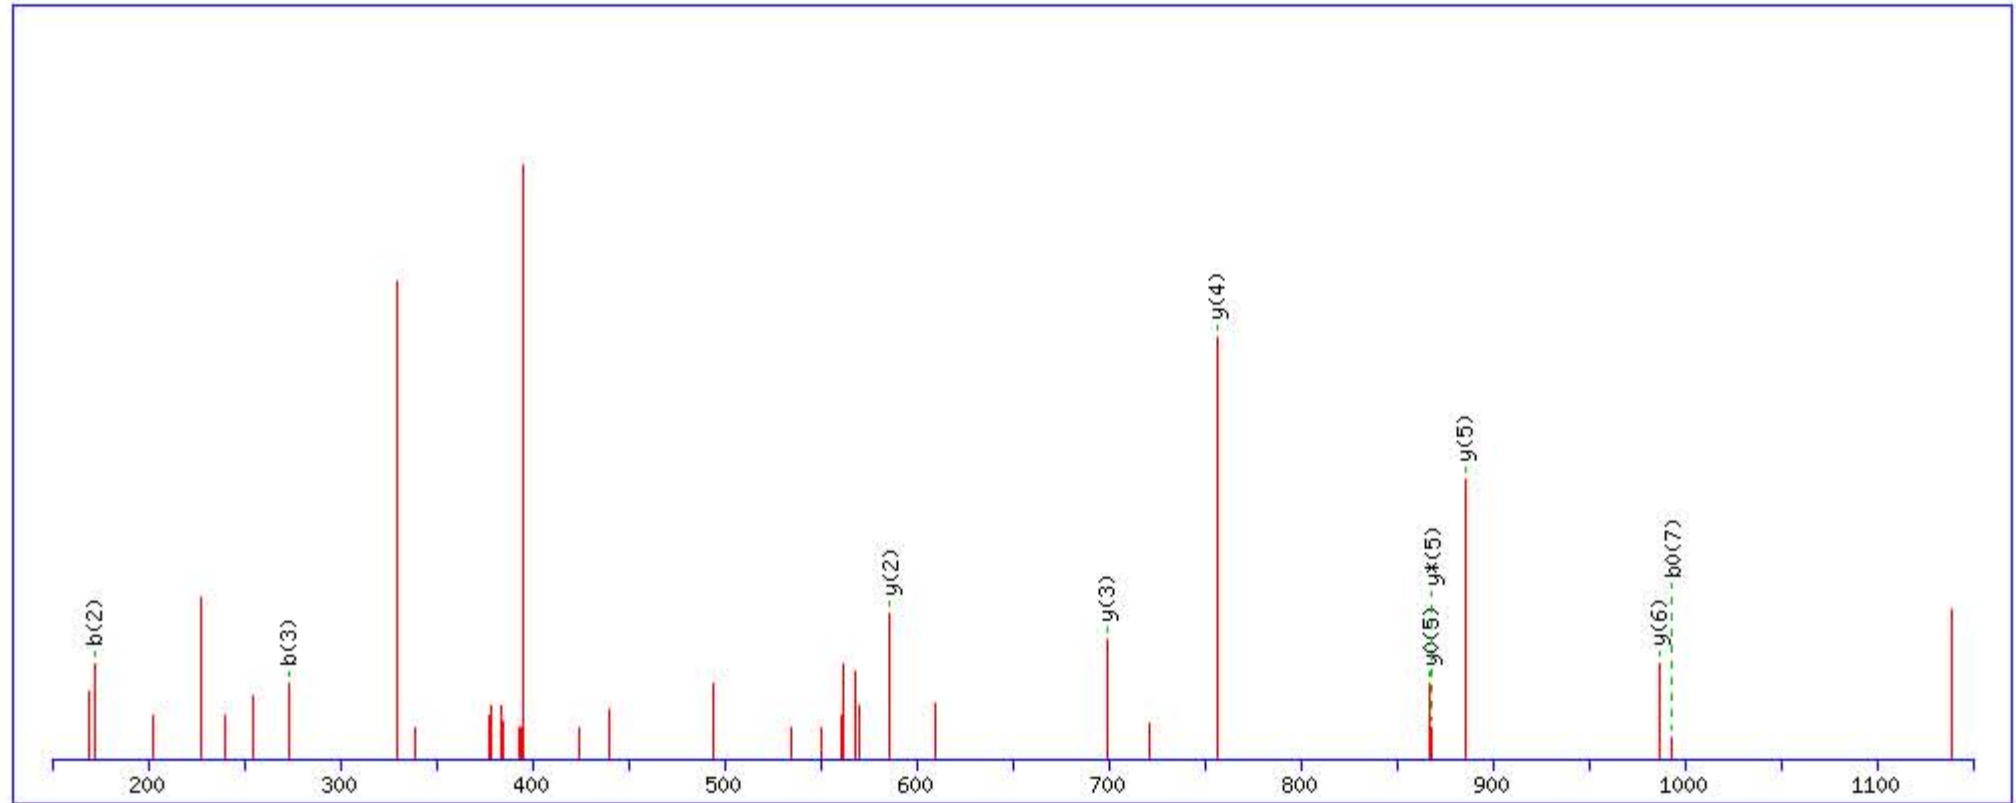

Monoisotopic mass of neutral peptide Mr(calc): 1156.591034

Fixed modifications: Carbamidomethyl (C) (apply to specified residues or termini only)

Variable modifications:

Q7 : Biotin:Thermo-21345 (Q)

Ions Score: 32 Expect: 0.012

Matches : 10/70 fragment ions using 18 most intense peaks [\(help\)](#)

| # | b                 | b <sup>++</sup> | b <sup>*</sup> | b <sup>+++</sup> | b <sup>0</sup>    | b <sup>0++</sup> | Seq.     | y                 | y <sup>++</sup> | y <sup>*</sup>    | y <sup>+++</sup> | y <sup>0</sup>    | y <sup>0++</sup> | #        |
|---|-------------------|-----------------|----------------|------------------|-------------------|------------------|----------|-------------------|-----------------|-------------------|------------------|-------------------|------------------|----------|
| 1 | 58.028740         | 29.518008       |                |                  |                   |                  | <b>G</b> |                   |                 |                   |                  |                   |                  | <b>8</b> |
| 2 | <b>172.071667</b> | 86.539471       | 155.045118     | 78.026197        |                   |                  | <b>N</b> | 1100.576857       | 550.792067      | 1083.550308       | 542.278792       | 1082.566292       | 541.786784       | <b>7</b> |
| 3 | <b>273.119346</b> | 137.063311      | 256.092797     | 128.550037       | 255.108781        | 128.058029       | <b>T</b> | <b>986.533930</b> | 493.770603      | 969.507381        | 485.257329       | 968.523365        | 484.765321       | <b>6</b> |
| 4 | 402.161939        | 201.584608      | 385.135390     | 193.071333       | 384.151374        | 192.579325       | <b>E</b> | <b>885.486251</b> | 443.246764      | <b>868.459702</b> | 434.733489       | <b>867.475686</b> | 434.241481       | <b>5</b> |
| 5 | 459.183403        | 230.095339      | 442.156854     | 221.582065       | 441.172838        | 221.090057       | <b>G</b> | <b>756.443658</b> | 378.725467      | 739.417109        | 370.212193       |                   |                  | <b>4</b> |
| 6 | 572.267467        | 286.637372      | 555.240918     | 278.124097       | 554.256902        | 277.632089       | <b>L</b> | <b>699.422194</b> | 350.214735      | 682.395645        | 341.701461       |                   |                  | <b>3</b> |
| 7 | 1011.492793       | 506.250035      | 994.466244     | 497.736760       | <b>993.482228</b> | 497.244752       | <b>Q</b> | <b>586.338130</b> | 293.672703      | 569.311581        | 285.159429       |                   |                  | <b>2</b> |
| 8 |                   |                 |                |                  |                   |                  | <b>K</b> | 147.112804        | 74.060040       | 130.086255        | 65.546766        |                   |                  | <b>1</b> |

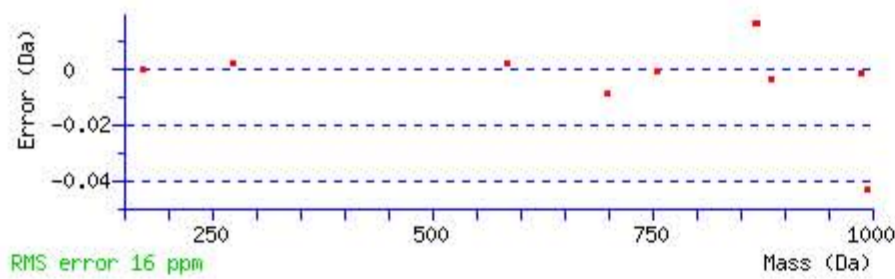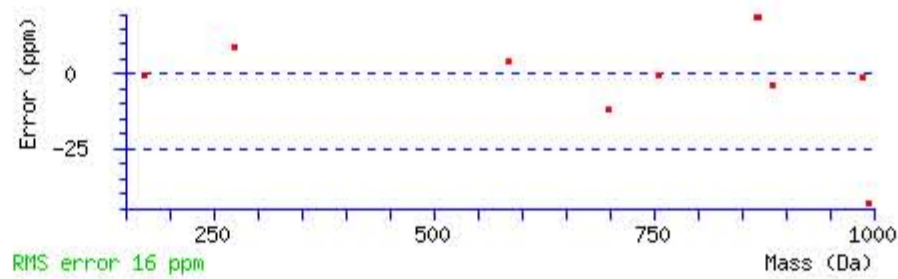

NCBI BLAST search of **GNTEGLQK**

(Parameters: blastp, nr protein database, expect=20000, no filter, PAM30)

Other BLAST [web gateways](#)

All matches to this query

| Score | Mr(calc):   | Delta     | Sequence                 |
|-------|-------------|-----------|--------------------------|
| 31.9  | 1156.591034 | -0.004446 | <a href="#">GNTEGLQK</a> |



# MASCOT Search Results

## Peptide View

MS/MS Fragmentation of **IDQNVEELK**

Found in **APOA4\_HUMAN**, Apolipoprotein A-IV OS=Homo sapiens GN=APOA4 PE=1 SV=3

Match to Query 38844: 1397.726468 from(699.870510,2+) rtinseconds(1855) index(79251)

Title: Locus:1.1.1.2525.18 File:"2013-07-02 CLN FXIII 30 min 1st FT.wiff"

Data file C:\Program Files (x86)\Matrix Science\Mascot Daemon\mgf1 FXIII 30 min 1st\mascot\_daemon\_merge.mgf

Click mouse within plot area to zoom in by factor of two about that point

Or, Plot from  to  Da

Label all possible matches  Label matches used for scoring

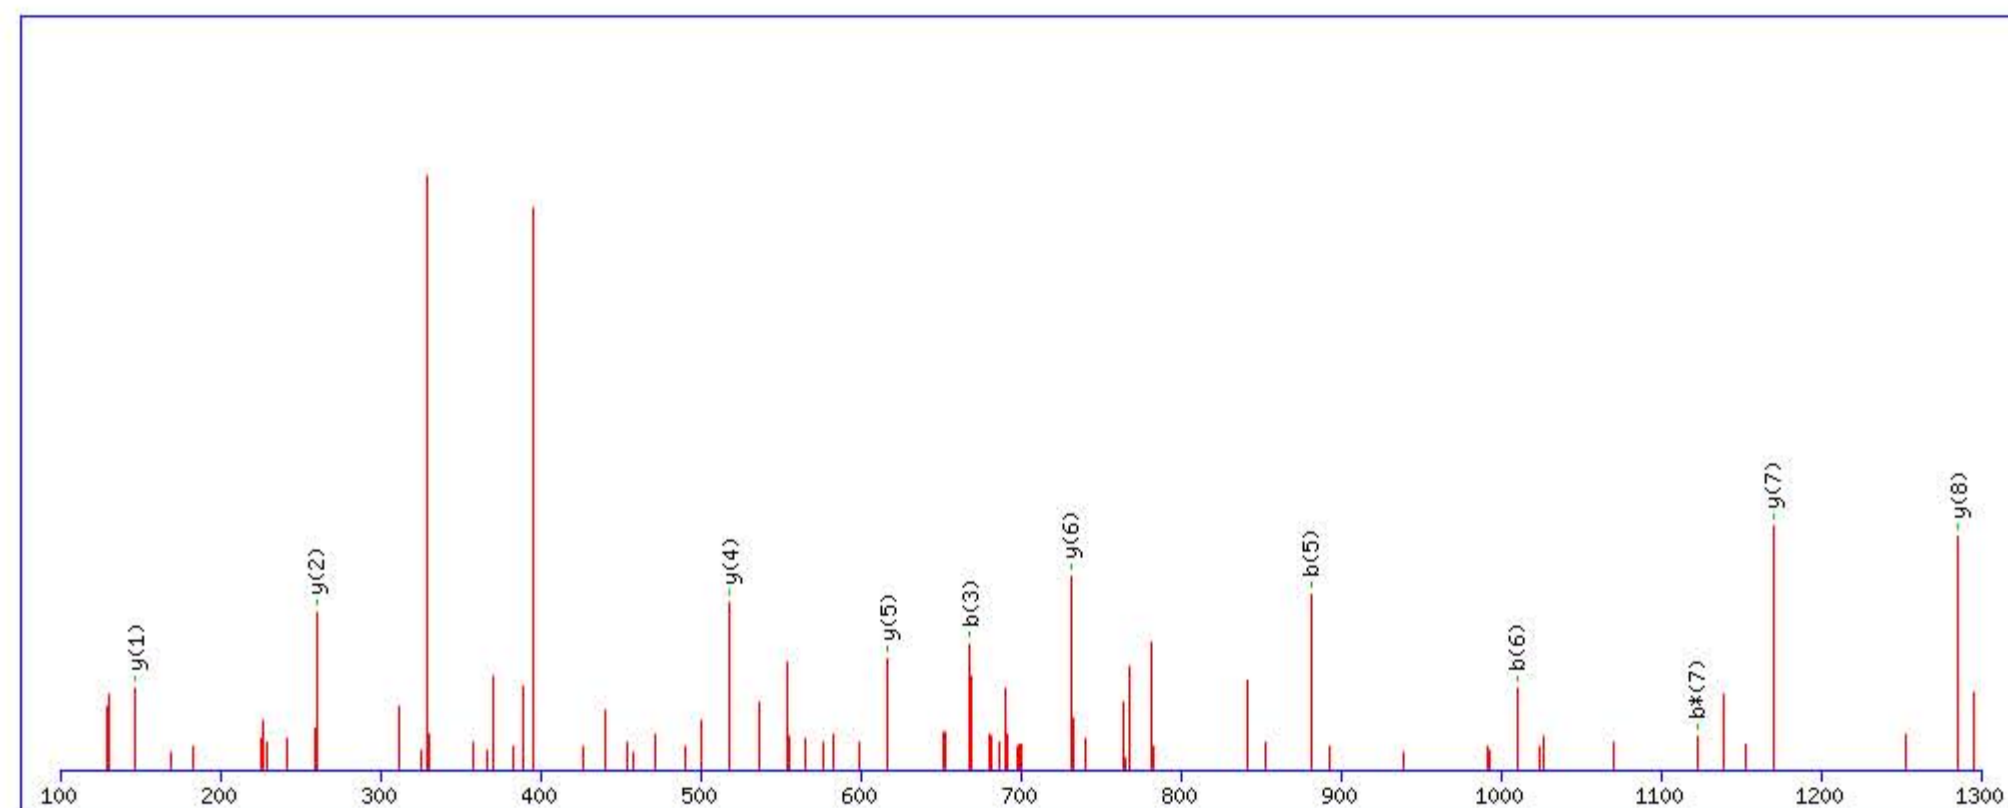

Monoisotopic mass of neutral peptide  $M_r(\text{calc})$ : 1397.722427

Fixed modifications: Carbamidomethyl (C) (apply to specified residues or termini only)

Variable modifications:

Q3 : Biotin:Thermo-21345 (Q)

Ions Score: 65 Expect: 9.1e-006

Matches : 11/86 fragment ions using 12 most intense peaks [\(help\)](#)

| # | b                  | b <sup>++</sup> | b <sup>*</sup>     | b <sup>*++</sup> | b <sup>0</sup> | b <sup>0++</sup> | Seq. | y                  | y <sup>++</sup> | y <sup>*</sup> | y <sup>*++</sup> | y <sup>0</sup> | y <sup>0++</sup> | # |
|---|--------------------|-----------------|--------------------|------------------|----------------|------------------|------|--------------------|-----------------|----------------|------------------|----------------|------------------|---|
| 1 | 114.091340         | 57.549308       |                    |                  |                |                  | I    |                    |                 |                |                  |                |                  | 9 |
| 2 | 229.118283         | 115.062779      |                    |                  | 211.107718     | 106.057497       | D    | <b>1285.645664</b> | 643.326470      | 1268.619115    | 634.813196       | 1267.635099    | 634.321187       | 8 |
| 3 | <b>668.343609</b>  | 334.675443      | 651.317060         | 326.162168       | 650.333044     | 325.670160       | Q    | <b>1170.618721</b> | 585.812998      | 1153.592172    | 577.299724       | 1152.608156    | 576.807716       | 7 |
| 4 | 782.386536         | 391.696906      | 765.359987         | 383.183631       | 764.375971     | 382.691623       | N    | <b>731.393395</b>  | 366.200335      | 714.366846     | 357.687061       | 713.382830     | 357.195053       | 6 |
| 5 | <b>881.454950</b>  | 441.231113      | 864.428401         | 432.717838       | 863.444385     | 432.225830       | V    | <b>617.350468</b>  | 309.178872      | 600.323919     | 300.665597       | 599.339903     | 300.173589       | 5 |
| 6 | <b>1010.497543</b> | 505.752410      | 993.470994         | 497.239135       | 992.486978     | 496.747127       | E    | <b>518.282054</b>  | 259.644665      | 501.255505     | 251.131390       | 500.271489     | 250.639382       | 4 |
| 7 | 1139.540136        | 570.273706      | <b>1122.513587</b> | 561.760431       | 1121.529571    | 561.268423       | E    | 389.239461         | 195.123368      | 372.212912     | 186.610094       | 371.228896     | 186.118086       | 3 |
| 8 | 1252.624200        | 626.815738      | 1235.597651        | 618.302463       | 1234.613635    | 617.810455       | L    | <b>260.196868</b>  | 130.602072      | 243.170319     | 122.088797       |                |                  | 2 |
| 9 |                    |                 |                    |                  |                |                  | K    | <b>147.112804</b>  | 74.060040       | 130.086255     | 65.546765        |                |                  | 1 |

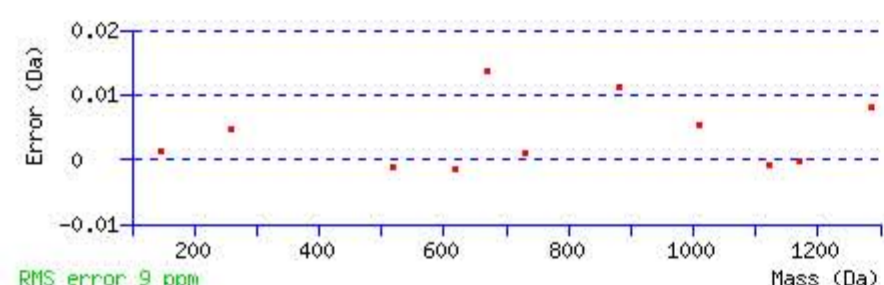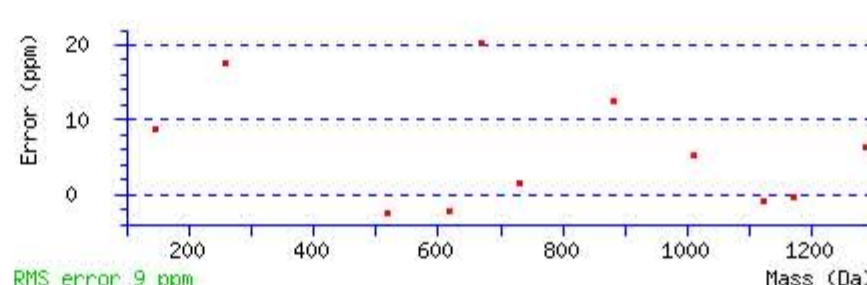

NCBI BLAST search of **IDQNVEELK**

(Parameters: blastp, nr protein database, expect=20000, no filter, PAM30)

Other BLAST [web gateways](#)

## All matches to this query

| Score | $M_r(\text{calc})$ | Delta     | Sequence                      |
|-------|--------------------|-----------|-------------------------------|
| 64.5  | 1397.722427        | 0.004041  | <a href="#">IDQNVEELK</a>     |
| 13.5  | 1397.744873        | -0.018405 | <a href="#">QRREEELK</a>      |
| 11.4  | 1397.734329        | -0.007861 | <a href="#">LYTHSYLGFLK</a>   |
| 9.8   | 1397.744873        | -0.018405 | <a href="#">MLEKARHQELK</a>   |
| 8.4   | 1397.733658        | -0.007190 | <a href="#">QNITNQLEK</a>     |
| 8.3   | 1397.715042        | 0.011426  | <a href="#">LQESQPGNAVIDK</a> |
| 7.9   | 1397.722412        | 0.004056  | <a href="#">QLEAQLEEK</a>     |
| 7.0   | 1397.733658        | -0.007190 | <a href="#">EVDQREALK</a>     |
| 6.4   | 1397.744904        | -0.018436 | <a href="#">SSGPQRAGSLK</a>   |
| 5.9   | 1397.733658        | -0.007190 | <a href="#">NQQTENLLK</a>     |



# MASCOT Search Results

## Peptide View

MS/MS Fragmentation of **IDQTVLEELR**

Found in **APOA4\_HUMAN**, Apolipoprotein A-IV OS=Homo sapiens GN=APOA4 PE=1 SV=3

Match to Query 39801: 1412.736128 from(707.375340,2+) rtinseconds(1926) index(79697)

Title: Locus:1.1.1.2550.15 File:"2013-07-02 CLN FXIII 30 min 1st FT.wiff"

Data file C:\Program Files (x86)\Matrix Science\Mascot Daemon\mgf\1 FXIII 30 min 1st\mascot\_daemon\_merge.mgf

Click mouse within plot area to zoom in by factor of two about that point

Or, Plot from 0 to 2200 Da Full range

Label all possible matches  Label matches used for scoring

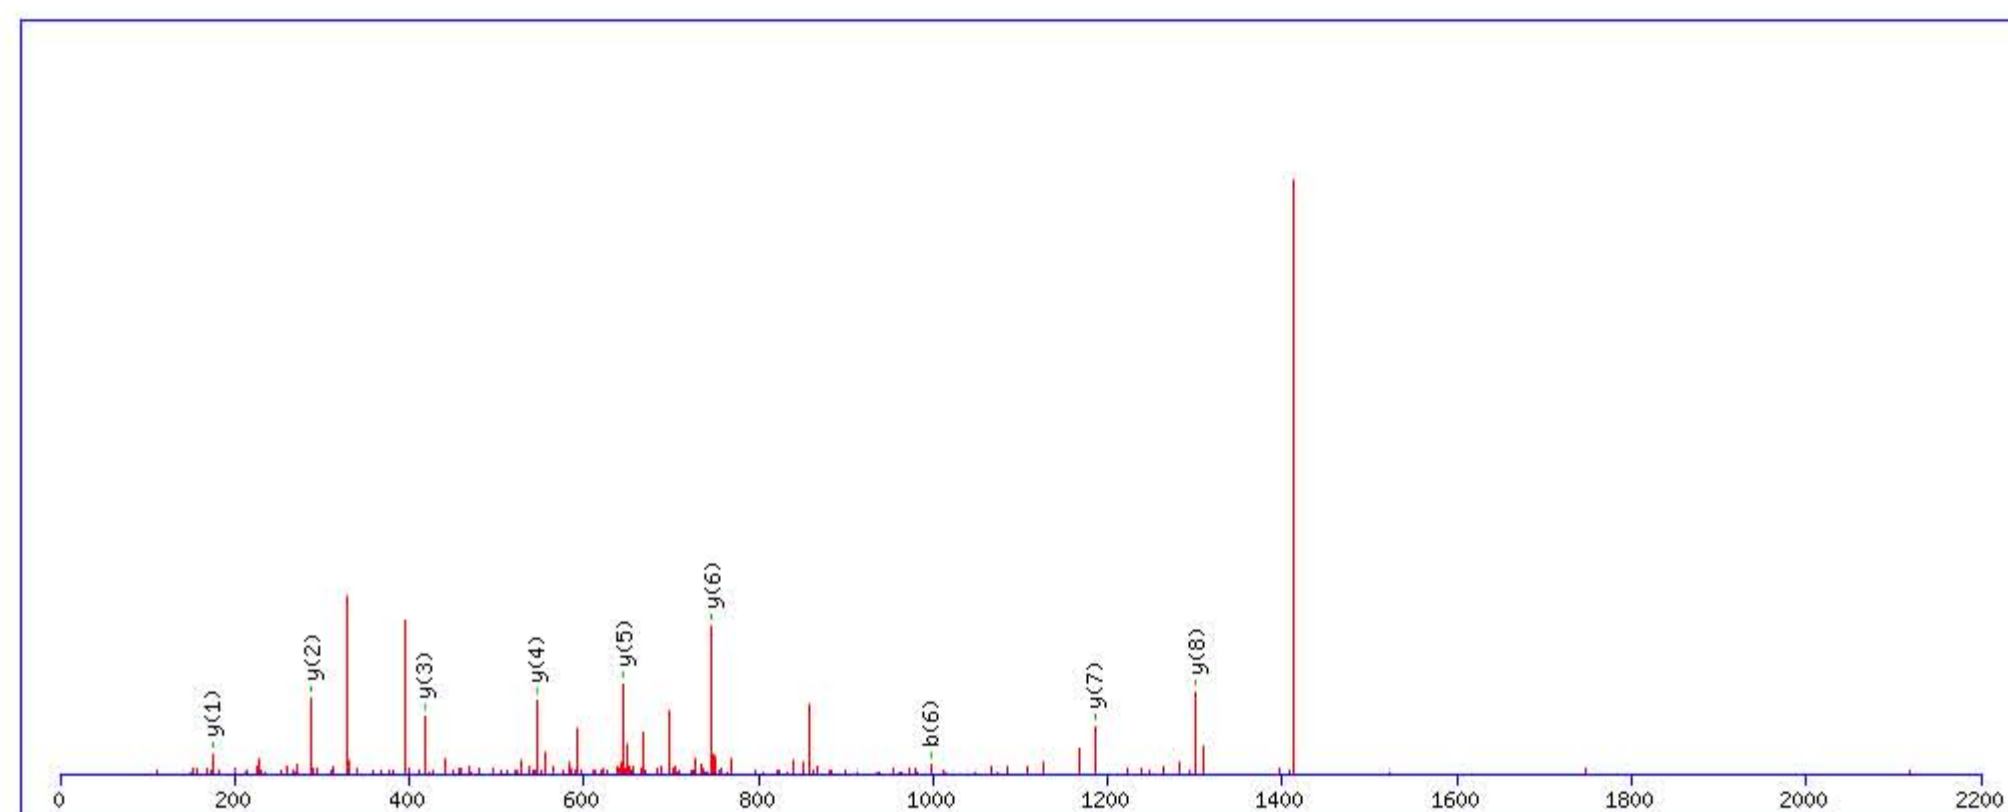

Monoisotopic mass of neutral peptide Mr(calc): 1412.733337

Fixed modifications: Carbamidomethyl (C) (apply to specified residues or termini only)

Variable modifications:

Q3 : Biotin:Thermo-21345 (Q)

Ions Score: 69 Expect: 3.3e-006

Matches : 9/86 fragment ions using 13 most intense peaks [\(help\)](#)

| # | b           | b <sup>++</sup> | b <sup>*</sup> | b <sup>*++</sup> | b <sup>0</sup> | b <sup>0++</sup> | Seq. | y           | y <sup>++</sup> | y <sup>*</sup> | y <sup>*++</sup> | y <sup>0</sup> | y <sup>0++</sup> | # |
|---|-------------|-----------------|----------------|------------------|----------------|------------------|------|-------------|-----------------|----------------|------------------|----------------|------------------|---|
| 1 | 114.091340  | 57.549308       |                |                  |                |                  | I    |             |                 |                |                  |                |                  | 9 |
| 2 | 229.118283  | 115.062779      |                |                  | 211.107718     | 106.057497       | D    | 1300.656564 | 650.831920      | 1283.630015    | 642.318646       | 1282.645999    | 641.826638       | 8 |
| 3 | 668.343609  | 334.675443      | 651.317060     | 326.162168       | 650.333044     | 325.670160       | Q    | 1185.629621 | 593.318449      | 1168.603072    | 584.805174       | 1167.619056    | 584.313166       | 7 |
| 4 | 769.391288  | 385.199282      | 752.364739     | 376.686008       | 751.380723     | 376.194000       | T    | 746.404295  | 373.705786      | 729.377746     | 365.192511       | 728.393730     | 364.700503       | 6 |
| 5 | 868.459702  | 434.733489      | 851.433153     | 426.220215       | 850.449137     | 425.728207       | V    | 645.356616  | 323.181946      | 628.330067     | 314.668672       | 627.346051     | 314.176664       | 5 |
| 6 | 997.502295  | 499.254786      | 980.475746     | 490.741511       | 979.491730     | 490.249503       | E    | 546.288202  | 273.647739      | 529.261653     | 265.134465       | 528.277637     | 264.642457       | 4 |
| 7 | 1126.544888 | 563.776082      | 1109.518339    | 555.262808       | 1108.534323    | 554.770800       | E    | 417.245609  | 209.126442      | 400.219060     | 200.613168       | 399.235044     | 200.121160       | 3 |
| 8 | 1239.628952 | 620.318114      | 1222.602403    | 611.804840       | 1221.618387    | 611.312832       | L    | 288.203016  | 144.605146      | 271.176467     | 136.091871       |                |                  | 2 |
| 9 |             |                 |                |                  |                |                  | R    | 175.118952  | 88.063114       | 158.092403     | 79.549839        |                |                  | 1 |

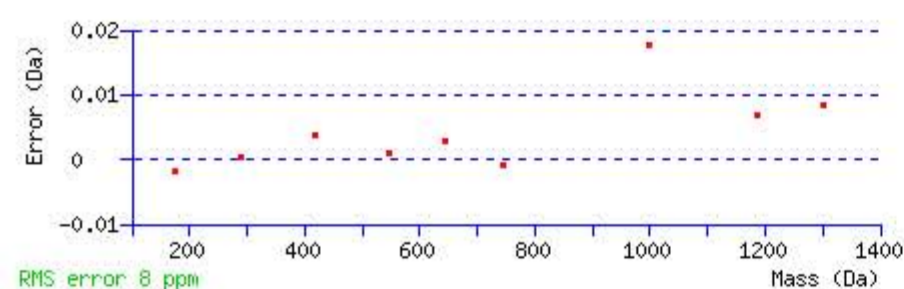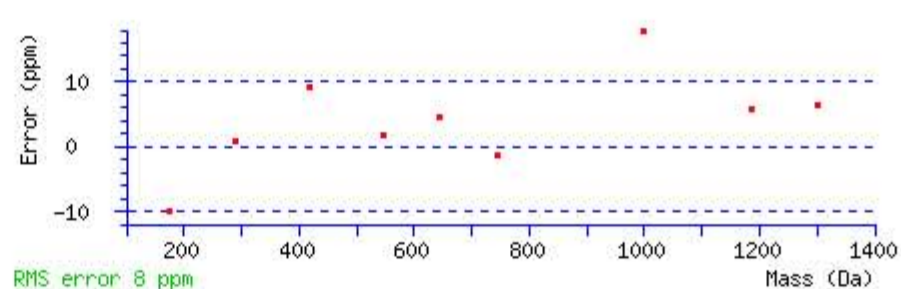

NCBI BLAST search of [IDQTVLEELR](#)

(Parameters: blastp, nr protein database, expect=20000, no filter, PAM30)

Other BLAST [web gateways](#)

## All matches to this query

| Score | Mr(calc):   | Delta     | Sequence                      |
|-------|-------------|-----------|-------------------------------|
| 69.1  | 1412.733337 | 0.002791  | <a href="#">IDQTVLEELR</a>    |
| 15.4  | 1412.744537 | -0.008409 | <a href="#">IPPEKMRELER</a>   |
| 8.8   | 1412.741211 | -0.005083 | <a href="#">KVTIYSFTGNQR</a>  |
| 8.7   | 1412.734665 | 0.001463  | <a href="#">MPADWRQQLR</a>    |
| 6.2   | 1412.733322 | 0.002806  | <a href="#">LSEEIDQLR</a>     |
| 5.4   | 1412.737167 | -0.001039 | <a href="#">ARPEDVISEGRGK</a> |
| 4.5   | 1412.719391 | 0.016737  | <a href="#">LKAEMDEHRLR</a>   |
| 4.2   | 1412.752441 | -0.016313 | <a href="#">QVHIPPNPQDLR</a>  |
| 3.4   | 1412.752411 | -0.016283 | <a href="#">LLEIQADYHRR</a>   |
| 3.1   | 1412.752396 | -0.016268 | <a href="#">AEKPKLHYSNAR</a>  |



# MASCOT Search Results

## Peptide View

MS/MS Fragmentation of **LEPYADQLR**

Found in **APOA4\_HUMAN**, Apolipoprotein A-IV OS=Homo sapiens GN=APOA4 PE=1 SV=3

Match to Query 39827: 1414.730288 from(708.372420,2+) rtinseconds(2005) index(80337)

Title: Locus:1.1.1.2577.11 File:"2013-07-02 CLN FXIII 30 min 1st FT.wiff"

Data file C:\Program Files (x86)\Matrix Science\Mascot Daemon\mgf1 FXIII 30 min 1st\mascot\_daemon\_merge.mgf

Click mouse within plot area to zoom in by factor of two about that point

Or, Plot from  to  Da

Label all possible matches  Label matches used for scoring

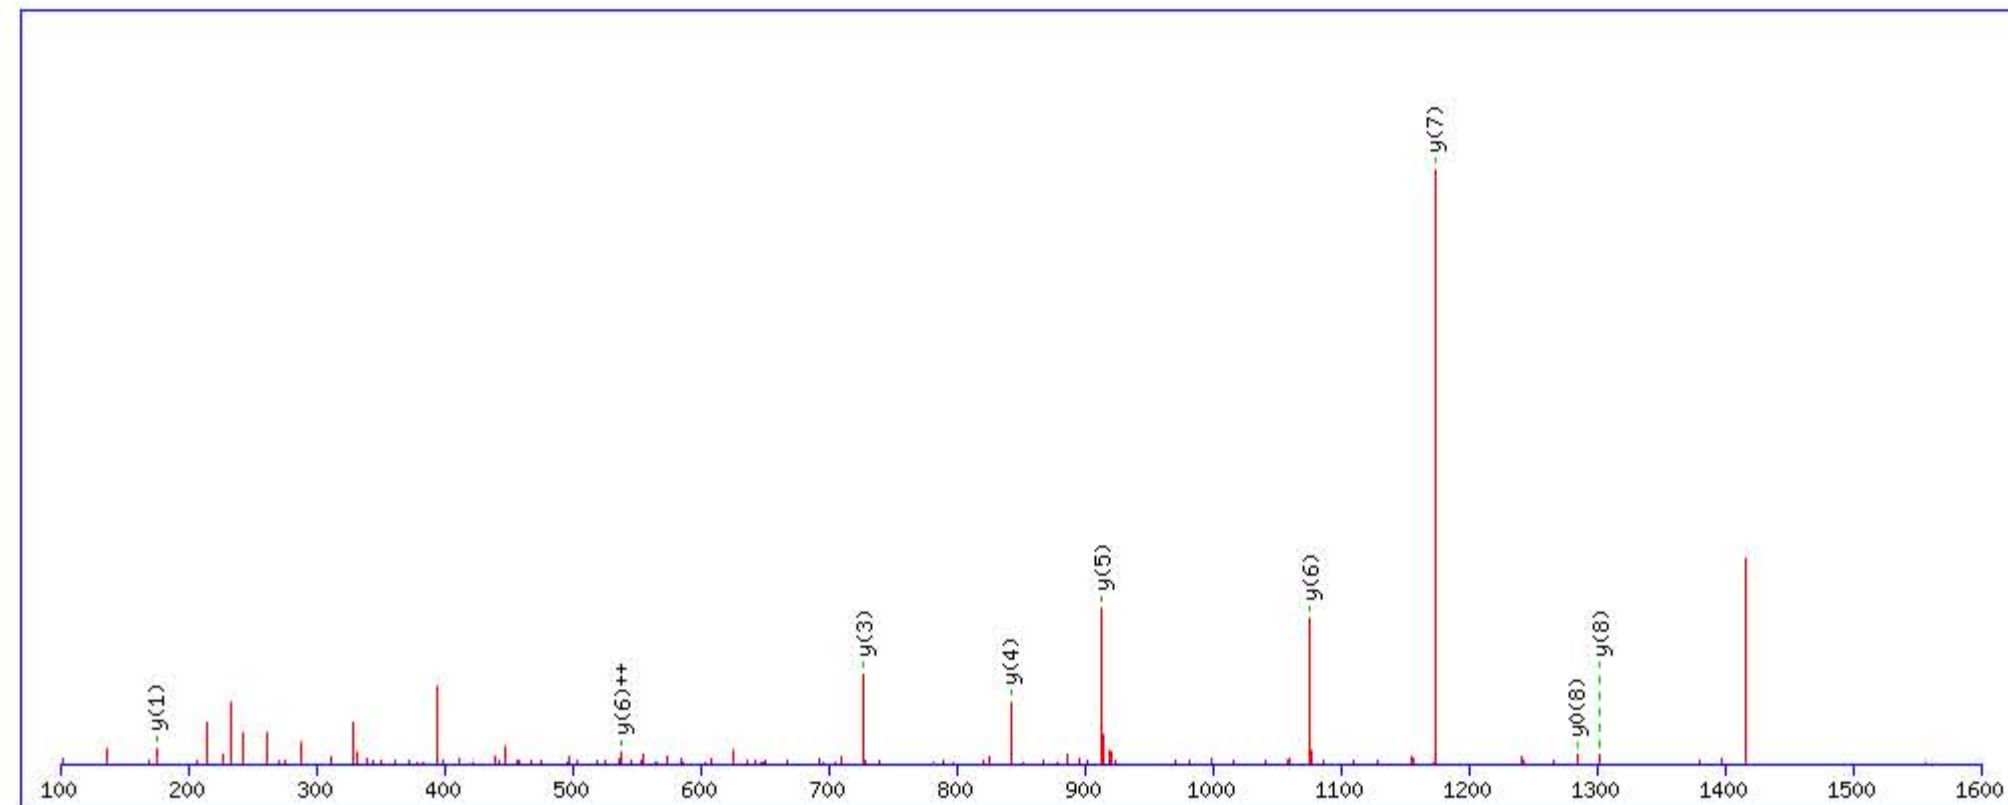

Monoisotopic mass of neutral peptide Mr(calc): 1414.727844

Fixed modifications: Carbamidomethyl (C) (apply to specified residues or termini only)

Variable modifications:

Q7 : Biotin:Thermo-21345 (Q)

Ions Score: 56 Expect: 3.6e-005

Matches : 9/76 fragment ions using 13 most intense peaks [\(help\)](#)

| # | b           | b <sup>++</sup> | b <sup>*</sup> | b <sup>*++</sup> | b <sup>0</sup> | b <sup>0++</sup> | Seq. | y                  | y <sup>++</sup>   | y <sup>*</sup> | y <sup>*++</sup> | y <sup>0</sup>     | y <sup>0++</sup> | # |
|---|-------------|-----------------|----------------|------------------|----------------|------------------|------|--------------------|-------------------|----------------|------------------|--------------------|------------------|---|
| 1 | 114.091340  | 57.549308       |                |                  |                |                  | L    |                    |                   |                |                  |                    |                  | 9 |
| 2 | 243.133933  | 122.070605      |                |                  | 225.123368     | 113.065322       | E    | <b>1302.651085</b> | 651.829181        | 1285.624536    | 643.315906       | <b>1284.640520</b> | 642.823898       | 8 |
| 3 | 340.186697  | 170.596987      |                |                  | 322.176132     | 161.591704       | P    | <b>1173.608492</b> | 587.307884        | 1156.581943    | 578.794610       | 1155.597927        | 578.302602       | 7 |
| 4 | 503.250026  | 252.128651      |                |                  | 485.239461     | 243.123369       | Y    | <b>1076.555728</b> | <b>538.781502</b> | 1059.529179    | 530.268228       | 1058.545163        | 529.776220       | 6 |
| 5 | 574.287140  | 287.647208      |                |                  | 556.276575     | 278.641926       | A    | <b>913.492399</b>  | 457.249838        | 896.465850     | 448.736563       | 895.481834         | 448.244555       | 5 |
| 6 | 689.314083  | 345.160680      |                |                  | 671.303518     | 336.155397       | D    | <b>842.455285</b>  | 421.731281        | 825.428736     | 413.218006       | 824.444720         | 412.725998       | 4 |
| 7 | 1128.539409 | 564.773343      | 1111.512860    | 556.260068       | 1110.528844    | 555.768060       | Q    | <b>727.428342</b>  | 364.217809        | 710.401793     | 355.704535       |                    |                  | 3 |
| 8 | 1241.623473 | 621.315375      | 1224.596924    | 612.802100       | 1223.612908    | 612.310092       | L    | 288.203016         | 144.605146        | 271.176467     | 136.091871       |                    |                  | 2 |
| 9 |             |                 |                |                  |                |                  | R    | <b>175.118952</b>  | 88.063114         | 158.092403     | 79.549839        |                    |                  | 1 |

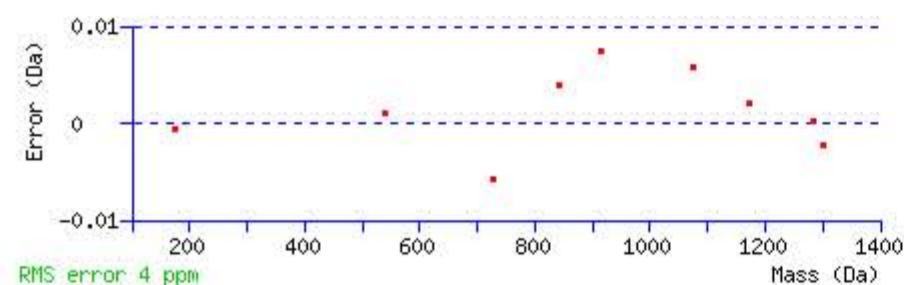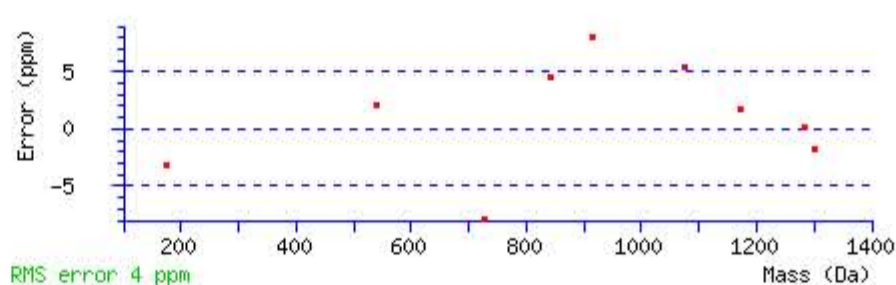

NCBI BLAST search of **LEPYADQLR**

(Parameters: blastp, nr protein database, expect=20000, no filter, PAM30)

Other BLAST [web gateways](#)

## All matches to this query

| Score | Mr(calc):   | Delta     | Sequence                     |
|-------|-------------|-----------|------------------------------|
| 55.8  | 1414.727844 | 0.002444  | <a href="#">LEPYADQLR</a>    |
| 7.9   | 1414.712585 | 0.017703  | <a href="#">EISTEEQLR</a>    |
| 5.0   | 1414.731689 | -0.001401 | <a href="#">NKAEFHQSVISR</a> |
| 4.1   | 1414.716400 | 0.013888  | <a href="#">LEEDARLEERR</a>  |
| 2.7   | 1414.735062 | -0.004774 | <a href="#">IQLMQEVDRQR</a>  |
| 1.5   | 1414.741547 | -0.011259 | <a href="#">LEKENLEERQK</a>  |
| 0.3   | 1414.741577 | -0.011289 | <a href="#">LETVQADNIREK</a> |
| 0.3   | 1414.741577 | -0.011289 | <a href="#">ELDVEVSRLEAR</a> |

Mascot: <http://www.matrixscience.com/>



# MASCOT Search Results

## Peptide View

MS/MS Fragmentation of **ALVQQMEQLR**

Found in **APOA4\_HUMAN**, Apolipoprotein A-IV OS=Homo sapiens GN=APOA4 PE=1 SV=3

Match to Query 43378: 1525.821028 from(763.917790,2+) rtinseconds(2139) index(81204)

Title: Locus:1.1.1.2624.14 File:"2013-07-02 CLN FXIII 30 min 1st FT.wiff"

Data file C:\Program Files (x86)\Matrix Science\Mascot Daemon\mgf1 FXIII 30 min 1st\mascot\_daemon\_merge.mgf

Click mouse within plot area to zoom in by factor of two about that point

Or, Plot from  to  Da

Label all possible matches  Label matches used for scoring

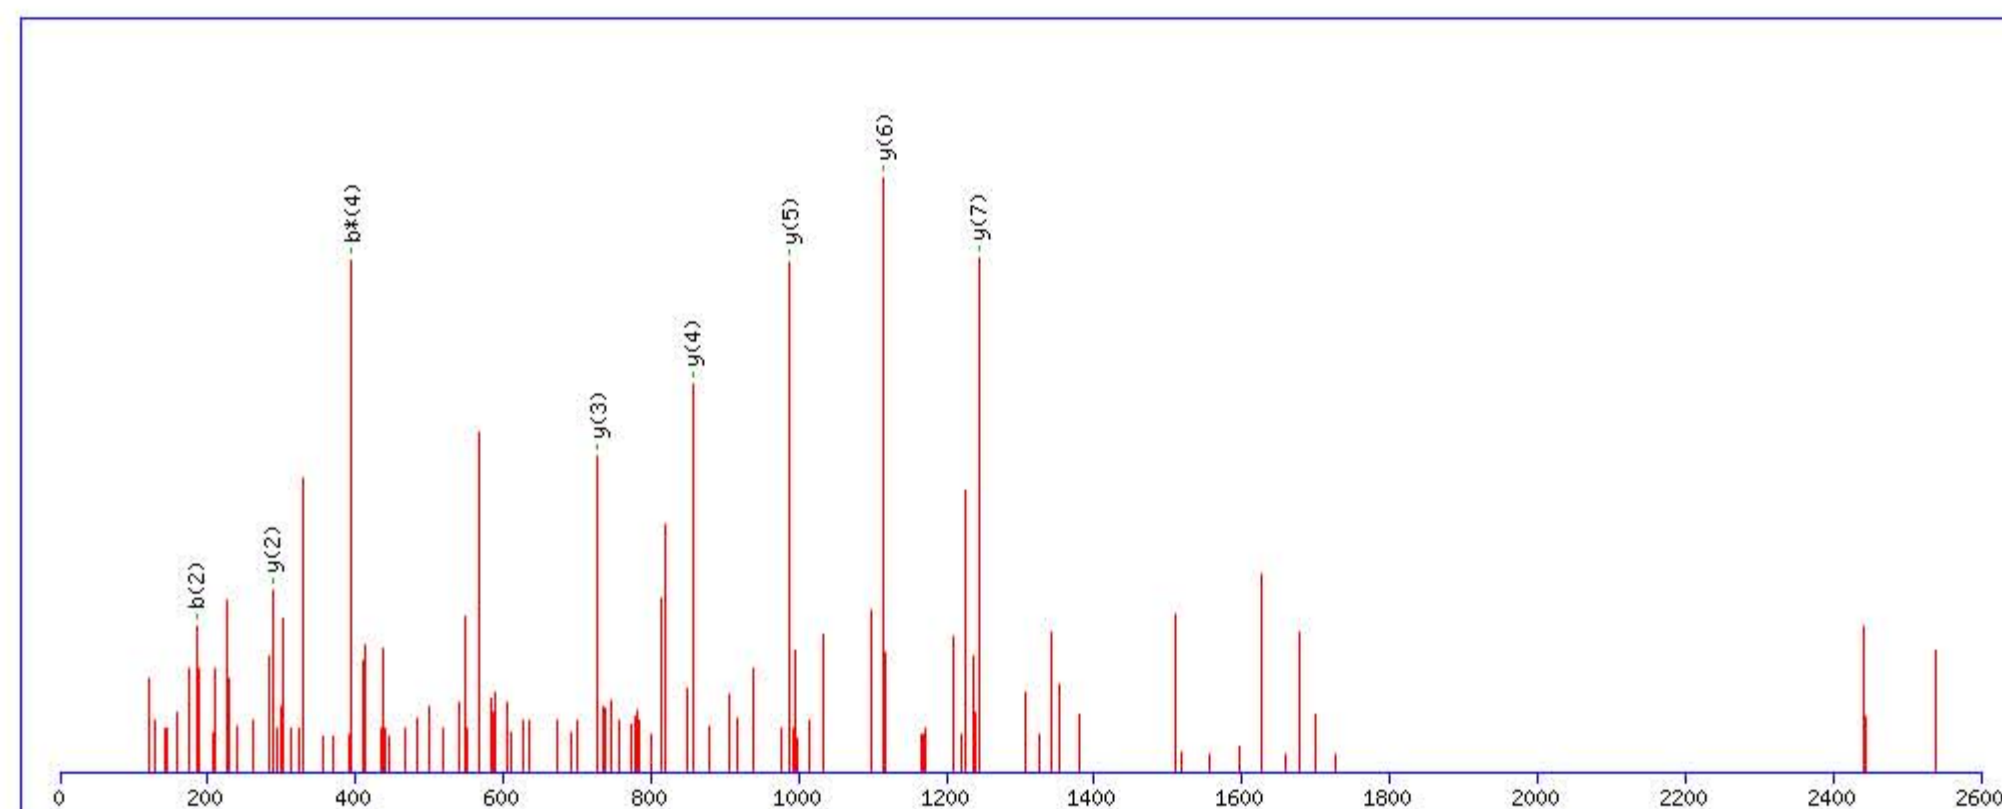

Monoisotopic mass of neutral peptide Mr(calc): 1525.810867

Fixed modifications: Carbamidomethyl (C) (apply to specified residues or termini only)

Variable modifications:

Q8 : Biotin:Thermo-21345 (Q)

Ions Score: 38 Expect: 0.0008

Matches : 8/84 fragment ions using 14 most intense peaks [\(help\)](#)

| #  | b                 | b <sup>++</sup> | b <sup>*</sup>    | b <sup>*++</sup> | b <sup>0</sup> | b <sup>0++</sup> | Seq. | y                  | y <sup>++</sup> | y <sup>*</sup> | y <sup>*++</sup> | y <sup>0</sup> | y <sup>0++</sup> | #  |
|----|-------------------|-----------------|-------------------|------------------|----------------|------------------|------|--------------------|-----------------|----------------|------------------|----------------|------------------|----|
| 1  | 72.044390         | 36.525833       |                   |                  |                |                  | A    |                    |                 |                |                  |                |                  | 10 |
| 2  | <b>185.128454</b> | 93.067865       |                   |                  |                |                  | L    | 1455.781054        | 728.394165      | 1438.754505    | 719.880890       | 1437.770489    | 719.388882       | 9  |
| 3  | 284.196868        | 142.602072      |                   |                  |                |                  | V    | 1342.696990        | 671.852133      | 1325.670441    | 663.338858       | 1324.686425    | 662.846850       | 8  |
| 4  | 412.255446        | 206.631361      | <b>395.228897</b> | 198.118087       |                |                  | Q    | <b>1243.628576</b> | 622.317926      | 1226.602027    | 613.804651       | 1225.618011    | 613.312643       | 7  |
| 5  | 540.314024        | 270.660650      | 523.287475        | 262.147376       |                |                  | Q    | <b>1115.569998</b> | 558.288637      | 1098.543449    | 549.775362       | 1097.559433    | 549.283354       | 6  |
| 6  | 671.354509        | 336.180893      | 654.327960        | 327.667618       |                |                  | M    | <b>987.511420</b>  | 494.259348      | 970.484871     | 485.746073       | 969.500855     | 485.254065       | 5  |
| 7  | 800.397102        | 400.702189      | 783.370553        | 392.188915       | 782.386537     | 391.696907       | E    | <b>856.470935</b>  | 428.739105      | 839.444386     | 420.225831       | 838.460370     | 419.733823       | 4  |
| 8  | 1239.622428       | 620.314852      | 1222.595879       | 611.801578       | 1221.611863    | 611.309569       | Q    | <b>727.428342</b>  | 364.217809      | 710.401793     | 355.704534       |                |                  | 3  |
| 9  | 1352.706492       | 676.856884      | 1335.679943       | 668.343609       | 1334.695927    | 667.851601       | L    | <b>288.203016</b>  | 144.605146      | 271.176467     | 136.091871       |                |                  | 2  |
| 10 |                   |                 |                   |                  |                |                  | R    | 175.118952         | 88.063114       | 158.092403     | 79.549839        |                |                  | 1  |

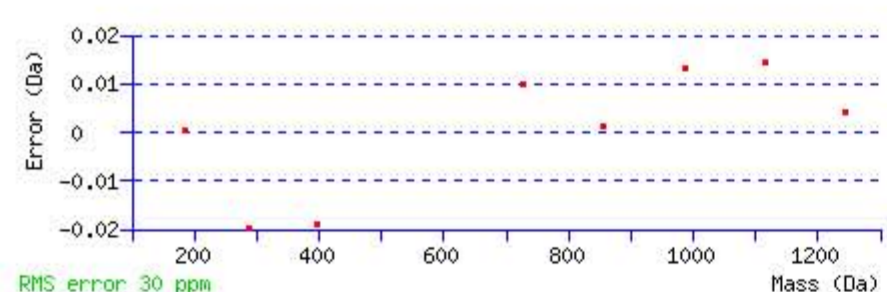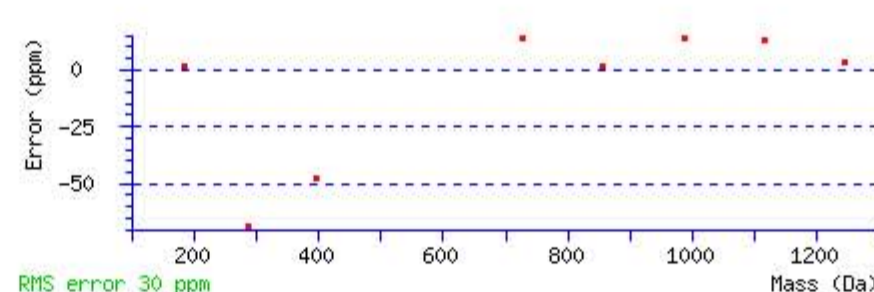

NCBI BLAST search of **ALVQQMEQLR**

(Parameters: blastp, nr protein database, expect=20000, no filter, PAM30)

Other BLAST [web gateways](#)

All matches to this query

| Score | Mr(calc):   | Delta    | Sequence                      |
|-------|-------------|----------|-------------------------------|
| 38.3  | 1525.810867 | 0.010161 | <a href="#">ALVQQMEQLR</a>    |
| 10.2  | 1525.810867 | 0.010161 | <a href="#">ALVQQMEQLR</a>    |
| 5.1   | 1525.807495 | 0.013533 | <a href="#">WPPQQLMLSAALR</a> |
| 1.8   | 1525.817383 | 0.003645 | <a href="#">IPSNILLPEDKCK</a> |

Mascot: <http://www.matrixscience.com/>



# MASCOT SEARCH RESULTS

## Peptide View

MS/MS Fragmentation of **SLAPYAQDTQEK**

Found in **APOA4\_HUMAN**, Apolipoprotein A-IV OS=Homo sapiens GN=APOA4 PE=1 SV=3

Match to Query 48601: 1660.815828 from(831.415190,2+) rtinseconds(1766) index(78668)

Title: Locus:1.1.1.2494.19 File:"2013-07-02 CLN FXIII 30 min 1st FT.wiff"

Data file C:\Program Files (x86)\Matrix Science\Mascot Daemon\mgf1 FXIII 30 min 1st\mascot\_daemon\_merge.mgf

Click mouse within plot area to zoom in by factor of two about that point

Or, Plot from  to  Da

Label all possible matches  Label matches used for scoring

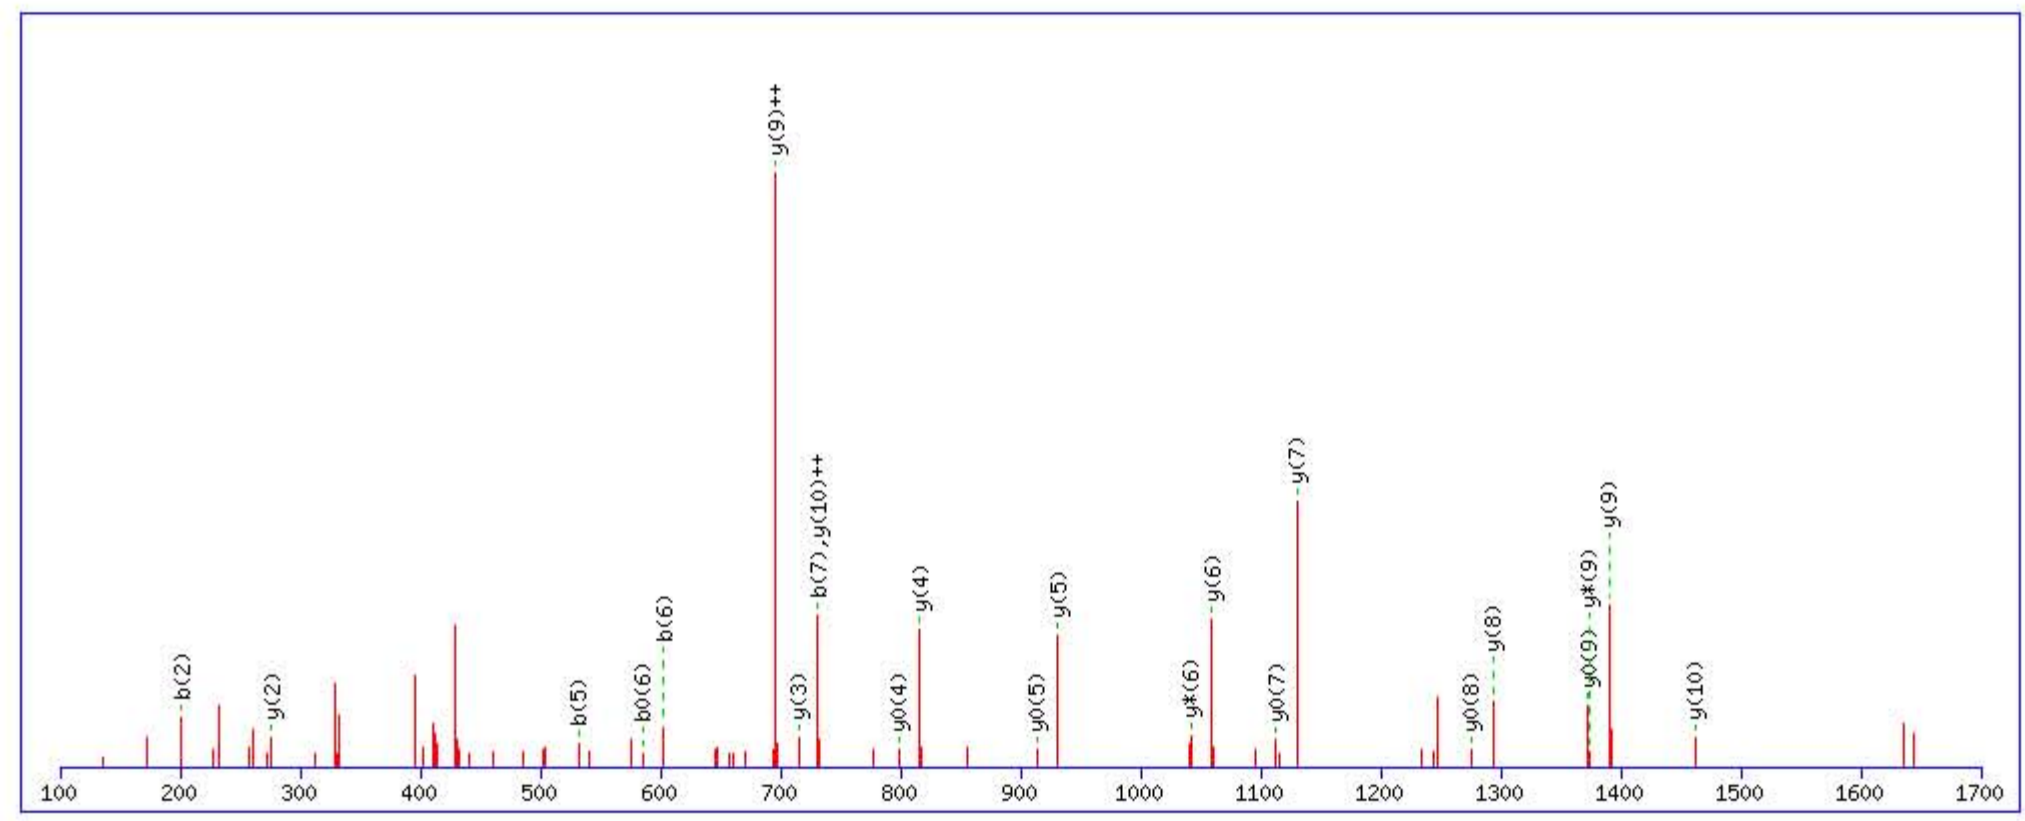

Monoisotopic mass of neutral peptide Mr(calc): 1660.813034

Fixed modifications: Carbamidomethyl (C) (apply to specified residues or termini only)

Variable modifications:

Q10 : Biotin:Thermo-21345 (Q)

Ions Score: 48 Expect: 5.4e-005

Matches : 23/118 fragment ions using 47 most intense peaks [\(help\)](#)

| #  | b                 | b <sup>++</sup> | b <sup>*</sup> | b <sup>*++</sup> | b <sup>0</sup>    | b <sup>0++</sup> | Seq. | y                  | y <sup>++</sup>   | y <sup>*</sup>     | y <sup>*++</sup> | y <sup>0</sup>     | y <sup>0++</sup> | #  |
|----|-------------------|-----------------|----------------|------------------|-------------------|------------------|------|--------------------|-------------------|--------------------|------------------|--------------------|------------------|----|
| 1  | 88.039304         | 44.523290       |                |                  | 70.028739         | 35.518008        | S    |                    |                   |                    |                  |                    |                  | 12 |
| 2  | <b>201.123368</b> | 101.065322      |                |                  | 183.112803        | 92.060039        | L    | 1574.788308        | 787.897792        | 1557.761759        | 779.384518       | 1556.777743        | 778.892510       | 11 |
| 3  | 272.160482        | 136.583879      |                |                  | 254.149917        | 127.578596       | A    | <b>1461.704244</b> | <b>731.355760</b> | 1444.677695        | 722.842486       | 1443.693679        | 722.350478       | 10 |
| 4  | 369.213246        | 185.110261      |                |                  | 351.202681        | 176.104978       | P    | <b>1390.667130</b> | <b>695.837203</b> | <b>1373.640581</b> | 687.323929       | <b>1372.656565</b> | 686.831921       | 9  |
| 5  | <b>532.276575</b> | 266.641926      |                |                  | 514.266010        | 257.636643       | Y    | <b>1293.614366</b> | 647.310821        | 1276.587817        | 638.797547       | <b>1275.603801</b> | 638.305539       | 8  |
| 6  | <b>603.313689</b> | 302.160483      |                |                  | <b>585.303124</b> | 293.155200       | A    | <b>1130.551037</b> | 565.779157        | 1113.524488        | 557.265882       | <b>1112.540472</b> | 556.773874       | 7  |
| 7  | <b>731.372267</b> | 366.189772      | 714.345718     | 357.676497       | 713.361702        | 357.184489       | Q    | <b>1059.513923</b> | 530.260600        | <b>1042.487374</b> | 521.747325       | 1041.503358        | 521.255317       | 6  |
| 8  | 846.399210        | 423.703243      | 829.372661     | 415.189969       | 828.388645        | 414.697961       | D    | <b>931.455345</b>  | 466.231311        | 914.428796         | 457.718036       | <b>913.444780</b>  | 457.226028       | 5  |
| 9  | 947.446889        | 474.227083      | 930.420340     | 465.713808       | 929.436324        | 465.221800       | T    | <b>816.428402</b>  | 408.717839        | 799.401853         | 400.204565       | <b>798.417837</b>  | 399.712557       | 4  |
| 10 | 1386.672215       | 693.839746      | 1369.645666    | 685.326471       | 1368.661650       | 684.834463       | Q    | <b>715.380723</b>  | 358.194000        | 698.354174         | 349.680725       | 697.370158         | 349.188717       | 3  |
| 11 | 1515.714808       | 758.361042      | 1498.688259    | 749.847768       | 1497.704243       | 749.355760       | E    | <b>276.155397</b>  | 138.581337        | 259.128848         | 130.068062       | 258.144832         | 129.576054       | 2  |
| 12 |                   |                 |                |                  |                   |                  | K    | 147.112804         | 74.060040         | 130.086255         | 65.546765        |                    |                  | 1  |

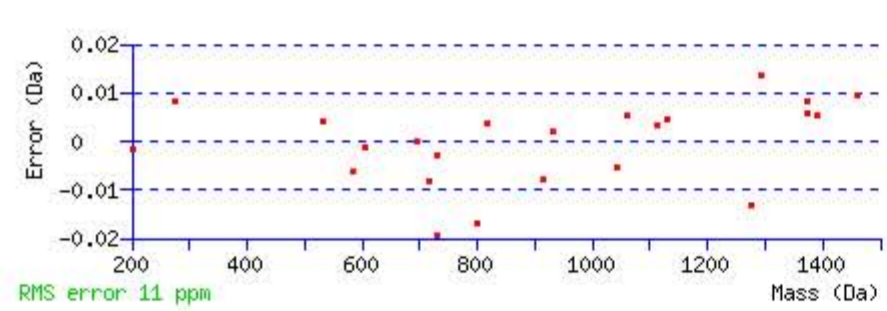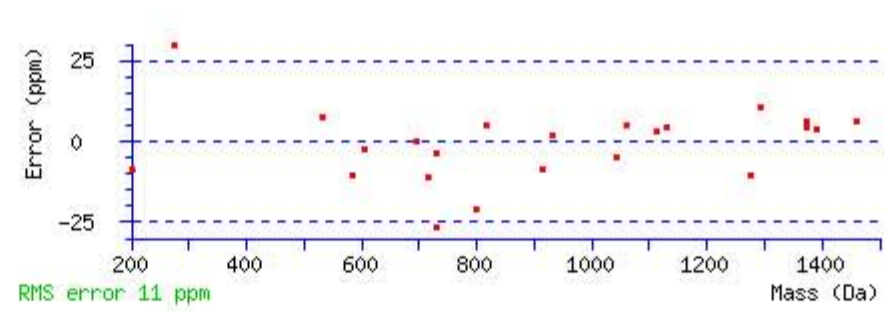

NCBI BLAST search of [SLAPYAQDTQEK](#)

(Parameters: blastp, nr protein database, expect=20000, no filter, PAM30)

Other BLAST [web gateways](#)

All matches to this query

| Score | Mr(calc):   | Delta     | Sequence                        |
|-------|-------------|-----------|---------------------------------|
| 48.4  | 1660.813034 | 0.002794  | <a href="#">SLAPYAQDTQEK</a>    |
| 19.6  | 1660.813034 | 0.002794  | <a href="#">SLAPYAQDTQEK</a>    |
| 2.9   | 1660.820908 | -0.005080 | <a href="#">SLARAGFYITGVNDK</a> |



# MASCOT SCIENCE Mascot Search Results

## Peptide View

MS/MS Fragmentation of **LGEVNTYAGDLQK**

Found in **APOA4\_HUMAN**, Apolipoprotein A-IV OS=Homo sapiens GN=APOA4 PE=1 SV=3

Match to Query 50002: 1717.869342 from(573.630390,3+) rtinseconds(2012) index(80382)

Title: Locus:1.1.1.2580.8 File:"2013-07-02 CLN FXIII 30 min 1st FT.wiff"

Data file C:\Program Files (x86)\Matrix Science\Mascot Daemon\mgf1 FXIII 30 min 1st\mascot\_daemon\_merge.mgf

Click mouse within plot area to zoom in by factor of two about that point

Or, Plot from  to  Da

Label all possible matches  Label matches used for scoring

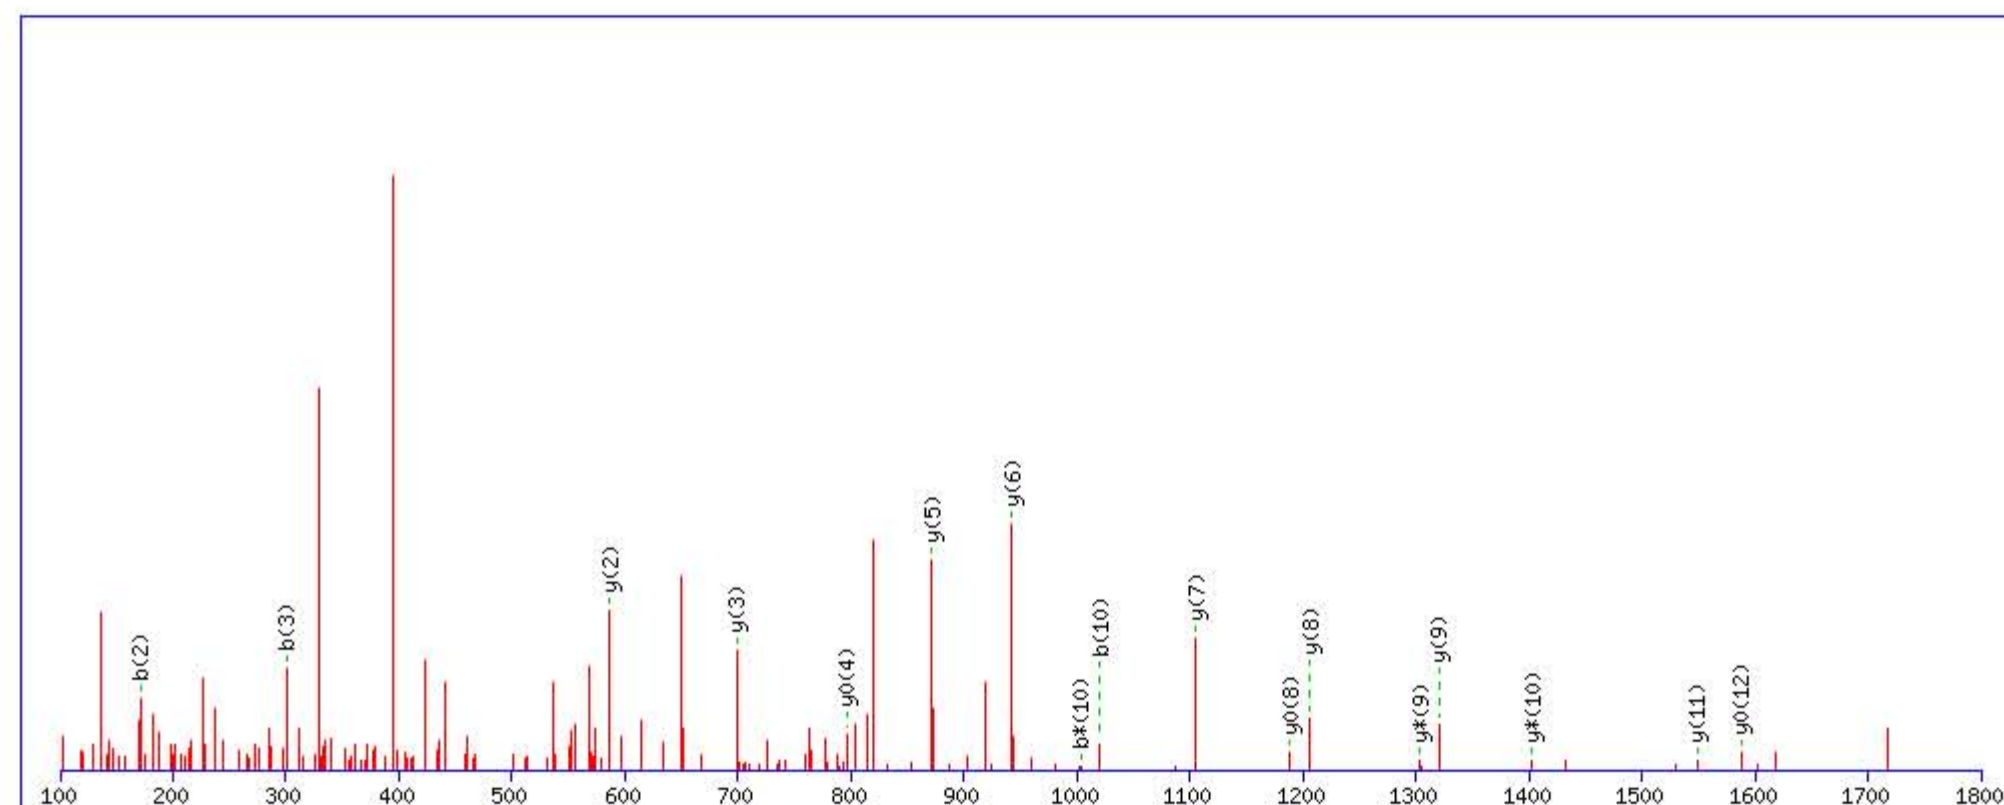

Monoisotopic mass of neutral peptide Mr(calc): 1717.870895

Fixed modifications: Carbamidomethyl (C) (apply to specified residues or termini only)

Variable modifications:

Q12 : Biotin:Thermo-21345 (Q)

Ions Score: 44 Expect: 8.5e-005

Matches : 17/126 fragment ions using 30 most intense peaks [\(help\)](#)

| #  | b                  | b <sup>++</sup> | b <sup>*</sup>     | b <sup>*++</sup> | b <sup>0</sup> | b <sup>0++</sup> | Seq. | y                  | y <sup>++</sup> | y <sup>*</sup>     | y <sup>*++</sup> | y <sup>0</sup>     | y <sup>0++</sup> | #  |
|----|--------------------|-----------------|--------------------|------------------|----------------|------------------|------|--------------------|-----------------|--------------------|------------------|--------------------|------------------|----|
| 1  | 114.091340         | 57.549308       |                    |                  |                |                  | L    |                    |                 |                    |                  |                    |                  | 13 |
| 2  | <b>171.112804</b>  | 86.060040       |                    |                  |                |                  | G    | 1605.794121        | 803.400699      | 1588.767572        | 794.887424       | <b>1587.783556</b> | 794.395416       | 12 |
| 3  | <b>300.155397</b>  | 150.581336      |                    |                  | 282.144832     | 141.576054       | E    | <b>1548.772657</b> | 774.889967      | 1531.746108        | 766.376692       | 1530.762092        | 765.884684       | 11 |
| 4  | 399.223811         | 200.115544      |                    |                  | 381.213246     | 191.110261       | V    | 1419.730064        | 710.368670      | <b>1402.703515</b> | 701.855396       | 1401.719499        | 701.363388       | 10 |
| 5  | 513.266738         | 257.137007      | 496.240189         | 248.623733       | 495.256173     | 248.131725       | N    | <b>1320.661650</b> | 660.834463      | <b>1303.635101</b> | 652.321189       | 1302.651085        | 651.829181       | 9  |
| 6  | 614.314417         | 307.660847      | 597.287868         | 299.147572       | 596.303852     | 298.655564       | T    | <b>1206.618723</b> | 603.813000      | 1189.592174        | 595.299725       | <b>1188.608158</b> | 594.807717       | 8  |
| 7  | 777.377746         | 389.192511      | 760.351197         | 380.679237       | 759.367181     | 380.187229       | Y    | <b>1105.571044</b> | 553.289160      | 1088.544495        | 544.775886       | 1087.560479        | 544.283878       | 7  |
| 8  | 848.414860         | 424.711068      | 831.388311         | 416.197794       | 830.404295     | 415.705786       | A    | <b>942.507715</b>  | 471.757496      | 925.481166         | 463.244221       | 924.497150         | 462.752213       | 6  |
| 9  | 905.436324         | 453.221800      | 888.409775         | 444.708526       | 887.425759     | 444.216518       | G    | <b>871.470601</b>  | 436.238939      | 854.444052         | 427.725664       | 853.460036         | 427.233656       | 5  |
| 10 | <b>1020.463267</b> | 510.735272      | <b>1003.436718</b> | 502.221997       | 1002.452702    | 501.729989       | D    | 814.449137         | 407.728207      | 797.422588         | 399.214932       | <b>796.438572</b>  | 398.722924       | 4  |
| 11 | 1133.547331        | 567.277304      | 1116.520782        | 558.764029       | 1115.536766    | 558.272021       | L    | <b>699.422194</b>  | 350.214735      | 682.395645         | 341.701461       |                    |                  | 3  |
| 12 | 1572.772657        | 786.889967      | 1555.746108        | 778.376692       | 1554.762092    | 777.884684       | Q    | <b>586.338130</b>  | 293.672703      | 569.311581         | 285.159429       |                    |                  | 2  |
| 13 |                    |                 |                    |                  |                |                  | K    | 147.112804         | 74.060040       | 130.086255         | 65.546765        |                    |                  | 1  |

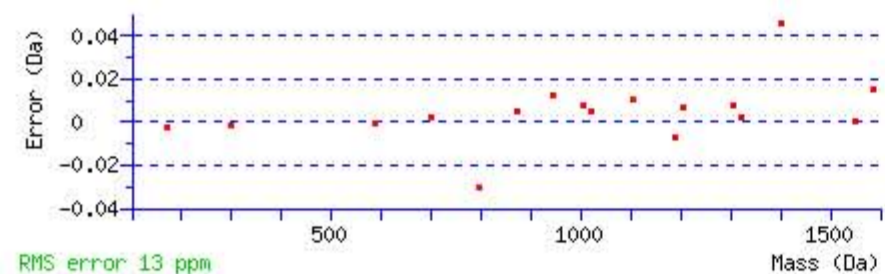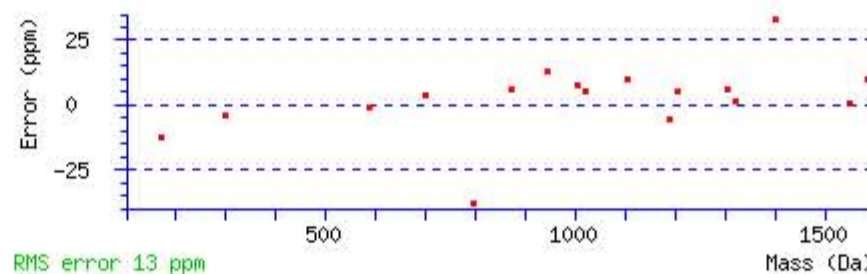

NCBI BLAST search of **LGEVNTYAGDLQK**

(Parameters: blastp, nr protein database, expect=20000, no filter, PAM30)

Other BLAST [web gateways](#)

All matches to this query

| Score | Mr(calc):   | Delta     | Sequence                      |
|-------|-------------|-----------|-------------------------------|
| 44.0  | 1717.870895 | -0.001553 | <a href="#">LGEVNTYAGDLQK</a> |
| 0.6   | 1717.855606 | 0.013736  | <a href="#">VANAEKLMDDLNK</a> |

Mascot: <http://www.matrixscience.com/>



# MASCOT SEARCH RESULTS

## Peptide View

MS/MS Fragmentation of **LNHQLEGLTFQMK**

Found in **APOA4\_HUMAN**, Apolipoprotein A-IV OS=Homo sapiens GN=APOA4 PE=1 SV=3

Match to Query 53766: 1868.970012 from(623.997280,3+) rtinseconds(2161) index(81336)  
 Title: Locus:1.1.1.2632.9 File:"2013-07-02 CLN FXIII 30 min 1st FT.wiff"

Data file C:\Program Files (x86)\Matrix Science\Mascot Daemon\mgf1 FXIII 30 min 1st\mascot\_daemon\_merge.mgf

Click mouse within plot area to zoom in by factor of two about that point

Or, Plot from  to  Da

Label all possible matches  Label matches used for scoring

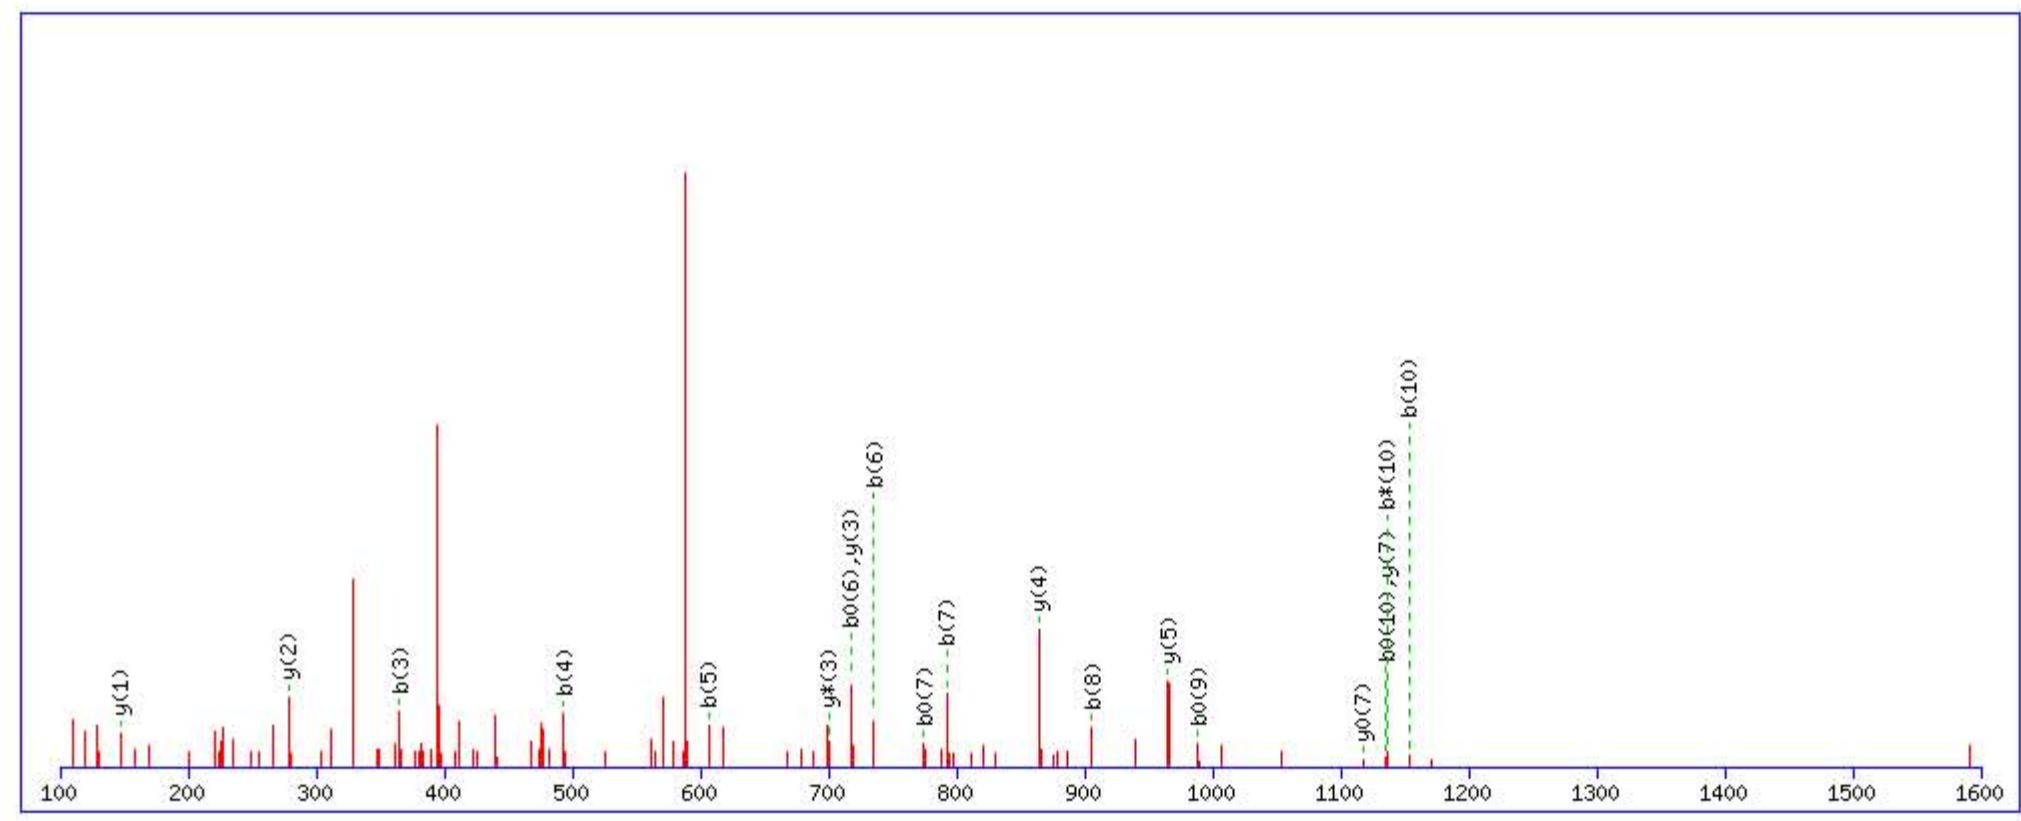

Monoisotopic mass of neutral peptide Mr(calc): 1868.964081

Fixed modifications: Carbamidomethyl (C) (apply to specified residues or termini only)

Variable modifications:

Q11 : Biotin:Thermo-21345 (Q)

Ions Score: 31 Expect: 0.0014

Matches : 20/124 fragment ions using 42 most intense peaks [\(help\)](#)

| #  | b                  | b <sup>++</sup> | b <sup>*</sup>     | b <sup>***</sup> | b <sup>0</sup>     | b <sup>0++</sup> | Seq. | y                  | y <sup>++</sup> | y <sup>*</sup>    | y <sup>***</sup> | y <sup>0</sup>     | y <sup>0++</sup> | #  |
|----|--------------------|-----------------|--------------------|------------------|--------------------|------------------|------|--------------------|-----------------|-------------------|------------------|--------------------|------------------|----|
| 1  | 114.091340         | 57.549308       |                    |                  |                    |                  | L    |                    |                 |                   |                  |                    |                  | 13 |
| 2  | 228.134267         | 114.570771      | 211.107718         | 106.057497       |                    |                  | N    | 1756.887310        | 878.947293      | 1739.860761       | 870.434019       | 1738.876745        | 869.942011       | 12 |
| 3  | <b>365.193179</b>  | 183.100227      | 348.166630         | 174.586953       |                    |                  | H    | 1642.844383        | 821.925830      | 1625.817834       | 813.412555       | 1624.833818        | 812.920547       | 11 |
| 4  | <b>493.251757</b>  | 247.129516      | 476.225208         | 238.616242       |                    |                  | Q    | 1505.785471        | 753.396374      | 1488.758922       | 744.883099       | 1487.774906        | 744.391091       | 10 |
| 5  | <b>606.335821</b>  | 303.671549      | 589.309272         | 295.158274       |                    |                  | L    | 1377.726893        | 689.367085      | 1360.700344       | 680.853810       | 1359.716328        | 680.361802       | 9  |
| 6  | <b>735.378414</b>  | 368.192845      | 718.351865         | 359.679571       | <b>717.367849</b>  | 359.187563       | E    | 1264.642829        | 632.825053      | 1247.616280       | 624.311778       | 1246.632264        | 623.819770       | 8  |
| 7  | <b>792.399878</b>  | 396.703577      | 775.373329         | 388.190303       | <b>774.389313</b>  | 387.698295       | G    | <b>1135.600236</b> | 568.303756      | 1118.573687       | 559.790482       | <b>1117.589671</b> | 559.298474       | 7  |
| 8  | <b>905.483942</b>  | 453.245609      | 888.457393         | 444.732335       | 887.473377         | 444.240327       | L    | 1078.578772        | 539.793024      | 1061.552223       | 531.279750       | 1060.568207        | 530.787742       | 6  |
| 9  | 1006.531621        | 503.769449      | 989.505072         | 495.256174       | <b>988.521056</b>  | 494.764166       | T    | <b>965.494708</b>  | 483.250992      | 948.468159        | 474.737718       | 947.484143         | 474.245710       | 5  |
| 10 | <b>1153.600035</b> | 577.303656      | <b>1136.573486</b> | 568.790381       | <b>1135.589470</b> | 568.298373       | F    | <b>864.447029</b>  | 432.727153      | 847.420480        | 424.213878       |                    |                  | 4  |
| 11 | 1592.825361        | 796.916319      | 1575.798812        | 788.403044       | 1574.814796        | 787.911036       | Q    | <b>717.378615</b>  | 359.192946      | <b>700.352066</b> | 350.679671       |                    |                  | 3  |
| 12 | 1723.865846        | 862.436561      | 1706.839297        | 853.923287       | 1705.855281        | 853.431279       | M    | <b>278.153289</b>  | 139.580282      | 261.126740        | 131.067008       |                    |                  | 2  |
| 13 |                    |                 |                    |                  |                    |                  | K    | <b>147.112804</b>  | 74.060040       | 130.086255        | 65.546765        |                    |                  | 1  |

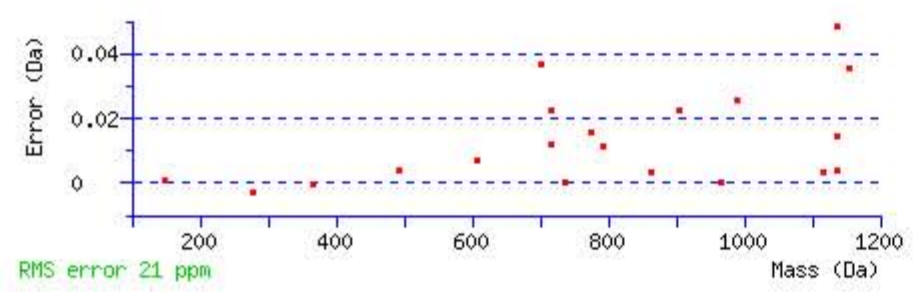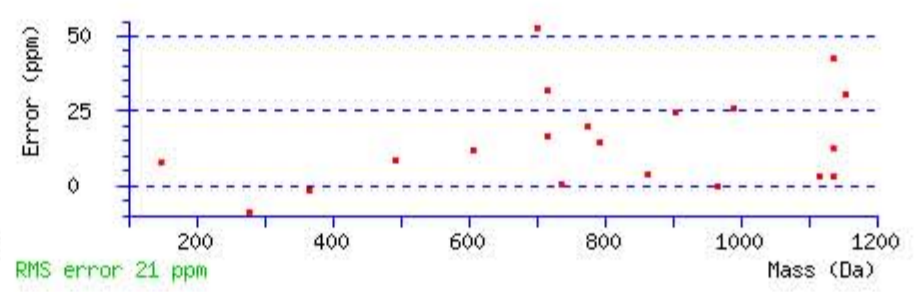

NCBI BLAST search of **LNHQLEGLTFQMK**

(Parameters: blastp, nr protein database, expect=20000, no filter, PAM30)

Other BLAST [web gateways](#)

All matches to this query

| Score | Mr(calc):   | Delta     | Sequence                          |
|-------|-------------|-----------|-----------------------------------|
| 30.8  | 1868.964081 | 0.005931  | <a href="#">LNHQLEGLTFQMK</a>     |
| 0.4   | 1868.977798 | -0.007786 | <a href="#">RGGMLGEPEPLTEKALR</a> |



# MASCOT Search Results

## Peptide View

MS/MS Fragmentation of **TQVNTQAEQLR**

Found in **APOA4\_HUMAN**, Apolipoprotein A-IV OS=Homo sapiens GN=APOA4 PE=1 SV=3

Match to Query 54530: 1908.989112 from(637.336980,3+) rtinseconds(1944) index(79845)

Title: Locus:1.1.1.2556.19 File:"2013-07-02 CLN FXIII 30 min 1st FT.wiff"

Data file C:\Program Files (x86)\Matrix Science\Mascot Daemon\mgf\1 FXIII 30 min 1st\mascot\_daemon\_merge.mgf

Click mouse within plot area to zoom in by factor of two about that point

Or, Plot from  to  Da

Label all possible matches  Label matches used for scoring

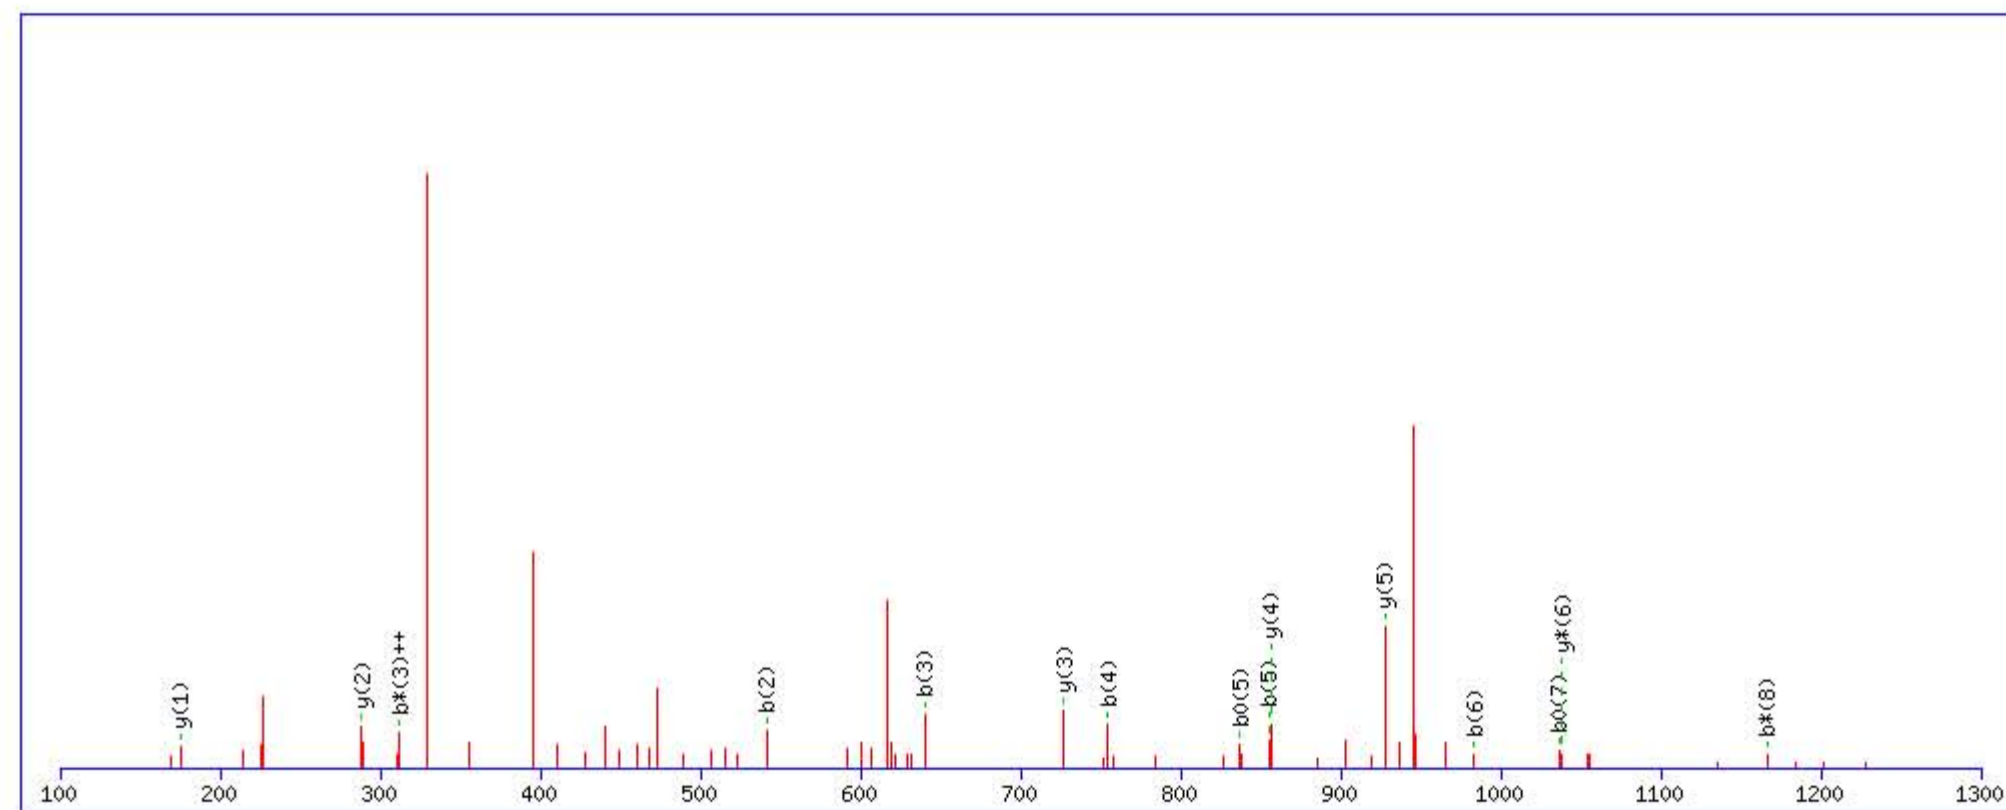

Monoisotopic mass of neutral peptide Mr(calc): 1908.991364

Fixed modifications: Carbamidomethyl (C) (apply to specified residues or termini only)

Variable modifications:

Q2 : Biotin:Thermo-21345 (Q)

Q9 : Biotin:Thermo-21345 (Q)

Ions Score: 26 Expect: 0.034

Matches : 15/112 fragment ions using 32 most intense peaks [\(help\)](#)

| #  | b                 | b <sup>++</sup> | b <sup>*</sup>     | b <sup>*++</sup>  | b <sup>0</sup>     | b <sup>0++</sup> | Seq. | y                 | y <sup>++</sup> | y <sup>*</sup>     | y <sup>*++</sup> | y <sup>0</sup> | y <sup>0++</sup> | #  |
|----|-------------------|-----------------|--------------------|-------------------|--------------------|------------------|------|-------------------|-----------------|--------------------|------------------|----------------|------------------|----|
| 1  | 102.054955        | 51.531116       |                    |                   | 84.044390          | 42.525833        | T    |                   |                 |                    |                  |                |                  | 11 |
| 2  | <b>541.280281</b> | 271.143779      | 524.253732         | 262.630504        | 523.269716         | 262.138496       | Q    | 1808.950973       | 904.979125      | 1791.924424        | 896.465850       | 1790.940408    | 895.973842       | 10 |
| 3  | <b>640.348695</b> | 320.677986      | 623.322146         | <b>312.164711</b> | 622.338130         | 311.672703       | V    | 1369.725647       | 685.366462      | 1352.699098        | 676.853187       | 1351.715082    | 676.361179       | 9  |
| 4  | <b>754.391622</b> | 377.699449      | 737.365073         | 369.186174        | 736.381057         | 368.694166       | N    | 1270.657233       | 635.832255      | 1253.630684        | 627.318980       | 1252.646668    | 626.826972       | 8  |
| 5  | <b>855.439301</b> | 428.223289      | 838.412752         | 419.710014        | <b>837.428736</b>  | 419.218006       | T    | 1156.614306       | 578.810791      | 1139.587757        | 570.297517       | 1138.603741    | 569.805509       | 7  |
| 6  | <b>983.497879</b> | 492.252578      | 966.471330         | 483.739303        | 965.487314         | 483.247295       | Q    | 1055.566627       | 528.286952      | <b>1038.540078</b> | 519.773677       | 1037.556062    | 519.281669       | 6  |
| 7  | 1054.534993       | 527.771135      | 1037.508444        | 519.257860        | <b>1036.524428</b> | 518.765852       | A    | <b>927.508049</b> | 464.257663      | 910.481500         | 455.744388       | 909.497484     | 455.252380       | 5  |
| 8  | 1183.577586       | 592.292431      | <b>1166.551037</b> | 583.779157        | 1165.567021        | 583.287149       | E    | <b>856.470935</b> | 428.739106      | 839.444386         | 420.225831       | 838.460370     | 419.733823       | 4  |
| 9  | 1622.802912       | 811.905094      | 1605.776363        | 803.391820        | 1604.792347        | 802.899812       | Q    | <b>727.428342</b> | 364.217809      | 710.401793         | 355.704535       |                |                  | 3  |
| 10 | 1735.886976       | 868.447126      | 1718.860427        | 859.933852        | 1717.876411        | 859.441844       | L    | <b>288.203016</b> | 144.605146      | 271.176467         | 136.091871       |                |                  | 2  |
| 11 |                   |                 |                    |                   |                    |                  | R    | <b>175.118952</b> | 88.063114       | 158.092403         | 79.549839        |                |                  | 1  |

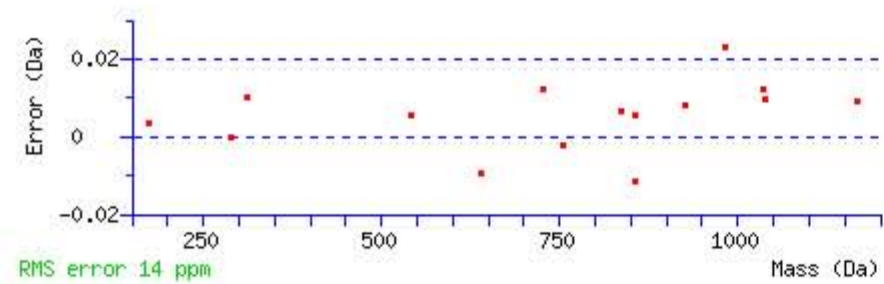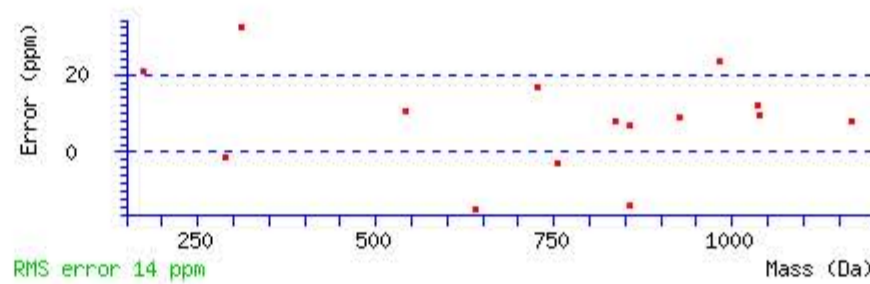

NCBI BLAST search of [TQVNTQAEQLR](#)

(Parameters: blastp, nr protein database, expect=20000, no filter, PAM30)

Other BLAST [web gateways](#)

All matches to this query

| Score | Mr(calc):   | Delta     | Sequence                           |
|-------|-------------|-----------|------------------------------------|
| 26.2  | 1908.991364 | -0.002252 | <a href="#">TQVNTQAEQLR</a>        |
| 12.1  | 1908.991364 | -0.002252 | <a href="#">TQVNTQAEQLR</a>        |
| 10.1  | 1908.974045 | 0.015067  | <a href="#">SAQWAINRVAMEIQHR</a>   |
| 3.4   | 1909.015610 | -0.026498 | <a href="#">SSIALTAPDAAADPKKPK</a> |
| 2.4   | 1908.991364 | -0.002252 | <a href="#">TQVNTQAEQLR</a>        |

Mascot: <http://www.matrixscience.com/>



# MASCOT Search Results

## Peptide View

MS/MS Fragmentation of **SLAELGGHLDQQVEEFR**  
 Found in **APOA4\_HUMAN**, Apolipoprotein A-IV OS=Homo sapiens GN=APOA4 PE=1 SV=3

Match to Query 62503: 2238.116202 from(747.046010,3+) rtinseconds(2232) index(64606)  
 Title: Locus:1.1.1.2774.19 File:"2013-07-02 CLN FXIII 30 min 1st F 4.wiff"  
 Data file C:\Program Files (x86)\Matrix Science\Mascot Daemon\mgf\1 FXIII 30 min 1st\mascot\_daemon\_merge.mgf

Click mouse within plot area to zoom in by factor of two about that point

Or, Plot from  to  Da

Label all possible matches  Label matches used for scoring

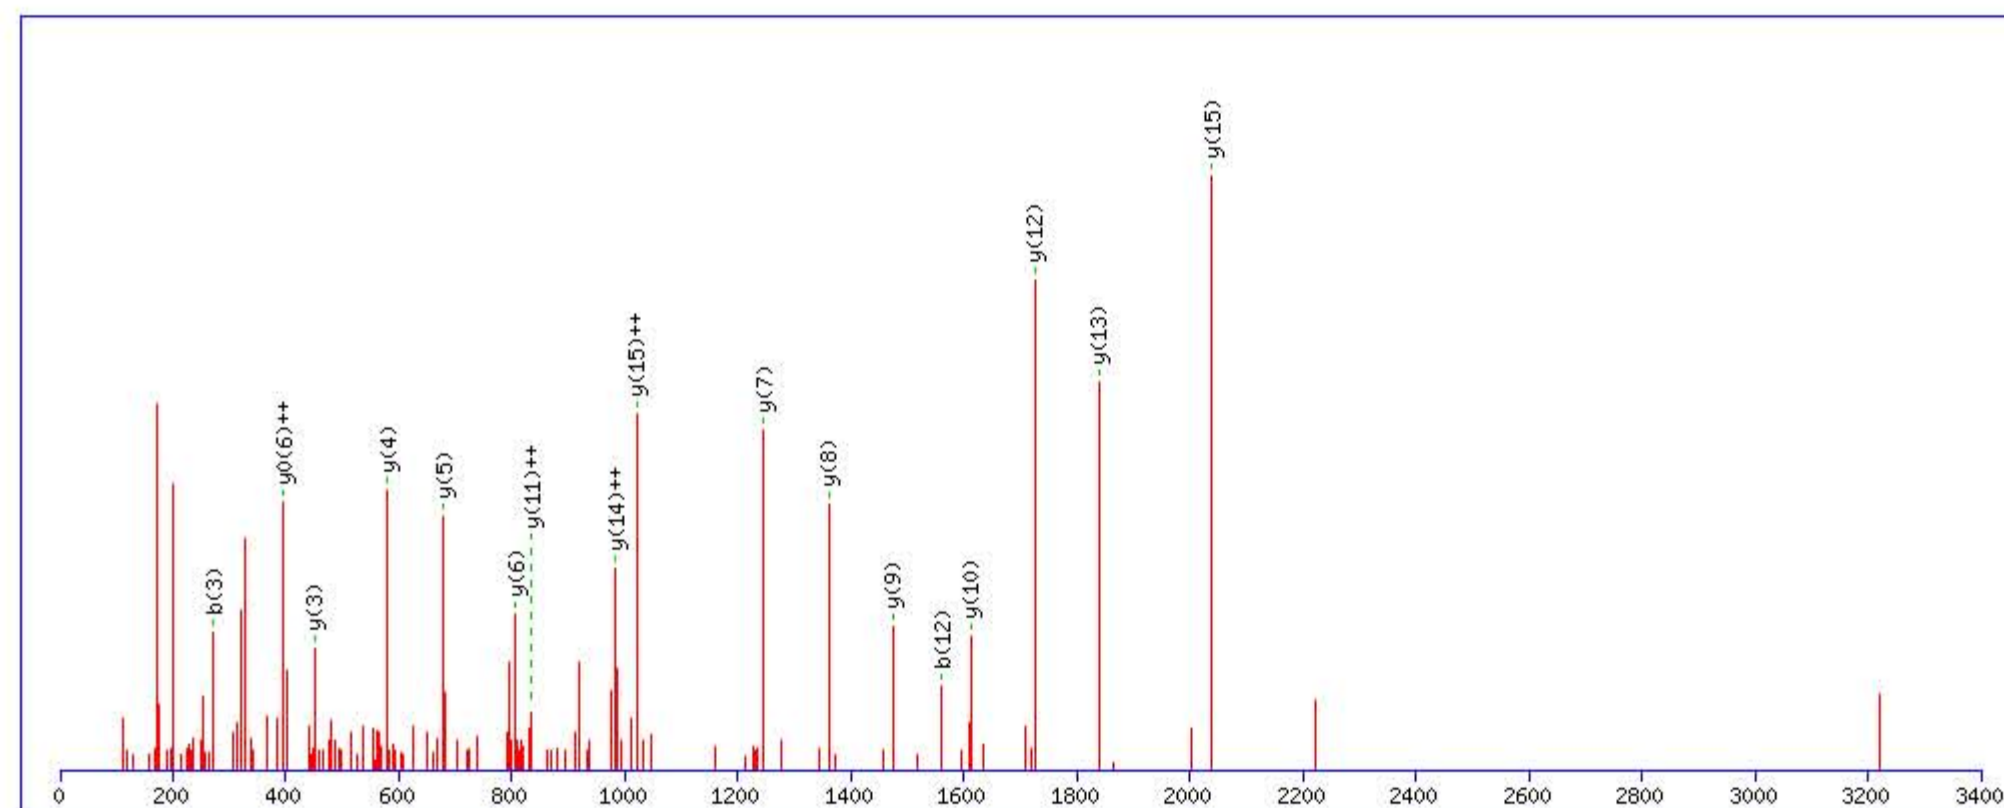

Monoisotopic mass of neutral peptide Mr(calc): 2238.110291  
 Fixed modifications: Carbamidomethyl (C) (apply to specified residues or termini only)  
 Variable modifications:  
 Q11 : Biotin:Thermo-21345 (Q)  
 Ions Score: 97 Expect: 5.1e-009  
 Matches : 17/168 fragment ions using 21 most intense peaks [\(help\)](#)

| #  | b                  | b <sup>++</sup> | b <sup>*</sup> | b <sup>***</sup> | b <sup>0</sup> | b <sup>0++</sup> | Seq. | y                  | y <sup>++</sup>    | y <sup>*</sup> | y <sup>***</sup> | y <sup>0</sup> | y <sup>0++</sup>  | #  |
|----|--------------------|-----------------|----------------|------------------|----------------|------------------|------|--------------------|--------------------|----------------|------------------|----------------|-------------------|----|
| 1  | 88.039304          | 44.523290       |                |                  | 70.028739      | 35.518008        | S    |                    |                    |                |                  |                |                   | 17 |
| 2  | 201.123368         | 101.065322      |                |                  | 183.112803     | 92.060039        | L    | 2152.085552        | 1076.546414        | 2135.059003    | 1068.033139      | 2134.074987    | 1067.541131       | 16 |
| 3  | <b>272.160482</b>  | 136.583879      |                |                  | 254.149917     | 127.578596       | A    | <b>2039.001488</b> | <b>1020.004382</b> | 2021.974939    | 1011.491108      | 2020.990923    | 1010.999100       | 15 |
| 4  | 401.203075         | 201.105175      |                |                  | 383.192510     | 192.099893       | E    | 1967.964374        | <b>984.485825</b>  | 1950.937825    | 975.972551       | 1949.953809    | 975.480543        | 14 |
| 5  | 514.287139         | 257.647208      |                |                  | 496.276574     | 248.641925       | L    | <b>1838.921781</b> | 919.964529         | 1821.895232    | 911.451254       | 1820.911216    | 910.959246        | 13 |
| 6  | 571.308603         | 286.157940      |                |                  | 553.298038     | 277.152657       | G    | <b>1725.837717</b> | 863.422497         | 1708.811168    | 854.909222       | 1707.827152    | 854.417214        | 12 |
| 7  | 628.330067         | 314.668672      |                |                  | 610.319502     | 305.663389       | G    | 1668.816253        | <b>834.911765</b>  | 1651.789704    | 826.398490       | 1650.805688    | 825.906482        | 11 |
| 8  | 765.388979         | 383.198128      |                |                  | 747.378414     | 374.192845       | H    | <b>1611.794789</b> | 806.401033         | 1594.768240    | 797.887758       | 1593.784224    | 797.395750        | 10 |
| 9  | 878.473043         | 439.740160      |                |                  | 860.462478     | 430.734877       | L    | <b>1474.735877</b> | 737.871577         | 1457.709328    | 729.358302       | 1456.725312    | 728.866294        | 9  |
| 10 | 993.499986         | 497.253631      |                |                  | 975.489421     | 488.248349       | D    | <b>1361.651813</b> | 681.329545         | 1344.625264    | 672.816270       | 1343.641248    | 672.324262        | 8  |
| 11 | 1432.725312        | 716.866294      | 1415.698763    | 708.353020       | 1414.714747    | 707.861012       | Q    | <b>1246.624870</b> | 623.816073         | 1229.598321    | 615.302799       | 1228.614305    | 614.810791        | 7  |
| 12 | <b>1560.783890</b> | 780.895583      | 1543.757341    | 772.382309       | 1542.773325    | 771.890301       | Q    | <b>807.399544</b>  | 404.203410         | 790.372995     | 395.690136       | 789.388979     | <b>395.198128</b> | 6  |
| 13 | 1659.852304        | 830.429790      | 1642.825755    | 821.916516       | 1641.841739    | 821.424508       | V    | <b>679.340966</b>  | 340.174121         | 662.314417     | 331.660846       | 661.330401     | 331.168838        | 5  |
| 14 | 1788.894897        | 894.951087      | 1771.868348    | 886.437812       | 1770.884332    | 885.945804       | E    | <b>580.272552</b>  | 290.639914         | 563.246003     | 282.126639       | 562.261987     | 281.634631        | 4  |
| 15 | 1917.937490        | 959.472383      | 1900.910941    | 950.959109       | 1899.926925    | 950.467101       | E    | <b>451.229959</b>  | 226.118617         | 434.203410     | 217.605343       | 433.219394     | 217.113335        | 3  |
| 16 | 2065.005904        | 1033.006590     | 2047.979355    | 1024.493316      | 2046.995339    | 1024.001307      | F    | 322.187366         | 161.597321         | 305.160817     | 153.084046       |                |                   | 2  |
| 17 |                    |                 |                |                  |                |                  | R    | 175.118952         | 88.063114          | 158.092403     | 79.549839        |                |                   | 1  |

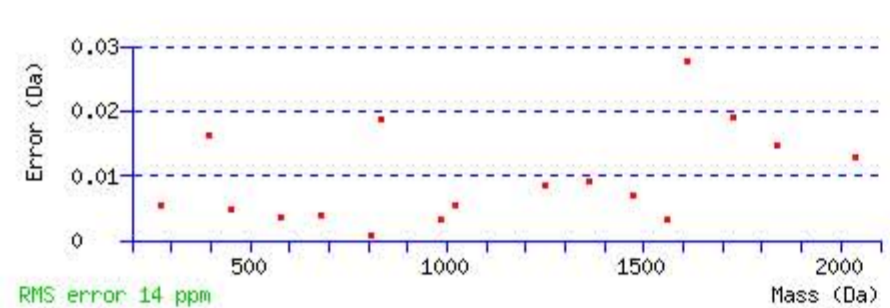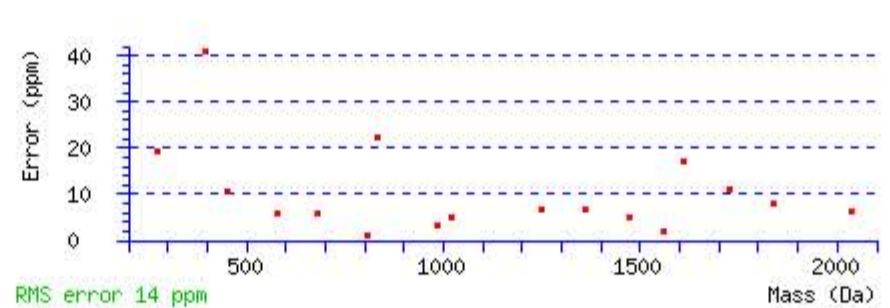

NCBI BLAST search of [SLAELGGHLDQQVEEFR](#)  
 (Parameters: blastp, nr protein database, expect=20000, no filter, PAM30)  
 Other BLAST [web gateways](#)

### All matches to this query

| Score | Mr(calc):   | Delta    | Sequence                          |
|-------|-------------|----------|-----------------------------------|
| 97.3  | 2238.110291 | 0.005911 | <a href="#">SLAELGGHLDQQVEEFR</a> |
| 77.5  | 2238.110291 | 0.005911 | <a href="#">SLAELGGHLDQQVEEFR</a> |



# MASCOT Search Results

## Peptide View

MS/MS Fragmentation of **STAAMSTYTGIFTDQVLSVLK**

Found in **APOC2\_HUMAN**, Apolipoprotein C-II OS=Homo sapiens GN=APOC2 PE=1 SV=1

Match to Query 69173: 2543.316192 from(848.779340,3+) rtinseconds(3190) index(70586)

Title: Locus:1.1.1.3103.17 File:"2013-07-02 CLN FXIII 30 min 1st F 4.wiff"

Data file C:\Program Files (x86)\Matrix Science\Mascot Daemon\mgf1 FXIII 30 min 1st\mascot\_daemon\_merge.mgf

Click mouse within plot area to zoom in by factor of two about that point

Or, Plot from  to  Da

Label all possible matches  Label matches used for scoring

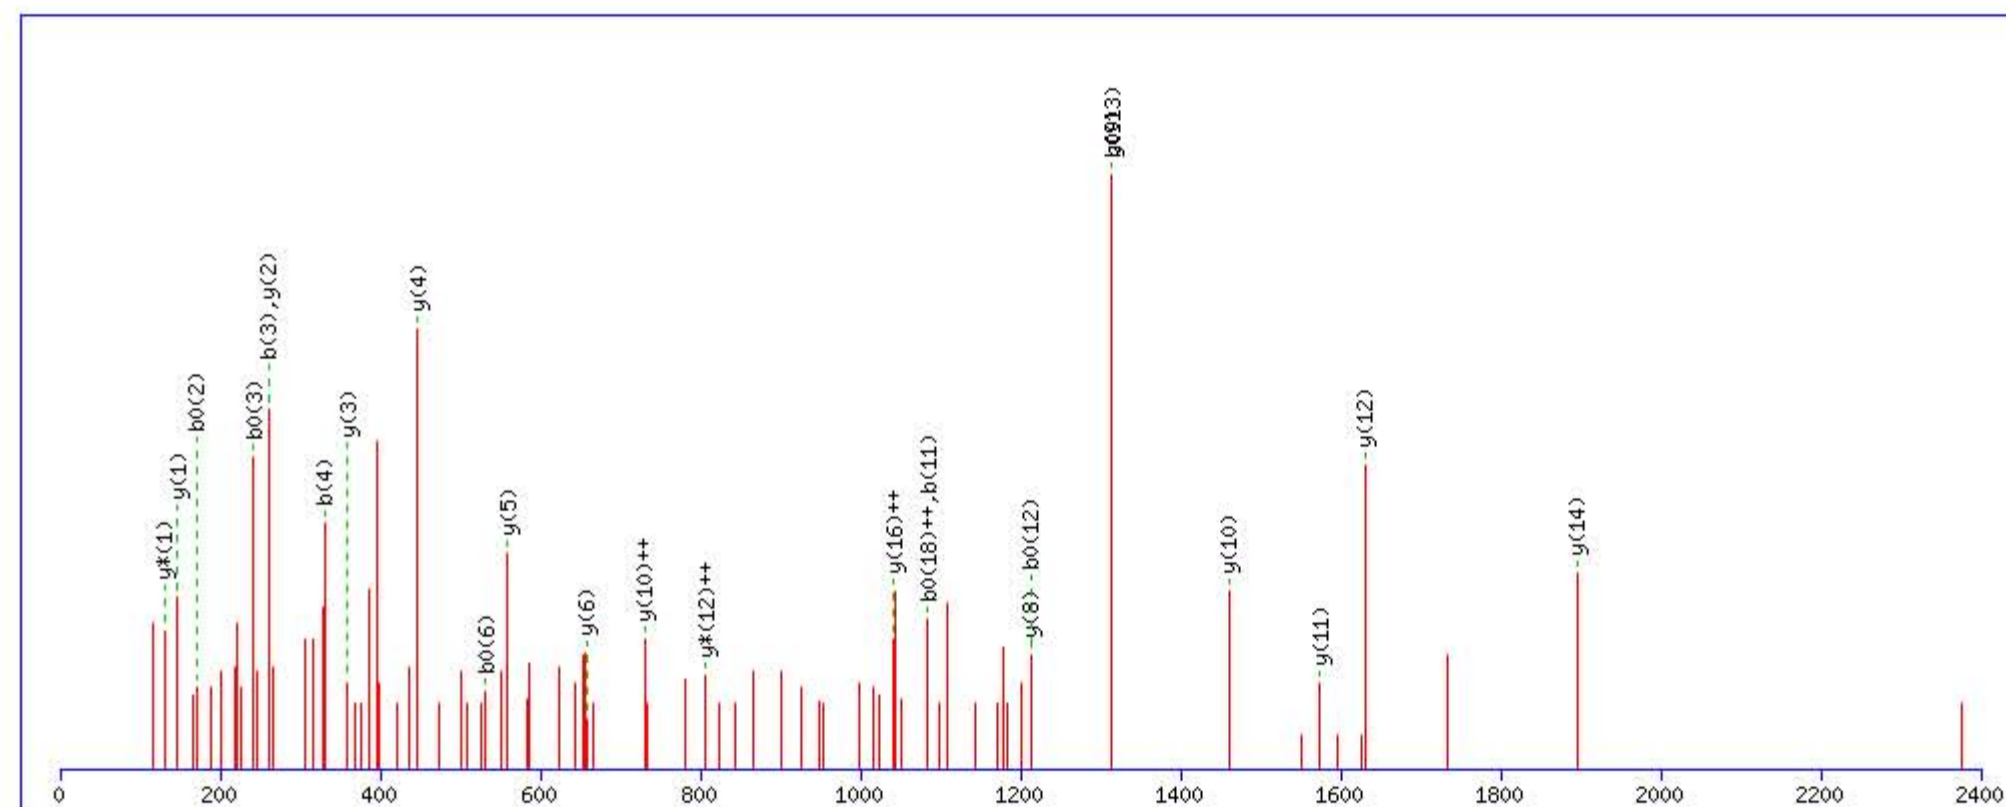

Monoisotopic mass of neutral peptide Mr(calc): 2543.301544

Fixed modifications: Carbamidomethyl (C) (apply to specified residues or termini only)

Variable modifications:

Q15 : Biotin:Thermo-21345 (Q)

Ions Score: 37 Expect: 0.0053

Matches : 25/206 fragment ions using 76 most intense peaks [\(help\)](#)

| #  | b           | b <sup>++</sup> | b <sup>*</sup> | b <sup>*++</sup> | b <sup>0</sup> | b <sup>0++</sup> | Seq. | y           | y <sup>++</sup> | y <sup>*</sup> | y <sup>*++</sup> | y <sup>0</sup> | y <sup>0++</sup> | #  |
|----|-------------|-----------------|----------------|------------------|----------------|------------------|------|-------------|-----------------|----------------|------------------|----------------|------------------|----|
| 1  | 88.039304   | 44.523290       |                |                  | 70.028739      | 35.518008        | S    |             |                 |                |                  |                |                  | 21 |
| 2  | 189.086983  | 95.047129       |                |                  | 171.076418     | 86.041847        | T    | 2457.276785 | 1229.142030     | 2440.250236    | 1220.628756      | 2439.266220    | 1220.136748      | 20 |
| 3  | 260.124097  | 130.565686      |                |                  | 242.113532     | 121.560404       | A    | 2356.229106 | 1178.618191     | 2339.202557    | 1170.104916      | 2338.218541    | 1169.612908      | 19 |
| 4  | 331.161211  | 166.084243      |                |                  | 313.150646     | 157.078961       | A    | 2285.191992 | 1143.099634     | 2268.165443    | 1134.586359      | 2267.181427    | 1134.094351      | 18 |
| 5  | 462.201696  | 231.604486      |                |                  | 444.191131     | 222.599203       | M    | 2214.154878 | 1107.581077     | 2197.128329    | 1099.067802      | 2196.144313    | 1098.575794      | 17 |
| 6  | 549.233724  | 275.120500      |                |                  | 531.223159     | 266.115217       | S    | 2083.114393 | 1042.060834     | 2066.087844    | 1033.547560      | 2065.103828    | 1033.055552      | 16 |
| 7  | 650.281403  | 325.644340      |                |                  | 632.270838     | 316.639057       | T    | 1996.082365 | 998.544821      | 1979.055816    | 990.031546       | 1978.071800    | 989.539538       | 15 |
| 8  | 813.344732  | 407.176004      |                |                  | 795.334167     | 398.170722       | Y    | 1895.034686 | 948.020981      | 1878.008137    | 939.507707       | 1877.024121    | 939.015699       | 14 |
| 9  | 914.392411  | 457.699844      |                |                  | 896.381846     | 448.694561       | T    | 1731.971357 | 866.489317      | 1714.944808    | 857.976042       | 1713.960792    | 857.484034       | 13 |
| 10 | 971.413875  | 486.210576      |                |                  | 953.403310     | 477.205293       | G    | 1630.923678 | 815.965477      | 1613.897129    | 807.452203       | 1612.913113    | 806.960195       | 12 |
| 11 | 1084.497939 | 542.752608      |                |                  | 1066.487374    | 533.747325       | I    | 1573.902214 | 787.454745      | 1556.875665    | 778.941471       | 1555.891649    | 778.449463       | 11 |
| 12 | 1231.566353 | 616.286815      |                |                  | 1213.555788    | 607.281532       | F    | 1460.818150 | 730.912713      | 1443.791601    | 722.399439       | 1442.807585    | 721.907431       | 10 |
| 13 | 1332.614032 | 666.810654      |                |                  | 1314.603467    | 657.805372       | T    | 1313.749736 | 657.378506      | 1296.723187    | 648.865232       | 1295.739171    | 648.373224       | 9  |
| 14 | 1447.640975 | 724.324126      |                |                  | 1429.630410    | 715.318843       | D    | 1212.702057 | 606.854667      | 1195.675508    | 598.341392       | 1194.691492    | 597.849384       | 8  |
| 15 | 1886.866301 | 943.936789      | 1869.839752    | 935.423514       | 1868.855736    | 934.931506       | Q    | 1097.675114 | 549.341195      | 1080.648565    | 540.827921       | 1079.664549    | 540.335913       | 7  |
| 16 | 1985.934715 | 993.470996      | 1968.908166    | 984.957721       | 1967.924150    | 984.465713       | V    | 658.449788  | 329.728532      | 641.423239     | 321.215258       | 640.439223     | 320.723250       | 6  |
| 17 | 2099.018779 | 1050.013027     | 2081.992230    | 1041.499753      | 2081.008214    | 1041.007745      | L    | 559.381374  | 280.194325      | 542.354825     | 271.681051       | 541.370809     | 271.189043       | 5  |
| 18 | 2186.050807 | 1093.529041     | 2169.024258    | 1085.015767      | 2168.040242    | 1084.523759      | S    | 446.297310  | 223.652293      | 429.270761     | 215.139019       | 428.286745     | 214.647011       | 4  |
| 19 | 2285.119221 | 1143.063248     | 2268.092672    | 1134.549974      | 2267.108656    | 1134.057966      | V    | 359.265282  | 180.136279      | 342.238733     | 171.623004       |                |                  | 3  |
| 20 | 2398.203285 | 1199.605280     | 2381.176736    | 1191.092006      | 2380.192720    | 1190.599998      | L    | 260.196868  | 130.602072      | 243.170319     | 122.088798       |                |                  | 2  |
| 21 |             |                 |                |                  |                |                  | K    | 147.112804  | 74.060040       | 130.086255     | 65.546765        |                |                  | 1  |

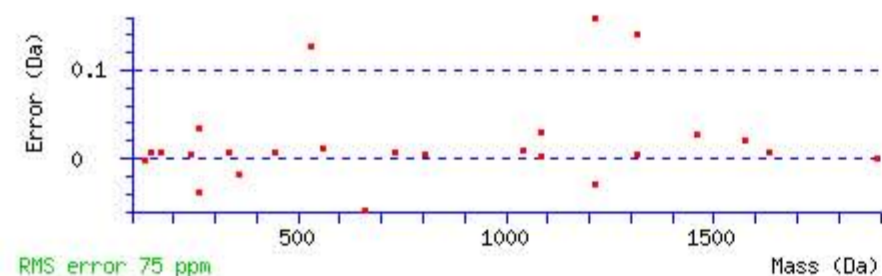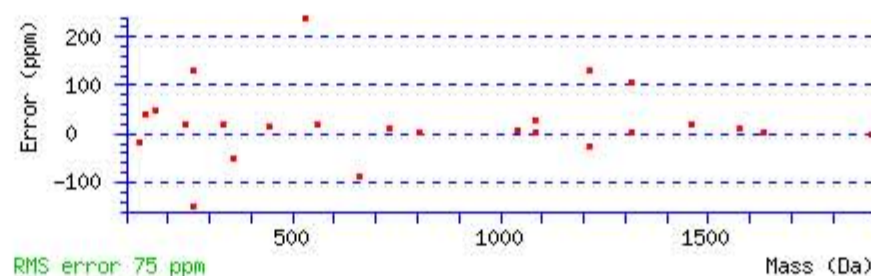

NCBI BLAST search of [STAAMSTYTGIFTDQVLSVLK](#)

(Parameters: blastp, nr protein database, expect=20000, no filter, PAM30)

Other BLAST [web gateways](#)

All matches to this query

| Score | Mr(calc):   | Delta    | Sequence                              |
|-------|-------------|----------|---------------------------------------|
| 37.3  | 2543.301544 | 0.014648 | <a href="#">STAAMSTYTGIFTDQVLSVLK</a> |

Mascot: <http://www.matrixscience.com/>



# MASCOT Search Results

## Peptide View

MS/MS Fragmentation of **DALSSVQESQVAQQAR**

Found in **APOC3\_HUMAN**, Apolipoprotein C-III OS=Homo sapiens GN=APOC3 PE=1 SV=1

Match to Query 57955: 2027.009322 from(676.677050,3+) rtinseconds(1940) index(62695)

Title: Locus:1.1.1.2673.16 File:"2013-07-02 CLN FXIII 30 min 1st F 4.wiff"

Data file C:\Program Files (x86)\Matrix Science\Mascot Daemon\mgf\1 FXIII 30 min 1st\mascot\_daemon\_merge.mgf

Click mouse within plot area to zoom in by factor of two about that point

Or, Plot from 100 to 1800 Da Full range

Label all possible matches  Label matches used for scoring

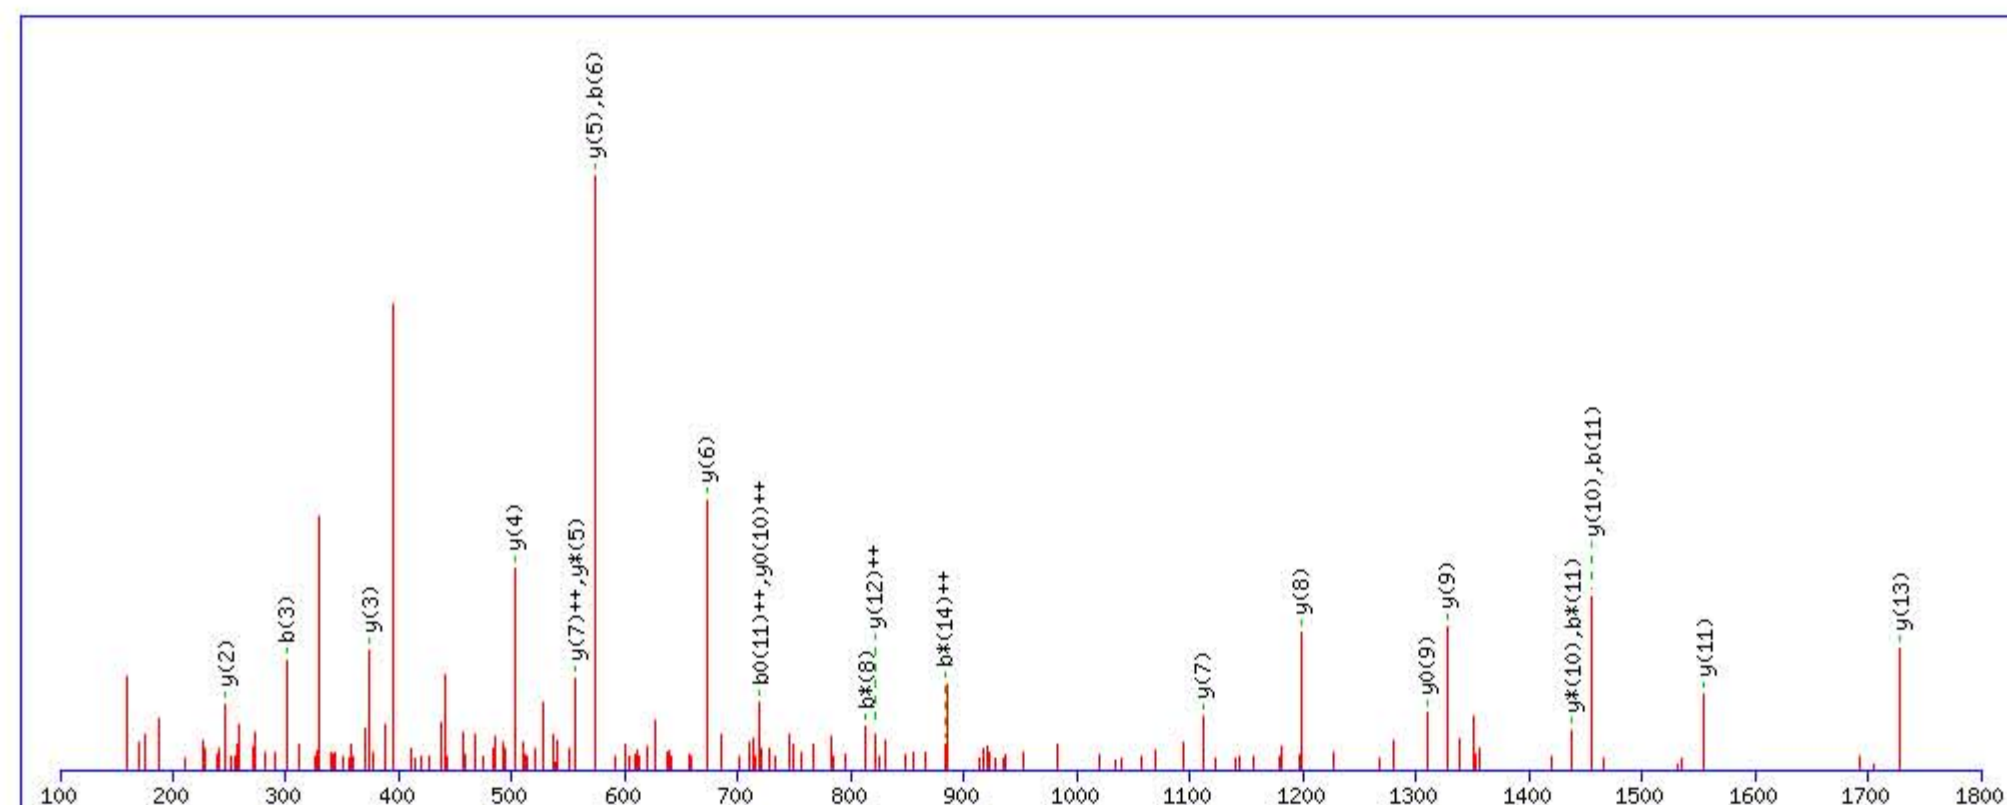

Monoisotopic mass of neutral peptide Mr(calc): 2027.010574

Fixed modifications: Carbamidomethyl (C) (apply to specified residues or termini only)

Variable modifications:

Q10 : Biotin:Thermo-21345 (Q)

Ions Score: 77 Expect: 1.1e-007

Matches : 24/154 fragment ions using 30 most intense peaks [\(help\)](#)

| #  | b                  | b <sup>++</sup> | b <sup>*</sup>     | b <sup>+++</sup>  | b <sup>0</sup> | b <sup>0++</sup>  | Seq. | y                  | y <sup>++</sup>   | y <sup>*</sup>     | y <sup>+++</sup> | y <sup>0</sup>     | y <sup>0++</sup>  | #  |
|----|--------------------|-----------------|--------------------|-------------------|----------------|-------------------|------|--------------------|-------------------|--------------------|------------------|--------------------|-------------------|----|
| 1  | 116.034219         | 58.520748       |                    |                   | 98.023654      | 49.515465         | D    |                    |                   |                    |                  |                    |                   | 16 |
| 2  | 187.071333         | 94.039304       |                    |                   | 169.060768     | 85.034022         | A    | 1912.990923        | 956.999100        | 1895.964374        | 948.485825       | 1894.980358        | 947.993817        | 15 |
| 3  | <b>300.155397</b>  | 150.581336      |                    |                   | 282.144832     | 141.576054        | L    | 1841.953809        | 921.480543        | 1824.927260        | 912.967268       | 1823.943244        | 912.475260        | 14 |
| 4  | 387.187425         | 194.097351      |                    |                   | 369.176860     | 185.092068        | S    | <b>1728.869745</b> | 864.938511        | 1711.843196        | 856.425236       | 1710.859180        | 855.933228        | 13 |
| 5  | 474.219453         | 237.613364      |                    |                   | 456.208888     | 228.608082        | S    | 1641.837717        | <b>821.422497</b> | 1624.811168        | 812.909222       | 1623.827152        | 812.417214        | 12 |
| 6  | <b>573.287867</b>  | 287.147572      |                    |                   | 555.277302     | 278.142289        | V    | <b>1554.805689</b> | 777.906483        | 1537.779140        | 769.393208       | 1536.795124        | 768.901200        | 11 |
| 7  | 701.346445         | 351.176861      | 684.319896         | 342.663586        | 683.335880     | 342.171578        | Q    | <b>1455.737275</b> | 728.372276        | <b>1438.710726</b> | 719.859001       | 1437.726710        | <b>719.366993</b> | 10 |
| 8  | 830.389038         | 415.698157      | <b>813.362489</b>  | 407.184883        | 812.378473     | 406.692875        | E    | <b>1327.678697</b> | 664.342987        | 1310.652148        | 655.829712       | <b>1309.668132</b> | 655.337704        | 9  |
| 9  | 917.421066         | 459.214171      | 900.394517         | 450.700897        | 899.410501     | 450.208889        | S    | <b>1198.636104</b> | 599.821690        | 1181.609555        | 591.308416       | 1180.625539        | 590.816408        | 8  |
| 10 | 1356.646392        | 678.826834      | 1339.619843        | 670.313560        | 1338.635827    | 669.821551        | Q    | <b>1111.604076</b> | <b>556.305676</b> | 1094.577527        | 547.792402       |                    |                   | 7  |
| 11 | <b>1455.714806</b> | 728.361041      | <b>1438.688257</b> | 719.847767        | 1437.704241    | <b>719.355758</b> | V    | <b>672.378750</b>  | 336.693013        | 655.352201         | 328.179739       |                    |                   | 6  |
| 12 | 1526.751920        | 763.879598      | 1509.725371        | 755.366324        | 1508.741355    | 754.874315        | A    | <b>573.310336</b>  | 287.158806        | <b>556.283787</b>  | 278.645532       |                    |                   | 5  |
| 13 | 1654.810498        | 827.908887      | 1637.783949        | 819.395613        | 1636.799933    | 818.903605        | Q    | <b>502.273222</b>  | 251.640249        | 485.246673         | 243.126975       |                    |                   | 4  |
| 14 | 1782.869076        | 891.938176      | 1765.842527        | <b>883.424902</b> | 1764.858511    | 882.932894        | Q    | <b>374.214644</b>  | 187.610960        | 357.188095         | 179.097686       |                    |                   | 3  |
| 15 | 1853.906190        | 927.456733      | 1836.879641        | 918.943459        | 1835.895625    | 918.451451        | A    | <b>246.156066</b>  | 123.581671        | 229.129517         | 115.068396       |                    |                   | 2  |
| 16 |                    |                 |                    |                   |                |                   | R    | 175.118952         | 88.063114         | 158.092403         | 79.549839        |                    |                   | 1  |

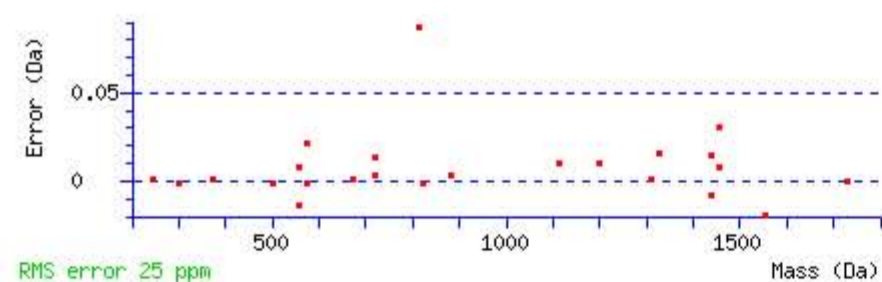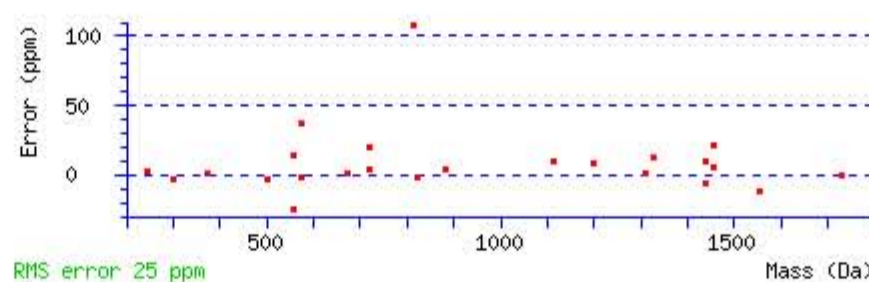

NCBI BLAST search of **DALSSVQESQVAQQAR**

(Parameters: blastp, nr protein database, expect=20000, no filter, PAM30)

Other BLAST [web gateways](#)

## All matches to this query

| Score | Mr(calc):   | Delta     | Sequence                         |
|-------|-------------|-----------|----------------------------------|
| 77.4  | 2027.010574 | -0.001252 | <a href="#">DALSSVQESQVAQQAR</a> |
| 76.7  | 2027.010574 | -0.001252 | <a href="#">DALSSVQESQVAQQAR</a> |
| 64.0  | 2027.010574 | -0.001252 | <a href="#">DALSSVQESQVAQQAR</a> |
| 35.2  | 2027.010574 | -0.001252 | <a href="#">DALSSVQESQVAQQAR</a> |
| 3.2   | 2027.021805 | -0.012483 | <a href="#">VASVESQSQEISGNRR</a> |



# MASCOT Search Results

## Peptide View

MS/MS Fragmentation of **DALSSVQESQVAQQAR**

Found in **APOC3\_HUMAN**, Apolipoprotein C-III OS=Homo sapiens GN=APOC3 PE=1 SV=1

Match to Query 57956: 2027.009322 from(676.677050,3+) rtinseconds(1932) index(62620)

Title: Locus:1.1.1.2670.16 File:"2013-07-02 CLN FXIII 30 min 1st F 4.wiff"

Data file C:\Program Files (x86)\Matrix Science\Mascot Daemon\mgf\1 FXIII 30 min 1st\mascot\_daemon\_merge.mgf

Click mouse within plot area to zoom in by factor of two about that point

Or, Plot from  to  Da

Label all possible matches  Label matches used for scoring

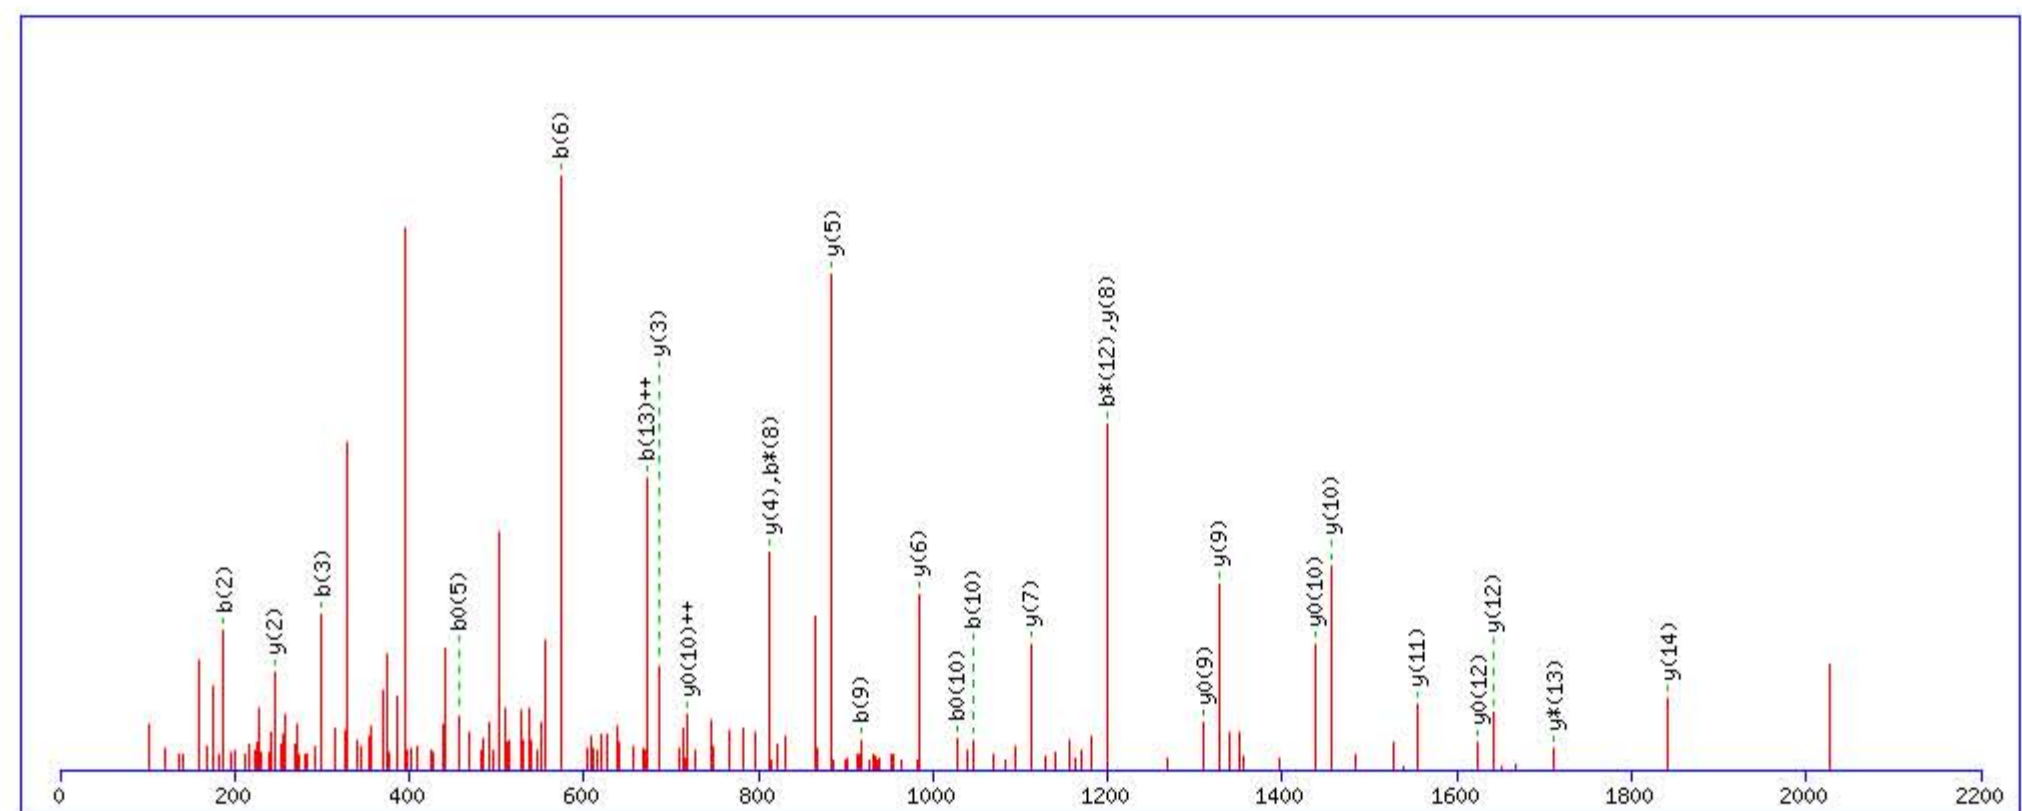

Monoisotopic mass of neutral peptide Mr(calc): 2027.010574

Fixed modifications: Carbamidomethyl (C) (apply to specified residues or termini only)

Variable modifications:

Q14 : Biotin:Thermo-21345 (Q)

Ions Score: 95 Expect: 7.3e-009

Matches : 27/154 fragment ions using 33 most intense peaks [\(help\)](#)

| #  | b                  | b <sup>++</sup>   | b <sup>+</sup>     | b <sup>+++</sup> | b <sup>0</sup>     | b <sup>0++</sup> | Seq. | y                  | y <sup>++</sup> | y <sup>+</sup>     | y <sup>+++</sup> | y <sup>0</sup>     | y <sup>0++</sup>  | #  |
|----|--------------------|-------------------|--------------------|------------------|--------------------|------------------|------|--------------------|-----------------|--------------------|------------------|--------------------|-------------------|----|
| 1  | 116.034219         | 58.520748         |                    |                  | 98.023654          | 49.515465        | D    |                    |                 |                    |                  |                    |                   | 16 |
| 2  | <b>187.071333</b>  | 94.039304         |                    |                  | 169.060768         | 85.034022        | A    | 1912.990923        | 956.999100      | 1895.964374        | 948.485825       | 1894.980358        | 947.993817        | 15 |
| 3  | <b>300.155397</b>  | 150.581336        |                    |                  | 282.144832         | 141.576054       | L    | <b>1841.953809</b> | 921.480543      | 1824.927260        | 912.967268       | 1823.943244        | 912.475260        | 14 |
| 4  | 387.187425         | 194.097351        |                    |                  | 369.176860         | 185.092068       | S    | 1728.869745        | 864.938511      | <b>1711.843196</b> | 856.425236       | 1710.859180        | 855.933228        | 13 |
| 5  | 474.219453         | 237.613364        |                    |                  | <b>456.208888</b>  | 228.608082       | S    | <b>1641.837717</b> | 821.422497      | 1624.811168        | 812.909222       | <b>1623.827152</b> | 812.417214        | 12 |
| 6  | <b>573.287867</b>  | 287.147572        |                    |                  | 555.277302         | 278.142289       | V    | <b>1554.805689</b> | 777.906483      | 1537.779140        | 769.393208       | 1536.795124        | 768.901200        | 11 |
| 7  | 701.346445         | 351.176861        | 684.319896         | 342.663586       | 683.335880         | 342.171578       | Q    | <b>1455.737275</b> | 728.372276      | 1438.710726        | 719.859001       | <b>1437.726710</b> | <b>719.366993</b> | 10 |
| 8  | 830.389038         | 415.698157        | <b>813.362489</b>  | 407.184883       | 812.378473         | 406.692875       | E    | <b>1327.678697</b> | 664.342987      | 1310.652148        | 655.829712       | <b>1309.668132</b> | 655.337704        | 9  |
| 9  | <b>917.421066</b>  | 459.214171        | 900.394517         | 450.700897       | 899.410501         | 450.208889       | S    | <b>1198.636104</b> | 599.821690      | 1181.609555        | 591.308416       | 1180.625539        | 590.816408        | 8  |
| 10 | <b>1045.479644</b> | 523.243460        | 1028.453095        | 514.730186       | <b>1027.469079</b> | 514.238178       | Q    | <b>1111.604076</b> | 556.305676      | 1094.577527        | 547.792402       |                    |                   | 7  |
| 11 | 1144.548058        | 572.777667        | 1127.521509        | 564.264393       | 1126.537493        | 563.772385       | V    | <b>983.545498</b>  | 492.276387      | 966.518949         | 483.763113       |                    |                   | 6  |
| 12 | 1215.585172        | 608.296224        | <b>1198.558623</b> | 599.782950       | 1197.574607        | 599.290942       | A    | <b>884.477084</b>  | 442.742180      | 867.450535         | 434.228906       |                    |                   | 5  |
| 13 | 1343.643750        | <b>672.325513</b> | 1326.617201        | 663.812239       | 1325.633185        | 663.320230       | Q    | <b>813.439970</b>  | 407.223623      | 796.413421         | 398.710349       |                    |                   | 4  |
| 14 | 1782.869076        | 891.938176        | 1765.842527        | 883.424902       | 1764.858511        | 882.932894       | Q    | <b>685.381392</b>  | 343.194334      | 668.354843         | 334.681060       |                    |                   | 3  |
| 15 | 1853.906190        | 927.456733        | 1836.879641        | 918.943459       | 1835.895625        | 918.451451       | A    | <b>246.156066</b>  | 123.581671      | 229.129517         | 115.068396       |                    |                   | 2  |
| 16 |                    |                   |                    |                  |                    |                  | R    | 175.118952         | 88.063114       | 158.092403         | 79.549839        |                    |                   | 1  |

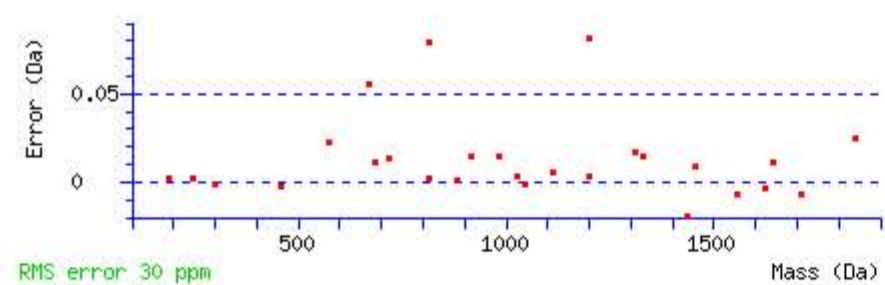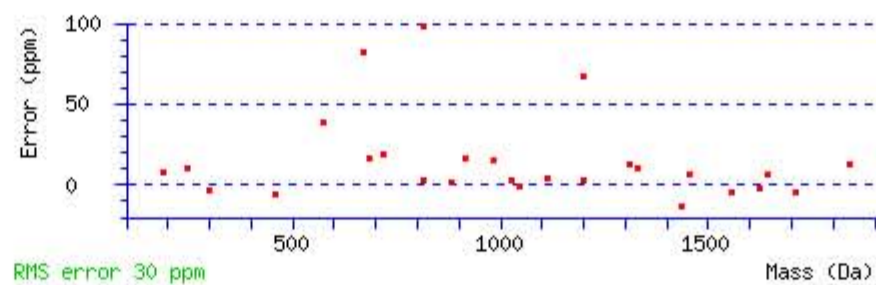

NCBI BLAST search of **DALSSVQESQVAQQAR**

(Parameters: blastp, nr protein database, expect=20000, no filter, PAM30)

Other BLAST [web gateways](#)

All matches to this query

| Score | Mr(calc):   | Delta     | Sequence                         |
|-------|-------------|-----------|----------------------------------|
| 95.4  | 2027.010574 | -0.001252 | <a href="#">DALSSVQESQVAQQAR</a> |
| 93.8  | 2027.010574 | -0.001252 | <a href="#">DALSSVQESQVAQQAR</a> |
| 91.7  | 2027.010574 | -0.001252 | <a href="#">DALSSVQESQVAQQAR</a> |
| 46.6  | 2027.010574 | -0.001252 | <a href="#">DALSSVQESQVAQQAR</a> |

Mascot: <http://www.matrixscience.com/>



# MASCOT Search Results

## Peptide View

MS/MS Fragmentation of **DALSSVQESQVAQQAR**

Found in **APOC3\_HUMAN**, Apolipoprotein C-III OS=Homo sapiens GN=APOC3 PE=1 SV=1

Match to Query 57957: 2027.010582 from(676.677470,3+) rtinseconds(1885) index(62223)

Title: Locus:1.1.1.2654.19 File:"2013-07-02 CLN FXIII 30 min 1st F 4.wiff"

Data file C:\Program Files (x86)\Matrix Science\Mascot Daemon\mgf\1 FXIII 30 min 1st\mascot\_daemon\_merge.mgf

Click mouse within plot area to zoom in by factor of two about that point

Or, Plot from  to  Da

Label all possible matches  Label matches used for scoring

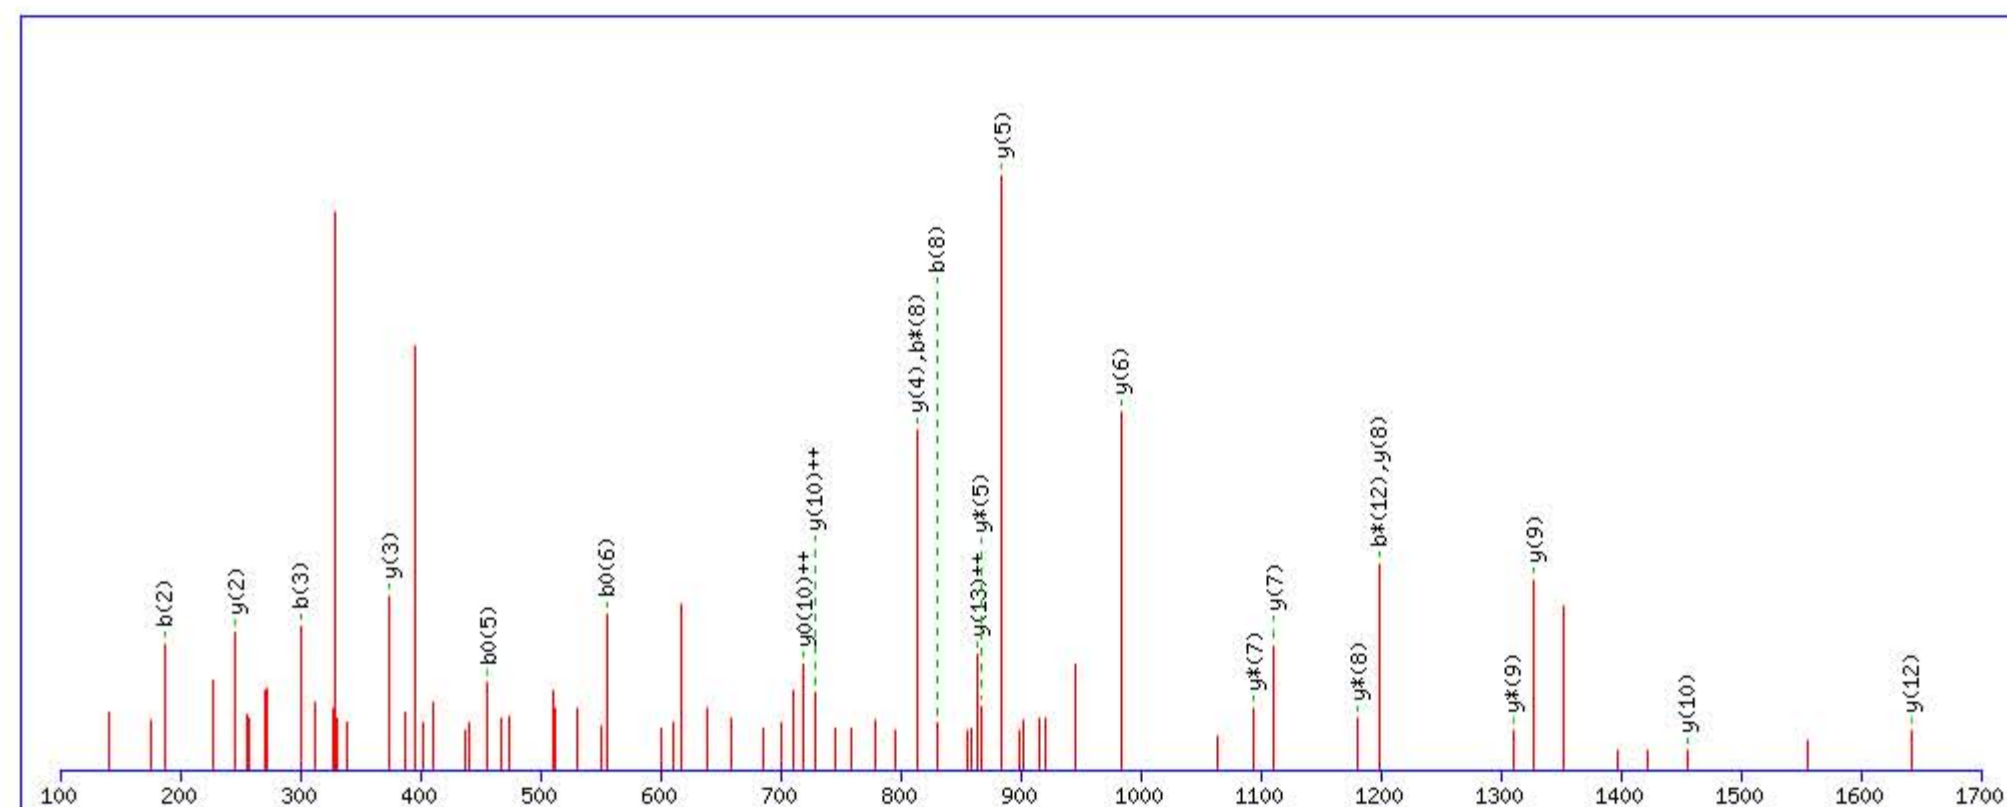

Monoisotopic mass of neutral peptide Mr(calc): 2027.010574

Fixed modifications: Carbamidomethyl (C) (apply to specified residues or termini only)

Variable modifications:

Q13 : Biotin:Thermo-21345 (Q)

Ions Score: 58 Expect: 3.6e-005

Matches : 24/154 fragment ions using 39 most intense peaks [\(help\)](#)

| #  | b                 | b <sup>++</sup> | b <sup>+</sup>     | b <sup>+++</sup> | b <sup>0</sup>    | b <sup>0++</sup> | Seq. | y                  | y <sup>++</sup>   | y <sup>+</sup>     | y <sup>+++</sup> | y <sup>0</sup> | y <sup>0++</sup>  | #  |
|----|-------------------|-----------------|--------------------|------------------|-------------------|------------------|------|--------------------|-------------------|--------------------|------------------|----------------|-------------------|----|
| 1  | 116.034219        | 58.520748       |                    |                  | 98.023654         | 49.515465        | D    |                    |                   |                    |                  |                |                   | 16 |
| 2  | <b>187.071333</b> | 94.039304       |                    |                  | 169.060768        | 85.034022        | A    | 1912.990923        | 956.999100        | 1895.964374        | 948.485825       | 1894.980358    | 947.993817        | 15 |
| 3  | <b>300.155397</b> | 150.581336      |                    |                  | 282.144832        | 141.576054       | L    | 1841.953809        | 921.480543        | 1824.927260        | 912.967268       | 1823.943244    | 912.475260        | 14 |
| 4  | 387.187425        | 194.097351      |                    |                  | 369.176860        | 185.092068       | S    | 1728.869745        | <b>864.938511</b> | 1711.843196        | 856.425236       | 1710.859180    | 855.933228        | 13 |
| 5  | 474.219453        | 237.613364      |                    |                  | <b>456.208888</b> | 228.608082       | S    | <b>1641.837717</b> | 821.422497        | 1624.811168        | 812.909222       | 1623.827152    | 812.417214        | 12 |
| 6  | 573.287867        | 287.147572      |                    |                  | <b>555.277302</b> | 278.142289       | V    | 1554.805689        | 777.906483        | 1537.779140        | 769.393208       | 1536.795124    | 768.901200        | 11 |
| 7  | 701.346445        | 351.176861      | 684.319896         | 342.663586       | 683.335880        | 342.171578       | Q    | <b>1455.737275</b> | <b>728.372276</b> | 1438.710726        | 719.859001       | 1437.726710    | <b>719.366993</b> | 10 |
| 8  | <b>830.389038</b> | 415.698157      | <b>813.362489</b>  | 407.184883       | 812.378473        | 406.692875       | E    | <b>1327.678697</b> | 664.342987        | <b>1310.652148</b> | 655.829712       | 1309.668132    | 655.337704        | 9  |
| 9  | 917.421066        | 459.214171      | 900.394517         | 450.700897       | 899.410501        | 450.208889       | S    | <b>1198.636104</b> | 599.821690        | <b>1181.609555</b> | 591.308416       | 1180.625539    | 590.816408        | 8  |
| 10 | 1045.479644       | 523.243460      | 1028.453095        | 514.730186       | 1027.469079       | 514.238178       | Q    | <b>1111.604076</b> | 556.305676        | <b>1094.577527</b> | 547.792402       |                |                   | 7  |
| 11 | 1144.548058       | 572.777667      | 1127.521509        | 564.264393       | 1126.537493       | 563.772385       | V    | <b>983.545498</b>  | 492.276387        | 966.518949         | 483.763113       |                |                   | 6  |
| 12 | 1215.585172       | 608.296224      | <b>1198.558623</b> | 599.782950       | 1197.574607       | 599.290942       | A    | <b>884.477084</b>  | 442.742180        | <b>867.450535</b>  | 434.228906       |                |                   | 5  |
| 13 | 1654.810498       | 827.908887      | 1637.783949        | 819.395613       | 1636.799933       | 818.903605       | Q    | <b>813.439970</b>  | 407.223623        | 796.413421         | 398.710349       |                |                   | 4  |
| 14 | 1782.869076       | 891.938176      | 1765.842527        | 883.424902       | 1764.858511       | 882.932894       | Q    | <b>374.214644</b>  | 187.610960        | 357.188095         | 179.097686       |                |                   | 3  |
| 15 | 1853.906190       | 927.456733      | 1836.879641        | 918.943459       | 1835.895625       | 918.451451       | A    | <b>246.156066</b>  | 123.581671        | 229.129517         | 115.068396       |                |                   | 2  |
| 16 |                   |                 |                    |                  |                   |                  | R    | 175.118952         | 88.063114         | 158.092403         | 79.549839        |                |                   | 1  |

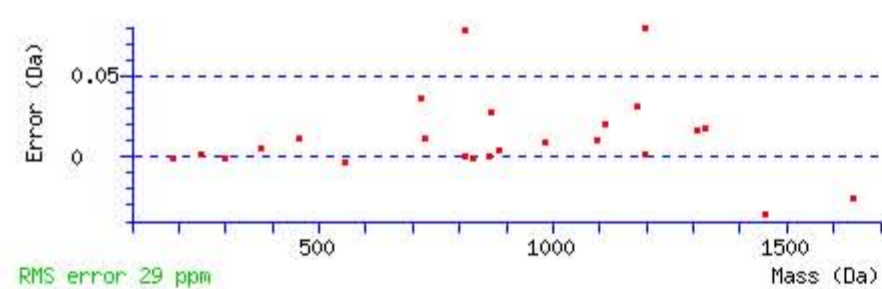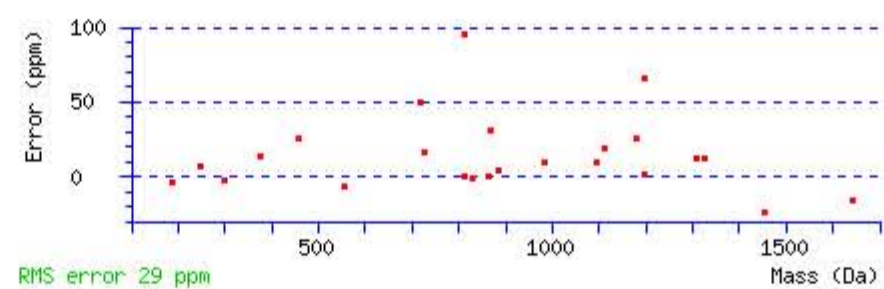

NCBI BLAST search of **DALSSVQESQVAQQAR**

(Parameters: blastp, nr protein database, expect=20000, no filter, PAM30)

Other BLAST [web gateways](#)

All matches to this query

| Score | Mr(calc):   | Delta    | Sequence                         |
|-------|-------------|----------|----------------------------------|
| 58.5  | 2027.010574 | 0.000008 | <a href="#">DALSSVQESQVAQQAR</a> |
| 48.8  | 2027.010574 | 0.000008 | <a href="#">DALSSVQESQVAQQAR</a> |
| 35.1  | 2027.010574 | 0.000008 | <a href="#">DALSSVQESQVAQQAR</a> |
| 8.3   | 2027.010574 | 0.000008 | <a href="#">DALSSVQESQVAQQAR</a> |



# {MATRIX} SCIENCE Mascot Search Results

## Peptide View

MS/MS Fragmentation of **LGPLVEQGR**

Found in **APOE\_HUMAN**, Apolipoprotein E OS=Homo sapiens GN=APOE PE=1 SV=1

Match to Query 34434: 1278.710368 from(640.362460,2+) rtinseconds(1949) index(62767)

Title: Locus:1.1.1.2676.13 File:"2013-07-02 CLN FXIII 30 min 1st F 4.wiff"

Data file C:\Program Files (x86)\Matrix Science\Mascot Daemon\mgf\1 FXIII 30 min 1st\mascot\_daemon\_merge.mgf

Click mouse within plot area to zoom in by factor of two about that point

Or, Plot from  to  Da

Label all possible matches  Label matches used for scoring

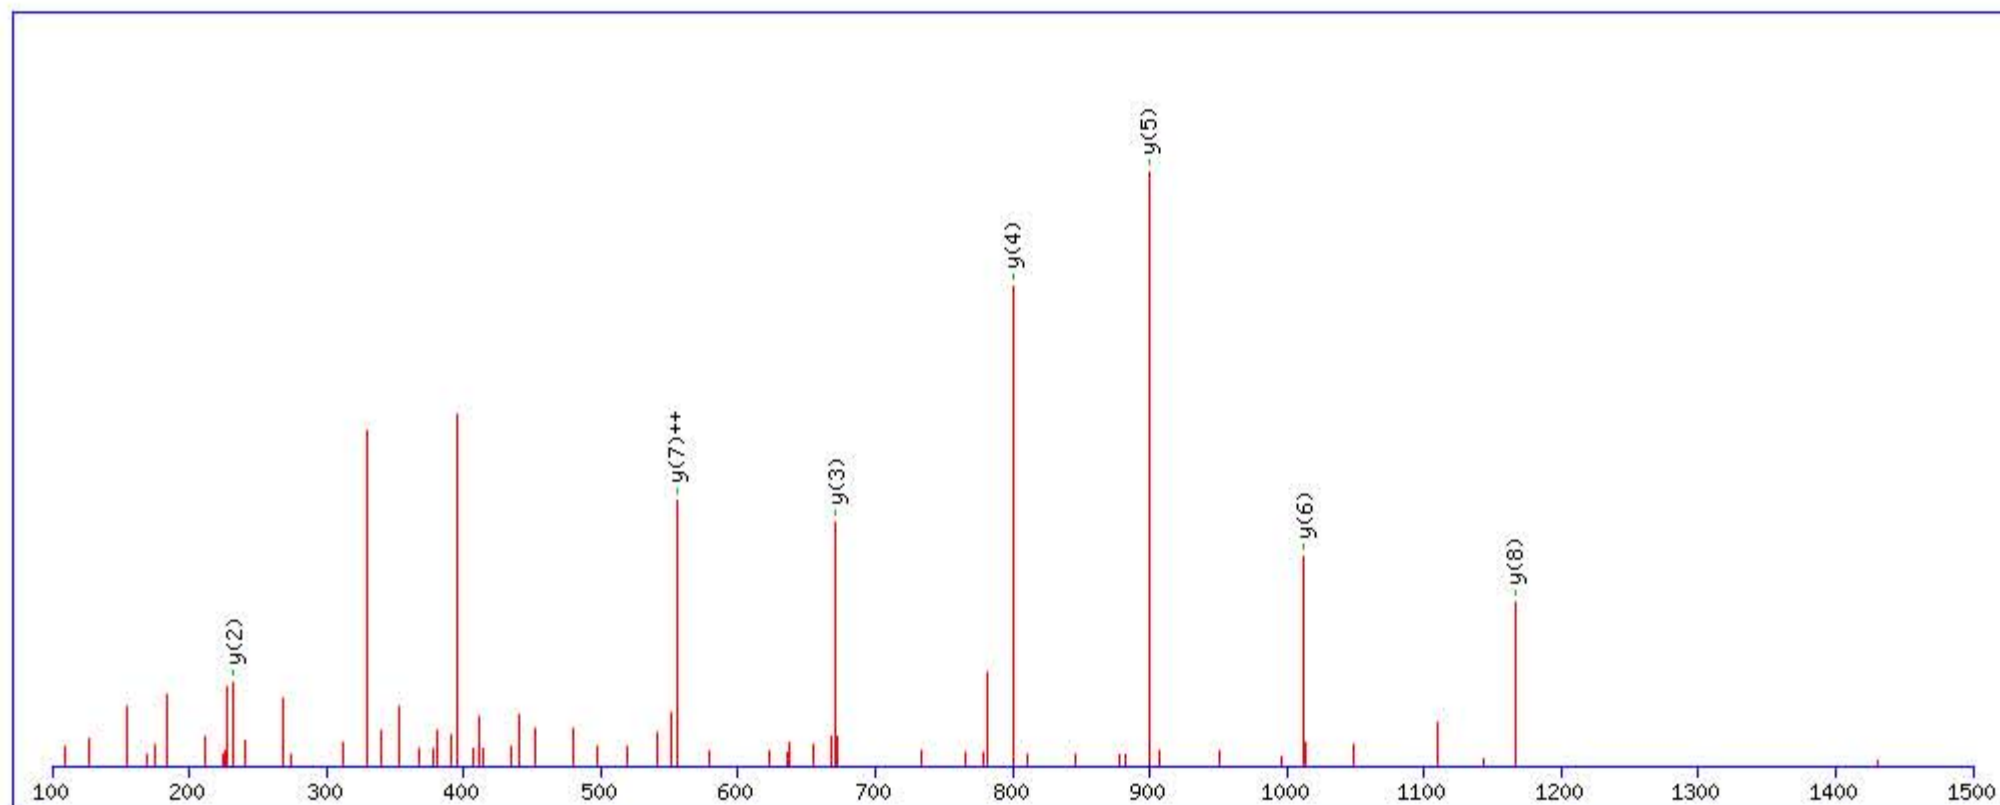

Monoisotopic mass of neutral peptide Mr(calc): 1278.711823

Fixed modifications: Carbamidomethyl (C) (apply to specified residues or termini only)

Variable modifications:

Q7 : Biotin:Thermo-21345 (Q)

Ions Score: 44 Expect: 0.00054

Matches : 7/68 fragment ions using 11 most intense peaks [\(help\)](#)

| # | b           | b <sup>++</sup> | b <sup>*</sup> | b <sup>*++</sup> | b <sup>0</sup> | b <sup>0++</sup> | Seq. | y                  | y <sup>++</sup>   | y <sup>*</sup> | y <sup>*++</sup> | y <sup>0</sup> | y <sup>0++</sup> | # |
|---|-------------|-----------------|----------------|------------------|----------------|------------------|------|--------------------|-------------------|----------------|------------------|----------------|------------------|---|
| 1 | 114.091340  | 57.549308       |                |                  |                |                  | L    |                    |                   |                |                  |                |                  | 9 |
| 2 | 171.112804  | 86.060040       |                |                  |                |                  | G    | <b>1166.635041</b> | 583.821159        | 1149.608492    | 575.307884       | 1148.624476    | 574.815876       | 8 |
| 3 | 268.165568  | 134.586422      |                |                  |                |                  | P    | 1109.613577        | <b>555.310426</b> | 1092.587028    | 546.797152       | 1091.603012    | 546.305144       | 7 |
| 4 | 381.249632  | 191.128454      |                |                  |                |                  | L    | <b>1012.560813</b> | 506.784044        | 995.534264     | 498.270770       | 994.550248     | 497.778762       | 6 |
| 5 | 480.318046  | 240.662661      |                |                  |                |                  | V    | <b>899.476749</b>  | 450.242012        | 882.450200     | 441.728738       | 881.466184     | 441.236730       | 5 |
| 6 | 609.360639  | 305.183958      |                |                  | 591.350074     | 296.178675       | E    | <b>800.408335</b>  | 400.707805        | 783.381786     | 392.194531       | 782.397770     | 391.702523       | 4 |
| 7 | 1048.585965 | 524.796621      | 1031.559416    | 516.283346       | 1030.575400    | 515.791338       | Q    | <b>671.365742</b>  | 336.186509        | 654.339193     | 327.673234       |                |                  | 3 |
| 8 | 1105.607429 | 553.307352      | 1088.580880    | 544.794078       | 1087.596864    | 544.302070       | G    | <b>232.140416</b>  | 116.573846        | 215.113867     | 108.060571       |                |                  | 2 |
| 9 |             |                 |                |                  |                |                  | R    | 175.118952         | 88.063114         | 158.092403     | 79.549839        |                |                  | 1 |

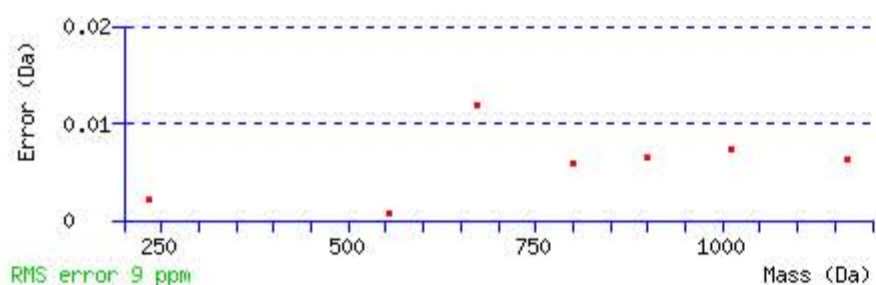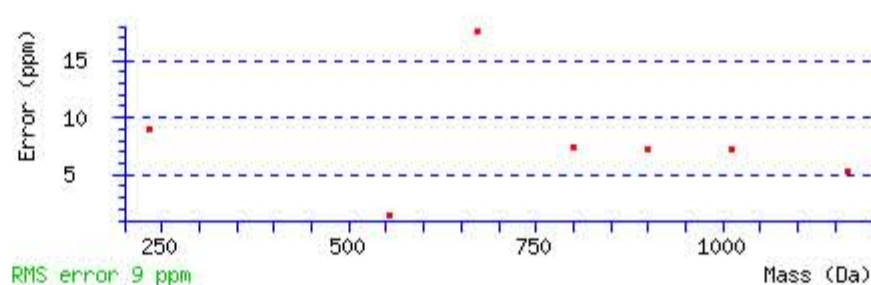

NCBI BLAST search of **LGPLVEQGR**

(Parameters: blastp, nr protein database, expect=20000, no filter, PAM30)

Other BLAST [web gateways](#)

All matches to this query

| Score | Mr(calc):   | Delta     | Sequence                  |
|-------|-------------|-----------|---------------------------|
| 44.0  | 1278.711823 | -0.001455 | <a href="#">LGPLVEQGR</a> |

Mascot: <http://www.matrixscience.com/>



# MASCOT Search Results

## Peptide View

MS/MS Fragmentation of **QQTEWQSGQR**

Found in **APOE\_HUMAN**, Apolipoprotein E OS=Homo sapiens GN=APOE PE=1 SV=1

Match to Query 44033: 1557.754452 from(520.258760,3+) rtinseconds(1536) index(40681)

Title: Locus:1.1.1.2563.18 File:"2013-07-02 CLN FXIII 30 min 1st F 3.wiff"

Data file C:\Program Files (x86)\Matrix Science\Mascot Daemon\mgf1 FXIII 30 min 1st\mascot\_daemon\_merge.mgf

Click mouse within plot area to zoom in by factor of two about that point

Or, Plot from  to  Da

Label all possible matches  Label matches used for scoring

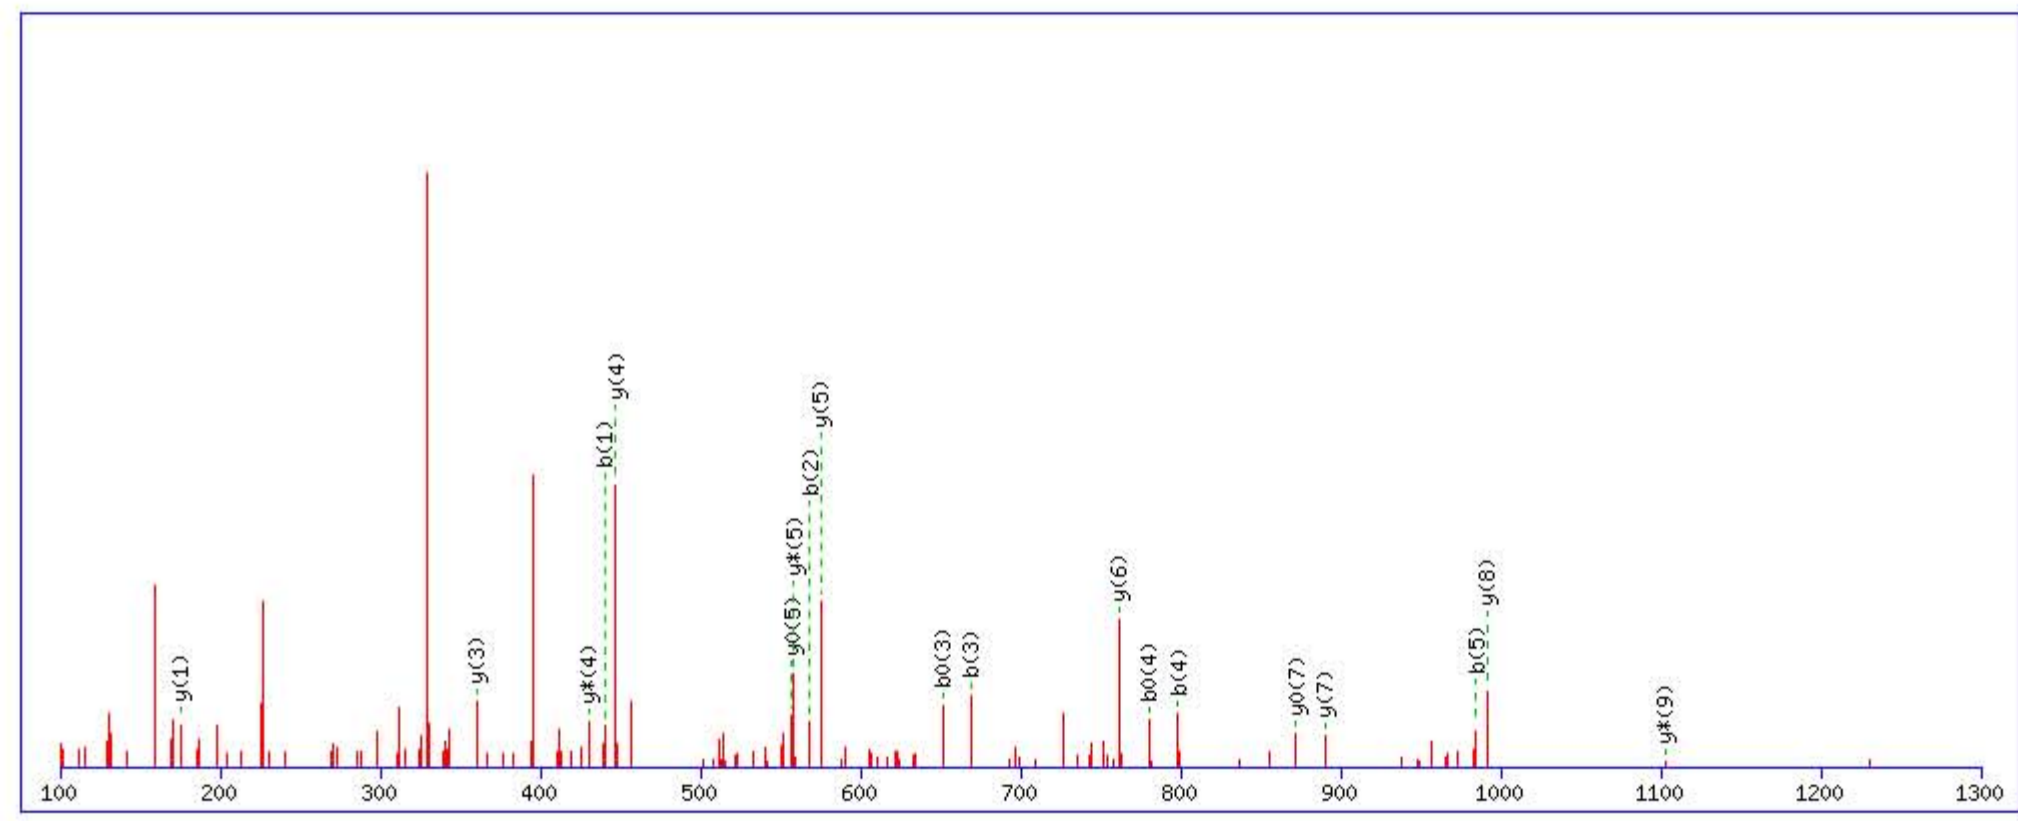

Monoisotopic mass of neutral peptide Mr(calc): 1557.735809

Fixed modifications: Carbamidomethyl (C) (apply to specified residues or termini only)

Variable modifications:

Q1 : Biotin:Thermo-21345 (Q)

Ions Score: 32 Expect: 0.0039

Matches : 19/98 fragment ions using 38 most intense peaks [\(help\)](#)

| #  | b           | b <sup>++</sup> | b <sup>*</sup> | b <sup>*++</sup> | b <sup>0</sup> | b <sup>0++</sup> | Seq. | y           | y <sup>++</sup> | y <sup>*</sup> | y <sup>*++</sup> | y <sup>0</sup> | y <sup>0++</sup> | #  |
|----|-------------|-----------------|----------------|------------------|----------------|------------------|------|-------------|-----------------|----------------|------------------|----------------|------------------|----|
| 1  | 440.232602  | 220.619939      | 423.206053     | 212.106664       |                |                  | Q    |             |                 |                |                  |                |                  | 10 |
| 2  | 568.291180  | 284.649228      | 551.264631     | 276.135954       |                |                  | Q    | 1119.517763 | 560.262520      | 1102.491214    | 551.749245       | 1101.507198    | 551.257237       | 9  |
| 3  | 669.338859  | 335.173068      | 652.312310     | 326.659793       | 651.328294     | 326.167785       | T    | 991.459185  | 496.233231      | 974.432636     | 487.719956       | 973.448620     | 487.227948       | 8  |
| 4  | 798.381452  | 399.694364      | 781.354903     | 391.181090       | 780.370887     | 390.689082       | E    | 890.411506  | 445.709391      | 873.384957     | 437.196117       | 872.400941     | 436.704109       | 7  |
| 5  | 984.460765  | 492.734021      | 967.434216     | 484.220746       | 966.450200     | 483.728738       | W    | 761.368913  | 381.188095      | 744.342364     | 372.674820       | 743.358348     | 372.182812       | 6  |
| 6  | 1112.519343 | 556.763310      | 1095.492794    | 548.250035       | 1094.508778    | 547.758027       | Q    | 575.289600  | 288.148438      | 558.263051     | 279.635164       | 557.279035     | 279.143156       | 5  |
| 7  | 1199.551371 | 600.279324      | 1182.524822    | 591.766049       | 1181.540806    | 591.274041       | S    | 447.231022  | 224.119149      | 430.204473     | 215.605875       | 429.220457     | 215.113867       | 4  |
| 8  | 1256.572835 | 628.790056      | 1239.546286    | 620.276781       | 1238.562270    | 619.784773       | G    | 360.198994  | 180.603135      | 343.172445     | 172.089860       |                |                  | 3  |
| 9  | 1384.631413 | 692.819345      | 1367.604864    | 684.306070       | 1366.620848    | 683.814062       | Q    | 303.177530  | 152.092403      | 286.150981     | 143.579129       |                |                  | 2  |
| 10 |             |                 |                |                  |                |                  | R    | 175.118952  | 88.063114       | 158.092403     | 79.549839        |                |                  | 1  |

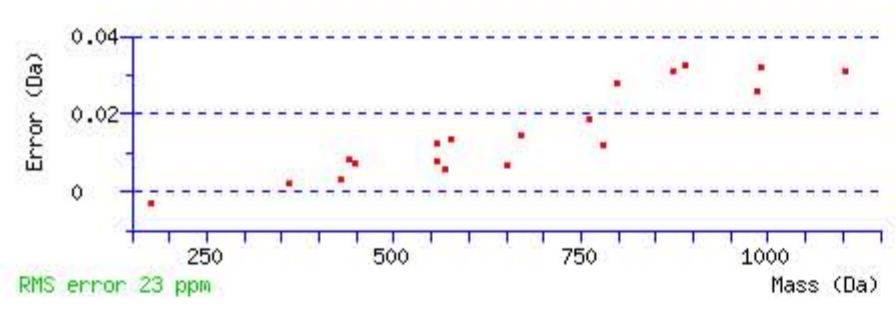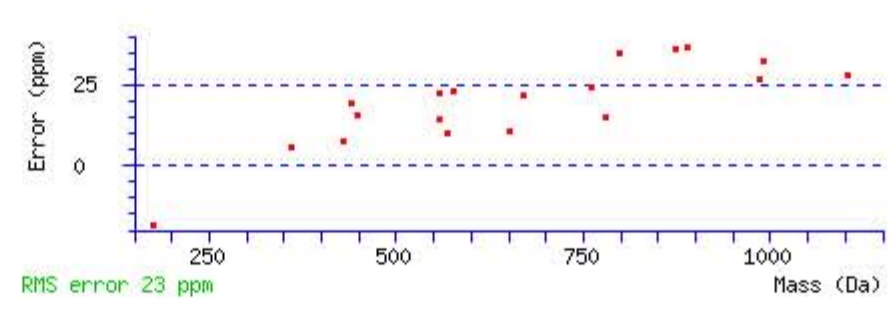

NCBI BLAST search of **QQTEWQSGQR**

(Parameters: blastp, nr protein database, expect=20000, no filter, PAM30)

Other BLAST [web gateways](#)

All matches to this query

| Score | Mr(calc):   | Delta     | Sequence                       |
|-------|-------------|-----------|--------------------------------|
| 31.6  | 1557.735809 | 0.018643  | <a href="#">QQTEWQSGQR</a>     |
| 28.9  | 1557.735809 | 0.018643  | <a href="#">QQTEWQSGQR</a>     |
| 5.7   | 1557.768158 | -0.013706 | <a href="#">SIQQTMARQSHQK</a>  |
| 4.1   | 1557.747040 | 0.007412  | <a href="#">AFSHCSSLTKHQR</a>  |
| 3.8   | 1557.745697 | 0.008755  | <a href="#">GSSLFMDTEKSGKR</a> |



# MASCOT Search Results

## Peptide View

MS/MS Fragmentation of **AKLEEQAQQIR**

Found in **APOE\_HUMAN**, Apolipoprotein E OS=Homo sapiens GN=APOE PE=1 SV=1

Match to Query 47073: 1623.886512 from(542.302780,3+) rtinseconds(1467) index(40205)

Title: Locus:1.1.1.2539.21 File:"2013-07-02 CLN FXIII 30 min 1st F 3.wiff"

Data file C:\Program Files (x86)\Matrix Science\Mascot Daemon\mgf\1 FXIII 30 min 1st\mascot\_daemon\_merge.mgf

Click mouse within plot area to zoom in by factor of two about that point

Or, Plot from  to  Da

Label all possible matches  Label matches used for scoring

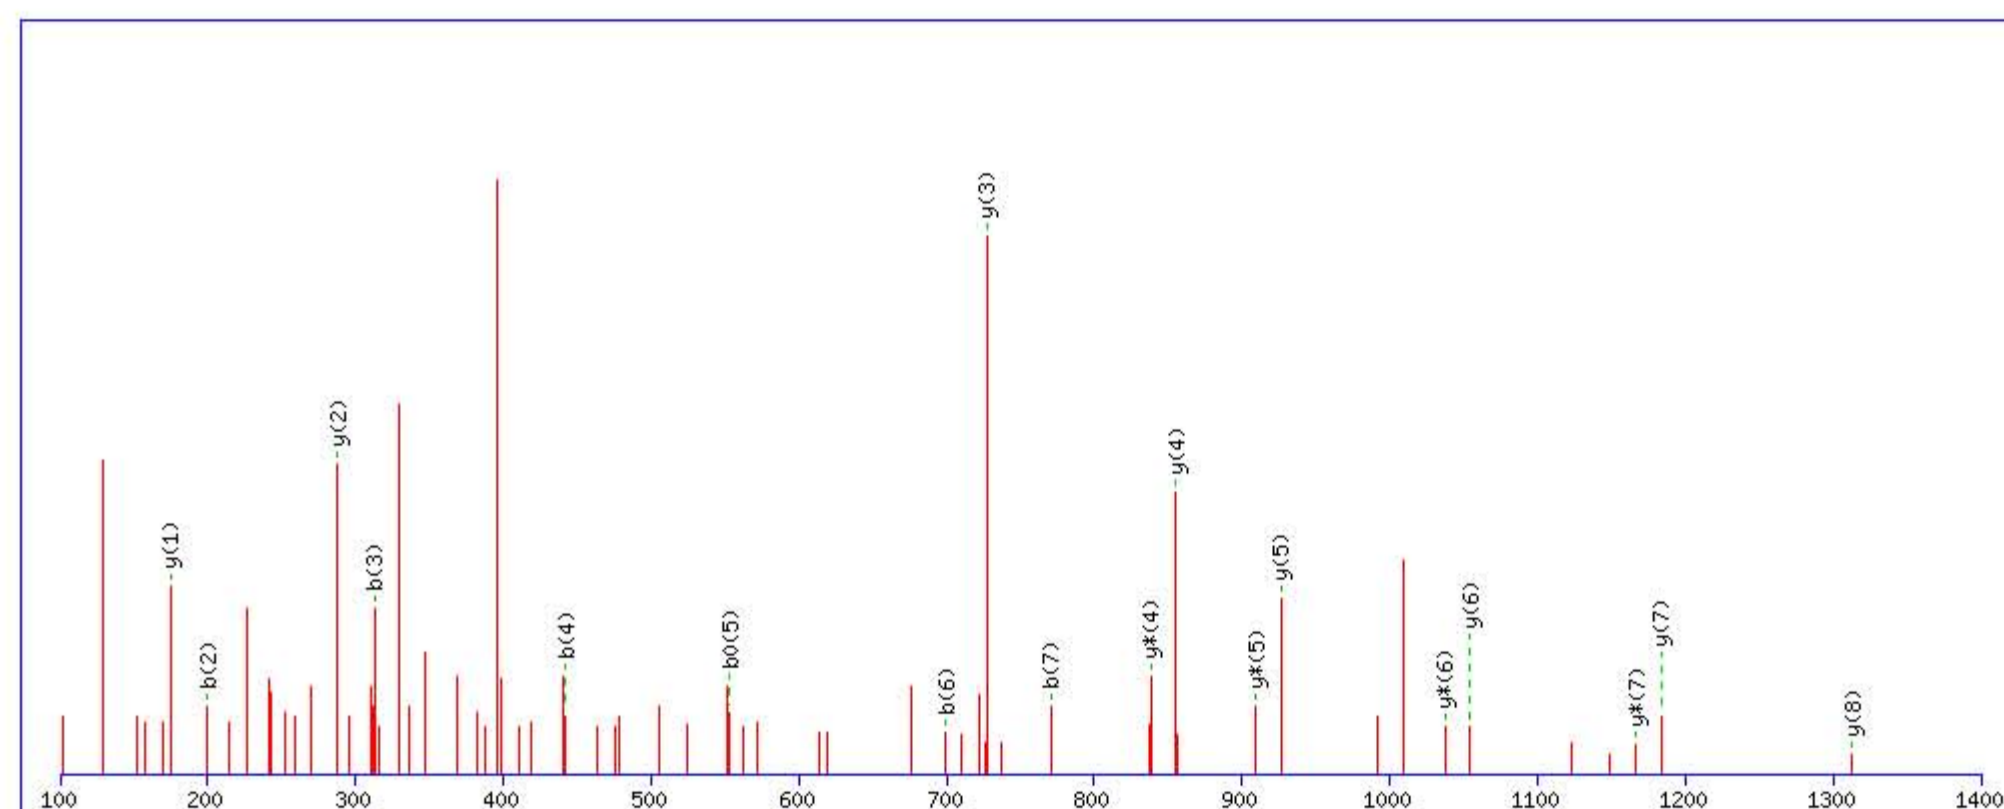

Monoisotopic mass of neutral peptide Mr(calc): 1623.876617

Fixed modifications: Carbamidomethyl (C) (apply to specified residues or termini only)

Variable modifications:

Q9 : Biotin:Thermo-21345 (Q)

Ions Score: 43 Expect: 0.00095

Matches : 18/100 fragment ions using 34 most intense peaks [\(help\)](#)

| #  | b                 | b <sup>++</sup> | b <sup>*</sup> | b <sup>+++</sup> | b <sup>0</sup>    | b <sup>0++</sup> | Seq. | y                  | y <sup>++</sup> | y <sup>*</sup>     | y <sup>+++</sup> | y <sup>0</sup> | y <sup>0++</sup> | #  |
|----|-------------------|-----------------|----------------|------------------|-------------------|------------------|------|--------------------|-----------------|--------------------|------------------|----------------|------------------|----|
| 1  | 72.044390         | 36.525833       |                |                  |                   |                  | A    |                    |                 |                    |                  |                |                  | 11 |
| 2  | <b>200.139353</b> | 100.573315      | 183.112804     | 92.060040        |                   |                  | K    | 1553.846825        | 777.427050      | 1536.820276        | 768.913776       | 1535.836260    | 768.421768       | 10 |
| 3  | <b>313.223417</b> | 157.115346      | 296.196868     | 148.602072       |                   |                  | L    | 1425.751862        | 713.379569      | 1408.725313        | 704.866294       | 1407.741297    | 704.374286       | 9  |
| 4  | <b>442.266010</b> | 221.636643      | 425.239461     | 213.123369       | 424.255445        | 212.631361       | E    | <b>1312.667798</b> | 656.837537      | 1295.641249        | 648.324262       | 1294.657233    | 647.832254       | 8  |
| 5  | 571.308603        | 286.157940      | 554.282054     | 277.644665       | <b>553.298038</b> | 277.152657       | E    | <b>1183.625205</b> | 592.316240      | <b>1166.598656</b> | 583.802966       | 1165.614640    | 583.310958       | 7  |
| 6  | <b>699.367181</b> | 350.187229      | 682.340632     | 341.673954       | 681.356616        | 341.181946       | Q    | <b>1054.582612</b> | 527.794944      | <b>1037.556063</b> | 519.281670       |                |                  | 6  |
| 7  | <b>770.404295</b> | 385.705786      | 753.377746     | 377.192511       | 752.393730        | 376.700503       | A    | <b>926.524034</b>  | 463.765655      | <b>909.497485</b>  | 455.252380       |                |                  | 5  |
| 8  | 898.462873        | 449.735075      | 881.436324     | 441.221800       | 880.452308        | 440.729792       | Q    | <b>855.486920</b>  | 428.247098      | <b>838.460371</b>  | 419.733823       |                |                  | 4  |
| 9  | 1337.688199       | 669.347737      | 1320.661650    | 660.834463       | 1319.677634       | 660.342455       | Q    | <b>727.428342</b>  | 364.217809      | 710.401793         | 355.704534       |                |                  | 3  |
| 10 | 1450.772263       | 725.889769      | 1433.745714    | 717.376495       | 1432.761698       | 716.884487       | I    | <b>288.203016</b>  | 144.605146      | 271.176467         | 136.091871       |                |                  | 2  |
| 11 |                   |                 |                |                  |                   |                  | R    | <b>175.118952</b>  | 88.063114       | 158.092403         | 79.549839        |                |                  | 1  |

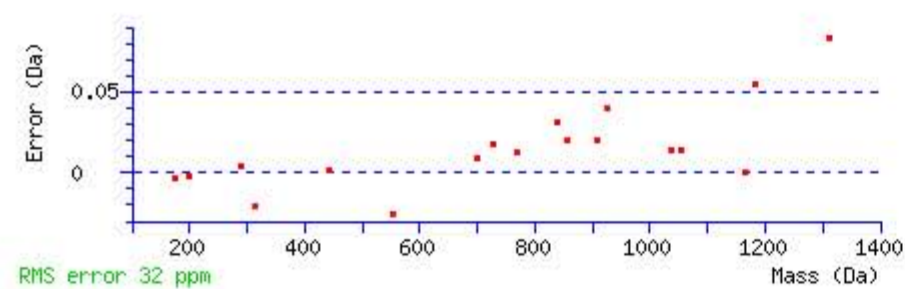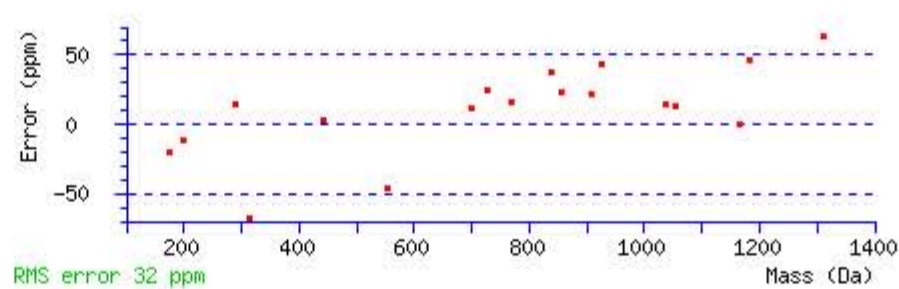

NCBI BLAST search of **AKLEEQAQQIR**

(Parameters: blastp, nr protein database, expect=20000, no filter, PAM30)

Other BLAST [web gateways](#)

## All matches to this query

| Score | Mr(calc):   | Delta    | Sequence                       |
|-------|-------------|----------|--------------------------------|
| 43.4  | 1623.876617 | 0.009895 | <a href="#">AKLEEQAQQIR</a>    |
| 31.8  | 1623.876617 | 0.009895 | <a href="#">AKLEEQAQQIR</a>    |
| 18.3  | 1623.877502 | 0.009010 | <a href="#">QMKAQQLR</a>       |
| 11.2  | 1623.877502 | 0.009010 | <a href="#">QMKAQQLR</a>       |
| 8.7   | 1623.876617 | 0.009895 | <a href="#">AKLEEQAQQIR</a>    |
| 3.8   | 1623.869247 | 0.017265 | <a href="#">KEADGDLPQRVQLR</a> |
| 3.3   | 1623.866745 | 0.019767 | <a href="#">QAQAQPHLPPAR</a>   |
| 2.5   | 1623.876617 | 0.009895 | <a href="#">QAEEAVAKLQAR</a>   |
| 2.4   | 1623.865402 | 0.021110 | <a href="#">KLKLPGDSSLMTYR</a> |
| 2.1   | 1623.877502 | 0.009010 | <a href="#">AQKMQQLR</a>       |



# MASCOT Search Results

## Peptide View

MS/MS Fragmentation of **SWFEPLVEDMQR**

Found in **APOE\_HUMAN**, Apolipoprotein E OS=Homo sapiens GN=APOE PE=1 SV=1

Match to Query 53233: 1846.899702 from(616.640510,3+) rtinseconds(2778) index(12259)

Title: Locus:1.1.1.2687.12 File:"2013-07-02 CLN FXIII 30 min 1st F 1.wiff"

Data file C:\Program Files (x86)\Matrix Science\Mascot Daemon\mgf1 FXIII 30 min 1st\mascot\_daemon\_merge.mgf

Click mouse within plot area to zoom in by factor of two about that point

Or, Plot from  to  Da

Label all possible matches  Label matches used for scoring

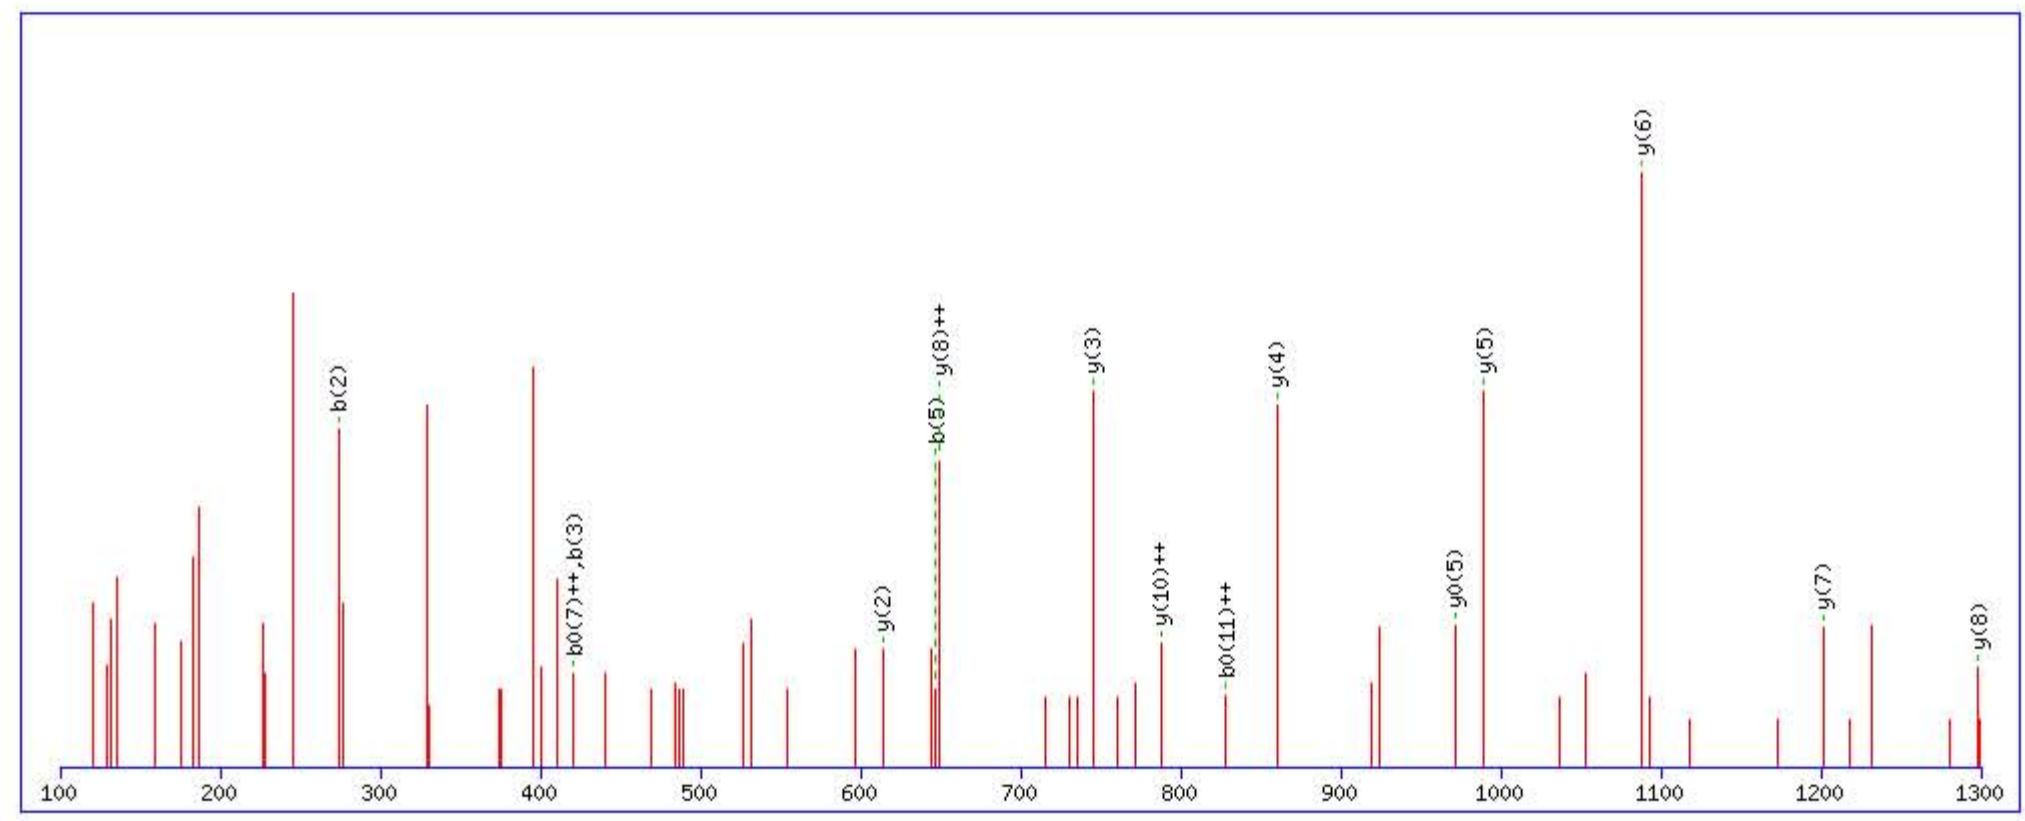

Monoisotopic mass of neutral peptide Mr(calc): 1846.874603

Fixed modifications: Carbamidomethyl (C) (apply to specified residues or termini only)

Variable modifications:

Q11 : Biotin:Thermo-21345 (Q)

Ions Score: 25 Expect: 0.034

Matches : 15/106 fragment ions using 36 most intense peaks [\(help\)](#)

| #  | b                 | b <sup>++</sup> | b <sup>*</sup> | b <sup>*++</sup> | b <sup>0</sup> | b <sup>0++</sup>  | Seq. | y                  | y <sup>++</sup>   | y <sup>*</sup> | y <sup>*++</sup> | y <sup>0</sup>    | y <sup>0++</sup> | #  |
|----|-------------------|-----------------|----------------|------------------|----------------|-------------------|------|--------------------|-------------------|----------------|------------------|-------------------|------------------|----|
| 1  | 88.039304         | 44.523290       |                |                  | 70.028739      | 35.518008         | S    |                    |                   |                |                  |                   |                  | 12 |
| 2  | <b>274.118617</b> | 137.562947      |                |                  | 256.108052     | 128.557664        | W    | 1760.849861        | 880.928568        | 1743.823312    | 872.415294       | 1742.839296       | 871.923286       | 11 |
| 3  | <b>421.187031</b> | 211.097153      |                |                  | 403.176466     | 202.091871        | F    | 1574.770548        | <b>787.888912</b> | 1557.743999    | 779.375638       | 1556.759983       | 778.883629       | 10 |
| 4  | 550.229624        | 275.618450      |                |                  | 532.219059     | 266.613168        | E    | 1427.702134        | 714.354705        | 1410.675585    | 705.841431       | 1409.691569       | 705.349422       | 9  |
| 5  | <b>647.282388</b> | 324.144832      |                |                  | 629.271823     | 315.139550        | P    | <b>1298.659541</b> | <b>649.833409</b> | 1281.632992    | 641.320134       | 1280.648976       | 640.828126       | 8  |
| 6  | 760.366452        | 380.686864      |                |                  | 742.355887     | 371.681582        | L    | <b>1201.606777</b> | 601.307027        | 1184.580228    | 592.793752       | 1183.596212       | 592.301744       | 7  |
| 7  | 859.434866        | 430.221071      |                |                  | 841.424301     | <b>421.215789</b> | V    | <b>1088.522713</b> | 544.764995        | 1071.496164    | 536.251720       | 1070.512148       | 535.759712       | 6  |
| 8  | 988.477459        | 494.742368      |                |                  | 970.466894     | 485.737085        | E    | <b>989.454299</b>  | 495.230788        | 972.427750     | 486.717513       | <b>971.443734</b> | 486.225505       | 5  |
| 9  | 1103.504402       | 552.255839      |                |                  | 1085.493837    | 543.250557        | D    | <b>860.411706</b>  | 430.709491        | 843.385157     | 422.196216       | 842.401141        | 421.704208       | 4  |
| 10 | 1234.544887       | 617.776082      |                |                  | 1216.534322    | 608.770799        | M    | <b>745.384763</b>  | 373.196020        | 728.358214     | 364.682745       |                   |                  | 3  |
| 11 | 1673.770213       | 837.388745      | 1656.743664    | 828.875470       | 1655.759648    | <b>828.383462</b> | Q    | <b>614.344278</b>  | 307.675777        | 597.317729     | 299.162503       |                   |                  | 2  |
| 12 |                   |                 |                |                  |                |                   | R    | 175.118952         | 88.063114         | 158.092403     | 79.549839        |                   |                  | 1  |

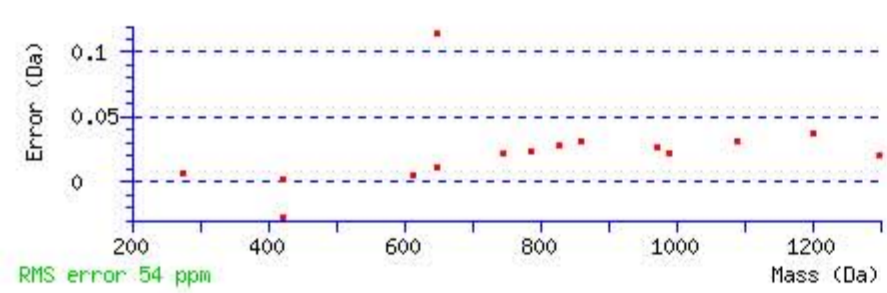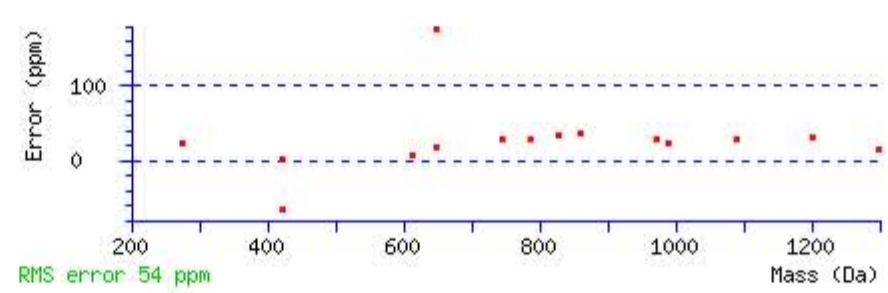

NCBI BLAST search of **SWFEPLVEDMQR**

(Parameters: blastp, nr protein database, expect=20000, no filter, PAM30)

Other BLAST [web gateways](#)

All matches to this query

| Score | Mr(calc):   | Delta     | Sequence                          |
|-------|-------------|-----------|-----------------------------------|
| 25.2  | 1846.874603 | 0.025099  | <a href="#">SWFEPLVEDMQR</a>      |
| 9.2   | 1846.895721 | 0.003981  | <a href="#">LQLEETMPSPYGR</a>     |
| 3.3   | 1846.909470 | -0.009768 | <a href="#">RATASLDTPGAIMGDVK</a> |



# MASCOT Search Results

## Peptide View

MS/MS Fragmentation of **SGVQQLIQYYQDQK**

Found in **APOF\_HUMAN**, Apolipoprotein F OS=Homo sapiens GN=APOF PE=1 SV=2

Match to Query 57599: 2008.020548 from(1005.017550,2+) rtinseconds(2459) index(65964)

Title: Locus:1.1.1.2853.16 File:"2013-07-02 CLN FXIII 30 min 1st F 4.wiff"

Data file C:\Program Files (x86)\Matrix Science\Mascot Daemon\mgf1 FXIII 30 min 1st\mascot\_daemon\_merge.mgf

Click mouse within plot area to zoom in by factor of two about that point

Or, Plot from  to  Da

Label all possible matches  Label matches used for scoring

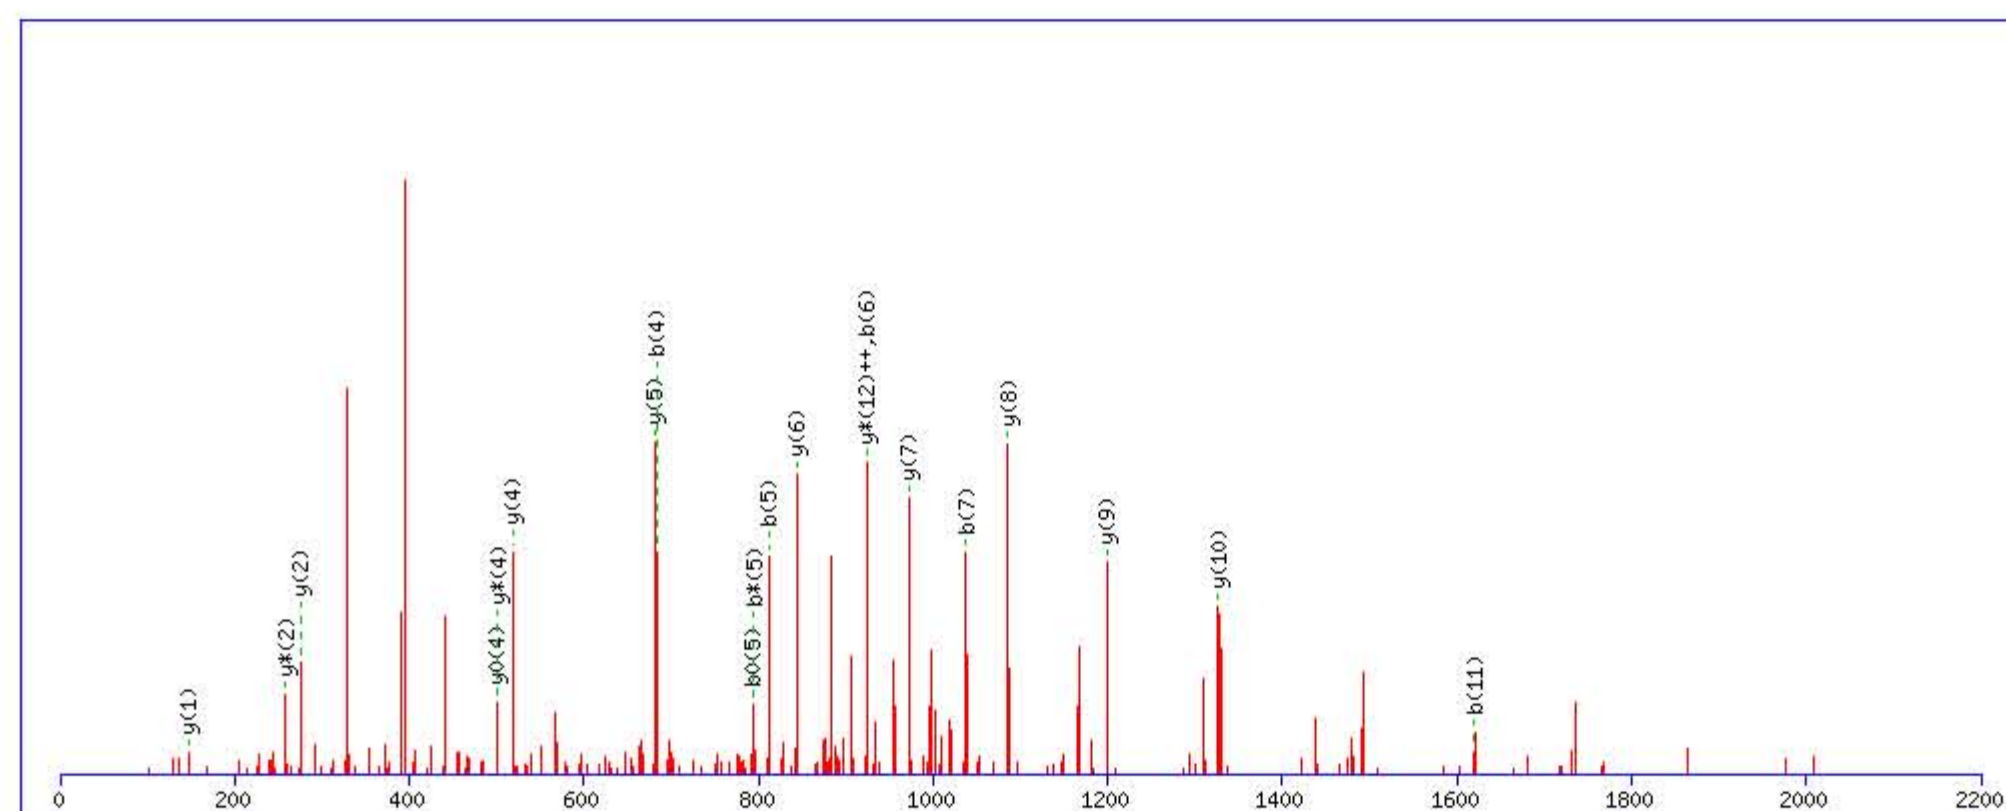

Monoisotopic mass of neutral peptide Mr(calc): 2008.008789

Fixed modifications: Carbamidomethyl (C) (apply to specified residues or termini only)

Variable modifications:

Q4 : Biotin:Thermo-21345 (Q)

Ions Score: 47 Expect: 0.00014

Matches : 20/146 fragment ions using 36 most intense peaks [\(help\)](#)

| #  | b                  | b <sup>++</sup> | b <sup>+</sup>    | b <sup>+++</sup> | b <sup>0</sup>    | b <sup>0++</sup> | Seq. | y                  | y <sup>++</sup> | y <sup>+</sup>    | y <sup>+++</sup> | y <sup>0</sup>    | y <sup>0++</sup> | #  |
|----|--------------------|-----------------|-------------------|------------------|-------------------|------------------|------|--------------------|-----------------|-------------------|------------------|-------------------|------------------|----|
| 1  | 88.039304          | 44.523290       |                   |                  | 70.028739         | 35.518008        | S    |                    |                 |                   |                  |                   |                  | 14 |
| 2  | 145.060768         | 73.034022       |                   |                  | 127.050203        | 64.028740        | G    | 1921.984049        | 961.495663      | 1904.957500       | 952.982388       | 1903.973484       | 952.490380       | 13 |
| 3  | 244.129182         | 122.568229      |                   |                  | 226.118617        | 113.562947       | V    | 1864.962585        | 932.984931      | 1847.936036       | 924.471656       | 1846.952020       | 923.979648       | 12 |
| 4  | <b>683.354508</b>  | 342.180892      | 666.327959        | 333.667618       | 665.343943        | 333.175610       | Q    | 1765.894171        | 883.450724      | 1748.867622       | 874.937449       | 1747.883606       | 874.445441       | 11 |
| 5  | <b>811.413086</b>  | 406.210181      | <b>794.386537</b> | 397.696907       | <b>793.402521</b> | 397.204899       | Q    | <b>1326.668845</b> | 663.838061      | 1309.642296       | 655.324786       | 1308.658280       | 654.832778       | 10 |
| 6  | <b>924.497150</b>  | 462.752213      | 907.470601        | 454.238939       | 906.486585        | 453.746931       | L    | <b>1198.610267</b> | 599.808772      | 1181.583718       | 591.295497       | 1180.599702       | 590.803489       | 9  |
| 7  | <b>1037.581214</b> | 519.294245      | 1020.554665       | 510.780971       | 1019.570649       | 510.288963       | I    | <b>1085.526203</b> | 543.266740      | 1068.499654       | 534.753465       | 1067.515638       | 534.261457       | 8  |
| 8  | 1165.639792        | 583.323534      | 1148.613243       | 574.810260       | 1147.629227       | 574.318252       | Q    | <b>972.442139</b>  | 486.724708      | 955.415590        | 478.211433       | 954.431574        | 477.719425       | 7  |
| 9  | 1328.703121        | 664.855199      | 1311.676572       | 656.341924       | 1310.692556       | 655.849916       | Y    | <b>844.383561</b>  | 422.695419      | 827.357012        | 414.182144       | 826.372996        | 413.690136       | 6  |
| 10 | 1491.766450        | 746.386863      | 1474.739901       | 737.873589       | 1473.755885       | 737.381581       | Y    | <b>681.320232</b>  | 341.163754      | 664.293683        | 332.650480       | 663.309667        | 332.158472       | 5  |
| 11 | <b>1619.825028</b> | 810.416152      | 1602.798479       | 801.902878       | 1601.814463       | 801.410870       | Q    | <b>518.256903</b>  | 259.632090      | <b>501.230354</b> | 251.118815       | <b>500.246338</b> | 250.626807       | 4  |
| 12 | 1734.851971        | 867.929624      | 1717.825422       | 859.416349       | 1716.841406       | 858.924341       | D    | 390.198325         | 195.602800      | 373.171776        | 187.089526       | 372.187760        | 186.597518       | 3  |
| 13 | 1862.910549        | 931.958913      | 1845.884000       | 923.445638       | 1844.899984       | 922.953630       | Q    | <b>275.171382</b>  | 138.089329      | <b>258.144833</b> | 129.576054       |                   |                  | 2  |
| 14 |                    |                 |                   |                  |                   |                  | K    | <b>147.112804</b>  | 74.060040       | 130.086255        | 65.546765        |                   |                  | 1  |

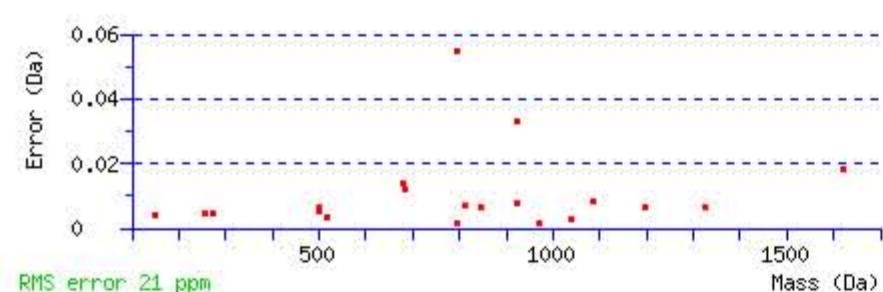

RMS error 21 ppm

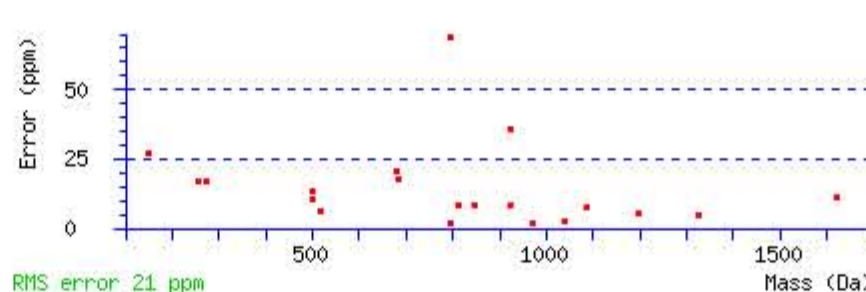

RMS error 21 ppm

NCBI BLAST search of **SGVQQLIQYYQDQK**

(Parameters: blastp, nr protein database, expect=20000, no filter, PAM30)

Other BLAST [web gateways](#)

## All matches to this query

| Score | Mr(calc):   | Delta     | Sequence                          |
|-------|-------------|-----------|-----------------------------------|
| 46.7  | 2008.008789 | 0.011759  | <a href="#">SGVQQLIQYYQDQK</a>    |
| 36.0  | 2008.008789 | 0.011759  | <a href="#">SGVQQLIQYYQDQK</a>    |
| 14.2  | 2008.008789 | 0.011759  | <a href="#">SGVQQLIQYYQDQK</a>    |
| 5.2   | 2008.037766 | -0.017218 | <a href="#">NYEDSVIQSVFRAKPKQ</a> |
| 3.5   | 2008.037308 | -0.016760 | <a href="#">VVPVSLSELYLLQCNMK</a> |
| 3.0   | 2008.048523 | -0.027975 | <a href="#">KLTIIFKNMQECIDQK</a>  |
| 2.8   | 2008.037277 | -0.016729 | <a href="#">IEELQEQLQK</a>        |
| 1.9   | 2008.005630 | 0.014918  | <a href="#">ITQRMVCAGYKEGGK</a>   |
| 1.8   | 2007.998215 | 0.022333  | <a href="#">QQLNLRTHMADENK</a>    |
| 1.8   | 2007.998215 | 0.022333  | <a href="#">QQLNLRTHMADENK</a>    |



# MASCOT Search Results

## Peptide View

MS/MS Fragmentation of **KCSYTEDAQCIDGTIEVPK**  
 Found in **APOH\_HUMAN**, Beta-2-glycoprotein 1 OS=Homo sapiens GN=APOH PE=1 SV=3

Match to Query 68929: 2524.173462 from(842.398430,3+) rtinseconds(1996) index(80285)  
 Title: Locus:1.1.1.2574.25 File:"2013-07-02 CLN FXIII 30 min 1st FT.wiff"  
 Data file C:\Program Files (x86)\Matrix Science\Mascot Daemon\mgf1 FXIII 30 min 1st\mascot\_daemon\_merge.mgf

Click mouse within plot area to zoom in by factor of two about that point  
 Or, Plot from  to  Da   
 Label all possible matches  Label matches used for scoring

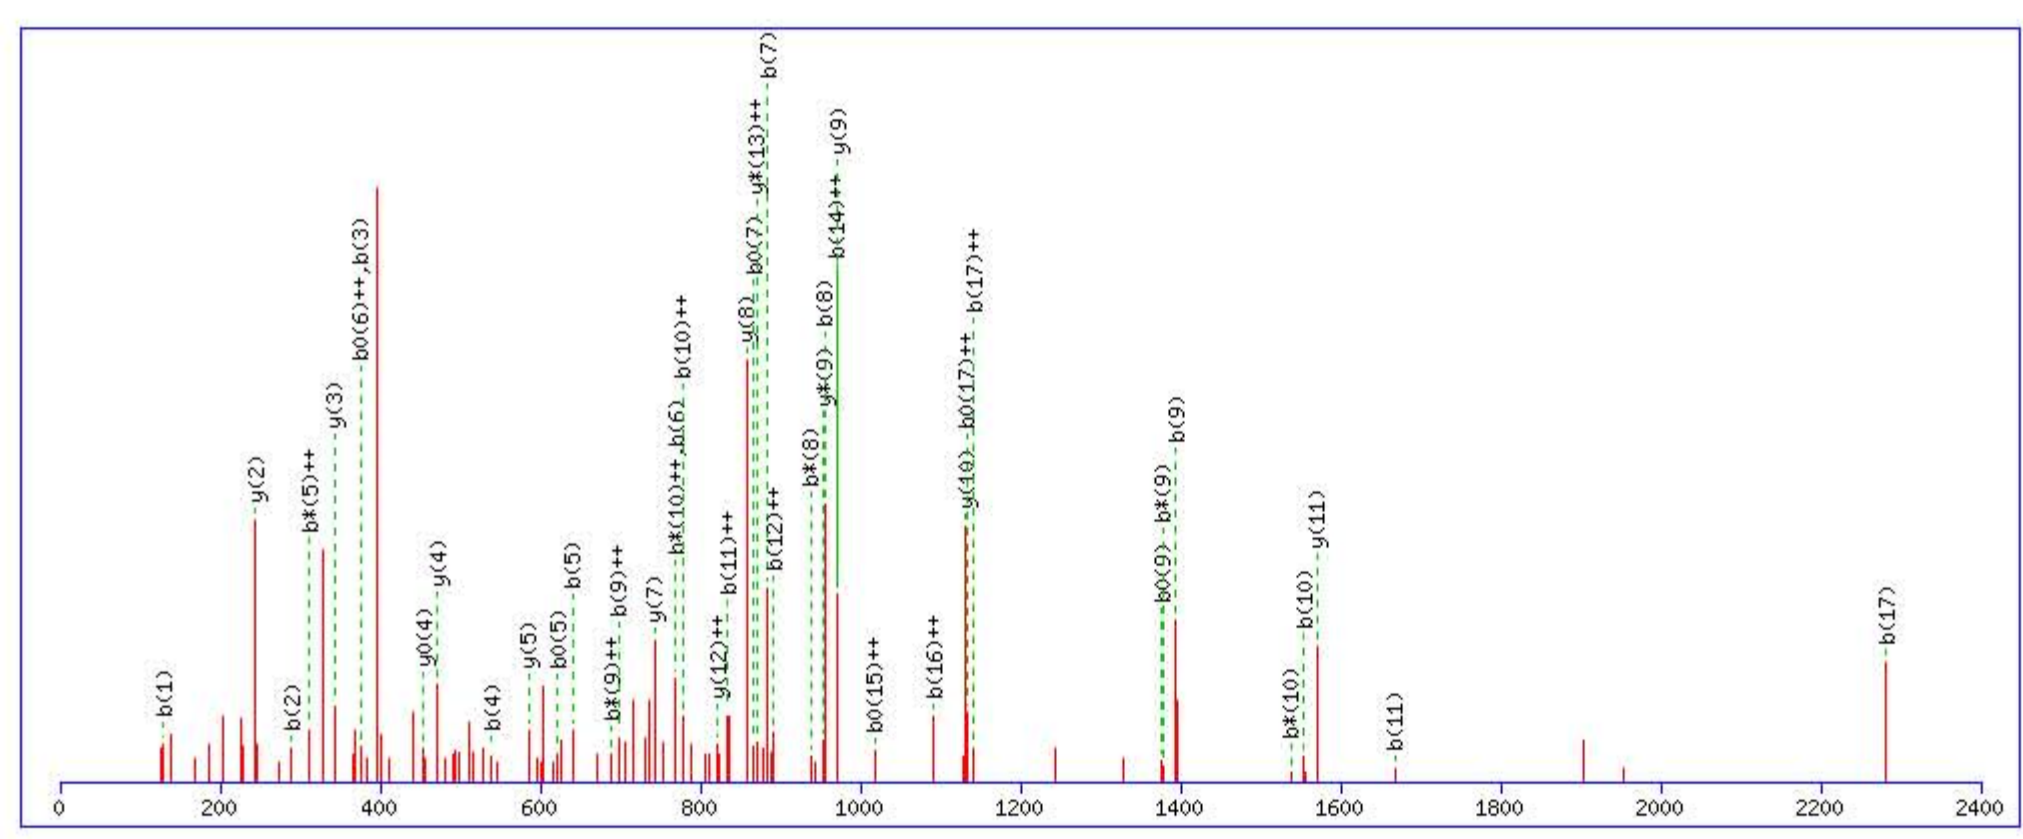

Monoisotopic mass of neutral peptide Mr(calc): 2524.164780  
 Fixed modifications: Carbamidomethyl (C) (apply to specified residues or termini only)  
 Variable modifications:  
 Q9 : Biotin:Thermo-21345 (Q)  
 Ions Score: 61 Expect: 1.2e-005  
 Matches : 44/206 fragment ions using 83 most intense peaks [\(help\)](#)

| #  | b                  | b <sup>++</sup>    | b <sup>*</sup>     | b <sup>*++</sup>  | b <sup>0</sup>     | b <sup>0++</sup>   | Seq.     | y                  | y <sup>++</sup>   | y <sup>*</sup>    | y <sup>*++</sup>  | y <sup>0</sup>    | y <sup>0++</sup> | #  |
|----|--------------------|--------------------|--------------------|-------------------|--------------------|--------------------|----------|--------------------|-------------------|-------------------|-------------------|-------------------|------------------|----|
| 1  | <b>129.102239</b>  | 65.054757          | 112.075690         | 56.541483         |                    |                    | <b>K</b> |                    |                   |                   |                   |                   |                  | 19 |
| 2  | <b>289.132888</b>  | 145.070082         | 272.106339         | 136.556808        |                    |                    | <b>C</b> | 2397.077099        | 1199.042187       | 2380.050550       | 1190.528913       | 2379.066534       | 1190.036905      | 18 |
| 3  | <b>376.164916</b>  | 188.586096         | 359.138367         | 180.072822        | 358.154351         | 179.580814         | <b>S</b> | 2237.046450        | 1119.026863       | 2220.019901       | 1110.513588       | 2219.035885       | 1110.021580      | 17 |
| 4  | <b>539.228245</b>  | 270.117761         | 522.201696         | 261.604486        | 521.217680         | 261.112478         | <b>Y</b> | 2150.014422        | 1075.510849       | 2132.987873       | 1066.997574       | 2132.003857       | 1066.505566      | 16 |
| 5  | <b>640.275924</b>  | 320.641600         | 623.249375         | <b>312.128326</b> | <b>622.265359</b>  | 311.636318         | <b>T</b> | 1986.951093        | 993.979185        | 1969.924544       | 985.465910        | 1968.940528       | 984.973902       | 15 |
| 6  | <b>769.318517</b>  | 385.162897         | 752.291968         | 376.649622        | 751.307952         | <b>376.157614</b>  | <b>E</b> | 1885.903414        | 943.455345        | 1868.876865       | 934.942071        | 1867.892849       | 934.450063       | 14 |
| 7  | <b>884.345460</b>  | 442.676368         | 867.318911         | 434.163094        | <b>866.334895</b>  | 433.671086         | <b>D</b> | 1756.860821        | 878.934049        | 1739.834272       | <b>870.420774</b> | 1738.850256       | 869.928766       | 13 |
| 8  | <b>955.382574</b>  | 478.194925         | <b>938.356025</b>  | 469.681650        | 937.372009         | 469.189642         | <b>A</b> | 1641.833878        | <b>821.420577</b> | 1624.807329       | 812.907303        | 1623.823313       | 812.415295       | 12 |
| 9  | <b>1394.607900</b> | <b>697.807588</b>  | <b>1377.581351</b> | <b>689.294314</b> | <b>1376.597335</b> | 688.802306         | <b>Q</b> | <b>1570.796764</b> | 785.902020        | 1553.770215       | 777.388746        | 1552.786199       | 776.896738       | 11 |
| 10 | <b>1554.638549</b> | <b>777.822913</b>  | <b>1537.612000</b> | <b>769.309638</b> | 1536.627984        | 768.817630         | <b>C</b> | <b>1131.571438</b> | 566.289357        | 1114.544889       | 557.776083        | 1113.560873       | 557.284075       | 10 |
| 11 | <b>1667.722613</b> | <b>834.364945</b>  | 1650.696064        | 825.851670        | 1649.712048        | 825.359662         | <b>I</b> | <b>971.540789</b>  | 486.274033        | <b>954.514240</b> | 477.760758        | 953.530224        | 477.268750       | 9  |
| 12 | 1782.749556        | <b>891.878416</b>  | 1765.723007        | 883.365142        | 1764.738991        | 882.873134         | <b>D</b> | <b>858.456725</b>  | 429.732001        | 841.430176        | 421.218726        | 840.446160        | 420.726718       | 8  |
| 13 | 1839.771020        | 920.389148         | 1822.744471        | 911.875874        | 1821.760455        | 911.383866         | <b>G</b> | <b>743.429782</b>  | 372.218529        | 726.403233        | 363.705255        | 725.419217        | 363.213247       | 7  |
| 14 | 1940.818699        | <b>970.912988</b>  | 1923.792150        | 962.399713        | 1922.808134        | 961.907705         | <b>T</b> | 686.408318         | 343.707797        | 669.381769        | 335.194523        | 668.397753        | 334.702515       | 6  |
| 15 | 2053.902763        | 1027.455019        | 2036.876214        | 1018.941745       | 2035.892198        | <b>1018.449737</b> | <b>I</b> | <b>585.360639</b>  | 293.183958        | 568.334090        | 284.670683        | 567.350074        | 284.178675       | 5  |
| 16 | 2182.945356        | <b>1091.976316</b> | 2165.918807        | 1083.463041       | 2164.934791        | 1082.971034        | <b>E</b> | <b>472.276575</b>  | 236.641925        | 455.250026        | 228.128651        | <b>454.266010</b> | 227.636643       | 4  |
| 17 | <b>2282.013770</b> | <b>1141.510523</b> | 2264.987221        | 1132.997248       | 2264.003205        | <b>1132.505240</b> | <b>V</b> | <b>343.233982</b>  | 172.120629        | 326.207433        | 163.607354        |                   |                  | 3  |
| 18 | 2379.066534        | 1190.036905        | 2362.039985        | 1181.523630       | 2361.055969        | 1181.031622        | <b>P</b> | <b>244.165568</b>  | 122.586422        | 227.139019        | 114.073148        |                   |                  | 2  |
| 19 |                    |                    |                    |                   |                    |                    | <b>K</b> | 147.112804         | 74.060040         | 130.086255        | 65.546765         |                   |                  | 1  |

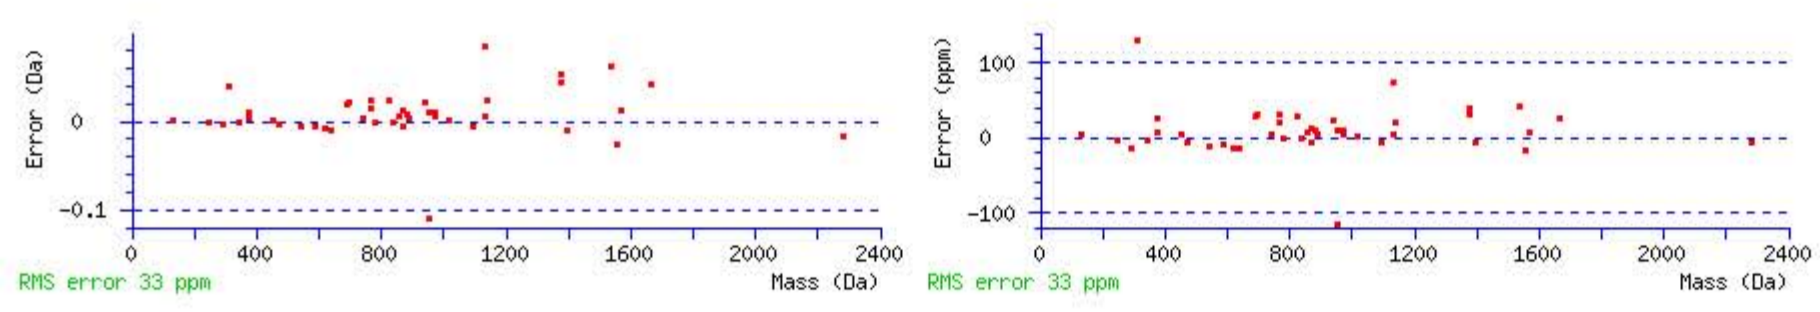

NCBI BLAST search of [KCSYTEDAQCIDGTIEVPK](#)  
 (Parameters: blastp, nr protein database, expect=20000, no filter, PAM30)  
 Other BLAST [web gateways](#)

### All matches to this query

| Score | Mr(calc):   | Delta    | Sequence                            |
|-------|-------------|----------|-------------------------------------|
| 60.6  | 2524.164780 | 0.008682 | <a href="#">KCSYTEDAQCIDGTIEVPK</a> |



**MASCOT** **SCIENCE** Mascot Search Results

Peptide View

MS/MS Fragmentation of **GYILVGQAK**

Found in **C4BPA\_HUMAN**, C4b-binding protein alpha chain OS=Homo sapiens GN=C4BPA PE=1 SV=2

Match to Query 33696: 1258.712588 from(630.363570,2+) rtinseconds(2018) index(63192)

Title: Locus:1.1.1.2700.7 File:"2013-07-02 CLN FXIII 30 min 1st F 4.wiff"

Data file C:\Program Files (x86)\Matrix Science\Mascot Daemon\mgf\1 FXIII 30 min 1st\mascot\_daemon\_merge.mgf

Click mouse within plot area to zoom in by factor of two about that point

Or, Plot from  to  Da

Label all possible matches  Label matches used for scoring

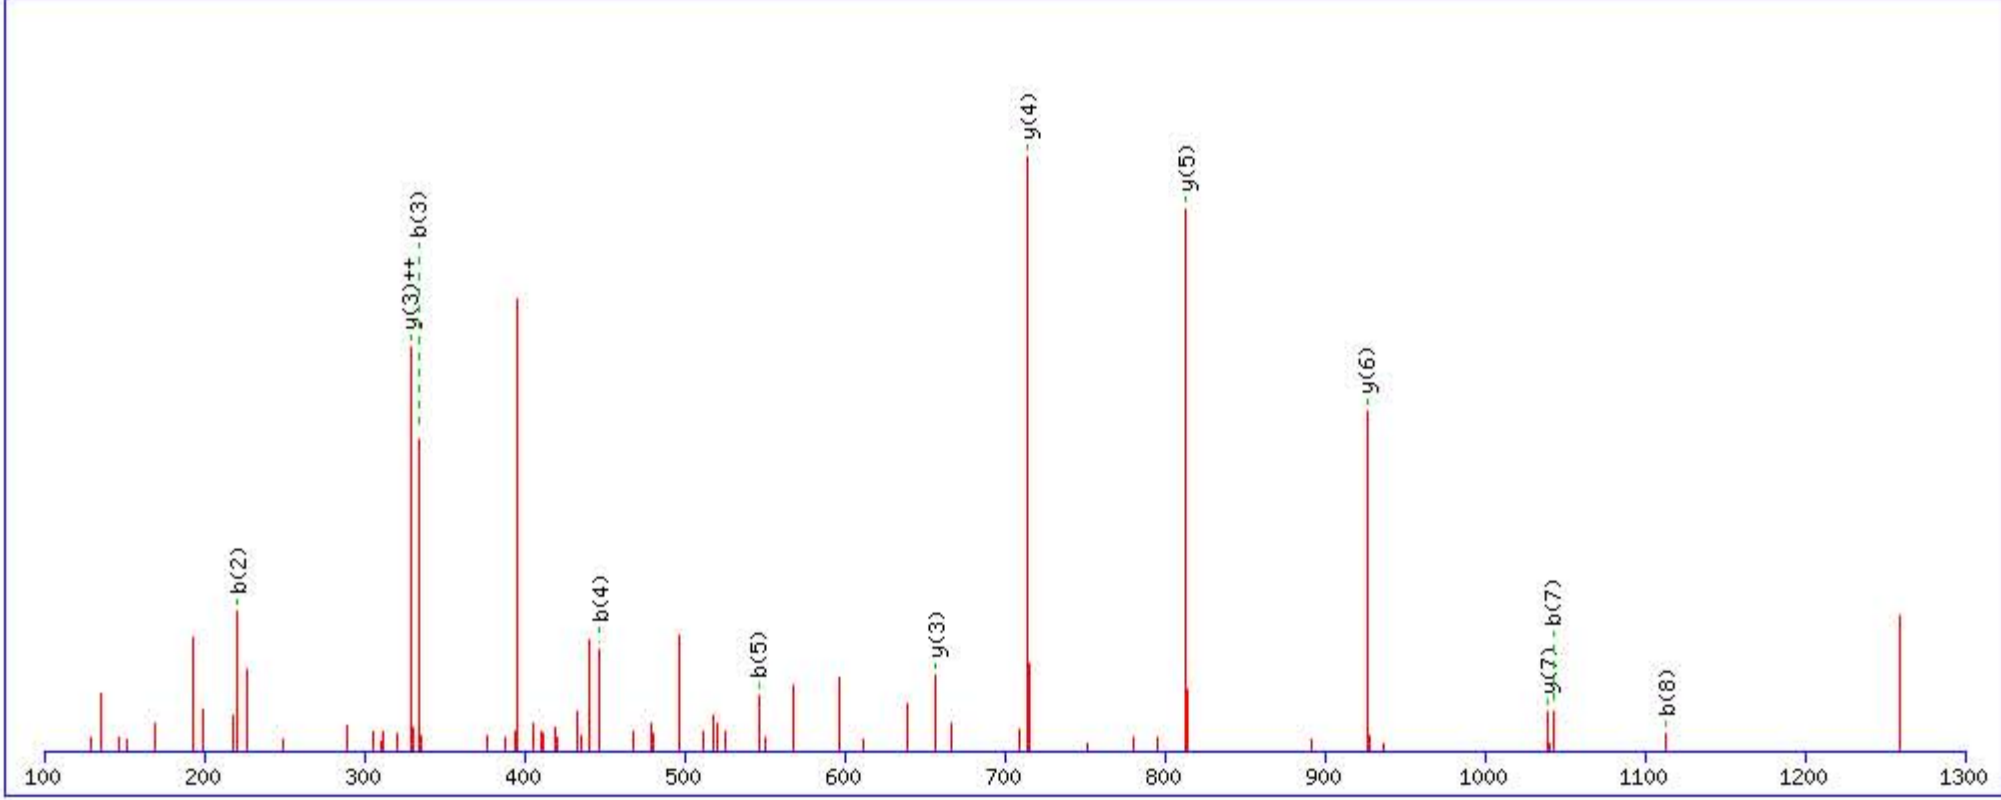

Monoisotopic mass of neutral peptide Mr(calc): 1258.710754

Fixed modifications: Carbamidomethyl (C) (apply to specified residues or termini only)

Variable modifications:

Q7 : Biotin:Thermo-21345 (Q)

Ions Score: 29 Expect: 0.021

Matches : 12/52 fragment ions using 28 most intense peaks [\(help\)](#)

| # | b                  | b <sup>++</sup> | b <sup>*</sup> | b <sup>*++</sup> | Seq. | y                  | y <sup>++</sup>   | y <sup>*</sup> | y <sup>*++</sup> | # |
|---|--------------------|-----------------|----------------|------------------|------|--------------------|-------------------|----------------|------------------|---|
| 1 | 58.028740          | 29.518008       |                |                  | G    |                    |                   |                |                  | 9 |
| 2 | <b>221.092069</b>  | 111.049673      |                |                  | Y    | 1202.696579        | 601.851928        | 1185.670030    | 593.338653       | 8 |
| 3 | <b>334.176133</b>  | 167.591704      |                |                  | I    | <b>1039.633250</b> | 520.320263        | 1022.606701    | 511.806989       | 7 |
| 4 | <b>447.260197</b>  | 224.133737      |                |                  | L    | <b>926.549186</b>  | 463.778231        | 909.522637     | 455.264957       | 6 |
| 5 | <b>546.328611</b>  | 273.667944      |                |                  | V    | <b>813.465122</b>  | 407.236199        | 796.438573     | 398.722925       | 5 |
| 6 | 603.350075         | 302.178676      |                |                  | G    | <b>714.396708</b>  | 357.701992        | 697.370159     | 349.188718       | 4 |
| 7 | <b>1042.575401</b> | 521.791339      | 1025.548852    | 513.278064       | Q    | <b>657.375244</b>  | <b>329.191260</b> | 640.348695     | 320.677986       | 3 |
| 8 | <b>1113.612515</b> | 557.309896      | 1096.585966    | 548.796621       | A    | 218.149918         | 109.578597        | 201.123369     | 101.065322       | 2 |
| 9 |                    |                 |                |                  | K    | 147.112804         | 74.060040         | 130.086255     | 65.546765        | 1 |

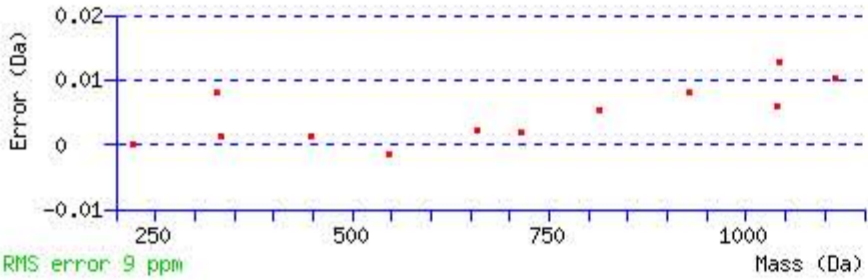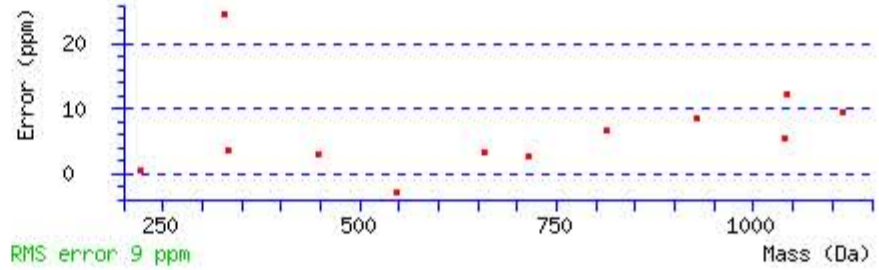

NCBI BLAST search of [GYILVGQAK](#)

(Parameters: blastp, nr protein database, expect=20000, no filter, PAM30)

Other BLAST [web gateways](#)

All matches to this query

| Score | Mr(calc):   | Delta     | Sequence                   |
|-------|-------------|-----------|----------------------------|
| 28.6  | 1258.710754 | 0.001834  | <a href="#">GYILVGQAK</a>  |
| 10.4  | 1258.717941 | -0.005353 | <a href="#">RILAKVQEMR</a> |
| 8.6   | 1258.721970 | -0.009382 | <a href="#">GYILQAKR</a>   |



# MASCOT Search Results

## Peptide View

MS/MS Fragmentation of **QSSSYSFFK**

Found in **C4BPA\_HUMAN**, C4b-binding protein alpha chain OS=Homo sapiens GN=C4BPA PE=1 SV=2

Match to Query 38507: 1390.665768 from(696.340160,2+) rtinseconds(2117) index(63848)

Title: Locus:1.1.1.2734.18 File:"2013-07-02 CLN FXIII 30 min 1st F 4.wiff"

Data file C:\Program Files (x86)\Matrix Science\Mascot Daemon\mgf1 FXIII 30 min 1st\mascot\_daemon\_merge.mgf

Click mouse within plot area to zoom in by factor of two about that point

Or, Plot from  to  Da

Label all possible matches  Label matches used for scoring

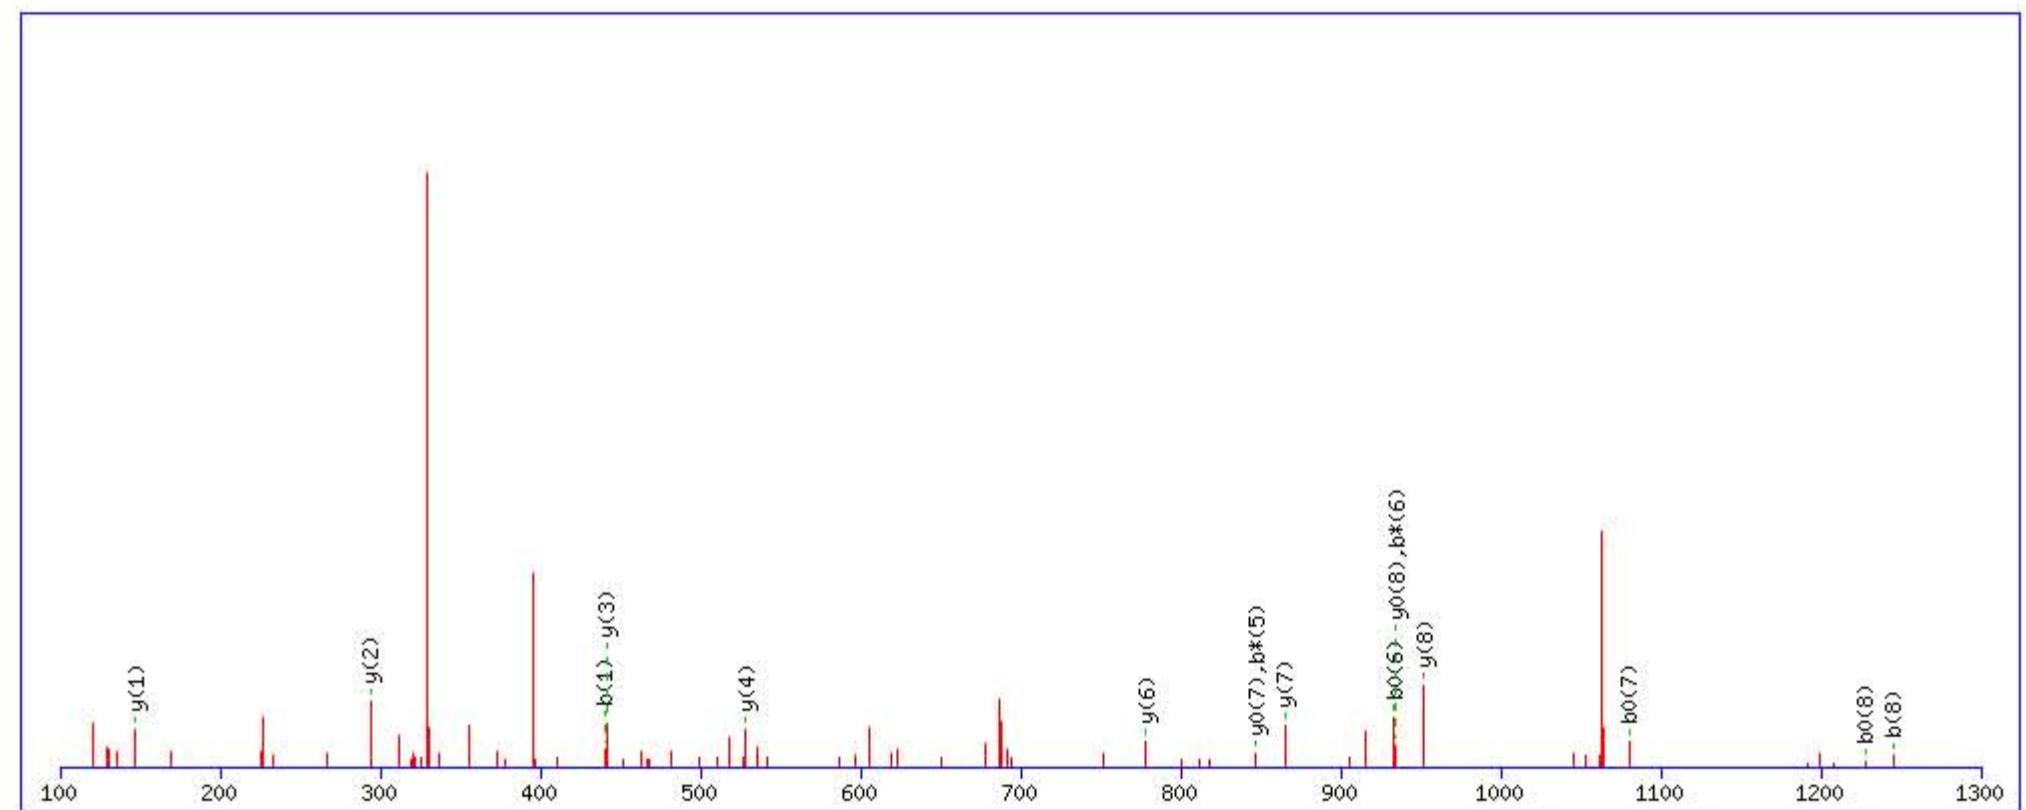

Monoisotopic mass of neutral peptide Mr(calc): 1390.659119

Fixed modifications: Carbamidomethyl (C) (apply to specified residues or termini only)

Variable modifications:

Q1 : Biotin:Thermo-21345 (Q)

Ions Score: 33 Expect: 0.0046

Matches : 16/88 fragment ions using 35 most intense peaks [\(help\)](#)

| # | b                  | b <sup>++</sup> | b <sup>*</sup>    | b <sup>*++</sup> | b <sup>0</sup>     | b <sup>0++</sup> | Seq. | y                 | y <sup>++</sup> | y <sup>*</sup> | y <sup>*++</sup> | y <sup>0</sup>    | y <sup>0++</sup> | # |
|---|--------------------|-----------------|-------------------|------------------|--------------------|------------------|------|-------------------|-----------------|----------------|------------------|-------------------|------------------|---|
| 1 | <b>440.232602</b>  | 220.619939      | 423.206053        | 212.106664       |                    |                  | Q    |                   |                 |                |                  |                   |                  | 9 |
| 2 | 527.264630         | 264.135953      | 510.238081        | 255.622679       | 509.254065         | 255.130671       | S    | <b>952.441073</b> | 476.724175      | 935.414524     | 468.210900       | <b>934.430508</b> | 467.718892       | 8 |
| 3 | 614.296658         | 307.651967      | 597.270109        | 299.138692       | 596.286093         | 298.646684       | S    | <b>865.409045</b> | 433.208161      | 848.382496     | 424.694886       | <b>847.398480</b> | 424.202878       | 7 |
| 4 | 701.328686         | 351.167981      | 684.302137        | 342.654706       | 683.318121         | 342.162698       | S    | <b>778.377017</b> | 389.692147      | 761.350468     | 381.178872       | 760.366452        | 380.686864       | 6 |
| 5 | 864.392015         | 432.699645      | <b>847.365466</b> | 424.186371       | 846.381450         | 423.694363       | Y    | 691.344989        | 346.176133      | 674.318440     | 337.662858       | 673.334424        | 337.170850       | 5 |
| 6 | 951.424043         | 476.215659      | <b>934.397494</b> | 467.702385       | <b>933.413478</b>  | 467.210377       | S    | <b>528.281660</b> | 264.644468      | 511.255111     | 256.131194       | 510.271095        | 255.639186       | 4 |
| 7 | 1098.492457        | 549.749866      | 1081.465908       | 541.236592       | <b>1080.481892</b> | 540.744584       | F    | <b>441.249632</b> | 221.128454      | 424.223083     | 212.615180       |                   |                  | 3 |
| 8 | <b>1245.560871</b> | 623.284073      | 1228.534322       | 614.770799       | <b>1227.550306</b> | 614.278791       | F    | <b>294.181218</b> | 147.594247      | 277.154669     | 139.080973       |                   |                  | 2 |
| 9 |                    |                 |                   |                  |                    |                  | K    | <b>147.112804</b> | 74.060040       | 130.086255     | 65.546765        |                   |                  | 1 |

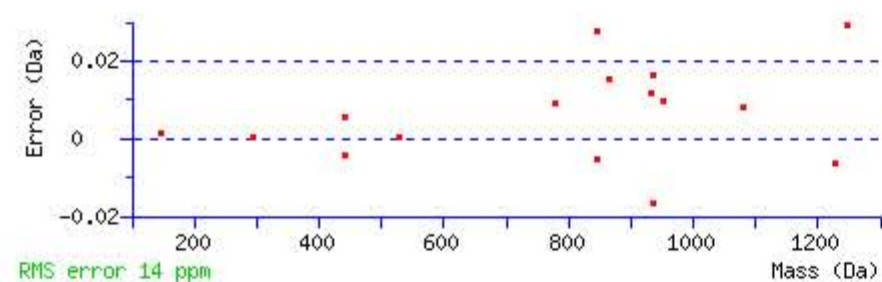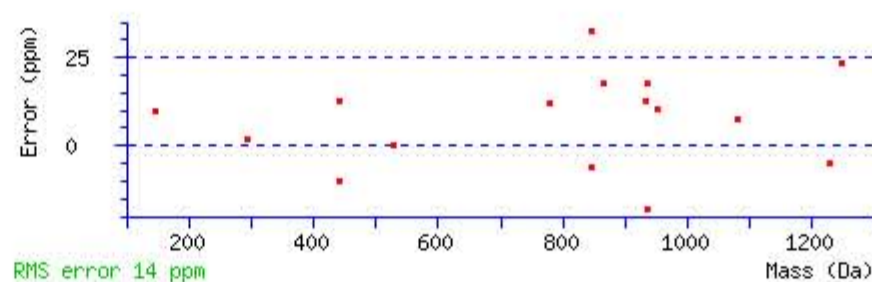

NCBI BLAST search of **QSSSYSFFK**

(Parameters: blastp, nr protein database, expect=20000, no filter, PAM30)

Other BLAST [web gateways](#)

All matches to this query

| Score | Mr(calc):   | Delta     | Sequence                     |
|-------|-------------|-----------|------------------------------|
| 32.8  | 1390.659119 | 0.006649  | <a href="#">QSSSYSFFK</a>    |
| 7.4   | 1390.676208 | -0.010440 | <a href="#">AEKSSSTDQK</a>   |
| 3.5   | 1390.676208 | -0.010440 | <a href="#">LTENNSQPLMTK</a> |
| 2.0   | 1390.669678 | -0.003910 | <a href="#">CAPASIRLMDNK</a> |
| 1.3   | 1390.673706 | -0.007938 | <a href="#">TLNADLMMFAHK</a> |
| 1.2   | 1390.673721 | -0.007953 | <a href="#">QPNCSSLFK</a>    |

Mascot: <http://www.matrixscience.com/>



# MASCOT Search Results

## Peptide View

MS/MS Fragmentation of **NALWHTGDTESQVR**

Found in **COMP\_HUMAN**, Cartilage oligomeric matrix protein OS=Homo sapiens GN=COMP PE=1 SV=2

Match to Query 54890: 1923.926082 from(642.315970,3+) rtinseconds(1732) index(61233)

Title: Locus:1.1.1.2601.12 File:"2013-07-02 CLN FXIII 30 min 1st F 4.wiff"

Data file C:\Program Files (x86)\Matrix Science\Mascot Daemon\mgf1 FXIII 30 min 1st\mascot\_daemon\_merge.mgf

Click mouse within plot area to zoom in by factor of two about that point

Or, Plot from  to  Da

Label all possible matches  Label matches used for scoring

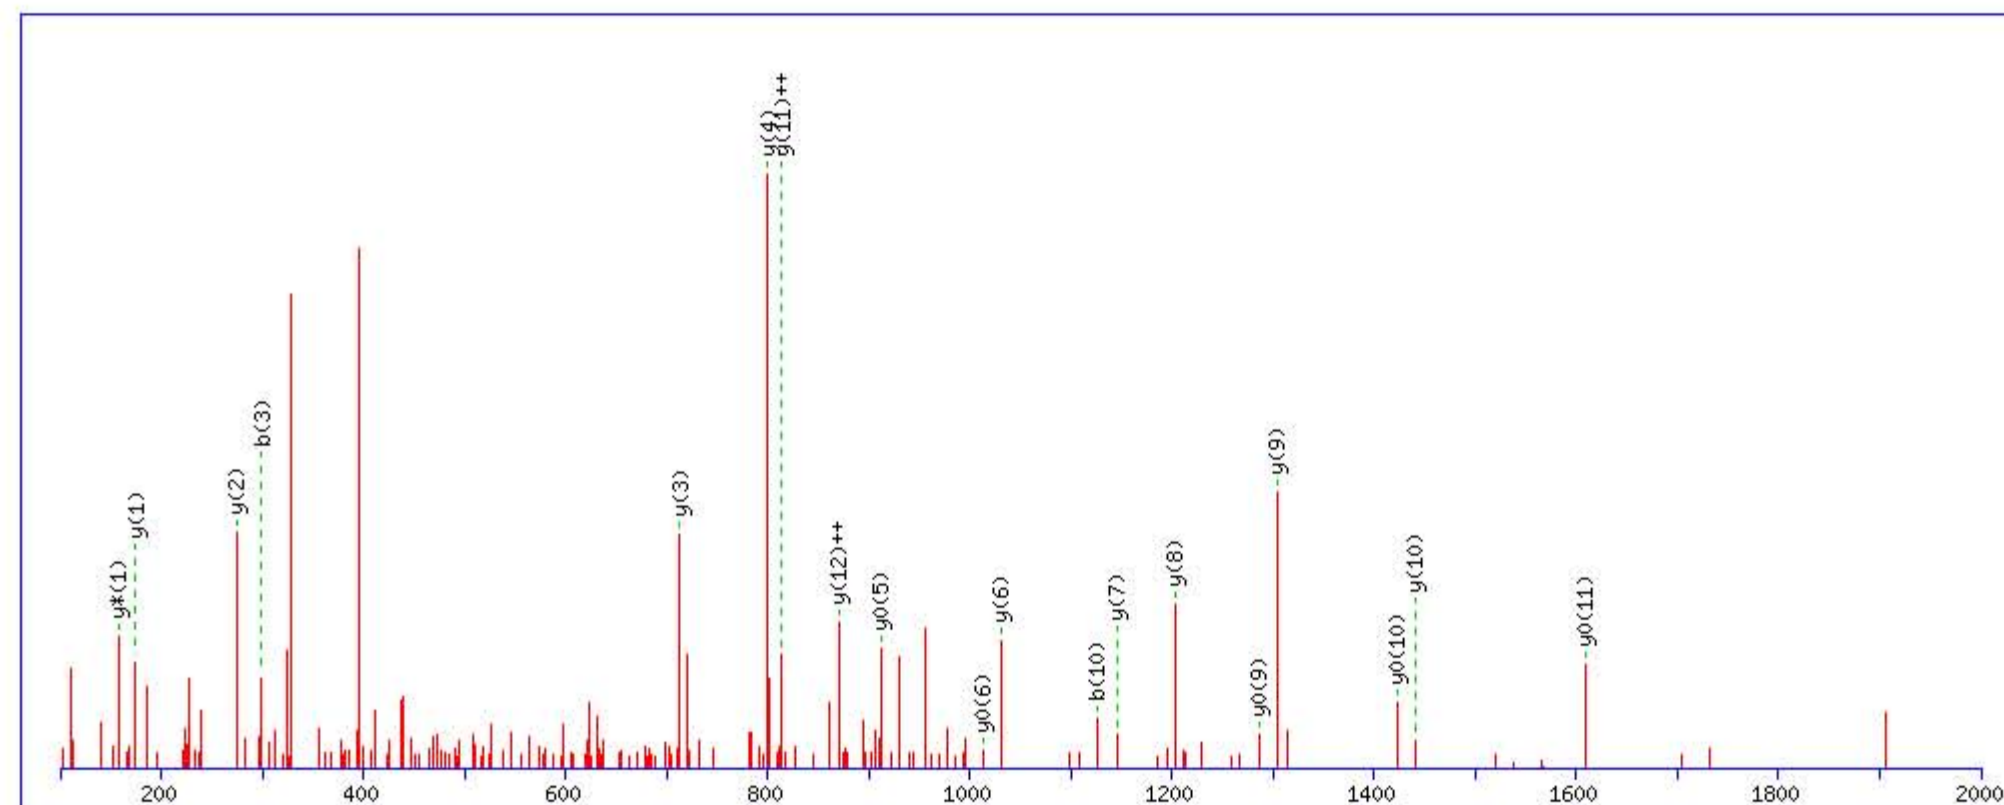

Monoisotopic mass of neutral peptide Mr(calc): 1923.926132

Fixed modifications: Carbamidomethyl (C) (apply to specified residues or termini only)

Variable modifications:

Q12 : Biotin:Thermo-21345 (Q)

Ions Score: 53 Expect: 2.9e-005

Matches : 19/140 fragment ions using 34 most intense peaks [\(help\)](#)

| #  | b                  | b <sup>++</sup> | b <sup>*</sup> | b <sup>*++</sup> | b <sup>0</sup> | b <sup>0++</sup> | Seq. | y                  | y <sup>++</sup>   | y <sup>*</sup>    | y <sup>*++</sup> | y <sup>0</sup>     | y <sup>0++</sup> | #  |
|----|--------------------|-----------------|----------------|------------------|----------------|------------------|------|--------------------|-------------------|-------------------|------------------|--------------------|------------------|----|
| 1  | 115.050203         | 58.028740       | 98.023654      | 49.515465        |                |                  | N    |                    |                   |                   |                  |                    |                  | 14 |
| 2  | 186.087317         | 93.547296       | 169.060768     | 85.034022        |                |                  | A    | 1810.890481        | 905.948879        | 1793.863932       | 897.435604       | 1792.879916        | 896.943596       | 13 |
| 3  | <b>299.171381</b>  | 150.089328      | 282.144832     | 141.576054       |                |                  | L    | 1739.853367        | <b>870.430322</b> | 1722.826818       | 861.917047       | 1721.842802        | 861.425039       | 12 |
| 4  | 485.250694         | 243.128985      | 468.224145     | 234.615711       |                |                  | W    | 1626.769303        | <b>813.888290</b> | 1609.742754       | 805.375015       | <b>1608.758738</b> | 804.883007       | 11 |
| 5  | 622.309606         | 311.658441      | 605.283057     | 303.145167       |                |                  | H    | <b>1440.689990</b> | 720.848633        | 1423.663441       | 712.335359       | <b>1422.679425</b> | 711.843351       | 10 |
| 6  | 723.357285         | 362.182281      | 706.330736     | 353.669006       | 705.346720     | 353.176998       | T    | <b>1303.631078</b> | 652.319177        | 1286.604529       | 643.805903       | <b>1285.620513</b> | 643.313895       | 9  |
| 7  | 780.378749         | 390.693013      | 763.352200     | 382.179738       | 762.368184     | 381.687730       | G    | <b>1202.583399</b> | 601.795338        | 1185.556850       | 593.282063       | 1184.572834        | 592.790055       | 8  |
| 8  | 895.405692         | 448.206484      | 878.379143     | 439.693210       | 877.395127     | 439.201202       | D    | <b>1145.561935</b> | 573.284606        | 1128.535386       | 564.771331       | 1127.551370        | 564.279323       | 7  |
| 9  | 996.453371         | 498.730324      | 979.426822     | 490.217049       | 978.442806     | 489.725041       | T    | <b>1030.534992</b> | 515.771134        | 1013.508443       | 507.257860       | <b>1012.524427</b> | 506.765852       | 6  |
| 10 | <b>1125.495964</b> | 563.251620      | 1108.469415    | 554.738346       | 1107.485399    | 554.246337       | E    | 929.487313         | 465.247295        | 912.460764        | 456.734020       | <b>911.476748</b>  | 456.242012       | 5  |
| 11 | 1212.527992        | 606.767634      | 1195.501443    | 598.254360       | 1194.517427    | 597.762352       | S    | <b>800.444720</b>  | 400.725998        | 783.418171        | 392.212724       | 782.434155         | 391.720716       | 4  |
| 12 | 1651.753318        | 826.380297      | 1634.726769    | 817.867023       | 1633.742753    | 817.375015       | Q    | <b>713.412692</b>  | 357.209984        | 696.386143        | 348.696710       |                    |                  | 3  |
| 13 | 1750.821732        | 875.914504      | 1733.795183    | 867.401230       | 1732.811167    | 866.909222       | V    | <b>274.187366</b>  | 137.597321        | 257.160817        | 129.084047       |                    |                  | 2  |
| 14 |                    |                 |                |                  |                |                  | R    | <b>175.118952</b>  | 88.063114         | <b>158.092403</b> | 79.549839        |                    |                  | 1  |

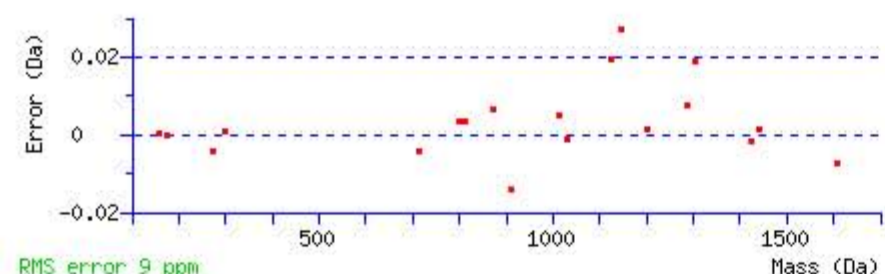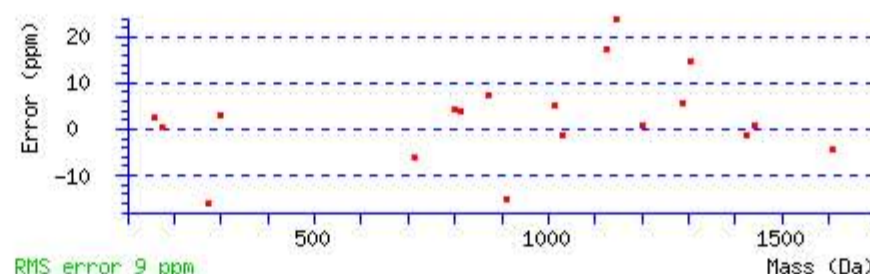

NCBI BLAST search of **NALWHTGDTESQVR**

(Parameters: blastp, nr protein database, expect=20000, no filter, PAM30)

Other BLAST [web gateways](#)

All matches to this query

| Score | Mr(calc):   | Delta     | Sequence                            |
|-------|-------------|-----------|-------------------------------------|
| 52.6  | 1923.926132 | -0.000050 | <a href="#">NALWHTGDTESQVR</a>      |
| 4.0   | 1923.928635 | -0.002553 | <a href="#">SDNTILPAPASNQGPTTPR</a> |
| 0.3   | 1923.909531 | 0.016551  | <a href="#">NLEAVETLGSTSTICSDK</a>  |

Mascot: <http://www.matrixscience.com/>



# MASCOT Search Results

## Peptide View

MS/MS Fragmentation of **ELDESLQVAER**

Found in **CLUS\_HUMAN**, Clusterin OS=Homo sapiens GN=CLU PE=1 SV=1

Match to Query 46050: 1598.800168 from(800.407360,2+) rtinseconds(1944) index(62723)

Title: Locus:1.1.1.2674.19 File:"2013-07-02 CLN FXIII 30 min 1st F 4.wiff"

Data file C:\Program Files (x86)\Matrix Science\Mascot Daemon\mgf\1 FXIII 30 min 1st\mascot\_daemon\_merge.mgf

Click mouse within plot area to zoom in by factor of two about that point

Or, Plot from  to  Da

Label all possible matches  Label matches used for scoring

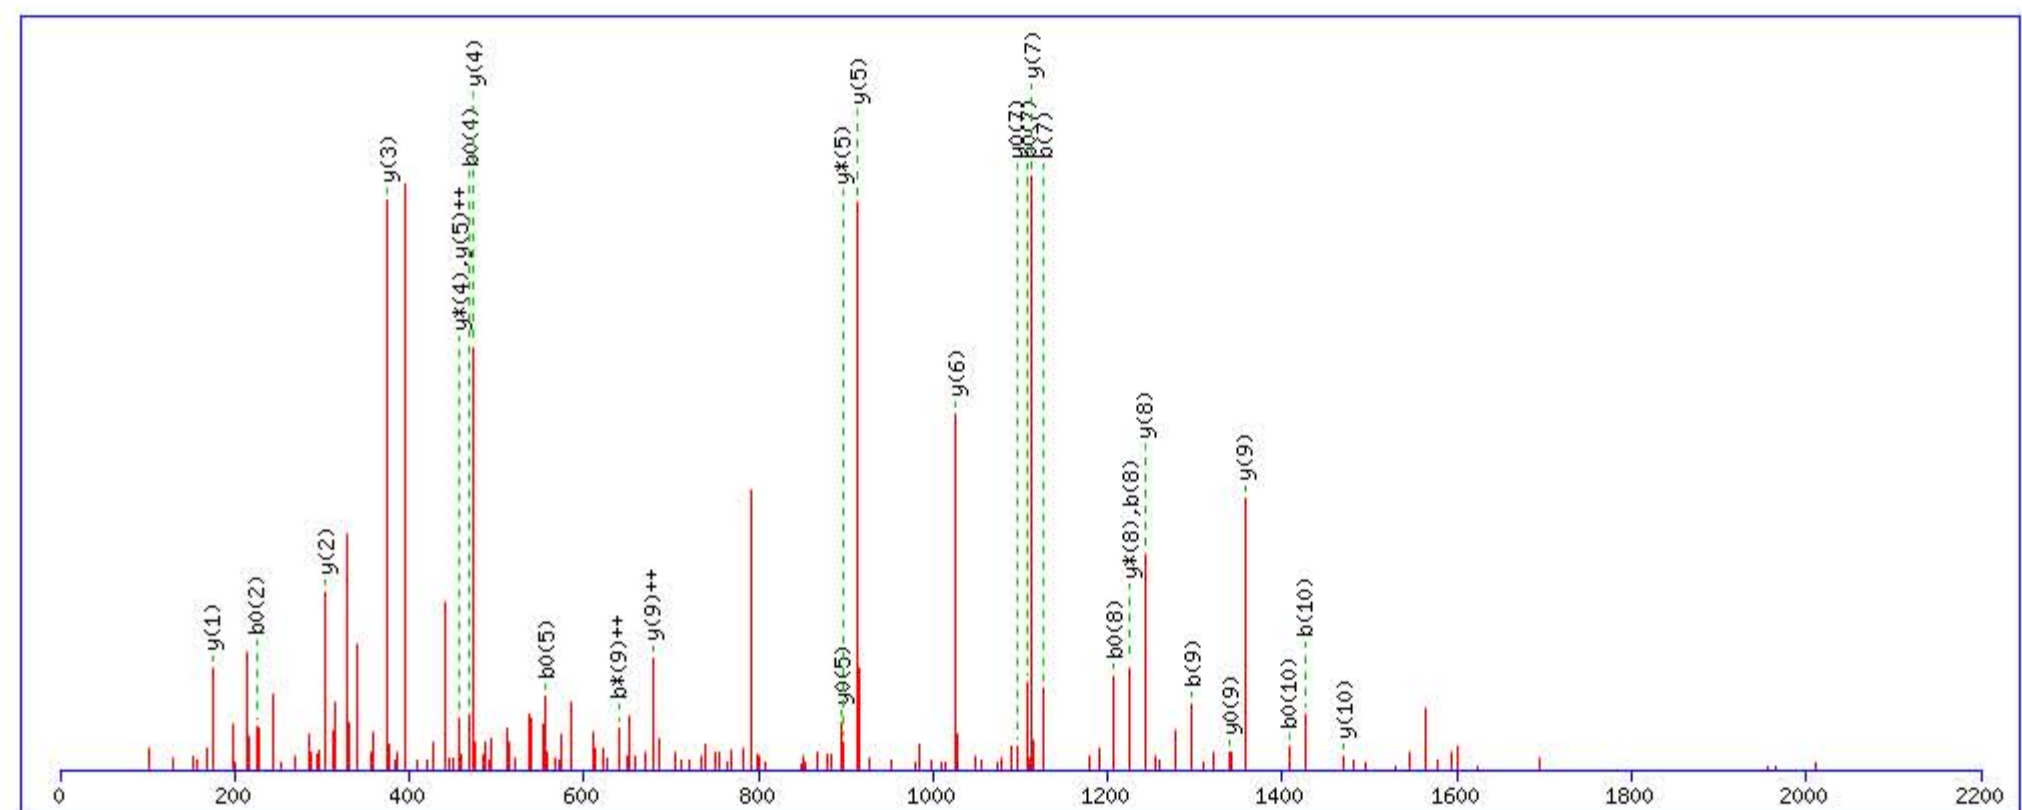

Monoisotopic mass of neutral peptide Mr(calc): 1598.797379

Fixed modifications: Carbamidomethyl (C) (apply to specified residues or termini only)

Variable modifications:

Q7 : Biotin:Thermo-21345 (Q)

Ions Score: 56 Expect: 5.2e-005

Matches : 29/106 fragment ions using 60 most intense peaks [\(help\)](#)

| #  | b           | b <sup>++</sup> | b <sup>*</sup> | b <sup>+++</sup> | b <sup>0</sup> | b <sup>0++</sup> | Seq. | y           | y <sup>++</sup> | y <sup>*</sup> | y <sup>+++</sup> | y <sup>0</sup> | y <sup>0++</sup> | #  |
|----|-------------|-----------------|----------------|------------------|----------------|------------------|------|-------------|-----------------|----------------|------------------|----------------|------------------|----|
| 1  | 130.049869  | 65.528572       |                |                  | 112.039304     | 56.523290        | E    |             |                 |                |                  |                |                  | 11 |
| 2  | 243.133933  | 122.070605      |                |                  | 225.123368     | 113.065322       | L    | 1470.762091 | 735.884684      | 1453.735542    | 727.371409       | 1452.751526    | 726.879401       | 10 |
| 3  | 358.160876  | 179.584076      |                |                  | 340.150311     | 170.578794       | D    | 1357.678027 | 679.342652      | 1340.651478    | 670.829377       | 1339.667462    | 670.337369       | 9  |
| 4  | 487.203469  | 244.105373      |                |                  | 469.192904     | 235.100090       | E    | 1242.651084 | 621.829180      | 1225.624535    | 613.315906       | 1224.640519    | 612.823898       | 8  |
| 5  | 574.235497  | 287.621387      |                |                  | 556.224932     | 278.616104       | S    | 1113.608491 | 557.307884      | 1096.581942    | 548.794609       | 1095.597926    | 548.302601       | 7  |
| 6  | 687.319561  | 344.163419      |                |                  | 669.308996     | 335.158136       | L    | 1026.576463 | 513.791870      | 1009.549914    | 505.278595       | 1008.565898    | 504.786587       | 6  |
| 7  | 1126.544887 | 563.776082      | 1109.518338    | 555.262807       | 1108.534322    | 554.770799       | Q    | 913.492399  | 457.249838      | 896.465850     | 448.736563       | 895.481834     | 448.244555       | 5  |
| 8  | 1225.613301 | 613.310289      | 1208.586752    | 604.797014       | 1207.602736    | 604.305006       | V    | 474.267073  | 237.637175      | 457.240524     | 229.123900       | 456.256508     | 228.631892       | 4  |
| 9  | 1296.650415 | 648.828846      | 1279.623866    | 640.315571       | 1278.639850    | 639.823563       | A    | 375.198659  | 188.102968      | 358.172110     | 179.589693       | 357.188094     | 179.097685       | 3  |
| 10 | 1425.693008 | 713.350142      | 1408.666459    | 704.836868       | 1407.682443    | 704.344860       | E    | 304.161545  | 152.584411      | 287.134996     | 144.071136       | 286.150980     | 143.579128       | 2  |
| 11 |             |                 |                |                  |                |                  | R    | 175.118952  | 88.063114       | 158.092403     | 79.549839        |                |                  | 1  |

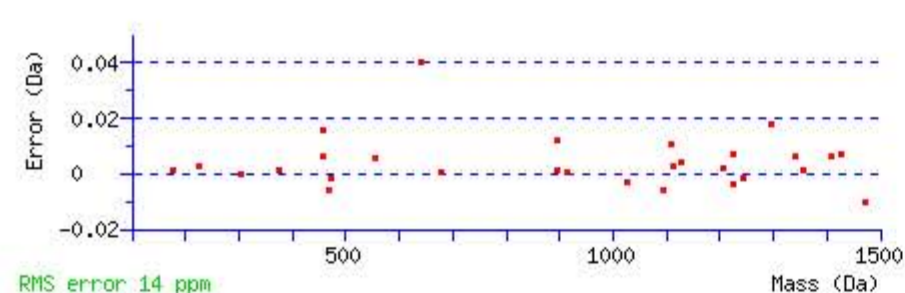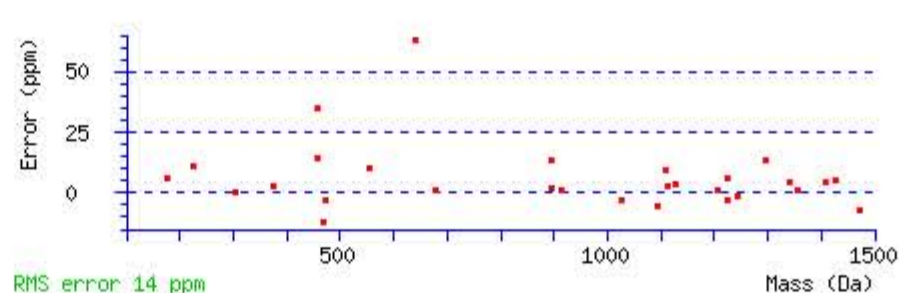

NCBI BLAST search of **ELDESLQVAER**

(Parameters: blastp, nr protein database, expect=20000, no filter, PAM30)

Other BLAST [web gateways](#)

## All matches to this query

| Score | Mr(calc):   | Delta     | Sequence                        |
|-------|-------------|-----------|---------------------------------|
| 56.2  | 1598.797379 | 0.002789  | <a href="#">ELDESLQVAER</a>     |
| 9.9   | 1598.790024 | 0.010144  | <a href="#">VTAEGDSHTEVVISR</a> |
| 7.6   | 1598.797379 | 0.002789  | <a href="#">LEESDVLQEAR</a>     |
| 4.2   | 1598.823883 | -0.023715 | <a href="#">TPTEKVEKMFPHR</a>   |
| 3.6   | 1598.802094 | -0.001926 | <a href="#">ELVSRGEMLHIR</a>    |
| 3.1   | 1598.797409 | 0.002759  | <a href="#">EDVDDLVSQLR</a>     |
| 2.9   | 1598.783478 | 0.016690  | <a href="#">EDSVQRSTPNR</a>     |
| 2.9   | 1598.819138 | -0.018970 | <a href="#">EYFLSEIDEAKKK</a>   |
| 2.6   | 1598.817352 | -0.017184 | <a href="#">QLNLMKWTLCHR</a>    |
| 1.9   | 1598.776932 | 0.023236  | <a href="#">FPIDYPYSPPTFR</a>   |



# MASCOT Search Results

## Peptide View

MS/MS Fragmentation of **ASSIIDELFQDR**

Found in **CLUS\_HUMAN**, Clusterin OS=Homo sapiens GN=CLU PE=1 SV=1

Match to Query 49675: 1703.861382 from(568.961070,3+) rtinseconds(2786) index(68148)

Title: Locus:1.1.1.2966.3 File:"2013-07-02 CLN FXIII 30 min 1st F 4.wiff"

Data file C:\Program Files (x86)\Matrix Science\Mascot Daemon\mgf1 FXIII 30 min 1st\mascot\_daemon\_merge.mgf

Click mouse within plot area to zoom in by factor of two about that point

Or, Plot from  to  Da

Label all possible matches  Label matches used for scoring

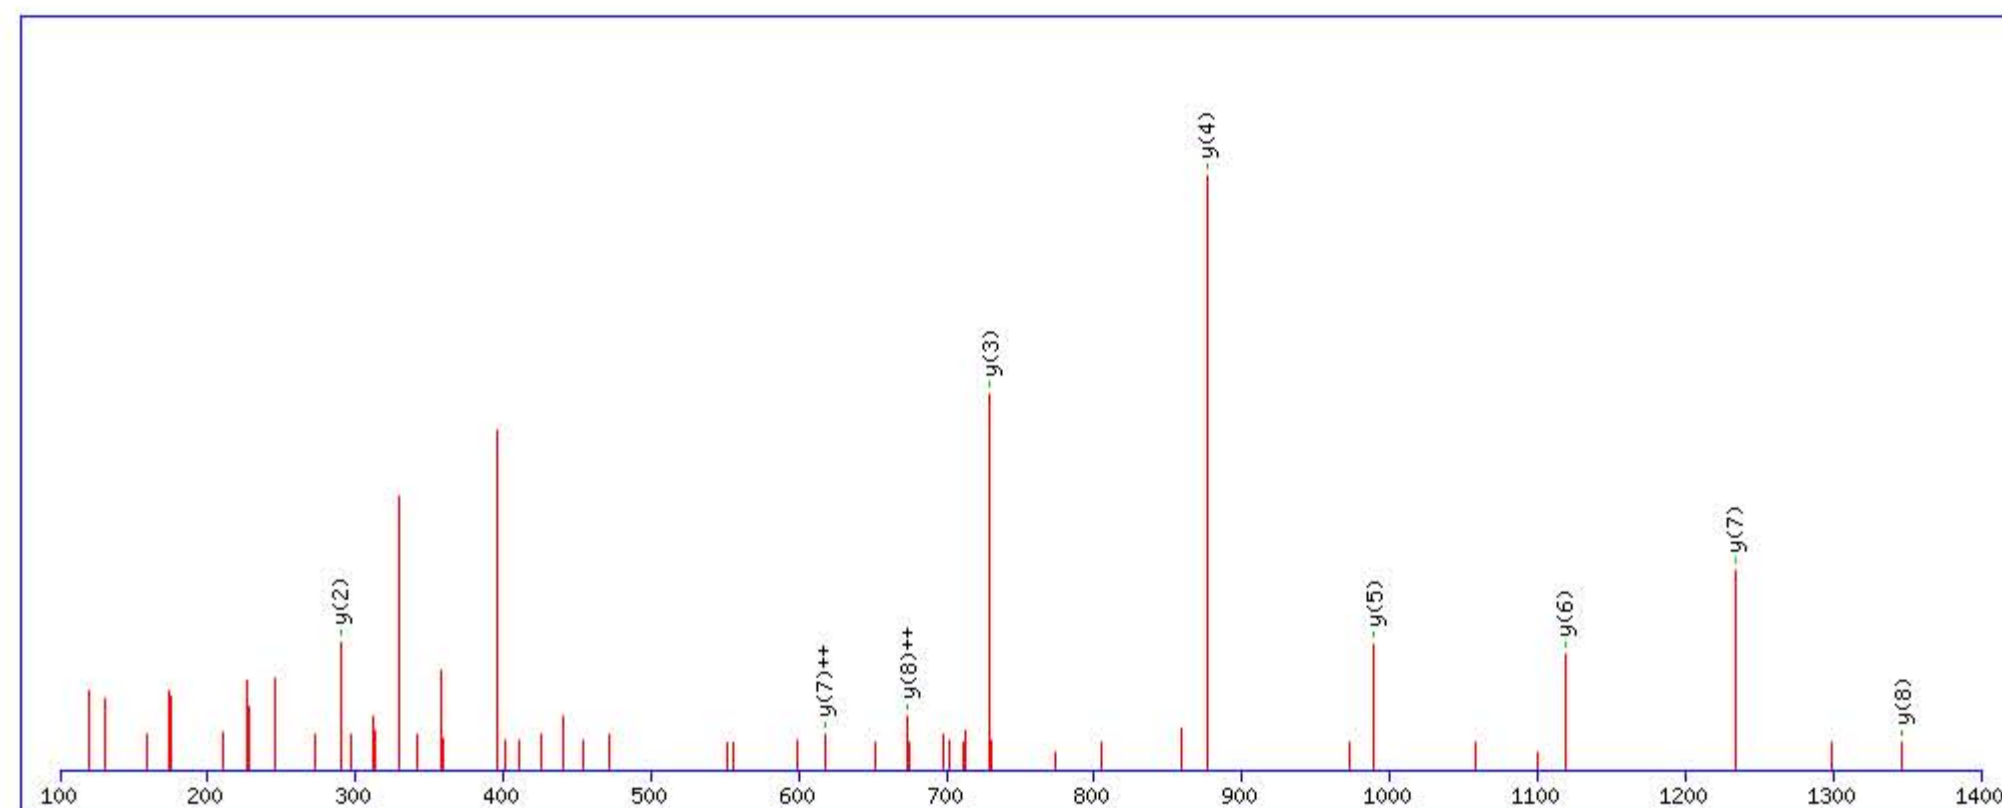

Monoisotopic mass of neutral peptide Mr(calc): 1703.855240

Fixed modifications: Carbamidomethyl (C) (apply to specified residues or termini only)

Variable modifications:

Q10 : Biotin:Thermo-21345 (Q)

Ions Score: 54 Expect: 0.00011

Matches : 9/110 fragment ions using 12 most intense peaks [\(help\)](#)

| #  | b           | b <sup>++</sup> | b <sup>+</sup> | b <sup>*++</sup> | b <sup>0</sup> | b <sup>0++</sup> | Seq. | y                  | y <sup>++</sup>   | y <sup>+</sup> | y <sup>*++</sup> | y <sup>0</sup> | y <sup>0++</sup> | #  |
|----|-------------|-----------------|----------------|------------------|----------------|------------------|------|--------------------|-------------------|----------------|------------------|----------------|------------------|----|
| 1  | 72.044390   | 36.525833       |                |                  |                |                  | A    |                    |                   |                |                  |                |                  | 12 |
| 2  | 159.076418  | 80.041847       |                |                  | 141.065853     | 71.036564        | S    | 1633.825419        | 817.416348        | 1616.798870    | 808.903073       | 1615.814854    | 808.411065       | 11 |
| 3  | 246.108446  | 123.557861      |                |                  | 228.097881     | 114.552578       | S    | 1546.793391        | 773.900333        | 1529.766842    | 765.387059       | 1528.782826    | 764.895051       | 10 |
| 4  | 359.192510  | 180.099893      |                |                  | 341.181945     | 171.094610       | I    | 1459.761363        | 730.384320        | 1442.734814    | 721.871045       | 1441.750798    | 721.379037       | 9  |
| 5  | 472.276574  | 236.641925      |                |                  | 454.266009     | 227.636642       | I    | <b>1346.677299</b> | <b>673.842288</b> | 1329.650750    | 665.329013       | 1328.666734    | 664.837005       | 8  |
| 6  | 587.303517  | 294.155397      |                |                  | 569.292952     | 285.150114       | D    | <b>1233.593235</b> | <b>617.300256</b> | 1216.566686    | 608.786981       | 1215.582670    | 608.294973       | 7  |
| 7  | 716.346110  | 358.676693      |                |                  | 698.335545     | 349.671411       | E    | <b>1118.566292</b> | 559.786784        | 1101.539743    | 551.273510       | 1100.555727    | 550.781501       | 6  |
| 8  | 829.430174  | 415.218725      |                |                  | 811.419609     | 406.213443       | L    | <b>989.523699</b>  | 495.265488        | 972.497150     | 486.752213       | 971.513134     | 486.260205       | 5  |
| 9  | 976.498588  | 488.752932      |                |                  | 958.488023     | 479.747650       | F    | <b>876.439635</b>  | 438.723456        | 859.413086     | 430.210181       | 858.429070     | 429.718173       | 4  |
| 10 | 1415.723914 | 708.365595      | 1398.697365    | 699.852321       | 1397.713349    | 699.360312       | Q    | <b>729.371221</b>  | 365.189249        | 712.344672     | 356.675974       | 711.360656     | 356.183966       | 3  |
| 11 | 1530.750857 | 765.879067      | 1513.724308    | 757.365792       | 1512.740292    | 756.873784       | D    | <b>290.145895</b>  | 145.576585        | 273.119346     | 137.063311       | 272.135330     | 136.571303       | 2  |
| 12 |             |                 |                |                  |                |                  | R    | 175.118952         | 88.063114         | 158.092403     | 79.549839        |                |                  | 1  |

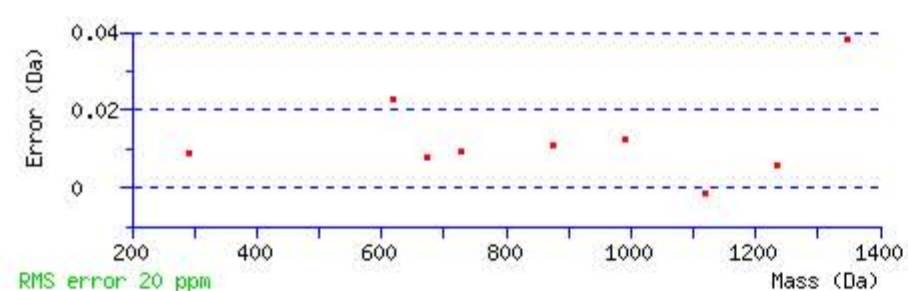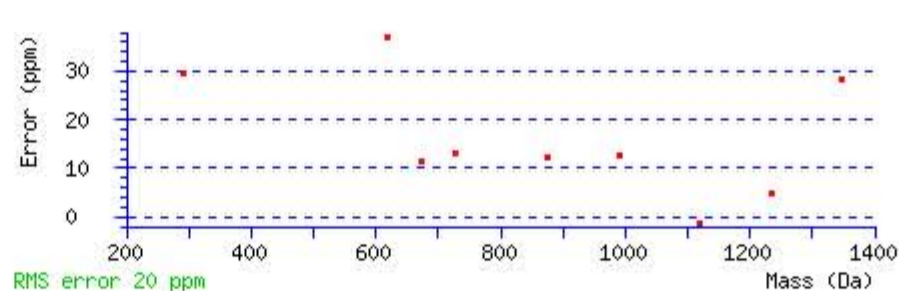

NCBI BLAST search of **ASSIIDELFQDR**

(Parameters: blastp, nr protein database, expect=20000, no filter, PAM30)

Other BLAST [web gateways](#)

All matches to this query

| Score | Mr(calc):   | Delta    | Sequence                     |
|-------|-------------|----------|------------------------------|
| 53.9  | 1703.855240 | 0.006142 | <a href="#">ASSIIDELFQDR</a> |

Mascot: <http://www.matrixscience.com/>



# MASCOT Search Results

## Peptide View

MS/MS Fragmentation of **EILSVDCSTNNPSQAK**

Found in **CLUS\_HUMAN**, Clusterin OS=Homo sapiens GN=CLU PE=1 SV=1

Match to Query 58961: 2072.987382 from(692.003070,3+) rtinseconds(1791) index(61651)

Title: Locus:1.1.1.2621.22 File:"2013-07-02 CLN FXIII 30 min 1st F 4.wiff"

Data file C:\Program Files (x86)\Matrix Science\Mascot Daemon\mgf\1 FXIII 30 min 1st\mascot\_daemon\_merge.mgf

Click mouse within plot area to zoom in by factor of two about that point

Or, Plot from  to  Da

Label all possible matches  Label matches used for scoring

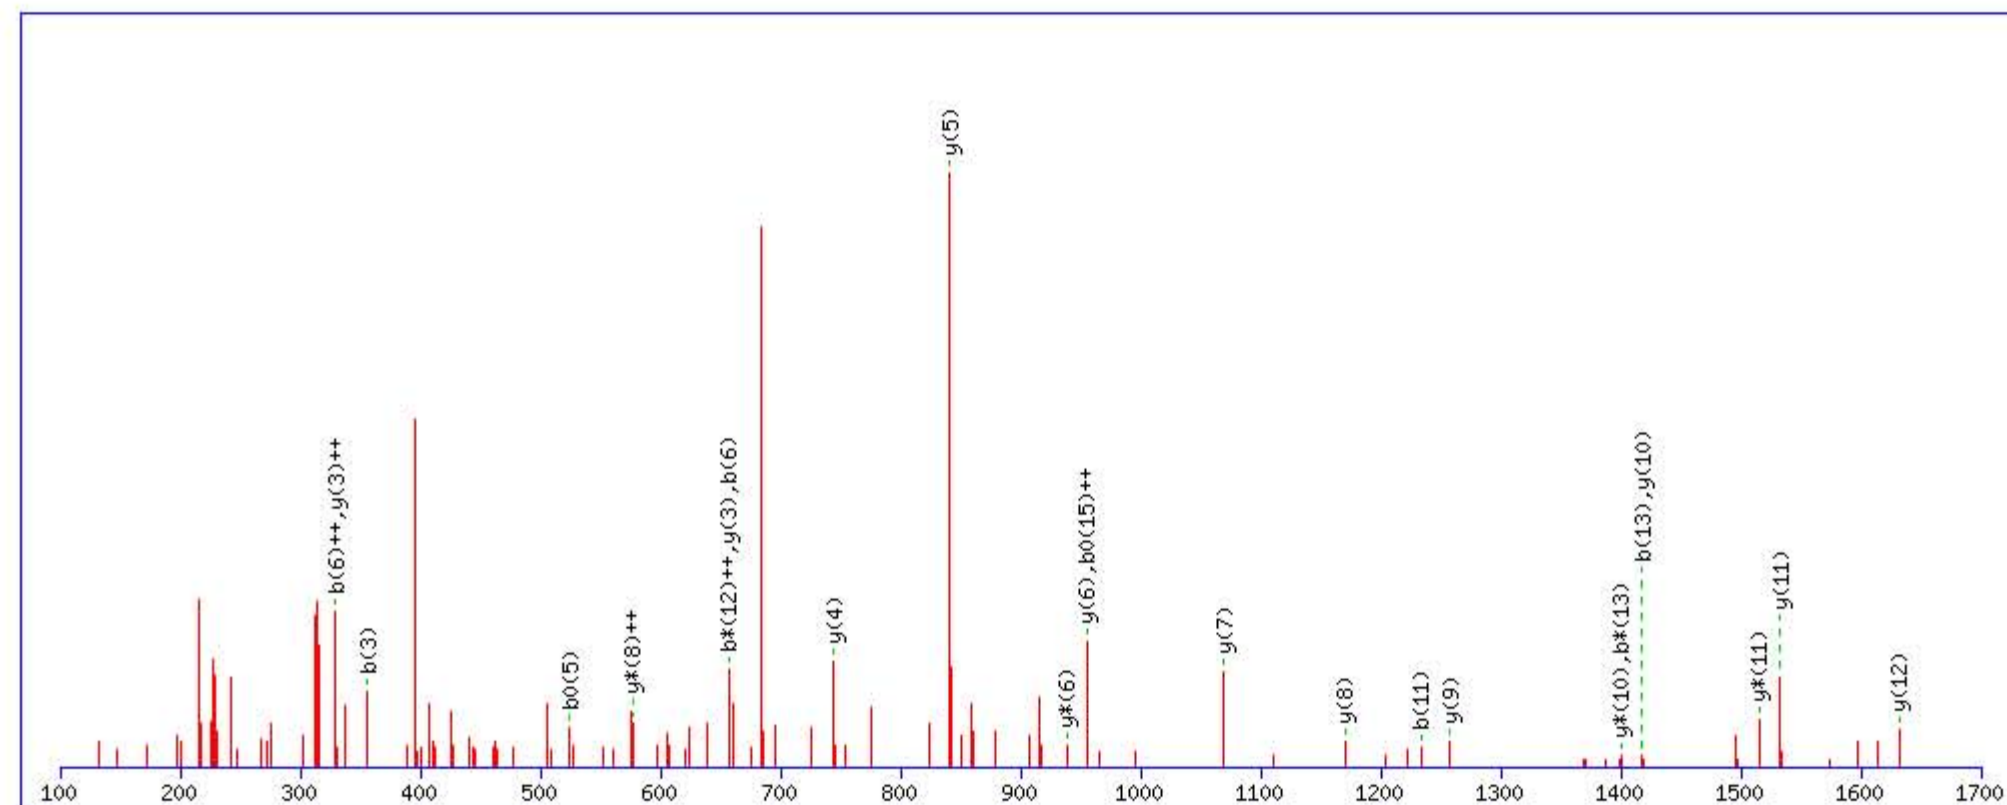

Monoisotopic mass of neutral peptide Mr(calc): 2072.987061

Fixed modifications: Carbamidomethyl (C) (apply to specified residues or termini only)

Variable modifications:

Q14 : Biotin:Thermo-21345 (Q)

Ions Score: 60 Expect: 3.4e-006

Matches : 24/156 fragment ions using 30 most intense peaks [\(help\)](#)

| #  | b                  | b <sup>++</sup>   | b <sup>*</sup>     | b <sup>*++</sup>  | b <sup>0</sup>    | b <sup>0++</sup> | Seq. | y                  | y <sup>++</sup>   | y <sup>*</sup>     | y <sup>*++</sup>  | y <sup>0</sup> | y <sup>0++</sup> | #  |
|----|--------------------|-------------------|--------------------|-------------------|-------------------|------------------|------|--------------------|-------------------|--------------------|-------------------|----------------|------------------|----|
| 1  | 130.049869         | 65.528572         |                    |                   | 112.039304        | 56.523290        | E    |                    |                   |                    |                   |                |                  | 16 |
| 2  | 243.133933         | 122.070605        |                    |                   | 225.123368        | 113.065322       | I    | 1944.951759        | 972.979517        | 1927.925210        | 964.466243        | 1926.941194    | 963.974235       | 15 |
| 3  | <b>356.217997</b>  | 178.612637        |                    |                   | 338.207432        | 169.607354       | L    | 1831.867695        | 916.437485        | 1814.841146        | 907.924211        | 1813.857130    | 907.432203       | 14 |
| 4  | 443.250025         | 222.128650        |                    |                   | 425.239460        | 213.123368       | S    | 1718.783631        | 859.895454        | 1701.757082        | 851.382179        | 1700.773066    | 850.890171       | 13 |
| 5  | 542.318439         | 271.662858        |                    |                   | <b>524.307874</b> | 262.657575       | V    | <b>1631.751603</b> | 816.379439        | 1614.725054        | 807.866165        | 1613.741038    | 807.374157       | 12 |
| 6  | <b>657.345382</b>  | <b>329.176329</b> |                    |                   | 639.334817        | 320.171046       | D    | <b>1532.683189</b> | 766.845233        | <b>1515.656640</b> | 758.331958        | 1514.672624    | 757.839950       | 11 |
| 7  | 817.376031         | 409.191654        |                    |                   | 799.365466        | 400.186371       | C    | <b>1417.656246</b> | 709.331761        | <b>1400.629697</b> | 700.818487        | 1399.645681    | 700.326479       | 10 |
| 8  | 904.408059         | 452.707668        |                    |                   | 886.397494        | 443.702385       | S    | <b>1257.625597</b> | 629.316437        | 1240.599048        | 620.803162        | 1239.615032    | 620.311154       | 9  |
| 9  | 1005.455738        | 503.231507        |                    |                   | 987.445173        | 494.226225       | T    | <b>1170.593569</b> | 585.800422        | 1153.567020        | <b>577.287148</b> | 1152.583004    | 576.795140       | 8  |
| 10 | 1119.498665        | 560.252971        | 1102.472116        | 551.739696        | 1101.488100       | 551.247688       | N    | <b>1069.545890</b> | 535.276583        | 1052.519341        | 526.763309        | 1051.535325    | 526.271301       | 7  |
| 11 | <b>1233.541592</b> | 617.274434        | 1216.515043        | 608.761160        | 1215.531027       | 608.269152       | N    | <b>955.502963</b>  | 478.255119        | <b>938.476414</b>  | 469.741845        | 937.492398     | 469.249837       | 6  |
| 12 | 1330.594356        | 665.800816        | 1313.567807        | <b>657.287542</b> | 1312.583791       | 656.795534       | P    | <b>841.460036</b>  | 421.233656        | 824.433487         | 412.720381        | 823.449471     | 412.228373       | 5  |
| 13 | <b>1417.626384</b> | 709.316830        | <b>1400.599835</b> | 700.803556        | 1399.615819       | 700.311548       | S    | <b>744.407272</b>  | 372.707274        | 727.380723         | 364.193999        | 726.396707     | 363.701991       | 4  |
| 14 | 1856.851710        | 928.929493        | 1839.825161        | 920.416219        | 1838.841145       | 919.924211       | Q    | <b>657.375244</b>  | <b>329.191260</b> | 640.348695         | 320.677985        |                |                  | 3  |
| 15 | 1927.888824        | 964.448050        | 1910.862275        | 955.934776        | 1909.878259       | 955.442768       | A    | 218.149918         | 109.578597        | 201.123369         | 101.065322        |                |                  | 2  |
| 16 |                    |                   |                    |                   |                   |                  | K    | 147.112804         | 74.060040         | 130.086255         | 65.546765         |                |                  | 1  |

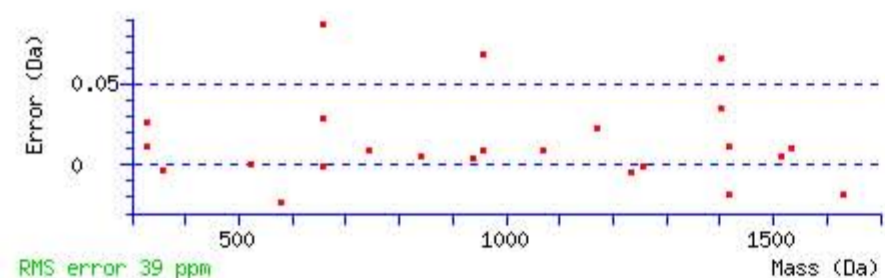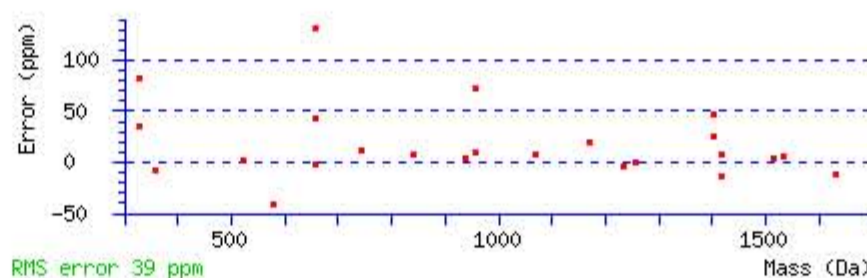

NCBI BLAST search of [EILSVDCSTNNPSQAK](#)

(Parameters: blastp, nr protein database, expect=20000, no filter, PAM30)

Other BLAST [web gateways](#)

## All matches to this query

| Score | Mr(calc):   | Delta     | Sequence                             |
|-------|-------------|-----------|--------------------------------------|
| 60.3  | 2072.987061 | 0.000321  | <a href="#">EILSVDCSTNNPSQAK</a>     |
| 1.9   | 2073.012680 | -0.025298 | <a href="#">TLVLD FETEGERN SPNPR</a> |

Mascot: <http://www.matrixscience.com/>



# MASCOT Search Results

## Peptide View

MS/MS Fragmentation of **QQTHMLDVMQDHF<sup>R</sup>**

Found in **CLUS\_HUMAN**, Clusterin OS=Homo sapiens GN=CLU PE=1 SV=1

Match to Query 61224: 2183.004816 from(546.758480,4+) rtinseconds(1992) index(63056)

Title: Locus:1.1.1.2691.6 File:"2013-07-02 CLN FXIII 30 min 1st F 4.wiff"

Data file C:\Program Files (x86)\Matrix Science\Mascot Daemon\mgf1 FXIII 30 min 1st\mascot\_daemon\_merge.mgf

Click mouse within plot area to zoom in by factor of two about that point

Or, Plot from  to  Da

Label all possible matches  Label matches used for scoring

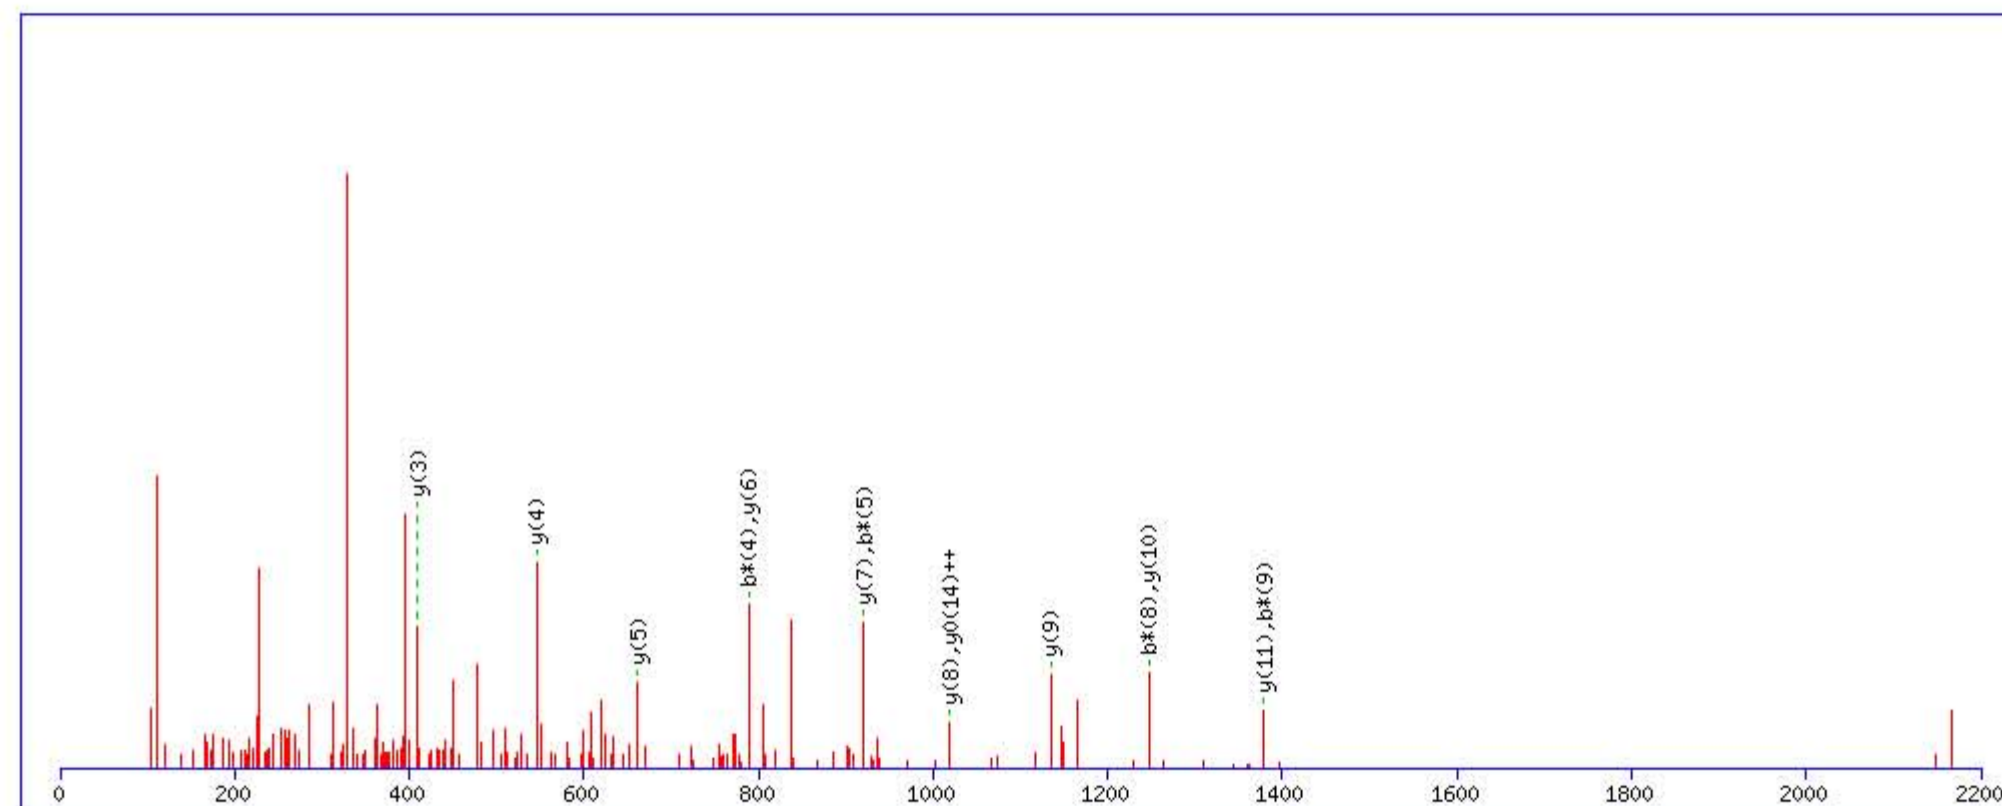

Monoisotopic mass of neutral peptide Mr(calc): 2183.007446

Fixed modifications: Carbamidomethyl (C) (apply to specified residues or termini only)

Variable modifications:

Q2 : Biotin:Thermo-21345 (Q)

Ions Score: 66 Expect: 3.5e-006

Matches : 14/162 fragment ions using 14 most intense peaks [\(help\)](#)

| #  | b           | b <sup>++</sup> | b <sup>*</sup> | b <sup>+++</sup> | b <sup>0</sup> | b <sup>0++</sup> | Seq. | y           | y <sup>++</sup> | y <sup>*</sup> | y <sup>+++</sup> | y <sup>0</sup> | y <sup>0++</sup> | #  |
|----|-------------|-----------------|----------------|------------------|----------------|------------------|------|-------------|-----------------|----------------|------------------|----------------|------------------|----|
| 1  | 129.065854  | 65.036565       | 112.039305     | 56.523291        |                |                  | Q    |             |                 |                |                  |                |                  | 15 |
| 2  | 568.291180  | 284.649228      | 551.264631     | 276.135954       |                |                  | Q    | 2055.956135 | 1028.481705     | 2038.929586    | 1019.968431      | 2037.945570    | 1019.476423      | 14 |
| 3  | 669.338859  | 335.173068      | 652.312310     | 326.659793       | 651.328294     | 326.167785       | T    | 1616.730809 | 808.869043      | 1599.704260    | 800.355768       | 1598.720244    | 799.863760       | 13 |
| 4  | 806.397771  | 403.702524      | 789.371222     | 395.189249       | 788.387206     | 394.697241       | H    | 1515.683130 | 758.345203      | 1498.656581    | 749.831929       | 1497.672565    | 749.339921       | 12 |
| 5  | 937.438256  | 469.222766      | 920.411707     | 460.709492       | 919.427691     | 460.217484       | M    | 1378.624218 | 689.815747      | 1361.597669    | 681.302473       | 1360.613653    | 680.810465       | 11 |
| 6  | 1050.522320 | 525.764798      | 1033.495771    | 517.251524       | 1032.511755    | 516.759516       | L    | 1247.583733 | 624.295505      | 1230.557184    | 615.782230       | 1229.573168    | 615.290222       | 10 |
| 7  | 1165.549263 | 583.278270      | 1148.522714    | 574.764995       | 1147.538698    | 574.272987       | D    | 1134.499669 | 567.753473      | 1117.473120    | 559.240198       | 1116.489104    | 558.748190       | 9  |
| 8  | 1264.617677 | 632.812477      | 1247.591128    | 624.299202       | 1246.607112    | 623.807194       | V    | 1019.472726 | 510.240001      | 1002.446177    | 501.726727       | 1001.462161    | 501.234719       | 8  |
| 9  | 1395.658162 | 698.332719      | 1378.631613    | 689.819445       | 1377.647597    | 689.327437       | M    | 920.404312  | 460.705794      | 903.377763     | 452.192520       | 902.393747     | 451.700512       | 7  |
| 10 | 1523.716740 | 762.362008      | 1506.690191    | 753.848734       | 1505.706175    | 753.356726       | Q    | 789.363827  | 395.185552      | 772.337278     | 386.672277       | 771.353262     | 386.180269       | 6  |
| 11 | 1638.743683 | 819.875480      | 1621.717134    | 811.362205       | 1620.733118    | 810.870197       | D    | 661.305249  | 331.156263      | 644.278700     | 322.642988       | 643.294684     | 322.150980       | 5  |
| 12 | 1775.802595 | 888.404936      | 1758.776046    | 879.891661       | 1757.792030    | 879.399653       | H    | 546.278306  | 273.642791      | 529.251757     | 265.129517       | 528.267741     | 264.637509       | 4  |
| 13 | 1922.871009 | 961.939143      | 1905.844460    | 953.425868       | 1904.860444    | 952.933860       | F    | 409.219394  | 205.113335      | 392.192845     | 196.600061       | 391.208829     | 196.108053       | 3  |
| 14 | 2009.903037 | 1005.455157     | 1992.876488    | 996.941882       | 1991.892472    | 996.449874       | S    | 262.150980  | 131.579128      | 245.124431     | 123.065854       | 244.140415     | 122.573846       | 2  |
| 15 |             |                 |                |                  |                |                  | R    | 175.118952  | 88.063114       | 158.092403     | 79.549839        |                |                  | 1  |

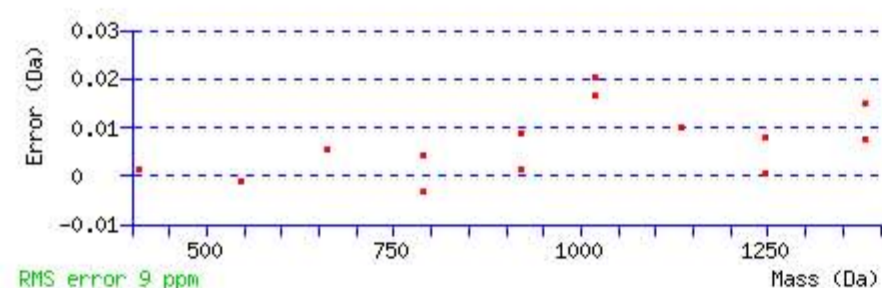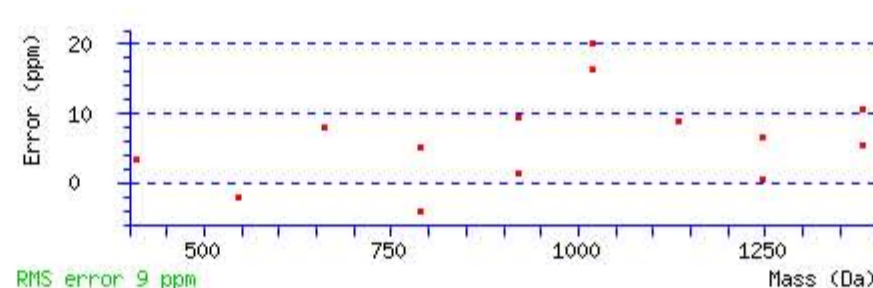

NCBI BLAST search of **QQTHMLDVMQDHF<sup>R</sup>**

(Parameters: blastp, nr protein database, expect=20000, no filter, PAM30)

Other BLAST [web gateways](#)

All matches to this query

| Score | Mr(calc):   | Delta     | Sequence                                  |
|-------|-------------|-----------|-------------------------------------------|
| 65.5  | 2183.007446 | -0.002630 | <a href="#">QQTHMLDVMQDHF<sup>R</sup></a> |
| 65.5  | 2183.007446 | -0.002630 | <a href="#">QQTHMLDVMQDHF<sup>R</sup></a> |

Mascot: <http://www.matrixscience.com/>



# MASCOT Search Results

## Peptide View

MS/MS Fragmentation of **VSVSQTSK**

Found in **FA9\_HUMAN**, Coagulation factor IX OS=Homo sapiens GN=F9 PE=1 SV=2

Match to Query 29415: 1145.607808 from(573.811180,2+) rtinseconds(1397) index(58756)

Title: Locus:1.1.1.2484.20 File:"2013-07-02 CLN FXIII 30 min 1st F 4.wiff"

Data file C:\Program Files (x86)\Matrix Science\Mascot Daemon\mgf\1 FXIII 30 min 1st\mascot\_daemon\_merge.mgf

Click mouse within plot area to zoom in by factor of two about that point

Or, Plot from  to  Da

Label all possible matches  Label matches used for scoring

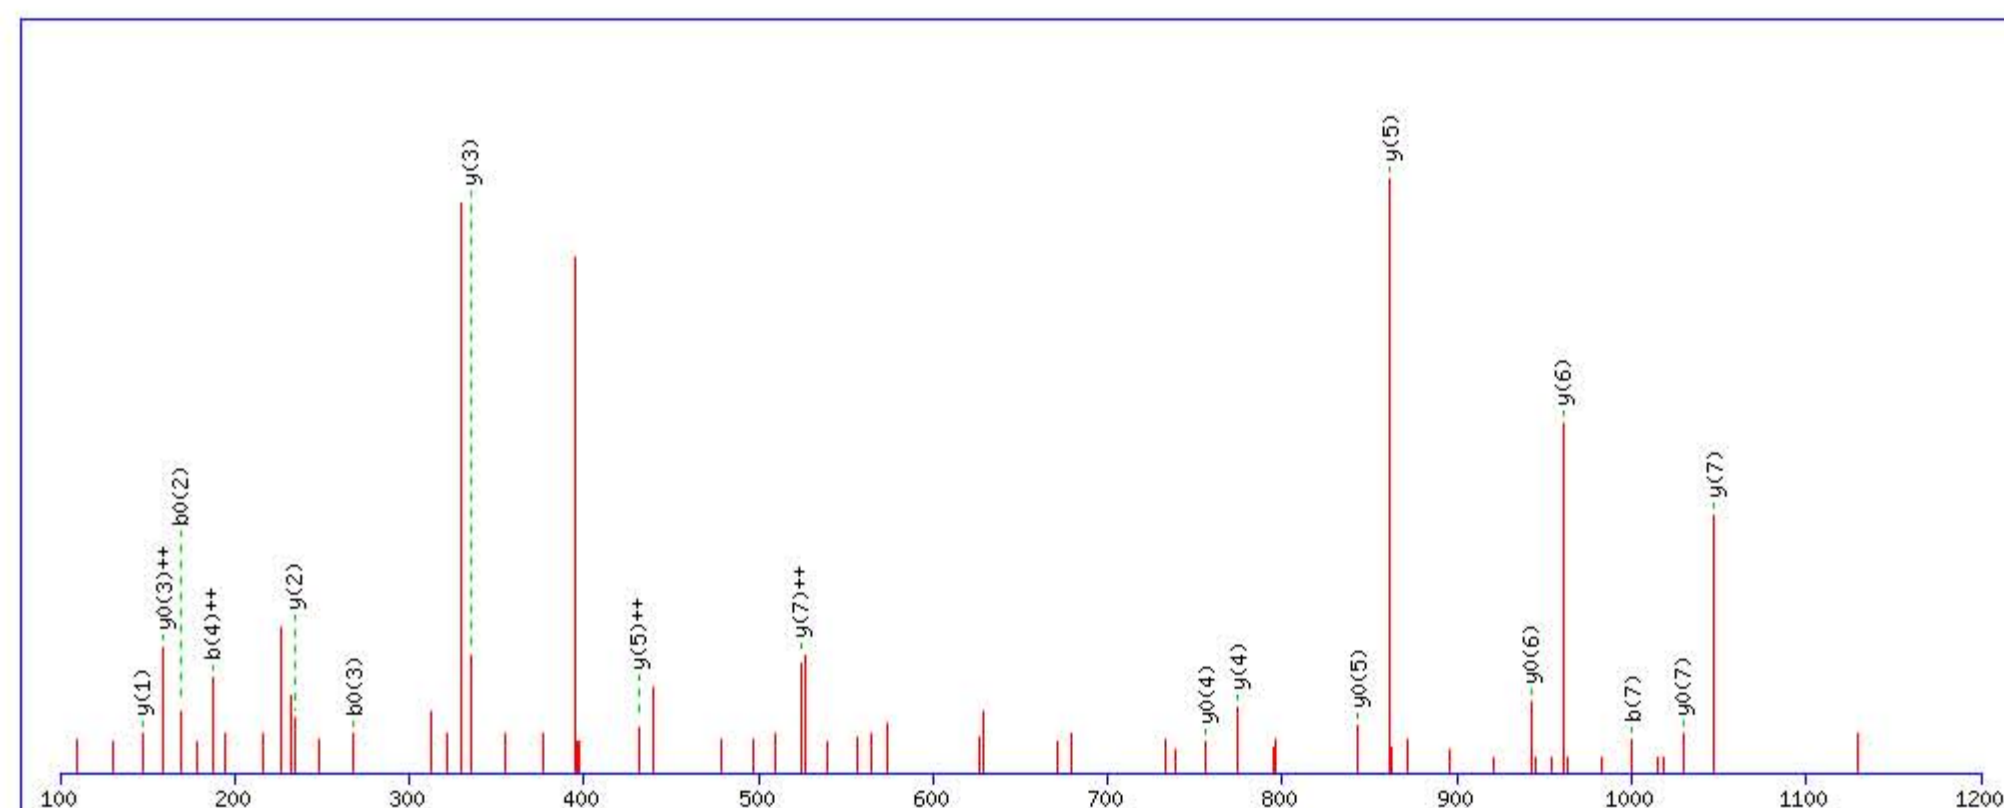

Monoisotopic mass of neutral peptide Mr(calc): 1145.611450

Fixed modifications: Carbamidomethyl (C) (apply to specified residues or termini only)

Variable modifications:

Q5 : Biotin:Thermo-21345 (Q)

Ions Score: 37 Expect: 0.004

Matches : 19/72 fragment ions using 41 most intense peaks [\(help\)](#)

| # | b                  | b <sup>++</sup>   | b <sup>+</sup> | b <sup>*++</sup> | b <sup>0</sup>    | b <sup>0++</sup> | Seq. | y                  | y <sup>++</sup>   | y <sup>+</sup> | y <sup>*++</sup> | y <sup>0</sup>     | y <sup>0++</sup>  | # |
|---|--------------------|-------------------|----------------|------------------|-------------------|------------------|------|--------------------|-------------------|----------------|------------------|--------------------|-------------------|---|
| 1 | 100.075690         | 50.541483         |                |                  |                   |                  | V    |                    |                   |                |                  |                    |                   | 8 |
| 2 | <b>187.107718</b>  | 94.057497         |                |                  | 169.097153        | 85.052214        | S    | <b>1047.550307</b> | <b>524.278792</b> | 1030.523758    | 515.765517       | <b>1029.539742</b> | 515.273509        | 7 |
| 3 | 286.176132         | 143.591704        |                |                  | <b>268.165567</b> | 134.586422       | V    | <b>960.518279</b>  | 480.762778        | 943.491730     | 472.249503       | <b>942.507714</b>  | 471.757495        | 6 |
| 4 | 373.208160         | <b>187.107718</b> |                |                  | 355.197595        | 178.102435       | S    | <b>861.449865</b>  | <b>431.228571</b> | 844.423316     | 422.715296       | <b>843.439300</b>  | 422.223288        | 5 |
| 5 | 812.433486         | 406.720381        | 795.406937     | 398.207107       | 794.422921        | 397.715099       | Q    | <b>774.417837</b>  | 387.712557        | 757.391288     | 379.199282       | <b>756.407272</b>  | 378.707274        | 4 |
| 6 | 913.481165         | 457.244221        | 896.454616     | 448.730946       | 895.470600        | 448.238938       | T    | <b>335.192511</b>  | 168.099893        | 318.165962     | 159.586619       | 317.181946         | <b>159.094611</b> | 3 |
| 7 | <b>1000.513193</b> | 500.760235        | 983.486644     | 492.246960       | 982.502628        | 491.754952       | S    | <b>234.144832</b>  | 117.576054        | 217.118283     | 109.062779       | 216.134267         | 108.570771        | 2 |
| 8 |                    |                   |                |                  |                   |                  | K    | <b>147.112804</b>  | 74.060040         | 130.086255     | 65.546765        |                    |                   | 1 |

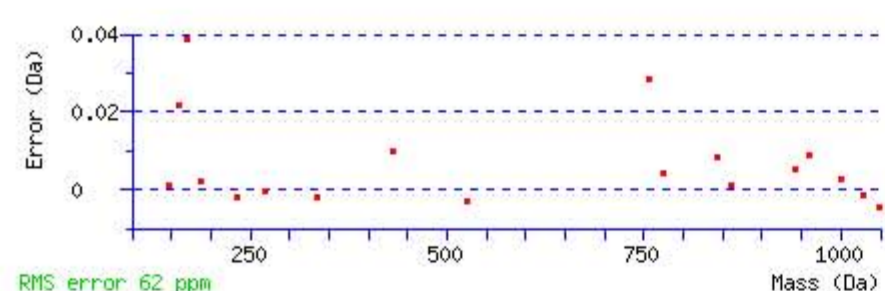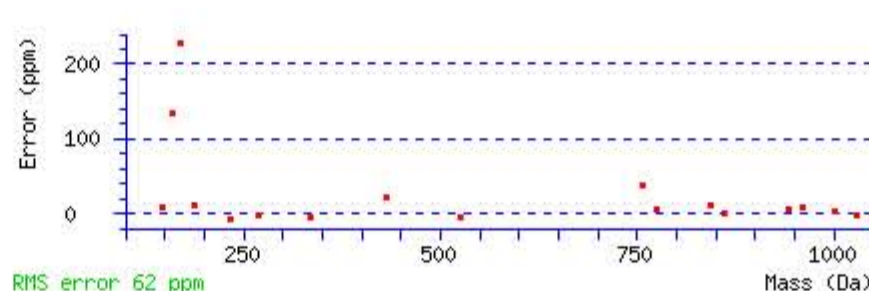

NCBI BLAST search of **VSVSQTSK**

(Parameters: blastp, nr protein database, expect=20000, no filter, PAM30)

Other BLAST [web gateways](#)

All matches to this query

| Score | Mr(calc):   | Delta     | Sequence                    |
|-------|-------------|-----------|-----------------------------|
| 37.0  | 1145.611450 | -0.003642 | <a href="#">VSVSQTSK</a>    |
| 10.9  | 1145.592819 | 0.014989  | <a href="#">VSDGVTKSPEK</a> |
| 8.5   | 1145.611420 | -0.003612 | <a href="#">KSIMVQSPEK</a>  |
| 2.8   | 1145.623337 | -0.015529 | <a href="#">WVDGGKPLFK</a>  |
| 2.4   | 1145.622650 | -0.014842 | <a href="#">VDNAMSRLK</a>   |

Mascot: <http://www.matrixscience.com/>



# MASCOT Search Results

## Peptide View

MS/MS Fragmentation of **ITVVAGEHNIETEHTEQK**

Found in **FA9\_HUMAN**, Coagulation factor IX OS=Homo sapiens GN=F9 PE=1 SV=2

Match to Query 67654: 2474.203696 from(619.558200,4+) rtinseconds(1589) index(60208)

Title: Locus:1.1.1.2551.14 File:"2013-07-02 CLN FXIII 30 min 1st F 4.wiff"

Data file C:\Program Files (x86)\Matrix Science\Mascot Daemon\mgf\1 FXIII 30 min 1st\mascot\_daemon\_merge.mgf

Click mouse within plot area to zoom in by factor of two about that point

Or, Plot from  to  Da

Label all possible matches  Label matches used for scoring

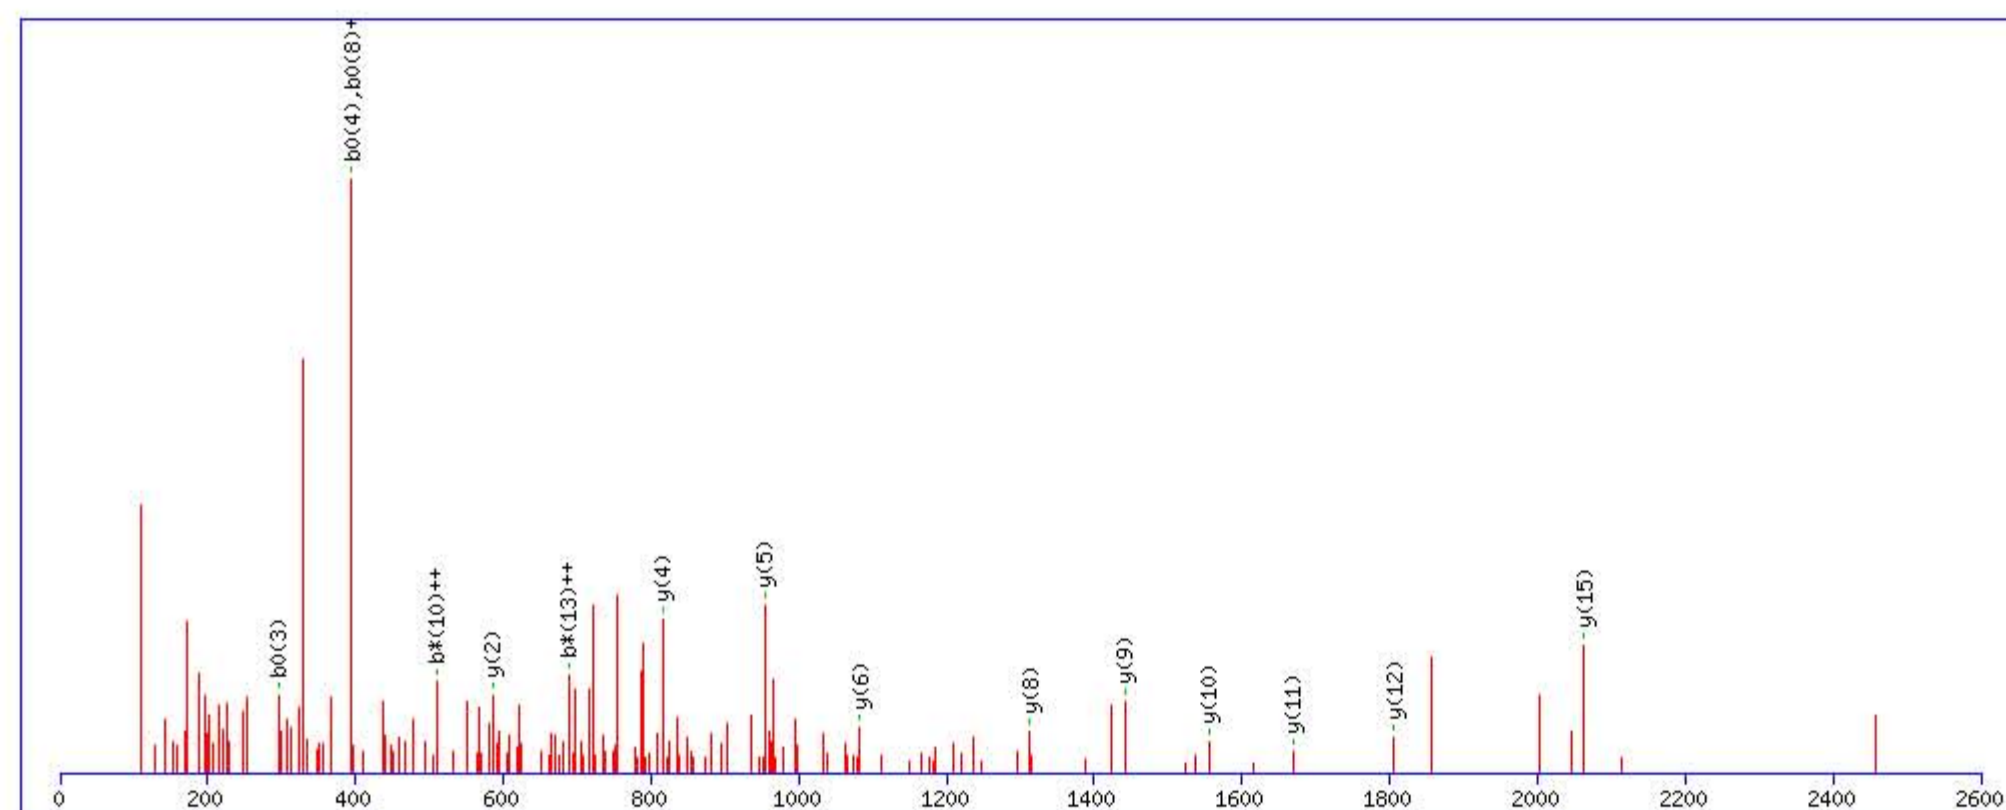

Monoisotopic mass of neutral peptide Mr(calc): 2474.211121

Fixed modifications: Carbamidomethyl (C) (apply to specified residues or termini only)

Variable modifications:

Q18 : Biotin:Thermo-21345 (Q)

Ions Score: 55 Expect: 8.4e-005

Matches : 15/194 fragment ions using 22 most intense peaks [\(help\)](#)

| #  | b           | b <sup>++</sup> | b <sup>+</sup> | b <sup>+++</sup> | b <sup>0</sup> | b <sup>0++</sup> | Seq. | y           | y <sup>++</sup> | y <sup>+</sup> | y <sup>+++</sup> | y <sup>0</sup> | y <sup>0++</sup> | #  |
|----|-------------|-----------------|----------------|------------------|----------------|------------------|------|-------------|-----------------|----------------|------------------|----------------|------------------|----|
| 1  | 114.091340  | 57.549308       |                |                  |                |                  | I    |             |                 |                |                  |                |                  | 19 |
| 2  | 215.139019  | 108.073147      |                |                  | 197.128454     | 99.067865        | T    | 2362.134353 | 1181.570814     | 2345.107804    | 1173.057540      | 2344.123788    | 1172.565532      | 18 |
| 3  | 314.207433  | 157.607354      |                |                  | 296.196868     | 148.602072       | V    | 2261.086674 | 1131.046975     | 2244.060125    | 1122.533700      | 2243.076109    | 1122.041692      | 17 |
| 4  | 413.275847  | 207.141561      |                |                  | 395.265282     | 198.136279       | V    | 2162.018260 | 1081.512768     | 2144.991711    | 1072.999493      | 2144.007695    | 1072.507485      | 16 |
| 5  | 484.312961  | 242.660119      |                |                  | 466.302396     | 233.654836       | A    | 2062.949846 | 1031.978561     | 2045.923297    | 1023.465286      | 2044.939281    | 1022.973278      | 15 |
| 6  | 541.334425  | 271.170851      |                |                  | 523.323860     | 262.165568       | G    | 1991.912732 | 996.460004      | 1974.886183    | 987.946730       | 1973.902167    | 987.454722       | 14 |
| 7  | 670.377018  | 335.692147      |                |                  | 652.366453     | 326.686865       | E    | 1934.891268 | 967.949272      | 1917.864719    | 959.435998       | 1916.880703    | 958.943990       | 13 |
| 8  | 807.435930  | 404.221603      |                |                  | 789.425365     | 395.216321       | H    | 1805.848675 | 903.427976      | 1788.822126    | 894.914701       | 1787.838110    | 894.422693       | 12 |
| 9  | 921.478857  | 461.243067      | 904.452308     | 452.729792       | 903.468292     | 452.237784       | N    | 1668.789763 | 834.898520      | 1651.763214    | 826.385245       | 1650.779198    | 825.893237       | 11 |
| 10 | 1034.562921 | 517.785099      | 1017.536372    | 509.271824       | 1016.552356    | 508.779816       | I    | 1554.746836 | 777.877056      | 1537.720287    | 769.363782       | 1536.736271    | 768.871774       | 10 |
| 11 | 1163.605514 | 582.306395      | 1146.578965    | 573.793121       | 1145.594949    | 573.301113       | E    | 1441.662772 | 721.335024      | 1424.636223    | 712.821750       | 1423.652207    | 712.329742       | 9  |
| 12 | 1292.648107 | 646.827692      | 1275.621558    | 638.314417       | 1274.637542    | 637.822409       | E    | 1312.620179 | 656.813728      | 1295.593630    | 648.300453       | 1294.609614    | 647.808445       | 8  |
| 13 | 1393.695786 | 697.351531      | 1376.669237    | 688.838257       | 1375.685221    | 688.346249       | T    | 1183.577586 | 592.292431      | 1166.551037    | 583.779157       | 1165.567021    | 583.287149       | 7  |
| 14 | 1522.738379 | 761.872828      | 1505.711830    | 753.359553       | 1504.727814    | 752.867545       | E    | 1082.529907 | 541.768592      | 1065.503358    | 533.255317       | 1064.519342    | 532.763309       | 6  |
| 15 | 1659.797291 | 830.402284      | 1642.770742    | 821.889009       | 1641.786726    | 821.397001       | H    | 953.487314  | 477.247295      | 936.460765     | 468.734021       | 935.476749     | 468.242013       | 5  |
| 16 | 1760.844970 | 880.926123      | 1743.818421    | 872.412849       | 1742.834405    | 871.920841       | T    | 816.428402  | 408.717839      | 799.401853     | 400.204565       | 798.417837     | 399.712557       | 4  |
| 17 | 1889.887563 | 945.447420      | 1872.861014    | 936.934145       | 1871.876998    | 936.442137       | E    | 715.380723  | 358.194000      | 698.354174     | 349.680725       | 697.370158     | 349.188717       | 3  |
| 18 | 2329.112889 | 1165.060082     | 2312.086340    | 1156.546808      | 2311.102324    | 1156.054800      | Q    | 586.338130  | 293.672703      | 569.311581     | 285.159429       |                |                  | 2  |
| 19 |             |                 |                |                  |                |                  | K    | 147.112804  | 74.060040       | 130.086255     | 65.546765        |                |                  | 1  |

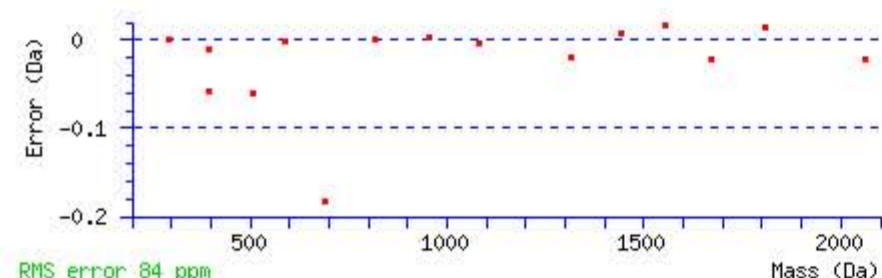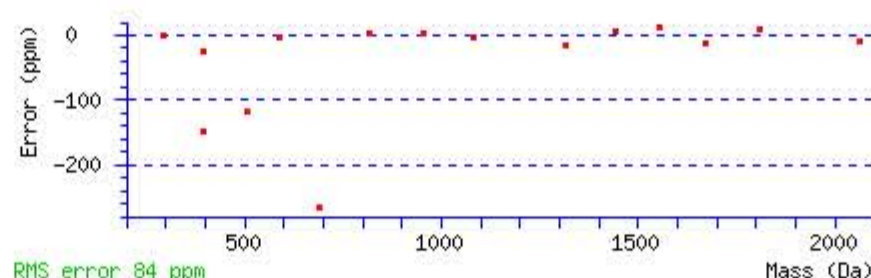

NCBI BLAST search of [ITVVAGEHNIETEHTEQK](#)

(Parameters: blastp, nr protein database, expect=20000, no filter, PAM30)

Other BLAST [web gateways](#)

All matches to this query

| Score | Mr(calc):   | Delta     | Sequence                           |
|-------|-------------|-----------|------------------------------------|
| 54.6  | 2474.211121 | -0.007425 | <a href="#">ITVVAGEHNIETEHTEQK</a> |

Mascot: <http://www.matrixscience.com/>



# MASCOT SEARCH RESULTS

## Peptide View

MS/MS Fragmentation of **SQHLDNFSNQIGK**

Found in **FA5\_HUMAN**, Coagulation factor V OS=Homo sapiens GN=F5 PE=1 SV=4

Match to Query 52060: 1797.880722 from(600.300850,3+) rtinseconds(1737) index(61277)

Title: Locus:1.1.1.2603.8 File:"2013-07-02 CLN FXIII 30 min 1st F 4.wiff"

Data file C:\Program Files (x86)\Matrix Science\Mascot Daemon\mgf1 FXIII 30 min 1st\mascot\_daemon\_merge.mgf

Click mouse within plot area to zoom in by factor of two about that point

Or, Plot from  to  Da

Label all possible matches  Label matches used for scoring

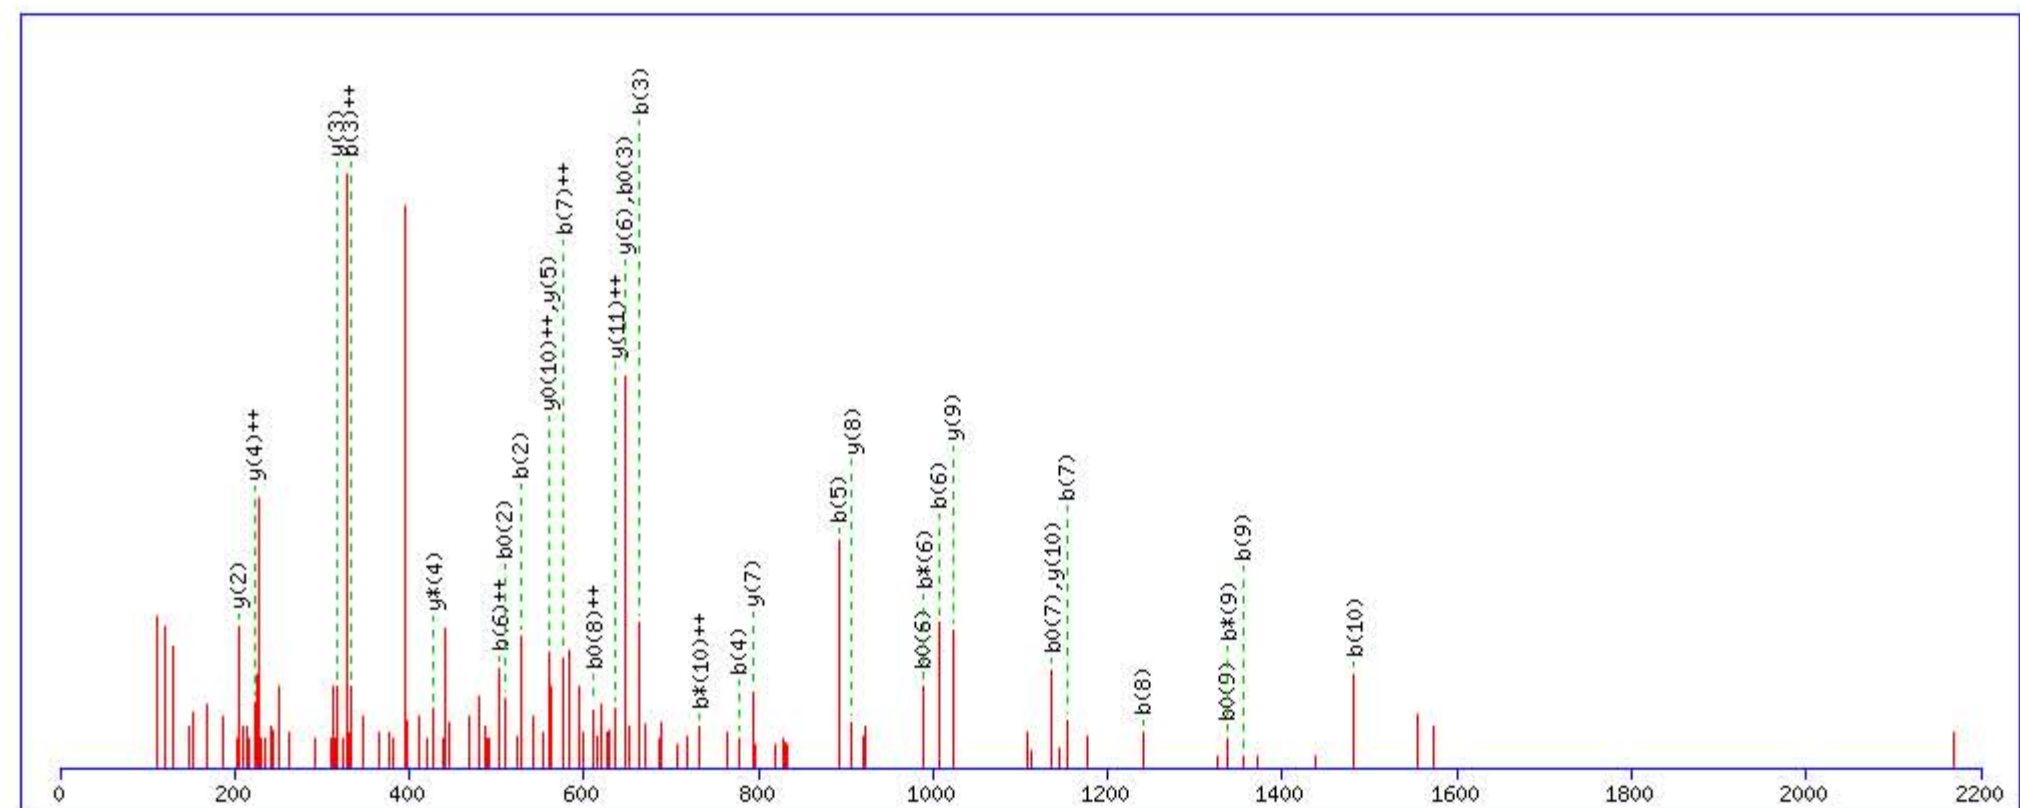

Monoisotopic mass of neutral peptide Mr(calc): 1797.883194

Fixed modifications: Carbamidomethyl (C) (apply to specified residues or termini only)

Variable modifications:

Q2 : Biotin:Thermo-21345 (Q)

Ions Score: 40 Expect: 0.0019

Matches : 33/132 fragment ions using 62 most intense peaks [\(help\)](#)

| #  | b                  | b <sup>++</sup>   | b <sup>*</sup>     | b <sup>*++</sup> | b <sup>0</sup>     | b <sup>0++</sup> | Seq. | y                  | y <sup>++</sup>   | y <sup>*</sup>    | y <sup>*++</sup> | y <sup>0</sup> | y <sup>0++</sup>  | #  |
|----|--------------------|-------------------|--------------------|------------------|--------------------|------------------|------|--------------------|-------------------|-------------------|------------------|----------------|-------------------|----|
| 1  | 88.039304          | 44.523290         |                    |                  | 70.028739          | 35.518008        | S    |                    |                   |                   |                  |                |                   | 13 |
| 2  | <b>527.264630</b>  | 264.135953        | 510.238081         | 255.622679       | <b>509.254065</b>  | 255.130671       | Q    | 1711.858451        | 856.432863        | 1694.831902       | 847.919589       | 1693.847886    | 847.427581        | 12 |
| 3  | <b>664.323542</b>  | <b>332.665409</b> | 647.296993         | 324.152134       | <b>646.312977</b>  | 323.660126       | H    | 1272.633125        | <b>636.820200</b> | 1255.606576       | 628.306926       | 1254.622560    | 627.814918        | 11 |
| 4  | <b>777.407606</b>  | 389.207441        | 760.381057         | 380.694166       | 759.397041         | 380.202159       | L    | <b>1135.574213</b> | 568.290744        | 1118.547664       | 559.777470       | 1117.563648    | <b>559.285462</b> | 10 |
| 5  | <b>892.434549</b>  | 446.720913        | 875.408000         | 438.207638       | 874.423984         | 437.715630       | D    | <b>1022.490149</b> | 511.748712        | 1005.463600       | 503.235438       | 1004.479584    | 502.743430        | 9  |
| 6  | <b>1006.477476</b> | <b>503.742376</b> | <b>989.450927</b>  | 495.229101       | <b>988.466911</b>  | 494.737093       | N    | <b>907.463206</b>  | 454.235241        | 890.436657        | 445.721966       | 889.452641     | 445.229958        | 8  |
| 7  | <b>1153.545890</b> | <b>577.276583</b> | 1136.519341        | 568.763308       | <b>1135.535325</b> | 568.271300       | F    | <b>793.420279</b>  | 397.213777        | 776.393730        | 388.700503       | 775.409714     | 388.208495        | 7  |
| 8  | <b>1240.577918</b> | 620.792597        | 1223.551369        | 612.279323       | 1222.567353        | 611.787314       | S    | <b>646.351865</b>  | 323.679570        | 629.325316        | 315.166296       | 628.341300     | 314.674288        | 6  |
| 9  | <b>1354.620845</b> | 677.814060        | <b>1337.594296</b> | 669.300786       | <b>1336.610280</b> | 668.808778       | N    | <b>559.319837</b>  | 280.163556        | 542.293288        | 271.650282       |                |                   | 5  |
| 10 | <b>1482.679423</b> | 741.843349        | 1465.652874        | 733.330075       | 1464.668858        | 732.838067       | Q    | 445.276910         | <b>223.142093</b> | <b>428.250361</b> | 214.628818       |                |                   | 4  |
| 11 | 1595.763487        | 798.385381        | 1578.736938        | 789.872107       | 1577.752922        | 789.380099       | I    | <b>317.218332</b>  | 159.112804        | 300.191783        | 150.599529       |                |                   | 3  |
| 12 | 1652.784951        | 826.896113        | 1635.758402        | 818.382839       | 1634.774386        | 817.890831       | G    | <b>204.134268</b>  | 102.570772        | 187.107719        | 94.057497        |                |                   | 2  |
| 13 |                    |                   |                    |                  |                    |                  | K    | 147.112804         | 74.060040         | 130.086255        | 65.546765        |                |                   | 1  |

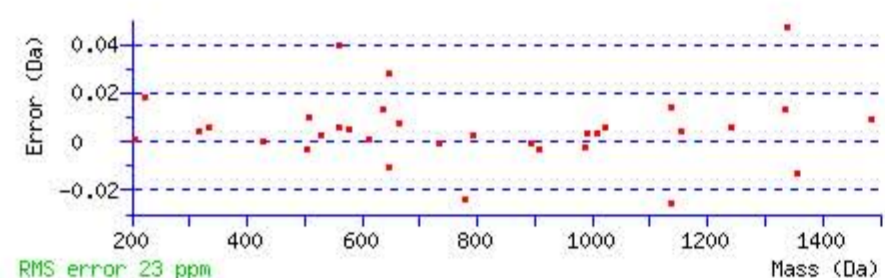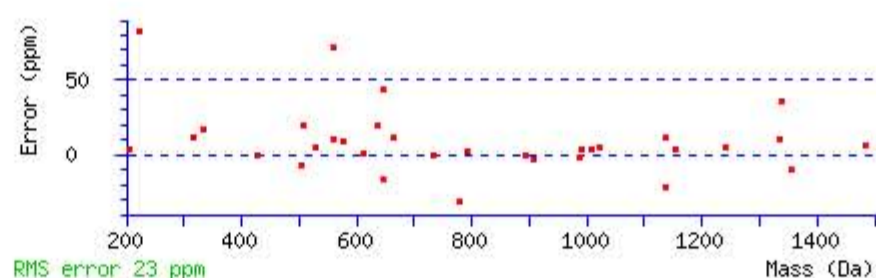

NCBI BLAST search of [SQHLDNFSNQIGK](#)

(Parameters: blastp, nr protein database, expect=20000, no filter, PAM30)

Other BLAST [web gateways](#)

All matches to this query

| Score | Mr(calc):   | Delta     | Sequence                      |
|-------|-------------|-----------|-------------------------------|
| 40.4  | 1797.883194 | -0.002472 | <a href="#">SQHLDNFSNQIGK</a> |

Mascot: <http://www.matrixscience.com/>



# MASCOT Search Results

## Peptide View

MS/MS Fragmentation of **APSHQQATTAGSPLR**

Found in **FA5\_HUMAN**, Coagulation factor V OS=Homo sapiens GN=F5 PE=1 SV=4

Match to Query 52837: 1831.932342 from(611.651390,3+) rtinseconds(1383) index(58635)

Title: Locus:1.1.1.2479.24 File:"2013-07-02 CLN FXIII 30 min 1st F 4.wiff"

Data file C:\Program Files (x86)\Matrix Science\Mascot Daemon\mgf1 FXIII 30 min 1st\mascot\_daemon\_merge.mgf

Click mouse within plot area to zoom in by factor of two about that point

Or, Plot from  to  Da

Label all possible matches  Label matches used for scoring

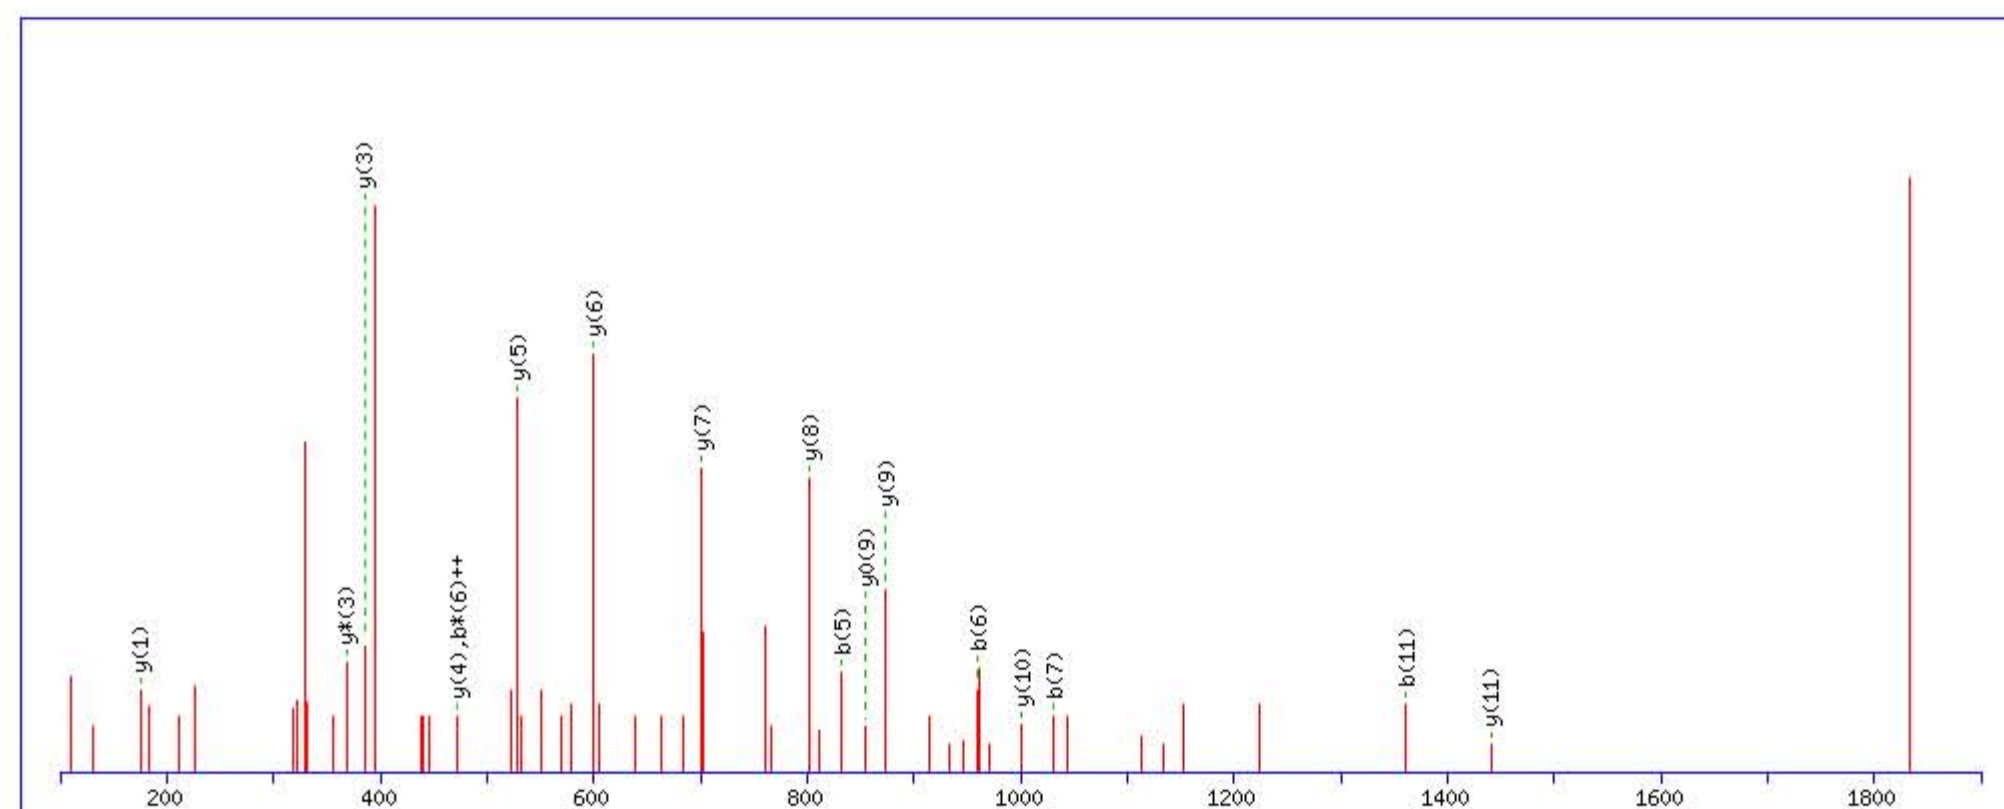

Monoisotopic mass of neutral peptide Mr(calc): 1831.936295

Fixed modifications: Carbamidomethyl (C) (apply to specified residues or termini only)

Variable modifications:

Q5 : Biotin:Thermo-21345 (Q)

Ions Score: 45 Expect: 0.00093

Matches : 17/150 fragment ions using 44 most intense peaks [\(help\)](#)

| #  | b                  | b <sup>++</sup> | b <sup>+</sup> | b <sup>+++</sup>  | b <sup>0</sup> | b <sup>0++</sup> | Seq. | y                  | y <sup>++</sup> | y <sup>+</sup>    | y <sup>+++</sup> | y <sup>0</sup>    | y <sup>0++</sup> | #  |
|----|--------------------|-----------------|----------------|-------------------|----------------|------------------|------|--------------------|-----------------|-------------------|------------------|-------------------|------------------|----|
| 1  | 72.044390          | 36.525833       |                |                   |                |                  | A    |                    |                 |                   |                  |                   |                  | 15 |
| 2  | 169.097154         | 85.052215       |                |                   |                |                  | P    | 1761.906466        | 881.456871      | 1744.879917       | 872.943597       | 1743.895901       | 872.451588       | 14 |
| 3  | 256.129182         | 128.568229      |                |                   | 238.118617     | 119.562947       | S    | 1664.853702        | 832.930489      | 1647.827153       | 824.417215       | 1646.843137       | 823.925206       | 13 |
| 4  | 393.188094         | 197.097685      |                |                   | 375.177529     | 188.092402       | H    | 1577.821674        | 789.414475      | 1560.795125       | 780.901200       | 1559.811109       | 780.409192       | 12 |
| 5  | <b>832.413420</b>  | 416.710348      | 815.386871     | 408.197073        | 814.402855     | 407.705065       | Q    | <b>1440.762762</b> | 720.885019      | 1423.736213       | 712.371744       | 1422.752197       | 711.879736       | 11 |
| 6  | <b>960.471998</b>  | 480.739637      | 943.445449     | <b>472.226362</b> | 942.461433     | 471.734354       | Q    | <b>1001.537436</b> | 501.272356      | 984.510887        | 492.759081       | 983.526871        | 492.267073       | 10 |
| 7  | <b>1031.509112</b> | 516.258194      | 1014.482563    | 507.744919        | 1013.498547    | 507.252911       | A    | <b>873.478858</b>  | 437.243067      | 856.452309        | 428.729792       | <b>855.468293</b> | 428.237784       | 9  |
| 8  | 1132.556791        | 566.782034      | 1115.530242    | 558.268759        | 1114.546226    | 557.776751       | T    | <b>802.441744</b>  | 401.724510      | 785.415195        | 393.211235       | 784.431179        | 392.719227       | 8  |
| 9  | 1233.604470        | 617.305873      | 1216.577921    | 608.792599        | 1215.593905    | 608.300591       | T    | <b>701.394065</b>  | 351.200671      | 684.367516        | 342.687396       | 683.383500        | 342.195388       | 7  |
| 10 | 1304.641584        | 652.824430      | 1287.615035    | 644.311156        | 1286.631019    | 643.819147       | A    | <b>600.346386</b>  | 300.676831      | 583.319837        | 292.163556       | 582.335821        | 291.671548       | 6  |
| 11 | <b>1361.663048</b> | 681.335162      | 1344.636499    | 672.821888        | 1343.652483    | 672.329879       | G    | <b>529.309272</b>  | 265.158274      | 512.282723        | 256.644999       | 511.298707        | 256.152991       | 5  |
| 12 | 1448.695076        | 724.851176      | 1431.668527    | 716.337902        | 1430.684511    | 715.845893       | S    | <b>472.287808</b>  | 236.647542      | 455.261259        | 228.134267       | 454.277243        | 227.642259       | 4  |
| 13 | 1545.747840        | 773.377558      | 1528.721291    | 764.864284        | 1527.737275    | 764.372276       | P    | <b>385.255780</b>  | 193.131528      | <b>368.229231</b> | 184.618253       |                   |                  | 3  |
| 14 | 1658.831904        | 829.919590      | 1641.805355    | 821.406316        | 1640.821339    | 820.914307       | L    | 288.203016         | 144.605146      | 271.176467        | 136.091871       |                   |                  | 2  |
| 15 |                    |                 |                |                   |                |                  | R    | <b>175.118952</b>  | 88.063114       | 158.092403        | 79.549839        |                   |                  | 1  |

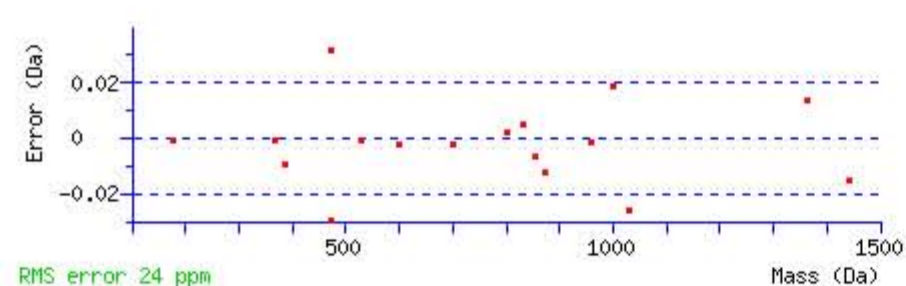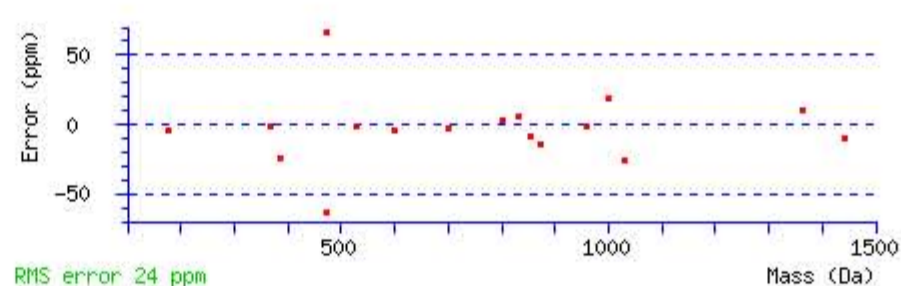

NCBI BLAST search of [APSHQQATTAGSPLR](#)

(Parameters: blastp, nr protein database, expect=20000, no filter, PAM30)

Other BLAST [web gateways](#)

All matches to this query

| Score | Mr(calc):   | Delta     | Sequence                        |
|-------|-------------|-----------|---------------------------------|
| 44.7  | 1831.936295 | -0.003953 | <a href="#">APSHQQATTAGSPLR</a> |
| 39.8  | 1831.936295 | -0.003953 | <a href="#">APSHQQATTAGSPLR</a> |

Mascot: <http://www.matrixscience.com/>



# MASCOT Search Results

## Peptide View

MS/MS Fragmentation of **MPMGLSTGIISDSQIK**

Found in **FA5\_HUMAN**, Coagulation factor V OS=Homo sapiens GN=F5 PE=1 SV=4

Match to Query 56324: 1988.022192 from(663.681340,3+) rtinseconds(2443) index(65899)

Title: Locus:1.1.1.2848.6 File:"2013-07-02 CLN FXIII 30 min 1st F 4.wiff"

Data file C:\Program Files (x86)\Matrix Science\Mascot Daemon\mgf\1 FXIII 30 min 1st\mascot\_daemon\_merge.mgf

Click mouse within plot area to zoom in by factor of two about that point

Or, Plot from  to  Da

Label all possible matches  Label matches used for scoring

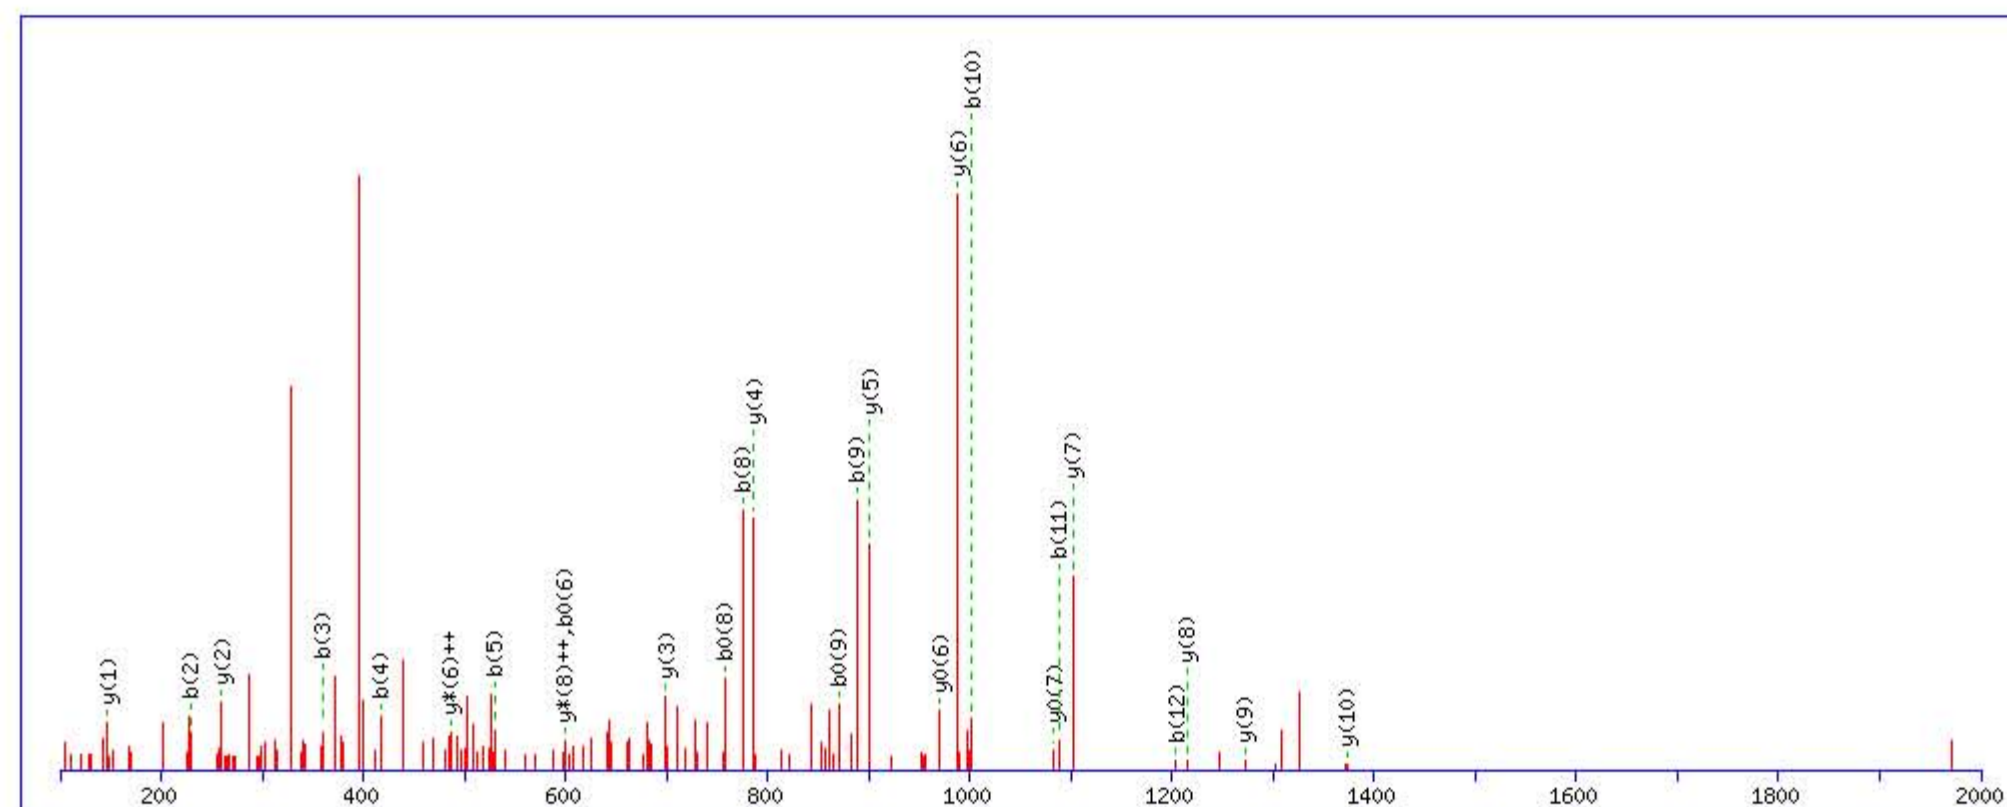

Monoisotopic mass of neutral peptide Mr(calc): 1988.014465

Fixed modifications: Carbamidomethyl (C) (apply to specified residues or termini only)

Variable modifications:

Q14 : Biotin:Thermo-21345 (Q)

Ions Score: 56 Expect: 1.5e-005

Matches : 26/138 fragment ions using 60 most intense peaks [\(help\)](#)

| #  | b                  | b <sup>++</sup> | b <sup>+</sup> | b <sup>+++</sup> | b <sup>0</sup>    | b <sup>0++</sup> | Seq. | y                  | y <sup>++</sup> | y <sup>+</sup> | y <sup>+++</sup>  | y <sup>0</sup>     | y <sup>0++</sup> | #  |
|----|--------------------|-----------------|----------------|------------------|-------------------|------------------|------|--------------------|-----------------|----------------|-------------------|--------------------|------------------|----|
| 1  | 132.047761         | 66.527518       |                |                  |                   |                  | M    |                    |                 |                |                   |                    |                  | 16 |
| 2  | <b>229.100525</b>  | 115.053900      |                |                  |                   |                  | P    | 1857.981269        | 929.494273      | 1840.954720    | 920.980998        | 1839.970704        | 920.488990       | 15 |
| 3  | <b>360.141010</b>  | 180.574143      |                |                  |                   |                  | M    | 1760.928505        | 880.967891      | 1743.901956    | 872.454616        | 1742.917940        | 871.962608       | 14 |
| 4  | <b>417.162474</b>  | 209.084875      |                |                  |                   |                  | G    | 1629.888020        | 815.447648      | 1612.861471    | 806.934374        | 1611.877455        | 806.442366       | 13 |
| 5  | <b>530.246538</b>  | 265.626907      |                |                  |                   |                  | L    | 1572.866556        | 786.936916      | 1555.840007    | 778.423642        | 1554.855991        | 777.931634       | 12 |
| 6  | 617.278566         | 309.142921      |                |                  | <b>599.268001</b> | 300.137638       | S    | 1459.782492        | 730.394884      | 1442.755943    | 721.881610        | 1441.771927        | 721.389602       | 11 |
| 7  | 718.326245         | 359.666761      |                |                  | 700.315680        | 350.661478       | T    | <b>1372.750464</b> | 686.878870      | 1355.723915    | 678.365596        | 1354.739899        | 677.873588       | 10 |
| 8  | <b>775.347709</b>  | 388.177493      |                |                  | <b>757.337144</b> | 379.172210       | G    | <b>1271.702785</b> | 636.355031      | 1254.676236    | 627.841756        | 1253.692220        | 627.349748       | 9  |
| 9  | <b>888.431773</b>  | 444.719525      |                |                  | <b>870.421208</b> | 435.714242       | I    | <b>1214.681321</b> | 607.844299      | 1197.654772    | <b>599.331024</b> | 1196.670756        | 598.839016       | 8  |
| 10 | <b>1001.515837</b> | 501.261557      |                |                  | 983.505272        | 492.256274       | I    | <b>1101.597257</b> | 551.302267      | 1084.570708    | 542.788992        | <b>1083.586692</b> | 542.296984       | 7  |
| 11 | <b>1088.547865</b> | 544.777571      |                |                  | 1070.537300       | 535.772288       | S    | <b>988.513193</b>  | 494.760235      | 971.486644     | <b>486.246960</b> | <b>970.502628</b>  | 485.754952       | 6  |
| 12 | <b>1203.574808</b> | 602.291042      |                |                  | 1185.564243       | 593.285760       | D    | <b>901.481165</b>  | 451.244221      | 884.454616     | 442.730946        | 883.470600         | 442.238938       | 5  |
| 13 | 1290.606836        | 645.807056      |                |                  | 1272.596271       | 636.801774       | S    | <b>786.454222</b>  | 393.730749      | 769.427673     | 385.217475        | 768.443657         | 384.725467       | 4  |
| 14 | 1729.832162        | 865.419719      | 1712.805613    | 856.906445       | 1711.821597       | 856.414437       | Q    | <b>699.422194</b>  | 350.214735      | 682.395645     | 341.701461        |                    |                  | 3  |
| 15 | 1842.916226        | 921.961751      | 1825.889677    | 913.448477       | 1824.905661       | 912.956469       | I    | <b>260.196868</b>  | 130.602072      | 243.170319     | 122.088797        |                    |                  | 2  |
| 16 |                    |                 |                |                  |                   |                  | K    | <b>147.112804</b>  | 74.060040       | 130.086255     | 65.546765         |                    |                  | 1  |

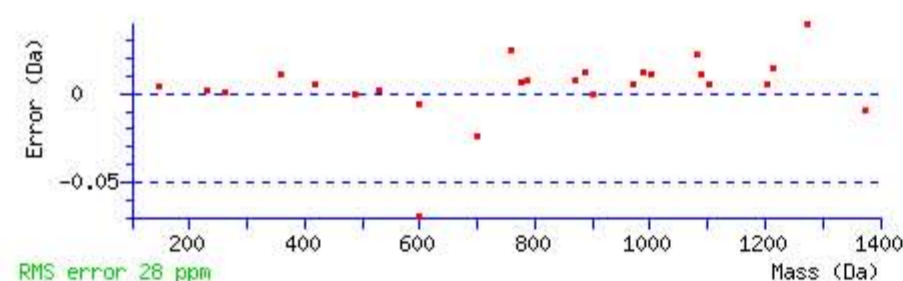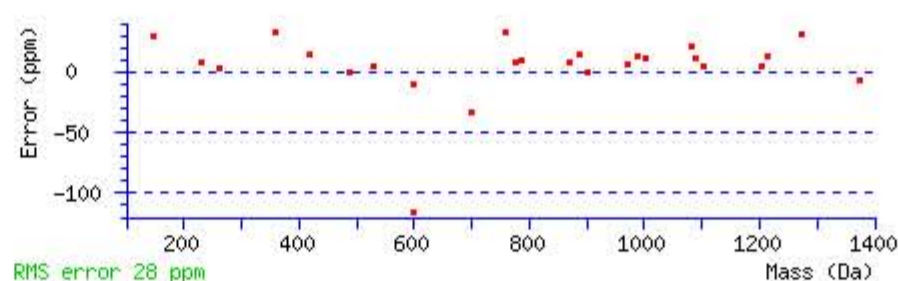

NCBI BLAST search of [MPMGLSTGIISDSQIK](#)

(Parameters: blastp, nr protein database, expect=20000, no filter, PAM30)

Other BLAST [web gateways](#)

All matches to this query

| Score | Mr(calc):   | Delta     | Sequence                          |
|-------|-------------|-----------|-----------------------------------|
| 56.0  | 1988.014465 | 0.007727  | <a href="#">MPMGLSTGIISDSQIK</a>  |
| 4.2   | 1988.051315 | -0.029123 | <a href="#">IVHQLNIMNSFSQKVK</a>  |
| 1.4   | 1988.051331 | -0.029139 | <a href="#">MTHKLVFLEDGTSQVRK</a> |
| 0.3   | 1987.998535 | 0.023657  | <a href="#">VCAQCRVFLRGTHAWK</a>  |

Mascot: <http://www.matrixscience.com/>



# Mascot Search Results

## Peptide View

MS/MS Fragmentation of **AADIEQQAVFAVFDENK**

Found in **FA5\_HUMAN**, Coagulation factor V OS=Homo sapiens GN=F5 PE=1 SV=4

Match to Query 61688: 2205.087642 from(736.036490,3+) rtinseconds(2725) index(67669)

Title: Locus:1.1.1.2945.17 File:"2013-07-02 CLN FXIII 30 min 1st F 4.wiff"

Data file C:\Program Files (x86)\Matrix Science\Mascot Daemon\mgf\1 FXIII 30 min 1st\mascot\_daemon\_merge.mgf

Click mouse within plot area to zoom in by factor of two about that point

Or, Plot from  to  Da

Label all possible matches  Label matches used for scoring

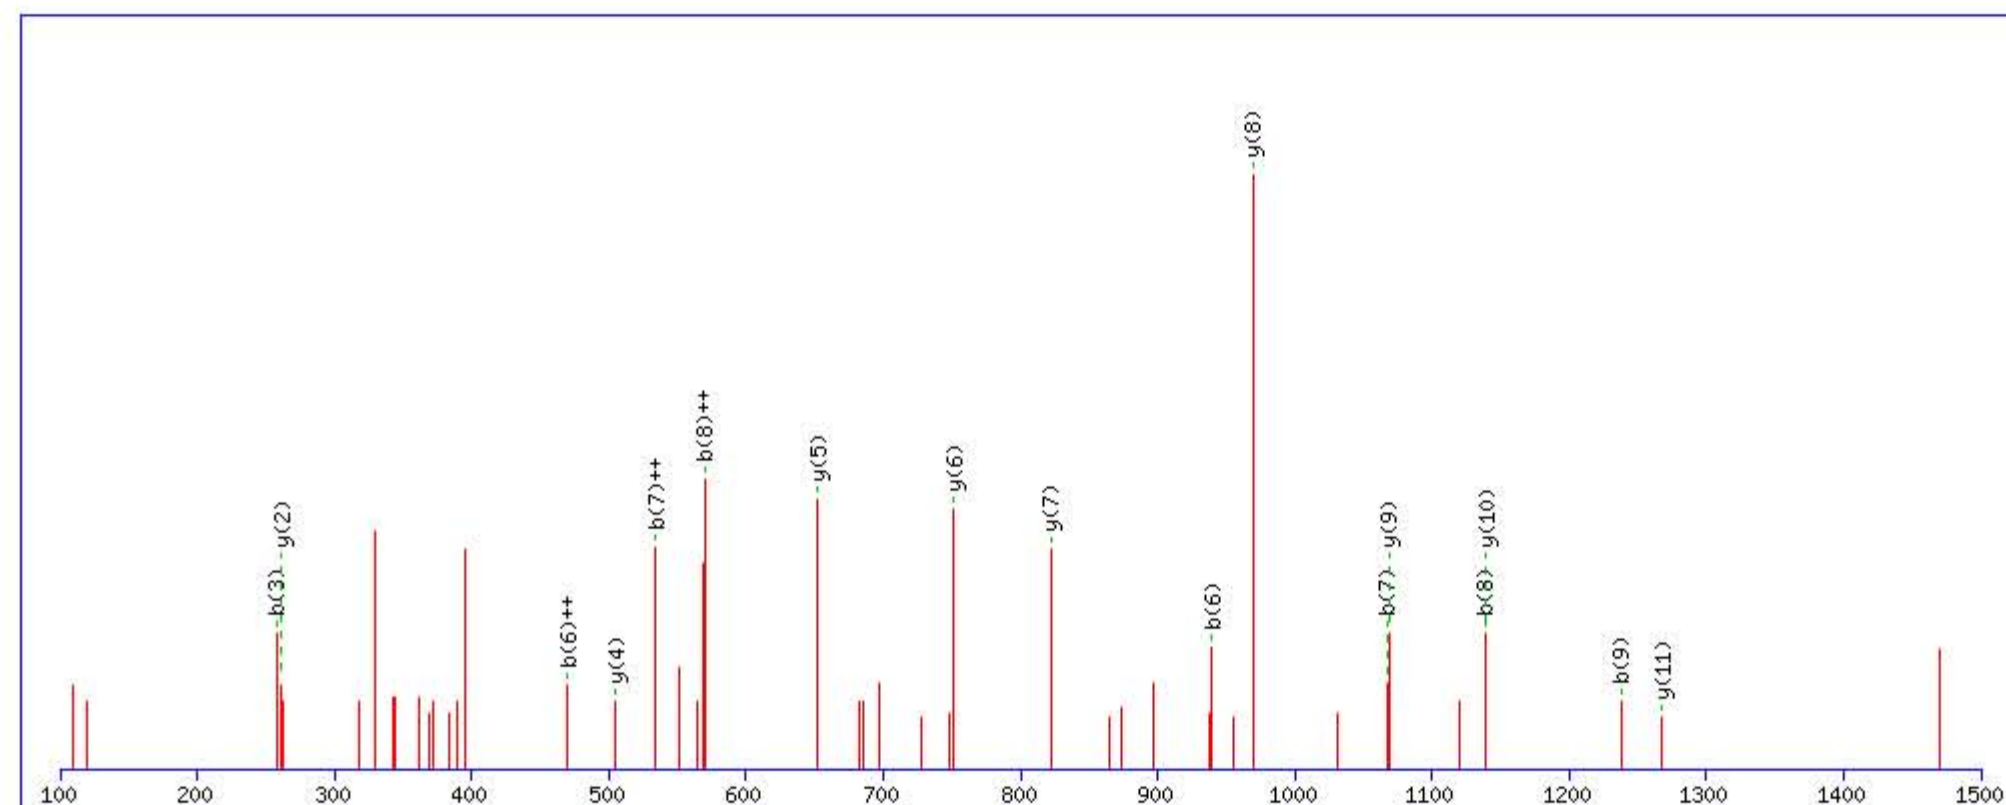

Monoisotopic mass of neutral peptide Mr(calc): 2205.077591

Fixed modifications: Carbamidomethyl (C) (apply to specified residues or termini only)

Variable modifications:

Q6 : Biotin:Thermo-21345 (Q)

Ions Score: 61 Expect: 4e-006

Matches : 17/174 fragment ions using 25 most intense peaks [\(help\)](#)

| #  | b                  | b <sup>++</sup>   | b <sup>*</sup> | b <sup>*++</sup> | b <sup>0</sup> | b <sup>0++</sup> | Seq. | y                  | y <sup>++</sup> | y <sup>*</sup> | y <sup>*++</sup> | y <sup>0</sup> | y <sup>0++</sup> | #  |
|----|--------------------|-------------------|----------------|------------------|----------------|------------------|------|--------------------|-----------------|----------------|------------------|----------------|------------------|----|
| 1  | 72.044390          | 36.525833         |                |                  |                |                  | A    |                    |                 |                |                  |                |                  | 17 |
| 2  | 143.081504         | 72.044390         |                |                  |                |                  | A    | 2135.047769        | 1068.027522     | 2118.021220    | 1059.514248      | 2117.037204    | 1059.022240      | 16 |
| 3  | <b>258.108447</b>  | 129.557862        |                |                  | 240.097882     | 120.552579       | D    | 2064.010655        | 1032.508965     | 2046.984106    | 1023.995691      | 2046.000090    | 1023.503683      | 15 |
| 4  | 371.192511         | 186.099894        |                |                  | 353.181946     | 177.094611       | I    | 1948.983712        | 974.995494      | 1931.957163    | 966.482220       | 1930.973147    | 965.990212       | 14 |
| 5  | 500.235104         | 250.621190        |                |                  | 482.224539     | 241.615908       | E    | 1835.899648        | 918.453462      | 1818.873099    | 909.940188       | 1817.889083    | 909.448180       | 13 |
| 6  | <b>939.460430</b>  | <b>470.233853</b> | 922.433881     | 461.720579       | 921.449865     | 461.228571       | Q    | 1706.857055        | 853.932166      | 1689.830506    | 845.418891       | 1688.846490    | 844.926883       | 12 |
| 7  | <b>1067.519008</b> | <b>534.263142</b> | 1050.492459    | 525.749868       | 1049.508443    | 525.257860       | Q    | <b>1267.631729</b> | 634.319503      | 1250.605180    | 625.806228       | 1249.621164    | 625.314220       | 11 |
| 8  | <b>1138.556122</b> | <b>569.781699</b> | 1121.529573    | 561.268425       | 1120.545557    | 560.776416       | A    | <b>1139.573151</b> | 570.290214      | 1122.546602    | 561.776939       | 1121.562586    | 561.284931       | 10 |
| 9  | <b>1237.624536</b> | 619.315906        | 1220.597987    | 610.802632       | 1219.613971    | 610.310624       | V    | <b>1068.536037</b> | 534.771657      | 1051.509488    | 526.258382       | 1050.525472    | 525.766374       | 9  |
| 10 | 1384.692950        | 692.850113        | 1367.666401    | 684.336839       | 1366.682385    | 683.844831       | F    | <b>969.467623</b>  | 485.237450      | 952.441074     | 476.724175       | 951.457058     | 476.232167       | 8  |
| 11 | 1455.730064        | 728.368670        | 1438.703515    | 719.855396       | 1437.719499    | 719.363388       | A    | <b>822.399209</b>  | 411.703243      | 805.372660     | 403.189968       | 804.388644     | 402.697960       | 7  |
| 12 | 1554.798478        | 777.902877        | 1537.771929    | 769.389603       | 1536.787913    | 768.897595       | V    | <b>751.362095</b>  | 376.184686      | 734.335546     | 367.671411       | 733.351530     | 367.179403       | 6  |
| 13 | 1701.866892        | 851.437084        | 1684.840343    | 842.923810       | 1683.856327    | 842.431802       | F    | <b>652.293681</b>  | 326.650479      | 635.267132     | 318.137204       | 634.283116     | 317.645196       | 5  |
| 14 | 1816.893835        | 908.950556        | 1799.867286    | 900.437281       | 1798.883270    | 899.945273       | D    | <b>505.225267</b>  | 253.116271      | 488.198718     | 244.602997       | 487.214702     | 244.110989       | 4  |
| 15 | 1945.936428        | 973.471852        | 1928.909879    | 964.958578       | 1927.925863    | 964.466570       | E    | 390.198324         | 195.602800      | 373.171775     | 187.089525       | 372.187759     | 186.597517       | 3  |
| 16 | 2059.979355        | 1030.493315       | 2042.952806    | 1021.980041      | 2041.968790    | 1021.488033      | N    | <b>261.155731</b>  | 131.081503      | 244.129182     | 122.568229       |                |                  | 2  |
| 17 |                    |                   |                |                  |                |                  | K    | 147.112804         | 74.060040       | 130.086255     | 65.546765        |                |                  | 1  |

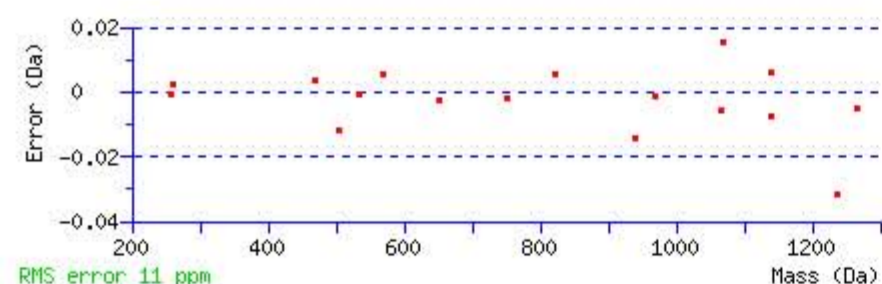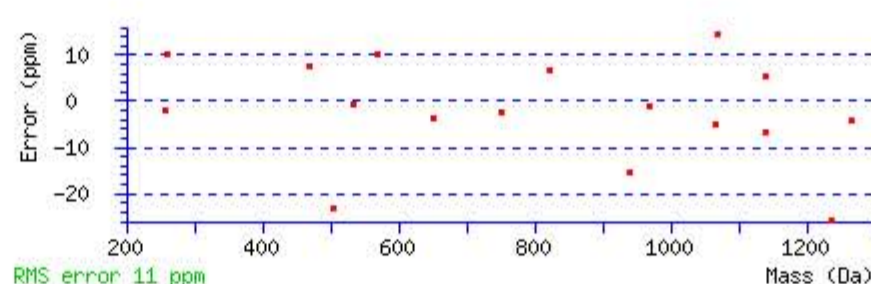

NCBI BLAST search of [AADIEQQAVFAVFDENK](#)

(Parameters: blastp, nr protein database, expect=20000, no filter, PAM30)

Other BLAST [web gateways](#)

## All matches to this query

| Score | Mr(calc):   | Delta    | Sequence                              |
|-------|-------------|----------|---------------------------------------|
| 61.4  | 2205.077591 | 0.010051 | <a href="#">AADIEQQAVFAVFDENK</a>     |
| 44.6  | 2205.077591 | 0.010051 | <a href="#">AADIEQQAVFAVFDENK</a>     |
| 3.8   | 2205.063492 | 0.024150 | <a href="#">GERGEPGIRGEDGRPGQEGPR</a> |
| 3.1   | 2205.080063 | 0.007579 | <a href="#">EKENDELDIQLKVFENK</a>     |



# MASCOT SCIENCE Mascot Search Results

## Peptide View

MS/MS Fragmentation of **IVGGQECK**

Found in **FA10\_HUMAN**, Coagulation factor X OS=Homo sapiens GN=F10 PE=1 SV=2

Match to Query 31703: 1200.596328 from(601.305440,2+) rtinseconds(1397) index(58759)

Title: Locus:1.1.1.2484.23 File:"2013-07-02 CLN FXIII 30 min 1st F 4.wiff"

Data file C:\Program Files (x86)\Matrix Science\Mascot Daemon\mgf\1 FXIII 30 min 1st\mascot\_daemon\_merge.mgf

Click mouse within plot area to zoom in by factor of two about that point

Or, Plot from  to  Da

Label all possible matches  Label matches used for scoring

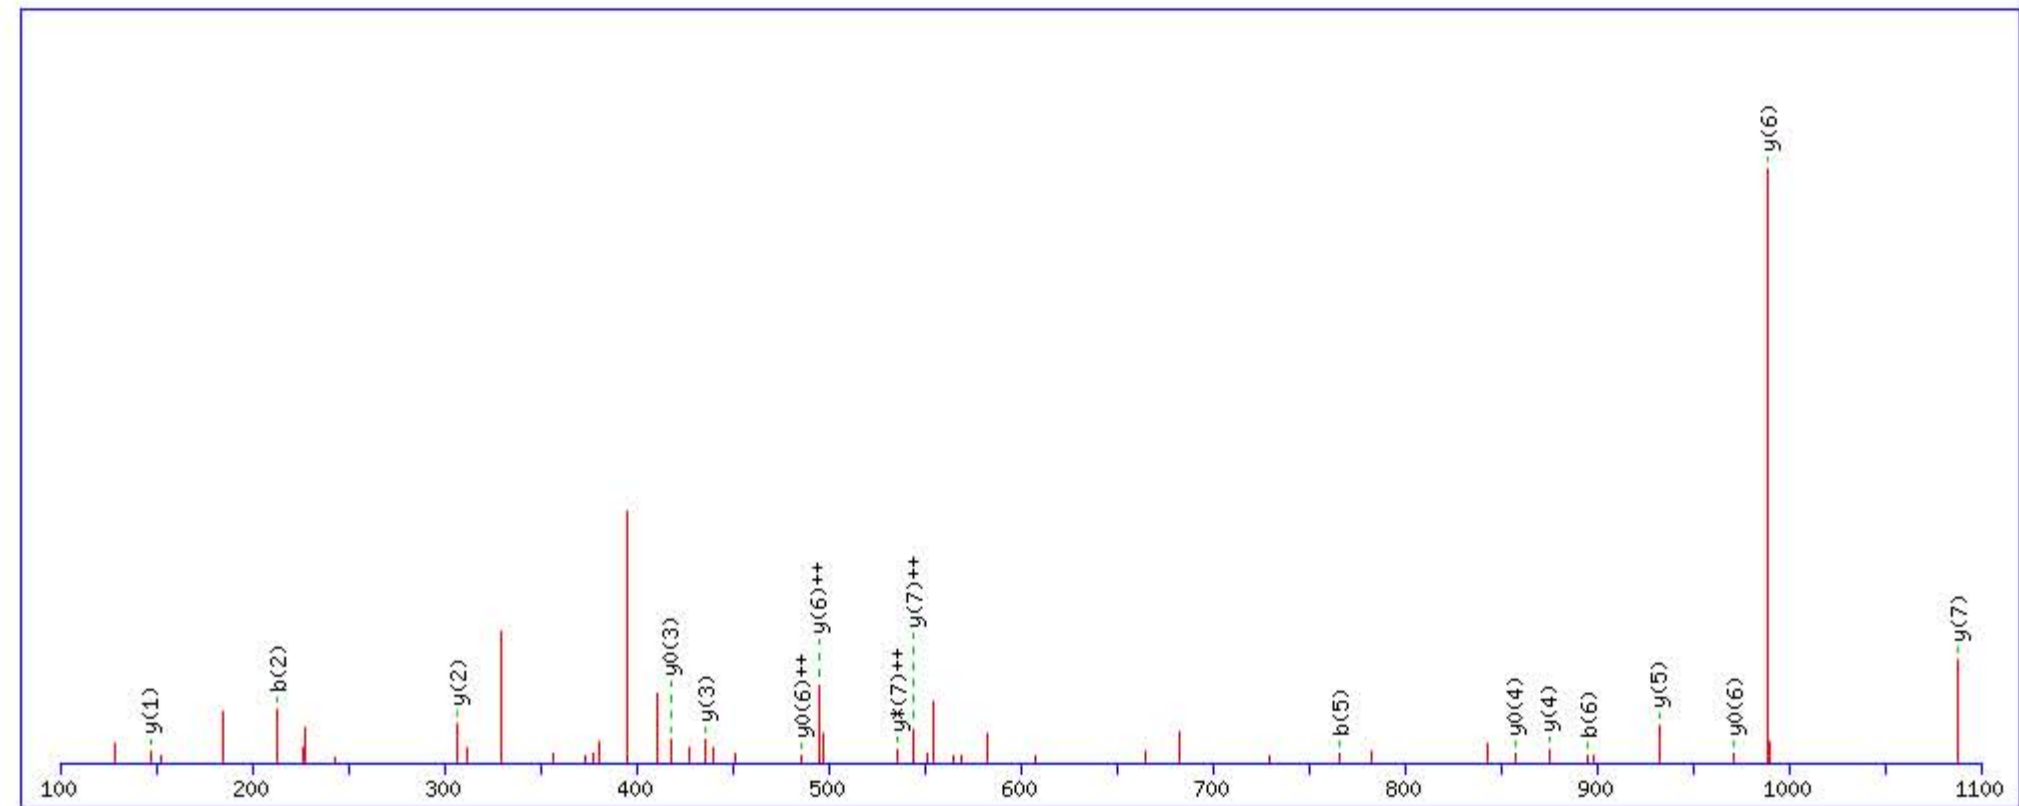

Monoisotopic mass of neutral peptide Mr(calc): 1200.599503

Fixed modifications: Carbamidomethyl (C) (apply to specified residues or termini only)

Variable modifications:

Q5 : Biotin:Thermo-21345 (Q)

Ions Score: 35 Expect: 0.0012

Matches : 17/62 fragment ions using 42 most intense peaks ([help](#))

| # | b                 | b <sup>++</sup> | b <sup>*</sup> | b <sup>+++</sup> | b <sup>0</sup> | b <sup>0++</sup> | Seq. | y                  | y <sup>++</sup>   | y <sup>*</sup> | y <sup>+++</sup>  | y <sup>0</sup>    | y <sup>0++</sup>  | # |
|---|-------------------|-----------------|----------------|------------------|----------------|------------------|------|--------------------|-------------------|----------------|-------------------|-------------------|-------------------|---|
| 1 | 114.091340        | 57.549308       |                |                  |                |                  | I    |                    |                   |                |                   |                   |                   | 8 |
| 2 | <b>213.159754</b> | 107.083515      |                |                  |                |                  | V    | <b>1088.522714</b> | <b>544.764995</b> | 1071.496165    | <b>536.251721</b> | 1070.512149       | 535.759713        | 7 |
| 3 | 270.181218        | 135.594247      |                |                  |                |                  | G    | <b>989.454300</b>  | <b>495.230788</b> | 972.427751     | 486.717514        | <b>971.443735</b> | <b>486.225506</b> | 6 |
| 4 | 327.202682        | 164.104979      |                |                  |                |                  | G    | <b>932.432836</b>  | 466.720056        | 915.406287     | 458.206782        | 914.422271        | 457.714774        | 5 |
| 5 | <b>766.428008</b> | 383.717642      | 749.401459     | 375.204368       |                |                  | Q    | <b>875.411372</b>  | 438.209324        | 858.384823     | 429.696050        | <b>857.400807</b> | 429.204042        | 4 |
| 6 | <b>895.470601</b> | 448.238939      | 878.444052     | 439.725664       | 877.460036     | 439.233656       | E    | <b>436.186046</b>  | 218.596661        | 419.159497     | 210.083386        | <b>418.175481</b> | 209.591378        | 3 |
| 7 | 1055.501250       | 528.254263      | 1038.474701    | 519.740989       | 1037.490685    | 519.248981       | C    | <b>307.143453</b>  | 154.075364        | 290.116904     | 145.562090        |                   |                   | 2 |
| 8 |                   |                 |                |                  |                |                  | K    | <b>147.112804</b>  | 74.060040         | 130.086255     | 65.546765         |                   |                   | 1 |

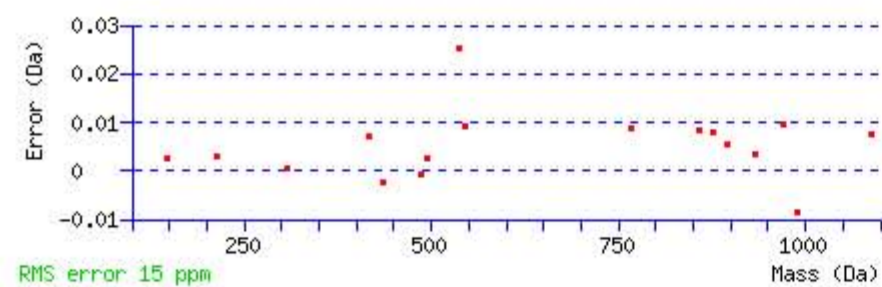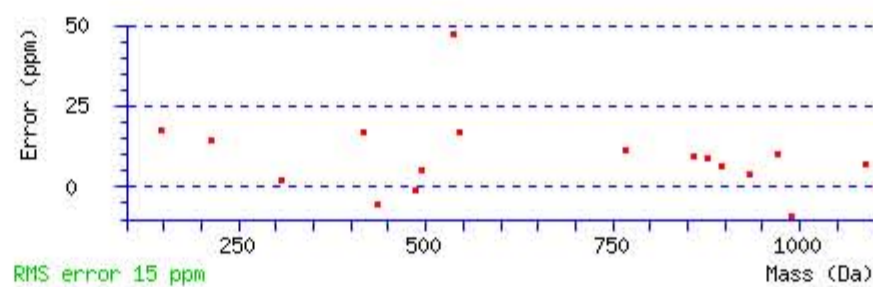

NCBI BLAST search of **IVGGQECK**

(Parameters: blastp, nr protein database, expect=20000, no filter, PAM30)

Other BLAST [web gateways](#)

### All matches to this query

| Score | Mr(calc):   | Delta     | Sequence                 |
|-------|-------------|-----------|--------------------------|
| 34.5  | 1200.599503 | -0.003175 | <a href="#">IVGGQECK</a> |
| 3.2   | 1200.596100 | 0.000228  | <a href="#">LVKMYDNR</a> |
| 1.4   | 1200.599503 | -0.003175 | <a href="#">LIQGDGCK</a> |

Mascot: <http://www.matrixscience.com/>



# MASCOT Search Results

## Peptide View

MS/MS Fragmentation of **DWAESTLMTQK**

Found in **FA10\_HUMAN**, Coagulation factor X OS=Homo sapiens GN=F10 PE=1 SV=2

Match to Query 46800: 1619.778288 from(810.896420,2+) rtinseconds(2263) index(64820)

Title: Locus:1.1.1.2785.15 File:"2013-07-02 CLN FXIII 30 min 1st F 4.wiff"

Data file C:\Program Files (x86)\Matrix Science\Mascot Daemon\mgf\1 FXIII 30 min 1st\mascot\_daemon\_merge.mgf

Click mouse within plot area to zoom in by factor of two about that point

Or, Plot from  to  Da

Label all possible matches  Label matches used for scoring

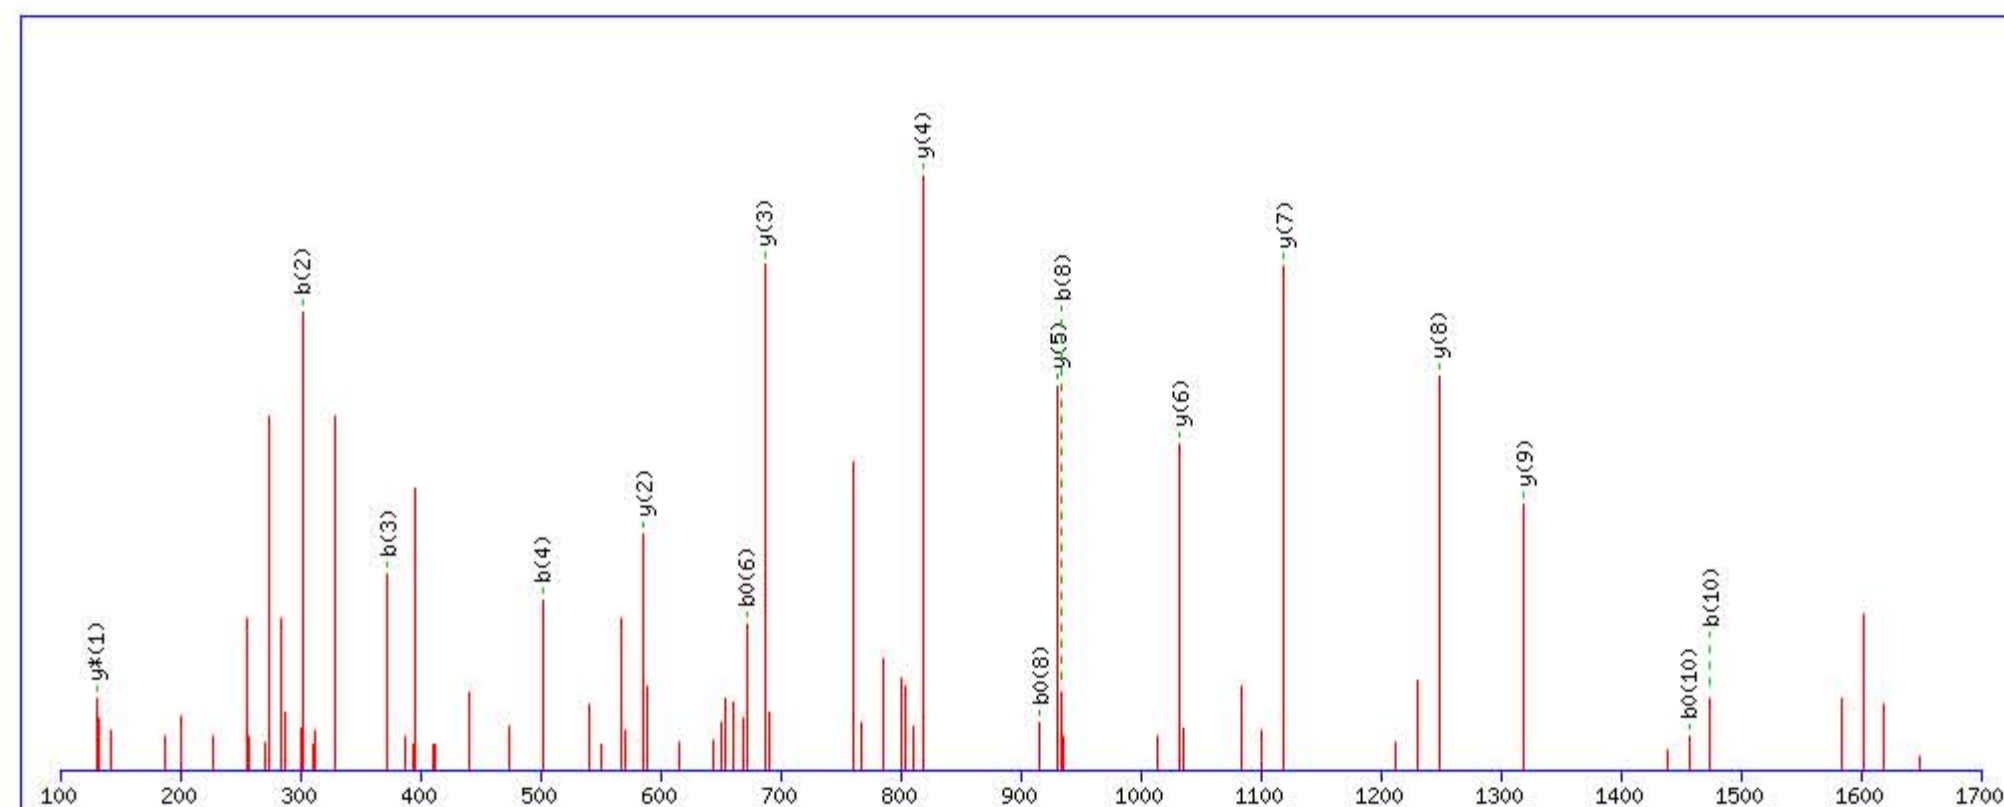

Monoisotopic mass of neutral peptide Mr(calc): 1619.768738

Fixed modifications: Carbamidomethyl (C) (apply to specified residues or termini only)

Variable modifications:

Q10 : Biotin:Thermo-21345 (Q)

Ions Score: 60 Expect: 2.1e-005

Matches : 17/98 fragment ions using 26 most intense peaks [\(help\)](#)

| #  | b                  | b <sup>++</sup> | b <sup>+</sup> | b <sup>+++</sup> | b <sup>0</sup>     | b <sup>0++</sup> | Seq. | y                  | y <sup>++</sup> | y <sup>+</sup>    | y <sup>+++</sup> | y <sup>0</sup> | y <sup>0++</sup> | #  |
|----|--------------------|-----------------|----------------|------------------|--------------------|------------------|------|--------------------|-----------------|-------------------|------------------|----------------|------------------|----|
| 1  | 116.034219         | 58.520748       |                |                  | 98.023654          | 49.515465        | D    |                    |                 |                   |                  |                |                  | 11 |
| 2  | <b>302.113532</b>  | 151.560404      |                |                  | 284.102967         | 142.555122       | W    | 1505.749085        | 753.378180      | 1488.722536       | 744.864906       | 1487.738520    | 744.372898       | 10 |
| 3  | <b>373.150646</b>  | 187.078961      |                |                  | 355.140081         | 178.073679       | A    | <b>1319.669772</b> | 660.338524      | 1302.643223       | 651.825250       | 1301.659207    | 651.333241       | 9  |
| 4  | <b>502.193239</b>  | 251.600258      |                |                  | 484.182674         | 242.594975       | E    | <b>1248.632658</b> | 624.819967      | 1231.606109       | 616.306693       | 1230.622093    | 615.814685       | 8  |
| 5  | 589.225267         | 295.116272      |                |                  | 571.214702         | 286.110989       | S    | <b>1119.590065</b> | 560.298671      | 1102.563516       | 551.785396       | 1101.579500    | 551.293388       | 7  |
| 6  | 690.272946         | 345.640111      |                |                  | <b>672.262381</b>  | 336.634829       | T    | <b>1032.558037</b> | 516.782657      | 1015.531488       | 508.269382       | 1014.547472    | 507.777374       | 6  |
| 7  | 803.357010         | 402.182143      |                |                  | 785.346445         | 393.176861       | L    | <b>931.510358</b>  | 466.258817      | 914.483809        | 457.745543       | 913.499793     | 457.253535       | 5  |
| 8  | <b>934.397495</b>  | 467.702386      |                |                  | <b>916.386930</b>  | 458.697103       | M    | <b>818.426294</b>  | 409.716785      | 801.399745        | 401.203510       | 800.415729     | 400.711502       | 4  |
| 9  | 1035.445174        | 518.226225      |                |                  | 1017.434609        | 509.220942       | T    | <b>687.385809</b>  | 344.196543      | 670.359260        | 335.683268       | 669.375244     | 335.191260       | 3  |
| 10 | <b>1474.670500</b> | 737.838888      | 1457.643951    | 729.325614       | <b>1456.659935</b> | 728.833605       | Q    | <b>586.338130</b>  | 293.672703      | 569.311581        | 285.159429       |                |                  | 2  |
| 11 |                    |                 |                |                  |                    |                  | K    | 147.112804         | 74.060040       | <b>130.086255</b> | 65.546765        |                |                  | 1  |

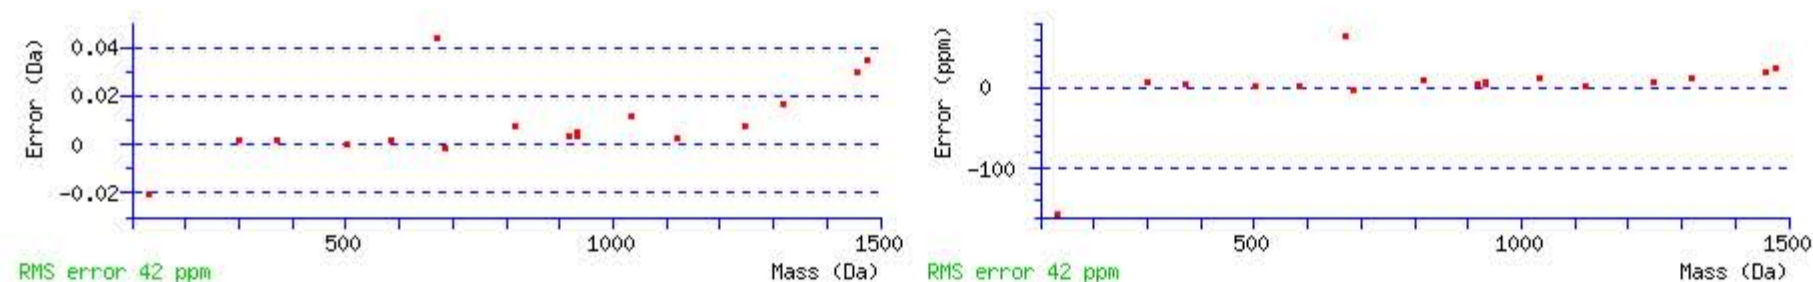

NCBI BLAST search of **DWAESTLMTQK**

(Parameters: blastp, nr protein database, expect=20000, no filter, PAM30)

Other BLAST [web gateways](#)

## All matches to this query

| Score | Mr(calc):   | Delta     | Sequence                             |
|-------|-------------|-----------|--------------------------------------|
| 59.8  | 1619.768738 | 0.009550  | <a href="#">DWAESTLMTQK</a>          |
| 10.8  | 1619.783340 | -0.005052 | <a href="#">MLGNEICLCIVGNK</a>       |
| 5.7   | 1619.793686 | -0.015398 | <a href="#">MEQPTSSINGEKRK</a>       |
| 5.0   | 1619.793716 | -0.015428 | <a href="#">LVCAVGSRRNGTEETK</a>     |
| 3.9   | 1619.775909 | 0.002379  | <a href="#">EEQCREMERLIK</a>         |
| 3.3   | 1619.768738 | 0.009550  | <a href="#">AFAPDSIQDSMK</a>         |
| 3.3   | 1619.782440 | -0.004152 | <a href="#">GDAEEMAQKKQEIK</a>       |
| 0.6   | 1619.790329 | -0.012041 | <a href="#">EAGEQGP HGS L GPK EK</a> |
| 0.2   | 1619.782455 | -0.004167 | <a href="#">NTEVNLM L NDG KEK</a>    |



# MASCOT SEARCH RESULTS

## Peptide View

MS/MS Fragmentation of **QEDACQGDSSGGPHVTR**

Found in **FA10\_HUMAN**, Coagulation factor X OS=Homo sapiens GN=F10 PE=1 SV=2

Match to Query 57890: 2023.881792 from(675.634540,3+) rtinseconds(1279) index(57912)

Title: Locus:1.1.1.2443.23 File:"2013-07-02 CLN FXIII 30 min 1st F 4.wiff"

Data file C:\Program Files (x86)\Matrix Science\Mascot Daemon\mgf\1 FXIII 30 min 1st\mascot\_daemon\_merge.mgf

Click mouse within plot area to zoom in by factor of two about that point

Or, Plot from  to  Da

Label all possible matches  Label matches used for scoring

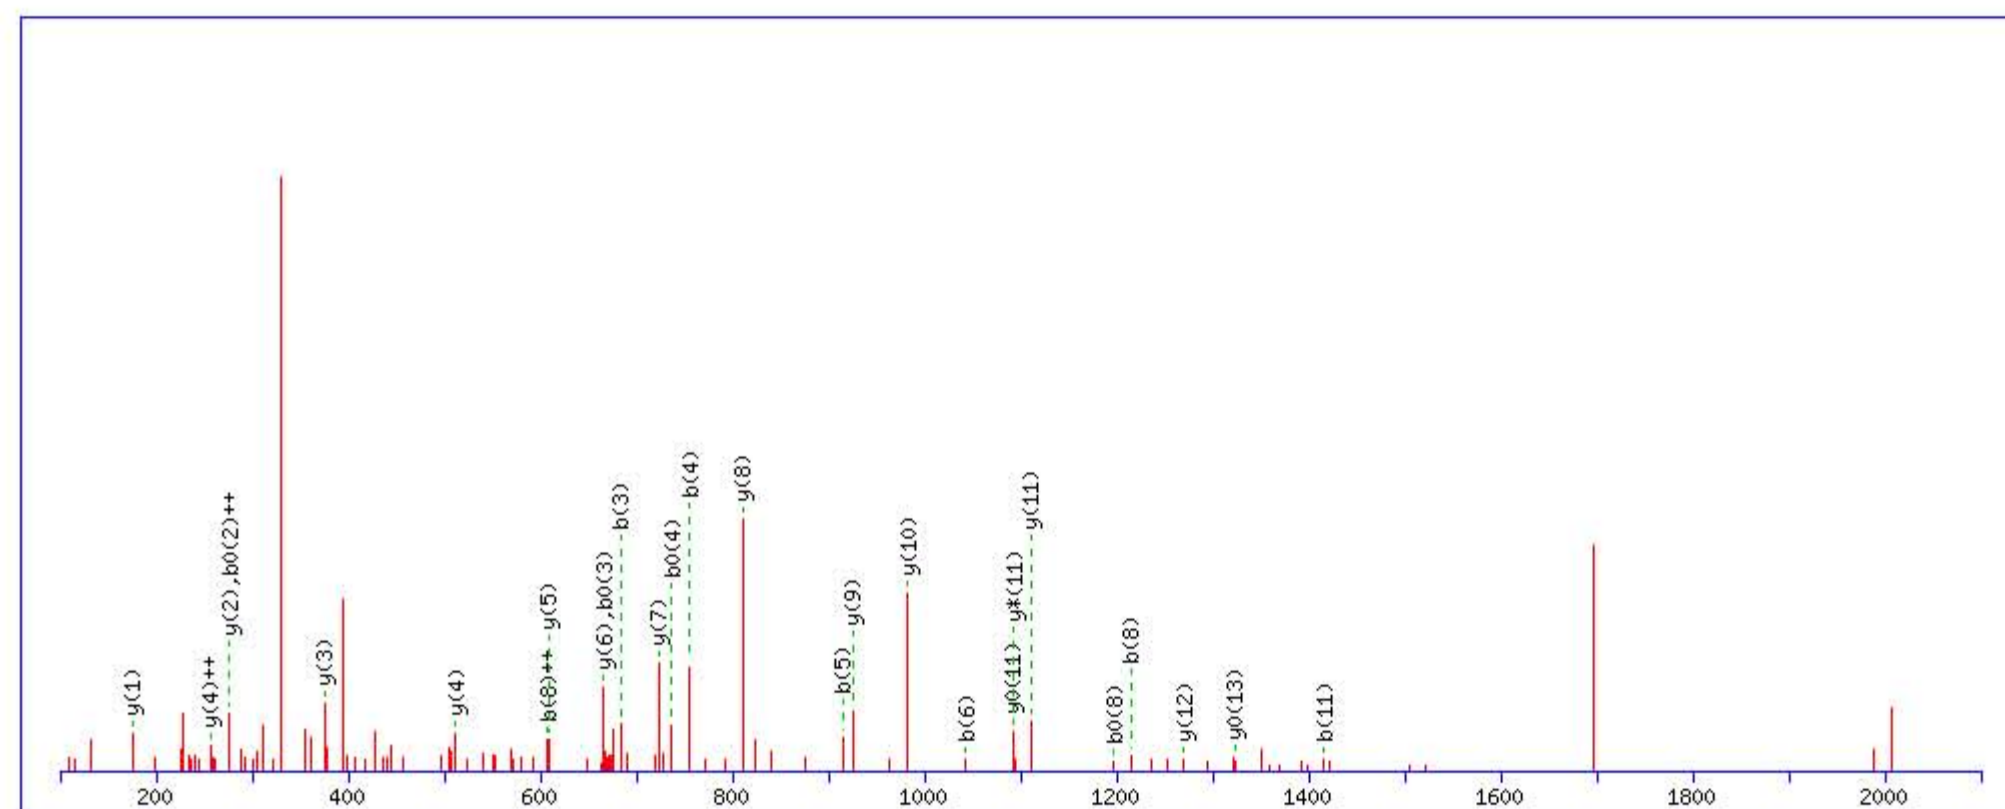

Monoisotopic mass of neutral peptide Mr(calc): 2023.884033

Fixed modifications: Carbamidomethyl (C) (apply to specified residues or termini only)

Variable modifications:

Q1 : Biotin:Thermo-21345 (Q)

Ions Score: 75 Expect: 1.5e-007

Matches : 27/176 fragment ions using 45 most intense peaks [\(help\)](#)

| #  | b                  | b <sup>++</sup>   | b <sup>*</sup> | b <sup>*++</sup> | b <sup>0</sup>     | b <sup>0++</sup> | Seq. | y                  | y <sup>++</sup>   | y <sup>*</sup>     | y <sup>*++</sup> | y <sup>0</sup>     | y <sup>0++</sup> | #  |
|----|--------------------|-------------------|----------------|------------------|--------------------|------------------|------|--------------------|-------------------|--------------------|------------------|--------------------|------------------|----|
| 1  | 440.232602         | 220.619939        | 423.206053     | 212.106664       |                    |                  | Q    |                    |                   |                    |                  |                    |                  | 16 |
| 2  | 569.275195         | 285.141236        | 552.248646     | 276.627961       | 551.264630         | 276.135953       | E    | 1585.665961        | 793.336618        | 1568.639412        | 784.823344       | 1567.655396        | 784.331336       | 15 |
| 3  | <b>684.302138</b>  | 342.654707        | 667.275589     | 334.141433       | <b>666.291573</b>  | 333.649425       | D    | 1456.623368        | 728.815322        | 1439.596819        | 720.302047       | 1438.612803        | 719.810039       | 14 |
| 4  | <b>755.339252</b>  | 378.173264        | 738.312703     | 369.659989       | <b>737.328687</b>  | 369.167982       | A    | 1341.596425        | 671.301851        | 1324.569876        | 662.788576       | <b>1323.585860</b> | 662.296568       | 13 |
| 5  | <b>915.369901</b>  | 458.188589        | 898.343352     | 449.675314       | 897.359336         | 449.183306       | C    | <b>1270.559311</b> | 635.783294        | 1253.532762        | 627.270019       | 1252.548746        | 626.778011       | 12 |
| 6  | <b>1043.428479</b> | 522.217877        | 1026.401930    | 513.704603       | 1025.417914        | 513.212595       | Q    | <b>1110.528662</b> | 555.767969        | <b>1093.502113</b> | 547.254695       | <b>1092.518097</b> | 546.762686       | 11 |
| 7  | 1100.449943        | 550.728609        | 1083.423394    | 542.215335       | 1082.439378        | 541.723327       | G    | <b>982.470084</b>  | 491.738680        | 965.443535         | 483.225406       | 964.459519         | 482.733398       | 10 |
| 8  | <b>1215.476886</b> | <b>608.242081</b> | 1198.450337    | 599.728807       | <b>1197.466321</b> | 599.236798       | D    | <b>925.448620</b>  | 463.227948        | 908.422071         | 454.714674       | 907.438055         | 454.222666       | 9  |
| 9  | 1302.508914        | 651.758095        | 1285.482365    | 643.244821       | 1284.498349        | 642.752813       | S    | <b>810.421677</b>  | 405.714477        | 793.395128         | 397.201202       | 792.411112         | 396.709194       | 8  |
| 10 | 1359.530378        | 680.268827        | 1342.503829    | 671.755553       | 1341.519813        | 671.263544       | G    | <b>723.389649</b>  | 362.198463        | 706.363100         | 353.685188       | 705.379084         | 353.193180       | 7  |
| 11 | <b>1416.551842</b> | 708.779559        | 1399.525293    | 700.266284       | 1398.541277        | 699.774276       | G    | <b>666.368185</b>  | 333.687731        | 649.341636         | 325.174456       | 648.357620         | 324.682448       | 6  |
| 12 | 1513.604606        | 757.305941        | 1496.578057    | 748.792667       | 1495.594041        | 748.300658       | P    | <b>609.346721</b>  | 305.176999        | 592.320172         | 296.663724       | 591.336156         | 296.171716       | 5  |
| 13 | 1650.663518        | 825.835397        | 1633.636969    | 817.322122       | 1632.652953        | 816.830114       | H    | <b>512.293957</b>  | <b>256.650617</b> | 495.267408         | 248.137342       | 494.283392         | 247.645334       | 4  |
| 14 | 1749.731932        | 875.369604        | 1732.705383    | 866.856330       | 1731.721367        | 866.364321       | V    | <b>375.235045</b>  | 188.121161        | 358.208496         | 179.607886       | 357.224480         | 179.115878       | 3  |
| 15 | 1850.779611        | 925.893443        | 1833.753062    | 917.380169       | 1832.769046        | 916.888161       | T    | <b>276.166631</b>  | 138.586953        | 259.140082         | 130.073679       | 258.156066         | 129.581671       | 2  |
| 16 |                    |                   |                |                  |                    |                  | R    | <b>175.118952</b>  | 88.063114         | 158.092403         | 79.549839        |                    |                  | 1  |

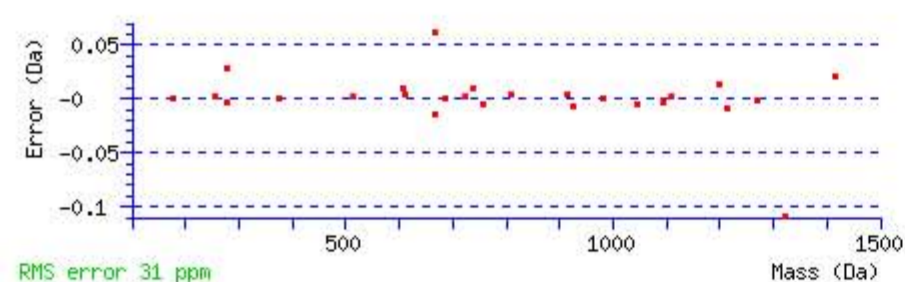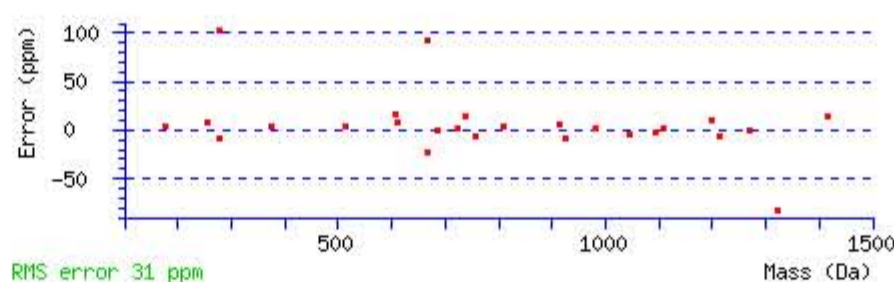

NCBI BLAST search of [QEDACQGDSSGGPHVTR](#)

(Parameters: blastp, nr protein database, expect=20000, no filter, PAM30)

Other BLAST [web gateways](#)

All matches to this query

| Score | Mr(calc):   | Delta     | Sequence                          |
|-------|-------------|-----------|-----------------------------------|
| 75.2  | 2023.884033 | -0.002241 | <a href="#">QEDACQGDSSGGPHVTR</a> |
| 53.6  | 2023.884033 | -0.002241 | <a href="#">QEDACQGDSSGGPHVTR</a> |

Mascot: <http://www.matrixscience.com/>



# MASCOT Search Results

## Peptide View

MS/MS Fragmentation of **YKDGDCETSPCQNQ GK**

Found in **FA10\_HUMAN**, Coagulation factor X OS=Homo sapiens GN=F10 PE=1 SV=2

Match to Query 64665: 2324.981082 from(776.000970,3+) rtinseconds(1248) index(57718)  
 Title: Locus:1.1.1.2432.17 File:"2013-07-02 CLN FXIII 30 min 1st F 4.wiff"  
 Data file C:\Program Files (x86)\Matrix Science\Mascot Daemon\mgf1 FXIII 30 min 1st\mascot\_daemon\_merge.mgf

Click mouse within plot area to zoom in by factor of two about that point

Or, Plot from  to  Da

Label all possible matches  Label matches used for scoring

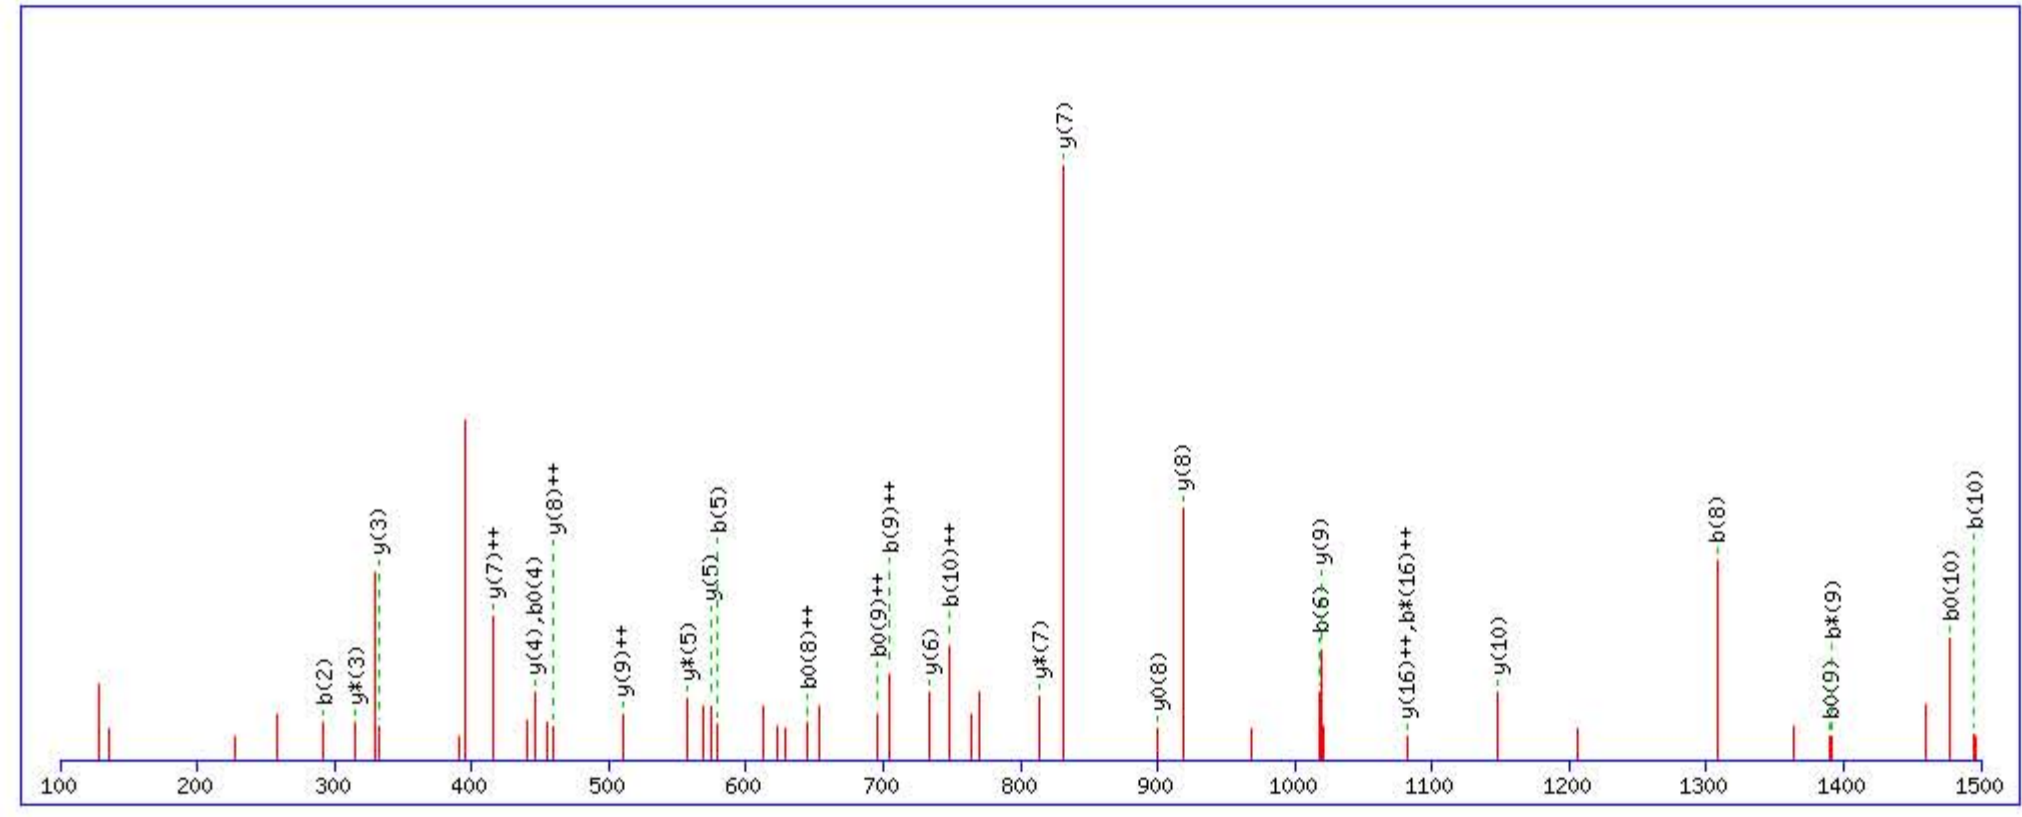

Monoisotopic mass of neutral peptide Mr(calc): 2324.982407

Fixed modifications: Carbamidomethyl (C) (apply to specified residues or termini only)

Variable modifications:

Q6 : Biotin:Thermo-21345 (Q)

Ions Score: 41 Expect: 0.00021

Matches : 30/172 fragment ions using 49 most intense peaks [\(help\)](#)

| #  | b                  | b <sup>++</sup>   | b <sup>*</sup>     | b <sup>*++</sup>   | b <sup>0</sup>     | b <sup>0++</sup>  | Seq. | y                  | y <sup>++</sup>    | y <sup>*</sup>    | y <sup>*++</sup> | y <sup>0</sup>    | y <sup>0++</sup> | #  |
|----|--------------------|-------------------|--------------------|--------------------|--------------------|-------------------|------|--------------------|--------------------|-------------------|------------------|-------------------|------------------|----|
| 1  | 164.070605         | 82.538940         |                    |                    |                    |                   | Y    |                    |                    |                   |                  |                   |                  | 17 |
| 2  | <b>292.165568</b>  | 146.586422        | 275.139019         | 138.073148         |                    |                   | K    | 2162.926352        | <b>1081.966814</b> | 2145.899803       | 1073.453539      | 2144.915787       | 1072.961531      | 16 |
| 3  | 407.192511         | 204.099894        | 390.165962         | 195.586619         | 389.181946         | 195.094611        | D    | 2034.831389        | 1017.919333        | 2017.804840       | 1009.406058      | 2016.820824       | 1008.914050      | 15 |
| 4  | 464.213975         | 232.610626        | 447.187426         | 224.097351         | <b>446.203410</b>  | 223.605343        | G    | 1919.804446        | 960.405861         | 1902.777897       | 951.892587       | 1901.793881       | 951.400579       | 14 |
| 5  | <b>579.240918</b>  | 290.124097        | 562.214369         | 281.610823         | 561.230353         | 281.118815        | D    | 1862.782982        | 931.895129         | 1845.756433       | 923.381855       | 1844.772417       | 922.889847       | 13 |
| 6  | <b>1018.466244</b> | 509.736760        | 1001.439695        | 501.223486         | 1000.455679        | 500.731478        | Q    | 1747.756039        | 874.381658         | 1730.729490       | 865.868383       | 1729.745474       | 865.376375       | 12 |
| 7  | 1178.496893        | 589.752085        | 1161.470344        | 581.238810         | 1160.486328        | 580.746802        | C    | 1308.530713        | 654.768995         | 1291.504164       | 646.255720       | 1290.520148       | 645.763712       | 11 |
| 8  | <b>1307.539486</b> | 654.273381        | 1290.512937        | 645.760107         | 1289.528921        | <b>645.268098</b> | E    | <b>1148.500064</b> | 574.753670         | 1131.473515       | 566.240396       | 1130.489499       | 565.748388       | 10 |
| 9  | 1408.587165        | <b>704.797220</b> | <b>1391.560616</b> | 696.283946         | <b>1390.576600</b> | <b>695.791938</b> | T    | <b>1019.457471</b> | <b>510.232374</b>  | 1002.430922       | 501.719099       | 1001.446906       | 501.227091       | 9  |
| 10 | <b>1495.619193</b> | <b>748.313235</b> | 1478.592644        | 739.799960         | <b>1477.608628</b> | 739.307952        | S    | <b>918.409792</b>  | <b>459.708534</b>  | 901.383243        | 451.195260       | <b>900.399227</b> | 450.703252       | 8  |
| 11 | 1592.671957        | 796.839617        | 1575.645408        | 788.326342         | 1574.661392        | 787.834334        | P    | <b>831.377764</b>  | <b>416.192520</b>  | <b>814.351215</b> | 407.679246       |                   |                  | 7  |
| 12 | 1752.702606        | 876.854941        | 1735.676057        | 868.341667         | 1734.692041        | 867.849659        | C    | <b>734.325000</b>  | 367.666138         | 717.298451        | 359.152864       |                   |                  | 6  |
| 13 | 1880.761184        | 940.884230        | 1863.734635        | 932.370956         | 1862.750619        | 931.878948        | Q    | <b>574.294351</b>  | 287.650814         | <b>557.267802</b> | 279.137539       |                   |                  | 5  |
| 14 | 1994.804111        | 997.905694        | 1977.777562        | 989.392419         | 1976.793546        | 988.900411        | N    | <b>446.235773</b>  | 223.621524         | 429.209224        | 215.108250       |                   |                  | 4  |
| 15 | 2122.862689        | 1061.934982       | 2105.836140        | 1053.421708        | 2104.852124        | 1052.929700       | Q    | <b>332.192846</b>  | 166.600061         | <b>315.166297</b> | 158.086787       |                   |                  | 3  |
| 16 | 2179.884153        | 1090.445714       | 2162.857604        | <b>1081.932440</b> | 2161.873588        | 1081.440432       | G    | 204.134268         | 102.570772         | 187.107719        | 94.057497        |                   |                  | 2  |
| 17 |                    |                   |                    |                    |                    |                   | K    | 147.112804         | 74.060040          | 130.086255        | 65.546765        |                   |                  | 1  |

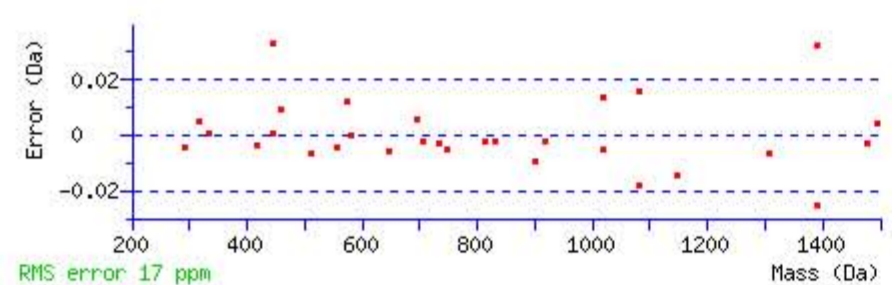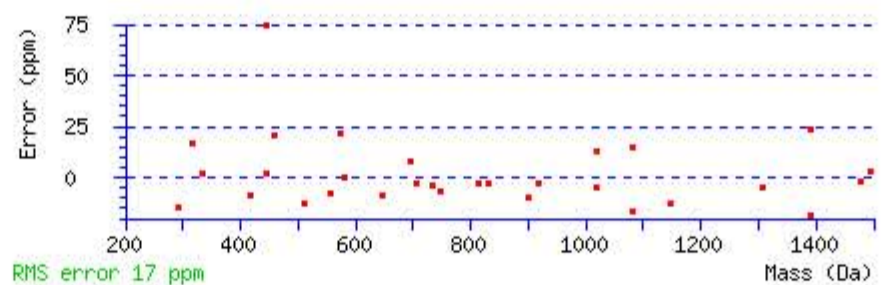

NCBI BLAST search of **YKDGDCETSPCQNQ GK**

(Parameters: blastp, nr protein database, expect=20000, no filter, PAM30)

Other BLAST [web gateways](#)

### All matches to this query

| Score | Mr(calc):   | Delta     | Sequence                          |
|-------|-------------|-----------|-----------------------------------|
| 40.8  | 2324.982407 | -0.001325 | <a href="#">YKDGDCETSPCQNQ GK</a> |



# MASCOT SEARCH RESULTS

## Peptide View

MS/MS Fragmentation of **TEQAAVAR**

Found in **FA12\_HUMAN**, Coagulation factor XII OS=Homo sapiens GN=F12 PE=1 SV=3

Match to Query 29816: 1155.602668 from(578.808610,2+) rtinseconds(1416) index(76230)

Title: Locus:1.1.1.2372.21 File:"2013-07-02 CLN FXIII 30 min 1st FT.wiff"

Data file C:\Program Files (x86)\Matrix Science\Mascot Daemon\mgf1 FXIII 30 min 1st\mascot\_daemon\_merge.mgf

Click mouse within plot area to zoom in by factor of two about that point

Or, Plot from  to  Da

Label all possible matches  Label matches used for scoring

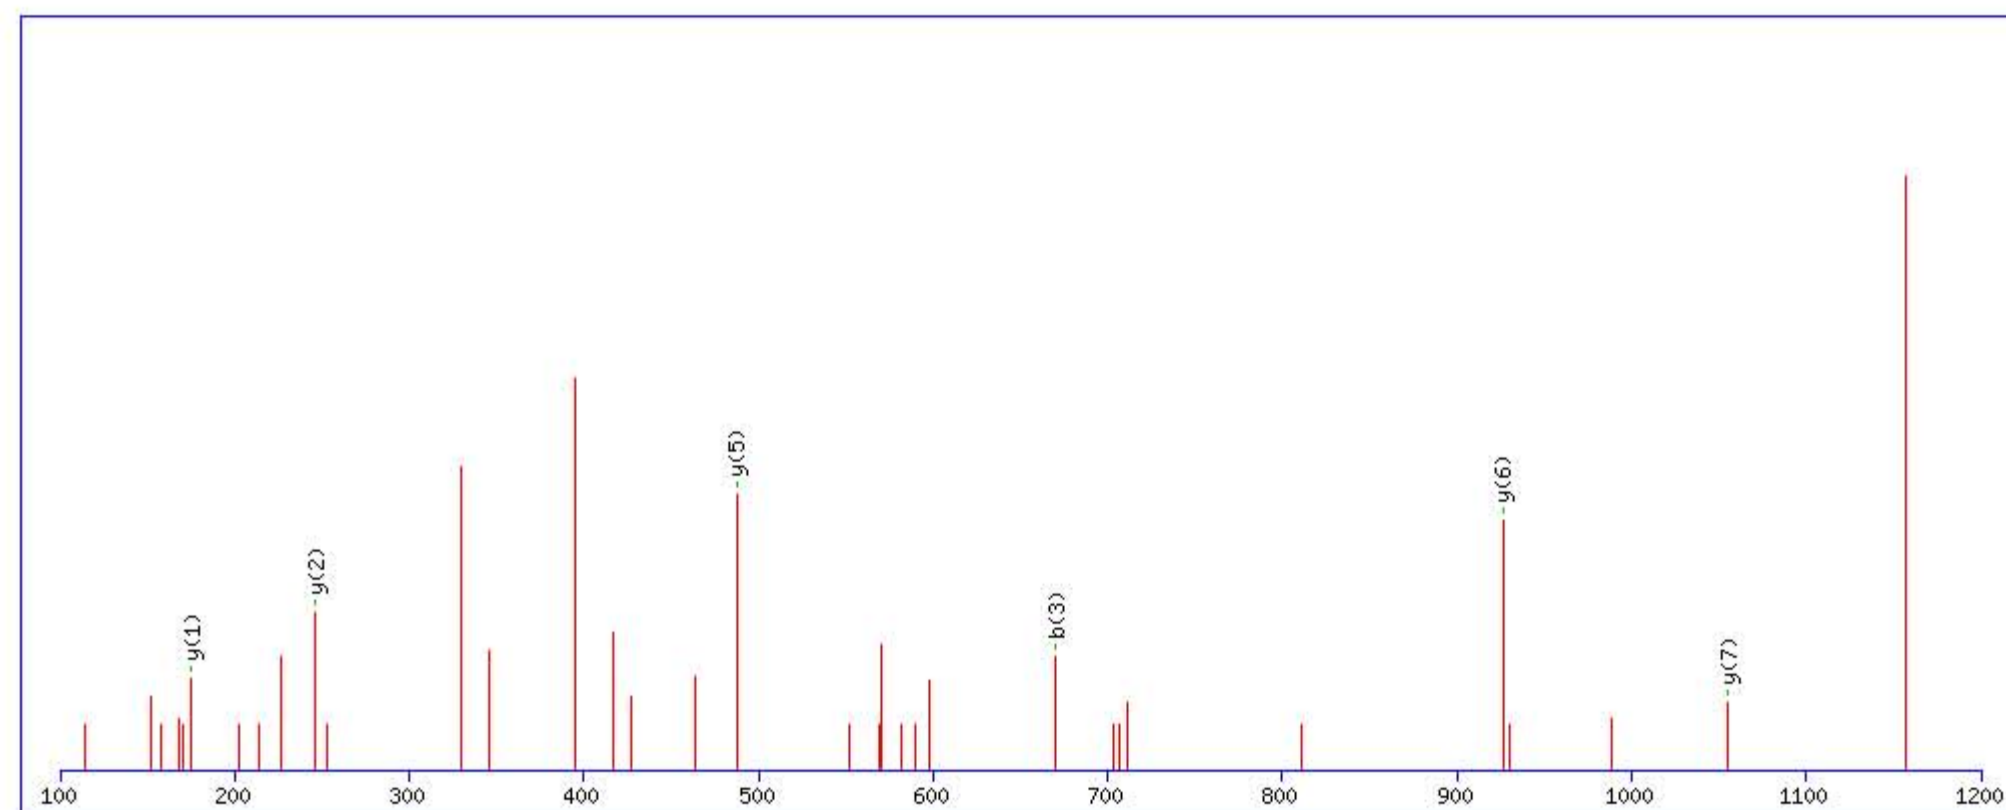

Monoisotopic mass of neutral peptide Mr(calc): 1155.607010

Fixed modifications: Carbamidomethyl (C) (apply to specified residues or termini only)

Variable modifications:

Q3 : Biotin:Thermo-21345 (Q)

Ions Score: 39 Expect: 0.0032

Matches : 6/68 fragment ions using 9 most intense peaks [\(help\)](#)

| # | b          | b <sup>++</sup> | b <sup>*</sup> | b <sup>*++</sup> | b <sup>0</sup> | b <sup>0++</sup> | Seq. | y           | y <sup>++</sup> | y <sup>*</sup> | y <sup>*++</sup> | y <sup>0</sup> | y <sup>0++</sup> | # |
|---|------------|-----------------|----------------|------------------|----------------|------------------|------|-------------|-----------------|----------------|------------------|----------------|------------------|---|
| 1 | 102.054955 | 51.531116       |                |                  | 84.044390      | 42.525833        | T    |             |                 |                |                  |                |                  | 8 |
| 2 | 231.097548 | 116.052412      |                |                  | 213.086983     | 107.047130       | E    | 1055.566627 | 528.286951      | 1038.540078    | 519.773677       | 1037.556062    | 519.281669       | 7 |
| 3 | 670.322874 | 335.665075      | 653.296325     | 327.151801       | 652.312309     | 326.659793       | Q    | 926.524034  | 463.765655      | 909.497485     | 455.252380       |                |                  | 6 |
| 4 | 741.359988 | 371.183632      | 724.333439     | 362.670358       | 723.349423     | 362.178350       | A    | 487.298708  | 244.152992      | 470.272159     | 235.639717       |                |                  | 5 |
| 5 | 812.397102 | 406.702189      | 795.370553     | 398.188915       | 794.386537     | 397.696907       | A    | 416.261594  | 208.634435      | 399.235045     | 200.121160       |                |                  | 4 |
| 6 | 911.465516 | 456.236396      | 894.438967     | 447.723121       | 893.454951     | 447.231113       | V    | 345.224480  | 173.115878      | 328.197931     | 164.602603       |                |                  | 3 |
| 7 | 982.502630 | 491.754953      | 965.476081     | 483.241678       | 964.492065     | 482.749670       | A    | 246.156066  | 123.581671      | 229.129517     | 115.068396       |                |                  | 2 |
| 8 |            |                 |                |                  |                |                  | R    | 175.118952  | 88.063114       | 158.092403     | 79.549839        |                |                  | 1 |

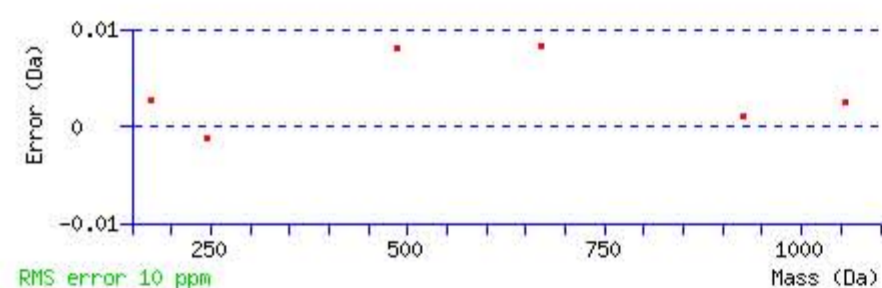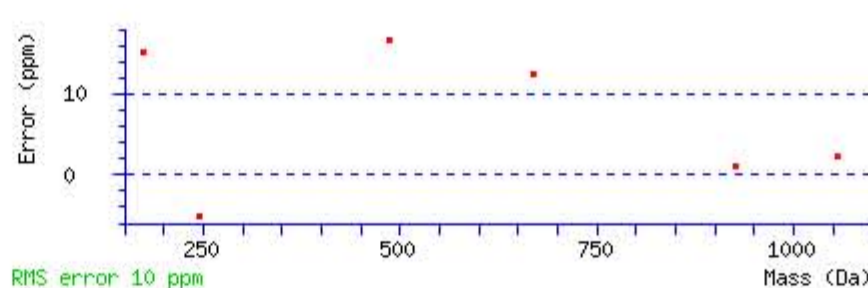

NCBI BLAST search of **TEQAAVAR**

(Parameters: blastp, nr protein database, expect=20000, no filter, PAM30)

Other BLAST [web gateways](#)

### All matches to this query

| Score | Mr(calc):   | Delta     | Sequence                      |
|-------|-------------|-----------|-------------------------------|
| 38.6  | 1155.607010 | -0.004342 | <a href="#">TEQAAVAR</a>      |
| 11.3  | 1155.610855 | -0.008187 | <a href="#">GAGAGLSRPGSAR</a> |
| 9.4   | 1155.599594 | 0.003074  | <a href="#">TKESKHEAAR</a>    |
| 8.7   | 1155.588379 | 0.014289  | <a href="#">TEVPLAENQR</a>    |
| 6.9   | 1155.588394 | 0.014274  | <a href="#">VEQIEAGTPGR</a>   |
| 5.7   | 1155.607025 | -0.004357 | <a href="#">VQDSAVAR</a>      |
| 1.6   | 1155.618256 | -0.015588 | <a href="#">TGQIDRR</a>       |



# MASCOT SCIENCE Mascot Search Results

## Peptide View

MS/MS Fragmentation of **AQMDLSGR**

Found in **F13A\_HUMAN**, Coagulation factor XIII A chain OS=Homo sapiens GN=F13A1 PE=1 SV=4

Match to Query 31313: 1187.577748 from(594.796150,2+) rtinseconds(1765) index(78661)

Title: Locus:1.1.1.2494.12 File:"2013-07-02 CLN FXIII 30 min 1st FT.wiff"

Data file C:\Program Files (x86)\Matrix Science\Mascot Daemon\mgf1 FXIII 30 min 1st\mascot\_daemon\_merge.mgf

Click mouse within plot area to zoom in by factor of two about that point

Or, Plot from  to  Da

Label all possible matches  Label matches used for scoring

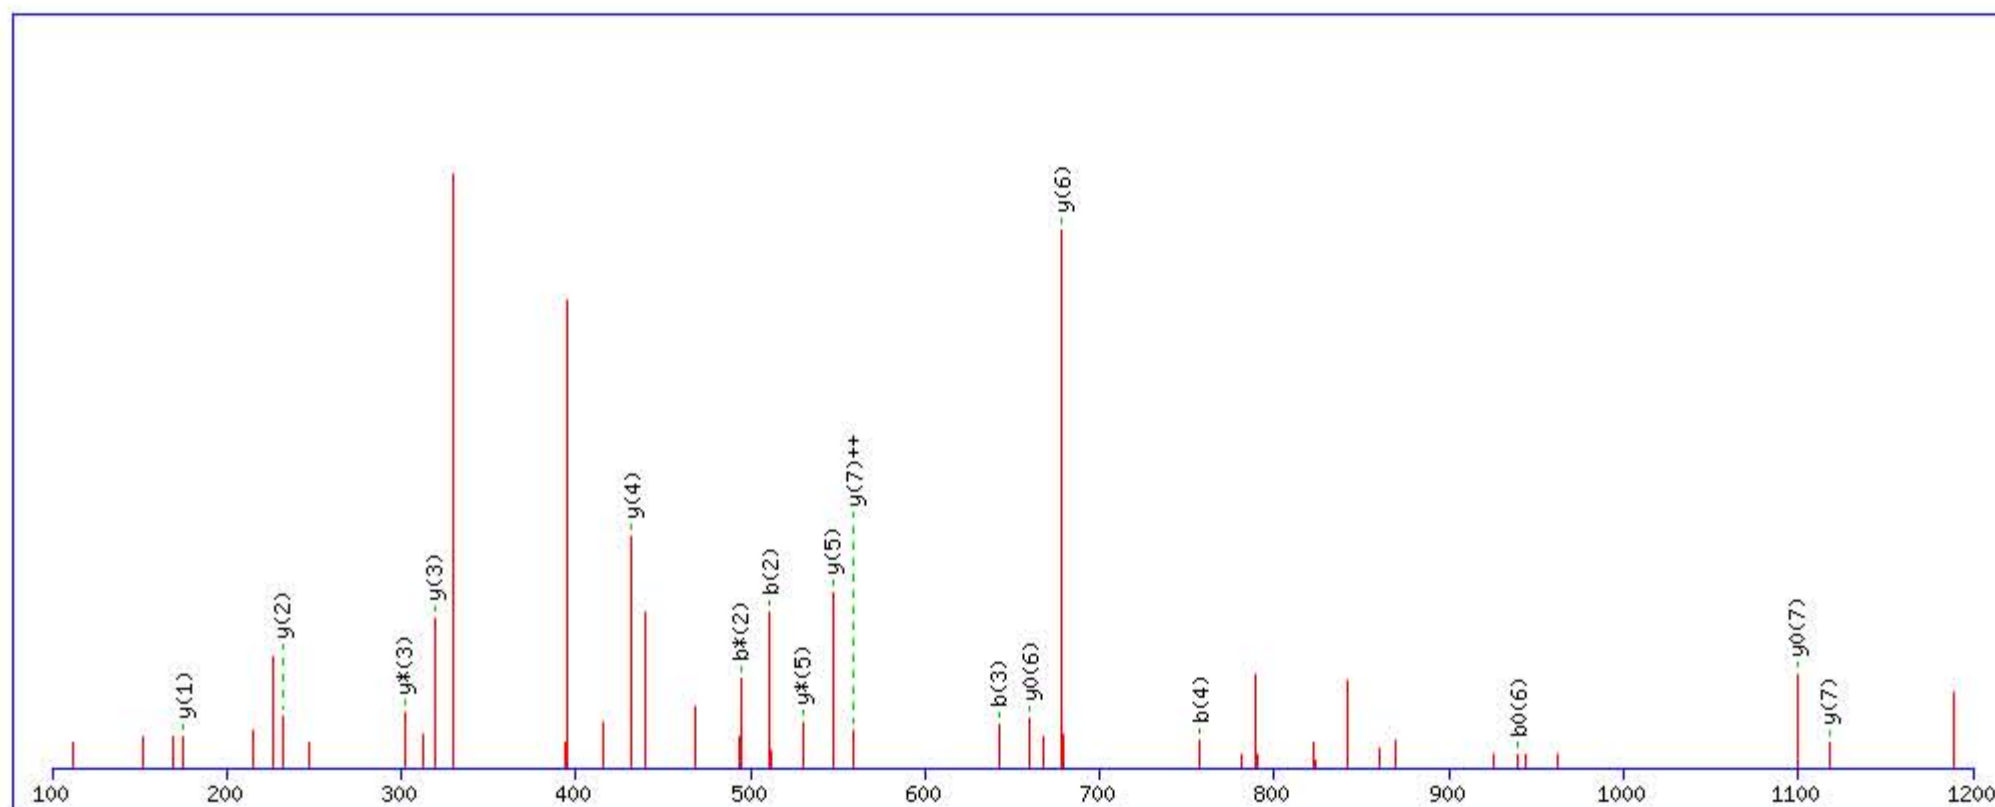

Monoisotopic mass of neutral peptide Mr(calc): 1187.579086

Fixed modifications: Carbamidomethyl (C) (apply to specified residues or termini only)

Variable modifications:

Q2 : Biotin:Thermo-21345 (Q)

Ions Score: 34 Expect: 0.00069

Matches : 17/72 fragment ions using 38 most intense peaks [\(help\)](#)

| # | b                 | b <sup>++</sup> | b <sup>*</sup>    | b <sup>+++</sup> | b <sup>0</sup>    | b <sup>0++</sup> | Seq. | y                  | y <sup>++</sup>   | y <sup>*</sup>    | y <sup>+++</sup> | y <sup>0</sup>     | y <sup>0++</sup> | # |
|---|-------------------|-----------------|-------------------|------------------|-------------------|------------------|------|--------------------|-------------------|-------------------|------------------|--------------------|------------------|---|
| 1 | 72.044390         | 36.525833       |                   |                  |                   |                  | A    |                    |                   |                   |                  |                    |                  | 8 |
| 2 | <b>511.269716</b> | 256.138496      | <b>494.243167</b> | 247.625221       |                   |                  | Q    | <b>1117.549262</b> | <b>559.278269</b> | 1100.522713       | 550.764995       | <b>1099.538697</b> | 550.272987       | 7 |
| 3 | <b>642.310201</b> | 321.658739      | 625.283652        | 313.145464       |                   |                  | M    | <b>678.323936</b>  | 339.665606        | 661.297387        | 331.152332       | <b>660.313371</b>  | 330.660324       | 6 |
| 4 | <b>757.337144</b> | 379.172210      | 740.310595        | 370.658935       | 739.326579        | 370.166927       | D    | <b>547.283451</b>  | 274.145364        | <b>530.256902</b> | 265.632089       | 529.272886         | 265.140081       | 5 |
| 5 | 870.421208        | 435.714242      | 853.394659        | 427.200967       | 852.410643        | 426.708959       | L    | <b>432.256508</b>  | 216.631892        | 415.229959        | 208.118617       | 414.245943         | 207.626609       | 4 |
| 6 | 957.453236        | 479.230256      | 940.426687        | 470.716981       | <b>939.442671</b> | 470.224973       | S    | <b>319.172444</b>  | 160.089860        | <b>302.145895</b> | 151.576585       | 301.161879         | 151.084577       | 3 |
| 7 | 1014.474700       | 507.740988      | 997.448151        | 499.227713       | 996.464135        | 498.735705       | G    | <b>232.140416</b>  | 116.573846        | 215.113867        | 108.060571       |                    |                  | 2 |
| 8 |                   |                 |                   |                  |                   |                  | R    | <b>175.118952</b>  | 88.063114         | 158.092403        | 79.549839        |                    |                  | 1 |

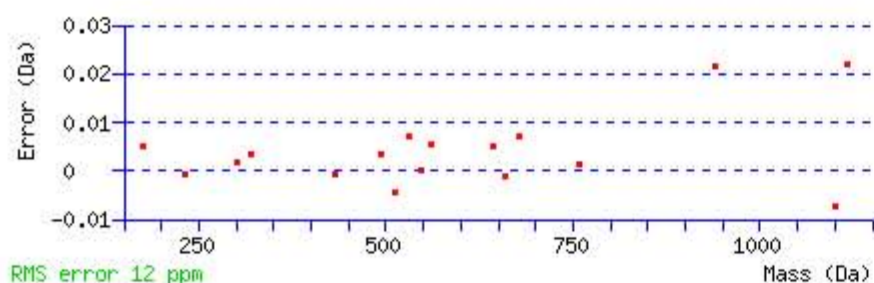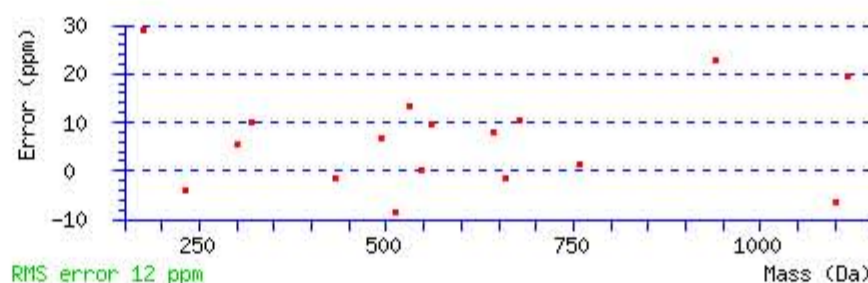

NCBI BLAST search of **AQMDLSGR**

(Parameters: blastp, nr protein database, expect=20000, no filter, PAM30)

Other BLAST [web gateways](#)

All matches to this query

| Score | Mr(calc):   | Delta     | Sequence                     |
|-------|-------------|-----------|------------------------------|
| 34.5  | 1187.579086 | -0.001338 | <a href="#">AQMDLSGR</a>     |
| 0.7   | 1187.578201 | -0.000453 | <a href="#">SSLENEPSLGR</a>  |
| 0.2   | 1187.578217 | -0.000469 | <a href="#">SKSNEGADGPVK</a> |



# MASCOT SCIENCE Mascot Search Results

## Peptide View

MS/MS Fragmentation of **FQEGQEEER**

Found in **F13A\_HUMAN**, Coagulation factor XIII A chain OS=Homo sapiens GN=F13A1 PE=1 SV=4

Match to Query 41409: 1461.654448 from(731.834500,2+) rtinseconds(1443) index(59118)

Title: Locus:1.1.1.2500.15 File:"2013-07-02 CLN FXIII 30 min 1st F 4.wiff"

Data file C:\Program Files (x86)\Matrix Science\Mascot Daemon\mgf1 FXIII 30 min 1st\mascot\_daemon\_merge.mgf

Click mouse within plot area to zoom in by factor of two about that point

Or, Plot from  to  Da

Label all possible matches  Label matches used for scoring

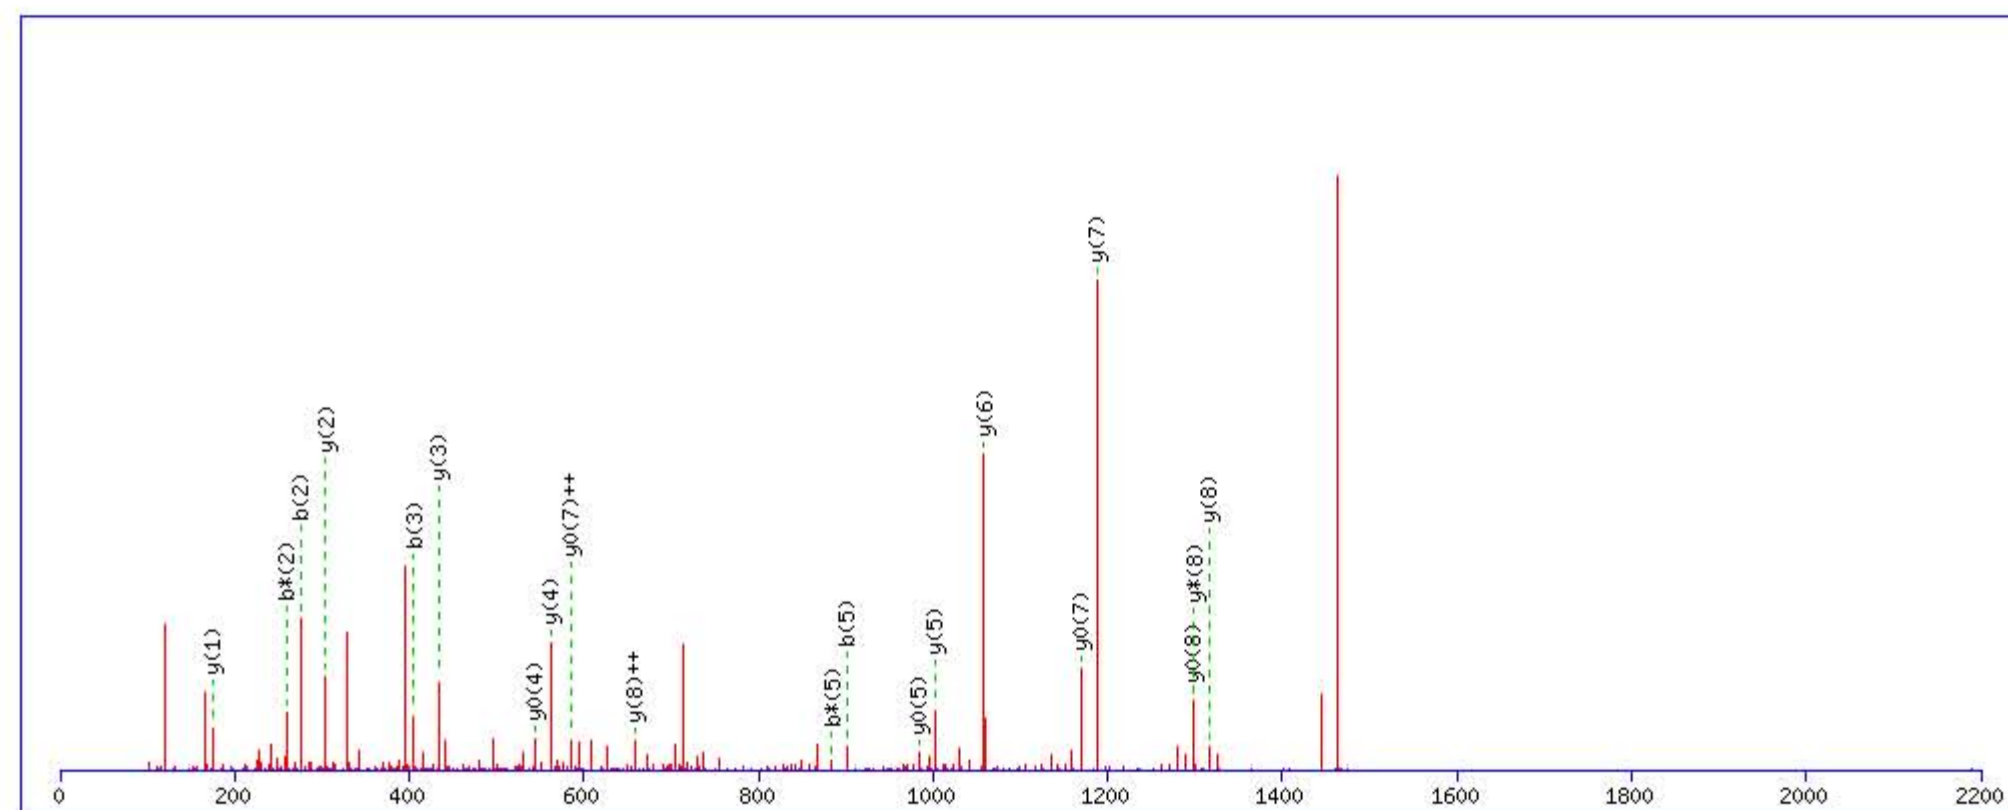

Monoisotopic mass of neutral peptide Mr(calc): 1461.655807

Fixed modifications: Carbamidomethyl (C) (apply to specified residues or termini only)

Variable modifications:

Q5 : Biotin:Thermo-21345 (Q)

Ions Score: 43 Expect: 0.00039

Matches : 20/88 fragment ions using 42 most intense peaks [\(help\)](#)

| # | b                 | b <sup>++</sup> | b <sup>*</sup>    | b <sup>*++</sup> | b <sup>0</sup> | b <sup>0++</sup> | Seq. | y                  | y <sup>++</sup>   | y <sup>*</sup>     | y <sup>*++</sup> | y <sup>0</sup>     | y <sup>0++</sup>  | # |
|---|-------------------|-----------------|-------------------|------------------|----------------|------------------|------|--------------------|-------------------|--------------------|------------------|--------------------|-------------------|---|
| 1 | 148.075690        | 74.541483       |                   |                  |                |                  | F    |                    |                   |                    |                  |                    |                   | 9 |
| 2 | <b>276.134268</b> | 138.570772      | <b>259.107719</b> | 130.057497       |                |                  | Q    | <b>1315.594692</b> | <b>658.300984</b> | <b>1298.568143</b> | 649.787710       | <b>1297.584127</b> | 649.295702        | 8 |
| 3 | <b>405.176861</b> | 203.092068      | 388.150312        | 194.578794       | 387.166296     | 194.086786       | E    | <b>1187.536114</b> | 594.271695        | 1170.509565        | 585.758421       | <b>1169.525549</b> | <b>585.266413</b> | 7 |
| 4 | 462.198325        | 231.602800      | 445.171776        | 223.089526       | 444.187760     | 222.597518       | G    | <b>1058.493521</b> | 529.750399        | 1041.466972        | 521.237124       | 1040.482956        | 520.745116        | 6 |
| 5 | <b>901.423651</b> | 451.215464      | <b>884.397102</b> | 442.702189       | 883.413086     | 442.210181       | Q    | <b>1001.472057</b> | 501.239667        | 984.445508         | 492.726392       | <b>983.461492</b>  | 492.234384        | 5 |
| 6 | 1030.466244       | 515.736760      | 1013.439695       | 507.223485       | 1012.455679    | 506.731477       | E    | <b>562.246731</b>  | 281.627004        | 545.220182         | 273.113729       | <b>544.236166</b>  | 272.621721        | 4 |
| 7 | 1159.508837       | 580.258057      | 1142.482288       | 571.744782       | 1141.498272    | 571.252774       | E    | <b>433.204138</b>  | 217.105707        | 416.177589         | 208.592433       | 415.193573         | 208.100425        | 3 |
| 8 | 1288.551430       | 644.779353      | 1271.524881       | 636.266079       | 1270.540865    | 635.774071       | E    | <b>304.161545</b>  | 152.584411        | 287.134996         | 144.071136       | 286.150980         | 143.579128        | 2 |
| 9 |                   |                 |                   |                  |                |                  | R    | <b>175.118952</b>  | 88.063114         | 158.092403         | 79.549839        |                    |                   | 1 |

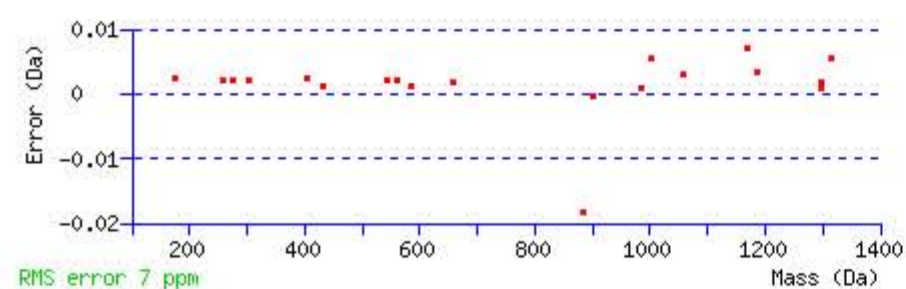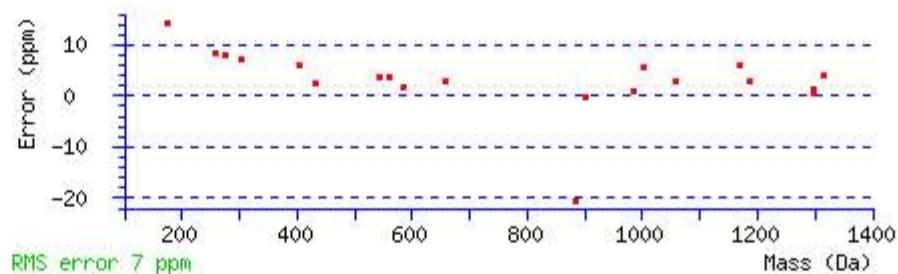

NCBI BLAST search of **FQEGQEEER**

(Parameters: blastp, nr protein database, expect=20000, no filter, PAM30)

Other BLAST [web gateways](#)

All matches to this query

| Score | Mr(calc):   | Delta     | Sequence                      |
|-------|-------------|-----------|-------------------------------|
| 42.6  | 1461.655807 | -0.001359 | <a href="#">FQEGQEEER</a>     |
| 12.2  | 1461.640564 | 0.013884  | <a href="#">NSGTQSDGEEK</a>   |
| 7.6   | 1461.655807 | -0.001359 | <a href="#">FQEGQEEER</a>     |
| 6.2   | 1461.640564 | 0.013884  | <a href="#">VMTDVAGNPEEER</a> |
| 4.5   | 1461.648392 | 0.006056  | <a href="#">HREELSDYEER</a>   |
| 2.8   | 1461.637161 | 0.017287  | <a href="#">ESELQWQEEER</a>   |

Mascot: <http://www.matrixscience.com/>



# MASCOT Search Results

## Peptide View

MS/MS Fragmentation of **HVYGELDVQIQR**

Found in **F13A\_HUMAN**, Coagulation factor XIII A chain OS=Homo sapiens GN=F13A1 PE=1 SV=4

Match to Query 51335: 1766.911572 from(589.977800,3+) rtinseconds(1955) index(62815)

Title: Locus:1.1.1.2678.11 File:"2013-07-02 CLN FXIII 30 min 1st F 4.wiff"

Data file C:\Program Files (x86)\Matrix Science\Mascot Daemon\mgf1 FXIII 30 min 1st\mascot\_daemon\_merge.mgf

Click mouse within plot area to zoom in by factor of two about that point

Or, Plot from  to  Da

Label all possible matches  Label matches used for scoring

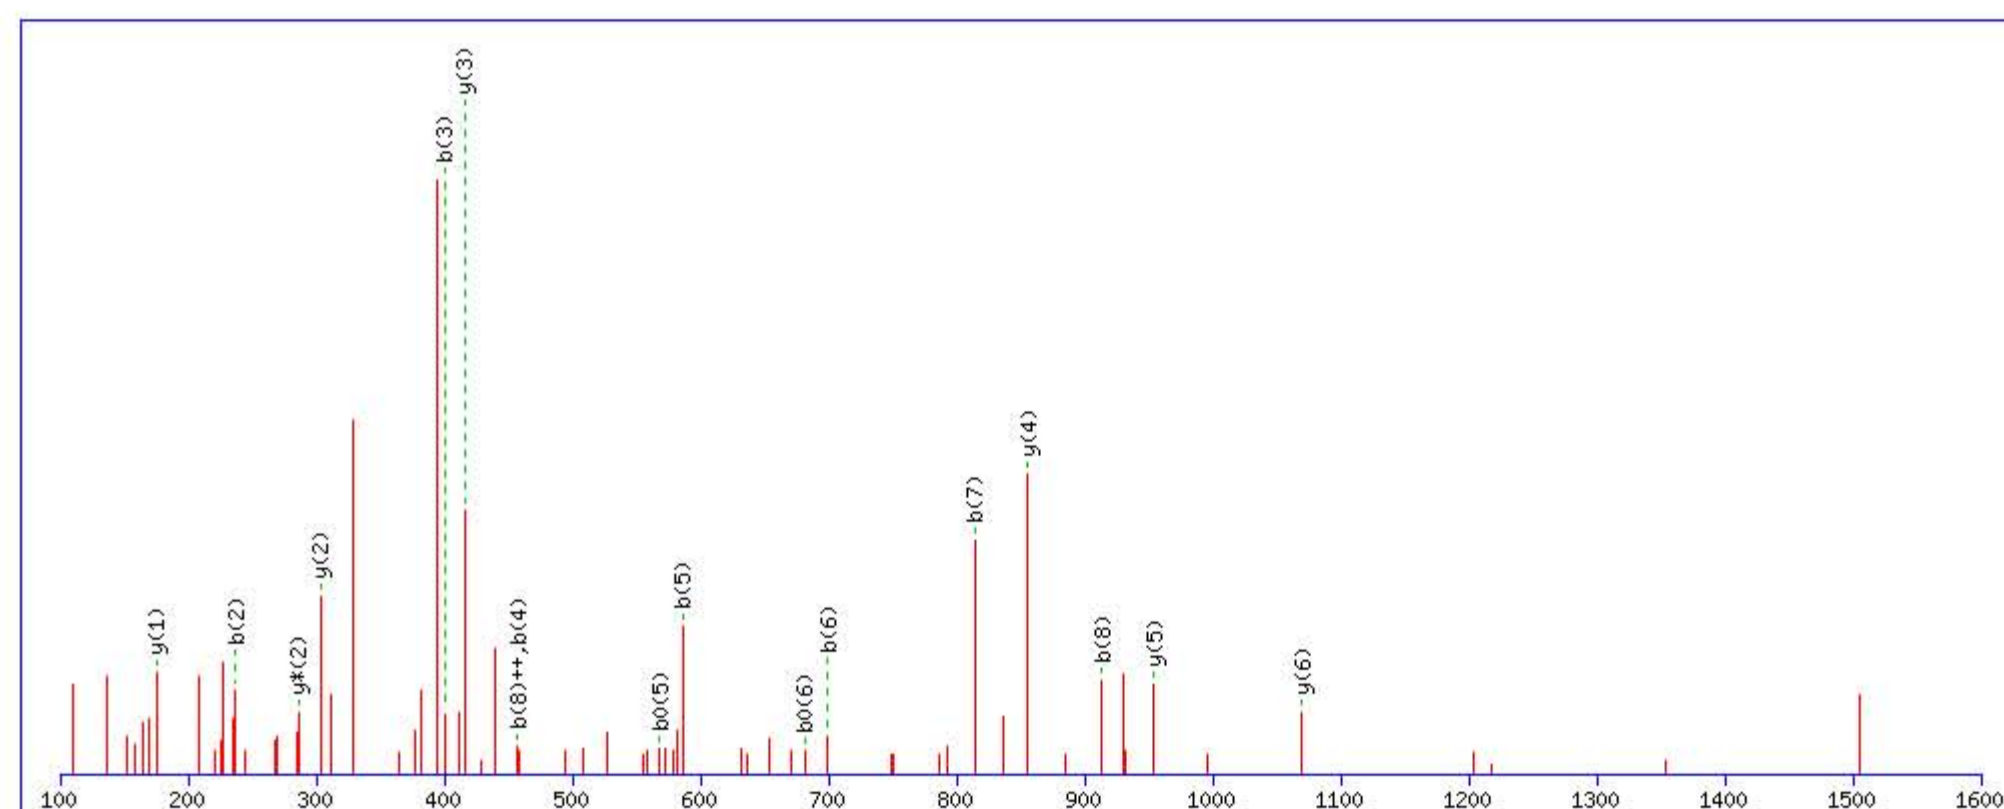

Monoisotopic mass of neutral peptide Mr(calc): 1766.913773

Fixed modifications: Carbamidomethyl (C) (apply to specified residues or termini only)

Variable modifications:

Q9 : Biotin:Thermo-21345 (Q)

Ions Score: 27 Expect: 0.0074

Matches : 17/98 fragment ions using 49 most intense peaks [\(help\)](#)

| #  | b                 | b <sup>++</sup>   | b <sup>*</sup> | b <sup>*++</sup> | b <sup>0</sup>    | b <sup>0++</sup> | Seq. | y                  | y <sup>++</sup> | y <sup>*</sup>    | y <sup>*++</sup> | y <sup>0</sup> | y <sup>0++</sup> | #  |
|----|-------------------|-------------------|----------------|------------------|-------------------|------------------|------|--------------------|-----------------|-------------------|------------------|----------------|------------------|----|
| 1  | 138.066188        | 69.536732         |                |                  |                   |                  | H    |                    |                 |                   |                  |                |                  | 12 |
| 2  | <b>237.134602</b> | 119.070939        |                |                  |                   |                  | V    | 1630.862141        | 815.934708      | 1613.835592       | 807.421434       | 1612.851576    | 806.929426       | 11 |
| 3  | <b>400.197931</b> | 200.602603        |                |                  |                   |                  | Y    | 1531.793727        | 766.400501      | 1514.767178       | 757.887227       | 1513.783162    | 757.395219       | 10 |
| 4  | <b>457.219395</b> | 229.113335        |                |                  |                   |                  | G    | 1368.730398        | 684.868837      | 1351.703849       | 676.355563       | 1350.719833    | 675.863554       | 9  |
| 5  | <b>586.261988</b> | 293.634632        |                |                  | <b>568.251423</b> | 284.629349       | E    | 1311.708934        | 656.358105      | 1294.682385       | 647.844830       | 1293.698369    | 647.352822       | 8  |
| 6  | <b>699.346052</b> | 350.176664        |                |                  | <b>681.335487</b> | 341.171382       | L    | 1182.666341        | 591.836808      | 1165.639792       | 583.323534       | 1164.655776    | 582.831526       | 7  |
| 7  | <b>814.372995</b> | 407.690136        |                |                  | 796.362430        | 398.684853       | D    | <b>1069.582277</b> | 535.294776      | 1052.555728       | 526.781502       | 1051.571712    | 526.289494       | 6  |
| 8  | <b>913.441409</b> | <b>457.224342</b> |                |                  | 895.430844        | 448.219060       | V    | <b>954.555334</b>  | 477.781305      | 937.528785        | 469.268030       |                |                  | 5  |
| 9  | 1352.666735       | 676.837006        | 1335.640186    | 668.323731       | 1334.656170       | 667.831723       | Q    | <b>855.486920</b>  | 428.247098      | 838.460371        | 419.733823       |                |                  | 4  |
| 10 | 1465.750799       | 733.379037        | 1448.724250    | 724.865763       | 1447.740234       | 724.373755       | I    | <b>416.261594</b>  | 208.634435      | 399.235045        | 200.121160       |                |                  | 3  |
| 11 | 1593.809377       | 797.408326        | 1576.782828    | 788.895052       | 1575.798812       | 788.403044       | Q    | <b>303.177530</b>  | 152.092403      | <b>286.150981</b> | 143.579128       |                |                  | 2  |
| 12 |                   |                   |                |                  |                   |                  | R    | <b>175.118952</b>  | 88.063114       | 158.092403        | 79.549839        |                |                  | 1  |

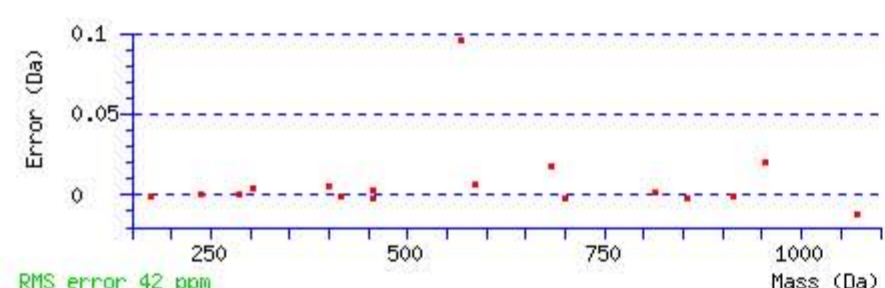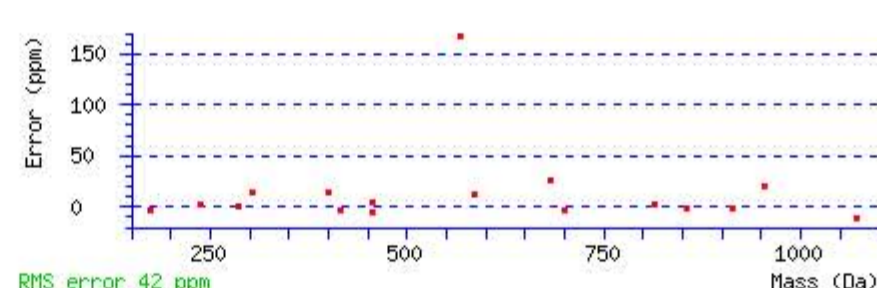

NCBI BLAST search of [HVYGELDVQIQR](#)

(Parameters: blastp, nr protein database, expect=20000, no filter, PAM30)

Other BLAST [web gateways](#)

All matches to this query

| Score | Mr(calc):   | Delta     | Sequence                     |
|-------|-------------|-----------|------------------------------|
| 26.6  | 1766.913773 | -0.002201 | <a href="#">HVYGELDVQIQR</a> |
| 15.4  | 1766.913773 | -0.002201 | <a href="#">HVYGELDVQIQR</a> |
| 3.9   | 1766.888138 | 0.023434  | <a href="#">IMQNGTILYTMR</a> |

Mascot: <http://www.matrixscience.com/>



# MASCOT SCIENCE Mascot Search Results

## Peptide View

MS/MS Fragmentation of **FQEGQEEER**

Found in **F13A\_HUMAN**, Coagulation factor XIII A chain OS=Homo sapiens GN=F13A1 PE=1 SV=4

Match to Query 51514: 1772.822952 from(591.948260,3+) rtinseconds(1827) index(61836)

Title: Locus:1.1.1.2634.9 File:"2013-07-02 CLN FXIII 30 min 1st F 4.wiff"

Data file C:\Program Files (x86)\Matrix Science\Mascot Daemon\mgf\1 FXIII 30 min 1st\mascot\_daemon\_merge.mgf

Click mouse within plot area to zoom in by factor of two about that point

Or, Plot from  to  Da

Label all possible matches  Label matches used for scoring

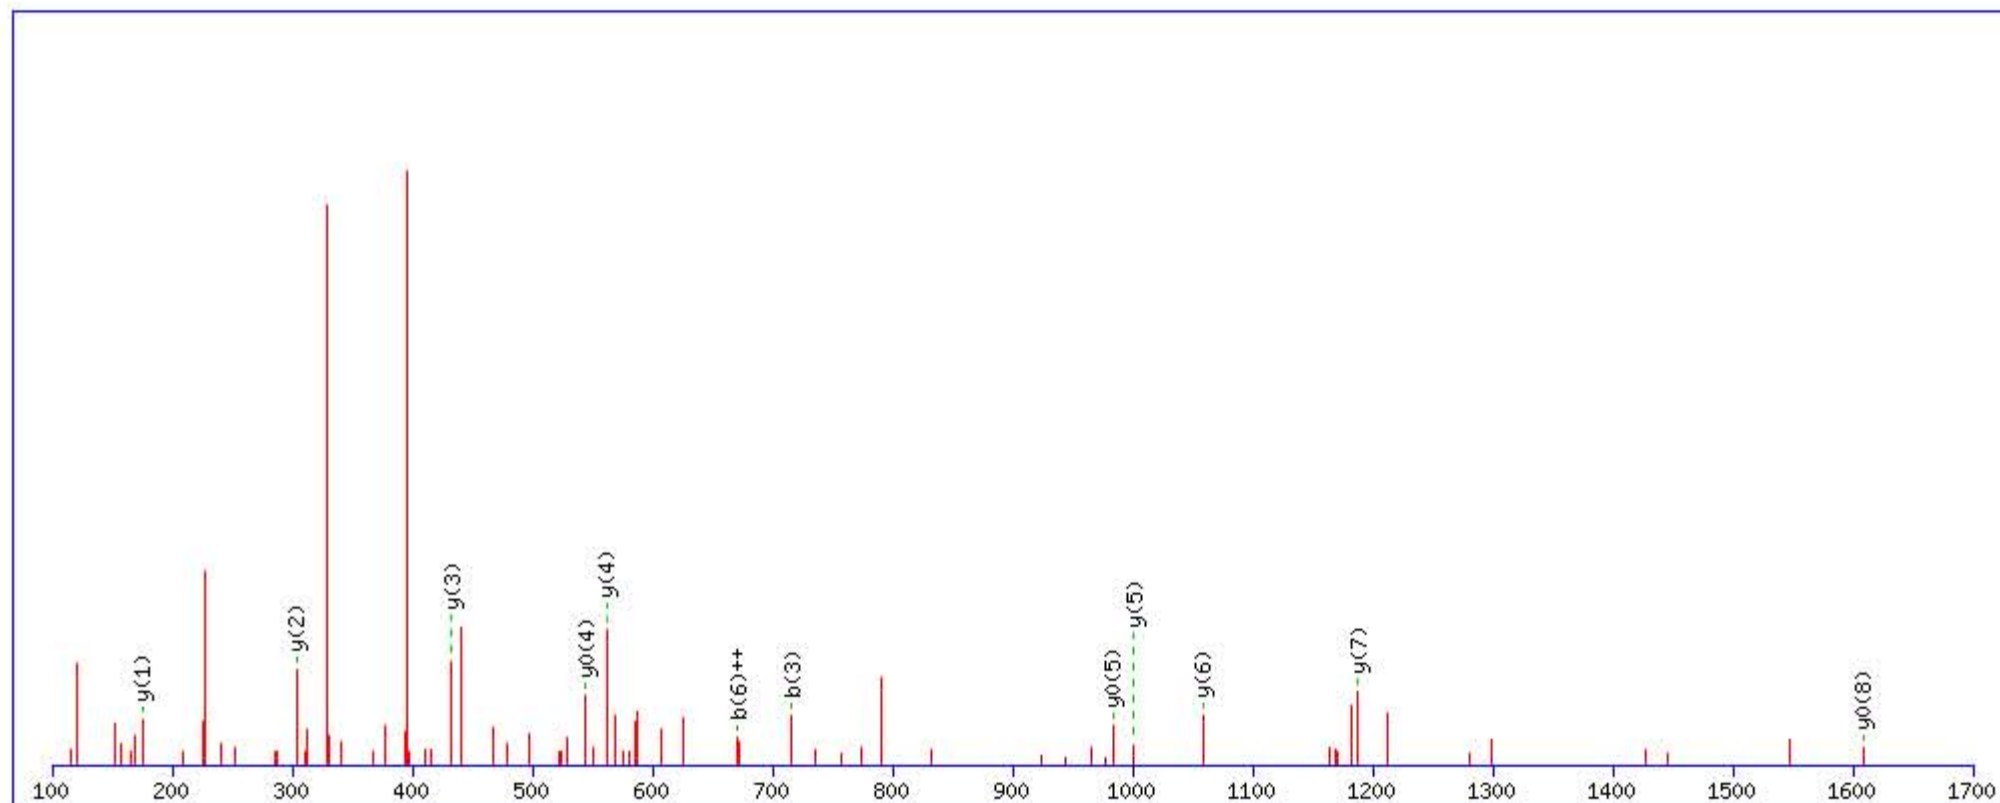

Monoisotopic mass of neutral peptide Mr(calc): 1772.822556

Fixed modifications: Carbamidomethyl (C) (apply to specified residues or termini only)

Variable modifications:

Q2 : Biotin:Thermo-21345 (Q)

Q5 : Biotin:Thermo-21345 (Q)

Ions Score: 27 Expect: 0.029

Matches : 12/88 fragment ions using 26 most intense peaks [\(help\)](#)

| # | b           | b <sup>++</sup> | b <sup>*</sup> | b <sup>*++</sup> | b <sup>0</sup> | b <sup>0++</sup> | Seq. | y           | y <sup>++</sup> | y <sup>*</sup> | y <sup>*++</sup> | y <sup>0</sup> | y <sup>0++</sup> | # |
|---|-------------|-----------------|----------------|------------------|----------------|------------------|------|-------------|-----------------|----------------|------------------|----------------|------------------|---|
| 1 | 148.075690  | 74.541483       |                |                  |                |                  | F    |             |                 |                |                  |                |                  | 9 |
| 2 | 587.301016  | 294.154146      | 570.274467     | 285.640872       |                |                  | Q    | 1626.761440 | 813.884358      | 1609.734891    | 805.371084       | 1608.750875    | 804.879076       | 8 |
| 3 | 716.343609  | 358.675443      | 699.317060     | 350.162168       | 698.333044     | 349.670160       | E    | 1187.536114 | 594.271695      | 1170.509565    | 585.758421       | 1169.525549    | 585.266413       | 7 |
| 4 | 773.365073  | 387.186175      | 756.338524     | 378.672900       | 755.354508     | 378.180892       | G    | 1058.493521 | 529.750399      | 1041.466972    | 521.237124       | 1040.482956    | 520.745116       | 6 |
| 5 | 1212.590399 | 606.798837      | 1195.563850    | 598.285563       | 1194.579834    | 597.793555       | Q    | 1001.472057 | 501.239667      | 984.445508     | 492.726392       | 983.461492     | 492.234384       | 5 |
| 6 | 1341.632992 | 671.320134      | 1324.606443    | 662.806860       | 1323.622427    | 662.314852       | E    | 562.246731  | 281.627004      | 545.220182     | 273.113729       | 544.236166     | 272.621721       | 4 |
| 7 | 1470.675585 | 735.841431      | 1453.649036    | 727.328156       | 1452.665020    | 726.836148       | E    | 433.204138  | 217.105707      | 416.177589     | 208.592433       | 415.193573     | 208.100425       | 3 |
| 8 | 1599.718178 | 800.362727      | 1582.691629    | 791.849453       | 1581.707613    | 791.357445       | E    | 304.161545  | 152.584411      | 287.134996     | 144.071136       | 286.150980     | 143.579128       | 2 |
| 9 |             |                 |                |                  |                |                  | R    | 175.118952  | 88.063114       | 158.092403     | 79.549839        |                |                  | 1 |

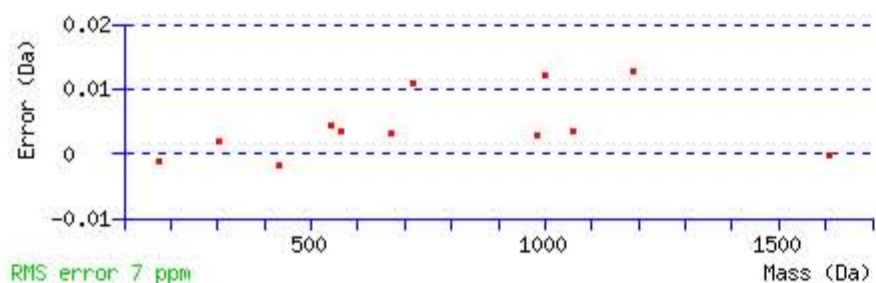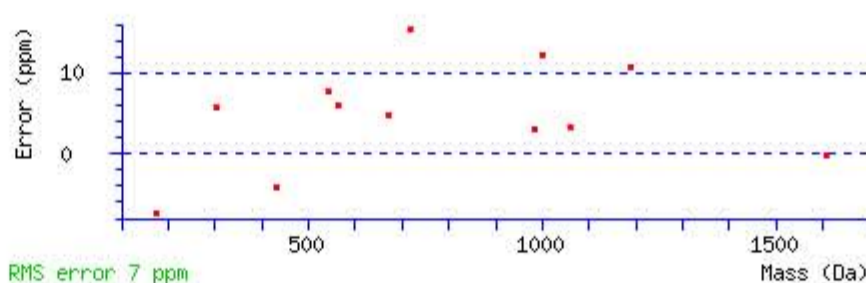

NCBI BLAST search of **FQEGQEEER**

(Parameters: blastp, nr protein database, expect=20000, no filter, PAM30)

Other BLAST [web gateways](#)

All matches to this query

| Score | Mr(calc):   | Delta    | Sequence                    |
|-------|-------------|----------|-----------------------------|
| 26.7  | 1772.822556 | 0.000396 | <a href="#">FQEGQEEER</a>   |
| 17.3  | 1772.803909 | 0.019043 | <a href="#">ESELQWQEEER</a> |



# MASCOT Search Results

## Peptide View

MS/MS Fragmentation of **GTYPVPIVSELQSGK**

Found in **F13A\_HUMAN**, Coagulation factor XIII A chain OS=Homo sapiens GN=F13A1 PE=1 SV=4

Match to Query 56584: 1998.095832 from(667.039220,3+) rtinseconds(2745) index(67835)

Title: Locus:1.1.1.2952.8 File:"2013-07-02 CLN FXIII 30 min 1st F 4.wiff"

Data file C:\Program Files (x86)\Matrix Science\Mascot Daemon\mgf\1 FXIII 30 min 1st\mascot\_daemon\_merge.mgf

Click mouse within plot area to zoom in by factor of two about that point

Or, Plot from  to  Da

Label all possible matches  Label matches used for scoring

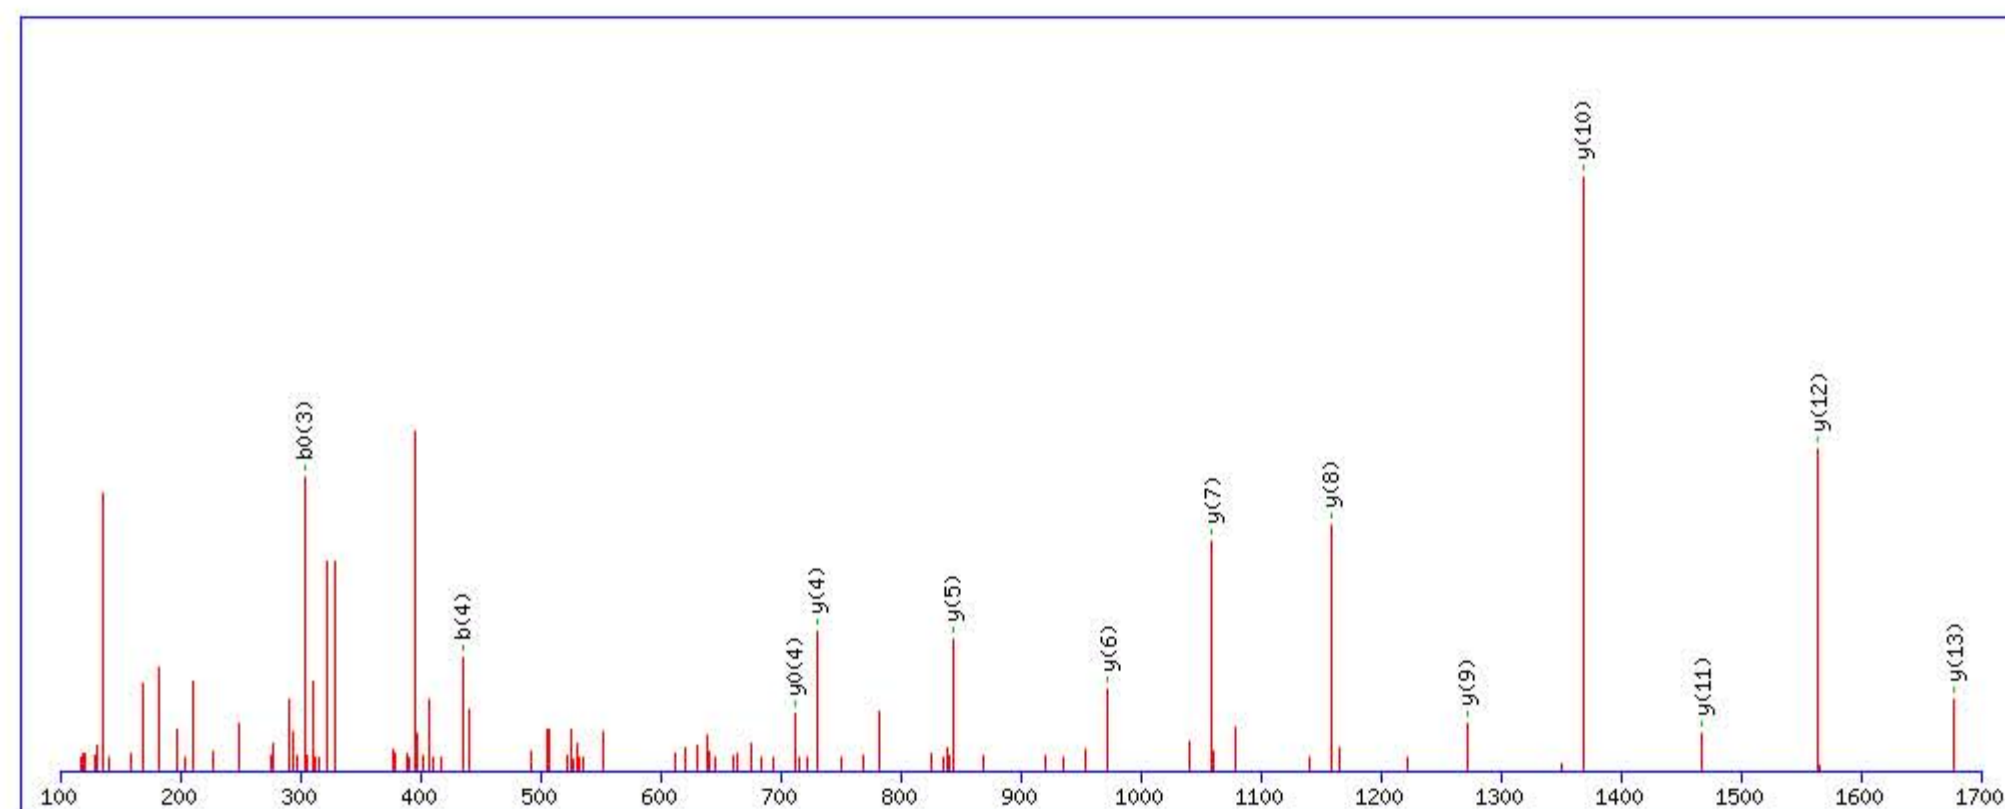

Monoisotopic mass of neutral peptide Mr(calc): 1998.085983

Fixed modifications: Carbamidomethyl (C) (apply to specified residues or termini only)

Variable modifications:

Q13 : Biotin:Thermo-21345 (Q)

Ions Score: 78 Expect: 5.3e-008

Matches : 13/150 fragment ions using 16 most intense peaks [\(help\)](#)

| #  | b                 | b <sup>++</sup> | b <sup>*</sup> | b <sup>*++</sup> | b <sup>0</sup> | b <sup>0++</sup> | Seq.     | y                  | y <sup>++</sup> | y <sup>*</sup> | y <sup>*++</sup> | y <sup>0</sup>    | y <sup>0++</sup> | #  |
|----|-------------------|-----------------|----------------|------------------|----------------|------------------|----------|--------------------|-----------------|----------------|------------------|-------------------|------------------|----|
| 1  | 58.028740         | 29.518008       |                |                  |                |                  | <b>G</b> |                    |                 |                |                  |                   |                  | 16 |
| 2  | 159.076419        | 80.041847       |                |                  | 141.065854     | 71.036565        | <b>T</b> | 1942.071799        | 971.539538      | 1925.045250    | 963.026263       | 1924.061234       | 962.534255       | 15 |
| 3  | 322.139748        | 161.573512      |                |                  | 304.129183     | 152.568230       | <b>Y</b> | 1841.024120        | 921.015698      | 1823.997571    | 912.502424       | 1823.013555       | 912.010416       | 14 |
| 4  | <b>435.223812</b> | 218.115544      |                |                  | 417.213247     | 209.110262       | <b>I</b> | <b>1677.960791</b> | 839.484034      | 1660.934242    | 830.970759       | 1659.950226       | 830.478751       | 13 |
| 5  | 532.276576        | 266.641926      |                |                  | 514.266011     | 257.636644       | <b>P</b> | <b>1564.876727</b> | 782.942002      | 1547.850178    | 774.428727       | 1546.866162       | 773.936719       | 12 |
| 6  | 631.344990        | 316.176133      |                |                  | 613.334425     | 307.170851       | <b>V</b> | <b>1467.823963</b> | 734.415620      | 1450.797414    | 725.902345       | 1449.813398       | 725.410337       | 11 |
| 7  | 728.397754        | 364.702515      |                |                  | 710.387189     | 355.697233       | <b>P</b> | <b>1368.755549</b> | 684.881413      | 1351.729000    | 676.368138       | 1350.744984       | 675.876130       | 10 |
| 8  | 841.481818        | 421.244547      |                |                  | 823.471253     | 412.239265       | <b>I</b> | <b>1271.702785</b> | 636.355031      | 1254.676236    | 627.841756       | 1253.692220       | 627.349748       | 9  |
| 9  | 940.550232        | 470.778754      |                |                  | 922.539667     | 461.773472       | <b>V</b> | <b>1158.618721</b> | 579.812999      | 1141.592172    | 571.299724       | 1140.608156       | 570.807716       | 8  |
| 10 | 1027.582260       | 514.294768      |                |                  | 1009.571695    | 505.289486       | <b>S</b> | <b>1059.550307</b> | 530.278792      | 1042.523758    | 521.765517       | 1041.539742       | 521.273509       | 7  |
| 11 | 1156.624853       | 578.816065      |                |                  | 1138.614288    | 569.810782       | <b>E</b> | <b>972.518279</b>  | 486.762777      | 955.491730     | 478.249503       | 954.507714        | 477.757495       | 6  |
| 12 | 1269.708917       | 635.358096      |                |                  | 1251.698352    | 626.352814       | <b>L</b> | <b>843.475686</b>  | 422.241481      | 826.449137     | 413.728207       | 825.465121        | 413.236199       | 5  |
| 13 | 1708.934243       | 854.970759      | 1691.907694    | 846.457485       | 1690.923678    | 845.965477       | <b>Q</b> | <b>730.391622</b>  | 365.699449      | 713.365073     | 357.186175       | <b>712.381057</b> | 356.694167       | 4  |
| 14 | 1795.966271       | 898.486774      | 1778.939722    | 889.973499       | 1777.955706    | 889.481491       | <b>S</b> | 291.166296         | 146.086786      | 274.139747     | 137.573512       | 273.155731        | 137.081504       | 3  |
| 15 | 1852.987735       | 926.997505      | 1835.961186    | 918.484231       | 1834.977170    | 917.992223       | <b>G</b> | 204.134268         | 102.570772      | 187.107719     | 94.057497        |                   |                  | 2  |
| 16 |                   |                 |                |                  |                |                  | <b>K</b> | 147.112804         | 74.060040       | 130.086255     | 65.546765        |                   |                  | 1  |

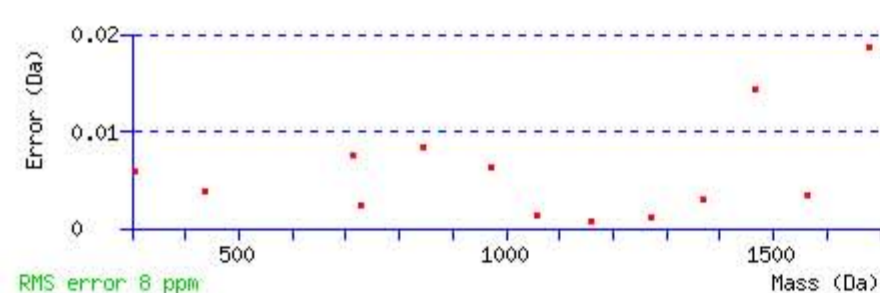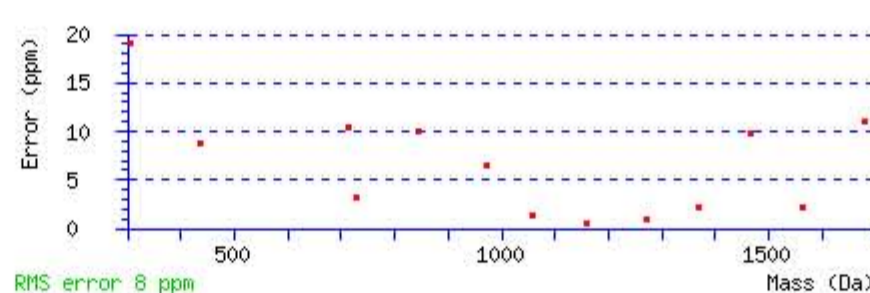

NCBI BLAST search of **GTYPVPIVSELQSGK**

(Parameters: blastp, nr protein database, expect=20000, no filter, PAM30)

Other BLAST [web gateways](#)

All matches to this query

| Score | Mr(calc):   | Delta     | Sequence                            |
|-------|-------------|-----------|-------------------------------------|
| 78.2  | 1998.085983 | 0.009849  | <a href="#">GTYPVPIVSELQSGK</a>     |
| 0.6   | 1998.099731 | -0.003899 | <a href="#">GDEVVVELVENGKKVTVGK</a> |

Mascot: <http://www.matrixscience.com/>



# MASCOT Search Results

## Peptide View

MS/MS Fragmentation of **GVNLQEFLNVTSVHLFK**

Found in **F13A\_HUMAN**, Coagulation factor XIII A chain OS=Homo sapiens GN=F13A1 PE=1 SV=4

Match to Query 62919: 2255.224422 from(752.748750,3+) rtinseconds(2950) index(69247)

Title: Locus:1.1.1.3021.11 File:"2013-07-02 CLN FXIII 30 min 1st F 4.wiff"

Data file C:\Program Files (x86)\Matrix Science\Mascot Daemon\mgf1 FXIII 30 min 1st\mascot\_daemon\_merge.mgf

Click mouse within plot area to zoom in by factor of two about that point

Or, Plot from  to  Da

Label all possible matches  Label matches used for scoring

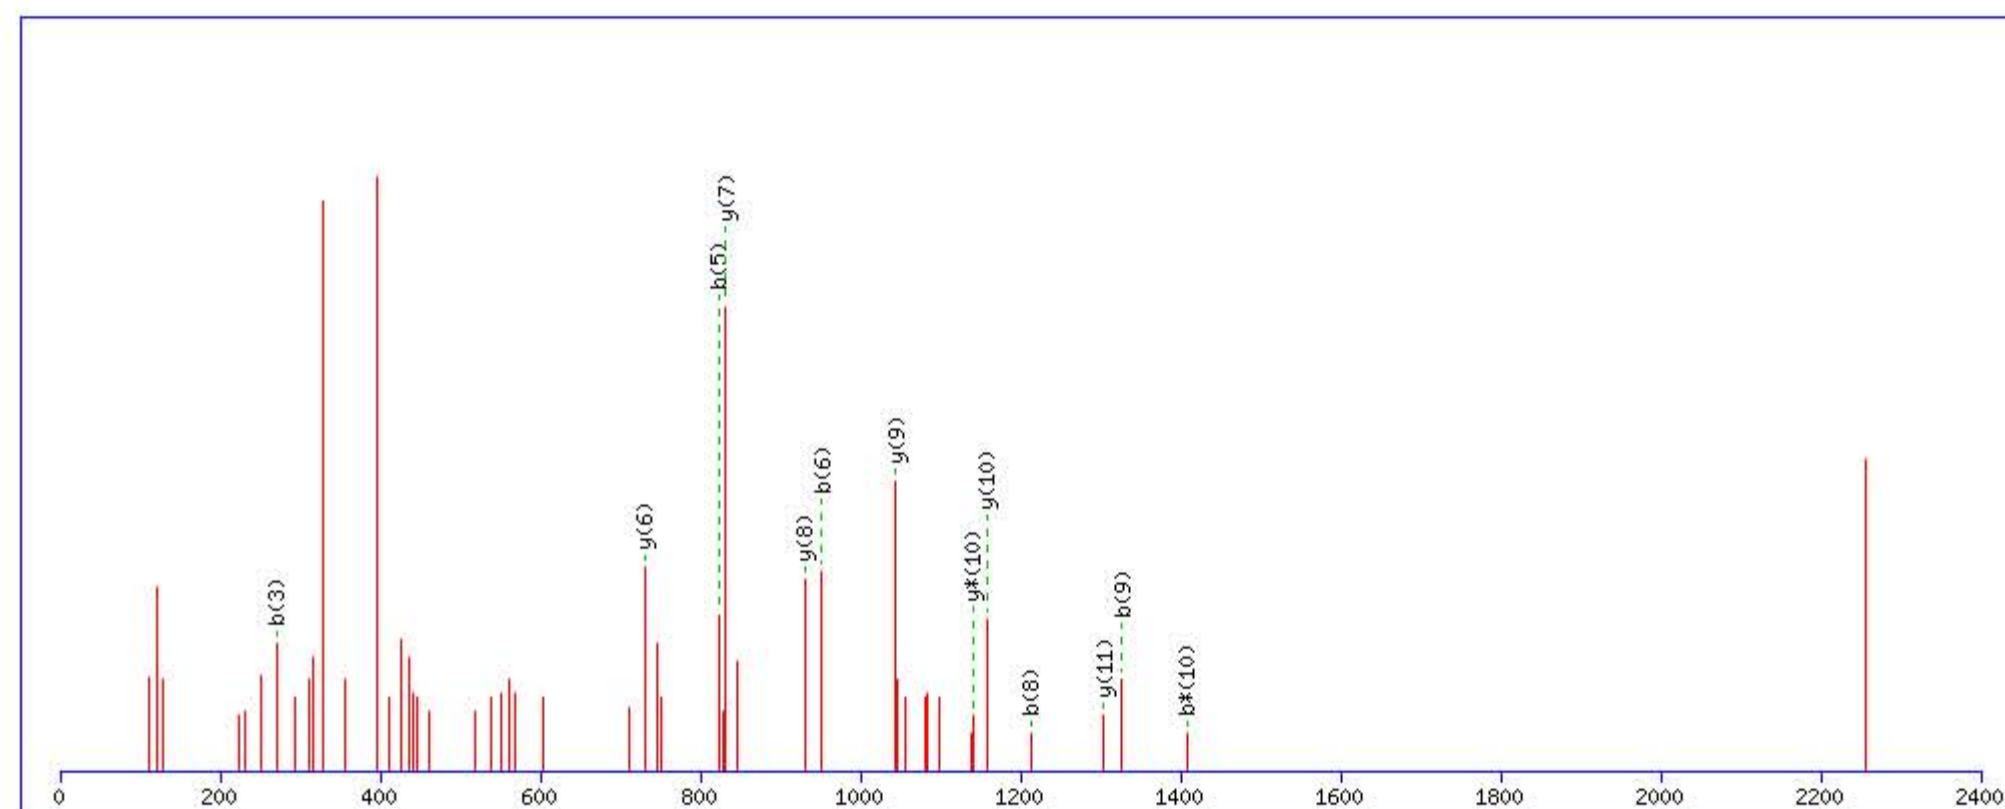

Monoisotopic mass of neutral peptide Mr(calc): 2255.213654

Fixed modifications: Carbamidomethyl (C) (apply to specified residues or termini only)

Variable modifications:

Q5 : Biotin:Thermo-21345 (Q)

Ions Score: 31 Expect: 0.017

Matches : 13/168 fragment ions using 24 most intense peaks [\(help\)](#)

| #  | b                  | b <sup>++</sup> | b <sup>*</sup>     | b <sup>*++</sup> | b <sup>0</sup> | b <sup>0++</sup> | Seq. | y                  | y <sup>++</sup> | y <sup>*</sup>     | y <sup>*++</sup> | y <sup>0</sup> | y <sup>0++</sup> | #  |
|----|--------------------|-----------------|--------------------|------------------|----------------|------------------|------|--------------------|-----------------|--------------------|------------------|----------------|------------------|----|
| 1  | 58.028740          | 29.518008       |                    |                  |                |                  | G    |                    |                 |                    |                  |                |                  | 17 |
| 2  | 157.097154         | 79.052215       |                    |                  |                |                  | V    | 2199.199458        | 1100.103367     | 2182.172909        | 1091.590092      | 2181.188893    | 1091.098084      | 16 |
| 3  | <b>271.140081</b>  | 136.073679      | 254.113532         | 127.560404       |                |                  | N    | 2100.131044        | 1050.569160     | 2083.104495        | 1042.055885      | 2082.120479    | 1041.563877      | 15 |
| 4  | 384.224145         | 192.615711      | 367.197596         | 184.102436       |                |                  | L    | 1986.088117        | 993.547697      | 1969.061568        | 985.034422       | 1968.077552    | 984.542414       | 14 |
| 5  | <b>823.449471</b>  | 412.228374      | 806.422922         | 403.715099       |                |                  | Q    | 1873.004053        | 937.005665      | 1855.977504        | 928.492390       | 1854.993488    | 928.000382       | 13 |
| 6  | <b>952.492064</b>  | 476.749670      | 935.465515         | 468.236396       | 934.481499     | 467.744388       | E    | 1433.778727        | 717.393002      | 1416.752178        | 708.879727       | 1415.768162    | 708.387719       | 12 |
| 7  | 1099.560478        | 550.283877      | 1082.533929        | 541.770603       | 1081.549913    | 541.278595       | F    | <b>1304.736134</b> | 652.871705      | 1287.709585        | 644.358431       | 1286.725569    | 643.866423       | 11 |
| 8  | <b>1212.644542</b> | 606.825909      | 1195.617993        | 598.312635       | 1194.633977    | 597.820627       | L    | <b>1157.667720</b> | 579.337498      | <b>1140.641171</b> | 570.824224       | 1139.657155    | 570.332216       | 10 |
| 9  | <b>1326.687469</b> | 663.847373      | 1309.660920        | 655.334098       | 1308.676904    | 654.842090       | N    | <b>1044.583656</b> | 522.795466      | 1027.557107        | 514.282192       | 1026.573091    | 513.790184       | 9  |
| 10 | 1425.755883        | 713.381580      | <b>1408.729334</b> | 704.868305       | 1407.745318    | 704.376297       | V    | <b>930.540729</b>  | 465.774003      | 913.514180         | 457.260728       | 912.530164     | 456.768720       | 8  |
| 11 | 1526.803562        | 763.905419      | 1509.777013        | 755.392145       | 1508.792997    | 754.900137       | T    | <b>831.472315</b>  | 416.239796      | 814.445766         | 407.726521       | 813.461750     | 407.234513       | 7  |
| 12 | 1613.835590        | 807.421433      | 1596.809041        | 798.908159       | 1595.825025    | 798.416151       | S    | <b>730.424636</b>  | 365.715956      | 713.398087         | 357.202682       | 712.414071     | 356.710674       | 6  |
| 13 | 1712.904004        | 856.955640      | 1695.877455        | 848.442366       | 1694.893439    | 847.950358       | V    | 643.392608         | 322.199942      | 626.366059         | 313.686668       |                |                  | 5  |
| 14 | 1849.962916        | 925.485096      | 1832.936367        | 916.971822       | 1831.952351    | 916.479814       | H    | 544.324194         | 272.665735      | 527.297645         | 264.152461       |                |                  | 4  |
| 15 | 1963.046980        | 982.027128      | 1946.020431        | 973.513854       | 1945.036415    | 973.021846       | L    | 407.265282         | 204.136279      | 390.238733         | 195.623004       |                |                  | 3  |
| 16 | 2110.115394        | 1055.561335     | 2093.088845        | 1047.048060      | 2092.104829    | 1046.556052      | F    | 294.181218         | 147.594247      | 277.154669         | 139.080973       |                |                  | 2  |
| 17 |                    |                 |                    |                  |                |                  | K    | 147.112804         | 74.060040       | 130.086255         | 65.546765        |                |                  | 1  |

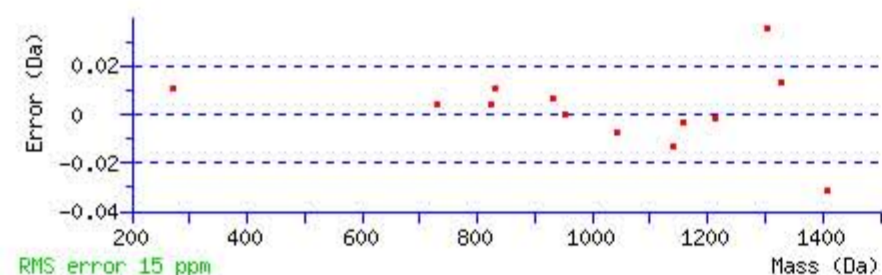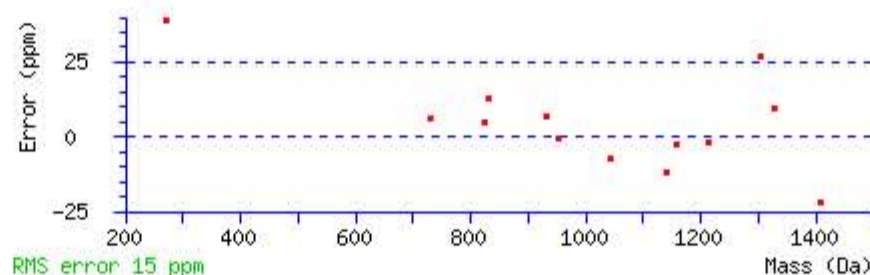

NCBI BLAST search of **GVNLQEFLNVTSVHLFK**

(Parameters: blastp, nr protein database, expect=20000, no filter, PAM30)

Other BLAST [web gateways](#)

All matches to this query

| Score | Mr(calc):   | Delta    | Sequence                          |
|-------|-------------|----------|-----------------------------------|
| 30.5  | 2255.213654 | 0.010768 | <a href="#">GVNLQEFLNVTSVHLFK</a> |

Mascot: <http://www.matrixscience.com/>



# Mascot Search Results

## Peptide View

MS/MS Fragmentation of **AVPPNNSNAEDDLPTVELQGVVPR**

Found in **F13A\_HUMAN**, Coagulation factor XIII A chain OS=Homo sapiens GN=F13A1 PE=1 SV=4

Match to Query 73467: 2912.479962 from(971.833930,3+) rtinseconds(2494) index(66169)

Title: Locus:1.1.1.2865.25 File:"2013-07-02 CLN FXIII 30 min 1st F 4.wiff"

Data file C:\Program Files (x86)\Matrix Science\Mascot Daemon\mgf1 FXIII 30 min 1st\mascot\_daemon\_merge.mgf

Click mouse within plot area to zoom in by factor of two about that point

Or, Plot from  to  Da

Label all possible matches  Label matches used for scoring

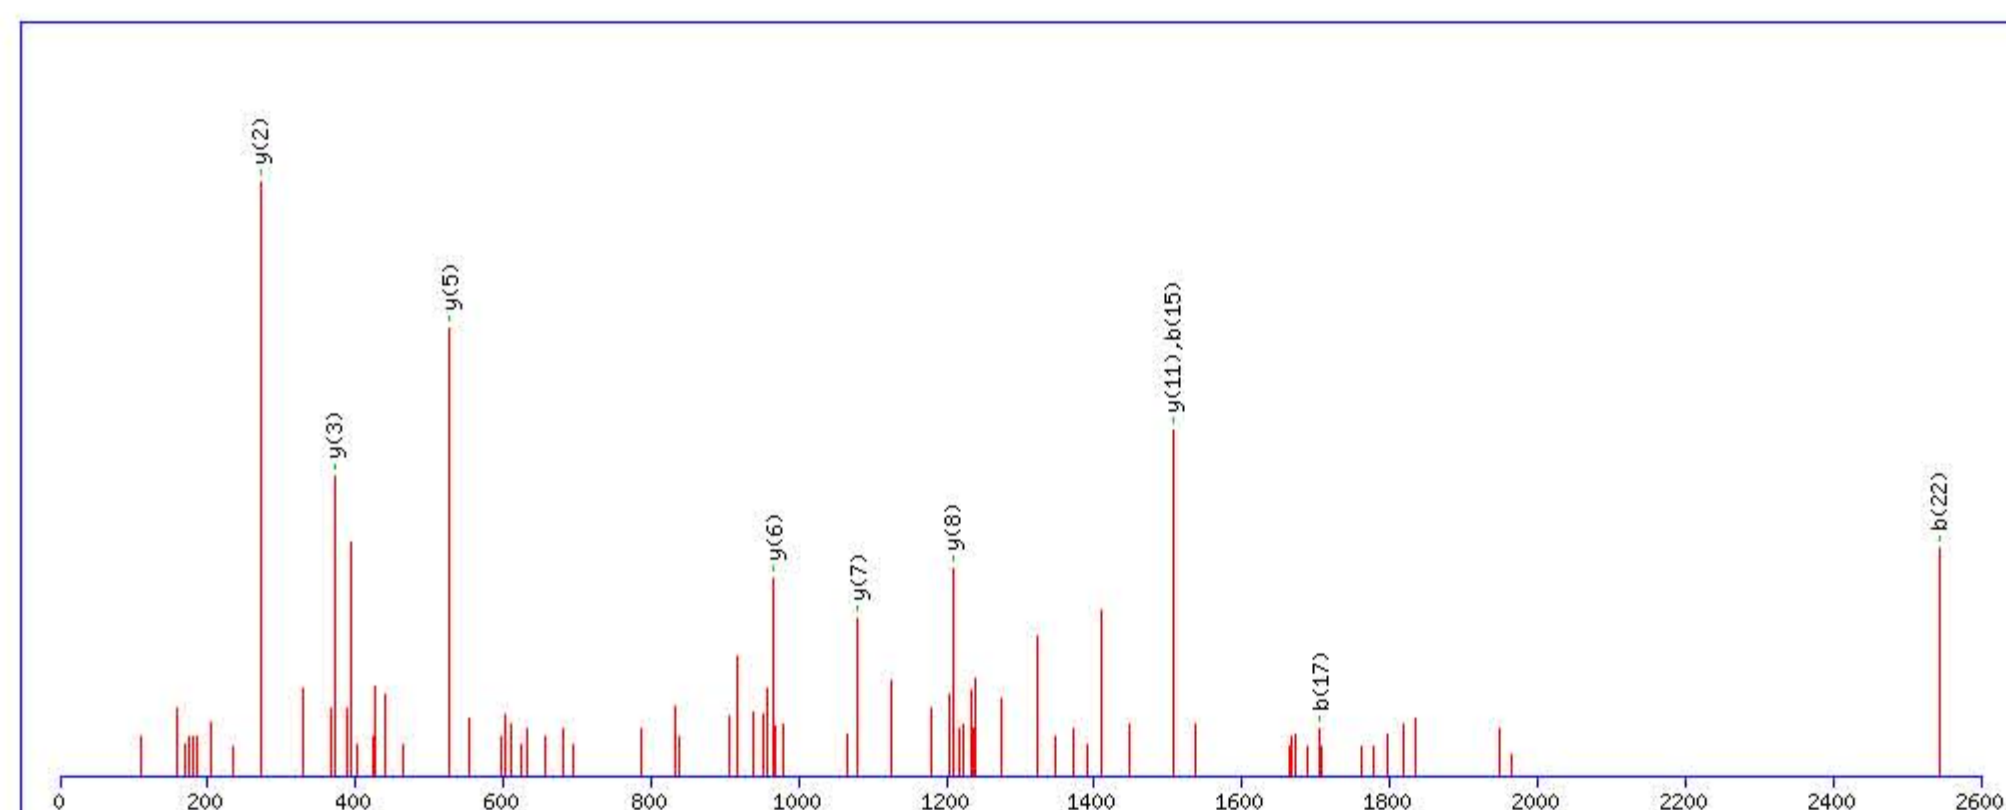

Monoisotopic mass of neutral peptide Mr(calc): 2912.470200

Fixed modifications: Carbamidomethyl (C) (apply to specified residues or termini only)

Variable modifications:

Q20 : Biotin:Thermo-21345 (Q)

Ions Score: 28 Expect: 0.043

Matches : 10/254 fragment ions using 20 most intense peaks [\(help\)](#)

| #  | b                  | b <sup>++</sup> | b <sup>+</sup> | b <sup>*++</sup> | b <sup>0</sup> | b <sup>0++</sup> | Seq. | y                  | y <sup>++</sup> | y <sup>+</sup> | y <sup>*++</sup> | y <sup>0</sup> | y <sup>0++</sup> | #  |
|----|--------------------|-----------------|----------------|------------------|----------------|------------------|------|--------------------|-----------------|----------------|------------------|----------------|------------------|----|
| 1  | 72.044390          | 36.525833       |                |                  |                |                  | A    |                    |                 |                |                  |                |                  | 25 |
| 2  | 171.112804         | 86.060040       |                |                  |                |                  | V    | 2842.440370        | 1421.723823     | 2825.413821    | 1413.210548      | 2824.429805    | 1412.718540      | 24 |
| 3  | 268.165568         | 134.586422      |                |                  |                |                  | P    | 2743.371956        | 1372.189616     | 2726.345407    | 1363.676341      | 2725.361391    | 1363.184333      | 23 |
| 4  | 365.218332         | 183.112804      |                |                  |                |                  | P    | 2646.319192        | 1323.663234     | 2629.292643    | 1315.149959      | 2628.308627    | 1314.657951      | 22 |
| 5  | 479.261259         | 240.134267      | 462.234710     | 231.620993       |                |                  | N    | 2549.266428        | 1275.136852     | 2532.239879    | 1266.623577      | 2531.255863    | 1266.131569      | 21 |
| 6  | 593.304186         | 297.155731      | 576.277637     | 288.642457       |                |                  | N    | 2435.223501        | 1218.115388     | 2418.196952    | 1209.602114      | 2417.212936    | 1209.110106      | 20 |
| 7  | 680.336214         | 340.671745      | 663.309665     | 332.158471       | 662.325649     | 331.666463       | S    | 2321.180574        | 1161.093925     | 2304.154025    | 1152.580650      | 2303.170009    | 1152.088642      | 19 |
| 8  | 794.379141         | 397.693209      | 777.352592     | 389.179934       | 776.368576     | 388.687926       | N    | 2234.148546        | 1117.577911     | 2217.121997    | 1109.064636      | 2216.137981    | 1108.572628      | 18 |
| 9  | 865.416255         | 433.211766      | 848.389706     | 424.698491       | 847.405690     | 424.206483       | A    | 2120.105619        | 1060.556447     | 2103.079070    | 1052.043173      | 2102.095054    | 1051.551165      | 17 |
| 10 | 936.453369         | 468.730323      | 919.426820     | 460.217048       | 918.442804     | 459.725040       | A    | 2049.068505        | 1025.037890     | 2032.041956    | 1016.524616      | 2031.057940    | 1016.032608      | 16 |
| 11 | 1065.495962        | 533.251619      | 1048.469413    | 524.738345       | 1047.485397    | 524.246336       | E    | 1978.031391        | 989.519333      | 1961.004842    | 981.006059       | 1960.020826    | 980.514051       | 15 |
| 12 | 1180.522905        | 590.765091      | 1163.496356    | 582.251816       | 1162.512340    | 581.759808       | D    | 1848.988798        | 924.998037      | 1831.962249    | 916.484762       | 1830.978233    | 915.992754       | 14 |
| 13 | 1295.549848        | 648.278562      | 1278.523299    | 639.765288       | 1277.539283    | 639.273280       | D    | 1733.961855        | 867.484565      | 1716.935306    | 858.971291       | 1715.951290    | 858.479283       | 13 |
| 14 | 1408.633912        | 704.820594      | 1391.607363    | 696.307320       | 1390.623347    | 695.815312       | L    | 1618.934912        | 809.971094      | 1601.908363    | 801.457819       | 1600.924347    | 800.965811       | 12 |
| 15 | <b>1505.686676</b> | 753.346976      | 1488.660127    | 744.833702       | 1487.676111    | 744.341694       | P    | <b>1505.850848</b> | 753.429062      | 1488.824299    | 744.915787       | 1487.840283    | 744.423779       | 11 |
| 16 | 1606.734355        | 803.870816      | 1589.707806    | 795.357541       | 1588.723790    | 794.865533       | T    | 1408.798084        | 704.902680      | 1391.771535    | 696.389405       | 1390.787519    | 695.897397       | 10 |
| 17 | <b>1705.802769</b> | 853.405023      | 1688.776220    | 844.891748       | 1687.792204    | 844.399740       | V    | 1307.750405        | 654.378840      | 1290.723856    | 645.865566       | 1289.739840    | 645.373558       | 9  |
| 18 | 1834.845362        | 917.926319      | 1817.818813    | 909.413045       | 1816.834797    | 908.921037       | E    | <b>1208.681991</b> | 604.844633      | 1191.655442    | 596.331359       | 1190.671426    | 595.839351       | 8  |
| 19 | 1947.929426        | 974.468351      | 1930.902877    | 965.955077       | 1929.918861    | 965.463069       | L    | <b>1079.639398</b> | 540.323337      | 1062.612849    | 531.810062       |                |                  | 7  |
| 20 | 2387.154752        | 1194.081014     | 2370.128203    | 1185.567739      | 2369.144187    | 1185.075731      | Q    | <b>966.555334</b>  | 483.781305      | 949.528785     | 475.268030       |                |                  | 6  |
| 21 | 2444.176216        | 1222.591746     | 2427.149667    | 1214.078471      | 2426.165651    | 1213.586463      | G    | <b>527.330008</b>  | 264.168642      | 510.303459     | 255.655367       |                |                  | 5  |
| 22 | <b>2543.244630</b> | 1272.125953     | 2526.218081    | 1263.612678      | 2525.234065    | 1263.120670      | V    | 470.308544         | 235.657910      | 453.281995     | 227.144635       |                |                  | 4  |
| 23 | 2642.313044        | 1321.660160     | 2625.286495    | 1313.146885      | 2624.302479    | 1312.654877      | V    | <b>371.240130</b>  | 186.123703      | 354.213581     | 177.610428       |                |                  | 3  |
| 24 | 2739.365808        | 1370.186542     | 2722.339259    | 1361.673267      | 2721.355243    | 1361.181259      | P    | <b>272.171716</b>  | 136.589496      | 255.145167     | 128.076221       |                |                  | 2  |
| 25 |                    |                 |                |                  |                |                  | R    | 175.118952         | 88.063114       | 158.092403     | 79.549839        |                |                  | 1  |

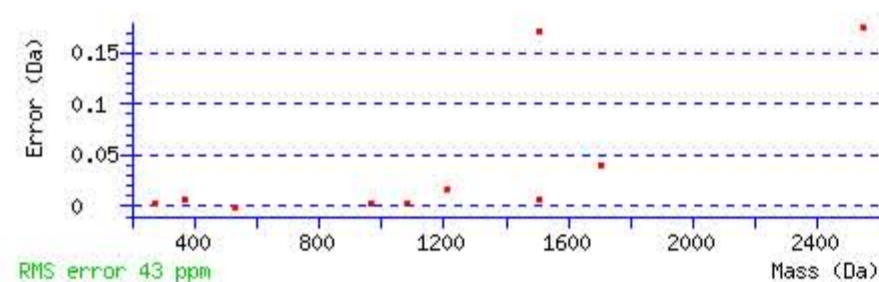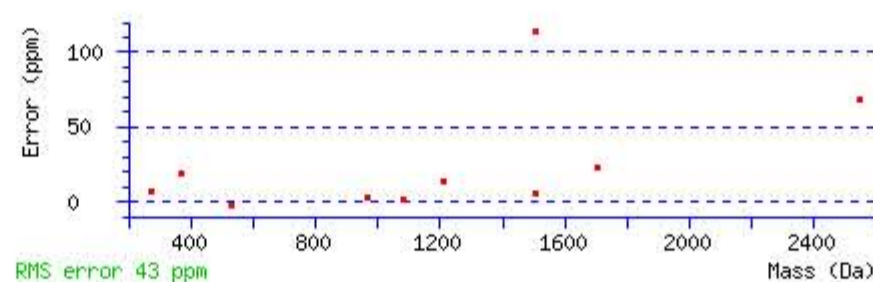

NCBI BLAST search of [AVPPNNSNAEDDLPTVELQGVVPR](#)

(Parameters: blastp, nr protein database, expect=20000, no filter, PAM30)

Other BLAST [web gateways](#)

## All matches to this query

| Score | Mr(calc):   | Delta    | Sequence                                 |
|-------|-------------|----------|------------------------------------------|
| 28.5  | 2912.470200 | 0.009762 | <a href="#">AVPPNNSNAEDDLPTVELQGVVPR</a> |



# MASCOT SEARCH RESULTS

## Peptide View

MS/MS Fragmentation of **KQELSEAEQATR**

Found in **CO3\_HUMAN**, Complement C3 OS=Homo sapiens GN=C3 PE=1 SV=2

Match to Query 49550: 1699.848612 from(567.623480,3+) rtinseconds(1370) index(58528)

Title: Locus:1.1.1.2475.17 File:"2013-07-02 CLN FXIII 30 min 1st F 4.wiff"

Data file C:\Program Files (x86)\Matrix Science\Mascot Daemon\mgf\1 FXIII 30 min 1st\mascot\_daemon\_merge.mgf

Click mouse within plot area to zoom in by factor of two about that point

Or, Plot from  to  Da

Label all possible matches  Label matches used for scoring

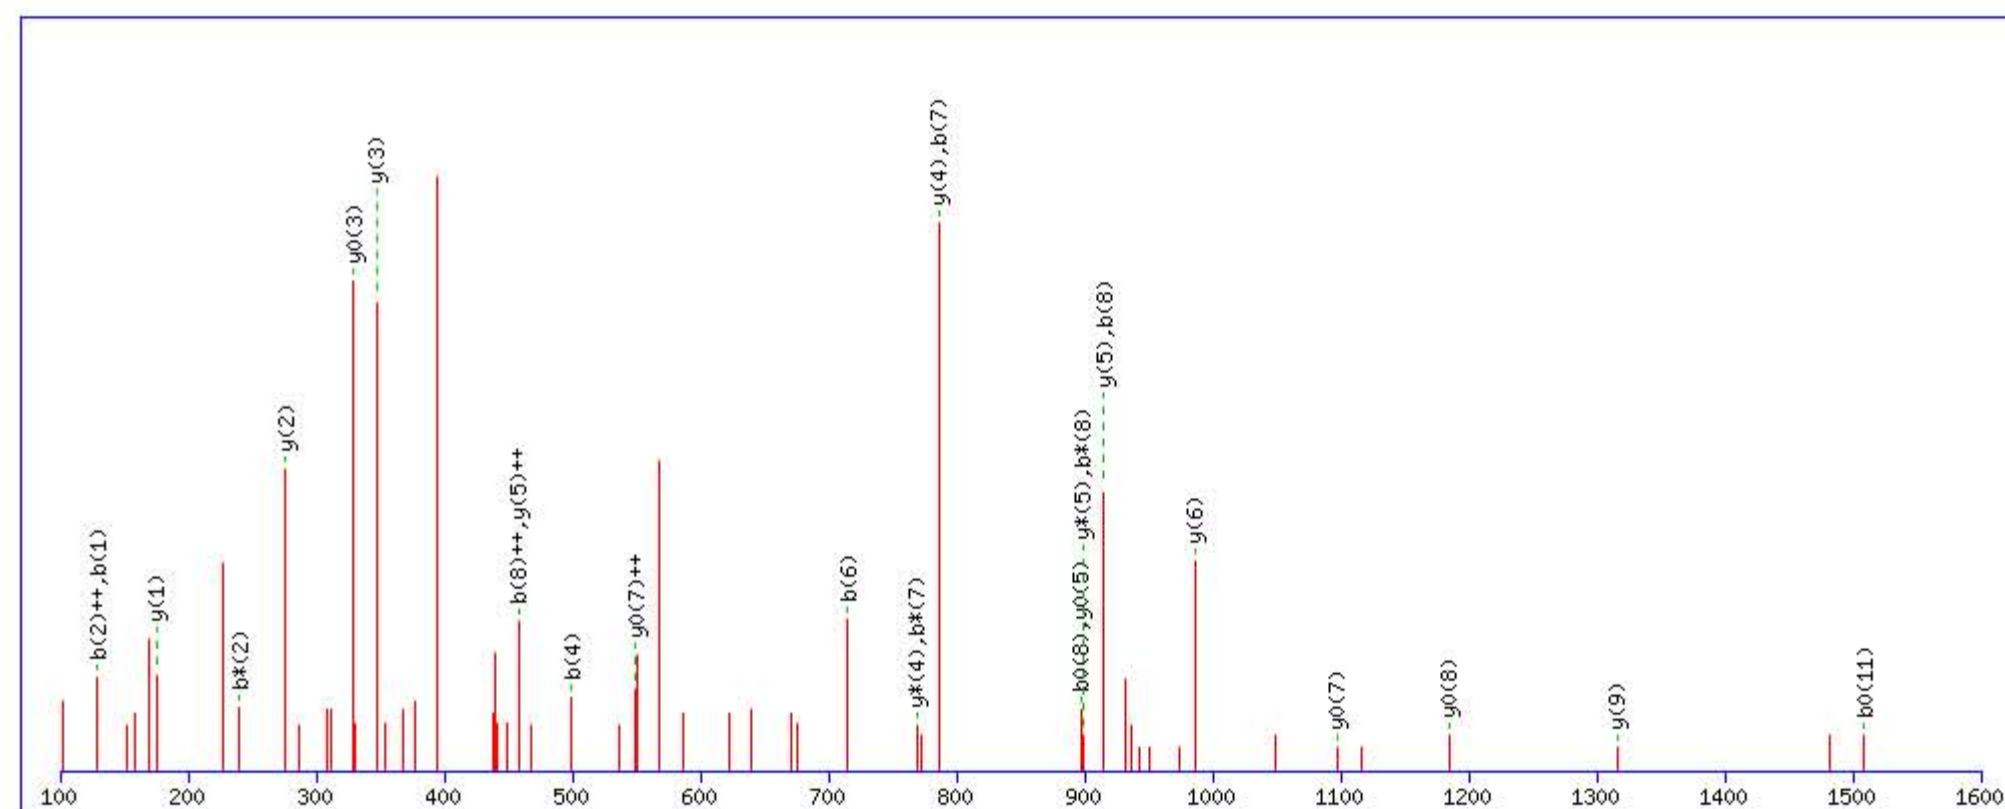

Monoisotopic mass of neutral peptide  $M_r(\text{calc})$ : 1699.856277

Fixed modifications: Carbamidomethyl (C) (apply to specified residues or termini only)

Variable modifications:

Q9 : Biotin:Thermo-21345 (Q)

Ions Score: 39 Expect: 0.0013

Matches : 27/126 fragment ions using 33 most intense peaks [\(help\)](#)

| #  | b                 | b <sup>++</sup>   | b <sup>*</sup>    | b <sup>*++</sup> | b <sup>0</sup>     | b <sup>0++</sup> | Seq.     | y                  | y <sup>++</sup>   | y <sup>*</sup>    | y <sup>*++</sup> | y <sup>0</sup>     | y <sup>0++</sup>  | #         |
|----|-------------------|-------------------|-------------------|------------------|--------------------|------------------|----------|--------------------|-------------------|-------------------|------------------|--------------------|-------------------|-----------|
| 1  | <b>129.102239</b> | 65.054757         | 112.075690        | 56.541483        |                    |                  | <b>K</b> |                    |                   |                   |                  |                    |                   | <b>12</b> |
| 2  | 257.160817        | <b>129.084047</b> | <b>240.134268</b> | 120.570772       |                    |                  | <b>Q</b> | 1572.768634        | 786.887955        | 1555.742085       | 778.374681       | 1554.758069        | 777.882673        | <b>11</b> |
| 3  | 386.203410        | 193.605343        | 369.176861        | 185.092069       | 368.192845         | 184.600061       | <b>E</b> | 1444.710056        | 722.858666        | 1427.683507       | 714.345392       | 1426.699491        | 713.853384        | <b>10</b> |
| 4  | <b>499.287474</b> | 250.147375        | 482.260925        | 241.634101       | 481.276909         | 241.142093       | <b>L</b> | <b>1315.667463</b> | 658.337370        | 1298.640914       | 649.824095       | 1297.656898        | 649.332087        | <b>9</b>  |
| 5  | 586.319502        | 293.663389        | 569.292953        | 285.150115       | 568.308937         | 284.658107       | <b>S</b> | 1202.583399        | 601.795338        | 1185.556850       | 593.282063       | <b>1184.572834</b> | 592.790055        | <b>8</b>  |
| 6  | <b>715.362095</b> | 358.184686        | 698.335546        | 349.671411       | 697.351530         | 349.179403       | <b>E</b> | 1115.551371        | 558.279324        | 1098.524822       | 549.766049       | <b>1097.540806</b> | <b>549.274041</b> | <b>7</b>  |
| 7  | <b>786.399209</b> | 393.703243        | <b>769.372660</b> | 385.189968       | 768.388644         | 384.697960       | <b>A</b> | <b>986.508778</b>  | 493.758027        | 969.482229        | 485.244753       | 968.498213         | 484.752745        | <b>6</b>  |
| 8  | <b>915.441802</b> | <b>458.224539</b> | <b>898.415253</b> | 449.711265       | <b>897.431237</b>  | 449.219257       | <b>E</b> | <b>915.471664</b>  | <b>458.239470</b> | <b>898.445115</b> | 449.726196       | <b>897.461099</b>  | 449.234188        | <b>5</b>  |
| 9  | 1354.667128       | 677.837202        | 1337.640579       | 669.323928       | 1336.656563        | 668.831920       | <b>Q</b> | <b>786.429071</b>  | 393.718174        | <b>769.402522</b> | 385.204899       | 768.418506         | 384.712891        | <b>4</b>  |
| 10 | 1425.704242       | 713.355759        | 1408.677693       | 704.842485       | 1407.693677        | 704.350477       | <b>A</b> | <b>347.203745</b>  | 174.105510        | 330.177196        | 165.592236       | <b>329.193180</b>  | 165.100228        | <b>3</b>  |
| 11 | 1526.751921       | 763.879599        | 1509.725372       | 755.366324       | <b>1508.741356</b> | 754.874316       | <b>T</b> | <b>276.166631</b>  | 138.586953        | 259.140082        | 130.073679       | 258.156066         | 129.581671        | <b>2</b>  |
| 12 |                   |                   |                   |                  |                    |                  | <b>R</b> | <b>175.118952</b>  | 88.063114         | 158.092403        | 79.549839        |                    |                   | <b>1</b>  |

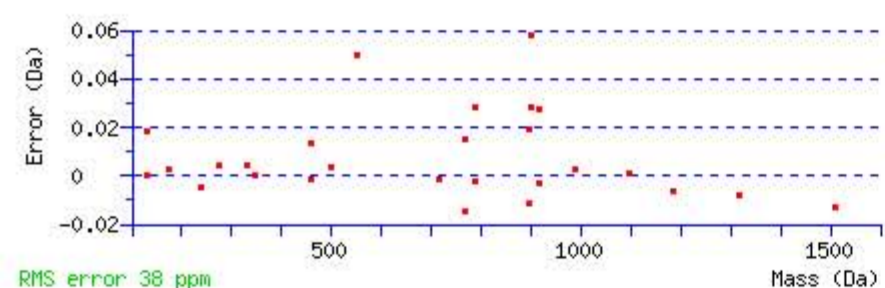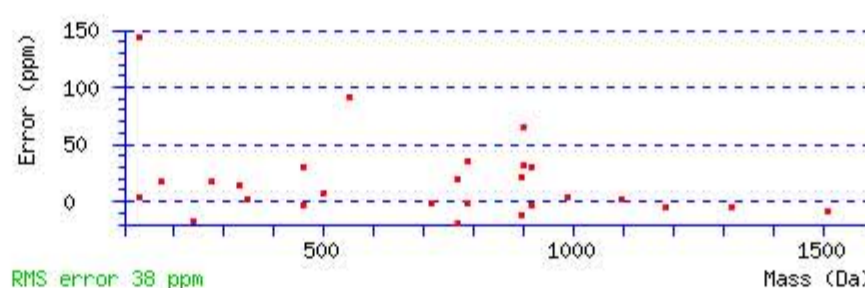

NCBI BLAST search of **KQELSEAEQATR**

(Parameters: blastp, nr protein database, expect=20000, no filter, PAM30)

Other BLAST [web gateways](#)

All matches to this query

| Score | $M_r(\text{calc})$ : | Delta     | Sequence                        |
|-------|----------------------|-----------|---------------------------------|
| 39.0  | 1699.856277          | -0.007665 | <a href="#">KQELSEAEQATR</a>    |
| 14.0  | 1699.856277          | -0.007665 | <a href="#">KQELSEAEQATR</a>    |
| 7.9   | 1699.874039          | -0.025427 | <a href="#">KEISVNDLNESSIPR</a> |
| 6.4   | 1699.845932          | 0.002680  | <a href="#">QAMQEQLSK</a>       |
| 4.6   | 1699.845932          | 0.002680  | <a href="#">QAMQEQLSK</a>       |
| 1.5   | 1699.849792          | -0.001180 | <a href="#">QEMRTTQLGPGR</a>    |
| 0.1   | 1699.843063          | 0.005549  | <a href="#">GKVSEGIDFVHHYGR</a> |



# MASCOT Search Results

## Peptide View

MS/MS Fragmentation of **LSINTHPSQKPLSITVR**

Found in **CO3\_HUMAN**, Complement C3 OS=Homo sapiens GN=C3 PE=1 SV=2

Match to Query 61624: 2201.232616 from(551.315430,4+) rtinseconds(1861) index(62043)

Title: Locus:1.1.1.2646.8 File:"2013-07-02 CLN FXIII 30 min 1st F 4.wiff"

Data file C:\Program Files (x86)\Matrix Science\Mascot Daemon\mgf1 FXIII 30 min 1st\mascot\_daemon\_merge.mgf

Click mouse within plot area to zoom in by factor of two about that point

Or, Plot from  to  Da

Label all possible matches  Label matches used for scoring

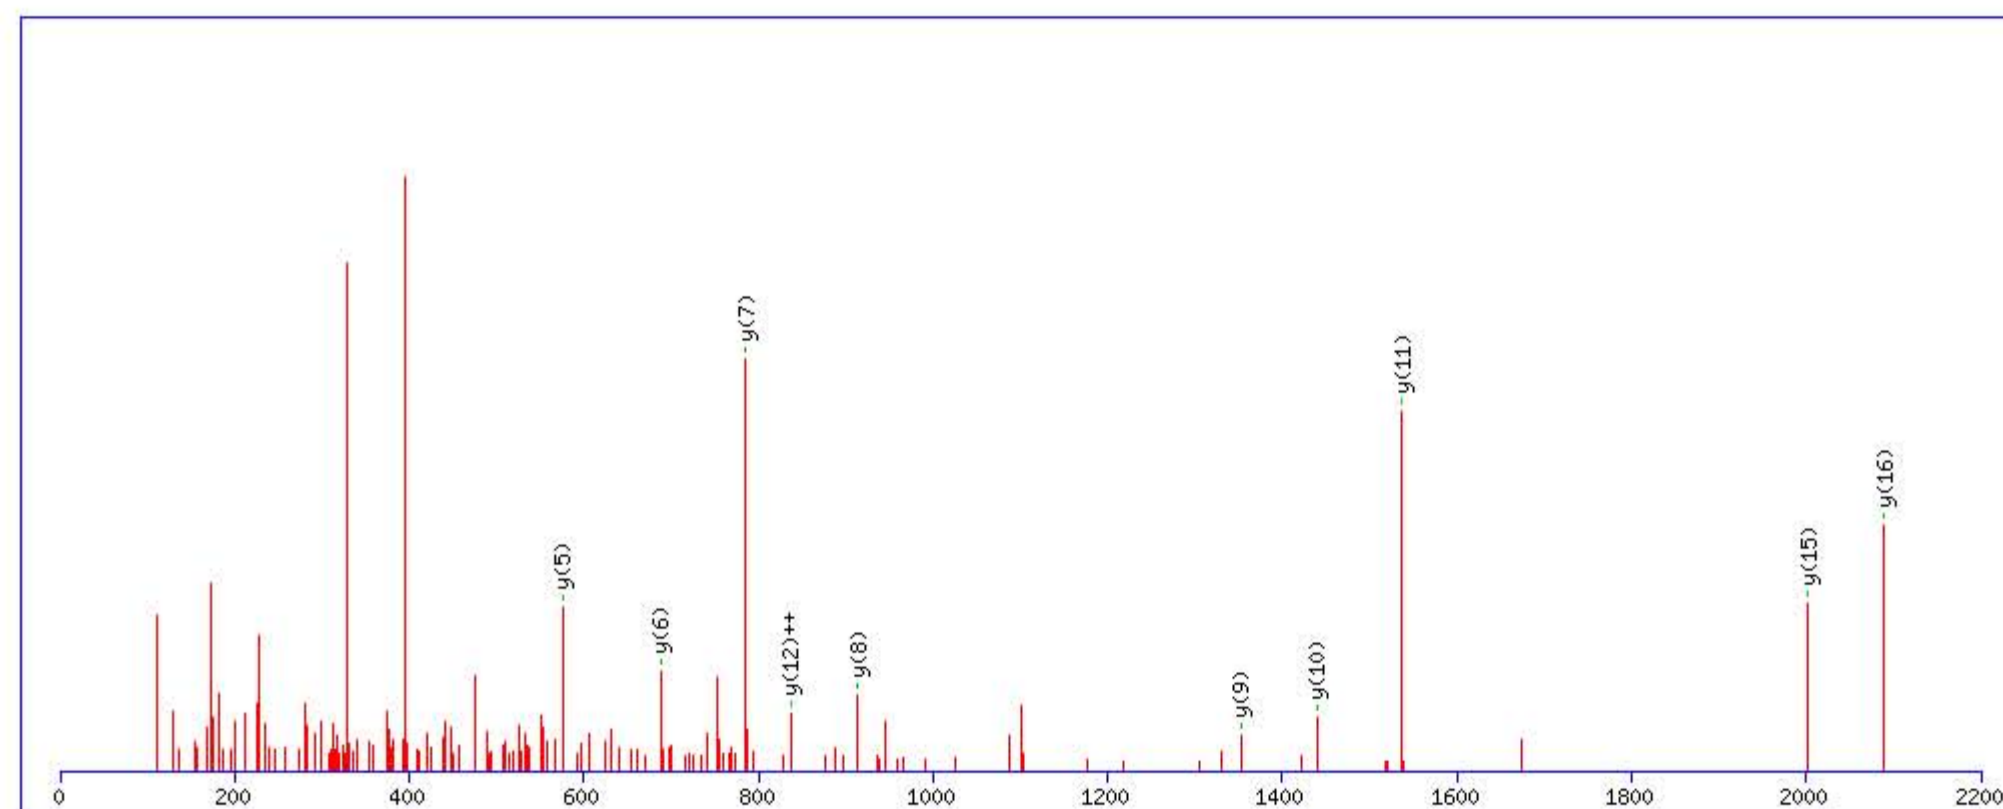

Monoisotopic mass of neutral peptide Mr(calc): 2201.235428

Fixed modifications: Carbamidomethyl (C) (apply to specified residues or termini only)

Variable modifications:

Q9 : Biotin:Thermo-21345 (Q)

Ions Score: 52 Expect: 5.5e-005

Matches : 10/180 fragment ions using 18 most intense peaks [\(help\)](#)

| #  | b           | b <sup>++</sup> | b <sup>*</sup> | b <sup>+++</sup> | b <sup>0</sup> | b <sup>0++</sup> | Seq. | y           | y <sup>++</sup> | y <sup>*</sup> | y <sup>+++</sup> | y <sup>0</sup> | y <sup>0++</sup> | #  |
|----|-------------|-----------------|----------------|------------------|----------------|------------------|------|-------------|-----------------|----------------|------------------|----------------|------------------|----|
| 1  | 114.091340  | 57.549308       |                |                  |                |                  | L    |             |                 |                |                  |                |                  | 17 |
| 2  | 201.123368  | 101.065322      |                |                  | 183.112803     | 92.060039        | S    | 2089.158656 | 1045.082966     | 2072.132107    | 1036.569691      | 2071.148091    | 1036.077683      | 16 |
| 3  | 314.207432  | 157.607354      |                |                  | 296.196867     | 148.602071       | I    | 2002.126628 | 1001.566952     | 1985.100079    | 993.053678       | 1984.116063    | 992.561669       | 15 |
| 4  | 428.250359  | 214.628818      | 411.223810     | 206.115543       | 410.239794     | 205.623535       | N    | 1889.042564 | 945.024920      | 1872.016015    | 936.511646       | 1871.031999    | 936.019638       | 14 |
| 5  | 529.298038  | 265.152657      | 512.271489     | 256.639383       | 511.287473     | 256.147375       | T    | 1774.999637 | 888.003456      | 1757.973088    | 879.490182       | 1756.989072    | 878.998174       | 13 |
| 6  | 666.356950  | 333.682113      | 649.330401     | 325.168838       | 648.346385     | 324.676830       | H    | 1673.951958 | 837.479617      | 1656.925409    | 828.966343       | 1655.941393    | 828.474334       | 12 |
| 7  | 763.409714  | 382.208495      | 746.383165     | 373.695221       | 745.399149     | 373.203213       | P    | 1536.893046 | 768.950161      | 1519.866497    | 760.436887       | 1518.882481    | 759.944878       | 11 |
| 8  | 850.441742  | 425.724509      | 833.415193     | 417.211234       | 832.431177     | 416.719226       | S    | 1439.840282 | 720.423779      | 1422.813733    | 711.910505       | 1421.829717    | 711.418496       | 10 |
| 9  | 1289.667068 | 645.337172      | 1272.640519    | 636.823898       | 1271.656503    | 636.331889       | Q    | 1352.808254 | 676.907765      | 1335.781705    | 668.394491       | 1334.797689    | 667.902483       | 9  |
| 10 | 1417.762031 | 709.384654      | 1400.735482    | 700.871379       | 1399.751466    | 700.379371       | K    | 913.582928  | 457.295102      | 896.556379     | 448.781828       | 895.572363     | 448.289820       | 8  |
| 11 | 1514.814795 | 757.911036      | 1497.788246    | 749.397761       | 1496.804230    | 748.905753       | P    | 785.487965  | 393.247621      | 768.461416     | 384.734346       | 767.477400     | 384.242338       | 7  |
| 12 | 1627.898859 | 814.453067      | 1610.872310    | 805.939793       | 1609.888294    | 805.447785       | L    | 688.435201  | 344.721239      | 671.408652     | 336.207964       | 670.424636     | 335.715956       | 6  |
| 13 | 1714.930887 | 857.969082      | 1697.904338    | 849.455807       | 1696.920322    | 848.963799       | S    | 575.351137  | 288.179207      | 558.324588     | 279.665932       | 557.340572     | 279.173924       | 5  |
| 14 | 1828.014951 | 914.511113      | 1810.988402    | 905.997839       | 1810.004386    | 905.505831       | I    | 488.319109  | 244.663192      | 471.292560     | 236.149918       | 470.308544     | 235.657910       | 4  |
| 15 | 1929.062630 | 965.034953      | 1912.036081    | 956.521679       | 1911.052065    | 956.029670       | T    | 375.235045  | 188.121161      | 358.208496     | 179.607886       | 357.224480     | 179.115878       | 3  |
| 16 | 2028.131044 | 1014.569160     | 2011.104495    | 1006.055886      | 2010.120479    | 1005.563878      | V    | 274.187366  | 137.597321      | 257.160817     | 129.084047       |                |                  | 2  |
| 17 |             |                 |                |                  |                |                  | R    | 175.118952  | 88.063114       | 158.092403     | 79.549839        |                |                  | 1  |

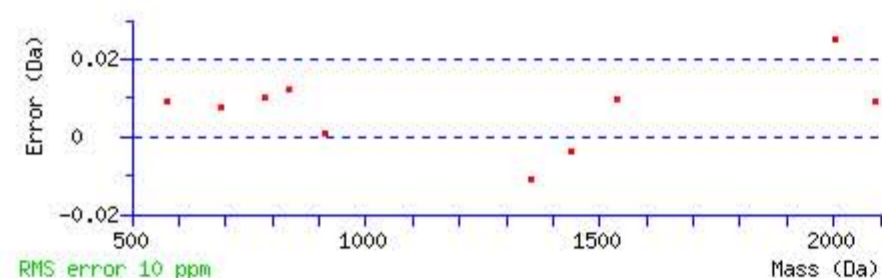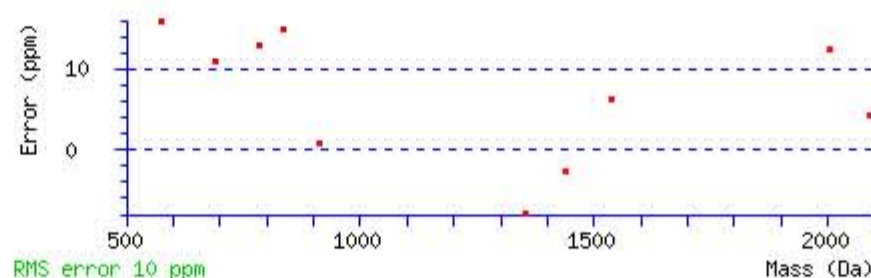

NCBI BLAST search of **LSINTHPSQKPLSITVR**

(Parameters: blastp, nr protein database, expect=20000, no filter, PAM30)

Other BLAST [web gateways](#)

All matches to this query

| Score | Mr(calc):   | Delta     | Sequence                          |
|-------|-------------|-----------|-----------------------------------|
| 51.9  | 2201.235428 | -0.002812 | <a href="#">LSINTHPSQKPLSITVR</a> |

Mascot: <http://www.matrixscience.com/>



# MASCOT Search Results

## Peptide View

MS/MS Fragmentation of **ILLQGTPVAQMTEDAVDAER**  
 Found in **CO3\_HUMAN**, Complement C3 OS=Homo sapiens GN=C3 PE=1 SV=2

Match to Query 67474: 2467.258272 from(823.426700,3+) rtinseconds(2634) index(66934)  
 Title: Locus:1.1.1.2914.4 File:"2013-07-02 CLN FXIII 30 min 1st F 4.wiff"  
 Data file C:\Program Files (x86)\Matrix Science\Mascot Daemon\mgf\1 FXIII 30 min 1st\mascot\_daemon\_merge.mgf

Click mouse within plot area to zoom in by factor of two about that point  
 Or, Plot from  to  Da   
 Label all possible matches  Label matches used for scoring

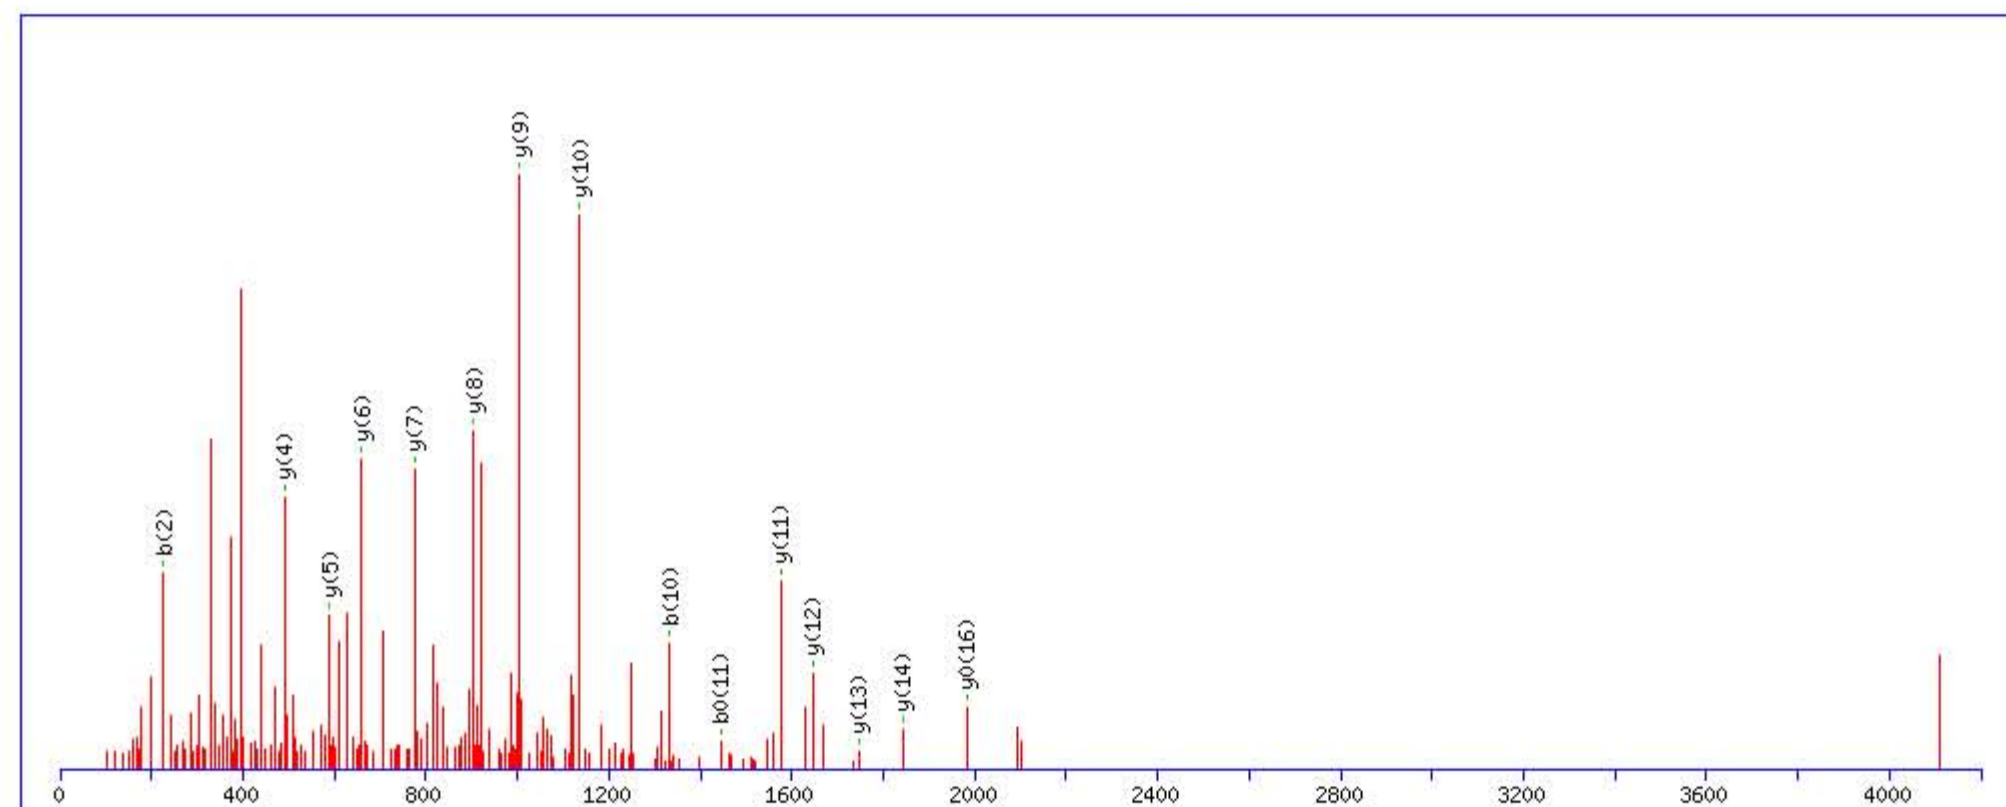

Monoisotopic mass of neutral peptide Mr(calc): 2467.245071  
 Fixed modifications: Carbamidomethyl (C) (apply to specified residues or termini only)  
 Variable modifications:  
 Q10 : Biotin:Thermo-21345 (Q)  
 Ions Score: 82 Expect: 2e-007  
 Matches : 15/210 fragment ions using 21 most intense peaks ([help](#))

| #  | b                  | b <sup>++</sup> | b <sup>*</sup> | b <sup>*++</sup> | b <sup>0</sup>     | b <sup>0++</sup> | Seq. | y                  | y <sup>++</sup> | y <sup>*</sup> | y <sup>*++</sup> | y <sup>0</sup>     | y <sup>0++</sup> | #  |
|----|--------------------|-----------------|----------------|------------------|--------------------|------------------|------|--------------------|-----------------|----------------|------------------|--------------------|------------------|----|
| 1  | 114.091340         | 57.549308       |                |                  |                    |                  | I    |                    |                 |                |                  |                    |                  | 20 |
| 2  | <b>227.175404</b>  | 114.091340      |                |                  |                    |                  | L    | 2355.168297        | 1178.087786     | 2338.141748    | 1169.574512      | 2337.157732        | 1169.082504      | 19 |
| 3  | 340.259468         | 170.633372      |                |                  |                    |                  | L    | 2242.084233        | 1121.545754     | 2225.057684    | 1113.032480      | 2224.073668        | 1112.540472      | 18 |
| 4  | 468.318046         | 234.662661      | 451.291497     | 226.149386       |                    |                  | Q    | 2129.000169        | 1065.003722     | 2111.973620    | 1056.490448      | 2110.989604        | 1055.998440      | 17 |
| 5  | 525.339510         | 263.173393      | 508.312961     | 254.660119       |                    |                  | G    | 2000.941591        | 1000.974434     | 1983.915042    | 992.461159       | <b>1982.931026</b> | 991.969151       | 16 |
| 6  | 626.387189         | 313.697233      | 609.360640     | 305.183958       | 608.376624         | 304.691950       | T    | 1943.920127        | 972.463702      | 1926.893578    | 963.950427       | 1925.909562        | 963.458419       | 15 |
| 7  | 723.439953         | 362.223615      | 706.413404     | 353.710340       | 705.429388         | 353.218332       | P    | <b>1842.872448</b> | 921.939862      | 1825.845899    | 913.426588       | 1824.861883        | 912.934580       | 14 |
| 8  | 822.508367         | 411.757822      | 805.481818     | 403.244547       | 804.497802         | 402.752539       | V    | <b>1745.819684</b> | 873.413480      | 1728.793135    | 864.900206       | 1727.809119        | 864.408198       | 13 |
| 9  | 893.545481         | 447.276379      | 876.518932     | 438.763104       | 875.534916         | 438.271096       | A    | <b>1646.751270</b> | 823.879273      | 1629.724721    | 815.365999       | 1628.740705        | 814.873991       | 12 |
| 10 | <b>1332.770807</b> | 666.889042      | 1315.744258    | 658.375767       | 1314.760242        | 657.883759       | Q    | <b>1575.714156</b> | 788.360716      | 1558.687607    | 779.847442       | 1557.703591        | 779.355434       | 11 |
| 11 | 1463.811292        | 732.409284      | 1446.784743    | 723.896010       | <b>1445.800727</b> | 723.404002       | M    | <b>1136.488830</b> | 568.748053      | 1119.462281    | 560.234779       | 1118.478265        | 559.742771       | 10 |
| 12 | 1564.858971        | 782.933124      | 1547.832422    | 774.419849       | 1546.848406        | 773.927841       | T    | <b>1005.448345</b> | 503.227811      | 988.421796     | 494.714536       | 987.437780         | 494.222528       | 9  |
| 13 | 1693.901564        | 847.454420      | 1676.875015    | 838.941146       | 1675.890999        | 838.449138       | E    | <b>904.400666</b>  | 452.703971      | 887.374117     | 444.190697       | 886.390101         | 443.698689       | 8  |
| 14 | 1808.928507        | 904.967892      | 1791.901958    | 896.454617       | 1790.917942        | 895.962609       | D    | <b>775.358073</b>  | 388.182675      | 758.331524     | 379.669400       | 757.347508         | 379.177392       | 7  |
| 15 | 1879.965621        | 940.486449      | 1862.939072    | 931.973174       | 1861.955056        | 931.481166       | A    | <b>660.331130</b>  | 330.669203      | 643.304581     | 322.155929       | 642.320565         | 321.663921       | 6  |
| 16 | 1979.034035        | 990.020656      | 1962.007486    | 981.507381       | 1961.023470        | 981.015373       | V    | <b>589.294016</b>  | 295.150646      | 572.267467     | 286.637372       | 571.283451         | 286.145364       | 5  |
| 17 | 2094.060978        | 1047.534127     | 2077.034429    | 1039.020852      | 2076.050413        | 1038.528844      | D    | <b>490.225602</b>  | 245.616439      | 473.199053     | 237.103165       | 472.215037         | 236.611157       | 4  |
| 18 | 2165.098092        | 1083.052684     | 2148.071543    | 1074.539409      | 2147.087527        | 1074.047402      | A    | 375.198659         | 188.102968      | 358.172110     | 179.589693       | 357.188094         | 179.097685       | 3  |
| 19 | 2294.140685        | 1147.573981     | 2277.114136    | 1139.060706      | 2276.130120        | 1138.568698      | E    | 304.161545         | 152.584411      | 287.134996     | 144.071136       | 286.150980         | 143.579128       | 2  |
| 20 |                    |                 |                |                  |                    |                  | R    | 175.118952         | 88.063114       | 158.092403     | 79.549839        |                    |                  | 1  |

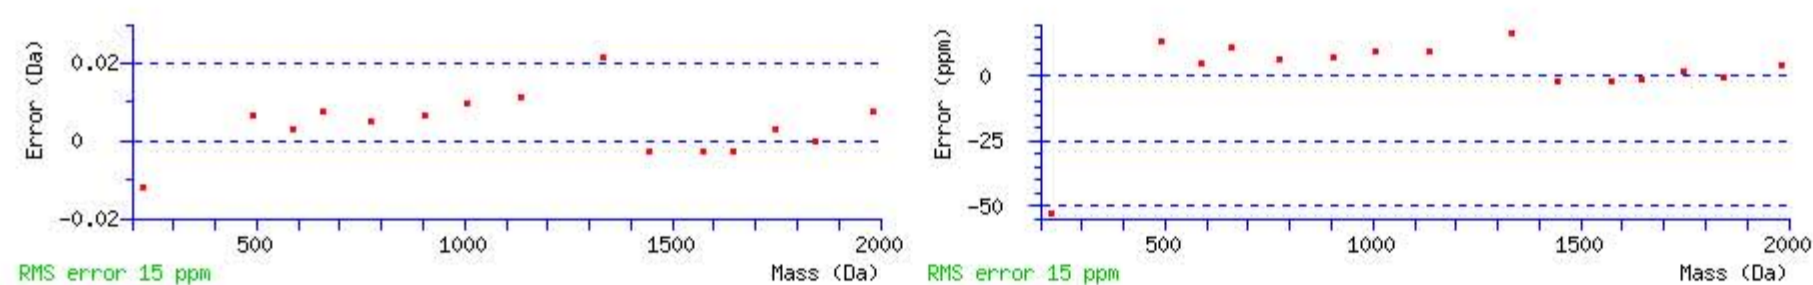

NCBI BLAST search of [ILLQGTPVAQMTEDAVDAER](#)  
 (Parameters: blastp, nr protein database, expect=20000, no filter, PAM30)  
 Other BLAST [web gateways](#)

### All matches to this query

| Score | Mr(calc):   | Delta    | Sequence                             |
|-------|-------------|----------|--------------------------------------|
| 81.6  | 2467.245071 | 0.013201 | <a href="#">ILLQGTPVAQMTEDAVDAER</a> |
| 32.2  | 2467.245071 | 0.013201 | <a href="#">ILLQGTPVAQMTEDAVDAER</a> |



# Mascot Search Results

## Peptide View

MS/MS Fragmentation of **VQQPDCR**

Found in **CO4A\_HUMAN**, Complement C4-A OS=Homo sapiens GN=C4A PE=1 SV=2

Match to Query 32107: 1212.579748 from(607.297150,2+) rtinseconds(1259) index(57781)

Title: Locus:1.1.1.2436.15 File:"2013-07-02 CLN FXIII 30 min 1st F 4.wiff"

Data file C:\Program Files (x86)\Matrix Science\Mascot Daemon\mgf\1 FXIII 30 min 1st\mascot\_daemon\_merge.mgf

Click mouse within plot area to zoom in by factor of two about that point

Or, Plot from  to  Da

Label all possible matches  Label matches used for scoring

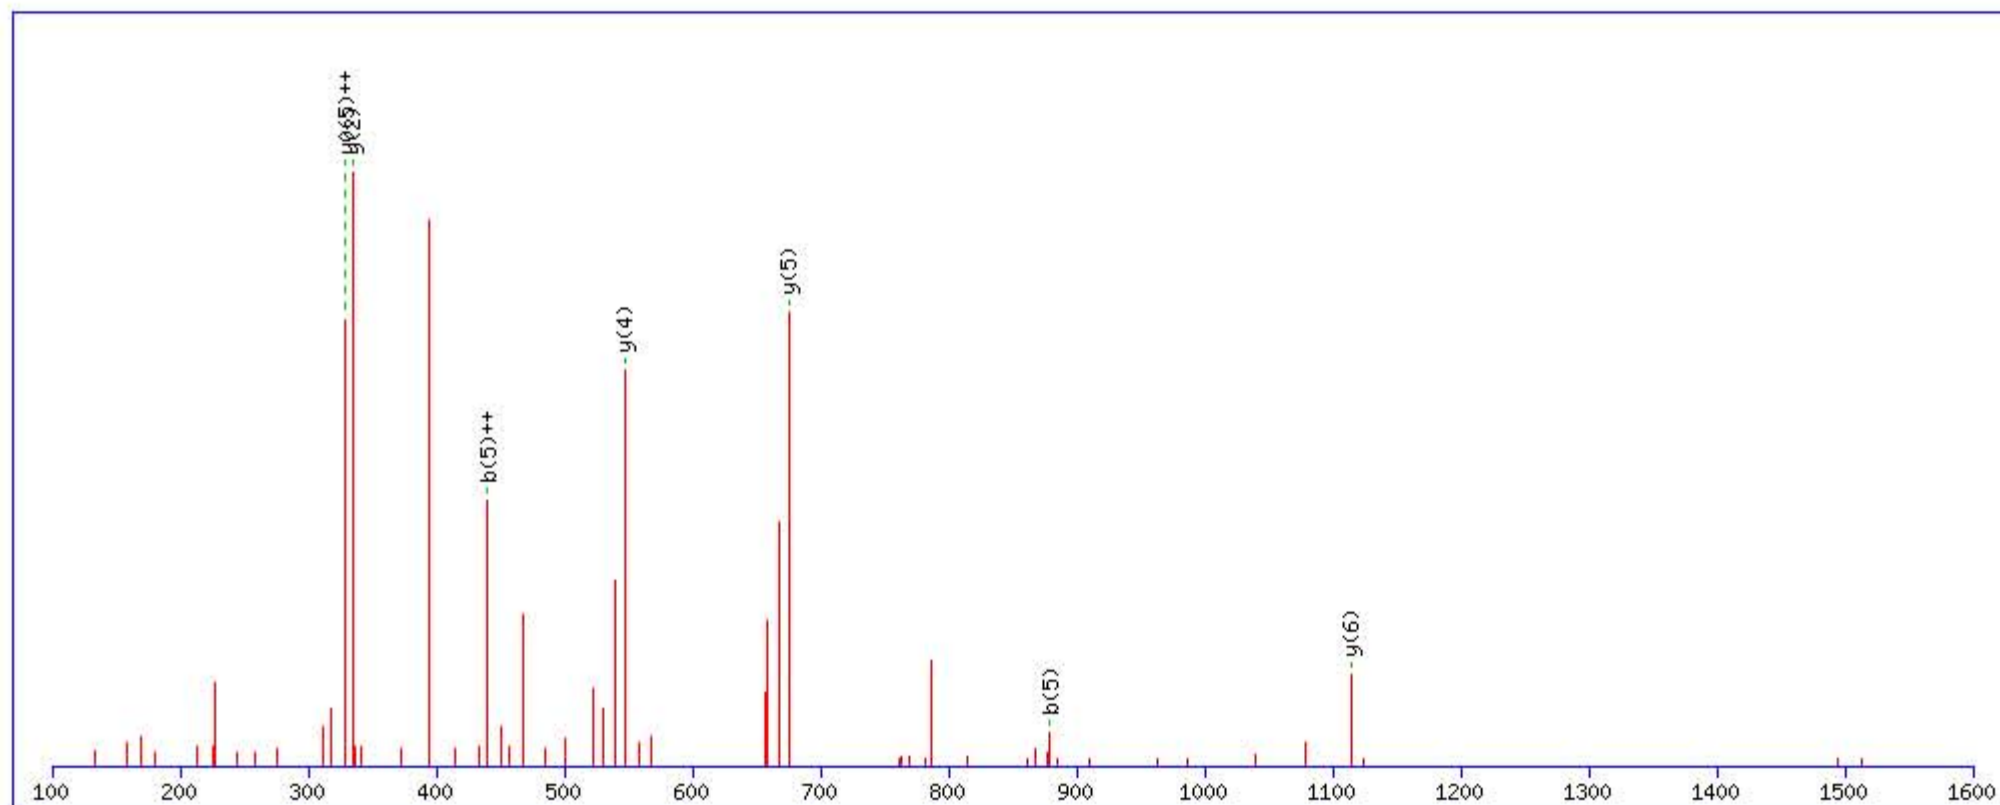

Monoisotopic mass of neutral peptide Mr(calc): 1212.574356

Fixed modifications: Carbamidomethyl (C) (apply to specified residues or termini only)

Variable modifications:

Q2 : Biotin:Thermo-21345 (Q)

Ions Score: 27 Expect: 0.0082

Matches : 7/58 fragment ions using 10 most intense peaks [\(help\)](#)

| # | b                 | b <sup>++</sup>   | b <sup>*</sup> | b <sup>*++</sup> | b <sup>0</sup> | b <sup>0++</sup> | Seq. | y                  | y <sup>++</sup> | y <sup>*</sup> | y <sup>*++</sup> | y <sup>0</sup> | y <sup>0++</sup>  | # |
|---|-------------------|-------------------|----------------|------------------|----------------|------------------|------|--------------------|-----------------|----------------|------------------|----------------|-------------------|---|
| 1 | 100.075690        | 50.541483         |                |                  |                |                  | V    |                    |                 |                |                  |                |                   | 7 |
| 2 | 539.301016        | 270.154146        | 522.274467     | 261.640872       |                |                  | Q    | <b>1114.513212</b> | 557.760244      | 1097.486663    | 549.246970       | 1096.502647    | 548.754962        | 6 |
| 3 | 667.359594        | 334.183435        | 650.333045     | 325.670161       |                |                  | Q    | <b>675.287886</b>  | 338.147581      | 658.261337     | 329.634307       | 657.277321     | <b>329.142299</b> | 5 |
| 4 | 764.412358        | 382.709817        | 747.385809     | 374.196543       |                |                  | P    | <b>547.229308</b>  | 274.118292      | 530.202759     | 265.605018       | 529.218743     | 265.113010        | 4 |
| 5 | <b>879.439301</b> | <b>440.223289</b> | 862.412752     | 431.710014       | 861.428736     | 431.218006       | D    | 450.176544         | 225.591910      | 433.149995     | 217.078635       | 432.165979     | 216.586627        | 3 |
| 6 | 1039.469950       | 520.238613        | 1022.443401    | 511.725339       | 1021.459385    | 511.233331       | C    | <b>335.149601</b>  | 168.078438      | 318.123052     | 159.565164       |                |                   | 2 |
| 7 |                   |                   |                |                  |                |                  | R    | 175.118952         | 88.063114       | 158.092403     | 79.549839        |                |                   | 1 |

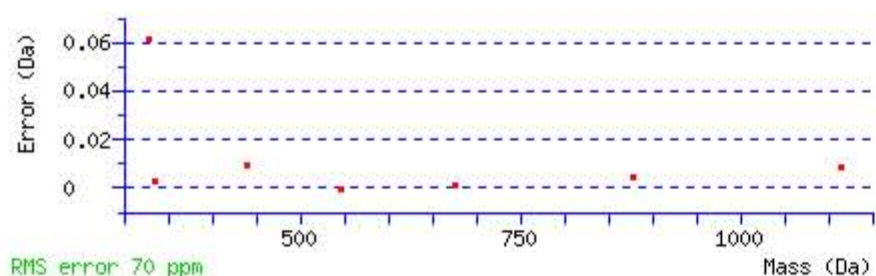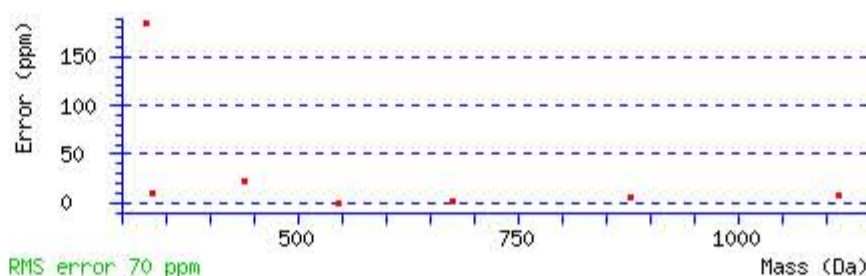

NCBI BLAST search of **VQQPDCR**

(Parameters: blastp, nr protein database, expect=20000, no filter, PAM30)

Other BLAST [web gateways](#)

All matches to this query

| Score | Mr(calc):   | Delta     | Sequence                    |
|-------|-------------|-----------|-----------------------------|
| 26.9  | 1212.574356 | 0.005392  | <a href="#">VQQPDCR</a>     |
| 11.7  | 1212.574356 | 0.005392  | <a href="#">VQQPDCR</a>     |
| 4.7   | 1212.596115 | -0.016367 | <a href="#">YFVEAGAMAVR</a> |

Mascot: <http://www.matrixscience.com/>



# MASCOT Search Results

## Peptide View

MS/MS Fragmentation of **VEYGFQVK**

Found in **CO4A\_HUMAN**, Complement C4-A OS=Homo sapiens GN=C4A PE=1 SV=2

Match to Query 34490: 1279.663528 from(640.839040,2+) rtinseconds(1964) index(62890)

Title: Locus:1.1.1.2681.11 File:"2013-07-02 CLN FXIII 30 min 1st F 4.wiff"

Data file C:\Program Files (x86)\Matrix Science\Mascot Daemon\mgf1 FXIII 30 min 1st\mascot\_daemon\_merge.mgf

Click mouse within plot area to zoom in by factor of two about that point

Or, Plot from  to  Da

Label all possible matches  Label matches used for scoring

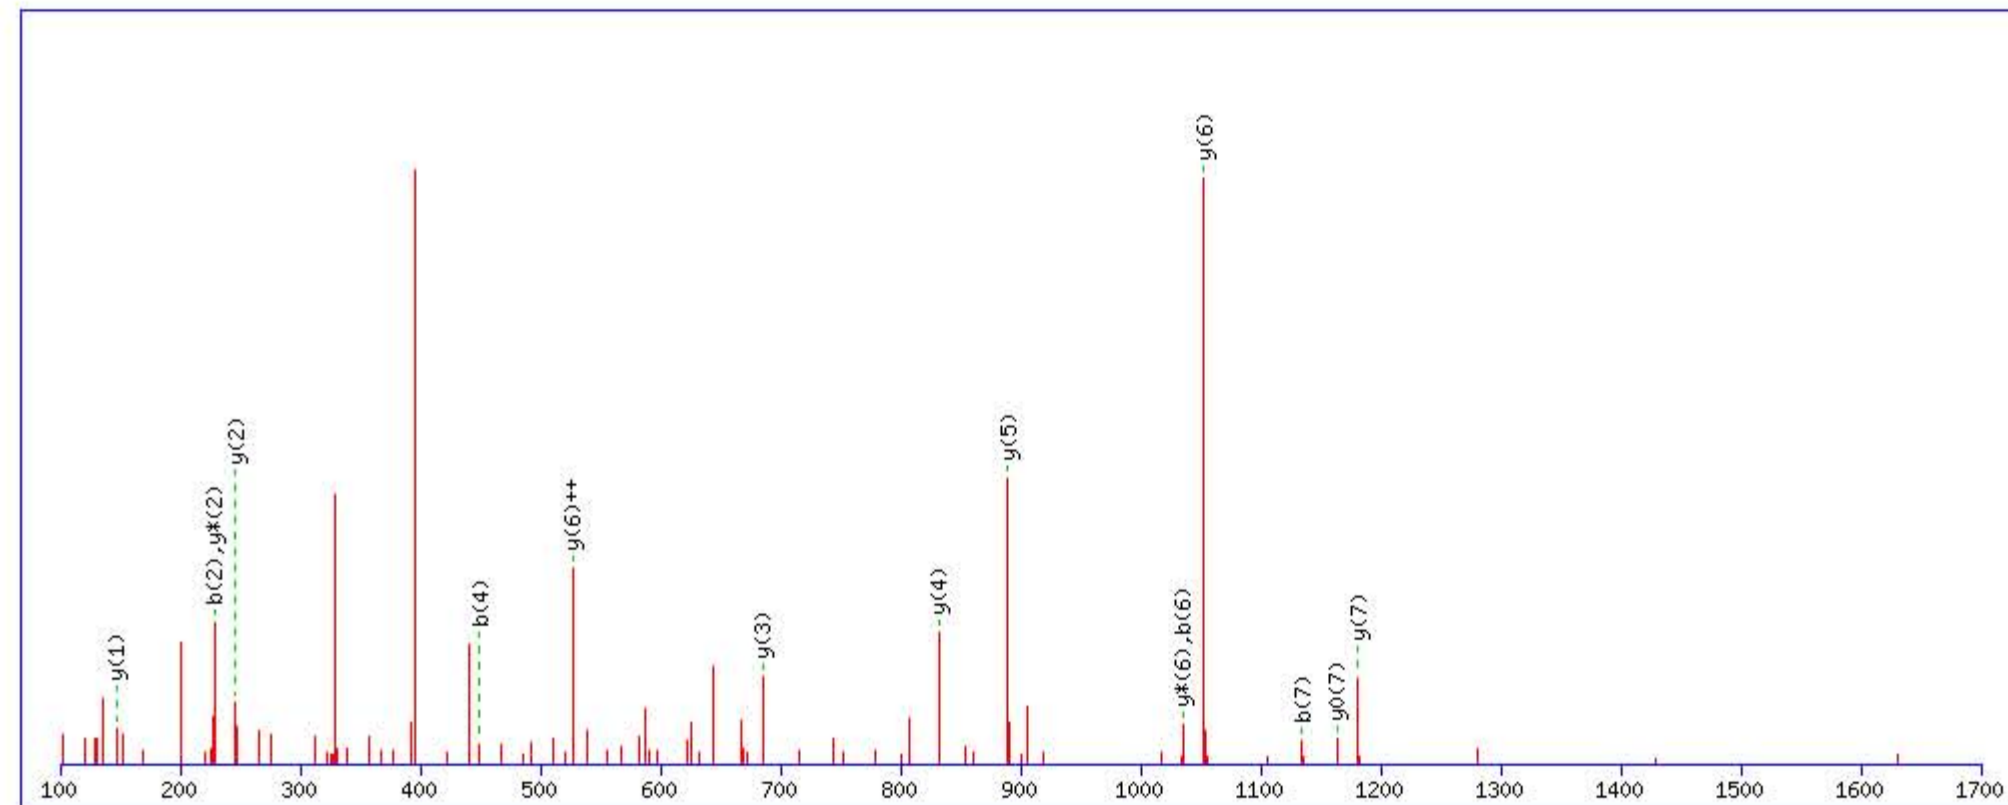

Monoisotopic mass of neutral peptide Mr(calc): 1279.663483

Fixed modifications: Carbamidomethyl (C) (apply to specified residues or termini only)

Variable modifications:

Q6 : Biotin:Thermo-21345 (Q)

Ions Score: 32 Expect: 0.012

Matches : 15/60 fragment ions using 32 most intense peaks [\(help\)](#)

| # | b                  | b <sup>++</sup> | b <sup>*</sup> | b <sup>+++</sup> | b <sup>0</sup> | b <sup>0++</sup> | Seq. | y                  | y <sup>++</sup>   | y <sup>*</sup>     | y <sup>+++</sup> | y <sup>0</sup>     | y <sup>0++</sup> | # |
|---|--------------------|-----------------|----------------|------------------|----------------|------------------|------|--------------------|-------------------|--------------------|------------------|--------------------|------------------|---|
| 1 | 100.075690         | 50.541483       |                |                  |                |                  | V    |                    |                   |                    |                  |                    |                  | 8 |
| 2 | <b>229.118283</b>  | 115.062780      |                |                  | 211.107718     | 106.057497       | E    | <b>1181.602344</b> | 591.304810        | 1164.575795        | 582.791536       | <b>1163.591779</b> | 582.299528       | 7 |
| 3 | 392.181612         | 196.594444      |                |                  | 374.171047     | 187.589162       | Y    | <b>1052.559751</b> | <b>526.783514</b> | <b>1035.533202</b> | 518.270239       |                    |                  | 6 |
| 4 | <b>449.203076</b>  | 225.105176      |                |                  | 431.192511     | 216.099894       | G    | <b>889.496422</b>  | 445.251849        | 872.469873         | 436.738575       |                    |                  | 5 |
| 5 | 596.271490         | 298.639383      |                |                  | 578.260925     | 289.634101       | F    | <b>832.474958</b>  | 416.741117        | 815.448409         | 408.227843       |                    |                  | 4 |
| 6 | <b>1035.496816</b> | 518.252046      | 1018.470267    | 509.738772       | 1017.486251    | 509.246764       | Q    | <b>685.406544</b>  | 343.206910        | 668.379995         | 334.693636       |                    |                  | 3 |
| 7 | <b>1134.565230</b> | 567.786253      | 1117.538681    | 559.272979       | 1116.554665    | 558.780971       | V    | <b>246.181218</b>  | 123.594247        | <b>229.154669</b>  | 115.080973       |                    |                  | 2 |
| 8 |                    |                 |                |                  |                |                  | K    | <b>147.112804</b>  | 74.060040         | 130.086255         | 65.546765        |                    |                  | 1 |

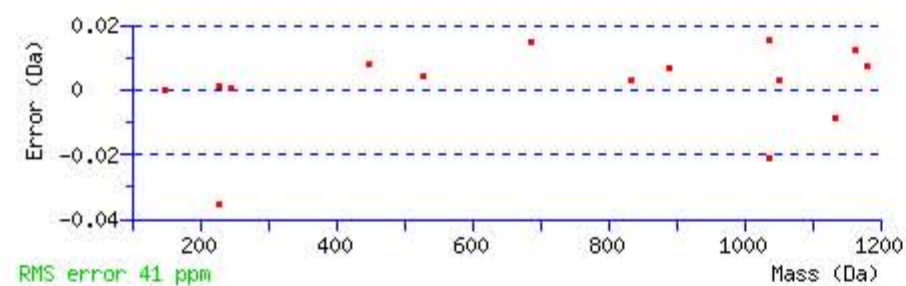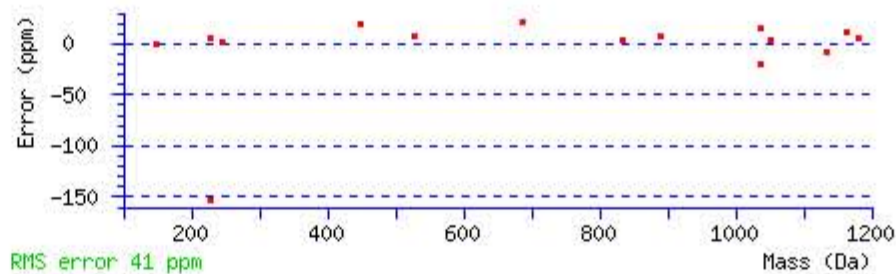

NCBI BLAST search of **VEYGFQVK**

(Parameters: blastp, nr protein database, expect=20000, no filter, PAM30)

Other BLAST [web gateways](#)

All matches to this query

| Score | Mr(calc):   | Delta     | Sequence                     |
|-------|-------------|-----------|------------------------------|
| 31.6  | 1279.663483 | 0.000045  | <a href="#">VEYGFQVK</a>     |
| 10.5  | 1279.681229 | -0.017701 | <a href="#">EVTVKEWYVK</a>   |
| 5.2   | 1279.663483 | 0.000045  | <a href="#">QFVGYLDK</a>     |
| 4.4   | 1279.659470 | 0.004058  | <a href="#">VCSFGKQVVEK</a>  |
| 3.4   | 1279.677216 | -0.013688 | <a href="#">VFKTEDITQGKK</a> |
| 0.8   | 1279.666824 | -0.003296 | <a href="#">VKEWSLMIMK</a>   |
| 0.3   | 1279.652039 | 0.011489  | <a href="#">QAVRSYNSEVK</a>  |
| 0.2   | 1279.652924 | 0.010604  | <a href="#">MVARVWSLMR</a>   |
| 0.1   | 1279.659424 | 0.004104  | <a href="#">VECLYEALKR</a>   |



# MASCOT Search Results

## Peptide View

MS/MS Fragmentation of **DKGQAGLQR**

Found in **CO4A\_HUMAN**, Complement C4-A OS=Homo sapiens GN=C4A PE=1 SV=2

Match to Query 34737: 1282.679888 from(642.347220,2+) rtinseconds(1299) index(58067)

Title: Locus:1.1.1.2450.18 File:"2013-07-02 CLN FXIII 30 min 1st F 4.wiff"

Data file C:\Program Files (x86)\Matrix Science\Mascot Daemon\mgf1 FXIII 30 min 1st\mascot\_daemon\_merge.mgf

Click mouse within plot area to zoom in by factor of two about that point

Or, Plot from  to  Da

Label all possible matches  Label matches used for scoring

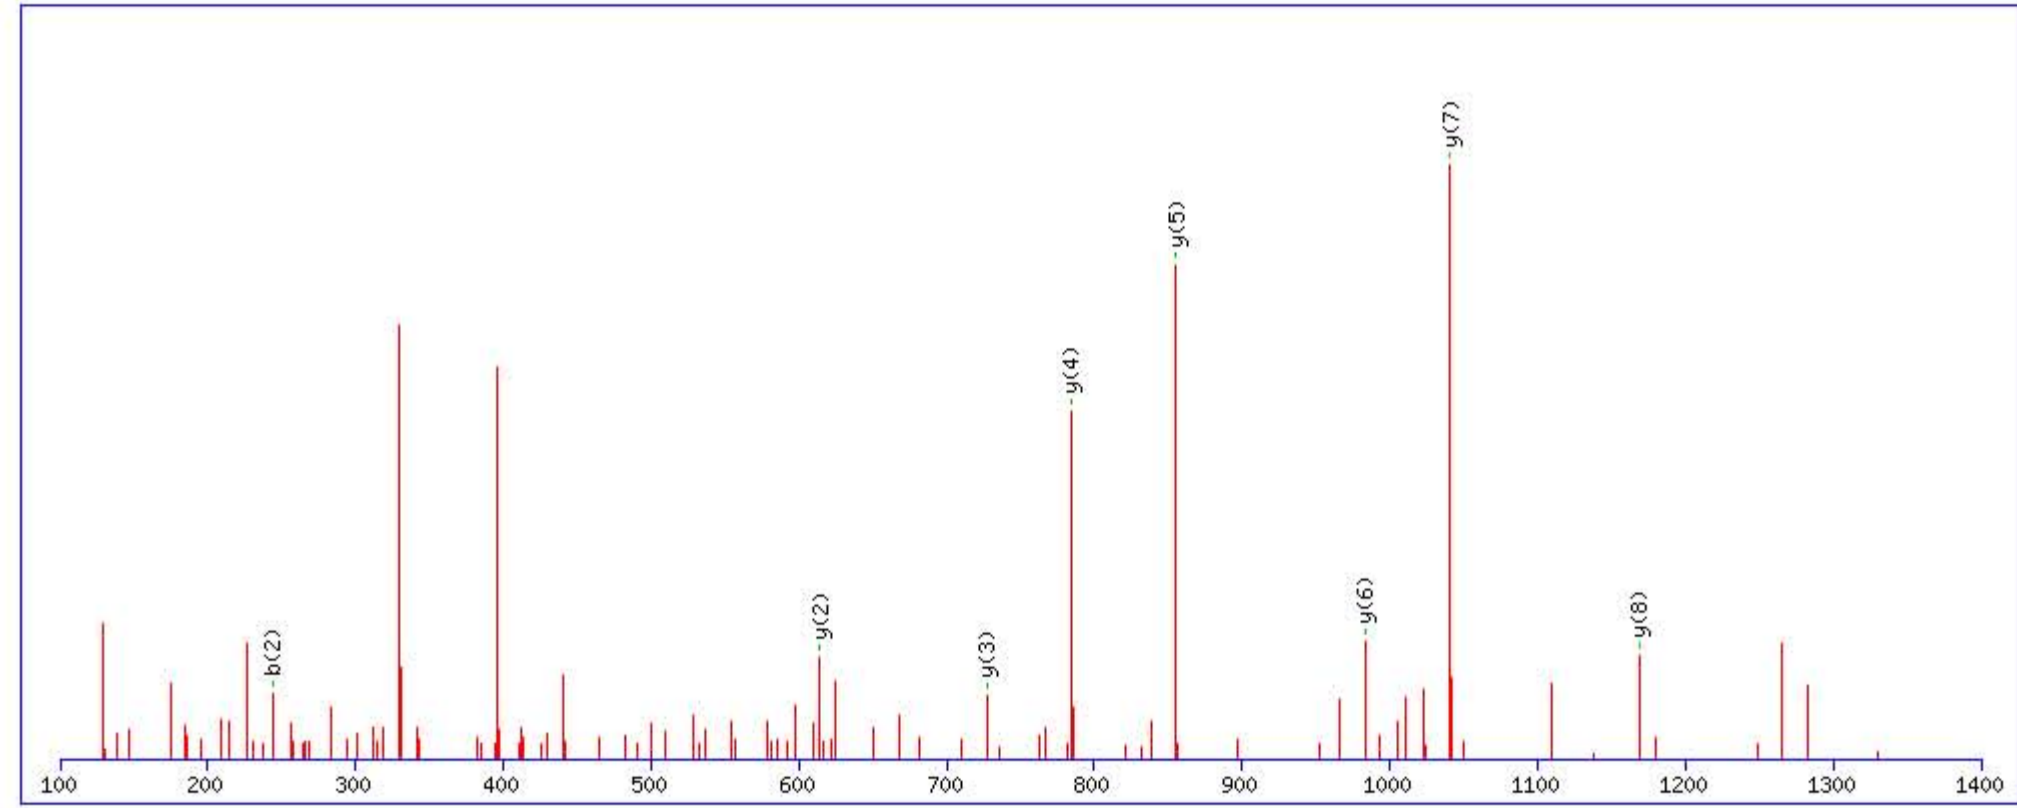

Monoisotopic mass of neutral peptide Mr(calc): 1282.681580

Fixed modifications: Carbamidomethyl (C) (apply to specified residues or termini only)

Variable modifications:

Q8 : Biotin:Thermo-21345 (Q)

Ions Score: 59 Expect: 2.7e-005

Matches : 8/78 fragment ions using 12 most intense peaks [\(help\)](#)

| # | b                 | b <sup>++</sup> | b <sup>*</sup> | b <sup>***</sup> | b <sup>0</sup> | b <sup>0++</sup> | Seq. | y                  | y <sup>++</sup> | y <sup>*</sup> | y <sup>***</sup> | # |
|---|-------------------|-----------------|----------------|------------------|----------------|------------------|------|--------------------|-----------------|----------------|------------------|---|
| 1 | 116.034219        | 58.520748       |                |                  | 98.023654      | 49.515465        | D    |                    |                 |                |                  | 9 |
| 2 | <b>244.129182</b> | 122.568229      | 227.102633     | 114.054955       | 226.118617     | 113.562947       | K    | <b>1168.661925</b> | 584.834600      | 1151.635376    | 576.321326       | 8 |
| 3 | 301.150646        | 151.078961      | 284.124097     | 142.565687       | 283.140081     | 142.073679       | G    | <b>1040.566962</b> | 520.787119      | 1023.540413    | 512.273844       | 7 |
| 4 | 429.209224        | 215.108250      | 412.182675     | 206.594976       | 411.198659     | 206.102968       | Q    | <b>983.545498</b>  | 492.276387      | 966.518949     | 483.763112       | 6 |
| 5 | 500.246338        | 250.626807      | 483.219789     | 242.113532       | 482.235773     | 241.621524       | A    | <b>855.486920</b>  | 428.247098      | 838.460371     | 419.733823       | 5 |
| 6 | 557.267802        | 279.137539      | 540.241253     | 270.624265       | 539.257237     | 270.132257       | G    | <b>784.449806</b>  | 392.728541      | 767.423257     | 384.215266       | 4 |
| 7 | 670.351866        | 335.679571      | 653.325317     | 327.166297       | 652.341301     | 326.674289       | L    | <b>727.428342</b>  | 364.217809      | 710.401793     | 355.704534       | 3 |
| 8 | 1109.577192       | 555.292234      | 1092.550643    | 546.778960       | 1091.566627    | 546.286951       | Q    | <b>614.344278</b>  | 307.675777      | 597.317729     | 299.162502       | 2 |
| 9 |                   |                 |                |                  |                |                  | R    | 175.118952         | 88.063114       | 158.092403     | 79.549839        | 1 |

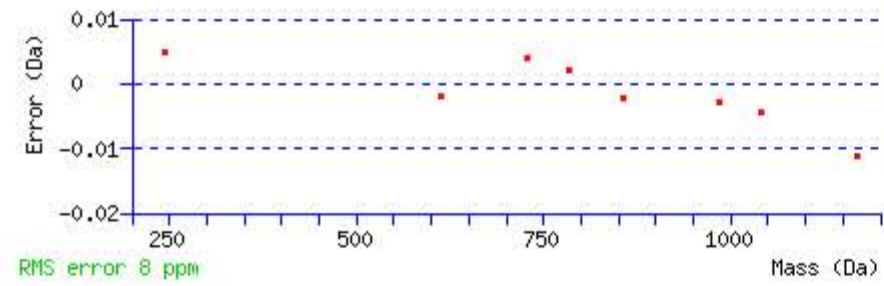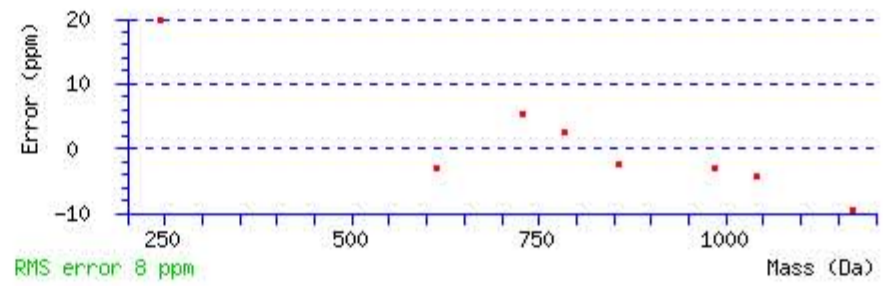

NCBI BLAST search of **DKGQAGLQR**

(Parameters: blastp, nr protein database, expect=20000, no filter, PAM30)

Other BLAST [web gateways](#)

### All matches to this query

| Score | Mr(calc):   | Delta     | Sequence                     |
|-------|-------------|-----------|------------------------------|
| 58.5  | 1282.681580 | -0.001692 | <a href="#">DKGQAGLQR</a>    |
| 13.0  | 1282.688095 | -0.008207 | <a href="#">KPTKPESQSPGK</a> |
| 11.7  | 1282.662933 | 0.016955  | <a href="#">QKNEGRPETPK</a>  |
| 10.6  | 1282.670334 | 0.009554  | <a href="#">ELEGQIQR</a>     |
| 7.7   | 1282.681580 | -0.001692 | <a href="#">DKGQAGLQR</a>    |
| 5.6   | 1282.674194 | 0.005694  | <a href="#">QGEGQSRLVPGR</a> |
| 5.3   | 1282.685623 | -0.005735 | <a href="#">VWVDGIQR</a>     |
| 4.8   | 1282.670334 | 0.009554  | <a href="#">QDLEAQIR</a>     |
| 3.6   | 1282.676834 | 0.003054  | <a href="#">KALEDEKPEPK</a>  |
| 3.1   | 1282.670319 | 0.009569  | <a href="#">MAAPEQPLAISR</a> |



# Mascot Search Results

## Peptide View

MS/MS Fragmentation of **VVEEQESR**

Found in **CO4A\_HUMAN**, Complement C4-A OS=Homo sapiens GN=C4A PE=1 SV=2

Match to Query 34842: 1285.625228 from(643.819890,2+) rtinseconds(1333) index(58250)

Title: Locus:1.1.1.2462.22 File:"2013-07-02 CLN FXIII 30 min 1st F 4.wiff"

Data file C:\Program Files (x86)\Matrix Science\Mascot Daemon\mgf1 FXIII 30 min 1st\mascot\_daemon\_merge.mgf

Click mouse within plot area to zoom in by factor of two about that point

Or, Plot from  to  Da

Label all possible matches  Label matches used for scoring

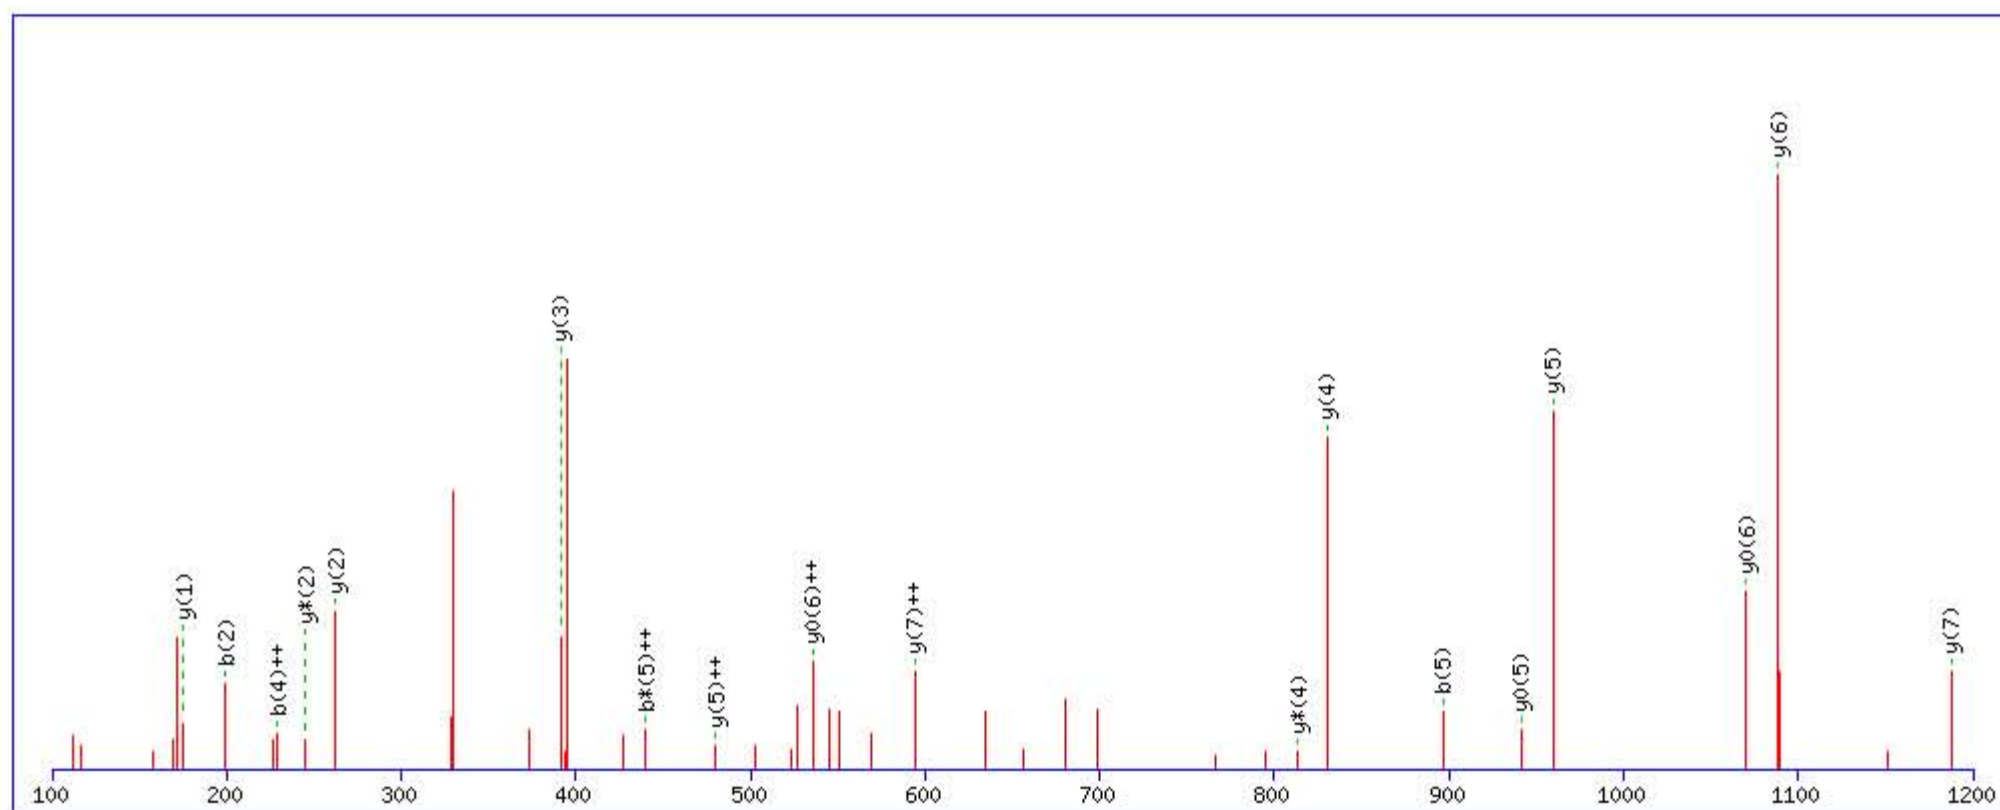

Monoisotopic mass of neutral peptide Mr(calc): 1285.633621

Fixed modifications: Carbamidomethyl (C) (apply to specified residues or termini only)

Variable modifications:

Q5 : Biotin:Thermo-21345 (Q)

Ions Score: 45 Expect: 0.00051

Matches : 18/70 fragment ions using 30 most intense peaks [\(help\)](#)

| # | b                 | b <sup>++</sup>   | b <sup>*</sup> | b <sup>+++</sup>  | b <sup>0</sup> | b <sup>0++</sup> | Seq. | y                  | y <sup>++</sup>   | y <sup>*</sup>    | y <sup>+++</sup> | y <sup>0</sup>     | y <sup>0++</sup>  | # |
|---|-------------------|-------------------|----------------|-------------------|----------------|------------------|------|--------------------|-------------------|-------------------|------------------|--------------------|-------------------|---|
| 1 | 100.075690        | 50.541483         |                |                   |                |                  | V    |                    |                   |                   |                  |                    |                   | 8 |
| 2 | <b>199.144104</b> | 100.075690        |                |                   |                |                  | V    | <b>1187.572499</b> | <b>594.289888</b> | 1170.545950       | 585.776613       | 1169.561934        | 585.284605        | 7 |
| 3 | 328.186697        | 164.596987        |                |                   | 310.176132     | 155.591704       | E    | <b>1088.504085</b> | 544.755681        | 1071.477536       | 536.242406       | <b>1070.493520</b> | <b>535.750398</b> | 6 |
| 4 | 457.229290        | <b>229.118283</b> |                |                   | 439.218725     | 220.113001       | E    | <b>959.461492</b>  | <b>480.234384</b> | 942.434943        | 471.721110       | <b>941.450927</b>  | 471.229102        | 5 |
| 5 | <b>896.454616</b> | 448.730946        | 879.428067     | <b>440.217672</b> | 878.444051     | 439.725664       | Q    | <b>830.418899</b>  | 415.713088        | <b>813.392350</b> | 407.199813       | 812.408334         | 406.707805        | 4 |
| 6 | 1025.497209       | 513.252243        | 1008.470660    | 504.738968        | 1007.486644    | 504.246960       | E    | <b>391.193573</b>  | 196.100425        | 374.167024        | 187.587150       | 373.183008         | 187.095142        | 3 |
| 7 | 1112.529237       | 556.768257        | 1095.502688    | 548.254982        | 1094.518672    | 547.762974       | S    | <b>262.150980</b>  | 131.579128        | <b>245.124431</b> | 123.065854       | 244.140415         | 122.573846        | 2 |
| 8 |                   |                   |                |                   |                |                  | R    | <b>175.118952</b>  | 88.063114         | 158.092403        | 79.549839        |                    |                   | 1 |

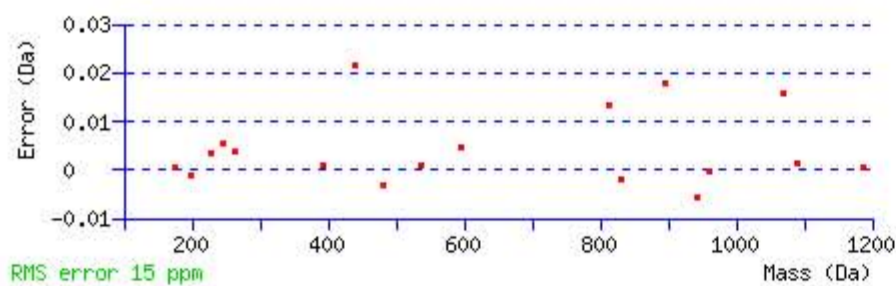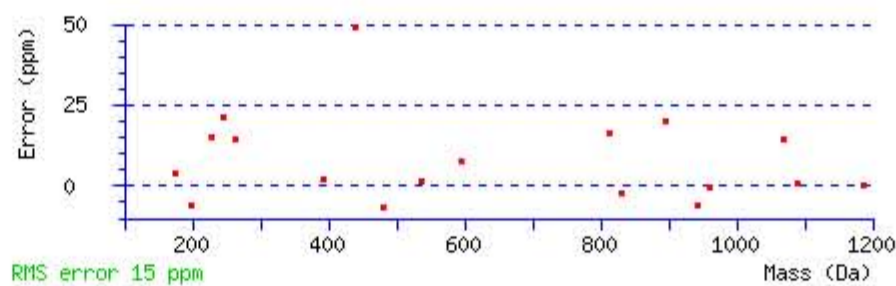

NCBI BLAST search of [VVEEQESR](#)

(Parameters: blastp, nr protein database, expect=20000, no filter, PAM30)

Other BLAST [web gateways](#)

All matches to this query

| Score | Mr(calc):   | Delta     | Sequence                 |
|-------|-------------|-----------|--------------------------|
| 45.3  | 1285.633621 | -0.008393 | <a href="#">VVEEQESR</a> |

Mascot: <http://www.matrixscience.com/>



# MASCOT Search Results

## Peptide View

MS/MS Fragmentation of **LGQYASPTAK**

Found in **CO4A\_HUMAN**, Complement C4-A OS=Homo sapiens GN=C4A PE=1 SV=2

Match to Query 36303: 1345.702868 from(673.858710,2+) rtinseconds(1569) index(60066)

Title: Locus:1.1.1.2544.17 File:"2013-07-02 CLN FXIII 30 min 1st F 4.wiff"

Data file C:\Program Files (x86)\Matrix Science\Mascot Daemon\mgf\1 FXIII 30 min 1st\mascot\_daemon\_merge.mgf

Click mouse within plot area to zoom in by factor of two about that point

Or, Plot from  to  Da

Label all possible matches  Label matches used for scoring

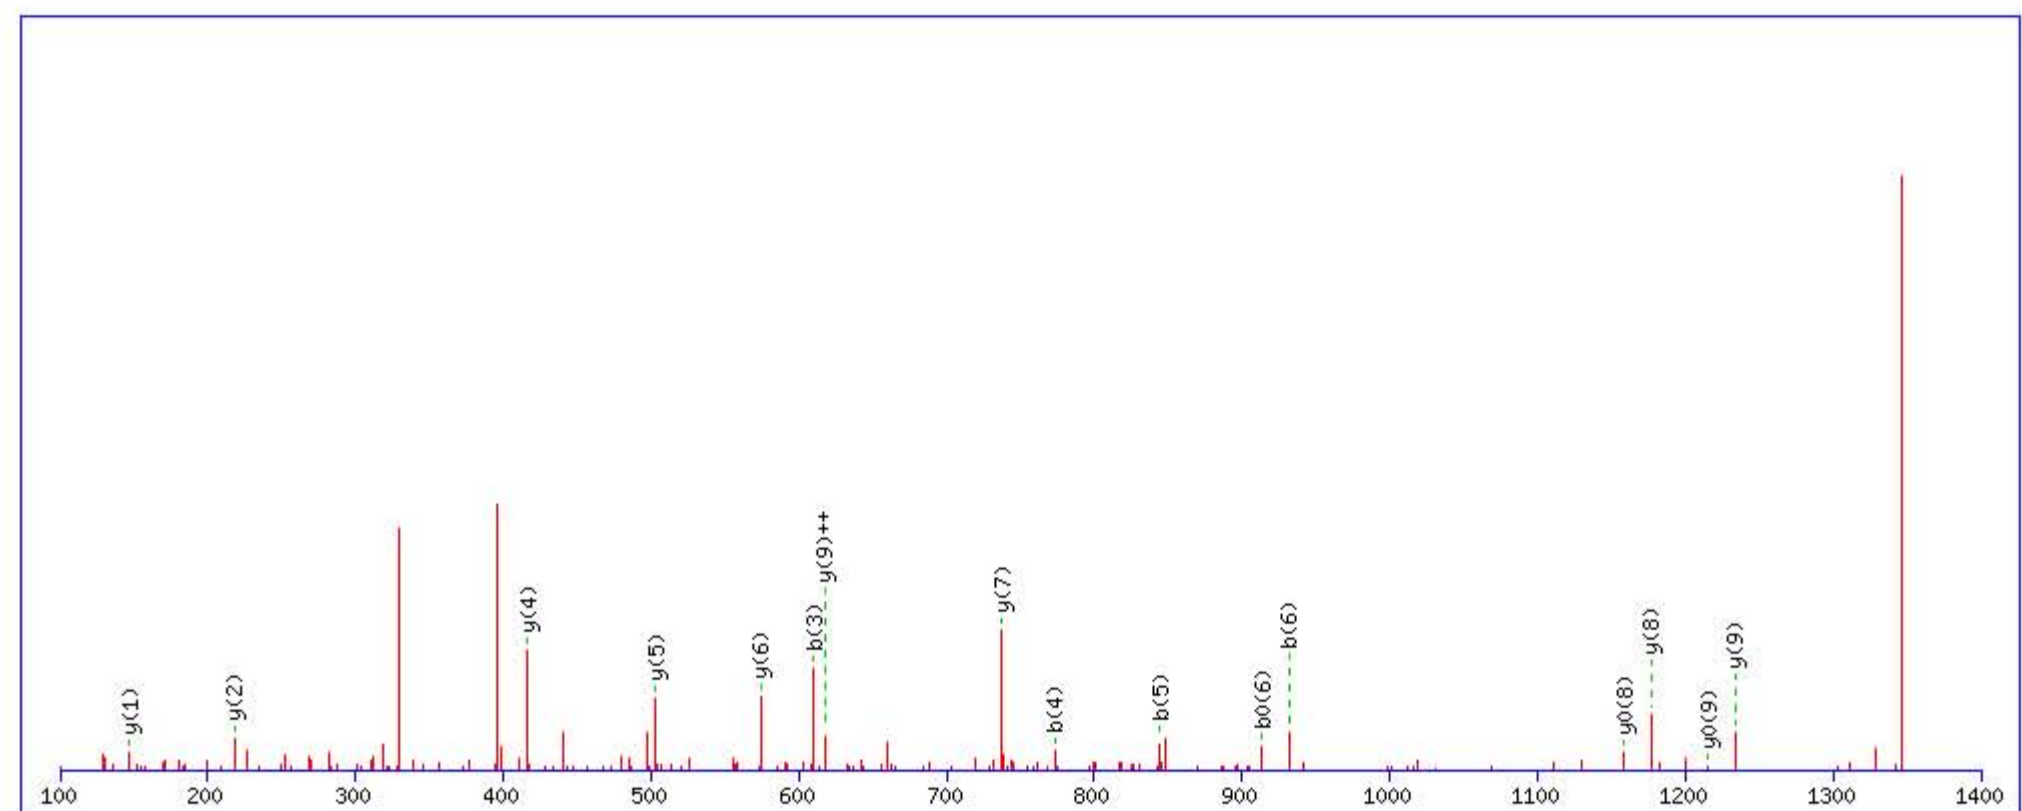

Monoisotopic mass of neutral peptide Mr(calc): 1345.706390

Fixed modifications: Carbamidomethyl (C) (apply to specified residues or termini only)

Variable modifications:

Q3 : Biotin:Thermo-21345 (Q)

Ions Score: 57 Expect: 5.9e-005

Matches : 16/90 fragment ions using 26 most intense peaks [\(help\)](#)

| #  | b           | b <sup>++</sup> | b <sup>+</sup> | b <sup>+++</sup> | b <sup>0</sup> | b <sup>0++</sup> | Seq. | y           | y <sup>++</sup> | y <sup>+</sup> | y <sup>+++</sup> | y <sup>0</sup> | y <sup>0++</sup> | #  |
|----|-------------|-----------------|----------------|------------------|----------------|------------------|------|-------------|-----------------|----------------|------------------|----------------|------------------|----|
| 1  | 114.091340  | 57.549308       |                |                  |                |                  | L    |             |                 |                |                  |                |                  | 10 |
| 2  | 171.112804  | 86.060040       |                |                  |                |                  | G    | 1233.629622 | 617.318449      | 1216.603073    | 608.805175       | 1215.619057    | 608.313167       | 9  |
| 3  | 610.338130  | 305.672703      | 593.311581     | 297.159429       |                |                  | Q    | 1176.608158 | 588.807717      | 1159.581609    | 580.294443       | 1158.597593    | 579.802435       | 8  |
| 4  | 773.401459  | 387.204368      | 756.374910     | 378.691093       |                |                  | Y    | 737.382832  | 369.195054      | 720.356283     | 360.681780       | 719.372267     | 360.189772       | 7  |
| 5  | 844.438573  | 422.722925      | 827.412024     | 414.209650       |                |                  | A    | 574.319503  | 287.663389      | 557.292954     | 279.150115       | 556.308938     | 278.658107       | 6  |
| 6  | 931.470601  | 466.238939      | 914.444052     | 457.725664       | 913.460036     | 457.233656       | S    | 503.282389  | 252.144832      | 486.255840     | 243.631558       | 485.271824     | 243.139550       | 5  |
| 7  | 1028.523365 | 514.765321      | 1011.496816    | 506.252046       | 1010.512800    | 505.760038       | P    | 416.250361  | 208.628818      | 399.223812     | 200.115544       | 398.239796     | 199.623536       | 4  |
| 8  | 1129.571044 | 565.289160      | 1112.544495    | 556.775886       | 1111.560479    | 556.283878       | T    | 319.197597  | 160.102436      | 302.171048     | 151.589162       | 301.187032     | 151.097154       | 3  |
| 9  | 1200.608158 | 600.807717      | 1183.581609    | 592.294443       | 1182.597593    | 591.802435       | A    | 218.149918  | 109.578597      | 201.123369     | 101.065322       |                |                  | 2  |
| 10 |             |                 |                |                  |                |                  | K    | 147.112804  | 74.060040       | 130.086255     | 65.546765        |                |                  | 1  |

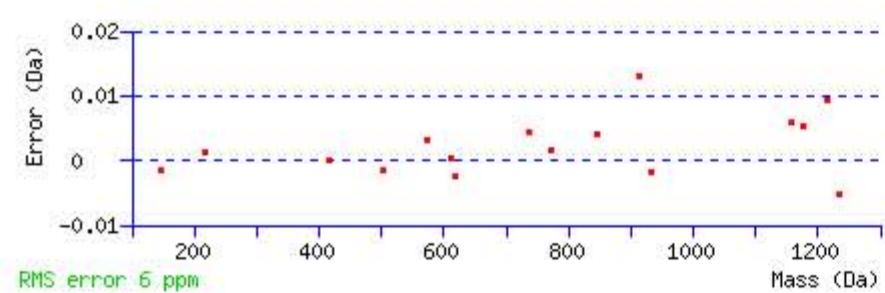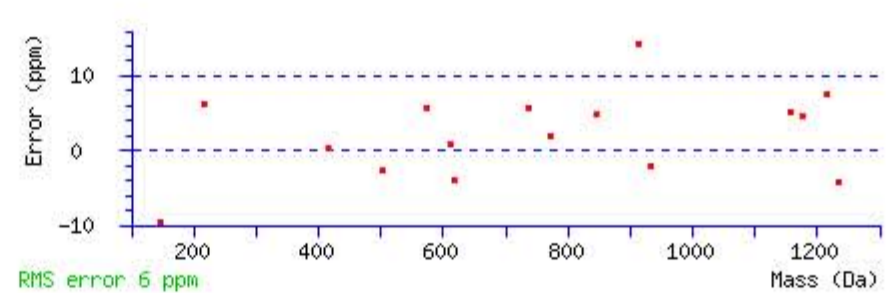

NCBI BLAST search of **LGQYASPTAK**

(Parameters: blastp, nr protein database, expect=20000, no filter, PAM30)

Other BLAST [web gateways](#)

## All matches to this query

| Score | Mr(calc):   | Delta     | Sequence                      |
|-------|-------------|-----------|-------------------------------|
| 56.9  | 1345.706390 | -0.003522 | <a href="#">LGQYASPTAK</a>    |
| 25.0  | 1345.706390 | -0.003522 | <a href="#">LGQYDQALK</a>     |
| 10.6  | 1345.692474 | 0.010394  | <a href="#">VASCRYPALGPR</a>  |
| 9.3   | 1345.706406 | -0.003538 | <a href="#">QGLYTPQTK</a>     |
| 3.7   | 1345.708862 | -0.005994 | <a href="#">LTESEEELLRK</a>   |
| 3.4   | 1345.713608 | -0.010740 | <a href="#">NGMLLTGGGKDRK</a> |
| 2.3   | 1345.720993 | -0.018125 | <a href="#">QVGMICERLLK</a>   |
| 1.8   | 1345.683746 | 0.019122  | <a href="#">QDASTLISDLQR</a>  |
| 1.2   | 1345.717636 | -0.014768 | <a href="#">QMPQPIFTLRK</a>   |
| 0.5   | 1345.720108 | -0.017240 | <a href="#">KQEEEVSTLRK</a>   |



# MASCOT Search Results

## Peptide View

MS/MS Fragmentation of **TEQWSTLPPETK**

Found in **CO4A\_HUMAN**, Complement C4-A OS=Homo sapiens GN=C4A PE=1 SV=2

Match to Query 50183: 1726.869408 from(864.441980,2+) rtinseconds(1997) index(63074)

Title: Locus:1.1.1.2692.14 File:"2013-07-02 CLN FXIII 30 min 1st F 4.wiff"

Data file C:\Program Files (x86)\Matrix Science\Mascot Daemon\mgf1 FXIII 30 min 1st\mascot\_daemon\_merge.mgf

Click mouse within plot area to zoom in by factor of two about that point

Or, Plot from  to  Da

Label all possible matches  Label matches used for scoring

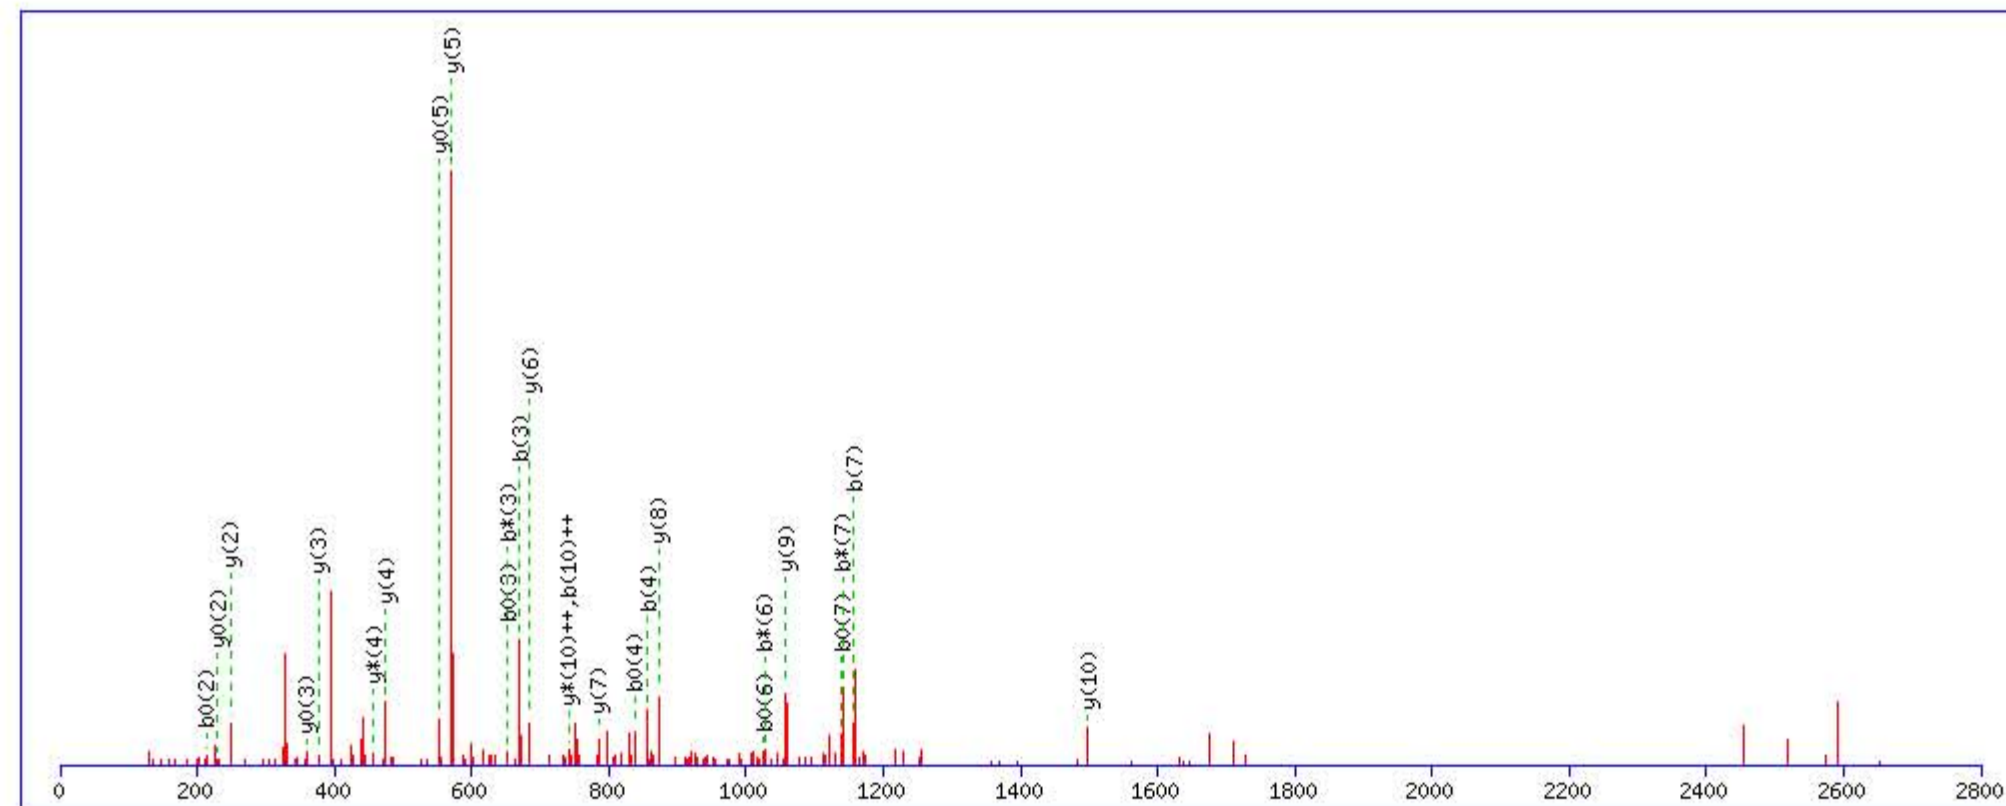

Monoisotopic mass of neutral peptide Mr(calc): 1726.860001

Fixed modifications: Carbamidomethyl (C) (apply to specified residues or termini only)

Variable modifications:

Q3 : Biotin:Thermo-21345 (Q)

Ions Score: 28 Expect: 0.013

Matches : 26/126 fragment ions using 82 most intense peaks [\(help\)](#)

| #  | b                  | b <sup>++</sup>   | b <sup>+</sup>     | b <sup>+++</sup> | b <sup>0</sup>     | b <sup>0++</sup> | Seq. | y                  | y <sup>++</sup> | y <sup>+</sup>    | y <sup>+++</sup>  | y <sup>0</sup>    | y <sup>0++</sup> | #  |
|----|--------------------|-------------------|--------------------|------------------|--------------------|------------------|------|--------------------|-----------------|-------------------|-------------------|-------------------|------------------|----|
| 1  | 102.054955         | 51.531116         |                    |                  | 84.044390          | 42.525833        | T    |                    |                 |                   |                   |                   |                  | 12 |
| 2  | 231.097548         | 116.052412        |                    |                  | 213.086983         | 107.047130       | E    | 1626.819607        | 813.913442      | 1609.793058       | 805.400167        | 1608.809042       | 804.908159       | 11 |
| 3  | <b>670.322874</b>  | 335.665075        | <b>653.296325</b>  | 327.151801       | <b>652.312309</b>  | 326.659793       | Q    | <b>1497.777014</b> | 749.392145      | 1480.750465       | <b>740.878871</b> | 1479.766449       | 740.386863       | 10 |
| 4  | <b>856.402187</b>  | 428.704732        | 839.375638         | 420.191457       | <b>838.391622</b>  | 419.699449       | W    | <b>1058.551688</b> | 529.779482      | 1041.525139       | 521.266208        | 1040.541123       | 520.774200       | 9  |
| 5  | 943.434215         | 472.220746        | 926.407666         | 463.707471       | 925.423650         | 463.215463       | S    | <b>872.472375</b>  | 436.739826      | 855.445826        | 428.226551        | 854.461810        | 427.734543       | 8  |
| 6  | 1044.481894        | 522.744585        | <b>1027.455345</b> | 514.231311       | <b>1026.471329</b> | 513.739303       | T    | <b>785.440347</b>  | 393.223812      | 768.413798        | 384.710537        | 767.429782        | 384.218529       | 7  |
| 7  | <b>1157.565958</b> | 579.286617        | <b>1140.539409</b> | 570.773343       | <b>1139.555393</b> | 570.281334       | L    | <b>684.392668</b>  | 342.699972      | 667.366119        | 334.186698        | 666.382103        | 333.694690       | 6  |
| 8  | 1254.618722        | 627.812999        | 1237.592173        | 619.299725       | 1236.608157        | 618.807716       | P    | <b>571.308604</b>  | 286.157940      | 554.282055        | 277.644666        | <b>553.298039</b> | 277.152658       | 5  |
| 9  | 1351.671486        | 676.339381        | 1334.644937        | 667.826107       | 1333.660921        | 667.334098       | P    | <b>474.255840</b>  | 237.631558      | <b>457.229291</b> | 229.118284        | 456.245275        | 228.626276       | 4  |
| 10 | 1480.714079        | <b>740.860678</b> | 1463.687530        | 732.347403       | 1462.703514        | 731.855395       | E    | <b>377.203076</b>  | 189.105176      | 360.176527        | 180.591902        | <b>359.192511</b> | 180.099894       | 3  |
| 11 | 1581.761758        | 791.384517        | 1564.735209        | 782.871243       | 1563.751193        | 782.379235       | T    | <b>248.160483</b>  | 124.583879      | 231.133934        | 116.070605        | <b>230.149918</b> | 115.578597       | 2  |
| 12 |                    |                   |                    |                  |                    |                  | K    | 147.112804         | 74.060040       | 130.086255        | 65.546765         |                   |                  | 1  |

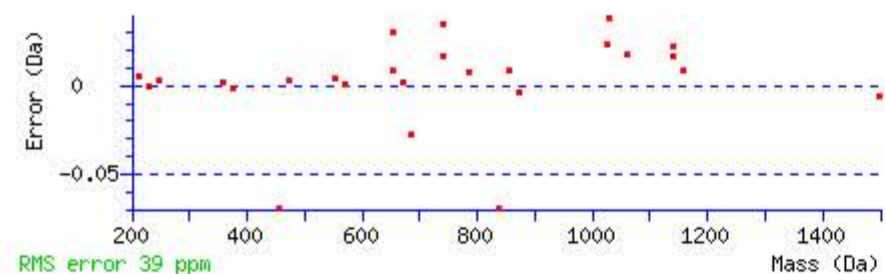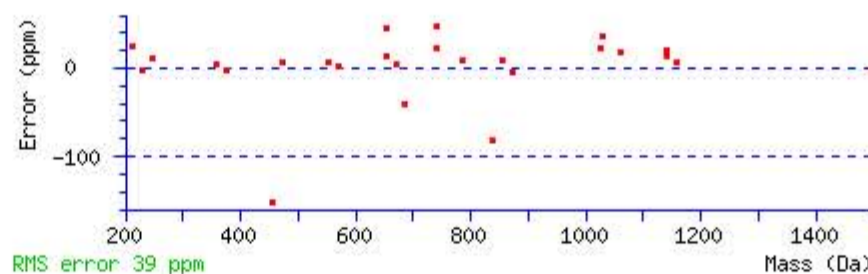

NCBI BLAST search of [TEQWSTLPPETK](#)

(Parameters: blastp, nr protein database, expect=20000, no filter, PAM30)

Other BLAST [web gateways](#)

All matches to this query

| Score | Mr(calc):   | Delta     | Sequence                           |
|-------|-------------|-----------|------------------------------------|
| 28.1  | 1726.860001 | 0.009407  | <a href="#">TEQWSTLPPETK</a>       |
| 7.4   | 1726.849960 | 0.019448  | <a href="#">TERFGQGGAGPVGGQGPR</a> |
| 3.8   | 1726.867188 | 0.002221  | <a href="#">KDHAEMQAVIDAKQK</a>    |
| 0.3   | 1726.871216 | -0.001808 | <a href="#">NLNTKLQMYFQSPK</a>     |

Mascot: <http://www.matrixscience.com/>



# MASCOT Search Results

## Peptide View

MS/MS Fragmentation of **GLEEELQFSLGSK**

Found in **CO4A\_HUMAN**, Complement C4-A OS=Homo sapiens GN=C4A PE=1 SV=2

Match to Query 50803: 1746.897668 from(874.456110,2+) rtinseconds(2522) index(66377)

Title: Locus:1.1.1.2875.8 File:"2013-07-02 CLN FXIII 30 min 1st F 4.wiff"

Data file C:\Program Files (x86)\Matrix Science\Mascot Daemon\mgf\1 FXIII 30 min 1st\mascot\_daemon\_merge.mgf

Click mouse within plot area to zoom in by factor of two about that point

Or, Plot from  to  Da

Label all possible matches  Label matches used for scoring

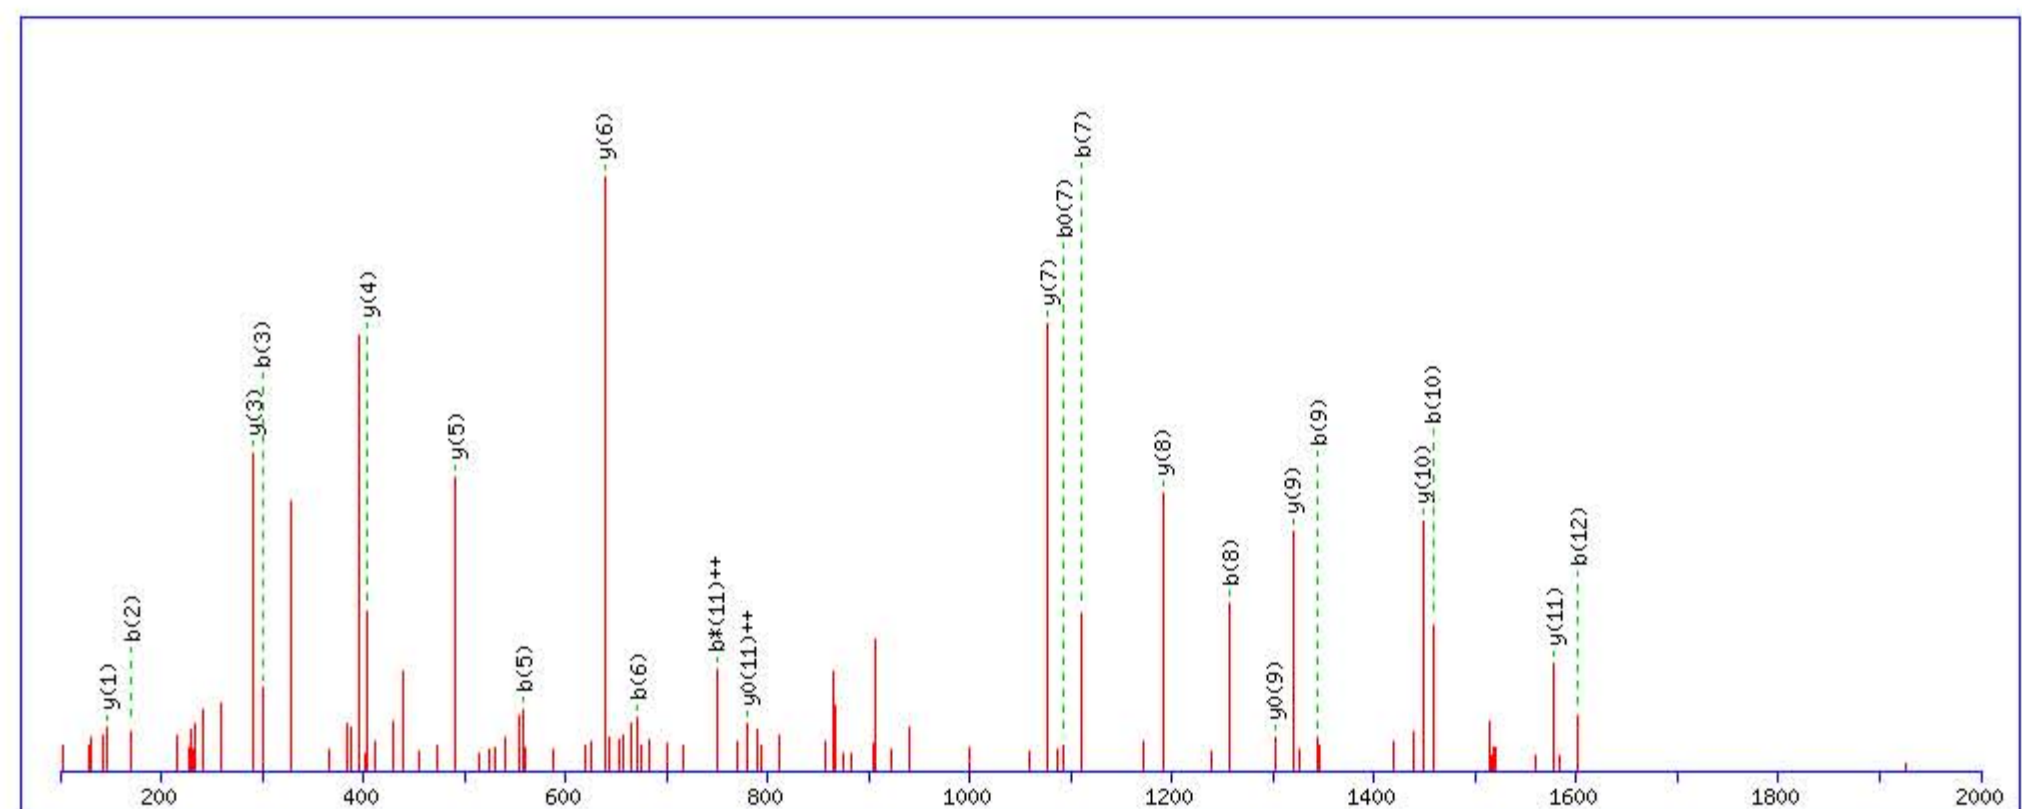

Monoisotopic mass of neutral peptide Mr(calc): 1746.886200

Fixed modifications: Carbamidomethyl (C) (apply to specified residues or termini only)

Variable modifications:

Q7 : Biotin:Thermo-21345 (Q)

Ions Score: 88 Expect: 2.7e-008

Matches : 23/126 fragment ions using 30 most intense peaks [\(help\)](#)

| #  | b                  | b <sup>++</sup> | b <sup>*</sup> | b <sup>*++</sup>  | b <sup>0</sup>     | b <sup>0++</sup> | Seq. | y                  | y <sup>++</sup> | y <sup>*</sup> | y <sup>*++</sup> | y <sup>0</sup>     | y <sup>0++</sup>  | #  |
|----|--------------------|-----------------|----------------|-------------------|--------------------|------------------|------|--------------------|-----------------|----------------|------------------|--------------------|-------------------|----|
| 1  | 58.028740          | 29.518008       |                |                   |                    |                  | G    |                    |                 |                |                  |                    |                   | 13 |
| 2  | <b>171.112804</b>  | 86.060040       |                |                   |                    |                  | L    | 1690.872035        | 845.939656      | 1673.845486    | 837.426381       | 1672.861470        | 836.934373        | 12 |
| 3  | <b>300.155397</b>  | 150.581336      |                |                   | 282.144832         | 141.576054       | E    | <b>1577.787971</b> | 789.397624      | 1560.761422    | 780.884349       | 1559.777406        | <b>780.392341</b> | 11 |
| 4  | 429.197990         | 215.102633      |                |                   | 411.187425         | 206.097351       | E    | <b>1448.745378</b> | 724.876327      | 1431.718829    | 716.363053       | 1430.734813        | 715.871045        | 10 |
| 5  | <b>558.240583</b>  | 279.623930      |                |                   | 540.230018         | 270.618647       | E    | <b>1319.702785</b> | 660.355031      | 1302.676236    | 651.841756       | <b>1301.692220</b> | 651.349748        | 9  |
| 6  | <b>671.324647</b>  | 336.165962      |                |                   | 653.314082         | 327.160679       | L    | <b>1190.660192</b> | 595.833734      | 1173.633643    | 587.320460       | 1172.649627        | 586.828452        | 8  |
| 7  | <b>1110.549973</b> | 555.778624      | 1093.523424    | 547.265350        | <b>1092.539408</b> | 546.773342       | Q    | <b>1077.576128</b> | 539.291702      | 1060.549579    | 530.778428       | 1059.565563        | 530.286419        | 7  |
| 8  | <b>1257.618387</b> | 629.312832      | 1240.591838    | 620.799557        | 1239.607822        | 620.307549       | F    | <b>638.350802</b>  | 319.679039      | 621.324253     | 311.165765       | 620.340237         | 310.673757        | 6  |
| 9  | <b>1344.650415</b> | 672.828846      | 1327.623866    | 664.315571        | 1326.639850        | 663.823563       | S    | <b>491.282388</b>  | 246.144832      | 474.255839     | 237.631557       | 473.271823         | 237.139549        | 5  |
| 10 | <b>1457.734479</b> | 729.370878      | 1440.707930    | 720.857603        | 1439.723914        | 720.365595       | L    | <b>404.250360</b>  | 202.628818      | 387.223811     | 194.115543       | 386.239795         | 193.623535        | 4  |
| 11 | 1514.755943        | 757.881609      | 1497.729394    | <b>749.368335</b> | 1496.745378        | 748.876327       | G    | <b>291.166296</b>  | 146.086786      | 274.139747     | 137.573512       | 273.155731         | 137.081504        | 3  |
| 12 | <b>1601.787971</b> | 801.397624      | 1584.761422    | 792.884349        | 1583.777406        | 792.392341       | S    | 234.144832         | 117.576054      | 217.118283     | 109.062780       | 216.134267         | 108.570772        | 2  |
| 13 |                    |                 |                |                   |                    |                  | K    | <b>147.112804</b>  | 74.060040       | 130.086255     | 65.546765        |                    |                   | 1  |

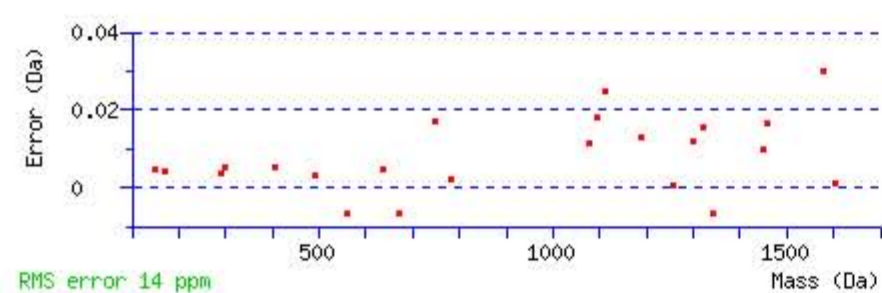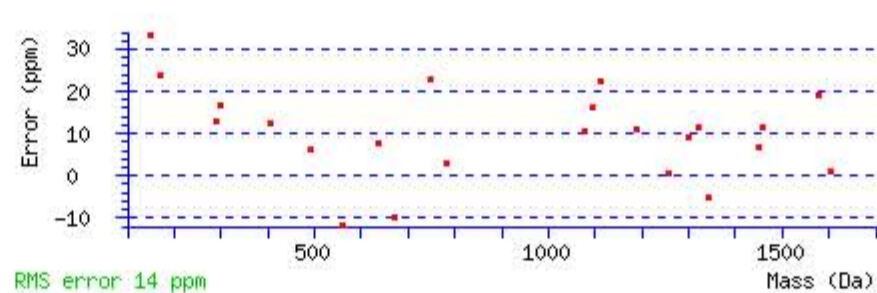

NCBI BLAST search of **GLEEELQFSLGSK**

(Parameters: blastp, nr protein database, expect=20000, no filter, PAM30)

Other BLAST [web gateways](#)

All matches to this query

| Score | Mr(calc):   | Delta     | Sequence                          |
|-------|-------------|-----------|-----------------------------------|
| 88.1  | 1746.886200 | 0.011468  | <a href="#">GLEEELQFSLGSK</a>     |
| 7.0   | 1746.887558 | 0.010110  | <a href="#">AVQSKAFCAGGLAPGWK</a> |
| 2.8   | 1746.886185 | 0.011483  | <a href="#">DLIDTYLLHMEKEK</a>    |
| 1.6   | 1746.918533 | -0.020865 | <a href="#">AKLQMTEAALALSEQK</a>  |
| 0.8   | 1746.876999 | 0.020669  | <a href="#">TWRAQRMSQTR</a>       |



# MASCOT Search Results

## Peptide View

MS/MS Fragmentation of **EPFLSCCQFAESLR**

Found in **CO4A\_HUMAN**, Complement C4-A OS=Homo sapiens GN=C4A PE=1 SV=2

Match to Query 58583: 2053.953402 from(685.658410,3+) rtinseconds(2464) index(65980)

Title: Locus:1.1.1.2855.5 File:"2013-07-02 CLN FXIII 30 min 1st F 4.wiff"

Data file C:\Program Files (x86)\Matrix Science\Mascot Daemon\mgf1 FXIII 30 min 1st\mascot\_daemon\_merge.mgf

Click mouse within plot area to zoom in by factor of two about that point

Or, Plot from  to  Da

Label all possible matches  Label matches used for scoring

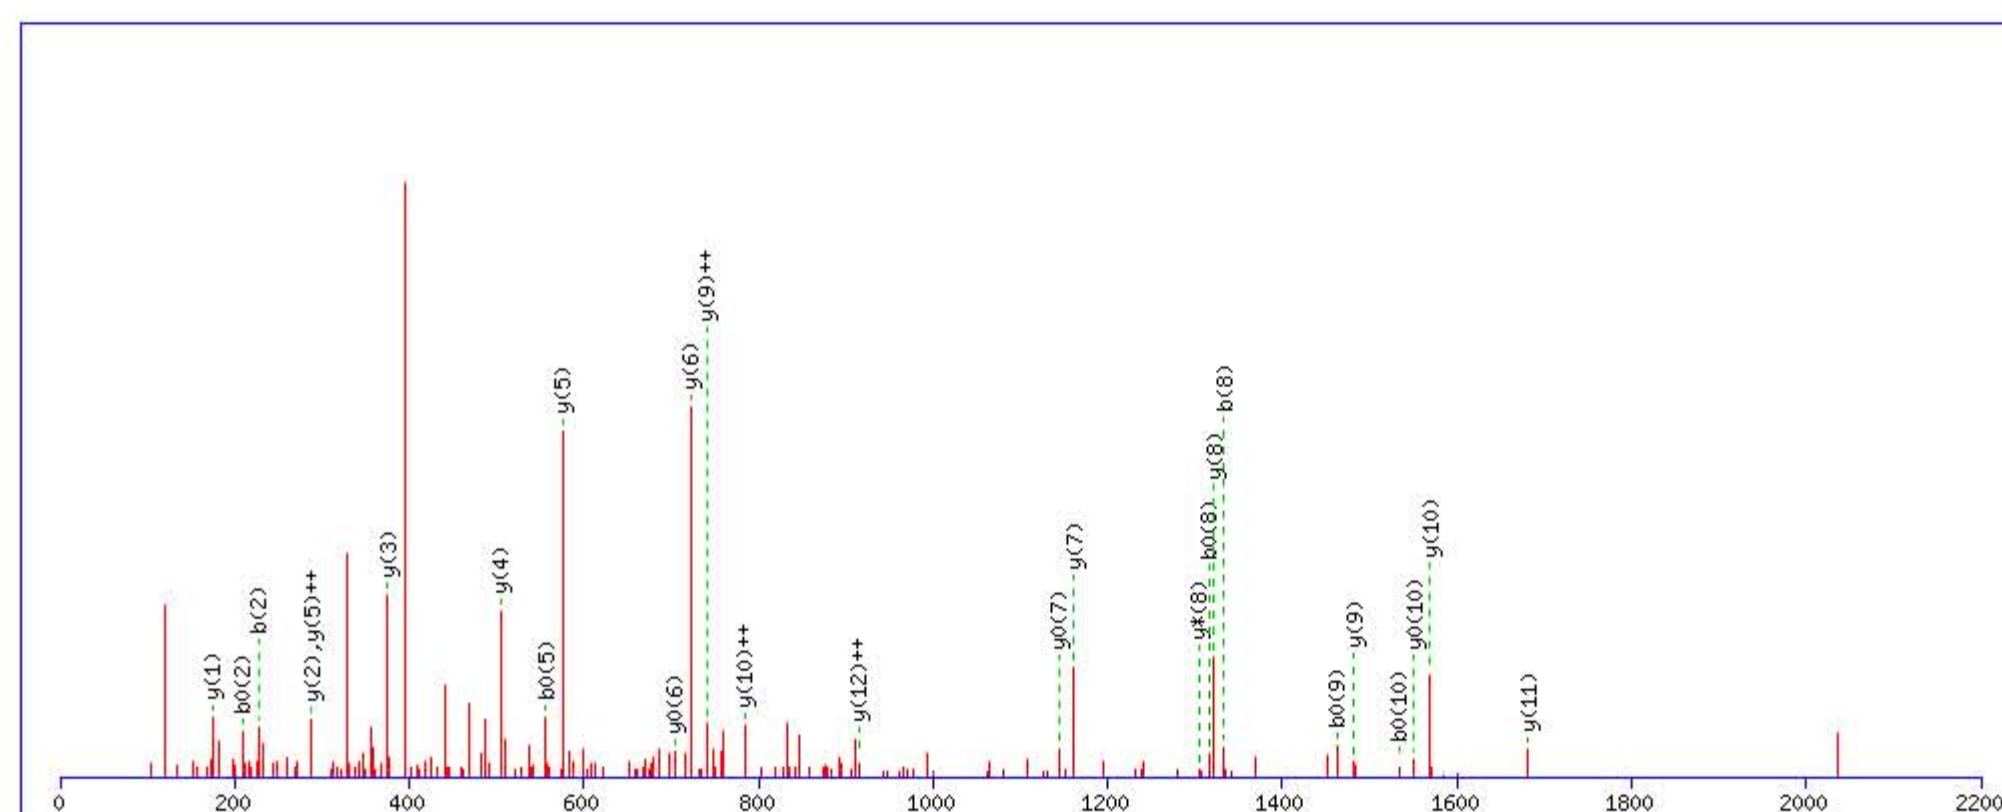

Monoisotopic mass of neutral peptide Mr(calc): 2053.942368

Fixed modifications: Carbamidomethyl (C) (apply to specified residues or termini only)

Variable modifications:

Q8 : Biotin:Thermo-21345 (Q)

Ions Score: 64 Expect: 5.5e-006

Matches : 26/138 fragment ions using 47 most intense peaks [\(help\)](#)

| #  | b                  | b <sup>++</sup> | b <sup>*</sup> | b <sup>*++</sup> | b <sup>0</sup>     | b <sup>0++</sup> | Seq. | y                  | y <sup>++</sup>   | y <sup>*</sup>     | y <sup>*++</sup> | y <sup>0</sup>     | y <sup>0++</sup> | #  |
|----|--------------------|-----------------|----------------|------------------|--------------------|------------------|------|--------------------|-------------------|--------------------|------------------|--------------------|------------------|----|
| 1  | 130.049869         | 65.528572       |                |                  | 112.039304         | 56.523290        | E    |                    |                   |                    |                  |                    |                  | 14 |
| 2  | <b>227.102633</b>  | 114.054954      |                |                  | <b>209.092068</b>  | 105.049672       | P    | 1925.907059        | 963.457168        | 1908.880510        | 954.943893       | 1907.896494        | 954.451885       | 13 |
| 3  | 374.171047         | 187.589161      |                |                  | 356.160482         | 178.583879       | F    | 1828.854295        | <b>914.930786</b> | 1811.827746        | 906.417511       | 1810.843730        | 905.925503       | 12 |
| 4  | 487.255111         | 244.131193      |                |                  | 469.244546         | 235.125911       | L    | <b>1681.785881</b> | 841.396579        | 1664.759332        | 832.883304       | 1663.775316        | 832.391296       | 11 |
| 5  | 574.287139         | 287.647208      |                |                  | <b>556.276574</b>  | 278.641925       | S    | <b>1568.701817</b> | <b>784.854547</b> | 1551.675268        | 776.341272       | <b>1550.691252</b> | 775.849264       | 10 |
| 6  | 734.317788         | 367.662532      |                |                  | 716.307223         | 358.657250       | C    | <b>1481.669789</b> | <b>741.338533</b> | 1464.643240        | 732.825258       | 1463.659224        | 732.333250       | 9  |
| 7  | 894.348437         | 447.677857      |                |                  | 876.337872         | 438.672574       | C    | <b>1321.639140</b> | 661.323208        | <b>1304.612591</b> | 652.809934       | 1303.628575        | 652.317926       | 8  |
| 8  | <b>1333.573763</b> | 667.290520      | 1316.547214    | 658.777245       | <b>1315.563198</b> | 658.285237       | Q    | <b>1161.608491</b> | 581.307884        | 1144.581942        | 572.794609       | <b>1143.597926</b> | 572.302601       | 7  |
| 9  | 1480.642177        | 740.824727      | 1463.615628    | 732.311452       | <b>1462.631612</b> | 731.819444       | F    | <b>722.383165</b>  | 361.695221        | 705.356616         | 353.181946       | <b>704.372600</b>  | 352.689938       | 6  |
| 10 | 1551.679291        | 776.343284      | 1534.652742    | 767.830009       | <b>1533.668726</b> | 767.338001       | A    | <b>575.314751</b>  | <b>288.161014</b> | 558.288202         | 279.647739       | 557.304186         | 279.155731       | 5  |
| 11 | 1680.721884        | 840.864580      | 1663.695335    | 832.351306       | 1662.711319        | 831.859298       | E    | <b>504.277637</b>  | 252.642457        | 487.251088         | 244.129182       | 486.267072         | 243.637174       | 4  |
| 12 | 1767.753912        | 884.380594      | 1750.727363    | 875.867320       | 1749.743347        | 875.375312       | S    | <b>375.235044</b>  | 188.121160        | 358.208495         | 179.607885       | 357.224479         | 179.115877       | 3  |
| 13 | 1880.837976        | 940.922626      | 1863.811427    | 932.409352       | 1862.827411        | 931.917344       | L    | <b>288.203016</b>  | 144.605146        | 271.176467         | 136.091871       |                    |                  | 2  |
| 14 |                    |                 |                |                  |                    |                  | R    | <b>175.118952</b>  | 88.063114         | 158.092403         | 79.549839        |                    |                  | 1  |

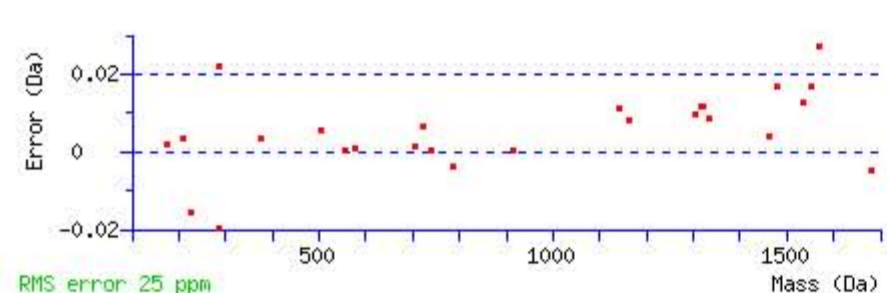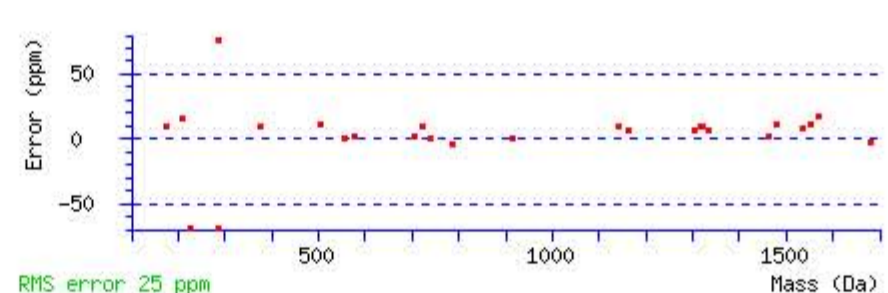

NCBI BLAST search of **EPFLSCCQFAESLR**

(Parameters: blastp, nr protein database, expect=20000, no filter, PAM30)

Other BLAST [web gateways](#)

### All matches to this query

| Score | Mr(calc):   | Delta    | Sequence                       |
|-------|-------------|----------|--------------------------------|
| 64.1  | 2053.942368 | 0.011034 | <a href="#">EPFLSCCQFAESLR</a> |

Mascot: <http://www.matrixscience.com/>



# MASCOT Search Results

## Peptide View

MS/MS Fragmentation of **LLATLCSAEVCQCAEGK**

Found in **CO4A\_HUMAN**, Complement C4-A OS=Homo sapiens GN=C4A PE=1 SV=2

Match to Query 62090: 2220.043392 from(741.021740,3+) rtinseconds(2099) index(63713)

Title: Locus:1.1.1.2728.8 File:"2013-07-02 CLN FXIII 30 min 1st F 4.wiff"

Data file C:\Program Files (x86)\Matrix Science\Mascot Daemon\mgf\1 FXIII 30 min 1st\mascot\_daemon\_merge.mgf

Click mouse within plot area to zoom in by factor of two about that point

Or, Plot from  to  Da

Label all possible matches  Label matches used for scoring

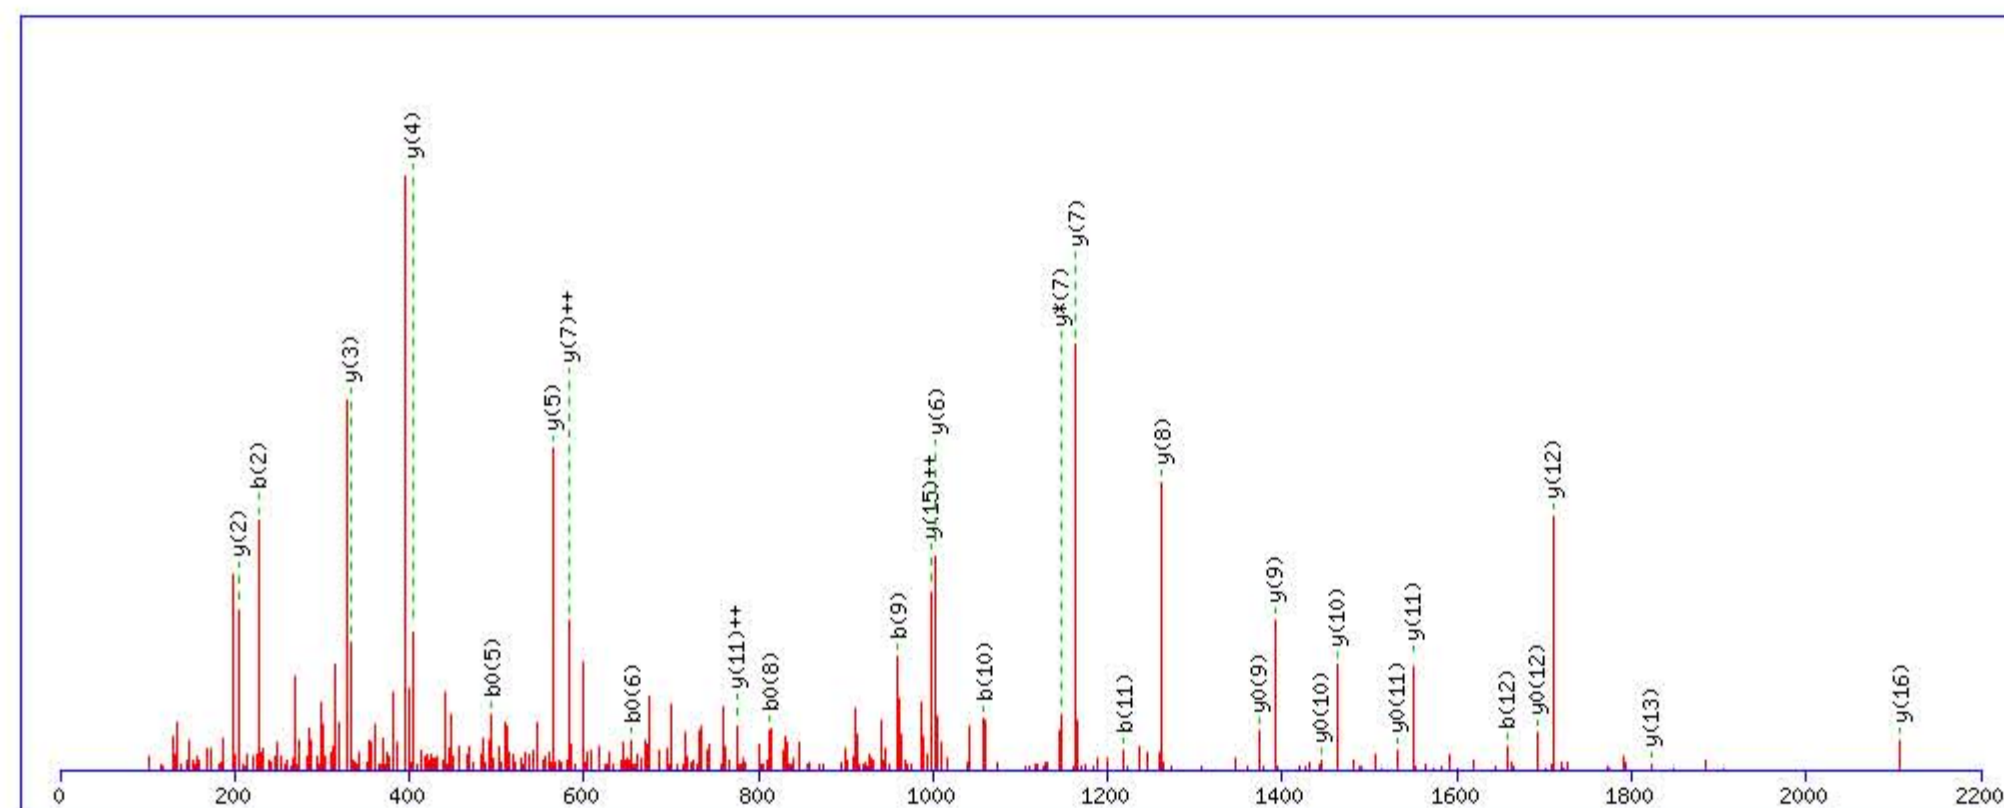

Monoisotopic mass of neutral peptide Mr(calc): 2220.041092

Fixed modifications: Carbamidomethyl (C) (apply to specified residues or termini only)

Variable modifications:

Q12 : Biotin:Thermo-21345 (Q)

Ions Score: 74 Expect: 2.2e-007

Matches : 29/160 fragment ions using 56 most intense peaks [\(help\)](#)

| #  | b                  | b <sup>++</sup> | b <sup>*</sup> | b <sup>***</sup> | b <sup>0</sup>    | b <sup>0++</sup> | Seq. | y                  | y <sup>++</sup>   | y <sup>*</sup>     | y <sup>***</sup> | y <sup>0</sup>     | y <sup>0++</sup> | #  |
|----|--------------------|-----------------|----------------|------------------|-------------------|------------------|------|--------------------|-------------------|--------------------|------------------|--------------------|------------------|----|
| 1  | 114.091340         | 57.549308       |                |                  |                   |                  | L    |                    |                   |                    |                  |                    |                  | 17 |
| 2  | <b>227.175404</b>  | 114.091340      |                |                  |                   |                  | L    | <b>2107.964318</b> | 1054.485797       | 2090.937769        | 1045.972522      | 2089.953753        | 1045.480514      | 16 |
| 3  | 298.212518         | 149.609897      |                |                  |                   |                  | A    | 1994.880254        | <b>997.943765</b> | 1977.853705        | 989.430491       | 1976.869689        | 988.938483       | 15 |
| 4  | 399.260197         | 200.133737      |                |                  | 381.249632        | 191.128454       | T    | 1923.843140        | 962.425208        | 1906.816591        | 953.911934       | 1905.832575        | 953.419926       | 14 |
| 5  | 512.344261         | 256.675769      |                |                  | <b>494.333696</b> | 247.670486       | L    | <b>1822.795461</b> | 911.901369        | 1805.768912        | 903.388094       | 1804.784896        | 902.896086       | 13 |
| 6  | 672.374910         | 336.691093      |                |                  | <b>654.364345</b> | 327.685811       | C    | <b>1709.711397</b> | 855.359337        | 1692.684848        | 846.846062       | <b>1691.700832</b> | 846.354054       | 12 |
| 7  | 759.406938         | 380.207107      |                |                  | 741.396373        | 371.201825       | S    | <b>1549.680748</b> | <b>775.344012</b> | 1532.654199        | 766.830738       | <b>1531.670183</b> | 766.338730       | 11 |
| 8  | 830.444052         | 415.725664      |                |                  | <b>812.433487</b> | 406.720382       | A    | <b>1462.648720</b> | 731.827998        | 1445.622171        | 723.314724       | <b>1444.638155</b> | 722.822716       | 10 |
| 9  | <b>959.486645</b>  | 480.246961      |                |                  | 941.476080        | 471.241678       | E    | <b>1391.611606</b> | 696.309441        | 1374.585057        | 687.796167       | <b>1373.601041</b> | 687.304159       | 9  |
| 10 | <b>1058.555059</b> | 529.781168      |                |                  | 1040.544494       | 520.775885       | V    | <b>1262.569013</b> | 631.788145        | 1245.542464        | 623.274870       | 1244.558448        | 622.782862       | 8  |
| 11 | <b>1218.585708</b> | 609.796492      |                |                  | 1200.575143       | 600.791210       | C    | <b>1163.500599</b> | <b>582.253938</b> | <b>1146.474050</b> | 573.740663       | 1145.490034        | 573.248655       | 7  |
| 12 | <b>1657.811034</b> | 829.409155      | 1640.784485    | 820.895881       | 1639.800469       | 820.403873       | Q    | <b>1003.469950</b> | 502.238613        | 986.443401         | 493.725339       | 985.459385         | 493.233331       | 6  |
| 13 | 1817.841683        | 909.424480      | 1800.815134    | 900.911205       | 1799.831118       | 900.419197       | C    | <b>564.244624</b>  | 282.625950        | 547.218075         | 274.112676       | 546.234059         | 273.620668       | 5  |
| 14 | 1888.878797        | 944.943037      | 1871.852248    | 936.429762       | 1870.868232       | 935.937754       | A    | <b>404.213975</b>  | 202.610626        | 387.187426         | 194.097351       | 386.203410         | 193.605343       | 4  |
| 15 | 2017.921390        | 1009.464333     | 2000.894841    | 1000.951059      | 1999.910825       | 1000.459051      | E    | <b>333.176861</b>  | 167.092069        | 316.150312         | 158.578794       | 315.166296         | 158.086786       | 3  |
| 16 | 2074.942854        | 1037.975065     | 2057.916305    | 1029.461790      | 2056.932289       | 1028.969782      | G    | <b>204.134268</b>  | 102.570772        | 187.107719         | 94.057497        |                    |                  | 2  |
| 17 |                    |                 |                |                  |                   |                  | K    | 147.112804         | 74.060040         | 130.086255         | 65.546765        |                    |                  | 1  |

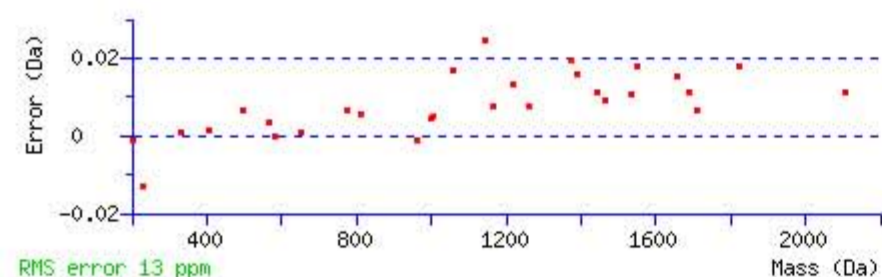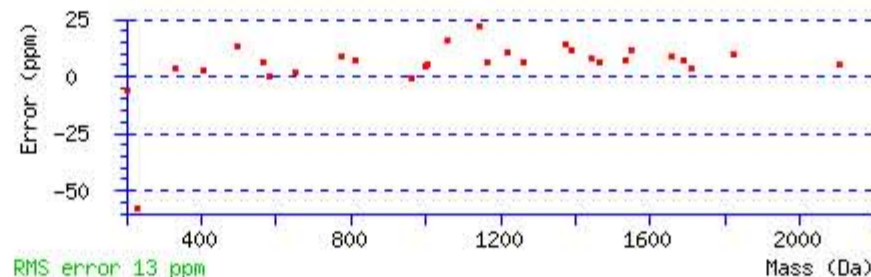

NCBI BLAST search of **LLATLCSAEVCQCAEGK**

(Parameters: blastp, nr protein database, expect=20000, no filter, PAM30)

Other BLAST [web gateways](#)

## All matches to this query

| Score | Mr(calc):   | Delta     | Sequence                           |
|-------|-------------|-----------|------------------------------------|
| 74.4  | 2220.041092 | 0.002300  | <a href="#">LLATLCSAEVCQCAEGK</a>  |
| 3.4   | 2220.048080 | -0.004688 | <a href="#">EPQEGAELPEATGTTSHR</a> |



# MASCOT Search Results

## Peptide View

MS/MS Fragmentation of **AACAQLNDFLQEYGTQGCQV**

Found in **CO4A\_HUMAN**, Complement C4-A OS=Homo sapiens GN=C4A PE=1 SV=2

Match to Query 69494: 2583.168882 from(862.063570,3+) rtinseconds(2711) index(67548)

Title: Locus:1.1.1.2940.21 File:"2013-07-02 CLN FXIII 30 min 1st F 4.wiff"

Data file C:\Program Files (x86)\Matrix Science\Mascot Daemon\mgf1 FXIII 30 min 1st\mascot\_daemon\_merge.mgf

Click mouse within plot area to zoom in by factor of two about that point

Or, Plot from  to  Da

Label all possible matches  Label matches used for scoring

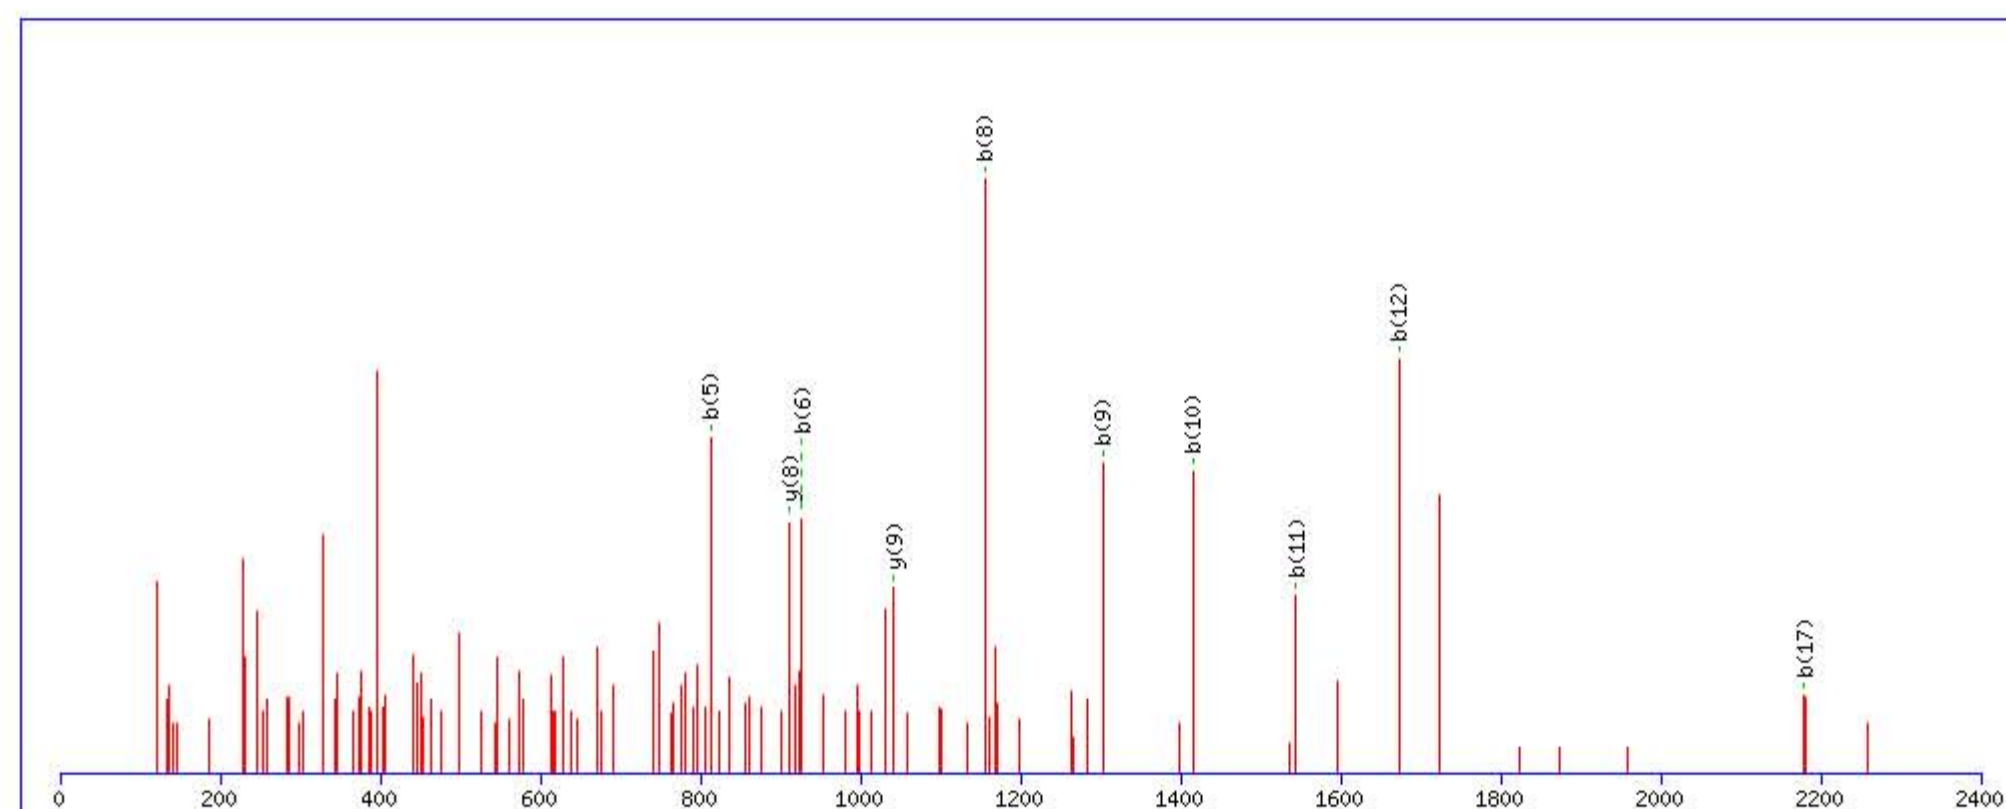

Monoisotopic mass of neutral peptide Mr(calc): 2583.155624

Fixed modifications: Carbamidomethyl (C) (apply to specified residues or termini only)

Variable modifications:

Q5 : Biotin:Thermo-21345 (Q)

Ions Score: 38 Expect: 0.0014

Matches : 10/194 fragment ions using 20 most intense peaks [\(help\)](#)

| #  | b                  | b <sup>++</sup> | b <sup>*</sup> | b <sup>+++</sup> | b <sup>0</sup> | b <sup>0++</sup> | Seq. | y                  | y <sup>++</sup> | y <sup>*</sup> | y <sup>+++</sup> | y <sup>0</sup> | y <sup>0++</sup> | #  |
|----|--------------------|-----------------|----------------|------------------|----------------|------------------|------|--------------------|-----------------|----------------|------------------|----------------|------------------|----|
| 1  | 72.044390          | 36.525833       |                |                  |                |                  | A    |                    |                 |                |                  |                |                  | 20 |
| 2  | 143.081504         | 72.044390       |                |                  |                |                  | A    | 2513.125782        | 1257.066529     | 2496.099233    | 1248.553254      | 2495.115217    | 1248.061246      | 19 |
| 3  | 303.112153         | 152.059714      |                |                  |                |                  | C    | 2442.088668        | 1221.547972     | 2425.062119    | 1213.034697      | 2424.078103    | 1212.542689      | 18 |
| 4  | 374.149267         | 187.578271      |                |                  |                |                  | A    | 2282.058019        | 1141.532647     | 2265.031470    | 1133.019373      | 2264.047454    | 1132.527365      | 17 |
| 5  | <b>813.374593</b>  | 407.190935      | 796.348044     | 398.677660       |                |                  | Q    | 2211.020905        | 1106.014090     | 2193.994356    | 1097.500816      | 2193.010340    | 1097.008808      | 16 |
| 6  | <b>926.458657</b>  | 463.732967      | 909.432108     | 455.219692       |                |                  | L    | 1771.795579        | 886.401428      | 1754.769030    | 877.888153       | 1753.785014    | 877.396145       | 15 |
| 7  | 1040.501584        | 520.754430      | 1023.475035    | 512.241155       |                |                  | N    | 1658.711515        | 829.859396      | 1641.684966    | 821.346121       | 1640.700950    | 820.854113       | 14 |
| 8  | <b>1155.528527</b> | 578.267902      | 1138.501978    | 569.754627       | 1137.517962    | 569.262619       | D    | 1544.668588        | 772.837932      | 1527.642039    | 764.324658       | 1526.658023    | 763.832650       | 13 |
| 9  | <b>1302.596941</b> | 651.802109      | 1285.570392    | 643.288834       | 1284.586376    | 642.796826       | F    | 1429.641645        | 715.324460      | 1412.615096    | 706.811186       | 1411.631080    | 706.319178       | 12 |
| 10 | <b>1415.681005</b> | 708.344141      | 1398.654456    | 699.830866       | 1397.670440    | 699.338858       | L    | 1282.573231        | 641.790253      | 1265.546682    | 633.276979       | 1264.562666    | 632.784971       | 11 |
| 11 | <b>1543.739583</b> | 772.373430      | 1526.713034    | 763.860155       | 1525.729018    | 763.368147       | Q    | 1169.489167        | 585.248222      | 1152.462618    | 576.734947       | 1151.478602    | 576.242939       | 10 |
| 12 | <b>1672.782176</b> | 836.894726      | 1655.755627    | 828.381452       | 1654.771611    | 827.889444       | E    | <b>1041.430589</b> | 521.218932      | 1024.404040    | 512.705658       | 1023.420024    | 512.213650       | 9  |
| 13 | 1835.845505        | 918.426391      | 1818.818956    | 909.913116       | 1817.834940    | 909.421108       | Y    | <b>912.387996</b>  | 456.697636      | 895.361447     | 448.184361       | 894.377431     | 447.692353       | 8  |
| 14 | 1892.866969        | 946.937123      | 1875.840420    | 938.423848       | 1874.856404    | 937.931840       | G    | 749.324667         | 375.165971      | 732.298118     | 366.652697       | 731.314102     | 366.160689       | 7  |
| 15 | 1993.914648        | 997.460962      | 1976.888099    | 988.947688       | 1975.904083    | 988.455680       | T    | 692.303203         | 346.655239      | 675.276654     | 338.141965       | 674.292638     | 337.649957       | 6  |
| 16 | 2121.973226        | 1061.490251     | 2104.946677    | 1052.976976      | 2103.962661    | 1052.484968      | Q    | 591.255524         | 296.131400      | 574.228975     | 287.618125       |                |                  | 5  |
| 17 | <b>2178.994690</b> | 1090.000983     | 2161.968141    | 1081.487708      | 2160.984125    | 1080.995700      | G    | 463.196946         | 232.102111      | 446.170397     | 223.588836       |                |                  | 4  |
| 18 | 2339.025339        | 1170.016307     | 2321.998790    | 1161.503033      | 2321.014774    | 1161.011025      | C    | 406.175482         | 203.591379      | 389.148933     | 195.078104       |                |                  | 3  |
| 19 | 2467.083917        | 1234.045596     | 2450.057368    | 1225.532322      | 2449.073352    | 1225.040314      | Q    | 246.144833         | 123.576054      | 229.118284     | 115.062780       |                |                  | 2  |
| 20 |                    |                 |                |                  |                |                  | V    | 118.086255         | 59.546765       |                |                  |                |                  | 1  |

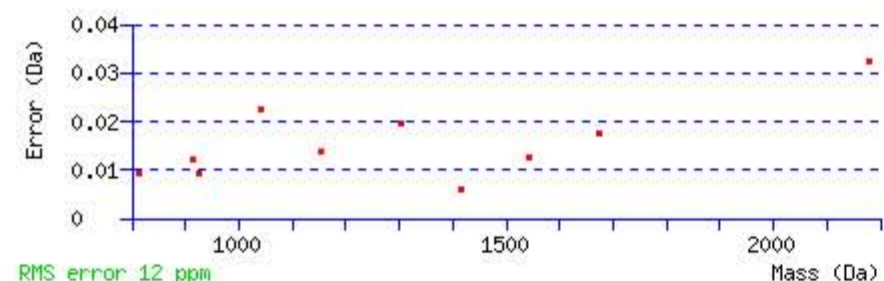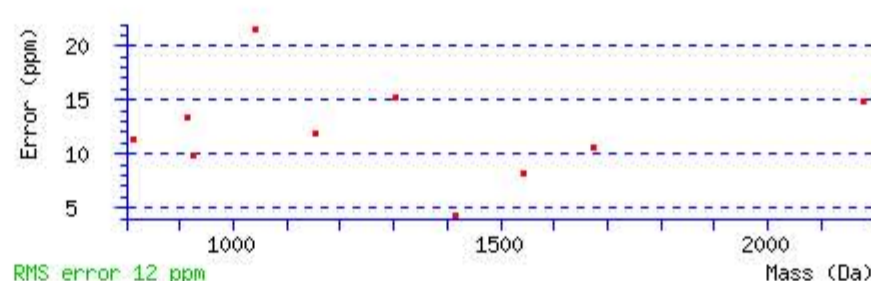

NCBI BLAST search of [AACAQLNDFLQEYGTQGCQV](#)

(Parameters: blastp, nr protein database, expect=20000, no filter, PAM30)

Other BLAST [web gateways](#)

All matches to this query

| Score | Mr(calc):   | Delta    | Sequence                             |
|-------|-------------|----------|--------------------------------------|
| 38.3  | 2583.155624 | 0.013258 | <a href="#">AACAQLNDFLQEYGTQGCQV</a> |

Mascot: <http://www.matrixscience.com/>



# MASCOT SCIENCE Mascot Search Results

## Peptide View

MS/MS Fragmentation of **CFSGQCISK**

Found in **CO7\_HUMAN**, Complement component C7 OS=Homo sapiens GN=C7 PE=1 SV=2

Match to Query 38827: 1396.642768 from(699.328660,2+) rtinseconds(1616) index(4754)

Title: Locus:1.1.1.2283.15 File:"2013-07-02 CLN FXIII 30 min 1st F 1.wiff"

Data file C:\Program Files (x86)\Matrix Science\Mascot Daemon\mgf\1 FXIII 30 min 1st\mascot\_daemon\_merge.mgf

Click mouse within plot area to zoom in by factor of two about that point

Or, Plot from  to  Da

Label all possible matches  Label matches used for scoring

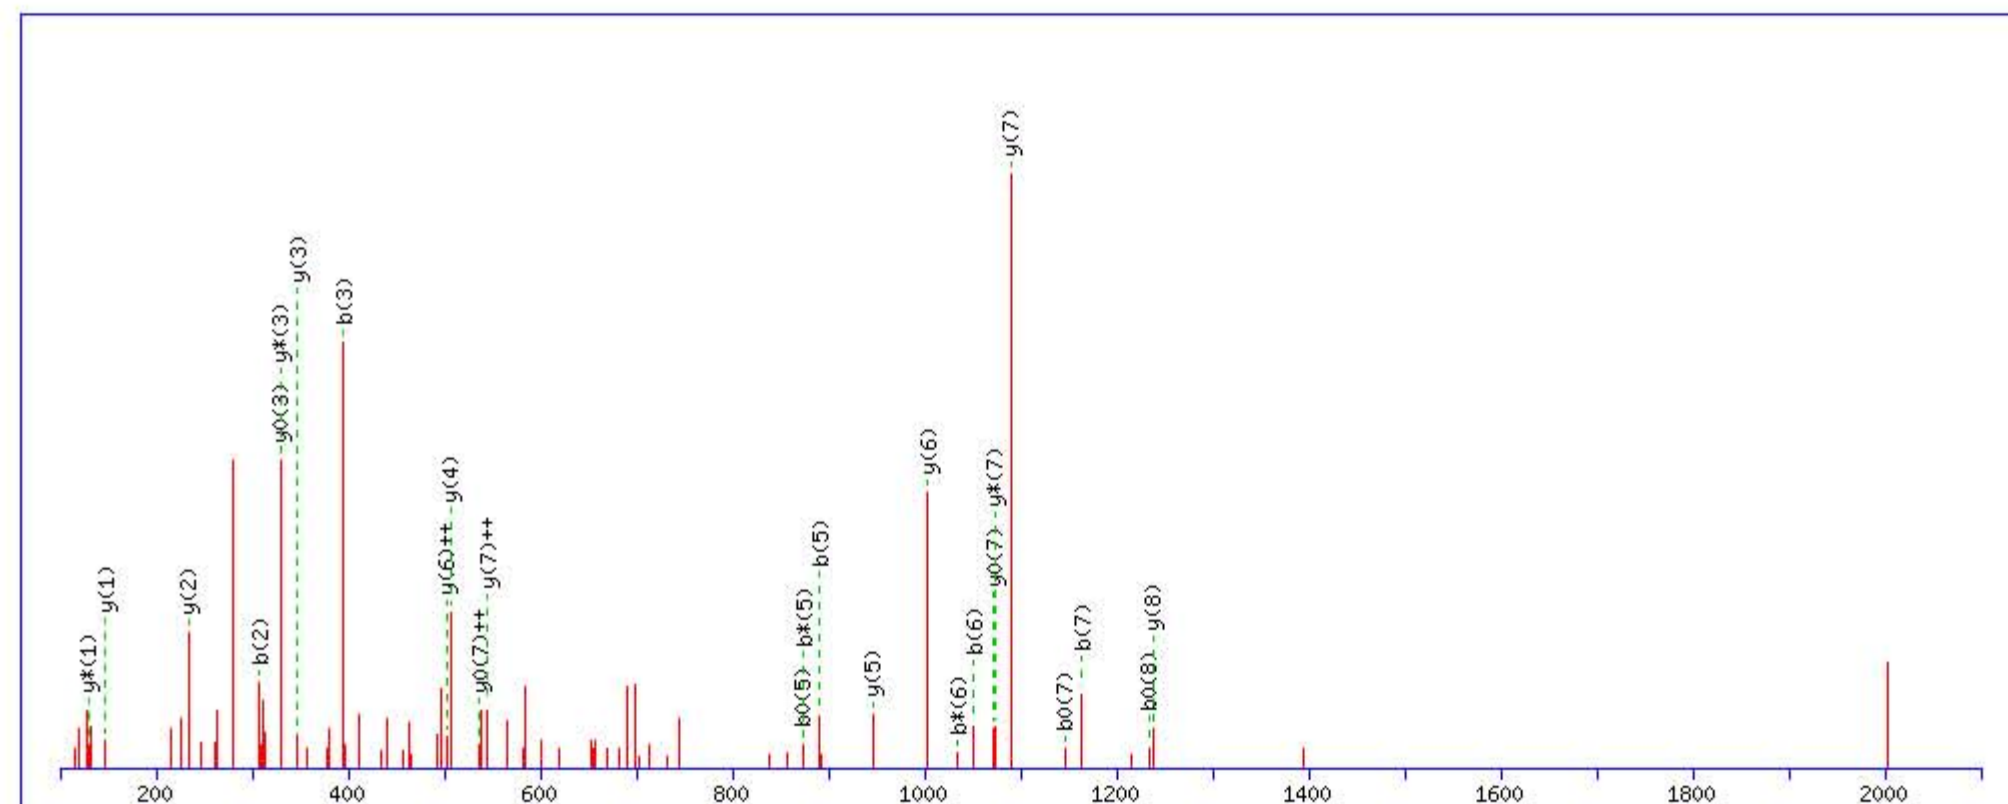

Monoisotopic mass of neutral peptide Mr(calc): 1396.630157

Fixed modifications: Carbamidomethyl (C) (apply to specified residues or termini only)

Variable modifications:

Q5 : Biotin:Thermo-21345 (Q)

Ions Score: 40 Expect: 0.00025

Matches : 26/82 fragment ions using 58 most intense peaks ([help](#))

| # | b                  | b <sup>++</sup> | b <sup>*</sup>     | b <sup>+++</sup> | b <sup>0</sup>     | b <sup>0++</sup> | Seq. | y                  | y <sup>++</sup>   | y <sup>*</sup>     | y <sup>+++</sup> | y <sup>0</sup>     | y <sup>0++</sup>  | # |
|---|--------------------|-----------------|--------------------|------------------|--------------------|------------------|------|--------------------|-------------------|--------------------|------------------|--------------------|-------------------|---|
| 1 | 161.037925         | 81.022600       |                    |                  |                    |                  | C    |                    |                   |                    |                  |                    |                   | 9 |
| 2 | <b>308.106339</b>  | 154.556807      |                    |                  |                    |                  | F    | <b>1237.606777</b> | 619.307027        | 1220.580228        | 610.793752       | 1219.596212        | 610.301744        | 8 |
| 3 | <b>395.138367</b>  | 198.072821      |                    |                  | 377.127802         | 189.067539       | S    | <b>1090.538363</b> | <b>545.772819</b> | <b>1073.511814</b> | 537.259545       | <b>1072.527798</b> | <b>536.767537</b> | 7 |
| 4 | 452.159831         | 226.583553      |                    |                  | 434.149266         | 217.578271       | G    | <b>1003.506335</b> | <b>502.256806</b> | 986.479786         | 493.743531       | 985.495770         | 493.251523        | 6 |
| 5 | <b>891.385157</b>  | 446.196217      | <b>874.358608</b>  | 437.682942       | <b>873.374592</b>  | 437.190934       | Q    | <b>946.484871</b>  | 473.746074        | 929.458322         | 465.232799       | 928.474306         | 464.740791        | 5 |
| 6 | <b>1051.415806</b> | 526.211541      | <b>1034.389257</b> | 517.698267       | 1033.405241        | 517.206258       | C    | <b>507.259545</b>  | 254.133410        | 490.232996         | 245.620136       | 489.248980         | 245.128128        | 4 |
| 7 | <b>1164.499870</b> | 582.753573      | 1147.473321        | 574.240298       | <b>1146.489305</b> | 573.748290       | I    | <b>347.228896</b>  | 174.118086        | <b>330.202347</b>  | 165.604811       | <b>329.218331</b>  | 165.112803        | 3 |
| 8 | 1251.531898        | 626.269587      | 1234.505349        | 617.756313       | <b>1233.521333</b> | 617.264304       | S    | <b>234.144832</b>  | 117.576054        | 217.118283         | 109.062780       | 216.134267         | 108.570772        | 2 |
| 9 |                    |                 |                    |                  |                    |                  | K    | <b>147.112804</b>  | 74.060040         | <b>130.086255</b>  | 65.546765        |                    |                   | 1 |

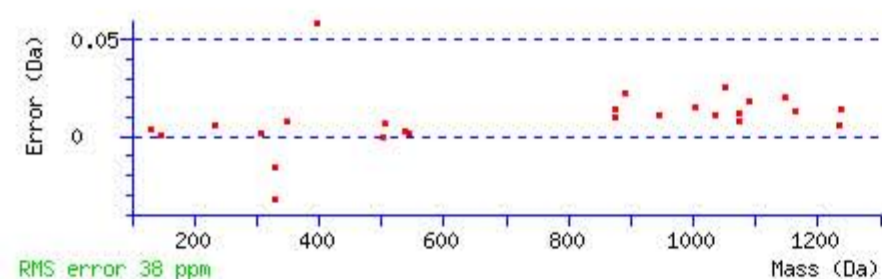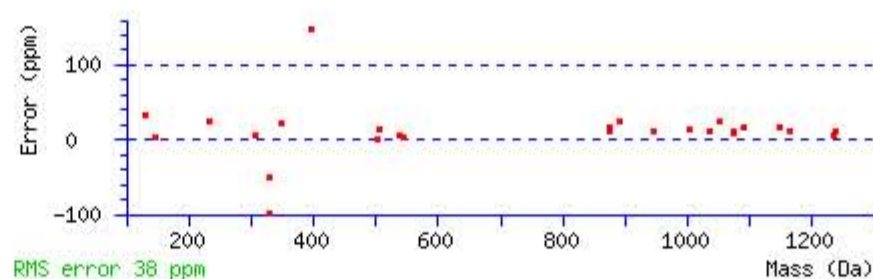

NCBI BLAST search of **CFSGQCISK**

(Parameters: blastp, nr protein database, expect=20000, no filter, PAM30)

Other BLAST [web gateways](#)

All matches to this query

| Score | Mr(calc):   | Delta    | Sequence                     |
|-------|-------------|----------|------------------------------|
| 39.7  | 1396.630157 | 0.012611 | <a href="#">CFSGQCISK</a>    |
| 1.2   | 1396.629272 | 0.013496 | <a href="#">QLSQAEATDFCK</a> |

Mascot: <http://www.matrixscience.com/>



# MASCOT Search Results

## Peptide View

MS/MS Fragmentation of **AASGTQNNVLR**

Found in **CO7\_HUMAN**, Complement component C7 OS=Homo sapiens GN=C7 PE=1 SV=2

Match to Query 40834: 1440.759988 from(721.387270,2+) rtinseconds(1522) index(4165)

Title: Locus:1.1.1.2250.22 File:"2013-07-02 CLN FXIII 30 min 1st F 1.wiff"

Data file C:\Program Files (x86)\Matrix Science\Mascot Daemon\mgf1 FXIII 30 min 1st\mascot\_daemon\_merge.mgf

Click mouse within plot area to zoom in by factor of two about that point

Or, Plot from  to  Da

Label all possible matches  Label matches used for scoring

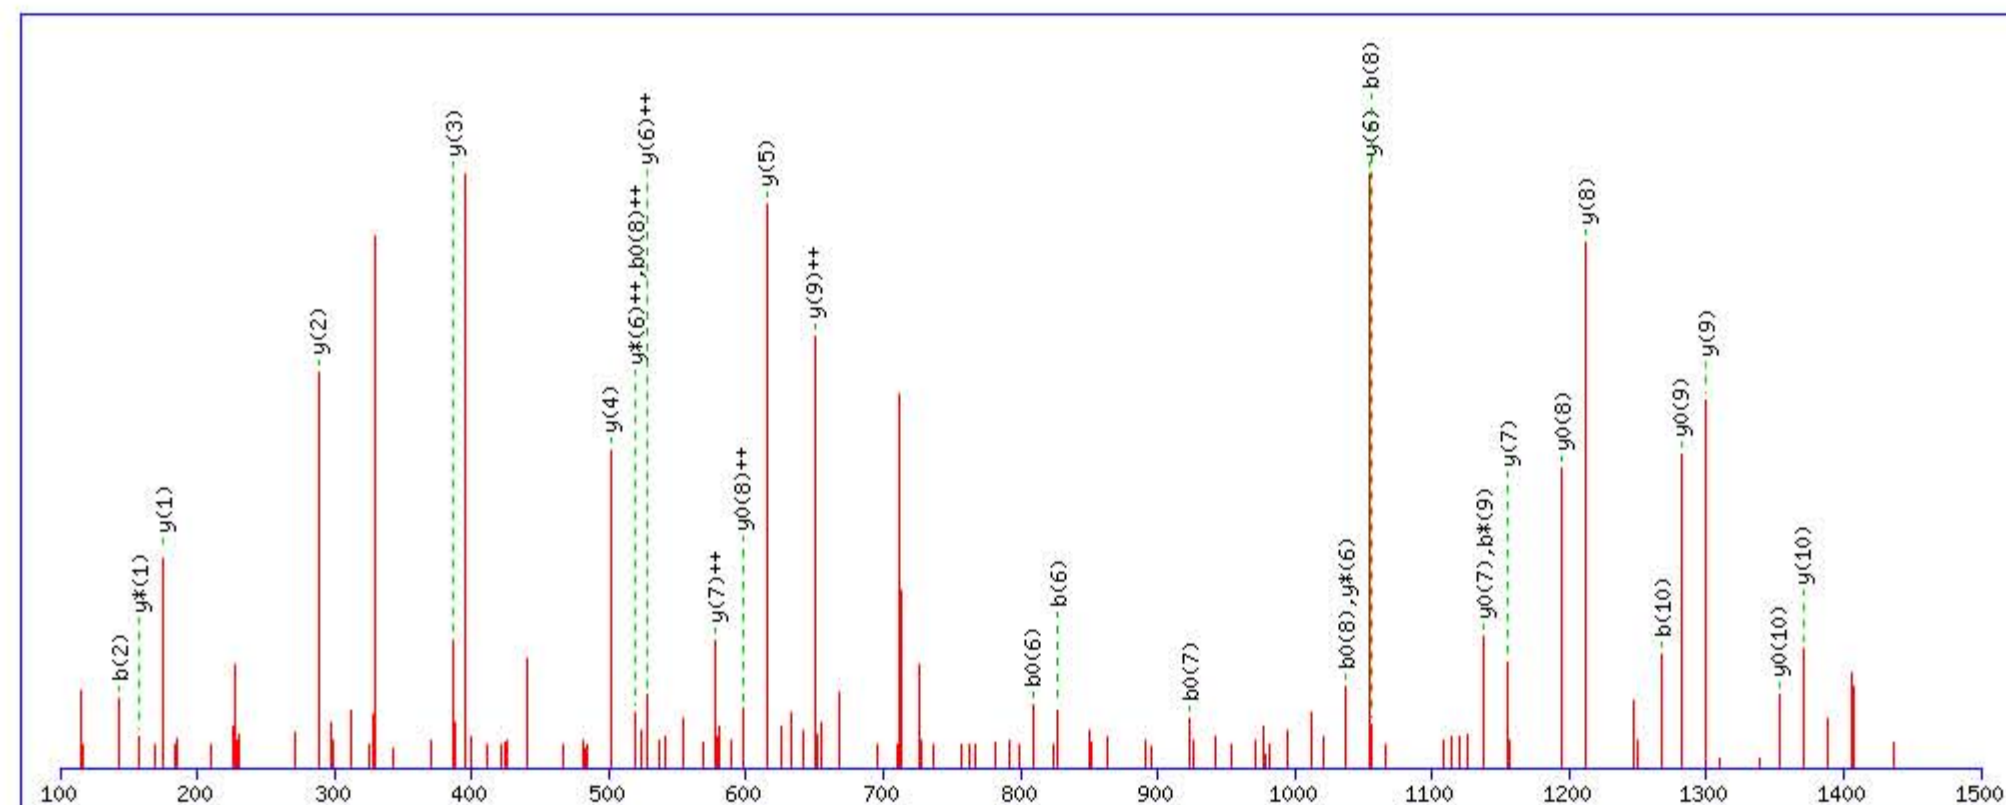

Monoisotopic mass of neutral peptide Mr(calc): 1440.750717

Fixed modifications: Carbamidomethyl (C) (apply to specified residues or termini only)

Variable modifications:

Q6 : Biotin:Thermo-21345 (Q)

Ions Score: 68 Expect: 2.2e-006

Matches : 30/94 fragment ions using 53 most intense peaks [\(help\)](#)

| #  | b                  | b <sup>++</sup> | b <sup>+</sup>     | b <sup>+++</sup> | b <sup>0</sup>     | b <sup>0++</sup>  | Seq. | y                  | y <sup>++</sup>   | y <sup>+</sup>     | y <sup>+++</sup>  | y <sup>0</sup>     | y <sup>0++</sup>  | #  |
|----|--------------------|-----------------|--------------------|------------------|--------------------|-------------------|------|--------------------|-------------------|--------------------|-------------------|--------------------|-------------------|----|
| 1  | 72.044390          | 36.525833       |                    |                  |                    |                   | A    |                    |                   |                    |                   |                    |                   | 11 |
| 2  | <b>143.081504</b>  | 72.044390       |                    |                  |                    |                   | A    | <b>1370.720895</b> | 685.864086        | 1353.694346        | 677.350811        | <b>1352.710330</b> | 676.858803        | 10 |
| 3  | 230.113532         | 115.560404      |                    |                  | 212.102967         | 106.555121        | S    | <b>1299.683781</b> | <b>650.345529</b> | 1282.657232        | 641.832254        | <b>1281.673216</b> | 641.340246        | 9  |
| 4  | 287.134996         | 144.071136      |                    |                  | 269.124431         | 135.065854        | G    | <b>1212.651753</b> | 606.829515        | 1195.625204        | 598.316240        | <b>1194.641188</b> | <b>597.824232</b> | 8  |
| 5  | 388.182675         | 194.594976      |                    |                  | 370.172110         | 185.589693        | T    | <b>1155.630289</b> | <b>578.318783</b> | 1138.603740        | 569.805508        | <b>1137.619724</b> | 569.313500        | 7  |
| 6  | <b>827.408001</b>  | 414.207639      | 810.381452         | 405.694364       | <b>809.397436</b>  | 405.202356        | Q    | <b>1054.582610</b> | <b>527.794943</b> | <b>1037.556061</b> | <b>519.281669</b> |                    |                   | 6  |
| 7  | 941.450928         | 471.229102      | 924.424379         | 462.715828       | <b>923.440363</b>  | 462.223820        | N    | <b>615.357284</b>  | 308.182280        | 598.330735         | 299.669006        |                    |                   | 5  |
| 8  | <b>1055.493855</b> | 528.250566      | 1038.467306        | 519.737291       | <b>1037.483290</b> | <b>519.245283</b> | N    | <b>501.314357</b>  | 251.160816        | 484.287808         | 242.647542        |                    |                   | 4  |
| 9  | 1154.562269        | 577.784773      | <b>1137.535720</b> | 569.271498       | 1136.551704        | 568.779490        | V    | <b>387.271430</b>  | 194.139353        | 370.244881         | 185.626078        |                    |                   | 3  |
| 10 | <b>1267.646333</b> | 634.326805      | 1250.619784        | 625.813530       | 1249.635768        | 625.321522        | L    | <b>288.203016</b>  | 144.605146        | 271.176467         | 136.091871        |                    |                   | 2  |
| 11 |                    |                 |                    |                  |                    |                   | R    | <b>175.118952</b>  | 88.063114         | <b>158.092403</b>  | 79.549839         |                    |                   | 1  |

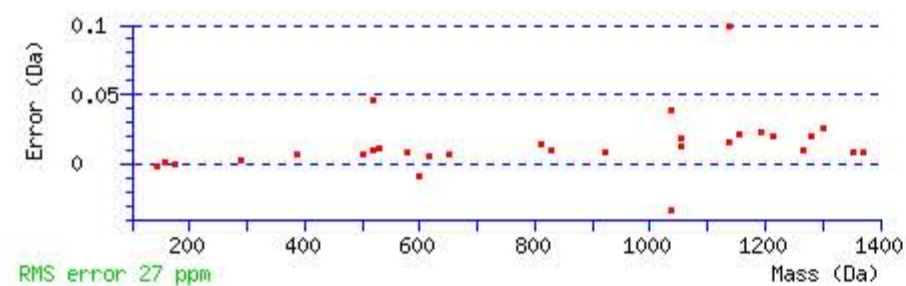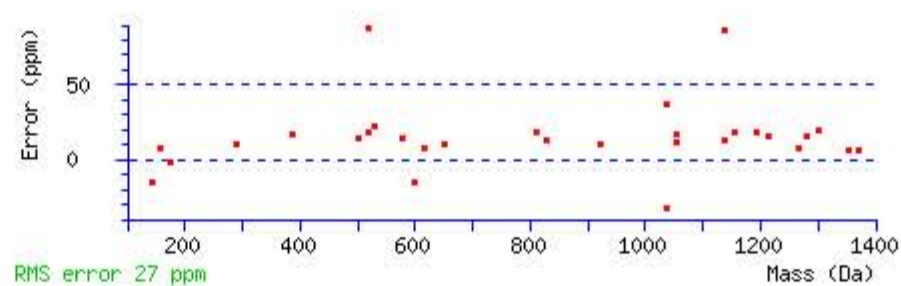

NCBI BLAST search of **AASGTQNNVLR**

(Parameters: blastp, nr protein database, expect=20000, no filter, PAM30)

Other BLAST [web gateways](#)

All matches to this query

| Score | Mr(calc):   | Delta    | Sequence                      |
|-------|-------------|----------|-------------------------------|
| 67.8  | 1440.750717 | 0.009271 | <a href="#">AASGTQNNVLR</a>   |
| 7.0   | 1440.739487 | 0.020501 | <a href="#">AAVTGQDEAIR</a>   |
| 4.2   | 1440.750717 | 0.009271 | <a href="#">TQMQLGLISIAAR</a> |
| 2.9   | 1440.754745 | 0.005243 | <a href="#">WEATQQVLR</a>     |
| 2.2   | 1440.754745 | 0.005243 | <a href="#">WEATQQVLR</a>     |
| 1.3   | 1440.750732 | 0.009256 | <a href="#">DGQLVTEGRR</a>    |



# MASCOT SCIENCE Mascot Search Results

## Peptide View

MS/MS Fragmentation of **WLVGEMHCQK**

Found in **CO7\_HUMAN**, Complement component C7 OS=Homo sapiens GN=C7 PE=1 SV=2

Match to Query 46010: 1597.767912 from(533.596580,3+) rtinseconds(1851) index(6293)

Title: Locus:1.1.1.2365.12 File:"2013-07-02 CLN FXIII 30 min 1st F 1.wiff"

Data file C:\Program Files (x86)\Matrix Science\Mascot Daemon\mgf1 FXIII 30 min 1st\mascot\_daemon\_merge.mgf

Click mouse within plot area to zoom in by factor of two about that point

Or, Plot from  to  Da

Label all possible matches  Label matches used for scoring

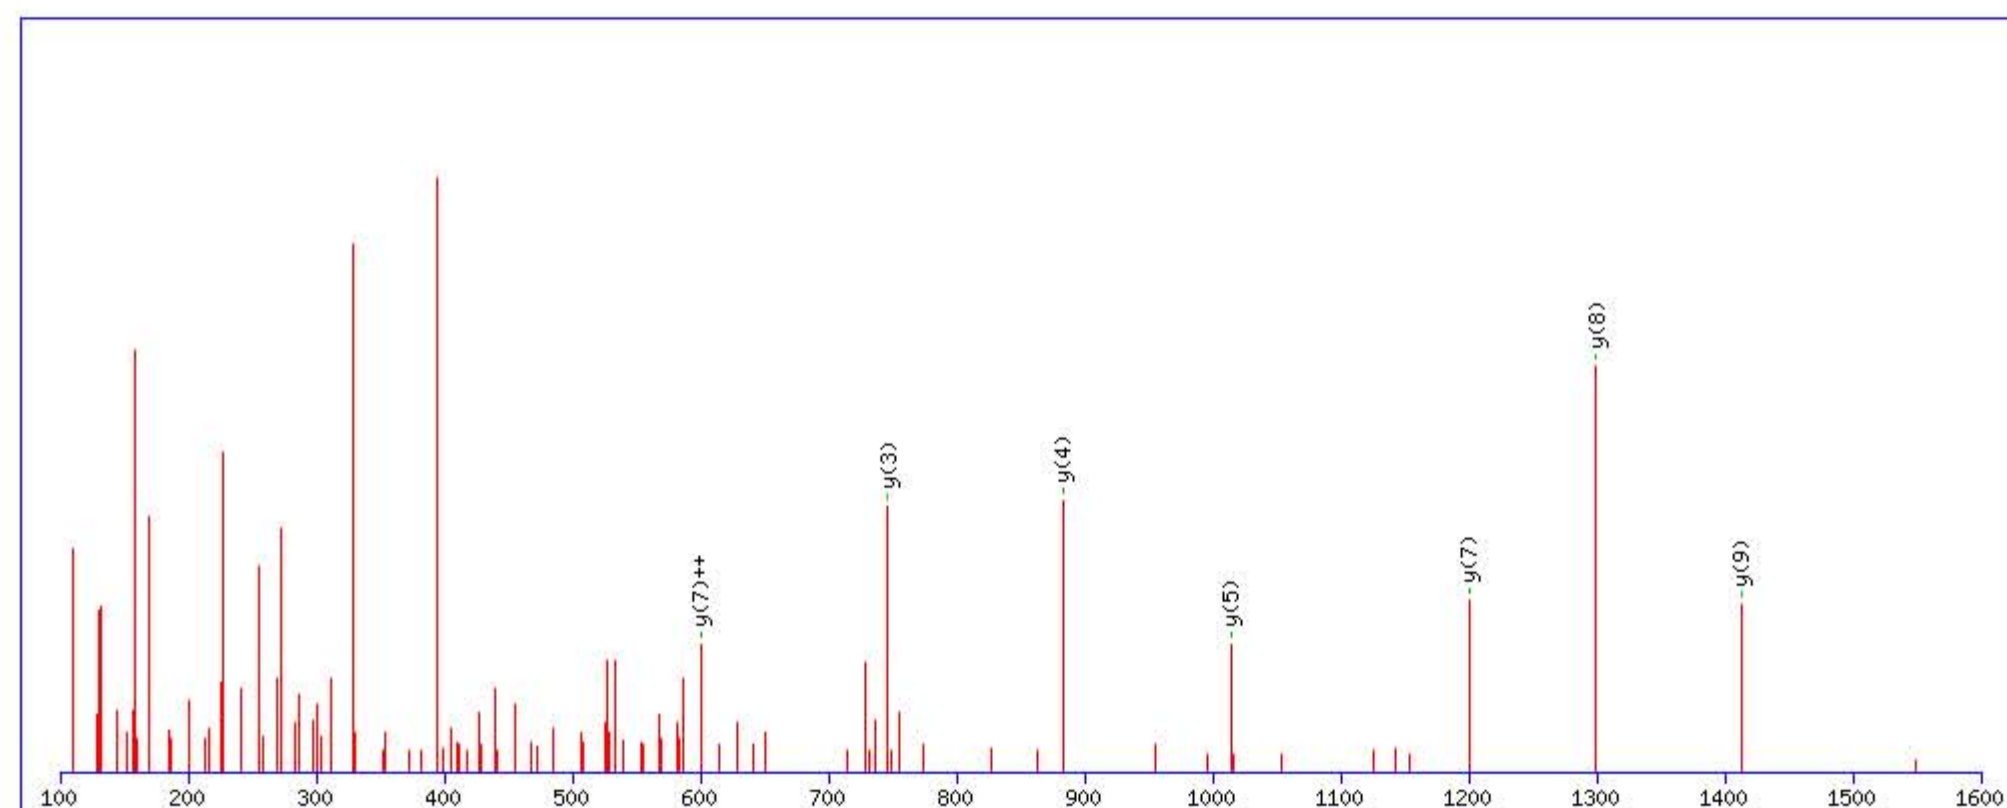

Monoisotopic mass of neutral peptide Mr(calc): 1597.756744

Fixed modifications: Carbamidomethyl (C) (apply to specified residues or termini only)

Variable modifications:

Q9 : Biotin:Thermo-21345 (Q)

Ions Score: 30 Expect: 0.0023

Matches : 7/74 fragment ions using 14 most intense peaks [\(help\)](#)

| #  | b           | b <sup>++</sup> | b <sup>*</sup> | b <sup>*++</sup> | b <sup>0</sup> | b <sup>0++</sup> | Seq. | y           | y <sup>++</sup> | y <sup>*</sup> | y <sup>*++</sup> | y <sup>0</sup> | y <sup>0++</sup> | #  |
|----|-------------|-----------------|----------------|------------------|----------------|------------------|------|-------------|-----------------|----------------|------------------|----------------|------------------|----|
| 1  | 187.086589  | 94.046932       |                |                  |                |                  | W    |             |                 |                |                  |                |                  | 10 |
| 2  | 300.170653  | 150.588965      |                |                  |                |                  | L    | 1412.684711 | 706.845994      | 1395.658162    | 698.332719       | 1394.674146    | 697.840711       | 9  |
| 3  | 399.239067  | 200.123172      |                |                  |                |                  | V    | 1299.600647 | 650.303962      | 1282.574098    | 641.790687       | 1281.590082    | 641.298679       | 8  |
| 4  | 456.260531  | 228.633904      |                |                  |                |                  | G    | 1200.532233 | 600.769755      | 1183.505684    | 592.256480       | 1182.521668    | 591.764472       | 7  |
| 5  | 585.303124  | 293.155200      |                |                  | 567.292559     | 284.149918       | E    | 1143.510769 | 572.259023      | 1126.484220    | 563.745748       | 1125.500204    | 563.253740       | 6  |
| 6  | 716.343609  | 358.675443      |                |                  | 698.333044     | 349.670160       | M    | 1014.468176 | 507.737726      | 997.441627     | 499.224452       |                |                  | 5  |
| 7  | 853.402521  | 427.204899      |                |                  | 835.391956     | 418.199616       | H    | 883.427691  | 442.217484      | 866.401142     | 433.704209       |                |                  | 4  |
| 8  | 1013.433170 | 507.220223      |                |                  | 995.422605     | 498.214941       | C    | 746.368779  | 373.688028      | 729.342230     | 365.174753       |                |                  | 3  |
| 9  | 1452.658496 | 726.832886      | 1435.631947    | 718.319612       | 1434.647931    | 717.827604       | Q    | 586.338130  | 293.672703      | 569.311581     | 285.159429       |                |                  | 2  |
| 10 |             |                 |                |                  |                |                  | K    | 147.112804  | 74.060040       | 130.086255     | 65.546765        |                |                  | 1  |

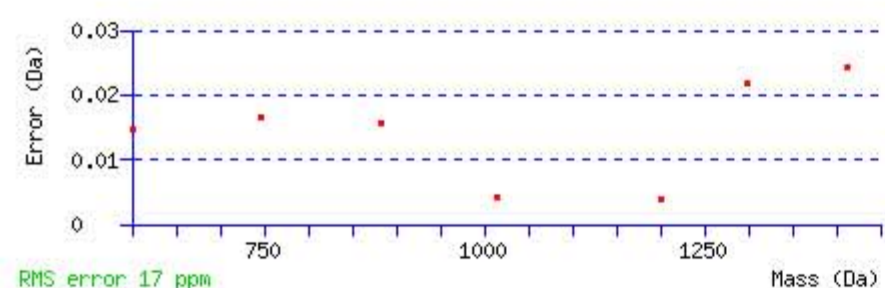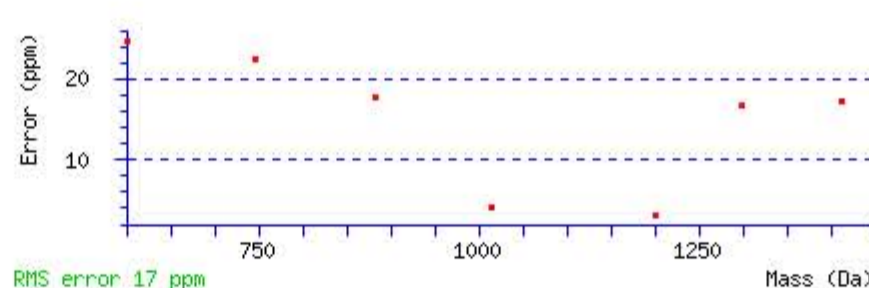

NCBI BLAST search of [WLVGEMHCQK](#)

(Parameters: blastp, nr protein database, expect=20000, no filter, PAM30)

Other BLAST [web gateways](#)

All matches to this query

| Score | Mr(calc):   | Delta    | Sequence                     |
|-------|-------------|----------|------------------------------|
| 30.2  | 1597.756744 | 0.011168 | <a href="#">WLVGEMHCQK</a>   |
| 2.0   | 1597.763718 | 0.004194 | <a href="#">LWKDEGRWEHDK</a> |



# MASCOT Search Results

## Peptide View

MS/MS Fragmentation of **SVAVYGQYGGQPCVGNAFETQSCEPTR**

Found in **CO7\_HUMAN**, Complement component C7 OS=Homo sapiens GN=C7 PE=1 SV=2

Match to Query 78005: 3272.512296 from(819.135350,4+) rtinseconds(2145) index(8258)

Title: Locus:1.1.1.2467.26 File:"2013-07-02 CLN FXIII 30 min 1st F 1.wiff"

Data file C:\Program Files (x86)\Matrix Science\Mascot Daemon\mgf1 FXIII 30 min 1st\mascot\_daemon\_merge.mgf

Click mouse within plot area to zoom in by factor of two about that point

Or, Plot from  to  Da

Label all possible matches  Label matches used for scoring

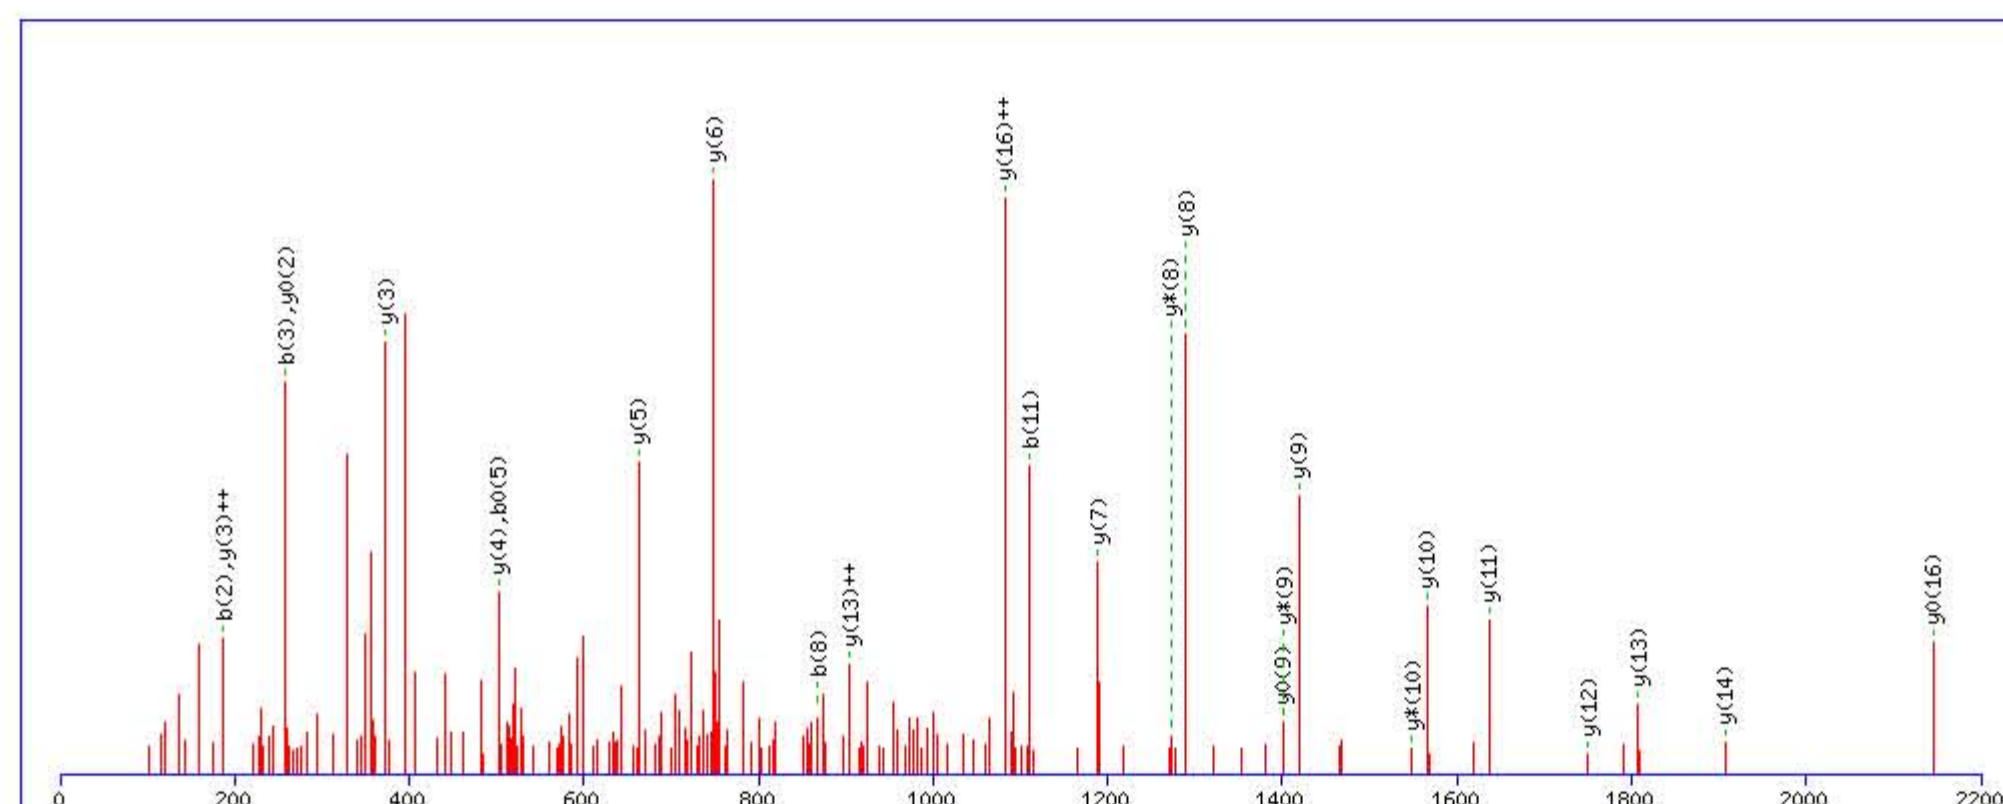

Monoisotopic mass of neutral peptide Mr(calc): 3272.468933

Fixed modifications: Carbamidomethyl (C) (apply to specified residues or termini only)

Variable modifications:

Q21 : Biotin:Thermo-21345 (Q)

Ions Score: 69 Expect: 1.8e-006

Matches : 26/298 fragment ions using 39 most intense peaks [\(help\)](#)

| #  | b                  | b <sup>++</sup> | b <sup>*</sup> | b <sup>+++</sup> | b <sup>0</sup>    | b <sup>0++</sup> | Seq. | y                  | y <sup>++</sup>    | y <sup>*</sup>     | y <sup>+++</sup> | y <sup>0</sup>     | y <sup>0++</sup> | #  |
|----|--------------------|-----------------|----------------|------------------|-------------------|------------------|------|--------------------|--------------------|--------------------|------------------|--------------------|------------------|----|
| 1  | 88.039304          | 44.523290       |                |                  | 70.028739         | 35.518008        | S    |                    |                    |                    |                  |                    |                  | 27 |
| 2  | <b>187.107718</b>  | 94.057497       |                |                  | 169.097153        | 85.052214        | V    | 3186.444157        | 1593.725716        | 3169.417608        | 1585.212442      | 3168.433592        | 1584.720434      | 26 |
| 3  | <b>258.144832</b>  | 129.576054      |                |                  | 240.134267        | 120.570772       | A    | 3087.375743        | 1544.191509        | 3070.349194        | 1535.678235      | 3069.365178        | 1535.186227      | 25 |
| 4  | 357.213246         | 179.110261      |                |                  | 339.202681        | 170.104979       | V    | 3016.338629        | 1508.672952        | 2999.312080        | 1500.159678      | 2998.328064        | 1499.667670      | 24 |
| 5  | 520.276575         | 260.641926      |                |                  | <b>502.266010</b> | 251.636643       | Y    | 2917.270215        | 1459.138745        | 2900.243666        | 1450.625471      | 2899.259650        | 1450.133463      | 23 |
| 6  | 577.298039         | 289.152658      |                |                  | 559.287474        | 280.147375       | G    | 2754.206886        | 1377.607081        | 2737.180337        | 1369.093806      | 2736.196321        | 1368.601798      | 22 |
| 7  | 705.356617         | 353.181947      | 688.330068     | 344.668672       | 687.346052        | 344.176664       | Q    | 2697.185422        | 1349.096349        | 2680.158873        | 1340.583074      | 2679.174857        | 1340.091066      | 21 |
| 8  | <b>868.419946</b>  | 434.713611      | 851.393397     | 426.200337       | 850.409381        | 425.708329       | Y    | 2569.126844        | 1285.067060        | 2552.100295        | 1276.553785      | 2551.116279        | 1276.061777      | 20 |
| 9  | 925.441410         | 463.224343      | 908.414861     | 454.711069       | 907.430845        | 454.219061       | G    | 2406.063515        | 1203.535395        | 2389.036966        | 1195.022121      | 2388.052950        | 1194.530113      | 19 |
| 10 | 982.462874         | 491.735075      | 965.436325     | 483.221801       | 964.452309        | 482.729793       | G    | 2349.042051        | 1175.024663        | 2332.015502        | 1166.511389      | 2331.031486        | 1166.019381      | 18 |
| 11 | <b>1110.521452</b> | 555.764364      | 1093.494903    | 547.251090       | 1092.510887       | 546.759082       | Q    | 2292.020587        | 1146.513931        | 2274.994038        | 1138.000657      | 2274.010022        | 1137.508649      | 17 |
| 12 | 1207.574216        | 604.290746      | 1190.547667    | 595.777472       | 1189.563651       | 595.285464       | P    | 2163.962009        | <b>1082.484642</b> | 2146.935460        | 1073.971368      | <b>2145.951444</b> | 1073.479360      | 16 |
| 13 | 1367.604865        | 684.306071      | 1350.578316    | 675.792796       | 1349.594300       | 675.300788       | C    | 2066.909245        | 1033.958260        | 2049.882696        | 1025.444986      | 2048.898680        | 1024.952978      | 15 |
| 14 | 1466.673279        | 733.840278      | 1449.646730    | 725.327003       | 1448.662714       | 724.834995       | V    | <b>1906.878596</b> | 953.942936         | 1889.852047        | 945.429662       | 1888.868031        | 944.937654       | 14 |
| 15 | 1523.694743        | 762.351010      | 1506.668194    | 753.837735       | 1505.684178       | 753.345727       | G    | <b>1807.810182</b> | <b>904.408729</b>  | 1790.783633        | 895.895455       | 1789.799617        | 895.403446       | 13 |
| 16 | 1637.737670        | 819.372473      | 1620.711121    | 810.859199       | 1619.727105       | 810.367191       | N    | <b>1750.788718</b> | 875.897997         | 1733.762169        | 867.384723       | 1732.778153        | 866.892715       | 12 |
| 17 | 1708.774784        | 854.891030      | 1691.748235    | 846.377756       | 1690.764219       | 845.885748       | A    | <b>1636.745791</b> | 818.876534         | 1619.719242        | 810.363259       | 1618.735226        | 809.871251       | 11 |
| 18 | 1855.843198        | 928.425237      | 1838.816649    | 919.911963       | 1837.832633       | 919.419955       | F    | <b>1565.708677</b> | 783.357977         | <b>1548.682128</b> | 774.844702       | 1547.698112        | 774.352694       | 10 |
| 19 | 1984.885791        | 992.946534      | 1967.859242    | 984.433259       | 1966.875226       | 983.941251       | E    | <b>1418.640263</b> | 709.823770         | <b>1401.613714</b> | 701.310495       | <b>1400.629698</b> | 700.818487       | 9  |
| 20 | 2085.933470        | 1043.470373     | 2068.906921    | 1034.957098      | 2067.922905       | 1034.465090      | T    | <b>1289.597670</b> | 645.302473         | <b>1272.571121</b> | 636.789199       | 1271.587105        | 636.297190       | 8  |
| 21 | 2525.158796        | 1263.083036     | 2508.132247    | 1254.569761      | 2507.148231       | 1254.077754      | Q    | <b>1188.549991</b> | 594.778634         | 1171.523442        | 586.265359       | 1170.539426        | 585.773351       | 7  |
| 22 | 2612.190824        | 1306.599050     | 2595.164275    | 1298.085776      | 2594.180259       | 1297.593768      | S    | <b>749.324665</b>  | 375.165970         | 732.298116         | 366.652696       | 731.314100         | 366.160688       | 6  |
| 23 | 2772.221473        | 1386.614374     | 2755.194924    | 1378.101100      | 2754.210908       | 1377.609092      | C    | <b>662.292637</b>  | 331.649956         | 645.266088         | 323.136682       | 644.282072         | 322.644674       | 5  |
| 24 | 2901.264066        | 1451.135671     | 2884.237517    | 1442.622396      | 2883.253501       | 1442.130389      | E    | <b>502.261988</b>  | 251.634632         | 485.235439         | 243.121357       | 484.251423         | 242.629349       | 4  |
| 25 | 2998.316830        | 1499.662053     | 2981.290281    | 1491.148778      | 2980.306265       | 1490.656771      | P    | <b>373.219395</b>  | <b>187.113335</b>  | 356.192846         | 178.600061       | 355.208830         | 178.108053       | 3  |
| 26 | 3099.364509        | 1550.185892     | 3082.337960    | 1541.672618      | 3081.353944       | 1541.180610      | T    | 276.166631         | 138.586953         | 259.140082         | 130.073679       | <b>258.156066</b>  | 129.581671       | 2  |
| 27 |                    |                 |                |                  |                   |                  | R    | 175.118952         | 88.063114          | 158.092403         | 79.549839        |                    |                  | 1  |

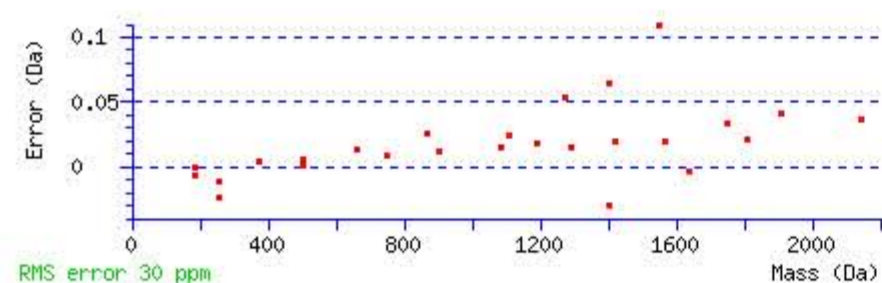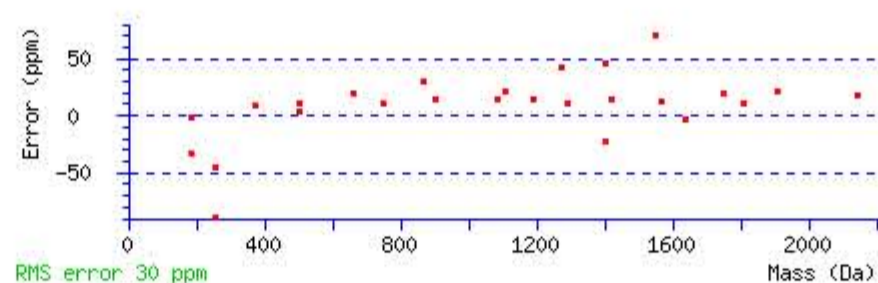

NCBI BLAST search of **SVAVYGQYGGQPCVGNAFETQSCEPTR**

(Parameters: blastp, nr protein database, expect=20000, no filter, PAM30)

Other BLAST [web gateways](#)

All matches to this query

| Score | Mr(calc):   | Delta    | Sequence                                    |
|-------|-------------|----------|---------------------------------------------|
| 68.7  | 3272.468933 | 0.043363 | <a href="#">SVAVYGQYGGQPCVGNAFETQSCEPTR</a> |
| 5.5   | 3272.468933 | 0.043363 | <a href="#">SVAVYGQYGGQPCVGNAFETQSCEPTR</a> |



# MASCOT Search Results

## Peptide View

MS/MS Fragmentation of **AGIQER**

Found in **CO8A\_HUMAN**, Complement component C8 alpha chain OS=Homo sapiens GN=C8A PE=1 SV=2

Match to Query 21529: 983.531308 from(492.772930,2+) rtinseconds(1387) index(20899)

Title: Locus:1.1.1.2335.18 File:"2013-07-02 CLN FXIII 30 min 1st F 2.wiff"

Data file C:\Program Files (x86)\Matrix Science\Mascot Daemon\mgf1 FXIII 30 min 1st\mascot\_daemon\_merge.mgf

Click mouse within plot area to zoom in by factor of two about that point

Or, Plot from  to  Da

Label all possible matches  Label matches used for scoring

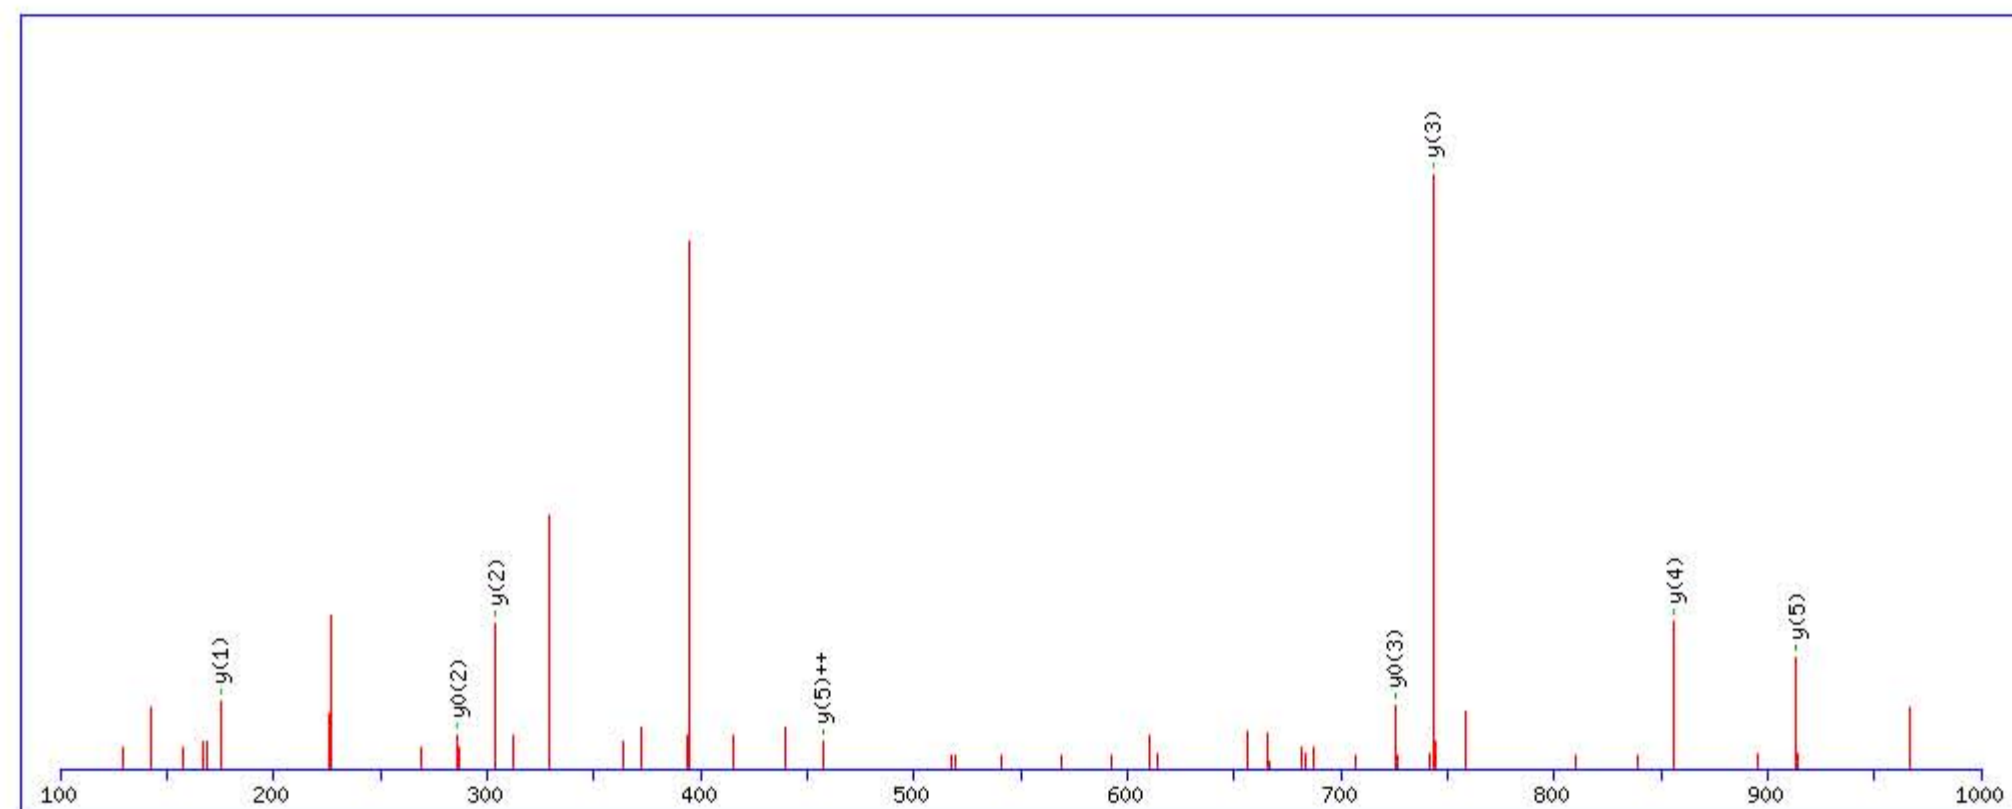

Monoisotopic mass of neutral peptide Mr(calc): 983.522217

Fixed modifications: Carbamidomethyl (C) (apply to specified residues or termini only)

Variable modifications:

Q4 : Biotin:Thermo-21345 (Q)

Ions Score: 28 Expect: 0.032

Matches : 8/44 fragment ions using 17 most intense peaks [\(help\)](#)

| # | b          | b <sup>++</sup> | b <sup>*</sup> | b <sup>+++</sup> | b <sup>0</sup> | b <sup>0++</sup> | Seq. | y          | y <sup>++</sup> | y <sup>*</sup> | y <sup>+++</sup> | y <sup>0</sup> | y <sup>0++</sup> | # |
|---|------------|-----------------|----------------|------------------|----------------|------------------|------|------------|-----------------|----------------|------------------|----------------|------------------|---|
| 1 | 72.044390  | 36.525833       |                |                  |                |                  | A    |            |                 |                |                  |                |                  | 6 |
| 2 | 129.065854 | 65.036565       |                |                  |                |                  | G    | 913.492399 | 457.249838      | 896.465850     | 448.736563       | 895.481834     | 448.244555       | 5 |
| 3 | 242.149918 | 121.578597      |                |                  |                |                  | I    | 856.470935 | 428.739106      | 839.444386     | 420.225831       | 838.460370     | 419.733823       | 4 |
| 4 | 681.375244 | 341.191260      | 664.348695     | 332.677986       |                |                  | Q    | 743.386871 | 372.197074      | 726.360322     | 363.683799       | 725.376306     | 363.191791       | 3 |
| 5 | 810.417837 | 405.712557      | 793.391288     | 397.199282       | 792.407272     | 396.707274       | E    | 304.161545 | 152.584411      | 287.134996     | 144.071136       | 286.150980     | 143.579128       | 2 |
| 6 |            |                 |                |                  |                |                  | R    | 175.118952 | 88.063114       | 158.092403     | 79.549840        |                |                  | 1 |

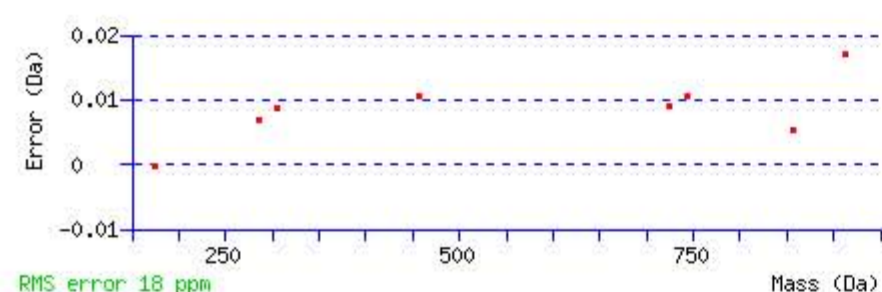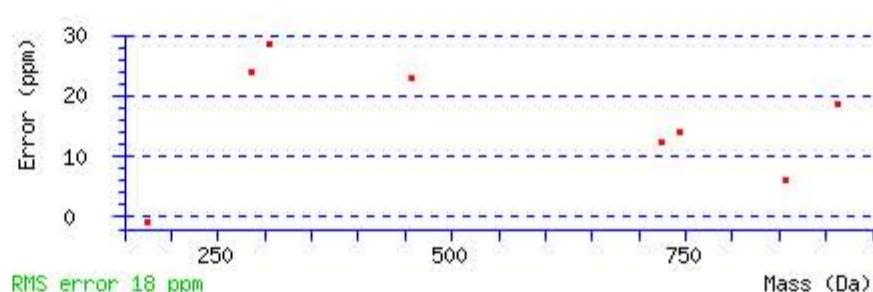

NCBI BLAST search of **AGIQER**

(Parameters: blastp, nr protein database, expect=20000, no filter, PAM30)

Other BLAST [web gateways](#)

All matches to this query

| Score | Mr(calc):  | Delta     | Sequence                 |
|-------|------------|-----------|--------------------------|
| 27.9  | 983.522217 | 0.009091  | <a href="#">AGIQER</a>   |
| 25.2  | 983.522217 | 0.009091  | <a href="#">AGLEQR</a>   |
| 16.9  | 983.522217 | 0.009091  | <a href="#">QIQER</a>    |
| 16.9  | 983.522217 | 0.009091  | <a href="#">QLQER</a>    |
| 14.6  | 983.522217 | 0.009091  | <a href="#">QLEQR</a>    |
| 8.0   | 983.522217 | 0.009091  | <a href="#">IQQER</a>    |
| 8.0   | 983.522217 | 0.009091  | <a href="#">LQQER</a>    |
| 7.4   | 983.544678 | -0.013370 | <a href="#">LKSHGMRR</a> |
| 6.9   | 983.522232 | 0.009076  | <a href="#">QLCLHVSK</a> |
| 6.7   | 983.522202 | 0.009106  | <a href="#">KLMENPPR</a> |

Mascot: <http://www.matrixscience.com/>



# MASCOT SEARCH RESULTS

## Peptide View

MS/MS Fragmentation of **LGSLGAACEQTQTEGAK**

Found in **CO8A\_HUMAN**, Complement component C8 alpha chain OS=Homo sapiens GN=C8A PE=1 SV=2

Match to Query 58027: 2031.005082 from(678.008970,3+) rtinseconds(1702) index(23158)

Title: Locus:1.1.1.2445.12 File:"2013-07-02 CLN FXIII 30 min 1st F 2.wiff"

Data file C:\Program Files (x86)\Matrix Science\Mascot Daemon\mgf\1 FXIII 30 min 1st\mascot\_daemon\_merge.mgf

Click mouse within plot area to zoom in by factor of two about that point

Or, Plot from  to  Da

Label all possible matches  Label matches used for scoring

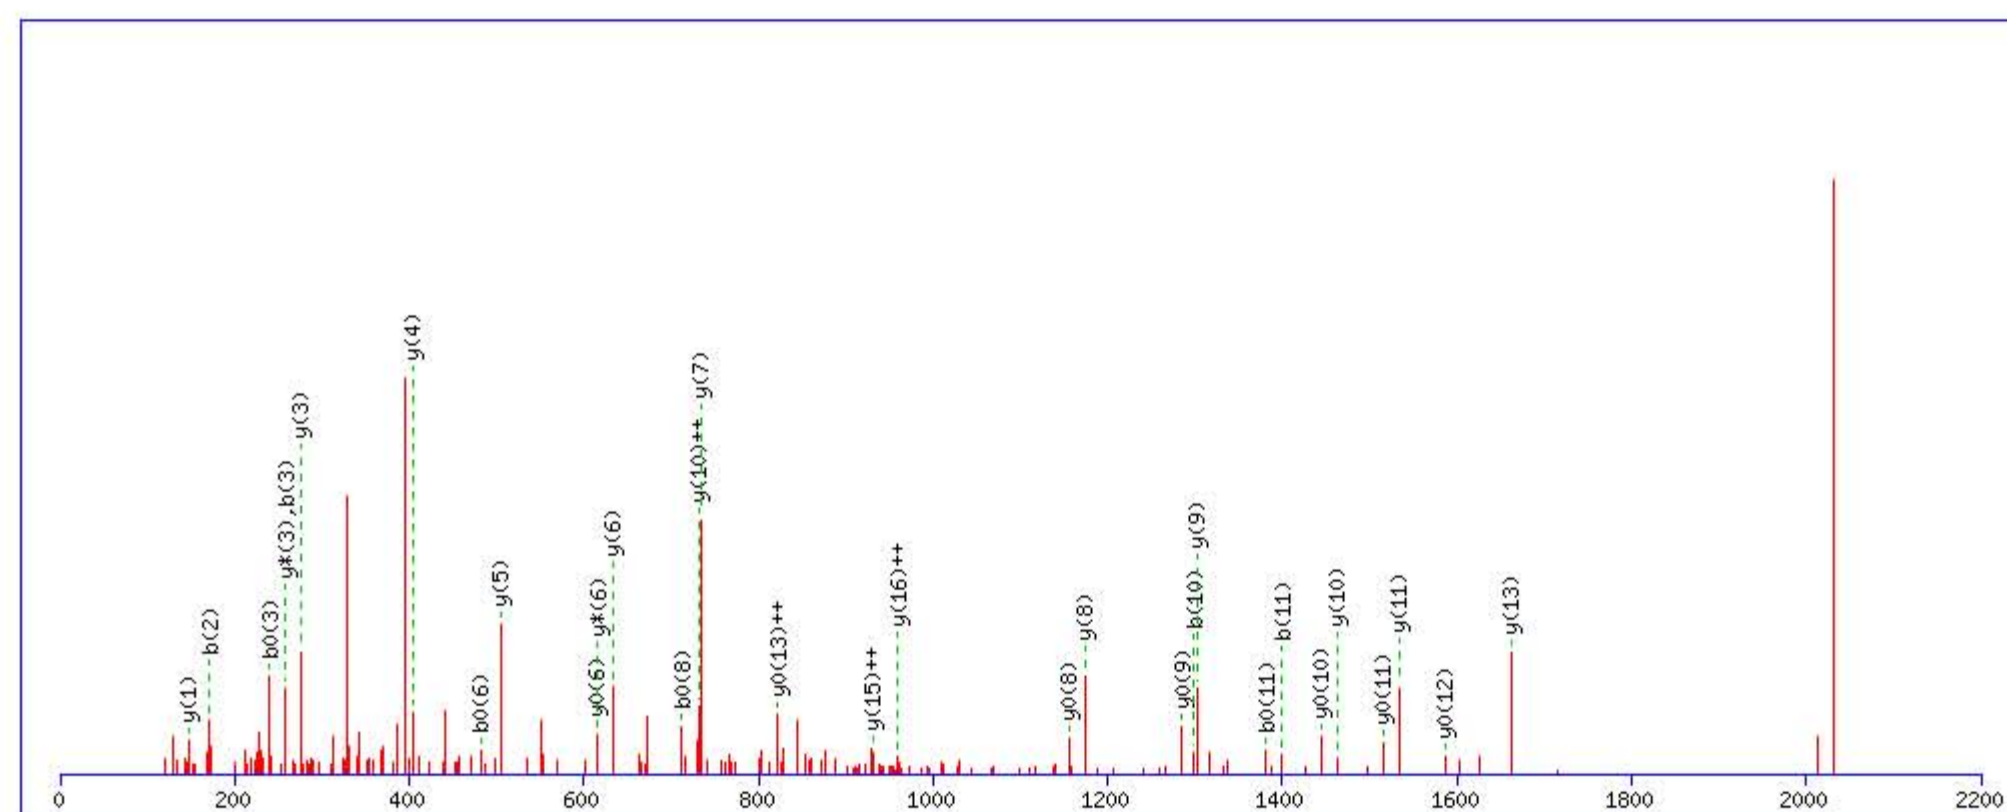

Monoisotopic mass of neutral peptide Mr(calc): 2030.976501

Fixed modifications: Carbamidomethyl (C) (apply to specified residues or termini only)

Variable modifications:

Q10 : Biotin:Thermo-21345 (Q)

Ions Score: 70 Expect: 2.8e-006

Matches : 31/164 fragment ions using 49 most intense peaks [\(help\)](#)

| #  | b                  | b <sup>++</sup> | b <sup>*</sup> | b <sup>*++</sup> | b <sup>0</sup>     | b <sup>0++</sup> | Seq. | y                  | y <sup>++</sup>   | y <sup>*</sup>    | y <sup>*++</sup> | y <sup>0</sup>     | y <sup>0++</sup>  | #  |
|----|--------------------|-----------------|----------------|------------------|--------------------|------------------|------|--------------------|-------------------|-------------------|------------------|--------------------|-------------------|----|
| 1  | 114.091340         | 57.549308       |                |                  |                    |                  | L    |                    |                   |                   |                  |                    |                   | 17 |
| 2  | <b>171.112804</b>  | 86.060040       |                |                  |                    |                  | G    | 1918.899727        | <b>959.953502</b> | 1901.873178       | 951.440227       | 1900.889162        | 950.948219        | 16 |
| 3  | <b>258.144832</b>  | 129.576054      |                |                  | <b>240.134267</b>  | 120.570772       | S    | 1861.878263        | <b>931.442770</b> | 1844.851714       | 922.929495       | 1843.867698        | 922.437487        | 15 |
| 4  | 371.228896         | 186.118086      |                |                  | 353.218331         | 177.112804       | L    | 1774.846235        | 887.926756        | 1757.819686       | 879.413481       | 1756.835670        | 878.921473        | 14 |
| 5  | 428.250360         | 214.628818      |                |                  | 410.239795         | 205.623536       | G    | <b>1661.762171</b> | 831.384724        | 1644.735622       | 822.871449       | 1643.751606        | <b>822.379441</b> | 13 |
| 6  | 499.287474         | 250.147375      |                |                  | <b>481.276909</b>  | 241.142093       | A    | 1604.740707        | 802.873992        | 1587.714158       | 794.360717       | <b>1586.730142</b> | 793.868709        | 12 |
| 7  | 570.324588         | 285.665932      |                |                  | 552.314023         | 276.660650       | A    | <b>1533.703593</b> | 767.355435        | 1516.677044       | 758.842160       | <b>1515.693028</b> | 758.350152        | 11 |
| 8  | 730.355237         | 365.681257      |                |                  | <b>712.344672</b>  | 356.675974       | C    | <b>1462.666479</b> | <b>731.836878</b> | 1445.639930       | 723.323603       | <b>1444.655914</b> | 722.831595        | 10 |
| 9  | 859.397830         | 430.202553      |                |                  | 841.387265         | 421.197271       | E    | <b>1302.635830</b> | 651.821553        | 1285.609281       | 643.308279       | <b>1284.625265</b> | 642.816270        | 9  |
| 10 | <b>1298.623156</b> | 649.815216      | 1281.596607    | 641.301942       | 1280.612591        | 640.809934       | Q    | <b>1173.593237</b> | 587.300257        | 1156.566688       | 578.786982       | <b>1155.582672</b> | 578.294974        | 8  |
| 11 | <b>1399.670835</b> | 700.339056      | 1382.644286    | 691.825781       | <b>1381.660270</b> | 691.333773       | T    | <b>734.367911</b>  | 367.687594        | 717.341362        | 359.174319       | 716.357346         | 358.682311        | 7  |
| 12 | 1527.729413        | 764.368345      | 1510.702864    | 755.855070       | 1509.718848        | 755.363062       | Q    | <b>633.320232</b>  | 317.163754        | <b>616.293683</b> | 308.650480       | <b>615.309667</b>  | 308.158472        | 6  |
| 13 | 1628.777092        | 814.892184      | 1611.750543    | 806.378910       | 1610.766527        | 805.886902       | T    | <b>505.261654</b>  | 253.134465        | 488.235105        | 244.621190       | 487.251089         | 244.129182        | 5  |
| 14 | 1757.819685        | 879.413481      | 1740.793136    | 870.900206       | 1739.809120        | 870.408198       | E    | <b>404.213975</b>  | 202.610625        | 387.187426        | 194.097351       | 386.203410         | 193.605343        | 4  |
| 15 | 1814.841149        | 907.924213      | 1797.814600    | 899.410938       | 1796.830584        | 898.918930       | G    | <b>275.171382</b>  | 138.089329        | <b>258.144833</b> | 129.576054       |                    |                   | 3  |
| 16 | 1885.878263        | 943.442770      | 1868.851714    | 934.929495       | 1867.867698        | 934.437487       | A    | 218.149918         | 109.578597        | 201.123369        | 101.065322       |                    |                   | 2  |
| 17 |                    |                 |                |                  |                    |                  | K    | <b>147.112804</b>  | 74.060040         | 130.086255        | 65.546765        |                    |                   | 1  |

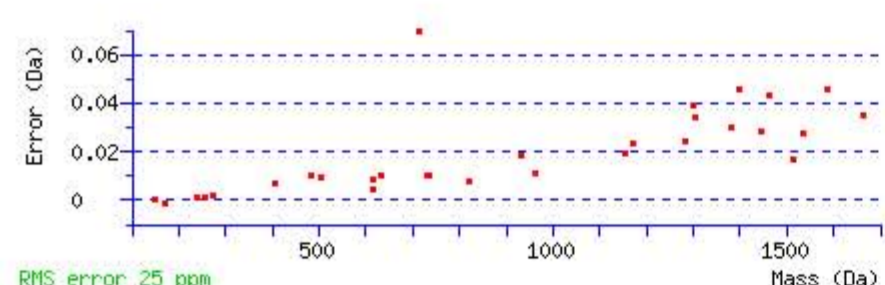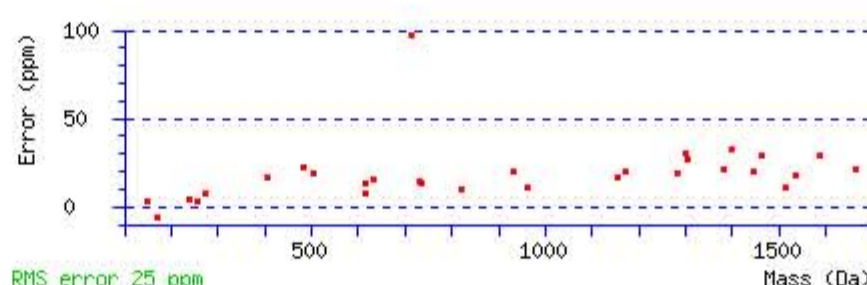

NCBI BLAST search of **LGSLGAACEQTQTEGAK**

(Parameters: blastp, nr protein database, expect=20000, no filter, PAM30)

Other BLAST [web gateways](#)

All matches to this query

| Score | Mr(calc):   | Delta    | Sequence                          |
|-------|-------------|----------|-----------------------------------|
| 69.9  | 2030.976501 | 0.028581 | <a href="#">LGSLGAACEQTQTEGAK</a> |
| 41.3  | 2030.976501 | 0.028581 | <a href="#">LGSLGAACEQTQTEGAK</a> |



# MASCOT Search Results

## Peptide View

MS/MS Fragmentation of **YGQTI R P I C L P C T E G T T R**

Found in **CFAB\_HUMAN**, Complement factor B OS=Homo sapiens GN=CFB PE=1 SV=2

Match to Query 66717: 2433.212742 from(812.078190,3+) rtinseconds(2087) index(80870)

Title: Locus:1.1.1.2606.15 File:"2013-07-02 CLN FXIII 30 min 1st FT.wiff"

Data file C:\Program Files (x86)\Matrix Science\Mascot Daemon\mgf\1 FXIII 30 min 1st\mascot\_daemon\_merge.mgf

Click mouse within plot area to zoom in by factor of two about that point

Or, Plot from  to  Da

Label all possible matches  Label matches used for scoring

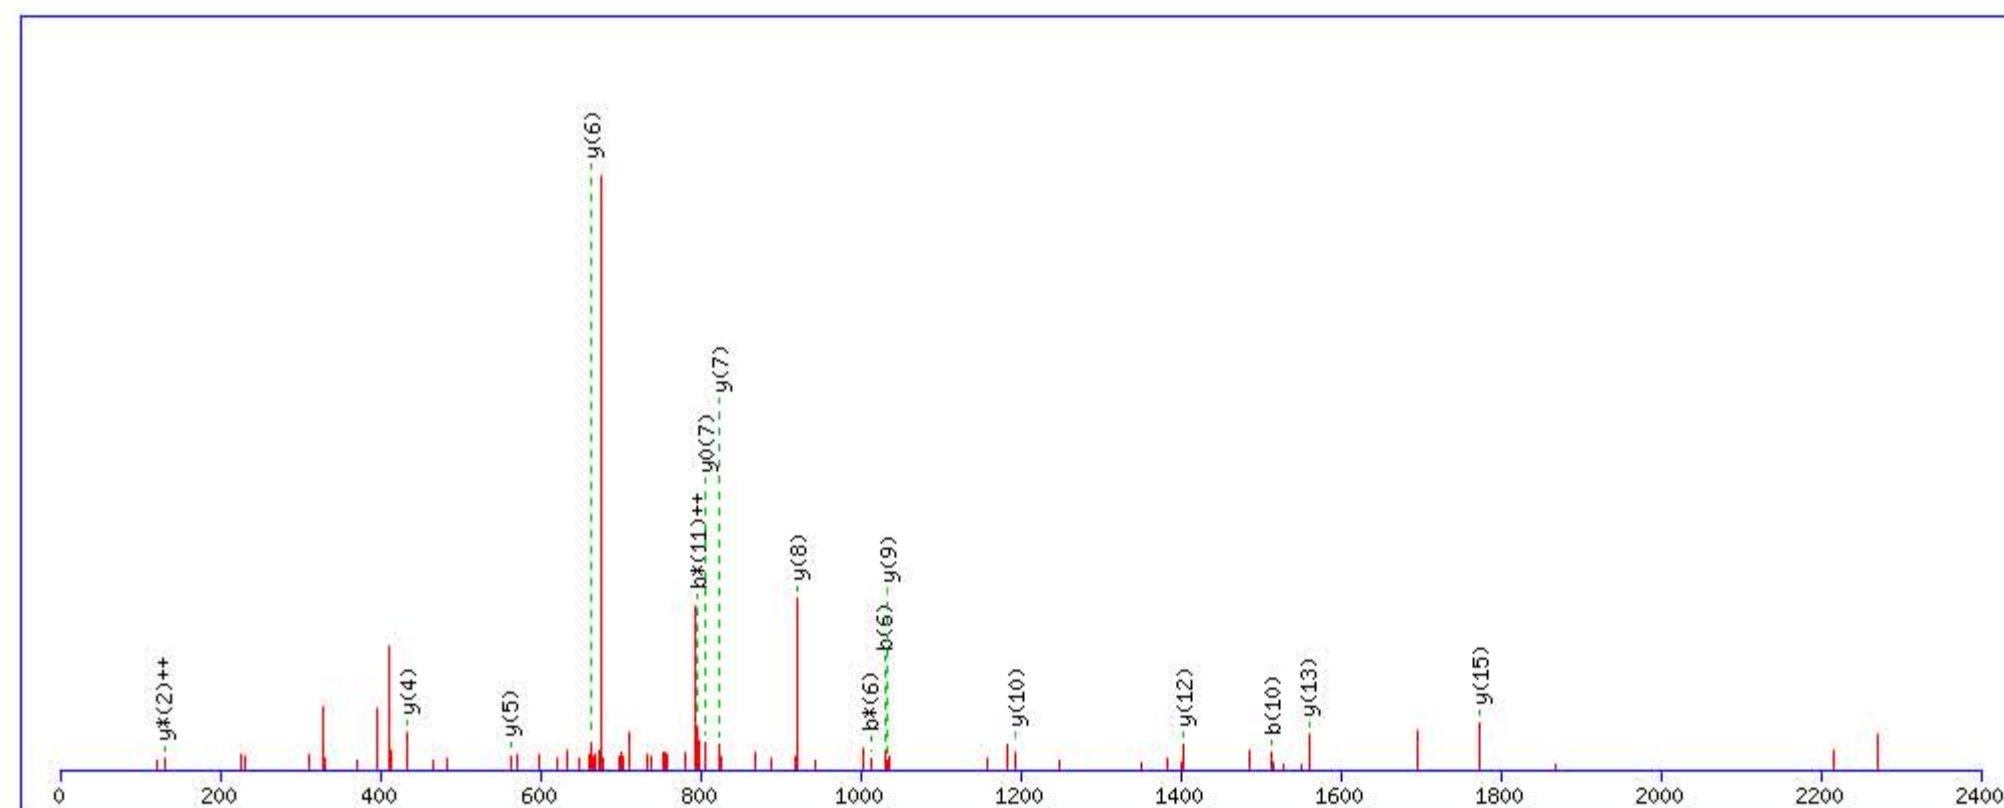

Monoisotopic mass of neutral peptide Mr(calc): 2433.196701

Fixed modifications: Carbamidomethyl (C) (apply to specified residues or termini only)

Variable modifications:

Q3 : Biotin:Thermo-21345 (Q)

Ions Score: 26 Expect: 0.076

Matches : 16/192 fragment ions using 56 most intense peaks [\(help\)](#)

| #  | b                  | b <sup>++</sup> | b <sup>*</sup>     | b <sup>*++</sup>  | b <sup>0</sup> | b <sup>0++</sup> | Seq. | y                  | y <sup>++</sup> | y <sup>*</sup> | y <sup>*++</sup>  | y <sup>0</sup>    | y <sup>0++</sup> | #  |
|----|--------------------|-----------------|--------------------|-------------------|----------------|------------------|------|--------------------|-----------------|----------------|-------------------|-------------------|------------------|----|
| 1  | 164.070605         | 82.538940       |                    |                   |                |                  | Y    |                    |                 |                |                   |                   |                  | 18 |
| 2  | 221.092069         | 111.049673      |                    |                   |                |                  | G    | 2271.140644        | 1136.073960     | 2254.114095    | 1127.560685       | 2253.130079       | 1127.068677      | 17 |
| 3  | 660.317395         | 330.662336      | 643.290846         | 322.149061        |                |                  | Q    | 2214.119180        | 1107.563228     | 2197.092631    | 1099.049953       | 2196.108615       | 1098.557945      | 16 |
| 4  | 761.365074         | 381.186175      | 744.338525         | 372.672901        | 743.354509     | 372.180893       | T    | <b>1774.893854</b> | 887.950565      | 1757.867305    | 879.437290        | 1756.883289       | 878.945282       | 15 |
| 5  | 874.449138         | 437.728207      | 857.422589         | 429.214933        | 856.438573     | 428.722925       | I    | 1673.846175        | 837.426725      | 1656.819626    | 828.913451        | 1655.835610       | 828.421443       | 14 |
| 6  | <b>1030.550249</b> | 515.778763      | <b>1013.523700</b> | 507.265488        | 1012.539684    | 506.773480       | R    | <b>1560.762111</b> | 780.884693      | 1543.735562    | 772.371419        | 1542.751546       | 771.879411       | 13 |
| 7  | 1127.603013        | 564.305145      | 1110.576464        | 555.791870        | 1109.592448    | 555.299862       | P    | <b>1404.661000</b> | 702.834138      | 1387.634451    | 694.320863        | 1386.650435       | 693.828855       | 12 |
| 8  | 1240.687077        | 620.847177      | 1223.660528        | 612.333902        | 1222.676512    | 611.841894       | I    | 1307.608236        | 654.307756      | 1290.581687    | 645.794481        | 1289.597671       | 645.302473       | 11 |
| 9  | 1400.717726        | 700.862501      | 1383.691177        | 692.349227        | 1382.707161    | 691.857219       | C    | <b>1194.524172</b> | 597.765724      | 1177.497623    | 589.252449        | 1176.513607       | 588.760441       | 10 |
| 10 | <b>1513.801790</b> | 757.404533      | 1496.775241        | 748.891259        | 1495.791225    | 748.399250       | L    | <b>1034.493523</b> | 517.750399      | 1017.466974    | 509.237125        | 1016.482958       | 508.745117       | 9  |
| 11 | 1610.854554        | 805.930915      | 1593.828005        | <b>797.417641</b> | 1592.843989    | 796.925633       | P    | <b>921.409459</b>  | 461.208367      | 904.382910     | 452.695093        | 903.398894        | 452.203085       | 8  |
| 12 | 1770.885203        | 885.946240      | 1753.858654        | 877.432965        | 1752.874638    | 876.940957       | C    | <b>824.356695</b>  | 412.681985      | 807.330146     | 404.168711        | <b>806.346130</b> | 403.676703       | 7  |
| 13 | 1871.932882        | 936.470079      | 1854.906333        | 927.956805        | 1853.922317    | 927.464797       | T    | <b>664.326046</b>  | 332.666661      | 647.299497     | 324.153386        | 646.315481        | 323.661378       | 6  |
| 14 | 2000.975475        | 1000.991376     | 1983.948926        | 992.478101        | 1982.964910    | 991.986093       | E    | <b>563.278367</b>  | 282.142821      | 546.251818     | 273.629547        | 545.267802        | 273.137539       | 5  |
| 15 | 2057.996939        | 1029.502107     | 2040.970390        | 1020.988833       | 2039.986374    | 1020.496825      | G    | <b>434.235774</b>  | 217.621525      | 417.209225     | 209.108250        | 416.225209        | 208.616242       | 4  |
| 16 | 2159.044618        | 1080.025947     | 2142.018069        | 1071.512672       | 2141.034053    | 1071.020664      | T    | 377.214310         | 189.110793      | 360.187761     | 180.597518        | 359.203745        | 180.105510       | 3  |
| 17 | 2260.092297        | 1130.549786     | 2243.065748        | 1122.036512       | 2242.081732    | 1121.544504      | T    | 276.166631         | 138.586953      | 259.140082     | <b>130.073679</b> | 258.156066        | 129.581671       | 2  |
| 18 |                    |                 |                    |                   |                |                  | R    | 175.118952         | 88.063114       | 158.092403     | 79.549839         |                   |                  | 1  |

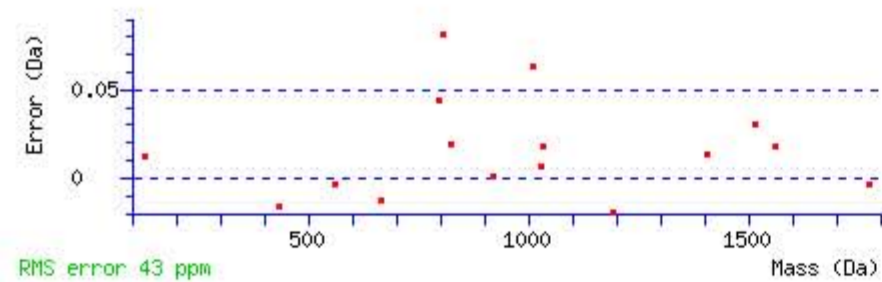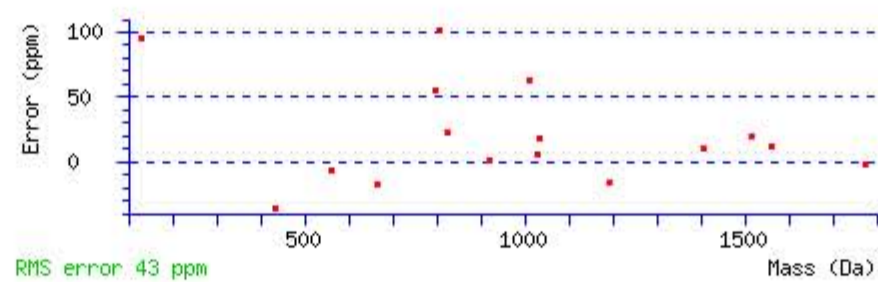

NCBI BLAST search of **YGQTI R P I C L P C T E G T T R**

(Parameters: blastp, nr protein database, expect=20000, no filter, PAM30)

Other BLAST [web gateways](#)

All matches to this query

| Score | Mr(calc):   | Delta    | Sequence                                        |
|-------|-------------|----------|-------------------------------------------------|
| 25.8  | 2433.196701 | 0.016041 | <a href="#">YGQTI R P I C L P C T E G T T R</a> |

Mascot: <http://www.matrixscience.com/>



# MASCOT Search Results

## Peptide View

MS/MS Fragmentation of **SFPTYCQQK**

Found in **CFAL\_HUMAN**, Complement factor I OS=Homo sapiens GN=CFI PE=1 SV=2

Match to Query 41664: 1468.686948 from(735.350750,2+) rtinseconds(1847) index(79206)

Title: Locus:1.1.1.2522.17 File:"2013-07-02 CLN FXIII 30 min 1st FT.wiff"

Data file C:\Program Files (x86)\Matrix Science\Mascot Daemon\mgf\1 FXIII 30 min 1st\mascot\_daemon\_merge.mgf

Click mouse within plot area to zoom in by factor of two about that point

Or, Plot from  to  Da

Label all possible matches  Label matches used for scoring

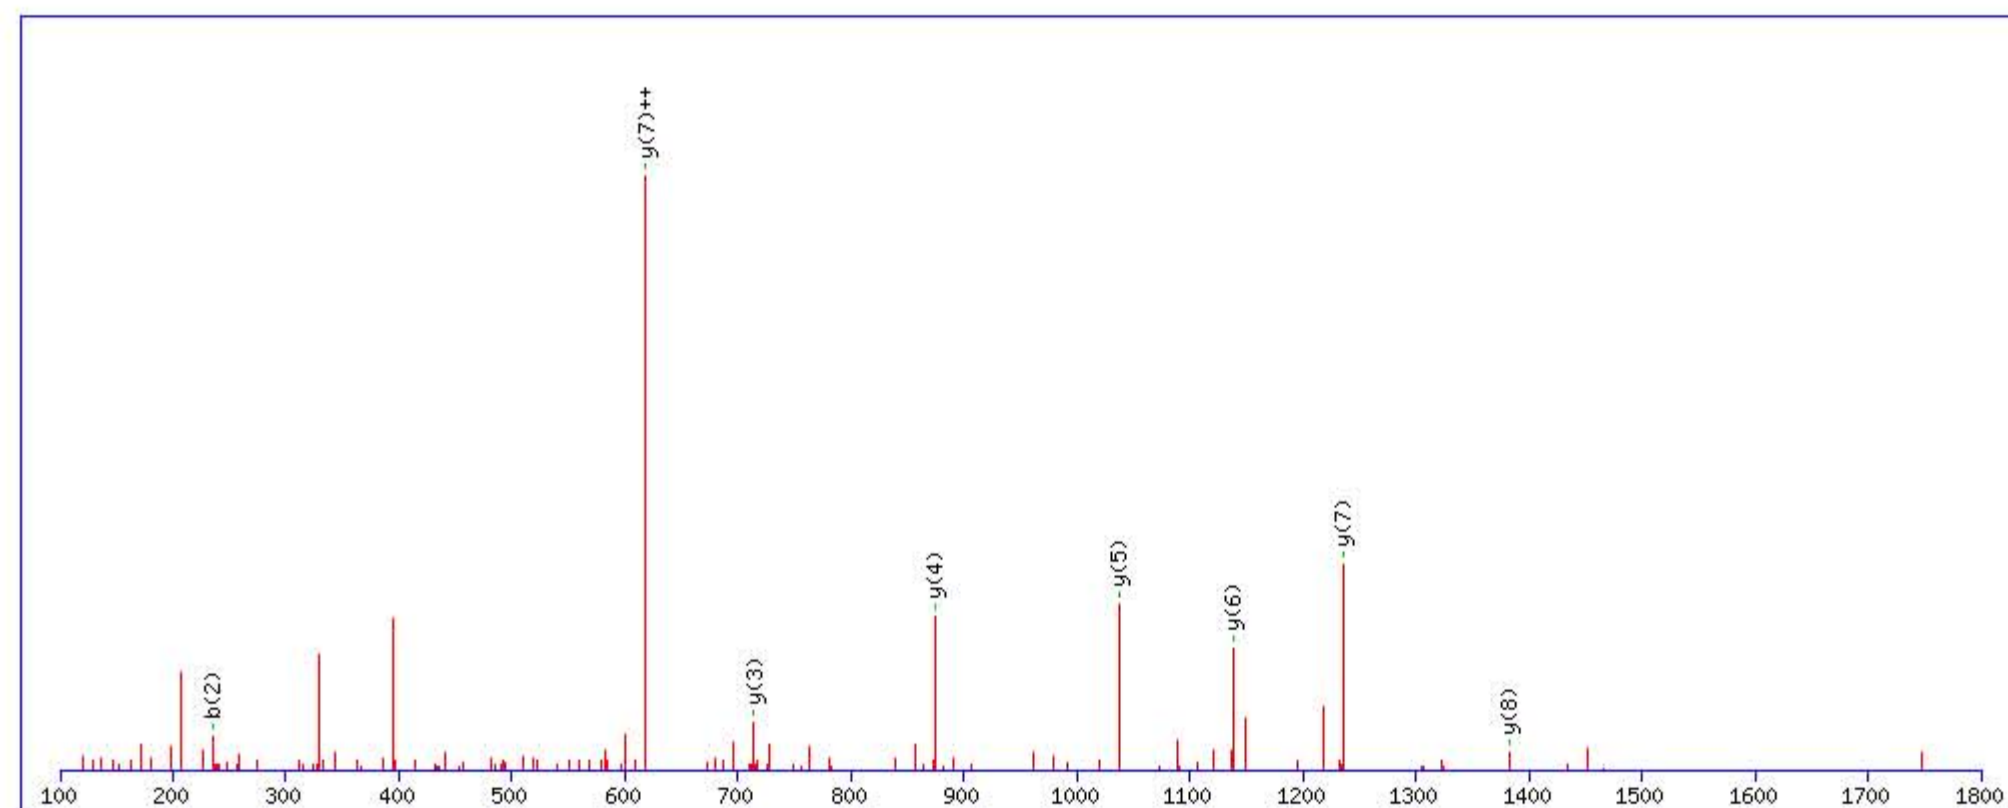

Monoisotopic mass of neutral peptide Mr(calc): 1468.684296

Fixed modifications: Carbamidomethyl (C) (apply to specified residues or termini only)

Variable modifications:

Q8 : Biotin:Thermo-21345 (Q)

Ions Score: 40 Expect: 0.00089

Matches : 8/74 fragment ions using 14 most intense peaks [\(help\)](#)

| # | b                 | b <sup>++</sup> | b <sup>*</sup> | b <sup>*++</sup> | b <sup>0</sup> | b <sup>0++</sup> | Seq. | y                  | y <sup>++</sup>   | y <sup>*</sup> | y <sup>*++</sup> | y <sup>0</sup> | y <sup>0++</sup> | # |
|---|-------------------|-----------------|----------------|------------------|----------------|------------------|------|--------------------|-------------------|----------------|------------------|----------------|------------------|---|
| 1 | 88.039304         | 44.523290       |                |                  | 70.028739      | 35.518008        | S    |                    |                   |                |                  |                |                  | 9 |
| 2 | <b>235.107718</b> | 118.057497      |                |                  | 217.097153     | 109.052214       | F    | <b>1382.659543</b> | 691.833410        | 1365.632994    | 683.320135       | 1364.648978    | 682.828127       | 8 |
| 3 | 332.160482        | 166.583879      |                |                  | 314.149917     | 157.578596       | P    | <b>1235.591129</b> | <b>618.299203</b> | 1218.564580    | 609.785928       | 1217.580564    | 609.293920       | 7 |
| 4 | 433.208161        | 217.107718      |                |                  | 415.197596     | 208.102436       | T    | <b>1138.538365</b> | 569.772821        | 1121.511816    | 561.259546       | 1120.527800    | 560.767538       | 6 |
| 5 | 596.271490        | 298.639383      |                |                  | 578.260925     | 289.634101       | Y    | <b>1037.490686</b> | 519.248981        | 1020.464137    | 510.735707       |                |                  | 5 |
| 6 | 756.302139        | 378.654708      |                |                  | 738.291574     | 369.649425       | C    | <b>874.427357</b>  | 437.717317        | 857.400808     | 429.204042       |                |                  | 4 |
| 7 | 884.360717        | 442.683997      | 867.334168     | 434.170722       | 866.350152     | 433.678714       | Q    | <b>714.396708</b>  | 357.701992        | 697.370159     | 349.188718       |                |                  | 3 |
| 8 | 1323.586043       | 662.296660      | 1306.559494    | 653.783385       | 1305.575478    | 653.291377       | Q    | 586.338130         | 293.672703        | 569.311581     | 285.159428       |                |                  | 2 |
| 9 |                   |                 |                |                  |                |                  | K    | 147.112804         | 74.060040         | 130.086255     | 65.546765        |                |                  | 1 |

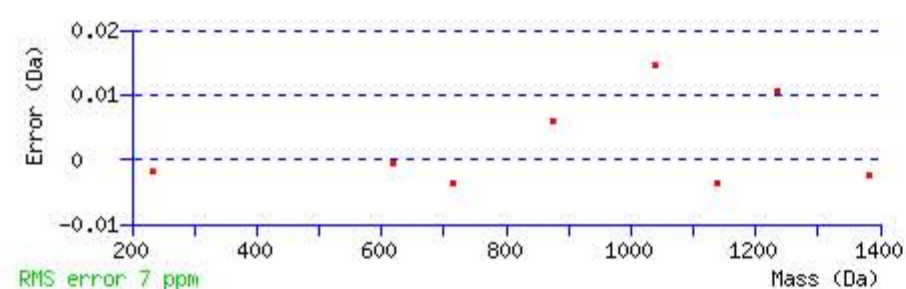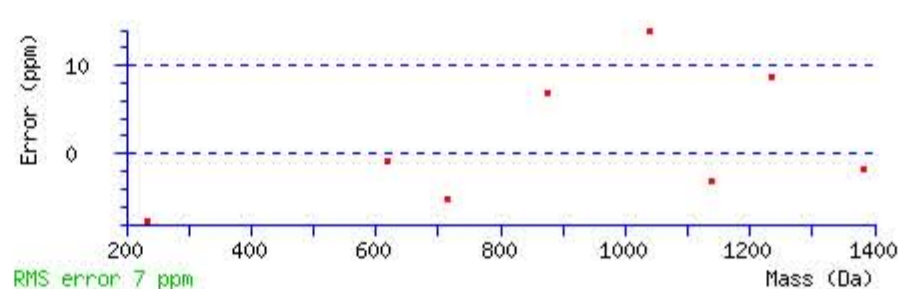

NCBI BLAST search of **SFPTYCQQK**

(Parameters: blastp, nr protein database, expect=20000, no filter, PAM30)

Other BLAST [web gateways](#)

All matches to this query

| Score | Mr(calc):   | Delta     | Sequence                       |
|-------|-------------|-----------|--------------------------------|
| 40.3  | 1468.684296 | 0.002652  | <a href="#">SFPTYCQQK</a>      |
| 40.3  | 1468.684296 | 0.002652  | <a href="#">SFPTYCQQK</a>      |
| 7.3   | 1468.691498 | -0.004550 | <a href="#">ESDCLVCRKFR</a>    |
| 3.1   | 1468.671524 | 0.015424  | <a href="#">MEAETGSSVETGKK</a> |
| 2.7   | 1468.672394 | 0.014554  | <a href="#">IMQSSQSMSK</a>     |
| 1.2   | 1468.688126 | -0.001178 | <a href="#">FSIPSMTEHHAGR</a>  |
| 1.2   | 1468.666336 | 0.020612  | <a href="#">SMAQHVHNMDKR</a>   |
| 0.1   | 1468.680252 | 0.006696  | <a href="#">YAKGNGDCALLCK</a>  |
| 0.1   | 1468.698029 | -0.011081 | <a href="#">SFLEGTMQVAQSR</a>  |
| 0.1   | 1468.695511 | -0.008563 | <a href="#">SFLYCNQAR</a>      |



# MASCOT Search Results

## Peptide View

MS/MS Fragmentation of **LLPAQLPAEK**

Found in **ECM1\_HUMAN**, Extracellular matrix protein 1 OS=Homo sapiens GN=ECM1 PE=1 SV=2

Match to Query 38504: 1389.816508 from(695.915530,2+) rtinseconds(1984) index(7221)

Title: Locus:1.1.1.2411.14 File:"2013-07-02 CLN FXIII 30 min 1st F 1.wiff"

Data file C:\Program Files (x86)\Matrix Science\Mascot Daemon\mgf\1 FXIII 30 min 1st\mascot\_daemon\_merge.mgf

Click mouse within plot area to zoom in by factor of two about that point

Or, Plot from  to  Da

Label all possible matches  Label matches used for scoring

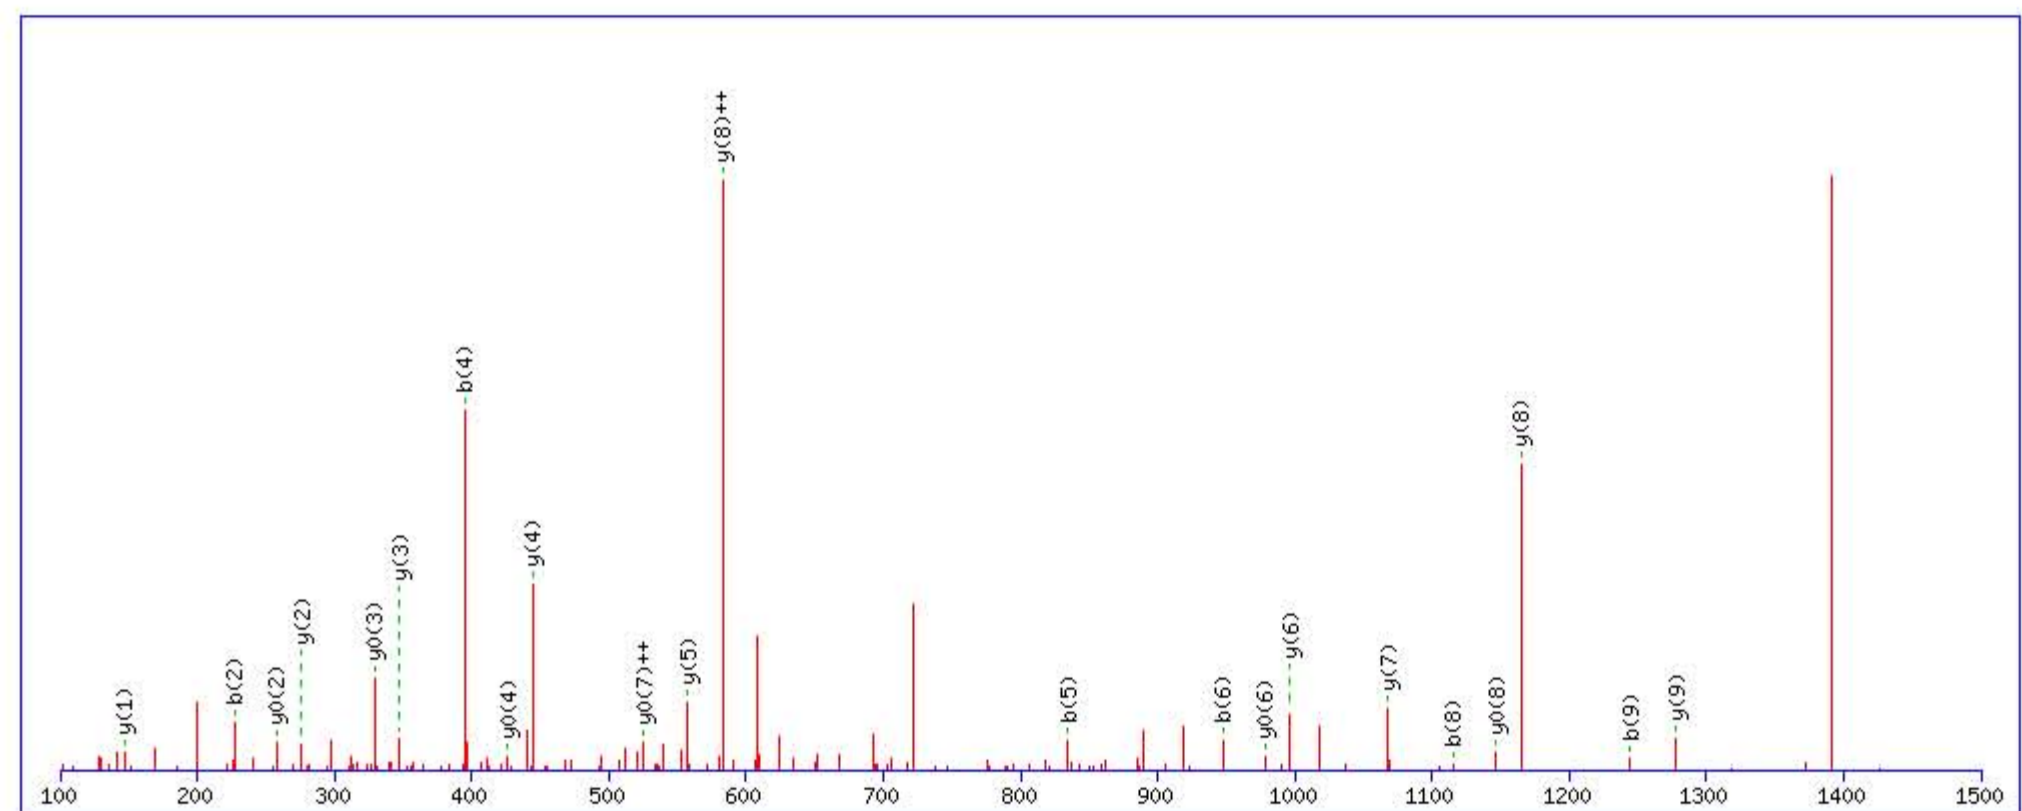

Monoisotopic mass of neutral peptide Mr(calc): 1389.805359

Fixed modifications: Carbamidomethyl (C) (apply to specified residues or termini only)

Variable modifications:

Q5 : Biotin:Thermo-21345 (Q)

Ions Score: 50 Expect: 6.5e-005

Matches : 22/82 fragment ions using 48 most intense peaks [\(help\)](#)

| #  | b                  | b <sup>++</sup> | b <sup>+</sup> | b <sup>+++</sup> | b <sup>0</sup> | b <sup>0++</sup> | Seq. | y                  | y <sup>++</sup>   | y <sup>+</sup> | y <sup>+++</sup> | y <sup>0</sup>     | y <sup>0++</sup>  | #  |
|----|--------------------|-----------------|----------------|------------------|----------------|------------------|------|--------------------|-------------------|----------------|------------------|--------------------|-------------------|----|
| 1  | 114.091340         | 57.549308       |                |                  |                |                  | L    |                    |                   |                |                  |                    |                   | 10 |
| 2  | <b>227.175404</b>  | 114.091340      |                |                  |                |                  | L    | <b>1277.728607</b> | 639.367942        | 1260.702058    | 630.854667       | 1259.718042        | 630.362659        | 9  |
| 3  | 324.228168         | 162.617722      |                |                  |                |                  | P    | <b>1164.644543</b> | <b>582.825909</b> | 1147.617994    | 574.312635       | <b>1146.633978</b> | 573.820627        | 8  |
| 4  | <b>395.265282</b>  | 198.136279      |                |                  |                |                  | A    | <b>1067.591779</b> | 534.299527        | 1050.565230    | 525.786253       | 1049.581214        | <b>525.294245</b> | 7  |
| 5  | <b>834.490608</b>  | 417.748942      | 817.464059     | 409.235668       |                |                  | Q    | <b>996.554665</b>  | 498.780970        | 979.528116     | 490.267696       | <b>978.544100</b>  | 489.775688        | 6  |
| 6  | <b>947.574672</b>  | 474.290974      | 930.548123     | 465.777700       |                |                  | L    | <b>557.329339</b>  | 279.168307        | 540.302790     | 270.655033       | 539.318774         | 270.163025        | 5  |
| 7  | 1044.627436        | 522.817356      | 1027.600887    | 514.304082       |                |                  | P    | <b>444.245275</b>  | 222.626275        | 427.218726     | 214.113001       | <b>426.234710</b>  | 213.620993        | 4  |
| 8  | <b>1115.664550</b> | 558.335913      | 1098.638001    | 549.822639       |                |                  | A    | <b>347.192511</b>  | 174.099893        | 330.165962     | 165.586619       | <b>329.181946</b>  | 165.094611        | 3  |
| 9  | <b>1244.707143</b> | 622.857209      | 1227.680594    | 614.343935       | 1226.696578    | 613.851927       | E    | <b>276.155397</b>  | 138.581336        | 259.128848     | 130.068062       | <b>258.144832</b>  | 129.576054        | 2  |
| 10 |                    |                 |                |                  |                |                  | K    | <b>147.112804</b>  | 74.060040         | 130.086255     | 65.546765        |                    |                   | 1  |

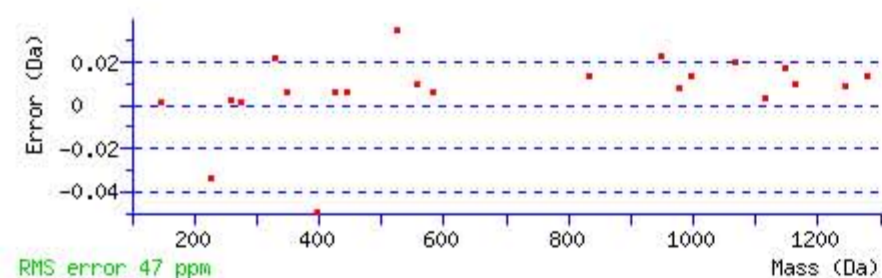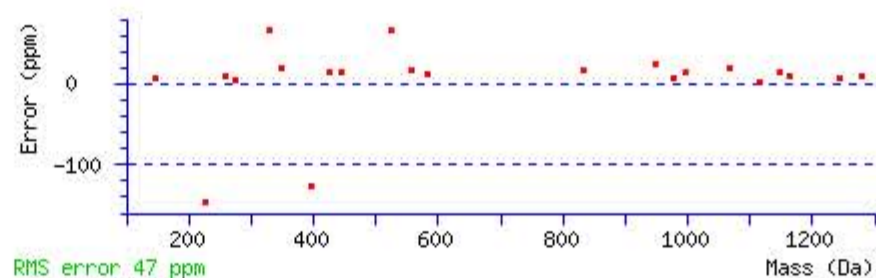

NCBI BLAST search of [LLPAQLPAEK](#)

(Parameters: blastp, nr protein database, expect=20000, no filter, PAM30)

Other BLAST [web gateways](#)

## All matches to this query

| Score | Mr(calc):   | Delta     | Sequence                     |
|-------|-------------|-----------|------------------------------|
| 49.9  | 1389.805359 | 0.011149  | <a href="#">LLPAQLPAEK</a>   |
| 6.9   | 1389.809189 | 0.007319  | <a href="#">LIKRLDLSYNR</a>  |
| 3.8   | 1389.816605 | -0.000097 | <a href="#">ILGPLPKHMIQK</a> |
| 3.5   | 1389.809204 | 0.007304  | <a href="#">IARVPRLPPDEK</a> |
| 2.5   | 1389.834366 | -0.017858 | <a href="#">AARPPVTPVLEK</a> |
| 2.5   | 1389.820450 | -0.003942 | <a href="#">LINRTHATVPIR</a> |
| 1.3   | 1389.797989 | 0.018519  | <a href="#">LLNLQSLFVTSR</a> |
| 1.2   | 1389.823135 | -0.006627 | <a href="#">ILIVITDGQKYK</a> |
| 1.2   | 1389.813232 | 0.003276  | <a href="#">LIQAPSKFAFLR</a> |
| 0.2   | 1389.797974 | 0.018534  | <a href="#">ILLYRGADKDVK</a> |



# MASCOT Search Results

## Peptide View

MS/MS Fragmentation of **VTPNLMGHLCGNQR**

Found in **ECM1\_HUMAN**, Extracellular matrix protein 1 OS=Homo sapiens GN=ECM1 PE=1 SV=2

Match to Query 54456: 1906.950912 from(636.657580,3+) rtinseconds(1856) index(6330)

Title: Locus:1.1.1.2367.11 File:"2013-07-02 CLN FXIII 30 min 1st F 1.wiff"

Data file C:\Program Files (x86)\Matrix Science\Mascot Daemon\mgf1 FXIII 30 min 1st\mascot\_daemon\_merge.mgf

Click mouse within plot area to zoom in by factor of two about that point

Or, Plot from  to  Da

Label all possible matches  Label matches used for scoring

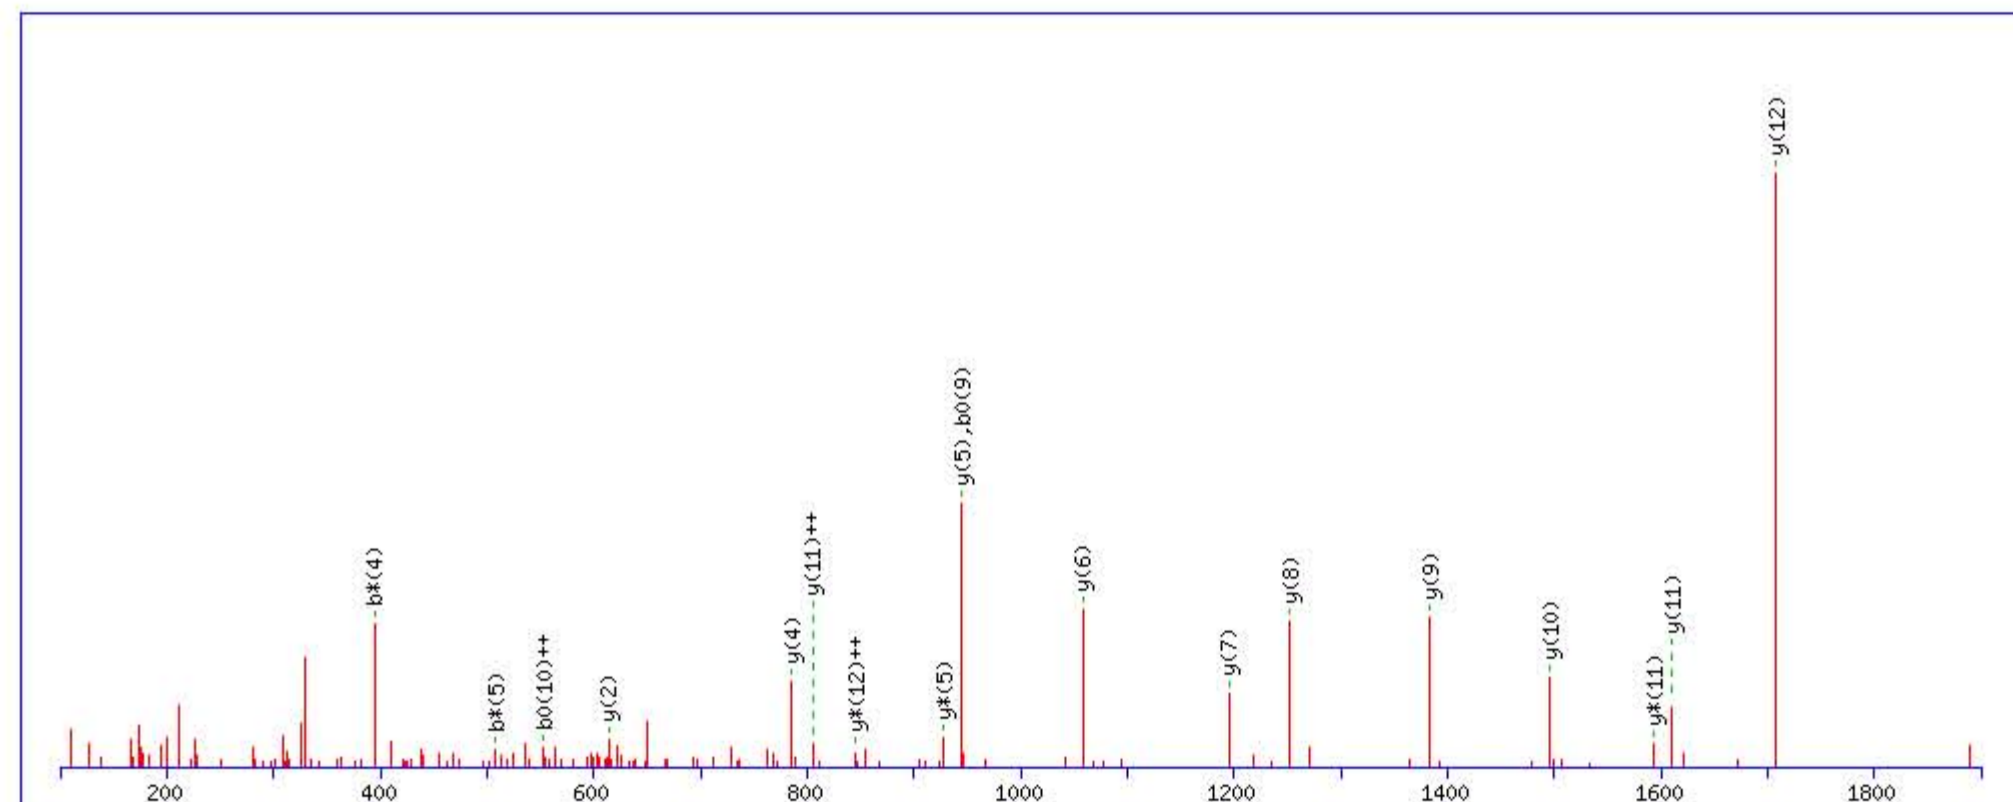

Monoisotopic mass of neutral peptide Mr(calc): 1906.932816

Fixed modifications: Carbamidomethyl (C) (apply to specified residues or termini only)

Variable modifications:

Q13 : Biotin:Thermo-21345 (Q)

Ions Score: 55 Expect: 7.8e-005

Matches : 18/124 fragment ions using 32 most intense peaks [\(help\)](#)

| #  | b           | b <sup>++</sup> | b <sup>*</sup>    | b <sup>*++</sup> | b <sup>0</sup>    | b <sup>0++</sup>  | Seq. | y                  | y <sup>++</sup>   | y <sup>*</sup>     | y <sup>*++</sup>  | y <sup>0</sup> | y <sup>0++</sup> | #  |
|----|-------------|-----------------|-------------------|------------------|-------------------|-------------------|------|--------------------|-------------------|--------------------|-------------------|----------------|------------------|----|
| 1  | 100.075690  | 50.541483       |                   |                  |                   |                   | V    |                    |                   |                    |                   |                |                  | 14 |
| 2  | 201.123369  | 101.065322      |                   |                  | 183.112804        | 92.060040         | T    | 1808.871677        | 904.939477        | 1791.845128        | 896.426202        | 1790.861112    | 895.934194       | 13 |
| 3  | 298.176133  | 149.591704      |                   |                  | 280.165568        | 140.586422        | P    | <b>1707.823998</b> | 854.415637        | 1690.797449        | <b>845.902363</b> |                |                  | 12 |
| 4  | 412.219060  | 206.613168      | <b>395.192511</b> | 198.099894       | 394.208495        | 197.607886        | N    | <b>1610.771234</b> | <b>805.889255</b> | <b>1593.744685</b> | 797.375981        |                |                  | 11 |
| 5  | 525.303124  | 263.155200      | <b>508.276575</b> | 254.641926       | 507.292559        | 254.149918        | L    | <b>1496.728307</b> | 748.867792        | 1479.701758        | 740.354517        |                |                  | 10 |
| 6  | 656.343609  | 328.675443      | 639.317060        | 320.162168       | 638.333044        | 319.670160        | M    | <b>1383.644243</b> | 692.325760        | 1366.617694        | 683.812485        |                |                  | 9  |
| 7  | 713.365073  | 357.186175      | 696.338524        | 348.672900       | 695.354508        | 348.180892        | G    | <b>1252.603758</b> | 626.805517        | 1235.577209        | 618.292243        |                |                  | 8  |
| 8  | 850.423985  | 425.715631      | 833.397436        | 417.202356       | 832.413420        | 416.710348        | H    | <b>1195.582294</b> | 598.294785        | 1178.555745        | 589.781511        |                |                  | 7  |
| 9  | 963.508049  | 482.257663      | 946.481500        | 473.744388       | <b>945.497484</b> | 473.252380        | L    | <b>1058.523382</b> | 529.765329        | 1041.496833        | 521.252055        |                |                  | 6  |
| 10 | 1123.538698 | 562.272987      | 1106.512149       | 553.759713       | 1105.528133       | <b>553.267705</b> | C    | <b>945.439318</b>  | 473.223297        | <b>928.412769</b>  | 464.710023        |                |                  | 5  |
| 11 | 1180.560162 | 590.783719      | 1163.533613       | 582.270445       | 1162.549597       | 581.778437        | G    | <b>785.408669</b>  | 393.207973        | 768.382120         | 384.694698        |                |                  | 4  |
| 12 | 1294.603089 | 647.805183      | 1277.576540       | 639.291908       | 1276.592524       | 638.799900        | N    | 728.387205         | 364.697241        | 711.360656         | 356.183966        |                |                  | 3  |
| 13 | 1733.828415 | 867.417846      | 1716.801866       | 858.904571       | 1715.817850       | 858.412563        | Q    | <b>614.344278</b>  | 307.675777        | 597.317729         | 299.162503        |                |                  | 2  |
| 14 |             |                 |                   |                  |                   |                   | R    | 175.118952         | 88.063114         | 158.092403         | 79.549839         |                |                  | 1  |

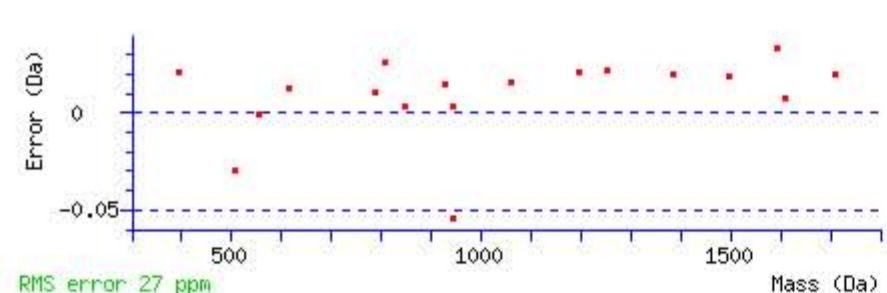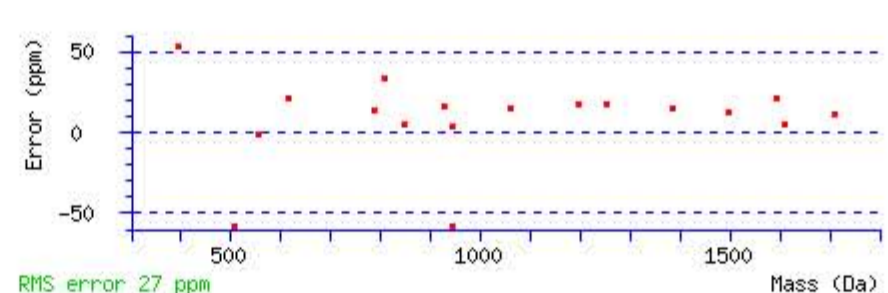

NCBI BLAST search of **VTPNLMGHLCGNQR**

(Parameters: blastp, nr protein database, expect=20000, no filter, PAM30)

Other BLAST [web gateways](#)

All matches to this query

| Score | Mr(calc):   | Delta    | Sequence                       |
|-------|-------------|----------|--------------------------------|
| 55.1  | 1906.932816 | 0.018096 | <a href="#">VTPNLMGHLCGNQR</a> |

Mascot: <http://www.matrixscience.com/>



# MASCOT Search Results

## Peptide View

MS/MS Fragmentation of **FSCFQEEAPQPHYQLR**

Found in **ECM1\_HUMAN**, Extracellular matrix protein 1 OS=Homo sapiens GN=ECM1 PE=1 SV=2

Match to Query 64979: 2347.111032 from(783.377620,3+) rtinseconds(1907) index(6720)

Title: Locus:1.1.1.2384.17 File:"2013-07-02 CLN FXIII 30 min 1st F 1.wiff"

Data file C:\Program Files (x86)\Matrix Science\Mascot Daemon\mgf1 FXIII 30 min 1st\mascot\_daemon\_merge.mgf

Click mouse within plot area to zoom in by factor of two about that point

Or, Plot from  to  Da

Label all possible matches  Label matches used for scoring

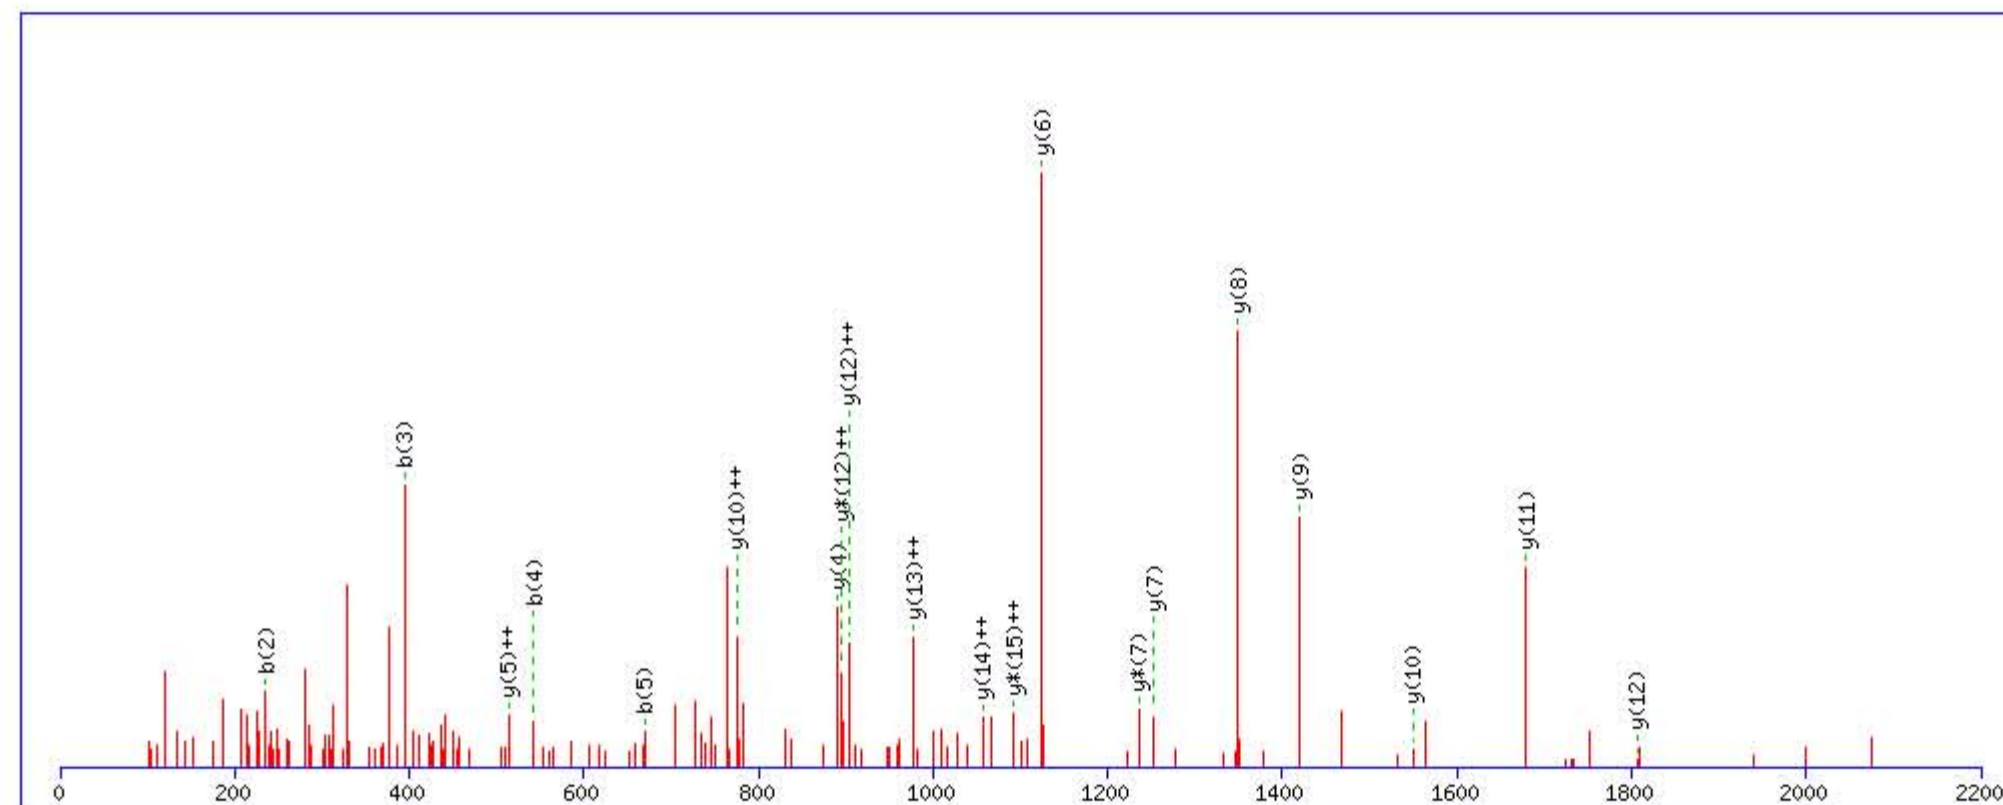

Monoisotopic mass of neutral peptide Mr(calc): 2347.087784

Fixed modifications: Carbamidomethyl (C) (apply to specified residues or termini only)

Variable modifications:

Q14 : Biotin:Thermo-21345 (Q)

Ions Score: 39 Expect: 0.0024

Matches : 20/152 fragment ions using 38 most intense peaks [\(help\)](#)

| #  | b                 | b <sup>++</sup> | b <sup>*</sup> | b <sup>+++</sup> | b <sup>0</sup> | b <sup>0++</sup> | Seq. | y                  | y <sup>++</sup>    | y <sup>*</sup>     | y <sup>+++</sup>   | y <sup>0</sup> | y <sup>0++</sup> | #  |
|----|-------------------|-----------------|----------------|------------------|----------------|------------------|------|--------------------|--------------------|--------------------|--------------------|----------------|------------------|----|
| 1  | 148.075690        | 74.541483       |                |                  |                |                  | F    |                    |                    |                    |                    |                |                  | 16 |
| 2  | <b>235.107718</b> | 118.057497      |                |                  | 217.097153     | 109.052214       | S    | 2201.026658        | 1101.016967        | 2184.000109        | <b>1092.503692</b> | 2183.016093    | 1092.011684      | 15 |
| 3  | <b>395.138367</b> | 198.072821      |                |                  | 377.127802     | 189.067539       | C    | 2113.994630        | <b>1057.500953</b> | 2096.968081        | 1048.987678        | 2095.984065    | 1048.495670      | 14 |
| 4  | <b>542.206781</b> | 271.607029      |                |                  | 524.196216     | 262.601746       | F    | 1953.963981        | <b>977.485629</b>  | 1936.937432        | 968.972354         | 1935.953416    | 968.480346       | 13 |
| 5  | <b>670.265359</b> | 335.636318      | 653.238810     | 327.123043       | 652.254794     | 326.631035       | Q    | <b>1806.895567</b> | <b>903.951422</b>  | 1789.869018        | <b>895.438147</b>  | 1788.885002    | 894.946139       | 12 |
| 6  | 799.307952        | 400.157614      | 782.281403     | 391.644340       | 781.297387     | 391.152332       | E    | <b>1678.836989</b> | 839.922133         | 1661.810440        | 831.408858         | 1660.826424    | 830.916850       | 11 |
| 7  | 928.350545        | 464.678911      | 911.323996     | 456.165636       | 910.339980     | 455.673628       | E    | <b>1549.794396</b> | <b>775.400836</b>  | 1532.767847        | 766.887562         | 1531.783831    | 766.395554       | 10 |
| 8  | 999.387659        | 500.197468      | 982.361110     | 491.684193       | 981.377094     | 491.192185       | A    | <b>1420.751803</b> | 710.879540         | 1403.725254        | 702.366265         |                |                  | 9  |
| 9  | 1096.440423       | 548.723850      | 1079.413874    | 540.210575       | 1078.429858    | 539.718567       | P    | <b>1349.714689</b> | 675.360983         | 1332.688140        | 666.847708         |                |                  | 8  |
| 10 | 1224.499001       | 612.753138      | 1207.472452    | 604.239864       | 1206.488436    | 603.747856       | Q    | <b>1252.661925</b> | 626.834601         | <b>1235.635376</b> | 618.321326         |                |                  | 7  |
| 11 | 1321.551765       | 661.279520      | 1304.525216    | 652.766246       | 1303.541200    | 652.274238       | P    | <b>1124.603347</b> | 562.805312         | 1107.576798        | 554.292037         |                |                  | 6  |
| 12 | 1458.610677       | 729.808976      | 1441.584128    | 721.295702       | 1440.600112    | 720.803694       | H    | 1027.550583        | <b>514.278930</b>  | 1010.524034        | 505.765655         |                |                  | 5  |
| 13 | 1621.674006       | 811.340641      | 1604.647457    | 802.827367       | 1603.663441    | 802.335358       | Y    | <b>890.491671</b>  | 445.749474         | 873.465122         | 437.236199         |                |                  | 4  |
| 14 | 2060.899332       | 1030.953304     | 2043.872783    | 1022.440030      | 2042.888767    | 1021.948022      | Q    | 727.428342         | 364.217809         | 710.401793         | 355.704535         |                |                  | 3  |
| 15 | 2173.983396       | 1087.495336     | 2156.956847    | 1078.982061      | 2155.972831    | 1078.490053      | L    | 288.203016         | 144.605146         | 271.176467         | 136.091872         |                |                  | 2  |
| 16 |                   |                 |                |                  |                |                  | R    | 175.118952         | 88.063114          | 158.092403         | 79.549839          |                |                  | 1  |

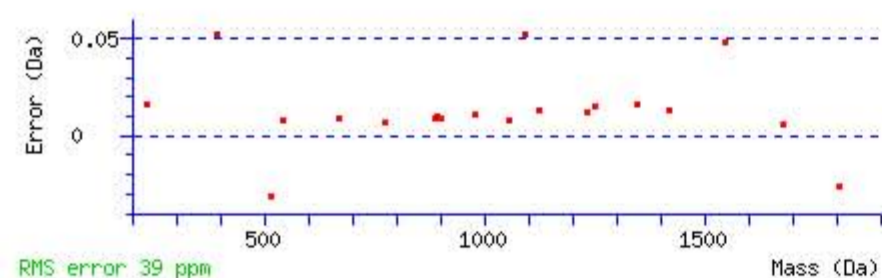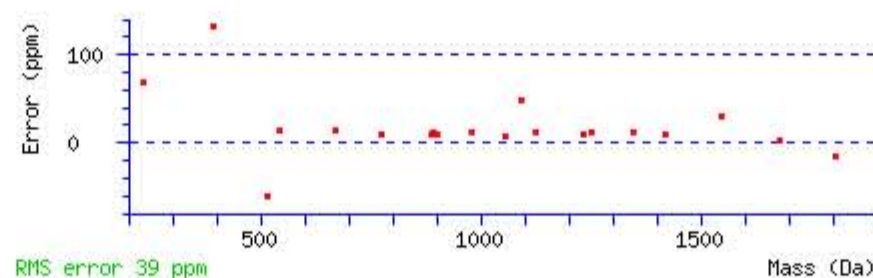

NCBI BLAST search of **FSCFQEEAPQPHYQLR**

(Parameters: blastp, nr protein database, expect=20000, no filter, PAM30)

Other BLAST [web gateways](#)

## All matches to this query

| Score | Mr(calc):   | Delta    | Sequence                         |
|-------|-------------|----------|----------------------------------|
| 39.2  | 2347.087784 | 0.023248 | <a href="#">FSCFQEEAPQPHYQLR</a> |
| 18.9  | 2347.087784 | 0.023248 | <a href="#">FSCFQEEAPQPHYQLR</a> |



# MASCOT Search Results

## Peptide View

MS/MS Fragmentation of **QLEQVIK**

Found in **FIBA\_HUMAN**, Fibrinogen alpha chain OS=Homo sapiens GN=FGA PE=1 SV=2

Match to Query 32978: 1238.701808 from(620.358180,2+) rtinseconds(1749) index(61357)

Title: Locus:1.1.1.2607.13 File:"2013-07-02 CLN FXIII 30 min 1st F 4.wiff"

Data file C:\Program Files (x86)\Matrix Science\Mascot Daemon\mgf1 FXIII 30 min 1st\mascot\_daemon\_merge.mgf

Click mouse within plot area to zoom in by factor of two about that point

Or, Plot from  to  Da

Label all possible matches  Label matches used for scoring

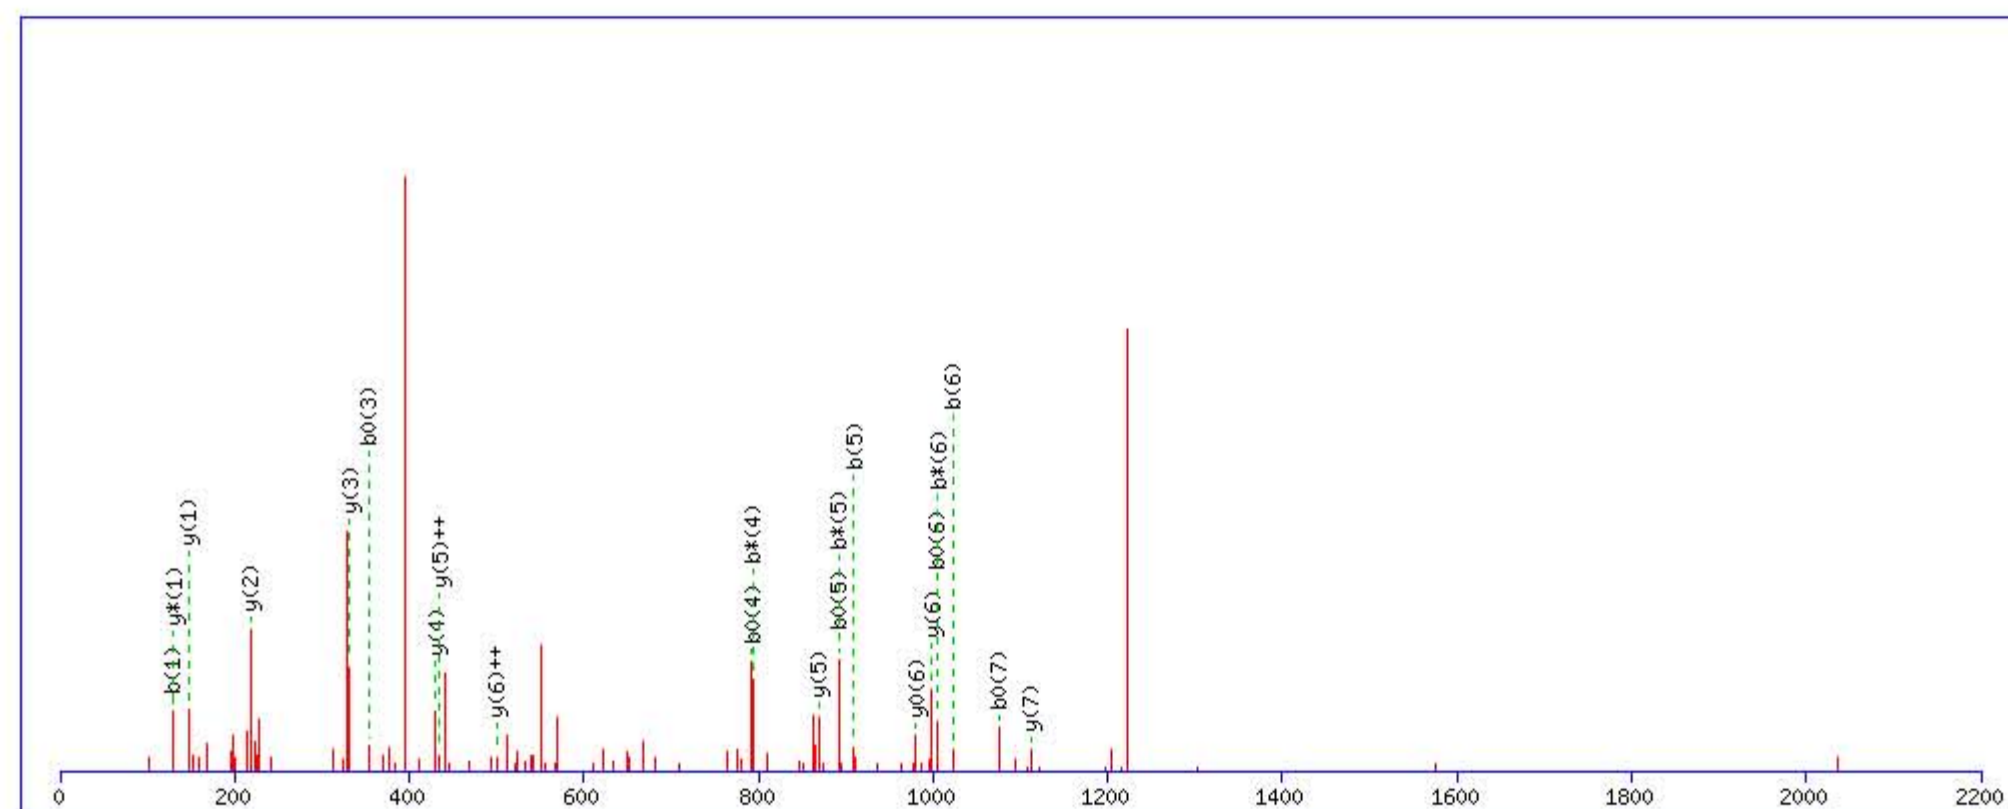

Monoisotopic mass of neutral peptide Mr(calc): 1238.705658

Fixed modifications: Carbamidomethyl (C) (apply to specified residues or termini only)

Variable modifications:

Q4 : Biotin:Thermo-21345 (Q)

Ions Score: 35 Expect: 0.0052

Matches : 22/70 fragment ions using 47 most intense peaks [\(help\)](#)

| # | b           | b <sup>++</sup> | b <sup>*</sup> | b <sup>+++</sup> | b <sup>0</sup> | b <sup>0++</sup> | Seq. | y           | y <sup>++</sup> | y <sup>*</sup> | y <sup>+++</sup> | y <sup>0</sup> | y <sup>0++</sup> | # |
|---|-------------|-----------------|----------------|------------------|----------------|------------------|------|-------------|-----------------|----------------|------------------|----------------|------------------|---|
| 1 | 129.065854  | 65.036565       | 112.039305     | 56.523291        |                |                  | Q    |             |                 |                |                  |                |                  | 8 |
| 2 | 242.149918  | 121.578597      | 225.123369     | 113.065323       |                |                  | L    | 1111.654379 | 556.330828      | 1094.627830    | 547.817553       | 1093.643814    | 547.325545       | 7 |
| 3 | 371.192511  | 186.099894      | 354.165962     | 177.586619       | 353.181946     | 177.094611       | E    | 998.570315  | 499.788796      | 981.543766     | 491.275521       | 980.559750     | 490.783513       | 6 |
| 4 | 810.417837  | 405.712557      | 793.391288     | 397.199282       | 792.407272     | 396.707274       | Q    | 869.527722  | 435.267499      | 852.501173     | 426.754225       |                |                  | 5 |
| 5 | 909.486251  | 455.246764      | 892.459702     | 446.733489       | 891.475686     | 446.241481       | V    | 430.302396  | 215.654836      | 413.275847     | 207.141562       |                |                  | 4 |
| 6 | 1022.570315 | 511.788796      | 1005.543766    | 503.275521       | 1004.559750    | 502.783513       | I    | 331.233982  | 166.120629      | 314.207433     | 157.607355       |                |                  | 3 |
| 7 | 1093.607429 | 547.307353      | 1076.580880    | 538.794078       | 1075.596864    | 538.302070       | A    | 218.149918  | 109.578597      | 201.123369     | 101.065323       |                |                  | 2 |
| 8 |             |                 |                |                  |                |                  | K    | 147.112804  | 74.060040       | 130.086255     | 65.546765        |                |                  | 1 |

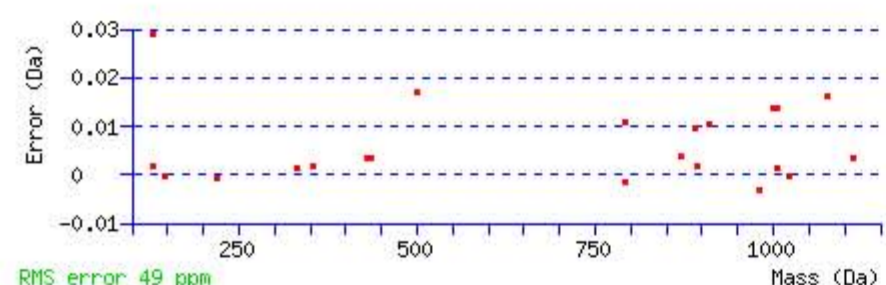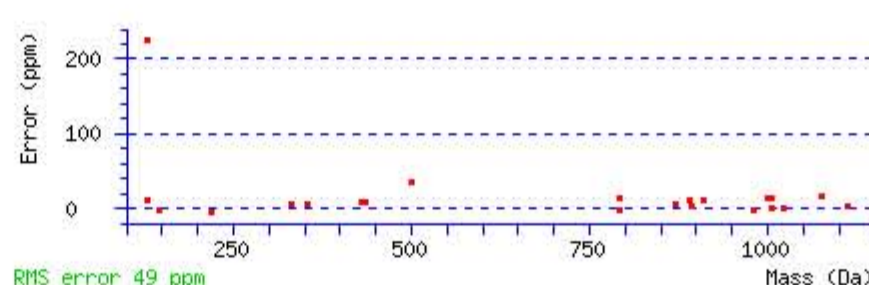

NCBI BLAST search of **QLEQVIK**

(Parameters: blastp, nr protein database, expect=20000, no filter, PAM30)

Other BLAST [web gateways](#)

All matches to this query

| Score | Mr(calc):   | Delta     | Sequence                     |
|-------|-------------|-----------|------------------------------|
| 34.9  | 1238.705658 | -0.003850 | <a href="#">QLEQVIK</a>      |
| 15.3  | 1238.705658 | -0.003850 | <a href="#">QLEQVIK</a>      |
| 11.0  | 1238.687027 | 0.014781  | <a href="#">KEETQPPVALK</a>  |
| 9.4   | 1238.698257 | 0.003551  | <a href="#">IHADASSKVLAK</a> |
| 7.6   | 1238.702301 | -0.000493 | <a href="#">DVFKKGFSLAK</a>  |
| 6.6   | 1238.716904 | -0.015096 | <a href="#">DRVQVAIK</a>     |
| 5.1   | 1238.705658 | -0.003850 | <a href="#">QIAQEIVK</a>     |
| 4.6   | 1238.691040 | 0.010768  | <a href="#">LYKEFIDLAK</a>   |
| 4.3   | 1238.698273 | 0.003535  | <a href="#">GHVTQLKESLK</a>  |
| 3.0   | 1238.716888 | -0.015080 | <a href="#">KRILCPLDPK</a>   |



# MASCOT Search Results

## Peptide View

MS/MS Fragmentation of **ALTDMPQMR**

Found in **FIBA\_HUMAN**, Fibrinogen alpha chain OS=Homo sapiens GN=FGA PE=1 SV=2

Match to Query 38327: 1388.657568 from(695.336060,2+) rtinseconds(1677) index(60797)

Title: Locus:1.1.1.2582.10 File:"2013-07-02 CLN FXIII 30 min 1st F 4.wiff"

Data file C:\Program Files (x86)\Matrix Science\Mascot Daemon\mgf\1 FXIII 30 min 1st\mascot\_daemon\_merge.mgf

Click mouse within plot area to zoom in by factor of two about that point

Or, Plot from  to  Da

Label all possible matches  Label matches used for scoring

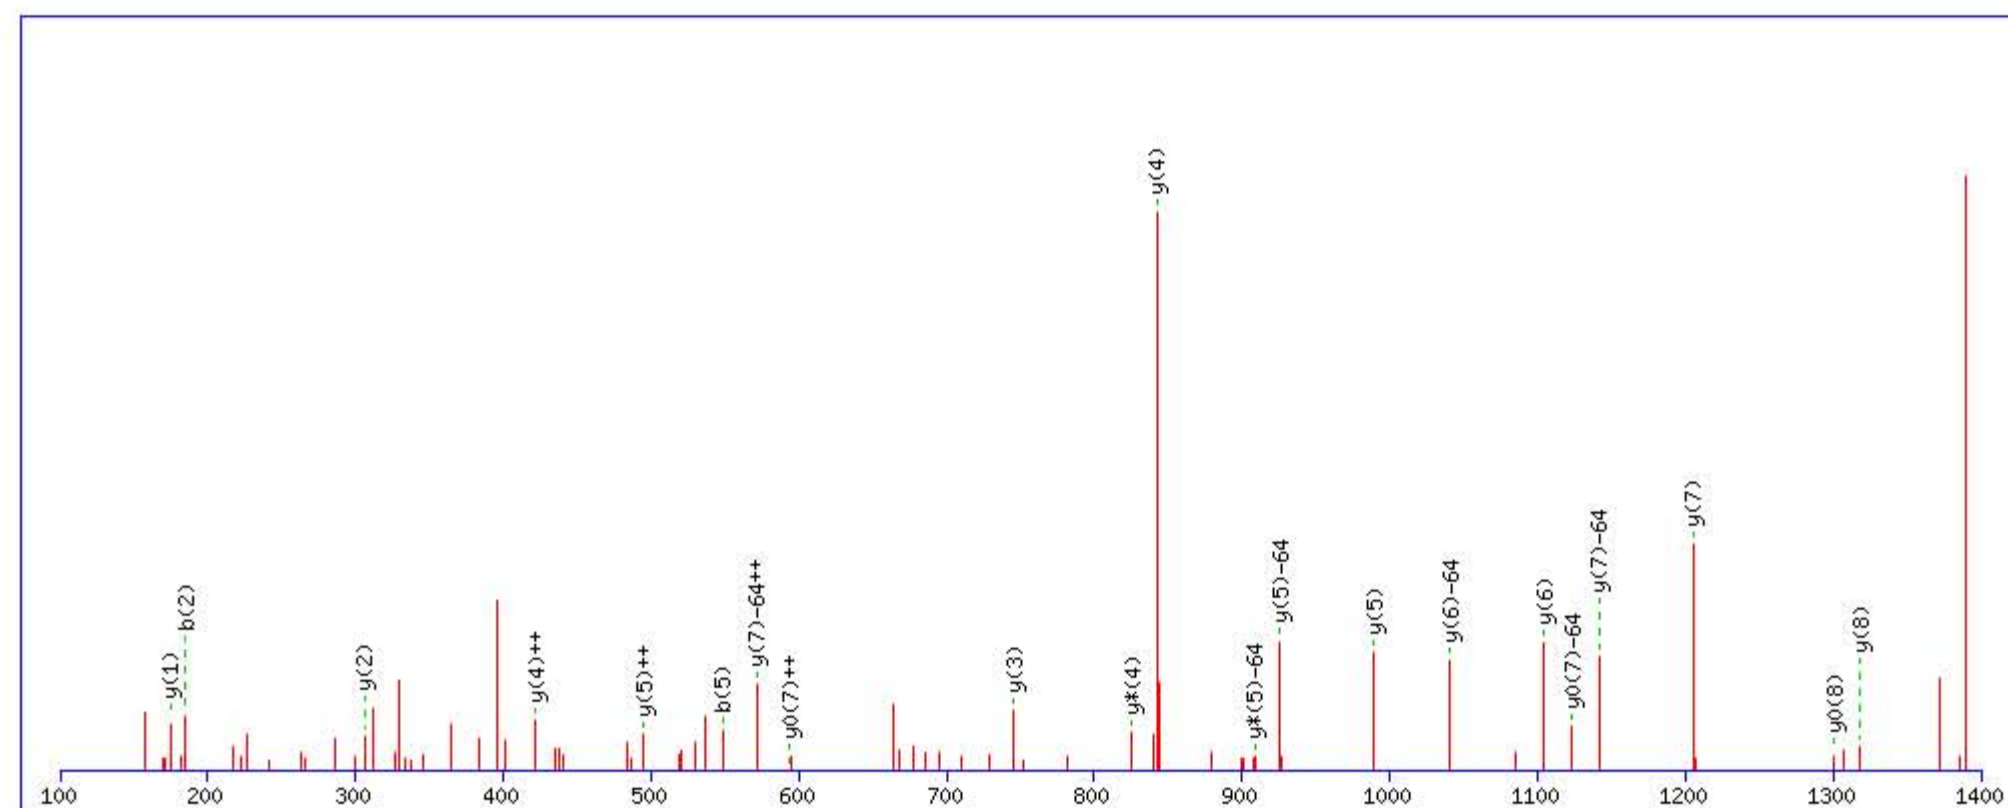

Monoisotopic mass of neutral peptide  $M_r(\text{calc})$ : 1388.661438

Fixed modifications: Carbamidomethyl (C) (apply to specified residues or termini only)

Variable modifications:

M5 : Oxidation (M), with neutral losses 0.000000 (shown in table), 63.998285

Q7 : Biotin:Thermo-21345 (Q)

Ions Score: 56 Expect: 1.2e-005

Matches : 21/112 fragment ions using 35 most intense peaks [\(help\)](#)

| # | b                 | b <sup>++</sup> | b <sup>*</sup> | b <sup>*++</sup> | b <sup>0</sup> | b <sup>0++</sup> | Seq. | y                  | y <sup>++</sup>   | y <sup>*</sup>    | y <sup>*++</sup> | y <sup>0</sup>     | y <sup>0++</sup>  | # |
|---|-------------------|-----------------|----------------|------------------|----------------|------------------|------|--------------------|-------------------|-------------------|------------------|--------------------|-------------------|---|
| 1 | 72.044390         | 36.525833       |                |                  |                |                  | A    |                    |                   |                   |                  |                    |                   | 9 |
| 2 | <b>185.128454</b> | 93.067865       |                |                  |                |                  | L    | <b>1318.631613</b> | 659.819445        | 1301.605064       | 651.306170       | <b>1300.621048</b> | 650.814162        | 8 |
| 3 | 286.176133        | 143.591704      |                |                  | 268.165568     | 134.586422       | T    | <b>1205.547549</b> | 603.277413        | 1188.521000       | 594.764138       | 1187.536984        | <b>594.272130</b> | 7 |
| 4 | 401.203076        | 201.105176      |                |                  | 383.192511     | 192.099894       | D    | <b>1104.499870</b> | 552.753573        | 1087.473321       | 544.240298       | 1086.489305        | 543.748290        | 6 |
| 5 | <b>548.238476</b> | 274.622876      |                |                  | 530.227911     | 265.617594       | M    | <b>989.472927</b>  | <b>495.240102</b> | 972.446378        | 486.726827       |                    |                   | 5 |
| 6 | 645.291240        | 323.149258      |                |                  | 627.280675     | 314.143976       | P    | <b>842.437527</b>  | <b>421.722402</b> | <b>825.410978</b> | 413.209127       |                    |                   | 4 |
| 7 | 1084.516566       | 542.761921      | 1067.490017    | 534.248647       | 1066.506001    | 533.756639       | Q    | <b>745.384763</b>  | 373.196020        | 728.358214        | 364.682745       |                    |                   | 3 |
| 8 | 1215.557051       | 608.282164      | 1198.530502    | 599.768889       | 1197.546486    | 599.276881       | M    | <b>306.159437</b>  | 153.583356        | 289.132888        | 145.070082       |                    |                   | 2 |
| 9 |                   |                 |                |                  |                |                  | R    | <b>175.118952</b>  | 88.063114         | 158.092403        | 79.549839        |                    |                   | 1 |

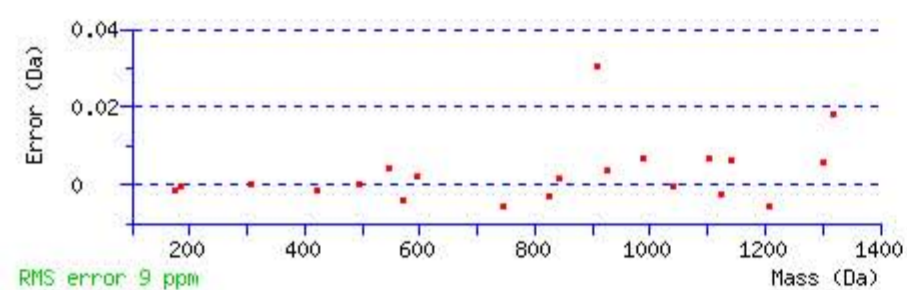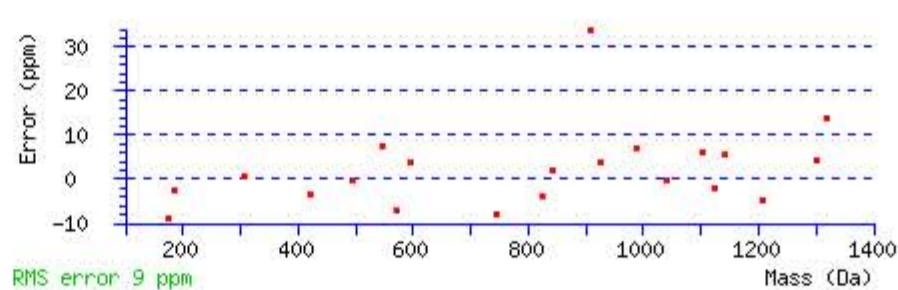

NCBI BLAST search of **ALTDMPQMR**

(Parameters: blastp, nr protein database, expect=20000, no filter, PAM30)

Other BLAST [web gateways](#)

All matches to this query

| Score | $M_r(\text{calc})$ : | Delta     | Sequence                      |
|-------|----------------------|-----------|-------------------------------|
| 55.7  | 1388.661438          | -0.003870 | <a href="#">ALTDMPQMR</a>     |
| 19.3  | 1388.661438          | -0.003870 | <a href="#">ALTDMPQMR</a>     |
| 3.0   | 1388.660568          | -0.003000 | <a href="#">SEMTASPLVGPER</a> |

Mascot: <http://www.matrixscience.com/>



# MASCOT SCIENCE Mascot Search Results

## Peptide View

MS/MS Fragmentation of **QFTSSTSYNR**

Found in **FIBA\_HUMAN**, Fibrinogen alpha chain OS=Homo sapiens GN=FGA PE=1 SV=2

Match to Query 42577: 1500.699268 from(751.356910,2+) rtinseconds(1698) index(60953)

Title: Locus:1.1.1.2589.12 File:"2013-07-02 CLN FXIII 30 min 1st F 4.wiff"

Data file C:\Program Files (x86)\Matrix Science\Mascot Daemon\mgf1 FXIII 30 min 1st\mascot\_daemon\_merge.mgf

Click mouse within plot area to zoom in by factor of two about that point

Or, Plot from  to  Da

Label all possible matches  Label matches used for scoring

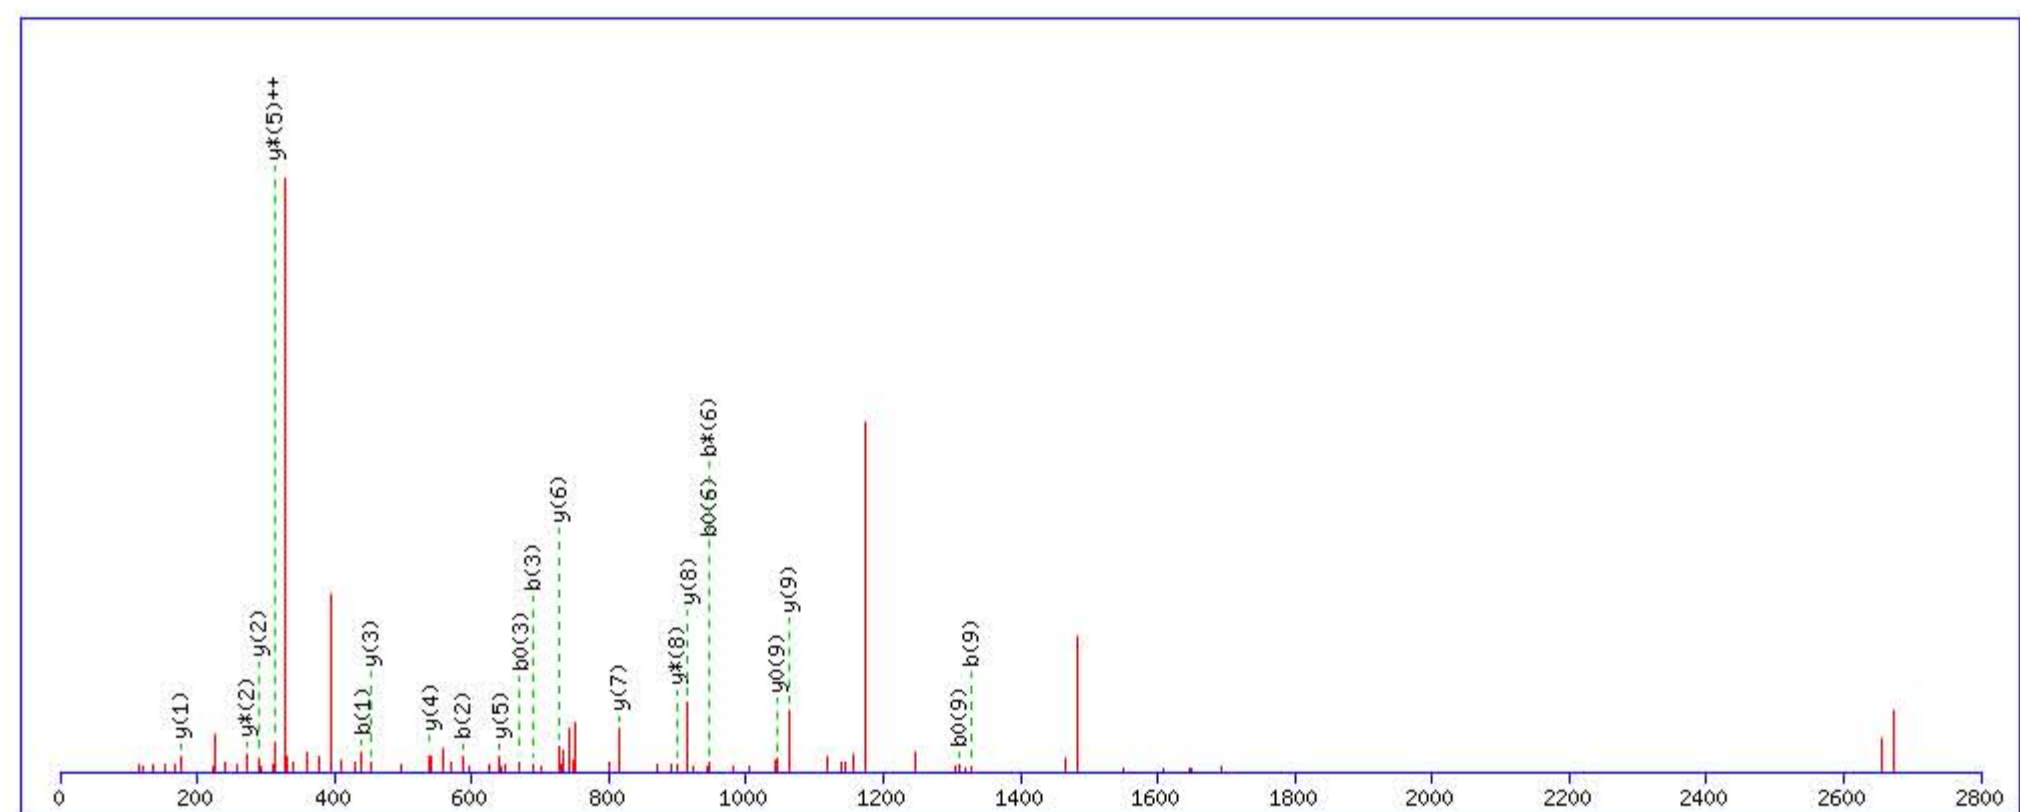

Monoisotopic mass of neutral peptide Mr(calc): 1500.703110

Fixed modifications: Carbamidomethyl (C) (apply to specified residues or termini only)

Variable modifications:

Q1 : Biotin:Thermo-21345 (Q)

Ions Score: 37 Expect: 0.00053

Matches : 21/98 fragment ions using 61 most intense peaks [\(help\)](#)

| #  | b           | b <sup>++</sup> | b <sup>*</sup> | b <sup>*++</sup> | b <sup>0</sup> | b <sup>0++</sup> | Seq. | y           | y <sup>++</sup> | y <sup>*</sup> | y <sup>*++</sup> | y <sup>0</sup> | y <sup>0++</sup> | #  |
|----|-------------|-----------------|----------------|------------------|----------------|------------------|------|-------------|-----------------|----------------|------------------|----------------|------------------|----|
| 1  | 440.232602  | 220.619939      | 423.206053     | 212.106664       |                |                  | Q    |             |                 |                |                  |                |                  | 10 |
| 2  | 587.301016  | 294.154146      | 570.274467     | 285.640872       |                |                  | F    | 1062.485064 | 531.746170      | 1045.458515    | 523.232896       | 1044.474499    | 522.740887       | 9  |
| 3  | 688.348695  | 344.677986      | 671.322146     | 336.164711       | 670.338130     | 335.672703       | T    | 915.416650  | 458.211963      | 898.390101     | 449.698689       | 897.406085     | 449.206681       | 8  |
| 4  | 775.380723  | 388.194000      | 758.354174     | 379.680725       | 757.370158     | 379.188717       | S    | 814.368971  | 407.688124      | 797.342422     | 399.174849       | 796.358406     | 398.682841       | 7  |
| 5  | 862.412751  | 431.710014      | 845.386202     | 423.196739       | 844.402186     | 422.704731       | S    | 727.336943  | 364.172110      | 710.310394     | 355.658835       | 709.326378     | 355.166827       | 6  |
| 6  | 963.460430  | 482.233853      | 946.433881     | 473.720578       | 945.449865     | 473.228570       | T    | 640.304915  | 320.656096      | 623.278366     | 312.142821       | 622.294350     | 311.650813       | 5  |
| 7  | 1050.492458 | 525.749867      | 1033.465909    | 517.236593       | 1032.481893    | 516.744584       | S    | 539.257236  | 270.132256      | 522.230687     | 261.618982       | 521.246671     | 261.126974       | 4  |
| 8  | 1213.555787 | 607.281532      | 1196.529238    | 598.768257       | 1195.545222    | 598.276249       | Y    | 452.225208  | 226.616242      | 435.198659     | 218.102967       |                |                  | 3  |
| 9  | 1327.598714 | 664.302995      | 1310.572165    | 655.789721       | 1309.588149    | 655.297712       | N    | 289.161879  | 145.084577      | 272.135330     | 136.571303       |                |                  | 2  |
| 10 |             |                 |                |                  |                |                  | R    | 175.118952  | 88.063114       | 158.092403     | 79.549839        |                |                  | 1  |

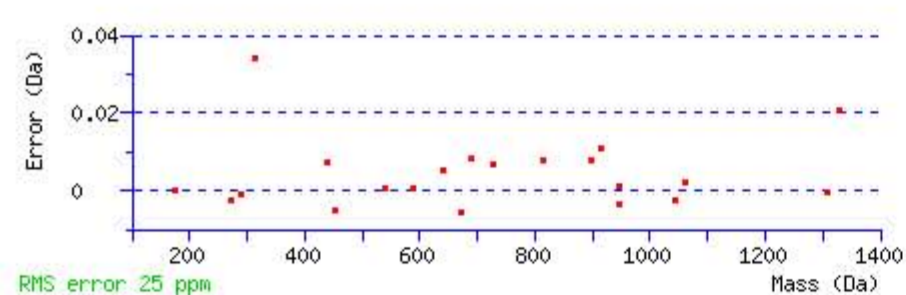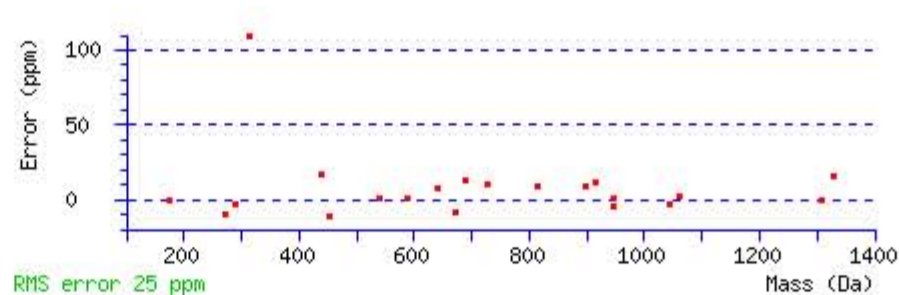

NCBI BLAST search of [QFTSSTSYNR](#)

(Parameters: blastp, nr protein database, expect=20000, no filter, PAM30)

Other BLAST [web gateways](#)

All matches to this query

| Score | Mr(calc):   | Delta     | Sequence                        |
|-------|-------------|-----------|---------------------------------|
| 36.6  | 1500.703110 | -0.003842 | <a href="#">QFTSSTSYNR</a>      |
| 1.6   | 1500.699768 | -0.000500 | <a href="#">AEAGSGGPGFTFTFR</a> |
| 1.5   | 1500.710464 | -0.011196 | <a href="#">LYYMVAPSAEAMR</a>   |
| 0.4   | 1500.714355 | -0.015087 | <a href="#">EEIALGGGGFCVHR</a>  |

Mascot: <http://www.matrixscience.com/>



# MASCOT Search Results

## Peptide View

MS/MS Fragmentation of **QLEQVIAK**

Found in **FIBA\_HUMAN**, Fibrinogen alpha chain OS=Homo sapiens GN=FGA PE=1 SV=2

Match to Query 43910: 1549.881288 from(775.947920,2+) rtinseconds(2105) index(63753)

Title: Locus:1.1.1.2730.18 File:"2013-07-02 CLN FXIII 30 min 1st F 4.wiff"

Data file C:\Program Files (x86)\Matrix Science\Mascot Daemon\mgf1 FXIII 30 min 1st\mascot\_daemon\_merge.mgf

Click mouse within plot area to zoom in by factor of two about that point

Or, Plot from  to  Da

Label all possible matches  Label matches used for scoring

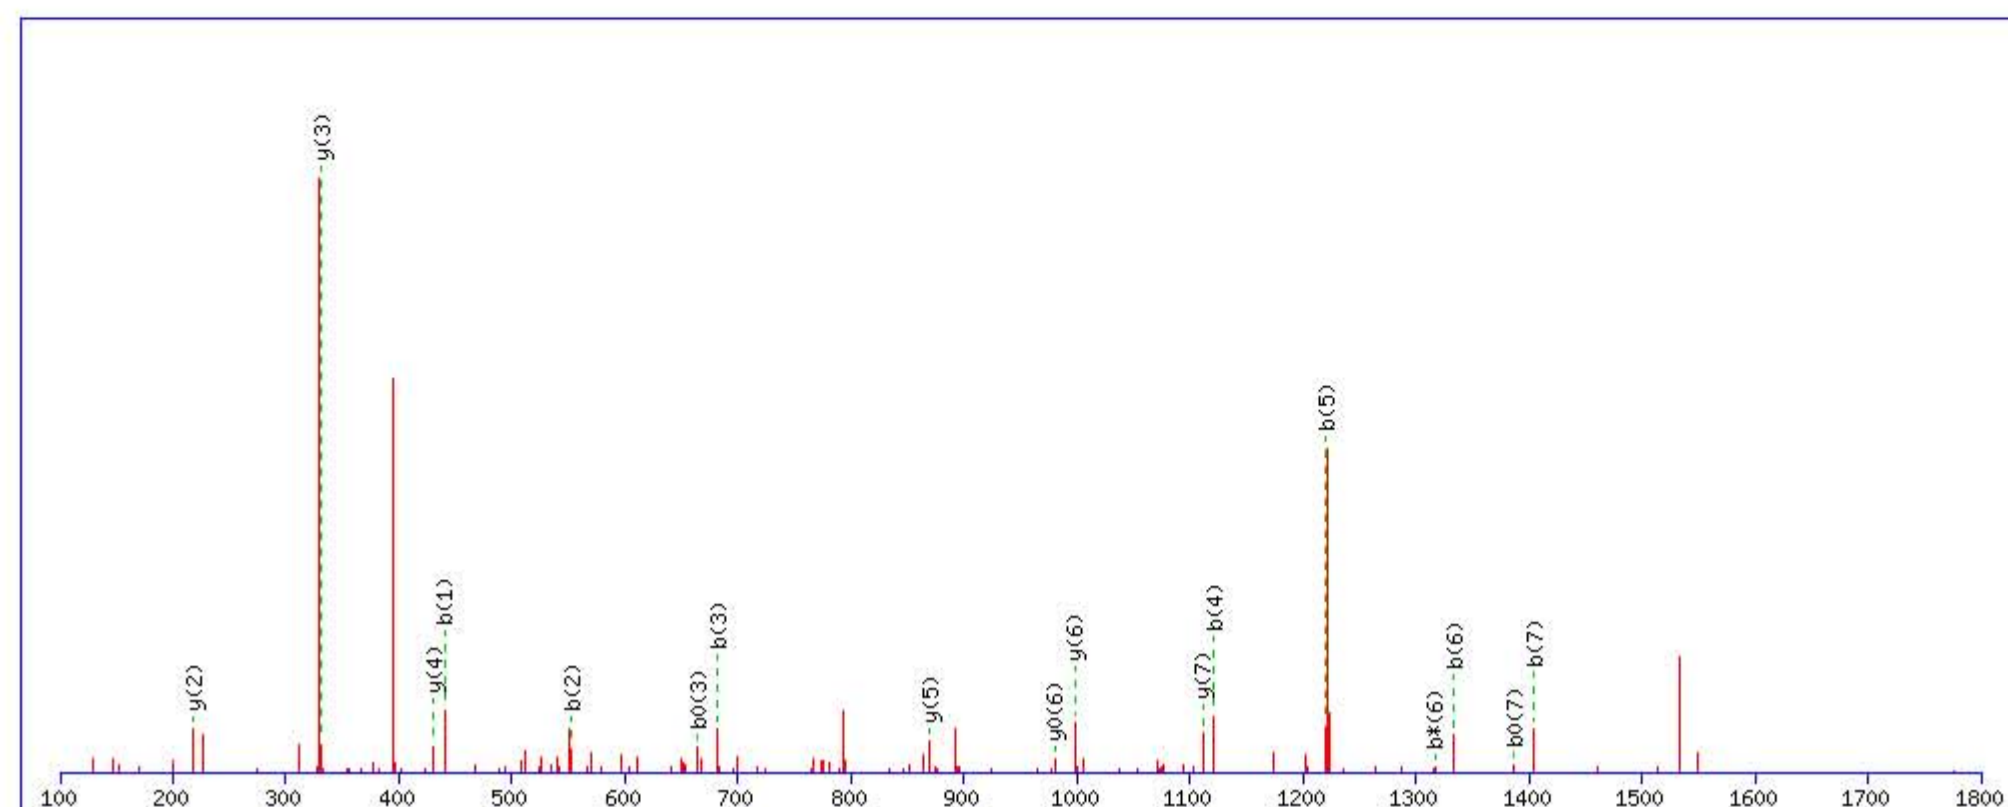

Monoisotopic mass of neutral peptide Mr(calc): 1549.872406

Fixed modifications: Carbamidomethyl (C) (apply to specified residues or termini only)

Variable modifications:

Q1 : Biotin:Thermo-21345 (Q)

Q4 : Biotin:Thermo-21345 (Q)

Ions Score: 28 Expect: 0.012

Matches : 17/70 fragment ions using 43 most intense peaks [\(help\)](#)

| # | b           | b <sup>++</sup> | b <sup>*</sup> | b <sup>*++</sup> | b <sup>0</sup> | b <sup>0++</sup> | Seq. | y           | y <sup>++</sup> | y <sup>*</sup> | y <sup>*++</sup> | y <sup>0</sup> | y <sup>0++</sup> | # |
|---|-------------|-----------------|----------------|------------------|----------------|------------------|------|-------------|-----------------|----------------|------------------|----------------|------------------|---|
| 1 | 440.232602  | 220.619939      | 423.206053     | 212.106664       |                |                  | Q    |             |                 |                |                  |                |                  | 8 |
| 2 | 553.316666  | 277.161971      | 536.290117     | 268.648697       |                |                  | L    | 1111.654379 | 556.330828      | 1094.627830    | 547.817553       | 1093.643814    | 547.325545       | 7 |
| 3 | 682.359259  | 341.683268      | 665.332710     | 333.169993       | 664.348694     | 332.677985       | E    | 998.570315  | 499.788796      | 981.543766     | 491.275521       | 980.559750     | 490.783513       | 6 |
| 4 | 1121.584585 | 561.295931      | 1104.558036    | 552.782656       | 1103.574020    | 552.290648       | Q    | 869.527722  | 435.267499      | 852.501173     | 426.754225       |                |                  | 5 |
| 5 | 1220.652999 | 610.830138      | 1203.626450    | 602.316863       | 1202.642434    | 601.824855       | V    | 430.302396  | 215.654836      | 413.275847     | 207.141561       |                |                  | 4 |
| 6 | 1333.737063 | 667.372170      | 1316.710514    | 658.858895       | 1315.726498    | 658.366887       | I    | 331.233982  | 166.120629      | 314.207433     | 157.607354       |                |                  | 3 |
| 7 | 1404.774177 | 702.890727      | 1387.747628    | 694.377452       | 1386.763612    | 693.885444       | A    | 218.149918  | 109.578597      | 201.123369     | 101.065322       |                |                  | 2 |
| 8 |             |                 |                |                  |                |                  | K    | 147.112804  | 74.060040       | 130.086255     | 65.546765        |                |                  | 1 |

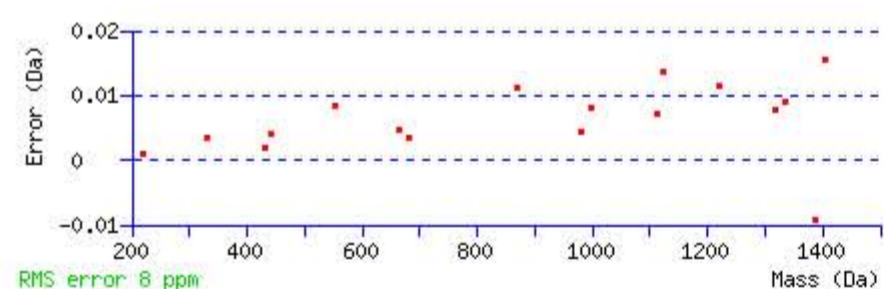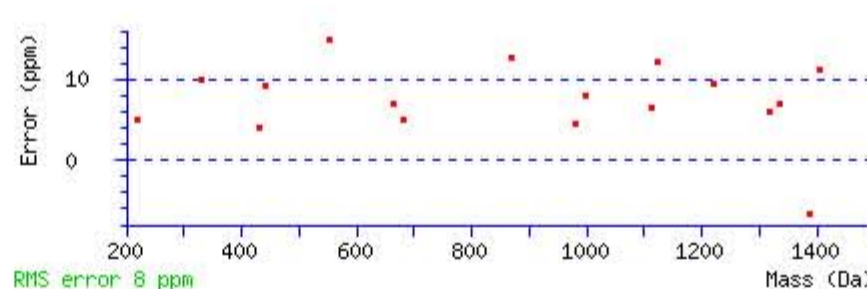

NCBI BLAST search of **QLEQVIAK**

(Parameters: blastp, nr protein database, expect=20000, no filter, PAM30)

Other BLAST [web gateways](#)

## All matches to this query

| Score | Mr(calc):   | Delta     | Sequence                         |
|-------|-------------|-----------|----------------------------------|
| 28.2  | 1549.872406 | 0.008882  | <a href="#">QLEQVIAK</a>         |
| 7.2   | 1549.861633 | 0.019655  | <a href="#">KLSRPFQSEIFAK</a>    |
| 7.2   | 1549.886810 | -0.005522 | <a href="#">YVIGIGVGAGAYVLAK</a> |
| 6.2   | 1549.886795 | -0.005507 | <a href="#">KGNLVYIIDFGLAK</a>   |
| 2.3   | 1549.861618 | 0.019670  | <a href="#">TAEKLYRTAWIAK</a>    |
| 2.1   | 1549.893967 | -0.012679 | <a href="#">LIRENHELKSAIK</a>    |
| 1.9   | 1549.862991 | 0.018297  | <a href="#">AAWLRVFQHLGPR</a>    |
| 1.5   | 1549.876236 | 0.005052  | <a href="#">QLEGRLALPSR</a>      |
| 1.3   | 1549.865005 | 0.016283  | <a href="#">KSLAGMLTPYVARK</a>   |
| 0.9   | 1549.876251 | 0.005037  | <a href="#">LVDINLVRCHALK</a>    |







# MASCOT Search Results

## Peptide View

MS/MS Fragmentation of **GSAGHWTSESSVSGSTGQWHSESGSFRPDPSPGSGNARPNPDWGTFFEEVSGNVSPGTR**  
 Found in **FIBA\_HUMAN**, Fibrinogen alpha chain OS=Homo sapiens GN=FGA PE=1 SV=2

Match to Query 90471: 6284.823864 from(1048.477920,6+) rtinseconds(2045) index(63379)  
 Title: Locus:1.1.1.2709.19 File:"2013-07-02 CLN FXIII 30 min 1st F 4.wiff"  
 Data file C:\Program Files (x86)\Matrix Science\Mascot Daemon\mgf1 FXIII 30 min 1st\mascot\_daemon\_merge.mgf

Click mouse within plot area to zoom in by factor of two about that point

Or, Plot from  to  Da

Label all possible matches  Label matches used for scoring

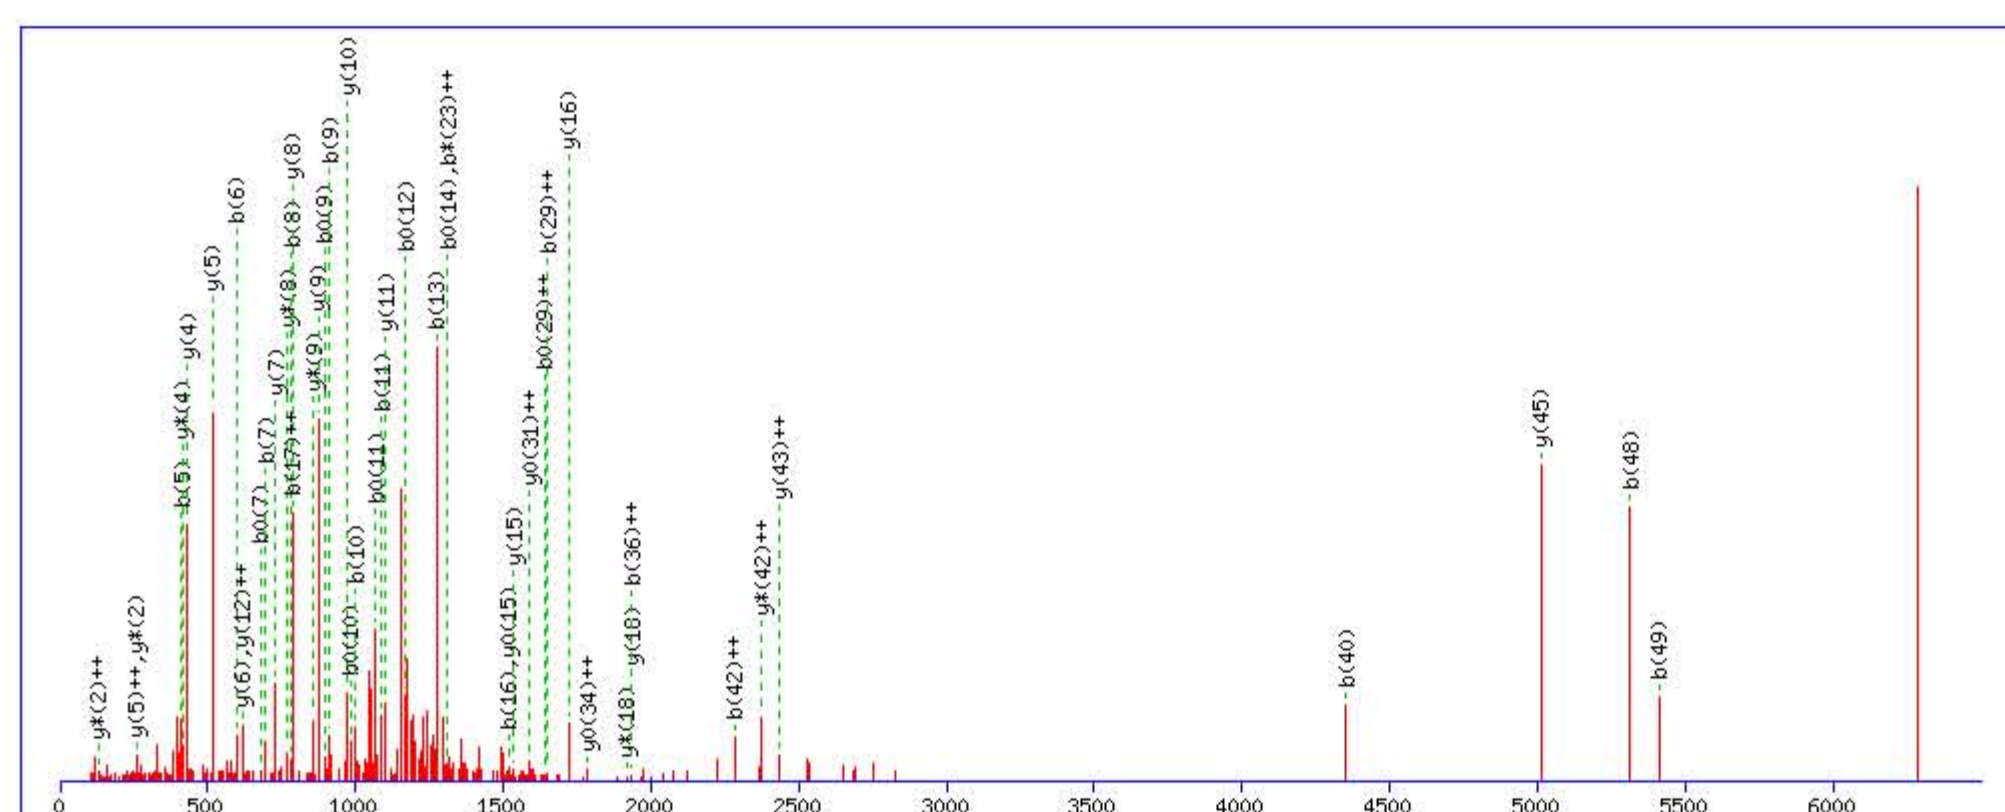

Monoisotopic mass of neutral peptide Mr(calc): 6284.792847  
 Fixed modifications: Carbamidomethyl (C) (apply to specified residues or termini only)  
 Variable modifications:  
 Q18 : Biotin:Thermo-21345 (Q)  
 Ions Score: 34 Expect: 0.002  
 Matches : 49/646 fragment ions using 113 most intense peaks [\(help\)](#)

| #  | b                  | b <sup>++</sup>    | b <sup>*</sup> | b <sup>*++</sup>   | b <sup>0</sup>     | b <sup>0++</sup>   | Seq. | y                  | y <sup>++</sup>    | y <sup>*</sup>     | y <sup>*++</sup>   | y <sup>0</sup>     | y <sup>0++</sup>   | #  |
|----|--------------------|--------------------|----------------|--------------------|--------------------|--------------------|------|--------------------|--------------------|--------------------|--------------------|--------------------|--------------------|----|
| 1  | 58.028740          | 29.518008          |                |                    |                    |                    | G    |                    |                    |                    |                    |                    |                    | 58 |
| 2  | 145.060768         | 73.034022          |                |                    | 127.050203         | 64.028740          | S    | 6228.778603        | 3114.892940        | 6211.752054        | 3106.379665        | 6210.768038        | 3105.887657        | 57 |
| 3  | 216.097882         | 108.552579         |                |                    | 198.087317         | 99.547296          | A    | 6141.746575        | 3071.376926        | 6124.720026        | 3062.863651        | 6123.736010        | 3062.371643        | 56 |
| 4  | 273.119346         | 137.063311         |                |                    | 255.108781         | 128.058029         | G    | 6070.709461        | 3035.858369        | 6053.682912        | 3027.345094        | 6052.698896        | 3026.853086        | 55 |
| 5  | <b>410.178258</b>  | 205.592767         |                |                    | 392.167693         | 196.587484         | H    | 6013.687997        | 3007.347637        | 5996.661448        | 2998.834362        | 5995.677432        | 2998.342354        | 54 |
| 6  | <b>596.257571</b>  | 298.632424         |                |                    | 578.247006         | 289.627141         | W    | 5876.629085        | 2938.818181        | 5859.602536        | 2930.304906        | 5858.618520        | 2929.812898        | 53 |
| 7  | <b>697.305250</b>  | 349.156263         |                |                    | <b>679.294685</b>  | 340.150981         | T    | 5690.549772        | 2845.778524        | 5673.523223        | 2837.265250        | 5672.539207        | 2836.773242        | 52 |
| 8  | <b>784.337278</b>  | 392.672277         |                |                    | 766.326713         | 383.666995         | S    | 5589.502093        | 2795.254685        | 5572.475544        | 2786.741410        | 5571.491528        | 2786.249402        | 51 |
| 9  | <b>913.379871</b>  | 457.193574         |                |                    | <b>895.369306</b>  | 448.188291         | E    | 5502.470065        | 2751.738671        | 5485.443516        | 2743.225396        | 5484.459500        | 2742.733388        | 50 |
| 10 | <b>1000.411899</b> | 500.709588         |                |                    | <b>982.401334</b>  | 491.704305         | S    | 5373.427472        | 2687.217374        | 5356.400923        | 2678.704100        | 5355.416907        | 2678.212092        | 49 |
| 11 | <b>1087.443927</b> | 544.225602         |                |                    | <b>1069.433362</b> | 535.220319         | S    | 5286.395444        | 2643.701360        | 5269.368895        | 2635.188086        | 5268.384879        | 2634.696078        | 48 |
| 12 | 1186.512341        | 593.759809         |                |                    | <b>1168.501776</b> | 584.754526         | V    | 5199.363416        | 2600.185346        | 5182.336867        | 2591.672072        | 5181.352851        | 2591.180064        | 47 |
| 13 | <b>1273.544369</b> | 637.275823         |                |                    | 1255.533804        | 628.270540         | S    | 5100.295002        | 2550.651139        | 5083.268453        | 2542.137865        | 5082.284437        | 2541.645857        | 46 |
| 14 | 1330.565833        | 665.786555         |                |                    | <b>1312.555268</b> | 656.781272         | G    | <b>5013.262974</b> | 2507.135125        | 4996.236425        | 2498.621851        | 4995.252409        | 2498.129843        | 45 |
| 15 | 1417.597861        | 709.302569         |                |                    | 1399.587296        | 700.297286         | S    | 4956.241510        | 2478.624393        | 4939.214961        | 2470.111119        | 4938.230945        | 2469.619111        | 44 |
| 16 | <b>1518.645540</b> | 759.826408         |                |                    | 1500.634975        | 750.821126         | T    | 4869.209482        | <b>2435.108379</b> | 4852.182933        | 2426.595105        | 4851.198917        | 2426.103097        | 43 |
| 17 | 1575.667004        | <b>788.337140</b>  |                |                    | 1557.656439        | 779.331858         | G    | 4768.161803        | 2384.584540        | 4751.135254        | <b>2376.071265</b> | 4750.151238        | 2375.579257        | 42 |
| 18 | 2014.892330        | 1007.949803        | 1997.865781    | 999.436529         | 1996.881765        | 998.944521         | Q    | 4711.140339        | 2356.073808        | 4694.113790        | 2347.560533        | 4693.129774        | 2347.068525        | 41 |
| 19 | 2200.971643        | 1100.989460        | 2183.945094    | 1092.476185        | 2182.961078        | 1091.984177        | W    | 4271.915013        | 2136.461145        | 4254.888464        | 2127.947870        | 4253.904448        | 2127.455862        | 40 |
| 20 | 2338.030555        | 1169.518916        | 2321.004006    | 1161.005641        | 2320.019990        | 1160.513633        | H    | 4085.835700        | 2043.421488        | 4068.809151        | 2034.908214        | 4067.825135        | 2034.416206        | 39 |
| 21 | 2425.062583        | 1213.034930        | 2408.036034    | 1204.521655        | 2407.052018        | 1204.029647        | S    | 3948.776788        | 1974.892032        | 3931.750239        | 1966.378758        | 3930.766223        | 1965.886750        | 38 |
| 22 | 2554.105176        | 1277.556226        | 2537.078627    | 1269.042952        | 2536.094611        | 1268.550944        | E    | 3861.744760        | 1931.376018        | 3844.718211        | 1922.862744        | 3843.734195        | 1922.370736        | 37 |
| 23 | 2641.137204        | 1321.072240        | 2624.110655    | <b>1312.558966</b> | 2623.126639        | 1312.066958        | S    | 3732.702167        | 1866.854722        | 3715.675618        | 1858.341447        | 3714.691602        | 1857.849439        | 36 |
| 24 | 2698.158668        | 1349.582972        | 2681.132119    | 1341.069698        | 2680.148103        | 1340.577690        | G    | 3645.670139        | 1823.338708        | 3628.643590        | 1814.825433        | 3627.659574        | 1814.333425        | 35 |
| 25 | 2785.190696        | 1393.098986        | 2768.164147    | 1384.585712        | 2767.180131        | 1384.093704        | S    | 3588.648675        | 1794.827976        | 3571.622126        | 1786.314701        | 3570.638110        | <b>1785.822693</b> | 34 |
| 26 | 2932.259110        | 1466.633193        | 2915.232561    | 1458.119919        | 2914.248545        | 1457.627911        | F    | 3501.616647        | 1751.311962        | 3484.590098        | 1742.798687        | 3483.606082        | 1742.306679        | 33 |
| 27 | 3088.360221        | 1544.683749        | 3071.333672    | 1536.170474        | 3070.349656        | 1535.678466        | R    | 3354.548233        | 1677.777755        | 3337.521684        | 1669.264480        | 3336.537668        | 1668.772472        | 32 |
| 28 | 3185.412985        | 1593.210131        | 3168.386436    | 1584.696856        | 3167.402420        | 1584.204848        | P    | 3198.447122        | 1599.727199        | 3181.420573        | 1591.213925        | 3180.436557        | <b>1590.721917</b> | 31 |
| 29 | 3300.439928        | <b>1650.723602</b> | 3283.413379    | 1642.210327        | 3282.429363        | <b>1641.718320</b> | D    | 3101.394358        | 1551.200817        | 3084.367809        | 1542.687543        | 3083.383793        | 1542.195535        | 30 |
| 30 | 3387.471956        | 1694.239616        | 3370.445407    | 1685.726342        | 3369.461391        | 1685.234334        | S    | 2986.367415        | 1493.687346        | 2969.340866        | 1485.174071        | 2968.356850        | 1484.682063        | 29 |
| 31 | 3484.524720        | 1742.765998        | 3467.498171    | 1734.252724        | 3466.514155        | 1733.760716        | P    | 2899.335387        | 1450.171332        | 2882.308838        | 1441.658057        | 2881.324822        | 1441.166049        | 28 |
| 32 | 3541.546184        | 1771.276730        | 3524.519635    | 1762.763456        | 3523.535619        | 1762.271448        | G    | 2802.282623        | 1401.644950        | 2785.256074        | 1393.131675        | 2784.272058        | 1392.639667        | 27 |
| 33 | 3628.578212        | 1814.792744        | 3611.551663    | 1806.279470        | 3610.567647        | 1805.787462        | S    | 2745.261159        | 1373.134218        | 2728.234610        | 1364.620943        | 2727.250594        | 1364.128935        | 26 |
| 34 | 3685.599676        | 1843.303476        | 3668.573127    | 1834.790202        | 3667.589111        | 1834.298194        | G    | 2658.229131        | 1329.618204        | 2641.202582        | 1321.104929        | 2640.218566        | 1320.612921        | 25 |
| 35 | 3799.642603        | 1900.324940        | 3782.616054    | 1891.811665        | 3781.632038        | 1891.319657        | N    | 2601.207667        | 1301.107472        | 2584.181118        | 1292.594197        | 2583.197102        | 1292.102189        | 24 |
| 36 | 3870.679717        | <b>1935.843497</b> | 3853.653168    | 1927.330222        | 3852.669152        | 1926.838214        | A    | 2487.164740        | 1244.086008        | 2470.138191        | 1235.572734        | 2469.154175        | 1235.080726        | 23 |
| 37 | 4026.780828        | 2013.894052        | 4009.754279    | 2005.380778        | 4008.770263        | 2004.888770        | R    | 2416.127626        | 1208.567451        | 2399.101077        | 1200.054177        | 2398.117061        | 1199.562169        | 22 |
| 38 | 4123.833592        | 2062.420434        | 4106.807043    | 2053.907160        | 4105.823027        | 2053.415152        | P    | 2260.026515        | 1130.516896        | 2242.999966        | 1122.003621        | 2242.015950        | 1121.511613        | 21 |
| 39 | 4237.876519        | 2119.441898        | 4220.849970    | 2110.928623        | 4219.865954        | 2110.436615        | N    | 2162.973751        | 1081.990514        | 2145.947202        | 1073.477239        | 2144.963186        | 1072.985231        | 20 |
| 40 | <b>4351.919446</b> | 2176.463361        | 4334.892897    | 2167.950087        | 4333.908881        | 2167.458079        | N    | 2048.930824        | 1024.969050        | 2031.904275        | 1016.455776        | 2030.920259        | 1015.963768        | 19 |
| 41 | 4448.972210        | 2224.989743        | 4431.945661    | 2216.476469        | 4430.961645        | 2215.984461        | P    | <b>1934.887897</b> | 967.947587         | <b>1917.861348</b> | 959.434312         | 1916.877332        | 958.942304         | 18 |
| 42 | 4563.999153        | <b>2282.503215</b> | 4546.972604    | 2273.989940        | 4545.988588        | 2273.497932        | D    | 1837.835133        | 919.421205         | 1820.808584        | 910.907930         | 1819.824568        | 910.415922         | 17 |
| 43 | 4750.078466        | 2375.542871        | 4733.051917    | 2367.029597        | 4732.067901        | 2366.537589        | W    | <b>1722.808190</b> | 861.907733         | 1705.781641        | 853.394459         | 1704.797625        | 852.902451         | 16 |
| 44 | 4807.099930        | 2404.053603        | 4790.073381    | 2395.540329        | 4789.089365        | 2395.048321        | G    | <b>1536.728877</b> | 768.868077         | 1519.702328        | 760.354802         | <b>1518.718312</b> | 759.862794         | 15 |
| 45 | 4908.147609        | 2454.577443        | 4891.121060    | 2446.064168        | 4890.137044        | 2445.572160        | T    | 1479.707413        | 740.357345         | 1462.680864        | 731.844070         | 1461.696848        | 731.352062         | 14 |
| 46 | 5055.216023        | 2528.111650        | 5038.189474    | 2519.598375        | 5037.205458        | 2519.106367        | F    | 1378.659734        | 689.833505         | 1361.633185        | 681.320231         | 1360.649169        | 680.828223         | 13 |
| 47 | 5184.258616        | 2592.632946        | 5167.232067    | 2584.119672        | 5166.248051        | 2583.627664        | E    | 1231.591320        | <b>616.299298</b>  | 1214.564771        | 607.786024         | 1213.580755        | 607.294016         | 12 |
| 48 | <b>5313.301209</b> | 2657.154243        | 5296.274660    | 2648.640968        | 5295.290644        | 2648.148960        | E    | <b>1102.548727</b> | 551.778002         | 1085.522178        | 543.264727         | 1084.538162        | 542.772719         | 11 |
| 49 | <b>5412.369623</b> | 2706.688450        | 5395.343074    | 2698.175175        | 5394.359058        | 2697.683167        | V    | <b>973.506134</b>  | 487.256705         | 956.479585         | 478.743431         | 955.495569         | 478.251423         | 10 |
| 50 | 5499.401651        | 2750.204464        | 5482.375102    | 2741.691189        | 5481.391086        | 2741.199181        | S    | <b>874.437720</b>  | 437.722498         | <b>857.411171</b>  | 429.209224         | 856.427155         | 428.717216         | 9  |
| 51 | 5556.423115        | 2778.715196        | 5539.396566    | 2770.201921        | 5538.412550        | 2769.709913        | G    | <b>787.405692</b>  | 394.206484         | <b>770.379143</b>  | 385.693210         | 769.395127         | 385.201202         | 8  |
| 52 | 5670.466042        | 2835.736659        | 5653.439493    | 2827.223385        | 5652.455477        | 2826.731377        | N    | <b>730.384228</b>  | 365.695752         | 713.357679         | 357.182478         | 712.373663         | 356.690470         | 7  |
| 53 | 5769.534456        | 2885.270866        | 5752.507907    | 2876.757592        | 5751.523891        | 2876.265584        | V    | <b>616.341301</b>  | 308.674289         | 599.314752         | 300.161014         | 598.330736         | 299.669006         | 6  |
| 54 | 5856.566484        | 2928.786880        | 5839.539935    | 2920.273606        | 5838.555919        | 2919.781598        | S    | <b>517.272887</b>  | <b>259.140082</b>  | 500.246338         | 250.626807         | 499.26             |                    |    |



# MASCOT SCIENCE Mascot Search Results

## Peptide View

MS/MS Fragmentation of **HQLYIDETVNSNIPTNLR**

Found in **FIBB\_HUMAN**, Fibrinogen beta chain OS=Homo sapiens GN=FGB PE=1 SV=2

Match to Query 66763: 2437.250352 from(813.424060,3+) rtinseconds(2149) index(64059)  
 Title: Locus:1.1.1.2745.25 File:"2013-07-02 CLN FXIII 30 min 1st F 4.wiff"  
 Data file C:\Program Files (x86)\Matrix Science\Mascot Daemon\mgf1 FXIII 30 min 1st\mascot\_daemon\_merge.mgf

Click mouse within plot area to zoom in by factor of two about that point  
 Or, Plot from  to  Da   
 Label all possible matches  Label matches used for scoring

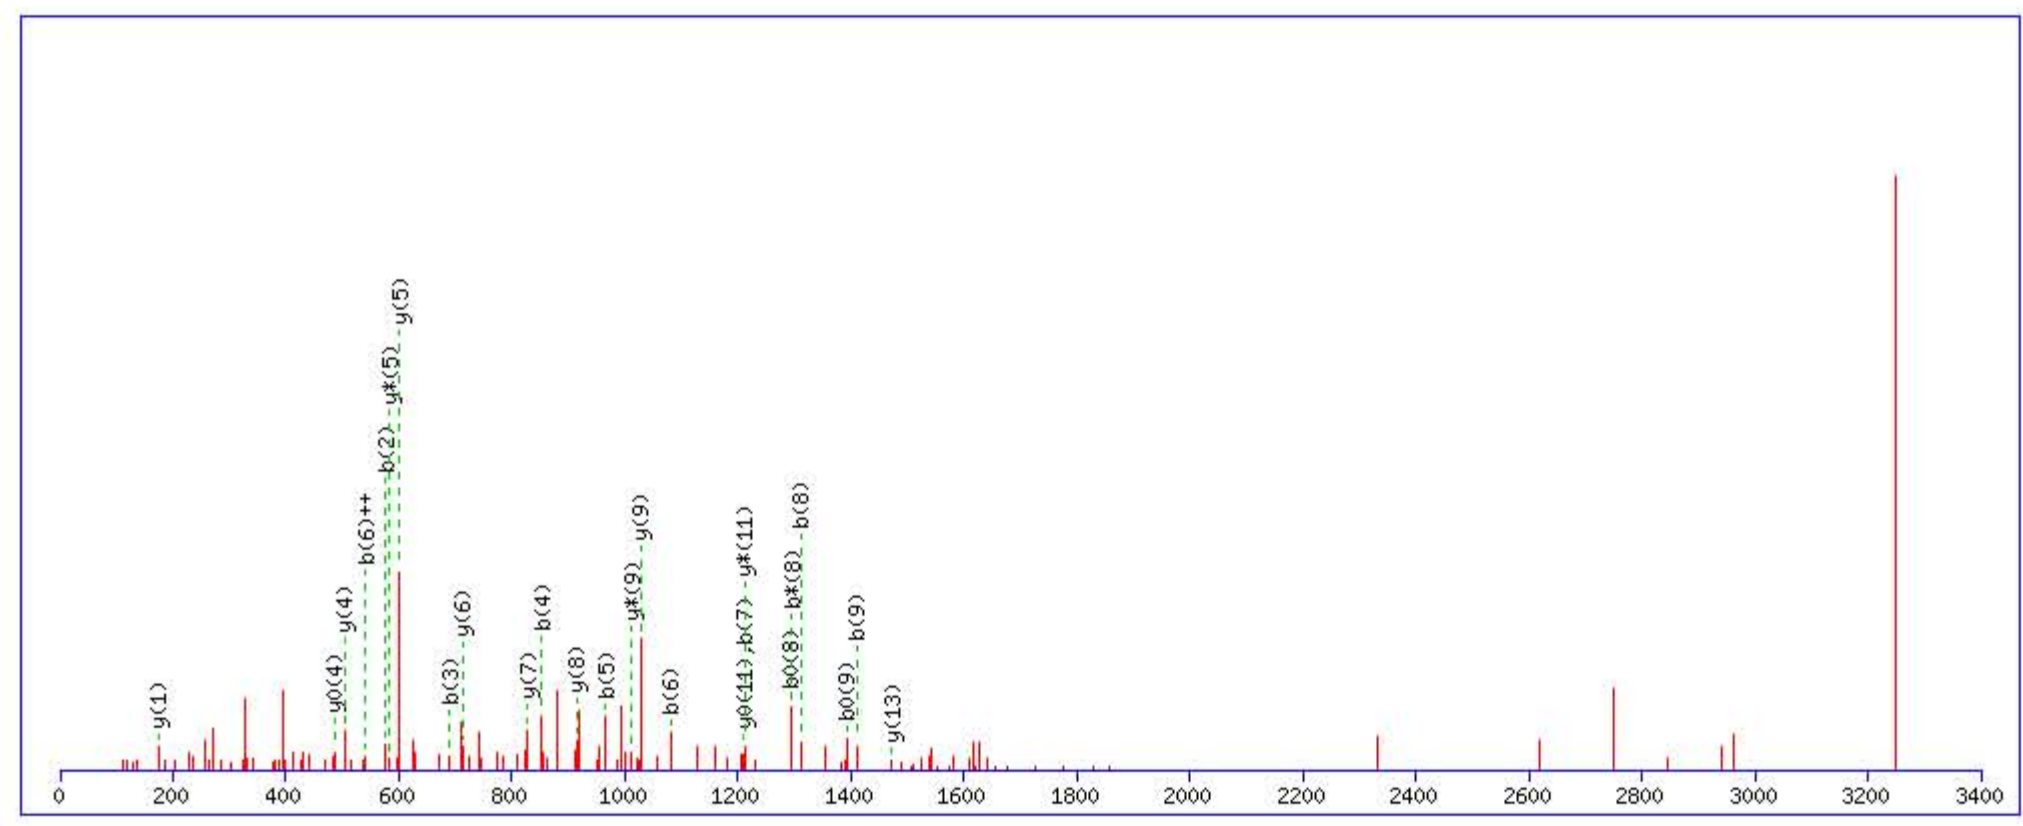

Monoisotopic mass of neutral peptide Mr(calc): 2437.242355  
 Fixed modifications: Carbamidomethyl (C) (apply to specified residues or termini only)  
 Variable modifications:  
 Q2 : Biotin:Thermo-21345 (Q)  
 Ions Score: 25 Expect: 0.08  
 Matches : 25/186 fragment ions using 84 most intense peaks [\(help\)](#)

| #  | b                  | b <sup>++</sup>   | b <sup>*</sup>     | b <sup>+++</sup> | b <sup>0</sup>     | b <sup>0++</sup> | Seq. | y                  | y <sup>++</sup> | y <sup>*</sup>     | y <sup>+++</sup> | y <sup>0</sup>     | y <sup>0++</sup> | #  |
|----|--------------------|-------------------|--------------------|------------------|--------------------|------------------|------|--------------------|-----------------|--------------------|------------------|--------------------|------------------|----|
| 1  | 138.066188         | 69.536732         |                    |                  |                    |                  | H    |                    |                 |                    |                  |                    |                  | 18 |
| 2  | <b>577.291514</b>  | 289.149395        | 560.264965         | 280.636121       |                    |                  | Q    | 2301.190744        | 1151.099010     | 2284.164195        | 1142.585735      | 2283.180179        | 1142.093727      | 17 |
| 3  | <b>690.375578</b>  | 345.691427        | 673.349029         | 337.178153       |                    |                  | L    | 1861.965418        | 931.486347      | 1844.938869        | 922.973073       | 1843.954853        | 922.481065       | 16 |
| 4  | <b>853.438907</b>  | 427.223092        | 836.412358         | 418.709817       |                    |                  | Y    | 1748.881354        | 874.944315      | 1731.854805        | 866.431041       | 1730.870789        | 865.939033       | 15 |
| 5  | <b>966.522971</b>  | 483.765124        | 949.496422         | 475.251849       |                    |                  | I    | 1585.818025        | 793.412651      | 1568.791476        | 784.899376       | 1567.807460        | 784.407368       | 14 |
| 6  | <b>1081.549914</b> | <b>541.278595</b> | 1064.523365        | 532.765321       | 1063.539349        | 532.273312       | D    | <b>1472.733961</b> | 736.870619      | 1455.707412        | 728.357344       | 1454.723396        | 727.865336       | 13 |
| 7  | <b>1210.592507</b> | 605.799892        | 1193.565958        | 597.286617       | 1192.581942        | 596.794609       | E    | 1357.707018        | 679.357147      | 1340.680469        | 670.843873       | 1339.696453        | 670.351865       | 12 |
| 8  | <b>1311.640186</b> | 656.323731        | <b>1294.613637</b> | 647.810457       | <b>1293.629621</b> | 647.318449       | T    | 1228.664425        | 614.835851      | <b>1211.637876</b> | 606.322576       | <b>1210.653860</b> | 605.830568       | 11 |
| 9  | <b>1410.708600</b> | 705.857938        | 1393.682051        | 697.344664       | <b>1392.698035</b> | 696.852656       | V    | 1127.616746        | 564.312011      | 1110.590197        | 555.798737       | 1109.606181        | 555.306729       | 10 |
| 10 | 1524.751527        | 762.879402        | 1507.724978        | 754.366127       | 1506.740962        | 753.874119       | N    | <b>1028.548332</b> | 514.777804      | <b>1011.521783</b> | 506.264530       | 1010.537767        | 505.772522       | 9  |
| 11 | 1611.783555        | 806.395416        | 1594.757006        | 797.882141       | 1593.772990        | 797.390133       | S    | <b>914.505405</b>  | 457.756341      | 897.478856         | 449.243066       | 896.494840         | 448.751058       | 8  |
| 12 | 1725.826482        | 863.416879        | 1708.799933        | 854.903605       | 1707.815917        | 854.411597       | N    | <b>827.473377</b>  | 414.240327      | 810.446828         | 405.727052       | 809.462812         | 405.235044       | 7  |
| 13 | 1838.910546        | 919.958911        | 1821.883997        | 911.445637       | 1820.899981        | 910.953629       | I    | <b>713.430450</b>  | 357.218863      | 696.403901         | 348.705589       | 695.419885         | 348.213581       | 6  |
| 14 | 1935.963310        | 968.485293        | 1918.936761        | 959.972019       | 1917.952745        | 959.480011       | P    | <b>600.346386</b>  | 300.676831      | <b>583.319837</b>  | 292.163557       | 582.335821         | 291.671549       | 5  |
| 15 | 2037.010989        | 1019.009133       | 2019.984440        | 1010.495858      | 2019.000424        | 1010.003850      | T    | <b>503.293622</b>  | 252.150449      | 486.267073         | 243.637175       | <b>485.283057</b>  | 243.145167       | 4  |
| 16 | 2151.053916        | 1076.030596       | 2134.027367        | 1067.517321      | 2133.043351        | 1067.025313      | N    | 402.245943         | 201.626610      | 385.219394         | 193.113335       |                    |                  | 3  |
| 17 | 2264.137980        | 1132.572628       | 2247.111431        | 1124.059353      | 2246.127415        | 1123.567345      | L    | 288.203016         | 144.605146      | 271.176467         | 136.091872       |                    |                  | 2  |
| 18 |                    |                   |                    |                  |                    |                  | R    | <b>175.118952</b>  | 88.063114       | 158.092403         | 79.549839        |                    |                  | 1  |

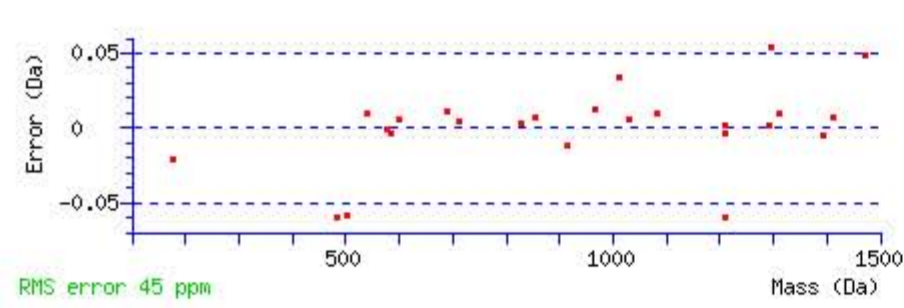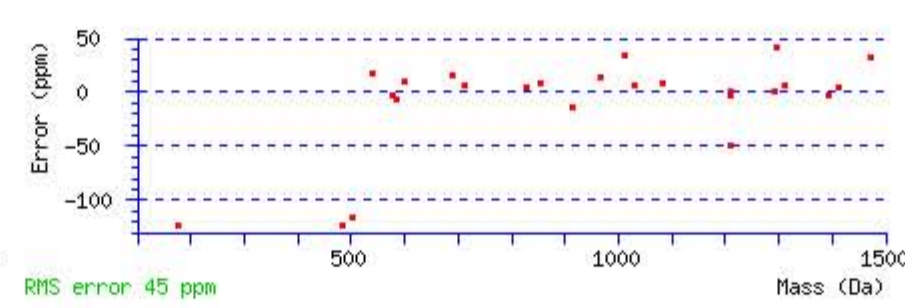

NCBI BLAST search of [HQLYIDETVNSNIPTNLR](#)  
 (Parameters: blastp, nr protein database, expect=20000, no filter, PAM30)  
 Other BLAST [web gateways](#)

### All matches to this query

| Score | Mr(calc):   | Delta    | Sequence                           |
|-------|-------------|----------|------------------------------------|
| 25.4  | 2437.242355 | 0.007997 | <a href="#">HQLYIDETVNSNIPTNLR</a> |



# MASCOT SCIENCE Mascot Search Results

## Peptide View

MS/MS Fragmentation of **YLQEIYNSNNQK**

Found in **FIBG\_HUMAN**, Fibrinogen gamma chain OS=Homo sapiens GN=FGG PE=1 SV=3

Match to Query 52726: 1823.888922 from(608.970250,3+) rtinseconds(1829) index(61853)

Title: Locus:1.1.1.2635.9 File:"2013-07-02 CLN FXIII 30 min 1st F 4.wiff"

Data file C:\Program Files (x86)\Matrix Science\Mascot Daemon\mgf1 FXIII 30 min 1st\mascot\_daemon\_merge.mgf

Click mouse within plot area to zoom in by factor of two about that point

Or, Plot from  to  Da

Label all possible matches  Label matches used for scoring

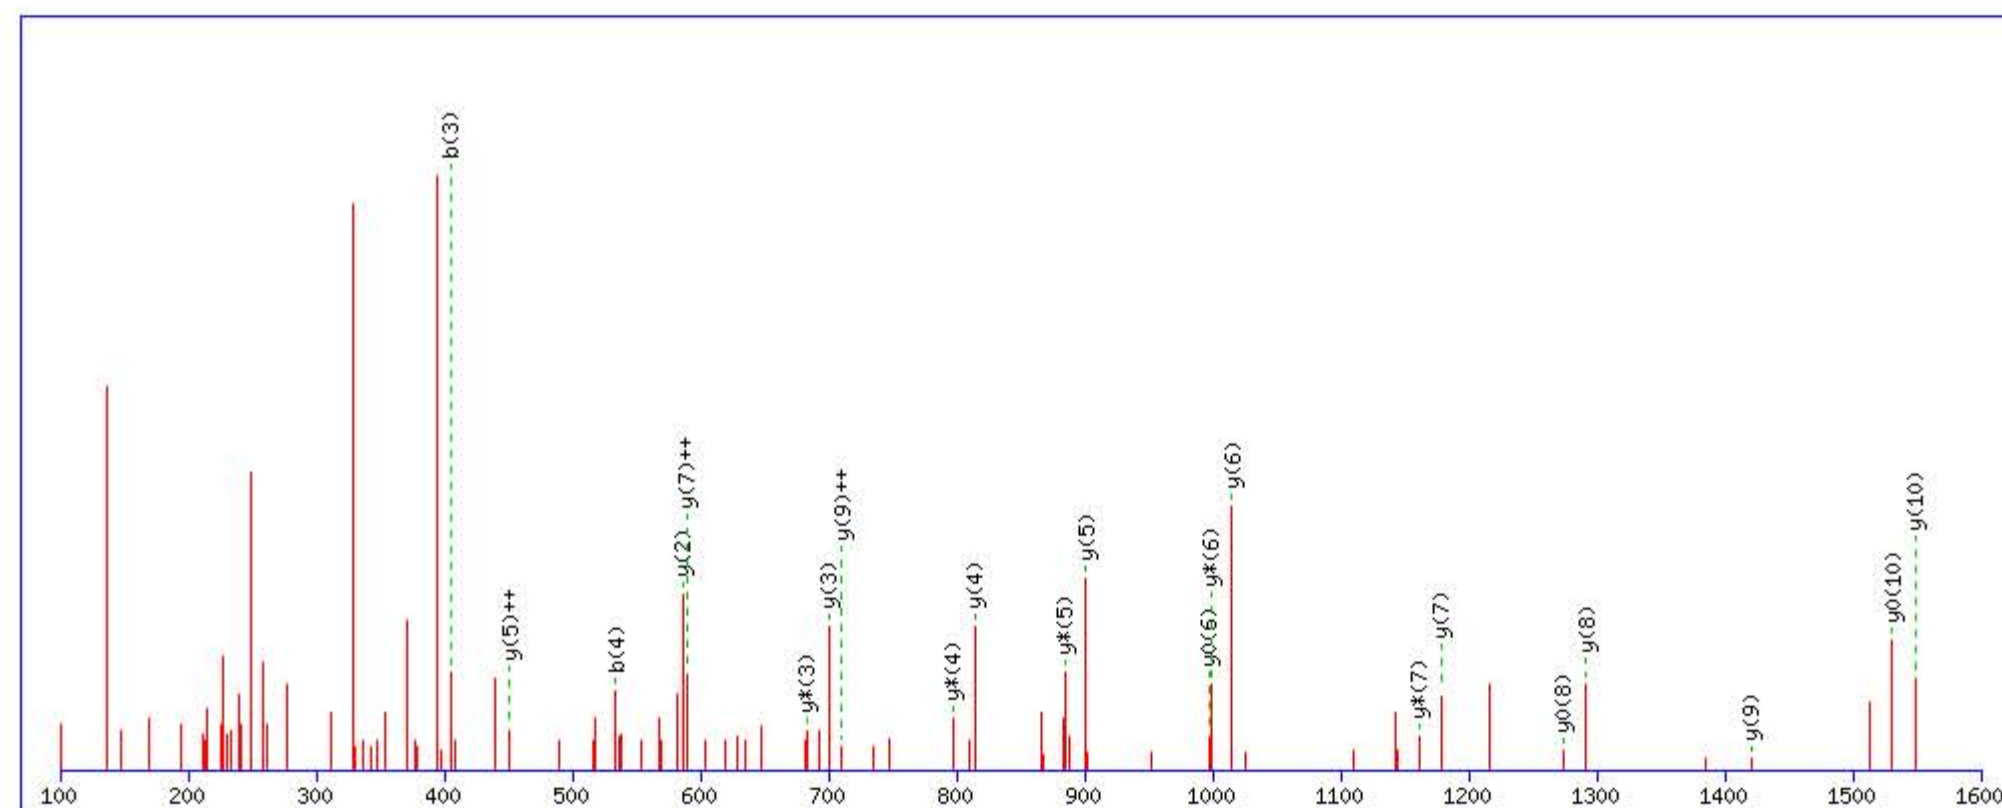

Monoisotopic mass of neutral peptide Mr(calc): 1823.887573

Fixed modifications: Carbamidomethyl (C) (apply to specified residues or termini only)

Variable modifications:

Q11 : Biotin:Thermo-21345 (Q)

Ions Score: 49 Expect: 0.00028

Matches : 22/114 fragment ions using 40 most intense peaks [\(help\)](#)

| #  | b                 | b <sup>++</sup> | b <sup>+</sup> | b <sup>*++</sup> | b <sup>0</sup> | b <sup>0++</sup> | Seq. | y                  | y <sup>++</sup>   | y <sup>+</sup>     | y <sup>*++</sup> | y <sup>0</sup>     | y <sup>0++</sup> | #  |
|----|-------------------|-----------------|----------------|------------------|----------------|------------------|------|--------------------|-------------------|--------------------|------------------|--------------------|------------------|----|
| 1  | 164.070605        | 82.538940       |                |                  |                |                  | Y    |                    |                   |                    |                  |                    |                  | 12 |
| 2  | 277.154669        | 139.080973      |                |                  |                |                  | L    | 1661.831567        | 831.419422        | 1644.805018        | 822.906147       | 1643.821002        | 822.414139       | 11 |
| 3  | <b>405.213247</b> | 203.110262      | 388.186698     | 194.596987       |                |                  | Q    | <b>1548.747503</b> | 774.877390        | 1531.720954        | 766.364115       | <b>1530.736938</b> | 765.872107       | 10 |
| 4  | <b>534.255840</b> | 267.631558      | 517.229291     | 259.118284       | 516.245275     | 258.626276       | E    | <b>1420.688925</b> | <b>710.848100</b> | 1403.662376        | 702.334826       | 1402.678360        | 701.842818       | 9  |
| 5  | 647.339904        | 324.173590      | 630.313355     | 315.660316       | 629.329339     | 315.168308       | I    | <b>1291.646332</b> | 646.326804        | 1274.619783        | 637.813530       | <b>1273.635767</b> | 637.321522       | 8  |
| 6  | 810.403233        | 405.705255      | 793.376684     | 397.191980       | 792.392668     | 396.699972       | Y    | <b>1178.562268</b> | <b>589.784772</b> | <b>1161.535719</b> | 581.271498       | 1160.551703        | 580.779489       | 7  |
| 7  | 924.446160        | 462.726718      | 907.419611     | 454.213443       | 906.435595     | 453.721435       | N    | <b>1015.498939</b> | 508.253108        | <b>998.472390</b>  | 499.739833       | <b>997.488374</b>  | 499.247825       | 6  |
| 8  | 1011.478188       | 506.242732      | 994.451639     | 497.729457       | 993.467623     | 497.237449       | S    | <b>901.456012</b>  | <b>451.231644</b> | <b>884.429463</b>  | 442.718370       | 883.445447         | 442.226362       | 5  |
| 9  | 1125.521115       | 563.264196      | 1108.494566    | 554.750921       | 1107.510550    | 554.258913       | N    | <b>814.423984</b>  | 407.715630        | <b>797.397435</b>  | 399.202356       |                    |                  | 4  |
| 10 | 1239.564042       | 620.285659      | 1222.537493    | 611.772385       | 1221.553477    | 611.280376       | N    | <b>700.381057</b>  | 350.694167        | <b>683.354508</b>  | 342.180892       |                    |                  | 3  |
| 11 | 1678.789368       | 839.898322      | 1661.762819    | 831.385048       | 1660.778803    | 830.893039       | Q    | <b>586.338130</b>  | 293.672703        | 569.311581         | 285.159429       |                    |                  | 2  |
| 12 |                   |                 |                |                  |                |                  | K    | 147.112804         | 74.060040         | 130.086255         | 65.546765        |                    |                  | 1  |

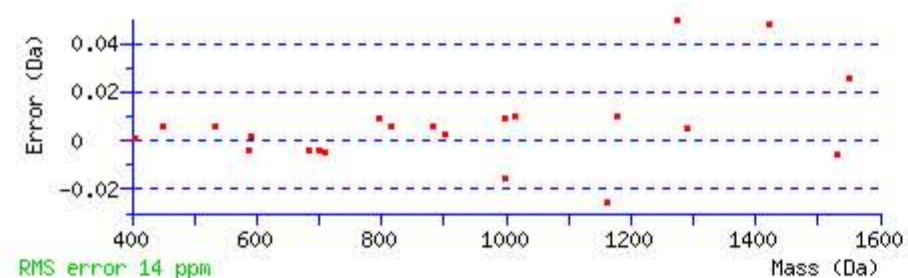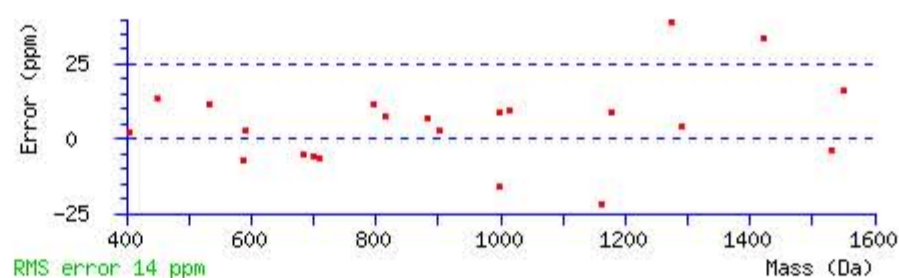

NCBI BLAST search of [YLQEIYNSNNQK](#)

(Parameters: blastp, nr protein database, expect=20000, no filter, PAM30)

Other BLAST [web gateways](#)

All matches to this query

| Score | Mr(calc):   | Delta    | Sequence                     |
|-------|-------------|----------|------------------------------|
| 48.7  | 1823.887573 | 0.001349 | <a href="#">YLQEIYNSNNQK</a> |

Mascot: <http://www.matrixscience.com/>



# MASCOT Search Results

## Peptide View

MS/MS Fragmentation of **LTIGEGQQHHLGGAK**

Found in **FIBG\_HUMAN**, Fibrinogen gamma chain OS=Homo sapiens GN=FGG PE=1 SV=3

Match to Query 53566: 1855.965456 from(464.998640,4+) rtinseconds(1485) index(59428)

Title: Locus:1.1.1.2515.7 File:"2013-07-02 CLN FXIII 30 min 1st F 4.wiff"

Data file C:\Program Files (x86)\Matrix Science\Mascot Daemon\mgf1 FXIII 30 min 1st\mascot\_daemon\_merge.mgf

Click mouse within plot area to zoom in by factor of two about that point

Or, Plot from  to  Da

Label all possible matches  Label matches used for scoring

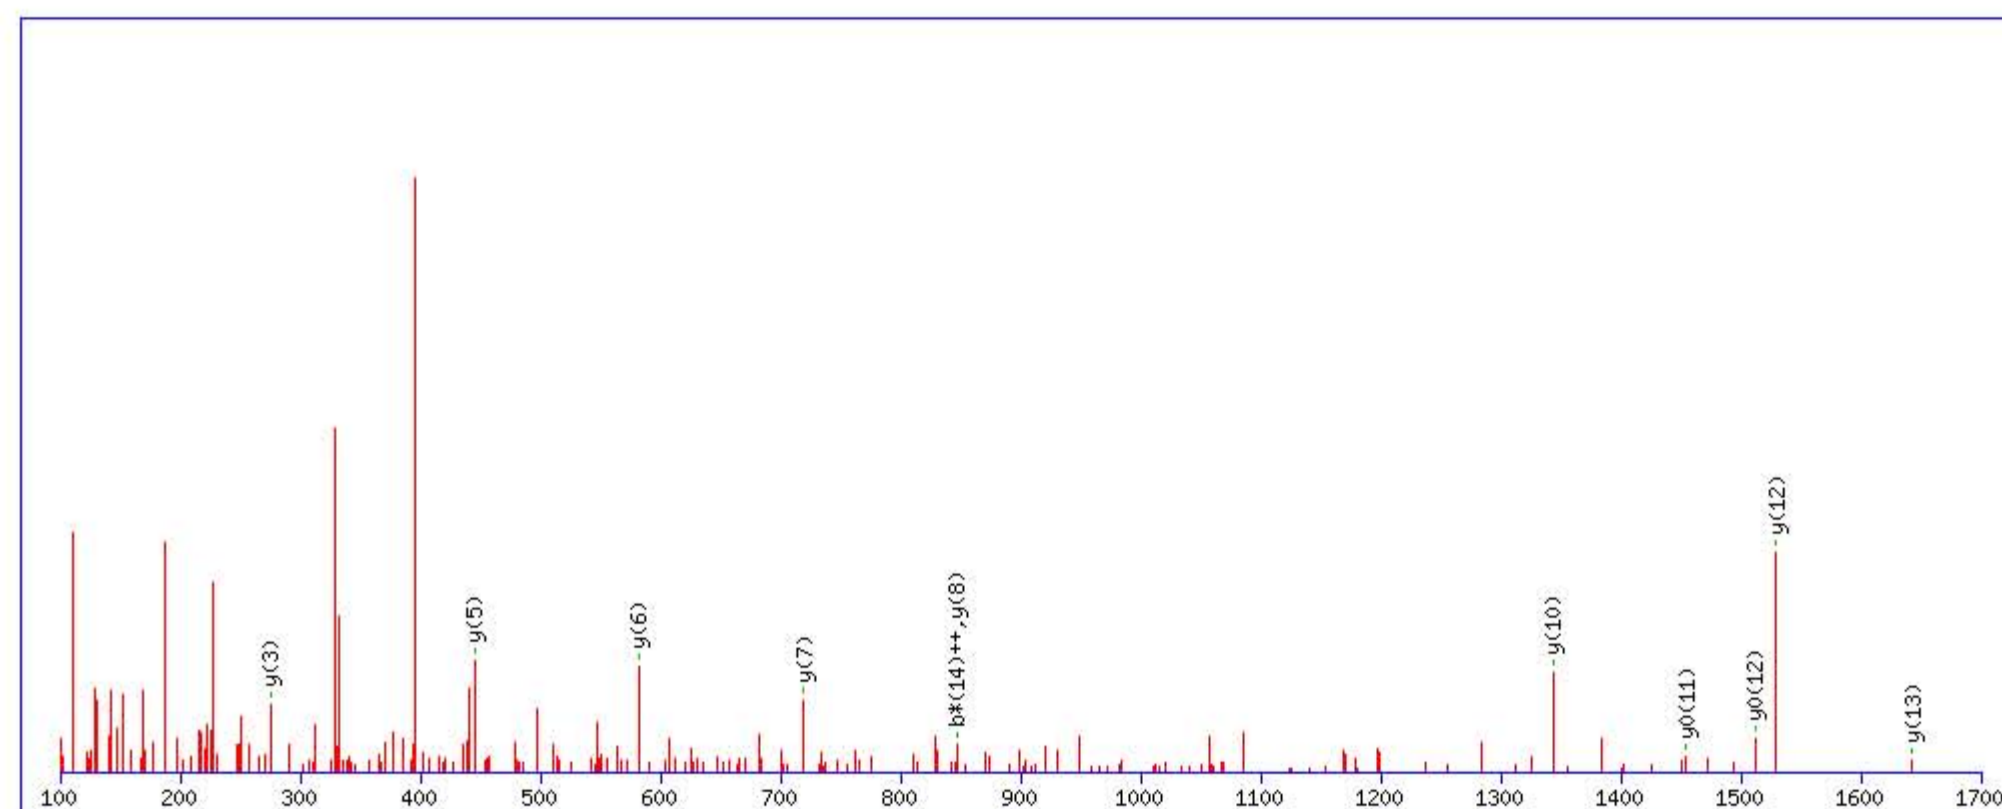

Monoisotopic mass of neutral peptide Mr(calc): 1855.972687

Fixed modifications: Carbamidomethyl (C) (apply to specified residues or termini only)

Variable modifications:

Q7 : Biotin:Thermo-21345 (Q)

Ions Score: 29 Expect: 0.037

Matches : 11/134 fragment ions using 31 most intense peaks [\(help\)](#)

| #  | b           | b <sup>++</sup> | b <sup>*</sup> | b <sup>*++</sup>  | b <sup>0</sup> | b <sup>0++</sup> | Seq. | y                  | y <sup>++</sup> | y <sup>*</sup> | y <sup>*++</sup> | y <sup>0</sup>     | y <sup>0++</sup> | #  |
|----|-------------|-----------------|----------------|-------------------|----------------|------------------|------|--------------------|-----------------|----------------|------------------|--------------------|------------------|----|
| 1  | 114.091340  | 57.549308       |                |                   |                |                  | L    |                    |                 |                |                  |                    |                  | 15 |
| 2  | 215.139019  | 108.073147      |                |                   | 197.128454     | 99.067865        | T    | 1743.895902        | 872.451589      | 1726.869353    | 863.938314       | 1725.885337        | 863.446306       | 14 |
| 3  | 328.223083  | 164.615179      |                |                   | 310.212518     | 155.609897       | I    | <b>1642.848223</b> | 821.927749      | 1625.821674    | 813.414475       | 1624.837658        | 812.922467       | 13 |
| 4  | 385.244547  | 193.125911      |                |                   | 367.233982     | 184.120629       | G    | <b>1529.764159</b> | 765.385717      | 1512.737610    | 756.872443       | <b>1511.753594</b> | 756.380435       | 12 |
| 5  | 514.287140  | 257.647208      |                |                   | 496.276575     | 248.641926       | E    | 1472.742695        | 736.874985      | 1455.716146    | 728.361711       | <b>1454.732130</b> | 727.869703       | 11 |
| 6  | 571.308604  | 286.157940      |                |                   | 553.298039     | 277.152658       | G    | <b>1343.700102</b> | 672.353689      | 1326.673553    | 663.840414       |                    |                  | 10 |
| 7  | 1010.533930 | 505.770603      | 993.507381     | 497.257329        | 992.523365     | 496.765321       | Q    | 1286.678638        | 643.842957      | 1269.652089    | 635.329682       |                    |                  | 9  |
| 8  | 1138.592508 | 569.799892      | 1121.565959    | 561.286618        | 1120.581943    | 560.794609       | Q    | <b>847.453312</b>  | 424.230294      | 830.426763     | 415.717019       |                    |                  | 8  |
| 9  | 1275.651420 | 638.329348      | 1258.624871    | 629.816074        | 1257.640855    | 629.324065       | H    | <b>719.394734</b>  | 360.201005      | 702.368185     | 351.687730       |                    |                  | 7  |
| 10 | 1412.710332 | 706.858804      | 1395.683783    | 698.345530        | 1394.699767    | 697.853521       | H    | <b>582.335822</b>  | 291.671549      | 565.309273     | 283.158274       |                    |                  | 6  |
| 11 | 1525.794396 | 763.400836      | 1508.767847    | 754.887561        | 1507.783831    | 754.395553       | L    | <b>445.276910</b>  | 223.142093      | 428.250361     | 214.628818       |                    |                  | 5  |
| 12 | 1582.815860 | 791.911568      | 1565.789311    | 783.398293        | 1564.805295    | 782.906285       | G    | 332.192846         | 166.600061      | 315.166297     | 158.086786       |                    |                  | 4  |
| 13 | 1639.837324 | 820.422300      | 1622.810775    | 811.909025        | 1621.826759    | 811.417017       | G    | <b>275.171382</b>  | 138.089329      | 258.144833     | 129.576054       |                    |                  | 3  |
| 14 | 1710.874438 | 855.940857      | 1693.847889    | <b>847.427582</b> | 1692.863873    | 846.935574       | A    | 218.149918         | 109.578597      | 201.123369     | 101.065322       |                    |                  | 2  |
| 15 |             |                 |                |                   |                |                  | K    | 147.112804         | 74.060040       | 130.086255     | 65.546765        |                    |                  | 1  |

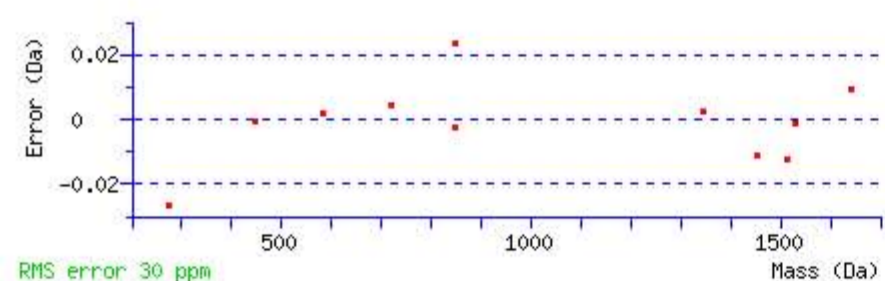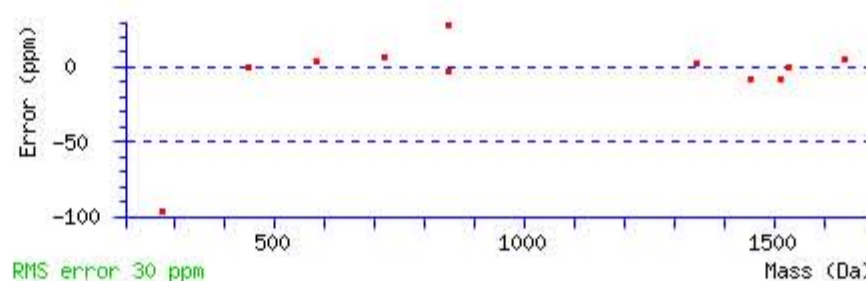

NCBI BLAST search of [LTIGEGQQHHLGGAK](#)

(Parameters: blastp, nr protein database, expect=20000, no filter, PAM30)

Other BLAST [web gateways](#)

All matches to this query

| Score | Mr(calc):   | Delta     | Sequence                        |
|-------|-------------|-----------|---------------------------------|
| 28.7  | 1855.972687 | -0.007231 | <a href="#">LTIGEGQQHHLGGAK</a> |
| 23.1  | 1855.972687 | -0.007231 | <a href="#">LTIGEGQQHHLGGAK</a> |

Mascot: <http://www.matrixscience.com/>



# MASCOT Search Results

## Peptide View

MS/MS Fragmentation of **LTIGEGQQHHLGGAK**

Found in **FIBG\_HUMAN**, Fibrinogen gamma chain OS=Homo sapiens GN=FGG PE=1 SV=3

Match to Query 53574: 1855.983582 from(619.668470,3+) rtinseconds(1433) index(3529)

Title: Locus:1.1.1.2219.23 File:"2013-07-02 CLN FXIII 30 min 1st F 1.wiff"

Data file C:\Program Files (x86)\Matrix Science\Mascot Daemon\mgf\1 FXIII 30 min 1st\mascot\_daemon\_merge.mgf

Click mouse within plot area to zoom in by factor of two about that point

Or, Plot from  to  Da

Label all possible matches  Label matches used for scoring

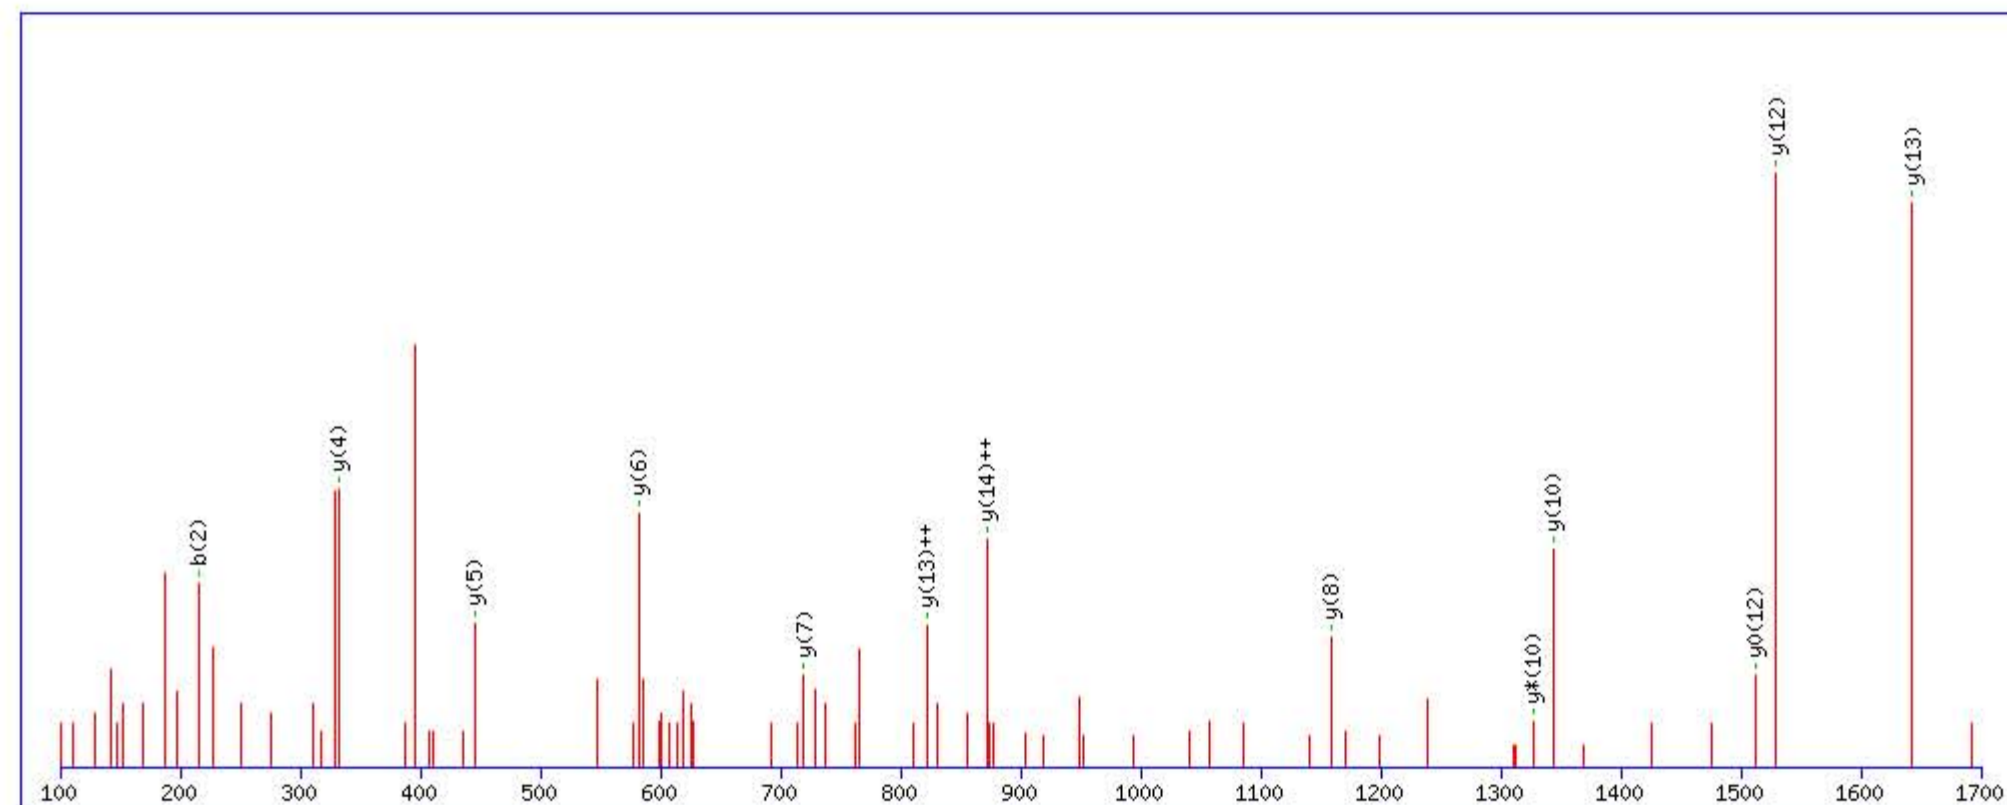

Monoisotopic mass of neutral peptide Mr(calc): 1855.972687

Fixed modifications: Carbamidomethyl (C) (apply to specified residues or termini only)

Variable modifications:

Q8 : Biotin:Thermo-21345 (Q)

Ions Score: 35 Expect: 0.0007

Matches : 13/134 fragment ions using 31 most intense peaks [\(help\)](#)

| #  | b           | b <sup>++</sup> | b <sup>*</sup> | b <sup>*++</sup> | b <sup>0</sup> | b <sup>0++</sup> | Seq. | y           | y <sup>++</sup> | y <sup>*</sup> | y <sup>*++</sup> | y <sup>0</sup> | y <sup>0++</sup> | #  |
|----|-------------|-----------------|----------------|------------------|----------------|------------------|------|-------------|-----------------|----------------|------------------|----------------|------------------|----|
| 1  | 114.091340  | 57.549308       |                |                  |                |                  | L    |             |                 |                |                  |                |                  | 15 |
| 2  | 215.139019  | 108.073147      |                |                  | 197.128454     | 99.067865        | T    | 1743.895902 | 872.451589      | 1726.869353    | 863.938314       | 1725.885337    | 863.446306       | 14 |
| 3  | 328.223083  | 164.615179      |                |                  | 310.212518     | 155.609897       | I    | 1642.848223 | 821.927749      | 1625.821674    | 813.414475       | 1624.837658    | 812.922467       | 13 |
| 4  | 385.244547  | 193.125911      |                |                  | 367.233982     | 184.120629       | G    | 1529.764159 | 765.385717      | 1512.737610    | 756.872443       | 1511.753594    | 756.380435       | 12 |
| 5  | 514.287140  | 257.647208      |                |                  | 496.276575     | 248.641926       | E    | 1472.742695 | 736.874985      | 1455.716146    | 728.361711       | 1454.732130    | 727.869703       | 11 |
| 6  | 571.308604  | 286.157940      |                |                  | 553.298039     | 277.152658       | G    | 1343.700102 | 672.353689      | 1326.673553    | 663.840414       |                |                  | 10 |
| 7  | 699.367182  | 350.187229      | 682.340633     | 341.673955       | 681.356617     | 341.181947       | Q    | 1286.678638 | 643.842957      | 1269.652089    | 635.329682       |                |                  | 9  |
| 8  | 1138.592508 | 569.799892      | 1121.565959    | 561.286618       | 1120.581943    | 560.794609       | Q    | 1158.620060 | 579.813668      | 1141.593511    | 571.300393       |                |                  | 8  |
| 9  | 1275.651420 | 638.329348      | 1258.624871    | 629.816074       | 1257.640855    | 629.324065       | H    | 719.394734  | 360.201005      | 702.368185     | 351.687730       |                |                  | 7  |
| 10 | 1412.710332 | 706.858804      | 1395.683783    | 698.345530       | 1394.699767    | 697.853521       | H    | 582.335822  | 291.671549      | 565.309273     | 283.158274       |                |                  | 6  |
| 11 | 1525.794396 | 763.400836      | 1508.767847    | 754.887561       | 1507.783831    | 754.395553       | L    | 445.276910  | 223.142093      | 428.250361     | 214.628818       |                |                  | 5  |
| 12 | 1582.815860 | 791.911568      | 1565.789311    | 783.398293       | 1564.805295    | 782.906285       | G    | 332.192846  | 166.600061      | 315.166297     | 158.086786       |                |                  | 4  |
| 13 | 1639.837324 | 820.422300      | 1622.810775    | 811.909025       | 1621.826759    | 811.417017       | G    | 275.171382  | 138.089329      | 258.144833     | 129.576054       |                |                  | 3  |
| 14 | 1710.874438 | 855.940857      | 1693.847889    | 847.427582       | 1692.863873    | 846.935574       | A    | 218.149918  | 109.578597      | 201.123369     | 101.065322       |                |                  | 2  |
| 15 |             |                 |                |                  |                |                  | K    | 147.112804  | 74.060040       | 130.086255     | 65.546765        |                |                  | 1  |

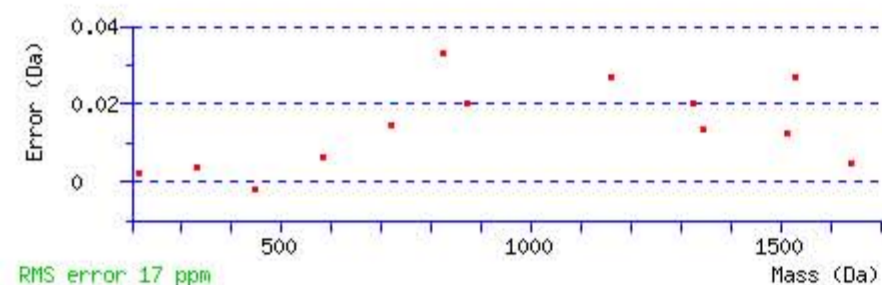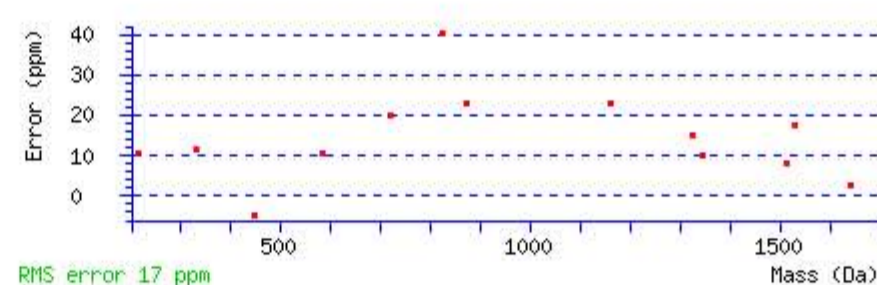

NCBI BLAST search of **LTIGEGQQHHLGGAK**

(Parameters: blastp, nr protein database, expect=20000, no filter, PAM30)

Other BLAST [web gateways](#)

All matches to this query

| Score | Mr(calc):   | Delta     | Sequence                         |
|-------|-------------|-----------|----------------------------------|
| 35.0  | 1855.972687 | 0.010895  | <a href="#">LTIGEGQQHHLGGAK</a>  |
| 25.7  | 1855.972687 | 0.010895  | <a href="#">LTIGEGQQHHLGGAK</a>  |
| 1.4   | 1856.000519 | -0.016937 | <a href="#">TIVVTILESPLYVMYK</a> |



# MASCOT Search Results

## Peptide View

MS/MS Fragmentation of **LTIGEGQQHHLGGAK**

Found in **FIBG\_HUMAN**, Fibrinogen gamma chain OS=Homo sapiens GN=FGG PE=1 SV=3

Match to Query 60870: 2167.135816 from(542.791230,4+) rtinseconds(1787) index(61617)

Title: Locus:1.1.1.2620.13 File:"2013-07-02 CLN FXIII 30 min 1st F 4.wiff"

Data file C:\Program Files (x86)\Matrix Science\Mascot Daemon\mgf\1 FXIII 30 min 1st\mascot\_daemon\_merge.mgf

Click mouse within plot area to zoom in by factor of two about that point

Or, Plot from  to  Da

Label all possible matches  Label matches used for scoring

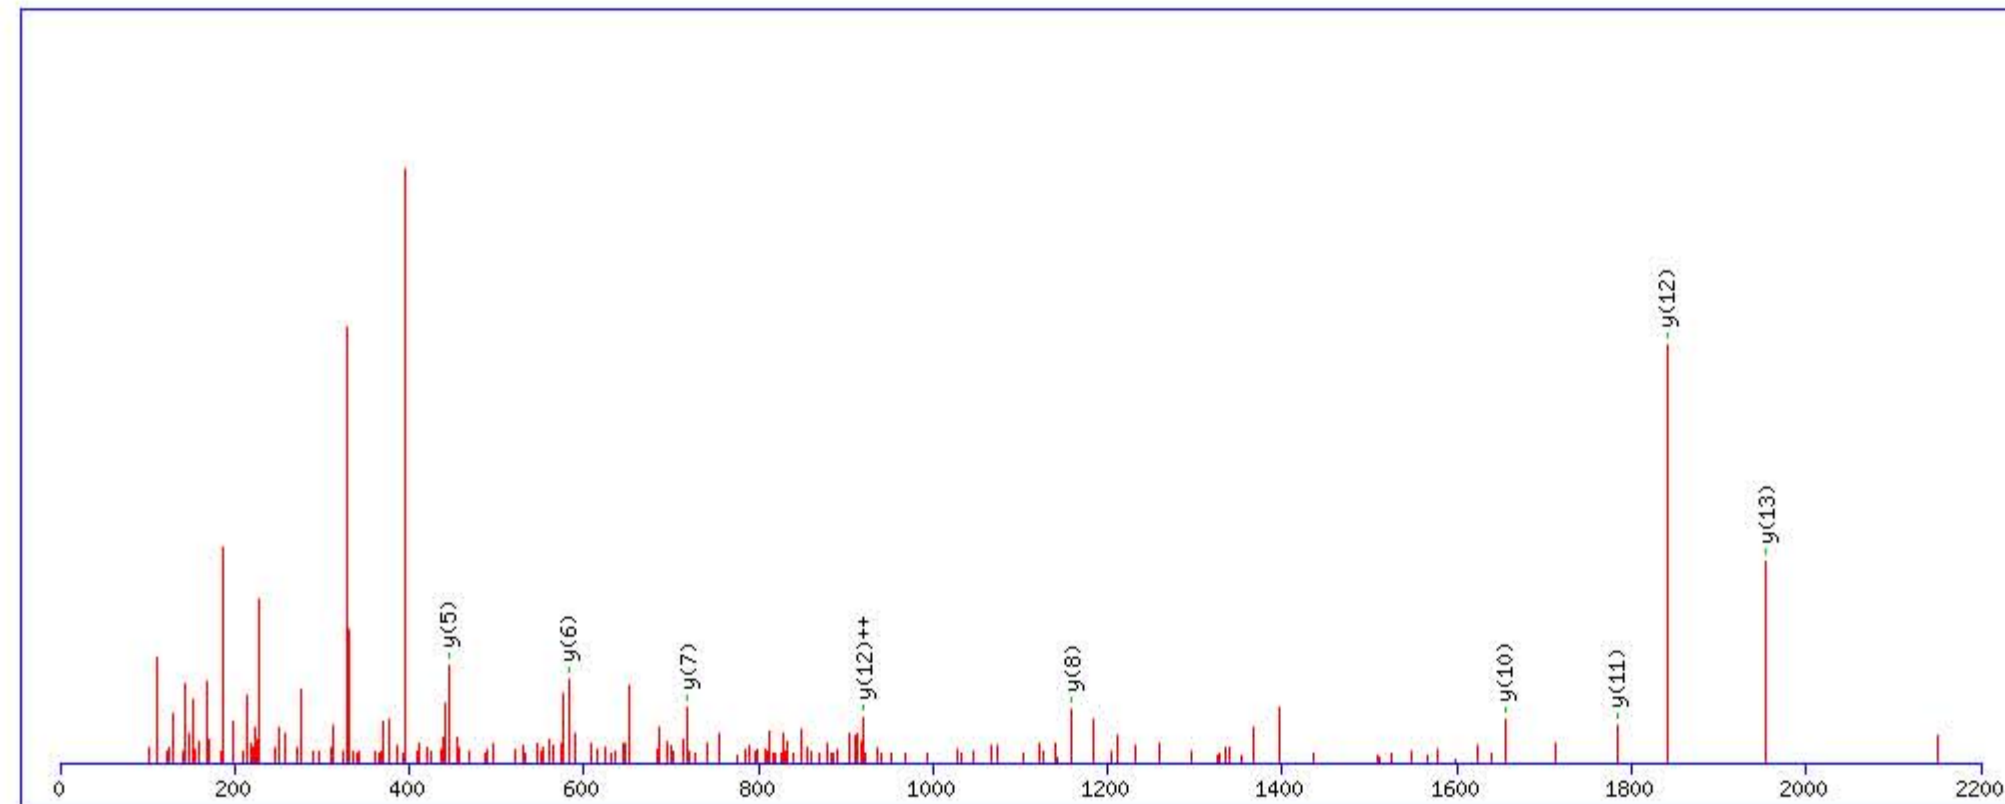

Monoisotopic mass of neutral peptide Mr(calc): 2167.139435

Fixed modifications: Carbamidomethyl (C) (apply to specified residues or termini only)

Variable modifications:

Q7 : Biotin:Thermo-21345 (Q)

Q8 : Biotin:Thermo-21345 (Q)

Ions Score: 37 Expect: 0.0046

Matches : 9/134 fragment ions using 20 most intense peaks [\(help\)](#)

| #  | b           | b <sup>++</sup> | b <sup>+</sup> | b <sup>*++</sup> | b <sup>0</sup> | b <sup>0++</sup> | Seq. | y                  | y <sup>++</sup>   | y <sup>+</sup> | y <sup>*++</sup> | y <sup>0</sup> | y <sup>0++</sup> | #  |
|----|-------------|-----------------|----------------|------------------|----------------|------------------|------|--------------------|-------------------|----------------|------------------|----------------|------------------|----|
| 1  | 114.091340  | 57.549308       |                |                  |                |                  | L    |                    |                   |                |                  |                |                  | 15 |
| 2  | 215.139019  | 108.073147      |                |                  | 197.128454     | 99.067865        | T    | 2055.062650        | 1028.034963       | 2038.036101    | 1019.521688      | 2037.052085    | 1019.029680      | 14 |
| 3  | 328.223083  | 164.615179      |                |                  | 310.212518     | 155.609897       | I    | <b>1954.014971</b> | 977.511123        | 1936.988422    | 968.997849       | 1936.004406    | 968.505841       | 13 |
| 4  | 385.244547  | 193.125911      |                |                  | 367.233982     | 184.120629       | G    | <b>1840.930907</b> | <b>920.969091</b> | 1823.904358    | 912.455817       | 1822.920342    | 911.963809       | 12 |
| 5  | 514.287140  | 257.647208      |                |                  | 496.276575     | 248.641926       | E    | <b>1783.909443</b> | 892.458359        | 1766.882894    | 883.945085       | 1765.898878    | 883.453077       | 11 |
| 6  | 571.308604  | 286.157940      |                |                  | 553.298039     | 277.152658       | G    | <b>1654.866850</b> | 827.937063        | 1637.840301    | 819.423788       |                |                  | 10 |
| 7  | 1010.533930 | 505.770603      | 993.507381     | 497.257329       | 992.523365     | 496.765321       | Q    | 1597.845386        | 799.426331        | 1580.818837    | 790.913056       |                |                  | 9  |
| 8  | 1449.759256 | 725.383266      | 1432.732707    | 716.869992       | 1431.748691    | 716.377984       | Q    | <b>1158.620060</b> | 579.813668        | 1141.593511    | 571.300393       |                |                  | 8  |
| 9  | 1586.818168 | 793.912722      | 1569.791619    | 785.399448       | 1568.807603    | 784.907440       | H    | <b>719.394734</b>  | 360.201005        | 702.368185     | 351.687730       |                |                  | 7  |
| 10 | 1723.877080 | 862.442178      | 1706.850531    | 853.928904       | 1705.866515    | 853.436895       | H    | <b>582.335822</b>  | 291.671549        | 565.309273     | 283.158274       |                |                  | 6  |
| 11 | 1836.961144 | 918.984210      | 1819.934595    | 910.470936       | 1818.950579    | 909.978927       | L    | <b>445.276910</b>  | 223.142093        | 428.250361     | 214.628818       |                |                  | 5  |
| 12 | 1893.982608 | 947.494942      | 1876.956059    | 938.981667       | 1875.972043    | 938.489659       | G    | 332.192846         | 166.600061        | 315.166297     | 158.086786       |                |                  | 4  |
| 13 | 1951.004072 | 976.005674      | 1933.977523    | 967.492399       | 1932.993507    | 967.000391       | G    | 275.171382         | 138.089329        | 258.144833     | 129.576054       |                |                  | 3  |
| 14 | 2022.041186 | 1011.524231     | 2005.014637    | 1003.010956      | 2004.030621    | 1002.518948      | A    | 218.149918         | 109.578597        | 201.123369     | 101.065322       |                |                  | 2  |
| 15 |             |                 |                |                  |                |                  | K    | 147.112804         | 74.060040         | 130.086255     | 65.546765        |                |                  | 1  |

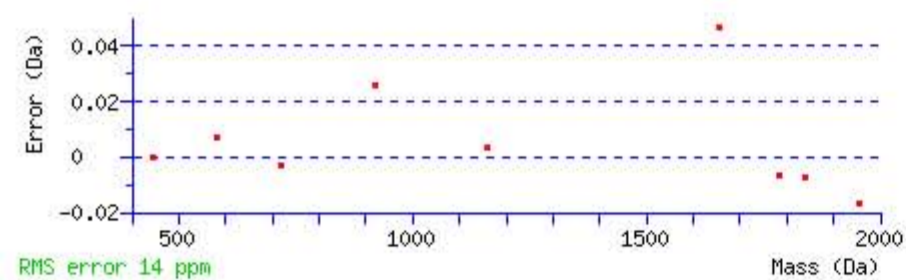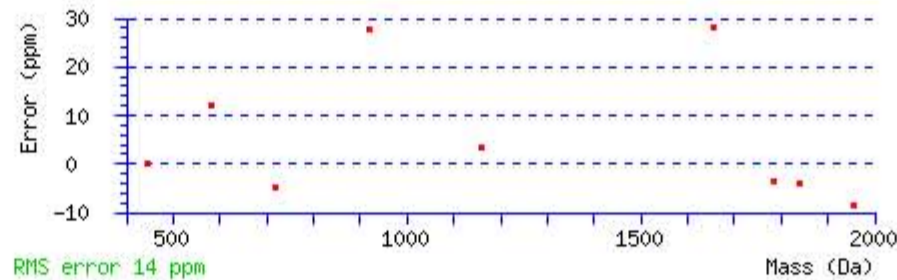

NCBI BLAST search of **LTIGEGQQHHLGGAK**

(Parameters: blastp, nr protein database, expect=20000, no filter, PAM30)

Other BLAST [web gateways](#)

All matches to this query

| Score | Mr(calc):   | Delta     | Sequence                        |
|-------|-------------|-----------|---------------------------------|
| 37.4  | 2167.139435 | -0.003619 | <a href="#">LTIGEGQQHHLGGAK</a> |

Mascot: <http://www.matrixscience.com/>



**MASCOT** Mascot Search Results

**Peptide View**

MS/MS Fragmentation of **TDELPQLVTLPHPNLHGPEILDVPSTVQK**  
 Found in **FINC\_HUMAN**, Fibronectin OS=Homo sapiens GN=FN1 PE=1 SV=4

Match to Query 79729: 3497.881536 from(875.477660,4+) rtinseconds(2574) index(66541)  
 Title: Locus:1.1.1.2893.21 File:"2013-07-02 CLN FXIII 30 min 1st F 4.wiff"  
 Data file C:\Program Files (x86)\Matrix Science\Mascot Daemon\mgf1 FXIII 30 min 1st\mascot\_daemon\_merge.mgf

Click mouse within plot area to zoom in by factor of two about that point  
 Or, Plot from  to  Da   
 Label all possible matches  Label matches used for scoring

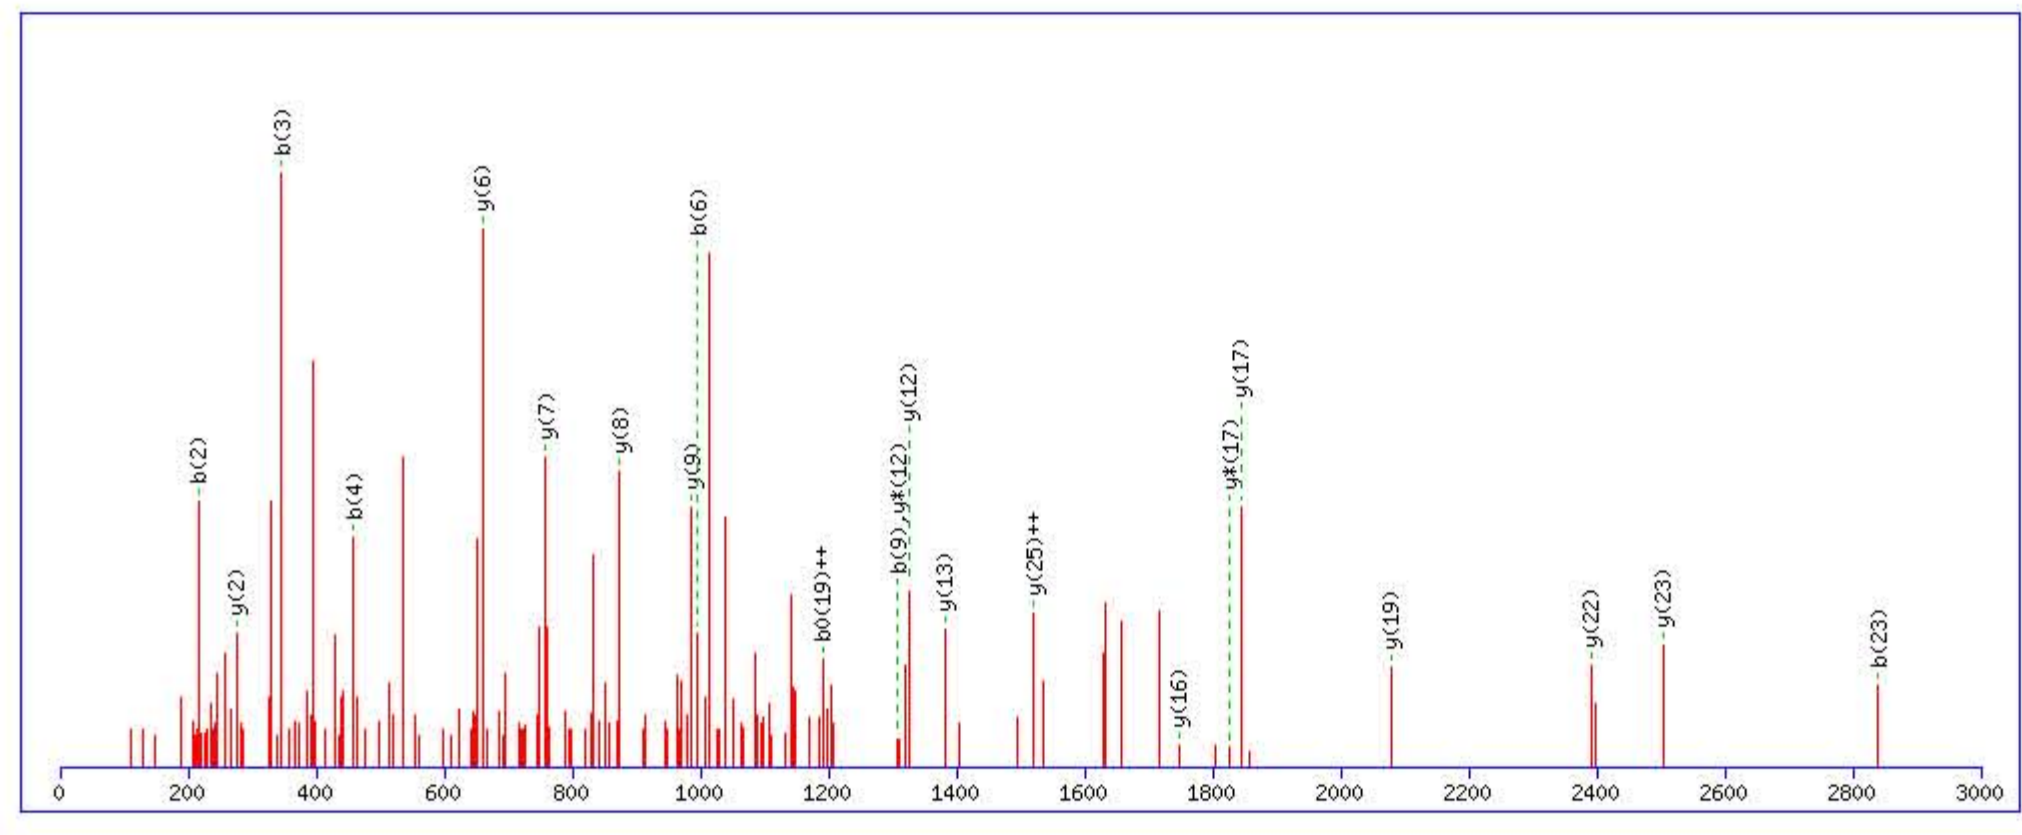

Monoisotopic mass of neutral peptide Mr(calc): 3497.859238  
 Fixed modifications: Carbamidomethyl (C) (apply to specified residues or termini only)  
 Variable modifications:  
 Q6 : Biotin:Thermo-21345 (Q)  
 Ions Score: 57 Expect: 2.9e-005  
 Matches : 22/320 fragment ions using 40 most intense peaks [\(help\)](#)

| #  | b                  | b <sup>++</sup> | b <sup>+</sup> | b <sup>+++</sup> | b <sup>0</sup> | b <sup>0++</sup> | Seq. | y                  | y <sup>++</sup>    | y <sup>*</sup>     | y <sup>+++</sup> | y <sup>0</sup> | y <sup>0++</sup> | #  |
|----|--------------------|-----------------|----------------|------------------|----------------|------------------|------|--------------------|--------------------|--------------------|------------------|----------------|------------------|----|
| 1  | 102.054955         | 51.531116       |                |                  | 84.044390      | 42.525833        | T    |                    |                    |                    |                  |                |                  | 29 |
| 2  | <b>217.081898</b>  | 109.044587      |                |                  | 199.071333     | 100.039304       | D    | 3397.818827        | 1699.413051        | 3380.792278        | 1690.899777      | 3379.808262    | 1690.407769      | 28 |
| 3  | <b>346.124491</b>  | 173.565883      |                |                  | 328.113926     | 164.560601       | E    | 3282.791884        | 1641.899580        | 3265.765335        | 1633.386305      | 3264.781319    | 1632.894297      | 27 |
| 4  | <b>459.208555</b>  | 230.107915      |                |                  | 441.197990     | 221.102633       | L    | 3153.749291        | 1577.378283        | 3136.722742        | 1568.865009      | 3135.738726    | 1568.373001      | 26 |
| 5  | 556.261319         | 278.634298      |                |                  | 538.250754     | 269.629015       | P    | 3040.665227        | <b>1520.836251</b> | 3023.638678        | 1512.322977      | 3022.654662    | 1511.830969      | 25 |
| 6  | <b>995.486645</b>  | 498.246961      | 978.460096     | 489.733686       | 977.476080     | 489.241678       | Q    | 2943.612463        | 1472.309869        | 2926.585914        | 1463.796595      | 2925.601898    | 1463.304587      | 24 |
| 7  | 1108.570709        | 554.788993      | 1091.544160    | 546.275718       | 1090.560144    | 545.783710       | L    | <b>2504.387137</b> | 1252.697206        | 2487.360588        | 1244.183932      | 2486.376572    | 1243.691924      | 23 |
| 8  | 1207.639123        | 604.323200      | 1190.612574    | 595.809925       | 1189.628558    | 595.317917       | V    | <b>2391.303073</b> | 1196.155174        | 2374.276524        | 1187.641900      | 2373.292508    | 1187.149892      | 22 |
| 9  | <b>1308.686802</b> | 654.847039      | 1291.660253    | 646.333765       | 1290.676237    | 645.841757       | T    | 2292.234659        | 1146.620967        | 2275.208110        | 1138.107693      | 2274.224094    | 1137.615685      | 21 |
| 10 | 1421.770866        | 711.389071      | 1404.744317    | 702.875797       | 1403.760301    | 702.383789       | L    | 2191.186980        | 1096.097128        | 2174.160431        | 1087.583853      | 2173.176415    | 1087.091845      | 20 |
| 11 | 1518.823630        | 759.915453      | 1501.797081    | 751.402179       | 1500.813065    | 750.910171       | P    | <b>2078.102916</b> | 1039.555096        | 2061.076367        | 1031.041821      | 2060.092351    | 1030.549813      | 19 |
| 12 | 1655.882542        | 828.444909      | 1638.855993    | 819.931635       | 1637.871977    | 819.439627       | H    | 1981.050152        | 991.028714         | 1964.023603        | 982.515440       | 1963.039587    | 982.023432       | 18 |
| 13 | 1752.935306        | 876.971291      | 1735.908757    | 868.458017       | 1734.924741    | 867.966009       | P    | <b>1843.991240</b> | 922.499258         | <b>1826.964691</b> | 913.985984       | 1825.980675    | 913.493976       | 17 |
| 14 | 1866.978233        | 933.992755      | 1849.951684    | 925.479480       | 1848.967668    | 924.987472       | N    | <b>1746.938476</b> | 873.972876         | 1729.911927        | 865.459602       | 1728.927911    | 864.967594       | 16 |
| 15 | 1980.062297        | 990.534787      | 1963.035748    | 982.021512       | 1962.051732    | 981.529504       | L    | 1632.895549        | 816.951413         | 1615.869000        | 808.438138       | 1614.884984    | 807.946130       | 15 |
| 16 | 2117.121209        | 1059.064242     | 2100.094660    | 1050.550968      | 2099.110644    | 1050.058960      | H    | 1519.811485        | 760.409381         | 1502.784936        | 751.896106       | 1501.800920    | 751.404098       | 14 |
| 17 | 2174.142673        | 1087.574974     | 2157.116124    | 1079.061700      | 2156.132108    | 1078.569692      | G    | <b>1382.752573</b> | 691.879925         | 1365.726024        | 683.366650       | 1364.742008    | 682.874642       | 13 |
| 18 | 2271.195437        | 1136.101356     | 2254.168888    | 1127.588082      | 2253.184872    | 1127.096074      | P    | <b>1325.731109</b> | 663.369193         | <b>1308.704560</b> | 654.855918       | 1307.720544    | 654.363910       | 12 |
| 19 | 2400.238030        | 1200.622653     | 2383.211481    | 1192.109378      | 2382.227465    | 1191.617370      | E    | 1228.678345        | 614.842811         | 1211.651796        | 606.329536       | 1210.667780    | 605.837528       | 11 |
| 20 | 2513.322094        | 1257.164685     | 2496.295545    | 1248.651410      | 2495.311529    | 1248.159402      | I    | 1099.635752        | 550.321514         | 1082.609203        | 541.808240       | 1081.625187    | 541.316231       | 10 |
| 21 | 2626.406158        | 1313.706717     | 2609.379609    | 1305.193442      | 2608.395593    | 1304.701435      | L    | <b>986.551688</b>  | 493.779482         | 969.525139         | 485.266207       | 968.541123     | 484.774199       | 9  |
| 22 | 2741.433101        | 1371.220188     | 2724.406552    | 1362.706914      | 2723.422536    | 1362.214906      | D    | <b>873.467624</b>  | 437.237450         | 856.441075         | 428.724175       | 855.457059     | 428.232167       | 8  |
| 23 | <b>2840.501515</b> | 1420.754395     | 2823.474966    | 1412.241121      | 2822.490950    | 1411.749113      | V    | <b>758.440681</b>  | 379.723978         | 741.414132         | 371.210704       | 740.430116     | 370.718696       | 7  |
| 24 | 2937.554279        | 1469.280777     | 2920.527730    | 1460.767503      | 2919.543714    | 1460.275495      | P    | <b>659.372267</b>  | 330.189772         | 642.345718         | 321.676497       | 641.361702     | 321.184489       | 6  |
| 25 | 3024.586307        | 1512.796791     | 3007.559758    | 1504.283517      | 3006.575742    | 1503.791509      | S    | 562.319503         | 281.663389         | 545.292954         | 273.150115       | 544.308938     | 272.658107       | 5  |
| 26 | 3125.633986        | 1563.320631     | 3108.607437    | 1554.807356      | 3107.623421    | 1554.315348      | T    | 475.287475         | 238.147375         | 458.260926         | 229.634101       | 457.276910     | 229.142093       | 4  |
| 27 | 3224.702400        | 1612.854838     | 3207.675851    | 1604.341563      | 3206.691835    | 1603.849555      | V    | 374.239796         | 187.623536         | 357.213247         | 179.110261       |                |                  | 3  |
| 28 | 3352.760978        | 1676.884127     | 3335.734429    | 1668.370852      | 3334.750413    | 1667.878844      | Q    | <b>275.171382</b>  | 138.089329         | 258.144833         | 129.576055       |                |                  | 2  |
| 29 |                    |                 |                |                  |                |                  | K    | 147.112804         | 74.060040          | 130.086255         | 65.546765        |                |                  | 1  |

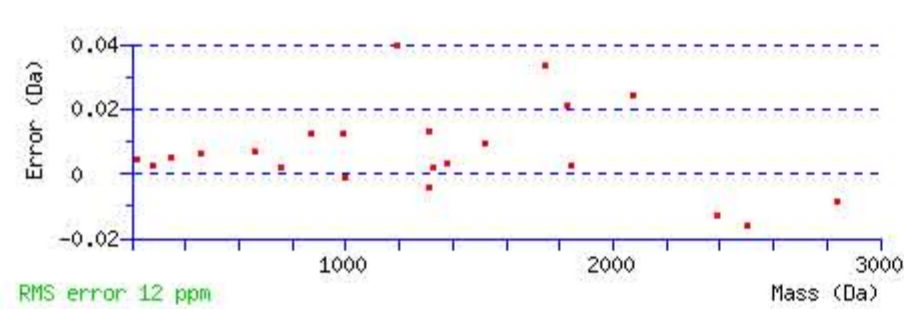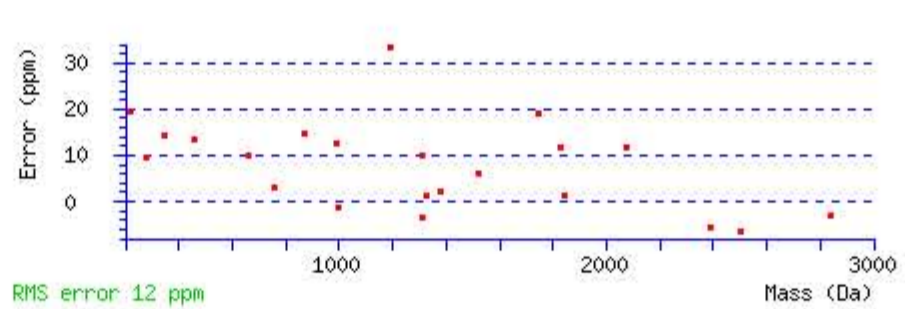

NCBI BLAST search of **TDELPQLVTLPHPNLHGPEILDVPSTVQK**  
 (Parameters: blastp, nr protein database, expect=20000, no filter, PAM30)  
 Other BLAST [web gateways](#)

**All matches to this query**

| Score | Mr(calc):   | Delta    | Sequence                                      |
|-------|-------------|----------|-----------------------------------------------|
| 56.5  | 3497.859238 | 0.022298 | <a href="#">TDELPQLVTLPHPNLHGPEILDVPSTVQK</a> |



# MASCOT Search Results

## Peptide View

MS/MS Fragmentation of **SAATLQQEK**

Found in **FBLN1\_HUMAN**, Fibulin-1 OS=Homo sapiens GN=FBLN1 PE=1 SV=4

Match to Query 34844: 1285.666248 from(643.840400,2+) rtinseconds(1457) index(59220)

Title: Locus:1.1.1.2505.18 File:"2013-07-02 CLN FXIII 30 min 1st F 4.wiff"

Data file C:\Program Files (x86)\Matrix Science\Mascot Daemon\mgf1 FXIII 30 min 1st\mascot\_daemon\_merge.mgf

Click mouse within plot area to zoom in by factor of two about that point

Or, Plot from  to  Da

Label all possible matches  Label matches used for scoring

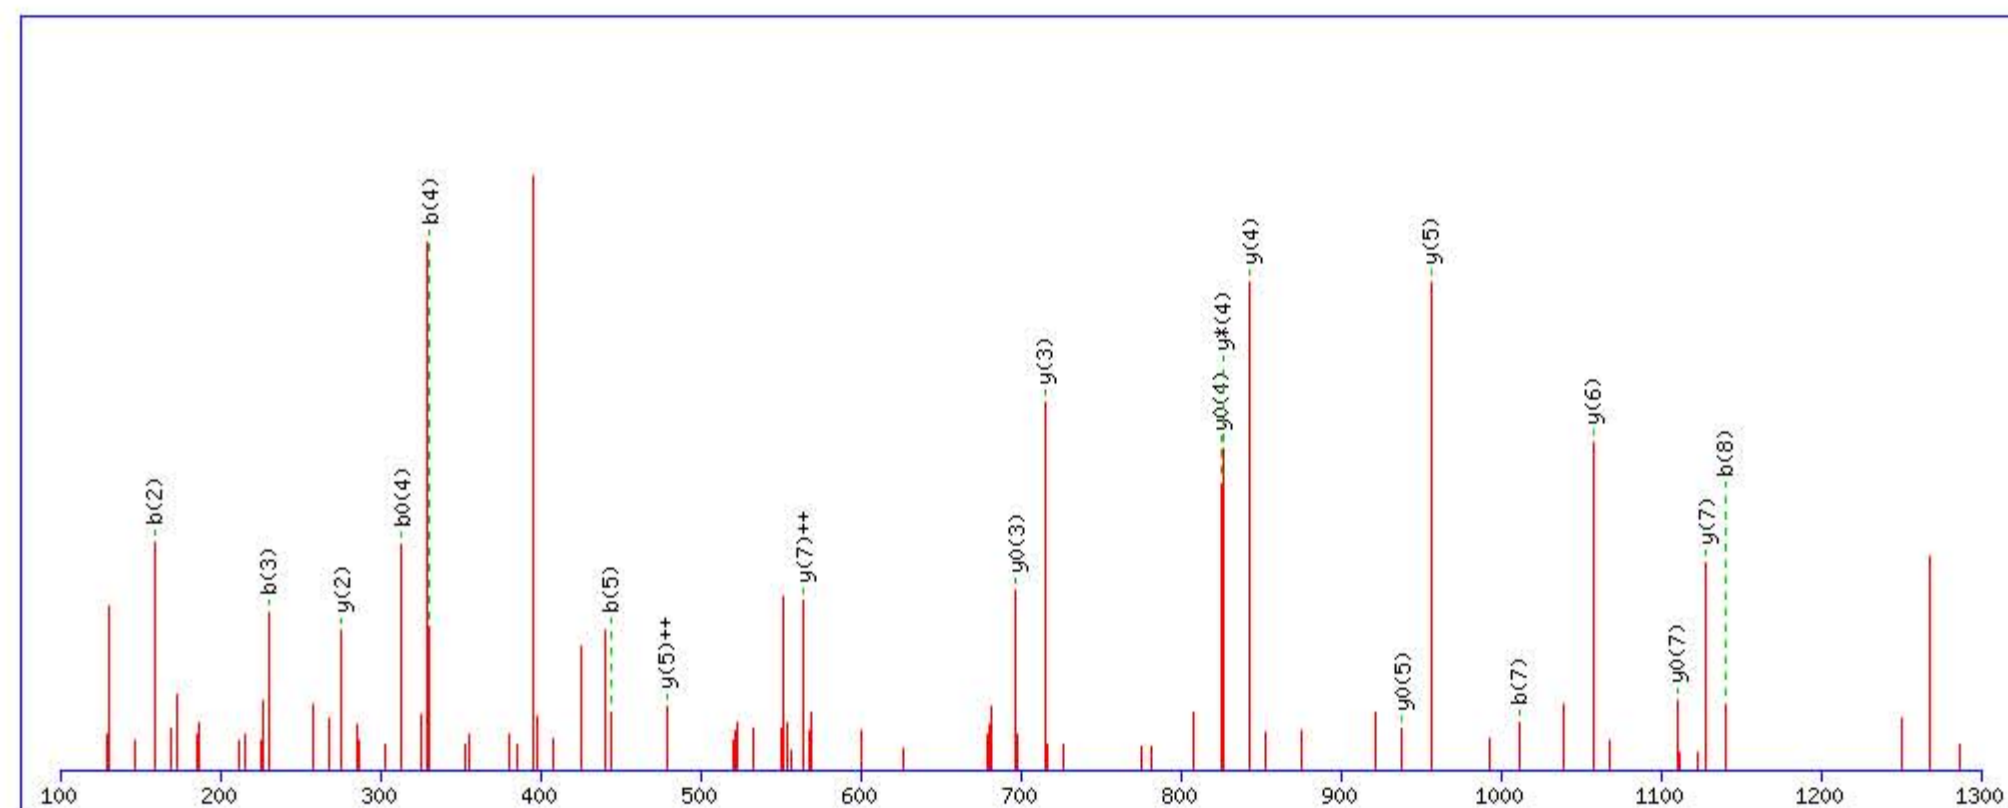

Monoisotopic mass of neutral peptide Mr(calc): 1285.669998

Fixed modifications: Carbamidomethyl (C) (apply to specified residues or termini only)

Variable modifications:

Q7 : Biotin:Thermo-21345 (Q)

Ions Score: 41 Expect: 0.0014

Matches : 20/84 fragment ions using 33 most intense peaks [\(help\)](#)

| # | b                  | b <sup>++</sup> | b <sup>*</sup> | b <sup>*++</sup> | b <sup>0</sup>    | b <sup>0++</sup> | Seq. | y                  | y <sup>++</sup>   | y <sup>*</sup>    | y <sup>*++</sup> | y <sup>0</sup>     | y <sup>0++</sup> | # |
|---|--------------------|-----------------|----------------|------------------|-------------------|------------------|------|--------------------|-------------------|-------------------|------------------|--------------------|------------------|---|
| 1 | 88.039304          | 44.523290       |                |                  | 70.028739         | 35.518008        | S    |                    |                   |                   |                  |                    |                  | 9 |
| 2 | <b>159.076418</b>  | 80.041847       |                |                  | 141.065853        | 71.036564        | A    | 1199.645272        | 600.326274        | 1182.618723       | 591.813000       | 1181.634707        | 591.320991       | 8 |
| 3 | <b>230.113532</b>  | 115.560404      |                |                  | 212.102967        | 106.555121       | A    | <b>1128.608158</b> | <b>564.807717</b> | 1111.581609       | 556.294443       | <b>1110.597593</b> | 555.802435       | 7 |
| 4 | <b>331.161211</b>  | 166.084243      |                |                  | <b>313.150646</b> | 157.078961       | T    | <b>1057.571044</b> | 529.289160        | 1040.544495       | 520.775886       | 1039.560479        | 520.283878       | 6 |
| 5 | <b>444.245275</b>  | 222.626275      |                |                  | 426.234710        | 213.620993       | L    | <b>956.523365</b>  | <b>478.765321</b> | 939.496816        | 470.252046       | <b>938.512800</b>  | 469.760038       | 5 |
| 6 | 572.303853         | 286.655565      | 555.277304     | 278.142290       | 554.293288        | 277.650282       | Q    | <b>843.439301</b>  | 422.223289        | <b>826.412752</b> | 413.710014       | <b>825.428736</b>  | 413.218006       | 4 |
| 7 | <b>1011.529179</b> | 506.268228      | 994.502630     | 497.754953       | 993.518614        | 497.262945       | Q    | <b>715.380723</b>  | 358.194000        | 698.354174        | 349.680725       | <b>697.370158</b>  | 349.188717       | 3 |
| 8 | <b>1140.571772</b> | 570.789524      | 1123.545223    | 562.276250       | 1122.561207       | 561.784242       | E    | <b>276.155397</b>  | 138.581336        | 259.128848        | 130.068062       | 258.144832         | 129.576054       | 2 |
| 9 |                    |                 |                |                  |                   |                  | K    | 147.112804         | 74.060040         | 130.086255        | 65.546765        |                    |                  | 1 |

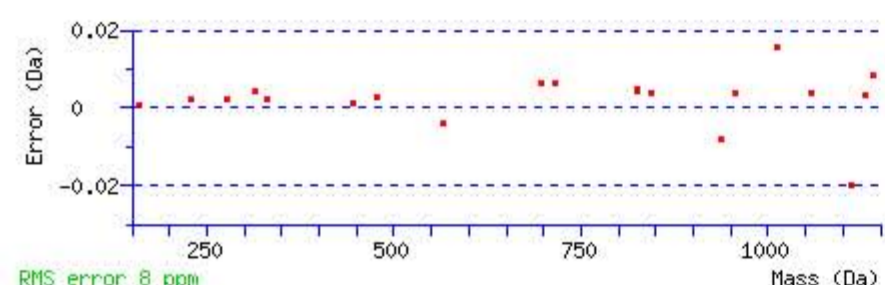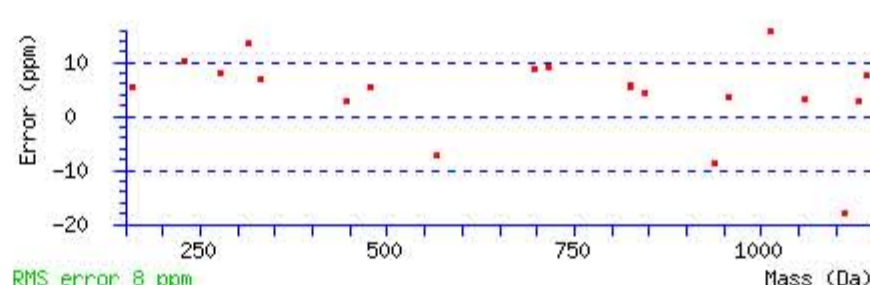

NCBI BLAST search of **SAATLQQEK**

(Parameters: blastp, nr protein database, expect=20000, no filter, PAM30)

Other BLAST [web gateways](#)

## All matches to this query

| Score | Mr(calc):   | Delta     | Sequence                     |
|-------|-------------|-----------|------------------------------|
| 40.8  | 1285.669998 | -0.003750 | <a href="#">SAATLQQEK</a>    |
| 33.8  | 1285.669998 | -0.003750 | <a href="#">SAATLQQEK</a>    |
| 9.7   | 1285.652237 | 0.014011  | <a href="#">AMQIQEQK</a>     |
| 6.5   | 1285.669998 | -0.003750 | <a href="#">ASLDQGKEK</a>    |
| 4.3   | 1285.652252 | 0.013996  | <a href="#">VCALEQQK</a>     |
| 4.2   | 1285.651367 | 0.014881  | <a href="#">LLQAVENGDAEK</a> |
| 4.0   | 1285.649582 | 0.016666  | <a href="#">SVPCRCVRR</a>    |
| 3.7   | 1285.652252 | 0.013996  | <a href="#">VCALEQQK</a>     |
| 3.0   | 1285.648880 | 0.017368  | <a href="#">MYEFAGRLVGK</a>  |
| 3.0   | 1285.652237 | 0.014011  | <a href="#">AMQIQEQK</a>     |



# MASCOT Search Results

## Peptide View

MS/MS Fragmentation of **MVQEQCCHSQLEELHLCATGISLANEQDR**  
 Found in **FBLN1\_HUMAN**, Fibulin-1 OS=Homo sapiens GN=FBLN1 PE=1 SV=4

Match to Query 80863: 3653.630216 from(914.414830,4+) rtinseconds(1962) index(62874)  
 Title: Locus:1.1.1.2680.20 File:"2013-07-02 CLN FXIII 30 min 1st F 4.wiff"  
 Data file C:\Program Files (x86)\Matrix Science\Mascot Daemon\mgf\1 FXIII 30 min 1st\mascot\_daemon\_merge.mgf

Click mouse within plot area to zoom in by factor of two about that point

Or, Plot from  to  Da

Label all possible matches  Label matches used for scoring

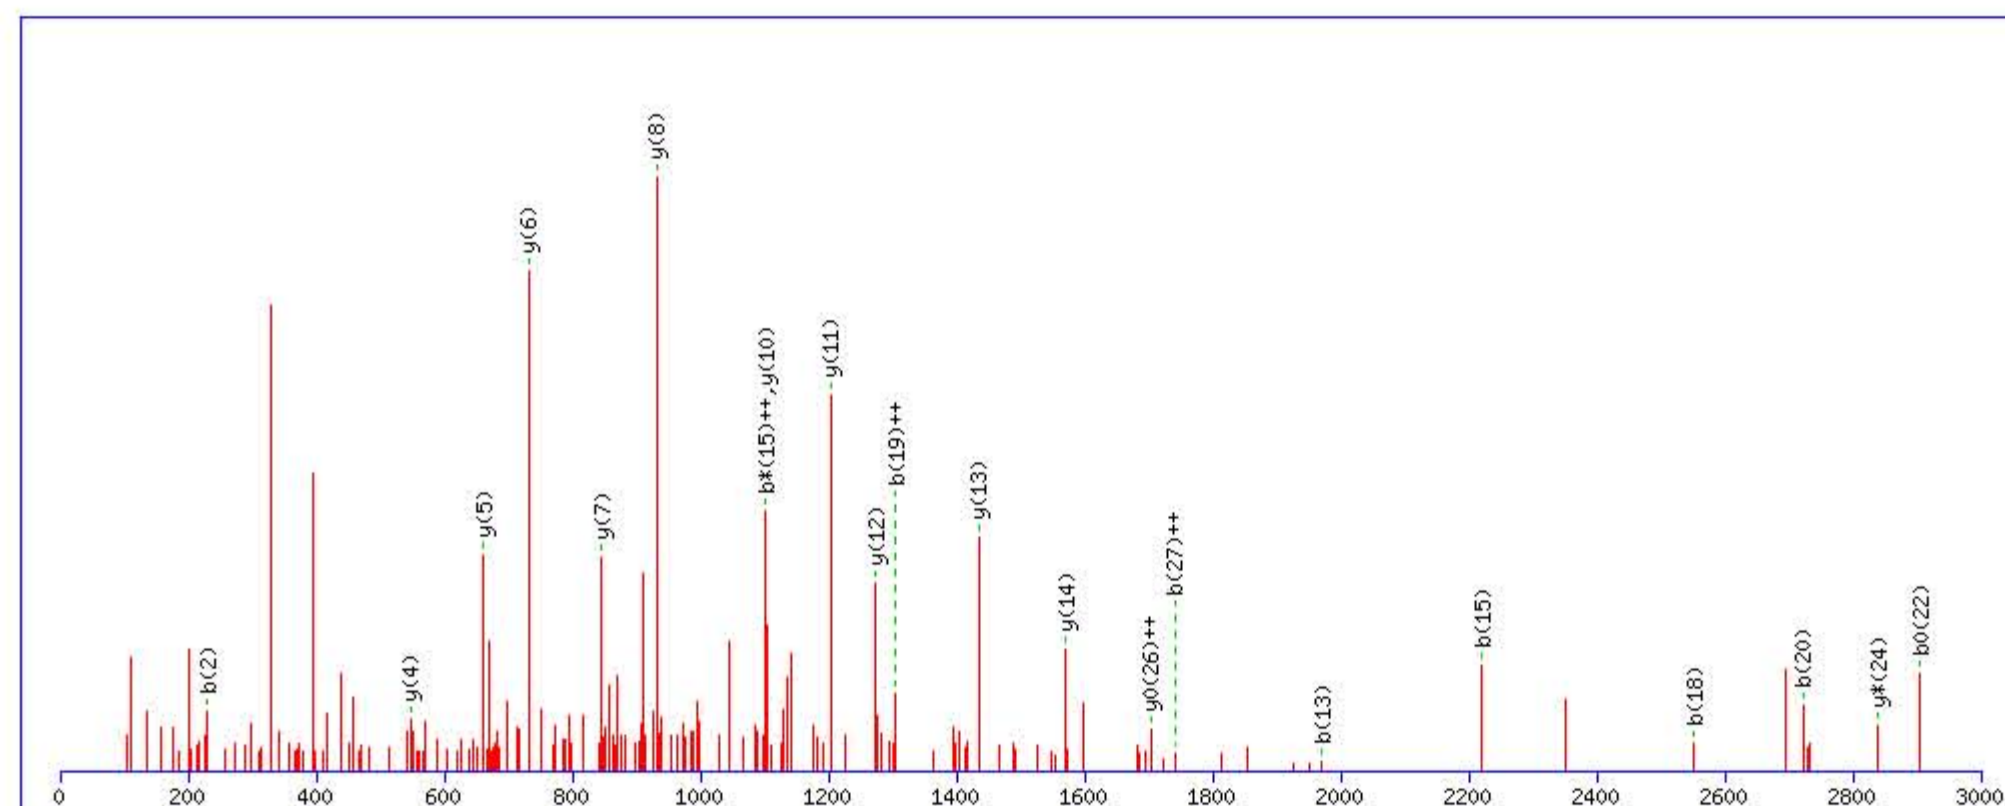

Monoisotopic mass of neutral peptide Mr(calc): 3653.615311  
 Fixed modifications: Carbamidomethyl (C) (apply to specified residues or termini only)  
 Variable modifications:  
 Q3 : Biotin:Thermo-21345 (Q)  
 Ions Score: 64 Expect: 1.9e-006  
 Matches : 21/312 fragment ions using 26 most intense peaks [\(help\)](#)

| #  | b                  | b <sup>++</sup>    | b <sup>*</sup> | b <sup>*++</sup>   | b <sup>0</sup>     | b <sup>0++</sup> | Seq. | y                  | y <sup>++</sup> | y <sup>*</sup>     | y <sup>*++</sup> | y <sup>0</sup> | y <sup>0++</sup>   | #  |
|----|--------------------|--------------------|----------------|--------------------|--------------------|------------------|------|--------------------|-----------------|--------------------|------------------|----------------|--------------------|----|
| 1  | 132.047761         | 66.527518          |                |                    |                    |                  | M    |                    |                 |                    |                  |                |                    | 28 |
| 2  | <b>231.116175</b>  | 116.061725         |                |                    |                    |                  | V    | 3523.582122        | 1762.294699     | 3506.555573        | 1753.781424      | 3505.571557    | 1753.289416        | 27 |
| 3  | 670.341501         | 335.674389         | 653.314952     | 327.161114         |                    |                  | Q    | 3424.513708        | 1712.760492     | 3407.487159        | 1704.247217      | 3406.503143    | <b>1703.755209</b> | 26 |
| 4  | 799.384094         | 400.195685         | 782.357545     | 391.682411         | 781.373529         | 391.190403       | E    | 2985.288382        | 1493.147829     | 2968.261833        | 1484.634554      | 2967.277817    | 1484.142546        | 25 |
| 5  | 927.442672         | 464.224974         | 910.416123     | 455.711700         | 909.432107         | 455.219692       | Q    | 2856.245789        | 1428.626532     | <b>2839.219240</b> | 1420.113258      | 2838.235224    | 1419.621250        | 24 |
| 6  | 1087.473321        | 544.240299         | 1070.446772    | 535.727024         | 1069.462756        | 535.235016       | C    | 2728.187211        | 1364.597243     | 2711.160662        | 1356.083969      | 2710.176646    | 1355.591961        | 23 |
| 7  | 1247.503970        | 624.255623         | 1230.477421    | 615.742349         | 1229.493405        | 615.250341       | C    | 2568.156562        | 1284.581919     | 2551.130013        | 1276.068644      | 2550.145997    | 1275.576636        | 22 |
| 8  | 1384.562882        | 692.785079         | 1367.536333    | 684.271805         | 1366.552317        | 683.779797       | H    | 2408.125913        | 1204.566594     | 2391.099364        | 1196.053320      | 2390.115348    | 1195.561312        | 21 |
| 9  | 1471.594910        | 736.301093         | 1454.568361    | 727.787819         | 1453.584345        | 727.295811       | S    | 2271.067001        | 1136.037138     | 2254.040452        | 1127.523864      | 2253.056436    | 1127.031856        | 20 |
| 10 | 1599.653488        | 800.330382         | 1582.626939    | 791.817108         | 1581.642923        | 791.325100       | Q    | 2184.034973        | 1092.521124     | 2167.008424        | 1084.007850      | 2166.024408    | 1083.515842        | 19 |
| 11 | 1712.737552        | 856.872414         | 1695.711003    | 848.359140         | 1694.726987        | 847.867132       | L    | 2055.976395        | 1028.491835     | 2038.949846        | 1019.978561      | 2037.965830    | 1019.486553        | 18 |
| 12 | 1841.780145        | 921.393711         | 1824.753596    | 912.880436         | 1823.769580        | 912.388428       | E    | 1942.892331        | 971.949804      | 1925.865782        | 963.436529       | 1924.881766    | 962.944521         | 17 |
| 13 | <b>1970.822738</b> | 985.915007         | 1953.796189    | 977.401733         | 1952.812173        | 976.909725       | E    | 1813.849738        | 907.428507      | 1796.823189        | 898.915233       | 1795.839173    | 898.423225         | 16 |
| 14 | 2083.906802        | 1042.457039        | 2066.880253    | 1033.943764        | 2065.896237        | 1033.451756      | L    | 1684.807145        | 842.907211      | 1667.780596        | 834.393936       | 1666.796580    | 833.901928         | 15 |
| 15 | <b>2220.965714</b> | 1110.986495        | 2203.939165    | <b>1102.473220</b> | 2202.955149        | 1101.981212      | H    | <b>1571.723081</b> | 786.365179      | 1554.696532        | 777.851904       | 1553.712516    | 777.359896         | 14 |
| 16 | 2380.996363        | 1191.001819        | 2363.969814    | 1182.488545        | 2362.985798        | 1181.996537      | C    | <b>1434.664169</b> | 717.835723      | 1417.637620        | 709.322448       | 1416.653604    | 708.830440         | 13 |
| 17 | 2452.033477        | 1226.520376        | 2435.006928    | 1218.007102        | 2434.022912        | 1217.515094      | A    | <b>1274.633520</b> | 637.820398      | 1257.606971        | 629.307124       | 1256.622955    | 628.815116         | 12 |
| 18 | <b>2553.081156</b> | 1277.044216        | 2536.054607    | 1268.530941        | 2535.070591        | 1268.038933      | T    | <b>1203.596406</b> | 602.301841      | 1186.569857        | 593.788567       | 1185.585841    | 593.296559         | 11 |
| 19 | 2610.102620        | <b>1305.554948</b> | 2593.076071    | 1297.041673        | 2592.092055        | 1296.549665      | G    | <b>1102.548727</b> | 551.778002      | 1085.522178        | 543.264727       | 1084.538162    | 542.772719         | 10 |
| 20 | <b>2723.186684</b> | 1362.096980        | 2706.160135    | 1353.583705        | 2705.176119        | 1353.091697      | I    | 1045.527263        | 523.267270      | 1028.500714        | 514.753995       | 1027.516698    | 514.261987         | 9  |
| 21 | 2810.218712        | 1405.612994        | 2793.192163    | 1397.099719        | 2792.208147        | 1396.607711      | S    | <b>932.443199</b>  | 466.725238      | 915.416650         | 458.211963       | 914.432634     | 457.719955         | 8  |
| 22 | 2923.302776        | 1462.155026        | 2906.276227    | 1453.641751        | <b>2905.292211</b> | 1453.149743      | L    | <b>845.411171</b>  | 423.209224      | 828.384622         | 414.695949       | 827.400606     | 414.203941         | 7  |
| 23 | 2994.339890        | 1497.673583        | 2977.313341    | 1489.160308        | 2976.329325        | 1488.668301      | A    | <b>732.327107</b>  | 366.667192      | 715.300558         | 358.153917       | 714.316542     | 357.661909         | 6  |
| 24 | 3108.382817        | 1554.695047        | 3091.356268    | 1546.181772        | 3090.372252        | 1545.689764      | N    | <b>661.289993</b>  | 331.148635      | 644.263444         | 322.635360       | 643.279428     | 322.143352         | 5  |
| 25 | 3237.425410        | 1619.216343        | 3220.398861    | 1610.703069        | 3219.414845        | 1610.211061      | E    | <b>547.247066</b>  | 274.127171      | 530.220517         | 265.613897       | 529.236501     | 265.121889         | 4  |
| 26 | 3365.483988        | 1683.245632        | 3348.457439    | 1674.732358        | 3347.473423        | 1674.240350      | Q    | 418.204473         | 209.605874      | 401.177924         | 201.092600       | 400.193908     | 200.600592         | 3  |
| 27 | 3480.510931        | <b>1740.759104</b> | 3463.484382    | 1732.245829        | 3462.500366        | 1731.753821      | D    | 290.145895         | 145.576585      | 273.119346         | 137.063311       | 272.135330     | 136.571303         | 2  |
| 28 |                    |                    |                |                    |                    |                  | R    | 175.118952         | 88.063114       | 158.092403         | 79.549839        |                |                    | 1  |

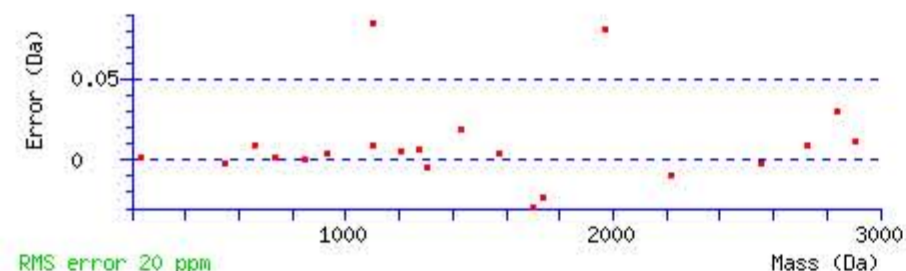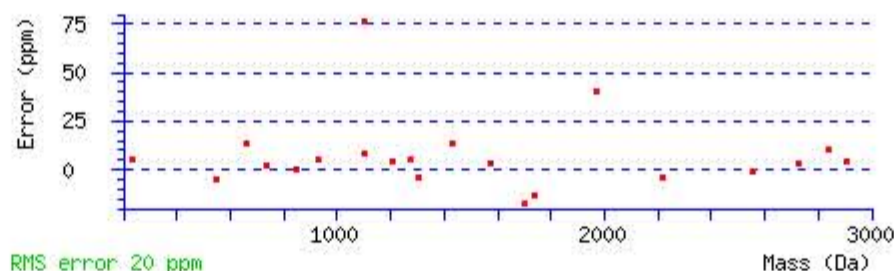

NCBI BLAST search of **MVQEQCCHSQLEELHLCATGISLANEQDR**  
 (Parameters: blastp, nr protein database, expect=20000, no filter, PAM30)  
 Other BLAST [web gateways](#)

### All matches to this query

| Score | Mr(calc):   | Delta     | Sequence                                          |
|-------|-------------|-----------|---------------------------------------------------|
| 64.2  | 3653.615311 | 0.014905  | <a href="#">MVQEQCCHSQLEELHLCATGISLANEQDR</a>     |
| 61.4  | 3653.615311 | 0.014905  | <a href="#">MVQEQCCHSQLEELHLCATGISLANEQDR</a>     |
| 61.4  | 3653.615311 | 0.014905  | <a href="#">MVQEQCCHSQLEELHLCATGISLANEQDR</a>     |
| 3.3   | 3653.684525 | -0.054309 | <a href="#">FTDRETEAAAGTLAHMGFAPPTSFSHFTDQELR</a> |



**Peptide View**

MS/MS Fragmentation of **SQLVYQSR**

Found in **LG3BP\_HUMAN**, Galectin-3-binding protein OS=Homo sapiens GN=LGALS3BP PE=1 SV=1

Match to Query 35015: 1290.670728 from(646.342640,2+) rtinseconds(1680) index(60818)

Title: Locus:1.1.1.2583.6 File:"2013-07-02 CLN FXIII 30 min 1st F 4.wiff"

Data file C:\Program Files (x86)\Matrix Science\Mascot Daemon\mgf\1 FXIII 30 min 1st\mascot\_daemon\_merge.mgf

Click mouse within plot area to zoom in by factor of two about that point

Or, Plot from 100 to 1400 Da Full range

Label all possible matches  Label matches used for scoring

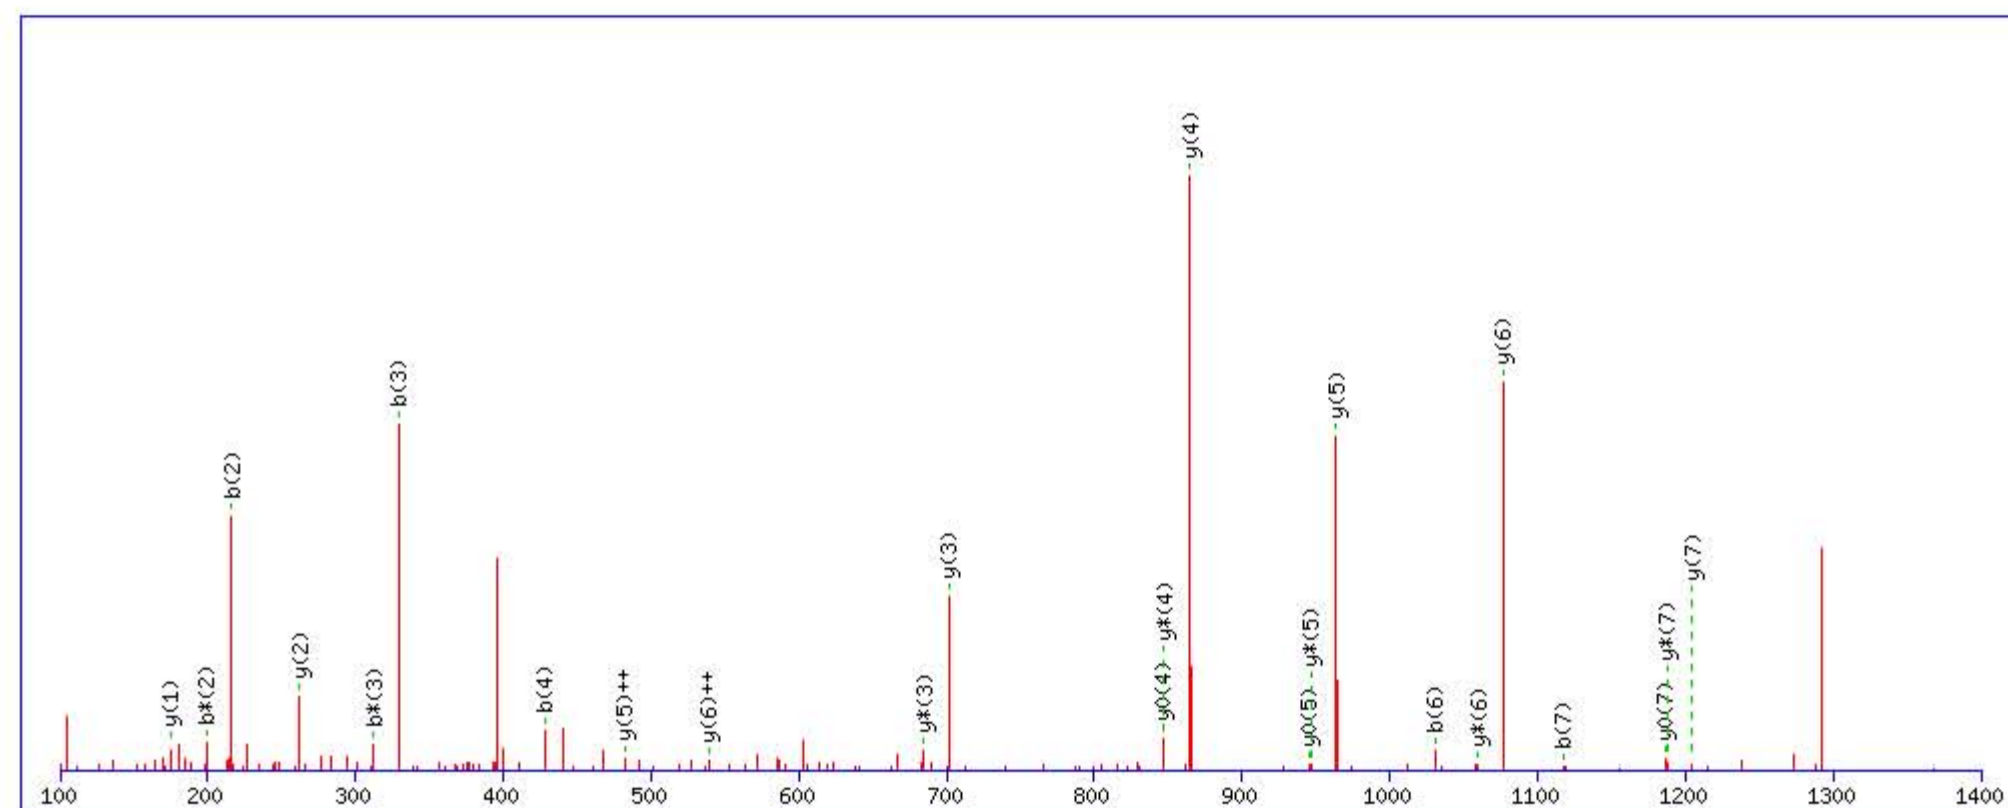

Monoisotopic mass of neutral peptide Mr(calc): 1290.675430

Fixed modifications: Carbamidomethyl (C) (apply to specified residues or termini only)

Variable modifications:

Q6 : Biotin:Thermo-21345 (Q)

Ions Score: 37 Expect: 0.0011

Matches : 24/80 fragment ions using 48 most intense peaks (help)

| # | b           | b <sup>++</sup> | b <sup>+</sup> | b <sup>*++</sup> | b <sup>0</sup> | b <sup>0++</sup> | Seq. | y           | y <sup>++</sup> | y <sup>+</sup> | y <sup>*++</sup> | y <sup>0</sup> | y <sup>0++</sup> | # |
|---|-------------|-----------------|----------------|------------------|----------------|------------------|------|-------------|-----------------|----------------|------------------|----------------|------------------|---|
| 1 | 88.039304   | 44.523290       |                |                  | 70.028739      | 35.518008        | S    |             |                 |                |                  |                |                  | 8 |
| 2 | 216.097882  | 108.552579      | 199.071333     | 100.039305       | 198.087317     | 99.547296        | Q    | 1204.650691 | 602.828984      | 1187.624142    | 594.315709       | 1186.640126    | 593.823701       | 7 |
| 3 | 329.181946  | 165.094611      | 312.155397     | 156.581336       | 311.171381     | 156.089328       | L    | 1076.592113 | 538.799695      | 1059.565564    | 530.286420       | 1058.581548    | 529.794412       | 6 |
| 4 | 428.250360  | 214.628818      | 411.223811     | 206.115544       | 410.239795     | 205.623536       | V    | 963.508049  | 482.257663      | 946.481500     | 473.744388       | 945.497484     | 473.252380       | 5 |
| 5 | 591.313689  | 296.160483      | 574.287140     | 287.647208       | 573.303124     | 287.155200       | Y    | 864.439635  | 432.723456      | 847.413086     | 424.210181       | 846.429070     | 423.718173       | 4 |
| 6 | 1030.539015 | 515.773146      | 1013.512466    | 507.259871       | 1012.528450    | 506.767863       | Q    | 701.376306  | 351.191791      | 684.349757     | 342.678517       | 683.365741     | 342.186509       | 3 |
| 7 | 1117.571043 | 559.289160      | 1100.544494    | 550.775885       | 1099.560478    | 550.283877       | S    | 262.150980  | 131.579128      | 245.124431     | 123.065854       | 244.140415     | 122.573846       | 2 |
| 8 |             |                 |                |                  |                |                  | R    | 175.118952  | 88.063114       | 158.092403     | 79.549839        |                |                  | 1 |

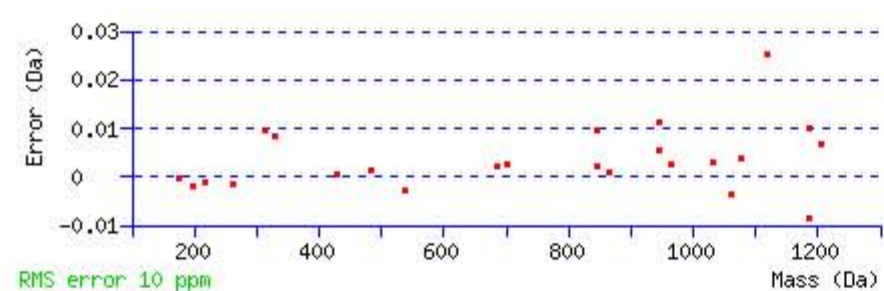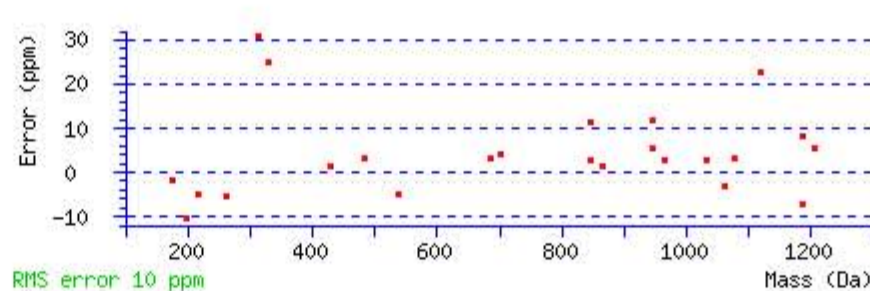

NCBI BLAST search of **SQLVYQSR**

(Parameters: blastp, nr protein database, expect=20000, no filter, PAM30)

Other BLAST [web gateways](#)

**All matches to this query**

| Score | Mr(calc):   | Delta     | Sequence                      |
|-------|-------------|-----------|-------------------------------|
| 37.1  | 1290.675430 | -0.004702 | <a href="#">SQLVYQSR</a>      |
| 5.2   | 1290.685303 | -0.014575 | <a href="#">SQISELNLLMK</a>   |
| 3.4   | 1290.652771 | 0.017957  | <a href="#">SLGAQSSKAGETR</a> |
| 1.5   | 1290.656799 | 0.013929  | <a href="#">SKSSSTTYFKR</a>   |
| 0.3   | 1290.668045 | 0.002683  | <a href="#">SSGKFISSVHSR</a>  |



# MASCOT SEARCH RESULTS

## Peptide View

MS/MS Fragmentation of **SQLVYQSR**

Found in **LG3BP\_HUMAN**, Galectin-3-binding protein OS=Homo sapiens GN=LGALS3BP PE=1 SV=1

Match to Query 46123: 1601.849408 from(801.931980,2+) rtinseconds(2053) index(63430)

Title: Locus:1.1.1.2712.19 File:"2013-07-02 CLN FXIII 30 min 1st F 4.wiff"

Data file C:\Program Files (x86)\Matrix Science\Mascot Daemon\mgf1 FXIII 30 min 1st\mascot\_daemon\_merge.mgf

Click mouse within plot area to zoom in by factor of two about that point

Or, Plot from  to  Da

Label all possible matches  Label matches used for scoring

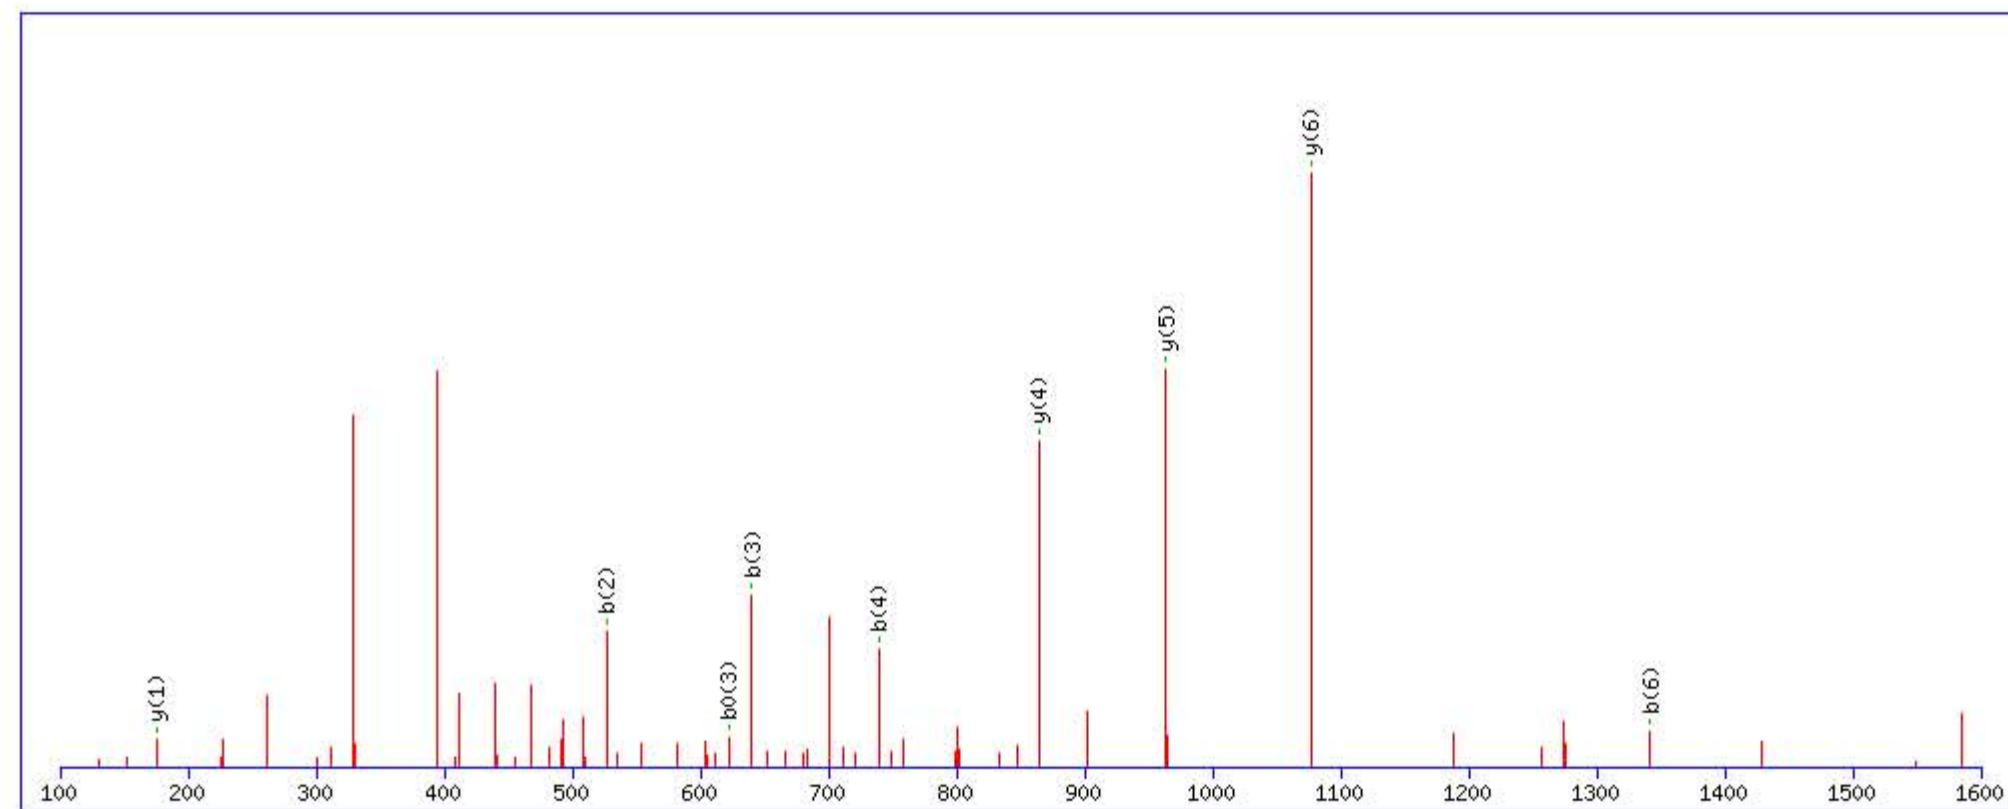

Monoisotopic mass of neutral peptide Mr(calc): 1601.842178

Fixed modifications: Carbamidomethyl (C) (apply to specified residues or termini only)

Variable modifications:

Q2 : Biotin:Thermo-21345 (Q)

Q6 : Biotin:Thermo-21345 (Q)

Ions Score: 28 Expect: 0.035

Matches : 9/80 fragment ions using 14 most intense peaks [\(help\)](#)

| # | b                  | b <sup>++</sup> | b <sup>+</sup> | b <sup>+++</sup> | b <sup>0</sup>    | b <sup>0++</sup> | Seq. | y                  | y <sup>++</sup> | y <sup>+</sup> | y <sup>+++</sup> | y <sup>0</sup> | y <sup>0++</sup> | # |
|---|--------------------|-----------------|----------------|------------------|-------------------|------------------|------|--------------------|-----------------|----------------|------------------|----------------|------------------|---|
| 1 | 88.039304          | 44.523290       |                |                  | 70.028739         | 35.518008        | S    |                    |                 |                |                  |                |                  | 8 |
| 2 | <b>527.264630</b>  | 264.135953      | 510.238081     | 255.622679       | 509.254065        | 255.130671       | Q    | 1515.817439        | 758.412358      | 1498.790890    | 749.899083       | 1497.806874    | 749.407075       | 7 |
| 3 | <b>640.348694</b>  | 320.677985      | 623.322145     | 312.164711       | <b>622.338129</b> | 311.672703       | L    | <b>1076.592113</b> | 538.799695      | 1059.565564    | 530.286420       | 1058.581548    | 529.794412       | 6 |
| 4 | <b>739.417108</b>  | 370.212192      | 722.390559     | 361.698917       | 721.406543        | 361.206909       | V    | <b>963.508049</b>  | 482.257663      | 946.481500     | 473.744388       | 945.497484     | 473.252380       | 5 |
| 5 | 902.480437         | 451.743856      | 885.453888     | 443.230582       | 884.469872        | 442.738574       | Y    | <b>864.439635</b>  | 432.723456      | 847.413086     | 424.210181       | 846.429070     | 423.718173       | 4 |
| 6 | <b>1341.705763</b> | 671.356520      | 1324.679214    | 662.843245       | 1323.695198       | 662.351237       | Q    | 701.376306         | 351.191791      | 684.349757     | 342.678517       | 683.365741     | 342.186509       | 3 |
| 7 | 1428.737791        | 714.872534      | 1411.711242    | 706.359259       | 1410.727226       | 705.867251       | S    | 262.150980         | 131.579128      | 245.124431     | 123.065854       | 244.140415     | 122.573846       | 2 |
| 8 |                    |                 |                |                  |                   |                  | R    | <b>175.118952</b>  | 88.063114       | 158.092403     | 79.549839        |                |                  | 1 |

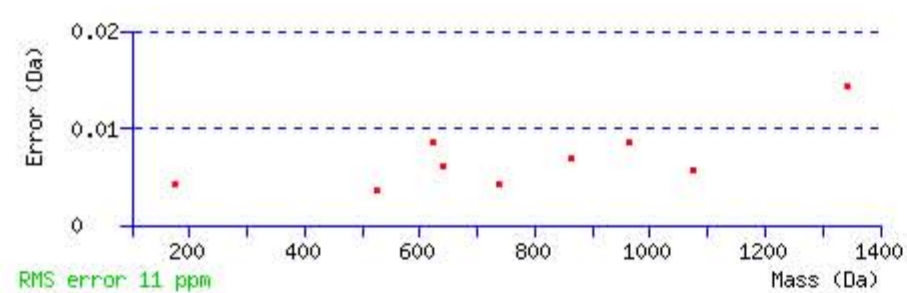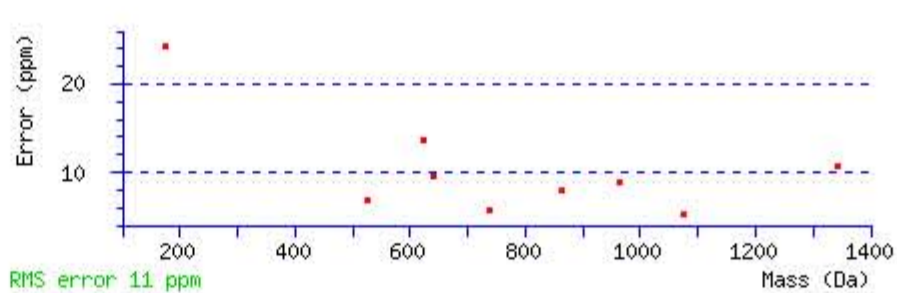

NCBI BLAST search of **SQLVYQSR**

(Parameters: blastp, nr protein database, expect=20000, no filter, PAM30)

Other BLAST [web gateways](#)

All matches to this query

| Score | Mr(calc):   | Delta     | Sequence                        |
|-------|-------------|-----------|---------------------------------|
| 28.3  | 1601.842178 | 0.007230  | <a href="#">SQLVYQSR</a>        |
| 12.8  | 1601.846024 | 0.003384  | <a href="#">RFVLSCSLLSHQR</a>   |
| 9.7   | 1601.834763 | 0.014645  | <a href="#">QMLEALNFLHSKR</a>   |
| 3.9   | 1601.841995 | 0.007413  | <a href="#">RPGTMTLQDGRKSR</a>  |
| 3.6   | 1601.867126 | -0.017718 | <a href="#">RLGLAQKLMQASR</a>   |
| 2.8   | 1601.855881 | -0.006473 | <a href="#">ELQRLQQAETMKK</a>   |
| 2.8   | 1601.852051 | -0.002643 | <a href="#">SQISELNLLMK</a>     |
| 1.7   | 1601.826050 | 0.023358  | <a href="#">SSPGEIVEERATVTK</a> |

Mascot: <http://www.matrixscience.com/>



# MASCOT SEARCH RESULTS

## Peptide View

MS/MS Fragmentation of **YSSDYFQAPSDYR**

Found in **LG3BP\_HUMAN**, Galectin-3-binding protein OS=Homo sapiens GN=LGALS3BP PE=1 SV=1

Match to Query 54520: 1908.846268 from(955.430410,2+) rtinseconds(2076) index(63588)

Title: Locus:1.1.1.2720.10 File:"2013-07-02 CLN FXIII 30 min 1st F 4.wiff"

Data file C:\Program Files (x86)\Matrix Science\Mascot Daemon\mgf1 FXIII 30 min 1st\mascot\_daemon\_merge.mgf

Click mouse within plot area to zoom in by factor of two about that point

Or, Plot from  to  Da

Label all possible matches  Label matches used for scoring

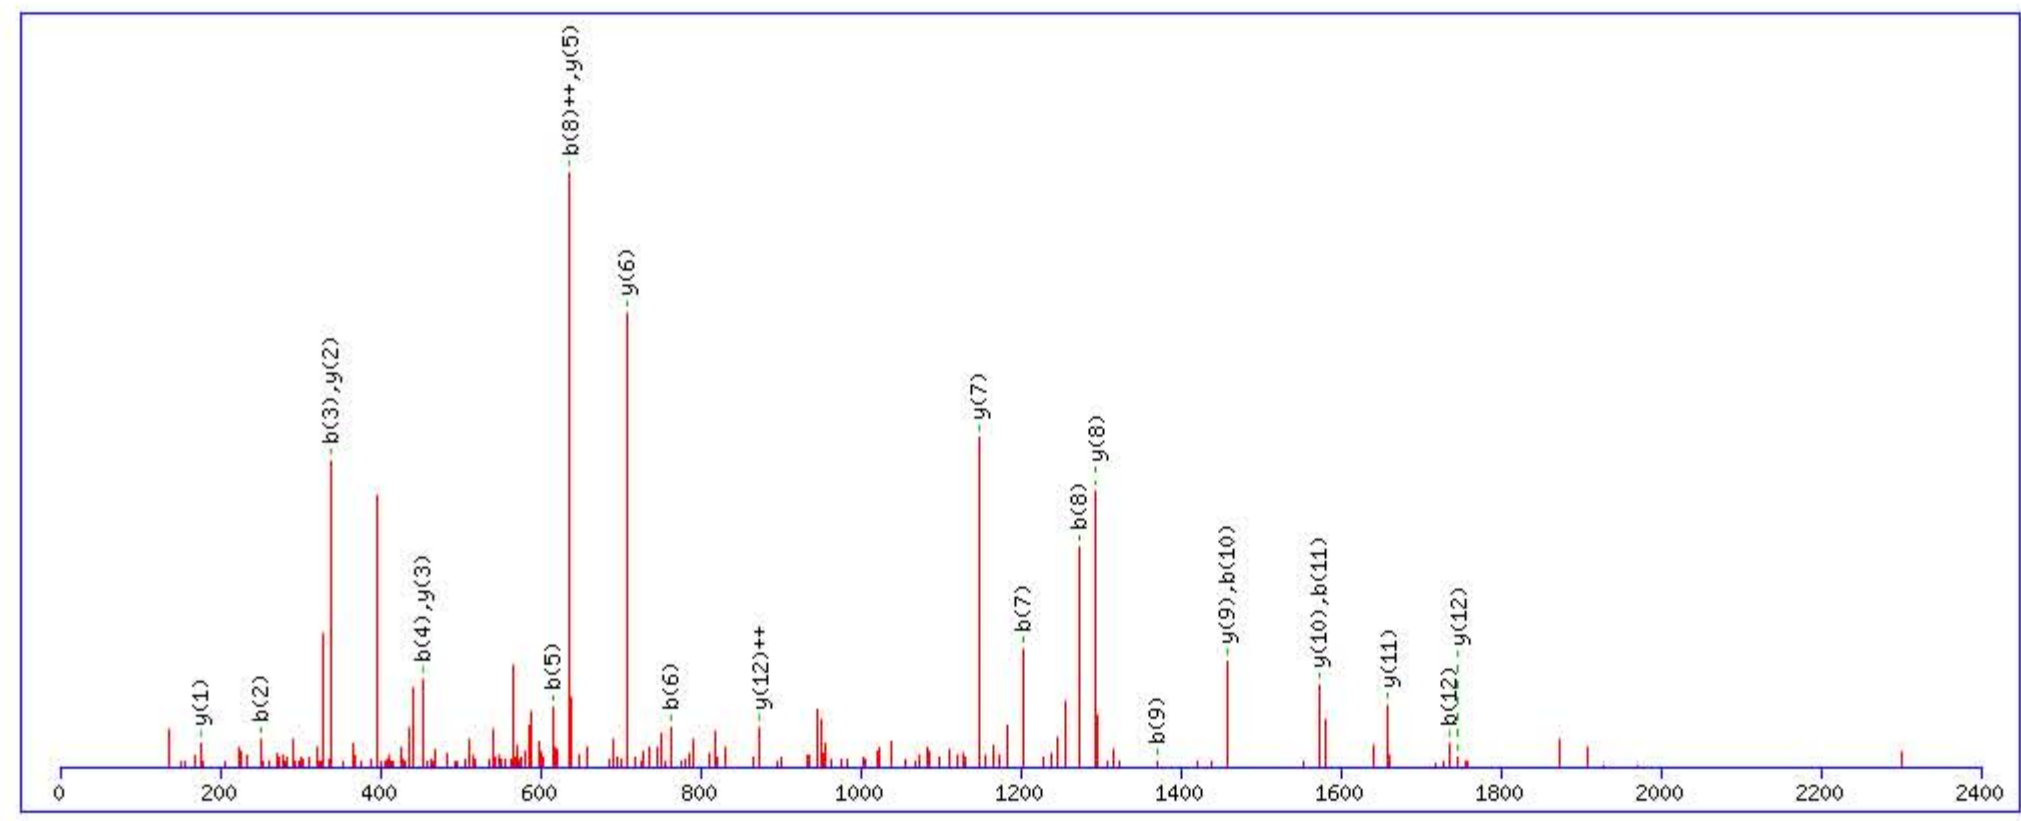

Monoisotopic mass of neutral peptide Mr(calc): 1908.835236

Fixed modifications: Carbamidomethyl (C) (apply to specified residues or termini only)

Variable modifications:

Q7 : Biotin:Thermo-21345 (Q)

Ions Score: 78 Expect: 6e-008

Matches : 24/126 fragment ions using 35 most intense peaks [\(help\)](#)

| #  | b                  | b <sup>++</sup>   | b <sup>*</sup> | b <sup>***</sup> | b <sup>0</sup> | b <sup>0++</sup> | Seq. | y                  | y <sup>++</sup>   | y <sup>*</sup> | y <sup>***</sup> | y <sup>0</sup> | y <sup>0++</sup> | #  |
|----|--------------------|-------------------|----------------|------------------|----------------|------------------|------|--------------------|-------------------|----------------|------------------|----------------|------------------|----|
| 1  | 164.070605         | 82.538940         |                |                  |                |                  | Y    |                    |                   |                |                  |                |                  | 13 |
| 2  | <b>251.102633</b>  | 126.054954        |                |                  | 233.092068     | 117.049672       | S    | <b>1746.779198</b> | <b>873.893237</b> | 1729.752649    | 865.379963       | 1728.768633    | 864.887955       | 12 |
| 3  | <b>338.134661</b>  | 169.570968        |                |                  | 320.124096     | 160.565686       | S    | <b>1659.747170</b> | 830.377223        | 1642.720621    | 821.863949       | 1641.736605    | 821.371941       | 11 |
| 4  | <b>453.161604</b>  | 227.084440        |                |                  | 435.151039     | 218.079158       | D    | <b>1572.715142</b> | 786.861209        | 1555.688593    | 778.347935       | 1554.704577    | 777.855927       | 10 |
| 5  | <b>616.224933</b>  | 308.616105        |                |                  | 598.214368     | 299.610822       | Y    | <b>1457.688199</b> | 729.347738        | 1440.661650    | 720.834463       | 1439.677634    | 720.342455       | 9  |
| 6  | <b>763.293347</b>  | 382.150312        |                |                  | 745.282782     | 373.145029       | F    | <b>1294.624870</b> | 647.816073        | 1277.598321    | 639.302799       | 1276.614305    | 638.810791       | 8  |
| 7  | <b>1202.518673</b> | 601.762975        | 1185.492124    | 593.249700       | 1184.508108    | 592.757692       | Q    | <b>1147.556456</b> | 574.281866        | 1130.529907    | 565.768592       | 1129.545891    | 565.276584       | 7  |
| 8  | <b>1273.555787</b> | <b>637.281532</b> | 1256.529238    | 628.768257       | 1255.545222    | 628.276249       | A    | <b>708.331130</b>  | 354.669203        | 691.304581     | 346.155929       | 690.320565     | 345.663921       | 6  |
| 9  | <b>1370.608551</b> | 685.807914        | 1353.582002    | 677.294639       | 1352.597986    | 676.802631       | P    | <b>637.294016</b>  | 319.150646        | 620.267467     | 310.637372       | 619.283451     | 310.145364       | 5  |
| 10 | <b>1457.640579</b> | 729.323928        | 1440.614030    | 720.810653       | 1439.630014    | 720.318645       | S    | 540.241252         | 270.624264        | 523.214703     | 262.110990       | 522.230687     | 261.618982       | 4  |
| 11 | <b>1572.667522</b> | 786.837399        | 1555.640973    | 778.324125       | 1554.656957    | 777.832117       | D    | <b>453.209224</b>  | 227.108250        | 436.182675     | 218.594976       | 435.198659     | 218.102968       | 3  |
| 12 | <b>1735.730851</b> | 868.369064        | 1718.704302    | 859.855789       | 1717.720286    | 859.363781       | Y    | <b>338.182281</b>  | 169.594778        | 321.155732     | 161.081504       |                |                  | 2  |
| 13 |                    |                   |                |                  |                |                  | R    | <b>175.118952</b>  | 88.063114         | 158.092403     | 79.549839        |                |                  | 1  |

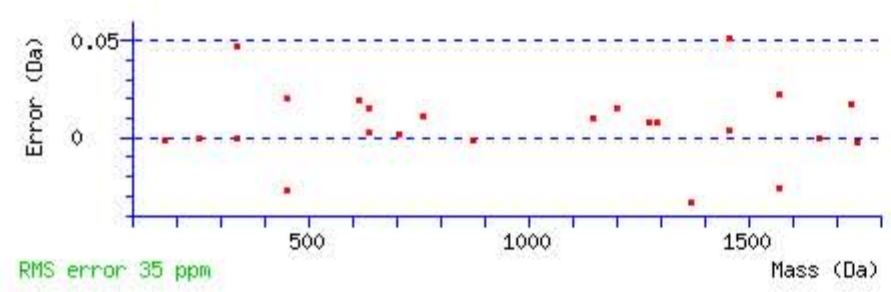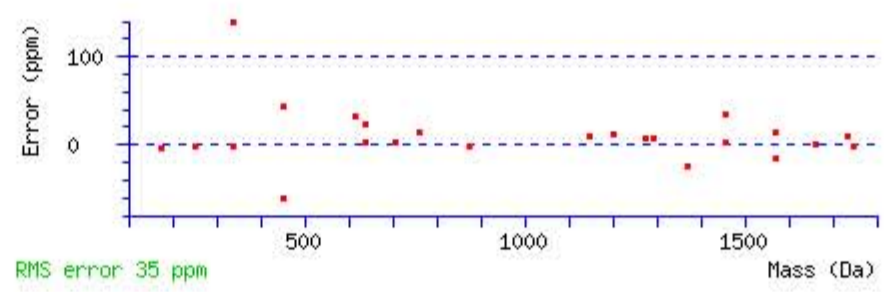

NCBI BLAST search of **YSSDYFQAPSDYR**

(Parameters: blastp, nr protein database, expect=20000, no filter, PAM30)

Other BLAST [web gateways](#)

All matches to this query

| Score | Mr(calc):   | Delta     | Sequence                      |
|-------|-------------|-----------|-------------------------------|
| 77.7  | 1908.835236 | 0.011032  | <a href="#">YSSDYFQAPSDYR</a> |
| 0.7   | 1908.868927 | -0.022659 | <a href="#">YSSYRSHDHYQR</a>  |



# MASCOT Search Results

## Peptide View

MS/MS Fragmentation of **GASQAGAPQGR**

Found in **GELS\_HUMAN**, Gelsolin OS=Homo sapiens GN=GSN PE=1 SV=1

Match to Query 35477: 1309.662988 from(655.838770,2+) rtinseconds(1215) index(1880)

Title: Locus:1.1.1.2143.19 File:"2013-07-02 CLN FXIII 30 min 1st F 1.wiff"

Data file C:\Program Files (x86)\Matrix Science\Mascot Daemon\mgf1 FXIII 30 min 1st\mascot\_daemon\_merge.mgf

Click mouse within plot area to zoom in by factor of two about that point

Or, Plot from  to  Da

Label all possible matches  Label matches used for scoring

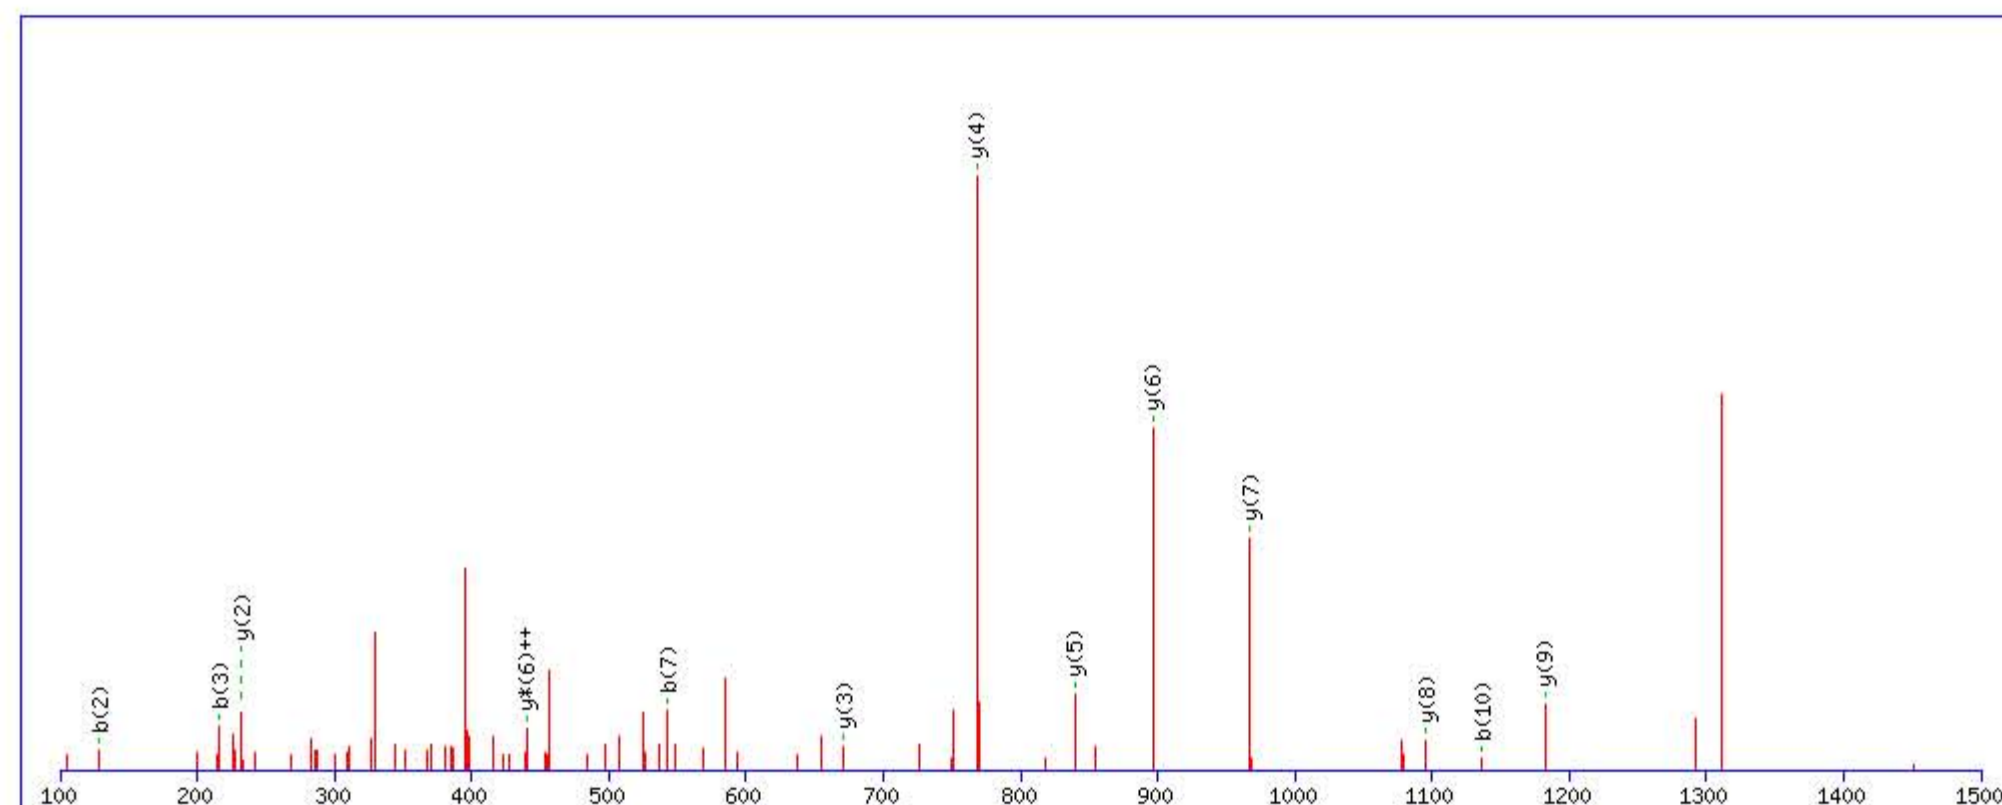

Monoisotopic mass of neutral peptide Mr(calc): 1309.656097

Fixed modifications: Carbamidomethyl (C) (apply to specified residues or termini only)

Variable modifications:

Q9 : Biotin:Thermo-21345 (Q)

Ions Score: 59 Expect: 8.1e-006

Matches : 13/94 fragment ions using 23 most intense peaks [\(help\)](#)

| #  | b                  | b <sup>++</sup> | b <sup>*</sup> | b <sup>*++</sup> | b <sup>0</sup> | b <sup>0++</sup> | Seq. | y                  | y <sup>++</sup> | y <sup>*</sup> | y <sup>*++</sup>  | y <sup>0</sup> | y <sup>0++</sup> | #  |
|----|--------------------|-----------------|----------------|------------------|----------------|------------------|------|--------------------|-----------------|----------------|-------------------|----------------|------------------|----|
| 1  | 58.028740          | 29.518008       |                |                  |                |                  | G    |                    |                 |                |                   |                |                  | 11 |
| 2  | <b>129.065854</b>  | 65.036565       |                |                  |                |                  | A    | 1253.641918        | 627.324597      | 1236.615369    | 618.811323        | 1235.631353    | 618.319315       | 10 |
| 3  | <b>216.097882</b>  | 108.552579      |                |                  | 198.087317     | 99.547296        | S    | <b>1182.604804</b> | 591.806040      | 1165.578255    | 583.292765        | 1164.594239    | 582.800757       | 9  |
| 4  | 344.156460         | 172.581868      | 327.129911     | 164.068593       | 326.145895     | 163.576585       | Q    | <b>1095.572776</b> | 548.290026      | 1078.546227    | 539.776752        |                |                  | 8  |
| 5  | 415.193574         | 208.100425      | 398.167025     | 199.587150       | 397.183009     | 199.095142       | A    | <b>967.514198</b>  | 484.260737      | 950.487649     | 475.747462        |                |                  | 7  |
| 6  | 472.215038         | 236.611157      | 455.188489     | 228.097882       | 454.204473     | 227.605874       | G    | <b>896.477084</b>  | 448.742180      | 879.450535     | <b>440.228906</b> |                |                  | 6  |
| 7  | <b>543.252152</b>  | 272.129714      | 526.225603     | 263.616440       | 525.241587     | 263.124432       | A    | <b>839.455620</b>  | 420.231448      | 822.429071     | 411.718173        |                |                  | 5  |
| 8  | 640.304916         | 320.656096      | 623.278367     | 312.142822       | 622.294351     | 311.650814       | P    | <b>768.418506</b>  | 384.712891      | 751.391957     | 376.199616        |                |                  | 4  |
| 9  | 1079.530242        | 540.268759      | 1062.503693    | 531.755485       | 1061.519677    | 531.263477       | Q    | <b>671.365742</b>  | 336.186509      | 654.339193     | 327.673234        |                |                  | 3  |
| 10 | <b>1136.551706</b> | 568.779491      | 1119.525157    | 560.266217       | 1118.541141    | 559.774208       | G    | <b>232.140416</b>  | 116.573846      | 215.113867     | 108.060571        |                |                  | 2  |
| 11 |                    |                 |                |                  |                |                  | R    | 175.118952         | 88.063114       | 158.092403     | 79.549839         |                |                  | 1  |

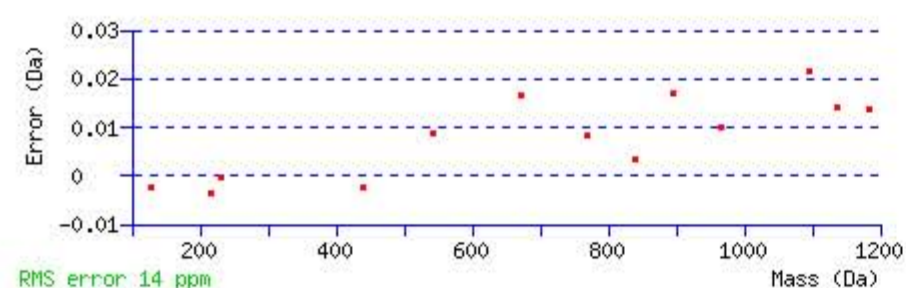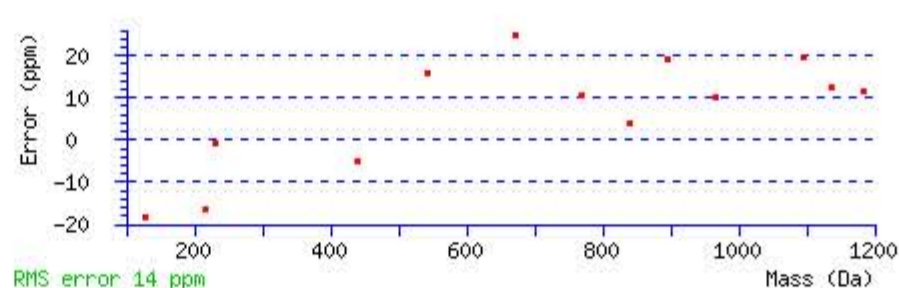

NCBI BLAST search of **GASQAGAPQGR**

(Parameters: blastp, nr protein database, expect=20000, no filter, PAM30)

Other BLAST [web gateways](#)

All matches to this query

| Score | Mr(calc):   | Delta     | Sequence                     |
|-------|-------------|-----------|------------------------------|
| 58.7  | 1309.656097 | 0.006891  | <a href="#">GASQAGAPQGR</a>  |
| 28.2  | 1309.656097 | 0.006891  | <a href="#">GASQAGAPQGR</a>  |
| 4.2   | 1309.681900 | -0.018912 | <a href="#">KAPDFVIFYAPR</a> |
| 0.5   | 1309.648682 | 0.014306  | <a href="#">KSTHRNPEDAR</a>  |

Mascot: <http://www.matrixscience.com/>



# MASCOT Search Results

## Peptide View

MS/MS Fragmentation of **QTQVSVLPEGGETPLFK**

Found in **GELS\_HUMAN**, Gelsolin OS=Homo sapiens GN=GSN PE=1 SV=1

Match to Query 67053: 2451.302562 from(818.108130,3+) rtinseconds(2585) index(66625)

Title: Locus:1.1.1.2897.15 File:"2013-07-02 CLN FXIII 30 min 1st F 4.wiff"

Data file C:\Program Files (x86)\Matrix Science\Mascot Daemon\mgf1 FXIII 30 min 1st\mascot\_daemon\_merge.mgf

Click mouse within plot area to zoom in by factor of two about that point

Or, Plot from  to  Da

Label all possible matches  Label matches used for scoring

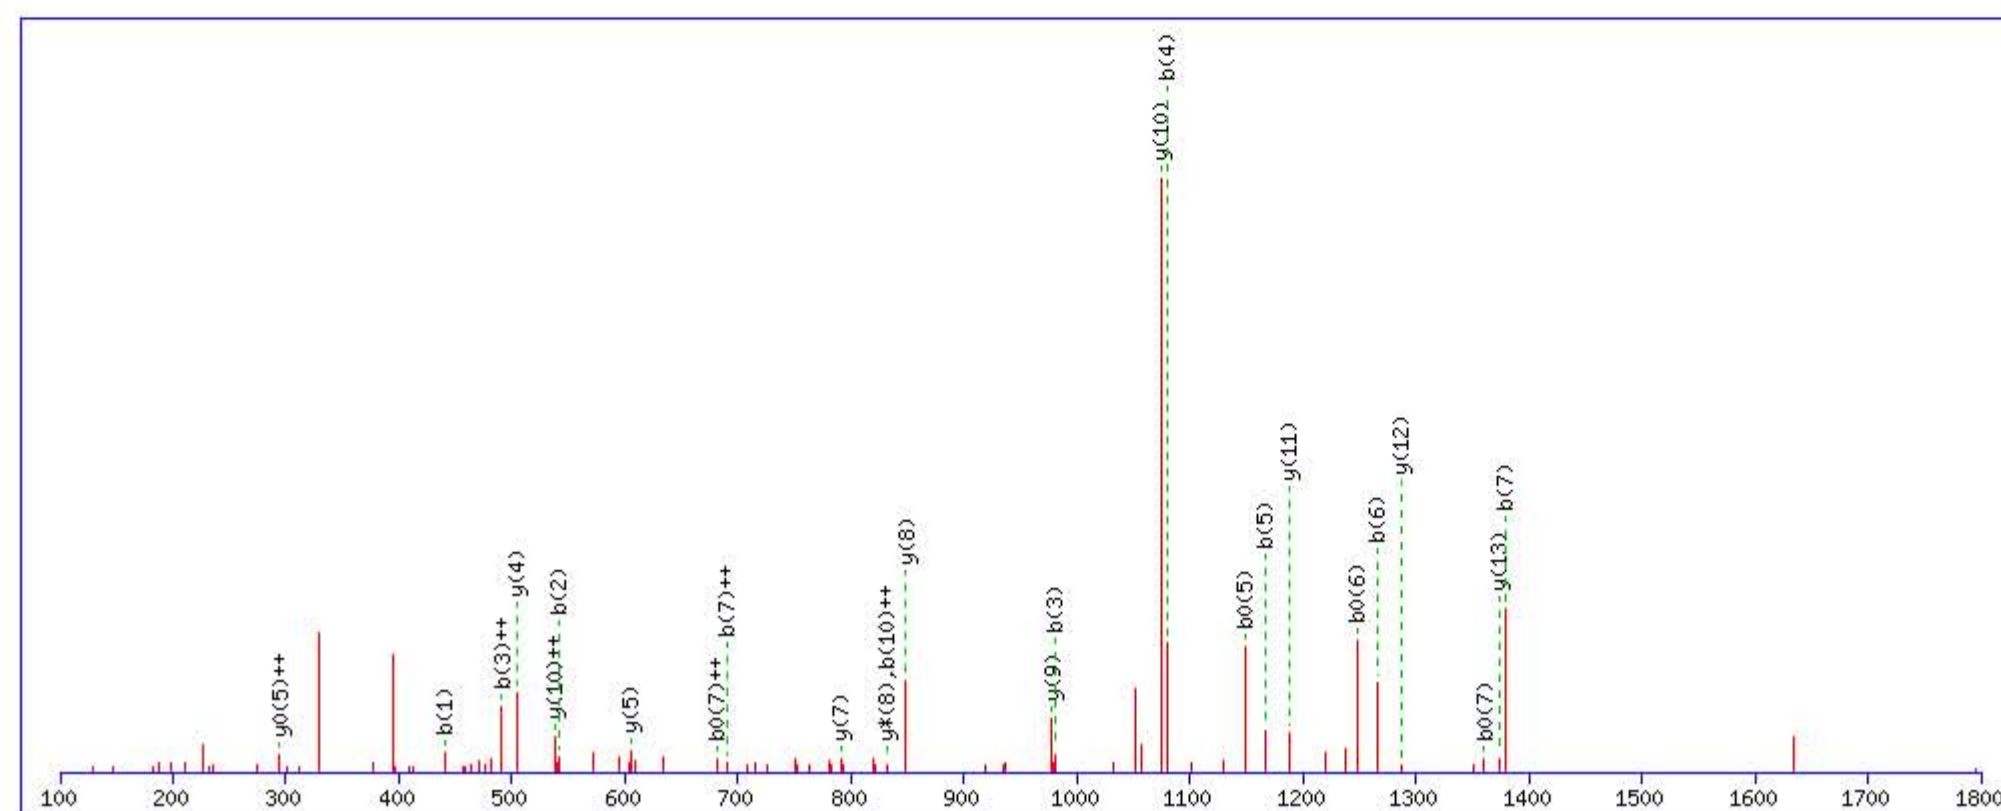

Monoisotopic mass of neutral peptide Mr(calc): 2451.290588

Fixed modifications: Carbamidomethyl (C) (apply to specified residues or termini only)

Variable modifications:

Q1 : Biotin:Thermo-21345 (Q)

Q3 : Biotin:Thermo-21345 (Q)

Ions Score: 46 Expect: 0.00011

Matches : 27/182 fragment ions using 54 most intense peaks [\(help\)](#)

| #  | b           | b <sup>++</sup> | b <sup>*</sup> | b <sup>+++</sup> | b <sup>0</sup> | b <sup>0++</sup> | Seq. | y           | y <sup>++</sup> | y <sup>*</sup> | y <sup>+++</sup> | y <sup>0</sup> | y <sup>0++</sup> | #  |
|----|-------------|-----------------|----------------|------------------|----------------|------------------|------|-------------|-----------------|----------------|------------------|----------------|------------------|----|
| 1  | 440.232602  | 220.619939      | 423.206053     | 212.106664       |                |                  | Q    |             |                 |                |                  |                |                  | 17 |
| 2  | 541.280281  | 271.143779      | 524.253732     | 262.630504       | 523.269716     | 262.138496       | T    | 2013.072528 | 1007.039902     | 1996.045979    | 998.526628       | 1995.061963    | 998.034620       | 16 |
| 3  | 980.505607  | 490.756442      | 963.479058     | 482.243167       | 962.495042     | 481.751159       | Q    | 1912.024849 | 956.516063      | 1894.998300    | 948.002788       | 1894.014284    | 947.510780       | 15 |
| 4  | 1079.574021 | 540.290649      | 1062.547472    | 531.777374       | 1061.563456    | 531.285366       | V    | 1472.799523 | 736.903400      | 1455.772974    | 728.390125       | 1454.788958    | 727.898117       | 14 |
| 5  | 1166.606049 | 583.806663      | 1149.579500    | 575.293388       | 1148.595484    | 574.801380       | S    | 1373.731109 | 687.369193      | 1356.704560    | 678.855918       | 1355.720544    | 678.363910       | 13 |
| 6  | 1265.674463 | 633.340870      | 1248.647914    | 624.827595       | 1247.663898    | 624.335587       | V    | 1286.699081 | 643.853179      | 1269.672532    | 635.339904       | 1268.688516    | 634.847896       | 12 |
| 7  | 1378.758527 | 689.882902      | 1361.731978    | 681.369627       | 1360.747962    | 680.877619       | L    | 1187.630667 | 594.318971      | 1170.604118    | 585.805697       | 1169.620102    | 585.313689       | 11 |
| 8  | 1475.811291 | 738.409284      | 1458.784742    | 729.896009       | 1457.800726    | 729.404001       | P    | 1074.546603 | 537.776940      | 1057.520054    | 529.263665       | 1056.536038    | 528.771657       | 10 |
| 9  | 1604.853884 | 802.930580      | 1587.827335    | 794.417306       | 1586.843319    | 793.925298       | E    | 977.493839  | 489.250558      | 960.467290     | 480.737283       | 959.483274     | 480.245275       | 9  |
| 10 | 1661.875348 | 831.441312      | 1644.848799    | 822.928038       | 1643.864783    | 822.436030       | G    | 848.451246  | 424.729261      | 831.424697     | 416.215986       | 830.440681     | 415.723978       | 8  |
| 11 | 1718.896812 | 859.952044      | 1701.870263    | 851.438770       | 1700.886247    | 850.946762       | G    | 791.429782  | 396.218529      | 774.403233     | 387.705254       | 773.419217     | 387.213246       | 7  |
| 12 | 1847.939405 | 924.473341      | 1830.912856    | 915.960066       | 1829.928840    | 915.468058       | E    | 734.408318  | 367.707797      | 717.381769     | 359.194523       | 716.397753     | 358.702515       | 6  |
| 13 | 1948.987084 | 974.997180      | 1931.960535    | 966.483906       | 1930.976519    | 965.991898       | T    | 605.365725  | 303.186500      | 588.339176     | 294.673226       | 587.355160     | 294.181218       | 5  |
| 14 | 2046.039848 | 1023.523562     | 2029.013299    | 1015.010288      | 2028.029283    | 1014.518280      | P    | 504.318046  | 252.662661      | 487.291497     | 244.149386       |                |                  | 4  |
| 15 | 2159.123912 | 1080.065594     | 2142.097363    | 1071.552319      | 2141.113347    | 1071.060311      | L    | 407.265282  | 204.136279      | 390.238733     | 195.623004       |                |                  | 3  |
| 16 | 2306.192326 | 1153.599801     | 2289.165777    | 1145.086526      | 2288.181761    | 1144.594518      | F    | 294.181218  | 147.594247      | 277.154669     | 139.080972       |                |                  | 2  |
| 17 |             |                 |                |                  |                |                  | K    | 147.112804  | 74.060040       | 130.086255     | 65.546765        |                |                  | 1  |

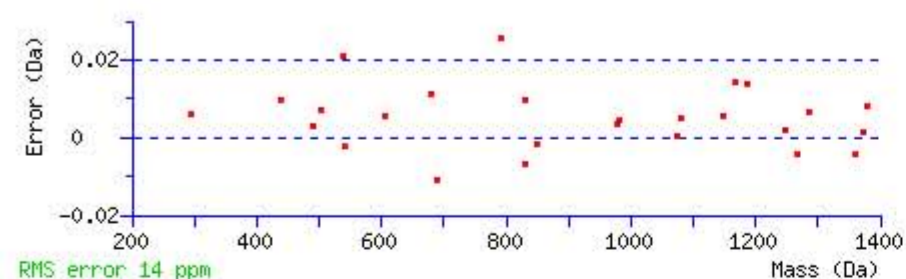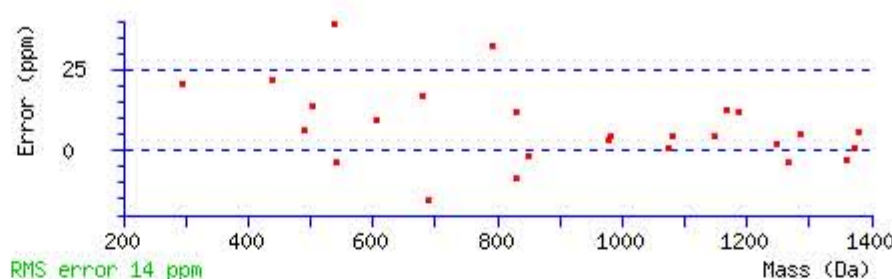

NCBI BLAST search of **QTQVSVLPEGGETPLFK**

(Parameters: blastp, nr protein database, expect=20000, no filter, PAM30)

Other BLAST [web gateways](#)

All matches to this query

| Score | Mr(calc):   | Delta    | Sequence                               |
|-------|-------------|----------|----------------------------------------|
| 45.7  | 2451.290588 | 0.011974 | <a href="#">QTQVSVLPEGGETPLFK</a>      |
| 3.5   | 2451.301590 | 0.000972 | <a href="#">ATKRISHMPSRPELSAVATDLR</a> |
| 2.3   | 2451.277130 | 0.025432 | <a href="#">GFPSDTQLLDLRRNHFPSVPR</a>  |

Mascot: <http://www.matrixscience.com/>



# MASCOT Search Results

## Peptide View

MS/MS Fragmentation of **VPFDAATLHTSTAMAAQHGMDDDDGTGQK**  
 Found in **GELS\_HUMAN**, Gelsolin OS=Homo sapiens GN=GSN PE=1 SV=1

Match to Query 76056: 3183.478056 from(796.876790,4+) rtinseconds(1929) index(6869)  
 Title: Locus:1.1.1.2392.22 File:"2013-07-02 CLN FXIII 30 min 1st F 1.wiff"  
 Data file C:\Program Files (x86)\Matrix Science\Mascot Daemon\mgf1 FXIII 30 min 1st\mascot\_daemon\_merge.mgf

Click mouse within plot area to zoom in by factor of two about that point

Or, Plot from  to  Da

Label all possible matches  Label matches used for scoring

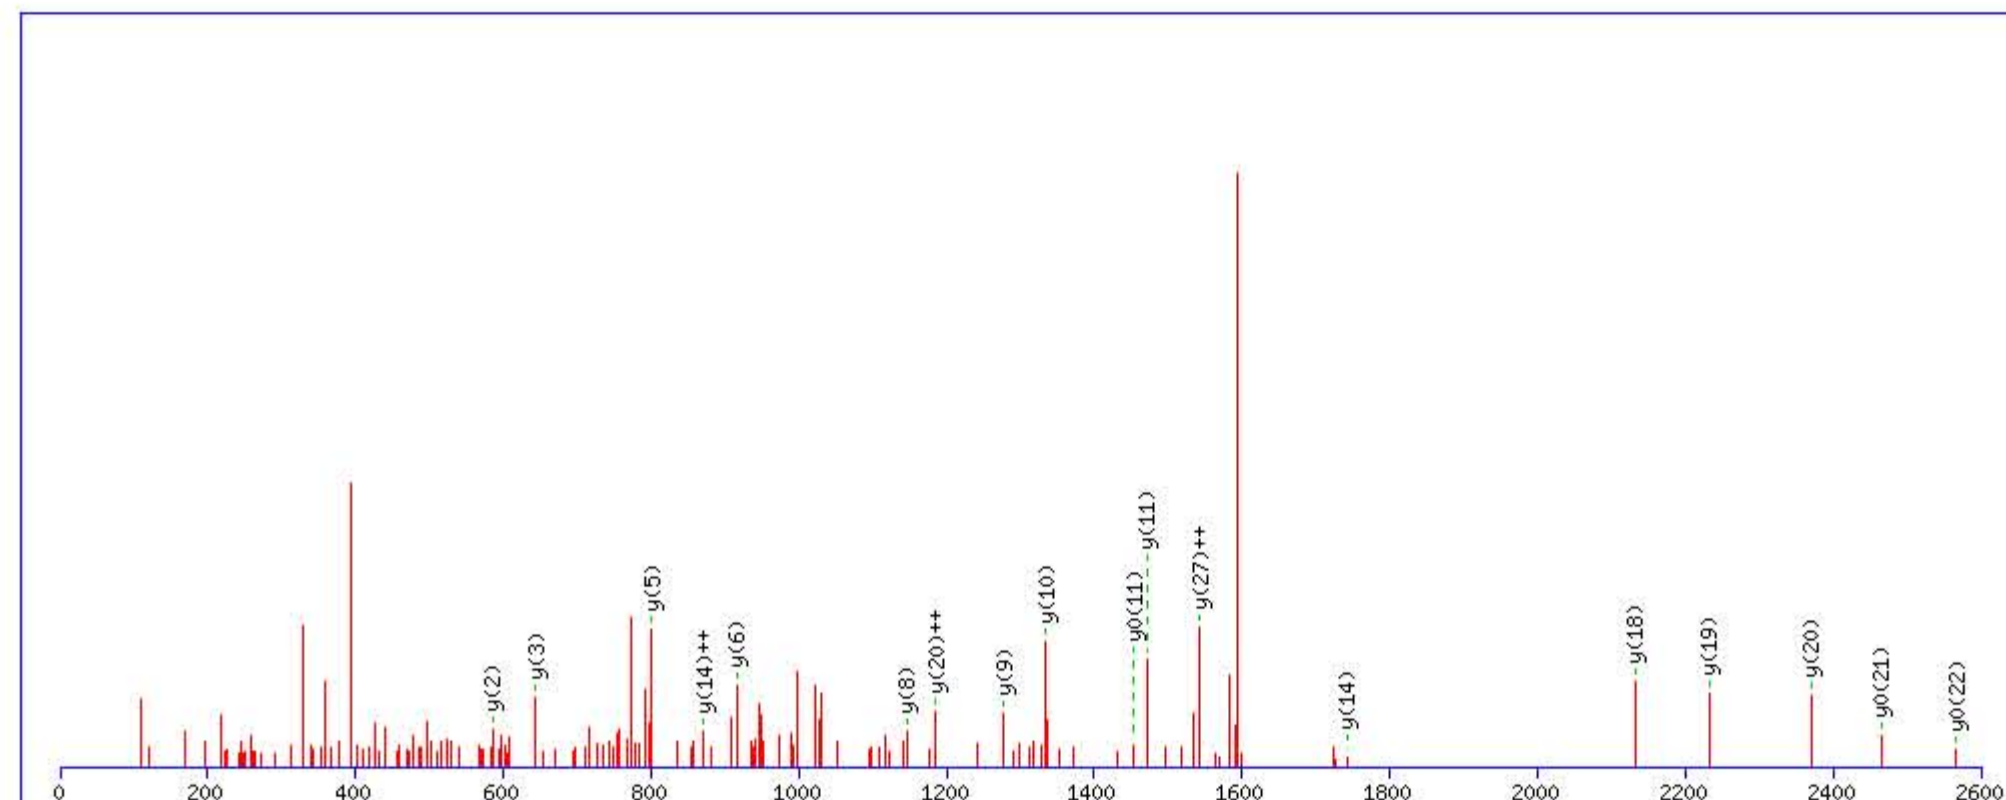

Monoisotopic mass of neutral peptide Mr(calc): 3183.442383  
 Fixed modifications: Carbamidomethyl (C) (apply to specified residues or termini only)  
 Variable modifications:  
 Q27 : Biotin:Thermo-21345 (Q)  
 Ions Score: 61 Expect: 1.2e-005  
 Matches : 18/280 fragment ions using 37 most intense peaks [\(help\)](#)

| #  | b           | b <sup>++</sup> | b <sup>*</sup> | b <sup>+++</sup> | b <sup>0</sup> | b <sup>0++</sup> | Seq. | y           | y <sup>++</sup> | y <sup>*</sup> | y <sup>+++</sup> | y <sup>0</sup> | y <sup>0++</sup> | #  |
|----|-------------|-----------------|----------------|------------------|----------------|------------------|------|-------------|-----------------|----------------|------------------|----------------|------------------|----|
| 1  | 100.075690  | 50.541483       |                |                  |                |                  | V    |             |                 |                |                  |                |                  | 28 |
| 2  | 197.128454  | 99.067865       |                |                  |                |                  | P    | 3085.381222 | 1543.194249     | 3068.354673    | 1534.680974      | 3067.370657    | 1534.188966      | 27 |
| 3  | 344.196868  | 172.602072      |                |                  |                |                  | F    | 2988.328458 | 1494.667867     | 2971.301909    | 1486.154592      | 2970.317893    | 1485.662584      | 26 |
| 4  | 459.223811  | 230.115543      |                |                  | 441.213246     | 221.110261       | D    | 2841.260044 | 1421.133660     | 2824.233495    | 1412.620385      | 2823.249479    | 1412.128377      | 25 |
| 5  | 530.260925  | 265.634101      |                |                  | 512.250360     | 256.628818       | A    | 2726.233101 | 1363.620188     | 2709.206552    | 1355.106914      | 2708.222536    | 1354.614906      | 24 |
| 6  | 601.298039  | 301.152658      |                |                  | 583.287474     | 292.147375       | A    | 2655.195987 | 1328.101631     | 2638.169438    | 1319.588357      | 2637.185422    | 1319.096349      | 23 |
| 7  | 702.345718  | 351.676497      |                |                  | 684.335153     | 342.671215       | T    | 2584.158873 | 1292.583074     | 2567.132324    | 1284.069800      | 2566.148308    | 1283.577792      | 22 |
| 8  | 815.429782  | 408.218529      |                |                  | 797.419217     | 399.213247       | L    | 2483.111194 | 1242.059235     | 2466.084645    | 1233.545960      | 2465.100629    | 1233.053952      | 21 |
| 9  | 952.488694  | 476.747985      |                |                  | 934.478129     | 467.742703       | H    | 2370.027130 | 1185.517203     | 2353.000581    | 1177.003928      | 2352.016565    | 1176.511920      | 20 |
| 10 | 1053.536373 | 527.271824      |                |                  | 1035.525808    | 518.266542       | T    | 2232.968218 | 1116.987747     | 2215.941669    | 1108.474472      | 2214.957653    | 1107.982464      | 19 |
| 11 | 1140.568401 | 570.787839      |                |                  | 1122.557836    | 561.782556       | S    | 2131.920539 | 1066.463907     | 2114.893990    | 1057.950633      | 2113.909974    | 1057.458625      | 18 |
| 12 | 1241.616080 | 621.311678      |                |                  | 1223.605515    | 612.306396       | T    | 2044.888511 | 1022.947893     | 2027.861962    | 1014.434619      | 2026.877946    | 1013.942611      | 17 |
| 13 | 1312.653194 | 656.830235      |                |                  | 1294.642629    | 647.824952       | A    | 1943.840832 | 972.424054      | 1926.814283    | 963.910779       | 1925.830267    | 963.418771       | 16 |
| 14 | 1443.693679 | 722.350478      |                |                  | 1425.683114    | 713.345195       | M    | 1872.803718 | 936.905497      | 1855.777169    | 928.392222       | 1854.793153    | 927.900214       | 15 |
| 15 | 1514.730793 | 757.869035      |                |                  | 1496.720228    | 748.863752       | A    | 1741.763233 | 871.385254      | 1724.736684    | 862.871980       | 1723.752668    | 862.379972       | 14 |
| 16 | 1585.767907 | 793.387591      |                |                  | 1567.757342    | 784.382309       | A    | 1670.726119 | 835.866697      | 1653.699570    | 827.353423       | 1652.715554    | 826.861415       | 13 |
| 17 | 1713.826485 | 857.416880      | 1696.799936    | 848.903606       | 1695.815920    | 848.411598       | Q    | 1599.689005 | 800.348140      | 1582.662456    | 791.834866       | 1581.678440    | 791.342858       | 12 |
| 18 | 1850.885397 | 925.946336      | 1833.858848    | 917.433062       | 1832.874832    | 916.941054       | H    | 1471.630427 | 736.318851      | 1454.603878    | 727.805577       | 1453.619862    | 727.313569       | 11 |
| 19 | 1907.906861 | 954.457068      | 1890.880312    | 945.943794       | 1889.896296    | 945.451786       | G    | 1334.571515 | 667.789395      | 1317.544966    | 659.276121       | 1316.560950    | 658.784113       | 10 |
| 20 | 2038.947346 | 1019.977311     | 2021.920797    | 1011.464036      | 2020.936781    | 1010.972028      | M    | 1277.550051 | 639.278663      | 1260.523502    | 630.765389       | 1259.539486    | 630.273381       | 9  |
| 21 | 2153.974289 | 1077.490782     | 2136.947740    | 1068.977508      | 2135.963724    | 1068.485500      | D    | 1146.509566 | 573.758421      | 1129.483017    | 565.245146       | 1128.499001    | 564.753138       | 8  |
| 22 | 2269.001232 | 1135.004254     | 2251.974683    | 1126.490979      | 2250.990667    | 1125.998971      | D    | 1031.482623 | 516.244949      | 1014.456074    | 507.731675       | 1013.472058    | 507.239667       | 7  |
| 23 | 2384.028175 | 1192.517725     | 2367.001626    | 1184.004451      | 2366.017610    | 1183.512443      | D    | 916.455680  | 458.731478      | 899.429131     | 450.218203       | 898.445115     | 449.726195       | 6  |
| 24 | 2441.049639 | 1221.028457     | 2424.023090    | 1212.515183      | 2423.039074    | 1212.023175      | G    | 801.428737  | 401.218007      | 784.402188     | 392.704732       | 783.418172     | 392.212724       | 5  |
| 25 | 2542.097318 | 1271.552297     | 2525.070769    | 1263.039022      | 2524.086753    | 1262.547014      | T    | 744.407273  | 372.707275      | 727.380724     | 364.194000       | 726.396708     | 363.701992       | 4  |
| 26 | 2599.118782 | 1300.063029     | 2582.092233    | 1291.549754      | 2581.108217    | 1291.057746      | G    | 643.359594  | 322.183435      | 626.333045     | 313.670161       |                |                  | 3  |
| 27 | 3038.344108 | 1519.675692     | 3021.317559    | 1511.162417      | 3020.333543    | 1510.670409      | Q    | 586.338130  | 293.672703      | 569.311581     | 285.159429       |                |                  | 2  |
| 28 |             |                 |                |                  |                |                  | K    | 147.112804  | 74.060040       | 130.086255     | 65.546765        |                |                  | 1  |

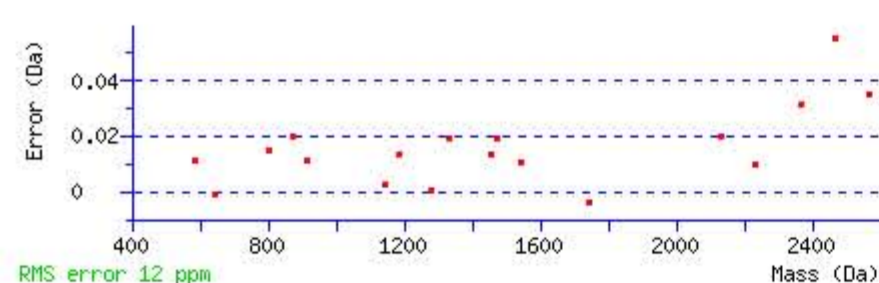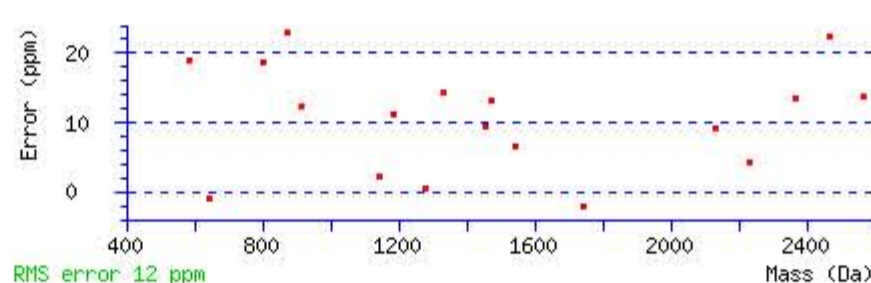

NCBI BLAST search of **VPFDAATLHTSTAMAAQHGMDDDDGTGQK**  
 (Parameters: blastp, nr protein database, expect=20000, no filter, PAM30)  
 Other BLAST [web gateways](#)

### All matches to this query

| Score | Mr(calc):   | Delta    | Sequence                                      |
|-------|-------------|----------|-----------------------------------------------|
| 61.2  | 3183.442383 | 0.035673 | <a href="#">VPFDAATLHTSTAMAAQHGMDDDDGTGQK</a> |
| 13.5  | 3183.442383 | 0.035673 | <a href="#">VPFDAATLHTSTAMAAQHGMDDDDGTGQK</a> |



# MASCOT Search Results

## Peptide View

MS/MS Fragmentation of **TYFPHFDSLHGSAQVK**

Found in **HBA\_HUMAN**, Hemoglobin subunit alpha OS=Homo sapiens GN=HBA1 PE=1 SV=2

Match to Query 60369: 2144.074482 from(715.698770,3+) rtinseconds(2044) index(7633)

Title: Locus:1.1.1.2432.13 File:"2013-07-02 CLN FXIII 30 min 1st F 1.wiff"

Data file C:\Program Files (x86)\Matrix Science\Mascot Daemon\mgf1 FXIII 30 min 1st\mascot\_daemon\_merge.mgf

Click mouse within plot area to zoom in by factor of two about that point

Or, Plot from  to  Da

Label all possible matches  Label matches used for scoring

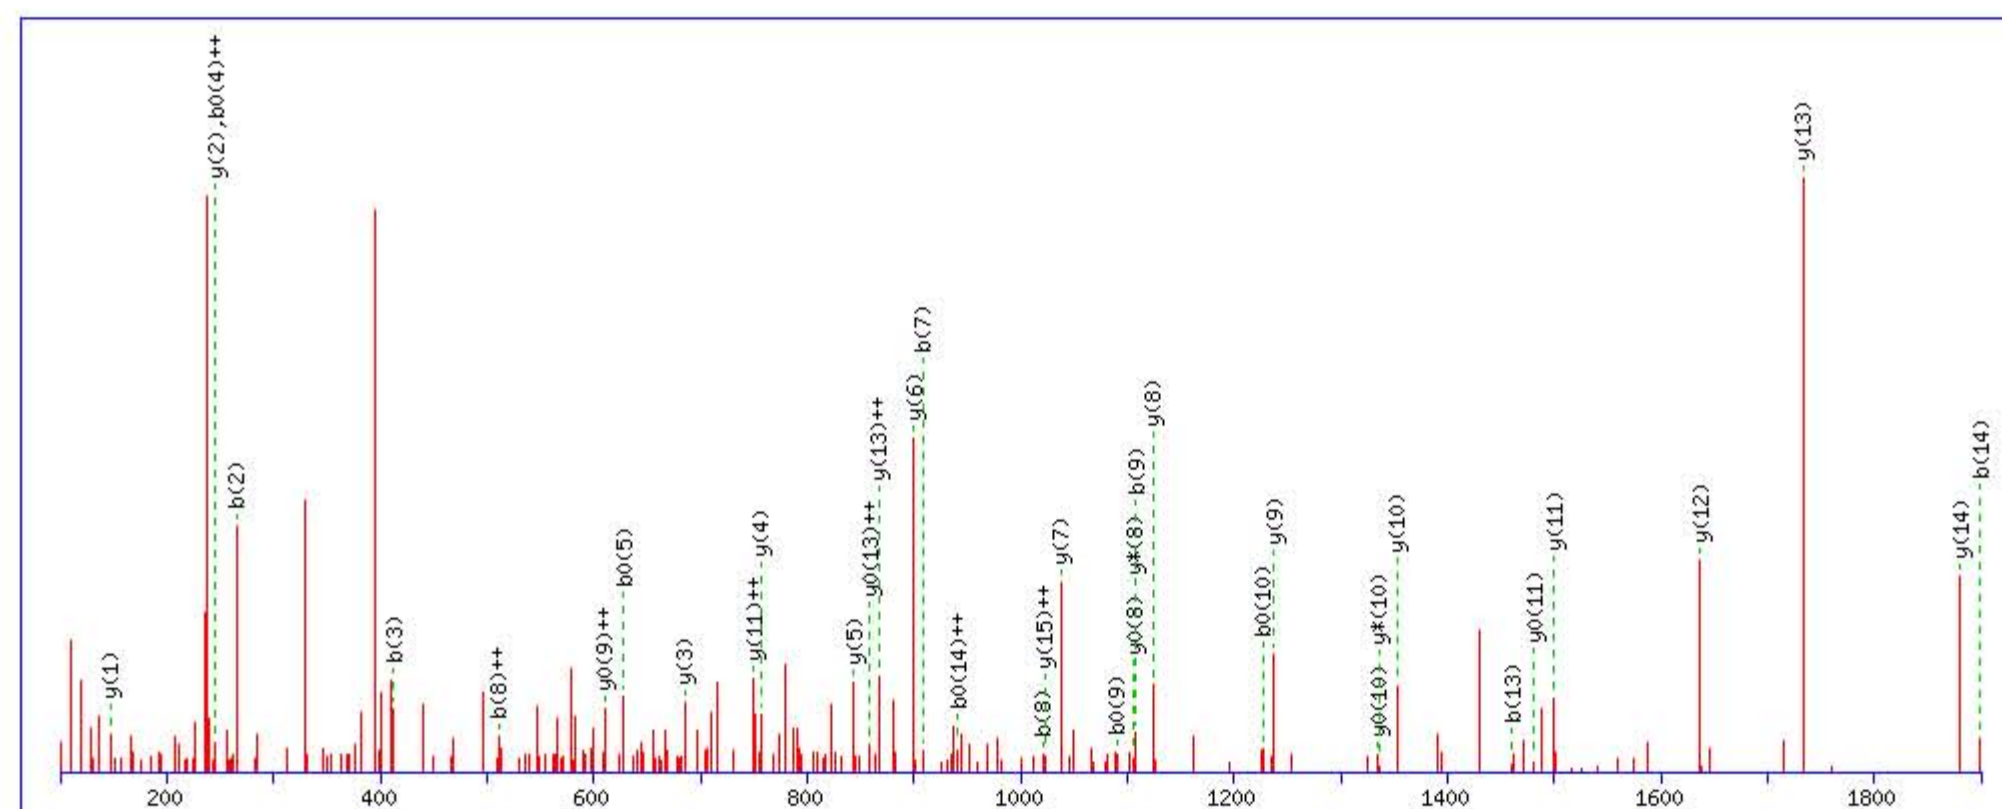

Monoisotopic mass of neutral peptide Mr(calc): 2144.051346

Fixed modifications: Carbamidomethyl (C) (apply to specified residues or termini only)

Variable modifications:

Q14 : Biotin:Thermo-21345 (Q)

Ions Score: 40 Expect: 0.0031

Matches : 37/146 fragment ions using 136 most intense peaks [\(help\)](#)

| #  | b                  | b <sup>++</sup>   | b <sup>*</sup> | b <sup>*++</sup> | b <sup>0</sup>     | b <sup>0++</sup>  | Seq. | y                  | y <sup>++</sup>    | y <sup>*</sup>     | y <sup>*++</sup> | y <sup>0</sup>     | y <sup>0++</sup>  | #  |
|----|--------------------|-------------------|----------------|------------------|--------------------|-------------------|------|--------------------|--------------------|--------------------|------------------|--------------------|-------------------|----|
| 1  | 102.054955         | 51.531116         |                |                  | 84.044390          | 42.525833         | T    |                    |                    |                    |                  |                    |                   | 16 |
| 2  | <b>265.118284</b>  | 133.062780        |                |                  | 247.107719         | 124.057498        | Y    | 2044.010930        | <b>1022.509103</b> | 2026.984381        | 1013.995829      | 2026.000365        | 1013.503821       | 15 |
| 3  | <b>412.186698</b>  | 206.596987        |                |                  | 394.176133         | 197.591705        | F    | <b>1880.947601</b> | 940.977438         | 1863.921052        | 932.464164       | 1862.937036        | 931.972156        | 14 |
| 4  | 509.239462         | 255.123369        |                |                  | 491.228897         | <b>246.118087</b> | P    | <b>1733.879187</b> | <b>867.443231</b>  | 1716.852638        | 858.929957       | 1715.868622        | <b>858.437949</b> | 13 |
| 5  | 646.298374         | 323.652825        |                |                  | <b>628.287809</b>  | 314.647543        | H    | <b>1636.826423</b> | 818.916849         | 1619.799874        | 810.403575       | 1618.815858        | 809.911567        | 12 |
| 6  | 793.366788         | 397.187032        |                |                  | 775.356223         | 388.181750        | F    | <b>1499.767511</b> | <b>750.387393</b>  | 1482.740962        | 741.874119       | <b>1481.756946</b> | 741.382111        | 11 |
| 7  | <b>908.393731</b>  | 454.700504        |                |                  | 890.383166         | 445.695221        | D    | <b>1352.699097</b> | 676.853186         | <b>1335.672548</b> | 668.339912       | <b>1334.688532</b> | 667.847904        | 10 |
| 8  | <b>1021.477795</b> | <b>511.242536</b> |                |                  | 1003.467230        | 502.237253        | L    | <b>1237.672154</b> | 619.339715         | 1220.645605        | 610.826441       | 1219.661589        | <b>610.334433</b> | 9  |
| 9  | <b>1108.509823</b> | 554.758550        |                |                  | <b>1090.499258</b> | 545.753267        | S    | <b>1124.588090</b> | 562.797683         | <b>1107.561541</b> | 554.284409       | <b>1106.577525</b> | 553.792400        | 8  |
| 10 | 1245.568735        | 623.288006        |                |                  | <b>1227.558170</b> | 614.282723        | H    | <b>1037.556062</b> | 519.281669         | 1020.529513        | 510.768394       | 1019.545497        | 510.276386        | 7  |
| 11 | 1302.590199        | 651.798738        |                |                  | 1284.579634        | 642.793455        | G    | <b>900.497150</b>  | 450.752213         | 883.470601         | 442.238938       | 882.486585         | 441.746930        | 6  |
| 12 | 1389.622227        | 695.314752        |                |                  | 1371.611662        | 686.309469        | S    | <b>843.475686</b>  | 422.241481         | 826.449137         | 413.728207       | 825.465121         | 413.236199        | 5  |
| 13 | <b>1460.659341</b> | 730.833309        |                |                  | 1442.648776        | 721.828026        | A    | <b>756.443658</b>  | 378.725467         | 739.417109         | 370.212192       |                    |                   | 4  |
| 14 | <b>1899.884667</b> | 950.445972        | 1882.858118    | 941.932697       | 1881.874102        | <b>941.440689</b> | Q    | <b>685.406544</b>  | 343.206910         | 668.379995         | 334.693635       |                    |                   | 3  |
| 15 | 1998.953081        | 999.980179        | 1981.926532    | 991.466904       | 1980.942516        | 990.974896        | V    | <b>246.181218</b>  | 123.594247         | 229.154669         | 115.080972       |                    |                   | 2  |
| 16 |                    |                   |                |                  |                    |                   | K    | <b>147.112804</b>  | 74.060040          | 130.086255         | 65.546765        |                    |                   | 1  |

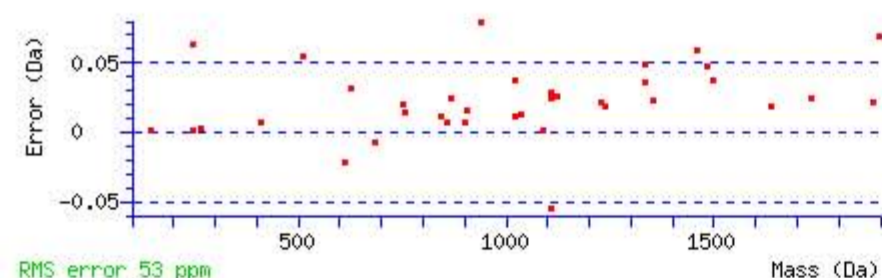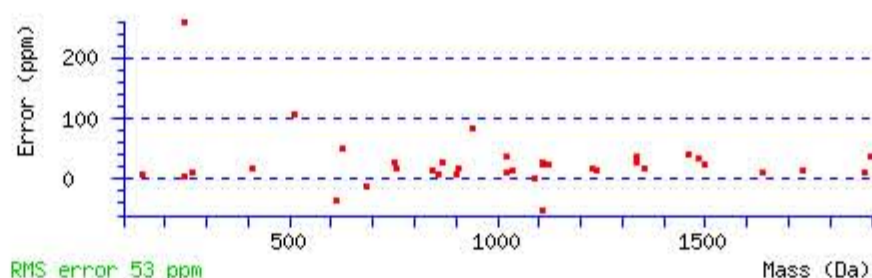

NCBI BLAST search of [TYFPHFDSLHGSAQVK](#)

(Parameters: blastp, nr protein database, expect=20000, no filter, PAM30)

Other BLAST [web gateways](#)

All matches to this query

| Score | Mr(calc):   | Delta    | Sequence                         |
|-------|-------------|----------|----------------------------------|
| 39.7  | 2144.051346 | 0.023136 | <a href="#">TYFPHFDSLHGSAQVK</a> |

Mascot: <http://www.matrixscience.com/>



# MASCOT Search Results

## Peptide View

MS/MS Fragmentation of **GECQAEGVLFFQGDR**

Found in **HEMO\_HUMAN**, Hemopexin OS=Homo sapiens GN=HPX PE=1 SV=2

Match to Query 57874: 2022.939312 from(675.320380,3+) rtinseconds(2426) index(83184)

Title: Locus:1.1.1.2724.7 File:"2013-07-02 CLN FXIII 30 min 1st FT.wiff"

Data file C:\Program Files (x86)\Matrix Science\Mascot Daemon\mgf\1 FXIII 30 min 1st\mascot\_daemon\_merge.mgf

Click mouse within plot area to zoom in by factor of two about that point

Or, Plot from  to  Da

Label all possible matches  Label matches used for scoring

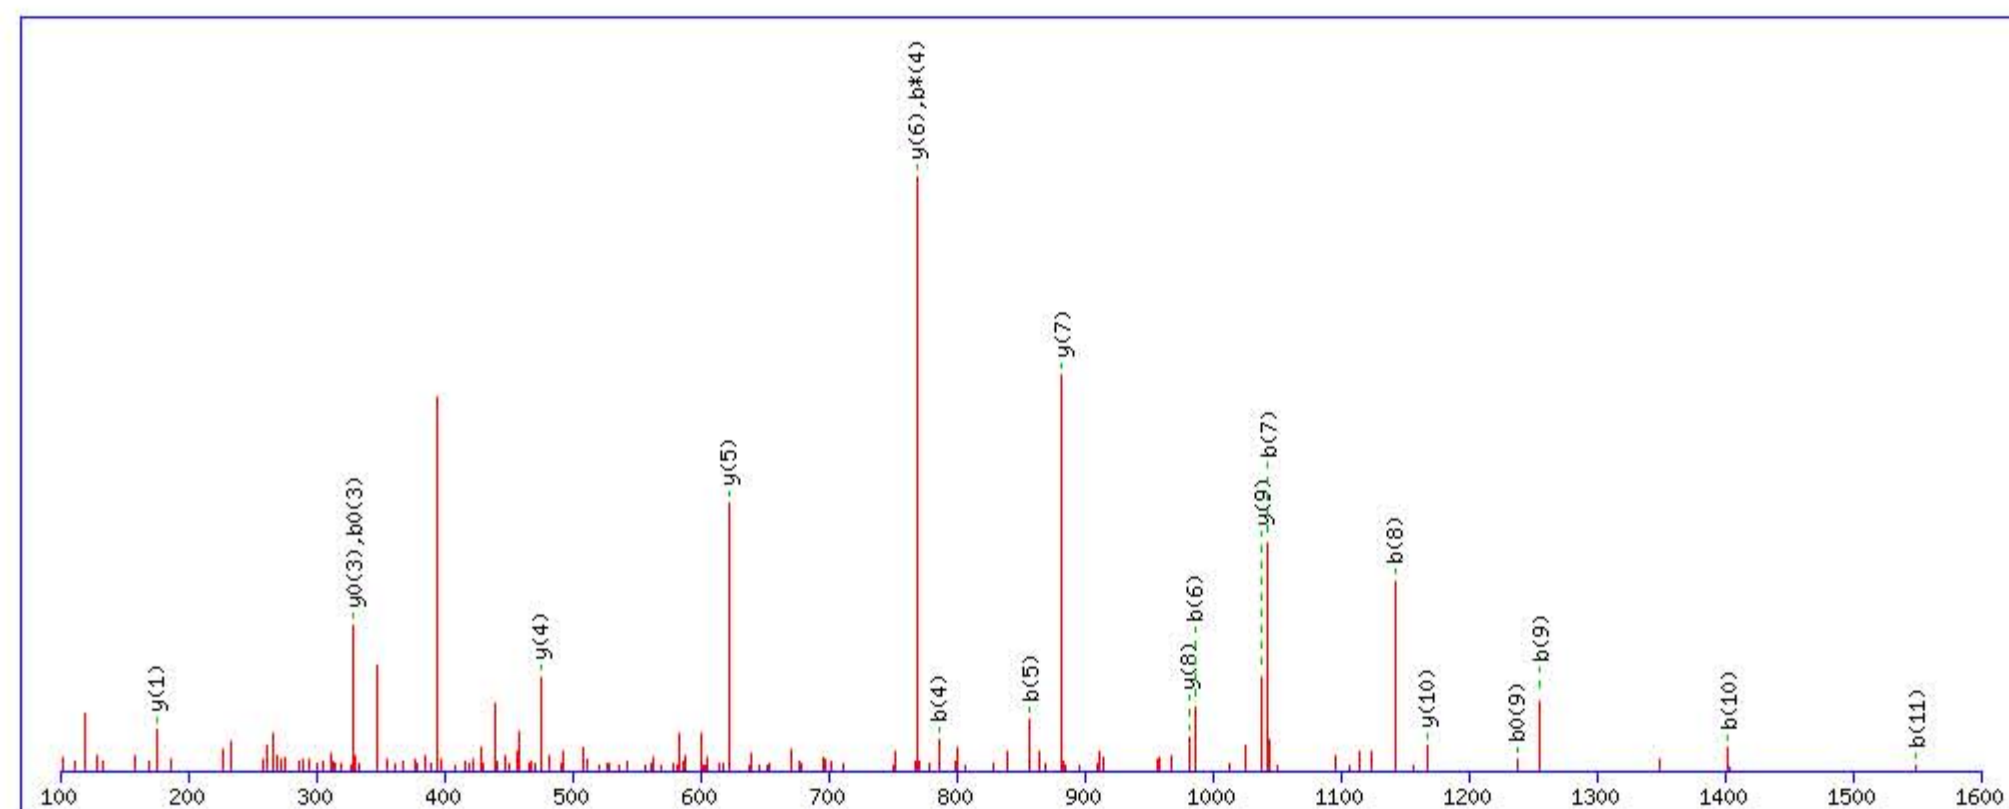

Monoisotopic mass of neutral peptide Mr(calc): 2022.929184

Fixed modifications: Carbamidomethyl (C) (apply to specified residues or termini only)

Variable modifications:

Q4 : Biotin:Thermo-21345 (Q)

Ions Score: 55 Expect: 7.2e-006

Matches : 20/158 fragment ions using 28 most intense peaks [\(help\)](#)

| #  | b           | b <sup>++</sup> | b*          | b <sup>+++</sup> | b <sup>0</sup> | b <sup>0++</sup> | Seq. | y           | y <sup>++</sup> | y*          | y <sup>+++</sup> | y <sup>0</sup> | y <sup>0++</sup> | #  |
|----|-------------|-----------------|-------------|------------------|----------------|------------------|------|-------------|-----------------|-------------|------------------|----------------|------------------|----|
| 1  | 58.028740   | 29.518008       |             |                  |                |                  | G    |             |                 |             |                  |                |                  | 15 |
| 2  | 187.071333  | 94.039305       |             |                  | 169.060768     | 85.034022        | E    | 1966.914982 | 983.961129      | 1949.888433 | 975.447855       | 1948.904417    | 974.955847       | 14 |
| 3  | 347.101982  | 174.054629      |             |                  | 329.091417     | 165.049347       | C    | 1837.872389 | 919.439833      | 1820.845840 | 910.926558       | 1819.861824    | 910.434550       | 13 |
| 4  | 786.327308  | 393.667292      | 769.300759  | 385.154018       | 768.316743     | 384.662010       | Q    | 1677.841740 | 839.424508      | 1660.815191 | 830.911234       | 1659.831175    | 830.419226       | 12 |
| 5  | 857.364422  | 429.185849      | 840.337873  | 420.672575       | 839.353857     | 420.180567       | A    | 1238.616414 | 619.811845      | 1221.589865 | 611.298571       | 1220.605849    | 610.806563       | 11 |
| 6  | 986.407015  | 493.707146      | 969.380466  | 485.193871       | 968.396450     | 484.701863       | E    | 1167.579300 | 584.293288      | 1150.552751 | 575.780014       | 1149.568735    | 575.288006       | 10 |
| 7  | 1043.428479 | 522.217878      | 1026.401930 | 513.704603       | 1025.417914    | 513.212595       | G    | 1038.536707 | 519.771992      | 1021.510158 | 511.258717       | 1020.526142    | 510.766709       | 9  |
| 8  | 1142.496893 | 571.752085      | 1125.470344 | 563.238810       | 1124.486328    | 562.746802       | V    | 981.515243  | 491.261260      | 964.488694  | 482.747985       | 963.504678     | 482.255977       | 8  |
| 9  | 1255.580957 | 628.294117      | 1238.554408 | 619.780842       | 1237.570392    | 619.288834       | L    | 882.446829  | 441.727053      | 865.420280  | 433.213778       | 864.436264     | 432.721770       | 7  |
| 10 | 1402.649371 | 701.828324      | 1385.622822 | 693.315049       | 1384.638806    | 692.823041       | F    | 769.362765  | 385.185021      | 752.336216  | 376.671746       | 751.352200     | 376.179738       | 6  |
| 11 | 1549.717785 | 775.362531      | 1532.691236 | 766.849256       | 1531.707220    | 766.357248       | F    | 622.294351  | 311.650814      | 605.267802  | 303.137539       | 604.283786     | 302.645531       | 5  |
| 12 | 1677.776363 | 839.391820      | 1660.749814 | 830.878545       | 1659.765798    | 830.386537       | Q    | 475.225937  | 238.116606      | 458.199388  | 229.603332       | 457.215372     | 229.111324       | 4  |
| 13 | 1734.797827 | 867.902552      | 1717.771278 | 859.389277       | 1716.787262    | 858.897269       | G    | 347.167359  | 174.087317      | 330.140810  | 165.574043       | 329.156794     | 165.082035       | 3  |
| 14 | 1849.824770 | 925.416023      | 1832.798221 | 916.902749       | 1831.814205    | 916.410741       | D    | 290.145895  | 145.576585      | 273.119346  | 137.063311       | 272.135330     | 136.571303       | 2  |
| 15 |             |                 |             |                  |                |                  | R    | 175.118952  | 88.063114       | 158.092403  | 79.549839        |                |                  | 1  |

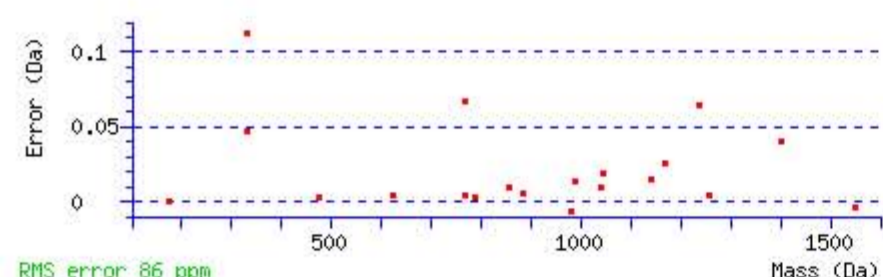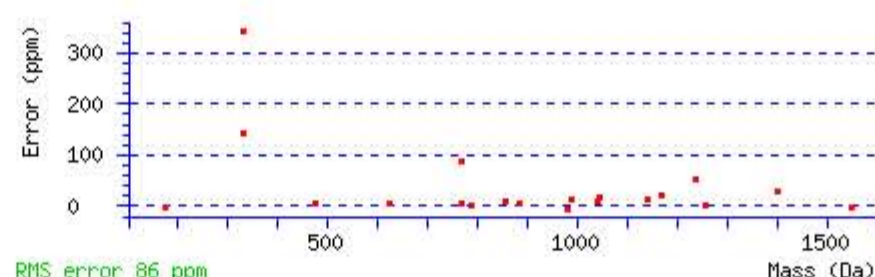

NCBI BLAST search of **GECQAEGVLFFQGDR**

(Parameters: blastp, nr protein database, expect=20000, no filter, PAM30)

Other BLAST [web gateways](#)

All matches to this query

| Score | Mr(calc):   | Delta    | Sequence                          |
|-------|-------------|----------|-----------------------------------|
| 55.2  | 2022.929184 | 0.010128 | <a href="#">GECQAEGVLFFQGDR</a>   |
| 3.4   | 2022.929184 | 0.010128 | <a href="#">GECQAEGVLFFQGDR</a>   |
| 0.4   | 2022.914581 | 0.024731 | <a href="#">SGKWYFEFEVVTGGDMR</a> |

Mascot: <http://www.matrixscience.com/>



# MASCOT Search Results

## Peptide View

MS/MS Fragmentation of **LLQDEFPGIPSPLDAAVECHR**

Found in **HEMO\_HUMAN**, Hemopexin OS=Homo sapiens GN=HPX PE=1 SV=2

Match to Query 70387: 2674.348632 from(892.456820,3+) rtinseconds(2656) index(84237)

Title: Locus:1.1.1.2804.14 File:"2013-07-02 CLN FXIII 30 min 1st FT.wiff"

Data file C:\Program Files (x86)\Matrix Science\Mascot Daemon\mgf\1 FXIII 30 min 1st\mascot\_daemon\_merge.mgf

Click mouse within plot area to zoom in by factor of two about that point

Or, Plot from  to  Da

Label all possible matches  Label matches used for scoring

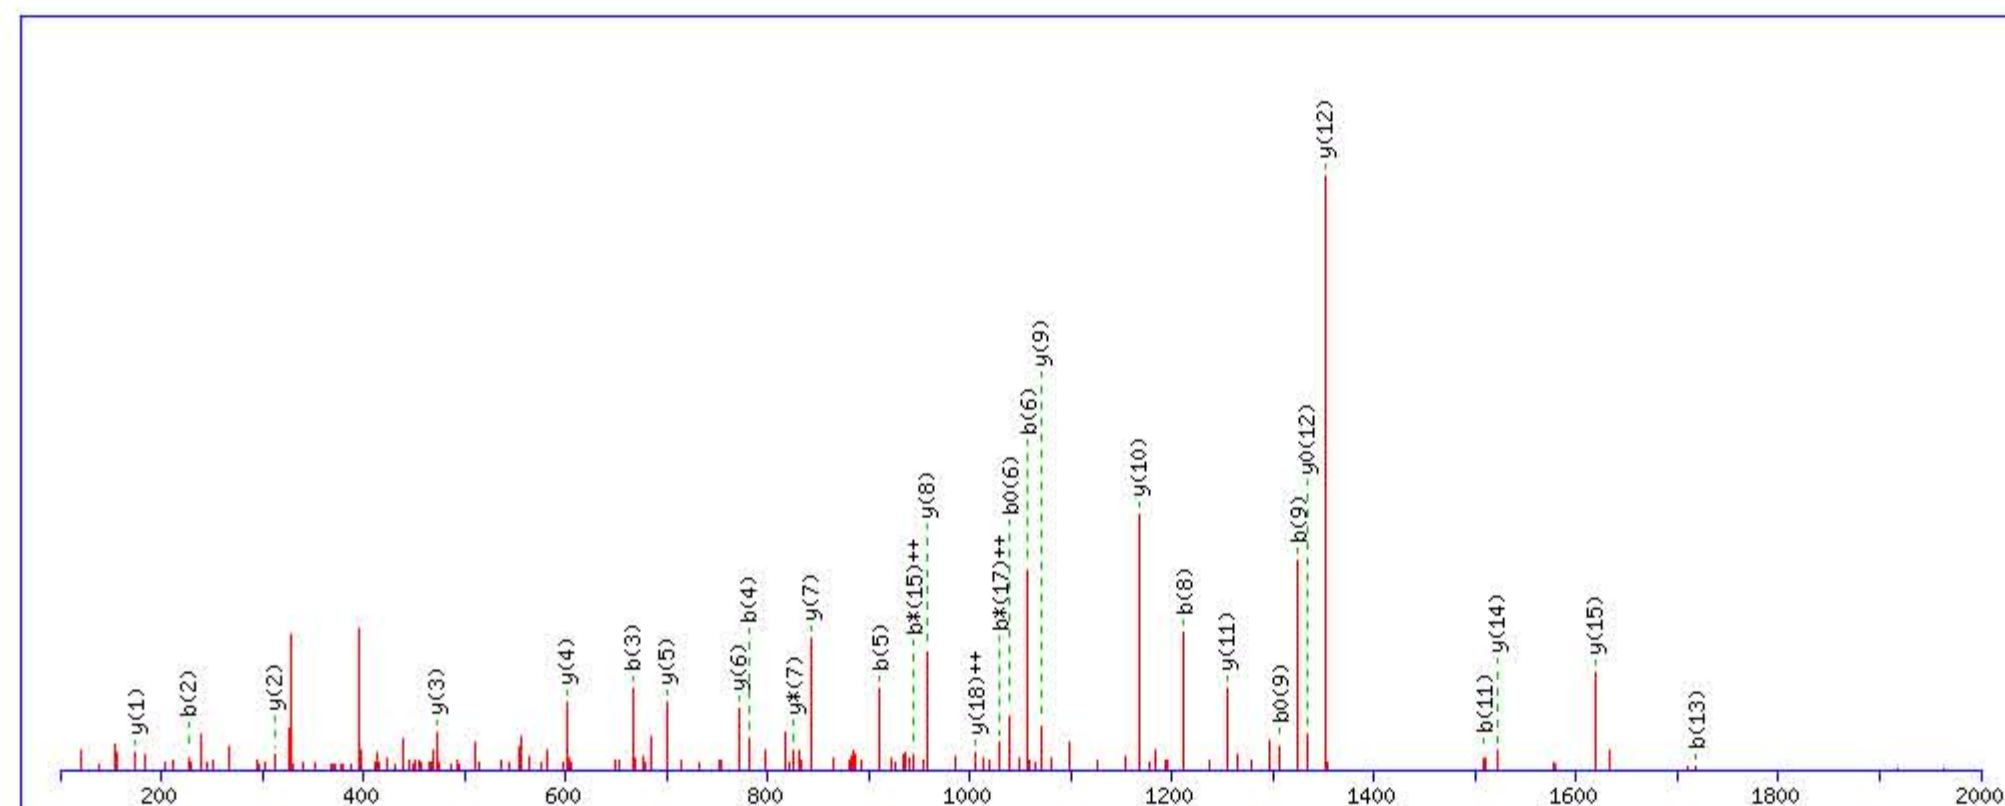

Monoisotopic mass of neutral peptide Mr(calc): 2674.324722

Fixed modifications: Carbamidomethyl (C) (apply to specified residues or termini only)

Variable modifications:

Q3 : Biotin:Thermo-21345 (Q)

Ions Score: 79 Expect: 4.1e-008

Matches : 30/224 fragment ions using 63 most intense peaks [\(help\)](#)

| #  | b                  | b <sup>++</sup> | b <sup>*</sup> | b <sup>*++</sup>   | b <sup>0</sup>     | b <sup>0++</sup> | Seq. | y                  | y <sup>++</sup>    | y <sup>*</sup>    | y <sup>*++</sup> | y <sup>0</sup>     | y <sup>0++</sup> | #  |
|----|--------------------|-----------------|----------------|--------------------|--------------------|------------------|------|--------------------|--------------------|-------------------|------------------|--------------------|------------------|----|
| 1  | 114.091340         | 57.549308       |                |                    |                    |                  | L    |                    |                    |                   |                  |                    |                  | 21 |
| 2  | <b>227.175404</b>  | 114.091340      |                |                    |                    |                  | L    | 2562.247943        | 1281.627609        | 2545.221394       | 1273.114335      | 2544.237378        | 1272.622327      | 20 |
| 3  | <b>666.400730</b>  | 333.704003      | 649.374181     | 325.190729         |                    |                  | Q    | 2449.163879        | 1225.085577        | 2432.137330       | 1216.572303      | 2431.153314        | 1216.080295      | 19 |
| 4  | <b>781.427673</b>  | 391.217475      | 764.401124     | 382.704200         | 763.417108         | 382.212192       | D    | 2009.938553        | <b>1005.472914</b> | 1992.912004       | 996.959640       | 1991.927988        | 996.467632       | 18 |
| 5  | <b>910.470266</b>  | 455.738771      | 893.443717     | 447.225497         | 892.459701         | 446.733489       | E    | 1894.911610        | 947.959443         | 1877.885061       | 939.446169       | 1876.901045        | 938.954160       | 17 |
| 6  | <b>1057.538680</b> | 529.272978      | 1040.512131    | 520.759704         | <b>1039.528115</b> | 520.267696       | F    | 1765.869017        | 883.438146         | 1748.842468       | 874.924872       | 1747.858452        | 874.432864       | 16 |
| 7  | 1154.591444        | 577.799360      | 1137.564895    | 569.286086         | 1136.580879        | 568.794078       | P    | <b>1618.800603</b> | 809.903939         | 1601.774054       | 801.390665       | 1600.790038        | 800.898657       | 15 |
| 8  | <b>1211.612908</b> | 606.310092      | 1194.586359    | 597.796818         | 1193.602343        | 597.304810       | G    | <b>1521.747839</b> | 761.377557         | 1504.721290       | 752.864283       | 1503.737274        | 752.372275       | 14 |
| 9  | <b>1324.696972</b> | 662.852124      | 1307.670423    | 654.338850         | <b>1306.686407</b> | 653.846841       | I    | 1464.726375        | 732.866825         | 1447.699826       | 724.353551       | 1446.715810        | 723.861543       | 13 |
| 10 | 1421.749736        | 711.378506      | 1404.723187    | 702.865232         | 1403.739171        | 702.373223       | P    | <b>1351.642311</b> | 676.324793         | 1334.615762       | 667.811519       | <b>1333.631746</b> | 667.319511       | 12 |
| 11 | <b>1508.781764</b> | 754.894520      | 1491.755215    | 746.381246         | 1490.771199        | 745.889238       | S    | <b>1254.589547</b> | 627.798411         | 1237.562998       | 619.285137       | 1236.578982        | 618.793129       | 11 |
| 12 | 1605.834528        | 803.420902      | 1588.807979    | 794.907628         | 1587.823963        | 794.415620       | P    | <b>1167.557519</b> | 584.282397         | 1150.530970       | 575.769123       | 1149.546954        | 575.277115       | 10 |
| 13 | <b>1718.918592</b> | 859.962934      | 1701.892043    | 851.449660         | 1700.908027        | 850.957652       | L    | <b>1070.504755</b> | 535.756015         | 1053.478206       | 527.242741       | 1052.494190        | 526.750733       | 9  |
| 14 | 1833.945535        | 917.476406      | 1816.918986    | 908.963131         | 1815.934970        | 908.471123       | D    | <b>957.420691</b>  | 479.213983         | 940.394142        | 470.700709       | 939.410126         | 470.208701       | 8  |
| 15 | 1904.982649        | 952.994963      | 1887.956100    | <b>944.481688</b>  | 1886.972084        | 943.989680       | A    | <b>842.393748</b>  | 421.700512         | <b>825.367199</b> | 413.187237       | 824.383183         | 412.695229       | 7  |
| 16 | 1976.019763        | 988.513520      | 1958.993214    | 980.000245         | 1958.009198        | 979.508237       | A    | <b>771.356634</b>  | 386.181955         | 754.330085        | 377.668680       | 753.346069         | 377.176672       | 6  |
| 17 | 2075.088177        | 1038.047726     | 2058.061628    | <b>1029.534452</b> | 2057.077612        | 1029.042444      | V    | <b>700.319520</b>  | 350.663398         | 683.292971        | 342.150123       | 682.308955         | 341.658115       | 5  |
| 18 | 2204.130770        | 1102.569023     | 2187.104221    | 1094.055748        | 2186.120205        | 1093.563740      | E    | <b>601.251106</b>  | 301.129191         | 584.224557        | 292.615916       | 583.240541         | 292.123908       | 4  |
| 19 | 2364.161419        | 1182.584347     | 2347.134870    | 1174.071073        | 2346.150854        | 1173.579065      | C    | <b>472.208513</b>  | 236.607894         | 455.181964        | 228.094620       |                    |                  | 3  |
| 20 | 2501.220331        | 1251.113803     | 2484.193782    | 1242.600529        | 2483.209766        | 1242.108521      | H    | <b>312.177864</b>  | 156.592570         | 295.151315        | 148.079295       |                    |                  | 2  |
| 21 |                    |                 |                |                    |                    |                  | R    | <b>175.118952</b>  | 88.063114          | 158.092403        | 79.549839        |                    |                  | 1  |

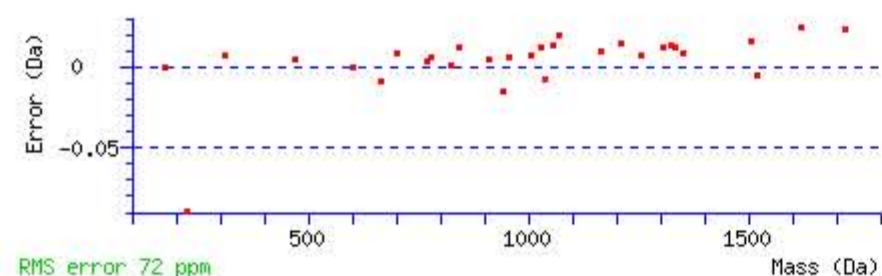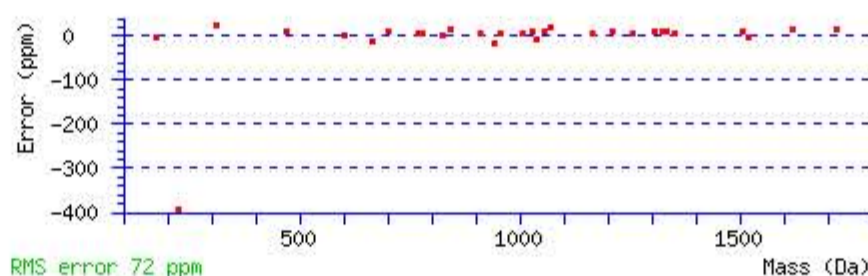

NCBI BLAST search of **LLQDEFPGIPSPLDAAVECHR**

(Parameters: blastp, nr protein database, expect=20000, no filter, PAM30)

Other BLAST [web gateways](#)

All matches to this query

| Score | Mr(calc):   | Delta    | Sequence                              |
|-------|-------------|----------|---------------------------------------|
| 78.8  | 2674.324722 | 0.023910 | <a href="#">LLQDEFPGIPSPLDAAVECHR</a> |
| 0.0   | 2674.320724 | 0.027908 | <a href="#">VSVETSPPQTA AQDPQOGQR</a> |



# MASCOT SEARCH RESULTS

## Peptide View

MS/MS Fragmentation of **QEATTVSCFR**

Found in **HGFL\_HUMAN**, Hepatocyte growth factor-like protein OS=Homo sapiens GN=MST1 PE=1 SV=2

Match to Query 42902: 1508.711468 from(755.363010,2+) rtinseconds(1780) index(78783)

Title: Locus:1.1.1.2499.17 File:"2013-07-02 CLN FXIII 30 min 1st FT.wiff"

Data file C:\Program Files (x86)\Matrix Science\Mascot Daemon\mgf1 FXIII 30 min 1st\mascot\_daemon\_merge.mgf

Click mouse within plot area to zoom in by factor of two about that point

Or, Plot from  to  Da

Label all possible matches  Label matches used for scoring

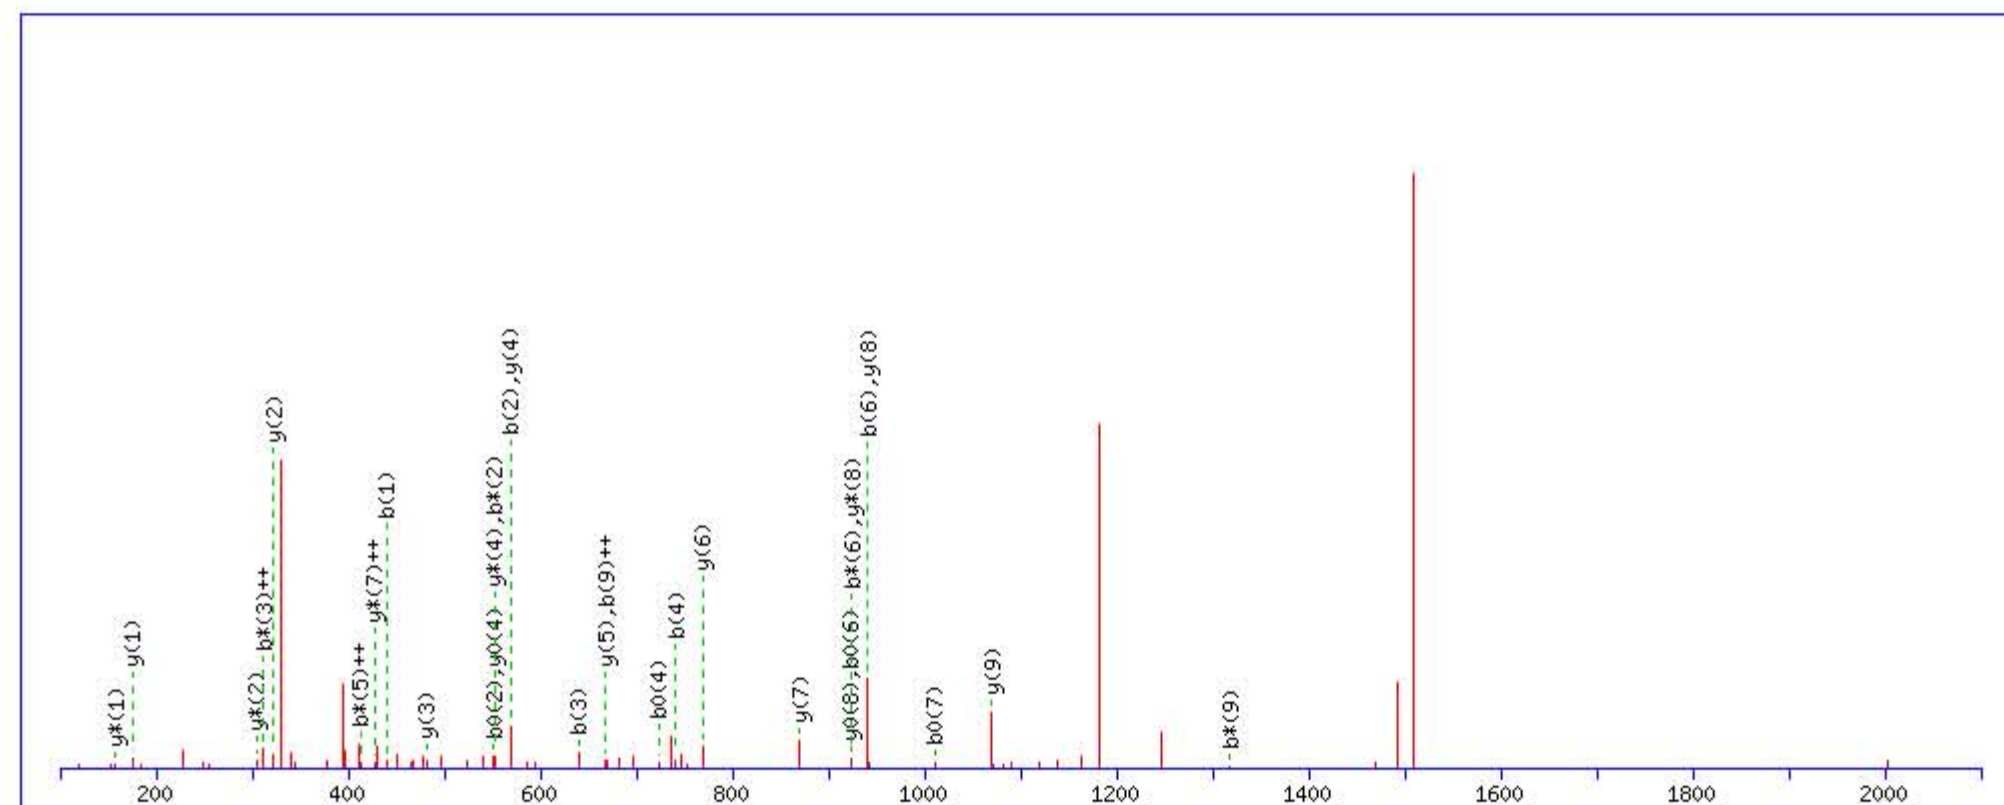

Monoisotopic mass of neutral peptide Mr(calc): 1508.711578

Fixed modifications: Carbamidomethyl (C) (apply to specified residues or termini only)

Variable modifications:

Q1 : Biotin:Thermo-21345 (Q)

Ions Score: 40 Expect: 0.00043

Matches : 31/100 fragment ions using 65 most intense peaks [\(help\)](#)

| #  | b                 | b <sup>++</sup>   | b <sup>*</sup>     | b <sup>*++</sup>  | b <sup>0</sup>     | b <sup>0++</sup> | Seq.     | y                  | y <sup>++</sup> | y <sup>*</sup>    | y <sup>*++</sup>  | y <sup>0</sup>    | y <sup>0++</sup> | #         |
|----|-------------------|-------------------|--------------------|-------------------|--------------------|------------------|----------|--------------------|-----------------|-------------------|-------------------|-------------------|------------------|-----------|
| 1  | <b>440.232602</b> | 220.619939        | 423.206053         | 212.106664        |                    |                  | <b>Q</b> |                    |                 |                   |                   |                   |                  | <b>10</b> |
| 2  | <b>569.275195</b> | 285.141236        | <b>552.248646</b>  | 276.627961        | <b>551.264630</b>  | 276.135953       | <b>E</b> | <b>1070.493522</b> | 535.750399      | 1053.466973       | 527.237125        | 1052.482957       | 526.745117       | <b>9</b>  |
| 3  | <b>640.312309</b> | 320.659793        | 623.285760         | <b>312.146518</b> | 622.301744         | 311.654510       | <b>A</b> | <b>941.450929</b>  | 471.229103      | <b>924.424380</b> | 462.715828        | <b>923.440364</b> | 462.223820       | <b>8</b>  |
| 4  | <b>741.359988</b> | 371.183632        | 724.333439         | 362.670358        | <b>723.349423</b>  | 362.178350       | <b>T</b> | <b>870.413815</b>  | 435.710546      | 853.387266        | <b>427.197271</b> | 852.403250        | 426.705263       | <b>7</b>  |
| 5  | 842.407667        | 421.707472        | 825.381118         | <b>413.194197</b> | 824.397102         | 412.702189       | <b>T</b> | <b>769.366136</b>  | 385.186706      | 752.339587        | 376.673432        | 751.355571        | 376.181424       | <b>6</b>  |
| 6  | <b>941.476081</b> | 471.241679        | <b>924.449532</b>  | 462.728404        | <b>923.465516</b>  | 462.236396       | <b>V</b> | <b>668.318457</b>  | 334.662867      | 651.291908        | 326.149592        | 650.307892        | 325.657584       | <b>5</b>  |
| 7  | 1028.508109       | 514.757693        | 1011.481560        | 506.244418        | <b>1010.497544</b> | 505.752410       | <b>S</b> | <b>569.250043</b>  | 285.128660      | <b>552.223494</b> | 276.615385        | <b>551.239478</b> | 276.123377       | <b>4</b>  |
| 8  | 1188.538758       | 594.773017        | 1171.512209        | 586.259743        | 1170.528193        | 585.767735       | <b>C</b> | <b>482.218015</b>  | 241.612646      | 465.191466        | 233.099371        |                   |                  | <b>3</b>  |
| 9  | 1335.607172       | <b>668.307224</b> | <b>1318.580623</b> | 659.793950        | 1317.596607        | 659.301942       | <b>F</b> | <b>322.187366</b>  | 161.597321      | <b>305.160817</b> | 153.084047        |                   |                  | <b>2</b>  |
| 10 |                   |                   |                    |                   |                    |                  | <b>R</b> | <b>175.118952</b>  | 88.063114       | <b>158.092403</b> | 79.549839         |                   |                  | <b>1</b>  |

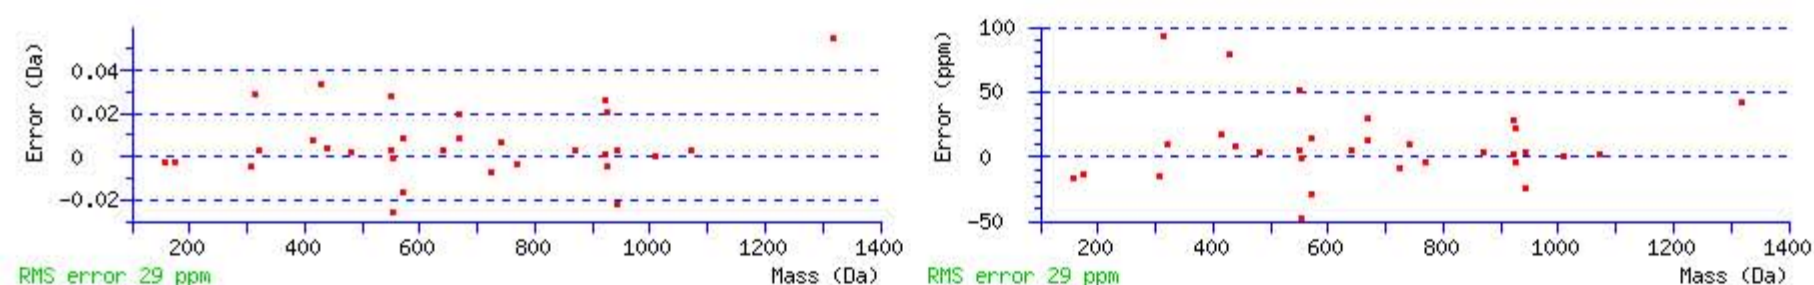

NCBI BLAST search of **QEATTVSCFR**

(Parameters: blastp, nr protein database, expect=20000, no filter, PAM30)

Other BLAST [web gateways](#)

All matches to this query

| Score | Mr(calc):   | Delta     | Sequence                       |
|-------|-------------|-----------|--------------------------------|
| 39.5  | 1508.711578 | -0.000110 | <a href="#">QEATTVSCFR</a>     |
| 3.4   | 1508.726624 | -0.015156 | <a href="#">RDGQLQRMNYGR</a>   |
| 2.9   | 1508.708191 | 0.003277  | <a href="#">EYGSMYTVHLGPR</a>  |
| 2.9   | 1508.711380 | 0.000088  | <a href="#">RTASGGRTEQGMSR</a> |
| 2.0   | 1508.732681 | -0.021213 | <a href="#">KEAMKVSSQPCTK</a>  |
| 0.9   | 1508.711548 | -0.000080 | <a href="#">QMSKYPSGER</a>     |
| 0.4   | 1508.719437 | -0.007969 | <a href="#">TFSWKSSLTCHR</a>   |

Mascot: <http://www.matrixscience.com/>



# MASCOT Search Results

## Peptide View

MS/MS Fragmentation of **WSAETPHKQFTFTSEPHAQLEENFCR**

Found in **HGFL\_HUMAN**, Hepatocyte growth factor-like protein OS=Homo sapiens GN=MST1 PE=1 SV=2

Match to Query 80579: 3584.673020 from(717.941880,5+) rtinseconds(2036) index(80514)

Title: Locus:1.1.1.2588.17 File:"2013-07-02 CLN FXIII 30 min 1st FT.wiff"

Data file C:\Program Files (x86)\Matrix Science\Mascot Daemon\mgf1 FXIII 30 min 1st\mascot\_daemon\_merge.mgf

Click mouse within plot area to zoom in by factor of two about that point

Or, Plot from  to  Da

Label all possible matches  Label matches used for scoring

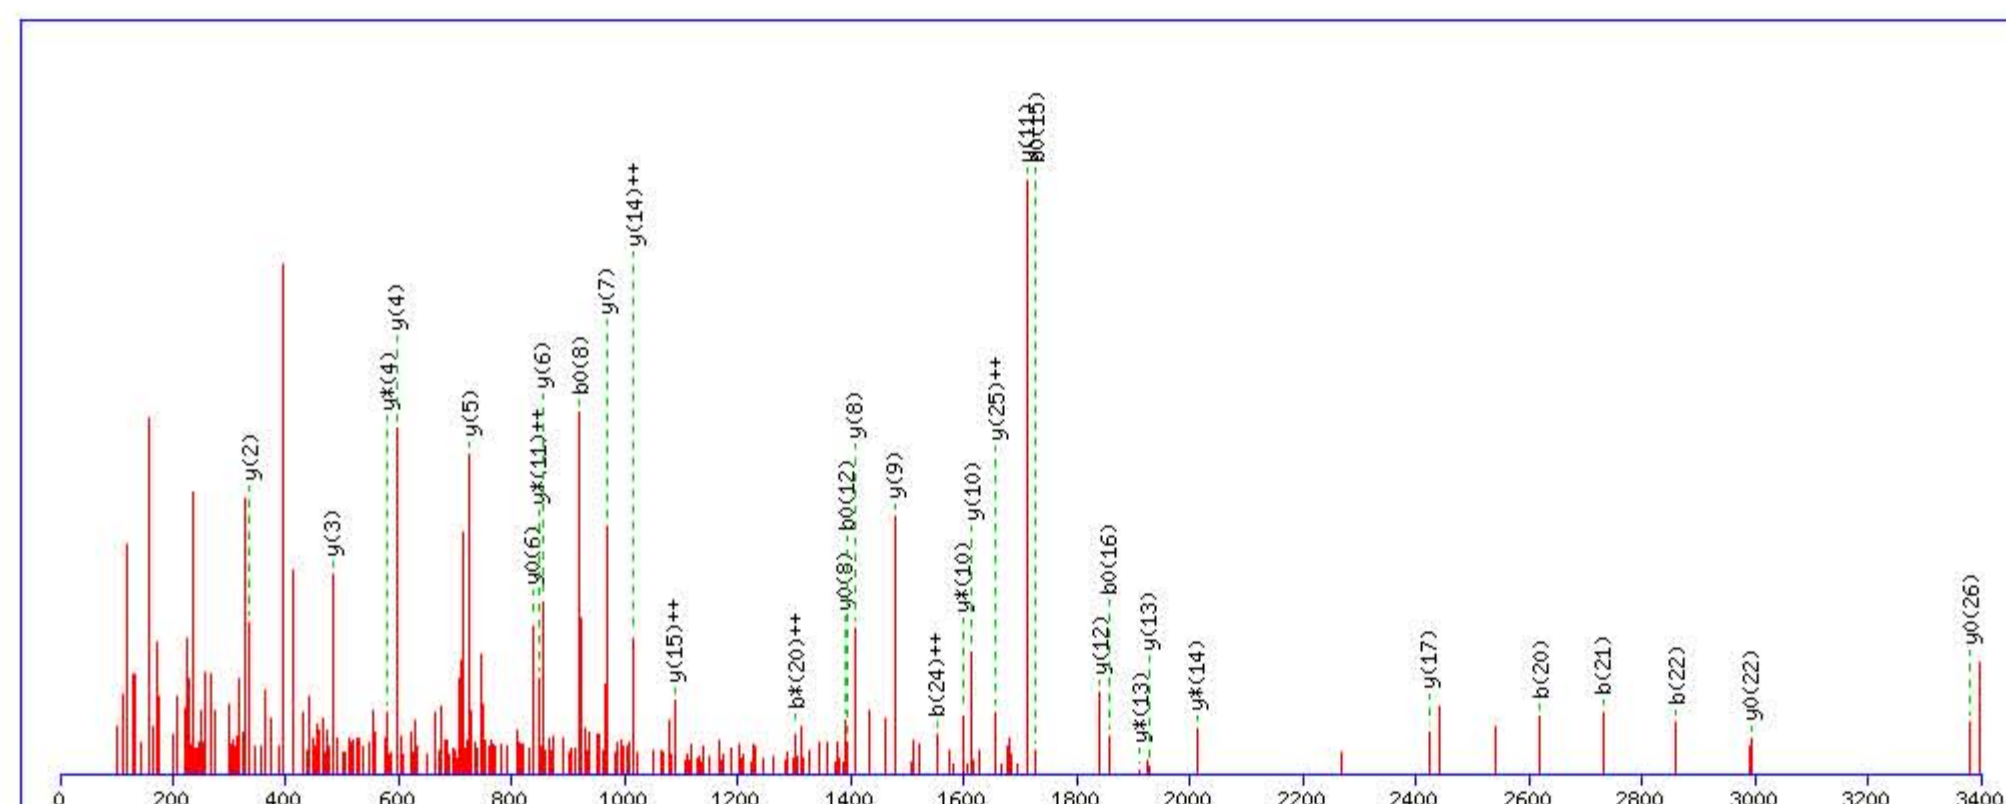

Monoisotopic mass of neutral peptide Mr(calc): 3584.660538

Fixed modifications: Carbamidomethyl (C) (apply to specified residues or termini only)

Variable modifications:

Q20 : Biotin:Thermo-21345 (Q)

Ions Score: 51 Expect: 0.00012

Matches : 34/288 fragment ions using 69 most intense peaks [\(help\)](#)

| #  | b           | b <sup>++</sup> | b <sup>*</sup> | b <sup>*++</sup> | b <sup>0</sup> | b <sup>0++</sup> | Seq. | y           | y <sup>++</sup> | y <sup>*</sup> | y <sup>*++</sup> | y <sup>0</sup> | y <sup>0++</sup> | #  |
|----|-------------|-----------------|----------------|------------------|----------------|------------------|------|-------------|-----------------|----------------|------------------|----------------|------------------|----|
| 1  | 187.086589  | 94.046932       |                |                  |                |                  | W    |             |                 |                |                  |                |                  | 27 |
| 2  | 274.118617  | 137.562947      |                |                  | 256.108052     | 128.557664       | S    | 3399.588510 | 1700.297893     | 3382.561961    | 1691.784618      | 3381.577945    | 1691.292610      | 26 |
| 3  | 345.155731  | 173.081504      |                |                  | 327.145166     | 164.076221       | A    | 3312.556482 | 1656.781879     | 3295.529933    | 1648.268605      | 3294.545917    | 1647.776597      | 25 |
| 4  | 474.198324  | 237.602800      |                |                  | 456.187759     | 228.597518       | E    | 3241.519368 | 1621.263322     | 3224.492819    | 1612.750047      | 3223.508803    | 1612.258040      | 24 |
| 5  | 575.246003  | 288.126640      |                |                  | 557.235438     | 279.121357       | T    | 3112.476775 | 1556.742026     | 3095.450226    | 1548.228751      | 3094.466210    | 1547.736743      | 23 |
| 6  | 672.298767  | 336.653022      |                |                  | 654.288202     | 327.647739       | P    | 3011.429096 | 1506.218186     | 2994.402547    | 1497.704912      | 2993.418531    | 1497.212904      | 22 |
| 7  | 809.357679  | 405.182478      |                |                  | 791.347114     | 396.177195       | H    | 2914.376332 | 1457.691804     | 2897.349783    | 1449.178530      | 2896.365767    | 1448.686522      | 21 |
| 8  | 937.452642  | 469.229959      | 920.426093     | 460.716685       | 919.442077     | 460.224677       | K    | 2777.317420 | 1389.162348     | 2760.290871    | 1380.649074      | 2759.306855    | 1380.157066      | 20 |
| 9  | 1034.505406 | 517.756341      | 1017.478857    | 509.243067       | 1016.494841    | 508.751059       | P    | 2649.222457 | 1325.114867     | 2632.195908    | 1316.601592      | 2631.211892    | 1316.109584      | 19 |
| 10 | 1162.563984 | 581.785630      | 1145.537435    | 573.272356       | 1144.553419    | 572.780348       | Q    | 2552.169693 | 1276.588485     | 2535.143144    | 1268.075210      | 2534.159128    | 1267.583202      | 18 |
| 11 | 1309.632398 | 655.319837      | 1292.605849    | 646.806563       | 1291.621833    | 646.314555       | F    | 2424.111115 | 1212.559196     | 2407.084566    | 1204.045921      | 2406.100550    | 1203.553913      | 17 |
| 12 | 1410.680077 | 705.843677      | 1393.653528    | 697.330402       | 1392.669512    | 696.838394       | T    | 2277.042701 | 1139.024988     | 2260.016152    | 1130.511714      | 2259.032136    | 1130.019706      | 16 |
| 13 | 1557.748491 | 779.377884      | 1540.721942    | 770.864609       | 1539.737926    | 770.372601       | F    | 2175.995022 | 1088.501149     | 2158.968473    | 1079.987874      | 2157.984457    | 1079.495866      | 15 |
| 14 | 1658.796170 | 829.901723      | 1641.769621    | 821.388449       | 1640.785605    | 820.896441       | T    | 2028.926608 | 1014.966942     | 2011.900059    | 1006.453668      | 2010.916043    | 1005.961660      | 14 |
| 15 | 1745.828198 | 873.417737      | 1728.801649    | 864.904463       | 1727.817633    | 864.412455       | S    | 1927.878929 | 964.443103      | 1910.852380    | 955.929828       | 1909.868364    | 955.437820       | 13 |
| 16 | 1874.870791 | 937.939034      | 1857.844242    | 929.425759       | 1856.860226    | 928.933751       | E    | 1840.846901 | 920.927089      | 1823.820352    | 912.413814       | 1822.836336    | 911.921806       | 12 |
| 17 | 1971.923555 | 986.465416      | 1954.897006    | 977.952141       | 1953.912990    | 977.460133       | P    | 1711.804308 | 856.405792      | 1694.777759    | 847.892518       | 1693.793743    | 847.400510       | 11 |
| 18 | 2108.982467 | 1054.994872     | 2091.955918    | 1046.481597      | 2090.971902    | 1045.989589      | H    | 1614.751544 | 807.879410      | 1597.724995    | 799.366136       | 1596.740979    | 798.874128       | 10 |
| 19 | 2180.019581 | 1090.513429     | 2162.993032    | 1082.000154      | 2162.009016    | 1081.508146      | A    | 1477.692632 | 739.349954      | 1460.666083    | 730.836680       | 1459.682067    | 730.344672       | 9  |
| 20 | 2619.244907 | 1310.126092     | 2602.218358    | 1301.612817      | 2601.234342    | 1301.120809      | Q    | 1406.655518 | 703.831397      | 1389.628969    | 695.318123       | 1388.644953    | 694.826115       | 8  |
| 21 | 2732.328971 | 1366.668124     | 2715.302422    | 1358.154849      | 2714.318406    | 1357.662841      | L    | 967.430192  | 484.218734      | 950.403643     | 475.705460       | 949.419627     | 475.213452       | 7  |
| 22 | 2861.371564 | 1431.189420     | 2844.345015    | 1422.676146      | 2843.360999    | 1422.184138      | E    | 854.346128  | 427.676702      | 837.319579     | 419.163427       | 836.335563     | 418.671419       | 6  |
| 23 | 2990.414157 | 1495.710717     | 2973.387608    | 1487.197442      | 2972.403592    | 1486.705434      | E    | 725.303535  | 363.155405      | 708.276986     | 354.642131       | 707.292970     | 354.150123       | 5  |
| 24 | 3104.457084 | 1552.732180     | 3087.430535    | 1544.218906      | 3086.446519    | 1543.726898      | N    | 596.260942  | 298.634109      | 579.234393     | 290.120834       |                |                  | 4  |
| 25 | 3251.525498 | 1626.266387     | 3234.498949    | 1617.753113      | 3233.514933    | 1617.261105      | F    | 482.218015  | 241.612645      | 465.191466     | 233.099371       |                |                  | 3  |
| 26 | 3411.556147 | 1706.281712     | 3394.529598    | 1697.768437      | 3393.545582    | 1697.276429      | C    | 335.149601  | 168.078438      | 318.123052     | 159.565164       |                |                  | 2  |
| 27 |             |                 |                |                  |                |                  | R    | 175.118952  | 88.063114       | 158.092403     | 79.549839        |                |                  | 1  |

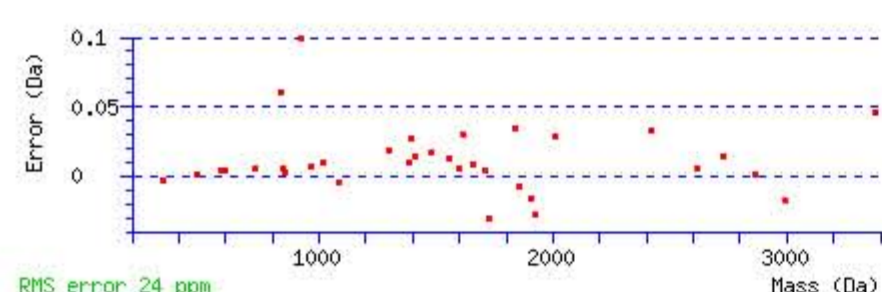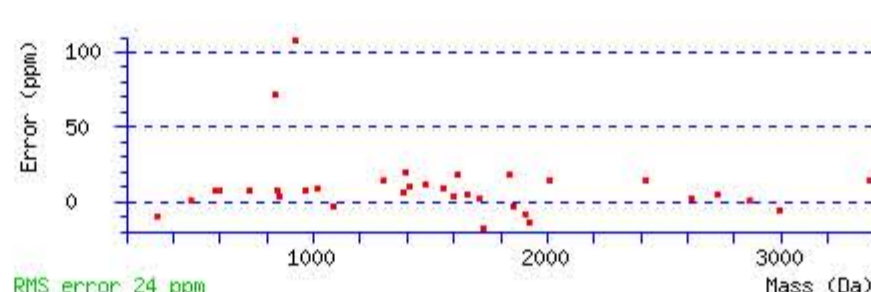

NCBI BLAST search of **WSAETPHKQFTFTSEPHAQLEENFCR**

(Parameters: blastp, nr protein database, expect=20000, no filter, PAM30)

Other BLAST [web gateways](#)

All matches to this query

| Score | Mr(calc):   | Delta    | Sequence                                   |
|-------|-------------|----------|--------------------------------------------|
| 51.3  | 3584.660538 | 0.012482 | <a href="#">WSAETPHKQFTFTSEPHAQLEENFCR</a> |
| 1.9   | 3584.660538 | 0.012482 | <a href="#">WSAETPHKQFTFTSEPHAQLEENFCR</a> |



# MASCOT Search Results

## Peptide View

MS/MS Fragmentation of **FTCACPDQFK**

Found in **HABP2\_HUMAN**, Hyaluronan-binding protein 2 OS=Homo sapiens GN=HABP2 PE=1 SV=1

Match to Query 45270: 1583.696408 from(792.855480,2+) rtinseconds(1854) index(61996)

Title: Locus:1.1.1.2643.18 File:"2013-07-02 CLN FXIII 30 min 1st F 4.wiff"

Data file C:\Program Files (x86)\Matrix Science\Mascot Daemon\mgf1 FXIII 30 min 1st\mascot\_daemon\_merge.mgf

Click mouse within plot area to zoom in by factor of two about that point

Or, Plot from  to  Da

Label all possible matches  Label matches used for scoring

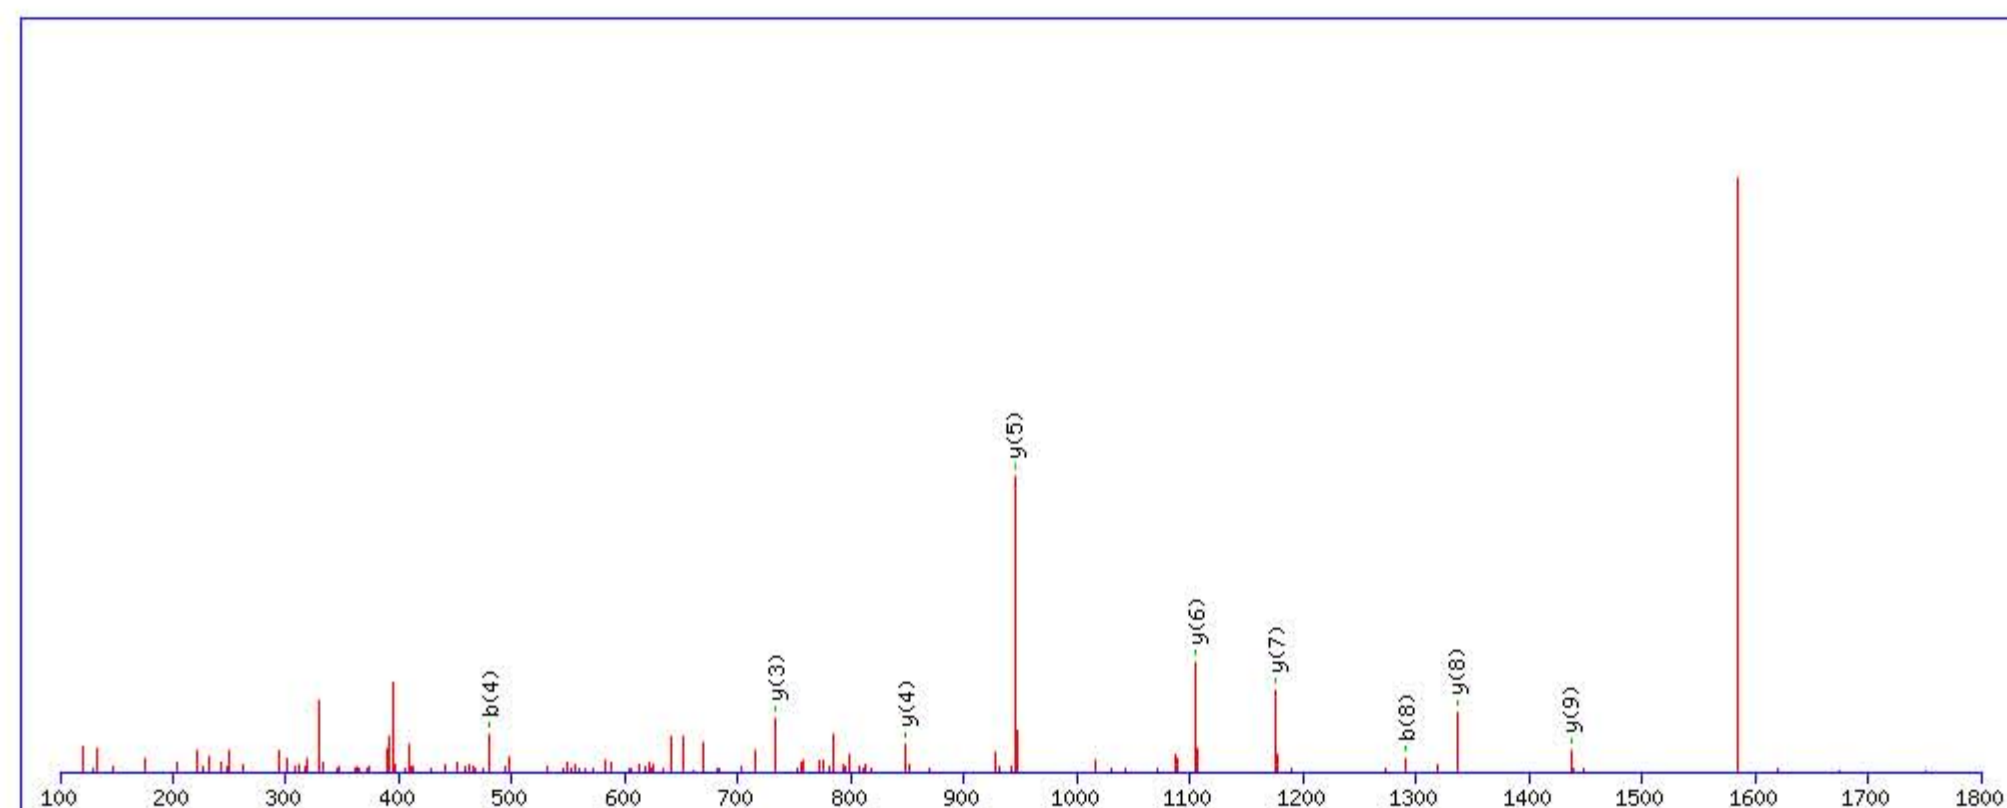

Monoisotopic mass of neutral peptide Mr(calc): 1583.693497

Fixed modifications: Carbamidomethyl (C) (apply to specified residues or termini only)

Variable modifications:

Q8 : Biotin:Thermo-21345 (Q)

Ions Score: 49 Expect: 7.6e-005

Matches : 9/86 fragment ions using 14 most intense peaks [\(help\)](#)

| #  | b           | b <sup>++</sup> | b <sup>*</sup> | b <sup>*++</sup> | b <sup>0</sup> | b <sup>0++</sup> | Seq. | y           | y <sup>++</sup> | y <sup>*</sup> | y <sup>*++</sup> | y <sup>0</sup> | y <sup>0++</sup> | #  |
|----|-------------|-----------------|----------------|------------------|----------------|------------------|------|-------------|-----------------|----------------|------------------|----------------|------------------|----|
| 1  | 148.075690  | 74.541483       |                |                  |                |                  | F    |             |                 |                |                  |                |                  | 10 |
| 2  | 249.123369  | 125.065322      |                |                  | 231.112804     | 116.060040       | T    | 1437.632342 | 719.319809      | 1420.605793    | 710.806535       | 1419.621777    | 710.314527       | 9  |
| 3  | 409.154018  | 205.080647      |                |                  | 391.143453     | 196.075365       | C    | 1336.584663 | 668.795970      | 1319.558114    | 660.282695       | 1318.574098    | 659.790687       | 8  |
| 4  | 480.191132  | 240.599204      |                |                  | 462.180567     | 231.593921       | A    | 1176.554014 | 588.780645      | 1159.527465    | 580.267371       | 1158.543449    | 579.775363       | 7  |
| 5  | 640.221781  | 320.614529      |                |                  | 622.211216     | 311.609246       | C    | 1105.516900 | 553.262088      | 1088.490351    | 544.748814       | 1087.506335    | 544.256806       | 6  |
| 6  | 737.274545  | 369.140911      |                |                  | 719.263980     | 360.135628       | P    | 945.486251  | 473.246764      | 928.459702     | 464.733489       | 927.475686     | 464.241481       | 5  |
| 7  | 852.301488  | 426.654382      |                |                  | 834.290923     | 417.649100       | D    | 848.433487  | 424.720382      | 831.406938     | 416.207107       | 830.422922     | 415.715099       | 4  |
| 8  | 1291.526814 | 646.267045      | 1274.500265    | 637.753771       | 1273.516249    | 637.261763       | Q    | 733.406544  | 367.206910      | 716.379995     | 358.693636       |                |                  | 3  |
| 9  | 1438.595228 | 719.801252      | 1421.568679    | 711.287978       | 1420.584663    | 710.795970       | F    | 294.181218  | 147.594247      | 277.154669     | 139.080973       |                |                  | 2  |
| 10 |             |                 |                |                  |                |                  | K    | 147.112804  | 74.060040       | 130.086255     | 65.546765        |                |                  | 1  |

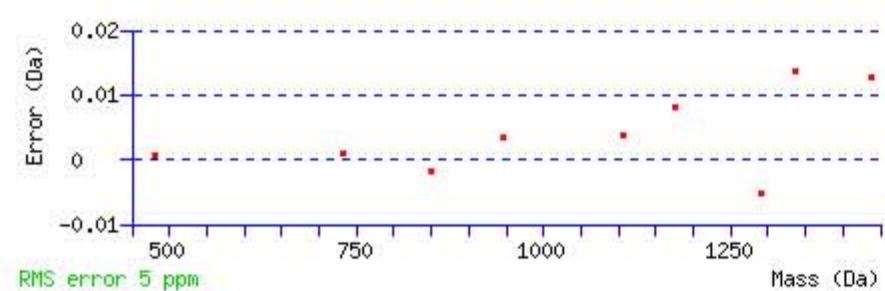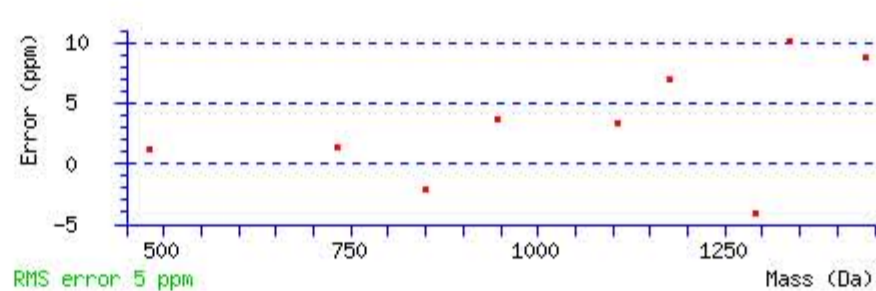

NCBI BLAST search of [FTCACPDQFK](#)

(Parameters: blastp, nr protein database, expect=20000, no filter, PAM30)

Other BLAST [web gateways](#)

## All matches to this query

| Score | Mr(calc):   | Delta     | Sequence                      |
|-------|-------------|-----------|-------------------------------|
| 48.5  | 1583.693497 | 0.002911  | <a href="#">FTCACPDQFK</a>    |
| 4.6   | 1583.703827 | -0.007419 | <a href="#">FKDACGKSEDWNK</a> |



# MASCOT Search Results

## Peptide View

MS/MS Fragmentation of **GQCLITQSPPYR**

Found in **HABP2\_HUMAN**, Hyaluronan-binding protein 2 OS=Homo sapiens GN=HABP2 PE=1 SV=1

Match to Query 54156: 1892.938288 from(947.476420,2+) rtinseconds(2079) index(63606)

Title: Locus:1.1.1.2721.12 File:"2013-07-02 CLN FXIII 30 min 1st F 4.wiff"

Data file C:\Program Files (x86)\Matrix Science\Mascot Daemon\mgf\1 FXIII 30 min 1st\mascot\_daemon\_merge.mgf

Click mouse within plot area to zoom in by factor of two about that point

Or, Plot from  to  Da

Label all possible matches  Label matches used for scoring

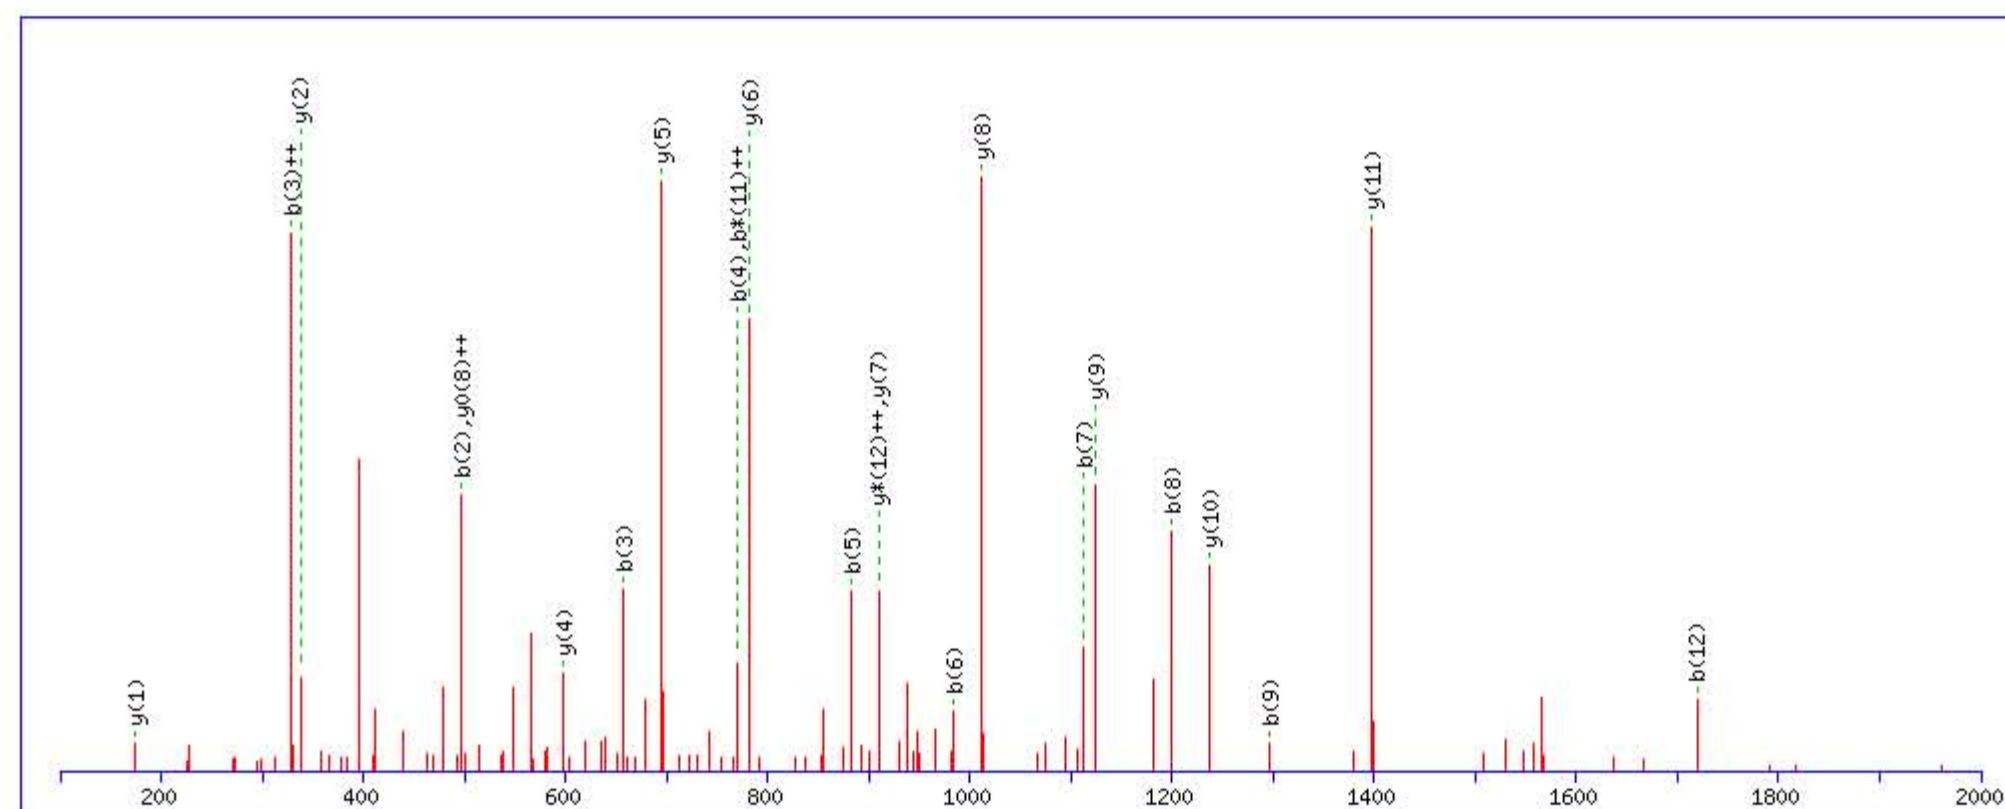

Monoisotopic mass of neutral peptide Mr(calc): 1892.927704

Fixed modifications: Carbamidomethyl (C) (apply to specified residues or termini only)

Variable modifications:

Q2 : Biotin:Thermo-21345 (Q)

Ions Score: 66 Expect: 9.7e-007

Matches : 23/122 fragment ions using 32 most intense peaks [\(help\)](#)

| #  | b                  | b <sup>++</sup>   | b <sup>*</sup> | b <sup>*++</sup>  | b <sup>0</sup> | b <sup>0++</sup> | Seq. | y                  | y <sup>++</sup> | y <sup>*</sup> | y <sup>*++</sup>  | y <sup>0</sup> | y <sup>0++</sup>  | #  |
|----|--------------------|-------------------|----------------|-------------------|----------------|------------------|------|--------------------|-----------------|----------------|-------------------|----------------|-------------------|----|
| 1  | 58.028740          | 29.518008         |                |                   |                |                  | G    |                    |                 |                |                   |                |                   | 13 |
| 2  | <b>497.254066</b>  | 249.130671        | 480.227517     | 240.617397        |                |                  | Q    | 1836.913526        | 918.960401      | 1819.886977    | <b>910.447127</b> | 1818.902961    | 909.955119        | 12 |
| 3  | <b>657.284715</b>  | <b>329.145996</b> | 640.258166     | 320.632721        |                |                  | C    | <b>1397.688200</b> | 699.347738      | 1380.661651    | 690.834464        | 1379.677635    | 690.342456        | 11 |
| 4  | <b>770.368779</b>  | 385.688028        | 753.342230     | 377.174753        |                |                  | L    | <b>1237.657551</b> | 619.332414      | 1220.631002    | 610.819139        | 1219.646986    | 610.327131        | 10 |
| 5  | <b>883.452843</b>  | 442.230060        | 866.426294     | 433.716785        |                |                  | I    | <b>1124.573487</b> | 562.790382      | 1107.546938    | 554.277107        | 1106.562922    | 553.785099        | 9  |
| 6  | <b>984.500522</b>  | 492.753899        | 967.473973     | 484.240625        | 966.489957     | 483.748617       | T    | <b>1011.489423</b> | 506.248350      | 994.462874     | 497.735075        | 993.478858     | <b>497.243067</b> | 8  |
| 7  | <b>1112.559100</b> | 556.783188        | 1095.532551    | 548.269914        | 1094.548535    | 547.777906       | Q    | <b>910.441744</b>  | 455.724510      | 893.415195     | 447.211236        | 892.431179     | 446.719228        | 7  |
| 8  | <b>1199.591128</b> | 600.299202        | 1182.564579    | 591.785928        | 1181.580563    | 591.293920       | S    | <b>782.383166</b>  | 391.695221      | 765.356617     | 383.181947        | 764.372601     | 382.689939        | 6  |
| 9  | <b>1296.643892</b> | 648.825584        | 1279.617343    | 640.312310        | 1278.633327    | 639.820302       | P    | <b>695.351138</b>  | 348.179207      | 678.324589     | 339.665933        |                |                   | 5  |
| 10 | 1393.696656        | 697.351966        | 1376.670107    | 688.838692        | 1375.686091    | 688.346684       | P    | <b>598.298374</b>  | 299.652825      | 581.271825     | 291.139551        |                |                   | 4  |
| 11 | 1556.759985        | 778.883631        | 1539.733436    | <b>770.370356</b> | 1538.749420    | 769.878348       | Y    | 501.245610         | 251.126443      | 484.219061     | 242.613169        |                |                   | 3  |
| 12 | <b>1719.823314</b> | 860.415295        | 1702.796765    | 851.902021        | 1701.812749    | 851.410013       | Y    | <b>338.182281</b>  | 169.594778      | 321.155732     | 161.081504        |                |                   | 2  |
| 13 |                    |                   |                |                   |                |                  | R    | <b>175.118952</b>  | 88.063114       | 158.092403     | 79.549839         |                |                   | 1  |

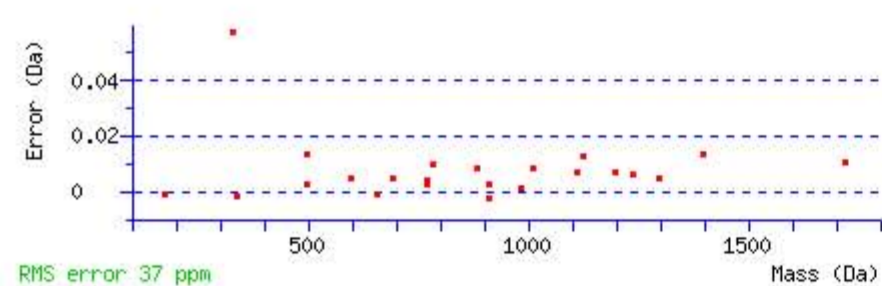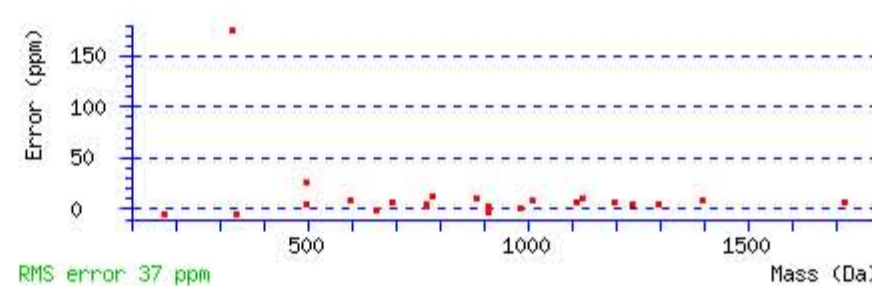

NCBI BLAST search of **GQCLITQSPPYR**

(Parameters: blastp, nr protein database, expect=20000, no filter, PAM30)

Other BLAST [web gateways](#)

All matches to this query

| Score | Mr(calc):   | Delta     | Sequence                            |
|-------|-------------|-----------|-------------------------------------|
| 66.3  | 1892.927704 | 0.010584  | <a href="#">GQCLITQSPPYR</a>        |
| 13.7  | 1892.927704 | 0.010584  | <a href="#">GQCLITQSPPYR</a>        |
| 2.1   | 1892.910400 | 0.027888  | <a href="#">SSRNYFGAQPBYR</a>       |
| 1.8   | 1892.963882 | -0.025594 | <a href="#">SGREQAEPRTPAQR</a>      |
| 1.3   | 1892.938065 | 0.000223  | <a href="#">AQESVGFDPAPAAANPGPR</a> |



# MASCOT Search Results

## Peptide View

MS/MS Fragmentation of **KGDTFSCMVGHEALPLAFTQK**

Found in **IGHA1\_HUMAN**, Ig alpha-1 chain C region OS=Homo sapiens GN=IGHA1 PE=1 SV=2

Match to Query 70123: 2647.305856 from(662.833740,4+) rtinseconds(2340) index(65285)

Title: Locus:1.1.1.2812.14 File:"2013-07-02 CLN FXIII 30 min 1st F 4.wiff"

Data file C:\Program Files (x86)\Matrix Science\Mascot Daemon\mgf1 FXIII 30 min 1st\mascot\_daemon\_merge.mgf

Click mouse within plot area to zoom in by factor of two about that point

Or, Plot from  to  Da

Label all possible matches  Label matches used for scoring

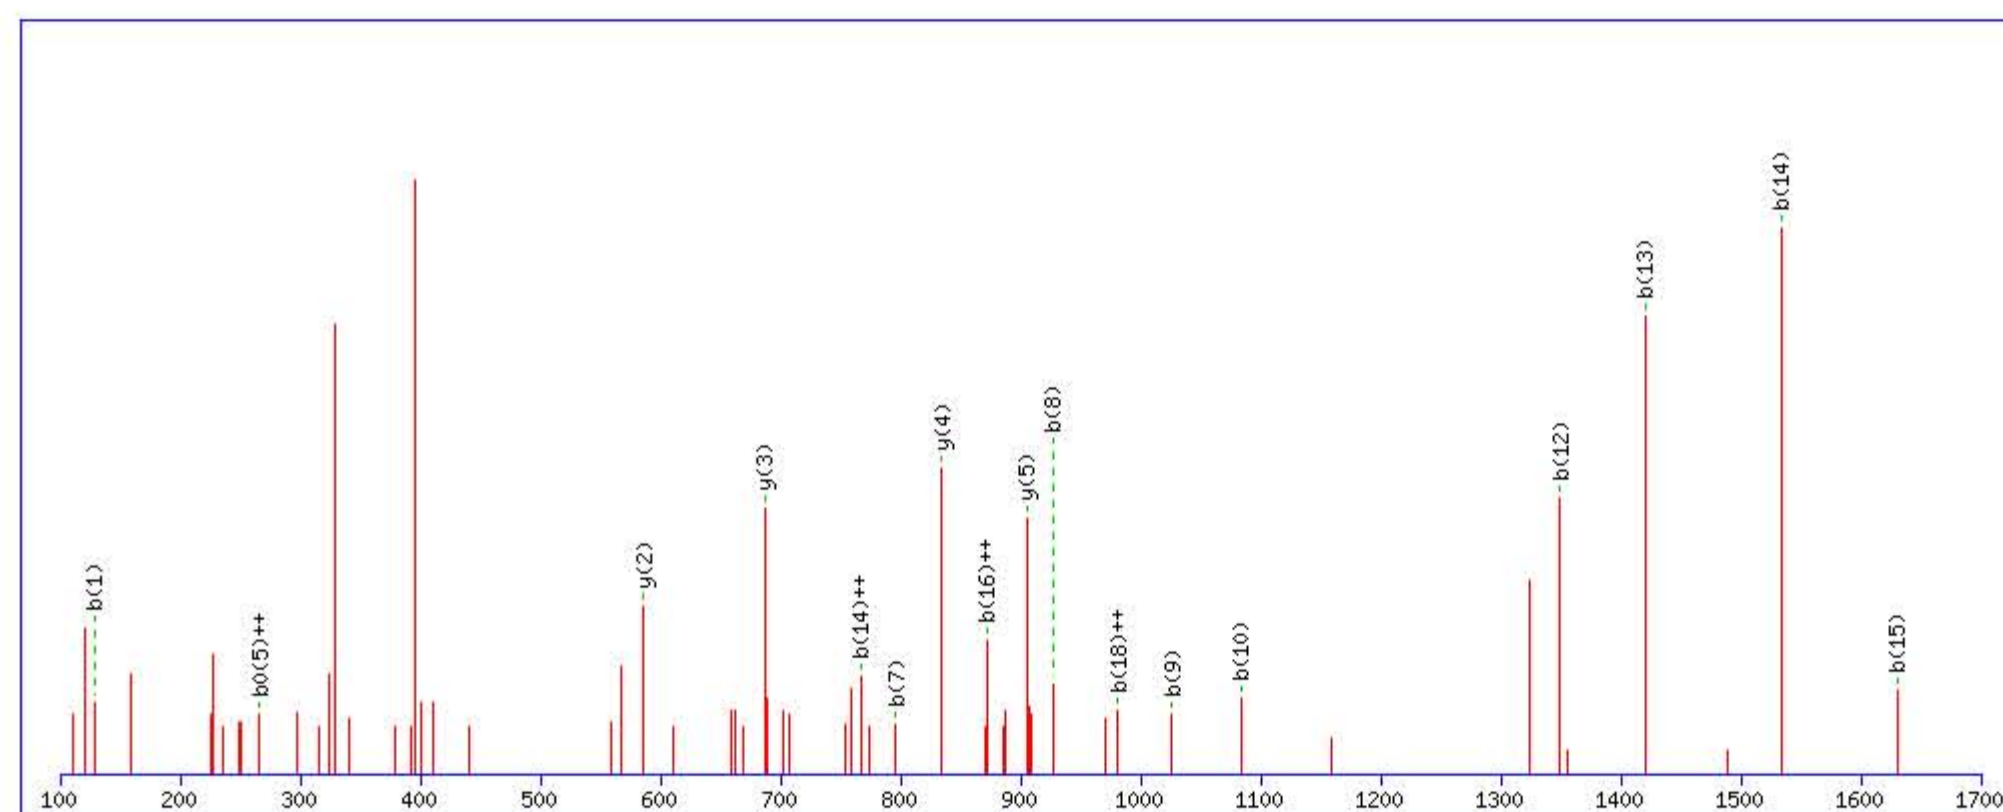

Monoisotopic mass of neutral peptide Mr(calc): 2647.296082

Fixed modifications: Carbamidomethyl (C) (apply to specified residues or termini only)

Variable modifications:

Q20 : Biotin:Thermo-21345 (Q)

Ions Score: 37 Expect: 0.0012

Matches : 17/232 fragment ions using 42 most intense peaks [\(help\)](#)

| #  | b                  | b <sup>++</sup>   | b <sup>*</sup> | b <sup>*++</sup> | b <sup>0</sup> | b <sup>0++</sup>  | Seq.     | y                 | y <sup>++</sup> | y <sup>*</sup> | y <sup>*++</sup> | y <sup>0</sup> | y <sup>0++</sup> | #         |
|----|--------------------|-------------------|----------------|------------------|----------------|-------------------|----------|-------------------|-----------------|----------------|------------------|----------------|------------------|-----------|
| 1  | <b>129.102239</b>  | 65.054757         | 112.075690     | 56.541483        |                |                   | <b>K</b> |                   |                 |                |                  |                |                  | <b>21</b> |
| 2  | 186.123703         | 93.565489         | 169.097154     | 85.052215        |                |                   | <b>G</b> | 2520.208388       | 1260.607832     | 2503.181839    | 1252.094557      | 2502.197823    | 1251.602549      | <b>20</b> |
| 3  | 301.150646         | 151.078961        | 284.124097     | 142.565687       | 283.140081     | 142.073679        | <b>D</b> | 2463.186924       | 1232.097100     | 2446.160375    | 1223.583825      | 2445.176359    | 1223.091817      | <b>19</b> |
| 4  | 402.198325         | 201.602801        | 385.171776     | 193.089526       | 384.187760     | 192.597518        | <b>T</b> | 2348.159981       | 1174.583628     | 2331.133432    | 1166.070354      | 2330.149416    | 1165.578346      | <b>18</b> |
| 5  | 549.266739         | 275.137008        | 532.240190     | 266.623733       | 531.256174     | <b>266.131725</b> | <b>F</b> | 2247.112302       | 1124.059789     | 2230.085753    | 1115.546514      | 2229.101737    | 1115.054506      | <b>17</b> |
| 6  | 636.298767         | 318.653022        | 619.272218     | 310.139747       | 618.288202     | 309.647739        | <b>S</b> | 2100.043888       | 1050.525582     | 2083.017339    | 1042.012307      | 2082.033323    | 1041.520299      | <b>16</b> |
| 7  | <b>796.329416</b>  | 398.668346        | 779.302867     | 390.155072       | 778.318851     | 389.663064        | <b>C</b> | 2013.011860       | 1007.009568     | 1995.985311    | 998.496294       | 1995.001295    | 998.004286       | <b>15</b> |
| 8  | <b>927.369901</b>  | 464.188589        | 910.343352     | 455.675314       | 909.359336     | 455.183306        | <b>M</b> | 1852.981211       | 926.994244      | 1835.954662    | 918.480969       | 1834.970646    | 917.988961       | <b>14</b> |
| 9  | <b>1026.438315</b> | 513.722796        | 1009.411766    | 505.209521       | 1008.427750    | 504.717513        | <b>V</b> | 1721.940726       | 861.474001      | 1704.914177    | 852.960727       | 1703.930161    | 852.468719       | <b>13</b> |
| 10 | <b>1083.459779</b> | 542.233528        | 1066.433230    | 533.720253       | 1065.449214    | 533.228245        | <b>G</b> | 1622.872312       | 811.939794      | 1605.845763    | 803.426520       | 1604.861747    | 802.934512       | <b>12</b> |
| 11 | 1220.518691        | 610.762984        | 1203.492142    | 602.249709       | 1202.508126    | 601.757701        | <b>H</b> | 1565.850848       | 783.429062      | 1548.824299    | 774.915788       | 1547.840283    | 774.423780       | <b>11</b> |
| 12 | <b>1349.561284</b> | 675.284280        | 1332.534735    | 666.771006       | 1331.550719    | 666.278998        | <b>E</b> | 1428.791936       | 714.899606      | 1411.765387    | 706.386332       | 1410.781371    | 705.894324       | <b>10</b> |
| 13 | <b>1420.598398</b> | 710.802837        | 1403.571849    | 702.289563       | 1402.587833    | 701.797555        | <b>A</b> | 1299.749343       | 650.378310      | 1282.722794    | 641.865035       | 1281.738778    | 641.373027       | <b>9</b>  |
| 14 | <b>1533.682462</b> | <b>767.344869</b> | 1516.655913    | 758.831595       | 1515.671897    | 758.339587        | <b>L</b> | 1228.712229       | 614.859753      | 1211.685680    | 606.346478       | 1210.701664    | 605.854470       | <b>8</b>  |
| 15 | <b>1630.735226</b> | 815.871251        | 1613.708677    | 807.357977       | 1612.724661    | 806.865969        | <b>P</b> | 1115.628165       | 558.317721      | 1098.601616    | 549.804446       | 1097.617600    | 549.312438       | <b>7</b>  |
| 16 | 1743.819290        | <b>872.413283</b> | 1726.792741    | 863.900009       | 1725.808725    | 863.408000        | <b>L</b> | 1018.575401       | 509.791339      | 1001.548852    | 501.278064       | 1000.564836    | 500.786056       | <b>6</b>  |
| 17 | 1814.856404        | 907.931840        | 1797.829855    | 899.418566       | 1796.845839    | 898.926557        | <b>A</b> | <b>905.491337</b> | 453.249307      | 888.464788     | 444.736032       | 887.480772     | 444.244024       | <b>5</b>  |
| 18 | 1961.924818        | <b>981.466047</b> | 1944.898269    | 972.952773       | 1943.914253    | 972.460764        | <b>F</b> | <b>834.454223</b> | 417.730750      | 817.427674     | 409.217475       | 816.443658     | 408.725467       | <b>4</b>  |
| 19 | 2062.972497        | 1031.989886       | 2045.945948    | 1023.476612      | 2044.961932    | 1022.984604       | <b>T</b> | <b>687.385809</b> | 344.196543      | 670.359260     | 335.683268       | 669.375244     | 335.191260       | <b>3</b>  |
| 20 | 2502.197823        | 1251.602549       | 2485.171274    | 1243.089275      | 2484.187258    | 1242.597267       | <b>Q</b> | <b>586.338130</b> | 293.672703      | 569.311581     | 285.159429       |                |                  | <b>2</b>  |
| 21 |                    |                   |                |                  |                |                   | <b>K</b> | 147.112804        | 74.060040       | 130.086255     | 65.546765        |                |                  | <b>1</b>  |

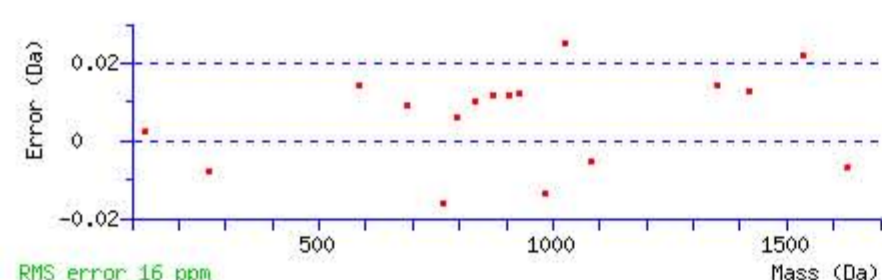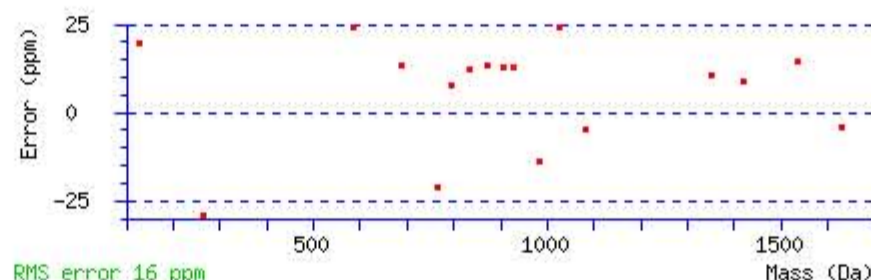

NCBI BLAST search of **KGDTFSCMVGHEALPLAFTQK**

(Parameters: blastp, nr protein database, expect=20000, no filter, PAM30)

Other BLAST [web gateways](#)

All matches to this query

| Score | Mr(calc):   | Delta    | Sequence                                |
|-------|-------------|----------|-----------------------------------------|
| 36.5  | 2647.296082 | 0.009774 | <a href="#">KGDTFSCMVGHEALPLAFTQK</a>   |
| 5.1   | 2647.281662 | 0.024194 | <a href="#">AAVLACQACCMLAIFLSMLVSYR</a> |
| 0.8   | 2647.285706 | 0.020150 | <a href="#">QKYGLCVIFLSCTMMPNFK</a>     |



# **MASCOT** Mascot Search Results

## Peptide View

MS/MS Fragmentation of **EPAAQAPVK**

Found in **IGHD\_HUMAN**, Ig delta chain C region OS=Homo sapiens GN=IGHD PE=1 SV=2

Match to Query 32301: 1220.655328 from(611.334940,2+) rtinseconds(1464) index(76638)

Title: Locus:1.1.1.2389.14 File:"2013-07-02 CLN FXIII 30 min 1st FT.wiff"

Data file C:\Program Files (x86)\Matrix Science\Mascot Daemon\mgf1 FXIII 30 min 1st\mascot\_daemon\_merge.mgf

Click mouse within plot area to zoom in by factor of two about that point

Or, Plot from  to  Da

Label all possible matches  Label matches used for scoring

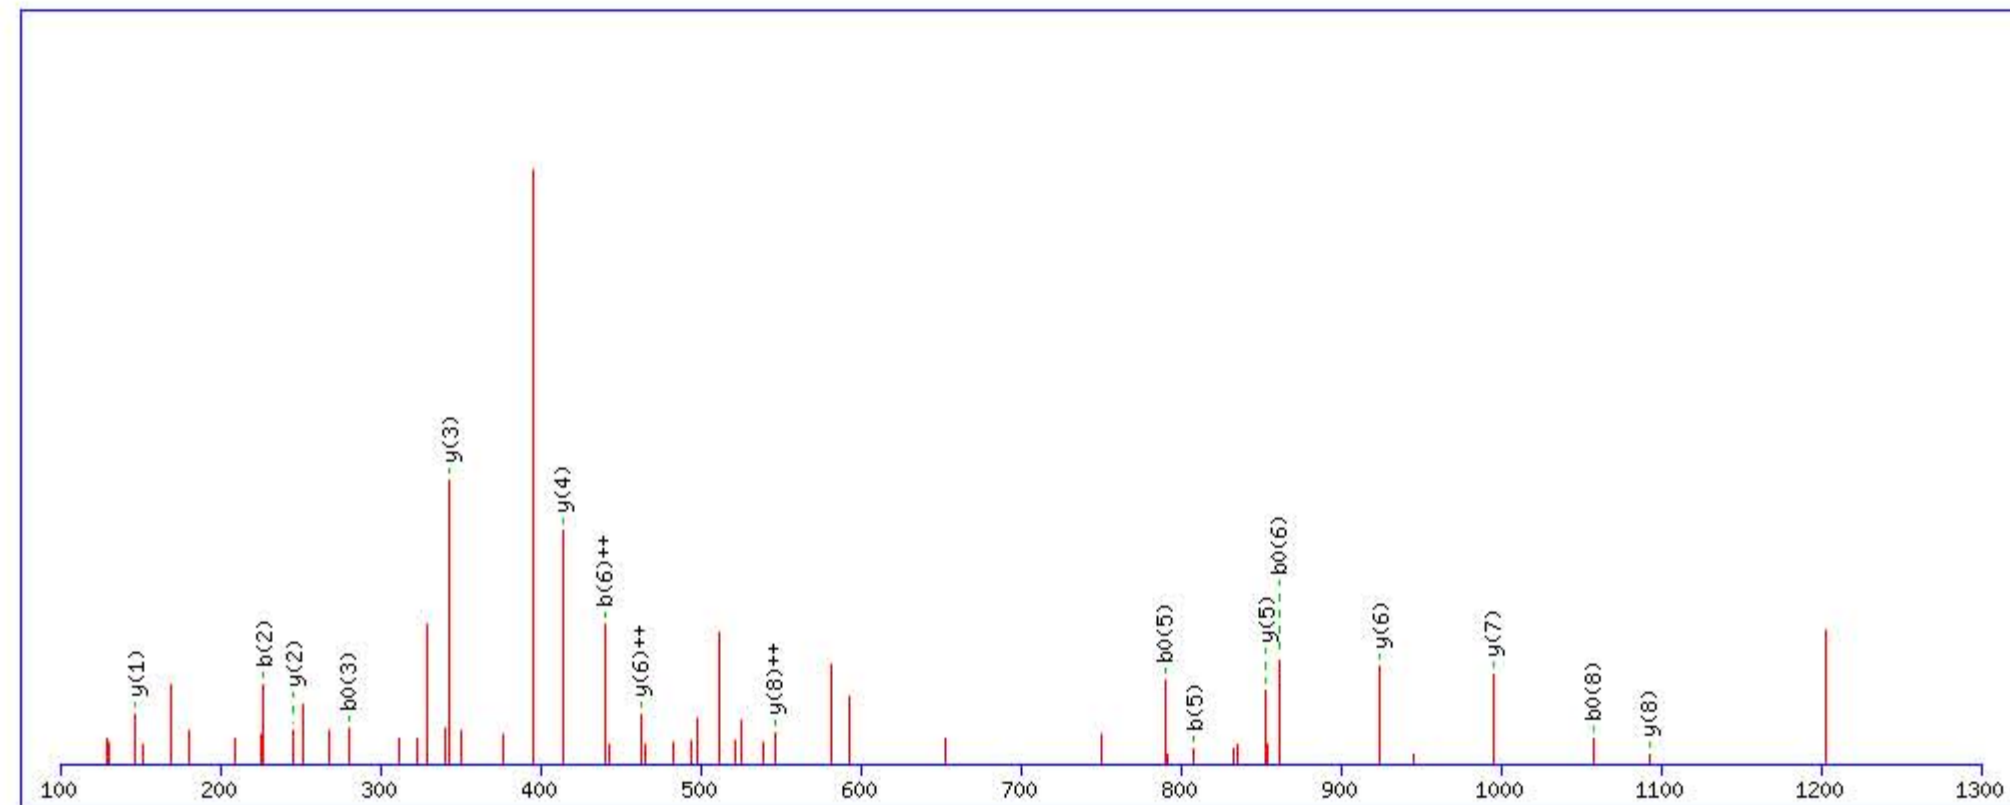

Monoisotopic mass of neutral peptide Mr(calc): 1220.658707

Fixed modifications: Carbamidomethyl (C) (apply to specified residues or termini only)

Variable modifications:

Q5 : Biotin:Thermo-21345 (Q)

Ions Score: 62 Expect: 1.1e-005

Matches : 17/72 fragment ions using 27 most intense peaks [\(help\)](#)

| # | b                 | b <sup>++</sup>   | b <sup>*</sup> | b <sup>*++</sup> | b <sup>0</sup>     | b <sup>0++</sup> | Seq. | y                  | y <sup>++</sup>   | y <sup>*</sup> | y <sup>*++</sup> | # |
|---|-------------------|-------------------|----------------|------------------|--------------------|------------------|------|--------------------|-------------------|----------------|------------------|---|
| 1 | 130.049869        | 65.528572         |                |                  | 112.039304         | 56.523290        | E    |                    |                   |                |                  | 9 |
| 2 | <b>227.102633</b> | 114.054954        |                |                  | 209.092068         | 105.049672       | P    | <b>1092.623414</b> | <b>546.815345</b> | 1075.596865    | 538.302071       | 8 |
| 3 | 298.139747        | 149.573512        |                |                  | <b>280.129182</b>  | 140.568229       | A    | <b>995.570650</b>  | 498.288963        | 978.544101     | 489.775689       | 7 |
| 4 | 369.176861        | 185.092068        |                |                  | 351.166296         | 176.086786       | A    | <b>924.533536</b>  | <b>462.770406</b> | 907.506987     | 454.257132       | 6 |
| 5 | <b>808.402187</b> | 404.704732        | 791.375638     | 396.191457       | <b>790.391622</b>  | 395.699449       | Q    | <b>853.496422</b>  | 427.251849        | 836.469873     | 418.738575       | 5 |
| 6 | 879.439301        | <b>440.223289</b> | 862.412752     | 431.710014       | <b>861.428736</b>  | 431.218006       | A    | <b>414.271096</b>  | 207.639186        | 397.244547     | 199.125911       | 4 |
| 7 | 976.492065        | 488.749671        | 959.465516     | 480.236396       | 958.481500         | 479.744388       | P    | <b>343.233982</b>  | 172.120629        | 326.207433     | 163.607354       | 3 |
| 8 | 1075.560479       | 538.283878        | 1058.533930    | 529.770603       | <b>1057.549914</b> | 529.278595       | V    | <b>246.181218</b>  | 123.594247        | 229.154669     | 115.080972       | 2 |
| 9 |                   |                   |                |                  |                    |                  | K    | <b>147.112804</b>  | 74.060040         | 130.086255     | 65.546765        | 1 |

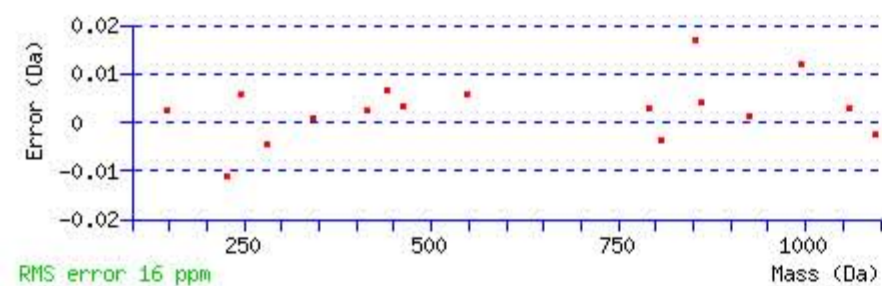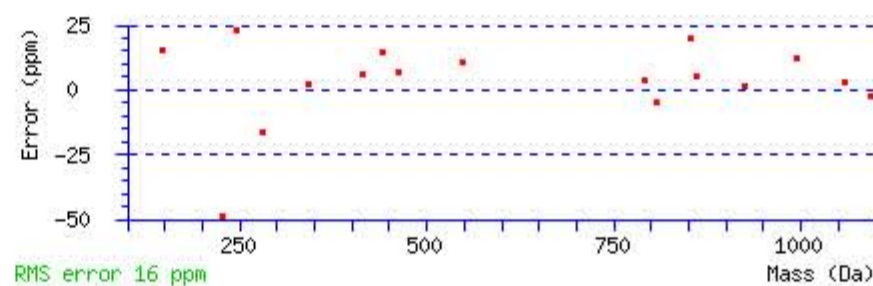

NCBI BLAST search of [EPAAQAPVK](#)

(Parameters: blastp, nr protein database, expect=20000, no filter, PAM30)

Other BLAST [web gateways](#)

All matches to this query

| Score | Mr(calc):   | Delta     | Sequence                    |
|-------|-------------|-----------|-----------------------------|
| 62.2  | 1220.658707 | -0.003379 | <a href="#">EPAAQAPVK</a>   |
| 15.0  | 1220.658722 | -0.003394 | <a href="#">EQNVPVPK</a>    |
| 6.5   | 1220.637589 | 0.017739  | <a href="#">NHMFFIAITK</a>  |
| 2.1   | 1220.651321 | 0.004007  | <a href="#">GQVLIASSYGR</a> |
| 0.0   | 1220.643463 | 0.011865  | <a href="#">EMDLLRITVK</a>  |

Mascot: <http://www.matrixscience.com/>



# MASCOT SCIENCE Mascot Search Results

## Peptide View

MS/MS Fragmentation of **NQVSLTCLVK**

Found in **IGHG1\_HUMAN**, Ig gamma-1 chain C region OS=Homo sapiens GN=IGHG1 PE=1 SV=1

Match to Query 41797: 1471.793768 from(736.904160,2+) rtinseconds(2244) index(81981)

Title: Locus:1.1.1.2661.9 File:"2013-07-02 CLN FXIII 30 min 1st FT.wiff"

Data file C:\Program Files (x86)\Matrix Science\Mascot Daemon\mgf\1 FXIII 30 min 1st\mascot\_daemon\_merge.mgf

Click mouse within plot area to zoom in by factor of two about that point

Or, Plot from  to  Da

Label all possible matches  Label matches used for scoring

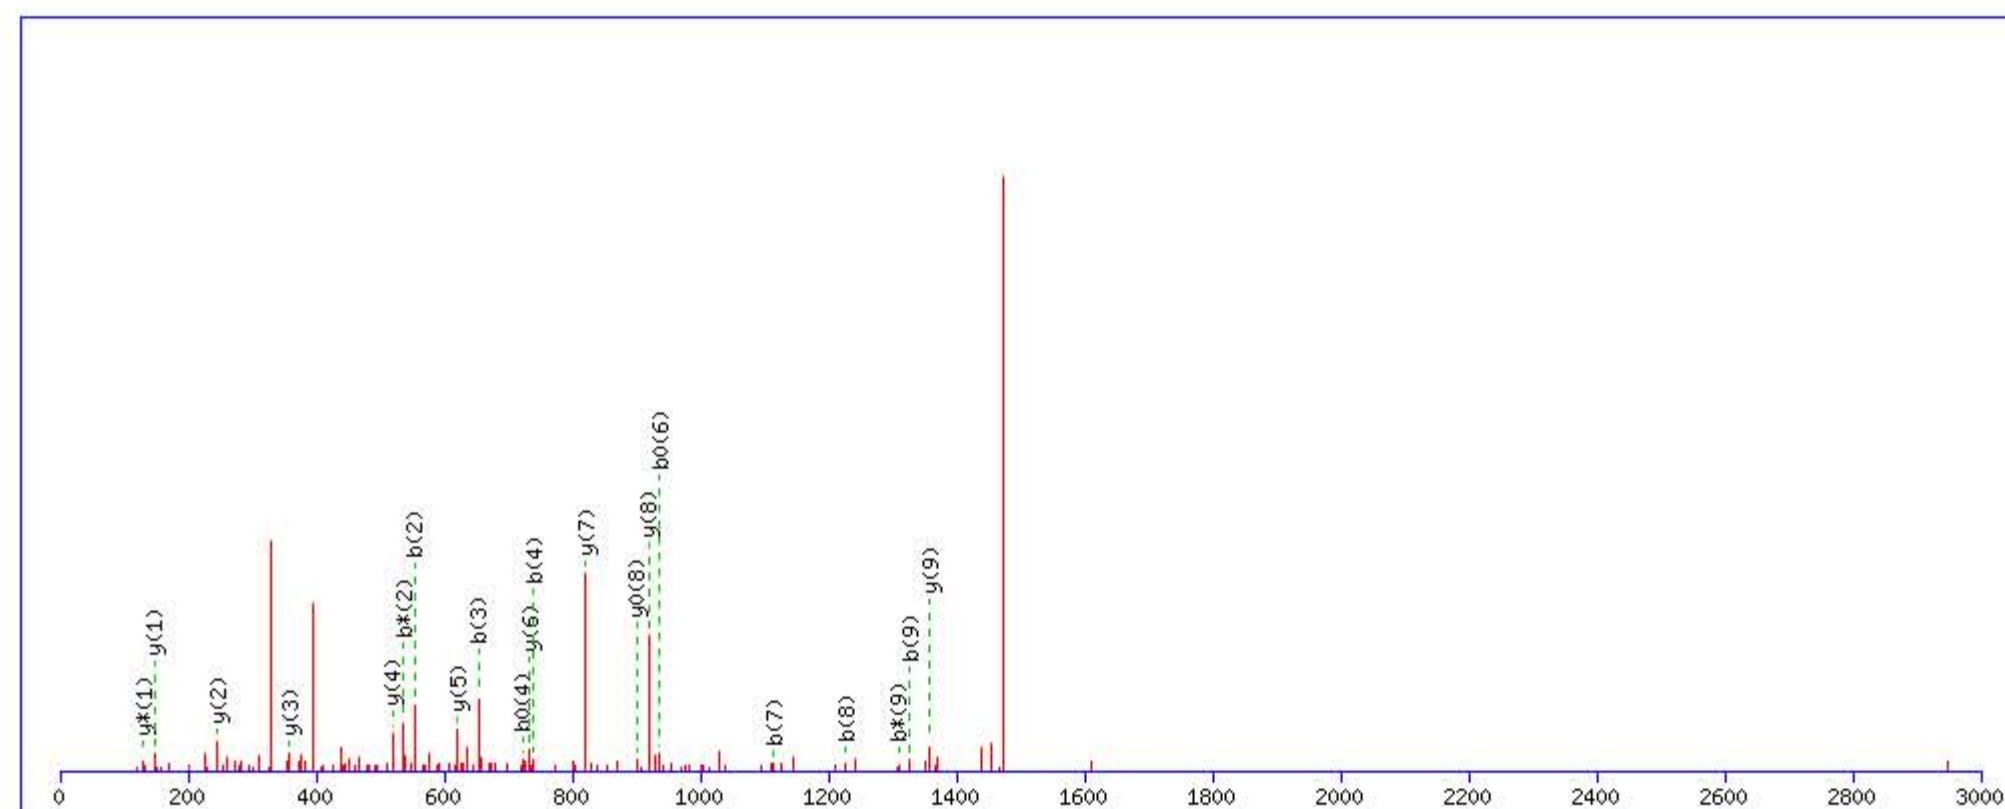

Monoisotopic mass of neutral peptide  $M_r(\text{calc})$ : 1471.789093

Fixed modifications: Carbamidomethyl (C) (apply to specified residues or termini only)

Variable modifications:

Q2 : Biotin:Thermo-21345 (Q)

Ions Score: 54 Expect: 4.7e-005

Matches : 21/94 fragment ions using 42 most intense peaks [\(help\)](#)

| #  | b                  | b <sup>++</sup> | b <sup>*</sup>     | b <sup>*++</sup> | b <sup>0</sup>    | b <sup>0++</sup> | Seq. | y                  | y <sup>++</sup> | y <sup>*</sup>    | y <sup>*++</sup> | y <sup>0</sup>    | y <sup>0++</sup> | #  |
|----|--------------------|-----------------|--------------------|------------------|-------------------|------------------|------|--------------------|-----------------|-------------------|------------------|-------------------|------------------|----|
| 1  | 115.050203         | 58.028740       | 98.023654          | 49.515465        |                   |                  | N    |                    |                 |                   |                  |                   |                  | 10 |
| 2  | <b>554.275529</b>  | 277.641403      | <b>537.248980</b>  | 269.128128       |                   |                  | Q    | <b>1358.753442</b> | 679.880359      | 1341.726893       | 671.367085       | 1340.742877       | 670.875076       | 9  |
| 3  | <b>653.343943</b>  | 327.175610      | 636.317394         | 318.662335       |                   |                  | V    | <b>919.528116</b>  | 460.267696      | 902.501567        | 451.754421       | <b>901.517551</b> | 451.262413       | 8  |
| 4  | <b>740.375971</b>  | 370.691623      | 723.349422         | 362.178349       | <b>722.365406</b> | 361.686341       | S    | <b>820.459702</b>  | 410.733489      | 803.433153        | 402.220215       | 802.449137        | 401.728207       | 7  |
| 5  | 853.460035         | 427.233656      | 836.433486         | 418.720381       | 835.449470        | 418.228373       | L    | <b>733.427674</b>  | 367.217475      | 716.401125        | 358.704201       | 715.417109        | 358.212193       | 6  |
| 6  | 954.507714         | 477.757495      | 937.481165         | 469.244220       | <b>936.497149</b> | 468.752212       | T    | <b>620.343610</b>  | 310.675443      | 603.317061        | 302.162169       | 602.333045        | 301.670161       | 5  |
| 7  | <b>1114.538363</b> | 557.772819      | 1097.511814        | 549.259545       | 1096.527798       | 548.767537       | C    | <b>519.295931</b>  | 260.151604      | 502.269382        | 251.638329       |                   |                  | 4  |
| 8  | <b>1227.622427</b> | 614.314851      | 1210.595878        | 605.801577       | 1209.611862       | 605.309569       | L    | <b>359.265282</b>  | 180.136279      | 342.238733        | 171.623004       |                   |                  | 3  |
| 9  | <b>1326.690841</b> | 663.849058      | <b>1309.664292</b> | 655.335784       | 1308.680276       | 654.843776       | V    | <b>246.181218</b>  | 123.594247      | 229.154669        | 115.080973       |                   |                  | 2  |
| 10 |                    |                 |                    |                  |                   |                  | K    | <b>147.112804</b>  | 74.060040       | <b>130.086255</b> | 65.546765        |                   |                  | 1  |

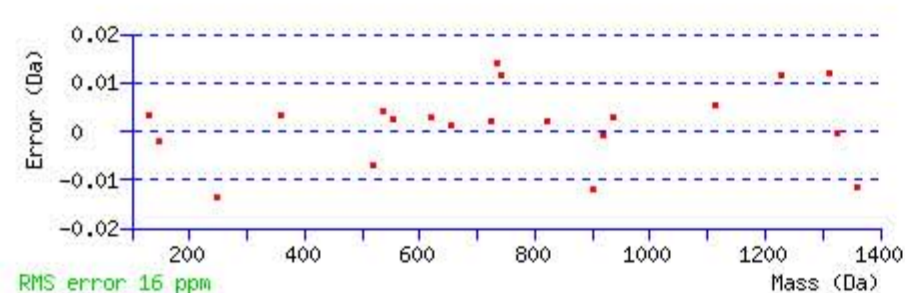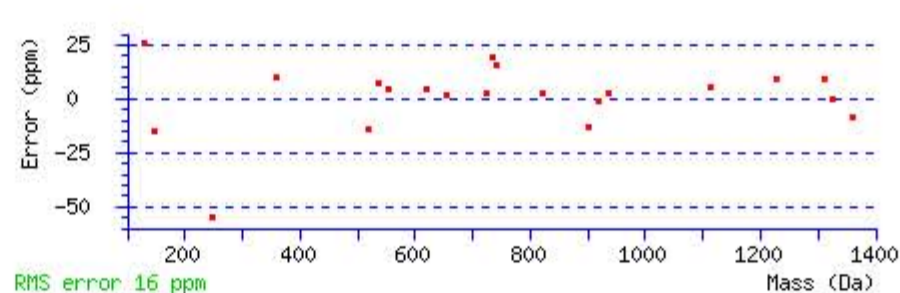

NCBI BLAST search of **NQVSLTCLVK**

(Parameters: blastp, nr protein database, expect=20000, no filter, PAM30)

Other BLAST [web gateways](#)

All matches to this query

| Score | $M_r(\text{calc})$ : | Delta     | Sequence                       |
|-------|----------------------|-----------|--------------------------------|
| 54.0  | 1471.789093          | 0.004675  | <a href="#">NQVSLTCLVK</a>     |
| 7.5   | 1471.797592          | -0.003824 | <a href="#">KYFWDRAFLVK</a>    |
| 4.7   | 1471.803467          | -0.009699 | <a href="#">EKQGPLLDLFGQK</a>  |
| 4.6   | 1471.792908          | 0.000860  | <a href="#">NITINCVKGINAR</a>  |
| 2.8   | 1471.799438          | -0.005670 | <a href="#">EVELDRLRDTVK</a>   |
| 2.6   | 1471.792221          | 0.001547  | <a href="#">NESIPLSPFEVK</a>   |
| 2.3   | 1471.806793          | -0.013025 | <a href="#">AAALLAKQAEMEYK</a> |
| 1.2   | 1471.777847          | 0.015921  | <a href="#">QLDMELVSVK</a>     |



# MASCOT Search Results

## Peptide View

MS/MS Fragmentation of **EPQVYTLPPSR**

Found in **IGHG1\_HUMAN**, Ig gamma-1 chain C region OS=Homo sapiens GN=IGHG1 PE=1 SV=1

Match to Query 45999: 1596.832228 from(799.423390,2+) rtinseconds(1989) index(80222)

Title: Locus:1.1.1.2572.12 File:"2013-07-02 CLN FXIII 30 min 1st FT.wiff"

Data file C:\Program Files (x86)\Matrix Science\Mascot Daemon\mgf1 FXIII 30 min 1st\mascot\_daemon\_merge.mgf

Click mouse within plot area to zoom in by factor of two about that point

Or, Plot from  to  Da

Label all possible matches  Label matches used for scoring

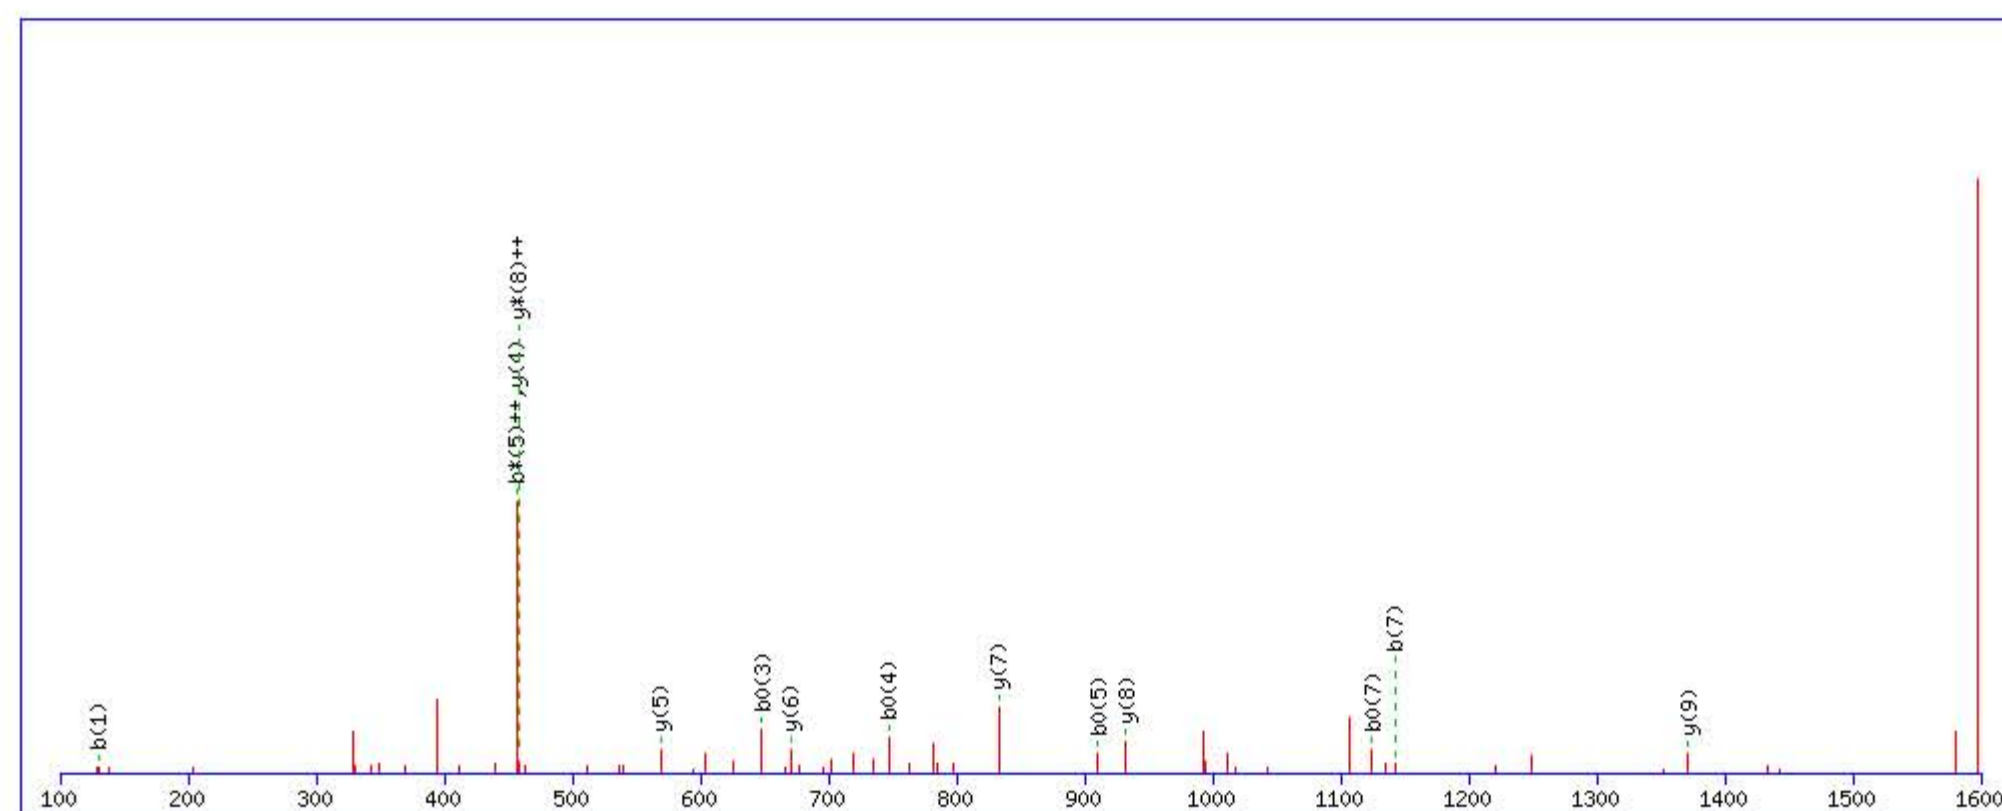

Monoisotopic mass of neutral peptide  $M_r(\text{calc})$ : 1596.833389

Fixed modifications: Carbamidomethyl (C) (apply to specified residues or termini only)

Variable modifications:

Q3 : Biotin:Thermo-21345 (Q)

Ions Score: 31 Expect: 0.0045

Matches : 14/114 fragment ions using 27 most intense peaks [\(help\)](#)

| #  | b                  | b <sup>++</sup> | b <sup>+</sup> | b <sup>*++</sup>  | b <sup>0</sup>     | b <sup>0++</sup> | Seq. | y                  | y <sup>++</sup> | y <sup>+</sup> | y <sup>*++</sup>  | y <sup>0</sup> | y <sup>0++</sup> | #  |
|----|--------------------|-----------------|----------------|-------------------|--------------------|------------------|------|--------------------|-----------------|----------------|-------------------|----------------|------------------|----|
| 1  | <b>130.049869</b>  | 65.528572       |                |                   | 112.039304         | 56.523290        | E    |                    |                 |                |                   |                |                  | 11 |
| 2  | 227.102633         | 114.054954      |                |                   | 209.092068         | 105.049672       | P    | 1468.798084        | 734.902680      | 1451.771535    | 726.389406        | 1450.787519    | 725.897398       | 10 |
| 3  | 666.327959         | 333.667618      | 649.301410     | 325.154343        | <b>648.317394</b>  | 324.662335       | Q    | <b>1371.745320</b> | 686.376298      | 1354.718771    | 677.863024        | 1353.734755    | 677.371016       | 9  |
| 4  | 765.396373         | 383.201825      | 748.369824     | 374.688550        | <b>747.385808</b>  | 374.196542       | V    | <b>932.519994</b>  | 466.763635      | 915.493445     | <b>458.250361</b> | 914.509429     | 457.758353       | 8  |
| 5  | 928.459702         | 464.733489      | 911.433153     | <b>456.220215</b> | <b>910.449137</b>  | 455.728207       | Y    | <b>833.451580</b>  | 417.229428      | 816.425031     | 408.716154        | 815.441015     | 408.224146       | 7  |
| 6  | 1029.507381        | 515.257329      | 1012.480832    | 506.744054        | 1011.496816        | 506.252046       | T    | <b>670.388251</b>  | 335.697764      | 653.361702     | 327.184489        | 652.377686     | 326.692481       | 6  |
| 7  | <b>1142.591445</b> | 571.799361      | 1125.564896    | 563.286086        | <b>1124.580880</b> | 562.794078       | L    | <b>569.340572</b>  | 285.173924      | 552.314023     | 276.660650        | 551.330007     | 276.168642       | 5  |
| 8  | 1239.644209        | 620.325743      | 1222.617660    | 611.812468        | 1221.633644        | 611.320460       | P    | <b>456.256508</b>  | 228.631892      | 439.229959     | 220.118618        | 438.245943     | 219.626610       | 4  |
| 9  | 1336.696973        | 668.852125      | 1319.670424    | 660.338850        | 1318.686408        | 659.846842       | P    | 359.203744         | 180.105510      | 342.177195     | 171.592236        | 341.193179     | 171.100228       | 3  |
| 10 | 1423.729001        | 712.368139      | 1406.702452    | 703.854864        | 1405.718436        | 703.362856       | S    | 262.150980         | 131.579128      | 245.124431     | 123.065854        | 244.140415     | 122.573846       | 2  |
| 11 |                    |                 |                |                   |                    |                  | R    | 175.118952         | 88.063114       | 158.092403     | 79.549839         |                |                  | 1  |

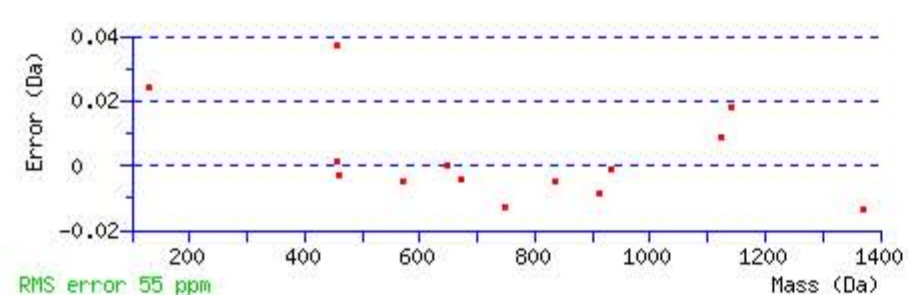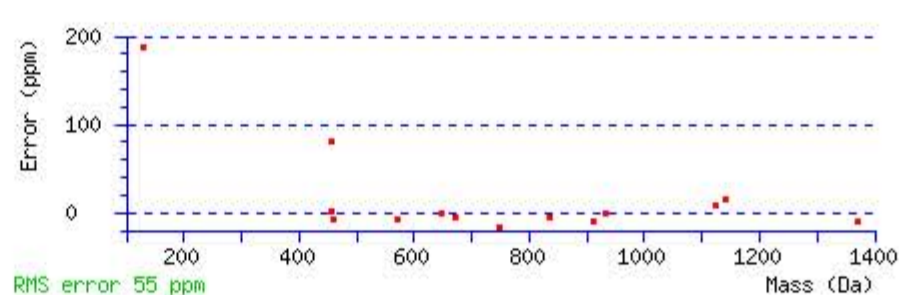

NCBI BLAST search of **EPQVYTLPPSR**

(Parameters: blastp, nr protein database, expect=20000, no filter, PAM30)

Other BLAST [web gateways](#)

All matches to this query

| Score | $M_r(\text{calc})$ : | Delta     | Sequence                        |
|-------|----------------------|-----------|---------------------------------|
| 31.0  | 1596.833389          | -0.001161 | <a href="#">EPQVYTLPPSR</a>     |
| 0.7   | 1596.825974          | 0.006254  | <a href="#">KLSLDLEAQWAPSPR</a> |

Mascot: <http://www.matrixscience.com/>



# MASCOT SEARCH RESULTS

## Peptide View

MS/MS Fragmentation of **NQVSLTCLVK**

Found in **IGHG1\_HUMAN**, Ig gamma-1 chain C region OS=Homo sapiens GN=IGHG1 PE=1 SV=1

Match to Query 41797: 1471.793768 from(736.904160,2+) rtinseconds(2244) index(81981)

Title: Locus:1.1.1.2661.9 File:"2013-07-02 CLN FXIII 30 min 1st FT.wiff"

Data file C:\Program Files (x86)\Matrix Science\Mascot Daemon\mgf\1 FXIII 30 min 1st\mascot\_daemon\_merge.mgf

Click mouse within plot area to zoom in by factor of two about that point

Or, Plot from  to  Da

Label all possible matches  Label matches used for scoring



Monoisotopic mass of neutral peptide Mr(calc): 1471.789093

Fixed modifications: Carbamidomethyl (C) (apply to specified residues or termini only)

Variable modifications:

Q2 : Biotin:Thermo-21345 (Q)

Ions Score: 54 Expect: 4.7e-005

Matches : 21/94 fragment ions using 42 most intense peaks [\(help\)](#)

| #  | b                  | b <sup>++</sup> | b <sup>*</sup>     | b <sup>*++</sup> | b <sup>0</sup>    | b <sup>0++</sup> | Seq. | y                  | y <sup>++</sup> | y <sup>*</sup>    | y <sup>*++</sup> | y <sup>0</sup>    | y <sup>0++</sup> | #  |
|----|--------------------|-----------------|--------------------|------------------|-------------------|------------------|------|--------------------|-----------------|-------------------|------------------|-------------------|------------------|----|
| 1  | 115.050203         | 58.028740       | 98.023654          | 49.515465        |                   |                  | N    |                    |                 |                   |                  |                   |                  | 10 |
| 2  | <b>554.275529</b>  | 277.641403      | <b>537.248980</b>  | 269.128128       |                   |                  | Q    | <b>1358.753442</b> | 679.880359      | 1341.726893       | 671.367085       | 1340.742877       | 670.875076       | 9  |
| 3  | <b>653.343943</b>  | 327.175610      | 636.317394         | 318.662335       |                   |                  | V    | <b>919.528116</b>  | 460.267696      | 902.501567        | 451.754421       | <b>901.517551</b> | 451.262413       | 8  |
| 4  | <b>740.375971</b>  | 370.691623      | 723.349422         | 362.178349       | <b>722.365406</b> | 361.686341       | S    | <b>820.459702</b>  | 410.733489      | 803.433153        | 402.220215       | 802.449137        | 401.728207       | 7  |
| 5  | 853.460035         | 427.233656      | 836.433486         | 418.720381       | 835.449470        | 418.228373       | L    | <b>733.427674</b>  | 367.217475      | 716.401125        | 358.704201       | 715.417109        | 358.212193       | 6  |
| 6  | 954.507714         | 477.757495      | 937.481165         | 469.244220       | <b>936.497149</b> | 468.752212       | T    | <b>620.343610</b>  | 310.675443      | 603.317061        | 302.162169       | 602.333045        | 301.670161       | 5  |
| 7  | <b>1114.538363</b> | 557.772819      | 1097.511814        | 549.259545       | 1096.527798       | 548.767537       | C    | <b>519.295931</b>  | 260.151604      | 502.269382        | 251.638329       |                   |                  | 4  |
| 8  | <b>1227.622427</b> | 614.314851      | 1210.595878        | 605.801577       | 1209.611862       | 605.309569       | L    | <b>359.265282</b>  | 180.136279      | 342.238733        | 171.623004       |                   |                  | 3  |
| 9  | <b>1326.690841</b> | 663.849058      | <b>1309.664292</b> | 655.335784       | 1308.680276       | 654.843776       | V    | <b>246.181218</b>  | 123.594247      | 229.154669        | 115.080973       |                   |                  | 2  |
| 10 |                    |                 |                    |                  |                   |                  | K    | <b>147.112804</b>  | 74.060040       | <b>130.086255</b> | 65.546765        |                   |                  | 1  |



NCBI BLAST search of **NQVSLTCLVK**

(Parameters: blastp, nr protein database, expect=20000, no filter, PAM30)

Other BLAST [web gateways](#)

All matches to this query

| Score | Mr(calc):   | Delta     | Sequence                       |
|-------|-------------|-----------|--------------------------------|
| 54.0  | 1471.789093 | 0.004675  | <a href="#">NQVSLTCLVK</a>     |
| 7.5   | 1471.797592 | -0.003824 | <a href="#">KYFWDRAFLVK</a>    |
| 4.7   | 1471.803467 | -0.009699 | <a href="#">EKQGPLLDLFGQK</a>  |
| 4.6   | 1471.792908 | 0.000860  | <a href="#">NITINCVKGINAR</a>  |
| 2.8   | 1471.799438 | -0.005670 | <a href="#">EVELDRLRDTVK</a>   |
| 2.6   | 1471.792221 | 0.001547  | <a href="#">NESIPLSPFEVK</a>   |
| 2.3   | 1471.806793 | -0.013025 | <a href="#">AAALLAKQAEMEYK</a> |
| 1.2   | 1471.777847 | 0.015921  | <a href="#">QLDMELVSVK</a>     |



# MASCOT Search Results

## Peptide View

MS/MS Fragmentation of **EPQVYTLPPSR**

Found in **IGHG1\_HUMAN**, Ig gamma-1 chain C region OS=Homo sapiens GN=IGHG1 PE=1 SV=1

Match to Query 45999: 1596.832228 from(799.423390,2+) rtinseconds(1989) index(80222)

Title: Locus:1.1.1.2572.12 File:"2013-07-02 CLN FXIII 30 min 1st FT.wiff"

Data file C:\Program Files (x86)\Matrix Science\Mascot Daemon\mgf1 FXIII 30 min 1st\mascot\_daemon\_merge.mgf

Click mouse within plot area to zoom in by factor of two about that point

Or, Plot from  to  Da

Label all possible matches  Label matches used for scoring

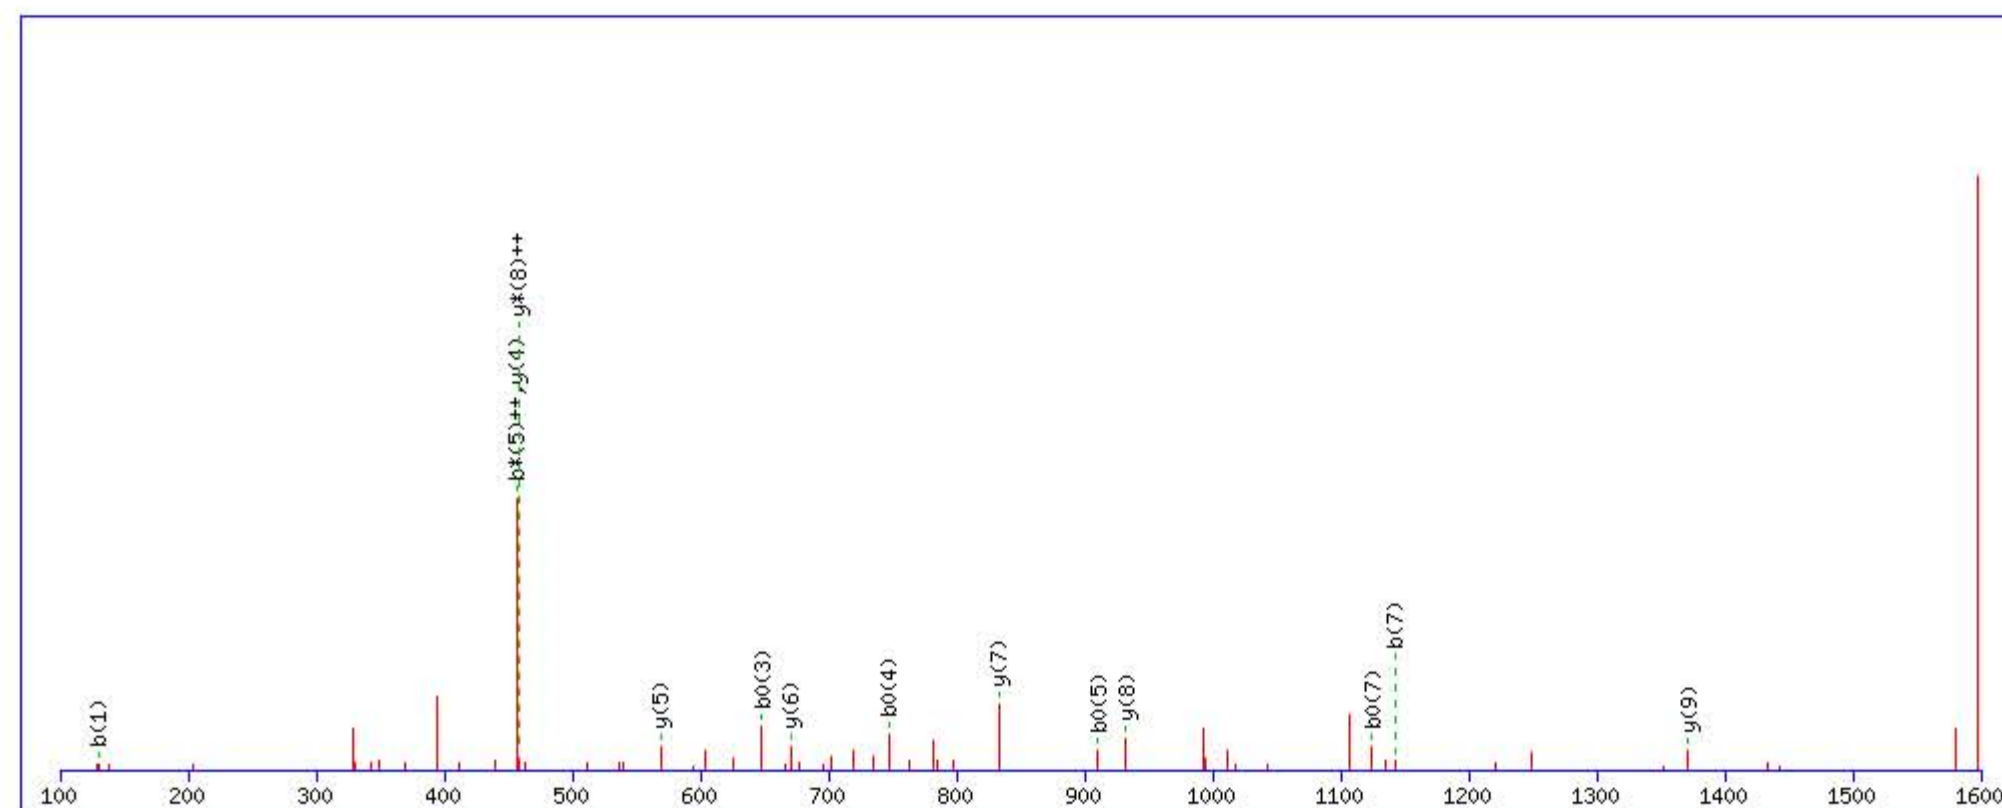

Monoisotopic mass of neutral peptide  $M_r(\text{calc})$ : 1596.833389

Fixed modifications: Carbamidomethyl (C) (apply to specified residues or termini only)

Variable modifications:

Q3 : Biotin:Thermo-21345 (Q)

Ions Score: 31 Expect: 0.0045

Matches : 14/114 fragment ions using 27 most intense peaks [\(help\)](#)

| #  | b                  | b <sup>++</sup> | b <sup>+</sup> | b <sup>*++</sup>  | b <sup>0</sup>     | b <sup>0++</sup> | Seq. | y                  | y <sup>++</sup> | y <sup>+</sup> | y <sup>*++</sup>  | y <sup>0</sup> | y <sup>0++</sup> | #  |
|----|--------------------|-----------------|----------------|-------------------|--------------------|------------------|------|--------------------|-----------------|----------------|-------------------|----------------|------------------|----|
| 1  | <b>130.049869</b>  | 65.528572       |                |                   | 112.039304         | 56.523290        | E    |                    |                 |                |                   |                |                  | 11 |
| 2  | 227.102633         | 114.054954      |                |                   | 209.092068         | 105.049672       | P    | 1468.798084        | 734.902680      | 1451.771535    | 726.389406        | 1450.787519    | 725.897398       | 10 |
| 3  | 666.327959         | 333.667618      | 649.301410     | 325.154343        | <b>648.317394</b>  | 324.662335       | Q    | <b>1371.745320</b> | 686.376298      | 1354.718771    | 677.863024        | 1353.734755    | 677.371016       | 9  |
| 4  | 765.396373         | 383.201825      | 748.369824     | 374.688550        | <b>747.385808</b>  | 374.196542       | V    | <b>932.519994</b>  | 466.763635      | 915.493445     | <b>458.250361</b> | 914.509429     | 457.758353       | 8  |
| 5  | 928.459702         | 464.733489      | 911.433153     | <b>456.220215</b> | <b>910.449137</b>  | 455.728207       | Y    | <b>833.451580</b>  | 417.229428      | 816.425031     | 408.716154        | 815.441015     | 408.224146       | 7  |
| 6  | 1029.507381        | 515.257329      | 1012.480832    | 506.744054        | 1011.496816        | 506.252046       | T    | <b>670.388251</b>  | 335.697764      | 653.361702     | 327.184489        | 652.377686     | 326.692481       | 6  |
| 7  | <b>1142.591445</b> | 571.799361      | 1125.564896    | 563.286086        | <b>1124.580880</b> | 562.794078       | L    | <b>569.340572</b>  | 285.173924      | 552.314023     | 276.660650        | 551.330007     | 276.168642       | 5  |
| 8  | 1239.644209        | 620.325743      | 1222.617660    | 611.812468        | 1221.633644        | 611.320460       | P    | <b>456.256508</b>  | 228.631892      | 439.229959     | 220.118618        | 438.245943     | 219.626610       | 4  |
| 9  | 1336.696973        | 668.852125      | 1319.670424    | 660.338850        | 1318.686408        | 659.846842       | P    | 359.203744         | 180.105510      | 342.177195     | 171.592236        | 341.193179     | 171.100228       | 3  |
| 10 | 1423.729001        | 712.368139      | 1406.702452    | 703.854864        | 1405.718436        | 703.362856       | S    | 262.150980         | 131.579128      | 245.124431     | 123.065854        | 244.140415     | 122.573846       | 2  |
| 11 |                    |                 |                |                   |                    |                  | R    | 175.118952         | 88.063114       | 158.092403     | 79.549839         |                |                  | 1  |

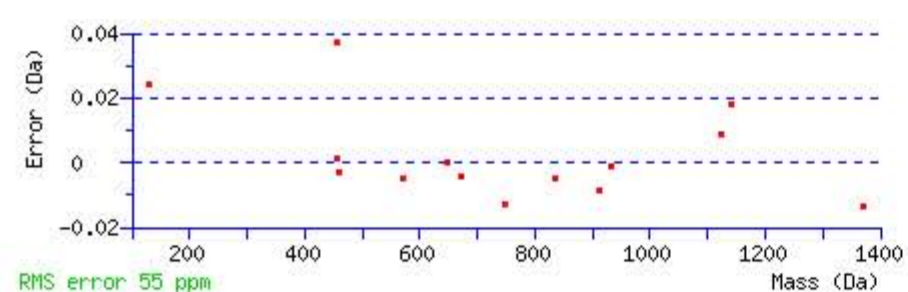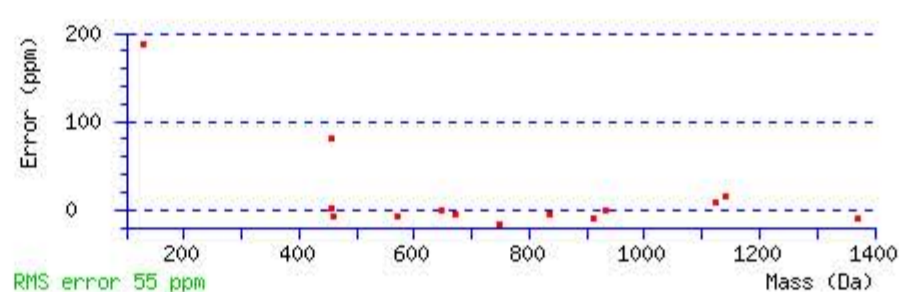

NCBI BLAST search of **EPQVYTLPPSR**

(Parameters: blastp, nr protein database, expect=20000, no filter, PAM30)

Other BLAST [web gateways](#)

All matches to this query

| Score | $M_r(\text{calc})$ : | Delta     | Sequence                        |
|-------|----------------------|-----------|---------------------------------|
| 31.0  | 1596.833389          | -0.001161 | <a href="#">EPQVYTLPPSR</a>     |
| 0.7   | 1596.825974          | 0.006254  | <a href="#">KLSLDLEAQWAPSPR</a> |

Mascot: <http://www.matrixscience.com/>



# MASCOT SEARCH RESULTS

## Peptide View

MS/MS Fragmentation of **NQVSLTCLVK**

Found in **IGHG1\_HUMAN**, Ig gamma-1 chain C region OS=Homo sapiens GN=IGHG1 PE=1 SV=1

Match to Query 41797: 1471.793768 from(736.904160,2+) rtinseconds(2244) index(81981)

Title: Locus:1.1.1.2661.9 File:"2013-07-02 CLN FXIII 30 min 1st FT.wiff"

Data file C:\Program Files (x86)\Matrix Science\Mascot Daemon\mgf\1 FXIII 30 min 1st\mascot\_daemon\_merge.mgf

Click mouse within plot area to zoom in by factor of two about that point

Or, Plot from  to  Da

Label all possible matches  Label matches used for scoring

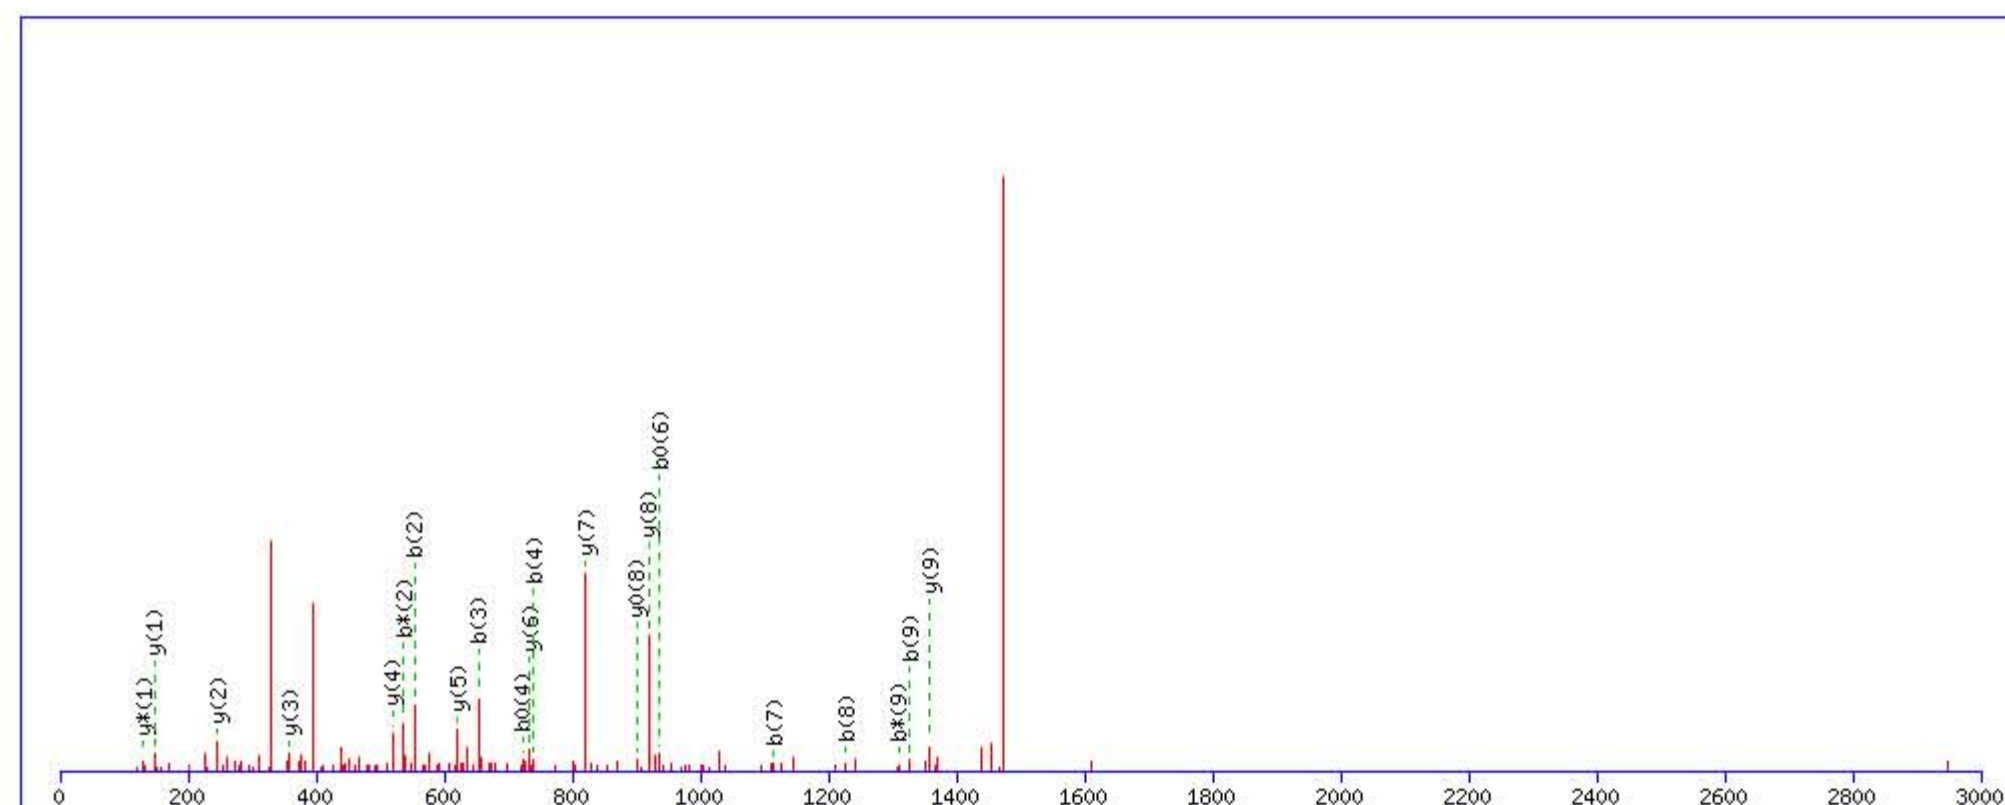

Monoisotopic mass of neutral peptide  $M_r(\text{calc})$ : 1471.789093

Fixed modifications: Carbamidomethyl (C) (apply to specified residues or termini only)

Variable modifications:

Q2 : Biotin:Thermo-21345 (Q)

Ions Score: 54 Expect: 4.7e-005

Matches : 21/94 fragment ions using 42 most intense peaks [\(help\)](#)

| #  | b                  | b <sup>++</sup> | b <sup>*</sup>     | b <sup>*++</sup> | b <sup>0</sup>    | b <sup>0++</sup> | Seq. | y                  | y <sup>++</sup> | y <sup>*</sup>    | y <sup>*++</sup> | y <sup>0</sup>    | y <sup>0++</sup> | #  |
|----|--------------------|-----------------|--------------------|------------------|-------------------|------------------|------|--------------------|-----------------|-------------------|------------------|-------------------|------------------|----|
| 1  | 115.050203         | 58.028740       | 98.023654          | 49.515465        |                   |                  | N    |                    |                 |                   |                  |                   |                  | 10 |
| 2  | <b>554.275529</b>  | 277.641403      | <b>537.248980</b>  | 269.128128       |                   |                  | Q    | <b>1358.753442</b> | 679.880359      | 1341.726893       | 671.367085       | 1340.742877       | 670.875076       | 9  |
| 3  | <b>653.343943</b>  | 327.175610      | 636.317394         | 318.662335       |                   |                  | V    | <b>919.528116</b>  | 460.267696      | 902.501567        | 451.754421       | <b>901.517551</b> | 451.262413       | 8  |
| 4  | <b>740.375971</b>  | 370.691623      | 723.349422         | 362.178349       | <b>722.365406</b> | 361.686341       | S    | <b>820.459702</b>  | 410.733489      | 803.433153        | 402.220215       | 802.449137        | 401.728207       | 7  |
| 5  | 853.460035         | 427.233656      | 836.433486         | 418.720381       | 835.449470        | 418.228373       | L    | <b>733.427674</b>  | 367.217475      | 716.401125        | 358.704201       | 715.417109        | 358.212193       | 6  |
| 6  | 954.507714         | 477.757495      | 937.481165         | 469.244220       | <b>936.497149</b> | 468.752212       | T    | <b>620.343610</b>  | 310.675443      | 603.317061        | 302.162169       | 602.333045        | 301.670161       | 5  |
| 7  | <b>1114.538363</b> | 557.772819      | 1097.511814        | 549.259545       | 1096.527798       | 548.767537       | C    | <b>519.295931</b>  | 260.151604      | 502.269382        | 251.638329       |                   |                  | 4  |
| 8  | <b>1227.622427</b> | 614.314851      | 1210.595878        | 605.801577       | 1209.611862       | 605.309569       | L    | <b>359.265282</b>  | 180.136279      | 342.238733        | 171.623004       |                   |                  | 3  |
| 9  | <b>1326.690841</b> | 663.849058      | <b>1309.664292</b> | 655.335784       | 1308.680276       | 654.843776       | V    | <b>246.181218</b>  | 123.594247      | 229.154669        | 115.080973       |                   |                  | 2  |
| 10 |                    |                 |                    |                  |                   |                  | K    | <b>147.112804</b>  | 74.060040       | <b>130.086255</b> | 65.546765        |                   |                  | 1  |



NCBI BLAST search of **NQVSLTCLVK**

(Parameters: blastp, nr protein database, expect=20000, no filter, PAM30)

Other BLAST [web gateways](#)

All matches to this query

| Score | $M_r(\text{calc})$ : | Delta     | Sequence                       |
|-------|----------------------|-----------|--------------------------------|
| 54.0  | 1471.789093          | 0.004675  | <a href="#">NQVSLTCLVK</a>     |
| 7.5   | 1471.797592          | -0.003824 | <a href="#">KYFWDRAFLVK</a>    |
| 4.7   | 1471.803467          | -0.009699 | <a href="#">EKQGPLLDLFGQK</a>  |
| 4.6   | 1471.792908          | 0.000860  | <a href="#">NITINCVKGINAR</a>  |
| 2.8   | 1471.799438          | -0.005670 | <a href="#">EVELDRLRDTVK</a>   |
| 2.6   | 1471.792221          | 0.001547  | <a href="#">NESIPLSPFEVK</a>   |
| 2.3   | 1471.806793          | -0.013025 | <a href="#">AAALLAKQAEMEYK</a> |
| 1.2   | 1471.777847          | 0.015921  | <a href="#">QLDMELVSVK</a>     |



# MASCOT Search Results

## Peptide View

MS/MS Fragmentation of **EPQVYTLPPSR**

Found in **IGHG1\_HUMAN**, Ig gamma-1 chain C region OS=Homo sapiens GN=IGHG1 PE=1 SV=1

Match to Query 45999: 1596.832228 from(799.423390,2+) rtinseconds(1989) index(80222)

Title: Locus:1.1.1.2572.12 File:"2013-07-02 CLN FXIII 30 min 1st FT.wiff"

Data file C:\Program Files (x86)\Matrix Science\Mascot Daemon\mgf1 FXIII 30 min 1st\mascot\_daemon\_merge.mgf

Click mouse within plot area to zoom in by factor of two about that point

Or, Plot from  to  Da

Label all possible matches  Label matches used for scoring



Monoisotopic mass of neutral peptide  $M_r(\text{calc})$ : 1596.833389

Fixed modifications: Carbamidomethyl (C) (apply to specified residues or termini only)

Variable modifications:

Q3 : Biotin:Thermo-21345 (Q)

Ions Score: 31 Expect: 0.0045

Matches : 14/114 fragment ions using 27 most intense peaks [\(help\)](#)

| #  | b                  | b <sup>++</sup> | b <sup>+</sup> | b <sup>*++</sup>  | b <sup>0</sup>     | b <sup>0++</sup> | Seq. | y                  | y <sup>++</sup> | y <sup>+</sup> | y <sup>*++</sup>  | y <sup>0</sup> | y <sup>0++</sup> | #  |
|----|--------------------|-----------------|----------------|-------------------|--------------------|------------------|------|--------------------|-----------------|----------------|-------------------|----------------|------------------|----|
| 1  | <b>130.049869</b>  | 65.528572       |                |                   | 112.039304         | 56.523290        | E    |                    |                 |                |                   |                |                  | 11 |
| 2  | 227.102633         | 114.054954      |                |                   | 209.092068         | 105.049672       | P    | 1468.798084        | 734.902680      | 1451.771535    | 726.389406        | 1450.787519    | 725.897398       | 10 |
| 3  | 666.327959         | 333.667618      | 649.301410     | 325.154343        | <b>648.317394</b>  | 324.662335       | Q    | <b>1371.745320</b> | 686.376298      | 1354.718771    | 677.863024        | 1353.734755    | 677.371016       | 9  |
| 4  | 765.396373         | 383.201825      | 748.369824     | 374.688550        | <b>747.385808</b>  | 374.196542       | V    | <b>932.519994</b>  | 466.763635      | 915.493445     | <b>458.250361</b> | 914.509429     | 457.758353       | 8  |
| 5  | 928.459702         | 464.733489      | 911.433153     | <b>456.220215</b> | <b>910.449137</b>  | 455.728207       | Y    | <b>833.451580</b>  | 417.229428      | 816.425031     | 408.716154        | 815.441015     | 408.224146       | 7  |
| 6  | 1029.507381        | 515.257329      | 1012.480832    | 506.744054        | 1011.496816        | 506.252046       | T    | <b>670.388251</b>  | 335.697764      | 653.361702     | 327.184489        | 652.377686     | 326.692481       | 6  |
| 7  | <b>1142.591445</b> | 571.799361      | 1125.564896    | 563.286086        | <b>1124.580880</b> | 562.794078       | L    | <b>569.340572</b>  | 285.173924      | 552.314023     | 276.660650        | 551.330007     | 276.168642       | 5  |
| 8  | 1239.644209        | 620.325743      | 1222.617660    | 611.812468        | 1221.633644        | 611.320460       | P    | <b>456.256508</b>  | 228.631892      | 439.229959     | 220.118618        | 438.245943     | 219.626610       | 4  |
| 9  | 1336.696973        | 668.852125      | 1319.670424    | 660.338850        | 1318.686408        | 659.846842       | P    | 359.203744         | 180.105510      | 342.177195     | 171.592236        | 341.193179     | 171.100228       | 3  |
| 10 | 1423.729001        | 712.368139      | 1406.702452    | 703.854864        | 1405.718436        | 703.362856       | S    | 262.150980         | 131.579128      | 245.124431     | 123.065854        | 244.140415     | 122.573846       | 2  |
| 11 |                    |                 |                |                   |                    |                  | R    | 175.118952         | 88.063114       | 158.092403     | 79.549839         |                |                  | 1  |



NCBI BLAST search of **EPQVYTLPPSR**

(Parameters: blastp, nr protein database, expect=20000, no filter, PAM30)

Other BLAST [web gateways](#)

All matches to this query

| Score | $M_r(\text{calc})$ : | Delta     | Sequence                        |
|-------|----------------------|-----------|---------------------------------|
| 31.0  | 1596.833389          | -0.001161 | <a href="#">EPQVYTLPPSR</a>     |
| 0.7   | 1596.825974          | 0.006254  | <a href="#">KLSLDLEAQWAPSPR</a> |

Mascot: <http://www.matrixscience.com/>



# MASCOT SEARCH RESULTS

## Peptide View

MS/MS Fragmentation of **NQVSLTCLVK**

Found in **IGHG1\_HUMAN**, Ig gamma-1 chain C region OS=Homo sapiens GN=IGHG1 PE=1 SV=1

Match to Query 41797: 1471.793768 from(736.904160,2+) rtinseconds(2244) index(81981)

Title: Locus:1.1.1.2661.9 File:"2013-07-02 CLN FXIII 30 min 1st FT.wiff"

Data file C:\Program Files (x86)\Matrix Science\Mascot Daemon\mgf\1 FXIII 30 min 1st\mascot\_daemon\_merge.mgf

Click mouse within plot area to zoom in by factor of two about that point

Or, Plot from  to  Da

Label all possible matches  Label matches used for scoring



Monoisotopic mass of neutral peptide  $M_r(\text{calc})$ : 1471.789093

Fixed modifications: Carbamidomethyl (C) (apply to specified residues or termini only)

Variable modifications:

Q2 : Biotin:Thermo-21345 (Q)

Ions Score: 54 Expect: 4.7e-005

Matches : 21/94 fragment ions using 42 most intense peaks [\(help\)](#)

| #  | b                  | b <sup>++</sup> | b <sup>*</sup>     | b <sup>*++</sup> | b <sup>0</sup>    | b <sup>0++</sup> | Seq. | y                  | y <sup>++</sup> | y <sup>*</sup>    | y <sup>*++</sup> | y <sup>0</sup>    | y <sup>0++</sup> | #  |
|----|--------------------|-----------------|--------------------|------------------|-------------------|------------------|------|--------------------|-----------------|-------------------|------------------|-------------------|------------------|----|
| 1  | 115.050203         | 58.028740       | 98.023654          | 49.515465        |                   |                  | N    |                    |                 |                   |                  |                   |                  | 10 |
| 2  | <b>554.275529</b>  | 277.641403      | <b>537.248980</b>  | 269.128128       |                   |                  | Q    | <b>1358.753442</b> | 679.880359      | 1341.726893       | 671.367085       | 1340.742877       | 670.875076       | 9  |
| 3  | <b>653.343943</b>  | 327.175610      | 636.317394         | 318.662335       |                   |                  | V    | <b>919.528116</b>  | 460.267696      | 902.501567        | 451.754421       | <b>901.517551</b> | 451.262413       | 8  |
| 4  | <b>740.375971</b>  | 370.691623      | 723.349422         | 362.178349       | <b>722.365406</b> | 361.686341       | S    | <b>820.459702</b>  | 410.733489      | 803.433153        | 402.220215       | 802.449137        | 401.728207       | 7  |
| 5  | 853.460035         | 427.233656      | 836.433486         | 418.720381       | 835.449470        | 418.228373       | L    | <b>733.427674</b>  | 367.217475      | 716.401125        | 358.704201       | 715.417109        | 358.212193       | 6  |
| 6  | 954.507714         | 477.757495      | 937.481165         | 469.244220       | <b>936.497149</b> | 468.752212       | T    | <b>620.343610</b>  | 310.675443      | 603.317061        | 302.162169       | 602.333045        | 301.670161       | 5  |
| 7  | <b>1114.538363</b> | 557.772819      | 1097.511814        | 549.259545       | 1096.527798       | 548.767537       | C    | <b>519.295931</b>  | 260.151604      | 502.269382        | 251.638329       |                   |                  | 4  |
| 8  | <b>1227.622427</b> | 614.314851      | 1210.595878        | 605.801577       | 1209.611862       | 605.309569       | L    | <b>359.265282</b>  | 180.136279      | 342.238733        | 171.623004       |                   |                  | 3  |
| 9  | <b>1326.690841</b> | 663.849058      | <b>1309.664292</b> | 655.335784       | 1308.680276       | 654.843776       | V    | <b>246.181218</b>  | 123.594247      | 229.154669        | 115.080973       |                   |                  | 2  |
| 10 |                    |                 |                    |                  |                   |                  | K    | <b>147.112804</b>  | 74.060040       | <b>130.086255</b> | 65.546765        |                   |                  | 1  |



NCBI BLAST search of **NQVSLTCLVK**

(Parameters: blastp, nr protein database, expect=20000, no filter, PAM30)

Other BLAST [web gateways](#)

All matches to this query

| Score | $M_r(\text{calc})$ : | Delta     | Sequence                       |
|-------|----------------------|-----------|--------------------------------|
| 54.0  | 1471.789093          | 0.004675  | <a href="#">NQVSLTCLVK</a>     |
| 7.5   | 1471.797592          | -0.003824 | <a href="#">KYFWDRAFLVK</a>    |
| 4.7   | 1471.803467          | -0.009699 | <a href="#">EKQGPLLDLFGQK</a>  |
| 4.6   | 1471.792908          | 0.000860  | <a href="#">NITINCVKGINAR</a>  |
| 2.8   | 1471.799438          | -0.005670 | <a href="#">EVELDRLRDTVK</a>   |
| 2.6   | 1471.792221          | 0.001547  | <a href="#">NESIPLSPFEVK</a>   |
| 2.3   | 1471.806793          | -0.013025 | <a href="#">AAALLAKQAEMEYK</a> |
| 1.2   | 1471.777847          | 0.015921  | <a href="#">QLDMELVSVK</a>     |



# MASCOT Search Results

## Peptide View

MS/MS Fragmentation of **VYACEVTHQGLSSPVTK**

Found in **IGKC\_HUMAN**, Ig kappa chain C region OS=Homo sapiens GN=IGKC PE=1 SV=1

Match to Query 61335: 2186.091072 from(729.704300,3+) rtinseconds(1797) index(78900)

Title: Locus:1.1.1.2505.17 File:"2013-07-02 CLN FXIII 30 min 1st FT.wiff"

Data file C:\Program Files (x86)\Matrix Science\Mascot Daemon\mgf1 FXIII 30 min 1st\mascot\_daemon\_merge.mgf

Click mouse within plot area to zoom in by factor of two about that point

Or, Plot from  to  Da

Label all possible matches  Label matches used for scoring

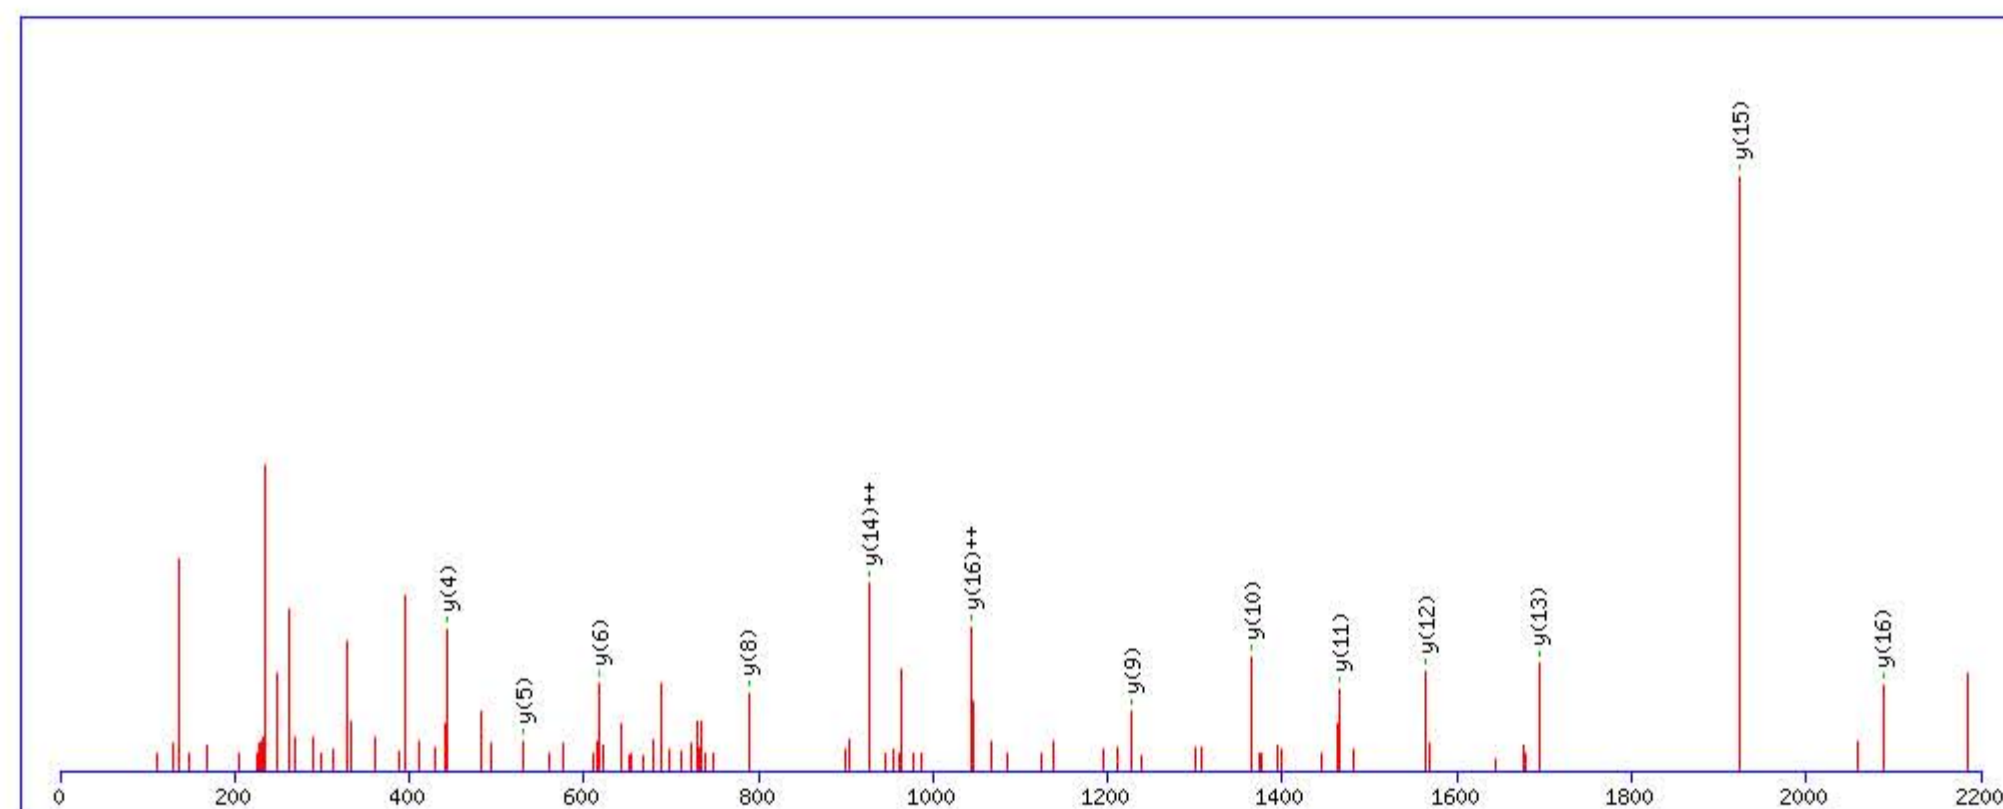

Monoisotopic mass of neutral peptide Mr(calc): 2186.086411

Fixed modifications: Carbamidomethyl (C) (apply to specified residues or termini only)

Variable modifications:

Q9 : Biotin:Thermo-21345 (Q)

Ions Score: 88 Expect: 4.1e-008

Matches : 13/166 fragment ions using 18 most intense peaks [\(help\)](#)

| #  | b           | b <sup>++</sup> | b <sup>*</sup> | b <sup>*++</sup> | b <sup>0</sup> | b <sup>0++</sup> | Seq. | y           | y <sup>++</sup> | y <sup>*</sup> | y <sup>*++</sup> | y <sup>0</sup> | y <sup>0++</sup> | #  |
|----|-------------|-----------------|----------------|------------------|----------------|------------------|------|-------------|-----------------|----------------|------------------|----------------|------------------|----|
| 1  | 100.075690  | 50.541483       |                |                  |                |                  | V    |             |                 |                |                  |                |                  | 17 |
| 2  | 263.139019  | 132.073148      |                |                  |                |                  | Y    | 2088.025261 | 1044.516268     | 2070.998712    | 1036.002994      | 2070.014696    | 1035.510986      | 16 |
| 3  | 334.176133  | 167.591704      |                |                  |                |                  | A    | 1924.961932 | 962.984604      | 1907.935383    | 954.471330       | 1906.951367    | 953.979322       | 15 |
| 4  | 494.206782  | 247.607029      |                |                  |                |                  | C    | 1853.924818 | 927.466047      | 1836.898269    | 918.952773       | 1835.914253    | 918.460765       | 14 |
| 5  | 623.249375  | 312.128326      |                |                  | 605.238810     | 303.123043       | E    | 1693.894169 | 847.450723      | 1676.867620    | 838.937448       | 1675.883604    | 838.445440       | 13 |
| 6  | 722.317789  | 361.662533      |                |                  | 704.307224     | 352.657250       | V    | 1564.851576 | 782.929426      | 1547.825027    | 774.416152       | 1546.841011    | 773.924144       | 12 |
| 7  | 823.365468  | 412.186372      |                |                  | 805.354903     | 403.181090       | T    | 1465.783162 | 733.395219      | 1448.756613    | 724.881945       | 1447.772597    | 724.389937       | 11 |
| 8  | 960.424380  | 480.715828      |                |                  | 942.413815     | 471.710546       | H    | 1364.735483 | 682.871380      | 1347.708934    | 674.358105       | 1346.724918    | 673.866097       | 10 |
| 9  | 1399.649706 | 700.328491      | 1382.623157    | 691.815217       | 1381.639141    | 691.323208       | Q    | 1227.676571 | 614.341924      | 1210.650022    | 605.828649       | 1209.666006    | 605.336641       | 9  |
| 10 | 1456.671170 | 728.839223      | 1439.644621    | 720.325948       | 1438.660605    | 719.833940       | G    | 788.451245  | 394.729261      | 771.424696     | 386.215986       | 770.440680     | 385.723978       | 8  |
| 11 | 1569.755234 | 785.381255      | 1552.728685    | 776.867980       | 1551.744669    | 776.375972       | L    | 731.429781  | 366.218529      | 714.403232     | 357.705254       | 713.419216     | 357.213246       | 7  |
| 12 | 1656.787262 | 828.897269      | 1639.760713    | 820.383994       | 1638.776697    | 819.891986       | S    | 618.345717  | 309.676497      | 601.319168     | 301.163222       | 600.335152     | 300.671214       | 6  |
| 13 | 1743.819290 | 872.413283      | 1726.792741    | 863.900009       | 1725.808725    | 863.408000       | S    | 531.313689  | 266.160483      | 514.287140     | 257.647208       | 513.303124     | 257.155200       | 5  |
| 14 | 1840.872054 | 920.939665      | 1823.845505    | 912.426391       | 1822.861489    | 911.934382       | P    | 444.281661  | 222.644469      | 427.255112     | 214.131194       | 426.271096     | 213.639186       | 4  |
| 15 | 1939.940468 | 970.473872      | 1922.913919    | 961.960598       | 1921.929903    | 961.468590       | V    | 347.228897  | 174.118087      | 330.202348     | 165.604812       | 329.218332     | 165.112804       | 3  |
| 16 | 2040.988147 | 1020.997712     | 2023.961598    | 1012.484437      | 2022.977582    | 1011.992429      | T    | 248.160483  | 124.583880      | 231.133934     | 116.070605       | 230.149918     | 115.578597       | 2  |
| 17 |             |                 |                |                  |                |                  | K    | 147.112804  | 74.060040       | 130.086255     | 65.546766        |                |                  | 1  |

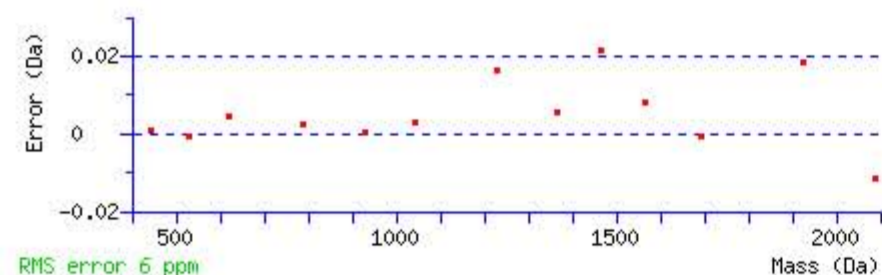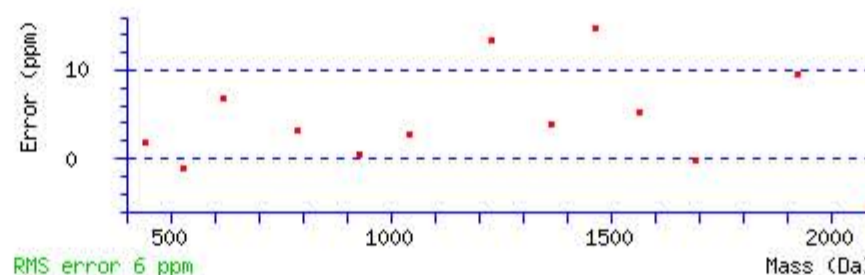

NCBI BLAST search of **VYACEVTHQGLSSPVTK**

(Parameters: blastp, nr protein database, expect=20000, no filter, PAM30)

Other BLAST [web gateways](#)

All matches to this query

| Score | Mr(calc):   | Delta    | Sequence                          |
|-------|-------------|----------|-----------------------------------|
| 88.4  | 2186.086411 | 0.004661 | <a href="#">VYACEVTHQGLSSPVTK</a> |

Mascot: <http://www.matrixscience.com/>



# MASCOT Search Results

## Peptide View

MS/MS Fragmentation of **ELAAQTIK**

Found in **ITIH1\_HUMAN**, Inter-alpha-trypsin inhibitor heavy chain H1 OS=Homo sapiens GN=ITIH1 PE=1 SV=3

Match to Query 31190: 1183.661668 from(592.838110,2+) rtinseconds(1709) index(61046)

Title: Locus:1.1.1.2593.9 File:"2013-07-02 CLN FXIII 30 min 1st F 4.wiff"

Data file C:\Program Files (x86)\Matrix Science\Mascot Daemon\mgf\1 FXIII 30 min 1st\mascot\_daemon\_merge.mgf

Click mouse within plot area to zoom in by factor of two about that point

Or, Plot from  to  Da

Label all possible matches  Label matches used for scoring

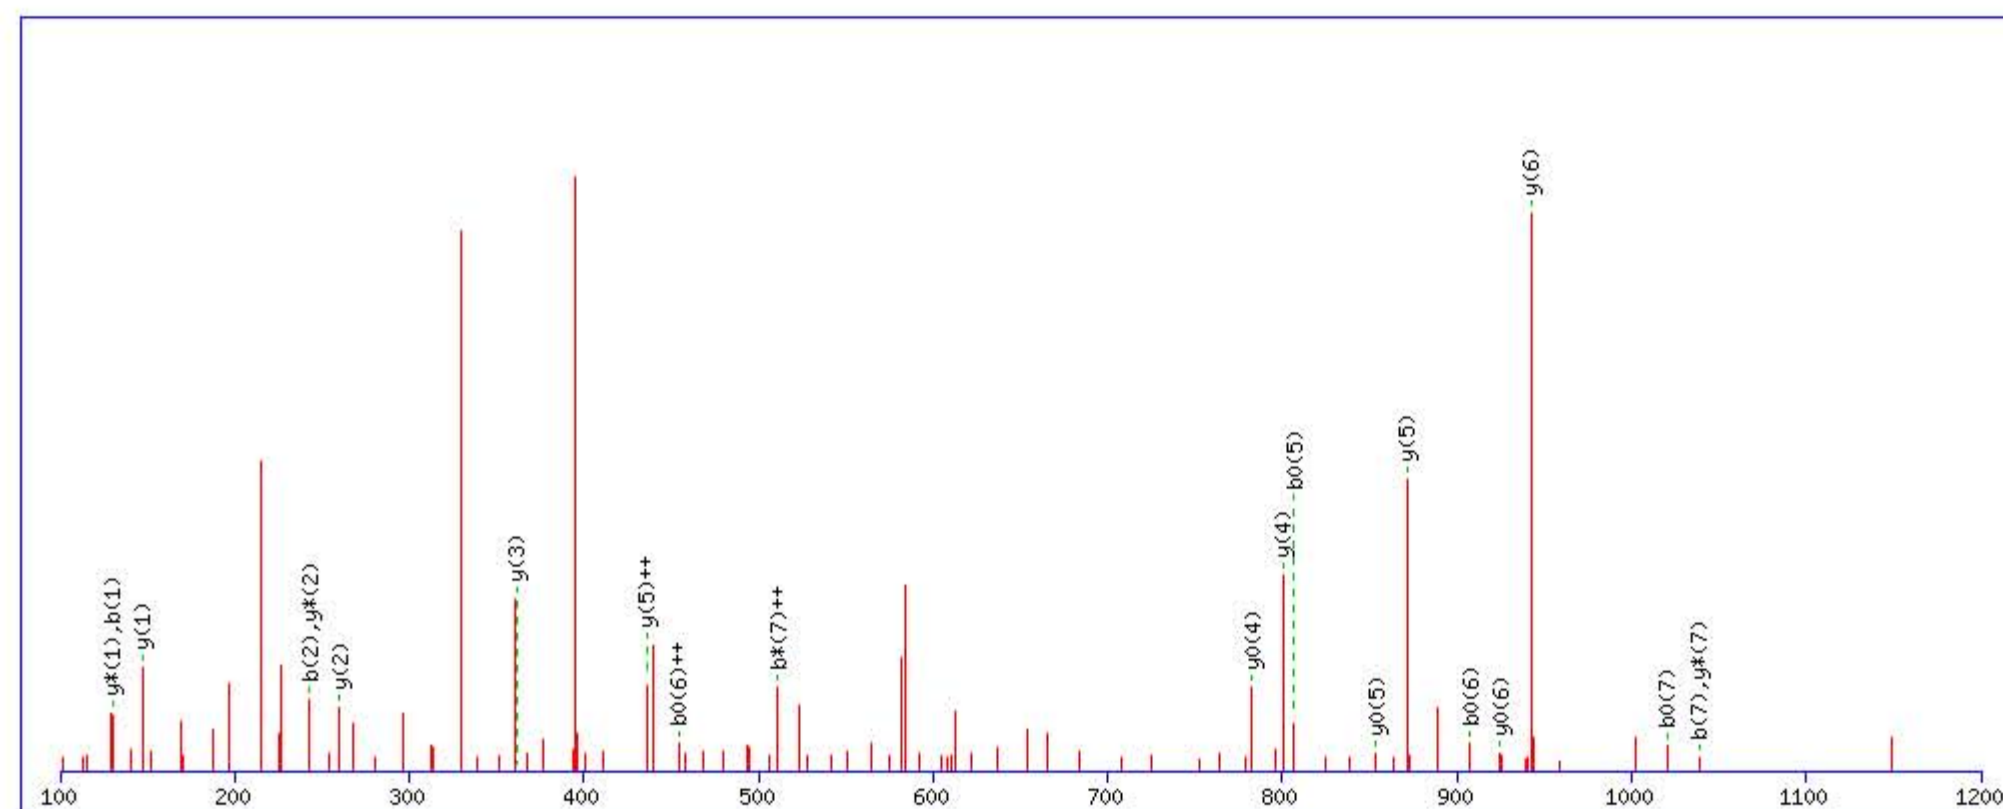

Monoisotopic mass of neutral peptide Mr(calc): 1183.663452

Fixed modifications: Carbamidomethyl (C) (apply to specified residues or termini only)

Variable modifications:

Q5 : Biotin:Thermo-21345 (Q)

Ions Score: 27 Expect: 0.043

Matches : 21/72 fragment ions using 40 most intense peaks [\(help\)](#)

| # | b           | b <sup>++</sup> | b <sup>*</sup> | b <sup>*++</sup> | b <sup>0</sup> | b <sup>0++</sup> | Seq. | y           | y <sup>++</sup> | y <sup>*</sup> | y <sup>*++</sup> | y <sup>0</sup> | y <sup>0++</sup> | # |
|---|-------------|-----------------|----------------|------------------|----------------|------------------|------|-------------|-----------------|----------------|------------------|----------------|------------------|---|
| 1 | 130.049869  | 65.528572       |                |                  | 112.039304     | 56.523290        | E    |             |                 |                |                  |                |                  | 8 |
| 2 | 243.133933  | 122.070605      |                |                  | 225.123368     | 113.065322       | L    | 1055.628165 | 528.317720      | 1038.601616    | 519.804446       | 1037.617600    | 519.312438       | 7 |
| 3 | 314.171047  | 157.589161      |                |                  | 296.160482     | 148.583879       | A    | 942.544101  | 471.775689      | 925.517552     | 463.262414       | 924.533536     | 462.770406       | 6 |
| 4 | 385.208161  | 193.107718      |                |                  | 367.197596     | 184.102436       | A    | 871.506987  | 436.257132      | 854.480438     | 427.743857       | 853.496422     | 427.251849       | 5 |
| 5 | 824.433487  | 412.720382      | 807.406938     | 404.207107       | 806.422922     | 403.715099       | Q    | 800.469873  | 400.738575      | 783.443324     | 392.225300       | 782.459308     | 391.733292       | 4 |
| 6 | 925.481166  | 463.244221      | 908.454617     | 454.730947       | 907.470601     | 454.238939       | T    | 361.244547  | 181.125911      | 344.217998     | 172.612637       | 343.233982     | 172.120629       | 3 |
| 7 | 1038.565230 | 519.786253      | 1021.538681    | 511.272978       | 1020.554665    | 510.780970       | I    | 260.196868  | 130.602072      | 243.170319     | 122.088797       |                |                  | 2 |
| 8 |             |                 |                |                  |                |                  | K    | 147.112804  | 74.060040       | 130.086255     | 65.546765        |                |                  | 1 |

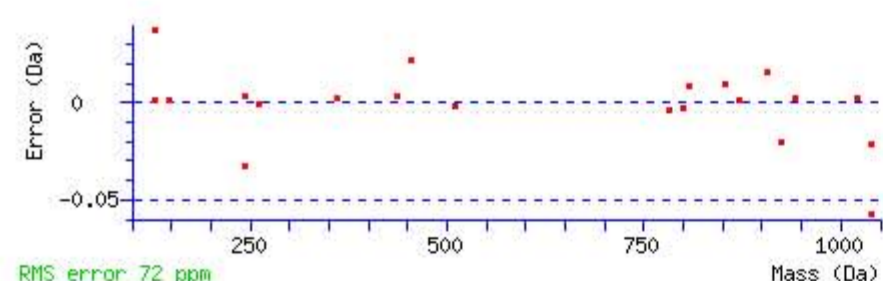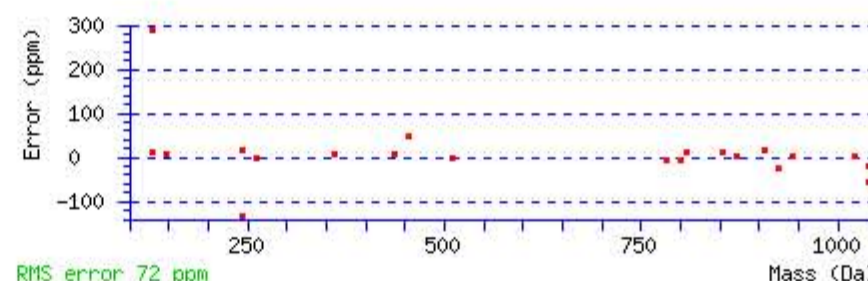

NCBI BLAST search of [ELAAQTIK](#)

(Parameters: blastp, nr protein database, expect=20000, no filter, PAM30)

Other BLAST [web gateways](#)

All matches to this query

| Score | Mr(calc):   | Delta     | Sequence                    |
|-------|-------------|-----------|-----------------------------|
| 27.1  | 1183.663452 | -0.001784 | <a href="#">ELAAQTIK</a>    |
| 18.7  | 1183.663452 | -0.001784 | <a href="#">ELAAQITK</a>    |
| 10.3  | 1183.649551 | 0.012117  | <a href="#">KVCVGHKQSLK</a> |
| 9.0   | 1183.663452 | -0.001784 | <a href="#">LEQAATLK</a>    |
| 7.8   | 1183.660080 | 0.001588  | <a href="#">AIEVAISPWK</a>  |
| 6.1   | 1183.656937 | 0.004731  | <a href="#">MRPQTLK</a>     |
| 5.9   | 1183.667282 | -0.005614 | <a href="#">GKQASEPALRK</a> |
| 5.4   | 1183.663467 | -0.001799 | <a href="#">TQLSPSIK</a>    |
| 4.6   | 1183.674683 | -0.013015 | <a href="#">ELRQLSK</a>     |
| 4.4   | 1183.667282 | -0.005614 | <a href="#">QLLRALIEGR</a>  |



# MASCOT Search Results

## Peptide View

MS/MS Fragmentation of **LDAQASFLPK**

Found in **ITIH1\_HUMAN**, Inter-alpha-trypsin inhibitor heavy chain H1 OS=Homo sapiens GN=ITIH1 PE=1 SV=3

Match to Query 38880: 1399.755788 from(700.885170,2+) rtinseconds(2177) index(64284)

Title: Locus:1.1.1.2755.15 File:"2013-07-02 CLN FXIII 30 min 1st F 4.wiff"

Data file C:\Program Files (x86)\Matrix Science\Mascot Daemon\mgf\1 FXIII 30 min 1st\mascot\_daemon\_merge.mgf

Click mouse within plot area to zoom in by factor of two about that point

Or, Plot from  to  Da

Label all possible matches  Label matches used for scoring

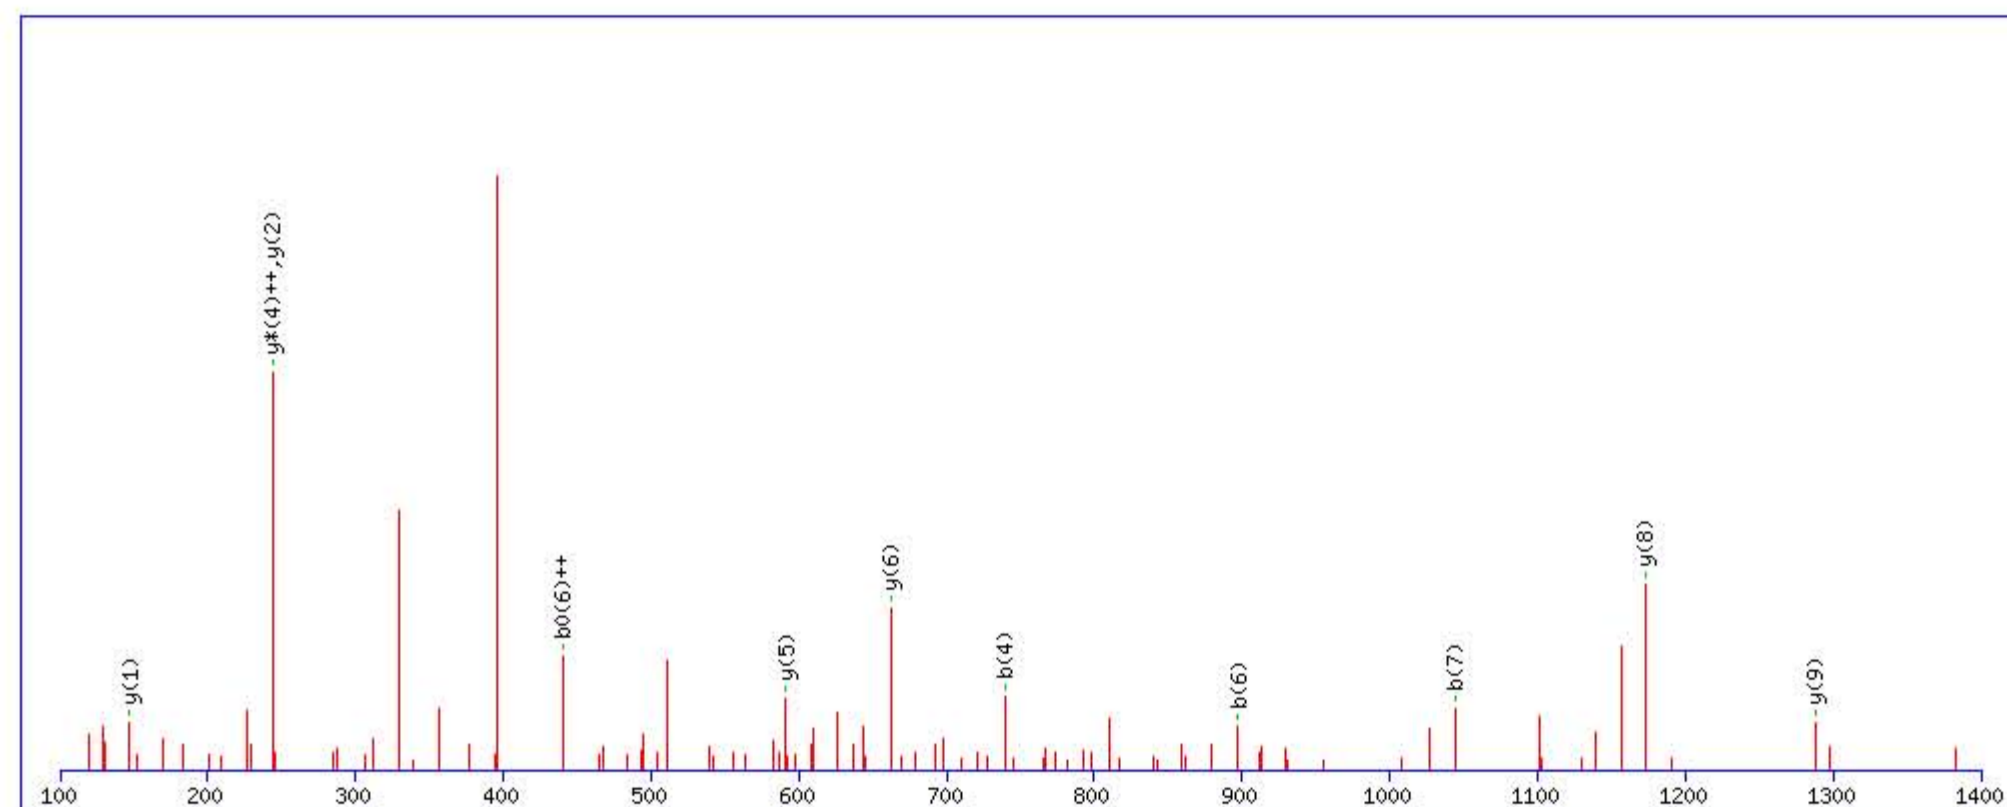

Monoisotopic mass of neutral peptide Mr(calc): 1399.753342

Fixed modifications: Carbamidomethyl (C) (apply to specified residues or termini only)

Variable modifications:

Q4 : Biotin:Thermo-21345 (Q)

Ions Score: 49 Expect: 0.00034

Matches : 11/92 fragment ions using 13 most intense peaks [\(help\)](#)

| #  | b                  | b <sup>++</sup> | b <sup>*</sup> | b <sup>*++</sup> | b <sup>0</sup> | b <sup>0++</sup>  | Seq. | y                  | y <sup>++</sup> | y <sup>*</sup> | y <sup>*++</sup>  | y <sup>0</sup> | y <sup>0++</sup> | #  |
|----|--------------------|-----------------|----------------|------------------|----------------|-------------------|------|--------------------|-----------------|----------------|-------------------|----------------|------------------|----|
| 1  | 114.091340         | 57.549308       |                |                  |                |                   | L    |                    |                 |                |                   |                |                  | 10 |
| 2  | 229.118283         | 115.062779      |                |                  | 211.107718     | 106.057497        | D    | <b>1287.676571</b> | 644.341924      | 1270.650022    | 635.828649        | 1269.666006    | 635.336641       | 9  |
| 3  | 300.155397         | 150.581336      |                |                  | 282.144832     | 141.576054        | A    | <b>1172.649628</b> | 586.828452      | 1155.623079    | 578.315178        | 1154.639063    | 577.823169       | 8  |
| 4  | <b>739.380723</b>  | 370.194000      | 722.354174     | 361.680725       | 721.370158     | 361.188717        | Q    | 1101.612514        | 551.309895      | 1084.585965    | 542.796621        | 1083.601949    | 542.304612       | 7  |
| 5  | 810.417837         | 405.712557      | 793.391288     | 397.199282       | 792.407272     | 396.707274        | A    | <b>662.387188</b>  | 331.697232      | 645.360639     | 323.183957        | 644.376623     | 322.691949       | 6  |
| 6  | <b>897.449865</b>  | 449.228570      | 880.423316     | 440.715296       | 879.439300     | <b>440.223288</b> | S    | <b>591.350074</b>  | 296.178675      | 574.323525     | 287.665400        | 573.339509     | 287.173392       | 5  |
| 7  | <b>1044.518279</b> | 522.762777      | 1027.491730    | 514.249503       | 1026.507714    | 513.757495        | F    | 504.318046         | 252.662661      | 487.291497     | <b>244.149386</b> |                |                  | 4  |
| 8  | 1157.602343        | 579.304809      | 1140.575794    | 570.791535       | 1139.591778    | 570.299527        | L    | 357.249632         | 179.128454      | 340.223083     | 170.615179        |                |                  | 3  |
| 9  | 1254.655107        | 627.831191      | 1237.628558    | 619.317917       | 1236.644542    | 618.825909        | P    | <b>244.165568</b>  | 122.586422      | 227.139019     | 114.073148        |                |                  | 2  |
| 10 |                    |                 |                |                  |                |                   | K    | <b>147.112804</b>  | 74.060040       | 130.086255     | 65.546765         |                |                  | 1  |

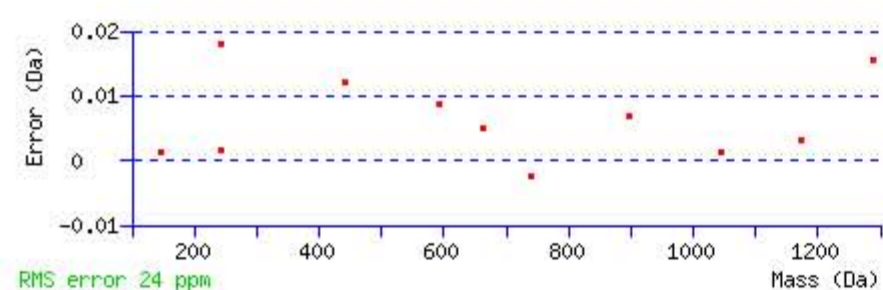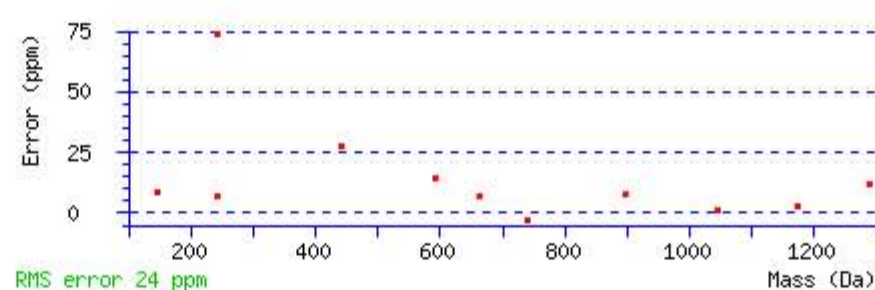

NCBI BLAST search of [LDAQASFLPK](#)

(Parameters: blastp, nr protein database, expect=20000, no filter, PAM30)

Other BLAST [web gateways](#)

## All matches to this query

| Score | Mr(calc):   | Delta     | Sequence                      |
|-------|-------------|-----------|-------------------------------|
| 48.8  | 1399.753342 | 0.002446  | <a href="#">LDAQASFLPK</a>    |
| 12.5  | 1399.745972 | 0.009816  | <a href="#">IDAATGIPVTTWR</a> |
| 5.7   | 1399.755814 | -0.000026 | <a href="#">KTELGPKLEEEK</a>  |
| 5.2   | 1399.746811 | 0.008977  | <a href="#">FKMPKIHMSGPK</a>  |
| 5.0   | 1399.738083 | 0.017705  | <a href="#">LQKEEVTDK</a>     |
| 4.0   | 1399.756729 | -0.000941 | <a href="#">QGTMPVSLK</a>     |
| 4.0   | 1399.738083 | 0.017705  | <a href="#">QASDLSLIDK</a>    |
| 2.8   | 1399.741913 | 0.013875  | <a href="#">DLQEVKAAARDGK</a> |
| 2.7   | 1399.771973 | -0.016185 | <a href="#">IWQGMLTIK</a>     |
| 2.7   | 1399.756714 | -0.000926 | <a href="#">LSQVPMSALK</a>    |



# MASCOT Search Results

## Peptide View

MS/MS Fragmentation of **GSLVQASEANLQAAQDFVR**

Found in **ITIH1\_HUMAN**, Inter-alpha-trypsin inhibitor heavy chain H1 OS=Homo sapiens GN=ITIH1 PE=1 SV=3

Match to Query 64410: 2314.185312 from(772.402380,3+) rtinseconds(2516) index(66353)

Title: Locus:1.1.1.2873.9 File:"2013-07-02 CLN FXIII 30 min 1st F 4.wiff"

Data file C:\Program Files (x86)\Matrix Science\Mascot Daemon\mgf1 FXIII 30 min 1st\mascot\_daemon\_merge.mgf

Click mouse within plot area to zoom in by factor of two about that point

Or, Plot from  to  Da

Label all possible matches  Label matches used for scoring

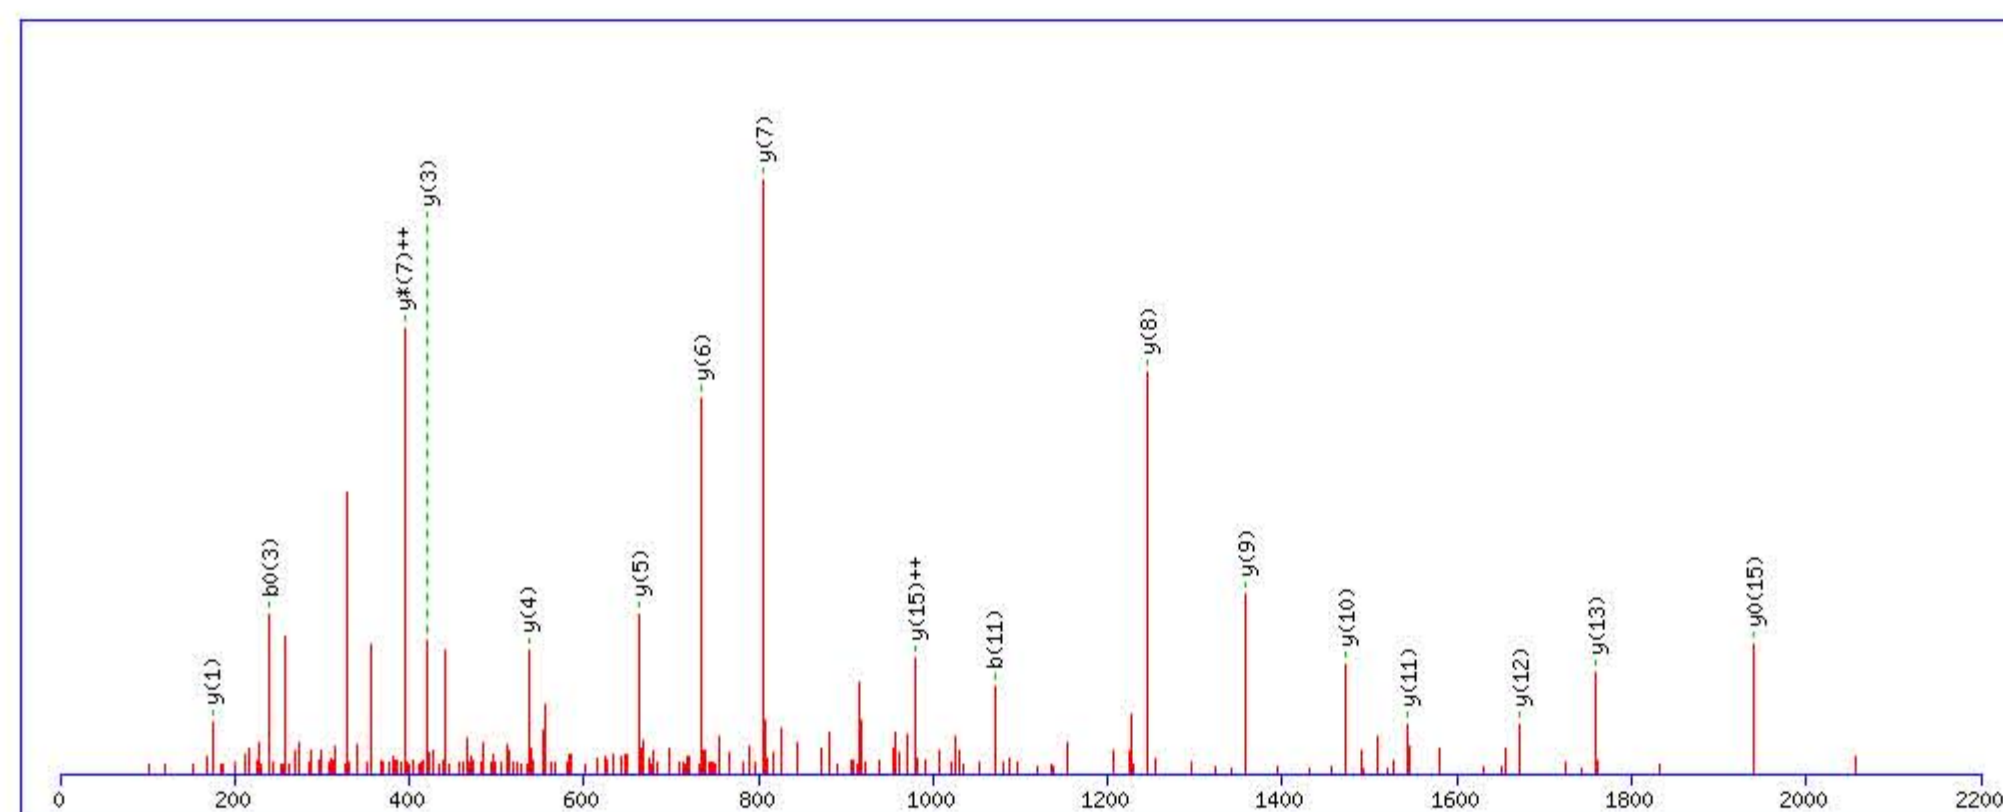

Monoisotopic mass of neutral peptide Mr(calc): 2314.173950

Fixed modifications: Carbamidomethyl (C) (apply to specified residues or termini only)

Variable modifications:

Q12 : Biotin:Thermo-21345 (Q)

Ions Score: 97 Expect: 2.1e-009

Matches : 17/200 fragment ions using 20 most intense peaks [\(help\)](#)

| #  | b           | b <sup>++</sup> | b <sup>*</sup> | b <sup>*++</sup> | b <sup>0</sup> | b <sup>0++</sup> | Seq.     | y           | y <sup>++</sup> | y <sup>*</sup> | y <sup>*++</sup> | y <sup>0</sup> | y <sup>0++</sup> | #  |
|----|-------------|-----------------|----------------|------------------|----------------|------------------|----------|-------------|-----------------|----------------|------------------|----------------|------------------|----|
| 1  | 58.028740   | 29.518008       |                |                  |                |                  | <b>G</b> |             |                 |                |                  |                |                  | 19 |
| 2  | 145.060768  | 73.034022       |                |                  | 127.050203     | 64.028740        | <b>S</b> | 2258.159779 | 1129.583527     | 2241.133230    | 1121.070253      | 2240.149214    | 1120.578245      | 18 |
| 3  | 258.144832  | 129.576054      |                |                  | 240.134267     | 120.570772       | <b>L</b> | 2171.127751 | 1086.067513     | 2154.101202    | 1077.554239      | 2153.117186    | 1077.062231      | 17 |
| 4  | 357.213246  | 179.110261      |                |                  | 339.202681     | 170.104979       | <b>V</b> | 2058.043687 | 1029.525481     | 2041.017138    | 1021.012207      | 2040.033122    | 1020.520199      | 16 |
| 5  | 485.271824  | 243.139550      | 468.245275     | 234.626276       | 467.261259     | 234.134268       | <b>Q</b> | 1958.975273 | 979.991275      | 1941.948724    | 971.478000       | 1940.964708    | 970.985992       | 15 |
| 6  | 556.308938  | 278.658107      | 539.282389     | 270.144833       | 538.298373     | 269.652825       | <b>A</b> | 1830.916695 | 915.961986      | 1813.890146    | 907.448711       | 1812.906130    | 906.956703       | 14 |
| 7  | 643.340966  | 322.174121      | 626.314417     | 313.660847       | 625.330401     | 313.168839       | <b>S</b> | 1759.879581 | 880.443429      | 1742.853032    | 871.930154       | 1741.869016    | 871.438146       | 13 |
| 8  | 772.383559  | 386.695418      | 755.357010     | 378.182143       | 754.372994     | 377.690135       | <b>E</b> | 1672.847553 | 836.927415      | 1655.821004    | 828.414140       | 1654.836988    | 827.922132       | 12 |
| 9  | 843.420673  | 422.213975      | 826.394124     | 413.700700       | 825.410108     | 413.208692       | <b>A</b> | 1543.804960 | 772.406118      | 1526.778411    | 763.892844       | 1525.794395    | 763.400836       | 11 |
| 10 | 957.463600  | 479.235438      | 940.437051     | 470.722164       | 939.453035     | 470.230156       | <b>N</b> | 1472.767846 | 736.887561      | 1455.741297    | 728.374287       | 1454.757281    | 727.882279       | 10 |
| 11 | 1070.547664 | 535.777470      | 1053.521115    | 527.264196       | 1052.537099    | 526.772187       | <b>L</b> | 1358.724919 | 679.866098      | 1341.698370    | 671.352823       | 1340.714354    | 670.860815       | 9  |
| 12 | 1509.772990 | 755.390133      | 1492.746441    | 746.876859       | 1491.762425    | 746.384851       | <b>Q</b> | 1245.640855 | 623.324066      | 1228.614306    | 614.810791       | 1227.630290    | 614.318783       | 8  |
| 13 | 1580.810104 | 790.908690      | 1563.783555    | 782.395416       | 1562.799539    | 781.903408       | <b>A</b> | 806.415529  | 403.711403      | 789.388980     | 395.198128       | 788.404964     | 394.706120       | 7  |
| 14 | 1651.847218 | 826.427247      | 1634.820669    | 817.913973       | 1633.836653    | 817.421965       | <b>A</b> | 735.378415  | 368.192846      | 718.351866     | 359.679571       | 717.367850     | 359.187563       | 6  |
| 15 | 1779.905796 | 890.456536      | 1762.879247    | 881.943262       | 1761.895231    | 881.451254       | <b>Q</b> | 664.341301  | 332.674289      | 647.314752     | 324.161014       | 646.330736     | 323.669006       | 5  |
| 16 | 1894.932739 | 947.970008      | 1877.906190    | 939.456733       | 1876.922174    | 938.964725       | <b>D</b> | 536.282723  | 268.645000      | 519.256174     | 260.131725       | 518.272158     | 259.639717       | 4  |
| 17 | 2042.001153 | 1021.504215     | 2024.974604    | 1012.990940      | 2023.990588    | 1012.498932      | <b>F</b> | 421.255780  | 211.131528      | 404.229231     | 202.618253       |                |                  | 3  |
| 18 | 2141.069567 | 1071.038421     | 2124.043018    | 1062.525147      | 2123.059002    | 1062.033139      | <b>V</b> | 274.187366  | 137.597321      | 257.160817     | 129.084046       |                |                  | 2  |
| 19 |             |                 |                |                  |                |                  | <b>R</b> | 175.118952  | 88.063114       | 158.092403     | 79.549839        |                |                  | 1  |

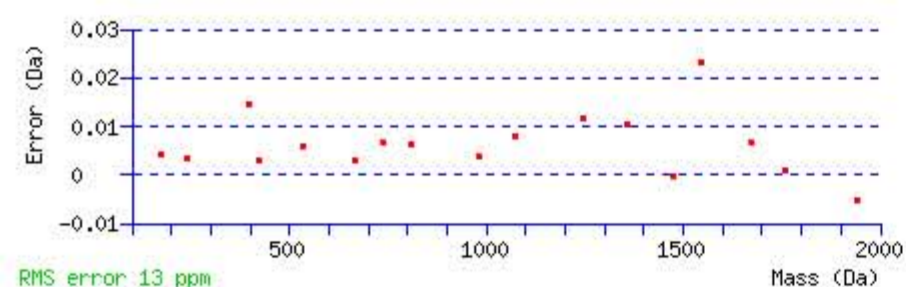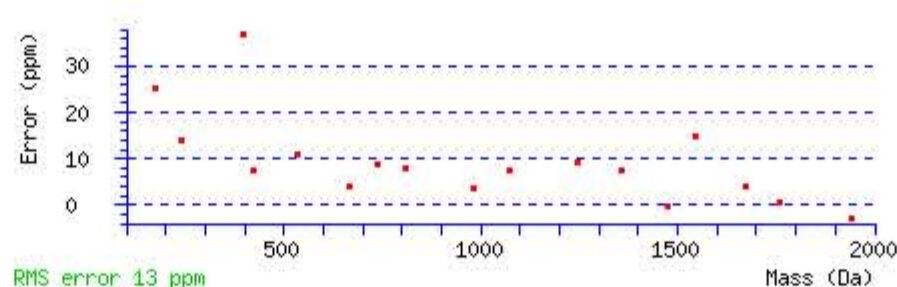

NCBI BLAST search of **GSLVQASEANLQAAQDFVR**

(Parameters: blastp, nr protein database, expect=20000, no filter, PAM30)

Other BLAST [web gateways](#)

All matches to this query

| Score | Mr(calc):   | Delta    | Sequence                            |
|-------|-------------|----------|-------------------------------------|
| 97.1  | 2314.173950 | 0.011362 | <a href="#">GSLVQASEANLQAAQDFVR</a> |
| 49.3  | 2314.173950 | 0.011362 | <a href="#">GSLVQASEANLQAAQDFVR</a> |
| 22.2  | 2314.173950 | 0.011362 | <a href="#">GSLVQASEANLQAAQDFVR</a> |
| 4.2   | 2314.178635 | 0.006677 | <a href="#">NKDRPAMQLYQPGARSR</a>   |
| 0.2   | 2314.153702 | 0.031610 | <a href="#">FAKFQHQVEMGSQR</a>      |



# MASCOT Search Results

## Peptide View

MS/MS Fragmentation of **GSLVQASEANLQAAQDFVR**  
 Found in **ITIH1\_HUMAN**, Inter-alpha-trypsin inhibitor heavy chain H1 OS=Homo sapiens GN=ITIH1 PE=1 SV=3

Match to Query 64412: 2314.192212 from(772.404680,3+) rtinseconds(2478) index(66053)  
 Title: Locus:1.1.1.2860.12 File:"2013-07-02 CLN FXIII 30 min 1st F 4.wiff"  
 Data file C:\Program Files (x86)\Matrix Science\Mascot Daemon\mgf\1 FXIII 30 min 1st\mascot\_daemon\_merge.mgf

Click mouse within plot area to zoom in by factor of two about that point  
 Or, Plot from  to  Da   
 Label all possible matches  Label matches used for scoring

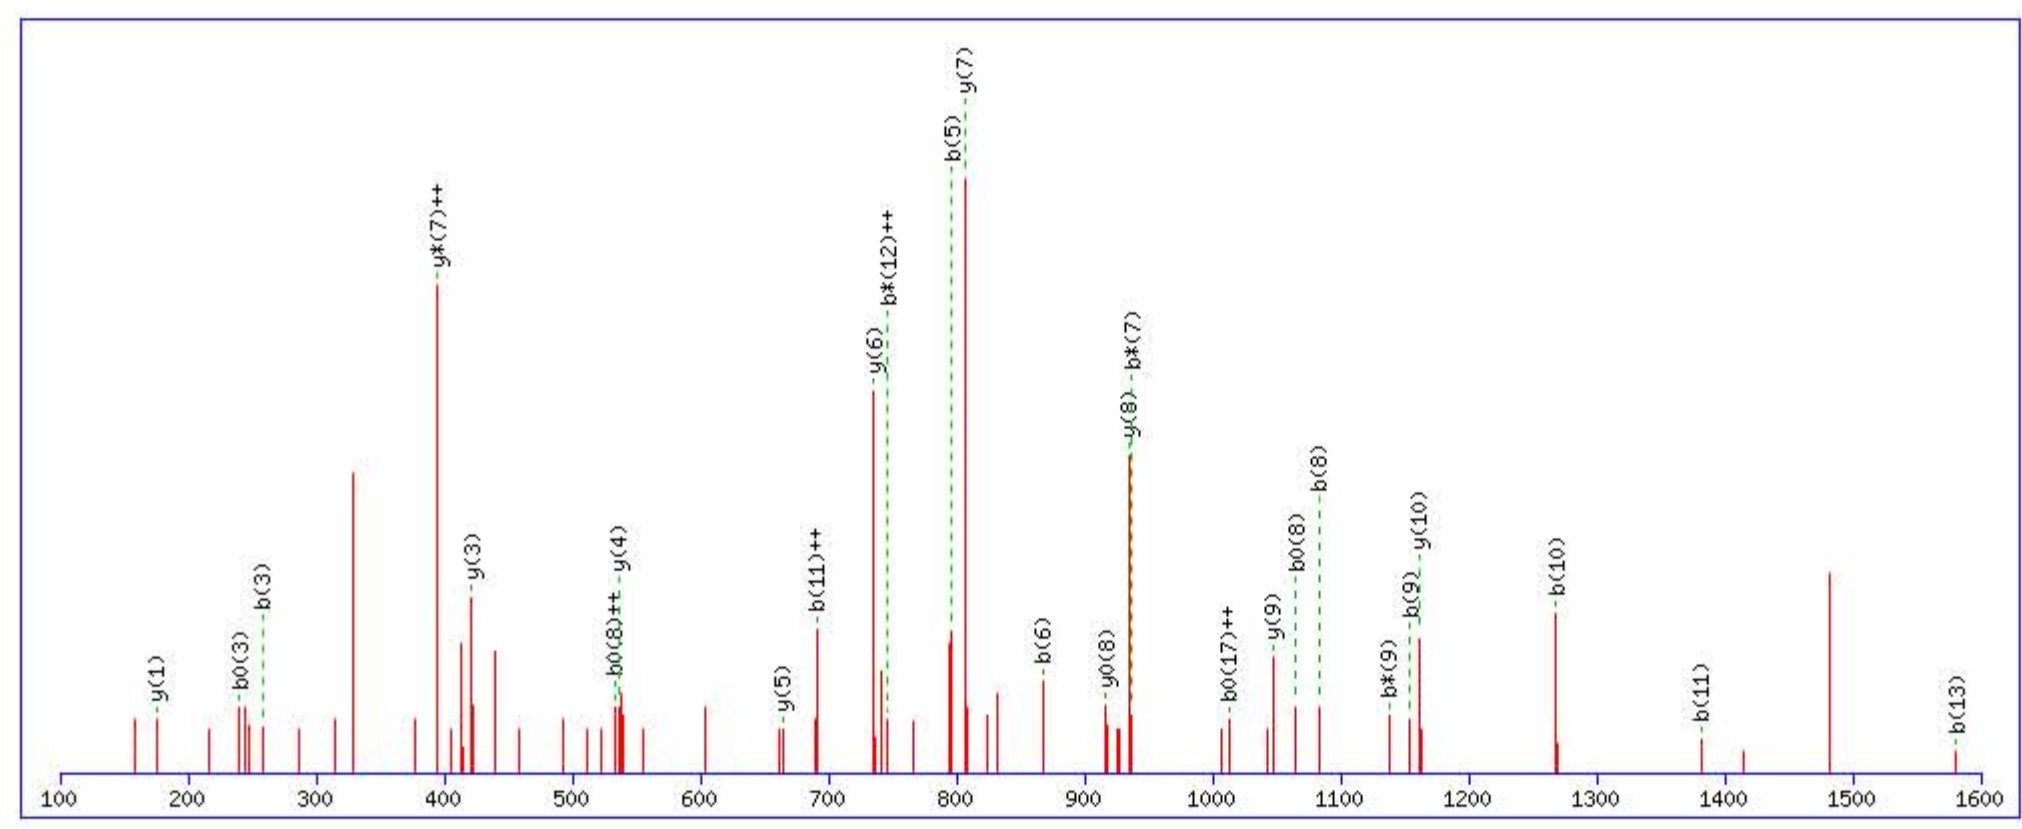

Monoisotopic mass of neutral peptide Mr(calc): 2314.173950  
 Fixed modifications: Carbamidomethyl (C) (apply to specified residues or termini only)  
 Variable modifications:  
 Q5 : Biotin:Thermo-21345 (Q)  
 Ions Score: 48 Expect: 0.00046  
 Matches : 27/200 fragment ions using 56 most intense peaks [\(help\)](#)

| #  | b                  | b <sup>++</sup>   | b <sup>+</sup>     | b <sup>+++</sup>  | b <sup>0</sup>     | b <sup>0++</sup>   | Seq.     | y                  | y <sup>++</sup> | y <sup>+</sup> | y <sup>+++</sup>  | y <sup>0</sup>    | y <sup>0++</sup> | #  |
|----|--------------------|-------------------|--------------------|-------------------|--------------------|--------------------|----------|--------------------|-----------------|----------------|-------------------|-------------------|------------------|----|
| 1  | 58.028740          | 29.518008         |                    |                   |                    |                    | <b>G</b> |                    |                 |                |                   |                   |                  | 19 |
| 2  | 145.060768         | 73.034022         |                    |                   | 127.050203         | 64.028740          | <b>S</b> | 2258.159779        | 1129.583527     | 2241.133230    | 1121.070253       | 2240.149214       | 1120.578245      | 18 |
| 3  | <b>258.144832</b>  | 129.576054        |                    |                   | <b>240.134267</b>  | 120.570772         | <b>L</b> | 2171.127751        | 1086.067513     | 2154.101202    | 1077.554239       | 2153.117186       | 1077.062231      | 17 |
| 4  | 357.213246         | 179.110261        |                    |                   | 339.202681         | 170.104979         | <b>V</b> | 2058.043687        | 1029.525481     | 2041.017138    | 1021.012207       | 2040.033122       | 1020.520199      | 16 |
| 5  | <b>796.438572</b>  | 398.722924        | 779.412023         | 390.209650        | 778.428007         | 389.717642         | <b>Q</b> | 1958.975273        | 979.991274      | 1941.948724    | 971.478000        | 1940.964708       | 970.985992       | 15 |
| 6  | <b>867.475686</b>  | 434.241481        | 850.449137         | 425.728207        | 849.465121         | 425.236199         | <b>A</b> | 1519.749947        | 760.378611      | 1502.723398    | 751.865337        | 1501.739382       | 751.373329       | 14 |
| 7  | 954.507714         | 477.757495        | <b>937.481165</b>  | 469.244220        | 936.497149         | 468.752212         | <b>S</b> | 1448.712833        | 724.860054      | 1431.686284    | 716.346780        | 1430.702268       | 715.854772       | 13 |
| 8  | <b>1083.550307</b> | 542.278792        | 1066.523758        | 533.765517        | <b>1065.539742</b> | <b>533.273509</b>  | <b>E</b> | 1361.680805        | 681.344040      | 1344.654256    | 672.830766        | 1343.670240       | 672.338758       | 12 |
| 9  | <b>1154.587421</b> | 577.797349        | <b>1137.560872</b> | 569.284074        | 1136.576856        | 568.792066         | <b>A</b> | 1232.638212        | 616.822744      | 1215.611663    | 608.309469        | 1214.627647       | 607.817461       | 11 |
| 10 | <b>1268.630348</b> | 634.818812        | 1251.603799        | 626.305538        | 1250.619783        | 625.813529         | <b>N</b> | <b>1161.601098</b> | 581.304187      | 1144.574549    | 572.790912        | 1143.590533       | 572.298904       | 10 |
| 11 | <b>1381.714412</b> | <b>691.360844</b> | 1364.687863        | 682.847569        | 1363.703847        | 682.355561         | <b>L</b> | <b>1047.558171</b> | 524.282723      | 1030.531622    | 515.769449        | 1029.547606       | 515.277441       | 9  |
| 12 | 1509.772990        | 755.390133        | 1492.746441        | <b>746.876858</b> | 1491.762425        | 746.384850         | <b>Q</b> | <b>934.474107</b>  | 467.740692      | 917.447558     | 459.227417        | <b>916.463542</b> | 458.735409       | 8  |
| 13 | <b>1580.810104</b> | 790.908690        | 1563.783555        | 782.395415        | 1562.799539        | 781.903407         | <b>A</b> | <b>806.415529</b>  | 403.711403      | 789.388980     | <b>395.198128</b> | 788.404964        | 394.706120       | 7  |
| 14 | 1651.847218        | 826.427247        | 1634.820669        | 817.913972        | 1633.836653        | 817.421964         | <b>A</b> | <b>735.378415</b>  | 368.192846      | 718.351866     | 359.679571        | 717.367850        | 359.187563       | 6  |
| 15 | 1779.905796        | 890.456536        | 1762.879247        | 881.943261        | 1761.895231        | 881.451253         | <b>Q</b> | <b>664.341301</b>  | 332.674289      | 647.314752     | 324.161014        | 646.330736        | 323.669006       | 5  |
| 16 | 1894.932739        | 947.970007        | 1877.906190        | 939.456733        | 1876.922174        | 938.964725         | <b>D</b> | <b>536.282723</b>  | 268.645000      | 519.256174     | 260.131725        | 518.272158        | 259.639717       | 4  |
| 17 | 2042.001153        | 1021.504215       | 2024.974604        | 1012.990940       | 2023.990588        | <b>1012.498932</b> | <b>F</b> | <b>421.255780</b>  | 211.131528      | 404.229231     | 202.618253        |                   |                  | 3  |
| 18 | 2141.069567        | 1071.038421       | 2124.043018        | 1062.525147       | 2123.059002        | 1062.033139        | <b>V</b> | 274.187366         | 137.597321      | 257.160817     | 129.084046        |                   |                  | 2  |
| 19 |                    |                   |                    |                   |                    |                    | <b>R</b> | <b>175.118952</b>  | 88.063114       | 158.092403     | 79.549839         |                   |                  | 1  |

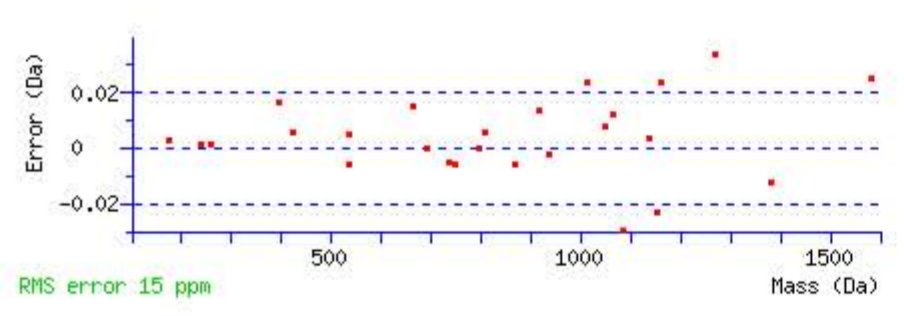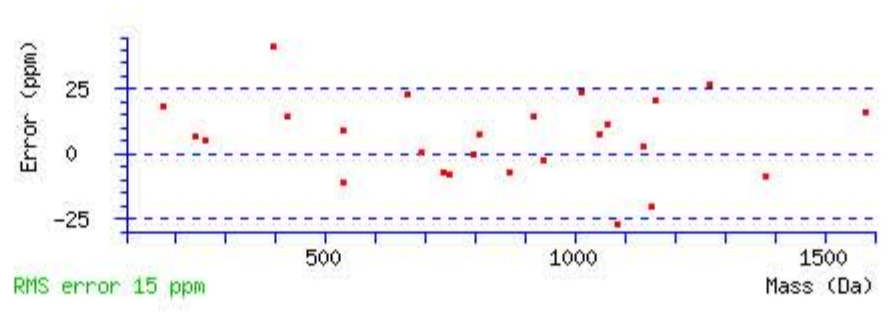

NCBI BLAST search of [GSLVQASEANLQAAQDFVR](#)  
 (Parameters: blastp, nr protein database, expect=20000, no filter, PAM30)  
 Other BLAST [web gateways](#)

### All matches to this query

| Score | Mr(calc):   | Delta    | Sequence                            |
|-------|-------------|----------|-------------------------------------|
| 47.8  | 2314.173950 | 0.018262 | <a href="#">GSLVQASEANLQAAQDFVR</a> |
| 9.1   | 2314.173950 | 0.018262 | <a href="#">GSLVQASEANLQAAQDFVR</a> |



# MASCOT Search Results

## Peptide View

MS/MS Fragmentation of **FAHYVVTSQVVNTANEAR**

Found in **ITIH1\_HUMAN**, Inter-alpha-trypsin inhibitor heavy chain H1 OS=Homo sapiens GN=ITIH1 PE=1 SV=3

Match to Query 64465: 2316.170112 from(773.063980,3+) rtinseconds(1929) index(62599)

Title: Locus:1.1.1.2669.20 File:"2013-07-02 CLN FXIII 30 min 1st F 4.wiff"

Data file C:\Program Files (x86)\Matrix Science\Mascot Daemon\mgf\1 FXIII 30 min 1st\mascot\_daemon\_merge.mgf

Click mouse within plot area to zoom in by factor of two about that point

Or, Plot from  to  Da

Label all possible matches  Label matches used for scoring

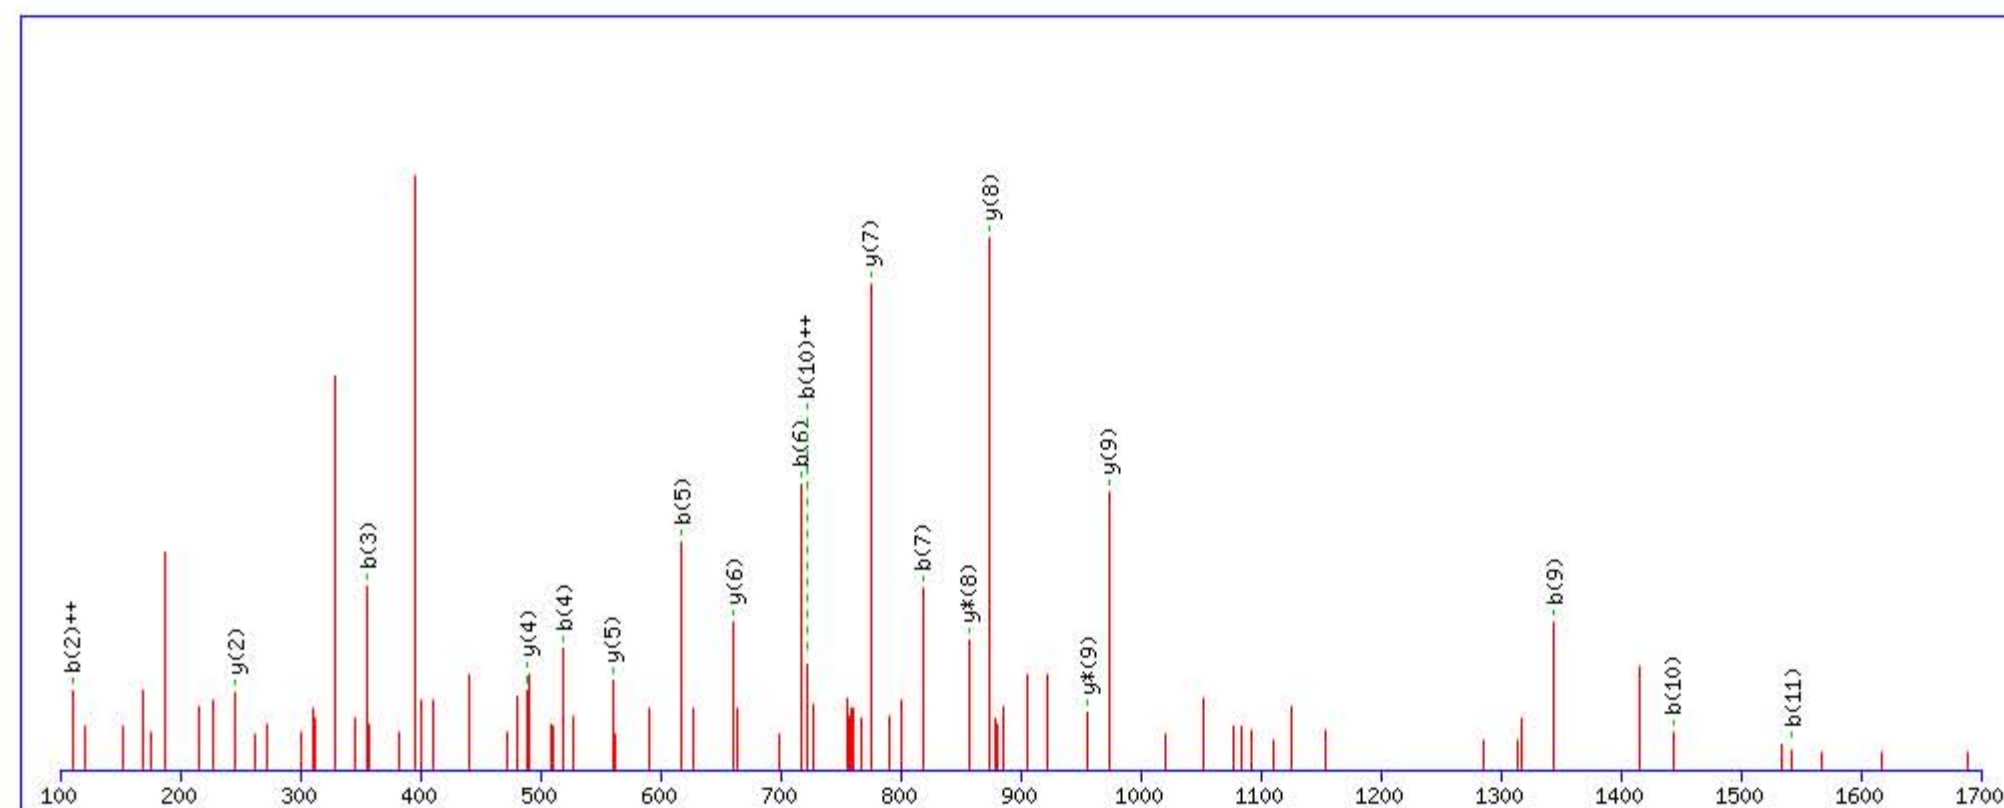

Monoisotopic mass of neutral peptide Mr(calc): 2316.168488

Fixed modifications: Carbamidomethyl (C) (apply to specified residues or termini only)

Variable modifications:

Q9 : Biotin:Thermo-21345 (Q)

Ions Score: 40 Expect: 0.0025

Matches : 19/172 fragment ions using 44 most intense peaks [\(help\)](#)

| #  | b                  | b <sup>++</sup>   | b <sup>*</sup> | b <sup>*++</sup> | b <sup>0</sup> | b <sup>0++</sup> | Seq. | y                 | y <sup>++</sup> | y <sup>*</sup>    | y <sup>*++</sup> | y <sup>0</sup> | y <sup>0++</sup> | #  |
|----|--------------------|-------------------|----------------|------------------|----------------|------------------|------|-------------------|-----------------|-------------------|------------------|----------------|------------------|----|
| 1  | 148.075690         | 74.541483         |                |                  |                |                  | F    |                   |                 |                   |                  |                |                  | 18 |
| 2  | 219.112804         | <b>110.060040</b> |                |                  |                |                  | A    | 2170.107350       | 1085.557313     | 2153.080801       | 1077.044038      | 2152.096785    | 1076.552030      | 17 |
| 3  | <b>356.171716</b>  | 178.589496        |                |                  |                |                  | H    | 2099.070236       | 1050.038756     | 2082.043687       | 1041.525481      | 2081.059671    | 1041.033473      | 16 |
| 4  | <b>519.235045</b>  | 260.121161        |                |                  |                |                  | Y    | 1962.011324       | 981.509300      | 1944.984775       | 972.996026       | 1944.000759    | 972.504018       | 15 |
| 5  | <b>618.303459</b>  | 309.655368        |                |                  |                |                  | V    | 1798.947995       | 899.977636      | 1781.921446       | 891.464361       | 1780.937430    | 890.972353       | 14 |
| 6  | <b>717.371873</b>  | 359.189575        |                |                  |                |                  | V    | 1699.879581       | 850.443429      | 1682.853032       | 841.930154       | 1681.869016    | 841.438146       | 13 |
| 7  | <b>818.419552</b>  | 409.713414        |                |                  | 800.408987     | 400.708132       | T    | 1600.811167       | 800.909222      | 1583.784618       | 792.395947       | 1582.800602    | 791.903939       | 12 |
| 8  | 905.451580         | 453.229428        |                |                  | 887.441015     | 444.224146       | S    | 1499.763488       | 750.385382      | 1482.736939       | 741.872108       | 1481.752923    | 741.380100       | 11 |
| 9  | <b>1344.676906</b> | 672.842091        | 1327.650357    | 664.328817       | 1326.666341    | 663.836808       | Q    | 1412.731460       | 706.869368      | 1395.704911       | 698.356094       | 1394.720895    | 697.864086       | 10 |
| 10 | <b>1443.745320</b> | <b>722.376298</b> | 1426.718771    | 713.863024       | 1425.734755    | 713.371016       | V    | <b>973.506134</b> | 487.256705      | <b>956.479585</b> | 478.743431       | 955.495569     | 478.251423       | 9  |
| 11 | <b>1542.813734</b> | 771.910505        | 1525.787185    | 763.397231       | 1524.803169    | 762.905223       | V    | <b>874.437720</b> | 437.722498      | <b>857.411171</b> | 429.209224       | 856.427155     | 428.717216       | 8  |
| 12 | 1656.856661        | 828.931969        | 1639.830112    | 820.418694       | 1638.846096    | 819.926686       | N    | <b>775.369306</b> | 388.188291      | 758.342757        | 379.675017       | 757.358741     | 379.183009       | 7  |
| 13 | 1757.904340        | 879.455808        | 1740.877791    | 870.942534       | 1739.893775    | 870.450526       | T    | <b>661.326379</b> | 331.166828      | 644.299830        | 322.653553       | 643.315814     | 322.161545       | 6  |
| 14 | 1828.941454        | 914.974365        | 1811.914905    | 906.461091       | 1810.930889    | 905.969083       | A    | <b>560.278700</b> | 280.642988      | 543.252151        | 272.129714       | 542.268135     | 271.637706       | 5  |
| 15 | 1942.984381        | 971.995829        | 1925.957832    | 963.482554       | 1924.973816    | 962.990546       | N    | <b>489.241586</b> | 245.124431      | 472.215037        | 236.611157       | 471.231021     | 236.119149       | 4  |
| 16 | 2072.026974        | 1036.517125       | 2055.000425    | 1028.003850      | 2054.016409    | 1027.511842      | E    | 375.198659        | 188.102968      | 358.172110        | 179.589693       | 357.188094     | 179.097685       | 3  |
| 17 | 2143.064088        | 1072.035682       | 2126.037539    | 1063.522407      | 2125.053523    | 1063.030399      | A    | <b>246.156066</b> | 123.581671      | 229.129517        | 115.068397       |                |                  | 2  |
| 18 |                    |                   |                |                  |                |                  | R    | 175.118952        | 88.063114       | 158.092403        | 79.549839        |                |                  | 1  |

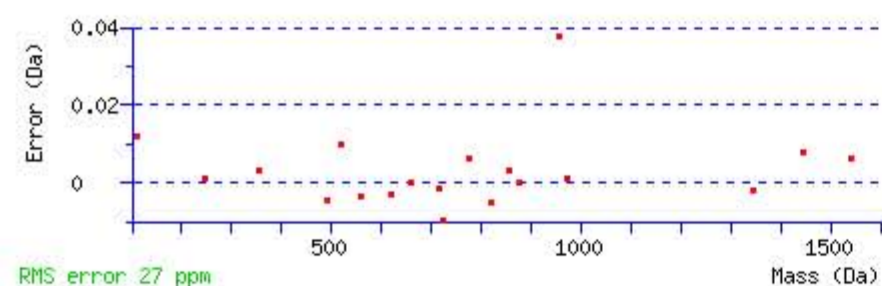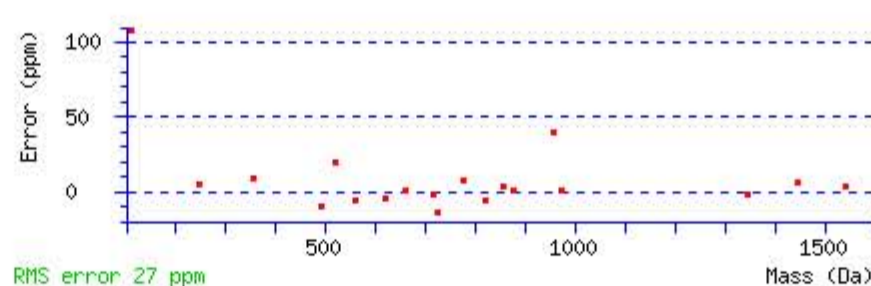

NCBI BLAST search of [FAHYVVTSQVVNTANEAR](#)

(Parameters: blastp, nr protein database, expect=20000, no filter, PAM30)

Other BLAST [web gateways](#)

All matches to this query

| Score | Mr(calc):   | Delta    | Sequence                           |
|-------|-------------|----------|------------------------------------|
| 40.3  | 2316.168488 | 0.001624 | <a href="#">FAHYVVTSQVVNTANEAR</a> |

Mascot: <http://www.matrixscience.com/>



# Mascot Search Results

## Peptide View

MS/MS Fragmentation of **GMADQDGLKPTIDKPSSEDSPPLEMLGPR**  
 Found in **ITIH1\_HUMAN**, Inter-alpha-trypsin inhibitor heavy chain H1 OS=Homo sapiens GN=ITIH1 PE=1 SV=3

Match to Query 78369: 3320.631376 from(831.165120,4+) rtinseconds(2128) index(63909)  
 Title: Locus:1.1.1.2738.17 File:"2013-07-02 CLN FXIII 30 min 1st F 4.wiff"  
 Data file C:\Program Files (x86)\Matrix Science\Mascot Daemon\mgf\1 FXIII 30 min 1st\mascot\_daemon\_merge.mgf

Click mouse within plot area to zoom in by factor of two about that point

Or, Plot from  to  Da

Label all possible matches  Label matches used for scoring

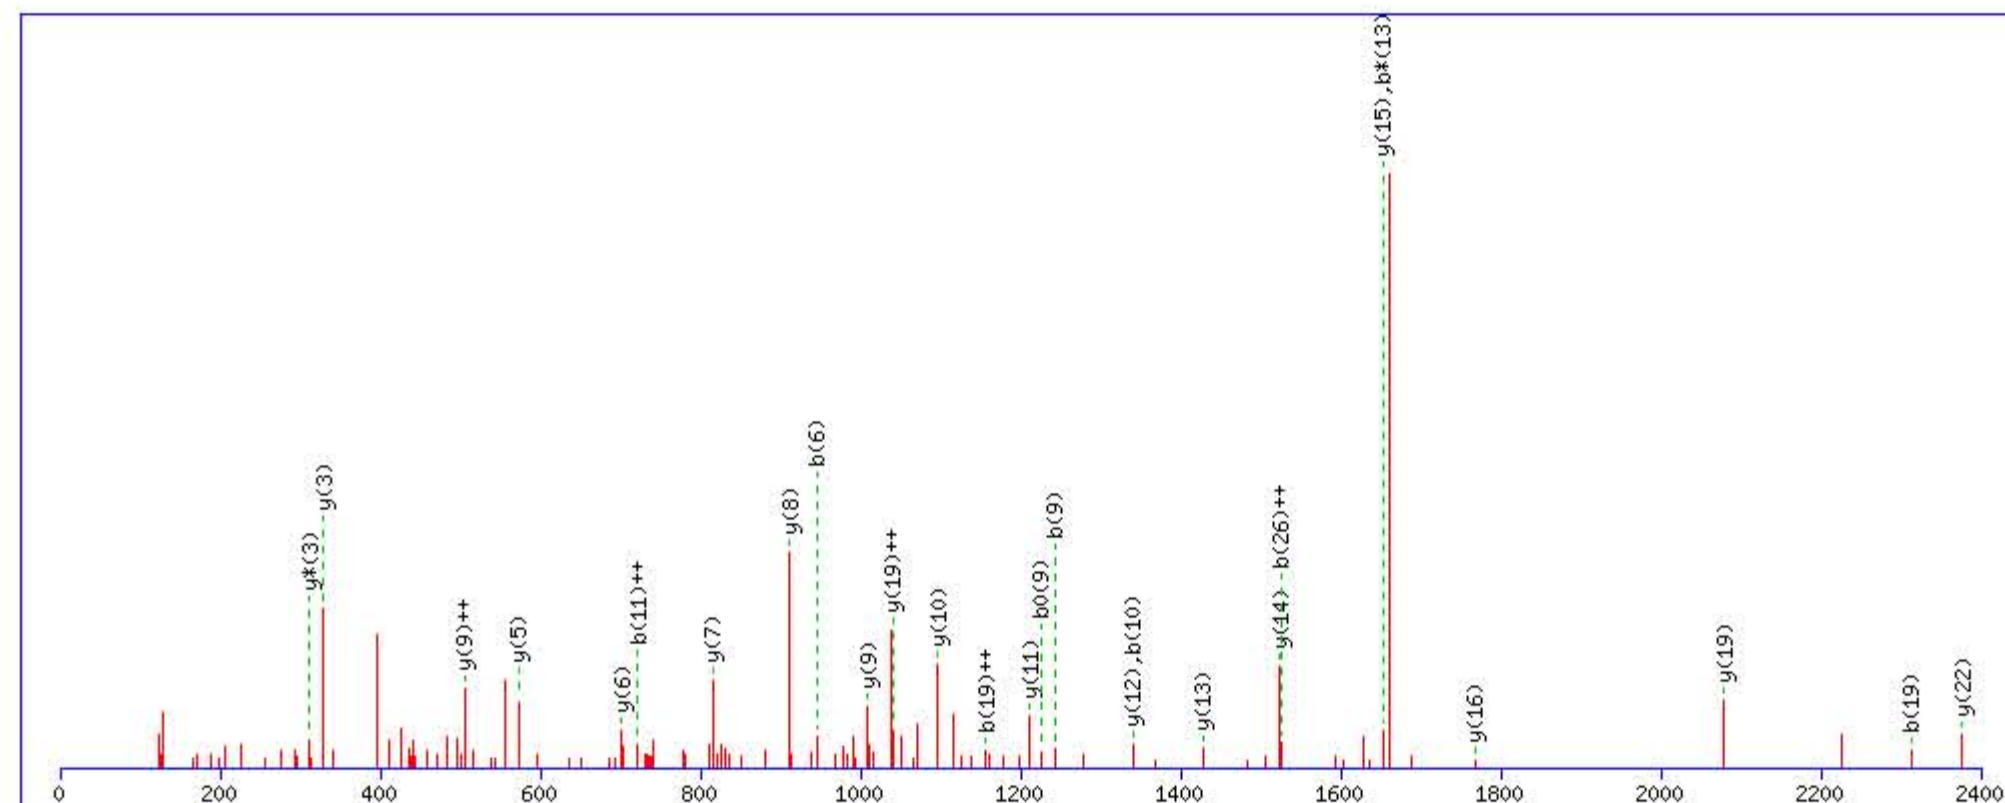

Monoisotopic mass of neutral peptide Mr(calc): 3320.609070  
 Fixed modifications: Carbamidomethyl (C) (apply to specified residues or termini only)  
 Variable modifications:  
 M2 : Oxidation (M), with neutral losses 0.000000 (shown in table), 63.998285  
 Q5 : Biotin:Thermo-21345 (Q)  
 Ions Score: 109 Expect: 6.2e-011  
 Matches : 27/452 fragment ions using 37 most intense peaks [\(help\)](#)

| #  | b                  | b <sup>++</sup>    | b <sup>*</sup>     | b <sup>*++</sup> | b <sup>0</sup>     | b <sup>0++</sup> | Seq. | y                  | y <sup>++</sup>    | y <sup>*</sup>    | y <sup>*++</sup> | y <sup>0</sup> | y <sup>0++</sup> | #  |
|----|--------------------|--------------------|--------------------|------------------|--------------------|------------------|------|--------------------|--------------------|-------------------|------------------|----------------|------------------|----|
| 1  | 58.028740          | 29.518008          |                    |                  |                    |                  | G    |                    |                    |                   |                  |                |                  | 28 |
| 2  | 205.064140         | 103.035708         |                    |                  |                    |                  | M    | 3264.594900        | 1632.801088        | 3247.568351       | 1624.287813      | 3246.584335    | 1623.795805      | 27 |
| 3  | 276.101254         | 138.554265         |                    |                  |                    |                  | A    | 3117.559500        | 1559.283388        | 3100.532951       | 1550.770113      | 3099.548935    | 1550.278105      | 26 |
| 4  | 391.128197         | 196.067737         |                    |                  | 373.117632         | 187.062454       | D    | 3046.522386        | 1523.764831        | 3029.495837       | 1515.251556      | 3028.511821    | 1514.759548      | 25 |
| 5  | 830.353523         | 415.680400         | 813.326974         | 407.167125       | 812.342958         | 406.675117       | Q    | 2931.495443        | 1466.251359        | 2914.468894       | 1457.738085      | 2913.484878    | 1457.246077      | 24 |
| 6  | <b>945.380466</b>  | 473.193871         | 928.353917         | 464.680597       | 927.369901         | 464.188589       | D    | 2492.270117        | 1246.638696        | 2475.243568       | 1238.125422      | 2474.259552    | 1237.633414      | 23 |
| 7  | 1002.401930        | 501.704603         | 985.375381         | 493.191329       | 984.391365         | 492.699321       | G    | <b>2377.243174</b> | 1189.125225        | 2360.216625       | 1180.611950      | 2359.232609    | 1180.119942      | 22 |
| 8  | 1115.485994        | 558.246635         | 1098.459445        | 549.733361       | 1097.475429        | 549.241353       | L    | 2320.221710        | 1160.614493        | 2303.195161       | 1152.101218      | 2302.211145    | 1151.609210      | 21 |
| 9  | <b>1243.580957</b> | 622.294117         | 1226.554408        | 613.780842       | <b>1225.570392</b> | 613.288834       | K    | 2207.137646        | 1104.072461        | 2190.111097       | 1095.559186      | 2189.127081    | 1095.067178      | 20 |
| 10 | <b>1340.633721</b> | 670.820499         | 1323.607172        | 662.307224       | 1322.623156        | 661.815216       | P    | <b>2079.042683</b> | <b>1040.024980</b> | 2062.016134       | 1031.511705      | 2061.032118    | 1031.019697      | 19 |
| 11 | 1441.681400        | <b>721.344338</b>  | 1424.654851        | 712.831064       | 1423.670835        | 712.339056       | T    | 1981.989919        | 991.498598         | 1964.963370       | 982.985323       | 1963.979354    | 982.493315       | 18 |
| 12 | 1554.765464        | 777.886370         | 1537.738915        | 769.373096       | 1536.754899        | 768.881088       | I    | 1880.942240        | 940.974758         | 1863.915691       | 932.461484       | 1862.931675    | 931.969476       | 17 |
| 13 | 1669.792407        | 835.399842         | <b>1652.765858</b> | 826.886567       | 1651.781842        | 826.394559       | D    | <b>1767.858176</b> | 884.432726         | 1750.831627       | 875.919452       | 1749.847611    | 875.427444       | 16 |
| 14 | 1797.887370        | 899.447323         | 1780.860821        | 890.934049       | 1779.876805        | 890.442041       | K    | <b>1652.831233</b> | 826.919255         | 1635.804684       | 818.405980       | 1634.820668    | 817.913972       | 15 |
| 15 | 1894.940134        | 947.973705         | 1877.913585        | 939.460431       | 1876.929569        | 938.968423       | P    | <b>1524.736270</b> | 762.871773         | 1507.709721       | 754.358499       | 1506.725705    | 753.866491       | 14 |
| 16 | 1981.972162        | 991.489719         | 1964.945613        | 982.976445       | 1963.961597        | 982.484437       | S    | <b>1427.683506</b> | 714.345391         | 1410.656957       | 705.832117       | 1409.672941    | 705.340109       | 13 |
| 17 | 2111.014755        | 1056.011016        | 2093.988206        | 1047.497741      | 2093.004190        | 1047.005733      | E    | <b>1340.651478</b> | 670.829377         | 1323.624929       | 662.316103       | 1322.640913    | 661.824095       | 12 |
| 18 | 2226.041698        | 1113.524487        | 2209.015149        | 1105.011212      | 2208.031133        | 1104.519204      | D    | <b>1211.608885</b> | 606.308081         | 1194.582336       | 597.794806       | 1193.598320    | 597.302798       | 11 |
| 19 | <b>2313.073726</b> | <b>1157.040501</b> | 2296.047177        | 1148.527226      | 2295.063161        | 1148.035218      | S    | <b>1096.581942</b> | 548.794609         | 1079.555393       | 540.281335       | 1078.571377    | 539.789327       | 10 |
| 20 | 2410.126490        | 1205.566883        | 2393.099941        | 1197.053608      | 2392.115925        | 1196.561600      | P    | <b>1009.549914</b> | <b>505.278595</b>  | 992.523365        | 496.765321       | 991.539349     | 496.273313       | 9  |
| 21 | 2507.179254        | 1254.093265        | 2490.152705        | 1245.579990      | 2489.168689        | 1245.087983      | P    | <b>912.497150</b>  | 456.752213         | 895.470601        | 448.238939       | 894.486585     | 447.746931       | 8  |
| 22 | 2620.263318        | 1310.635297        | 2603.236769        | 1302.122023      | 2602.252753        | 1301.630015      | L    | <b>815.444386</b>  | 408.225831         | 798.417837        | 399.712557       | 797.433821     | 399.220549       | 7  |
| 23 | 2749.305911        | 1375.156594        | 2732.279362        | 1366.643319      | 2731.295346        | 1366.151311      | E    | <b>702.360322</b>  | 351.683799         | 685.333773        | 343.170525       | 684.349757     | 342.678517       | 6  |
| 24 | 2880.346396        | 1440.676836        | 2863.319847        | 1432.163562      | 2862.335831        | 1431.671554      | M    | <b>573.317729</b>  | 287.162503         | 556.291180        | 278.649228       |                |                  | 5  |
| 25 | 2993.430460        | 1497.218868        | 2976.403911        | 1488.705594      | 2975.419895        | 1488.213586      | L    | 442.277244         | 221.642260         | 425.250695        | 213.128986       |                |                  | 4  |
| 26 | 3050.451924        | <b>1525.729600</b> | 3033.425375        | 1517.216326      | 3032.441359        | 1516.724318      | G    | <b>329.193180</b>  | 165.100228         | <b>312.166631</b> | 156.586953       |                |                  | 3  |
| 27 | 3147.504688        | 1574.255982        | 3130.478139        | 1565.742708      | 3129.494123        | 1565.250700      | P    | 272.171716         | 136.589496         | 255.145167        | 128.076221       |                |                  | 2  |
| 28 |                    |                    |                    |                  |                    |                  | R    | 175.118952         | 88.063114          | 158.092403        | 79.549839        |                |                  | 1  |

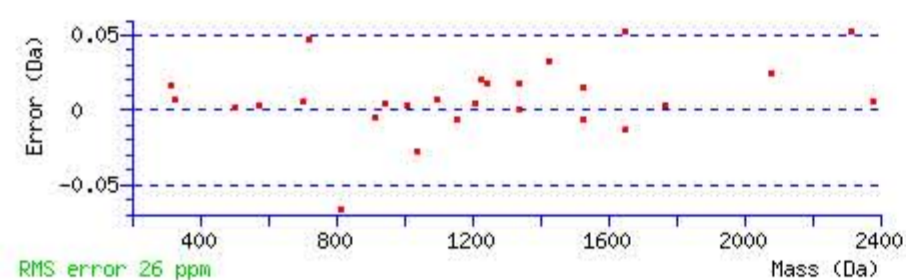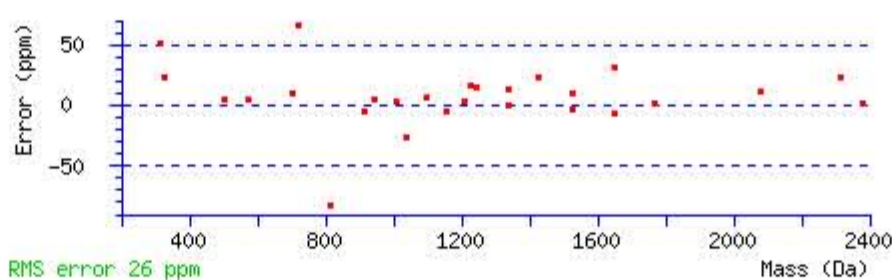

NCBI BLAST search of **GMADQDGLKPTIDKPSSEDSPPLEMLGPR**  
 (Parameters: blastp, nr protein database, expect=20000, no filter, PAM30)  
 Other BLAST [web gateways](#)

### All matches to this query

| Score | Mr(calc):   | Delta     | Sequence                                      |
|-------|-------------|-----------|-----------------------------------------------|
| 109.2 | 3320.609070 | 0.022306  | <a href="#">GMADQDGLKPTIDKPSSEDSPPLEMLGPR</a> |
| 0.3   | 3320.645462 | -0.014086 | <a href="#">QDIGDILHQIMTTIDQSLDEAQAQK</a>     |



# **MASCOT** Mascot Search Results

## Peptide View

MS/MS Fragmentation of **TQVADAK**

Found in **ITIH2\_HUMAN**, Inter-alpha-trypsin inhibitor heavy chain H2 OS=Homo sapiens GN=ITIH2 PE=1 SV=2

Match to Query 24156: 1042.544968 from(522.279760,2+) rtinseconds(1273) index(57861)

Title: Locus:1.1.1.2441.18 File:"2013-07-02 CLN FXIII 30 min 1st F 4.wiff"

Data file C:\Program Files (x86)\Matrix Science\Mascot Daemon\mgf\1 FXIII 30 min 1st\mascot\_daemon\_merge.mgf

Click mouse within plot area to zoom in by factor of two about that point

Or, Plot from  to  Da

Label all possible matches  Label matches used for scoring

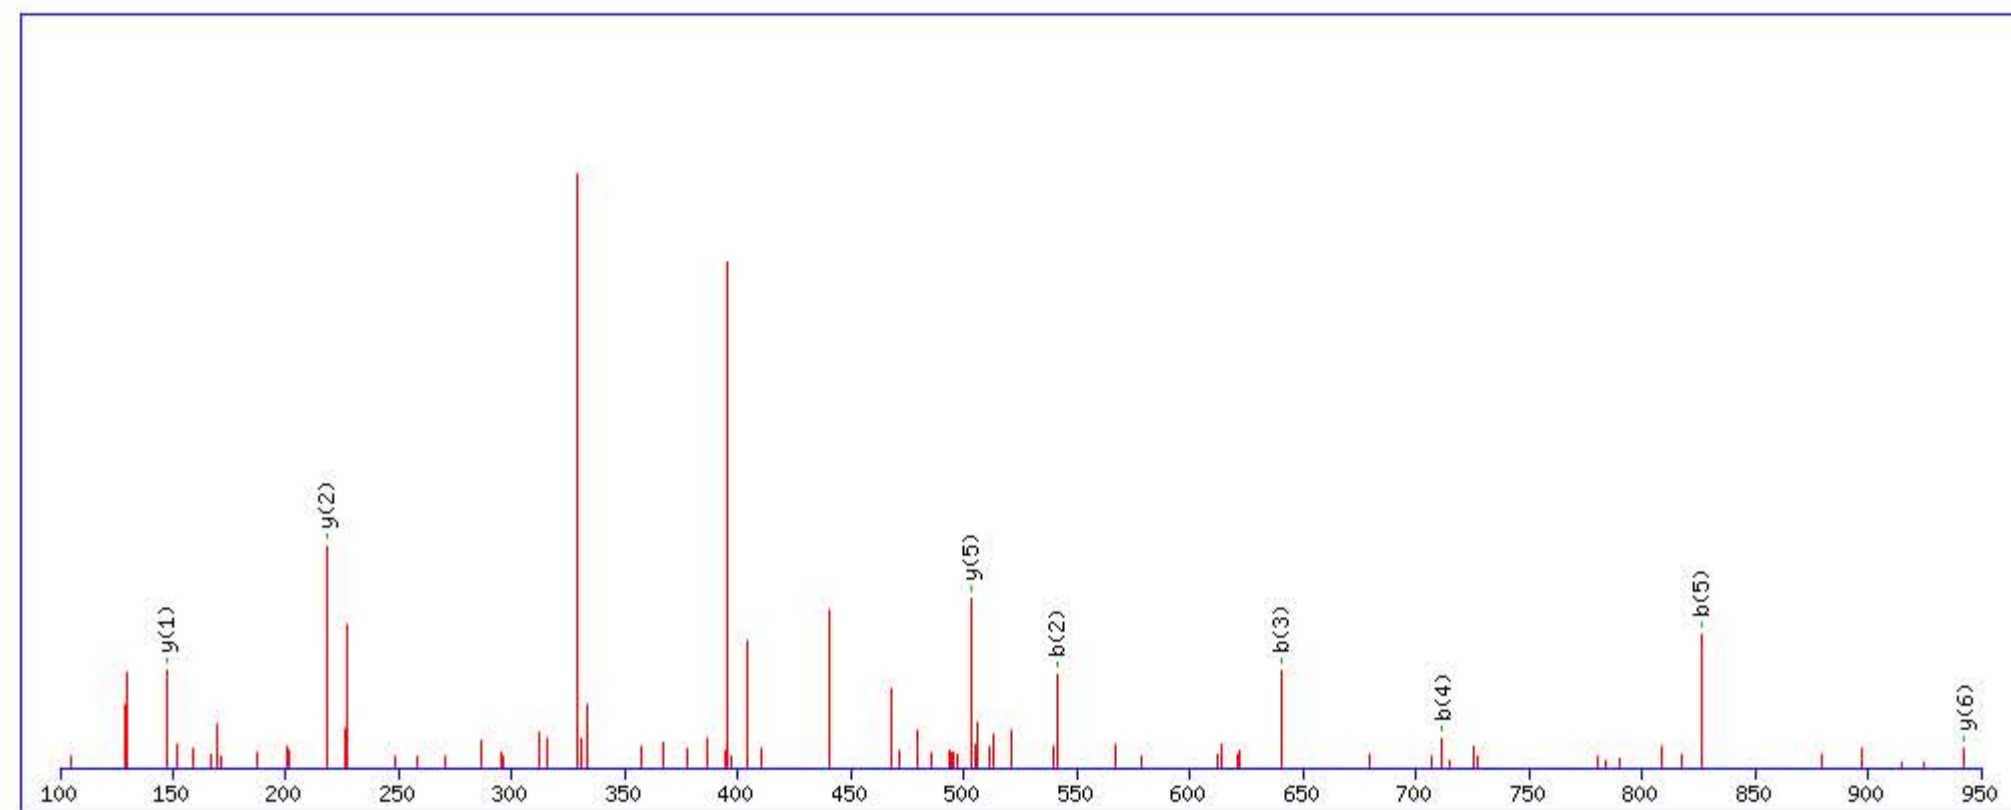

Monoisotopic mass of neutral peptide Mr(calc): 1042.548111

Fixed modifications: Carbamidomethyl (C) (apply to specified residues or termini only)

Variable modifications:

Q2 : Biotin:Thermo-21345 (Q)

Ions Score: 41 Expect: 0.0019

Matches : 8/66 fragment ions using 9 most intense peaks [\(help\)](#)

| # | b                 | b <sup>++</sup> | b <sup>*</sup> | b <sup>*++</sup> | b <sup>0</sup> | b <sup>0++</sup> | Seq. | y                 | y <sup>++</sup> | y <sup>*</sup> | y <sup>*++</sup> | y <sup>0</sup> | y <sup>0++</sup> | # |
|---|-------------------|-----------------|----------------|------------------|----------------|------------------|------|-------------------|-----------------|----------------|------------------|----------------|------------------|---|
| 1 | 102.054955        | 51.531116       |                |                  | 84.044390      | 42.525833        | T    |                   |                 |                |                  |                |                  | 7 |
| 2 | <b>541.280281</b> | 271.143779      | 524.253732     | 262.630504       | 523.269716     | 262.138496       | Q    | <b>942.507715</b> | 471.757496      | 925.481166     | 463.244221       | 924.497150     | 462.752213       | 6 |
| 3 | <b>640.348695</b> | 320.677986      | 623.322146     | 312.164711       | 622.338130     | 311.672703       | V    | <b>503.282389</b> | 252.144832      | 486.255840     | 243.631558       | 485.271824     | 243.139550       | 5 |
| 4 | <b>711.385809</b> | 356.196543      | 694.359260     | 347.683268       | 693.375244     | 347.191260       | A    | 404.213975        | 202.610625      | 387.187426     | 194.097351       | 386.203410     | 193.605343       | 4 |
| 5 | <b>826.412752</b> | 413.710014      | 809.386203     | 405.196739       | 808.402187     | 404.704731       | D    | 333.176861        | 167.092068      | 316.150312     | 158.578794       | 315.166296     | 158.086786       | 3 |
| 6 | 897.449866        | 449.228571      | 880.423317     | 440.715296       | 879.439301     | 440.223288       | A    | <b>218.149918</b> | 109.578597      | 201.123369     | 101.065322       |                |                  | 2 |
| 7 |                   |                 |                |                  |                |                  | K    | <b>147.112804</b> | 74.060040       | 130.086255     | 65.546765        |                |                  | 1 |

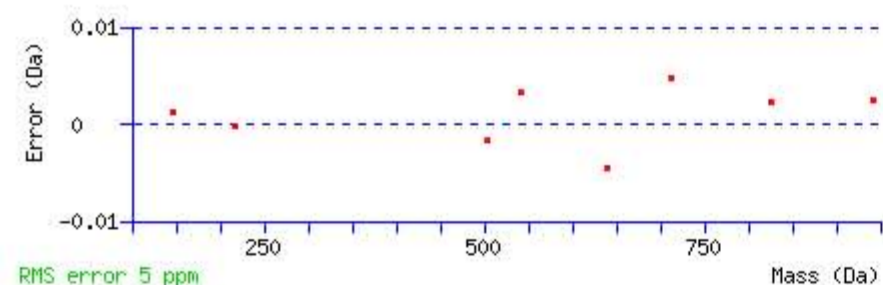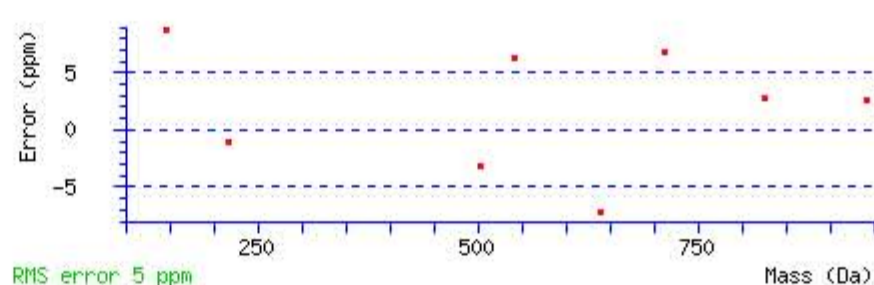

NCBI BLAST search of **TQVADAK**

(Parameters: blastp, nr protein database, expect=20000, no filter, PAM30)

Other BLAST [web gateways](#)

### All matches to this query

| Score | Mr(calc):   | Delta     | Sequence                   |
|-------|-------------|-----------|----------------------------|
| 41.4  | 1042.548111 | -0.003143 | <a href="#">TQVADAK</a>    |
| 17.6  | 1042.529480 | 0.015488  | <a href="#">TSPQPESGIK</a> |
| 15.4  | 1042.540726 | 0.004242  | <a href="#">KPVSEVGDGR</a> |
| 12.2  | 1042.548096 | -0.003128 | <a href="#">SLQADAK</a>    |
| 10.7  | 1042.540680 | 0.004288  | <a href="#">EAEKRPADK</a>  |
| 10.0  | 1042.544724 | 0.000244  | <a href="#">WKGIEPGEK</a>  |
| 8.0   | 1042.540680 | 0.004288  | <a href="#">TPEERAAAAK</a> |
| 7.5   | 1042.540680 | 0.004288  | <a href="#">SLENPAERK</a>  |
| 7.2   | 1042.548080 | -0.003112 | <a href="#">KEQEAK</a>     |
| 7.2   | 1042.548080 | -0.003112 | <a href="#">KQEEAK</a>     |



# {MATRIX} SCIENCE Mascot Search Results

## Peptide View

MS/MS Fragmentation of **ALYAQAR**

Found in **ITIH2\_HUMAN**, Inter-alpha-trypsin inhibitor heavy chain H2 OS=Homo sapiens GN=ITIH2 PE=1 SV=2

Match to Query 26247: 1102.591248 from(552.302900,2+) rtinseconds(1628) index(60439)

Title: Locus:1.1.1.2565.5 File:"2013-07-02 CLN FXIII 30 min 1st F 4.wiff"

Data file C:\Program Files (x86)\Matrix Science\Mascot Daemon\mgf1 FXIII 30 min 1st\mascot\_daemon\_merge.mgf

Click mouse within plot area to zoom in by factor of two about that point

Or, Plot from  to  Da

Label all possible matches  Label matches used for scoring

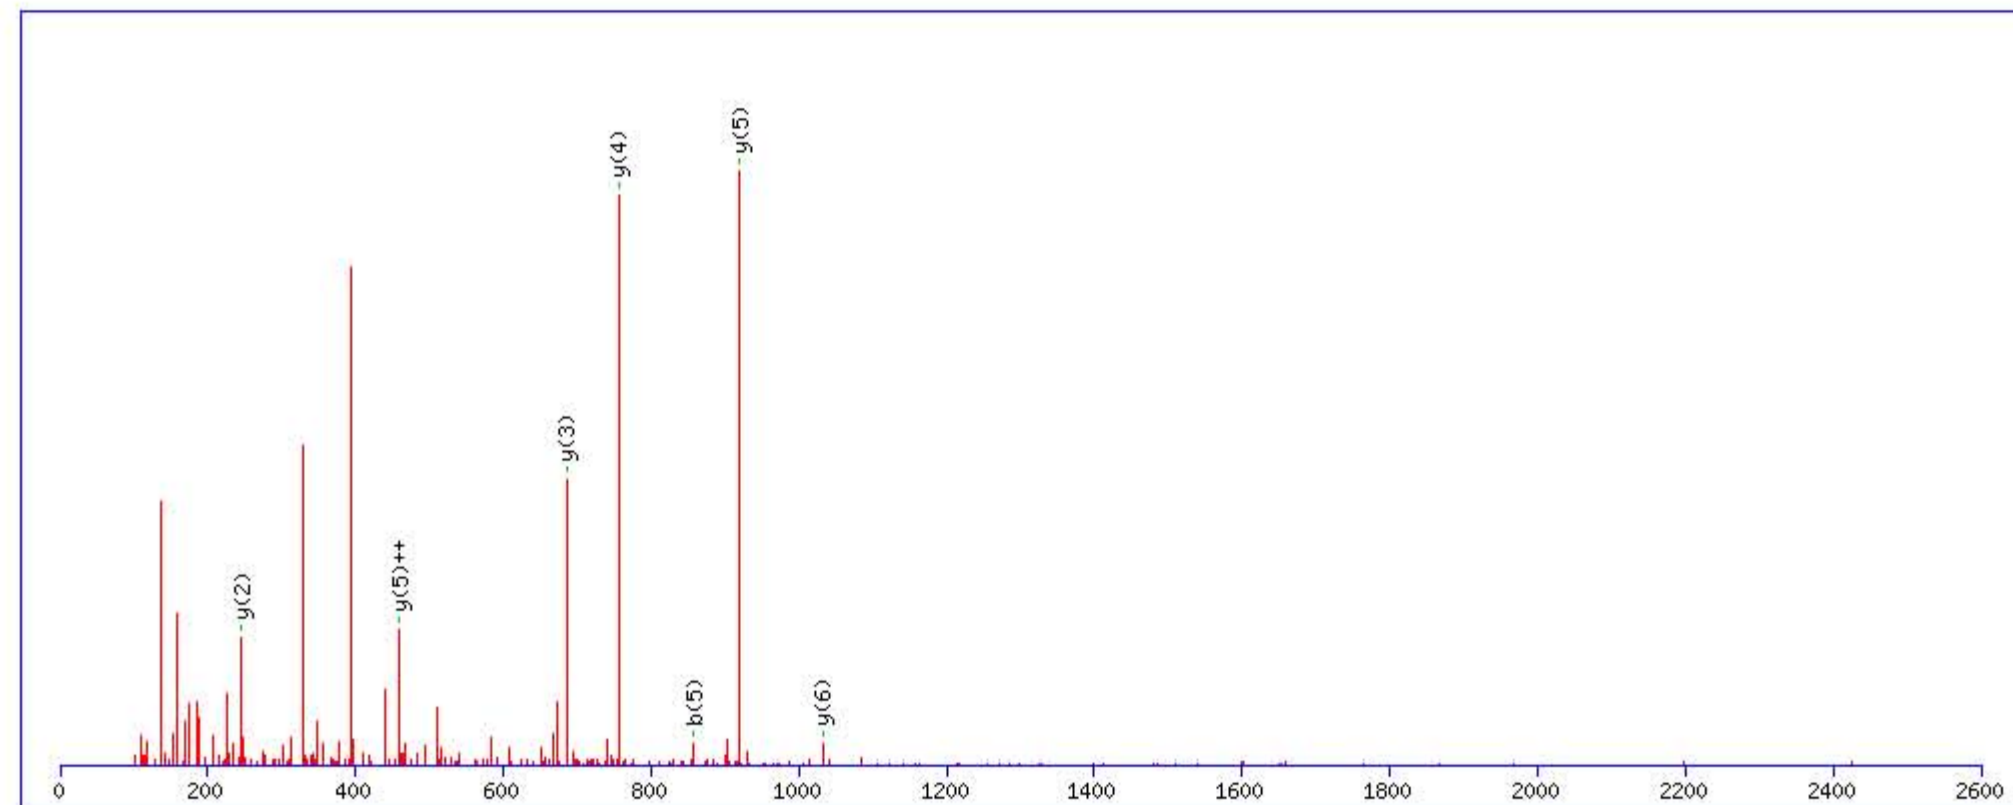

Monoisotopic mass of neutral peptide Mr(calc): 1102.595703

Fixed modifications: Carbamidomethyl (C) (apply to specified residues or termini only)

Variable modifications:

Q5 : Biotin:Thermo-21345 (Q)

Ions Score: 37 Expect: 0.0035

Matches : 7/40 fragment ions using 10 most intense peaks [\(help\)](#)

| # | b                 | b <sup>++</sup> | b <sup>*</sup> | b <sup>+++</sup> | Seq. | y                  | y <sup>++</sup>   | y <sup>*</sup> | y <sup>+++</sup> | # |
|---|-------------------|-----------------|----------------|------------------|------|--------------------|-------------------|----------------|------------------|---|
| 1 | 72.044390         | 36.525833       |                |                  | A    |                    |                   |                |                  | 7 |
| 2 | 185.128454        | 93.067865       |                |                  | L    | <b>1032.565899</b> | 516.786588        | 1015.539350    | 508.273313       | 6 |
| 3 | 348.191783        | 174.599529      |                |                  | Y    | <b>919.481835</b>  | <b>460.244556</b> | 902.455286     | 451.731281       | 5 |
| 4 | 419.228897        | 210.118087      |                |                  | A    | <b>756.418506</b>  | 378.712891        | 739.391957     | 370.199617       | 4 |
| 5 | <b>858.454223</b> | 429.730750      | 841.427674     | 421.217475       | Q    | <b>685.381392</b>  | 343.194334        | 668.354843     | 334.681060       | 3 |
| 6 | 929.491337        | 465.249307      | 912.464788     | 456.736032       | A    | <b>246.156066</b>  | 123.581671        | 229.129517     | 115.068397       | 2 |
| 7 |                   |                 |                |                  | R    | 175.118952         | 88.063114         | 158.092403     | 79.549840        | 1 |

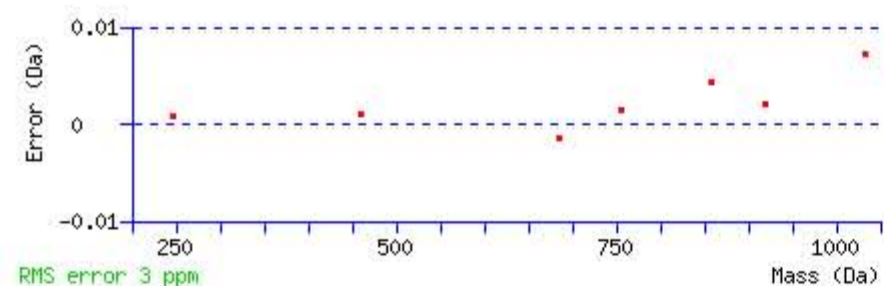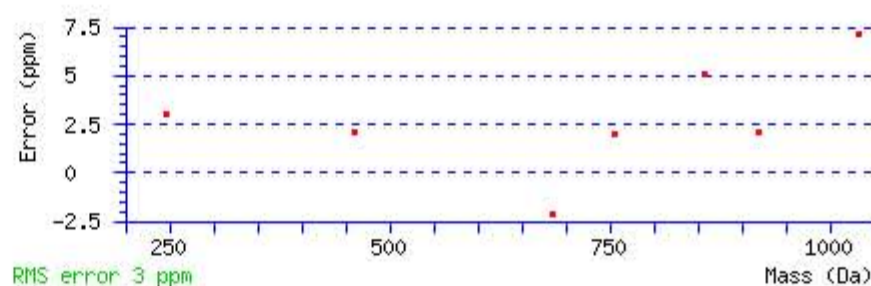

NCBI BLAST search of [ALYAQAR](#)

(Parameters: blastp, nr protein database, expect=20000, no filter, PAM30)

Other BLAST [web gateways](#)

All matches to this query

| Score | Mr(calc):   | Delta     | Sequence                   |
|-------|-------------|-----------|----------------------------|
| 37.4  | 1102.595703 | -0.004455 | <a href="#">ALYAQAR</a>    |
| 10.5  | 1102.602234 | -0.010986 | <a href="#">AIELGYNPVK</a> |
| 6.0   | 1102.580475 | 0.010773  | <a href="#">SPQMVSAIVR</a> |
| 4.4   | 1102.580460 | 0.010788  | <a href="#">AMVENVTLAR</a> |
| 3.6   | 1102.588333 | 0.002915  | <a href="#">SPYGLTPRGR</a> |
| 1.7   | 1102.591660 | -0.000412 | <a href="#">AMKRLEEAR</a>  |
| 1.5   | 1102.584305 | 0.006943  | <a href="#">QSSQRGLTAR</a> |
| 1.3   | 1102.598221 | -0.006973 | <a href="#">DDLKATLTAR</a> |
| 0.3   | 1102.602921 | -0.011673 | <a href="#">LLRQRMDR</a>   |

Mascot: <http://www.matrixscience.com/>



# MASCOT Search Results

## Peptide View

MS/MS Fragmentation of **VQSTITSR**

Found in **ITIH2\_HUMAN**, Inter-alpha-trypsin inhibitor heavy chain H2 OS=Homo sapiens GN=ITIH2 PE=1 SV=2

Match to Query 31716: 1201.645228 from(601.829890,2+) rtinseconds(1469) index(59321)

Title: Locus:1.1.1.2509.19 File:"2013-07-02 CLN FXIII 30 min 1st F 4.wiff"

Data file C:\Program Files (x86)\Matrix Science\Mascot Daemon\mgf\1 FXIII 30 min 1st\mascot\_daemon\_merge.mgf

Click mouse within plot area to zoom in by factor of two about that point

Or, Plot from  to  Da

Label all possible matches  Label matches used for scoring

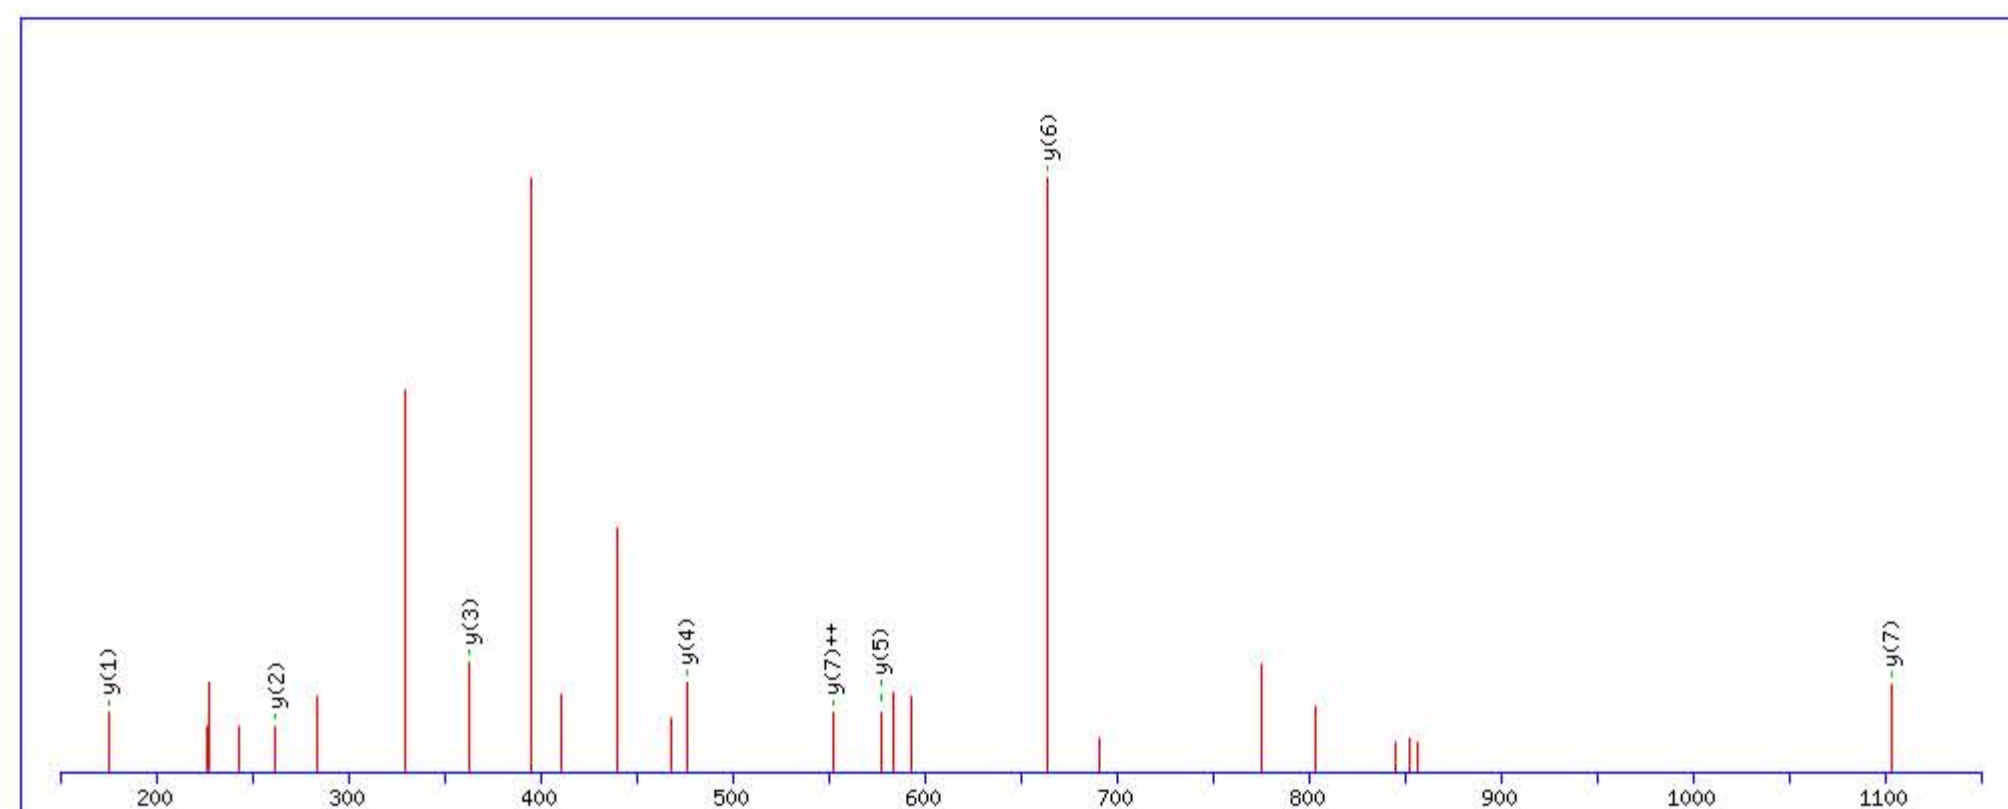

Monoisotopic mass of neutral peptide Mr(calc): 1201.648895

Fixed modifications: Carbamidomethyl (C) (apply to specified residues or termini only)

Variable modifications:

Q2 : Biotin:Thermo-21345 (Q)

Ions Score: 32 Expect: 0.0053

Matches : 8/76 fragment ions using 25 most intense peaks [\(help\)](#)

| # | b           | b <sup>++</sup> | b <sup>*</sup> | b <sup>*++</sup> | b <sup>0</sup> | b <sup>0++</sup> | Seq. | y           | y <sup>++</sup> | y <sup>*</sup> | y <sup>*++</sup> | y <sup>0</sup> | y <sup>0++</sup> | # |
|---|-------------|-----------------|----------------|------------------|----------------|------------------|------|-------------|-----------------|----------------|------------------|----------------|------------------|---|
| 1 | 100.075690  | 50.541483       |                |                  |                |                  | V    |             |                 |                |                  |                |                  | 8 |
| 2 | 539.301016  | 270.154146      | 522.274467     | 261.640872       |                |                  | Q    | 1103.587756 | 552.297516      | 1086.561207    | 543.784242       | 1085.577191    | 543.292234       | 7 |
| 3 | 626.333044  | 313.670160      | 609.306495     | 305.156886       | 608.322479     | 304.664878       | S    | 664.362430  | 332.684853      | 647.335881     | 324.171579       | 646.351865     | 323.679571       | 6 |
| 4 | 727.380723  | 364.194000      | 710.354174     | 355.680725       | 709.370158     | 355.188717       | T    | 577.330402  | 289.168839      | 560.303853     | 280.655565       | 559.319837     | 280.163557       | 5 |
| 5 | 840.464787  | 420.736032      | 823.438238     | 412.222757       | 822.454222     | 411.730749       | I    | 476.282723  | 238.645000      | 459.256174     | 230.131725       | 458.272158     | 229.639717       | 4 |
| 6 | 941.512466  | 471.259871      | 924.485917     | 462.746597       | 923.501901     | 462.254589       | T    | 363.198659  | 182.102968      | 346.172110     | 173.589693       | 345.188094     | 173.097685       | 3 |
| 7 | 1028.544494 | 514.775885      | 1011.517945    | 506.262611       | 1010.533929    | 505.770603       | S    | 262.150980  | 131.579128      | 245.124431     | 123.065854       | 244.140415     | 122.573846       | 2 |
| 8 |             |                 |                |                  |                |                  | R    | 175.118952  | 88.063114       | 158.092403     | 79.549839        |                |                  | 1 |

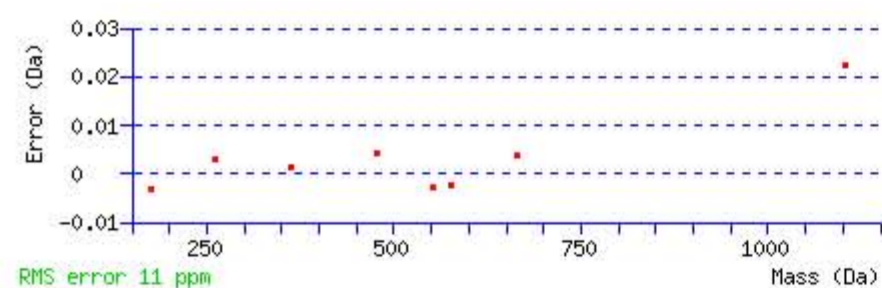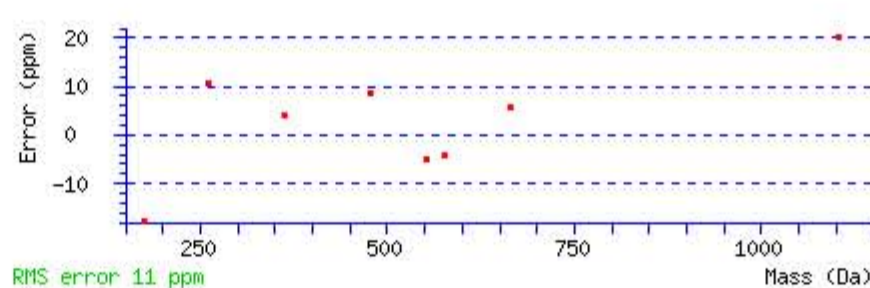

NCBI BLAST search of **VQSTITSR**

(Parameters: blastp, nr protein database, expect=20000, no filter, PAM30)

Other BLAST [web gateways](#)

All matches to this query

| Score | Mr(calc):   | Delta     | Sequence                   |
|-------|-------------|-----------|----------------------------|
| 32.5  | 1201.648895 | -0.003667 | <a href="#">VQSTITSR</a>   |
| 7.9   | 1201.638992 | 0.006236  | <a href="#">VQPPSHAR</a>   |
| 6.5   | 1201.641479 | 0.003749  | <a href="#">VSIKDNQKDR</a> |
| 6.4   | 1201.638992 | 0.006236  | <a href="#">VQGREFR</a>    |
| 6.4   | 1201.660767 | -0.015539 | <a href="#">VWKPQLFER</a>  |
| 3.1   | 1201.648895 | -0.003667 | <a href="#">VALGVPMTKR</a> |

Mascot: <http://www.matrixscience.com/>



# MASCOT Search Results

## Peptide View

MS/MS Fragmentation of **MATTMIQSK**

Found in **ITIH2\_HUMAN**, Inter-alpha-trypsin inhibitor heavy chain H2 OS=Homo sapiens GN=ITIH2 PE=1 SV=2

Match to Query 35670: 1320.658408 from(661.336480,2+) rtinseconds(1706) index(61024)

Title: Locus:1.1.1.2592.12 File:"2013-07-02 CLN FXIII 30 min 1st F 4.wiff"

Data file C:\Program Files (x86)\Matrix Science\Mascot Daemon\mgf1 FXIII 30 min 1st\mascot\_daemon\_merge.mgf

Click mouse within plot area to zoom in by factor of two about that point

Or, Plot from  to  Da

Label all possible matches  Label matches used for scoring

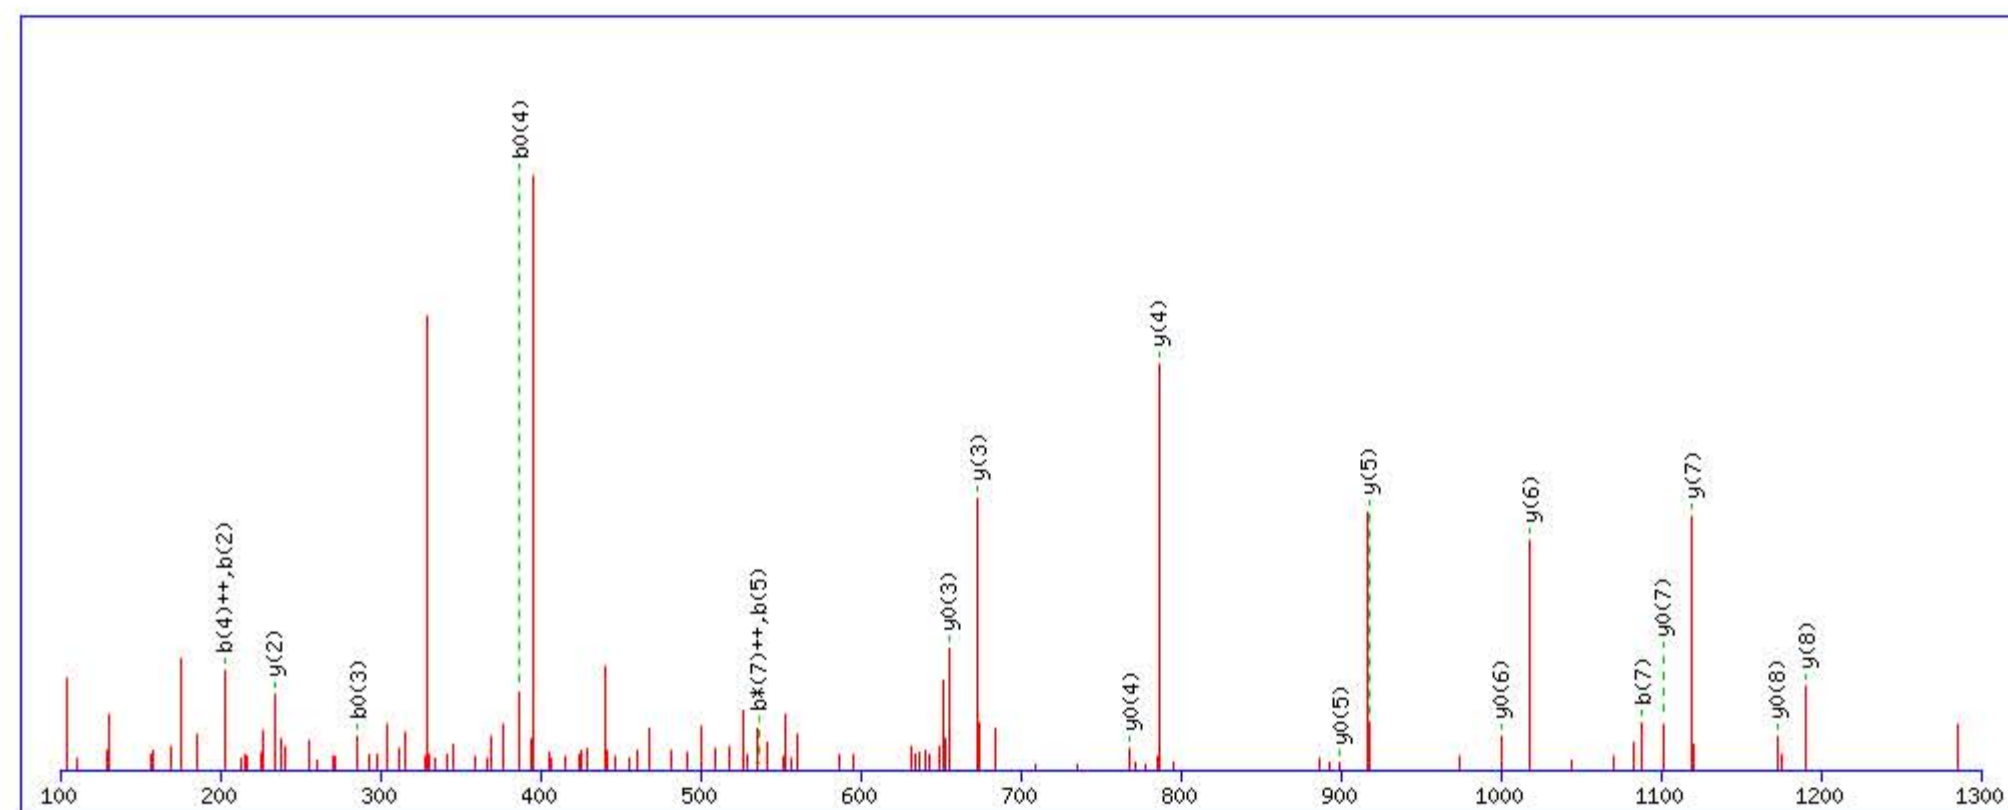

Monoisotopic mass of neutral peptide Mr(calc): 1320.660370

Fixed modifications: Carbamidomethyl (C) (apply to specified residues or termini only)

Variable modifications:

Q7 : Biotin:Thermo-21345 (Q)

Ions Score: 42 Expect: 0.00048

Matches : 20/78 fragment ions using 34 most intense peaks [\(help\)](#)

| # | b                  | b <sup>++</sup>   | b <sup>*</sup> | b <sup>*++</sup>  | b <sup>0</sup>    | b <sup>0++</sup> | Seq. | y                  | y <sup>++</sup> | y <sup>*</sup> | y <sup>*++</sup> | y <sup>0</sup>     | y <sup>0++</sup> | # |
|---|--------------------|-------------------|----------------|-------------------|-------------------|------------------|------|--------------------|-----------------|----------------|------------------|--------------------|------------------|---|
| 1 | 132.047761         | 66.527518         |                |                   |                   |                  | M    |                    |                 |                |                  |                    |                  | 9 |
| 2 | <b>203.084875</b>  | 102.046075        |                |                   |                   |                  | A    | <b>1190.627179</b> | 595.817228      | 1173.600630    | 587.303953       | <b>1172.616614</b> | 586.811945       | 8 |
| 3 | 304.132554         | 152.569915        |                |                   | <b>286.121989</b> | 143.564632       | T    | <b>1119.590065</b> | 560.298671      | 1102.563516    | 551.785396       | <b>1101.579500</b> | 551.293388       | 7 |
| 4 | 405.180233         | <b>203.093754</b> |                |                   | <b>387.169668</b> | 194.088472       | T    | <b>1018.542386</b> | 509.774831      | 1001.515837    | 501.261557       | <b>1000.531821</b> | 500.769549       | 6 |
| 5 | <b>536.220718</b>  | 268.613997        |                |                   | 518.210153        | 259.608715       | M    | <b>917.494707</b>  | 459.250992      | 900.468158     | 450.737717       | <b>899.484142</b>  | 450.245709       | 5 |
| 6 | 649.304782         | 325.156029        |                |                   | 631.294217        | 316.150747       | I    | <b>786.454222</b>  | 393.730749      | 769.427673     | 385.217475       | <b>768.443657</b>  | 384.725467       | 4 |
| 7 | <b>1088.530108</b> | 544.768692        | 1071.503559    | <b>536.255418</b> | 1070.519543       | 535.763410       | Q    | <b>673.370158</b>  | 337.188717      | 656.343609     | 328.675443       | <b>655.359593</b>  | 328.183435       | 3 |
| 8 | 1175.562136        | 588.284706        | 1158.535587    | 579.771432        | 1157.551571       | 579.279424       | S    | <b>234.144832</b>  | 117.576054      | 217.118283     | 109.062780       | 216.134267         | 108.570772       | 2 |
| 9 |                    |                   |                |                   |                   |                  | K    | 147.112804         | 74.060040       | 130.086255     | 65.546765        |                    |                  | 1 |

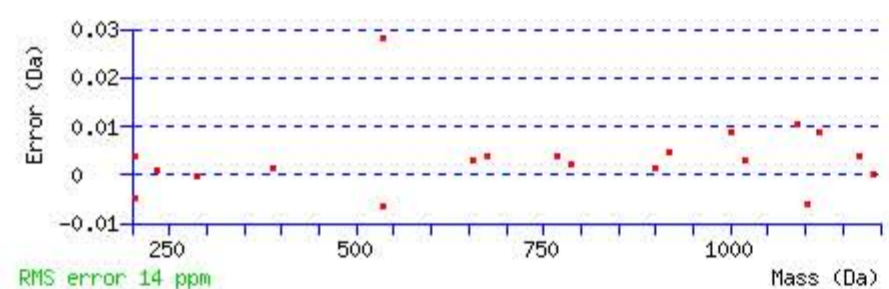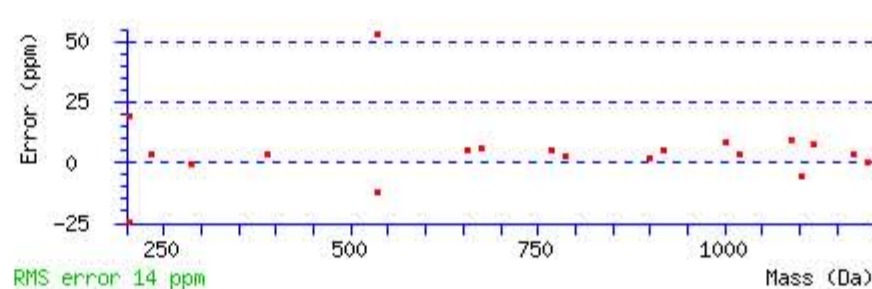

NCBI BLAST search of **MATTMIQSK**

(Parameters: blastp, nr protein database, expect=20000, no filter, PAM30)

Other BLAST [web gateways](#)

## All matches to this query

| Score | Mr(calc):   | Delta     | Sequence                       |
|-------|-------------|-----------|--------------------------------|
| 42.0  | 1320.660370 | -0.001962 | <a href="#">MATTMIQSK</a>      |
| 6.4   | 1320.643082 | 0.015326  | <a href="#">MADSQRFR</a>       |
| 5.5   | 1320.670715 | -0.012307 | <a href="#">IAPKASMAGASSSK</a> |
| 4.5   | 1320.640854 | 0.017554  | <a href="#">EPSEKLESTSSK</a>   |
| 2.2   | 1320.675461 | -0.017053 | <a href="#">RMRLVVDGMGR</a>    |
| 1.3   | 1320.674759 | -0.016351 | <a href="#">QSTFEFAISK</a>     |



# MASCOT Search Results

## Peptide View

MS/MS Fragmentation of **LSNENHGIAQR**

Found in **ITIH2\_HUMAN**, Inter-alpha-trypsin inhibitor heavy chain H2 OS=Homo sapiens GN=ITIH2 PE=1 SV=2

Match to Query 43869: 1548.775782 from(517.265870,3+) rtinseconds(1376) index(58578)

Title: Locus:1.1.1.2477.17 File:"2013-07-02 CLN FXIII 30 min 1st F 4.wiff"

Data file C:\Program Files (x86)\Matrix Science\Mascot Daemon\mgf1 FXIII 30 min 1st\mascot\_daemon\_merge.mgf

Click mouse within plot area to zoom in by factor of two about that point

Or, Plot from  to  Da

Label all possible matches  Label matches used for scoring

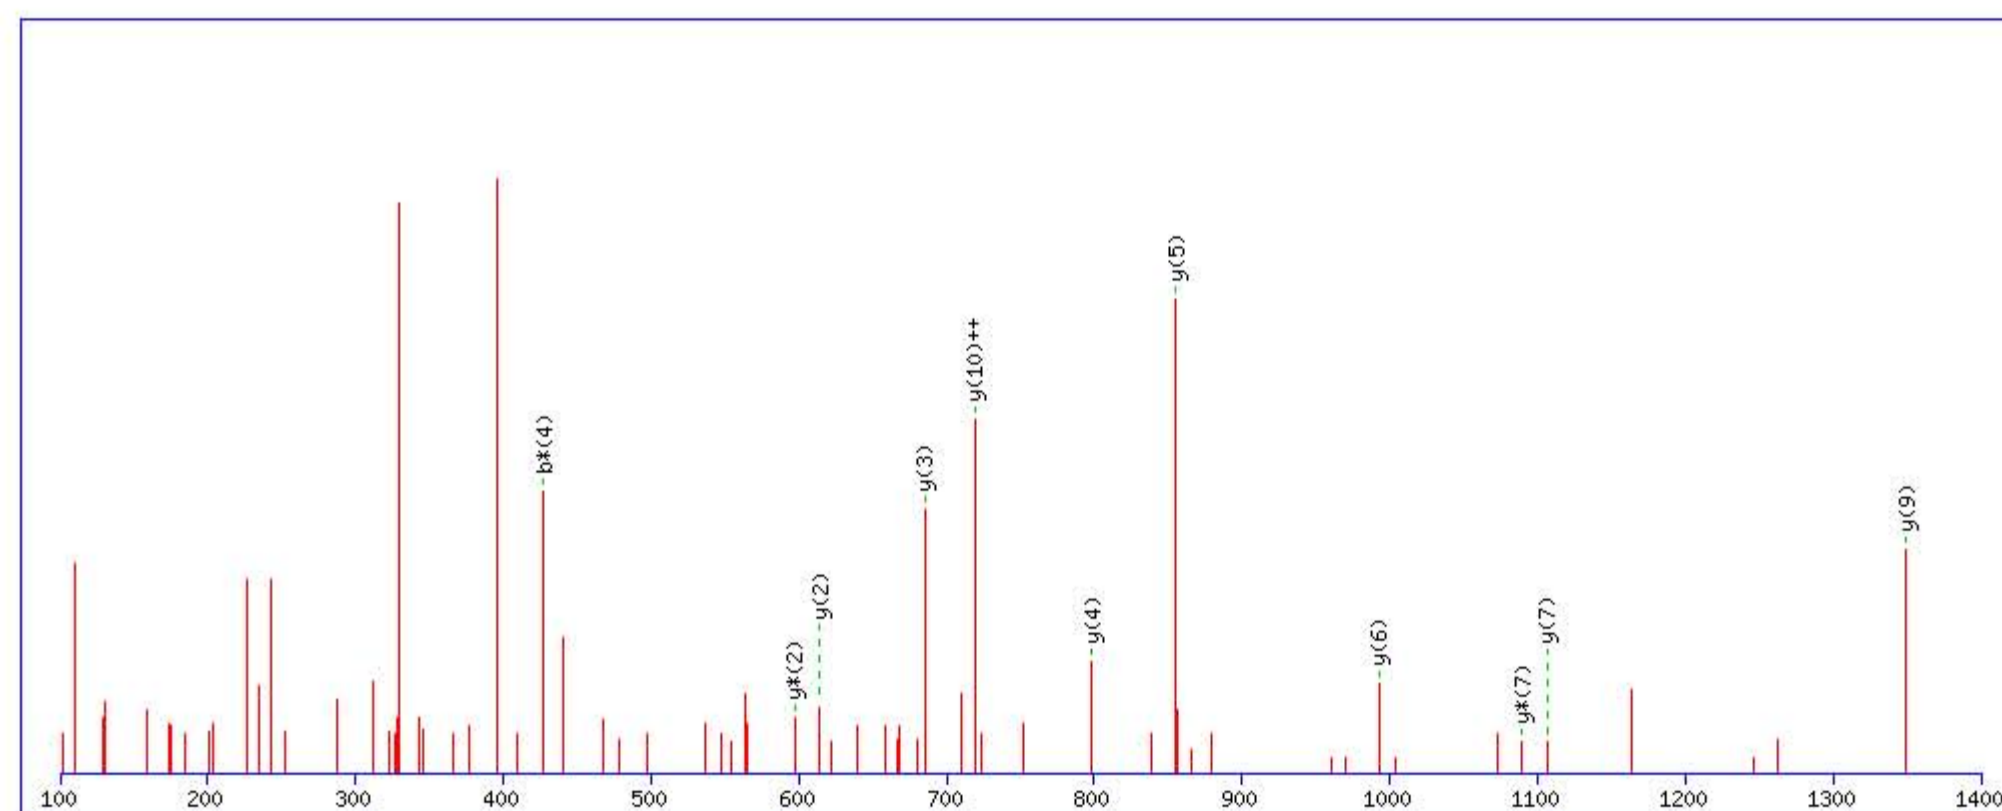

Monoisotopic mass of neutral peptide Mr(calc): 1548.783066

Fixed modifications: Carbamidomethyl (C) (apply to specified residues or termini only)

Variable modifications:

Q10 : Biotin:Thermo-21345 (Q)

Ions Score: 30 Expect: 0.0044

Matches : 11/100 fragment ions using 25 most intense peaks [\(help\)](#)

| #  | b           | b <sup>++</sup> | b <sup>+</sup> | b <sup>*++</sup> | b <sup>0</sup> | b <sup>0++</sup> | Seq. | y           | y <sup>++</sup> | y <sup>+</sup> | y <sup>*++</sup> | y <sup>0</sup> | y <sup>0++</sup> | #  |
|----|-------------|-----------------|----------------|------------------|----------------|------------------|------|-------------|-----------------|----------------|------------------|----------------|------------------|----|
| 1  | 114.091340  | 57.549308       |                |                  |                |                  | L    |             |                 |                |                  |                |                  | 11 |
| 2  | 201.123368  | 101.065322      |                |                  | 183.112803     | 92.060039        | S    | 1436.706307 | 718.856792      | 1419.679758    | 710.343517       | 1418.695742    | 709.851509       | 10 |
| 3  | 315.166295  | 158.086785      | 298.139746     | 149.573511       | 297.155730     | 149.081503       | N    | 1349.674279 | 675.340778      | 1332.647730    | 666.827503       | 1331.663714    | 666.335495       | 9  |
| 4  | 444.208888  | 222.608082      | 427.182339     | 214.094808       | 426.198323     | 213.602800       | E    | 1235.631352 | 618.319314      | 1218.604803    | 609.806040       | 1217.620787    | 609.314032       | 8  |
| 5  | 558.251815  | 279.629546      | 541.225266     | 271.116271       | 540.241250     | 270.624263       | N    | 1106.588759 | 553.798018      | 1089.562210    | 545.284743       |                |                  | 7  |
| 6  | 695.310727  | 348.159002      | 678.284178     | 339.645727       | 677.300162     | 339.153719       | H    | 992.545832  | 496.776554      | 975.519283     | 488.263280       |                |                  | 6  |
| 7  | 752.332191  | 376.669734      | 735.305642     | 368.156459       | 734.321626     | 367.664451       | G    | 855.486920  | 428.247098      | 838.460371     | 419.733824       |                |                  | 5  |
| 8  | 865.416255  | 433.211766      | 848.389706     | 424.698491       | 847.405690     | 424.206483       | I    | 798.465456  | 399.736366      | 781.438907     | 391.223092       |                |                  | 4  |
| 9  | 936.453369  | 468.730323      | 919.426820     | 460.217048       | 918.442804     | 459.725040       | A    | 685.381392  | 343.194334      | 668.354843     | 334.681060       |                |                  | 3  |
| 10 | 1375.678695 | 688.342986      | 1358.652146    | 679.829711       | 1357.668130    | 679.337703       | Q    | 614.344278  | 307.675777      | 597.317729     | 299.162503       |                |                  | 2  |
| 11 |             |                 |                |                  |                |                  | R    | 175.118952  | 88.063114       | 158.092403     | 79.549839        |                |                  | 1  |

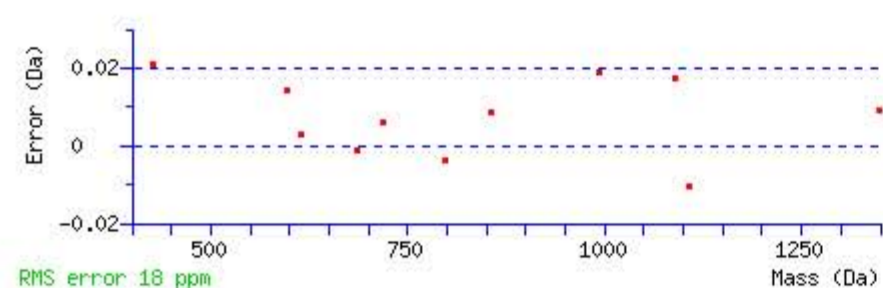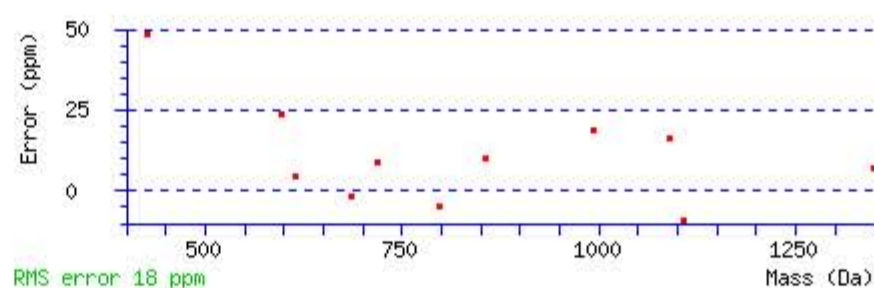

NCBI BLAST search of **LSNENHGIAQR**

(Parameters: blastp, nr protein database, expect=20000, no filter, PAM30)

Other BLAST [web gateways](#)

All matches to this query

| Score | Mr(calc):   | Delta     | Sequence                      |
|-------|-------------|-----------|-------------------------------|
| 29.9  | 1548.783066 | -0.007284 | <a href="#">LSNENHGIAQR</a>   |
| 4.8   | 1548.782394 | -0.006612 | <a href="#">IIPPYTDDAFEIR</a> |

Mascot: <http://www.matrixscience.com/>



# MASCOT Search Results

## Peptide View

MS/MS Fragmentation of **FYNQVSTPLLR**

Found in **ITIH2\_HUMAN**, Inter-alpha-trypsin inhibitor heavy chain H2 OS=Homo sapiens GN=ITIH2 PE=1 SV=2

Match to Query 48329: 1647.886428 from(824.950490,2+) rtinseconds(2268) index(64853)

Title: Locus:1.1.1.2787.10 File:"2013-07-02 CLN FXIII 30 min 1st F 4.wiff"

Data file C:\Program Files (x86)\Matrix Science\Mascot Daemon\mgf\1 FXIII 30 min 1st\mascot\_daemon\_merge.mgf

Click mouse within plot area to zoom in by factor of two about that point

Or, Plot from  to  Da

Label all possible matches  Label matches used for scoring

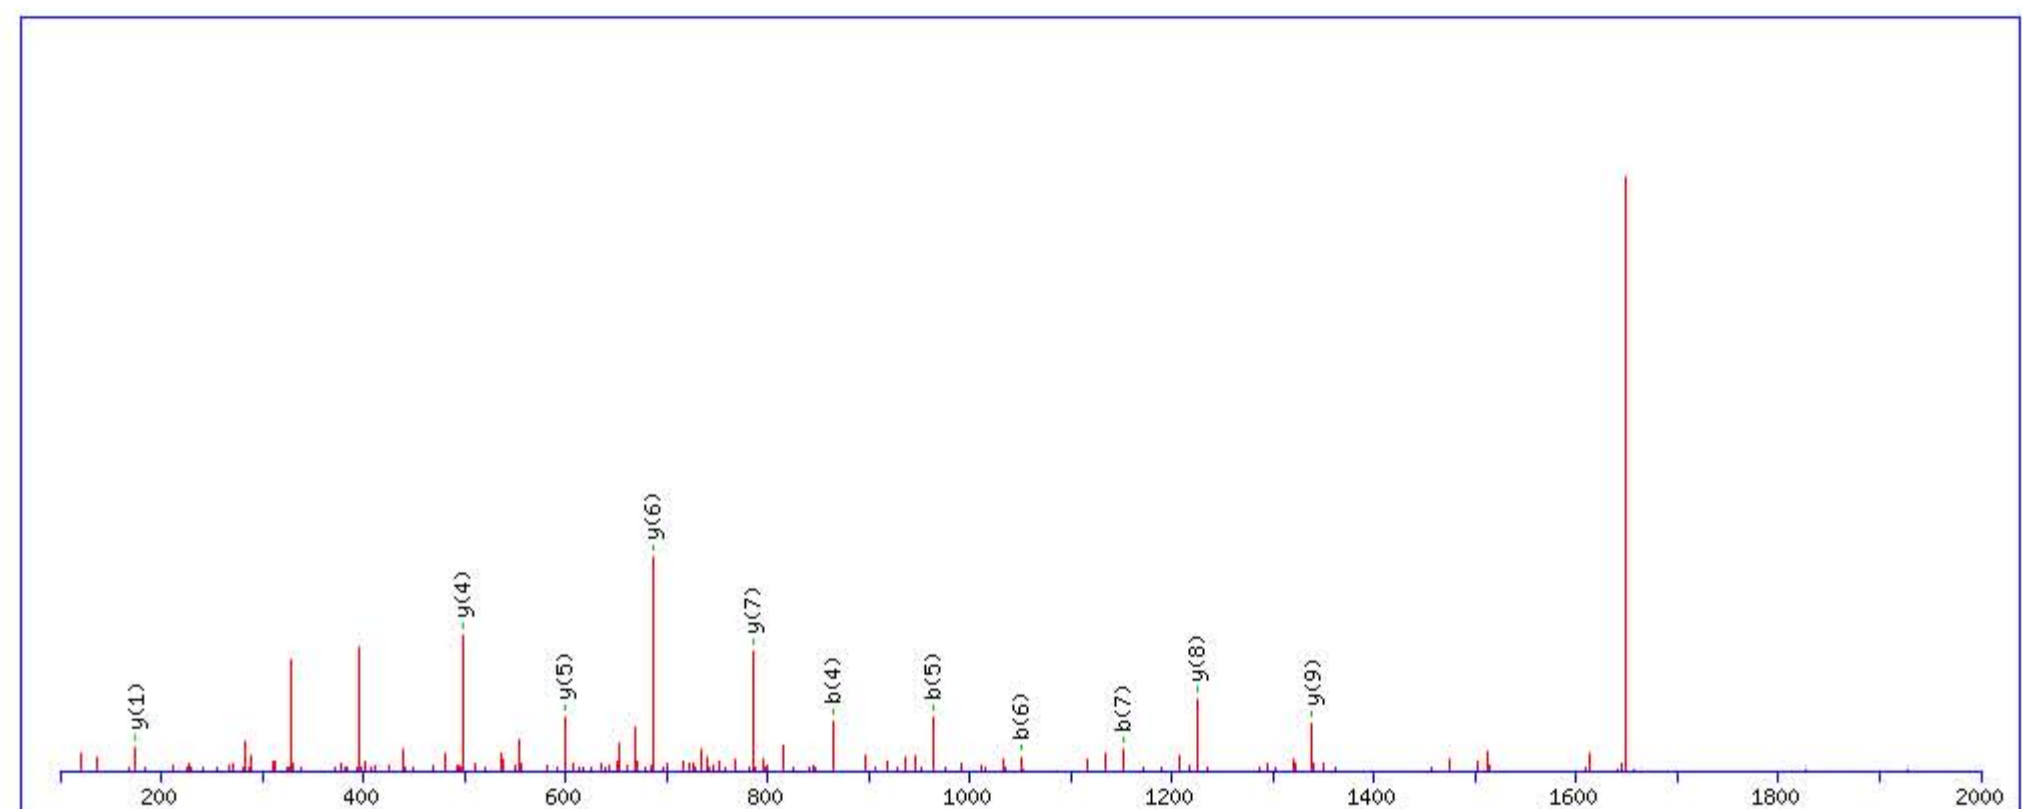

Monoisotopic mass of neutral peptide Mr(calc): 1647.880676

Fixed modifications: Carbamidomethyl (C) (apply to specified residues or termini only)

Variable modifications:

Q4 : Biotin:Thermo-21345 (Q)

Ions Score: 53 Expect: 4.5e-005

Matches : 11/98 fragment ions using 16 most intense peaks [\(help\)](#)

| #  | b                  | b <sup>++</sup> | b <sup>*</sup> | b <sup>*++</sup> | b <sup>0</sup> | b <sup>0++</sup> | Seq. | y                  | y <sup>++</sup> | y <sup>*</sup> | y <sup>*++</sup> | y <sup>0</sup> | y <sup>0++</sup> | #  |
|----|--------------------|-----------------|----------------|------------------|----------------|------------------|------|--------------------|-----------------|----------------|------------------|----------------|------------------|----|
| 1  | 148.075690         | 74.541483       |                |                  |                |                  | F    |                    |                 |                |                  |                |                  | 11 |
| 2  | 311.139019         | 156.073148      |                |                  |                |                  | Y    | 1501.819547        | 751.413411      | 1484.792998    | 742.900137       | 1483.808982    | 742.408129       | 10 |
| 3  | 425.181946         | 213.094611      | 408.155397     | 204.581337       |                |                  | N    | <b>1338.756218</b> | 669.881747      | 1321.729669    | 661.368472       | 1320.745653    | 660.876464       | 9  |
| 4  | <b>864.407272</b>  | 432.707274      | 847.380723     | 424.194000       |                |                  | Q    | <b>1224.713291</b> | 612.860283      | 1207.686742    | 604.347009       | 1206.702726    | 603.855001       | 8  |
| 5  | <b>963.475686</b>  | 482.241481      | 946.449137     | 473.728207       |                |                  | V    | <b>785.487965</b>  | 393.247620      | 768.461416     | 384.734346       | 767.477400     | 384.242338       | 7  |
| 6  | <b>1050.507714</b> | 525.757495      | 1033.481165    | 517.244221       | 1032.497149    | 516.752213       | S    | <b>686.419551</b>  | 343.713414      | 669.393002     | 335.200139       | 668.408986     | 334.708131       | 6  |
| 7  | <b>1151.555393</b> | 576.281335      | 1134.528844    | 567.768060       | 1133.544828    | 567.276052       | T    | <b>599.387523</b>  | 300.197399      | 582.360974     | 291.684125       | 581.376958     | 291.192117       | 5  |
| 8  | 1248.608157        | 624.807717      | 1231.581608    | 616.294442       | 1230.597592    | 615.802434       | P    | <b>498.339844</b>  | 249.673560      | 481.313295     | 241.160285       |                |                  | 4  |
| 9  | 1361.692221        | 681.349749      | 1344.665672    | 672.836474       | 1343.681656    | 672.344466       | L    | 401.287080         | 201.147178      | 384.260531     | 192.633903       |                |                  | 3  |
| 10 | 1474.776285        | 737.891780      | 1457.749736    | 729.378506       | 1456.765720    | 728.886498       | L    | 288.203016         | 144.605146      | 271.176467     | 136.091871       |                |                  | 2  |
| 11 |                    |                 |                |                  |                |                  | R    | <b>175.118952</b>  | 88.063114       | 158.092403     | 79.549839        |                |                  | 1  |

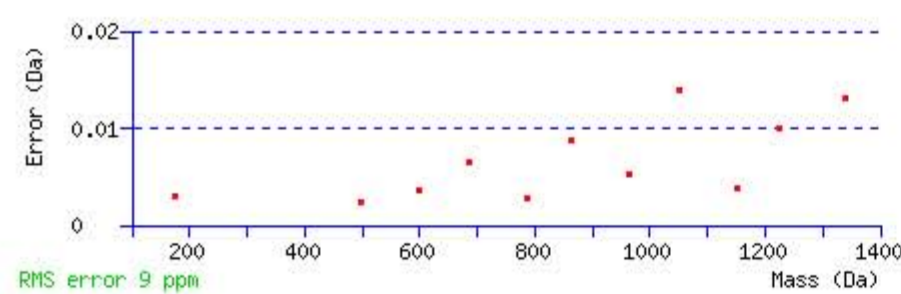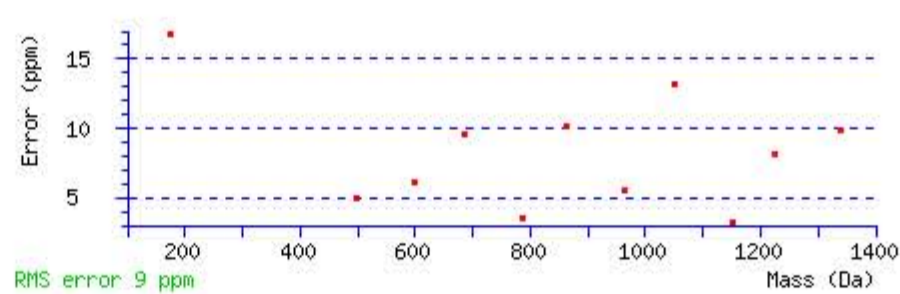

NCBI BLAST search of **FYNQVSTPLLR**

(Parameters: blastp, nr protein database, expect=20000, no filter, PAM30)

Other BLAST [web gateways](#)

All matches to this query

| Score | Mr(calc):   | Delta     | Sequence                        |
|-------|-------------|-----------|---------------------------------|
| 52.9  | 1647.880676 | 0.005752  | <a href="#">FYNQVSTPLLR</a>     |
| 6.1   | 1647.887878 | -0.001450 | <a href="#">TLNQQLTNHIR</a>     |
| 4.8   | 1647.887878 | -0.001450 | <a href="#">TLNQQLTNHIR</a>     |
| 2.8   | 1647.910339 | -0.023911 | <a href="#">LMRPRREGGPPGGLR</a> |
| 2.8   | 1647.873260 | 0.013168  | <a href="#">AFKELPVNAQNYVR</a>  |
| 1.6   | 1647.903137 | -0.016709 | <a href="#">EVRIMRWFGLVSR</a>   |
| 0.2   | 1647.895264 | -0.008836 | <a href="#">MKPILLQGHER</a>     |



# MASCOT SCIENCE Mascot Search Results

## Peptide View

MS/MS Fragmentation of **IYGNQDTSSQLK**

Found in **ITIH2\_HUMAN**, Inter-alpha-trypsin inhibitor heavy chain H2 OS=Homo sapiens GN=ITIH2 PE=1 SV=2

Match to Query 48671: 1663.824828 from(832.919690,2+) rtinseconds(1621) index(60403)

Title: Locus:1.1.1.2562.13 File:"2013-07-02 CLN FXIII 30 min 1st F 4.wiff"

Data file C:\Program Files (x86)\Matrix Science\Mascot Daemon\mgf1 FXIII 30 min 1st\mascot\_daemon\_merge.mgf

Click mouse within plot area to zoom in by factor of two about that point

Or, Plot from  to  Da

Label all possible matches  Label matches used for scoring

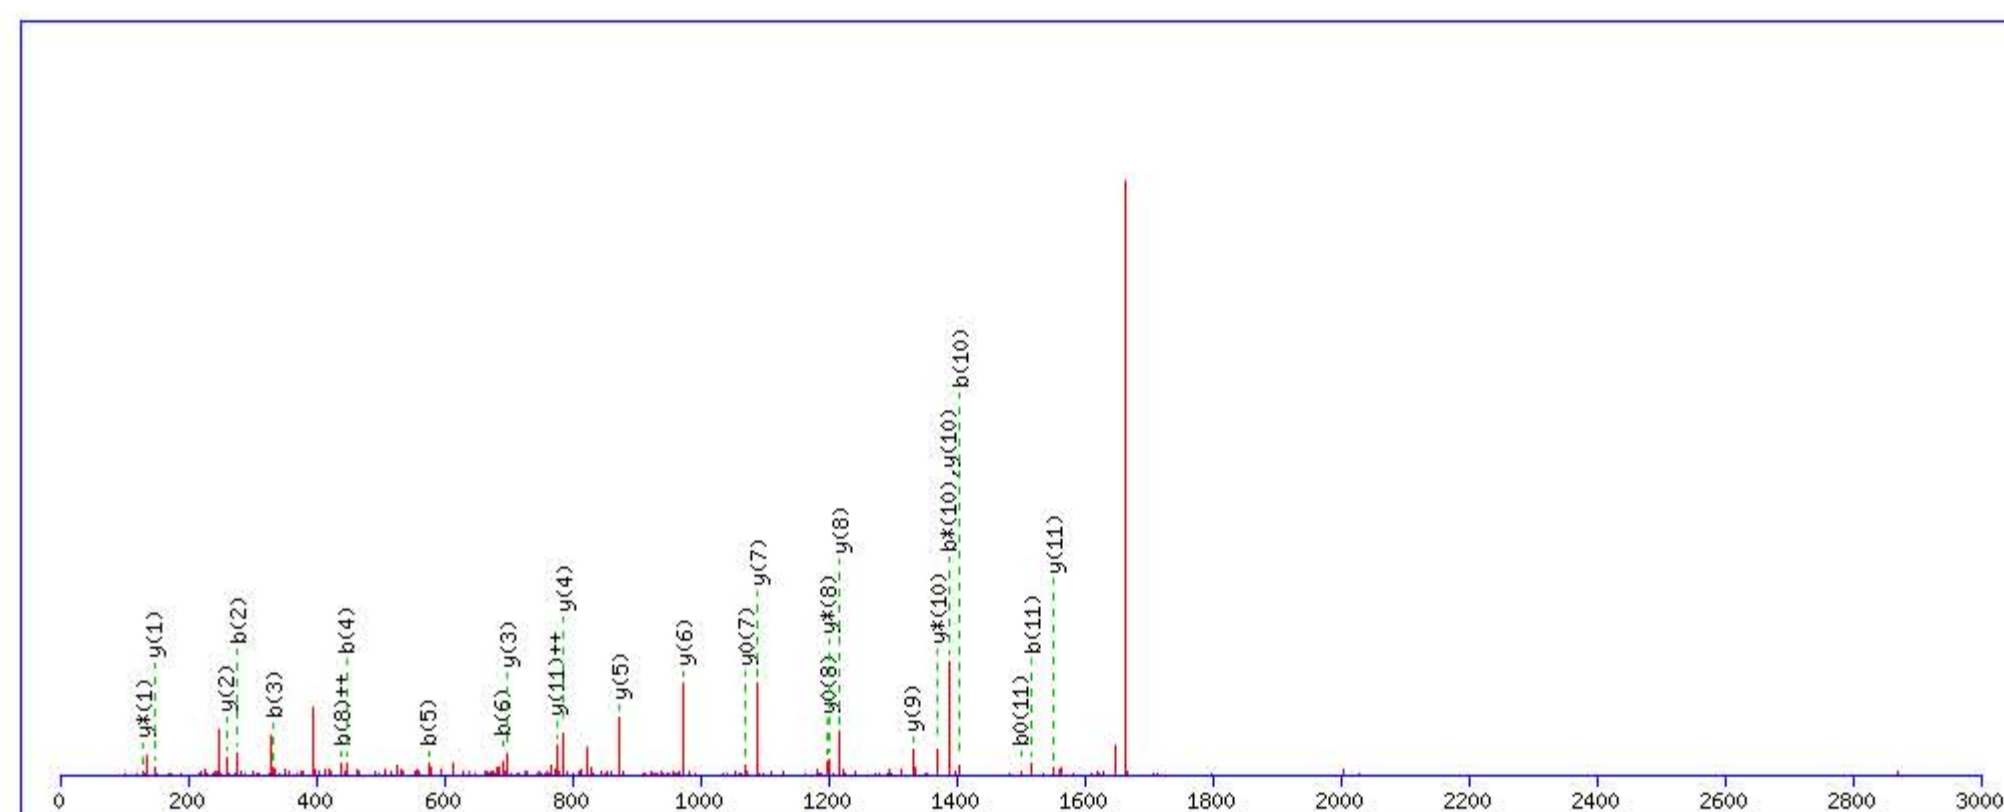

Monoisotopic mass of neutral peptide Mr(calc): 1663.823944

Fixed modifications: Carbamidomethyl (C) (apply to specified residues or termini only)

Variable modifications:

Q10 : Biotin:Thermo-21345 (Q)

Ions Score: 72 Expect: 3.3e-007

Matches : 27/110 fragment ions using 48 most intense peaks [\(help\)](#)

| #  | b                  | b <sup>++</sup>   | b <sup>*</sup>     | b <sup>*++</sup> | b <sup>0</sup>     | b <sup>0++</sup> | Seq. | y                  | y <sup>++</sup>   | y <sup>*</sup>     | y <sup>*++</sup> | y <sup>0</sup>     | y <sup>0++</sup> | #  |
|----|--------------------|-------------------|--------------------|------------------|--------------------|------------------|------|--------------------|-------------------|--------------------|------------------|--------------------|------------------|----|
| 1  | 114.091340         | 57.549308         |                    |                  |                    |                  | I    |                    |                   |                    |                  |                    |                  | 12 |
| 2  | <b>277.154669</b>  | 139.080973        |                    |                  |                    |                  | Y    | <b>1551.747170</b> | <b>776.377223</b> | 1534.720621        | 767.863948       | 1533.736605        | 767.371940       | 11 |
| 3  | <b>334.176133</b>  | 167.591704        |                    |                  |                    |                  | G    | <b>1388.683841</b> | 694.845558        | <b>1371.657292</b> | 686.332284       | 1370.673276        | 685.840276       | 10 |
| 4  | <b>448.219060</b>  | 224.613168        | 431.192511         | 216.099894       |                    |                  | N    | <b>1331.662377</b> | 666.334826        | 1314.635828        | 657.821552       | 1313.651812        | 657.329544       | 9  |
| 5  | <b>576.277638</b>  | 288.642457        | 559.251089         | 280.129183       |                    |                  | Q    | <b>1217.619450</b> | 609.313363        | <b>1200.592901</b> | 600.800088       | <b>1199.608885</b> | 600.308080       | 8  |
| 6  | <b>691.304581</b>  | 346.155929        | 674.278032         | 337.642654       | 673.294016         | 337.150646       | D    | <b>1089.560872</b> | 545.284074        | 1072.534323        | 536.770799       | <b>1071.550307</b> | 536.278791       | 7  |
| 7  | 792.352260         | 396.679768        | 775.325711         | 388.166494       | 774.341695         | 387.674486       | T    | <b>974.533929</b>  | 487.770602        | 957.507380         | 479.257328       | 956.523364         | 478.765320       | 6  |
| 8  | 879.384288         | <b>440.195782</b> | 862.357739         | 431.682507       | 861.373723         | 431.190499       | S    | <b>873.486250</b>  | 437.246763        | 856.459701         | 428.733488       | 855.475685         | 428.241480       | 5  |
| 9  | 966.416316         | 483.711796        | 949.389767         | 475.198521       | 948.405751         | 474.706513       | S    | <b>786.454222</b>  | 393.730749        | 769.427673         | 385.217474       | 768.443657         | 384.725466       | 4  |
| 10 | <b>1405.641642</b> | 703.324459        | <b>1388.615093</b> | 694.811184       | 1387.631077        | 694.319176       | Q    | <b>699.422194</b>  | 350.214735        | 682.395645         | 341.701460       |                    |                  | 3  |
| 11 | <b>1518.725706</b> | 759.866491        | 1501.699157        | 751.353216       | <b>1500.715141</b> | 750.861208       | L    | <b>260.196868</b>  | 130.602072        | 243.170319         | 122.088797       |                    |                  | 2  |
| 12 |                    |                   |                    |                  |                    |                  | K    | <b>147.112804</b>  | 74.060040         | <b>130.086255</b>  | 65.546765        |                    |                  | 1  |

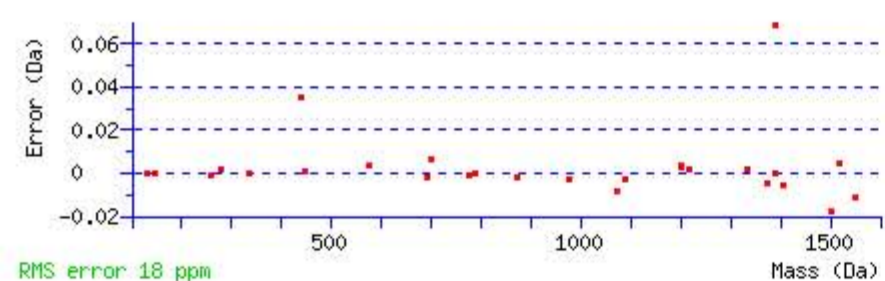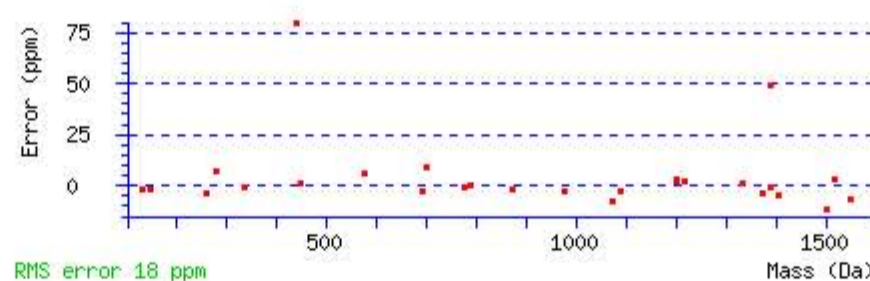

NCBI BLAST search of [IYGNQDTSSQLK](#)

(Parameters: blastp, nr protein database, expect=20000, no filter, PAM30)

Other BLAST [web gateways](#)

## All matches to this query

| Score | Mr(calc):   | Delta     | Sequence                       |
|-------|-------------|-----------|--------------------------------|
| 72.0  | 1663.823944 | 0.000884  | <a href="#">IYGNQDTSSQLK</a>   |
| 16.3  | 1663.823944 | 0.000884  | <a href="#">IYGNQDTSSQLK</a>   |
| 2.8   | 1663.821442 | 0.003386  | <a href="#">LYGCFLRVYMQSK</a>  |
| 2.4   | 1663.827957 | -0.003129 | <a href="#">EEAFLHVAVDMYLK</a> |
| 1.8   | 1663.806198 | 0.018630  | <a href="#">INGTWNGMIGEVMK</a> |

Mascot: <http://www.matrixscience.com/>



# MASCOT Search Results

## Peptide View

MS/MS Fragmentation of **AHVSFKPTVAQQR**

Found in **ITIH2\_HUMAN**, Inter-alpha-trypsin inhibitor heavy chain H2 OS=Homo sapiens GN=ITIH2 PE=1 SV=2

Match to Query 51673: 1778.957142 from(593.992990,3+) rtinseconds(1486) index(59437)

Title: Locus:1.1.1.2515.16 File:"2013-07-02 CLN FXIII 30 min 1st F 4.wiff"

Data file C:\Program Files (x86)\Matrix Science\Mascot Daemon\mgf1 FXIII 30 min 1st\mascot\_daemon\_merge.mgf

Click mouse within plot area to zoom in by factor of two about that point

Or, Plot from  to  Da

Label all possible matches  Label matches used for scoring

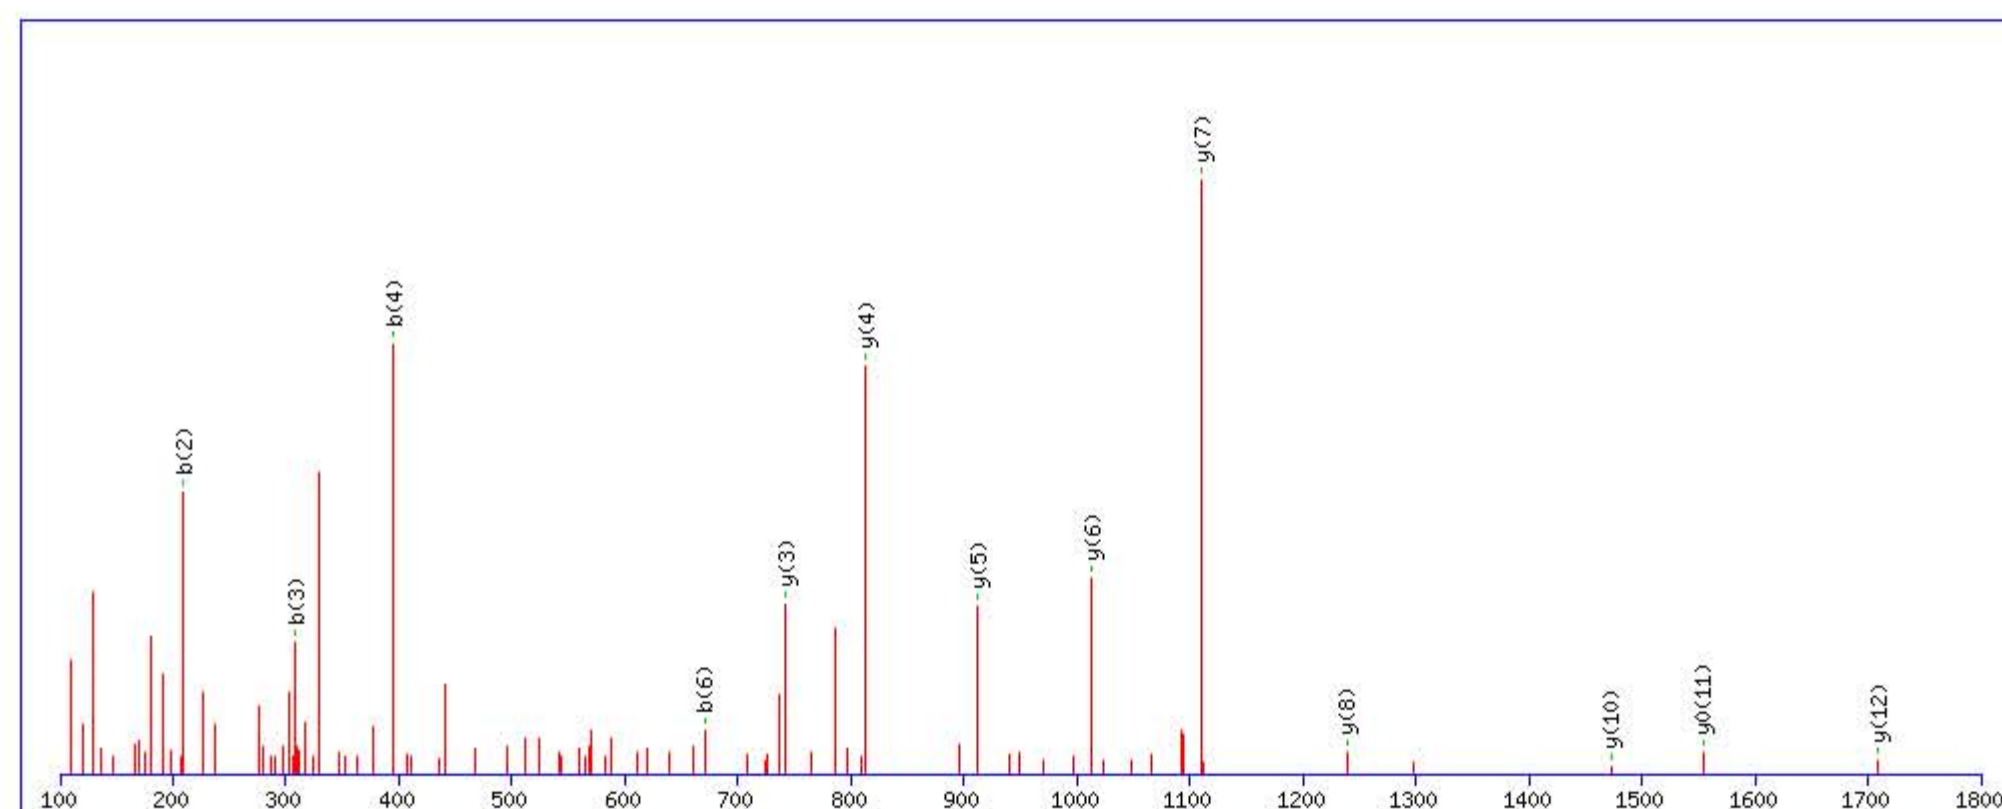

Monoisotopic mass of neutral peptide Mr(calc): 1778.961395

Fixed modifications: Carbamidomethyl (C) (apply to specified residues or termini only)

Variable modifications:

Q12 : Biotin:Thermo-21345 (Q)

Ions Score: 69 Expect: 2.5e-006

Matches : 13/118 fragment ions using 15 most intense peaks [\(help\)](#)

| #  | b                 | b <sup>++</sup> | b <sup>*</sup> | b <sup>*++</sup> | b <sup>0</sup> | b <sup>0++</sup> | Seq. | y                  | y <sup>++</sup> | y <sup>*</sup> | y <sup>*++</sup> | y <sup>0</sup>     | y <sup>0++</sup> | #  |
|----|-------------------|-----------------|----------------|------------------|----------------|------------------|------|--------------------|-----------------|----------------|------------------|--------------------|------------------|----|
| 1  | 72.044390         | 36.525833       |                |                  |                |                  | A    |                    |                 |                |                  |                    |                  | 13 |
| 2  | <b>209.103302</b> | 105.055289      |                |                  |                |                  | H    | <b>1708.931558</b> | 854.969417      | 1691.905009    | 846.456143       | 1690.920993        | 845.964135       | 12 |
| 3  | <b>308.171716</b> | 154.589496      |                |                  |                |                  | V    | 1571.872646        | 786.439961      | 1554.846097    | 777.926687       | <b>1553.862081</b> | 777.434679       | 11 |
| 4  | <b>395.203744</b> | 198.105510      |                |                  | 377.193179     | 189.100227       | S    | <b>1472.804232</b> | 736.905754      | 1455.777683    | 728.392480       | 1454.793667        | 727.900472       | 10 |
| 5  | 542.272158        | 271.639717      |                |                  | 524.261593     | 262.634435       | F    | 1385.772204        | 693.389740      | 1368.745655    | 684.876466       | 1367.761639        | 684.384458       | 9  |
| 6  | <b>670.367121</b> | 335.687199      | 653.340572     | 327.173924       | 652.356556     | 326.681916       | K    | <b>1238.703790</b> | 619.855533      | 1221.677241    | 611.342259       | 1220.693225        | 610.850251       | 8  |
| 7  | 767.419885        | 384.213581      | 750.393336     | 375.700306       | 749.409320     | 375.208298       | P    | <b>1110.608827</b> | 555.808052      | 1093.582278    | 547.294777       | 1092.598262        | 546.802769       | 7  |
| 8  | 868.467564        | 434.737420      | 851.441015     | 426.224146       | 850.456999     | 425.732138       | T    | <b>1013.556063</b> | 507.281670      | 996.529514     | 498.768395       | 995.545498         | 498.276387       | 6  |
| 9  | 967.535978        | 484.271627      | 950.509429     | 475.758353       | 949.525413     | 475.266345       | V    | <b>912.508384</b>  | 456.757830      | 895.481835     | 448.244556       |                    |                  | 5  |
| 10 | 1038.573092       | 519.790184      | 1021.546543    | 511.276910       | 1020.562527    | 510.784902       | A    | <b>813.439970</b>  | 407.223623      | 796.413421     | 398.710349       |                    |                  | 4  |
| 11 | 1166.631670       | 583.819473      | 1149.605121    | 575.306199       | 1148.621105    | 574.814191       | Q    | <b>742.402856</b>  | 371.705066      | 725.376307     | 363.191792       |                    |                  | 3  |
| 12 | 1605.856996       | 803.432136      | 1588.830447    | 794.918862       | 1587.846431    | 794.426854       | Q    | 614.344278         | 307.675777      | 597.317729     | 299.162503       |                    |                  | 2  |
| 13 |                   |                 |                |                  |                |                  | R    | 175.118952         | 88.063114       | 158.092403     | 79.549839        |                    |                  | 1  |

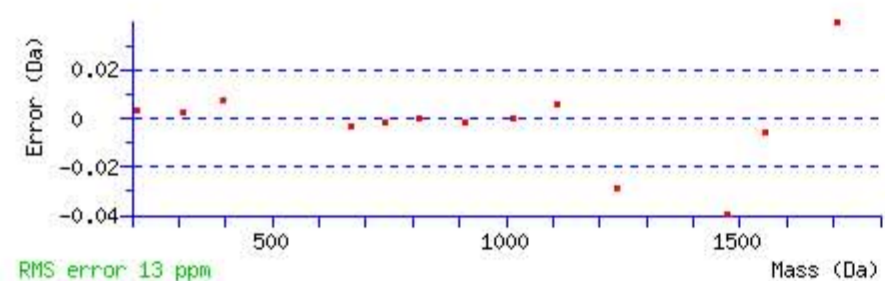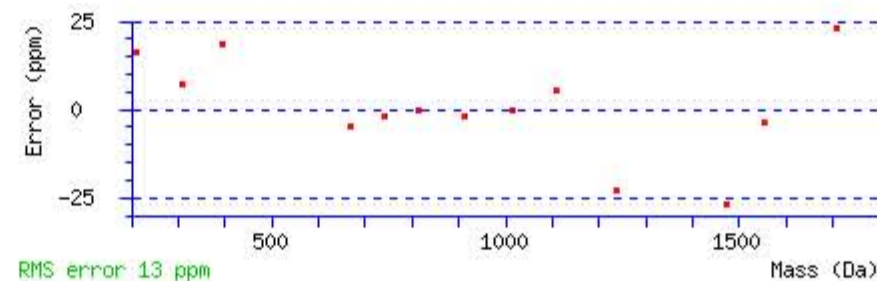

NCBI BLAST search of **AHVSFKPTVAQQR**

(Parameters: blastp, nr protein database, expect=20000, no filter, PAM30)

Other BLAST [web gateways](#)

All matches to this query

| Score | Mr(calc):   | Delta     | Sequence                      |
|-------|-------------|-----------|-------------------------------|
| 69.4  | 1778.961395 | -0.004253 | <a href="#">AHVSFKPTVAQQR</a> |
| 69.4  | 1778.961395 | -0.004253 | <a href="#">AHVSFKPTVAQQR</a> |



# MASCOT SEARCH RESULTS

## Peptide View

MS/MS Fragmentation of **IYGNQDTSSQLK**

Found in **ITIH2\_HUMAN**, Inter-alpha-trypsin inhibitor heavy chain H2 OS=Homo sapiens GN=ITIH2 PE=1 SV=2

Match to Query 56086: 1974.995652 from(659.339160,3+) rtinseconds(1975) index(62983)

Title: Locus:1.1.1.2685.4 File:"2013-07-02 CLN FXIII 30 min 1st F 4.wiff"

Data file C:\Program Files (x86)\Matrix Science\Mascot Daemon\mgf1 FXIII 30 min 1st\mascot\_daemon\_merge.mgf

Click mouse within plot area to zoom in by factor of two about that point

Or, Plot from  to  Da

Label all possible matches  Label matches used for scoring

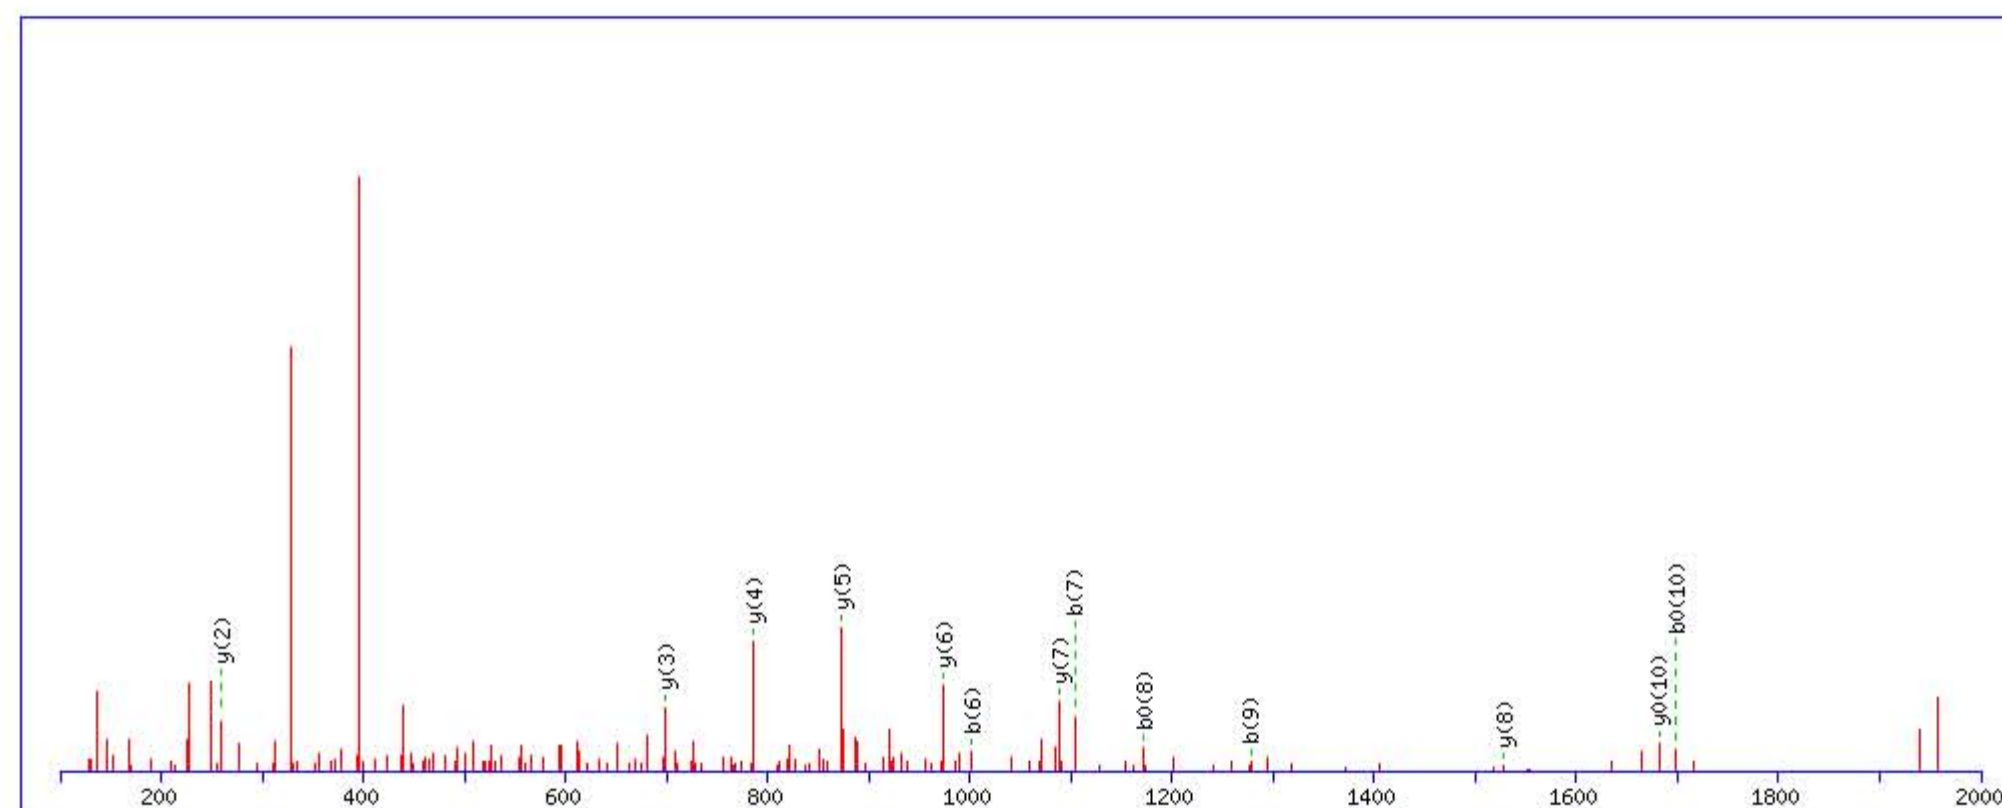

Monoisotopic mass of neutral peptide Mr(calc): 1974.990692

Fixed modifications: Carbamidomethyl (C) (apply to specified residues or termini only)

Variable modifications:

Q5 : Biotin:Thermo-21345 (Q)

Q10 : Biotin:Thermo-21345 (Q)

Ions Score: 25 Expect: 0.077

Matches : 13/110 fragment ions using 34 most intense peaks [\(help\)](#)

| #  | b           | b <sup>++</sup> | b <sup>*</sup> | b <sup>+++</sup> | b <sup>0</sup> | b <sup>0++</sup> | Seq. | y           | y <sup>++</sup> | y <sup>*</sup> | y <sup>+++</sup> | y <sup>0</sup> | y <sup>0++</sup> | #  |
|----|-------------|-----------------|----------------|------------------|----------------|------------------|------|-------------|-----------------|----------------|------------------|----------------|------------------|----|
| 1  | 114.091340  | 57.549308       |                |                  |                |                  | I    |             |                 |                |                  |                |                  | 12 |
| 2  | 277.154669  | 139.080973      |                |                  |                |                  | Y    | 1862.913918 | 931.960597      | 1845.887369    | 923.447323       | 1844.903353    | 922.955315       | 11 |
| 3  | 334.176133  | 167.591704      |                |                  |                |                  | G    | 1699.850589 | 850.428933      | 1682.824040    | 841.915658       | 1681.840024    | 841.423650       | 10 |
| 4  | 448.219060  | 224.613168      | 431.192511     | 216.099894       |                |                  | N    | 1642.829125 | 821.918201      | 1625.802576    | 813.404926       | 1624.818560    | 812.912918       | 9  |
| 5  | 887.444386  | 444.225831      | 870.417837     | 435.712557       |                |                  | Q    | 1528.786198 | 764.896737      | 1511.759649    | 756.383463       | 1510.775633    | 755.891455       | 8  |
| 6  | 1002.471329 | 501.739303      | 985.444780     | 493.226028       | 984.460764     | 492.734020       | D    | 1089.560872 | 545.284074      | 1072.534323    | 536.770800       | 1071.550307    | 536.278792       | 7  |
| 7  | 1103.519008 | 552.263142      | 1086.492459    | 543.749868       | 1085.508443    | 543.257860       | T    | 974.533929  | 487.770603      | 957.507380     | 479.257328       | 956.523364     | 478.765320       | 6  |
| 8  | 1190.551036 | 595.779156      | 1173.524487    | 587.265882       | 1172.540471    | 586.773874       | S    | 873.486250  | 437.246763      | 856.459701     | 428.733489       | 855.475685     | 428.241481       | 5  |
| 9  | 1277.583064 | 639.295170      | 1260.556515    | 630.781896       | 1259.572499    | 630.289888       | S    | 786.454222  | 393.730749      | 769.427673     | 385.217475       | 768.443657     | 384.725467       | 4  |
| 10 | 1716.808390 | 858.907833      | 1699.781841    | 850.394559       | 1698.797825    | 849.902551       | Q    | 699.422194  | 350.214735      | 682.395645     | 341.701461       |                |                  | 3  |
| 11 | 1829.892454 | 915.449865      | 1812.865905    | 906.936591       | 1811.881889    | 906.444583       | L    | 260.196868  | 130.602072      | 243.170319     | 122.088797       |                |                  | 2  |
| 12 |             |                 |                |                  |                |                  | K    | 147.112804  | 74.060040       | 130.086255     | 65.546765        |                |                  | 1  |

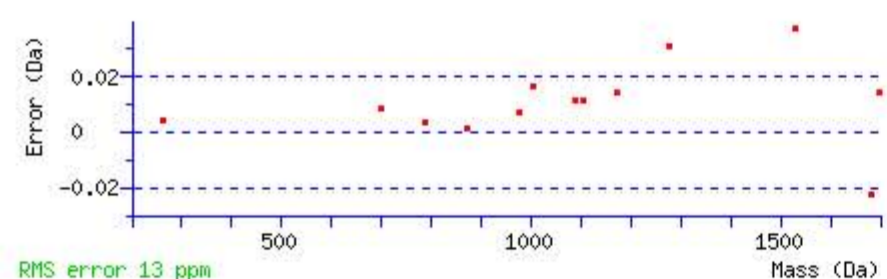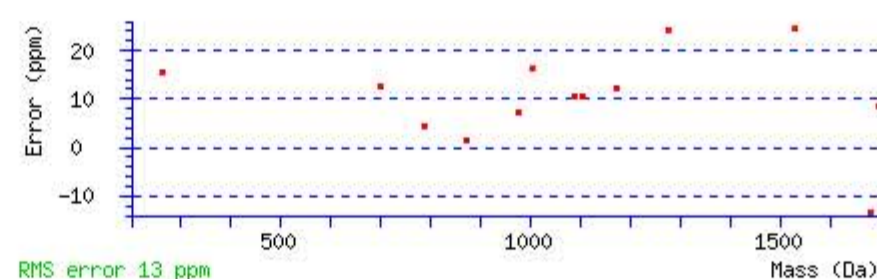

NCBI BLAST search of **IYGNQDTSSQLK**

(Parameters: blastp, nr protein database, expect=20000, no filter, PAM30)

Other BLAST [web gateways](#)

All matches to this query

| Score | Mr(calc):   | Delta    | Sequence                     |
|-------|-------------|----------|------------------------------|
| 25.4  | 1974.990692 | 0.004960 | <a href="#">IYGNQDTSSQLK</a> |

Mascot: <http://www.matrixscience.com/>



# MASCOT Search Results

## Peptide View

MS/MS Fragmentation of **AEDHFSVIDFNQIR**

Found in **ITIH2\_HUMAN**, Inter-alpha-trypsin inhibitor heavy chain H2 OS=Homo sapiens GN=ITIH2 PE=1 SV=2

Match to Query 59853: 2115.024762 from(706.015530,3+) rtinseconds(2265) index(64833)

Title: Locus:1.1.1.2786.8 File:"2013-07-02 CLN FXIII 30 min 1st F 4.wiff"

Data file C:\Program Files (x86)\Matrix Science\Mascot Daemon\mgf1 FXIII 30 min 1st\mascot\_daemon\_merge.mgf

Click mouse within plot area to zoom in by factor of two about that point

Or, Plot from  to  Da

Label all possible matches  Label matches used for scoring

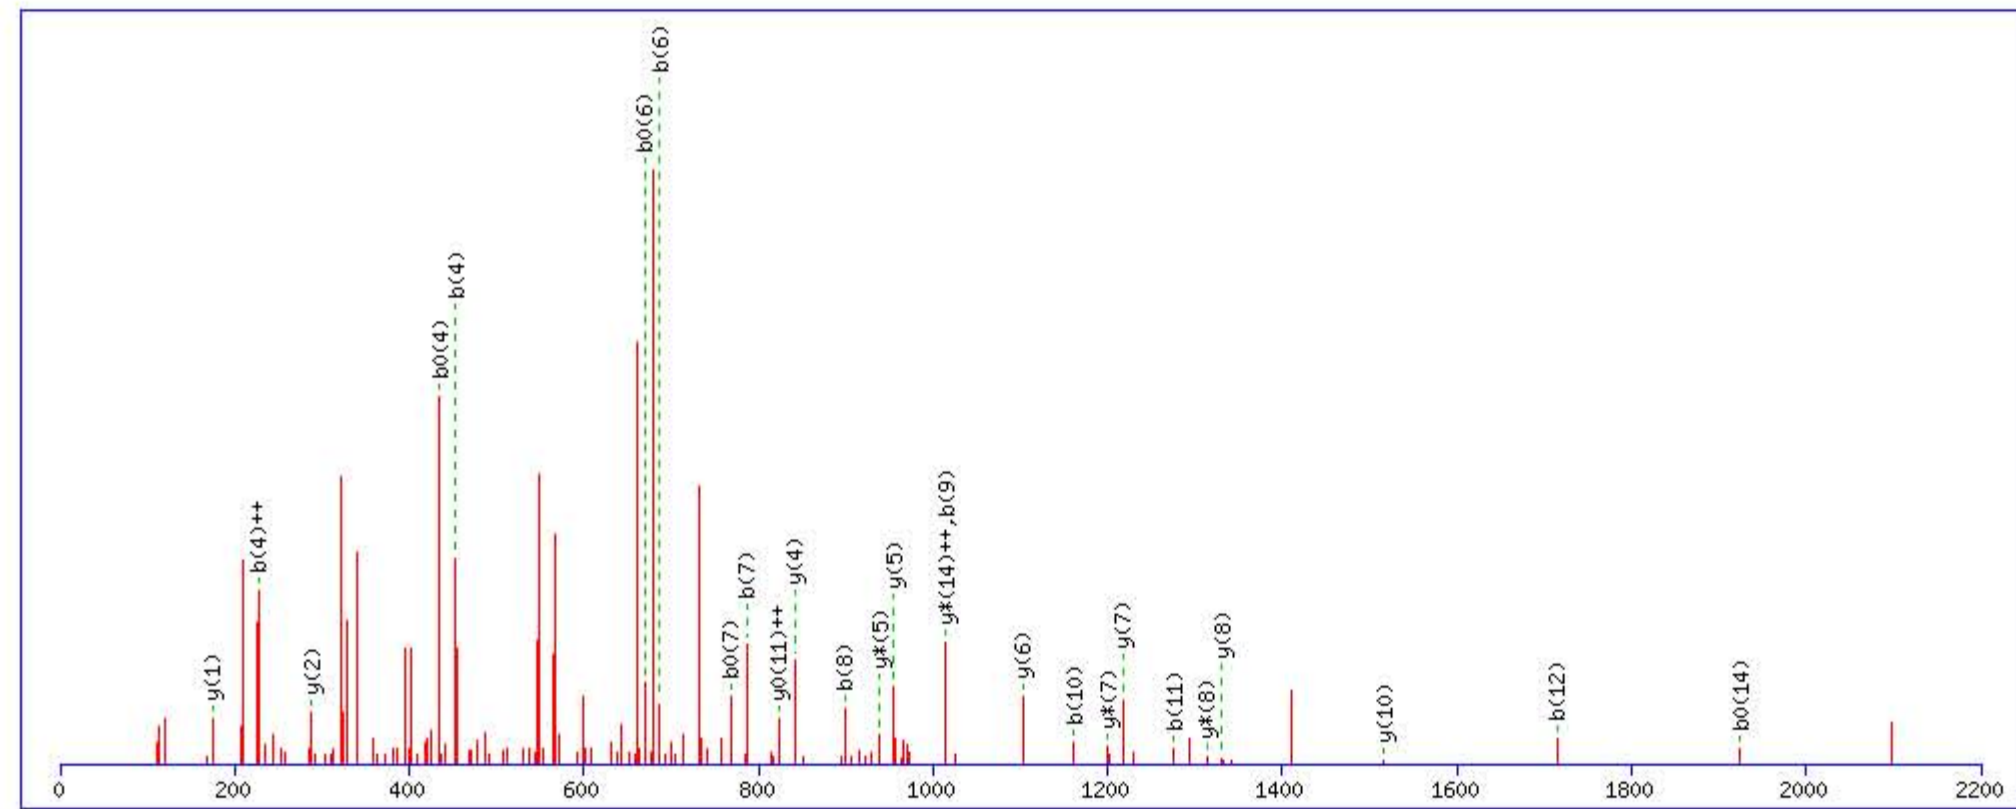

Monoisotopic mass of neutral peptide Mr(calc): 2115.020752

Fixed modifications: Carbamidomethyl (C) (apply to specified residues or termini only)

Variable modifications:

Q12 : Biotin:Thermo-21345 (Q)

Ions Score: 36 Expect: 0.0023

Matches : 26/134 fragment ions using 55 most intense peaks [\(help\)](#)

| #  | b           | b <sup>++</sup> | b <sup>*</sup> | b <sup>+++</sup> | b <sup>0</sup> | b <sup>0++</sup> | Seq. | y           | y <sup>++</sup> | y <sup>*</sup> | y <sup>+++</sup> | y <sup>0</sup> | y <sup>0++</sup> | #  |
|----|-------------|-----------------|----------------|------------------|----------------|------------------|------|-------------|-----------------|----------------|------------------|----------------|------------------|----|
| 1  | 72.044390   | 36.525833       |                |                  |                |                  | A    |             |                 |                |                  |                |                  | 15 |
| 2  | 201.086983  | 101.047130      |                |                  | 183.076418     | 92.041847        | E    | 2044.990921 | 1022.999099     | 2027.964372    | 1014.485824      | 2026.980356    | 1013.993816      | 14 |
| 3  | 316.113926  | 158.560601      |                |                  | 298.103361     | 149.555319       | D    | 1915.948328 | 958.477802      | 1898.921779    | 949.964528       | 1897.937763    | 949.472519       | 13 |
| 4  | 453.172838  | 227.090057      |                |                  | 435.162273     | 218.084775       | H    | 1800.921385 | 900.964331      | 1783.894836    | 892.451056       | 1782.910820    | 891.959048       | 12 |
| 5  | 600.241252  | 300.624264      |                |                  | 582.230687     | 291.618982       | F    | 1663.862473 | 832.434874      | 1646.835924    | 823.921600       | 1645.851908    | 823.429592       | 11 |
| 6  | 687.273280  | 344.140278      |                |                  | 669.262715     | 335.134996       | S    | 1516.794059 | 758.900668      | 1499.767510    | 750.387393       | 1498.783494    | 749.895385       | 10 |
| 7  | 786.341694  | 393.674485      |                |                  | 768.331129     | 384.669202       | V    | 1429.762031 | 715.384654      | 1412.735482    | 706.871379       | 1411.751466    | 706.379371       | 9  |
| 8  | 899.425758  | 450.216517      |                |                  | 881.415193     | 441.211234       | I    | 1330.693617 | 665.850447      | 1313.667068    | 657.337172       | 1312.683052    | 656.845164       | 8  |
| 9  | 1014.452701 | 507.729988      |                |                  | 996.442136     | 498.724706       | D    | 1217.609553 | 609.308415      | 1200.583004    | 600.795140       | 1199.598988    | 600.303132       | 7  |
| 10 | 1161.521115 | 581.264196      |                |                  | 1143.510550    | 572.258913       | F    | 1102.582610 | 551.794943      | 1085.556061    | 543.281669       |                |                  | 6  |
| 11 | 1275.564042 | 638.285659      | 1258.537493    | 629.772385       | 1257.553477    | 629.280376       | N    | 955.514196  | 478.260736      | 938.487647     | 469.747462       |                |                  | 5  |
| 12 | 1714.789368 | 857.898322      | 1697.762819    | 849.385048       | 1696.778803    | 848.893039       | Q    | 841.471269  | 421.239273      | 824.444720     | 412.725998       |                |                  | 4  |
| 13 | 1828.832295 | 914.919785      | 1811.805746    | 906.406511       | 1810.821730    | 905.914503       | N    | 402.245943  | 201.626610      | 385.219394     | 193.113335       |                |                  | 3  |
| 14 | 1941.916359 | 971.461817      | 1924.889810    | 962.948543       | 1923.905794    | 962.456535       | I    | 288.203016  | 144.605146      | 271.176467     | 136.091872       |                |                  | 2  |
| 15 |             |                 |                |                  |                |                  | R    | 175.118952  | 88.063114       | 158.092403     | 79.549840        |                |                  | 1  |

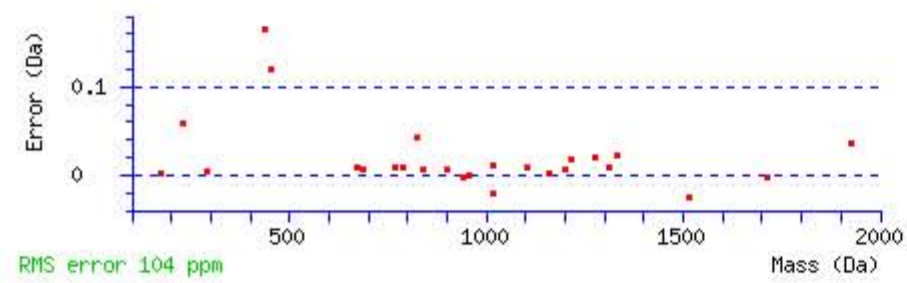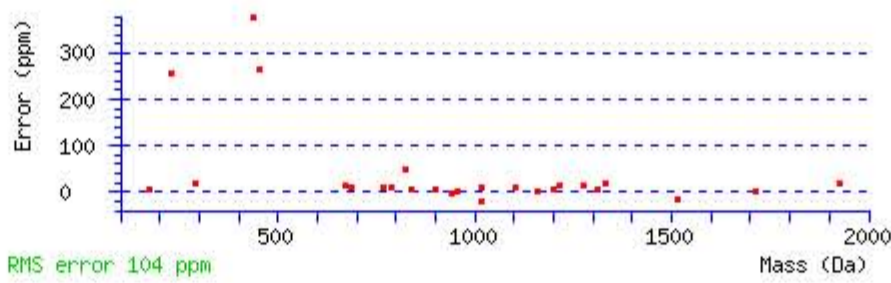

NCBI BLAST search of **AEDHFSVIDFNQIR**

(Parameters: blastp, nr protein database, expect=20000, no filter, PAM30)

Other BLAST [web gateways](#)

All matches to this query

| Score | Mr(calc):   | Delta     | Sequence                             |
|-------|-------------|-----------|--------------------------------------|
| 35.6  | 2115.020752 | 0.004010  | <a href="#">AEDHFSVIDFNQIR</a>       |
| 7.6   | 2115.027237 | -0.002475 | <a href="#">KYS DYIKGSNLD APEPYR</a> |

Mascot: <http://www.matrixscience.com/>



# MASCOT Search Results

## Peptide View

MS/MS Fragmentation of **MLADAPPQDPSCCSGALYYGSK**

Found in **ITIH2\_HUMAN**, Inter-alpha-trypsin inhibitor heavy chain H2 OS=Homo sapiens GN=ITIH2 PE=1 SV=2

Match to Query 70616: 2698.203642 from(900.408490,3+) rtinseconds(2091) index(63671)

Title: Locus:1.1.1.2725.17 File:"2013-07-02 CLN FXIII 30 min 1st F 4.wiff"

Data file C:\Program Files (x86)\Matrix Science\Mascot Daemon\mgf1 FXIII 30 min 1st\mascot\_daemon\_merge.mgf

Click mouse within plot area to zoom in by factor of two about that point

Or, Plot from  to  Da

Label all possible matches  Label matches used for scoring

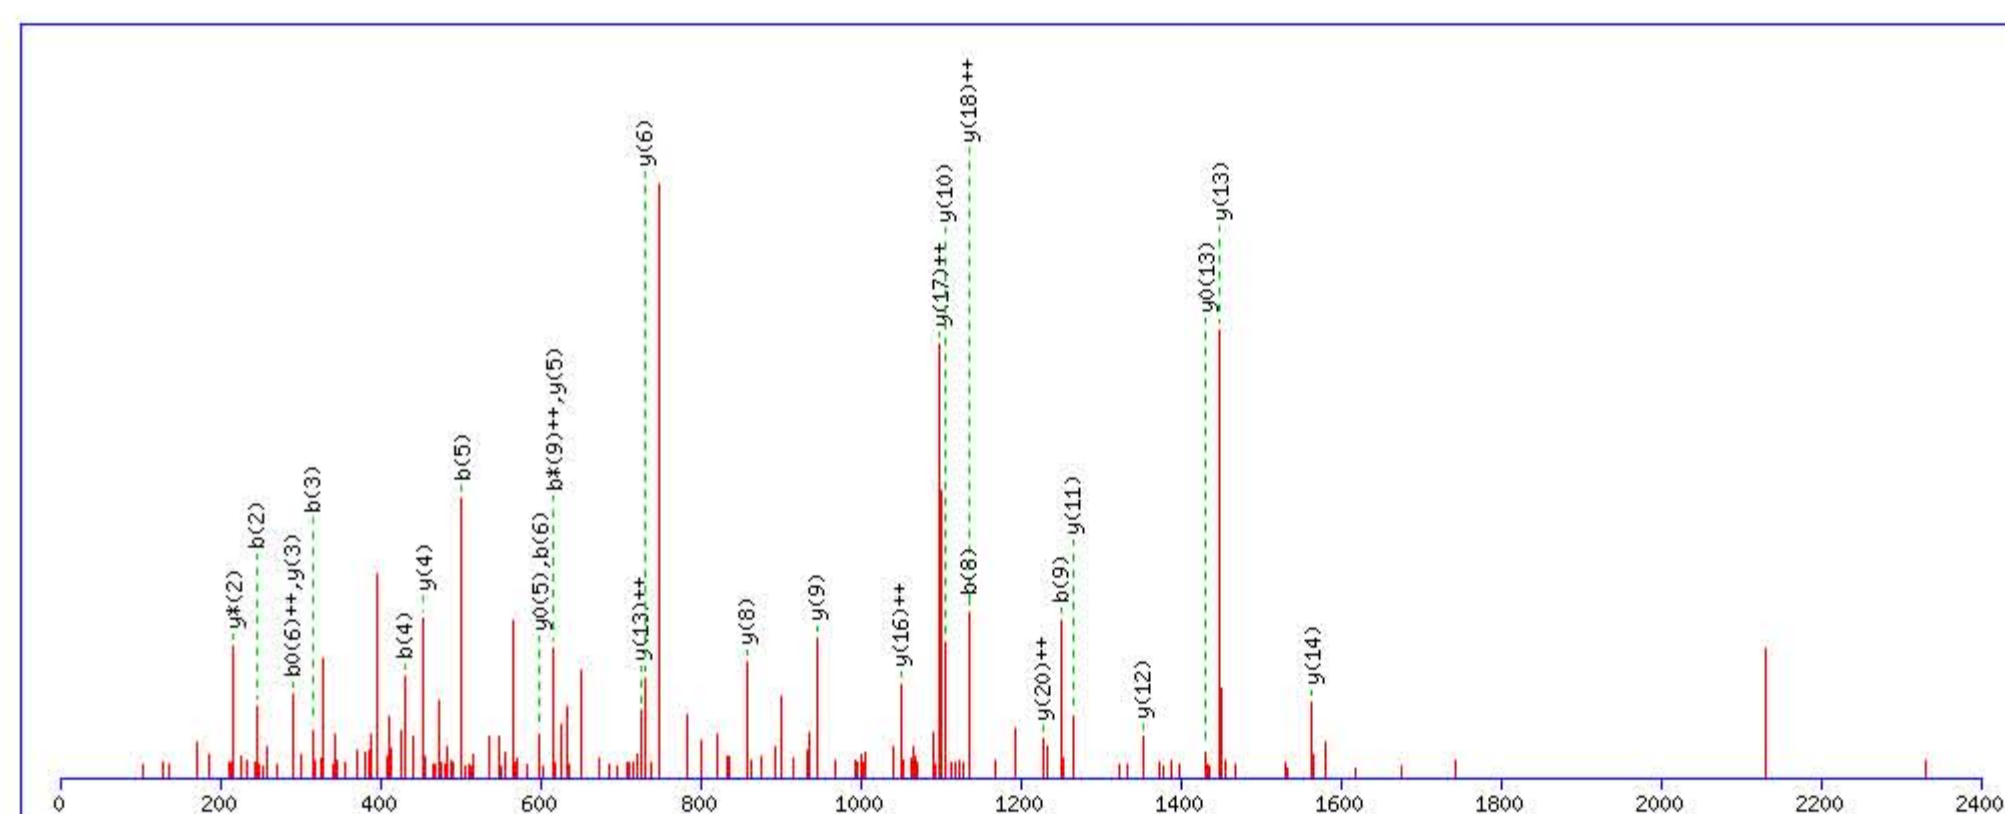

Monoisotopic mass of neutral peptide Mr(calc): 2698.189941

Fixed modifications: Carbamidomethyl (C) (apply to specified residues or termini only)

Variable modifications:

Q8 : Biotin:Thermo-21345 (Q)

Ions Score: 61 Expect: 6.9e-006

Matches : 28/230 fragment ions using 50 most intense peaks [\(help\)](#)

| #  | b                  | b <sup>++</sup> | b <sup>*</sup> | b <sup>*++</sup>  | b <sup>0</sup> | b <sup>0++</sup>  | Seq. | y                  | y <sup>++</sup>    | y <sup>*</sup>    | y <sup>*++</sup> | y <sup>0</sup>     | y <sup>0++</sup> | #  |
|----|--------------------|-----------------|----------------|-------------------|----------------|-------------------|------|--------------------|--------------------|-------------------|------------------|--------------------|------------------|----|
| 1  | 132.047761         | 66.527518       |                |                   |                |                   | M    |                    |                    |                   |                  |                    |                  | 22 |
| 2  | <b>245.131825</b>  | 123.069550      |                |                   |                |                   | L    | 2568.156746        | 1284.582011        | 2551.130197       | 1276.068736      | 2550.146181        | 1275.576728      | 21 |
| 3  | <b>316.168939</b>  | 158.588107      |                |                   |                |                   | A    | 2455.072682        | <b>1228.039979</b> | 2438.046133       | 1219.526704      | 2437.062117        | 1219.034696      | 20 |
| 4  | <b>431.195882</b>  | 216.101579      |                |                   | 413.185317     | 207.096296        | D    | 2384.035568        | 1192.521422        | 2367.009019       | 1184.008148      | 2366.025003        | 1183.516140      | 19 |
| 5  | <b>502.232996</b>  | 251.620136      |                |                   | 484.222431     | 242.614854        | A    | 2269.008625        | <b>1135.007950</b> | 2251.982076       | 1126.494676      | 2250.998060        | 1126.002668      | 18 |
| 6  | <b>599.285760</b>  | 300.146518      |                |                   | 581.275195     | <b>291.141236</b> | P    | 2197.971511        | <b>1099.489394</b> | 2180.944962       | 1090.976119      | 2179.960946        | 1090.484111      | 17 |
| 7  | 696.338524         | 348.672900      |                |                   | 678.327959     | 339.667618        | P    | 2100.918747        | <b>1050.963012</b> | 2083.892198       | 1042.449737      | 2082.908182        | 1041.957729      | 16 |
| 8  | <b>1135.563850</b> | 568.285563      | 1118.537301    | 559.772289        | 1117.553285    | 559.280281        | Q    | 2003.865983        | 1002.436630        | 1986.839434       | 993.923355       | 1985.855418        | 993.431347       | 15 |
| 9  | <b>1250.590793</b> | 625.799035      | 1233.564244    | <b>617.285760</b> | 1232.580228    | 616.793752        | D    | <b>1564.640657</b> | 782.823967         | 1547.614108       | 774.310692       | 1546.630092        | 773.818684       | 14 |
| 10 | 1347.643557        | 674.325417      | 1330.617008    | 665.812142        | 1329.632992    | 665.320134        | P    | <b>1449.613714</b> | <b>725.310495</b>  | 1432.587165       | 716.797221       | <b>1431.603149</b> | 716.305213       | 13 |
| 11 | 1434.675585        | 717.841431      | 1417.649036    | 709.328156        | 1416.665020    | 708.836148        | S    | <b>1352.560950</b> | 676.784113         | 1335.534401       | 668.270839       | 1334.550385        | 667.778831       | 12 |
| 12 | 1594.706234        | 797.856755      | 1577.679685    | 789.343481        | 1576.695669    | 788.851473        | C    | <b>1265.528922</b> | 633.268099         | 1248.502373       | 624.754825       | 1247.518357        | 624.262817       | 11 |
| 13 | 1754.736883        | 877.872080      | 1737.710334    | 869.358805        | 1736.726318    | 868.866797        | C    | <b>1105.498273</b> | 553.252775         | 1088.471724       | 544.739500       | 1087.487708        | 544.247492       | 10 |
| 14 | 1841.768911        | 921.388094      | 1824.742362    | 912.874819        | 1823.758346    | 912.382811        | S    | <b>945.467624</b>  | 473.237450         | 928.441075        | 464.724176       | 927.457059         | 464.232168       | 9  |
| 15 | 1898.790375        | 949.898826      | 1881.763826    | 941.385551        | 1880.779810    | 940.893543        | G    | <b>858.435596</b>  | 429.721436         | 841.409047        | 421.208162       | 840.425031         | 420.716154       | 8  |
| 16 | 1969.827489        | 985.417383      | 1952.800940    | 976.904108        | 1951.816924    | 976.412100        | A    | 801.414132         | 401.210704         | 784.387583        | 392.697430       | 783.403567         | 392.205422       | 7  |
| 17 | 2082.911553        | 1041.959415     | 2065.885004    | 1033.446140       | 2064.900988    | 1032.954132       | L    | <b>730.377018</b>  | 365.692147         | 713.350469        | 357.178873       | 712.366453         | 356.686865       | 6  |
| 18 | 2245.974882        | 1123.491079     | 2228.948333    | 1114.977805       | 2227.964317    | 1114.485797       | Y    | <b>617.292954</b>  | 309.150115         | 600.266405        | 300.636841       | <b>599.282389</b>  | 300.144833       | 5  |
| 19 | 2409.038211        | 1205.022744     | 2392.011662    | 1196.509469       | 2391.027646    | 1196.017461       | Y    | <b>454.229625</b>  | 227.618451         | 437.203076        | 219.105176       | 436.219060         | 218.613168       | 4  |
| 20 | 2466.059675        | 1233.533476     | 2449.033126    | 1225.020201       | 2448.049110    | 1224.528193       | G    | <b>291.166296</b>  | 146.086786         | 274.139747        | 137.573512       | 273.155731         | 137.081504       | 3  |
| 21 | 2553.091703        | 1277.049490     | 2536.065154    | 1268.536215       | 2535.081138    | 1268.044207       | S    | 234.144832         | 117.576054         | <b>217.118283</b> | 109.062780       | 216.134267         | 108.570772       | 2  |
| 22 |                    |                 |                |                   |                |                   | K    | 147.112804         | 74.060040          | 130.086255        | 65.546765        |                    |                  | 1  |

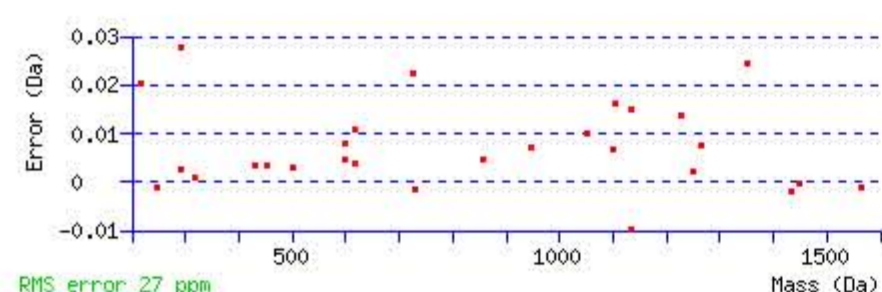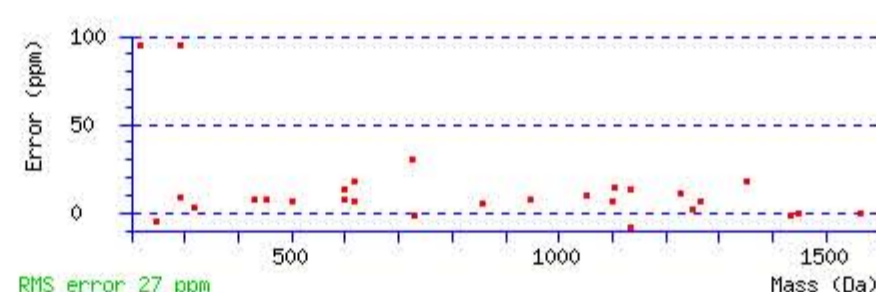

NCBI BLAST search of **MLADAPPQDPSCCSGALYYGSK**

(Parameters: blastp, nr protein database, expect=20000, no filter, PAM30)

Other BLAST [web gateways](#)

All matches to this query

| Score | Mr(calc):   | Delta    | Sequence                      |
|-------|-------------|----------|-------------------------------|
| 60.5  | 2698.189941 | 0.013701 | <b>MLADAPPQDPSCCSGALYYGSK</b> |

Mascot: <http://www.matrixscience.com/>



# MASCOT Search Results

## Peptide View

MS/MS Fragmentation of **SILQMSLDHHIVTPLTSLVIENEAGDER**

Found in **ITIH2\_HUMAN**, Inter-alpha-trypsin inhibitor heavy chain H2 OS=Homo sapiens GN=ITIH2 PE=1 SV=2

Match to Query 79291: 3443.762896 from(861.948000,4+) rtinseconds(2612) index(66855)

Title: Locus:1.1.1.2906.20 File:"2013-07-02 CLN FXIII 30 min 1st F 4.wiff"

Data file C:\Program Files (x86)\Matrix Science\Mascot Daemon\mgf\1 FXIII 30 min 1st\mascot\_daemon\_merge.mgf

Click mouse within plot area to zoom in by factor of two about that point

Or, Plot from  to  Da

Label all possible matches  Label matches used for scoring

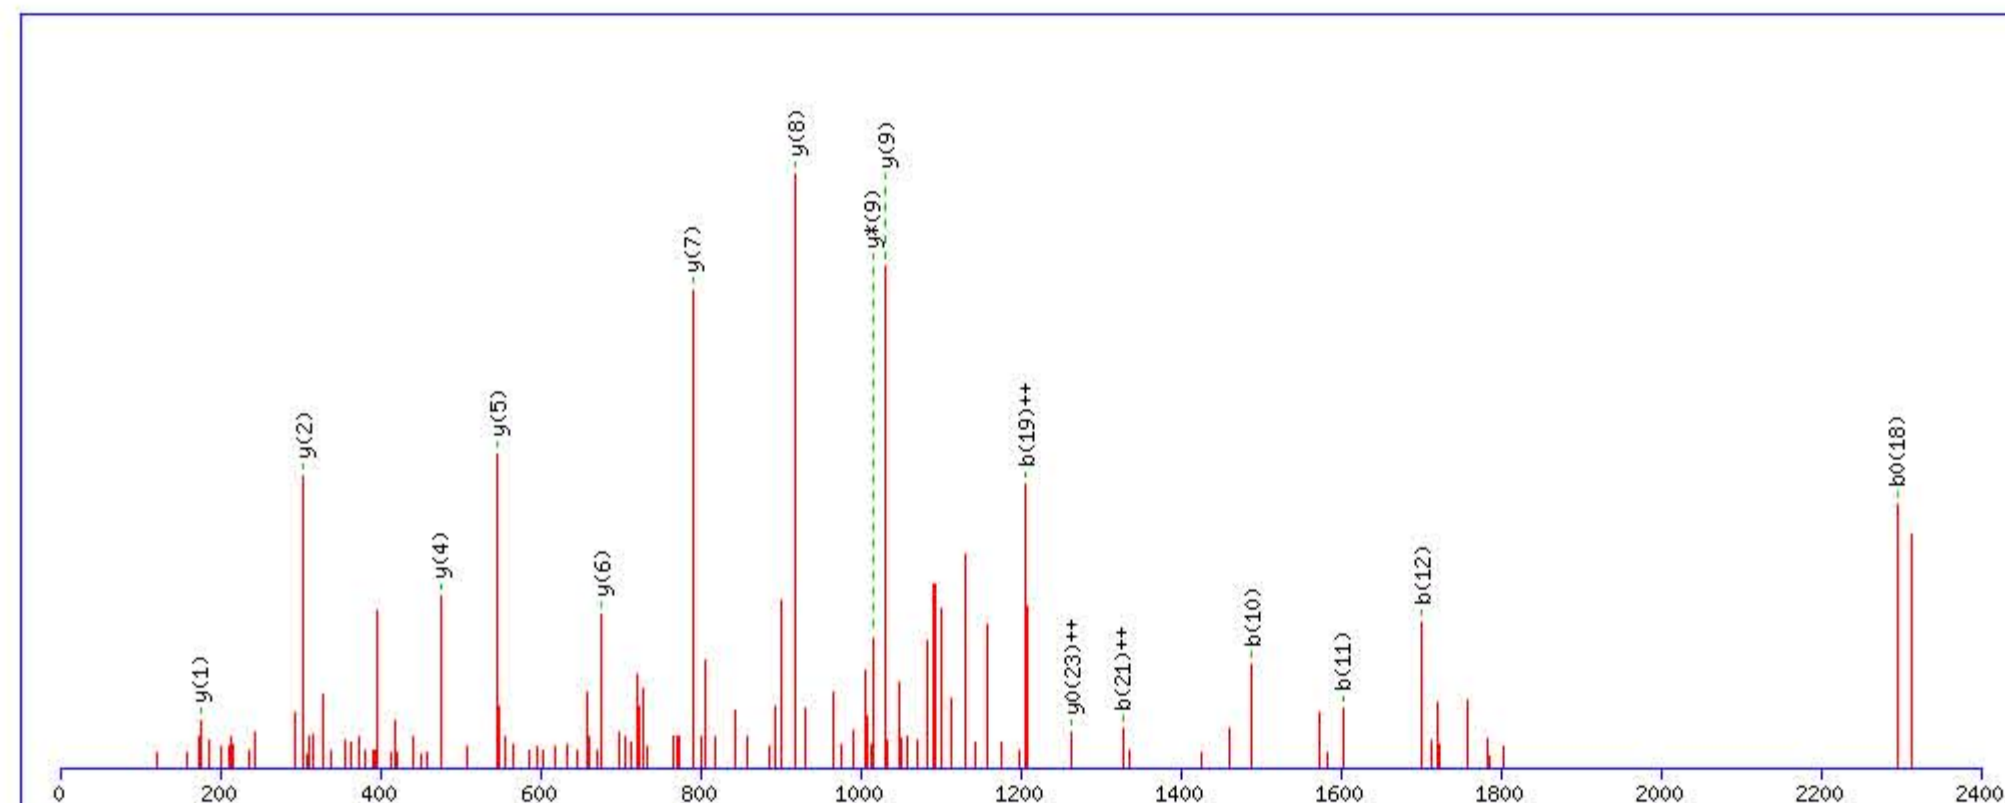

Monoisotopic mass of neutral peptide Mr(calc): 3443.742859

Fixed modifications: Carbamidomethyl (C) (apply to specified residues or termini only)

Variable modifications:

Q4 : Biotin:Thermo-21345 (Q)

M5 : Oxidation (M), with neutral losses 0.000000 (shown in table), 63.998285

Ions Score: 58 Expect: 3.8e-006

Matches : 16/478 fragment ions using 18 most intense peaks [\(help\)](#)

| #  | b                  | b <sup>++</sup>    | b <sup>*</sup> | b <sup>*++</sup> | b <sup>0</sup>     | b <sup>0++</sup> | Seq. | y                  | y <sup>++</sup> | y <sup>*</sup>     | y <sup>*++</sup> | y <sup>0</sup> | y <sup>0++</sup> | #  |
|----|--------------------|--------------------|----------------|------------------|--------------------|------------------|------|--------------------|-----------------|--------------------|------------------|----------------|------------------|----|
| 1  | 88.039304          | 44.523290          |                |                  | 70.028739          | 35.518008        | S    |                    |                 |                    |                  |                |                  | 28 |
| 2  | 201.123368         | 101.065322         |                |                  | 183.112803         | 92.060039        | I    | 3357.718126        | 1679.362701     | 3340.691577        | 1670.849426      | 3339.707561    | 1670.357418      | 27 |
| 3  | 314.207432         | 157.607354         |                |                  | 296.196867         | 148.602071       | L    | 3244.634062        | 1622.820669     | 3227.607513        | 1614.307394      | 3226.623497    | 1613.815386      | 26 |
| 4  | 753.432758         | 377.220017         | 736.406209     | 368.706743       | 735.422193         | 368.214735       | Q    | 3131.549998        | 1566.278637     | 3114.523449        | 1557.765362      | 3113.539433    | 1557.273354      | 25 |
| 5  | 900.468158         | 450.737717         | 883.441609     | 442.224443       | 882.457593         | 441.732435       | M    | 2692.324672        | 1346.665974     | 2675.298123        | 1338.152699      | 2674.314107    | 1337.660691      | 24 |
| 6  | 987.500186         | 494.253731         | 970.473637     | 485.740456       | 969.489621         | 485.248448       | S    | 2545.289272        | 1273.148274     | 2528.262723        | 1264.634999      | 2527.278707    | 1264.142991      | 23 |
| 7  | 1100.584250        | 550.795763         | 1083.557701    | 542.282489       | 1082.573685        | 541.790480       | L    | 2458.257244        | 1229.632260     | 2441.230695        | 1221.118985      | 2440.246679    | 1220.626977      | 22 |
| 8  | 1215.611193        | 608.309235         | 1198.584644    | 599.795960       | 1197.600628        | 599.303952       | D    | 2345.173180        | 1173.090228     | 2328.146631        | 1164.576953      | 2327.162615    | 1164.084945      | 21 |
| 9  | 1352.670105        | 676.838690         | 1335.643556    | 668.325416       | 1334.659540        | 667.833408       | H    | 2230.146237        | 1115.576756     | 2213.119688        | 1107.063482      | 2212.135672    | 1106.571474      | 20 |
| 10 | <b>1489.729017</b> | 745.368146         | 1472.702468    | 736.854872       | 1471.718452        | 736.362864       | H    | 2093.087325        | 1047.047300     | 2076.060776        | 1038.534026      | 2075.076760    | 1038.042018      | 19 |
| 11 | <b>1602.813081</b> | 801.910178         | 1585.786532    | 793.396904       | 1584.802516        | 792.904896       | I    | 1956.028413        | 978.517845      | 1939.001864        | 970.004570       | 1938.017848    | 969.512562       | 18 |
| 12 | <b>1701.881495</b> | 851.444385         | 1684.854946    | 842.931111       | 1683.870930        | 842.439103       | V    | 1842.944349        | 921.975813      | 1825.917800        | 913.462538       | 1824.933784    | 912.970530       | 17 |
| 13 | 1802.929174        | 901.968225         | 1785.902625    | 893.454951       | 1784.918609        | 892.962942       | T    | 1743.875935        | 872.441606      | 1726.849386        | 863.928331       | 1725.865370    | 863.436323       | 16 |
| 14 | 1899.981938        | 950.494607         | 1882.955389    | 941.981333       | 1881.971373        | 941.489324       | P    | 1642.828256        | 821.917766      | 1625.801707        | 813.404492       | 1624.817691    | 812.912484       | 15 |
| 15 | 2013.066002        | 1007.036639        | 1996.039453    | 998.523364       | 1995.055437        | 998.031356       | L    | 1545.775492        | 773.391384      | 1528.748943        | 764.878110       | 1527.764927    | 764.386102       | 14 |
| 16 | 2114.113681        | 1057.560478        | 2097.087132    | 1049.047204      | 2096.103116        | 1048.555196      | T    | 1432.691428        | 716.849352      | 1415.664879        | 708.336078       | 1414.680863    | 707.844070       | 13 |
| 17 | 2201.145709        | 1101.076492        | 2184.119160    | 1092.563218      | 2183.135144        | 1092.071210      | S    | 1331.643749        | 666.325513      | 1314.617200        | 657.812238       | 1313.633184    | 657.320230       | 12 |
| 18 | 2314.229773        | 1157.618524        | 2297.203224    | 1149.105250      | <b>2296.219208</b> | 1148.613242      | L    | 1244.611721        | 622.809499      | 1227.585172        | 614.296224       | 1226.601156    | 613.804216       | 11 |
| 19 | 2413.298187        | <b>1207.152731</b> | 2396.271638    | 1198.639457      | 2395.287622        | 1198.147449      | V    | 1131.527657        | 566.267467      | 1114.501108        | 557.754192       | 1113.517092    | 557.262184       | 10 |
| 20 | 2526.382251        | 1263.694763        | 2509.355702    | 1255.181489      | 2508.371686        | 1254.689481      | I    | <b>1032.459243</b> | 516.733260      | <b>1015.432694</b> | 508.219985       | 1014.448678    | 507.727977       | 9  |
| 21 | 2655.424844        | <b>1328.216060</b> | 2638.398295    | 1319.702785      | 2637.414279        | 1319.210777      | E    | <b>919.375179</b>  | 460.191228      | 902.348630         | 451.677953       | 901.364614     | 451.185945       | 8  |
| 22 | 2769.467771        | 1385.237523        | 2752.441222    | 1376.724249      | 2751.457206        | 1376.232241      | N    | <b>790.332586</b>  | 395.669931      | 773.306037         | 387.156657       | 772.322021     | 386.664649       | 7  |
| 23 | 2898.510364        | 1449.758820        | 2881.483815    | 1441.245545      | 2880.499799        | 1440.753537      | E    | <b>676.289659</b>  | 338.648468      | 659.263110         | 330.135193       | 658.279094     | 329.643185       | 6  |
| 24 | 2969.547478        | 1485.277377        | 2952.520929    | 1476.764102      | 2951.536913        | 1476.272094      | A    | <b>547.247066</b>  | 274.127171      | 530.220517         | 265.613897       | 529.236501     | 265.121889       | 5  |
| 25 | 3026.568942        | 1513.788109        | 3009.542393    | 1505.274834      | 3008.558377        | 1504.782826      | G    | <b>476.209952</b>  | 238.608614      | 459.183403         | 230.095339       | 458.199387     | 229.603331       | 4  |
| 26 | 3141.595885        | 1571.301580        | 3124.569336    | 1562.788306      | 3123.585320        | 1562.296298      | D    | 419.188488         | 210.097882      | 402.161939         | 201.584607       | 401.177923     | 201.092599       | 3  |
| 27 | 3270.638478        | 1635.822877        | 3253.611929    | 1627.309602      | 3252.627913        | 1626.817594      | E    | <b>304.161545</b>  | 152.584411      | 287.134996         | 144.071136       | 286.150980     | 143.579128       | 2  |
| 28 |                    |                    |                |                  |                    |                  | R    | <b>175.118952</b>  | 88.063114       | 158.092403         | 79.549839        |                |                  | 1  |

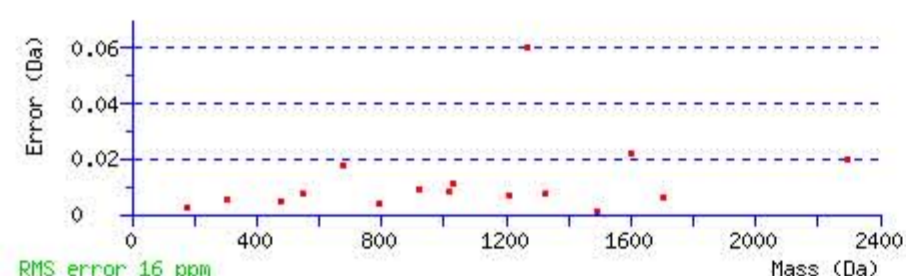

NCBI BLAST search of **SILQMSLDHHIVTPLTSLVIENEAGDER**

(Parameters: blastp, nr protein database, expect=20000, no filter, PAM30)

Other BLAST [web gateways](#)

All matches to this query

| Score | Mr(calc):   | Delta    | Sequence                                          |
|-------|-------------|----------|---------------------------------------------------|
| 57.9  | 3443.742859 | 0.020037 | <a href="#">SILQMSLDHHIVTPLTSLVIENEAGDER</a>      |
| 0.1   | 3443.760620 | 0.002276 | <a href="#">AIVNSALKLYSQDKTGMVDFALESGGGSILSTR</a> |

Mascot: <http://www.matrixscience.com/>



# MASCOT Search Results

## Peptide View

MS/MS Fragmentation of **NVQFNYPHTSVTDVDTQNNFHNYFGGSEIVVAGK**  
 Found in **ITIH2\_HUMAN**, Inter-alpha-trypsin inhibitor heavy chain H2 OS=Homo sapiens GN=ITIH2 PE=1 SV=2

Match to Query 82544: 3993.930256 from(999.489840,4+) rtinseconds(2364) index(65447)  
 Title: Locus:1.1.1.2820.21 File:"2013-07-02 CLN FXIII 30 min 1st F 4.wiff"  
 Data file C:\Program Files (x86)\Matrix Science\Mascot Daemon\mgf\1 FXIII 30 min 1st\mascot\_daemon\_merge.mgf

Click mouse within plot area to zoom in by factor of two about that point

Or, Plot from  to  Da

Label all possible matches  Label matches used for scoring

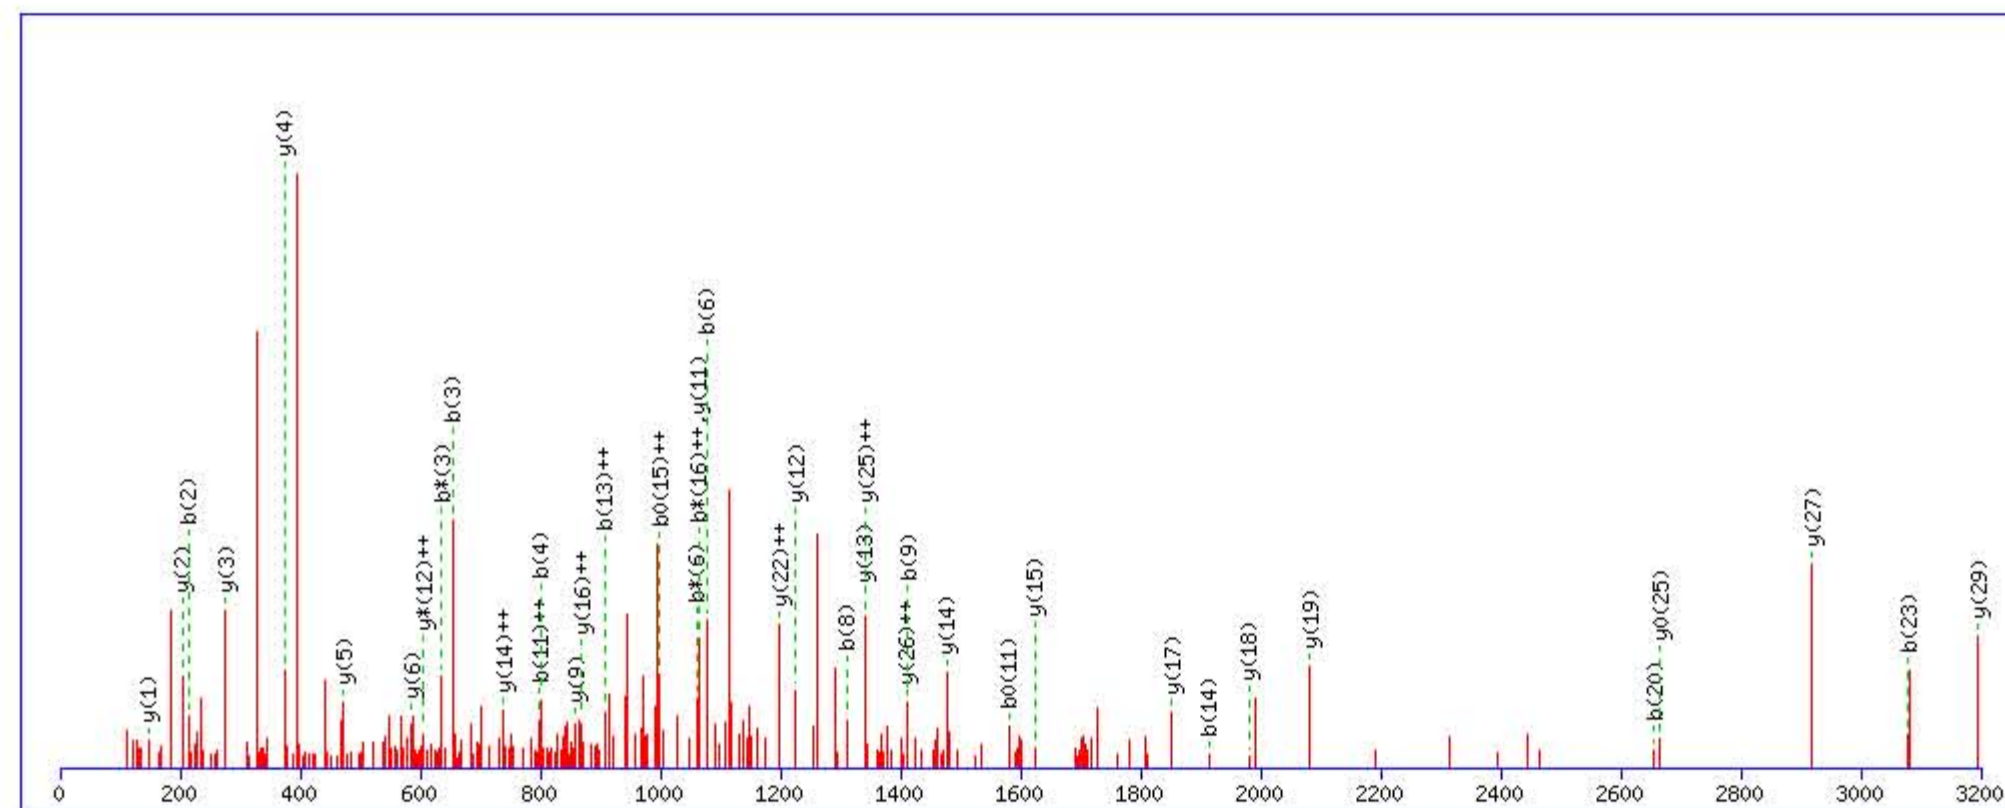

Monoisotopic mass of neutral peptide Mr(calc): 3993.910858  
 Fixed modifications: Carbamidomethyl (C) (apply to specified residues or termini only)  
 Variable modifications:  
 Q3 : Biotin:Thermo-21345 (Q)  
 Ions Score: 59 Expect: 2.7e-005  
 Matches : 40/356 fragment ions using 102 most intense peaks ([help](#))

| #  | b                  | b <sup>++</sup>   | b*                 | b <sup>+++</sup>   | b <sup>0</sup>     | b <sup>0++</sup>  | Seq. | y                  | y <sup>++</sup>    | y*          | y <sup>+++</sup>  | y <sup>0</sup>     | y <sup>0++</sup> | #  |
|----|--------------------|-------------------|--------------------|--------------------|--------------------|-------------------|------|--------------------|--------------------|-------------|-------------------|--------------------|------------------|----|
| 1  | 115.050203         | 58.028740         | 98.023654          | 49.515465          |                    |                   | N    |                    |                    |             |                   |                    |                  | 33 |
| 2  | <b>214.118617</b>  | 107.562947        | 197.092068         | 99.049672          |                    |                   | V    | 3880.875173        | 1940.941224        | 3863.848624 | 1932.427950       | 3862.864608        | 1931.935942      | 32 |
| 3  | <b>653.343943</b>  | 327.175610        | <b>636.317394</b>  | 318.662335         |                    |                   | Q    | 3781.806759        | 1891.407017        | 3764.780210 | 1882.893743       | 3763.796194        | 1882.401735      | 31 |
| 4  | <b>800.412357</b>  | 400.709817        | 783.385808         | 392.196542         |                    |                   | F    | 3342.581433        | 1671.794354        | 3325.554884 | 1663.281080       | 3324.570868        | 1662.789072      | 30 |
| 5  | 914.455284         | 457.731280        | 897.428735         | 449.218006         |                    |                   | N    | <b>3195.513019</b> | 1598.260147        | 3178.486470 | 1589.746873       | 3177.502454        | 1589.254865      | 29 |
| 6  | <b>1077.518613</b> | 539.262945        | <b>1060.492064</b> | 530.749670         |                    |                   | Y    | 3081.470092        | 1541.238684        | 3064.443543 | 1532.725409       | 3063.459527        | 1532.233401      | 28 |
| 7  | 1174.571377        | 587.789327        | 1157.544828        | 579.276052         |                    |                   | P    | <b>2918.406763</b> | 1459.707019        | 2901.380214 | 1451.193745       | 2900.396198        | 1450.701737      | 27 |
| 8  | <b>1311.630289</b> | 656.318783        | 1294.603740        | 647.805508         |                    |                   | H    | 2821.353999        | <b>1411.180637</b> | 2804.327450 | 1402.667363       | 2803.343434        | 1402.175355      | 26 |
| 9  | <b>1412.677968</b> | 706.842622        | 1395.651419        | 698.329348         | 1394.667403        | 697.837339        | T    | 2684.295087        | <b>1342.651181</b> | 2667.268538 | 1334.137907       | <b>2666.284522</b> | 1333.645899      | 25 |
| 10 | 1499.709996        | 750.358636        | 1482.683447        | 741.845362         | 1481.699431        | 741.353354        | S    | 2583.247408        | 1292.127342        | 2566.220859 | 1283.614067       | 2565.236843        | 1283.122059      | 24 |
| 11 | 1598.778410        | <b>799.892843</b> | 1581.751861        | 791.379569         | <b>1580.767845</b> | 790.887561        | V    | 2496.215380        | 1248.611328        | 2479.188831 | 1240.098053       | 2478.204815        | 1239.606045      | 23 |
| 12 | 1699.826089        | 850.416683        | 1682.799540        | 841.903408         | 1681.815524        | 841.411400        | T    | 2397.146966        | <b>1199.077121</b> | 2380.120417 | 1190.563846       | 2379.136401        | 1190.071838      | 22 |
| 13 | 1814.853032        | <b>907.930154</b> | 1797.826483        | 899.416880         | 1796.842467        | 898.924872        | D    | 2296.099287        | 1148.553281        | 2279.072738 | 1140.040007       | 2278.088722        | 1139.547999      | 21 |
| 14 | <b>1913.921446</b> | 957.464361        | 1896.894897        | 948.951087         | 1895.910881        | 948.459079        | V    | 2181.072344        | 1091.039810        | 2164.045795 | 1082.526535       | 2163.061779        | 1082.034527      | 20 |
| 15 | 2014.969125        | 1007.988201       | 1997.942576        | 999.474926         | 1996.958560        | <b>998.982918</b> | T    | <b>2082.003930</b> | 1041.505603        | 2064.977381 | 1032.992328       | 2063.993365        | 1032.500320      | 19 |
| 16 | 2143.027703        | 1072.017490       | 2126.001154        | <b>1063.504215</b> | 2125.017138        | 1063.012207       | Q    | <b>1980.956251</b> | 990.981763         | 1963.929702 | 982.468489        | 1962.945686        | 981.976481       | 18 |
| 17 | 2257.070630        | 1129.038953       | 2240.044081        | 1120.525678        | 2239.060065        | 1120.033671       | N    | <b>1852.897673</b> | 926.952474         | 1835.871124 | 918.439200        | 1834.887108        | 917.947192       | 17 |
| 18 | 2371.113557        | 1186.060417       | 2354.087008        | 1177.547142        | 2353.102992        | 1177.055134       | N    | 1738.854746        | <b>869.931011</b>  | 1721.828197 | 861.417736        | 1720.844181        | 860.925728       | 16 |
| 19 | 2518.181971        | 1259.594623       | 2501.155422        | 1251.081349        | 2500.171406        | 1250.589341       | F    | <b>1624.811819</b> | 812.909547         | 1607.785270 | 804.396273        | 1606.801254        | 803.904265       | 15 |
| 20 | <b>2655.240883</b> | 1328.124079       | 2638.214334        | 1319.610805        | 2637.230318        | 1319.118797       | H    | <b>1477.743405</b> | <b>739.375340</b>  | 1460.716856 | 730.862066        | 1459.732840        | 730.370058       | 14 |
| 21 | 2769.283810        | 1385.145543       | 2752.257261        | 1376.632268        | 2751.273245        | 1376.140260       | N    | <b>1340.684493</b> | 670.845885         | 1323.657944 | 662.332610        | 1322.673928        | 661.840602       | 13 |
| 22 | 2932.347139        | 1466.677207       | 2915.320590        | 1458.163933        | 2914.336574        | 1457.671925       | Y    | <b>1226.641566</b> | 613.824421         | 1209.615017 | <b>605.311147</b> | 1208.631001        | 604.819139       | 12 |
| 23 | <b>3079.415553</b> | 1540.211414       | 3062.389004        | 1531.698140        | 3061.404988        | 1531.206132       | F    | <b>1063.578237</b> | 532.292757         | 1046.551688 | 523.779482        | 1045.567672        | 523.287474       | 11 |
| 24 | 3136.437017        | 1568.722146       | 3119.410468        | 1560.208872        | 3118.426452        | 1559.716864       | G    | 916.509823         | 458.758550         | 899.483274  | 450.245275        | 898.499258         | 449.753267       | 10 |
| 25 | 3193.458481        | 1597.232878       | 3176.431932        | 1588.719604        | 3175.447916        | 1588.227596       | G    | <b>859.488359</b>  | 430.247818         | 842.461810  | 421.734543        | 841.477794         | 421.242535       | 9  |
| 26 | 3280.490509        | 1640.748892       | 3263.463960        | 1632.235618        | 3262.479944        | 1631.743610       | S    | 802.466895         | 401.737086         | 785.440346  | 393.223811        | 784.456330         | 392.731803       | 8  |
| 27 | 3409.533102        | 1705.270189       | 3392.506553        | 1696.756914        | 3391.522537        | 1696.264906       | E    | 715.434867         | 358.221072         | 698.408318  | 349.707797        | 697.424302         | 349.215789       | 7  |
| 28 | 3522.617166        | 1761.812221       | 3505.590617        | 1753.298946        | 3504.606601        | 1752.806938       | I    | <b>586.392274</b>  | 293.699775         | 569.365725  | 285.186501        |                    |                  | 6  |
| 29 | 3621.685580        | 1811.346428       | 3604.659031        | 1802.833153        | 3603.675015        | 1802.341145       | V    | <b>473.308210</b>  | 237.157743         | 456.281661  | 228.644468        |                    |                  | 5  |
| 30 | 3720.753994        | 1860.880635       | 3703.727445        | 1852.367360        | 3702.743429        | 1851.875352       | V    | <b>374.239796</b>  | 187.623536         | 357.213247  | 179.110261        |                    |                  | 4  |
| 31 | 3791.791108        | 1896.399192       | 3774.764559        | 1887.885917        | 3773.780543        | 1887.393909       | A    | <b>275.171382</b>  | 138.089329         | 258.144833  | 129.576055        |                    |                  | 3  |
| 32 | 3848.812572        | 1924.909924       | 3831.786023        | 1916.396649        | 3830.802007        | 1915.904641       | G    | <b>204.134268</b>  | 102.570772         | 187.107719  | 94.057497         |                    |                  | 2  |
| 33 |                    |                   |                    |                    |                    |                   | K    | <b>147.112804</b>  | 74.060040          | 130.086255  | 65.546765         |                    |                  | 1  |

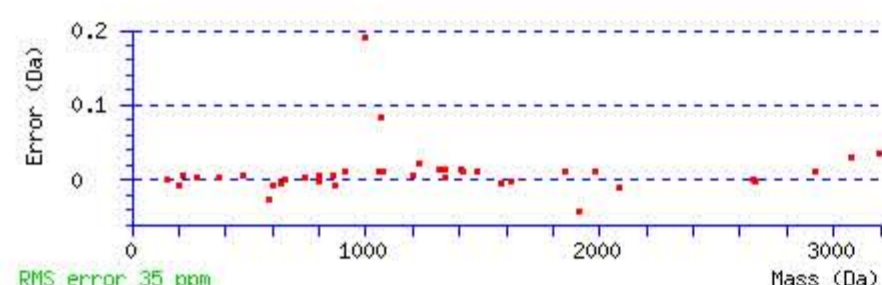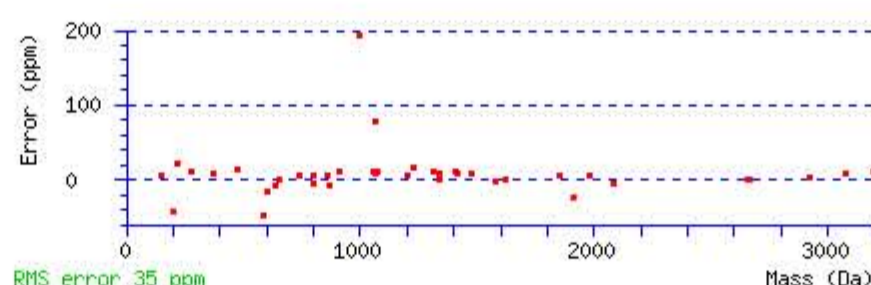

NCBI BLAST search of **NVQFNYPHTSVTDVDTQNNFHNYFGGSEIVVAGK**  
 (Parameters: blastp, nr protein database, expect=20000, no filter, PAM30)  
 Other BLAST [web gateways](#)

## All matches to this query

| Score | Mr(calc):   | Delta    | Sequence                                           |
|-------|-------------|----------|----------------------------------------------------|
| 59.1  | 3993.910858 | 0.019398 | <a href="#">NVQFNYPHTSVTDVDTQNNFHNYFGGSEIVVAGK</a> |
| 14.6  | 3993.910858 | 0.019398 | <a href="#">NVQFNYPHTSVTDVDTQNNFHNYFGGSEIVVAGK</a> |



# MASCOT Search Results

## Peptide View

MS/MS Fragmentation of **GHVSFKPSLDQQR**

Found in **ITIH3\_HUMAN**, Inter-alpha-trypsin inhibitor heavy chain H3 OS=Homo sapiens GN=ITIH3 PE=1 SV=2

Match to Query 52341: 1808.929512 from(603.983780,3+) rtinseconds(1551) index(59911)

Title: Locus:1.1.1.2538.9 File:"2013-07-02 CLN FXIII 30 min 1st F 4.wiff"

Data file C:\Program Files (x86)\Matrix Science\Mascot Daemon\mgf1 FXIII 30 min 1st\mascot\_daemon\_merge.mgf

Click mouse within plot area to zoom in by factor of two about that point

Or, Plot from  to  Da

Label all possible matches  Label matches used for scoring

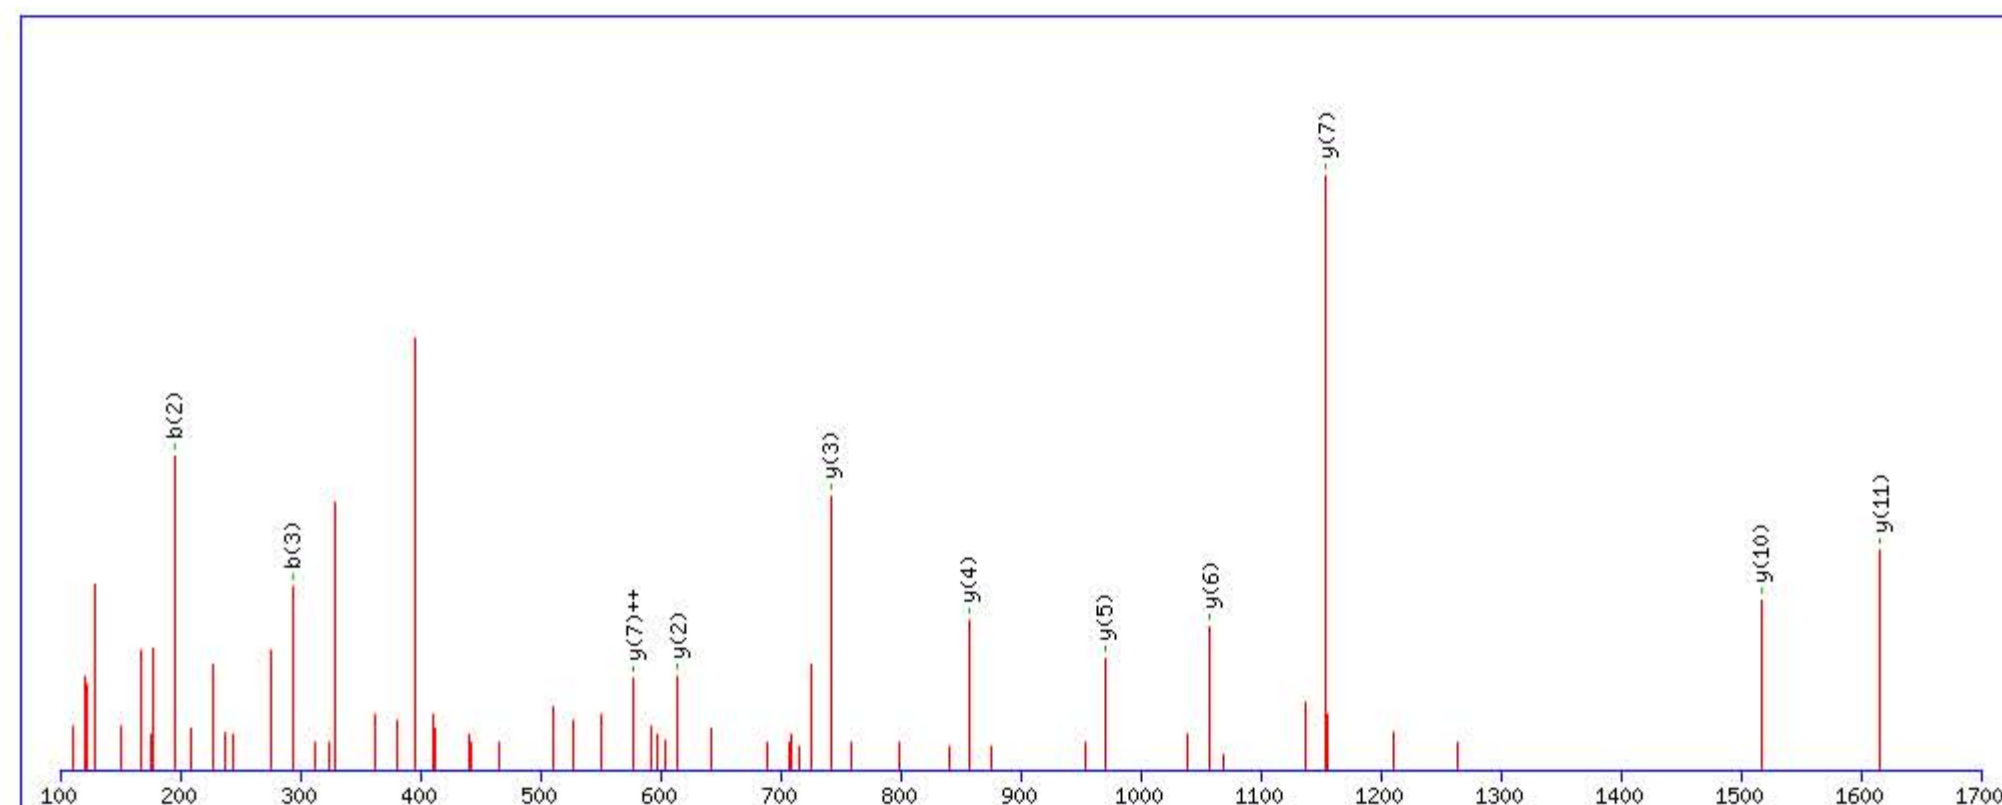

Monoisotopic mass of neutral peptide Mr(calc): 1808.935577

Fixed modifications: Carbamidomethyl (C) (apply to specified residues or termini only)

Variable modifications:

Q12 : Biotin:Thermo-21345 (Q)

Ions Score: 65 Expect: 8.3e-006

Matches : 11/122 fragment ions using 14 most intense peaks [\(help\)](#)

| #  | b                 | b <sup>++</sup> | b <sup>*</sup> | b <sup>*++</sup> | b <sup>0</sup> | b <sup>0++</sup> | Seq. | y                  | y <sup>++</sup>   | y <sup>*</sup> | y <sup>*++</sup> | y <sup>0</sup> | y <sup>0++</sup> | #  |
|----|-------------------|-----------------|----------------|------------------|----------------|------------------|------|--------------------|-------------------|----------------|------------------|----------------|------------------|----|
| 1  | 58.028740         | 29.518008       |                |                  |                |                  | G    |                    |                   |                |                  |                |                  | 13 |
| 2  | <b>195.087652</b> | 98.047464       |                |                  |                |                  | H    | 1752.921386        | 876.964331        | 1735.894837    | 868.451057       | 1734.910821    | 867.959049       | 12 |
| 3  | <b>294.156066</b> | 147.581671      |                |                  |                |                  | V    | <b>1615.862474</b> | 808.434875        | 1598.835925    | 799.921601       | 1597.851909    | 799.429593       | 11 |
| 4  | 381.188094        | 191.097685      |                |                  | 363.177529     | 182.092403       | S    | <b>1516.794060</b> | 758.900668        | 1499.767511    | 750.387394       | 1498.783495    | 749.895386       | 10 |
| 5  | 528.256508        | 264.631892      |                |                  | 510.245943     | 255.626610       | F    | 1429.762032        | 715.384654        | 1412.735483    | 706.871380       | 1411.751467    | 706.379372       | 9  |
| 6  | 656.351471        | 328.679374      | 639.324922     | 320.166099       | 638.340906     | 319.674091       | K    | 1282.693618        | 641.850447        | 1265.667069    | 633.337173       | 1264.683053    | 632.845165       | 8  |
| 7  | 753.404235        | 377.205756      | 736.377686     | 368.692481       | 735.393670     | 368.200473       | P    | <b>1154.598655</b> | <b>577.802966</b> | 1137.572106    | 569.289691       | 1136.588090    | 568.797683       | 7  |
| 8  | 840.436263        | 420.721770      | 823.409714     | 412.208495       | 822.425698     | 411.716487       | S    | <b>1057.545891</b> | 529.276584        | 1040.519342    | 520.763309       | 1039.535326    | 520.271301       | 6  |
| 9  | 953.520327        | 477.263802      | 936.493778     | 468.750527       | 935.509762     | 468.258519       | L    | <b>970.513863</b>  | 485.760570        | 953.487314     | 477.247295       | 952.503298     | 476.755287       | 5  |
| 10 | 1068.547270       | 534.777273      | 1051.520721    | 526.263999       | 1050.536705    | 525.771991       | D    | <b>857.429799</b>  | 429.218538        | 840.403250     | 420.705263       | 839.419234     | 420.213255       | 4  |
| 11 | 1196.605848       | 598.806562      | 1179.579299    | 590.293288       | 1178.595283    | 589.801279       | Q    | <b>742.402856</b>  | 371.705066        | 725.376307     | 363.191792       |                |                  | 3  |
| 12 | 1635.831174       | 818.419225      | 1618.804625    | 809.905951       | 1617.820609    | 809.413943       | Q    | <b>614.344278</b>  | 307.675777        | 597.317729     | 299.162503       |                |                  | 2  |
| 13 |                   |                 |                |                  |                |                  | R    | 175.118952         | 88.063114         | 158.092403     | 79.549839        |                |                  | 1  |

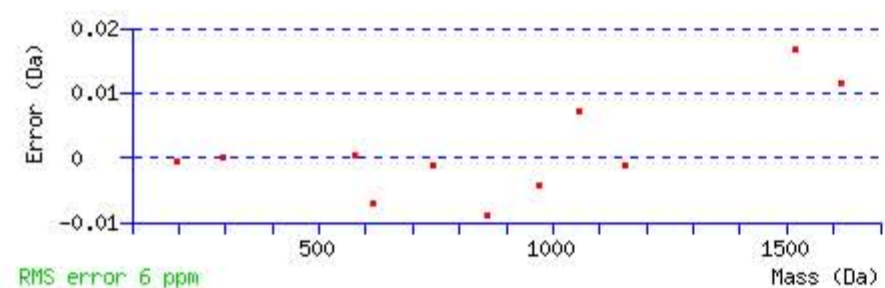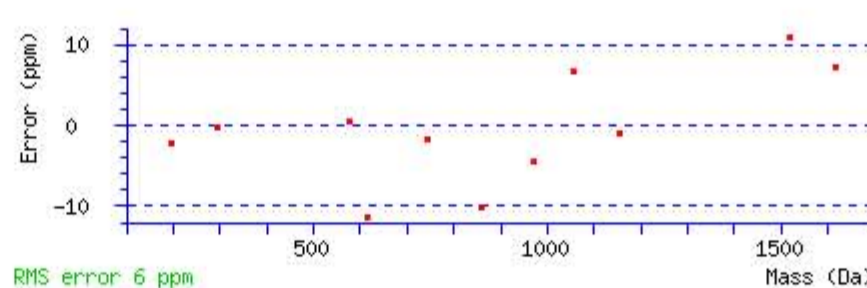

NCBI BLAST search of **GHVSFKPSLDQQR**

(Parameters: blastp, nr protein database, expect=20000, no filter, PAM30)

Other BLAST [web gateways](#)

All matches to this query

| Score | Mr(calc):   | Delta     | Sequence                      |
|-------|-------------|-----------|-------------------------------|
| 64.8  | 1808.935577 | -0.006065 | <a href="#">GHVSFKPSLDQQR</a> |
| 50.0  | 1808.935577 | -0.006065 | <a href="#">GHVSFKPSLDQQR</a> |

Mascot: <http://www.matrixscience.com/>



# MATRIX SCIENCE Mascot Search Results

## Peptide View

MS/MS Fragmentation of **GHVSFKPSLDQQR**

Found in **ITIH3\_HUMAN**, Inter-alpha-trypsin inhibitor heavy chain H3 OS=Homo sapiens GN=ITIH3 PE=1 SV=2

Match to Query 52342: 1808.931522 from(603.984450,3+) rtinseconds(1574) index(60107)  
 Title: Locus:1.1.1.2546.8 File:"2013-07-02 CLN FXIII 30 min 1st F 4.wiff"

Data file C:\Program Files (x86)\Matrix Science\Mascot Daemon\mgf1 FXIII 30 min 1st\mascot\_daemon\_merge.mgf

Click mouse within plot area to zoom in by factor of two about that point

Or, Plot from  to  Da

Label all possible matches  Label matches used for scoring

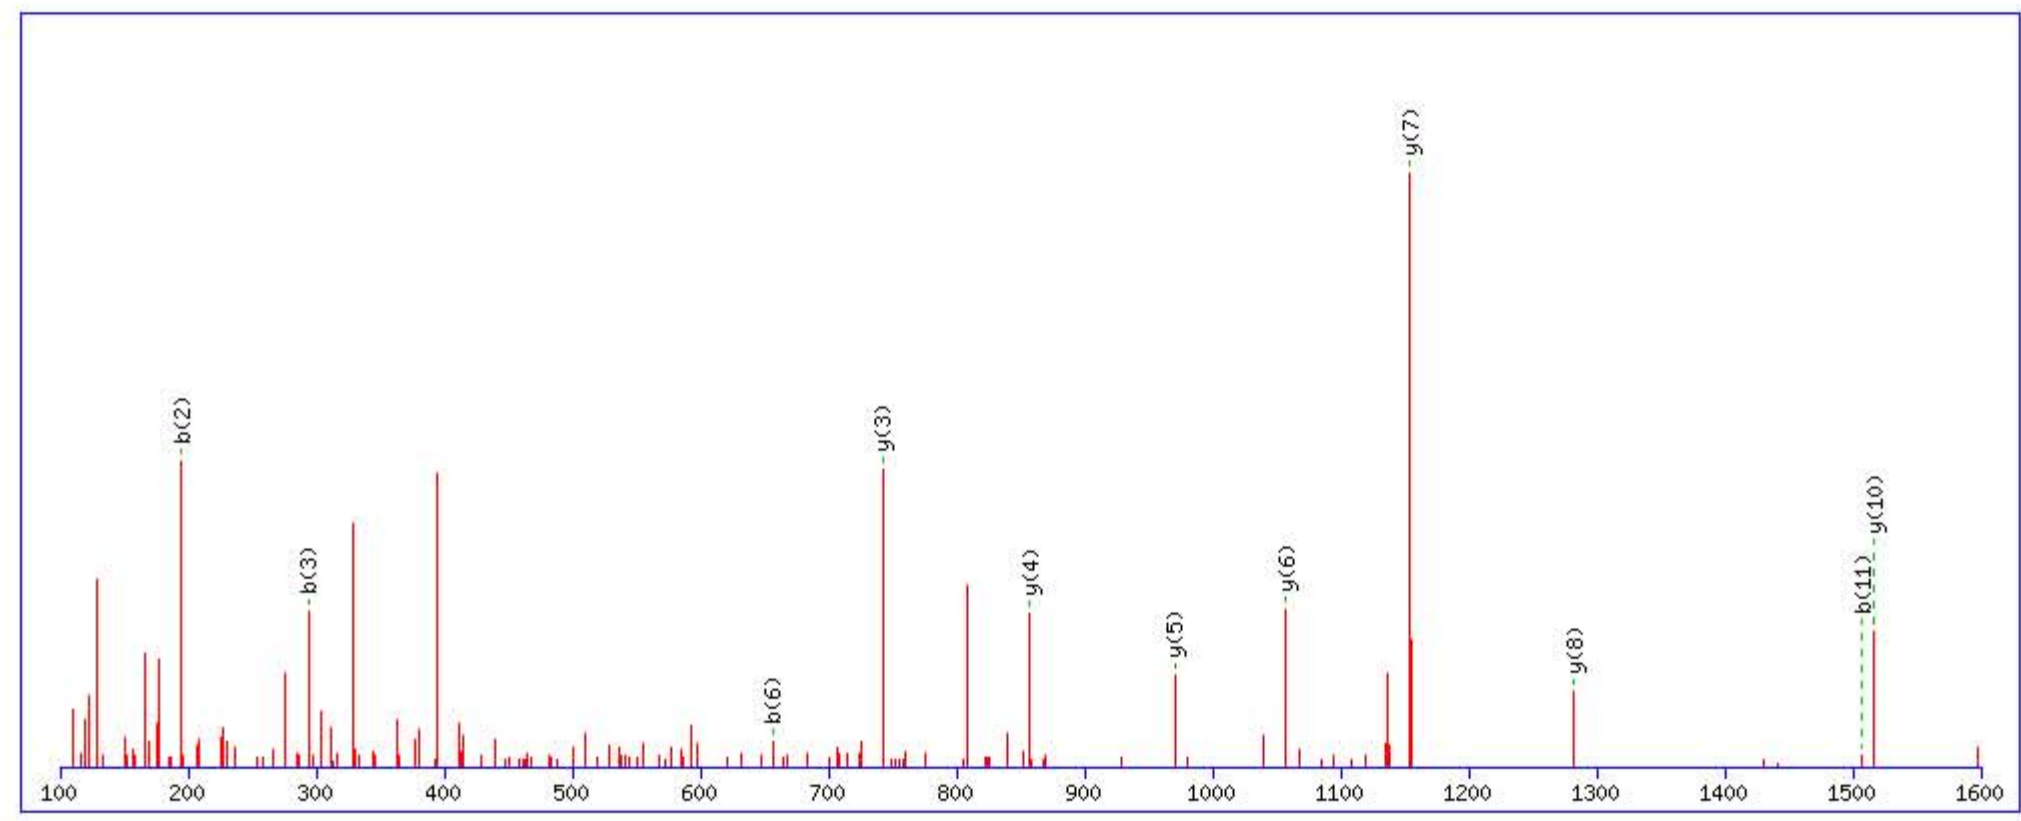

Monoisotopic mass of neutral peptide Mr(calc): 1808.935577

Fixed modifications: Carbamidomethyl (C) (apply to specified residues or termini only)

Variable modifications:

Q11 : Biotin:Thermo-21345 (Q)

Ions Score: 54 Expect: 0.0001

Matches : 11/122 fragment ions using 14 most intense peaks [\(help\)](#)

| #  | b                  | b <sup>++</sup> | b <sup>*</sup> | b <sup>***</sup> | b <sup>0</sup> | b <sup>0++</sup> | Seq. | y                  | y <sup>++</sup> | y <sup>*</sup> | y <sup>***</sup> | y <sup>0</sup> | y <sup>0++</sup> | #  |
|----|--------------------|-----------------|----------------|------------------|----------------|------------------|------|--------------------|-----------------|----------------|------------------|----------------|------------------|----|
| 1  | 58.028740          | 29.518008       |                |                  |                |                  | G    |                    |                 |                |                  |                |                  | 13 |
| 2  | <b>195.087652</b>  | 98.047464       |                |                  |                |                  | H    | 1752.921386        | 876.964331      | 1735.894837    | 868.451057       | 1734.910821    | 867.959049       | 12 |
| 3  | <b>294.156066</b>  | 147.581671      |                |                  |                |                  | V    | 1615.862474        | 808.434875      | 1598.835925    | 799.921601       | 1597.851909    | 799.429593       | 11 |
| 4  | 381.188094         | 191.097685      |                |                  | 363.177529     | 182.092403       | S    | <b>1516.794060</b> | 758.900668      | 1499.767511    | 750.387394       | 1498.783495    | 749.895386       | 10 |
| 5  | 528.256508         | 264.631892      |                |                  | 510.245943     | 255.626610       | F    | 1429.762032        | 715.384654      | 1412.735483    | 706.871380       | 1411.751467    | 706.379372       | 9  |
| 6  | <b>656.351471</b>  | 328.679374      | 639.324922     | 320.166099       | 638.340906     | 319.674091       | K    | <b>1282.693618</b> | 641.850447      | 1265.667069    | 633.337173       | 1264.683053    | 632.845165       | 8  |
| 7  | 753.404235         | 377.205756      | 736.377686     | 368.692481       | 735.393670     | 368.200473       | P    | <b>1154.598655</b> | 577.802966      | 1137.572106    | 569.289691       | 1136.588090    | 568.797683       | 7  |
| 8  | 840.436263         | 420.721770      | 823.409714     | 412.208495       | 822.425698     | 411.716487       | S    | <b>1057.545891</b> | 529.276584      | 1040.519342    | 520.763309       | 1039.535326    | 520.271301       | 6  |
| 9  | 953.520327         | 477.263802      | 936.493778     | 468.750527       | 935.509762     | 468.258519       | L    | <b>970.513863</b>  | 485.760570      | 953.487314     | 477.247295       | 952.503298     | 476.755287       | 5  |
| 10 | 1068.547270        | 534.777273      | 1051.520721    | 526.263999       | 1050.536705    | 525.771991       | D    | <b>857.429799</b>  | 429.218538      | 840.403250     | 420.705263       | 839.419234     | 420.213255       | 4  |
| 11 | <b>1507.772596</b> | 754.389936      | 1490.746047    | 745.876662       | 1489.762031    | 745.384654       | Q    | <b>742.402856</b>  | 371.705066      | 725.376307     | 363.191792       |                |                  | 3  |
| 12 | 1635.831174        | 818.419225      | 1618.804625    | 809.905951       | 1617.820609    | 809.413943       | Q    | 303.177530         | 152.092403      | 286.150981     | 143.579129       |                |                  | 2  |
| 13 |                    |                 |                |                  |                |                  | R    | 175.118952         | 88.063114       | 158.092403     | 79.549839        |                |                  | 1  |

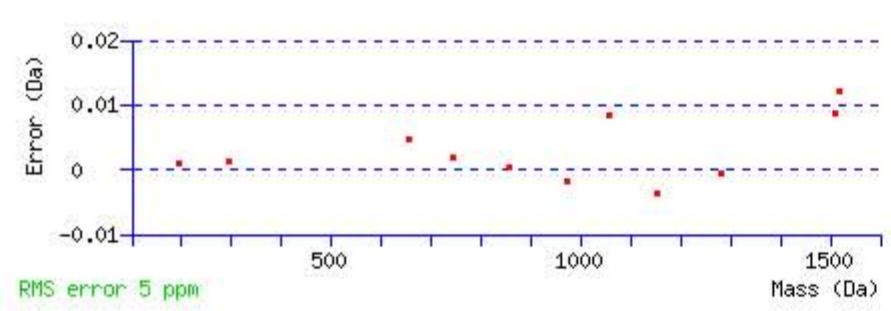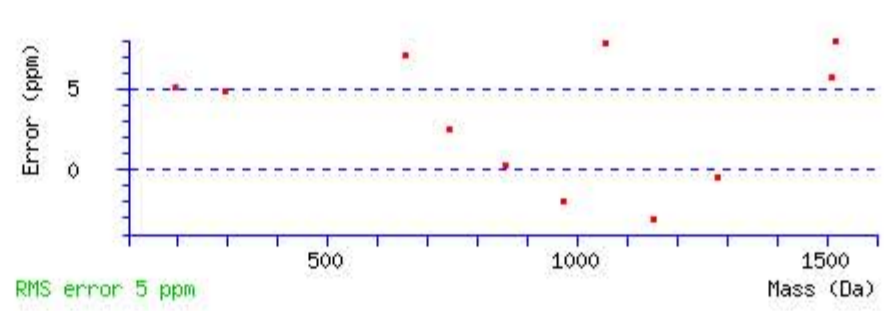

NCBI BLAST search of **GHVSFKPSLDQQR**

(Parameters: blastp, nr protein database, expect=20000, no filter, PAM30)

Other BLAST [web gateways](#)

All matches to this query

| Score | Mr(calc):   | Delta     | Sequence                      |
|-------|-------------|-----------|-------------------------------|
| 53.9  | 1808.935577 | -0.004055 | <a href="#">GHVSFKPSLDQQR</a> |
| 49.8  | 1808.935577 | -0.004055 | <a href="#">GHVSFKPSLDQQR</a> |

Mascot: <http://www.matrixscience.com/>



# MASCOT Search Results

## Peptide View

MS/MS Fragmentation of **QLGLPGPPDVPDHAAYHPFR**

Found in **ITIH4\_HUMAN**, Inter-alpha-trypsin inhibitor heavy chain H4 OS=Homo sapiens GN=ITIH4 PE=1 SV=4

Match to Query 68367: 2494.282016 from(624.577780,4+) rtinseconds(2127) index(8127)

Title: Locus:1.1.1.2461.15 File:"2013-07-02 CLN FXIII 30 min 1st F 1.wiff"

Data file C:\Program Files (x86)\Matrix Science\Mascot Daemon\mgf1 FXIII 30 min 1st\mascot\_daemon\_merge.mgf

Click mouse within plot area to zoom in by factor of two about that point

Or, Plot from  to  Da

Label all possible matches  Label matches used for scoring

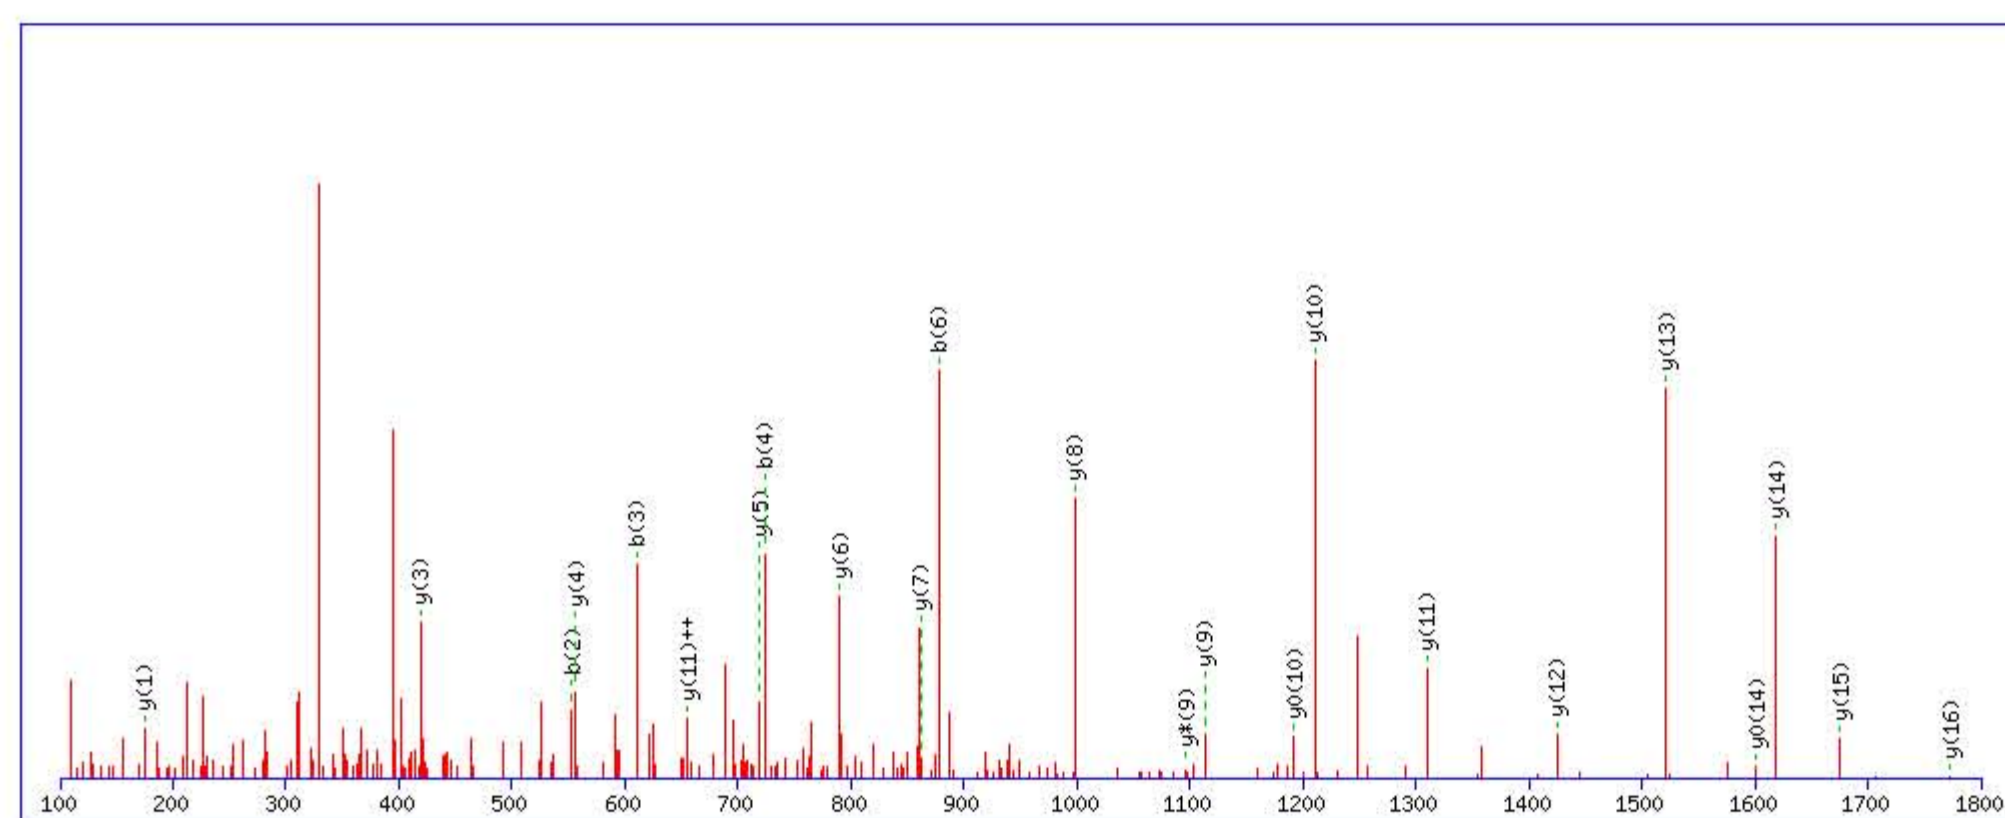

Monoisotopic mass of neutral peptide Mr(calc): 2494.257980

Fixed modifications: Carbamidomethyl (C) (apply to specified residues or termini only)

Variable modifications:

Q1 : Biotin:Thermo-21345 (Q)

Ions Score: 87 Expect: 2.1e-008

Matches : 23/196 fragment ions using 49 most intense peaks [\(help\)](#)

| #  | b                 | b <sup>++</sup> | b*          | b <sup>+++</sup> | b <sup>0</sup> | b <sup>0++</sup> | Seq. | y                  | y <sup>++</sup>   | y*                 | y <sup>+++</sup> | y <sup>0</sup>     | y <sup>0++</sup> | #  |
|----|-------------------|-----------------|-------------|------------------|----------------|------------------|------|--------------------|-------------------|--------------------|------------------|--------------------|------------------|----|
| 1  | 440.232602        | 220.619939      | 423.206053  | 212.106664       |                |                  | Q    |                    |                   |                    |                  |                    |                  | 20 |
| 2  | <b>553.316666</b> | 277.161971      | 536.290117  | 268.648697       |                |                  | L    | 2056.039923        | 1028.523599       | 2039.013374        | 1020.010325      | 2038.029358        | 1019.518317      | 19 |
| 3  | <b>610.338130</b> | 305.672703      | 593.311581  | 297.159429       |                |                  | G    | 1942.955859        | 971.981568        | 1925.929310        | 963.468293       | 1924.945294        | 962.976285       | 18 |
| 4  | <b>723.422194</b> | 362.214735      | 706.395645  | 353.701461       |                |                  | L    | 1885.934395        | 943.470836        | 1868.907846        | 934.957561       | 1867.923830        | 934.465553       | 17 |
| 5  | 820.474958        | 410.741117      | 803.448409  | 402.227843       |                |                  | P    | <b>1772.850331</b> | 886.928804        | 1755.823782        | 878.415529       | 1754.839766        | 877.923521       | 16 |
| 6  | <b>877.496422</b> | 439.251849      | 860.469873  | 430.738575       |                |                  | G    | <b>1675.797567</b> | 838.402422        | 1658.771018        | 829.889147       | 1657.787002        | 829.397139       | 15 |
| 7  | 974.549186        | 487.778231      | 957.522637  | 479.264957       |                |                  | P    | <b>1618.776103</b> | 809.891690        | 1601.749554        | 801.378415       | <b>1600.765538</b> | 800.886407       | 14 |
| 8  | 1071.601950       | 536.304613      | 1054.575401 | 527.791339       |                |                  | P    | <b>1521.723339</b> | 761.365308        | 1504.696790        | 752.852033       | 1503.712774        | 752.360025       | 13 |
| 9  | 1186.628893       | 593.818085      | 1169.602344 | 585.304810       | 1168.618328    | 584.812802       | D    | <b>1424.670575</b> | 712.838926        | 1407.644026        | 704.325651       | 1406.660010        | 703.833643       | 12 |
| 10 | 1285.697307       | 643.352292      | 1268.670758 | 634.839017       | 1267.686742    | 634.347009       | V    | <b>1309.643632</b> | <b>655.325454</b> | 1292.617083        | 646.812180       | 1291.633067        | 646.320172       | 11 |
| 11 | 1382.750071       | 691.878674      | 1365.723522 | 683.365399       | 1364.739506    | 682.873391       | P    | <b>1210.575218</b> | 605.791247        | 1193.548669        | 597.277973       | <b>1192.564653</b> | 596.785964       | 10 |
| 12 | 1497.777014       | 749.392145      | 1480.750465 | 740.878871       | 1479.766449    | 740.386863       | D    | <b>1113.522454</b> | 557.264865        | <b>1096.495905</b> | 548.751591       | 1095.511889        | 548.259582       | 9  |
| 13 | 1634.835926       | 817.921601      | 1617.809377 | 809.408327       | 1616.825361    | 808.916319       | H    | <b>998.495511</b>  | 499.751393        | 981.468962         | 491.238119       |                    |                  | 8  |
| 14 | 1705.873040       | 853.440158      | 1688.846491 | 844.926884       | 1687.862475    | 844.434876       | A    | <b>861.436599</b>  | 431.221937        | 844.410050         | 422.708663       |                    |                  | 7  |
| 15 | 1776.910154       | 888.958715      | 1759.883605 | 880.445441       | 1758.899589    | 879.953433       | A    | <b>790.399485</b>  | 395.703380        | 773.372936         | 387.190106       |                    |                  | 6  |
| 16 | 1939.973483       | 970.490380      | 1922.946934 | 961.977105       | 1921.962918    | 961.485097       | Y    | <b>719.362371</b>  | 360.184823        | 702.335822         | 351.671549       |                    |                  | 5  |
| 17 | 2077.032395       | 1039.019836     | 2060.005846 | 1030.506561      | 2059.021830    | 1030.014553      | H    | <b>556.299042</b>  | 278.653159        | 539.272493         | 270.139884       |                    |                  | 4  |
| 18 | 2174.085159       | 1087.546218     | 2157.058610 | 1079.032943      | 2156.074594    | 1078.540935      | P    | <b>419.240130</b>  | 210.123703        | 402.213581         | 201.610428       |                    |                  | 3  |
| 19 | 2321.153573       | 1161.080424     | 2304.127024 | 1152.567150      | 2303.143008    | 1152.075142      | F    | 322.187366         | 161.597321        | 305.160817         | 153.084046       |                    |                  | 2  |
| 20 |                   |                 |             |                  |                |                  | R    | <b>175.118952</b>  | 88.063114         | 158.092403         | 79.549839        |                    |                  | 1  |

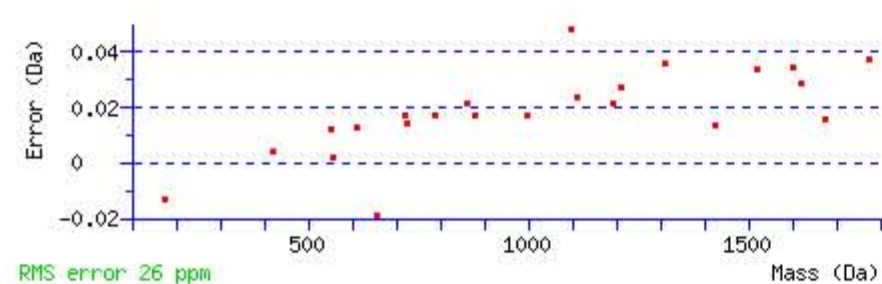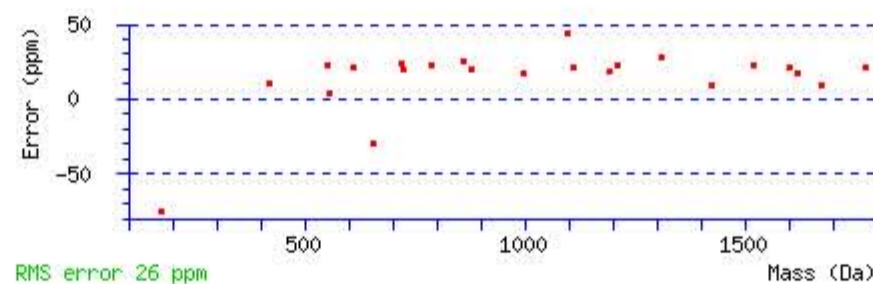

NCBI BLAST search of **QLGLPGPPDVPDHAAYHPFR**

(Parameters: blastp, nr protein database, expect=20000, no filter, PAM30)

Other BLAST [web gateways](#)

All matches to this query

| Score | Mr(calc):   | Delta    | Sequence                                 |
|-------|-------------|----------|------------------------------------------|
| 87.1  | 2494.257980 | 0.024036 | <a href="#">QLGLPGPPDVPDHAAYHPFR</a>     |
| 5.0   | 2494.256424 | 0.025592 | <a href="#">SPHRESLPGLSSTATPGNPALYSR</a> |
| 2.0   | 2494.278381 | 0.003635 | <a href="#">MSAPLDAALHALQEEQARLKMR</a>   |



# MASCOT Search Results

## Peptide View

MS/MS Fragmentation of **VECSDNLFTQR**

Found in **MASPI\_HUMAN**, Mannan-binding lectin serine protease 1 OS=Homo sapiens GN=MASP1 PE=1 SV=3

Match to Query 49008: 1678.780272 from(560.600700,3+) rtinseconds(2083) index(63629)

Title: Locus:1.1.1.2723.3 File:"2013-07-02 CLN FXIII 30 min 1st F 4.wiff"

Data file C:\Program Files (x86)\Matrix Science\Mascot Daemon\mgf1 FXIII 30 min 1st\mascot\_daemon\_merge.mgf

Click mouse within plot area to zoom in by factor of two about that point

Or, Plot from  to  Da

Label all possible matches  Label matches used for scoring

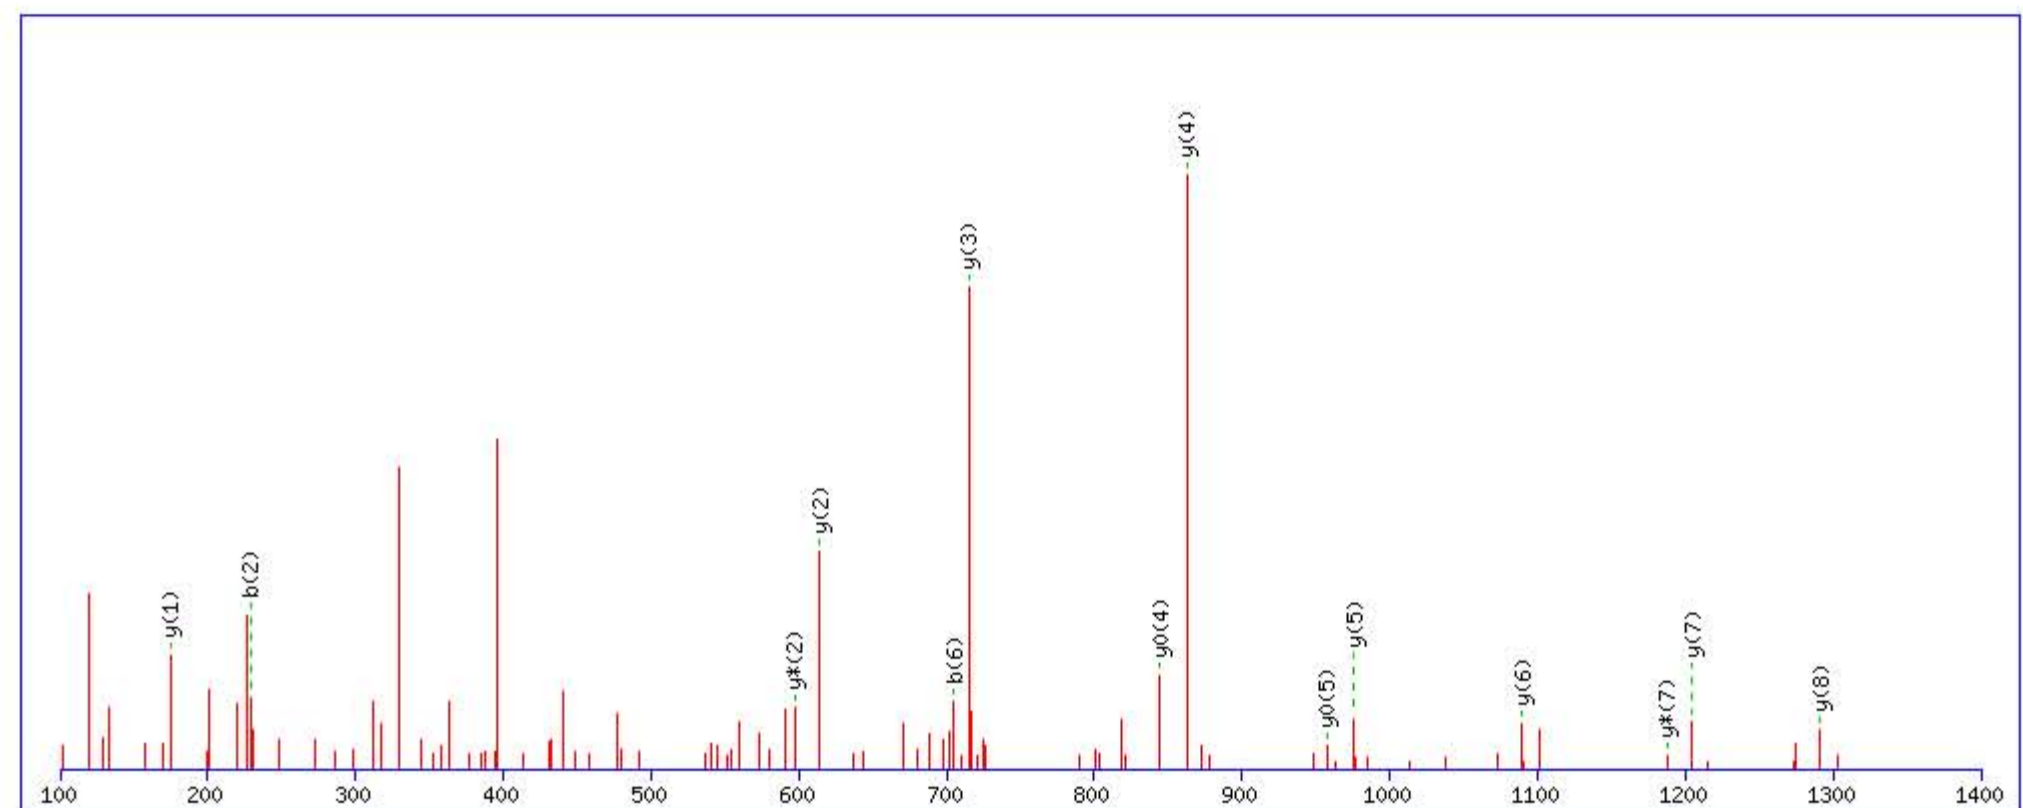

Monoisotopic mass of neutral peptide  $M_r(\text{calc})$ : 1678.780716

Fixed modifications: Carbamidomethyl (C) (apply to specified residues or termini only)

Variable modifications:

Q10 : Biotin:Thermo-21345 (Q)

Ions Score: 49 Expect: 0.00014

Matches : 14/104 fragment ions using 24 most intense peaks ([help](#))

| #  | b                 | b <sup>++</sup> | b <sup>*</sup> | b <sup>*++</sup> | b <sup>0</sup> | b <sup>0++</sup> | Seq. | y                  | y <sup>++</sup> | y <sup>*</sup>     | y <sup>*++</sup> | y <sup>0</sup>    | y <sup>0++</sup> | #  |
|----|-------------------|-----------------|----------------|------------------|----------------|------------------|------|--------------------|-----------------|--------------------|------------------|-------------------|------------------|----|
| 1  | 100.075690        | 50.541483       |                |                  |                |                  | V    |                    |                 |                    |                  |                   |                  | 11 |
| 2  | <b>229.118283</b> | 115.062780      |                |                  | 211.107718     | 106.057497       | E    | 1580.719575        | 790.863426      | 1563.693026        | 782.350151       | 1562.709010       | 781.858143       | 10 |
| 3  | 389.148932        | 195.078104      |                |                  | 371.138367     | 186.072822       | C    | 1451.676982        | 726.342129      | 1434.650433        | 717.828855       | 1433.666417       | 717.336847       | 9  |
| 4  | 476.180960        | 238.594118      |                |                  | 458.170395     | 229.588835       | S    | <b>1291.646333</b> | 646.326805      | 1274.619784        | 637.813530       | 1273.635768       | 637.321522       | 8  |
| 5  | 591.207903        | 296.107590      |                |                  | 573.197338     | 287.102307       | D    | <b>1204.614305</b> | 602.810791      | <b>1187.587756</b> | 594.297516       | 1186.603740       | 593.805508       | 7  |
| 6  | <b>705.250830</b> | 353.129053      | 688.224281     | 344.615778       | 687.240265     | 344.123770       | N    | <b>1089.587362</b> | 545.297319      | 1072.560813        | 536.784045       | 1071.576797       | 536.292037       | 6  |
| 7  | 818.334894        | 409.671085      | 801.308345     | 401.157810       | 800.324329     | 400.665802       | L    | <b>975.544435</b>  | 488.275856      | 958.517886         | 479.762581       | <b>957.533870</b> | 479.270573       | 5  |
| 8  | 965.403308        | 483.205292      | 948.376759     | 474.692017       | 947.392743     | 474.200009       | F    | <b>862.460371</b>  | 431.733824      | 845.433822         | 423.220549       | <b>844.449806</b> | 422.728541       | 4  |
| 9  | 1066.450987       | 533.729131      | 1049.424438    | 525.215857       | 1048.440422    | 524.723849       | T    | <b>715.391957</b>  | 358.199617      | 698.365408         | 349.686342       | 697.381392        | 349.194334       | 3  |
| 10 | 1505.676313       | 753.341795      | 1488.649764    | 744.828520       | 1487.665748    | 744.336512       | Q    | <b>614.344278</b>  | 307.675777      | <b>597.317729</b>  | 299.162503       |                   |                  | 2  |
| 11 |                   |                 |                |                  |                |                  | R    | <b>175.118952</b>  | 88.063114       | 158.092403         | 79.549839        |                   |                  | 1  |

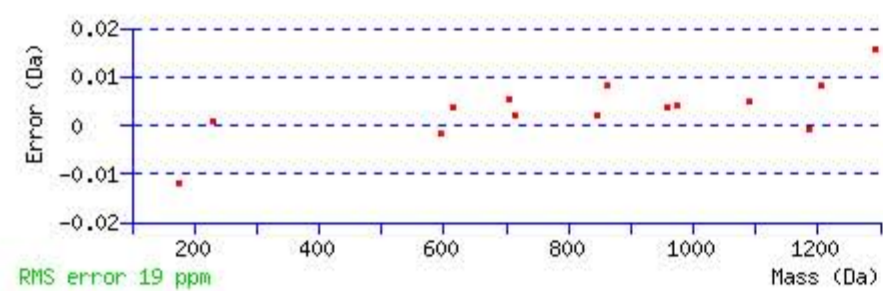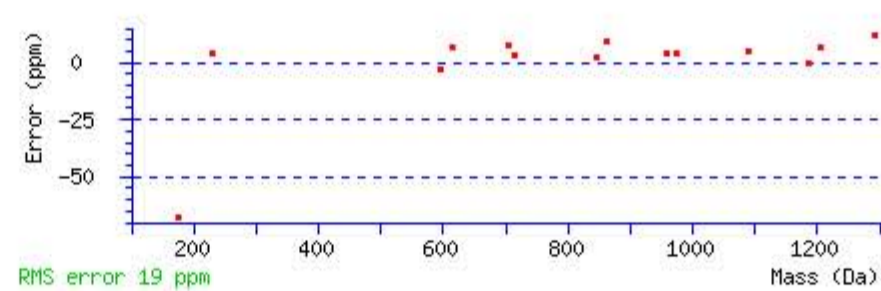

NCBI BLAST search of [VECSDNLFTQR](#)

(Parameters: blastp, nr protein database, expect=20000, no filter, PAM30)

Other BLAST [web gateways](#)

All matches to this query

| Score | $M_r(\text{calc})$ : | Delta     | Sequence                    |
|-------|----------------------|-----------|-----------------------------|
| 49.5  | 1678.780716          | -0.000444 | <a href="#">VECSDNLFTQR</a> |

Mascot: <http://www.matrixscience.com/>



# MASCOT Search Results

## Peptide View

MS/MS Fragmentation of **FPETLMEIEIPIVDHSTCQK**

Found in **MASPI\_HUMAN**, Mannan-binding lectin serine protease 1 OS=Homo sapiens GN=MASP1 PE=1 SV=3

Match to Query 70607: 2697.334572 from(900.118800,3+) rtinseconds(2729) index(67699)

Title: Locus:1.1.1.2946.22 File:"2013-07-02 CLN FXIII 30 min 1st F 4.wiff"

Data file C:\Program Files (x86)\Matrix Science\Mascot Daemon\mgf1 FXIII 30 min 1st\mascot\_daemon\_merge.mgf

Click mouse within plot area to zoom in by factor of two about that point

Or, Plot from  to  Da

Label all possible matches  Label matches used for scoring

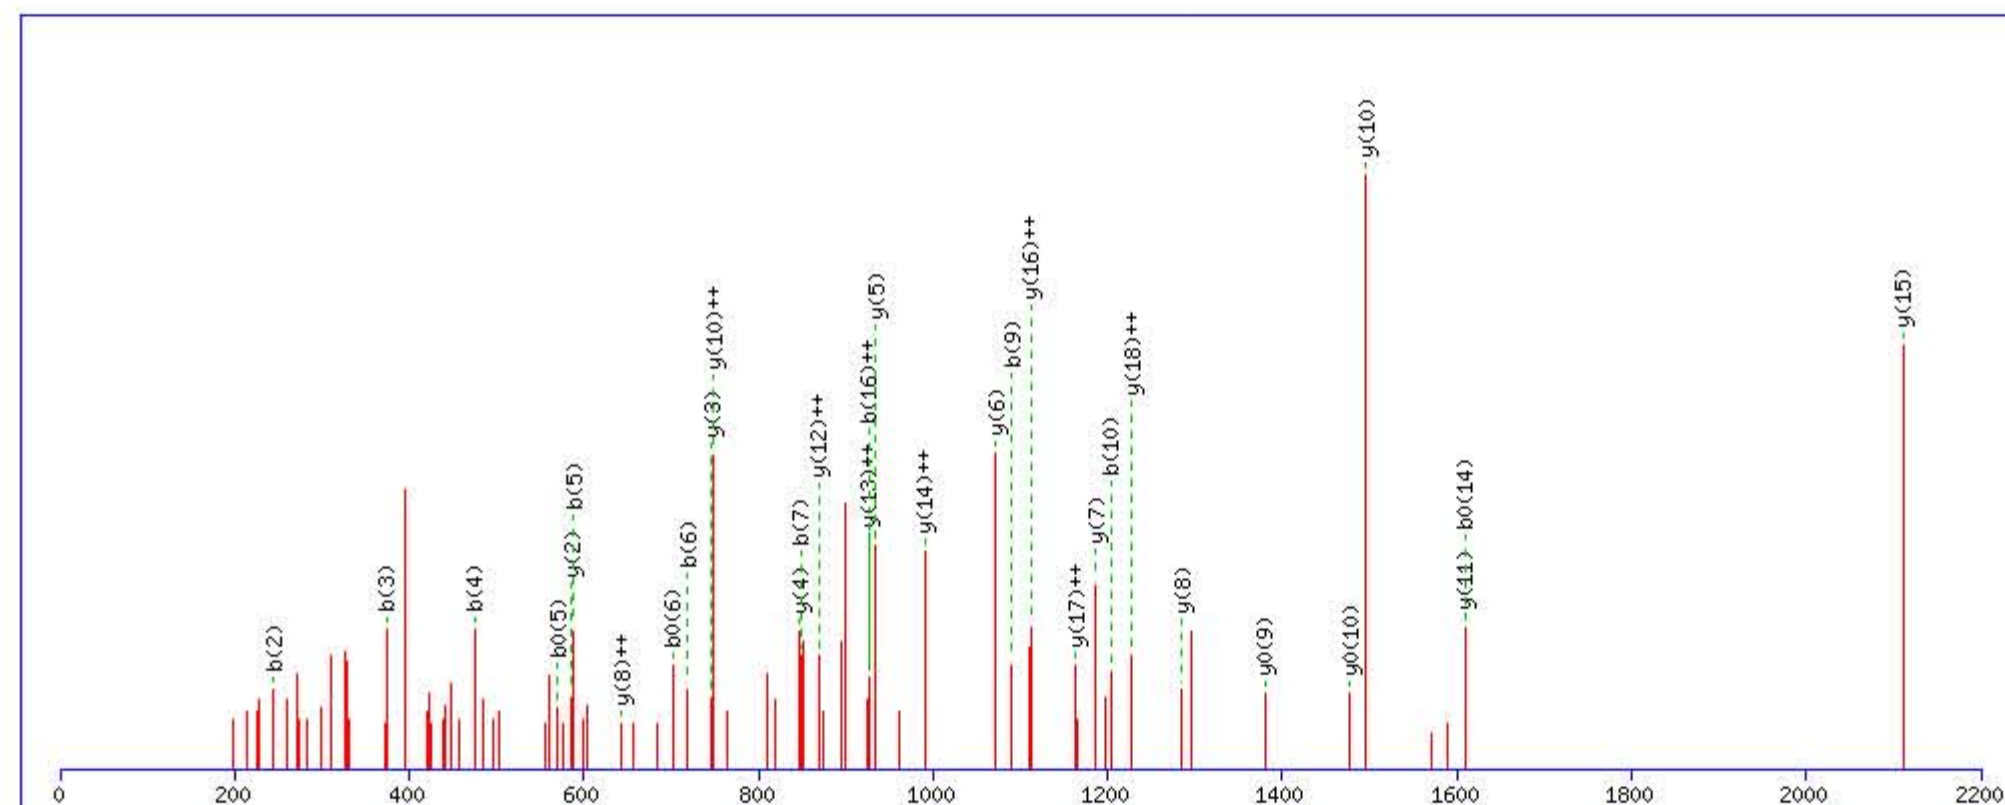

Monoisotopic mass of neutral peptide Mr(calc): 2697.321609

Fixed modifications: Carbamidomethyl (C) (apply to specified residues or termini only)

Variable modifications:

Q19 : Biotin:Thermo-21345 (Q)

Ions Score: 52 Expect: 1.9e-005

Matches : 32/182 fragment ions using 68 most intense peaks [\(help\)](#)

| #  | b                  | b <sup>++</sup>   | b <sup>*</sup> | b <sup>*++</sup> | b <sup>0</sup>     | b <sup>0++</sup> | Seq. | y                  | y <sup>++</sup>    | y <sup>*</sup> | y <sup>*++</sup> | y <sup>0</sup>     | y <sup>0++</sup> | #  |
|----|--------------------|-------------------|----------------|------------------|--------------------|------------------|------|--------------------|--------------------|----------------|------------------|--------------------|------------------|----|
| 1  | 148.075690         | 74.541483         |                |                  |                    |                  | F    |                    |                    |                |                  |                    |                  | 20 |
| 2  | <b>245.128454</b>  | 123.067865        |                |                  |                    |                  | P    | 2551.260482        | 1276.133879        | 2534.233933    | 1267.620604      | 2533.249917        | 1267.128596      | 19 |
| 3  | <b>374.171047</b>  | 187.589161        |                |                  | 356.160482         | 178.583879       | E    | 2454.207718        | <b>1227.607497</b> | 2437.181169    | 1219.094222      | 2436.197153        | 1218.602214      | 18 |
| 4  | <b>475.218726</b>  | 238.113001        |                |                  | 457.208161         | 229.107719       | T    | 2325.165125        | <b>1163.086200</b> | 2308.138576    | 1154.572926      | 2307.154560        | 1154.080918      | 17 |
| 5  | <b>588.302790</b>  | 294.655033        |                |                  | <b>570.292225</b>  | 285.649751       | L    | 2224.117446        | <b>1112.562361</b> | 2207.090897    | 1104.049086      | 2206.106881        | 1103.557078      | 16 |
| 6  | <b>719.343275</b>  | 360.175276        |                |                  | <b>701.332710</b>  | 351.169993       | M    | <b>2111.033382</b> | 1056.020329        | 2094.006833    | 1047.507054      | 2093.022817        | 1047.015046      | 15 |
| 7  | <b>848.385868</b>  | 424.696572        |                |                  | 830.375303         | 415.691290       | E    | 1979.992897        | <b>990.500087</b>  | 1962.966348    | 981.986812       | 1961.982332        | 981.494804       | 14 |
| 8  | 961.469932         | 481.238604        |                |                  | 943.459367         | 472.233322       | I    | 1850.950304        | <b>925.978790</b>  | 1833.923755    | 917.465516       | 1832.939739        | 916.973508       | 13 |
| 9  | <b>1090.512525</b> | 545.759901        |                |                  | 1072.501960        | 536.754618       | E    | 1737.866240        | <b>869.436758</b>  | 1720.839691    | 860.923484       | 1719.855675        | 860.431476       | 12 |
| 10 | <b>1203.596589</b> | 602.301933        |                |                  | 1185.586024        | 593.296650       | I    | <b>1608.823647</b> | 804.915462         | 1591.797098    | 796.402187       | 1590.813082        | 795.910179       | 11 |
| 11 | 1300.649353        | 650.828315        |                |                  | 1282.638788        | 641.823032       | P    | <b>1495.739583</b> | <b>748.373430</b>  | 1478.713034    | 739.860155       | <b>1477.729018</b> | 739.368147       | 10 |
| 12 | 1413.733417        | 707.370346        |                |                  | 1395.722852        | 698.365064       | I    | 1398.686819        | 699.847048         | 1381.660270    | 691.333773       | <b>1380.676254</b> | 690.841765       | 9  |
| 13 | 1512.801831        | 756.904554        |                |                  | 1494.791266        | 747.899271       | V    | <b>1285.602755</b> | <b>643.305016</b>  | 1268.576206    | 634.791741       | 1267.592190        | 634.299733       | 8  |
| 14 | 1627.828774        | 814.418025        |                |                  | <b>1609.818209</b> | 805.412743       | D    | <b>1186.534341</b> | 593.770809         | 1169.507792    | 585.257534       | 1168.523776        | 584.765526       | 7  |
| 15 | 1764.887686        | 882.947481        |                |                  | 1746.877121        | 873.942199       | H    | <b>1071.507398</b> | 536.257337         | 1054.480849    | 527.744063       | 1053.496833        | 527.252055       | 6  |
| 16 | 1851.919714        | <b>926.463495</b> |                |                  | 1833.909149        | 917.458213       | S    | <b>934.448486</b>  | 467.727881         | 917.421937     | 459.214607       | 916.437921         | 458.722599       | 5  |
| 17 | 1952.967393        | 976.987335        |                |                  | 1934.956828        | 967.982052       | T    | <b>847.416458</b>  | 424.211867         | 830.389909     | 415.698593       | 829.405893         | 415.206585       | 4  |
| 18 | 2112.998042        | 1057.002659       |                |                  | 2094.987477        | 1047.997376      | C    | <b>746.368779</b>  | 373.688028         | 729.342230     | 365.174753       |                    |                  | 3  |
| 19 | 2552.223368        | 1276.615322       | 2535.196819    | 1268.102047      | 2534.212803        | 1267.610039      | Q    | <b>586.338130</b>  | 293.672703         | 569.311581     | 285.159429       |                    |                  | 2  |
| 20 |                    |                   |                |                  |                    |                  | K    | 147.112804         | 74.060040          | 130.086255     | 65.546765        |                    |                  | 1  |

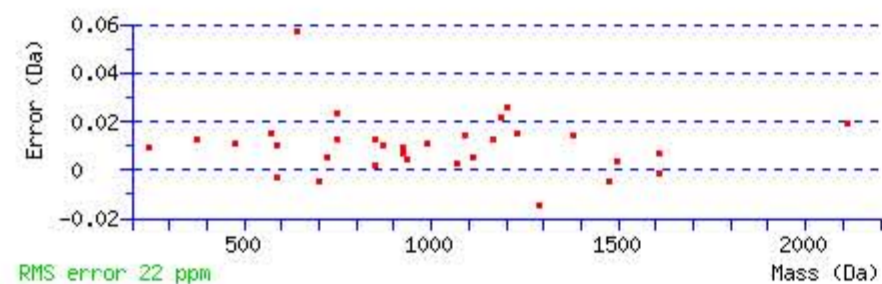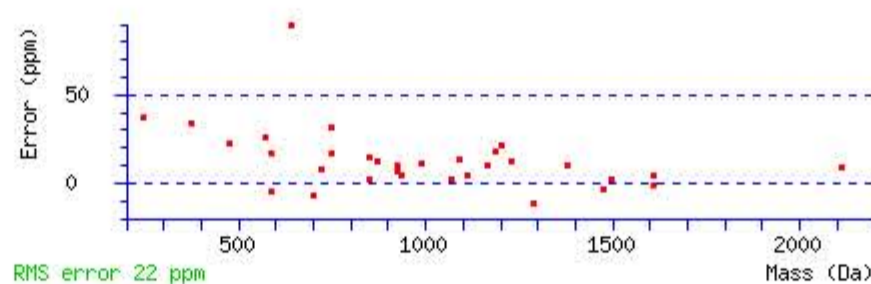

NCBI BLAST search of **FPETLMEIEIPIVDHSTCQK**

(Parameters: blastp, nr protein database, expect=20000, no filter, PAM30)

Other BLAST [web gateways](#)

All matches to this query

| Score | Mr(calc):   | Delta    | Sequence                               |
|-------|-------------|----------|----------------------------------------|
| 52.0  | 2697.321609 | 0.012963 | <a href="#">FPETLMEIEIPIVDHSTCQK</a>   |
| 1.5   | 2697.325470 | 0.009102 | <a href="#">KDAATTVCSKFNFGDQQT LQK</a> |
| 1.5   | 2697.325470 | 0.009102 | <a href="#">KDAATTVCSKFNFGDQQT LQK</a> |



# MASCOT Search Results

## Peptide View

MS/MS Fragmentation of **APEPISTQSHSVLILFHSDNSGENR**

Found in **MASPI\_HUMAN**, Mannan-binding lectin serine protease 1 OS=Homo sapiens GN=MASPI PE=1 SV=3

Match to Query 74857: 3045.505936 from(762.383760,4+) rtinseconds(2238) index(64649)

Title: Locus:1.1.1.2776.12 File:"2013-07-02 CLN FXIII 30 min 1st F 4.wiff"

Data file C:\Program Files (x86)\Matrix Science\Mascot Daemon\mgf1 FXIII 30 min 1st\mascot\_daemon\_merge.mgf

Click mouse within plot area to zoom in by factor of two about that point

Or, Plot from  to  Da

Label all possible matches  Label matches used for scoring

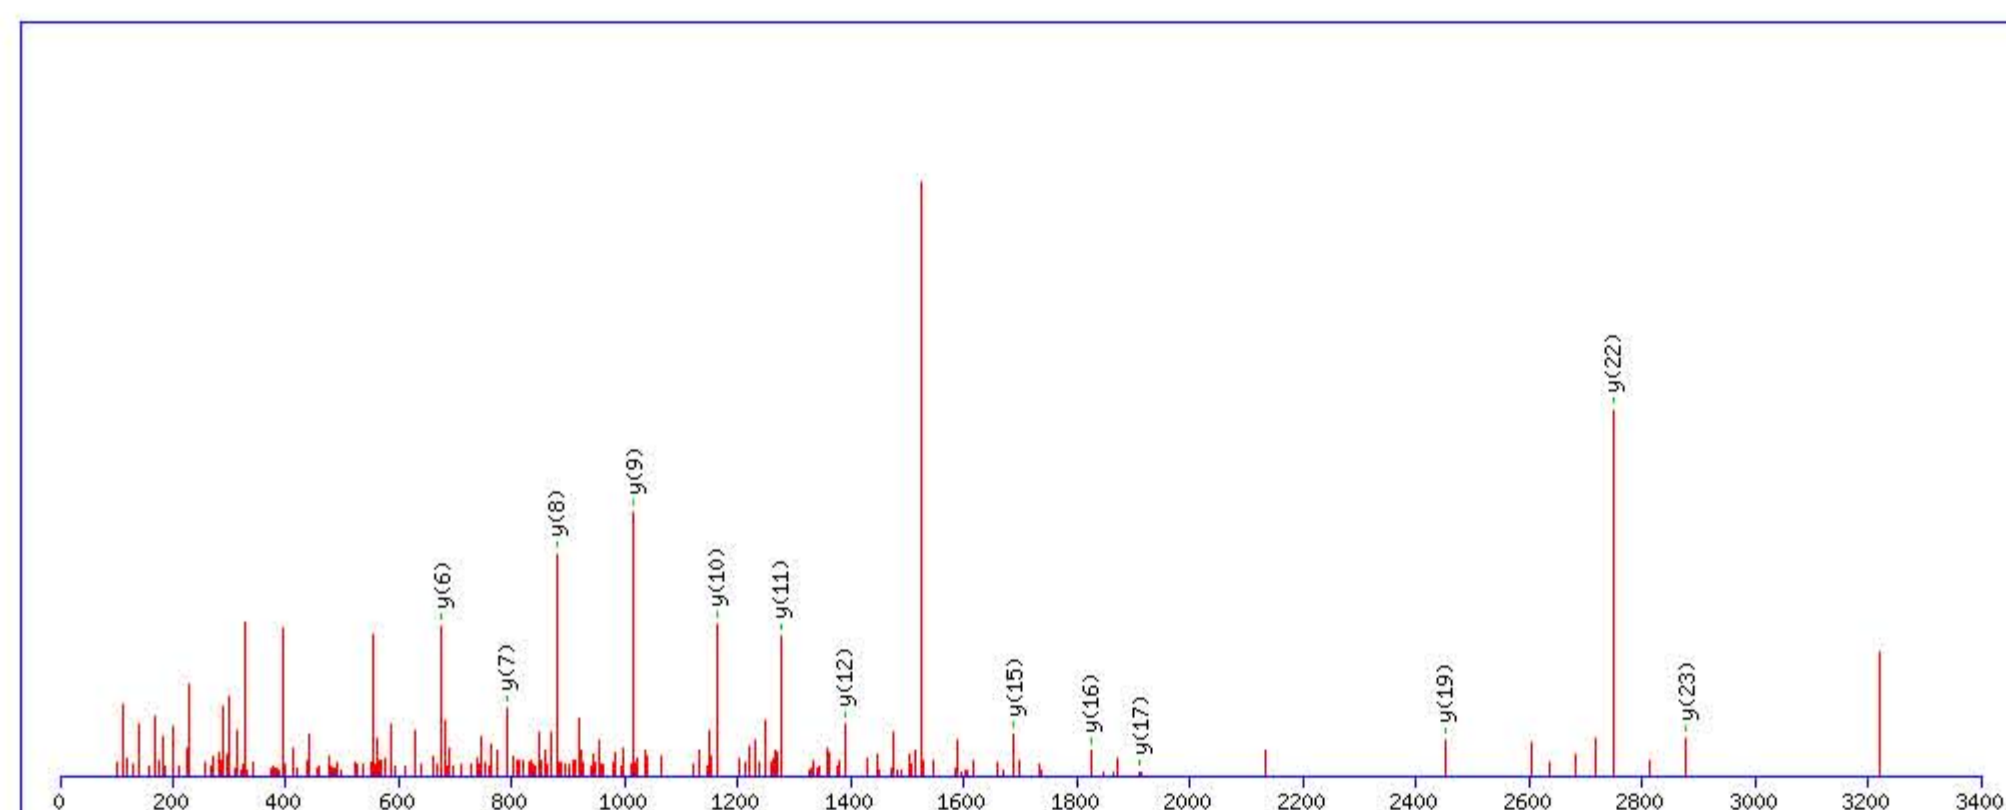

Monoisotopic mass of neutral peptide Mr(calc): 3045.497803

Fixed modifications: Carbamidomethyl (C) (apply to specified residues or termini only)

Variable modifications:

Q8 : Biotin:Thermo-21345 (Q)

Ions Score: 82 Expect: 1.8e-007

Matches : 13/266 fragment ions using 24 most intense peaks [\(help\)](#)

| #  | b           | b <sup>++</sup> | b <sup>+</sup> | b <sup>+++</sup> | b <sup>0</sup> | b <sup>0++</sup> | Seq. | y                  | y <sup>++</sup> | y <sup>+</sup> | y <sup>+++</sup> | y <sup>0</sup> | y <sup>0++</sup> | #  |
|----|-------------|-----------------|----------------|------------------|----------------|------------------|------|--------------------|-----------------|----------------|------------------|----------------|------------------|----|
| 1  | 72.044390   | 36.525833       |                |                  |                |                  | A    |                    |                 |                |                  |                |                  | 25 |
| 2  | 169.097154  | 85.052215       |                |                  |                |                  | P    | 2975.467980        | 1488.237628     | 2958.441431    | 1479.724353      | 2957.457415    | 1479.232345      | 24 |
| 3  | 298.139747  | 149.573512      |                |                  | 280.129182     | 140.568229       | E    | <b>2878.415216</b> | 1439.711246     | 2861.388667    | 1431.197971      | 2860.404651    | 1430.705963      | 23 |
| 4  | 395.192511  | 198.099894      |                |                  | 377.181946     | 189.094611       | P    | <b>2749.372623</b> | 1375.189949     | 2732.346074    | 1366.676675      | 2731.362058    | 1366.184667      | 22 |
| 5  | 508.276575  | 254.641926      |                |                  | 490.266010     | 245.636643       | I    | 2652.319859        | 1326.663567     | 2635.293310    | 1318.150293      | 2634.309294    | 1317.658285      | 21 |
| 6  | 595.308603  | 298.157940      |                |                  | 577.298038     | 289.152657       | S    | 2539.235795        | 1270.121535     | 2522.209246    | 1261.608261      | 2521.225230    | 1261.116253      | 20 |
| 7  | 696.356282  | 348.681779      |                |                  | 678.345717     | 339.676497       | T    | <b>2452.203767</b> | 1226.605521     | 2435.177218    | 1218.092247      | 2434.193202    | 1217.600239      | 19 |
| 8  | 1135.581608 | 568.294442      | 1118.555059    | 559.781168       | 1117.571043    | 559.289160       | Q    | 2351.156088        | 1176.081682     | 2334.129539    | 1167.568407      | 2333.145523    | 1167.076399      | 18 |
| 9  | 1222.613636 | 611.810456      | 1205.587087    | 603.297182       | 1204.603071    | 602.805174       | S    | <b>1911.930762</b> | 956.469019      | 1894.904213    | 947.955745       | 1893.920197    | 947.463737       | 17 |
| 10 | 1359.672548 | 680.339912      | 1342.645999    | 671.826638       | 1341.661983    | 671.334630       | H    | <b>1824.898734</b> | 912.953005      | 1807.872185    | 904.439731       | 1806.888169    | 903.947723       | 16 |
| 11 | 1446.704576 | 723.855926      | 1429.678027    | 715.342652       | 1428.694011    | 714.850644       | S    | <b>1687.839822</b> | 844.423549      | 1670.813273    | 835.910275       | 1669.829257    | 835.418267       | 15 |
| 12 | 1545.772990 | 773.390133      | 1528.746441    | 764.876859       | 1527.762425    | 764.384851       | V    | 1600.807794        | 800.907535      | 1583.781245    | 792.394261       | 1582.797229    | 791.902253       | 14 |
| 13 | 1658.857054 | 829.932165      | 1641.830505    | 821.418891       | 1640.846489    | 820.926883       | L    | 1501.739380        | 751.373328      | 1484.712831    | 742.860054       | 1483.728815    | 742.368045       | 13 |
| 14 | 1771.941118 | 886.474197      | 1754.914569    | 877.960923       | 1753.930553    | 877.468915       | I    | <b>1388.655316</b> | 694.831296      | 1371.628767    | 686.318022       | 1370.644751    | 685.826014       | 12 |
| 15 | 1885.025182 | 943.016229      | 1867.998633    | 934.502955       | 1867.014617    | 934.010947       | L    | <b>1275.571252</b> | 638.289264      | 1258.544703    | 629.775990       | 1257.560687    | 629.283982       | 11 |
| 16 | 2032.093596 | 1016.550436     | 2015.067047    | 1008.037162      | 2014.083031    | 1007.545154      | F    | <b>1162.487188</b> | 581.747232      | 1145.460639    | 573.233958       | 1144.476623    | 572.741950       | 10 |
| 17 | 2169.152508 | 1085.079892     | 2152.125959    | 1076.566617      | 2151.141943    | 1076.074610      | H    | <b>1015.418774</b> | 508.213025      | 998.392225     | 499.699751       | 997.408209     | 499.207743       | 9  |
| 18 | 2256.184536 | 1128.595906     | 2239.157987    | 1120.082631      | 2238.173971    | 1119.590624      | S    | <b>878.359862</b>  | 439.683569      | 861.333313     | 431.170295       | 860.349297     | 430.678287       | 8  |
| 19 | 2371.211479 | 1186.109377     | 2354.184930    | 1177.596103      | 2353.200914    | 1177.104095      | D    | <b>791.327834</b>  | 396.167555      | 774.301285     | 387.654280       | 773.317269     | 387.162272       | 7  |
| 20 | 2485.254406 | 1243.130841     | 2468.227857    | 1234.617566      | 2467.243841    | 1234.125558      | N    | <b>676.300891</b>  | 338.654084      | 659.274342     | 330.140809       | 658.290326     | 329.648801       | 6  |
| 21 | 2572.286434 | 1286.646855     | 2555.259885    | 1278.133580      | 2554.275869    | 1277.641572      | S    | 562.257964         | 281.632620      | 545.231415     | 273.119346       | 544.247399     | 272.627338       | 5  |
| 22 | 2629.307898 | 1315.157587     | 2612.281349    | 1306.644312      | 2611.297333    | 1306.152304      | G    | 475.225936         | 238.116606      | 458.199387     | 229.603331       | 457.215371     | 229.111323       | 4  |
| 23 | 2758.350491 | 1379.678884     | 2741.323942    | 1371.165609      | 2740.339926    | 1370.673601      | E    | 418.204472         | 209.605874      | 401.177923     | 201.092600       | 400.193907     | 200.600592       | 3  |
| 24 | 2872.393418 | 1436.700347     | 2855.366869    | 1428.187072      | 2854.382853    | 1427.695064      | N    | 289.161879         | 145.084577      | 272.135330     | 136.571303       |                |                  | 2  |
| 25 |             |                 |                |                  |                |                  | R    | 175.118952         | 88.063114       | 158.092403     | 79.549839        |                |                  | 1  |

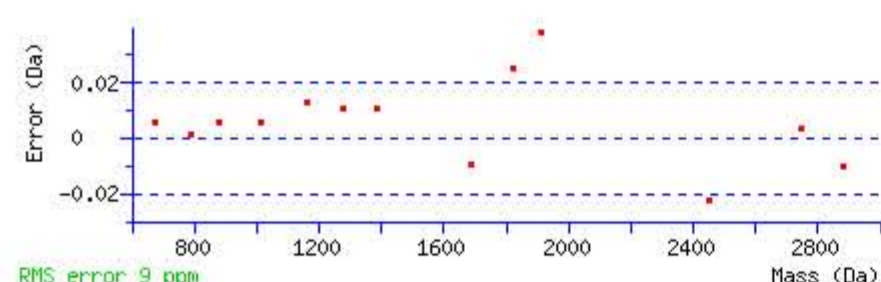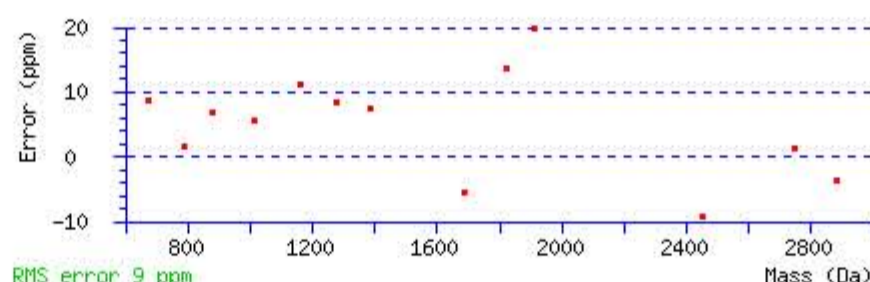

NCBI BLAST search of **APEPISTQSHSVLILFHSDNSGENR**

(Parameters: blastp, nr protein database, expect=20000, no filter, PAM30)

Other BLAST [web gateways](#)

All matches to this query

| Score | Mr(calc):   | Delta    | Sequence                                  |
|-------|-------------|----------|-------------------------------------------|
| 81.8  | 3045.497803 | 0.008133 | <a href="#">APEPISTQSHSVLILFHSDNSGENR</a> |

Mascot: <http://www.matrixscience.com/>



# Mascot Search Results

## Peptide View

MS/MS Fragmentation of **LCQPVLSPACQLVLHQILK**

Found in **PMEL\_HUMAN**, Melanocyte protein PMEL OS=Homo sapiens GN=PMEL PE=1 SV=2

Match to Query 69958: 2624.453952 from(875.825260,3+) rtinseconds(2632) index(66928)

Title: Locus:1.1.1.2913.10 File:"2013-07-02 CLN FXIII 30 min 1st F 4.wiff"

Data file C:\Program Files (x86)\Matrix Science\Mascot Daemon\mgf\1 FXIII 30 min 1st\mascot\_daemon\_merge.mgf

Click mouse within plot area to zoom in by factor of two about that point

Or, Plot from  to  Da

Label all possible matches  Label matches used for scoring

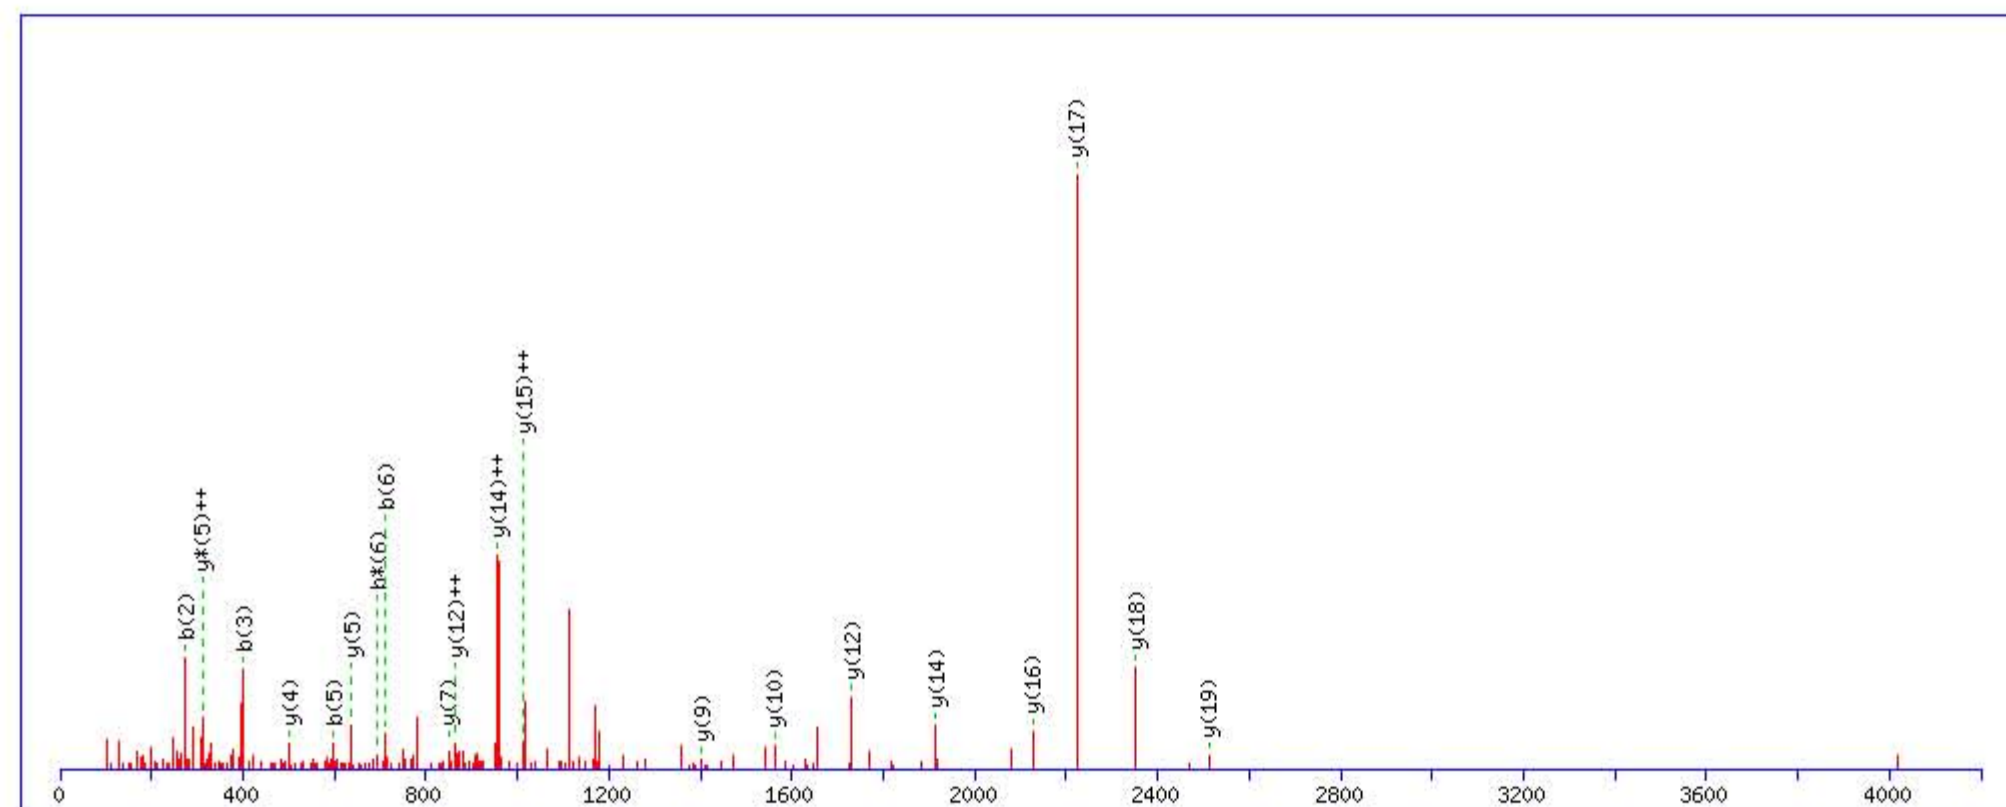

Monoisotopic mass of neutral peptide Mr(calc): 2624.436859

Fixed modifications: Carbamidomethyl (C) (apply to specified residues or termini only)

Variable modifications:

Q12 : Biotin:Thermo-21345 (Q)

Ions Score: 51 Expect: 7.6e-005

Matches : 20/186 fragment ions using 44 most intense peaks [\(help\)](#)

| #  | b                 | b <sup>++</sup> | b <sup>*</sup>    | b <sup>*++</sup> | b <sup>0</sup> | b <sup>0++</sup> | Seq. | y                  | y <sup>++</sup>    | y <sup>*</sup> | y <sup>*++</sup>  | y <sup>0</sup> | y <sup>0++</sup> | #  |
|----|-------------------|-----------------|-------------------|------------------|----------------|------------------|------|--------------------|--------------------|----------------|-------------------|----------------|------------------|----|
| 1  | 114.091340        | 57.549308       |                   |                  |                |                  | L    |                    |                    |                |                   |                |                  | 20 |
| 2  | <b>274.121989</b> | 137.564632      |                   |                  |                |                  | C    | <b>2512.360078</b> | 1256.683677        | 2495.333529    | 1248.170402       | 2494.349513    | 1247.678394      | 19 |
| 3  | <b>402.180567</b> | 201.593921      | 385.154018        | 193.080647       |                |                  | Q    | <b>2352.329429</b> | 1176.668352        | 2335.302880    | 1168.155078       | 2334.318864    | 1167.663070      | 18 |
| 4  | 499.233331        | 250.120303      | 482.206782        | 241.607029       |                |                  | P    | <b>2224.270851</b> | 1112.639063        | 2207.244302    | 1104.125789       | 2206.260286    | 1103.633781      | 17 |
| 5  | <b>598.301745</b> | 299.654511      | 581.275196        | 291.141236       |                |                  | V    | <b>2127.218087</b> | 1064.112681        | 2110.191538    | 1055.599407       | 2109.207522    | 1055.107399      | 16 |
| 6  | <b>711.385809</b> | 356.196543      | <b>694.359260</b> | 347.683268       |                |                  | L    | 2028.149673        | <b>1014.578475</b> | 2011.123124    | 1006.065200       | 2010.139108    | 1005.573192      | 15 |
| 7  | 808.438573        | 404.722925      | 791.412024        | 396.209650       |                |                  | P    | <b>1915.065609</b> | <b>958.036443</b>  | 1898.039060    | 949.523168        | 1897.055044    | 949.031160       | 14 |
| 8  | 895.470601        | 448.238939      | 878.444052        | 439.725664       | 877.460036     | 439.233656       | S    | 1818.012845        | 909.510061         | 1800.986296    | 900.996786        | 1800.002280    | 900.504778       | 13 |
| 9  | 992.523365        | 496.765321      | 975.496816        | 488.252046       | 974.512800     | 487.760038       | P    | <b>1730.980817</b> | <b>865.994047</b>  | 1713.954268    | 857.480772        |                |                  | 12 |
| 10 | 1063.560479       | 532.283878      | 1046.533930       | 523.770603       | 1045.549914    | 523.278595       | A    | 1633.928053        | 817.467665         | 1616.901504    | 808.954390        |                |                  | 11 |
| 11 | 1223.591128       | 612.299202      | 1206.564579       | 603.785928       | 1205.580563    | 603.293920       | C    | <b>1562.890939</b> | 781.949108         | 1545.864390    | 773.435833        |                |                  | 10 |
| 12 | 1662.816454       | 831.911865      | 1645.789905       | 823.398591       | 1644.805889    | 822.906583       | Q    | <b>1402.860290</b> | 701.933783         | 1385.833741    | 693.420509        |                |                  | 9  |
| 13 | 1775.900518       | 888.453897      | 1758.873969       | 879.940623       | 1757.889953    | 879.448614       | L    | 963.634964         | 482.321120         | 946.608415     | 473.807846        |                |                  | 8  |
| 14 | 1874.968932       | 937.988104      | 1857.942383       | 929.474830       | 1856.958367    | 928.982822       | V    | <b>850.550900</b>  | 425.779088         | 833.524351     | 417.265814        |                |                  | 7  |
| 15 | 1988.052996       | 994.530136      | 1971.026447       | 986.016862       | 1970.042431    | 985.524853       | L    | 751.482486         | 376.244881         | 734.455937     | 367.731607        |                |                  | 6  |
| 16 | 2125.111908       | 1063.059592     | 2108.085359       | 1054.546317      | 2107.101343    | 1054.054309      | H    | <b>638.398422</b>  | 319.702849         | 621.371873     | <b>311.189575</b> |                |                  | 5  |
| 17 | 2253.170486       | 1127.088881     | 2236.143937       | 1118.575606      | 2235.159921    | 1118.083598      | Q    | <b>501.339510</b>  | 251.173393         | 484.312961     | 242.660119        |                |                  | 4  |
| 18 | 2366.254550       | 1183.630913     | 2349.228001       | 1175.117638      | 2348.243985    | 1174.625630      | I    | 373.280932         | 187.144104         | 356.254383     | 178.630830        |                |                  | 3  |
| 19 | 2479.338614       | 1240.172945     | 2462.312065       | 1231.659670      | 2461.328049    | 1231.167663      | L    | 260.196868         | 130.602072         | 243.170319     | 122.088798        |                |                  | 2  |
| 20 |                   |                 |                   |                  |                |                  | K    | 147.112804         | 74.060040          | 130.086255     | 65.546765         |                |                  | 1  |

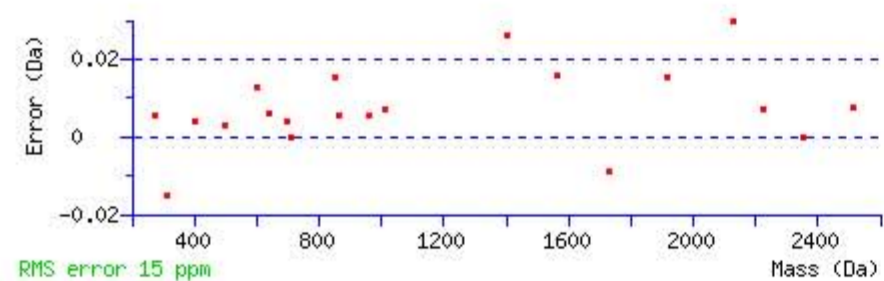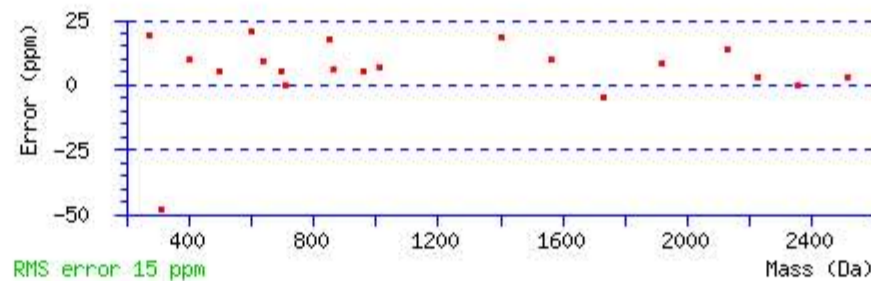

NCBI BLAST search of **LCQPVLSPACQLVLHQILK**

(Parameters: blastp, nr protein database, expect=20000, no filter, PAM30)

Other BLAST [web gateways](#)

All matches to this query

| Score | Mr(calc):   | Delta    | Sequence                            |
|-------|-------------|----------|-------------------------------------|
| 51.2  | 2624.436859 | 0.017093 | <a href="#">LCQPVLSPACQLVLHQILK</a> |
| 23.7  | 2624.436859 | 0.017093 | <a href="#">LCQPVLSPACQLVLHQILK</a> |



**Peptide View**

MS/MS Fragmentation of **IIGLDQVAGMSETALPGAFK**  
 Found in **MYH9\_HUMAN**, Myosin-9 OS=Homo sapiens GN=MYH9 PE=1 SV=4

Match to Query 64715: 2328.213552 from(777.078460,3+) rtinseconds(2823) index(68457)  
 Title: Locus:1.1.1.2978.12 File:"2013-07-02 CLN FXIII 30 min 1st F 4.wiff"  
 Data file C:\Program Files (x86)\Matrix Science\Mascot Daemon\mgf\1 FXIII 30 min 1st\mascot\_daemon\_merge.mgf

Click mouse within plot area to zoom in by factor of two about that point  
 Or, Plot from  to  Da   
 Label all possible matches  Label matches used for scoring

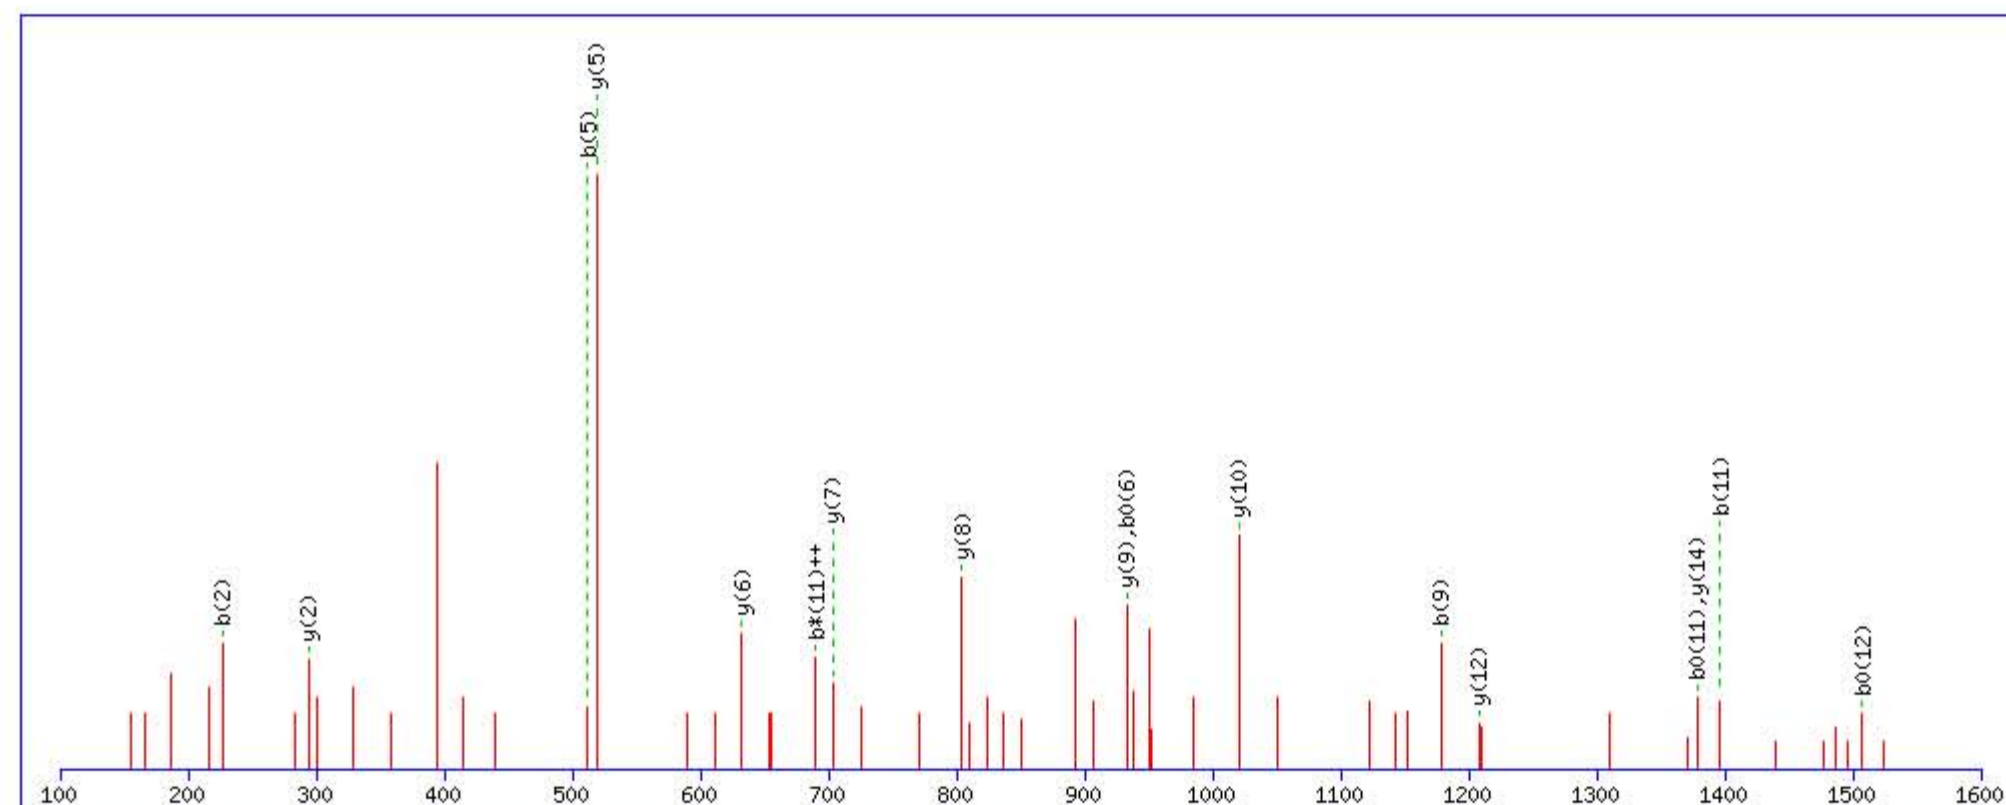

Monoisotopic mass of neutral peptide Mr(calc): 2328.222153  
 Fixed modifications: Carbamidomethyl (C) (apply to specified residues or termini only)  
 Variable modifications:  
 Q6 : Biotin:Thermo-21345 (Q)  
 Ions Score: 51 Expect: 0.00022  
 Matches : 17/196 fragment ions using 27 most intense peaks [\(help\)](#)

| #  | b                  | b <sup>++</sup> | b <sup>*</sup> | b <sup>*++</sup>  | b <sup>0</sup>     | b <sup>0++</sup> | Seq. | y                  | y <sup>++</sup> | y <sup>*</sup> | y <sup>*++</sup> | y <sup>0</sup> | y <sup>0++</sup> | #  |
|----|--------------------|-----------------|----------------|-------------------|--------------------|------------------|------|--------------------|-----------------|----------------|------------------|----------------|------------------|----|
| 1  | 114.091340         | 57.549308       |                |                   |                    |                  | I    |                    |                 |                |                  |                |                  | 20 |
| 2  | <b>227.175404</b>  | 114.091340      |                |                   |                    |                  | I    | 2216.145376        | 1108.576326     | 2199.118827    | 1100.063051      | 2198.134811    | 1099.571043      | 19 |
| 3  | 284.196868         | 142.602072      |                |                   |                    |                  | G    | 2103.061312        | 1052.034294     | 2086.034763    | 1043.521019      | 2085.050747    | 1043.029011      | 18 |
| 4  | 397.280932         | 199.144104      |                |                   |                    |                  | L    | 2046.039848        | 1023.523562     | 2029.013299    | 1015.010288      | 2028.029283    | 1014.518279      | 17 |
| 5  | <b>512.307875</b>  | 256.657576      |                |                   | 494.297310         | 247.652293       | D    | 1932.955784        | 966.981530      | 1915.929235    | 958.468255       | 1914.945219    | 957.976247       | 16 |
| 6  | 951.533201         | 476.270239      | 934.506652     | 467.756964        | <b>933.522636</b>  | 467.264956       | Q    | 1817.928841        | 909.468058      | 1800.902292    | 900.954784       | 1799.918276    | 900.462776       | 15 |
| 7  | 1050.601615        | 525.804446      | 1033.575066    | 517.291171        | 1032.591050        | 516.799163       | V    | <b>1378.703515</b> | 689.855395      | 1361.676966    | 681.342121       | 1360.692950    | 680.850113       | 14 |
| 8  | 1121.638729        | 561.323003      | 1104.612180    | 552.809728        | 1103.628164        | 552.317720       | A    | 1279.635101        | 640.321188      | 1262.608552    | 631.807914       | 1261.624536    | 631.315906       | 13 |
| 9  | <b>1178.660193</b> | 589.833734      | 1161.633644    | 581.320460        | 1160.649628        | 580.828452       | G    | <b>1208.597987</b> | 604.802631      | 1191.571438    | 596.289357       | 1190.587422    | 595.797349       | 12 |
| 10 | 1309.700678        | 655.353977      | 1292.674129    | 646.840703        | 1291.690113        | 646.348694       | M    | 1151.576523        | 576.291900      | 1134.549974    | 567.778625       | 1133.565958    | 567.286617       | 11 |
| 11 | <b>1396.732706</b> | 698.869991      | 1379.706157    | <b>690.356717</b> | <b>1378.722141</b> | 689.864709       | S    | <b>1020.536038</b> | 510.771657      | 1003.509489    | 502.258382       | 1002.525473    | 501.766374       | 10 |
| 12 | 1525.775299        | 763.391288      | 1508.748750    | 754.878013        | <b>1507.764734</b> | 754.386005       | E    | <b>933.504010</b>  | 467.255643      | 916.477461     | 458.742368       | 915.493445     | 458.250360       | 9  |
| 13 | 1626.822978        | 813.915127      | 1609.796429    | 805.401853        | 1608.812413        | 804.909845       | T    | <b>804.461417</b>  | 402.734346      | 787.434868     | 394.221072       | 786.450852     | 393.729064       | 8  |
| 14 | 1697.860092        | 849.433684      | 1680.833543    | 840.920410        | 1679.849527        | 840.428402       | A    | <b>703.413738</b>  | 352.210507      | 686.387189     | 343.697232       |                |                  | 7  |
| 15 | 1810.944156        | 905.975716      | 1793.917607    | 897.462442        | 1792.933591        | 896.970434       | L    | <b>632.376624</b>  | 316.691950      | 615.350075     | 308.178675       |                |                  | 6  |
| 16 | 1907.996920        | 954.502098      | 1890.970371    | 945.988824        | 1889.986355        | 945.496816       | P    | <b>519.292560</b>  | 260.149918      | 502.266011     | 251.636643       |                |                  | 5  |
| 17 | 1965.018384        | 983.012830      | 1947.991835    | 974.499556        | 1947.007819        | 974.007547       | G    | 422.239796         | 211.623536      | 405.213247     | 203.110261       |                |                  | 4  |
| 18 | 2036.055498        | 1018.531387     | 2019.028949    | 1010.018113       | 2018.044933        | 1009.526105      | A    | 365.218332         | 183.112804      | 348.191783     | 174.599529       |                |                  | 3  |
| 19 | 2183.123912        | 1092.065594     | 2166.097363    | 1083.552319       | 2165.113347        | 1083.060311      | F    | <b>294.181218</b>  | 147.594247      | 277.154669     | 139.080972       |                |                  | 2  |
| 20 |                    |                 |                |                   |                    |                  | K    | 147.112804         | 74.060040       | 130.086255     | 65.546765        |                |                  | 1  |

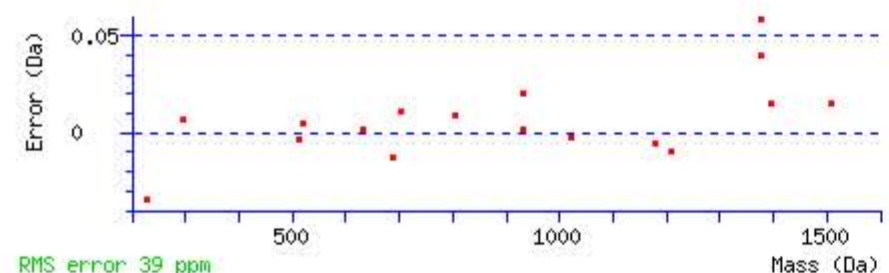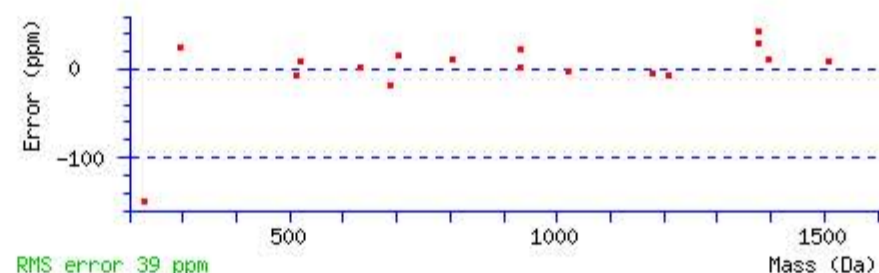

NCBI BLAST search of **IIGLDQVAGMSETALPGAFK**  
 (Parameters: blastp, nr protein database, expect=20000, no filter, PAM30)  
 Other BLAST [web gateways](#)

**All matches to this query**

| Score | Mr(calc):   | Delta     | Sequence                             |
|-------|-------------|-----------|--------------------------------------|
| 51.0  | 2328.222153 | -0.008601 | <a href="#">IIGLDQVAGMSETALPGAFK</a> |



# MASCOT Search Results

## Peptide View

MS/MS Fragmentation of **QVLLVGAPTYDDVSK**

Found in **PHLD\_HUMAN**, Phosphatidylinositol-glycan-specific phospholipase D OS=Homo sapiens GN=GPLD1 PE=1 SV=3

Match to Query 54694: 1915.029308 from(958.521930,2+) rtinseconds(2294) index(64997)

Title: Locus:1.1.1.2796.11 File:"2013-07-02 CLN FXIII 30 min 1st F 4.wiff"

Data file C:\Program Files (x86)\Matrix Science\Mascot Daemon\mgf\1 FXIII 30 min 1st\mascot\_daemon\_merge.mgf

Click mouse within plot area to zoom in by factor of two about that point

Or, Plot from  to  Da

Label all possible matches  Label matches used for scoring

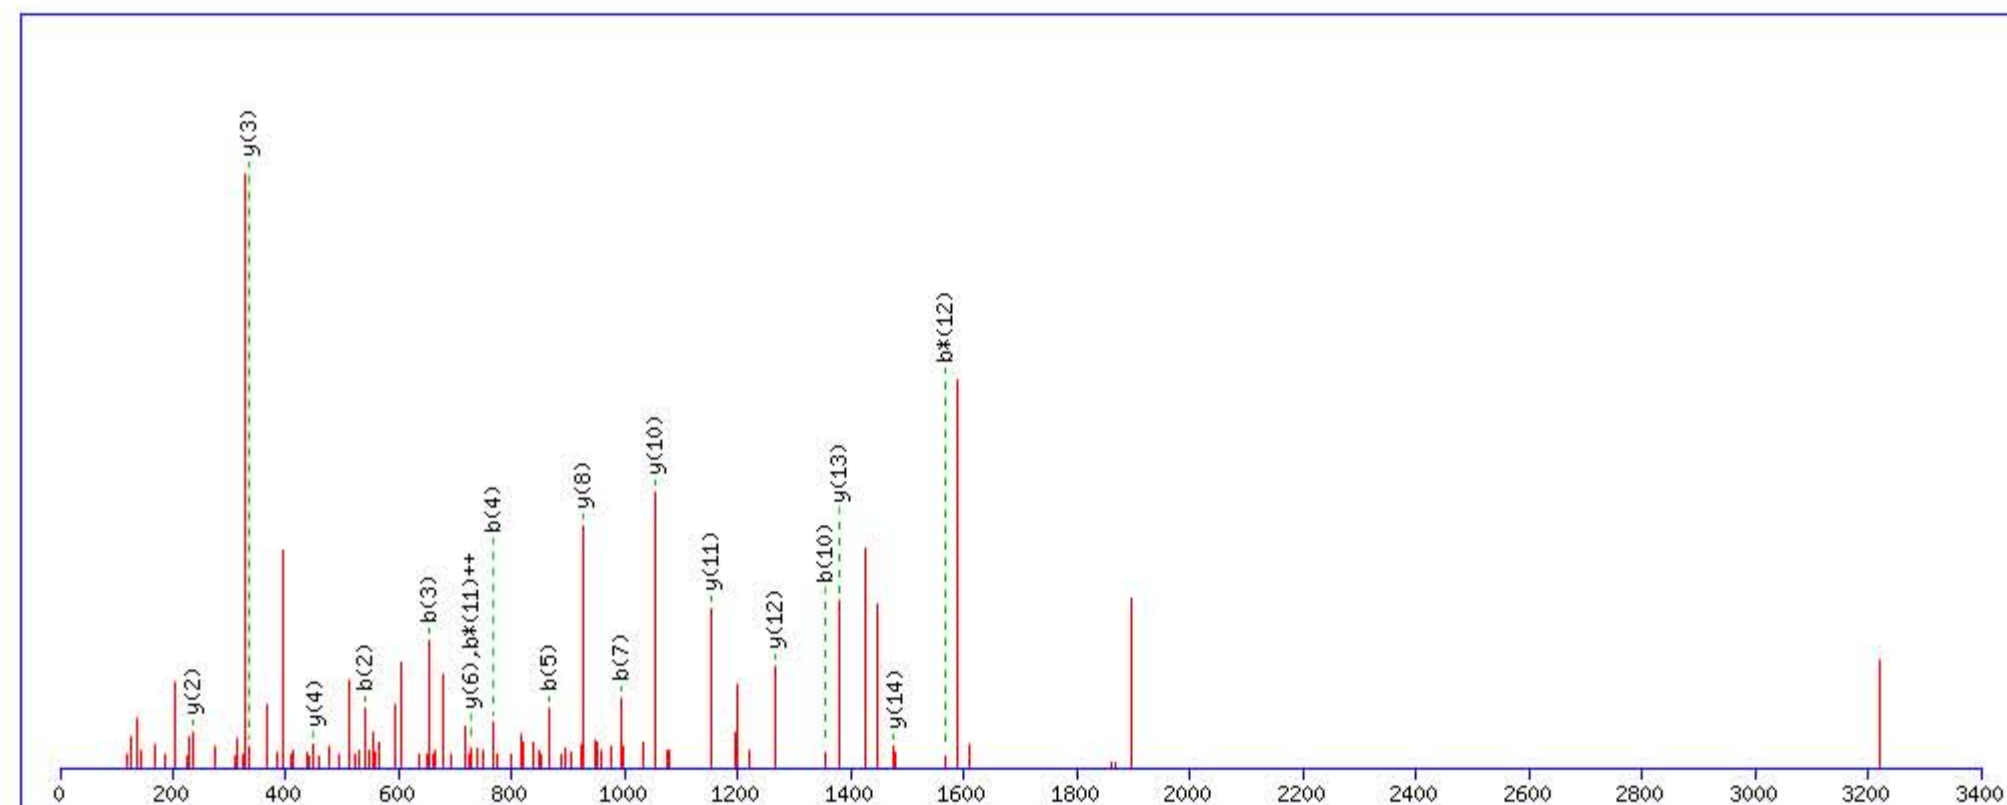

Monoisotopic mass of neutral peptide Mr(calc): 1915.012497

Fixed modifications: Carbamidomethyl (C) (apply to specified residues or termini only)

Variable modifications:

Q1 : Biotin:Thermo-21345 (Q)

Ions Score: 34 Expect: 0.0029

Matches : 18/150 fragment ions using 59 most intense peaks [\(help\)](#)

| #  | b                  | b <sup>++</sup> | b <sup>*</sup>     | b <sup>***</sup>  | b <sup>0</sup> | b <sup>0++</sup> | Seq. | y                  | y <sup>++</sup> | y <sup>*</sup> | y <sup>***</sup> | y <sup>0</sup> | y <sup>0++</sup> | #  |
|----|--------------------|-----------------|--------------------|-------------------|----------------|------------------|------|--------------------|-----------------|----------------|------------------|----------------|------------------|----|
| 1  | 440.232602         | 220.619939      | 423.206053         | 212.106664        |                |                  | Q    |                    |                 |                |                  |                |                  | 15 |
| 2  | <b>539.301016</b>  | 270.154146      | 522.274467         | 261.640872        |                |                  | V    | <b>1476.794438</b> | 738.900857      | 1459.767889    | 730.387583       | 1458.783873    | 729.895575       | 14 |
| 3  | <b>652.385080</b>  | 326.696178      | 635.358531         | 318.182904        |                |                  | L    | <b>1377.726024</b> | 689.366650      | 1360.699475    | 680.853376       | 1359.715459    | 680.361368       | 13 |
| 4  | <b>765.469144</b>  | 383.238210      | 748.442595         | 374.724936        |                |                  | L    | <b>1264.641960</b> | 632.824618      | 1247.615411    | 624.311344       | 1246.631395    | 623.819336       | 12 |
| 5  | <b>864.537558</b>  | 432.772417      | 847.511009         | 424.259143        |                |                  | V    | <b>1151.557896</b> | 576.282586      | 1134.531347    | 567.769312       | 1133.547331    | 567.277304       | 11 |
| 6  | 921.559022         | 461.283149      | 904.532473         | 452.769875        |                |                  | G    | <b>1052.489482</b> | 526.748379      | 1035.462933    | 518.235105       | 1034.478917    | 517.743097       | 10 |
| 7  | <b>992.596136</b>  | 496.801706      | 975.569587         | 488.288432        |                |                  | A    | 995.468018         | 498.237647      | 978.441469     | 489.724373       | 977.457453     | 489.232365       | 9  |
| 8  | 1089.648900        | 545.328088      | 1072.622351        | 536.814814        |                |                  | P    | <b>924.430904</b>  | 462.719090      | 907.404355     | 454.205816       | 906.420339     | 453.713808       | 8  |
| 9  | 1190.696579        | 595.851927      | 1173.670030        | 587.338653        | 1172.686014    | 586.846645       | T    | 827.378140         | 414.192708      | 810.351591     | 405.679434       | 809.367575     | 405.187426       | 7  |
| 10 | <b>1353.759908</b> | 677.383592      | 1336.733359        | 668.870318        | 1335.749343    | 668.378310       | Y    | <b>726.330461</b>  | 363.668869      | 709.303912     | 355.155594       | 708.319896     | 354.663586       | 6  |
| 11 | 1468.786851        | 734.897064      | 1451.760302        | <b>726.383789</b> | 1450.776286    | 725.891781       | D    | 563.267132         | 282.137204      | 546.240583     | 273.623930       | 545.256567     | 273.131922       | 5  |
| 12 | 1583.813794        | 792.410535      | <b>1566.787245</b> | 783.897261        | 1565.803229    | 783.405253       | D    | <b>448.240189</b>  | 224.623733      | 431.213640     | 216.110458       | 430.229624     | 215.618450       | 4  |
| 13 | 1682.882208        | 841.944742      | 1665.855659        | 833.431468        | 1664.871643    | 832.939460       | V    | <b>333.213246</b>  | 167.110261      | 316.186697     | 158.596987       | 315.202681     | 158.104979       | 3  |
| 14 | 1769.914236        | 885.460756      | 1752.887687        | 876.947482        | 1751.903671    | 876.455474       | S    | <b>234.144832</b>  | 117.576054      | 217.118283     | 109.062780       | 216.134267     | 108.570772       | 2  |
| 15 |                    |                 |                    |                   |                |                  | K    | 147.112804         | 74.060040       | 130.086255     | 65.546765        |                |                  | 1  |

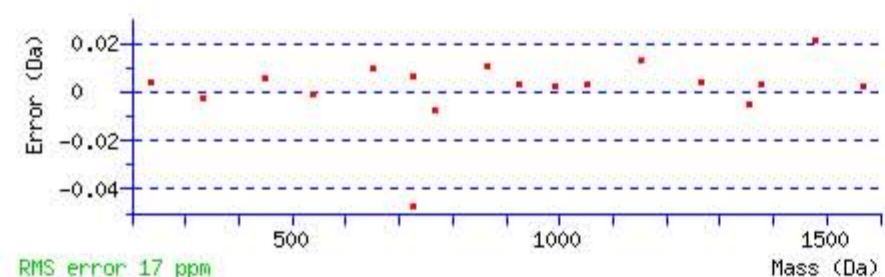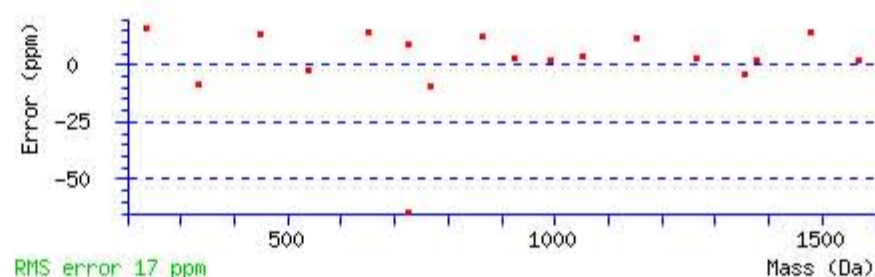

NCBI BLAST search of **QVLLVGAPTYDDVSK**

(Parameters: blastp, nr protein database, expect=20000, no filter, PAM30)

Other BLAST [web gateways](#)

All matches to this query

| Score | Mr(calc):   | Delta    | Sequence                        |
|-------|-------------|----------|---------------------------------|
| 34.3  | 1915.012497 | 0.016811 | <a href="#">QVLLVGAPTYDDVSK</a> |
| 7.0   | 1915.027710 | 0.001598 | <a href="#">DYPIYLLKFKQCLSK</a> |
| 2.9   | 1915.008438 | 0.020870 | <a href="#">VIQKNQEETTSISK</a>  |

Mascot: <http://www.matrixscience.com/>



# MASCOT Search Results

## Peptide View

MS/MS Fragmentation of **VSSVVEECQK**

Found in **KLKB1\_HUMAN**, Plasma kallikrein OS=Homo sapiens GN=KLKB1 PE=1 SV=1

Match to Query 38014: 1375.644448 from(688.829500,2+) rtinseconds(1408) index(76160)

Title: Locus:1.1.1.2369.26 File:"2013-07-02 CLN FXIII 30 min 1st FT.wiff"

Data file C:\Program Files (x86)\Matrix Science\Mascot Daemon\mgf\1 FXIII 30 min 1st\mascot\_daemon\_merge.mgf

Click mouse within plot area to zoom in by factor of two about that point

Or, Plot from  to  Da

Label all possible matches  Label matches used for scoring

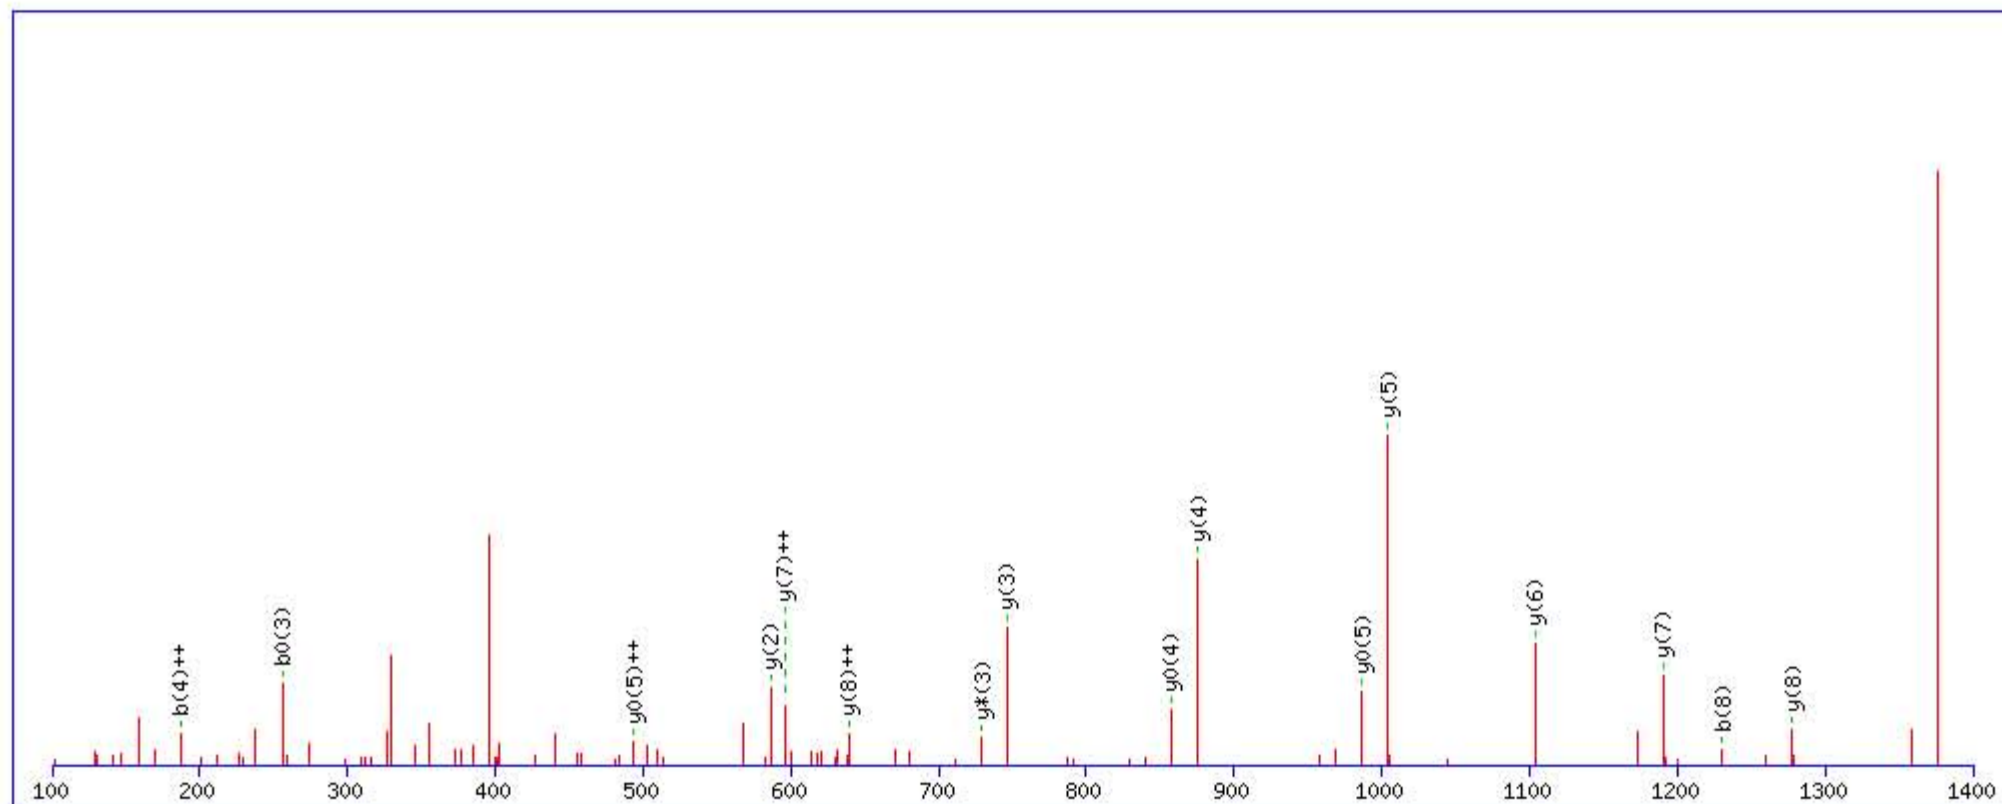

Monoisotopic mass of neutral peptide Mr(calc): 1375.647568

Fixed modifications: Carbamidomethyl (C) (apply to specified residues or termini only)

Variable modifications:

Q8 : Biotin:Thermo-21345 (Q)

Ions Score: 51 Expect: 8e-005

Matches : 17/74 fragment ions using 25 most intense peaks [\(help\)](#)

| # | b                  | b <sup>++</sup>   | b <sup>*</sup> | b <sup>*++</sup> | b <sup>0</sup>    | b <sup>0++</sup> | Seq. | y                  | y <sup>++</sup>   | y <sup>*</sup>    | y <sup>*++</sup> | y <sup>0</sup>    | y <sup>0++</sup>  | # |
|---|--------------------|-------------------|----------------|------------------|-------------------|------------------|------|--------------------|-------------------|-------------------|------------------|-------------------|-------------------|---|
| 1 | 100.075690         | 50.541483         |                |                  |                   |                  | V    |                    |                   |                   |                  |                   |                   | 9 |
| 2 | <b>187.107718</b>  | 94.057497         |                |                  | 169.097153        | 85.052214        | S    | <b>1277.586435</b> | <b>639.296856</b> | 1260.559886       | 630.783581       | 1259.575870       | 630.291573        | 8 |
| 3 | 274.139746         | 137.573511        |                |                  | <b>256.129181</b> | 128.568229       | S    | <b>1190.554407</b> | <b>595.780842</b> | 1173.527858       | 587.267567       | 1172.543842       | 586.775559        | 7 |
| 4 | 373.208160         | <b>187.107718</b> |                |                  | 355.197595        | 178.102436       | V    | <b>1103.522379</b> | 552.264828        | 1086.495830       | 543.751553       | 1085.511814       | 543.259545        | 6 |
| 5 | 502.250753         | 251.629015        |                |                  | 484.240188        | 242.623732       | E    | <b>1004.453965</b> | 502.730621        | 987.427416        | 494.217346       | <b>986.443400</b> | <b>493.725338</b> | 5 |
| 6 | 631.293346         | 316.150311        |                |                  | 613.282781        | 307.145029       | E    | <b>875.411372</b>  | 438.209324        | 858.384823        | 429.696050       | <b>857.400807</b> | 429.204042        | 4 |
| 7 | 791.323995         | 396.165636        |                |                  | 773.313430        | 387.160353       | C    | <b>746.368779</b>  | 373.688028        | <b>729.342230</b> | 365.174753       |                   |                   | 3 |
| 8 | <b>1230.549321</b> | 615.778299        | 1213.522772    | 607.265024       | 1212.538756       | 606.773016       | Q    | <b>586.338130</b>  | 293.672703        | 569.311581        | 285.159429       |                   |                   | 2 |
| 9 |                    |                   |                |                  |                   |                  | K    | 147.112804         | 74.060040         | 130.086255        | 65.546765        |                   |                   | 1 |

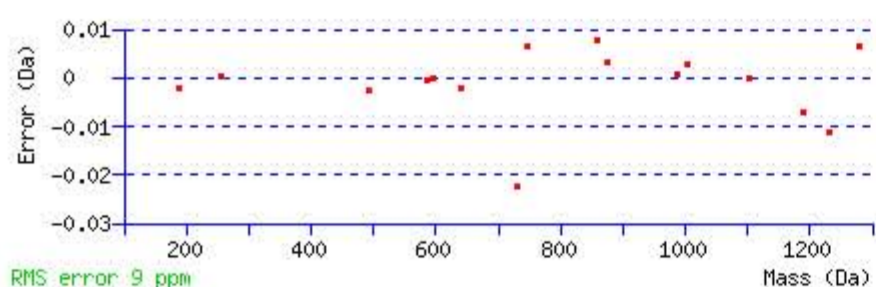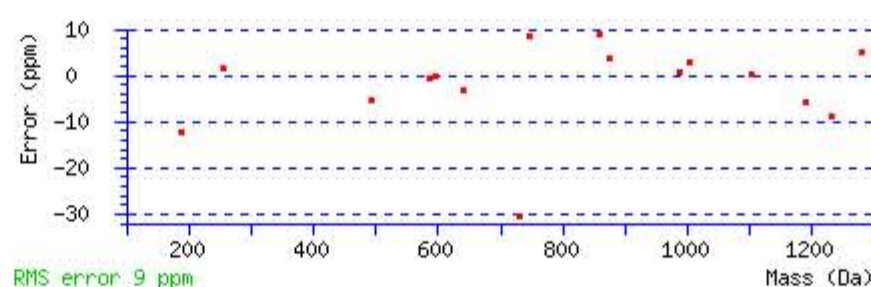

NCBI BLAST search of **VSSVVEECQK**

(Parameters: blastp, nr protein database, expect=20000, no filter, PAM30)

Other BLAST [web gateways](#)

All matches to this query

| Score | Mr(calc):   | Delta     | Sequence                   |
|-------|-------------|-----------|----------------------------|
| 51.3  | 1375.647568 | -0.003120 | <a href="#">VSSVVEECQK</a> |
| 7.2   | 1375.662827 | -0.018379 | <a href="#">GFSIPECQK</a>  |
| 0.5   | 1375.644196 | 0.000252  | <a href="#">DFQESSPQK</a>  |



# MASCOT SEARCH RESULTS

## Peptide View

MS/MS Fragmentation of **VNIPLVTNEECQK**

Found in **KLKB1\_HUMAN**, Plasma kallikrein OS=Homo sapiens GN=KLKB1 PE=1 SV=1

Match to Query 53502: 1853.956008 from(927.985280,2+) rtinseconds(2163) index(81348)

Title: Locus:1.1.1.2632.21 File:"2013-07-02 CLN FXIII 30 min 1st FT.wiff"

Data file C:\Program Files (x86)\Matrix Science\Mascot Daemon\mgf1 FXIII 30 min 1st\mascot\_daemon\_merge.mgf

Click mouse within plot area to zoom in by factor of two about that point

Or, Plot from  to  Da

Label all possible matches  Label matches used for scoring

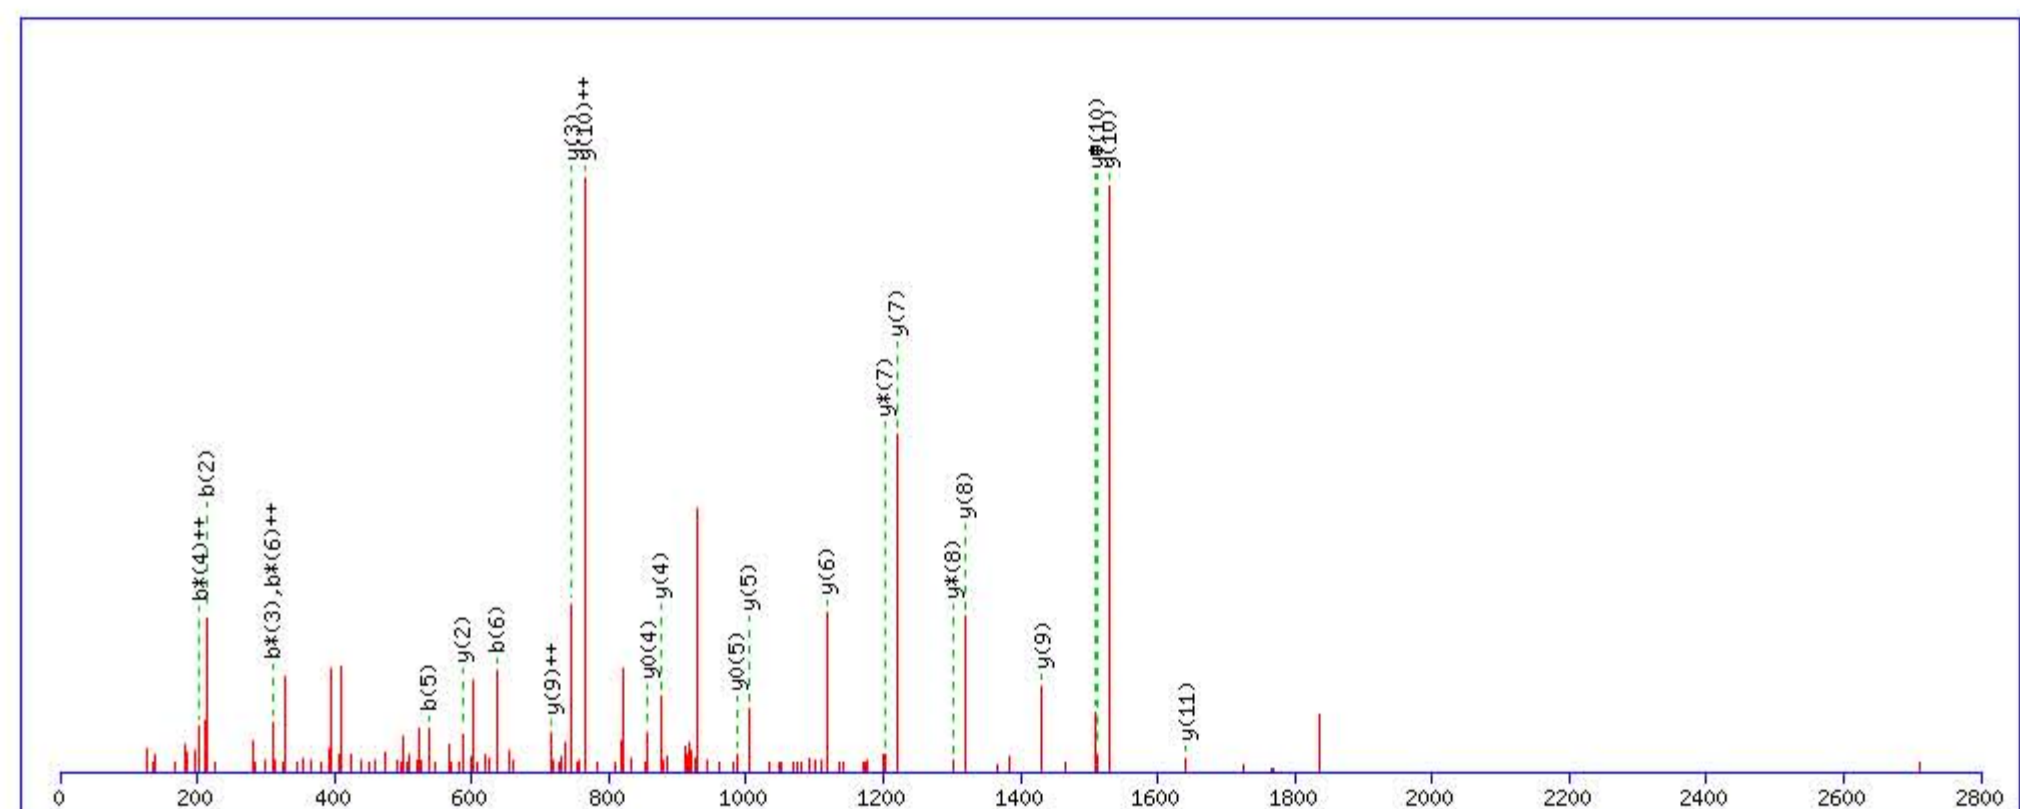

Monoisotopic mass of neutral peptide Mr(calc): 1853.937927

Fixed modifications: Carbamidomethyl (C) (apply to specified residues or termini only)

Variable modifications:

Q12 : Biotin:Thermo-21345 (Q)

Ions Score: 56 Expect: 7.2e-005

Matches : 24/124 fragment ions using 47 most intense peaks [\(help\)](#)

| #  | b                 | b <sup>++</sup> | b <sup>*</sup>    | b <sup>*++</sup>  | b <sup>0</sup> | b <sup>0++</sup> | Seq. | y                  | y <sup>++</sup>   | y <sup>*</sup>     | y <sup>*++</sup> | y <sup>0</sup>     | y <sup>0++</sup> | #  |
|----|-------------------|-----------------|-------------------|-------------------|----------------|------------------|------|--------------------|-------------------|--------------------|------------------|--------------------|------------------|----|
| 1  | 100.075690        | 50.541483       |                   |                   |                |                  | V    |                    |                   |                    |                  |                    |                  | 13 |
| 2  | <b>214.118617</b> | 107.562947      | 197.092068        | 99.049672         |                |                  | N    | 1755.876804        | 878.442040        | 1738.850255        | 869.928766       | 1737.866239        | 869.436758       | 12 |
| 3  | 327.202681        | 164.104978      | <b>310.176132</b> | 155.591704        |                |                  | I    | <b>1641.833877</b> | 821.420577        | 1624.807328        | 812.907302       | 1623.823312        | 812.415294       | 11 |
| 4  | 424.255445        | 212.631360      | 407.228896        | <b>204.118086</b> |                |                  | P    | <b>1528.749813</b> | <b>764.878545</b> | <b>1511.723264</b> | 756.365270       | <b>1510.739248</b> | 755.873262       | 10 |
| 5  | <b>537.339509</b> | 269.173393      | 520.312960        | 260.660118        |                |                  | L    | <b>1431.697049</b> | <b>716.352163</b> | 1414.670500        | 707.838888       | 1413.686484        | 707.346880       | 9  |
| 6  | <b>636.407923</b> | 318.707600      | 619.381374        | <b>310.194325</b> |                |                  | V    | <b>1318.612985</b> | 659.810131        | <b>1301.586436</b> | 651.296856       | 1300.602420        | 650.804848       | 8  |
| 7  | 737.455602        | 369.231439      | 720.429053        | 360.718165        | 719.445037     | 360.226157       | T    | <b>1219.544571</b> | 610.275924        | <b>1202.518022</b> | 601.762649       | 1201.534006        | 601.270641       | 7  |
| 8  | 851.498529        | 426.252903      | 834.471980        | 417.739628        | 833.487964     | 417.247620       | N    | <b>1118.496892</b> | 559.752084        | 1101.470343        | 551.238810       | 1100.486327        | 550.746802       | 6  |
| 9  | 980.541122        | 490.774199      | 963.514573        | 482.260924        | 962.530557     | 481.768916       | E    | <b>1004.453965</b> | 502.730621        | 987.427416         | 494.217346       | <b>986.443400</b>  | 493.725338       | 5  |
| 10 | 1109.583715       | 555.295496      | 1092.557166       | 546.782221        | 1091.573150    | 546.290213       | E    | <b>875.411372</b>  | 438.209324        | 858.384823         | 429.696050       | <b>857.400807</b>  | 429.204042       | 4  |
| 11 | 1269.614364       | 635.310820      | 1252.587815       | 626.797546        | 1251.603799    | 626.305538       | C    | <b>746.368779</b>  | 373.688028        | 729.342230         | 365.174753       |                    |                  | 3  |
| 12 | 1708.839690       | 854.923483      | 1691.813141       | 846.410209        | 1690.829125    | 845.918201       | Q    | <b>586.338130</b>  | 293.672703        | 569.311581         | 285.159429       |                    |                  | 2  |
| 13 |                   |                 |                   |                   |                |                  | K    | 147.112804         | 74.060040         | 130.086255         | 65.546765        |                    |                  | 1  |

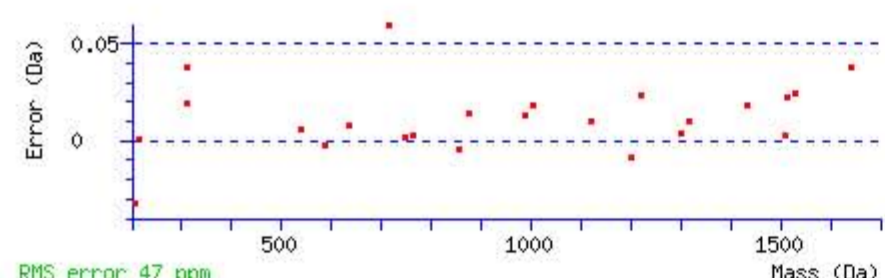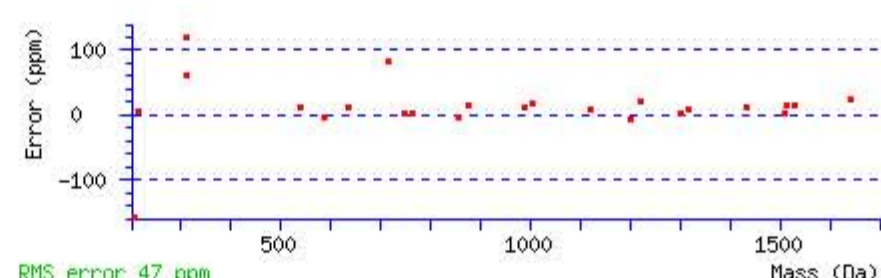

NCBI BLAST search of **VNIPLVTNEECQK**

(Parameters: blastp, nr protein database, expect=20000, no filter, PAM30)

Other BLAST [web gateways](#)

All matches to this query

| Score | Mr(calc):   | Delta    | Sequence             |
|-------|-------------|----------|----------------------|
| 55.6  | 1853.937927 | 0.018081 | <b>VNIPLVTNEECQK</b> |

Mascot: <http://www.matrixscience.com/>



# MASCOT Search Results

## Peptide View

MS/MS Fragmentation of **QCGHQISACHR**

Found in **KLKB1\_HUMAN**, Plasma kallikrein OS=Homo sapiens GN=KLKB1 PE=1 SV=1

Match to Query 56078: 1974.940296 from(494.742350,4+) rtinseconds(1438) index(39952)

Title: Locus:1.1.1.2529.18 File:"2013-07-02 CLN FXIII 30 min 1st F 3.wiff"

Data file C:\Program Files (x86)\Matrix Science\Mascot Daemon\mgf1 FXIII 30 min 1st\mascot\_daemon\_merge.mgf

Click mouse within plot area to zoom in by factor of two about that point

Or, Plot from  to  Da

Label all possible matches  Label matches used for scoring

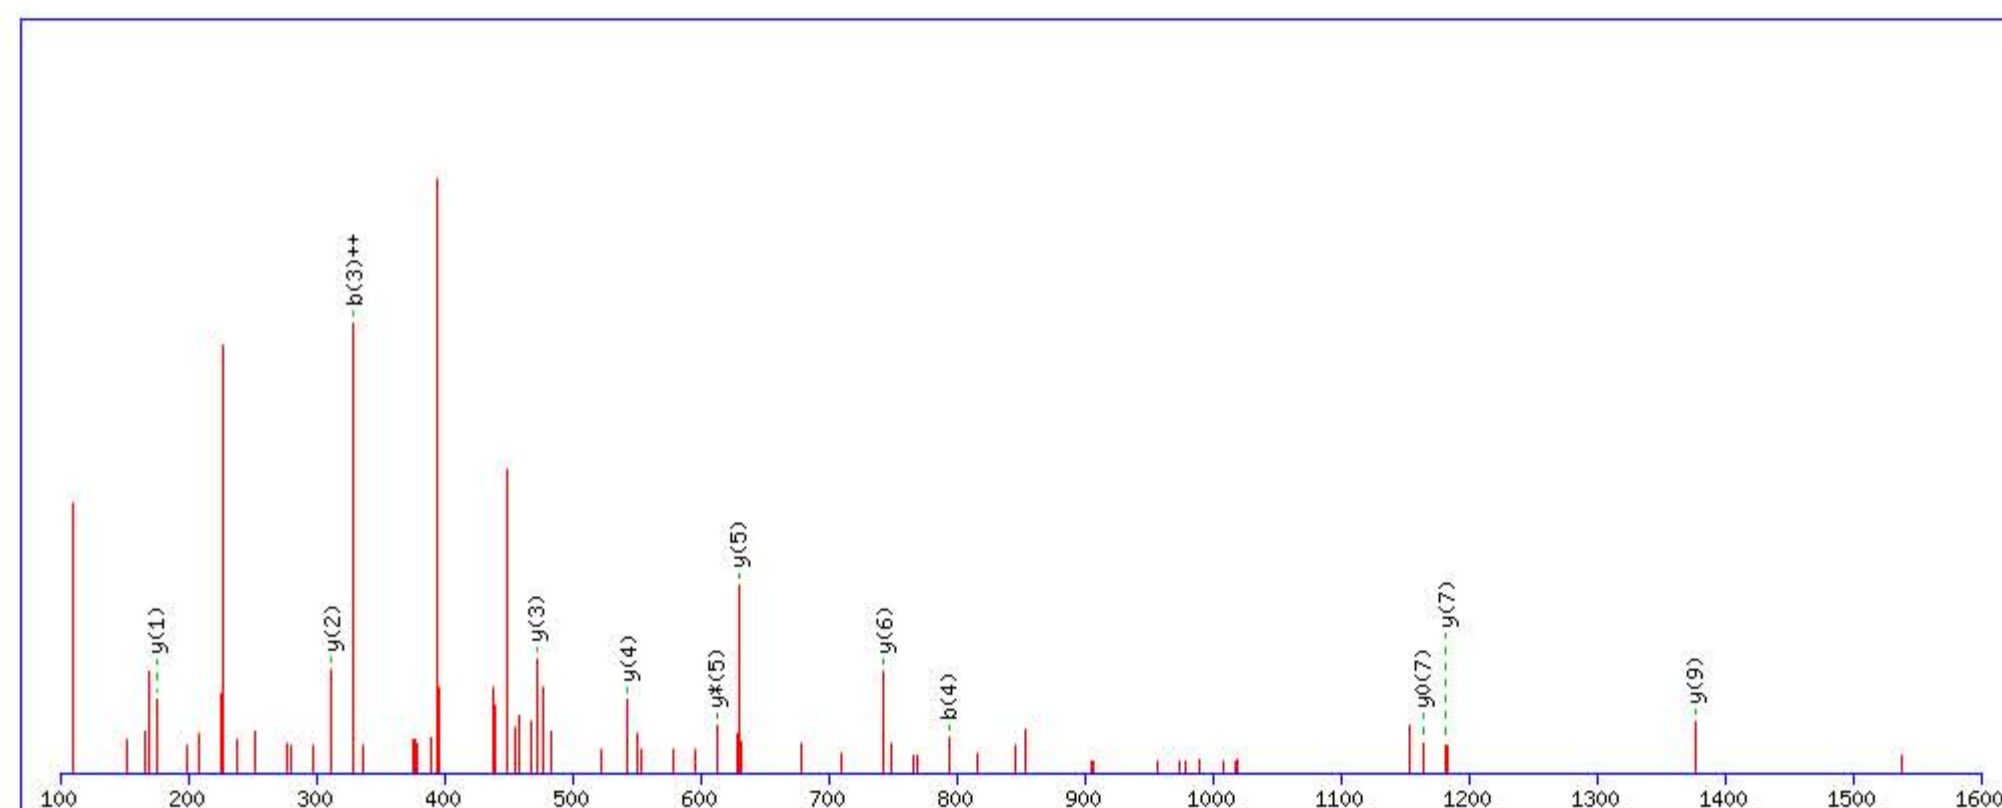

Monoisotopic mass of neutral peptide Mr(calc): 1974.916122

Fixed modifications: Carbamidomethyl (C) (apply to specified residues or termini only)

Variable modifications:

Q1 : Biotin:Thermo-21345 (Q)

Q5 : Biotin:Thermo-21345 (Q)

Ions Score: 26 Expect: 0.051

Matches : 12/100 fragment ions using 34 most intense peaks [\(help\)](#)

| #  | b           | b <sup>++</sup> | b <sup>*</sup> | b <sup>*++</sup> | b <sup>0</sup> | b <sup>0++</sup> | Seq. | y           | y <sup>++</sup> | y <sup>*</sup> | y <sup>*++</sup> | y <sup>0</sup> | y <sup>0++</sup> | #  |
|----|-------------|-----------------|----------------|------------------|----------------|------------------|------|-------------|-----------------|----------------|------------------|----------------|------------------|----|
| 1  | 440.232602  | 220.619939      | 423.206053     | 212.106664       |                |                  | Q    |             |                 |                |                  |                |                  | 11 |
| 2  | 600.263251  | 300.635264      | 583.236702     | 292.121989       |                |                  | C    | 1536.698070 | 768.852673      | 1519.671521    | 760.339399       | 1518.687505    | 759.847391       | 10 |
| 3  | 657.284715  | 329.145996      | 640.258166     | 320.632721       |                |                  | G    | 1376.667421 | 688.837349      | 1359.640872    | 680.324074       | 1358.656856    | 679.832066       | 9  |
| 4  | 794.343627  | 397.675452      | 777.317078     | 389.162177       |                |                  | H    | 1319.645957 | 660.326617      | 1302.619408    | 651.813342       | 1301.635392    | 651.321334       | 8  |
| 5  | 1233.568953 | 617.288115      | 1216.542404    | 608.774840       |                |                  | Q    | 1182.587045 | 591.797161      | 1165.560496    | 583.283886       | 1164.576480    | 582.791878       | 7  |
| 6  | 1346.653017 | 673.830147      | 1329.626468    | 665.316872       |                |                  | I    | 743.361719  | 372.184498      | 726.335170     | 363.671223       | 725.351154     | 363.179215       | 6  |
| 7  | 1433.685045 | 717.346161      | 1416.658496    | 708.832886       | 1415.674480    | 708.340878       | S    | 630.277655  | 315.642466      | 613.251106     | 307.129191       | 612.267090     | 306.637183       | 5  |
| 8  | 1504.722159 | 752.864718      | 1487.695610    | 744.351443       | 1486.711594    | 743.859435       | A    | 543.245627  | 272.126452      | 526.219078     | 263.613177       |                |                  | 4  |
| 9  | 1664.752808 | 832.880042      | 1647.726259    | 824.366768       | 1646.742243    | 823.874760       | C    | 472.208513  | 236.607894      | 455.181964     | 228.094620       |                |                  | 3  |
| 10 | 1801.811720 | 901.409498      | 1784.785171    | 892.896224       | 1783.801155    | 892.404216       | H    | 312.177864  | 156.592570      | 295.151315     | 148.079295       |                |                  | 2  |
| 11 |             |                 |                |                  |                |                  | R    | 175.118952  | 88.063114       | 158.092403     | 79.549839        |                |                  | 1  |

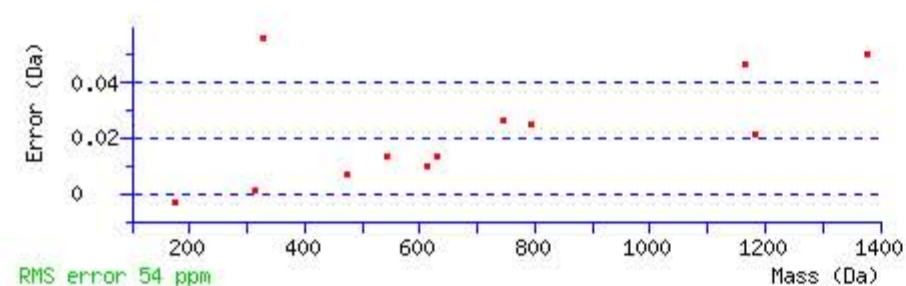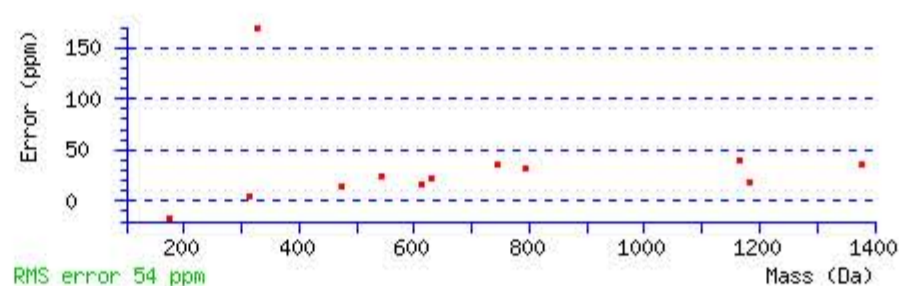

NCBI BLAST search of **QCGHQISACHR**

(Parameters: blastp, nr protein database, expect=20000, no filter, PAM30)

Other BLAST [web gateways](#)

All matches to this query

| Score | Mr(calc):   | Delta    | Sequence                    |
|-------|-------------|----------|-----------------------------|
| 25.5  | 1974.916122 | 0.024174 | <a href="#">QCGHQISACHR</a> |

Mascot: <http://www.matrixscience.com/>



# MASCOT Search Results

## Peptide View

MS/MS Fragmentation of **EAQLPVIENK**

Found in **PLMN\_HUMAN**, Plasminogen OS=Homo sapiens GN=PLG PE=1 SV=2

Match to Query 41157: 1450.787968 from(726.401260,2+) rtinseconds(2034) index(80498)

Title: Locus:1.1.1.2587.16 File:"2013-07-02 CLN FXIII 30 min 1st FT.wiff"

Data file C:\Program Files (x86)\Matrix Science\Mascot Daemon\mgf1 FXIII 30 min 1st\mascot\_daemon\_merge.mgf

Click mouse within plot area to zoom in by factor of two about that point

Or, Plot from  to  Da

Label all possible matches  Label matches used for scoring

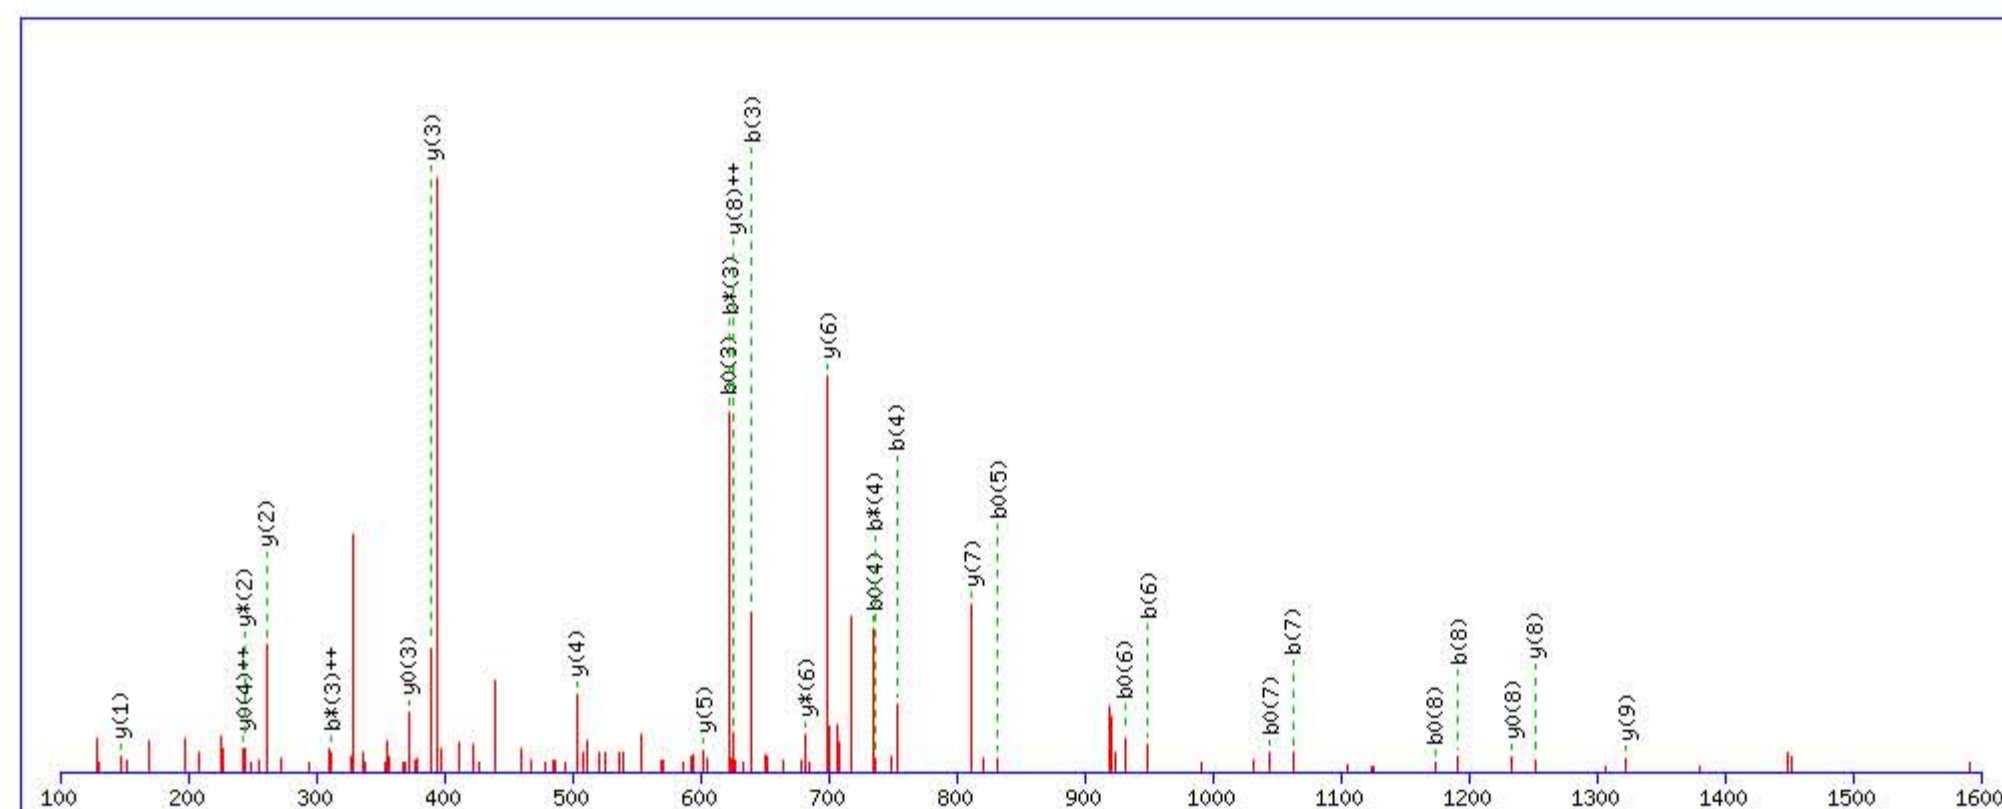

Monoisotopic mass of neutral peptide Mr(calc): 1450.785355

Fixed modifications: Carbamidomethyl (C) (apply to specified residues or termini only)

Variable modifications:

Q3 : Biotin:Thermo-21345 (Q)

Ions Score: 40 Expect: 0.00039

Matches : 29/100 fragment ions using 70 most intense peaks [\(help\)](#)

| #  | b                  | b <sup>++</sup> | b <sup>*</sup>    | b <sup>*++</sup>  | b <sup>0</sup>     | b <sup>0++</sup> | Seq. | y                  | y <sup>++</sup>   | y <sup>*</sup>    | y <sup>*++</sup> | y <sup>0</sup>     | y <sup>0++</sup>  | #  |
|----|--------------------|-----------------|-------------------|-------------------|--------------------|------------------|------|--------------------|-------------------|-------------------|------------------|--------------------|-------------------|----|
| 1  | 130.049869         | 65.528572       |                   |                   | 112.039304         | 56.523290        | E    |                    |                   |                   |                  |                    |                   | 10 |
| 2  | 201.086983         | 101.047130      |                   |                   | 183.076418         | 92.041847        | A    | <b>1322.750070</b> | 661.878673        | 1305.723521       | 653.365398       | 1304.739505        | 652.873390        | 9  |
| 3  | <b>640.312309</b>  | 320.659793      | <b>623.285760</b> | <b>312.146518</b> | <b>622.301744</b>  | 311.654510       | Q    | <b>1251.712956</b> | <b>626.360116</b> | 1234.686407       | 617.846841       | <b>1233.702391</b> | 617.354833        | 8  |
| 4  | <b>753.396373</b>  | 377.201825      | <b>736.369824</b> | 368.688550        | <b>735.385808</b>  | 368.196542       | L    | <b>812.487630</b>  | 406.747453        | 795.461081        | 398.234178       | 794.477065         | 397.742170        | 7  |
| 5  | 850.449137         | 425.728207      | 833.422588        | 417.214932        | <b>832.438572</b>  | 416.722924       | P    | <b>699.403566</b>  | 350.205421        | <b>682.377017</b> | 341.692146       | 681.393001         | 341.200138        | 6  |
| 6  | <b>949.517551</b>  | 475.262414      | 932.491002        | 466.749139        | <b>931.506986</b>  | 466.257131       | V    | <b>602.350802</b>  | 301.679039        | 585.324253        | 293.165764       | 584.340237         | 292.673756        | 5  |
| 7  | <b>1062.601615</b> | 531.804446      | 1045.575066       | 523.291171        | <b>1044.591050</b> | 522.799163       | I    | <b>503.282388</b>  | 252.144832        | 486.255839        | 243.631557       | 485.271823         | <b>243.139549</b> | 4  |
| 8  | <b>1191.644208</b> | 596.325742      | 1174.617659       | 587.812468        | <b>1173.633643</b> | 587.320459       | E    | <b>390.198324</b>  | 195.602800        | 373.171775        | 187.089525       | <b>372.187759</b>  | 186.597517        | 3  |
| 9  | 1305.687135        | 653.347205      | 1288.660586       | 644.833931        | 1287.676570        | 644.341923       | N    | <b>261.155731</b>  | 131.081503        | <b>244.129182</b> | 122.568229       |                    |                   | 2  |
| 10 |                    |                 |                   |                   |                    |                  | K    | <b>147.112804</b>  | 74.060040         | 130.086255        | 65.546765        |                    |                   | 1  |

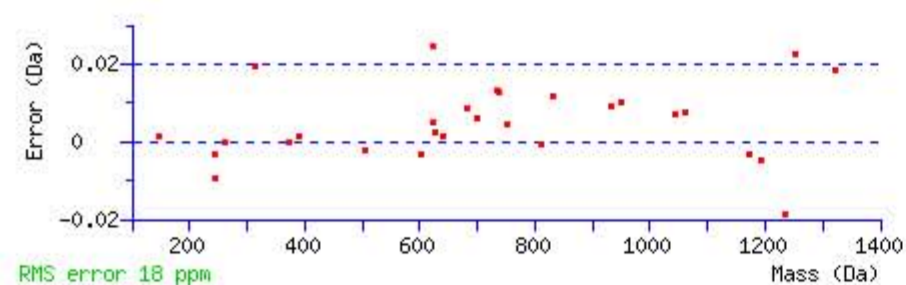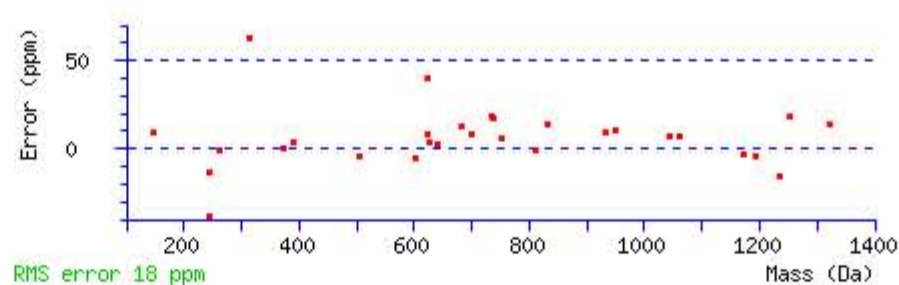

NCBI BLAST search of [EAQLPVIENK](#)

(Parameters: blastp, nr protein database, expect=20000, no filter, PAM30)

Other BLAST [web gateways](#)

All matches to this query

| Score | Mr(calc):   | Delta     | Sequence                        |
|-------|-------------|-----------|---------------------------------|
| 40.4  | 1450.785355 | 0.002613  | <a href="#">EAQLPVIENK</a>      |
| 3.9   | 1450.804459 | -0.016491 | <a href="#">AFLEVNRPQIHK</a>    |
| 1.2   | 1450.777985 | 0.009983  | <a href="#">AGTPSPIQLQSPAGK</a> |
| 0.3   | 1450.779312 | 0.008656  | <a href="#">AFNQTSHLIRHK</a>    |



# MASCOT Search Results

## Peptide View

MS/MS Fragmentation of **EQQCIVMAENR**

Found in **PLGB\_HUMAN**, Plasminogen-like protein B OS=Homo sapiens GN=PLGLB1 PE=1 SV=1

Match to Query 49259: 1687.780752 from(563.600860,3+) rtinseconds(1834) index(79144)

Title: Locus:1.1.1.2518.14 File:"2013-07-02 CLN FXIII 30 min 1st FT.wiff"

Data file C:\Program Files (x86)\Matrix Science\Mascot Daemon\mgf\1 FXIII 30 min 1st\mascot\_daemon\_merge.mgf

Click mouse within plot area to zoom in by factor of two about that point

Or, Plot from  to  Da

Label all possible matches  Label matches used for scoring

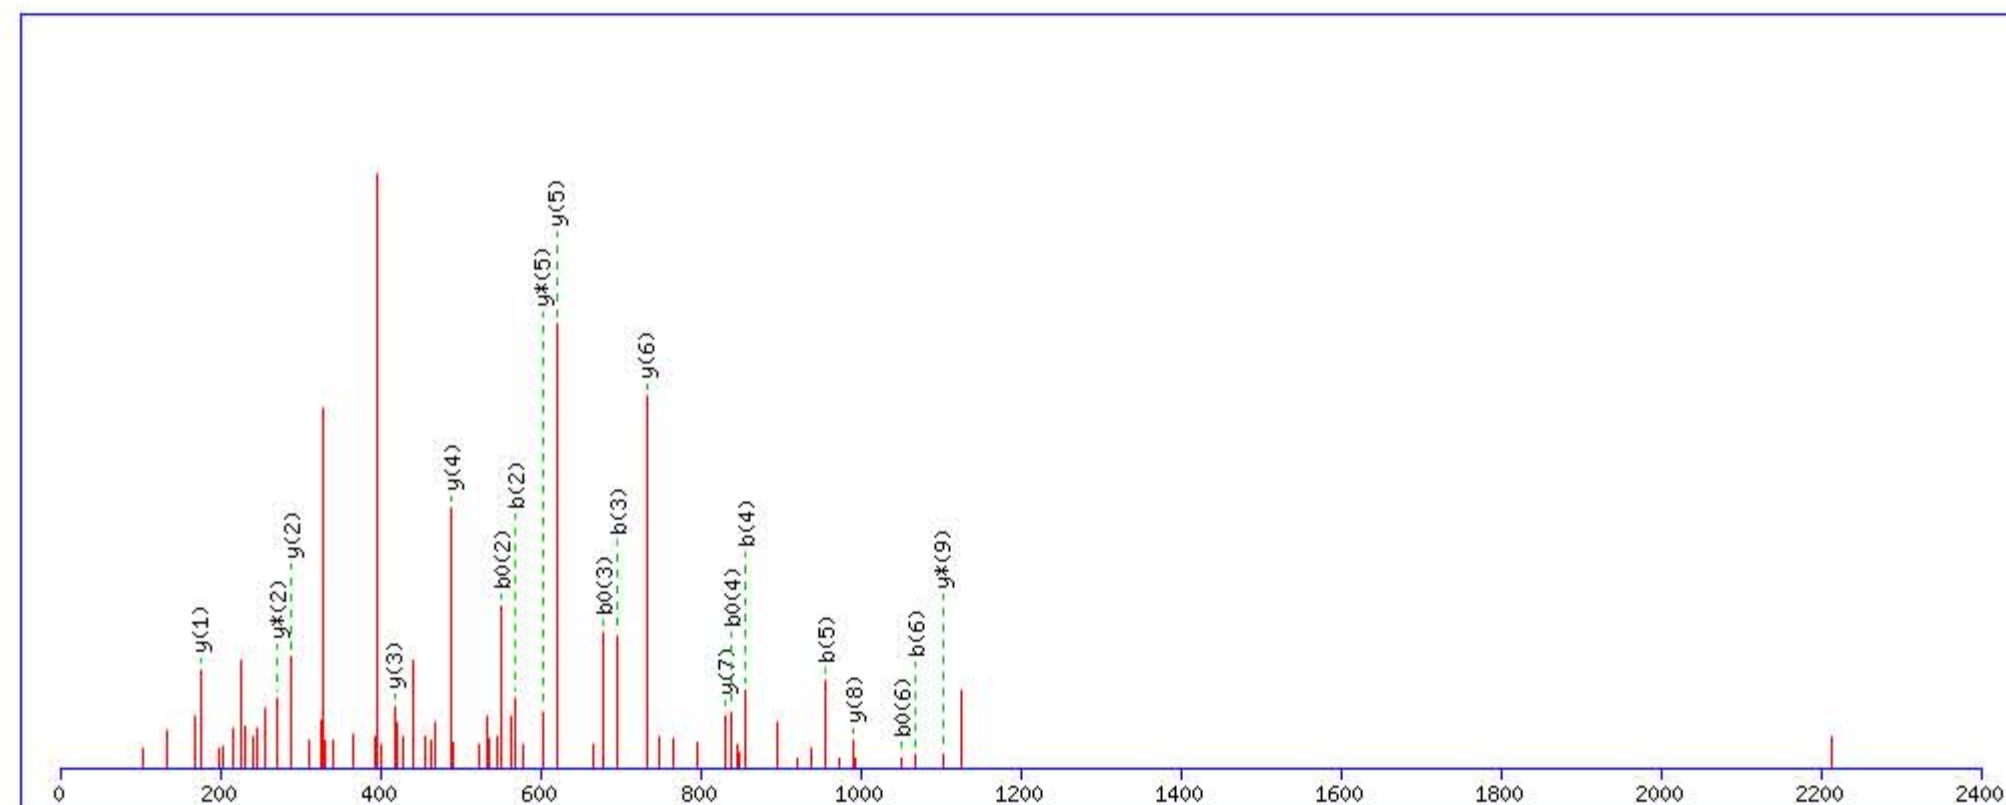

Monoisotopic mass of neutral peptide Mr(calc): 1687.784393

Fixed modifications: Carbamidomethyl (C) (apply to specified residues or termini only)

Variable modifications:

Q2 : Biotin:Thermo-21345 (Q)

Ions Score: 51 Expect: 5.2e-005

Matches : 20/114 fragment ions using 31 most intense peaks [\(help\)](#)

| #  | b                  | b <sup>++</sup> | b <sup>+</sup> | b <sup>+++</sup> | b <sup>0</sup>     | b <sup>0++</sup> | Seq. | y                 | y <sup>++</sup> | y <sup>+</sup>     | y <sup>+++</sup> | y <sup>0</sup> | y <sup>0++</sup> | #  |
|----|--------------------|-----------------|----------------|------------------|--------------------|------------------|------|-------------------|-----------------|--------------------|------------------|----------------|------------------|----|
| 1  | 130.049869         | 65.528572       |                |                  | 112.039304         | 56.523290        | E    |                   |                 |                    |                  |                |                  | 11 |
| 2  | <b>569.275195</b>  | 285.141236      | 552.248646     | 276.627961       | <b>551.264630</b>  | 276.135953       | Q    | 1559.749102       | 780.378189      | 1542.722553        | 771.864915       | 1541.738537    | 771.372907       | 10 |
| 3  | <b>697.333773</b>  | 349.170525      | 680.307224     | 340.657250       | <b>679.323208</b>  | 340.165242       | Q    | 1120.523776       | 560.765526      | <b>1103.497227</b> | 552.252252       | 1102.513211    | 551.760244       | 9  |
| 4  | <b>857.364422</b>  | 429.185849      | 840.337873     | 420.672575       | <b>839.353857</b>  | 420.180567       | C    | <b>992.465198</b> | 496.736237      | 975.438649         | 488.222963       | 974.454633     | 487.730955       | 8  |
| 5  | <b>956.432836</b>  | 478.720056      | 939.406287     | 470.206782       | 938.422271         | 469.714774       | V    | <b>832.434549</b> | 416.720913      | 815.408000         | 408.207638       | 814.423984     | 407.715630       | 7  |
| 6  | <b>1069.516900</b> | 535.262088      | 1052.490351    | 526.748814       | <b>1051.506335</b> | 526.256806       | I    | <b>733.366135</b> | 367.186706      | 716.339586         | 358.673431       | 715.355570     | 358.181423       | 6  |
| 7  | 1200.557385        | 600.782331      | 1183.530836    | 592.269056       | 1182.546820        | 591.777048       | M    | <b>620.282071</b> | 310.644674      | <b>603.255522</b>  | 302.131399       | 602.271506     | 301.639391       | 5  |
| 8  | 1271.594499        | 636.300888      | 1254.567950    | 627.787613       | 1253.583934        | 627.295605       | A    | <b>489.241586</b> | 245.124431      | 472.215037         | 236.611156       | 471.231021     | 236.119148       | 4  |
| 9  | 1400.637092        | 700.822184      | 1383.610543    | 692.308910       | 1382.626527        | 691.816902       | E    | <b>418.204472</b> | 209.605874      | 401.177923         | 201.092600       | 400.193907     | 200.600592       | 3  |
| 10 | 1514.680019        | 757.843648      | 1497.653470    | 749.330373       | 1496.669454        | 748.838365       | N    | <b>289.161879</b> | 145.084577      | <b>272.135330</b>  | 136.571303       |                |                  | 2  |
| 11 |                    |                 |                |                  |                    |                  | R    | <b>175.118952</b> | 88.063114       | 158.092403         | 79.549839        |                |                  | 1  |

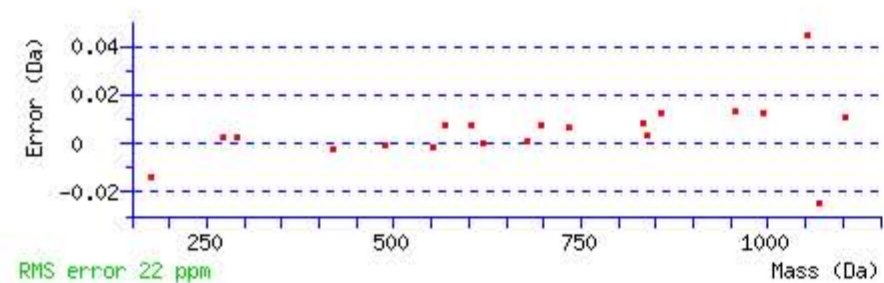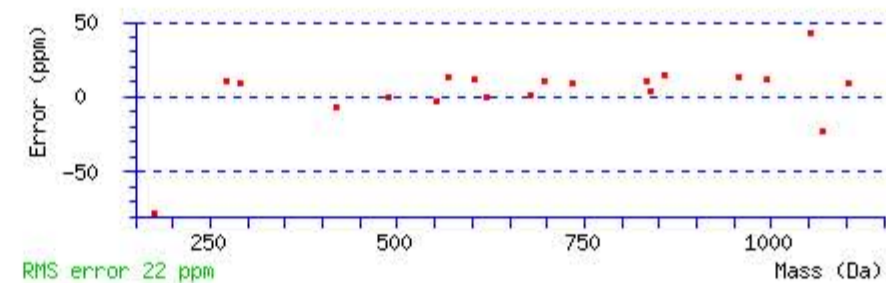

NCBI BLAST search of **EQQCIVMAENR**

(Parameters: blastp, nr protein database, expect=20000, no filter, PAM30)

Other BLAST [web gateways](#)

All matches to this query

| Score | Mr(calc):   | Delta     | Sequence                         |
|-------|-------------|-----------|----------------------------------|
| 50.7  | 1687.784393 | -0.003641 | <a href="#">EQQCIVMAENR</a>      |
| 44.8  | 1687.784393 | -0.003641 | <a href="#">EQQCIVMAENR</a>      |
| 4.8   | 1687.758408 | 0.022344  | <a href="#">ADGSCSTDFKTRSR</a>   |
| 3.7   | 1687.773666 | 0.007086  | <a href="#">ITGPPSGQMPDNPPHR</a> |
| 1.8   | 1687.787552 | -0.006800 | <a href="#">SDAYVCPLYKTSER</a>   |
| 0.6   | 1687.787552 | -0.006800 | <a href="#">GASEDGEYFLMIRGK</a>  |



# MASCOT Search Results

## Peptide View

MS/MS Fragmentation of **EQQCHEMAENR**

Found in **PLGB\_HUMAN**, Plasminogen-like protein B OS=Homo sapiens GN=PLGLB1 PE=1 SV=1

Match to Query 49260: 1687.788968 from(844.901760,2+) rtinseconds(1827) index(79090)

Title: Locus:1.1.1.2515.26 File:"2013-07-02 CLN FXIII 30 min 1st FT.wiff"

Data file C:\Program Files (x86)\Matrix Science\Mascot Daemon\mgf\1 FXIII 30 min 1st\mascot\_daemon\_merge.mgf

Click mouse within plot area to zoom in by factor of two about that point

Or, Plot from  to  Da

Label all possible matches  Label matches used for scoring

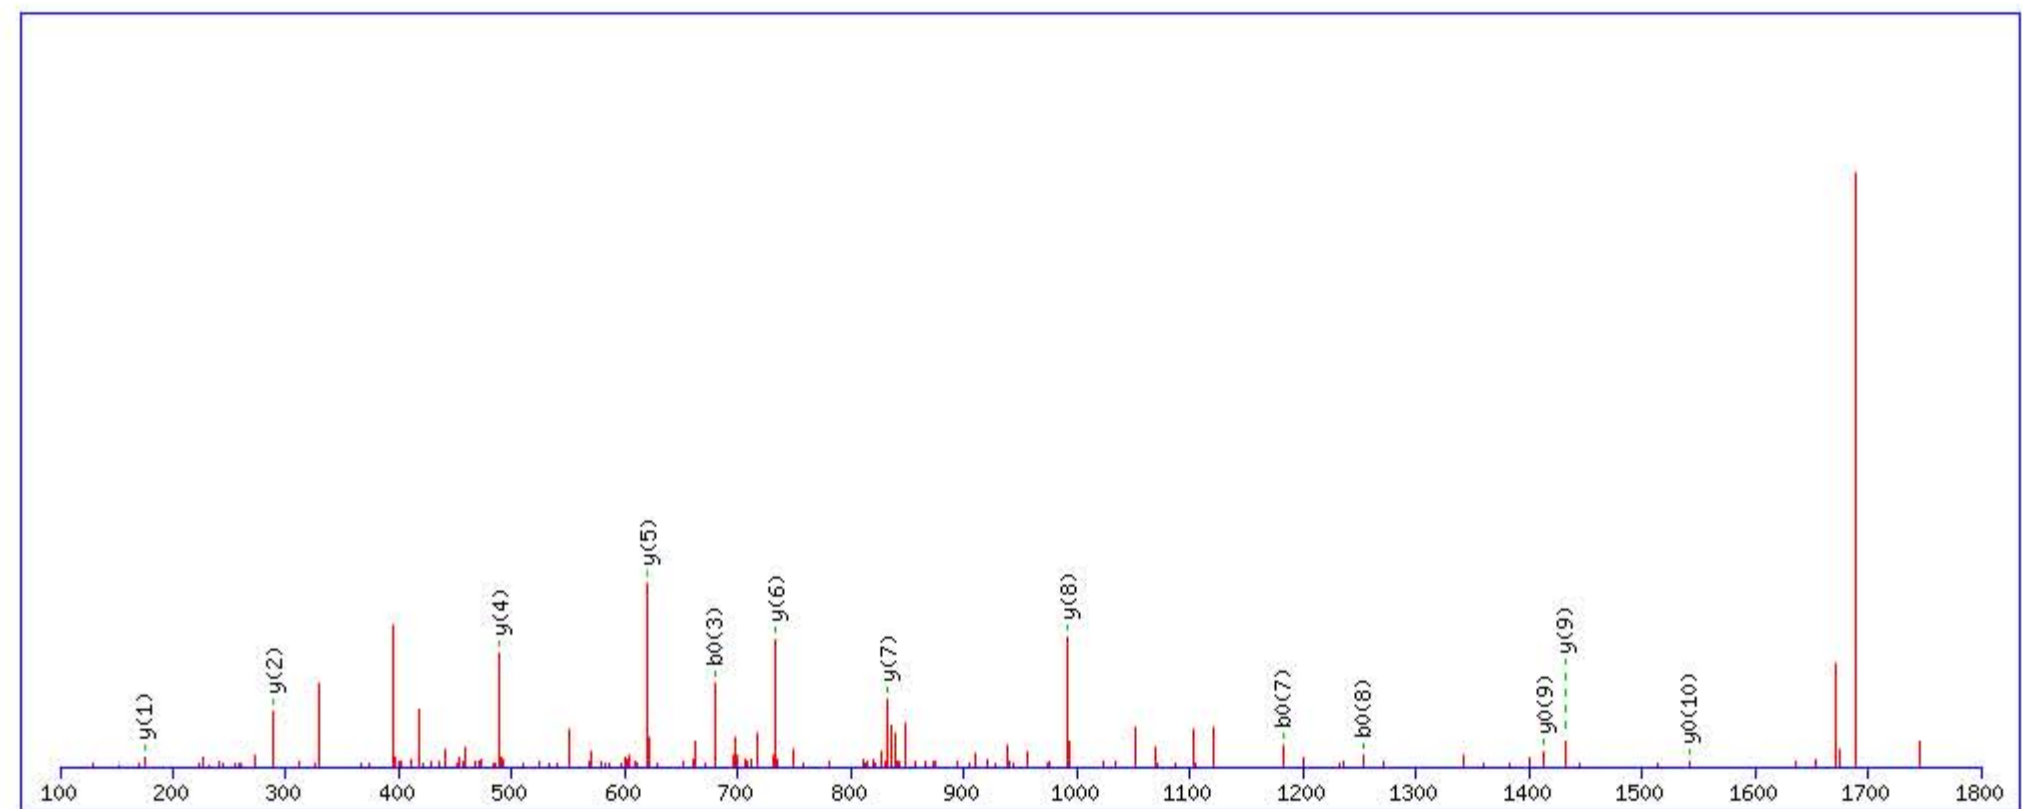

Monoisotopic mass of neutral peptide Mr(calc): 1687.784393

Fixed modifications: Carbamidomethyl (C) (apply to specified residues or termini only)

Variable modifications:

Q3 : Biotin:Thermo-21345 (Q)

Ions Score: 60 Expect: 1.3e-005

Matches : 13/114 fragment ions using 16 most intense peaks [\(help\)](#)

| #  | b           | b <sup>++</sup> | b <sup>*</sup> | b <sup>*++</sup> | b <sup>0</sup> | b <sup>0++</sup> | Seq. | y           | y <sup>++</sup> | y <sup>*</sup> | y <sup>*++</sup> | y <sup>0</sup> | y <sup>0++</sup> | #  |
|----|-------------|-----------------|----------------|------------------|----------------|------------------|------|-------------|-----------------|----------------|------------------|----------------|------------------|----|
| 1  | 130.049869  | 65.528572       |                |                  | 112.039304     | 56.523290        | E    |             |                 |                |                  |                |                  | 11 |
| 2  | 258.108447  | 129.557862      | 241.081898     | 121.044587       | 240.097882     | 120.552579       | Q    | 1559.749102 | 780.378189      | 1542.722553    | 771.864915       | 1541.738537    | 771.372907       | 10 |
| 3  | 697.333773  | 349.170525      | 680.307224     | 340.657250       | 679.323208     | 340.165242       | Q    | 1431.690524 | 716.348900      | 1414.663975    | 707.835626       | 1413.679959    | 707.343618       | 9  |
| 4  | 857.364422  | 429.185849      | 840.337873     | 420.672575       | 839.353857     | 420.180567       | C    | 992.465198  | 496.736237      | 975.438649     | 488.222963       | 974.454633     | 487.730955       | 8  |
| 5  | 956.432836  | 478.720056      | 939.406287     | 470.206782       | 938.422271     | 469.714774       | V    | 832.434549  | 416.720913      | 815.408000     | 408.207638       | 814.423984     | 407.715630       | 7  |
| 6  | 1069.516900 | 535.262088      | 1052.490351    | 526.748814       | 1051.506335    | 526.256806       | I    | 733.366135  | 367.186706      | 716.339586     | 358.673431       | 715.355570     | 358.181423       | 6  |
| 7  | 1200.557385 | 600.782331      | 1183.530836    | 592.269056       | 1182.546820    | 591.777048       | M    | 620.282071  | 310.644674      | 603.255522     | 302.131399       | 602.271506     | 301.639391       | 5  |
| 8  | 1271.594499 | 636.300888      | 1254.567950    | 627.787613       | 1253.583934    | 627.295605       | A    | 489.241586  | 245.124431      | 472.215037     | 236.611156       | 471.231021     | 236.119148       | 4  |
| 9  | 1400.637092 | 700.822184      | 1383.610543    | 692.308910       | 1382.626527    | 691.816902       | E    | 418.204472  | 209.605874      | 401.177923     | 201.092600       | 400.193907     | 200.600592       | 3  |
| 10 | 1514.680019 | 757.843648      | 1497.653470    | 749.330373       | 1496.669454    | 748.838365       | N    | 289.161879  | 145.084577      | 272.135330     | 136.571303       |                |                  | 2  |
| 11 |             |                 |                |                  |                |                  | R    | 175.118952  | 88.063114       | 158.092403     | 79.549839        |                |                  | 1  |

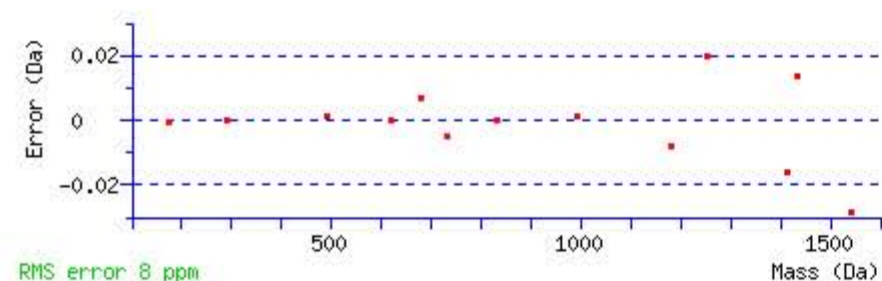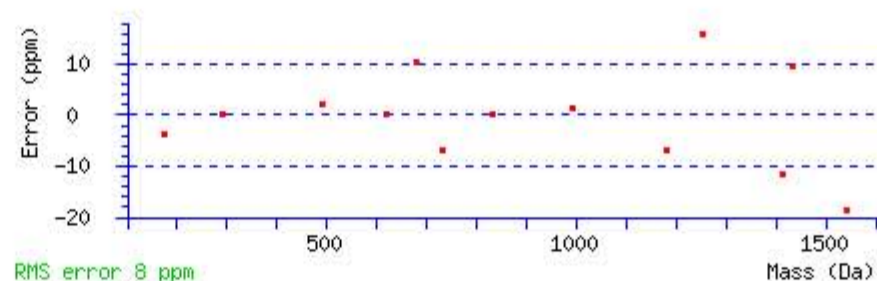

NCBI BLAST search of **EQQCHEMAENR**

(Parameters: blastp, nr protein database, expect=20000, no filter, PAM30)

Other BLAST [web gateways](#)

All matches to this query

| Score | Mr(calc):   | Delta     | Sequence                         |
|-------|-------------|-----------|----------------------------------|
| 59.5  | 1687.784393 | 0.004575  | <a href="#">EQQCHEMAENR</a>      |
| 56.3  | 1687.784393 | 0.004575  | <a href="#">EQQCHEMAENR</a>      |
| 7.2   | 1687.813370 | -0.024402 | <a href="#">MKQSPALAPEERCR</a>   |
| 6.5   | 1687.773666 | 0.015302  | <a href="#">TTGPPSGQMPDNPPHR</a> |
| 5.5   | 1687.781006 | 0.007962  | <a href="#">ELMAWNQAENR</a>      |
| 2.1   | 1687.773193 | 0.015775  | <a href="#">FGAVCTCMEKATGLK</a>  |
| 1.9   | 1687.788254 | 0.000714  | <a href="#">SQCHLSPISRSTR</a>    |



# MATRIX SCIENCE Mascot Search Results

## Peptide View

MS/MS Fragmentation of **APWCHTTNSQVR**

Found in **PLMN\_HUMAN**, Plasminogen OS=Homo sapiens GN=PLG PE=1 SV=2

Match to Query 51325: 1766.830242 from(589.950690,3+) rtinseconds(1548) index(77267)

Title: Locus:1.1.1.2418.18 File:"2013-07-02 CLN FXIII 30 min 1st FT.wiff"

Data file C:\Program Files (x86)\Matrix Science\Mascot Daemon\mgf1 FXIII 30 min 1st\mascot\_daemon\_merge.mgf

Click mouse within plot area to zoom in by factor of two about that point

Or, Plot from  to  Da

Label all possible matches  Label matches used for scoring

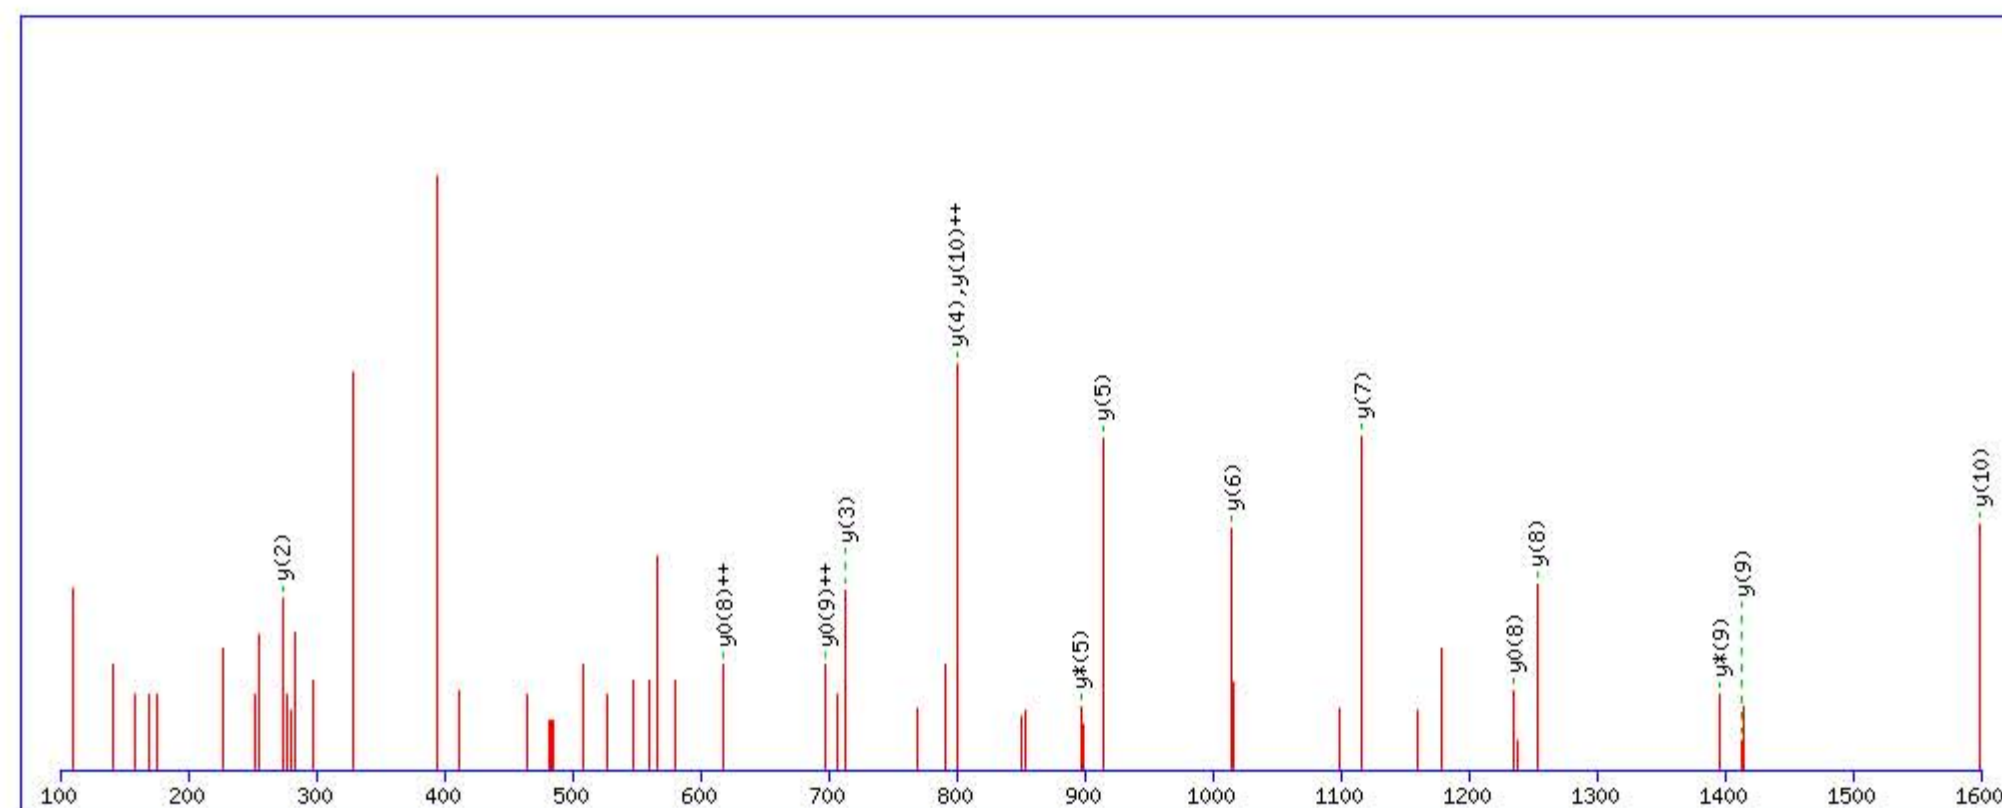

Monoisotopic mass of neutral peptide Mr(calc): 1766.834488

Fixed modifications: Carbamidomethyl (C) (apply to specified residues or termini only)

Variable modifications:

Q10 : Biotin:Thermo-21345 (Q)

Ions Score: 54 Expect: 6.1e-005

Matches : 15/102 fragment ions using 27 most intense peaks [\(help\)](#)

| #  | b           | b <sup>++</sup> | b <sup>+</sup> | b <sup>*++</sup> | b <sup>0</sup> | b <sup>0++</sup> | Seq. | y                  | y <sup>++</sup>   | y <sup>+</sup>     | y <sup>*++</sup> | y <sup>0</sup>     | y <sup>0++</sup>  | #  |
|----|-------------|-----------------|----------------|------------------|----------------|------------------|------|--------------------|-------------------|--------------------|------------------|--------------------|-------------------|----|
| 1  | 72.044390   | 36.525833       |                |                  |                |                  | A    |                    |                   |                    |                  |                    |                   | 12 |
| 2  | 169.097154  | 85.052215       |                |                  |                |                  | P    | 1696.804643        | 848.905960        | 1679.778094        | 840.392685       | 1678.794078        | 839.900677        | 11 |
| 3  | 355.176467  | 178.091872      |                |                  |                |                  | W    | <b>1599.751879</b> | <b>800.379578</b> | 1582.725330        | 791.866303       | 1581.741314        | 791.374295        | 10 |
| 4  | 515.207116  | 258.107196      |                |                  |                |                  | C    | <b>1413.672566</b> | 707.339921        | <b>1396.646017</b> | 698.826647       | 1395.662001        | <b>698.334639</b> | 9  |
| 5  | 652.266028  | 326.636652      |                |                  |                |                  | H    | <b>1253.641917</b> | 627.324597        | 1236.615368        | 618.811322       | <b>1235.631352</b> | <b>618.319314</b> | 8  |
| 6  | 753.313707  | 377.160492      |                |                  | 735.303142     | 368.155209       | T    | <b>1116.583005</b> | 558.795141        | 1099.556456        | 550.281866       | 1098.572440        | 549.789858        | 7  |
| 7  | 854.361386  | 427.684331      |                |                  | 836.350821     | 418.679049       | T    | <b>1015.535326</b> | 508.271301        | 998.508777         | 499.758027       | 997.524761         | 499.266019        | 6  |
| 8  | 968.404313  | 484.705795      | 951.377764     | 476.192520       | 950.393748     | 475.700512       | N    | <b>914.487647</b>  | 457.747462        | <b>897.461098</b>  | 449.234187       | 896.477082         | 448.742179        | 5  |
| 9  | 1055.436341 | 528.221809      | 1038.409792    | 519.708534       | 1037.425776    | 519.216526       | S    | <b>800.444720</b>  | 400.725998        | 783.418171         | 392.212724       | 782.434155         | 391.720716        | 4  |
| 10 | 1494.661667 | 747.834472      | 1477.635118    | 739.321197       | 1476.651102    | 738.829189       | Q    | <b>713.412692</b>  | 357.209984        | 696.386143         | 348.696710       |                    |                   | 3  |
| 11 | 1593.730081 | 797.368679      | 1576.703532    | 788.855404       | 1575.719516    | 788.363396       | V    | <b>274.187366</b>  | 137.597321        | 257.160817         | 129.084047       |                    |                   | 2  |
| 12 |             |                 |                |                  |                |                  | R    | 175.118952         | 88.063114         | 158.092403         | 79.549839        |                    |                   | 1  |

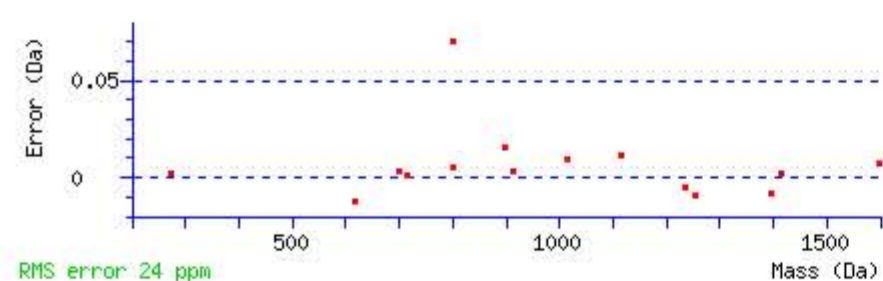

RMS error 24 ppm

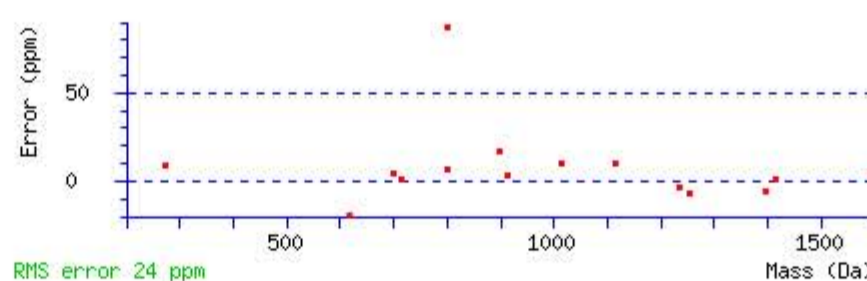

RMS error 24 ppm

NCBI BLAST search of **APWCHTTNSQVR**

(Parameters: blastp, nr protein database, expect=20000, no filter, PAM30)

Other BLAST [web gateways](#)

All matches to this query

| Score | Mr(calc):   | Delta     | Sequence                     |
|-------|-------------|-----------|------------------------------|
| 54.3  | 1766.834488 | -0.004246 | <a href="#">APWCHTTNSQVR</a> |

Mascot: <http://www.matrixscience.com/>



# MASCOT SCIENCE Mascot Search Results

## Peptide View

MS/MS Fragmentation of **EQQCHEMAENR**

Found in **PLGB\_HUMAN**, Plasminogen-like protein B OS=Homo sapiens GN=PLGLB1 PE=1 SV=1

Match to Query 56607: 1998.977308 from(1000.495930,2+) rtinseconds(2137) index(81190)

Title: Locus:1.1.1.2623.25 File:"2013-07-02 CLN FXIII 30 min 1st FT.wiff"

Data file C:\Program Files (x86)\Matrix Science\Mascot Daemon\mgf\1 FXIII 30 min 1st\mascot\_daemon\_merge.mgf

Click mouse within plot area to zoom in by factor of two about that point

Or, Plot from  to  Da

Label all possible matches  Label matches used for scoring

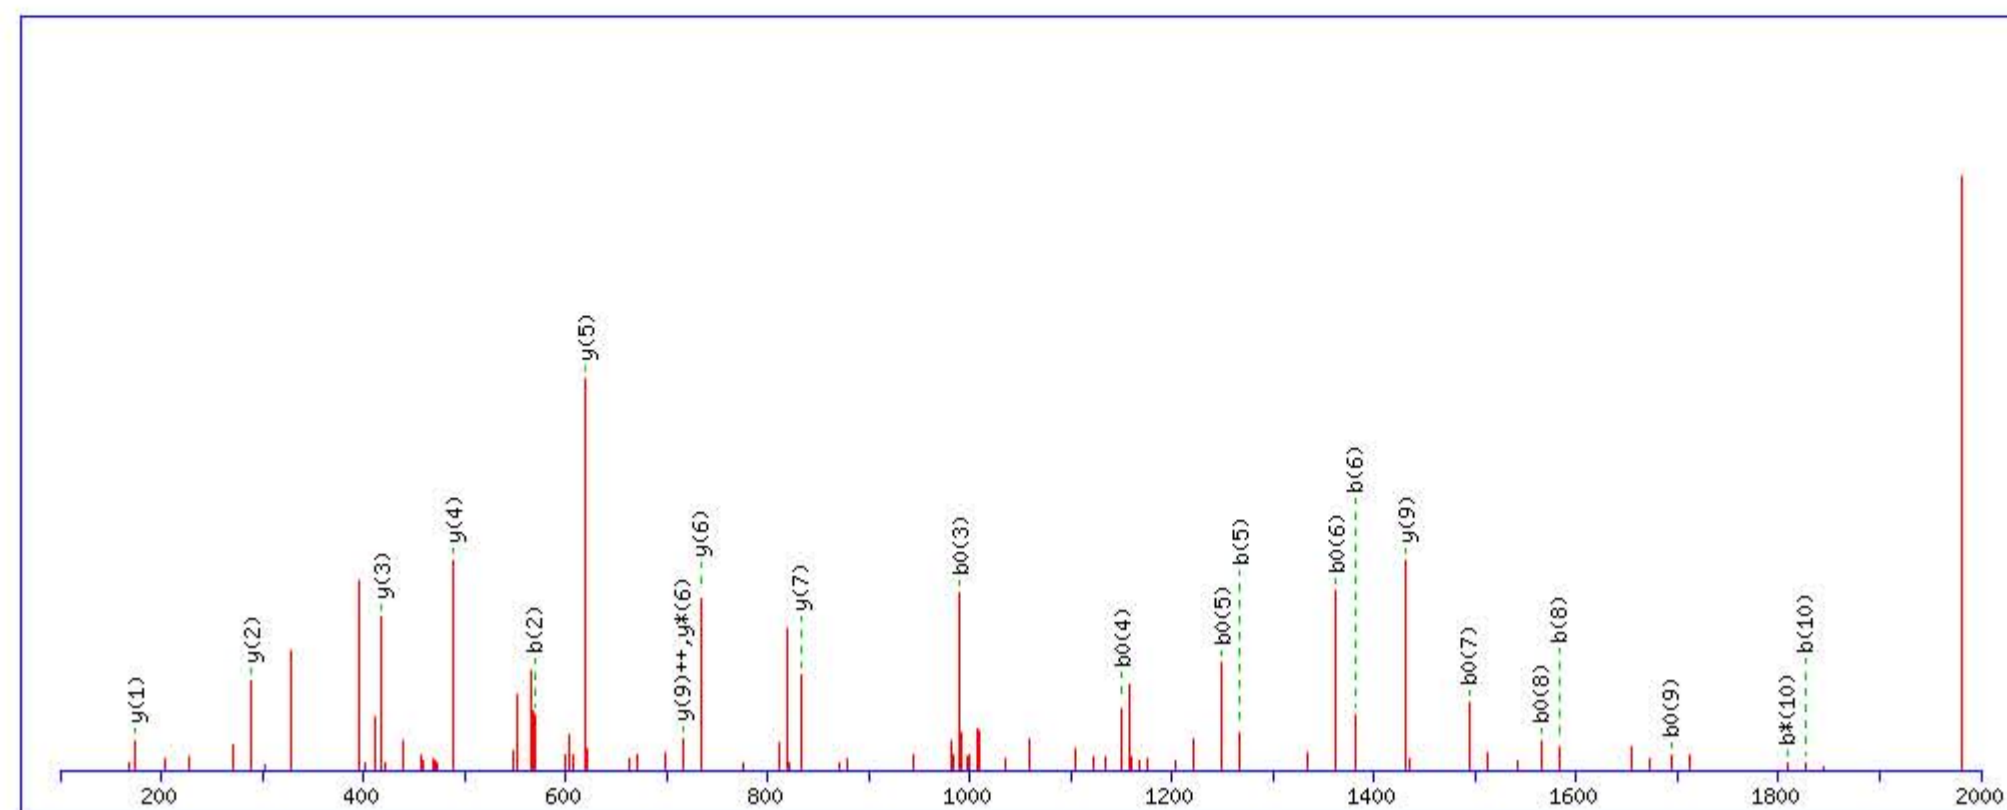

Monoisotopic mass of neutral peptide Mr(calc): 1998.951141

Fixed modifications: Carbamidomethyl (C) (apply to specified residues or termini only)

Variable modifications:

Q2 : Biotin:Thermo-21345 (Q)

Q3 : Biotin:Thermo-21345 (Q)

Ions Score: 48 Expect: 0.00038

Matches : 23/114 fragment ions using 35 most intense peaks [\(help\)](#)

| #  | b                  | b <sup>++</sup> | b <sup>*</sup>     | b <sup>*++</sup> | b <sup>0</sup>     | b <sup>0++</sup> | Seq. | y                  | y <sup>++</sup>   | y <sup>*</sup>    | y <sup>*++</sup> | y <sup>0</sup> | y <sup>0++</sup> | #  |
|----|--------------------|-----------------|--------------------|------------------|--------------------|------------------|------|--------------------|-------------------|-------------------|------------------|----------------|------------------|----|
| 1  | 130.049869         | 65.528572       |                    |                  | 112.039304         | 56.523290        | E    |                    |                   |                   |                  |                |                  | 11 |
| 2  | <b>569.275195</b>  | 285.141236      | 552.248646         | 276.627961       | 551.264630         | 276.135953       | Q    | 1870.915850        | 935.961563        | 1853.889301       | 927.448288       | 1852.905285    | 926.956280       | 10 |
| 3  | 1008.500521        | 504.753899      | 991.473972         | 496.240624       | <b>990.489956</b>  | 495.748616       | Q    | <b>1431.690524</b> | <b>716.348900</b> | 1414.663975       | 707.835625       | 1413.679959    | 707.343617       | 9  |
| 4  | 1168.531170        | 584.769223      | 1151.504621        | 576.255949       | <b>1150.520605</b> | 575.763940       | C    | 992.465198         | 496.736237        | 975.438649        | 488.222962       | 974.454633     | 487.730954       | 8  |
| 5  | <b>1267.599584</b> | 634.303430      | 1250.573035        | 625.790156       | <b>1249.589019</b> | 625.298148       | V    | <b>832.434549</b>  | 416.720912        | 815.408000        | 408.207638       | 814.423984     | 407.715630       | 7  |
| 6  | <b>1380.683648</b> | 690.845462      | 1363.657099        | 682.332188       | <b>1362.673083</b> | 681.840179       | I    | <b>733.366135</b>  | 367.186705        | <b>716.339586</b> | 358.673431       | 715.355570     | 358.181423       | 6  |
| 7  | 1511.724133        | 756.365704      | 1494.697584        | 747.852430       | <b>1493.713568</b> | 747.360422       | M    | <b>620.282071</b>  | 310.644673        | 603.255522        | 302.131399       | 602.271506     | 301.639391       | 5  |
| 8  | <b>1582.761247</b> | 791.884261      | 1565.734698        | 783.370987       | <b>1564.750682</b> | 782.878979       | A    | <b>489.241586</b>  | 245.124431        | 472.215037        | 236.611156       | 471.231021     | 236.119148       | 4  |
| 9  | 1711.803840        | 856.405558      | 1694.777291        | 847.892283       | <b>1693.793275</b> | 847.400275       | E    | <b>418.204472</b>  | 209.605874        | 401.177923        | 201.092599       | 400.193907     | 200.600591       | 3  |
| 10 | <b>1825.846767</b> | 913.427021      | <b>1808.820218</b> | 904.913747       | 1807.836202        | 904.421739       | N    | <b>289.161879</b>  | 145.084577        | 272.135330        | 136.571303       |                |                  | 2  |
| 11 |                    |                 |                    |                  |                    |                  | R    | <b>175.118952</b>  | 88.063114         | 158.092403        | 79.549839        |                |                  | 1  |

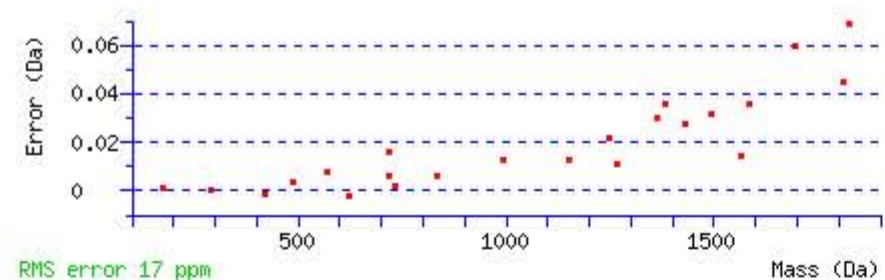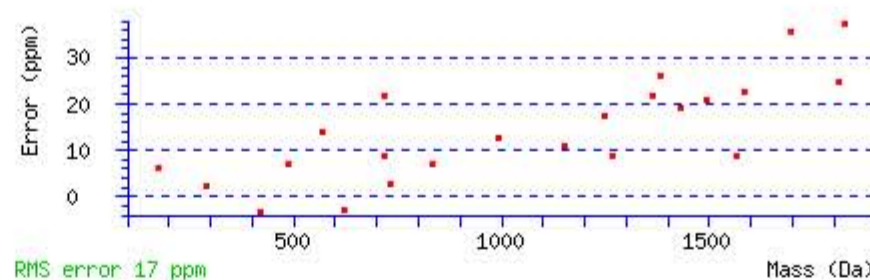

NCBI BLAST search of **EQQCHEMAENR**

(Parameters: blastp, nr protein database, expect=20000, no filter, PAM30)

Other BLAST [web gateways](#)

All matches to this query

| Score | Mr(calc):   | Delta     | Sequence                            |
|-------|-------------|-----------|-------------------------------------|
| 47.9  | 1998.951141 | 0.026167  | <a href="#">EQQCHEMAENR</a>         |
| 11.7  | 1999.001053 | -0.023745 | <a href="#">QLPPEKESTRIVDSWN</a>    |
| 7.1   | 1998.960159 | 0.017149  | <a href="#">SSTLSSSSMSLSPKLCSEK</a> |
| 2.4   | 1998.950912 | 0.026396  | <a href="#">YEAQQLRIFYQMYDK</a>     |
| 1.4   | 1998.976746 | 0.000562  | <a href="#">NMTAQNYTYAIRSR</a>      |
| 0.6   | 1998.958130 | 0.019178  | <a href="#">RAGDVYYREATDPAMLR</a>   |

Mascot: <http://www.matrixscience.com/>



# MASCOT Search Results

## Peptide View

MS/MS Fragmentation of **ATTVTGTPCQDWAAQEPHR**

Found in **PLMN\_HUMAN**, Plasminogen OS=Homo sapiens GN=PLG PE=1 SV=2

Match to Query 66749: 2436.142542 from(813.054790,3+) rtinseconds(1874) index(79361)

Title: Locus:1.1.1.2532.10 File:"2013-07-02 CLN FXIII 30 min 1st FT.wiff"

Data file C:\Program Files (x86)\Matrix Science\Mascot Daemon\mgf\1 FXIII 30 min 1st\mascot\_daemon\_merge.mgf

Click mouse within plot area to zoom in by factor of two about that point

Or, Plot from  to  Da

Label all possible matches  Label matches used for scoring

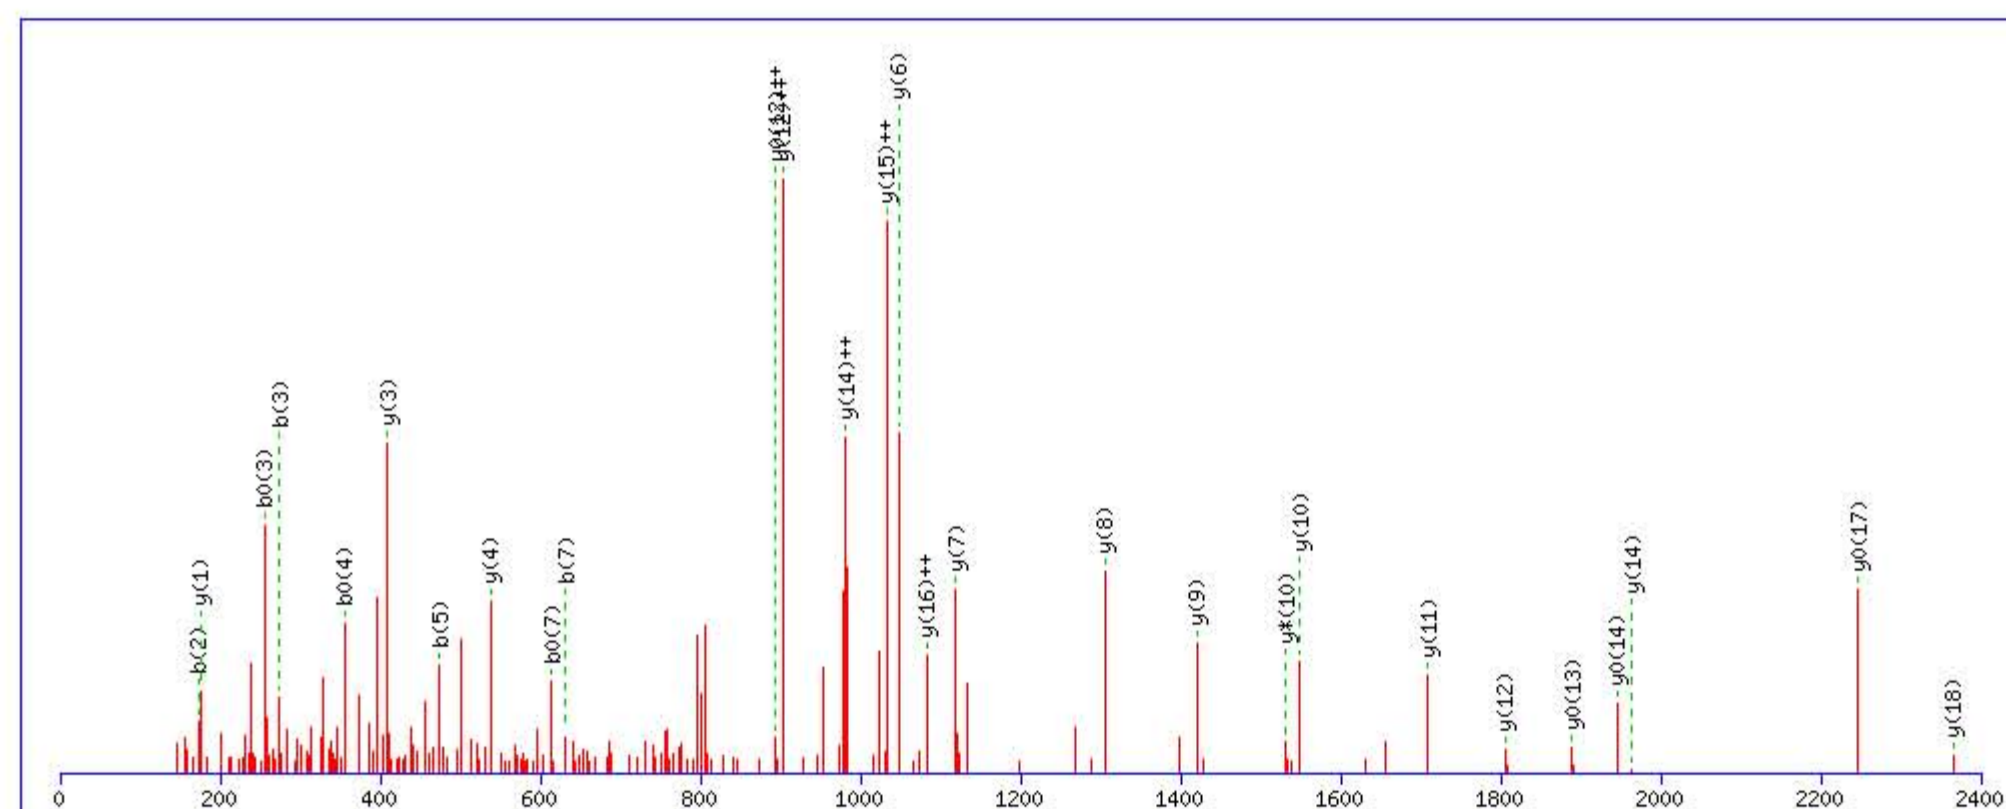

Monoisotopic mass of neutral peptide Mr(calc): 2436.131470

Fixed modifications: Carbamidomethyl (C) (apply to specified residues or termini only)

Variable modifications:

Q15 : Biotin:Thermo-21345 (Q)

Ions Score: 63 Expect: 7.7e-006

Matches : 28/190 fragment ions using 55 most intense peaks [\(help\)](#)

| #  | b                 | b <sup>++</sup> | b <sup>*</sup> | b <sup>*++</sup> | b <sup>0</sup>    | b <sup>0++</sup> | Seq. | y                  | y <sup>++</sup>    | y <sup>*</sup>     | y <sup>*++</sup> | y <sup>0</sup>     | y <sup>0++</sup>  | #  |
|----|-------------------|-----------------|----------------|------------------|-------------------|------------------|------|--------------------|--------------------|--------------------|------------------|--------------------|-------------------|----|
| 1  | 72.044390         | 36.525833       |                |                  |                   |                  | A    |                    |                    |                    |                  |                    |                   | 19 |
| 2  | <b>173.092069</b> | 87.049672       |                |                  | 155.081504        | 78.044390        | T    | <b>2366.101616</b> | 1183.554446        | 2349.075067        | 1175.041171      | 2348.091051        | 1174.549163       | 18 |
| 3  | <b>274.139748</b> | 137.573512      |                |                  | <b>256.129183</b> | 128.568230       | T    | 2265.053937        | 1133.030606        | 2248.027388        | 1124.517332      | <b>2247.043372</b> | 1124.025324       | 17 |
| 4  | 373.208162        | 187.107719      |                |                  | <b>355.197597</b> | 178.102437       | V    | 2164.006258        | <b>1082.506767</b> | 2146.979709        | 1073.993492      | 2145.995693        | 1073.501484       | 16 |
| 5  | <b>474.255841</b> | 237.631559      |                |                  | 456.245276        | 228.626276       | T    | 2064.937844        | <b>1032.972560</b> | 2047.911295        | 1024.459285      | 2046.927279        | 1023.967277       | 15 |
| 6  | 531.277305        | 266.142291      |                |                  | 513.266740        | 257.137008       | G    | <b>1963.890165</b> | <b>982.448721</b>  | 1946.863616        | 973.935446       | <b>1945.879600</b> | 973.443438        | 14 |
| 7  | <b>632.324984</b> | 316.666130      |                |                  | <b>614.314419</b> | 307.660848       | T    | 1906.868701        | 953.937989         | 1889.842152        | 945.424714       | <b>1888.858136</b> | 944.932706        | 13 |
| 8  | 729.377748        | 365.192512      |                |                  | 711.367183        | 356.187230       | P    | <b>1805.821022</b> | <b>903.414149</b>  | 1788.794473        | 894.900875       | 1787.810457        | <b>894.408867</b> | 12 |
| 9  | 889.408397        | 445.207837      |                |                  | 871.397832        | 436.202554       | C    | <b>1708.768258</b> | 854.887767         | 1691.741709        | 846.374493       | 1690.757693        | 845.882485        | 11 |
| 10 | 1017.466975       | 509.237126      | 1000.440426    | 500.723851       | 999.456410        | 500.231843       | Q    | <b>1548.737609</b> | 774.872443         | <b>1531.711060</b> | 766.359168       | 1530.727044        | 765.867160        | 10 |
| 11 | 1132.493918       | 566.750597      | 1115.467369    | 558.237323       | 1114.483353       | 557.745315       | D    | <b>1420.679031</b> | 710.843154         | 1403.652482        | 702.329879       | 1402.668466        | 701.837871        | 9  |
| 12 | 1318.573231       | 659.790254      | 1301.546682    | 651.276979       | 1300.562666       | 650.784971       | W    | <b>1305.652088</b> | 653.329682         | 1288.625539        | 644.816408       | 1287.641523        | 644.324400        | 8  |
| 13 | 1389.610345       | 695.308811      | 1372.583796    | 686.795536       | 1371.599780       | 686.303528       | A    | <b>1119.572775</b> | 560.290026         | 1102.546226        | 551.776751       | 1101.562210        | 551.284743        | 7  |
| 14 | 1460.647459       | 730.827368      | 1443.620910    | 722.314093       | 1442.636894       | 721.822085       | A    | <b>1048.535661</b> | 524.771469         | 1031.509112        | 516.258194       | 1030.525096        | 515.766186        | 6  |
| 15 | 1899.872785       | 950.440031      | 1882.846236    | 941.926756       | 1881.862220       | 941.434748       | Q    | 977.498547         | 489.252912         | 960.471998         | 480.739637       | 959.487982         | 480.247629        | 5  |
| 16 | 2028.915378       | 1014.961327     | 2011.888829    | 1006.448053      | 2010.904813       | 1005.956045      | E    | <b>538.273221</b>  | 269.640249         | 521.246672         | 261.126974       | 520.262656         | 260.634966        | 4  |
| 17 | 2125.968142       | 1063.487709     | 2108.941593    | 1054.974434      | 2107.957577       | 1054.482427      | P    | <b>409.230628</b>  | 205.118952         | 392.204079         | 196.605677       |                    |                   | 3  |
| 18 | 2263.027054       | 1132.017165     | 2246.000505    | 1123.503890      | 2245.016489       | 1123.011883      | H    | 312.177864         | 156.592570         | 295.151315         | 148.079295       |                    |                   | 2  |
| 19 |                   |                 |                |                  |                   |                  | R    | <b>175.118952</b>  | 88.063114          | 158.092403         | 79.549839        |                    |                   | 1  |

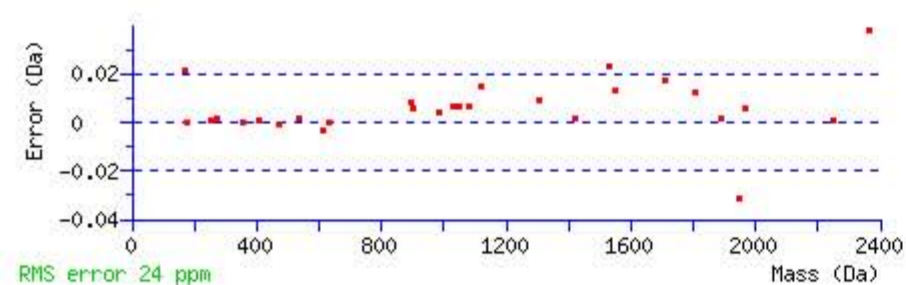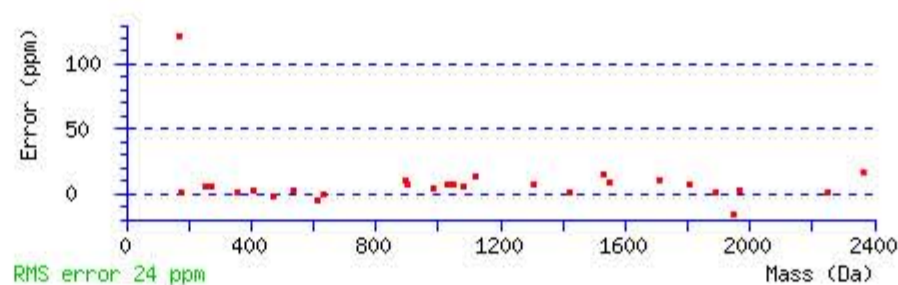

NCBI BLAST search of **ATTVTGTPCQDWAAQEPHR**

(Parameters: blastp, nr protein database, expect=20000, no filter, PAM30)

Other BLAST [web gateways](#)

All matches to this query

| Score | Mr(calc):   | Delta    | Sequence                            |
|-------|-------------|----------|-------------------------------------|
| 63.4  | 2436.131470 | 0.011072 | <a href="#">ATTVTGTPCQDWAAQEPHR</a> |
| 27.2  | 2436.131470 | 0.011072 | <a href="#">ATTVTGTPCQDWAAQEPHR</a> |

Mascot: <http://www.matrixscience.com/>



# MASCOT SCIENCE Mascot Search Results

## Peptide View

MS/MS Fragmentation of **VVGGCVAHPHSWPWQVSLR**

Found in **PLMN\_HUMAN**, Plasminogen OS=Homo sapiens GN=PLG PE=1 SV=2

Match to Query 67892: 2482.256416 from(621.571380,4+) rtinseconds(2208) index(81698)

Title: Locus:1.1.1.2648.18 File:"2013-07-02 CLN FXIII 30 min 1st FT.wiff"

Data file C:\Program Files (x86)\Matrix Science\Mascot Daemon\mgf1 FXIII 30 min 1st\mascot\_daemon\_merge.mgf

Click mouse within plot area to zoom in by factor of two about that point

Or, Plot from  to  Da

Label all possible matches  Label matches used for scoring

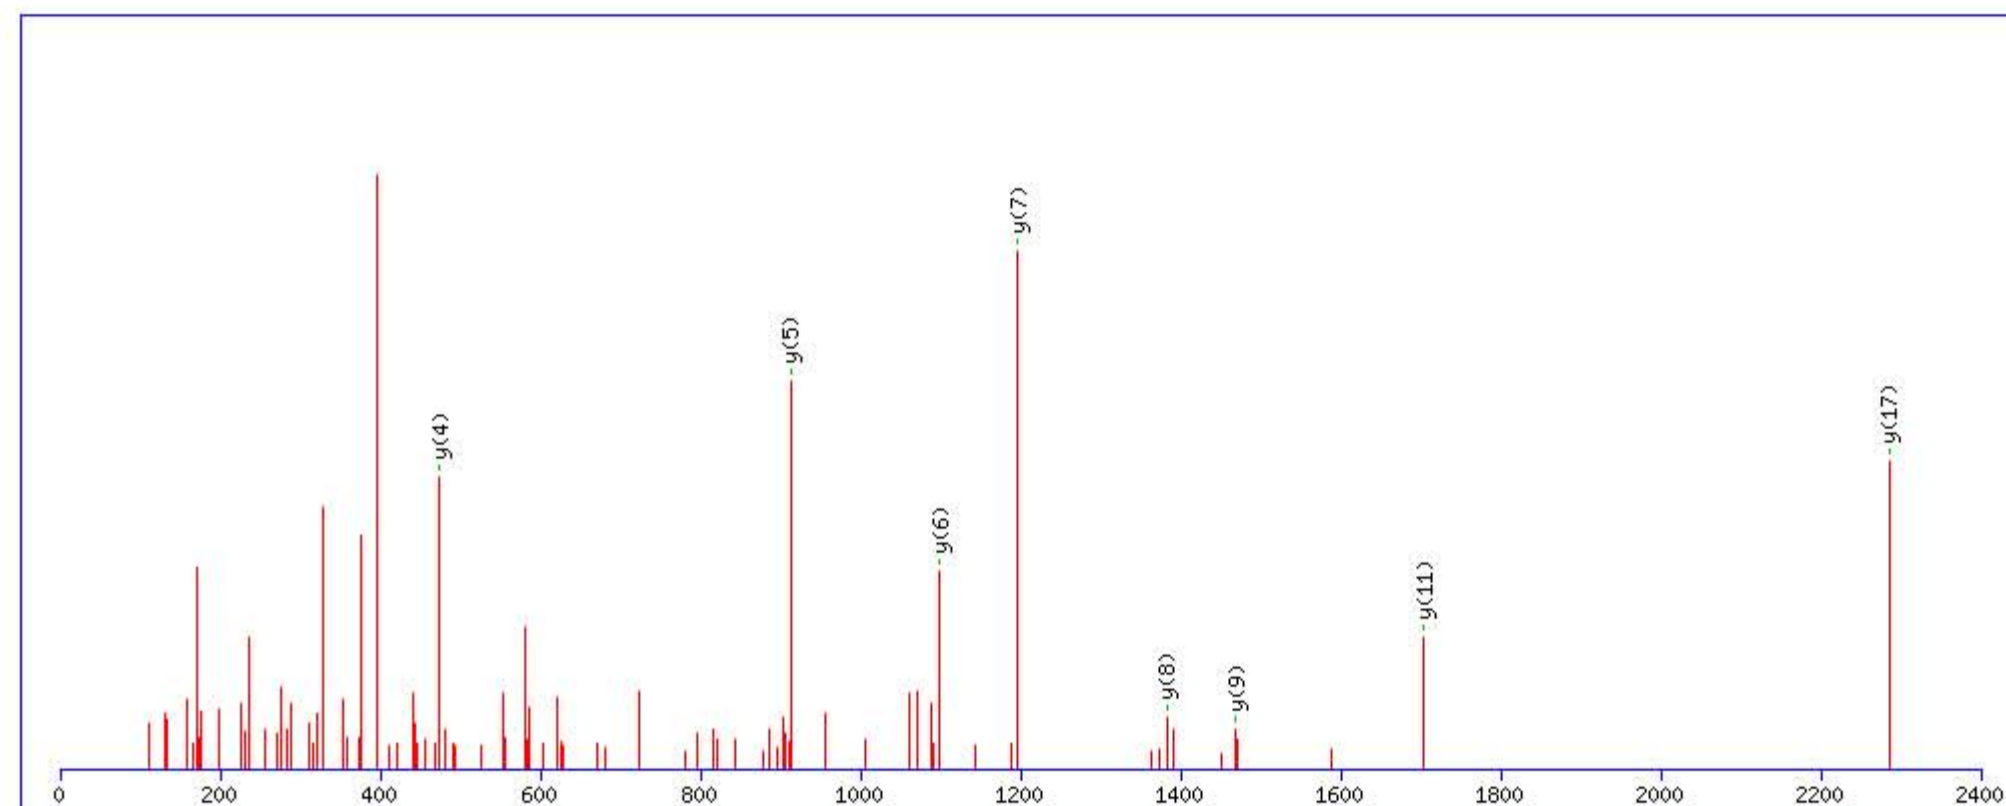

Monoisotopic mass of neutral peptide Mr(calc): 2482.251480

Fixed modifications: Carbamidomethyl (C) (apply to specified residues or termini only)

Variable modifications:

Q15 : Biotin:Thermo-21345 (Q)

Ions Score: 42 Expect: 0.002

Matches : 8/164 fragment ions using 16 most intense peaks [\(help\)](#)

| #  | b           | b <sup>++</sup> | b <sup>+</sup> | b <sup>+++</sup> | b <sup>0</sup> | b <sup>0++</sup> | Seq. | y                  | y <sup>++</sup> | y <sup>+</sup> | y <sup>+++</sup> | y <sup>0</sup> | y <sup>0++</sup> | #  |
|----|-------------|-----------------|----------------|------------------|----------------|------------------|------|--------------------|-----------------|----------------|------------------|----------------|------------------|----|
| 1  | 100.075690  | 50.541483       |                |                  |                |                  | V    |                    |                 |                |                  |                |                  | 19 |
| 2  | 199.144104  | 100.075690      |                |                  |                |                  | V    | 2384.190309        | 1192.598792     | 2367.163760    | 1184.085518      | 2366.179744    | 1183.593510      | 18 |
| 3  | 256.165568  | 128.586422      |                |                  |                |                  | G    | <b>2285.121895</b> | 1143.064585     | 2268.095346    | 1134.551311      | 2267.111330    | 1134.059303      | 17 |
| 4  | 313.187032  | 157.097154      |                |                  |                |                  | G    | 2228.100431        | 1114.553853     | 2211.073882    | 1106.040579      | 2210.089866    | 1105.548571      | 16 |
| 5  | 473.217681  | 237.112479      |                |                  |                |                  | C    | 2171.078967        | 1086.043121     | 2154.052418    | 1077.529847      | 2153.068402    | 1077.037839      | 15 |
| 6  | 572.286095  | 286.646686      |                |                  |                |                  | V    | 2011.048318        | 1006.027797     | 1994.021769    | 997.514523       | 1993.037753    | 997.022515       | 14 |
| 7  | 643.323209  | 322.165243      |                |                  |                |                  | A    | 1911.979904        | 956.493590      | 1894.953355    | 947.980316       | 1893.969339    | 947.488308       | 13 |
| 8  | 780.382121  | 390.694699      |                |                  |                |                  | H    | 1840.942790        | 920.975033      | 1823.916241    | 912.461759       | 1822.932225    | 911.969751       | 12 |
| 9  | 877.434885  | 439.221081      |                |                  |                |                  | P    | <b>1703.883878</b> | 852.445577      | 1686.857329    | 843.932303       | 1685.873313    | 843.440295       | 11 |
| 10 | 1014.493797 | 507.750537      |                |                  |                |                  | H    | 1606.831114        | 803.919195      | 1589.804565    | 795.405921       | 1588.820549    | 794.913913       | 10 |
| 11 | 1101.525825 | 551.266550      |                |                  | 1083.515260    | 542.261268       | S    | <b>1469.772202</b> | 735.389739      | 1452.745653    | 726.876465       | 1451.761637    | 726.384457       | 9  |
| 12 | 1287.605138 | 644.306207      |                |                  | 1269.594573    | 635.300924       | W    | <b>1382.740174</b> | 691.873725      | 1365.713625    | 683.360451       | 1364.729609    | 682.868443       | 8  |
| 13 | 1384.657902 | 692.832589      |                |                  | 1366.647337    | 683.827306       | P    | <b>1196.660861</b> | 598.834069      | 1179.634312    | 590.320794       | 1178.650296    | 589.828786       | 7  |
| 14 | 1570.737215 | 785.872245      |                |                  | 1552.726650    | 776.866963       | W    | <b>1099.608097</b> | 550.307687      | 1082.581548    | 541.794412       | 1081.597532    | 541.302404       | 6  |
| 15 | 2009.962541 | 1005.484909     | 1992.935992    | 996.971634       | 1991.951976    | 996.479626       | Q    | <b>913.528784</b>  | 457.268030      | 896.502235     | 448.754756       | 895.518219     | 448.262748       | 5  |
| 16 | 2109.030955 | 1055.019115     | 2092.004406    | 1046.505841      | 2091.020390    | 1046.013833      | V    | <b>474.303458</b>  | 237.655367      | 457.276909     | 229.142092       | 456.292893     | 228.650084       | 4  |
| 17 | 2196.062983 | 1098.535129     | 2179.036434    | 1090.021855      | 2178.052418    | 1089.529847      | S    | 375.235044         | 188.121160      | 358.208495     | 179.607886       | 357.224479     | 179.115878       | 3  |
| 18 | 2309.147047 | 1155.077161     | 2292.120498    | 1146.563887      | 2291.136482    | 1146.071879      | L    | 288.203016         | 144.605146      | 271.176467     | 136.091872       |                |                  | 2  |
| 19 |             |                 |                |                  |                |                  | R    | 175.118952         | 88.063114       | 158.092403     | 79.549839        |                |                  | 1  |

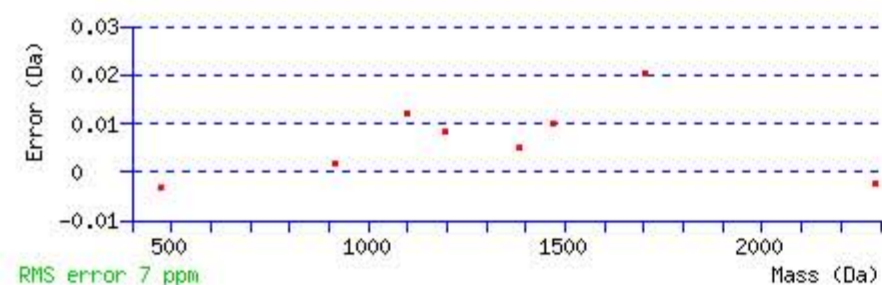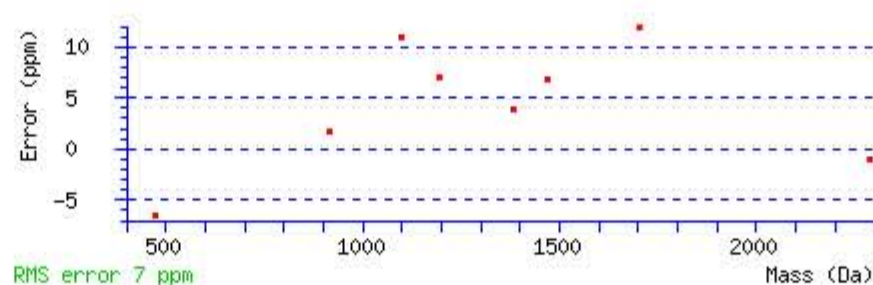

NCBI BLAST search of [VVGGCVAHPHSWPWQVSLR](#)

(Parameters: blastp, nr protein database, expect=20000, no filter, PAM30)

Other BLAST [web gateways](#)

All matches to this query

| Score | Mr(calc):   | Delta    | Sequence                            |
|-------|-------------|----------|-------------------------------------|
| 42.0  | 2482.251480 | 0.004936 | <a href="#">VVGGCVAHPHSWPWQVSLR</a> |

Mascot: <http://www.matrixscience.com/>



# MASCOT Search Results

## Peptide View

MS/MS Fragmentation of **TECFITGWGETQGTFGAGLLK**

Found in **PLMN\_HUMAN**, Plasminogen OS=Homo sapiens GN=PLG PE=1 SV=2

Match to Query 69497: 2583.280482 from(862.100770,3+) rtinseconds(2809) index(85372)

Title: Locus:1.1.1.2856.18 File:"2013-07-02 CLN FXIII 30 min 1st FT.wiff"

Data file C:\Program Files (x86)\Matrix Science\Mascot Daemon\mgf\1 FXIII 30 min 1st\mascot\_daemon\_merge.mgf

Click mouse within plot area to zoom in by factor of two about that point

Or, Plot from  to  Da

Label all possible matches  Label matches used for scoring

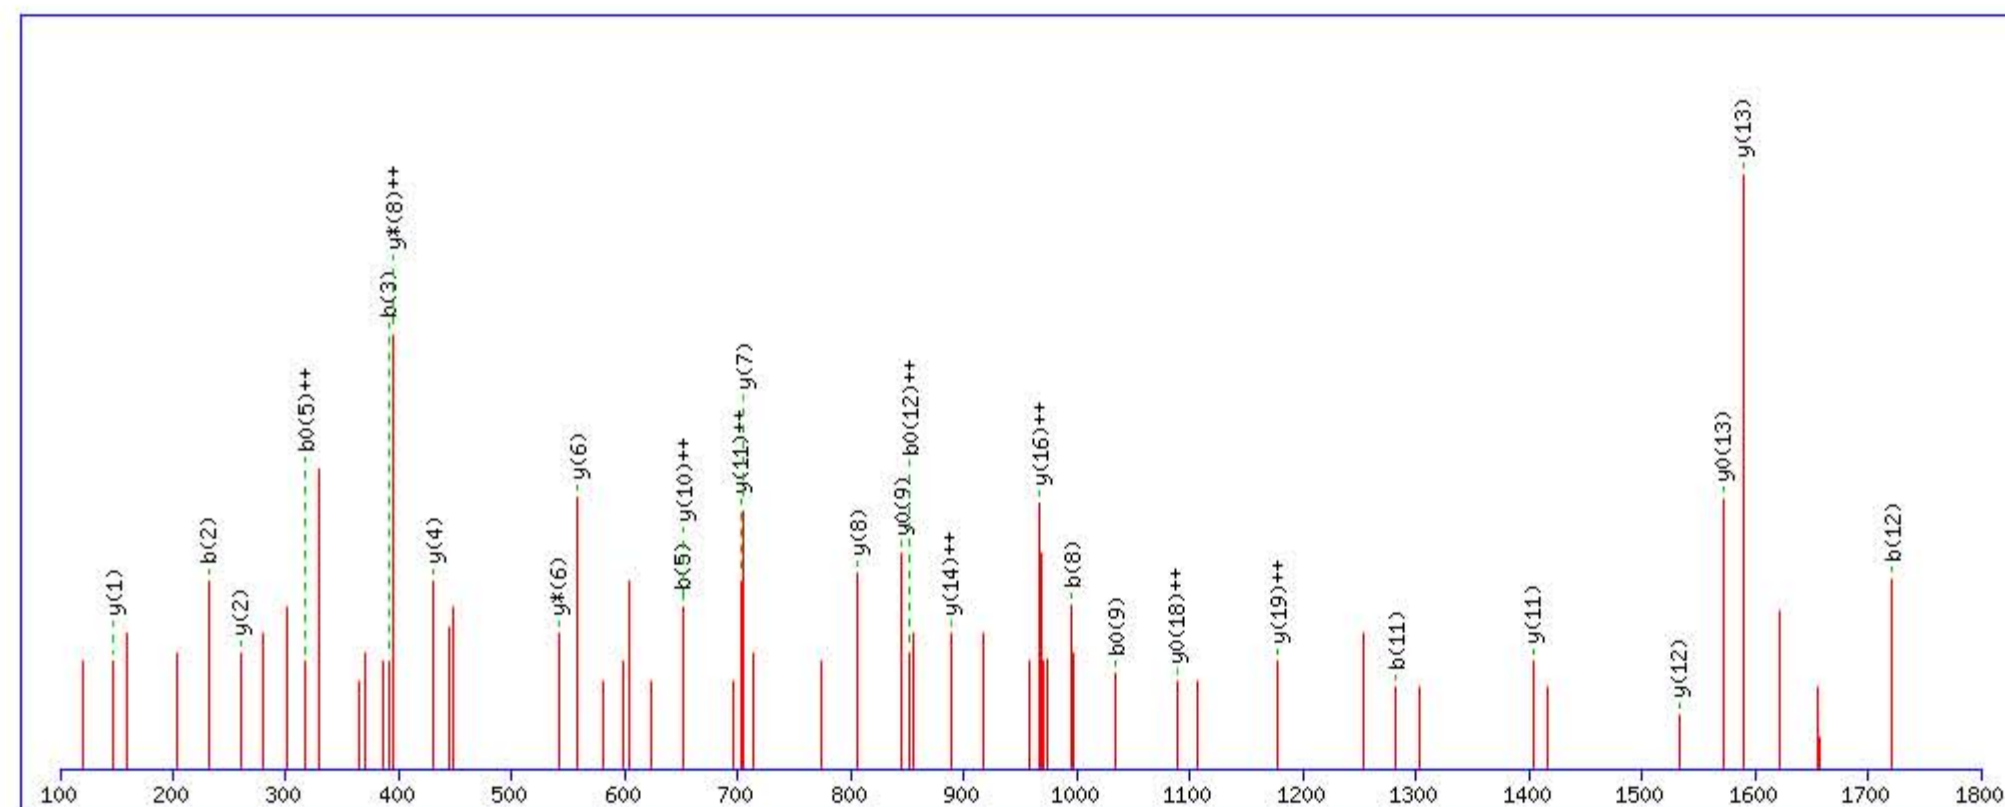

Monoisotopic mass of neutral peptide Mr(calc): 2583.250198

Fixed modifications: Carbamidomethyl (C) (apply to specified residues or termini only)

Variable modifications:

Q12 : Biotin:Thermo-21345 (Q)

Ions Score: 46 Expect: 0.0006

Matches : 28/204 fragment ions using 56 most intense peaks [\(help\)](#)

| #  | b                  | b <sup>++</sup> | b <sup>*</sup> | b <sup>*++</sup> | b <sup>0</sup>     | b <sup>0++</sup>  | Seq. | y                  | y <sup>++</sup>    | y <sup>*</sup>    | y <sup>*++</sup>  | y <sup>0</sup>     | y <sup>0++</sup>   | #  |
|----|--------------------|-----------------|----------------|------------------|--------------------|-------------------|------|--------------------|--------------------|-------------------|-------------------|--------------------|--------------------|----|
| 1  | 102.054955         | 51.531116       |                |                  | 84.044390          | 42.525833         | T    |                    |                    |                   |                   |                    |                    | 21 |
| 2  | <b>231.097548</b>  | 116.052412      |                |                  | 213.086983         | 107.047130        | E    | 2483.209769        | 1242.108522        | 2466.183220       | 1233.595248       | 2465.199204        | 1233.103240        | 20 |
| 3  | <b>391.128197</b>  | 196.067737      |                |                  | 373.117632         | 187.062454        | C    | 2354.167176        | <b>1177.587226</b> | 2337.140627       | 1169.073951       | 2336.156611        | 1168.581943        | 19 |
| 4  | 538.196611         | 269.601944      |                |                  | 520.186046         | 260.596661        | F    | 2194.136527        | 1097.571901        | 2177.109978       | 1089.058627       | 2176.125962        | <b>1088.566619</b> | 18 |
| 5  | <b>651.280675</b>  | 326.143976      |                |                  | 633.270110         | <b>317.138693</b> | I    | 2047.068113        | 1024.037695        | 2030.041564       | 1015.524420       | 2029.057548        | 1015.032412        | 17 |
| 6  | 752.328354         | 376.667815      |                |                  | 734.317789         | 367.662533        | T    | 1933.984049        | <b>967.495663</b>  | 1916.957500       | 958.982388        | 1915.973484        | 958.490380         | 16 |
| 7  | 809.349818         | 405.178547      |                |                  | 791.339253         | 396.173265        | G    | 1832.936370        | 916.971823         | 1815.909821       | 908.458549        | 1814.925805        | 907.966541         | 15 |
| 8  | <b>995.429131</b>  | 498.218204      |                |                  | 977.418566         | 489.212921        | W    | 1775.914906        | <b>888.461091</b>  | 1758.888357       | 879.947817        | 1757.904341        | 879.455809         | 14 |
| 9  | 1052.450595        | 526.728936      |                |                  | <b>1034.440030</b> | 517.723653        | G    | <b>1589.835593</b> | 795.421435         | 1572.809044       | 786.908160        | <b>1571.825028</b> | 786.416152         | 13 |
| 10 | 1181.493188        | 591.250232      |                |                  | 1163.482623        | 582.244950        | E    | <b>1532.814129</b> | 766.910703         | 1515.787580       | 758.397428        | 1514.803564        | 757.905420         | 12 |
| 11 | <b>1282.540867</b> | 641.774072      |                |                  | 1264.530302        | 632.768789        | T    | <b>1403.771536</b> | <b>702.389406</b>  | 1386.744987       | 693.876132        | 1385.760971        | 693.384124         | 11 |
| 12 | <b>1721.766193</b> | 861.386735      | 1704.739644    | 852.873460       | 1703.755628        | <b>852.381452</b> | Q    | 1302.723857        | <b>651.865567</b>  | 1285.697308       | 643.352292        | 1284.713292        | 642.860284         | 10 |
| 13 | 1778.787657        | 889.897467      | 1761.761108    | 881.384192       | 1760.777092        | 880.892184        | G    | 863.498531         | 432.252904         | 846.471982        | 423.739629        | <b>845.487966</b>  | 423.247621         | 9  |
| 14 | 1879.835336        | 940.421306      | 1862.808787    | 931.908032       | 1861.824771        | 931.416024        | T    | <b>806.477067</b>  | 403.742172         | 789.450518        | <b>395.228897</b> | 788.466502         | 394.736889         | 8  |
| 15 | 2026.903750        | 1013.955513     | 2009.877201    | 1005.442239      | 2008.893185        | 1004.950231       | F    | <b>705.429388</b>  | 353.218332         | 688.402839        | 344.705058        |                    |                    | 7  |
| 16 | 2083.925214        | 1042.466245     | 2066.898665    | 1033.952970      | 2065.914649        | 1033.460962       | G    | <b>558.360974</b>  | 279.684125         | <b>541.334425</b> | 271.170851        |                    |                    | 6  |
| 17 | 2154.962328        | 1077.984802     | 2137.935779    | 1069.471527      | 2136.951763        | 1068.979519       | A    | 501.339510         | 251.173393         | 484.312961        | 242.660119        |                    |                    | 5  |
| 18 | 2211.983792        | 1106.495534     | 2194.957243    | 1097.982259      | 2193.973227        | 1097.490251       | G    | <b>430.302396</b>  | 215.654836         | 413.275847        | 207.141562        |                    |                    | 4  |
| 19 | 2325.067856        | 1163.037566     | 2308.041307    | 1154.524291      | 2307.057291        | 1154.032283       | L    | 373.280932         | 187.144104         | 356.254383        | 178.630830        |                    |                    | 3  |
| 20 | 2438.151920        | 1219.579598     | 2421.125371    | 1211.066324      | 2420.141355        | 1210.574316       | L    | <b>260.196868</b>  | 130.602072         | 243.170319        | 122.088798        |                    |                    | 2  |
| 21 |                    |                 |                |                  |                    |                   | K    | <b>147.112804</b>  | 74.060040          | 130.086255        | 65.546765         |                    |                    | 1  |

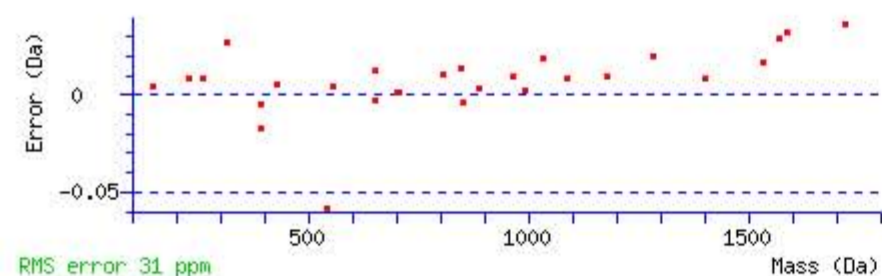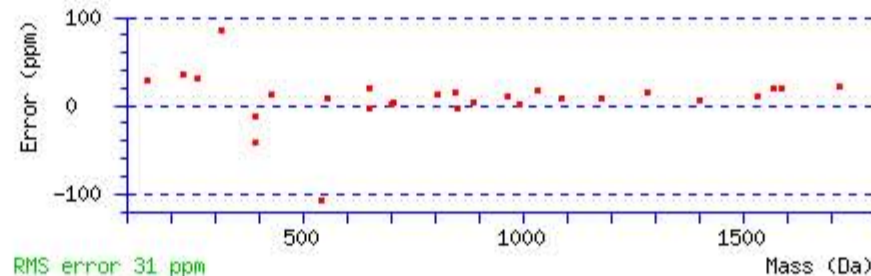

NCBI BLAST search of **TECFITGWGETQGTFGAGLLK**

(Parameters: blastp, nr protein database, expect=20000, no filter, PAM30)

Other BLAST [web gateways](#)

All matches to this query

| Score | Mr(calc):   | Delta    | Sequence                              |
|-------|-------------|----------|---------------------------------------|
| 46.3  | 2583.250198 | 0.030284 | <a href="#">TECFITGWGETQGTFGAGLLK</a> |



# MASCOT Search Results

## Peptide View

MS/MS Fragmentation of **NPDNDPQGPWCYTTDPEKR**  
 Found in **PLMN\_HUMAN**, Plasminogen OS=Homo sapiens GN=PLG PE=1 SV=2

Match to Query 69723: 2600.154192 from(867.725340,3+) rtinseconds(1967) index(80050)  
 Title: Locus:1.1.1.2564.24 File:"2013-07-02 CLN FXIII 30 min 1st FT.wiff"  
 Data file C:\Program Files (x86)\Matrix Science\Mascot Daemon\mgf1 FXIII 30 min 1st\mascot\_daemon\_merge.mgf

Click mouse within plot area to zoom in by factor of two about that point

Or, Plot from  to  Da

Label all possible matches  Label matches used for scoring

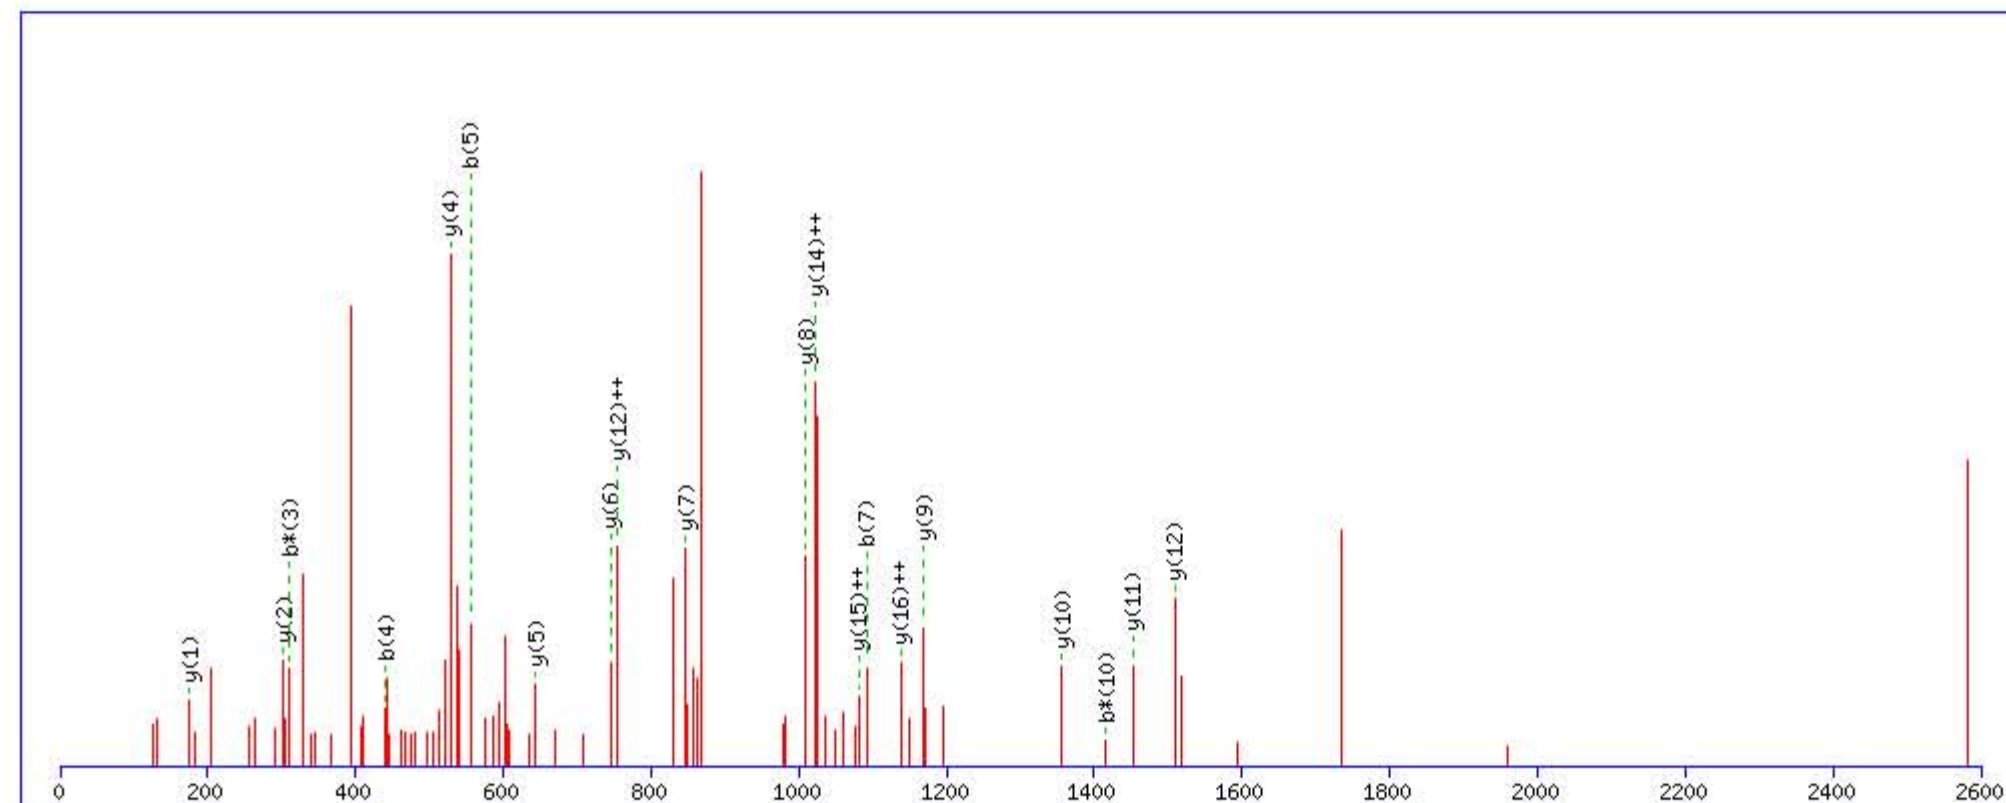

Monoisotopic mass of neutral peptide Mr(calc): 2600.142410  
 Fixed modifications: Carbamidomethyl (C) (apply to specified residues or termini only)  
 Variable modifications:  
 Q7 : Biotin:Thermo-21345 (Q)  
 Ions Score: 56 Expect: 1.7e-005  
 Matches : 20/208 fragment ions using 41 most intense peaks [\(help\)](#)

| #  | b                  | b <sup>++</sup> | b <sup>+</sup>     | b <sup>+++</sup> | b <sup>0</sup> | b <sup>0++</sup> | Seq. | y                  | y <sup>++</sup>    | y <sup>+</sup> | y <sup>+++</sup> | y <sup>0</sup> | y <sup>0++</sup> | #  |
|----|--------------------|-----------------|--------------------|------------------|----------------|------------------|------|--------------------|--------------------|----------------|------------------|----------------|------------------|----|
| 1  | 115.050203         | 58.028740       | 98.023654          | 49.515465        |                |                  | N    |                    |                    |                |                  |                |                  | 19 |
| 2  | 212.102967         | 106.555121      | 195.076418         | 98.041847        |                |                  | P    | 2487.106759        | 1244.057017        | 2470.080210    | 1235.543743      | 2469.096194    | 1235.051735      | 18 |
| 3  | 327.129910         | 164.068593      | <b>310.103361</b>  | 155.555319       | 309.119345     | 155.063311       | D    | 2390.053995        | 1195.530635        | 2373.027446    | 1187.017361      | 2372.043430    | 1186.525353      | 17 |
| 4  | <b>441.172837</b>  | 221.090057      | 424.146288         | 212.576782       | 423.162272     | 212.084774       | N    | 2275.027052        | <b>1138.017164</b> | 2258.000503    | 1129.503889      | 2257.016487    | 1129.011881      | 16 |
| 5  | <b>556.199780</b>  | 278.603528      | 539.173231         | 270.090254       | 538.189215     | 269.598246       | D    | 2160.984125        | <b>1080.995700</b> | 2143.957576    | 1072.482426      | 2142.973560    | 1071.990418      | 15 |
| 6  | 653.252544         | 327.129910      | 636.225995         | 318.616636       | 635.241979     | 318.124628       | P    | 2045.957182        | <b>1023.482229</b> | 2028.930633    | 1014.968955      | 2027.946617    | 1014.476946      | 14 |
| 7  | <b>1092.477870</b> | 546.742573      | 1075.451321        | 538.229299       | 1074.467305    | 537.737290       | Q    | 1948.904418        | 974.955847         | 1931.877869    | 966.442572       | 1930.893853    | 965.950564       | 13 |
| 8  | 1149.499334        | 575.253305      | 1132.472785        | 566.740030       | 1131.488769    | 566.248022       | G    | <b>1509.679092</b> | <b>755.343184</b>  | 1492.652543    | 746.829910       | 1491.668527    | 746.337902       | 12 |
| 9  | 1246.552098        | 623.779687      | 1229.525549        | 615.266413       | 1228.541533    | 614.774404       | P    | <b>1452.657628</b> | 726.832452         | 1435.631079    | 718.319178       | 1434.647063    | 717.827170       | 11 |
| 10 | 1432.631411        | 716.819343      | <b>1415.604862</b> | 708.306069       | 1414.620846    | 707.814061       | W    | <b>1355.604864</b> | 678.306070         | 1338.578315    | 669.792796       | 1337.594299    | 669.300788       | 10 |
| 11 | 1592.662060        | 796.834668      | 1575.635511        | 788.321394       | 1574.651495    | 787.829385       | C    | <b>1169.525551</b> | 585.266414         | 1152.499002    | 576.753139       | 1151.514986    | 576.261131       | 9  |
| 12 | 1755.725389        | 878.366333      | 1738.698840        | 869.853058       | 1737.714824    | 869.361050       | Y    | <b>1009.494902</b> | 505.251089         | 992.468353     | 496.737815       | 991.484337     | 496.245807       | 8  |
| 13 | 1856.773068        | 928.890172      | 1839.746519        | 920.376898       | 1838.762503    | 919.884889       | T    | <b>846.431573</b>  | 423.719425         | 829.405024     | 415.206150       | 828.421008     | 414.714142       | 7  |
| 14 | 1957.820747        | 979.414012      | 1940.794198        | 970.900737       | 1939.810182    | 970.408729       | T    | <b>745.383894</b>  | 373.195585         | 728.357345     | 364.682311       | 727.373329     | 364.190303       | 6  |
| 15 | 2072.847690        | 1036.927483     | 2055.821141        | 1028.414208      | 2054.837125    | 1027.922200      | D    | <b>644.336215</b>  | 322.671746         | 627.309666     | 314.158471       | 626.325650     | 313.666463       | 5  |
| 16 | 2169.900454        | 1085.453865     | 2152.873905        | 1076.940590      | 2151.889889    | 1076.448582      | P    | <b>529.309272</b>  | 265.158274         | 512.282723     | 256.645000       | 511.298707     | 256.152992       | 4  |
| 17 | 2298.943047        | 1149.975161     | 2281.916498        | 1141.461887      | 2280.932482    | 1140.969879      | E    | 432.256508         | 216.631892         | 415.229959     | 208.118618       | 414.245943     | 207.626610       | 3  |
| 18 | 2427.038010        | 1214.022643     | 2410.011461        | 1205.509368      | 2409.027445    | 1205.017360      | K    | <b>303.213915</b>  | 152.110595         | 286.187366     | 143.597321       |                |                  | 2  |
| 19 |                    |                 |                    |                  |                |                  | R    | <b>175.118952</b>  | 88.063114          | 158.092403     | 79.549839        |                |                  | 1  |

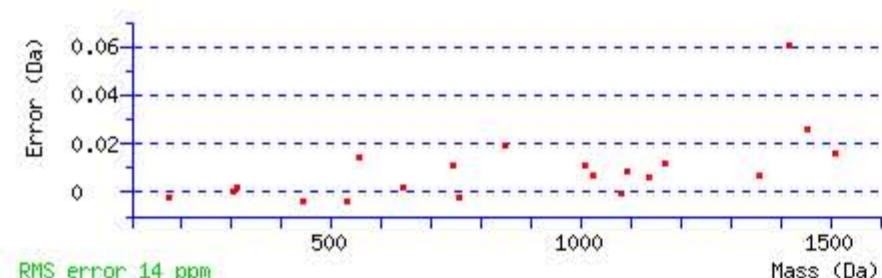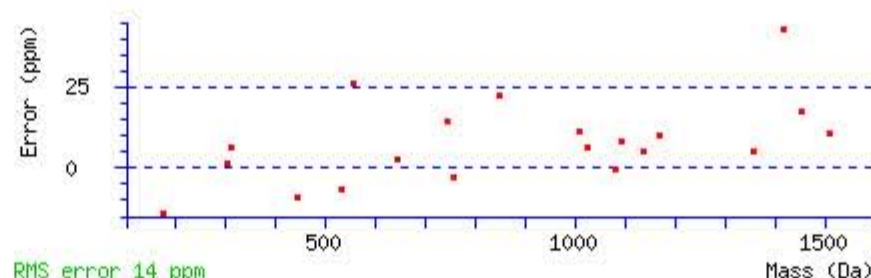

NCBI BLAST search of [NPDNDPQGPWCYTTDPEKR](#)  
 (Parameters: blastp, nr protein database, expect=20000, no filter, PAM30)  
 Other BLAST [web gateways](#)

## All matches to this query

| Score | Mr(calc):   | Delta    | Sequence                            |
|-------|-------------|----------|-------------------------------------|
| 56.4  | 2600.142410 | 0.011782 | <a href="#">NPDNDPQGPWCYTTDPEKR</a> |



# Mascot Search Results

## Peptide View

MS/MS Fragmentation of **VILGAHQEVNLEPHVQIEVSR**  
 Found in **PLMN\_HUMAN**, Plasminogen OS=Homo sapiens GN=PLG PE=1 SV=2

Match to Query 71857: 2806.497552 from(936.506460,3+) rtinseconds(2070) index(80740)  
 Title: Locus:1.1.1.2600.12 File:"2013-07-02 CLN FXIII 30 min 1st FT.wiff"  
 Data file C:\Program Files (x86)\Matrix Science\Mascot Daemon\mgf1 FXIII 30 min 1st\mascot\_daemon\_merge.mgf

Click mouse within plot area to zoom in by factor of two about that point

Or, Plot from  to  Da

Label all possible matches  Label matches used for scoring

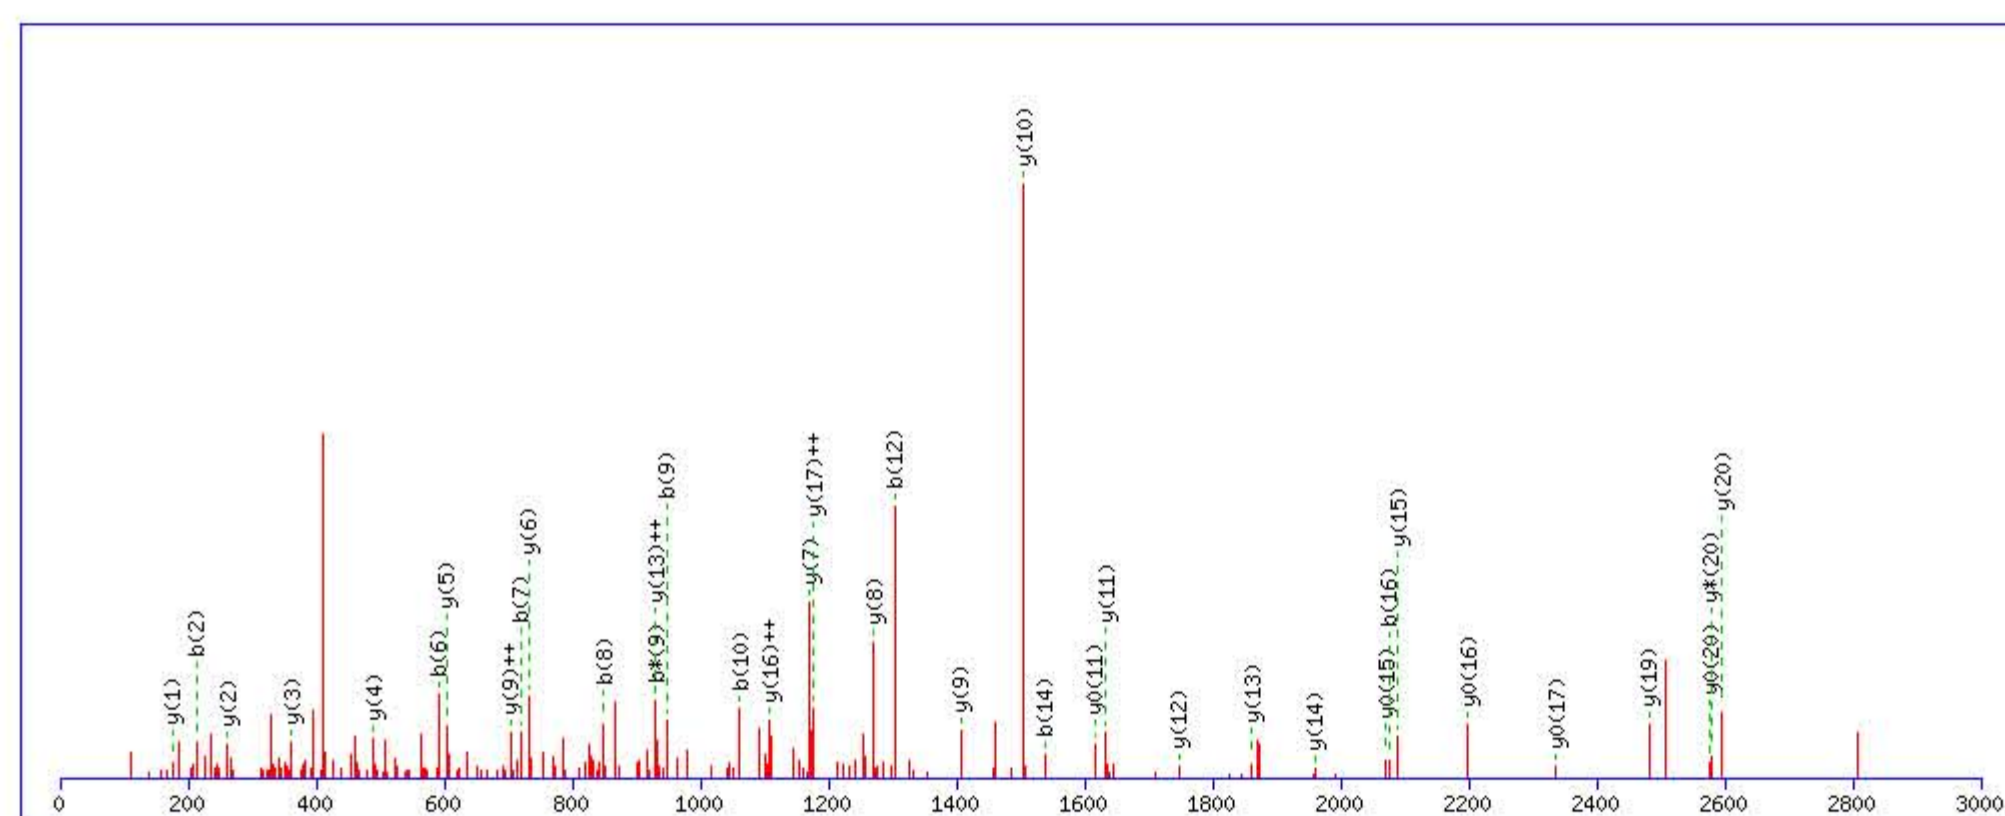

Monoisotopic mass of neutral peptide Mr(calc): 2806.479965  
 Fixed modifications: Carbamidomethyl (C) (apply to specified residues or termini only)  
 Variable modifications:  
 Q16 : Biotin:Thermo-21345 (Q)  
 Ions Score: 109 Expect: 2.4e-010  
 Matches : 37/224 fragment ions using 65 most intense peaks [\(help\)](#)

| #  | b                  | b <sup>++</sup> | b <sup>*</sup>    | b <sup>*++</sup> | b <sup>0</sup> | b <sup>0++</sup> | Seq. | y                  | y <sup>++</sup>    | y <sup>*</sup>     | y <sup>*++</sup> | y <sup>0</sup>     | y <sup>0++</sup> | #  |
|----|--------------------|-----------------|-------------------|------------------|----------------|------------------|------|--------------------|--------------------|--------------------|------------------|--------------------|------------------|----|
| 1  | 100.075690         | 50.541483       |                   |                  |                |                  | V    |                    |                    |                    |                  |                    |                  | 22 |
| 2  | <b>213.159754</b>  | 107.083515      |                   |                  |                |                  | I    | 2708.418847        | 1354.713061        | 2691.392298        | 1346.199787      | 2690.408282        | 1345.707779      | 21 |
| 3  | 326.243818         | 163.625547      |                   |                  |                |                  | L    | <b>2595.334783</b> | 1298.171029        | <b>2578.308234</b> | 1289.657755      | <b>2577.324218</b> | 1289.165747      | 20 |
| 4  | 383.265282         | 192.136279      |                   |                  |                |                  | G    | <b>2482.250719</b> | 1241.628997        | 2465.224170        | 1233.115723      | 2464.240154        | 1232.623715      | 19 |
| 5  | 454.302396         | 227.654836      |                   |                  |                |                  | A    | 2425.229255        | 1213.118265        | 2408.202706        | 1204.604991      | 2407.218690        | 1204.112983      | 18 |
| 6  | <b>591.361308</b>  | 296.184292      |                   |                  |                |                  | H    | 2354.192141        | <b>1177.599708</b> | 2337.165592        | 1169.086434      | <b>2336.181576</b> | 1168.594426      | 17 |
| 7  | <b>719.419886</b>  | 360.213581      | 702.393337        | 351.700307       |                |                  | Q    | 2217.133229        | <b>1109.070252</b> | 2200.106680        | 1100.556978      | <b>2199.122664</b> | 1100.064970      | 16 |
| 8  | <b>848.462479</b>  | 424.734878      | 831.435930        | 416.221603       | 830.451914     | 415.729595       | E    | <b>2089.074651</b> | 1045.040963        | 2072.048102        | 1036.527689      | <b>2071.064086</b> | 1036.035681      | 15 |
| 9  | <b>947.530893</b>  | 474.269085      | <b>930.504344</b> | 465.755810       | 929.520328     | 465.263802       | V    | <b>1960.032058</b> | 980.519667         | 1943.005509        | 972.006393       | 1942.021493        | 971.514385       | 14 |
| 10 | <b>1061.573820</b> | 531.290548      | 1044.547271       | 522.777274       | 1043.563255    | 522.285266       | N    | <b>1860.963644</b> | <b>930.985460</b>  | 1843.937095        | 922.472186       | 1842.953079        | 921.980178       | 13 |
| 11 | 1174.657884        | 587.832580      | 1157.631335       | 579.319306       | 1156.647319    | 578.827297       | L    | <b>1746.920717</b> | 873.963997         | 1729.894168        | 865.450722       | 1728.910152        | 864.958714       | 12 |
| 12 | <b>1303.700477</b> | 652.353877      | 1286.673928       | 643.840602       | 1285.689912    | 643.348594       | E    | <b>1633.836653</b> | 817.421965         | 1616.810104        | 808.908690       | <b>1615.826088</b> | 808.416682       | 11 |
| 13 | 1400.753241        | 700.880259      | 1383.726692       | 692.366984       | 1382.742676    | 691.874976       | P    | <b>1504.794060</b> | 752.900668         | 1487.767511        | 744.387394       | 1486.783495        | 743.895386       | 10 |
| 14 | <b>1537.812153</b> | 769.409715      | 1520.785604       | 760.896440       | 1519.801588    | 760.404432       | H    | <b>1407.741296</b> | <b>704.374286</b>  | 1390.714747        | 695.861012       | 1389.730731        | 695.369004       | 9  |
| 15 | 1636.880567        | 818.943922      | 1619.854018       | 810.430647       | 1618.870002    | 809.938639       | V    | <b>1270.682384</b> | 635.844830         | 1253.655835        | 627.331556       | 1252.671819        | 626.839548       | 8  |
| 16 | <b>2076.105893</b> | 1038.556584     | 2059.079344       | 1030.043310      | 2058.095328    | 1029.551302      | Q    | <b>1171.613970</b> | 586.310623         | 1154.587421        | 577.797349       | 1153.603405        | 577.305341       | 7  |
| 17 | 2205.148486        | 1103.077881     | 2188.121937       | 1094.564606      | 2187.137921    | 1094.072598      | E    | <b>732.388644</b>  | 366.697960         | 715.362095         | 358.184686       | 714.378079         | 357.692678       | 6  |
| 18 | 2318.232550        | 1159.619913     | 2301.206001       | 1151.106638      | 2300.221985    | 1150.614631      | I    | <b>603.346051</b>  | 302.176664         | 586.319502         | 293.663389       | 585.335486         | 293.171381       | 5  |
| 19 | 2447.275143        | 1224.141210     | 2430.248594       | 1215.627935      | 2429.264578    | 1215.135927      | E    | <b>490.261987</b>  | 245.634631         | 473.235438         | 237.121357       | 472.251422         | 236.629349       | 4  |
| 20 | 2546.343557        | 1273.675417     | 2529.317008       | 1265.162142      | 2528.332992    | 1264.670134      | V    | <b>361.219394</b>  | 181.113335         | 344.192845         | 172.600060       | 343.208829         | 172.108052       | 3  |
| 21 | 2633.375585        | 1317.191431     | 2616.349036       | 1308.678156      | 2615.365020    | 1308.186148      | S    | <b>262.150980</b>  | 131.579128         | 245.124431         | 123.065854       | 244.140415         | 122.573846       | 2  |
| 22 |                    |                 |                   |                  |                |                  | R    | <b>175.118952</b>  | 88.063114          | 158.092403         | 79.549839        |                    |                  | 1  |

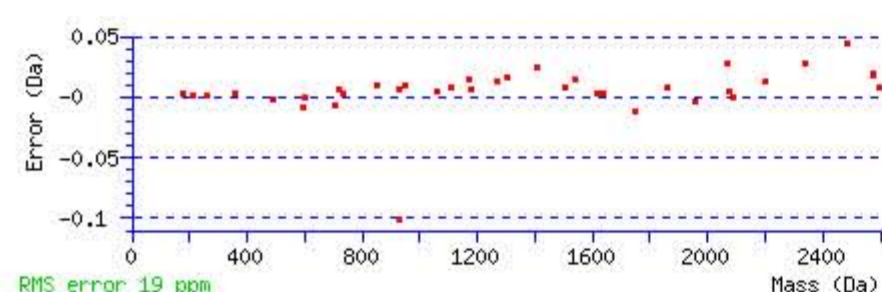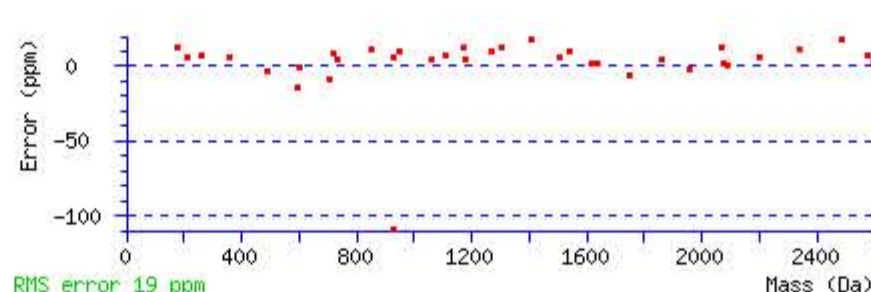

NCBI BLAST search of [VILGAHQEVNLEPHVQIEVSR](#)  
 (Parameters: blastp, nr protein database, expect=20000, no filter, PAM30)  
 Other BLAST [web gateways](#)

### All matches to this query

| Score | Mr(calc):   | Delta    | Sequence                              |
|-------|-------------|----------|---------------------------------------|
| 109.1 | 2806.479965 | 0.017587 | <a href="#">VILGAHQEVNLEPHVQIEVSR</a> |
| 8.8   | 2806.479965 | 0.017587 | <a href="#">VILGAHQEVNLEPHVQIEVSR</a> |



# MASCOT Search Results

## Peptide View

MS/MS Fragmentation of **TMSGLECAWDSQSPHAHGYIPSK**

Found in **PLMN\_HUMAN**, Plasminogen OS=Homo sapiens GN=PLG PE=1 SV=2

Match to Query 74390: 2997.367976 from(750.349270,4+) rtinseconds(1976) index(80123)

Title: Locus:1.1.1.2567.22 File:"2013-07-02 CLN FXIII 30 min 1st FT.wiff"

Data file C:\Program Files (x86)\Matrix Science\Mascot Daemon\mgf1 FXIII 30 min 1st\mascot\_daemon\_merge.mgf

Click mouse within plot area to zoom in by factor of two about that point

Or, Plot from  to  Da

Label all possible matches  Label matches used for scoring

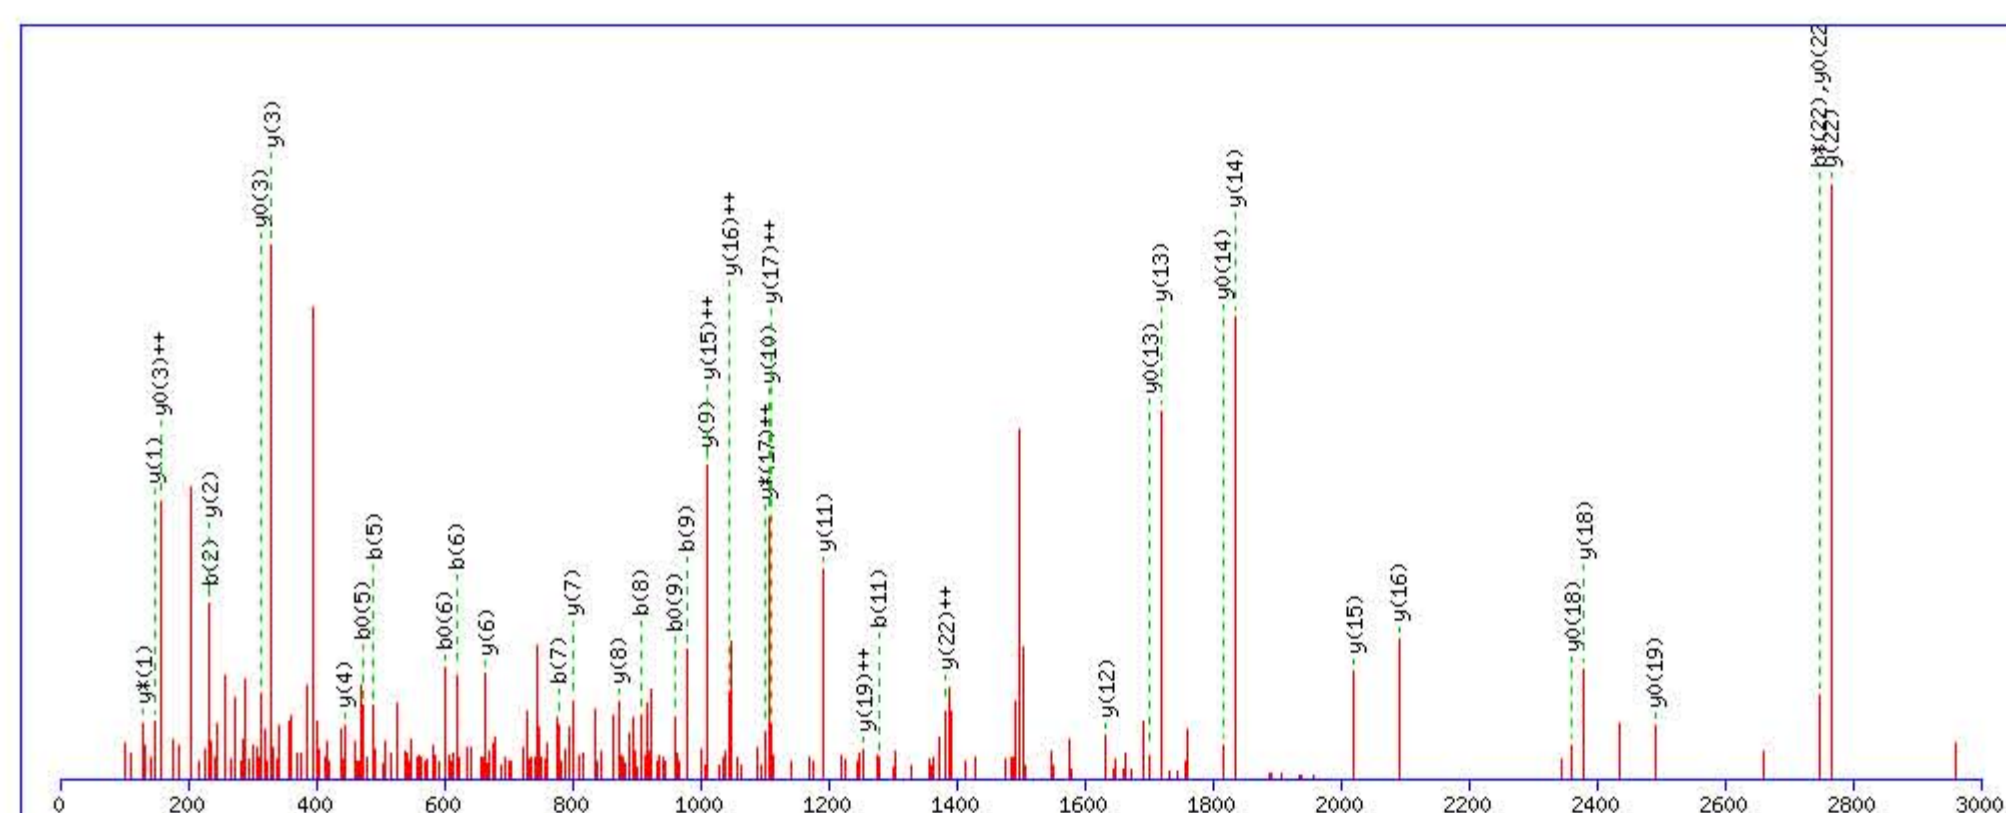

Monoisotopic mass of neutral peptide Mr(calc): 2997.357162

Fixed modifications: Carbamidomethyl (C) (apply to specified residues or termini only)

Variable modifications:

Q13 : Biotin:Thermo-21345 (Q)

Ions Score: 75 Expect: 3.8e-007

Matches : 42/260 fragment ions using 105 most intense peaks [\(help\)](#)

| #  | b                  | b <sup>++</sup> | b <sup>+</sup>     | b <sup>+++</sup> | b <sup>0</sup>    | b <sup>0++</sup> | Seq. | y                  | y <sup>++</sup>    | y <sup>+</sup>    | y <sup>+++</sup>   | y <sup>0</sup>     | y <sup>0++</sup>  | #  |
|----|--------------------|-----------------|--------------------|------------------|-------------------|------------------|------|--------------------|--------------------|-------------------|--------------------|--------------------|-------------------|----|
| 1  | 102.054955         | 51.531116       |                    |                  | 84.044390         | 42.525833        | T    |                    |                    |                   |                    |                    |                   | 24 |
| 2  | <b>233.095440</b>  | 117.051358      |                    |                  | 215.084875        | 108.046076       | M    | 2897.316768        | 1449.162022        | 2880.290219       | 1440.648748        | 2879.306203        | 1440.156740       | 23 |
| 3  | 320.127468         | 160.567372      |                    |                  | 302.116903        | 151.562089       | S    | <b>2766.276283</b> | <b>1383.641780</b> | 2749.249734       | 1375.128505        | <b>2748.265718</b> | 1374.636497       | 22 |
| 4  | 377.148932         | 189.078104      |                    |                  | 359.138367        | 180.072821       | G    | 2679.244255        | 1340.125766        | 2662.217706       | 1331.612491        | 2661.233690        | 1331.120483       | 21 |
| 5  | <b>490.232996</b>  | 245.620136      |                    |                  | <b>472.222431</b> | 236.614853       | L    | 2622.222791        | 1311.615034        | 2605.196242       | 1303.101759        | 2604.212226        | 1302.609751       | 20 |
| 6  | <b>619.275589</b>  | 310.141433      |                    |                  | <b>601.265024</b> | 301.136150       | E    | 2509.138727        | <b>1255.073002</b> | 2492.112178       | 1246.559727        | <b>2491.128162</b> | 1246.067719       | 19 |
| 7  | <b>779.306238</b>  | 390.156757      |                    |                  | 761.295673        | 381.151475       | C    | <b>2380.096134</b> | 1190.551705        | 2363.069585       | 1182.038431        | <b>2362.085569</b> | 1181.546423       | 18 |
| 8  | <b>907.364816</b>  | 454.186046      | 890.338267         | 445.672772       | 889.354251        | 445.180764       | Q    | 2220.065485        | <b>1110.536381</b> | 2203.038936       | <b>1102.023106</b> | 2202.054920        | 1101.531098       | 17 |
| 9  | <b>978.401930</b>  | 489.704603      | 961.375381         | 481.191329       | <b>960.391365</b> | 480.699321       | A    | <b>2092.006907</b> | <b>1046.507092</b> | 2074.980358       | 1037.993817        | 2073.996342        | 1037.501809       | 16 |
| 10 | 1164.481243        | 582.744260      | 1147.454694        | 574.230985       | 1146.470678       | 573.738977       | W    | <b>2020.969793</b> | <b>1010.988535</b> | 2003.943244       | 1002.475260        | 2002.959228        | 1001.983252       | 15 |
| 11 | <b>1279.508186</b> | 640.257731      | 1262.481637        | 631.744457       | 1261.497621       | 631.252449       | D    | <b>1834.890480</b> | 917.948878         | 1817.863931       | 909.435604         | <b>1816.879915</b> | 908.943596        | 14 |
| 12 | 1366.540214        | 683.773745      | 1349.513665        | 675.260471       | 1348.529649       | 674.768463       | S    | <b>1719.863537</b> | 860.435407         | 1702.836988       | 851.922132         | <b>1701.852972</b> | 851.430124        | 13 |
| 13 | 1805.765540        | 903.386408      | 1788.738991        | 894.873134       | 1787.754975       | 894.381126       | Q    | <b>1632.831509</b> | 816.919393         | 1615.804960       | 808.406118         | 1614.820944        | 807.914110        | 12 |
| 14 | 1892.797568        | 946.902422      | 1875.771019        | 938.389148       | 1874.787003       | 937.897140       | S    | <b>1193.606183</b> | 597.306730         | 1176.579634       | 588.793455         | 1175.595618        | 588.301447        | 11 |
| 15 | 1989.850332        | 995.428804      | 1972.823783        | 986.915530       | 1971.839767       | 986.423522       | P    | <b>1106.574155</b> | 553.790716         | 1089.547606       | 545.277441         | 1088.563590        | 544.785433        | 10 |
| 16 | 2126.909244        | 1063.958260     | 2109.882695        | 1055.444986      | 2108.898679       | 1054.952978      | H    | <b>1009.521391</b> | 505.264334         | 992.494842        | 496.751059         | 991.510826         | 496.259051        | 9  |
| 17 | 2197.946358        | 1099.476817     | 2180.919809        | 1090.963543      | 2179.935793       | 1090.471535      | A    | <b>872.462479</b>  | 436.734878         | 855.435930        | 428.221603         | 854.451914         | 427.729595        | 8  |
| 18 | 2335.005270        | 1168.006273     | 2317.978721        | 1159.492999      | 2316.994705       | 1159.000991      | H    | <b>801.425365</b>  | 401.216321         | 784.398816        | 392.703046         | 783.414800         | 392.211038        | 7  |
| 19 | 2392.026734        | 1196.517005     | 2375.000185        | 1188.003731      | 2374.016169       | 1187.511723      | G    | <b>664.366453</b>  | 332.686865         | 647.339904        | 324.173590         | 646.355888         | 323.681582        | 6  |
| 20 | 2555.090063        | 1278.048670     | 2538.063514        | 1269.535395      | 2537.079498       | 1269.043387      | Y    | 607.344989         | 304.176133         | 590.318440        | 295.662858         | 589.334424         | 295.170850        | 5  |
| 21 | 2668.174127        | 1334.590702     | 2651.147578        | 1326.077427      | 2650.163562       | 1325.585419      | I    | <b>444.281660</b>  | 222.644468         | 427.255111        | 214.131194         | 426.271095         | 213.639186        | 4  |
| 22 | 2765.226891        | 1383.117084     | <b>2748.200342</b> | 1374.603809      | 2747.216326       | 1374.111801      | P    | <b>331.197596</b>  | 166.102436         | 314.171047        | 157.589162         | <b>313.187031</b>  | <b>157.097154</b> | 3  |
| 23 | 2852.258919        | 1426.633098     | 2835.232370        | 1418.119823      | 2834.248354       | 1417.627815      | S    | <b>234.144832</b>  | 117.576054         | 217.118283        | 109.062780         | 216.134267         | 108.570772        | 2  |
| 24 |                    |                 |                    |                  |                   |                  | K    | <b>147.112804</b>  | 74.060040          | <b>130.086255</b> | 65.546765          |                    |                   | 1  |

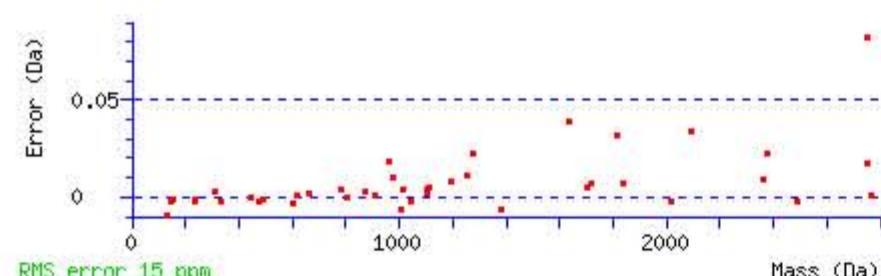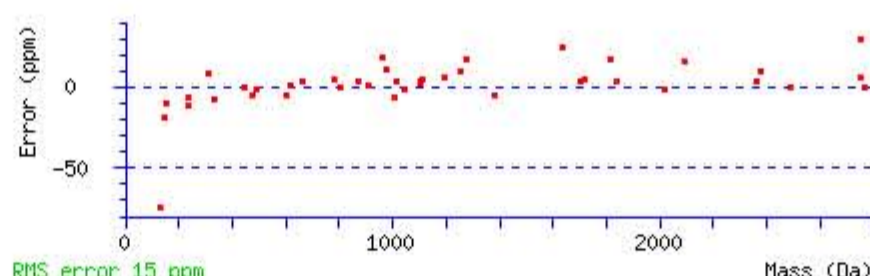

NCBI BLAST search of **TMSGLECAWDSQSPHAHGYIPSK**

(Parameters: blastp, nr protein database, expect=20000, no filter, PAM30)

Other BLAST [web gateways](#)

All matches to this query

| Score | Mr(calc):   | Delta    | Sequence                                |
|-------|-------------|----------|-----------------------------------------|
| 75.0  | 2997.357162 | 0.010814 | <a href="#">TMSGLECAWDSQSPHAHGYIPSK</a> |
| 30.1  | 2997.357162 | 0.010814 | <a href="#">TMSGLECAWDSQSPHAHGYIPSK</a> |



# MASCOT Search Results

## Peptide View

MS/MS Fragmentation of **GNVAVTVSGHTCQHWSAQTPHTHNR**  
 Found in **PLMN\_HUMAN**, Plasminogen OS=Homo sapiens GN=PLG PE=1 SV=2

Match to Query 75169: 3092.444720 from(619.496220,5+) rtinseconds(1464) index(76640)  
 Title: Locus:1.1.1.2389.16 File:"2013-07-02 CLN FXIII 30 min 1st FT.wiff"  
 Data file C:\Program Files (x86)\Matrix Science\Mascot Daemon\mgf1 FXIII 30 min 1st\mascot\_daemon\_merge.mgf

Click mouse within plot area to zoom in by factor of two about that point  
 Or, Plot from  to  Da   
 Label all possible matches  Label matches used for scoring

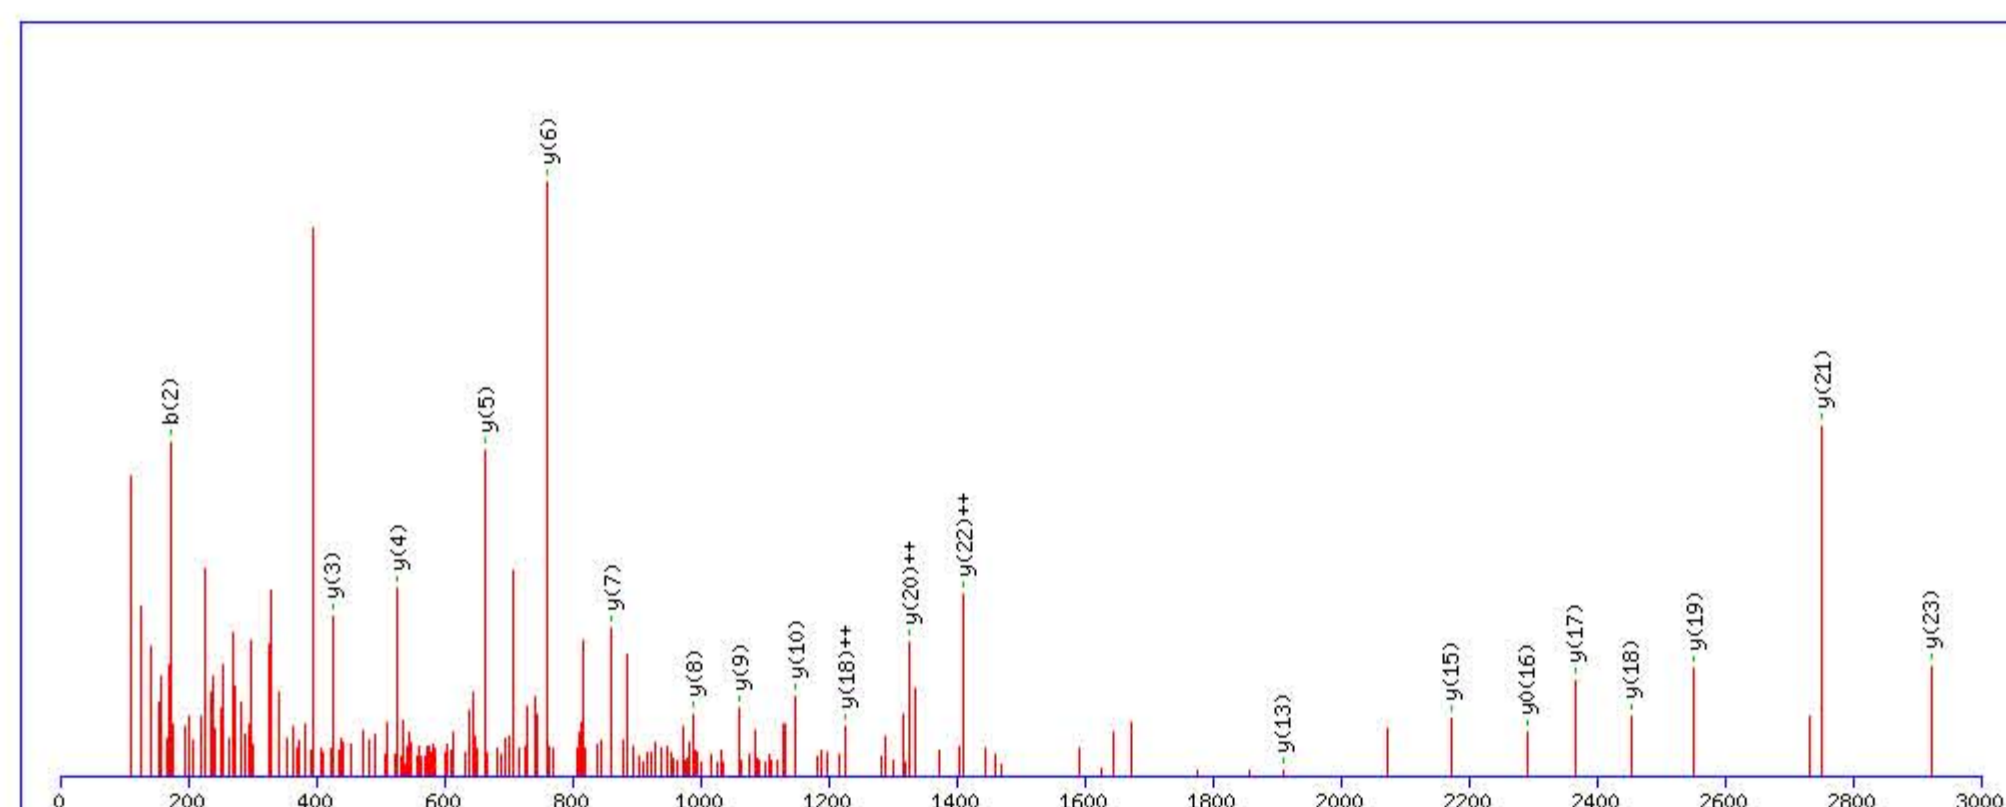

Monoisotopic mass of neutral peptide Mr(calc): 3092.457016  
 Fixed modifications: Carbamidomethyl (C) (apply to specified residues or termini only)  
 Variable modifications:  
 Q13 : Biotin:Thermo-21345 (Q)  
 Ions Score: 115 Expect: 5.2e-011  
 Matches : 20/270 fragment ions using 27 most intense peaks [\(help\)](#)

| #  | b           | b <sup>++</sup> | b <sup>+</sup> | b <sup>+++</sup> | b <sup>0</sup> | b <sup>0++</sup> | Seq. | y           | y <sup>++</sup> | y <sup>+</sup> | y <sup>+++</sup> | y <sup>0</sup> | y <sup>0++</sup> | #  |
|----|-------------|-----------------|----------------|------------------|----------------|------------------|------|-------------|-----------------|----------------|------------------|----------------|------------------|----|
| 1  | 58.028740   | 29.518008       |                |                  |                |                  | G    |             |                 |                |                  |                |                  | 25 |
| 2  | 172.071667  | 86.539471       | 155.045118     | 78.026197        |                |                  | N    | 3036.442790 | 1518.725033     | 3019.416241    | 1510.211758      | 3018.432225    | 1509.719750      | 24 |
| 3  | 271.140081  | 136.073679      | 254.113532     | 127.560404       |                |                  | V    | 2922.399863 | 1461.703569     | 2905.373314    | 1453.190295      | 2904.389298    | 1452.698287      | 23 |
| 4  | 342.177195  | 171.592236      | 325.150646     | 163.078961       |                |                  | A    | 2823.331449 | 1412.169362     | 2806.304900    | 1403.656088      | 2805.320884    | 1403.164080      | 22 |
| 5  | 441.245609  | 221.126443      | 424.219060     | 212.613168       |                |                  | V    | 2752.294335 | 1376.650805     | 2735.267786    | 1368.137531      | 2734.283770    | 1367.645523      | 21 |
| 6  | 542.293288  | 271.650282      | 525.266739     | 263.137008       | 524.282723     | 262.645000       | T    | 2653.225921 | 1327.116598     | 2636.199372    | 1318.603324      | 2635.215356    | 1318.111316      | 20 |
| 7  | 641.361702  | 321.184489      | 624.335153     | 312.671215       | 623.351137     | 312.179207       | V    | 2552.178242 | 1276.592759     | 2535.151693    | 1268.079484      | 2534.167677    | 1267.587476      | 19 |
| 8  | 728.393730  | 364.700503      | 711.367181     | 356.187229       | 710.383165     | 355.695221       | S    | 2453.109828 | 1227.058552     | 2436.083279    | 1218.545277      | 2435.099263    | 1218.053269      | 18 |
| 9  | 785.415194  | 393.211235      | 768.388645     | 384.697961       | 767.404629     | 384.205953       | G    | 2366.077800 | 1183.542538     | 2349.051251    | 1175.029263      | 2348.067235    | 1174.537255      | 17 |
| 10 | 922.474106  | 461.740691      | 905.447557     | 453.227417       | 904.463541     | 452.735409       | H    | 2309.056336 | 1155.031806     | 2292.029787    | 1146.518531      | 2291.045771    | 1146.026523      | 16 |
| 11 | 1023.521785 | 512.264530      | 1006.495236    | 503.751256       | 1005.511220    | 503.259248       | T    | 2171.997424 | 1086.502350     | 2154.970875    | 1077.989075      | 2153.986859    | 1077.497067      | 15 |
| 12 | 1183.552434 | 592.279855      | 1166.525885    | 583.766581       | 1165.541869    | 583.274572       | C    | 2070.949745 | 1035.978510     | 2053.923196    | 1027.465236      | 2052.939180    | 1026.973228      | 14 |
| 13 | 1622.777760 | 811.892518      | 1605.751211    | 803.379244       | 1604.767195    | 802.887236       | Q    | 1910.919096 | 955.963186      | 1893.892547    | 947.449911       | 1892.908531    | 946.957903       | 13 |
| 14 | 1759.836672 | 880.421974      | 1742.810123    | 871.908700       | 1741.826107    | 871.416692       | H    | 1471.693770 | 736.350523      | 1454.667221    | 727.837248       | 1453.683205    | 727.345240       | 12 |
| 15 | 1945.915985 | 973.461631      | 1928.889436    | 964.948356       | 1927.905420    | 964.456348       | W    | 1334.634858 | 667.821067      | 1317.608309    | 659.307792       | 1316.624293    | 658.815784       | 11 |
| 16 | 2032.948013 | 1016.977645     | 2015.921464    | 1008.464370      | 2014.937448    | 1007.972362      | S    | 1148.555545 | 574.781410      | 1131.528996    | 566.268136       | 1130.544980    | 565.776128       | 10 |
| 17 | 2103.985127 | 1052.496201     | 2086.958578    | 1043.982927      | 2085.974562    | 1043.490919      | A    | 1061.523517 | 531.265396      | 1044.496968    | 522.752122       | 1043.512952    | 522.260114       | 9  |
| 18 | 2232.043705 | 1116.525490     | 2215.017156    | 1108.012216      | 2214.033140    | 1107.520208      | Q    | 990.486403  | 495.746839      | 973.459854     | 487.233565       | 972.475838     | 486.741557       | 8  |
| 19 | 2333.091384 | 1167.049330     | 2316.064835    | 1158.536055      | 2315.080819    | 1158.044047      | T    | 862.427825  | 431.717550      | 845.401276     | 423.204276       | 844.417260     | 422.712268       | 7  |
| 20 | 2430.144148 | 1215.575712     | 2413.117599    | 1207.062437      | 2412.133583    | 1206.570429      | P    | 761.380146  | 381.193711      | 744.353597     | 372.680436       | 743.369581     | 372.188428       | 6  |
| 21 | 2567.203060 | 1284.105168     | 2550.176511    | 1275.591893      | 2549.192495    | 1275.099885      | H    | 664.327382  | 332.667329      | 647.300833     | 324.154054       | 646.316817     | 323.662046       | 5  |
| 22 | 2668.250739 | 1334.629007     | 2651.224190    | 1326.115733      | 2650.240174    | 1325.623725      | T    | 527.268470  | 264.137873      | 510.241921     | 255.624598       | 509.257905     | 255.132590       | 4  |
| 23 | 2805.309651 | 1403.158463     | 2788.283102    | 1394.645189      | 2787.299086    | 1394.153181      | H    | 426.220791  | 213.614033      | 409.194242     | 205.100759       |                |                  | 3  |
| 24 | 2919.352578 | 1460.179927     | 2902.326029    | 1451.666652      | 2901.342013    | 1451.174644      | N    | 289.161879  | 145.084577      | 272.135330     | 136.571303       |                |                  | 2  |
| 25 |             |                 |                |                  |                |                  | R    | 175.118952  | 88.063114       | 158.092403     | 79.549839        |                |                  | 1  |

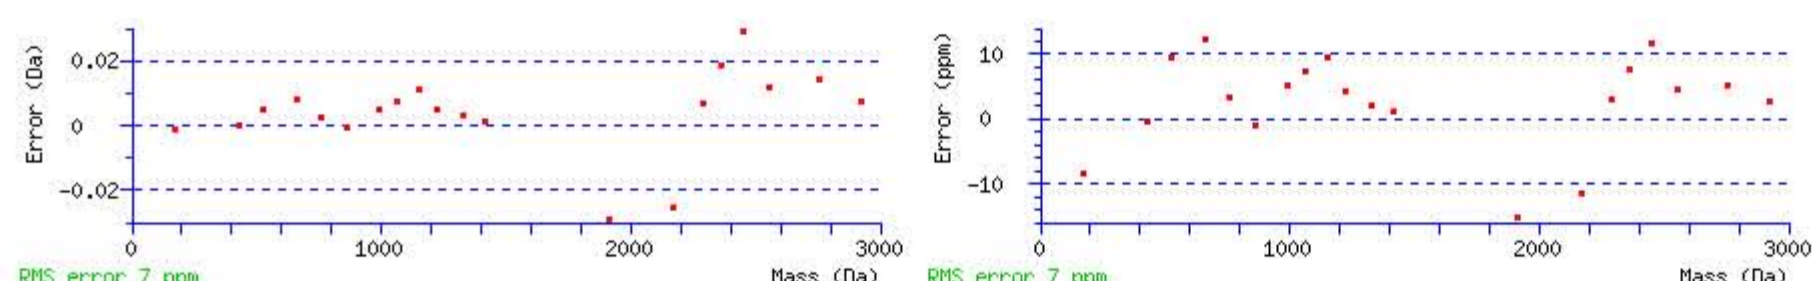

NCBI BLAST search of **GNVAVTVSGHTCQHWSAQTPHTHNR**  
 (Parameters: blastp, nr protein database, expect=20000, no filter, PAM30)  
 Other BLAST [web gateways](#)

## All matches to this query

| Score | Mr(calc):   | Delta     | Sequence                                  |
|-------|-------------|-----------|-------------------------------------------|
| 115.0 | 3092.457016 | -0.012296 | <a href="#">GNVAVTVSGHTCQHWSAQTPHTHNR</a> |
| 73.1  | 3092.457016 | -0.012296 | <a href="#">GNVAVTVSGHTCQHWSAQTPHTHNR</a> |



# MASCOT Search Results

## Peptide View

MS/MS Fragmentation of **GNVAVTVSGHTCQHWSAQTPHTHNR**  
 Found in **PLMN\_HUMAN**, Plasminogen OS=Homo sapiens GN=PLG PE=1 SV=2

Match to Query 75170: 3092.450170 from(619.497310,5+) rtinseconds(1442) index(76458)  
 Title: Locus:1.1.1.2381.24 File:"2013-07-02 CLN FXIII 30 min 1st FT.wiff"  
 Data file C:\Program Files (x86)\Matrix Science\Mascot Daemon\mgf1 FXIII 30 min 1st\mascot\_daemon\_merge.mgf

Click mouse within plot area to zoom in by factor of two about that point  
 Or, Plot from  to  Da   
 Label all possible matches  Label matches used for scoring

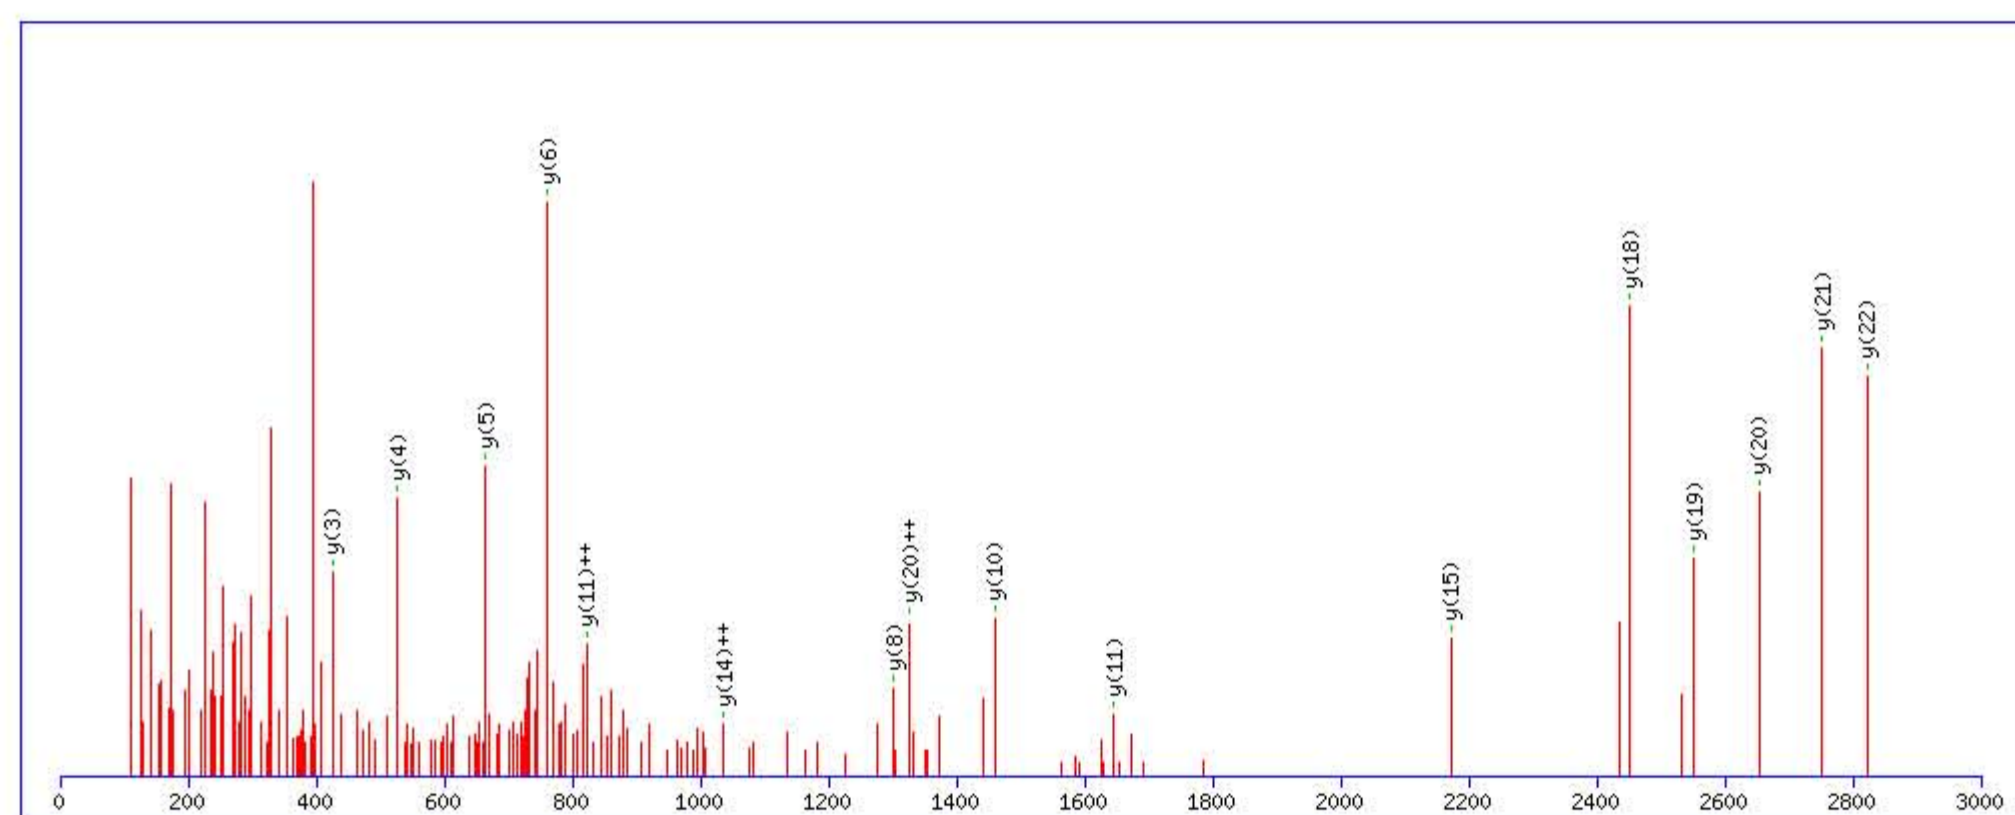

Monoisotopic mass of neutral peptide Mr(calc): 3092.457016  
 Fixed modifications: Carbamidomethyl (C) (apply to specified residues or termini only)  
 Variable modifications:  
 Q18 : Biotin:Thermo-21345 (Q)  
 Ions Score: 95 Expect: 6e-009  
 Matches : 16/270 fragment ions using 23 most intense peaks [\(help\)](#)

| #  | b           | b <sup>++</sup> | b <sup>+</sup> | b <sup>+++</sup> | b <sup>0</sup> | b <sup>0++</sup> | Seq. | y                  | y <sup>++</sup>    | y <sup>+</sup> | y <sup>+++</sup> | y <sup>0</sup> | y <sup>0++</sup> | #  |
|----|-------------|-----------------|----------------|------------------|----------------|------------------|------|--------------------|--------------------|----------------|------------------|----------------|------------------|----|
| 1  | 58.028740   | 29.518008       |                |                  |                |                  | G    |                    |                    |                |                  |                |                  | 25 |
| 2  | 172.071667  | 86.539471       | 155.045118     | 78.026197        |                |                  | N    | 3036.442790        | 1518.725033        | 3019.416241    | 1510.211758      | 3018.432225    | 1509.719750      | 24 |
| 3  | 271.140081  | 136.073679      | 254.113532     | 127.560404       |                |                  | V    | 2922.399863        | 1461.703569        | 2905.373314    | 1453.190295      | 2904.389298    | 1452.698287      | 23 |
| 4  | 342.177195  | 171.592236      | 325.150646     | 163.078961       |                |                  | A    | <b>2823.331449</b> | 1412.169362        | 2806.304900    | 1403.656088      | 2805.320884    | 1403.164080      | 22 |
| 5  | 441.245609  | 221.126443      | 424.219060     | 212.613168       |                |                  | V    | <b>2752.294335</b> | 1376.650805        | 2735.267786    | 1368.137531      | 2734.283770    | 1367.645523      | 21 |
| 6  | 542.293288  | 271.650282      | 525.266739     | 263.137008       | 524.282723     | 262.645000       | T    | <b>2653.225921</b> | <b>1327.116598</b> | 2636.199372    | 1318.603324      | 2635.215356    | 1318.111316      | 20 |
| 7  | 641.361702  | 321.184489      | 624.335153     | 312.671215       | 623.351137     | 312.179207       | V    | <b>2552.178242</b> | 1276.592759        | 2535.151693    | 1268.079484      | 2534.167677    | 1267.587476      | 19 |
| 8  | 728.393730  | 364.700503      | 711.367181     | 356.187229       | 710.383165     | 355.695221       | S    | <b>2453.109828</b> | 1227.058552        | 2436.083279    | 1218.545277      | 2435.099263    | 1218.053269      | 18 |
| 9  | 785.415194  | 393.211235      | 768.388645     | 384.697961       | 767.404629     | 384.205953       | G    | 2366.077800        | 1183.542538        | 2349.051251    | 1175.029263      | 2348.067235    | 1174.537255      | 17 |
| 10 | 922.474106  | 461.740691      | 905.447557     | 453.227417       | 904.463541     | 452.735409       | H    | 2309.056336        | 1155.031806        | 2292.029787    | 1146.518531      | 2291.045771    | 1146.026523      | 16 |
| 11 | 1023.521785 | 512.264530      | 1006.495236    | 503.751256       | 1005.511220    | 503.259248       | T    | <b>2171.997424</b> | 1086.502350        | 2154.970875    | 1077.989075      | 2153.986859    | 1077.497067      | 15 |
| 12 | 1183.552434 | 592.279855      | 1166.525885    | 583.766581       | 1165.541869    | 583.274572       | C    | 2070.949745        | <b>1035.978510</b> | 2053.923196    | 1027.465236      | 2052.939180    | 1026.973228      | 14 |
| 13 | 1311.611012 | 656.309144      | 1294.584463    | 647.795870       | 1293.600447    | 647.303862       | Q    | 1910.919096        | 955.963186         | 1893.892547    | 947.449911       | 1892.908531    | 946.957903       | 13 |
| 14 | 1448.669924 | 724.838600      | 1431.643375    | 716.325326       | 1430.659359    | 715.833318       | H    | 1782.860518        | 891.933897         | 1765.833969    | 883.420622       | 1764.849953    | 882.928614       | 12 |
| 15 | 1634.749237 | 817.878257      | 1617.722688    | 809.364982       | 1616.738672    | 808.872974       | W    | <b>1645.801606</b> | <b>823.404441</b>  | 1628.775057    | 814.891166       | 1627.791041    | 814.399158       | 11 |
| 16 | 1721.781265 | 861.394271      | 1704.754716    | 852.880996       | 1703.770700    | 852.388988       | S    | <b>1459.722293</b> | 730.364784         | 1442.695744    | 721.851510       | 1441.711728    | 721.359502       | 10 |
| 17 | 1792.818379 | 896.912828      | 1775.791830    | 888.399553       | 1774.807814    | 887.907545       | A    | 1372.690265        | 686.848770         | 1355.663716    | 678.335496       | 1354.679700    | 677.843488       | 9  |
| 18 | 2232.043705 | 1116.525490     | 2215.017156    | 1108.012216      | 2214.033140    | 1107.520208      | Q    | <b>1301.653151</b> | 651.330213         | 1284.626602    | 642.816939       | 1283.642586    | 642.324931       | 8  |
| 19 | 2333.091384 | 1167.049330     | 2316.064835    | 1158.536055      | 2315.080819    | 1158.044047      | T    | 862.427825         | 431.717550         | 845.401276     | 423.204276       | 844.417260     | 422.712268       | 7  |
| 20 | 2430.144148 | 1215.575712     | 2413.117599    | 1207.062437      | 2412.133583    | 1206.570429      | P    | <b>761.380146</b>  | 381.193711         | 744.353597     | 372.680436       | 743.369581     | 372.188428       | 6  |
| 21 | 2567.203060 | 1284.105168     | 2550.176511    | 1275.591893      | 2549.192495    | 1275.099885      | H    | <b>664.327382</b>  | 332.667329         | 647.300833     | 324.154054       | 646.316817     | 323.662046       | 5  |
| 22 | 2668.250739 | 1334.629007     | 2651.224190    | 1326.115733      | 2650.240174    | 1325.623725      | T    | <b>527.268470</b>  | 264.137873         | 510.241921     | 255.624598       | 509.257905     | 255.132590       | 4  |
| 23 | 2805.309651 | 1403.158463     | 2788.283102    | 1394.645189      | 2787.299086    | 1394.153181      | H    | <b>426.220791</b>  | 213.614033         | 409.194242     | 205.100759       |                |                  | 3  |
| 24 | 2919.352578 | 1460.179927     | 2902.326029    | 1451.666652      | 2901.342013    | 1451.174644      | N    | 289.161879         | 145.084577         | 272.135330     | 136.571303       |                |                  | 2  |
| 25 |             |                 |                |                  |                |                  | R    | 175.118952         | 88.063114          | 158.092403     | 79.549839        |                |                  | 1  |

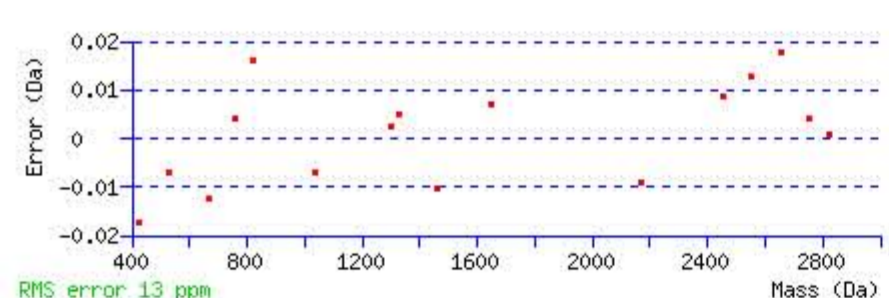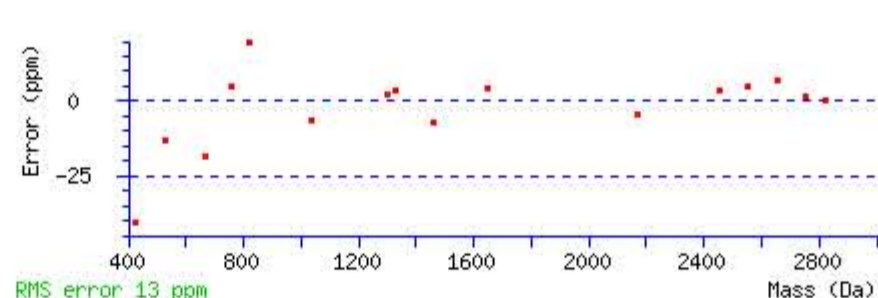

NCBI BLAST search of **GNVAVTVSGHTCQHWSAQTPHTHNR**  
 (Parameters: blastp, nr protein database, expect=20000, no filter, PAM30)  
 Other BLAST [web gateways](#)

### All matches to this query

| Score | Mr(calc):   | Delta     | Sequence                                  |
|-------|-------------|-----------|-------------------------------------------|
| 94.6  | 3092.457016 | -0.006846 | <a href="#">GNVAVTVSGHTCQHWSAQTPHTHNR</a> |
| 52.2  | 3092.457016 | -0.006846 | <a href="#">GNVAVTVSGHTCQHWSAQTPHTHNR</a> |



# MASCOT Search Results

## Peptide View

MS/MS Fragmentation of **KLYDYCDVPQCAAPSFDCGKQPVEPK**  
 Found in **PLMN\_HUMAN**, Plasminogen OS=Homo sapiens GN=PLG PE=1 SV=2

Match to Query 78684: 3382.564816 from(846.648480,4+) rtinseconds(1993) index(80250)  
 Title: Locus:1.1.1.2573.15 File:"2013-07-02 CLN FXIII 30 min 1st FT.wiff"  
 Data file C:\Program Files (x86)\Matrix Science\Mascot Daemon\mgf1 FXIII 30 min 1st\mascot\_daemon\_merge.mgf

Click mouse within plot area to zoom in by factor of two about that point  
 Or, Plot from  to  Da   
 Label all possible matches  Label matches used for scoring

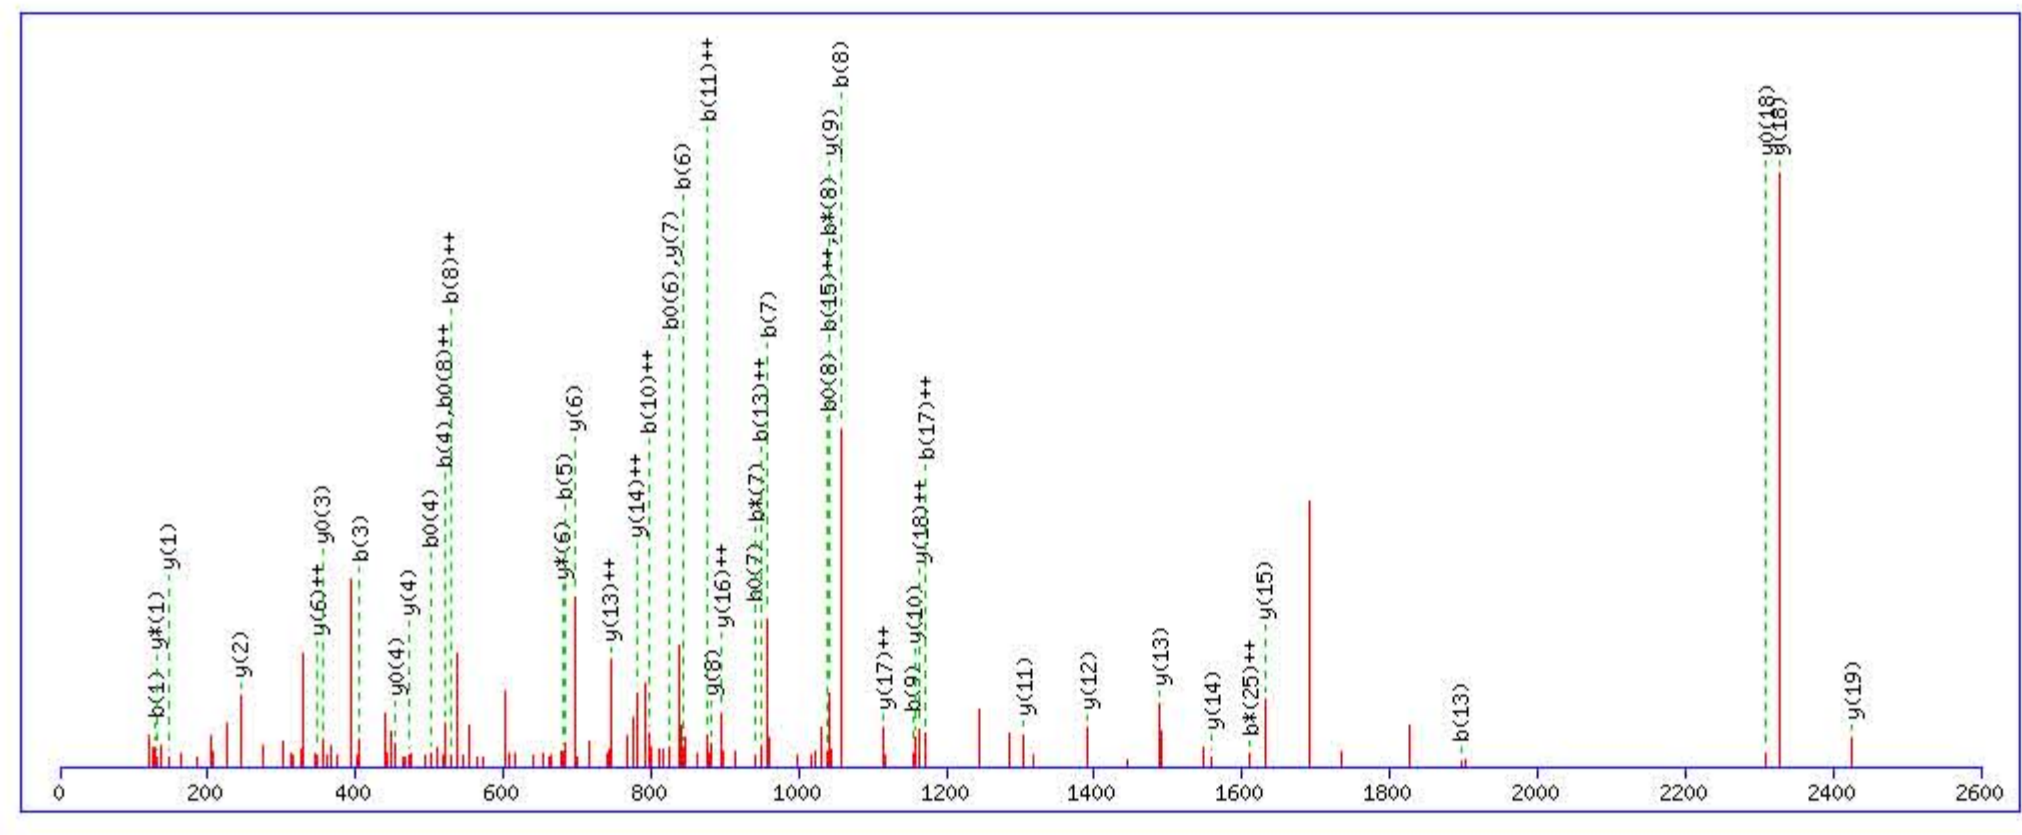

Monoisotopic mass of neutral peptide Mr(calc): 3382.549469  
 Fixed modifications: Carbamidomethyl (C) (apply to specified residues or termini only)  
 Variable modifications:  
 Q10 : Biotin:Thermo-21345 (Q)  
 Ions Score: 56 Expect: 6.1e-006  
 Matches : 49/290 fragment ions using 123 most intense peaks [\(help\)](#)

| #  | b                  | b <sup>++</sup>    | b <sup>*</sup>     | b <sup>+++</sup>   | b <sup>0</sup>     | b <sup>0++</sup>  | Seq.     | y                  | y <sup>++</sup>    | y <sup>*</sup>    | y <sup>+++</sup> | y <sup>0</sup>     | y <sup>0++</sup> | #         |
|----|--------------------|--------------------|--------------------|--------------------|--------------------|-------------------|----------|--------------------|--------------------|-------------------|------------------|--------------------|------------------|-----------|
| 1  | <b>129.102239</b>  | 65.054757          | 112.075690         | 56.541483          |                    |                   | <b>K</b> |                    |                    |                   |                  |                    |                  | <b>26</b> |
| 2  | 242.186303         | 121.596790         | 225.159754         | 113.083515         |                    |                   | <b>L</b> | 3255.461780        | 1628.234528        | 3238.435231       | 1619.721253      | 3237.451215        | 1619.229245      | <b>25</b> |
| 3  | <b>405.249632</b>  | 203.128454         | 388.223083         | 194.615180         |                    |                   | <b>Y</b> | 3142.377716        | 1571.692496        | 3125.351167       | 1563.179221      | 3124.367151        | 1562.687213      | <b>24</b> |
| 4  | <b>520.276575</b>  | 260.641926         | 503.250026         | 252.128651         | <b>502.266010</b>  | 251.636643        | <b>D</b> | 2979.314387        | 1490.160831        | 2962.287838       | 1481.647557      | 2961.303822        | 1481.155549      | <b>23</b> |
| 5  | <b>683.339904</b>  | 342.173590         | 666.313355         | 333.660316         | 665.329339         | 333.168308        | <b>Y</b> | 2864.287444        | 1432.647360        | 2847.260895       | 1424.134085      | 2846.276879        | 1423.642077      | <b>22</b> |
| 6  | <b>843.370553</b>  | 422.188915         | 826.344004         | 413.675640         | <b>825.359988</b>  | 413.183632        | <b>C</b> | 2701.224115        | 1351.115695        | 2684.197566       | 1342.602421      | 2683.213550        | 1342.110413      | <b>21</b> |
| 7  | <b>958.397496</b>  | 479.702386         | <b>941.370947</b>  | 471.189112         | <b>940.386931</b>  | 470.697104        | <b>D</b> | 2541.193466        | 1271.100371        | 2524.166917       | 1262.587096      | 2523.182901        | 1262.095088      | <b>20</b> |
| 8  | <b>1057.465910</b> | <b>529.236593</b>  | <b>1040.439361</b> | 520.723319         | <b>1039.455345</b> | <b>520.231311</b> | <b>V</b> | <b>2426.166523</b> | 1213.586899        | 2409.139974       | 1205.073625      | 2408.155958        | 1204.581617      | <b>19</b> |
| 9  | <b>1154.518674</b> | 577.762975         | 1137.492125        | 569.249701         | 1136.508109        | 568.757693        | <b>P</b> | <b>2327.098109</b> | <b>1164.052692</b> | 2310.071560       | 1155.539418      | <b>2309.087544</b> | 1155.047410      | <b>18</b> |
| 10 | 1593.744000        | <b>797.375638</b>  | 1576.717451        | 788.862364         | 1575.733435        | 788.370356        | <b>Q</b> | 2230.045345        | <b>1115.526310</b> | 2213.018796       | 1107.013036      | 2212.034780        | 1106.521028      | <b>17</b> |
| 11 | 1753.774649        | <b>877.390963</b>  | 1736.748100        | 868.877688         | 1735.764084        | 868.385680        | <b>C</b> | 1790.820019        | <b>895.913647</b>  | 1773.793470       | 887.400373       | 1772.809454        | 886.908365       | <b>16</b> |
| 12 | 1824.811763        | 912.909520         | 1807.785214        | 904.396245         | 1806.801198        | 903.904237        | <b>A</b> | <b>1630.789370</b> | 815.898323         | 1613.762821       | 807.385048       | 1612.778805        | 806.893040       | <b>15</b> |
| 13 | <b>1895.848877</b> | <b>948.428077</b>  | 1878.822328        | 939.914802         | 1877.838312        | 939.422794        | <b>A</b> | <b>1559.752256</b> | <b>780.379766</b>  | 1542.725707       | 771.866491       | 1541.741691        | 771.374483       | <b>14</b> |
| 14 | 1992.901641        | 996.954459         | 1975.875092        | 988.441184         | 1974.891076        | 987.949176        | <b>P</b> | <b>1488.715142</b> | <b>744.861209</b>  | 1471.688593       | 736.347934       | 1470.704577        | 735.855926       | <b>13</b> |
| 15 | 2079.933669        | <b>1040.470472</b> | 2062.907120        | 1031.957198        | 2061.923104        | 1031.465190       | <b>S</b> | <b>1391.662378</b> | 696.334827         | 1374.635829       | 687.821552       | 1373.651813        | 687.329544       | <b>12</b> |
| 16 | 2227.002083        | 1114.004679        | 2209.975534        | 1105.491405        | 2208.991518        | 1104.999397       | <b>F</b> | <b>1304.630350</b> | 652.818813         | 1287.603801       | 644.305538       | 1286.619785        | 643.813530       | <b>11</b> |
| 17 | 2342.029026        | <b>1171.518151</b> | 2325.002477        | 1163.004876        | 2324.018461        | 1162.512868       | <b>D</b> | <b>1157.561936</b> | 579.284606         | 1140.535387       | 570.771331       | 1139.551371        | 570.279323       | <b>10</b> |
| 18 | 2502.059675        | 1251.533475        | 2485.033126        | 1243.020201        | 2484.049110        | 1242.528193       | <b>C</b> | <b>1042.534993</b> | 521.771135         | 1025.508444       | 513.257860       | 1024.524428        | 512.765852       | <b>9</b>  |
| 19 | 2559.081139        | 1280.044207        | 2542.054590        | 1271.530933        | 2541.070574        | 1271.038925       | <b>G</b> | <b>882.504344</b>  | 441.755810         | 865.477795        | 433.242536       | 864.493779         | 432.750528       | <b>8</b>  |
| 20 | 2687.176102        | 1344.091689        | 2670.149553        | 1335.578414        | 2669.165537        | 1335.086406       | <b>K</b> | <b>825.482880</b>  | 413.245078         | 808.456331        | 404.731804       | 807.472315         | 404.239796       | <b>7</b>  |
| 21 | 2784.228866        | 1392.618071        | 2767.202317        | 1384.104796        | 2766.218301        | 1383.612788       | <b>P</b> | <b>697.387917</b>  | <b>349.197597</b>  | <b>680.361368</b> | 340.684322       | 679.377352         | 340.192314       | <b>6</b>  |
| 22 | 2912.287444        | 1456.647360        | 2895.260895        | 1448.134085        | 2894.276879        | 1447.642077       | <b>Q</b> | 600.335153         | 300.671215         | 583.308604        | 292.157940       | 582.324588         | 291.665932       | <b>5</b>  |
| 23 | 3011.355858        | 1506.181567        | 2994.329309        | 1497.668292        | 2993.345293        | 1497.176284       | <b>V</b> | <b>472.276575</b>  | 236.641925         | 455.250026        | 228.128651       | <b>454.266010</b>  | 227.636643       | <b>4</b>  |
| 24 | 3140.398451        | 1570.702863        | 3123.371902        | 1562.189589        | 3122.387886        | 1561.697581       | <b>E</b> | 373.208161         | 187.107719         | 356.181612        | 178.594444       | <b>355.197596</b>  | 178.102436       | <b>3</b>  |
| 25 | 3237.451215        | 1619.229245        | 3220.424666        | <b>1610.715971</b> | 3219.440650        | 1610.223963       | <b>P</b> | <b>244.165568</b>  | 122.586422         | 227.139019        | 114.073148       |                    |                  | <b>2</b>  |
| 26 |                    |                    |                    |                    |                    |                   | <b>K</b> | <b>147.112804</b>  | 74.060040          | <b>130.086255</b> | 65.546765        |                    |                  | <b>1</b>  |

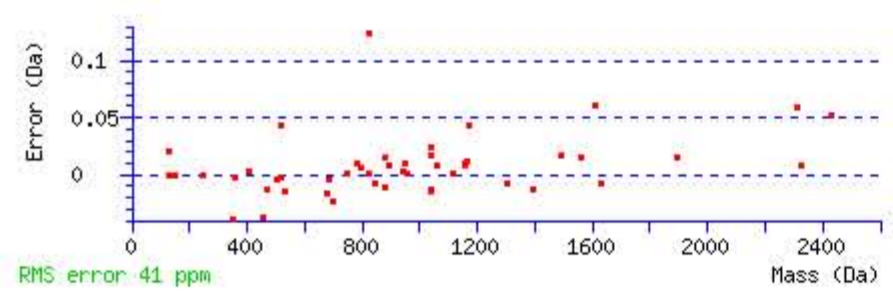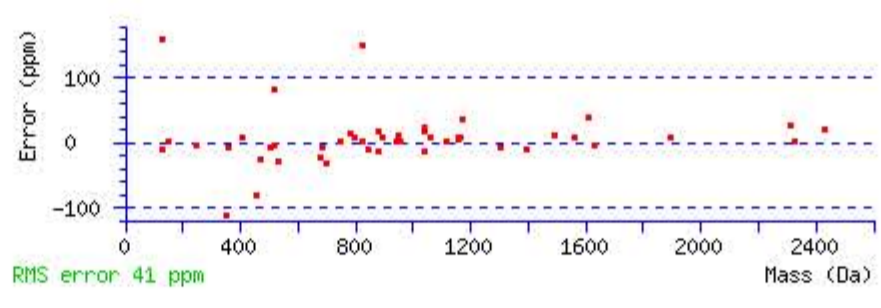

NCBI BLAST search of **KLYDYCDVPQCAAPSFDCGKQPVEPK**  
 (Parameters: blastp, nr protein database, expect=20000, no filter, PAM30)  
 Other BLAST [web gateways](#)

### All matches to this query

| Score | Mr(calc):   | Delta     | Sequence                                   |
|-------|-------------|-----------|--------------------------------------------|
| 56.5  | 3382.549469 | 0.015347  | <a href="#">KLYDYCDVPQCAAPSFDCGKQPVEPK</a> |
| 7.9   | 3382.549469 | 0.015347  | <a href="#">KLYDYCDVPQCAAPSFDCGKQPVEPK</a> |
| 0.9   | 3382.580414 | -0.015598 | <a href="#">HLYPNTPYAYTFWYMMNARSKNVGWR</a> |
| 0.9   | 3382.580414 | -0.015598 | <a href="#">HLYPNTPYAYTFWYMMNARSKNVGWR</a> |



# Mascot Search Results

## Peptide View

MS/MS Fragmentation of **GNVAVTVSGHTCQHWSAQTPHTHNR**  
 Found in **PLMN\_HUMAN**, Plasminogen OS=Homo sapiens GN=PLG PE=1 SV=2

Match to Query 78967: 3403.612284 from(568.275990,6+) rtinseconds(1674) index(78081)  
 Title: Locus:1.1.1.2462.11 File:"2013-07-02 CLN FXIII 30 min 1st FT.wiff"  
 Data file C:\Program Files (x86)\Matrix Science\Mascot Daemon\mgf1 FXIII 30 min 1st\mascot\_daemon\_merge.mgf

Click mouse within plot area to zoom in by factor of two about that point  
 Or, Plot from  to  Da   
 Label all possible matches  Label matches used for scoring

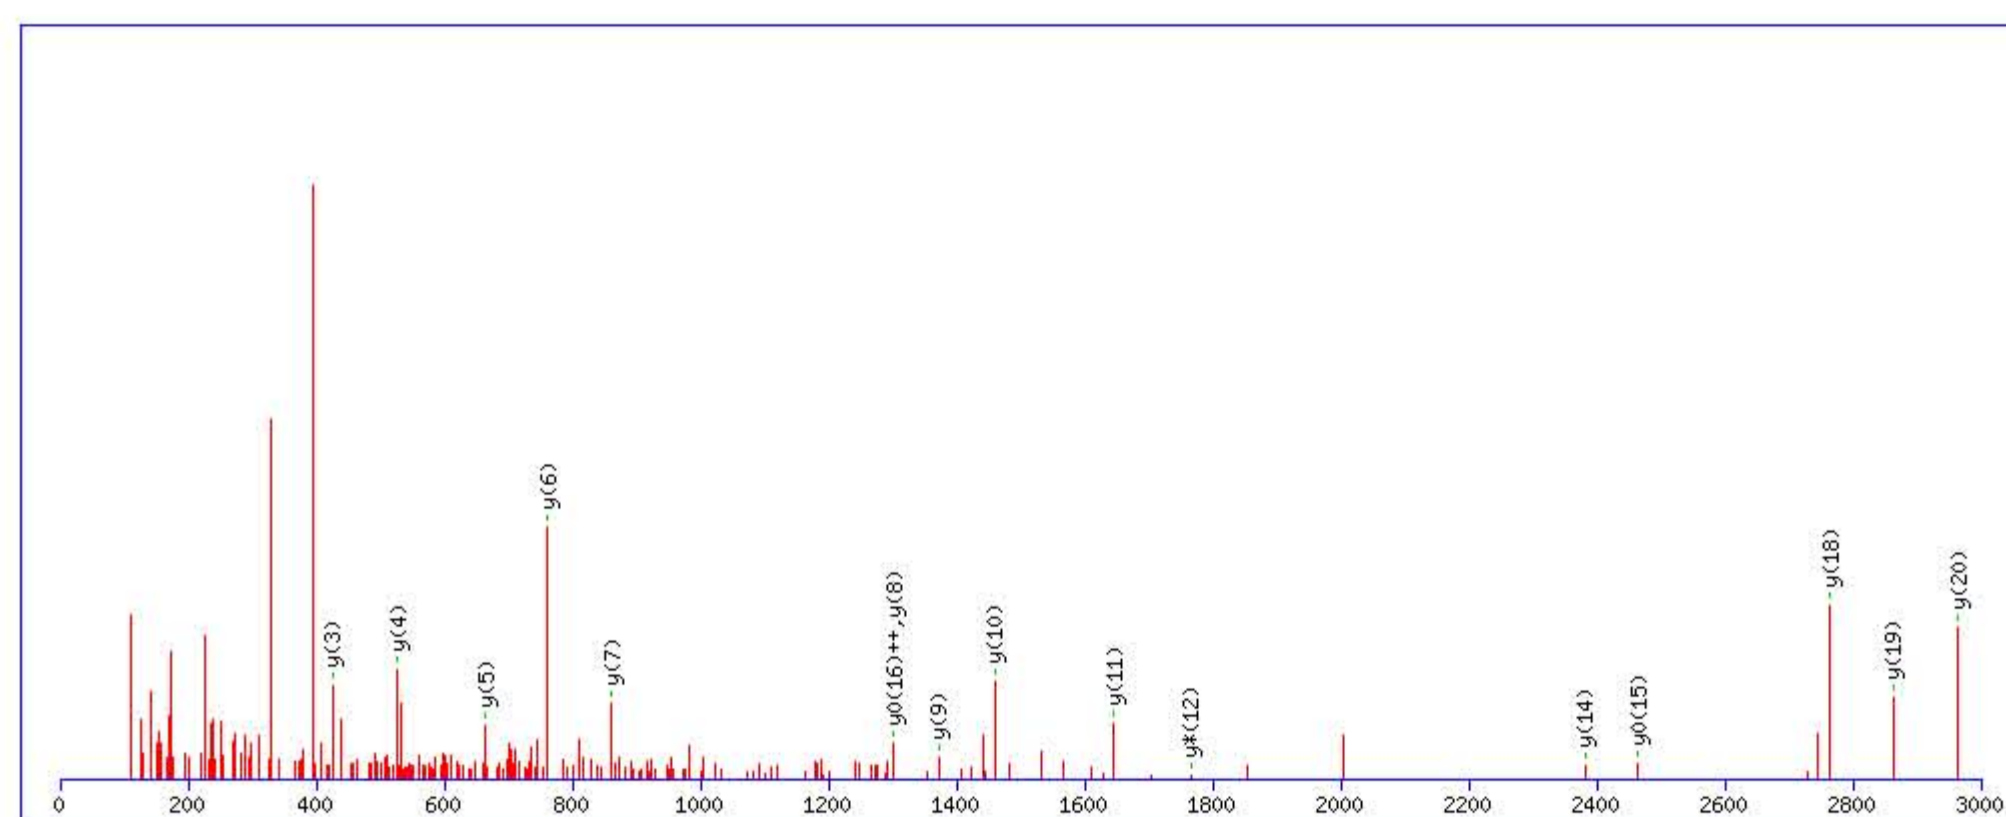

Monoisotopic mass of neutral peptide  $M_r(\text{calc})$ : 3403.623764  
 Fixed modifications: Carbamidomethyl (C) (apply to specified residues or termini only)  
 Variable modifications:  
 Q13 : Biotin:Thermo-21345 (Q)  
 Q18 : Biotin:Thermo-21345 (Q)  
 Ions Score: 83 Expect: 1e-007  
 Matches : 16/270 fragment ions using 24 most intense peaks [\(help\)](#)

| #  | b           | b <sup>++</sup> | b <sup>+</sup> | b <sup>+++</sup> | b <sup>0</sup> | b <sup>0++</sup> | Seq. | y                  | y <sup>++</sup> | y <sup>+</sup>     | y <sup>+++</sup> | y <sup>0</sup> | y <sup>0++</sup> | #  |
|----|-------------|-----------------|----------------|------------------|----------------|------------------|------|--------------------|-----------------|--------------------|------------------|----------------|------------------|----|
| 1  | 58.028740   | 29.518008       |                |                  |                |                  | G    |                    |                 |                    |                  |                |                  | 25 |
| 2  | 172.071667  | 86.539471       | 155.045118     | 78.026197        |                |                  | N    | 3347.609538        | 1674.308407     | 3330.582989        | 1665.795132      | 3329.598973    | 1665.303124      | 24 |
| 3  | 271.140081  | 136.073679      | 254.113532     | 127.560404       |                |                  | V    | 3233.566611        | 1617.286943     | 3216.540062        | 1608.773669      | 3215.556046    | 1608.281661      | 23 |
| 4  | 342.177195  | 171.592236      | 325.150646     | 163.078961       |                |                  | A    | 3134.498197        | 1567.752736     | 3117.471648        | 1559.239462      | 3116.487632    | 1558.747454      | 22 |
| 5  | 441.245609  | 221.126443      | 424.219060     | 212.613168       |                |                  | V    | 3063.461083        | 1532.234179     | 3046.434534        | 1523.720905      | 3045.450518    | 1523.228897      | 21 |
| 6  | 542.293288  | 271.650282      | 525.266739     | 263.137008       | 524.282723     | 262.645000       | T    | <b>2964.392669</b> | 1482.699972     | 2947.366120        | 1474.186698      | 2946.382104    | 1473.694690      | 20 |
| 7  | 641.361702  | 321.184489      | 624.335153     | 312.671215       | 623.351137     | 312.179207       | V    | <b>2863.344990</b> | 1432.176133     | 2846.318441        | 1423.662858      | 2845.334425    | 1423.170850      | 19 |
| 8  | 728.393730  | 364.700503      | 711.367181     | 356.187229       | 710.383165     | 355.695221       | S    | <b>2764.276576</b> | 1382.641926     | 2747.250027        | 1374.128651      | 2746.266011    | 1373.636643      | 18 |
| 9  | 785.415194  | 393.211235      | 768.388645     | 384.697961       | 767.404629     | 384.205953       | G    | 2677.244548        | 1339.125912     | 2660.217999        | 1330.612637      | 2659.233983    | 1330.120629      | 17 |
| 10 | 922.474106  | 461.740691      | 905.447557     | 453.227417       | 904.463541     | 452.735409       | H    | 2620.223084        | 1310.615180     | 2603.196535        | 1302.101905      | 2602.212519    | 1301.609897      | 16 |
| 11 | 1023.521785 | 512.264530      | 1006.495236    | 503.751256       | 1005.511220    | 503.259248       | T    | 2483.164172        | 1242.085724     | 2466.137623        | 1233.572449      | 2465.153607    | 1233.080441      | 15 |
| 12 | 1183.552434 | 592.279855      | 1166.525885    | 583.766581       | 1165.541869    | 583.274572       | C    | <b>2382.116493</b> | 1191.561884     | 2365.089944        | 1183.048610      | 2364.105928    | 1182.556602      | 14 |
| 13 | 1622.777760 | 811.892518      | 1605.751211    | 803.379244       | 1604.767195    | 802.887236       | Q    | 2222.085844        | 1111.546560     | 2205.059295        | 1103.033285      | 2204.075279    | 1102.541277      | 13 |
| 14 | 1759.836672 | 880.421974      | 1742.810123    | 871.908700       | 1741.826107    | 871.416692       | H    | 1782.860518        | 891.933897      | <b>1765.833969</b> | 883.420622       | 1764.849953    | 882.928614       | 12 |
| 15 | 1945.915985 | 973.461631      | 1928.889436    | 964.948356       | 1927.905420    | 964.456348       | W    | <b>1645.801606</b> | 823.404441      | 1628.775057        | 814.891166       | 1627.791041    | 814.399158       | 11 |
| 16 | 2032.948013 | 1016.977645     | 2015.921464    | 1008.464370      | 2014.937448    | 1007.972362      | S    | <b>1459.722293</b> | 730.364784      | 1442.695744        | 721.851510       | 1441.711728    | 721.359502       | 10 |
| 17 | 2103.985127 | 1052.496201     | 2086.958578    | 1043.982927      | 2085.974562    | 1043.490919      | A    | <b>1372.690265</b> | 686.848770      | 1355.663716        | 678.335496       | 1354.679700    | 677.843488       | 9  |
| 18 | 2543.210453 | 1272.108865     | 2526.183904    | 1263.595590      | 2525.199888    | 1263.103582      | Q    | <b>1301.653151</b> | 651.330213      | 1284.626602        | 642.816939       | 1283.642586    | 642.324931       | 8  |
| 19 | 2644.258132 | 1322.632704     | 2627.231583    | 1314.119429      | 2626.247567    | 1313.627421      | T    | <b>862.427825</b>  | 431.717550      | 845.401276         | 423.204276       | 844.417260     | 422.712268       | 7  |
| 20 | 2741.310896 | 1371.159086     | 2724.284347    | 1362.645811      | 2723.300331    | 1362.153803      | P    | <b>761.380146</b>  | 381.193711      | 744.353597         | 372.680436       | 743.369581     | 372.188428       | 6  |
| 21 | 2878.369808 | 1439.688542     | 2861.343259    | 1431.175267      | 2860.359243    | 1430.683259      | H    | <b>664.327382</b>  | 332.667329      | 647.300833         | 324.154054       | 646.316817     | 323.662046       | 5  |
| 22 | 2979.417487 | 1490.212381     | 2962.390938    | 1481.699107      | 2961.406922    | 1481.207099      | T    | <b>527.268470</b>  | 264.137873      | 510.241921         | 255.624598       | 509.257905     | 255.132590       | 4  |
| 23 | 3116.476399 | 1558.741837     | 3099.449850    | 1550.228563      | 3098.465834    | 1549.736555      | H    | <b>426.220791</b>  | 213.614033      | 409.194242         | 205.100759       |                |                  | 3  |
| 24 | 3230.519326 | 1615.763301     | 3213.492777    | 1607.250026      | 3212.508761    | 1606.758018      | N    | 289.161879         | 145.084577      | 272.135330         | 136.571303       |                |                  | 2  |
| 25 |             |                 |                |                  |                |                  | R    | 175.118952         | 88.063114       | 158.092403         | 79.549839        |                |                  | 1  |

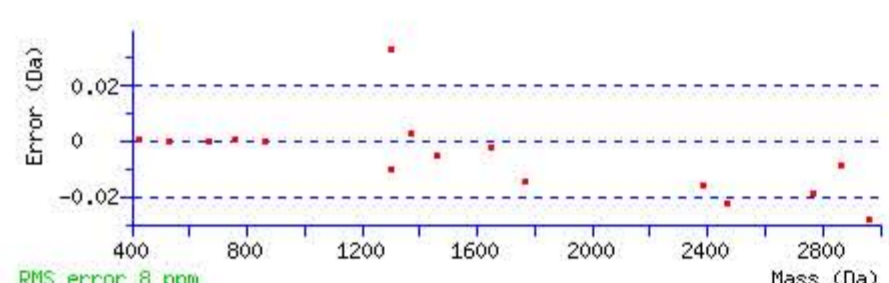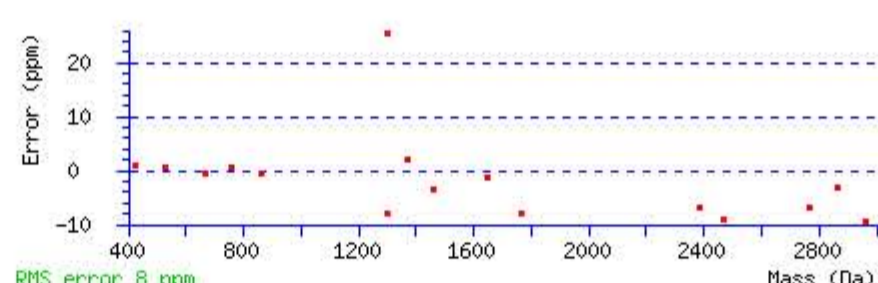

NCBI BLAST search of **GNVAVTVSGHTCQHWSAQTPHTHNR**  
 (Parameters: blastp, nr protein database, expect=20000, no filter, PAM30)  
 Other BLAST [web gateways](#)

## All matches to this query

| Score | $M_r(\text{calc})$ : | Delta     | Sequence                                  |
|-------|----------------------|-----------|-------------------------------------------|
| 83.4  | 3403.623764          | -0.011480 | <a href="#">GNVAVTVSGHTCQHWSAQTPHTHNR</a> |



# MASCOT Search Results

## Peptide View

MS/MS Fragmentation of **VQSTELCAGHLAGGTDSCQGDSGGPLVCFEK**  
 Found in **PLMN\_HUMAN**, Plasminogen OS=Homo sapiens GN=PLG PE=1 SV=2

Match to Query 80114: 3547.624336 from(887.913360,4+) rtinseconds(2180) index(81457)  
 Title: Locus:1.1.1.2638.26 File:"2013-07-02 CLN FXIII 30 min 1st FT.wiff"  
 Data file C:\Program Files (x86)\Matrix Science\Mascot Daemon\mgf1 FXIII 30 min 1st\mascot\_daemon\_merge.mgf

Click mouse within plot area to zoom in by factor of two about that point  
 Or, Plot from  to  Da   
 Label all possible matches  Label matches used for scoring

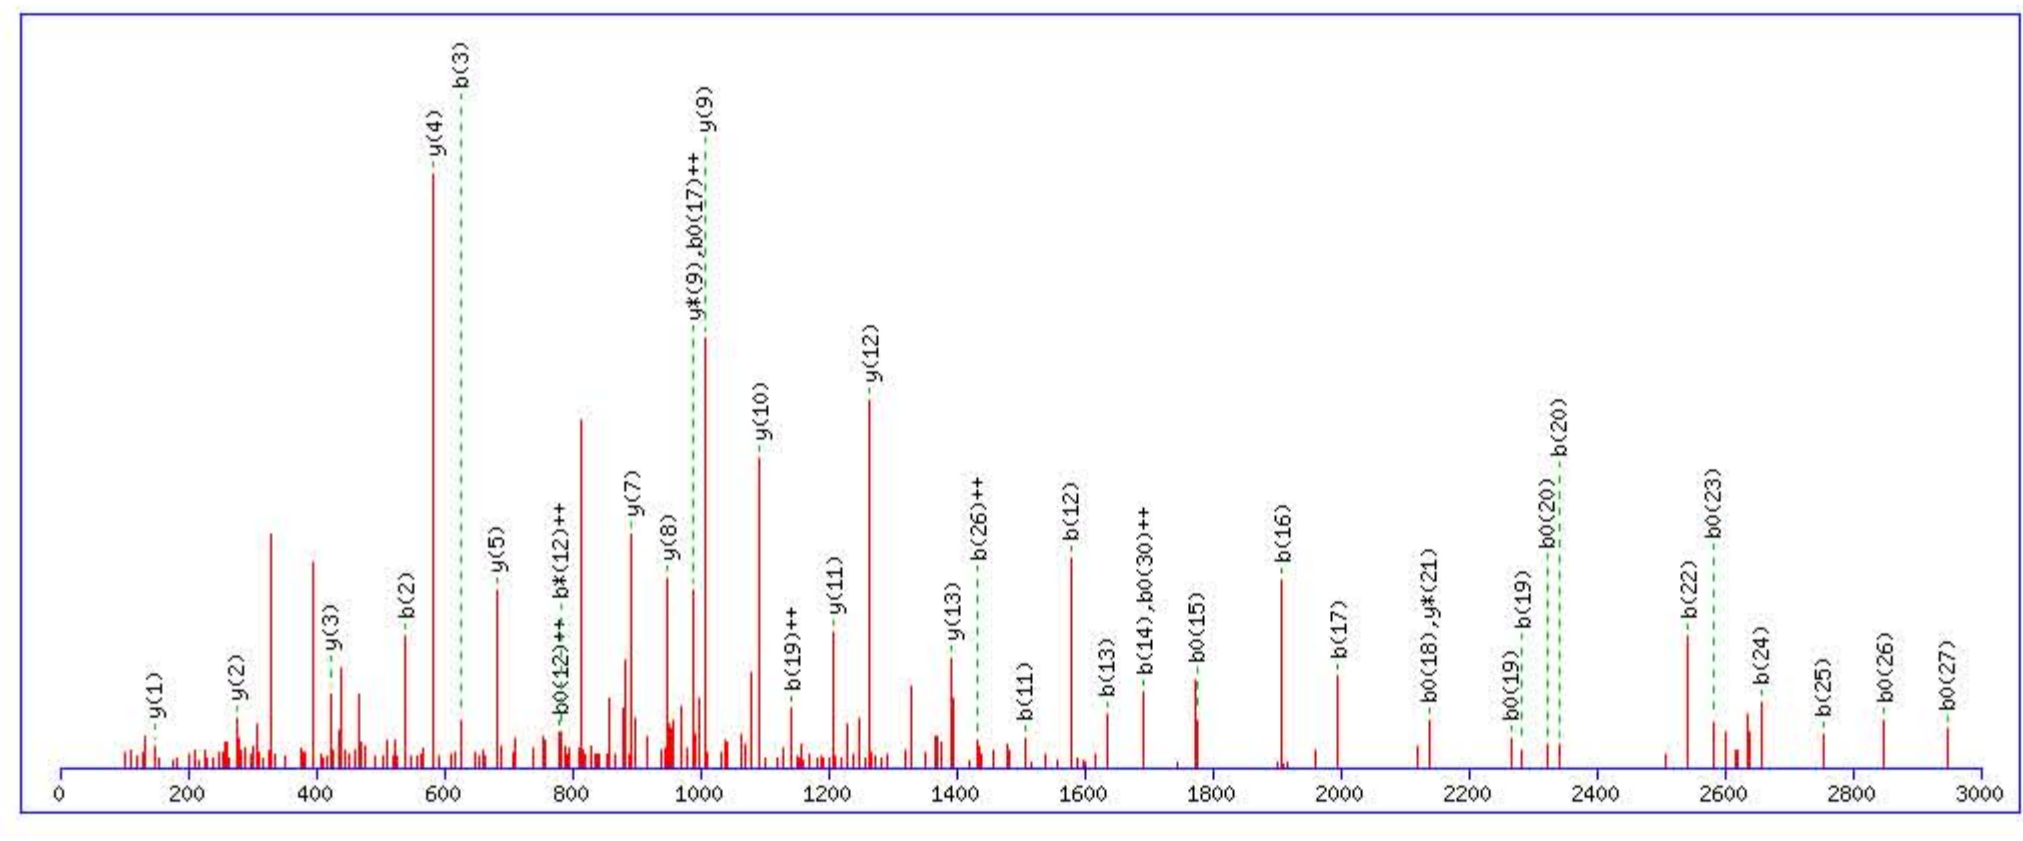

Monoisotopic mass of neutral peptide Mr(calc): 3547.584061  
 Fixed modifications: Carbamidomethyl (C) (apply to specified residues or termini only)  
 Variable modifications:  
 Q2 : Biotin:Thermo-21345 (Q)  
 Ions Score: 117 Expect: 2.1e-011  
 Matches : 40/352 fragment ions using 50 most intense peaks [\(help\)](#)

| #  | b                  | b <sup>++</sup>    | b <sup>*</sup> | b <sup>*++</sup>  | b <sup>0</sup>     | b <sup>0++</sup>   | Seq. | y                  | y <sup>++</sup> | y <sup>*</sup>     | y <sup>*++</sup> | y <sup>0</sup> | y <sup>0++</sup> | #  |
|----|--------------------|--------------------|----------------|-------------------|--------------------|--------------------|------|--------------------|-----------------|--------------------|------------------|----------------|------------------|----|
| 1  | 100.075690         | 50.541483          |                |                   |                    |                    | V    |                    |                 |                    |                  |                |                  | 31 |
| 2  | <b>539.301016</b>  | 270.154146         | 522.274467     | 261.640872        |                    |                    | Q    | 3449.522877        | 1725.265076     | 3432.496328        | 1716.751802      | 3431.512312    | 1716.259794      | 30 |
| 3  | <b>626.333044</b>  | 313.670160         | 609.306495     | 305.156886        | 608.322479         | 304.664878         | S    | 3010.297551        | 1505.652413     | 2993.271002        | 1497.139139      | 2992.286986    | 1496.647131      | 29 |
| 4  | 727.380723         | 364.194000         | 710.354174     | 355.680725        | 709.370158         | 355.188717         | T    | 2923.265523        | 1462.136399     | 2906.238974        | 1453.623125      | 2905.254958    | 1453.131117      | 28 |
| 5  | 856.423316         | 428.715296         | 839.396767     | 420.202022        | 838.412751         | 419.710014         | E    | 2822.217844        | 1411.612560     | 2805.191295        | 1403.099285      | 2804.207279    | 1402.607277      | 27 |
| 6  | 969.507380         | 485.257328         | 952.480831     | 476.744054        | 951.496815         | 476.252046         | L    | 2693.175251        | 1347.091263     | 2676.148702        | 1338.577989      | 2675.164686    | 1338.085981      | 26 |
| 7  | 1129.538029        | 565.272653         | 1112.511480    | 556.759378        | 1111.527464        | 556.267370         | C    | 2580.091187        | 1290.549231     | 2563.064638        | 1282.035957      | 2562.080622    | 1281.543949      | 25 |
| 8  | 1200.575143        | 600.791210         | 1183.548594    | 592.277935        | 1182.564578        | 591.785927         | A    | 2420.060538        | 1210.533907     | 2403.033989        | 1202.020632      | 2402.049973    | 1201.528624      | 24 |
| 9  | 1257.596607        | 629.301942         | 1240.570058    | 620.788667        | 1239.586042        | 620.296659         | G    | 2349.023424        | 1175.015350     | 2331.996875        | 1166.502075      | 2331.012859    | 1166.010067      | 23 |
| 10 | 1394.655519        | 697.831397         | 1377.628970    | 689.318123        | 1376.644954        | 688.826115         | H    | 2292.001960        | 1146.504618     | 2274.975411        | 1137.991343      | 2273.991395    | 1137.499335      | 22 |
| 11 | <b>1507.739583</b> | 754.373429         | 1490.713034    | 745.860155        | 1489.729018        | 745.368147         | L    | 2154.943048        | 1077.975162     | <b>2137.916499</b> | 1069.461887      | 2136.932483    | 1068.969879      | 21 |
| 12 | <b>1578.776697</b> | 789.891986         | 1561.750148    | <b>781.378712</b> | 1560.766132        | <b>780.886704</b>  | A    | 2041.858984        | 1021.433130     | 2024.832435        | 1012.919855      | 2023.848419    | 1012.427847      | 20 |
| 13 | <b>1635.798161</b> | 818.402718         | 1618.771612    | 809.889444        | 1617.787596        | 809.397436         | G    | 1970.821870        | 985.914573      | 1953.795321        | 977.401298       | 1952.811305    | 976.909290       | 19 |
| 14 | <b>1692.819625</b> | 846.913450         | 1675.793076    | 838.400176        | 1674.809060        | 837.908168         | G    | 1913.800406        | 957.403841      | 1896.773857        | 948.890566       | 1895.789841    | 948.398558       | 18 |
| 15 | 1793.867304        | 897.437290         | 1776.840755    | 888.924015        | <b>1775.856739</b> | 888.432007         | T    | 1856.778942        | 928.893109      | 1839.752393        | 920.379835       | 1838.768377    | 919.887826       | 17 |
| 16 | <b>1908.894247</b> | 954.950761         | 1891.867698    | 946.437487        | 1890.883682        | 945.945479         | D    | 1755.731263        | 878.369269      | 1738.704714        | 869.855995       | 1737.720698    | 869.363987       | 16 |
| 17 | <b>1995.926275</b> | 998.466775         | 1978.899726    | 989.953501        | 1977.915710        | <b>989.461493</b>  | S    | 1640.704320        | 820.855798      | 1623.677771        | 812.342523       | 1622.693755    | 811.850515       | 15 |
| 18 | 2155.956924        | 1078.482100        | 2138.930375    | 1069.968825       | <b>2137.946359</b> | 1069.476817        | C    | 1553.672292        | 777.339784      | 1536.645743        | 768.826509       | 1535.661727    | 768.334501       | 14 |
| 19 | <b>2284.015502</b> | <b>1142.511389</b> | 2266.988953    | 1133.998114       | <b>2266.004937</b> | 1133.506106        | Q    | <b>1393.641643</b> | 697.324459      | 1376.615094        | 688.811185       | 1375.631078    | 688.319177       | 13 |
| 20 | <b>2341.036966</b> | 1171.022121        | 2324.010417    | 1162.508846       | <b>2323.026401</b> | 1162.016838        | G    | <b>1265.583065</b> | 633.295170      | 1248.556516        | 624.781896       | 1247.572500    | 624.289888       | 12 |
| 21 | 2456.063909        | 1228.535592        | 2439.037360    | 1220.022318       | 2438.053344        | 1219.530310        | D    | <b>1208.561601</b> | 604.784438      | 1191.535052        | 596.271164       | 1190.551036    | 595.779156       | 11 |
| 22 | <b>2543.095937</b> | 1272.051606        | 2526.069388    | 1263.538332       | 2525.085372        | 1263.046324        | S    | <b>1093.534658</b> | 547.270967      | 1076.508109        | 538.757692       | 1075.524093    | 538.265684       | 10 |
| 23 | 2600.117401        | 1300.562338        | 2583.090852    | 1292.049064       | <b>2582.106836</b> | 1291.557056        | G    | <b>1006.502630</b> | 503.754953      | <b>989.476081</b>  | 495.241678       | 988.492065     | 494.749670       | 9  |
| 24 | <b>2657.138865</b> | 1329.073070        | 2640.112316    | 1320.559796       | 2639.128300        | 1320.067788        | G    | <b>949.481166</b>  | 475.244221      | 932.454617         | 466.730946       | 931.470601     | 466.238938       | 8  |
| 25 | <b>2754.191629</b> | 1377.599452        | 2737.165080    | 1369.086178       | 2736.181064        | 1368.594170        | P    | <b>892.459702</b>  | 446.733489      | 875.433153         | 438.220214       | 874.449137     | 437.728206       | 7  |
| 26 | 2867.275693        | <b>1434.141484</b> | 2850.249144    | 1425.628210       | <b>2849.265128</b> | 1425.136202        | L    | 795.406938         | 398.207107      | 778.380389         | 389.693832       | 777.396373     | 389.201824       | 6  |
| 27 | 2966.344107        | 1483.675691        | 2949.317558    | 1475.162417       | <b>2948.333542</b> | 1474.670409        | V    | <b>682.322874</b>  | 341.665075      | 665.296325         | 333.151800       | 664.312309     | 332.659792       | 5  |
| 28 | 3126.374756        | 1563.691016        | 3109.348207    | 1555.177741       | 3108.364191        | 1554.685733        | C    | <b>583.254460</b>  | 292.130868      | 566.227911         | 283.617593       | 565.243895     | 283.125585       | 4  |
| 29 | 3273.443170        | 1637.225223        | 3256.416621    | 1628.711948       | 3255.432605        | 1628.219940        | F    | <b>423.223811</b>  | 212.115543      | 406.197262         | 203.602269       | 405.213246     | 203.110261       | 3  |
| 30 | 3402.485763        | 1701.746519        | 3385.459214    | 1693.233245       | 3384.475198        | <b>1692.741237</b> | E    | <b>276.155397</b>  | 138.581337      | 259.128848         | 130.068062       | 258.144832     | 129.576054       | 2  |
| 31 |                    |                    |                |                   |                    |                    | K    | <b>147.112804</b>  | 74.060040       | 130.086255         | 65.546765        |                |                  | 1  |

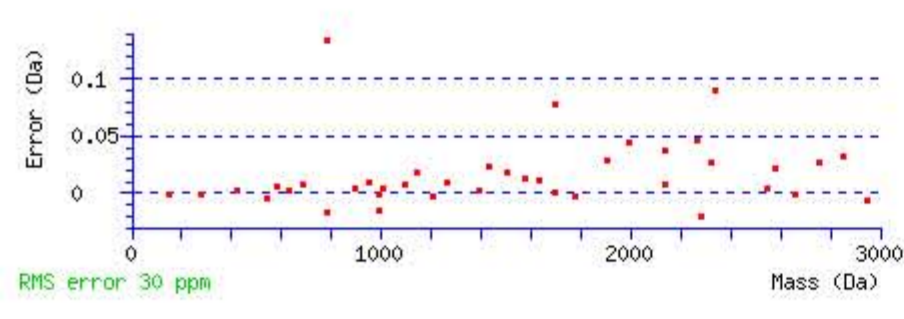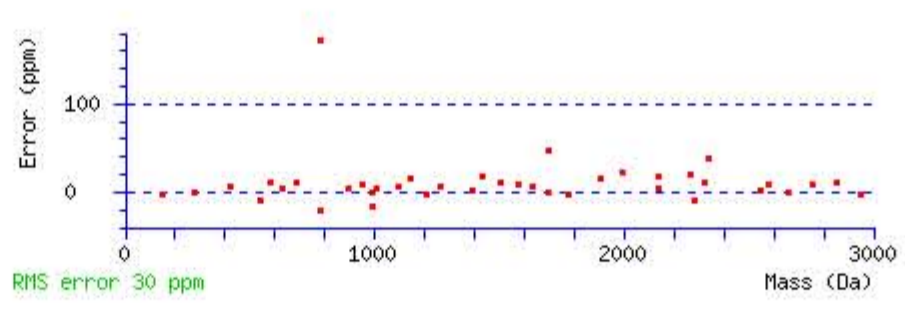

NCBI BLAST search of **VQSTELCAGHLAGGTDSCQGDSGGPLVCFEK**  
 (Parameters: blastp, nr protein database, expect=20000, no filter, PAM30)  
 Other BLAST [web gateways](#)

### All matches to this query

| Score | Mr(calc):   | Delta    | Sequence                                        |
|-------|-------------|----------|-------------------------------------------------|
| 117.4 | 3547.584061 | 0.040275 | <a href="#">VQSTELCAGHLAGGTDSCQGDSGGPLVCFEK</a> |
| 45.5  | 3547.584061 | 0.040275 | <a href="#">VQSTELCAGHLAGGTDSCQGDSGGPLVCFEK</a> |



# MASCOT SEARCH RESULTS

## Peptide View

MS/MS Fragmentation of **TNTQPFDLQVYHPSR**

Found in **LRP1\_HUMAN**, Prolow-density lipoprotein receptor-related protein 1 OS=Homo sapiens GN=LRP1 PE=1 SV=2

Match to Query 59830: 2113.048242 from(705.356690,3+) rtinseconds(2075) index(63582)

Title: Locus:1.1.1.2720.4 File:"2013-07-02 CLN FXIII 30 min 1st F 4.wiff"

Data file C:\Program Files (x86)\Matrix Science\Mascot Daemon\mgf1 FXIII 30 min 1st\mascot\_daemon\_merge.mgf

Click mouse within plot area to zoom in by factor of two about that point

Or, Plot from  to  Da

Label all possible matches  Label matches used for scoring

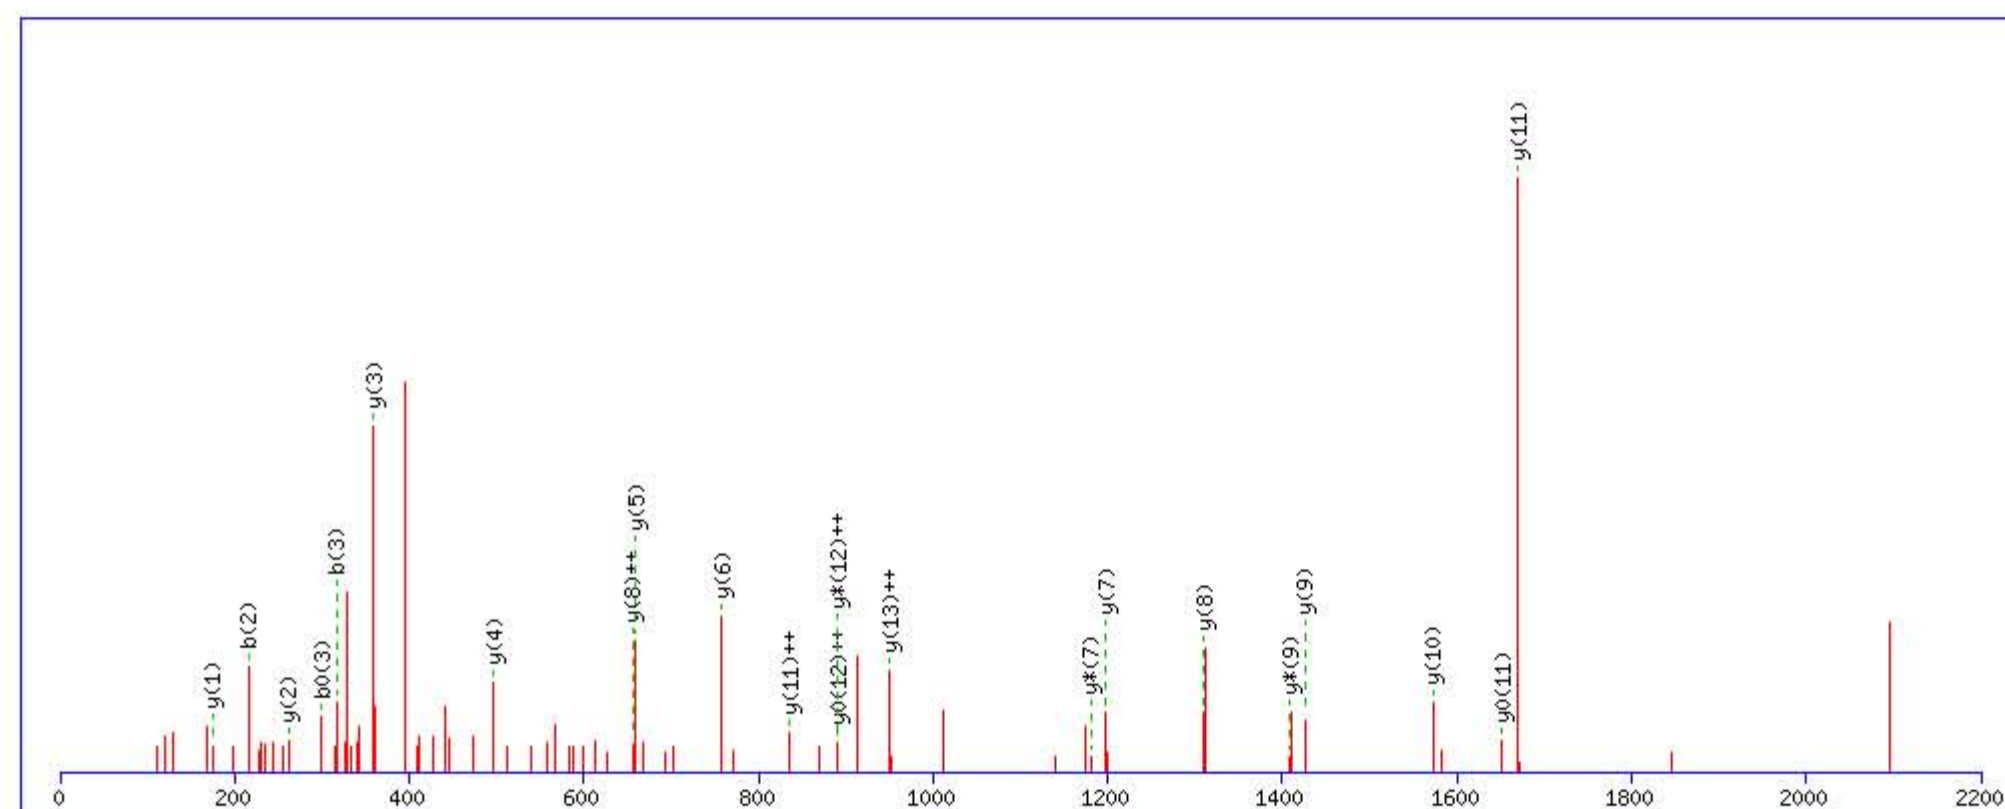

Monoisotopic mass of neutral peptide Mr(calc): 2113.041504

Fixed modifications: Carbamidomethyl (C) (apply to specified residues or termini only)

Variable modifications:

Q9 : Biotin:Thermo-21345 (Q)

Ions Score: 52 Expect: 0.00016

Matches : 22/164 fragment ions using 53 most intense peaks [\(help\)](#)

| #  | b                 | b <sup>++</sup> | b <sup>+</sup> | b <sup>+++</sup> | b <sup>0</sup>    | b <sup>0++</sup> | Seq. | y                  | y <sup>++</sup>   | y <sup>+</sup>     | y <sup>+++</sup>  | y <sup>0</sup>     | y <sup>0++</sup>  | #  |
|----|-------------------|-----------------|----------------|------------------|-------------------|------------------|------|--------------------|-------------------|--------------------|-------------------|--------------------|-------------------|----|
| 1  | 102.054955        | 51.531116       |                |                  | 84.044390         | 42.525833        | T    |                    |                   |                    |                   |                    |                   | 15 |
| 2  | <b>216.097882</b> | 108.552579      | 199.071333     | 100.039305       | 198.087317        | 99.547296        | N    | 2013.001094        | 1007.004185       | 1995.974545        | 998.490911        | 1994.990529        | 997.998903        | 14 |
| 3  | <b>317.145561</b> | 159.076418      | 300.119012     | 150.563144       | <b>299.134996</b> | 150.071136       | T    | 1898.958167        | <b>949.982722</b> | 1881.931618        | 941.469447        | 1880.947602        | 940.977439        | 13 |
| 4  | 445.204139        | 223.105707      | 428.177590     | 214.592433       | 427.193574        | 214.100425       | Q    | 1797.910488        | 899.458882        | 1780.883939        | <b>890.945608</b> | 1779.899923        | <b>890.453600</b> | 12 |
| 5  | 542.256903        | 271.632090      | 525.230354     | 263.118815       | 524.246338        | 262.626807       | P    | <b>1669.851910</b> | <b>835.429593</b> | 1652.825361        | 826.916319        | <b>1651.841345</b> | 826.424311        | 11 |
| 6  | 689.325317        | 345.166297      | 672.298768     | 336.653022       | 671.314752        | 336.161014       | F    | <b>1572.799146</b> | 786.903211        | 1555.772597        | 778.389937        | 1554.788581        | 777.897929        | 10 |
| 7  | 804.352260        | 402.679768      | 787.325711     | 394.166494       | 786.341695        | 393.674486       | D    | <b>1425.730732</b> | 713.369004        | <b>1408.704183</b> | 704.855730        | 1407.720167        | 704.363722        | 9  |
| 8  | 917.436324        | 459.221800      | 900.409775     | 450.708526       | 899.425759        | 450.216518       | L    | <b>1310.703789</b> | <b>655.855533</b> | 1293.677240        | 647.342258        | 1292.693224        | 646.850250        | 8  |
| 9  | 1356.661650       | 678.834463      | 1339.635101    | 670.321189       | 1338.651085       | 669.829181       | Q    | <b>1197.619725</b> | 599.313501        | <b>1180.593176</b> | 590.800226        | 1179.609160        | 590.308218        | 7  |
| 10 | 1455.730064       | 728.368670      | 1438.703515    | 719.855396       | 1437.719499       | 719.363388       | V    | <b>758.394399</b>  | 379.700838        | 741.367850         | 371.187563        | 740.383834         | 370.695555        | 6  |
| 11 | 1618.793393       | 809.900335      | 1601.766844    | 801.387060       | 1600.782828       | 800.895052       | Y    | <b>659.325985</b>  | 330.166631        | 642.299436         | 321.653356        | 641.315420         | 321.161348        | 5  |
| 12 | 1755.852305       | 878.429791      | 1738.825756    | 869.916516       | 1737.841740       | 869.424508       | H    | <b>496.262656</b>  | 248.634966        | 479.236107         | 240.121692        | 478.252091         | 239.629684        | 4  |
| 13 | 1852.905069       | 926.956173      | 1835.878520    | 918.442898       | 1834.894504       | 917.950890       | P    | <b>359.203744</b>  | 180.105510        | 342.177195         | 171.592236        | 341.193179         | 171.100228        | 3  |
| 14 | 1939.937097       | 970.472187      | 1922.910548    | 961.958912       | 1921.926532       | 961.466904       | S    | <b>262.150980</b>  | 131.579128        | 245.124431         | 123.065854        | 244.140415         | 122.573846        | 2  |
| 15 |                   |                 |                |                  |                   |                  | R    | <b>175.118952</b>  | 88.063114         | 158.092403         | 79.549840         |                    |                   | 1  |

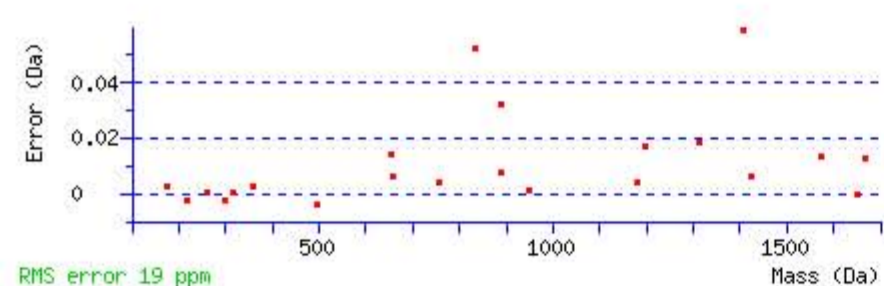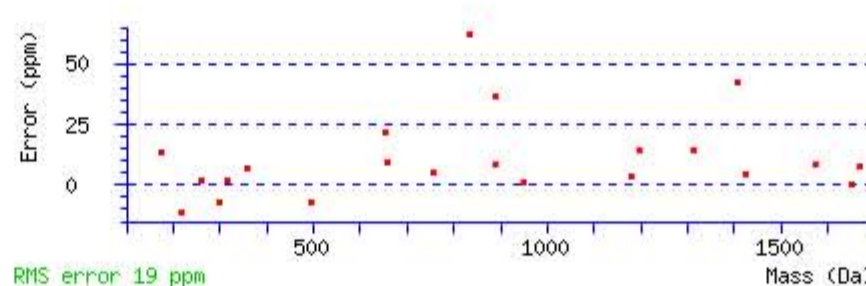

NCBI BLAST search of [TNTQPFDLQVYHPSR](#)

(Parameters: blastp, nr protein database, expect=20000, no filter, PAM30)

Other BLAST [web gateways](#)

All matches to this query

| Score | Mr(calc):   | Delta    | Sequence                        |
|-------|-------------|----------|---------------------------------|
| 52.1  | 2113.041504 | 0.006738 | <a href="#">TNTQPFDLQVYHPSR</a> |
| 8.0   | 2113.041504 | 0.006738 | <a href="#">TNTQPFDLQVYHPSR</a> |

Mascot: <http://www.matrixscience.com/>



# MASCOT Search Results

## Peptide View

MS/MS Fragmentation of **ECLQTCR**

Found in **AMBP\_HUMAN**, Protein AMBP OS=Homo sapiens GN=AMBP PE=1 SV=1

Match to Query 34363: 1276.570328 from(639.292440,2+) rtinseconds(1466) index(59296)

Title: Locus:1.1.1.2508.19 File:"2013-07-02 CLN FXIII 30 min 1st F 4.wiff"

Data file C:\Program Files (x86)\Matrix Science\Mascot Daemon\mgf1 FXIII 30 min 1st\mascot\_daemon\_merge.mgf

Click mouse within plot area to zoom in by factor of two about that point

Or, Plot from  to  Da

Label all possible matches  Label matches used for scoring

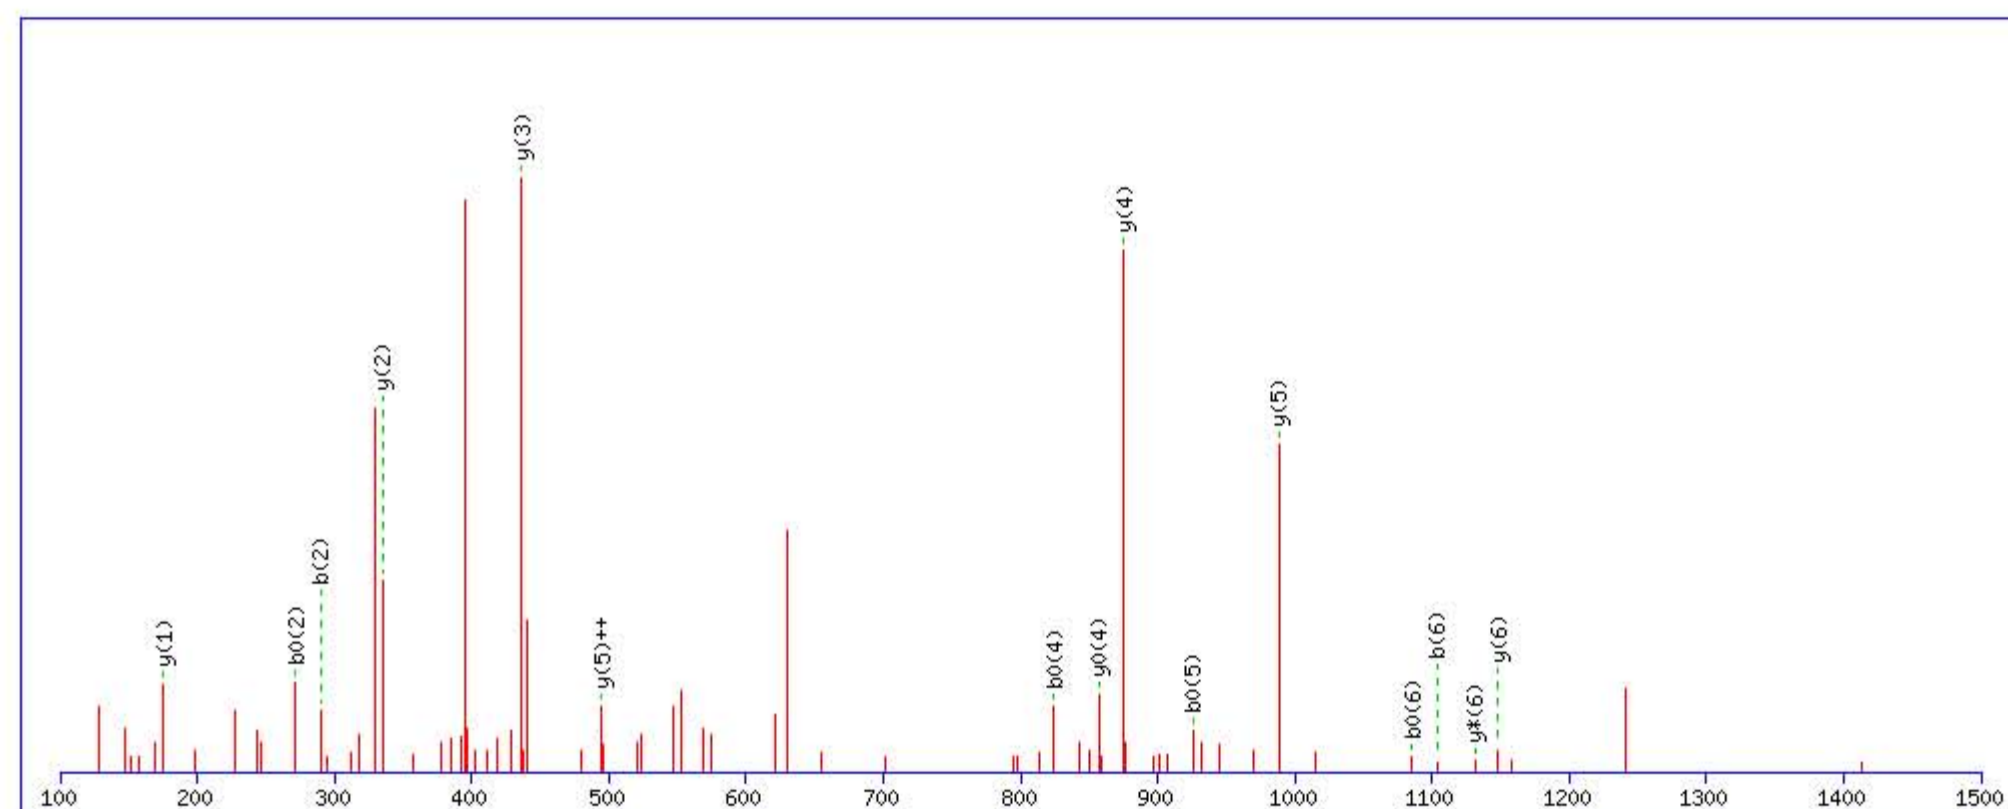

Monoisotopic mass of neutral peptide Mr(calc): 1276.572632

Fixed modifications: Carbamidomethyl (C) (apply to specified residues or termini only)

Variable modifications:

Q4 : Biotin:Thermo-21345 (Q)

Ions Score: 32 Expect: 0.004

Matches : 15/62 fragment ions using 33 most intense peaks ([help](#))

| # | b                  | b <sup>++</sup> | b <sup>*</sup> | b <sup>*++</sup> | b <sup>0</sup>     | b <sup>0++</sup> | Seq. | y                  | y <sup>++</sup>   | y <sup>*</sup>     | y <sup>*++</sup> | y <sup>0</sup>    | y <sup>0++</sup> | # |
|---|--------------------|-----------------|----------------|------------------|--------------------|------------------|------|--------------------|-------------------|--------------------|------------------|-------------------|------------------|---|
| 1 | 130.049869         | 65.528572       |                |                  | 112.039304         | 56.523290        | E    |                    |                   |                    |                  |                   |                  | 7 |
| 2 | <b>290.080518</b>  | 145.543897      |                |                  | <b>272.069953</b>  | 136.538615       | C    | <b>1148.537319</b> | 574.772298        | <b>1131.510770</b> | 566.259023       | 1130.526754       | 565.767015       | 6 |
| 3 | 403.164582         | 202.085929      |                |                  | 385.154017         | 193.080647       | L    | <b>988.506670</b>  | <b>494.756973</b> | 971.480121         | 486.243699       | 970.496105        | 485.751691       | 5 |
| 4 | 842.389908         | 421.698592      | 825.363359     | 413.185318       | <b>824.379343</b>  | 412.693310       | Q    | <b>875.422606</b>  | 438.214941        | 858.396057         | 429.701667       | <b>857.412041</b> | 429.209659       | 4 |
| 5 | 943.437587         | 472.222432      | 926.411038     | 463.709157       | <b>925.427022</b>  | 463.217149       | T    | <b>436.197280</b>  | 218.602278        | 419.170731         | 210.089003       | 418.186715        | 209.596995       | 3 |
| 6 | <b>1103.468236</b> | 552.237756      | 1086.441687    | 543.724482       | <b>1085.457671</b> | 543.232474       | C    | <b>335.149601</b>  | 168.078438        | 318.123052         | 159.565164       |                   |                  | 2 |
| 7 |                    |                 |                |                  |                    |                  | R    | <b>175.118952</b>  | 88.063114         | 158.092403         | 79.549839        |                   |                  | 1 |

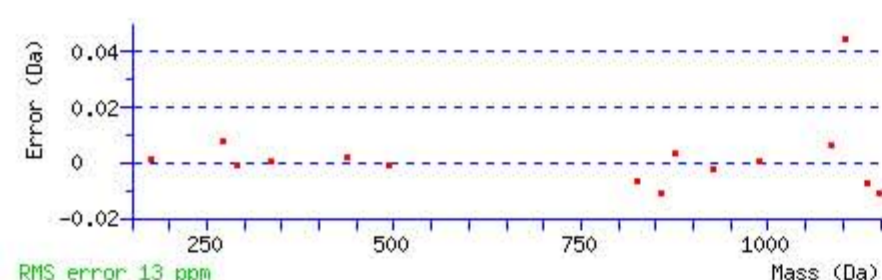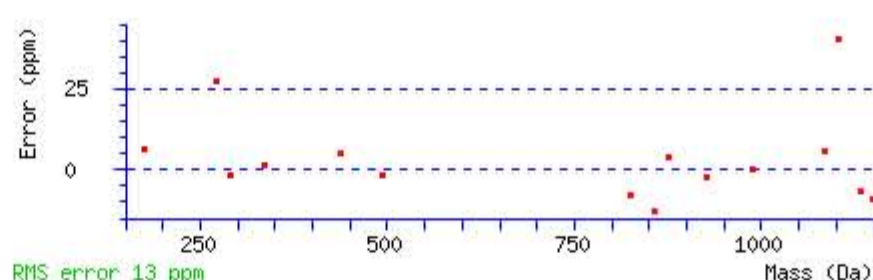

NCBI BLAST search of **ECLQTCR**

(Parameters: blastp, nr protein database, expect=20000, no filter, PAM30)

Other BLAST [web gateways](#)

## All matches to this query

| Score | Mr(calc):   | Delta     | Sequence                      |
|-------|-------------|-----------|-------------------------------|
| 31.6  | 1276.572632 | -0.002304 | <a href="#">ECLQTCR</a>       |
| 8.8   | 1276.583862 | -0.013534 | <a href="#">KMSLSCHVCR</a>    |
| 8.6   | 1276.579605 | -0.009277 | <a href="#">EEQRSPFNDR</a>    |
| 7.0   | 1276.571762 | -0.001434 | <a href="#">AGAESPTMSVDGR</a> |
| 6.5   | 1276.569229 | 0.001099  | <a href="#">MTGRYEMYAR</a>    |
| 5.3   | 1276.560516 | 0.009812  | <a href="#">QQVPSSEDSMEK</a>  |
| 4.8   | 1276.553116 | 0.017212  | <a href="#">EDLDNASKDDR</a>   |



# MASCOT Search Results

## Peptide View

MS/MS Fragmentation of **KEDSCQLGYSAGPCMGMTSR**

Found in **AMBP\_HUMAN**, Protein AMBP OS=Homo sapiens GN=AMBP PE=1 SV=1

Match to Query 69322: 2561.097522 from(854.706450,3+) rtinseconds(1501) index(59545)

Title: Locus:1.1.1.2520.21 File:"2013-07-02 CLN FXIII 30 min 1st F 4.wiff"

Data file C:\Program Files (x86)\Matrix Science\Mascot Daemon\mgf1 FXIII 30 min 1st\mascot\_daemon\_merge.mgf

Click mouse within plot area to zoom in by factor of two about that point

Or, Plot from  to  Da

Label all possible matches  Label matches used for scoring

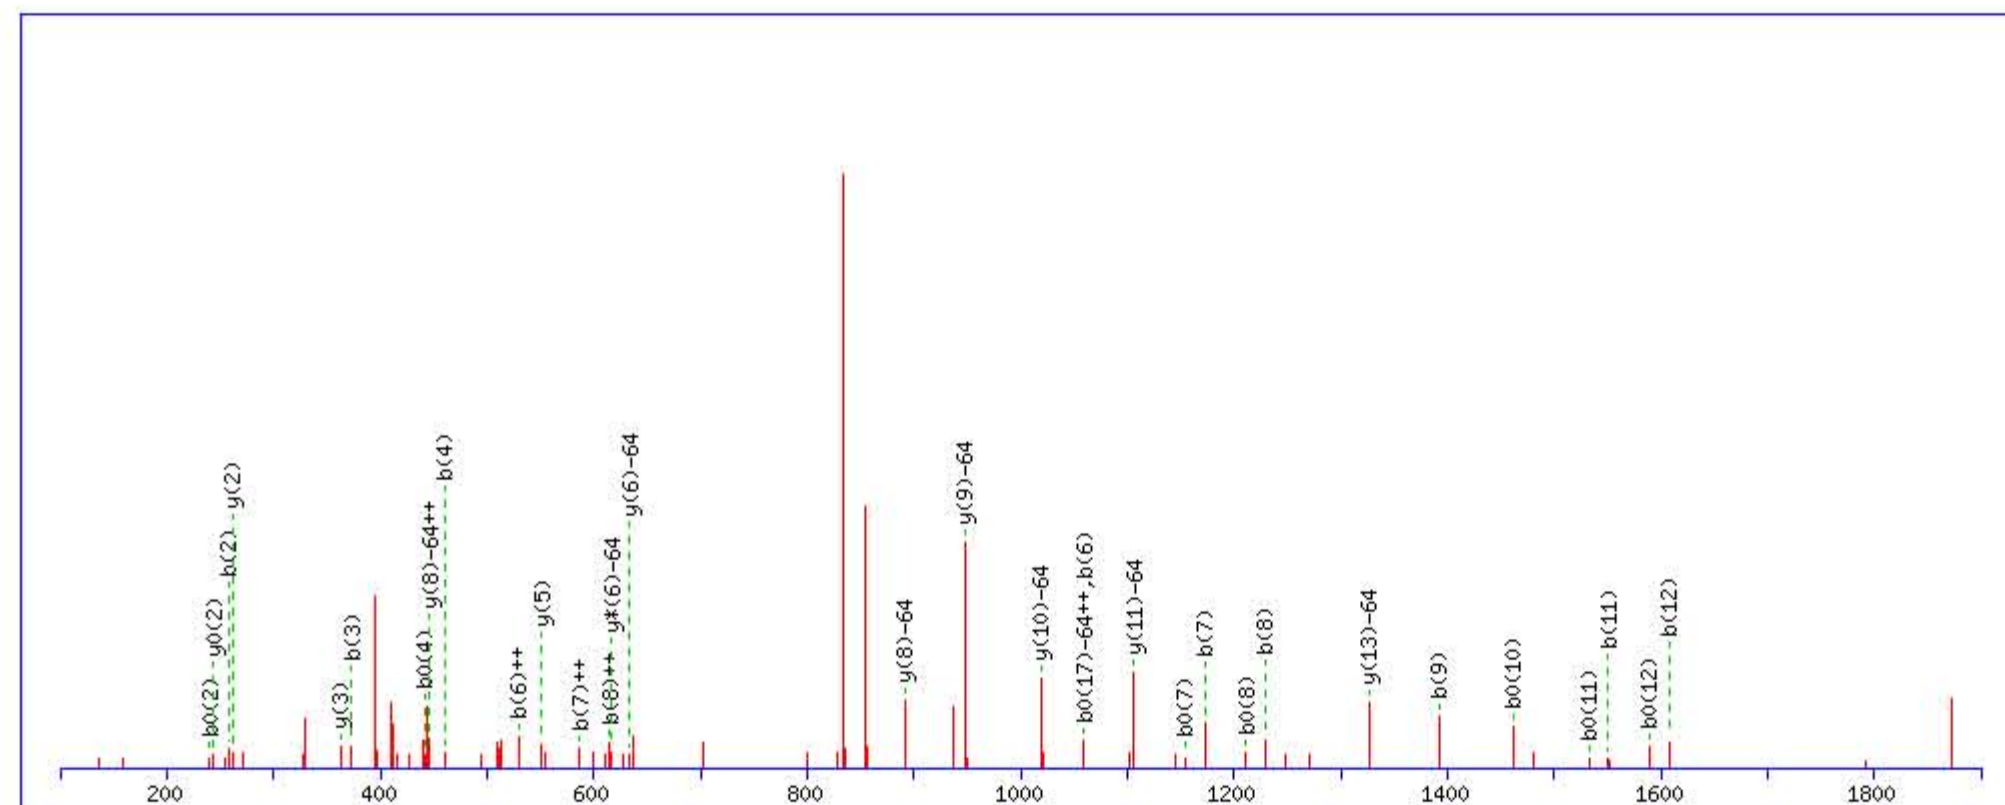

Monoisotopic mass of neutral peptide Mr(calc): 2561.084106

Fixed modifications: Carbamidomethyl (C) (apply to specified residues or termini only)

Variable modifications:

Q6 : Biotin:Thermo-21345 (Q)

M15 : Oxidation (M), with neutral losses 63.998285 (shown in table), 0.000000

Ions Score: 36 Expect: 0.00099

Matches : 32/338 fragment ions using 80 most intense peaks [\(help\)](#)

| #  | b                  | b <sup>++</sup>   | b <sup>*</sup> | b <sup>*++</sup> | b <sup>0</sup>     | b <sup>0++</sup>   | Seq.     | y                  | y <sup>++</sup>   | y <sup>*</sup>    | y <sup>*++</sup> | y <sup>0</sup>    | y <sup>0++</sup> | #  |
|----|--------------------|-------------------|----------------|------------------|--------------------|--------------------|----------|--------------------|-------------------|-------------------|------------------|-------------------|------------------|----|
| 1  | 129.102239         | 65.054757         | 112.075690     | 56.541483        |                    |                    | <b>K</b> |                    |                   |                   |                  |                   |                  | 20 |
| 2  | <b>258.144832</b>  | 129.576054        | 241.118283     | 121.062780       | <b>240.134267</b>  | 120.570772         | <b>E</b> | 2369.998138        | 1185.502707       | 2352.971589       | 1176.989432      | 2351.987573       | 1176.497424      | 19 |
| 3  | <b>373.171775</b>  | 187.089526        | 356.145226     | 178.576251       | 355.161210         | 178.084243         | <b>D</b> | 2240.955545        | 1120.981410       | 2223.928996       | 1112.468136      | 2222.944980       | 1111.976128      | 18 |
| 4  | <b>460.203803</b>  | 230.605540        | 443.177254     | 222.092265       | <b>442.193238</b>  | 221.600257         | <b>S</b> | 2125.928602        | 1063.467939       | 2108.902053       | 1054.954664      | 2107.918037       | 1054.462656      | 17 |
| 5  | 620.234452         | 310.620864        | 603.207903     | 302.107590       | 602.223887         | 301.615582         | <b>C</b> | 2038.896574        | 1019.951925       | 2021.870025       | 1011.438650      | 2020.886009       | 1010.946642      | 16 |
| 6  | <b>1059.459778</b> | <b>530.233527</b> | 1042.433229    | 521.720253       | 1041.449213        | 521.228245         | <b>Q</b> | 1878.865925        | 939.936600        | 1861.839376       | 931.423326       | 1860.855360       | 930.931318       | 15 |
| 7  | <b>1172.543842</b> | <b>586.775559</b> | 1155.517293    | 578.262285       | <b>1154.533277</b> | 577.770277         | <b>L</b> | 1439.640599        | 720.323937        | 1422.614050       | 711.810663       | 1421.630034       | 711.318655       | 14 |
| 8  | <b>1229.565306</b> | <b>615.286291</b> | 1212.538757    | 606.773017       | <b>1211.554741</b> | 606.281008         | <b>G</b> | <b>1326.556535</b> | 663.781905        | 1309.529986       | 655.268631       | 1308.545970       | 654.776623       | 13 |
| 9  | <b>1392.628635</b> | 696.817956        | 1375.602086    | 688.304681       | 1374.618070        | 687.812673         | <b>Y</b> | 1269.535071        | 635.271174        | 1252.508522       | 626.757899       | 1251.524506       | 626.265891       | 12 |
| 10 | 1479.660663        | 740.333970        | 1462.634114    | 731.820695       | <b>1461.650098</b> | 731.328687         | <b>S</b> | <b>1106.471742</b> | 553.739509        | 1089.445193       | 545.226235       | 1088.461177       | 544.734226       | 11 |
| 11 | <b>1550.697777</b> | 775.852527        | 1533.671228    | 767.339252       | <b>1532.687212</b> | 766.847244         | <b>A</b> | <b>1019.439714</b> | 510.223495        | 1002.413165       | 501.710220       | 1001.429149       | 501.218212       | 10 |
| 12 | <b>1607.719241</b> | 804.363259        | 1590.692692    | 795.849984       | <b>1589.708676</b> | 795.357976         | <b>G</b> | <b>948.402600</b>  | 474.704938        | 931.376051        | 466.191663       | 930.392035        | 465.699655       | 9  |
| 13 | 1704.772005        | 852.889641        | 1687.745456    | 844.376366       | 1686.761440        | 843.884358         | <b>P</b> | <b>891.381136</b>  | <b>446.194206</b> | 874.354587        | 437.680931       | 873.370571        | 437.188923       | 8  |
| 14 | 1864.802654        | 932.904965        | 1847.776105    | 924.391691       | 1846.792089        | 923.899683         | <b>C</b> | 794.328372         | 397.667824        | 777.301823        | 389.154549       | 776.317807        | 388.662541       | 7  |
| 15 | 1947.839769        | 974.423523        | 1930.813220    | 965.910248       | 1929.829204        | 965.418240         | <b>M</b> | <b>634.297723</b>  | 317.652499        | <b>617.271174</b> | 309.139225       | 616.287158        | 308.647217       | 6  |
| 16 | 2004.861233        | 1002.934255       | 1987.834684    | 994.420980       | 1986.850668        | 993.928972         | <b>G</b> | <b>551.260608</b>  | 276.133942        | 534.234059        | 267.620667       | 533.250043        | 267.128659       | 5  |
| 17 | 2135.901718        | 1068.454497       | 2118.875169    | 1059.941222      | 2117.891153        | <b>1059.449214</b> | <b>M</b> | 494.239144         | 247.623210        | 477.212595        | 239.109935       | 476.228579        | 238.617927       | 4  |
| 18 | 2236.949397        | 1118.978336       | 2219.922848    | 1110.465062      | 2218.938832        | 1109.973054        | <b>T</b> | <b>363.198659</b>  | 182.102967        | 346.172110        | 173.589693       | 345.188094        | 173.097685       | 3  |
| 19 | 2323.981425        | 1162.494350       | 2306.954876    | 1153.981076      | 2305.970860        | 1153.489068        | <b>S</b> | <b>262.150980</b>  | 131.579128        | 245.124431        | 123.065854       | <b>244.140415</b> | 122.573846       | 2  |
| 20 |                    |                   |                |                  |                    |                    | <b>R</b> | 175.118952         | 88.063114         | 158.092403        | 79.549839        |                   |                  | 1  |

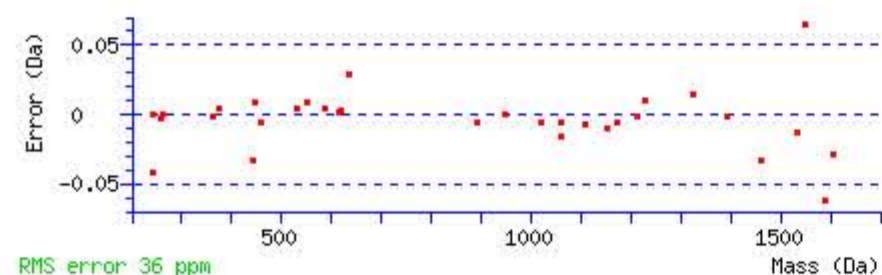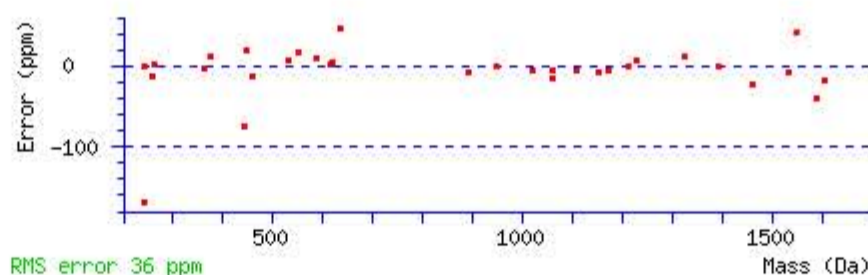

NCBI BLAST search of **KEDSCQLGYSAGPCMGMTSR**

(Parameters: blastp, nr protein database, expect=20000, no filter, PAM30)

Other BLAST [web gateways](#)

All matches to this query

| Score | Mr(calc):   | Delta    | Sequence                             |
|-------|-------------|----------|--------------------------------------|
| 35.7  | 2561.084106 | 0.013416 | <a href="#">KEDSCQLGYSAGPCMGMTSR</a> |
| 28.8  | 2561.084106 | 0.013416 | <a href="#">KEDSCQLGYSAGPCMGMTSR</a> |



# MASCOT SEARCH RESULTS

## Peptide View

MS/MS Fragmentation of **VGALSQLR**

Found in **MENT\_HUMAN**, Protein MENT OS=Homo sapiens GN=MENT PE=2 SV=1

Match to Query 29792: 1153.660228 from(577.837390,2+) rtinseconds(1920) index(62518)

Title: Locus:1.1.1.2666.14 File:"2013-07-02 CLN FXIII 30 min 1st F 4.wiff"

Data file C:\Program Files (x86)\Matrix Science\Mascot Daemon\mgf1 FXIII 30 min 1st\mascot\_daemon\_merge.mgf

Click mouse within plot area to zoom in by factor of two about that point

Or, Plot from  to  Da

Label all possible matches  Label matches used for scoring

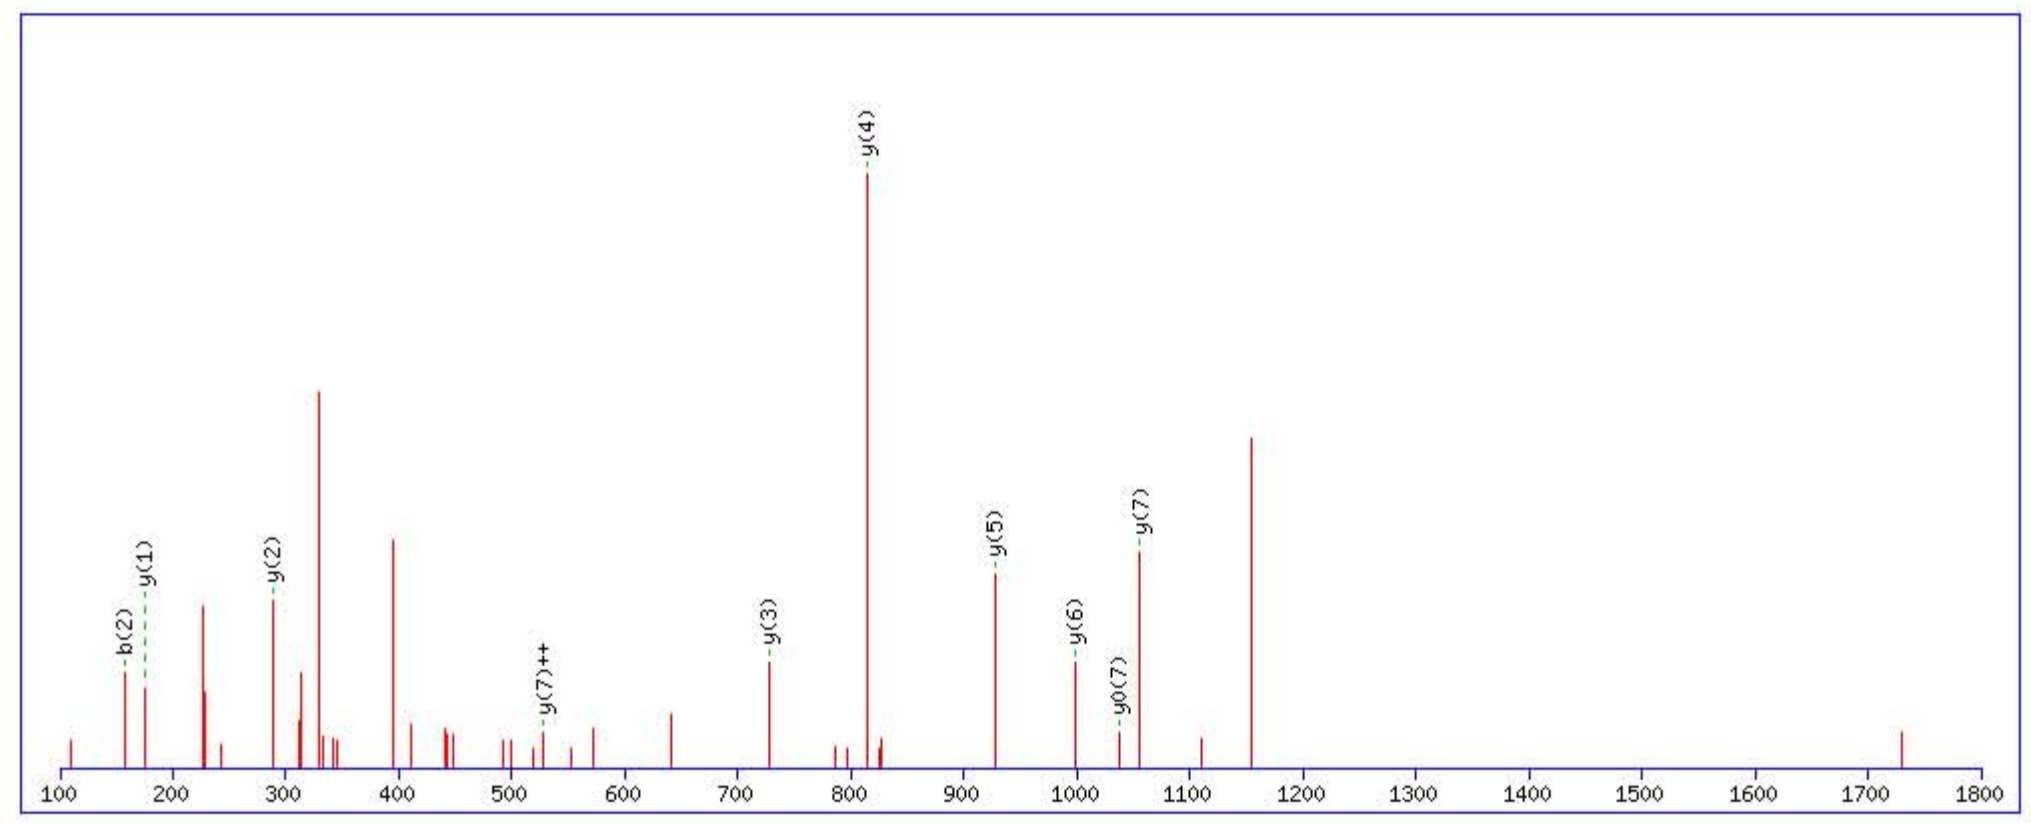

Monoisotopic mass of neutral peptide Mr(calc): 1153.664139

Fixed modifications: Carbamidomethyl (C) (apply to specified residues or termini only)

Variable modifications:

Q6 : Biotin:Thermo-21345 (Q)

Ions Score: 42 Expect: 0.00088

Matches : 10/60 fragment ions using 19 most intense peaks [\(help\)](#)

| # | b          | b <sup>++</sup> | b <sup>*</sup> | b <sup>++</sup> | b <sup>0</sup> | b <sup>0++</sup> | Seq. | y           | y <sup>++</sup> | y <sup>*</sup> | y <sup>++</sup> | y <sup>0</sup> | y <sup>0++</sup> | # |
|---|------------|-----------------|----------------|-----------------|----------------|------------------|------|-------------|-----------------|----------------|-----------------|----------------|------------------|---|
| 1 | 100.075690 | 50.541483       |                |                 |                |                  | V    |             |                 |                |                 |                |                  | 8 |
| 2 | 157.097154 | 79.052215       |                |                 |                |                  | G    | 1055.603012 | 528.305144      | 1038.576463    | 519.791870      | 1037.592447    | 519.299862       | 7 |
| 3 | 228.134268 | 114.570772      |                |                 |                |                  | A    | 998.581548  | 499.794412      | 981.554999     | 491.281138      | 980.570983     | 490.789130       | 6 |
| 4 | 341.218332 | 171.112804      |                |                 |                |                  | L    | 927.544434  | 464.275855      | 910.517885     | 455.762581      | 909.533869     | 455.270573       | 5 |
| 5 | 428.250360 | 214.628818      |                |                 | 410.239795     | 205.623535       | S    | 814.460370  | 407.733823      | 797.433821     | 399.220549      | 796.449805     | 398.728541       | 4 |
| 6 | 867.475686 | 434.241481      | 850.449137     | 425.728207      | 849.465121     | 425.236199       | Q    | 727.428342  | 364.217809      | 710.401793     | 355.704535      |                |                  | 3 |
| 7 | 980.559750 | 490.783513      | 963.533201     | 482.270239      | 962.549185     | 481.778231       | L    | 288.203016  | 144.605146      | 271.176467     | 136.091872      |                |                  | 2 |
| 8 |            |                 |                |                 |                |                  | R    | 175.118952  | 88.063114       | 158.092403     | 79.549840       |                |                  | 1 |

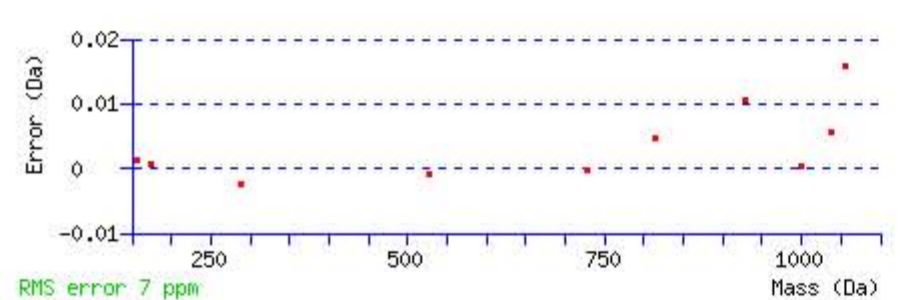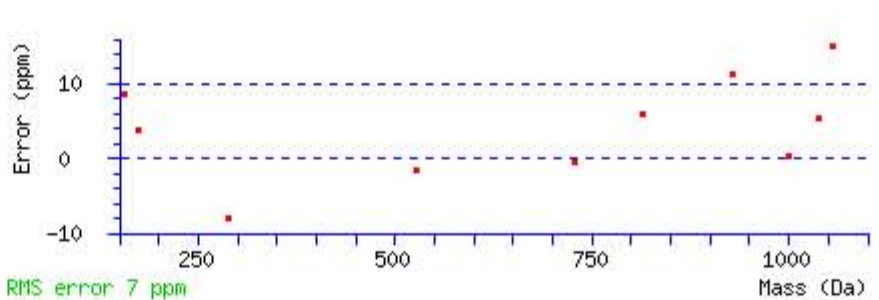

NCBI BLAST search of **VGALSQLR**

(Parameters: blastp, nr protein database, expect=20000, no filter, PAM30)

Other BLAST [web gateways](#)

### All matches to this query

| Score | Mr(calc):   | Delta     | Sequence                     |
|-------|-------------|-----------|------------------------------|
| 42.0  | 1153.664139 | -0.003911 | <a href="#">VGALSQLR</a>     |
| 8.8   | 1153.675354 | -0.015126 | <a href="#">RALLSQR</a>      |
| 8.8   | 1153.675369 | -0.015141 | <a href="#">RALTVQR</a>      |
| 8.6   | 1153.664124 | -0.003896 | <a href="#">VKQEALR</a>      |
| 5.6   | 1153.645477 | 0.014751  | <a href="#">RALAAPVAEEK</a>  |
| 5.1   | 1153.645523 | 0.014705  | <a href="#">GGLSVAVPGEIR</a> |
| 4.5   | 1153.650864 | 0.009364  | <a href="#">LWQRPWLR</a>     |
| 1.0   | 1153.645493 | 0.014735  | <a href="#">NLLKLDAPDR</a>   |
| 0.1   | 1153.656723 | 0.003505  | <a href="#">RPSADPGKKAK</a>  |



# MASCOT Search Results

## Peptide View

MS/MS Fragmentation of **ETAASLLQAGYK**

Found in **THRB\_HUMAN**, Prothrombin OS=Homo sapiens GN=F2 PE=1 SV=2

Match to Query 44160: 1561.813428 from(781.913990,2+) rtinseconds(2117) index(63853)

Title: Locus:1.1.1.2734.23 File:"2013-07-02 CLN FXIII 30 min 1st F 4.wiff"

Data file C:\Program Files (x86)\Matrix Science\Mascot Daemon\mgf1 FXIII 30 min 1st\mascot\_daemon\_merge.mgf

Click mouse within plot area to zoom in by factor of two about that point

Or, Plot from  to  Da

Label all possible matches  Label matches used for scoring

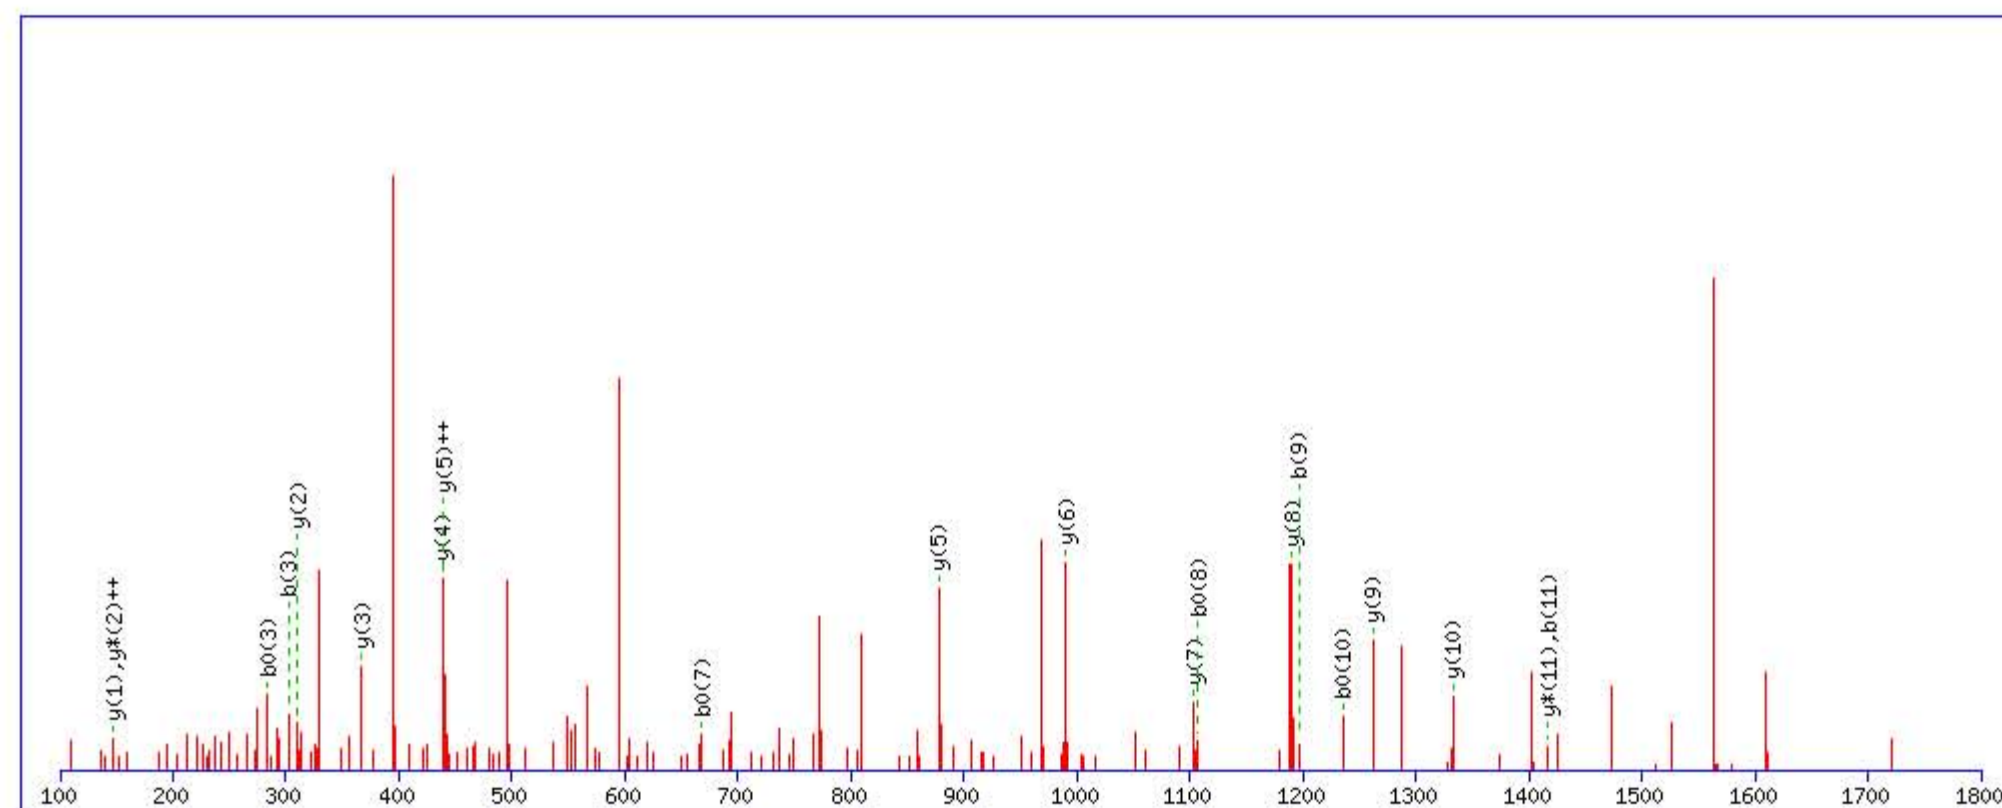

Monoisotopic mass of neutral peptide  $M_r(\text{calc})$ : 1561.817383

Fixed modifications: Carbamidomethyl (C) (apply to specified residues or termini only)

Variable modifications:

Q8 : Biotin:Thermo-21345 (Q)

Ions Score: 42 Expect: 0.0016

Matches : 20/104 fragment ions using 57 most intense peaks [\(help\)](#)

| #  | b                  | b <sup>++</sup> | b <sup>+</sup> | b <sup>*++</sup> | b <sup>0</sup>     | b <sup>0++</sup> | Seq. | y                  | y <sup>++</sup>   | y <sup>+</sup> | y <sup>*++</sup>  | y <sup>0</sup> | y <sup>0++</sup> | #  |
|----|--------------------|-----------------|----------------|------------------|--------------------|------------------|------|--------------------|-------------------|----------------|-------------------|----------------|------------------|----|
| 1  | 130.049869         | 65.528572       |                |                  | 112.039304         | 56.523290        | E    |                    |                   |                |                   |                |                  | 12 |
| 2  | 231.097548         | 116.052412      |                |                  | 213.086983         | 107.047130       | T    | 1433.782100        | 717.394688        | 1416.755551    | 708.881414        | 1415.771535    | 708.389406       | 11 |
| 3  | <b>302.134662</b>  | 151.570969      |                |                  | <b>284.124097</b>  | 142.565687       | A    | <b>1332.734421</b> | 666.870848        | 1315.707872    | 658.357574        | 1314.723856    | 657.865566       | 10 |
| 4  | 373.171776         | 187.089526      |                |                  | 355.161211         | 178.084243       | A    | <b>1261.697307</b> | 631.352292        | 1244.670758    | 622.839017        | 1243.686742    | 622.347009       | 9  |
| 5  | 460.203804         | 230.605540      |                |                  | 442.193239         | 221.600257       | S    | <b>1190.660193</b> | 595.833734        | 1173.633644    | 587.320460        | 1172.649628    | 586.828452       | 8  |
| 6  | 573.287868         | 287.147572      |                |                  | 555.277303         | 278.142290       | L    | <b>1103.628165</b> | 552.317721        | 1086.601616    | 543.804446        |                |                  | 7  |
| 7  | 686.371932         | 343.689604      |                |                  | <b>668.361367</b>  | 334.684322       | L    | <b>990.544101</b>  | 495.775689        | 973.517552     | 487.262414        |                |                  | 6  |
| 8  | 1125.597258        | 563.302267      | 1108.570709    | 554.788993       | <b>1107.586693</b> | 554.296985       | Q    | <b>877.460037</b>  | <b>439.233657</b> | 860.433488     | 430.720382        |                |                  | 5  |
| 9  | <b>1196.634372</b> | 598.820824      | 1179.607823    | 590.307550       | 1178.623807        | 589.815541       | A    | <b>438.234711</b>  | 219.620993        | 421.208162     | 211.107719        |                |                  | 4  |
| 10 | 1253.655836        | 627.331556      | 1236.629287    | 618.818282       | <b>1235.645271</b> | 618.326273       | G    | <b>367.197597</b>  | 184.102436        | 350.171048     | 175.589162        |                |                  | 3  |
| 11 | <b>1416.719165</b> | 708.863221      | 1399.692616    | 700.349946       | 1398.708600        | 699.857938       | Y    | <b>310.176133</b>  | 155.591705        | 293.149584     | <b>147.078430</b> |                |                  | 2  |
| 12 |                    |                 |                |                  |                    |                  | K    | <b>147.112804</b>  | 74.060040         | 130.086255     | 65.546765         |                |                  | 1  |

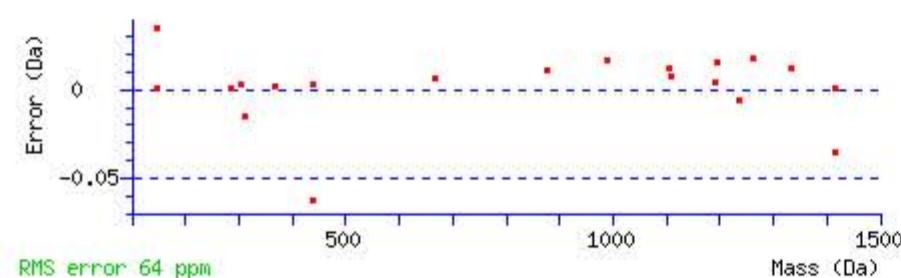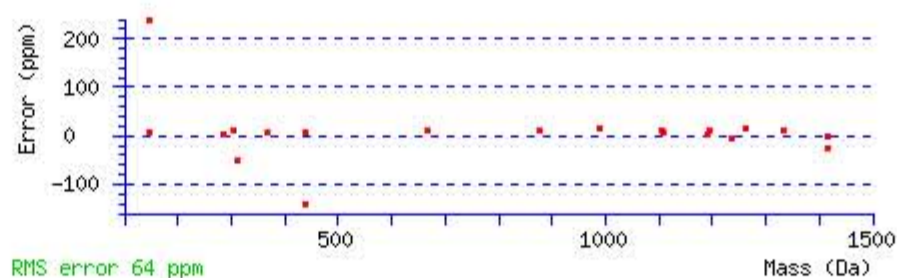

NCBI BLAST search of **ETAASLLQAGYK**

(Parameters: blastp, nr protein database, expect=20000, no filter, PAM30)

Other BLAST [web gateways](#)

All matches to this query

| Score | $M_r(\text{calc})$ : | Delta     | Sequence                     |
|-------|----------------------|-----------|------------------------------|
| 41.6  | 1561.817383          | -0.003955 | <a href="#">ETAASLLQAGYK</a> |

Mascot: <http://www.matrixscience.com/>



# MATRIX SCIENCE Mascot Search Results

## Peptide View

MS/MS Fragmentation of **TATSEYQTFNPR**

Found in **THRB\_HUMAN**, Prothrombin OS=Homo sapiens GN=F2 PE=1 SV=2

Match to Query 53843: 1871.896248 from(936.955400,2+) rtinseconds(2251) index(64738)

Title: Locus:1.1.1.2781.11 File:"2013-07-02 CLN FXIII 30 min 1st F 4.wiff"

Data file C:\Program Files (x86)\Matrix Science\Mascot Daemon\mgf1 FXIII 30 min 1st\mascot\_daemon\_merge.mgf

Click mouse within plot area to zoom in by factor of two about that point

Or, Plot from  to  Da

Label all possible matches  Label matches used for scoring

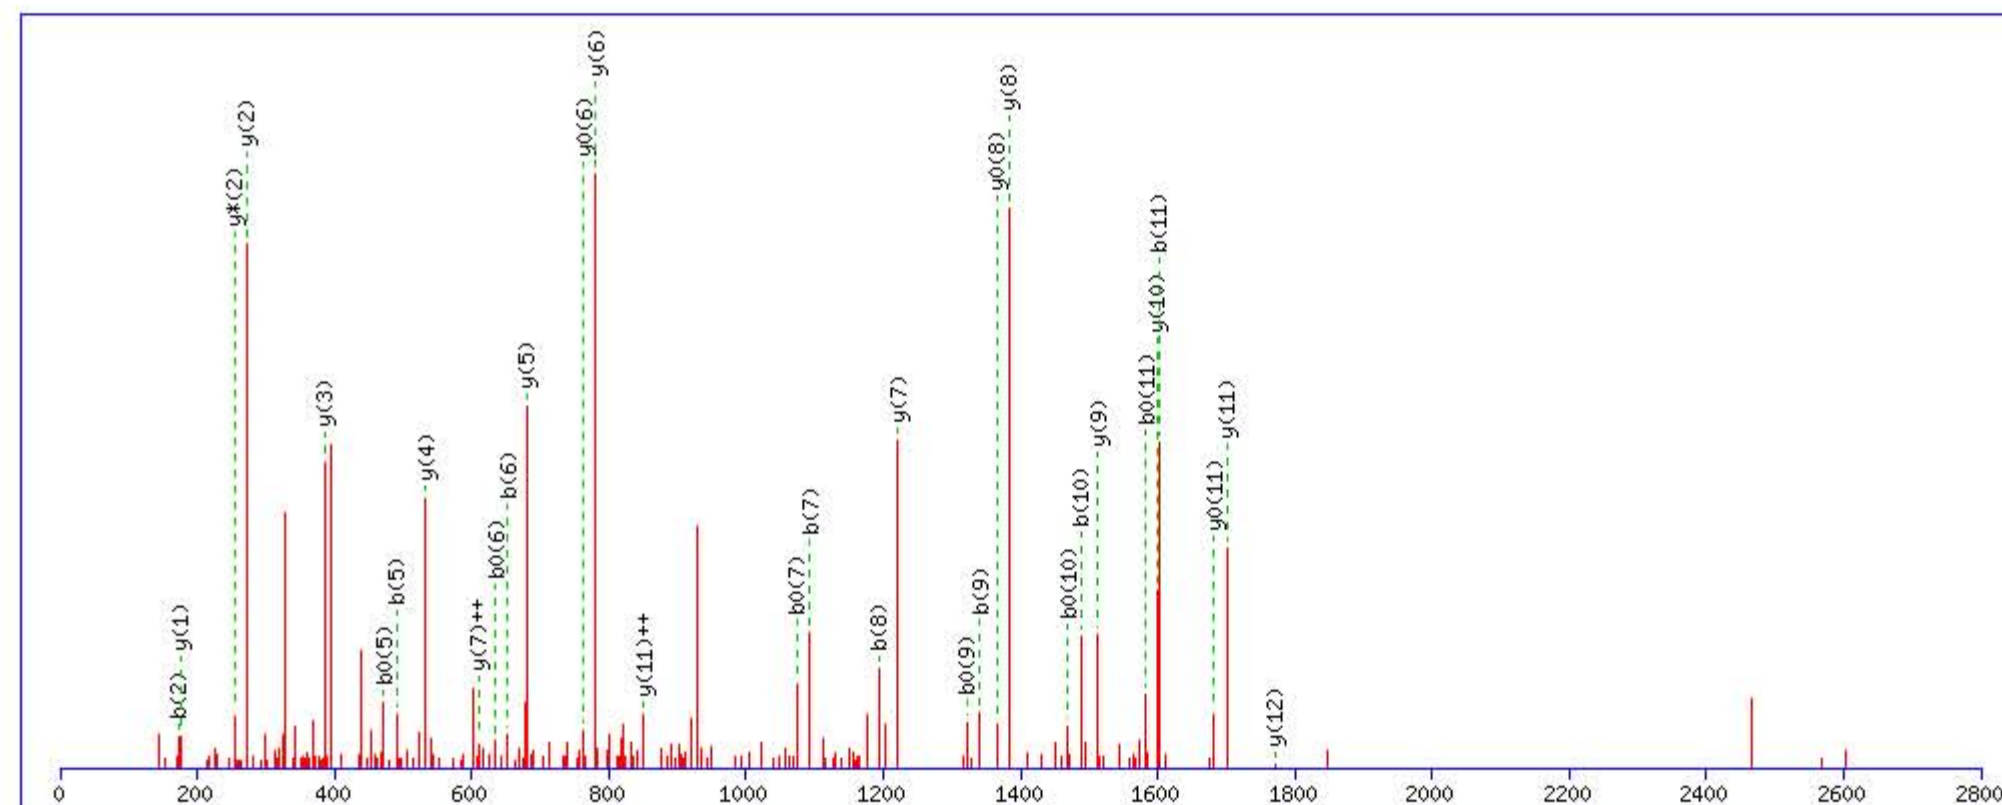

Monoisotopic mass of neutral peptide Mr(calc): 1871.887619

Fixed modifications: Carbamidomethyl (C) (apply to specified residues or termini only)

Variable modifications:

Q7 : Biotin:Thermo-21345 (Q)

Ions Score: 90 Expect: 1.9e-008

Matches : 32/122 fragment ions using 50 most intense peaks [\(help\)](#)

| #  | b                  | b <sup>++</sup> | b <sup>*</sup> | b <sup>*++</sup> | b <sup>0</sup>     | b <sup>0++</sup> | Seq. | y                  | y <sup>++</sup>   | y <sup>*</sup>    | y <sup>*++</sup> | y <sup>0</sup>     | y <sup>0++</sup> | #  |
|----|--------------------|-----------------|----------------|------------------|--------------------|------------------|------|--------------------|-------------------|-------------------|------------------|--------------------|------------------|----|
| 1  | 102.054955         | 51.531116       |                |                  | 84.044390          | 42.525833        | T    |                    |                   |                   |                  |                    |                  | 13 |
| 2  | <b>173.092069</b>  | 87.049672       |                |                  | 155.081504         | 78.044390        | A    | <b>1771.847219</b> | 886.427248        | 1754.820670       | 877.913973       | 1753.836654        | 877.421965       | 12 |
| 3  | 274.139748         | 137.573512      |                |                  | 256.129183         | 128.568230       | T    | <b>1700.810105</b> | <b>850.908691</b> | 1683.783556       | 842.395416       | <b>1682.799540</b> | 841.903408       | 11 |
| 4  | 361.171776         | 181.089526      |                |                  | 343.161211         | 172.084243       | S    | <b>1599.762426</b> | 800.384851        | 1582.735877       | 791.871577       | 1581.751861        | 791.379569       | 10 |
| 5  | <b>490.214369</b>  | 245.610822      |                |                  | <b>472.203804</b>  | 236.605540       | E    | <b>1512.730398</b> | 756.868837        | 1495.703849       | 748.355563       | 1494.719833        | 747.863555       | 9  |
| 6  | <b>653.277698</b>  | 327.142487      |                |                  | <b>635.267133</b>  | 318.137205       | Y    | <b>1383.687805</b> | 692.347541        | 1366.661256       | 683.834266       | <b>1365.677240</b> | 683.342258       | 8  |
| 7  | <b>1092.503024</b> | 546.755150      | 1075.476475    | 538.241876       | <b>1074.492459</b> | 537.749868       | Q    | <b>1220.624476</b> | <b>610.815876</b> | 1203.597927       | 602.302602       | 1202.613911        | 601.810594       | 7  |
| 8  | <b>1193.550703</b> | 597.278990      | 1176.524154    | 588.765715       | 1175.540138        | 588.273707       | T    | <b>781.399150</b>  | 391.203213        | 764.372601        | 382.689939       | <b>763.388585</b>  | 382.197931       | 6  |
| 9  | <b>1340.619117</b> | 670.813197      | 1323.592568    | 662.299922       | <b>1322.608552</b> | 661.807914       | F    | <b>680.351471</b>  | 340.679374        | 663.324922        | 332.166099       |                    |                  | 5  |
| 10 | <b>1487.687531</b> | 744.347404      | 1470.660982    | 735.834129       | <b>1469.676966</b> | 735.342121       | F    | <b>533.283057</b>  | 267.145167        | 516.256508        | 258.631892       |                    |                  | 4  |
| 11 | <b>1601.730458</b> | 801.368867      | 1584.703909    | 792.855593       | <b>1583.719893</b> | 792.363585       | N    | <b>386.214643</b>  | 193.610959        | 369.188094        | 185.097685       |                    |                  | 3  |
| 12 | 1698.783222        | 849.895249      | 1681.756673    | 841.381975       | 1680.772657        | 840.889967       | P    | <b>272.171716</b>  | 136.589496        | <b>255.145167</b> | 128.076221       |                    |                  | 2  |
| 13 |                    |                 |                |                  |                    |                  | R    | <b>175.118952</b>  | 88.063114         | 158.092403        | 79.549839        |                    |                  | 1  |

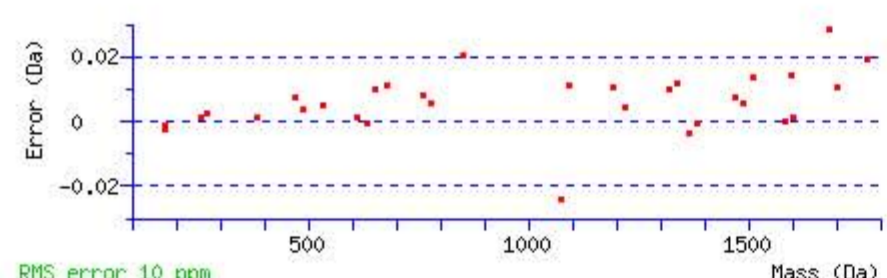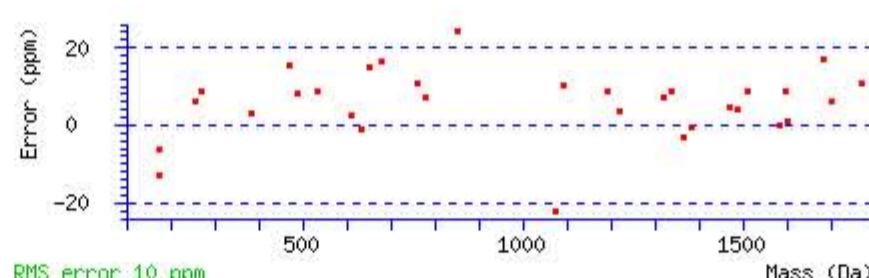

NCBI BLAST search of **TATSEYQTFNPR**

(Parameters: blastp, nr protein database, expect=20000, no filter, PAM30)

Other BLAST [web gateways](#)

All matches to this query

| Score | Mr(calc):   | Delta    | Sequence            |
|-------|-------------|----------|---------------------|
| 90.2  | 1871.887619 | 0.008629 | <b>TATSEYQTFNPR</b> |

Mascot: <http://www.matrixscience.com/>



# MASCOT Search Results

## Peptide View

MS/MS Fragmentation of **SPQELLCGASLISDR**

Found in **THRB\_HUMAN**, Prothrombin OS=Homo sapiens GN=F2 PE=1 SV=2

Match to Query 55583: 1955.991132 from(653.004320,3+) rtinseconds(2469) index(66008)

Title: Locus:1.1.1.2857.9 File:"2013-07-02 CLN FXIII 30 min 1st F 4.wiff"

Data file C:\Program Files (x86)\Matrix Science\Mascot Daemon\mgf\1 FXIII 30 min 1st\mascot\_daemon\_merge.mgf

Click mouse within plot area to zoom in by factor of two about that point

Or, Plot from  to  Da

Label all possible matches  Label matches used for scoring

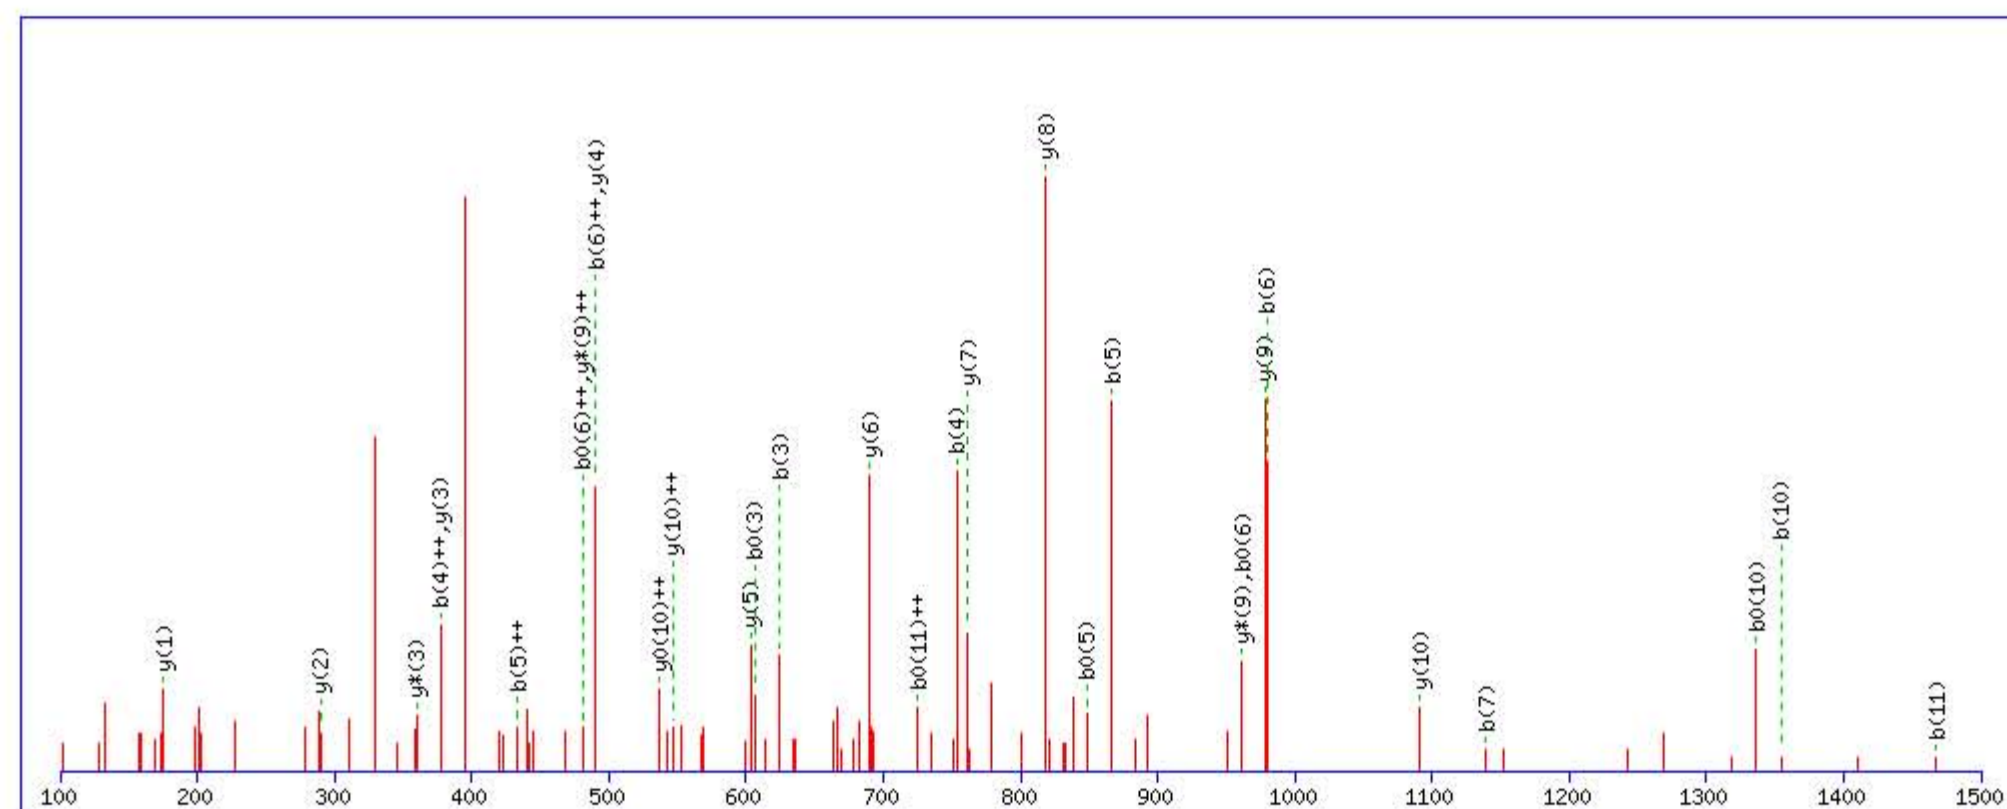

Monoisotopic mass of neutral peptide Mr(calc): 1955.980850

Fixed modifications: Carbamidomethyl (C) (apply to specified residues or termini only)

Variable modifications:

Q3 : Biotin:Thermo-21345 (Q)

Ions Score: 58 Expect: 1.3e-005

Matches : 31/162 fragment ions using 46 most intense peaks [\(help\)](#)

| #  | b                  | b <sup>++</sup>   | b <sup>*</sup> | b <sup>*++</sup> | b <sup>0</sup>     | b <sup>0++</sup>  | Seq. | y                  | y <sup>++</sup>   | y <sup>*</sup>    | y <sup>*++</sup>  | y <sup>0</sup> | y <sup>0++</sup>  | #  |
|----|--------------------|-------------------|----------------|------------------|--------------------|-------------------|------|--------------------|-------------------|-------------------|-------------------|----------------|-------------------|----|
| 1  | 88.039304          | 44.523290         |                |                  | 70.028739          | 35.518008         | S    |                    |                   |                   |                   |                |                   | 15 |
| 2  | 185.092068         | 93.049672         |                |                  | 167.081503         | 84.044389         | P    | 1869.956117        | 935.481697        | 1852.929568       | 926.968422        | 1851.945552    | 926.476414        | 14 |
| 3  | <b>624.317394</b>  | 312.662335        | 607.290845     | 304.149061       | <b>606.306829</b>  | 303.657053        | Q    | 1772.903353        | 886.955314        | 1755.876804       | 878.442040        | 1754.892788    | 877.950032        | 13 |
| 4  | <b>753.359987</b>  | <b>377.183632</b> | 736.333438     | 368.670357       | 735.349422         | 368.178349        | E    | 1333.678027        | 667.342652        | 1316.651478       | 658.829377        | 1315.667462    | 658.337369        | 12 |
| 5  | <b>866.444051</b>  | <b>433.725664</b> | 849.417502     | 425.212389       | <b>848.433486</b>  | 424.720381        | L    | 1204.635434        | 602.821355        | 1187.608885       | 594.308081        | 1186.624869    | 593.816073        | 11 |
| 6  | <b>979.528115</b>  | <b>490.267696</b> | 962.501566     | 481.754421       | <b>961.517550</b>  | <b>481.262413</b> | L    | <b>1091.551370</b> | <b>546.279323</b> | 1074.524821       | 537.766049        | 1073.540805    | <b>537.274040</b> | 10 |
| 7  | <b>1139.558764</b> | 570.283020        | 1122.532215    | 561.769746       | 1121.548199        | 561.277738        | C    | <b>978.467306</b>  | 489.737291        | <b>961.440757</b> | <b>481.224017</b> | 960.456741     | 480.732009        | 9  |
| 8  | 1196.580228        | 598.793752        | 1179.553679    | 590.280478       | 1178.569663        | 589.788470        | G    | <b>818.436657</b>  | 409.721967        | 801.410108        | 401.208692        | 800.426092     | 400.716684        | 8  |
| 9  | 1267.617342        | 634.312309        | 1250.590793    | 625.799035       | 1249.606777        | 625.307027        | A    | <b>761.415193</b>  | 381.211235        | 744.388644        | 372.697960        | 743.404628     | 372.205952        | 7  |
| 10 | <b>1354.649370</b> | 677.828323        | 1337.622821    | 669.315049       | <b>1336.638805</b> | 668.823041        | S    | <b>690.378079</b>  | 345.692678        | 673.351530        | 337.179403        | 672.367514     | 336.687395        | 6  |
| 11 | <b>1467.733434</b> | 734.370355        | 1450.706885    | 725.857081       | 1449.722869        | <b>725.365073</b> | L    | <b>603.346051</b>  | 302.176664        | 586.319502        | 293.663389        | 585.335486     | 293.171381        | 5  |
| 12 | 1580.817498        | 790.912387        | 1563.790949    | 782.399113       | 1562.806933        | 781.907104        | I    | <b>490.261987</b>  | 245.634631        | 473.235438        | 237.121357        | 472.251422     | 236.629349        | 4  |
| 13 | 1667.849526        | 834.428401        | 1650.822977    | 825.915127       | 1649.838961        | 825.423118        | S    | <b>377.177923</b>  | 189.092600        | <b>360.151374</b> | 180.579325        | 359.167358     | 180.087317        | 3  |
| 14 | 1782.876469        | 891.941873        | 1765.849920    | 883.428598       | 1764.865904        | 882.936590        | D    | <b>290.145895</b>  | 145.576585        | 273.119346        | 137.063311        | 272.135330     | 136.571303        | 2  |
| 15 |                    |                   |                |                  |                    |                   | R    | <b>175.118952</b>  | 88.063114         | 158.092403        | 79.549839         |                |                   | 1  |

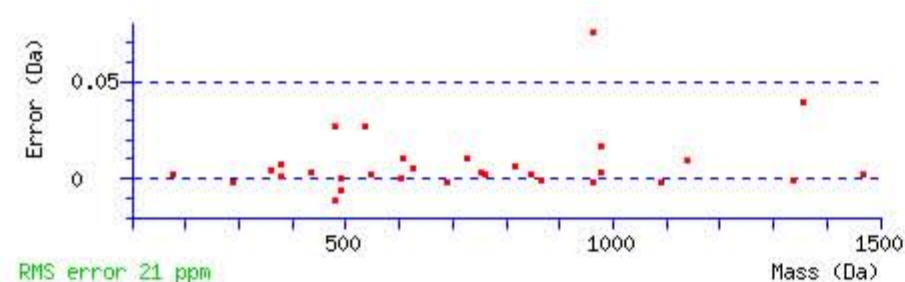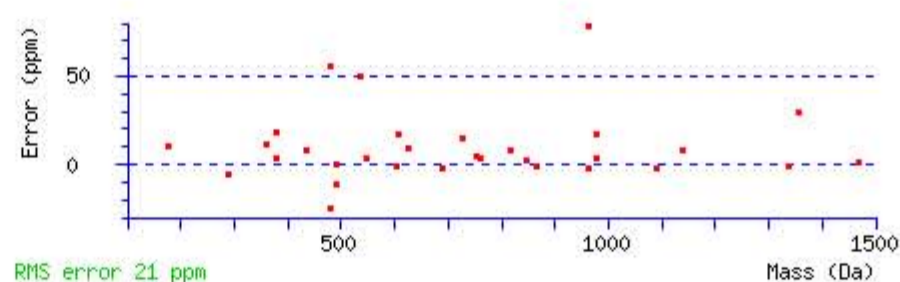

NCBI BLAST search of **SPQELLCGASLISDR**

(Parameters: blastp, nr protein database, expect=20000, no filter, PAM30)

Other BLAST [web gateways](#)

All matches to this query

| Score | Mr(calc):   | Delta     | Sequence                          |
|-------|-------------|-----------|-----------------------------------|
| 58.4  | 1955.980850 | 0.010282  | <a href="#">SPQELLCGASLISDR</a>   |
| 6.3   | 1955.966949 | 0.024183  | <a href="#">EQQPGKCEGTRTVR</a>    |
| 6.3   | 1955.966949 | 0.024183  | <a href="#">EQQPGKCEGTRTVR</a>    |
| 4.0   | 1956.006470 | -0.015338 | <a href="#">AILRVAELSSDDFHLDR</a> |



# MASCOT Search Results

## Peptide View

MS/MS Fragmentation of **HQDFNSAVQLVENFCR**

Found in **THRB\_HUMAN**, Prothrombin OS=Homo sapiens GN=F2 PE=1 SV=2

Match to Query 63463: 2274.074742 from(759.032190,3+) rtinseconds(2487) index(66111)

Title: Locus:1.1.1.2863.17 File:"2013-07-02 CLN FXIII 30 min 1st F 4.wiff"

Data file C:\Program Files (x86)\Matrix Science\Mascot Daemon\mgf1 FXIII 30 min 1st\mascot\_daemon\_merge.mgf

Click mouse within plot area to zoom in by factor of two about that point

Or, Plot from  to  Da

Label all possible matches  Label matches used for scoring

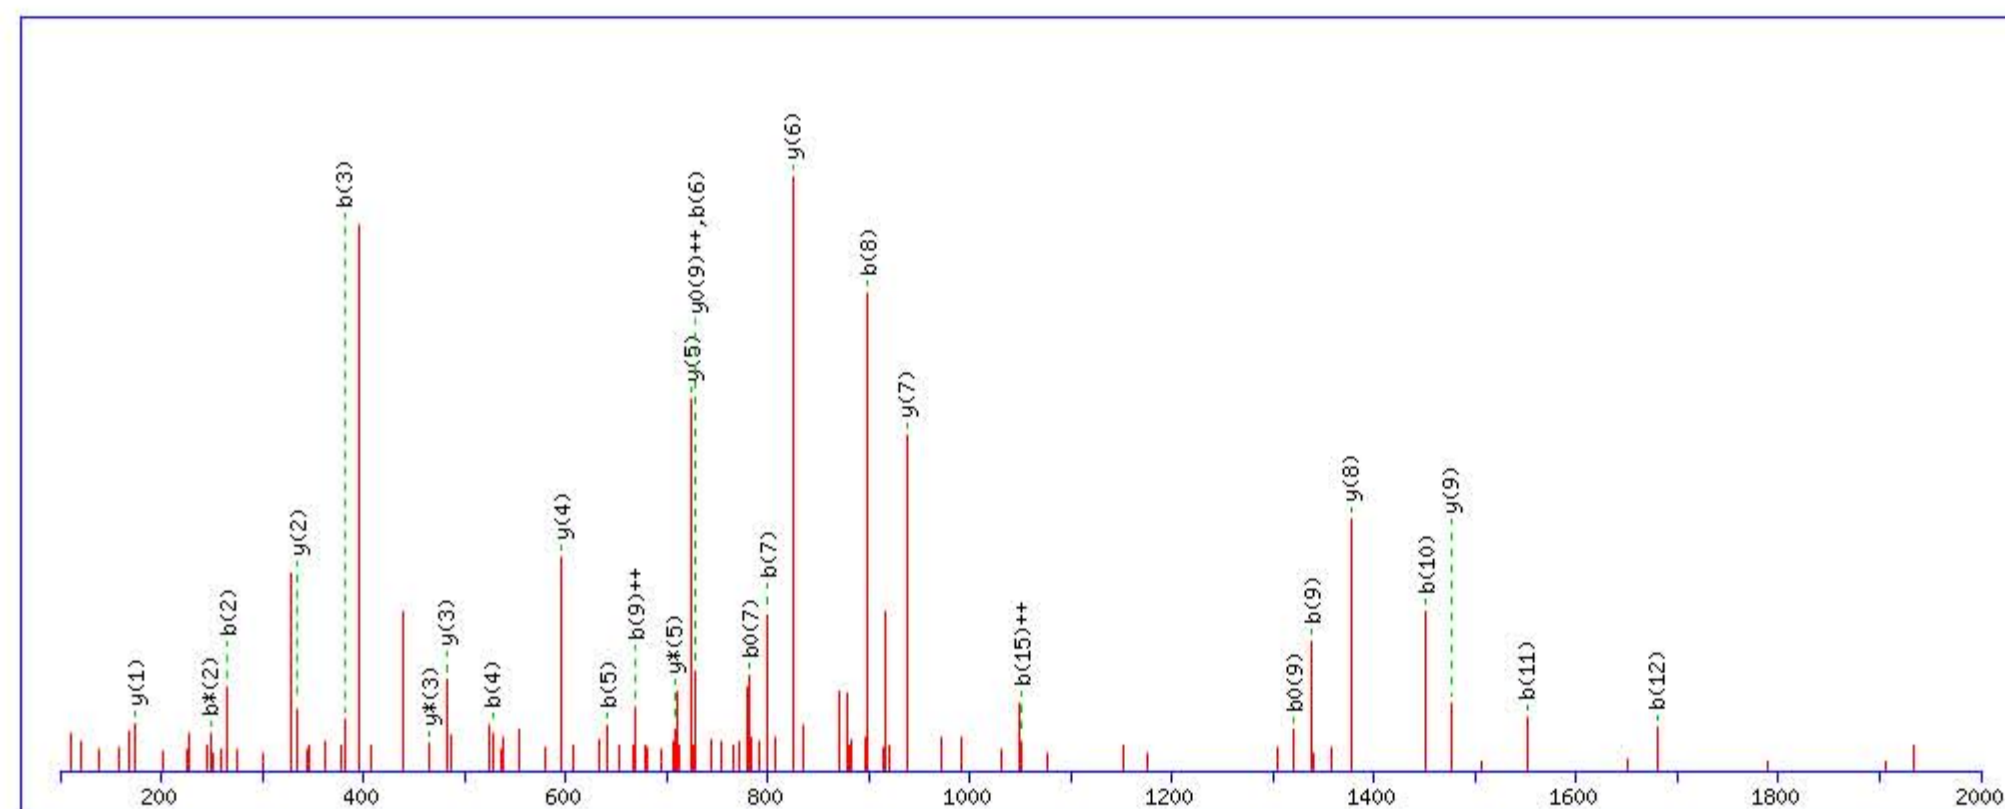

Monoisotopic mass of neutral peptide Mr(calc): 2274.067398

Fixed modifications: Carbamidomethyl (C) (apply to specified residues or termini only)

Variable modifications:

Q9 : Biotin:Thermo-21345 (Q)

Ions Score: 60 Expect: 2e-005

Matches : 28/166 fragment ions using 56 most intense peaks [\(help\)](#)

| #  | b                  | b <sup>++</sup>    | b <sup>*</sup>    | b <sup>*++</sup> | b <sup>0</sup>     | b <sup>0++</sup> | Seq. | y                  | y <sup>++</sup> | y <sup>*</sup>    | y <sup>*++</sup> | y <sup>0</sup> | y <sup>0++</sup>  | #  |
|----|--------------------|--------------------|-------------------|------------------|--------------------|------------------|------|--------------------|-----------------|-------------------|------------------|----------------|-------------------|----|
| 1  | 138.066188         | 69.536732          |                   |                  |                    |                  | H    |                    |                 |                   |                  |                |                   | 16 |
| 2  | <b>266.124766</b>  | 133.566021         | <b>249.098217</b> | 125.052746       |                    |                  | Q    | 2138.015757        | 1069.511516     | 2120.989208       | 1060.998242      | 2120.005192    | 1060.506234       | 15 |
| 3  | <b>381.151709</b>  | 191.079492         | 364.125160        | 182.566218       | 363.141144         | 182.074210       | D    | 2009.957179        | 1005.482228     | 1992.930630       | 996.968953       | 1991.946614    | 996.476945        | 14 |
| 4  | <b>528.220123</b>  | 264.613700         | 511.193574        | 256.100425       | 510.209558         | 255.608417       | F    | 1894.930236        | 947.968756      | 1877.903687       | 939.455482       | 1876.919671    | 938.963474        | 13 |
| 5  | <b>642.263050</b>  | 321.635163         | 625.236501        | 313.121889       | 624.252485         | 312.629881       | N    | 1747.861822        | 874.434549      | 1730.835273       | 865.921275       | 1729.851257    | 865.429267        | 12 |
| 6  | <b>729.295078</b>  | 365.151177         | 712.268529        | 356.637903       | 711.284513         | 356.145895       | S    | 1633.818895        | 817.413086      | 1616.792346       | 808.899811       | 1615.808330    | 808.407803        | 11 |
| 7  | <b>800.332192</b>  | 400.669734         | 783.305643        | 392.156459       | <b>782.321627</b>  | 391.664451       | A    | 1546.786867        | 773.897072      | 1529.760318       | 765.383797       | 1528.776302    | 764.891789        | 10 |
| 8  | <b>899.400606</b>  | 450.203941         | 882.374057        | 441.690666       | 881.390041         | 441.198658       | V    | <b>1475.749753</b> | 738.378515      | 1458.723204       | 729.865240       | 1457.739188    | <b>729.373232</b> | 9  |
| 9  | <b>1338.625932</b> | <b>669.816604</b>  | 1321.599383       | 661.303330       | <b>1320.615367</b> | 660.811322       | Q    | <b>1376.681339</b> | 688.844308      | 1359.654790       | 680.331033       | 1358.670774    | 679.839025        | 8  |
| 10 | <b>1451.709996</b> | 726.358636         | 1434.683447       | 717.845362       | 1433.699431        | 717.353354       | L    | <b>937.456013</b>  | 469.231645      | 920.429464        | 460.718370       | 919.445448     | 460.226362        | 7  |
| 11 | <b>1550.778410</b> | 775.892843         | 1533.751861       | 767.379569       | 1532.767845        | 766.887561       | V    | <b>824.371949</b>  | 412.689613      | 807.345400        | 404.176338       | 806.361384     | 403.684330        | 6  |
| 12 | <b>1679.821003</b> | 840.414140         | 1662.794454       | 831.900865       | 1661.810438        | 831.408857       | E    | <b>725.303535</b>  | 363.155406      | <b>708.276986</b> | 354.642131       | 707.292970     | 354.150123        | 5  |
| 13 | 1793.863930        | 897.435603         | 1776.837381       | 888.922329       | 1775.853365        | 888.430321       | N    | <b>596.260942</b>  | 298.634109      | 579.234393        | 290.120835       |                |                   | 4  |
| 14 | 1940.932344        | 970.969810         | 1923.905795       | 962.456536       | 1922.921779        | 961.964528       | F    | <b>482.218015</b>  | 241.612646      | <b>465.191466</b> | 233.099371       |                |                   | 3  |
| 15 | 2100.962993        | <b>1050.985135</b> | 2083.936444       | 1042.471860      | 2082.952428        | 1041.979852      | C    | <b>335.149601</b>  | 168.078438      | 318.123052        | 159.565164       |                |                   | 2  |
| 16 |                    |                    |                   |                  |                    |                  | R    | <b>175.118952</b>  | 88.063114       | 158.092403        | 79.549839        |                |                   | 1  |

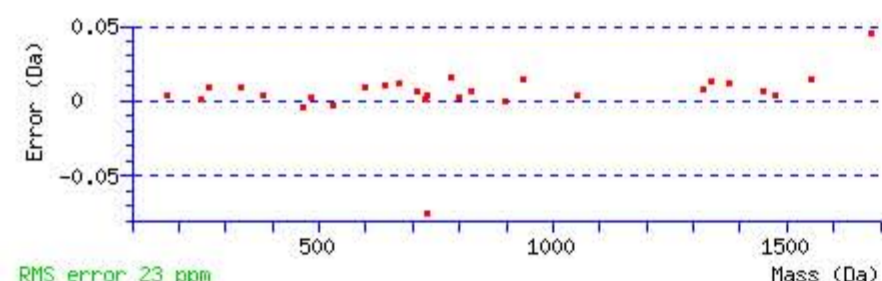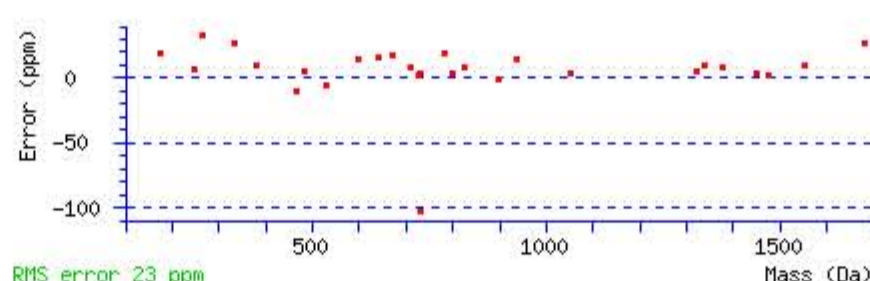

NCBI BLAST search of **HQDFNSAVQLVENFCR**

(Parameters: blastp, nr protein database, expect=20000, no filter, PAM30)

Other BLAST [web gateways](#)

## All matches to this query

| Score | Mr(calc):   | Delta    | Sequence                         |
|-------|-------------|----------|----------------------------------|
| 59.9  | 2274.067398 | 0.007344 | <a href="#">HQDFNSAVQLVENFCR</a> |
| 19.1  | 2274.067398 | 0.007344 | <a href="#">HQDFNSAVQLVENFCR</a> |



# MASCOT Search Results

## Peptide View

MS/MS Fragmentation of **LAVTTHGLPCLAWASAQAK**

Found in **THRB\_HUMAN**, Prothrombin OS=Homo sapiens GN=F2 PE=1 SV=2

Match to Query 64234: 2305.218312 from(769.413380,3+) rtinseconds(2358) index(65394)

Title: Locus:1.1.1.2818.17 File:"2013-07-02 CLN FXIII 30 min 1st F 4.wiff"

Data file C:\Program Files (x86)\Matrix Science\Mascot Daemon\mgf\1 FXIII 30 min 1st\mascot\_daemon\_merge.mgf

Click mouse within plot area to zoom in by factor of two about that point

Or, Plot from  to  Da

Label all possible matches  Label matches used for scoring

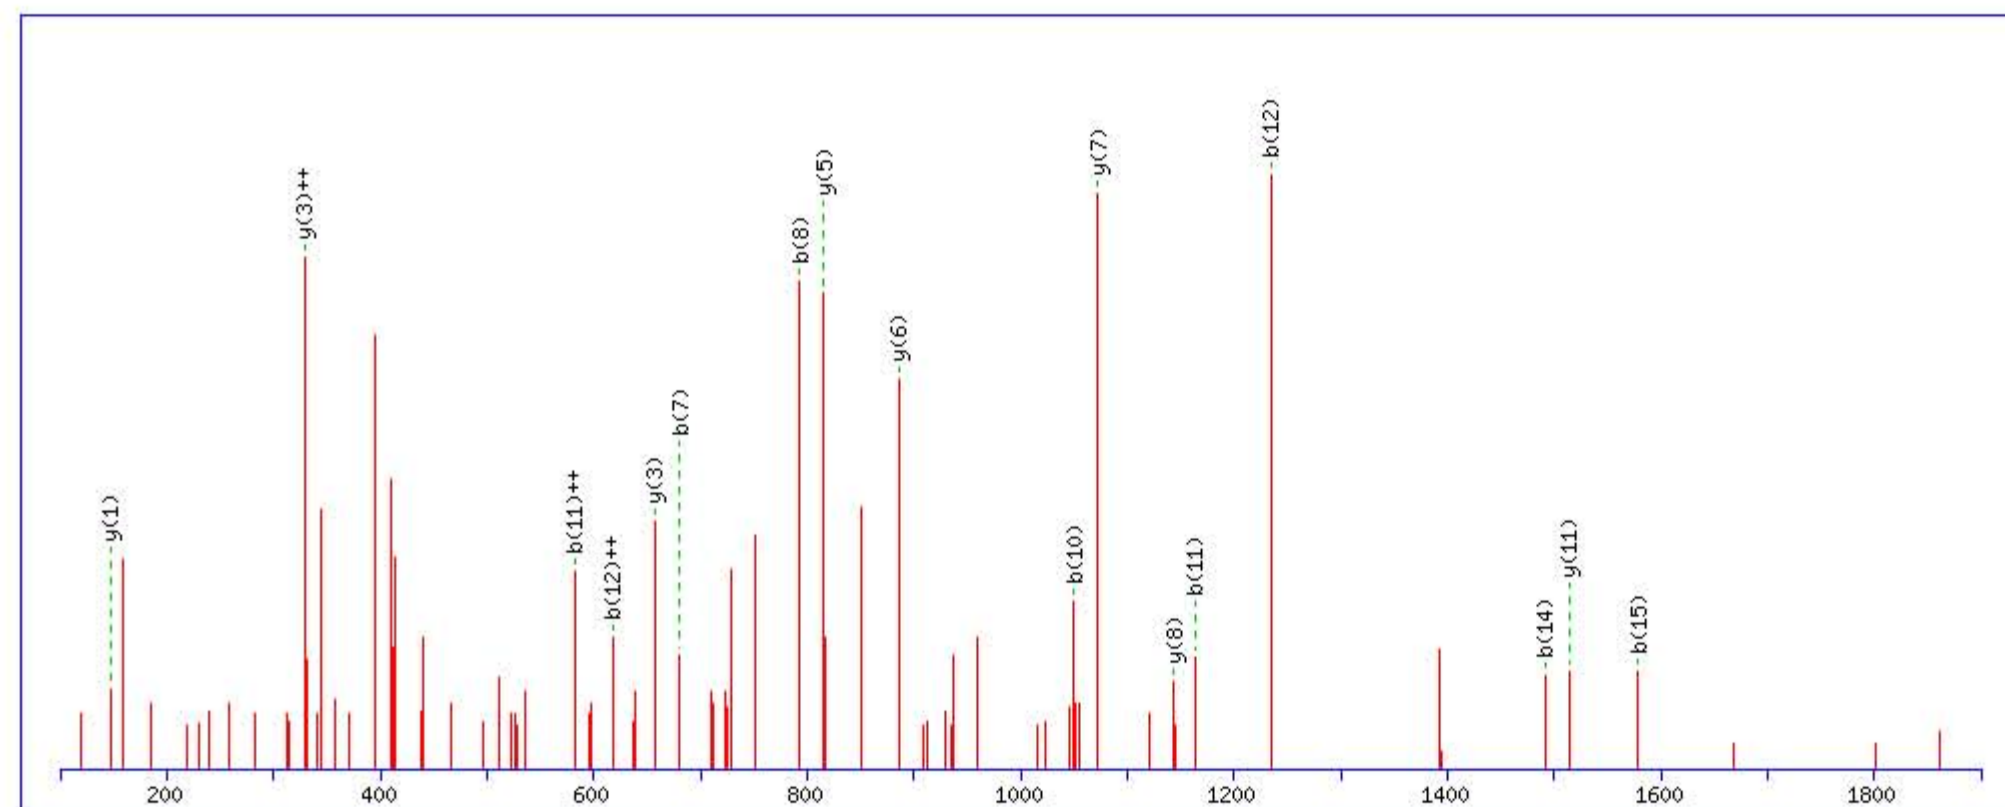

Monoisotopic mass of neutral peptide Mr(calc): 2305.207504

Fixed modifications: Carbamidomethyl (C) (apply to specified residues or termini only)

Variable modifications:

Q17 : Biotin:Thermo-21345 (Q)

Ions Score: 40 Expect: 0.00021

Matches : 17/170 fragment ions using 32 most intense peaks [\(help\)](#)

| #  | b                  | b <sup>++</sup>   | b <sup>*</sup> | b <sup>+++</sup> | b <sup>0</sup> | b <sup>0++</sup> | Seq. | y                  | y <sup>++</sup>   | y <sup>*</sup> | y <sup>+++</sup> | y <sup>0</sup> | y <sup>0++</sup> | #  |
|----|--------------------|-------------------|----------------|------------------|----------------|------------------|------|--------------------|-------------------|----------------|------------------|----------------|------------------|----|
| 1  | 114.091340         | 57.549308         |                |                  |                |                  | L    |                    |                   |                |                  |                |                  | 19 |
| 2  | 185.128454         | 93.067865         |                |                  |                |                  | A    | 2193.130730        | 1097.069003       | 2176.104181    | 1088.555728      | 2175.120165    | 1088.063720      | 18 |
| 3  | 284.196868         | 142.602072        |                |                  |                |                  | V    | 2122.093616        | 1061.550446       | 2105.067067    | 1053.037171      | 2104.083051    | 1052.545163      | 17 |
| 4  | 385.244547         | 193.125912        |                |                  | 367.233982     | 184.120629       | T    | 2023.025202        | 1012.016239       | 2005.998653    | 1003.502965      | 2005.014637    | 1003.010957      | 16 |
| 5  | 486.292226         | 243.649751        |                |                  | 468.281661     | 234.644469       | T    | 1921.977523        | 961.492400        | 1904.950974    | 952.979125       | 1903.966958    | 952.487117       | 15 |
| 6  | 623.351138         | 312.179207        |                |                  | 605.340573     | 303.173925       | H    | 1820.929844        | 910.968560        | 1803.903295    | 902.455286       | 1802.919279    | 901.963278       | 14 |
| 7  | <b>680.372602</b>  | 340.689939        |                |                  | 662.362037     | 331.684657       | G    | 1683.870932        | 842.439104        | 1666.844383    | 833.925830       | 1665.860367    | 833.433822       | 13 |
| 8  | <b>793.456666</b>  | 397.231971        |                |                  | 775.446101     | 388.226689       | L    | 1626.849468        | 813.928372        | 1609.822919    | 805.415098       | 1608.838903    | 804.923090       | 12 |
| 9  | 890.509430         | 445.758353        |                |                  | 872.498865     | 436.753071       | P    | <b>1513.765404</b> | 757.386340        | 1496.738855    | 748.873066       | 1495.754839    | 748.381058       | 11 |
| 10 | <b>1050.540079</b> | 525.773678        |                |                  | 1032.529514    | 516.768395       | C    | 1416.712640        | 708.859958        | 1399.686091    | 700.346684       | 1398.702075    | 699.854675       | 10 |
| 11 | <b>1163.624143</b> | <b>582.315710</b> |                |                  | 1145.613578    | 573.310427       | L    | 1256.681991        | 628.844634        | 1239.655442    | 620.331359       | 1238.671426    | 619.839351       | 9  |
| 12 | <b>1234.661257</b> | <b>617.834267</b> |                |                  | 1216.650692    | 608.828984       | A    | <b>1143.597927</b> | 572.302602        | 1126.571378    | 563.789327       | 1125.587362    | 563.297319       | 8  |
| 13 | 1420.740570        | 710.873923        |                |                  | 1402.730005    | 701.868640       | W    | <b>1072.560813</b> | 536.784045        | 1055.534264    | 528.270770       | 1054.550248    | 527.778762       | 7  |
| 14 | <b>1491.777684</b> | 746.392480        |                |                  | 1473.767119    | 737.387197       | A    | <b>886.481500</b>  | 443.744388        | 869.454951     | 435.231114       | 868.470935     | 434.739106       | 6  |
| 15 | <b>1578.809712</b> | 789.908494        |                |                  | 1560.799147    | 780.903212       | S    | <b>815.444386</b>  | 408.225831        | 798.417837     | 399.712557       | 797.433821     | 399.220549       | 5  |
| 16 | 1649.846826        | 825.427051        |                |                  | 1631.836261    | 816.421768       | A    | 728.412358         | 364.709817        | 711.385809     | 356.196543       |                |                  | 4  |
| 17 | 2089.072152        | 1045.039714       | 2072.045603    | 1036.526439      | 2071.061587    | 1036.034431      | Q    | <b>657.375244</b>  | <b>329.191260</b> | 640.348695     | 320.677986       |                |                  | 3  |
| 18 | 2160.109266        | 1080.558271       | 2143.082717    | 1072.044996      | 2142.098701    | 1071.552988      | A    | 218.149918         | 109.578597        | 201.123369     | 101.065323       |                |                  | 2  |
| 19 |                    |                   |                |                  |                |                  | K    | <b>147.112804</b>  | 74.060040         | 130.086255     | 65.546765        |                |                  | 1  |

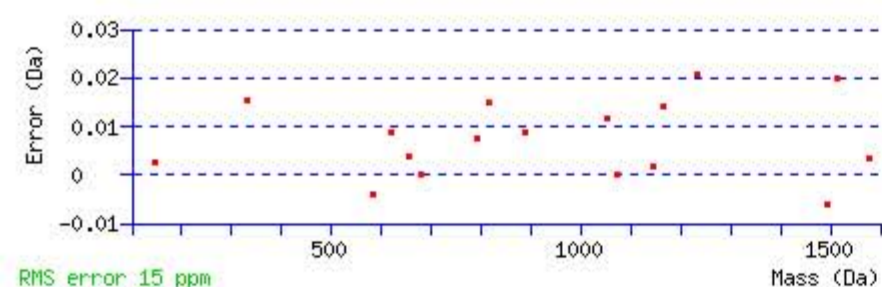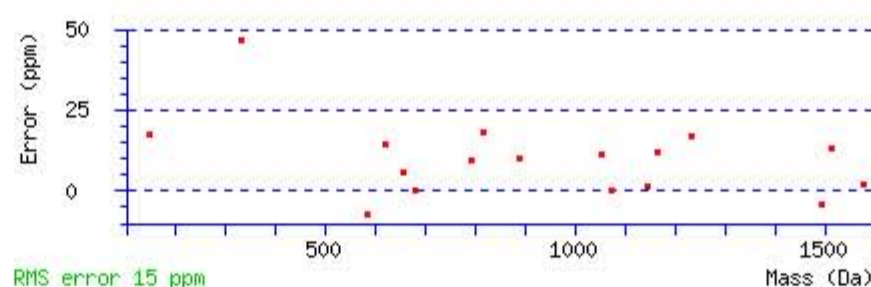

NCBI BLAST search of [LAVTTHGLPCLAWASAQAK](#)

(Parameters: blastp, nr protein database, expect=20000, no filter, PAM30)

Other BLAST [web gateways](#)

## All matches to this query

| Score | Mr(calc):   | Delta     | Sequence                              |
|-------|-------------|-----------|---------------------------------------|
| 40.0  | 2305.207504 | 0.010808  | <a href="#">LAVTTHGLPCLAWASAQAK</a>   |
| 0.8   | 2305.184830 | 0.033482  | <a href="#">QAAASATQTIAAAQHAASTPK</a> |
| 0.2   | 2305.236481 | -0.018169 | <a href="#">STLSQHLRIHTGKPYK</a>      |



# MASCOT Search Results

## Peptide View

MS/MS Fragmentation of **SEGSSVNLSPPLEQVPDR**

Found in **THRB\_HUMAN**, Prothrombin OS=Homo sapiens GN=F2 PE=1 SV=2

Match to Query 65388: 2381.142582 from(794.721470,3+) rtinseconds(2146) index(64031)

Title: Locus:1.1.1.2744.22 File:"2013-07-02 CLN FXIII 30 min 1st F 4.wiff"

Data file C:\Program Files (x86)\Matrix Science\Mascot Daemon\mgf1 FXIII 30 min 1st\mascot\_daemon\_merge.mgf

Click mouse within plot area to zoom in by factor of two about that point

Or, Plot from  to  Da

Label all possible matches  Label matches used for scoring

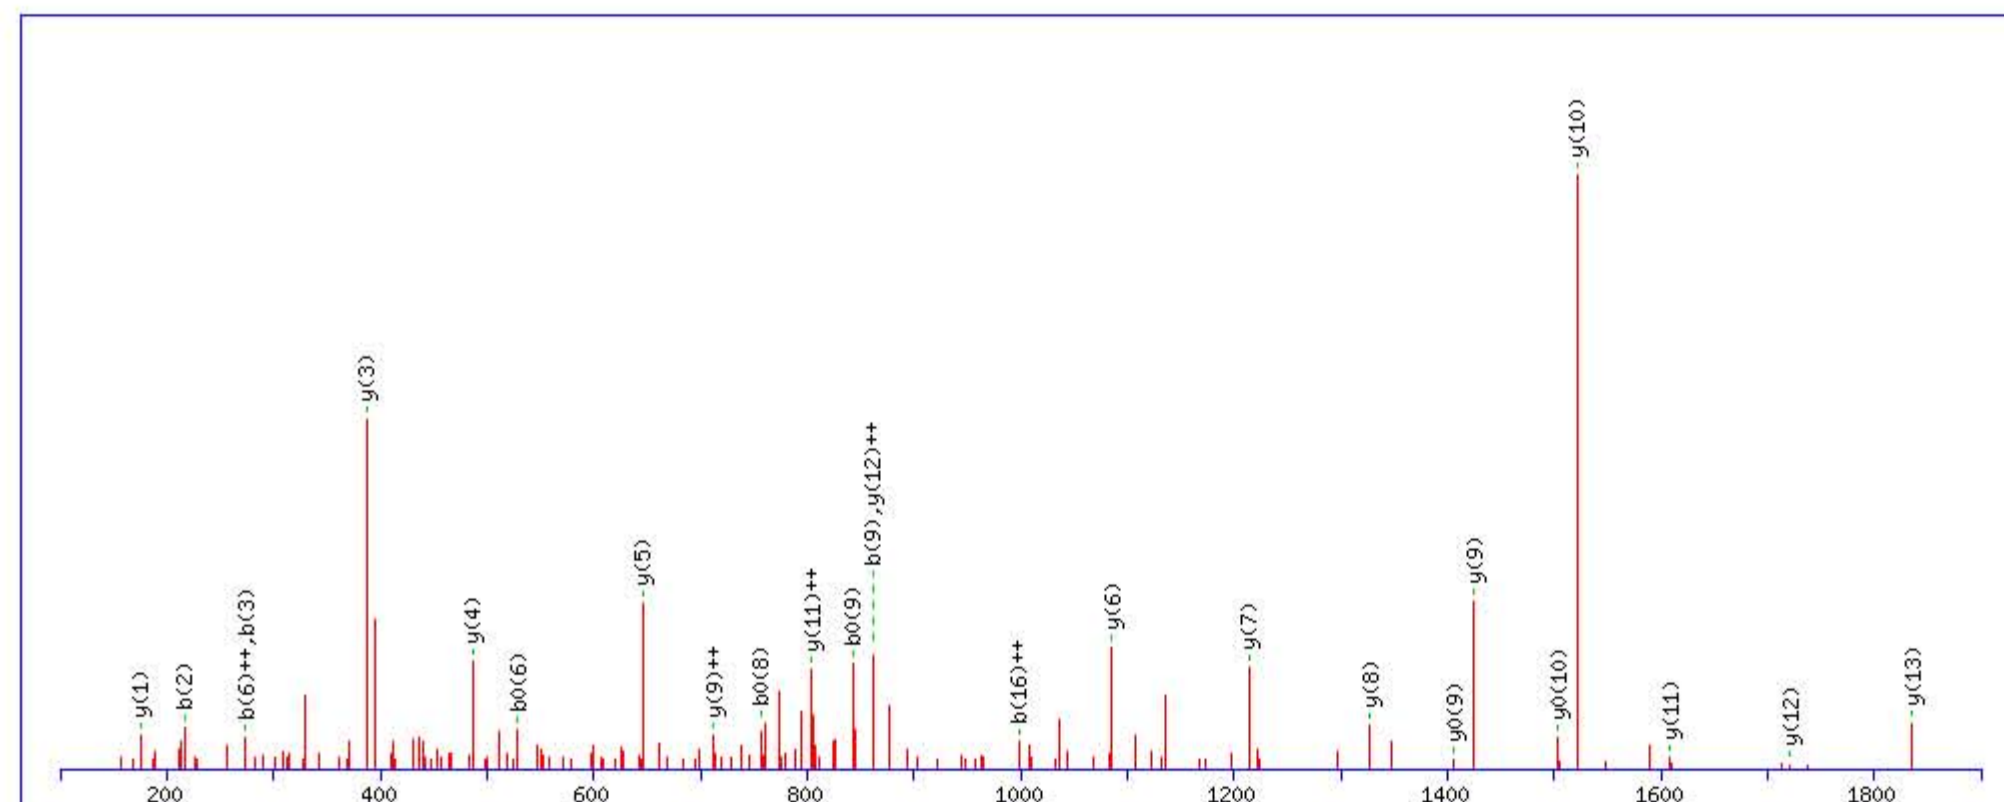

Monoisotopic mass of neutral peptide Mr(calc): 2381.135529

Fixed modifications: Carbamidomethyl (C) (apply to specified residues or termini only)

Variable modifications:

Q14 : Biotin:Thermo-21345 (Q)

Ions Score: 88 Expect: 3e-008

Matches : 25/202 fragment ions using 33 most intense peaks [\(help\)](#)

| #  | b                 | b <sup>++</sup>   | b <sup>+</sup> | b <sup>+++</sup> | b <sup>0</sup>    | b <sup>0++</sup> | Seq. | y                  | y <sup>++</sup>   | y <sup>+</sup> | y <sup>+++</sup> | y <sup>0</sup>     | y <sup>0++</sup> | #  |
|----|-------------------|-------------------|----------------|------------------|-------------------|------------------|------|--------------------|-------------------|----------------|------------------|--------------------|------------------|----|
| 1  | 88.039304         | 44.523290         |                |                  | 70.028739         | 35.518008        | S    |                    |                   |                |                  |                    |                  | 19 |
| 2  | <b>217.081897</b> | 109.044586        |                |                  | 199.071332        | 100.039304       | E    | 2295.110779        | 1148.059027       | 2278.084230    | 1139.545753      | 2277.100214        | 1139.053745      | 18 |
| 3  | <b>274.103361</b> | 137.555319        |                |                  | 256.092796        | 128.550036       | G    | 2166.068186        | 1083.537731       | 2149.041637    | 1075.024456      | 2148.057621        | 1074.532448      | 17 |
| 4  | 361.135389        | 181.071332        |                |                  | 343.124824        | 172.066050       | S    | 2109.046722        | 1055.026999       | 2092.020173    | 1046.513724      | 2091.036157        | 1046.021716      | 16 |
| 5  | 448.167417        | 224.587346        |                |                  | 430.156852        | 215.582064       | S    | 2022.014694        | 1011.510985       | 2004.988145    | 1002.997711      | 2004.004129        | 1002.505703      | 15 |
| 6  | 547.235831        | <b>274.121554</b> |                |                  | <b>529.225266</b> | 265.116271       | V    | 1934.982666        | 967.994971        | 1917.956117    | 959.481697       | 1916.972101        | 958.989689       | 14 |
| 7  | 661.278758        | 331.143017        | 644.252209     | 322.629742       | 643.268193        | 322.137734       | N    | <b>1835.914252</b> | 918.460764        | 1818.887703    | 909.947490       | 1817.903687        | 909.455482       | 13 |
| 8  | 774.362822        | 387.685049        | 757.336273     | 379.171774       | <b>756.352257</b> | 378.679766       | L    | <b>1721.871325</b> | <b>861.439301</b> | 1704.844776    | 852.926026       | 1703.860760        | 852.434018       | 12 |
| 9  | <b>861.394850</b> | 431.201063        | 844.368301     | 422.687788       | <b>843.384285</b> | 422.195780       | S    | <b>1608.787261</b> | <b>804.897269</b> | 1591.760712    | 796.383994       | 1590.776696        | 795.891986       | 11 |
| 10 | 958.447614        | 479.727445        | 941.421065     | 471.214170       | 940.437049        | 470.722162       | P    | <b>1521.755233</b> | 761.381255        | 1504.728684    | 752.867980       | <b>1503.744668</b> | 752.375972       | 10 |
| 11 | 1055.500378       | 528.253827        | 1038.473829    | 519.740553       | 1037.489813       | 519.248544       | P    | <b>1424.702469</b> | <b>712.854873</b> | 1407.675920    | 704.341598       | <b>1406.691904</b> | 703.849590       | 9  |
| 12 | 1168.584442       | 584.795859        | 1151.557893    | 576.282584       | 1150.573877       | 575.790576       | L    | <b>1327.649705</b> | 664.328491        | 1310.623156    | 655.815216       | 1309.639140        | 655.323208       | 8  |
| 13 | 1297.627035       | 649.317155        | 1280.600486    | 640.803881       | 1279.616470       | 640.311873       | E    | <b>1214.565641</b> | 607.786459        | 1197.539092    | 599.273184       | 1196.555076        | 598.781176       | 7  |
| 14 | 1736.852361       | 868.929819        | 1719.825812    | 860.416544       | 1718.841796       | 859.924536       | Q    | <b>1085.523048</b> | 543.265162        | 1068.496499    | 534.751888       | 1067.512483        | 534.259880       | 6  |
| 15 | 1896.883010       | 948.945143        | 1879.856461    | 940.431869       | 1878.872445       | 939.939861       | C    | <b>646.297722</b>  | 323.652499        | 629.271173     | 315.139225       | 628.287157         | 314.647217       | 5  |
| 16 | 1995.951424       | <b>998.479350</b> | 1978.924875    | 989.966076       | 1977.940859       | 989.474068       | V    | <b>486.267073</b>  | 243.637174        | 469.240524     | 235.123900       | 468.256508         | 234.631892       | 4  |
| 17 | 2093.004188       | 1047.005732       | 2075.977639    | 1038.492457      | 2074.993623       | 1038.000449      | P    | <b>387.198659</b>  | 194.102967        | 370.172110     | 185.589693       | 369.188094         | 185.097685       | 3  |
| 18 | 2208.031131       | 1104.519203       | 2191.004582    | 1096.005929      | 2190.020566       | 1095.513921      | D    | 290.145895         | 145.576585        | 273.119346     | 137.063311       | 272.135330         | 136.571303       | 2  |
| 19 |                   |                   |                |                  |                   |                  | R    | <b>175.118952</b>  | 88.063114         | 158.092403     | 79.549839        |                    |                  | 1  |

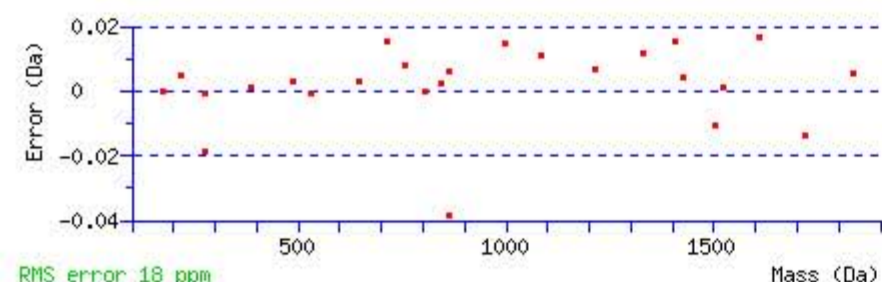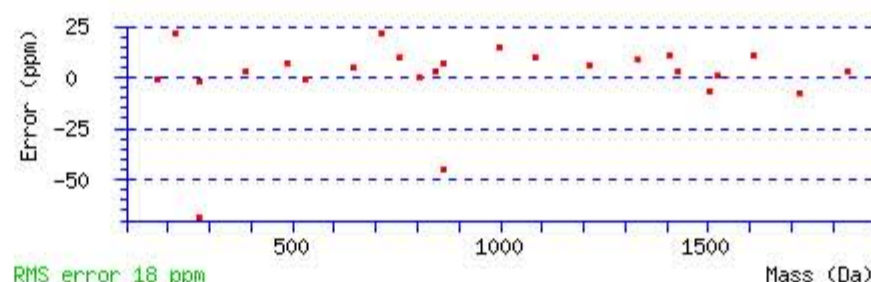

NCBI BLAST search of [SEGSSVNLSPPLEQVPDR](#)

(Parameters: blastp, nr protein database, expect=20000, no filter, PAM30)

Other BLAST [web gateways](#)

All matches to this query

| Score | Mr(calc):   | Delta    | Sequence                           |
|-------|-------------|----------|------------------------------------|
| 88.5  | 2381.135529 | 0.007053 | <a href="#">SEGSSVNLSPPLEQVPDR</a> |

Mascot: <http://www.matrixscience.com/>



**MASCOT** Mascot Search Results

**Peptide View**

MS/MS Fragmentation of **GQPSVLQVVNLPIVERPVCK**  
 Found in **THRB\_HUMAN**, Prothrombin OS=Homo sapiens GN=F2 PE=1 SV=2

Match to Query 69164: 2542.427562 from(848.483130,3+) rtinseconds(2511) index(66317)  
 Title: Locus:1.1.1.2871.23 File:"2013-07-02 CLN FXIII 30 min 1st F 4.wiff"  
 Data file C:\Program Files (x86)\Matrix Science\Mascot Daemon\mgf\1 FXIII 30 min 1st\mascot\_daemon\_merge.mgf

Click mouse within plot area to zoom in by factor of two about that point  
 Or, Plot from 100 to 2000 Da Full range  
 Label all possible matches  Label matches used for scoring

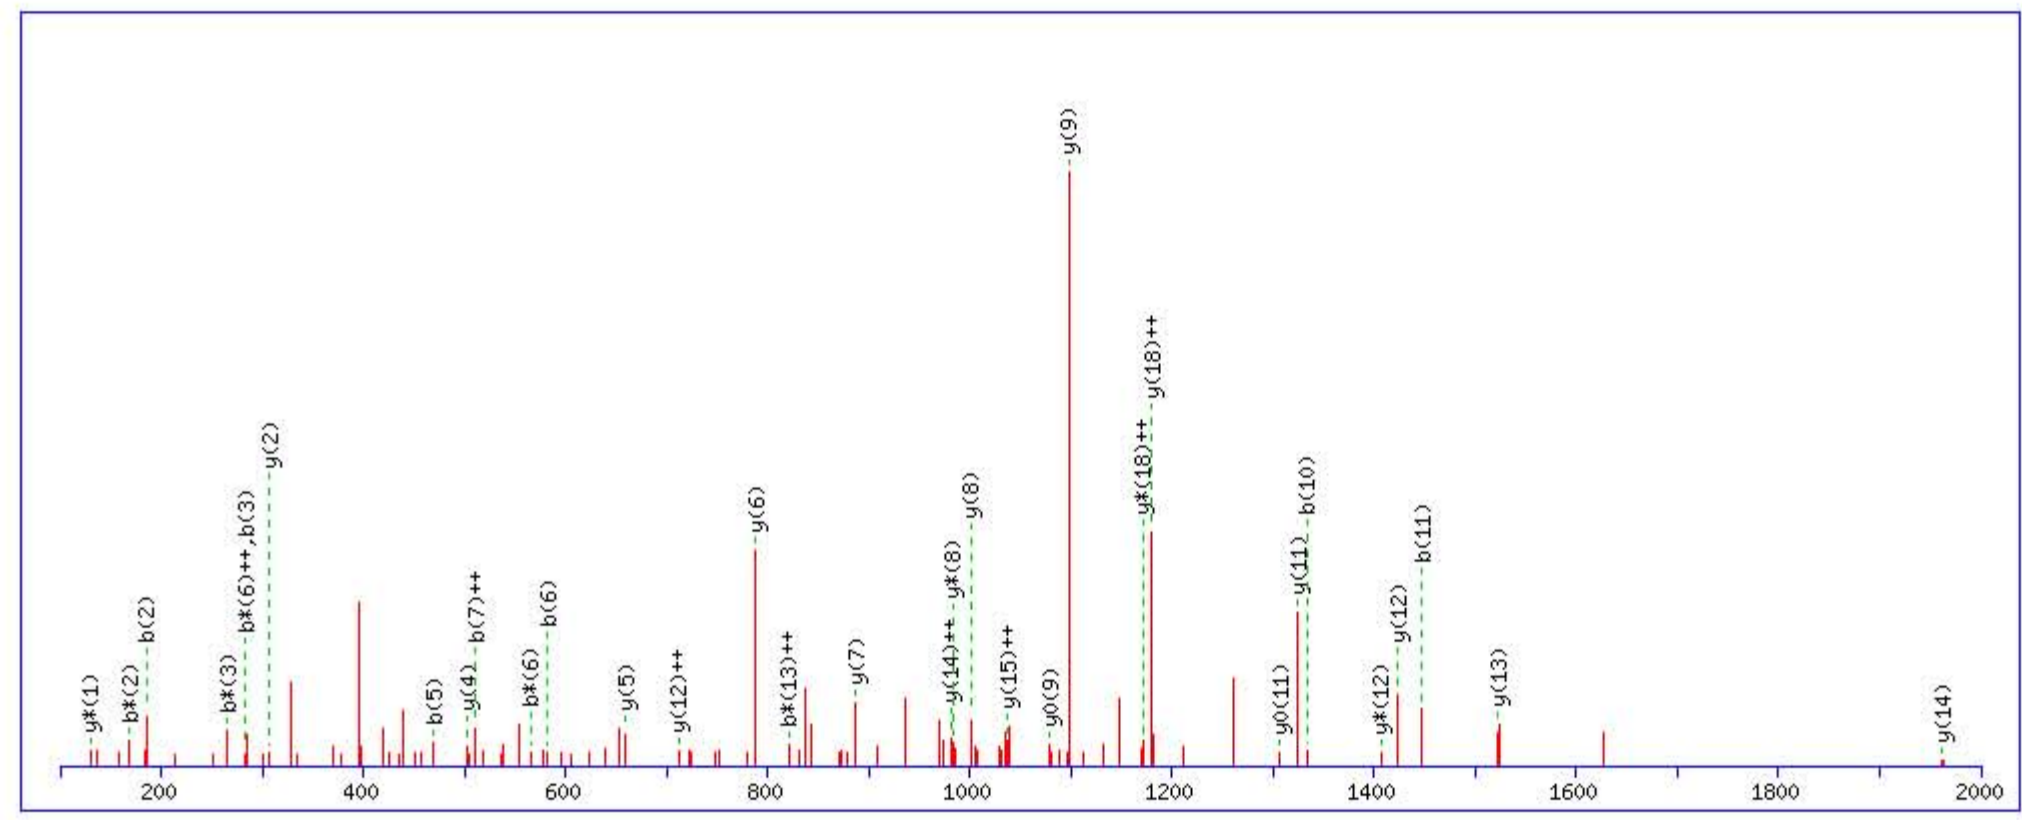

Monoisotopic mass of neutral peptide Mr(calc): 2542.412766  
 Fixed modifications: Carbamidomethyl (C) (apply to specified residues or termini only)  
 Variable modifications:  
 Q7 : Biotin:Thermo-21345 (Q)  
 Ions Score: 42 Expect: 0.00045  
 Matches : 33/210 fragment ions using 78 most intense peaks [\(help\)](#)

| #  | b                  | b <sup>++</sup>   | b <sup>*</sup>    | b <sup>+++</sup>  | b <sup>0</sup> | b <sup>0++</sup> | Seq. | y                  | y <sup>++</sup>    | y <sup>*</sup>     | y <sup>+++</sup>   | y <sup>0</sup>     | y <sup>0++</sup> | #  |
|----|--------------------|-------------------|-------------------|-------------------|----------------|------------------|------|--------------------|--------------------|--------------------|--------------------|--------------------|------------------|----|
| 1  | 58.028740          | 29.518008         |                   |                   |                |                  | G    |                    |                    |                    |                    |                    |                  | 20 |
| 2  | <b>186.087318</b>  | 93.547297         | <b>169.060769</b> | 85.034023         |                |                  | Q    | 2486.398570        | 1243.702923        | 2469.372021        | 1235.189648        | 2468.388005        | 1234.697640      | 19 |
| 3  | <b>283.140082</b>  | 142.073679        | <b>266.113533</b> | 133.560405        |                |                  | P    | 2358.339992        | <b>1179.673634</b> | 2341.313443        | <b>1171.160359</b> | 2340.329427        | 1170.668351      | 18 |
| 4  | 370.172110         | 185.589693        | 353.145561        | 177.076419        | 352.161545     | 176.584411       | S    | 2261.287228        | 1131.147252        | 2244.260679        | 1122.633977        | 2243.276663        | 1122.141969      | 17 |
| 5  | <b>469.240524</b>  | 235.123900        | 452.213975        | 226.610626        | 451.229959     | 226.118618       | V    | 2174.255200        | 1087.631238        | 2157.228651        | 1079.117963        | 2156.244635        | 1078.625955      | 16 |
| 6  | <b>582.324588</b>  | 291.665932        | <b>565.298039</b> | <b>283.152658</b> | 564.314023     | 282.660650       | L    | 2075.186786        | <b>1038.097031</b> | 2058.160237        | 1029.583756        | 2057.176221        | 1029.091748      | 15 |
| 7  | 1021.549914        | <b>511.278595</b> | 1004.523365       | 502.765321        | 1003.539349    | 502.273313       | Q    | <b>1962.102722</b> | <b>981.554999</b>  | 1945.076173        | 973.041724         | 1944.092157        | 972.549716       | 14 |
| 8  | 1120.618328        | 560.812802        | 1103.591779       | 552.299528        | 1102.607763    | 551.807520       | V    | <b>1522.877396</b> | 761.942336         | 1505.850847        | 753.429061         | 1504.866831        | 752.937053       | 13 |
| 9  | 1219.686742        | 610.347009        | 1202.660193       | 601.833735        | 1201.676177    | 601.341727       | V    | <b>1423.808982</b> | <b>712.408129</b>  | <b>1406.782433</b> | 703.894854         | 1405.798417        | 703.402846       | 12 |
| 10 | <b>1333.729669</b> | 667.368473        | 1316.703120       | 658.855198        | 1315.719104    | 658.363190       | N    | <b>1324.740568</b> | 662.873922         | 1307.714019        | 654.360647         | <b>1306.730003</b> | 653.868639       | 11 |
| 11 | <b>1446.813733</b> | 723.910505        | 1429.78184        | 715.397230        | 1428.803168    | 714.905222       | L    | 1210.697641        | 605.852458         | 1193.671092        | 597.339184         | 1192.687076        | 596.847176       | 10 |
| 12 | 1543.866497        | 772.436887        | 1526.839948       | 763.923612        | 1525.855932    | 763.431604       | P    | <b>1097.613577</b> | 549.310426         | 1080.587028        | 540.797152         | <b>1079.603012</b> | 540.305144       | 9  |
| 13 | 1656.950561        | 828.978918        | 1639.924012       | <b>820.465644</b> | 1638.939996    | 819.973636       | I    | <b>1000.560813</b> | 500.784044         | <b>983.534264</b>  | 492.270770         | 982.550248         | 491.778762       | 8  |
| 14 | 1756.018975        | 878.513126        | 1738.992426       | 869.999851        | 1738.008410    | 869.507843       | V    | <b>887.476749</b>  | 444.242012         | 870.450200         | 435.728738         | 869.466184         | 435.236730       | 7  |
| 15 | 1885.061568        | 943.034422        | 1868.035019       | 934.521147        | 1867.051003    | 934.029139       | E    | <b>788.408335</b>  | 394.707805         | 771.381786         | 386.194531         | 770.397770         | 385.702523       | 6  |
| 16 | 2041.162679        | 1021.084977       | 2024.136130       | 1012.571703       | 2023.152114    | 1012.079695      | R    | <b>659.365742</b>  | 330.186509         | 642.339193         | 321.673234         |                    |                  | 5  |
| 17 | 2138.215443        | 1069.611359       | 2121.188894       | 1061.098085       | 2120.204878    | 1060.606077      | P    | <b>503.264631</b>  | 252.135953         | 486.238082         | 243.622679         |                    |                  | 4  |
| 18 | 2237.283857        | 1119.145566       | 2220.257308       | 1110.632292       | 2219.273292    | 1110.140284      | V    | 406.211867         | 203.609571         | 389.185318         | 195.096297         |                    |                  | 3  |
| 19 | 2397.314506        | 1199.160891       | 2380.287957       | 1190.647616       | 2379.303941    | 1190.155608      | C    | <b>307.143453</b>  | 154.075364         | 290.116904         | 145.562090         |                    |                  | 2  |
| 20 |                    |                   |                   |                   |                |                  | K    | 147.112804         | 74.060040          | <b>130.086255</b>  | 65.546765          |                    |                  | 1  |

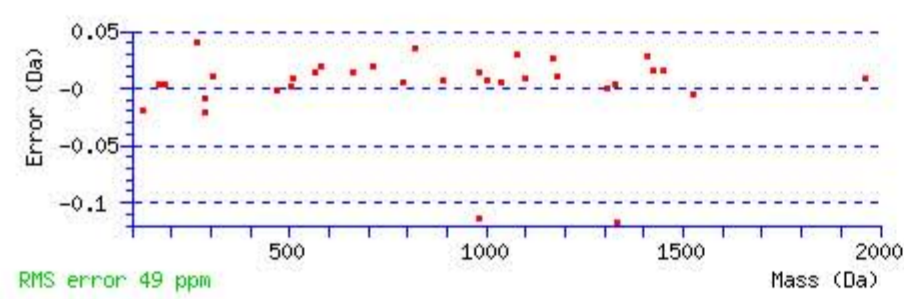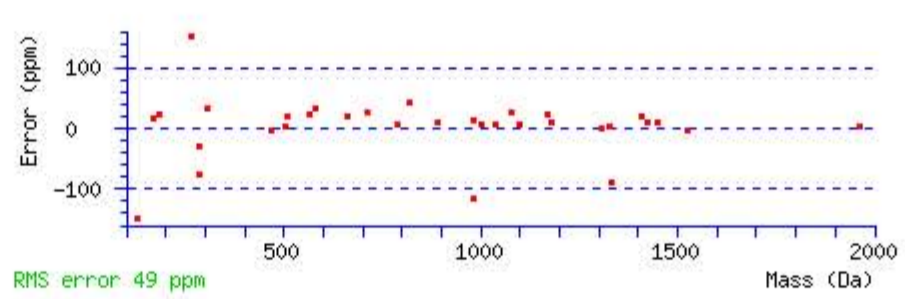

NCBI BLAST search of **GQPSVLQVVNLPIVERPVCK**  
 (Parameters: blastp, nr protein database, expect=20000, no filter, PAM30)  
 Other BLAST [web gateways](#)

**All matches to this query**

| Score | Mr(calc):   | Delta    | Sequence                             |
|-------|-------------|----------|--------------------------------------|
| 41.9  | 2542.412766 | 0.014796 | <a href="#">GQPSVLQVVNLPIVERPVCK</a> |
| 20.7  | 2542.412766 | 0.014796 | <a href="#">GQPSVLQVVNLPIVERPVCK</a> |



# MASCOT Search Results

## Peptide View

MS/MS Fragmentation of **RQEC SIPVCGQDQVT VAMTPR**

Found in **THRB\_HUMAN**, Prothrombin OS=Homo sapiens GN=F2 PE=1 SV=2

Match to Query 71078: 2742.311176 from(686.585070,4+) rtinseconds(1955) index(62818)

Title: Locus:1.1.1.2678.14 File:"2013-07-02 CLN FXIII 30 min 1st F 4.wiff"

Data file C:\Program Files (x86)\Matrix Science\Mascot Daemon\mgf1 FXIII 30 min 1st\mascot\_daemon\_merge.mgf

Click mouse within plot area to zoom in by factor of two about that point

Or, Plot from  to  Da

Label all possible matches  Label matches used for scoring

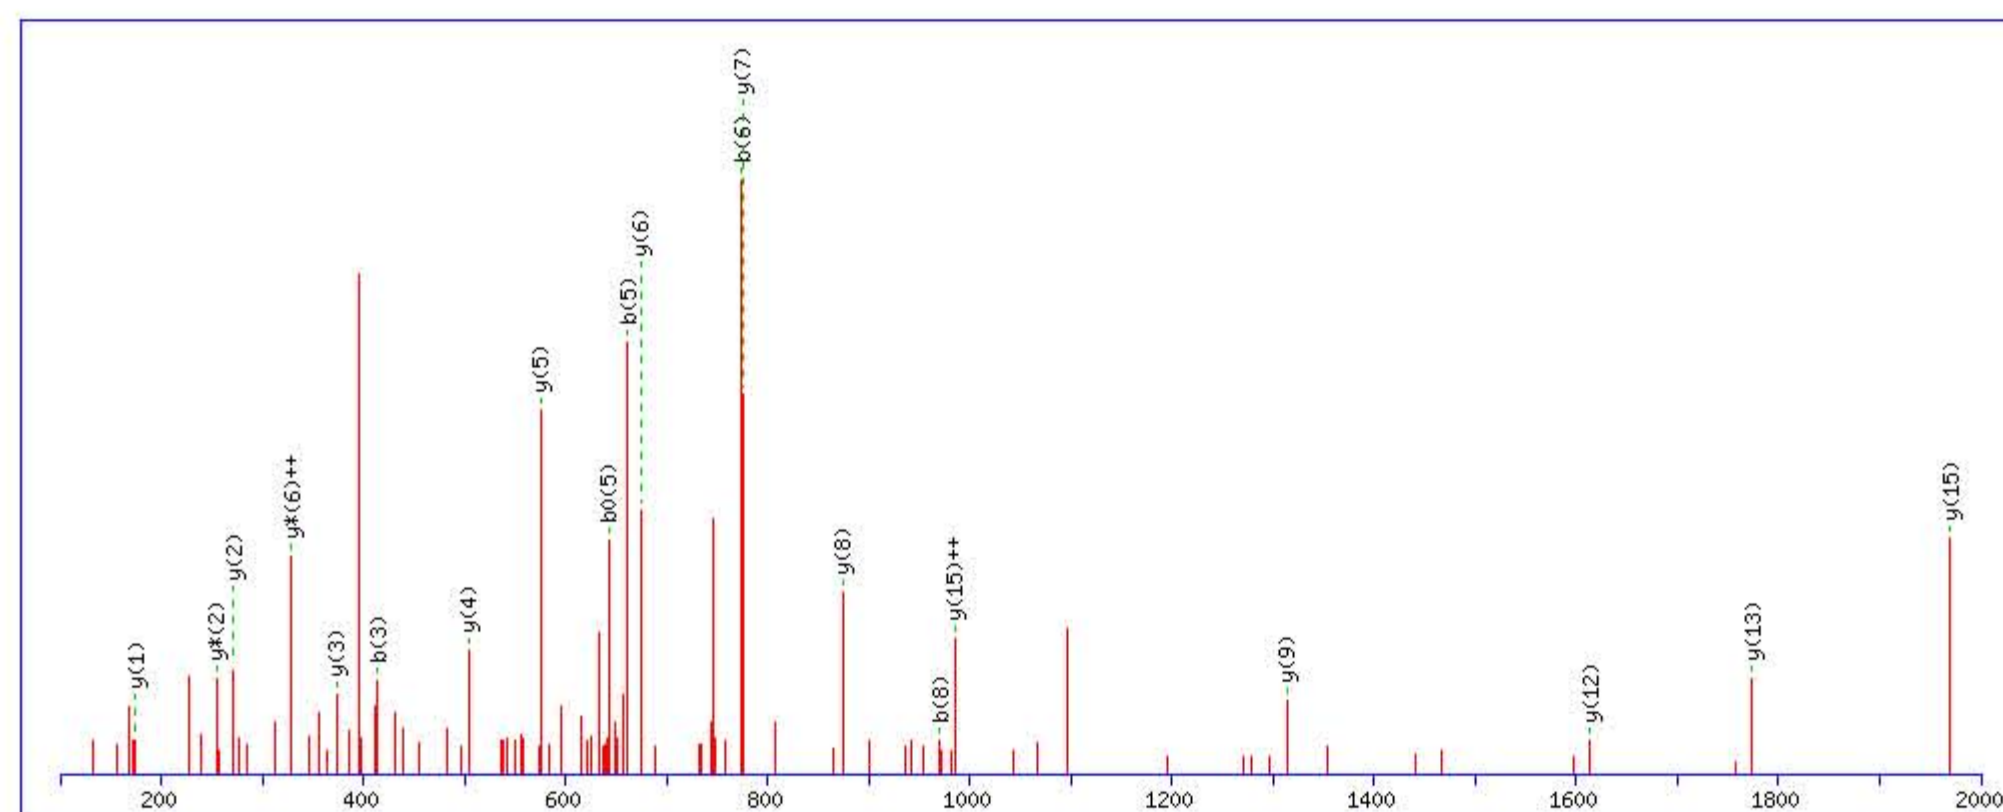

Monoisotopic mass of neutral peptide  $M_r(\text{calc})$ : 2742.307404

Fixed modifications: Carbamidomethyl (C) (apply to specified residues or termini only)

Variable modifications:

Q13 : Biotin:Thermo-21345 (Q)

Ions Score: 62 Expect: 1.4e-005

Matches : 20/232 fragment ions using 42 most intense peaks [\(help\)](#)

| #  | b                 | b <sup>++</sup> | b <sup>*</sup> | b <sup>*++</sup> | b <sup>0</sup>    | b <sup>0++</sup> | Seq. | y                  | y <sup>++</sup>   | y <sup>*</sup>    | y <sup>*++</sup>  | y <sup>0</sup> | y <sup>0++</sup> | #  |
|----|-------------------|-----------------|----------------|------------------|-------------------|------------------|------|--------------------|-------------------|-------------------|-------------------|----------------|------------------|----|
| 1  | 157.108387        | 79.057831       | 140.081838     | 70.544557        |                   |                  | R    |                    |                   |                   |                   |                |                  | 21 |
| 2  | 285.166965        | 143.087121      | 268.140416     | 134.573846       |                   |                  | Q    | 2587.213551        | 1294.110413       | 2570.187002       | 1285.597139       | 2569.202986    | 1285.105131      | 20 |
| 3  | <b>414.209558</b> | 207.608417      | 397.183009     | 199.095143       | 396.198993        | 198.603135       | E    | 2459.154973        | 1230.081124       | 2442.128424       | 1221.567850       | 2441.144408    | 1221.075842      | 19 |
| 4  | 574.240207        | 287.623742      | 557.213658     | 279.110467       | 556.229642        | 278.618459       | C    | 2330.112380        | 1165.559828       | 2313.085831       | 1157.046553       | 2312.101815    | 1156.554545      | 18 |
| 5  | <b>661.272235</b> | 331.139756      | 644.245686     | 322.626481       | <b>643.261670</b> | 322.134473       | S    | 2170.081731        | 1085.544503       | 2153.055182       | 1077.031229       | 2152.071166    | 1076.539221      | 17 |
| 6  | <b>774.356299</b> | 387.681788      | 757.329750     | 379.168513       | 756.345734        | 378.676505       | I    | 2083.049703        | 1042.028489       | 2066.023154       | 1033.515215       | 2065.039138    | 1033.023207      | 16 |
| 7  | 871.409063        | 436.208170      | 854.382514     | 427.694895       | 853.398498        | 427.202887       | P    | <b>1969.965639</b> | <b>985.486458</b> | 1952.939090       | 976.973183        | 1951.955074    | 976.481175       | 15 |
| 8  | <b>970.477477</b> | 485.742377      | 953.450928     | 477.229102       | 952.466912        | 476.737094       | V    | 1872.912875        | 936.960076        | 1855.886326       | 928.446801        | 1854.902310    | 927.954793       | 14 |
| 9  | 1130.508126       | 565.757701      | 1113.481577    | 557.244427       | 1112.497561       | 556.752418       | C    | <b>1773.844461</b> | 887.425868        | 1756.817912       | 878.912594        | 1755.833896    | 878.420586       | 13 |
| 10 | 1187.529590       | 594.268433      | 1170.503041    | 585.755158       | 1169.519025       | 585.263150       | G    | <b>1613.813812</b> | 807.410544        | 1596.787263       | 798.897270        | 1595.803247    | 798.405262       | 12 |
| 11 | 1315.588168       | 658.297722      | 1298.561619    | 649.784448       | 1297.577603       | 649.292440       | Q    | 1556.792348        | 778.899812        | 1539.765799       | 770.386538        | 1538.781783    | 769.894530       | 11 |
| 12 | 1430.615111       | 715.811194      | 1413.588562    | 707.297919       | 1412.604546       | 706.805911       | D    | 1428.733770        | 714.870523        | 1411.707221       | 706.357249        | 1410.723205    | 705.865241       | 10 |
| 13 | 1869.840437       | 935.423857      | 1852.813888    | 926.910582       | 1851.829872       | 926.418574       | Q    | <b>1313.706827</b> | 657.357052        | 1296.680278       | 648.843777        | 1295.696262    | 648.351769       | 9  |
| 14 | 1968.908851       | 984.958064      | 1951.882302    | 976.444789       | 1950.898286       | 975.952781       | V    | <b>874.481501</b>  | 437.744389        | 857.454952        | 429.231114        | 856.470936     | 428.739106       | 8  |
| 15 | 2069.956530       | 1035.481903     | 2052.929981    | 1026.968628      | 2051.945965       | 1026.476620      | T    | <b>775.413087</b>  | 388.210181        | 758.386538        | 379.696907        | 757.402522     | 379.204899       | 7  |
| 16 | 2169.024944       | 1085.016110     | 2151.998395    | 1076.502835      | 2151.014379       | 1076.010827      | V    | <b>674.365408</b>  | 337.686342        | 657.338859        | <b>329.173067</b> | 656.354843     | 328.681059       | 6  |
| 17 | 2240.062058       | 1120.534667     | 2223.035509    | 1112.021392      | 2222.051493       | 1111.529384      | A    | <b>575.296994</b>  | 288.152135        | 558.270445        | 279.638861        | 557.286429     | 279.146853       | 5  |
| 18 | 2371.102543       | 1186.054909     | 2354.075994    | 1177.541635      | 2353.091978       | 1177.049627      | M    | <b>504.259880</b>  | 252.633578        | 487.233331        | 244.120303        | 486.249315     | 243.628295       | 4  |
| 19 | 2472.150222       | 1236.578749     | 2455.123673    | 1228.065474      | 2454.139657       | 1227.573466      | T    | <b>373.219395</b>  | 187.113335        | 356.192846        | 178.600061        | 355.208830     | 178.108053       | 3  |
| 20 | 2569.202986       | 1285.105131     | 2552.176437    | 1276.591856      | 2551.192421       | 1276.099848      | P    | <b>272.171716</b>  | 136.589496        | <b>255.145167</b> | 128.076221        |                |                  | 2  |
| 21 |                   |                 |                |                  |                   |                  | R    | <b>175.118952</b>  | 88.063114         | 158.092403        | 79.549839         |                |                  | 1  |

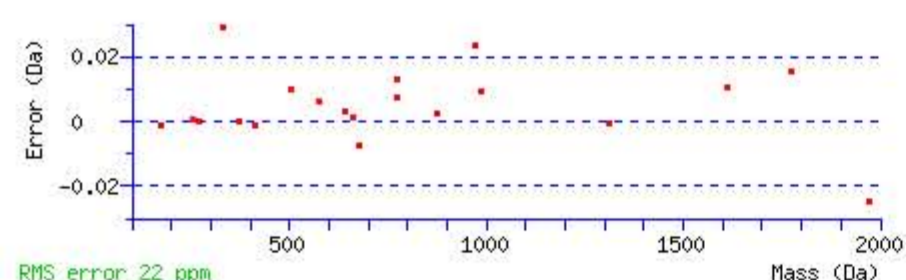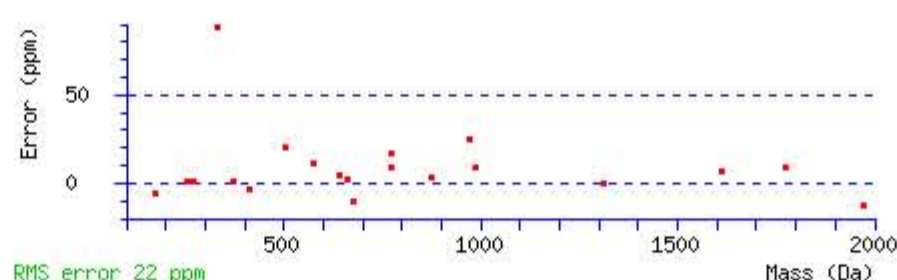

NCBI BLAST search of [RQEC SIPVCGQDQVT VAMTPR](#)

(Parameters: blastp, nr protein database, expect=20000, no filter, PAM30)

Other BLAST [web gateways](#)

All matches to this query

| Score | $M_r(\text{calc})$ : | Delta    | Sequence                                |
|-------|----------------------|----------|-----------------------------------------|
| 62.3  | 2742.307404          | 0.003772 | <a href="#">RQEC SIPVCGQDQVT VAMTPR</a> |
| 53.7  | 2742.307404          | 0.003772 | <a href="#">RQEC SIPVCGQDQVT VAMTPR</a> |
| 19.3  | 2742.307404          | 0.003772 | <a href="#">RQEC SIPVCGQDQVT VAMTPR</a> |



# MASCOT Search Results

## Peptide View

MS/MS Fragmentation of **RQECSIPVCGQDQVTAMTPR**

Found in **THRB\_HUMAN**, Prothrombin OS=Homo sapiens GN=F2 PE=1 SV=2

Match to Query 71079: 2742.319002 from(915.113610,3+) rtinseconds(1953) index(62801)

Title: Locus:1.1.1.2677.22 File:"2013-07-02 CLN FXIII 30 min 1st F 4.wiff"

Data file C:\Program Files (x86)\Matrix Science\Mascot Daemon\mgf1 FXIII 30 min 1st\mascot\_daemon\_merge.mgf

Click mouse within plot area to zoom in by factor of two about that point

Or, Plot from  to  Da

Label all possible matches  Label matches used for scoring

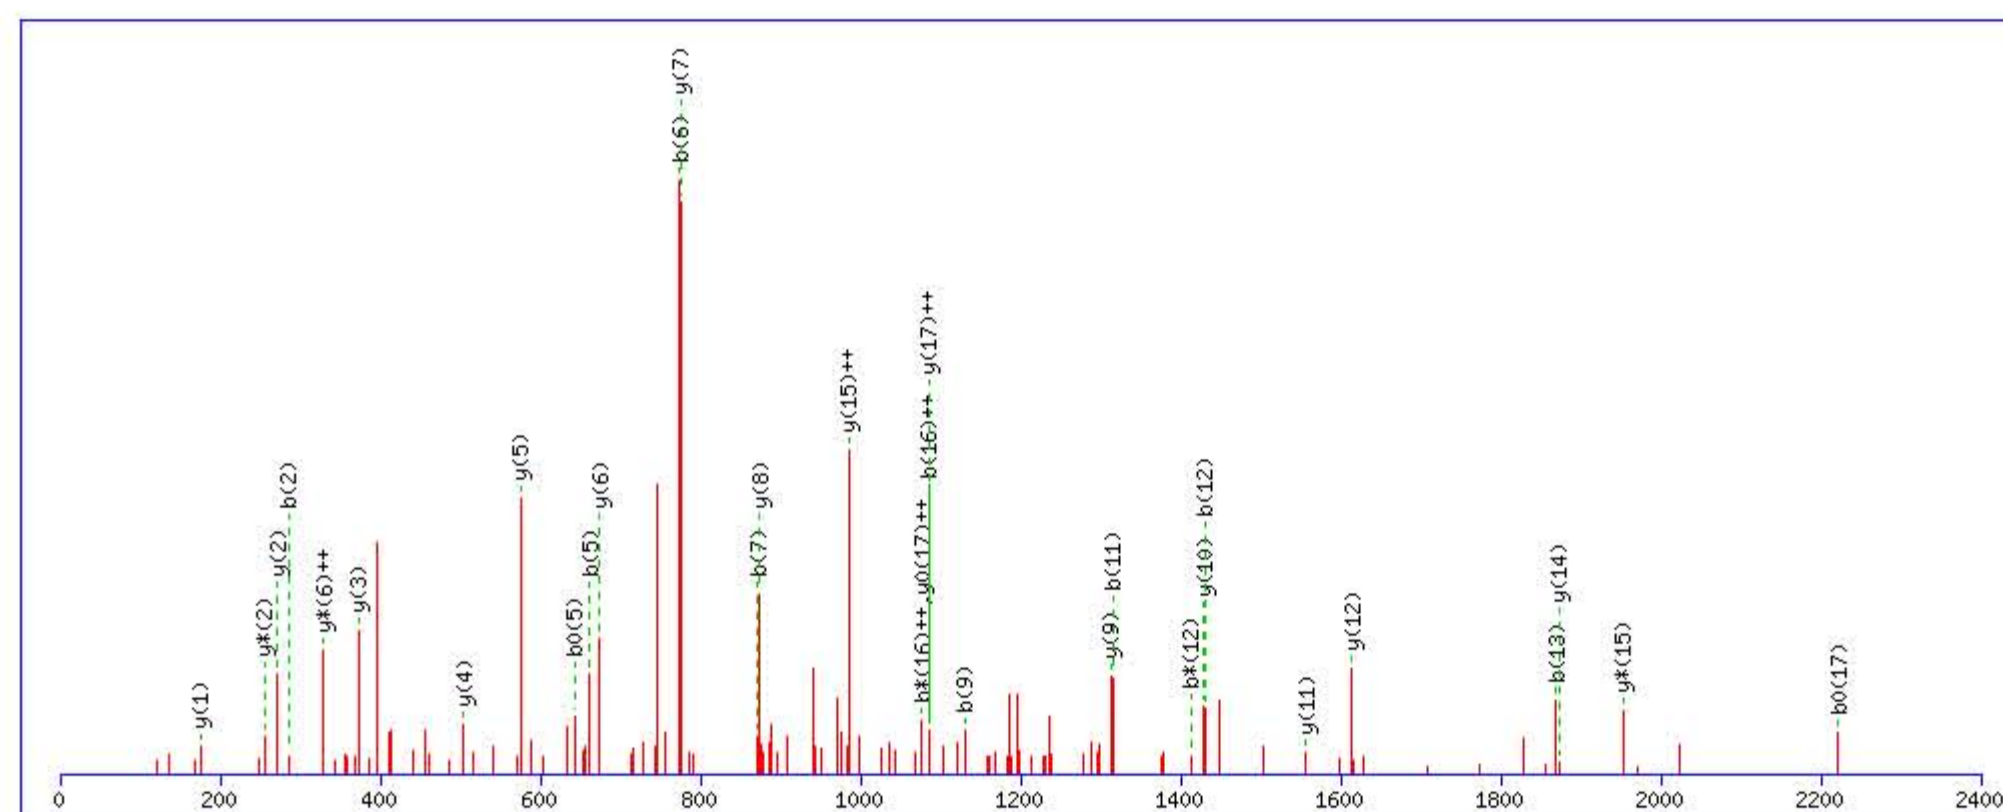

Monoisotopic mass of neutral peptide Mr(calc): 2742.307404

Fixed modifications: Carbamidomethyl (C) (apply to specified residues or termini only)

Variable modifications:

Q13 : Biotin:Thermo-21345 (Q)

Ions Score: 72 Expect: 1.6e-006

Matches : 32/232 fragment ions using 55 most intense peaks [\(help\)](#)

| #  | b                  | b <sup>++</sup>    | b <sup>*</sup>     | b <sup>*++</sup>   | b <sup>0</sup>     | b <sup>0++</sup> | Seq. | y                  | y <sup>++</sup>    | y <sup>*</sup>     | y <sup>*++</sup>  | y <sup>0</sup> | y <sup>0++</sup>   | #  |
|----|--------------------|--------------------|--------------------|--------------------|--------------------|------------------|------|--------------------|--------------------|--------------------|-------------------|----------------|--------------------|----|
| 1  | 157.108387         | 79.057831          | 140.081838         | 70.544557          |                    |                  | R    |                    |                    |                    |                   |                |                    | 21 |
| 2  | <b>285.166965</b>  | 143.087121         | 268.140416         | 134.573846         |                    |                  | Q    | 2587.213551        | 1294.110413        | 2570.187002        | 1285.597139       | 2569.202986    | 1285.105131        | 20 |
| 3  | 414.209558         | 207.608417         | 397.183009         | 199.095143         | 396.198993         | 198.603135       | E    | 2459.154973        | 1230.081124        | 2442.128424        | 1221.567850       | 2441.144408    | 1221.075842        | 19 |
| 4  | 574.240207         | 287.623742         | 557.213658         | 279.110467         | 556.229642         | 278.618459       | C    | 2330.112380        | 1165.559828        | 2313.085831        | 1157.046553       | 2312.101815    | 1156.554545        | 18 |
| 5  | <b>661.272235</b>  | 331.139756         | 644.245686         | 322.626481         | <b>643.261670</b>  | 322.134473       | S    | 2170.081731        | <b>1085.544503</b> | 2153.055182        | 1077.031229       | 2152.071166    | <b>1076.539221</b> | 17 |
| 6  | <b>774.356299</b>  | 387.681788         | 757.329750         | 379.168513         | 756.345734         | 378.676505       | I    | 2083.049703        | 1042.028489        | 2066.023154        | 1033.515215       | 2065.039138    | 1033.023207        | 16 |
| 7  | <b>871.409063</b>  | 436.208170         | 854.382514         | 427.694895         | 853.398498         | 427.202887       | P    | 1969.965639        | <b>985.486458</b>  | <b>1952.939090</b> | 976.973183        | 1951.955074    | 976.481175         | 15 |
| 8  | 970.477477         | 485.742377         | 953.450928         | 477.229102         | 952.466912         | 476.737094       | V    | <b>1872.912875</b> | 936.960076         | 1855.886326        | 928.446801        | 1854.902310    | 927.954793         | 14 |
| 9  | <b>1130.508126</b> | 565.757701         | 1113.481577        | 557.244427         | 1112.497561        | 556.752418       | C    | 1773.844461        | 887.425868         | 1756.817912        | 878.912594        | 1755.833896    | 878.420586         | 13 |
| 10 | 1187.529590        | 594.268433         | 1170.503041        | 585.755158         | 1169.519025        | 585.263150       | G    | <b>1613.813812</b> | 807.410544         | 1596.787263        | 798.897270        | 1595.803247    | 798.405262         | 12 |
| 11 | <b>1315.588168</b> | 658.297722         | 1298.561619        | 649.784448         | 1297.577603        | 649.292440       | Q    | <b>1556.792348</b> | 778.899812         | 1539.765799        | 770.386538        | 1538.781783    | 769.894530         | 11 |
| 12 | <b>1430.615111</b> | 715.811194         | <b>1413.588562</b> | 707.297919         | 1412.604546        | 706.805911       | D    | <b>1428.733770</b> | 714.870523         | 1411.707221        | 706.357249        | 1410.723205    | 705.865241         | 10 |
| 13 | <b>1869.840437</b> | 935.423857         | 1852.813888        | 926.910582         | 1851.829872        | 926.418574       | Q    | <b>1313.706827</b> | 657.357052         | 1296.680278        | 648.843777        | 1295.696262    | 648.351769         | 9  |
| 14 | 1968.908851        | 984.958064         | 1951.882302        | 976.444789         | 1950.898286        | 975.952781       | V    | <b>874.481501</b>  | 437.744389         | 857.454952         | 429.231114        | 856.470936     | 428.739106         | 8  |
| 15 | 2069.956530        | 1035.481903        | 2052.929981        | 1026.968628        | 2051.945965        | 1026.476620      | T    | <b>775.413087</b>  | 388.210181         | 758.386538         | 379.696907        | 757.402522     | 379.204899         | 7  |
| 16 | 2169.024944        | <b>1085.016110</b> | 2151.998395        | <b>1076.502835</b> | 2151.014379        | 1076.010827      | V    | <b>674.365408</b>  | 337.686342         | 657.338859         | <b>329.173067</b> | 656.354843     | 328.681059         | 6  |
| 17 | 2240.062058        | 1120.534667        | 2223.035509        | 1112.021392        | <b>2222.051493</b> | 1111.529384      | A    | <b>575.296994</b>  | 288.152135         | 558.270445         | 279.638861        | 557.286429     | 279.146853         | 5  |
| 18 | 2371.102543        | 1186.054909        | 2354.075994        | 1177.541635        | 2353.091978        | 1177.049627      | M    | <b>504.259880</b>  | 252.633578         | 487.233331         | 244.120303        | 486.249315     | 243.628295         | 4  |
| 19 | 2472.150222        | 1236.578749        | 2455.123673        | 1228.065474        | 2454.139657        | 1227.573466      | T    | <b>373.219395</b>  | 187.113335         | 356.192846         | 178.600061        | 355.208830     | 178.108053         | 3  |
| 20 | 2569.202986        | 1285.105131        | 2552.176437        | 1276.591856        | 2551.192421        | 1276.099848      | P    | <b>272.171716</b>  | 136.589496         | <b>255.145167</b>  | 128.076221        |                |                    | 2  |
| 21 |                    |                    |                    |                    |                    |                  | R    | <b>175.118952</b>  | 88.063114          | 158.092403         | 79.549839         |                |                    | 1  |

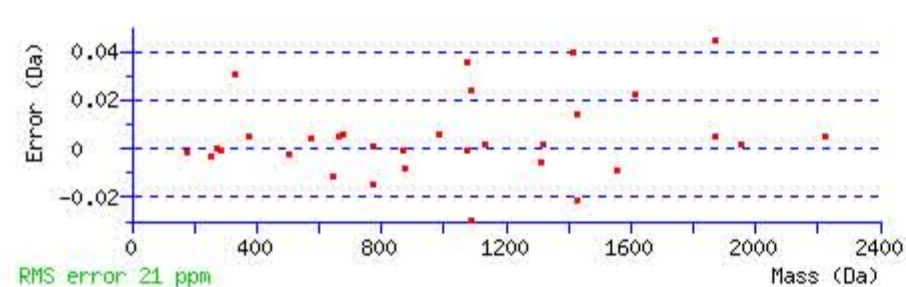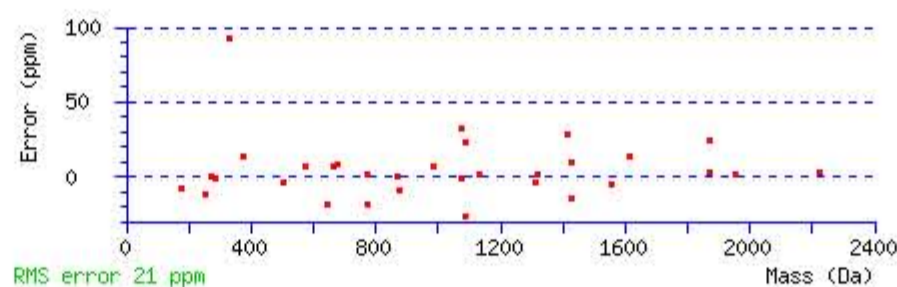

NCBI BLAST search of **RQECSIPVCGQDQVTAMTPR**

(Parameters: blastp, nr protein database, expect=20000, no filter, PAM30)

Other BLAST [web gateways](#)

All matches to this query

| Score | Mr(calc):   | Delta    | Sequence                             |
|-------|-------------|----------|--------------------------------------|
| 72.0  | 2742.307404 | 0.011598 | <a href="#">RQECSIPVCGQDQVTAMTPR</a> |
| 48.3  | 2742.307404 | 0.011598 | <a href="#">RQECSIPVCGQDQVTAMTPR</a> |
| 23.3  | 2742.307404 | 0.011598 | <a href="#">RQECSIPVCGQDQVTAMTPR</a> |



# MASCOT SCIENCE Mascot Search Results

## Peptide View

MS/MS Fragmentation of **DMPASEDLQDLQK**

Found in **SEPP1\_HUMAN**, Selenoprotein P OS=Homo sapiens GN=SEPP1 PE=1 SV=3

Match to Query 52119: 1799.851288 from(900.932920,2+) rtinseconds(2169) index(64230)

Title: Locus:1.1.1.2752.21 File:"2013-07-02 CLN FXIII 30 min 1st F 4.wiff"

Data file C:\Program Files (x86)\Matrix Science\Mascot Daemon\mgf1 FXIII 30 min 1st\mascot\_daemon\_merge.mgf

Click mouse within plot area to zoom in by factor of two about that point

Or, Plot from  to  Da

Label all possible matches  Label matches used for scoring

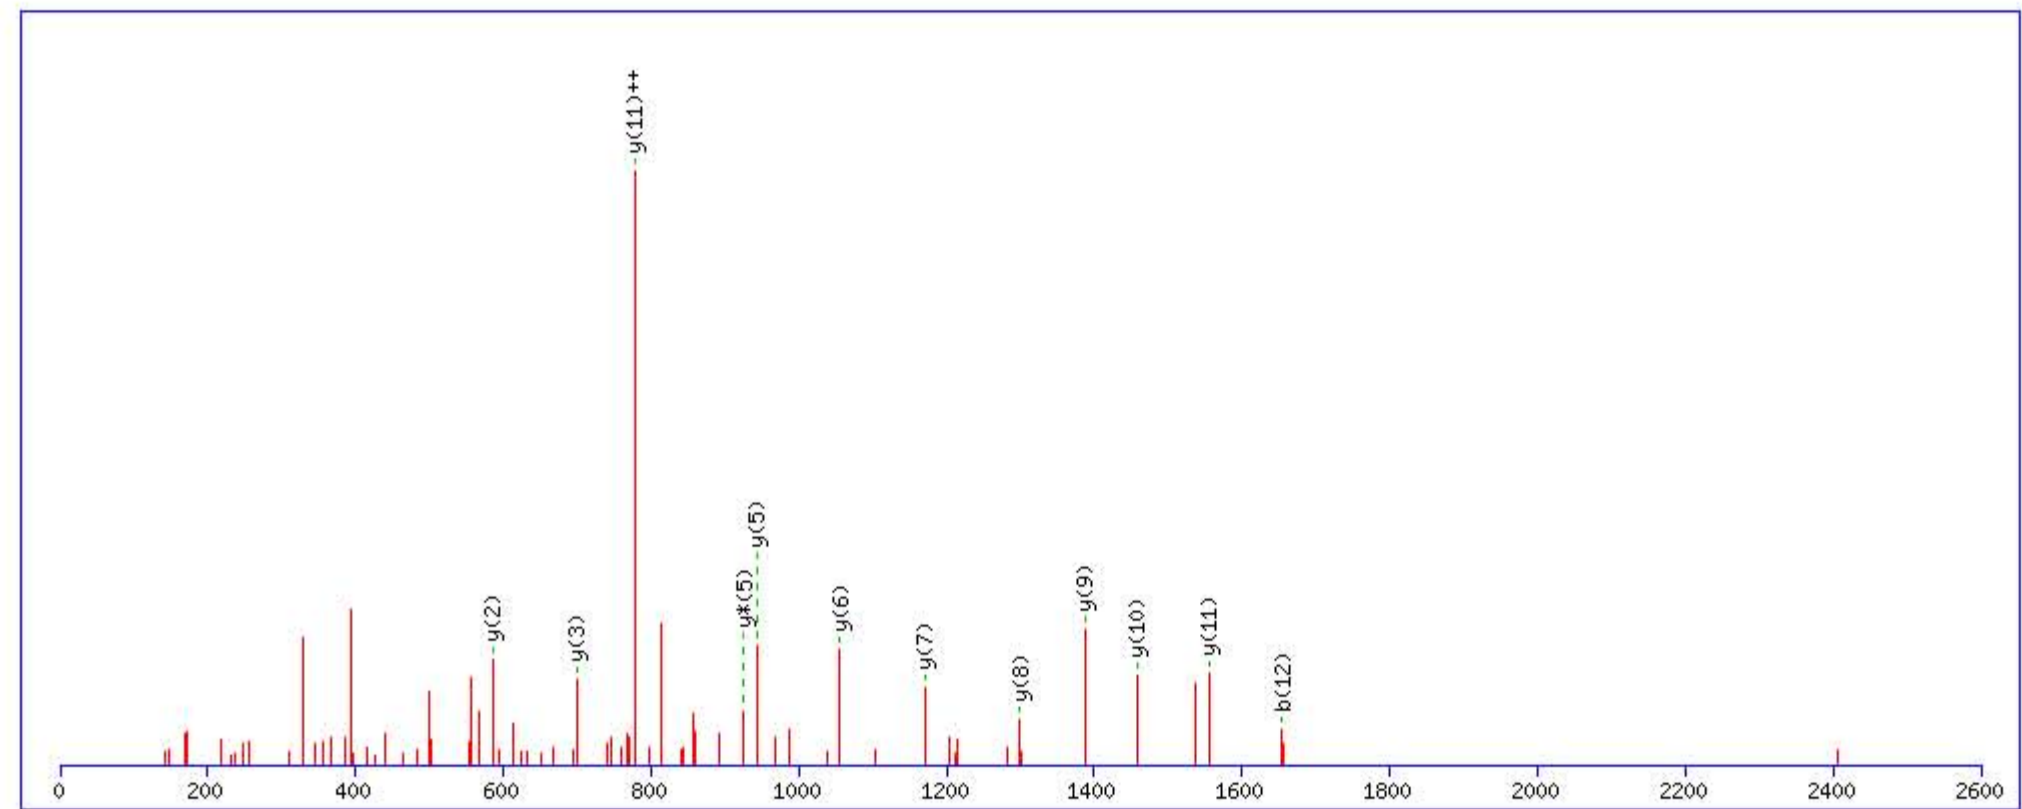

Monoisotopic mass of neutral peptide Mr(calc): 1799.843353

Fixed modifications: Carbamidomethyl (C) (apply to specified residues or termini only)

Variable modifications:

Q12 : Biotin:Thermo-21345 (Q)

Ions Score: 66 Expect: 1e-006

Matches : 12/122 fragment ions using 16 most intense peaks [\(help\)](#)

| #  | b                  | b <sup>++</sup> | b <sup>+</sup> | b <sup>+++</sup> | b <sup>0</sup> | b <sup>0++</sup> | Seq. | y                  | y <sup>++</sup>   | y <sup>+</sup>    | y <sup>+++</sup> | y <sup>0</sup> | y <sup>0++</sup> | #  |
|----|--------------------|-----------------|----------------|------------------|----------------|------------------|------|--------------------|-------------------|-------------------|------------------|----------------|------------------|----|
| 1  | 116.034219         | 58.520748       |                |                  | 98.023654      | 49.515465        | D    |                    |                   |                   |                  |                |                  | 13 |
| 2  | 247.074704         | 124.040990      |                |                  | 229.064139     | 115.035708       | M    | 1685.823706        | 843.415491        | 1668.797157       | 834.902217       | 1667.813141    | 834.410209       | 12 |
| 3  | 344.127468         | 172.567372      |                |                  | 326.116903     | 163.562089       | P    | <b>1554.783221</b> | <b>777.895249</b> | 1537.756672       | 769.381974       | 1536.772656    | 768.889966       | 11 |
| 4  | 415.164582         | 208.085929      |                |                  | 397.154017     | 199.080646       | A    | <b>1457.730457</b> | 729.368867        | 1440.703908       | 720.855592       | 1439.719892    | 720.363584       | 10 |
| 5  | 502.196610         | 251.601943      |                |                  | 484.186045     | 242.596660       | S    | <b>1386.693343</b> | 693.850310        | 1369.666794       | 685.337035       | 1368.682778    | 684.845027       | 9  |
| 6  | 631.239203         | 316.123240      |                |                  | 613.228638     | 307.117957       | E    | <b>1299.661315</b> | 650.334296        | 1282.634766       | 641.821021       | 1281.650750    | 641.329013       | 8  |
| 7  | 746.266146         | 373.636711      |                |                  | 728.255581     | 364.631428       | D    | <b>1170.618722</b> | 585.812999        | 1153.592173       | 577.299725       | 1152.608157    | 576.807717       | 7  |
| 8  | 859.350210         | 430.178743      |                |                  | 841.339645     | 421.173460       | L    | <b>1055.591779</b> | 528.299528        | 1038.565230       | 519.786253       | 1037.581214    | 519.294245       | 6  |
| 9  | 987.408788         | 494.208032      | 970.382239     | 485.694757       | 969.398223     | 485.202749       | Q    | <b>942.507715</b>  | 471.757496        | <b>925.481166</b> | 463.244221       | 924.497150     | 462.752213       | 5  |
| 10 | 1102.435731        | 551.721504      | 1085.409182    | 543.208229       | 1084.425166    | 542.716221       | D    | 814.449137         | 407.728207        | 797.422588        | 399.214932       | 796.438572     | 398.722924       | 4  |
| 11 | 1215.519795        | 608.263535      | 1198.493246    | 599.750261       | 1197.509230    | 599.258253       | L    | <b>699.422194</b>  | 350.214735        | 682.395645        | 341.701461       |                |                  | 3  |
| 12 | <b>1654.745121</b> | 827.876199      | 1637.718572    | 819.362924       | 1636.734556    | 818.870916       | Q    | <b>586.338130</b>  | 293.672703        | 569.311581        | 285.159429       |                |                  | 2  |
| 13 |                    |                 |                |                  |                |                  | K    | 147.112804         | 74.060040         | 130.086255        | 65.546765        |                |                  | 1  |

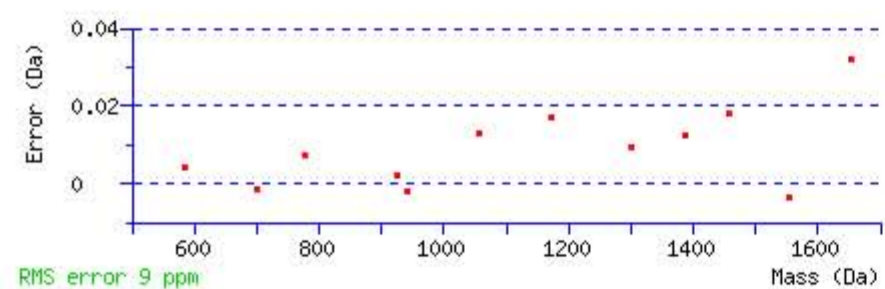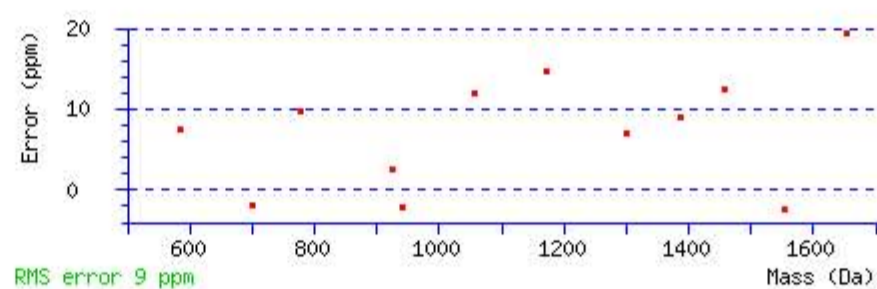

NCBI BLAST search of **DMPASEDLQDLQK**

(Parameters: blastp, nr protein database, expect=20000, no filter, PAM30)

Other BLAST [web gateways](#)

All matches to this query

| Score | Mr(calc):   | Delta     | Sequence                      |
|-------|-------------|-----------|-------------------------------|
| 65.8  | 1799.843353 | 0.007935  | <a href="#">DMPASEDLQDLQK</a> |
| 38.9  | 1799.843353 | 0.007935  | <a href="#">DMPASEDLQDLQK</a> |
| 1.9   | 1799.873230 | -0.021942 | <a href="#">QLDSKGDGCQK</a>   |

Mascot: <http://www.matrixscience.com/>



# MASCOT Search Results

## Peptide View

MS/MS Fragmentation of **HQTVPQNTGGK**

Found in **TRFE\_HUMAN**, Serotransferrin OS=Homo sapiens GN=TF PE=1 SV=3

Match to Query 41955: 1476.744132 from(493.255320,3+) rtinseconds(1203) index(74677)

Title: Locus:1.1.1.2298.17 File:"2013-07-02 CLN FXIII 30 min 1st FT.wiff"

Data file C:\Program Files (x86)\Matrix Science\Mascot Daemon\mgf1 FXIII 30 min 1st\mascot\_daemon\_merge.mgf

Click mouse within plot area to zoom in by factor of two about that point

Or, Plot from  to  Da

Label all possible matches  Label matches used for scoring

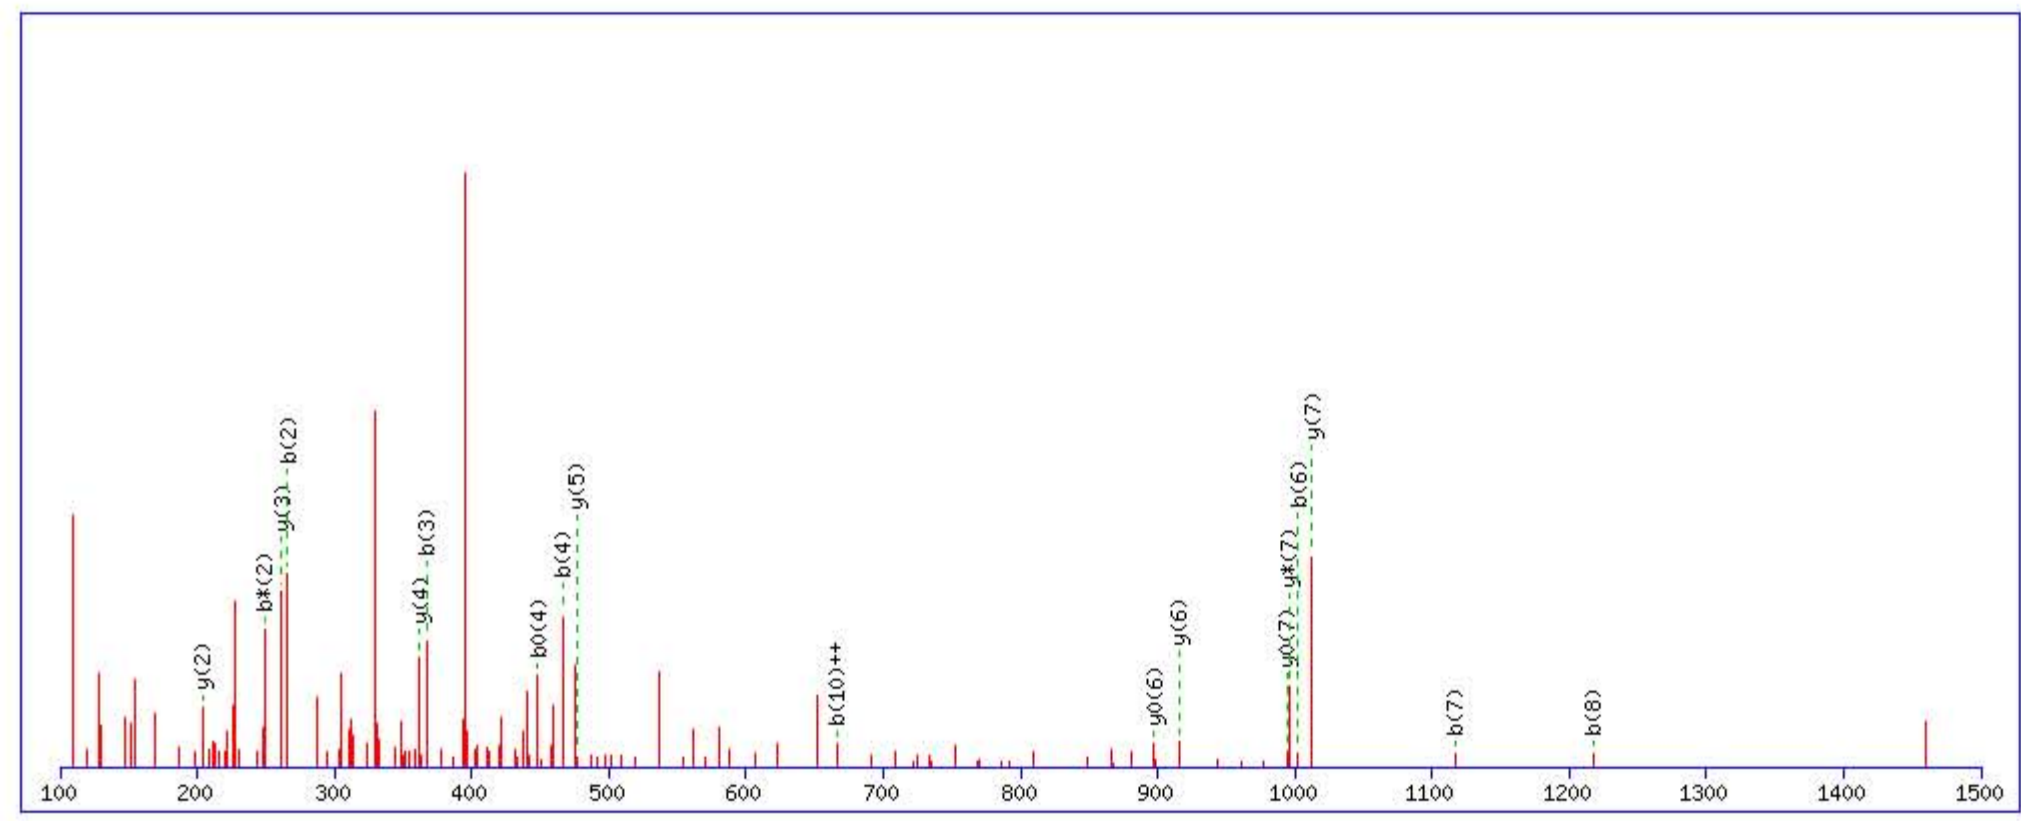

Monoisotopic mass of neutral peptide Mr(calc): 1476.750748

Fixed modifications: Carbamidomethyl (C) (apply to specified residues or termini only)

Variable modifications:

Q6 : Biotin:Thermo-21345 (Q)

Ions Score: 28 Expect: 0.016

Matches : 18/108 fragment ions using 40 most intense peaks [\(help\)](#)

| #  | b                  | b <sup>++</sup>   | b <sup>*</sup>    | b <sup>***</sup> | b <sup>0</sup>    | b <sup>0++</sup> | Seq. | y                  | y <sup>++</sup> | y <sup>*</sup>    | y <sup>***</sup> | y <sup>0</sup>    | y <sup>0++</sup> | #  |
|----|--------------------|-------------------|-------------------|------------------|-------------------|------------------|------|--------------------|-----------------|-------------------|------------------|-------------------|------------------|----|
| 1  | 138.066188         | 69.536732         |                   |                  |                   |                  | H    |                    |                 |                   |                  |                   |                  | 11 |
| 2  | <b>266.124766</b>  | 133.566021        | <b>249.098217</b> | 125.052746       |                   |                  | Q    | 1340.699099        | 670.853187      | 1323.672550       | 662.339913       | 1322.688534       | 661.847905       | 10 |
| 3  | <b>367.172445</b>  | 184.089860        | 350.145896        | 175.576586       | 349.161880        | 175.084578       | T    | 1212.640521        | 606.823899      | 1195.613972       | 598.310624       | 1194.629956       | 597.818616       | 9  |
| 4  | <b>466.240859</b>  | 233.624068        | 449.214310        | 225.110793       | <b>448.230294</b> | 224.618785       | V    | 1111.592842        | 556.300059      | 1094.566293       | 547.786784       | 1093.582277       | 547.294776       | 8  |
| 5  | 563.293623         | 282.150450        | 546.267074        | 273.637175       | 545.283058        | 273.145167       | P    | <b>1012.524428</b> | 506.765852      | <b>995.497879</b> | 498.252577       | <b>994.513863</b> | 497.760569       | 7  |
| 6  | <b>1002.518949</b> | 501.763113        | 985.492400        | 493.249838       | 984.508384        | 492.757830       | Q    | <b>915.471664</b>  | 458.239470      | 898.445115        | 449.726195       | <b>897.461099</b> | 449.234187       | 6  |
| 7  | <b>1116.561876</b> | 558.784576        | 1099.535327       | 550.271302       | 1098.551311       | 549.779293       | N    | <b>476.246338</b>  | 238.626807      | 459.219789        | 230.113532       | 458.235773        | 229.621524       | 5  |
| 8  | <b>1217.609555</b> | 609.308416        | 1200.583006       | 600.795141       | 1199.598990       | 600.303133       | T    | <b>362.203411</b>  | 181.605343      | 345.176862        | 173.092069       | 344.192846        | 172.600061       | 4  |
| 9  | 1274.631019        | 637.819147        | 1257.604470       | 629.305873       | 1256.620454       | 628.813865       | G    | <b>261.155732</b>  | 131.081504      | 244.129183        | 122.568229       |                   |                  | 3  |
| 10 | 1331.652483        | <b>666.329879</b> | 1314.625934       | 657.816605       | 1313.641918       | 657.324597       | G    | <b>204.134268</b>  | 102.570772      | 187.107719        | 94.057497        |                   |                  | 2  |
| 11 |                    |                   |                   |                  |                   |                  | K    | 147.112804         | 74.060040       | 130.086255        | 65.546765        |                   |                  | 1  |

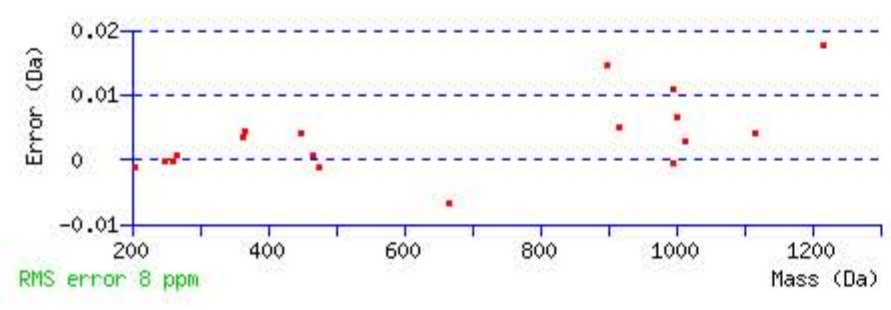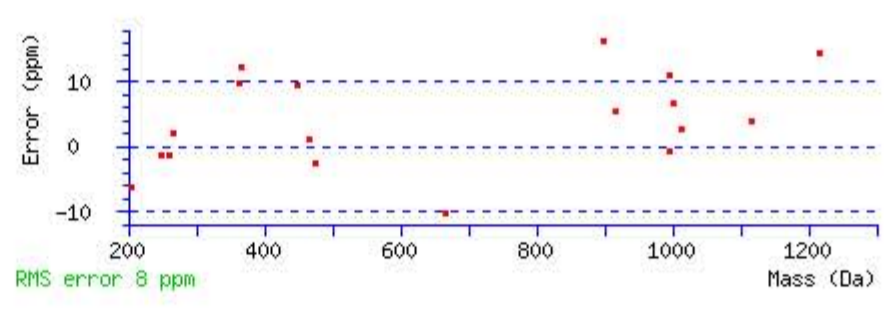

NCBI BLAST search of **HQTVPQNTGGK**

(Parameters: blastp, nr protein database, expect=20000, no filter, PAM30)

Other BLAST [web gateways](#)

### All matches to this query

| Score | Mr(calc):   | Delta     | Sequence                       |
|-------|-------------|-----------|--------------------------------|
| 28.2  | 1476.750748 | -0.006616 | <a href="#">HQTVPQNTGGK</a>    |
| 8.5   | 1476.736115 | 0.008017  | <a href="#">HQEALIGQSFYQK</a>  |
| 1.3   | 1476.750748 | -0.006616 | <a href="#">HQTVPQNTGGK</a>    |
| 1.0   | 1476.743317 | 0.000815  | <a href="#">RNVGANGIGYQSNK</a> |



# MASCOT Search Results

## Peptide View

MS/MS Fragmentation of **DSGFQMNQLR**

Found in **TRFE\_HUMAN**, Serotransferrin OS=Homo sapiens GN=TF PE=1 SV=3

Match to Query 42764: 1505.715308 from(753.864930,2+) rtinseconds(2078) index(80802)

Title: Locus:1.1.1.2603.11 File:"2013-07-02 CLN FXIII 30 min 1st FT.wiff"

Data file C:\Program Files (x86)\Matrix Science\Mascot Daemon\mgf\1 FXIII 30 min 1st\mascot\_daemon\_merge.mgf

Click mouse within plot area to zoom in by factor of two about that point

Or, Plot from  to  Da

Label all possible matches  Label matches used for scoring

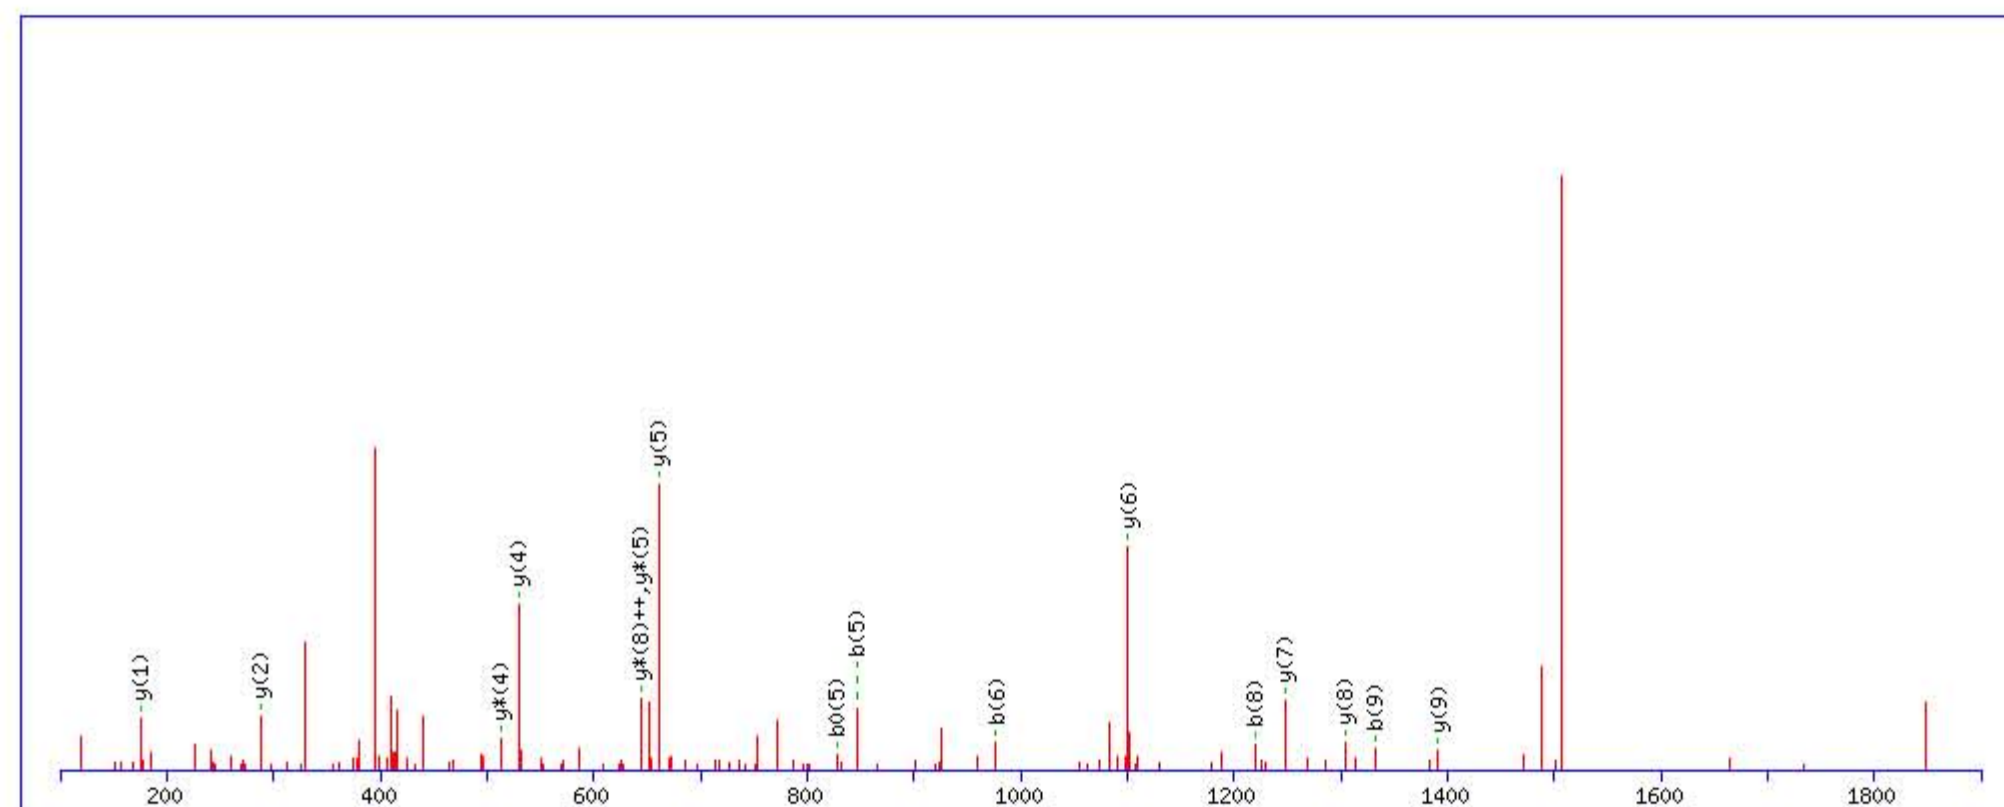

Monoisotopic mass of neutral peptide Mr(calc): 1505.711899

Fixed modifications: Carbamidomethyl (C) (apply to specified residues or termini only)

Variable modifications:

Q5 : Biotin:Thermo-21345 (Q)

Ions Score: 52 Expect: 0.0001

Matches : 16/84 fragment ions using 28 most intense peaks [\(help\)](#)

| #  | b                  | b <sup>++</sup> | b <sup>+</sup> | b <sup>+++</sup> | b <sup>0</sup>    | b <sup>0++</sup> | Seq. | y                  | y <sup>++</sup> | y <sup>+</sup>    | y <sup>+++</sup>  | y <sup>0</sup> | y <sup>0++</sup> | #  |
|----|--------------------|-----------------|----------------|------------------|-------------------|------------------|------|--------------------|-----------------|-------------------|-------------------|----------------|------------------|----|
| 1  | 116.034219         | 58.520748       |                |                  | 98.023654         | 49.515465        | D    |                    |                 |                   |                   |                |                  | 10 |
| 2  | 203.066247         | 102.036761      |                |                  | 185.055682        | 93.031479        | S    | <b>1391.692238</b> | 696.349757      | 1374.665689       | 687.836482        | 1373.681673    | 687.344474       | 9  |
| 3  | 260.087711         | 130.547493      |                |                  | 242.077146        | 121.542211       | G    | <b>1304.660210</b> | 652.833743      | 1287.633661       | <b>644.320469</b> |                |                  | 8  |
| 4  | 407.156125         | 204.081700      |                |                  | 389.145560        | 195.076418       | F    | <b>1247.638746</b> | 624.323011      | 1230.612197       | 615.809736        |                |                  | 7  |
| 5  | <b>846.381451</b>  | 423.694364      | 829.354902     | 415.181089       | <b>828.370886</b> | 414.689081       | Q    | <b>1100.570332</b> | 550.788804      | 1083.543783       | 542.275530        |                |                  | 6  |
| 6  | <b>977.421936</b>  | 489.214606      | 960.395387     | 480.701331       | 959.411371        | 480.209323       | M    | <b>661.345006</b>  | 331.176141      | <b>644.318457</b> | 322.662867        |                |                  | 5  |
| 7  | 1091.464863        | 546.236069      | 1074.438314    | 537.722795       | 1073.454298       | 537.230787       | N    | <b>530.304521</b>  | 265.655899      | <b>513.277972</b> | 257.142624        |                |                  | 4  |
| 8  | <b>1219.523441</b> | 610.265359      | 1202.496892    | 601.752084       | 1201.512876       | 601.260076       | Q    | 416.261594         | 208.634435      | 399.235045        | 200.121160        |                |                  | 3  |
| 9  | <b>1332.607505</b> | 666.807391      | 1315.580956    | 658.294116       | 1314.596940       | 657.802108       | L    | <b>288.203016</b>  | 144.605146      | 271.176467        | 136.091871        |                |                  | 2  |
| 10 |                    |                 |                |                  |                   |                  | R    | <b>175.118952</b>  | 88.063114       | 158.092403        | 79.549839         |                |                  | 1  |

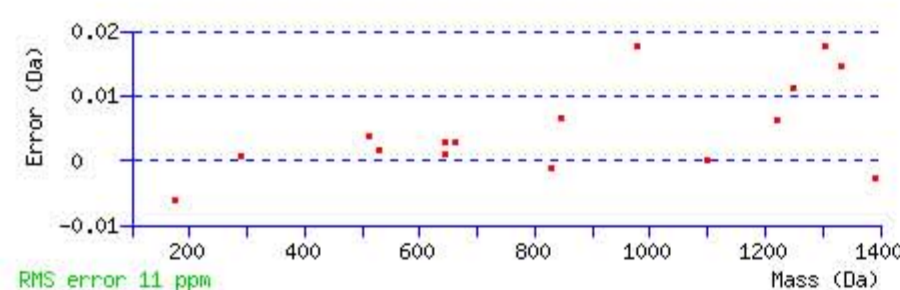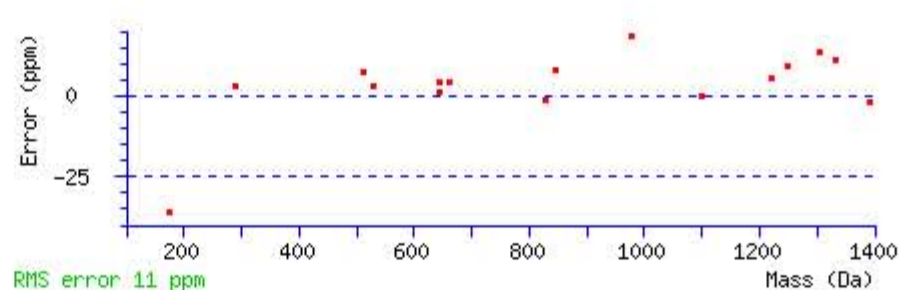

NCBI BLAST search of **DSGFQMNQLR**

(Parameters: blastp, nr protein database, expect=20000, no filter, PAM30)

Other BLAST [web gateways](#)

## All matches to this query

| Score | Mr(calc):   | Delta     | Sequence                          |
|-------|-------------|-----------|-----------------------------------|
| 52.2  | 1505.711899 | 0.003409  | <a href="#">DSGFQMNQLR</a>        |
| 21.3  | 1505.711899 | 0.003409  | <a href="#">DSGFQMNQLR</a>        |
| 15.1  | 1505.703140 | 0.012168  | <a href="#">DETMEEQDIKLR</a>      |
| 6.6   | 1505.730530 | -0.015222 | <a href="#">QIFCQACLR</a>         |
| 5.2   | 1505.704025 | 0.011283  | <a href="#">MQMEIDQLR</a>         |
| 3.9   | 1505.736877 | -0.021569 | <a href="#">AAMAVGGAGGSRVSSGR</a> |
| 3.4   | 1505.718384 | -0.003076 | <a href="#">AESEQEAYLR</a>        |
| 2.8   | 1505.736862 | -0.021554 | <a href="#">EVMSPGTSARGRSR</a>    |
| 0.4   | 1505.715271 | 0.000037  | <a href="#">CELCLGIMGGKPR</a>     |
| 0.1   | 1505.721802 | -0.006494 | <a href="#">GMQVSM DIPDILR</a>    |



# MASCOT Search Results

## Peptide View

MS/MS Fragmentation of **DSGFQMNQLR**

Found in **TRFE\_HUMAN**, Serotransferrin OS=Homo sapiens GN=TF PE=1 SV=3

Match to Query 42767: 1505.718568 from(753.866560,2+) rtinseconds(2142) index(81222)

Title: Locus:1.1.1.2625.17 File:"2013-07-02 CLN FXIII 30 min 1st FT.wiff"

Data file C:\Program Files (x86)\Matrix Science\Mascot Daemon\mgf\1 FXIII 30 min 1st\mascot\_daemon\_merge.mgf

Click mouse within plot area to zoom in by factor of two about that point

Or, Plot from  to  Da

Label all possible matches  Label matches used for scoring

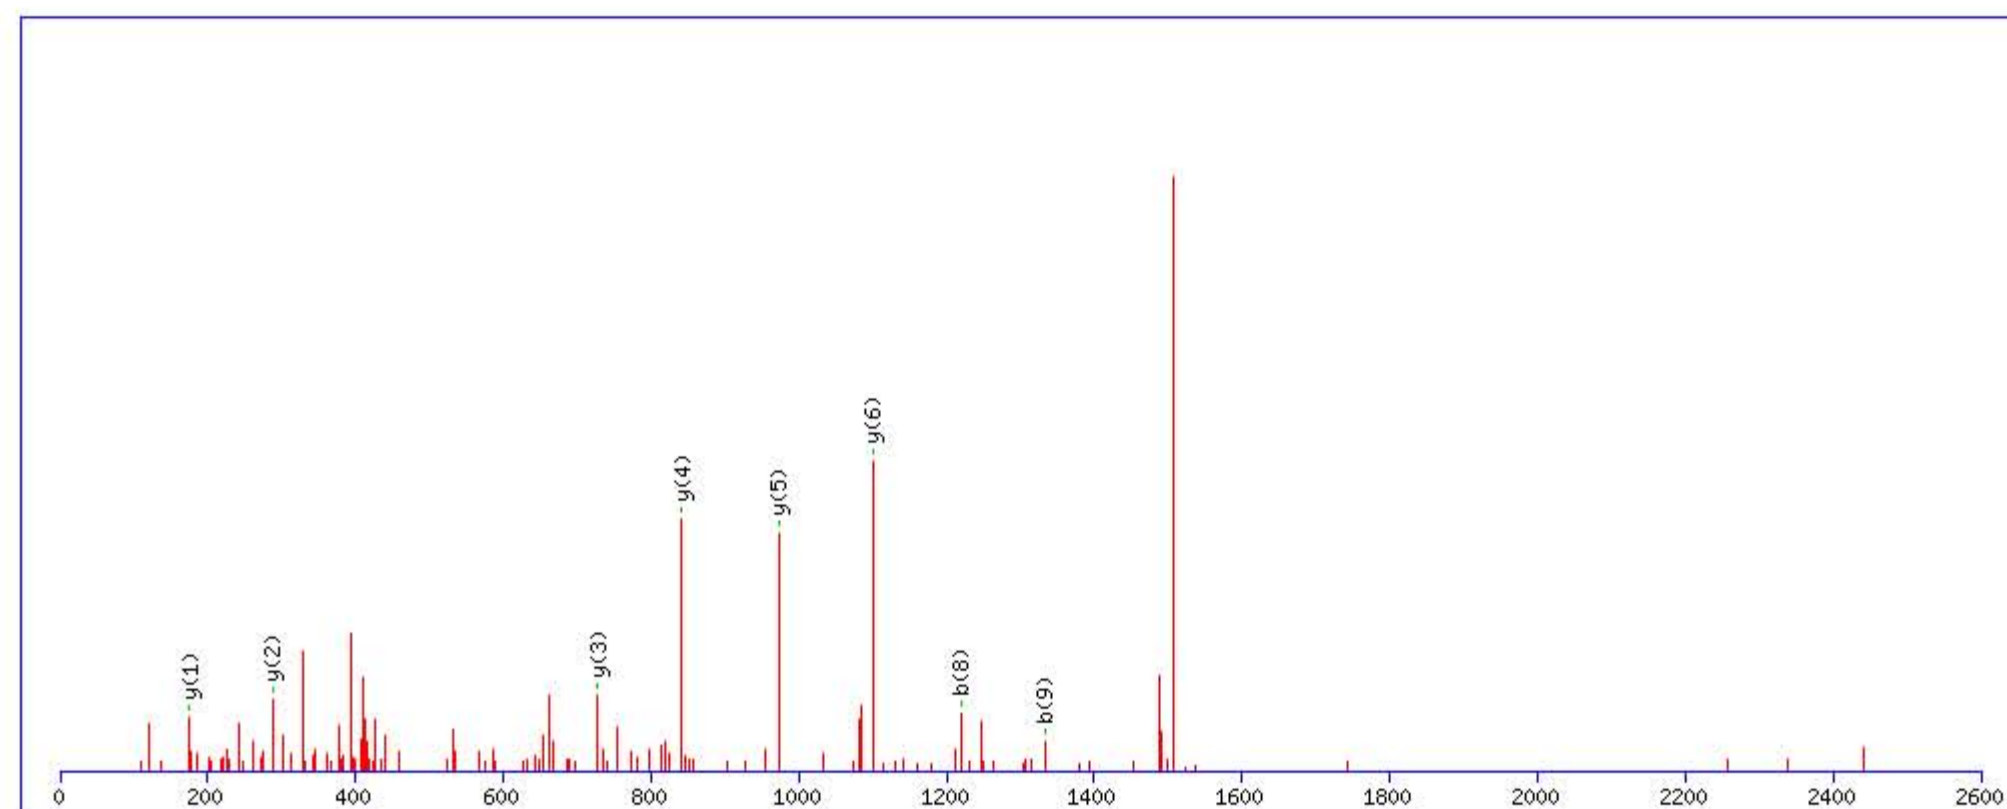

Monoisotopic mass of neutral peptide  $M_r(\text{calc})$ : 1505.711899

Fixed modifications: Carbamidomethyl (C) (apply to specified residues or termini only)

Variable modifications:

Q8 : Biotin:Thermo-21345 (Q)

Ions Score: 39 Expect: 0.00078

Matches : 8/84 fragment ions using 14 most intense peaks [\(help\)](#)

| #  | b                  | b <sup>++</sup> | b <sup>*</sup> | b <sup>*++</sup> | b <sup>0</sup> | b <sup>0++</sup> | Seq. | y                  | y <sup>++</sup> | y <sup>*</sup> | y <sup>*++</sup> | y <sup>0</sup> | y <sup>0++</sup> | #  |
|----|--------------------|-----------------|----------------|------------------|----------------|------------------|------|--------------------|-----------------|----------------|------------------|----------------|------------------|----|
| 1  | 116.034219         | 58.520748       |                |                  | 98.023654      | 49.515465        | D    |                    |                 |                |                  |                |                  | 10 |
| 2  | 203.066247         | 102.036761      |                |                  | 185.055682     | 93.031479        | S    | 1391.692238        | 696.349757      | 1374.665689    | 687.836482       | 1373.681673    | 687.344474       | 9  |
| 3  | 260.087711         | 130.547493      |                |                  | 242.077146     | 121.542211       | G    | 1304.660210        | 652.833743      | 1287.633661    | 644.320469       |                |                  | 8  |
| 4  | 407.156125         | 204.081700      |                |                  | 389.145560     | 195.076418       | F    | 1247.638746        | 624.323011      | 1230.612197    | 615.809736       |                |                  | 7  |
| 5  | 535.214703         | 268.110990      | 518.188154     | 259.597715       | 517.204138     | 259.105707       | Q    | <b>1100.570332</b> | 550.788804      | 1083.543783    | 542.275530       |                |                  | 6  |
| 6  | 666.255188         | 333.631232      | 649.228639     | 325.117957       | 648.244623     | 324.625949       | M    | <b>972.511754</b>  | 486.759515      | 955.485205     | 478.246241       |                |                  | 5  |
| 7  | 780.298115         | 390.652695      | 763.271566     | 382.139421       | 762.287550     | 381.647413       | N    | <b>841.471269</b>  | 421.239273      | 824.444720     | 412.725998       |                |                  | 4  |
| 8  | <b>1219.523441</b> | 610.265359      | 1202.496892    | 601.752084       | 1201.512876    | 601.260076       | Q    | <b>727.428342</b>  | 364.217809      | 710.401793     | 355.704535       |                |                  | 3  |
| 9  | <b>1332.607505</b> | 666.807391      | 1315.580956    | 658.294116       | 1314.596940    | 657.802108       | L    | <b>288.203016</b>  | 144.605146      | 271.176467     | 136.091871       |                |                  | 2  |
| 10 |                    |                 |                |                  |                |                  | R    | <b>175.118952</b>  | 88.063114       | 158.092403     | 79.549839        |                |                  | 1  |

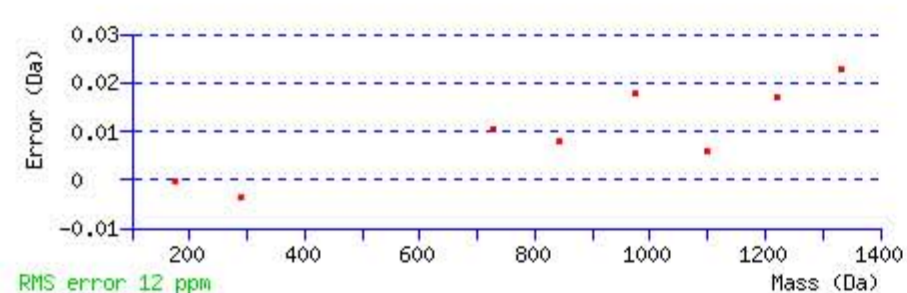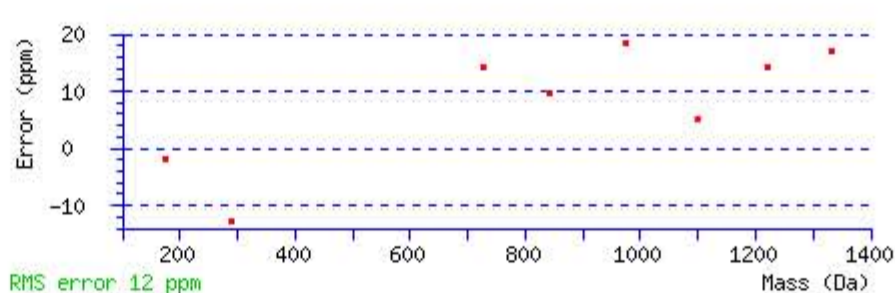

NCBI BLAST search of **DSGFQMNQLR**

(Parameters: blastp, nr protein database, expect=20000, no filter, PAM30)

Other BLAST [web gateways](#)

## All matches to this query

| Score | $M_r(\text{calc})$ : | Delta     | Sequence                       |
|-------|----------------------|-----------|--------------------------------|
| 38.9  | 1505.711899          | 0.006669  | <a href="#">DSGFQMNQLR</a>     |
| 11.7  | 1505.711899          | 0.006669  | <a href="#">DSGFQMNQLR</a>     |
| 5.6   | 1505.721802          | -0.003234 | <a href="#">GMQVSM DIPDILR</a> |
| 4.5   | 1505.740875          | -0.022307 | <a href="#">ECGKAFSHSSKLR</a>  |
| 4.0   | 1505.704025          | 0.014543  | <a href="#">MQMEIDQLR</a>      |
| 3.9   | 1505.700653          | 0.017915  | <a href="#">FMEDEQQLR</a>      |
| 3.9   | 1505.704025          | 0.014543  | <a href="#">MQMEIDQLR</a>      |
| 3.6   | 1505.718384          | 0.000184  | <a href="#">AESEQEAYLR</a>     |
| 2.9   | 1505.703140          | 0.015428  | <a href="#">DETMEEQDIKLR</a>   |



# MASCOT Search Results

## Peptide View

MS/MS Fragmentation of **EFQLFSSPHGK**

Found in **TRFE\_HUMAN**, Serotransferrin OS=Homo sapiens GN=TF PE=1 SV=3

Match to Query 45395: 1586.801068 from(794.407810,2+) rtinseconds(2107) index(81006)

Title: Locus:1.1.1.2613.13 File:"2013-07-02 CLN FXIII 30 min 1st FT.wiff"

Data file C:\Program Files (x86)\Matrix Science\Mascot Daemon\mgf1 FXIII 30 min 1st\mascot\_daemon\_merge.mgf

Click mouse within plot area to zoom in by factor of two about that point

Or, Plot from  to  Da

Label all possible matches  Label matches used for scoring

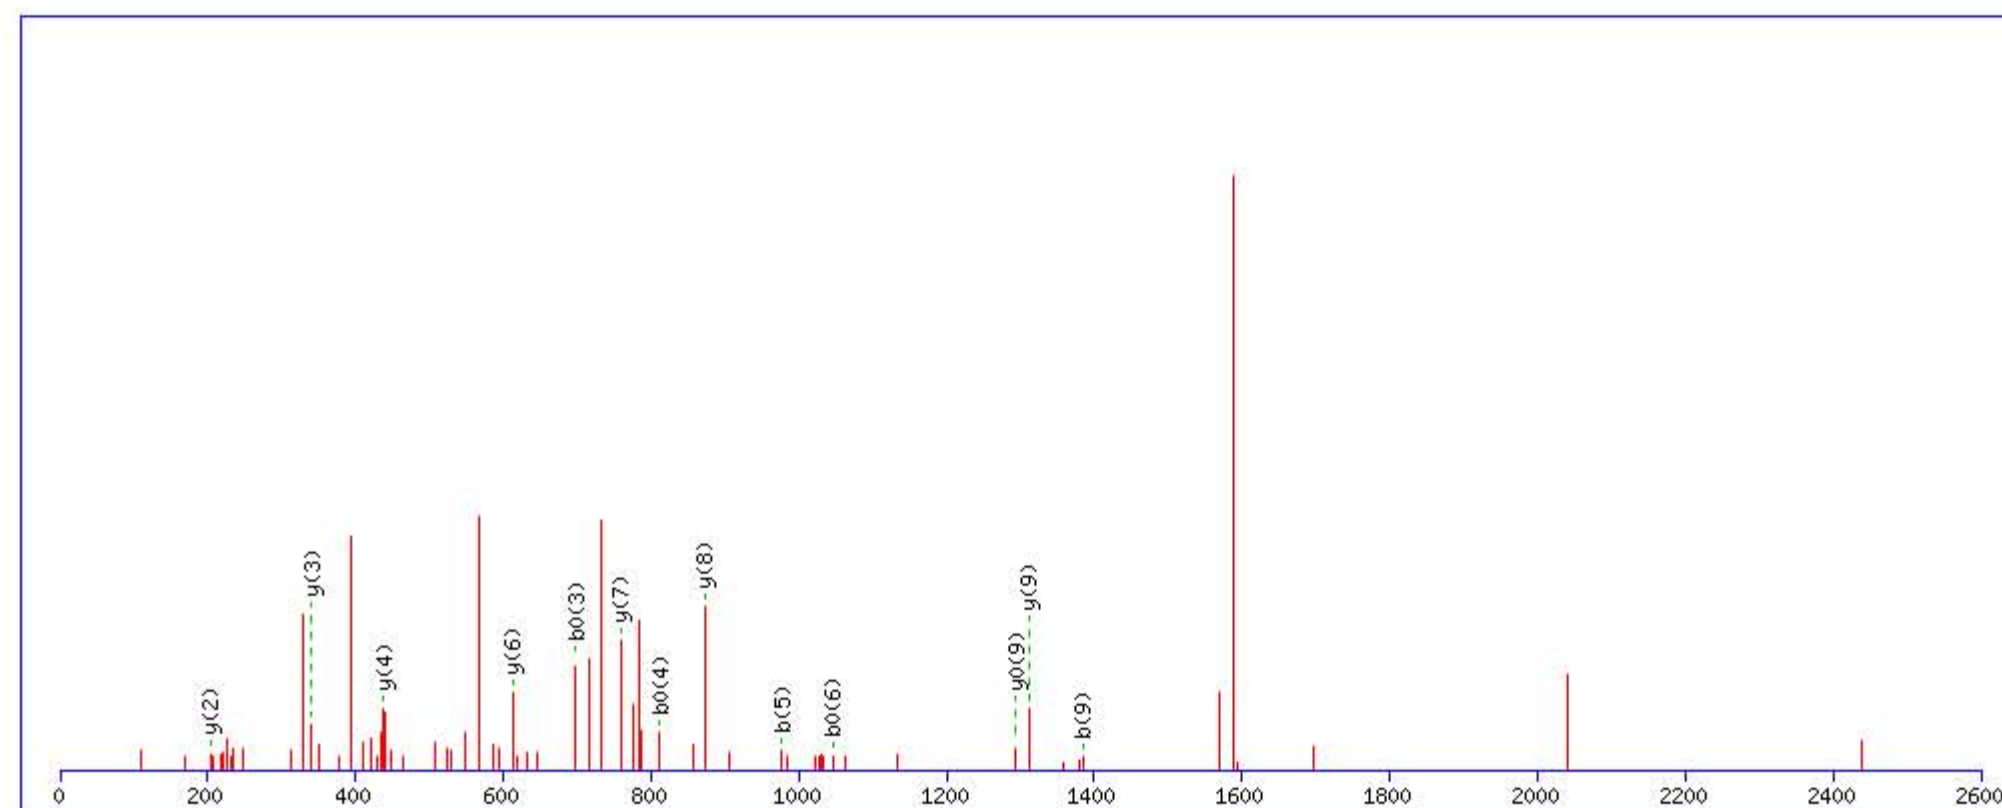

Monoisotopic mass of neutral peptide  $M_r(\text{calc})$ : 1586.791534

Fixed modifications: Carbamidomethyl (C) (apply to specified residues or termini only)

Variable modifications:

Q3 : Biotin:Thermo-21345 (Q)

Ions Score: 29 Expect: 0.0022

Matches : 13/108 fragment ions using 35 most intense peaks [\(help\)](#)

| #  | b           | b <sup>++</sup> | b <sup>+</sup> | b <sup>*++</sup> | b <sup>0</sup> | b <sup>0++</sup> | Seq. | y           | y <sup>++</sup> | y <sup>+</sup> | y <sup>*++</sup> | y <sup>0</sup> | y <sup>0++</sup> | #  |
|----|-------------|-----------------|----------------|------------------|----------------|------------------|------|-------------|-----------------|----------------|------------------|----------------|------------------|----|
| 1  | 130.049869  | 65.528572       |                |                  | 112.039304     | 56.523290        | E    |             |                 |                |                  |                |                  | 11 |
| 2  | 277.118283  | 139.062779      |                |                  | 259.107718     | 130.057497       | F    | 1458.756218 | 729.881747      | 1441.729669    | 721.368473       | 1440.745653    | 720.876465       | 10 |
| 3  | 716.343609  | 358.675443      | 699.317060     | 350.162168       | 698.333044     | 349.670160       | Q    | 1311.687804 | 656.347540      | 1294.661255    | 647.834266       | 1293.677239    | 647.342258       | 9  |
| 4  | 829.427673  | 415.217475      | 812.401124     | 406.704200       | 811.417108     | 406.212192       | L    | 872.462478  | 436.734877      | 855.435929     | 428.221603       | 854.451913     | 427.729595       | 8  |
| 5  | 976.496087  | 488.751682      | 959.469538     | 480.238407       | 958.485522     | 479.746399       | F    | 759.378414  | 380.192845      | 742.351865     | 371.679571       | 741.367849     | 371.187563       | 7  |
| 6  | 1063.528115 | 532.267696      | 1046.501566    | 523.754421       | 1045.517550    | 523.262413       | S    | 612.310000  | 306.658638      | 595.283451     | 298.145364       | 594.299435     | 297.653356       | 6  |
| 7  | 1150.560143 | 575.783710      | 1133.533594    | 567.270435       | 1132.549578    | 566.778427       | S    | 525.277972  | 263.142624      | 508.251423     | 254.629350       | 507.267407     | 254.137342       | 5  |
| 8  | 1247.612907 | 624.310092      | 1230.586358    | 615.796817       | 1229.602342    | 615.304809       | P    | 438.245944  | 219.626610      | 421.219395     | 211.113335       |                |                  | 4  |
| 9  | 1384.671819 | 692.839548      | 1367.645270    | 684.326273       | 1366.661254    | 683.834265       | H    | 341.193180  | 171.100228      | 324.166631     | 162.586953       |                |                  | 3  |
| 10 | 1441.693283 | 721.350280      | 1424.666734    | 712.837005       | 1423.682718    | 712.344997       | G    | 204.134268  | 102.570772      | 187.107719     | 94.057497        |                |                  | 2  |
| 11 |             |                 |                |                  |                |                  | K    | 147.112804  | 74.060040       | 130.086255     | 65.546765        |                |                  | 1  |

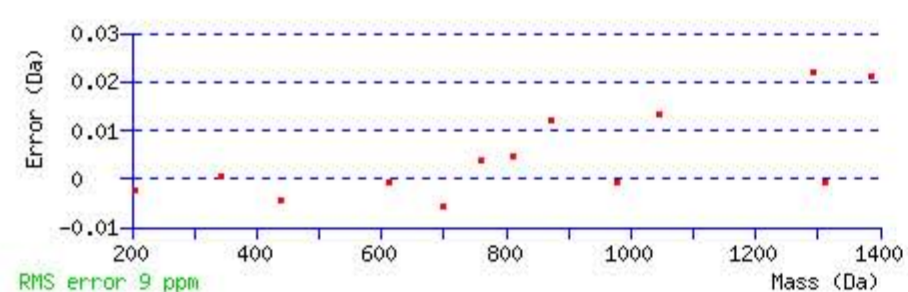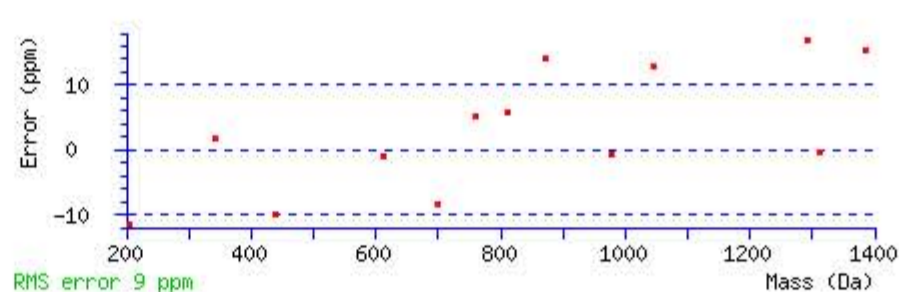

NCBI BLAST search of **EFQLFSSPHGK**

(Parameters: blastp, nr protein database, expect=20000, no filter, PAM30)

Other BLAST [web gateways](#)

All matches to this query

| Score | $M_r(\text{calc})$ : | Delta     | Sequence                     |
|-------|----------------------|-----------|------------------------------|
| 29.0  | 1586.791534          | 0.009534  | <a href="#">EFQLFSSPHGK</a>  |
| 0.6   | 1586.813980          | -0.012912 | <a href="#">FTQNHMLIYHKR</a> |



# MASCOT Search Results

## Peptide View

MS/MS Fragmentation of **KDSGFQMNQLR**

Found in **TRFE\_HUMAN**, Serotransferrin OS=Homo sapiens GN=TF PE=1 SV=3

Match to Query 47839: 1633.809488 from(817.912020,2+) rtinseconds(1777) index(78760)

Title: Locus:1.1.1.2498.17 File:"2013-07-02 CLN FXIII 30 min 1st FT.wiff"

Data file C:\Program Files (x86)\Matrix Science\Mascot Daemon\mgf1 FXIII 30 min 1st\mascot\_daemon\_merge.mgf

Click mouse within plot area to zoom in by factor of two about that point

Or, Plot from  to  Da

Label all possible matches  Label matches used for scoring

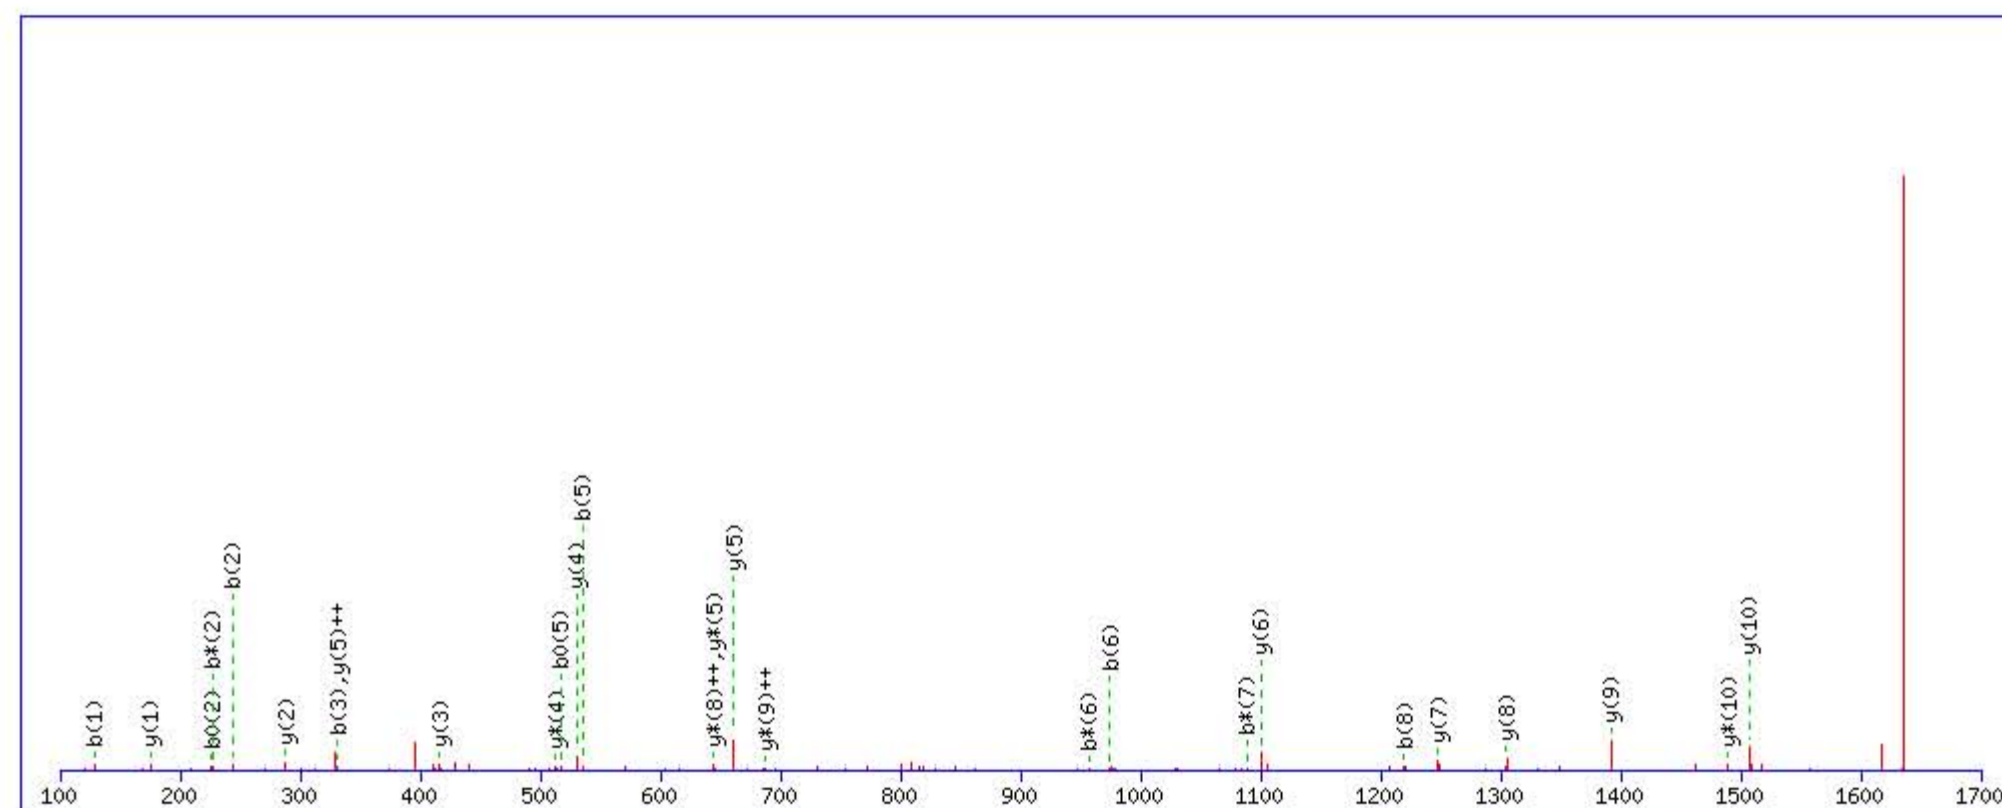

Monoisotopic mass of neutral peptide Mr(calc): 1633.806854

Fixed modifications: Carbamidomethyl (C) (apply to specified residues or termini only)

Variable modifications:

Q6 : Biotin:Thermo-21345 (Q)

Ions Score: 39 Expect: 0.0028

Matches : 27/102 fragment ions using 76 most intense peaks [\(help\)](#)

| #  | b           | b <sup>++</sup> | b <sup>+</sup> | b <sup>*++</sup> | b <sup>0</sup> | b <sup>0++</sup> | Seq. | y           | y <sup>++</sup> | y <sup>+</sup> | y <sup>*++</sup> | y <sup>0</sup> | y <sup>0++</sup> | #  |
|----|-------------|-----------------|----------------|------------------|----------------|------------------|------|-------------|-----------------|----------------|------------------|----------------|------------------|----|
| 1  | 129.102239  | 65.054757       | 112.075690     | 56.541483        |                |                  | K    |             |                 |                |                  |                |                  | 11 |
| 2  | 244.129182  | 122.568229      | 227.102633     | 114.054955       | 226.118617     | 113.562947       | D    | 1506.719181 | 753.863228      | 1489.692632    | 745.349954       | 1488.708616    | 744.857946       | 10 |
| 3  | 331.161210  | 166.084243      | 314.134661     | 157.570969       | 313.150645     | 157.078961       | S    | 1391.692238 | 696.349757      | 1374.665689    | 687.836482       | 1373.681673    | 687.344474       | 9  |
| 4  | 388.182674  | 194.594975      | 371.156125     | 186.081701       | 370.172109     | 185.589693       | G    | 1304.660210 | 652.833743      | 1287.633661    | 644.320468       |                |                  | 8  |
| 5  | 535.251088  | 268.129182      | 518.224539     | 259.615908       | 517.240523     | 259.123900       | F    | 1247.638746 | 624.323011      | 1230.612197    | 615.809736       |                |                  | 7  |
| 6  | 974.476414  | 487.741845      | 957.449865     | 479.228571       | 956.465849     | 478.736563       | Q    | 1100.570332 | 550.788804      | 1083.543783    | 542.275530       |                |                  | 6  |
| 7  | 1105.516899 | 553.262088      | 1088.490350    | 544.748813       | 1087.506334    | 544.256805       | M    | 661.345006  | 331.176141      | 644.318457     | 322.662866       |                |                  | 5  |
| 8  | 1219.559826 | 610.283551      | 1202.533277    | 601.770277       | 1201.549261    | 601.278268       | N    | 530.304521  | 265.655899      | 513.277972     | 257.142624       |                |                  | 4  |
| 9  | 1347.618404 | 674.312840      | 1330.591855    | 665.799566       | 1329.607839    | 665.307558       | Q    | 416.261594  | 208.634435      | 399.235045     | 200.121160       |                |                  | 3  |
| 10 | 1460.702468 | 730.854872      | 1443.675919    | 722.341598       | 1442.691903    | 721.849589       | L    | 288.203016  | 144.605146      | 271.176467     | 136.091871       |                |                  | 2  |
| 11 |             |                 |                |                  |                |                  | R    | 175.118952  | 88.063114       | 158.092403     | 79.549839        |                |                  | 1  |

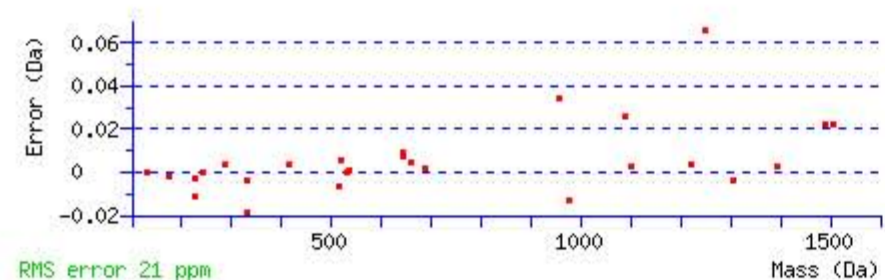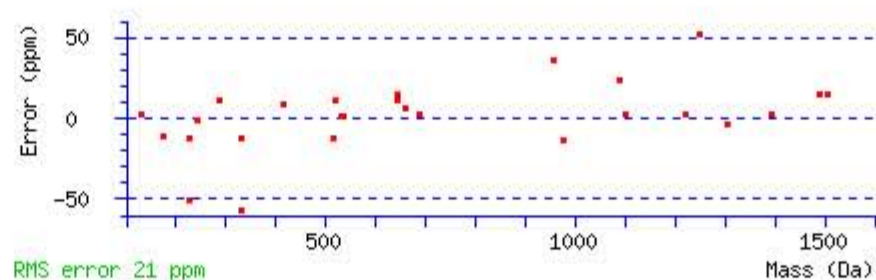

NCBI BLAST search of **KDSGFQMNQLR**

(Parameters: blastp, nr protein database, expect=20000, no filter, PAM30)

Other BLAST [web gateways](#)

All matches to this query

| Score | Mr(calc):   | Delta    | Sequence                    |
|-------|-------------|----------|-----------------------------|
| 39.1  | 1633.806854 | 0.002634 | <a href="#">KDSGFQMNQLR</a> |
| 11.8  | 1633.806854 | 0.002634 | <a href="#">KDSGFQMNQLR</a> |



# MASCOT Search Results

## Peptide View

MS/MS Fragmentation of **ADRDQYELLCLDNTR**

Found in **TRFE\_HUMAN**, Serotransferrin OS=Homo sapiens GN=TF PE=1 SV=3

Match to Query 61451: 2192.048982 from(731.690270,3+) rtinseconds(2208) index(81702)

Title: Locus:1.1.1.2648.22 File:"2013-07-02 CLN FXIII 30 min 1st FT.wiff"

Data file C:\Program Files (x86)\Matrix Science\Mascot Daemon\mgf1 FXIII 30 min 1st\mascot\_daemon\_merge.mgf

Click mouse within plot area to zoom in by factor of two about that point

Or, Plot from  to  Da

Label all possible matches  Label matches used for scoring

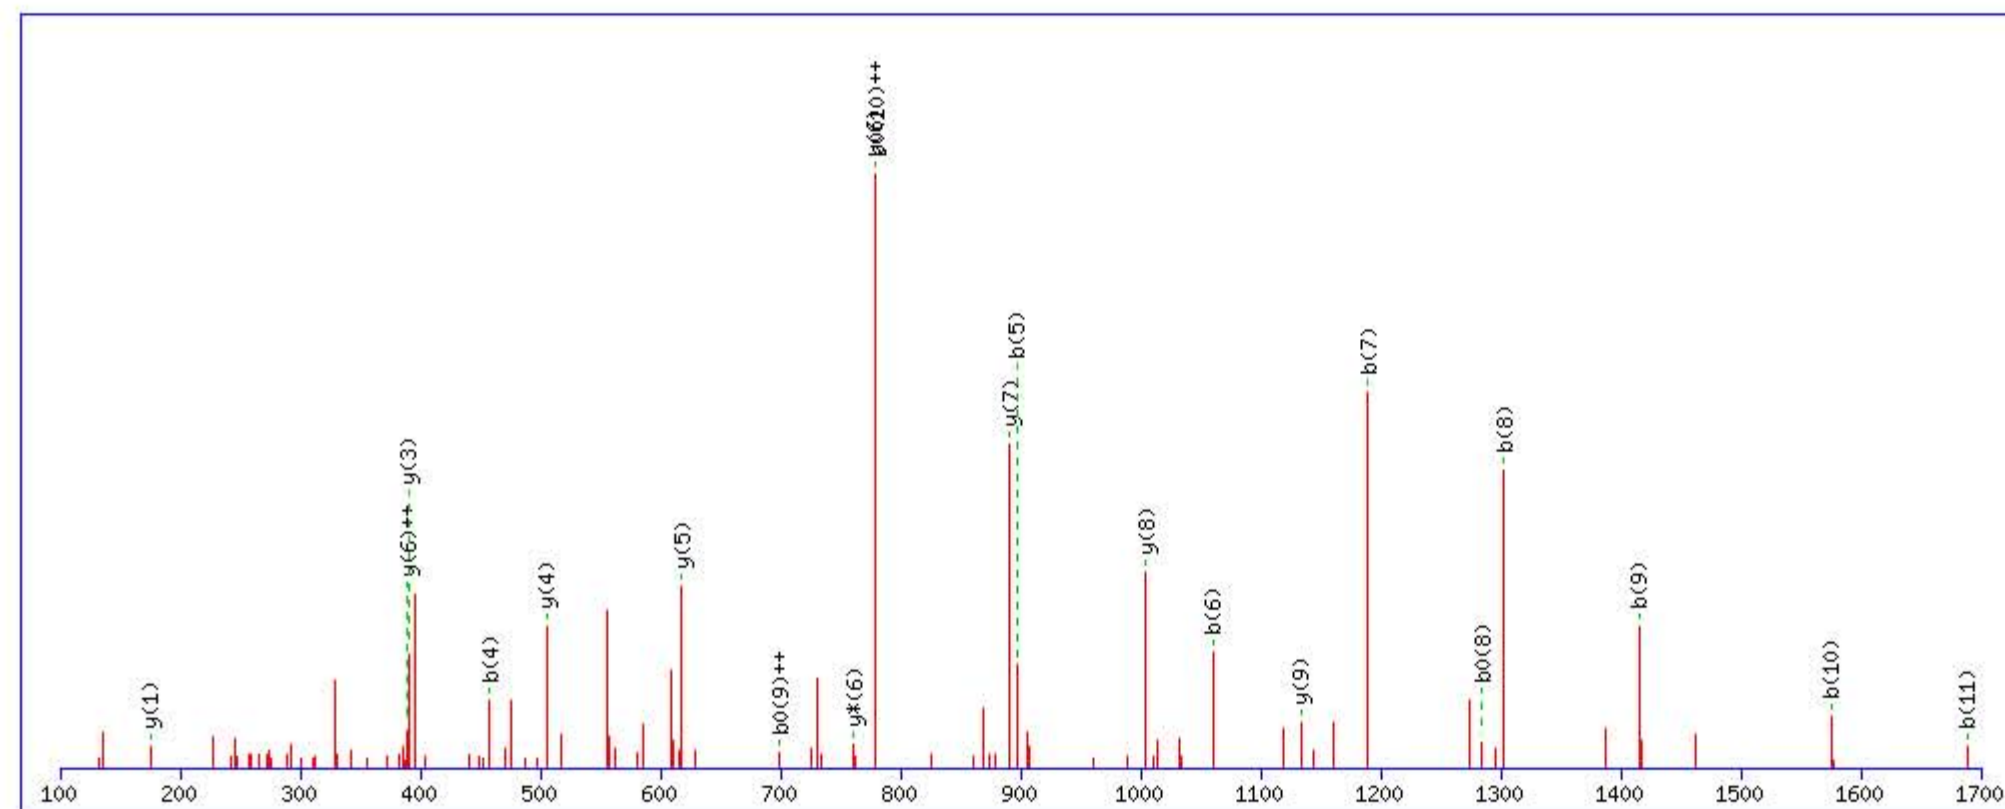

Monoisotopic mass of neutral peptide Mr(calc): 2192.035400

Fixed modifications: Carbamidomethyl (C) (apply to specified residues or termini only)

Variable modifications:

Q5 : Biotin:Thermo-21345 (Q)

Ions Score: 41 Expect: 0.00023

Matches : 21/160 fragment ions using 43 most intense peaks [\(help\)](#)

| #  | b                  | b <sup>++</sup> | b <sup>*</sup> | b <sup>+++</sup> | b <sup>0</sup>     | b <sup>0++</sup>  | Seq. | y                  | y <sup>++</sup>   | y <sup>*</sup>    | y <sup>+++</sup> | y <sup>0</sup> | y <sup>0++</sup> | #  |
|----|--------------------|-----------------|----------------|------------------|--------------------|-------------------|------|--------------------|-------------------|-------------------|------------------|----------------|------------------|----|
| 1  | 72.044390          | 36.525833       |                |                  |                    |                   | A    |                    |                   |                   |                  |                |                  | 15 |
| 2  | 187.071333         | 94.039304       |                |                  | 169.060768         | 85.034022         | D    | 2122.005587        | 1061.506431       | 2104.979038       | 1052.993157      | 2103.995022    | 1052.501149      | 14 |
| 3  | 343.172444         | 172.089860      | 326.145895     | 163.576585       | 325.161879         | 163.084577        | R    | 2006.978644        | 1003.992960       | 1989.952095       | 995.479685       | 1988.968079    | 994.987677       | 13 |
| 4  | <b>458.199387</b>  | 229.603332      | 441.172838     | 221.090057       | 440.188822         | 220.598049        | D    | 1850.877533        | 925.942404        | 1833.850984       | 917.429130       | 1832.866968    | 916.937122       | 12 |
| 5  | <b>897.424713</b>  | 449.215995      | 880.398164     | 440.702720       | 879.414148         | 440.210712        | Q    | 1735.850590        | 868.428933        | 1718.824041       | 859.915658       | 1717.840025    | 859.423650       | 11 |
| 6  | <b>1060.488042</b> | 530.747659      | 1043.461493    | 522.234385       | 1042.477477        | 521.742376        | Y    | 1296.625264        | 648.816270        | 1279.598715       | 640.302995       | 1278.614699    | 639.810987       | 10 |
| 7  | <b>1189.530635</b> | 595.268955      | 1172.504086    | 586.755681       | 1171.520070        | 586.263673        | E    | <b>1133.561935</b> | 567.284605        | 1116.535386       | 558.771331       | 1115.551370    | 558.279323       | 9  |
| 8  | <b>1302.614699</b> | 651.810987      | 1285.588150    | 643.297713       | <b>1284.604134</b> | 642.805705        | L    | <b>1004.519342</b> | 502.763309        | 987.492793        | 494.250034       | 986.508777     | 493.758026       | 8  |
| 9  | <b>1415.698763</b> | 708.353019      | 1398.672214    | 699.839745       | 1397.688198        | <b>699.347737</b> | L    | <b>891.435278</b>  | 446.221277        | 874.408729        | 437.708002       | 873.424713     | 437.215994       | 7  |
| 10 | <b>1575.729412</b> | 788.368344      | 1558.702863    | 779.855069       | 1557.718847        | <b>779.363061</b> | C    | <b>778.351214</b>  | <b>389.679245</b> | <b>761.324665</b> | 381.165971       | 760.340649     | 380.673963       | 6  |
| 11 | <b>1688.813476</b> | 844.910376      | 1671.786927    | 836.397101       | 1670.802911        | 835.905093        | L    | <b>618.320565</b>  | 309.663921        | 601.294016        | 301.150646       | 600.310000     | 300.658638       | 5  |
| 12 | 1803.840419        | 902.423847      | 1786.813870    | 893.910573       | 1785.829854        | 893.418565        | D    | <b>505.236501</b>  | 253.121888        | 488.209952        | 244.608614       | 487.225936     | 244.116606       | 4  |
| 13 | 1917.883346        | 959.445311      | 1900.856797    | 950.932036       | 1899.872781        | 950.440028        | N    | <b>390.209558</b>  | 195.608417        | 373.183009        | 187.095142       | 372.198993     | 186.603134       | 3  |
| 14 | 2018.931025        | 1009.969150     | 2001.904476    | 1001.455876      | 2000.920460        | 1000.963868       | T    | 276.166631         | 138.586953        | 259.140082        | 130.073679       | 258.156066     | 129.581671       | 2  |
| 15 |                    |                 |                |                  |                    |                   | R    | <b>175.118952</b>  | 88.063114         | 158.092403        | 79.549839        |                |                  | 1  |

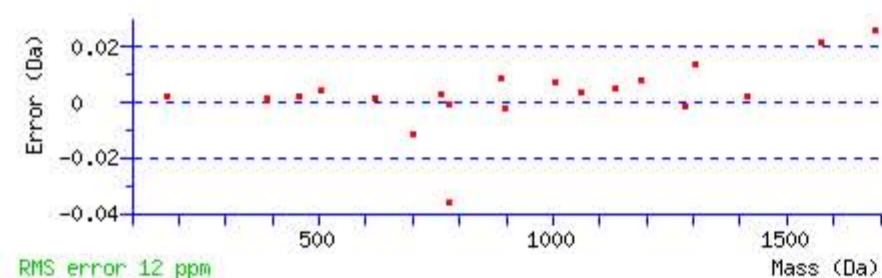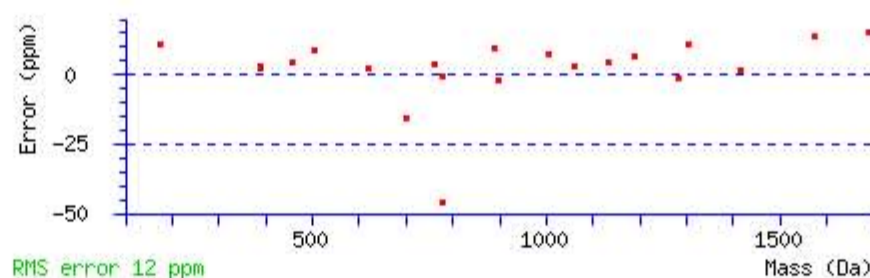

NCBI BLAST search of **ADRDQYELLCLDNTR**

(Parameters: blastp, nr protein database, expect=20000, no filter, PAM30)

Other BLAST [web gateways](#)

All matches to this query

| Score | Mr(calc):   | Delta    | Sequence                        |
|-------|-------------|----------|---------------------------------|
| 40.9  | 2192.035400 | 0.013582 | <a href="#">ADRDQYELLCLDNTR</a> |
| 2.2   | 2192.021027 | 0.027955 | <a href="#">AQRDVIEDCLMSLCR</a> |



# Mascot Search Results

## Peptide View

MS/MS Fragmentation of **EDLIWELLNQAQEHFGK**

Found in **TRFE\_HUMAN**, Serotransferrin OS=Homo sapiens GN=TF PE=1 SV=3

Match to Query 65379: 2380.209372 from(794.410400,3+) rtinseconds(3221) index(88365)

Title: Locus:1.1.1.2996.18 File:"2013-07-02 CLN FXIII 30 min 1st FT.wiff"

Data file C:\Program Files (x86)\Matrix Science\Mascot Daemon\mgf\1 FXIII 30 min 1st\mascot\_daemon\_merge.mgf

Click mouse within plot area to zoom in by factor of two about that point

Or, Plot from  to  Da

Label all possible matches  Label matches used for scoring

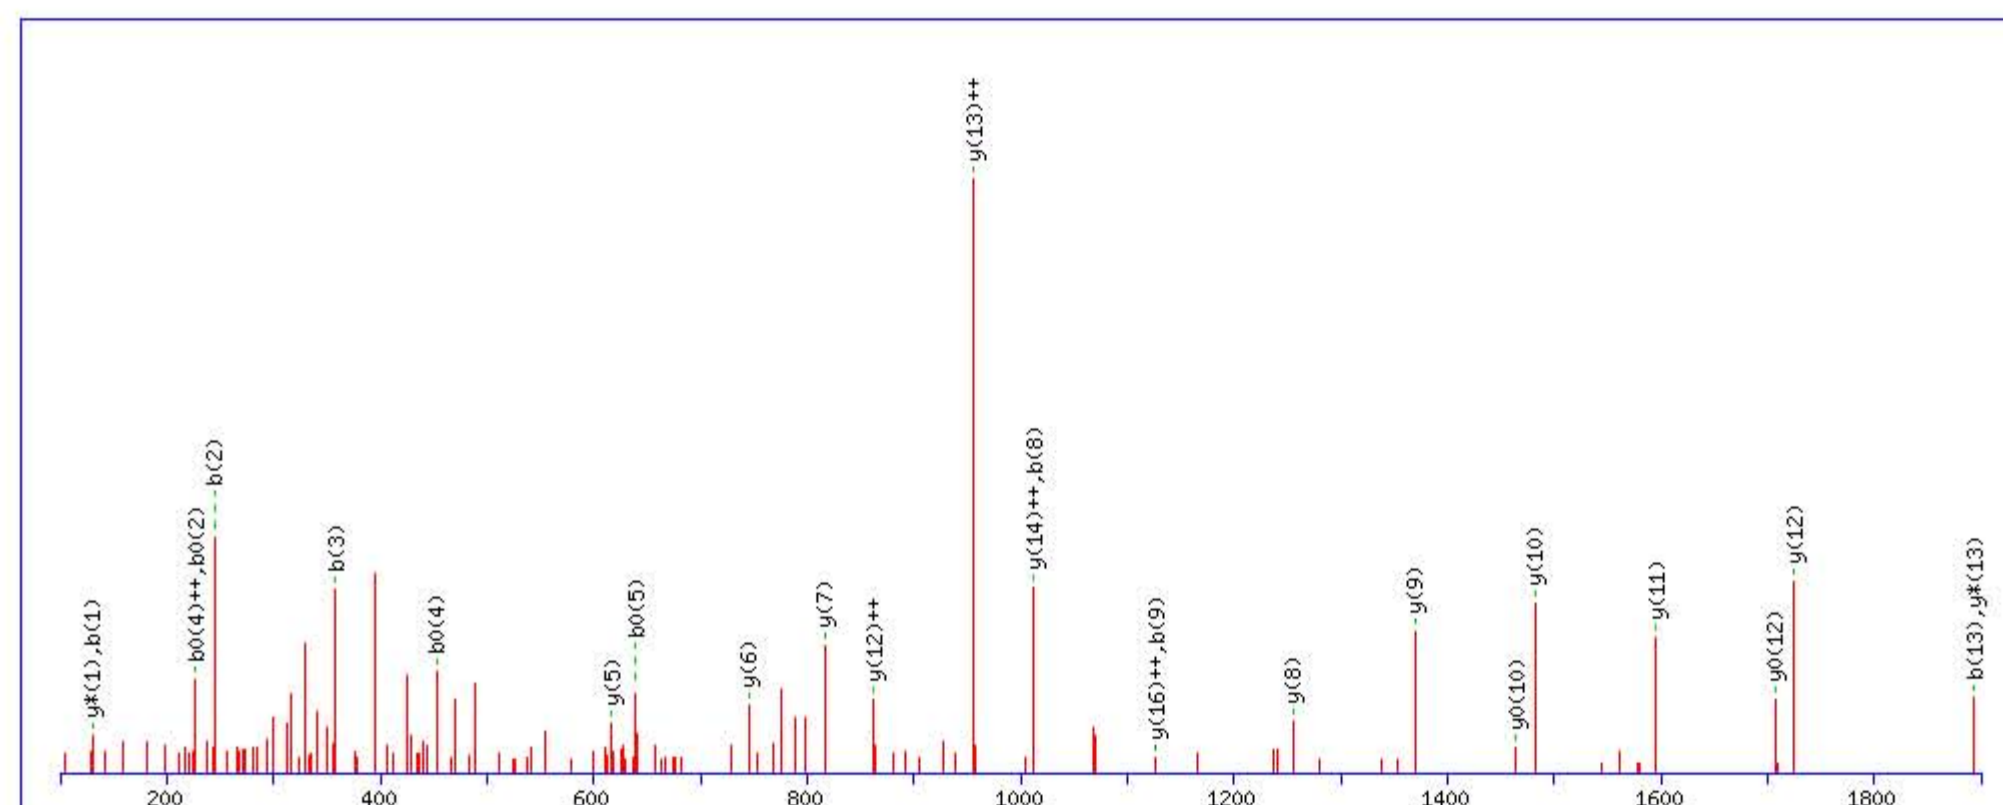

Monoisotopic mass of neutral peptide Mr(calc): 2380.188522

Fixed modifications: Carbamidomethyl (C) (apply to specified residues or termini only)

Variable modifications:

Q10 : Biotin:Thermo-21345 (Q)

Ions Score: 54 Expect: 3.1e-005

Matches : 26/168 fragment ions using 33 most intense peaks [\(help\)](#)

| #  | b                  | b <sup>++</sup> | b <sup>*</sup> | b <sup>+++</sup> | b <sup>0</sup>    | b <sup>0++</sup>  | Seq. | y                  | y <sup>++</sup>    | y <sup>*</sup>     | y <sup>+++</sup> | y <sup>0</sup>     | y <sup>0++</sup> | #  |
|----|--------------------|-----------------|----------------|------------------|-------------------|-------------------|------|--------------------|--------------------|--------------------|------------------|--------------------|------------------|----|
| 1  | <b>130.049869</b>  | 65.528572       |                |                  | 112.039304        | 56.523290         | E    |                    |                    |                    |                  |                    |                  | 17 |
| 2  | <b>245.076812</b>  | 123.042044      |                |                  | <b>227.066247</b> | 114.036762        | D    | 2252.153237        | <b>1126.580256</b> | 2235.126688        | 1118.066982      | 2234.142672        | 1117.574974      | 16 |
| 3  | <b>358.160876</b>  | 179.584076      |                |                  | 340.150311        | 170.578794        | L    | 2137.126294        | 1069.066785        | 2120.099745        | 1060.553510      | 2119.115729        | 1060.061502      | 15 |
| 4  | 471.244940         | 236.126108      |                |                  | <b>453.234375</b> | <b>227.120826</b> | I    | 2024.042230        | <b>1012.524753</b> | 2007.015681        | 1004.011479      | 2006.031665        | 1003.519470      | 14 |
| 5  | 657.324253         | 329.165765      |                |                  | <b>639.313688</b> | 320.160482        | W    | 1910.958166        | <b>955.982721</b>  | <b>1893.931617</b> | 947.469447       | 1892.947601        | 946.977438       | 13 |
| 6  | 786.366846         | 393.687061      |                |                  | 768.356281        | 384.681779        | E    | <b>1724.878853</b> | <b>862.943064</b>  | 1707.852304        | 854.429790       | <b>1706.868288</b> | 853.937782       | 12 |
| 7  | 899.450910         | 450.229093      |                |                  | 881.440345        | 441.223811        | L    | <b>1595.836260</b> | 798.421768         | 1578.809711        | 789.908493       | 1577.825695        | 789.416485       | 11 |
| 8  | <b>1012.534974</b> | 506.771125      |                |                  | 994.524409        | 497.765843        | L    | <b>1482.752196</b> | 741.879736         | 1465.725647        | 733.366461       | <b>1464.741631</b> | 732.874453       | 10 |
| 9  | <b>1126.577901</b> | 563.792589      | 1109.551352    | 555.279314       | 1108.567336       | 554.787306        | N    | <b>1369.668132</b> | 685.337704         | 1352.641583        | 676.824429       | 1351.657567        | 676.332421       | 9  |
| 10 | 1565.803227        | 783.405252      | 1548.776678    | 774.891977       | 1547.792662       | 774.399969        | Q    | <b>1255.625205</b> | 628.316240         | 1238.598656        | 619.802966       | 1237.614640        | 619.310958       | 8  |
| 11 | 1636.840341        | 818.923809      | 1619.813792    | 810.410534       | 1618.829776       | 809.918526        | A    | <b>816.399879</b>  | 408.703577         | 799.373330         | 400.190303       | 798.389314         | 399.698295       | 7  |
| 12 | 1764.898919        | 882.953098      | 1747.872370    | 874.439823       | 1746.888354       | 873.947815        | Q    | <b>745.362765</b>  | 373.185020         | 728.336216         | 364.671746       | 727.352200         | 364.179738       | 6  |
| 13 | <b>1893.941512</b> | 947.474394      | 1876.914963    | 938.961120       | 1875.930947       | 938.469112        | E    | <b>617.304187</b>  | 309.155732         | 600.277638         | 300.642457       | 599.293622         | 300.150449       | 5  |
| 14 | 2031.000424        | 1016.003850     | 2013.973875    | 1007.490576      | 2012.989859       | 1006.998568       | H    | 488.261594         | 244.634435         | 471.235045         | 236.121160       |                    |                  | 4  |
| 15 | 2178.068838        | 1089.538057     | 2161.042289    | 1081.024782      | 2160.058273       | 1080.532774       | F    | 351.202682         | 176.104979         | 334.176133         | 167.591704       |                    |                  | 3  |
| 16 | 2235.090302        | 1118.048789     | 2218.063753    | 1109.535514      | 2217.079737       | 1109.043506       | G    | 204.134268         | 102.570772         | 187.107719         | 94.057497        |                    |                  | 2  |
| 17 |                    |                 |                |                  |                   |                   | K    | 147.112804         | 74.060040          | <b>130.086255</b>  | 65.546765        |                    |                  | 1  |

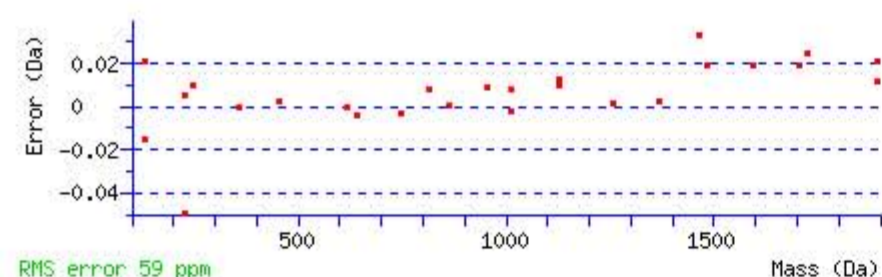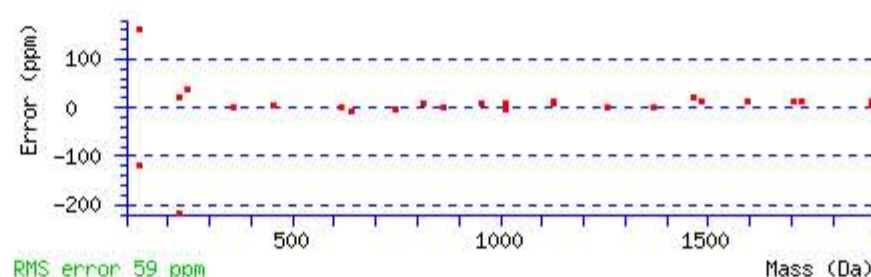

NCBI BLAST search of [EDLIWELLNQAQEHFGK](#)

(Parameters: blastp, nr protein database, expect=20000, no filter, PAM30)

Other BLAST [web gateways](#)

## All matches to this query

| Score | Mr(calc):   | Delta     | Sequence                                 |
|-------|-------------|-----------|------------------------------------------|
| 53.7  | 2380.188522 | 0.020850  | <a href="#">EDLIWELLNQAQEHFGK</a>        |
| 37.3  | 2380.188522 | 0.020850  | <a href="#">EDLIWELLNQAQEHFGK</a>        |
| 5.4   | 2380.199814 | 0.009558  | <a href="#">GEPGLQGFPKPGFLGEVGGPPGMR</a> |
| 1.4   | 2380.212997 | -0.003625 | <a href="#">ELTLEHMETERLELAQK</a>        |



# MASCOT Search Results

## Peptide View

MS/MS Fragmentation of **KPVDEYKDCHLAQVPSHTVVAR**  
 Found in **TRFE\_HUMAN**, Serotransferrin OS=Homo sapiens GN=TF PE=1 SV=3

Match to Query 72786: 2859.446470 from(572.896570,5+) rtinseconds(1551) index(77284)  
 Title: Locus:1.1.1.2419.13 File:"2013-07-02 CLN FXIII 30 min 1st FT.wiff"  
 Data file C:\Program Files (x86)\Matrix Science\Mascot Daemon\mgf1 FXIII 30 min 1st\mascot\_daemon\_merge.mgf

Click mouse within plot area to zoom in by factor of two about that point  
 Or, Plot from  to  Da   
 Label all possible matches  Label matches used for scoring

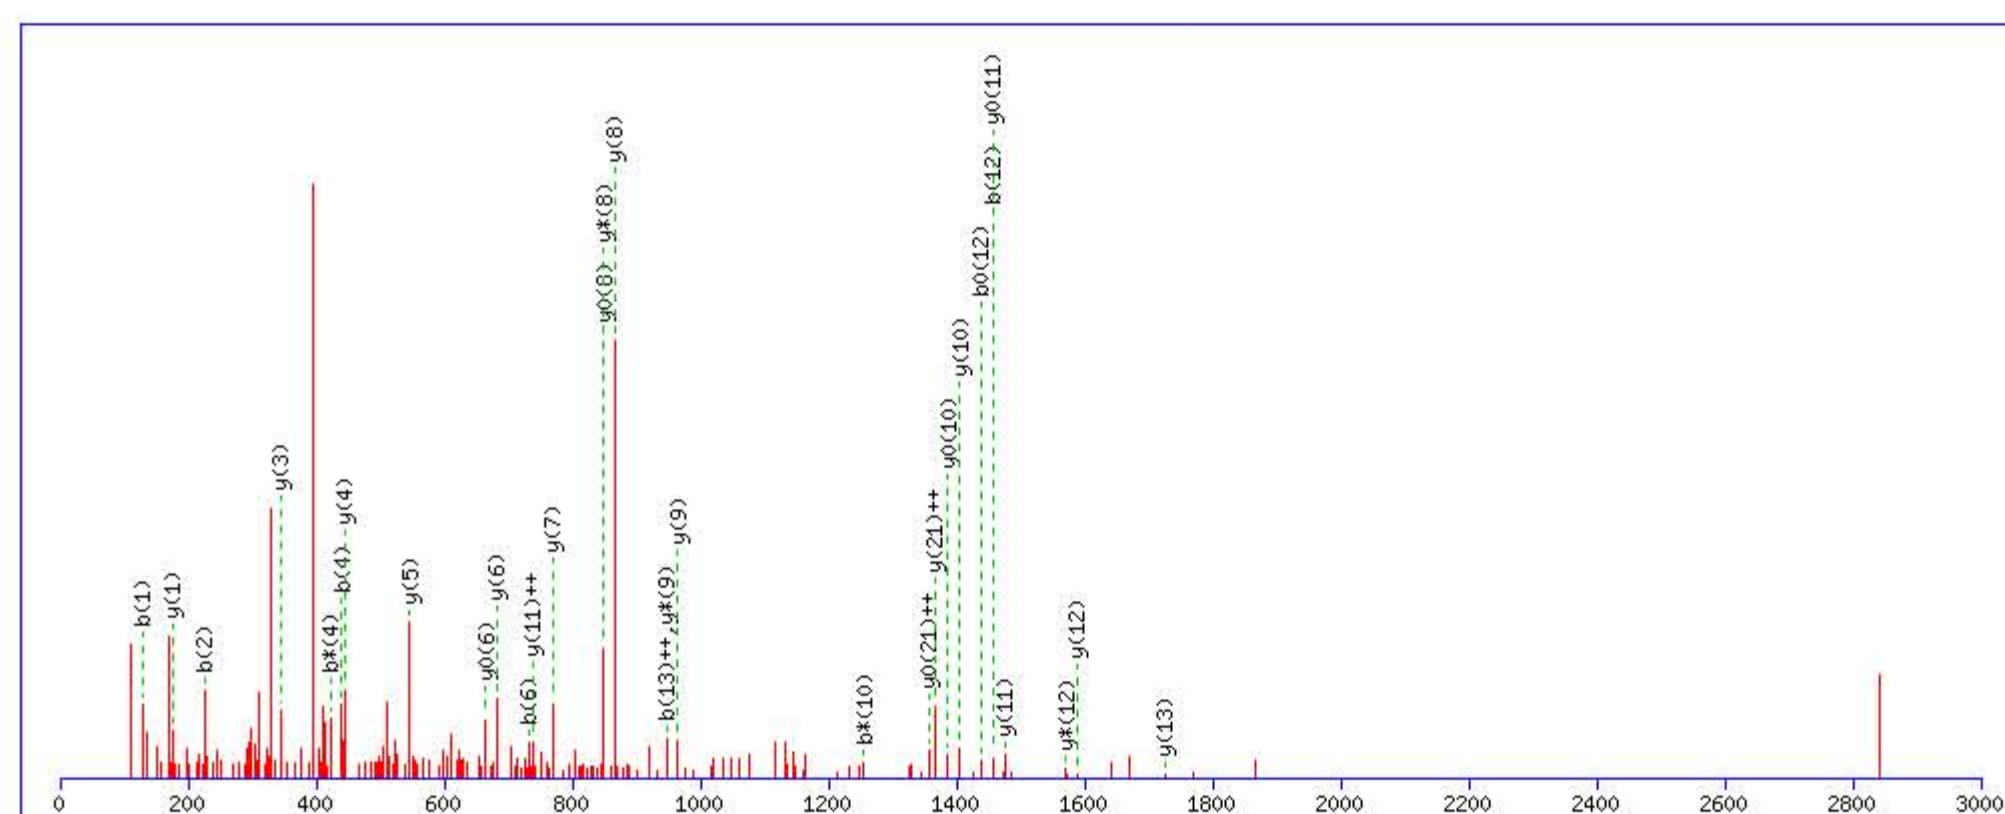

Monoisotopic mass of neutral peptide Mr(calc): 2859.452393  
 Fixed modifications: Carbamidomethyl (C) (apply to specified residues or termini only)  
 Variable modifications:  
 Q13 : Biotin:Thermo-21345 (Q)  
 Ions Score: 52 Expect: 0.00021  
 Matches : 31/238 fragment ions using 65 most intense peaks [\(help\)](#)

| #  | b           | b <sup>++</sup> | b <sup>*</sup> | b <sup>*++</sup> | b <sup>0</sup> | b <sup>0++</sup> | Seq. | y           | y <sup>++</sup> | y <sup>*</sup> | y <sup>*++</sup> | y <sup>0</sup> | y <sup>0++</sup> | #  |
|----|-------------|-----------------|----------------|------------------|----------------|------------------|------|-------------|-----------------|----------------|------------------|----------------|------------------|----|
| 1  | 129.102239  | 65.054757       | 112.075690     | 56.541483        |                |                  | K    |             |                 |                |                  |                |                  | 22 |
| 2  | 226.155003  | 113.581139      | 209.128454     | 105.067865       |                |                  | P    | 2732.364705 | 1366.685990     | 2715.338156    | 1358.172716      | 2714.354140    | 1357.680708      | 21 |
| 3  | 325.223417  | 163.115346      | 308.196868     | 154.602072       |                |                  | V    | 2635.311941 | 1318.159608     | 2618.285392    | 1309.646334      | 2617.301376    | 1309.154326      | 20 |
| 4  | 440.250360  | 220.628818      | 423.223811     | 212.115544       | 422.239795     | 211.623536       | D    | 2536.243527 | 1268.625401     | 2519.216978    | 1260.112127      | 2518.232962    | 1259.620119      | 19 |
| 5  | 569.292953  | 285.150115      | 552.266404     | 276.636840       | 551.282388     | 276.144832       | E    | 2421.216584 | 1211.111930     | 2404.190035    | 1202.598655      | 2403.206019    | 1202.106647      | 18 |
| 6  | 732.356282  | 366.681779      | 715.329733     | 358.168505       | 714.345717     | 357.676497       | Y    | 2292.173991 | 1146.590633     | 2275.147442    | 1138.077359      | 2274.163426    | 1137.585351      | 17 |
| 7  | 860.451245  | 430.729261      | 843.424696     | 422.215986       | 842.440680     | 421.723978       | K    | 2129.110662 | 1065.058969     | 2112.084113    | 1056.545694      | 2111.100097    | 1056.053686      | 16 |
| 8  | 975.478188  | 488.242732      | 958.451639     | 479.729458       | 957.467623     | 479.237450       | D    | 2001.015699 | 1001.011487     | 1983.989150    | 992.498213       | 1983.005134    | 992.006205       | 15 |
| 9  | 1135.508837 | 568.258057      | 1118.482288    | 559.744782       | 1117.498272    | 559.252774       | C    | 1885.988756 | 943.498016      | 1868.962207    | 934.984741       | 1867.978191    | 934.492733       | 14 |
| 10 | 1272.567749 | 636.787513      | 1255.541200    | 628.274238       | 1254.557184    | 627.782230       | H    | 1725.958107 | 863.482691      | 1708.931558    | 854.969417       | 1707.947542    | 854.477409       | 13 |
| 11 | 1385.651813 | 693.329545      | 1368.625264    | 684.816270       | 1367.641248    | 684.324262       | L    | 1588.899195 | 794.953235      | 1571.872646    | 786.439961       | 1570.888630    | 785.947953       | 12 |
| 12 | 1456.688927 | 728.848101      | 1439.662378    | 720.334827       | 1438.678362    | 719.842819       | A    | 1475.815131 | 738.411203      | 1458.788582    | 729.897929       | 1457.804566    | 729.405921       | 11 |
| 13 | 1895.914253 | 948.460765      | 1878.887704    | 939.947490       | 1877.903688    | 939.455482       | Q    | 1404.778017 | 702.892646      | 1387.751468    | 694.379372       | 1386.767452    | 693.887364       | 10 |
| 14 | 1994.982667 | 997.994972      | 1977.956118    | 989.481697       | 1976.972102    | 988.989689       | V    | 965.552691  | 483.279983      | 948.526142     | 474.766709       | 947.542126     | 474.274701       | 9  |
| 15 | 2092.035431 | 1046.521353     | 2075.008882    | 1038.008079      | 2074.024866    | 1037.516071      | P    | 866.484277  | 433.745776      | 849.457728     | 425.232502       | 848.473712     | 424.740494       | 8  |
| 16 | 2179.067459 | 1090.037367     | 2162.040910    | 1081.524093      | 2161.056894    | 1081.032085      | S    | 769.431513  | 385.219394      | 752.404964     | 376.706120       | 751.420948     | 376.214112       | 7  |
| 17 | 2316.126371 | 1158.566823     | 2299.099822    | 1150.053549      | 2298.115806    | 1149.561541      | H    | 682.399485  | 341.703380      | 665.372936     | 333.190106       | 664.388920     | 332.698098       | 6  |
| 18 | 2417.174050 | 1209.090663     | 2400.147501    | 1200.577388      | 2399.163485    | 1200.085380      | T    | 545.340573  | 273.173924      | 528.314024     | 264.660650       | 527.330008     | 264.168642       | 5  |
| 19 | 2516.242464 | 1258.624870     | 2499.215915    | 1250.111595      | 2498.231899    | 1249.619587      | V    | 444.292894  | 222.650085      | 427.266345     | 214.136810       |                |                  | 4  |
| 20 | 2615.310878 | 1308.159077     | 2598.284329    | 1299.645802      | 2597.300313    | 1299.153794      | V    | 345.224480  | 173.115878      | 328.197931     | 164.602603       |                |                  | 3  |
| 21 | 2686.347992 | 1343.677634     | 2669.321443    | 1335.164359      | 2668.337427    | 1334.672351      | A    | 246.156066  | 123.581671      | 229.129517     | 115.068397       |                |                  | 2  |
| 22 |             |                 |                |                  |                |                  | R    | 175.118952  | 88.063114       | 158.092403     | 79.549839        |                |                  | 1  |

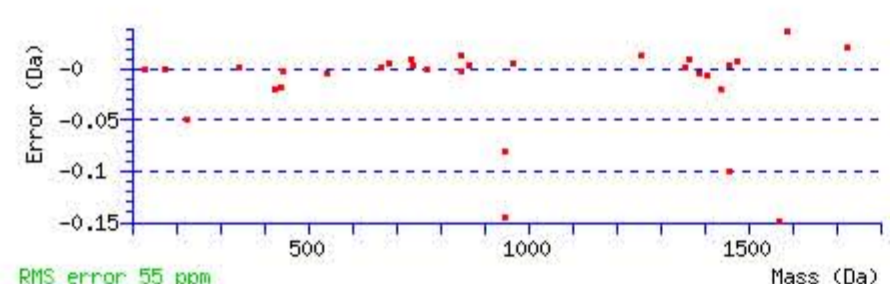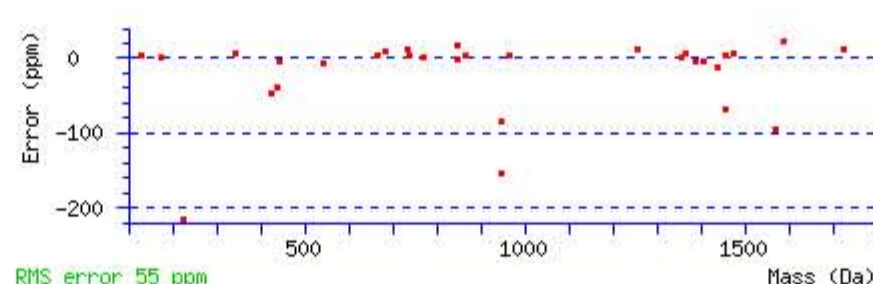

NCBI BLAST search of **KPVDEYKDCHLAQVPSHTVVAR**  
 (Parameters: blastp, nr protein database, expect=20000, no filter, PAM30)  
 Other BLAST [web gateways](#)

## All matches to this query

| Score | Mr(calc):   | Delta     | Sequence                               |
|-------|-------------|-----------|----------------------------------------|
| 51.6  | 2859.452393 | -0.005923 | <a href="#">KPVDEYKDCHLAQVPSHTVVAR</a> |



# MASCOT Search Results

## Peptide View

MS/MS Fragmentation of **AKLIALLTLLGMGLALFRNHQSSYQTR**

Found in **PON1\_HUMAN**, Serum paraoxonase/arylesterase 1 OS=Homo sapiens GN=PON1 PE=1 SV=3

Match to Query 76278: 3212.790420 from(643.565360,5+) rtinseconds(3141) index(70240)

Title: Locus:1.1.1.3087.3 File:"2013-07-02 CLN FXIII 30 min 1st F 4.wiff"

Data file C:\Program Files (x86)\Matrix Science\Mascot Daemon\mgf1 FXIII 30 min 1st\mascot\_daemon\_merge.mgf

Click mouse within plot area to zoom in by factor of two about that point

Or, Plot from  to  Da

Label all possible matches  Label matches used for scoring

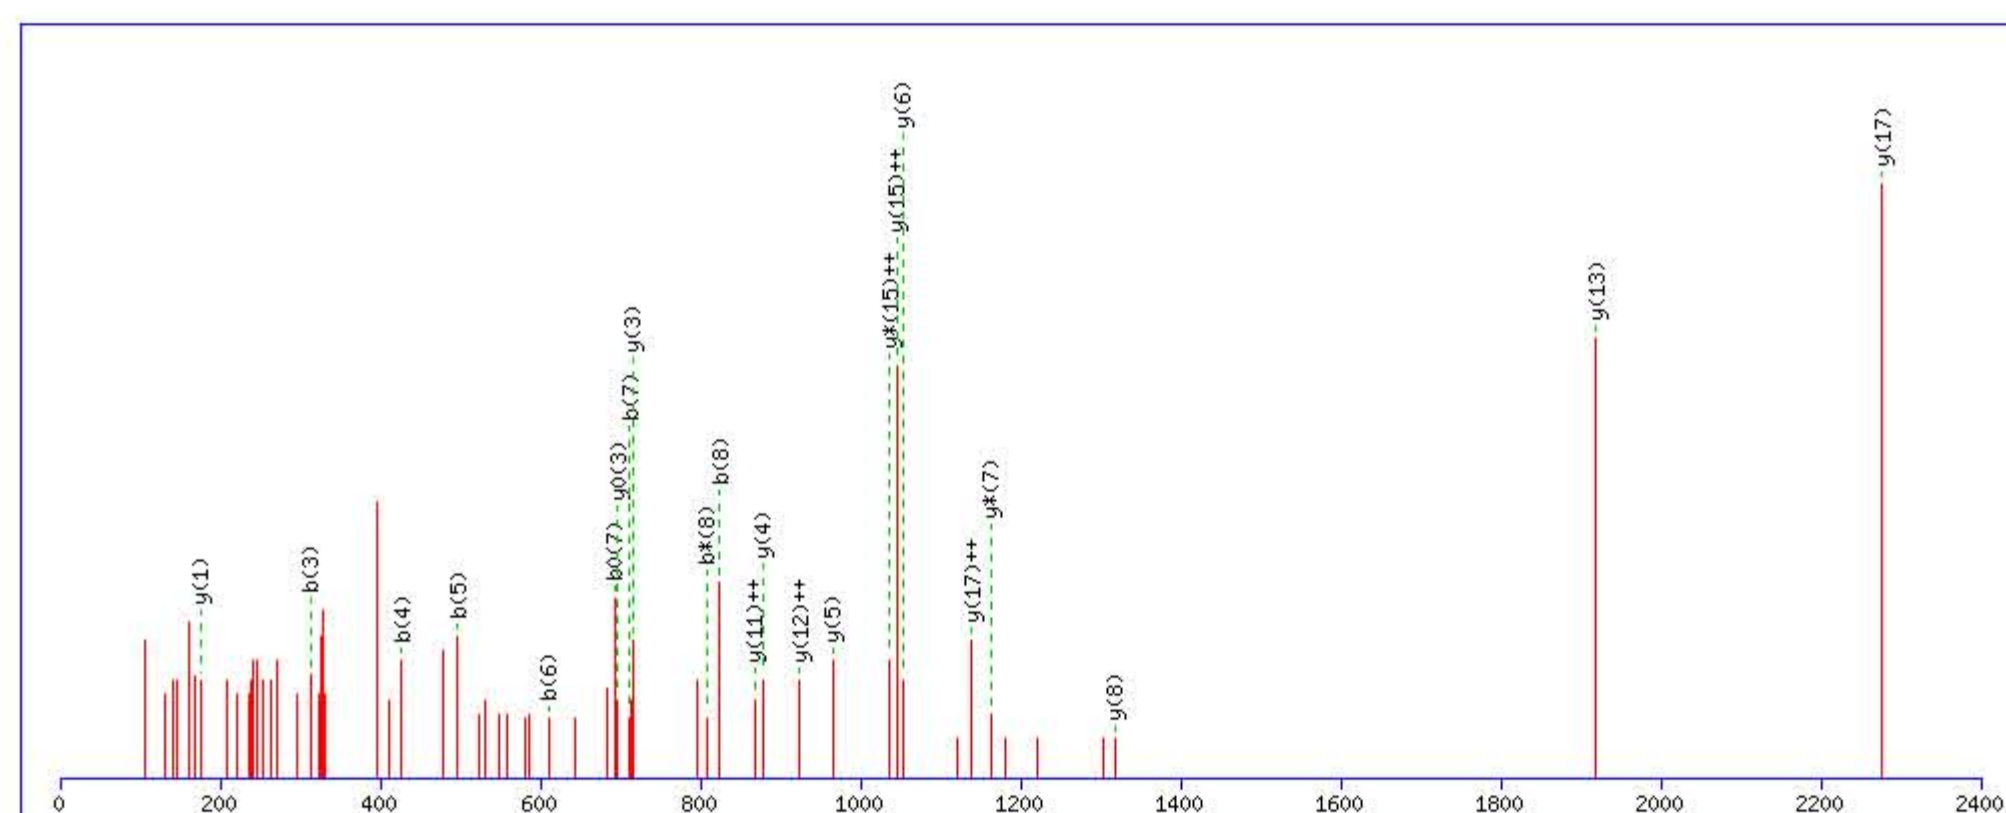

Monoisotopic mass of neutral peptide Mr(calc): 3212.767807

Fixed modifications: Carbamidomethyl (C) (apply to specified residues or termini only)

Variable modifications:

Q24 : Biotin:Thermo-21345 (Q)

Ions Score: 35 Expect: 0.0019

Matches : 23/284 fragment ions using 54 most intense peaks [\(help\)](#)

| #  | b                 | b <sup>++</sup> | b <sup>*</sup>    | b <sup>++</sup> | b <sup>0</sup>    | b <sup>0++</sup> | Seq. | y                  | y <sup>++</sup>    | y <sup>*</sup>     | y <sup>++</sup>    | y <sup>0</sup>    | y <sup>0++</sup> | #  |
|----|-------------------|-----------------|-------------------|-----------------|-------------------|------------------|------|--------------------|--------------------|--------------------|--------------------|-------------------|------------------|----|
| 1  | 72.044390         | 36.525833       |                   |                 |                   |                  | A    |                    |                    |                    |                    |                   |                  | 26 |
| 2  | 200.139353        | 100.573315      | 183.112804        | 92.060040       |                   |                  | K    | 3142.738015        | 1571.872645        | 3125.711466        | 1563.359371        | 3124.727450       | 1562.867363      | 25 |
| 3  | <b>313.223417</b> | 157.115346      | 296.196868        | 148.602072      |                   |                  | L    | 3014.643052        | 1507.825164        | 2997.616503        | 1499.311889        | 2996.632487       | 1498.819881      | 24 |
| 4  | <b>426.307481</b> | 213.657378      | 409.280932        | 205.144104      |                   |                  | I    | 2901.558988        | 1451.283132        | 2884.532439        | 1442.769857        | 2883.548423       | 1442.277849      | 23 |
| 5  | <b>497.344595</b> | 249.175935      | 480.318046        | 240.662661      |                   |                  | A    | 2788.474924        | 1394.741100        | 2771.448375        | 1386.227825        | 2770.464359       | 1385.735817      | 22 |
| 6  | <b>610.428659</b> | 305.717968      | 593.402110        | 297.204693      |                   |                  | L    | 2717.437810        | 1359.222543        | 2700.411261        | 1350.709268        | 2699.427245       | 1350.217260      | 21 |
| 7  | <b>711.476338</b> | 356.241807      | 694.449789        | 347.728533      | <b>693.465773</b> | 347.236525       | T    | 2604.353746        | 1302.680511        | 2587.327197        | 1294.167236        | 2586.343181       | 1293.675228      | 20 |
| 8  | <b>824.560402</b> | 412.783839      | <b>807.533853</b> | 404.270565      | 806.549837        | 403.778557       | L    | 2503.306067        | 1252.156671        | 2486.279518        | 1243.643397        | 2485.295502       | 1243.151389      | 19 |
| 9  | 937.644466        | 469.325871      | 920.617917        | 460.812597      | 919.633901        | 460.320589       | L    | 2390.222003        | 1195.614639        | 2373.195454        | 1187.101365        | 2372.211438       | 1186.609357      | 18 |
| 10 | 994.665930        | 497.836603      | 977.639381        | 489.323329      | 976.655365        | 488.831321       | G    | <b>2277.137939</b> | <b>1139.072607</b> | 2260.111390        | 1130.559333        | 2259.127374       | 1130.067325      | 17 |
| 11 | 1125.706415       | 563.356846      | 1108.679866       | 554.843571      | 1107.695850       | 554.351563       | M    | 2220.116475        | 1110.561875        | 2203.089926        | 1102.048601        | 2202.105910       | 1101.556593      | 16 |
| 12 | 1182.727879       | 591.867578      | 1165.701330       | 583.354303      | 1164.717314       | 582.862295       | G    | 2089.075990        | <b>1045.041633</b> | 2072.049441        | <b>1036.528358</b> | 2071.065425       | 1036.036350      | 15 |
| 13 | 1295.811943       | 648.409609      | 1278.785394       | 639.896335      | 1277.801378       | 639.404327       | L    | 2032.054526        | 1016.530901        | 2015.027977        | 1008.017627        | 2014.043961       | 1007.525619      | 14 |
| 14 | 1366.849057       | 683.928166      | 1349.822508       | 675.414892      | 1348.838492       | 674.922884       | A    | <b>1918.970462</b> | 959.988869         | 1901.943913        | 951.475595         | 1900.959897       | 950.983587       | 13 |
| 15 | 1479.933121       | 740.470198      | 1462.906572       | 731.956924      | 1461.922556       | 731.464916       | L    | 1847.933348        | <b>924.470312</b>  | 1830.906799        | 915.957038         | 1829.922783       | 915.465030       | 12 |
| 16 | 1627.001535       | 814.004405      | 1609.974986       | 805.491131      | 1608.990970       | 804.999123       | F    | 1734.849284        | <b>867.928280</b>  | 1717.822735        | 859.415006         | 1716.838719       | 858.922998       | 11 |
| 17 | 1783.102646       | 892.054961      | 1766.076097       | 883.541686      | 1765.092081       | 883.049678       | R    | 1587.780870        | 794.394073         | 1570.754321        | 785.880799         | 1569.770305       | 785.388791       | 10 |
| 18 | 1897.145573       | 949.076424      | 1880.119024       | 940.563150      | 1879.135008       | 940.071142       | N    | 1431.679759        | 716.343518         | 1414.653210        | 707.830243         | 1413.669194       | 707.338235       | 9  |
| 19 | 2034.204485       | 1017.605880     | 2017.177936       | 1009.092606     | 2016.193920       | 1008.600598      | H    | <b>1317.636832</b> | 659.322054         | 1300.610283        | 650.808780         | 1299.626267       | 650.316772       | 8  |
| 20 | 2162.263063       | 1081.635169     | 2145.236514       | 1073.121895     | 2144.252498       | 1072.629887      | Q    | 1180.577920        | 590.792598         | <b>1163.551371</b> | 582.279324         | 1162.567355       | 581.787316       | 7  |
| 21 | 2249.295091       | 1125.151183     | 2232.268542       | 1116.637909     | 2231.284526       | 1116.145901      | S    | <b>1052.519342</b> | 526.763309         | 1035.492793        | 518.250035         | 1034.508777       | 517.758027       | 6  |
| 22 | 2336.327119       | 1168.667197     | 2319.300570       | 1160.153923     | 2318.316554       | 1159.661915      | S    | <b>965.487314</b>  | 483.247295         | 948.460765         | 474.734021         | 947.476749        | 474.242013       | 5  |
| 23 | 2499.390448       | 1250.198862     | 2482.363899       | 1241.685587     | 2481.379883       | 1241.193579      | Y    | <b>878.455286</b>  | 439.731281         | 861.428737         | 431.218007         | 860.444721        | 430.725999       | 4  |
| 24 | 2938.615774       | 1469.811525     | 2921.589225       | 1461.298250     | 2920.605209       | 1460.806242      | Q    | <b>715.391957</b>  | 358.199617         | 698.365408         | 349.686342         | <b>697.381392</b> | 349.194334       | 3  |
| 25 | 3039.663453       | 1520.335364     | 3022.636904       | 1511.822090     | 3021.652888       | 1511.330082      | T    | 276.166631         | 138.586953         | 259.140082         | 130.073679         | 258.156066        | 129.581671       | 2  |
| 26 |                   |                 |                   |                 |                   |                  | R    | <b>175.118952</b>  | 88.063114          | 158.092403         | 79.549839          |                   |                  | 1  |

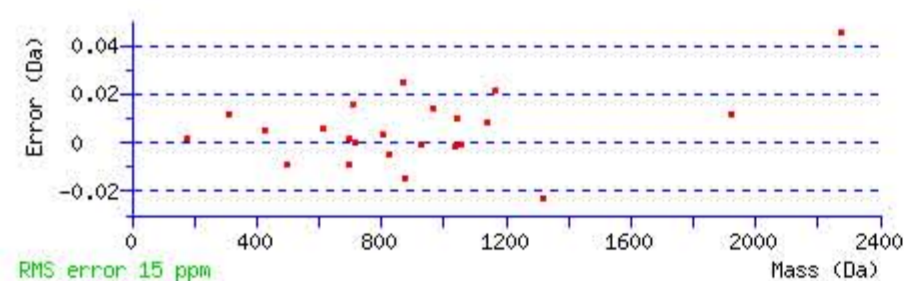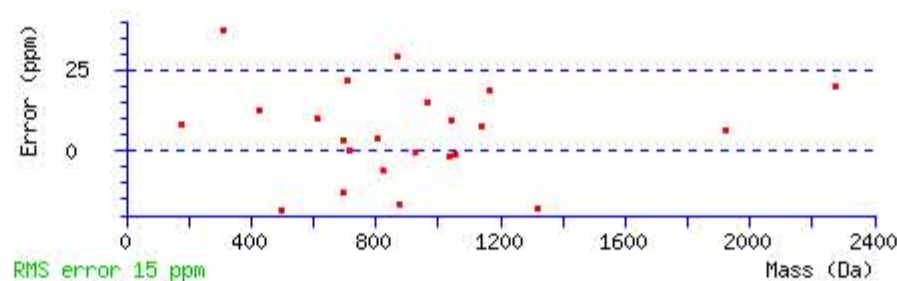

NCBI BLAST search of **AKLIALLTLLGMGLALFRNHQSSYQTR**

(Parameters: blastp, nr protein database, expect=20000, no filter, PAM30)

Other BLAST [web gateways](#)

All matches to this query

| Score | Mr(calc):   | Delta    | Sequence                                    |
|-------|-------------|----------|---------------------------------------------|
| 35.2  | 3212.767807 | 0.022613 | <a href="#">AKLIALLTLLGMGLALFRNHQSSYQTR</a> |
| 17.0  | 3212.767807 | 0.022613 | <a href="#">AKLIALLTLLGMGLALFRNHQSSYQTR</a> |



# MASCOT Search Results

## Peptide View

MS/MS Fragmentation of **GHQLQLDYFGACK**

Found in **SPRL1\_HUMAN**, SPARC-like protein 1 OS=Homo sapiens GN=SPARCL1 PE=1 SV=2

Match to Query 53232: 1846.890012 from(616.637280,3+) rtinseconds(2105) index(63749)

Title: Locus:1.1.1.2730.14 File:"2013-07-02 CLN FXIII 30 min 1st F 4.wiff"

Data file C:\Program Files (x86)\Matrix Science\Mascot Daemon\mgf1 FXIII 30 min 1st\mascot\_daemon\_merge.mgf

Click mouse within plot area to zoom in by factor of two about that point

Or, Plot from  to  Da

Label all possible matches  Label matches used for scoring

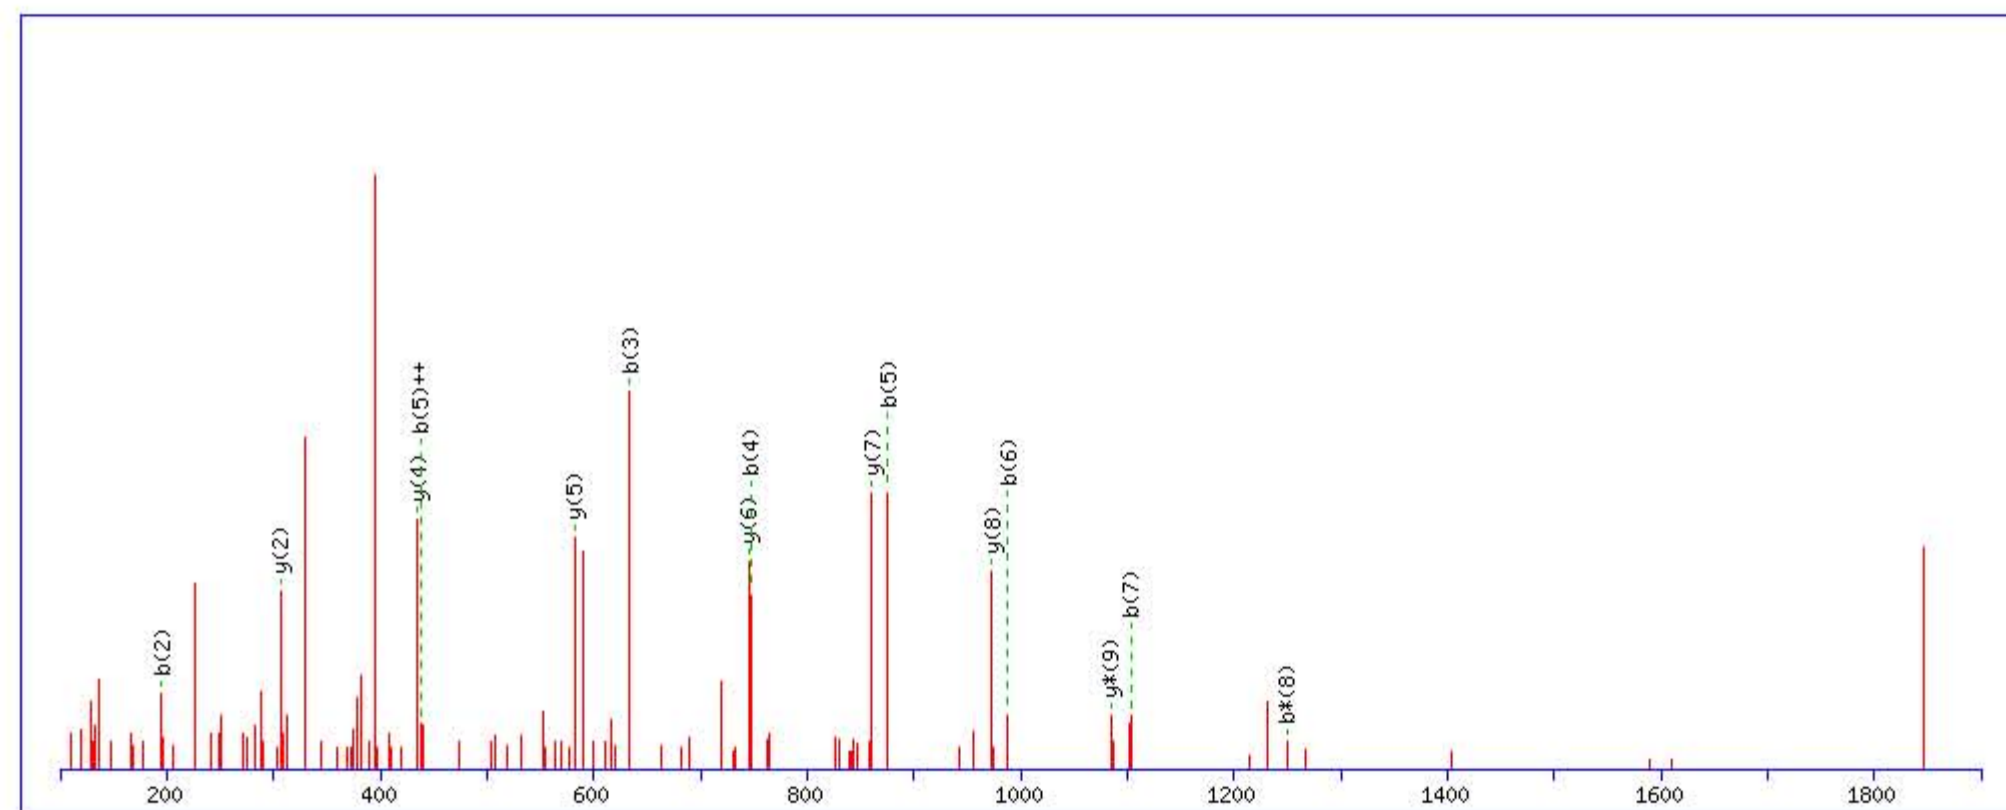

Monoisotopic mass of neutral peptide Mr(calc): 1846.885849

Fixed modifications: Carbamidomethyl (C) (apply to specified residues or termini only)

Variable modifications:

Q3 : Biotin:Thermo-21345 (Q)

Ions Score: 39 Expect: 0.00024

Matches : 15/116 fragment ions using 26 most intense peaks [\(help\)](#)

| #  | b                  | b <sup>++</sup>   | b <sup>+</sup>     | b <sup>+++</sup> | b <sup>0</sup> | b <sup>0++</sup> | Seq. | y                 | y <sup>++</sup> | y <sup>+</sup>     | y <sup>+++</sup> | y <sup>0</sup> | y <sup>0++</sup> | #  |
|----|--------------------|-------------------|--------------------|------------------|----------------|------------------|------|-------------------|-----------------|--------------------|------------------|----------------|------------------|----|
| 1  | 58.028740          | 29.518008         |                    |                  |                |                  | G    |                   |                 |                    |                  |                |                  | 13 |
| 2  | <b>195.087652</b>  | 98.047464         |                    |                  |                |                  | H    | 1790.871661       | 895.939469      | 1773.845112        | 887.426194       | 1772.861096    | 886.934186       | 12 |
| 3  | <b>634.312978</b>  | 317.660127        | 617.286429         | 309.146853       |                |                  | Q    | 1653.812749       | 827.410013      | 1636.786200        | 818.896738       | 1635.802184    | 818.404730       | 11 |
| 4  | <b>747.397042</b>  | 374.202159        | 730.370493         | 365.688885       |                |                  | L    | 1214.587423       | 607.797350      | 1197.560874        | 599.284075       | 1196.576858    | 598.792067       | 10 |
| 5  | <b>875.455620</b>  | <b>438.231448</b> | 858.429071         | 429.718174       |                |                  | Q    | 1101.503359       | 551.255318      | <b>1084.476810</b> | 542.742043       | 1083.492794    | 542.250035       | 9  |
| 6  | <b>988.539684</b>  | 494.773480        | 971.513135         | 486.260206       |                |                  | L    | <b>973.444781</b> | 487.226029      | 956.418232         | 478.712754       | 955.434216     | 478.220746       | 8  |
| 7  | <b>1103.566627</b> | 552.286952        | 1086.540078        | 543.773677       | 1085.556062    | 543.281669       | D    | <b>860.360717</b> | 430.683997      | 843.334168         | 422.170722       | 842.350152     | 421.678714       | 7  |
| 8  | 1266.629956        | 633.818616        | <b>1249.603407</b> | 625.305342       | 1248.619391    | 624.813334       | Y    | <b>745.333774</b> | 373.170525      | 728.307225         | 364.657251       |                |                  | 6  |
| 9  | 1413.698370        | 707.352823        | 1396.671821        | 698.839549       | 1395.687805    | 698.347541       | F    | <b>582.270445</b> | 291.638861      | 565.243896         | 283.125586       |                |                  | 5  |
| 10 | 1470.719834        | 735.863555        | 1453.693285        | 727.350281       | 1452.709269    | 726.858273       | G    | <b>435.202031</b> | 218.104653      | 418.175482         | 209.591379       |                |                  | 4  |
| 11 | 1541.756948        | 771.382112        | 1524.730399        | 762.868838       | 1523.746383    | 762.376830       | A    | 378.180567        | 189.593921      | 361.154018         | 181.080647       |                |                  | 3  |
| 12 | 1701.787597        | 851.397437        | 1684.761048        | 842.884162       | 1683.777032    | 842.392154       | C    | <b>307.143453</b> | 154.075365      | 290.116904         | 145.562090       |                |                  | 2  |
| 13 |                    |                   |                    |                  |                |                  | K    | 147.112804        | 74.060040       | 130.086255         | 65.546765        |                |                  | 1  |

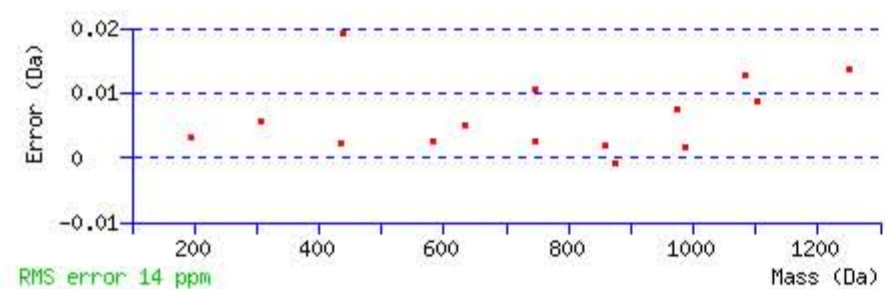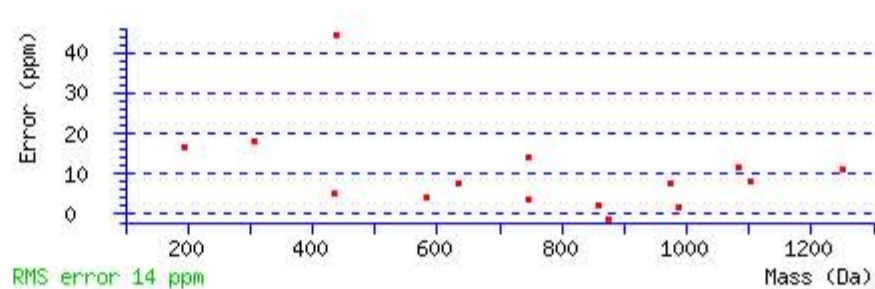

NCBI BLAST search of **GHQLQLDYFGACK**

(Parameters: blastp, nr protein database, expect=20000, no filter, PAM30)

Other BLAST [web gateways](#)

All matches to this query

| Score | Mr(calc):   | Delta     | Sequence                      |
|-------|-------------|-----------|-------------------------------|
| 38.6  | 1846.885849 | 0.004163  | <a href="#">GHQLQLDYFGACK</a> |
| 22.0  | 1846.885849 | 0.004163  | <a href="#">GHQLQLDYFGACK</a> |
| 0.0   | 1846.895721 | -0.005709 | <a href="#">LQLEETMPSYGR</a>  |

Mascot: <http://www.matrixscience.com/>



# MASCOT Search Results

## Peptide View

MS/MS Fragmentation of **SPYQLVLQHSR**

Found in **BGH3\_HUMAN**, Transforming growth factor-beta-induced protein ig-h3 OS=Homo sapiens GN=TGFBI PE=1 SV=1

Match to Query 47994: 1637.891712 from(546.971180,3+) rtinseconds(1889) index(24437)

Title: Locus:1.1.1.2510.12 File:"2013-07-02 CLN FXIII 30 min 1st F 2.wiff"

Data file C:\Program Files (x86)\Matrix Science\Mascot Daemon\mgf1 FXIII 30 min 1st\mascot\_daemon\_merge.mgf

Click mouse within plot area to zoom in by factor of two about that point

Or, Plot from  to  Da

Label all possible matches  Label matches used for scoring

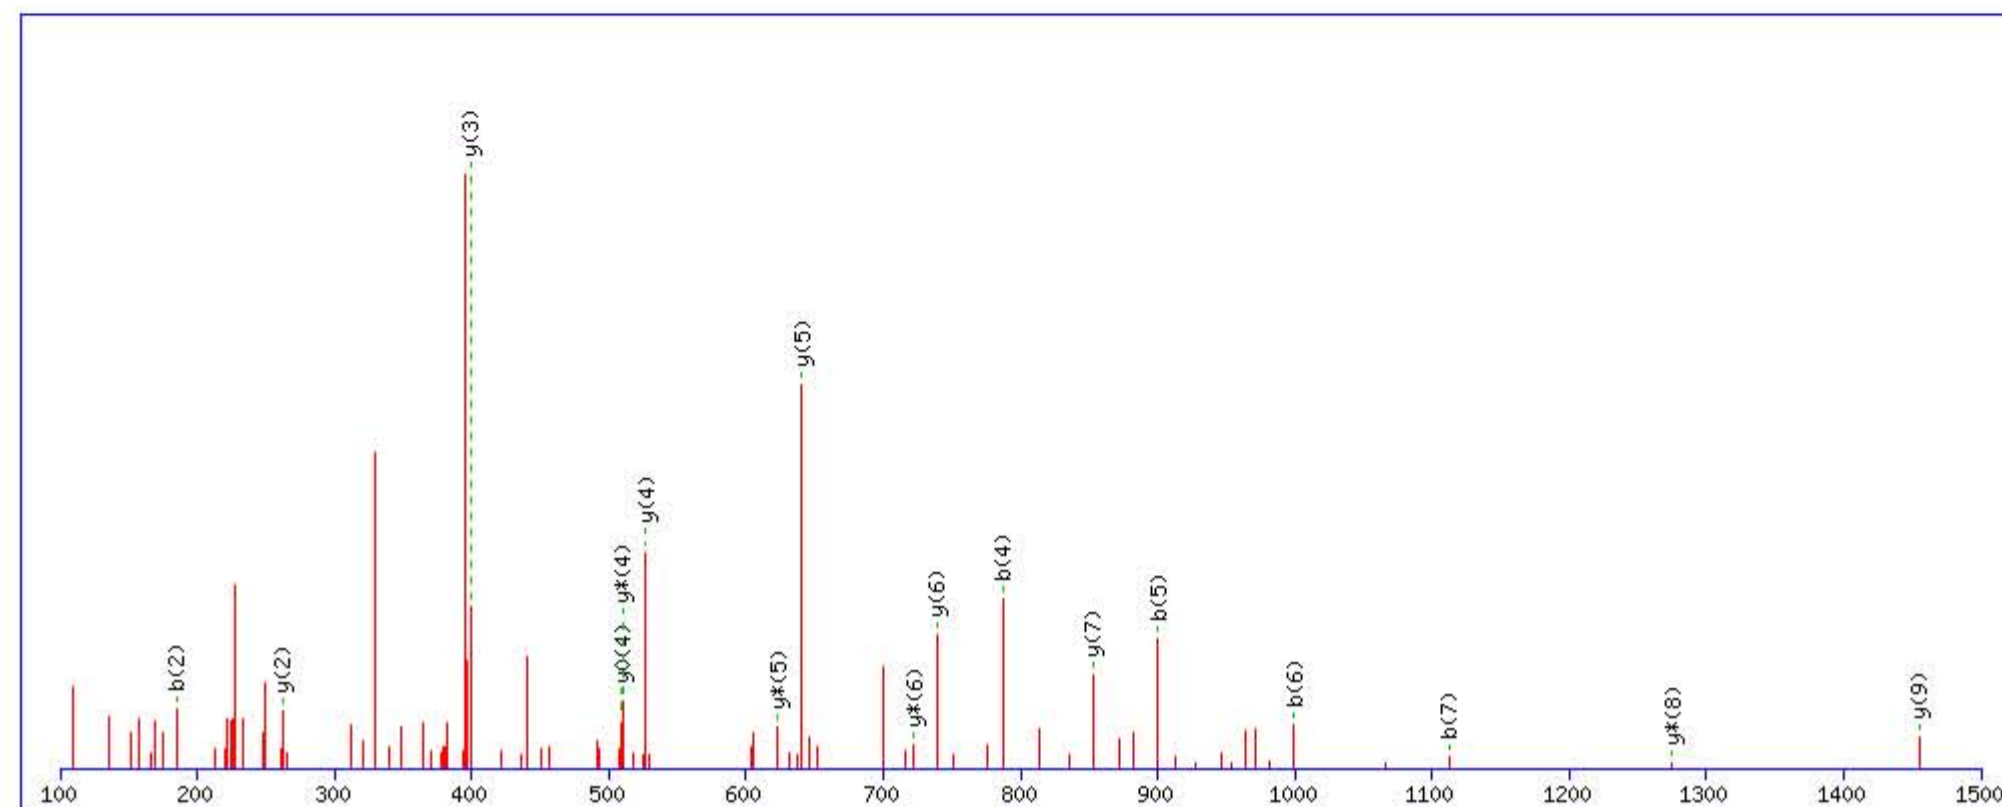

Monoisotopic mass of neutral peptide Mr(calc): 1637.871170

Fixed modifications: Carbamidomethyl (C) (apply to specified residues or termini only)

Variable modifications:

Q4 : Biotin:Thermo-21345 (Q)

Ions Score: 36 Expect: 0.0047

Matches : 17/112 fragment ions using 31 most intense peaks [\(help\)](#)

| #  | b                  | b <sup>++</sup> | b <sup>*</sup> | b <sup>*++</sup> | b <sup>0</sup> | b <sup>0++</sup> | Seq. | y                  | y <sup>++</sup> | y <sup>*</sup>     | y <sup>*++</sup> | y <sup>0</sup>    | y <sup>0++</sup> | #  |
|----|--------------------|-----------------|----------------|------------------|----------------|------------------|------|--------------------|-----------------|--------------------|------------------|-------------------|------------------|----|
| 1  | 88.039304          | 44.523290       |                |                  | 70.028739      | 35.518008        | S    |                    |                 |                    |                  |                   |                  | 11 |
| 2  | <b>185.092068</b>  | 93.049672       |                |                  | 167.081503     | 84.044389        | P    | 1551.846431        | 776.426853      | 1534.819882        | 767.913579       | 1533.835866       | 767.421571       | 10 |
| 3  | 348.155397         | 174.581336      |                |                  | 330.144832     | 165.576054       | Y    | <b>1454.793667</b> | 727.900471      | 1437.767118        | 719.387197       | 1436.783102       | 718.895189       | 9  |
| 4  | <b>787.380723</b>  | 394.194000      | 770.354174     | 385.680725       | 769.370158     | 385.188717       | Q    | 1291.730338        | 646.368807      | <b>1274.703789</b> | 637.855532       | 1273.719773       | 637.363524       | 8  |
| 5  | <b>900.464787</b>  | 450.736032      | 883.438238     | 442.222757       | 882.454222     | 441.730749       | L    | <b>852.505012</b>  | 426.756144      | 835.478463         | 418.242869       | 834.494447        | 417.750861       | 7  |
| 6  | <b>999.533201</b>  | 500.270239      | 982.506652     | 491.756964       | 981.522636     | 491.264956       | V    | <b>739.420948</b>  | 370.214112      | <b>722.394399</b>  | 361.700837       | 721.410383        | 361.208829       | 6  |
| 7  | <b>1112.617265</b> | 556.812270      | 1095.590716    | 548.298996       | 1094.606700    | 547.806988       | L    | <b>640.352534</b>  | 320.679905      | <b>623.325985</b>  | 312.166630       | 622.341969        | 311.674622       | 5  |
| 8  | 1240.675843        | 620.841559      | 1223.649294    | 612.328285       | 1222.665278    | 611.836277       | Q    | <b>527.268470</b>  | 264.137873      | <b>510.241921</b>  | 255.624598       | <b>509.257905</b> | 255.132590       | 4  |
| 9  | 1377.734755        | 689.371015      | 1360.708206    | 680.857741       | 1359.724190    | 680.365733       | H    | <b>399.209892</b>  | 200.108584      | 382.183343         | 191.595309       | 381.199327        | 191.103301       | 3  |
| 10 | 1464.766783        | 732.887029      | 1447.740234    | 724.373755       | 1446.756218    | 723.881747       | S    | <b>262.150980</b>  | 131.579128      | 245.124431         | 123.065854       | 244.140415        | 122.573846       | 2  |
| 11 |                    |                 |                |                  |                |                  | R    | 175.118952         | 88.063114       | 158.092403         | 79.549839        |                   |                  | 1  |

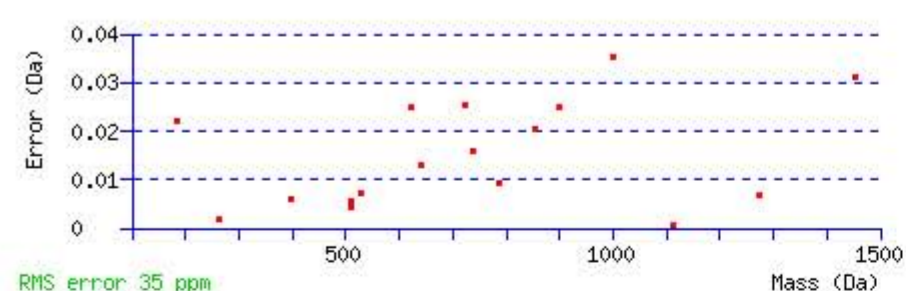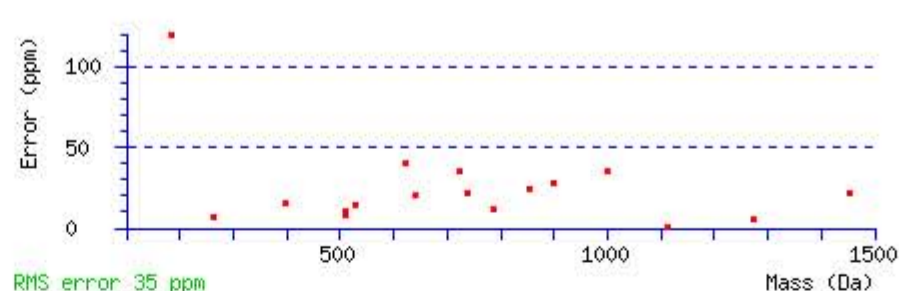

NCBI BLAST search of **SPYQLVLQHSR**

(Parameters: blastp, nr protein database, expect=20000, no filter, PAM30)

Other BLAST [web gateways](#)

All matches to this query

| Score | Mr(calc):   | Delta    | Sequence           |
|-------|-------------|----------|--------------------|
| 36.3  | 1637.871170 | 0.020542 | <b>SPYQLVLQHSR</b> |

Mascot: <http://www.matrixscience.com/>



# MASCOT SCIENCE Mascot Search Results

## Peptide View

MS/MS Fragmentation of **LGDDLLQCHPAVK**

Found in **PROC\_HUMAN**, Vitamin K-dependent protein C OS=Homo sapiens GN=PROC PE=1 SV=1

Match to Query 51610: 1775.902722 from(592.974850,3+) rtinseconds(1935) index(62645)

Title: Locus:1.1.1.2671.16 File:"2013-07-02 CLN FXIII 30 min 1st F 4.wiff"

Data file C:\Program Files (x86)\Matrix Science\Mascot Daemon\mgf1 FXIII 30 min 1st\mascot\_daemon\_merge.mgf

Click mouse within plot area to zoom in by factor of two about that point

Or, Plot from  to  Da

Label all possible matches  Label matches used for scoring

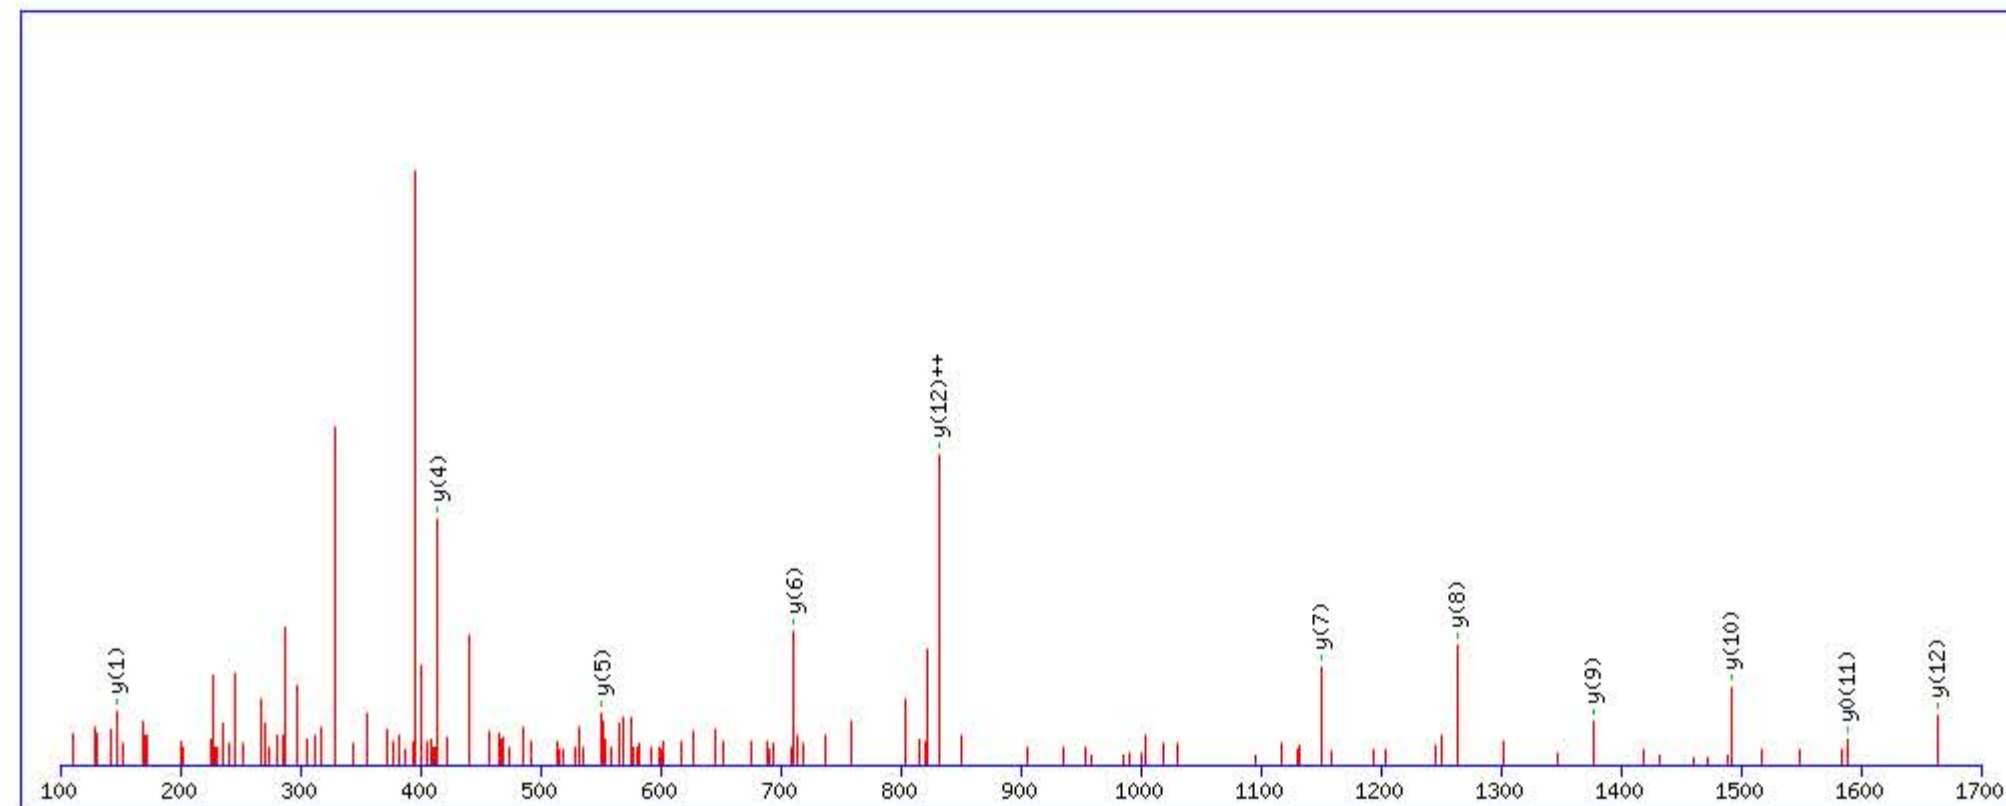

Monoisotopic mass of neutral peptide Mr(calc): 1775.906250

Fixed modifications: Carbamidomethyl (C) (apply to specified residues or termini only)

Variable modifications:

Q7 : Biotin:Thermo-21345 (Q)

Ions Score: 65 Expect: 1.9e-006

Matches : 11/110 fragment ions using 16 most intense peaks [\(help\)](#)

| #  | b           | b <sup>++</sup> | b <sup>+</sup> | b <sup>+++</sup> | b <sup>0</sup> | b <sup>0++</sup> | Seq. | y           | y <sup>++</sup> | y <sup>+</sup> | y <sup>+++</sup> | y <sup>0</sup> | y <sup>0++</sup> | #  |
|----|-------------|-----------------|----------------|------------------|----------------|------------------|------|-------------|-----------------|----------------|------------------|----------------|------------------|----|
| 1  | 114.091340  | 57.549308       |                |                  |                |                  | L    |             |                 |                |                  |                |                  | 13 |
| 2  | 171.112804  | 86.060040       |                |                  |                |                  | G    | 1663.829461 | 832.418369      | 1646.802912    | 823.905094       | 1645.818896    | 823.413086       | 12 |
| 3  | 286.139747  | 143.573512      |                |                  | 268.129182     | 134.568229       | D    | 1606.807997 | 803.907637      | 1589.781448    | 795.394362       | 1588.797432    | 794.902354       | 11 |
| 4  | 401.166690  | 201.086983      |                |                  | 383.156125     | 192.081701       | D    | 1491.781054 | 746.394165      | 1474.754505    | 737.880891       | 1473.770489    | 737.388883       | 10 |
| 5  | 514.250754  | 257.629015      |                |                  | 496.240189     | 248.623733       | L    | 1376.754111 | 688.880694      | 1359.727562    | 680.367419       |                |                  | 9  |
| 6  | 627.334818  | 314.171047      |                |                  | 609.324253     | 305.165765       | L    | 1263.670047 | 632.338662      | 1246.643498    | 623.825387       |                |                  | 8  |
| 7  | 1066.560144 | 533.783710      | 1049.533595    | 525.270436       | 1048.549579    | 524.778428       | Q    | 1150.585983 | 575.796630      | 1133.559434    | 567.283355       |                |                  | 7  |
| 8  | 1226.590793 | 613.799035      | 1209.564244    | 605.285760       | 1208.580228    | 604.793752       | C    | 711.360657  | 356.183967      | 694.334108     | 347.670692       |                |                  | 6  |
| 9  | 1363.649705 | 682.328491      | 1346.623156    | 673.815216       | 1345.639140    | 673.323208       | H    | 551.330008  | 276.168642      | 534.303459     | 267.655368       |                |                  | 5  |
| 10 | 1460.702469 | 730.854873      | 1443.675920    | 722.341598       | 1442.691904    | 721.849590       | P    | 414.271096  | 207.639186      | 397.244547     | 199.125912       |                |                  | 4  |
| 11 | 1531.739583 | 766.373430      | 1514.713034    | 757.860155       | 1513.729018    | 757.368147       | A    | 317.218332  | 159.112804      | 300.191783     | 150.599530       |                |                  | 3  |
| 12 | 1630.807997 | 815.907637      | 1613.781448    | 807.394362       | 1612.797432    | 806.902354       | V    | 246.181218  | 123.594247      | 229.154669     | 115.080973       |                |                  | 2  |
| 13 |             |                 |                |                  |                |                  | K    | 147.112804  | 74.060040       | 130.086255     | 65.546765        |                |                  | 1  |

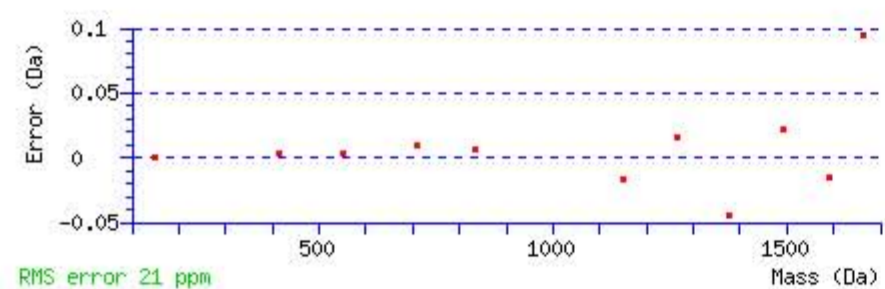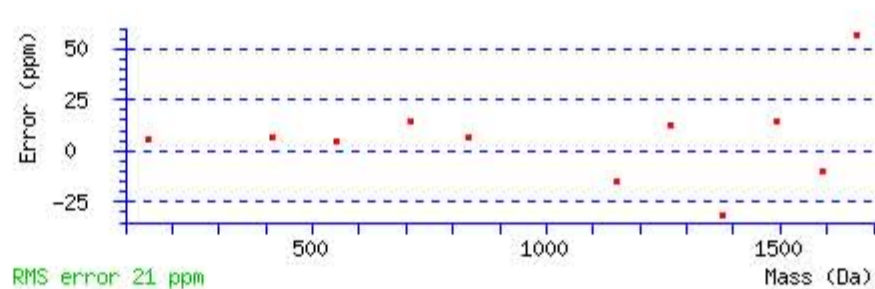

NCBI BLAST search of **LGDDLLQCHPAVK**

(Parameters: blastp, nr protein database, expect=20000, no filter, PAM30)

Other BLAST [web gateways](#)

All matches to this query

| Score | Mr(calc):   | Delta     | Sequence                          |
|-------|-------------|-----------|-----------------------------------|
| 64.5  | 1775.906250 | -0.003528 | <a href="#">LGDDLLQCHPAVK</a>     |
| 3.3   | 1775.879761 | 0.022961  | <a href="#">VASMDSIGNLMVSPPVK</a> |
| 0.6   | 1775.927994 | -0.025272 | <a href="#">IIADIFEYTAKHMPK</a>   |

Mascot: <http://www.matrixscience.com/>



# MASCOT Search Results

## Peptide View

MS/MS Fragmentation of **QLAVLDK**

Found in **PROS\_HUMAN**, Vitamin K-dependent protein S OS=Homo sapiens GN=PROS1 PE=1 SV=1

Match to Query 26123: 1096.628608 from(549.321580,2+) rtinseconds(1946) index(62739)

Title: Locus:1.1.1.2675.10 File:"2013-07-02 CLN FXIII 30 min 1st F 4.wiff"

Data file C:\Program Files (x86)\Matrix Science\Mascot Daemon\mgf1 FXIII 30 min 1st\mascot\_daemon\_merge.mgf

Click mouse within plot area to zoom in by factor of two about that point

Or, Plot from  to  Da

Label all possible matches  Label matches used for scoring

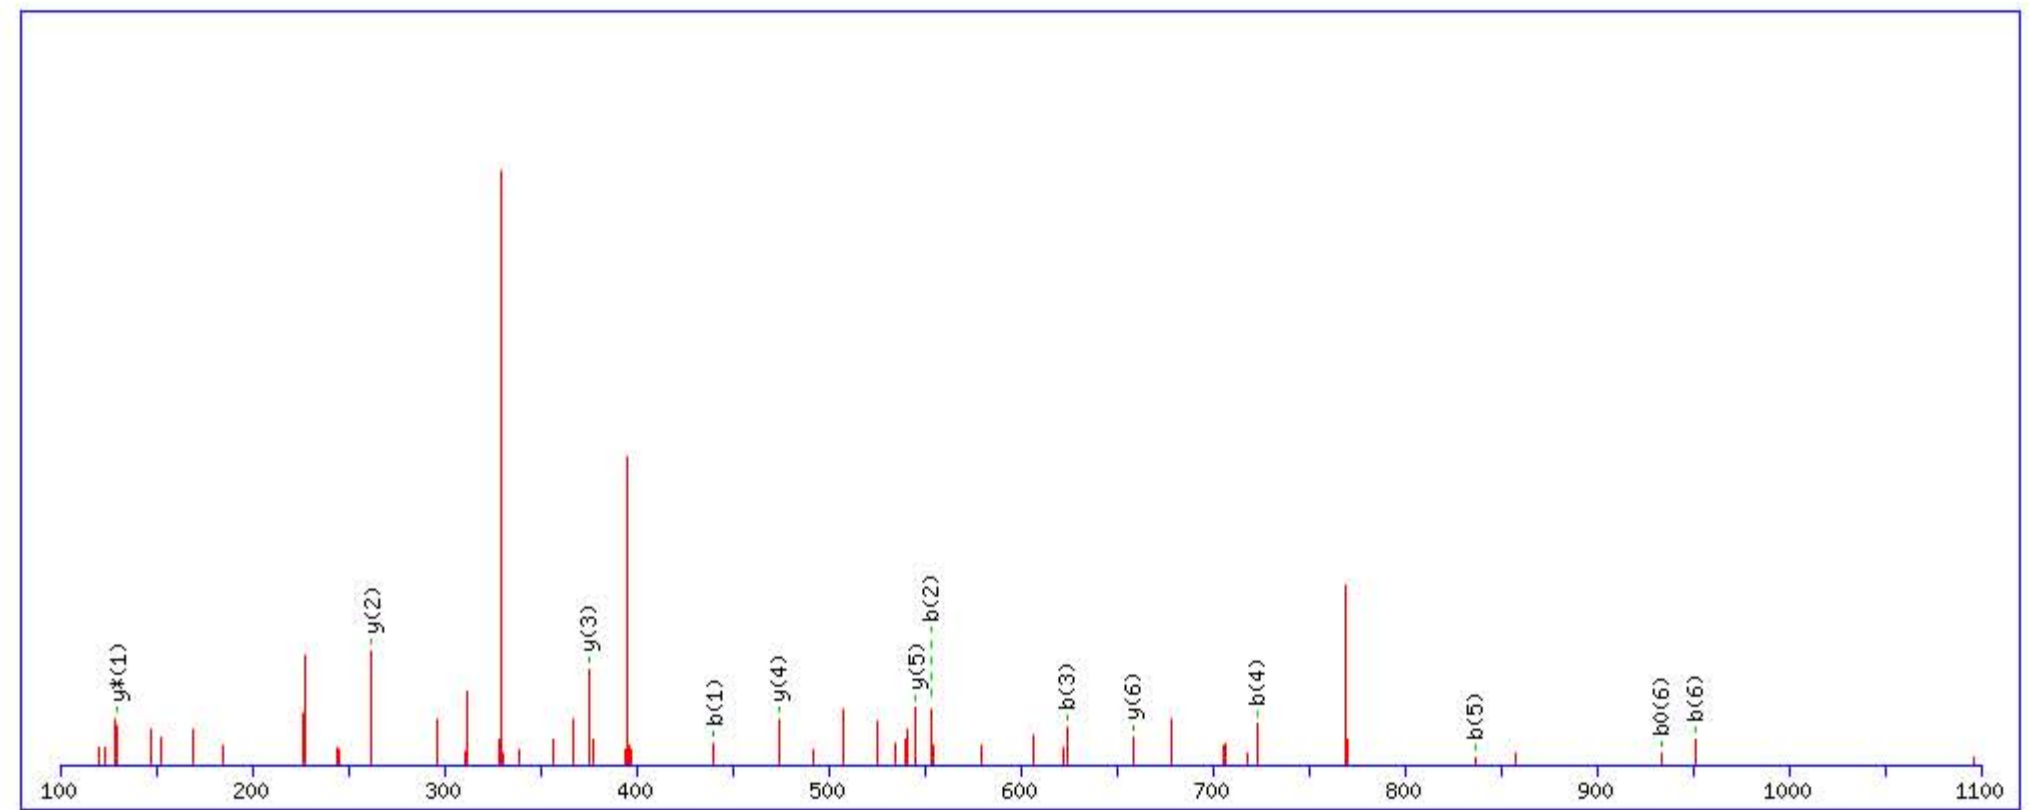

Monoisotopic mass of neutral peptide Mr(calc): 1096.631439

Fixed modifications: Carbamidomethyl (C) (apply to specified residues or termini only)

Variable modifications:

Q1 : Biotin:Thermo-21345 (Q)

Ions Score: 31 Expect: 0.014

Matches : 13/60 fragment ions using 26 most intense peaks [\(help\)](#)

| # | b                 | b <sup>++</sup> | b <sup>*</sup> | b <sup>*++</sup> | b <sup>0</sup>    | b <sup>0++</sup> | Seq.     | y                 | y <sup>++</sup> | y <sup>*</sup>    | y <sup>*++</sup> | y <sup>0</sup> | y <sup>0++</sup> | # |
|---|-------------------|-----------------|----------------|------------------|-------------------|------------------|----------|-------------------|-----------------|-------------------|------------------|----------------|------------------|---|
| 1 | <b>440.232602</b> | 220.619939      | 423.206053     | 212.106664       |                   |                  | <b>Q</b> |                   |                 |                   |                  |                |                  | 7 |
| 2 | <b>553.316666</b> | 277.161971      | 536.290117     | 268.648697       |                   |                  | <b>L</b> | <b>658.413403</b> | 329.710340      | 641.386854        | 321.197065       | 640.402838     | 320.705057       | 6 |
| 3 | <b>624.353780</b> | 312.680528      | 607.327231     | 304.167254       |                   |                  | <b>A</b> | <b>545.329339</b> | 273.168308      | 528.302790        | 264.655033       | 527.318774     | 264.163025       | 5 |
| 4 | <b>723.422194</b> | 362.214735      | 706.395645     | 353.701461       |                   |                  | <b>V</b> | <b>474.292225</b> | 237.649750      | 457.265676        | 229.136476       | 456.281660     | 228.644468       | 4 |
| 5 | <b>836.506258</b> | 418.756767      | 819.479709     | 410.243493       |                   |                  | <b>L</b> | <b>375.223811</b> | 188.115543      | 358.197262        | 179.602269       | 357.213246     | 179.110261       | 3 |
| 6 | <b>951.533201</b> | 476.270239      | 934.506652     | 467.756964       | <b>933.522636</b> | 467.264956       | <b>D</b> | <b>262.139747</b> | 131.573511      | 245.113198        | 123.060237       | 244.129182     | 122.568229       | 2 |
| 7 |                   |                 |                |                  |                   |                  | <b>K</b> | 147.112804        | 74.060040       | <b>130.086255</b> | 65.546765        |                |                  | 1 |

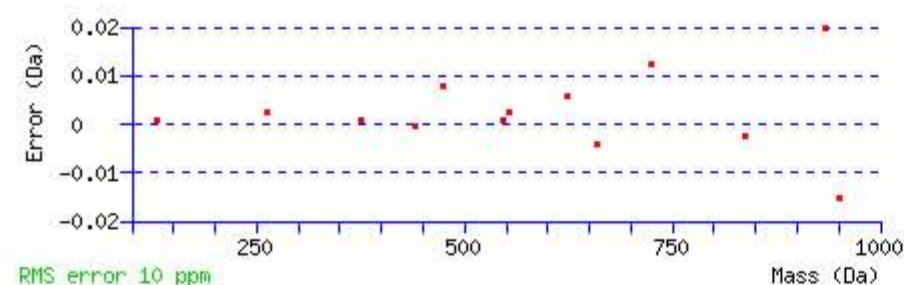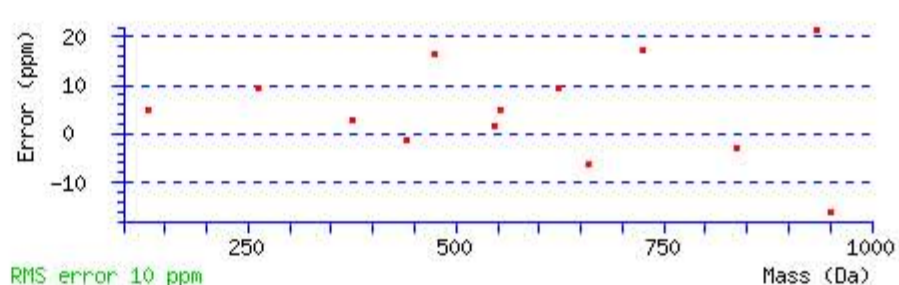

NCBI BLAST search of **QLAVLDK**

(Parameters: blastp, nr protein database, expect=20000, no filter, PAM30)

Other BLAST [web gateways](#)

All matches to this query

| Score | Mr(calc):   | Delta     | Sequence                    |
|-------|-------------|-----------|-----------------------------|
| 30.8  | 1096.631439 | -0.002831 | <a href="#">QLAVLDK</a>     |
| 15.4  | 1096.624054 | 0.004554  | <a href="#">KPVDSVPLSR</a>  |
| 7.3   | 1096.624023 | 0.004585  | <a href="#">IPRENLLDK</a>   |
| 4.2   | 1096.639297 | -0.010689 | <a href="#">AHVSPLFKAK</a>  |
| 1.5   | 1096.631439 | -0.002831 | <a href="#">GILQLDK</a>     |
| 1.3   | 1096.628052 | 0.000556  | <a href="#">YQLSAIFKK</a>   |
| 1.3   | 1096.631439 | -0.002831 | <a href="#">QIDVAIK</a>     |
| 0.6   | 1096.642654 | -0.014046 | <a href="#">NITMHLK</a>     |
| 0.1   | 1096.612808 | 0.015800  | <a href="#">APAVTEATPLK</a> |
| 0.0   | 1096.635269 | -0.006661 | <a href="#">SSSLVIHKAR</a>  |

Mascot: <http://www.matrixscience.com/>



# MASCOT Search Results

## Peptide View

MS/MS Fragmentation of **QSTNAYPDLR**

Found in **PROS\_HUMAN**, Vitamin K-dependent protein S OS=Homo sapiens GN=PROS1 PE=1 SV=1

Match to Query 41871: 1474.726088 from(738.370320,2+) rtinseconds(1732) index(61237)

Title: Locus:1.1.1.2601.16 File:"2013-07-02 CLN FXIII 30 min 1st F 4.wiff"

Data file C:\Program Files (x86)\Matrix Science\Mascot Daemon\mgf\1 FXIII 30 min 1st\mascot\_daemon\_merge.mgf

Click mouse within plot area to zoom in by factor of two about that point

Or, Plot from  to  Da

Label all possible matches  Label matches used for scoring

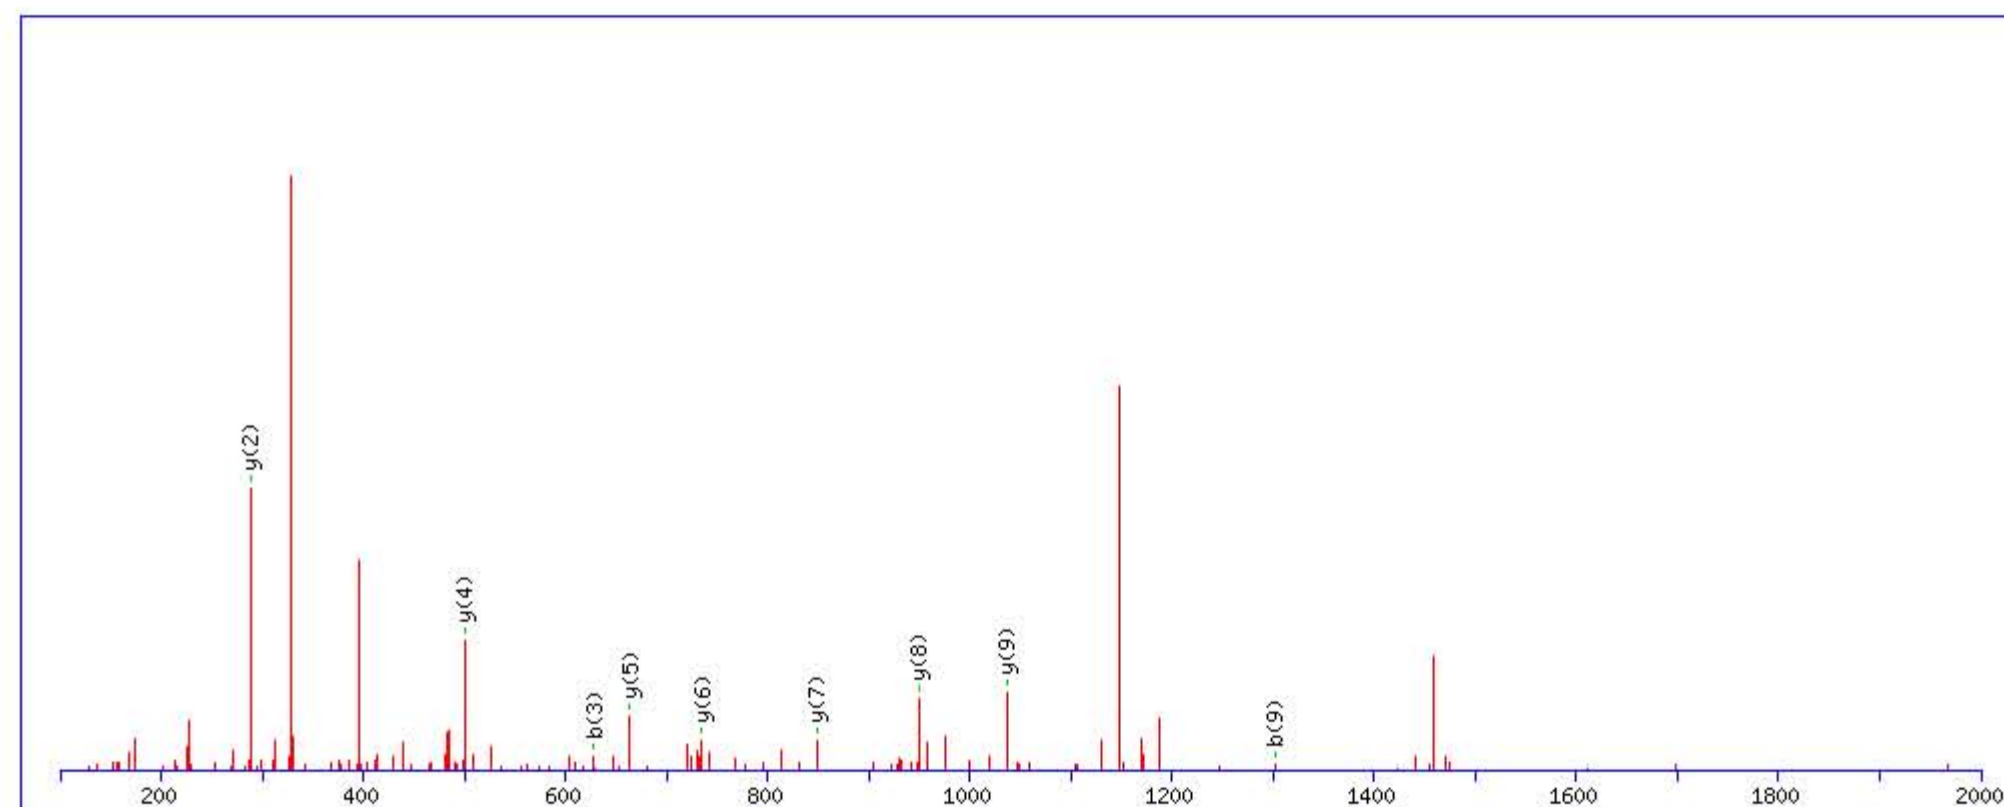

Monoisotopic mass of neutral peptide Mr(calc): 1474.723831

Fixed modifications: Carbamidomethyl (C) (apply to specified residues or termini only)

Variable modifications:

Q1 : Biotin:Thermo-21345 (Q)

Ions Score: 51 Expect: 0.00016

Matches : 9/102 fragment ions using 14 most intense peaks [\(help\)](#)

| #  | b           | b <sup>++</sup> | b <sup>+</sup> | b <sup>+++</sup> | b <sup>0</sup> | b <sup>0++</sup> | Seq. | y           | y <sup>++</sup> | y <sup>+</sup> | y <sup>+++</sup> | y <sup>0</sup> | y <sup>0++</sup> | #  |
|----|-------------|-----------------|----------------|------------------|----------------|------------------|------|-------------|-----------------|----------------|------------------|----------------|------------------|----|
| 1  | 440.232602  | 220.619939      | 423.206053     | 212.106664       |                |                  | Q    |             |                 |                |                  |                |                  | 10 |
| 2  | 527.264630  | 264.135953      | 510.238081     | 255.622679       | 509.254065     | 255.130671       | S    | 1036.505800 | 518.756538      | 1019.479251    | 510.243263       | 1018.495235    | 509.751255       | 9  |
| 3  | 628.312309  | 314.659793      | 611.285760     | 306.146518       | 610.301744     | 305.654510       | T    | 949.473772  | 475.240524      | 932.447223     | 466.727249       | 931.463207     | 466.235241       | 8  |
| 4  | 742.355236  | 371.681256      | 725.328687     | 363.167982       | 724.344671     | 362.675974       | N    | 848.426093  | 424.716684      | 831.399544     | 416.203410       | 830.415528     | 415.711402       | 7  |
| 5  | 813.392350  | 407.199813      | 796.365801     | 398.686538       | 795.381785     | 398.194530       | A    | 734.383166  | 367.695221      | 717.356617     | 359.181946       | 716.372601     | 358.689938       | 6  |
| 6  | 976.455679  | 488.731477      | 959.429130     | 480.218203       | 958.445114     | 479.726195       | Y    | 663.346052  | 332.176664      | 646.319503     | 323.663389       | 645.335487     | 323.171382       | 5  |
| 7  | 1073.508443 | 537.257860      | 1056.481894    | 528.744585       | 1055.497878    | 528.252577       | P    | 500.282723  | 250.644999      | 483.256174     | 242.131725       | 482.272158     | 241.639717       | 4  |
| 8  | 1188.535386 | 594.771331      | 1171.508837    | 586.258057       | 1170.524821    | 585.766049       | D    | 403.229959  | 202.118617      | 386.203410     | 193.605343       | 385.219394     | 193.113335       | 3  |
| 9  | 1301.619450 | 651.313363      | 1284.592901    | 642.800089       | 1283.608885    | 642.308080       | L    | 288.203016  | 144.605146      | 271.176467     | 136.091871       |                |                  | 2  |
| 10 |             |                 |                |                  |                |                  | R    | 175.118952  | 88.063114       | 158.092403     | 79.549839        |                |                  | 1  |

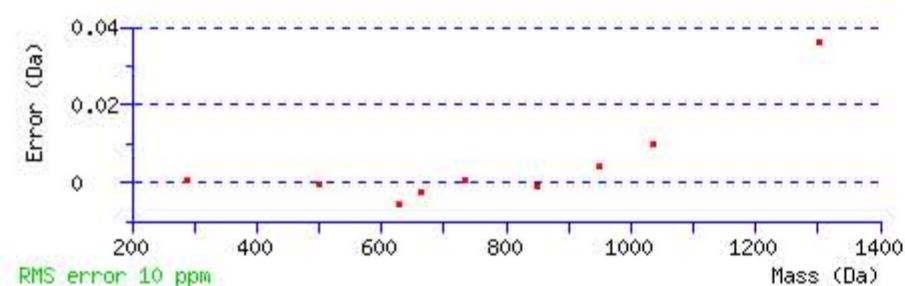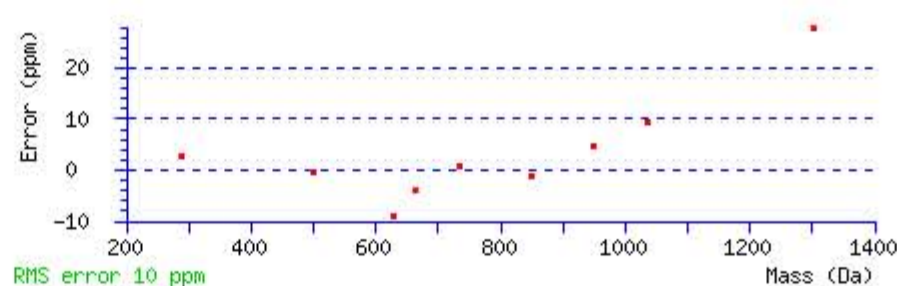

NCBI BLAST search of **QSTNAYPDLR**

(Parameters: blastp, nr protein database, expect=20000, no filter, PAM30)

Other BLAST [web gateways](#)

## All matches to this query

| Score | Mr(calc):   | Delta     | Sequence                        |
|-------|-------------|-----------|---------------------------------|
| 51.2  | 1474.723831 | 0.002257  | <a href="#">QSTNAYPDLR</a>      |
| 16.7  | 1474.721161 | 0.004927  | <a href="#">QSTHGERGHR</a>      |
| 10.4  | 1474.741592 | -0.015504 | <a href="#">SSLEHGSDVYLLR</a>   |
| 7.2   | 1474.744934 | -0.018846 | <a href="#">LSKEELIQNMDR</a>    |
| 5.8   | 1474.746307 | -0.020219 | <a href="#">DAVQHERGPR</a>      |
| 4.9   | 1474.745605 | -0.019517 | <a href="#">EPWEELFSIGLR</a>    |
| 4.7   | 1474.731033 | -0.004945 | <a href="#">RGDGGKMAAAGALER</a> |
| 4.3   | 1474.727661 | -0.001573 | <a href="#">SSATLWNPSRNR</a>    |
| 2.8   | 1474.725189 | 0.000899  | <a href="#">LDMNHGFVHHIR</a>    |
| 1.7   | 1474.719788 | 0.006300  | <a href="#">QQEELEQMRLR</a>     |



# MASCOT Search Results

## Peptide View

MS/MS Fragmentation of **SFQTGLFTAAR**

Found in **PROS\_HUMAN**, Vitamin K-dependent protein S OS=Homo sapiens GN=PROS1 PE=1 SV=1

Match to Query 42922: 1508.784708 from(755.399630,2+) rtinseconds(2285) index(64947)

Title: Locus:1.1.1.2793.9 File:"2013-07-02 CLN FXIII 30 min 1st F 4.wiff"

Data file C:\Program Files (x86)\Matrix Science\Mascot Daemon\mgf\1 FXIII 30 min 1st\mascot\_daemon\_merge.mgf

Click mouse within plot area to zoom in by factor of two about that point

Or, Plot from  to  Da

Label all possible matches  Label matches used for scoring

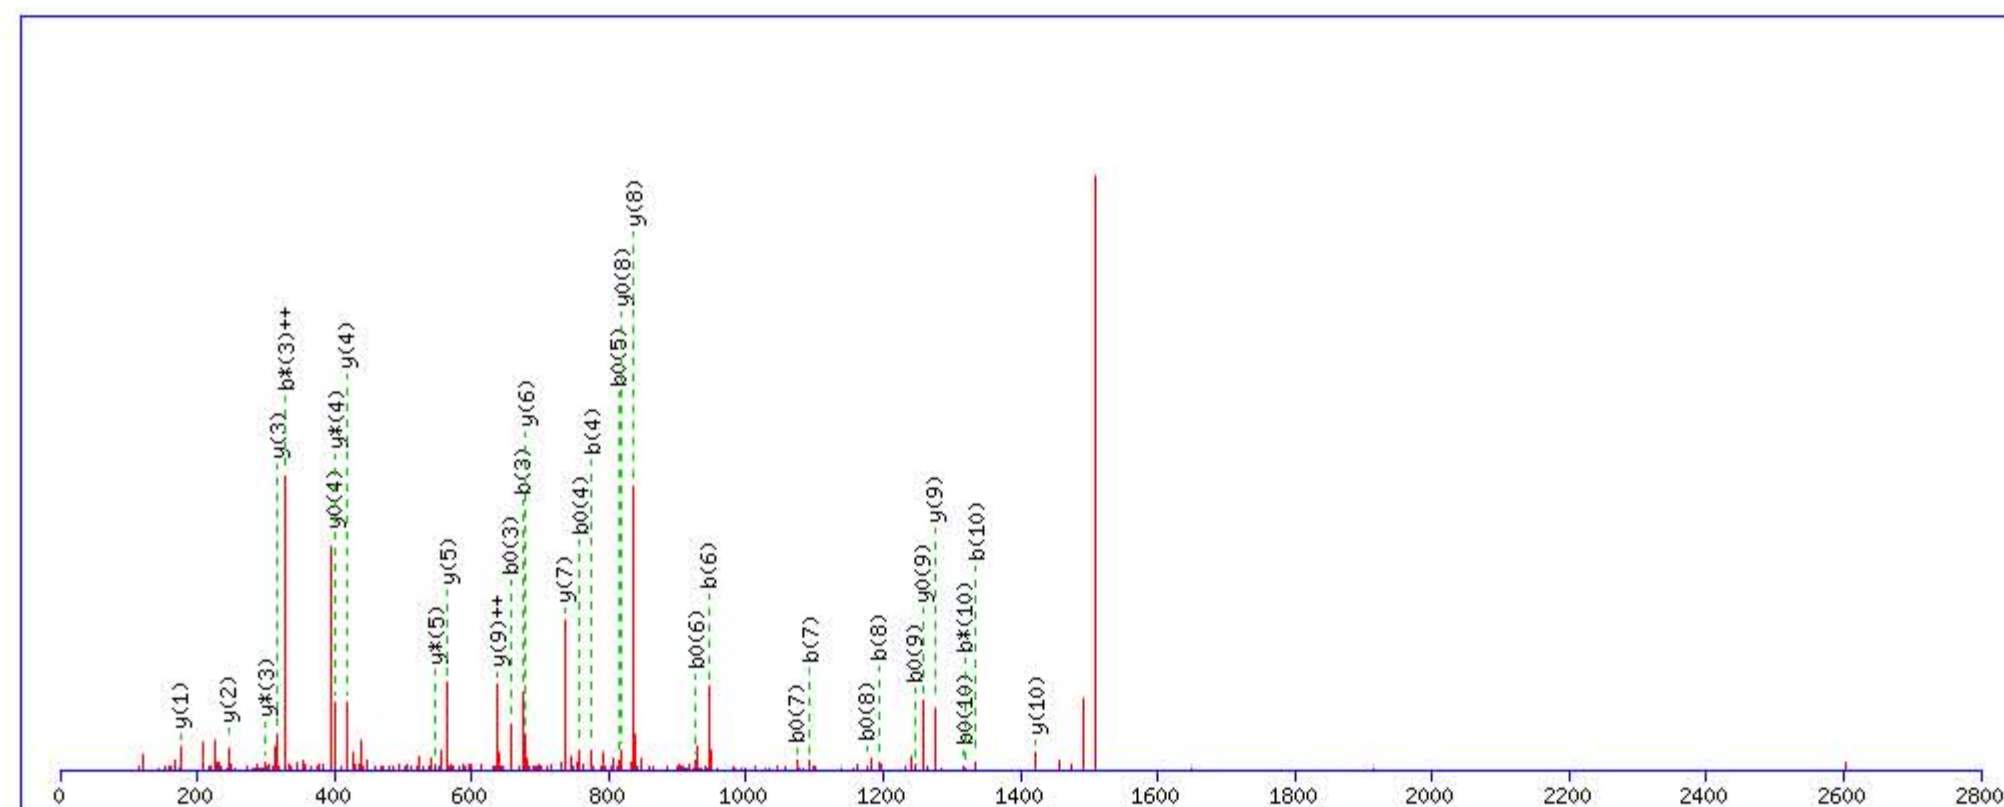

Monoisotopic mass of neutral peptide Mr(calc): 1508.780975

Fixed modifications: Carbamidomethyl (C) (apply to specified residues or termini only)

Variable modifications:

Q3 : Biotin:Thermo-21345 (Q)

Ions Score: 56 Expect: 2.7e-005

Matches : 33/110 fragment ions using 67 most intense peaks [\(help\)](#)

| #  | b           | b <sup>++</sup> | b <sup>+</sup> | b <sup>+++</sup> | b <sup>0</sup> | b <sup>0++</sup> | Seq. | y           | y <sup>++</sup> | y <sup>+</sup> | y <sup>+++</sup> | y <sup>0</sup> | y <sup>0++</sup> | #  |
|----|-------------|-----------------|----------------|------------------|----------------|------------------|------|-------------|-----------------|----------------|------------------|----------------|------------------|----|
| 1  | 88.039304   | 44.523290       |                |                  | 70.028739      | 35.518008        | S    |             |                 |                |                  |                |                  | 11 |
| 2  | 235.107718  | 118.057497      |                |                  | 217.097153     | 109.052214       | F    | 1422.756220 | 711.881748      | 1405.729671    | 703.368474       | 1404.745655    | 702.876465       | 10 |
| 3  | 674.333044  | 337.670160      | 657.306495     | 329.156885       | 656.322479     | 328.664877       | Q    | 1275.687806 | 638.347541      | 1258.661257    | 629.834267       | 1257.677241    | 629.342259       | 9  |
| 4  | 775.380723  | 388.194000      | 758.354174     | 379.680725       | 757.370158     | 379.188717       | T    | 836.462480  | 418.734878      | 819.435931     | 410.221604       | 818.451915     | 409.729596       | 8  |
| 5  | 832.402187  | 416.704732      | 815.375638     | 408.191457       | 814.391622     | 407.699449       | G    | 735.414801  | 368.211039      | 718.388252     | 359.697764       | 717.404236     | 359.205756       | 7  |
| 6  | 945.486251  | 473.246764      | 928.459702     | 464.733489       | 927.475686     | 464.241481       | L    | 678.393337  | 339.700307      | 661.366788     | 331.187032       | 660.382772     | 330.695024       | 6  |
| 7  | 1092.554665 | 546.780971      | 1075.528116    | 538.267696       | 1074.544100    | 537.775688       | F    | 565.309273  | 283.158275      | 548.282724     | 274.645000       | 547.298708     | 274.152992       | 5  |
| 8  | 1193.602344 | 597.304810      | 1176.575795    | 588.791536       | 1175.591779    | 588.299528       | T    | 418.240859  | 209.624067      | 401.214310     | 201.110793       | 400.230294     | 200.618785       | 4  |
| 9  | 1264.639458 | 632.823367      | 1247.612909    | 624.310093       | 1246.628893    | 623.818085       | A    | 317.193180  | 159.100228      | 300.166631     | 150.586953       |                |                  | 3  |
| 10 | 1335.676572 | 668.341924      | 1318.650023    | 659.828650       | 1317.666007    | 659.336642       | A    | 246.156066  | 123.581671      | 229.129517     | 115.068396       |                |                  | 2  |
| 11 |             |                 |                |                  |                |                  | R    | 175.118952  | 88.063114       | 158.092403     | 79.549839        |                |                  | 1  |

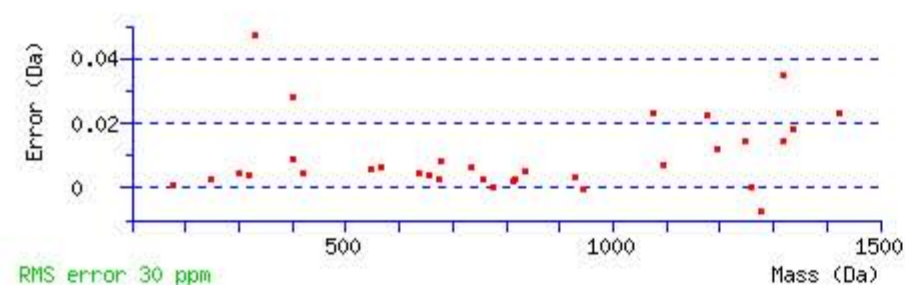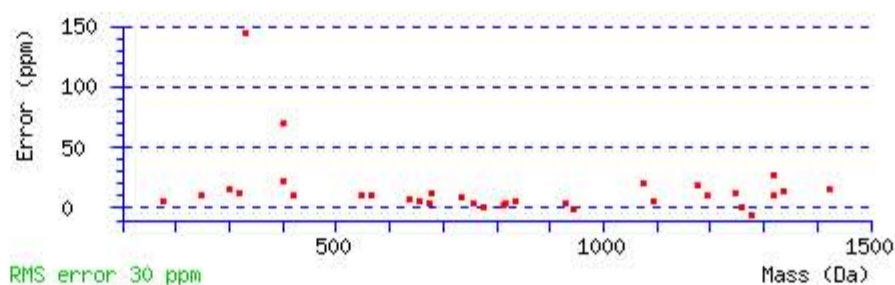

NCBI BLAST search of **SFQTGLFTAAR**

(Parameters: blastp, nr protein database, expect=20000, no filter, PAM30)

Other BLAST [web gateways](#)

## All matches to this query

| Score | Mr(calc):   | Delta     | Sequence                       |
|-------|-------------|-----------|--------------------------------|
| 56.4  | 1508.780975 | 0.003733  | <a href="#">SFQTGLFTAAR</a>    |
| 7.3   | 1508.762344 | 0.022364  | <a href="#">EDFVPFTGEKKGR</a>  |
| 6.2   | 1508.798721 | -0.014013 | <a href="#">SSYGVAAPVDFLRK</a> |
| 4.7   | 1508.776932 | 0.007776  | <a href="#">LMGADSLQLFRSR</a>  |
| 3.0   | 1508.780960 | 0.003748  | <a href="#">TQPPPENLFR</a>     |
| 1.9   | 1508.805939 | -0.021231 | <a href="#">SSPEHTTILRGGVR</a> |
| 0.8   | 1508.765671 | 0.019037  | <a href="#">YDQALKIEMDKR</a>   |
| 0.7   | 1508.762314 | 0.022394  | <a href="#">EPAETLKPPEGWR</a>  |
| 0.1   | 1508.765701 | 0.019007  | <a href="#">TKPLSMLYVDNGR</a>  |



# MASCOT Search Results

## Peptide View

MS/MS Fragmentation of **IETISHEDLQR**

Found in **PROS\_HUMAN**, Vitamin K-dependent protein S OS=Homo sapiens GN=PROS1 PE=1 SV=1

Match to Query 48396: 1650.833262 from(551.285030,3+) rtinseconds(1611) index(60348)

Title: Locus:1.1.1.2559.8 File:"2013-07-02 CLN FXIII 30 min 1st F 4.wiff"

Data file C:\Program Files (x86)\Matrix Science\Mascot Daemon\mgf\1 FXIII 30 min 1st\mascot\_daemon\_merge.mgf

Click mouse within plot area to zoom in by factor of two about that point

Or, Plot from  to  Da

Label all possible matches  Label matches used for scoring

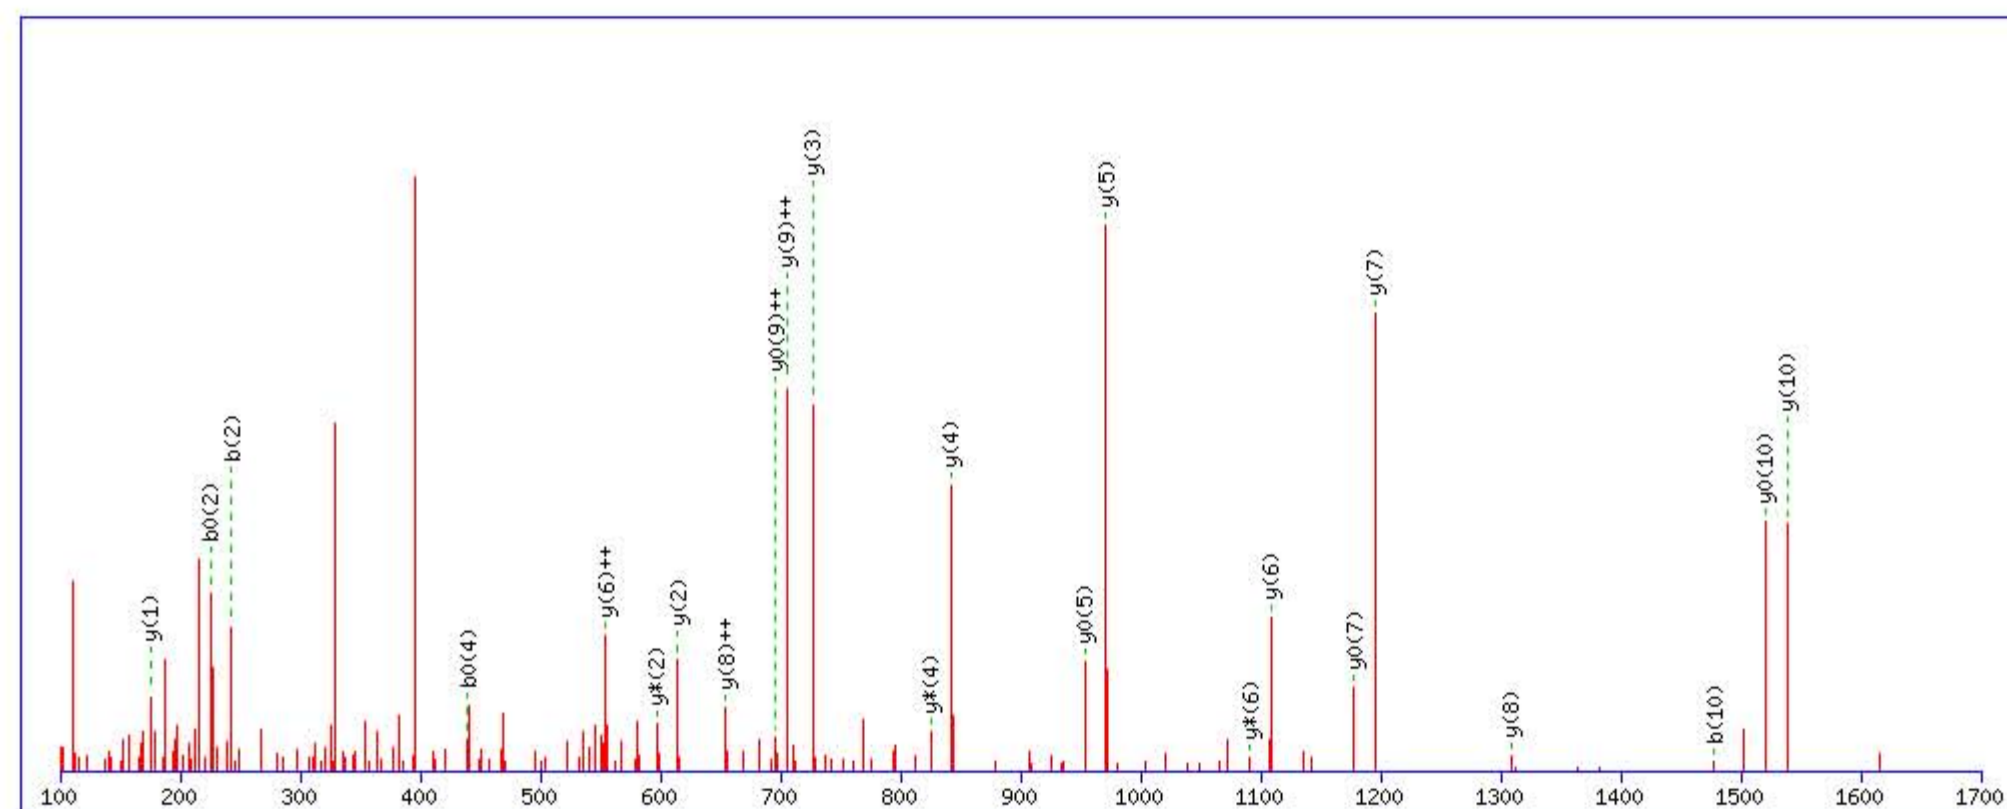

Monoisotopic mass of neutral peptide Mr(calc): 1650.839920

Fixed modifications: Carbamidomethyl (C) (apply to specified residues or termini only)

Variable modifications:

Q10 : Biotin:Thermo-21345 (Q)

Ions Score: 56 Expect: 5.9e-005

Matches : 23/94 fragment ions using 41 most intense peaks [\(help\)](#)

| #  | b                  | b <sup>++</sup> | b <sup>*</sup> | b <sup>*++</sup> | b <sup>0</sup>    | b <sup>0++</sup> | Seq. | y                  | y <sup>++</sup>   | y <sup>*</sup>     | y <sup>*++</sup> | y <sup>0</sup>     | y <sup>0++</sup>  | #  |
|----|--------------------|-----------------|----------------|------------------|-------------------|------------------|------|--------------------|-------------------|--------------------|------------------|--------------------|-------------------|----|
| 1  | 114.091340         | 57.549308       |                |                  |                   |                  | I    |                    |                   |                    |                  |                    |                   | 11 |
| 2  | <b>243.133933</b>  | 122.070605      |                |                  | <b>225.123368</b> | 113.065322       | E    | <b>1538.763154</b> | 769.885215        | 1521.736605        | 761.371941       | <b>1520.752589</b> | 760.879933        | 10 |
| 3  | 344.181612         | 172.594444      |                |                  | 326.171047        | 163.589162       | T    | 1409.720561        | <b>705.363919</b> | 1392.694012        | 696.850644       | 1391.709996        | <b>696.358636</b> | 9  |
| 4  | 457.265676         | 229.136476      |                |                  | <b>439.255111</b> | 220.131194       | I    | <b>1308.672882</b> | <b>654.840079</b> | 1291.646333        | 646.326805       | 1290.662317        | 645.834797        | 8  |
| 5  | 544.297704         | 272.652490      |                |                  | 526.287139        | 263.647208       | S    | <b>1195.588818</b> | 598.298047        | 1178.562269        | 589.784773       | <b>1177.578253</b> | 589.292764        | 7  |
| 6  | 681.356616         | 341.181946      |                |                  | 663.346051        | 332.176664       | H    | <b>1108.556790</b> | <b>554.782033</b> | <b>1091.530241</b> | 546.268759       | 1090.546225        | 545.776751        | 6  |
| 7  | 810.399209         | 405.703243      |                |                  | 792.388644        | 396.697960       | E    | <b>971.497878</b>  | 486.252577        | 954.471329         | 477.739303       | <b>953.487313</b>  | 477.247295        | 5  |
| 8  | 925.426152         | 463.216714      |                |                  | 907.415587        | 454.211432       | D    | <b>842.455285</b>  | 421.731281        | <b>825.428736</b>  | 413.218006       | 824.444720         | 412.725998        | 4  |
| 9  | 1038.510216        | 519.758746      |                |                  | 1020.499651       | 510.753463       | L    | <b>727.428342</b>  | 364.217809        | 710.401793         | 355.704535       |                    |                   | 3  |
| 10 | <b>1477.735542</b> | 739.371409      | 1460.708993    | 730.858135       | 1459.724977       | 730.366127       | Q    | <b>614.344278</b>  | 307.675777        | <b>597.317729</b>  | 299.162503       |                    |                   | 2  |
| 11 |                    |                 |                |                  |                   |                  | R    | <b>175.118952</b>  | 88.063114         | 158.092403         | 79.549839        |                    |                   | 1  |

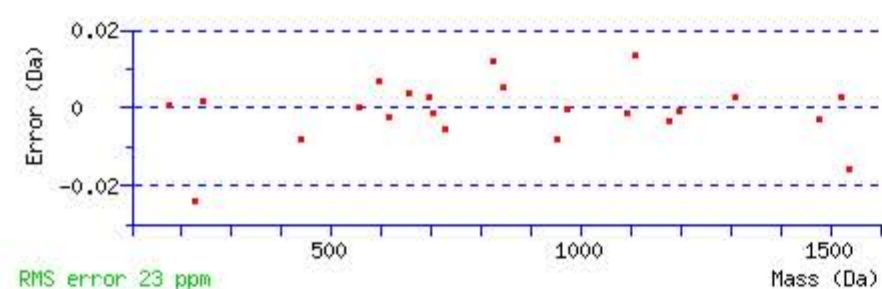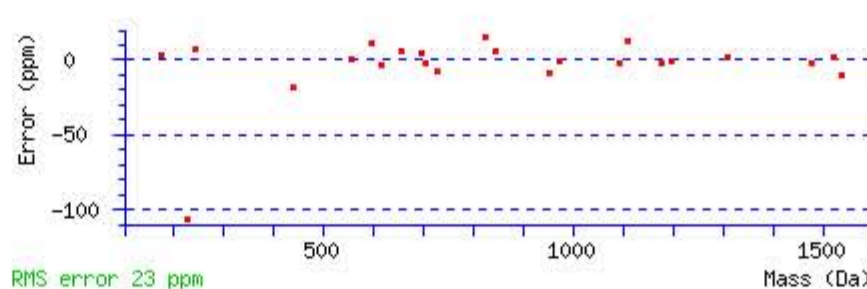

NCBI BLAST search of **IETISHEDLQR**

(Parameters: blastp, nr protein database, expect=20000, no filter, PAM30)

Other BLAST [web gateways](#)

All matches to this query

| Score | Mr(calc):   | Delta     | Sequence                        |
|-------|-------------|-----------|---------------------------------|
| 55.6  | 1650.839920 | -0.006658 | <a href="#">IETISHEDLQR</a>     |
| 9.8   | 1650.833389 | -0.000127 | <a href="#">QQLEHIMATNR</a>     |
| 8.0   | 1650.843765 | -0.010503 | <a href="#">TLQPSSQNTKAHPSR</a> |
| 4.2   | 1650.847305 | -0.014043 | <a href="#">LLFQELMSMSIAPR</a>  |
| 3.0   | 1650.847305 | -0.014043 | <a href="#">LLFQELMSMSIAPR</a>  |
| 2.6   | 1650.839935 | -0.006673 | <a href="#">MQLLKDVVGNDTYR</a>  |
| 0.7   | 1650.822144 | 0.011118  | <a href="#">QSALNTEKMYR</a>     |
| 0.1   | 1650.821274 | 0.011988  | <a href="#">ELSRLDKELDDYR</a>   |



# MASCOT Search Results

## Peptide View

MS/MS Fragmentation of **IQALSLCSDQQSHLEFR**

Found in **PROS\_HUMAN**, Vitamin K-dependent protein S OS=Homo sapiens GN=PROS1 PE=1 SV=1

Match to Query 64932: 2342.160102 from(781.727310,3+) rtinseconds(2169) index(64226)

Title: Locus:1.1.1.2752.17 File:"2013-07-02 CLN FXIII 30 min 1st F 4.wiff"

Data file C:\Program Files (x86)\Matrix Science\Mascot Daemon\mgf\1 FXIII 30 min 1st\mascot\_daemon\_merge.mgf

Click mouse within plot area to zoom in by factor of two about that point

Or, Plot from  to  Da

Label all possible matches  Label matches used for scoring

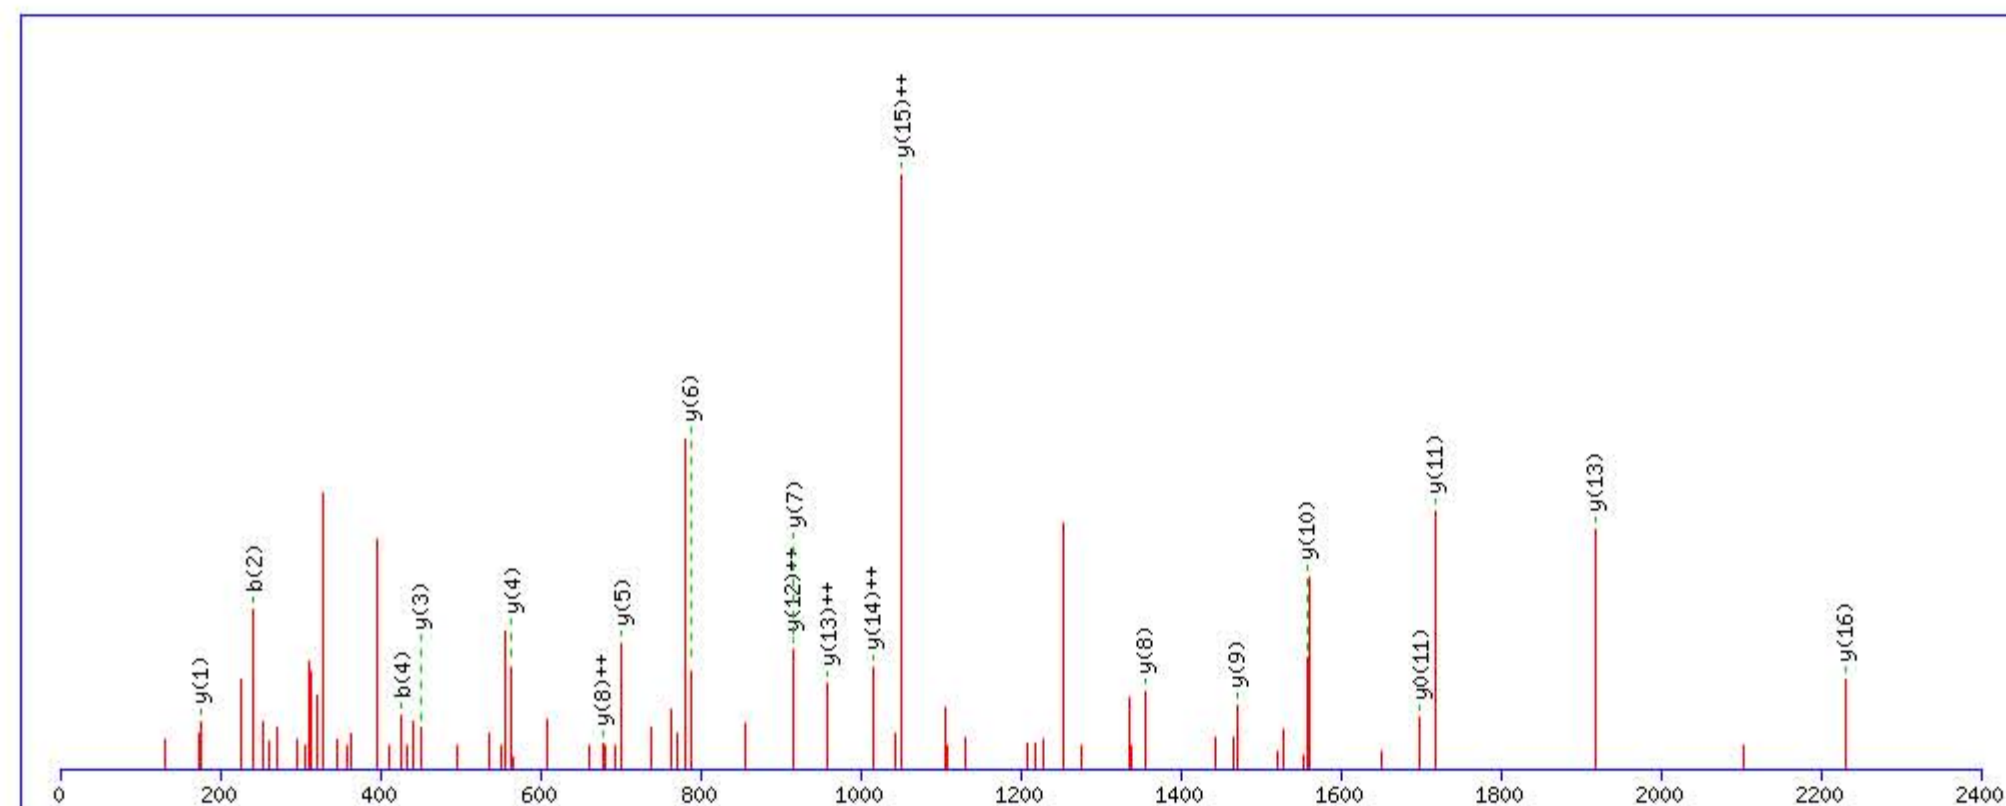

Monoisotopic mass of neutral peptide Mr(calc): 2342.151108

Fixed modifications: Carbamidomethyl (C) (apply to specified residues or termini only)

Variable modifications:

Q10 : Biotin:Thermo-21345 (Q)

Ions Score: 74 Expect: 1.2e-006

Matches : 20/178 fragment ions using 36 most intense peaks [\(help\)](#)

| #  | b                 | b <sup>++</sup> | b <sup>+</sup> | b <sup>+++</sup> | b <sup>0</sup> | b <sup>0++</sup> | Seq. | y                  | y <sup>++</sup>    | y <sup>+</sup> | y <sup>+++</sup> | y <sup>0</sup>     | y <sup>0++</sup> | #  |
|----|-------------------|-----------------|----------------|------------------|----------------|------------------|------|--------------------|--------------------|----------------|------------------|--------------------|------------------|----|
| 1  | 114.091340        | 57.549308       |                |                  |                |                  | I    |                    |                    |                |                  |                    |                  | 17 |
| 2  | <b>242.149918</b> | 121.578597      | 225.123369     | 113.065323       |                |                  | Q    | <b>2230.074335</b> | 1115.540805        | 2213.047786    | 1107.027531      | 2212.063770        | 1106.535523      | 16 |
| 3  | 313.187032        | 157.097154      | 296.160483     | 148.583879       |                |                  | A    | 2102.015757        | <b>1051.511516</b> | 2084.989208    | 1042.998242      | 2084.005192        | 1042.506234      | 15 |
| 4  | <b>426.271096</b> | 213.639186      | 409.244547     | 205.125912       |                |                  | L    | 2030.978643        | <b>1015.992959</b> | 2013.952094    | 1007.479685      | 2012.968078        | 1006.987677      | 14 |
| 5  | 513.303124        | 257.155200      | 496.276575     | 248.641926       | 495.292559     | 248.149918       | S    | <b>1917.894579</b> | <b>959.450927</b>  | 1900.868030    | 950.937653       | 1899.884014        | 950.445645       | 13 |
| 6  | 626.387188        | 313.697232      | 609.360639     | 305.183958       | 608.376623     | 304.691950       | L    | 1830.862551        | <b>915.934913</b>  | 1813.836002    | 907.421639       | 1812.851986        | 906.929631       | 12 |
| 7  | 786.417837        | 393.712557      | 769.391288     | 385.199282       | 768.407272     | 384.707274       | C    | <b>1717.778487</b> | 859.392881         | 1700.751938    | 850.879607       | <b>1699.767922</b> | 850.387599       | 11 |
| 8  | 873.449865        | 437.228571      | 856.423316     | 428.715296       | 855.439300     | 428.223288       | S    | <b>1557.747838</b> | 779.377557         | 1540.721289    | 770.864282       | 1539.737273        | 770.372274       | 10 |
| 9  | 988.476808        | 494.742042      | 971.450259     | 486.228768       | 970.466243     | 485.736760       | D    | <b>1470.715810</b> | 735.861543         | 1453.689261    | 727.348268       | 1452.705245        | 726.856260       | 9  |
| 10 | 1427.702134       | 714.354705      | 1410.675585    | 705.841431       | 1409.691569    | 705.349422       | Q    | <b>1355.688867</b> | <b>678.348071</b>  | 1338.662318    | 669.834797       | 1337.678302        | 669.342789       | 8  |
| 11 | 1555.760712       | 778.383994      | 1538.734163    | 769.870720       | 1537.750147    | 769.378712       | Q    | <b>916.463541</b>  | 458.735408         | 899.436992     | 450.222134       | 898.452976         | 449.730126       | 7  |
| 12 | 1642.792740       | 821.900008      | 1625.766191    | 813.386734       | 1624.782175    | 812.894726       | S    | <b>788.404963</b>  | 394.706119         | 771.378414     | 386.192845       | 770.394398         | 385.700837       | 6  |
| 13 | 1779.851652       | 890.429464      | 1762.825103    | 881.916190       | 1761.841087    | 881.424182       | H    | <b>701.372935</b>  | 351.190105         | 684.346386     | 342.676831       | 683.362370         | 342.184823       | 5  |
| 14 | 1892.935716       | 946.971496      | 1875.909167    | 938.458222       | 1874.925151    | 937.966213       | L    | <b>564.314023</b>  | 282.660649         | 547.287474     | 274.147375       | 546.303458         | 273.655367       | 4  |
| 15 | 2021.978309       | 1011.492793     | 2004.951760    | 1002.979518      | 2003.967744    | 1002.487510      | E    | <b>451.229959</b>  | 226.118617         | 434.203410     | 217.605343       | 433.219394         | 217.113335       | 3  |
| 16 | 2169.046723       | 1085.026999     | 2152.020174    | 1076.513725      | 2151.036158    | 1076.021717      | F    | 322.187366         | 161.597321         | 305.160817     | 153.084046       |                    |                  | 2  |
| 17 |                   |                 |                |                  |                |                  | R    | <b>175.118952</b>  | 88.063114          | 158.092403     | 79.549839        |                    |                  | 1  |

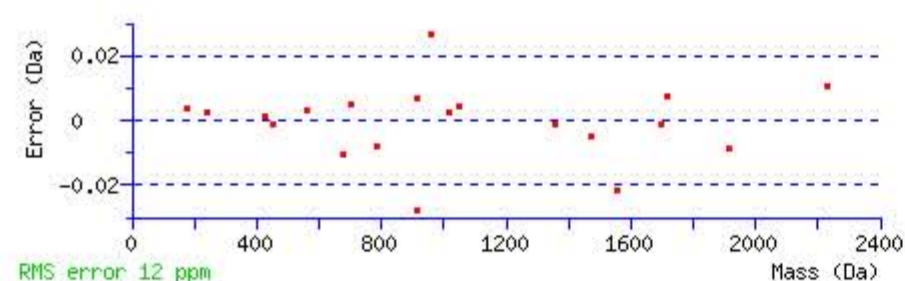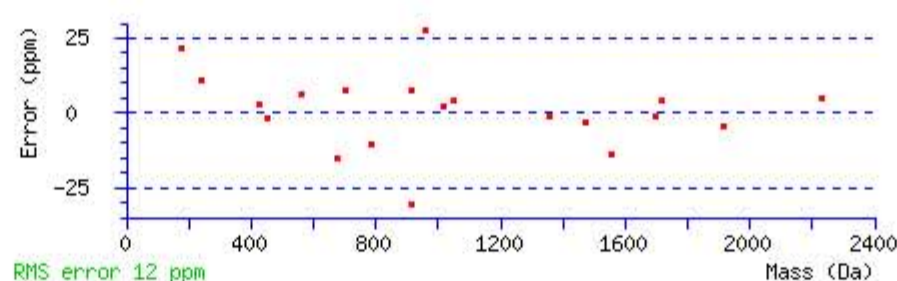

NCBI BLAST search of **IQALSLCSDQQSHLEFR**

(Parameters: blastp, nr protein database, expect=20000, no filter, PAM30)

Other BLAST [web gateways](#)

## All matches to this query

| Score | Mr(calc):   | Delta    | Sequence                          |
|-------|-------------|----------|-----------------------------------|
| 74.0  | 2342.151108 | 0.008994 | <a href="#">IQALSLCSDQQSHLEFR</a> |
| 73.9  | 2342.151108 | 0.008994 | <a href="#">IQALSLCSDQQSHLEFR</a> |
| 7.6   | 2342.151108 | 0.008994 | <a href="#">IQALSLCSDQQSHLEFR</a> |



# MASCOT Search Results

## Peptide View

MS/MS Fragmentation of **IQALSLCSDQQSHLEFR**

Found in **PROS\_HUMAN**, Vitamin K-dependent protein S OS=Homo sapiens GN=PROS1 PE=1 SV=1

Match to Query 64933: 2342.160102 from(781.727310,3+) rtinseconds(2151) index(64080)

Title: Locus:1.1.1.2746.21 File:"2013-07-02 CLN FXIII 30 min 1st F 4.wiff"

Data file C:\Program Files (x86)\Matrix Science\Mascot Daemon\mgf\1 FXIII 30 min 1st\mascot\_daemon\_merge.mgf

Click mouse within plot area to zoom in by factor of two about that point

Or, Plot from  to  Da

Label all possible matches  Label matches used for scoring

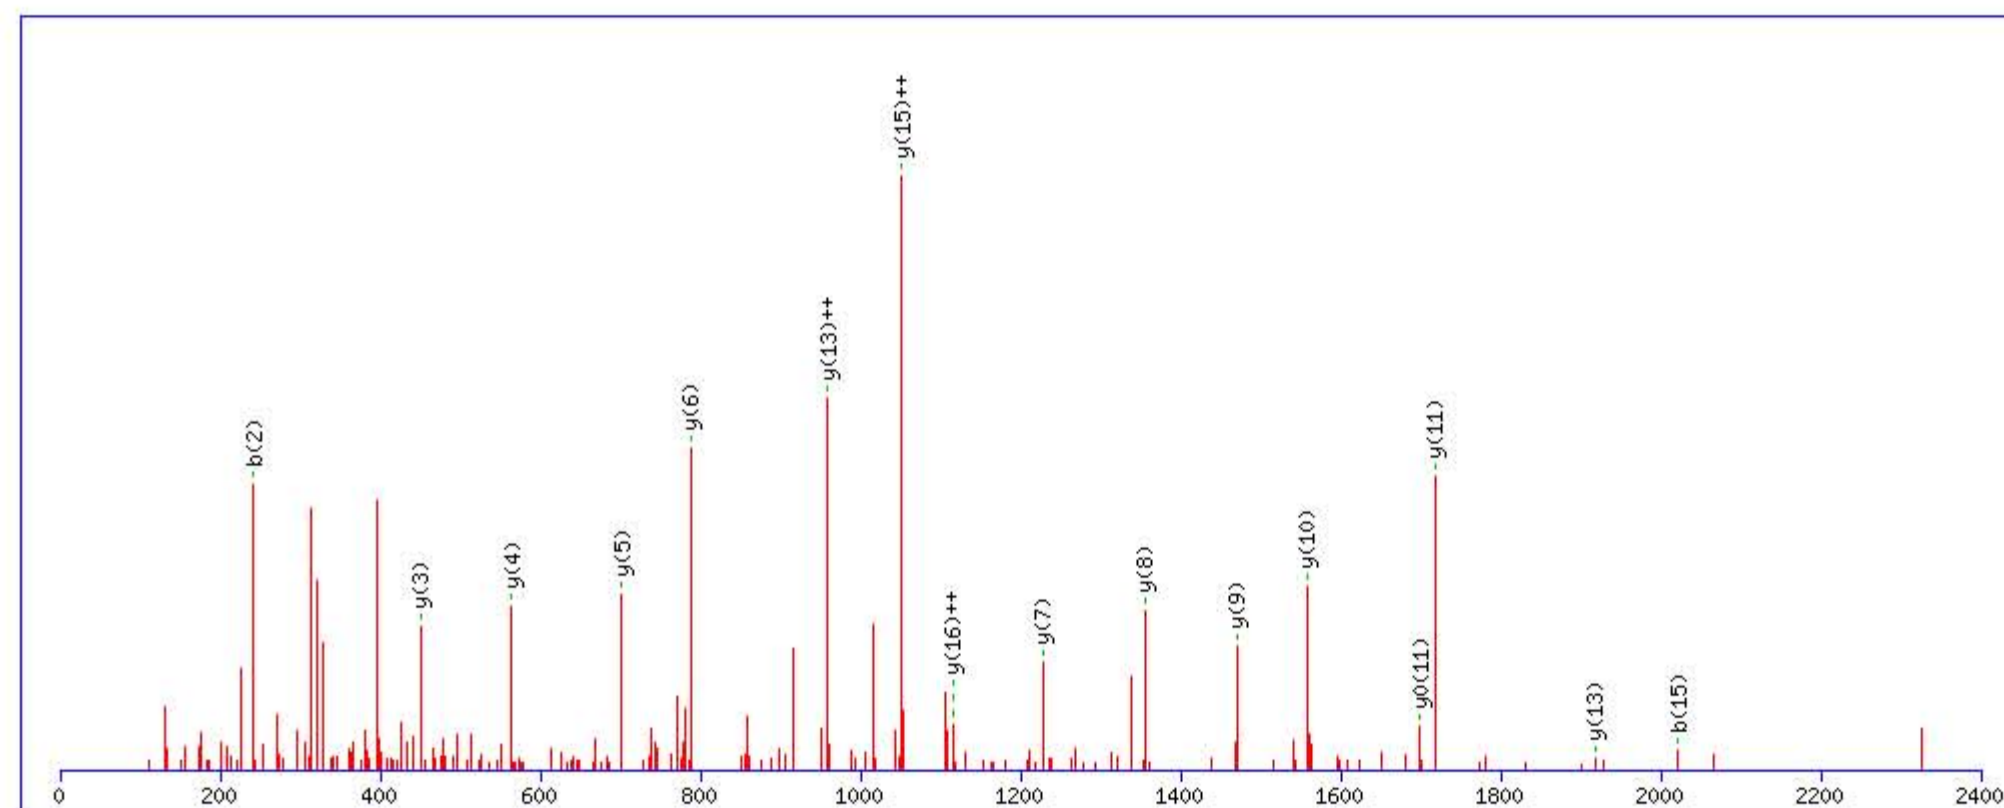

Monoisotopic mass of neutral peptide Mr(calc): 2342.151108

Fixed modifications: Carbamidomethyl (C) (apply to specified residues or termini only)

Variable modifications:

Q11 : Biotin:Thermo-21345 (Q)

Ions Score: 79 Expect: 3.6e-007

Matches : 16/178 fragment ions using 21 most intense peaks [\(help\)](#)

| #  | b                  | b <sup>++</sup> | b <sup>*</sup> | b <sup>***</sup> | b <sup>0</sup> | b <sup>0++</sup> | Seq. | y                  | y <sup>++</sup>    | y <sup>*</sup> | y <sup>***</sup> | y <sup>0</sup>     | y <sup>0++</sup> | #  |
|----|--------------------|-----------------|----------------|------------------|----------------|------------------|------|--------------------|--------------------|----------------|------------------|--------------------|------------------|----|
| 1  | 114.091340         | 57.549308       |                |                  |                |                  | I    |                    |                    |                |                  |                    |                  | 17 |
| 2  | <b>242.149918</b>  | 121.578597      | 225.123369     | 113.065323       |                |                  | Q    | 2230.074335        | <b>1115.540805</b> | 2213.047786    | 1107.027531      | 2212.063770        | 1106.535523      | 16 |
| 3  | 313.187032         | 157.097154      | 296.160483     | 148.583879       |                |                  | A    | 2102.015757        | <b>1051.511516</b> | 2084.989208    | 1042.998242      | 2084.005192        | 1042.506234      | 15 |
| 4  | 426.271096         | 213.639186      | 409.244547     | 205.125912       |                |                  | L    | 2030.978643        | 1015.992959        | 2013.952094    | 1007.479685      | 2012.968078        | 1006.987677      | 14 |
| 5  | 513.303124         | 257.155200      | 496.276575     | 248.641926       | 495.292559     | 248.149918       | S    | <b>1917.894579</b> | <b>959.450927</b>  | 1900.868030    | 950.937653       | 1899.884014        | 950.445645       | 13 |
| 6  | 626.387188         | 313.697232      | 609.360639     | 305.183958       | 608.376623     | 304.691950       | L    | 1830.862551        | 915.934913         | 1813.836002    | 907.421639       | 1812.851986        | 906.929631       | 12 |
| 7  | 786.417837         | 393.712557      | 769.391288     | 385.199282       | 768.407272     | 384.707274       | C    | <b>1717.778487</b> | 859.392881         | 1700.751938    | 850.879607       | <b>1699.767922</b> | 850.387599       | 11 |
| 8  | 873.449865         | 437.228571      | 856.423316     | 428.715296       | 855.439300     | 428.223288       | S    | <b>1557.747838</b> | 779.377557         | 1540.721289    | 770.864282       | 1539.737273        | 770.372274       | 10 |
| 9  | 988.476808         | 494.742042      | 971.450259     | 486.228768       | 970.466243     | 485.736760       | D    | <b>1470.715810</b> | 735.861543         | 1453.689261    | 727.348268       | 1452.705245        | 726.856260       | 9  |
| 10 | 1116.535386        | 558.771331      | 1099.508837    | 550.258057       | 1098.524821    | 549.766049       | Q    | <b>1355.688867</b> | 678.348071         | 1338.662318    | 669.834797       | 1337.678302        | 669.342789       | 8  |
| 11 | 1555.760712        | 778.383994      | 1538.734163    | 769.870720       | 1537.750147    | 769.378712       | Q    | <b>1227.630289</b> | 614.318782         | 1210.603740    | 605.805508       | 1209.619724        | 605.313500       | 7  |
| 12 | 1642.792740        | 821.900008      | 1625.766191    | 813.386734       | 1624.782175    | 812.894726       | S    | <b>788.404963</b>  | 394.706119         | 771.378414     | 386.192845       | 770.394398         | 385.700837       | 6  |
| 13 | 1779.851652        | 890.429464      | 1762.825103    | 881.916190       | 1761.841087    | 881.424182       | H    | <b>701.372935</b>  | 351.190105         | 684.346386     | 342.676831       | 683.362370         | 342.184823       | 5  |
| 14 | 1892.935716        | 946.971496      | 1875.909167    | 938.458222       | 1874.925151    | 937.966213       | L    | <b>564.314023</b>  | 282.660649         | 547.287474     | 274.147375       | 546.303458         | 273.655367       | 4  |
| 15 | <b>2021.978309</b> | 1011.492793     | 2004.951760    | 1002.979518      | 2003.967744    | 1002.487510      | E    | <b>451.229959</b>  | 226.118617         | 434.203410     | 217.605343       | 433.219394         | 217.113335       | 3  |
| 16 | 2169.046723        | 1085.026999     | 2152.020174    | 1076.513725      | 2151.036158    | 1076.021717      | F    | 322.187366         | 161.597321         | 305.160817     | 153.084046       |                    |                  | 2  |
| 17 |                    |                 |                |                  |                |                  | R    | 175.118952         | 88.063114          | 158.092403     | 79.549839        |                    |                  | 1  |

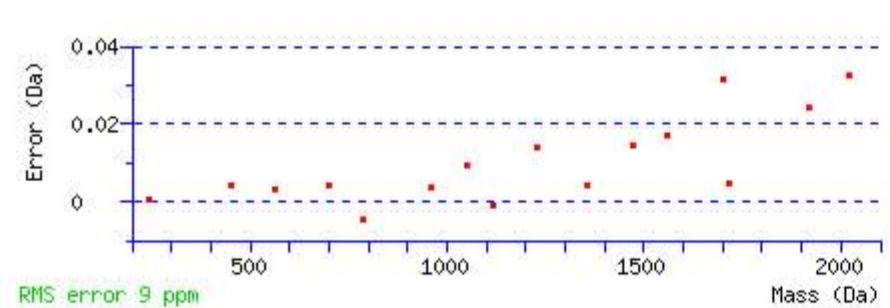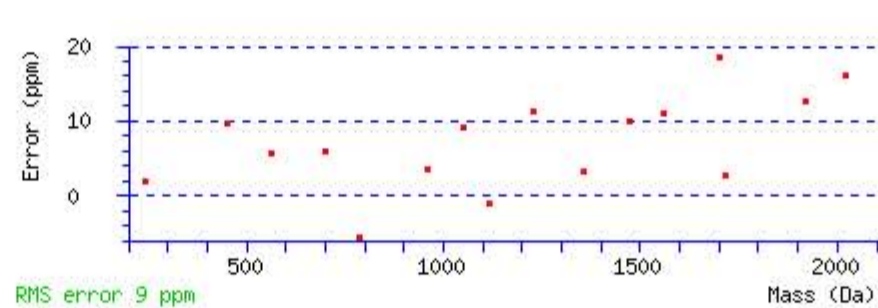

NCBI BLAST search of **IQALSLCSDQQSHLEFR**  
 (Parameters: blastp, nr protein database, expect=20000, no filter, PAM30)  
 Other BLAST [web gateways](#)

### All matches to this query

| Score | Mr(calc):   | Delta    | Sequence                          |
|-------|-------------|----------|-----------------------------------|
| 79.2  | 2342.151108 | 0.008994 | <a href="#">IQALSLCSDQQSHLEFR</a> |
| 64.8  | 2342.151108 | 0.008994 | <a href="#">IQALSLCSDQQSHLEFR</a> |



**MASCOT** Mascot Search Results

**Peptide View**

MS/MS Fragmentation of **TDGCQHFCLPGQESYTCSCAQGYR**  
 Found in **PROZ\_HUMAN**, Vitamin K-dependent protein Z OS=Homo sapiens GN=PROZ PE=1 SV=2

Match to Query 60152: 3192.310002 from(1065.110610,3+) rtinseconds(2031) index(63295)  
 Title: Locus:1.1.1.2704.18 File:"2013-07-02 CLN FXIII 30 min 1st F 4.wiff"  
 Data file C:\Program Files (x86)\Matrix Science\Mascot Daemon\mgf1 FXIII 30 min 1st\mascot\_daemon\_merge.mgf

Click mouse within plot area to zoom in by factor of two about that point  
 Or, Plot from  to  Da   
 Label all possible matches  Label matches used for scoring

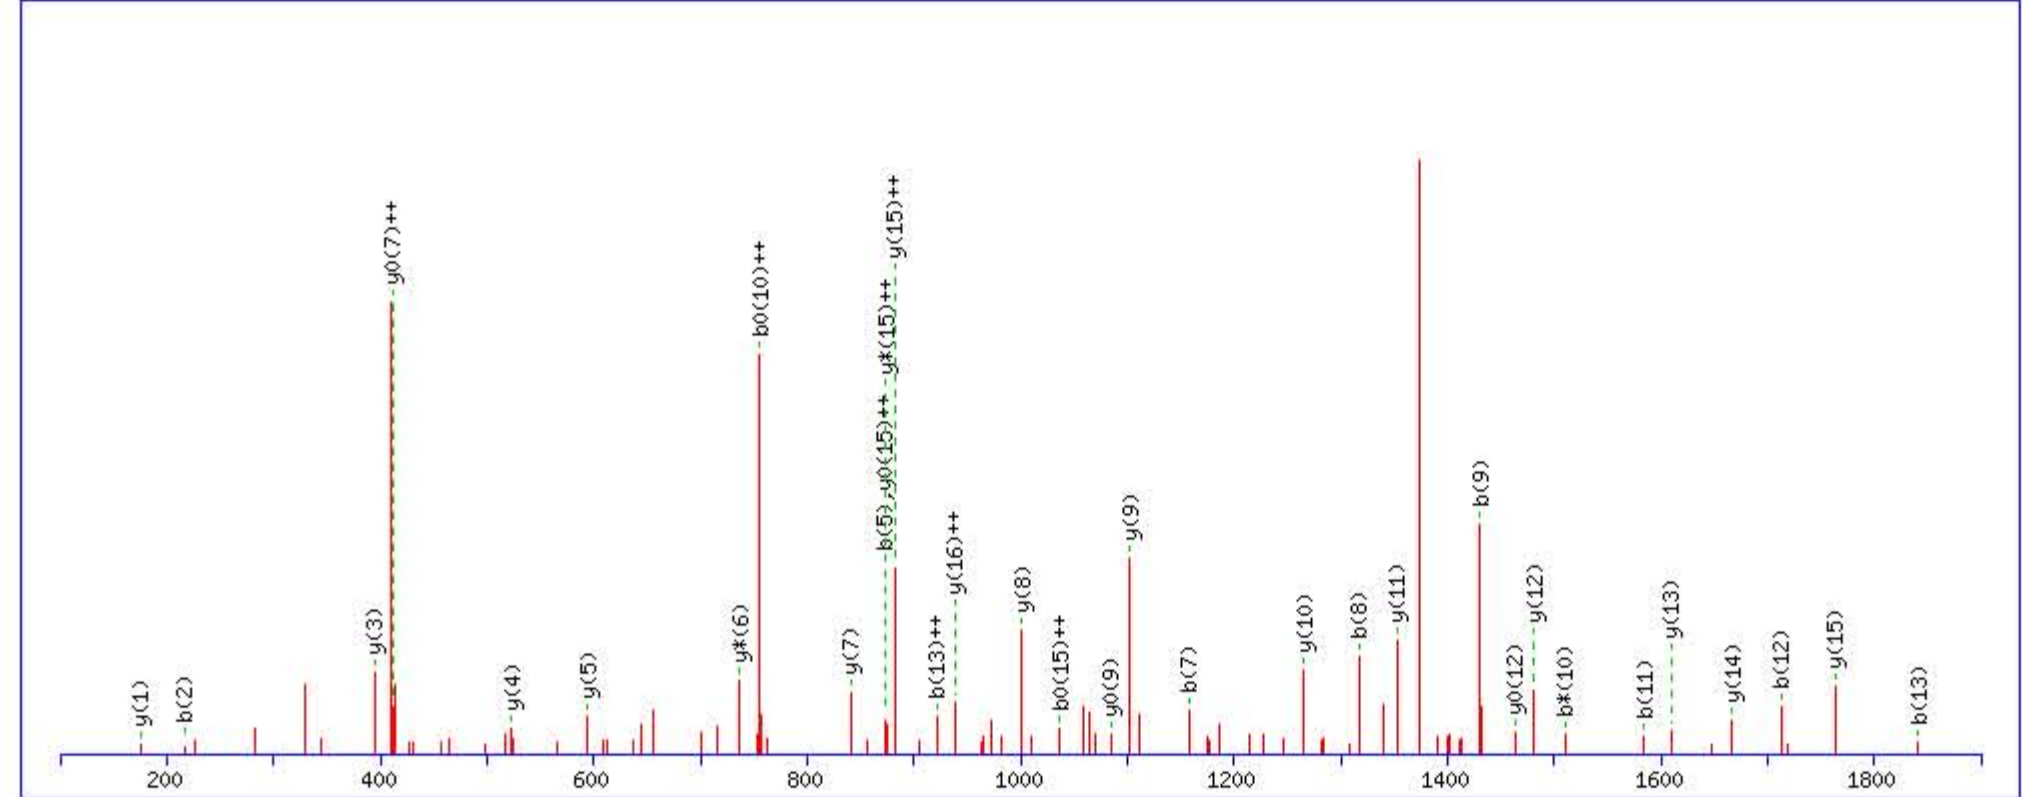

Monoisotopic mass of neutral peptide Mr(calc): 3192.298050  
 Fixed modifications: Carbamidomethyl (C) (apply to specified residues or termini only)  
 Variable modifications:  
 Q5 : Biotin:Thermo-21345 (Q)  
 Ions Score: 64 Expect: 4.1e-006  
 Matches : 33/256 fragment ions using 61 most intense peaks [\(help\)](#)

| #  | b                  | b <sup>++</sup>   | b <sup>+</sup>     | b <sup>+++</sup> | b <sup>0</sup> | b <sup>0++</sup>   | Seq. | y                  | y <sup>++</sup>   | y <sup>+</sup>    | y <sup>+++</sup>  | y <sup>0</sup>     | y <sup>0++</sup>  | #  |
|----|--------------------|-------------------|--------------------|------------------|----------------|--------------------|------|--------------------|-------------------|-------------------|-------------------|--------------------|-------------------|----|
| 1  | 102.054955         | 51.531116         |                    |                  | 84.044390      | 42.525833          | T    |                    |                   |                   |                   |                    |                   | 24 |
| 2  | <b>217.081898</b>  | 109.044587        |                    |                  | 199.071333     | 100.039304         | D    | 3092.257619        | 1546.632447       | 3075.231070       | 1538.119173       | 3074.247054        | 1537.627165       | 23 |
| 3  | 274.103362         | 137.555319        |                    |                  | 256.092797     | 128.550037         | G    | 2977.230676        | 1489.118976       | 2960.204127       | 1480.605701       | 2959.220111        | 1480.113693       | 22 |
| 4  | 434.134011         | 217.570644        |                    |                  | 416.123446     | 208.565361         | C    | 2920.209212        | 1460.608244       | 2903.182663       | 1452.094969       | 2902.198647        | 1451.602961       | 21 |
| 5  | <b>873.359337</b>  | 437.183307        | 856.332788         | 428.670032       | 855.348772     | 428.178024         | Q    | 2760.178563        | 1380.592919       | 2743.152014       | 1372.079645       | 2742.167998        | 1371.587637       | 20 |
| 6  | 1010.418249        | 505.712763        | 993.391700         | 497.199488       | 992.407684     | 496.707480         | H    | 2320.953237        | 1160.980256       | 2303.926688       | 1152.466982       | 2302.942672        | 1151.974974       | 19 |
| 7  | <b>1157.486663</b> | 579.246970        | 1140.460114        | 570.733695       | 1139.476098    | 570.241687         | F    | 2183.894325        | 1092.450800       | 2166.867776       | 1083.937526       | 2165.883760        | 1083.445518       | 18 |
| 8  | <b>1317.517312</b> | 659.262294        | 1300.490763        | 650.749020       | 1299.506747    | 650.257012         | C    | 2036.825911        | 1018.916594       | 2019.799362       | 1010.403319       | 2018.815346        | 1009.911311       | 17 |
| 9  | <b>1430.601376</b> | 715.804326        | 1413.574827        | 707.291052       | 1412.590811    | 706.799044         | L    | 1876.795262        | <b>938.901269</b> | 1859.768713       | 930.387994        | 1858.784697        | 929.895986        | 16 |
| 10 | 1527.654140        | 764.330708        | <b>1510.627591</b> | 755.817434       | 1509.643575    | <b>755.325426</b>  | P    | <b>1763.711198</b> | <b>882.359237</b> | 1746.684649       | <b>873.845963</b> | 1745.700633        | <b>873.353954</b> | 15 |
| 11 | <b>1584.675604</b> | 792.841440        | 1567.649055        | 784.328166       | 1566.665039    | 783.836158         | G    | <b>1666.658434</b> | 833.832855        | 1649.631885       | 825.319581        | 1648.647869        | 824.827572        | 14 |
| 12 | <b>1712.734182</b> | 856.870729        | 1695.707633        | 848.357455       | 1694.723617    | 847.865446         | Q    | <b>1609.636970</b> | 805.322123        | 1592.610421       | 796.808849        | 1591.626405        | 796.316841        | 13 |
| 13 | <b>1841.776775</b> | <b>921.392026</b> | 1824.750226        | 912.878751       | 1823.766210    | 912.386743         | E    | <b>1481.578392</b> | 741.292834        | 1464.551843       | 732.779560        | <b>1463.567827</b> | 732.287552        | 12 |
| 14 | 1928.808803        | 964.908040        | 1911.782254        | 956.394765       | 1910.798238    | 955.902757         | S    | <b>1352.535799</b> | 676.771538        | 1335.509250       | 668.258263        | 1334.525234        | 667.766255        | 11 |
| 15 | 2091.872132        | 1046.439704       | 2074.845583        | 1037.926429      | 2073.861567    | <b>1037.434421</b> | Y    | <b>1265.503771</b> | 633.255523        | 1248.477222       | 624.742249        | 1247.493206        | 624.250241        | 10 |
| 16 | 2192.919811        | 1096.963543       | 2175.893262        | 1088.450269      | 2174.909246    | 1087.958261        | T    | <b>1102.440442</b> | 551.723859        | 1085.413893       | 543.210584        | <b>1084.429877</b> | 542.718576        | 9  |
| 17 | 2352.950460        | 1176.978868       | 2335.923911        | 1168.465593      | 2334.939895    | 1167.973585        | C    | <b>1001.392763</b> | 501.200020        | 984.366214        | 492.686745        | 983.382198         | 492.194737        | 8  |
| 18 | 2439.982488        | 1220.494882       | 2422.955939        | 1211.981607      | 2421.971923    | 1211.489599        | S    | <b>841.362114</b>  | 421.184695        | 824.335565        | 412.671421        | 823.351549         | <b>412.179413</b> | 7  |
| 19 | 2600.013137        | 1300.510206       | 2582.986588        | 1291.996932      | 2582.002572    | 1291.504924        | C    | 754.330086         | 377.668681        | <b>737.303537</b> | 369.155407        |                    |                   | 6  |
| 20 | 2671.050251        | 1336.028763       | 2654.023702        | 1327.515489      | 2653.039686    | 1327.023481        | A    | <b>594.299437</b>  | 297.653357        | 577.272888        | 289.140082        |                    |                   | 5  |
| 21 | 2799.108829        | 1400.058052       | 2782.082280        | 1391.544778      | 2781.098264    | 1391.052770        | Q    | <b>523.262323</b>  | 262.134800        | 506.235774        | 253.621525        |                    |                   | 4  |
| 22 | 2856.130293        | 1428.568784       | 2839.103744        | 1420.055510      | 2838.119728    | 1419.563502        | G    | <b>395.203745</b>  | 198.105510        | 378.177196        | 189.592236        |                    |                   | 3  |
| 23 | 3019.193622        | 1510.100449       | 3002.167073        | 1501.587174      | 3001.183057    | 1501.095166        | Y    | 338.182281         | 169.594778        | 321.155732        | 161.081504        |                    |                   | 2  |
| 24 |                    |                   |                    |                  |                |                    | R    | <b>175.118952</b>  | 88.063114         | 158.092403        | 79.549839         |                    |                   | 1  |

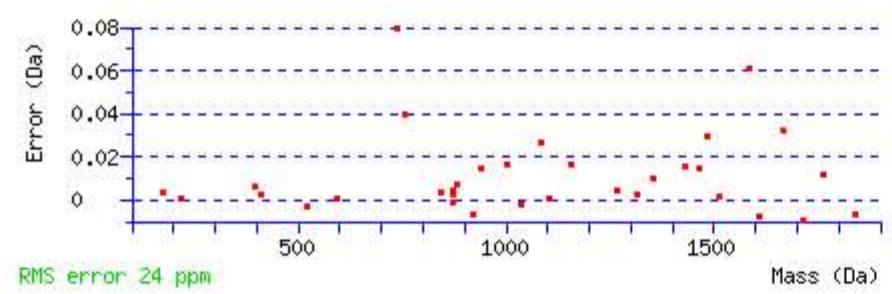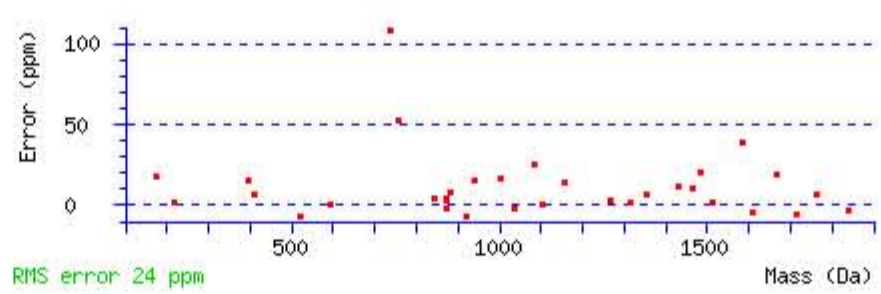

NCBI BLAST search of **TDGCQHFCLPGQESYTCSCAQGYR**  
 (Parameters: blastp, nr protein database, expect=20000, no filter, PAM30)  
 Other BLAST [web gateways](#)

**All matches to this query**

| Score | Mr(calc):   | Delta    | Sequence                                 |
|-------|-------------|----------|------------------------------------------|
| 64.1  | 3192.298050 | 0.011952 | <a href="#">TDGCQHFCLPGQESYTCSCAQGYR</a> |
| 27.1  | 3192.298050 | 0.011952 | <a href="#">TDGCQHFCLPGQESYTCSCAQGYR</a> |



# MASCOT Search Results

## Peptide View

MS/MS Fragmentation of **GQYCYELDEK**

Found in **VTNC\_HUMAN**, Vitronectin OS=Homo sapiens GN=VTN PE=1 SV=1

Match to Query 46570: 1614.710908 from(808.362730,2+) rtinseconds(1857) index(62021)

Title: Locus:1.1.1.2644.25 File:"2013-07-02 CLN FXIII 30 min 1st F 4.wiff"

Data file C:\Program Files (x86)\Matrix Science\Mascot Daemon\mgf1 FXIII 30 min 1st\mascot\_daemon\_merge.mgf

Click mouse within plot area to zoom in by factor of two about that point

Or, Plot from  to  Da

Label all possible matches  Label matches used for scoring

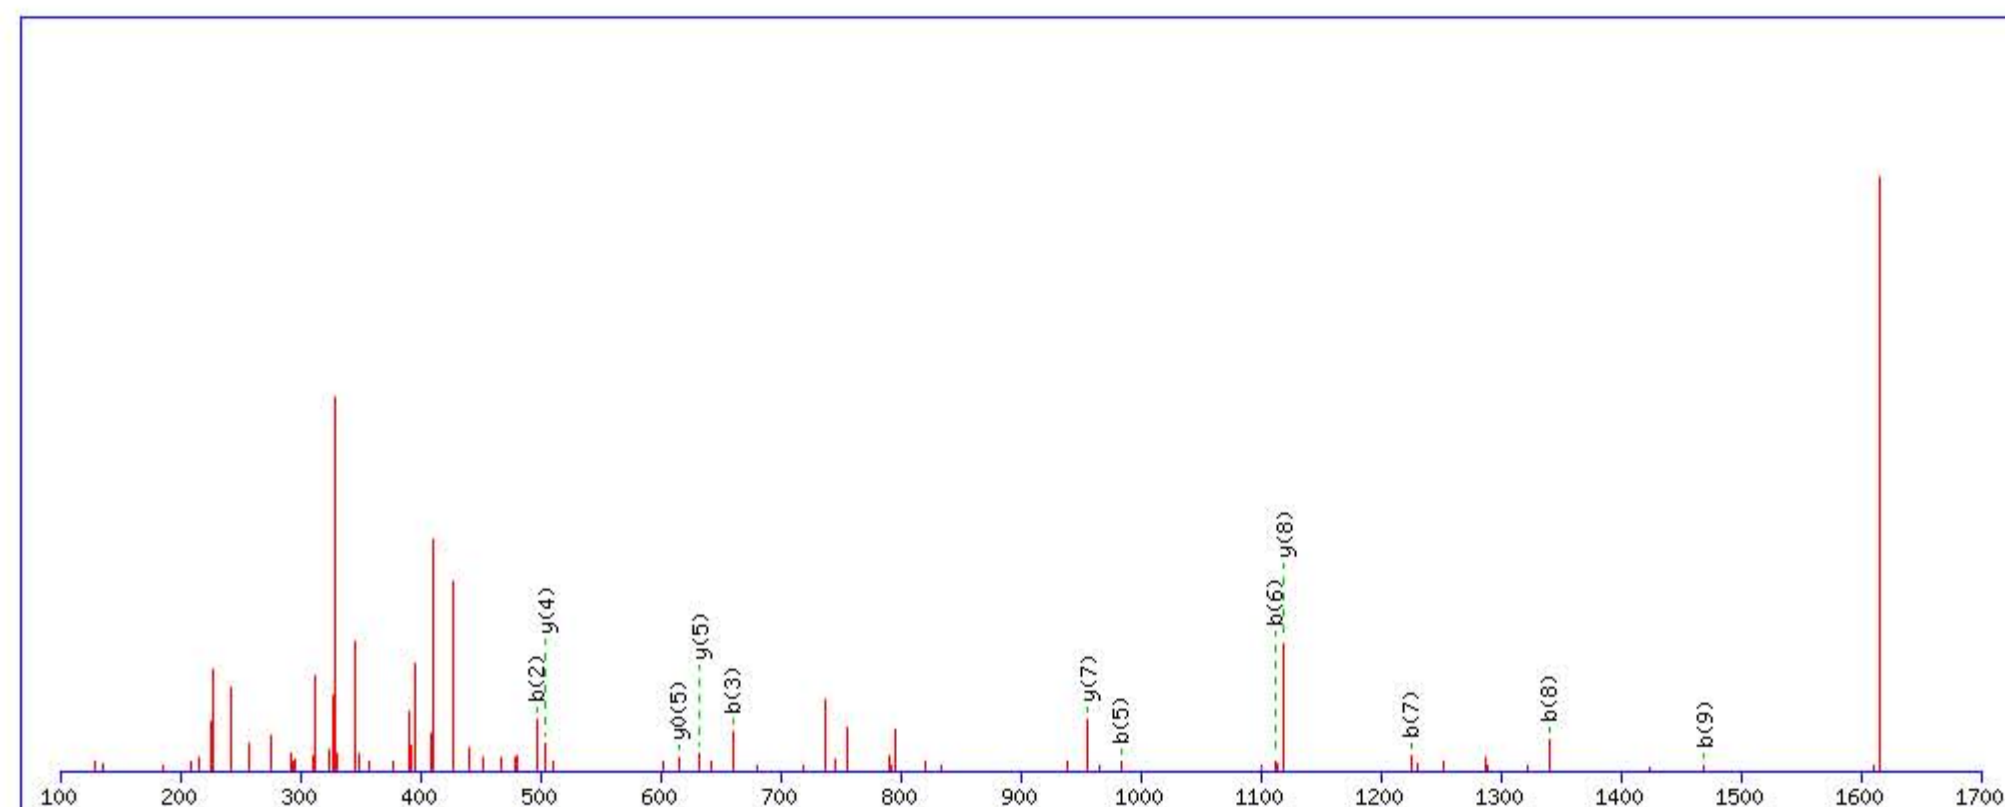

Monoisotopic mass of neutral peptide Mr(calc): 1614.705795

Fixed modifications: Carbamidomethyl (C) (apply to specified residues or termini only)

Variable modifications:

Q2 : Biotin:Thermo-21345 (Q)

Ions Score: 30 Expect: 0.0039

Matches : 12/94 fragment ions using 26 most intense peaks [\(help\)](#)

| #  | b                  | b <sup>++</sup> | b <sup>*</sup> | b <sup>*++</sup> | b <sup>0</sup> | b <sup>0++</sup> | Seq. | y                  | y <sup>++</sup> | y <sup>*</sup> | y <sup>*++</sup> | y <sup>0</sup>    | y <sup>0++</sup> | #  |
|----|--------------------|-----------------|----------------|------------------|----------------|------------------|------|--------------------|-----------------|----------------|------------------|-------------------|------------------|----|
| 1  | 58.028740          | 29.518008       |                |                  |                |                  | G    |                    |                 |                |                  |                   |                  | 10 |
| 2  | <b>497.254066</b>  | 249.130671      | 480.227517     | 240.617397       |                |                  | Q    | 1558.691630        | 779.849453      | 1541.665081    | 771.336179       | 1540.681065       | 770.844171       | 9  |
| 3  | <b>660.317395</b>  | 330.662336      | 643.290846     | 322.149061       |                |                  | Y    | <b>1119.466304</b> | 560.236790      | 1102.439755    | 551.723516       | 1101.455739       | 551.231508       | 8  |
| 4  | 820.348044         | 410.677660      | 803.321495     | 402.164386       |                |                  | C    | <b>956.402975</b>  | 478.705126      | 939.376426     | 470.191851       | 938.392410        | 469.699843       | 7  |
| 5  | <b>983.411373</b>  | 492.209325      | 966.384824     | 483.696050       |                |                  | Y    | 796.372326         | 398.689801      | 779.345777     | 390.176527       | 778.361761        | 389.684519       | 6  |
| 6  | <b>1112.453966</b> | 556.730621      | 1095.427417    | 548.217347       | 1094.443401    | 547.725339       | E    | <b>633.308997</b>  | 317.158137      | 616.282448     | 308.644862       | <b>615.298432</b> | 308.152854       | 5  |
| 7  | <b>1225.538030</b> | 613.272653      | 1208.511481    | 604.759379       | 1207.527465    | 604.267371       | L    | <b>504.266404</b>  | 252.636840      | 487.239855     | 244.123566       | 486.255839        | 243.631558       | 4  |
| 8  | <b>1340.564973</b> | 670.786125      | 1323.538424    | 662.272850       | 1322.554408    | 661.780842       | D    | 391.182340         | 196.094808      | 374.155791     | 187.581534       | 373.171775        | 187.089526       | 3  |
| 9  | <b>1469.607566</b> | 735.307421      | 1452.581017    | 726.794147       | 1451.597001    | 726.302139       | E    | 276.155397         | 138.581337      | 259.128848     | 130.068062       | 258.144832        | 129.576054       | 2  |
| 10 |                    |                 |                |                  |                |                  | K    | 147.112804         | 74.060040       | 130.086255     | 65.546765        |                   |                  | 1  |

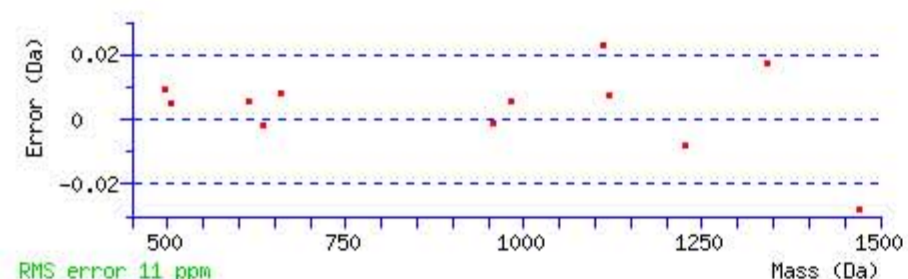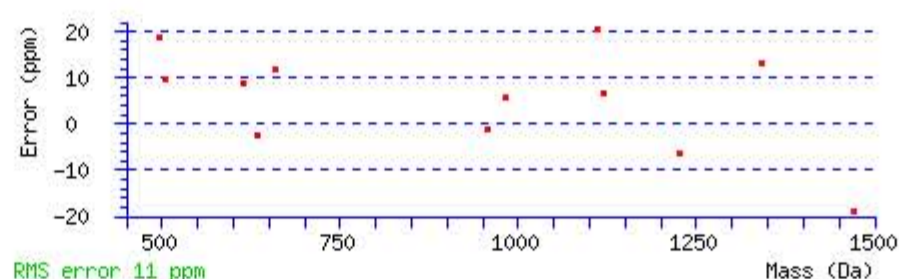

NCBI BLAST search of **GQYCYELDEK**

(Parameters: blastp, nr protein database, expect=20000, no filter, PAM30)

Other BLAST [web gateways](#)

All matches to this query

| Score | Mr(calc):   | Delta    | Sequence                   |
|-------|-------------|----------|----------------------------|
| 30.3  | 1614.705795 | 0.005113 | <a href="#">GQYCYELDEK</a> |

Mascot: <http://www.matrixscience.com/>



# MASCOT Search Results

## Peptide View

MS/MS Fragmentation of **DWHGVPGQVDAAMAGR**

Found in **VTNC\_HUMAN**, Vitronectin OS=Homo sapiens GN=VTN PE=1 SV=1

Match to Query 56100: 1976.937942 from(659.986590,3+) rtinseconds(2148) index(64054)

Title: Locus:1.1.1.2745.20 File:"2013-07-02 CLN FXIII 30 min 1st F 4.wiff"

Data file C:\Program Files (x86)\Matrix Science\Mascot Daemon\mgf\1 FXIII 30 min 1st\mascot\_daemon\_merge.mgf

Click mouse within plot area to zoom in by factor of two about that point

Or, Plot from  to  Da

Label all possible matches  Label matches used for scoring

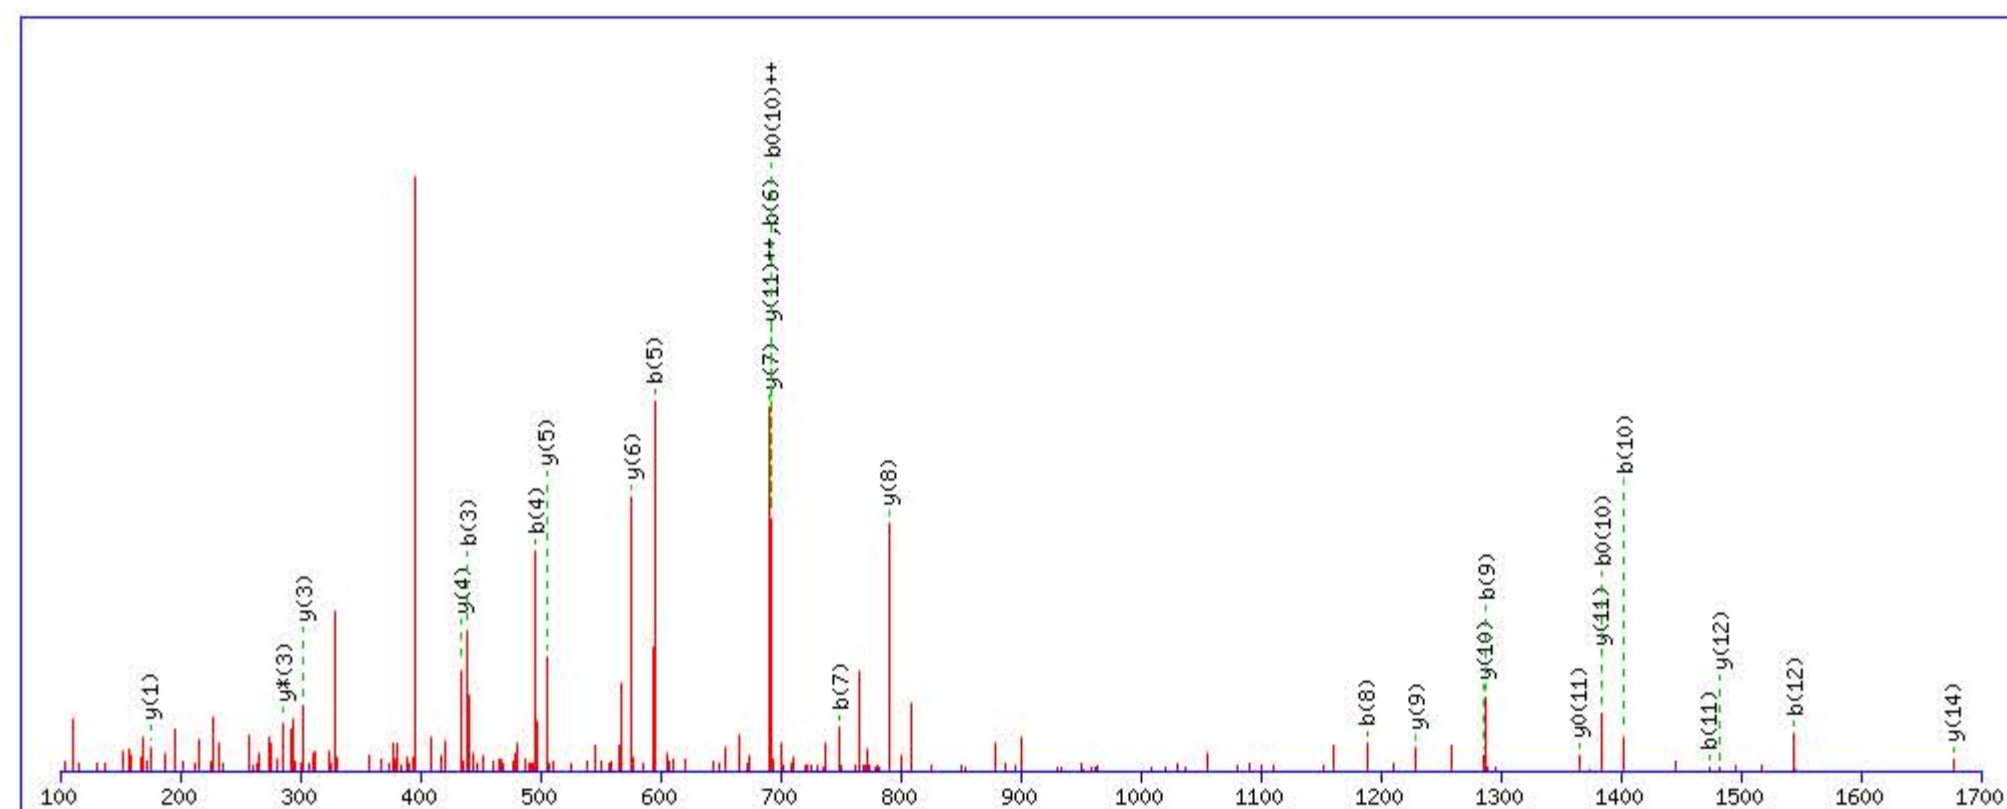

Monoisotopic mass of neutral peptide Mr(calc): 1976.934937

Fixed modifications: Carbamidomethyl (C) (apply to specified residues or termini only)

Variable modifications:

Q8 : Biotin:Thermo-21345 (Q)

Ions Score: 62 Expect: 6.3e-006

Matches : 27/154 fragment ions using 60 most intense peaks [\(help\)](#)

| #  | b                  | b <sup>++</sup> | b <sup>*</sup> | b <sup>*++</sup> | b <sup>0</sup>     | b <sup>0++</sup>  | Seq. | y                  | y <sup>++</sup>   | y <sup>*</sup>    | y <sup>*++</sup> | y <sup>0</sup>     | y <sup>0++</sup> | #  |
|----|--------------------|-----------------|----------------|------------------|--------------------|-------------------|------|--------------------|-------------------|-------------------|------------------|--------------------|------------------|----|
| 1  | 116.034219         | 58.520748       |                |                  | 98.023654          | 49.515465         | D    |                    |                   |                   |                  |                    |                  | 16 |
| 2  | 302.113532         | 151.560404      |                |                  | 284.102967         | 142.555122        | W    | 1862.915257        | 931.961266        | 1845.888708       | 923.447992       | 1844.904692        | 922.955984       | 15 |
| 3  | <b>439.172444</b>  | 220.089860      |                |                  | 421.161879         | 211.084577        | H    | <b>1676.835944</b> | 838.921610        | 1659.809395       | 830.408336       | 1658.825379        | 829.916327       | 14 |
| 4  | <b>496.193908</b>  | 248.600592      |                |                  | 478.183343         | 239.595309        | G    | 1539.777032        | 770.392154        | 1522.750483       | 761.878880       | 1521.766467        | 761.386871       | 13 |
| 5  | <b>595.262322</b>  | 298.134799      |                |                  | 577.251757         | 289.129517        | V    | <b>1482.755568</b> | 741.881422        | 1465.729019       | 733.368148       | 1464.745003        | 732.876140       | 12 |
| 6  | <b>692.315086</b>  | 346.661181      |                |                  | 674.304521         | 337.655899        | P    | <b>1383.687154</b> | <b>692.347215</b> | 1366.660605       | 683.833941       | <b>1365.676589</b> | 683.341932       | 11 |
| 7  | <b>749.336550</b>  | 375.171913      |                |                  | 731.325985         | 366.166631        | G    | <b>1286.634390</b> | 643.820833        | 1269.607841       | 635.307559       | 1268.623825        | 634.815550       | 10 |
| 8  | <b>1188.561876</b> | 594.784576      | 1171.535327    | 586.271302       | 1170.551311        | 585.779293        | Q    | <b>1229.612926</b> | 615.310101        | 1212.586377       | 606.796827       | 1211.602361        | 606.304819       | 9  |
| 9  | <b>1287.630290</b> | 644.318783      | 1270.603741    | 635.805509       | 1269.619725        | 635.313501        | V    | <b>790.387600</b>  | 395.697438        | 773.361051        | 387.184164       | 772.377035         | 386.692156       | 8  |
| 10 | <b>1402.657233</b> | 701.832255      | 1385.630684    | 693.318980       | <b>1384.646668</b> | <b>692.826972</b> | D    | <b>691.319186</b>  | 346.163231        | 674.292637        | 337.649956       | 673.308621         | 337.157948       | 7  |
| 11 | <b>1473.694347</b> | 737.350812      | 1456.667798    | 728.837537       | 1455.683782        | 728.345529        | A    | <b>576.292243</b>  | 288.649759        | 559.265694        | 280.136485       |                    |                  | 6  |
| 12 | <b>1544.731461</b> | 772.869369      | 1527.704912    | 764.356094       | 1526.720896        | 763.864086        | A    | <b>505.255129</b>  | 253.131202        | 488.228580        | 244.617928       |                    |                  | 5  |
| 13 | 1675.771946        | 838.389611      | 1658.745397    | 829.876337       | 1657.761381        | 829.384329        | M    | <b>434.218015</b>  | 217.612645        | 417.191466        | 209.099371       |                    |                  | 4  |
| 14 | 1746.809060        | 873.908168      | 1729.782511    | 865.394894       | 1728.798495        | 864.902886        | A    | <b>303.177530</b>  | 152.092403        | <b>286.150981</b> | 143.579128       |                    |                  | 3  |
| 15 | 1803.830524        | 902.418900      | 1786.803975    | 893.905626       | 1785.819959        | 893.413617        | G    | 232.140416         | 116.573846        | 215.113867        | 108.060571       |                    |                  | 2  |
| 16 |                    |                 |                |                  |                    |                   | R    | <b>175.118952</b>  | 88.063114         | 158.092403        | 79.549839        |                    |                  | 1  |

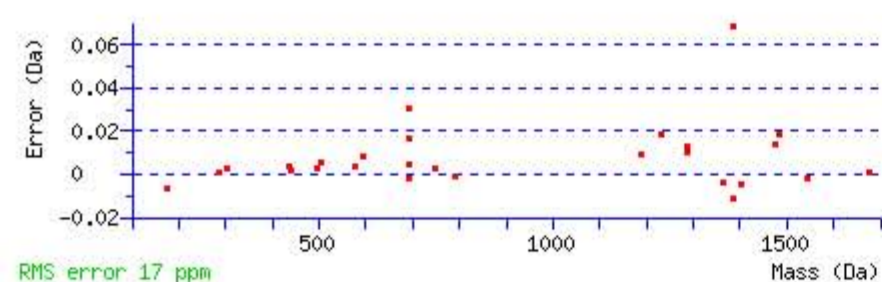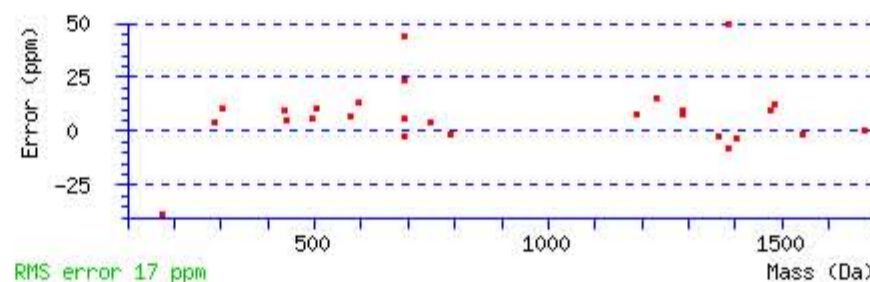

NCBI BLAST search of **DWHGVPGQVDAAMAGR**

(Parameters: blastp, nr protein database, expect=20000, no filter, PAM30)

Other BLAST [web gateways](#)

All matches to this query

| Score | Mr(calc):   | Delta    | Sequence                          |
|-------|-------------|----------|-----------------------------------|
| 62.2  | 1976.934937 | 0.003005 | <a href="#">DWHGVPGQVDAAMAGR</a>  |
| 6.7   | 1976.918793 | 0.019149 | <a href="#">DDGLQYRPDVKDASDQR</a> |

Mascot: <http://www.matrixscience.com/>



# Mascot Search Results

## Peptide View

MS/MS Fragmentation of **GNPEQTPVLKPEEEAPAPEV GASKPEGIDSRPETLHPGRPQPPAEELCSGKPFDAFTDLK**  
 Found in **VTNC\_HUMAN**, Vitronectin OS=Homo sapiens GN=VTN PE=1 SV=1

Match to Query 90933: 6883.416568 from(984.352500,7+) rtinseconds(2071) index(63551)  
 Title: Locus:1.1.1.2718.18 File:"2013-07-02 CLN FXIII 30 min 1st F 4.wiff"  
 Data file C:\Program Files (x86)\Matrix Science\Mascot Daemon\mgf\1 FXIII 30 min 1st\mascot\_daemon\_merge.mgf

Click mouse within plot area to zoom in by factor of two about that point

Or, Plot from  to  Da  Full range

Label all possible matches  Label matches used for scoring

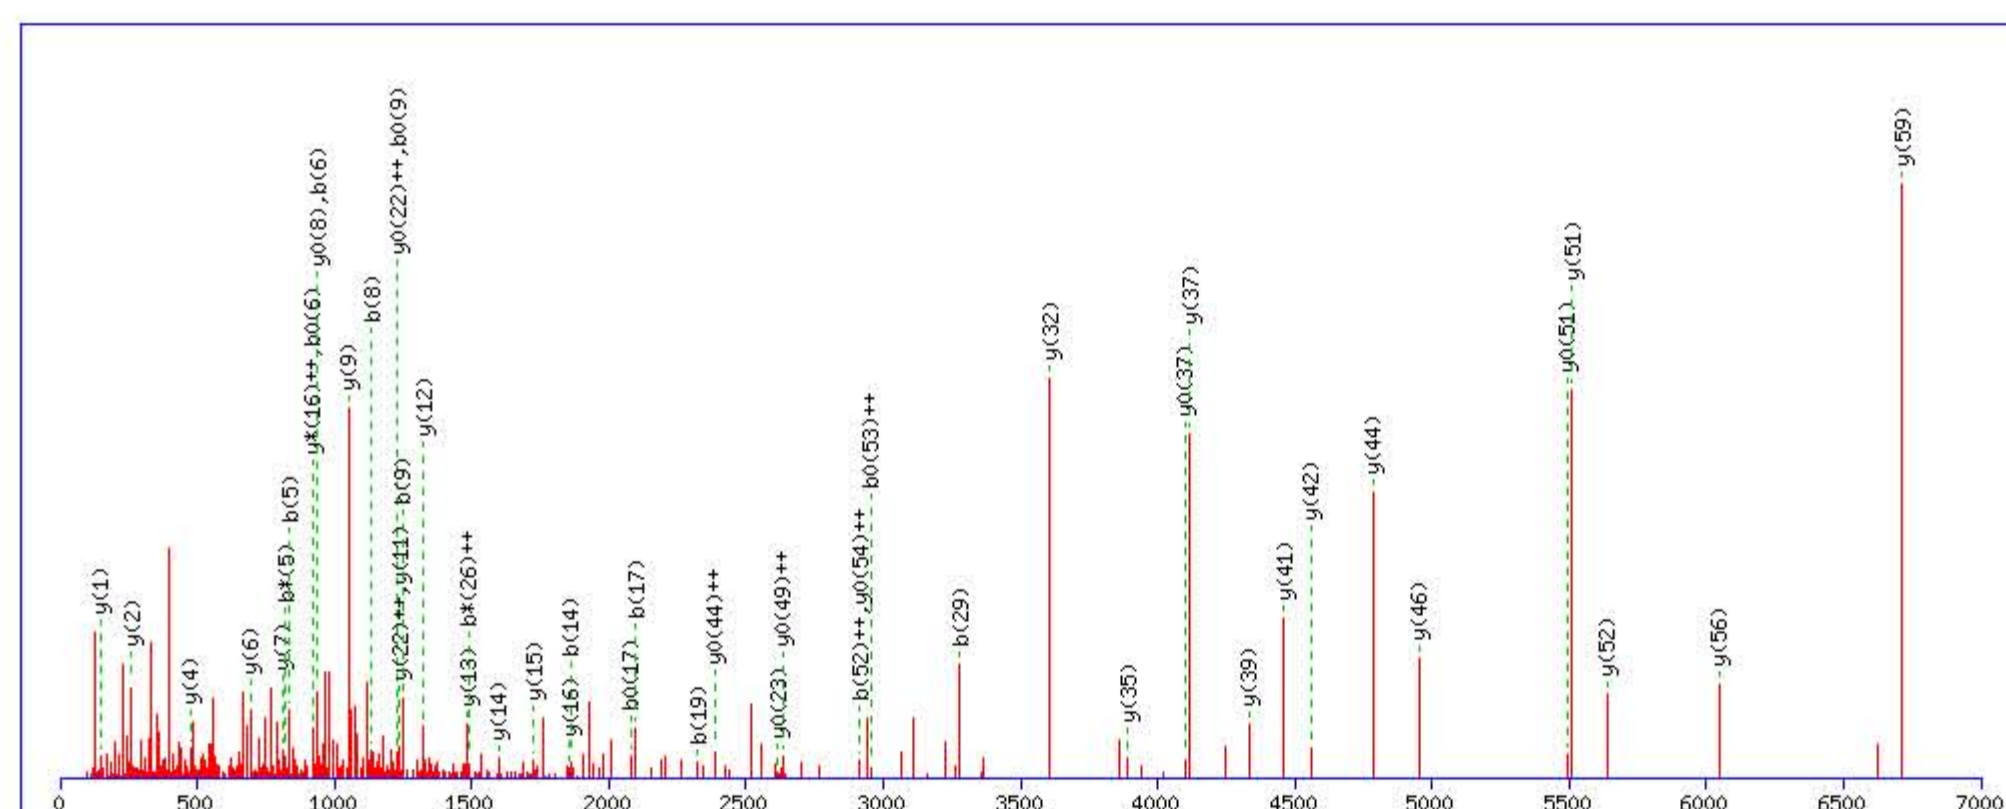

Monoisotopic mass of neutral peptide Mr(calc): 6883.374893  
 Fixed modifications: Carbamidomethyl (C) (apply to specified residues or termini only)  
 Variable modifications:  
 Q5 : Biotin:Thermo-21345 (Q)  
 Ions Score: 68 Expect: 1.7e-006  
 Matches : 49/708 fragment ions using 131 most intense peaks [\(help\)](#)

| #  | b                  | b <sup>++</sup>    | b <sup>+</sup>    | b <sup>+++</sup>   | b <sup>0</sup>     | b <sup>0++</sup> | Seq. | y                  | y <sup>++</sup>    | y <sup>+</sup> | y <sup>+++</sup>  | y <sup>0</sup>     | y <sup>0++</sup>   | #  |
|----|--------------------|--------------------|-------------------|--------------------|--------------------|------------------|------|--------------------|--------------------|----------------|-------------------|--------------------|--------------------|----|
| 1  | 58.028740          | 29.518008          |                   |                    |                    |                  | G    |                    |                    |                |                   |                    |                    | 61 |
| 2  | 172.071667         | 86.539471          | 155.045118        | 78.026197          |                    |                  | N    | 6827.360757        | 3414.184017        | 6810.334208    | 3405.670742       | 6809.350192        | 3405.178734        | 60 |
| 3  | 269.124431         | 135.065854         | 252.097882        | 126.552579         |                    |                  | P    | <b>6713.317830</b> | 3357.162553        | 6696.291281    | 3348.649279       | 6695.307265        | 3348.157271        | 59 |
| 4  | 398.167024         | 199.587150         | 381.140475        | 191.073876         | 380.156459         | 190.581868       | E    | 6616.265066        | 3308.636171        | 6599.238517    | 3300.122897       | 6598.254501        | 3299.630889        | 58 |
| 5  | <b>837.392350</b>  | 419.199813         | <b>820.365801</b> | 410.686539         | 819.381785         | 410.194531       | Q    | 6487.222473        | 3244.114875        | 6470.195924    | 3235.601600       | 6469.211908        | 3235.109592        | 57 |
| 6  | <b>938.440029</b>  | 469.723653         | 921.413480        | 461.210378         | <b>920.429464</b>  | 460.718370       | T    | <b>6047.997147</b> | 3024.502212        | 6030.970598    | 3015.988937       | 6029.986582        | 3015.496929        | 56 |
| 7  | 1035.492793        | 518.250035         | 1018.466244       | 509.736760         | 1017.482228        | 509.244752       | P    | 5946.949468        | 2973.978372        | 5929.922919    | 2965.465098       | 5928.938903        | 2964.973090        | 55 |
| 8  | <b>1134.561207</b> | 567.784242         | 1117.534658       | 559.270967         | 1116.550642        | 558.778959       | V    | 5849.896704        | 2925.451990        | 5832.870155    | 2916.938716       | 5831.886139        | <b>2916.446708</b> | 54 |
| 9  | <b>1247.645271</b> | 624.326274         | 1230.618722       | 615.812999         | <b>1229.634706</b> | 615.320991       | L    | 5750.828290        | 2875.917783        | 5733.801741    | 2867.404509       | 5732.817725        | 2866.912501        | 53 |
| 10 | 1375.740234        | 688.373755         | 1358.713685       | 679.860481         | 1357.729669        | 679.368473       | K    | <b>5637.744226</b> | 2819.375751        | 5620.717677    | 2810.862477       | 5619.733661        | 2810.370469        | 52 |
| 11 | 1472.792998        | 736.900137         | 1455.766449       | 728.386863         | 1454.782433        | 727.894855       | P    | <b>5509.649263</b> | 2755.328270        | 5492.622714    | 2746.814995       | <b>5491.638698</b> | 2746.322987        | 51 |
| 12 | 1601.835591        | 801.421434         | 1584.809042       | 792.908159         | 1583.825026        | 792.416151       | E    | 5412.596499        | 2706.801888        | 5395.569950    | 2698.288613       | 5394.585934        | 2697.796605        | 50 |
| 13 | 1730.878184        | 865.942730         | 1713.851635       | 857.429456         | 1712.867619        | 856.937448       | E    | 5283.553906        | 2642.280591        | 5266.527357    | 2633.767317       | 5265.543341        | <b>2633.275309</b> | 49 |
| 14 | <b>1859.920777</b> | 930.464027         | 1842.894228       | 921.950752         | 1841.910212        | 921.458744       | E    | 5154.511313        | 2577.759295        | 5137.484764    | 2569.246020       | 5136.500748        | 2568.754012        | 48 |
| 15 | 1930.957891        | 965.982584         | 1913.931342       | 957.469309         | 1912.947326        | 956.977301       | A    | 5025.468720        | 2513.237998        | 5008.442171    | 2504.724724       | 5007.458155        | 2504.232716        | 47 |
| 16 | 2028.010655        | 1014.508966        | 2010.984106       | 1005.995691        | 2010.000090        | 1005.503683      | P    | <b>4954.431606</b> | 2477.719441        | 4937.405057    | 2469.206167       | 4936.421041        | 2468.714159        | 46 |
| 17 | <b>2099.047769</b> | 1050.027523        | 2082.021220       | 1041.514248        | <b>2081.037204</b> | 1041.022240      | A    | 4857.378842        | 2429.193059        | 4840.352293    | 2420.679785       | 4839.368277        | 2420.187777        | 45 |
| 18 | 2196.100533        | 1098.553905        | 2179.073984       | 1090.040630        | 2178.089968        | 1089.548622      | P    | <b>4786.341728</b> | 2393.674502        | 4769.315179    | 2385.161228       | 4768.331163        | <b>2384.669220</b> | 44 |
| 19 | <b>2325.143126</b> | 1163.075201        | 2308.116577       | 1154.561927        | 2307.132561        | 1154.069919      | E    | 4689.288964        | 2345.148120        | 4672.262415    | 2336.634846       | 4671.278399        | 2336.142838        | 43 |
| 20 | 2424.211540        | 1212.609408        | 2407.184991       | 1204.096134        | 2406.200975        | 1203.604126      | V    | <b>4560.246371</b> | 2280.626824        | 4543.219822    | 2272.113549       | 4542.235806        | 2271.621541        | 42 |
| 21 | 2481.233004        | 1241.120140        | 2464.206455       | 1232.606865        | 2463.222439        | 1232.114858      | G    | <b>4461.177957</b> | 2231.092617        | 4444.151408    | 2222.579342       | 4443.167392        | 2222.087334        | 41 |
| 22 | 2552.270118        | 1276.638697        | 2535.243569       | 1268.125423        | 2534.259553        | 1267.633415      | A    | 4404.156493        | 2202.581885        | 4387.129944    | 2194.068610       | 4386.145928        | 2193.576602        | 40 |
| 23 | 2639.302146        | 1320.154711        | 2622.275597       | 1311.641437        | 2621.291581        | 1311.149429      | S    | <b>4333.119379</b> | 2167.063328        | 4316.092830    | 2158.550053       | 4315.108814        | 2158.058045        | 39 |
| 24 | 2767.397109        | 1384.202193        | 2750.370560       | 1375.688918        | 2749.386544        | 1375.196910      | K    | 4246.087351        | 2123.547314        | 4229.060802    | 2115.034039       | 4228.076786        | 2114.542031        | 38 |
| 25 | 2864.449873        | 1432.728575        | 2847.423324       | 1424.215300        | 2846.439308        | 1423.723292      | P    | <b>4117.992388</b> | 2059.499832        | 4100.965839    | 2050.986558       | <b>4099.981823</b> | 2050.494550        | 37 |
| 26 | 2993.492466        | 1497.249871        | 2976.465917       | <b>1488.736597</b> | 2975.481901        | 1488.244589      | E    | 4020.939624        | 2010.973450        | 4003.913075    | 2002.460176       | 4002.929059        | 2001.968168        | 36 |
| 27 | 3050.513930        | 1525.760603        | 3033.487381       | 1517.247329        | 3032.503365        | 1516.755321      | G    | <b>3891.897031</b> | 1946.452154        | 3874.870482    | 1937.938879       | 3873.886466        | 1937.446871        | 35 |
| 28 | 3163.597994        | 1582.302635        | 3146.571445       | 1573.789361        | 3145.587429        | 1573.297353      | I    | 3834.875567        | 1917.941422        | 3817.849018    | 1909.428147       | 3816.865002        | 1908.936139        | 34 |
| 29 | <b>3278.624937</b> | 1639.816107        | 3261.598388       | 1631.302832        | 3260.614372        | 1630.810824      | D    | 3721.791503        | 1861.399390        | 3704.764954    | 1852.886115       | 3703.780938        | 1852.394107        | 33 |
| 30 | 3365.656965        | 1683.332121        | 3348.630416       | 1674.818846        | 3347.646400        | 1674.326838      | S    | <b>3606.764560</b> | 1803.885918        | 3589.738011    | 1795.372644       | 3588.753995        | 1794.880636        | 32 |
| 31 | 3521.758076        | 1761.382676        | 3504.731527       | 1752.869402        | 3503.747511        | 1752.377394      | R    | 3519.732532        | 1760.369904        | 3502.705983    | 1751.856630       | 3501.721967        | 1751.364622        | 31 |
| 32 | 3618.810840        | 1809.909058        | 3601.784291       | 1801.395784        | 3600.800275        | 1800.903776      | P    | 3363.631421        | 1682.319349        | 3346.604872    | 1673.806074       | 3345.620856        | 1673.314066        | 30 |
| 33 | 3747.853433        | 1874.430355        | 3730.826884       | 1865.917080        | 3729.842868        | 1865.425072      | E    | 3266.578657        | 1633.792967        | 3249.552108    | 1625.279692       | 3248.568092        | 1624.787684        | 29 |
| 34 | 3848.901112        | 1924.954194        | 3831.874563       | 1916.440920        | 3830.890547        | 1915.948912      | T    | 3137.536064        | 1569.271670        | 3120.509515    | 1560.758396       | 3119.525499        | 1560.266388        | 28 |
| 35 | 3961.985176        | 1981.496226        | 3944.958627       | 1972.982952        | 3943.974611        | 1972.490944      | L    | 3036.488385        | 1518.747831        | 3019.461836    | 1510.234556       | 3018.477820        | 1509.742548        | 27 |
| 36 | 4099.044088        | 2050.025682        | 4082.017539       | 2041.512408        | 4081.033523        | 2041.020400      | H    | 2923.404321        | 1462.205799        | 2906.377772    | 1453.692524       | 2905.393756        | 1453.200516        | 26 |
| 37 | 4196.096852        | 2098.552064        | 4179.070303       | 2090.038790        | 4178.086287        | 2089.546782      | P    | 2786.345409        | 1393.676343        | 2769.318860    | 1385.163068       | 2768.334844        | 1384.671060        | 25 |
| 38 | 4253.118316        | 2127.062796        | 4236.091767       | 2118.549522        | 4235.107751        | 2118.057514      | G    | 2689.292645        | 1345.149961        | 2672.266096    | 1336.636686       | 2671.282080        | 1336.144678        | 24 |
| 39 | 4409.219427        | 2205.113352        | 4392.192878       | 2196.600077        | 4391.208862        | 2196.108069      | R    | 2632.271181        | 1316.639229        | 2615.244632    | 1308.125954       | <b>2614.260616</b> | 1307.633946        | 23 |
| 40 | 4506.272191        | 2253.639734        | 4489.245642       | 2245.126459        | 4488.261626        | 2244.634451      | P    | 2476.170070        | <b>1238.588673</b> | 2459.143521    | 1230.075399       | 2458.159505        | <b>1229.583391</b> | 22 |
| 41 | 4634.330769        | 2317.669023        | 4617.304220       | 2309.155748        | 4616.320204        | 2308.663740      | Q    | 2379.117306        | 1190.062291        | 2362.090757    | 1181.549017       | 2361.106741        | 1181.057009        | 21 |
| 42 | 4731.383533        | 2366.195405        | 4714.356984       | 2357.682130        | 4713.372968        | 2357.190122      | P    | 2251.058728        | 1126.033002        | 2234.032179    | 1117.519728       | 2233.048163        | 1117.027720        | 20 |
| 43 | 4828.436297        | 2414.721787        | 4811.409748       | 2406.208512        | 4810.425732        | 2405.716504      | P    | 2154.005964        | 1077.506620        | 2136.979415    | 1068.993346       | 2135.995399        | 1068.501338        | 19 |
| 44 | 4899.473411        | 2450.240344        | 4882.446862       | 2441.727069        | 4881.462846        | 2441.235061      | A    | 2056.953200        | 1028.980238        | 2039.926651    | 1020.466964       | 2038.942635        | 1019.974956        | 18 |
| 45 | 5028.516004        | 2514.761640        | 5011.489455       | 2506.248366        | 5010.505439        | 2505.756358      | E    | 1985.916086        | 993.461681         | 1968.889537    | 984.948407        | 1967.905521        | 984.456399         | 17 |
| 46 | 5157.558597        | 2579.282937        | 5140.532048       | 2570.769662        | 5139.548032        | 2570.277654      | E    | <b>1856.873493</b> | 928.940385         | 1839.846944    | <b>920.427110</b> | 1838.862928        | 919.935102         | 16 |
| 47 | 5286.601190        | 2643.804233        | 5269.574641       | 2635.290959        | 5268.590625        | 2634.798951      | E    | <b>1727.830900</b> | 864.419088         | 1710.804351    | 855.905814        | 1709.820335        | 855.413806         | 15 |
| 48 | 5399.685254        | 2700.346265        | 5382.658705       | 2691.832991        | 5381.674689        | 2691.340983      | L    | <b>1598.788307</b> | 799.897792         | 1581.761758    | 791.384517        | 1580.777742        | 790.892509         | 14 |
| 49 | 5559.715903        | 2780.361590        | 5542.689354       | 2771.848315        | 5541.705338        | 2771.356307      | C    | <b>1485.704243</b> | 743.355760         | 1468.677694    | 734.842485        | 1467.693678        | 734.350477         | 13 |
| 50 | 5646.747931        | 2823.877604        | 5629.721382       | 2815.364329        | 5628.737366        | 2814.872321      | S    | <b>1325.673594</b> | 663.340435         | 1308.647045    | 654.827161        | 1307.663029        | 654.335153         | 12 |
| 51 | 5703.769395        | 2852.388336        | 5686.742846       | 2843.875061        | 5685.758830        | 2843.383053      | G    | <b>1238.641566</b> | 619.824421         | 1221.615017    | 611.311147        | 1220.631001        | 610.819139         | 11 |
| 52 | 5831.864358        | <b>2916.435817</b> | 5814.837809       | 2907.922543        | 5813.853793        | 2907.430535      | K    | 1181.620102        | 591.313689         | 1164.593553    | 582.800415        | 1163.609537        | 582.308407         | 10 |
| 53 |                    |                    |                   |                    |                    |                  |      |                    |                    |                |                   |                    |                    |    |



# MASCOT Search Results

## Peptide View

MS/MS Fragmentation of **GGQIMTLK**

Found in **VWF\_HUMAN**, von Willebrand factor OS=Homo sapiens GN=VWF PE=1 SV=4

Match to Query 29910: 1157.629348 from(579.821950,2+) rtinseconds(1896) index(62320)

Title: Locus:1.1.1.2658.16 File:"2013-07-02 CLN FXIII 30 min 1st F 4.wiff"

Data file C:\Program Files (x86)\Matrix Science\Mascot Daemon\mgf1 FXIII 30 min 1st\mascot\_daemon\_merge.mgf

Click mouse within plot area to zoom in by factor of two about that point

Or, Plot from  to  Da

Label all possible matches  Label matches used for scoring

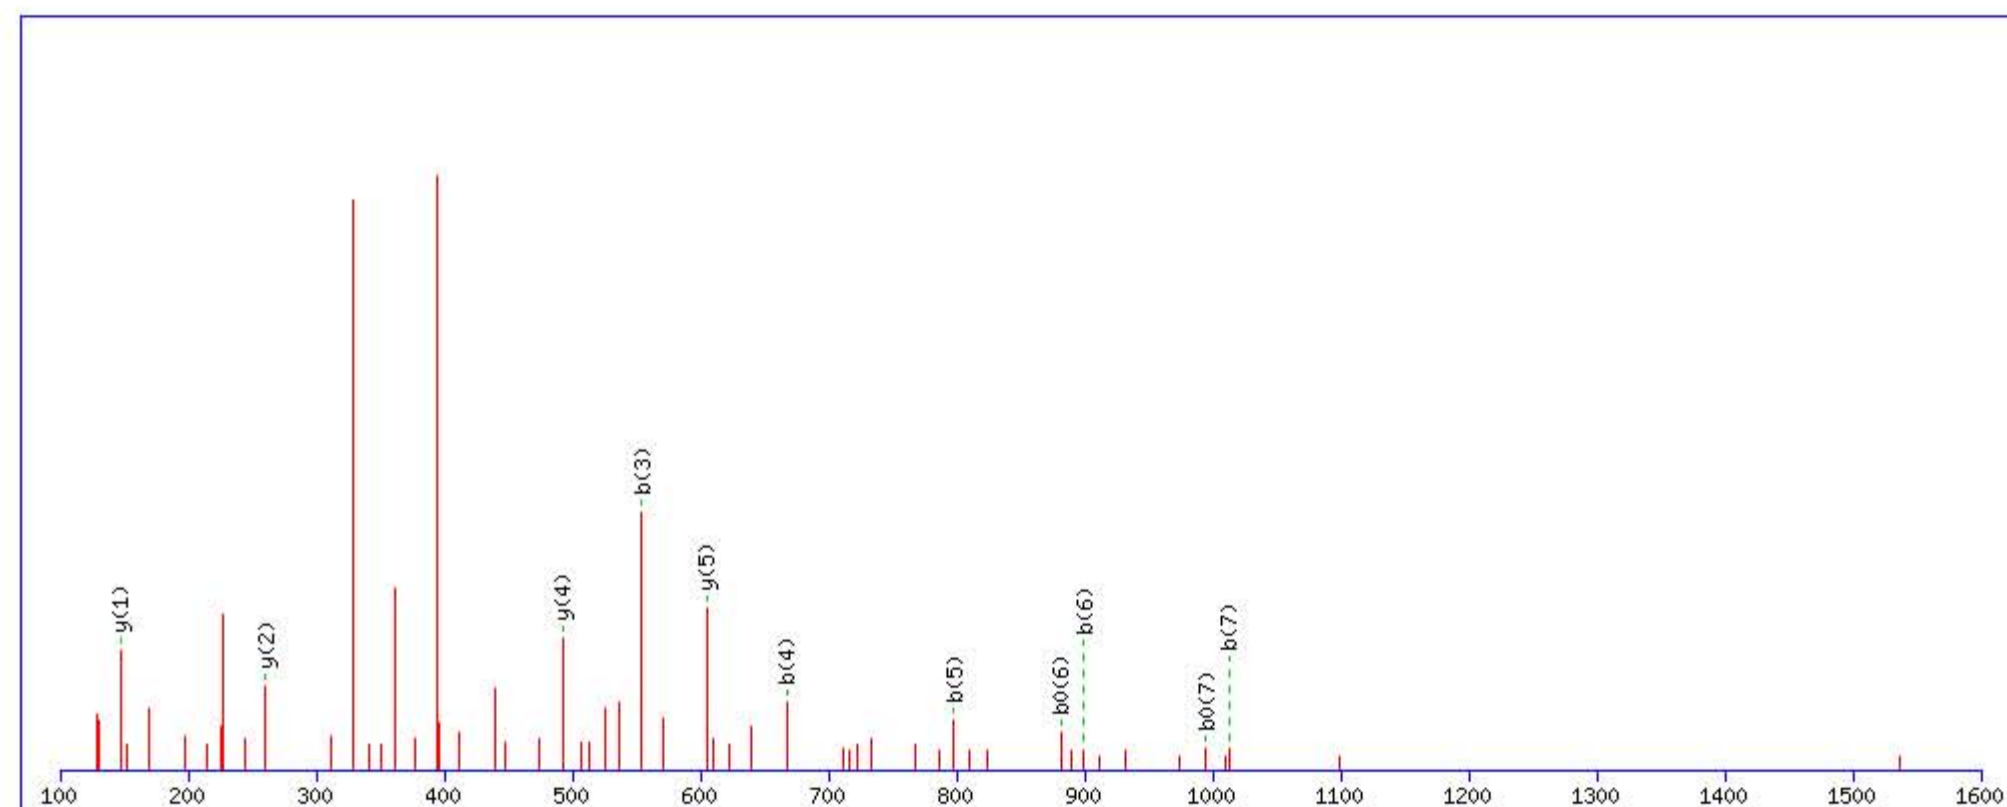

Monoisotopic mass of neutral peptide Mr(calc): 1157.630066

Fixed modifications: Carbamidomethyl (C) (apply to specified residues or termini only)

Variable modifications:

Q3 : Biotin:Thermo-21345 (Q)

Ions Score: 26 Expect: 0.054

Matches : 11/66 fragment ions using 19 most intense peaks [\(help\)](#)

| # | b                  | b <sup>++</sup> | b <sup>*</sup> | b <sup>+++</sup> | b <sup>0</sup>    | b <sup>0++</sup> | Seq. | y                 | y <sup>++</sup> | y <sup>*</sup> | y <sup>+++</sup> | y <sup>0</sup> | y <sup>0++</sup> | # |
|---|--------------------|-----------------|----------------|------------------|-------------------|------------------|------|-------------------|-----------------|----------------|------------------|----------------|------------------|---|
| 1 | 58.028740          | 29.518008       |                |                  |                   |                  | G    |                   |                 |                |                  |                |                  | 8 |
| 2 | 115.050204         | 58.028740       |                |                  |                   |                  | G    | 1101.615886       | 551.311581      | 1084.589337    | 542.798307       | 1083.605321    | 542.306299       | 7 |
| 3 | <b>554.275530</b>  | 277.641403      | 537.248981     | 269.128129       |                   |                  | Q    | 1044.594422       | 522.800849      | 1027.567873    | 514.287575       | 1026.583857    | 513.795567       | 6 |
| 4 | <b>667.359594</b>  | 334.183435      | 650.333045     | 325.670161       |                   |                  | I    | <b>605.369096</b> | 303.188186      | 588.342547     | 294.674912       | 587.358531     | 294.182904       | 5 |
| 5 | <b>798.400079</b>  | 399.703678      | 781.373530     | 391.190403       |                   |                  | M    | <b>492.285032</b> | 246.646154      | 475.258483     | 238.132880       | 474.274467     | 237.640872       | 4 |
| 6 | <b>899.447758</b>  | 450.227517      | 882.421209     | 441.714243       | <b>881.437193</b> | 441.222235       | T    | 361.244547        | 181.125912      | 344.217998     | 172.612637       | 343.233982     | 172.120629       | 3 |
| 7 | <b>1012.531822</b> | 506.769549      | 995.505273     | 498.256275       | <b>994.521257</b> | 497.764267       | L    | <b>260.196868</b> | 130.602072      | 243.170319     | 122.088798       |                |                  | 2 |
| 8 |                    |                 |                |                  |                   |                  | K    | <b>147.112804</b> | 74.060040       | 130.086255     | 65.546765        |                |                  | 1 |

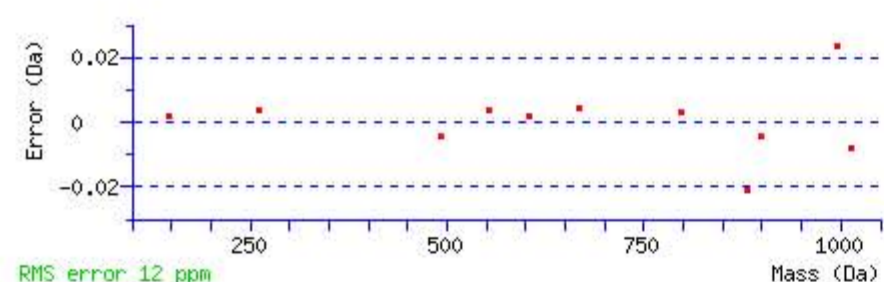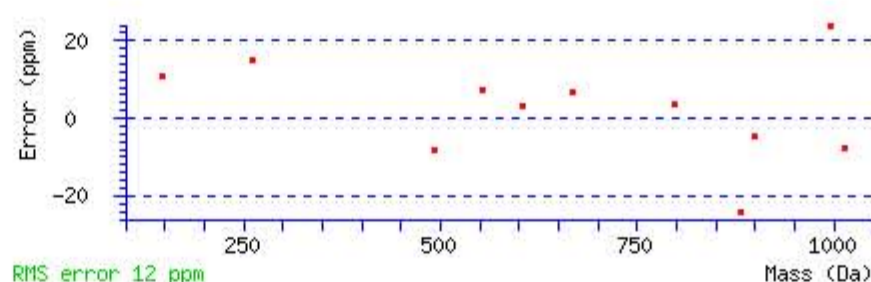

NCBI BLAST search of [GGQIMTLK](#)

(Parameters: blastp, nr protein database, expect=20000, no filter, PAM30)

Other BLAST [web gateways](#)

All matches to this query

| Score | Mr(calc):   | Delta     | Sequence                    |
|-------|-------------|-----------|-----------------------------|
| 26.3  | 1157.630066 | -0.000718 | <a href="#">GGQIMTLK</a>    |
| 12.0  | 1157.630051 | -0.000703 | <a href="#">QLSQMLK</a>     |
| 8.8   | 1157.629196 | 0.000152  | <a href="#">EPQITITQLTK</a> |
| 7.7   | 1157.640411 | -0.011063 | <a href="#">AQQLLSSGNLK</a> |
| 7.2   | 1157.619293 | 0.010055  | <a href="#">TNFEGPPRLK</a>  |
| 6.9   | 1157.622665 | 0.006683  | <a href="#">QRTDSLK</a>     |
| 6.7   | 1157.630051 | -0.000703 | <a href="#">QLSQMLK</a>     |
| 6.6   | 1157.630051 | -0.000703 | <a href="#">QAGAMLLK</a>    |
| 5.6   | 1157.640411 | -0.011063 | <a href="#">SPGKNSSIQLK</a> |
| 5.5   | 1157.630051 | -0.000703 | <a href="#">QIKSMLQ</a>     |



# MASCOT SEARCH RESULTS

## Peptide View

MS/MS Fragmentation of **VKEEVFIQQR**

Found in **VWF\_HUMAN**, von Willebrand factor OS=Homo sapiens GN=VWF PE=1 SV=4

Match to Query 45382: 1585.887972 from(529.636600,3+) rtinseconds(1753) index(42147)

Title: Locus:1.1.1.2639.10 File:"2013-07-02 CLN FXIII 30 min 1st F 3.wiff"

Data file C:\Program Files (x86)\Matrix Science\Mascot Daemon\mgf1 FXIII 30 min 1st\mascot\_daemon\_merge.mgf

Click mouse within plot area to zoom in by factor of two about that point

Or, Plot from  to  Da

Label all possible matches  Label matches used for scoring

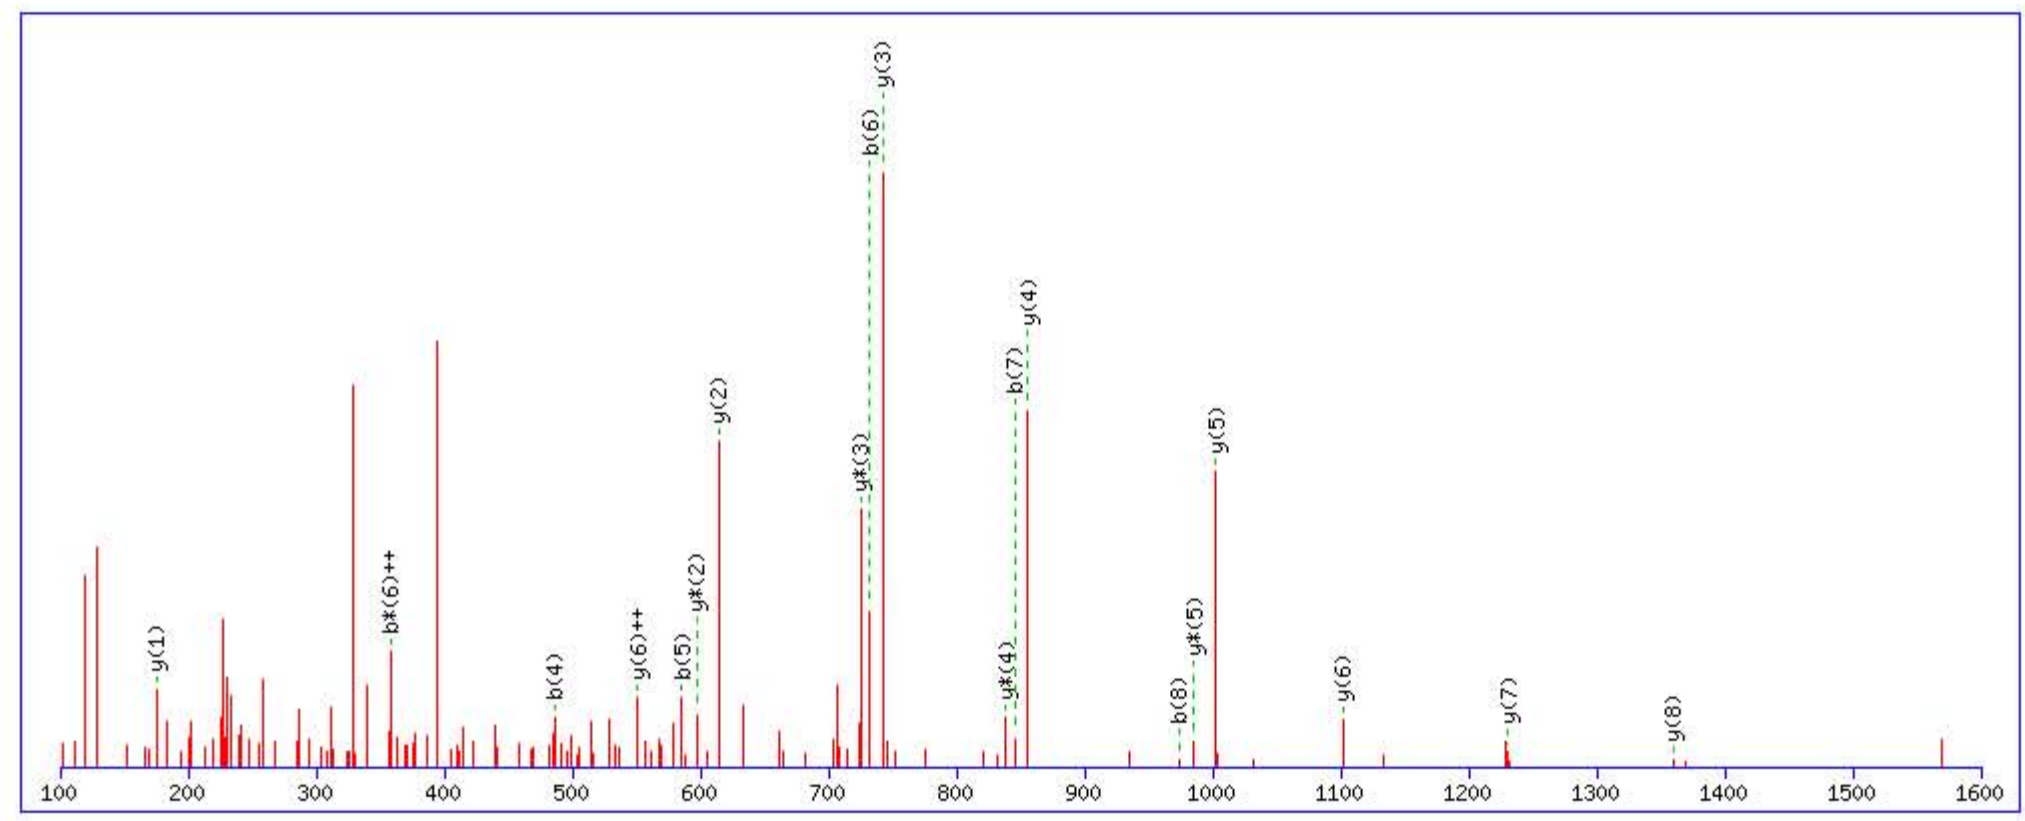

Monoisotopic mass of neutral peptide Mr(calc): 1585.865021

Fixed modifications: Carbamidomethyl (C) (apply to specified residues or termini only)

Variable modifications:

Q9 : Biotin:Thermo-21345 (Q)

Ions Score: 40 Expect: 0.00032

Matches : 19/90 fragment ions using 39 most intense peaks [\(help\)](#)

| #  | b                 | b <sup>++</sup> | b <sup>*</sup> | b <sup>*++</sup>  | b <sup>0</sup> | b <sup>0++</sup> | Seq. | y                  | y <sup>++</sup>   | y <sup>*</sup>    | y <sup>*++</sup> | y <sup>0</sup> | y <sup>0++</sup> | #  |
|----|-------------------|-----------------|----------------|-------------------|----------------|------------------|------|--------------------|-------------------|-------------------|------------------|----------------|------------------|----|
| 1  | 100.075690        | 50.541483       |                |                   |                |                  | V    |                    |                   |                   |                  |                |                  | 10 |
| 2  | 228.170653        | 114.588965      | 211.144104     | 106.075690        |                |                  | K    | 1487.803897        | 744.405587        | 1470.777348       | 735.892312       | 1469.793332    | 735.400304       | 9  |
| 3  | 357.213246        | 179.110261      | 340.186697     | 170.596987        | 339.202681     | 170.104979       | E    | <b>1359.708934</b> | 680.358105        | 1342.682385       | 671.844831       | 1341.698369    | 671.352823       | 8  |
| 4  | <b>486.255839</b> | 243.631558      | 469.229290     | 235.118283        | 468.245274     | 234.626275       | E    | <b>1230.666341</b> | 615.836809        | 1213.639792       | 607.323534       | 1212.655776    | 606.831526       | 7  |
| 5  | <b>585.324253</b> | 293.165765      | 568.297704     | 284.652490        | 567.313688     | 284.160482       | V    | <b>1101.623748</b> | <b>551.315512</b> | 1084.597199       | 542.802238       |                |                  | 6  |
| 6  | <b>732.392667</b> | 366.699972      | 715.366118     | <b>358.186697</b> | 714.382102     | 357.694689       | F    | <b>1002.555334</b> | 501.781305        | <b>985.528785</b> | 493.268031       |                |                  | 5  |
| 7  | <b>845.476731</b> | 423.242004      | 828.450182     | 414.728729        | 827.466166     | 414.236721       | I    | <b>855.486920</b>  | 428.247098        | <b>838.460371</b> | 419.733824       |                |                  | 4  |
| 8  | <b>973.535309</b> | 487.271293      | 956.508760     | 478.758018        | 955.524744     | 478.266010       | Q    | <b>742.402856</b>  | 371.705066        | <b>725.376307</b> | 363.191792       |                |                  | 3  |
| 9  | 1412.760635       | 706.883956      | 1395.734086    | 698.370681        | 1394.750070    | 697.878673       | Q    | <b>614.344278</b>  | 307.675777        | <b>597.317729</b> | 299.162503       |                |                  | 2  |
| 10 |                   |                 |                |                   |                |                  | R    | <b>175.118952</b>  | 88.063114         | 158.092403        | 79.549839        |                |                  | 1  |

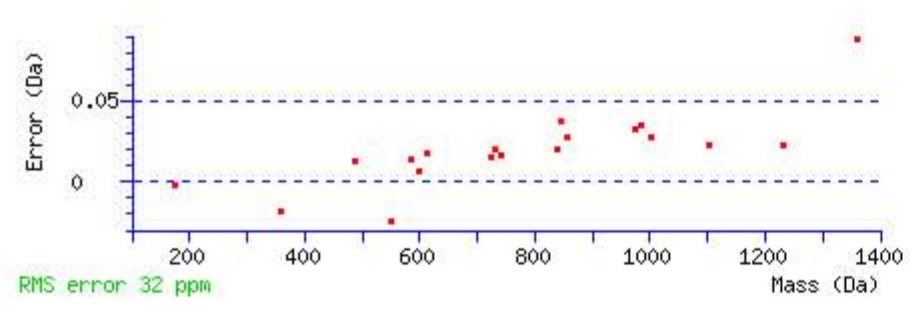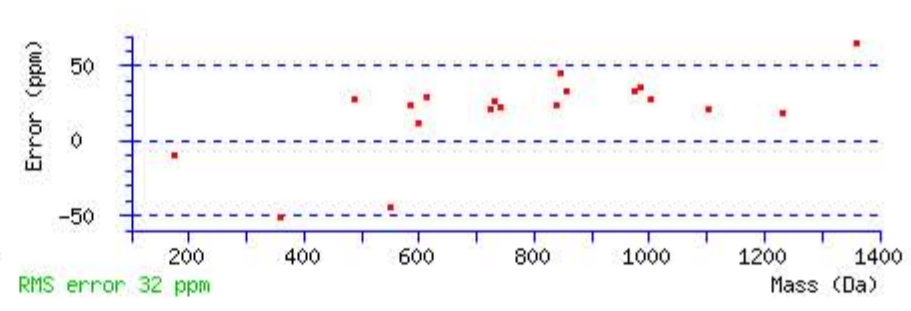

NCBI BLAST search of **VKEEVFIQQR**

(Parameters: blastp, nr protein database, expect=20000, no filter, PAM30)

Other BLAST [web gateways](#)

### All matches to this query

| Score | Mr(calc):   | Delta     | Sequence                       |
|-------|-------------|-----------|--------------------------------|
| 40.3  | 1585.865021 | 0.022951  | <a href="#">VKEEVFIQQR</a>     |
| 27.4  | 1585.865021 | 0.022951  | <a href="#">VKEEVFIQQR</a>     |
| 2.9   | 1585.867493 | 0.020479  | <a href="#">KVKELSIQIEDER</a>  |
| 2.3   | 1585.886154 | 0.001818  | <a href="#">QTKLGCCKVLVPEK</a> |
| 1.2   | 1585.893524 | -0.005552 | <a href="#">QDLIKSLAMLK</a>    |
