# Supplementary material
Source: PubMed Central journal article supplement (PMC3945317)
Supplement: supp_M113.517904_jbc.M113.517904-5.pdf [file supp_M113.517904_jbc.M113.517904-5.pdf]

# MASCOT Search Results

## Peptide View

MS/MS Fragmentation of **SYELPDGQVITIGNER**

Found in **ACTA\_HUMAN**, Actin, aortic smooth muscle OS=Homo sapiens GN=ACTA2 PE=1 SV=1

Match to Query 51981: 2101.049532 from(701.357120,3+) rtinseconds(2622) index(59395)

Title: Locus:1.1.1.3398.11 File:"2013-07-02 CLN FXIII 30 min 2nd F 4.wiff"

Data file C:\Program Files (x86)\Matrix Science\Mascot Daemon\mgf2 FXIII 30 min 2nd\mascot\_daemon\_merge.mgf

Click mouse within plot area to zoom in by factor of two about that point

Or, Plot from  to  Da

Label all possible matches  Label matches used for scoring

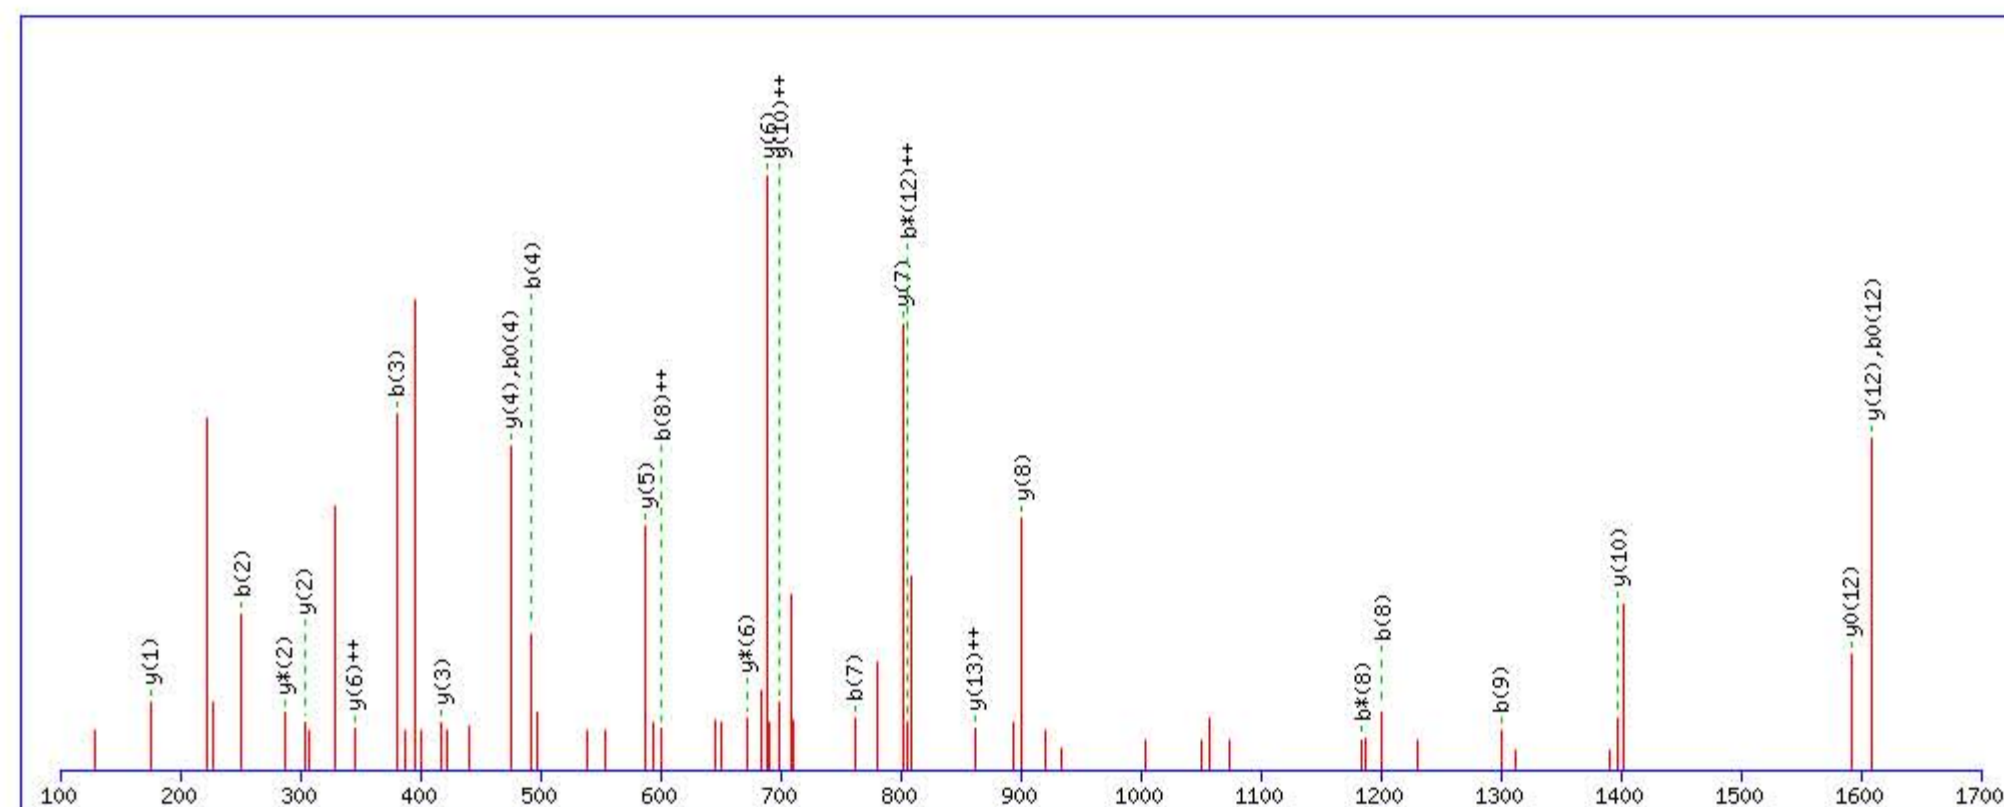

Monoisotopic mass of neutral peptide Mr(calc): 2101.051376

Fixed modifications: Carbamidomethyl (C) (apply to specified residues or termini only)

Variable modifications:

Q8 : Biotin:Thermo-21345 (Q)

Ions Score: 50 Expect: 7.2e-005

Matches : 27/164 fragment ions using 52 most intense peaks [\(help\)](#)

| #  | b                  | b <sup>++</sup>   | b <sup>+</sup>     | b <sup>+++</sup>  | b <sup>0</sup>     | b <sup>0++</sup> | Seq. | y                  | y <sup>++</sup>   | y <sup>+</sup>    | y <sup>+++</sup> | y <sup>0</sup>     | y <sup>0++</sup> | #  |
|----|--------------------|-------------------|--------------------|-------------------|--------------------|------------------|------|--------------------|-------------------|-------------------|------------------|--------------------|------------------|----|
| 1  | 88.039304          | 44.523290         |                    |                   | 70.028739          | 35.518008        | S    |                    |                   |                   |                  |                    |                  | 16 |
| 2  | <b>251.102633</b>  | 126.054954        |                    |                   | 233.092068         | 117.049672       | Y    | 2015.026640        | 1008.016958       | 1998.000091       | 999.503683       | 1997.016075        | 999.011675       | 15 |
| 3  | <b>380.145226</b>  | 190.576251        |                    |                   | 362.134661         | 181.570969       | E    | 1851.963311        | 926.485294        | 1834.936762       | 917.972019       | 1833.952746        | 917.480011       | 14 |
| 4  | <b>493.229290</b>  | 247.118283        |                    |                   | <b>475.218725</b>  | 238.113001       | L    | 1722.920718        | <b>861.963997</b> | 1705.894169       | 853.450722       | 1704.910153        | 852.958714       | 13 |
| 5  | 590.282054         | 295.644665        |                    |                   | 572.271489         | 286.639383       | P    | <b>1609.836654</b> | 805.421965        | 1592.810105       | 796.908691       | <b>1591.826089</b> | 796.416682       | 12 |
| 6  | 705.308997         | 353.158137        |                    |                   | 687.298432         | 344.152854       | D    | 1512.783890        | 756.895583        | 1495.757341       | 748.382309       | 1494.773325        | 747.890300       | 11 |
| 7  | <b>762.330461</b>  | 381.668869        |                    |                   | 744.319896         | 372.663586       | G    | <b>1397.756947</b> | <b>699.382111</b> | 1380.730398       | 690.868837       | 1379.746382        | 690.376829       | 10 |
| 8  | <b>1201.555787</b> | <b>601.281532</b> | <b>1184.529238</b> | 592.768257        | 1183.545222        | 592.276249       | Q    | 1340.735483        | 670.871379        | 1323.708934       | 662.358105       | 1322.724918        | 661.866097       | 9  |
| 9  | <b>1300.624201</b> | 650.815739        | 1283.597652        | 642.302464        | 1282.613636        | 641.810456       | V    | <b>901.510157</b>  | 451.258716        | 884.483608        | 442.745442       | 883.499592         | 442.253434       | 8  |
| 10 | 1413.708265        | 707.357771        | 1396.681716        | 698.844496        | 1395.697700        | 698.352488       | I    | <b>802.441743</b>  | 401.724509        | 785.415194        | 393.211235       | 784.431178         | 392.719227       | 7  |
| 11 | 1514.755944        | 757.881610        | 1497.729395        | 749.368336        | 1496.745379        | 748.876328       | T    | <b>689.357679</b>  | <b>345.182478</b> | <b>672.331130</b> | 336.669203       | 671.347114         | 336.177195       | 6  |
| 12 | 1627.840008        | 814.423642        | 1610.813459        | <b>805.910368</b> | <b>1609.829443</b> | 805.418359       | I    | <b>588.310000</b>  | 294.658638        | 571.283451        | 286.145363       | 570.299435         | 285.653355       | 5  |
| 13 | 1684.861472        | 842.934374        | 1667.834923        | 834.421099        | 1666.850907        | 833.929091       | G    | <b>475.225936</b>  | 238.116606        | 458.199387        | 229.603331       | 457.215371         | 229.111323       | 4  |
| 14 | 1798.904399        | 899.955837        | 1781.877850        | 891.442563        | 1780.893834        | 890.950555       | N    | <b>418.204472</b>  | 209.605874        | 401.177923        | 201.092600       | 400.193907         | 200.600592       | 3  |
| 15 | 1927.946992        | 964.477134        | 1910.920443        | 955.963860        | 1909.936427        | 955.471851       | E    | <b>304.161545</b>  | 152.584411        | <b>287.134996</b> | 144.071136       | 286.150980         | 143.579128       | 2  |
| 16 |                    |                   |                    |                   |                    |                  | R    | <b>175.118952</b>  | 88.063114         | 158.092403        | 79.549839        |                    |                  | 1  |

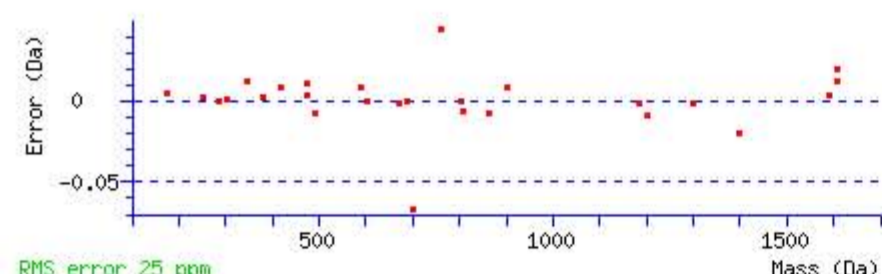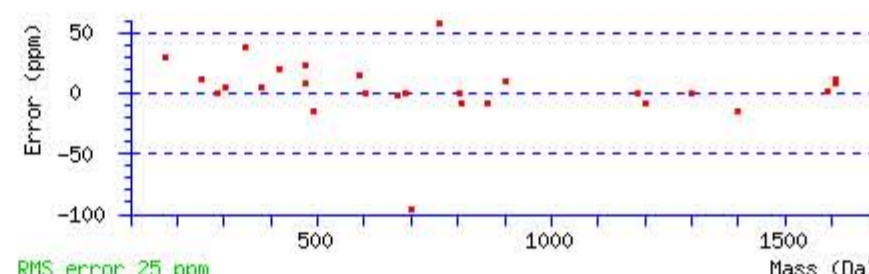

NCBI BLAST search of [SYELPDGQVITIGNER](#)

(Parameters: blastp, nr protein database, expect=20000, no filter, PAM30)

Other BLAST [web gateways](#)

All matches to this query

| Score | Mr(calc):   | Delta     | Sequence                             |
|-------|-------------|-----------|--------------------------------------|
| 49.7  | 2101.051376 | -0.001844 | <a href="#">SYELPDGQVITIGNER</a>     |
| 5.3   | 2101.055237 | -0.005705 | <a href="#">VSGEQSLTWGLGGPSQSQKR</a> |
| 3.9   | 2101.029602 | 0.019930  | <a href="#">MGKLISATVHEDGCEVSIR</a>  |
| 1.7   | 2101.022842 | 0.026690  | <a href="#">SDGSKITYIDYRQQHK</a>     |

Mascot: <http://www.matrixscience.com/>



# MASCOT SCIENCE Mascot Search Results

## Peptide View

MS/MS Fragmentation of **VNCLQTR**

Found in **AFAM\_HUMAN**, Afamin OS=Homo sapiens GN=AFM PE=1 SV=1

Match to Query 25252: 1200.611708 from(601.313130,2+) rtinseconds(1498) index(2856)

Title: Locus:1.1.1.2957.15 File:"2013-07-02 CLN FXIII 30 min 2nd F 1.wiff"

Data file C:\Program Files (x86)\Matrix Science\Mascot Daemon\mgf\2 FXIII 30 min 2nd\mascot\_daemon\_merge.mgf

Click mouse within plot area to zoom in by factor of two about that point

Or, Plot from  to  Da

Label all possible matches  Label matches used for scoring

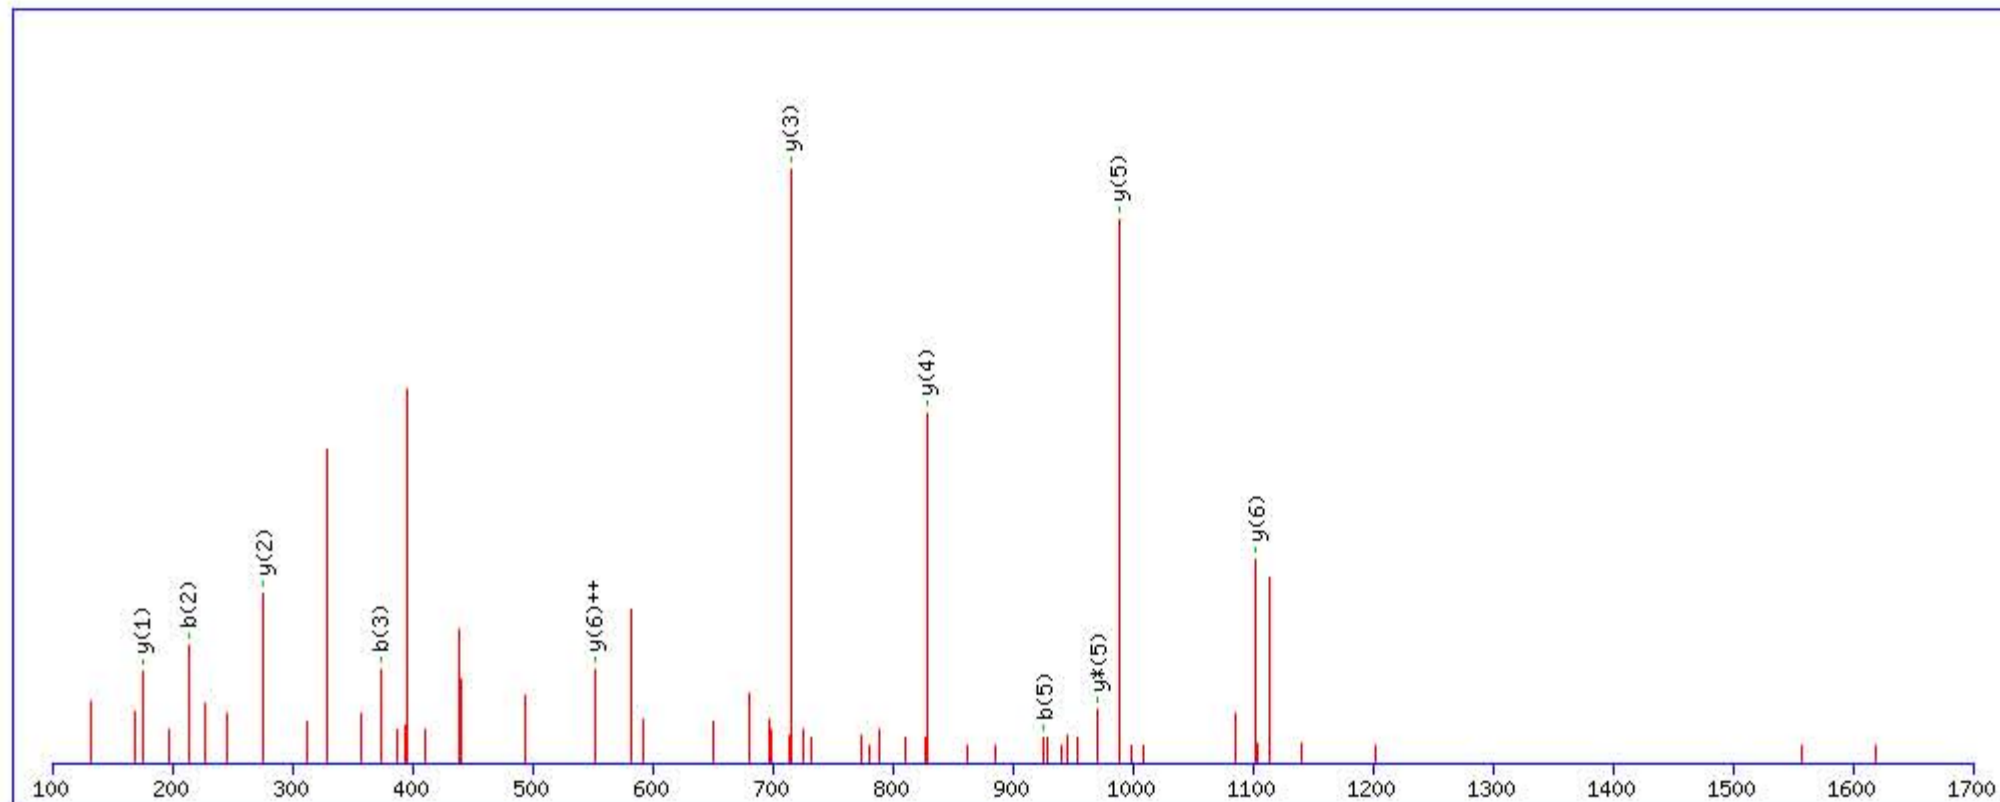

Monoisotopic mass of neutral peptide Mr(calc): 1200.610733

Fixed modifications: Carbamidomethyl (C) (apply to specified residues or termini only)

Variable modifications:

Q5 : Biotin:Thermo-21345 (Q)

Ions Score: 36 Expect: 0.0015

Matches : 11/58 fragment ions using 21 most intense peaks ([help](#))

| # | b                 | b <sup>++</sup> | b <sup>*</sup> | b <sup>+++</sup> | b <sup>0</sup> | b <sup>0++</sup> | Seq. | y                  | y <sup>++</sup>   | y <sup>*</sup>    | y <sup>+++</sup> | y <sup>0</sup> | y <sup>0++</sup> | # |
|---|-------------------|-----------------|----------------|------------------|----------------|------------------|------|--------------------|-------------------|-------------------|------------------|----------------|------------------|---|
| 1 | 100.075690        | 50.541483       |                |                  |                |                  | V    |                    |                   |                   |                  |                |                  | 7 |
| 2 | <b>214.118617</b> | 107.562947      | 197.092068     | 99.049672        |                |                  | N    | <b>1102.549597</b> | <b>551.778437</b> | 1085.523048       | 543.265162       | 1084.539032    | 542.773154       | 6 |
| 3 | <b>374.149266</b> | 187.578271      | 357.122717     | 179.064997       |                |                  | C    | <b>988.506670</b>  | 494.756973        | <b>971.480121</b> | 486.243698       | 970.496105     | 485.751691       | 5 |
| 4 | 487.233330        | 244.120303      | 470.206781     | 235.607029       |                |                  | L    | <b>828.476021</b>  | 414.741649        | 811.449472        | 406.228374       | 810.465456     | 405.736366       | 4 |
| 5 | <b>926.458656</b> | 463.732966      | 909.432107     | 455.219692       |                |                  | Q    | <b>715.391957</b>  | 358.199617        | 698.365408        | 349.686342       | 697.381392     | 349.194334       | 3 |
| 6 | 1027.506335       | 514.256806      | 1010.479786    | 505.743531       | 1009.495770    | 505.251523       | T    | <b>276.166631</b>  | 138.586953        | 259.140082        | 130.073679       | 258.156066     | 129.581671       | 2 |
| 7 |                   |                 |                |                  |                |                  | R    | <b>175.118952</b>  | 88.063114         | 158.092403        | 79.549839        |                |                  | 1 |

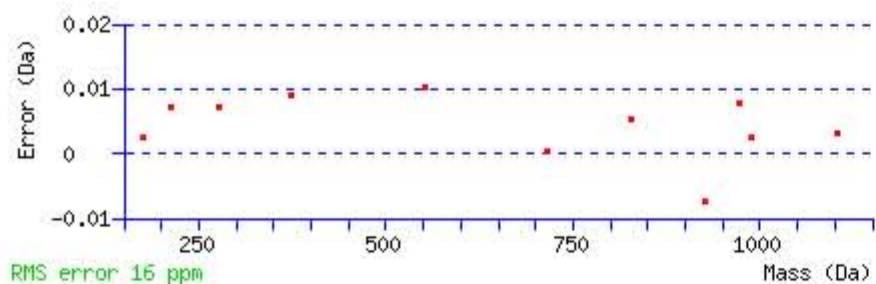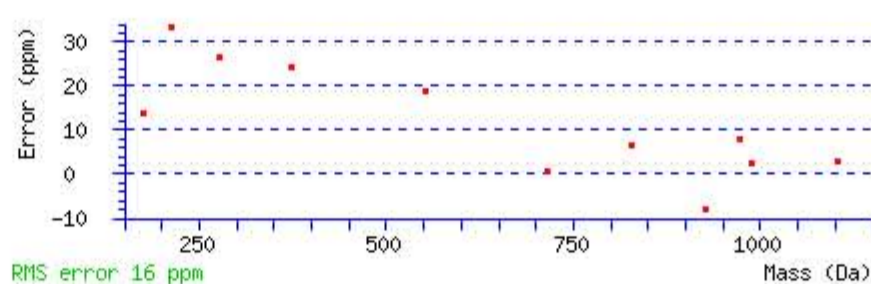

NCBI BLAST search of **VNCLQTR**

(Parameters: blastp, nr protein database, expect=20000, no filter, PAM30)

Other BLAST [web gateways](#)

All matches to this query

| Score | Mr(calc):   | Delta     | Sequence                    |
|-------|-------------|-----------|-----------------------------|
| 35.9  | 1200.610733 | 0.000975  | <a href="#">VNCLQTR</a>     |
| 5.8   | 1200.598618 | 0.013090  | <a href="#">VNPKGLDDESK</a> |
| 3.4   | 1200.621948 | -0.010240 | <a href="#">VNMLKHCKR</a>   |
| 3.0   | 1200.603333 | 0.008375  | <a href="#">GRIAEPSVCGR</a> |

Mascot: <http://www.matrixscience.com/>



# MASCOT Search Results

## Peptide View

MS/MS Fragmentation of **GQCIINSNKDDRPK**

Found in **AFAM\_HUMAN**, Afamin OS=Homo sapiens GN=AFM PE=1 SV=1

Match to Query 48069: 1954.965402 from(652.662410,3+) rtinseconds(1358) index(1831)

Title: Locus:1.1.1.2908.26 File:"2013-07-02 CLN FXIII 30 min 2nd F 1.wiff"

Data file C:\Program Files (x86)\Matrix Science\Mascot Daemon\mgf2 FXIII 30 min 2nd\mascot\_daemon\_merge.mgf

Click mouse within plot area to zoom in by factor of two about that point

Or, Plot from  to  Da

Label all possible matches  Label matches used for scoring

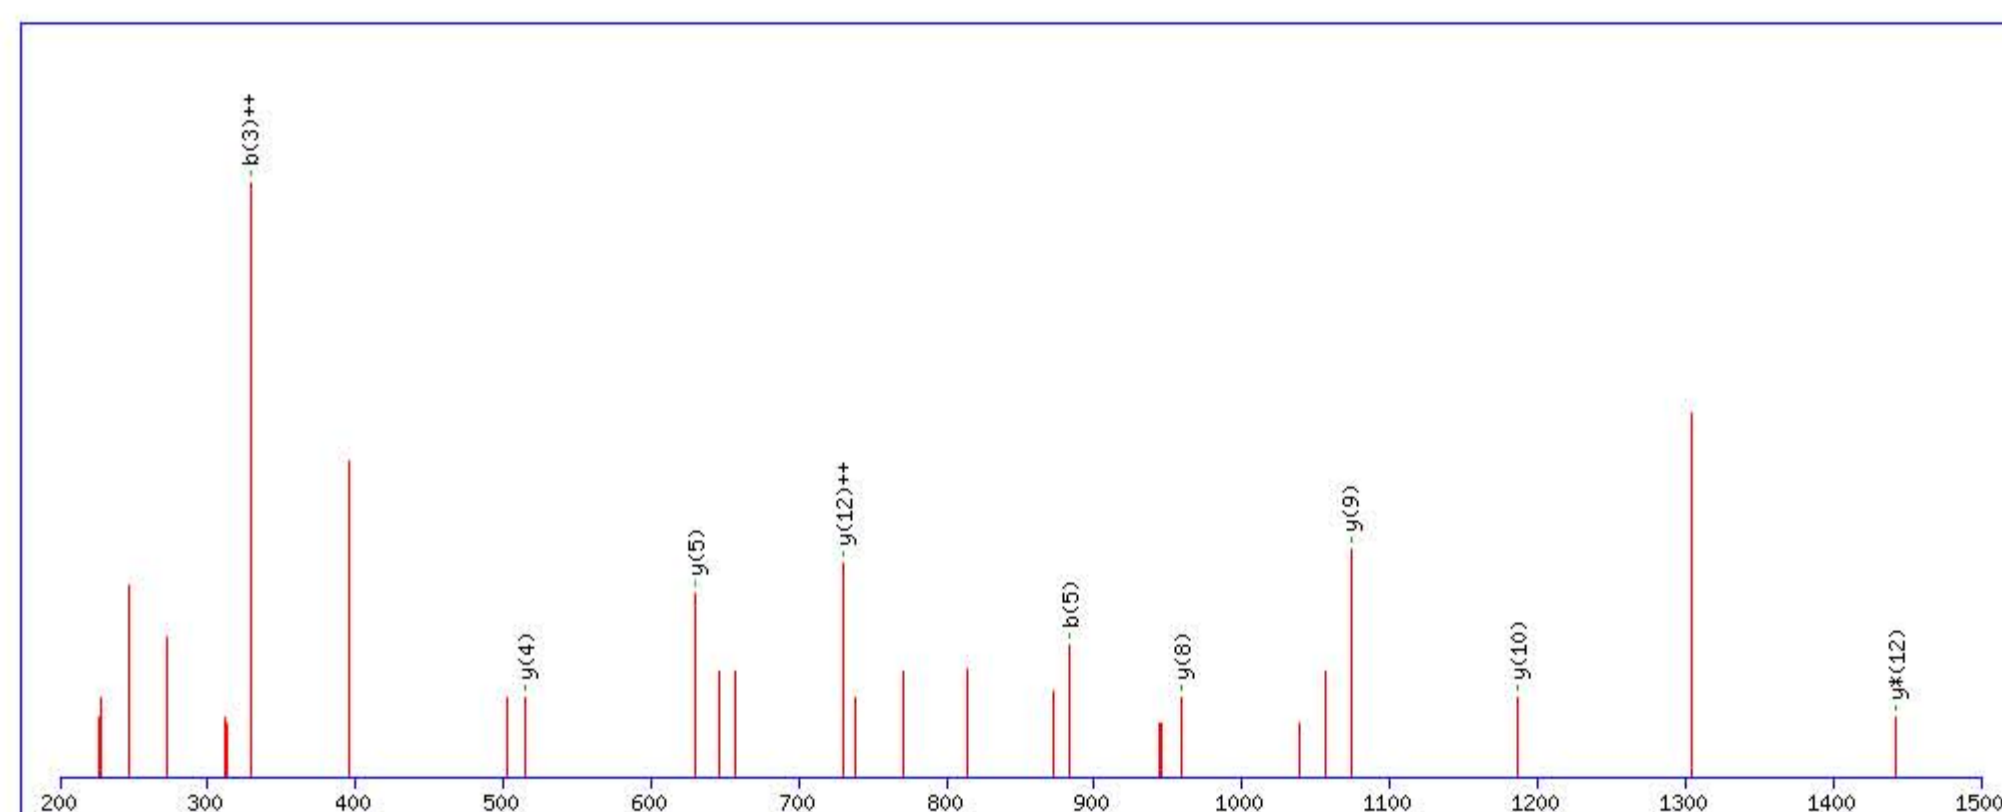

Monoisotopic mass of neutral peptide Mr(calc): 1954.971680

Fixed modifications: Carbamidomethyl (C) (apply to specified residues or termini only)

Variable modifications:

Q2 : Biotin:Thermo-21345 (Q)

Ions Score: 35 Expect: 0.0081

Matches : 9/136 fragment ions using 11 most intense peaks [\(help\)](#)

| #  | b                 | b <sup>++</sup>   | b <sup>*</sup> | b <sup>*++</sup> | b <sup>0</sup> | b <sup>0++</sup> | Seq. | y                  | y <sup>++</sup>   | y <sup>*</sup>     | y <sup>*++</sup> | y <sup>0</sup> | y <sup>0++</sup> | #  |
|----|-------------------|-------------------|----------------|------------------|----------------|------------------|------|--------------------|-------------------|--------------------|------------------|----------------|------------------|----|
| 1  | 58.028740         | 29.518008         |                |                  |                |                  | G    |                    |                   |                    |                  |                |                  | 14 |
| 2  | 497.254066        | 249.130671        | 480.227517     | 240.617397       |                |                  | Q    | 1898.957513        | 949.982395        | 1881.930964        | 941.469120       | 1880.946948    | 940.977112       | 13 |
| 3  | 657.284715        | <b>329.145996</b> | 640.258166     | 320.632721       |                |                  | C    | 1459.732187        | <b>730.369732</b> | <b>1442.705638</b> | 721.856457       | 1441.721622    | 721.364449       | 12 |
| 4  | 770.368779        | 385.688028        | 753.342230     | 377.174753       |                |                  | I    | 1299.701538        | 650.354407        | 1282.674989        | 641.841133       | 1281.690973    | 641.349125       | 11 |
| 5  | <b>883.452843</b> | 442.230060        | 866.426294     | 433.716785       |                |                  | I    | <b>1186.617474</b> | 593.812375        | 1169.590925        | 585.299101       | 1168.606909    | 584.807093       | 10 |
| 6  | 997.495770        | 499.251523        | 980.469221     | 490.738249       |                |                  | N    | <b>1073.533410</b> | 537.270343        | 1056.506861        | 528.757069       | 1055.522845    | 528.265061       | 9  |
| 7  | 1084.527798       | 542.767537        | 1067.501249    | 534.254263       | 1066.517233    | 533.762255       | S    | <b>959.490483</b>  | 480.248880        | 942.463934         | 471.735605       | 941.479918     | 471.243597       | 8  |
| 8  | 1198.570725       | 599.789001        | 1181.544176    | 591.275726       | 1180.560160    | 590.783718       | N    | 872.458455         | 436.732866        | 855.431906         | 428.219591       | 854.447890     | 427.727583       | 7  |
| 9  | 1326.665688       | 663.836482        | 1309.639139    | 655.323208       | 1308.655123    | 654.831200       | K    | 758.415528         | 379.711402        | 741.388979         | 371.198128       | 740.404963     | 370.706120       | 6  |
| 10 | 1441.692631       | 721.349954        | 1424.666082    | 712.836679       | 1423.682066    | 712.344671       | D    | <b>630.320565</b>  | 315.663921        | 613.294016         | 307.150646       | 612.310000     | 306.658638       | 5  |
| 11 | 1556.719574       | 778.863425        | 1539.693025    | 770.350151       | 1538.709009    | 769.858143       | D    | <b>515.293622</b>  | 258.150449        | 498.267073         | 249.637175       | 497.283057     | 249.145167       | 4  |
| 12 | 1712.820685       | 856.913981        | 1695.794136    | 848.400706       | 1694.810120    | 847.908698       | R    | 400.266679         | 200.636977        | 383.240130         | 192.123703       |                |                  | 3  |
| 13 | 1809.873449       | 905.440363        | 1792.846900    | 896.927088       | 1791.862884    | 896.435080       | P    | 244.165568         | 122.586422        | 227.139019         | 114.073148       |                |                  | 2  |
| 14 |                   |                   |                |                  |                |                  | K    | 147.112804         | 74.060040         | 130.086255         | 65.546765        |                |                  | 1  |

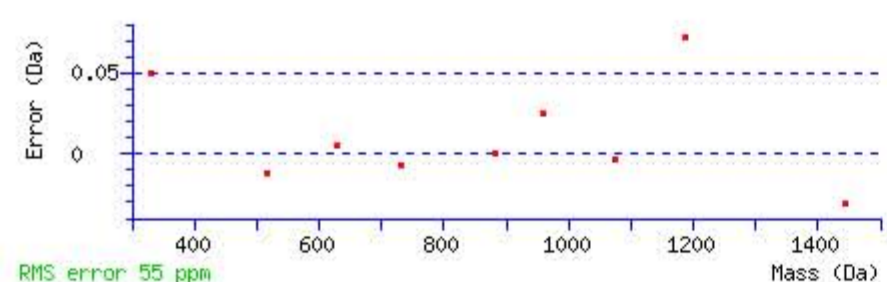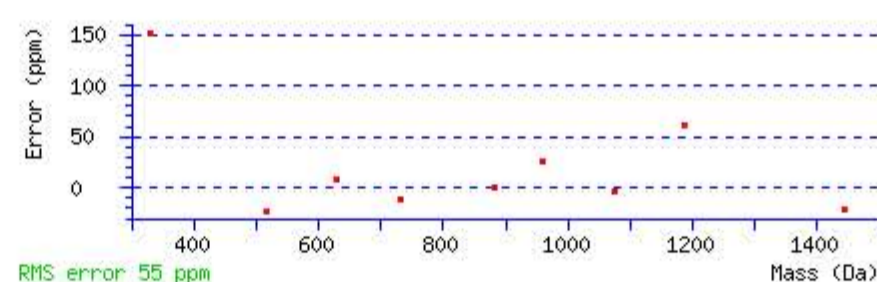

NCBI BLAST search of [GQCIINSNKDDRPK](#)

(Parameters: blastp, nr protein database, expect=20000, no filter, PAM30)

Other BLAST [web gateways](#)

### All matches to this query

| Score | Mr(calc):   | Delta     | Sequence                       |
|-------|-------------|-----------|--------------------------------|
| 34.8  | 1954.971680 | -0.006278 | <a href="#">GQCIINSNKDDRPK</a> |



# MASCOT SCIENCE Mascot Search Results

## Peptide View

MS/MS Fragmentation of **EQQDSPGNK**

Found in **A2AP\_HUMAN**, Alpha-2-antiplasmin OS=Homo sapiens GN=SERPINF2 PE=1 SV=3

Match to Query 28706: 1312.598708 from(657.306630,2+) rtinseconds(1184) index(65968)

Title: Locus:1.1.1.2945.19 File:"2013-07-02 CLN FXIII 30 min 2nd FT.wiff"

Data file C:\Program Files (x86)\Matrix Science\Mascot Daemon\mgf2 FXIII 30 min 2nd\mascot\_daemon\_merge.mgf

Click mouse within plot area to zoom in by factor of two about that point

Or, Plot from  to  Da

Label all possible matches  Label matches used for scoring

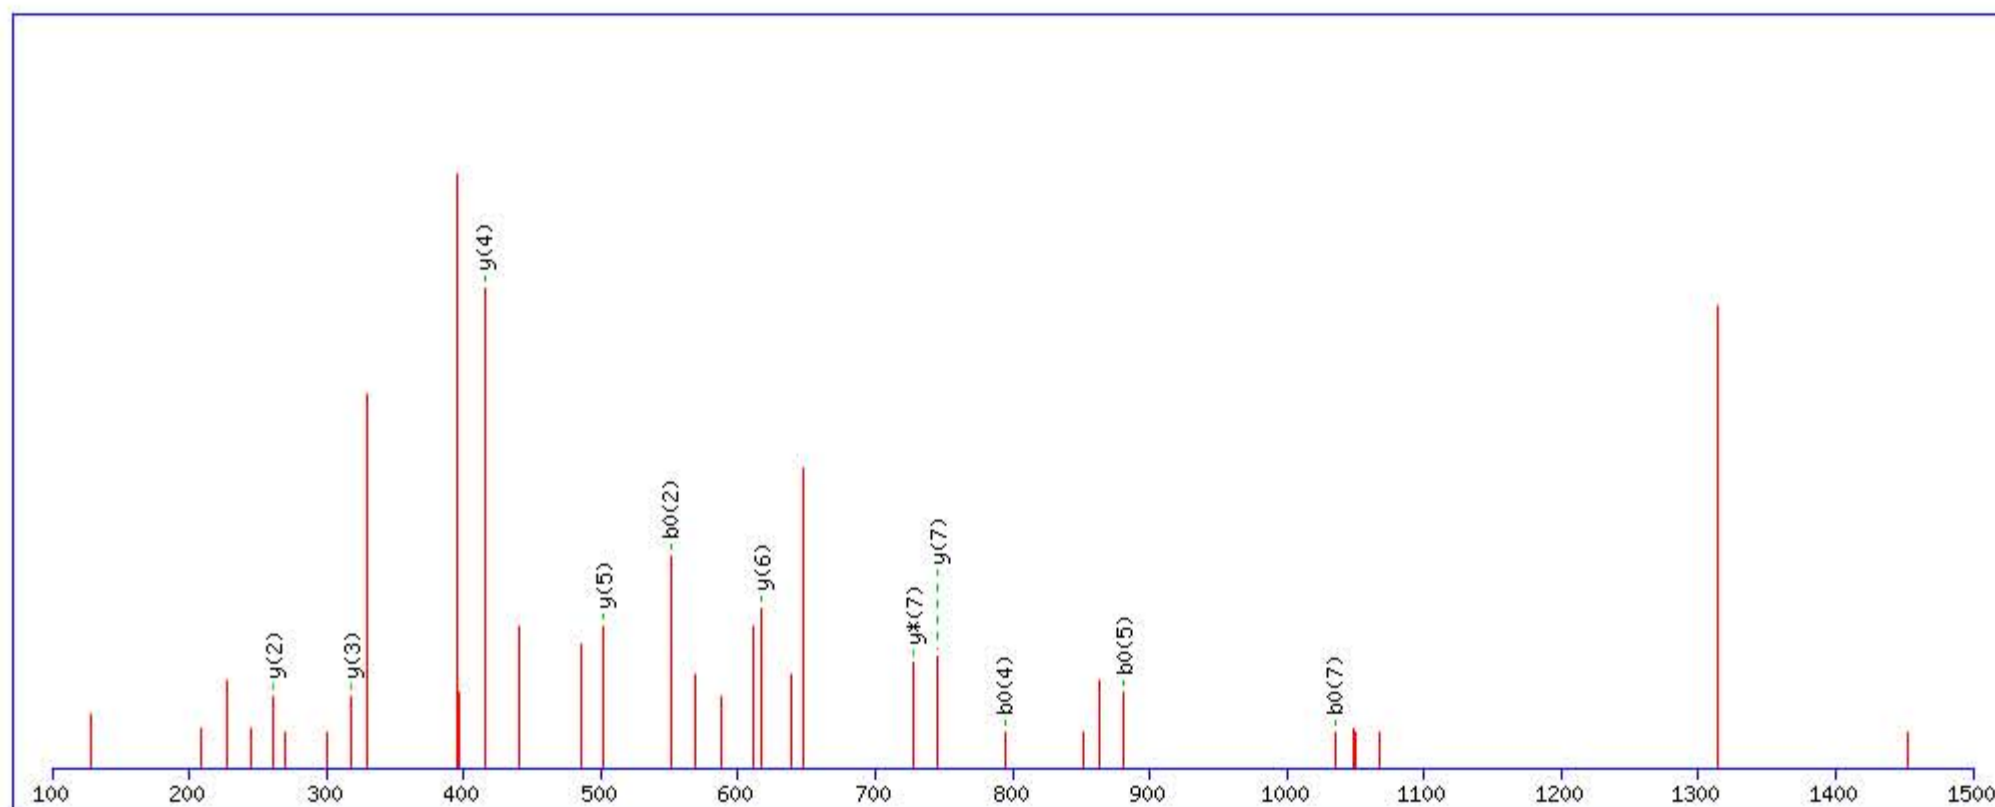

Monoisotopic mass of neutral peptide Mr(calc): 1312.608139

Fixed modifications: Carbamidomethyl (C) (apply to specified residues or termini only)

Variable modifications:

Q2 : Biotin:Thermo-21345 (Q)

Ions Score: 31 Expect: 0.0062

Matches : 11/86 fragment ions using 18 most intense peaks ([help](#))

| # | b           | b <sup>++</sup> | b <sup>*</sup> | b <sup>+++</sup> | b <sup>0</sup> | b <sup>0++</sup> | Seq. | y           | y <sup>++</sup> | y <sup>*</sup> | y <sup>+++</sup> | y <sup>0</sup> | y <sup>0++</sup> | # |
|---|-------------|-----------------|----------------|------------------|----------------|------------------|------|-------------|-----------------|----------------|------------------|----------------|------------------|---|
| 1 | 130.049869  | 65.528572       |                |                  | 112.039304     | 56.523290        | E    |             |                 |                |                  |                |                  | 9 |
| 2 | 569.275195  | 285.141236      | 552.248646     | 276.627961       | 551.264630     | 276.135953       | Q    | 1184.572834 | 592.790055      | 1167.546285    | 584.276780       | 1166.562269    | 583.784772       | 8 |
| 3 | 697.333773  | 349.170525      | 680.307224     | 340.657250       | 679.323208     | 340.165242       | Q    | 745.347508  | 373.177392      | 728.320959     | 364.664117       | 727.336943     | 364.172109       | 7 |
| 4 | 812.360716  | 406.683996      | 795.334167     | 398.170722       | 794.350151     | 397.678714       | D    | 617.288930  | 309.148103      | 600.262381     | 300.634828       | 599.278365     | 300.142820       | 6 |
| 5 | 899.392744  | 450.200010      | 882.366195     | 441.686736       | 881.382179     | 441.194728       | S    | 502.261987  | 251.634631      | 485.235438     | 243.121357       | 484.251422     | 242.629349       | 5 |
| 6 | 996.445508  | 498.726392      | 979.418959     | 490.213118       | 978.434943     | 489.721110       | P    | 415.229959  | 208.118617      | 398.203410     | 199.605343       |                |                  | 4 |
| 7 | 1053.466972 | 527.237124      | 1036.440423    | 518.723850       | 1035.456407    | 518.231841       | G    | 318.177195  | 159.592235      | 301.150646     | 151.078961       |                |                  | 3 |
| 8 | 1167.509899 | 584.258587      | 1150.483350    | 575.745313       | 1149.499334    | 575.253305       | N    | 261.155731  | 131.081503      | 244.129182     | 122.568229       |                |                  | 2 |
| 9 |             |                 |                |                  |                |                  | K    | 147.112804  | 74.060040       | 130.086255     | 65.546765        |                |                  | 1 |

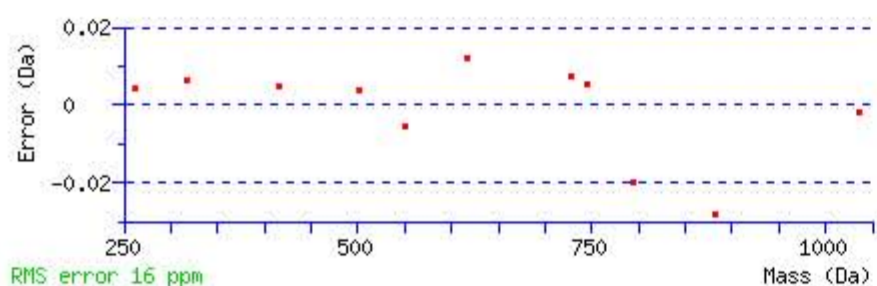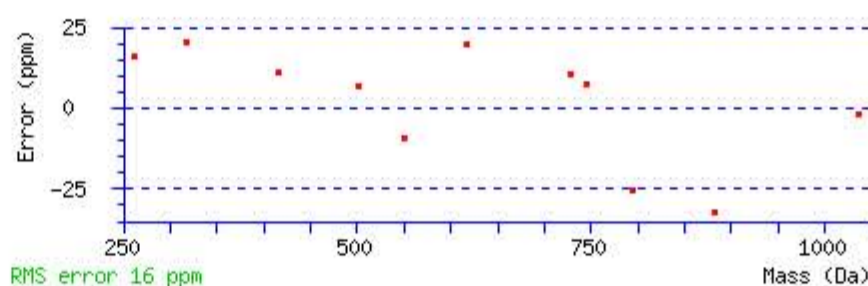

NCBI BLAST search of [EQQDSPGNK](#)

(Parameters: blastp, nr protein database, expect=20000, no filter, PAM30)

Other BLAST [web gateways](#)

All matches to this query

| Score | Mr(calc):   | Delta     | Sequence                  |
|-------|-------------|-----------|---------------------------|
| 31.3  | 1312.608139 | -0.009431 | <a href="#">EQQDSPGNK</a> |
| 18.3  | 1312.608139 | -0.009431 | <a href="#">EQQDSPGNK</a> |



# MASCOT Search Results

## Peptide View

MS/MS Fragmentation of **LGNQEPGGQTALK**

Found in **A2AP\_HUMAN**, Alpha-2-antiplasmin OS=Homo sapiens GN=SERPINF2 PE=1 SV=3

Match to Query 39864: 1622.830148 from(812.422350,2+) rtinseconds(1594) index(68760)

Title: Locus:1.1.1.3088.9 File:"2013-07-02 CLN FXIII 30 min 2nd FT.wiff"

Data file C:\Program Files (x86)\Matrix Science\Mascot Daemon\mgf\2 FXIII 30 min 2nd\mascot\_daemon\_merge.mgf

Click mouse within plot area to zoom in by factor of two about that point

Or, Plot from  to  Da

Label all possible matches  Label matches used for scoring

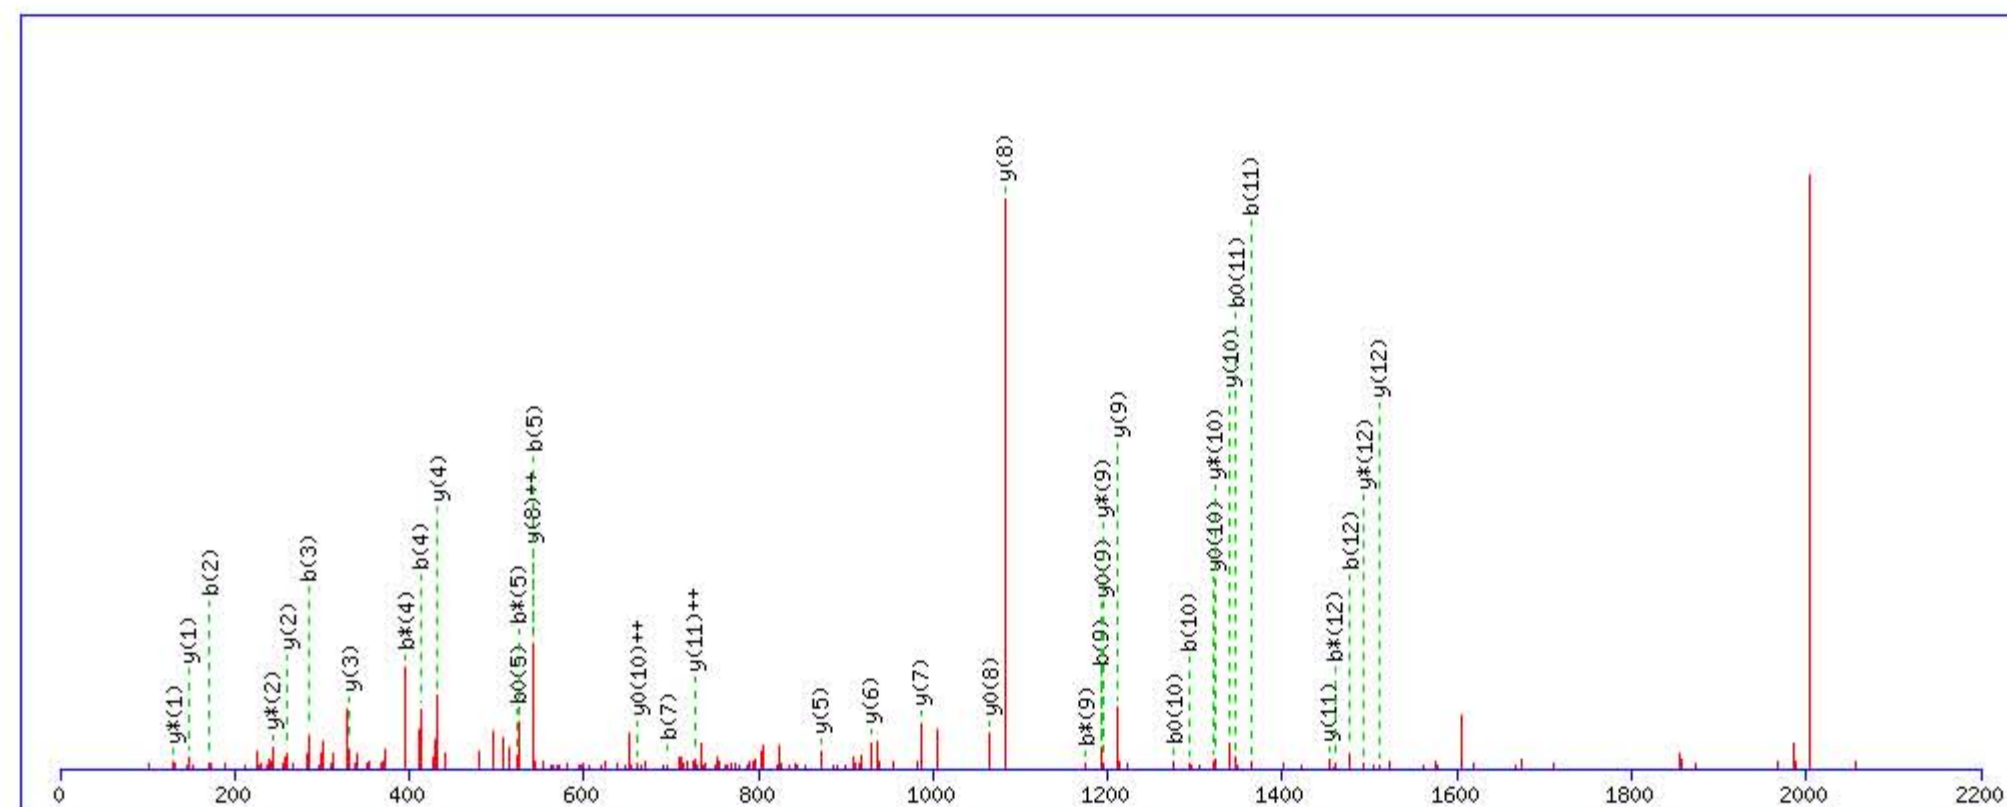

Monoisotopic mass of neutral peptide Mr(calc): 1622.845016

Fixed modifications: Carbamidomethyl (C) (apply to specified residues or termini only)

Variable modifications:

Q9 : Biotin:Thermo-21345 (Q)

Ions Score: 67 Expect: 4.4e-006

Matches : 39/126 fragment ions using 88 most intense peaks [\(help\)](#)

| #  | b                  | b <sup>++</sup> | b <sup>*</sup>     | b <sup>+++</sup> | b <sup>0</sup>     | b <sup>0++</sup> | Seq. | y                  | y <sup>++</sup>   | y <sup>*</sup>     | y <sup>+++</sup> | y <sup>0</sup>     | y <sup>0++</sup>  | #  |
|----|--------------------|-----------------|--------------------|------------------|--------------------|------------------|------|--------------------|-------------------|--------------------|------------------|--------------------|-------------------|----|
| 1  | 114.091340         | 57.549308       |                    |                  |                    |                  | L    |                    |                   |                    |                  |                    |                   | 13 |
| 2  | <b>171.112804</b>  | 86.060040       |                    |                  |                    |                  | G    | <b>1510.768241</b> | 755.887759        | <b>1493.741692</b> | 747.374484       | 1492.757676        | 746.882476        | 12 |
| 3  | <b>285.155731</b>  | 143.081504      | 268.129182         | 134.568229       |                    |                  | N    | <b>1453.746777</b> | <b>727.377027</b> | 1436.720228        | 718.863752       | 1435.736212        | 718.371744        | 11 |
| 4  | <b>413.214309</b>  | 207.110793      | <b>396.187760</b>  | 198.597518       |                    |                  | Q    | <b>1339.703850</b> | 670.355563        | <b>1322.677301</b> | 661.842289       | <b>1321.693285</b> | <b>661.350281</b> | 10 |
| 5  | <b>542.256902</b>  | 271.632089      | <b>525.230353</b>  | 263.118815       | <b>524.246337</b>  | 262.626807       | E    | <b>1211.645272</b> | 606.326274        | <b>1194.618723</b> | 597.813000       | <b>1193.634707</b> | 597.320991        | 9  |
| 6  | 639.309666         | 320.158471      | 622.283117         | 311.645197       | 621.299101         | 311.153189       | P    | <b>1082.602679</b> | <b>541.804978</b> | 1065.576130        | 533.291703       | <b>1064.592114</b> | 532.799695        | 8  |
| 7  | <b>696.331130</b>  | 348.669203      | 679.304581         | 340.155929       | 678.320565         | 339.663921       | G    | <b>985.549915</b>  | 493.278596        | 968.523366         | 484.765321       | 967.539350         | 484.273313        | 7  |
| 8  | 753.352594         | 377.179935      | 736.326045         | 368.666661       | 735.342029         | 368.174653       | G    | <b>928.528451</b>  | 464.767864        | 911.501902         | 456.254589       | 910.517886         | 455.762581        | 6  |
| 9  | <b>1192.577920</b> | 596.792598      | <b>1175.551371</b> | 588.279324       | 1174.567355        | 587.787316       | Q    | <b>871.506987</b>  | 436.257132        | 854.480438         | 427.743857       | 853.496422         | 427.251849        | 5  |
| 10 | <b>1293.625599</b> | 647.316438      | 1276.599050        | 638.803163       | <b>1275.615034</b> | 638.311155       | T    | <b>432.281661</b>  | 216.644468        | 415.255112         | 208.131194       | 414.271096         | 207.639186        | 4  |
| 11 | <b>1364.662713</b> | 682.834995      | 1347.636164        | 674.321720       | <b>1346.652148</b> | 673.829712       | A    | <b>331.233982</b>  | 166.120629        | 314.207433         | 157.607354       |                    |                   | 3  |
| 12 | <b>1477.746777</b> | 739.377027      | <b>1460.720228</b> | 730.863752       | 1459.736212        | 730.371744       | L    | <b>260.196868</b>  | 130.602072        | <b>243.170319</b>  | 122.088797       |                    |                   | 2  |
| 13 |                    |                 |                    |                  |                    |                  | K    | <b>147.112804</b>  | 74.060040         | <b>130.086255</b>  | 65.546765        |                    |                   | 1  |

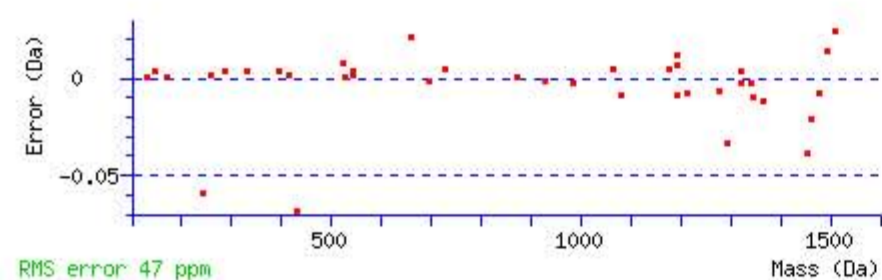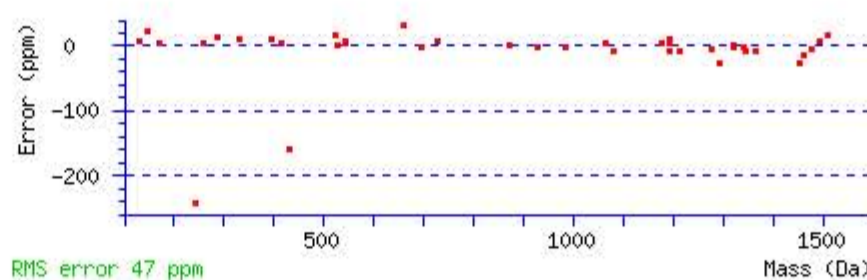

NCBI BLAST search of **LGNQEPGGQTALK**

(Parameters: blastp, nr protein database, expect=20000, no filter, PAM30)

Other BLAST [web gateways](#)

All matches to this query

| Score | Mr(calc):   | Delta     | Sequence                        |
|-------|-------------|-----------|---------------------------------|
| 67.1  | 1622.845016 | -0.014868 | <a href="#">LGNQEPGGQTALK</a>   |
| 17.4  | 1622.845016 | -0.014868 | <a href="#">LGNQEPGGQTALK</a>   |
| 9.4   | 1622.813324 | 0.016824  | <a href="#">NGLAQRMSHGK</a>     |
| 3.0   | 1622.831085 | -0.000937 | <a href="#">GLNPNPSHQMTKRK</a>  |
| 2.9   | 1622.837601 | -0.007453 | <a href="#">SQSEKQTYLEVRR</a>   |
| 1.9   | 1622.820511 | 0.009637  | <a href="#">FPPEASGYLHIGHAK</a> |
| 1.1   | 1622.849045 | -0.018897 | <a href="#">IPMPDFDLHLKGP</a>   |
| 1.1   | 1622.819855 | 0.010293  | <a href="#">NSSPRMPHLAVATDK</a> |
| 0.8   | 1622.852890 | -0.022742 | <a href="#">QFEFVGSAPTRRTK</a>  |



# MASCOT SEARCH RESULTS

## Peptide View

MS/MS Fragmentation of **QLTSGPNQEQVSPLTLK**

Found in **A2AP\_HUMAN**, Alpha-2-antiplasmin OS=Homo sapiens GN=SERPINF2 PE=1 SV=3

Match to Query 55295: 2263.214382 from(755.412070,3+) rtinseconds(2529) index(74491)

Title: Locus:1.1.1.3414.8 File:"2013-07-02 CLN FXIII 30 min 2nd FT.wiff"

Data file C:\Program Files (x86)\Matrix Science\Mascot Daemon\mgf2 FXIII 30 min 2nd\mascot\_daemon\_merge.mgf

Click mouse within plot area to zoom in by factor of two about that point

Or, Plot from  to  Da

Label all possible matches  Label matches used for scoring

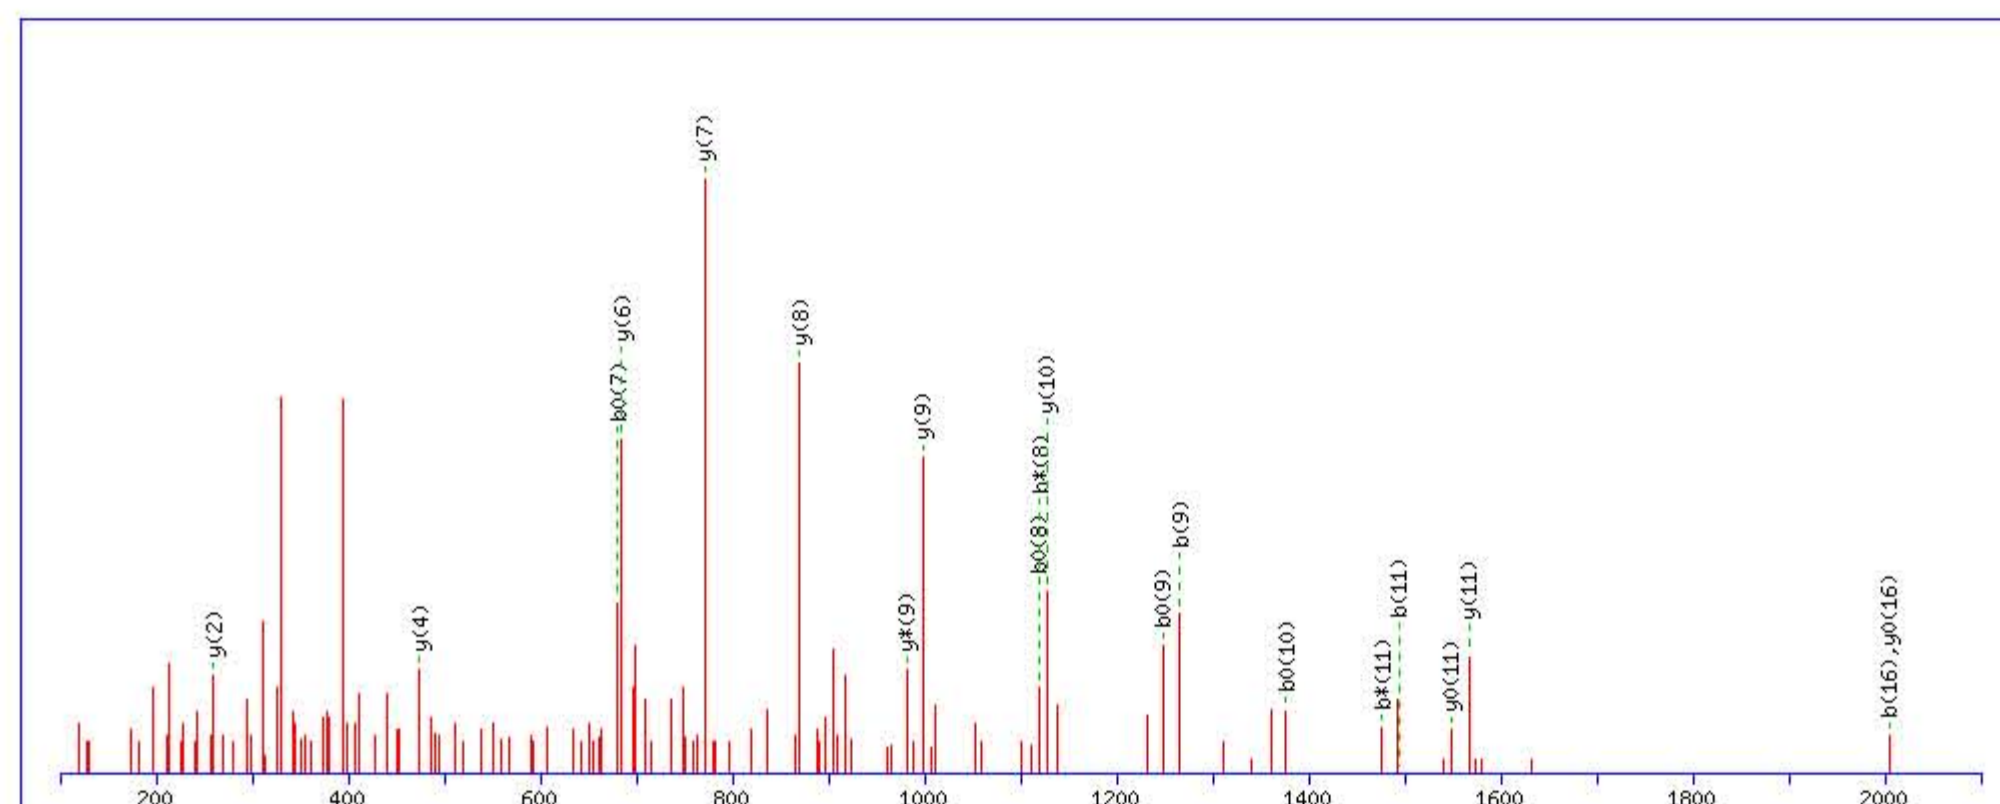

Monoisotopic mass of neutral peptide Mr(calc): 2263.224594

Fixed modifications: Carbamidomethyl (C) (apply to specified residues or termini only)

Variable modifications:

Q8 : Biotin:Thermo-21345 (Q)

Ions Score: 42 Expect: 0.00052

Matches : 20/194 fragment ions using 32 most intense peaks [\(help\)](#)

| #  | b           | b <sup>++</sup> | b*          | b <sup>*++</sup> | b <sup>0</sup> | b <sup>0++</sup> | Seq. | y           | y <sup>++</sup> | y*          | y <sup>*++</sup> | y <sup>0</sup> | y <sup>0++</sup> | #  |
|----|-------------|-----------------|-------------|------------------|----------------|------------------|------|-------------|-----------------|-------------|------------------|----------------|------------------|----|
| 1  | 129.065854  | 65.036565       | 112.039305  | 56.523291        |                |                  | Q    |             |                 |             |                  |                |                  | 18 |
| 2  | 242.149918  | 121.578597      | 225.123369  | 113.065323       |                |                  | L    | 2136.173304 | 1068.590290     | 2119.146755 | 1060.077015      | 2118.162739    | 1059.585007      | 17 |
| 3  | 343.197597  | 172.102437      | 326.171048  | 163.589162       | 325.187032     | 163.097154       | T    | 2023.089240 | 1012.048258     | 2006.062691 | 1003.534984      | 2005.078675    | 1003.042976      | 16 |
| 4  | 430.229625  | 215.618450      | 413.203076  | 207.105176       | 412.219060     | 206.613168       | S    | 1922.041561 | 961.524419      | 1905.015012 | 953.011144       | 1904.030996    | 952.519136       | 15 |
| 5  | 487.251089  | 244.129182      | 470.224540  | 235.615908       | 469.240524     | 235.123900       | G    | 1835.009533 | 918.008405      | 1817.982984 | 909.495130       | 1816.998968    | 909.003122       | 14 |
| 6  | 584.303853  | 292.655565      | 567.277304  | 284.142290       | 566.293288     | 283.650282       | P    | 1777.988069 | 889.497673      | 1760.961520 | 880.984398       | 1759.977504    | 880.492390       | 13 |
| 7  | 698.346780  | 349.677028      | 681.320231  | 341.163753       | 680.336215     | 340.671745       | N    | 1680.935305 | 840.971291      | 1663.908756 | 832.458016       | 1662.924740    | 831.966008       | 12 |
| 8  | 1137.572106 | 569.289691      | 1120.545557 | 560.776416       | 1119.561541    | 560.284408       | Q    | 1566.892378 | 783.949827      | 1549.865829 | 775.436553       | 1548.881813    | 774.944545       | 11 |
| 9  | 1266.614699 | 633.810988      | 1249.588150 | 625.297713       | 1248.604134    | 624.805705       | E    | 1127.667052 | 564.337164      | 1110.640503 | 555.823890       | 1109.656487    | 555.331882       | 10 |
| 10 | 1394.673277 | 697.840277      | 1377.646728 | 689.327002       | 1376.662712    | 688.834994       | Q    | 998.624459  | 499.815868      | 981.597910  | 491.302593       | 980.613894     | 490.810585       | 9  |
| 11 | 1493.741691 | 747.374484      | 1476.715142 | 738.861209       | 1475.731126    | 738.369201       | V    | 870.565881  | 435.786579      | 853.539332  | 427.273304       | 852.555316     | 426.781296       | 8  |
| 12 | 1580.773719 | 790.890498      | 1563.747170 | 782.377223       | 1562.763154    | 781.885215       | S    | 771.497467  | 386.252372      | 754.470918  | 377.739097       | 753.486902     | 377.247089       | 7  |
| 13 | 1677.826483 | 839.416880      | 1660.799934 | 830.903605       | 1659.815918    | 830.411597       | P    | 684.465439  | 342.736358      | 667.438890  | 334.223083       | 666.454874     | 333.731075       | 6  |
| 14 | 1790.910547 | 895.958912      | 1773.883998 | 887.445637       | 1772.899982    | 886.953629       | L    | 587.412675  | 294.209976      | 570.386126  | 285.696701       | 569.402110     | 285.204693       | 5  |
| 15 | 1891.958226 | 946.482751      | 1874.931677 | 937.969477       | 1873.947661    | 937.477469       | T    | 474.328611  | 237.667944      | 457.302062  | 229.154669       | 456.318046     | 228.662661       | 4  |
| 16 | 2005.042290 | 1003.024783     | 1988.015741 | 994.511509       | 1987.031725    | 994.019501       | L    | 373.280932  | 187.144104      | 356.254383  | 178.630830       |                |                  | 3  |
| 17 | 2118.126354 | 1059.566815     | 2101.099805 | 1051.053540      | 2100.115789    | 1050.561532      | L    | 260.196868  | 130.602072      | 243.170319  | 122.088798       |                |                  | 2  |
| 18 |             |                 |             |                  |                |                  | K    | 147.112804  | 74.060040       | 130.086255  | 65.546765        |                |                  | 1  |

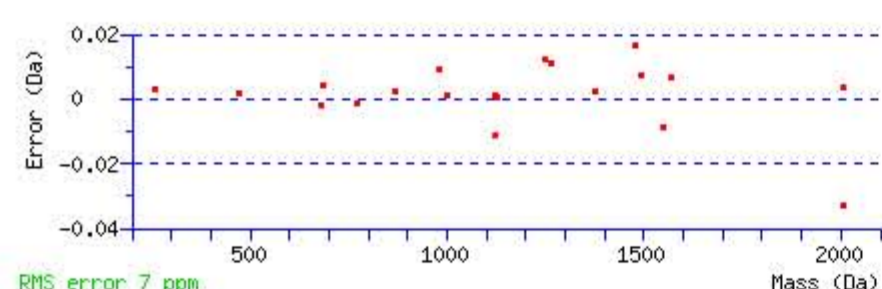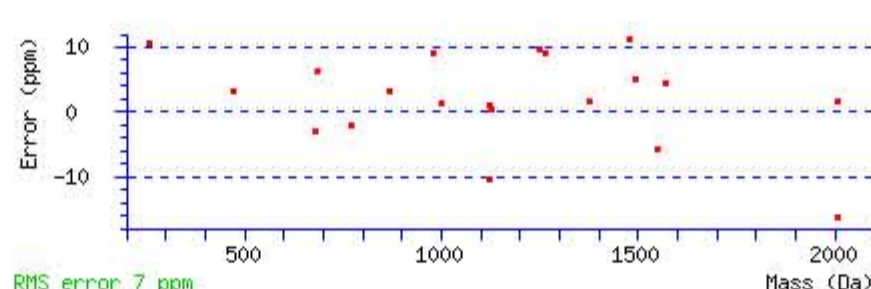

NCBI BLAST search of **QLTSGPNQEQVSPLTLK**

(Parameters: blastp, nr protein database, expect=20000, no filter, PAM30)

Other BLAST [web gateways](#)

All matches to this query

| Score | Mr(calc):   | Delta     | Sequence                            |
|-------|-------------|-----------|-------------------------------------|
| 41.6  | 2263.224594 | -0.010212 | <a href="#">QLTSGPNQEQVSPLTLK</a>   |
| 30.0  | 2263.224594 | -0.010212 | <a href="#">QLTSGPNQEQVSPLTLK</a>   |
| 17.9  | 2263.224594 | -0.010212 | <a href="#">QLTSGPNQEQVSPLTLK</a>   |
| 6.3   | 2263.197586 | 0.016796  | <a href="#">TCWLAAFRLFKYGVQLYK</a>  |
| 1.3   | 2263.224594 | -0.010212 | <a href="#">GLALSSNKVKSVMVVDNEK</a> |



# MASCOT Search Results

## Peptide View

MS/MS Fragmentation of **ELKEQQDSPGNKDFLQSLK**

Found in **A2AP\_HUMAN**, Alpha-2-antiplasmin OS=Homo sapiens GN=SERPINF2 PE=1 SV=3

Match to Query 60328: 2514.286016 from(629.578780,4+) rtinseconds(1897) index(5188)

Title: Locus:1.1.1.3096.23 File:"2013-07-02 CLN FXIII 30 min 2nd F 1.wiff"

Data file C:\Program Files (x86)\Matrix Science\Mascot Daemon\mgf2 FXIII 30 min 2nd\mascot\_daemon\_merge.mgf

Click mouse within plot area to zoom in by factor of two about that point

Or, Plot from  to  Da

Label all possible matches  Label matches used for scoring

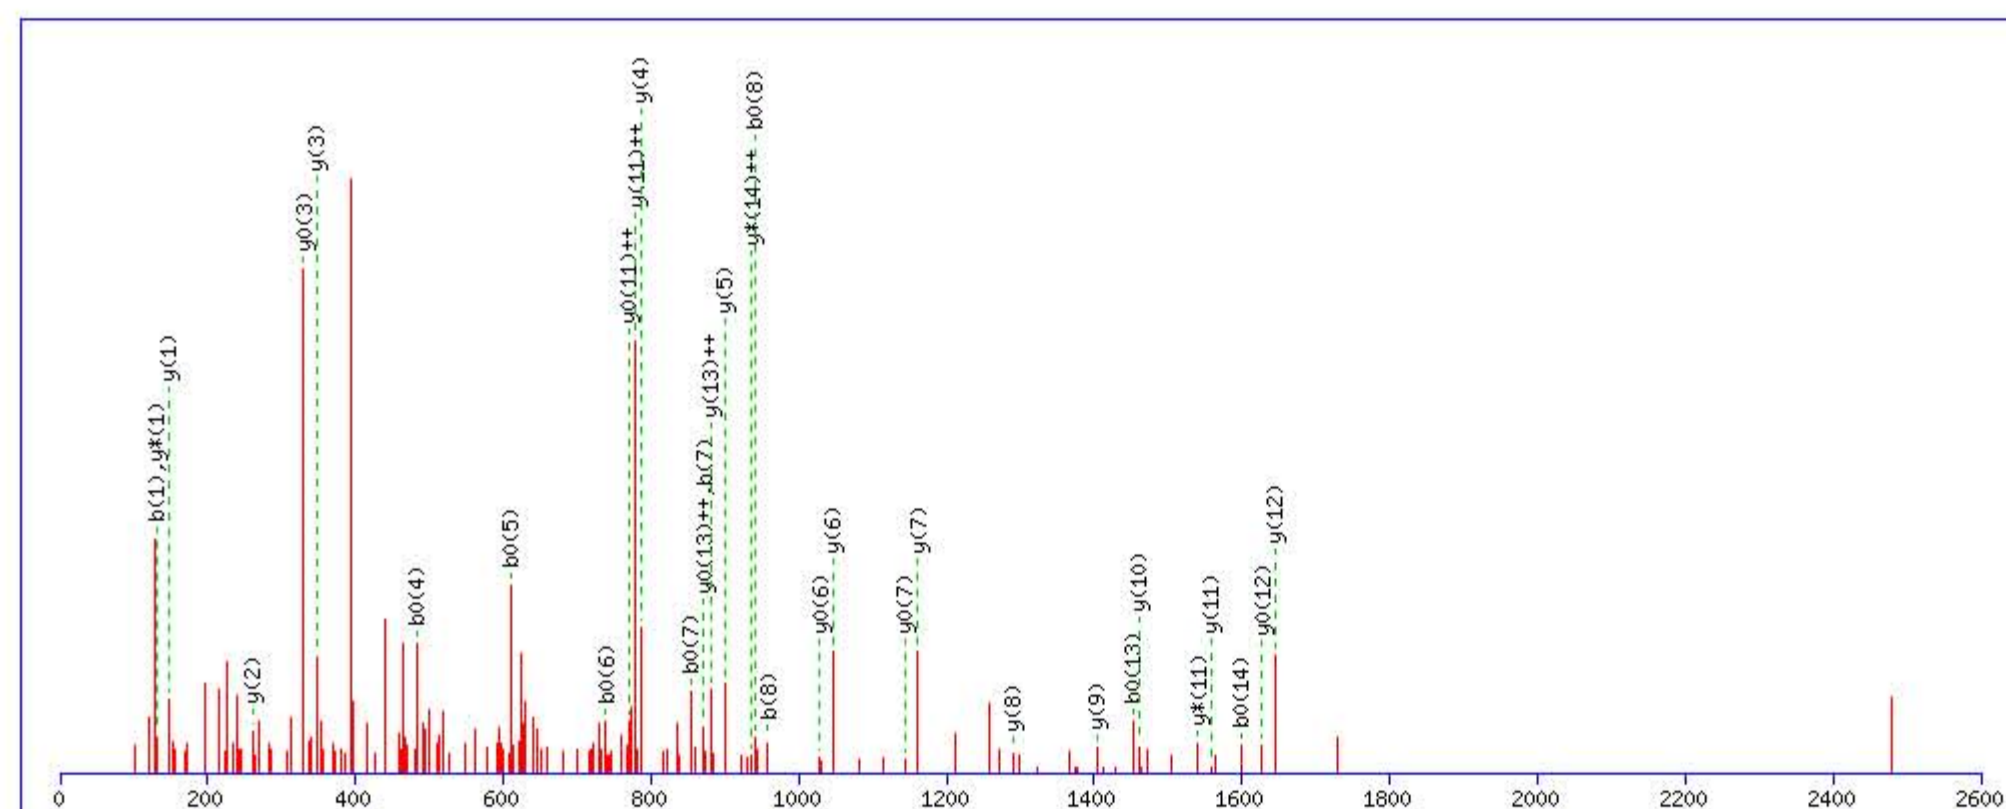

Monoisotopic mass of neutral peptide Mr(calc): 2514.278793

Fixed modifications: Carbamidomethyl (C) (apply to specified residues or termini only)

Variable modifications:

Q16 : Biotin:Thermo-21345 (Q)

Ions Score: 42 Expect: 0.00013

Matches : 33/208 fragment ions using 85 most intense peaks [\(help\)](#)

| #  | b                 | b <sup>++</sup> | b <sup>*</sup> | b <sup>*++</sup> | b <sup>0</sup>     | b <sup>0++</sup> | Seq. | y                  | y <sup>++</sup>   | y <sup>*</sup>     | y <sup>*++</sup>  | y <sup>0</sup>     | y <sup>0++</sup>  | #  |
|----|-------------------|-----------------|----------------|------------------|--------------------|------------------|------|--------------------|-------------------|--------------------|-------------------|--------------------|-------------------|----|
| 1  | <b>130.049869</b> | 65.528572       |                |                  | 112.039304         | 56.523290        | E    |                    |                   |                    |                   |                    |                   | 19 |
| 2  | 243.133933        | 122.070605      |                |                  | 225.123368         | 113.065322       | L    | 2386.243508        | 1193.625392       | 2369.216959        | 1185.112117       | 2368.232943        | 1184.620109       | 18 |
| 3  | 371.228896        | 186.118086      | 354.202347     | 177.604812       | 353.218331         | 177.112804       | K    | 2273.159444        | 1137.083360       | 2256.132895        | 1128.570085       | 2255.148879        | 1128.078077       | 17 |
| 4  | 500.271489        | 250.639383      | 483.244940     | 242.126108       | <b>482.260924</b>  | 241.634100       | E    | 2145.064481        | 1073.035878       | 2128.037932        | 1064.522604       | 2127.053916        | 1064.030596       | 16 |
| 5  | 628.330067        | 314.668672      | 611.303518     | 306.155397       | <b>610.319502</b>  | 305.663389       | Q    | 2016.021888        | 1008.514582       | 1998.995339        | 1000.001308       | 1998.011323        | 999.509300        | 15 |
| 6  | 756.388645        | 378.697961      | 739.362096     | 370.184686       | <b>738.378080</b>  | 369.692678       | Q    | 1887.963310        | 944.485293        | 1870.936761        | <b>935.972019</b> | 1869.952745        | 935.480011        | 14 |
| 7  | <b>871.415588</b> | 436.211432      | 854.389039     | 427.698158       | <b>853.405023</b>  | 427.206150       | D    | 1759.904732        | <b>880.456004</b> | 1742.878183        | 871.942730        | 1741.894167        | <b>871.450722</b> | 13 |
| 8  | <b>958.447616</b> | 479.727446      | 941.421067     | 471.214172       | <b>940.437051</b>  | 470.722164       | S    | <b>1644.877789</b> | 822.942533        | 1627.851240        | 814.429258        | <b>1626.867224</b> | 813.937250        | 12 |
| 9  | 1055.500380       | 528.253828      | 1038.473831    | 519.740554       | 1037.489815        | 519.248545       | P    | <b>1557.845761</b> | <b>779.426519</b> | <b>1540.819212</b> | 770.913244        | 1539.835196        | <b>770.421236</b> | 11 |
| 10 | 1112.521844       | 556.764560      | 1095.495295    | 548.251285       | 1094.511279        | 547.759277       | G    | <b>1460.792997</b> | 730.900137        | 1443.766448        | 722.386862        | 1442.782432        | 721.894854        | 10 |
| 11 | 1226.564771       | 613.786023      | 1209.538222    | 605.272749       | 1208.554206        | 604.780741       | N    | <b>1403.771533</b> | 702.389405        | 1386.744984        | 693.876130        | 1385.760968        | 693.384122        | 9  |
| 12 | 1354.659734       | 677.833505      | 1337.633185    | 669.320230       | 1336.649169        | 668.828222       | K    | <b>1289.728606</b> | 645.367941        | 1272.702057        | 636.854667        | 1271.718041        | 636.362659        | 8  |
| 13 | 1469.686677       | 735.346976      | 1452.660128    | 726.833702       | <b>1451.676112</b> | 726.341694       | D    | <b>1161.633643</b> | 581.320460        | 1144.607094        | 572.807185        | <b>1143.623078</b> | 572.315177        | 7  |
| 14 | 1616.755091       | 808.881184      | 1599.728542    | 800.367909       | <b>1598.744526</b> | 799.875901       | F    | <b>1046.606700</b> | 523.806988        | 1029.580151        | 515.293714        | <b>1028.596135</b> | 514.801706        | 6  |
| 15 | 1729.839155       | 865.423215      | 1712.812606    | 856.909941       | 1711.828590        | 856.417933       | L    | <b>899.538286</b>  | 450.272781        | 882.511737         | 441.759507        | 881.527721         | 441.267499        | 5  |
| 16 | 2169.064481       | 1085.035878     | 2152.037932    | 1076.522604      | 2151.053916        | 1076.030596      | Q    | <b>786.454222</b>  | 393.730749        | 769.427673         | 385.217475        | 768.443657         | 384.725467        | 4  |
| 17 | 2256.096509       | 1128.551892     | 2239.069960    | 1120.038618      | 2238.085944        | 1119.546610      | S    | <b>347.228896</b>  | 174.118086        | 330.202347         | 165.604812        | <b>329.218331</b>  | 165.112804        | 3  |
| 18 | 2369.180573       | 1185.093925     | 2352.154024    | 1176.580650      | 2351.170008        | 1176.088642      | L    | <b>260.196868</b>  | 130.602072        | 243.170319         | 122.088798        |                    |                   | 2  |
| 19 |                   |                 |                |                  |                    |                  | K    | <b>147.112804</b>  | 74.060040         | <b>130.086255</b>  | 65.546765         |                    |                   | 1  |

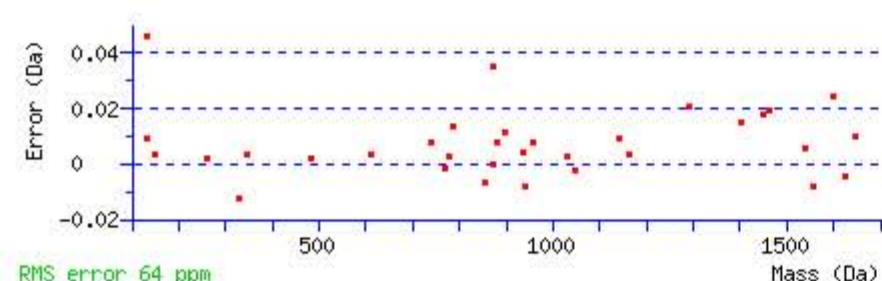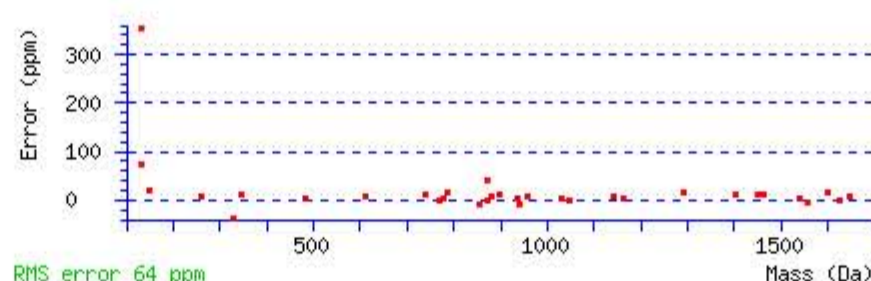

NCBI BLAST search of [ELKEQQDSPGNKDFLQSLK](#)

(Parameters: blastp, nr protein database, expect=20000, no filter, PAM30)

Other BLAST [web gateways](#)

All matches to this query

| Score | Mr(calc):   | Delta    | Sequence                               |
|-------|-------------|----------|----------------------------------------|
| 42.1  | 2514.278793 | 0.007223 | <a href="#">ELKEQQDSPGNKDFLQSLK</a>    |
| 0.6   | 2514.267563 | 0.018453 | <a href="#">TLADVNGVIEEEFTMARLYISK</a> |

Mascot: <http://www.matrixscience.com/>



# MASCOT Search Results

## Peptide View

MS/MS Fragmentation of **GFPIKEDFLEQSEQLFGAKPVSLTGK**

Found in **A2AP\_HUMAN**, Alpha-2-antiplasmin OS=Homo sapiens GN=SERPINF2 PE=1 SV=3

Match to Query 67046: 3175.662736 from(794.922960,4+) rtinseconds(2760) index(10356)

Title: Locus:1.1.1.3396.7 File:"2013-07-02 CLN FXIII 30 min 2nd F 1.wiff"

Data file C:\Program Files (x86)\Matrix Science\Mascot Daemon\mgf2 FXIII 30 min 2nd\mascot\_daemon\_merge.mgf

Click mouse within plot area to zoom in by factor of two about that point

Or, Plot from  to  Da

Label all possible matches  Label matches used for scoring

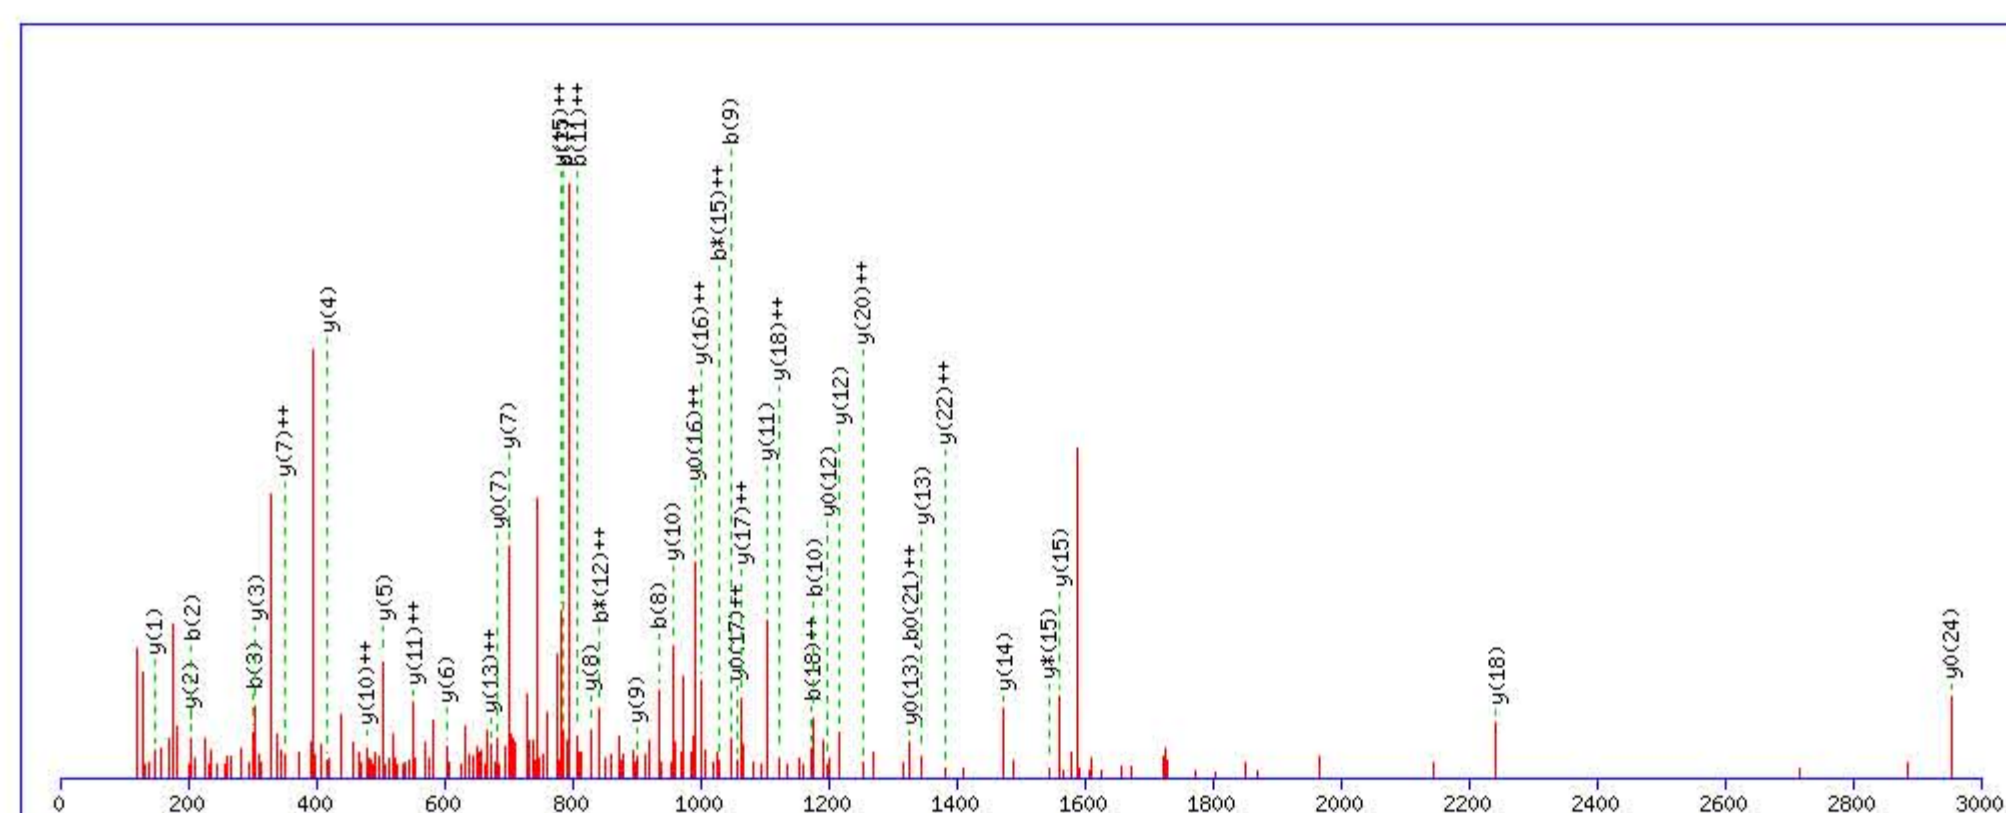

Monoisotopic mass of neutral peptide Mr(calc): 3175.662750

Fixed modifications: Carbamidomethyl (C) (apply to specified residues or termini only)

Variable modifications:

Q11 : Biotin:Thermo-21345 (Q)

Ions Score: 45 Expect: 0.00079

Matches : 44/278 fragment ions using 144 most intense peaks [\(help\)](#)

| #  | b                  | b <sup>++</sup>    | b <sup>*</sup> | b <sup>++</sup>    | b <sup>0</sup> | b <sup>0++</sup> | Seq. | y                  | y <sup>++</sup>    | y <sup>*</sup>     | y <sup>++</sup> | y <sup>0</sup>     | y <sup>0++</sup>   | #  |
|----|--------------------|--------------------|----------------|--------------------|----------------|------------------|------|--------------------|--------------------|--------------------|-----------------|--------------------|--------------------|----|
| 1  | 58.028740          | 29.518008          |                |                    |                |                  | G    |                    |                    |                    |                 |                    |                    | 26 |
| 2  | <b>205.097154</b>  | 103.052215         |                |                    |                |                  | F    | 3119.648573        | 1560.327924        | 3102.622024        | 1551.814650     | 3101.638008        | 1551.322642        | 25 |
| 3  | <b>302.149918</b>  | 151.578597         |                |                    |                |                  | P    | 2972.580159        | 1486.793717        | 2955.553610        | 1478.280443     | <b>2954.569594</b> | 1477.788435        | 24 |
| 4  | 415.233982         | 208.120629         |                |                    |                |                  | I    | 2875.527395        | 1438.267335        | 2858.500846        | 1429.754061     | 2857.516830        | 1429.262053        | 23 |
| 5  | 543.328945         | 272.168111         | 526.302396     | 263.654836         |                |                  | K    | 2762.443331        | <b>1381.725303</b> | 2745.416782        | 1373.212029     | 2744.432766        | 1372.720021        | 22 |
| 6  | 672.371538         | 336.689407         | 655.344989     | 328.176133         | 654.360973     | 327.684125       | E    | 2634.348368        | 1317.677822        | 2617.321819        | 1309.164547     | 2616.337803        | 1308.672539        | 21 |
| 7  | <b>787.398481</b>  | 394.202879         | 770.371932     | 385.689604         | 769.387916     | 385.197596       | D    | 2505.305775        | <b>1253.156525</b> | 2488.279226        | 1244.643251     | 2487.295210        | 1244.151243        | 20 |
| 8  | <b>934.466895</b>  | 467.737086         | 917.440346     | 459.223811         | 916.456330     | 458.731803       | F    | 2390.278832        | 1195.643054        | 2373.252283        | 1187.129779     | 2372.268267        | 1186.637771        | 19 |
| 9  | <b>1047.550959</b> | 524.279117         | 1030.524410    | 515.765843         | 1029.540394    | 515.273835       | L    | <b>2243.210418</b> | <b>1122.108847</b> | 2226.183869        | 1113.595572     | 2225.199853        | 1113.103564        | 18 |
| 10 | <b>1176.593552</b> | 588.800414         | 1159.567003    | 580.287140         | 1158.582987    | 579.795132       | E    | 2130.126354        | <b>1065.566815</b> | 2113.099805        | 1057.053540     | 2112.115789        | <b>1056.561532</b> | 17 |
| 11 | 1615.818878        | <b>808.413077</b>  | 1598.792329    | 799.899803         | 1597.808313    | 799.407795       | Q    | 2001.083761        | <b>1001.045519</b> | 1984.057212        | 992.532244      | 1983.073196        | <b>992.040236</b>  | 16 |
| 12 | 1702.850906        | 851.929091         | 1685.824357    | <b>843.415817</b>  | 1684.840341    | 842.923809       | S    | <b>1561.858435</b> | <b>781.432856</b>  | <b>1544.831886</b> | 772.919581      | 1543.847870        | 772.427573         | 15 |
| 13 | 1831.893499        | 916.450388         | 1814.866950    | 907.937113         | 1813.882934    | 907.445105       | E    | <b>1474.826407</b> | 737.916842         | 1457.799858        | 729.403567      | 1456.815842        | 728.911559         | 14 |
| 14 | 1959.952077        | 980.479677         | 1942.925528    | 971.966402         | 1941.941512    | 971.474394       | Q    | <b>1345.783814</b> | <b>673.395545</b>  | 1328.757265        | 664.882271      | <b>1327.773249</b> | 664.390263         | 13 |
| 15 | 2073.036141        | 1037.021709        | 2056.009592    | <b>1028.508434</b> | 2055.025576    | 1028.016426      | L    | <b>1217.725236</b> | 609.366256         | 1200.698687        | 600.852982      | <b>1199.714671</b> | 600.360974         | 12 |
| 16 | 2220.104555        | 1110.555916        | 2203.078006    | 1102.042641        | 2202.093990    | 1101.550633      | F    | <b>1104.641172</b> | <b>552.824224</b>  | 1087.614623        | 544.310949      | 1086.630607        | 543.818941         | 11 |
| 17 | 2277.126019        | 1139.066648        | 2260.099470    | 1130.553373        | 2259.115454    | 1130.061365      | G    | <b>957.572758</b>  | <b>479.290017</b>  | 940.546209         | 470.776743      | 939.562193         | 470.284735         | 10 |
| 18 | 2348.163133        | <b>1174.585205</b> | 2331.136584    | 1166.071930        | 2330.152568    | 1165.579922      | A    | <b>900.551294</b>  | 450.779285         | 883.524745         | 442.266011      | 882.540729         | 441.774003         | 9  |
| 19 | 2476.258096        | 1238.632686        | 2459.231547    | 1230.119412        | 2458.247531    | 1229.627404      | K    | <b>829.514180</b>  | 415.260728         | 812.487631         | 406.747453      | 811.503615         | 406.255445         | 8  |
| 20 | 2573.310860        | 1287.159068        | 2556.284311    | 1278.645794        | 2555.300295    | 1278.153786      | P    | <b>701.419217</b>  | <b>351.213246</b>  | 684.392668         | 342.699972      | <b>683.408652</b>  | 342.207964         | 7  |
| 21 | 2672.379274        | 1336.693275        | 2655.352725    | 1328.180001        | 2654.368709    | 1327.687993      | V    | <b>604.366453</b>  | 302.686864         | 587.339904         | 294.173590      | 586.355888         | 293.681582         | 6  |
| 22 | 2759.411302        | 1380.209289        | 2742.384753    | 1371.696015        | 2741.400737    | 1371.204007      | S    | <b>505.298039</b>  | 253.152657         | 488.271490         | 244.639383      | 487.287474         | 244.147375         | 5  |
| 23 | 2872.495366        | 1436.751321        | 2855.468817    | 1428.238047        | 2854.484801    | 1427.746039      | L    | <b>418.266011</b>  | 209.636643         | 401.239462         | 201.123369      | 400.255446         | 200.631361         | 4  |
| 24 | 2973.543045        | 1487.275161        | 2956.516496    | 1478.761886        | 2955.532480    | 1478.269878      | T    | <b>305.181947</b>  | 153.094611         | 288.155398         | 144.581337      | 287.171382         | 144.089329         | 3  |
| 25 | 3030.564509        | 1515.785893        | 3013.537960    | 1507.272618        | 3012.553944    | 1506.780610      | G    | <b>204.134268</b>  | 102.570772         | 187.107719         | 94.057497       |                    |                    | 2  |
| 26 |                    |                    |                |                    |                |                  | K    | <b>147.112804</b>  | 74.060040          | 130.086255         | 65.546765       |                    |                    | 1  |

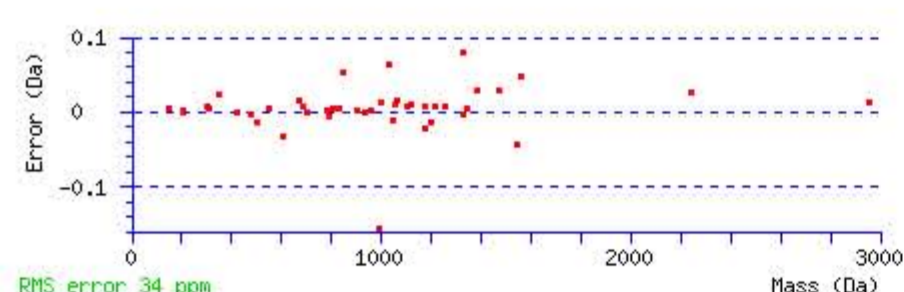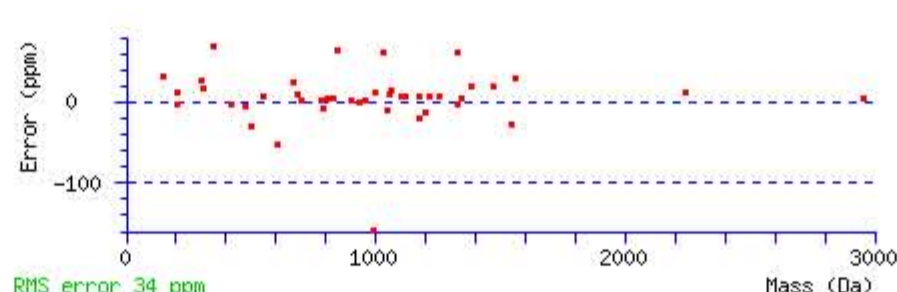

NCBI BLAST search of **GFPIKEDFLEQSEQLFGAKPVSLTGK**

(Parameters: blastp, nr protein database, expect=20000, no filter, PAM30)

Other BLAST [web gateways](#)

All matches to this query

| Score | Mr(calc):   | Delta     | Sequence                                   |
|-------|-------------|-----------|--------------------------------------------|
| 44.8  | 3175.662750 | -0.000014 | <a href="#">GFPIKEDFLEQSEQLFGAKPVSLTGK</a> |
| 24.3  | 3175.662750 | -0.000014 | <a href="#">GFPIKEDFLEQSEQLFGAKPVSLTGK</a> |



# MASCOT SEARCH RESULTS

## Peptide View

MS/MS Fragmentation of **EHAVEGDCDFQLLK**

Found in **FETUA\_HUMAN**, Alpha-2-HS-glycoprotein OS=Homo sapiens GN=AHSG PE=1 SV=1

Match to Query 48547: 1970.930142 from(657.983990,3+) rtinseconds(2078) index(39162)

Title: Locus:1.1.1.2746.11 File:"2013-07-02 CLN FXIII 30 min 2nd F 3.wiff"

Data file C:\Program Files (x86)\Matrix Science\Mascot Daemon\mgf2 FXIII 30 min 2nd\mascot\_daemon\_merge.mgf

Click mouse within plot area to zoom in by factor of two about that point

Or, Plot from  to  Da

Label all possible matches  Label matches used for scoring

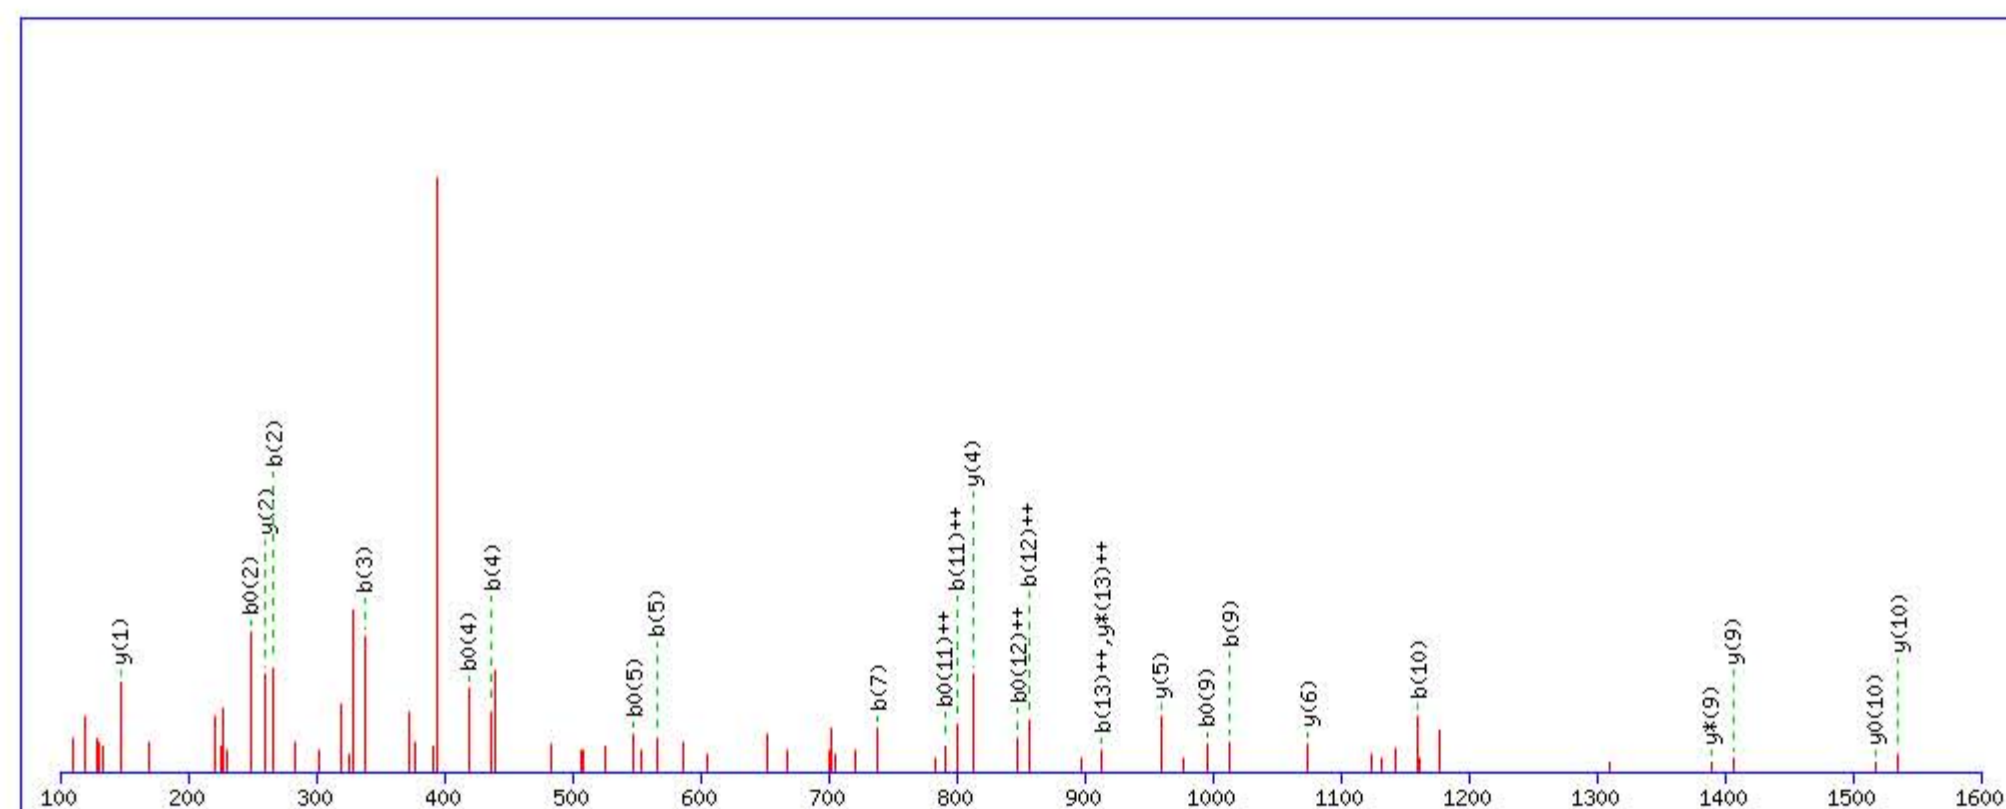

Monoisotopic mass of neutral peptide Mr(calc): 1970.923019

Fixed modifications: Carbamidomethyl (C) (apply to specified residues or termini only)

Variable modifications:

Q11 : Biotin:Thermo-21345 (Q)

Ions Score: 50 Expect: 4.4e-005

Matches : 26/126 fragment ions using 37 most intense peaks [\(help\)](#)

| #  | b                  | b <sup>++</sup>   | b <sup>*</sup> | b <sup>+++</sup> | b <sup>0</sup>    | b <sup>0++</sup>  | Seq. | y                  | y <sup>++</sup> | y <sup>*</sup>     | y <sup>+++</sup>  | y <sup>0</sup>     | y <sup>0++</sup> | #  |
|----|--------------------|-------------------|----------------|------------------|-------------------|-------------------|------|--------------------|-----------------|--------------------|-------------------|--------------------|------------------|----|
| 1  | 130.049869         | 65.528572         |                |                  | 112.039304        | 56.523290         | E    |                    |                 |                    |                   |                    |                  | 14 |
| 2  | <b>267.108781</b>  | 134.058028        |                |                  | <b>249.098216</b> | 125.052746        | H    | 1842.887704        | 921.947490      | 1825.861155        | <b>913.434216</b> | 1824.877139        | 912.942207       | 13 |
| 3  | <b>338.145895</b>  | 169.576585        |                |                  | 320.135330        | 160.571303        | A    | 1705.828792        | 853.418034      | 1688.802243        | 844.904760        | 1687.818227        | 844.412752       | 12 |
| 4  | <b>437.214309</b>  | 219.110792        |                |                  | <b>419.203744</b> | 210.105510        | V    | 1634.791678        | 817.899477      | 1617.765129        | 809.386203        | 1616.781113        | 808.894195       | 11 |
| 5  | <b>566.256902</b>  | 283.632089        |                |                  | <b>548.246337</b> | 274.626807        | E    | <b>1535.723264</b> | 768.365270      | 1518.696715        | 759.851996        | <b>1517.712699</b> | 759.359988       | 10 |
| 6  | 623.278366         | 312.142821        |                |                  | 605.267801        | 303.137539        | G    | <b>1406.680671</b> | 703.843974      | <b>1389.654122</b> | 695.330699        | 1388.670106        | 694.838691       | 9  |
| 7  | <b>738.305309</b>  | 369.656293        |                |                  | 720.294744        | 360.651010        | D    | 1349.659207        | 675.333241      | 1332.632658        | 666.819967        | 1331.648642        | 666.327959       | 8  |
| 8  | 898.335958         | 449.671617        |                |                  | 880.325393        | 440.666335        | C    | 1234.632264        | 617.819770      | 1217.605715        | 609.306496        | 1216.621699        | 608.814488       | 7  |
| 9  | <b>1013.362901</b> | 507.185089        |                |                  | <b>995.352336</b> | 498.179806        | D    | <b>1074.601615</b> | 537.804446      | 1057.575066        | 529.291171        | 1056.591050        | 528.799163       | 6  |
| 10 | <b>1160.431315</b> | 580.719296        |                |                  | 1142.420750       | 571.714013        | F    | <b>959.574672</b>  | 480.290974      | 942.548123         | 471.777700        |                    |                  | 5  |
| 11 | 1599.656641        | <b>800.331959</b> | 1582.630092    | 791.818684       | 1581.646076       | <b>791.326676</b> | Q    | <b>812.506258</b>  | 406.756767      | 795.479709         | 398.243493        |                    |                  | 4  |
| 12 | 1712.740705        | <b>856.873991</b> | 1695.714156    | 848.360716       | 1694.730140       | <b>847.868708</b> | L    | 373.280932         | 187.144104      | 356.254383         | 178.630829        |                    |                  | 3  |
| 13 | 1825.824769        | <b>913.416023</b> | 1808.798220    | 904.902748       | 1807.814204       | 904.410740        | L    | <b>260.196868</b>  | 130.602072      | 243.170319         | 122.088797        |                    |                  | 2  |
| 14 |                    |                   |                |                  |                   |                   | K    | <b>147.112804</b>  | 74.060040       | 130.086255         | 65.546765         |                    |                  | 1  |

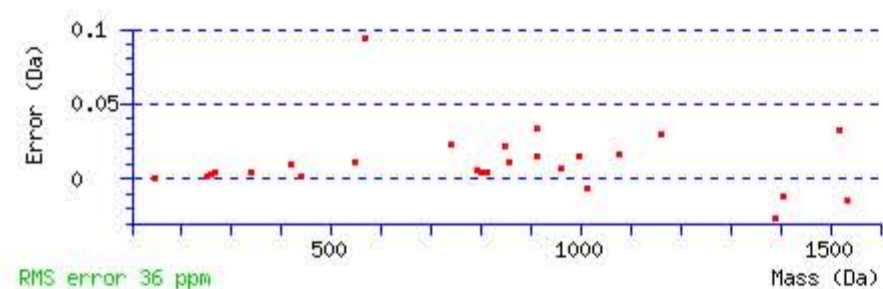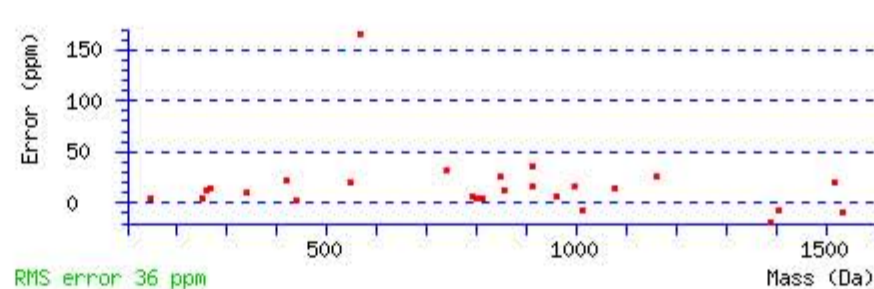

NCBI BLAST search of **EHAVEGDCDFQLLK**

(Parameters: blastp, nr protein database, expect=20000, no filter, PAM30)

Other BLAST [web gateways](#)

All matches to this query

| Score | Mr(calc):   | Delta     | Sequence                        |
|-------|-------------|-----------|---------------------------------|
| 50.2  | 1970.923019 | 0.007123  | <a href="#">EHAVEGDCDFQLLK</a>  |
| 3.5   | 1970.959396 | -0.029254 | <a href="#">DVQSAMDRYTAFLK</a>  |
| 1.5   | 1970.905258 | 0.024884  | <a href="#">LDFNMTNHSFMCLIK</a> |

Mascot: <http://www.matrixscience.com/>



# MASCOT Search Results

## Peptide View

MS/MS Fragmentation of **VTAAPQSVCALR**

Found in **A2MG\_HUMAN**, Alpha-2-macroglobulin OS=Homo sapiens GN=A2M PE=1 SV=3

Match to Query 38067: 1582.828188 from(792.421370,2+) rtinseconds(1826) index(20765)

Title: Locus:1.1.1.1517.16 File:"2013-07-02 CLN FXIII 30 min 2nd F 2.wiff"

Data file C:\Program Files (x86)\Matrix Science\Mascot Daemon\mgf2 FXIII 30 min 2nd\mascot\_daemon\_merge.mgf

Click mouse within plot area to zoom in by factor of two about that point

Or, Plot from  to  Da

Label all possible matches  Label matches used for scoring

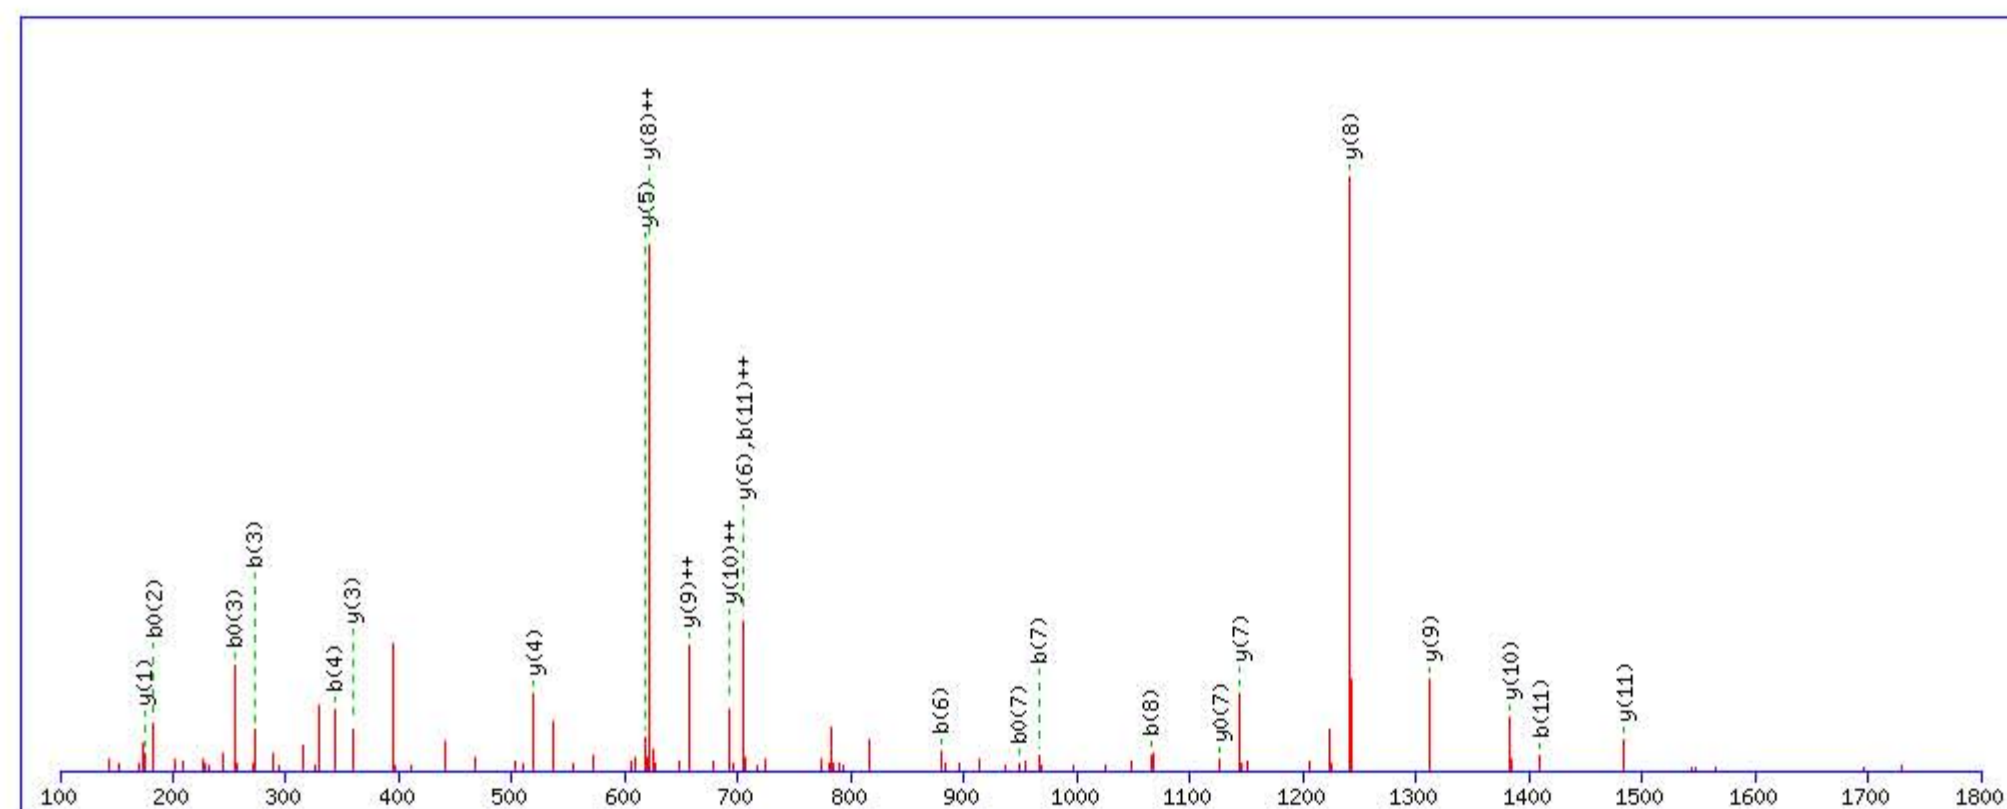

Monoisotopic mass of neutral peptide Mr(calc): 1582.832352

Fixed modifications: Carbamidomethyl (C) (apply to specified residues or termini only)

Variable modifications:

Q6 : Biotin:Thermo-21345 (Q)

Ions Score: 71 Expect: 1.1e-006

Matches : 24/110 fragment ions using 41 most intense peaks [\(help\)](#)

| #  | b           | b <sup>++</sup> | b <sup>*</sup> | b <sup>*++</sup> | b <sup>0</sup> | b <sup>0++</sup> | Seq. | y           | y <sup>++</sup> | y <sup>*</sup> | y <sup>*++</sup> | y <sup>0</sup> | y <sup>0++</sup> | #  |
|----|-------------|-----------------|----------------|------------------|----------------|------------------|------|-------------|-----------------|----------------|------------------|----------------|------------------|----|
| 1  | 100.075690  | 50.541483       |                |                  |                |                  | V    |             |                 |                |                  |                |                  | 12 |
| 2  | 201.123369  | 101.065322      |                |                  | 183.112804     | 92.060040        | T    | 1484.771218 | 742.889247      | 1467.744669    | 734.375972       | 1466.760653    | 733.883964       | 11 |
| 3  | 272.160483  | 136.583879      |                |                  | 254.149918     | 127.578597       | A    | 1383.723539 | 692.365407      | 1366.696990    | 683.852133       | 1365.712974    | 683.360125       | 10 |
| 4  | 343.197597  | 172.102437      |                |                  | 325.187032     | 163.097154       | A    | 1312.686425 | 656.846850      | 1295.659876    | 648.333576       | 1294.675860    | 647.841568       | 9  |
| 5  | 440.250361  | 220.628819      |                |                  | 422.239796     | 211.623536       | P    | 1241.649311 | 621.328293      | 1224.622762    | 612.815019       | 1223.638746    | 612.323011       | 8  |
| 6  | 879.475687  | 440.241482      | 862.449138     | 431.728207       | 861.465122     | 431.236199       | Q    | 1144.596547 | 572.801911      | 1127.569998    | 564.288637       | 1126.585982    | 563.796629       | 7  |
| 7  | 966.507715  | 483.757496      | 949.481166     | 475.244221       | 948.497150     | 474.752213       | S    | 705.371221  | 353.189248      | 688.344672     | 344.675974       | 687.360656     | 344.183966       | 6  |
| 8  | 1065.576129 | 533.291703      | 1048.549580    | 524.778428       | 1047.565564    | 524.286420       | V    | 618.339193  | 309.673234      | 601.312644     | 301.159960       |                |                  | 5  |
| 9  | 1225.606778 | 613.307027      | 1208.580229    | 604.793753       | 1207.596213    | 604.301745       | C    | 519.270779  | 260.139028      | 502.244230     | 251.625753       |                |                  | 4  |
| 10 | 1296.643892 | 648.825584      | 1279.617343    | 640.312310       | 1278.633327    | 639.820302       | A    | 359.240130  | 180.123703      | 342.213581     | 171.610428       |                |                  | 3  |
| 11 | 1409.727956 | 705.367616      | 1392.701407    | 696.854342       | 1391.717391    | 696.362333       | L    | 288.203016  | 144.605146      | 271.176467     | 136.091871       |                |                  | 2  |
| 12 |             |                 |                |                  |                |                  | R    | 175.118952  | 88.063114       | 158.092403     | 79.549839        |                |                  | 1  |

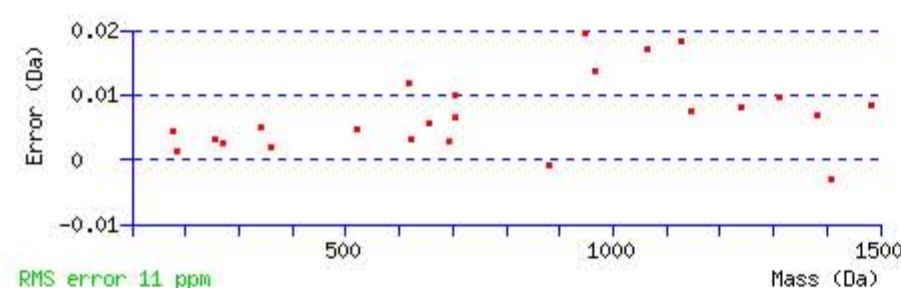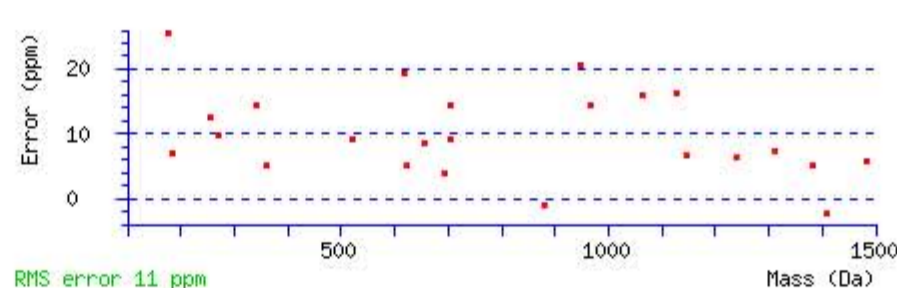

NCBI BLAST search of **VTAAPQSVCALR**

(Parameters: blastp, nr protein database, expect=20000, no filter, PAM30)

Other BLAST [web gateways](#)

## All matches to this query

| Score | Mr(calc):   | Delta     | Sequence                        |
|-------|-------------|-----------|---------------------------------|
| 71.1  | 1582.832352 | -0.004164 | <a href="#">VTAAPQSVCALR</a>    |
| 7.0   | 1582.844040 | -0.015852 | <a href="#">APRHGPARDPGLPSR</a> |
| 4.4   | 1582.821564 | 0.006624  | <a href="#">LSKAVATWHANTER</a>  |
| 2.1   | 1582.817535 | 0.010653  | <a href="#">KTLSEETRQHQAR</a>   |
| 1.3   | 1582.807175 | 0.021013  | <a href="#">QPRMLQENTR</a>      |
| 0.8   | 1582.831451 | -0.003263 | <a href="#">SAKELVEQDIQPAR</a>  |
| 0.1   | 1582.850098 | -0.021910 | <a href="#">VRSSPDKDQIK</a>     |



# MASCOT Search Results

## Peptide View

MS/MS Fragmentation of **FSGQLNSHGCFYQQVK**

Found in **A2MG\_HUMAN**, Alpha-2-macroglobulin OS=Homo sapiens GN=A2M PE=1 SV=3

Match to Query 54072: 2210.040792 from(737.687540,3+) rtinseconds(1869) index(21006)

Title: Locus:1.1.1.1532.20 File:"2013-07-02 CLN FXIII 30 min 2nd F 2.wiff"

Data file C:\Program Files (x86)\Matrix Science\Mascot Daemon\mgf2 FXIII 30 min 2nd\mascot\_daemon\_merge.mgf

Click mouse within plot area to zoom in by factor of two about that point

Or, Plot from  to  Da

Label all possible matches  Label matches used for scoring

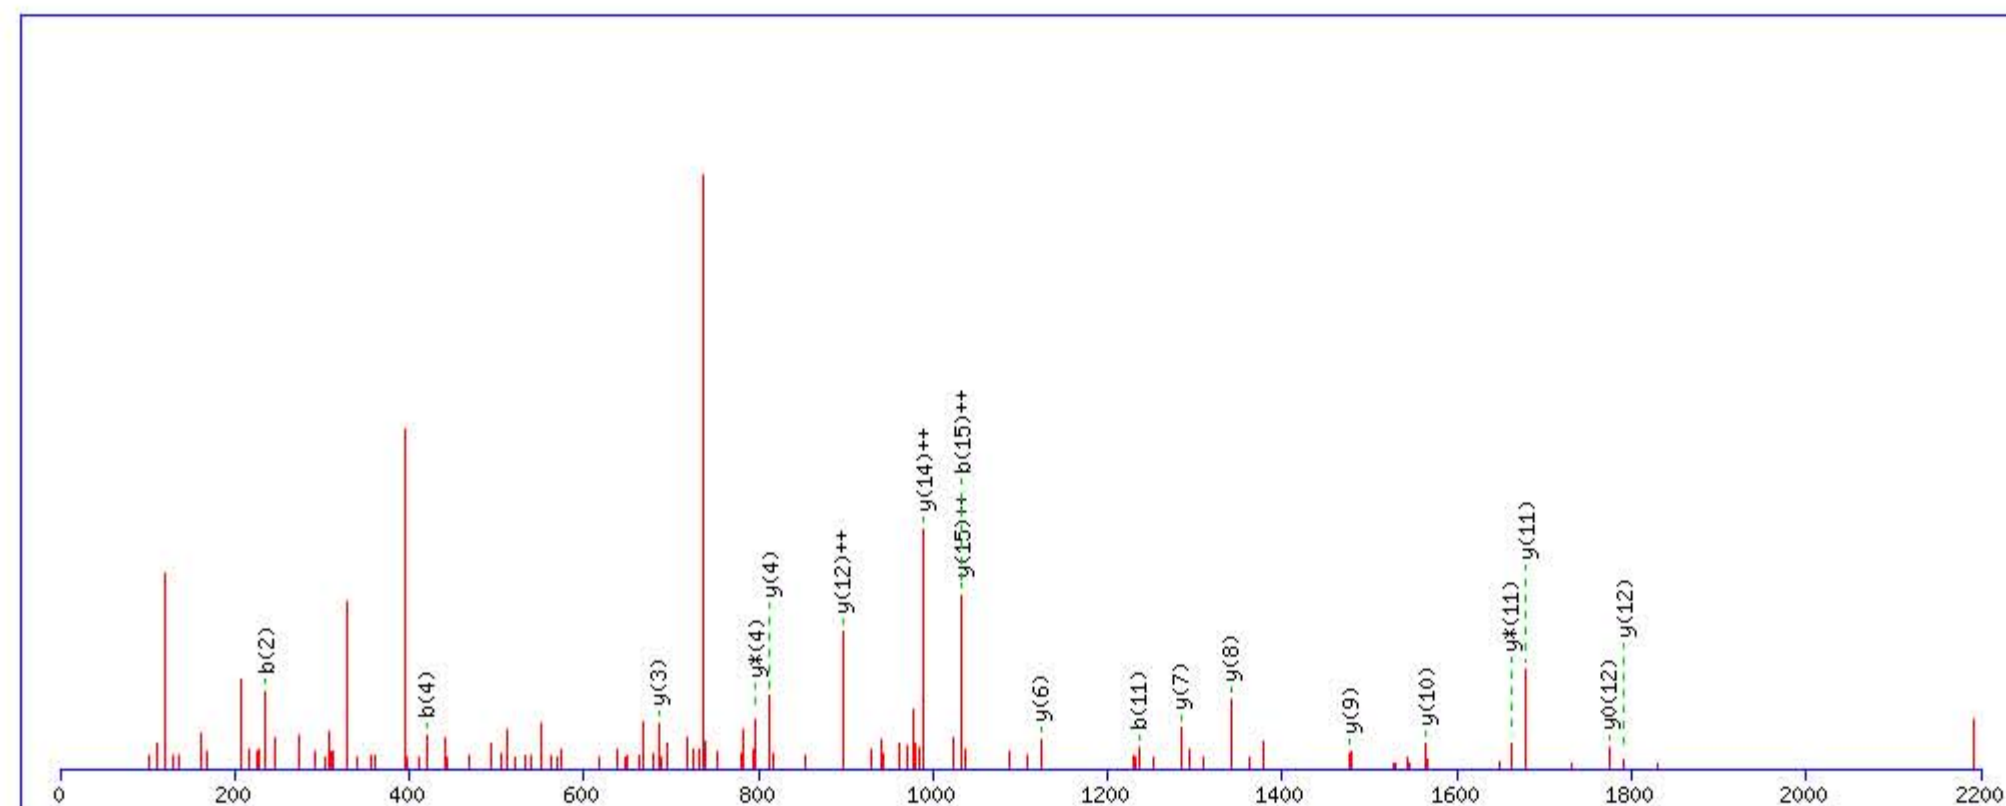

Monoisotopic mass of neutral peptide Mr(calc): 2210.040131

Fixed modifications: Carbamidomethyl (C) (apply to specified residues or termini only)

Variable modifications:

Q14 : Biotin:Thermo-21345 (Q)

Ions Score: 45 Expect: 0.00013

Matches : 19/154 fragment ions using 36 most intense peaks [\(help\)](#)

| #  | b                  | b <sup>++</sup>    | b <sup>+</sup> | b <sup>+++</sup> | b <sup>0</sup> | b <sup>0++</sup> | Seq. | y                  | y <sup>++</sup>    | y <sup>+</sup>     | y <sup>+++</sup> | y <sup>0</sup>     | y <sup>0++</sup> | #  |
|----|--------------------|--------------------|----------------|------------------|----------------|------------------|------|--------------------|--------------------|--------------------|------------------|--------------------|------------------|----|
| 1  | 148.075690         | 74.541483          |                |                  |                |                  | F    |                    |                    |                    |                  |                    |                  | 16 |
| 2  | <b>235.107718</b>  | 118.057497         |                |                  | 217.097153     | 109.052214       | S    | 2063.978979        | <b>1032.493127</b> | 2046.952430        | 1023.979853      | 2045.968414        | 1023.487845      | 15 |
| 3  | 292.129182         | 146.568229         |                |                  | 274.118617     | 137.562946       | G    | 1976.946951        | <b>988.977114</b>  | 1959.920402        | 980.463839       | 1958.936386        | 979.971831       | 14 |
| 4  | <b>420.187760</b>  | 210.597518         | 403.161211     | 202.084243       | 402.177195     | 201.592235       | Q    | 1919.925487        | 960.466382         | 1902.898938        | 951.953107       | 1901.914922        | 951.461099       | 13 |
| 5  | 533.271824         | 267.139550         | 516.245275     | 258.626276       | 515.261259     | 258.134268       | L    | <b>1791.866909</b> | <b>896.437093</b>  | 1774.840360        | 887.923818       | <b>1773.856344</b> | 887.431810       | 12 |
| 6  | 647.314751         | 324.161014         | 630.288202     | 315.647739       | 629.304186     | 315.155731       | N    | <b>1678.782845</b> | 839.895061         | <b>1661.756296</b> | 831.381786       | 1660.772280        | 830.889778       | 11 |
| 7  | 734.346779         | 367.677028         | 717.320230     | 359.163753       | 716.336214     | 358.671745       | S    | <b>1564.739918</b> | 782.873597         | 1547.713369        | 774.360323       | 1546.729353        | 773.868315       | 10 |
| 8  | 871.405691         | 436.206483         | 854.379142     | 427.693209       | 853.395126     | 427.201201       | H    | <b>1477.707890</b> | 739.357583         | 1460.681341        | 730.844309       |                    |                  | 9  |
| 9  | 928.427155         | 464.717216         | 911.400606     | 456.203941       | 910.416590     | 455.711933       | G    | <b>1340.648978</b> | 670.828127         | 1323.622429        | 662.314853       |                    |                  | 8  |
| 10 | 1088.457804        | 544.732540         | 1071.431255    | 536.219266       | 1070.447239    | 535.727257       | C    | <b>1283.627514</b> | 642.317395         | 1266.600965        | 633.804121       |                    |                  | 7  |
| 11 | <b>1235.526218</b> | 618.266747         | 1218.499669    | 609.753473       | 1217.515653    | 609.261464       | F    | <b>1123.596865</b> | 562.302071         | 1106.570316        | 553.788796       |                    |                  | 6  |
| 12 | 1398.589547        | 699.798412         | 1381.562998    | 691.285137       | 1380.578982    | 690.793129       | Y    | 976.528451         | 488.767864         | 959.501902         | 480.254589       |                    |                  | 5  |
| 13 | 1526.648125        | 763.827700         | 1509.621576    | 755.314426       | 1508.637560    | 754.822418       | Q    | <b>813.465122</b>  | 407.236199         | <b>796.438573</b>  | 398.722925       |                    |                  | 4  |
| 14 | 1965.873451        | 983.440364         | 1948.846902    | 974.927089       | 1947.862886    | 974.435081       | Q    | <b>685.406544</b>  | 343.206910         | 668.379995         | 334.693636       |                    |                  | 3  |
| 15 | 2064.941865        | <b>1032.974570</b> | 2047.915316    | 1024.461296      | 2046.931300    | 1023.969288      | V    | 246.181218         | 123.594247         | 229.154669         | 115.080972       |                    |                  | 2  |
| 16 |                    |                    |                |                  |                |                  | K    | 147.112804         | 74.060040          | 130.086255         | 65.546765        |                    |                  | 1  |

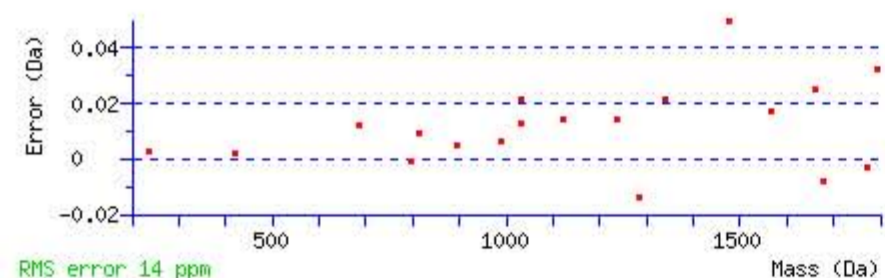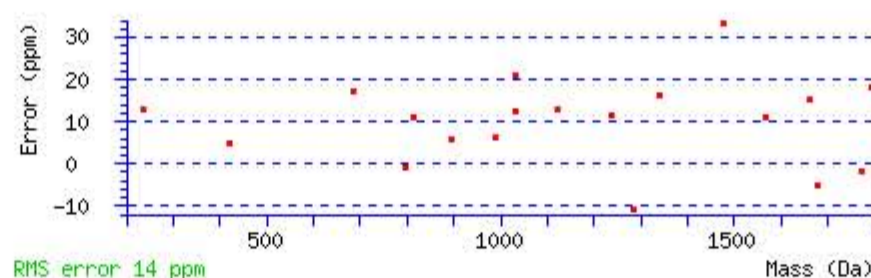

NCBI BLAST search of **FSGQLNSHGCFYQQVK**

(Parameters: blastp, nr protein database, expect=20000, no filter, PAM30)

Other BLAST [web gateways](#)

All matches to this query

| Score | Mr(calc):   | Delta     | Sequence                         |
|-------|-------------|-----------|----------------------------------|
| 44.9  | 2210.040131 | 0.000661  | <a href="#">FSGQLNSHGCFYQQVK</a> |
| 34.8  | 2210.040131 | 0.000661  | <a href="#">FSGQLNSHGCFYQQVK</a> |
| 3.6   | 2210.045486 | -0.004694 | <a href="#">MSMKEVDEQMLAIQSK</a> |
| 0.0   | 2210.045486 | -0.004694 | <a href="#">MSMKEVDEQMLAIQSK</a> |



# Mascot Search Results

## Peptide View

MS/MS Fragmentation of **LLLQVSLPELPGEYSMK**

Found in **A2MG\_HUMAN**, Alpha-2-macroglobulin OS=Homo sapiens GN=A2M PE=1 SV=3

Match to Query 56964: 2355.266592 from(786.096140,3+) rtinseconds(2842) index(27061)  
 Title: Locus:1.1.1.1869.14 File:"2013-07-02 CLN FXIII 30 min 2nd F 2.wiff"  
 Data file C:\Program Files (x86)\Matrix Science\Mascot Daemon\mgf2 FXIII 30 min 2nd\mascot\_daemon\_merge.mgf

Click mouse within plot area to zoom in by factor of two about that point  
 Or, Plot from  to  Da   
 Label all possible matches  Label matches used for scoring

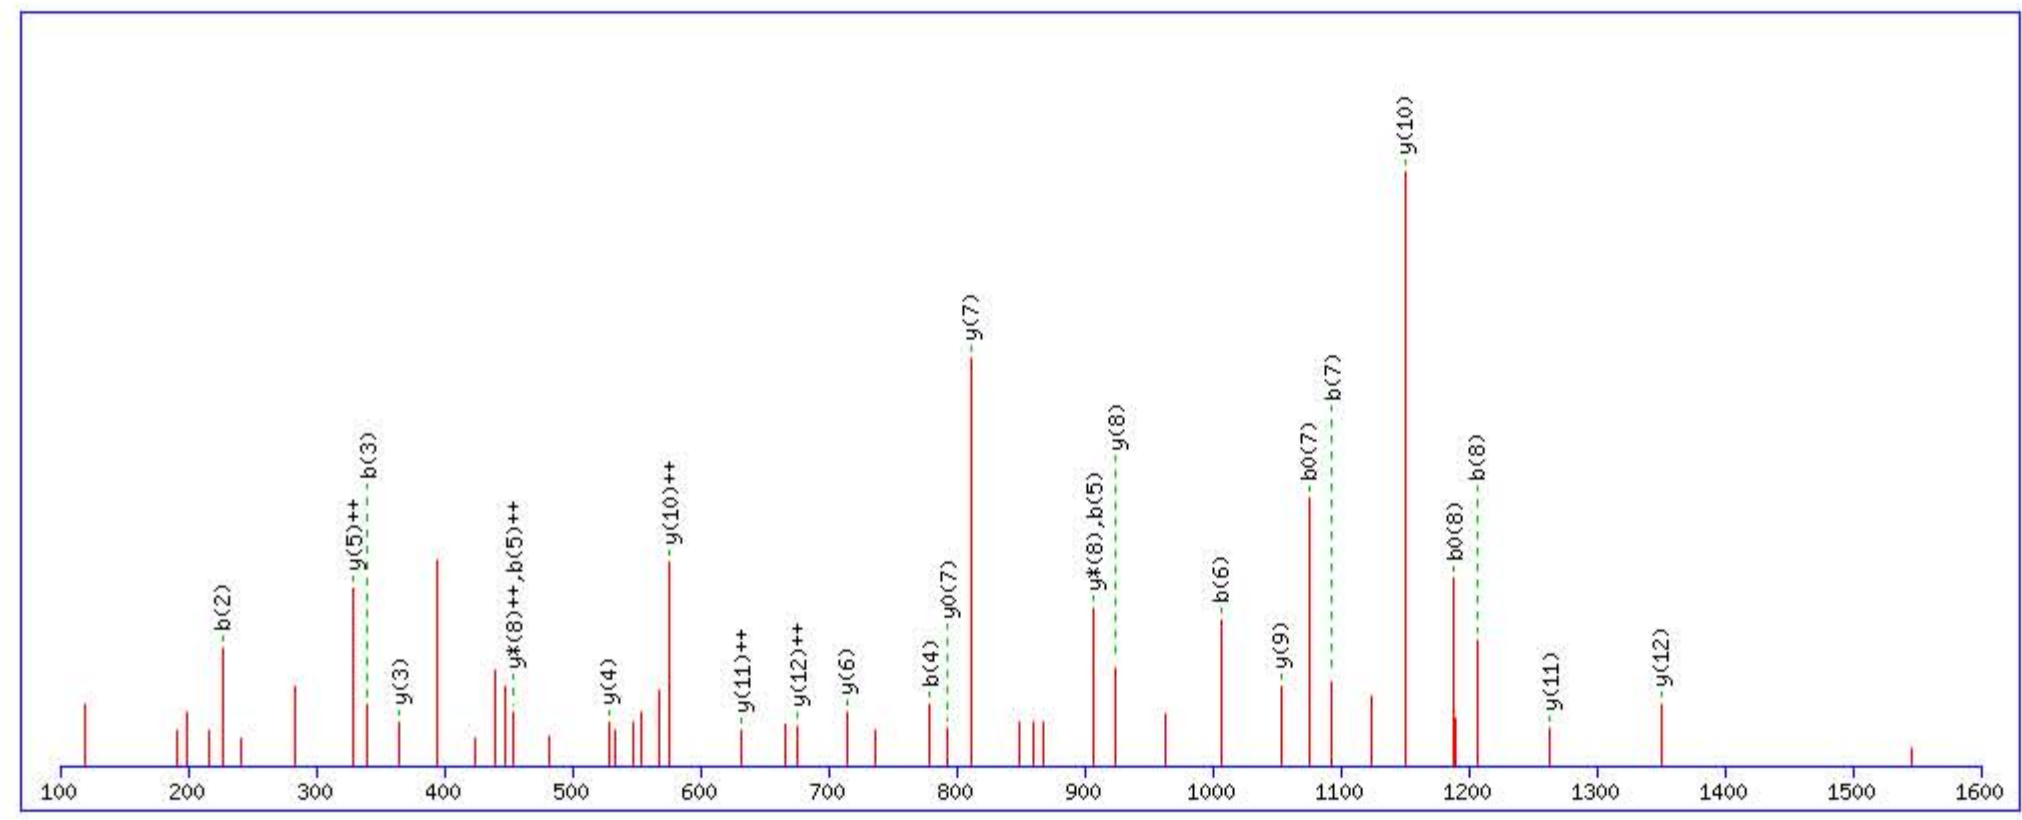

Monoisotopic mass of neutral peptide Mr(calc): 2355.258179  
 Fixed modifications: Carbamidomethyl (C) (apply to specified residues or termini only)  
 Variable modifications:  
 Q4 : Biotin:Thermo-21345 (Q)  
 Ions Score: 55 Expect: 1.5e-005  
 Matches : 26/182 fragment ions using 44 most intense peaks [\(help\)](#)

| #  | b                  | b <sup>++</sup>   | b <sup>*</sup> | b <sup>***</sup> | b <sup>0</sup>     | b <sup>0++</sup> | Seq. | y                  | y <sup>++</sup>   | y <sup>*</sup>    | y <sup>***</sup>  | y <sup>0</sup>    | y <sup>0++</sup> | #  |
|----|--------------------|-------------------|----------------|------------------|--------------------|------------------|------|--------------------|-------------------|-------------------|-------------------|-------------------|------------------|----|
| 1  | 114.091340         | 57.549308         |                |                  |                    |                  | L    |                    |                   |                   |                   |                   |                  | 18 |
| 2  | <b>227.175404</b>  | 114.091340        |                |                  |                    |                  | L    | 2243.181426        | 1122.094351       | 2226.154877       | 1113.581076       | 2225.170861       | 1113.089068      | 17 |
| 3  | <b>340.259468</b>  | 170.633372        |                |                  |                    |                  | L    | 2130.097362        | 1065.552319       | 2113.070813       | 1057.039044       | 2112.086797       | 1056.547036      | 16 |
| 4  | <b>779.484794</b>  | 390.246035        | 762.458245     | 381.732760       |                    |                  | Q    | 2017.013298        | 1009.010287       | 1999.986749       | 1000.497013       | 1999.002733       | 1000.005005      | 15 |
| 5  | <b>907.543372</b>  | <b>454.275324</b> | 890.516823     | 445.762049       |                    |                  | Q    | 1577.787972        | 789.397624        | 1560.761423       | 780.884350        | 1559.777407       | 780.392342       | 14 |
| 6  | <b>1006.611786</b> | 503.809531        | 989.585237     | 495.296256       |                    |                  | V    | 1449.729394        | 725.368335        | 1432.702845       | 716.855061        | 1431.718829       | 716.363053       | 13 |
| 7  | <b>1093.643814</b> | 547.325545        | 1076.617265    | 538.812271       | <b>1075.633249</b> | 538.320263       | S    | <b>1350.660980</b> | <b>675.834128</b> | 1333.634431       | 667.320854        | 1332.650415       | 666.828846       | 12 |
| 8  | <b>1206.727878</b> | 603.867577        | 1189.701329    | 595.354303       | <b>1188.717313</b> | 594.862294       | L    | <b>1263.628952</b> | <b>632.318114</b> | 1246.602403       | 623.804840        | 1245.618387       | 623.312832       | 11 |
| 9  | 1303.780642        | 652.393959        | 1286.754093    | 643.880685       | 1285.770077        | 643.388676       | P    | <b>1150.544888</b> | <b>575.776082</b> | 1133.518339       | 567.262808        | 1132.534323       | 566.770800       | 10 |
| 10 | 1432.823235        | 716.915256        | 1415.796686    | 708.401981       | 1414.812670        | 707.909973       | E    | <b>1053.492124</b> | 527.249700        | 1036.465575       | 518.736426        | 1035.481559       | 518.244418       | 9  |
| 11 | 1545.907299        | 773.457288        | 1528.880750    | 764.944013       | 1527.896734        | 764.452005       | L    | <b>924.449531</b>  | 462.728404        | <b>907.422982</b> | <b>454.215129</b> | 906.438966        | 453.723121       | 8  |
| 12 | 1642.960063        | 821.983670        | 1625.933514    | 813.470395       | 1624.949498        | 812.978387       | P    | <b>811.365467</b>  | 406.186372        | 794.338918        | 397.673097        | <b>793.354902</b> | 397.181089       | 7  |
| 13 | 1699.981527        | 850.494401        | 1682.954978    | 841.981127       | 1681.970962        | 841.489119       | G    | <b>714.312703</b>  | 357.659990        | 697.286154        | 349.146715        | 696.302138        | 348.654707       | 6  |
| 14 | 1829.024120        | 915.015698        | 1811.997571    | 906.502423       | 1811.013555        | 906.010415       | E    | 657.291239         | <b>329.149258</b> | 640.264690        | 320.635983        | 639.280674        | 320.143975       | 5  |
| 15 | 1992.087449        | 996.547362        | 1975.060900    | 988.034088       | 1974.076884        | 987.542080       | Y    | <b>528.248646</b>  | 264.627961        | 511.222097        | 256.114687        | 510.238081        | 255.622679       | 4  |
| 16 | 2079.119477        | 1040.063376       | 2062.092928    | 1031.550102      | 2061.108912        | 1031.058094      | S    | <b>365.185317</b>  | 183.096297        | 348.158768        | 174.583022        | 347.174752        | 174.091014       | 3  |
| 17 | 2210.159962        | 1105.583619       | 2193.133413    | 1097.070344      | 2192.149397        | 1096.578336      | M    | 278.153289         | 139.580282        | 261.126740        | 131.067008        |                   |                  | 2  |
| 18 |                    |                   |                |                  |                    |                  | K    | 147.112804         | 74.060040         | 130.086255        | 65.546765         |                   |                  | 1  |

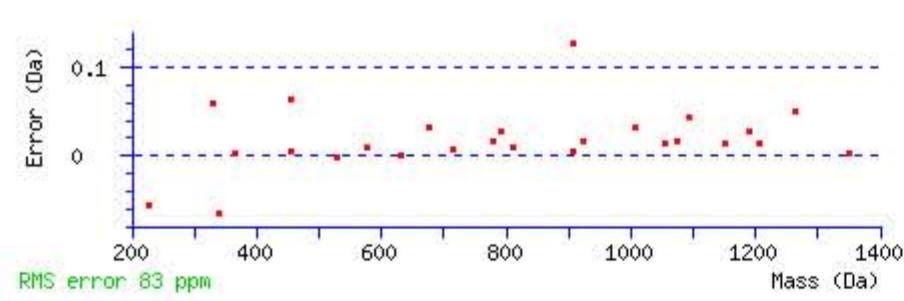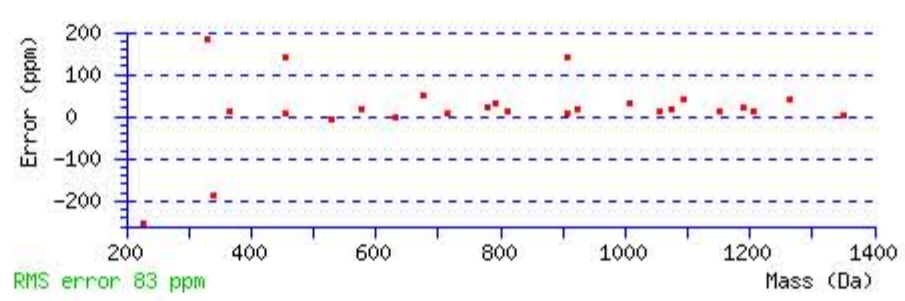

NCBI BLAST search of **LLLQVSLPELPGEYSMK**  
 (Parameters: blastp, nr protein database, expect=20000, no filter, PAM30)  
 Other BLAST [web gateways](#)

### All matches to this query

| Score | Mr(calc):   | Delta     | Sequence                          |
|-------|-------------|-----------|-----------------------------------|
| 54.7  | 2355.258179 | 0.008413  | <a href="#">LLLQVSLPELPGEYSMK</a> |
| 47.2  | 2355.258179 | 0.008413  | <a href="#">LLLQVSLPELPGEYSMK</a> |
| 3.2   | 2355.288498 | -0.021906 | <a href="#">LIQQRALLNFTEWKR</a>   |
| 2.6   | 2355.288498 | -0.021906 | <a href="#">LIQQRALLNFTEWKR</a>   |



# MASCOT Search Results

## Peptide View

MS/MS Fragmentation of **MCPQLQQYEMHGPEGLR**  
 Found in **A2MG\_HUMAN**, Alpha-2-macroglobulin OS=Homo sapiens GN=A2M PE=1 SV=3

Match to Query 57237: 2384.066948 from(1193.040750,2+) rtinseconds(2025) index(21979)  
 Title: Locus:1.1.1.1586.14 File:"2013-07-02 CLN FXIII 30 min 2nd F 2.wiff"  
 Data file C:\Program Files (x86)\Matrix Science\Mascot Daemon\mgf2 FXIII 30 min 2nd\mascot\_daemon\_merge.mgf

Click mouse within plot area to zoom in by factor of two about that point  
 Or, Plot from  to  Da   
 Label all possible matches  Label matches used for scoring

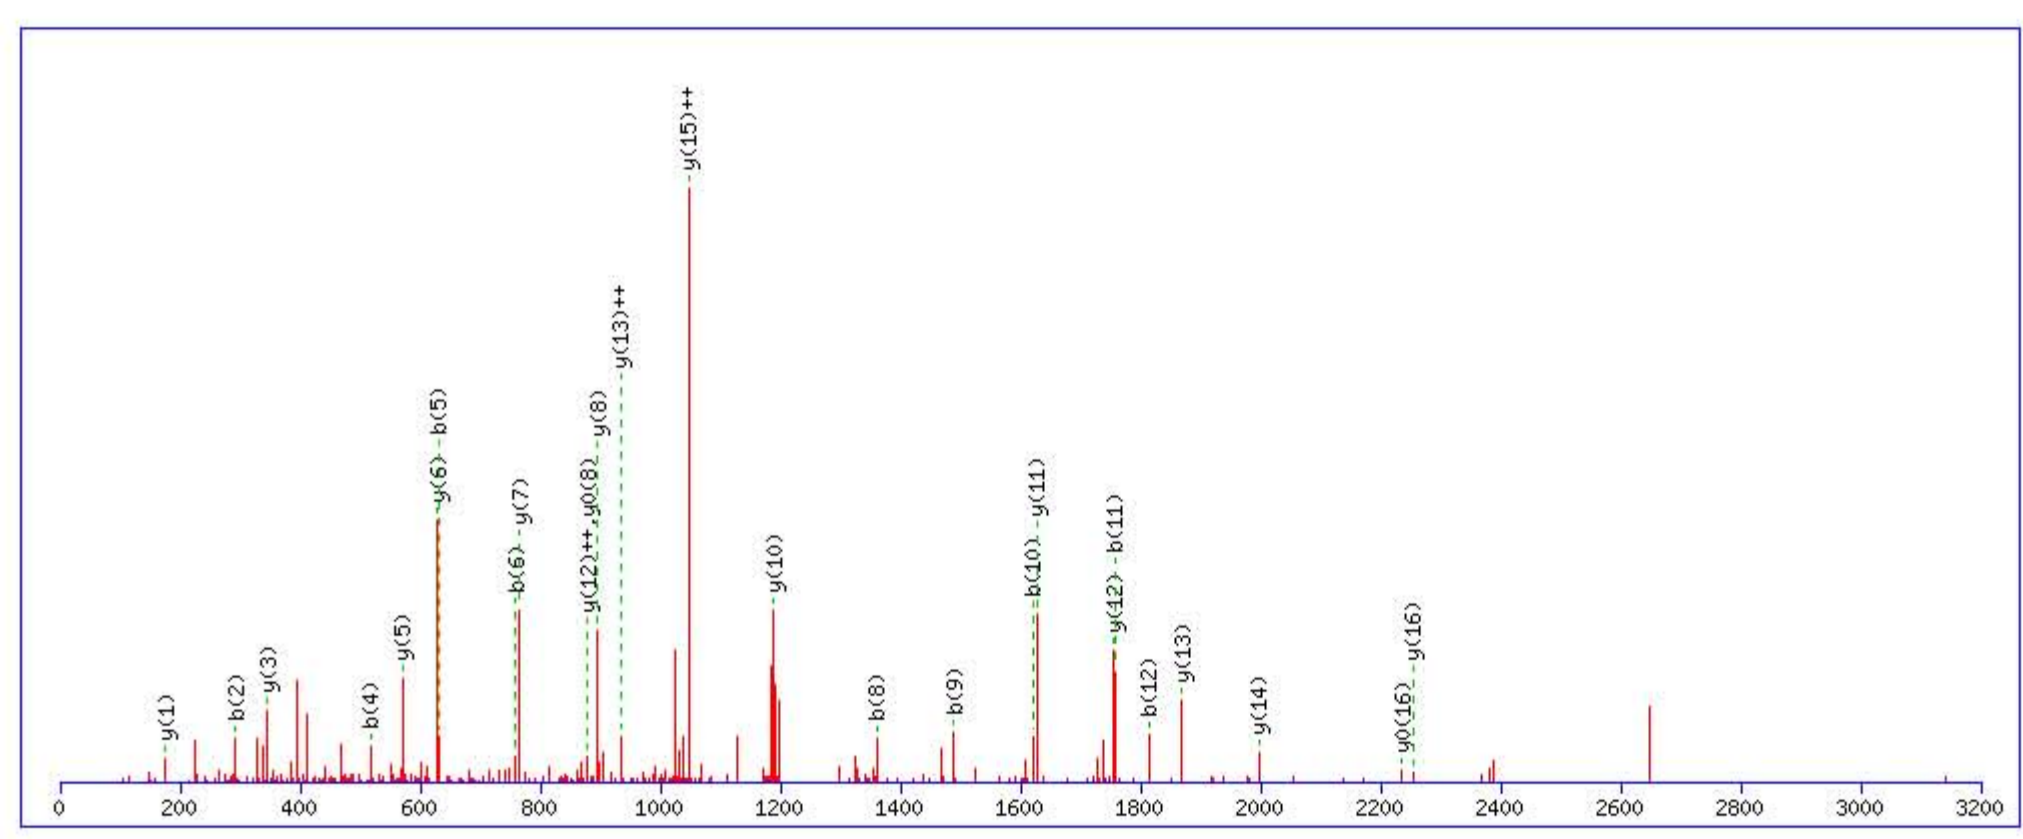

Monoisotopic mass of neutral peptide Mr(calc): 2384.089767  
 Fixed modifications: Carbamidomethyl (C) (apply to specified residues or termini only)  
 Variable modifications:  
 Q7 : Biotin:Thermo-21345 (Q)  
 Ions Score: 73 Expect: 3.8e-007  
 Matches : 26/164 fragment ions using 44 most intense peaks [\(help\)](#)

| #  | b                  | b <sup>++</sup> | b <sup>*</sup> | b <sup>*++</sup> | b <sup>0</sup> | b <sup>0++</sup> | Seq. | y                  | y <sup>++</sup>    | y <sup>*</sup> | y <sup>*++</sup> | y <sup>0</sup>     | y <sup>0++</sup> | #  |
|----|--------------------|-----------------|----------------|------------------|----------------|------------------|------|--------------------|--------------------|----------------|------------------|--------------------|------------------|----|
| 1  | 132.047761         | 66.527518       |                |                  |                |                  | M    |                    |                    |                |                  |                    |                  | 17 |
| 2  | <b>292.078410</b>  | 146.542843      |                |                  |                |                  | C    | <b>2254.056579</b> | 1127.531927        | 2237.030030    | 1119.018653      | <b>2236.046014</b> | 1118.526645      | 16 |
| 3  | 389.131174         | 195.069225      |                |                  |                |                  | P    | 2094.025930        | <b>1047.516603</b> | 2076.999381    | 1039.003328      | 2076.015365        | 1038.511320      | 15 |
| 4  | <b>517.189752</b>  | 259.098514      | 500.163203     | 250.585240       |                |                  | Q    | <b>1996.973166</b> | 998.990221         | 1979.946617    | 990.476947       | 1978.962601        | 989.984939       | 14 |
| 5  | <b>630.273816</b>  | 315.640546      | 613.247267     | 307.127272       |                |                  | L    | <b>1868.914588</b> | <b>934.960932</b>  | 1851.888039    | 926.447658       | 1850.904023        | 925.955650       | 13 |
| 6  | <b>758.332394</b>  | 379.669835      | 741.305845     | 371.156561       |                |                  | Q    | <b>1755.830524</b> | <b>878.418900</b>  | 1738.803975    | 869.905626       | 1737.819959        | 869.413618       | 12 |
| 7  | 1197.557720        | 599.282498      | 1180.531171    | 590.769224       |                |                  | Q    | <b>1627.771946</b> | 814.389611         | 1610.745397    | 805.876337       | 1609.761381        | 805.384329       | 11 |
| 8  | <b>1360.621049</b> | 680.814163      | 1343.594500    | 672.300888       |                |                  | Y    | <b>1188.546620</b> | 594.776948         | 1171.520071    | 586.263674       | 1170.536055        | 585.771666       | 10 |
| 9  | <b>1489.663642</b> | 745.335459      | 1472.637093    | 736.822185       | 1471.653077    | 736.330177       | E    | 1025.483291        | 513.245284         | 1008.456742    | 504.732009       | 1007.472726        | 504.240001       | 9  |
| 10 | <b>1620.704127</b> | 810.855702      | 1603.677578    | 802.342427       | 1602.693562    | 801.850419       | M    | <b>896.440698</b>  | 448.723987         | 879.414149     | 440.210713       | <b>878.430133</b>  | 439.718705       | 8  |
| 11 | <b>1757.763039</b> | 879.385158      | 1740.736490    | 870.871883       | 1739.752474    | 870.379875       | H    | <b>765.400213</b>  | 383.203745         | 748.373664     | 374.690470       | 747.389648         | 374.198462       | 7  |
| 12 | <b>1814.784503</b> | 907.895890      | 1797.757954    | 899.382615       | 1796.773938    | 898.890607       | G    | <b>628.341301</b>  | 314.674289         | 611.314752     | 306.161014       | 610.330736         | 305.669006       | 6  |
| 13 | 1911.837267        | 956.422272      | 1894.810718    | 947.908997       | 1893.826702    | 947.416989       | P    | <b>571.319837</b>  | 286.163557         | 554.293288     | 277.650282       | 553.309272         | 277.158274       | 5  |
| 14 | 2040.879860        | 1020.943568     | 2023.853311    | 1012.430294      | 2022.869295    | 1011.938286      | E    | 474.267073         | 237.637175         | 457.240524     | 229.123900       | 456.256508         | 228.631892       | 4  |
| 15 | 2097.901324        | 1049.454300     | 2080.874775    | 1040.941025      | 2079.890759    | 1040.449017      | G    | <b>345.224480</b>  | 173.115878         | 328.197931     | 164.602603       |                    |                  | 3  |
| 16 | 2210.985388        | 1105.996332     | 2193.958839    | 1097.483057      | 2192.974823    | 1096.991049      | L    | 288.203016         | 144.605146         | 271.176467     | 136.091872       |                    |                  | 2  |
| 17 |                    |                 |                |                  |                |                  | R    | <b>175.118952</b>  | 88.063114          | 158.092403     | 79.549839        |                    |                  | 1  |

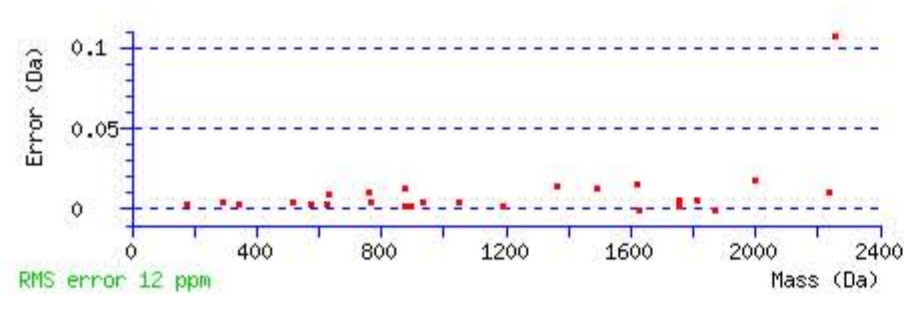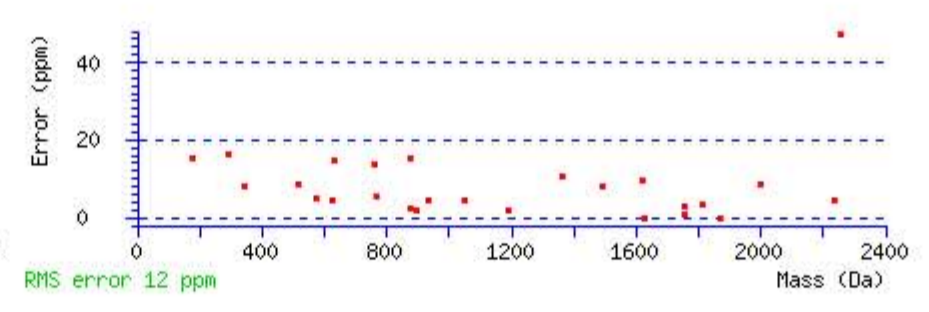

NCBI BLAST search of **MCPQLQQYEMHGPEGLR**  
 (Parameters: blastp, nr protein database, expect=20000, no filter, PAM30)  
 Other BLAST [web gateways](#)

### All matches to this query

| Score | Mr(calc):   | Delta     | Sequence                          |
|-------|-------------|-----------|-----------------------------------|
| 72.6  | 2384.089767 | -0.022819 | <a href="#">MCPQLQQYEMHGPEGLR</a> |
| 60.9  | 2384.089767 | -0.022819 | <a href="#">MCPQLQQYEMHGPEGLR</a> |
| 34.6  | 2384.089767 | -0.022819 | <a href="#">MCPQLQQYEMHGPEGLR</a> |



**Peptide View**

MS/MS Fragmentation of **MCPQLQQYEMHGPEGLR**

Found in **A2MG\_HUMAN**, Alpha-2-macroglobulin OS=Homo sapiens GN=A2M PE=1 SV=3

Match to Query 57256: 2384.105336 from(597.033610,4+) rtinseconds(2058) index(39040)

Title: Locus:1.1.1.2739.10 File:"2013-07-02 CLN FXIII 30 min 2nd F 3.wiff"

Data file C:\Program Files (x86)\Matrix Science\Mascot Daemon\mgf2 FXIII 30 min 2nd\mascot\_daemon\_merge.mgf

Click mouse within plot area to zoom in by factor of two about that point

Or, Plot from  to  Da

Label all possible matches  Label matches used for scoring

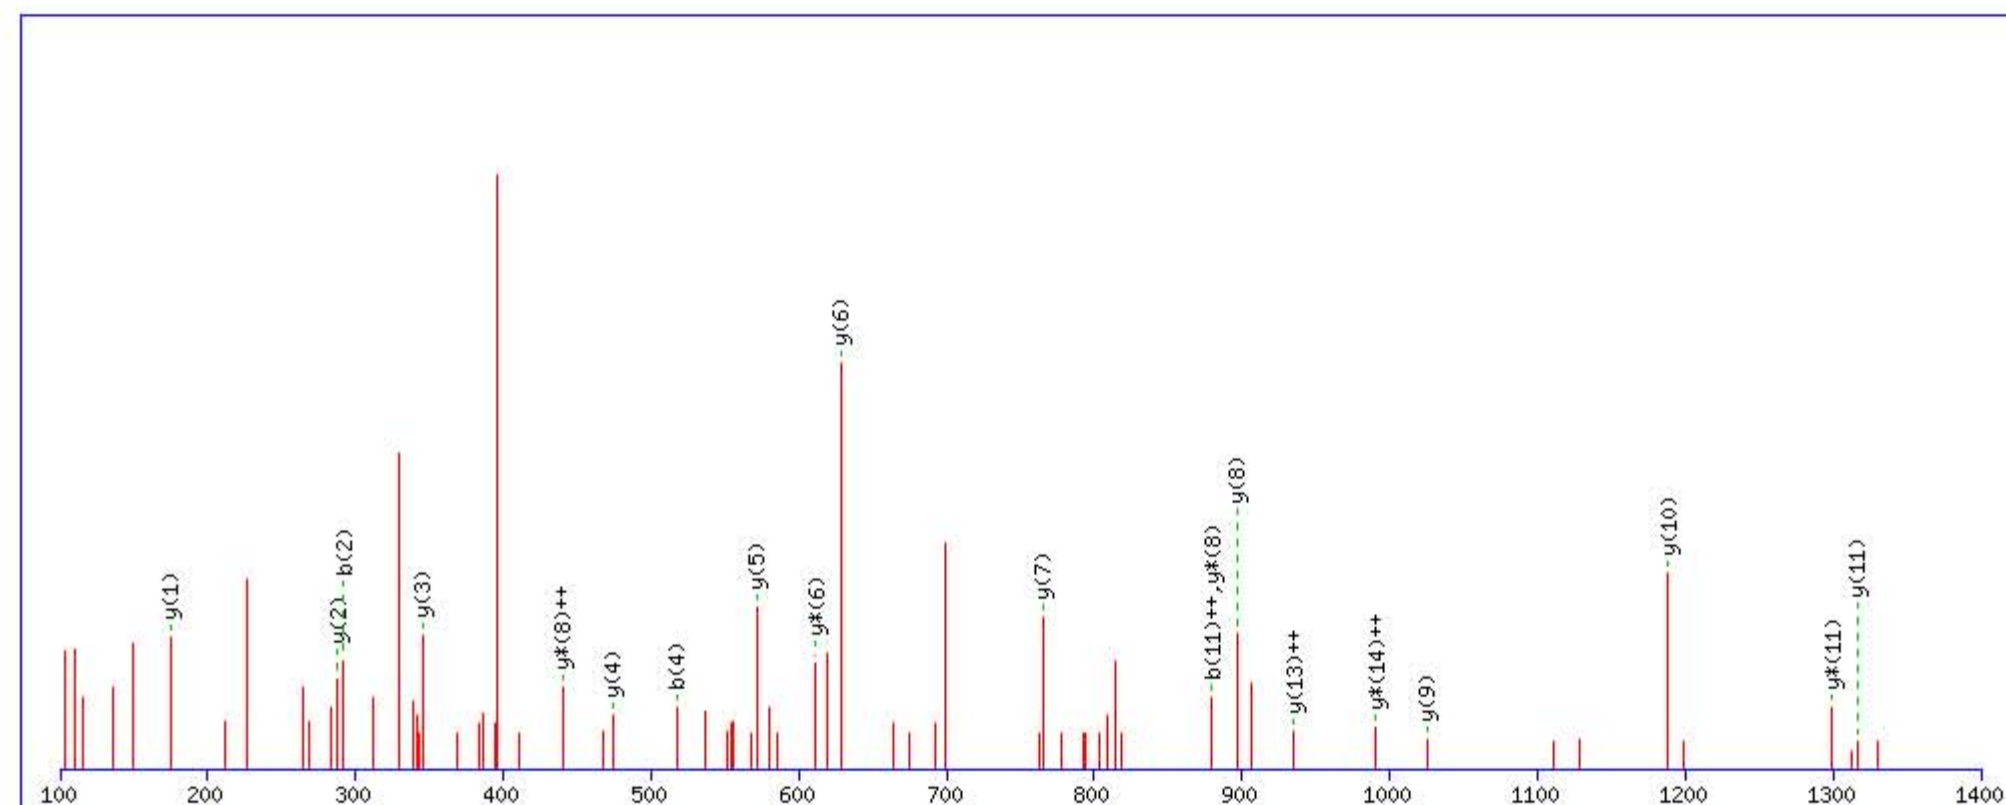

Monoisotopic mass of neutral peptide Mr(calc): 2384.089767

Fixed modifications: Carbamidomethyl (C) (apply to specified residues or termini only)

Variable modifications:

Q6 : Biotin:Thermo-21345 (Q)

Ions Score: 49 Expect: 2.6e-005

Matches : 20/164 fragment ions using 44 most intense peaks [\(help\)](#)

| #  | b                 | b <sup>++</sup>   | b <sup>*</sup> | b <sup>*++</sup> | b <sup>0</sup> | b <sup>0++</sup> | Seq. | y                  | y <sup>++</sup>   | y <sup>*</sup>     | y <sup>*++</sup>  | y <sup>0</sup> | y <sup>0++</sup> | #  |
|----|-------------------|-------------------|----------------|------------------|----------------|------------------|------|--------------------|-------------------|--------------------|-------------------|----------------|------------------|----|
| 1  | 132.047761        | 66.527518         |                |                  |                |                  | M    |                    |                   |                    |                   |                |                  | 17 |
| 2  | <b>292.078410</b> | 146.542843        |                |                  |                |                  | C    | 2254.056579        | 1127.531927       | 2237.030030        | 1119.018653       | 2236.046014    | 1118.526645      | 16 |
| 3  | 389.131174        | 195.069225        |                |                  |                |                  | P    | 2094.025930        | 1047.516603       | 2076.999381        | 1039.003328       | 2076.015365    | 1038.511320      | 15 |
| 4  | <b>517.189752</b> | 259.098514        | 500.163203     | 250.585240       |                |                  | Q    | 1996.973166        | 998.990221        | 1979.946617        | <b>990.476947</b> | 1978.962601    | 989.984939       | 14 |
| 5  | 630.273816        | 315.640546        | 613.247267     | 307.127272       |                |                  | L    | 1868.914588        | <b>934.960932</b> | 1851.888039        | 926.447658        | 1850.904023    | 925.955650       | 13 |
| 6  | 1069.499142       | 535.253209        | 1052.472593    | 526.739935       |                |                  | Q    | 1755.830524        | 878.418900        | 1738.803975        | 869.905626        | 1737.819959    | 869.413618       | 12 |
| 7  | 1197.557720       | 599.282498        | 1180.531171    | 590.769224       |                |                  | Q    | <b>1316.605198</b> | 658.806237        | <b>1299.578649</b> | 650.292963        | 1298.594633    | 649.800955       | 11 |
| 8  | 1360.621049       | 680.814163        | 1343.594500    | 672.300888       |                |                  | Y    | <b>1188.546620</b> | 594.776948        | 1171.520071        | 586.263674        | 1170.536055    | 585.771666       | 10 |
| 9  | 1489.663642       | 745.335459        | 1472.637093    | 736.822185       | 1471.653077    | 736.330177       | E    | <b>1025.483291</b> | 513.245284        | 1008.456742        | 504.732009        | 1007.472726    | 504.240001       | 9  |
| 10 | 1620.704127       | 810.855702        | 1603.677578    | 802.342427       | 1602.693562    | 801.850419       | M    | <b>896.440698</b>  | 448.723987        | <b>879.414149</b>  | <b>440.210713</b> | 878.430133     | 439.718705       | 8  |
| 11 | 1757.763039       | <b>879.385158</b> | 1740.736490    | 870.871883       | 1739.752474    | 870.379875       | H    | <b>765.400213</b>  | 383.203745        | 748.373664         | 374.690470        | 747.389648     | 374.198462       | 7  |
| 12 | 1814.784503       | 907.895890        | 1797.757954    | 899.382615       | 1796.773938    | 898.890607       | G    | <b>628.341301</b>  | 314.674289        | <b>611.314752</b>  | 306.161014        | 610.330736     | 305.669006       | 6  |
| 13 | 1911.837267       | 956.422272        | 1894.810718    | 947.908997       | 1893.826702    | 947.416989       | P    | <b>571.319837</b>  | 286.163557        | 554.293288         | 277.650282        | 553.309272     | 277.158274       | 5  |
| 14 | 2040.879860       | 1020.943568       | 2023.853311    | 1012.430294      | 2022.869295    | 1011.938286      | E    | <b>474.267073</b>  | 237.637175        | 457.240524         | 229.123900        | 456.256508     | 228.631892       | 4  |
| 15 | 2097.901324       | 1049.454300       | 2080.874775    | 1040.941025      | 2079.890759    | 1040.449017      | G    | <b>345.224480</b>  | 173.115878        | 328.197931         | 164.602603        |                |                  | 3  |
| 16 | 2210.985388       | 1105.996332       | 2193.958839    | 1097.483057      | 2192.974823    | 1096.991049      | L    | <b>288.203016</b>  | 144.605146        | 271.176467         | 136.091872        |                |                  | 2  |
| 17 |                   |                   |                |                  |                |                  | R    | <b>175.118952</b>  | 88.063114         | 158.092403         | 79.549839         |                |                  | 1  |

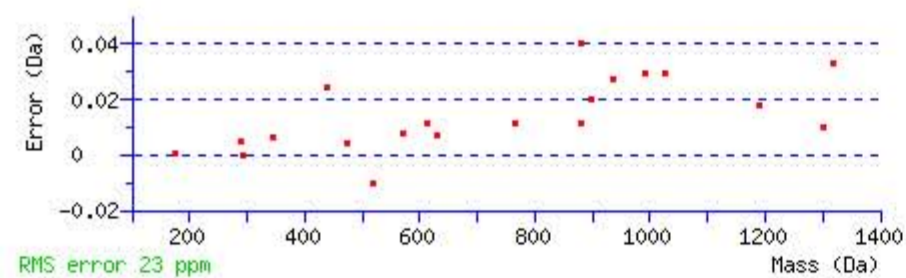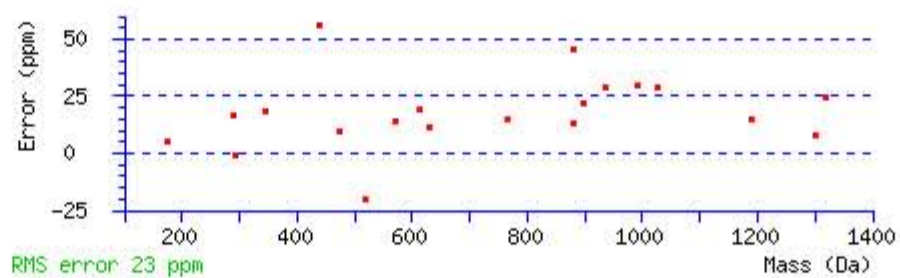

NCBI BLAST search of **MCPQLQQYEMHGPEGLR**

(Parameters: blastp, nr protein database, expect=20000, no filter, PAM30)

Other BLAST [web gateways](#)

**All matches to this query**

| Score | Mr(calc):   | Delta     | Sequence                          |
|-------|-------------|-----------|-----------------------------------|
| 49.2  | 2384.089767 | 0.015569  | <a href="#">MCPQLQQYEMHGPEGLR</a> |
| 45.9  | 2384.089767 | 0.015569  | <a href="#">MCPQLQQYEMHGPEGLR</a> |
| 41.3  | 2384.089767 | 0.015569  | <a href="#">MCPQLQQYEMHGPEGLR</a> |
| 0.3   | 2384.118774 | -0.013438 | <a href="#">QYFRNLCSDDTMVR</a>    |



# MASCOT Search Results

## Peptide View

MS/MS Fragmentation of **MCPQLQQYEMHGPEGLR**

Found in **A2MG\_HUMAN**, Alpha-2-macroglobulin OS=Homo sapiens GN=A2M PE=1 SV=3

Match to Query 61920: 2695.265816 from(674.823730,4+) rtinseconds(2211) index(23096)

Title: Locus:1.1.1.1651.8 File:"2013-07-02 CLN FXIII 30 min 2nd F 2.wiff"

Data file C:\Program Files (x86)\Matrix Science\Mascot Daemon\mgf2 FXIII 30 min 2nd\mascot\_daemon\_merge.mgf

Click mouse within plot area to zoom in by factor of two about that point

Or, Plot from  to  Da

Label all possible matches  Label matches used for scoring

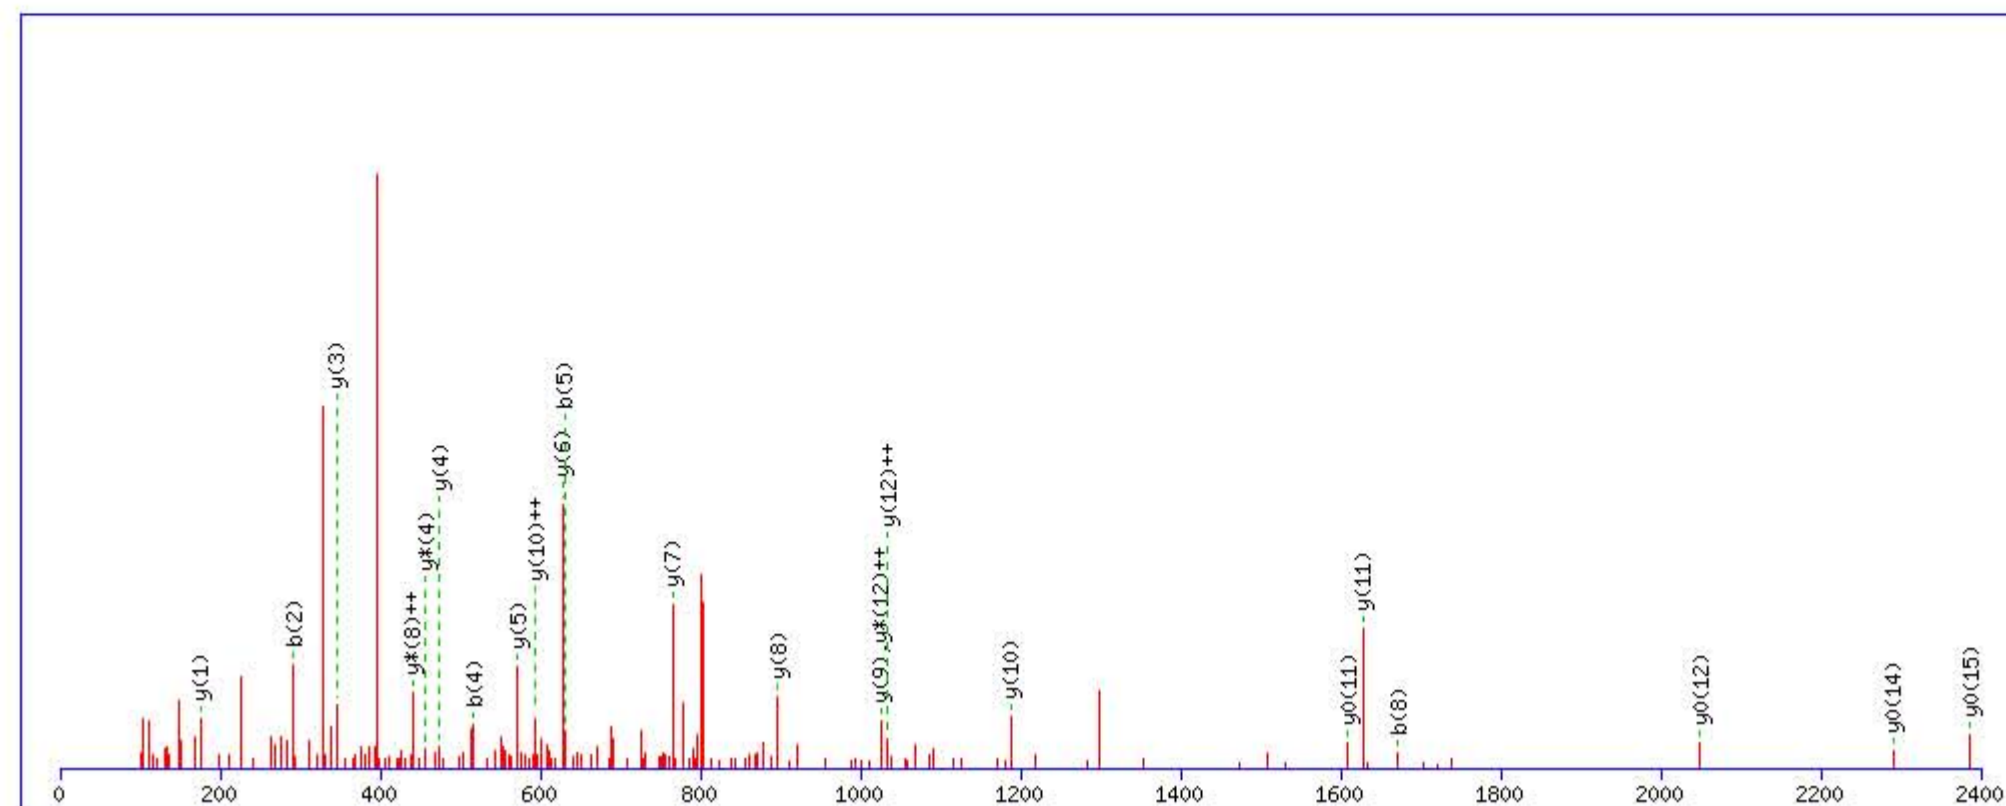

Monoisotopic mass of neutral peptide Mr(calc): 2695.265816

Fixed modifications: Carbamidomethyl (C) (apply to specified residues or termini only)

Variable modifications:

Q6 : Biotin:Thermo-21345 (Q)

Q7 : Biotin:Thermo-21345 (Q)

Ions Score: 39 Expect: 0.0022

Matches : 23/164 fragment ions using 49 most intense peaks [\(help\)](#)

| #  | b                  | b <sup>++</sup> | b <sup>+</sup> | b <sup>+++</sup> | b <sup>0</sup> | b <sup>0++</sup> | Seq. | y                  | y <sup>++</sup>    | y <sup>+</sup>    | y <sup>+++</sup>   | y <sup>0</sup>     | y <sup>0++</sup> | #  |
|----|--------------------|-----------------|----------------|------------------|----------------|------------------|------|--------------------|--------------------|-------------------|--------------------|--------------------|------------------|----|
| 1  | 132.047761         | 66.527518       |                |                  |                |                  | M    |                    |                    |                   |                    |                    |                  | 17 |
| 2  | <b>292.078410</b>  | 146.542843      |                |                  |                |                  | C    | 2565.223327        | 1283.115301        | 2548.196778       | 1274.602027        | 2547.212762        | 1274.110019      | 16 |
| 3  | 389.131174         | 195.069225      |                |                  |                |                  | P    | 2405.192678        | 1203.099977        | 2388.166129       | 1194.586702        | <b>2387.182113</b> | 1194.094694      | 15 |
| 4  | <b>517.189752</b>  | 259.098514      | 500.163203     | 250.585240       |                |                  | Q    | 2308.139914        | 1154.573595        | 2291.113365       | 1146.060320        | <b>2290.129349</b> | 1145.568312      | 14 |
| 5  | <b>630.273816</b>  | 315.640546      | 613.247267     | 307.127272       |                |                  | L    | 2180.081336        | 1090.544306        | 2163.054787       | 1082.031031        | 2162.070771        | 1081.539023      | 13 |
| 6  | 1069.499142        | 535.253209      | 1052.472593    | 526.739935       |                |                  | Q    | 2066.997272        | <b>1034.002274</b> | 2049.970723       | <b>1025.488999</b> | <b>2048.986707</b> | 1024.996991      | 12 |
| 7  | 1508.724468        | 754.865872      | 1491.697919    | 746.352598       |                |                  | Q    | <b>1627.771946</b> | 814.389611         | 1610.745397       | 805.876337         | <b>1609.761381</b> | 805.384329       | 11 |
| 8  | <b>1671.787797</b> | 836.397537      | 1654.761248    | 827.884262       |                |                  | Y    | <b>1188.546620</b> | <b>594.776948</b>  | 1171.520071       | 586.263674         | 1170.536055        | 585.771666       | 10 |
| 9  | 1800.830390        | 900.918833      | 1783.803841    | 892.405559       | 1782.819825    | 891.913551       | E    | <b>1025.483291</b> | 513.245284         | 1008.456742       | 504.732009         | 1007.472726        | 504.240001       | 9  |
| 10 | 1931.870875        | 966.439076      | 1914.844326    | 957.925801       | 1913.860310    | 957.433793       | M    | <b>896.440698</b>  | 448.723987         | 879.414149        | <b>440.210713</b>  | 878.430133         | 439.718705       | 8  |
| 11 | 2068.929787        | 1034.968531     | 2051.903238    | 1026.455257      | 2050.919222    | 1025.963249      | H    | <b>765.400213</b>  | 383.203745         | 748.373664        | 374.690470         | 747.389648         | 374.198462       | 7  |
| 12 | 2125.951251        | 1063.479263     | 2108.924702    | 1054.965989      | 2107.940686    | 1054.473981      | G    | <b>628.341301</b>  | 314.674289         | 611.314752        | 306.161014         | 610.330736         | 305.669006       | 6  |
| 13 | 2223.004015        | 1112.005645     | 2205.977466    | 1103.492371      | 2204.993450    | 1103.000363      | P    | <b>571.319837</b>  | 286.163557         | 554.293288        | 277.650282         | 553.309272         | 277.158274       | 5  |
| 14 | 2352.046608        | 1176.526942     | 2335.020059    | 1168.013667      | 2334.036043    | 1167.521659      | E    | <b>474.267073</b>  | 237.637175         | <b>457.240524</b> | 229.123900         | 456.256508         | 228.631892       | 4  |
| 15 | 2409.068072        | 1205.037674     | 2392.041523    | 1196.524399      | 2391.057507    | 1196.032391      | G    | <b>345.224480</b>  | 173.115878         | 328.197931        | 164.602603         |                    |                  | 3  |
| 16 | 2522.152136        | 1261.579706     | 2505.125587    | 1253.066431      | 2504.141571    | 1252.574424      | L    | 288.203016         | 144.605146         | 271.176467        | 136.091872         |                    |                  | 2  |
| 17 |                    |                 |                |                  |                |                  | R    | <b>175.118952</b>  | 88.063114          | 158.092403        | 79.549839          |                    |                  | 1  |

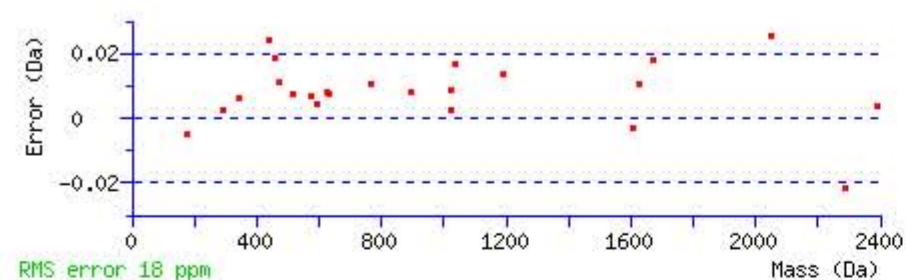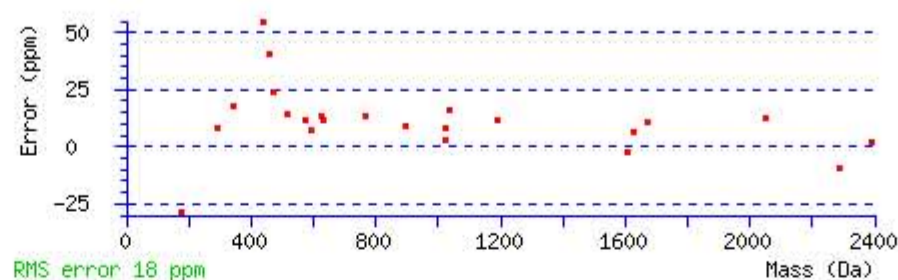

NCBI BLAST search of [MCPQLQQYEMHGPEGLR](#)

(Parameters: blastp, nr protein database, expect=20000, no filter, PAM30)

Other BLAST [web gateways](#)

All matches to this query

| Score | Mr(calc):   | Delta    | Sequence                          |
|-------|-------------|----------|-----------------------------------|
| 39.0  | 2695.265816 | 0.009300 | <a href="#">MCPQLQQYEMHGPEGLR</a> |
| 33.1  | 2695.265816 | 0.009300 | <a href="#">MCPQLQQYEMHGPEGLR</a> |
| 25.2  | 2695.265816 | 0.009300 | <a href="#">MCPQLQQYEMHGPEGLR</a> |



# Mascot Search Results

## Peptide View

MS/MS Fragmentation of **MCPQLQQYEMHGPEGLR**

Found in **A2MG\_HUMAN**, Alpha-2-macroglobulin OS=Homo sapiens GN=A2M PE=1 SV=3

Match to Query 62086: 2711.259536 from(678.822160,4+) rtinseconds(2154) index(22747)

Title: Locus:1.1.1.1631.22 File:"2013-07-02 CLN FXIII 30 min 2nd F 2.wiff"

Data file C:\Program Files (x86)\Matrix Science\Mascot Daemon\mgf2 FXIII 30 min 2nd\mascot\_daemon\_merge.mgf

Click mouse within plot area to zoom in by factor of two about that point

Or, Plot from  to  Da

Label all possible matches  Label matches used for scoring

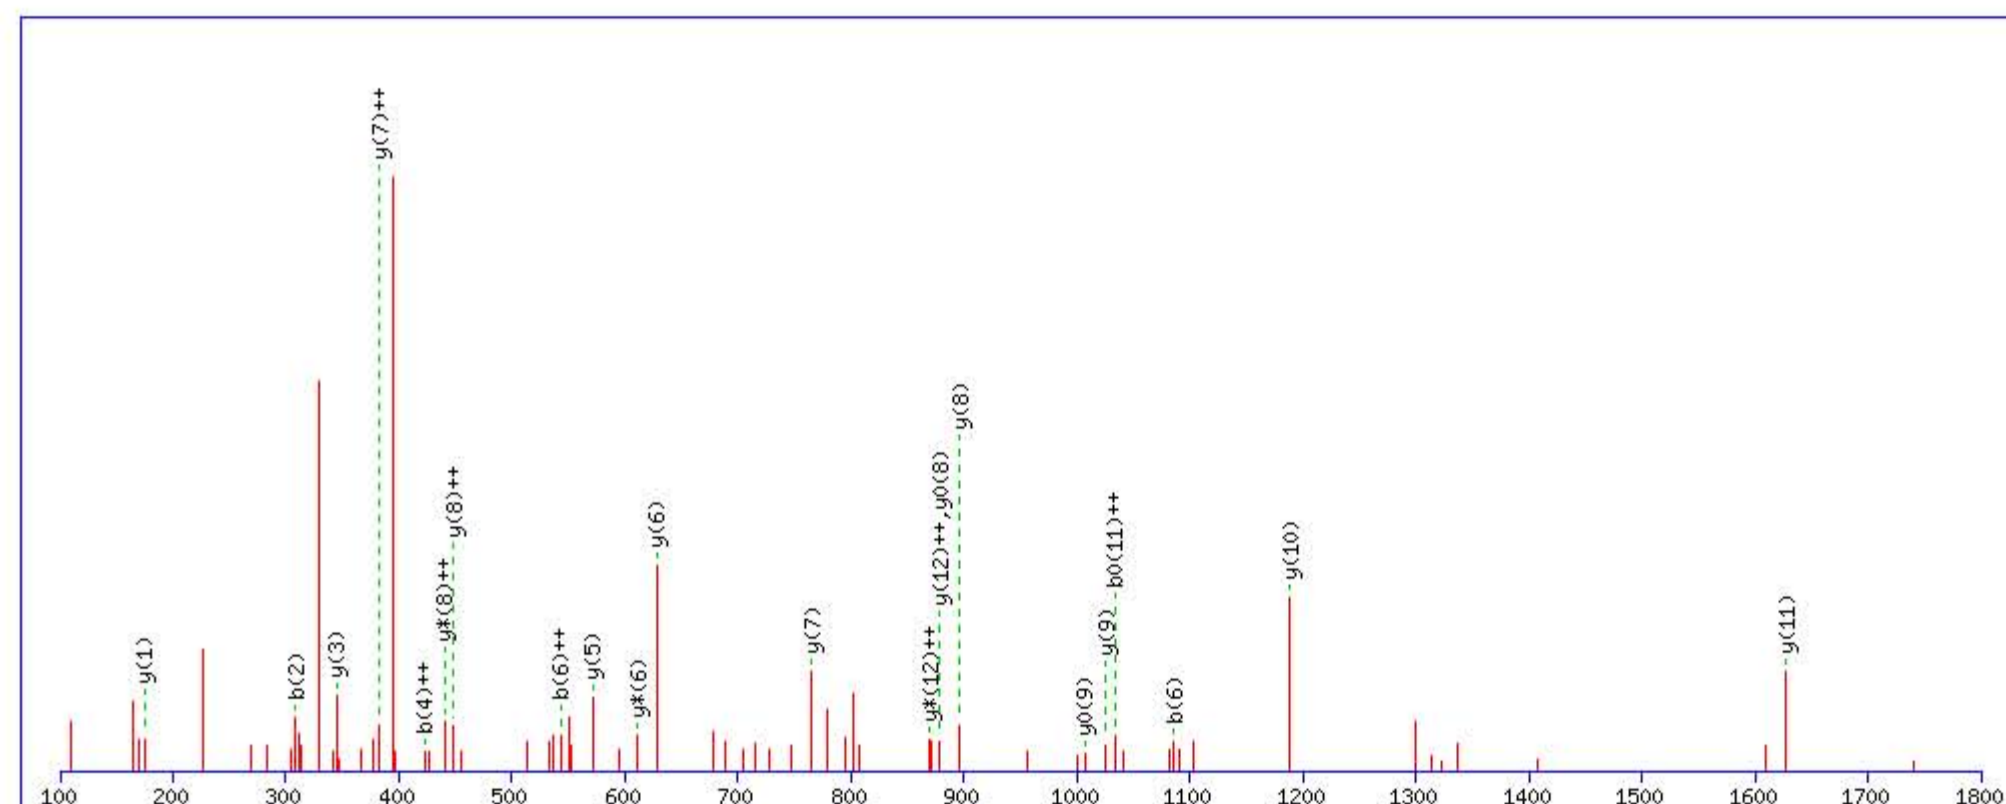

Monoisotopic mass of neutral peptide Mr(calc): 2711.251434

Fixed modifications: Carbamidomethyl (C) (apply to specified residues or termini only)

Variable modifications:

M1 : Oxidation (M), with neutral losses 0.000000 (shown in table), 63.998285

Q4 : Biotin:Thermo-21345 (Q)

Q7 : Biotin:Thermo-21345 (Q)

Ions Score: 32 Expect: 0.01

Matches : 22/238 fragment ions using 48 most intense peaks ([help](#))

| #  | b                  | b <sup>++</sup>   | b <sup>*</sup> | b <sup>+++</sup> | b <sup>0</sup> | b <sup>0++</sup>   | Seq. | y                  | y <sup>++</sup>   | y <sup>*</sup>    | y <sup>+++</sup>  | y <sup>0</sup>     | y <sup>0++</sup> | #  |
|----|--------------------|-------------------|----------------|------------------|----------------|--------------------|------|--------------------|-------------------|-------------------|-------------------|--------------------|------------------|----|
| 1  | 148.042676         | 74.524976         |                |                  |                |                    | M    |                    |                   |                   |                   |                    |                  | 17 |
| 2  | <b>308.073325</b>  | 154.540301        |                |                  |                |                    | C    | 2565.223327        | 1283.115302       | 2548.196778       | 1274.602027       | 2547.212762        | 1274.110019      | 16 |
| 3  | 405.126089         | 203.066683        |                |                  |                |                    | P    | 2405.192678        | 1203.099977       | 2388.166129       | 1194.586702       | 2387.182113        | 1194.094694      | 15 |
| 4  | 844.351415         | <b>422.679346</b> | 827.324866     | 414.166071       |                |                    | Q    | 2308.139914        | 1154.573595       | 2291.113365       | 1146.060320       | 2290.129349        | 1145.568312      | 14 |
| 5  | 957.435479         | 479.221378        | 940.408930     | 470.708103       |                |                    | L    | 1868.914588        | 934.960932        | 1851.888039       | 926.447658        | 1850.904023        | 925.955650       | 13 |
| 6  | <b>1085.494057</b> | <b>543.250667</b> | 1068.467508    | 534.737392       |                |                    | Q    | 1755.830524        | <b>878.418900</b> | 1738.803975       | <b>869.905626</b> | 1737.819959        | 869.413618       | 12 |
| 7  | 1524.719383        | 762.863330        | 1507.692834    | 754.350055       |                |                    | Q    | <b>1627.771946</b> | 814.389611        | 1610.745397       | 805.876337        | 1609.761381        | 805.384329       | 11 |
| 8  | 1687.782712        | 844.394994        | 1670.756163    | 835.881720       |                |                    | Y    | <b>1188.546620</b> | 594.776948        | 1171.520071       | 586.263674        | 1170.536055        | 585.771666       | 10 |
| 9  | 1816.825305        | 908.916291        | 1799.798756    | 900.403016       | 1798.814740    | 899.911008         | E    | <b>1025.483291</b> | 513.245284        | 1008.456742       | 504.732009        | <b>1007.472726</b> | 504.240001       | 9  |
| 10 | 1947.865790        | 974.436533        | 1930.839241    | 965.923259       | 1929.855225    | 965.431251         | M    | <b>896.440698</b>  | <b>448.723987</b> | 879.414149        | <b>440.210713</b> | <b>878.430133</b>  | 439.718705       | 8  |
| 11 | 2084.924702        | 1042.965989       | 2067.898153    | 1034.452715      | 2066.914137    | <b>1033.960707</b> | H    | <b>765.400213</b>  | <b>383.203745</b> | 748.373664        | 374.690470        | 747.389648         | 374.198462       | 7  |
| 12 | 2141.946166        | 1071.476721       | 2124.919617    | 1062.963446      | 2123.935601    | 1062.471439        | G    | <b>628.341301</b>  | 314.674289        | <b>611.314752</b> | 306.161014        | 610.330736         | 305.669006       | 6  |
| 13 | 2238.998930        | 1120.003103       | 2221.972381    | 1111.489828      | 2220.988365    | 1110.997821        | P    | <b>571.319837</b>  | 286.163557        | 554.293288        | 277.650282        | 553.309272         | 277.158274       | 5  |
| 14 | 2368.041523        | 1184.524400       | 2351.014974    | 1176.011125      | 2350.030958    | 1175.519117        | E    | 474.267073         | 237.637175        | 457.240524        | 229.123900        | 456.256508         | 228.631892       | 4  |
| 15 | 2425.062987        | 1213.035132       | 2408.036438    | 1204.521857      | 2407.052422    | 1204.029849        | G    | <b>345.224480</b>  | 173.115878        | 328.197931        | 164.602603        |                    |                  | 3  |
| 16 | 2538.147051        | 1269.577164       | 2521.120502    | 1261.063889      | 2520.136486    | 1260.571881        | L    | 288.203016         | 144.605146        | 271.176467        | 136.091872        |                    |                  | 2  |
| 17 |                    |                   |                |                  |                |                    | R    | <b>175.118952</b>  | 88.063114         | 158.092403        | 79.549839         |                    |                  | 1  |

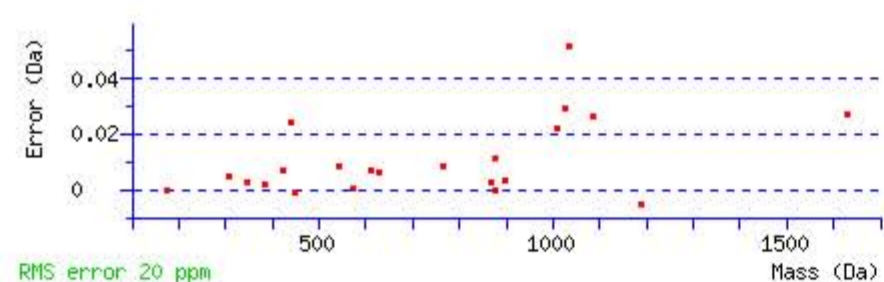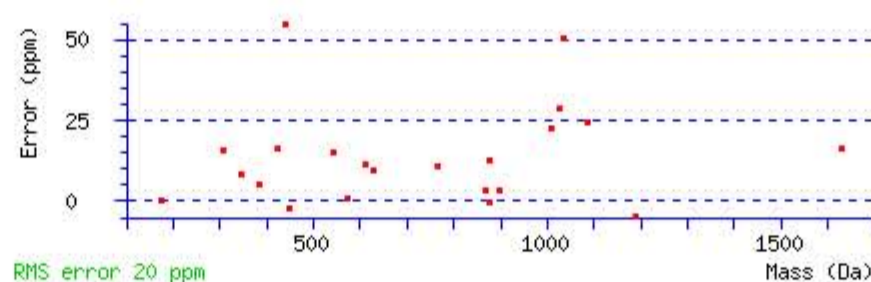

NCBI BLAST search of [MCPQLQQYEMHGPEGLR](#)

(Parameters: blastp, nr protein database, expect=20000, no filter, PAM30)

Other BLAST [web gateways](#)

## All matches to this query

| Score | Mr(calc):   | Delta    | Sequence                          |
|-------|-------------|----------|-----------------------------------|
| 31.8  | 2711.251434 | 0.008102 | <a href="#">MCPQLQQYEMHGPEGLR</a> |
| 28.0  | 2711.251434 | 0.008102 | <a href="#">MCPQLQQYEMHGPEGLR</a> |
| 19.5  | 2711.251434 | 0.008102 | <a href="#">MCPQLQQYEMHGPEGLR</a> |



# MASCOT Search Results

## Peptide View

MS/MS Fragmentation of **MCPQLQQYEMHGPEGLR**

Found in **A2MG\_HUMAN**, Alpha-2-macroglobulin OS=Homo sapiens GN=A2M PE=1 SV=3

Match to Query 65575: 3006.439496 from(752.617150,4+) rtinseconds(2346) index(23803)

Title: Locus:1.1.1.1698.14 File:"2013-07-02 CLN FXIII 30 min 2nd F 2.wiff"

Data file C:\Program Files (x86)\Matrix Science\Mascot Daemon\mgf\2 FXIII 30 min 2nd\mascot\_daemon\_merge.mgf

Click mouse within plot area to zoom in by factor of two about that point

Or, Plot from  to  Da

Label all possible matches  Label matches used for scoring

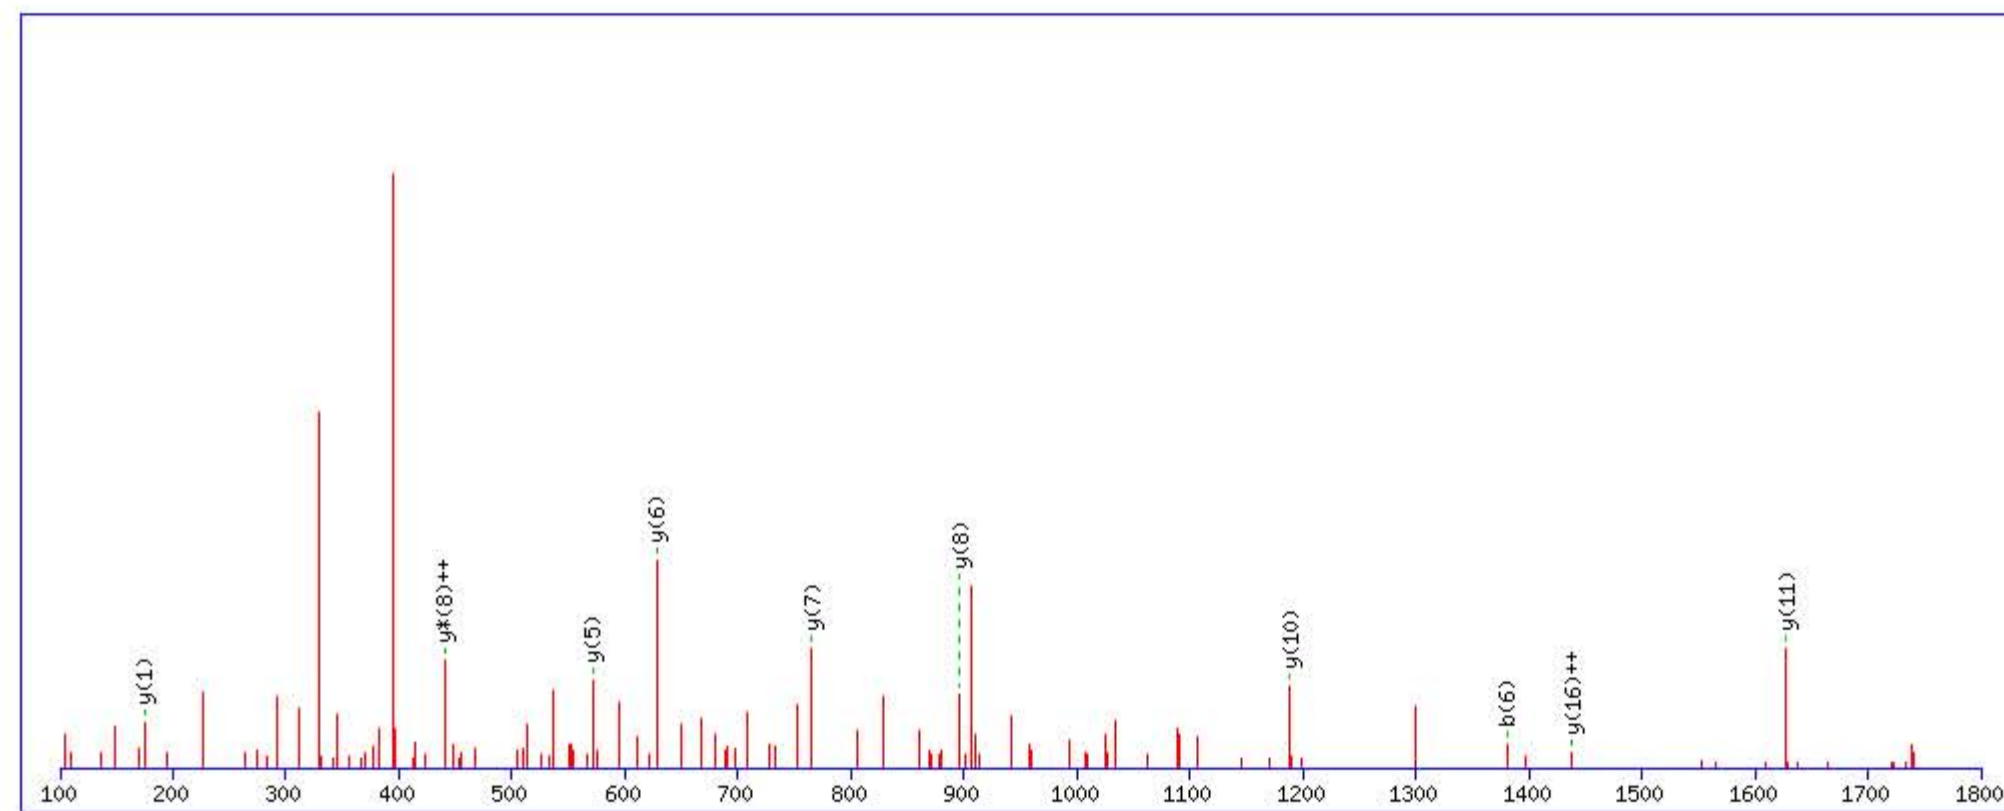

Monoisotopic mass of neutral peptide Mr(calc): 3006.423264

Fixed modifications: Carbamidomethyl (C) (apply to specified residues or termini only)

Variable modifications:

Q4 : Biotin:Thermo-21345 (Q)

Q6 : Biotin:Thermo-21345 (Q)

Q7 : Biotin:Thermo-21345 (Q)

Ions Score: 28 Expect: 0.038

Matches : 10/164 fragment ions using 17 most intense peaks [\(help\)](#)

| #  | b           | b <sup>++</sup> | b <sup>*</sup> | b <sup>+++</sup> | b <sup>0</sup> | b <sup>0++</sup> | Seq. | y           | y <sup>++</sup> | y <sup>*</sup> | y <sup>+++</sup> | y <sup>0</sup> | y <sup>0++</sup> | #  |
|----|-------------|-----------------|----------------|------------------|----------------|------------------|------|-------------|-----------------|----------------|------------------|----------------|------------------|----|
| 1  | 132.047761  | 66.527518       |                |                  |                |                  | M    |             |                 |                |                  |                |                  | 17 |
| 2  | 292.078410  | 146.542843      |                |                  |                |                  | C    | 2876.390075 | 1438.698675     | 2859.363526    | 1430.185401      | 2858.379510    | 1429.693393      | 16 |
| 3  | 389.131174  | 195.069225      |                |                  |                |                  | P    | 2716.359426 | 1358.683351     | 2699.332877    | 1350.170076      | 2698.348861    | 1349.678068      | 15 |
| 4  | 828.356500  | 414.681888      | 811.329951     | 406.168614       |                |                  | Q    | 2619.306662 | 1310.156969     | 2602.280113    | 1301.643694      | 2601.296097    | 1301.151686      | 14 |
| 5  | 941.440564  | 471.223920      | 924.414015     | 462.710646       |                |                  | L    | 2180.081336 | 1090.544306     | 2163.054787    | 1082.031031      | 2162.070771    | 1081.539023      | 13 |
| 6  | 1380.665890 | 690.836583      | 1363.639341    | 682.323309       |                |                  | Q    | 2066.997272 | 1034.002274     | 2049.970723    | 1025.488999      | 2048.986707    | 1024.996991      | 12 |
| 7  | 1819.891216 | 910.449246      | 1802.864667    | 901.935972       |                |                  | Q    | 1627.771946 | 814.389611      | 1610.745397    | 805.876337       | 1609.761381    | 805.384329       | 11 |
| 8  | 1982.954545 | 991.980911      | 1965.927996    | 983.467636       |                |                  | Y    | 1188.546620 | 594.776948      | 1171.520071    | 586.263674       | 1170.536055    | 585.771666       | 10 |
| 9  | 2111.997138 | 1056.502207     | 2094.970589    | 1047.988932      | 2093.986573    | 1047.496925      | E    | 1025.483291 | 513.245284      | 1008.456742    | 504.732009       | 1007.472726    | 504.240001       | 9  |
| 10 | 2243.037623 | 1122.022450     | 2226.011074    | 1113.509175      | 2225.027058    | 1113.017167      | M    | 896.440698  | 448.723987      | 879.414149     | 440.210713       | 878.430133     | 439.718705       | 8  |
| 11 | 2380.096535 | 1190.551906     | 2363.069986    | 1182.038631      | 2362.085970    | 1181.546623      | H    | 765.400213  | 383.203745      | 748.373664     | 374.690470       | 747.389648     | 374.198462       | 7  |
| 12 | 2437.117999 | 1219.062637     | 2420.091450    | 1210.549363      | 2419.107434    | 1210.057355      | G    | 628.341301  | 314.674289      | 611.314752     | 306.161014       | 610.330736     | 305.669006       | 6  |
| 13 | 2534.170763 | 1267.589019     | 2517.144214    | 1259.075745      | 2516.160198    | 1258.583737      | P    | 571.319837  | 286.163557      | 554.293288     | 277.650282       | 553.309272     | 277.158274       | 5  |
| 14 | 2663.213356 | 1332.110316     | 2646.186807    | 1323.597041      | 2645.202791    | 1323.105034      | E    | 474.267073  | 237.637175      | 457.240524     | 229.123900       | 456.256508     | 228.631892       | 4  |
| 15 | 2720.234820 | 1360.621048     | 2703.208271    | 1352.107773      | 2702.224255    | 1351.615766      | G    | 345.224480  | 173.115878      | 328.197931     | 164.602603       |                |                  | 3  |
| 16 | 2833.318884 | 1417.163080     | 2816.292335    | 1408.649806      | 2815.308319    | 1408.157798      | L    | 288.203016  | 144.605146      | 271.176467     | 136.091872       |                |                  | 2  |
| 17 |             |                 |                |                  |                |                  | R    | 175.118952  | 88.063114       | 158.092403     | 79.549839        |                |                  | 1  |

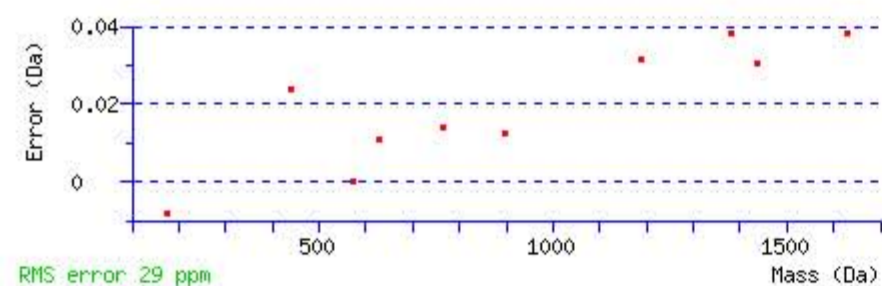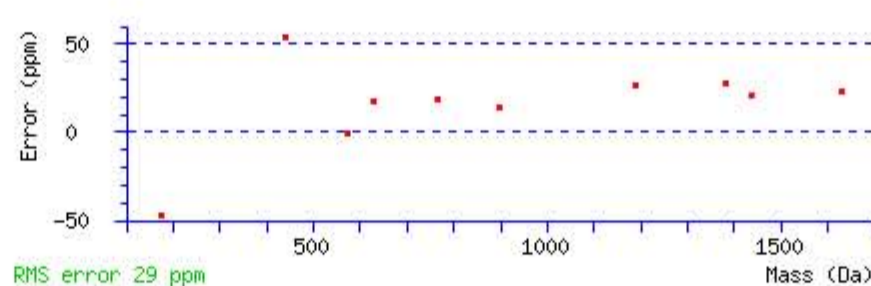

NCBI BLAST search of [MCPQLQQYEMHGPEGLR](#)

(Parameters: blastp, nr protein database, expect=20000, no filter, PAM30)

Other BLAST [web gateways](#)

All matches to this query

| Score | Mr(calc):   | Delta    | Sequence                          |
|-------|-------------|----------|-----------------------------------|
| 27.9  | 3006.423264 | 0.016232 | <a href="#">MCPQLQQYEMHGPEGLR</a> |

Mascot: <http://www.matrixscience.com/>



**MASCOT** Mascot Search Results

**Peptide View**

MS/MS Fragmentation of **AVDQSVLLMKPDAELSASSVYNLLPEK**  
 Found in **A2MG\_HUMAN**, Alpha-2-macroglobulin OS=Homo sapiens GN=A2M PE=1 SV=3

Match to Query 68036: 3227.697256 from(807.931590,4+) rtinseconds(2754) index(26477)  
 Title: Locus:1.1.1.1839.14 File:"2013-07-02 CLN FXIII 30 min 2nd F 2.wiff"  
 Data file C:\Program Files (x86)\Matrix Science\Mascot Daemon\mgf2 FXIII 30 min 2nd\mascot\_daemon\_merge.mgf

Click mouse within plot area to zoom in by factor of two about that point  
 Or, Plot from  to  Da   
 Label all possible matches  Label matches used for scoring

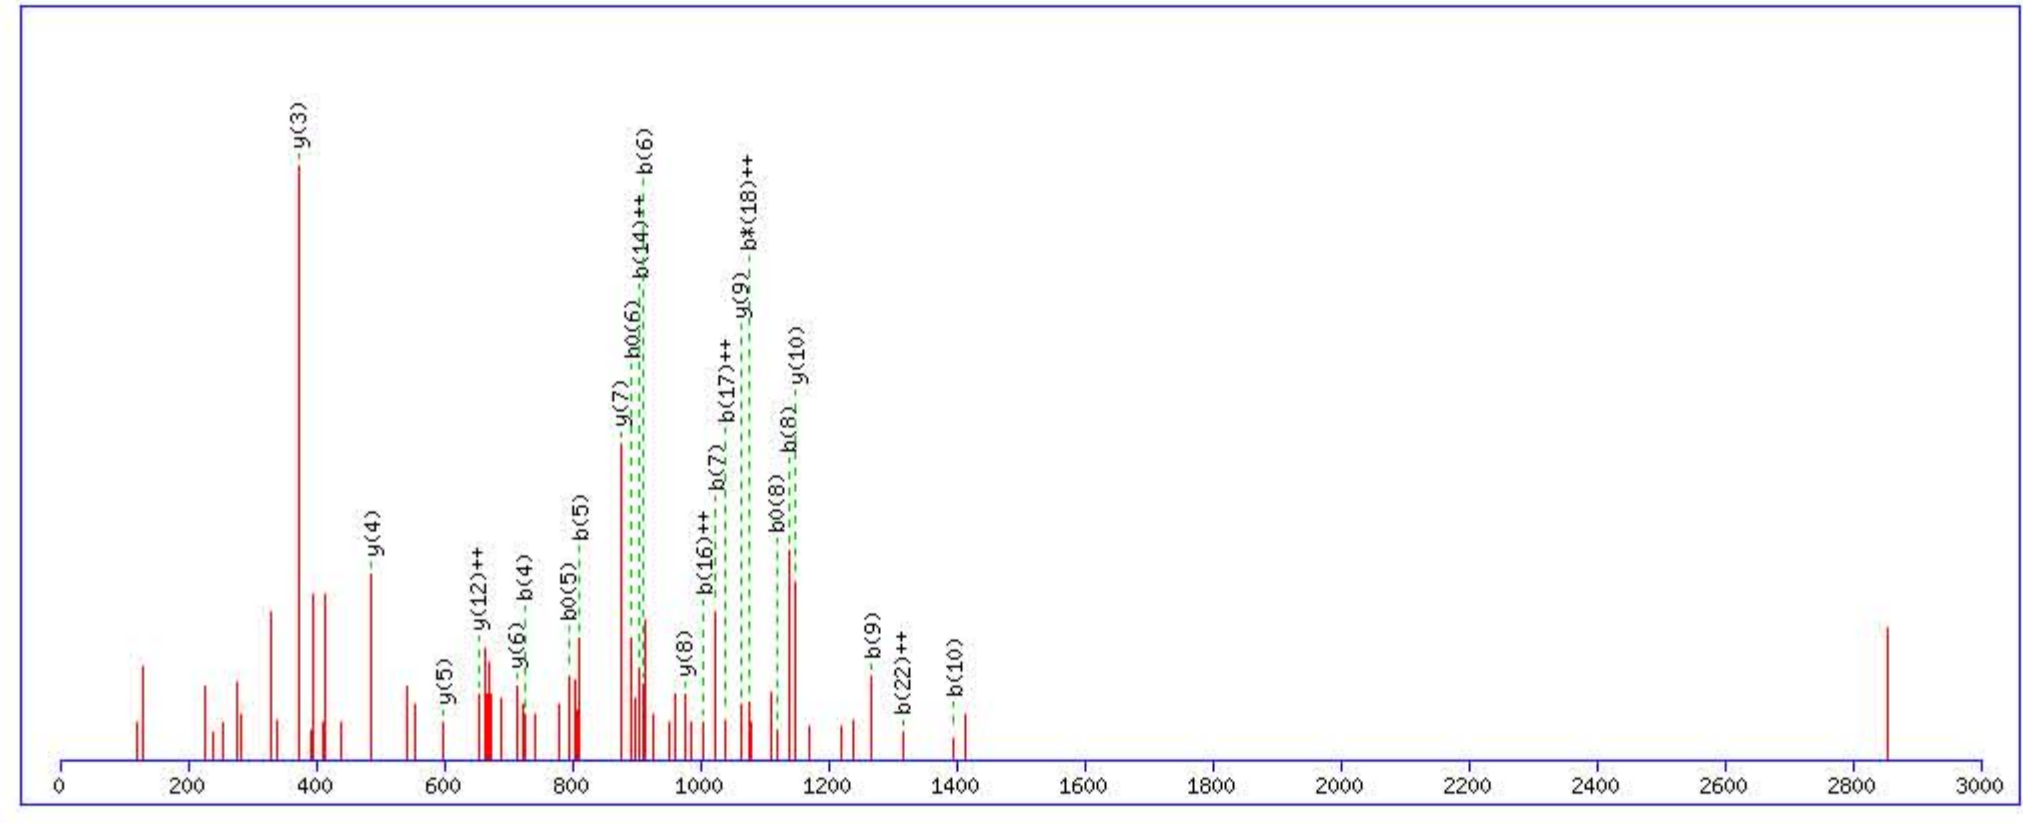

Monoisotopic mass of neutral peptide Mr(calc): 3227.682129  
 Fixed modifications: Carbamidomethyl (C) (apply to specified residues or termini only)  
 Variable modifications:  
 Q4 : Biotin:Thermo-21345 (Q)  
 Ions Score: 30 Expect: 0.0024  
 Matches : 24/300 fragment ions using 67 most intense peaks [\(help\)](#)

| #  | b                  | b <sup>++</sup>    | b <sup>*</sup> | b <sup>*++</sup>   | b <sup>0</sup>     | b <sup>0++</sup> | Seq. | y                  | y <sup>++</sup>   | y <sup>*</sup> | y <sup>*++</sup> | y <sup>0</sup> | y <sup>0++</sup> | #  |
|----|--------------------|--------------------|----------------|--------------------|--------------------|------------------|------|--------------------|-------------------|----------------|------------------|----------------|------------------|----|
| 1  | 72.044390          | 36.525833          |                |                    |                    |                  | A    |                    |                   |                |                  |                |                  | 27 |
| 2  | 171.112804         | 86.060040          |                |                    |                    |                  | V    | 3157.652336        | 1579.329806       | 3140.625787    | 1570.816531      | 3139.641771    | 1570.324523      | 26 |
| 3  | 286.139747         | 143.573512         |                |                    | 268.129182         | 134.568229       | D    | 3058.583922        | 1529.795599       | 3041.557373    | 1521.282324      | 3040.573357    | 1520.790316      | 25 |
| 4  | <b>725.365073</b>  | 363.186175         | 708.338524     | 354.672900         | 707.354508         | 354.180892       | Q    | 2943.556979        | 1472.282127       | 2926.530430    | 1463.768853      | 2925.546414    | 1463.276845      | 24 |
| 5  | <b>812.397101</b>  | 406.702189         | 795.370552     | 398.188914         | <b>794.386536</b>  | 397.696906       | S    | 2504.331653        | 1252.669464       | 2487.305104    | 1244.156190      | 2486.321088    | 1243.664182      | 23 |
| 6  | <b>911.465515</b>  | 456.236396         | 894.438966     | 447.723121         | <b>893.454950</b>  | 447.231113       | V    | 2417.299625        | 1209.153451       | 2400.273076    | 1200.640176      | 2399.289060    | 1200.148168      | 22 |
| 7  | <b>1024.549579</b> | 512.778427         | 1007.523030    | 504.265153         | 1006.539014        | 503.773145       | L    | 2318.231211        | 1159.619243       | 2301.204662    | 1151.105969      | 2300.220646    | 1150.613961      | 21 |
| 8  | <b>1137.633643</b> | 569.320459         | 1120.607094    | 560.807185         | <b>1119.623078</b> | 560.315177       | L    | 2205.147147        | 1103.077212       | 2188.120598    | 1094.563937      | 2187.136582    | 1094.071929      | 20 |
| 9  | <b>1268.674128</b> | 634.840702         | 1251.647579    | 626.327428         | 1250.663563        | 625.835419       | M    | 2092.063083        | 1046.535179       | 2075.036534    | 1038.021905      | 2074.052518    | 1037.529897      | 19 |
| 10 | <b>1396.769091</b> | 698.888183         | 1379.742542    | 690.374909         | 1378.758526        | 689.882901       | K    | 1961.022598        | 981.014937        | 1943.996049    | 972.501663       | 1943.012033    | 972.009655       | 18 |
| 11 | 1493.821855        | 747.414565         | 1476.795306    | 738.901291         | 1475.811290        | 738.409283       | P    | 1832.927635        | 916.967456        | 1815.901086    | 908.454181       | 1814.917070    | 907.962173       | 17 |
| 12 | 1608.848798        | 804.928037         | 1591.822249    | 796.414763         | 1590.838233        | 795.922755       | D    | 1735.874871        | 868.441074        | 1718.848322    | 859.927799       | 1717.864306    | 859.435791       | 16 |
| 13 | 1679.885912        | 840.446594         | 1662.859363    | 831.933320         | 1661.875347        | 831.441311       | A    | 1620.847928        | 810.927602        | 1603.821379    | 802.414328       | 1602.837363    | 801.922320       | 15 |
| 14 | 1808.928505        | <b>904.967891</b>  | 1791.901956    | 896.454616         | 1790.917940        | 895.962608       | E    | 1549.810814        | 775.409045        | 1532.784265    | 766.895771       | 1531.800249    | 766.403763       | 14 |
| 15 | 1922.012569        | 961.509923         | 1904.986020    | 952.996648         | 1904.002004        | 952.504640       | L    | 1420.768221        | 710.887749        | 1403.741672    | 702.374474       | 1402.757656    | 701.882466       | 13 |
| 16 | 2009.044597        | <b>1005.025937</b> | 1992.018048    | 996.512662         | 1991.034032        | 996.020654       | S    | 1307.684157        | <b>654.345717</b> | 1290.657608    | 645.832442       | 1289.673592    | 645.340434       | 12 |
| 17 | 2080.081711        | <b>1040.544493</b> | 2063.055162    | 1032.031219        | 2062.071146        | 1031.539211      | A    | 1220.652129        | 610.829703        | 1203.625580    | 602.316428       | 1202.641564    | 601.824420       | 11 |
| 18 | 2167.113739        | 1084.060507        | 2150.087190    | <b>1075.547233</b> | 2149.103174        | 1075.055225      | S    | <b>1149.615015</b> | 575.311146        | 1132.588466    | 566.797871       | 1131.604450    | 566.305863       | 10 |
| 19 | 2254.145767        | 1127.576521        | 2237.119218    | 1119.063247        | 2236.135202        | 1118.571239      | S    | <b>1062.582987</b> | 531.795132        | 1045.556438    | 523.281857       | 1044.572422    | 522.789849       | 9  |
| 20 | 2353.214181        | 1177.110728        | 2336.187632    | 1168.597454        | 2335.203616        | 1168.105446      | V    | <b>975.550959</b>  | 488.279118        | 958.524410     | 479.765843       | 957.540394     | 479.273835       | 8  |
| 21 | 2516.277510        | 1258.642393        | 2499.250961    | 1250.129118        | 2498.266945        | 1249.637110      | Y    | <b>876.482545</b>  | 438.744911        | 859.455996     | 430.231636       | 858.471980     | 429.739628       | 7  |
| 22 | 2630.320437        | <b>1315.663856</b> | 2613.293888    | 1307.150582        | 2612.309872        | 1306.658574      | N    | <b>713.419216</b>  | 357.213246        | 696.392667     | 348.699972       | 695.408651     | 348.207964       | 6  |
| 23 | 2743.404501        | 1372.205888        | 2726.377952    | 1363.692614        | 2725.393936        | 1363.200606      | L    | <b>599.376289</b>  | 300.191783        | 582.349740     | 291.678508       | 581.365724     | 291.186500       | 5  |
| 24 | 2856.488565        | 1428.747921        | 2839.462016    | 1420.234646        | 2838.478000        | 1419.742638      | L    | <b>486.292225</b>  | 243.649751        | 469.265676     | 235.136476       | 468.281660     | 234.644468       | 4  |
| 25 | 2953.541329        | 1477.274303        | 2936.514780    | 1468.761028        | 2935.530764        | 1468.269020      | P    | <b>373.208161</b>  | 187.107719        | 356.181612     | 178.594444       | 355.197596     | 178.102436       | 3  |
| 26 | 3082.583922        | 1541.795599        | 3065.557373    | 1533.282325        | 3064.573357        | 1532.790317      | E    | 276.155397         | 138.581337        | 259.128848     | 130.068062       | 258.144832     | 129.576054       | 2  |
| 27 |                    |                    |                |                    |                    |                  | K    | 147.112804         | 74.060040         | 130.086255     | 65.546765        |                |                  | 1  |

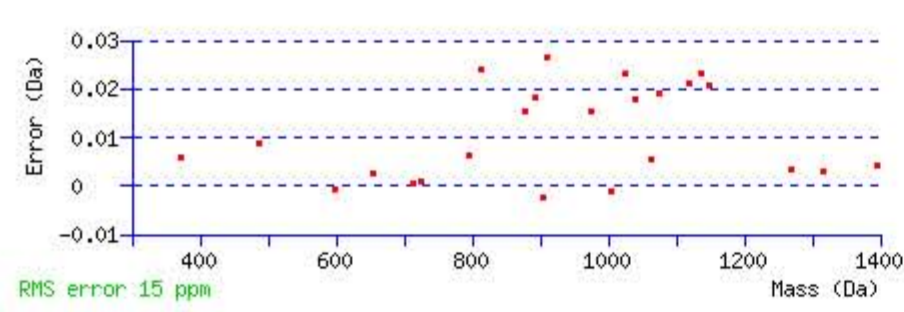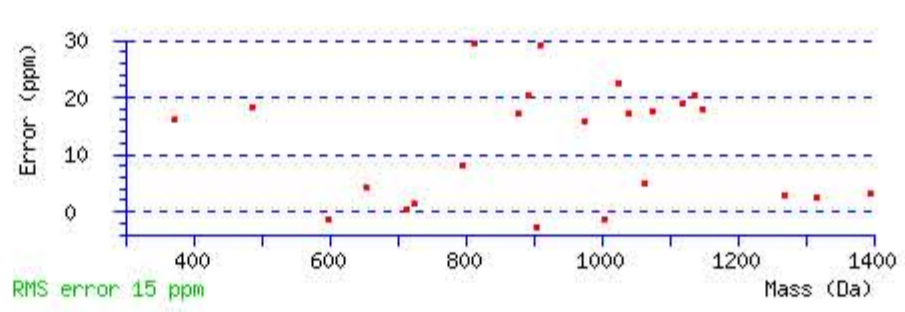

NCBI BLAST search of **AVDQSVLLMKPDAELSASSVYNLLPEK**  
 (Parameters: blastp, nr protein database, expect=20000, no filter, PAM30)  
 Other BLAST [web gateways](#)

**All matches to this query**

| Score | Mr(calc):   | Delta    | Sequence                                       |
|-------|-------------|----------|------------------------------------------------|
| 29.9  | 3227.682129 | 0.015127 | <a href="#">AVDQSVLLMKPDAELSASSVYNLLPEK</a>    |
| 1.8   | 3227.668900 | 0.028356 | <a href="#">SQGRGKYDFYIGLGLAMSSSIFIGGSFILK</a> |
| 1.3   | 3227.687317 | 0.009939 | <a href="#">TAWPELQQSHAVNQLKDLLRQQADK</a>      |
| 0.1   | 3227.673828 | 0.023428 | <a href="#">LLFRCPRLLNLGLQCLSCGCLPTR</a>       |



# MASCOT Search Results

## Peptide View

MS/MS Fragmentation of **SPCYGYQWVSEEHEEAHHTAYLVFSPSK**  
 Found in **A2MG\_HUMAN**, Alpha-2-macroglobulin OS=Homo sapiens GN=A2M PE=1 SV=3

Match to Query 71844: 3648.668070 from(730.740890,5+) rtinseconds(2168) index(39765)  
 Title: Locus:1.1.1.2777.22 File:"2013-07-02 CLN FXIII 30 min 2nd F 3.wiff"  
 Data file C:\Program Files (x86)\Matrix Science\Mascot Daemon\mgf\2 FXIII 30 min 2nd\mascot\_daemon\_merge.mgf

Click mouse within plot area to zoom in by factor of two about that point

Or, Plot from  to  Da

Label all possible matches  Label matches used for scoring

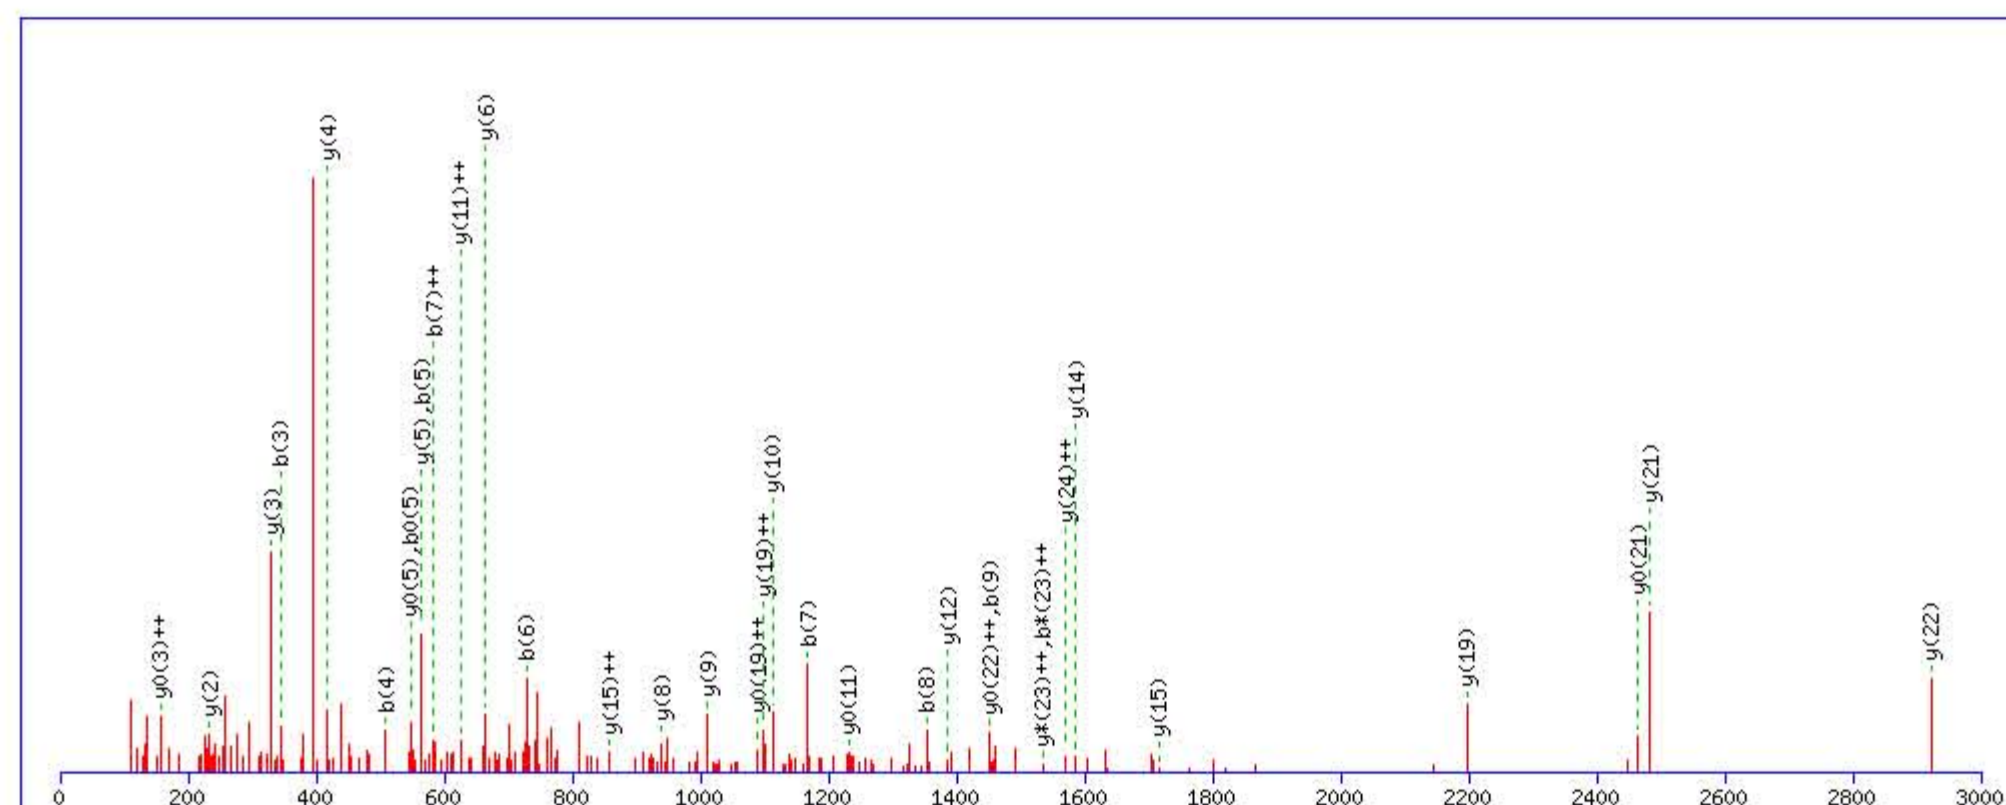

Monoisotopic mass of neutral peptide Mr(calc): 3648.644211  
 Fixed modifications: Carbamidomethyl (C) (apply to specified residues or termini only)  
 Variable modifications:  
 Q7 : Biotin:Thermo-21345 (Q)  
 Ions Score: 50 Expect: 2.5e-005  
 Matches : 35/310 fragment ions using 75 most intense peaks [\(help\)](#)

| #  | b                  | b <sup>++</sup>   | b <sup>*</sup> | b <sup>*++</sup>   | b <sup>0</sup>    | b <sup>0++</sup> | Seq. | y                  | y <sup>++</sup>    | y <sup>*</sup> | y <sup>*++</sup>   | y <sup>0</sup>     | y <sup>0++</sup>   | #  |
|----|--------------------|-------------------|----------------|--------------------|-------------------|------------------|------|--------------------|--------------------|----------------|--------------------|--------------------|--------------------|----|
| 1  | 88.039304          | 44.523290         |                |                    | 70.028739         | 35.518008        | S    |                    |                    |                |                    |                    |                    | 28 |
| 2  | 185.092068         | 93.049672         |                |                    | 167.081503        | 84.044389        | P    | 3562.619476        | 1781.813376        | 3545.592927    | 1773.300101        | 3544.608911        | 1772.808093        | 27 |
| 3  | <b>345.122717</b>  | 173.064997        |                |                    | 327.112152        | 164.059714       | C    | 3465.566712        | 1733.286994        | 3448.540163    | 1724.773719        | 3447.556147        | 1724.281711        | 26 |
| 4  | <b>508.186046</b>  | 254.596661        |                |                    | 490.175481        | 245.591379       | Y    | 3305.536063        | 1653.271669        | 3288.509514    | 1644.758395        | 3287.525498        | 1644.266387        | 25 |
| 5  | <b>565.207510</b>  | 283.107393        |                |                    | <b>547.196945</b> | 274.102111       | G    | 3142.472734        | <b>1571.740005</b> | 3125.446185    | 1563.226730        | 3124.462169        | 1562.734722        | 24 |
| 6  | <b>728.270839</b>  | 364.639058        |                |                    | 710.260274        | 355.633775       | Y    | 3085.451270        | 1543.229273        | 3068.424721    | <b>1534.715998</b> | 3067.440705        | 1534.223990        | 23 |
| 7  | <b>1167.496165</b> | <b>584.251721</b> | 1150.469616    | 575.738446         | 1149.485600       | 575.246438       | Q    | <b>2922.387941</b> | 1461.697608        | 2905.361392    | 1453.184334        | 2904.377376        | <b>1452.692326</b> | 22 |
| 8  | <b>1353.575478</b> | 677.291377        | 1336.548929    | 668.778103         | 1335.564913       | 668.286094       | W    | <b>2483.162615</b> | 1242.084945        | 2466.136066    | 1233.571671        | <b>2465.152050</b> | 1233.079663        | 21 |
| 9  | <b>1452.643892</b> | 726.825584        | 1435.617343    | 718.312310         | 1434.633327       | 717.820302       | V    | 2297.083302        | 1149.045289        | 2280.056753    | 1140.532014        | 2279.072737        | 1140.040006        | 20 |
| 10 | 1539.675920        | 770.341598        | 1522.649371    | 761.828324         | 1521.665355       | 761.336316       | S    | <b>2198.014888</b> | <b>1099.511082</b> | 2180.988339    | 1090.997807        | 2180.004323        | <b>1090.505800</b> | 19 |
| 11 | 1668.718513        | 834.862895        | 1651.691964    | 826.349620         | 1650.707948       | 825.857612       | E    | 2110.982860        | 1055.995068        | 2093.956311    | 1047.481793        | 2092.972295        | 1046.989785        | 18 |
| 12 | 1797.761106        | 899.384191        | 1780.734557    | 890.870917         | 1779.750541       | 890.378909       | E    | 1981.940267        | 991.473772         | 1964.913718    | 982.960497         | 1963.929702        | 982.468489         | 17 |
| 13 | 1934.820018        | 967.913647        | 1917.793469    | 959.400373         | 1916.809453       | 958.908365       | H    | 1852.897674        | 926.952475         | 1835.871125    | 918.439201         | 1834.887109        | 917.947193         | 16 |
| 14 | 2063.862611        | 1032.434943       | 2046.836062    | 1023.921669        | 2045.852046       | 1023.429661      | E    | <b>1715.838762</b> | <b>858.423019</b>  | 1698.812213    | 849.909745         | 1697.828197        | 849.417737         | 15 |
| 15 | 2192.905204        | 1096.956240       | 2175.878655    | 1088.442965        | 2174.894639       | 1087.950958      | E    | <b>1586.796169</b> | 793.901723         | 1569.769620    | 785.388448         | 1568.785604        | 784.896440         | 14 |
| 16 | 2263.942318        | 1132.474797       | 2246.915769    | 1123.961523        | 2245.931753       | 1123.469515      | A    | 1457.753576        | 729.380426         | 1440.727027    | 720.867152         | 1439.743011        | 720.375144         | 13 |
| 17 | 2401.001230        | 1201.004253       | 2383.974681    | 1192.490979        | 2382.990665       | 1191.998971      | H    | <b>1386.716462</b> | 693.861869         | 1369.689913    | 685.348595         | 1368.705897        | 684.856587         | 12 |
| 18 | 2538.060142        | 1269.533709       | 2521.033593    | 1261.020435        | 2520.049577       | 1260.528427      | H    | 1249.657550        | <b>625.332413</b>  | 1232.631001    | 616.819139         | <b>1231.646985</b> | 616.327131         | 11 |
| 19 | 2639.107821        | 1320.057548       | 2622.081272    | 1311.544274        | 2621.097256       | 1311.052266      | T    | <b>1112.598638</b> | 556.802957         | 1095.572089    | 548.289683         | 1094.588073        | 547.797675         | 10 |
| 20 | 2710.144935        | 1355.576106       | 2693.118386    | 1347.062831        | 2692.134370       | 1346.570823      | A    | <b>1011.550959</b> | 506.279118         | 994.524410     | 497.765843         | 993.540394         | 497.273835         | 9  |
| 21 | 2873.208264        | 1437.107770       | 2856.181715    | 1428.594496        | 2855.197699       | 1428.102488      | Y    | <b>940.513845</b>  | 470.760561         | 923.487296     | 462.247286         | 922.503280         | 461.755278         | 8  |
| 22 | 2986.292328        | 1493.649802       | 2969.265779    | 1485.136528        | 2968.281763       | 1484.644520      | L    | 777.450516         | 389.228896         | 760.423967     | 380.715622         | 759.439951         | 380.223614         | 7  |
| 23 | 3085.360742        | 1543.184009       | 3068.334193    | <b>1534.670735</b> | 3067.350177       | 1534.178727      | V    | <b>664.366452</b>  | 332.686864         | 647.339903     | 324.173589         | 646.355887         | 323.681581         | 6  |
| 24 | 3232.429156        | 1616.718216       | 3215.402607    | 1608.204941        | 3214.418591       | 1607.712934      | F    | <b>565.298038</b>  | 283.152657         | 548.271489     | 274.639383         | <b>547.287473</b>  | 274.147375         | 5  |
| 25 | 3319.461184        | 1660.234230       | 3302.434635    | 1651.720955        | 3301.450619       | 1651.228948      | S    | <b>418.229624</b>  | 209.618450         | 401.203075     | 201.105176         | 400.219059         | 200.613168         | 4  |
| 26 | 3416.513948        | 1708.760612       | 3399.487399    | 1700.247338        | 3398.503383       | 1699.755330      | P    | <b>331.197596</b>  | 166.102436         | 314.171047     | 157.589162         | 313.187031         | <b>157.097154</b>  | 3  |
| 27 | 3503.545976        | 1752.276626       | 3486.519427    | 1743.763352        | 3485.535411       | 1743.271344      | S    | <b>234.144832</b>  | 117.576054         | 217.118283     | 109.062780         | 216.134267         | 108.570772         | 2  |
| 28 |                    |                   |                |                    |                   |                  | K    | 147.112804         | 74.060040          | 130.086255     | 65.546765          |                    |                    | 1  |

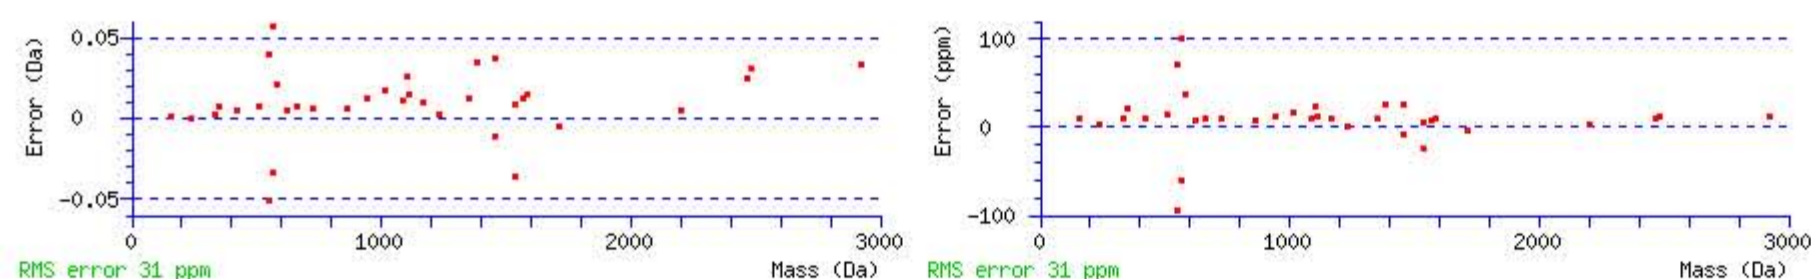

NCBI BLAST search of **SPCYGYQWVSEEHEEAHHTAYLVFSPSK**  
 (Parameters: blastp, nr protein database, expect=20000, no filter, PAM30)  
 Other BLAST [web gateways](#)

### All matches to this query

| Score | Mr(calc):   | Delta     | Sequence                                         |
|-------|-------------|-----------|--------------------------------------------------|
| 49.6  | 3648.644211 | 0.023859  | <a href="#">SPCYGYQWVSEEHEEAHHTAYLVFSPSK</a>     |
| 0.7   | 3648.698624 | -0.030554 | <a href="#">RTSSVVDFKMMAFDPDVWGHCPPPTTQPMLER</a> |



# **MASCOT** Mascot Search Results

## Peptide View

MS/MS Fragmentation of **ENAEQSR**

Found in **ANT3\_HUMAN**, Antithrombin-III OS=Homo sapiens GN=SERPINC1 PE=1 SV=1

Match to Query 23159: 1143.539268 from(572.776910,2+) rtinseconds(1149) index(16753)

Title: Locus:1.1.1.1281.14 File:"2013-07-02 CLN FXIII 30 min 2nd F 2.wiff"

Data file C:\Program Files (x86)\Matrix Science\Mascot Daemon\mgf2 FXIII 30 min 2nd\mascot\_daemon\_merge.mgf

Click mouse within plot area to zoom in by factor of two about that point

Or, Plot from  to  Da

Label all possible matches  Label matches used for scoring

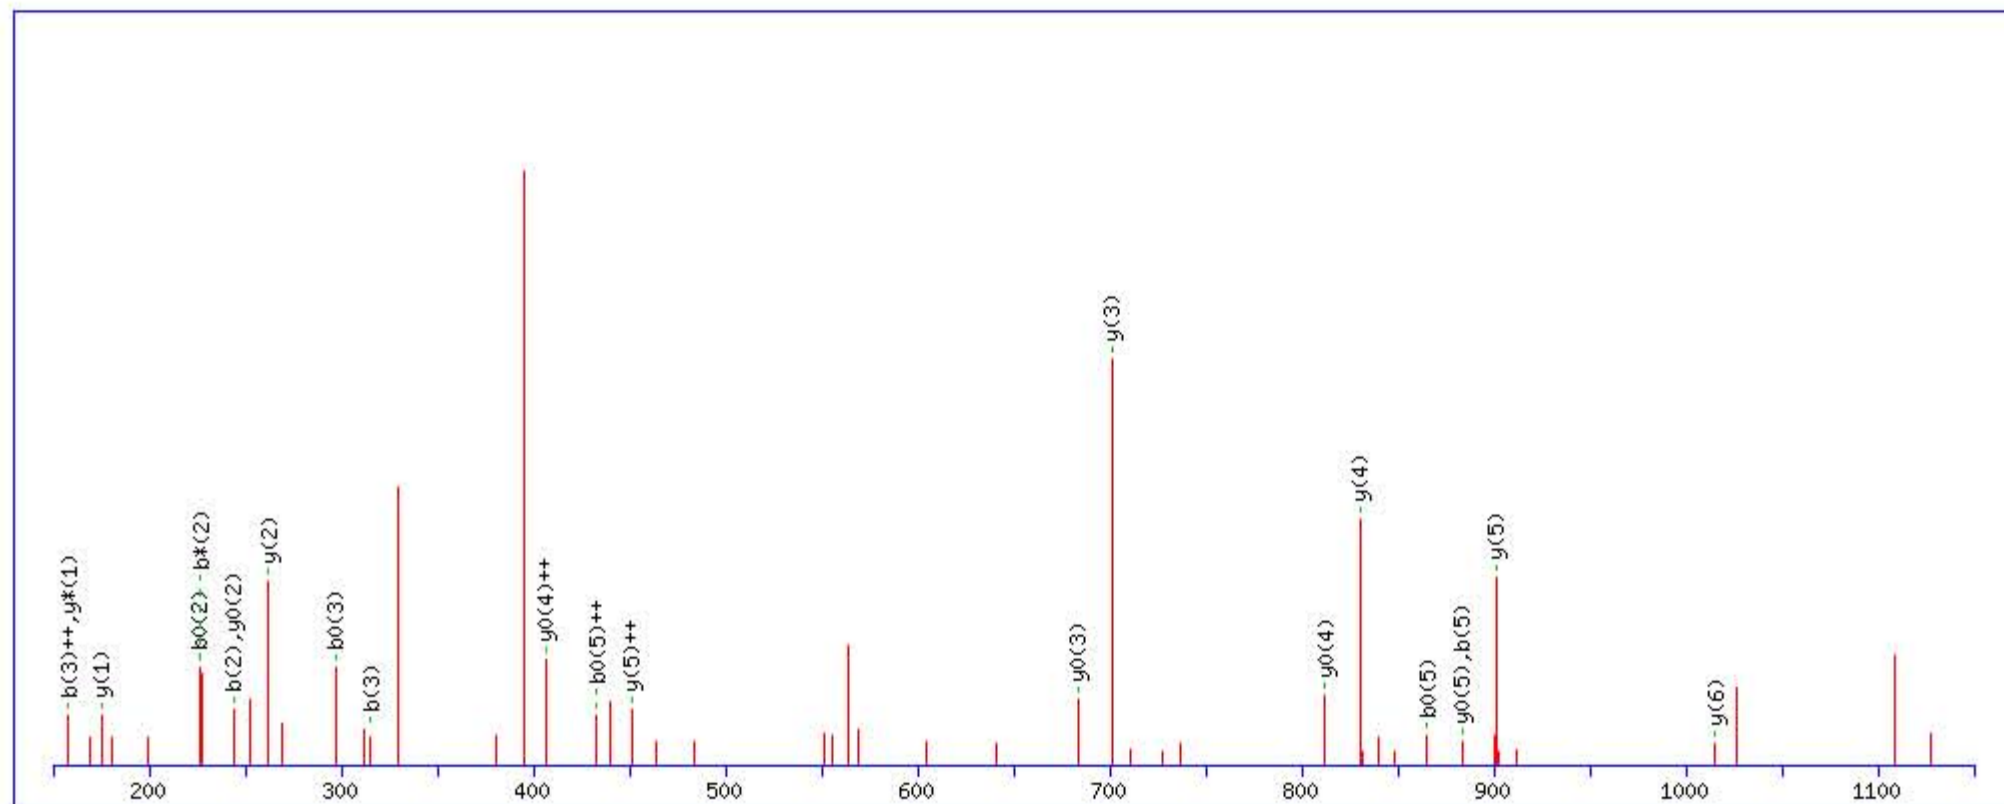

Monoisotopic mass of neutral peptide Mr(calc): 1143.534225

Fixed modifications: Carbamidomethyl (C) (apply to specified residues or termini only)

Variable modifications:

Q5 : Biotin:Thermo-21345 (Q)

Ions Score: 28 Expect: 0.02

Matches : 22/68 fragment ions using 46 most intense peaks [\(help\)](#)

| # | b                 | b <sup>++</sup>   | b <sup>*</sup>    | b <sup>*++</sup> | b <sup>0</sup>    | b <sup>0++</sup>  | Seq. | y                  | y <sup>++</sup>   | y <sup>*</sup>    | y <sup>*++</sup> | y <sup>0</sup>    | y <sup>0++</sup>  | # |
|---|-------------------|-------------------|-------------------|------------------|-------------------|-------------------|------|--------------------|-------------------|-------------------|------------------|-------------------|-------------------|---|
| 1 | 130.049869        | 65.528572         |                   |                  | 112.039304        | 56.523290         | E    |                    |                   |                   |                  |                   |                   | 7 |
| 2 | <b>244.092796</b> | 122.550036        | <b>227.066247</b> | 114.036762       | <b>226.082231</b> | 113.544754        | N    | <b>1015.498940</b> | 508.253108        | 998.472391        | 499.739834       | 997.488375        | 499.247826        | 6 |
| 3 | <b>315.129910</b> | <b>158.068593</b> | 298.103361        | 149.555319       | <b>297.119345</b> | 149.063311        | A    | <b>901.456013</b>  | <b>451.231645</b> | 884.429464        | 442.718370       | <b>883.445448</b> | 442.226362        | 5 |
| 4 | 444.172503        | 222.589890        | 427.145954        | 214.076615       | 426.161938        | 213.584607        | E    | <b>830.418899</b>  | 415.713088        | 813.392350        | 407.199813       | <b>812.408334</b> | <b>406.707805</b> | 4 |
| 5 | <b>883.397829</b> | 442.202553        | 866.371280        | 433.689278       | <b>865.387264</b> | <b>433.197270</b> | Q    | <b>701.376306</b>  | 351.191791        | 684.349757        | 342.678517       | <b>683.365741</b> | 342.186509        | 3 |
| 6 | 970.429857        | 485.718567        | 953.403308        | 477.205292       | 952.419292        | 476.713284        | S    | <b>262.150980</b>  | 131.579128        | 245.124431        | 123.065853       | <b>244.140415</b> | 122.573845        | 2 |
| 7 |                   |                   |                   |                  |                   |                   | R    | <b>175.118952</b>  | 88.063114         | <b>158.092403</b> | 79.549839        |                   |                   | 1 |

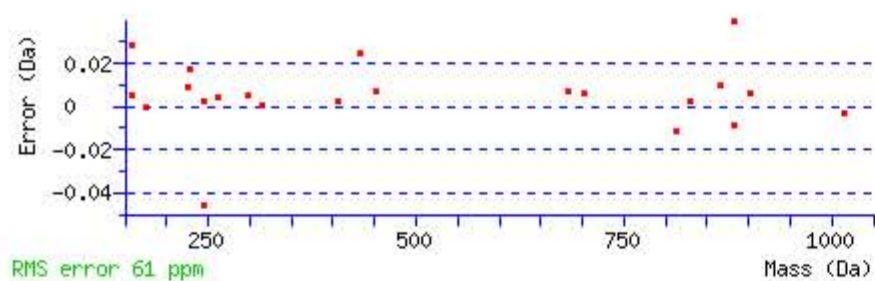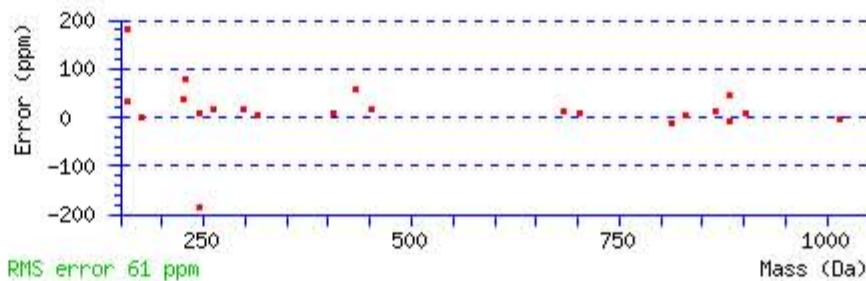

NCBI BLAST search of **ENAEQSR**

(Parameters: blastp, nr protein database, expect=20000, no filter, PAM30)

Other BLAST [web gateways](#)

### All matches to this query

| Score | Mr(calc):   | Delta     | Sequence                     |
|-------|-------------|-----------|------------------------------|
| 27.7  | 1143.534225 | 0.005043  | <a href="#">ENAEQSR</a>      |
| 12.6  | 1143.552017 | -0.012749 | <a href="#">VDDGTGREAPK</a>  |
| 9.5   | 1143.549500 | -0.010232 | <a href="#">WQEQSR</a>       |
| 7.3   | 1143.552002 | -0.012734 | <a href="#">SSSALDSPAGPR</a> |
| 0.7   | 1143.527710 | 0.011558  | <a href="#">REFMMRSR</a>     |



# MASCOT Search Results

## Peptide View

MS/MS Fragmentation of **QGLLPVLESFK**

Found in **APOA1\_HUMAN**, Apolipoprotein A-I OS=Homo sapiens GN=APOA1 PE=1 SV=1

Match to Query 36662: 1540.860968 from(771.437760,2+) rtinseconds(2821) index(76534)

Title: Locus:1.1.1.3514.15 File:"2013-07-02 CLN FXIII 30 min 2nd FT.wiff"

Data file C:\Program Files (x86)\Matrix Science\Mascot Daemon\mgf\2 FXIII 30 min 2nd\mascot\_daemon\_merge.mgf

Click mouse within plot area to zoom in by factor of two about that point

Or, Plot from  to  Da

Label all possible matches  Label matches used for scoring

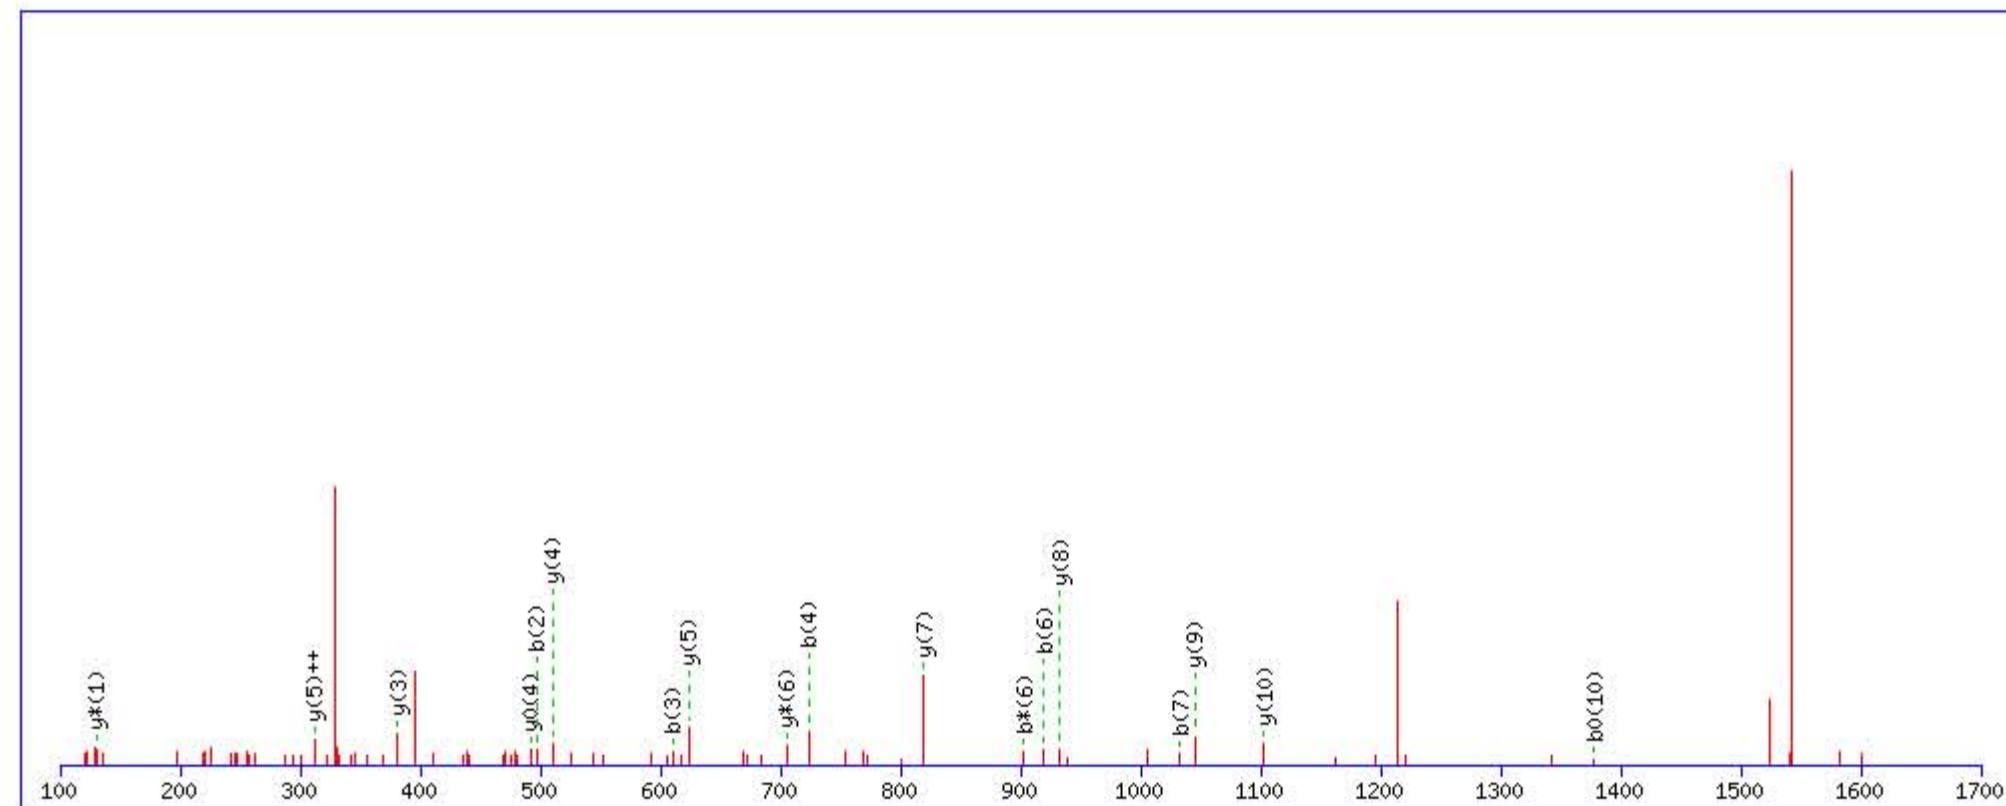

Monoisotopic mass of neutral peptide Mr(calc): 1540.868713

Fixed modifications: Carbamidomethyl (C) (apply to specified residues or termini only)

Variable modifications:

Q1 : Biotin:Thermo-21345 (Q)

Ions Score: 34 Expect: 0.0007

Matches : 18/102 fragment ions using 36 most intense peaks [\(help\)](#)

| #  | b                  | b <sup>++</sup> | b <sup>+</sup>    | b <sup>*++</sup> | b <sup>0</sup>     | b <sup>0++</sup> | Seq. | y                  | y <sup>++</sup>   | y <sup>+</sup>    | y <sup>*++</sup> | y <sup>0</sup>    | y <sup>0++</sup> | #  |
|----|--------------------|-----------------|-------------------|------------------|--------------------|------------------|------|--------------------|-------------------|-------------------|------------------|-------------------|------------------|----|
| 1  | 440.232602         | 220.619939      | 423.206053        | 212.106664       |                    |                  | Q    |                    |                   |                   |                  |                   |                  | 11 |
| 2  | <b>497.254066</b>  | 249.130671      | 480.227517        | 240.617396       |                    |                  | G    | <b>1102.650673</b> | 551.828975        | 1085.624124       | 543.315700       | 1084.640108       | 542.823692       | 10 |
| 3  | <b>610.338130</b>  | 305.672703      | 593.311581        | 297.159428       |                    |                  | L    | <b>1045.629209</b> | 523.318243        | 1028.602660       | 514.804968       | 1027.618644       | 514.312960       | 9  |
| 4  | <b>723.422194</b>  | 362.214735      | 706.395645        | 353.701461       |                    |                  | L    | <b>932.545145</b>  | 466.776211        | 915.518596        | 458.262936       | 914.534580        | 457.770928       | 8  |
| 5  | 820.474958         | 410.741117      | 803.448409        | 402.227843       |                    |                  | P    | <b>819.461081</b>  | 410.234179        | 802.434532        | 401.720904       | 801.450516        | 401.228896       | 7  |
| 6  | <b>919.543372</b>  | 460.275324      | <b>902.516823</b> | 451.762049       |                    |                  | V    | 722.408317         | 361.707797        | <b>705.381768</b> | 353.194522       | 704.397752        | 352.702514       | 6  |
| 7  | <b>1032.627436</b> | 516.817356      | 1015.600887       | 508.304082       |                    |                  | L    | <b>623.339903</b>  | <b>312.173590</b> | 606.313354        | 303.660315       | 605.329338        | 303.168307       | 5  |
| 8  | 1161.670029        | 581.338653      | 1144.643480       | 572.825378       | 1143.659464        | 572.333370       | E    | <b>510.255839</b>  | 255.631558        | 493.229290        | 247.118283       | <b>492.245274</b> | 246.626275       | 4  |
| 9  | 1248.702057        | 624.854667      | 1231.675508       | 616.341392       | 1230.691492        | 615.849384       | S    | <b>381.213246</b>  | 191.110261        | 364.186697        | 182.596987       | 363.202681        | 182.104979       | 3  |
| 10 | 1395.770471        | 698.388874      | 1378.743922       | 689.875599       | <b>1377.759906</b> | 689.383591       | F    | 294.181218         | 147.594247        | 277.154669        | 139.080973       |                   |                  | 2  |
| 11 |                    |                 |                   |                  |                    |                  | K    | 147.112804         | 74.060040         | <b>130.086255</b> | 65.546765        |                   |                  | 1  |

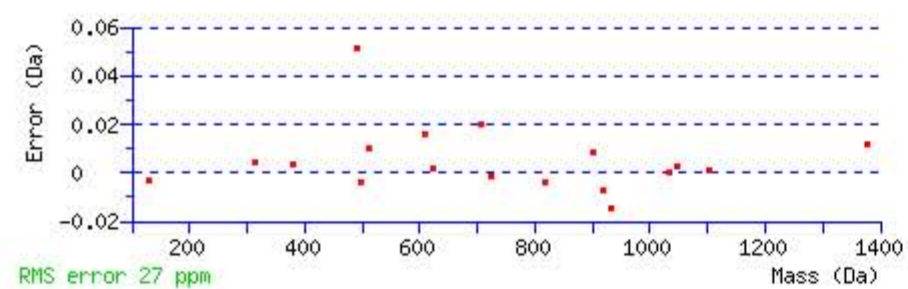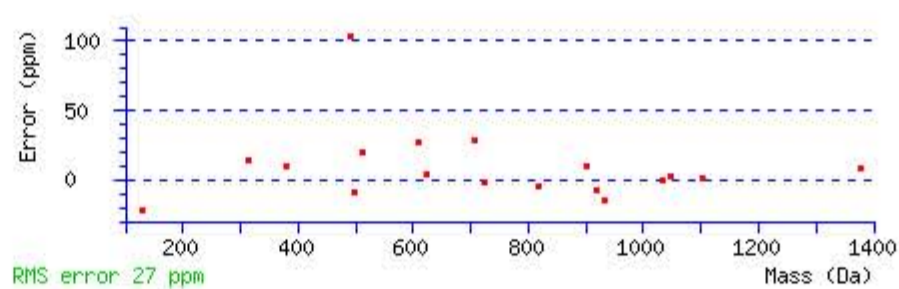

NCBI BLAST search of **QGLLPVLESFK**

(Parameters: blastp, nr protein database, expect=20000, no filter, PAM30)

Other BLAST [web gateways](#)

All matches to this query

| Score | Mr(calc):   | Delta     | Sequence                       |
|-------|-------------|-----------|--------------------------------|
| 34.4  | 1540.868713 | -0.007745 | <a href="#">QGLLPVLESFK</a>    |
| 0.8   | 1540.850769 | 0.010199  | <a href="#">KTVLGADSQRR</a>    |
| 0.8   | 1540.864700 | -0.003732 | <a href="#">KVTVGKDDIQK</a>    |
| 0.7   | 1540.846054 | 0.014914  | <a href="#">ISQDADLKTPTKPK</a> |
| 0.7   | 1540.879761 | -0.018793 | <a href="#">TVQVLRDTANRLR</a>  |



# MASCOT Search Results

## Peptide View

MS/MS Fragmentation of **EPCVESLVSQYFQTVTDYGK**

Found in **APOA2\_HUMAN**, Apolipoprotein A-II OS=Homo sapiens GN=APOA2 PE=1 SV=1

Match to Query 61573: 2660.229372 from(887.750400,3+) rtinseconds(3137) index(78721)

Title: Locus:1.1.1.3623.16 File:"2013-07-02 CLN FXIII 30 min 2nd FT.wiff"

Data file C:\Program Files (x86)\Matrix Science\Mascot Daemon\mgf2 FXIII 30 min 2nd\mascot\_daemon\_merge.mgf

Click mouse within plot area to zoom in by factor of two about that point

Or, Plot from 100 to 1800 Da Full range

Label all possible matches  Label matches used for scoring

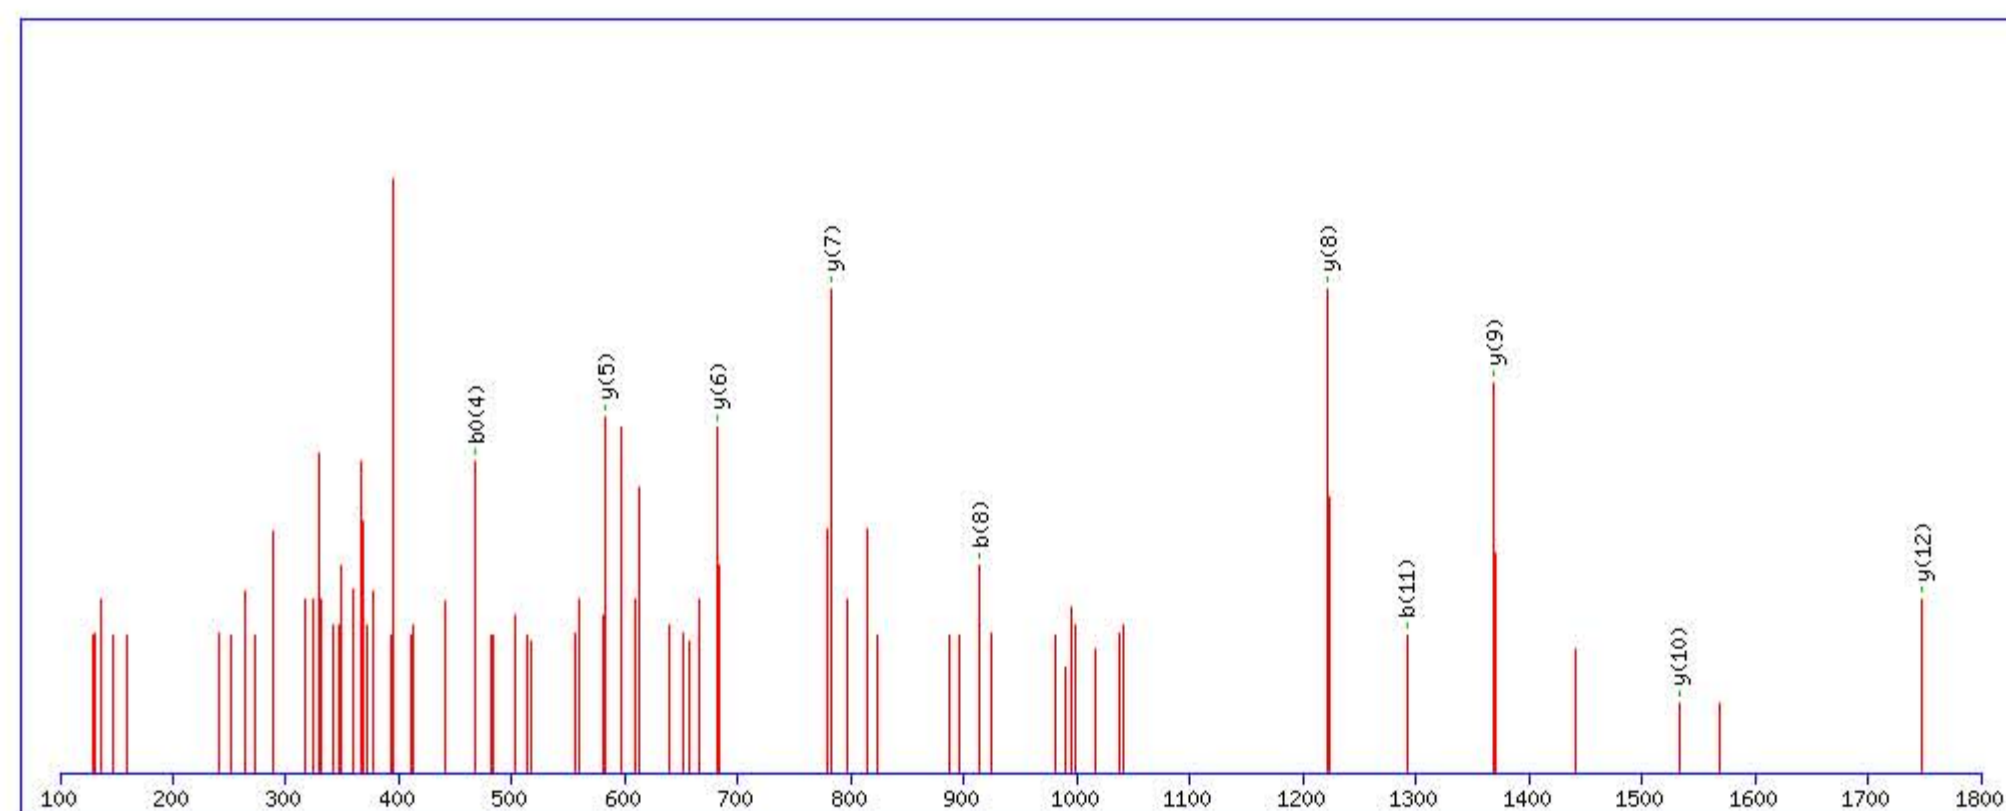

Monoisotopic mass of neutral peptide  $M_r(\text{calc})$ : 2660.250244

Fixed modifications: Carbamidomethyl (C) (apply to specified residues or termini only)

Variable modifications:

Q13 : Biotin:Thermo-21345 (Q)

Ions Score: 37 Expect: 0.0032

Matches : 10/204 fragment ions using 16 most intense peaks [\(help\)](#)

| #  | b           | b <sup>++</sup> | b <sup>*</sup> | b <sup>*++</sup> | b <sup>0</sup> | b <sup>0++</sup> | Seq. | y           | y <sup>++</sup> | y <sup>*</sup> | y <sup>*++</sup> | y <sup>0</sup> | y <sup>0++</sup> | #  |
|----|-------------|-----------------|----------------|------------------|----------------|------------------|------|-------------|-----------------|----------------|------------------|----------------|------------------|----|
| 1  | 130.049869  | 65.528572       |                |                  | 112.039304     | 56.523290        | E    |             |                 |                |                  |                |                  | 20 |
| 2  | 227.102633  | 114.054954      |                |                  | 209.092068     | 105.049672       | P    | 2532.214913 | 1266.611094     | 2515.188364    | 1258.097820      | 2514.204348    | 1257.605812      | 19 |
| 3  | 387.133282  | 194.070279      |                |                  | 369.122717     | 185.064997       | C    | 2435.162149 | 1218.084712     | 2418.135600    | 1209.571438      | 2417.151584    | 1209.079430      | 18 |
| 4  | 486.201696  | 243.604486      |                |                  | 468.191131     | 234.599204       | V    | 2275.131500 | 1138.069388     | 2258.104951    | 1129.556113      | 2257.120935    | 1129.064105      | 17 |
| 5  | 615.244289  | 308.125783      |                |                  | 597.233724     | 299.120500       | E    | 2176.063086 | 1088.535181     | 2159.036537    | 1080.021906      | 2158.052521    | 1079.529898      | 16 |
| 6  | 702.276317  | 351.641797      |                |                  | 684.265752     | 342.636514       | S    | 2047.020493 | 1024.013885     | 2029.993944    | 1015.500610      | 2029.009928    | 1015.008602      | 15 |
| 7  | 815.360381  | 408.183829      |                |                  | 797.349816     | 399.178546       | L    | 1959.988465 | 980.497871      | 1942.961916    | 971.984596       | 1941.977900    | 971.492588       | 14 |
| 8  | 914.428795  | 457.718036      |                |                  | 896.418230     | 448.712753       | V    | 1846.904401 | 923.955839      | 1829.877852    | 915.442564       | 1828.893836    | 914.950556       | 13 |
| 9  | 1001.460823 | 501.234050      |                |                  | 983.450258     | 492.228767       | S    | 1747.835987 | 874.421632      | 1730.809438    | 865.908357       | 1729.825422    | 865.416349       | 12 |
| 10 | 1129.519401 | 565.263339      | 1112.492852    | 556.750064       | 1111.508836    | 556.258056       | Q    | 1660.803959 | 830.905618      | 1643.777410    | 822.392343       | 1642.793394    | 821.900335       | 11 |
| 11 | 1292.582730 | 646.795003      | 1275.556181    | 638.281729       | 1274.572165    | 637.789721       | Y    | 1532.745381 | 766.876329      | 1515.718832    | 758.363054       | 1514.734816    | 757.871046       | 10 |
| 12 | 1439.651144 | 720.329210      | 1422.624595    | 711.815936       | 1421.640579    | 711.323928       | F    | 1369.682052 | 685.344664      | 1352.655503    | 676.831390       | 1351.671487    | 676.339382       | 9  |
| 13 | 1878.876470 | 939.941873      | 1861.849921    | 931.428599       | 1860.865905    | 930.936591       | Q    | 1222.613638 | 611.810457      | 1205.587089    | 603.297183       | 1204.603073    | 602.805175       | 8  |
| 14 | 1979.924149 | 990.465713      | 1962.897600    | 981.952438       | 1961.913584    | 981.460430       | T    | 783.388312  | 392.197794      | 766.361763     | 383.684519       | 765.377747     | 383.192511       | 7  |
| 15 | 2078.992563 | 1039.999920     | 2061.966014    | 1031.486645      | 2060.981998    | 1030.994637      | V    | 682.340633  | 341.673954      | 665.314084     | 333.160680       | 664.330068     | 332.668672       | 6  |
| 16 | 2180.040242 | 1090.523759     | 2163.013693    | 1082.010484      | 2162.029677    | 1081.518476      | T    | 583.272219  | 292.139747      | 566.245670     | 283.626473       | 565.261654     | 283.134465       | 5  |
| 17 | 2295.067185 | 1148.037230     | 2278.040636    | 1139.523956      | 2277.056620    | 1139.031948      | D    | 482.224540  | 241.615908      | 465.197991     | 233.102633       | 464.213975     | 232.610625       | 4  |
| 18 | 2458.130514 | 1229.568895     | 2441.103965    | 1221.055620      | 2440.119949    | 1220.563612      | Y    | 367.197597  | 184.102436      | 350.171048     | 175.589162       |                |                  | 3  |
| 19 | 2515.151978 | 1258.079627     | 2498.125429    | 1249.566352      | 2497.141413    | 1249.074344      | G    | 204.134268  | 102.570772      | 187.107719     | 94.057497        |                |                  | 2  |
| 20 |             |                 |                |                  |                |                  | K    | 147.112804  | 74.060040       | 130.086255     | 65.546765        |                |                  | 1  |

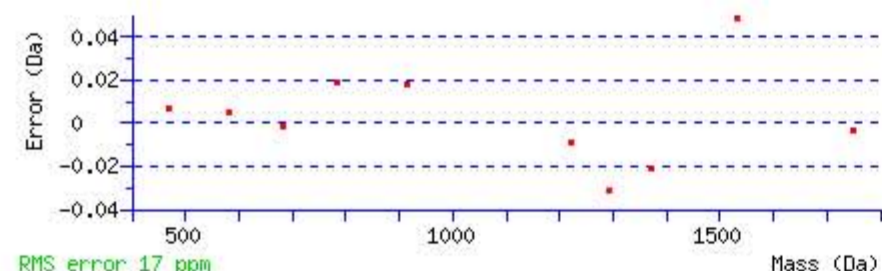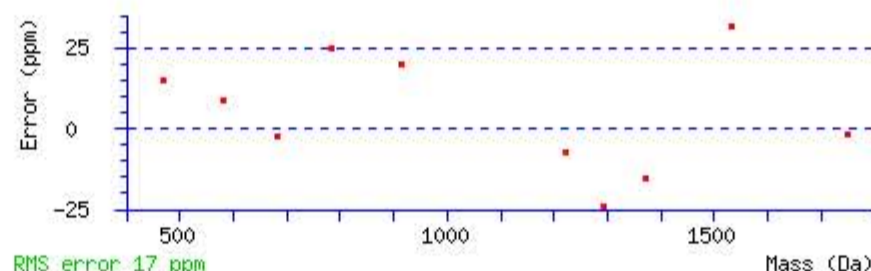

NCBI BLAST search of [EPCVESLVSQYFQTVTDYGK](#)

(Parameters: blastp, nr protein database, expect=20000, no filter, PAM30)

Other BLAST [web gateways](#)

All matches to this query

| Score | $M_r(\text{calc})$ : | Delta     | Sequence                             |
|-------|----------------------|-----------|--------------------------------------|
| 37.1  | 2660.250244          | -0.020872 | <a href="#">EPCVESLVSQYFQTVTDYGK</a> |
| 11.2  | 2660.250244          | -0.020872 | <a href="#">EPCVESLVSQYFQTVTDYGK</a> |



# MASCOT Search Results

## Peptide View

MS/MS Fragmentation of **EPCVESLVSQYFQTVTDYGK**

Found in **APOA2\_HUMAN**, Apolipoprotein A-II OS=Homo sapiens GN=APOA2 PE=1 SV=1

Match to Query 61576: 2660.245602 from(887.755810,3+) rtinseconds(3158) index(13145)

Title: Locus:1.1.1.3532.19 File:"2013-07-02 CLN FXIII 30 min 2nd F 1.wiff"

Data file C:\Program Files (x86)\Matrix Science\Mascot Daemon\mgf2 FXIII 30 min 2nd\mascot\_daemon\_merge.mgf

Click mouse within plot area to zoom in by factor of two about that point

Or, Plot from  to  Da

Label all possible matches  Label matches used for scoring

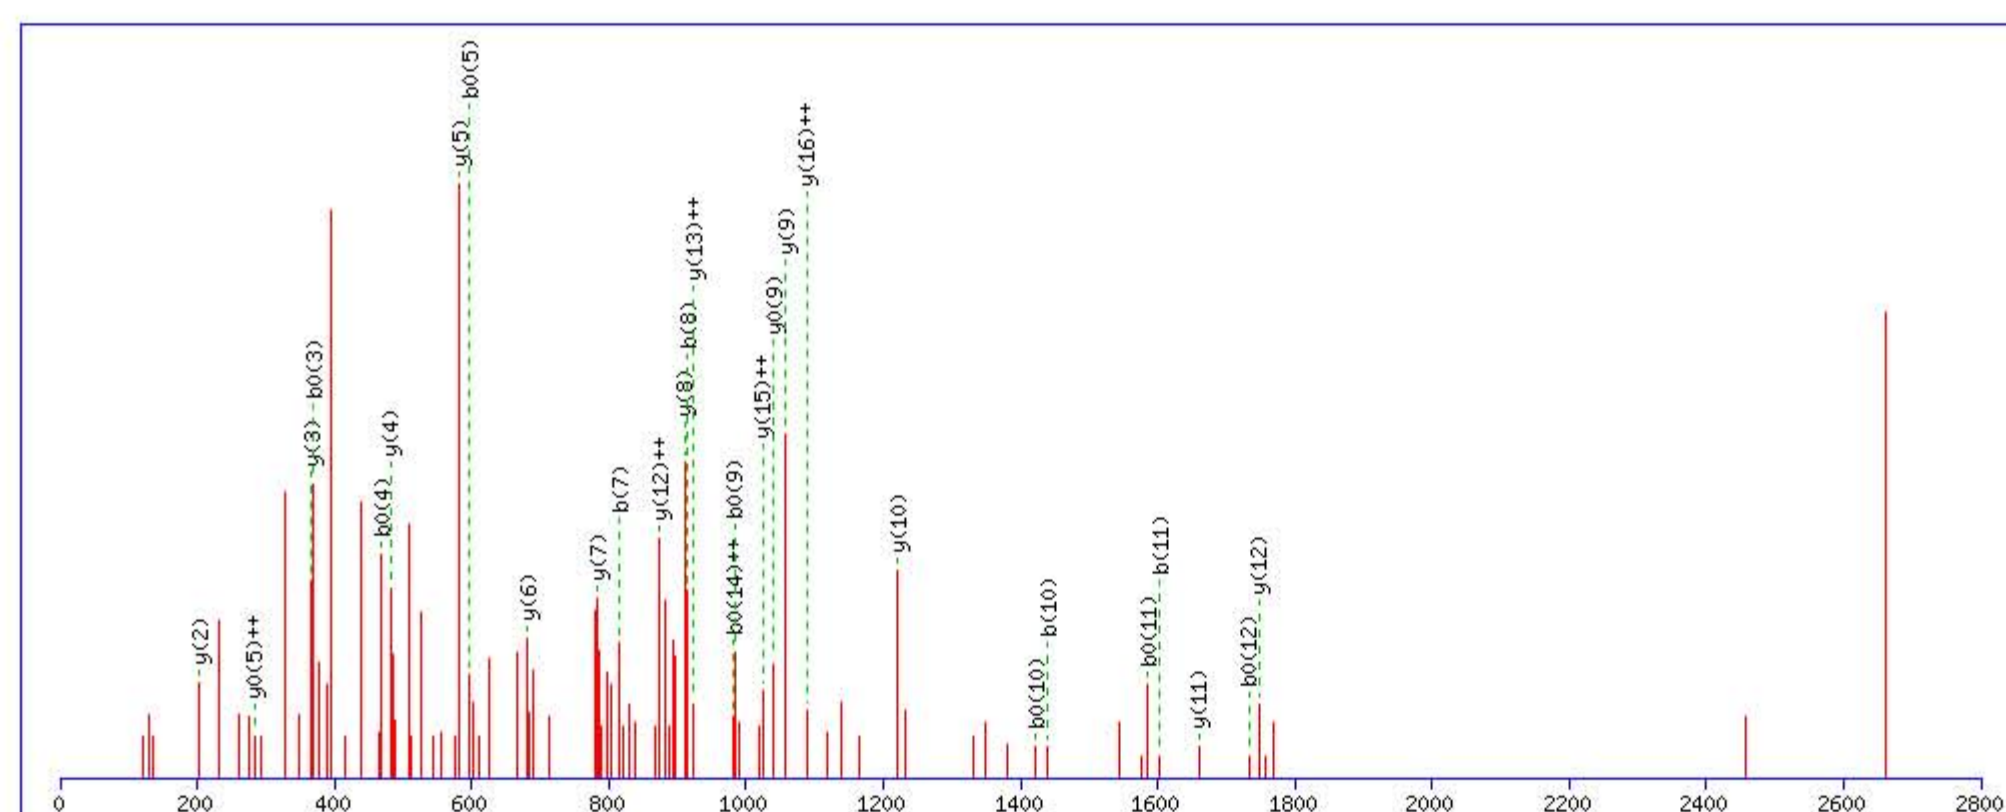

Monoisotopic mass of neutral peptide Mr(calc): 2660.250244

Fixed modifications: Carbamidomethyl (C) (apply to specified residues or termini only)

Variable modifications:

Q10 : Biotin:Thermo-21345 (Q)

Ions Score: 49 Expect: 0.00023

Matches : 29/204 fragment ions using 59 most intense peaks [\(help\)](#)

| #  | b           | b <sup>++</sup> | b <sup>*</sup> | b <sup>*++</sup> | b <sup>0</sup> | b <sup>0++</sup> | Seq. | y           | y <sup>++</sup> | y <sup>*</sup> | y <sup>*++</sup> | y <sup>0</sup> | y <sup>0++</sup> | #  |
|----|-------------|-----------------|----------------|------------------|----------------|------------------|------|-------------|-----------------|----------------|------------------|----------------|------------------|----|
| 1  | 130.049869  | 65.528572       |                |                  | 112.039304     | 56.523290        | E    |             |                 |                |                  |                |                  | 20 |
| 2  | 227.102633  | 114.054954      |                |                  | 209.092068     | 105.049672       | P    | 2532.214913 | 1266.611094     | 2515.188364    | 1258.097820      | 2514.204348    | 1257.605812      | 19 |
| 3  | 387.133282  | 194.070279      |                |                  | 369.122717     | 185.064997       | C    | 2435.162149 | 1218.084712     | 2418.135600    | 1209.571438      | 2417.151584    | 1209.079430      | 18 |
| 4  | 486.201696  | 243.604486      |                |                  | 468.191131     | 234.599204       | V    | 2275.131500 | 1138.069388     | 2258.104951    | 1129.556113      | 2257.120935    | 1129.064105      | 17 |
| 5  | 615.244289  | 308.125783      |                |                  | 597.233724     | 299.120500       | E    | 2176.063086 | 1088.535181     | 2159.036537    | 1080.021906      | 2158.052521    | 1079.529898      | 16 |
| 6  | 702.276317  | 351.641797      |                |                  | 684.265752     | 342.636514       | S    | 2047.020493 | 1024.013884     | 2029.993944    | 1015.500610      | 2029.009928    | 1015.008602      | 15 |
| 7  | 815.360381  | 408.183829      |                |                  | 797.349816     | 399.178546       | L    | 1959.988465 | 980.497870      | 1942.961916    | 971.984596       | 1941.977900    | 971.492588       | 14 |
| 8  | 914.428795  | 457.718036      |                |                  | 896.418230     | 448.712753       | V    | 1846.904401 | 923.955838      | 1829.877852    | 915.442564       | 1828.893836    | 914.950556       | 13 |
| 9  | 1001.460823 | 501.234050      |                |                  | 983.450258     | 492.228767       | S    | 1747.835987 | 874.421631      | 1730.809438    | 865.908357       | 1729.825422    | 865.416349       | 12 |
| 10 | 1440.686149 | 720.846712      | 1423.659600    | 712.333438       | 1422.675584    | 711.841430       | Q    | 1660.803959 | 830.905617      | 1643.777410    | 822.392343       | 1642.793394    | 821.900335       | 11 |
| 11 | 1603.749478 | 802.378377      | 1586.722929    | 793.865103       | 1585.738913    | 793.373094       | Y    | 1221.578633 | 611.292954      | 1204.552084    | 602.779680       | 1203.568068    | 602.287672       | 10 |
| 12 | 1750.817892 | 875.912584      | 1733.791343    | 867.399310       | 1732.807327    | 866.907302       | F    | 1058.515304 | 529.761290      | 1041.488755    | 521.248015       | 1040.504739    | 520.756007       | 9  |
| 13 | 1878.876470 | 939.941873      | 1861.849921    | 931.428599       | 1860.865905    | 930.936590       | Q    | 911.446890  | 456.227083      | 894.420341     | 447.713808       | 893.436325     | 447.221800       | 8  |
| 14 | 1979.924149 | 990.465713      | 1962.897600    | 981.952438       | 1961.913584    | 981.460430       | T    | 783.388312  | 392.197794      | 766.361763     | 383.684519       | 765.377747     | 383.192511       | 7  |
| 15 | 2078.992563 | 1039.999919     | 2061.966014    | 1031.486645      | 2060.981998    | 1030.994637      | V    | 682.340633  | 341.673954      | 665.314084     | 333.160680       | 664.330068     | 332.668672       | 6  |
| 16 | 2180.040242 | 1090.523759     | 2163.013693    | 1082.010484      | 2162.029677    | 1081.518476      | T    | 583.272219  | 292.139747      | 566.245670     | 283.626473       | 565.261654     | 283.134465       | 5  |
| 17 | 2295.067185 | 1148.037230     | 2278.040636    | 1139.523956      | 2277.056620    | 1139.031948      | D    | 482.224540  | 241.615908      | 465.197991     | 233.102633       | 464.213975     | 232.610625       | 4  |
| 18 | 2458.130514 | 1229.568895     | 2441.103965    | 1221.055620      | 2440.119949    | 1220.563612      | Y    | 367.197597  | 184.102436      | 350.171048     | 175.589162       |                |                  | 3  |
| 19 | 2515.151978 | 1258.079627     | 2498.125429    | 1249.566352      | 2497.141413    | 1249.074344      | G    | 204.134268  | 102.570772      | 187.107719     | 94.057497        |                |                  | 2  |
| 20 |             |                 |                |                  |                |                  | K    | 147.112804  | 74.060040       | 130.086255     | 65.546765        |                |                  | 1  |

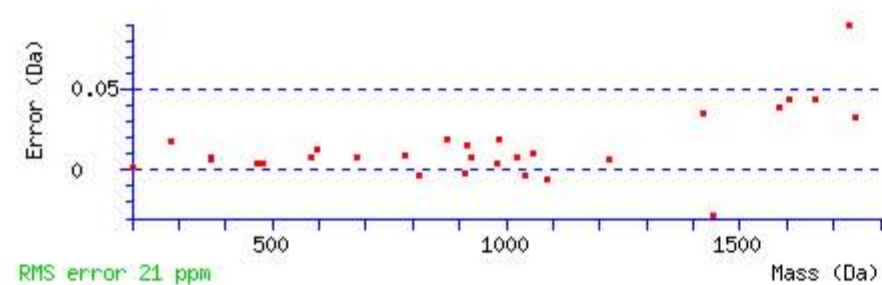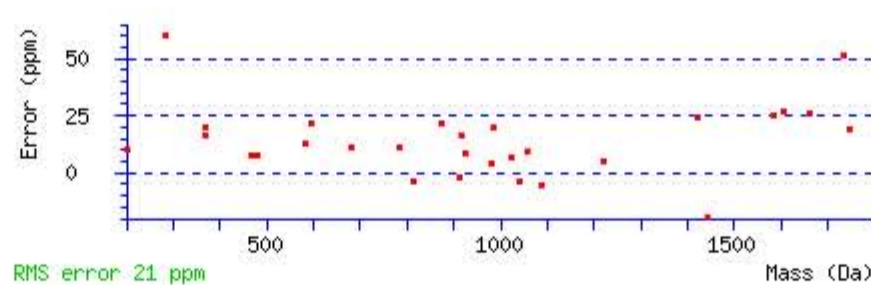

NCBI BLAST search of [EPCVESLVSQYFQTVTDYGK](#)

(Parameters: blastp, nr protein database, expect=20000, no filter, PAM30)

Other BLAST [web gateways](#)

All matches to this query

| Score | Mr(calc):   | Delta     | Sequence                             |
|-------|-------------|-----------|--------------------------------------|
| 49.3  | 2660.250244 | -0.004642 | <a href="#">EPCVESLVSQYFQTVTDYGK</a> |
| 21.5  | 2660.250244 | -0.004642 | <a href="#">EPCVESLVSQYFQTVTDYGK</a> |



# MASCOT Search Results

## Peptide View

MS/MS Fragmentation of **GNTEGLQK**

Found in **APOA4\_HUMAN**, Apolipoprotein A-IV OS=Homo sapiens GN=APOA4 PE=1 SV=3

Match to Query 23596: 1156.591148 from(579.302850,2+) rtinseconds(1433) index(67594)

Title: Locus:1.1.1.3032.22 File:"2013-07-02 CLN FXIII 30 min 2nd FT.wiff"

Data file C:\Program Files (x86)\Matrix Science\Mascot Daemon\mgf2 FXIII 30 min 2nd\mascot\_daemon\_merge.mgf

Click mouse within plot area to zoom in by factor of two about that point

Or, Plot from  to  Da

Label all possible matches  Label matches used for scoring

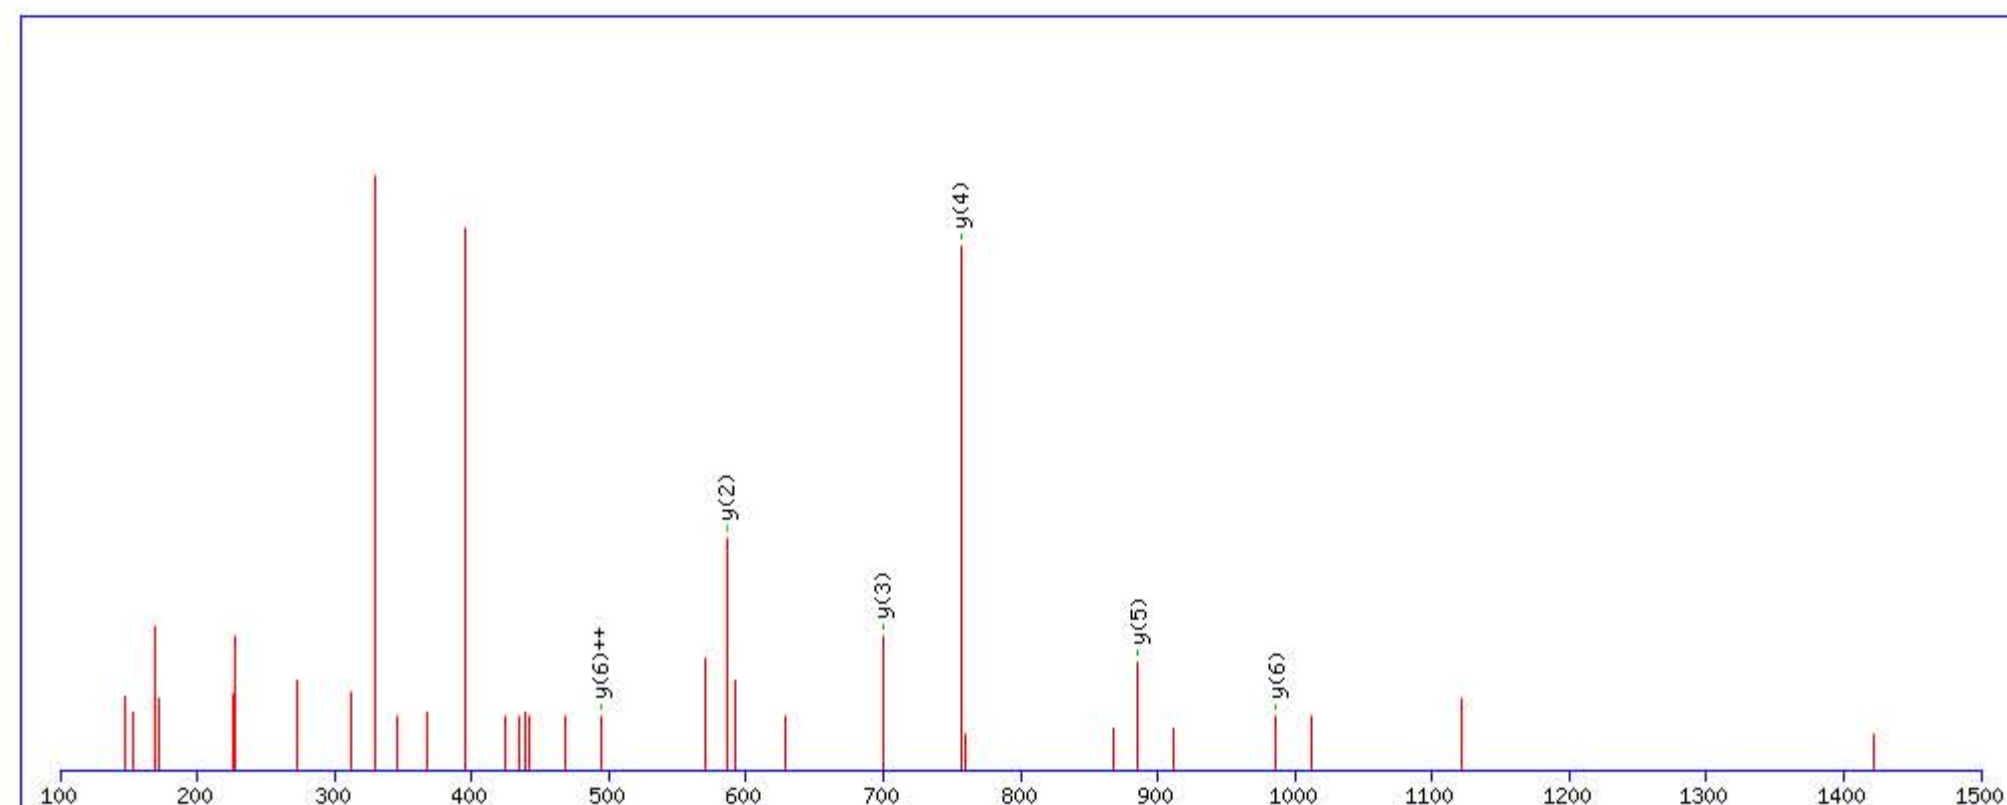

Monoisotopic mass of neutral peptide Mr(calc): 1156.591034

Fixed modifications: Carbamidomethyl (C) (apply to specified residues or termini only)

Variable modifications:

Q7 : Biotin:Thermo-21345 (Q)

Ions Score: 32 Expect: 0.0033

Matches : 6/70 fragment ions using 10 most intense peaks [\(help\)](#)

| # | b           | b <sup>++</sup> | b <sup>*</sup> | b <sup>*++</sup> | b <sup>0</sup> | b <sup>0++</sup> | Seq. | y                 | y <sup>++</sup>   | y <sup>*</sup> | y <sup>*++</sup> | y <sup>0</sup> | y <sup>0++</sup> | # |
|---|-------------|-----------------|----------------|------------------|----------------|------------------|------|-------------------|-------------------|----------------|------------------|----------------|------------------|---|
| 1 | 58.028740   | 29.518008       |                |                  |                |                  | G    |                   |                   |                |                  |                |                  | 8 |
| 2 | 172.071667  | 86.539471       | 155.045118     | 78.026197        |                |                  | N    | 1100.576857       | 550.792067        | 1083.550308    | 542.278792       | 1082.566292    | 541.786784       | 7 |
| 3 | 273.119346  | 137.063311      | 256.092797     | 128.550037       | 255.108781     | 128.058029       | T    | <b>986.533930</b> | <b>493.770603</b> | 969.507381     | 485.257329       | 968.523365     | 484.765321       | 6 |
| 4 | 402.161939  | 201.584608      | 385.135390     | 193.071333       | 384.151374     | 192.579325       | E    | <b>885.486251</b> | 443.246764        | 868.459702     | 434.733489       | 867.475686     | 434.241481       | 5 |
| 5 | 459.183403  | 230.095339      | 442.156854     | 221.582065       | 441.172838     | 221.090057       | G    | <b>756.443658</b> | 378.725467        | 739.417109     | 370.212193       |                |                  | 4 |
| 6 | 572.267467  | 286.637372      | 555.240918     | 278.124097       | 554.256902     | 277.632089       | L    | <b>699.422194</b> | 350.214735        | 682.395645     | 341.701461       |                |                  | 3 |
| 7 | 1011.492793 | 506.250035      | 994.466244     | 497.736760       | 993.482228     | 497.244752       | Q    | <b>586.338130</b> | 293.672703        | 569.311581     | 285.159429       |                |                  | 2 |
| 8 |             |                 |                |                  |                |                  | K    | 147.112804        | 74.060040         | 130.086255     | 65.546766        |                |                  | 1 |

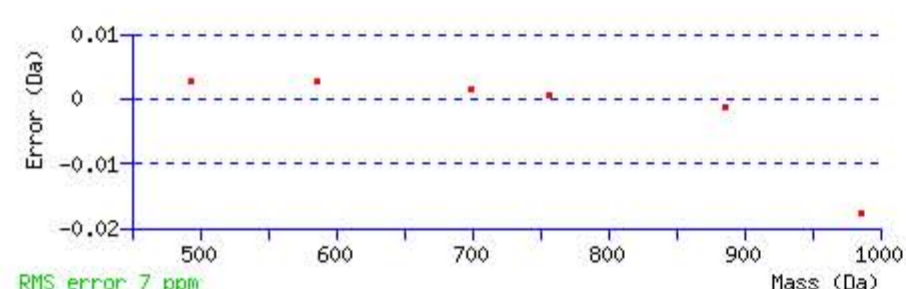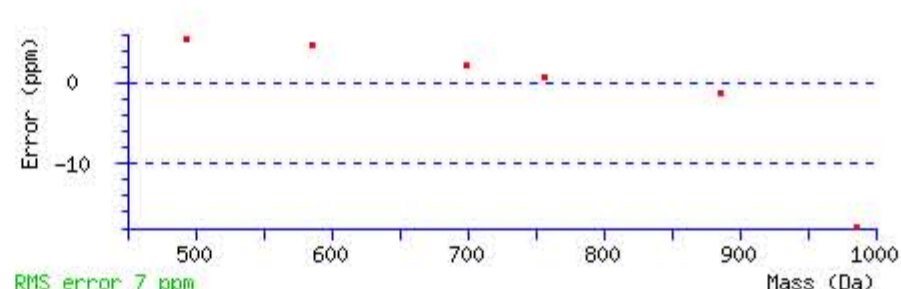

NCBI BLAST search of **GNTEGLQK**

(Parameters: blastp, nr protein database, expect=20000, no filter, PAM30)

Other BLAST [web gateways](#)

All matches to this query

| Score | Mr(calc):   | Delta     | Sequence                    |
|-------|-------------|-----------|-----------------------------|
| 32.0  | 1156.591034 | 0.000114  | <a href="#">GNTEGLQK</a>    |
| 5.3   | 1156.576416 | 0.014732  | <a href="#">IKSQDFYEK</a>   |
| 5.3   | 1156.591019 | 0.000129  | <a href="#">ENTNLQK</a>     |
| 5.1   | 1156.595047 | -0.003899 | <a href="#">CDYFLAKIK</a>   |
| 4.5   | 1156.587662 | 0.003486  | <a href="#">APGGLSLHDIK</a> |
| 2.7   | 1156.602264 | -0.011116 | <a href="#">NGMLNVSPIGR</a> |
| 1.3   | 1156.577118 | 0.014030  | <a href="#">QLSTRCHQK</a>   |



# MASCOT Search Results

## Peptide View

MS/MS Fragmentation of **IDQNVEELK**

Found in **APOA4\_HUMAN**, Apolipoprotein A-IV OS=Homo sapiens GN=APOA4 PE=1 SV=3

Match to Query 32052: 1397.715308 from(699.864930,2+) rtinseconds(1832) index(70088)

Title: Locus:1.1.1.3171.9 File:"2013-07-02 CLN FXIII 30 min 2nd FT.wiff"

Data file C:\Program Files (x86)\Matrix Science\Mascot Daemon\mgf\2 FXIII 30 min 2nd\mascot\_daemon\_merge.mgf

Click mouse within plot area to zoom in by factor of two about that point

Or, Plot from  to  Da

Label all possible matches  Label matches used for scoring

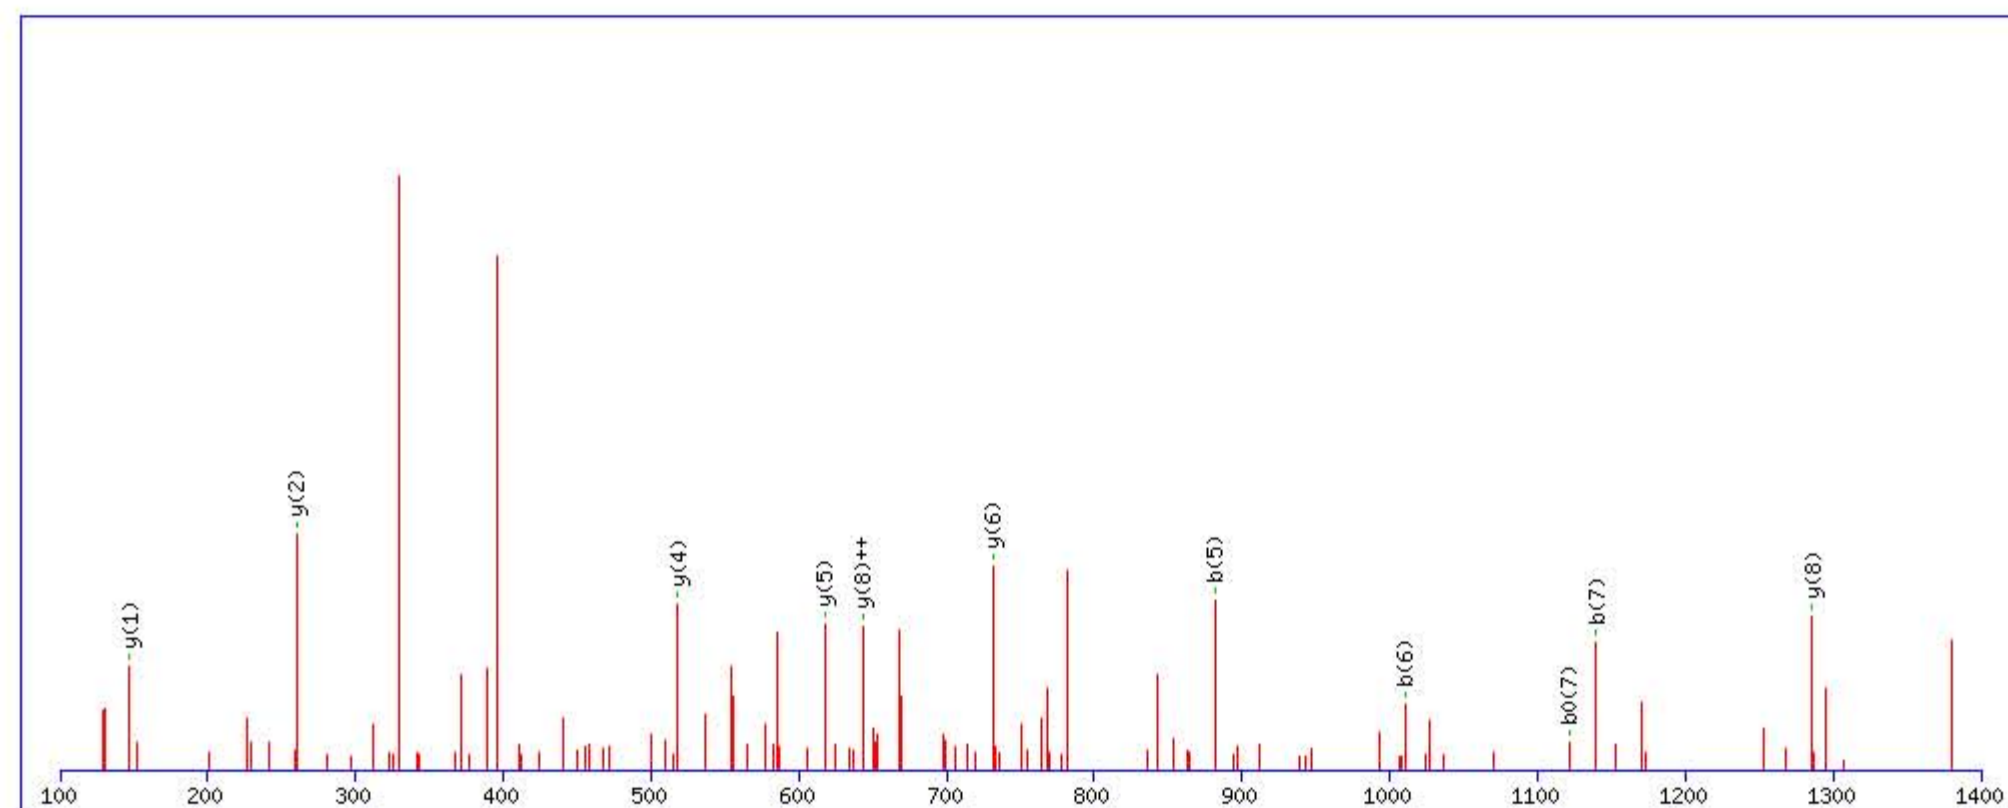

Monoisotopic mass of neutral peptide Mr(calc): 1397.722427

Fixed modifications: Carbamidomethyl (C) (apply to specified residues or termini only)

Variable modifications:

Q3 : Biotin:Thermo-21345 (Q)

Ions Score: 52 Expect: 0.00012

Matches : 11/86 fragment ions using 13 most intense peaks [\(help\)](#)

| # | b           | b <sup>++</sup> | b <sup>*</sup> | b <sup>*++</sup> | b <sup>0</sup> | b <sup>0++</sup> | Seq. | y           | y <sup>++</sup> | y <sup>*</sup> | y <sup>*++</sup> | y <sup>0</sup> | y <sup>0++</sup> | # |
|---|-------------|-----------------|----------------|------------------|----------------|------------------|------|-------------|-----------------|----------------|------------------|----------------|------------------|---|
| 1 | 114.091340  | 57.549308       |                |                  |                |                  | I    |             |                 |                |                  |                |                  | 9 |
| 2 | 229.118283  | 115.062779      |                |                  | 211.107718     | 106.057497       | D    | 1285.645664 | 643.326470      | 1268.619115    | 634.813196       | 1267.635099    | 634.321187       | 8 |
| 3 | 668.343609  | 334.675443      | 651.317060     | 326.162168       | 650.333044     | 325.670160       | Q    | 1170.618721 | 585.812998      | 1153.592172    | 577.299724       | 1152.608156    | 576.807716       | 7 |
| 4 | 782.386536  | 391.696906      | 765.359987     | 383.183631       | 764.375971     | 382.691623       | N    | 731.393395  | 366.200335      | 714.366846     | 357.687061       | 713.382830     | 357.195053       | 6 |
| 5 | 881.454950  | 441.231113      | 864.428401     | 432.717838       | 863.444385     | 432.225830       | V    | 617.350468  | 309.178872      | 600.323919     | 300.665597       | 599.339903     | 300.173589       | 5 |
| 6 | 1010.497543 | 505.752410      | 993.470994     | 497.239135       | 992.486978     | 496.747127       | E    | 518.282054  | 259.644665      | 501.255505     | 251.131390       | 500.271489     | 250.639382       | 4 |
| 7 | 1139.540136 | 570.273706      | 1122.513587    | 561.760431       | 1121.529571    | 561.268423       | E    | 389.239461  | 195.123368      | 372.212912     | 186.610094       | 371.228896     | 186.118086       | 3 |
| 8 | 1252.624200 | 626.815738      | 1235.597651    | 618.302463       | 1234.613635    | 617.810455       | L    | 260.196868  | 130.602072      | 243.170319     | 122.088797       |                |                  | 2 |
| 9 |             |                 |                |                  |                |                  | K    | 147.112804  | 74.060040       | 130.086255     | 65.546765        |                |                  | 1 |

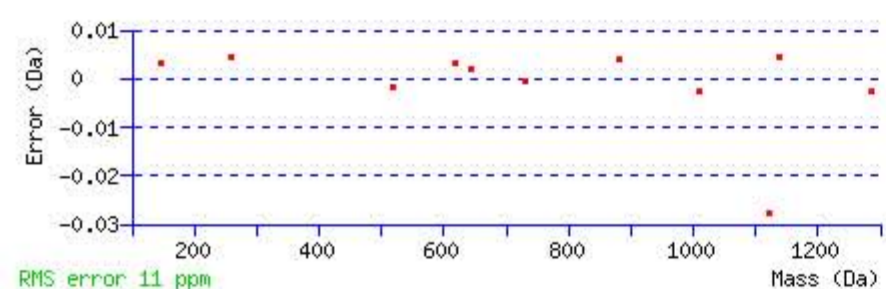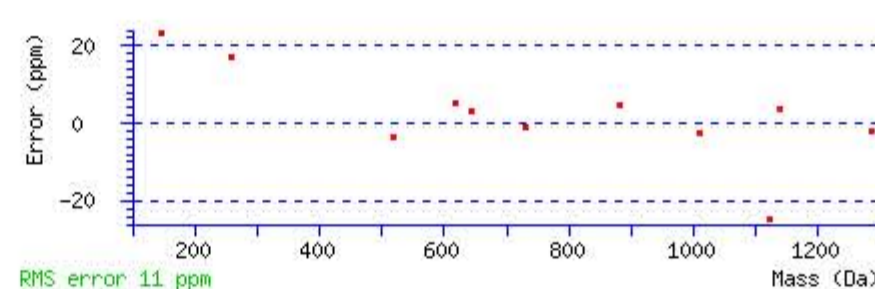

NCBI BLAST search of **IDQNVEELK**

(Parameters: blastp, nr protein database, expect=20000, no filter, PAM30)

Other BLAST [web gateways](#)

All matches to this query

| Score | Mr(calc):   | Delta     | Sequence                      |
|-------|-------------|-----------|-------------------------------|
| 52.0  | 1397.722427 | -0.007119 | <a href="#">IDQNVEELK</a>     |
| 9.7   | 1397.734329 | -0.019021 | <a href="#">LYTHSYLGFGFK</a>  |
| 7.7   | 1397.715057 | 0.000251  | <a href="#">LEDGSHLTGQTLK</a> |
| 7.7   | 1397.726456 | -0.011148 | <a href="#">LEIMEFVNFLK</a>   |
| 7.7   | 1397.722427 | -0.007119 | <a href="#">LENDVEQLK</a>     |
| 7.7   | 1397.712540 | 0.002768  | <a href="#">LMFDAFNQRLK</a>   |
| 7.5   | 1397.733658 | -0.018350 | <a href="#">QNITNQLEK</a>     |
| 5.4   | 1397.708496 | 0.006812  | <a href="#">QMEIQKHKDNK</a>   |
| 4.6   | 1397.701309 | 0.013999  | <a href="#">LLFNFVEQNMK</a>   |
| 4.5   | 1397.733643 | -0.018335 | <a href="#">QQKAENELK</a>     |



# MASCOT SEARCH RESULTS

## Peptide View

MS/MS Fragmentation of **IDQTV EELR**

Found in **APOA4\_HUMAN**, Apolipoprotein A-IV OS=Homo sapiens GN=APOA4 PE=1 SV=3

Match to Query 32978: 1412.726008 from(707.370280,2+) rtinseconds(1912) index(70555)

Title: Locus:1.1.1.3199.24 File:"2013-07-02 CLN FXIII 30 min 2nd FT.wiff"

Data file C:\Program Files (x86)\Matrix Science\Mascot Daemon\mgf2 FXIII 30 min 2nd\mascot\_daemon\_merge.mgf

Click mouse within plot area to zoom in by factor of two about that point

Or, Plot from  to  Da

Label all possible matches  Label matches used for scoring

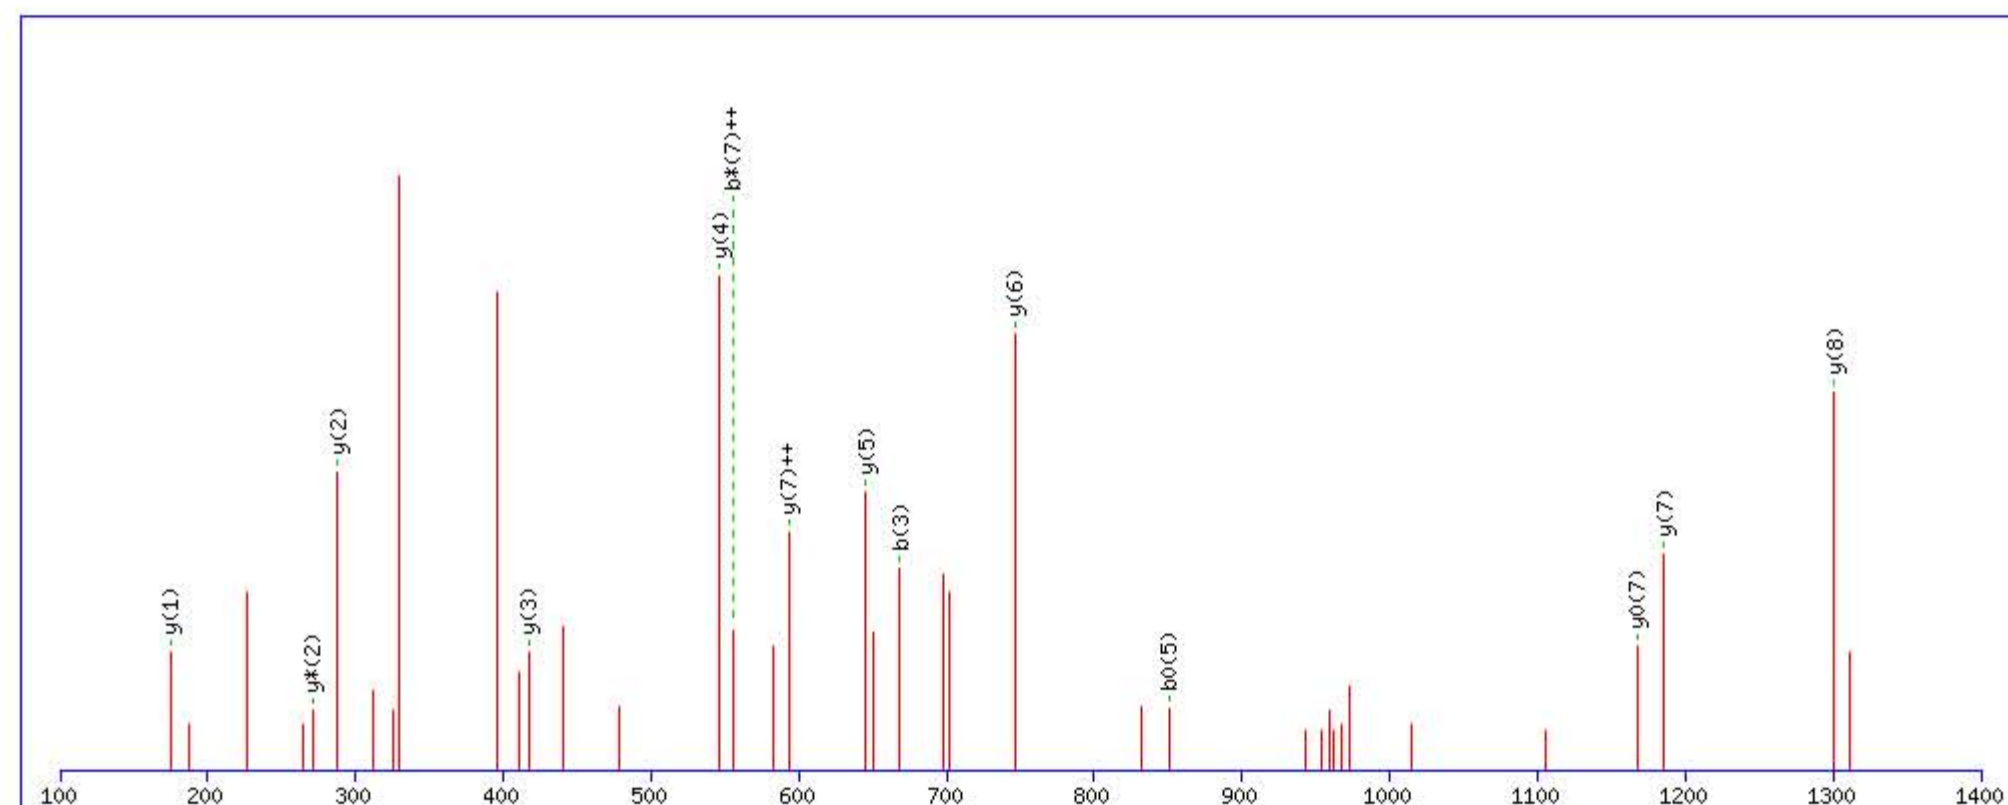

Monoisotopic mass of neutral peptide Mr(calc): 1412.733337

Fixed modifications: Carbamidomethyl (C) (apply to specified residues or termini only)

Variable modifications:

Q3 : Biotin:Thermo-21345 (Q)

Ions Score: 40 Expect: 0.0025

Matches : 14/86 fragment ions using 30 most intense peaks [\(help\)](#)

| # | b                 | b <sup>++</sup> | b <sup>*</sup> | b <sup>*++</sup>  | b <sup>0</sup>    | b <sup>0++</sup> | Seq. | y                  | y <sup>++</sup>   | y <sup>*</sup>    | y <sup>*++</sup> | y <sup>0</sup>     | y <sup>0++</sup> | # |
|---|-------------------|-----------------|----------------|-------------------|-------------------|------------------|------|--------------------|-------------------|-------------------|------------------|--------------------|------------------|---|
| 1 | 114.091340        | 57.549308       |                |                   |                   |                  | I    |                    |                   |                   |                  |                    |                  | 9 |
| 2 | 229.118283        | 115.062779      |                |                   | 211.107718        | 106.057497       | D    | <b>1300.656564</b> | 650.831920        | 1283.630015       | 642.318646       | 1282.645999        | 641.826638       | 8 |
| 3 | <b>668.343609</b> | 334.675443      | 651.317060     | 326.162168        | 650.333044        | 325.670160       | Q    | <b>1185.629621</b> | <b>593.318449</b> | 1168.603072       | 584.805174       | <b>1167.619056</b> | 584.313166       | 7 |
| 4 | 769.391288        | 385.199282      | 752.364739     | 376.686008        | 751.380723        | 376.194000       | T    | <b>746.404295</b>  | 373.705786        | 729.377746        | 365.192511       | 728.393730         | 364.700503       | 6 |
| 5 | 868.459702        | 434.733489      | 851.433153     | 426.220215        | <b>850.449137</b> | 425.728207       | V    | <b>645.356616</b>  | 323.181946        | 628.330067        | 314.668672       | 627.346051         | 314.176664       | 5 |
| 6 | 997.502295        | 499.254786      | 980.475746     | 490.741511        | 979.491730        | 490.249503       | E    | <b>546.288202</b>  | 273.647739        | 529.261653        | 265.134465       | 528.277637         | 264.642457       | 4 |
| 7 | 1126.544888       | 563.776082      | 1109.518339    | <b>555.262808</b> | 1108.534323       | 554.770800       | E    | <b>417.245609</b>  | 209.126442        | 400.219060        | 200.613168       | 399.235044         | 200.121160       | 3 |
| 8 | 1239.628952       | 620.318114      | 1222.602403    | 611.804840        | 1221.618387       | 611.312832       | L    | <b>288.203016</b>  | 144.605146        | <b>271.176467</b> | 136.091871       |                    |                  | 2 |
| 9 |                   |                 |                |                   |                   |                  | R    | <b>175.118952</b>  | 88.063114         | 158.092403        | 79.549839        |                    |                  | 1 |

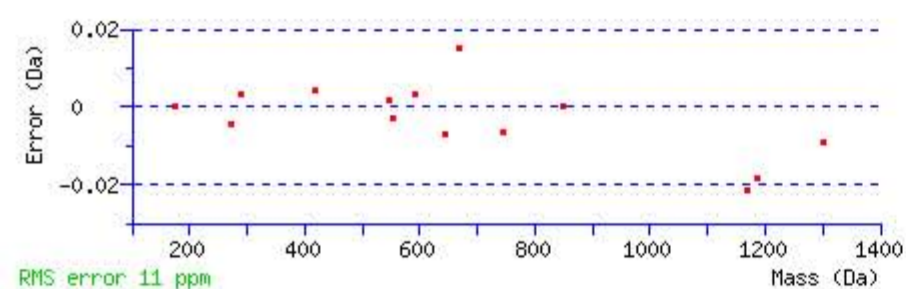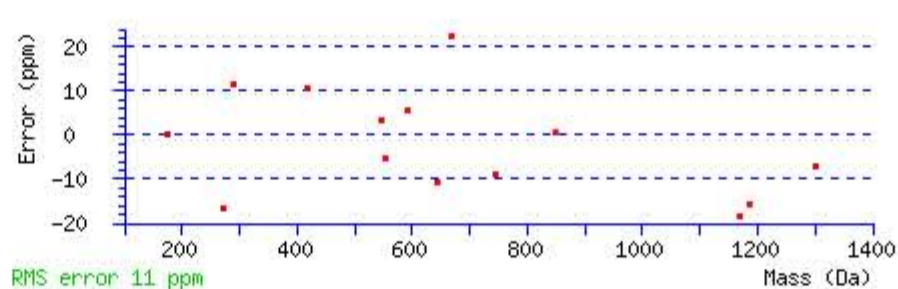

NCBI BLAST search of **IDQTV EELR**

(Parameters: blastp, nr protein database, expect=20000, no filter, PAM30)

Other BLAST [web gateways](#)

## All matches to this query

| Score | Mr(calc):   | Delta     | Sequence                     |
|-------|-------------|-----------|------------------------------|
| 39.9  | 1412.733337 | -0.007329 | <a href="#">IDQTV EELR</a>   |
| 14.0  | 1412.744537 | -0.018529 | <a href="#">IPPEKMRELER</a>  |
| 6.6   | 1412.708191 | 0.017817  | <a href="#">LQESASGTGPR</a>  |
| 5.0   | 1412.719391 | 0.006617  | <a href="#">LKAEMDEHRLR</a>  |
| 4.9   | 1412.734665 | -0.008657 | <a href="#">MPADWRQQLR</a>   |
| 1.8   | 1412.729950 | -0.003942 | <a href="#">LDAFIEALHQEK</a> |



# MASCOT Search Results

## Peptide View

MS/MS Fragmentation of **LEPYADQLR**

Found in **APOA4\_HUMAN**, Apolipoprotein A-IV OS=Homo sapiens GN=APOA4 PE=1 SV=3

Match to Query 33001: 1414.721948 from(708.368250,2+) rtinseconds(1990) index(71155)

Title: Locus:1.1.1.3226.13 File:"2013-07-02 CLN FXIII 30 min 2nd FT.wiff"

Data file C:\Program Files (x86)\Matrix Science\Mascot Daemon\mgf\2 FXIII 30 min 2nd\mascot\_daemon\_merge.mgf

Click mouse within plot area to zoom in by factor of two about that point

Or, Plot from  to  Da

Label all possible matches  Label matches used for scoring

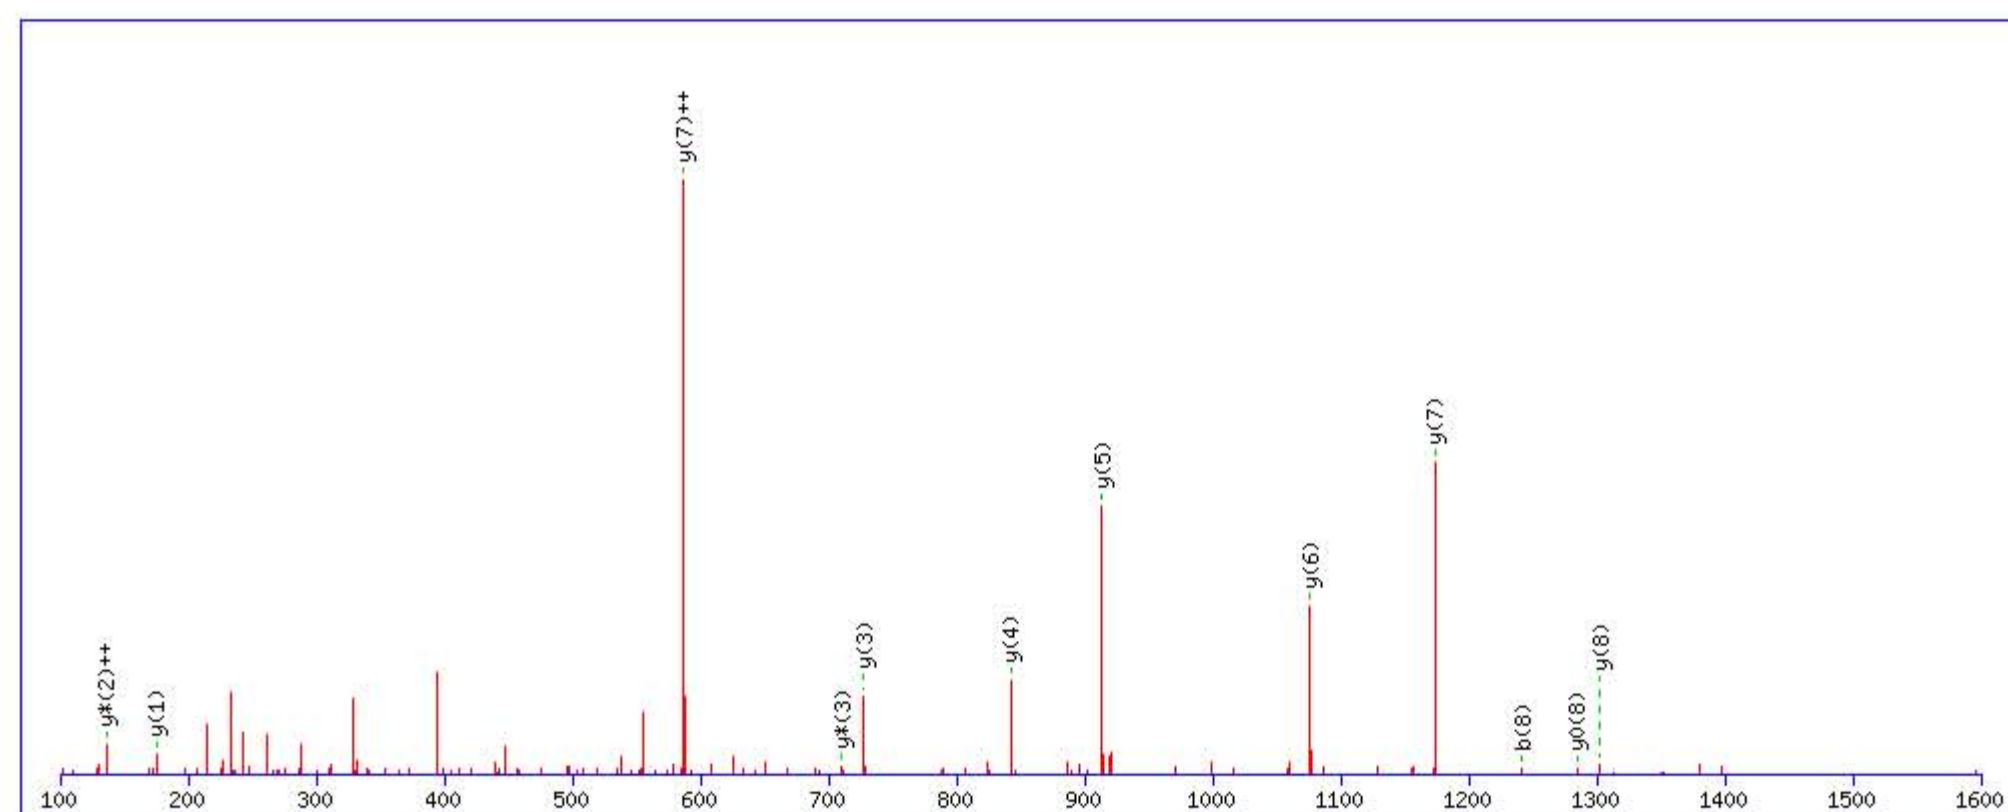

Monoisotopic mass of neutral peptide Mr(calc): 1414.727844

Fixed modifications: Carbamidomethyl (C) (apply to specified residues or termini only)

Variable modifications:

Q7 : Biotin:Thermo-21345 (Q)

Ions Score: 35 Expect: 0.0048

Matches : 12/76 fragment ions using 26 most intense peaks [\(help\)](#)

| # | b                  | b <sup>++</sup> | b <sup>*</sup> | b <sup>*++</sup> | b <sup>0</sup> | b <sup>0++</sup> | Seq. | y                  | y <sup>++</sup>   | y <sup>*</sup>    | y <sup>*++</sup>  | y <sup>0</sup>     | y <sup>0++</sup> | # |
|---|--------------------|-----------------|----------------|------------------|----------------|------------------|------|--------------------|-------------------|-------------------|-------------------|--------------------|------------------|---|
| 1 | 114.091340         | 57.549308       |                |                  |                |                  | L    |                    |                   |                   |                   |                    |                  | 9 |
| 2 | 243.133933         | 122.070605      |                |                  | 225.123368     | 113.065322       | E    | <b>1302.651085</b> | 651.829181        | 1285.624536       | 643.315906        | <b>1284.640520</b> | 642.823898       | 8 |
| 3 | 340.186697         | 170.596987      |                |                  | 322.176132     | 161.591704       | P    | <b>1173.608492</b> | <b>587.307884</b> | 1156.581943       | 578.794610        | 1155.597927        | 578.302602       | 7 |
| 4 | 503.250026         | 252.128651      |                |                  | 485.239461     | 243.123369       | Y    | <b>1076.555728</b> | 538.781502        | 1059.529179       | 530.268228        | 1058.545163        | 529.776220       | 6 |
| 5 | 574.287140         | 287.647208      |                |                  | 556.276575     | 278.641926       | A    | <b>913.492399</b>  | 457.249838        | 896.465850        | 448.736563        | 895.481834         | 448.244555       | 5 |
| 6 | 689.314083         | 345.160680      |                |                  | 671.303518     | 336.155397       | D    | <b>842.455285</b>  | 421.731281        | 825.428736        | 413.218006        | 824.444720         | 412.725998       | 4 |
| 7 | 1128.539409        | 564.773343      | 1111.512860    | 556.260068       | 1110.528844    | 555.768060       | Q    | <b>727.428342</b>  | 364.217809        | <b>710.401793</b> | 355.704535        |                    |                  | 3 |
| 8 | <b>1241.623473</b> | 621.315375      | 1224.596924    | 612.802100       | 1223.612908    | 612.310092       | L    | 288.203016         | 144.605146        | 271.176467        | <b>136.091871</b> |                    |                  | 2 |
| 9 |                    |                 |                |                  |                |                  | R    | <b>175.118952</b>  | 88.063114         | 158.092403        | 79.549839         |                    |                  | 1 |

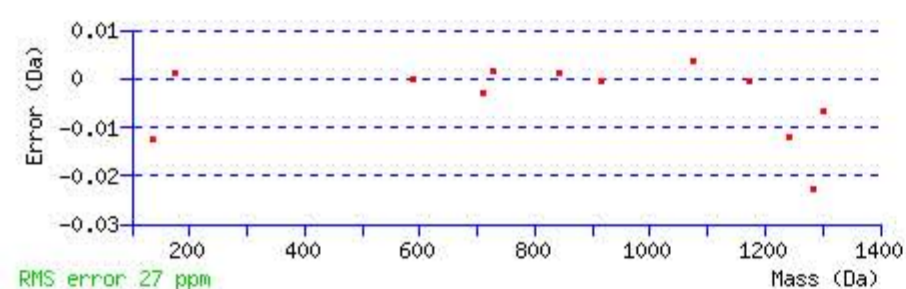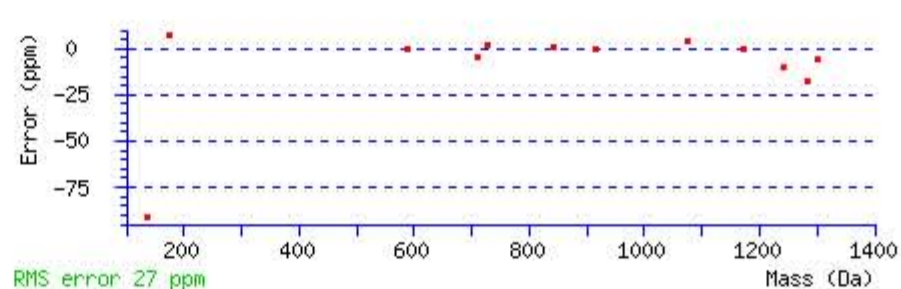

NCBI BLAST search of [LEPYADQLR](#)

(Parameters: blastp, nr protein database, expect=20000, no filter, PAM30)

Other BLAST [web gateways](#)

## All matches to this query

| Score | Mr(calc):   | Delta     | Sequence                       |
|-------|-------------|-----------|--------------------------------|
| 34.6  | 1414.727844 | -0.005896 | <a href="#">LEPYADQLR</a>      |
| 9.3   | 1414.712585 | 0.009363  | <a href="#">EISTEEQLR</a>      |
| 4.2   | 1414.735931 | -0.013983 | <a href="#">LMRGLLHCMIR</a>    |
| 2.1   | 1414.713943 | 0.008005  | <a href="#">KLQCIADQFHR</a>    |
| 0.7   | 1414.735077 | -0.013129 | <a href="#">SSMSGHLHLVKQGR</a> |
| 0.6   | 1414.702713 | 0.019235  | <a href="#">IQRDFMLSFSR</a>    |
| 0.6   | 1414.716400 | 0.005548  | <a href="#">LEEDARLEERR</a>    |
| 0.6   | 1414.730347 | -0.008399 | <a href="#">ELSVQNQDLIEK</a>   |
| 0.4   | 1414.742905 | -0.020957 | <a href="#">ERLSRNYPQPR</a>    |
| 0.2   | 1414.731689 | -0.009741 | <a href="#">NKAEFHQSVISR</a>   |



# MASCOT SEARCH RESULTS

## Peptide View

MS/MS Fragmentation of **ALVQQMEQLR**

Found in **APOA4\_HUMAN**, Apolipoprotein A-IV OS=Homo sapiens GN=APOA4 PE=1 SV=3

Match to Query 36345: 1525.802948 from(763.908750,2+) rtinseconds(2125) index(71946)

Title: Locus:1.1.1.3273.23 File:"2013-07-02 CLN FXIII 30 min 2nd FT.wiff"

Data file C:\Program Files (x86)\Matrix Science\Mascot Daemon\mgf\2 FXIII 30 min 2nd\mascot\_daemon\_merge.mgf

Click mouse within plot area to zoom in by factor of two about that point

Or, Plot from  to  Da

Label all possible matches  Label matches used for scoring

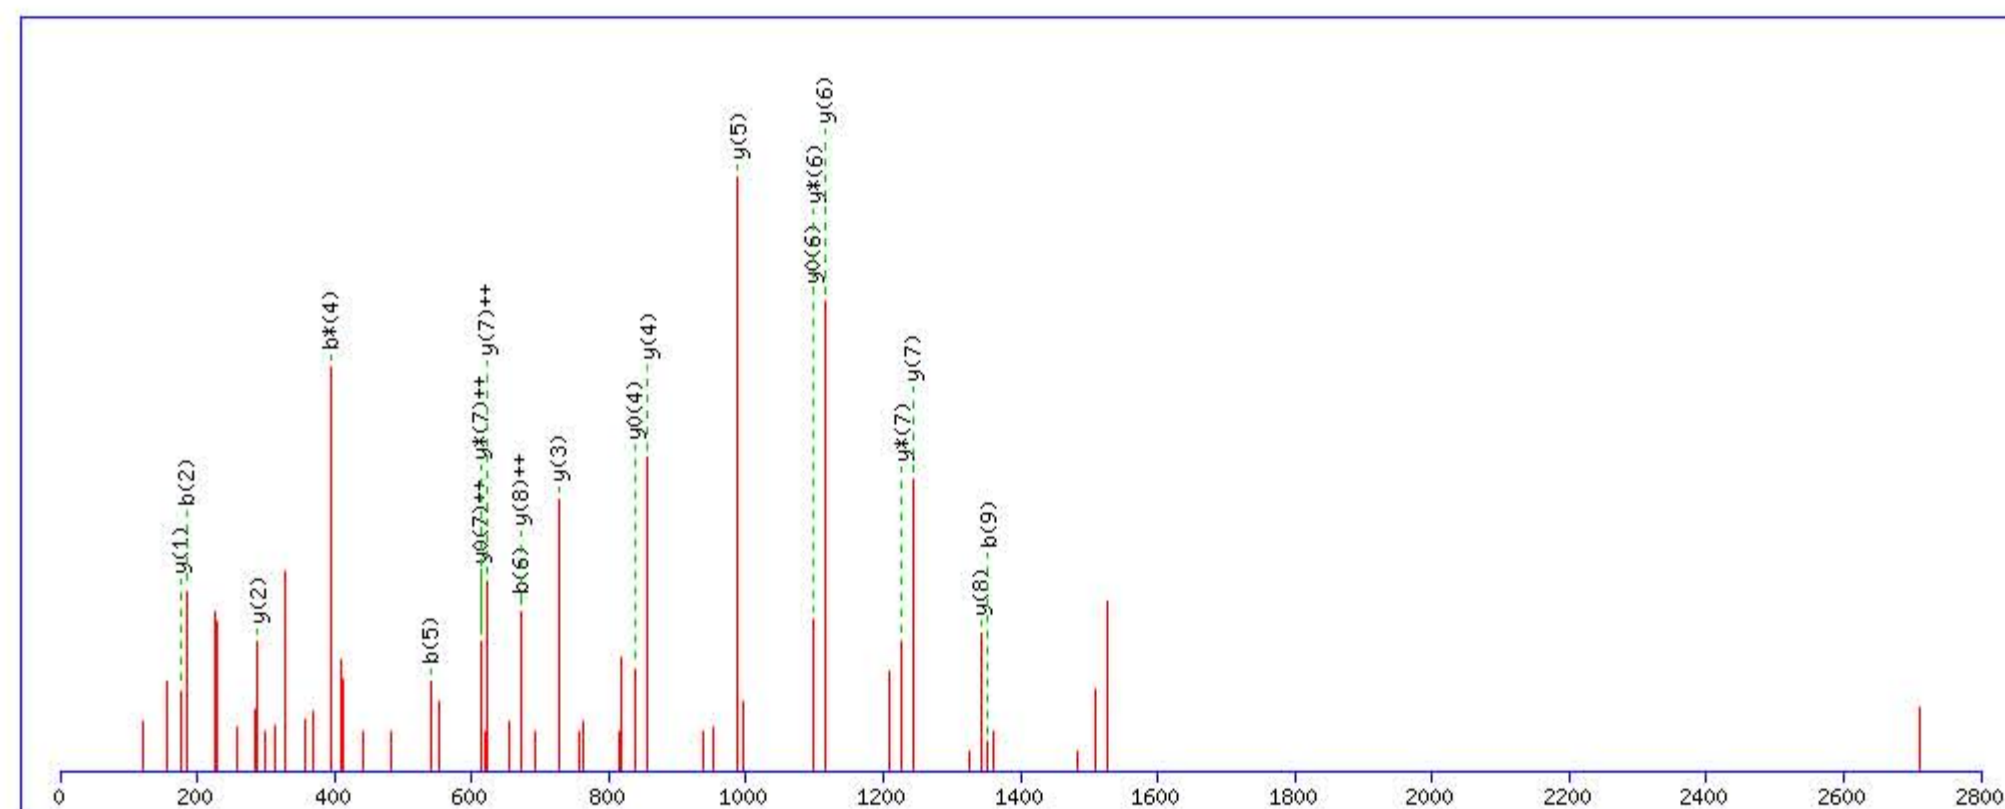

Monoisotopic mass of neutral peptide Mr(calc): 1525.810867

Fixed modifications: Carbamidomethyl (C) (apply to specified residues or termini only)

Variable modifications:

Q8 : Biotin:Thermo-21345 (Q)

Ions Score: 49 Expect: 0.00029

Matches : 21/84 fragment ions using 38 most intense peaks [\(help\)](#)

| #  | b                  | b <sup>++</sup> | b <sup>*</sup>    | b <sup>*++</sup> | b <sup>0</sup> | b <sup>0++</sup> | Seq. | y                  | y <sup>++</sup>   | y <sup>*</sup>     | y <sup>*++</sup>  | y <sup>0</sup>     | y <sup>0++</sup>  | #  |
|----|--------------------|-----------------|-------------------|------------------|----------------|------------------|------|--------------------|-------------------|--------------------|-------------------|--------------------|-------------------|----|
| 1  | 72.044390          | 36.525833       |                   |                  |                |                  | A    |                    |                   |                    |                   |                    |                   | 10 |
| 2  | <b>185.128454</b>  | 93.067865       |                   |                  |                |                  | L    | 1455.781054        | 728.394165        | 1438.754505        | 719.880890        | 1437.770489        | 719.388882        | 9  |
| 3  | 284.196868         | 142.602072      |                   |                  |                |                  | V    | <b>1342.696990</b> | <b>671.852133</b> | 1325.670441        | 663.338858        | 1324.686425        | 662.846850        | 8  |
| 4  | 412.255446         | 206.631361      | <b>395.228897</b> | 198.118087       |                |                  | Q    | <b>1243.628576</b> | <b>622.317926</b> | <b>1226.602027</b> | <b>613.804651</b> | 1225.618011        | <b>613.312643</b> | 7  |
| 5  | <b>540.314024</b>  | 270.660650      | 523.287475        | 262.147376       |                |                  | Q    | <b>1115.569998</b> | 558.288637        | <b>1098.543449</b> | 549.775362        | <b>1097.559433</b> | 549.283354        | 6  |
| 6  | <b>671.354509</b>  | 336.180893      | 654.327960        | 327.667618       |                |                  | M    | <b>987.511420</b>  | 494.259348        | 970.484871         | 485.746073        | 969.500855         | 485.254065        | 5  |
| 7  | 800.397102         | 400.702189      | 783.370553        | 392.188915       | 782.386537     | 391.696907       | E    | <b>856.470935</b>  | 428.739105        | 839.444386         | 420.225831        | <b>838.460370</b>  | 419.733823        | 4  |
| 8  | 1239.622428        | 620.314852      | 1222.595879       | 611.801578       | 1221.611863    | 611.309569       | Q    | <b>727.428342</b>  | 364.217809        | 710.401793         | 355.704534        |                    |                   | 3  |
| 9  | <b>1352.706492</b> | 676.856884      | 1335.679943       | 668.343609       | 1334.695927    | 667.851601       | L    | <b>288.203016</b>  | 144.605146        | 271.176467         | 136.091871        |                    |                   | 2  |
| 10 |                    |                 |                   |                  |                |                  | R    | <b>175.118952</b>  | 88.063114         | 158.092403         | 79.549839         |                    |                   | 1  |

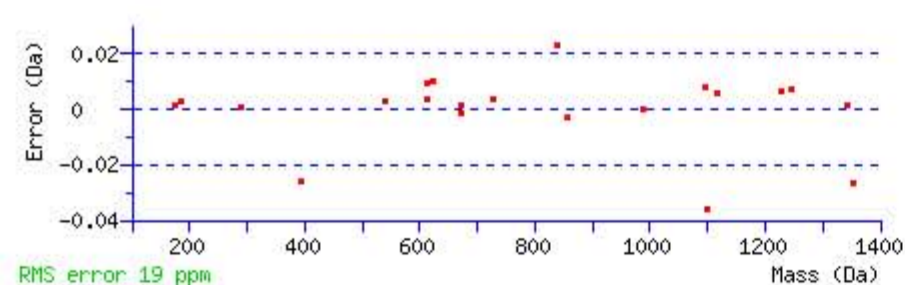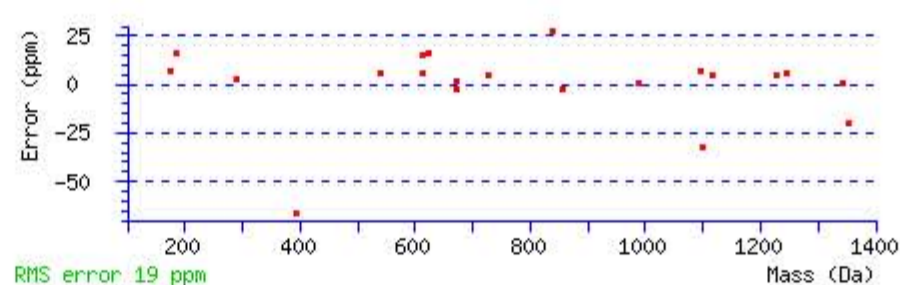

NCBI BLAST search of **ALVQQMEQLR**

(Parameters: blastp, nr protein database, expect=20000, no filter, PAM30)

Other BLAST [web gateways](#)

All matches to this query

| Score | Mr(calc):   | Delta     | Sequence                      |
|-------|-------------|-----------|-------------------------------|
| 48.8  | 1525.810867 | -0.007919 | <a href="#">ALVQQMEQLR</a>    |
| 15.8  | 1525.810867 | -0.007919 | <a href="#">ALVQQMEQLR</a>    |
| 10.4  | 1525.798752 | 0.004196  | <a href="#">SPVKEEEKPQEVK</a> |
| 8.1   | 1525.792236 | 0.010712  | <a href="#">ALTEQQEQLR</a>    |
| 5.5   | 1525.810867 | -0.007919 | <a href="#">ALVQQMEQLR</a>    |
| 5.5   | 1525.784836 | 0.018112  | <a href="#">LAQVATEEPERQR</a> |
| 4.2   | 1525.800064 | 0.002884  | <a href="#">ARALQSYEAKAR</a>  |
| 0.9   | 1525.807495 | -0.004547 | <a href="#">WPPQQLMLSAALR</a> |



**Peptide View**

MS/MS Fragmentation of **LLPHANEVSQK**

Found in **APOA4\_HUMAN**, Apolipoprotein A-IV OS=Homo sapiens GN=APOA4 PE=1 SV=3

Match to Query 36766: 1545.840282 from(516.287370,3+) rtinseconds(1530) index(68337)

Title: Locus:1.1.1.3066.9 File:"2013-07-02 CLN FXIII 30 min 2nd FT.wiff"

Data file C:\Program Files (x86)\Matrix Science\Mascot Daemon\mgf2 FXIII 30 min 2nd\mascot\_daemon\_merge.mgf

Click mouse within plot area to zoom in by factor of two about that point

Or, Plot from  to  Da

Label all possible matches  Label matches used for scoring

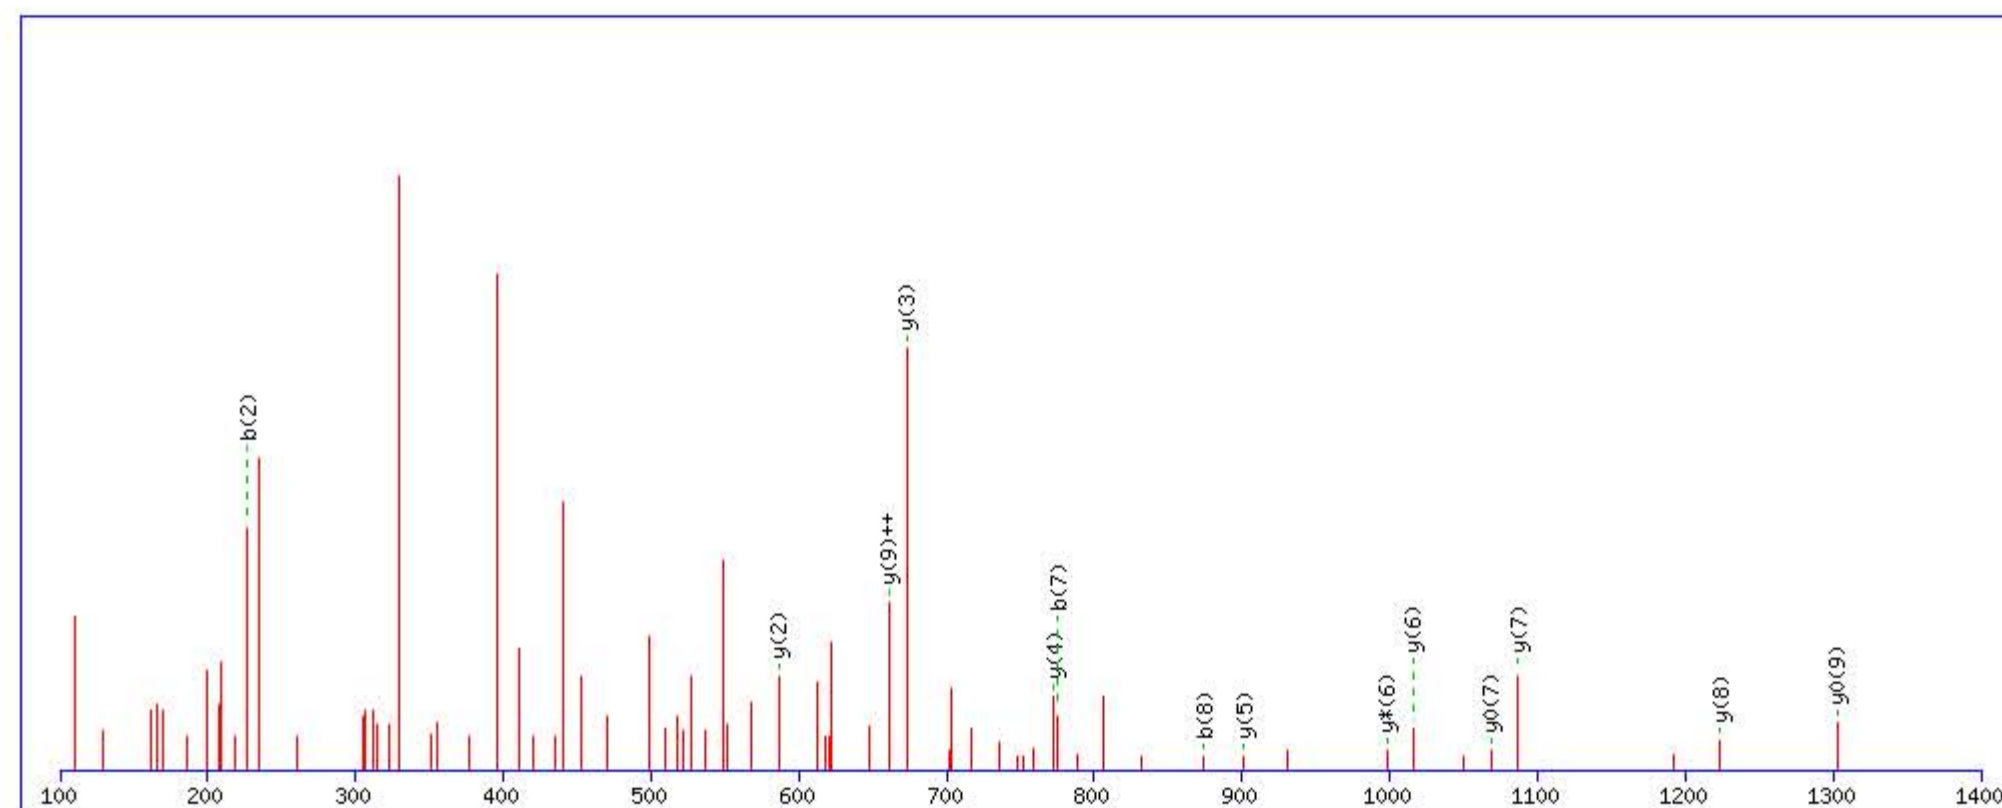

Monoisotopic mass of neutral peptide Mr(calc): 1545.833710

Fixed modifications: Carbamidomethyl (C) (apply to specified residues or termini only)

Variable modifications:

Q10 : Biotin:Thermo-21345 (Q)

Ions Score: 28 Expect: 0.003

Matches : 14/94 fragment ions using 32 most intense peaks [\(help\)](#)

| #  | b                 | b <sup>++</sup> | b <sup>+</sup> | b <sup>*++</sup> | b <sup>0</sup> | b <sup>0++</sup> | Seq. | y                  | y <sup>++</sup>   | y <sup>+</sup>    | y <sup>*++</sup> | y <sup>0</sup>     | y <sup>0++</sup> | #  |
|----|-------------------|-----------------|----------------|------------------|----------------|------------------|------|--------------------|-------------------|-------------------|------------------|--------------------|------------------|----|
| 1  | 114.091340        | 57.549308       |                |                  |                |                  | L    |                    |                   |                   |                  |                    |                  | 11 |
| 2  | <b>227.175404</b> | 114.091340      |                |                  |                |                  | L    | 1433.756946        | 717.382111        | 1416.730397       | 708.868837       | 1415.746381        | 708.376828       | 10 |
| 3  | 324.228168        | 162.617722      |                |                  |                |                  | P    | 1320.672882        | <b>660.840079</b> | 1303.646333       | 652.326804       | <b>1302.662317</b> | 651.834796       | 9  |
| 4  | 461.287080        | 231.147178      |                |                  |                |                  | H    | <b>1223.620118</b> | 612.313697        | 1206.593569       | 603.800422       | 1205.609553        | 603.308414       | 8  |
| 5  | 532.324194        | 266.665735      |                |                  |                |                  | A    | <b>1086.561206</b> | 543.784241        | 1069.534657       | 535.270966       | <b>1068.550641</b> | 534.778958       | 7  |
| 6  | 646.367121        | 323.687199      | 629.340572     | 315.173924       |                |                  | N    | <b>1015.524092</b> | 508.265684        | <b>998.497543</b> | 499.752409       | 997.513527         | 499.260401       | 6  |
| 7  | <b>775.409714</b> | 388.208495      | 758.383165     | 379.695221       | 757.399149     | 379.203213       | E    | <b>901.481165</b>  | 451.244220        | 884.454616        | 442.730946       | 883.470600         | 442.238938       | 5  |
| 8  | <b>874.478128</b> | 437.742702      | 857.451579     | 429.229427       | 856.467563     | 428.737419       | V    | <b>772.438572</b>  | 386.722924        | 755.412023        | 378.209649       | 754.428007         | 377.717641       | 4  |
| 9  | 961.510156        | 481.258716      | 944.483607     | 472.745441       | 943.499591     | 472.253433       | S    | <b>673.370158</b>  | 337.188717        | 656.343609        | 328.675442       | 655.359593         | 328.183434       | 3  |
| 10 | 1400.735482       | 700.871379      | 1383.708933    | 692.358104       | 1382.724917    | 691.866096       | Q    | <b>586.338130</b>  | 293.672703        | 569.311581        | 285.159428       |                    |                  | 2  |
| 11 |                   |                 |                |                  |                |                  | K    | 147.112804         | 74.060040         | 130.086255        | 65.546765        |                    |                  | 1  |

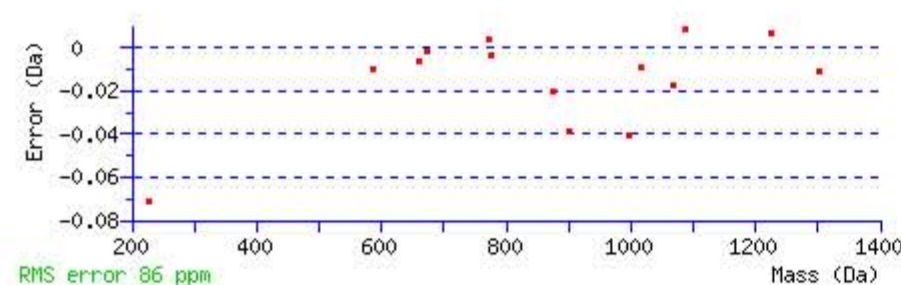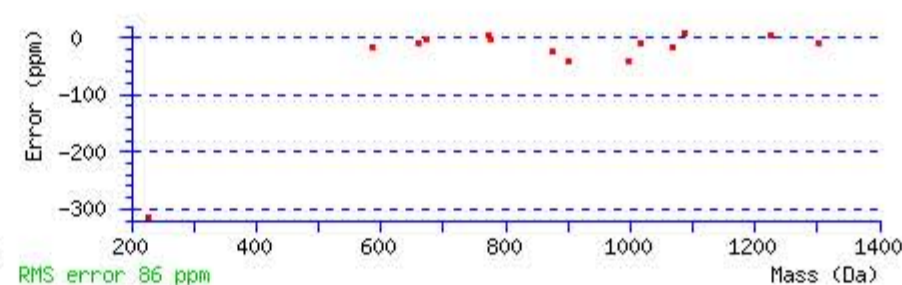

NCBI BLAST search of **LLPHANEVSQK**

(Parameters: blastp, nr protein database, expect=20000, no filter, PAM30)

Other BLAST [web gateways](#)

All matches to this query

| Score | Mr(calc):   | Delta    | Sequence                      |
|-------|-------------|----------|-------------------------------|
| 28.0  | 1545.833710 | 0.006572 | <a href="#">LLPHANEVSQK</a>   |
| 1.1   | 1545.826309 | 0.013973 | <a href="#">AEKSRTAWTDLLR</a> |



# MASCOT Search Results

## Peptide View

MS/MS Fragmentation of **SLAPYAQDTQEK**

Found in **APOA4\_HUMAN**, Apolipoprotein A-IV OS=Homo sapiens GN=APOA4 PE=1 SV=3

Match to Query 41351: 1660.798128 from(831.406340,2+) rtinseconds(1734) index(69502)

Title: Locus:1.1.1.3137.14 File:"2013-07-02 CLN FXIII 30 min 2nd FT.wiff"

Data file C:\Program Files (x86)\Matrix Science\Mascot Daemon\mgf2 FXIII 30 min 2nd\mascot\_daemon\_merge.mgf

Click mouse within plot area to zoom in by factor of two about that point

Or, Plot from  to  Da

Label all possible matches  Label matches used for scoring

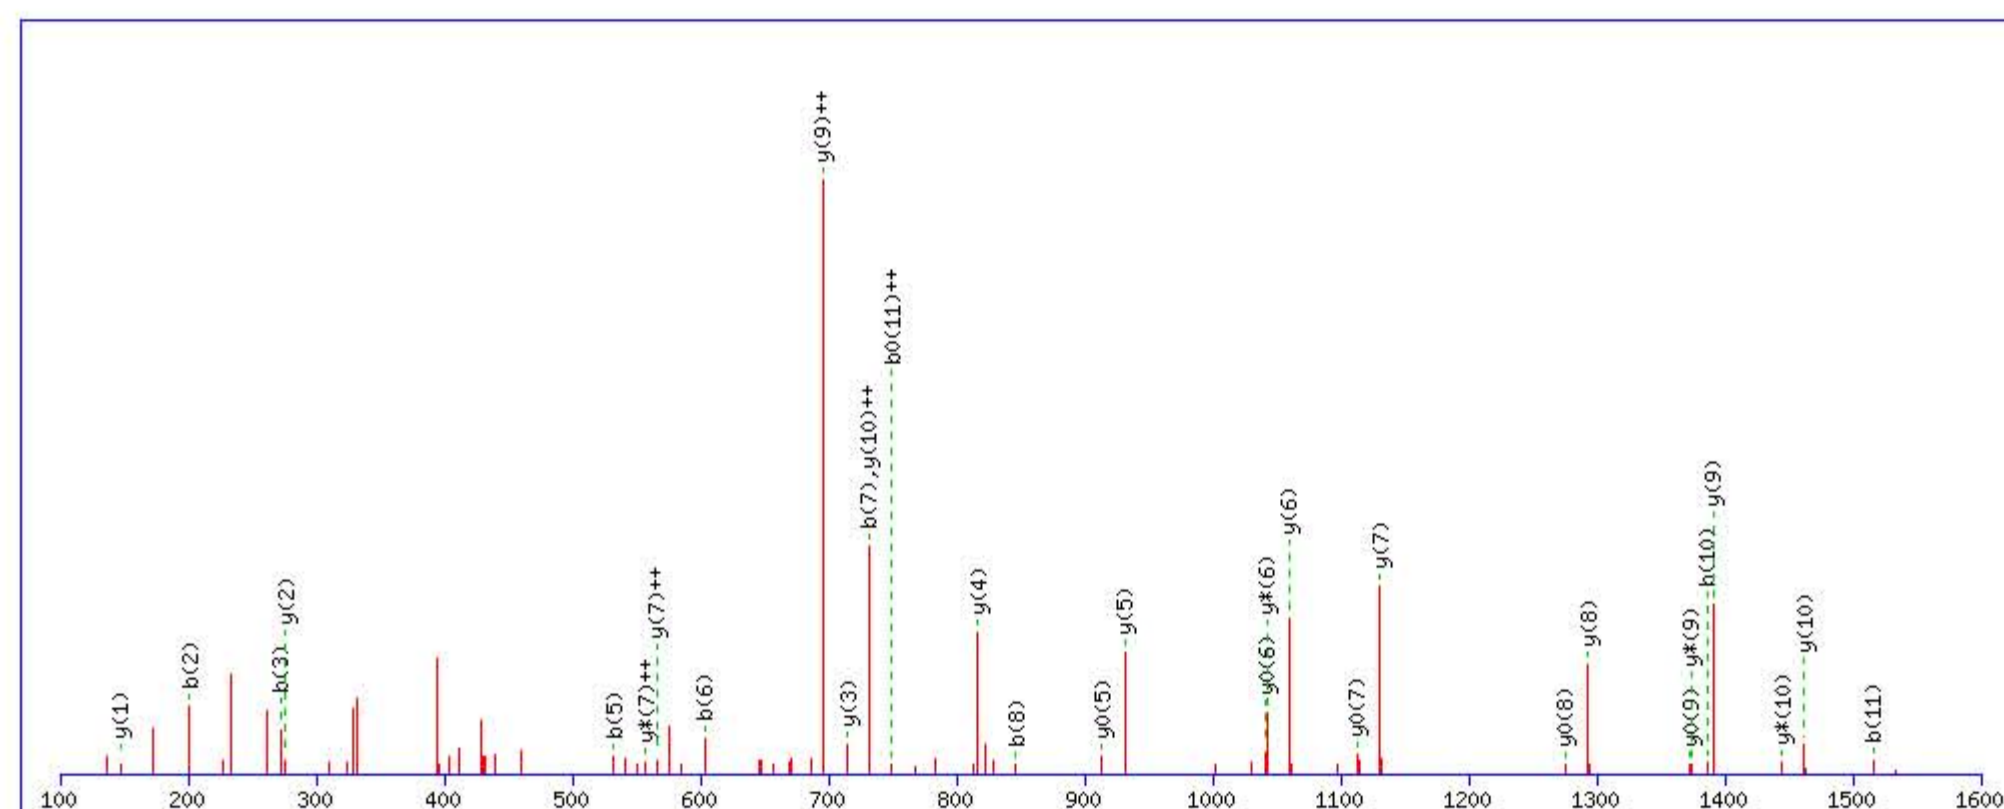

Monoisotopic mass of neutral peptide Mr(calc): 1660.813034

Fixed modifications: Carbamidomethyl (C) (apply to specified residues or termini only)

Variable modifications:

Q10 : Biotin:Thermo-21345 (Q)

Ions Score: 55 Expect: 2.7e-005

Matches : 31/118 fragment ions using 64 most intense peaks [\(help\)](#)

| #  | b                  | b <sup>++</sup> | b <sup>*</sup> | b <sup>+++</sup> | b <sup>0</sup> | b <sup>0++</sup>  | Seq. | y                  | y <sup>++</sup>   | y <sup>*</sup>     | y <sup>+++</sup>  | y <sup>0</sup>     | y <sup>0++</sup> | #  |
|----|--------------------|-----------------|----------------|------------------|----------------|-------------------|------|--------------------|-------------------|--------------------|-------------------|--------------------|------------------|----|
| 1  | 88.039304          | 44.523290       |                |                  | 70.028739      | 35.518008         | S    |                    |                   |                    |                   |                    |                  | 12 |
| 2  | <b>201.123368</b>  | 101.065322      |                |                  | 183.112803     | 92.060039         | L    | 1574.788308        | 787.897792        | 1557.761759        | 779.384518        | 1556.777743        | 778.892510       | 11 |
| 3  | <b>272.160482</b>  | 136.583879      |                |                  | 254.149917     | 127.578596        | A    | <b>1461.704244</b> | <b>731.355760</b> | <b>1444.677695</b> | 722.842486        | 1443.693679        | 722.350478       | 10 |
| 4  | 369.213246         | 185.110261      |                |                  | 351.202681     | 176.104978        | P    | <b>1390.667130</b> | <b>695.837203</b> | <b>1373.640581</b> | 687.323929        | <b>1372.656565</b> | 686.831921       | 9  |
| 5  | <b>532.276575</b>  | 266.641926      |                |                  | 514.266010     | 257.636643        | Y    | <b>1293.614366</b> | 647.310821        | 1276.587817        | 638.797547        | <b>1275.603801</b> | 638.305539       | 8  |
| 6  | <b>603.313689</b>  | 302.160483      |                |                  | 585.303124     | 293.155200        | A    | <b>1130.551037</b> | <b>565.779157</b> | 1113.524488        | <b>557.265882</b> | <b>1112.540472</b> | 556.773874       | 7  |
| 7  | <b>731.372267</b>  | 366.189772      | 714.345718     | 357.676497       | 713.361702     | 357.184489        | Q    | <b>1059.513923</b> | 530.260600        | <b>1042.487374</b> | 521.747325        | <b>1041.503358</b> | 521.255317       | 6  |
| 8  | <b>846.399210</b>  | 423.703243      | 829.372661     | 415.189969       | 828.388645     | 414.697961        | D    | <b>931.455345</b>  | 466.231311        | 914.428796         | 457.718036        | <b>913.444780</b>  | 457.226028       | 5  |
| 9  | 947.446889         | 474.227083      | 930.420340     | 465.713808       | 929.436324     | 465.221800        | T    | <b>816.428402</b>  | 408.717839        | 799.401853         | 400.204565        | 798.417837         | 399.712557       | 4  |
| 10 | <b>1386.672215</b> | 693.839746      | 1369.645666    | 685.326471       | 1368.661650    | 684.834463        | Q    | <b>715.380723</b>  | 358.194000        | 698.354174         | 349.680725        | 697.370158         | 349.188717       | 3  |
| 11 | <b>1515.714808</b> | 758.361042      | 1498.688259    | 749.847768       | 1497.704243    | <b>749.355760</b> | E    | <b>276.155397</b>  | 138.581337        | 259.128848         | 130.068062        | 258.144832         | 129.576054       | 2  |
| 12 |                    |                 |                |                  |                |                   | K    | <b>147.112804</b>  | 74.060040         | 130.086255         | 65.546765         |                    |                  | 1  |

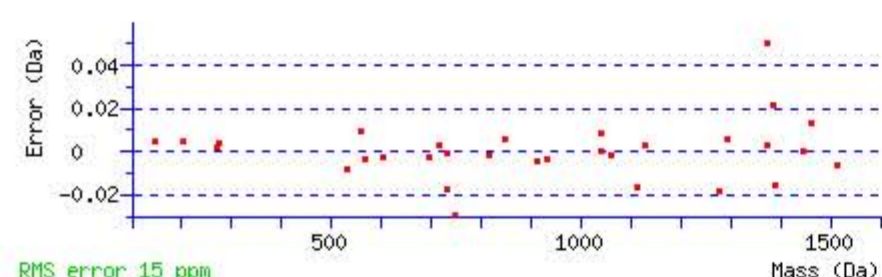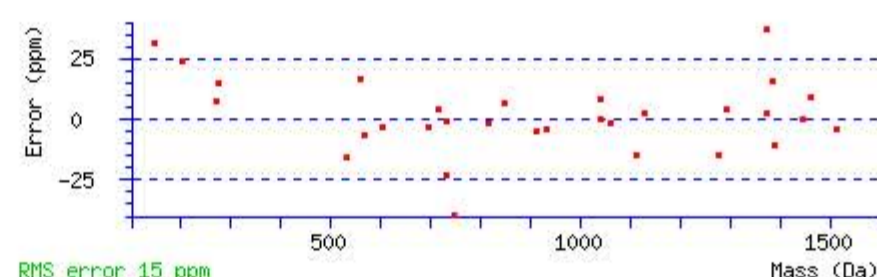

NCBI BLAST search of **SLAPYAQDTQEK**

(Parameters: blastp, nr protein database, expect=20000, no filter, PAM30)

Other BLAST [web gateways](#)

All matches to this query

| Score | Mr(calc):   | Delta     | Sequence                         |
|-------|-------------|-----------|----------------------------------|
| 54.6  | 1660.813034 | -0.014906 | <a href="#">SLAPYAQDTQEK</a>     |
| 27.2  | 1660.813034 | -0.014906 | <a href="#">SLAPYAQDTQEK</a>     |
| 5.6   | 1660.777344 | 0.020784  | <a href="#">QEMQSAGSQRGR</a>     |
| 5.5   | 1660.820908 | -0.022780 | <a href="#">SLARAGFYITGVNDK</a>  |
| 5.0   | 1660.809021 | -0.010893 | <a href="#">STEASPSRDVSPMGLK</a> |
| 2.6   | 1660.776642 | 0.021486  | <a href="#">EAHVLAFTMEEEK</a>    |
| 1.6   | 1660.820236 | -0.022108 | <a href="#">MALSGEGQEKGKASPR</a> |
| 0.9   | 1660.808990 | -0.010862 | <a href="#">INPDEREEMKVSAAK</a>  |
| 0.7   | 1660.797791 | 0.000337  | <a href="#">VSKESSVEPVSCPEK</a>  |



# MASCOT Search Results

## Peptide View

MS/MS Fragmentation of **LGEVNTYAGDLQK**

Found in **APOA4\_HUMAN**, Apolipoprotein A-IV OS=Homo sapiens GN=APOA4 PE=1 SV=3

Match to Query 42677: 1717.858028 from(859.936290,2+) rtinseconds(1989) index(5757)

Title: Locus:1.1.1.3128.18 File:"2013-07-02 CLN FXIII 30 min 2nd F 1.wiff"

Data file C:\Program Files (x86)\Matrix Science\Mascot Daemon\mgf2 FXIII 30 min 2nd\mascot\_daemon\_merge.mgf

Click mouse within plot area to zoom in by factor of two about that point

Or, Plot from  to  Da

Label all possible matches  Label matches used for scoring

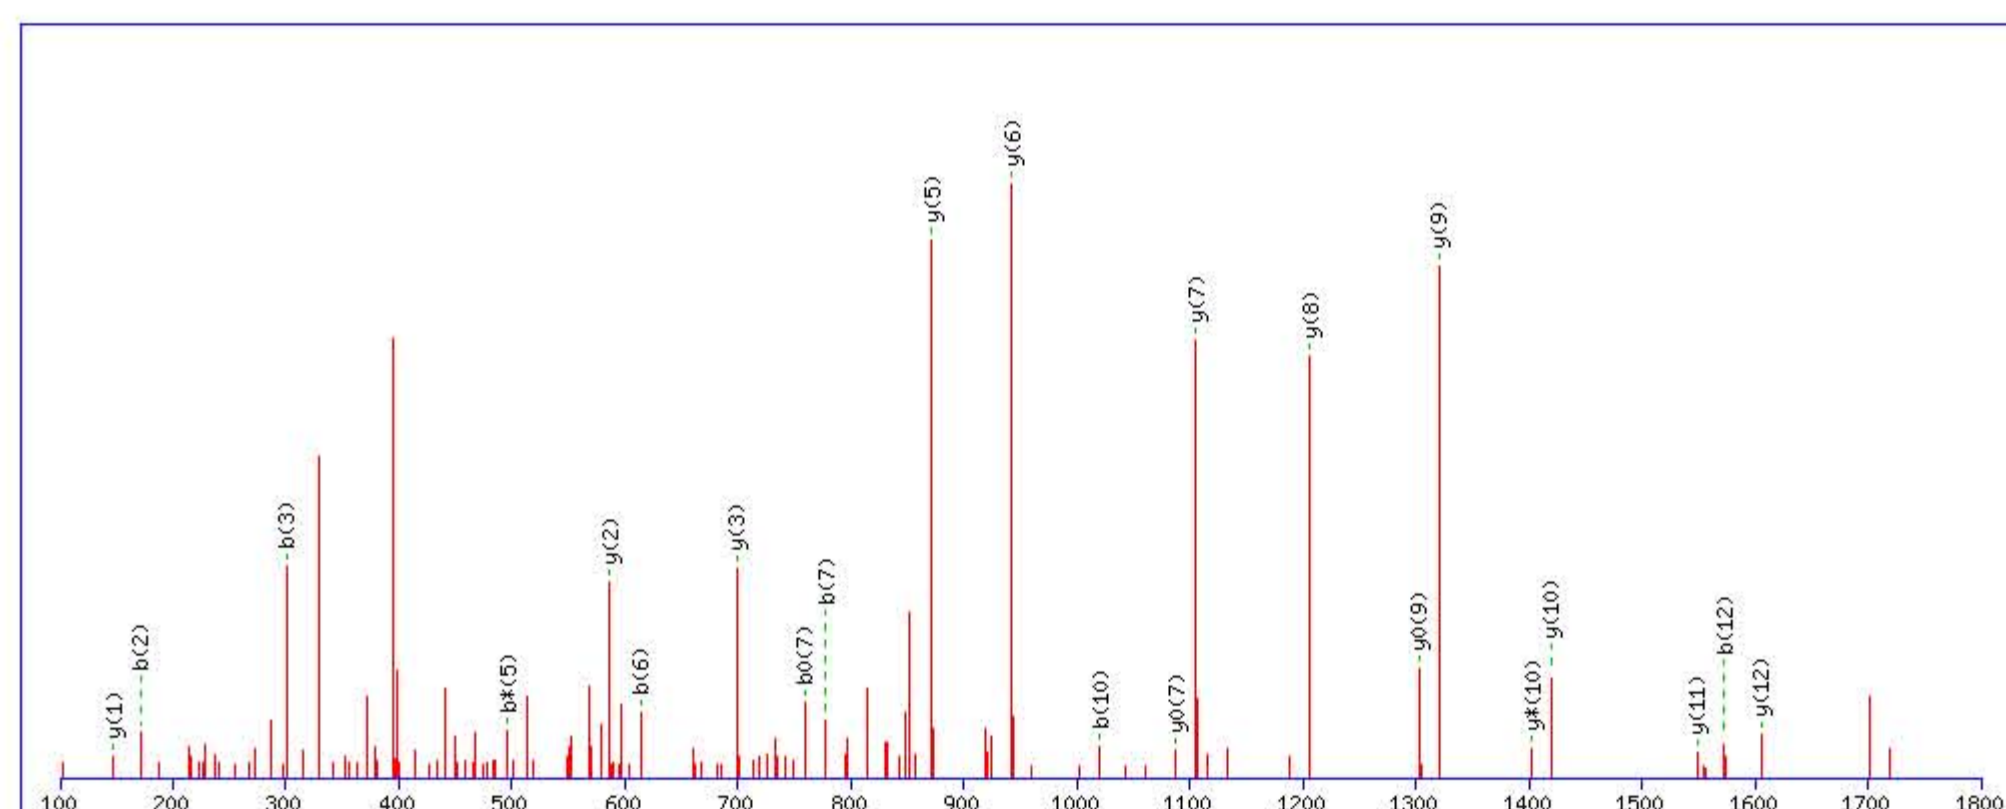

Monoisotopic mass of neutral peptide Mr(calc): 1717.870895

Fixed modifications: Carbamidomethyl (C) (apply to specified residues or termini only)

Variable modifications:

Q12 : Biotin:Thermo-21345 (Q)

Ions Score: 95 Expect: 8.2e-009

Matches : 22/126 fragment ions using 31 most intense peaks [\(help\)](#)

| #  | b                  | b <sup>++</sup> | b <sup>*</sup>    | b <sup>***</sup> | b <sup>0</sup>    | b <sup>0++</sup> | Seq. | y                  | y <sup>++</sup> | y <sup>*</sup>     | y <sup>***</sup> | y <sup>0</sup>     | y <sup>0++</sup> | #  |
|----|--------------------|-----------------|-------------------|------------------|-------------------|------------------|------|--------------------|-----------------|--------------------|------------------|--------------------|------------------|----|
| 1  | 114.091340         | 57.549308       |                   |                  |                   |                  | L    |                    |                 |                    |                  |                    |                  | 13 |
| 2  | <b>171.112804</b>  | 86.060040       |                   |                  |                   |                  | G    | <b>1605.794121</b> | 803.400699      | 1588.767572        | 794.887424       | 1587.783556        | 794.395416       | 12 |
| 3  | <b>300.155397</b>  | 150.581336      |                   |                  | 282.144832        | 141.576054       | E    | <b>1548.772657</b> | 774.889967      | 1531.746108        | 766.376692       | 1530.762092        | 765.884684       | 11 |
| 4  | 399.223811         | 200.115544      |                   |                  | 381.213246        | 191.110261       | V    | <b>1419.730064</b> | 710.368670      | <b>1402.703515</b> | 701.855396       | 1401.719499        | 701.363388       | 10 |
| 5  | 513.266738         | 257.137007      | <b>496.240189</b> | 248.623733       | 495.256173        | 248.131725       | N    | <b>1320.661650</b> | 660.834463      | 1303.635101        | 652.321189       | <b>1302.651085</b> | 651.829181       | 9  |
| 6  | <b>614.314417</b>  | 307.660847      | 597.287868        | 299.147572       | 596.303852        | 298.655564       | T    | <b>1206.618723</b> | 603.813000      | 1189.592174        | 595.299725       | 1188.608158        | 594.807717       | 8  |
| 7  | <b>777.377746</b>  | 389.192511      | 760.351197        | 380.679237       | <b>759.367181</b> | 380.187229       | Y    | <b>1105.571044</b> | 553.289160      | 1088.544495        | 544.775886       | <b>1087.560479</b> | 544.283878       | 7  |
| 8  | 848.414860         | 424.711068      | 831.388311        | 416.197794       | 830.404295        | 415.705786       | A    | <b>942.507715</b>  | 471.757496      | 925.481166         | 463.244221       | 924.497150         | 462.752213       | 6  |
| 9  | 905.436324         | 453.221800      | 888.409775        | 444.708526       | 887.425759        | 444.216518       | G    | <b>871.470601</b>  | 436.238939      | 854.444052         | 427.725664       | 853.460036         | 427.233656       | 5  |
| 10 | <b>1020.463267</b> | 510.735272      | 1003.436718       | 502.221997       | 1002.452702       | 501.729989       | D    | 814.449137         | 407.728207      | 797.422588         | 399.214932       | 796.438572         | 398.722924       | 4  |
| 11 | 1133.547331        | 567.277304      | 1116.520782       | 558.764029       | 1115.536766       | 558.272021       | L    | <b>699.422194</b>  | 350.214735      | 682.395645         | 341.701461       |                    |                  | 3  |
| 12 | <b>1572.772657</b> | 786.889967      | 1555.746108       | 778.376692       | 1554.762092       | 777.884684       | Q    | <b>586.338130</b>  | 293.672703      | 569.311581         | 285.159429       |                    |                  | 2  |
| 13 |                    |                 |                   |                  |                   |                  | K    | <b>147.112804</b>  | 74.060040       | 130.086255         | 65.546765        |                    |                  | 1  |

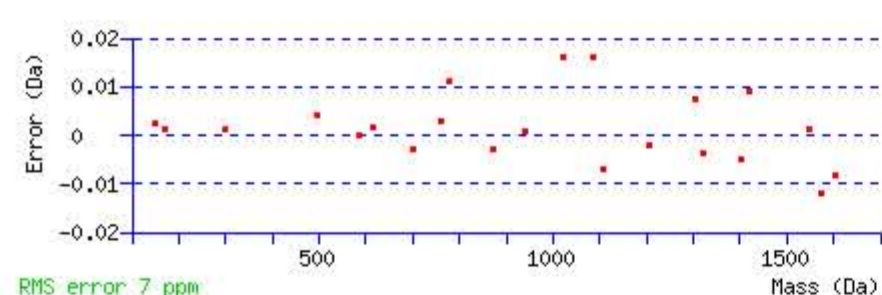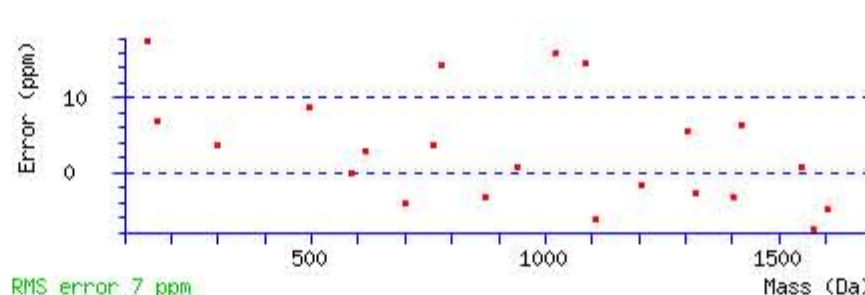

NCBI BLAST search of **LGEVNTYAGDLQK**

(Parameters: blastp, nr protein database, expect=20000, no filter, PAM30)

Other BLAST [web gateways](#)

All matches to this query

| Score | Mr(calc):   | Delta     | Sequence                         |
|-------|-------------|-----------|----------------------------------|
| 95.0  | 1717.870895 | -0.012867 | <a href="#">LGEVNTYAGDLQK</a>    |
| 14.7  | 1717.866867 | -0.008839 | <a href="#">IDAVNAETIREVCTK</a>  |
| 7.2   | 1717.878067 | -0.020039 | <a href="#">RATEKEINNMGNTLK</a>  |
| 4.2   | 1717.878754 | -0.020726 | <a href="#">IDAVAWNTTPYQLAR</a>  |
| 3.5   | 1717.882126 | -0.024098 | <a href="#">NNKNFSTVDIQK</a>     |
| 3.0   | 1717.863495 | -0.005467 | <a href="#">KSNISVYEVGKDHK</a>   |
| 2.1   | 1717.855606 | 0.002422  | <a href="#">VANAEKLMDDLK</a>     |
| 1.9   | 1717.874741 | -0.016713 | <a href="#">GIEVTSWTADASRGLR</a> |
| 1.3   | 1717.837860 | 0.020168  | <a href="#">MENKPTSELQK</a>      |
| 1.2   | 1717.855652 | 0.002376  | <a href="#">VSLVELCDGQADLTK</a>  |



# MASCOT SEARCH RESULTS

## Peptide View

MS/MS Fragmentation of **LNHQLEGLTFQMK**  
 Found in **APOA4\_HUMAN**, Apolipoprotein A-IV OS=Homo sapiens GN=APOA4 PE=1 SV=3

Match to Query 46306: 1868.976552 from(623.999460,3+) rtinseconds(2159) index(39683)  
 Title: Locus:1.1.1.2774.15 File:"2013-07-02 CLN FXIII 30 min 2nd F 3.wiff"  
 Data file C:\Program Files (x86)\Matrix Science\Mascot Daemon\mgf2 FXIII 30 min 2nd\mascot\_daemon\_merge.mgf

Click mouse within plot area to zoom in by factor of two about that point  
 Or, Plot from  to  Da   
 Label all possible matches  Label matches used for scoring

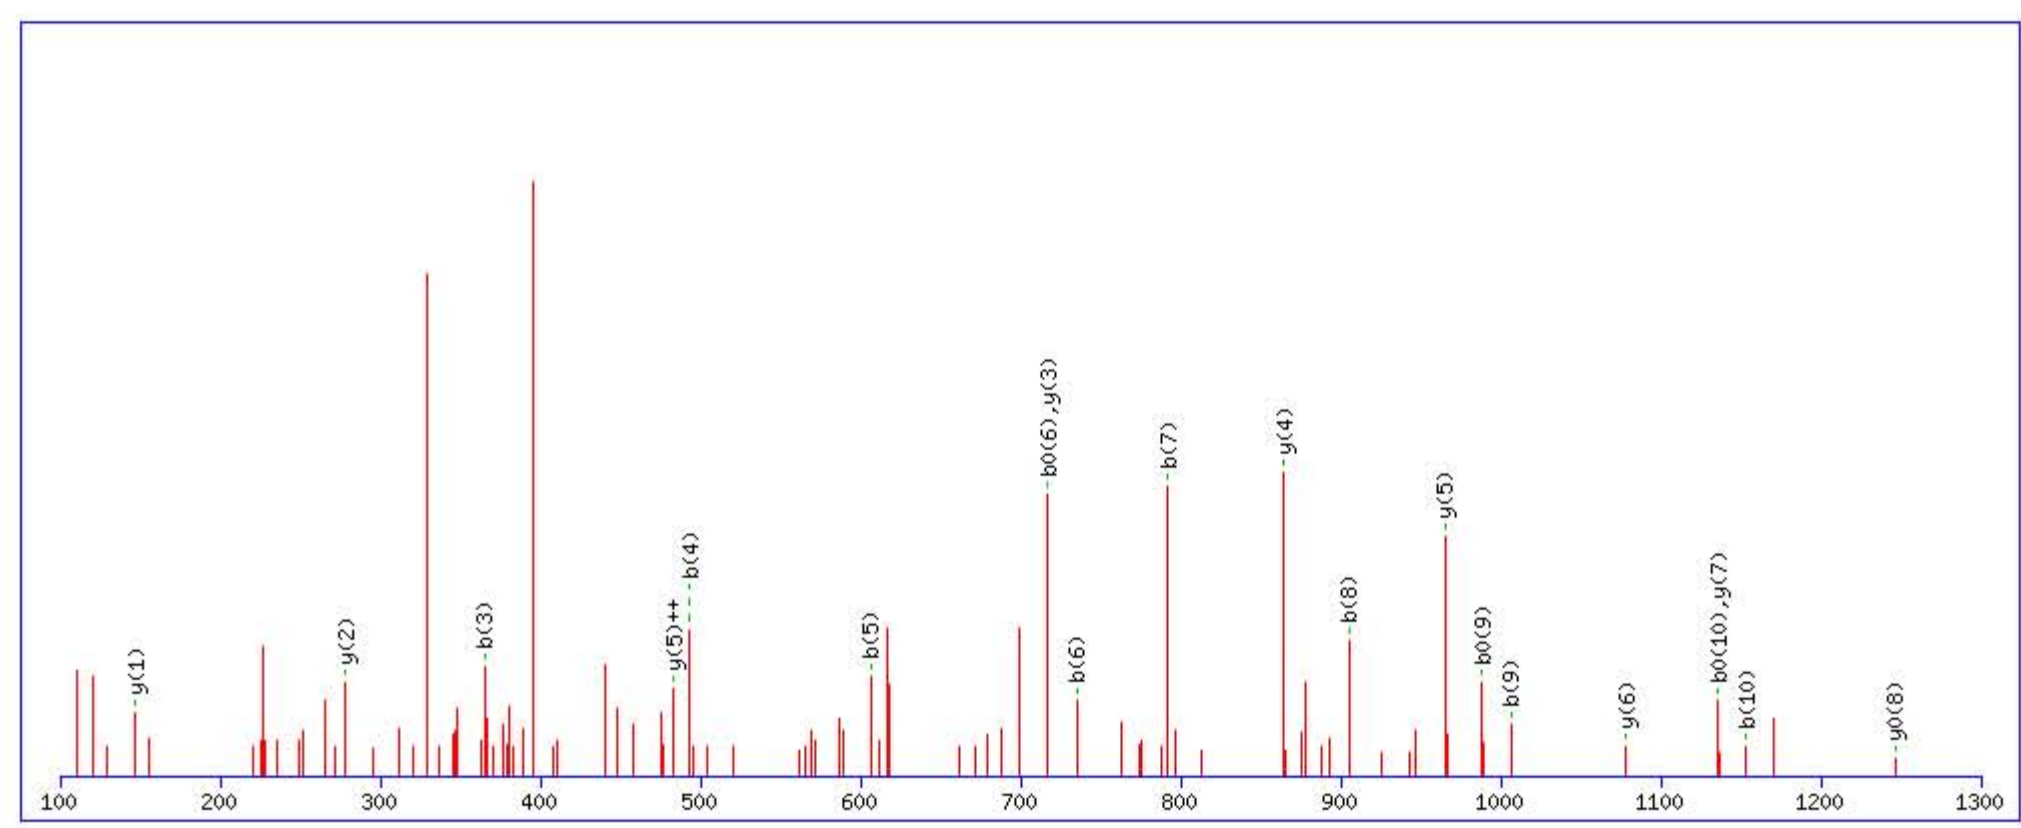

Monoisotopic mass of neutral peptide Mr(calc): 1868.964081  
 Fixed modifications: Carbamidomethyl (C) (apply to specified residues or termini only)  
 Variable modifications:  
 Q11 : Biotin:Thermo-21345 (Q)  
 Ions Score: 47 Expect: 0.00058  
 Matches : 20/124 fragment ions using 32 most intense peaks [\(help\)](#)

| #  | b                  | b <sup>++</sup> | b <sup>*</sup> | b <sup>*++</sup> | b <sup>0</sup>     | b <sup>0++</sup> | Seq. | y                  | y <sup>++</sup>   | y <sup>*</sup> | y <sup>*++</sup> | y <sup>0</sup>     | y <sup>0++</sup> | #  |
|----|--------------------|-----------------|----------------|------------------|--------------------|------------------|------|--------------------|-------------------|----------------|------------------|--------------------|------------------|----|
| 1  | 114.091340         | 57.549308       |                |                  |                    |                  | L    |                    |                   |                |                  |                    |                  | 13 |
| 2  | 228.134267         | 114.570771      | 211.107718     | 106.057497       |                    |                  | N    | 1756.887310        | 878.947293        | 1739.860761    | 870.434019       | 1738.876745        | 869.942011       | 12 |
| 3  | <b>365.193179</b>  | 183.100227      | 348.166630     | 174.586953       |                    |                  | H    | 1642.844383        | 821.925830        | 1625.817834    | 813.412555       | 1624.833818        | 812.920547       | 11 |
| 4  | <b>493.251757</b>  | 247.129516      | 476.225208     | 238.616242       |                    |                  | Q    | 1505.785471        | 753.396374        | 1488.758922    | 744.883099       | 1487.774906        | 744.391091       | 10 |
| 5  | <b>606.335821</b>  | 303.671549      | 589.309272     | 295.158274       |                    |                  | L    | 1377.726893        | 689.367085        | 1360.700344    | 680.853810       | 1359.716328        | 680.361802       | 9  |
| 6  | <b>735.378414</b>  | 368.192845      | 718.351865     | 359.679571       | <b>717.367849</b>  | 359.187563       | E    | 1264.642829        | 632.825053        | 1247.616280    | 624.311778       | <b>1246.632264</b> | 623.819770       | 8  |
| 7  | <b>792.399878</b>  | 396.703577      | 775.373329     | 388.190303       | 774.389313         | 387.698295       | G    | <b>1135.600236</b> | 568.303756        | 1118.573687    | 559.790482       | 1117.589671        | 559.298474       | 7  |
| 8  | <b>905.483942</b>  | 453.245609      | 888.457393     | 444.732335       | 887.473377         | 444.240327       | L    | <b>1078.578772</b> | 539.793024        | 1061.552223    | 531.279750       | 1060.568207        | 530.787742       | 6  |
| 9  | <b>1006.531621</b> | 503.769449      | 989.505072     | 495.256174       | <b>988.521056</b>  | 494.764166       | T    | <b>965.494708</b>  | <b>483.250992</b> | 948.468159     | 474.737718       | 947.484143         | 474.245710       | 5  |
| 10 | <b>1153.600035</b> | 577.303656      | 1136.573486    | 568.790381       | <b>1135.589470</b> | 568.298373       | F    | <b>864.447029</b>  | 432.727153        | 847.420480     | 424.213878       |                    |                  | 4  |
| 11 | 1592.825361        | 796.916319      | 1575.798812    | 788.403044       | 1574.814796        | 787.911036       | Q    | <b>717.378615</b>  | 359.192946        | 700.352066     | 350.679671       |                    |                  | 3  |
| 12 | 1723.865846        | 862.436561      | 1706.839297    | 853.923287       | 1705.855281        | 853.431279       | M    | <b>278.153289</b>  | 139.580282        | 261.126740     | 131.067008       |                    |                  | 2  |
| 13 |                    |                 |                |                  |                    |                  | K    | <b>147.112804</b>  | 74.060040         | 130.086255     | 65.546765        |                    |                  | 1  |

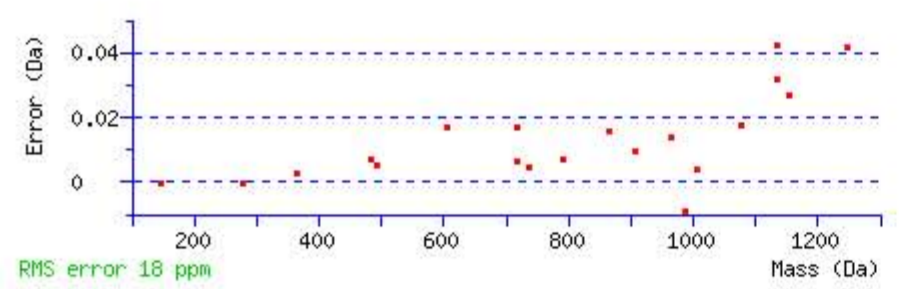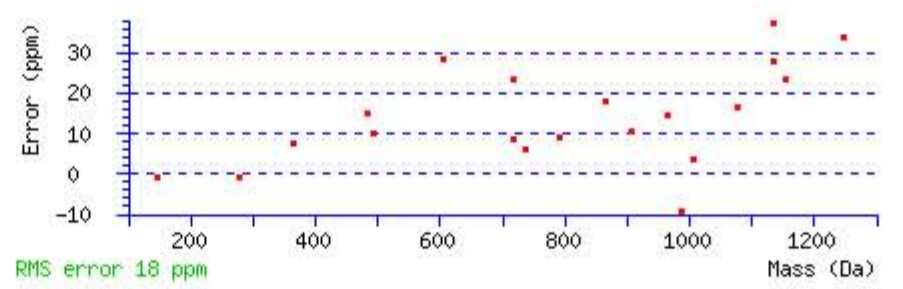

NCBI BLAST search of **LNHQLEGLTFQMK**  
 (Parameters: blastp, nr protein database, expect=20000, no filter, PAM30)  
 Other BLAST [web gateways](#)

### All matches to this query

| Score | Mr(calc):   | Delta    | Sequence                      |
|-------|-------------|----------|-------------------------------|
| 47.1  | 1868.964081 | 0.012471 | <a href="#">LNHQLEGLTFQMK</a> |



# MASCOT SEARCH RESULTS

## Peptide View

MS/MS Fragmentation of **TQVNTQAEQLR**

Found in **APOA4\_HUMAN**, Apolipoprotein A-IV OS=Homo sapiens GN=APOA4 PE=1 SV=3

Match to Query 47021: 1908.986802 from(637.336210,3+) rtinseconds(1926) index(70671)

Title: Locus:1.1.1.3204.15 File:"2013-07-02 CLN FXIII 30 min 2nd FT.wiff"

Data file C:\Program Files (x86)\Matrix Science\Mascot Daemon\mgf2 FXIII 30 min 2nd\mascot\_daemon\_merge.mgf

Click mouse within plot area to zoom in by factor of two about that point

Or, Plot from  to  Da

Label all possible matches  Label matches used for scoring

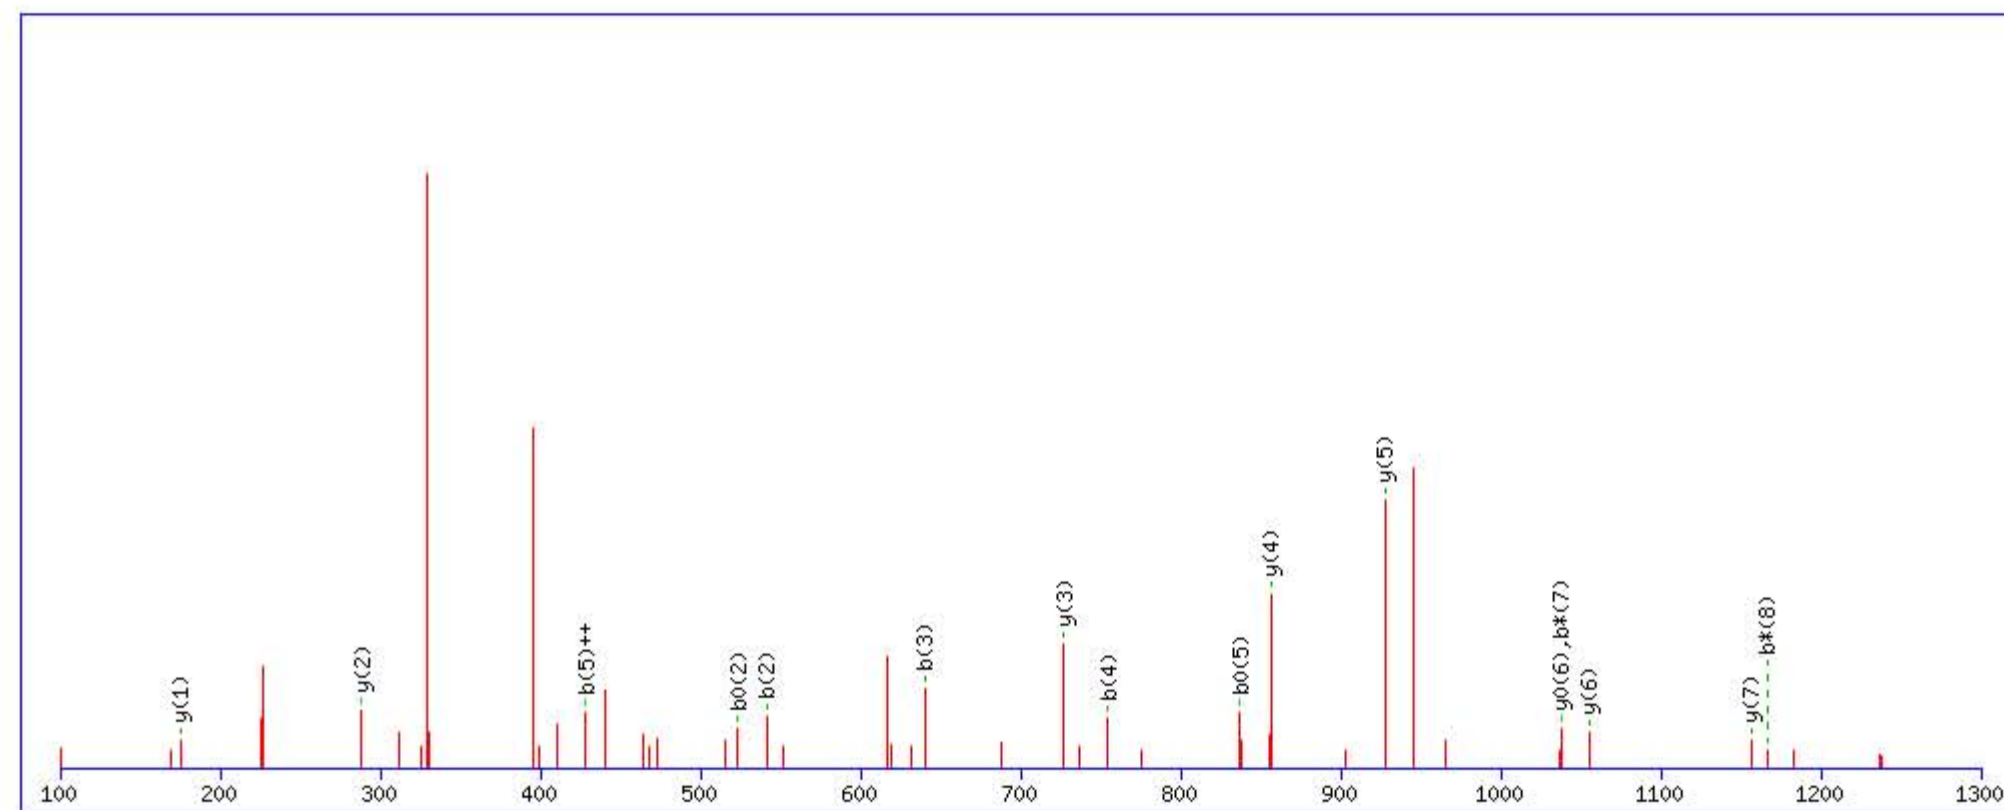

Monoisotopic mass of neutral peptide Mr(calc): 1908.991364

Fixed modifications: Carbamidomethyl (C) (apply to specified residues or termini only)

Variable modifications:

Q2 : Biotin:Thermo-21345 (Q)

Q9 : Biotin:Thermo-21345 (Q)

Ions Score: 37 Expect: 0.00041

Matches : 16/112 fragment ions using 24 most intense peaks [\(help\)](#)

| #  | b                 | b <sup>++</sup>   | b <sup>+</sup>     | b <sup>+++</sup> | b <sup>0</sup>    | b <sup>0++</sup> | Seq. | y                  | y <sup>++</sup> | y <sup>+</sup> | y <sup>+++</sup> | y <sup>0</sup>     | y <sup>0++</sup> | #  |
|----|-------------------|-------------------|--------------------|------------------|-------------------|------------------|------|--------------------|-----------------|----------------|------------------|--------------------|------------------|----|
| 1  | 102.054955        | 51.531116         |                    |                  | 84.044390         | 42.525833        | T    |                    |                 |                |                  |                    |                  | 11 |
| 2  | <b>541.280281</b> | 271.143779        | 524.253732         | 262.630504       | <b>523.269716</b> | 262.138496       | Q    | 1808.950973        | 904.979125      | 1791.924424    | 896.465850       | 1790.940408        | 895.973842       | 10 |
| 3  | <b>640.348695</b> | 320.677986        | 623.322146         | 312.164711       | 622.338130        | 311.672703       | V    | 1369.725647        | 685.366462      | 1352.699098    | 676.853187       | 1351.715082        | 676.361179       | 9  |
| 4  | <b>754.391622</b> | 377.699449        | 737.365073         | 369.186174       | 736.381057        | 368.694166       | N    | 1270.657233        | 635.832255      | 1253.630684    | 627.318980       | 1252.646668        | 626.826972       | 8  |
| 5  | 855.439301        | <b>428.223289</b> | 838.412752         | 419.710014       | <b>837.428736</b> | 419.218006       | T    | <b>1156.614306</b> | 578.810791      | 1139.587757    | 570.297517       | 1138.603741        | 569.805509       | 7  |
| 6  | 983.497879        | 492.252578        | 966.471330         | 483.739303       | 965.487314        | 483.247295       | Q    | <b>1055.566627</b> | 528.286952      | 1038.540078    | 519.773677       | <b>1037.556062</b> | 519.281669       | 6  |
| 7  | 1054.534993       | 527.771135        | <b>1037.508444</b> | 519.257860       | 1036.524428       | 518.765852       | A    | <b>927.508049</b>  | 464.257663      | 910.481500     | 455.744388       | 909.497484         | 455.252380       | 5  |
| 8  | 1183.577586       | 592.292431        | <b>1166.551037</b> | 583.779157       | 1165.567021       | 583.287149       | E    | <b>856.470935</b>  | 428.739106      | 839.444386     | 420.225831       | 838.460370         | 419.733823       | 4  |
| 9  | 1622.802912       | 811.905094        | 1605.776363        | 803.391820       | 1604.792347       | 802.899812       | Q    | <b>727.428342</b>  | 364.217809      | 710.401793     | 355.704535       |                    |                  | 3  |
| 10 | 1735.886976       | 868.447126        | 1718.860427        | 859.933852       | 1717.876411       | 859.441844       | L    | <b>288.203016</b>  | 144.605146      | 271.176467     | 136.091871       |                    |                  | 2  |
| 11 |                   |                   |                    |                  |                   |                  | R    | <b>175.118952</b>  | 88.063114       | 158.092403     | 79.549839        |                    |                  | 1  |

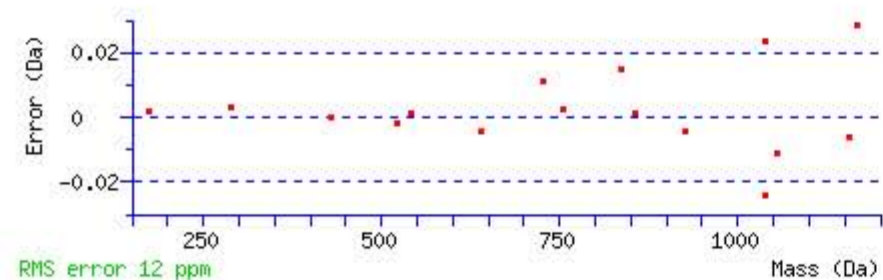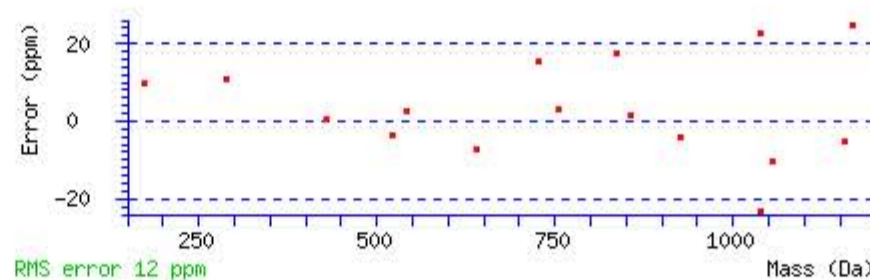

NCBI BLAST search of **TQVNTQAEQLR**

(Parameters: blastp, nr protein database, expect=20000, no filter, PAM30)

Other BLAST [web gateways](#)

All matches to this query

| Score | Mr(calc):   | Delta     | Sequence                      |
|-------|-------------|-----------|-------------------------------|
| 37.3  | 1908.991364 | -0.004562 | <a href="#">TQVNTQAEQLR</a>   |
| 11.1  | 1908.991364 | -0.004562 | <a href="#">TQVNTQAEQLR</a>   |
| 9.6   | 1908.991364 | -0.004562 | <a href="#">TQVNTQAEQLR</a>   |
| 1.1   | 1908.966202 | 0.020600  | <a href="#">KASQILPQATMNR</a> |
| 0.5   | 1909.002579 | -0.015777 | <a href="#">QQLETARNATR</a>   |

Mascot: <http://www.matrixscience.com/>



# MASCOT Search Results

## Peptide View

MS/MS Fragmentation of **SLAELGGHLDQQVEEFR**  
 Found in **APOA4\_HUMAN**, Apolipoprotein A-IV OS=Homo sapiens GN=APOA4 PE=1 SV=3

Match to Query 54746: 2238.096882 from(747.039570,3+) rtinseconds(2243) index(72731)  
 Title: Locus:1.1.1.3314.25 File:"2013-07-02 CLN FXIII 30 min 2nd FT.wiff"  
 Data file C:\Program Files (x86)\Matrix Science\Mascot Daemon\mgf2 FXIII 30 min 2nd\mascot\_daemon\_merge.mgf

Click mouse within plot area to zoom in by factor of two about that point

Or, Plot from  to  Da

Label all possible matches  Label matches used for scoring

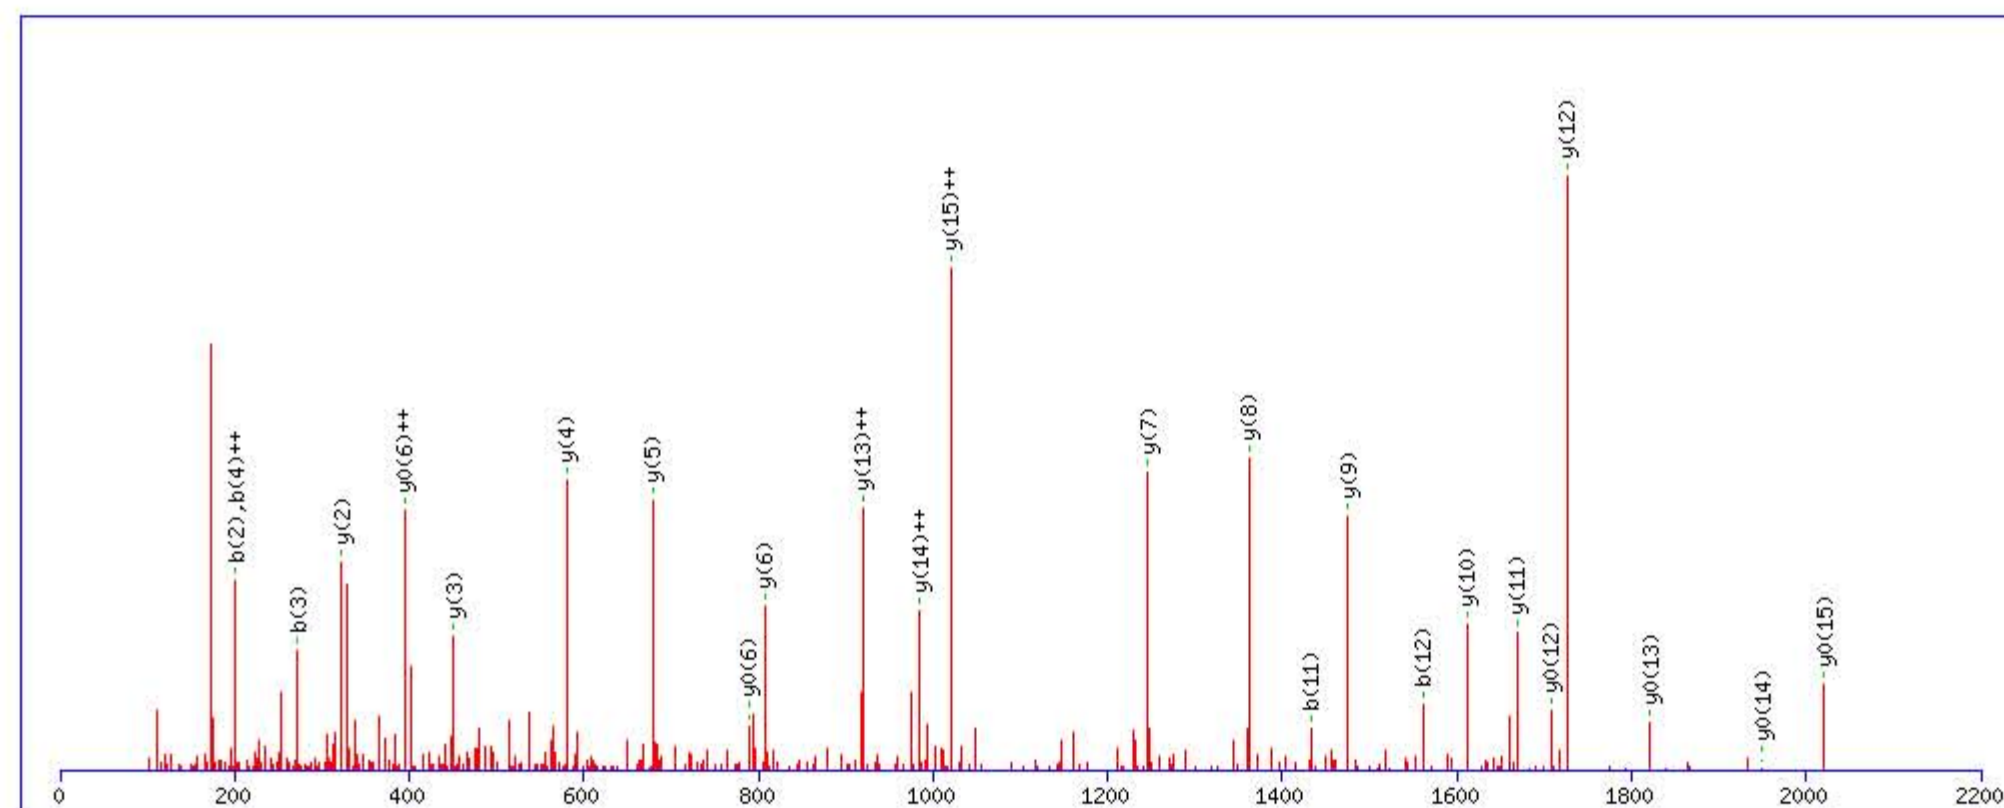

Monoisotopic mass of neutral peptide Mr(calc): 2238.110291  
 Fixed modifications: Carbamidomethyl (C) (apply to specified residues or termini only)  
 Variable modifications:  
 Q11 : Biotin:Thermo-21345 (Q)  
 Ions Score: 70 Expect: 2.6e-006  
 Matches : 25/168 fragment ions using 39 most intense peaks [\(help\)](#)

| #  | b                  | b <sup>++</sup>   | b <sup>*</sup> | b <sup>*++</sup> | b <sup>0</sup> | b <sup>0++</sup> | Seq. | y                  | y <sup>++</sup>    | y <sup>*</sup> | y <sup>*++</sup> | y <sup>0</sup>     | y <sup>0++</sup>  | #  |
|----|--------------------|-------------------|----------------|------------------|----------------|------------------|------|--------------------|--------------------|----------------|------------------|--------------------|-------------------|----|
| 1  | 88.039304          | 44.523290         |                |                  | 70.028739      | 35.518008        | S    |                    |                    |                |                  |                    |                   | 17 |
| 2  | <b>201.123368</b>  | 101.065322        |                |                  | 183.112803     | 92.060039        | L    | 2152.085552        | 1076.546414        | 2135.059003    | 1068.033139      | 2134.074987        | 1067.541131       | 16 |
| 3  | <b>272.160482</b>  | 136.583879        |                |                  | 254.149917     | 127.578596       | A    | 2039.001488        | <b>1020.004382</b> | 2021.974939    | 1011.491108      | <b>2020.990923</b> | 1010.999100       | 15 |
| 4  | 401.203075         | <b>201.105175</b> |                |                  | 383.192510     | 192.099893       | E    | 1967.964374        | <b>984.485825</b>  | 1950.937825    | 975.972551       | <b>1949.953809</b> | 975.480543        | 14 |
| 5  | 514.287139         | 257.647208        |                |                  | 496.276574     | 248.641925       | L    | 1838.921781        | <b>919.964529</b>  | 1821.895232    | 911.451254       | <b>1820.911216</b> | 910.959246        | 13 |
| 6  | 571.308603         | 286.157940        |                |                  | 553.298038     | 277.152657       | G    | <b>1725.837717</b> | 863.422497         | 1708.811168    | 854.909222       | <b>1707.827152</b> | 854.417214        | 12 |
| 7  | 628.330067         | 314.668672        |                |                  | 610.319502     | 305.663389       | G    | <b>1668.816253</b> | 834.911765         | 1651.789704    | 826.398490       | 1650.805688        | 825.906482        | 11 |
| 8  | 765.388979         | 383.198128        |                |                  | 747.378414     | 374.192845       | H    | <b>1611.794789</b> | 806.401033         | 1594.768240    | 797.887758       | 1593.784224        | 797.395750        | 10 |
| 9  | 878.473043         | 439.740160        |                |                  | 860.462478     | 430.734877       | L    | <b>1474.735877</b> | 737.871577         | 1457.709328    | 729.358302       | 1456.725312        | 728.866294        | 9  |
| 10 | 993.499986         | 497.253631        |                |                  | 975.489421     | 488.248349       | D    | <b>1361.651813</b> | 681.329545         | 1344.625264    | 672.816270       | 1343.641248        | 672.324262        | 8  |
| 11 | <b>1432.725312</b> | 716.866294        | 1415.698763    | 708.353020       | 1414.714747    | 707.861012       | Q    | <b>1246.624870</b> | 623.816073         | 1229.598321    | 615.302799       | 1228.614305        | 614.810791        | 7  |
| 12 | <b>1560.783890</b> | 780.895583        | 1543.757341    | 772.382309       | 1542.773325    | 771.890301       | Q    | <b>807.399544</b>  | 404.203410         | 790.372995     | 395.690136       | <b>789.388979</b>  | <b>395.198128</b> | 6  |
| 13 | 1659.852304        | 830.429790        | 1642.825755    | 821.916516       | 1641.841739    | 821.424508       | V    | <b>679.340966</b>  | 340.174121         | 662.314417     | 331.660846       | 661.330401         | 331.168838        | 5  |
| 14 | 1788.894897        | 894.951087        | 1771.868348    | 886.437812       | 1770.884332    | 885.945804       | E    | <b>580.272552</b>  | 290.639914         | 563.246003     | 282.126639       | 562.261987         | 281.634631        | 4  |
| 15 | 1917.937490        | 959.472383        | 1900.910941    | 950.959109       | 1899.926925    | 950.467101       | E    | <b>451.229959</b>  | 226.118617         | 434.203410     | 217.605343       | 433.219394         | 217.113335        | 3  |
| 16 | 2065.005904        | 1033.006590       | 2047.979355    | 1024.493316      | 2046.995339    | 1024.001307      | F    | <b>322.187366</b>  | 161.597321         | 305.160817     | 153.084046       |                    |                   | 2  |
| 17 |                    |                   |                |                  |                |                  | R    | 175.118952         | 88.063114          | 158.092403     | 79.549839        |                    |                   | 1  |

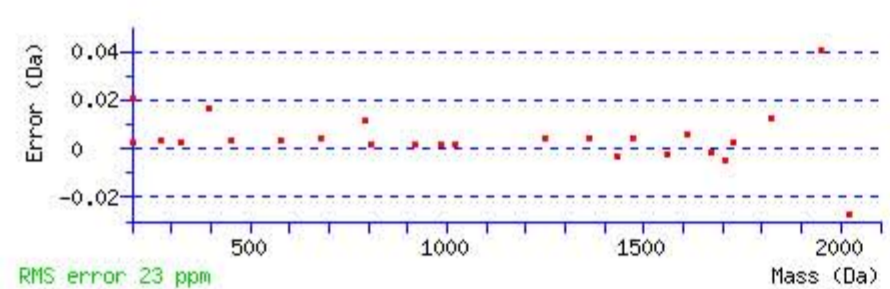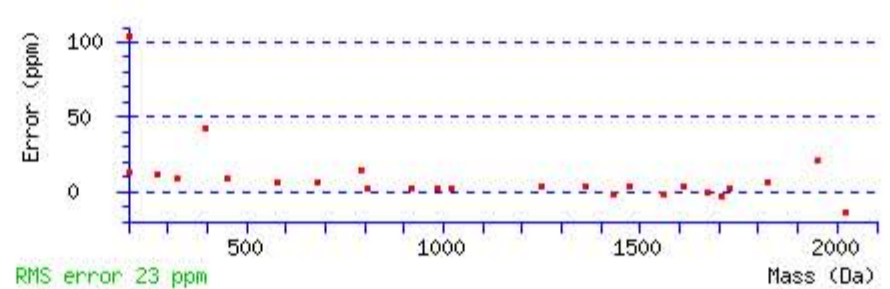

NCBI BLAST search of [SLAELGGHLDQQVEEFR](#)  
 (Parameters: blastp, nr protein database, expect=20000, no filter, PAM30)  
 Other BLAST [web gateways](#)

### All matches to this query

| Score | Mr(calc):   | Delta     | Sequence                          |
|-------|-------------|-----------|-----------------------------------|
| 69.8  | 2238.110291 | -0.013409 | <a href="#">SLAELGGHLDQQVEEFR</a> |
| 52.4  | 2238.110291 | -0.013409 | <a href="#">SLAELGGHLDQQVEEFR</a> |



# Mascot Search Results

## Peptide View

MS/MS Fragmentation of **STAAMSTYTGIFTDQVLSVLK**

Found in **APOC2\_HUMAN**, Apolipoprotein C-II OS=Homo sapiens GN=APOC2 PE=1 SV=1

Match to Query 60665: 2543.301912 from(848.774580,3+) rtinseconds(3213) index(63332)

Title: Locus:1.1.1.3599.14 File:"2013-07-02 CLN FXIII 30 min 2nd F 4.wiff"

Data file C:\Program Files (x86)\Matrix Science\Mascot Daemon\mgf2 FXIII 30 min 2nd\mascot\_daemon\_merge.mgf

Click mouse within plot area to zoom in by factor of two about that point

Or, Plot from  to  Da

Label all possible matches  Label matches used for scoring

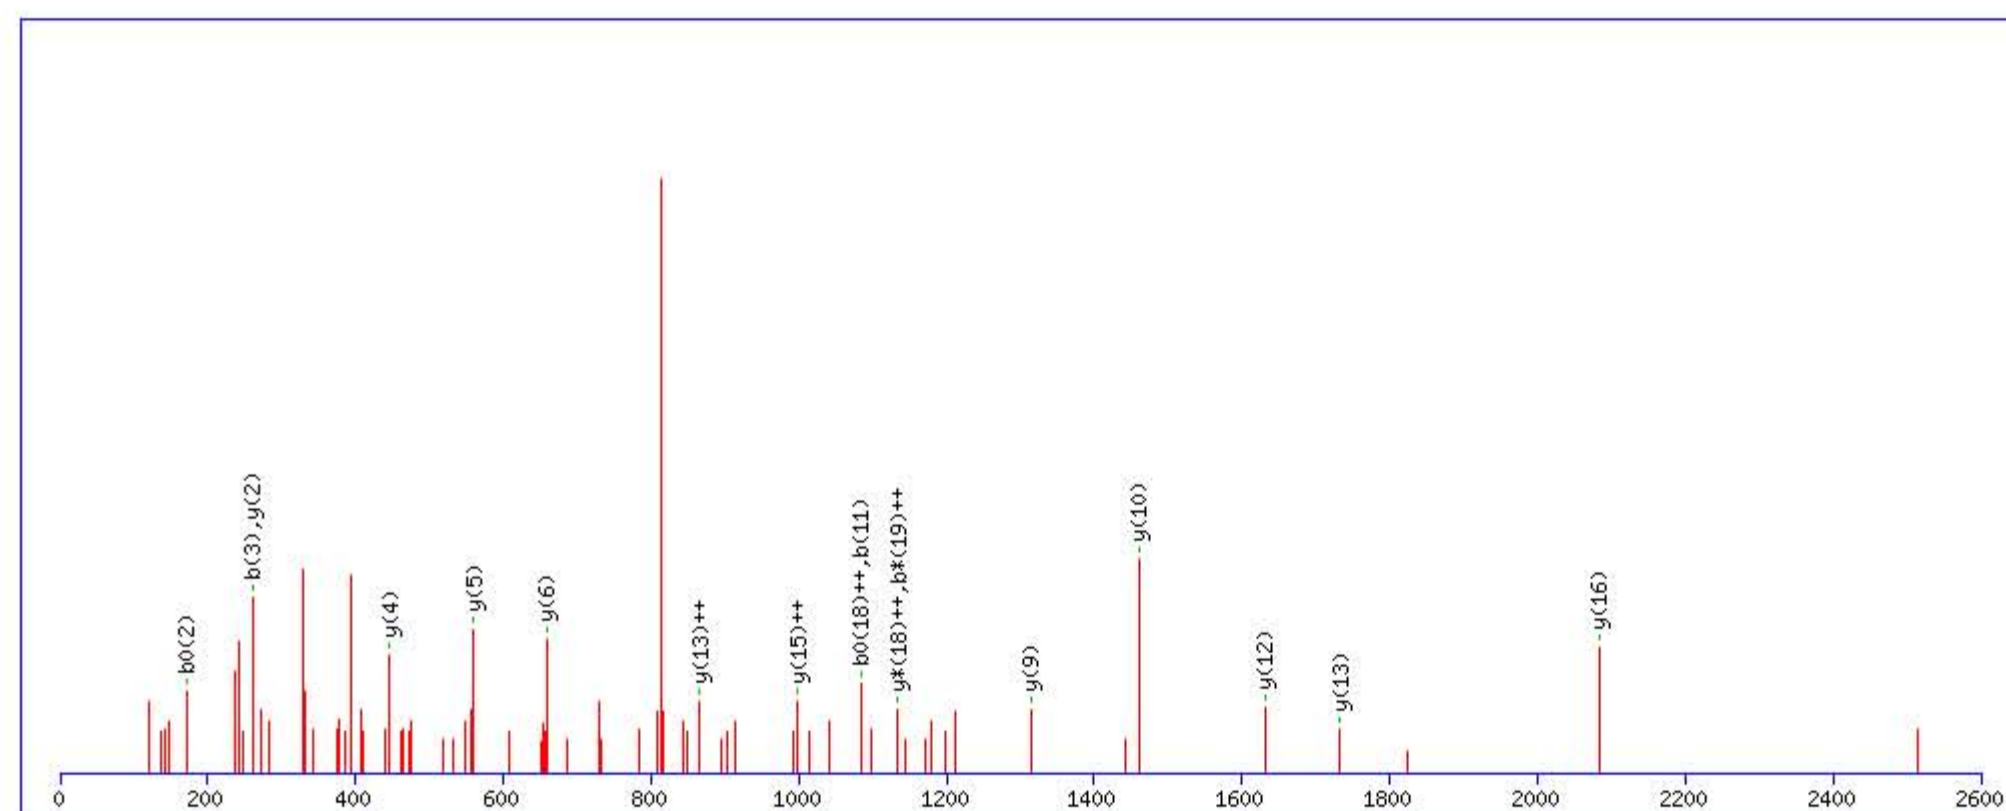

Monoisotopic mass of neutral peptide Mr(calc): 2543.301544

Fixed modifications: Carbamidomethyl (C) (apply to specified residues or termini only)

Variable modifications:

Q15 : Biotin:Thermo-21345 (Q)

Ions Score: 65 Expect: 9.1e-006

Matches : 17/206 fragment ions using 18 most intense peaks [\(help\)](#)

| #  | b           | b <sup>++</sup> | b <sup>*</sup> | b <sup>*++</sup> | b <sup>0</sup> | b <sup>0++</sup> | Seq. | y           | y <sup>++</sup> | y <sup>*</sup> | y <sup>*++</sup> | y <sup>0</sup> | y <sup>0++</sup> | #  |
|----|-------------|-----------------|----------------|------------------|----------------|------------------|------|-------------|-----------------|----------------|------------------|----------------|------------------|----|
| 1  | 88.039304   | 44.523290       |                |                  | 70.028739      | 35.518008        | S    |             |                 |                |                  |                |                  | 21 |
| 2  | 189.086983  | 95.047129       |                |                  | 171.076418     | 86.041847        | T    | 2457.276785 | 1229.142030     | 2440.250236    | 1220.628756      | 2439.266220    | 1220.136748      | 20 |
| 3  | 260.124097  | 130.565686      |                |                  | 242.113532     | 121.560404       | A    | 2356.229106 | 1178.618191     | 2339.202557    | 1170.104916      | 2338.218541    | 1169.612908      | 19 |
| 4  | 331.161211  | 166.084243      |                |                  | 313.150646     | 157.078961       | A    | 2285.191992 | 1143.099634     | 2268.165443    | 1134.586359      | 2267.181427    | 1134.094351      | 18 |
| 5  | 462.201696  | 231.604486      |                |                  | 444.191131     | 222.599203       | M    | 2214.154878 | 1107.581077     | 2197.128329    | 1099.067802      | 2196.144313    | 1098.575794      | 17 |
| 6  | 549.233724  | 275.120500      |                |                  | 531.223159     | 266.115217       | S    | 2083.114393 | 1042.060834     | 2066.087844    | 1033.547560      | 2065.103828    | 1033.055552      | 16 |
| 7  | 650.281403  | 325.644340      |                |                  | 632.270838     | 316.639057       | T    | 1996.082365 | 998.544821      | 1979.055816    | 990.031546       | 1978.071800    | 989.539538       | 15 |
| 8  | 813.344732  | 407.176004      |                |                  | 795.334167     | 398.170722       | Y    | 1895.034686 | 948.020981      | 1878.008137    | 939.507707       | 1877.024121    | 939.015699       | 14 |
| 9  | 914.392411  | 457.699844      |                |                  | 896.381846     | 448.694561       | T    | 1731.971357 | 866.489317      | 1714.944808    | 857.976042       | 1713.960792    | 857.484034       | 13 |
| 10 | 971.413875  | 486.210576      |                |                  | 953.403310     | 477.205293       | G    | 1630.923678 | 815.965477      | 1613.897129    | 807.452203       | 1612.913113    | 806.960195       | 12 |
| 11 | 1084.497939 | 542.752608      |                |                  | 1066.487374    | 533.747325       | I    | 1573.902214 | 787.454745      | 1556.875665    | 778.941471       | 1555.891649    | 778.449463       | 11 |
| 12 | 1231.566353 | 616.286815      |                |                  | 1213.555788    | 607.281532       | F    | 1460.818150 | 730.912713      | 1443.791601    | 722.399439       | 1442.807585    | 721.907431       | 10 |
| 13 | 1332.614032 | 666.810654      |                |                  | 1314.603467    | 657.805372       | T    | 1313.749736 | 657.378506      | 1296.723187    | 648.865232       | 1295.739171    | 648.373224       | 9  |
| 14 | 1447.640975 | 724.324126      |                |                  | 1429.630410    | 715.318843       | D    | 1212.702057 | 606.854667      | 1195.675508    | 598.341392       | 1194.691492    | 597.849384       | 8  |
| 15 | 1886.866301 | 943.936789      | 1869.839752    | 935.423514       | 1868.855736    | 934.931506       | Q    | 1097.675114 | 549.341195      | 1080.648565    | 540.827921       | 1079.664549    | 540.335913       | 7  |
| 16 | 1985.934715 | 993.470996      | 1968.908166    | 984.957721       | 1967.924150    | 984.465713       | V    | 658.449788  | 329.728532      | 641.423239     | 321.215258       | 640.439223     | 320.723250       | 6  |
| 17 | 2099.018779 | 1050.013027     | 2081.992230    | 1041.499753      | 2081.008214    | 1041.007745      | L    | 559.381374  | 280.194325      | 542.354825     | 271.681051       | 541.370809     | 271.189043       | 5  |
| 18 | 2186.050807 | 1093.529041     | 2169.024258    | 1085.015767      | 2168.040242    | 1084.523759      | S    | 446.297310  | 223.652293      | 429.270761     | 215.139019       | 428.286745     | 214.647011       | 4  |
| 19 | 2285.119221 | 1143.063248     | 2268.092672    | 1134.549974      | 2267.108656    | 1134.057966      | V    | 359.265282  | 180.136279      | 342.238733     | 171.623004       |                |                  | 3  |
| 20 | 2398.203285 | 1199.605280     | 2381.176736    | 1191.092006      | 2380.192720    | 1190.599998      | L    | 260.196868  | 130.602072      | 243.170319     | 122.088798       |                |                  | 2  |
| 21 |             |                 |                |                  |                |                  | K    | 147.112804  | 74.060040       | 130.086255     | 65.546765        |                |                  | 1  |

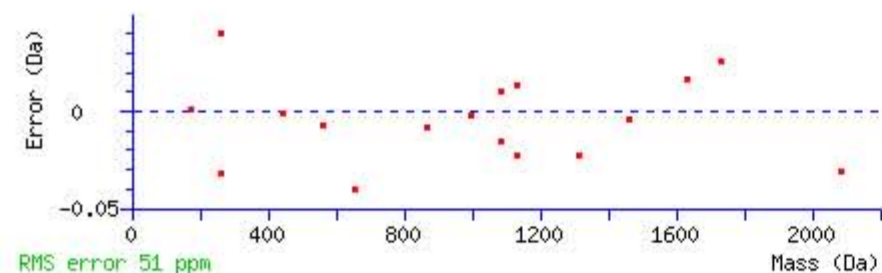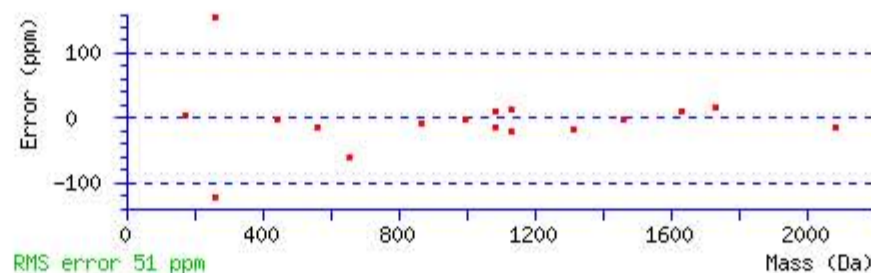

NCBI BLAST search of [STAAMSTYTGIFTDQVLSVLK](#)

(Parameters: blastp, nr protein database, expect=20000, no filter, PAM30)

Other BLAST [web gateways](#)

All matches to this query

| Score | Mr(calc):   | Delta    | Sequence                              |
|-------|-------------|----------|---------------------------------------|
| 65.1  | 2543.301544 | 0.000368 | <a href="#">STAAMSTYTGIFTDQVLSVLK</a> |

Mascot: <http://www.matrixscience.com/>



# MASCOT Search Results

## Peptide View

MS/MS Fragmentation of **DALSSVQESQVAQQAR**

Found in **APOC3\_HUMAN**, Apolipoprotein C-III OS=Homo sapiens GN=APOC3 PE=1 SV=1

Match to Query 50483: 2027.006712 from(676.676180,3+) rtinseconds(1942) index(55380)

Title: Locus:1.1.1.3162.12 File:"2013-07-02 CLN FXIII 30 min 2nd F 4.wiff"

Data file C:\Program Files (x86)\Matrix Science\Mascot Daemon\mgf\2 FXIII 30 min 2nd\mascot\_daemon\_merge.mgf

Click mouse within plot area to zoom in by factor of two about that point

Or, Plot from 0 to 2800 Da Full range

Label all possible matches  Label matches used for scoring

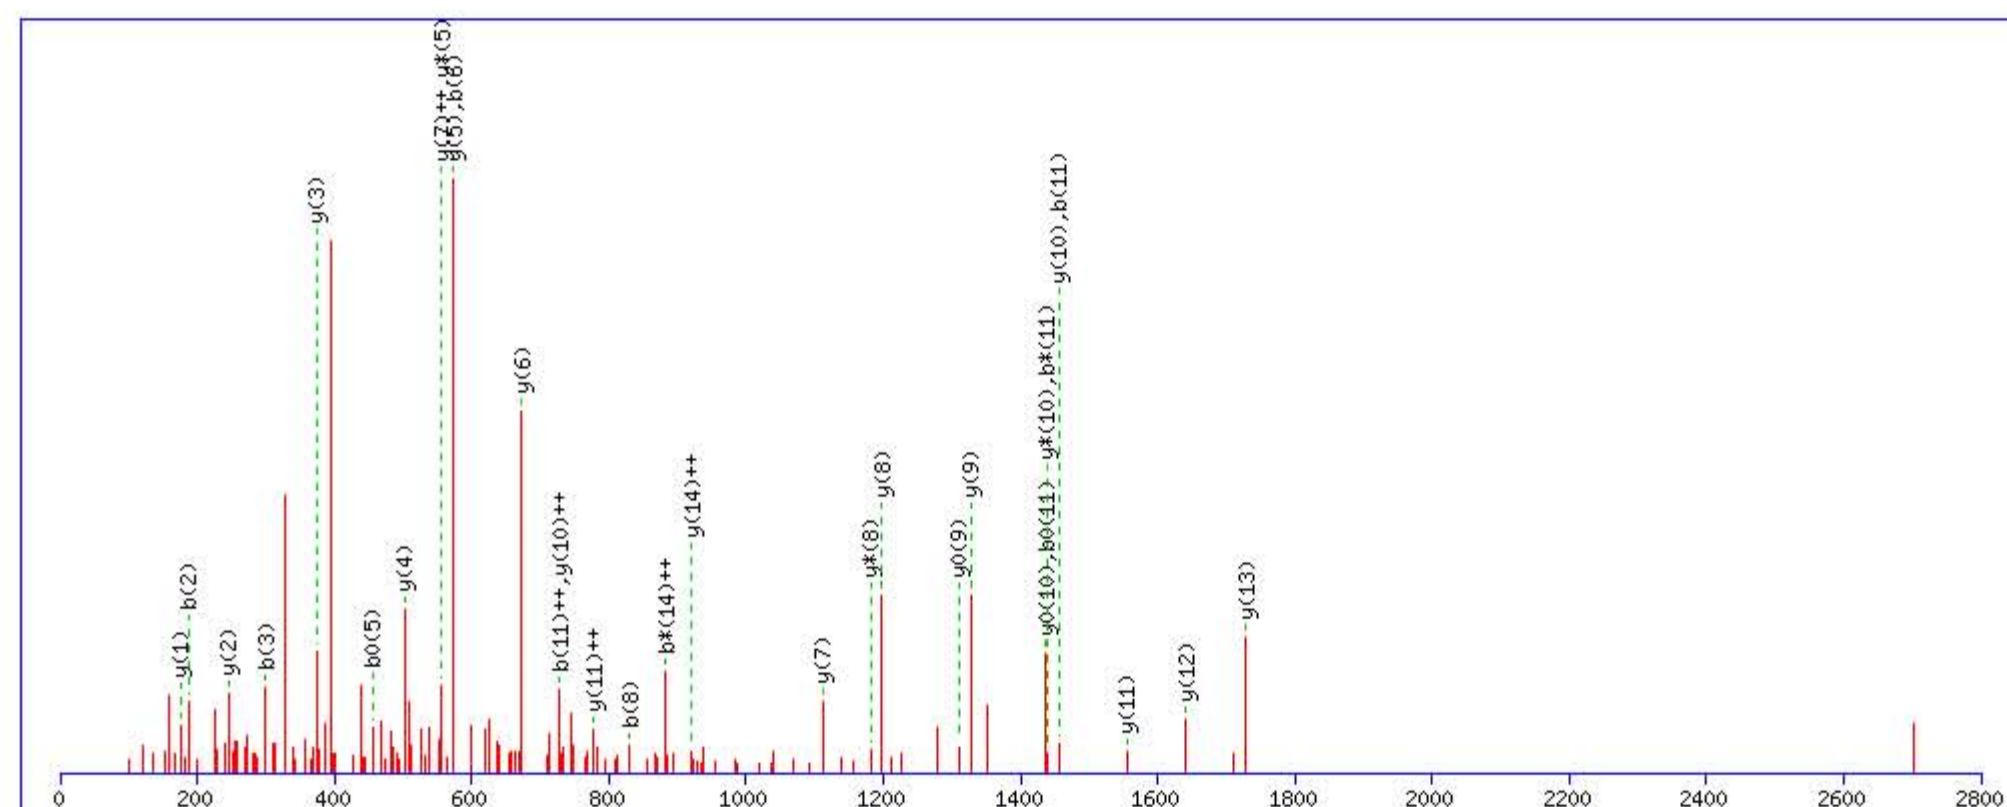

Monoisotopic mass of neutral peptide Mr(calc): 2027.010574

Fixed modifications: Carbamidomethyl (C) (apply to specified residues or termini only)

Variable modifications:

Q10 : Biotin:Thermo-21345 (Q)

Ions Score: 87 Expect: 1.4e-008

Matches : 32/154 fragment ions using 46 most intense peaks [\(help\)](#)

| #  | b                  | b <sup>++</sup>   | b <sup>*</sup>     | b <sup>+++</sup>  | b <sup>0</sup>     | b <sup>0++</sup> | Seq. | y                  | y <sup>++</sup>   | y <sup>*</sup>     | y <sup>+++</sup> | y <sup>0</sup>     | y <sup>0++</sup> | #  |
|----|--------------------|-------------------|--------------------|-------------------|--------------------|------------------|------|--------------------|-------------------|--------------------|------------------|--------------------|------------------|----|
| 1  | 116.034219         | 58.520748         |                    |                   | 98.023654          | 49.515465        | D    |                    |                   |                    |                  |                    |                  | 16 |
| 2  | <b>187.071333</b>  | 94.039304         |                    |                   | 169.060768         | 85.034022        | A    | 1912.990923        | 956.999100        | 1895.964374        | 948.485825       | 1894.980358        | 947.993817       | 15 |
| 3  | <b>300.155397</b>  | 150.581336        |                    |                   | 282.144832         | 141.576054       | L    | 1841.953809        | <b>921.480543</b> | 1824.927260        | 912.967268       | 1823.943244        | 912.475260       | 14 |
| 4  | 387.187425         | 194.097351        |                    |                   | 369.176860         | 185.092068       | S    | <b>1728.869745</b> | 864.938511        | 1711.843196        | 856.425236       | 1710.859180        | 855.933228       | 13 |
| 5  | 474.219453         | 237.613364        |                    |                   | <b>456.208888</b>  | 228.608082       | S    | <b>1641.837717</b> | 821.422497        | 1624.811168        | 812.909222       | 1623.827152        | 812.417214       | 12 |
| 6  | <b>573.287867</b>  | 287.147572        |                    |                   | 555.277302         | 278.142289       | V    | <b>1554.805689</b> | <b>777.906483</b> | 1537.779140        | 769.393208       | 1536.795124        | 768.901200       | 11 |
| 7  | 701.346445         | 351.176861        | 684.319896         | 342.663586        | 683.335880         | 342.171578       | Q    | <b>1455.737275</b> | <b>728.372276</b> | <b>1438.710726</b> | 719.859001       | <b>1437.726710</b> | 719.366993       | 10 |
| 8  | <b>830.389038</b>  | 415.698157        | 813.362489         | 407.184883        | 812.378473         | 406.692875       | E    | <b>1327.678697</b> | 664.342987        | 1310.652148        | 655.829712       | <b>1309.668132</b> | 655.337704       | 9  |
| 9  | 917.421066         | 459.214171        | 900.394517         | 450.700897        | 899.410501         | 450.208889       | S    | <b>1198.636104</b> | 599.821690        | <b>1181.609555</b> | 591.308416       | 1180.625539        | 590.816408       | 8  |
| 10 | 1356.646392        | 678.826834        | 1339.619843        | 670.313560        | 1338.635827        | 669.821551       | Q    | <b>1111.604076</b> | <b>556.305676</b> | 1094.577527        | 547.792402       |                    |                  | 7  |
| 11 | <b>1455.714806</b> | <b>728.361041</b> | <b>1438.688257</b> | 719.847767        | <b>1437.704241</b> | 719.355758       | V    | <b>672.378750</b>  | 336.693013        | 655.352201         | 328.179739       |                    |                  | 6  |
| 12 | 1526.751920        | 763.879598        | 1509.725371        | 755.366324        | 1508.741355        | 754.874315       | A    | <b>573.310336</b>  | 287.158806        | <b>556.283787</b>  | 278.645532       |                    |                  | 5  |
| 13 | 1654.810498        | 827.908887        | 1637.783949        | 819.395613        | 1636.799933        | 818.903605       | Q    | <b>502.273222</b>  | 251.640249        | 485.246673         | 243.126975       |                    |                  | 4  |
| 14 | 1782.869076        | 891.938176        | 1765.842527        | <b>883.424902</b> | 1764.858511        | 882.932894       | Q    | <b>374.214644</b>  | 187.610960        | 357.188095         | 179.097686       |                    |                  | 3  |
| 15 | 1853.906190        | 927.456733        | 1836.879641        | 918.943459        | 1835.895625        | 918.451451       | A    | <b>246.156066</b>  | 123.581671        | 229.129517         | 115.068396       |                    |                  | 2  |
| 16 |                    |                   |                    |                   |                    |                  | R    | <b>175.118952</b>  | 88.063114         | 158.092403         | 79.549839        |                    |                  | 1  |

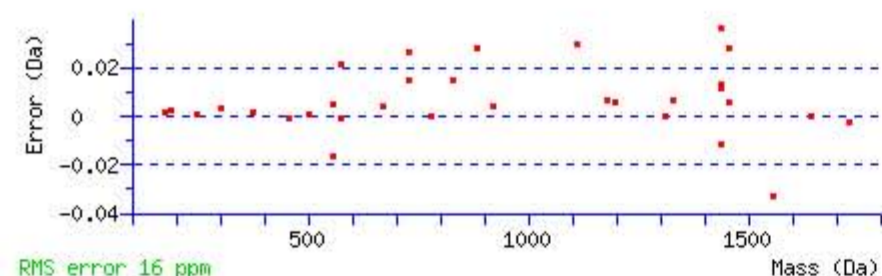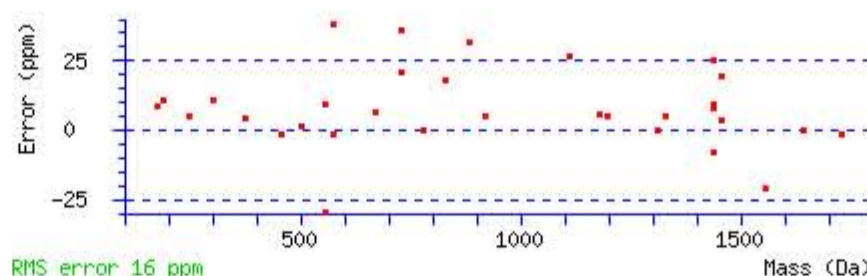

NCBI BLAST search of **DALSSVQESQVAQQAR**

(Parameters: blastp, nr protein database, expect=20000, no filter, PAM30)

Other BLAST [web gateways](#)

## All matches to this query

| Score | Mr(calc):   | Delta     | Sequence                            |
|-------|-------------|-----------|-------------------------------------|
| 87.1  | 2027.010574 | -0.003862 | <a href="#">DALSSVQESQVAQQAR</a>    |
| 56.6  | 2027.010574 | -0.003862 | <a href="#">DALSSVQESQVAQQAR</a>    |
| 47.8  | 2027.010574 | -0.003862 | <a href="#">DALSSVQESQVAQQAR</a>    |
| 46.5  | 2027.010574 | -0.003862 | <a href="#">DALSSVQESQVAQQAR</a>    |
| 3.1   | 2027.035721 | -0.029009 | <a href="#">LLLQMDSSATAYGSTVSKR</a> |
| 2.4   | 2027.029633 | -0.022921 | <a href="#">QEESHSHKHLIELRR</a>     |



# MASCOT Search Results

## Peptide View

MS/MS Fragmentation of **DALSSVQESQVAQQAR**

Found in **APOC3\_HUMAN**, Apolipoprotein C-III OS=Homo sapiens GN=APOC3 PE=1 SV=1

Match to Query 50484: 2027.006712 from(676.676180,3+) rtinseconds(1933) index(55306)

Title: Locus:1.1.1.3159.13 File:"2013-07-02 CLN FXIII 30 min 2nd F 4.wiff"

Data file C:\Program Files (x86)\Matrix Science\Mascot Daemon\mgf\2 FXIII 30 min 2nd\mascot\_daemon\_merge.mgf

Click mouse within plot area to zoom in by factor of two about that point

Or, Plot from  to  Da

Label all possible matches  Label matches used for scoring

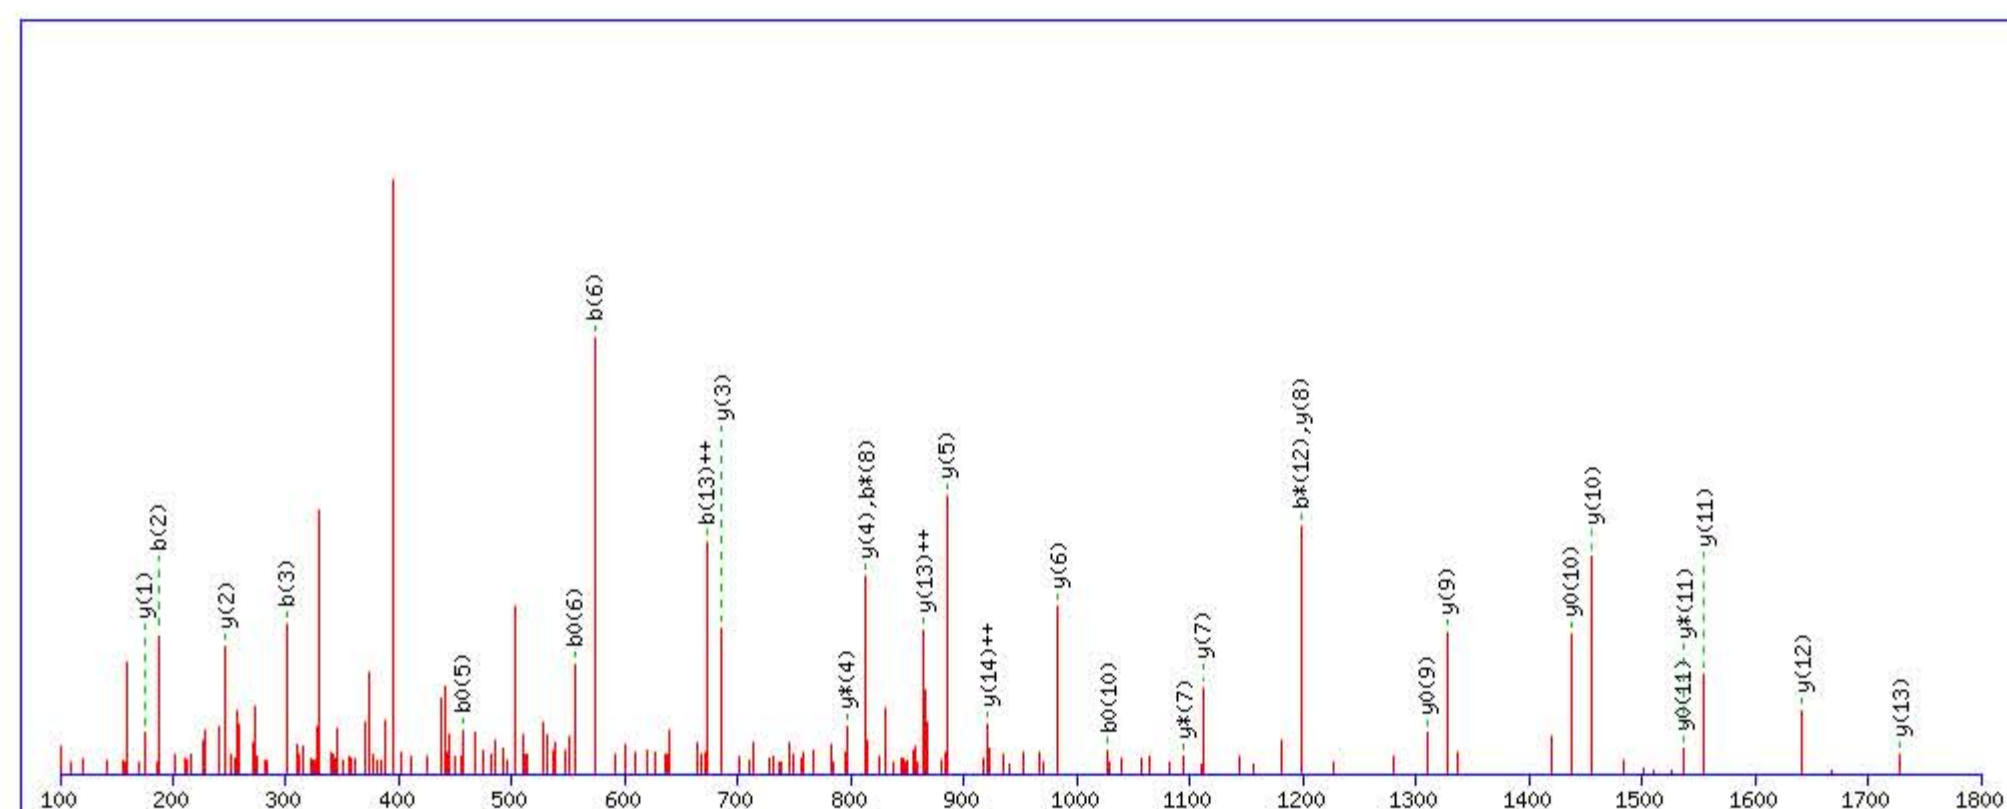

Monoisotopic mass of neutral peptide Mr(calc): 2027.010574

Fixed modifications: Carbamidomethyl (C) (apply to specified residues or termini only)

Variable modifications:

Q14 : Biotin:Thermo-21345 (Q)

Ions Score: 88 Expect: 1.4e-008

Matches : 30/154 fragment ions using 47 most intense peaks [\(help\)](#)

| #  | b                 | b <sup>++</sup>   | b <sup>*</sup>     | b <sup>+++</sup> | b <sup>0</sup>     | b <sup>0++</sup> | Seq. | y                  | y <sup>++</sup>   | y <sup>*</sup>     | y <sup>+++</sup> | y <sup>0</sup>     | y <sup>0++</sup> | #  |
|----|-------------------|-------------------|--------------------|------------------|--------------------|------------------|------|--------------------|-------------------|--------------------|------------------|--------------------|------------------|----|
| 1  | 116.034219        | 58.520748         |                    |                  | 98.023654          | 49.515465        | D    |                    |                   |                    |                  |                    |                  | 16 |
| 2  | <b>187.071333</b> | 94.039304         |                    |                  | 169.060768         | 85.034022        | A    | 1912.990923        | 956.999100        | 1895.964374        | 948.485825       | 1894.980358        | 947.993817       | 15 |
| 3  | <b>300.155397</b> | 150.581336        |                    |                  | 282.144832         | 141.576054       | L    | 1841.953809        | <b>921.480543</b> | 1824.927260        | 912.967268       | 1823.943244        | 912.475260       | 14 |
| 4  | 387.187425        | 194.097351        |                    |                  | 369.176860         | 185.092068       | S    | <b>1728.869745</b> | <b>864.938511</b> | 1711.843196        | 856.425236       | 1710.859180        | 855.933228       | 13 |
| 5  | 474.219453        | 237.613364        |                    |                  | <b>456.208888</b>  | 228.608082       | S    | <b>1641.837717</b> | 821.422497        | 1624.811168        | 812.909222       | 1623.827152        | 812.417214       | 12 |
| 6  | <b>573.287867</b> | 287.147572        |                    |                  | <b>555.277302</b>  | 278.142289       | V    | <b>1554.805689</b> | 777.906483        | <b>1537.779140</b> | 769.393208       | <b>1536.795124</b> | 768.901200       | 11 |
| 7  | 701.346445        | 351.176861        | 684.319896         | 342.663586       | 683.335880         | 342.171578       | Q    | <b>1455.737275</b> | 728.372276        | 1438.710726        | 719.859001       | <b>1437.726710</b> | 719.366993       | 10 |
| 8  | 830.389038        | 415.698157        | <b>813.362489</b>  | 407.184883       | 812.378473         | 406.692875       | E    | <b>1327.678697</b> | 664.342987        | 1310.652148        | 655.829712       | <b>1309.668132</b> | 655.337704       | 9  |
| 9  | 917.421066        | 459.214171        | 900.394517         | 450.700897       | 899.410501         | 450.208889       | S    | <b>1198.636104</b> | 599.821690        | 1181.609555        | 591.308416       | 1180.625539        | 590.816408       | 8  |
| 10 | 1045.479644       | 523.243460        | 1028.453095        | 514.730186       | <b>1027.469079</b> | 514.238178       | Q    | <b>1111.604076</b> | 556.305676        | <b>1094.577527</b> | 547.792402       |                    |                  | 7  |
| 11 | 1144.548058       | 572.777667        | 1127.521509        | 564.264393       | 1126.537493        | 563.772385       | V    | <b>983.545498</b>  | 492.276387        | 966.518949         | 483.763113       |                    |                  | 6  |
| 12 | 1215.585172       | 608.296224        | <b>1198.558623</b> | 599.782950       | 1197.574607        | 599.290942       | A    | <b>884.477084</b>  | 442.742180        | 867.450535         | 434.228906       |                    |                  | 5  |
| 13 | 1343.643750       | <b>672.325513</b> | 1326.617201        | 663.812239       | 1325.633185        | 663.320230       | Q    | <b>813.439970</b>  | 407.223623        | <b>796.413421</b>  | 398.710349       |                    |                  | 4  |
| 14 | 1782.869076       | 891.938176        | 1765.842527        | 883.424902       | 1764.858511        | 882.932894       | Q    | <b>685.381392</b>  | 343.194334        | 668.354843         | 334.681060       |                    |                  | 3  |
| 15 | 1853.906190       | 927.456733        | 1836.879641        | 918.943459       | 1835.895625        | 918.451451       | A    | <b>246.156066</b>  | 123.581671        | 229.129517         | 115.068396       |                    |                  | 2  |
| 16 |                   |                   |                    |                  |                    |                  | R    | <b>175.118952</b>  | 88.063114         | 158.092403         | 79.549839        |                    |                  | 1  |

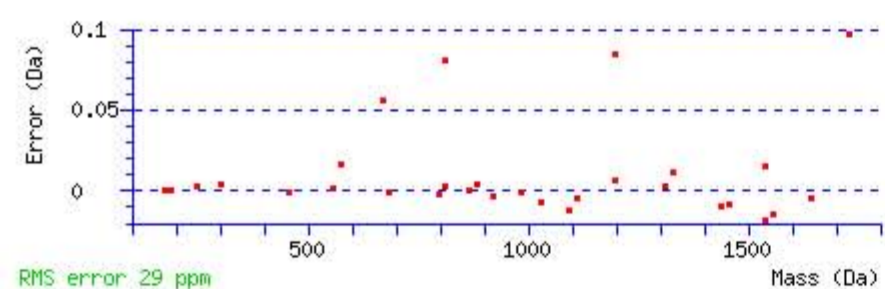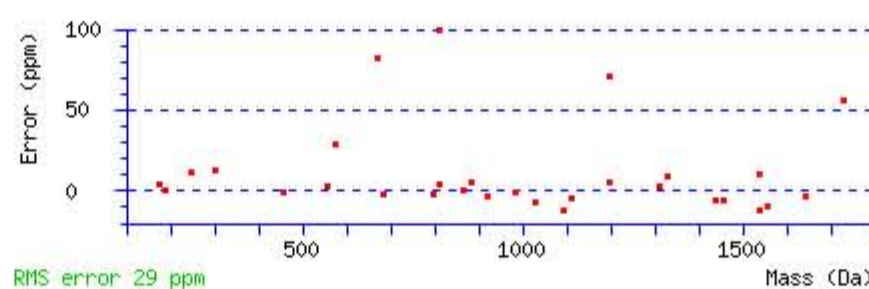

NCBI BLAST search of **DALSSVQESQVAQQAR**

(Parameters: blastp, nr protein database, expect=20000, no filter, PAM30)

Other BLAST [web gateways](#)

## All matches to this query

| Score | Mr(calc):   | Delta     | Sequence                         |
|-------|-------------|-----------|----------------------------------|
| 87.5  | 2027.010574 | -0.003862 | <a href="#">DALSSVQESQVAQQAR</a> |
| 87.2  | 2027.010574 | -0.003862 | <a href="#">DALSSVQESQVAQQAR</a> |
| 83.1  | 2027.010574 | -0.003862 | <a href="#">DALSSVQESQVAQQAR</a> |
| 42.8  | 2027.010574 | -0.003862 | <a href="#">DALSSVQESQVAQQAR</a> |
| 3.7   | 2027.029633 | -0.022921 | <a href="#">QEESHSKHLIELRR</a>   |



# MASCOT Search Results

## Peptide View

MS/MS Fragmentation of **DALSSVQESQVAQQAR**

Found in **APOC3\_HUMAN**, Apolipoprotein C-III OS=Homo sapiens GN=APOC3 PE=1 SV=1

Match to Query 50485: 2027.007312 from(676.676380,3+) rtinseconds(1886) index(54909)

Title: Locus:1.1.1.3143.16 File:"2013-07-02 CLN FXIII 30 min 2nd F 4.wiff"

Data file C:\Program Files (x86)\Matrix Science\Mascot Daemon\mgf\2 FXIII 30 min 2nd\mascot\_daemon\_merge.mgf

Click mouse within plot area to zoom in by factor of two about that point

Or, Plot from  to  Da

Label all possible matches  Label matches used for scoring

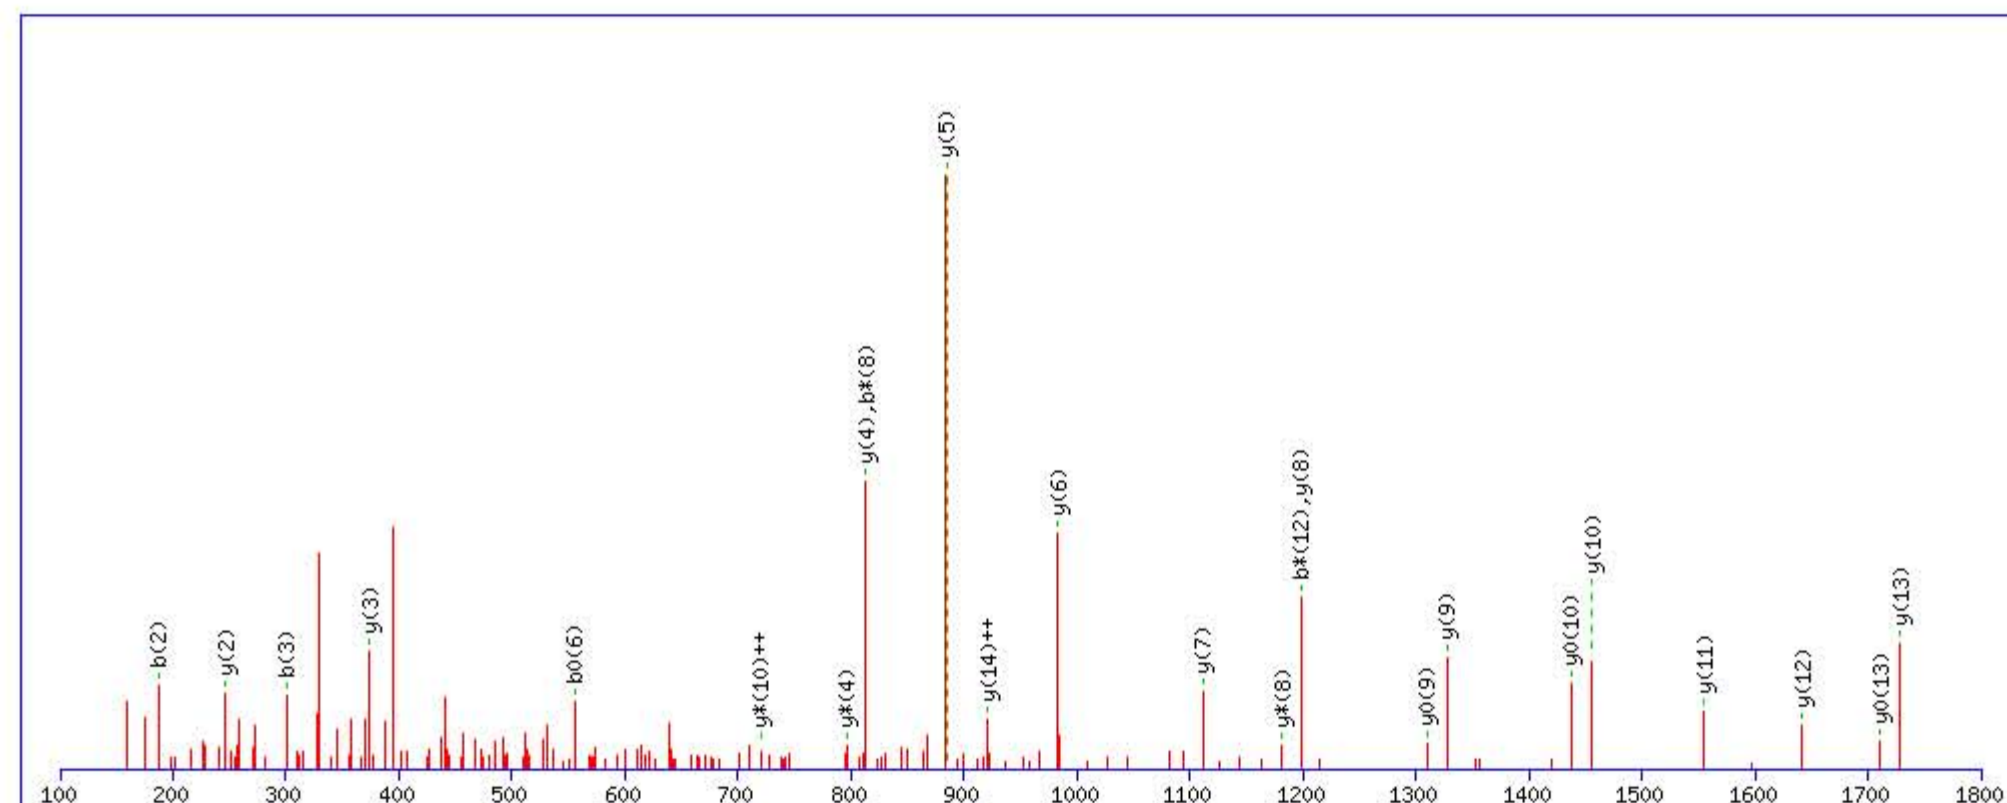

Monoisotopic mass of neutral peptide Mr(calc): 2027.010574

Fixed modifications: Carbamidomethyl (C) (apply to specified residues or termini only)

Variable modifications:

Q13 : Biotin:Thermo-21345 (Q)

Ions Score: 93 Expect: 3e-009

Matches : 24/154 fragment ions using 31 most intense peaks [\(help\)](#)

| #  | b                 | b <sup>++</sup> | b <sup>*</sup>     | b <sup>***</sup> | b <sup>0</sup>    | b <sup>0++</sup> | Seq. | y                  | y <sup>++</sup>   | y <sup>*</sup>     | y <sup>***</sup>  | y <sup>0</sup>     | y <sup>0++</sup> | #  |
|----|-------------------|-----------------|--------------------|------------------|-------------------|------------------|------|--------------------|-------------------|--------------------|-------------------|--------------------|------------------|----|
| 1  | 116.034219        | 58.520748       |                    |                  | 98.023654         | 49.515465        | D    |                    |                   |                    |                   |                    |                  | 16 |
| 2  | <b>187.071333</b> | 94.039304       |                    |                  | 169.060768        | 85.034022        | A    | 1912.990923        | 956.999100        | 1895.964374        | 948.485825        | 1894.980358        | 947.993817       | 15 |
| 3  | <b>300.155397</b> | 150.581336      |                    |                  | 282.144832        | 141.576054       | L    | 1841.953809        | <b>921.480543</b> | 1824.927260        | 912.967268        | 1823.943244        | 912.475260       | 14 |
| 4  | 387.187425        | 194.097351      |                    |                  | 369.176860        | 185.092068       | S    | <b>1728.869745</b> | 864.938511        | 1711.843196        | 856.425236        | <b>1710.859180</b> | 855.933228       | 13 |
| 5  | 474.219453        | 237.613364      |                    |                  | 456.208888        | 228.608082       | S    | <b>1641.837717</b> | 821.422497        | 1624.811168        | 812.909222        | 1623.827152        | 812.417214       | 12 |
| 6  | 573.287867        | 287.147572      |                    |                  | <b>555.277302</b> | 278.142289       | V    | <b>1554.805689</b> | 777.906483        | 1537.779140        | 769.393208        | 1536.795124        | 768.901200       | 11 |
| 7  | 701.346445        | 351.176861      | 684.319896         | 342.663586       | 683.335880        | 342.171578       | Q    | <b>1455.737275</b> | 728.372276        | 1438.710726        | <b>719.859001</b> | <b>1437.726710</b> | 719.366993       | 10 |
| 8  | 830.389038        | 415.698157      | <b>813.362489</b>  | 407.184883       | 812.378473        | 406.692875       | E    | <b>1327.678697</b> | 664.342987        | 1310.652148        | 655.829712        | <b>1309.668132</b> | 655.337704       | 9  |
| 9  | 917.421066        | 459.214171      | 900.394517         | 450.700897       | 899.410501        | 450.208889       | S    | <b>1198.636104</b> | 599.821690        | <b>1181.609555</b> | 591.308416        | 1180.625539        | 590.816408       | 8  |
| 10 | 1045.479644       | 523.243460      | 1028.453095        | 514.730186       | 1027.469079       | 514.238178       | Q    | <b>1111.604076</b> | 556.305676        | 1094.577527        | 547.792402        |                    |                  | 7  |
| 11 | 1144.548058       | 572.777667      | 1127.521509        | 564.264393       | 1126.537493       | 563.772385       | V    | <b>983.545498</b>  | 492.276387        | 966.518949         | 483.763113        |                    |                  | 6  |
| 12 | 1215.585172       | 608.296224      | <b>1198.558623</b> | 599.782950       | 1197.574607       | 599.290942       | A    | <b>884.477084</b>  | 442.742180        | 867.450535         | 434.228906        |                    |                  | 5  |
| 13 | 1654.810498       | 827.908887      | 1637.783949        | 819.395613       | 1636.799933       | 818.903605       | Q    | <b>813.439970</b>  | 407.223623        | <b>796.413421</b>  | 398.710349        |                    |                  | 4  |
| 14 | 1782.869076       | 891.938176      | 1765.842527        | 883.424902       | 1764.858511       | 882.932894       | Q    | <b>374.214644</b>  | 187.610960        | 357.188095         | 179.097686        |                    |                  | 3  |
| 15 | 1853.906190       | 927.456733      | 1836.879641        | 918.943459       | 1835.895625       | 918.451451       | A    | <b>246.156066</b>  | 123.581671        | 229.129517         | 115.068396        |                    |                  | 2  |
| 16 |                   |                 |                    |                  |                   |                  | R    | 175.118952         | 88.063114         | 158.092403         | 79.549839         |                    |                  | 1  |

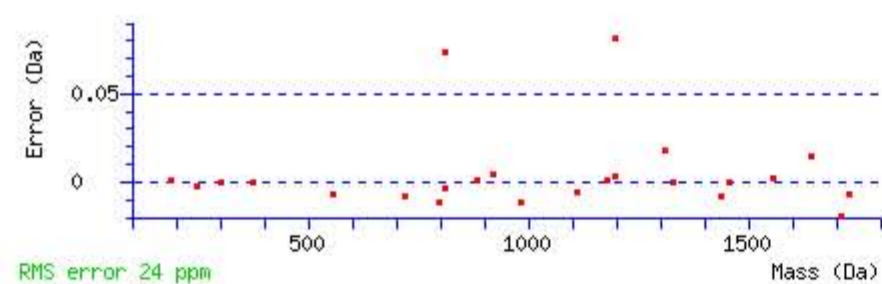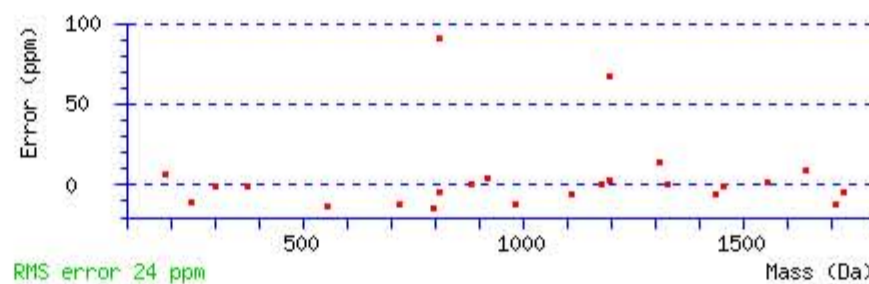

NCBI BLAST search of **DALSSVQESQVAQQAR**

(Parameters: blastp, nr protein database, expect=20000, no filter, PAM30)

Other BLAST [web gateways](#)

All matches to this query

| Score | Mr(calc):   | Delta     | Sequence                             |
|-------|-------------|-----------|--------------------------------------|
| 92.6  | 2027.010574 | -0.003262 | <a href="#">DALSSVQESQVAQQAR</a>     |
| 78.4  | 2027.010574 | -0.003262 | <a href="#">DALSSVQESQVAQQAR</a>     |
| 55.3  | 2027.010574 | -0.003262 | <a href="#">DALSSVQESQVAQQAR</a>     |
| 19.8  | 2027.010574 | -0.003262 | <a href="#">DALSSVQESQVAQQAR</a>     |
| 1.6   | 2026.978012 | 0.029300  | <a href="#">AEGAQNQGQKGEQAQNQGKK</a> |
| 0.4   | 2027.017960 | -0.010648 | <a href="#">MFELTLRGMSEALVDKR</a>    |



# MASCOT SEARCH RESULTS

## Peptide View

MS/MS Fragmentation of **DALSSVQESQVAQQAR**

Found in **APOC3\_HUMAN**, Apolipoprotein C-III OS=Homo sapiens GN=APOC3 PE=1 SV=1

Match to Query 50486: 2027.018802 from(676.680210,3+) rtinseconds(1967) index(38442)

Title: Locus:1.1.1.2707.21 File:"2013-07-02 CLN FXIII 30 min 2nd F 3.wiff"

Data file C:\Program Files (x86)\Matrix Science\Mascot Daemon\mgf\2 FXIII 30 min 2nd\mascot\_daemon\_merge.mgf

Click mouse within plot area to zoom in by factor of two about that point

Or, Plot from 100 to 1500 Da Full range

Label all possible matches  Label matches used for scoring

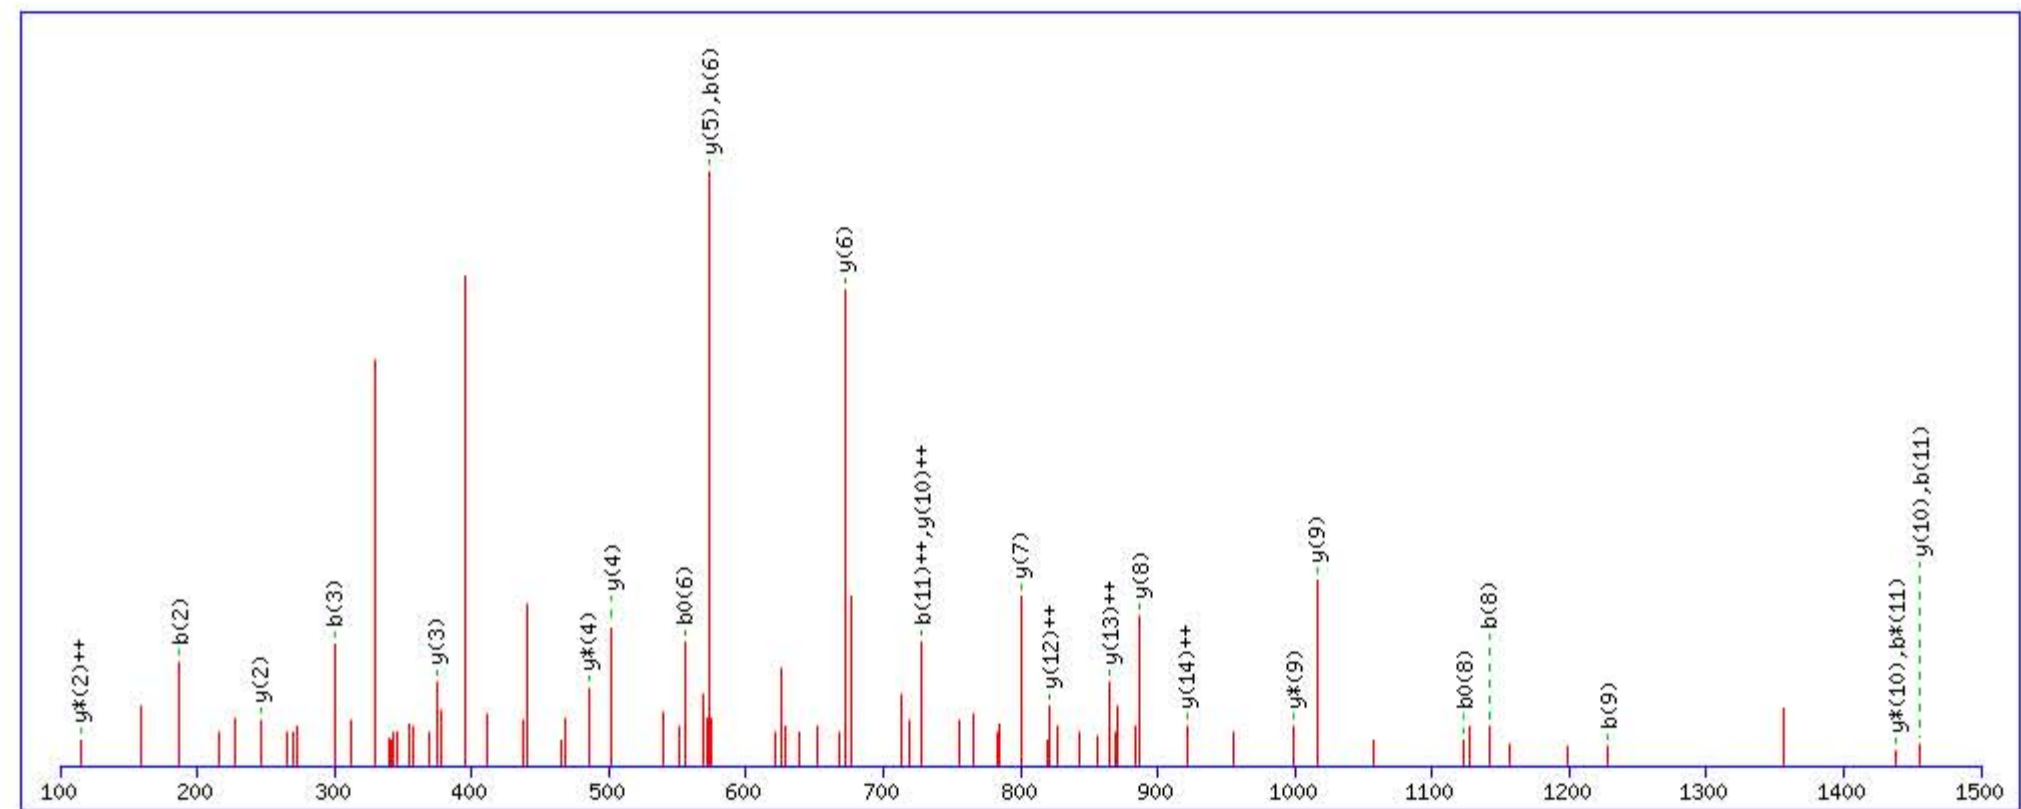

Monoisotopic mass of neutral peptide Mr(calc): 2027.010574

Fixed modifications: Carbamidomethyl (C) (apply to specified residues or termini only)

Variable modifications:

Q7 : Biotin:Thermo-21345 (Q)

Ions Score: 55 Expect: 1.5e-005

Matches : 27/154 fragment ions using 36 most intense peaks [\(help\)](#)

| #  | b                  | b <sup>++</sup>   | b <sup>*</sup>     | b <sup>*++</sup> | b <sup>0</sup>     | b <sup>0++</sup> | Seq. | y                  | y <sup>++</sup>   | y <sup>*</sup>     | y <sup>*++</sup>  | y <sup>0</sup> | y <sup>0++</sup> | #  |
|----|--------------------|-------------------|--------------------|------------------|--------------------|------------------|------|--------------------|-------------------|--------------------|-------------------|----------------|------------------|----|
| 1  | 116.034219         | 58.520748         |                    |                  | 98.023654          | 49.515465        | D    |                    |                   |                    |                   |                |                  | 16 |
| 2  | <b>187.071333</b>  | 94.039304         |                    |                  | 169.060768         | 85.034022        | A    | 1912.990923        | 956.999100        | 1895.964374        | 948.485825        | 1894.980358    | 947.993817       | 15 |
| 3  | <b>300.155397</b>  | 150.581336        |                    |                  | 282.144832         | 141.576054       | L    | 1841.953809        | <b>921.480543</b> | 1824.927260        | 912.967268        | 1823.943244    | 912.475260       | 14 |
| 4  | 387.187425         | 194.097351        |                    |                  | 369.176860         | 185.092068       | S    | 1728.869745        | <b>864.938511</b> | 1711.843196        | 856.425236        | 1710.859180    | 855.933228       | 13 |
| 5  | 474.219453         | 237.613364        |                    |                  | 456.208888         | 228.608082       | S    | 1641.837717        | <b>821.422497</b> | 1624.811168        | 812.909222        | 1623.827152    | 812.417214       | 12 |
| 6  | <b>573.287867</b>  | 287.147572        |                    |                  | <b>555.277302</b>  | 278.142289       | V    | 1554.805689        | 777.906483        | 1537.779140        | 769.393208        | 1536.795124    | 768.901200       | 11 |
| 7  | 1012.513193        | 506.760235        | 995.486644         | 498.246960       | 994.502628         | 497.754952       | Q    | <b>1455.737275</b> | <b>728.372276</b> | <b>1438.710726</b> | 719.859001        | 1437.726710    | 719.366993       | 10 |
| 8  | <b>1141.555786</b> | 571.281531        | 1124.529237        | 562.768257       | <b>1123.545221</b> | 562.276249       | E    | <b>1016.511949</b> | 508.759613        | <b>999.485400</b>  | 500.246338        | 998.501384     | 499.754330       | 9  |
| 9  | <b>1228.587814</b> | 614.797545        | 1211.561265        | 606.284271       | 1210.577249        | 605.792263       | S    | <b>887.469356</b>  | 444.238316        | 870.442807         | 435.725042        | 869.458791     | 435.233034       | 8  |
| 10 | 1356.646392        | 678.826834        | 1339.619843        | 670.313560       | 1338.635827        | 669.821552       | Q    | <b>800.437328</b>  | 400.722302        | 783.410779         | 392.209028        |                |                  | 7  |
| 11 | <b>1455.714806</b> | <b>728.361041</b> | <b>1438.688257</b> | 719.847767       | 1437.704241        | 719.355759       | V    | <b>672.378750</b>  | 336.693013        | 655.352201         | 328.179739        |                |                  | 6  |
| 12 | 1526.751920        | 763.879598        | 1509.725371        | 755.366324       | 1508.741355        | 754.874316       | A    | <b>573.310336</b>  | 287.158806        | 556.283787         | 278.645532        |                |                  | 5  |
| 13 | 1654.810498        | 827.908887        | 1637.783949        | 819.395613       | 1636.799933        | 818.903605       | Q    | <b>502.273222</b>  | 251.640249        | <b>485.246673</b>  | 243.126975        |                |                  | 4  |
| 14 | 1782.869076        | 891.938176        | 1765.842527        | 883.424902       | 1764.858511        | 882.932894       | Q    | <b>374.214644</b>  | 187.610960        | 357.188095         | 179.097686        |                |                  | 3  |
| 15 | 1853.906190        | 927.456733        | 1836.879641        | 918.943459       | 1835.895625        | 918.451451       | A    | <b>246.156066</b>  | 123.581671        | 229.129517         | <b>115.068396</b> |                |                  | 2  |
| 16 |                    |                   |                    |                  |                    |                  | R    | 175.118952         | 88.063114         | 158.092403         | 79.549839         |                |                  | 1  |

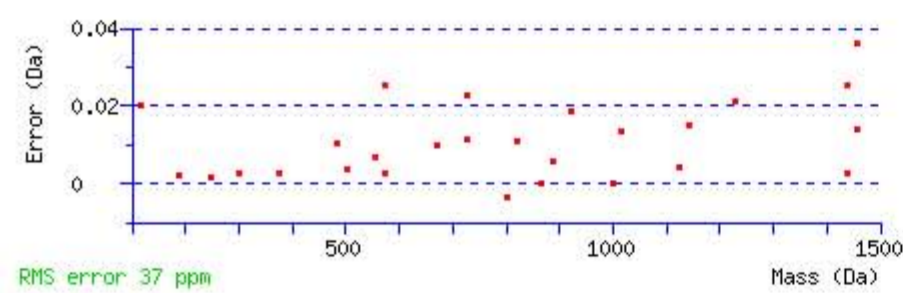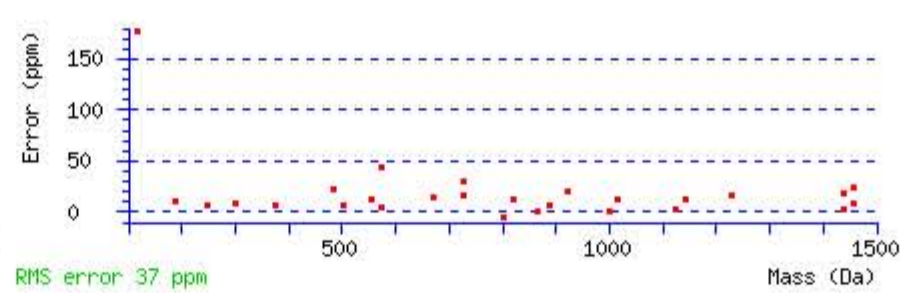

NCBI BLAST search of **DALSSVQESQVAQQAR**

(Parameters: blastp, nr protein database, expect=20000, no filter, PAM30)

Other BLAST [web gateways](#)

## All matches to this query

| Score | Mr(calc):   | Delta    | Sequence                          |
|-------|-------------|----------|-----------------------------------|
| 55.0  | 2027.010574 | 0.008228 | <a href="#">DALSSVQESQVAQQAR</a>  |
| 21.4  | 2027.010574 | 0.008228 | <a href="#">DALSSVQESQVAQQAR</a>  |
| 8.0   | 2027.010574 | 0.008228 | <a href="#">DALSSVQESQVAQQAR</a>  |
| 6.3   | 2027.010574 | 0.008228 | <a href="#">DALSSVQESQVAQQAR</a>  |
| 3.6   | 2027.010559 | 0.008243 | <a href="#">LTGRGAEDSLADQAANK</a> |
| 3.3   | 2027.000870 | 0.017932 | <a href="#">QMSEPNIPFPQGFK</a>    |



# MASCOT SCIENCE Mascot Search Results

## Peptide View

MS/MS Fragmentation of **LGPLVEQGR**

Found in **APOE\_HUMAN**, Apolipoprotein E OS=Homo sapiens GN=APOE PE=1 SV=1

Match to Query 27711: 1278.709688 from(640.362120,2+) rtinseconds(1957) index(55509)

Title: Locus:1.1.1.3167.16 File:"2013-07-02 CLN FXIII 30 min 2nd F 4.wiff"

Data file C:\Program Files (x86)\Matrix Science\Mascot Daemon\mgf\2 FXIII 30 min 2nd\mascot\_daemon\_merge.mgf

Click mouse within plot area to zoom in by factor of two about that point

Or, Plot from  to  Da

Label all possible matches  Label matches used for scoring

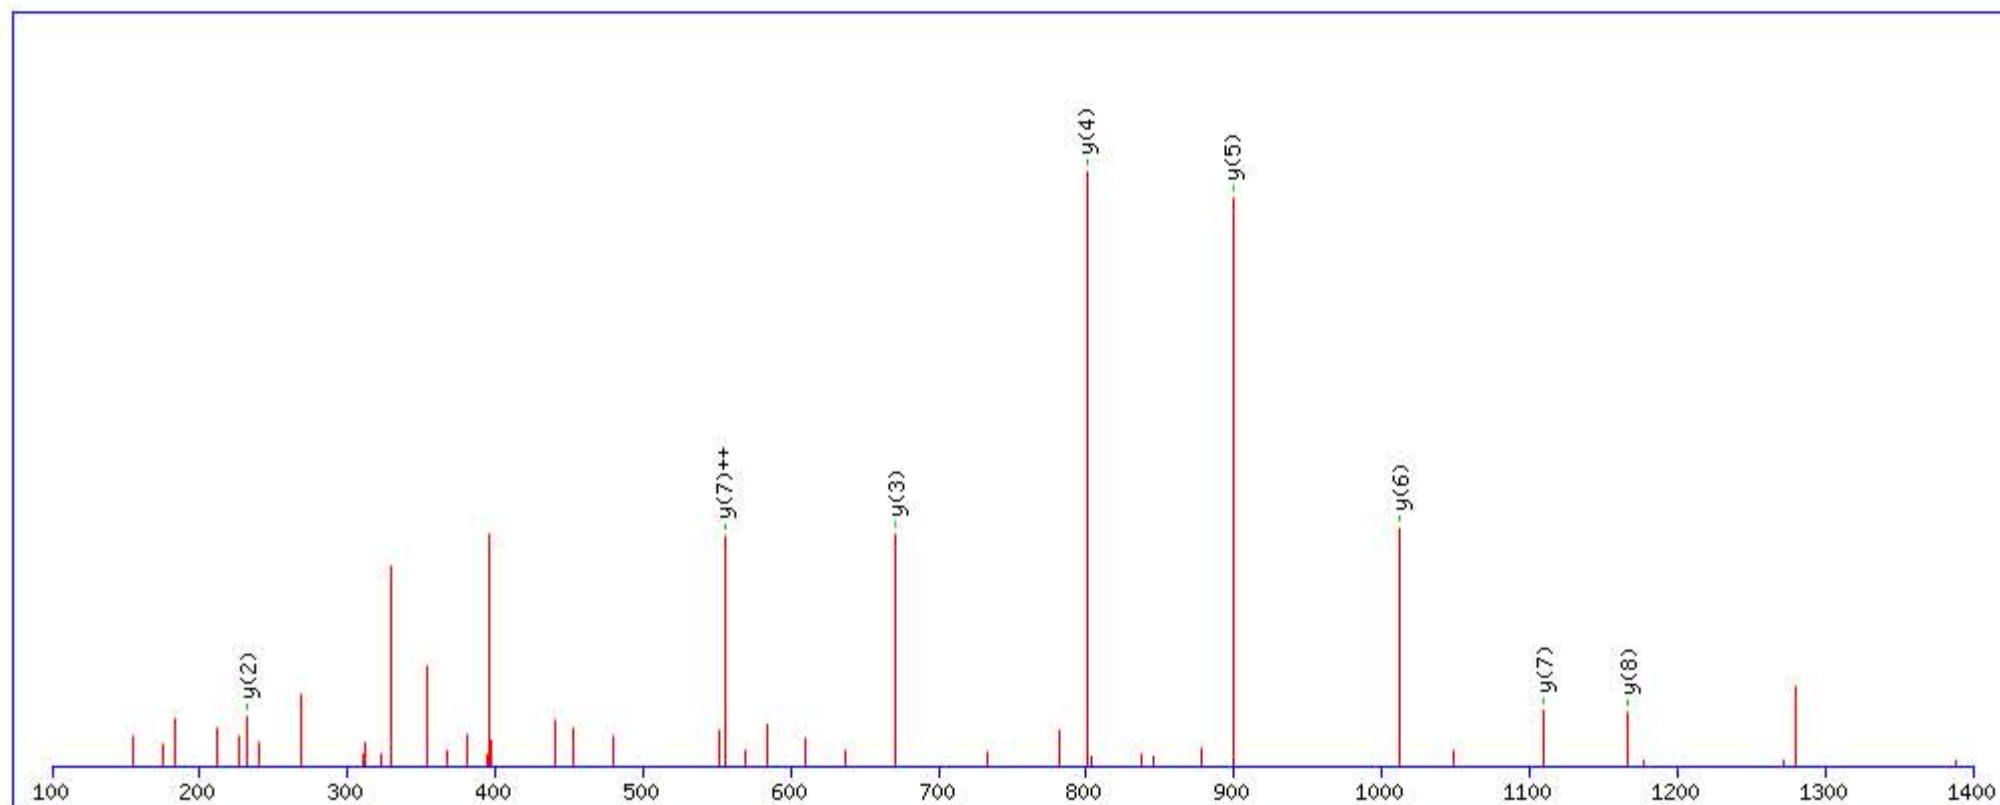

Monoisotopic mass of neutral peptide Mr(calc): 1278.711823

Fixed modifications: Carbamidomethyl (C) (apply to specified residues or termini only)

Variable modifications:

Q7 : Biotin:Thermo-21345 (Q)

Ions Score: 57 Expect: 2.8e-005

Matches : 8/68 fragment ions using 12 most intense peaks [\(help\)](#)

| # | b           | b <sup>++</sup> | b <sup>*</sup> | b <sup>*++</sup> | b <sup>0</sup> | b <sup>0++</sup> | Seq. | y           | y <sup>++</sup> | y <sup>*</sup> | y <sup>*++</sup> | y <sup>0</sup> | y <sup>0++</sup> | # |
|---|-------------|-----------------|----------------|------------------|----------------|------------------|------|-------------|-----------------|----------------|------------------|----------------|------------------|---|
| 1 | 114.091340  | 57.549308       |                |                  |                |                  | L    |             |                 |                |                  |                |                  | 9 |
| 2 | 171.112804  | 86.060040       |                |                  |                |                  | G    | 1166.635041 | 583.821159      | 1149.608492    | 575.307884       | 1148.624476    | 574.815876       | 8 |
| 3 | 268.165568  | 134.586422      |                |                  |                |                  | P    | 1109.613577 | 555.310426      | 1092.587028    | 546.797152       | 1091.603012    | 546.305144       | 7 |
| 4 | 381.249632  | 191.128454      |                |                  |                |                  | L    | 1012.560813 | 506.784044      | 995.534264     | 498.270770       | 994.550248     | 497.778762       | 6 |
| 5 | 480.318046  | 240.662661      |                |                  |                |                  | V    | 899.476749  | 450.242012      | 882.450200     | 441.728738       | 881.466184     | 441.236730       | 5 |
| 6 | 609.360639  | 305.183958      |                |                  | 591.350074     | 296.178675       | E    | 800.408335  | 400.707805      | 783.381786     | 392.194531       | 782.397770     | 391.702523       | 4 |
| 7 | 1048.585965 | 524.796621      | 1031.559416    | 516.283346       | 1030.575400    | 515.791338       | Q    | 671.365742  | 336.186509      | 654.339193     | 327.673234       |                |                  | 3 |
| 8 | 1105.607429 | 553.307352      | 1088.580880    | 544.794078       | 1087.596864    | 544.302070       | G    | 232.140416  | 116.573846      | 215.113867     | 108.060571       |                |                  | 2 |
| 9 |             |                 |                |                  |                |                  | R    | 175.118952  | 88.063114       | 158.092403     | 79.549839        |                |                  | 1 |

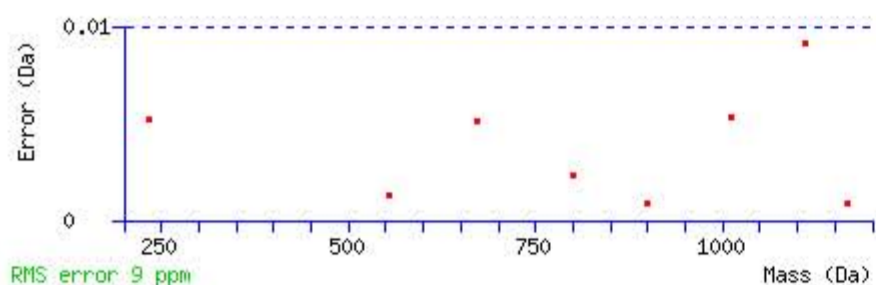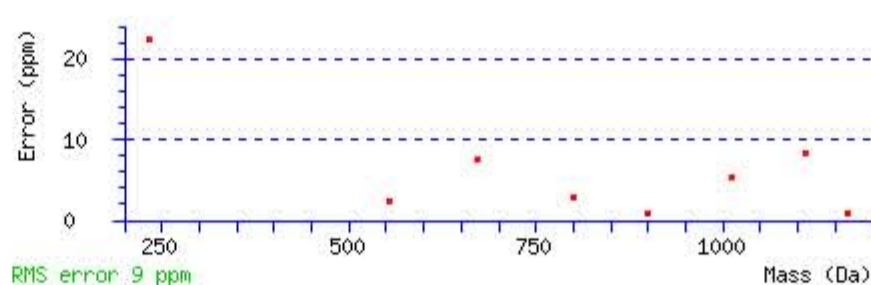

NCBI BLAST search of **LGPLVEQGR**

(Parameters: blastp, nr protein database, expect=20000, no filter, PAM30)

Other BLAST [web gateways](#)

All matches to this query

| Score | Mr(calc):   | Delta     | Sequence                  |
|-------|-------------|-----------|---------------------------|
| 56.9  | 1278.711823 | -0.002135 | <a href="#">LGPLVEQGR</a> |

Mascot: <http://www.matrixscience.com/>



# MASCOT Search Results

## Peptide View

MS/MS Fragmentation of **LEEQAQQIR**

Found in **APOE\_HUMAN**, Apolipoprotein E OS=Homo sapiens GN=APOE PE=1 SV=1

Match to Query 33508: 1424.744888 from(713.379720,2+) rtinseconds(1566) index(35986)

Title: Locus:1.1.1.2567.24 File:"2013-07-02 CLN FXIII 30 min 2nd F 3.wiff"

Data file C:\Program Files (x86)\Matrix Science\Mascot Daemon\mgf2 FXIII 30 min 2nd\mascot\_daemon\_merge.mgf

Click mouse within plot area to zoom in by factor of two about that point

Or, Plot from  to  Da

Label all possible matches  Label matches used for scoring

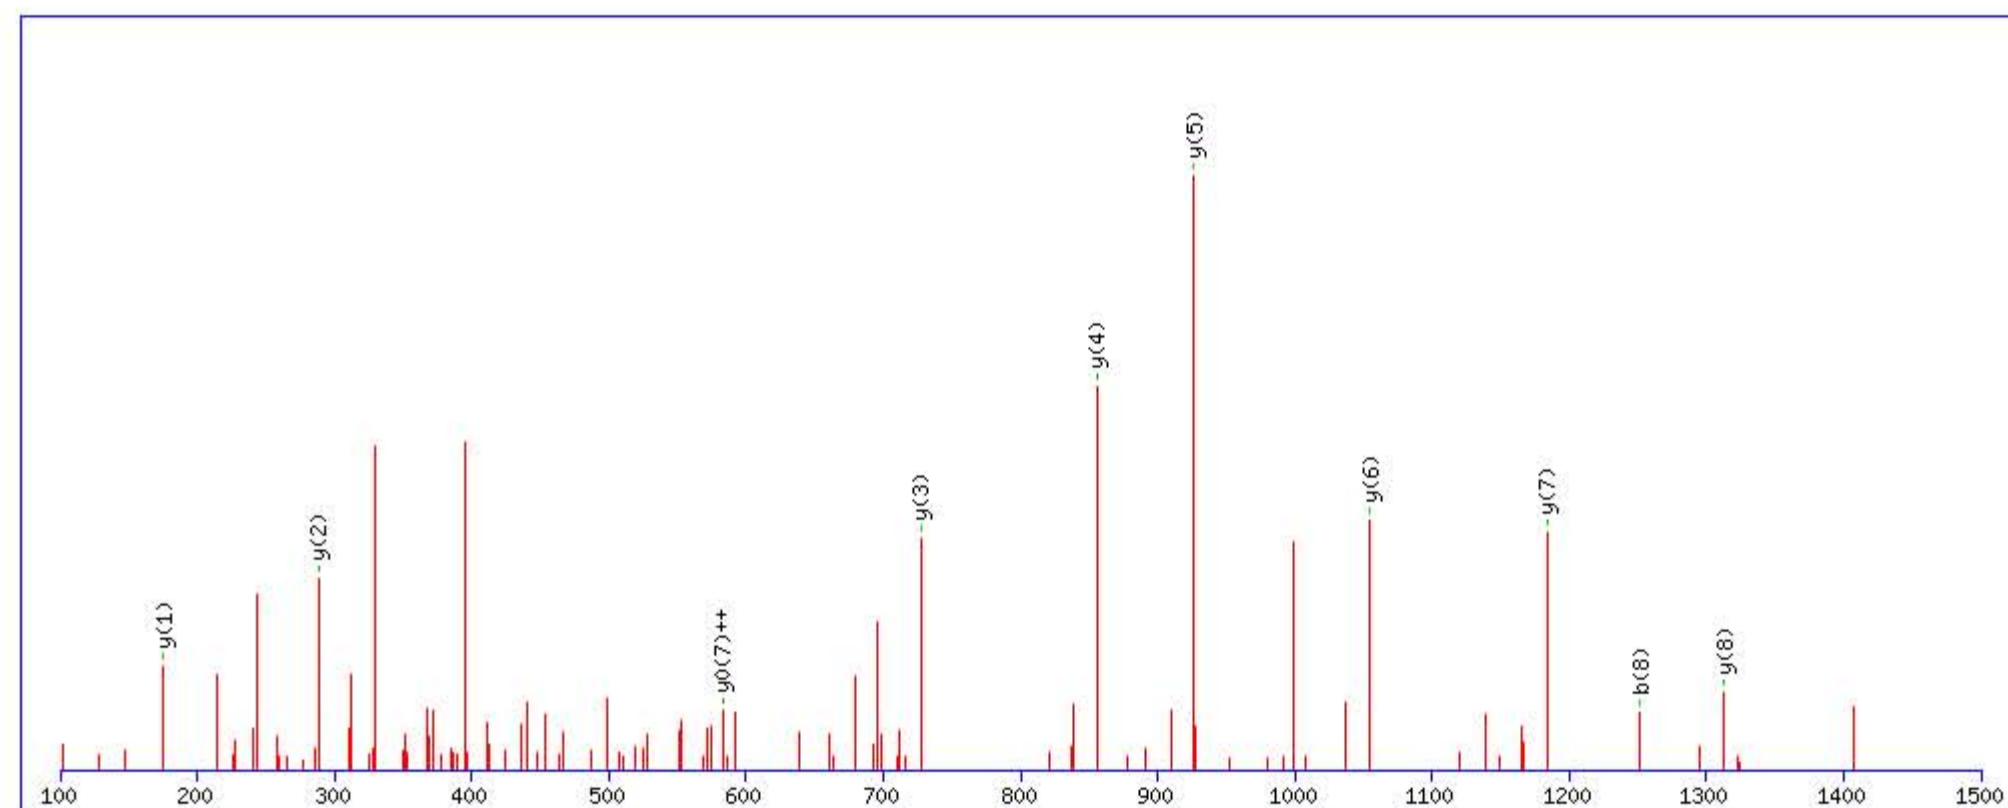

Monoisotopic mass of neutral peptide Mr(calc): 1424.744553

Fixed modifications: Carbamidomethyl (C) (apply to specified residues or termini only)

Variable modifications:

Q7 : Biotin:Thermo-21345 (Q)

Ions Score: 74 Expect: 7.8e-007

Matches : 10/76 fragment ions using 14 most intense peaks [\(help\)](#)

| # | b                  | b <sup>++</sup> | b <sup>*</sup> | b <sup>*++</sup> | b <sup>0</sup> | b <sup>0++</sup> | Seq. | y                  | y <sup>++</sup> | y <sup>*</sup> | y <sup>*++</sup> | y <sup>0</sup> | y <sup>0++</sup>  | # |
|---|--------------------|-----------------|----------------|------------------|----------------|------------------|------|--------------------|-----------------|----------------|------------------|----------------|-------------------|---|
| 1 | 114.091340         | 57.549308       |                |                  |                |                  | L    |                    |                 |                |                  |                |                   | 9 |
| 2 | 243.133933         | 122.070605      |                |                  | 225.123368     | 113.065322       | E    | <b>1312.667798</b> | 656.837537      | 1295.641249    | 648.324263       | 1294.657233    | 647.832255        | 8 |
| 3 | 372.176526         | 186.591901      |                |                  | 354.165961     | 177.586619       | E    | <b>1183.625205</b> | 592.316241      | 1166.598656    | 583.802966       | 1165.614640    | <b>583.310958</b> | 7 |
| 4 | 500.235104         | 250.621190      | 483.208555     | 242.107916       | 482.224539     | 241.615908       | Q    | <b>1054.582612</b> | 527.794944      | 1037.556063    | 519.281670       |                |                   | 6 |
| 5 | 571.272218         | 286.139747      | 554.245669     | 277.626473       | 553.261653     | 277.134465       | A    | <b>926.524034</b>  | 463.765655      | 909.497485     | 455.252381       |                |                   | 5 |
| 6 | 699.330796         | 350.169036      | 682.304247     | 341.655762       | 681.320231     | 341.163754       | Q    | <b>855.486920</b>  | 428.247098      | 838.460371     | 419.733824       |                |                   | 4 |
| 7 | 1138.556122        | 569.781699      | 1121.529573    | 561.268425       | 1120.545557    | 560.776417       | Q    | <b>727.428342</b>  | 364.217809      | 710.401793     | 355.704535       |                |                   | 3 |
| 8 | <b>1251.640186</b> | 626.323731      | 1234.613637    | 617.810457       | 1233.629621    | 617.318449       | I    | <b>288.203016</b>  | 144.605146      | 271.176467     | 136.091871       |                |                   | 2 |
| 9 |                    |                 |                |                  |                |                  | R    | <b>175.118952</b>  | 88.063114       | 158.092403     | 79.549839        |                |                   | 1 |

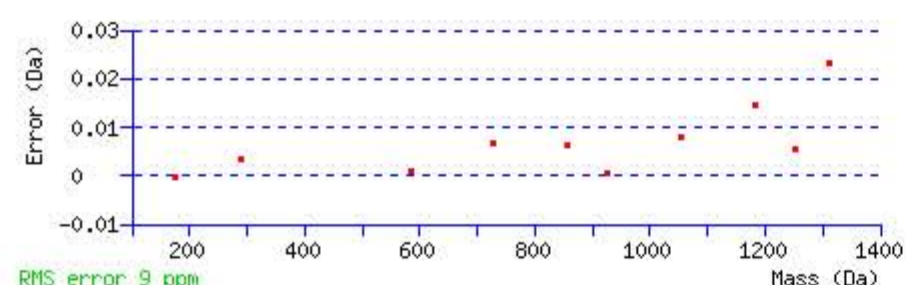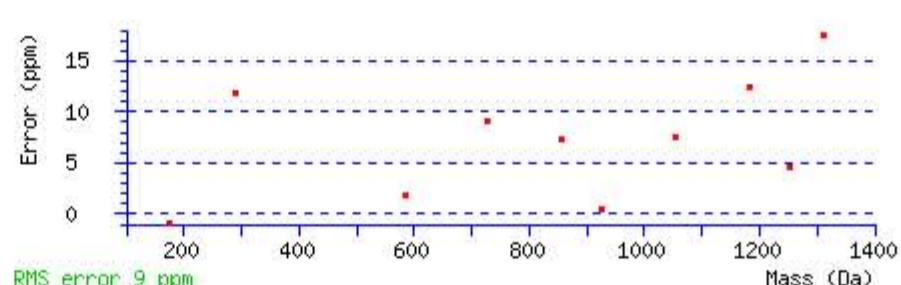

NCBI BLAST search of [LEEQAQQIR](#)

(Parameters: blastp, nr protein database, expect=20000, no filter, PAM30)

Other BLAST [web gateways](#)

## All matches to this query

| Score | Mr(calc):   | Delta     | Sequence                       |
|-------|-------------|-----------|--------------------------------|
| 74.5  | 1424.744553 | 0.000335  | <a href="#">LEEQAQQIR</a>      |
| 57.6  | 1424.744553 | 0.000335  | <a href="#">LEEQAQQIR</a>      |
| 27.7  | 1424.744553 | 0.000335  | <a href="#">LEEQAQQIR</a>      |
| 18.5  | 1424.733322 | 0.011566  | <a href="#">LEQETEPLR</a>      |
| 12.7  | 1424.745438 | -0.000550 | <a href="#">QMQQIR</a>         |
| 8.2   | 1424.744583 | 0.000305  | <a href="#">QLSGDQPTIR</a>     |
| 7.3   | 1424.734680 | 0.010208  | <a href="#">WVLTAAHCLAQR</a>   |
| 6.0   | 1424.730667 | 0.014221  | <a href="#">QPGCAVPOSGRRLR</a> |
| 5.9   | 1424.737183 | 0.007705  | <a href="#">IEGDPQGVQQAKR</a>  |
| 5.9   | 1424.744553 | 0.000335  | <a href="#">IEIAHALCLTER</a>   |



# MASCOT SEARCH RESULTS

## Peptide View

MS/MS Fragmentation of **QQTEWQSGQR**

Found in **APOE\_HUMAN**, Apolipoprotein E OS=Homo sapiens GN=APOE PE=1 SV=1

Match to Query 37004: 1557.730648 from(779.872600,2+) rtinseconds(1562) index(52941)

Title: Locus:1.1.1.3030.16 File:"2013-07-02 CLN FXIII 30 min 2nd F 4.wiff"

Data file C:\Program Files (x86)\Matrix Science\Mascot Daemon\mgf2 FXIII 30 min 2nd\mascot\_daemon\_merge.mgf

Click mouse within plot area to zoom in by factor of two about that point

Or, Plot from  to  Da

Label all possible matches  Label matches used for scoring

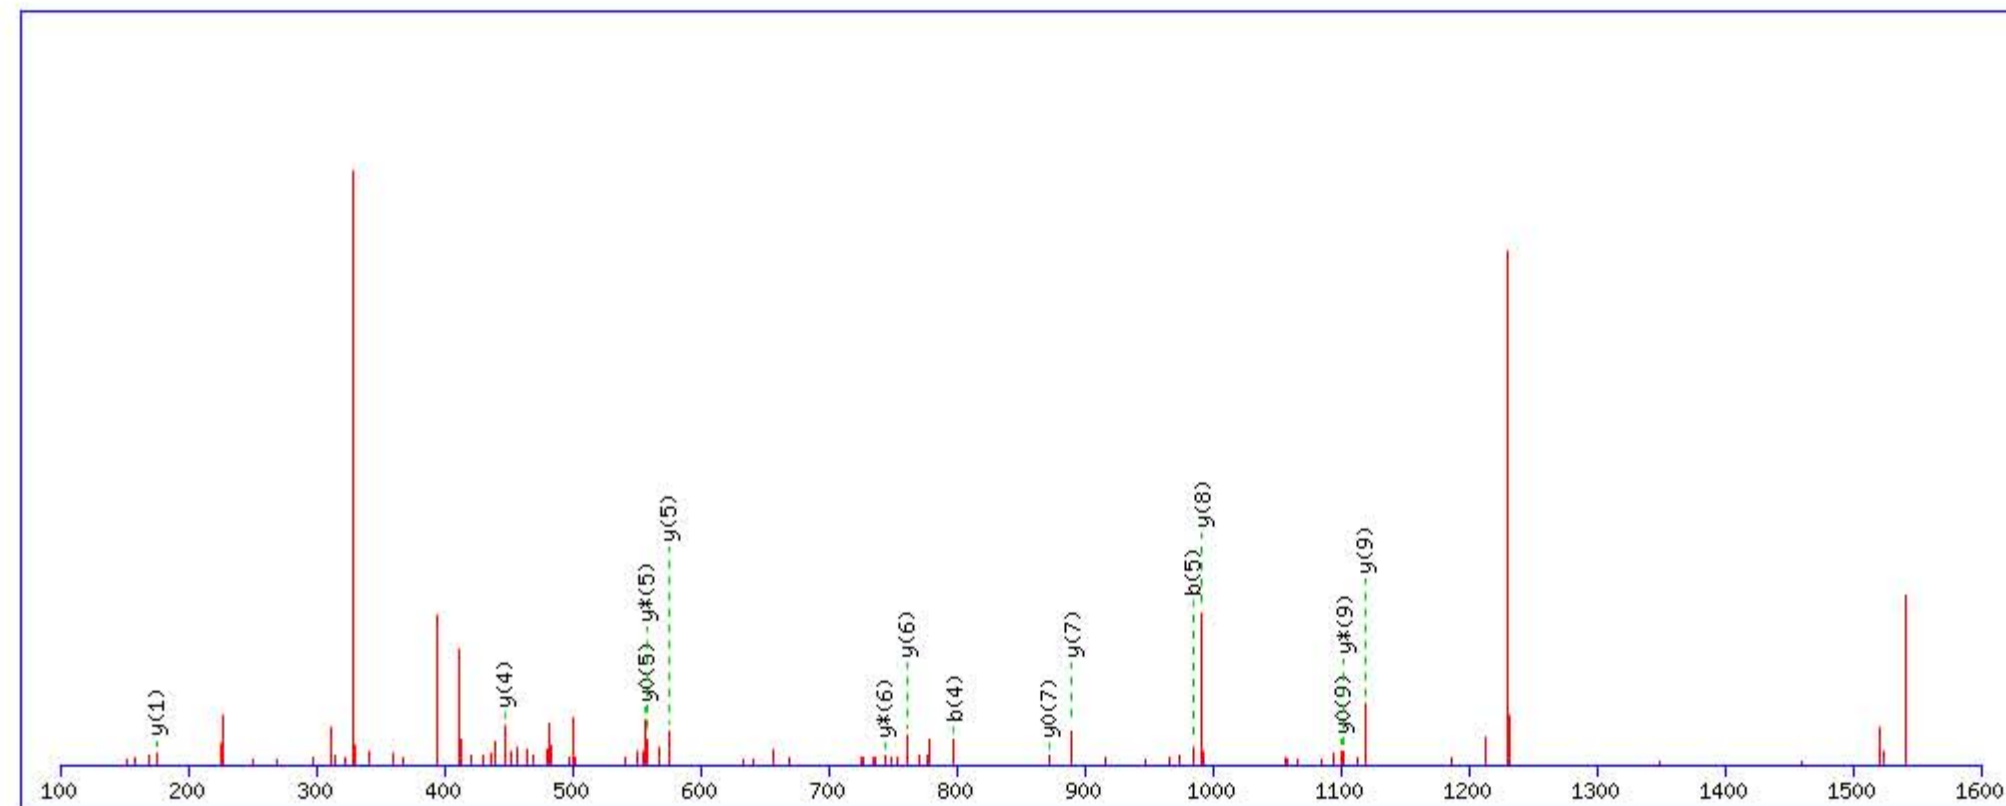

Monoisotopic mass of neutral peptide Mr(calc): 1557.735809

Fixed modifications: Carbamidomethyl (C) (apply to specified residues or termini only)

Variable modifications:

Q1 : Biotin:Thermo-21345 (Q)

Ions Score: 28 Expect: 0.02

Matches : 15/98 fragment ions using 37 most intense peaks [\(help\)](#)

| #  | b           | b <sup>++</sup> | b <sup>+</sup> | b <sup>+++</sup> | b <sup>0</sup> | b <sup>0++</sup> | Seq. | y           | y <sup>++</sup> | y <sup>+</sup> | y <sup>+++</sup> | y <sup>0</sup> | y <sup>0++</sup> | #  |
|----|-------------|-----------------|----------------|------------------|----------------|------------------|------|-------------|-----------------|----------------|------------------|----------------|------------------|----|
| 1  | 440.232602  | 220.619939      | 423.206053     | 212.106664       |                |                  | Q    |             |                 |                |                  |                |                  | 10 |
| 2  | 568.291180  | 284.649228      | 551.264631     | 276.135954       |                |                  | Q    | 1119.517763 | 560.262520      | 1102.491214    | 551.749245       | 1101.507198    | 551.257237       | 9  |
| 3  | 669.338859  | 335.173068      | 652.312310     | 326.659793       | 651.328294     | 326.167785       | T    | 991.459185  | 496.233231      | 974.432636     | 487.719956       | 973.448620     | 487.227948       | 8  |
| 4  | 798.381452  | 399.694364      | 781.354903     | 391.181090       | 780.370887     | 390.689082       | E    | 890.411506  | 445.709391      | 873.384957     | 437.196117       | 872.400941     | 436.704109       | 7  |
| 5  | 984.460765  | 492.734021      | 967.434216     | 484.220746       | 966.450200     | 483.728738       | W    | 761.368913  | 381.188095      | 744.342364     | 372.674820       | 743.358348     | 372.182812       | 6  |
| 6  | 1112.519343 | 556.763310      | 1095.492794    | 548.250035       | 1094.508778    | 547.758027       | Q    | 575.289600  | 288.148438      | 558.263051     | 279.635164       | 557.279035     | 279.143156       | 5  |
| 7  | 1199.551371 | 600.279324      | 1182.524822    | 591.766049       | 1181.540806    | 591.274041       | S    | 447.231022  | 224.119149      | 430.204473     | 215.605875       | 429.220457     | 215.113867       | 4  |
| 8  | 1256.572835 | 628.790056      | 1239.546286    | 620.276781       | 1238.562270    | 619.784773       | G    | 360.198994  | 180.603135      | 343.172445     | 172.089860       |                |                  | 3  |
| 9  | 1384.631413 | 692.819345      | 1367.604864    | 684.306070       | 1366.620848    | 683.814062       | Q    | 303.177530  | 152.092403      | 286.150981     | 143.579129       |                |                  | 2  |
| 10 |             |                 |                |                  |                |                  | R    | 175.118952  | 88.063114       | 158.092403     | 79.549839        |                |                  | 1  |

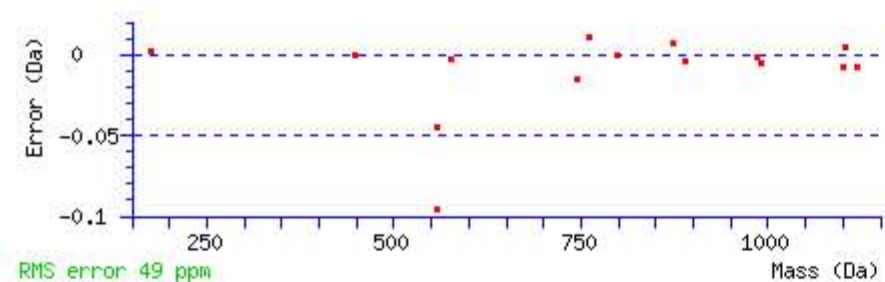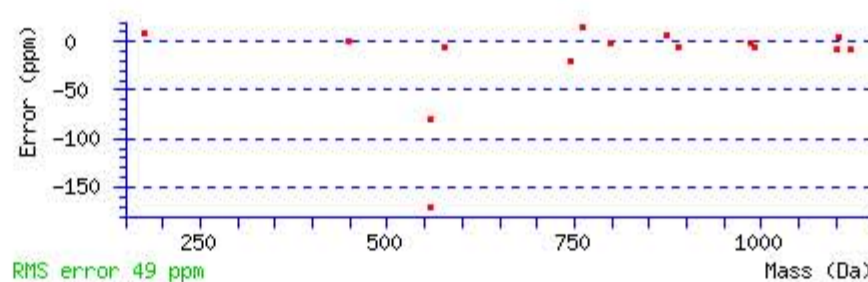

NCBI BLAST search of **QQTEWQSGQR**

(Parameters: blastp, nr protein database, expect=20000, no filter, PAM30)

Other BLAST [web gateways](#)

## All matches to this query

| Score | Mr(calc):   | Delta     | Sequence                       |
|-------|-------------|-----------|--------------------------------|
| 28.4  | 1557.735809 | -0.005161 | <a href="#">QQTEWQSGQR</a>     |
| 17.0  | 1557.735809 | -0.005161 | <a href="#">QQTEWQSGQR</a>     |
| 10.0  | 1557.720566 | 0.010082  | <a href="#">QEAATGVDICTHR</a>  |
| 1.8   | 1557.709274 | 0.021374  | <a href="#">EAQDMLNHSEKEK</a>  |
| 1.8   | 1557.749496 | -0.018848 | <a href="#">QAEATRQAAQEEER</a> |
| 1.7   | 1557.747040 | -0.016392 | <a href="#">AFSHCSSLTKHQR</a>  |



# MASCOT Search Results

## Peptide View

MS/MS Fragmentation of **AATVGS LAGQPLQER**

Found in **APOE\_HUMAN**, Apolipoprotein E OS=Homo sapiens GN=APOE PE=1 SV=1

Match to Query 44849: 1807.950702 from(603.657510,3+) rtinseconds(1948) index(55430)

Title: Locus:1.1.1.3164.12 File:"2013-07-02 CLN FXIII 30 min 2nd F 4.wiff"

Data file C:\Program Files (x86)\Matrix Science\Mascot Daemon\mgf2 FXIII 30 min 2nd\mascot\_daemon\_merge.mgf

Click mouse within plot area to zoom in by factor of two about that point

Or, Plot from  to  Da

Label all possible matches  Label matches used for scoring

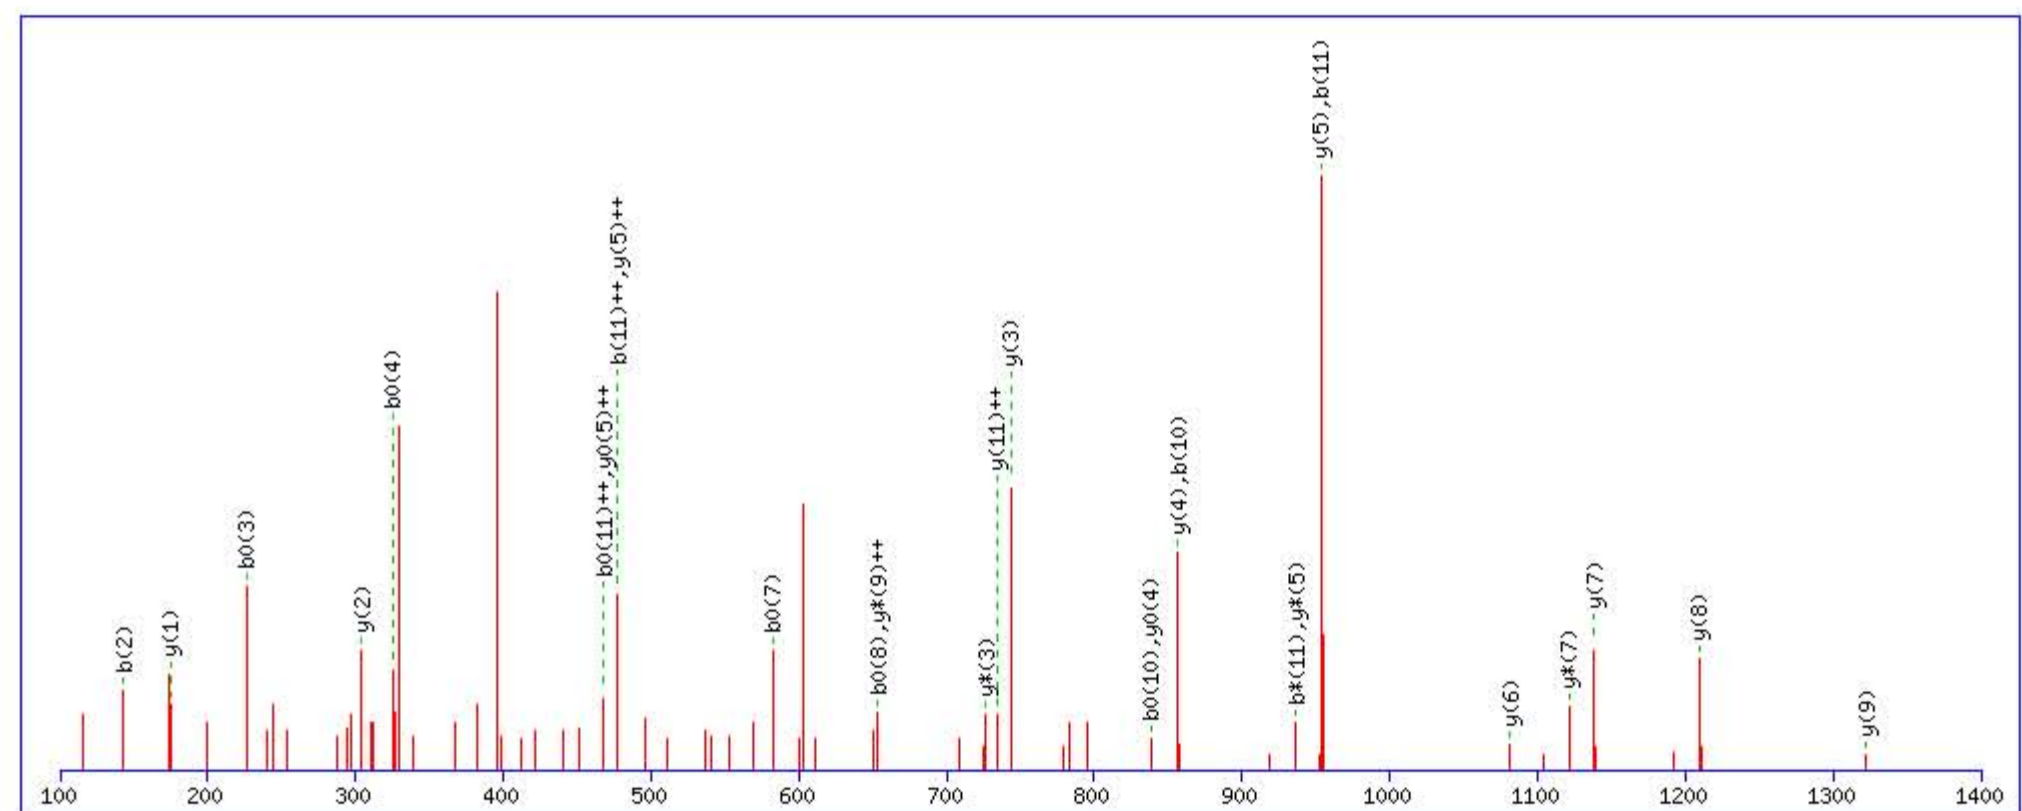

Monoisotopic mass of neutral peptide Mr(calc): 1807.961441

Fixed modifications: Carbamidomethyl (C) (apply to specified residues or termini only)

Variable modifications:

Q13 : Biotin:Thermo-21345 (Q)

Ions Score: 58 Expect: 8.1e-006

Matches : 28/144 fragment ions using 33 most intense peaks [\(help\)](#)

| #  | b                 | b <sup>++</sup>   | b <sup>+</sup>    | b <sup>+++</sup> | b <sup>0</sup>    | b <sup>0++</sup>  | Seq. | y                  | y <sup>++</sup>   | y <sup>+</sup>     | y <sup>+++</sup>  | y <sup>0</sup>    | y <sup>0++</sup>  | #  |
|----|-------------------|-------------------|-------------------|------------------|-------------------|-------------------|------|--------------------|-------------------|--------------------|-------------------|-------------------|-------------------|----|
| 1  | 72.044390         | 36.525833         |                   |                  |                   |                   | A    |                    |                   |                    |                   |                   |                   | 15 |
| 2  | <b>143.081504</b> | 72.044390         |                   |                  |                   |                   | A    | 1737.931618        | 869.469447        | 1720.905069        | 860.956173        | 1719.921053       | 860.464165        | 14 |
| 3  | 244.129183        | 122.568230        |                   |                  | <b>226.118618</b> | 113.562947        | T    | 1666.894504        | 833.950890        | 1649.867955        | 825.437616        | 1648.883939       | 824.945608        | 13 |
| 4  | 343.197597        | 172.102437        |                   |                  | <b>325.187032</b> | 163.097154        | V    | 1565.846825        | 783.427051        | 1548.820276        | 774.913776        | 1547.836260       | 774.421768        | 12 |
| 5  | 400.219061        | 200.613169        |                   |                  | 382.208496        | 191.607886        | G    | 1466.778411        | <b>733.892844</b> | 1449.751862        | 725.379569        | 1448.767846       | 724.887561        | 11 |
| 6  | 487.251089        | 244.129183        |                   |                  | 469.240524        | 235.123900        | S    | 1409.756947        | 705.382112        | 1392.730398        | 696.868837        | 1391.746382       | 696.376829        | 10 |
| 7  | 600.335153        | 300.671215        |                   |                  | <b>582.324588</b> | 291.665932        | L    | <b>1322.724919</b> | 661.866098        | 1305.698370        | <b>653.352823</b> | 1304.714354       | 652.860815        | 9  |
| 8  | 671.372267        | 336.189772        |                   |                  | <b>653.361702</b> | 327.184489        | A    | <b>1209.640855</b> | 605.324066        | 1192.614306        | 596.810791        | 1191.630290       | 596.318783        | 8  |
| 9  | 728.393731        | 364.700504        |                   |                  | 710.383166        | 355.695221        | G    | <b>1138.603741</b> | 569.805509        | <b>1121.577192</b> | 561.292234        | 1120.593176       | 560.800226        | 7  |
| 10 | <b>856.452309</b> | 428.729793        | 839.425760        | 420.216518       | <b>838.441744</b> | 419.724510        | Q    | <b>1081.582277</b> | 541.294777        | 1064.555728        | 532.781502        | 1063.571712       | 532.289494        | 6  |
| 11 | <b>953.505073</b> | <b>477.256175</b> | <b>936.478524</b> | 468.742900       | 935.494508        | <b>468.250892</b> | P    | <b>953.523699</b>  | <b>477.265488</b> | <b>936.497150</b>  | 468.752213        | 935.513134        | <b>468.260205</b> | 5  |
| 12 | 1066.589137       | 533.798207        | 1049.562588       | 525.284932       | 1048.578572       | 524.792924        | L    | <b>856.470935</b>  | 428.739106        | 839.444386         | 420.225831        | <b>838.460370</b> | 419.733823        | 4  |
| 13 | 1505.814463       | 753.410870        | 1488.787914       | 744.897595       | 1487.803898       | 744.405587        | Q    | <b>743.386871</b>  | 372.197074        | <b>726.360322</b>  | 363.683799        | 725.376306        | 363.191791        | 3  |
| 14 | 1634.857056       | 817.932166        | 1617.830507       | 809.418892       | 1616.846491       | 808.926884        | E    | <b>304.161545</b>  | 152.584411        | 287.134996         | 144.071136        | 286.150980        | 143.579128        | 2  |
| 15 |                   |                   |                   |                  |                   |                   | R    | <b>175.118952</b>  | 88.063114         | 158.092403         | 79.549839         |                   |                   | 1  |

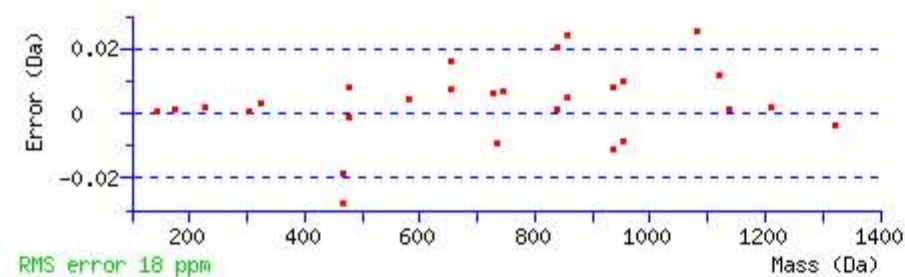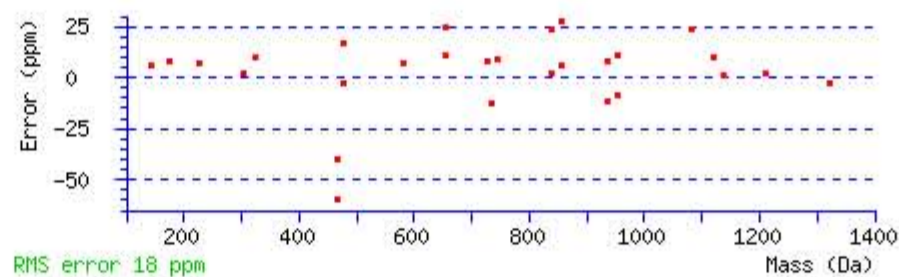

NCBI BLAST search of **AATVGS LAGQPLQER**

(Parameters: blastp, nr protein database, expect=20000, no filter, PAM30)

Other BLAST [web gateways](#)

All matches to this query

| Score | Mr(calc):   | Delta     | Sequence                          |
|-------|-------------|-----------|-----------------------------------|
| 58.4  | 1807.961441 | -0.010739 | <a href="#">AATVGS LAGQPLQER</a>  |
| 14.2  | 1807.961441 | -0.010739 | <a href="#">AATVGS LAGQPLQER</a>  |
| 3.8   | 1807.942795 | 0.007907  | <a href="#">ENKDQLESVLEVLHR</a>   |
| 3.4   | 1807.947510 | 0.003192  | <a href="#">VGLAQIAAMDISRGNHR</a> |
| 0.5   | 1807.925720 | 0.024982  | <a href="#">WNWIIVLVSSDTYGR</a>   |



# MASCOT SEARCH RESULTS

## Peptide View

MS/MS Fragmentation of **SWFEPLVEDMQR**

Found in **APOE\_HUMAN**, Apolipoprotein E OS=Homo sapiens GN=APOE PE=1 SV=1

Match to Query 45743: 1846.881868 from(924.448210,2+) rtinseconds(2814) index(43926)

Title: Locus:1.1.1.3000.8 File:"2013-07-02 CLN FXIII 30 min 2nd F 3.wiff"

Data file C:\Program Files (x86)\Matrix Science\Mascot Daemon\mgf2 FXIII 30 min 2nd\mascot\_daemon\_merge.mgf

Click mouse within plot area to zoom in by factor of two about that point

Or, Plot from  to  Da

Label all possible matches  Label matches used for scoring

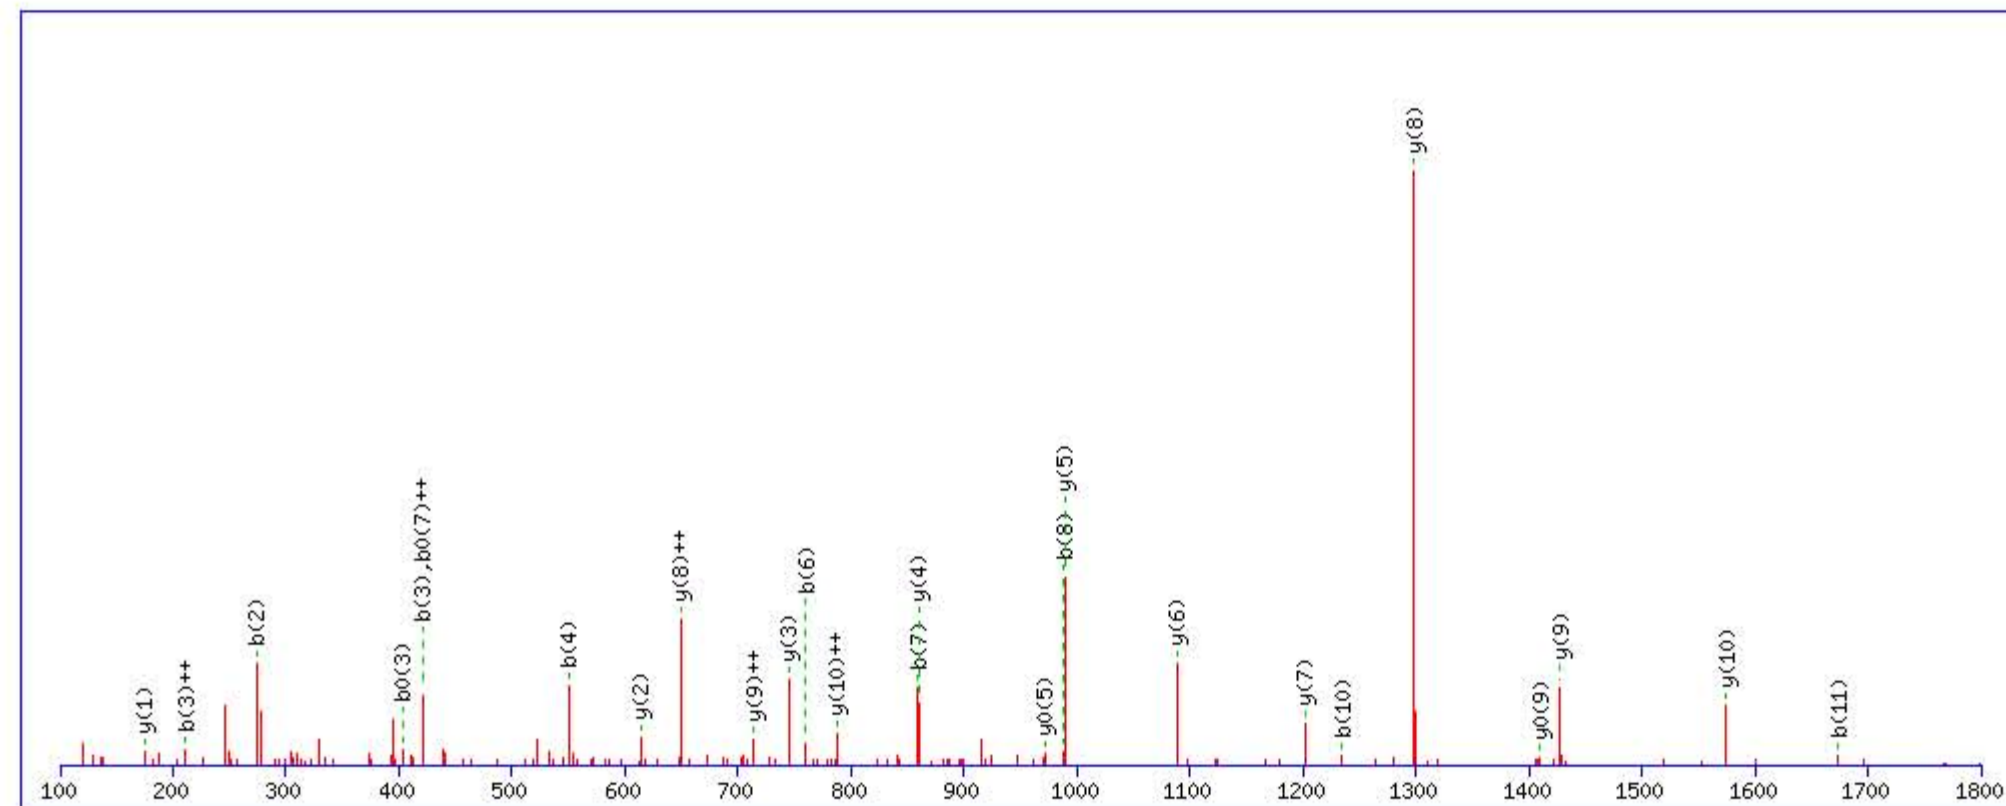

Monoisotopic mass of neutral peptide Mr(calc): 1846.874603

Fixed modifications: Carbamidomethyl (C) (apply to specified residues or termini only)

Variable modifications:

Q11 : Biotin:Thermo-21345 (Q)

Ions Score: 56 Expect: 4.5e-005

Matches : 26/106 fragment ions using 49 most intense peaks [\(help\)](#)

| #  | b                  | b <sup>++</sup>   | b <sup>+</sup> | b <sup>+++</sup> | b <sup>0</sup>    | b <sup>0++</sup>  | Seq. | y                  | y <sup>++</sup>   | y <sup>+</sup> | y <sup>+++</sup> | y <sup>0</sup>     | y <sup>0++</sup> | #  |
|----|--------------------|-------------------|----------------|------------------|-------------------|-------------------|------|--------------------|-------------------|----------------|------------------|--------------------|------------------|----|
| 1  | 88.039304          | 44.523290         |                |                  | 70.028739         | 35.518008         | S    |                    |                   |                |                  |                    |                  | 12 |
| 2  | <b>274.118617</b>  | 137.562947        |                |                  | 256.108052        | 128.557664        | W    | 1760.849861        | 880.928568        | 1743.823312    | 872.415294       | 1742.839296        | 871.923286       | 11 |
| 3  | <b>421.187031</b>  | <b>211.097153</b> |                |                  | <b>403.176466</b> | 202.091871        | F    | <b>1574.770548</b> | <b>787.888912</b> | 1557.743999    | 779.375638       | 1556.759983        | 778.883629       | 10 |
| 4  | <b>550.229624</b>  | 275.618450        |                |                  | 532.219059        | 266.613168        | E    | <b>1427.702134</b> | <b>714.354705</b> | 1410.675585    | 705.841431       | <b>1409.691569</b> | 705.349422       | 9  |
| 5  | 647.282388         | 324.144832        |                |                  | 629.271823        | 315.139550        | P    | <b>1298.659541</b> | <b>649.833409</b> | 1281.632992    | 641.320134       | 1280.648976        | 640.828126       | 8  |
| 6  | <b>760.366452</b>  | 380.686864        |                |                  | 742.355887        | 371.681582        | L    | <b>1201.606777</b> | 601.307027        | 1184.580228    | 592.793752       | 1183.596212        | 592.301744       | 7  |
| 7  | <b>859.434866</b>  | 430.221071        |                |                  | 841.424301        | <b>421.215789</b> | V    | <b>1088.522713</b> | 544.764995        | 1071.496164    | 536.251720       | 1070.512148        | 535.759712       | 6  |
| 8  | <b>988.477459</b>  | 494.742368        |                |                  | 970.466894        | 485.737085        | E    | <b>989.454299</b>  | 495.230788        | 972.427750     | 486.717513       | <b>971.443734</b>  | 486.225505       | 5  |
| 9  | 1103.504402        | 552.255839        |                |                  | 1085.493837       | 543.250557        | D    | <b>860.411706</b>  | 430.709491        | 843.385157     | 422.196216       | 842.401141         | 421.704208       | 4  |
| 10 | <b>1234.544887</b> | 617.776082        |                |                  | 1216.534322       | 608.770799        | M    | <b>745.384763</b>  | 373.196020        | 728.358214     | 364.682745       |                    |                  | 3  |
| 11 | <b>1673.770213</b> | 837.388745        | 1656.743664    | 828.875470       | 1655.759648       | 828.383462        | Q    | <b>614.344278</b>  | 307.675777        | 597.317729     | 299.162503       |                    |                  | 2  |
| 12 |                    |                   |                |                  |                   |                   | R    | <b>175.118952</b>  | 88.063114         | 158.092403     | 79.549839        |                    |                  | 1  |

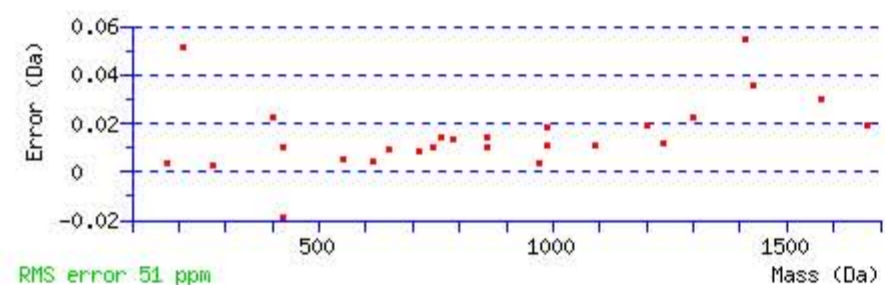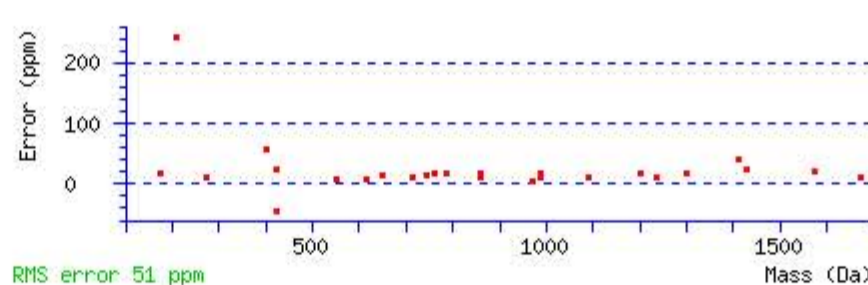

NCBI BLAST search of **SWFEPLVEDMQR**

(Parameters: blastp, nr protein database, expect=20000, no filter, PAM30)

Other BLAST [web gateways](#)

All matches to this query

| Score | Mr(calc):   | Delta     | Sequence                         |
|-------|-------------|-----------|----------------------------------|
| 56.0  | 1846.874603 | 0.007265  | <a href="#">SWFEPLVEDMQR</a>     |
| 17.6  | 1846.866562 | 0.015306  | <a href="#">LCMAQPRTVQDVEER</a>  |
| 7.3   | 1846.895706 | -0.013838 | <a href="#">CFELQALLEEER</a>     |
| 2.2   | 1846.870560 | 0.011308  | <a href="#">IHIGEKPYECKECKGK</a> |

Mascot: <http://www.matrixscience.com/>



# MASCOT Search Results

## Peptide View

MS/MS Fragmentation of **SGVQQLIQYYQDQK**

Found in **APOF\_HUMAN**, Apolipoprotein F OS=Homo sapiens GN=APOF PE=1 SV=2

Match to Query 50151: 2008.017008 from(1005.015780,2+) rtinseconds(2470) index(58436)

Title: Locus:1.1.1.3345.25 File:"2013-07-02 CLN FXIII 30 min 2nd F 4.wiff"

Data file C:\Program Files (x86)\Matrix Science\Mascot Daemon\mgf2 FXIII 30 min 2nd\mascot\_daemon\_merge.mgf

Click mouse within plot area to zoom in by factor of two about that point

Or, Plot from  to  Da

Label all possible matches  Label matches used for scoring

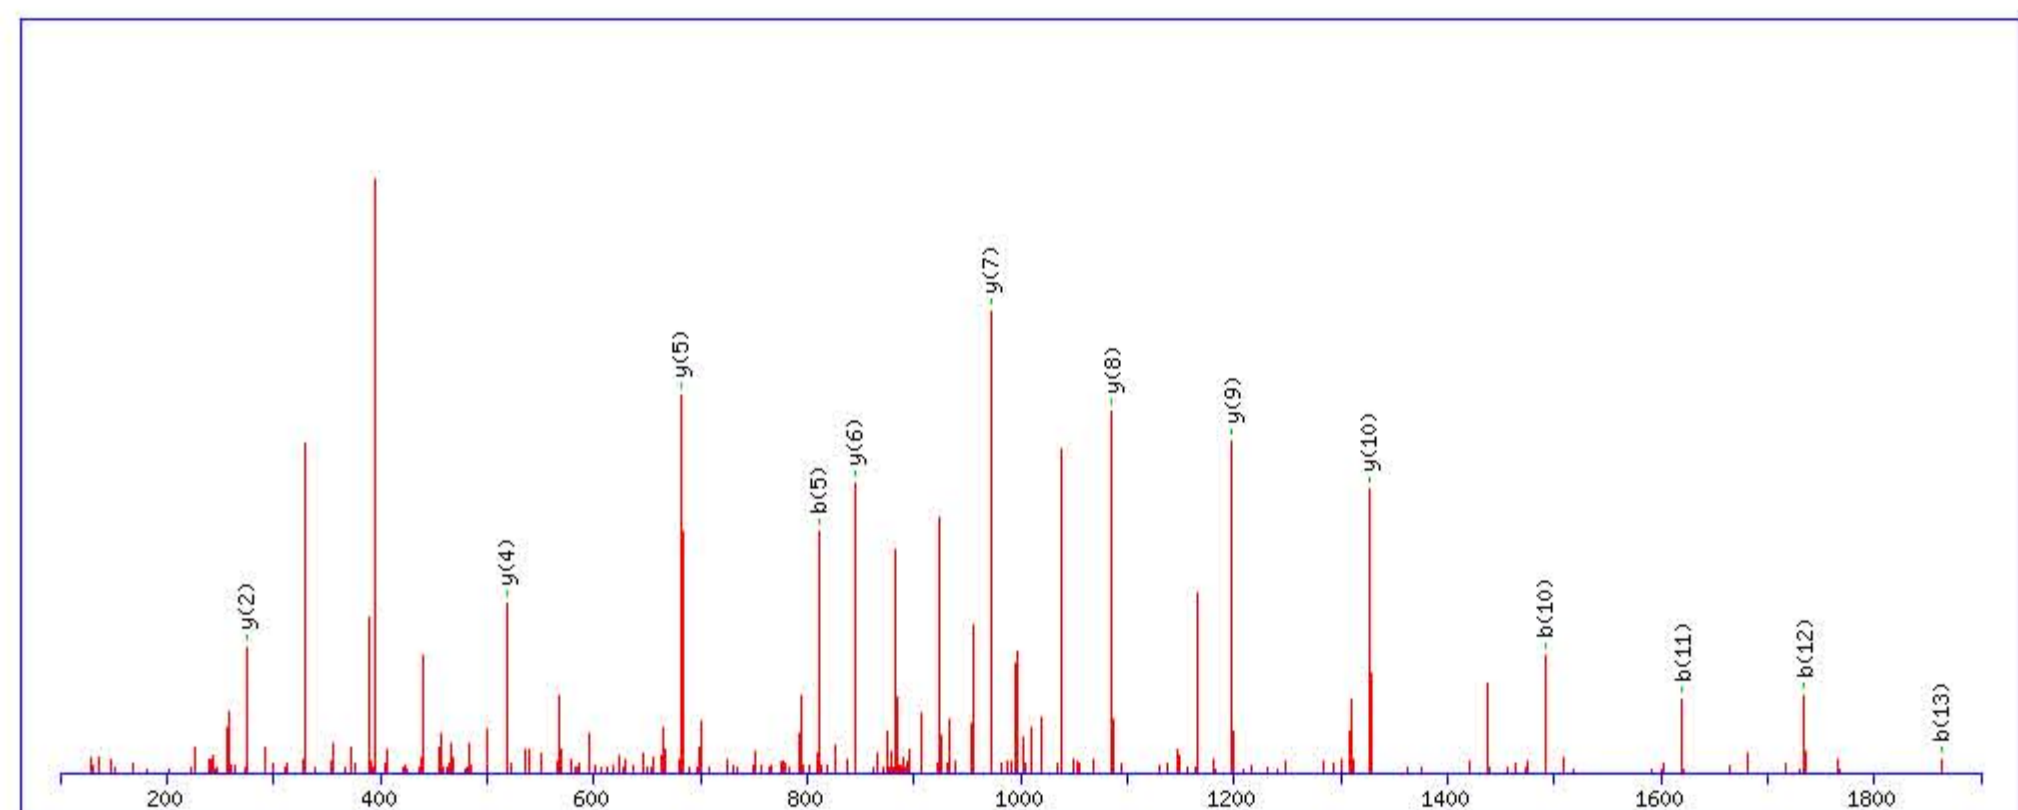

Monoisotopic mass of neutral peptide Mr(calc): 2008.008789

Fixed modifications: Carbamidomethyl (C) (apply to specified residues or termini only)

Variable modifications:

Q4 : Biotin:Thermo-21345 (Q)

Ions Score: 57 Expect: 1.9e-005

Matches : 13/146 fragment ions using 18 most intense peaks [\(help\)](#)

| #  | b                  | b <sup>++</sup> | b <sup>*</sup> | b <sup>*++</sup> | b <sup>0</sup> | b <sup>0++</sup> | Seq. | y                  | y <sup>++</sup> | y <sup>*</sup> | y <sup>*++</sup> | y <sup>0</sup> | y <sup>0++</sup> | #  |
|----|--------------------|-----------------|----------------|------------------|----------------|------------------|------|--------------------|-----------------|----------------|------------------|----------------|------------------|----|
| 1  | 88.039304          | 44.523290       |                |                  | 70.028739      | 35.518008        | S    |                    |                 |                |                  |                |                  | 14 |
| 2  | 145.060768         | 73.034022       |                |                  | 127.050203     | 64.028740        | G    | 1921.984049        | 961.495663      | 1904.957500    | 952.982388       | 1903.973484    | 952.490380       | 13 |
| 3  | 244.129182         | 122.568229      |                |                  | 226.118617     | 113.562947       | V    | 1864.962585        | 932.984931      | 1847.936036    | 924.471656       | 1846.952020    | 923.979648       | 12 |
| 4  | 683.354508         | 342.180892      | 666.327959     | 333.667618       | 665.343943     | 333.175610       | Q    | 1765.894171        | 883.450724      | 1748.867622    | 874.937449       | 1747.883606    | 874.445441       | 11 |
| 5  | <b>811.413086</b>  | 406.210181      | 794.386537     | 397.696907       | 793.402521     | 397.204899       | Q    | <b>1326.668845</b> | 663.838061      | 1309.642296    | 655.324786       | 1308.658280    | 654.832778       | 10 |
| 6  | 924.497150         | 462.752213      | 907.470601     | 454.238939       | 906.486585     | 453.746931       | L    | <b>1198.610267</b> | 599.808772      | 1181.583718    | 591.295497       | 1180.599702    | 590.803489       | 9  |
| 7  | 1037.581214        | 519.294245      | 1020.554665    | 510.780971       | 1019.570649    | 510.288963       | I    | <b>1085.526203</b> | 543.266740      | 1068.499654    | 534.753465       | 1067.515638    | 534.261457       | 8  |
| 8  | 1165.639792        | 583.323534      | 1148.613243    | 574.810260       | 1147.629227    | 574.318252       | Q    | <b>972.442139</b>  | 486.724708      | 955.415590     | 478.211433       | 954.431574     | 477.719425       | 7  |
| 9  | 1328.703121        | 664.855199      | 1311.676572    | 656.341924       | 1310.692556    | 655.849916       | Y    | <b>844.383561</b>  | 422.695419      | 827.357012     | 414.182144       | 826.372996     | 413.690136       | 6  |
| 10 | <b>1491.766450</b> | 746.386863      | 1474.739901    | 737.873589       | 1473.755885    | 737.381581       | Y    | <b>681.320232</b>  | 341.163754      | 664.293683     | 332.650480       | 663.309667     | 332.158472       | 5  |
| 11 | <b>1619.825028</b> | 810.416152      | 1602.798479    | 801.902878       | 1601.814463    | 801.410870       | Q    | <b>518.256903</b>  | 259.632090      | 501.230354     | 251.118815       | 500.246338     | 250.626807       | 4  |
| 12 | <b>1734.851971</b> | 867.929624      | 1717.825422    | 859.416349       | 1716.841406    | 858.924341       | D    | 390.198325         | 195.602800      | 373.171776     | 187.089526       | 372.187760     | 186.597518       | 3  |
| 13 | <b>1862.910549</b> | 931.958913      | 1845.884000    | 923.445638       | 1844.899984    | 922.953630       | Q    | <b>275.171382</b>  | 138.089329      | 258.144833     | 129.576054       |                |                  | 2  |
| 14 |                    |                 |                |                  |                |                  | K    | 147.112804         | 74.060040       | 130.086255     | 65.546765        |                |                  | 1  |

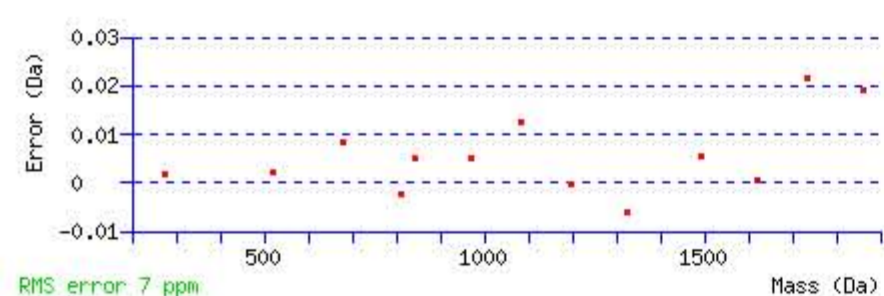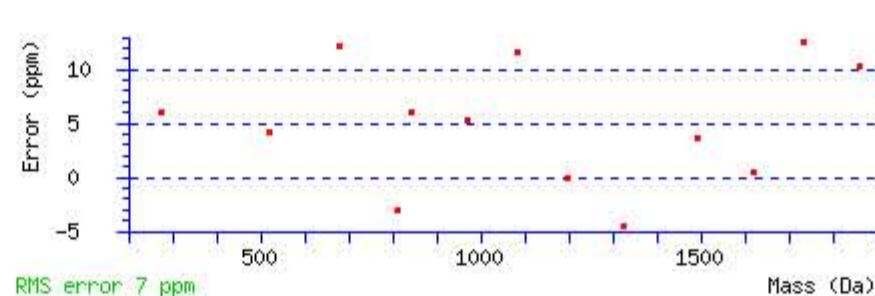

NCBI BLAST search of **SGVQQLIQYYQDQK**

(Parameters: blastp, nr protein database, expect=20000, no filter, PAM30)

Other BLAST [web gateways](#)

All matches to this query

| Score | Mr(calc):   | Delta     | Sequence                           |
|-------|-------------|-----------|------------------------------------|
| 57.0  | 2008.008789 | 0.008219  | <a href="#">SGVQQLIQYYQDQK</a>     |
| 49.3  | 2008.008789 | 0.008219  | <a href="#">SGVQQLIQYYQDQK</a>     |
| 26.8  | 2008.008789 | 0.008219  | <a href="#">SGVQQLIQYYQDQK</a>     |
| 6.3   | 2007.998215 | 0.018793  | <a href="#">QQLNLRTHMADENK</a>     |
| 6.2   | 2008.037308 | -0.020300 | <a href="#">VVPVLSLSELYLLQCNMK</a> |
| 5.9   | 2007.998215 | 0.018793  | <a href="#">QQLNLRTHMADENK</a>     |
| 5.6   | 2008.005630 | 0.011378  | <a href="#">ITQRMVCAGYKEGGK</a>    |
| 5.5   | 2008.008789 | 0.008219  | <a href="#">SGVQQLIQYYQDQK</a>     |
| 4.9   | 2008.030762 | -0.013754 | <a href="#">ASVMLFMKGKQEAQ</a>     |
| 1.8   | 2008.037766 | -0.020758 | <a href="#">NYEDSVIQSVFRAKPKQ</a>  |



# MASCOT SCIENCE Mascot Search Results

## Peptide View

MS/MS Fragmentation of **KCSYTEDAQCIDGTIEVPK**  
 Found in **APOH\_HUMAN**, Beta-2-glycoprotein 1 OS=Homo sapiens GN=APOH PE=1 SV=3

Match to Query 60442: 2524.148862 from(842.390230,3+) rtinseconds(1982) index(71118)  
 Title: Locus:1.1.1.3223.13 File:"2013-07-02 CLN FXIII 30 min 2nd FT.wiff"  
 Data file C:\Program Files (x86)\Matrix Science\Mascot Daemon\mgf2 FXIII 30 min 2nd\mascot\_daemon\_merge.mgf

Click mouse within plot area to zoom in by factor of two about that point  
 Or, Plot from  to  Da   
 Label all possible matches  Label matches used for scoring

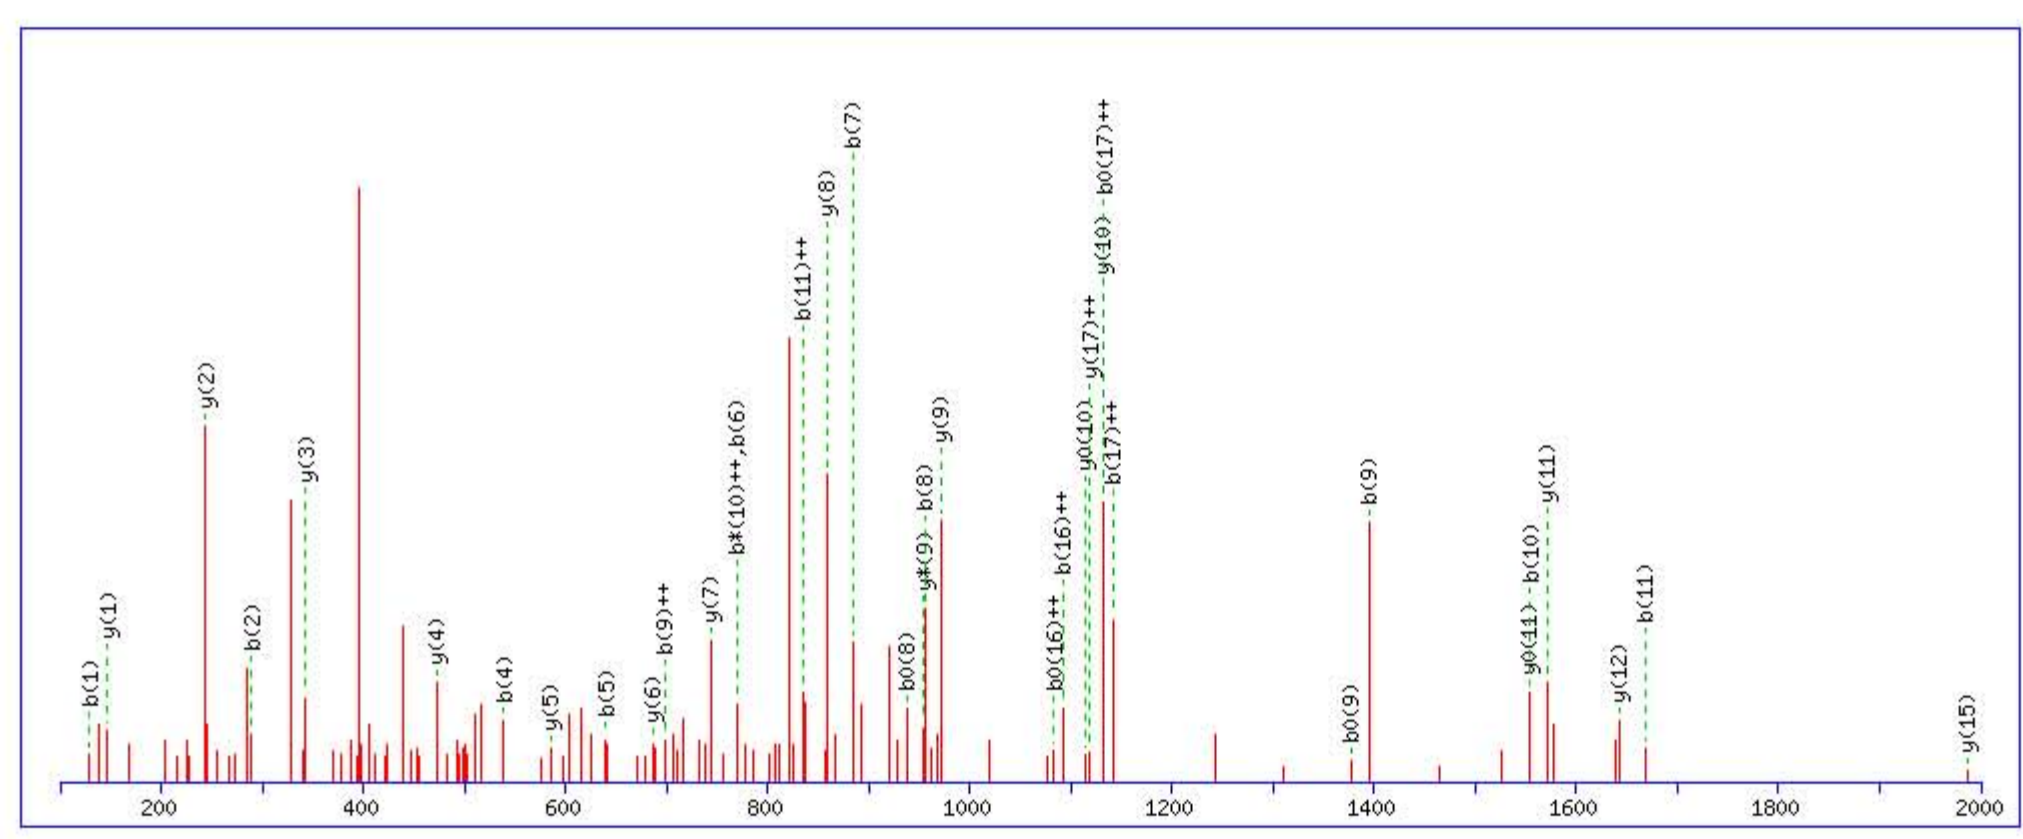

Monoisotopic mass of neutral peptide Mr(calc): 2524.164780  
 Fixed modifications: Carbamidomethyl (C) (apply to specified residues or termini only)  
 Variable modifications:  
 Q9 : Biotin:Thermo-21345 (Q)  
 Ions Score: 63 Expect: 4.7e-006  
 Matches : 36/206 fragment ions using 79 most intense peaks [\(help\)](#)

| #  | b                  | b <sup>++</sup>    | b <sup>*</sup> | b <sup>*++</sup>  | b <sup>0</sup>     | b <sup>0++</sup>   | Seq.     | y                  | y <sup>++</sup>    | y <sup>*</sup>    | y <sup>*++</sup> | y <sup>0</sup>     | y <sup>0++</sup> | #  |
|----|--------------------|--------------------|----------------|-------------------|--------------------|--------------------|----------|--------------------|--------------------|-------------------|------------------|--------------------|------------------|----|
| 1  | <b>129.102239</b>  | 65.054757          | 112.075690     | 56.541483         |                    |                    | <b>K</b> |                    |                    |                   |                  |                    |                  | 19 |
| 2  | <b>289.132888</b>  | 145.070082         | 272.106339     | 136.556808        |                    |                    | <b>C</b> | 2397.077099        | 1199.042187        | 2380.050550       | 1190.528913      | 2379.066534        | 1190.036905      | 18 |
| 3  | 376.164916         | 188.586096         | 359.138367     | 180.072822        | 358.154351         | 179.580814         | <b>S</b> | 2237.046450        | <b>1119.026863</b> | 2220.019901       | 1110.513588      | 2219.035885        | 1110.021580      | 17 |
| 4  | <b>539.228245</b>  | 270.117761         | 522.201696     | 261.604486        | 521.217680         | 261.112478         | <b>Y</b> | 2150.014422        | 1075.510849        | 2132.987873       | 1066.997574      | 2132.003857        | 1066.505566      | 16 |
| 5  | <b>640.275924</b>  | 320.641600         | 623.249375     | 312.128326        | 622.265359         | 311.636318         | <b>T</b> | <b>1986.951093</b> | 993.979185         | 1969.924544       | 985.465910       | 1968.940528        | 984.973902       | 15 |
| 6  | <b>769.318517</b>  | 385.162897         | 752.291968     | 376.649622        | 751.307952         | 376.157614         | <b>E</b> | 1885.903414        | 943.455345         | 1868.876865       | 934.942071       | 1867.892849        | 934.450063       | 14 |
| 7  | <b>884.345460</b>  | 442.676368         | 867.318911     | 434.163094        | 866.334895         | 433.671086         | <b>D</b> | 1756.860821        | 878.934049         | 1739.834272       | 870.420774       | 1738.850256        | 869.928766       | 13 |
| 8  | <b>955.382574</b>  | 478.194925         | 938.356025     | 469.681650        | <b>937.372009</b>  | 469.189642         | <b>A</b> | <b>1641.833878</b> | 821.420577         | 1624.807329       | 812.907303       | 1623.823313        | 812.415295       | 12 |
| 9  | <b>1394.607900</b> | <b>697.807588</b>  | 1377.581351    | 689.294314        | <b>1376.597335</b> | 688.802306         | <b>Q</b> | <b>1570.796764</b> | 785.902020         | 1553.770215       | 777.388746       | <b>1552.786199</b> | 776.896738       | 11 |
| 10 | <b>1554.638549</b> | 777.822913         | 1537.612000    | <b>769.309638</b> | 1536.627984        | 768.817630         | <b>C</b> | <b>1131.571438</b> | 566.289357         | 1114.544889       | 557.776083       | <b>1113.560873</b> | 557.284075       | 10 |
| 11 | <b>1667.722613</b> | <b>834.364945</b>  | 1650.696064    | 825.851670        | 1649.712048        | 825.359662         | <b>I</b> | <b>971.540789</b>  | 486.274033         | <b>954.514240</b> | 477.760758       | 953.530224         | 477.268750       | 9  |
| 12 | 1782.749556        | 891.878416         | 1765.723007    | 883.365142        | 1764.738991        | 882.873134         | <b>D</b> | <b>858.456725</b>  | 429.732001         | 841.430176        | 421.218726       | 840.446160         | 420.726718       | 8  |
| 13 | 1839.771020        | 920.389148         | 1822.744471    | 911.875874        | 1821.760455        | 911.383866         | <b>G</b> | <b>743.429782</b>  | 372.218529         | 726.403233        | 363.705255       | 725.419217         | 363.213247       | 7  |
| 14 | 1940.818699        | 970.912988         | 1923.792150    | 962.399713        | 1922.808134        | 961.907705         | <b>T</b> | <b>686.408318</b>  | 343.707797         | 669.381769        | 335.194523       | 668.397753         | 334.702515       | 6  |
| 15 | 2053.902763        | 1027.455019        | 2036.876214    | 1018.941745       | 2035.892198        | 1018.449737        | <b>I</b> | <b>585.360639</b>  | 293.183958         | 568.334090        | 284.670683       | 567.350074         | 284.178675       | 5  |
| 16 | 2182.945356        | <b>1091.976316</b> | 2165.918807    | 1083.463041       | 2164.934791        | <b>1082.971034</b> | <b>E</b> | <b>472.276575</b>  | 236.641925         | 455.250026        | 228.128651       | 454.266010         | 227.636643       | 4  |
| 17 | 2282.013770        | <b>1141.510523</b> | 2264.987221    | 1132.997248       | 2264.003205        | <b>1132.505240</b> | <b>V</b> | <b>343.233982</b>  | 172.120629         | 326.207433        | 163.607354       |                    |                  | 3  |
| 18 | 2379.066534        | 1190.036905        | 2362.039985    | 1181.523630       | 2361.055969        | 1181.031622        | <b>P</b> | <b>244.165568</b>  | 122.586422         | 227.139019        | 114.073148       |                    |                  | 2  |
| 19 |                    |                    |                |                   |                    |                    | <b>K</b> | <b>147.112804</b>  | 74.060040          | 130.086255        | 65.546765        |                    |                  | 1  |

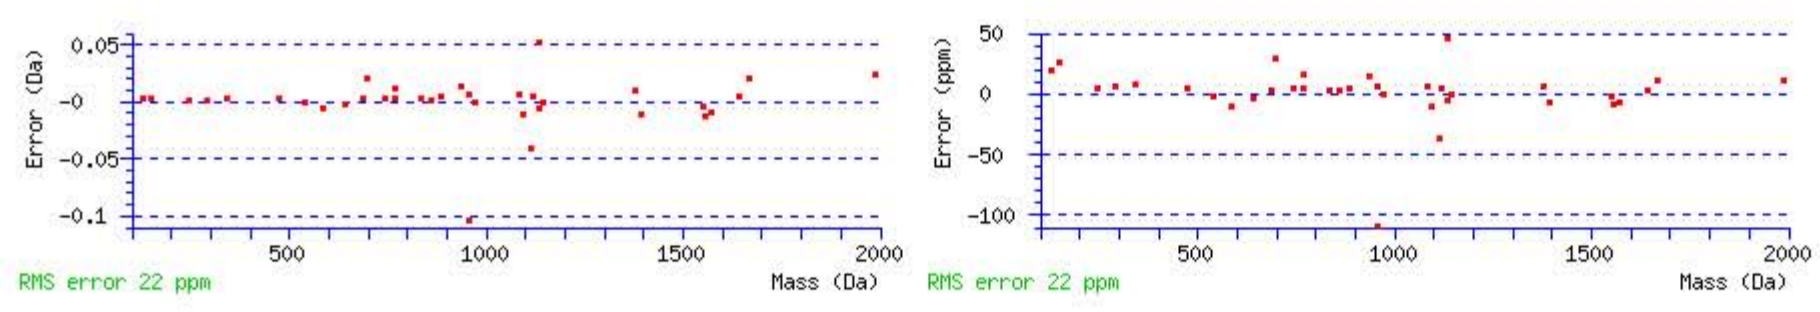

NCBI BLAST search of **KCSYTEDAQCIDGTIEVPK**  
 (Parameters: blastp, nr protein database, expect=20000, no filter, PAM30)  
 Other BLAST [web gateways](#)

### All matches to this query

| Score | Mr(calc):   | Delta     | Sequence                   |
|-------|-------------|-----------|----------------------------|
| 63.5  | 2524.164780 | -0.015918 | <b>KCSYTEDAQCIDGTIEVPK</b> |



# MASCOT SCIENCE Mascot Search Results

## Peptide View

MS/MS Fragmentation of **GYILVGQAK**

Found in **C4BPA\_HUMAN**, C4b-binding protein alpha chain OS=Homo sapiens GN=C4BPA PE=1 SV=2

Match to Query 27039: 1258.704008 from(630.359280,2+) rtinseconds(2034) index(55992)

Title: Locus:1.1.1.3194.9 File:"2013-07-02 CLN FXIII 30 min 2nd F 4.wiff"

Data file C:\Program Files (x86)\Matrix Science\Mascot Daemon\mgf2 FXIII 30 min 2nd\mascot\_daemon\_merge.mgf

Click mouse within plot area to zoom in by factor of two about that point

Or, Plot from  to  Da

Label all possible matches  Label matches used for scoring

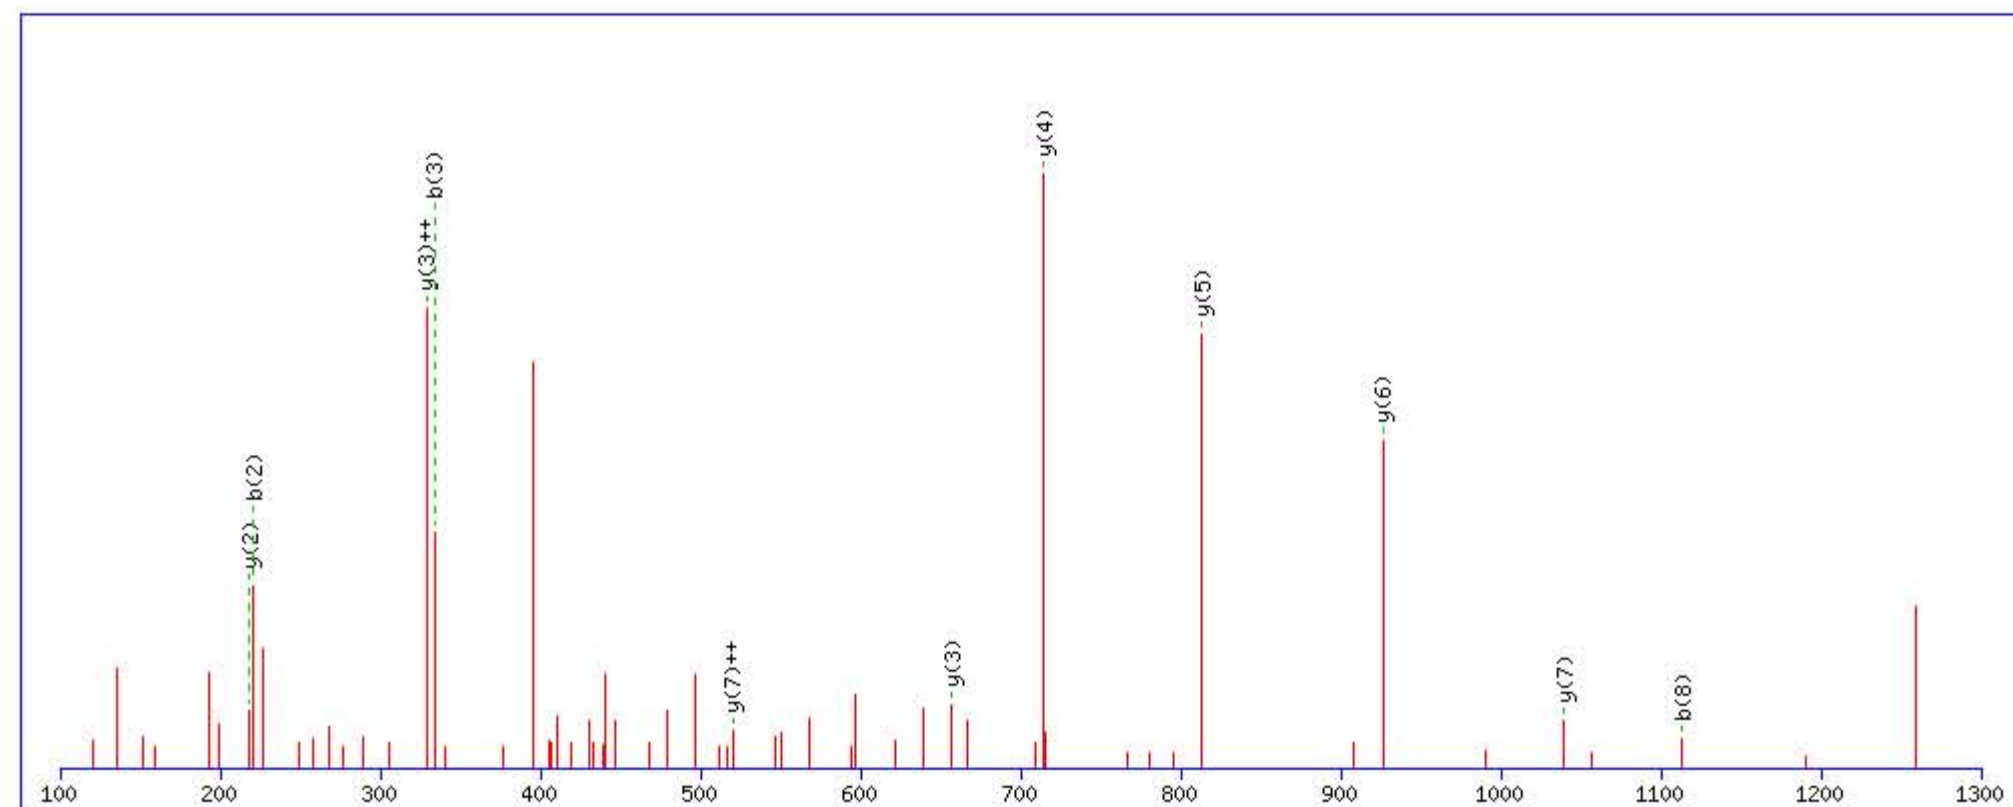

Monoisotopic mass of neutral peptide Mr(calc): 1258.710754

Fixed modifications: Carbamidomethyl (C) (apply to specified residues or termini only)

Variable modifications:

Q7 : Biotin:Thermo-21345 (Q)

Ions Score: 27 Expect: 0.032

Matches : 11/52 fragment ions using 28 most intense peaks [\(help\)](#)

| # | b                  | b <sup>++</sup> | b <sup>*</sup> | b <sup>***</sup> | Seq.     | y                  | y <sup>++</sup>   | y <sup>*</sup> | y <sup>***</sup> | #        |
|---|--------------------|-----------------|----------------|------------------|----------|--------------------|-------------------|----------------|------------------|----------|
| 1 | 58.028740          | 29.518008       |                |                  | <b>G</b> |                    |                   |                |                  | <b>9</b> |
| 2 | <b>221.092069</b>  | 111.049673      |                |                  | <b>Y</b> | 1202.696579        | 601.851928        | 1185.670030    | 593.338653       | <b>8</b> |
| 3 | <b>334.176133</b>  | 167.591704      |                |                  | <b>I</b> | <b>1039.633250</b> | <b>520.320263</b> | 1022.606701    | 511.806989       | <b>7</b> |
| 4 | 447.260197         | 224.133737      |                |                  | <b>L</b> | <b>926.549186</b>  | 463.778231        | 909.522637     | 455.264957       | <b>6</b> |
| 5 | 546.328611         | 273.667944      |                |                  | <b>V</b> | <b>813.465122</b>  | 407.236199        | 796.438573     | 398.722925       | <b>5</b> |
| 6 | 603.350075         | 302.178676      |                |                  | <b>G</b> | <b>714.396708</b>  | 357.701992        | 697.370159     | 349.188718       | <b>4</b> |
| 7 | 1042.575401        | 521.791339      | 1025.548852    | 513.278064       | <b>Q</b> | <b>657.375244</b>  | <b>329.191260</b> | 640.348695     | 320.677986       | <b>3</b> |
| 8 | <b>1113.612515</b> | 557.309896      | 1096.585966    | 548.796621       | <b>A</b> | <b>218.149918</b>  | 109.578597        | 201.123369     | 101.065322       | <b>2</b> |
| 9 |                    |                 |                |                  | <b>K</b> | 147.112804         | 74.060040         | 130.086255     | 65.546765        | <b>1</b> |

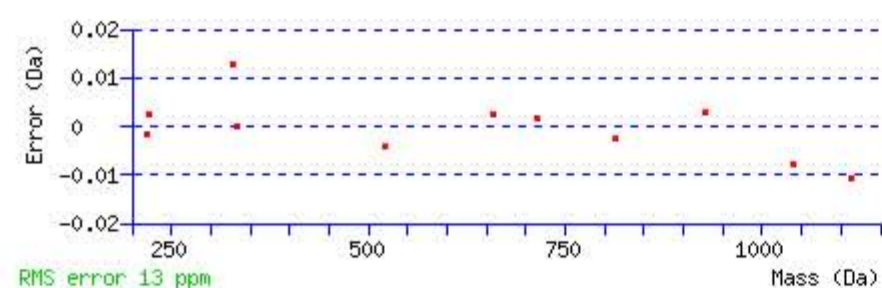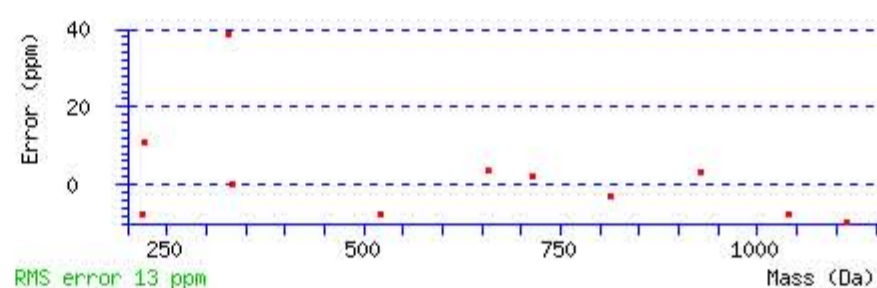

NCBI BLAST search of [GYILVGQAK](#)

(Parameters: blastp, nr protein database, expect=20000, no filter, PAM30)

Other BLAST [web gateways](#)

All matches to this query

| Score | Mr(calc):   | Delta     | Sequence                   |
|-------|-------------|-----------|----------------------------|
| 26.9  | 1258.710754 | -0.006746 | <a href="#">GYILVGQAK</a>  |
| 10.4  | 1258.717941 | -0.013933 | <a href="#">RILAKVQEMR</a> |
| 7.3   | 1258.721970 | -0.017962 | <a href="#">GYILQAKR</a>   |

Mascot: <http://www.matrixscience.com/>



# MASCOT Search Results

## Peptide View

MS/MS Fragmentation of **QSSYSFFK**

Found in **C4BPA\_HUMAN**, C4b-binding protein alpha chain OS=Homo sapiens GN=C4BPA PE=1 SV=2

Match to Query 31722: 1390.665088 from(696.339820,2+) rtinseconds(2124) index(56604)

Title: Locus:1.1.1.3225.9 File:"2013-07-02 CLN FXIII 30 min 2nd F 4.wiff"

Data file C:\Program Files (x86)\Matrix Science\Mascot Daemon\mgf2 FXIII 30 min 2nd\mascot\_daemon\_merge.mgf

Click mouse within plot area to zoom in by factor of two about that point

Or, Plot from  to  Da

Label all possible matches  Label matches used for scoring

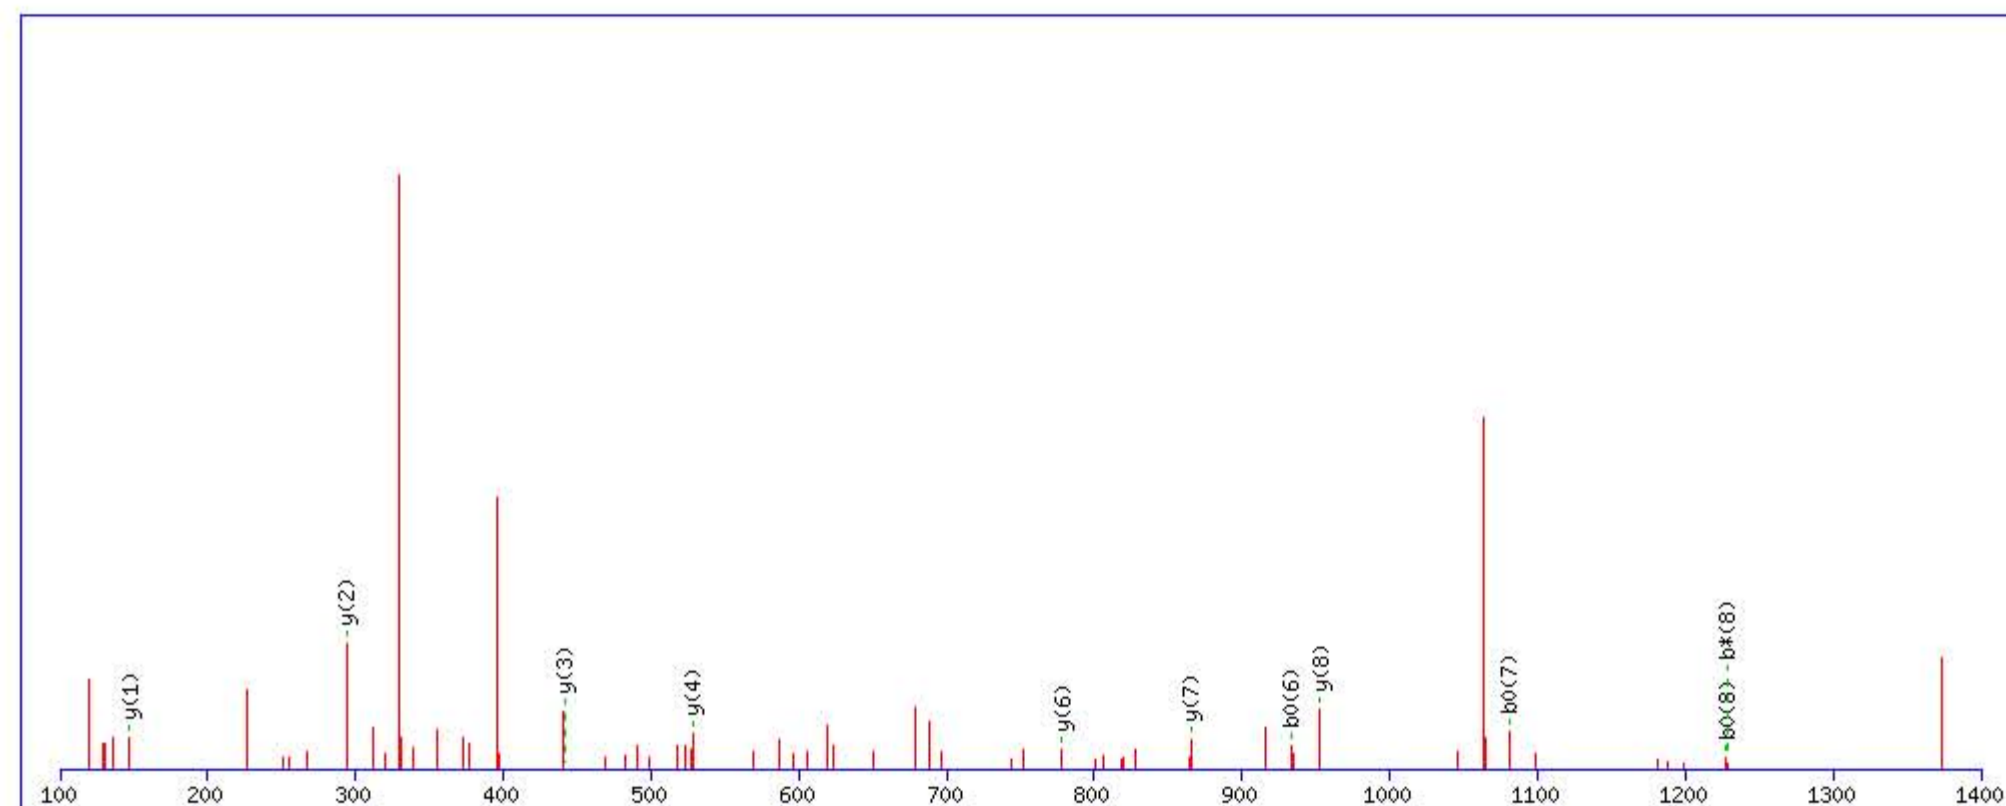

Monoisotopic mass of neutral peptide  $M_r(\text{calc})$ : 1390.659119

Fixed modifications: Carbamidomethyl (C) (apply to specified residues or termini only)

Variable modifications:

Q1 : Biotin:Thermo-21345 (Q)

Ions Score: 30 Expect: 0.0047

Matches : 11/88 fragment ions using 25 most intense peaks [\(help\)](#)

| # | b           | b <sup>++</sup> | b <sup>*</sup> | b <sup>*++</sup> | b <sup>0</sup> | b <sup>0++</sup> | Seq. | y          | y <sup>++</sup> | y <sup>*</sup> | y <sup>*++</sup> | y <sup>0</sup> | y <sup>0++</sup> | # |
|---|-------------|-----------------|----------------|------------------|----------------|------------------|------|------------|-----------------|----------------|------------------|----------------|------------------|---|
| 1 | 440.232602  | 220.619939      | 423.206053     | 212.106664       |                |                  | Q    |            |                 |                |                  |                |                  | 9 |
| 2 | 527.264630  | 264.135953      | 510.238081     | 255.622679       | 509.254065     | 255.130671       | S    | 952.441073 | 476.724175      | 935.414524     | 468.210900       | 934.430508     | 467.718892       | 8 |
| 3 | 614.296658  | 307.651967      | 597.270109     | 299.138692       | 596.286093     | 298.646684       | S    | 865.409045 | 433.208161      | 848.382496     | 424.694886       | 847.398480     | 424.202878       | 7 |
| 4 | 701.328686  | 351.167981      | 684.302137     | 342.654706       | 683.318121     | 342.162698       | S    | 778.377017 | 389.692147      | 761.350468     | 381.178872       | 760.366452     | 380.686864       | 6 |
| 5 | 864.392015  | 432.699645      | 847.365466     | 424.186371       | 846.381450     | 423.694363       | Y    | 691.344989 | 346.176133      | 674.318440     | 337.662858       | 673.334424     | 337.170850       | 5 |
| 6 | 951.424043  | 476.215659      | 934.397494     | 467.702385       | 933.413478     | 467.210377       | S    | 528.281660 | 264.644468      | 511.255111     | 256.131194       | 510.271095     | 255.639186       | 4 |
| 7 | 1098.492457 | 549.749866      | 1081.465908    | 541.236592       | 1080.481892    | 540.744584       | F    | 441.249632 | 221.128454      | 424.223083     | 212.615180       |                |                  | 3 |
| 8 | 1245.560871 | 623.284073      | 1228.534322    | 614.770799       | 1227.550306    | 614.278791       | F    | 294.181218 | 147.594247      | 277.154669     | 139.080973       |                |                  | 2 |
| 9 |             |                 |                |                  |                |                  | K    | 147.112804 | 74.060040       | 130.086255     | 65.546765        |                |                  | 1 |

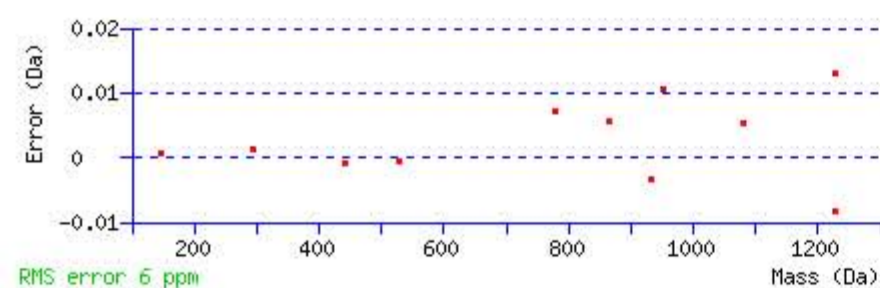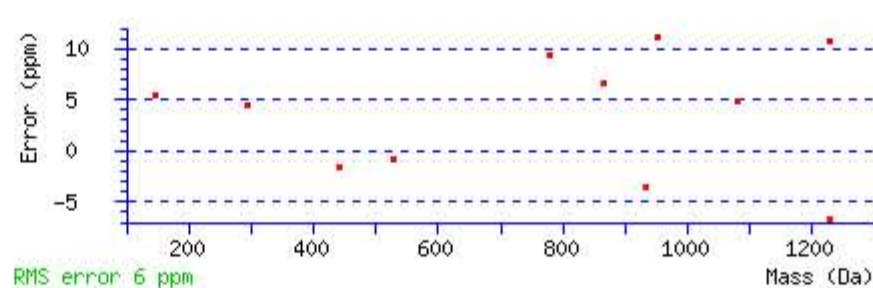

NCBI BLAST search of **QSSYSFFK**

(Parameters: blastp, nr protein database, expect=20000, no filter, PAM30)

Other BLAST [web gateways](#)

All matches to this query

| Score | $M_r(\text{calc})$ : | Delta     | Sequence                     |
|-------|----------------------|-----------|------------------------------|
| 29.5  | 1390.659119          | 0.005969  | <a href="#">QSSYSFFK</a>     |
| 4.5   | 1390.646317          | 0.018771  | <a href="#">TNELEEELSAEK</a> |
| 2.0   | 1390.676208          | -0.011120 | <a href="#">LTENNSQPLMTK</a> |
| 1.8   | 1390.669678          | -0.004590 | <a href="#">CAPASIRLMDNK</a> |
| 0.5   | 1390.673706          | -0.008618 | <a href="#">TLNADLMMFAHK</a> |

Mascot: <http://www.matrixscience.com/>



# MASCOT Search Results

## Peptide View

MS/MS Fragmentation of **LSCSYSHWSAPAPQCK**

Found in **C4BPA\_HUMAN**, C4b-binding protein alpha chain OS=Homo sapiens GN=C4BPA PE=1 SV=2

Match to Query 53707: 2188.989372 from(730.670400,3+) rtinseconds(1777) index(37193)

Title: Locus:1.1.1.2641.19 File:"2013-07-02 CLN FXIII 30 min 2nd F 3.wiff"

Data file C:\Program Files (x86)\Matrix Science\Mascot Daemon\mgf2 FXIII 30 min 2nd\mascot\_daemon\_merge.mgf

Click mouse within plot area to zoom in by factor of two about that point

Or, Plot from 100 to 1900 Da Full range

Label all possible matches  Label matches used for scoring

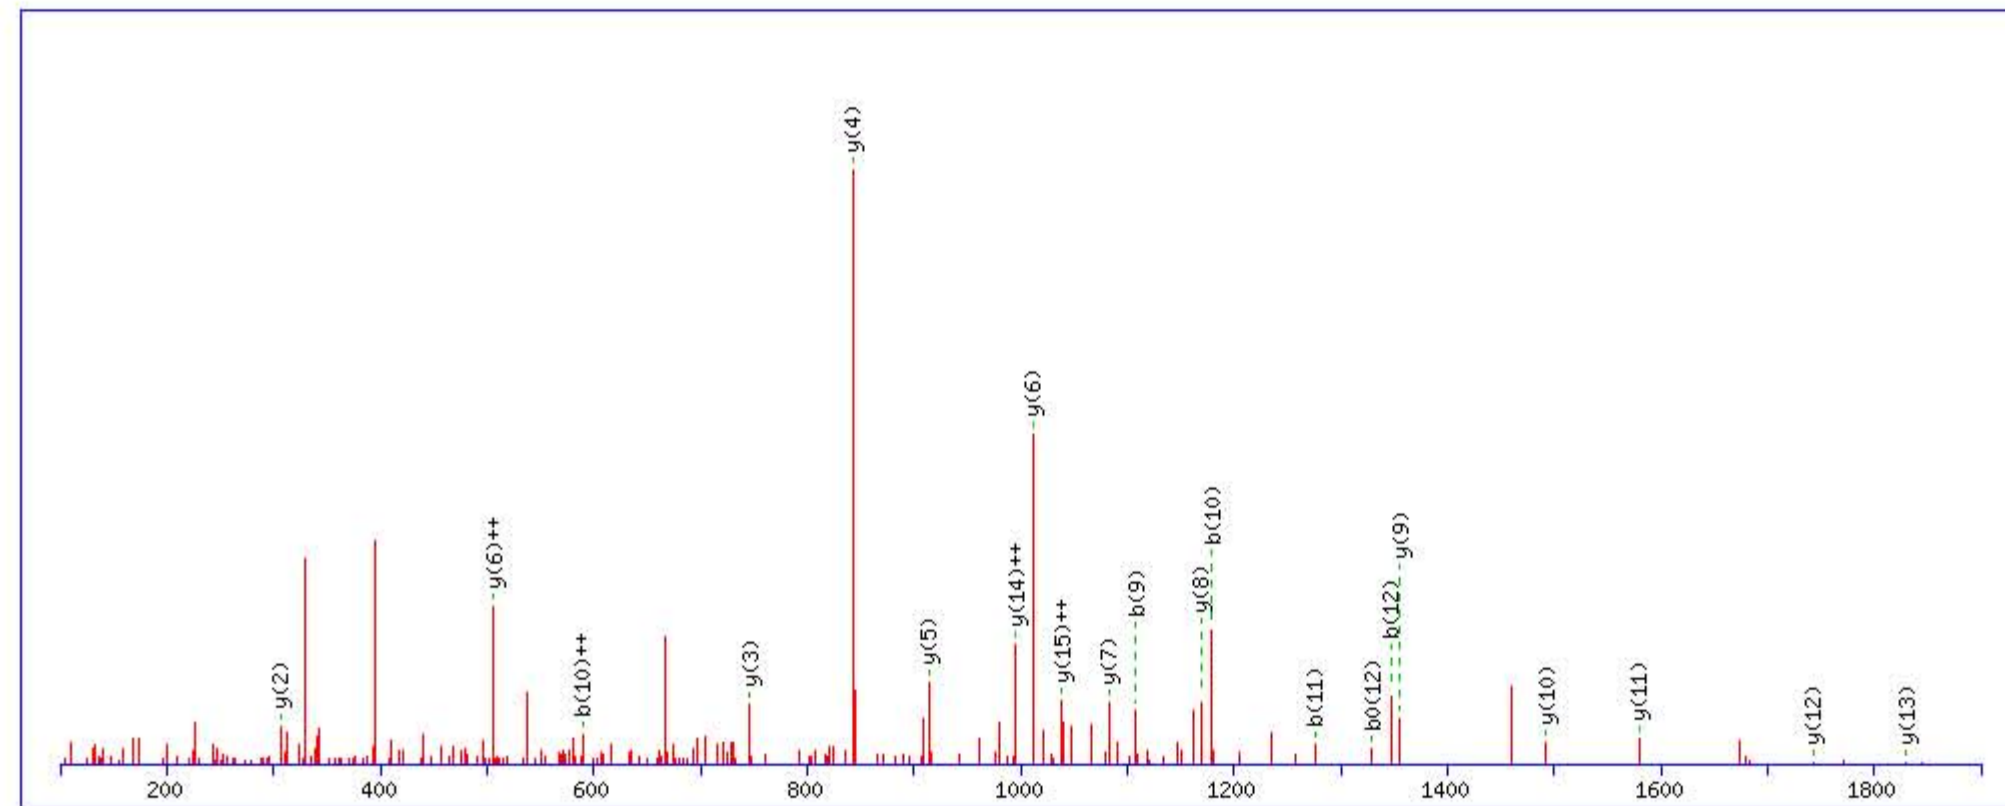

Monoisotopic mass of neutral peptide Mr(calc): 2188.985626

Fixed modifications: Carbamidomethyl (C) (apply to specified residues or termini only)

Variable modifications:

Q14 : Biotin:Thermo-21345 (Q)

Ions Score: 60 Expect: 1.1e-005

Matches : 21/138 fragment ions using 49 most intense peaks [\(help\)](#)

| #  | b           | b <sup>++</sup> | b <sup>*</sup> | b <sup>+++</sup> | b <sup>0</sup> | b <sup>0++</sup> | Seq. | y           | y <sup>++</sup> | y <sup>*</sup> | y <sup>+++</sup> | y <sup>0</sup> | y <sup>0++</sup> | #  |
|----|-------------|-----------------|----------------|------------------|----------------|------------------|------|-------------|-----------------|----------------|------------------|----------------|------------------|----|
| 1  | 114.091340  | 57.549308       |                |                  |                |                  | L    |             |                 |                |                  |                |                  | 16 |
| 2  | 201.123368  | 101.065322      |                |                  | 183.112803     | 92.060039        | S    | 2076.908850 | 1038.958063     | 2059.882301    | 1030.444788      | 2058.898285    | 1029.952780      | 15 |
| 3  | 361.154017  | 181.080647      |                |                  | 343.143452     | 172.075364       | C    | 1989.876822 | 995.442049      | 1972.850273    | 986.928775       | 1971.866257    | 986.436767       | 14 |
| 4  | 448.186045  | 224.596660      |                |                  | 430.175480     | 215.591378       | S    | 1829.846173 | 915.426725      | 1812.819624    | 906.913450       | 1811.835608    | 906.421442       | 13 |
| 5  | 611.249374  | 306.128325      |                |                  | 593.238809     | 297.123043       | Y    | 1742.814145 | 871.910711      | 1725.787596    | 863.397436       | 1724.803580    | 862.905428       | 12 |
| 6  | 698.281402  | 349.644339      |                |                  | 680.270837     | 340.639056       | S    | 1579.750816 | 790.379046      | 1562.724267    | 781.865772       | 1561.740251    | 781.373764       | 11 |
| 7  | 835.340314  | 418.173795      |                |                  | 817.329749     | 409.168512       | H    | 1492.718788 | 746.863032      | 1475.692239    | 738.349758       | 1474.708223    | 737.857750       | 10 |
| 8  | 1021.419627 | 511.213452      |                |                  | 1003.409062    | 502.208169       | W    | 1355.659876 | 678.333576      | 1338.633327    | 669.820302       | 1337.649311    | 669.328294       | 9  |
| 9  | 1108.451655 | 554.729466      |                |                  | 1090.441090    | 545.724183       | S    | 1169.580563 | 585.293920      | 1152.554014    | 576.780645       | 1151.569998    | 576.288637       | 8  |
| 10 | 1179.488769 | 590.248023      |                |                  | 1161.478204    | 581.242740       | A    | 1082.548535 | 541.777906      | 1065.521986    | 533.264631       |                |                  | 7  |
| 11 | 1276.541533 | 638.774405      |                |                  | 1258.530968    | 629.769122       | P    | 1011.511421 | 506.259349      | 994.484872     | 497.746074       |                |                  | 6  |
| 12 | 1347.578647 | 674.292962      |                |                  | 1329.568082    | 665.287679       | A    | 914.458657  | 457.732967      | 897.432108     | 449.219692       |                |                  | 5  |
| 13 | 1444.631411 | 722.819344      |                |                  | 1426.620846    | 713.814061       | P    | 843.421543  | 422.214410      | 826.394994     | 413.701135       |                |                  | 4  |
| 14 | 1883.856737 | 942.432007      | 1866.830188    | 933.918732       | 1865.846172    | 933.426724       | Q    | 746.368779  | 373.688028      | 729.342230     | 365.174753       |                |                  | 3  |
| 15 | 2043.887386 | 1022.447331     | 2026.860837    | 1013.934057      | 2025.876821    | 1013.442049      | C    | 307.143453  | 154.075365      | 290.116904     | 145.562090       |                |                  | 2  |
| 16 |             |                 |                |                  |                |                  | K    | 147.112804  | 74.060040       | 130.086255     | 65.546766        |                |                  | 1  |

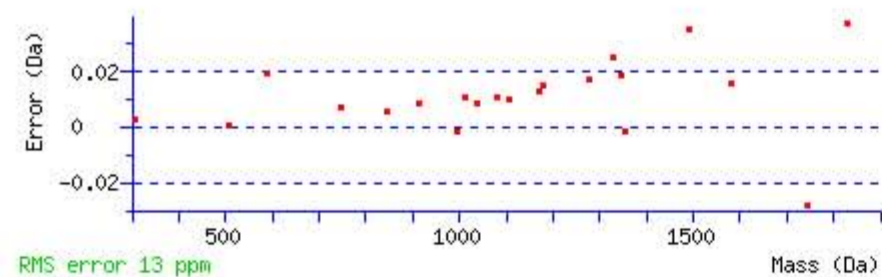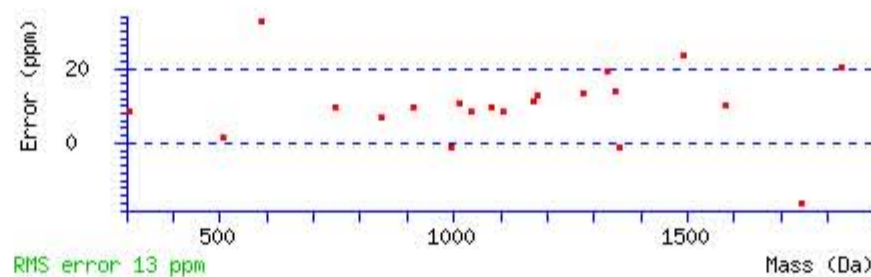

NCBI BLAST search of **LSCSYSHWSAPAPQCK**

(Parameters: blastp, nr protein database, expect=20000, no filter, PAM30)

Other BLAST [web gateways](#)

All matches to this query

| Score | Mr(calc):   | Delta    | Sequence                         |
|-------|-------------|----------|----------------------------------|
| 59.5  | 2188.985626 | 0.003746 | <a href="#">LSCSYSHWSAPAPQCK</a> |

Mascot: <http://www.matrixscience.com/>



# MASCOT Search Results

## Peptide View

MS/MS Fragmentation of **DHLGFQVTWPDESK**

Found in **CPN2\_HUMAN**, Carboxypeptidase N subunit 2 OS=Homo sapiens GN=CPN2 PE=1 SV=3

Match to Query 48479: 1968.951702 from(657.324510,3+) rtinseconds(2317) index(40631)

Title: Locus:1.1.1.2829.11 File:"2013-07-02 CLN FXIII 30 min 2nd F 3.wiff"

Data file C:\Program Files (x86)\Matrix Science\Mascot Daemon\mgf2 FXIII 30 min 2nd\mascot\_daemon\_merge.mgf

Click mouse within plot area to zoom in by factor of two about that point

Or, Plot from  to  Da

Label all possible matches  Label matches used for scoring

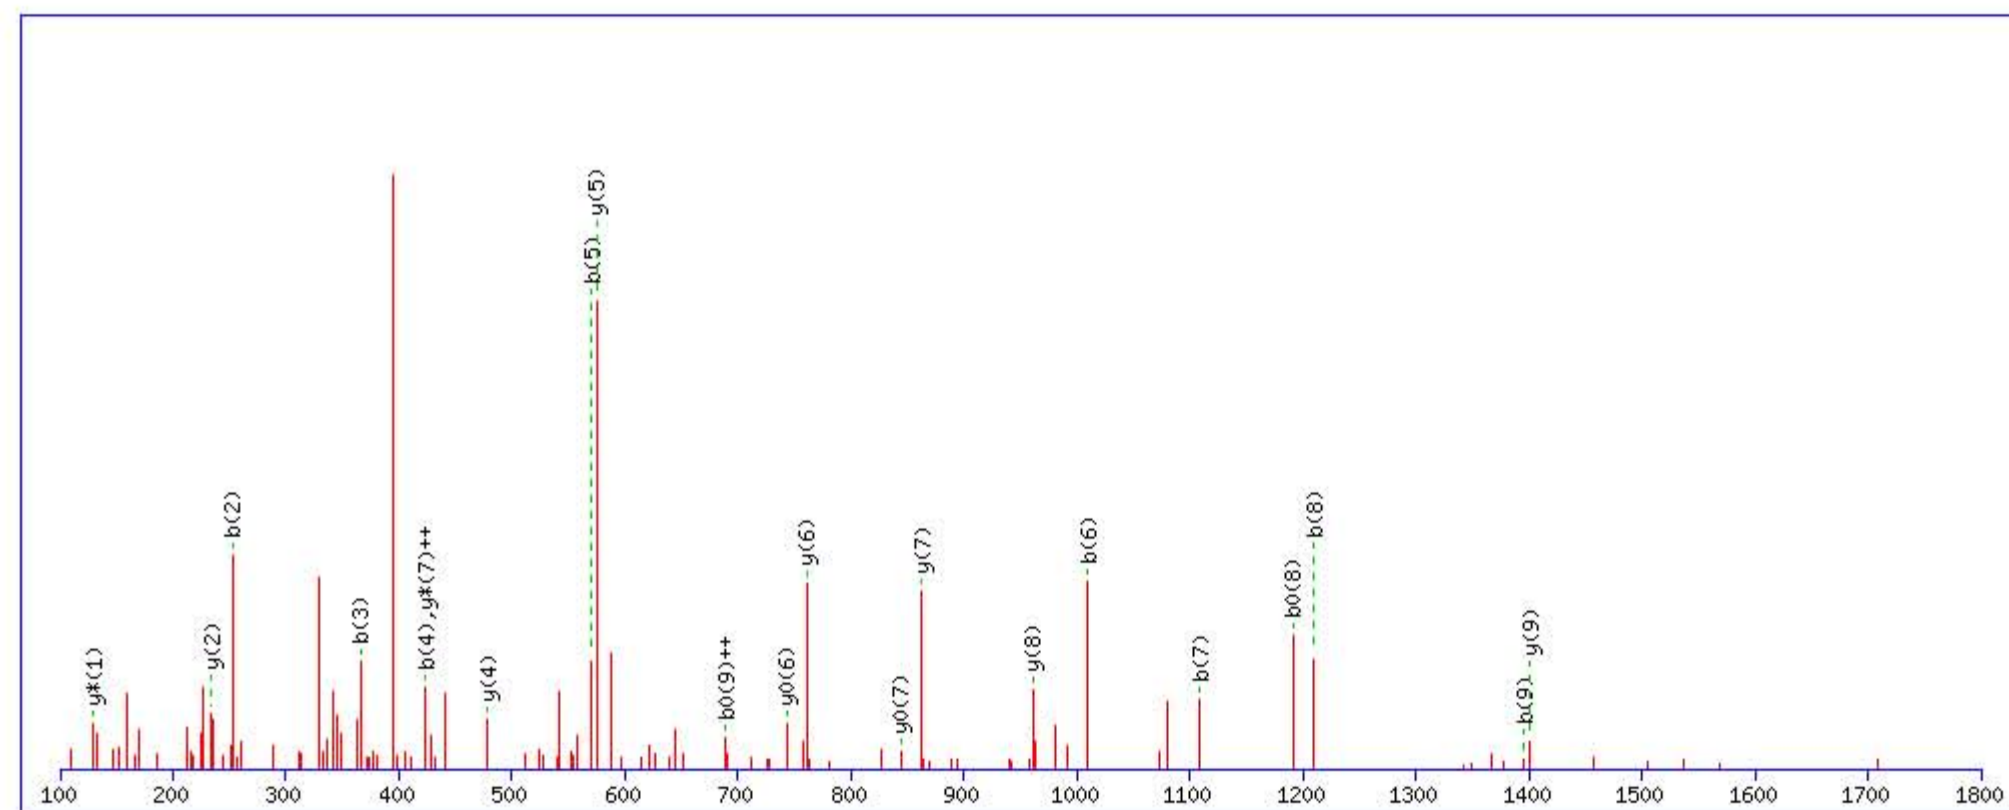

Monoisotopic mass of neutral peptide Mr(calc): 1968.940399

Fixed modifications: Carbamidomethyl (C) (apply to specified residues or termini only)

Variable modifications:

Q6 : Biotin:Thermo-21345 (Q)

Ions Score: 42 Expect: 0.0007

Matches : 21/144 fragment ions using 40 most intense peaks [\(help\)](#)

| #  | b                  | b <sup>++</sup> | b <sup>*</sup> | b <sup>*++</sup> | b <sup>0</sup>     | b <sup>0++</sup>  | Seq. | y                  | y <sup>++</sup> | y <sup>*</sup>    | y <sup>*++</sup>  | y <sup>0</sup>    | y <sup>0++</sup> | #  |
|----|--------------------|-----------------|----------------|------------------|--------------------|-------------------|------|--------------------|-----------------|-------------------|-------------------|-------------------|------------------|----|
| 1  | 116.034219         | 58.520748       |                |                  | 98.023654          | 49.515465         | D    |                    |                 |                   |                   |                   |                  | 14 |
| 2  | <b>253.093131</b>  | 127.050203      |                |                  | 235.082566         | 118.044921        | H    | 1854.920718        | 927.963997      | 1837.894169       | 919.450723        | 1836.910153       | 918.958715       | 13 |
| 3  | <b>366.177195</b>  | 183.592235      |                |                  | 348.166630         | 174.586953        | L    | 1717.861806        | 859.434541      | 1700.835257       | 850.921267        | 1699.851241       | 850.429259       | 12 |
| 4  | <b>423.198659</b>  | 212.102967      |                |                  | 405.188094         | 203.097685        | G    | 1604.777742        | 802.892509      | 1587.751193       | 794.379235        | 1586.767177       | 793.887227       | 11 |
| 5  | <b>570.267073</b>  | 285.637175      |                |                  | 552.256508         | 276.631892        | F    | 1547.756278        | 774.381777      | 1530.729729       | 765.868503        | 1529.745713       | 765.376495       | 10 |
| 6  | <b>1009.492399</b> | 505.249838      | 992.465850     | 496.736563       | 991.481834         | 496.244555        | Q    | <b>1400.687864</b> | 700.847570      | 1383.661315       | 692.334296        | 1382.677299       | 691.842288       | 9  |
| 7  | <b>1108.560813</b> | 554.784045      | 1091.534264    | 546.270770       | 1090.550248        | 545.778762        | V    | <b>961.462538</b>  | 481.234907      | 944.435989        | 472.721633        | 943.451973        | 472.229625       | 8  |
| 8  | <b>1209.608492</b> | 605.307884      | 1192.581943    | 596.794610       | <b>1191.597927</b> | 596.302602        | T    | <b>862.394124</b>  | 431.700700      | 845.367575        | <b>423.187426</b> | <b>844.383559</b> | 422.695418       | 7  |
| 9  | <b>1395.687805</b> | 698.347541      | 1378.661256    | 689.834266       | 1377.677240        | <b>689.342258</b> | W    | <b>761.346445</b>  | 381.176861      | 744.319896        | 372.663586        | <b>743.335880</b> | 372.171578       | 6  |
| 10 | 1492.740569        | 746.873923      | 1475.714020    | 738.360648       | 1474.730004        | 737.868640        | P    | <b>575.267132</b>  | 288.137204      | 558.240583        | 279.623930        | 557.256567        | 279.131922       | 5  |
| 11 | 1607.767512        | 804.387394      | 1590.740963    | 795.874120       | 1589.756947        | 795.382112        | D    | <b>478.214368</b>  | 239.610822      | 461.187819        | 231.097548        | 460.203803        | 230.605540       | 4  |
| 12 | 1736.810105        | 868.908691      | 1719.783556    | 860.395416       | 1718.799540        | 859.903408        | E    | 363.187425         | 182.097351      | 346.160876        | 173.584076        | 345.176860        | 173.092068       | 3  |
| 13 | 1823.842133        | 912.424705      | 1806.815584    | 903.911430       | 1805.831568        | 903.419422        | S    | <b>234.144832</b>  | 117.576054      | 217.118283        | 109.062780        | 216.134267        | 108.570772       | 2  |
| 14 |                    |                 |                |                  |                    |                   | K    | 147.112804         | 74.060040       | <b>130.086255</b> | 65.546765         |                   |                  | 1  |

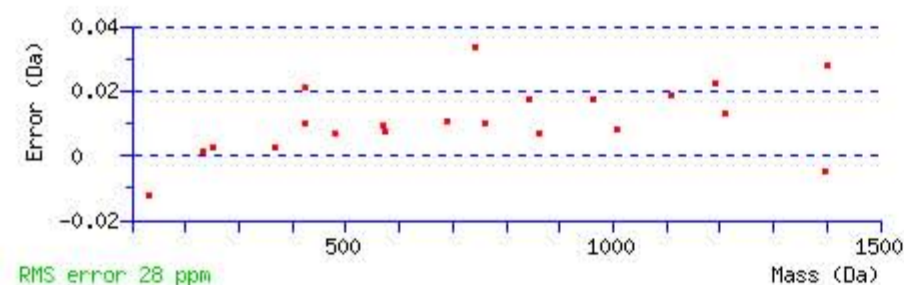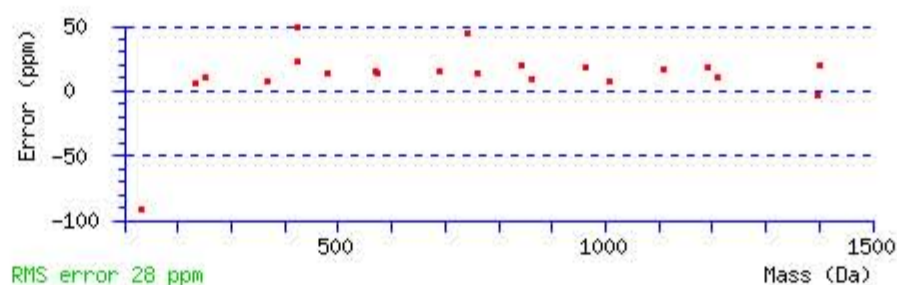

NCBI BLAST search of **DHLGFQVTWPDESK**

(Parameters: blastp, nr protein database, expect=20000, no filter, PAM30)

Other BLAST [web gateways](#)

All matches to this query

| Score | Mr(calc):   | Delta    | Sequence                           |
|-------|-------------|----------|------------------------------------|
| 42.1  | 1968.940399 | 0.011303 | <a href="#">DHLGFQVTWPDESK</a>     |
| 8.5   | 1968.949585 | 0.002117 | <a href="#">EGQMESVEAAMSSKTLKK</a> |

Mascot: <http://www.matrixscience.com/>



# Mascot Search Results

## Peptide View

MS/MS Fragmentation of **SQCTYSNPEGTVVLACDQAQCR**

Found in **CPN2\_HUMAN**, Carboxypeptidase N subunit 2 OS=Homo sapiens GN=CPN2 PE=1 SV=3

Match to Query 63912: 2854.253502 from(952.425110,3+) rtinseconds(2057) index(39028)

Title: Locus:1.1.1.2738.23 File:"2013-07-02 CLN FXIII 30 min 2nd F 3.wiff"

Data file C:\Program Files (x86)\Matrix Science\Mascot Daemon\mgf2 FXIII 30 min 2nd\mascot\_daemon\_merge.mgf

Click mouse within plot area to zoom in by factor of two about that point

Or, Plot from  to  Da

Label all possible matches  Label matches used for scoring

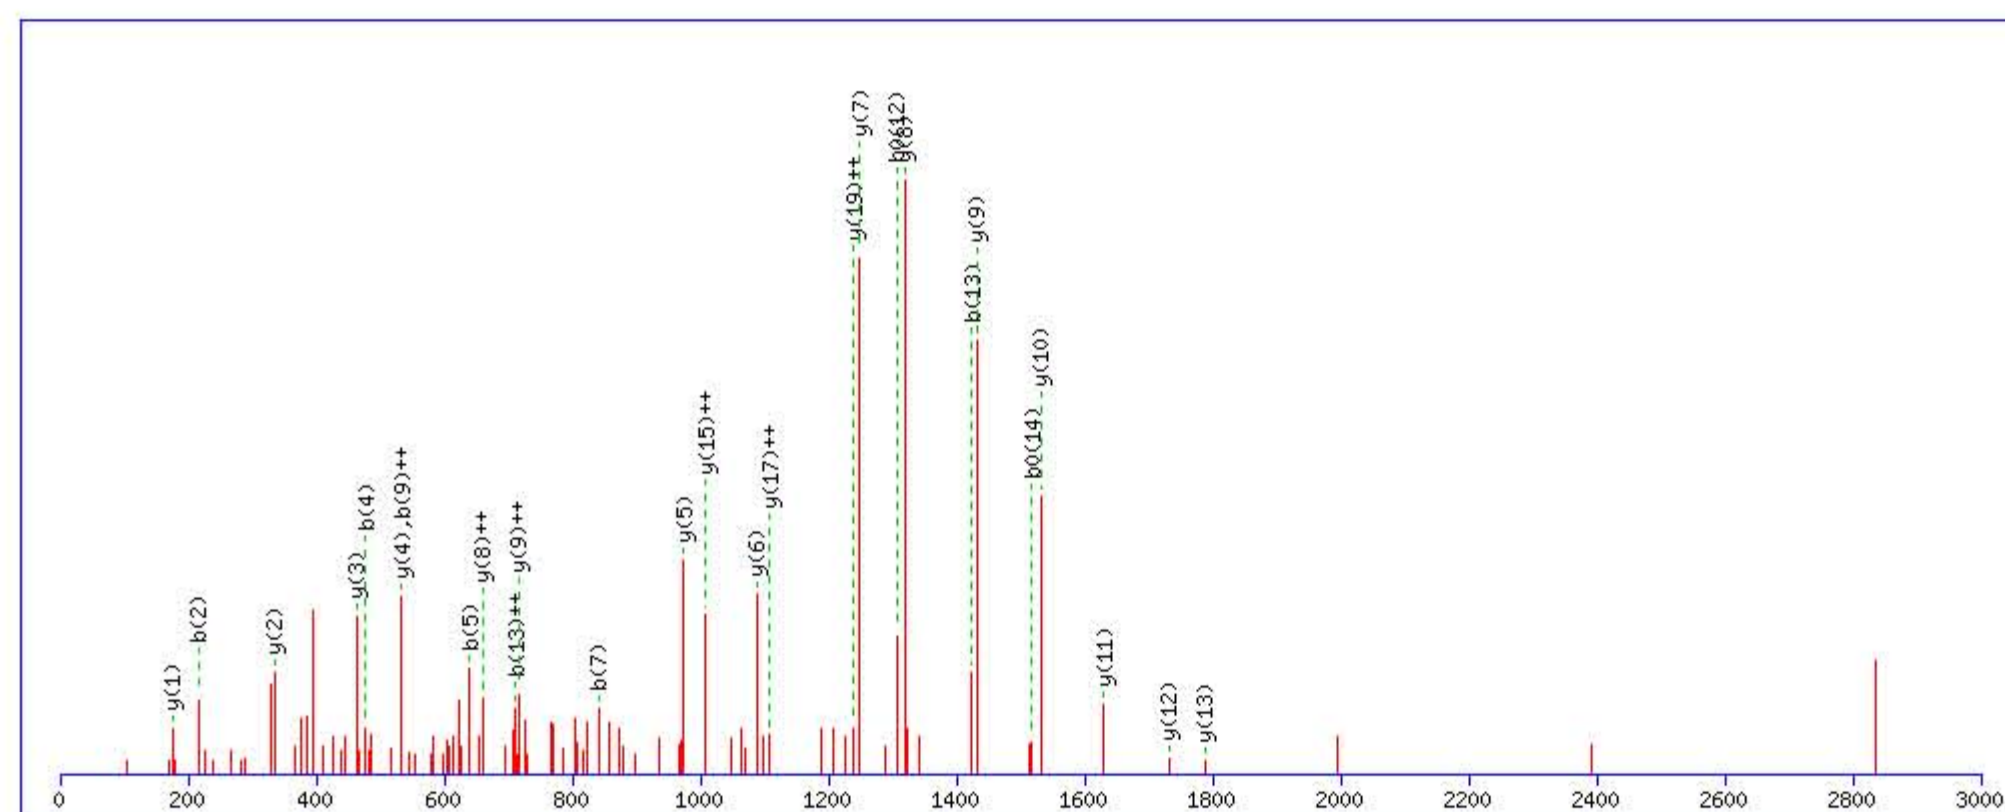

Monoisotopic mass of neutral peptide Mr(calc): 2854.250671

Fixed modifications: Carbamidomethyl (C) (apply to specified residues or termini only)

Variable modifications:

Q18 : Biotin:Thermo-21345 (Q)

Ions Score: 98 Expect: 8e-010

Matches : 27/240 fragment ions using 36 most intense peaks [\(help\)](#)

| #  | b                  | b <sup>++</sup>   | b <sup>*</sup> | b <sup>*++</sup> | b <sup>0</sup>     | b <sup>0++</sup> | Seq. | y                  | y <sup>++</sup>    | y <sup>*</sup> | y <sup>*++</sup> | y <sup>0</sup> | y <sup>0++</sup> | #  |
|----|--------------------|-------------------|----------------|------------------|--------------------|------------------|------|--------------------|--------------------|----------------|------------------|----------------|------------------|----|
| 1  | 88.039304          | 44.523290         |                |                  | 70.028739          | 35.518008        | S    |                    |                    |                |                  |                |                  | 22 |
| 2  | <b>216.097882</b>  | 108.552579        | 199.071333     | 100.039305       | 198.087317         | 99.547296        | Q    | 2768.225907        | 1384.616591        | 2751.199358    | 1376.103317      | 2750.215342    | 1375.611309      | 21 |
| 3  | 376.128531         | 188.567904        | 359.101982     | 180.054629       | 358.117966         | 179.562621       | C    | 2640.167329        | 1320.587302        | 2623.140780    | 1312.074028      | 2622.156764    | 1311.582020      | 20 |
| 4  | <b>477.176210</b>  | 239.091743        | 460.149661     | 230.578469       | 459.165645         | 230.086461       | T    | 2480.136680        | <b>1240.571978</b> | 2463.110131    | 1232.058703      | 2462.126115    | 1231.566695      | 19 |
| 5  | <b>640.239539</b>  | 320.623408        | 623.212990     | 312.110133       | 622.228974         | 311.618125       | Y    | 2379.089001        | 1190.048138        | 2362.062452    | 1181.534864      | 2361.078436    | 1181.042856      | 18 |
| 6  | 727.271567         | 364.139422        | 710.245018     | 355.626147       | 709.261002         | 355.134139       | S    | 2216.025672        | <b>1108.516474</b> | 2198.999123    | 1100.003199      | 2198.015107    | 1099.511191      | 17 |
| 7  | <b>841.314494</b>  | 421.160885        | 824.287945     | 412.647611       | 823.303929         | 412.155603       | N    | 2128.993644        | 1065.000460        | 2111.967095    | 1056.487185      | 2110.983079    | 1055.995177      | 16 |
| 8  | 938.367258         | 469.687267        | 921.340709     | 461.173993       | 920.356693         | 460.681985       | P    | 2014.950717        | <b>1007.978997</b> | 1997.924168    | 999.465722       | 1996.940152    | 998.973714       | 15 |
| 9  | 1067.409851        | <b>534.208564</b> | 1050.383302    | 525.695289       | 1049.399286        | 525.203281       | E    | 1917.897953        | 959.452615         | 1900.871404    | 950.939340       | 1899.887388    | 950.447332       | 14 |
| 10 | 1124.431315        | 562.719296        | 1107.404766    | 554.206021       | 1106.420750        | 553.714013       | G    | <b>1788.855360</b> | 894.931318         | 1771.828811    | 886.418044       | 1770.844795    | 885.926036       | 13 |
| 11 | 1225.478994        | 613.243135        | 1208.452445    | 604.729861       | 1207.468429        | 604.237853       | T    | <b>1731.833896</b> | 866.420586         | 1714.807347    | 857.907312       | 1713.823331    | 857.415304       | 12 |
| 12 | 1324.547408        | 662.777342        | 1307.520859    | 654.264068       | <b>1306.536843</b> | 653.772060       | V    | <b>1630.786217</b> | 815.896747         | 1613.759668    | 807.383472       | 1612.775652    | 806.891464       | 11 |
| 13 | <b>1423.615822</b> | <b>712.311549</b> | 1406.589273    | 703.798275       | 1405.605257        | 703.306267       | V    | <b>1531.717803</b> | 766.362540         | 1514.691254    | 757.849265       | 1513.707238    | 757.357257       | 10 |
| 14 | 1536.699886        | 768.853581        | 1519.673337    | 760.340307       | <b>1518.689321</b> | 759.848299       | L    | <b>1432.649389</b> | <b>716.828333</b>  | 1415.622840    | 708.315058       | 1414.638824    | 707.823050       | 9  |
| 15 | 1607.737000        | 804.372138        | 1590.710451    | 795.858864       | 1589.726435        | 795.366856       | A    | <b>1319.565325</b> | <b>660.286301</b>  | 1302.538776    | 651.773026       | 1301.554760    | 651.281018       | 8  |
| 16 | 1767.767649        | 884.387463        | 1750.741100    | 875.874188       | 1749.757084        | 875.382180       | C    | <b>1248.528211</b> | 624.767744         | 1231.501662    | 616.254469       | 1230.517646    | 615.762461       | 7  |
| 17 | 1882.794592        | 941.900934        | 1865.768043    | 933.387660       | 1864.784027        | 932.895652       | D    | <b>1088.497562</b> | 544.752419         | 1071.471013    | 536.239145       | 1070.486997    | 535.747137       | 6  |
| 18 | 2322.019918        | 1161.513597       | 2304.993369    | 1153.000322      | 2304.009353        | 1152.508314      | Q    | <b>973.470619</b>  | 487.238948         | 956.444070     | 478.725673       |                |                  | 5  |
| 19 | 2393.057032        | 1197.032154       | 2376.030483    | 1188.518879      | 2375.046467        | 1188.026872      | A    | <b>534.245293</b>  | 267.626285         | 517.218744     | 259.113010       |                |                  | 4  |
| 20 | 2521.115610        | 1261.061443       | 2504.089061    | 1252.548169      | 2503.105045        | 1252.056161      | Q    | <b>463.208179</b>  | 232.107727         | 446.181630     | 223.594453       |                |                  | 3  |
| 21 | 2681.146259        | 1341.076768       | 2664.119710    | 1332.563493      | 2663.135694        | 1332.071485      | C    | <b>335.149601</b>  | 168.078438         | 318.123052     | 159.565164       |                |                  | 2  |
| 22 |                    |                   |                |                  |                    |                  | R    | <b>175.118952</b>  | 88.063114          | 158.092403     | 79.549839        |                |                  | 1  |

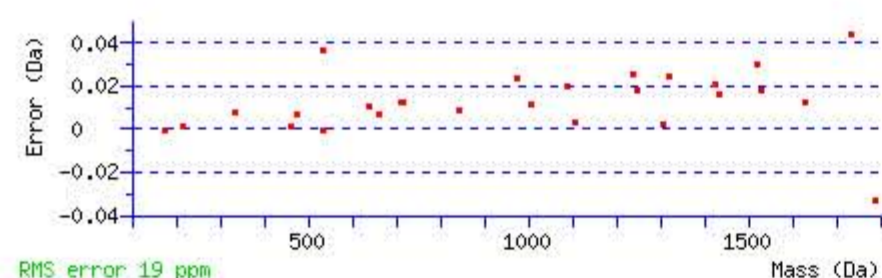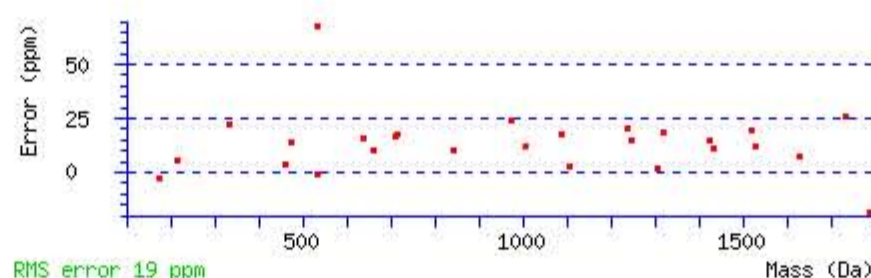

NCBI BLAST search of **SQCTYSNPEGTVVLACDQAQCR**

(Parameters: blastp, nr protein database, expect=20000, no filter, PAM30)

Other BLAST [web gateways](#)

All matches to this query

| Score | Mr(calc):   | Delta    | Sequence                               |
|-------|-------------|----------|----------------------------------------|
| 98.0  | 2854.250671 | 0.002831 | <a href="#">SQCTYSNPEGTVVLACDQAQCR</a> |
| 75.8  | 2854.250671 | 0.002831 | <a href="#">SQCTYSNPEGTVVLACDQAQCR</a> |
| 1.9   | 2854.250671 | 0.002831 | <a href="#">SQCTYSNPEGTVVLACDQAQCR</a> |

Mascot: <http://www.matrixscience.com/>



# MASCOT SEARCH RESULTS

## Peptide View

MS/MS Fragmentation of **NALWHTGDTESQVR**

Found in **COMP\_HUMAN**, Cartilage oligomeric matrix protein OS=Homo sapiens GN=COMP PE=1 SV=2

Match to Query 47367: 1923.920802 from(642.314210,3+) rtinseconds(1740) index(54079)  
 Title: Locus:1.1.1.3092.13 File:"2013-07-02 CLN FXIII 30 min 2nd F 4.wiff"

Data file C:\Program Files (x86)\Matrix Science\Mascot Daemon\mgf2 FXIII 30 min 2nd\mascot\_daemon\_merge.mgf

Click mouse within plot area to zoom in by factor of two about that point

Or, Plot from  to  Da

Label all possible matches  Label matches used for scoring

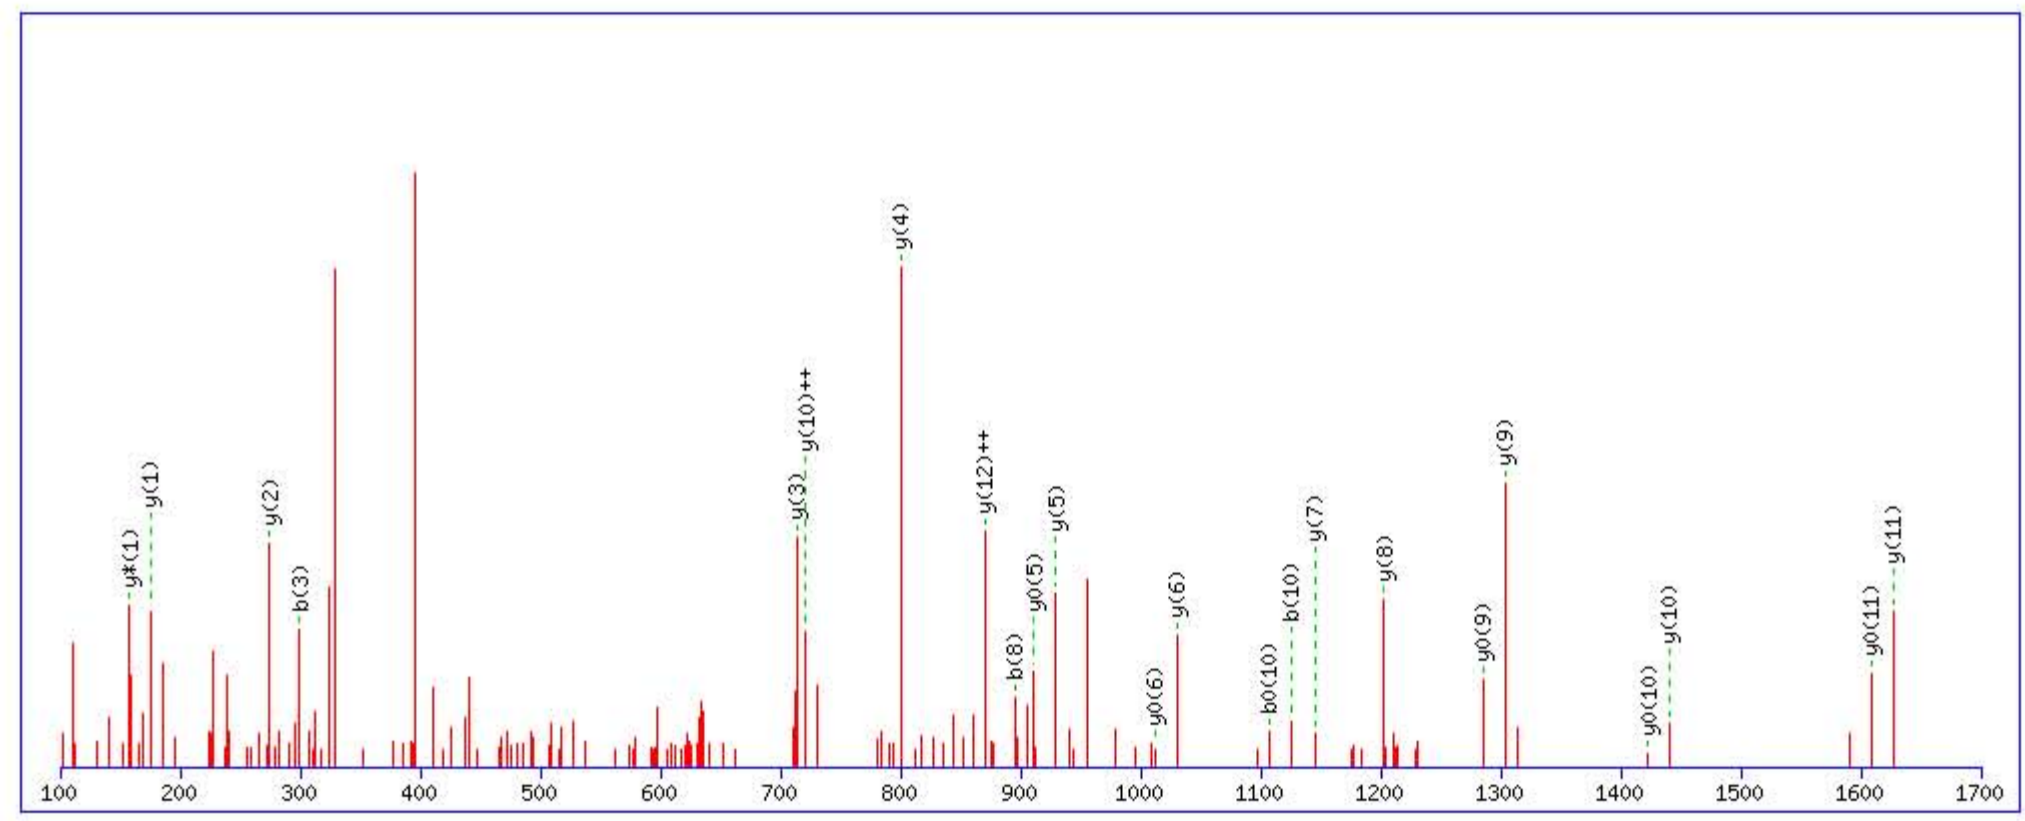

Monoisotopic mass of neutral peptide Mr(calc): 1923.926132

Fixed modifications: Carbamidomethyl (C) (apply to specified residues or termini only)

Variable modifications:

Q12 : Biotin:Thermo-21345 (Q)

Ions Score: 66 Expect: 4.9e-006

Matches : 23/140 fragment ions using 43 most intense peaks [\(help\)](#)

| #  | b                  | b <sup>++</sup> | b <sup>*</sup> | b <sup>*++</sup> | b <sup>0</sup>     | b <sup>0++</sup> | Seq. | y                  | y <sup>++</sup>   | y <sup>*</sup>    | y <sup>*++</sup> | y <sup>0</sup>     | y <sup>0++</sup> | #  |
|----|--------------------|-----------------|----------------|------------------|--------------------|------------------|------|--------------------|-------------------|-------------------|------------------|--------------------|------------------|----|
| 1  | 115.050203         | 58.028740       | 98.023654      | 49.515465        |                    |                  | N    |                    |                   |                   |                  |                    |                  | 14 |
| 2  | 186.087317         | 93.547296       | 169.060768     | 85.034022        |                    |                  | A    | 1810.890481        | 905.948879        | 1793.863932       | 897.435604       | 1792.879916        | 896.943596       | 13 |
| 3  | <b>299.171381</b>  | 150.089328      | 282.144832     | 141.576054       |                    |                  | L    | 1739.853367        | <b>870.430322</b> | 1722.826818       | 861.917047       | 1721.842802        | 861.425039       | 12 |
| 4  | 485.250694         | 243.128985      | 468.224145     | 234.615711       |                    |                  | W    | <b>1626.769303</b> | 813.888290        | 1609.742754       | 805.375015       | <b>1608.758738</b> | 804.883007       | 11 |
| 5  | 622.309606         | 311.658441      | 605.283057     | 303.145167       |                    |                  | H    | <b>1440.689990</b> | <b>720.848633</b> | 1423.663441       | 712.335359       | <b>1422.679425</b> | 711.843351       | 10 |
| 6  | 723.357285         | 362.182281      | 706.330736     | 353.669006       | 705.346720         | 353.176998       | T    | <b>1303.631078</b> | 652.319177        | 1286.604529       | 643.805903       | <b>1285.620513</b> | 643.313895       | 9  |
| 7  | 780.378749         | 390.693013      | 763.352200     | 382.179738       | 762.368184         | 381.687730       | G    | <b>1202.583399</b> | 601.795338        | 1185.556850       | 593.282063       | 1184.572834        | 592.790055       | 8  |
| 8  | <b>895.405692</b>  | 448.206484      | 878.379143     | 439.693210       | 877.395127         | 439.201202       | D    | <b>1145.561935</b> | 573.284606        | 1128.535386       | 564.771331       | 1127.551370        | 564.279323       | 7  |
| 9  | 996.453371         | 498.730324      | 979.426822     | 490.217049       | 978.442806         | 489.725041       | T    | <b>1030.534992</b> | 515.771134        | 1013.508443       | 507.257860       | <b>1012.524427</b> | 506.765852       | 6  |
| 10 | <b>1125.495964</b> | 563.251620      | 1108.469415    | 554.738346       | <b>1107.485399</b> | 554.246337       | E    | <b>929.487313</b>  | 465.247295        | 912.460764        | 456.734020       | <b>911.476748</b>  | 456.242012       | 5  |
| 11 | 1212.527992        | 606.767634      | 1195.501443    | 598.254360       | 1194.517427        | 597.762352       | S    | <b>800.444720</b>  | 400.725998        | 783.418171        | 392.212724       | 782.434155         | 391.720716       | 4  |
| 12 | 1651.753318        | 826.380297      | 1634.726769    | 817.867023       | 1633.742753        | 817.375015       | Q    | <b>713.412692</b>  | 357.209984        | 696.386143        | 348.696710       |                    |                  | 3  |
| 13 | 1750.821732        | 875.914504      | 1733.795183    | 867.401230       | 1732.811167        | 866.909222       | V    | <b>274.187366</b>  | 137.597321        | 257.160817        | 129.084047       |                    |                  | 2  |
| 14 |                    |                 |                |                  |                    |                  | R    | <b>175.118952</b>  | 88.063114         | <b>158.092403</b> | 79.549839        |                    |                  | 1  |

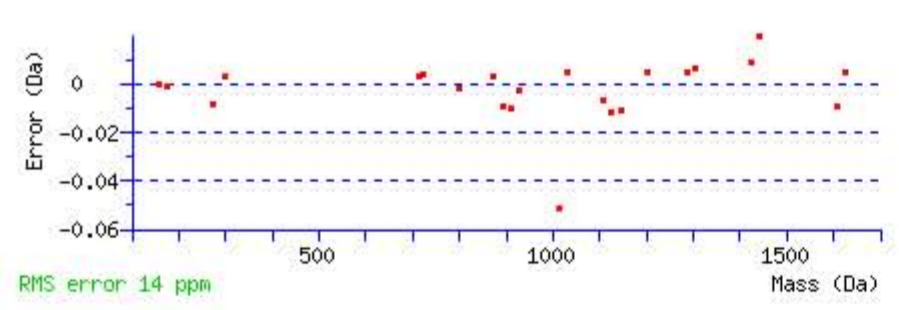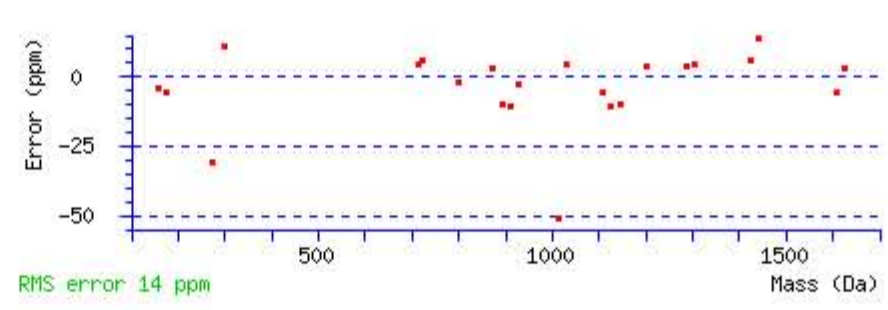

NCBI BLAST search of **NALWHTGDTESQVR**

(Parameters: blastp, nr protein database, expect=20000, no filter, PAM30)

Other BLAST [web gateways](#)

All matches to this query

| Score | Mr(calc):   | Delta     | Sequence                       |
|-------|-------------|-----------|--------------------------------|
| 65.5  | 1923.926132 | -0.005330 | <a href="#">NALWHTGDTESQVR</a> |

Mascot: <http://www.matrixscience.com/>



# MASCOT Search Results

## Peptide View

MS/MS Fragmentation of **ELDESLQVAER**

Found in **CLUS\_HUMAN**, Clusterin OS=Homo sapiens GN=CLU PE=1 SV=1

Match to Query 38939: 1598.795868 from(800.405210,2+) rtinseconds(1949) index(55441)

Title: Locus:1.1.1.3164.23 File:"2013-07-02 CLN FXIII 30 min 2nd F 4.wiff"

Data file C:\Program Files (x86)\Matrix Science\Mascot Daemon\mgf\2 FXIII 30 min 2nd\mascot\_daemon\_merge.mgf

Click mouse within plot area to zoom in by factor of two about that point

Or, Plot from  to  Da

Label all possible matches  Label matches used for scoring

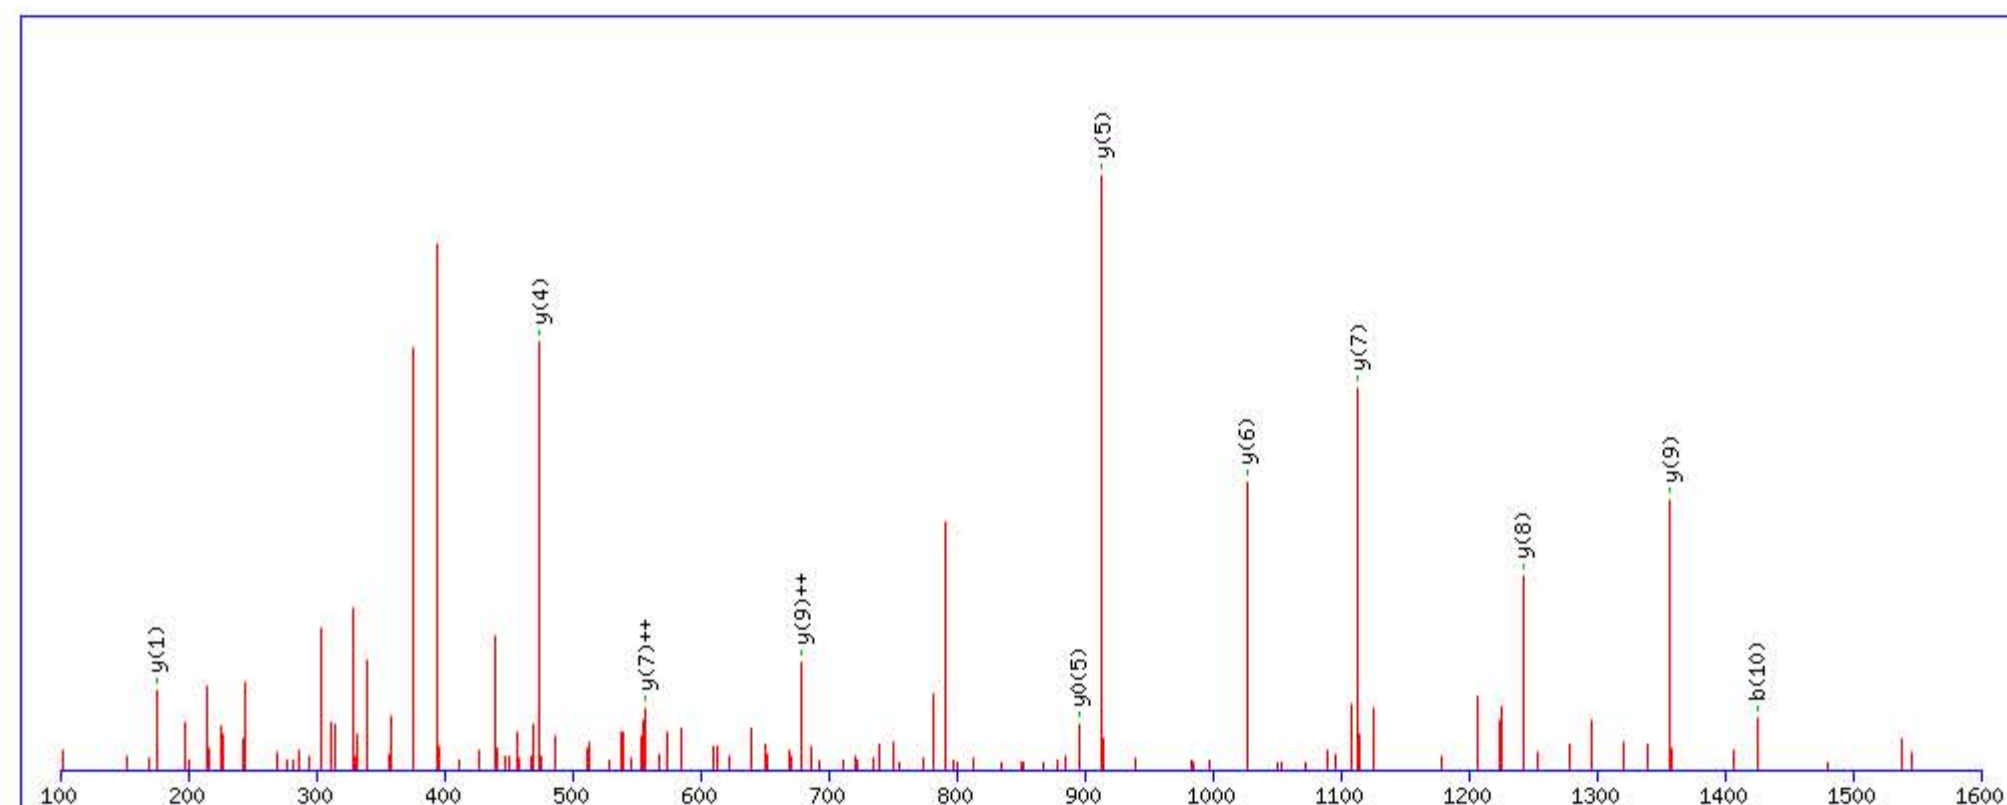

Monoisotopic mass of neutral peptide Mr(calc): 1598.797379

Fixed modifications: Carbamidomethyl (C) (apply to specified residues or termini only)

Variable modifications:

Q7 : Biotin:Thermo-21345 (Q)

Ions Score: 53 Expect: 7.3e-005

Matches : 11/106 fragment ions using 15 most intense peaks [\(help\)](#)

| #  | b                  | b <sup>++</sup> | b <sup>*</sup> | b <sup>+++</sup> | b <sup>0</sup> | b <sup>0++</sup> | Seq. | y                  | y <sup>++</sup>   | y <sup>*</sup> | y <sup>+++</sup> | y <sup>0</sup>    | y <sup>0++</sup> | #  |
|----|--------------------|-----------------|----------------|------------------|----------------|------------------|------|--------------------|-------------------|----------------|------------------|-------------------|------------------|----|
| 1  | 130.049869         | 65.528572       |                |                  | 112.039304     | 56.523290        | E    |                    |                   |                |                  |                   |                  | 11 |
| 2  | 243.133933         | 122.070605      |                |                  | 225.123368     | 113.065322       | L    | 1470.762091        | 735.884684        | 1453.735542    | 727.371409       | 1452.751526       | 726.879401       | 10 |
| 3  | 358.160876         | 179.584076      |                |                  | 340.150311     | 170.578794       | D    | <b>1357.678027</b> | <b>679.342652</b> | 1340.651478    | 670.829377       | 1339.667462       | 670.337369       | 9  |
| 4  | 487.203469         | 244.105373      |                |                  | 469.192904     | 235.100090       | E    | <b>1242.651084</b> | 621.829180        | 1225.624535    | 613.315906       | 1224.640519       | 612.823898       | 8  |
| 5  | 574.235497         | 287.621387      |                |                  | 556.224932     | 278.616104       | S    | <b>1113.608491</b> | <b>557.307884</b> | 1096.581942    | 548.794609       | 1095.597926       | 548.302601       | 7  |
| 6  | 687.319561         | 344.163419      |                |                  | 669.308996     | 335.158136       | L    | <b>1026.576463</b> | 513.791870        | 1009.549914    | 505.278595       | 1008.565898       | 504.786587       | 6  |
| 7  | 1126.544887        | 563.776082      | 1109.518338    | 555.262807       | 1108.534322    | 554.770799       | Q    | <b>913.492399</b>  | 457.249838        | 896.465850     | 448.736563       | <b>895.481834</b> | 448.244555       | 5  |
| 8  | 1225.613301        | 613.310289      | 1208.586752    | 604.797014       | 1207.602736    | 604.305006       | V    | <b>474.267073</b>  | 237.637175        | 457.240524     | 229.123900       | 456.256508        | 228.631892       | 4  |
| 9  | 1296.650415        | 648.828846      | 1279.623866    | 640.315571       | 1278.639850    | 639.823563       | A    | 375.198659         | 188.102968        | 358.172110     | 179.589693       | 357.188094        | 179.097685       | 3  |
| 10 | <b>1425.693008</b> | 713.350142      | 1408.666459    | 704.836868       | 1407.682443    | 704.344860       | E    | 304.161545         | 152.584411        | 287.134996     | 144.071136       | 286.150980        | 143.579128       | 2  |
| 11 |                    |                 |                |                  |                |                  | R    | <b>175.118952</b>  | 88.063114         | 158.092403     | 79.549839        |                   |                  | 1  |

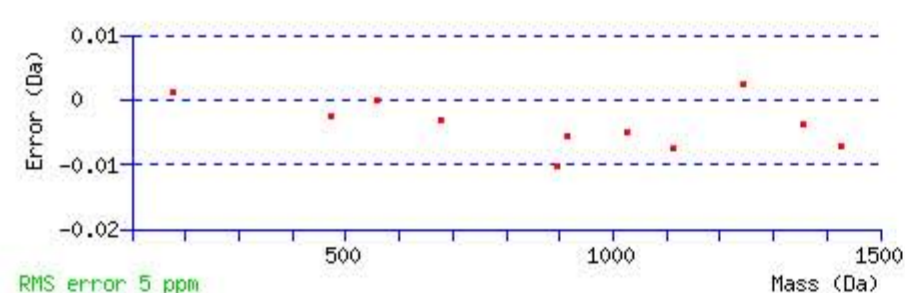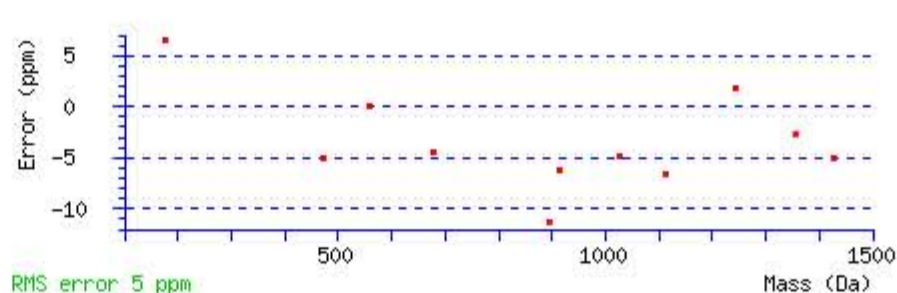

NCBI BLAST search of [ELDESLQVAER](#)

(Parameters: blastp, nr protein database, expect=20000, no filter, PAM30)

Other BLAST [web gateways](#)

## All matches to this query

| Score | Mr(calc):   | Delta     | Sequence                         |
|-------|-------------|-----------|----------------------------------|
| 52.5  | 1598.797379 | -0.001511 | <a href="#">ELDESLQVAER</a>      |
| 7.9   | 1598.783478 | 0.012390  | <a href="#">EDSVQRSTPNR</a>      |
| 7.5   | 1598.797409 | -0.001541 | <a href="#">EDVDDLVSQLR</a>      |
| 5.0   | 1598.776932 | 0.018936  | <a href="#">FPIDYPYSPPTFR</a>    |
| 4.2   | 1598.790024 | 0.005844  | <a href="#">VTAEGDSHTEVVISR</a>  |
| 4.2   | 1598.797379 | -0.001511 | <a href="#">LEESDVLQEAR</a>      |
| 2.9   | 1598.808640 | -0.012772 | <a href="#">SLGAVEPICSVNTPR</a>  |
| 1.6   | 1598.816025 | -0.020157 | <a href="#">LDQPMTEIVSR</a>      |
| 1.6   | 1598.789993 | 0.005875  | <a href="#">AGATSGELPVVEAENR</a> |
| 1.3   | 1598.787506 | 0.008362  | <a href="#">AGGSWDLAVQER</a>     |



# MASCOT SCIENCE Mascot Search Results

## Peptide View

MS/MS Fragmentation of **ASSIIDELFQDR**

Found in **CLUS\_HUMAN**, Clusterin OS=Homo sapiens GN=CLU PE=1 SV=1

Match to Query 42378: 1703.856372 from(568.959400,3+) rtinseconds(2806) index(60754)

Title: Locus:1.1.1.3461.5 File:"2013-07-02 CLN FXIII 30 min 2nd F 4.wiff"

Data file C:\Program Files (x86)\Matrix Science\Mascot Daemon\mgf\2 FXIII 30 min 2nd\mascot\_daemon\_merge.mgf

Click mouse within plot area to zoom in by factor of two about that point

Or, Plot from  to  Da

Label all possible matches  Label matches used for scoring

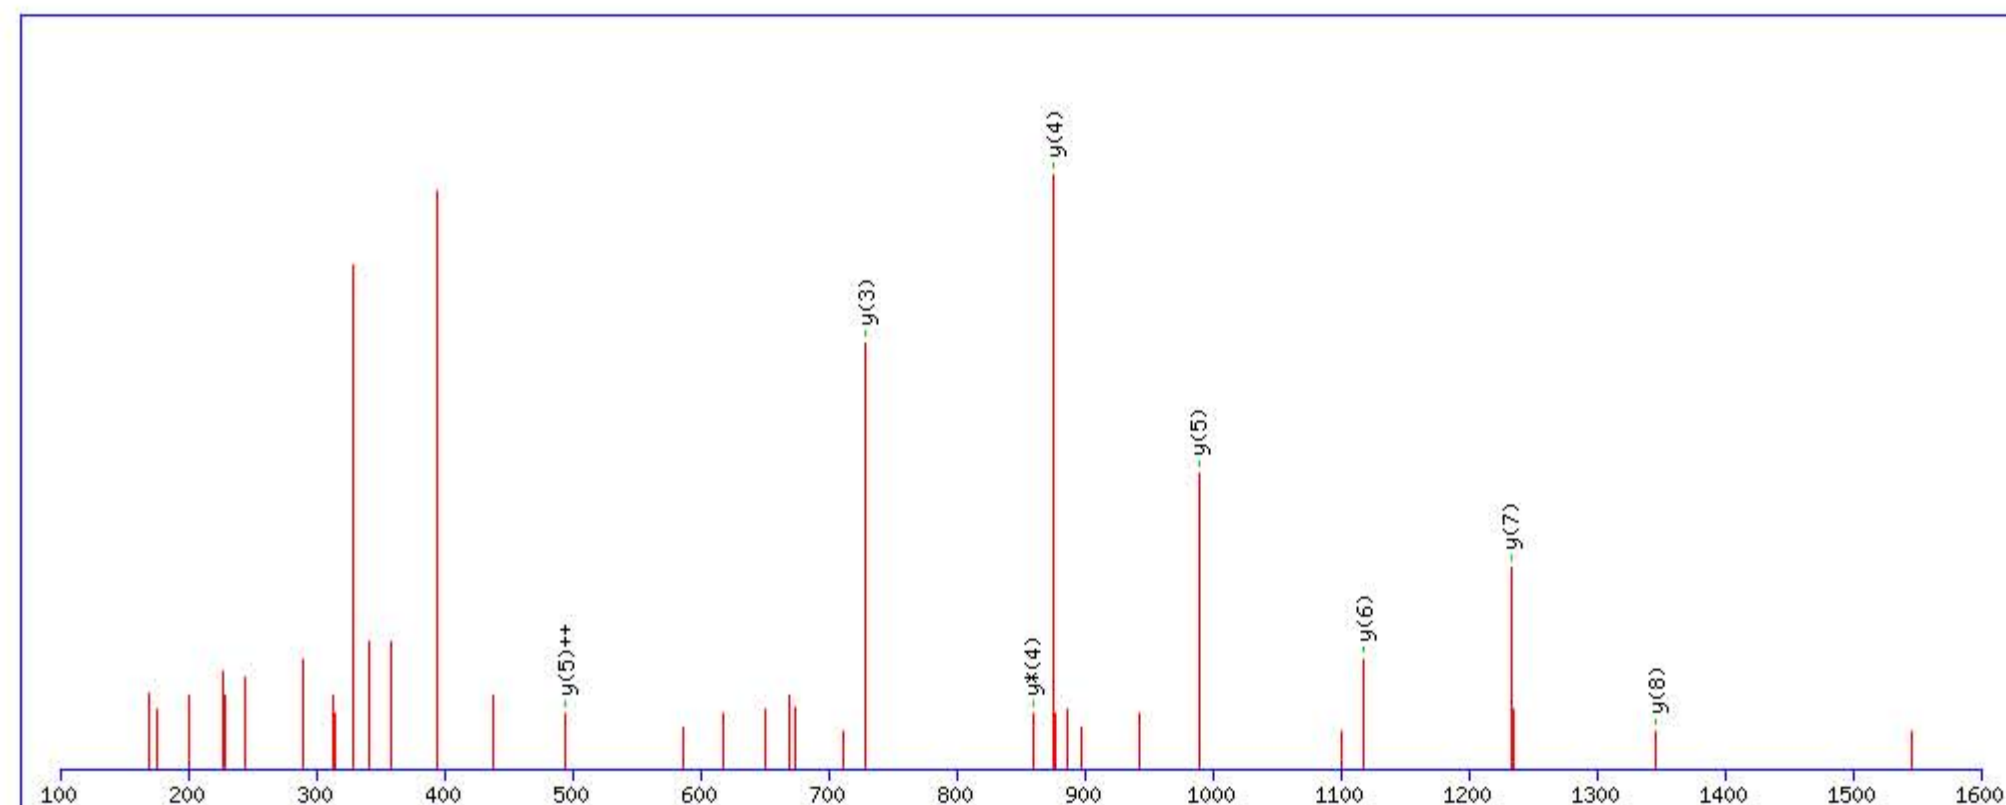

Monoisotopic mass of neutral peptide Mr(calc): 1703.855240

Fixed modifications: Carbamidomethyl (C) (apply to specified residues or termini only)

Variable modifications:

Q10 : Biotin:Thermo-21345 (Q)

Ions Score: 37 Expect: 0.00055

Matches : 8/110 fragment ions using 13 most intense peaks [\(help\)](#)

| #  | b           | b <sup>++</sup> | b <sup>*</sup> | b <sup>*++</sup> | b <sup>0</sup> | b <sup>0++</sup> | Seq. | y                  | y <sup>++</sup>   | y <sup>*</sup>    | y <sup>*++</sup> | y <sup>0</sup> | y <sup>0++</sup> | #  |
|----|-------------|-----------------|----------------|------------------|----------------|------------------|------|--------------------|-------------------|-------------------|------------------|----------------|------------------|----|
| 1  | 72.044390   | 36.525833       |                |                  |                |                  | A    |                    |                   |                   |                  |                |                  | 12 |
| 2  | 159.076418  | 80.041847       |                |                  | 141.065853     | 71.036564        | S    | 1633.825419        | 817.416348        | 1616.798870       | 808.903073       | 1615.814854    | 808.411065       | 11 |
| 3  | 246.108446  | 123.557861      |                |                  | 228.097881     | 114.552578       | S    | 1546.793391        | 773.900333        | 1529.766842       | 765.387059       | 1528.782826    | 764.895051       | 10 |
| 4  | 359.192510  | 180.099893      |                |                  | 341.181945     | 171.094610       | I    | 1459.761363        | 730.384320        | 1442.734814       | 721.871045       | 1441.750798    | 721.379037       | 9  |
| 5  | 472.276574  | 236.641925      |                |                  | 454.266009     | 227.636642       | I    | <b>1346.677299</b> | 673.842288        | 1329.650750       | 665.329013       | 1328.666734    | 664.837005       | 8  |
| 6  | 587.303517  | 294.155397      |                |                  | 569.292952     | 285.150114       | D    | <b>1233.593235</b> | 617.300256        | 1216.566686       | 608.786981       | 1215.582670    | 608.294973       | 7  |
| 7  | 716.346110  | 358.676693      |                |                  | 698.335545     | 349.671411       | E    | <b>1118.566292</b> | 559.786784        | 1101.539743       | 551.273510       | 1100.555727    | 550.781501       | 6  |
| 8  | 829.430174  | 415.218725      |                |                  | 811.419609     | 406.213443       | L    | <b>989.523699</b>  | <b>495.265488</b> | 972.497150        | 486.752213       | 971.513134     | 486.260205       | 5  |
| 9  | 976.498588  | 488.752932      |                |                  | 958.488023     | 479.747650       | F    | <b>876.439635</b>  | 438.723456        | <b>859.413086</b> | 430.210181       | 858.429070     | 429.718173       | 4  |
| 10 | 1415.723914 | 708.365595      | 1398.697365    | 699.852321       | 1397.713349    | 699.360312       | Q    | <b>729.371221</b>  | 365.189249        | 712.344672        | 356.675974       | 711.360656     | 356.183966       | 3  |
| 11 | 1530.750857 | 765.879067      | 1513.724308    | 757.365792       | 1512.740292    | 756.873784       | D    | 290.145895         | 145.576585        | 273.119346        | 137.063311       | 272.135330     | 136.571303       | 2  |
| 12 |             |                 |                |                  |                |                  | R    | 175.118952         | 88.063114         | 158.092403        | 79.549839        |                |                  | 1  |

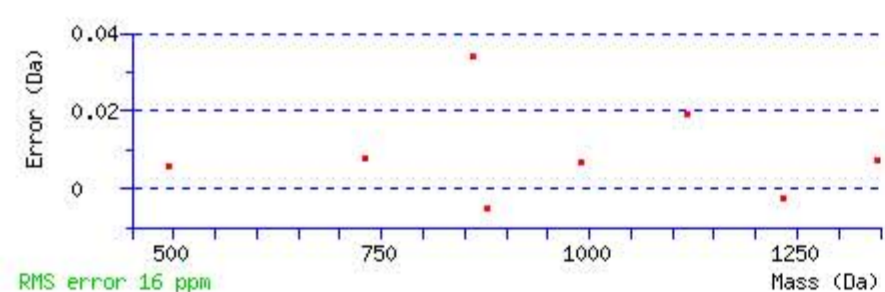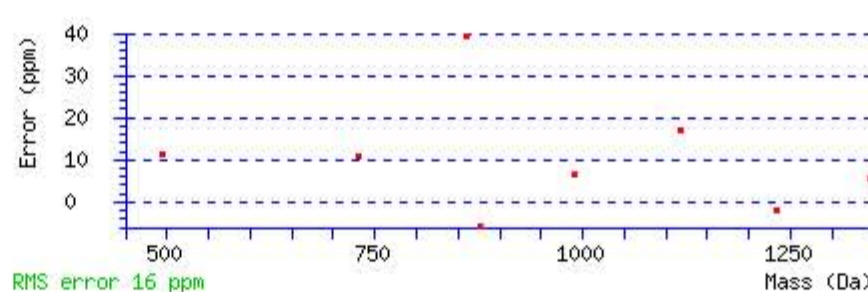

NCBI BLAST search of [ASSIIDELFQDR](#)

(Parameters: blastp, nr protein database, expect=20000, no filter, PAM30)

Other BLAST [web gateways](#)

All matches to this query

| Score | Mr(calc):   | Delta     | Sequence                        |
|-------|-------------|-----------|---------------------------------|
| 37.0  | 1703.855240 | 0.001132  | <a href="#">ASSIIDELFQDR</a>    |
| 2.2   | 1703.877701 | -0.021329 | <a href="#">SSSPNSPLPMFRRTK</a> |
| 1.8   | 1703.881088 | -0.024716 | <a href="#">VQTSIAVCKLQACAR</a> |
| 1.0   | 1703.839966 | 0.016406  | <a href="#">DCQDLEDLIKAKEK</a>  |

Mascot: <http://www.matrixscience.com/>



# MASCOT Search Results

## Peptide View

MS/MS Fragmentation of **EILSVDCSTNNPSQAK**

Found in **CLUS\_HUMAN**, Clusterin OS=Homo sapiens GN=CLU PE=1 SV=1

Match to Query 51492: 2072.969868 from(1037.492210,2+) rtinseconds(1798) index(20614)

Title: Locus:1.1.1.1507.16 File:"2013-07-02 CLN FXIII 30 min 2nd F 2.wiff"

Data file C:\Program Files (x86)\Matrix Science\Mascot Daemon\mgf\2 FXIII 30 min 2nd\mascot\_daemon\_merge.mgf

Click mouse within plot area to zoom in by factor of two about that point

Or, Plot from 0 to 2400 Da Full range

Label all possible matches  Label matches used for scoring

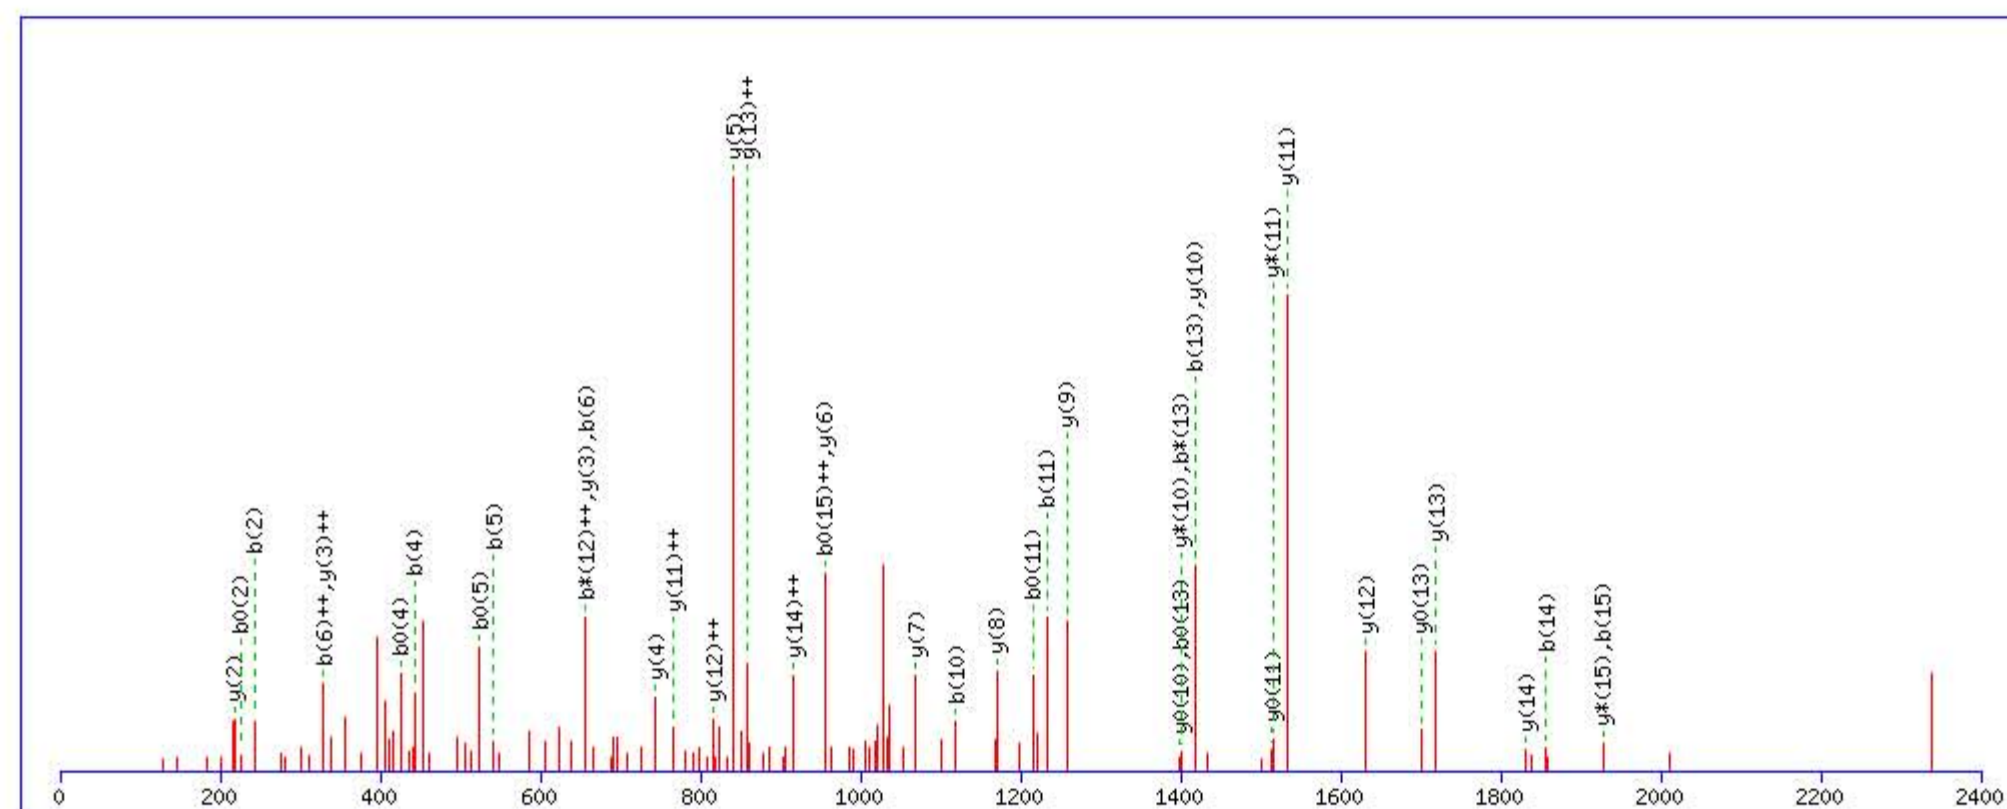

Monoisotopic mass of neutral peptide Mr(calc): 2072.987061

Fixed modifications: Carbamidomethyl (C) (apply to specified residues or termini only)

Variable modifications:

Q14 : Biotin:Thermo-21345 (Q)

Ions Score: 102 Expect: 1e-009

Matches : 42/156 fragment ions using 50 most intense peaks (help)

| #  | b                  | b <sup>++</sup>   | b <sup>*</sup>     | b <sup>*++</sup>  | b <sup>0</sup>     | b <sup>0++</sup>  | Seq. | y                  | y <sup>++</sup>   | y <sup>*</sup>     | y <sup>*++</sup> | y <sup>0</sup>     | y <sup>0++</sup> | #  |
|----|--------------------|-------------------|--------------------|-------------------|--------------------|-------------------|------|--------------------|-------------------|--------------------|------------------|--------------------|------------------|----|
| 1  | 130.049869         | 65.528572         |                    |                   | 112.039304         | 56.523290         | E    |                    |                   |                    |                  |                    |                  | 16 |
| 2  | <b>243.133933</b>  | 122.070605        |                    |                   | <b>225.123368</b>  | 113.065322        | I    | 1944.951759        | 972.979517        | <b>1927.925210</b> | 964.466243       | 1926.941194        | 963.974235       | 15 |
| 3  | 356.217997         | 178.612637        |                    |                   | 338.207432         | 169.607354        | L    | <b>1831.867695</b> | <b>916.437485</b> | 1814.841146        | 907.924211       | 1813.857130        | 907.432203       | 14 |
| 4  | <b>443.250025</b>  | 222.128650        |                    |                   | <b>425.239460</b>  | 213.123368        | S    | <b>1718.783631</b> | <b>859.895454</b> | 1701.757082        | 851.382179       | <b>1700.773066</b> | 850.890171       | 13 |
| 5  | <b>542.318439</b>  | 271.662858        |                    |                   | <b>524.307874</b>  | 262.657575        | V    | <b>1631.751603</b> | <b>816.379439</b> | 1614.725054        | 807.866165       | 1613.741038        | 807.374157       | 12 |
| 6  | <b>657.345382</b>  | <b>329.176329</b> |                    |                   | 639.334817         | 320.171046        | D    | <b>1532.683189</b> | <b>766.845233</b> | <b>1515.656640</b> | 758.331958       | <b>1514.672624</b> | 757.839950       | 11 |
| 7  | 817.376031         | 409.191654        |                    |                   | 799.365466         | 400.186371        | C    | <b>1417.656246</b> | 709.331761        | <b>1400.629697</b> | 700.818487       | <b>1399.645681</b> | 700.326479       | 10 |
| 8  | 904.408059         | 452.707668        |                    |                   | 886.397494         | 443.702385        | S    | <b>1257.625597</b> | 629.316437        | 1240.599048        | 620.803162       | 1239.615032        | 620.311154       | 9  |
| 9  | 1005.455738        | 503.231507        |                    |                   | 987.445173         | 494.226225        | T    | <b>1170.593569</b> | 585.800422        | 1153.567020        | 577.287148       | 1152.583004        | 576.795140       | 8  |
| 10 | <b>1119.498665</b> | 560.252971        | 1102.472116        | 551.739696        | 1101.488100        | 551.247688        | N    | <b>1069.545890</b> | 535.276583        | 1052.519341        | 526.763309       | 1051.535325        | 526.271301       | 7  |
| 11 | <b>1233.541592</b> | 617.274434        | 1216.515043        | 608.761160        | <b>1215.531027</b> | 608.269152        | N    | <b>955.502963</b>  | 478.255119        | 938.476414         | 469.741845       | 937.492398         | 469.249837       | 6  |
| 12 | 1330.594356        | 665.800816        | 1313.567807        | <b>657.287542</b> | 1312.583791        | 656.795534        | P    | <b>841.460036</b>  | 421.233656        | 824.433487         | 412.720381       | 823.449471         | 412.228373       | 5  |
| 13 | <b>1417.626384</b> | 709.316830        | <b>1400.599835</b> | 700.803556        | <b>1399.615819</b> | 700.311548        | S    | <b>744.407272</b>  | 372.707274        | 727.380723         | 364.193999       | 726.396707         | 363.701991       | 4  |
| 14 | <b>1856.851710</b> | 928.929493        | 1839.825161        | 920.416219        | 1838.841145        | 919.924211        | Q    | <b>657.375244</b>  | <b>329.191260</b> | 640.348695         | 320.677985       |                    |                  | 3  |
| 15 | <b>1927.888824</b> | 964.448050        | 1910.862275        | 955.934776        | 1909.878259        | <b>955.442768</b> | A    | <b>218.149918</b>  | 109.578597        | 201.123369         | 101.065322       |                    |                  | 2  |
| 16 |                    |                   |                    |                   |                    |                   | K    | 147.112804         | 74.060040         | 130.086255         | 65.546765        |                    |                  | 1  |

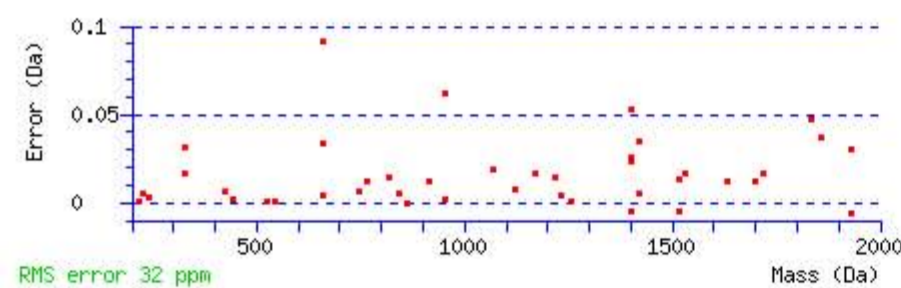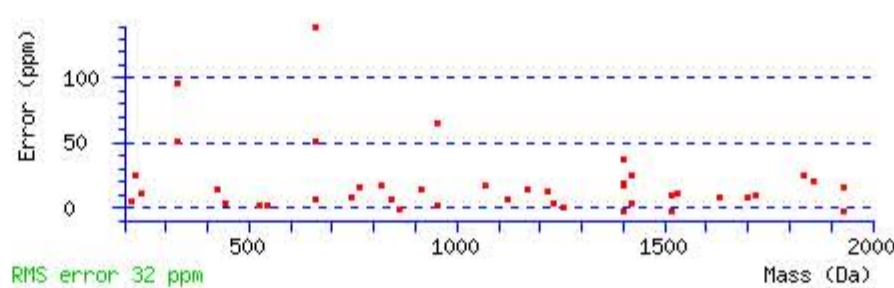

NCBI BLAST search of **EILSVDCSTNNPSQAK**

(Parameters: blastp, nr protein database, expect=20000, no filter, PAM30)

Other BLAST [web gateways](#)

## All matches to this query

| Score | Mr(calc):   | Delta     | Sequence                           |
|-------|-------------|-----------|------------------------------------|
| 101.7 | 2072.987061 | -0.017193 | <a href="#">EILSVDCSTNNPSQAK</a>   |
| 7.8   | 2072.994492 | -0.024624 | <a href="#">ELVKSGLGADGVCMTFMK</a> |
| 1.9   | 2072.994904 | -0.025036 | <a href="#">MQDPNADTEWNDILRKK</a>  |



# MASCOT SCIENCE Mascot Search Results

## Peptide View

MS/MS Fragmentation of **VSVSQTSK**

Found in **FA9\_HUMAN**, Coagulation factor IX OS=Homo sapiens GN=F9 PE=1 SV=2

Match to Query 23233: 1145.604868 from(573.809710,2+) rtinseconds(1411) index(51960)

Title: Locus:1.1.1.2977.18 File:"2013-07-02 CLN FXIII 30 min 2nd F 4.wiff"

Data file C:\Program Files (x86)\Matrix Science\Mascot Daemon\mgf2 FXIII 30 min 2nd\mascot\_daemon\_merge.mgf

Click mouse within plot area to zoom in by factor of two about that point

Or, Plot from  to  Da

Label all possible matches  Label matches used for scoring

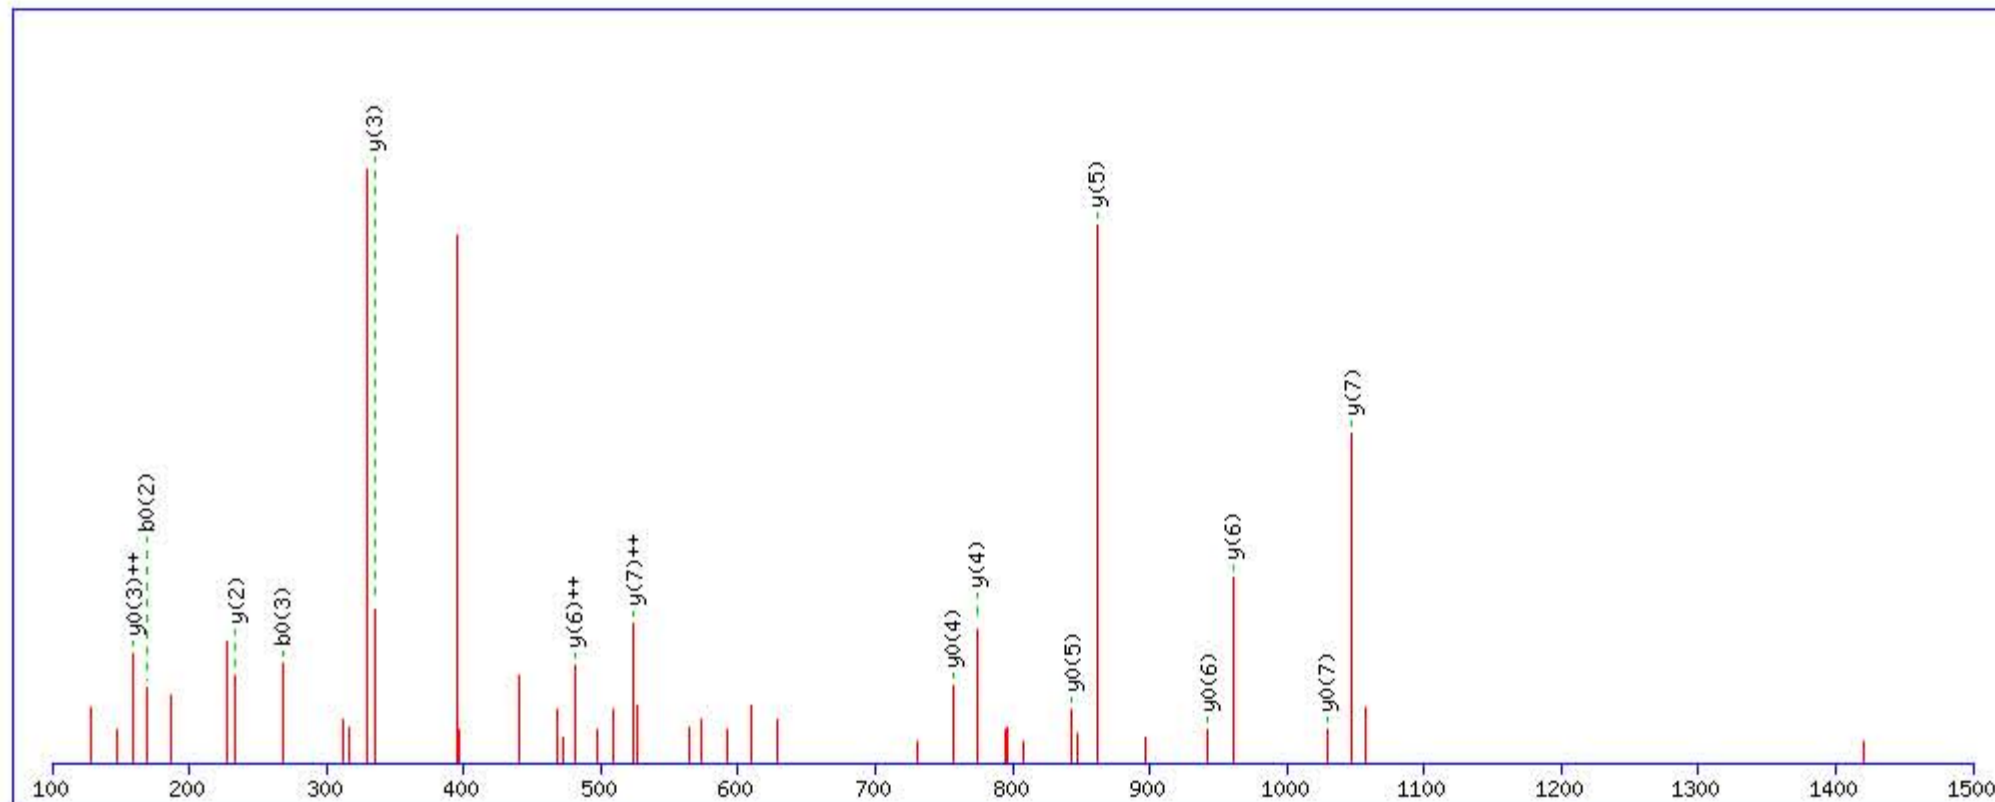

Monoisotopic mass of neutral peptide Mr(calc): 1145.611450

Fixed modifications: Carbamidomethyl (C) (apply to specified residues or termini only)

Variable modifications:

Q5 : Biotin:Thermo-21345 (Q)

Ions Score: 33 Expect: 0.0031

Matches : 15/72 fragment ions using 26 most intense peaks [\(help\)](#)

| # | b           | b <sup>++</sup> | b <sup>*</sup> | b <sup>+++</sup> | b <sup>0</sup> | b <sup>0++</sup> | Seq. | y           | y <sup>++</sup> | y <sup>*</sup> | y <sup>+++</sup> | y <sup>0</sup> | y <sup>0++</sup> | # |
|---|-------------|-----------------|----------------|------------------|----------------|------------------|------|-------------|-----------------|----------------|------------------|----------------|------------------|---|
| 1 | 100.075690  | 50.541483       |                |                  |                |                  | V    |             |                 |                |                  |                |                  | 8 |
| 2 | 187.107718  | 94.057497       |                |                  | 169.097153     | 85.052214        | S    | 1047.550307 | 524.278792      | 1030.523758    | 515.765517       | 1029.539742    | 515.273509       | 7 |
| 3 | 286.176132  | 143.591704      |                |                  | 268.165567     | 134.586422       | V    | 960.518279  | 480.762778      | 943.491730     | 472.249503       | 942.507714     | 471.757495       | 6 |
| 4 | 373.208160  | 187.107718      |                |                  | 355.197595     | 178.102435       | S    | 861.449865  | 431.228571      | 844.423316     | 422.715296       | 843.439300     | 422.223288       | 5 |
| 5 | 812.433486  | 406.720381      | 795.406937     | 398.207107       | 794.422921     | 397.715099       | Q    | 774.417837  | 387.712557      | 757.391288     | 379.199282       | 756.407272     | 378.707274       | 4 |
| 6 | 913.481165  | 457.244221      | 896.454616     | 448.730946       | 895.470600     | 448.238938       | T    | 335.192511  | 168.099893      | 318.165962     | 159.586619       | 317.181946     | 159.094611       | 3 |
| 7 | 1000.513193 | 500.760235      | 983.486644     | 492.246960       | 982.502628     | 491.754952       | S    | 234.144832  | 117.576054      | 217.118283     | 109.062779       | 216.134267     | 108.570771       | 2 |
| 8 |             |                 |                |                  |                |                  | K    | 147.112804  | 74.060040       | 130.086255     | 65.546765        |                |                  | 1 |

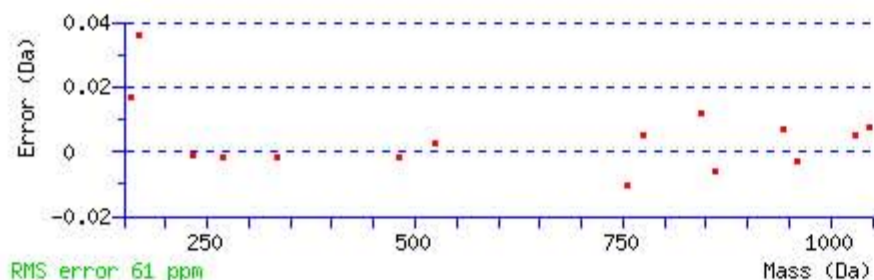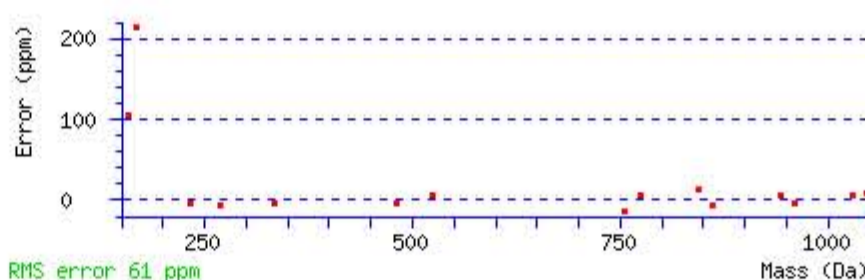

NCBI BLAST search of **VSVSQTSK**

(Parameters: blastp, nr protein database, expect=20000, no filter, PAM30)

Other BLAST [web gateways](#)

All matches to this query

| Score | Mr(calc):   | Delta     | Sequence                    |
|-------|-------------|-----------|-----------------------------|
| 32.6  | 1145.611450 | -0.006582 | <a href="#">VSVSQTSK</a>    |
| 5.5   | 1145.592819 | 0.012049  | <a href="#">VSDGVTKSPEK</a> |
| 0.6   | 1145.608047 | -0.003179 | <a href="#">WTKEKTEPK</a>   |



# MASCOT SEARCH RESULTS

## Peptide View

MS/MS Fragmentation of **SQHLDNFSNQIGK**

Found in **FA5\_HUMAN**, Coagulation factor V OS=Homo sapiens GN=F5 PE=1 SV=4

Match to Query 44656: 1797.877752 from(600.299860,3+) rtinseconds(1742) index(54101)

Title: Locus:1.1.1.3093.10 File:"2013-07-02 CLN FXIII 30 min 2nd F 4.wiff"

Data file C:\Program Files (x86)\Matrix Science\Mascot Daemon\mgf2 FXIII 30 min 2nd\mascot\_daemon\_merge.mgf

Click mouse within plot area to zoom in by factor of two about that point

Or, Plot from  to  Da

Label all possible matches  Label matches used for scoring

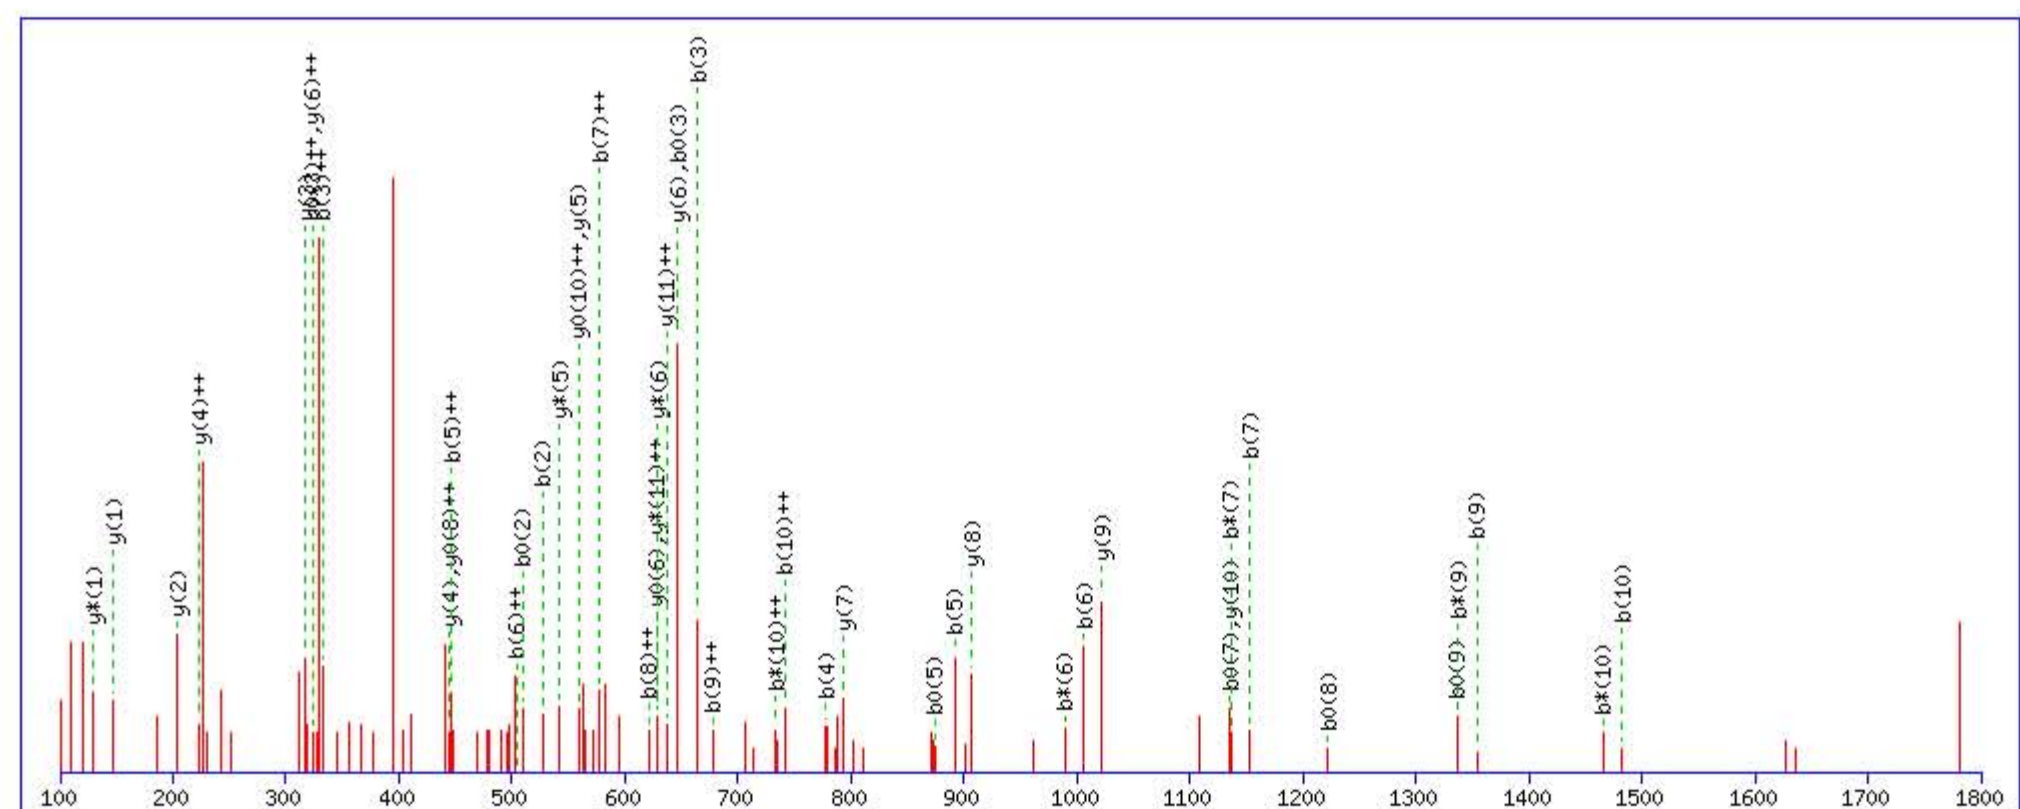

Monoisotopic mass of neutral peptide Mr(calc): 1797.883194

Fixed modifications: Carbamidomethyl (C) (apply to specified residues or termini only)

Variable modifications:



# MASCOT Search Results

## Peptide View

MS/MS Fragmentation of **APSHQQATTAGSPLR**

Found in **FA5\_HUMAN**, Coagulation factor V OS=Homo sapiens GN=F5 PE=1 SV=4

Match to Query 45374: 1831.929072 from(611.650300,3+) rtinseconds(1399) index(51864)

Title: Locus:1.1.1.2973.22 File:"2013-07-02 CLN FXIII 30 min 2nd F 4.wiff"

Data file C:\Program Files (x86)\Matrix Science\Mascot Daemon\mgf\2 FXIII 30 min 2nd\mascot\_daemon\_merge.mgf

Click mouse within plot area to zoom in by factor of two about that point

Or, Plot from  to  Da

Label all possible matches  Label matches used for scoring

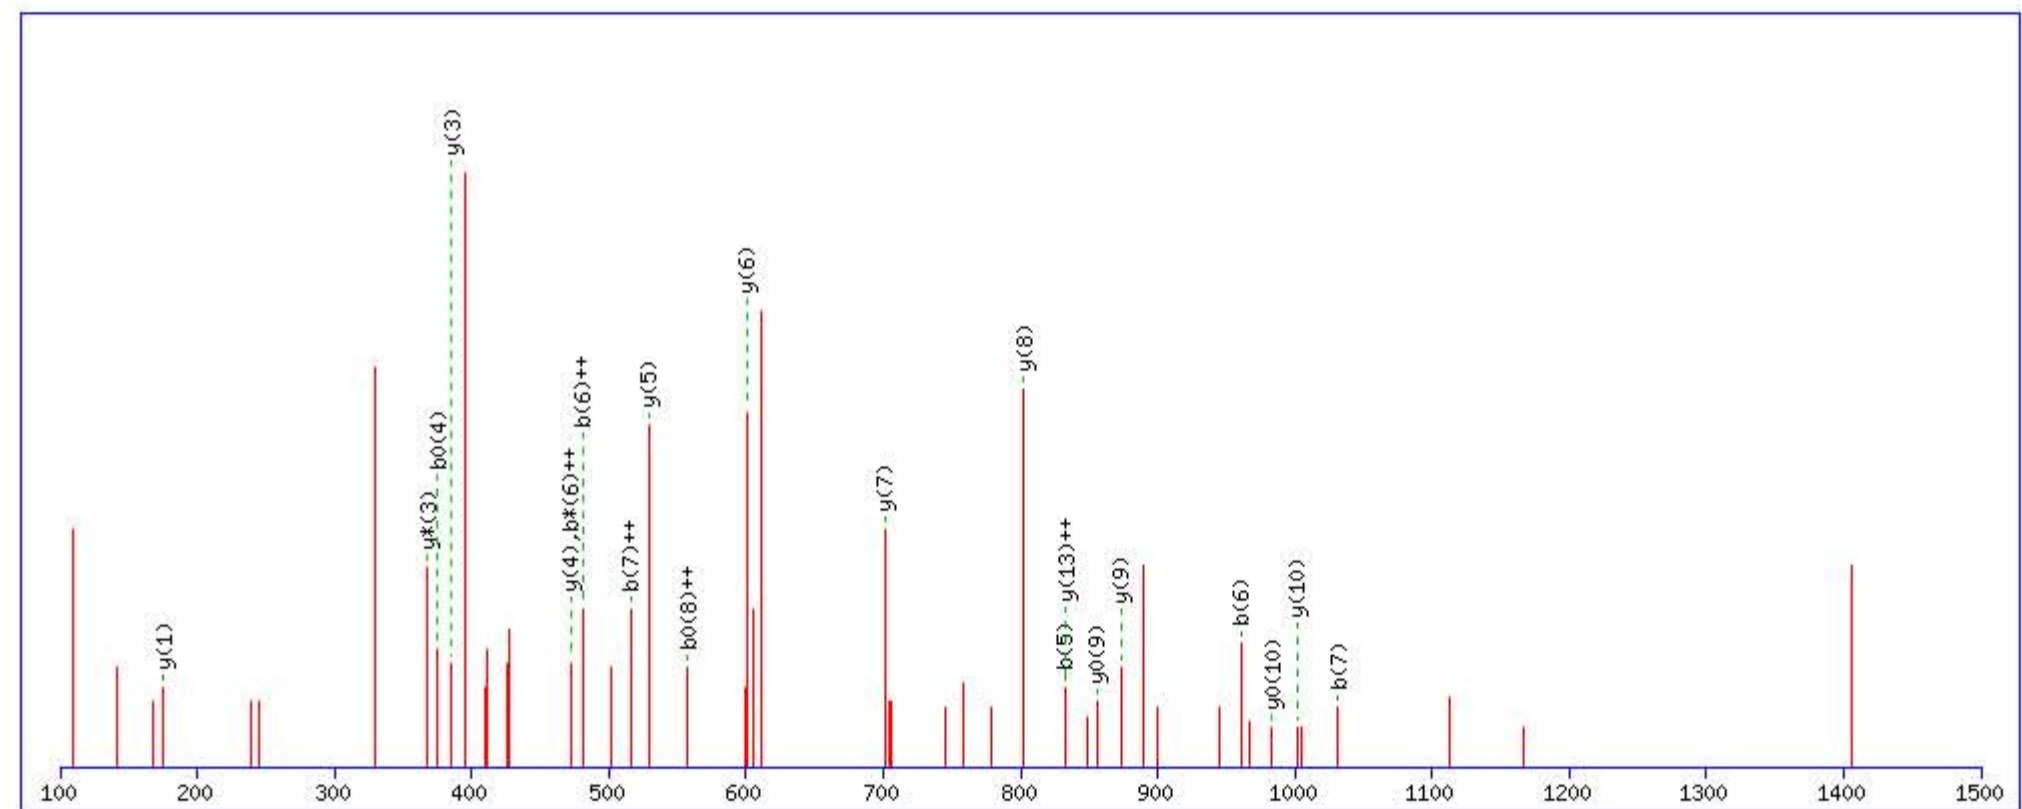

Monoisotopic mass of neutral peptide Mr(calc): 1831.936295

Fixed modifications: Carbamidomethyl (C) (apply to specified residues or termini only)

Variable modifications:

Q5 : Biotin:Thermo-21345 (Q)

Ions Score: 40 Expect: 0.00056

Matches : 21/150 fragment ions using 47 most intense peaks [\(help\)](#)

| #  | b                  | b <sup>++</sup>   | b <sup>*</sup> | b <sup>*++</sup>  | b <sup>0</sup>    | b <sup>0++</sup>  | Seq. | y                  | y <sup>++</sup>   | y <sup>*</sup>    | y <sup>*++</sup> | y <sup>0</sup>    | y <sup>0++</sup> | #  |
|----|--------------------|-------------------|----------------|-------------------|-------------------|-------------------|------|--------------------|-------------------|-------------------|------------------|-------------------|------------------|----|
| 1  | 72.044390          | 36.525833         |                |                   |                   |                   | A    |                    |                   |                   |                  |                   |                  | 15 |
| 2  | 169.097154         | 85.052215         |                |                   |                   |                   | P    | 1761.906466        | 881.456871        | 1744.879917       | 872.943597       | 1743.895901       | 872.451588       | 14 |
| 3  | 256.129182         | 128.568229        |                |                   | 238.118617        | 119.562947        | S    | 1664.853702        | <b>832.930489</b> | 1647.827153       | 824.417215       | 1646.843137       | 823.925206       | 13 |
| 4  | 393.188094         | 197.097685        |                |                   | <b>375.177529</b> | 188.092402        | H    | 1577.821674        | 789.414475        | 1560.795125       | 780.901200       | 1559.811109       | 780.409192       | 12 |
| 5  | <b>832.413420</b>  | 416.710348        | 815.386871     | 408.197073        | 814.402855        | 407.705065        | Q    | 1440.762762        | 720.885019        | 1423.736213       | 712.371744       | 1422.752197       | 711.879736       | 11 |
| 6  | <b>960.471998</b>  | <b>480.739637</b> | 943.445449     | <b>472.226362</b> | 942.461433        | 471.734354        | Q    | <b>1001.537436</b> | 501.272356        | 984.510887        | 492.759081       | <b>983.526871</b> | 492.267073       | 10 |
| 7  | <b>1031.509112</b> | <b>516.258194</b> | 1014.482563    | 507.744919        | 1013.498547       | 507.252911        | A    | <b>873.478858</b>  | 437.243067        | 856.452309        | 428.729792       | <b>855.468293</b> | 428.237784       | 9  |
| 8  | 1132.556791        | 566.782034        | 1115.530242    | 558.268759        | 1114.546226       | <b>557.776751</b> | T    | <b>802.441744</b>  | 401.724510        | 785.415195        | 393.211235       | 784.431179        | 392.719227       | 8  |
| 9  | 1233.604470        | 617.305873        | 1216.577921    | 608.792599        | 1215.593905       | 608.300591        | T    | <b>701.394065</b>  | 351.200671        | 684.367516        | 342.687396       | 683.383500        | 342.195388       | 7  |
| 10 | 1304.641584        | 652.824430        | 1287.615035    | 644.311156        | 1286.631019       | 643.819147        | A    | <b>600.346386</b>  | 300.676831        | 583.319837        | 292.163556       | 582.335821        | 291.671548       | 6  |
| 11 | 1361.663048        | 681.335162        | 1344.636499    | 672.821888        | 1343.652483       | 672.329879        | G    | <b>529.309272</b>  | 265.158274        | 512.282723        | 256.644999       | 511.298707        | 256.152991       | 5  |
| 12 | 1448.695076        | 724.851176        | 1431.668527    | 716.337902        | 1430.684511       | 715.845893        | S    | <b>472.287808</b>  | 236.647542        | 455.261259        | 228.134267       | 454.277243        | 227.642259       | 4  |
| 13 | 1545.747840        | 773.377558        | 1528.721291    | 764.864284        | 1527.737275       | 764.372276        | P    | <b>385.255780</b>  | 193.131528        | <b>368.229231</b> | 184.618253       |                   |                  | 3  |
| 14 | 1658.831904        | 829.919590        | 1641.805355    | 821.406316        | 1640.821339       | 820.914307        | L    | 288.203016         | 144.605146        | 271.176467        | 136.091871       |                   |                  | 2  |
| 15 |                    |                   |                |                   |                   |                   | R    | <b>175.118952</b>  | 88.063114         | 158.092403        | 79.549839        |                   |                  | 1  |

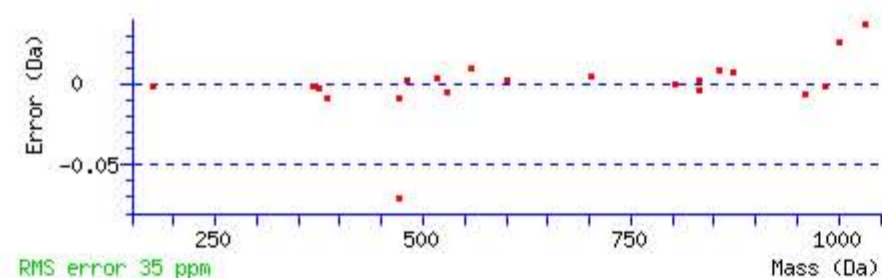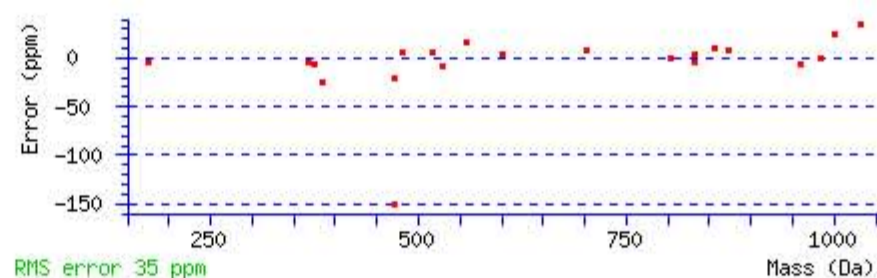

NCBI BLAST search of **APSHQQATTAGSPLR**

(Parameters: blastp, nr protein database, expect=20000, no filter, PAM30)

Other BLAST [web gateways](#)

All matches to this query

| Score | Mr(calc):   | Delta     | Sequence                          |
|-------|-------------|-----------|-----------------------------------|
| 40.0  | 1831.936295 | -0.007223 | <a href="#">APSHQQATTAGSPLR</a>   |
| 29.9  | 1831.936295 | -0.007223 | <a href="#">APSHQQATTAGSPLR</a>   |
| 5.4   | 1831.916336 | 0.012736  | <a href="#">VQTTADSVSDEAELLVR</a> |

Mascot: <http://www.matrixscience.com/>



# MASCOT Search Results

## Peptide View

MS/MS Fragmentation of **MPMGLSTGIISDSQIK**

Found in **FA5\_HUMAN**, Coagulation factor V OS=Homo sapiens GN=F5 PE=1 SV=4

Match to Query 48821: 1988.016042 from(663.679290,3+) rtinseconds(2456) index(58354)

Title: Locus:1.1.1.3341.4 File:"2013-07-02 CLN FXIII 30 min 2nd F 4.wiff"

Data file C:\Program Files (x86)\Matrix Science\Mascot Daemon\mgf2 FXIII 30 min 2nd\mascot\_daemon\_merge.mgf

Click mouse within plot area to zoom in by factor of two about that point

Or, Plot from  to  Da

Label all possible matches  Label matches used for scoring

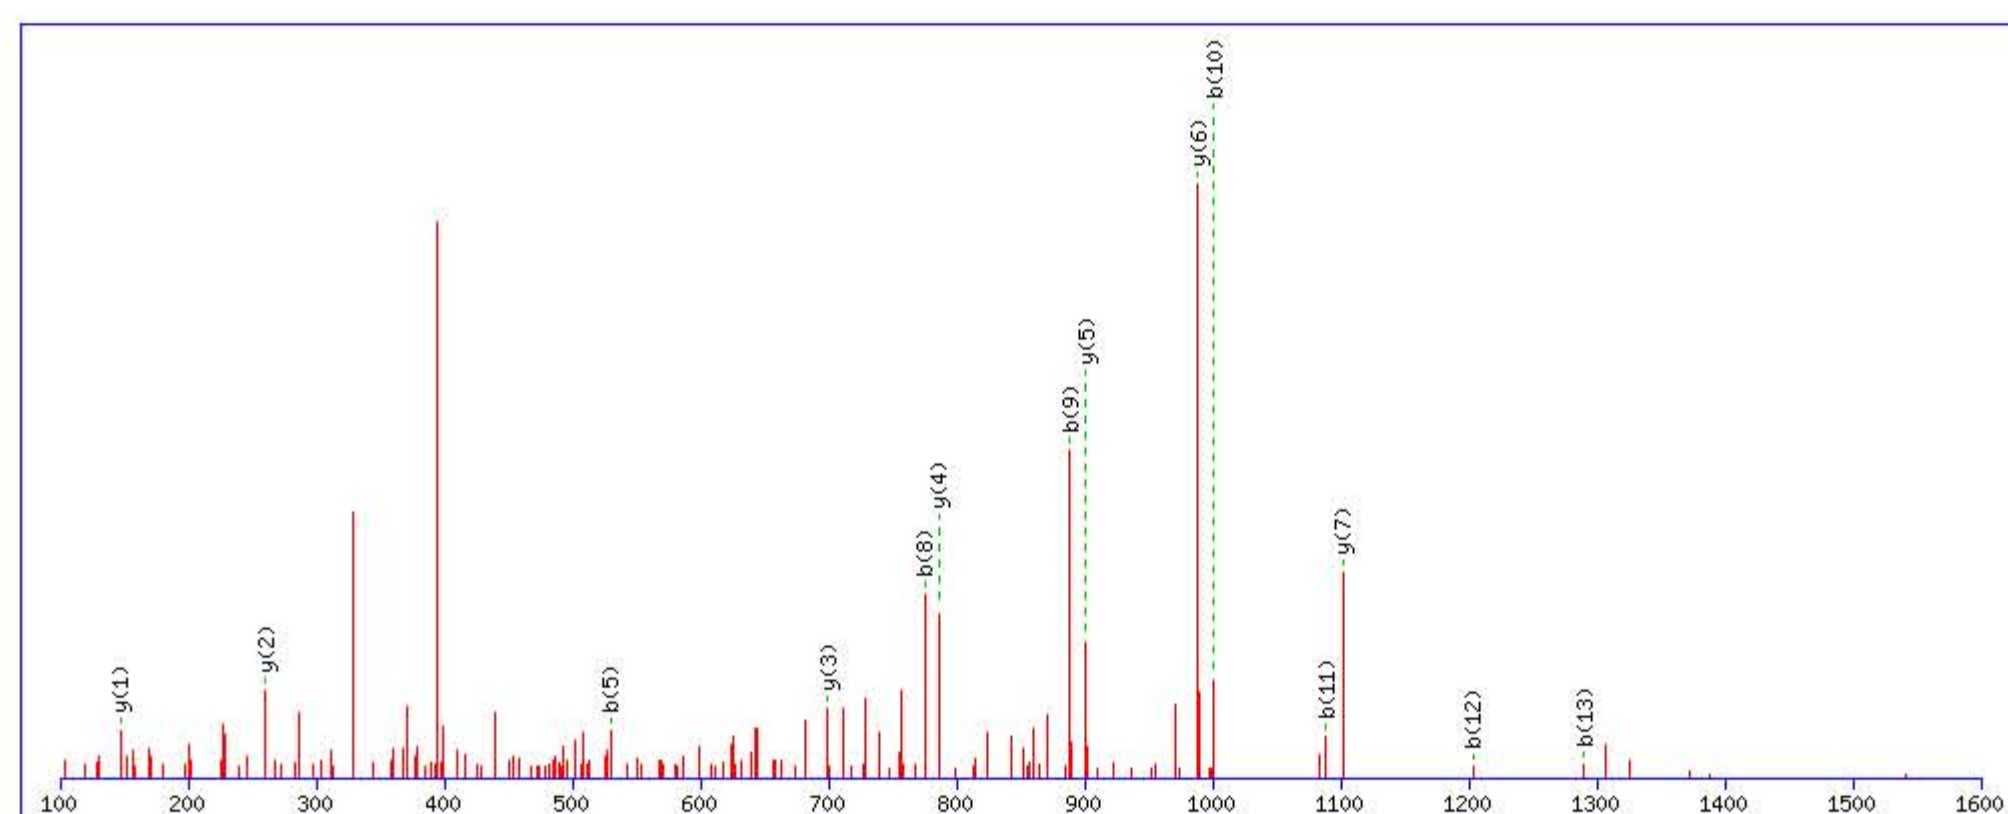

Monoisotopic mass of neutral peptide Mr(calc): 1988.014465

Fixed modifications: Carbamidomethyl (C) (apply to specified residues or termini only)

Variable modifications:

Q14 : Biotin:Thermo-21345 (Q)

Ions Score: 43 Expect: 0.00057

Matches : 14/138 fragment ions using 26 most intense peaks [\(help\)](#)

| #  | b                  | b <sup>++</sup> | b <sup>*</sup> | b <sup>*++</sup> | b <sup>0</sup> | b <sup>0++</sup> | Seq. | y                  | y <sup>++</sup> | y <sup>*</sup> | y <sup>*++</sup> | y <sup>0</sup> | y <sup>0++</sup> | #  |
|----|--------------------|-----------------|----------------|------------------|----------------|------------------|------|--------------------|-----------------|----------------|------------------|----------------|------------------|----|
| 1  | 132.047761         | 66.527518       |                |                  |                |                  | M    |                    |                 |                |                  |                |                  | 16 |
| 2  | 229.100525         | 115.053900      |                |                  |                |                  | P    | 1857.981269        | 929.494273      | 1840.954720    | 920.980998       | 1839.970704    | 920.488990       | 15 |
| 3  | 360.141010         | 180.574143      |                |                  |                |                  | M    | 1760.928505        | 880.967891      | 1743.901956    | 872.454616       | 1742.917940    | 871.962608       | 14 |
| 4  | 417.162474         | 209.084875      |                |                  |                |                  | G    | 1629.888020        | 815.447648      | 1612.861471    | 806.934374       | 1611.877455    | 806.442366       | 13 |
| 5  | <b>530.246538</b>  | 265.626907      |                |                  |                |                  | L    | 1572.866556        | 786.936916      | 1555.840007    | 778.423642       | 1554.855991    | 777.931634       | 12 |
| 6  | 617.278566         | 309.142921      |                |                  | 599.268001     | 300.137638       | S    | 1459.782492        | 730.394884      | 1442.755943    | 721.881610       | 1441.771927    | 721.389602       | 11 |
| 7  | 718.326245         | 359.666761      |                |                  | 700.315680     | 350.661478       | T    | 1372.750464        | 686.878870      | 1355.723915    | 678.365596       | 1354.739899    | 677.873588       | 10 |
| 8  | <b>775.347709</b>  | 388.177493      |                |                  | 757.337144     | 379.172210       | G    | 1271.702785        | 636.355031      | 1254.676236    | 627.841756       | 1253.692220    | 627.349748       | 9  |
| 9  | <b>888.431773</b>  | 444.719525      |                |                  | 870.421208     | 435.714242       | I    | 1214.681321        | 607.844299      | 1197.654772    | 599.331024       | 1196.670756    | 598.839016       | 8  |
| 10 | <b>1001.515837</b> | 501.261557      |                |                  | 983.505272     | 492.256274       | I    | <b>1101.597257</b> | 551.302267      | 1084.570708    | 542.788992       | 1083.586692    | 542.296984       | 7  |
| 11 | <b>1088.547865</b> | 544.777571      |                |                  | 1070.537300    | 535.772288       | S    | <b>988.513193</b>  | 494.760235      | 971.486644     | 486.246960       | 970.502628     | 485.754952       | 6  |
| 12 | <b>1203.574808</b> | 602.291042      |                |                  | 1185.564243    | 593.285760       | D    | <b>901.481165</b>  | 451.244221      | 884.454616     | 442.730946       | 883.470600     | 442.238938       | 5  |
| 13 | <b>1290.606836</b> | 645.807056      |                |                  | 1272.596271    | 636.801774       | S    | <b>786.454222</b>  | 393.730749      | 769.427673     | 385.217475       | 768.443657     | 384.725467       | 4  |
| 14 | 1729.832162        | 865.419719      | 1712.805613    | 856.906445       | 1711.821597    | 856.414437       | Q    | <b>699.422194</b>  | 350.214735      | 682.395645     | 341.701461       |                |                  | 3  |
| 15 | 1842.916226        | 921.961751      | 1825.889677    | 913.448477       | 1824.905661    | 912.956469       | I    | <b>260.196868</b>  | 130.602072      | 243.170319     | 122.088797       |                |                  | 2  |
| 16 |                    |                 |                |                  |                |                  | K    | <b>147.112804</b>  | 74.060040       | 130.086255     | 65.546765        |                |                  | 1  |

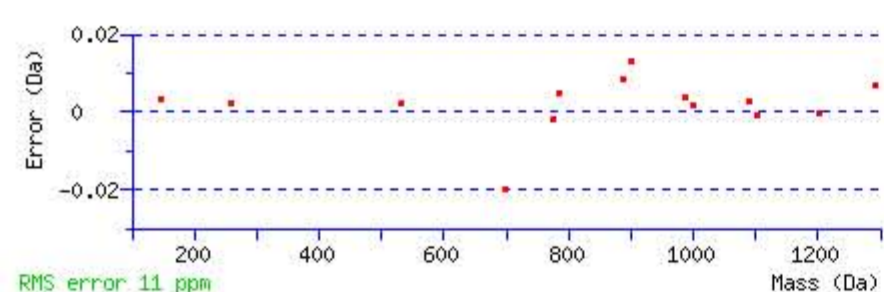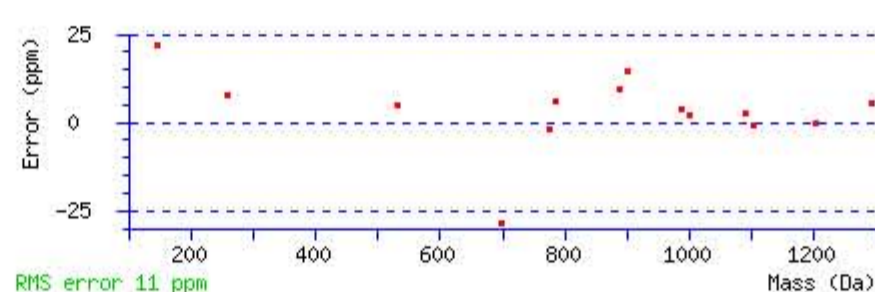

NCBI BLAST search of **MPMGLSTGIISDSQIK**

(Parameters: blastp, nr protein database, expect=20000, no filter, PAM30)

Other BLAST [web gateways](#)

All matches to this query

| Score | Mr(calc):   | Delta    | Sequence                         |
|-------|-------------|----------|----------------------------------|
| 43.4  | 1988.014465 | 0.001577 | <a href="#">MPMGLSTGIISDSQIK</a> |
| 8.3   | 1988.000519 | 0.015523 | <a href="#">QQMLENQMEVRKK</a>    |
| 4.0   | 1987.989319 | 0.026723 | <a href="#">MQKSEGSQGTQLK</a>    |
| 2.6   | 1988.004562 | 0.011480 | <a href="#">QNLDKCYGQIK</a>      |
| 0.9   | 1987.998535 | 0.017507 | <a href="#">VCAQCRVFLRGTHAWK</a> |
| 0.6   | 1988.000519 | 0.015523 | <a href="#">QQMLENQMEVRKK</a>    |
| 0.4   | 1987.989273 | 0.026769 | <a href="#">ENQMRMADLSELLK</a>   |

Mascot: <http://www.matrixscience.com/>



# MASCOT Search Results

## Peptide View

MS/MS Fragmentation of **AADIEQQAVFAVFDENK**  
 Found in **FA5\_HUMAN**, Coagulation factor V OS=Homo sapiens GN=F5 PE=1 SV=4

Match to Query 53990: 2205.081462 from(736.034430,3+) rtinseconds(2745) index(60259)  
 Title: Locus:1.1.1.3440.9 File:"2013-07-02 CLN FXIII 30 min 2nd F 4.wiff"  
 Data file C:\Program Files (x86)\Matrix Science\Mascot Daemon\mgf2 FXIII 30 min 2nd\mascot\_daemon\_merge.mgf

Click mouse within plot area to zoom in by factor of two about that point  
 Or, Plot from  to  Da   
 Label all possible matches  Label matches used for scoring

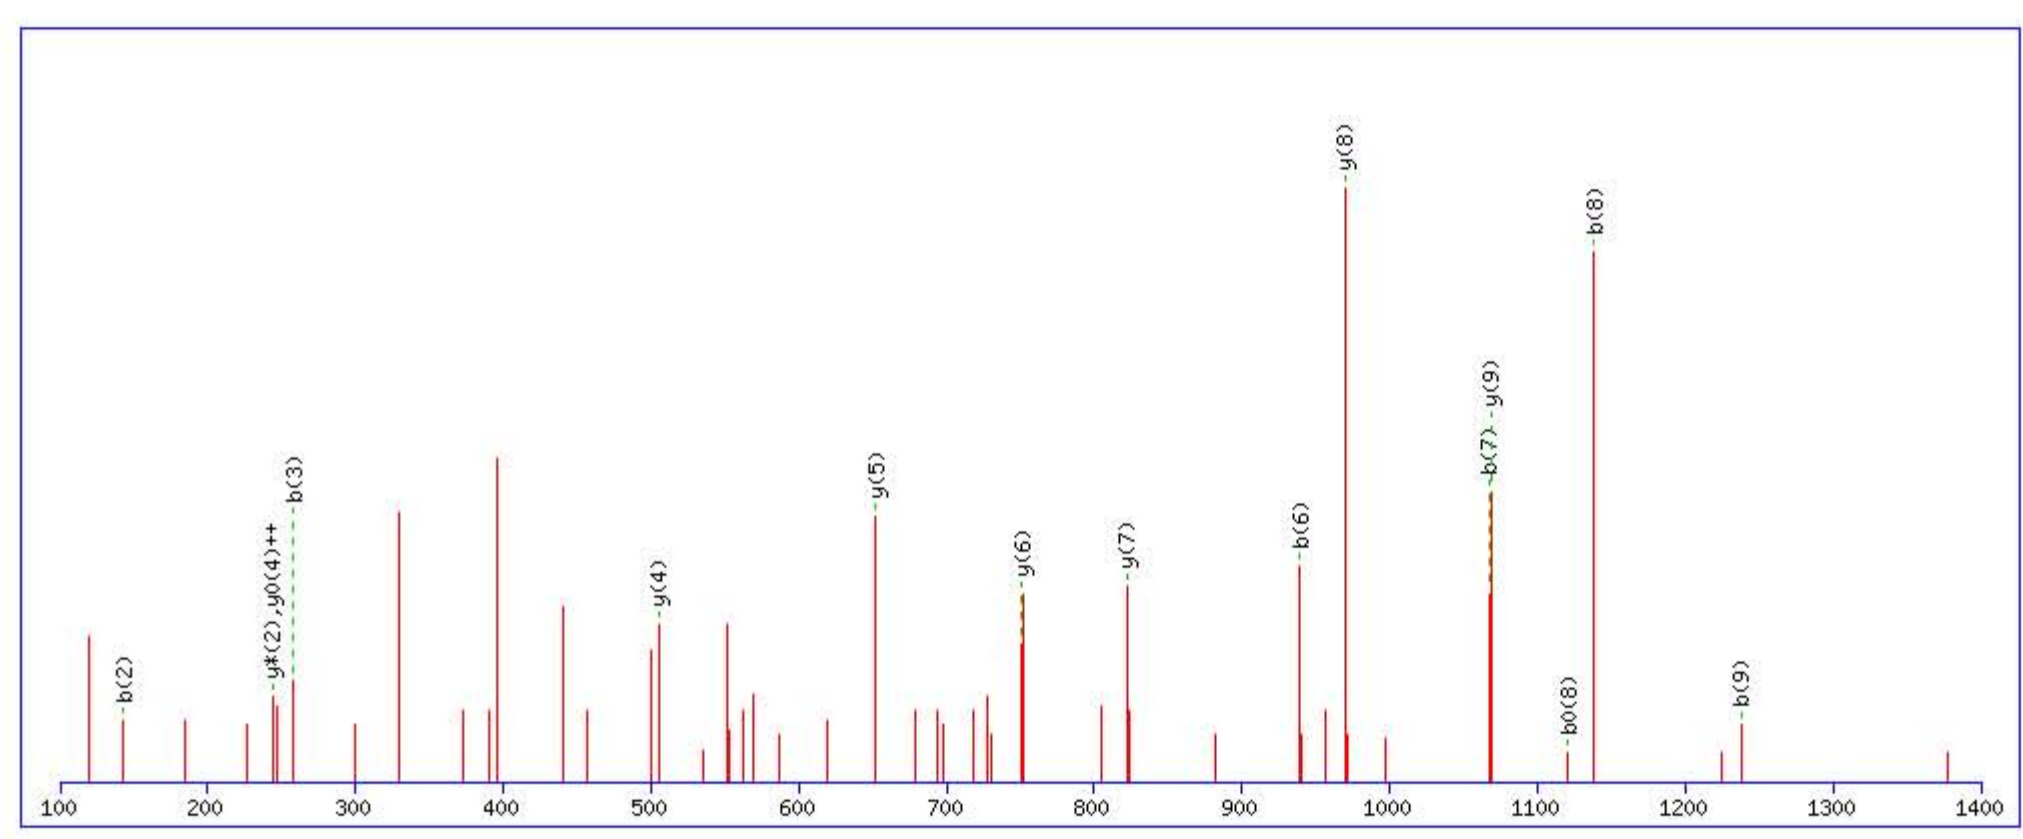

Monoisotopic mass of neutral peptide Mr(calc): 2205.077591  
 Fixed modifications: Carbamidomethyl (C) (apply to specified residues or termini only)  
 Variable modifications:  
 Q6 : Biotin:Thermo-21345 (Q)  
 Ions Score: 42 Expect: 0.00016  
 Matches : 15/174 fragment ions using 25 most intense peaks [\(help\)](#)

| #  | b                  | b <sup>++</sup> | b <sup>*</sup> | b <sup>*++</sup> | b <sup>0</sup>     | b <sup>0++</sup> | Seq. | y                  | y <sup>++</sup> | y <sup>*</sup>    | y <sup>*++</sup> | y <sup>0</sup> | y <sup>0++</sup>  | #  |
|----|--------------------|-----------------|----------------|------------------|--------------------|------------------|------|--------------------|-----------------|-------------------|------------------|----------------|-------------------|----|
| 1  | 72.044390          | 36.525833       |                |                  |                    |                  | A    |                    |                 |                   |                  |                |                   | 17 |
| 2  | <b>143.081504</b>  | 72.044390       |                |                  |                    |                  | A    | 2135.047769        | 1068.027522     | 2118.021220       | 1059.514248      | 2117.037204    | 1059.022240       | 16 |
| 3  | <b>258.108447</b>  | 129.557862      |                |                  | 240.097882         | 120.552579       | D    | 2064.010655        | 1032.508965     | 2046.984106       | 1023.995691      | 2046.000090    | 1023.503683       | 15 |
| 4  | 371.192511         | 186.099894      |                |                  | 353.181946         | 177.094611       | I    | 1948.983712        | 974.995494      | 1931.957163       | 966.482220       | 1930.973147    | 965.990212        | 14 |
| 5  | 500.235104         | 250.621190      |                |                  | 482.224539         | 241.615908       | E    | 1835.899648        | 918.453462      | 1818.873099       | 909.940188       | 1817.889083    | 909.448180        | 13 |
| 6  | <b>939.460430</b>  | 470.233853      | 922.433881     | 461.720579       | 921.449865         | 461.228571       | Q    | 1706.857055        | 853.932166      | 1689.830506       | 845.418891       | 1688.846490    | 844.926883        | 12 |
| 7  | <b>1067.519008</b> | 534.263142      | 1050.492459    | 525.749868       | 1049.508443        | 525.257860       | Q    | 1267.631729        | 634.319503      | 1250.605180       | 625.806228       | 1249.621164    | 625.314220        | 11 |
| 8  | <b>1138.556122</b> | 569.781699      | 1121.529573    | 561.268425       | <b>1120.545557</b> | 560.776416       | A    | 1139.573151        | 570.290214      | 1122.546602       | 561.776939       | 1121.562586    | 561.284931        | 10 |
| 9  | <b>1237.624536</b> | 619.315906      | 1220.597987    | 610.802632       | 1219.613971        | 610.310624       | V    | <b>1068.536037</b> | 534.771657      | 1051.509488       | 526.258382       | 1050.525472    | 525.766374        | 9  |
| 10 | 1384.692950        | 692.850113      | 1367.666401    | 684.336839       | 1366.682385        | 683.844831       | F    | <b>969.467623</b>  | 485.237450      | 952.441074        | 476.724175       | 951.457058     | 476.232167        | 8  |
| 11 | 1455.730064        | 728.368670      | 1438.703515    | 719.855396       | 1437.719499        | 719.363388       | A    | <b>822.399209</b>  | 411.703243      | 805.372660        | 403.189968       | 804.388644     | 402.697960        | 7  |
| 12 | 1554.798478        | 777.902877      | 1537.771929    | 769.389603       | 1536.787913        | 768.897595       | V    | <b>751.362095</b>  | 376.184686      | 734.335546        | 367.671411       | 733.351530     | 367.179403        | 6  |
| 13 | 1701.866892        | 851.437084      | 1684.840343    | 842.923810       | 1683.856327        | 842.431802       | F    | <b>652.293681</b>  | 326.650479      | 635.267132        | 318.137204       | 634.283116     | 317.645196        | 5  |
| 14 | 1816.893835        | 908.950556      | 1799.867286    | 900.437281       | 1798.883270        | 899.945273       | D    | <b>505.225267</b>  | 253.116271      | 488.198718        | 244.602997       | 487.214702     | <b>244.110989</b> | 4  |
| 15 | 1945.936428        | 973.471852      | 1928.909879    | 964.958578       | 1927.925863        | 964.466570       | E    | 390.198324         | 195.602800      | 373.171775        | 187.089525       | 372.187759     | 186.597517        | 3  |
| 16 | 2059.979355        | 1030.493315     | 2042.952806    | 1021.980041      | 2041.968790        | 1021.488033      | N    | 261.155731         | 131.081503      | <b>244.129182</b> | 122.568229       |                |                   | 2  |
| 17 |                    |                 |                |                  |                    |                  | K    | 147.112804         | 74.060040       | 130.086255        | 65.546765        |                |                   | 1  |

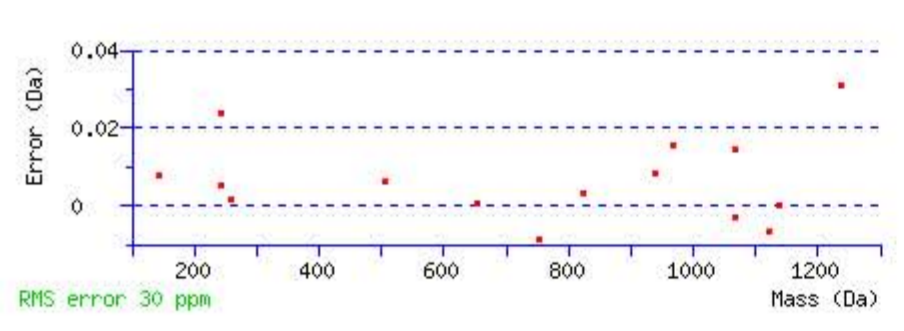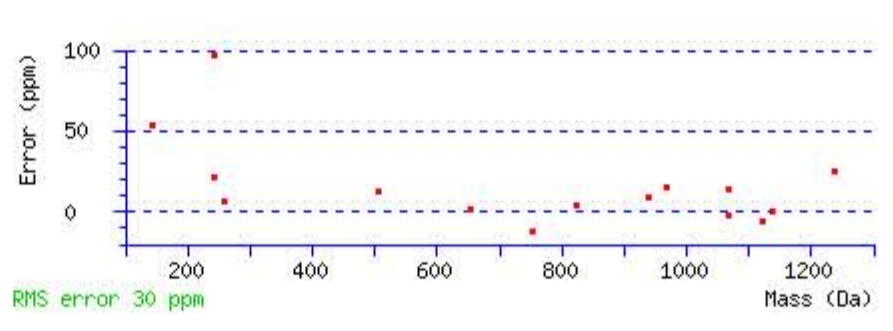

NCBI BLAST search of **AADIEQQAVFAVFDENK**  
 (Parameters: blastp, nr protein database, expect=20000, no filter, PAM30)  
 Other BLAST [web gateways](#)

### All matches to this query

| Score | Mr(calc):   | Delta    | Sequence                            |
|-------|-------------|----------|-------------------------------------|
| 41.7  | 2205.077591 | 0.003871 | <a href="#">AADIEQQAVFAVFDENK</a>   |
| 33.6  | 2205.077591 | 0.003871 | <a href="#">AADIEQQAVFAVFDENK</a>   |
| 1.2   | 2205.080063 | 0.001399 | <a href="#">EKENDELDIQLKVF DENK</a> |



# MASCOT SCIENCE Mascot Search Results

## Peptide View

MS/MS Fragmentation of **IVGGQECK**

Found in **FA10\_HUMAN**, Coagulation factor X OS=Homo sapiens GN=F10 PE=1 SV=2

Match to Query 25249: 1200.592788 from(601.303670,2+) rtinseconds(1411) index(51961)

Title: Locus:1.1.1.2977.19 File:"2013-07-02 CLN FXIII 30 min 2nd F 4.wiff"

Data file C:\Program Files (x86)\Matrix Science\Mascot Daemon\mgf2 FXIII 30 min 2nd\mascot\_daemon\_merge.mgf

Click mouse within plot area to zoom in by factor of two about that point

Or, Plot from  to  Da

Label all possible matches  Label matches used for scoring

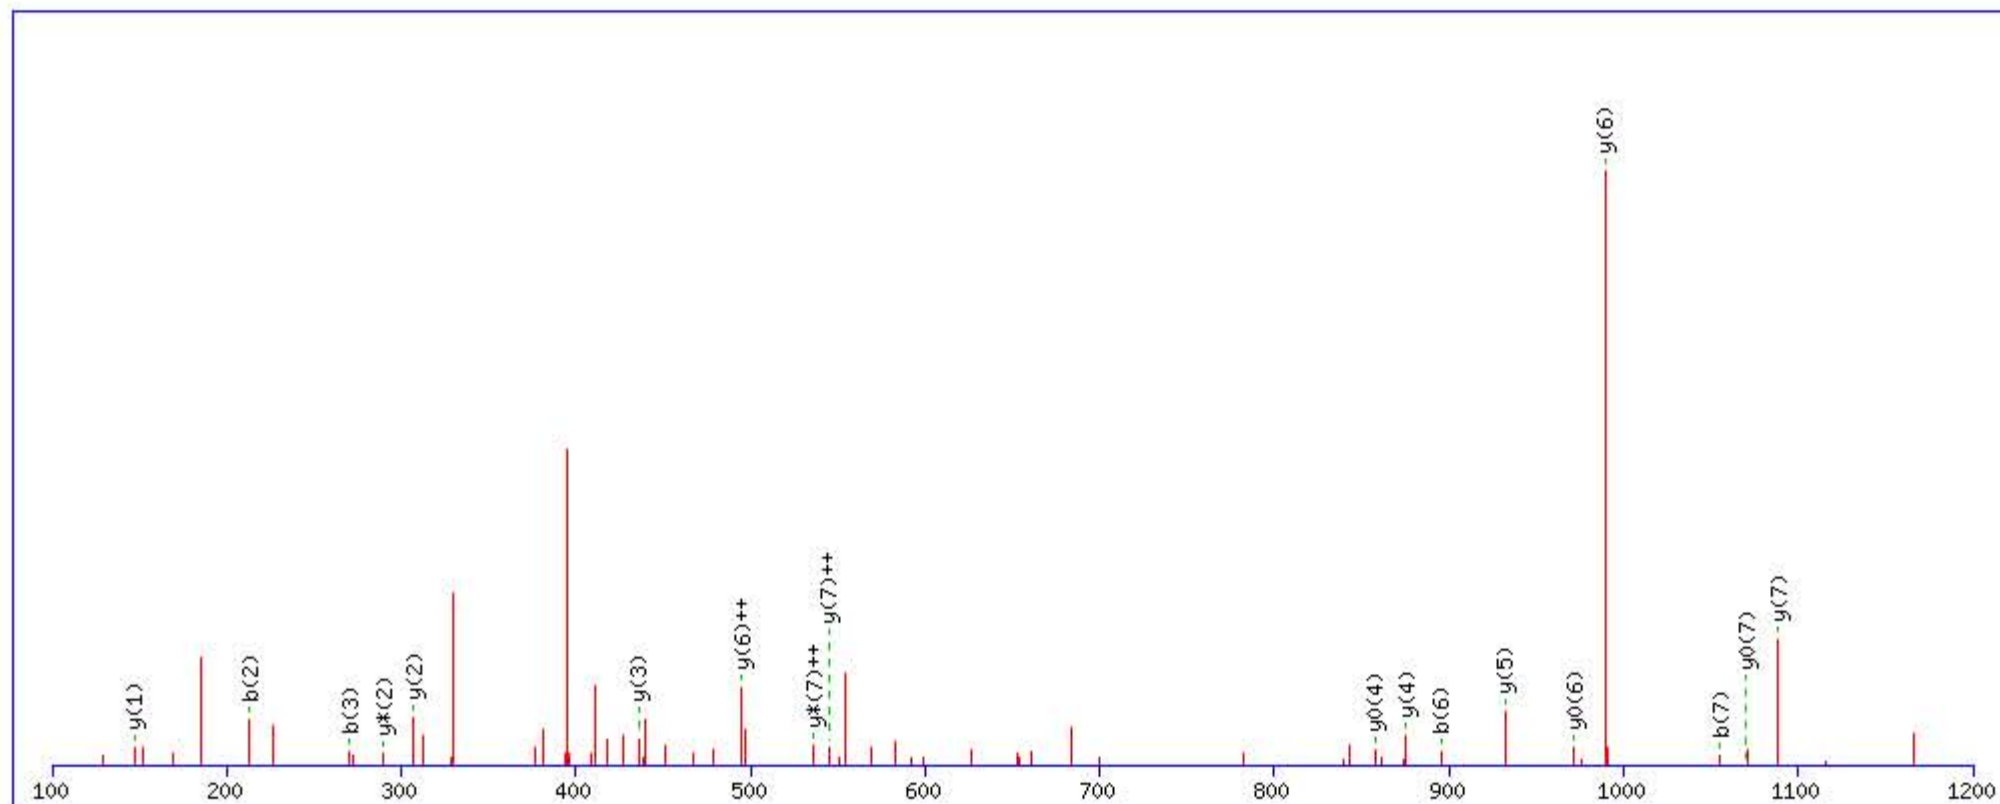

Monoisotopic mass of neutral peptide Mr(calc): 1200.599503

Fixed modifications: Carbamidomethyl (C) (apply to specified residues or termini only)

Variable modifications:

Q5 : Biotin:Thermo-21345 (Q)

Ions Score: 34 Expect: 0.0081

Matches : 18/62 fragment ions using 47 most intense peaks [\(help\)](#)

| # | b                  | b <sup>++</sup> | b <sup>*</sup> | b <sup>*++</sup> | b <sup>0</sup> | b <sup>0++</sup> | Seq. | y                  | y <sup>++</sup>   | y <sup>*</sup>    | y <sup>*++</sup>  | y <sup>0</sup>     | y <sup>0++</sup> | # |
|---|--------------------|-----------------|----------------|------------------|----------------|------------------|------|--------------------|-------------------|-------------------|-------------------|--------------------|------------------|---|
| 1 | 114.091340         | 57.549308       |                |                  |                |                  | I    |                    |                   |                   |                   |                    |                  | 8 |
| 2 | <b>213.159754</b>  | 107.083515      |                |                  |                |                  | V    | <b>1088.522714</b> | <b>544.764995</b> | 1071.496165       | <b>536.251721</b> | <b>1070.512149</b> | 535.759713       | 7 |
| 3 | <b>270.181218</b>  | 135.594247      |                |                  |                |                  | G    | <b>989.454300</b>  | <b>495.230788</b> | 972.427751        | 486.717514        | <b>971.443735</b>  | 486.225506       | 6 |
| 4 | 327.202682         | 164.104979      |                |                  |                |                  | G    | <b>932.432836</b>  | 466.720056        | 915.406287        | 458.206782        | 914.422271         | 457.714774       | 5 |
| 5 | 766.428008         | 383.717642      | 749.401459     | 375.204368       |                |                  | Q    | <b>875.411372</b>  | 438.209324        | 858.384823        | 429.696050        | <b>857.400807</b>  | 429.204042       | 4 |
| 6 | <b>895.470601</b>  | 448.238939      | 878.444052     | 439.725664       | 877.460036     | 439.233656       | E    | <b>436.186046</b>  | 218.596661        | 419.159497        | 210.083386        | 418.175481         | 209.591378       | 3 |
| 7 | <b>1055.501250</b> | 528.254263      | 1038.474701    | 519.740989       | 1037.490685    | 519.248981       | C    | <b>307.143453</b>  | 154.075364        | <b>290.116904</b> | 145.562090        |                    |                  | 2 |
| 8 |                    |                 |                |                  |                |                  | K    | <b>147.112804</b>  | 74.060040         | 130.086255        | 65.546765         |                    |                  | 1 |

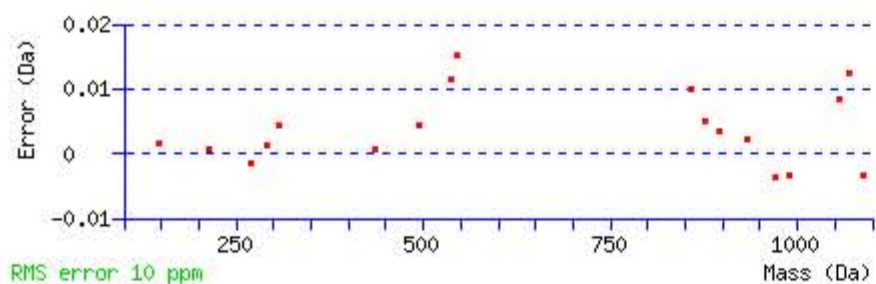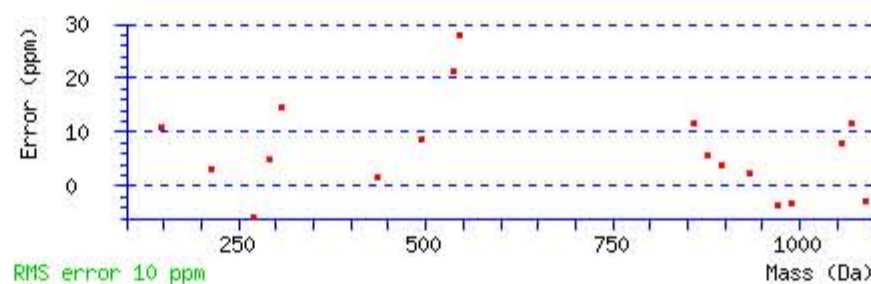

NCBI BLAST search of **IVGGQECK**

(Parameters: blastp, nr protein database, expect=20000, no filter, PAM30)

Other BLAST [web gateways](#)

## All matches to this query

| Score | Mr(calc):   | Delta     | Sequence                 |
|-------|-------------|-----------|--------------------------|
| 33.6  | 1200.599503 | -0.006715 | <a href="#">IVGGQECK</a> |
| 13.0  | 1200.599503 | -0.006715 | <a href="#">LIQGDGCK</a> |
| 8.9   | 1200.599487 | -0.006699 | <a href="#">LLNDQCK</a>  |
| 3.4   | 1200.596100 | -0.003312 | <a href="#">LVKMYDNR</a> |



# MASCOT SEARCH RESULTS

## Peptide View

MS/MS Fragmentation of **DWAESTLMTQK**

Found in **FA10\_HUMAN**, Coagulation factor X OS=Homo sapiens GN=F10 PE=1 SV=2

Match to Query 39637: 1619.768848 from(810.891700,2+) rtinseconds(2271) index(57475)

Title: Locus:1.1.1.3276.10 File:"2013-07-02 CLN FXIII 30 min 2nd F 4.wiff"

Data file C:\Program Files (x86)\Matrix Science\Mascot Daemon\mgf2 FXIII 30 min 2nd\mascot\_daemon\_merge.mgf

Click mouse within plot area to zoom in by factor of two about that point

Or, Plot from  to  Da

Label all possible matches  Label matches used for scoring

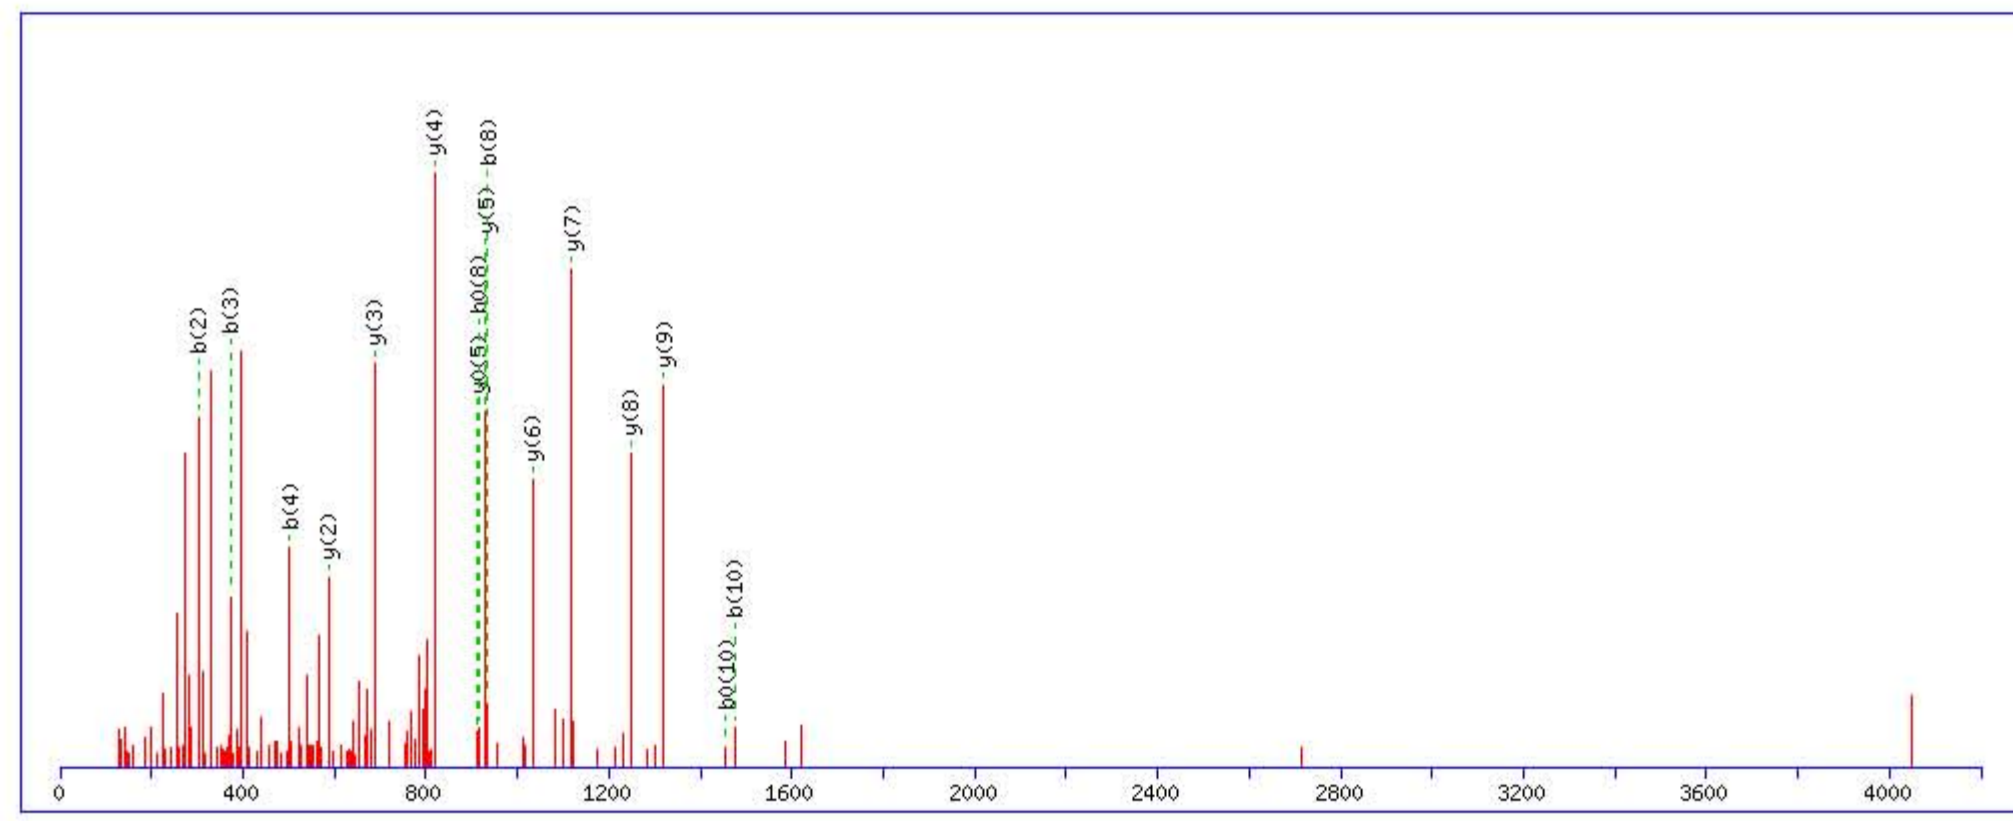

Monoisotopic mass of neutral peptide Mr(calc): 1619.768738

Fixed modifications: Carbamidomethyl (C) (apply to specified residues or termini only)

Variable modifications:

Q10 : Biotin:Thermo-21345 (Q)

Ions Score: 53 Expect: 2.5e-005

Matches : 16/98 fragment ions using 27 most intense peaks [\(help\)](#)

| #  | b                  | b <sup>++</sup> | b <sup>*</sup> | b <sup>+++</sup> | b <sup>0</sup>     | b <sup>0++</sup> | Seq. | y                  | y <sup>++</sup> | y <sup>*</sup> | y <sup>+++</sup> | y <sup>0</sup>    | y <sup>0++</sup> | #  |
|----|--------------------|-----------------|----------------|------------------|--------------------|------------------|------|--------------------|-----------------|----------------|------------------|-------------------|------------------|----|
| 1  | 116.034219         | 58.520748       |                |                  | 98.023654          | 49.515465        | D    |                    |                 |                |                  |                   |                  | 11 |
| 2  | <b>302.113532</b>  | 151.560404      |                |                  | 284.102967         | 142.555122       | W    | 1505.749085        | 753.378180      | 1488.722536    | 744.864906       | 1487.738520       | 744.372898       | 10 |
| 3  | <b>373.150646</b>  | 187.078961      |                |                  | 355.140081         | 178.073679       | A    | <b>1319.669772</b> | 660.338524      | 1302.643223    | 651.825250       | 1301.659207       | 651.333241       | 9  |
| 4  | <b>502.193239</b>  | 251.600258      |                |                  | 484.182674         | 242.594975       | E    | <b>1248.632658</b> | 624.819967      | 1231.606109    | 616.306693       | 1230.622093       | 615.814685       | 8  |
| 5  | 589.225267         | 295.116272      |                |                  | 571.214702         | 286.110989       | S    | <b>1119.590065</b> | 560.298671      | 1102.563516    | 551.785396       | 1101.579500       | 551.293388       | 7  |
| 6  | 690.272946         | 345.640111      |                |                  | 672.262381         | 336.634829       | T    | <b>1032.558037</b> | 516.782657      | 1015.531488    | 508.269382       | 1014.547472       | 507.777374       | 6  |
| 7  | 803.357010         | 402.182143      |                |                  | 785.346445         | 393.176861       | L    | <b>931.510358</b>  | 466.258817      | 914.483809     | 457.745543       | <b>913.499793</b> | 457.253535       | 5  |
| 8  | <b>934.397495</b>  | 467.702386      |                |                  | <b>916.386930</b>  | 458.697103       | M    | <b>818.426294</b>  | 409.716785      | 801.399745     | 401.203510       | 800.415729        | 400.711502       | 4  |
| 9  | 1035.445174        | 518.226225      |                |                  | 1017.434609        | 509.220942       | T    | <b>687.385809</b>  | 344.196543      | 670.359260     | 335.683268       | 669.375244        | 335.191260       | 3  |
| 10 | <b>1474.670500</b> | 737.838888      | 1457.643951    | 729.325614       | <b>1456.659935</b> | 728.833605       | Q    | <b>586.338130</b>  | 293.672703      | 569.311581     | 285.159429       |                   |                  | 2  |
| 11 |                    |                 |                |                  |                    |                  | K    | 147.112804         | 74.060040       | 130.086255     | 65.546765        |                   |                  | 1  |

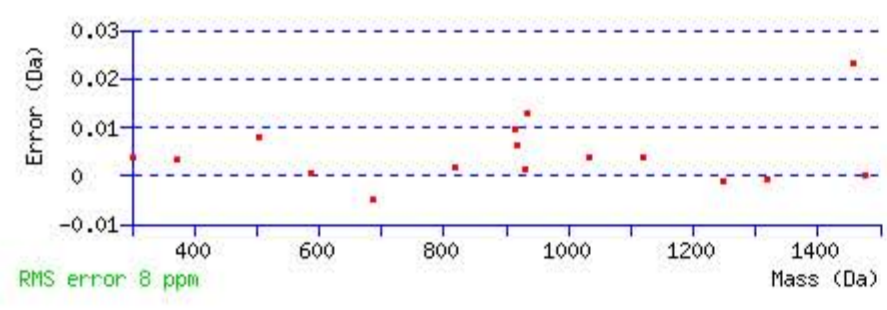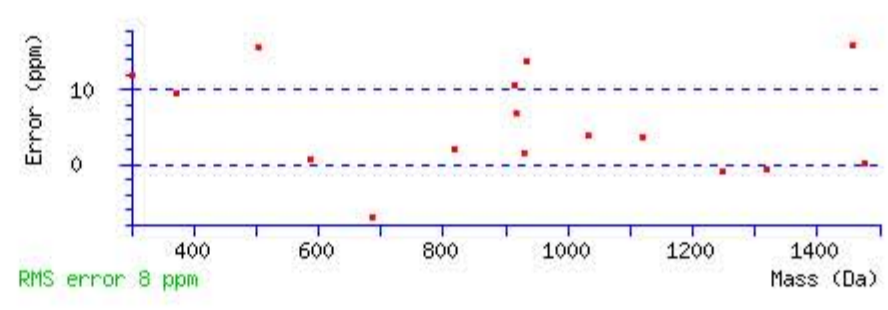

NCBI BLAST search of **DWAESTLMTQK**

(Parameters: blastp, nr protein database, expect=20000, no filter, PAM30)

Other BLAST [web gateways](#)

### All matches to this query

| Score | Mr(calc):   | Delta     | Sequence                         |
|-------|-------------|-----------|----------------------------------|
| 53.0  | 1619.768738 | 0.000110  | <a href="#">DWAESTLMTQK</a>      |
| 3.7   | 1619.747437 | 0.021411  | <a href="#">MAPADSGPHRDPPTTR</a> |
| 3.3   | 1619.783340 | -0.014492 | <a href="#">MLGNEICLCIVGNK</a>   |
| 1.7   | 1619.750107 | 0.018741  | <a href="#">DCPWKISDEEITK</a>    |



# MASCOT Search Results

## Peptide View

MS/MS Fragmentation of **QEDACQGDSSGGPHVTR**

Found in **FA10\_HUMAN**, Coagulation factor X OS=Homo sapiens GN=F10 PE=1 SV=2

Match to Query 50412: 2023.875762 from(675.632530,3+) rtinseconds(1296) index(51202)

Title: Locus:1.1.1.2937.26 File:"2013-07-02 CLN FXIII 30 min 2nd F 4.wiff"

Data file C:\Program Files (x86)\Matrix Science\Mascot Daemon\mgf\2 FXIII 30 min 2nd\mascot\_daemon\_merge.mgf

Click mouse within plot area to zoom in by factor of two about that point

Or, Plot from  to  Da

Label all possible matches  Label matches used for scoring

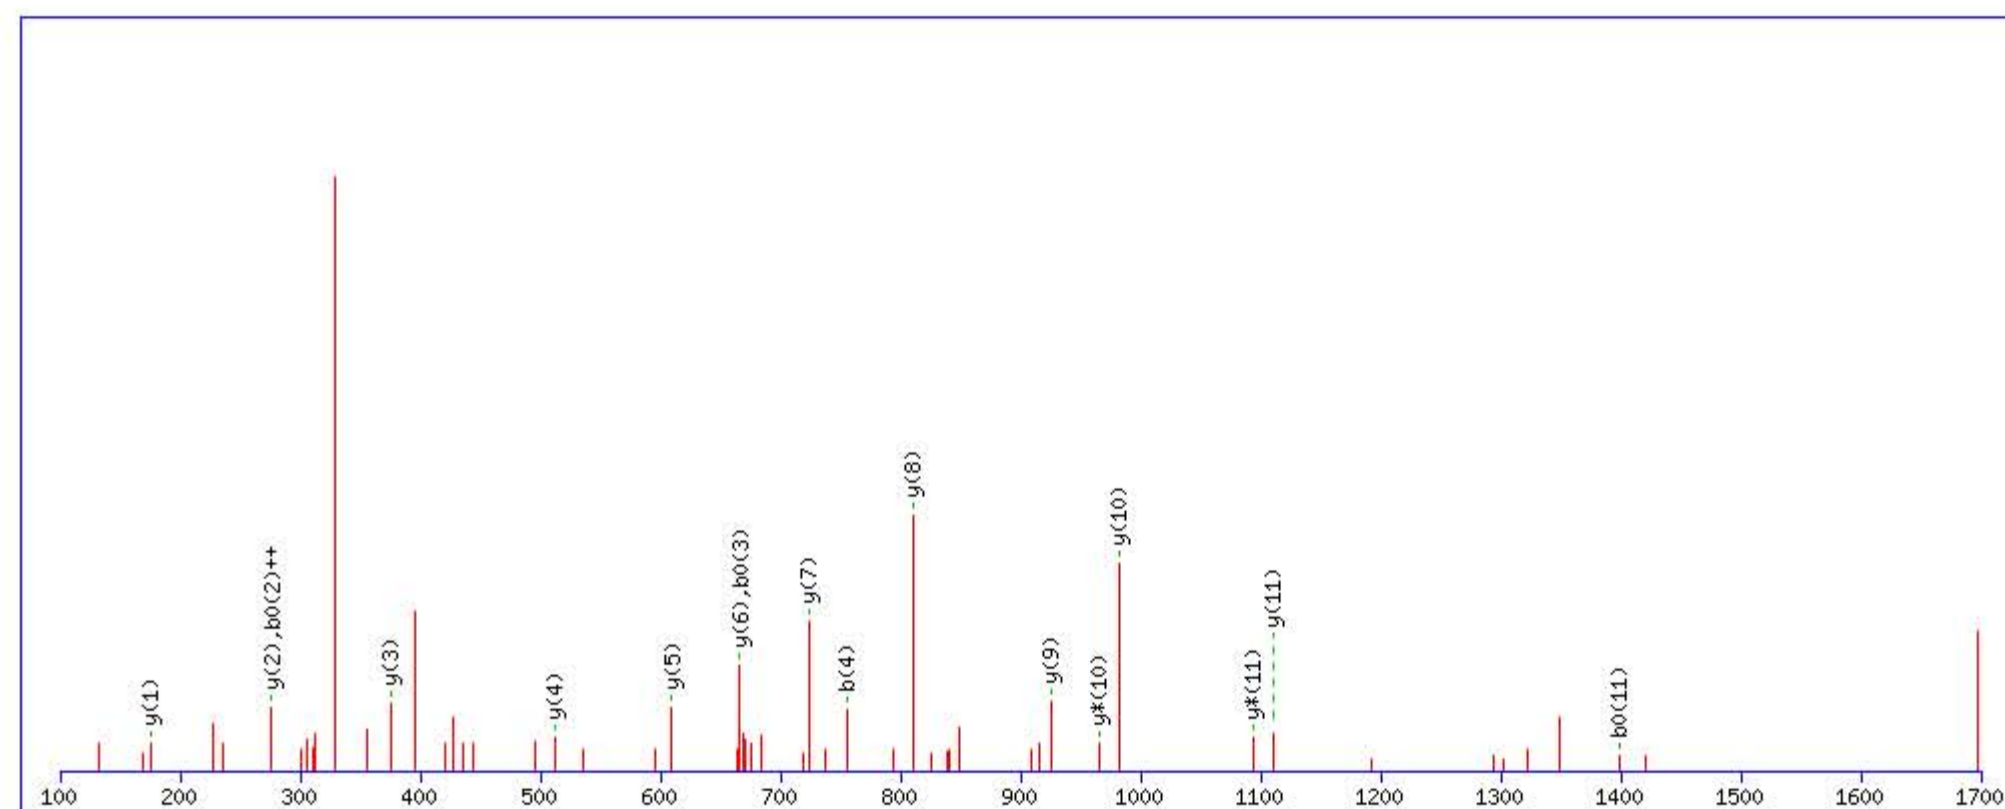

Monoisotopic mass of neutral peptide Mr(calc): 2023.884033

Fixed modifications: Carbamidomethyl (C) (apply to specified residues or termini only)

Variable modifications:

Q1 : Biotin:Thermo-21345 (Q)

Ions Score: 69 Expect: 5.1e-007

Matches : 17/176 fragment ions using 26 most intense peaks [\(help\)](#)

| #  | b           | b <sup>++</sup> | b <sup>*</sup> | b <sup>*++</sup> | b <sup>0</sup> | b <sup>0++</sup> | Seq. | y           | y <sup>++</sup> | y <sup>*</sup> | y <sup>*++</sup> | y <sup>0</sup> | y <sup>0++</sup> | #  |
|----|-------------|-----------------|----------------|------------------|----------------|------------------|------|-------------|-----------------|----------------|------------------|----------------|------------------|----|
| 1  | 440.232602  | 220.619939      | 423.206053     | 212.106664       |                |                  | Q    |             |                 |                |                  |                |                  | 16 |
| 2  | 569.275195  | 285.141236      | 552.248646     | 276.627961       | 551.264630     | 276.135953       | E    | 1585.665961 | 793.336618      | 1568.639412    | 784.823344       | 1567.655396    | 784.331336       | 15 |
| 3  | 684.302138  | 342.654707      | 667.275589     | 334.141433       | 666.291573     | 333.649425       | D    | 1456.623368 | 728.815322      | 1439.596819    | 720.302047       | 1438.612803    | 719.810039       | 14 |
| 4  | 755.339252  | 378.173264      | 738.312703     | 369.659989       | 737.328687     | 369.167982       | A    | 1341.596425 | 671.301851      | 1324.569876    | 662.788576       | 1323.585860    | 662.296568       | 13 |
| 5  | 915.369901  | 458.188589      | 898.343352     | 449.675314       | 897.359336     | 449.183306       | C    | 1270.559311 | 635.783294      | 1253.532762    | 627.270019       | 1252.548746    | 626.778011       | 12 |
| 6  | 1043.428479 | 522.217877      | 1026.401930    | 513.704603       | 1025.417914    | 513.212595       | Q    | 1110.528662 | 555.767969      | 1093.502113    | 547.254695       | 1092.518097    | 546.762686       | 11 |
| 7  | 1100.449943 | 550.728609      | 1083.423394    | 542.215335       | 1082.439378    | 541.723327       | G    | 982.470084  | 491.738680      | 965.443535     | 483.225406       | 964.459519     | 482.733398       | 10 |
| 8  | 1215.476886 | 608.242081      | 1198.450337    | 599.728807       | 1197.466321    | 599.236798       | D    | 925.448620  | 463.227948      | 908.422071     | 454.714674       | 907.438055     | 454.222666       | 9  |
| 9  | 1302.508914 | 651.758095      | 1285.482365    | 643.244821       | 1284.498349    | 642.752813       | S    | 810.421677  | 405.714477      | 793.395128     | 397.201202       | 792.411112     | 396.709194       | 8  |
| 10 | 1359.530378 | 680.268827      | 1342.503829    | 671.755553       | 1341.519813    | 671.263544       | G    | 723.389649  | 362.198463      | 706.363100     | 353.685188       | 705.379084     | 353.193180       | 7  |
| 11 | 1416.551842 | 708.779559      | 1399.525293    | 700.266284       | 1398.541277    | 699.774276       | G    | 666.368185  | 333.687731      | 649.341636     | 325.174456       | 648.357620     | 324.682448       | 6  |
| 12 | 1513.604606 | 757.305941      | 1496.578057    | 748.792667       | 1495.594041    | 748.300658       | P    | 609.346721  | 305.176999      | 592.320172     | 296.663724       | 591.336156     | 296.171716       | 5  |
| 13 | 1650.663518 | 825.835397      | 1633.636969    | 817.322122       | 1632.652953    | 816.830114       | H    | 512.293957  | 256.650617      | 495.267408     | 248.137342       | 494.283392     | 247.645334       | 4  |
| 14 | 1749.731932 | 875.369604      | 1732.705383    | 866.856330       | 1731.721367    | 866.364321       | V    | 375.235045  | 188.121161      | 358.208496     | 179.607886       | 357.224480     | 179.115878       | 3  |
| 15 | 1850.779611 | 925.893443      | 1833.753062    | 917.380169       | 1832.769046    | 916.888161       | T    | 276.166631  | 138.586953      | 259.140082     | 130.073679       | 258.156066     | 129.581671       | 2  |
| 16 |             |                 |                |                  |                |                  | R    | 175.118952  | 88.063114       | 158.092403     | 79.549839        |                |                  | 1  |

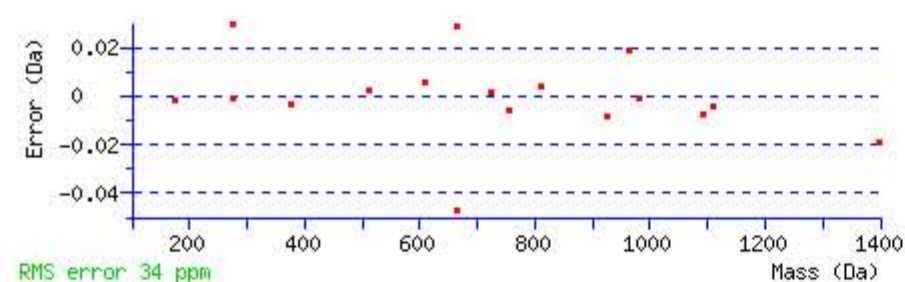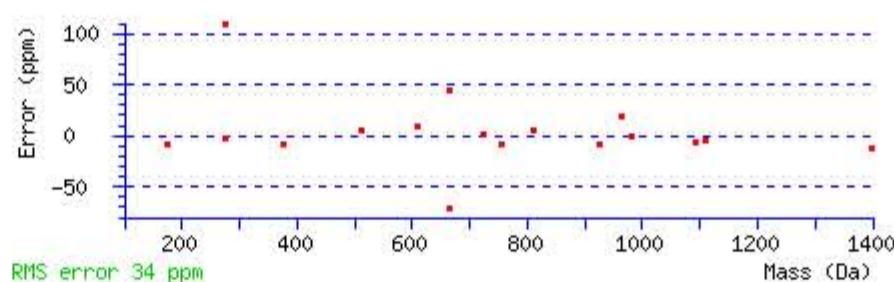

NCBI BLAST search of **QEDACQGDSSGGPHVTR**

(Parameters: blastp, nr protein database, expect=20000, no filter, PAM30)

Other BLAST [web gateways](#)

### All matches to this query

| Score | Mr(calc):   | Delta     | Sequence                          |
|-------|-------------|-----------|-----------------------------------|
| 69.3  | 2023.884033 | -0.008271 | <a href="#">QEDACQGDSSGGPHVTR</a> |
| 55.1  | 2023.884033 | -0.008271 | <a href="#">QEDACQGDSSGGPHVTR</a> |



# MASCOT Search Results

## Peptide View

MS/MS Fragmentation of **YKDGQCETSPCQNQGK**

Found in **FA10\_HUMAN**, Coagulation factor X OS=Homo sapiens GN=F10 PE=1 SV=2

Match to Query 56529: 2324.981202 from(776.001010,3+) rtinseconds(1262) index(51000)

Title: Locus:1.1.1.2925.11 File:"2013-07-02 CLN FXIII 30 min 2nd F 4.wiff"

Data file C:\Program Files (x86)\Matrix Science\Mascot Daemon\mgf2 FXIII 30 min 2nd\mascot\_daemon\_merge.mgf

Click mouse within plot area to zoom in by factor of two about that point

Or, Plot from  to  Da

Label all possible matches  Label matches used for scoring

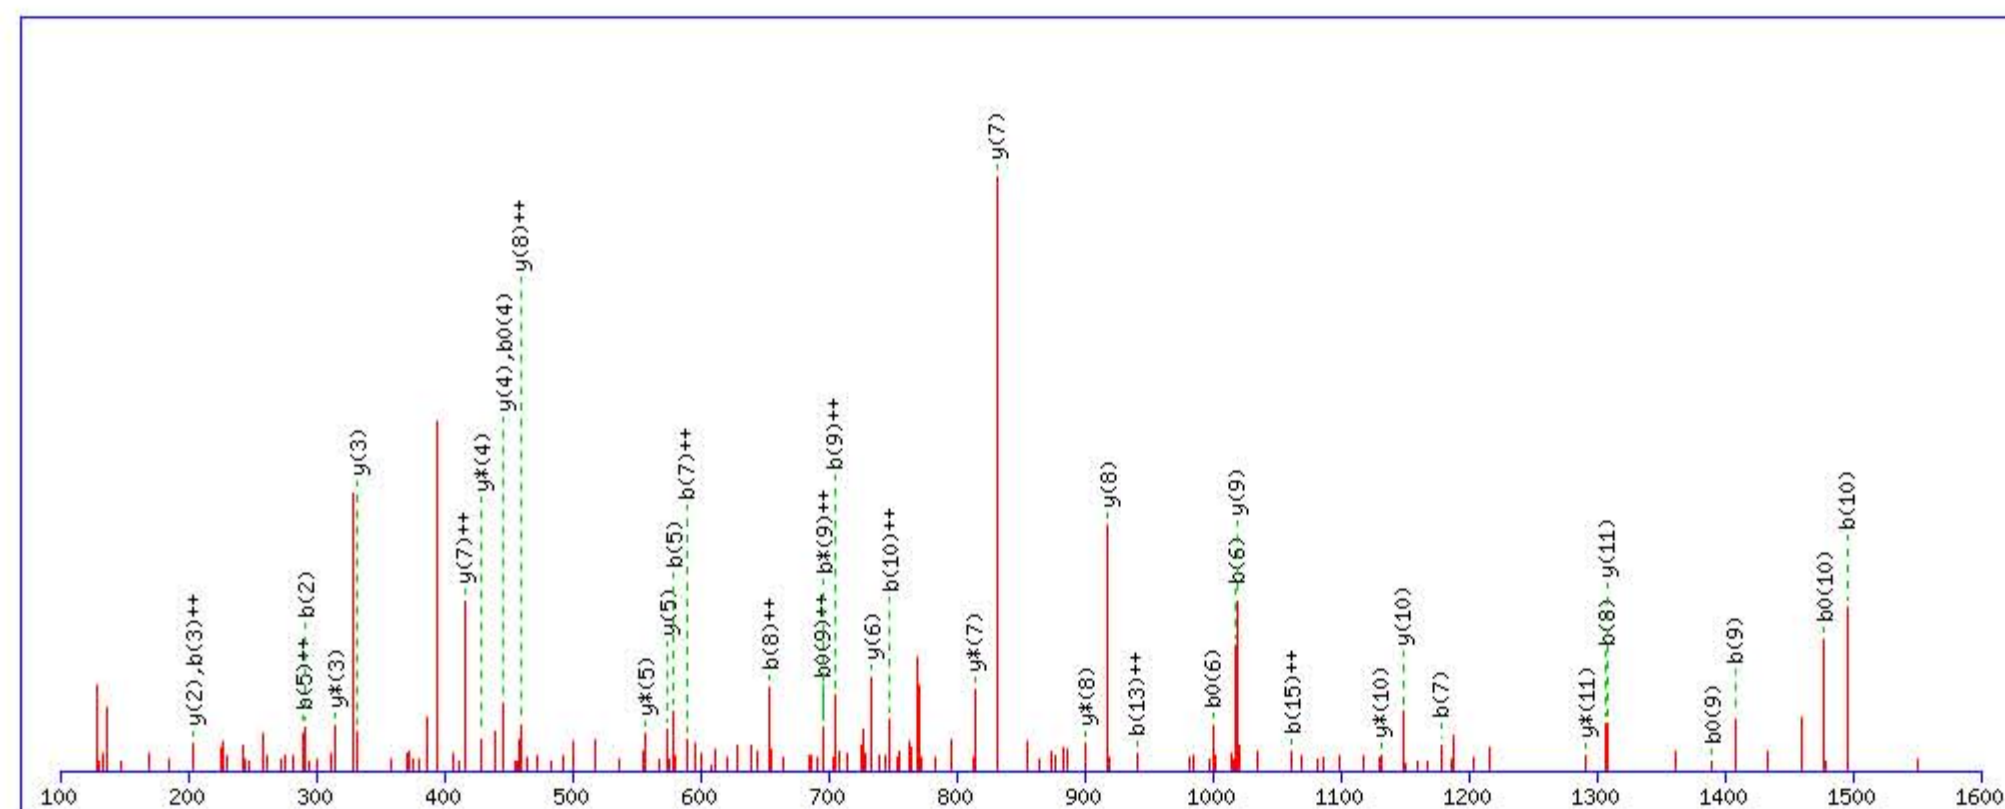

Monoisotopic mass of neutral peptide Mr(calc): 2324.982407

Fixed modifications: Carbamidomethyl (C) (apply to specified residues or termini only)

Variable modifications:

Q6 : Biotin:Thermo-21345 (Q)

Ions Score: 50 Expect: 2.5e-005

Matches : 40/172 fragment ions using 67 most intense peaks [\(help\)](#)

| #  | b                  | b <sup>++</sup>    | b <sup>*</sup> | b <sup>*++</sup>  | b <sup>0</sup>     | b <sup>0++</sup>  | Seq. | y                  | y <sup>++</sup>   | y <sup>*</sup>     | y <sup>*++</sup> | y <sup>0</sup> | y <sup>0++</sup> | #  |
|----|--------------------|--------------------|----------------|-------------------|--------------------|-------------------|------|--------------------|-------------------|--------------------|------------------|----------------|------------------|----|
| 1  | 164.070605         | 82.538940          |                |                   |                    |                   | Y    |                    |                   |                    |                  |                |                  | 17 |
| 2  | <b>292.165568</b>  | 146.586422         | 275.139019     | 138.073148        |                    |                   | K    | 2162.926352        | 1081.966814       | 2145.899803        | 1073.453539      | 2144.915787    | 1072.961531      | 16 |
| 3  | 407.192511         | <b>204.099894</b>  | 390.165962     | 195.586619        | 389.181946         | 195.094611        | D    | 2034.831389        | 1017.919333       | 2017.804840        | 1009.406058      | 2016.820824    | 1008.914050      | 15 |
| 4  | 464.213975         | 232.610626         | 447.187426     | 224.097351        | <b>446.203410</b>  | 223.605343        | G    | 1919.804446        | 960.405861        | 1902.777897        | 951.892587       | 1901.793881    | 951.400579       | 14 |
| 5  | <b>579.240918</b>  | <b>290.124097</b>  | 562.214369     | 281.610823        | 561.230353         | 281.118815        | D    | 1862.782982        | 931.895129        | 1845.756433        | 923.381855       | 1844.772417    | 922.889847       | 13 |
| 6  | <b>1018.466244</b> | 509.736760         | 1001.439695    | 501.223486        | <b>1000.455679</b> | 500.731478        | Q    | 1747.756039        | 874.381658        | 1730.729490        | 865.868383       | 1729.745474    | 865.376375       | 12 |
| 7  | <b>1178.496893</b> | <b>589.752085</b>  | 1161.470344    | 581.238810        | 1160.486328        | 580.746802        | C    | <b>1308.530713</b> | 654.768995        | <b>1291.504164</b> | 646.255720       | 1290.520148    | 645.763712       | 11 |
| 8  | <b>1307.539486</b> | <b>654.273381</b>  | 1290.512937    | 645.760107        | 1289.528921        | 645.268098        | E    | <b>1148.500064</b> | 574.753670        | <b>1131.473515</b> | 566.240396       | 1130.489499    | 565.748388       | 10 |
| 9  | <b>1408.587165</b> | <b>704.797220</b>  | 1391.560616    | <b>696.283946</b> | <b>1390.576600</b> | <b>695.791938</b> | T    | <b>1019.457471</b> | 510.232374        | 1002.430922        | 501.719099       | 1001.446906    | 501.227091       | 9  |
| 10 | <b>1495.619193</b> | <b>748.313235</b>  | 1478.592644    | 739.799960        | <b>1477.608628</b> | 739.307952        | S    | <b>918.409792</b>  | <b>459.708534</b> | <b>901.383243</b>  | 451.195260       | 900.399227     | 450.703252       | 8  |
| 11 | 1592.671957        | 796.839617         | 1575.645408    | 788.326342        | 1574.661392        | 787.834334        | P    | <b>831.377764</b>  | <b>416.192520</b> | <b>814.351215</b>  | 407.679246       |                |                  | 7  |
| 12 | 1752.702606        | 876.854941         | 1735.676057    | 868.341667        | 1734.692041        | 867.849659        | C    | <b>734.325000</b>  | 367.666138        | 717.298451         | 359.152864       |                |                  | 6  |
| 13 | 1880.761184        | <b>940.884230</b>  | 1863.734635    | 932.370956        | 1862.750619        | 931.878948        | Q    | <b>574.294351</b>  | 287.650814        | <b>557.267802</b>  | 279.137539       |                |                  | 5  |
| 14 | 1994.804111        | 997.905694         | 1977.777562    | 989.392419        | 1976.793546        | 988.900411        | N    | <b>446.235773</b>  | 223.621524        | <b>429.209224</b>  | 215.108250       |                |                  | 4  |
| 15 | 2122.862689        | <b>1061.934982</b> | 2105.836140    | 1053.421708       | 2104.852124        | 1052.929700       | Q    | <b>332.192846</b>  | 166.600061        | <b>315.166297</b>  | 158.086787       |                |                  | 3  |
| 16 | 2179.884153        | 1090.445714        | 2162.857604    | 1081.932440       | 2161.873588        | 1081.440432       | G    | <b>204.134268</b>  | 102.570772        | 187.107719         | 94.057497        |                |                  | 2  |
| 17 |                    |                    |                |                   |                    |                   | K    | 147.112804         | 74.060040         | 130.086255         | 65.546765        |                |                  | 1  |

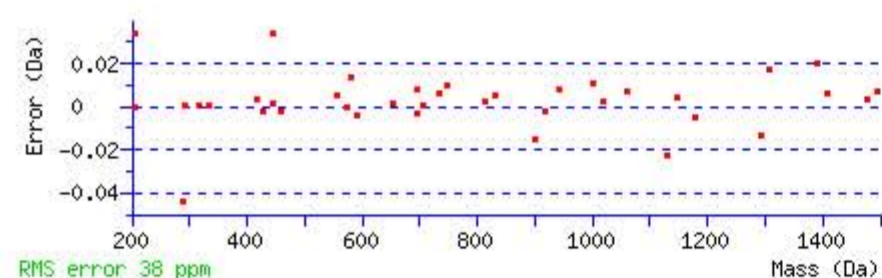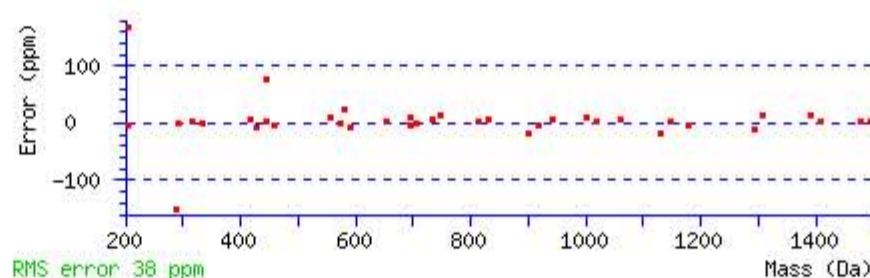

NCBI BLAST search of **YKDGQCETSPCQNQGK**

(Parameters: blastp, nr protein database, expect=20000, no filter, PAM30)

Other BLAST [web gateways](#)

All matches to this query

| Score | Mr(calc):   | Delta     | Sequence                         |
|-------|-------------|-----------|----------------------------------|
| 50.0  | 2324.982407 | -0.001205 | <a href="#">YKDGQCETSPCQNQGK</a> |

Mascot: <http://www.matrixscience.com/>



# {MATRIX} {SCIENCE} Mascot Search Results

## Peptide View

MS/MS Fragmentation of **TEQAAVAR**

Found in **FA12\_HUMAN**, Coagulation factor XII OS=Homo sapiens GN=F12 PE=1 SV=3

Match to Query 23577: 1155.605688 from(578.810120,2+) rtinseconds(1399) index(67296)

Title: Locus:1.1.1.3020.22 File:"2013-07-02 CLN FXIII 30 min 2nd FT.wiff"

Data file C:\Program Files (x86)\Matrix Science\Mascot Daemon\mgf2 FXIII 30 min 2nd\mascot\_daemon\_merge.mgf

Click mouse within plot area to zoom in by factor of two about that point

Or, Plot from  to  Da

Label all possible matches  Label matches used for scoring

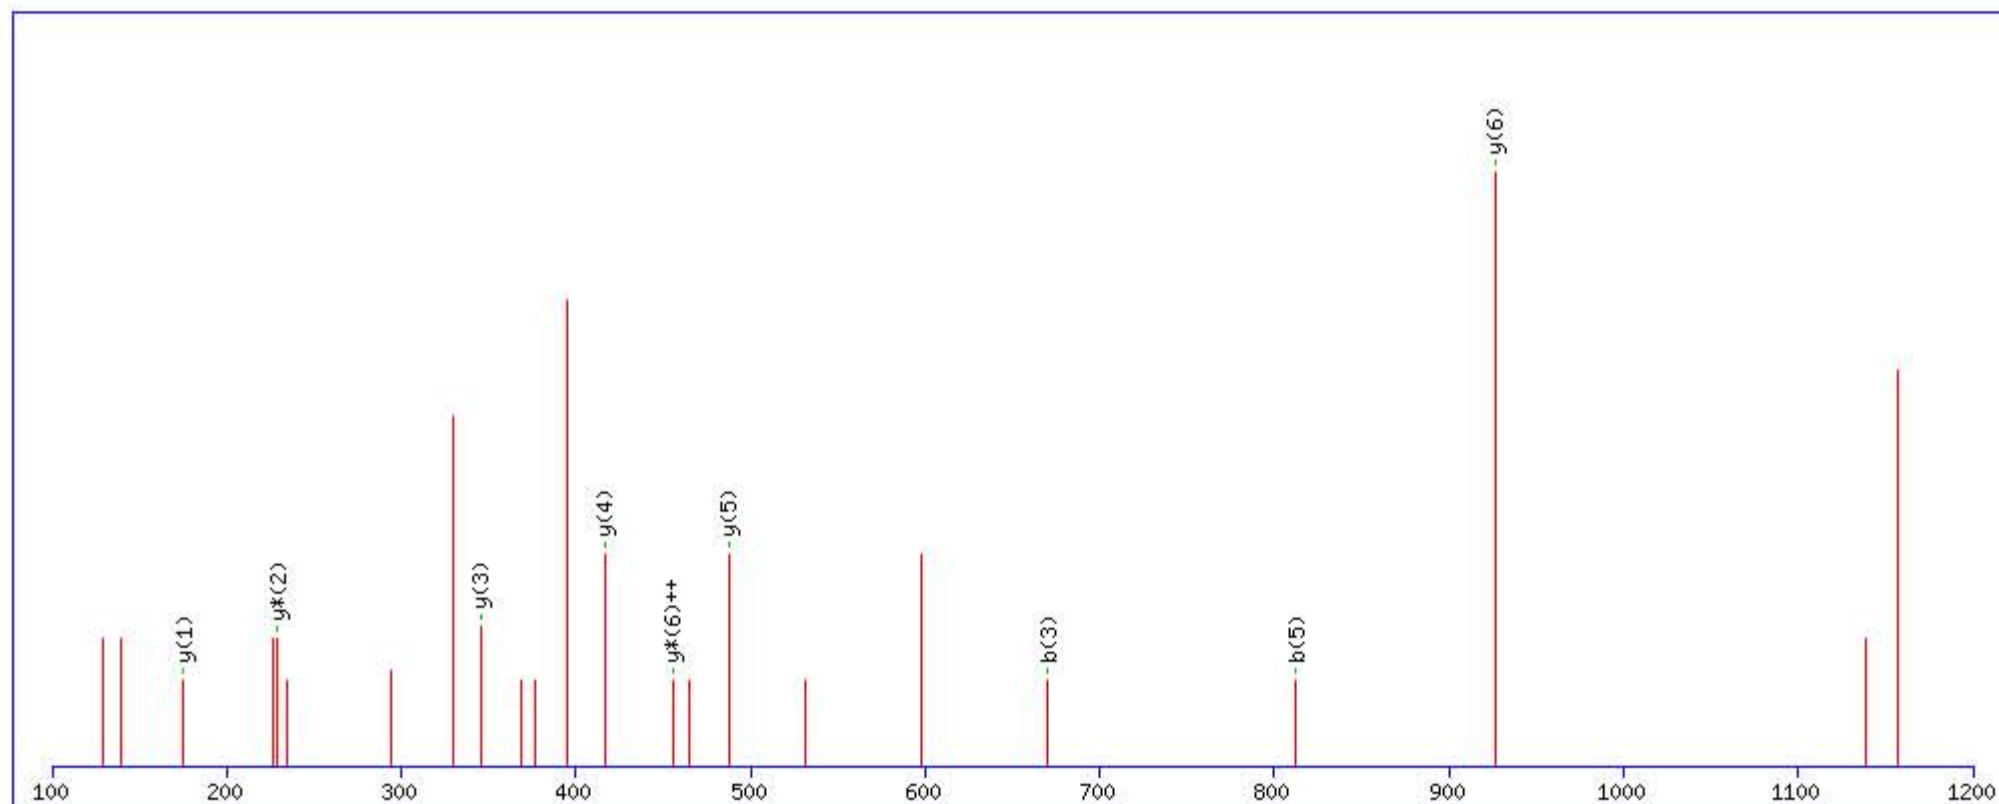

Monoisotopic mass of neutral peptide Mr(calc): 1155.607010

Fixed modifications: Carbamidomethyl (C) (apply to specified residues or termini only)

Variable modifications:

Q3 : Biotin:Thermo-21345 (Q)

Ions Score: 26 Expect: 0.016

Matches : 9/68 fragment ions using 20 most intense peaks [\(help\)](#)

| # | b                 | b <sup>++</sup> | b <sup>*</sup> | b <sup>*++</sup> | b <sup>0</sup> | b <sup>0++</sup> | Seq. | y                 | y <sup>++</sup> | y <sup>*</sup>    | y <sup>*++</sup>  | y <sup>0</sup> | y <sup>0++</sup> | # |
|---|-------------------|-----------------|----------------|------------------|----------------|------------------|------|-------------------|-----------------|-------------------|-------------------|----------------|------------------|---|
| 1 | 102.054955        | 51.531116       |                |                  | 84.044390      | 42.525833        | T    |                   |                 |                   |                   |                |                  | 8 |
| 2 | 231.097548        | 116.052412      |                |                  | 213.086983     | 107.047130       | E    | 1055.566627       | 528.286951      | 1038.540078       | 519.773677        | 1037.556062    | 519.281669       | 7 |
| 3 | <b>670.322874</b> | 335.665075      | 653.296325     | 327.151801       | 652.312309     | 326.659793       | Q    | <b>926.524034</b> | 463.765655      | 909.497485        | <b>455.252380</b> |                |                  | 6 |
| 4 | 741.359988        | 371.183632      | 724.333439     | 362.670358       | 723.349423     | 362.178350       | A    | <b>487.298708</b> | 244.152992      | 470.272159        | 235.639717        |                |                  | 5 |
| 5 | <b>812.397102</b> | 406.702189      | 795.370553     | 398.188915       | 794.386537     | 397.696907       | A    | <b>416.261594</b> | 208.634435      | 399.235045        | 200.121160        |                |                  | 4 |
| 6 | 911.465516        | 456.236396      | 894.438967     | 447.723121       | 893.454951     | 447.231113       | V    | <b>345.224480</b> | 173.115878      | 328.197931        | 164.602603        |                |                  | 3 |
| 7 | 982.502630        | 491.754953      | 965.476081     | 483.241678       | 964.492065     | 482.749670       | A    | 246.156066        | 123.581671      | <b>229.129517</b> | 115.068396        |                |                  | 2 |
| 8 |                   |                 |                |                  |                |                  | R    | <b>175.118952</b> | 88.063114       | 158.092403        | 79.549839         |                |                  | 1 |

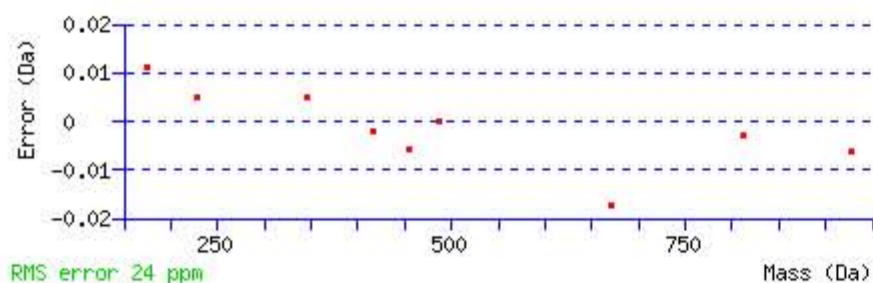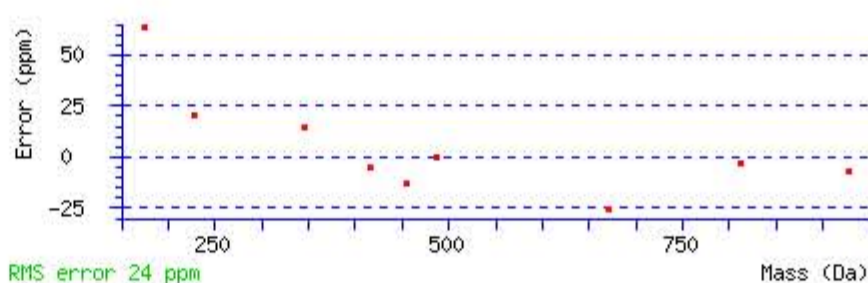

NCBI BLAST search of [TEQAAVAR](#)

(Parameters: blastp, nr protein database, expect=20000, no filter, PAM30)

Other BLAST [web gateways](#)

All matches to this query

| Score | Mr(calc):   | Delta     | Sequence                    |
|-------|-------------|-----------|-----------------------------|
| 26.0  | 1155.607010 | -0.001322 | <a href="#">TEQAAVAR</a>    |
| 6.9   | 1155.588394 | 0.017294  | <a href="#">VEQIEAGTPGR</a> |

Mascot: <http://www.matrixscience.com/>



# MASCOT Search Results

## Peptide View

MS/MS Fragmentation of **AQMDLSGR**

Found in **F13A\_HUMAN**, Coagulation factor XIII A chain OS=Homo sapiens GN=F13A1 PE=1 SV=4

Match to Query 24866: 1187.581248 from(594.797900,2+) rtinseconds(1736) index(20205)

Title: Locus:1.1.1.1486.9 File:"2013-07-02 CLN FXIII 30 min 2nd F 2.wiff"

Data file C:\Program Files (x86)\Matrix Science\Mascot Daemon\mgf2 FXIII 30 min 2nd\mascot\_daemon\_merge.mgf

Click mouse within plot area to zoom in by factor of two about that point

Or, Plot from  to  Da

Label all possible matches  Label matches used for scoring

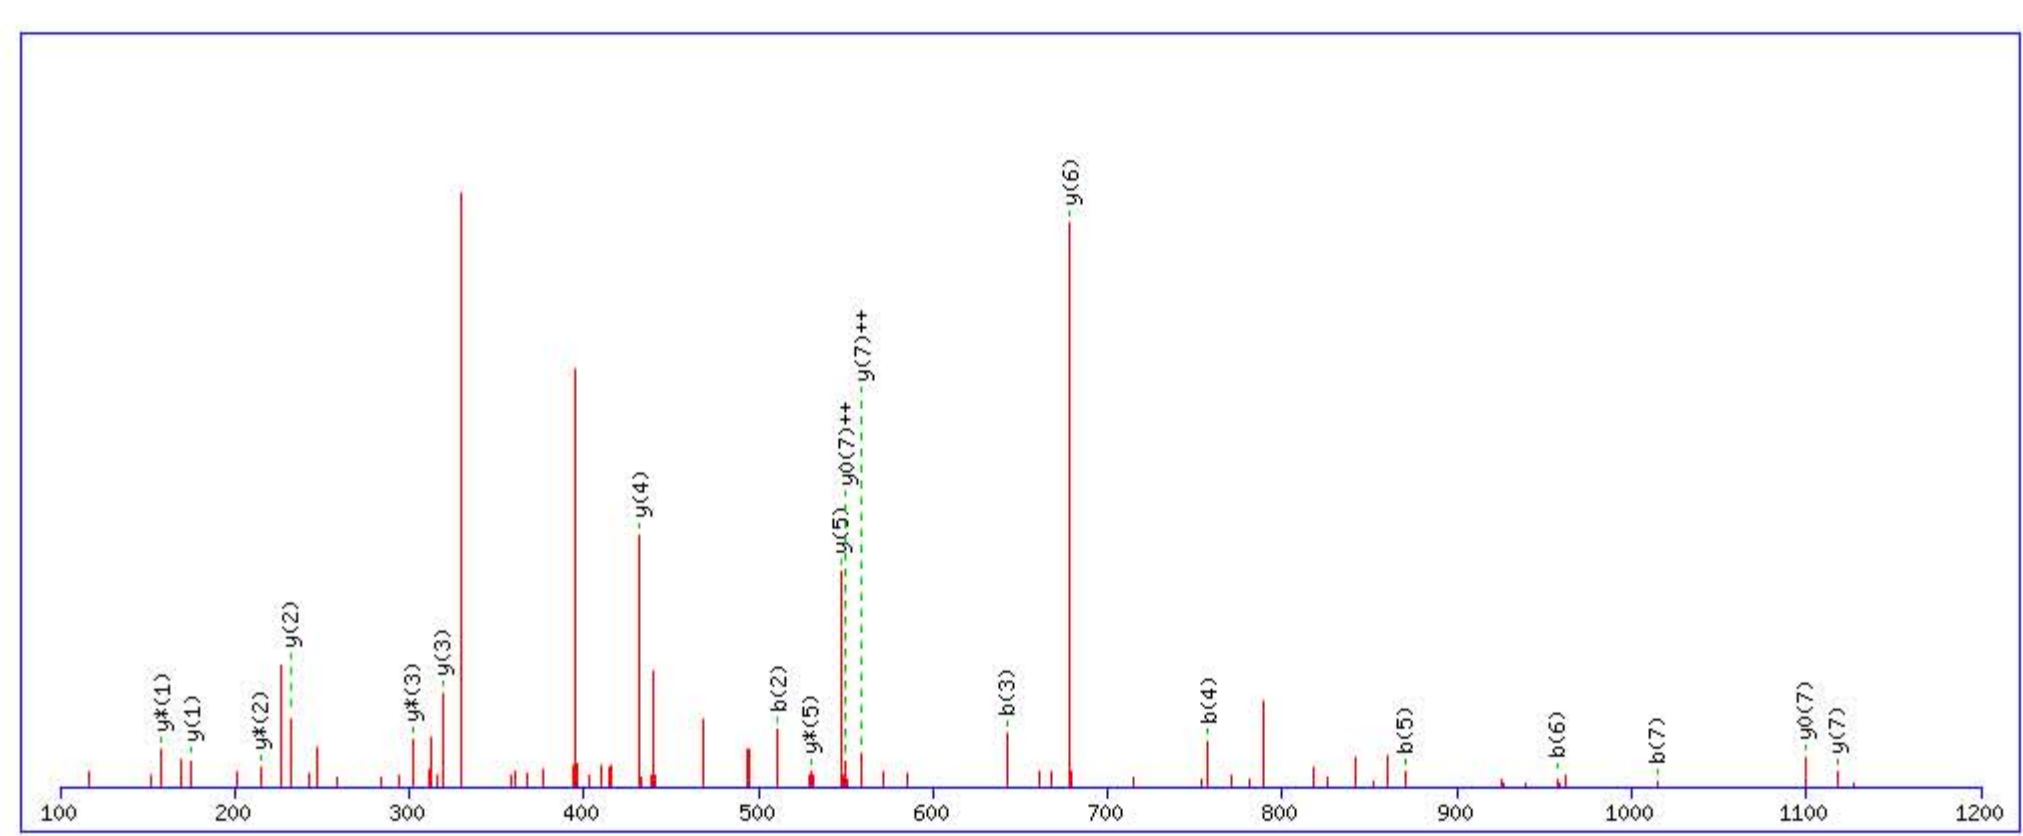

Monoisotopic mass of neutral peptide Mr(calc): 1187.579086

Fixed modifications: Carbamidomethyl (C) (apply to specified residues or termini only)

Variable modifications:

Q2 : Biotin:Thermo-21345 (Q)

Ions Score: 37 Expect: 0.0023

Matches : 20/72 fragment ions using 39 most intense peaks [\(help\)](#)

| # | b                  | b <sup>++</sup> | b <sup>*</sup> | b <sup>*++</sup> | b <sup>0</sup> | b <sup>0++</sup> | Seq. | y                  | y <sup>++</sup>   | y <sup>*</sup>    | y <sup>*++</sup> | y <sup>0</sup>     | y <sup>0++</sup>  | # |
|---|--------------------|-----------------|----------------|------------------|----------------|------------------|------|--------------------|-------------------|-------------------|------------------|--------------------|-------------------|---|
| 1 | 72.044390          | 36.525833       |                |                  |                |                  | A    |                    |                   |                   |                  |                    |                   | 8 |
| 2 | <b>511.269716</b>  | 256.138496      | 494.243167     | 247.625221       |                |                  | Q    | <b>1117.549262</b> | <b>559.278269</b> | 1100.522713       | 550.764995       | <b>1099.538697</b> | <b>550.272987</b> | 7 |
| 3 | <b>642.310201</b>  | 321.658739      | 625.283652     | 313.145464       |                |                  | M    | <b>678.323936</b>  | 339.665606        | 661.297387        | 331.152332       | 660.313371         | 330.660324        | 6 |
| 4 | <b>757.337144</b>  | 379.172210      | 740.310595     | 370.658935       | 739.326579     | 370.166927       | D    | <b>547.283451</b>  | 274.145364        | <b>530.256902</b> | 265.632089       | 529.272886         | 265.140081        | 5 |
| 5 | <b>870.421208</b>  | 435.714242      | 853.394659     | 427.200967       | 852.410643     | 426.708959       | L    | <b>432.256508</b>  | 216.631892        | 415.229959        | 208.118617       | 414.245943         | 207.626609        | 4 |
| 6 | <b>957.453236</b>  | 479.230256      | 940.426687     | 470.716981       | 939.442671     | 470.224973       | S    | <b>319.172444</b>  | 160.089860        | <b>302.145895</b> | 151.576585       | 301.161879         | 151.084577        | 3 |
| 7 | <b>1014.474700</b> | 507.740988      | 997.448151     | 499.227713       | 996.464135     | 498.735705       | G    | <b>232.140416</b>  | 116.573846        | <b>215.113867</b> | 108.060571       |                    |                   | 2 |
| 8 |                    |                 |                |                  |                |                  | R    | <b>175.118952</b>  | 88.063114         | <b>158.092403</b> | 79.549839        |                    |                   | 1 |

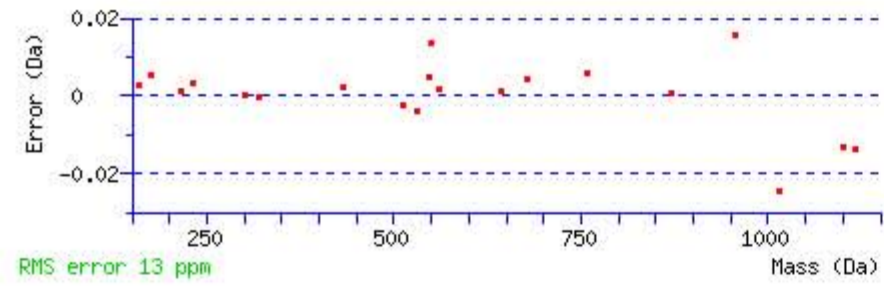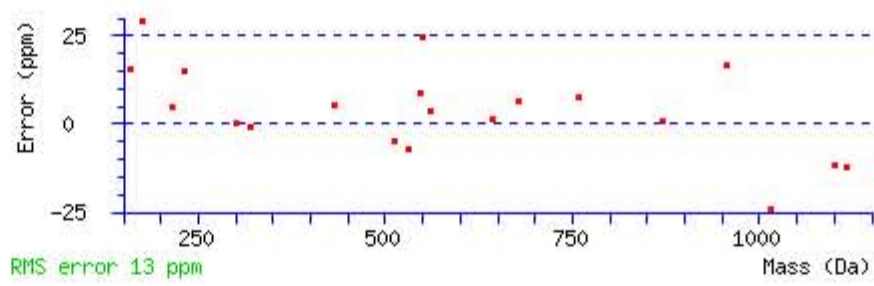

NCBI BLAST search of **AQMDLSGR**

(Parameters: blastp, nr protein database, expect=20000, no filter, PAM30)

Other BLAST [web gateways](#)

## All matches to this query

| Score | Mr(calc):   | Delta     | Sequence                    |
|-------|-------------|-----------|-----------------------------|
| 37.2  | 1187.579086 | 0.002162  | <a href="#">AQMDLSGR</a>    |
| 8.5   | 1187.578201 | 0.003047  | <a href="#">SSLENEPSLGR</a> |
| 8.0   | 1187.568344 | 0.012904  | <a href="#">DHGFKVSADGR</a> |
| 4.1   | 1187.579086 | 0.002162  | <a href="#">QAAEVMGR</a>    |
| 4.0   | 1187.568314 | 0.012934  | <a href="#">QREDIWEGR</a>   |
| 3.6   | 1187.564270 | 0.016978  | <a href="#">REERAEQDR</a>   |
| 3.4   | 1187.575714 | 0.005534  | <a href="#">YQDAAGPR</a>    |
| 2.0   | 1187.596832 | -0.015584 | <a href="#">TLNGAEMAPIR</a> |
| 1.7   | 1187.593475 | -0.012227 | <a href="#">AESFPNTPLGR</a> |
| 0.3   | 1187.564255 | 0.016993  | <a href="#">ARREEENR</a>    |



# MASCOT Search Results

## Peptide View

MS/MS Fragmentation of **FQEGQEEER**

Found in **F13A\_HUMAN**, Coagulation factor XIII A chain OS=Homo sapiens GN=F13A1 PE=1 SV=4

Match to Query 34549: 1461.650308 from(731.832430,2+) rtinseconds(1450) index(52214)

Title: Locus:1.1.1.2991.13 File:"2013-07-02 CLN FXIII 30 min 2nd F 4.wiff"

Data file C:\Program Files (x86)\Matrix Science\Mascot Daemon\mgf2 FXIII 30 min 2nd\mascot\_daemon\_merge.mgf

Click mouse within plot area to zoom in by factor of two about that point

Or, Plot from  to  Da

Label all possible matches  Label matches used for scoring

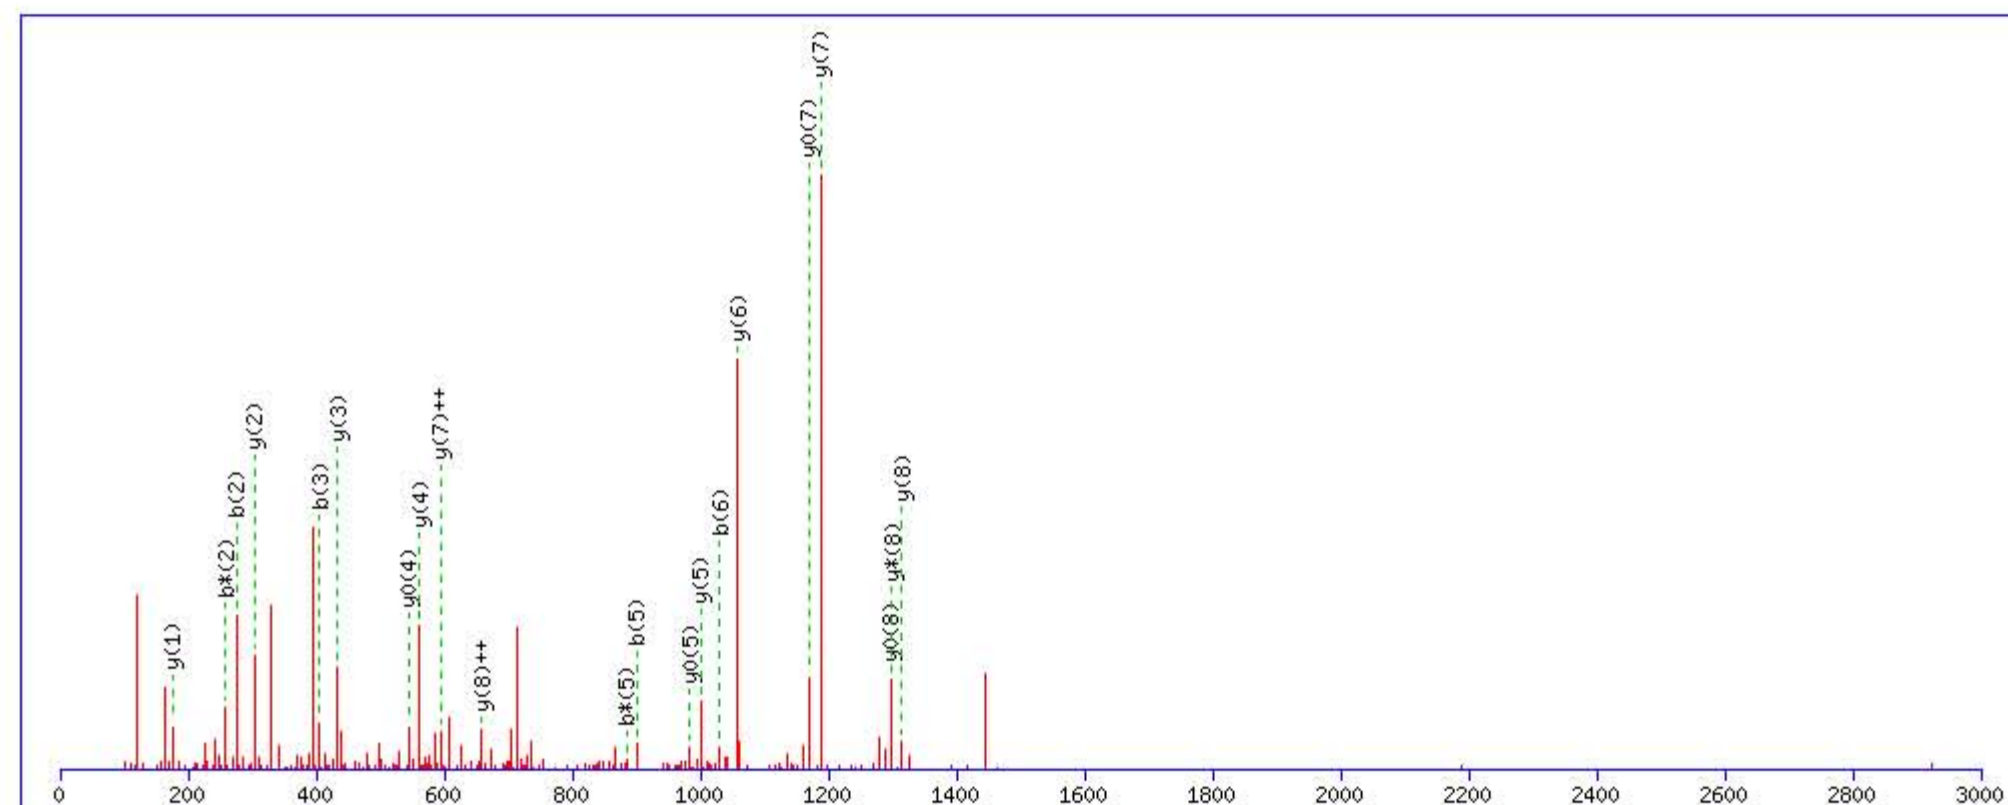

Monoisotopic mass of neutral peptide Mr(calc): 1461.655807

Fixed modifications: Carbamidomethyl (C) (apply to specified residues or termini only)

Variable modifications:

Q5 : Biotin:Thermo-21345 (Q)

Ions Score: 46 Expect: 0.00014

Matches : 21/88 fragment ions using 41 most intense peaks [\(help\)](#)

| # | b                  | b <sup>++</sup> | b <sup>+</sup>    | b <sup>+++</sup> | b <sup>0</sup> | b <sup>0++</sup> | Seq. | y                  | y <sup>++</sup>   | y <sup>+</sup>     | y <sup>+++</sup> | y <sup>0</sup>     | y <sup>0++</sup> | # |
|---|--------------------|-----------------|-------------------|------------------|----------------|------------------|------|--------------------|-------------------|--------------------|------------------|--------------------|------------------|---|
| 1 | 148.075690         | 74.541483       |                   |                  |                |                  | F    |                    |                   |                    |                  |                    |                  | 9 |
| 2 | <b>276.134268</b>  | 138.570772      | <b>259.107719</b> | 130.057497       |                |                  | Q    | <b>1315.594692</b> | 658.300984        | <b>1298.568143</b> | 649.787710       | <b>1297.584127</b> | 649.295702       | 8 |
| 3 | <b>405.176861</b>  | 203.092068      | 388.150312        | 194.578794       | 387.166296     | 194.086786       | E    | <b>1187.536114</b> | <b>594.271695</b> | 1170.509565        | 585.758421       | <b>1169.525549</b> | 585.266413       | 7 |
| 4 | 462.198325         | 231.602800      | 445.171776        | 223.089526       | 444.187760     | 222.597518       | G    | <b>1058.493521</b> | 529.750399        | 1041.466972        | 521.237124       | 1040.482956        | 520.745116       | 6 |
| 5 | <b>901.423651</b>  | 451.215464      | <b>884.397102</b> | 442.702189       | 883.413086     | 442.210181       | Q    | <b>1001.472057</b> | 501.239667        | 984.445508         | 492.726392       | <b>983.461492</b>  | 492.234384       | 5 |
| 6 | <b>1030.466244</b> | 515.736760      | 1013.439695       | 507.223485       | 1012.455679    | 506.731477       | E    | <b>562.246731</b>  | 281.627004        | 545.220182         | 273.113729       | <b>544.236166</b>  | 272.621721       | 4 |
| 7 | 1159.508837        | 580.258057      | 1142.482288       | 571.744782       | 1141.498272    | 571.252774       | E    | <b>433.204138</b>  | 217.105707        | 416.177589         | 208.592433       | 415.193573         | 208.100425       | 3 |
| 8 | 1288.551430        | 644.779353      | 1271.524881       | 636.266079       | 1270.540865    | 635.774071       | E    | <b>304.161545</b>  | 152.584411        | 287.134996         | 144.071136       | 286.150980         | 143.579128       | 2 |
| 9 |                    |                 |                   |                  |                |                  | R    | <b>175.118952</b>  | 88.063114         | 158.092403         | 79.549839        |                    |                  | 1 |

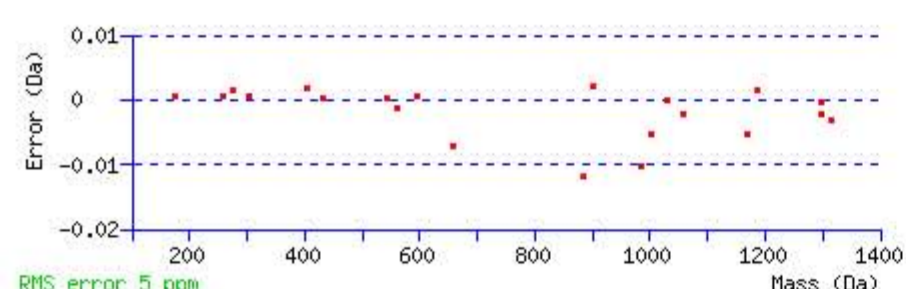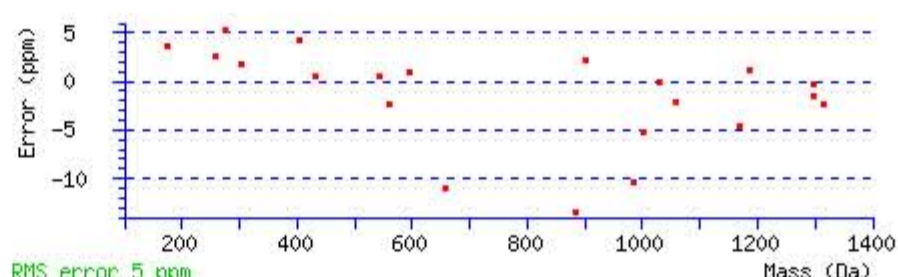

NCBI BLAST search of **FQEGQEEER**

(Parameters: blastp, nr protein database, expect=20000, no filter, PAM30)

Other BLAST [web gateways](#)

All matches to this query

| Score | Mr(calc):   | Delta     | Sequence                      |
|-------|-------------|-----------|-------------------------------|
| 46.4  | 1461.655807 | -0.005499 | <a href="#">FQEGQEEER</a>     |
| 11.0  | 1461.640564 | 0.009744  | <a href="#">NSGTQSDGEEK</a>   |
| 9.1   | 1461.655807 | -0.005499 | <a href="#">FQEGQEEER</a>     |
| 8.1   | 1461.648392 | 0.001916  | <a href="#">HREELSDYEER</a>   |
| 7.5   | 1461.640564 | 0.009744  | <a href="#">VMTDVAGNPEEER</a> |
| 3.4   | 1461.637161 | 0.013147  | <a href="#">ESELQWQEEER</a>   |
| 0.1   | 1461.657166 | -0.006858 | <a href="#">CSFSPWTEHRR</a>   |

Mascot: <http://www.matrixscience.com/>



# MASCOT SEARCH RESULTS

## Peptide View

MS/MS Fragmentation of **HVYGELDVQIQR**

Found in **F13A\_HUMAN**, Coagulation factor XIII A chain OS=Homo sapiens GN=F13A1 PE=1 SV=4

Match to Query 43990: 1766.908092 from(589.976640,3+) rtinseconds(1960) index(55531)

Title: Locus:1.1.1.3168.13 File:"2013-07-02 CLN FXIII 30 min 2nd F 4.wiff"

Data file C:\Program Files (x86)\Matrix Science\Mascot Daemon\mgf2 FXIII 30 min 2nd\mascot\_daemon\_merge.mgf

Click mouse within plot area to zoom in by factor of two about that point

Or, Plot from  to  Da

Label all possible matches  Label matches used for scoring

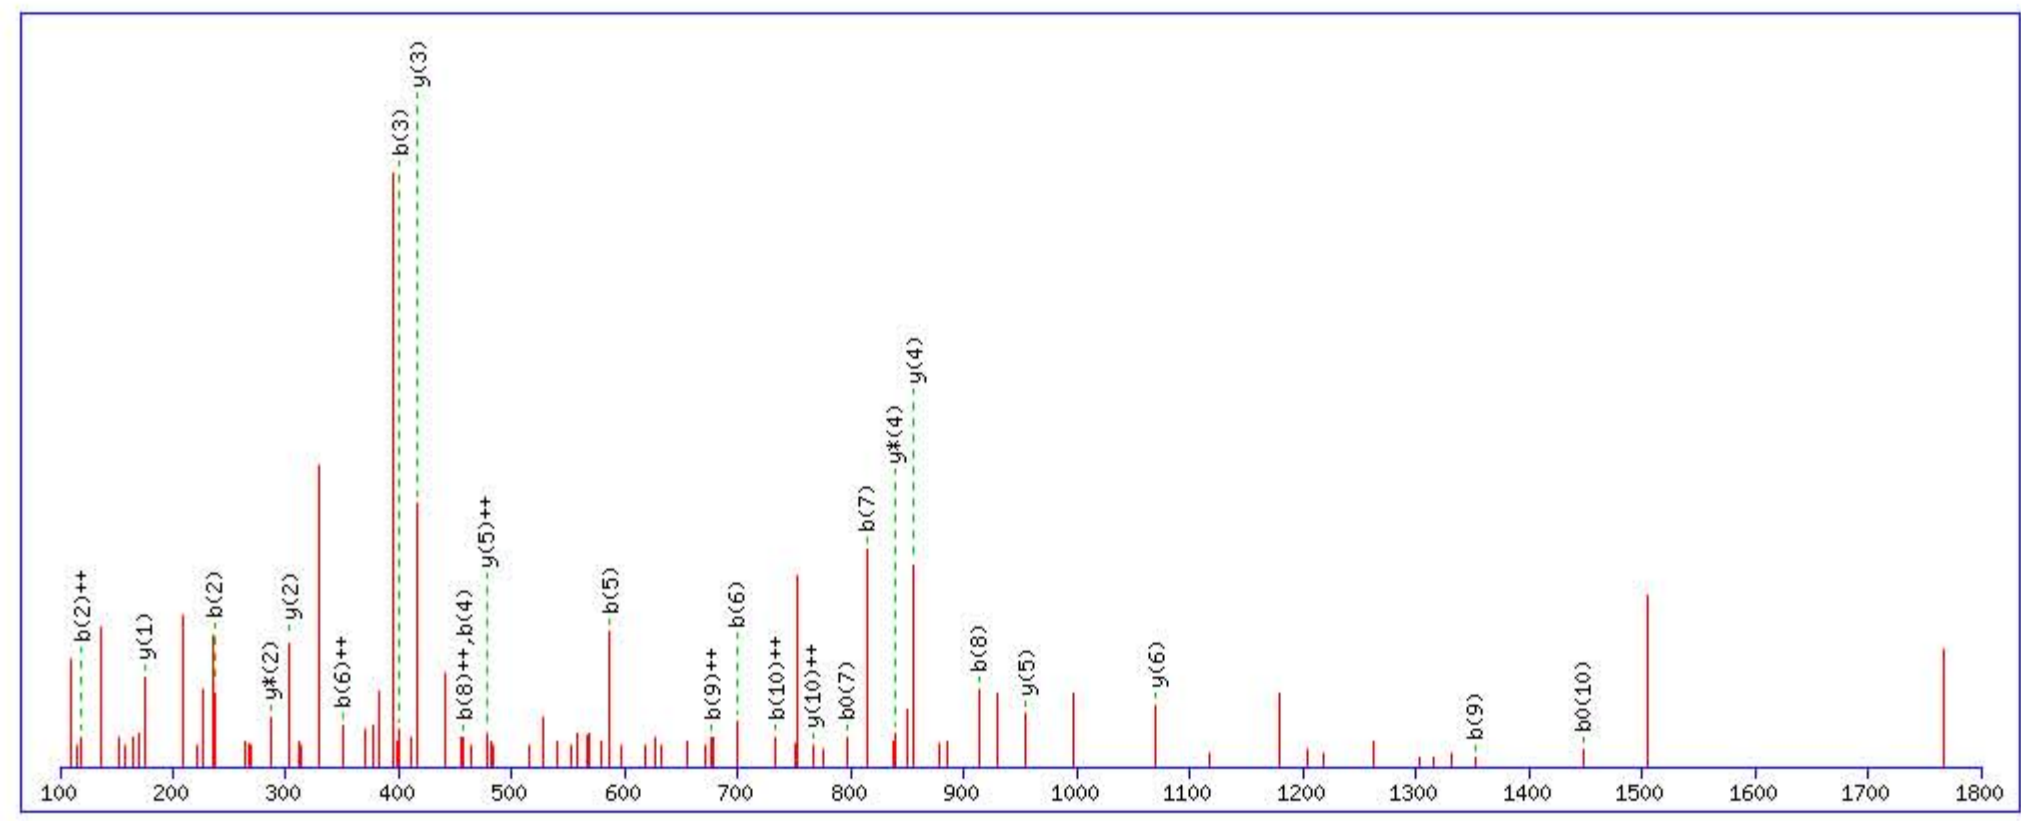

Monoisotopic mass of neutral peptide Mr(calc): 1766.913773

Fixed modifications: Carbamidomethyl (C) (apply to specified residues or termini only)

Variable modifications:

Q9 : Biotin:Thermo-21345 (Q)

Ions Score: 27 Expect: 0.0071

Matches : 25/98 fragment ions using 65 most intense peaks [\(help\)](#)

| #  | b                  | b <sup>++</sup>   | b <sup>*</sup> | b <sup>***</sup> | b <sup>0</sup>     | b <sup>0++</sup> | Seq. | y                  | y <sup>++</sup>   | y <sup>*</sup>    | y <sup>***</sup> | y <sup>0</sup> | y <sup>0++</sup> | #  |
|----|--------------------|-------------------|----------------|------------------|--------------------|------------------|------|--------------------|-------------------|-------------------|------------------|----------------|------------------|----|
| 1  | 138.066188         | 69.536732         |                |                  |                    |                  | H    |                    |                   |                   |                  |                |                  | 12 |
| 2  | <b>237.134602</b>  | <b>119.070939</b> |                |                  |                    |                  | V    | 1630.862141        | 815.934708        | 1613.835592       | 807.421434       | 1612.851576    | 806.929426       | 11 |
| 3  | <b>400.197931</b>  | 200.602603        |                |                  |                    |                  | Y    | 1531.793727        | <b>766.400501</b> | 1514.767178       | 757.887227       | 1513.783162    | 757.395219       | 10 |
| 4  | <b>457.219395</b>  | 229.113335        |                |                  |                    |                  | G    | 1368.730398        | 684.868837        | 1351.703849       | 676.355563       | 1350.719833    | 675.863554       | 9  |
| 5  | <b>586.261988</b>  | 293.634632        |                |                  | 568.251423         | 284.629349       | E    | 1311.708934        | 656.358105        | 1294.682385       | 647.844830       | 1293.698369    | 647.352822       | 8  |
| 6  | <b>699.346052</b>  | <b>350.176664</b> |                |                  | 681.335487         | 341.171382       | L    | 1182.666341        | 591.836808        | 1165.639792       | 583.323534       | 1164.655776    | 582.831526       | 7  |
| 7  | <b>814.372995</b>  | 407.690136        |                |                  | <b>796.362430</b>  | 398.684853       | D    | <b>1069.582277</b> | 535.294776        | 1052.555728       | 526.781502       | 1051.571712    | 526.289494       | 6  |
| 8  | <b>913.441409</b>  | <b>457.224342</b> |                |                  | 895.430844         | 448.219060       | V    | <b>954.555334</b>  | <b>477.781305</b> | 937.528785        | 469.268030       |                |                  | 5  |
| 9  | <b>1352.666735</b> | <b>676.837006</b> | 1335.640186    | 668.323731       | 1334.656170        | 667.831723       | Q    | <b>855.486920</b>  | 428.247098        | <b>838.460371</b> | 419.733823       |                |                  | 4  |
| 10 | 1465.750799        | <b>733.379037</b> | 1448.724250    | 724.865763       | <b>1447.740234</b> | 724.373755       | I    | <b>416.261594</b>  | 208.634435        | 399.235045        | 200.121160       |                |                  | 3  |
| 11 | 1593.809377        | 797.408326        | 1576.782828    | 788.895052       | 1575.798812        | 788.403044       | Q    | <b>303.177530</b>  | 152.092403        | <b>286.150981</b> | 143.579128       |                |                  | 2  |
| 12 |                    |                   |                |                  |                    |                  | R    | <b>175.118952</b>  | 88.063114         | 158.092403        | 79.549839        |                |                  | 1  |

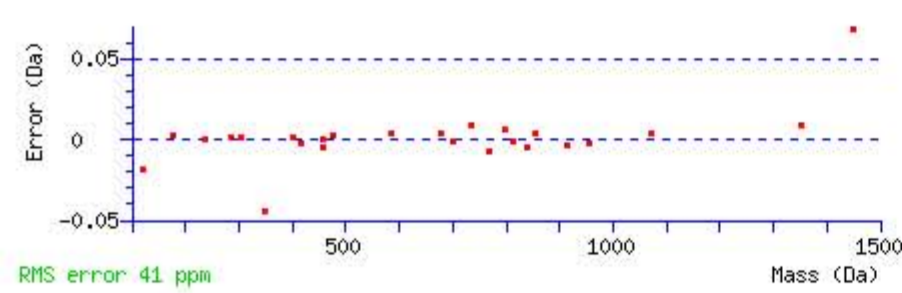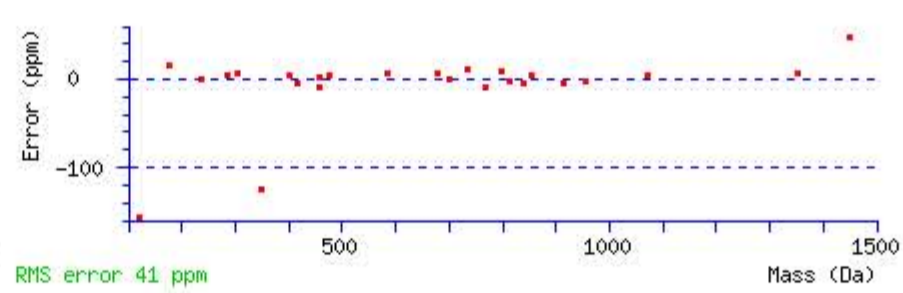

NCBI BLAST search of **HVYGELDVQIQR**

(Parameters: blastp, nr protein database, expect=20000, no filter, PAM30)

Other BLAST [web gateways](#)

All matches to this query

| Score | Mr(calc):   | Delta     | Sequence                         |
|-------|-------------|-----------|----------------------------------|
| 26.8  | 1766.913773 | -0.005681 | <a href="#">HVYGELDVQIQR</a>     |
| 11.9  | 1766.913773 | -0.005681 | <a href="#">HVYGELDVQIQR</a>     |
| 3.9   | 1766.924988 | -0.016896 | <a href="#">GNFPVEAVKMQHALAR</a> |

Mascot: <http://www.matrixscience.com/>



# MASCOT SCIENCE Mascot Search Results

## Peptide View

MS/MS Fragmentation of **FQEGQEEER**

Found in **F13A\_HUMAN**, Coagulation factor XIII A chain OS=Homo sapiens GN=F13A1 PE=1 SV=4

Match to Query 44166: 1772.815812 from(591.945880,3+) rtinseconds(1840) index(54599)

Title: Locus:1.1.1.3127.7 File:"2013-07-02 CLN FXIII 30 min 2nd F 4.wiff"

Data file C:\Program Files (x86)\Matrix Science\Mascot Daemon\mgf2 FXIII 30 min 2nd\mascot\_daemon\_merge.mgf

Click mouse within plot area to zoom in by factor of two about that point

Or, Plot from  to  Da

Label all possible matches  Label matches used for scoring

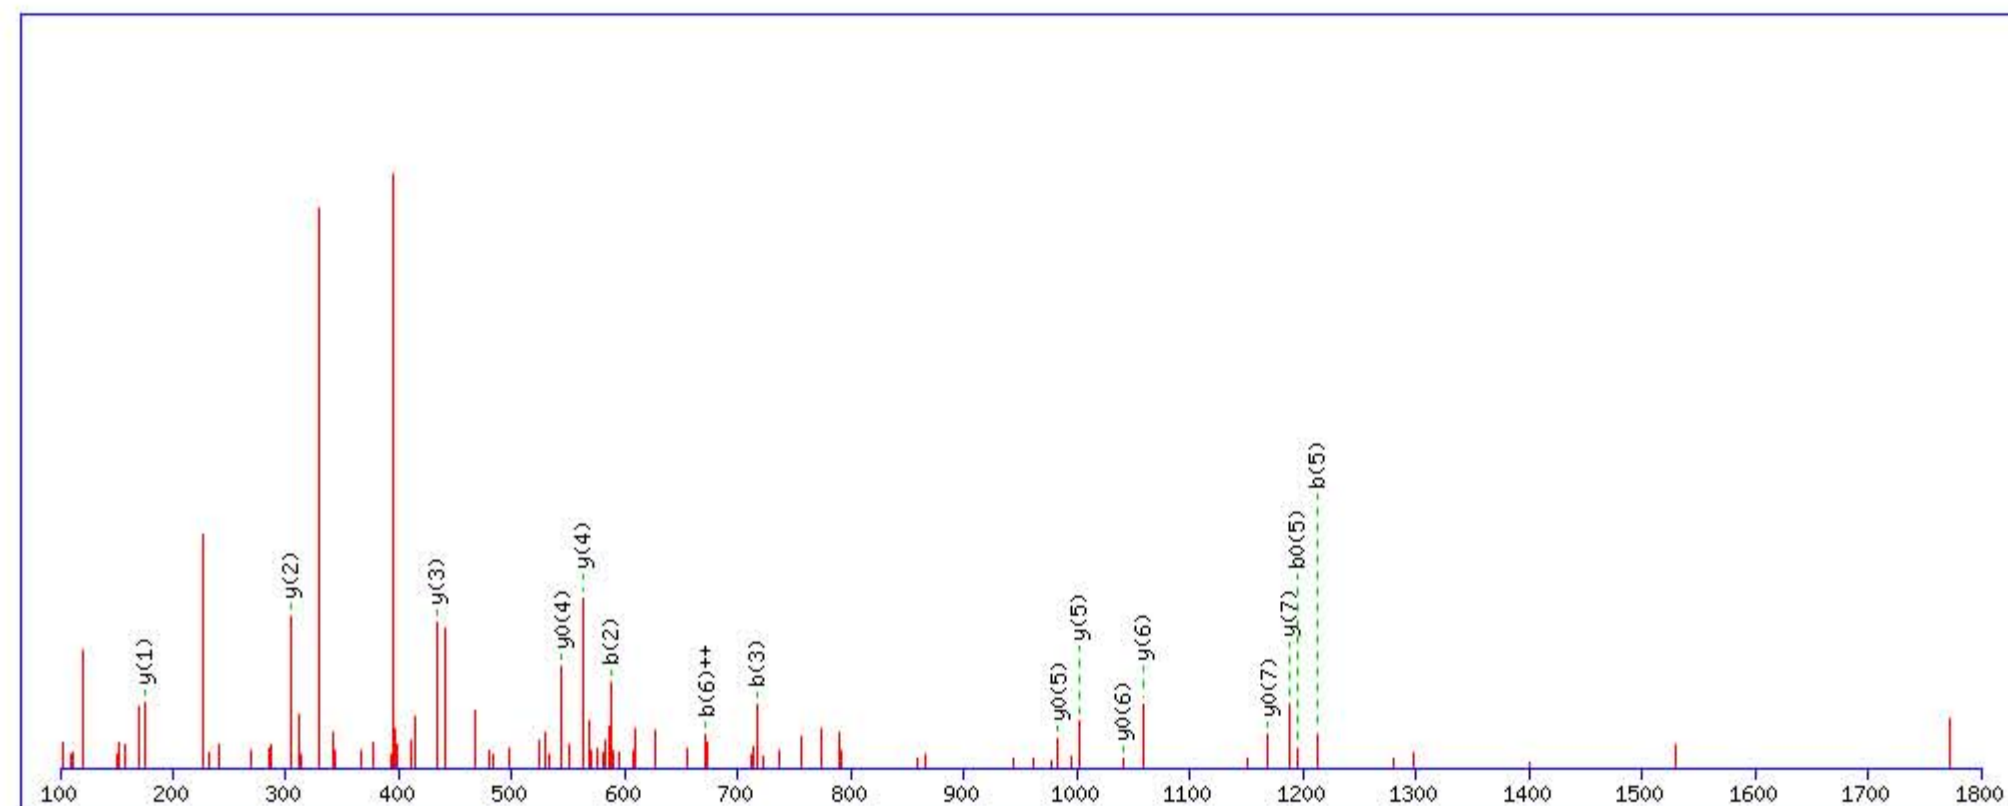

Monoisotopic mass of neutral peptide Mr(calc): 1772.822556

Fixed modifications: Carbamidomethyl (C) (apply to specified residues or termini only)

Variable modifications:

Q2 : Biotin:Thermo-21345 (Q)

Q5 : Biotin:Thermo-21345 (Q)

Ions Score: 26 Expect: 0.029

Matches : 16/88 fragment ions using 36 most intense peaks [\(help\)](#)

| # | b                  | b <sup>++</sup>   | b <sup>+</sup> | b <sup>+++</sup> | b <sup>0</sup>     | b <sup>0++</sup> | Seq. | y                  | y <sup>++</sup> | y <sup>+</sup> | y <sup>+++</sup> | y <sup>0</sup>     | y <sup>0++</sup> | # |
|---|--------------------|-------------------|----------------|------------------|--------------------|------------------|------|--------------------|-----------------|----------------|------------------|--------------------|------------------|---|
| 1 | 148.075690         | 74.541483         |                |                  |                    |                  | F    |                    |                 |                |                  |                    |                  | 9 |
| 2 | <b>587.301016</b>  | 294.154146        | 570.274467     | 285.640872       |                    |                  | Q    | 1626.761440        | 813.884358      | 1609.734891    | 805.371084       | 1608.750875        | 804.879076       | 8 |
| 3 | <b>716.343609</b>  | 358.675443        | 699.317060     | 350.162168       | 698.333044         | 349.670160       | E    | <b>1187.536114</b> | 594.271695      | 1170.509565    | 585.758421       | <b>1169.525549</b> | 585.266413       | 7 |
| 4 | 773.365073         | 387.186175        | 756.338524     | 378.672900       | 755.354508         | 378.180892       | G    | <b>1058.493521</b> | 529.750399      | 1041.466972    | 521.237124       | <b>1040.482956</b> | 520.745116       | 6 |
| 5 | <b>1212.590399</b> | 606.798837        | 1195.563850    | 598.285563       | <b>1194.579834</b> | 597.793555       | Q    | <b>1001.472057</b> | 501.239667      | 984.445508     | 492.726392       | <b>983.461492</b>  | 492.234384       | 5 |
| 6 | 1341.632992        | <b>671.320134</b> | 1324.606443    | 662.806860       | 1323.622427        | 662.314852       | E    | <b>562.246731</b>  | 281.627004      | 545.220182     | 273.113729       | <b>544.236166</b>  | 272.621721       | 4 |
| 7 | 1470.675585        | 735.841431        | 1453.649036    | 727.328156       | 1452.665020        | 726.836148       | E    | <b>433.204138</b>  | 217.105707      | 416.177589     | 208.592433       | 415.193573         | 208.100425       | 3 |
| 8 | 1599.718178        | 800.362727        | 1582.691629    | 791.849453       | 1581.707613        | 791.357445       | E    | <b>304.161545</b>  | 152.584411      | 287.134996     | 144.071136       | 286.150980         | 143.579128       | 2 |
| 9 |                    |                   |                |                  |                    |                  | R    | <b>175.118952</b>  | 88.063114       | 158.092403     | 79.549839        |                    |                  | 1 |

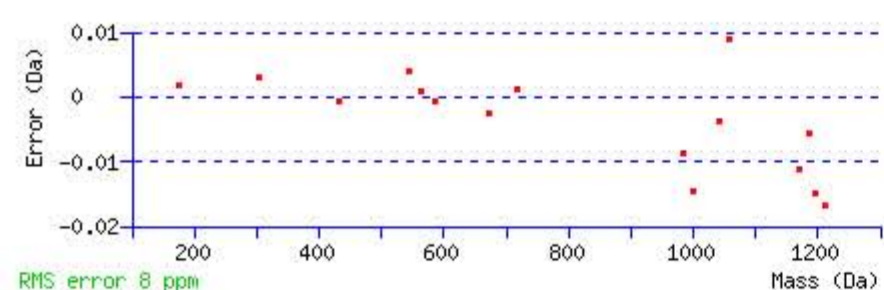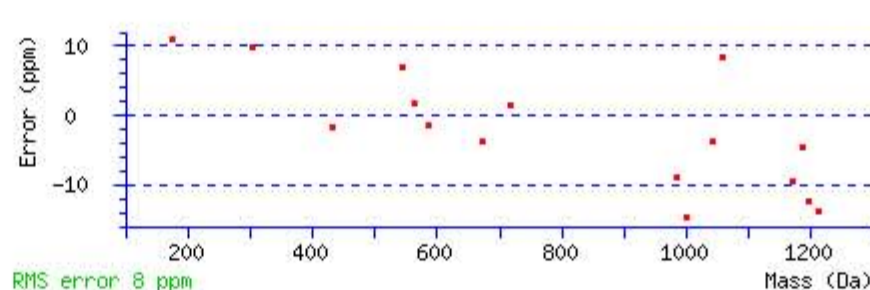

NCBI BLAST search of **FQEGQEEER**

(Parameters: blastp, nr protein database, expect=20000, no filter, PAM30)

Other BLAST [web gateways](#)

## All matches to this query

| Score | Mr(calc):   | Delta     | Sequence                         |
|-------|-------------|-----------|----------------------------------|
| 26.1  | 1772.822556 | -0.006744 | <a href="#">FQEGQEEER</a>        |
| 16.3  | 1772.803909 | 0.011903  | <a href="#">ESELQWQEEER</a>      |
| 2.8   | 1772.798752 | 0.017060  | <a href="#">HISSCMRWPGHYSR</a>   |
| 0.7   | 1772.811127 | 0.004685  | <a href="#">QHELSESCSASALQAR</a> |



# MASCOT Search Results

## Peptide View

MS/MS Fragmentation of **GTYPVPIVSELQSGK**

Found in **F13A\_HUMAN**, Coagulation factor XIII A chain OS=Homo sapiens GN=F13A1 PE=1 SV=4

Match to Query 49031: 1998.084522 from(667.035450,3+) rtinseconds(2759) index(76009)

Title: Locus:1.1.1.3493.15 File:"2013-07-02 CLN FXIII 30 min 2nd FT.wiff"

Data file C:\Program Files (x86)\Matrix Science\Mascot Daemon\mgf\2 FXIII 30 min 2nd\mascot\_daemon\_merge.mgf

Click mouse within plot area to zoom in by factor of two about that point

Or, Plot from  to  Da

Label all possible matches  Label matches used for scoring

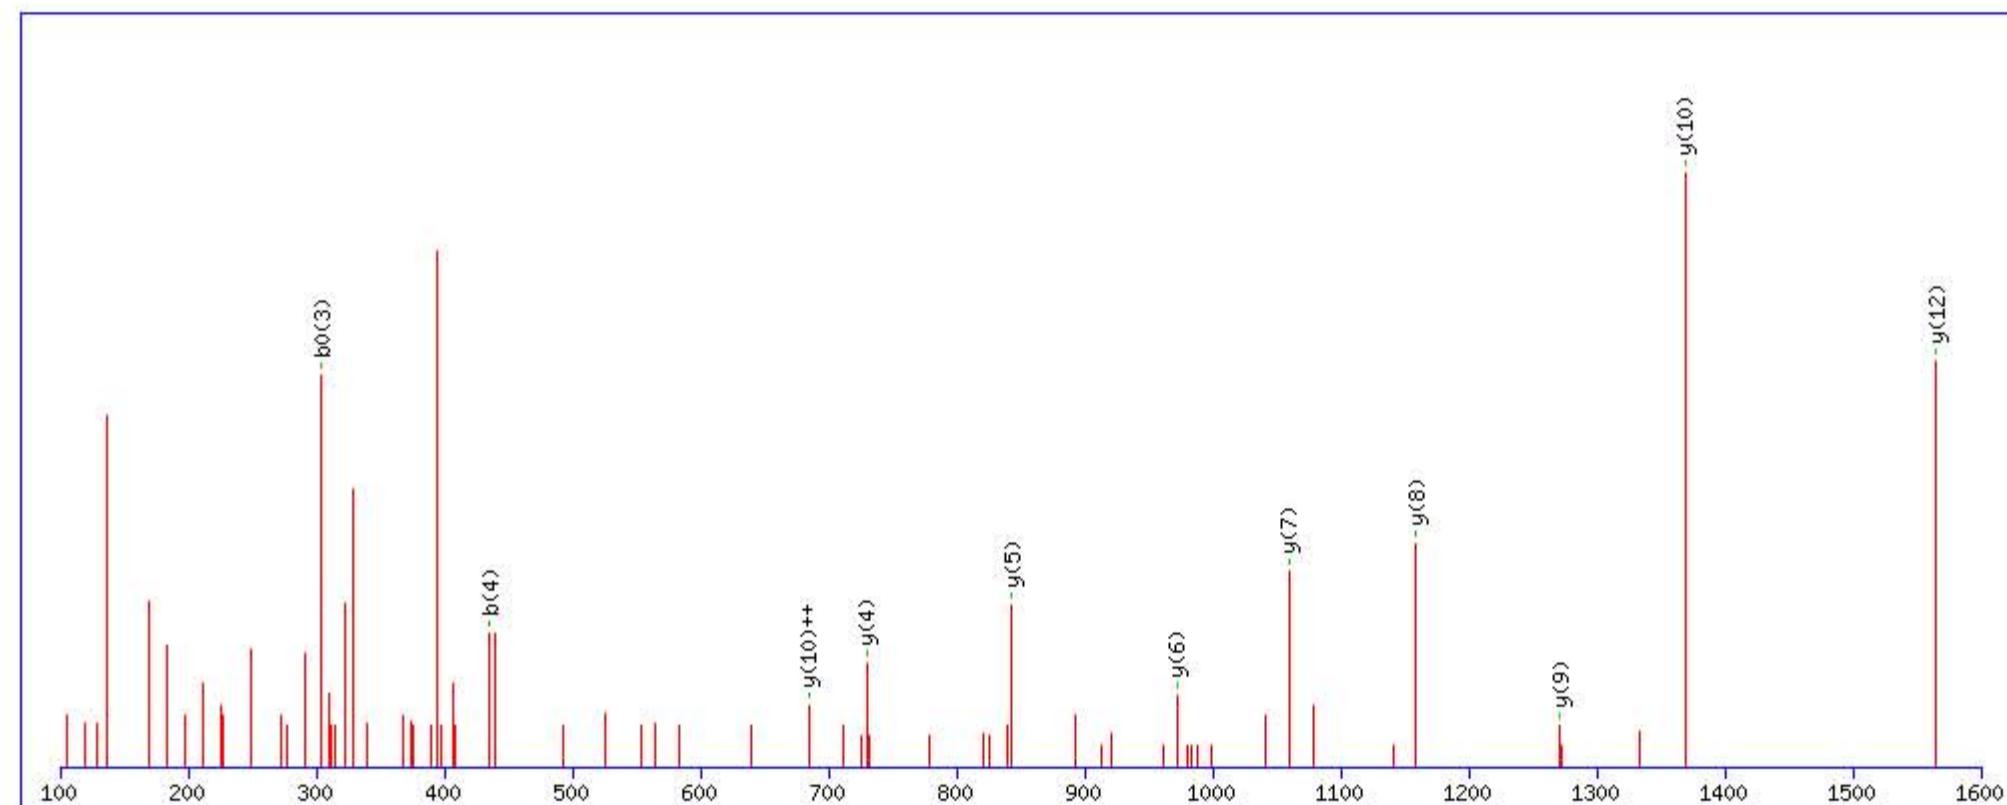

Monoisotopic mass of neutral peptide Mr(calc): 1998.085983

Fixed modifications: Carbamidomethyl (C) (apply to specified residues or termini only)

Variable modifications:

Q13 : Biotin:Thermo-21345 (Q)

Ions Score: 62 Expect: 2.4e-006

Matches : 11/150 fragment ions using 14 most intense peaks [\(help\)](#)

| #  | b                 | b <sup>++</sup> | b <sup>*</sup> | b <sup>*++</sup> | b <sup>0</sup>    | b <sup>0++</sup> | Seq.     | y                  | y <sup>++</sup>   | y <sup>*</sup> | y <sup>*++</sup> | y <sup>0</sup> | y <sup>0++</sup> | #  |
|----|-------------------|-----------------|----------------|------------------|-------------------|------------------|----------|--------------------|-------------------|----------------|------------------|----------------|------------------|----|
| 1  | 58.028740         | 29.518008       |                |                  |                   |                  | <b>G</b> |                    |                   |                |                  |                |                  | 16 |
| 2  | 159.076419        | 80.041847       |                |                  | 141.065854        | 71.036565        | <b>T</b> | 1942.071799        | 971.539538        | 1925.045250    | 963.026263       | 1924.061234    | 962.534255       | 15 |
| 3  | 322.139748        | 161.573512      |                |                  | <b>304.129183</b> | 152.568230       | <b>Y</b> | 1841.024120        | 921.015698        | 1823.997571    | 912.502424       | 1823.013555    | 912.010416       | 14 |
| 4  | <b>435.223812</b> | 218.115544      |                |                  | 417.213247        | 209.110262       | <b>I</b> | 1677.960791        | 839.484034        | 1660.934242    | 830.970759       | 1659.950226    | 830.478751       | 13 |
| 5  | 532.276576        | 266.641926      |                |                  | 514.266011        | 257.636644       | <b>P</b> | <b>1564.876727</b> | 782.942002        | 1547.850178    | 774.428727       | 1546.866162    | 773.936719       | 12 |
| 6  | 631.344990        | 316.176133      |                |                  | 613.334425        | 307.170851       | <b>V</b> | 1467.823963        | 734.415620        | 1450.797414    | 725.902345       | 1449.813398    | 725.410337       | 11 |
| 7  | 728.397754        | 364.702515      |                |                  | 710.387189        | 355.697233       | <b>P</b> | <b>1368.755549</b> | <b>684.881413</b> | 1351.729000    | 676.368138       | 1350.744984    | 675.876130       | 10 |
| 8  | 841.481818        | 421.244547      |                |                  | 823.471253        | 412.239265       | <b>I</b> | <b>1271.702785</b> | 636.355031        | 1254.676236    | 627.841756       | 1253.692220    | 627.349748       | 9  |
| 9  | 940.550232        | 470.778754      |                |                  | 922.539667        | 461.773472       | <b>V</b> | <b>1158.618721</b> | 579.812999        | 1141.592172    | 571.299724       | 1140.608156    | 570.807716       | 8  |
| 10 | 1027.582260       | 514.294768      |                |                  | 1009.571695       | 505.289486       | <b>S</b> | <b>1059.550307</b> | 530.278792        | 1042.523758    | 521.765517       | 1041.539742    | 521.273509       | 7  |
| 11 | 1156.624853       | 578.816065      |                |                  | 1138.614288       | 569.810782       | <b>E</b> | <b>972.518279</b>  | 486.762777        | 955.491730     | 478.249503       | 954.507714     | 477.757495       | 6  |
| 12 | 1269.708917       | 635.358096      |                |                  | 1251.698352       | 626.352814       | <b>L</b> | <b>843.475686</b>  | 422.241481        | 826.449137     | 413.728207       | 825.465121     | 413.236199       | 5  |
| 13 | 1708.934243       | 854.970759      | 1691.907694    | 846.457485       | 1690.923678       | 845.965477       | <b>Q</b> | <b>730.391622</b>  | 365.699449        | 713.365073     | 357.186175       | 712.381057     | 356.694167       | 4  |
| 14 | 1795.966271       | 898.486774      | 1778.939722    | 889.973499       | 1777.955706       | 889.481491       | <b>S</b> | 291.166296         | 146.086786        | 274.139747     | 137.573512       | 273.155731     | 137.081504       | 3  |
| 15 | 1852.987735       | 926.997505      | 1835.961186    | 918.484231       | 1834.977170       | 917.992223       | <b>G</b> | 204.134268         | 102.570772        | 187.107719     | 94.057497        |                |                  | 2  |
| 16 |                   |                 |                |                  |                   |                  | <b>K</b> | 147.112804         | 74.060040         | 130.086255     | 65.546765        |                |                  | 1  |

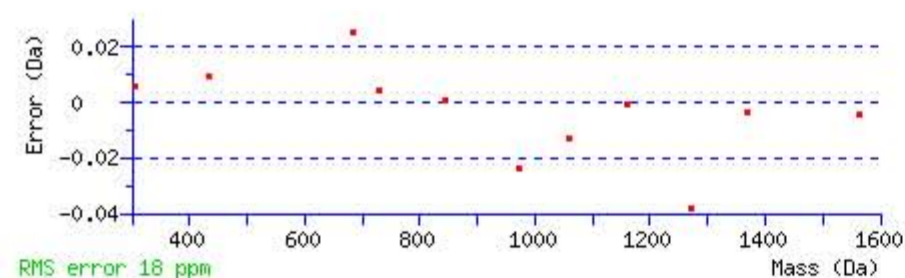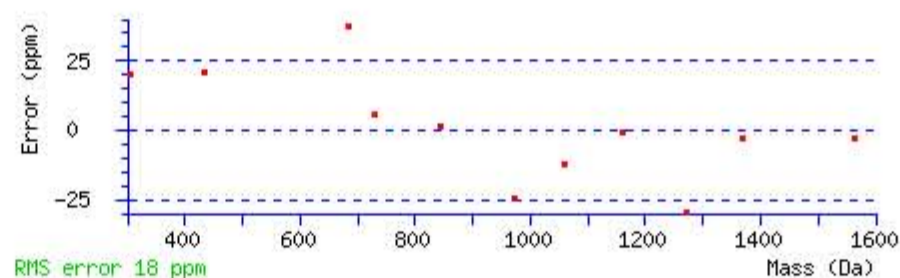

NCBI BLAST search of **GTYPVPIVSELQSGK**

(Parameters: blastp, nr protein database, expect=20000, no filter, PAM30)

Other BLAST [web gateways](#)

### All matches to this query

| Score | Mr(calc):   | Delta     | Sequence                            |
|-------|-------------|-----------|-------------------------------------|
| 62.0  | 1998.085983 | -0.001461 | <a href="#">GTYPVPIVSELQSGK</a>     |
| 1.9   | 1998.099731 | -0.015209 | <a href="#">GDEVVVELVENGKKVTVGK</a> |



# MASCOT Search Results

## Peptide View

MS/MS Fragmentation of **GVNLQEFLNVTSVHLFK**

Found in **F13A\_HUMAN**, Coagulation factor XIII A chain OS=Homo sapiens GN=F13A1 PE=1 SV=4

Match to Query 55079: 2255.203932 from(752.741920,3+) rtinseconds(3007) index(77876)

Title: Locus:1.1.1.3578.10 File:"2013-07-02 CLN FXIII 30 min 2nd FT.wiff"

Data file C:\Program Files (x86)\Matrix Science\Mascot Daemon\mgf2 FXIII 30 min 2nd\mascot\_daemon\_merge.mgf

Click mouse within plot area to zoom in by factor of two about that point

Or, Plot from  to  Da

Label all possible matches  Label matches used for scoring

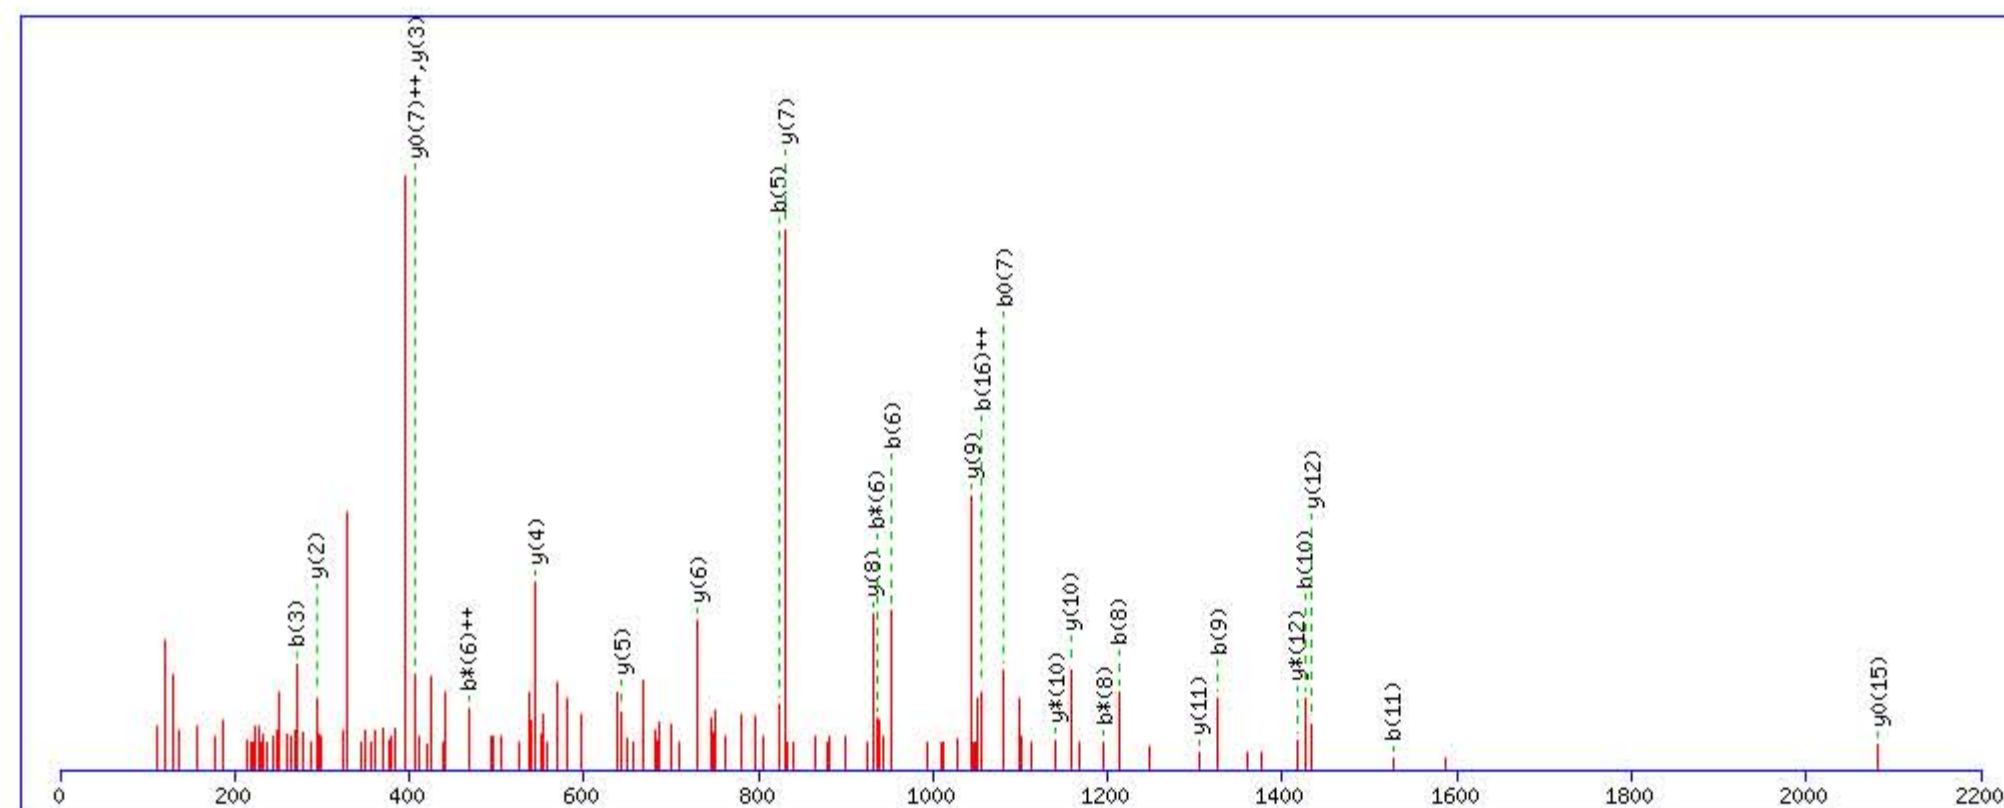

Monoisotopic mass of neutral peptide Mr(calc): 2255.213654

Fixed modifications: Carbamidomethyl (C) (apply to specified residues or termini only)

Variable modifications:

Q5 : Biotin:Thermo-21345 (Q)

Ions Score: 62 Expect: 3.2e-006

Matches : 27/168 fragment ions using 45 most intense peaks [\(help\)](#)

| #  | b                  | b <sup>++</sup>    | b <sup>*</sup>     | b <sup>*++</sup>  | b <sup>0</sup>     | b <sup>0++</sup> | Seq. | y                  | y <sup>++</sup> | y <sup>*</sup>     | y <sup>*++</sup> | y <sup>0</sup>     | y <sup>0++</sup>  | #  |
|----|--------------------|--------------------|--------------------|-------------------|--------------------|------------------|------|--------------------|-----------------|--------------------|------------------|--------------------|-------------------|----|
| 1  | 58.028740          | 29.518008          |                    |                   |                    |                  | G    |                    |                 |                    |                  |                    |                   | 17 |
| 2  | 157.097154         | 79.052215          |                    |                   |                    |                  | V    | 2199.199458        | 1100.103367     | 2182.172909        | 1091.590092      | 2181.188893        | 1091.098084       | 16 |
| 3  | <b>271.140081</b>  | 136.073679         | 254.113532         | 127.560404        |                    |                  | N    | 2100.131044        | 1050.569160     | 2083.104495        | 1042.055885      | <b>2082.120479</b> | 1041.563877       | 15 |
| 4  | 384.224145         | 192.615711         | 367.197596         | 184.102436        |                    |                  | L    | 1986.088117        | 993.547697      | 1969.061568        | 985.034422       | 1968.077552        | 984.542414        | 14 |
| 5  | <b>823.449471</b>  | 412.228374         | 806.422922         | 403.715099        |                    |                  | Q    | 1873.004053        | 937.005665      | 1855.977504        | 928.492390       | 1854.993488        | 928.000382        | 13 |
| 6  | <b>952.492064</b>  | 476.749670         | <b>935.465515</b>  | <b>468.236396</b> | 934.481499         | 467.744388       | E    | <b>1433.778727</b> | 717.393002      | <b>1416.752178</b> | 708.879727       | 1415.768162        | 708.387719        | 12 |
| 7  | 1099.560478        | 550.283877         | 1082.533929        | 541.770603        | <b>1081.549913</b> | 541.278595       | F    | <b>1304.736134</b> | 652.871705      | 1287.709585        | 644.358431       | 1286.725569        | 643.866423        | 11 |
| 8  | <b>1212.644542</b> | 606.825909         | <b>1195.617993</b> | 598.312635        | 1194.633977        | 597.820627       | L    | <b>1157.667720</b> | 579.337498      | <b>1140.641171</b> | 570.824224       | 1139.657155        | 570.332216        | 10 |
| 9  | <b>1326.687469</b> | 663.847373         | 1309.660920        | 655.334098        | 1308.676904        | 654.842090       | N    | <b>1044.583656</b> | 522.795466      | 1027.557107        | 514.282192       | 1026.573091        | 513.790184        | 9  |
| 10 | <b>1425.755883</b> | 713.381580         | 1408.729334        | 704.868305        | 1407.745318        | 704.376297       | V    | <b>930.540729</b>  | 465.774003      | 913.514180         | 457.260728       | 912.530164         | 456.768720        | 8  |
| 11 | <b>1526.803562</b> | 763.905419         | 1509.777013        | 755.392145        | 1508.792997        | 754.900137       | T    | <b>831.472315</b>  | 416.239796      | 814.445766         | 407.726521       | 813.461750         | <b>407.234513</b> | 7  |
| 12 | 1613.835590        | 807.421433         | 1596.809041        | 798.908159        | 1595.825025        | 798.416151       | S    | <b>730.424636</b>  | 365.715956      | 713.398087         | 357.202682       | 712.414071         | 356.710674        | 6  |
| 13 | 1712.904004        | 856.955640         | 1695.877455        | 848.442366        | 1694.893439        | 847.950358       | V    | <b>643.392608</b>  | 322.199942      | 626.366059         | 313.686668       |                    |                   | 5  |
| 14 | 1849.962916        | 925.485096         | 1832.936367        | 916.971822        | 1831.952351        | 916.479814       | H    | <b>544.324194</b>  | 272.665735      | 527.297645         | 264.152461       |                    |                   | 4  |
| 15 | 1963.046980        | 982.027128         | 1946.020431        | 973.513854        | 1945.036415        | 973.021846       | L    | <b>407.265282</b>  | 204.136279      | 390.238733         | 195.623004       |                    |                   | 3  |
| 16 | 2110.115394        | <b>1055.561335</b> | 2093.088845        | 1047.048060       | 2092.104829        | 1046.556052      | F    | <b>294.181218</b>  | 147.594247      | 277.154669         | 139.080973       |                    |                   | 2  |
| 17 |                    |                    |                    |                   |                    |                  | K    | 147.112804         | 74.060040       | 130.086255         | 65.546765        |                    |                   | 1  |

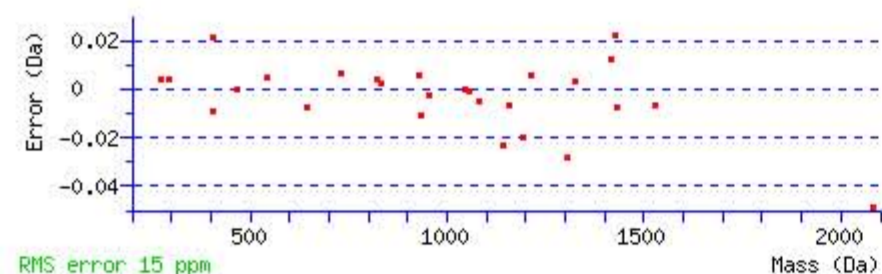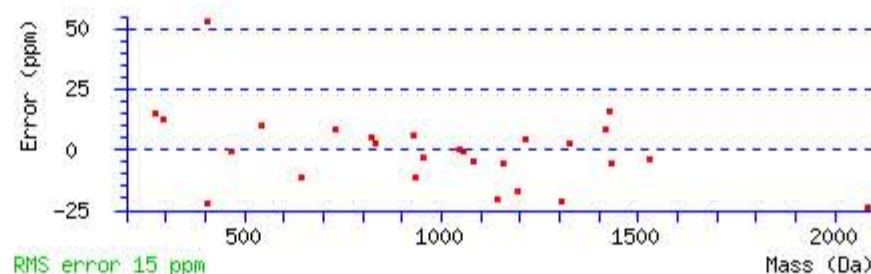

NCBI BLAST search of **GVNLQEFLNVTSVHLFK**

(Parameters: blastp, nr protein database, expect=20000, no filter, PAM30)

Other BLAST [web gateways](#)

## All matches to this query

| Score | Mr(calc):   | Delta     | Sequence                            |
|-------|-------------|-----------|-------------------------------------|
| 61.6  | 2255.213654 | -0.009722 | <a href="#">GVNLQEFLNVTSVHLFK</a>   |
| 3.0   | 2255.177032 | 0.026900  | <a href="#">RPEYRHLSTGDISAQKELR</a> |



# MASCOT Search Results

## Peptide View

MS/MS Fragmentation of **AVPPNNSNAEEDDLPTVELQGVVPR**  
 Found in **F13A\_HUMAN**, Coagulation factor XIII A chain OS=Homo sapiens GN=F13A1 PE=1 SV=4

Match to Query 64647: 2912.463456 from(729.123140,4+) rtinseconds(2488) index(74148)  
 Title: Locus:1.1.1.3400.14 File:"2013-07-02 CLN FXIII 30 min 2nd FT.wiff"  
 Data file C:\Program Files (x86)\Matrix Science\Mascot Daemon\mgf2 FXIII 30 min 2nd\mascot\_daemon\_merge.mgf

Click mouse within plot area to zoom in by factor of two about that point

Or, Plot from  to  Da

Label all possible matches  Label matches used for scoring

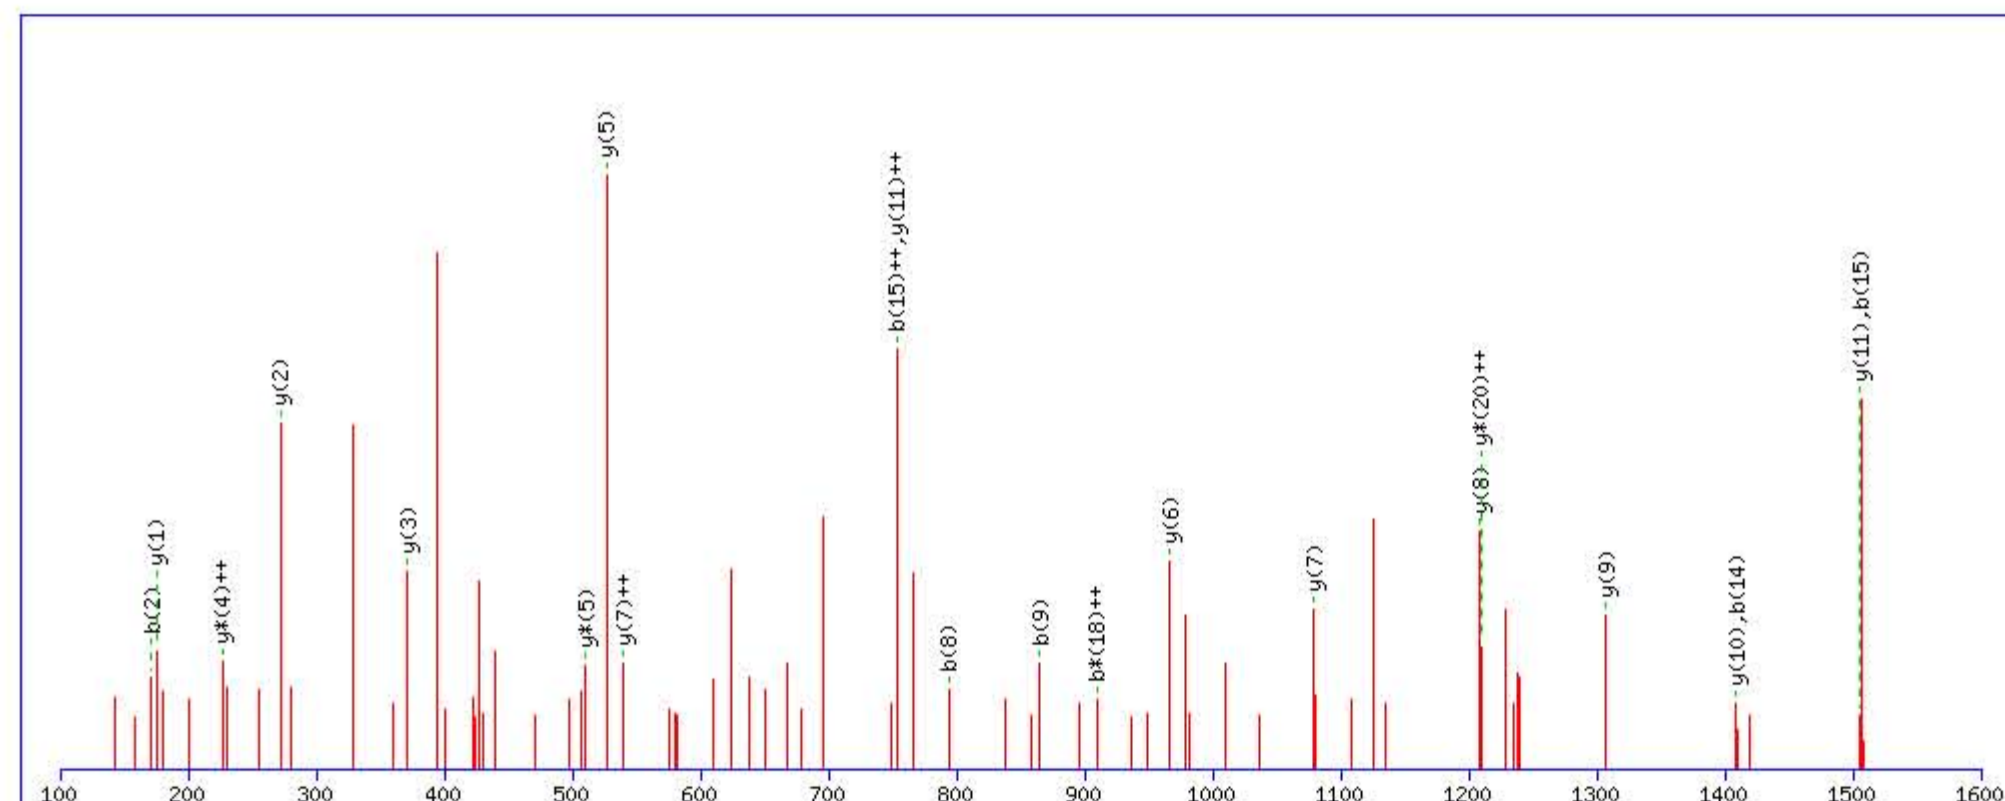

Monoisotopic mass of neutral peptide Mr(calc): 2912.470200  
 Fixed modifications: Carbamidomethyl (C) (apply to specified residues or termini only)  
 Variable modifications:  
 Q20 : Biotin:Thermo-21345 (Q)  
 Ions Score: 43 Expect: 0.00033  
 Matches : 22/254 fragment ions using 40 most intense peaks [\(help\)](#)

| #  | b                  | b <sup>++</sup>   | b <sup>*</sup> | b <sup>*++</sup>  | b <sup>0</sup> | b <sup>0++</sup> | Seq. | y                  | y <sup>++</sup>   | y <sup>*</sup>    | y <sup>*++</sup>   | y <sup>0</sup> | y <sup>0++</sup> | #  |
|----|--------------------|-------------------|----------------|-------------------|----------------|------------------|------|--------------------|-------------------|-------------------|--------------------|----------------|------------------|----|
| 1  | 72.044390          | 36.525833         |                |                   |                |                  | A    |                    |                   |                   |                    |                |                  | 25 |
| 2  | <b>171.112804</b>  | 86.060040         |                |                   |                |                  | V    | 2842.440370        | 1421.723823       | 2825.413821       | 1413.210548        | 2824.429805    | 1412.718540      | 24 |
| 3  | 268.165568         | 134.586422        |                |                   |                |                  | P    | 2743.371956        | 1372.189616       | 2726.345407       | 1363.676341        | 2725.361391    | 1363.184333      | 23 |
| 4  | 365.218332         | 183.112804        |                |                   |                |                  | P    | 2646.319192        | 1323.663234       | 2629.292643       | 1315.149959        | 2628.308627    | 1314.657951      | 22 |
| 5  | 479.261259         | 240.134267        | 462.234710     | 231.620993        |                |                  | N    | 2549.266428        | 1275.136852       | 2532.239879       | 1266.623577        | 2531.255863    | 1266.131569      | 21 |
| 6  | 593.304186         | 297.155731        | 576.277637     | 288.642457        |                |                  | N    | 2435.223501        | 1218.115388       | 2418.196952       | <b>1209.602114</b> | 2417.212936    | 1209.110106      | 20 |
| 7  | 680.336214         | 340.671745        | 663.309665     | 332.158471        | 662.325649     | 331.666463       | S    | 2321.180574        | 1161.093925       | 2304.154025       | 1152.580650        | 2303.170009    | 1152.088642      | 19 |
| 8  | <b>794.379141</b>  | 397.693209        | 777.352592     | 389.179934        | 776.368576     | 388.687926       | N    | 2234.148546        | 1117.577911       | 2217.121997       | 1109.064636        | 2216.137981    | 1108.572628      | 18 |
| 9  | <b>865.416255</b>  | 433.211766        | 848.389706     | 424.698491        | 847.405690     | 424.206483       | A    | 2120.105619        | 1060.556447       | 2103.079070       | 1052.043173        | 2102.095054    | 1051.551165      | 17 |
| 10 | 936.453369         | 468.730323        | 919.426820     | 460.217048        | 918.442804     | 459.725040       | A    | 2049.068505        | 1025.037890       | 2032.041956       | 1016.524616        | 2031.057940    | 1016.032608      | 16 |
| 11 | 1065.495962        | 533.251619        | 1048.469413    | 524.738345        | 1047.485397    | 524.246336       | E    | 1978.031391        | 989.519333        | 1961.004842       | 981.006059         | 1960.020826    | 980.514051       | 15 |
| 12 | 1180.522905        | 590.765091        | 1163.496356    | 582.251816        | 1162.512340    | 581.759808       | D    | 1848.988798        | 924.998037        | 1831.962249       | 916.484762         | 1830.978233    | 915.992754       | 14 |
| 13 | 1295.549848        | 648.278562        | 1278.523299    | 639.765288        | 1277.539283    | 639.273280       | D    | 1733.961855        | 867.484565        | 1716.935306       | 858.971291         | 1715.951290    | 858.479283       | 13 |
| 14 | <b>1408.633912</b> | 704.820594        | 1391.607363    | 696.307320        | 1390.623347    | 695.815312       | L    | 1618.934912        | 809.971094        | 1601.908363       | 801.457819         | 1600.924347    | 800.965811       | 12 |
| 15 | <b>1505.686676</b> | <b>753.346976</b> | 1488.660127    | 744.833702        | 1487.676111    | 744.341694       | P    | <b>1505.850848</b> | <b>753.429062</b> | 1488.824299       | 744.915787         | 1487.840283    | 744.423779       | 11 |
| 16 | 1606.734355        | 803.870816        | 1589.707806    | 795.357541        | 1588.723790    | 794.865533       | T    | <b>1408.798084</b> | 704.902680        | 1391.771535       | 696.389405         | 1390.787519    | 695.897397       | 10 |
| 17 | 1705.802769        | 853.405023        | 1688.776220    | 844.891748        | 1687.792204    | 844.399740       | V    | <b>1307.750405</b> | 654.378840        | 1290.723856       | 645.865566         | 1289.739840    | 645.373558       | 9  |
| 18 | 1834.845362        | 917.926319        | 1817.818813    | <b>909.413045</b> | 1816.834797    | 908.921037       | E    | <b>1208.681991</b> | 604.844633        | 1191.655442       | 596.331359         | 1190.671426    | 595.839351       | 8  |
| 19 | 1947.929426        | 974.468351        | 1930.902877    | 965.955077        | 1929.918861    | 965.463069       | L    | <b>1079.639398</b> | <b>540.323337</b> | 1062.612849       | 531.810062         |                |                  | 7  |
| 20 | 2387.154752        | 1194.081014       | 2370.128203    | 1185.567739       | 2369.144187    | 1185.075731      | Q    | <b>966.555334</b>  | 483.781305        | 949.528785        | 475.268030         |                |                  | 6  |
| 21 | 2444.176216        | 1222.591746       | 2427.149667    | 1214.078471       | 2426.165651    | 1213.586463      | G    | <b>527.330008</b>  | 264.168642        | <b>510.303459</b> | 255.655367         |                |                  | 5  |
| 22 | 2543.244630        | 1272.125953       | 2526.218081    | 1263.612678       | 2525.234065    | 1263.120670      | V    | 470.308544         | 235.657910        | 453.281995        | <b>227.144635</b>  |                |                  | 4  |
| 23 | 2642.313044        | 1321.660160       | 2625.286495    | 1313.146885       | 2624.302479    | 1312.654877      | V    | <b>371.240130</b>  | 186.123703        | 354.213581        | 177.610428         |                |                  | 3  |
| 24 | 2739.365808        | 1370.186542       | 2722.339259    | 1361.673267       | 2721.355243    | 1361.181259      | P    | <b>272.171716</b>  | 136.589496        | 255.145167        | 128.076221         |                |                  | 2  |
| 25 |                    |                   |                |                   |                |                  | R    | <b>175.118952</b>  | 88.063114         | 158.092403        | 79.549839          |                |                  | 1  |

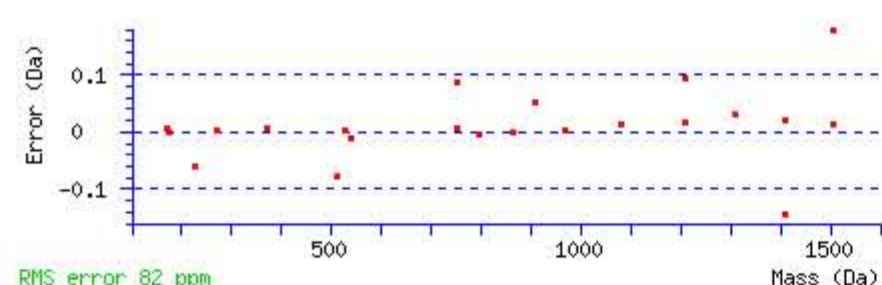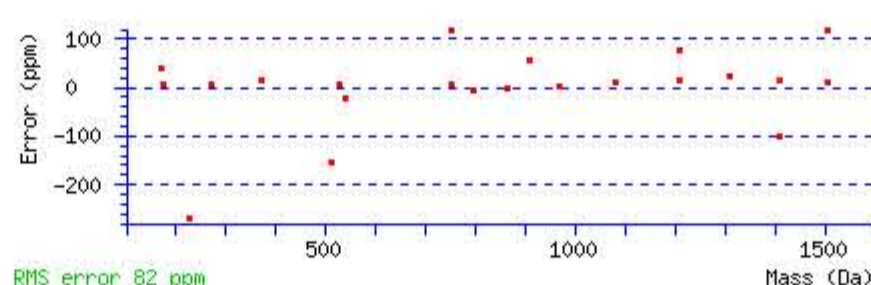

NCBI BLAST search of **AVPPNNSNAEEDDLPTVELQGVVPR**  
 (Parameters: blastp, nr protein database, expect=20000, no filter, PAM30)  
 Other BLAST [web gateways](#)

## All matches to this query

| Score | Mr(calc):   | Delta     | Sequence                                   |
|-------|-------------|-----------|--------------------------------------------|
| 43.0  | 2912.470200 | -0.006744 | <a href="#">AVPPNNSNAEEDDLPTVELQGVVPR</a>  |
| 5.5   | 2912.492661 | -0.029205 | <a href="#">TNHSSPEAQSKQTGRVLEPPVPSR</a>   |
| 4.1   | 2912.492661 | -0.029205 | <a href="#">TNHSSPEAQSKQTGRVLEPPVPSR</a>   |
| 0.3   | 2912.506577 | -0.043121 | <a href="#">VQQNMFSGSEDIAVERVISVEPLLPR</a> |
| 0.0   | 2912.482285 | -0.018829 | <a href="#">YTQDHKQMKGRPSLILDTPAMR</a>     |
| 0.0   | 2912.482285 | -0.018829 | <a href="#">YTQDHKQMKGRPSLILDTPAMR</a>     |



# MASCOT Search Results

## Peptide View

MS/MS Fragmentation of **TGLQEVEVK**

Found in **CO3\_HUMAN**, Complement C3 OS=Homo sapiens GN=C3 PE=1 SV=2

Match to Query 28711: 1312.707848 from(657.361200,2+) rtinseconds(1822) index(37453)

Title: Locus:1.1.1.2657.12 File:"2013-07-02 CLN FXIII 30 min 2nd F 3.wiff"

Data file C:\Program Files (x86)\Matrix Science\Mascot Daemon\mgf2 FXIII 30 min 2nd\mascot\_daemon\_merge.mgf

Click mouse within plot area to zoom in by factor of two about that point

Or, Plot from  to  Da

Label all possible matches  Label matches used for scoring

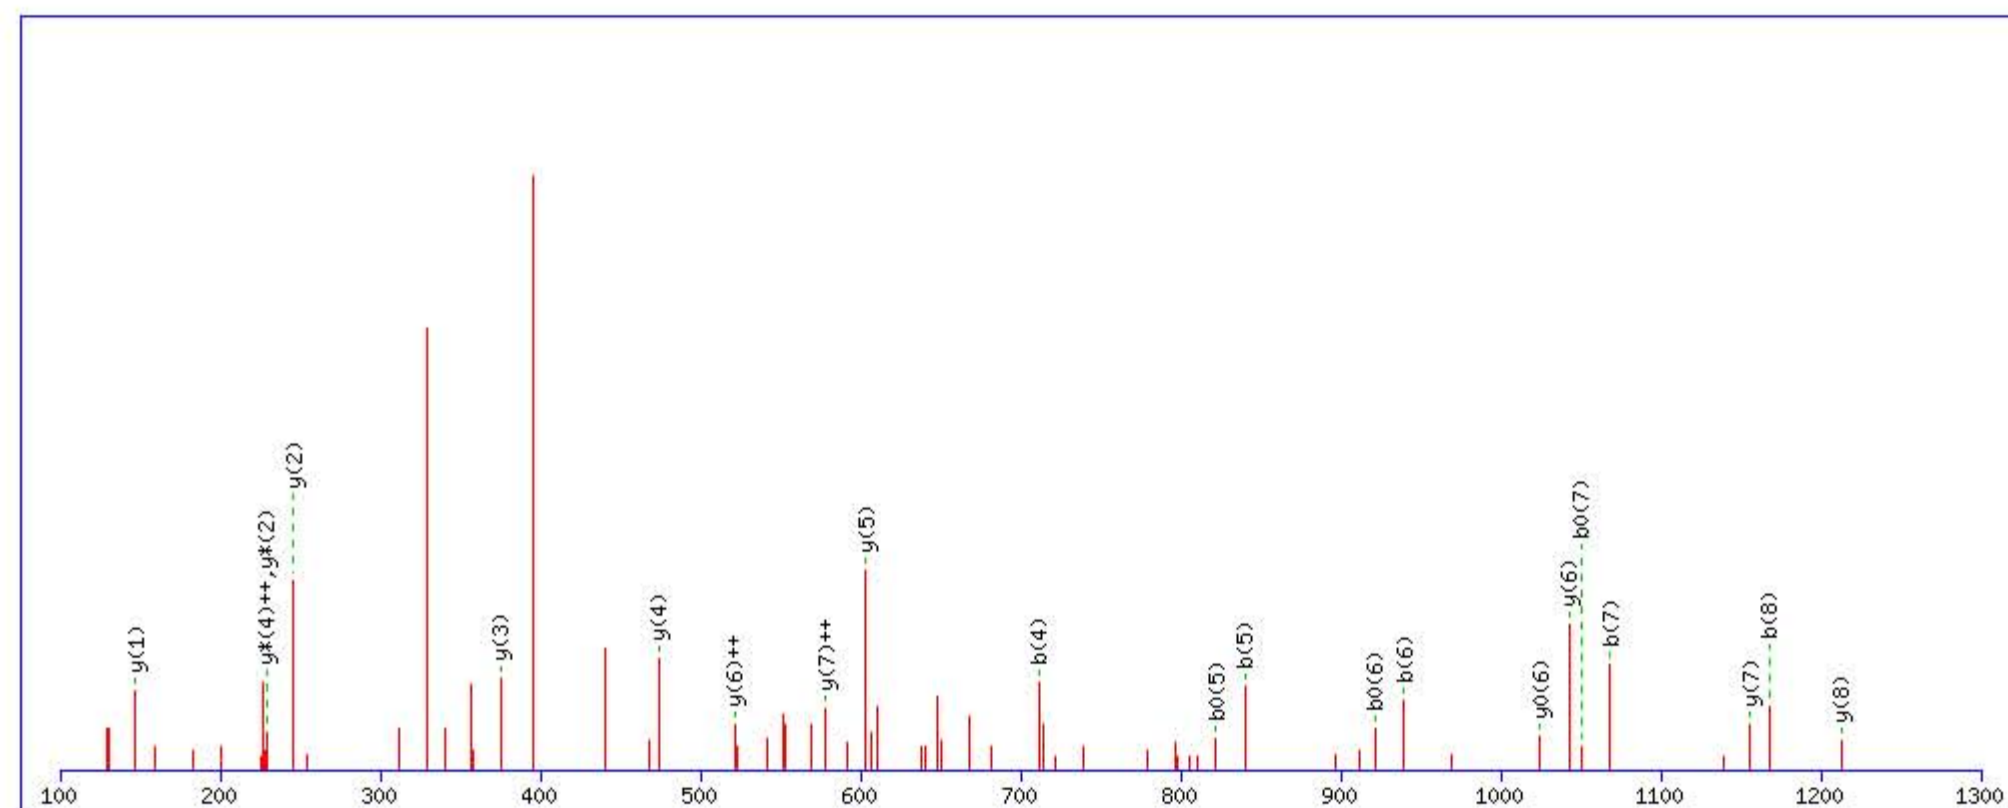

Monoisotopic mass of neutral peptide Mr(calc): 1312.706070

Fixed modifications: Carbamidomethyl (C) (apply to specified residues or termini only)

Variable modifications:

Q4 : Biotin:Thermo-21345 (Q)

Ions Score: 55 Expect: 0.00019

Matches : 21/86 fragment ions using 33 most intense peaks [\(help\)](#)

| # | b                  | b <sup>++</sup> | b <sup>*</sup> | b <sup>*++</sup> | b <sup>0</sup>     | b <sup>0++</sup> | Seq. | y                  | y <sup>++</sup>   | y <sup>*</sup>    | y <sup>*++</sup>  | y <sup>0</sup>     | y <sup>0++</sup> | # |
|---|--------------------|-----------------|----------------|------------------|--------------------|------------------|------|--------------------|-------------------|-------------------|-------------------|--------------------|------------------|---|
| 1 | 102.054955         | 51.531116       |                |                  | 84.044390          | 42.525833        | T    |                    |                   |                   |                   |                    |                  | 9 |
| 2 | 159.076419         | 80.041847       |                |                  | 141.065854         | 71.036565        | G    | <b>1212.665672</b> | 606.836474        | 1195.639123       | 598.323200        | 1194.655107        | 597.831192       | 8 |
| 3 | 272.160483         | 136.583879      |                |                  | 254.149918         | 127.578597       | L    | <b>1155.644208</b> | <b>578.325742</b> | 1138.617659       | 569.812468        | 1137.633643        | 569.320460       | 7 |
| 4 | <b>711.385809</b>  | 356.196543      | 694.359260     | 347.683268       | 693.375244         | 347.191260       | Q    | <b>1042.560144</b> | <b>521.783710</b> | 1025.533595       | 513.270436        | <b>1024.549579</b> | 512.778428       | 6 |
| 5 | <b>840.428402</b>  | 420.717839      | 823.401853     | 412.204565       | <b>822.417837</b>  | 411.712557       | E    | <b>603.334818</b>  | 302.171047        | 586.308269        | 293.657773        | 585.324253         | 293.165765       | 5 |
| 6 | <b>939.496816</b>  | 470.252046      | 922.470267     | 461.738772       | <b>921.486251</b>  | 461.246764       | V    | <b>474.292225</b>  | 237.649751        | 457.265676        | <b>229.136476</b> | 456.281660         | 228.644468       | 4 |
| 7 | <b>1068.539409</b> | 534.773343      | 1051.512860    | 526.260068       | <b>1050.528844</b> | 525.768060       | E    | <b>375.223811</b>  | 188.115544        | 358.197262        | 179.602269        | 357.213246         | 179.110261       | 3 |
| 8 | <b>1167.607823</b> | 584.307550      | 1150.581274    | 575.794275       | 1149.597258        | 575.302267       | V    | <b>246.181218</b>  | 123.594247        | <b>229.154669</b> | 115.080973        |                    |                  | 2 |
| 9 |                    |                 |                |                  |                    |                  | K    | <b>147.112804</b>  | 74.060040         | 130.086255        | 65.546765         |                    |                  | 1 |

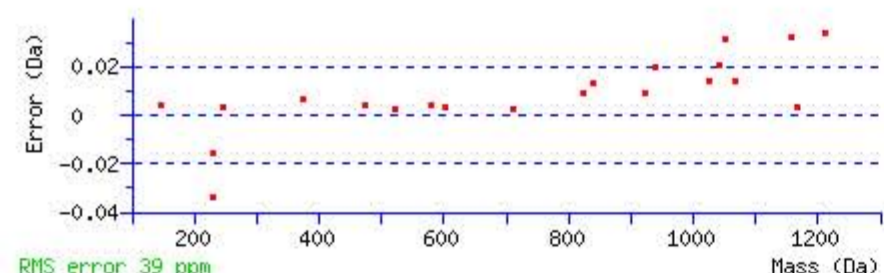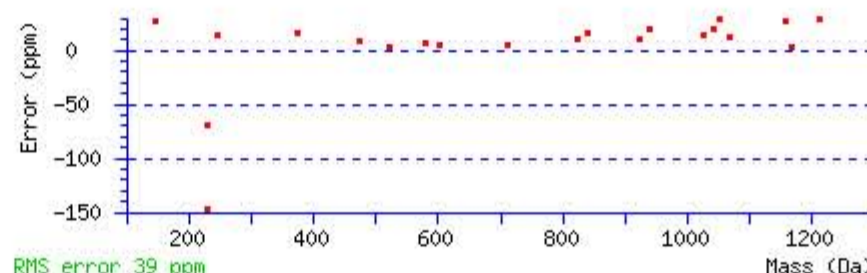

NCBI BLAST search of **TGLQEVEVK**

(Parameters: blastp, nr protein database, expect=20000, no filter, PAM30)

Other BLAST [web gateways](#)

## All matches to this query

| Score | Mr(calc):   | Delta     | Sequence                    |
|-------|-------------|-----------|-----------------------------|
| 55.3  | 1312.706070 | 0.001778  | <a href="#">TGLQEVEVK</a>   |
| 15.0  | 1312.713913 | -0.006065 | <a href="#">KVFEKYTTAAR</a> |
| 7.6   | 1312.699524 | 0.008324  | <a href="#">TIMHLMINNVK</a> |
| 5.1   | 1312.721130 | -0.013282 | <a href="#">QVEVLTNQRR</a>  |
| 3.3   | 1312.691422 | 0.016426  | <a href="#">YKELYLEEVEK</a> |
| 2.9   | 1312.717300 | -0.009452 | <a href="#">ASLQTVDIR</a>   |
| 2.5   | 1312.692139 | 0.015709  | <a href="#">DRQSQIQK</a>    |
| 2.5   | 1312.706055 | 0.001793  | <a href="#">LQSELGVEK</a>   |
| 2.4   | 1312.702682 | 0.005166  | <a href="#">IQYSLGKYDVK</a> |
| 2.4   | 1312.721115 | -0.013267 | <a href="#">KKPQRDSQAQK</a> |



# MASCOT Search Results

## Peptide View

MS/MS Fragmentation of **SGSDEVQVGQQR**

Found in **CO3\_HUMAN**, Complement C3 OS=Homo sapiens GN=C3 PE=1 SV=2

Match to Query 38964: 1599.779472 from(534.267100,3+) rtinseconds(1533) index(35784)

Title: Locus:1.1.1.2556.9 File:"2013-07-02 CLN FXIII 30 min 2nd F 3.wiff"

Data file C:\Program Files (x86)\Matrix Science\Mascot Daemon\mgf\2 FXIII 30 min 2nd\mascot\_daemon\_merge.mgf

Click mouse within plot area to zoom in by factor of two about that point

Or, Plot from  to  Da

Label all possible matches  Label matches used for scoring

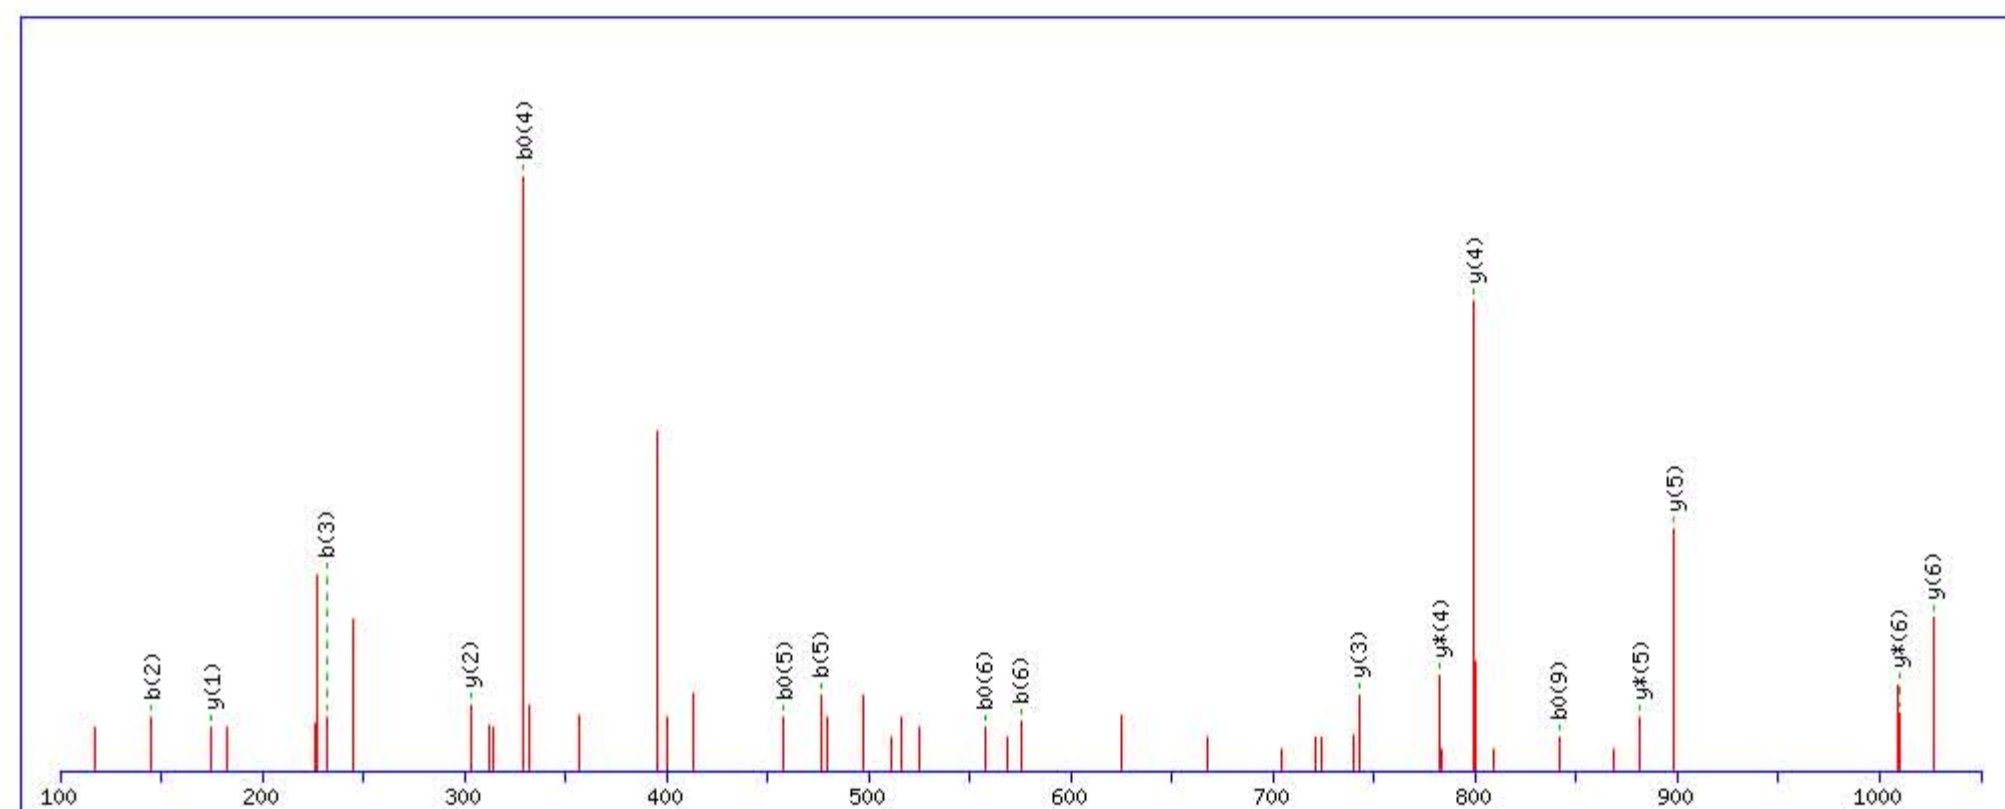

Monoisotopic mass of neutral peptide Mr(calc): 1599.767517

Fixed modifications: Carbamidomethyl (C) (apply to specified residues or termini only)

Variable modifications:

Q10 : Biotin:Thermo-21345 (Q)

Ions Score: 32 Expect: 0.0011

Matches : 17/106 fragment ions using 34 most intense peaks [\(help\)](#)

| #  | b                 | b <sup>++</sup> | b <sup>*</sup> | b <sup>***</sup> | b <sup>0</sup>    | b <sup>0++</sup> | Seq. | y                  | y <sup>++</sup> | y <sup>*</sup>     | y <sup>***</sup> | y <sup>0</sup> | y <sup>0++</sup> | #  |
|----|-------------------|-----------------|----------------|------------------|-------------------|------------------|------|--------------------|-----------------|--------------------|------------------|----------------|------------------|----|
| 1  | 88.039304         | 44.523290       |                |                  | 70.028739         | 35.518008        | S    |                    |                 |                    |                  |                |                  | 12 |
| 2  | <b>145.060768</b> | 73.034022       |                |                  | 127.050203        | 64.028740        | G    | 1513.742754        | 757.375015      | 1496.716205        | 748.861741       | 1495.732189    | 748.369733       | 11 |
| 3  | <b>232.092796</b> | 116.550036      |                |                  | 214.082231        | 107.544753       | S    | 1456.721290        | 728.864283      | 1439.694741        | 720.351009       | 1438.710725    | 719.859001       | 10 |
| 4  | 347.119739        | 174.063507      |                |                  | <b>329.109174</b> | 165.058225       | D    | 1369.689262        | 685.348269      | 1352.662713        | 676.834995       | 1351.678697    | 676.342987       | 9  |
| 5  | <b>476.162332</b> | 238.584804      |                |                  | <b>458.151767</b> | 229.579522       | E    | 1254.662319        | 627.834798      | 1237.635770        | 619.321523       | 1236.651754    | 618.829515       | 8  |
| 6  | <b>575.230746</b> | 288.119011      |                |                  | <b>557.220181</b> | 279.113729       | V    | 1125.619726        | 563.313501      | 1108.593177        | 554.800227       |                |                  | 7  |
| 7  | 703.289324        | 352.148300      | 686.262775     | 343.635026       | 685.278759        | 343.143018       | Q    | <b>1026.551312</b> | 513.779294      | <b>1009.524763</b> | 505.266020       |                |                  | 6  |
| 8  | 802.357738        | 401.682507      | 785.331189     | 393.169233       | 784.347173        | 392.677225       | V    | <b>898.492734</b>  | 449.750005      | <b>881.466185</b>  | 441.236731       |                |                  | 5  |
| 9  | 859.379202        | 430.193239      | 842.352653     | 421.679965       | <b>841.368637</b> | 421.187957       | G    | <b>799.424320</b>  | 400.215798      | <b>782.397771</b>  | 391.702524       |                |                  | 4  |
| 10 | 1298.604528       | 649.805902      | 1281.577979    | 641.292628       | 1280.593963       | 640.800620       | Q    | <b>742.402856</b>  | 371.705066      | 725.376307         | 363.191792       |                |                  | 3  |
| 11 | 1426.663106       | 713.835191      | 1409.636557    | 705.321917       | 1408.652541       | 704.829909       | Q    | <b>303.177530</b>  | 152.092403      | 286.150981         | 143.579129       |                |                  | 2  |
| 12 |                   |                 |                |                  |                   |                  | R    | <b>175.118952</b>  | 88.063114       | 158.092403         | 79.549839        |                |                  | 1  |

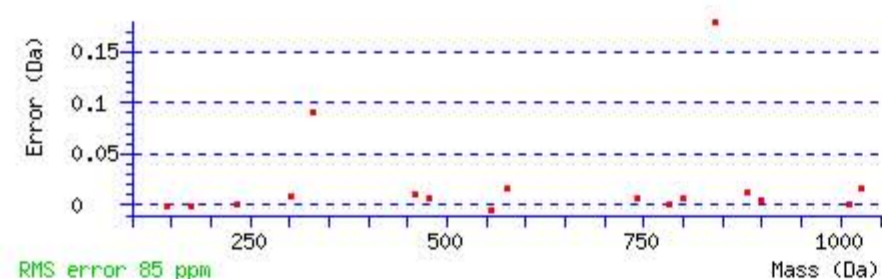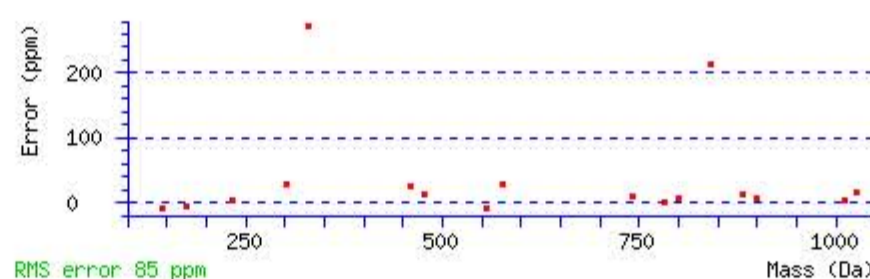

NCBI BLAST search of **SGSDEVQVGQQR**

(Parameters: blastp, nr protein database, expect=20000, no filter, PAM30)

Other BLAST [web gateways](#)

All matches to this query

| Score | Mr(calc):   | Delta     | Sequence                        |
|-------|-------------|-----------|---------------------------------|
| 32.4  | 1599.767517 | 0.011955  | <a href="#">SGSDEVQVGQQR</a>    |
| 25.3  | 1599.767517 | 0.011955  | <a href="#">SGSDEVQVGQQR</a>    |
| 9.3   | 1599.767517 | 0.011955  | <a href="#">SGSDEVQVGQQR</a>    |
| 0.8   | 1599.771515 | 0.007957  | <a href="#">YVTSAPMPEPQAPGR</a> |
| 0.6   | 1599.793961 | -0.014489 | <a href="#">VGAPAWREAAQAMAR</a> |
| 0.2   | 1599.763641 | 0.015831  | <a href="#">MLCGNSLLGYLSEK</a>  |



# MASCOT SEARCH RESULTS

## Peptide View

MS/MS Fragmentation of **KQELSEAEQATR**

Found in **CO3\_HUMAN**, Complement C3 OS=Homo sapiens GN=C3 PE=1 SV=2

Match to Query 42274: 1699.848432 from(567.623420,3+) rtinseconds(1385) index(51739)

Title: Locus:1.1.1.2968.22 File:"2013-07-02 CLN FXIII 30 min 2nd F 4.wiff"

Data file C:\Program Files (x86)\Matrix Science\Mascot Daemon\mgf2 FXIII 30 min 2nd\mascot\_daemon\_merge.mgf

Click mouse within plot area to zoom in by factor of two about that point

Or, Plot from  to  Da

Label all possible matches  Label matches used for scoring

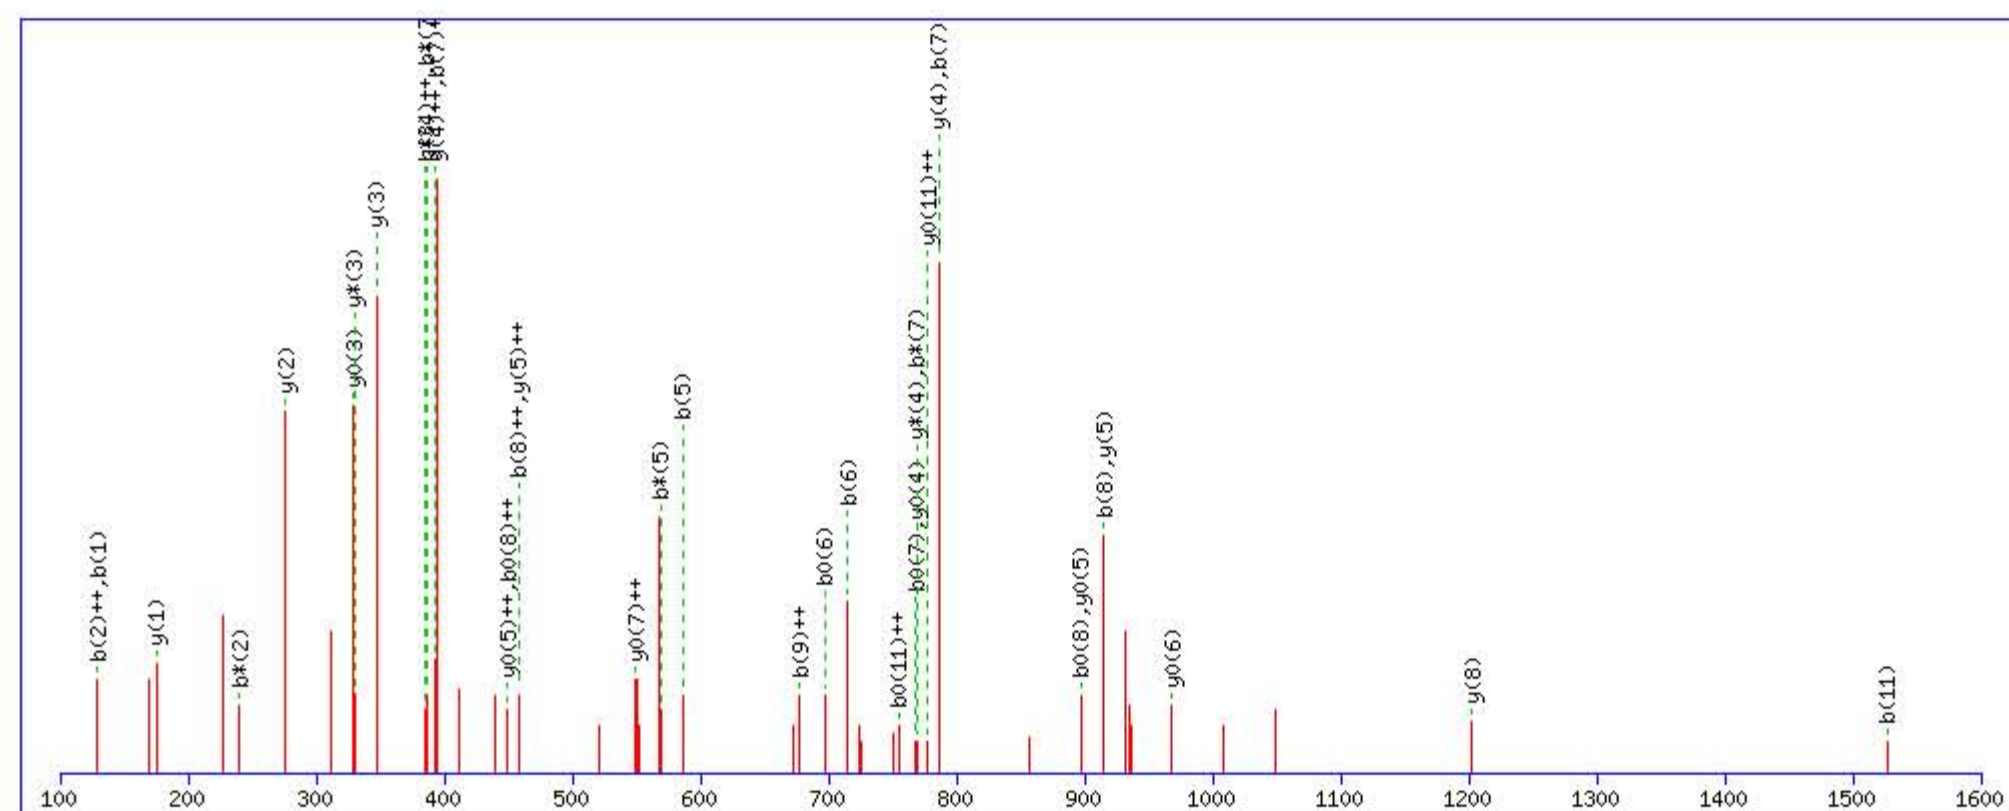

Monoisotopic mass of neutral peptide Mr(calc): 1699.856277

Fixed modifications: Carbamidomethyl (C) (apply to specified residues or termini only)

Variable modifications:

Q9 : Biotin:Thermo-21345 (Q)

Ions Score: 37 Expect: 0.0039

Matches : 38/126 fragment ions using 50 most intense peaks [\(help\)](#)

| #  | b                  | b <sup>++</sup>   | b <sup>*</sup>    | b <sup>*++</sup>  | b <sup>0</sup>    | b <sup>0++</sup>  | Seq.     | y                  | y <sup>++</sup>   | y <sup>*</sup>    | y <sup>*++</sup>  | y <sup>0</sup>    | y <sup>0++</sup>  | #         |
|----|--------------------|-------------------|-------------------|-------------------|-------------------|-------------------|----------|--------------------|-------------------|-------------------|-------------------|-------------------|-------------------|-----------|
| 1  | <b>129.102239</b>  | 65.054757         | 112.075690        | 56.541483         |                   |                   | <b>K</b> |                    |                   |                   |                   |                   |                   | <b>12</b> |
| 2  | 257.160817         | <b>129.084047</b> | <b>240.134268</b> | 120.570772        |                   |                   | <b>Q</b> | 1572.768634        | 786.887955        | 1555.742085       | 778.374681        | 1554.758069       | <b>777.882673</b> | <b>11</b> |
| 3  | <b>386.203410</b>  | 193.605343        | 369.176861        | 185.092069        | 368.192845        | 184.600061        | <b>E</b> | 1444.710056        | 722.858666        | 1427.683507       | 714.345392        | 1426.699491       | 713.853384        | <b>10</b> |
| 4  | 499.287474         | 250.147375        | 482.260925        | 241.634101        | 481.276909        | 241.142093        | <b>L</b> | 1315.667463        | 658.337370        | 1298.640914       | 649.824095        | 1297.656898       | 649.332087        | <b>9</b>  |
| 5  | <b>586.319502</b>  | 293.663389        | <b>569.292953</b> | 285.150115        | 568.308937        | 284.658107        | <b>S</b> | <b>1202.583399</b> | 601.795338        | 1185.556850       | 593.282063        | 1184.572834       | 592.790055        | <b>8</b>  |
| 6  | <b>715.362095</b>  | 358.184686        | 698.335546        | 349.671411        | <b>697.351530</b> | 349.179403        | <b>E</b> | 1115.551371        | 558.279324        | 1098.524822       | 549.766049        | 1097.540806       | <b>549.274041</b> | <b>7</b>  |
| 7  | <b>786.399209</b>  | <b>393.703243</b> | <b>769.372660</b> | <b>385.189968</b> | <b>768.388644</b> | 384.697960        | <b>A</b> | 986.508778         | 493.758027        | 969.482229        | 485.244753        | <b>968.498213</b> | 484.752745        | <b>6</b>  |
| 8  | <b>915.441802</b>  | <b>458.224539</b> | 898.415253        | 449.711265        | <b>897.431237</b> | <b>449.219257</b> | <b>E</b> | <b>915.471664</b>  | <b>458.239470</b> | 898.445115        | 449.726196        | <b>897.461099</b> | <b>449.234188</b> | <b>5</b>  |
| 9  | 1354.667128        | <b>677.837202</b> | 1337.640579       | 669.323928        | 1336.656563       | 668.831920        | <b>Q</b> | <b>786.429071</b>  | <b>393.718174</b> | <b>769.402522</b> | <b>385.204899</b> | <b>768.418506</b> | 384.712891        | <b>4</b>  |
| 10 | 1425.704242        | 713.355759        | 1408.677693       | 704.842485        | 1407.693677       | 704.350477        | <b>A</b> | <b>347.203745</b>  | 174.105510        | <b>330.177196</b> | 165.592236        | <b>329.193180</b> | 165.100228        | <b>3</b>  |
| 11 | <b>1526.751921</b> | 763.879599        | 1509.725372       | 755.366324        | 1508.741356       | <b>754.874316</b> | <b>T</b> | <b>276.166631</b>  | 138.586953        | 259.140082        | 130.073679        | 258.156066        | 129.581671        | <b>2</b>  |
| 12 |                    |                   |                   |                   |                   |                   | <b>R</b> | <b>175.118952</b>  | 88.063114         | 158.092403        | 79.549839         |                   |                   | <b>1</b>  |

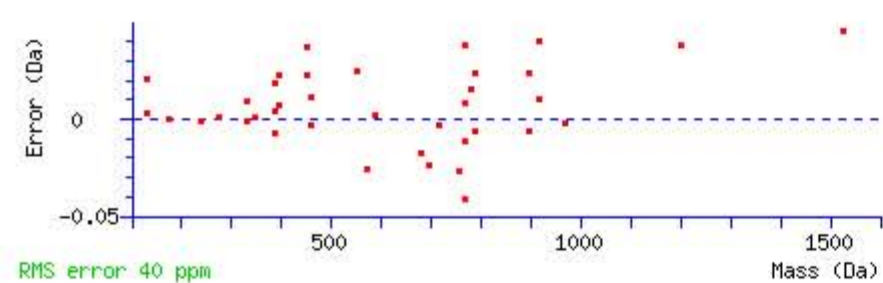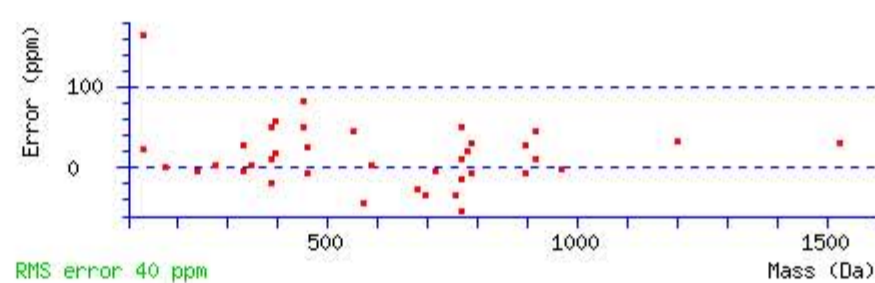

NCBI BLAST search of **KQELSEAEQATR**

(Parameters: blastp, nr protein database, expect=20000, no filter, PAM30)

Other BLAST [web gateways](#)

All matches to this query

| Score | Mr(calc):   | Delta     | Sequence                        |
|-------|-------------|-----------|---------------------------------|
| 37.1  | 1699.856277 | -0.007845 | <a href="#">KQELSEAEQATR</a>    |
| 17.6  | 1699.856277 | -0.007845 | <a href="#">KQELSEAEQATR</a>    |
| 10.8  | 1699.845932 | 0.002500  | <a href="#">QAMQEQLSK</a>       |
| 5.9   | 1699.849792 | -0.001360 | <a href="#">QEMRTTQLGPGR</a>    |
| 5.8   | 1699.845932 | 0.002500  | <a href="#">QAMQEQLSK</a>       |
| 5.4   | 1699.839874 | 0.008558  | <a href="#">QKMFQHRENK</a>      |
| 1.7   | 1699.843063 | 0.005369  | <a href="#">GKVSEGIDFVHHYGR</a> |
| 1.6   | 1699.832016 | 0.016416  | <a href="#">EPQRGMGSMGPKR</a>   |
| 1.6   | 1699.832016 | 0.016416  | <a href="#">EPQRGMGSMGPKR</a>   |
| 1.2   | 1699.846405 | 0.002027  | <a href="#">HQEVKMQAPAFRDK</a>  |



# MASCOT SCIENCE Mascot Search Results

## Peptide View

MS/MS Fragmentation of **HQQTVTIPPK**

Found in **CO3\_HUMAN**, Complement C3 OS=Homo sapiens GN=C3 PE=1 SV=2

Match to Query 44102: 1769.980452 from(591.000760,3+) rtinseconds(1894) index(37845)

Title: Locus:1.1.1.2682.18 File:"2013-07-02 CLN FXIII 30 min 2nd F 3.wiff"

Data file C:\Program Files (x86)\Matrix Science\Mascot Daemon\mgf2 FXIII 30 min 2nd\mascot\_daemon\_merge.mgf

Click mouse within plot area to zoom in by factor of two about that point

Or, Plot from  to  Da

Label all possible matches  Label matches used for scoring

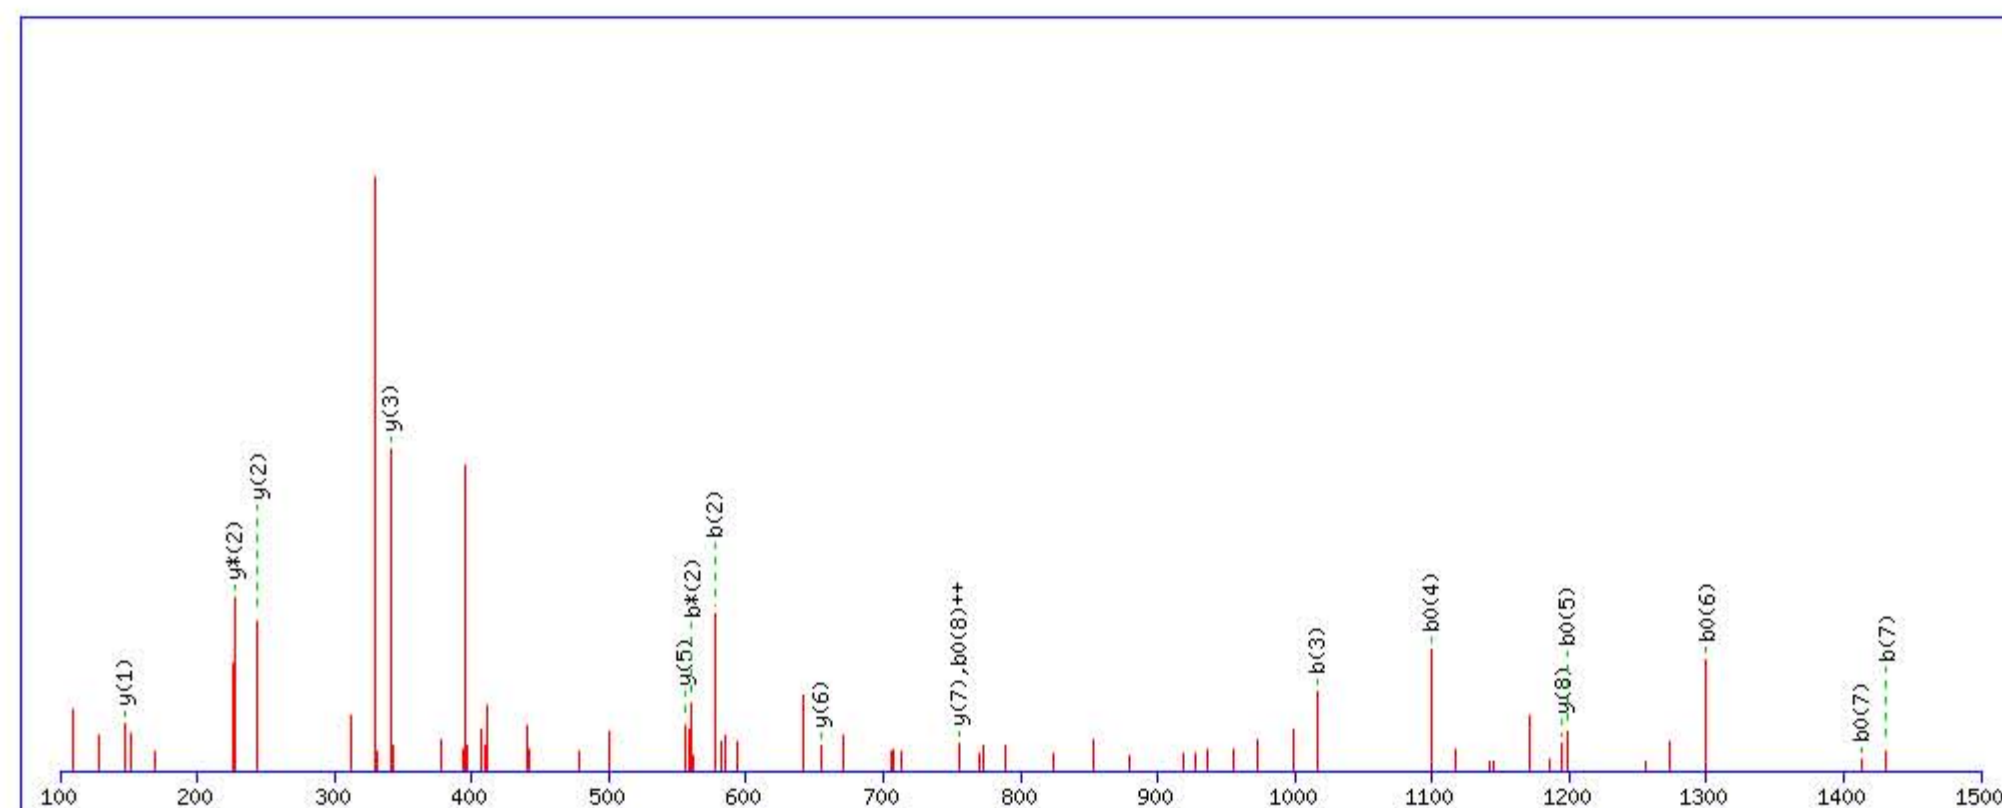

Monoisotopic mass of neutral peptide Mr(calc): 1769.968460

Fixed modifications: Carbamidomethyl (C) (apply to specified residues or termini only)

Variable modifications:

Q2 : Biotin:Thermo-21345 (Q)

Q3 : Biotin:Thermo-21345 (Q)

Ions Score: 28 Expect: 0.018

Matches : 17/92 fragment ions using 37 most intense peaks [\(help\)](#)

| #  | b                  | b <sup>++</sup> | b <sup>*</sup>    | b <sup>*++</sup> | b <sup>0</sup>     | b <sup>0++</sup>  | Seq. | y                  | y <sup>++</sup> | y <sup>*</sup>    | y <sup>*++</sup> | y <sup>0</sup> | y <sup>0++</sup> | #  |
|----|--------------------|-----------------|-------------------|------------------|--------------------|-------------------|------|--------------------|-----------------|-------------------|------------------|----------------|------------------|----|
| 1  | 138.066188         | 69.536732       |                   |                  |                    |                   | H    |                    |                 |                   |                  |                |                  | 10 |
| 2  | <b>577.291514</b>  | 289.149395      | <b>560.264965</b> | 280.636121       |                    |                   | Q    | 1633.916820        | 817.462048      | 1616.890271       | 808.948774       | 1615.906255    | 808.456766       | 9  |
| 3  | <b>1016.516840</b> | 508.762058      | 999.490291        | 500.248784       |                    |                   | Q    | <b>1194.691494</b> | 597.849385      | 1177.664945       | 589.336111       | 1176.680929    | 588.844103       | 8  |
| 4  | 1117.564519        | 559.285898      | 1100.537970       | 550.772623       | <b>1099.553954</b> | 550.280615        | T    | <b>755.466168</b>  | 378.236722      | 738.439619        | 369.723448       | 737.455603     | 369.231440       | 7  |
| 5  | 1216.632933        | 608.820105      | 1199.606384       | 600.306830       | <b>1198.622368</b> | 599.814822        | V    | <b>654.418489</b>  | 327.712883      | 637.391940        | 319.199608       | 636.407924     | 318.707600       | 6  |
| 6  | 1317.680612        | 659.343944      | 1300.654063       | 650.830670       | <b>1299.670047</b> | 650.338662        | T    | <b>555.350075</b>  | 278.178676      | 538.323526        | 269.665401       | 537.339510     | 269.173393       | 5  |
| 7  | <b>1430.764676</b> | 715.885976      | 1413.738127       | 707.372702       | <b>1412.754111</b> | 706.880694        | I    | 454.302396         | 227.654836      | 437.275847        | 219.141561       |                |                  | 4  |
| 8  | 1527.817440        | 764.412358      | 1510.790891       | 755.899084       | 1509.806875        | <b>755.407076</b> | P    | <b>341.218332</b>  | 171.112804      | 324.191783        | 162.599530       |                |                  | 3  |
| 9  | 1624.870204        | 812.938740      | 1607.843655       | 804.425466       | 1606.859639        | 803.933458        | P    | <b>244.165568</b>  | 122.586422      | <b>227.139019</b> | 114.073148       |                |                  | 2  |
| 10 |                    |                 |                   |                  |                    |                   | K    | <b>147.112804</b>  | 74.060040       | 130.086255        | 65.546765        |                |                  | 1  |

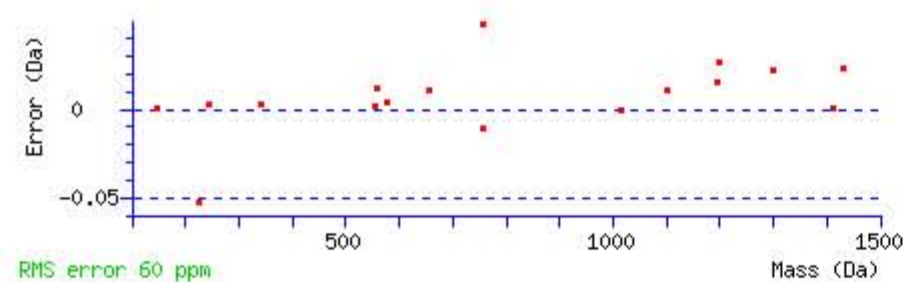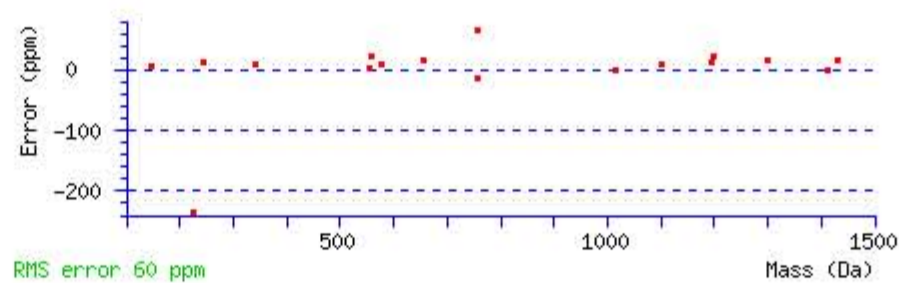

NCBI BLAST search of [HQQTVTIPPK](#)

(Parameters: blastp, nr protein database, expect=20000, no filter, PAM30)

Other BLAST [web gateways](#)

All matches to this query

| Score | Mr(calc):   | Delta     | Sequence                          |
|-------|-------------|-----------|-----------------------------------|
| 28.1  | 1769.968460 | 0.011992  | <a href="#">HQQTVTIPPK</a>        |
| 9.0   | 1769.997437 | -0.016985 | <a href="#">AVPPRMPAVNLGQVPPK</a> |
| 0.9   | 1769.961029 | 0.019423  | <a href="#">WMLSRDRASTLPLPK</a>   |



# MASCOT Search Results

## Peptide View

MS/MS Fragmentation of **GQGTLSSVVTMYHAK**

Found in **CO3\_HUMAN**, Complement C3 OS=Homo sapiens GN=C3 PE=1 SV=2

Match to Query 44743: 1801.918842 from(601.646890,3+) rtinseconds(1988) index(55746)

Title: Locus:1.1.1.3178.8 File:"2013-07-02 CLN FXIII 30 min 2nd F 4.wiff"

Data file C:\Program Files (x86)\Matrix Science\Mascot Daemon\mgf\2 FXIII 30 min 2nd\mascot\_daemon\_merge.mgf

Click mouse within plot area to zoom in by factor of two about that point

Or, Plot from  to  Da

Label all possible matches  Label matches used for scoring

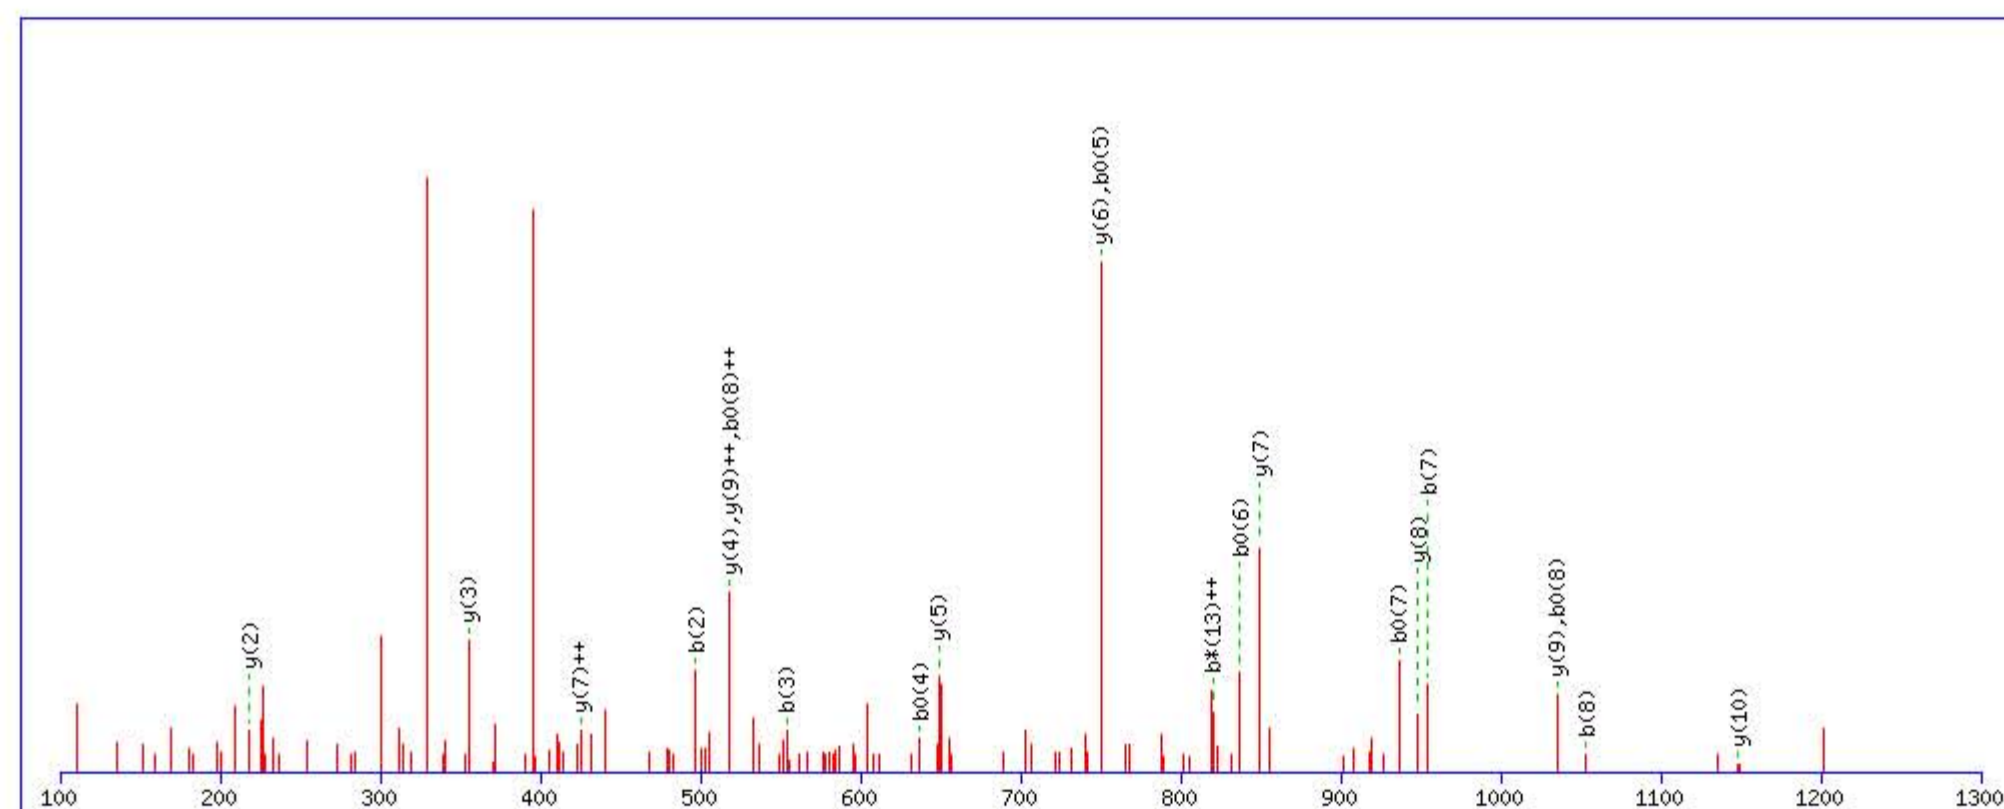

Monoisotopic mass of neutral peptide Mr(calc): 1801.921906

Fixed modifications: Carbamidomethyl (C) (apply to specified residues or termini only)

Variable modifications:

Q2 : Biotin:Thermo-21345 (Q)

Ions Score: 41 Expect: 0.00056

Matches : 22/138 fragment ions using 42 most intense peaks [\(help\)](#)

| #  | b                  | b <sup>++</sup> | b <sup>*</sup> | b <sup>*++</sup>  | b <sup>0</sup>     | b <sup>0++</sup>  | Seq. | y                  | y <sup>++</sup>   | y <sup>*</sup> | y <sup>*++</sup> | y <sup>0</sup> | y <sup>0++</sup> | #  |
|----|--------------------|-----------------|----------------|-------------------|--------------------|-------------------|------|--------------------|-------------------|----------------|------------------|----------------|------------------|----|
| 1  | 58.028740          | 29.518008       |                |                   |                    |                   | G    |                    |                   |                |                  |                |                  | 14 |
| 2  | <b>497.254066</b>  | 249.130671      | 480.227517     | 240.617397        |                    |                   | Q    | 1745.907712        | 873.457494        | 1728.881163    | 864.944220       | 1727.897147    | 864.452212       | 13 |
| 3  | <b>554.275530</b>  | 277.641403      | 537.248981     | 269.128129        |                    |                   | G    | 1306.682386        | 653.844831        | 1289.655837    | 645.331557       | 1288.671821    | 644.839549       | 12 |
| 4  | 655.323209         | 328.165243      | 638.296660     | 319.651968        | <b>637.312644</b>  | 319.159960        | T    | 1249.660922        | 625.334099        | 1232.634373    | 616.820825       | 1231.650357    | 616.328817       | 11 |
| 5  | 768.407273         | 384.707275      | 751.380724     | 376.194000        | <b>750.396708</b>  | 375.701992        | L    | <b>1148.613243</b> | 574.810260        | 1131.586694    | 566.296985       | 1130.602678    | 565.804977       | 10 |
| 6  | 855.439301         | 428.223289      | 838.412752     | 419.710014        | <b>837.428736</b>  | 419.218006        | S    | <b>1035.529179</b> | <b>518.268228</b> | 1018.502630    | 509.754953       | 1017.518614    | 509.262945       | 9  |
| 7  | <b>954.507715</b>  | 477.757496      | 937.481166     | 469.244221        | <b>936.497150</b>  | 468.752213        | V    | <b>948.497151</b>  | 474.752214        | 931.470602     | 466.238939       | 930.486586     | 465.746931       | 8  |
| 8  | <b>1053.576129</b> | 527.291703      | 1036.549580    | 518.778428        | <b>1035.565564</b> | <b>518.286420</b> | V    | <b>849.428737</b>  | <b>425.218007</b> | 832.402188     | 416.704732       | 831.418172     | 416.212724       | 7  |
| 9  | 1154.623808        | 577.815542      | 1137.597259    | 569.302268        | 1136.613243        | 568.810260        | T    | <b>750.360323</b>  | 375.683800        | 733.333774     | 367.170525       | 732.349758     | 366.678517       | 6  |
| 10 | 1285.664293        | 643.335785      | 1268.637744    | 634.822510        | 1267.653728        | 634.330502        | M    | <b>649.312644</b>  | 325.159960        | 632.286095     | 316.646686       |                |                  | 5  |
| 11 | 1448.727622        | 724.867449      | 1431.701073    | 716.354175        | 1430.717057        | 715.862167        | Y    | <b>518.272159</b>  | 259.639718        | 501.245610     | 251.126443       |                |                  | 4  |
| 12 | 1585.786534        | 793.396905      | 1568.759985    | 784.883631        | 1567.775969        | 784.391623        | H    | <b>355.208830</b>  | 178.108053        | 338.182281     | 169.594778       |                |                  | 3  |
| 13 | 1656.823648        | 828.915462      | 1639.797099    | <b>820.402188</b> | 1638.813083        | 819.910180        | A    | <b>218.149918</b>  | 109.578597        | 201.123369     | 101.065322       |                |                  | 2  |
| 14 |                    |                 |                |                   |                    |                   | K    | 147.112804         | 74.060040         | 130.086255     | 65.546765        |                |                  | 1  |

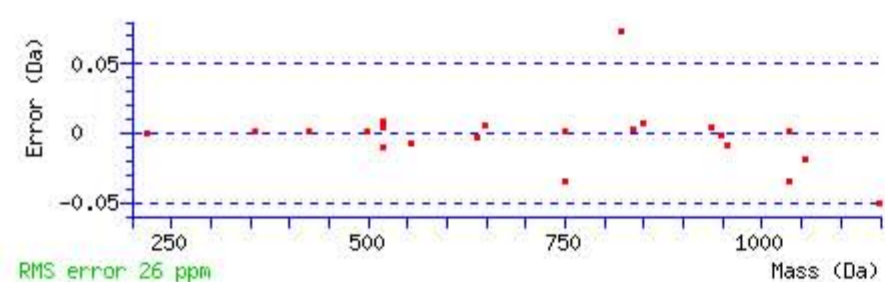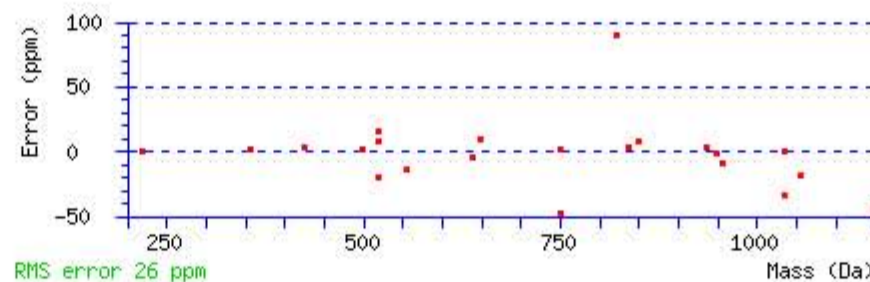

NCBI BLAST search of **GQGTLSSVVTMYHAK**

(Parameters: blastp, nr protein database, expect=20000, no filter, PAM30)

Other BLAST [web gateways](#)

All matches to this query

| Score | Mr(calc):   | Delta     | Sequence                        |
|-------|-------------|-----------|---------------------------------|
| 40.9  | 1801.921906 | -0.003064 | <a href="#">GQGTLSSVVTMYHAK</a> |
| 6.0   | 1801.928421 | -0.009579 | <a href="#">KFMTLDPVSDALPPK</a> |
| 2.9   | 1801.896729 | 0.022113  | <a href="#">QDNERVLFAPMR</a>    |

Mascot: <http://www.matrixscience.com/>



# MASCOT SCIENCE Mascot Search Results

## Peptide View

MS/MS Fragmentation of **SGIPIVTSPYQIHFTK**

Found in **CO3\_HUMAN**, Complement C3 OS=Homo sapiens GN=C3 PE=1 SV=2

Match to Query 51933: 2098.138962 from(700.386930,3+) rtinseconds(2334) index(40717)

Title: Locus:1.1.1.2835.10 File:"2013-07-02 CLN FXIII 30 min 2nd F 3.wiff"

Data file C:\Program Files (x86)\Matrix Science\Mascot Daemon\mgf2 FXIII 30 min 2nd\mascot\_daemon\_merge.mgf

Click mouse within plot area to zoom in by factor of two about that point

Or, Plot from  to  Da

Label all possible matches  Label matches used for scoring

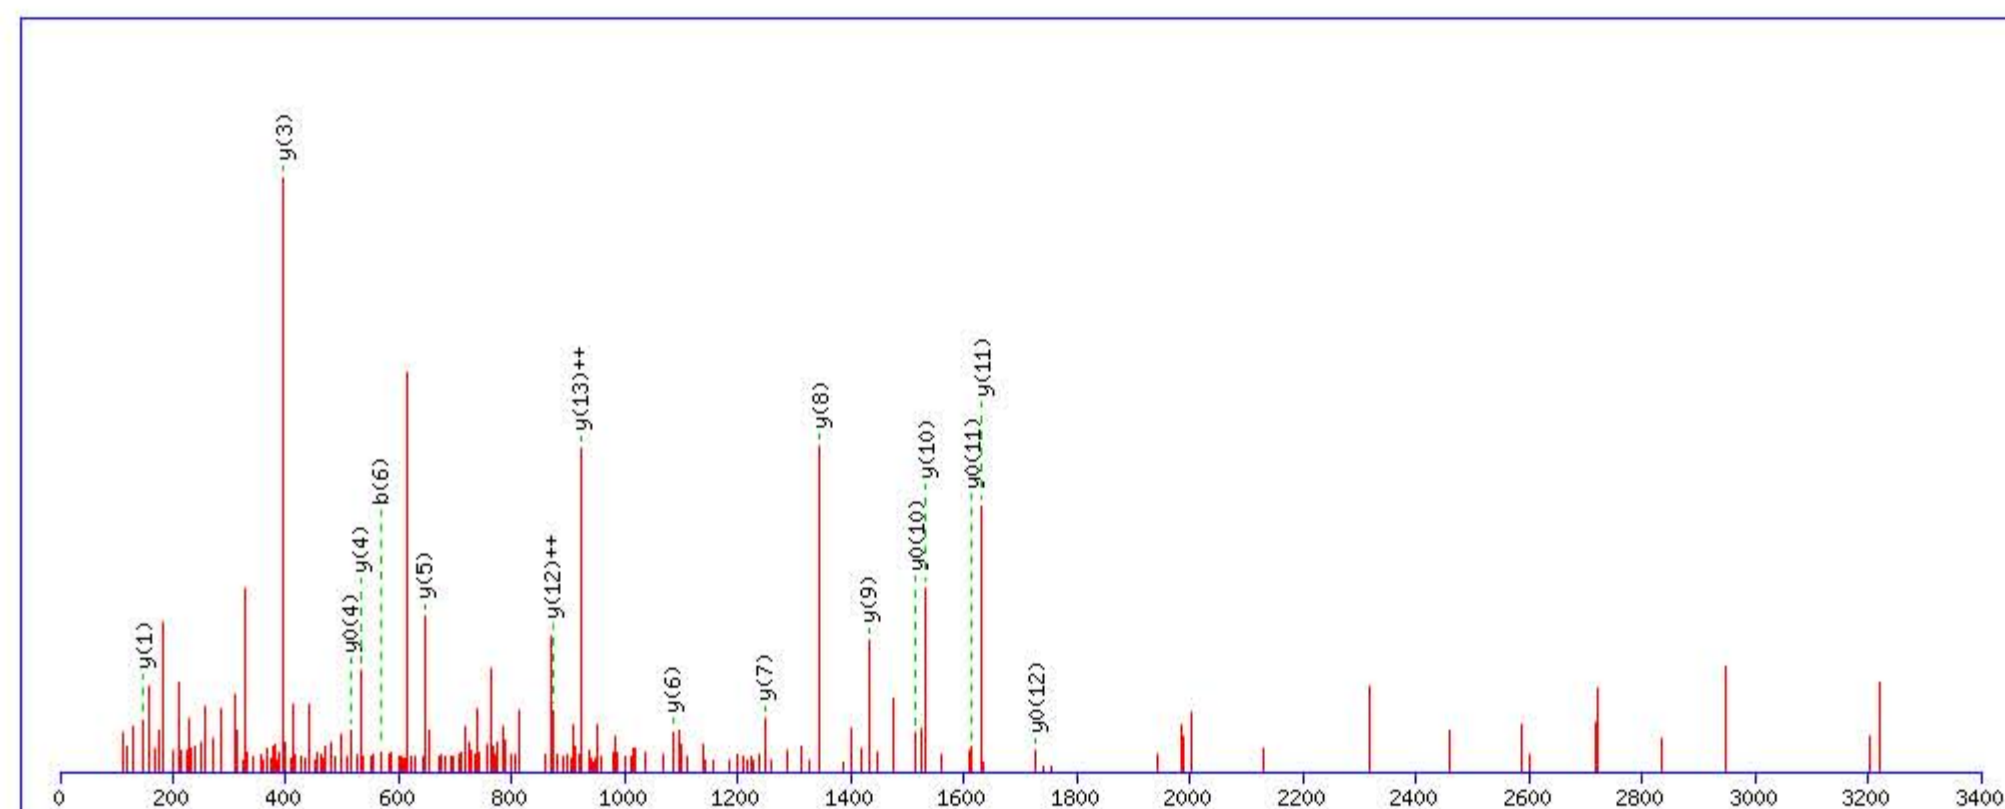

Monoisotopic mass of neutral peptide Mr(calc): 2098.128525

Fixed modifications: Carbamidomethyl (C) (apply to specified residues or termini only)

Variable modifications:

Q11 : Biotin:Thermo-21345 (Q)

Ions Score: 33 Expect: 0.0096

Matches : 17/158 fragment ions using 54 most intense peaks [\(help\)](#)

| #  | b           | b <sup>++</sup> | b <sup>+</sup> | b <sup>+++</sup> | b <sup>0</sup> | b <sup>0++</sup> | Seq. | y           | y <sup>++</sup> | y <sup>+</sup> | y <sup>+++</sup> | y <sup>0</sup> | y <sup>0++</sup> | #  |
|----|-------------|-----------------|----------------|------------------|----------------|------------------|------|-------------|-----------------|----------------|------------------|----------------|------------------|----|
| 1  | 88.039304   | 44.523290       |                |                  | 70.028739      | 35.518008        | S    |             |                 |                |                  |                |                  | 16 |
| 2  | 145.060768  | 73.034022       |                |                  | 127.050203     | 64.028740        | G    | 2012.103769 | 1006.555523     | 1995.077220    | 998.042248       | 1994.093204    | 997.550240       | 15 |
| 3  | 258.144832  | 129.576054      |                |                  | 240.134267     | 120.570772       | I    | 1955.082305 | 978.044791      | 1938.055756    | 969.531516       | 1937.071740    | 969.039508       | 14 |
| 4  | 355.197596  | 178.102436      |                |                  | 337.187031     | 169.097154       | P    | 1841.998241 | 921.502759      | 1824.971692    | 912.989484       | 1823.987676    | 912.497476       | 13 |
| 5  | 468.281660  | 234.644468      |                |                  | 450.271095     | 225.639186       | I    | 1744.945477 | 872.976377      | 1727.918928    | 864.463102       | 1726.934912    | 863.971094       | 12 |
| 6  | 567.350074  | 284.178675      |                |                  | 549.339509     | 275.173393       | V    | 1631.861413 | 816.434345      | 1614.834864    | 807.921070       | 1613.850848    | 807.429062       | 11 |
| 7  | 668.397753  | 334.702515      |                |                  | 650.387188     | 325.697232       | T    | 1532.792999 | 766.900138      | 1515.766450    | 758.386863       | 1514.782434    | 757.894855       | 10 |
| 8  | 755.429781  | 378.218529      |                |                  | 737.419216     | 369.213246       | S    | 1431.745320 | 716.376298      | 1414.718771    | 707.863024       | 1413.734755    | 707.371016       | 9  |
| 9  | 852.482545  | 426.744911      |                |                  | 834.471980     | 417.739628       | P    | 1344.713292 | 672.860284      | 1327.686743    | 664.347010       | 1326.702727    | 663.855002       | 8  |
| 10 | 1015.545874 | 508.276575      |                |                  | 997.535309     | 499.271293       | Y    | 1247.660528 | 624.333902      | 1230.633979    | 615.820628       | 1229.649963    | 615.328620       | 7  |
| 11 | 1454.771200 | 727.889238      | 1437.744651    | 719.375964       | 1436.760635    | 718.883956       | Q    | 1084.597199 | 542.802238      | 1067.570650    | 534.288963       | 1066.586634    | 533.796955       | 6  |
| 12 | 1567.855264 | 784.431270      | 1550.828715    | 775.917996       | 1549.844699    | 775.425988       | I    | 645.371873  | 323.189574      | 628.345324     | 314.676300       | 627.361308     | 314.184292       | 5  |
| 13 | 1704.914176 | 852.960726      | 1687.887627    | 844.447452       | 1686.903611    | 843.955444       | H    | 532.287809  | 266.647542      | 515.261260     | 258.134268       | 514.277244     | 257.642260       | 4  |
| 14 | 1851.982590 | 926.494933      | 1834.956041    | 917.981659       | 1833.972025    | 917.489651       | F    | 395.228897  | 198.118086      | 378.202348     | 189.604812       | 377.218332     | 189.112804       | 3  |
| 15 | 1953.030269 | 977.018773      | 1936.003720    | 968.505498       | 1935.019704    | 968.013490       | T    | 248.160483  | 124.583879      | 231.133934     | 116.070605       | 230.149918     | 115.578597       | 2  |
| 16 |             |                 |                |                  |                |                  | K    | 147.112804  | 74.060040       | 130.086255     | 65.546765        |                |                  | 1  |

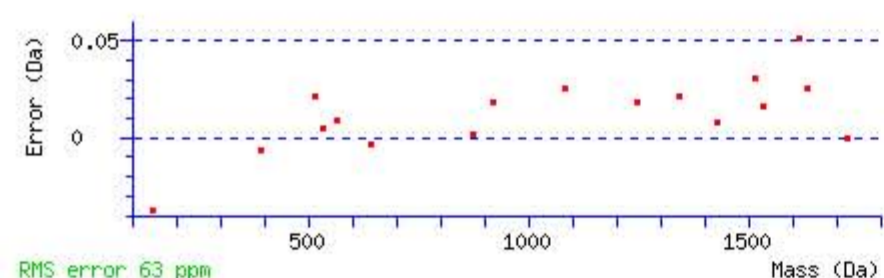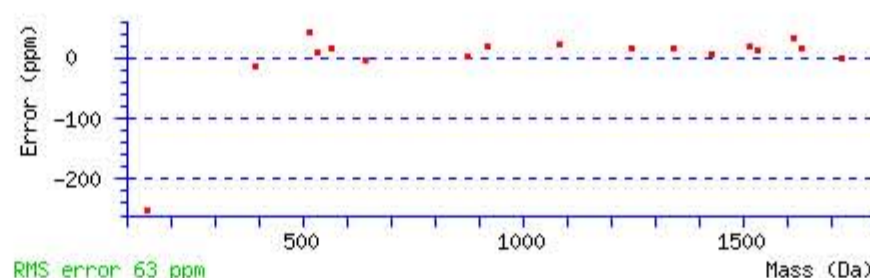

NCBI BLAST search of [SGIPIVTSPYQIHFTK](#)

(Parameters: blastp, nr protein database, expect=20000, no filter, PAM30)

Other BLAST [web gateways](#)

All matches to this query

| Score | Mr(calc):   | Delta    | Sequence                         |
|-------|-------------|----------|----------------------------------|
| 32.8  | 2098.128525 | 0.010437 | <a href="#">SGIPIVTSPYQIHFTK</a> |

Mascot: <http://www.matrixscience.com/>



# MASCOT Search Results

## Peptide View

MS/MS Fragmentation of **LSINTHPSQKPLSITVR**

Found in **CO3\_HUMAN**, Complement C3 OS=Homo sapiens GN=C3 PE=1 SV=2

Match to Query 53934: 2201.228896 from(551.314500,4+) rtinseconds(1880) index(54855)

Title: Locus:1.1.1.3141.12 File:"2013-07-02 CLN FXIII 30 min 2nd F 4.wiff"

Data file C:\Program Files (x86)\Matrix Science\Mascot Daemon\mgf2 FXIII 30 min 2nd\mascot\_daemon\_merge.mgf

Click mouse within plot area to zoom in by factor of two about that point

Or, Plot from  to  Da

Label all possible matches  Label matches used for scoring

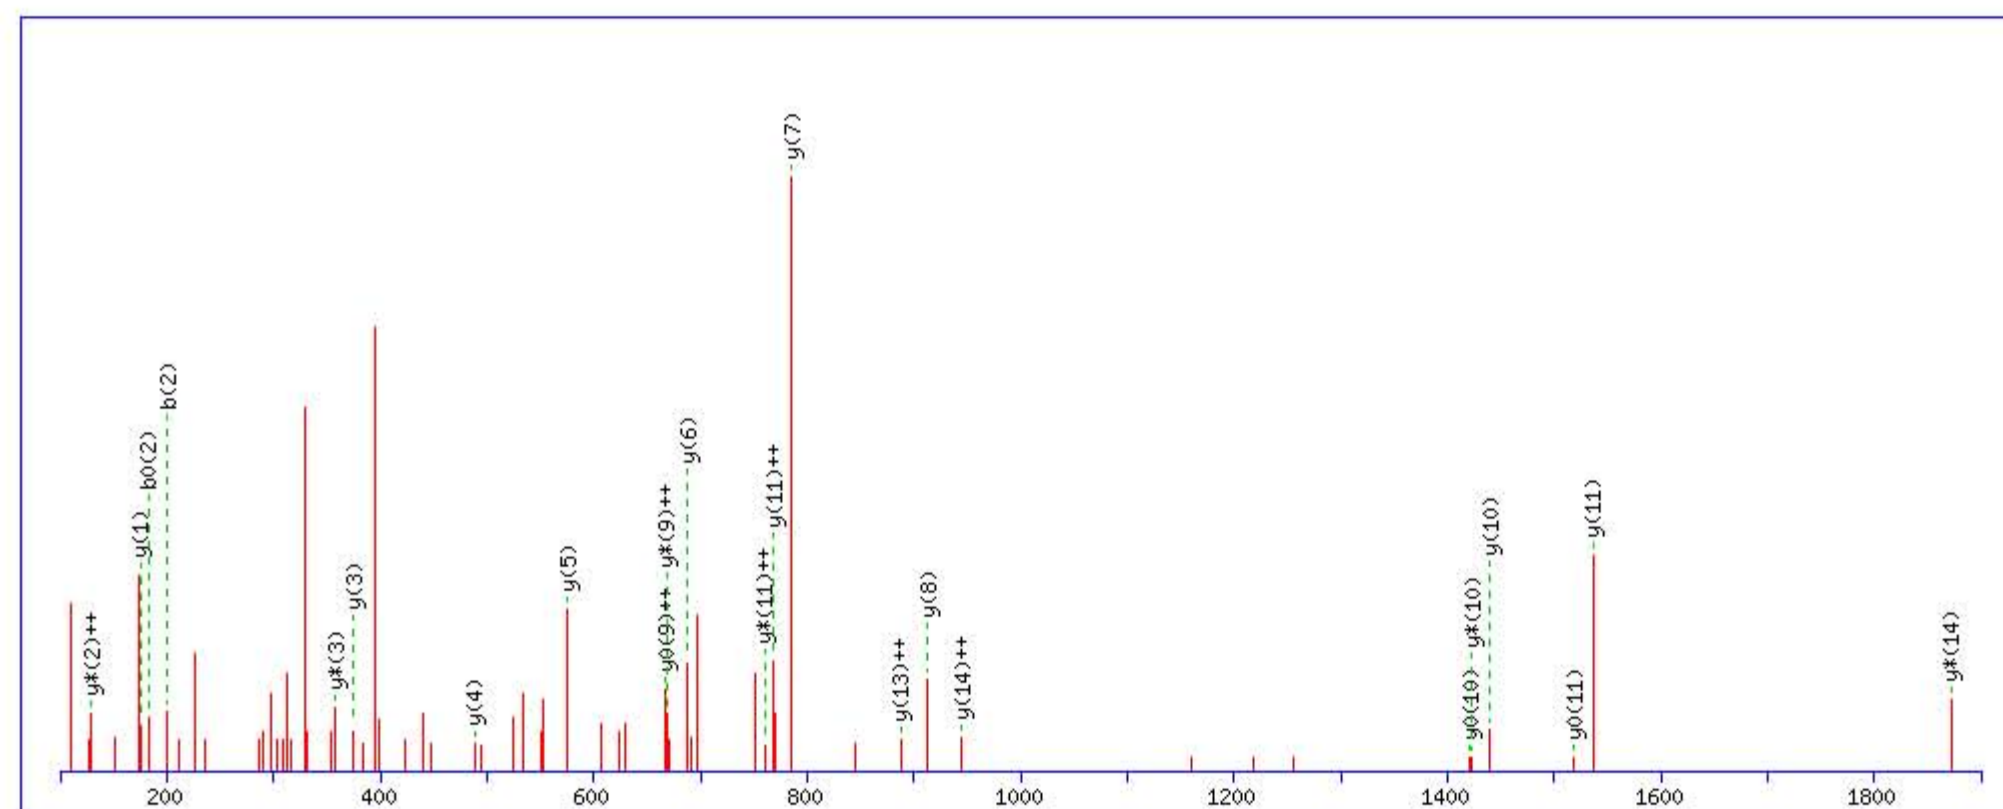

Monoisotopic mass of neutral peptide  $M_r(\text{calc})$ : 2201.235428

Fixed modifications: Carbamidomethyl (C) (apply to specified residues or termini only)

Variable modifications:

Q9 : Biotin:Thermo-21345 (Q)

Ions Score: 28 Expect: 0.016

Matches : 23/180 fragment ions using 61 most intense peaks ([help](#))

| #  | b                 | b <sup>++</sup> | b <sup>*</sup> | b <sup>+++</sup> | b <sup>0</sup>    | b <sup>0++</sup> | Seq. | y                  | y <sup>++</sup>   | y <sup>*</sup>     | y <sup>+++</sup>  | y <sup>0</sup>     | y <sup>0++</sup>  | #  |
|----|-------------------|-----------------|----------------|------------------|-------------------|------------------|------|--------------------|-------------------|--------------------|-------------------|--------------------|-------------------|----|
| 1  | 114.091340        | 57.549308       |                |                  |                   |                  | L    |                    |                   |                    |                   |                    |                   | 17 |
| 2  | <b>201.123368</b> | 101.065322      |                |                  | <b>183.112803</b> | 92.060039        | S    | 2089.158656        | 1045.082966       | 2072.132107        | 1036.569691       | 2071.148091        | 1036.077683       | 16 |
| 3  | 314.207432        | 157.607354      |                |                  | 296.196867        | 148.602071       | I    | 2002.126628        | 1001.566952       | 1985.100079        | 993.053678        | 1984.116063        | 992.561669        | 15 |
| 4  | 428.250359        | 214.628818      | 411.223810     | 206.115543       | 410.239794        | 205.623535       | N    | 1889.042564        | <b>945.024920</b> | <b>1872.016015</b> | 936.511646        | 1871.031999        | 936.019638        | 14 |
| 5  | 529.298038        | 265.152657      | 512.271489     | 256.639383       | 511.287473        | 256.147375       | T    | 1774.999637        | <b>888.003456</b> | 1757.973088        | 879.490182        | 1756.989072        | 878.998174        | 13 |
| 6  | 666.356950        | 333.682113      | 649.330401     | 325.168838       | 648.346385        | 324.676830       | H    | 1673.951958        | 837.479617        | 1656.925409        | 828.966343        | 1655.941393        | 828.474334        | 12 |
| 7  | 763.409714        | 382.208495      | 746.383165     | 373.695221       | 745.399149        | 373.203213       | P    | <b>1536.893046</b> | <b>768.950161</b> | 1519.866497        | <b>760.436887</b> | <b>1518.882481</b> | 759.944878        | 11 |
| 8  | 850.441742        | 425.724509      | 833.415193     | 417.211234       | 832.431177        | 416.719226       | S    | <b>1439.840282</b> | 720.423779        | <b>1422.813733</b> | 711.910505        | <b>1421.829717</b> | 711.418496        | 10 |
| 9  | 1289.667068       | 645.337172      | 1272.640519    | 636.823898       | 1271.656503       | 636.331889       | Q    | 1352.808254        | 676.907765        | 1335.781705        | <b>668.394491</b> | 1334.797689        | <b>667.902483</b> | 9  |
| 10 | 1417.762031       | 709.384654      | 1400.735482    | 700.871379       | 1399.751466       | 700.379371       | K    | <b>913.582928</b>  | 457.295102        | 896.556379         | 448.781828        | 895.572363         | 448.289820        | 8  |
| 11 | 1514.814795       | 757.911036      | 1497.788246    | 749.397761       | 1496.804230       | 748.905753       | P    | <b>785.487965</b>  | 393.247621        | 768.461416         | 384.734346        | 767.477400         | 384.242338        | 7  |
| 12 | 1627.898859       | 814.453067      | 1610.872310    | 805.939793       | 1609.888294       | 805.447785       | L    | <b>688.435201</b>  | 344.721239        | 671.408652         | 336.207964        | 670.424636         | 335.715956        | 6  |
| 13 | 1714.930887       | 857.969082      | 1697.904338    | 849.455807       | 1696.920322       | 848.963799       | S    | <b>575.351137</b>  | 288.179207        | 558.324588         | 279.665932        | 557.340572         | 279.173924        | 5  |
| 14 | 1828.014951       | 914.511113      | 1810.988402    | 905.997839       | 1810.004386       | 905.505831       | I    | <b>488.319109</b>  | 244.663192        | 471.292560         | 236.149918        | 470.308544         | 235.657910        | 4  |
| 15 | 1929.062630       | 965.034953      | 1912.036081    | 956.521679       | 1911.052065       | 956.029670       | T    | <b>375.235045</b>  | 188.121161        | <b>358.208496</b>  | 179.607886        | 357.224480         | 179.115878        | 3  |
| 16 | 2028.131044       | 1014.569160     | 2011.104495    | 1006.055886      | 2010.120479       | 1005.563878      | V    | 274.187366         | 137.597321        | 257.160817         | <b>129.084047</b> |                    |                   | 2  |
| 17 |                   |                 |                |                  |                   |                  | R    | <b>175.118952</b>  | 88.063114         | 158.092403         | 79.549839         |                    |                   | 1  |

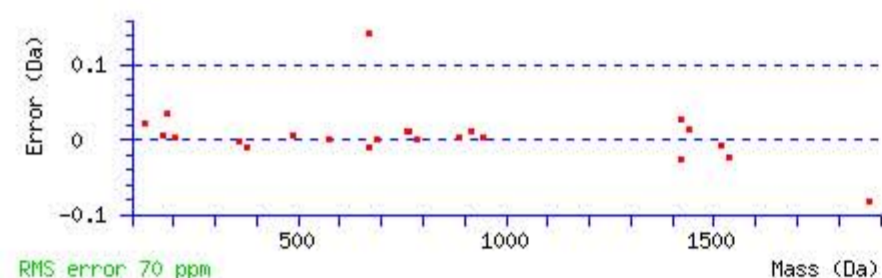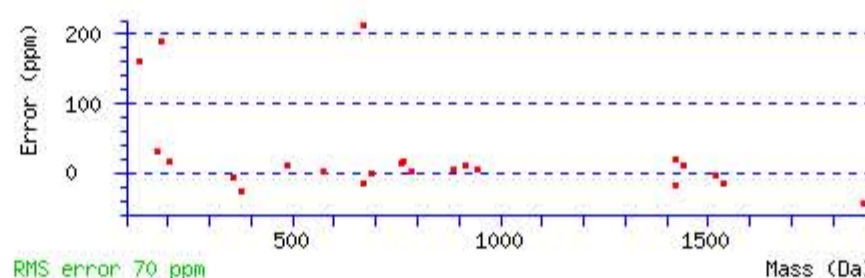

NCBI BLAST search of [LSINTHPSQKPLSITVR](#)

(Parameters: blastp, nr protein database, expect=20000, no filter, PAM30)

Other BLAST [web gateways](#)

## All matches to this query

| Score | $M_r(\text{calc})$ : | Delta     | Sequence                          |
|-------|----------------------|-----------|-----------------------------------|
| 27.6  | 2201.235428          | -0.006532 | <a href="#">LSINTHPSQKPLSITVR</a> |

Mascot: <http://www.matrixscience.com/>



# Mascot Search Results

## Peptide View

MS/MS Fragmentation of **DAPDHQELNLDVSLQLPSR**

Found in **CO3\_HUMAN**, Complement C3 OS=Homo sapiens GN=C3 PE=1 SV=2

Match to Query 58644: 2457.239472 from(820.087100,3+) rtinseconds(2493) index(41648)

Title: Locus:1.1.1.2890.21 File:"2013-07-02 CLN FXIII 30 min 2nd F 3.wiff"

Data file C:\Program Files (x86)\Matrix Science\Mascot Daemon\mgf2 FXIII 30 min 2nd\mascot\_daemon\_merge.mgf

Click mouse within plot area to zoom in by factor of two about that point

Or, Plot from  to  Da

Label all possible matches  Label matches used for scoring

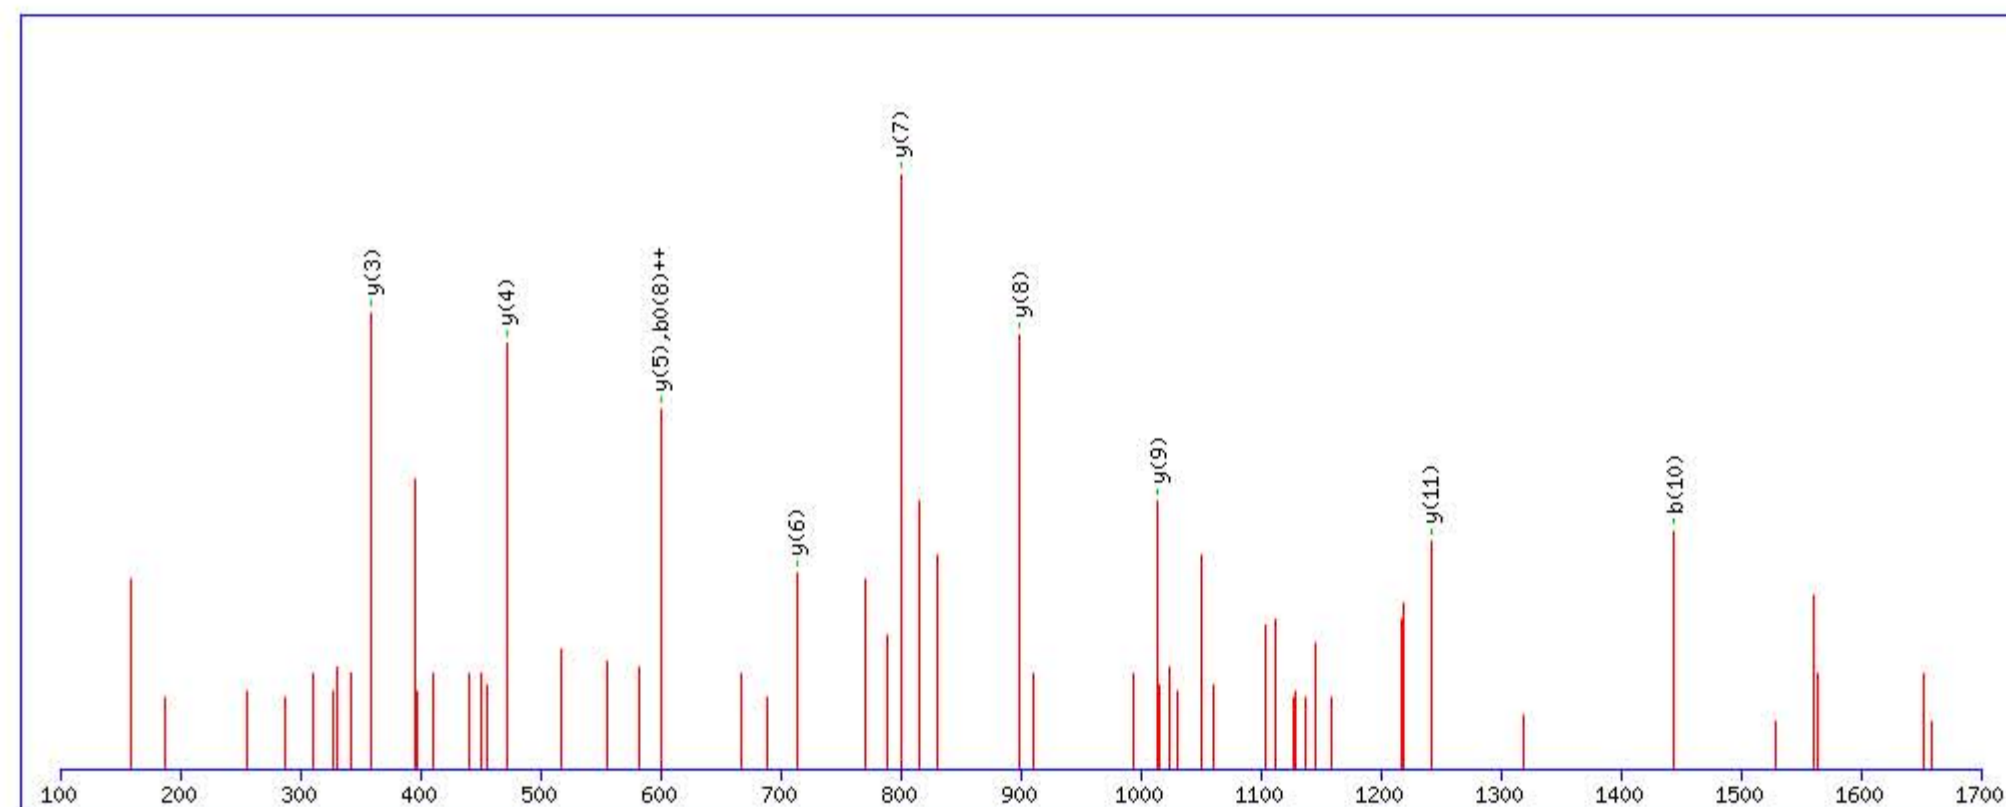

Monoisotopic mass of neutral peptide Mr(calc): 2457.232193

Fixed modifications: Carbamidomethyl (C) (apply to specified residues or termini only)

Variable modifications:

Q6 : Biotin:Thermo-21345 (Q)

Ions Score: 43 Expect: 0.0016

Matches : 10/204 fragment ions using 16 most intense peaks ([help](#))

| #  | b           | b <sup>++</sup> | b <sup>*</sup> | b <sup>*++</sup> | b <sup>0</sup> | b <sup>0++</sup> | Seq. | y           | y <sup>++</sup> | y <sup>*</sup> | y <sup>*++</sup> | y <sup>0</sup> | y <sup>0++</sup> | #  |
|----|-------------|-----------------|----------------|------------------|----------------|------------------|------|-------------|-----------------|----------------|------------------|----------------|------------------|----|
| 1  | 116.034219  | 58.520748       |                |                  | 98.023654      | 49.515465        | D    |             |                 |                |                  |                |                  | 19 |
| 2  | 187.071333  | 94.039304       |                |                  | 169.060768     | 85.034022        | A    | 2343.212542 | 1172.109909     | 2326.185993    | 1163.596634      | 2325.201977    | 1163.104626      | 18 |
| 3  | 284.124097  | 142.565686      |                |                  | 266.113532     | 133.560404       | P    | 2272.175428 | 1136.591352     | 2255.148879    | 1128.078077      | 2254.164863    | 1127.586069      | 17 |
| 4  | 399.151040  | 200.079158      |                |                  | 381.140475     | 191.073875       | D    | 2175.122664 | 1088.064970     | 2158.096115    | 1079.551695      | 2157.112099    | 1079.059687      | 16 |
| 5  | 536.209952  | 268.608614      |                |                  | 518.199387     | 259.603332       | H    | 2060.095721 | 1030.551498     | 2043.069172    | 1022.038224      | 2042.085156    | 1021.546216      | 15 |
| 6  | 975.435278  | 488.221277      | 958.408729     | 479.708003       | 957.424713     | 479.215995       | Q    | 1923.036809 | 962.022043      | 1906.010260    | 953.508768       | 1905.026244    | 953.016760       | 14 |
| 7  | 1104.477871 | 552.742574      | 1087.451322    | 544.229299       | 1086.467306    | 543.737291       | E    | 1483.811483 | 742.409380      | 1466.784934    | 733.896105       | 1465.800918    | 733.404097       | 13 |
| 8  | 1217.561935 | 609.284606      | 1200.535386    | 600.771331       | 1199.551370    | 600.279323       | L    | 1354.768890 | 677.888083      | 1337.742341    | 669.374809       | 1336.758325    | 668.882801       | 12 |
| 9  | 1331.604862 | 666.306069      | 1314.578313    | 657.792795       | 1313.594297    | 657.300786       | N    | 1241.684826 | 621.346051      | 1224.658277    | 612.832777       | 1223.674261    | 612.340769       | 11 |
| 10 | 1444.688926 | 722.848101      | 1427.662377    | 714.334826       | 1426.678361    | 713.842818       | L    | 1127.641899 | 564.324588      | 1110.615350    | 555.811313       | 1109.631334    | 555.319305       | 10 |
| 11 | 1559.715869 | 780.361572      | 1542.689320    | 771.848298       | 1541.705304    | 771.356290       | D    | 1014.557835 | 507.782556      | 997.531286     | 499.269281       | 996.547270     | 498.777273       | 9  |
| 12 | 1658.784283 | 829.895780      | 1641.757734    | 821.382505       | 1640.773718    | 820.890497       | V    | 899.530892  | 450.269084      | 882.504343     | 441.755810       | 881.520327     | 441.263802       | 8  |
| 13 | 1745.816311 | 873.411794      | 1728.789762    | 864.898519       | 1727.805746    | 864.406511       | S    | 800.462478  | 400.734877      | 783.435929     | 392.221603       | 782.451913     | 391.729595       | 7  |
| 14 | 1858.900375 | 929.953825      | 1841.873826    | 921.440551       | 1840.889810    | 920.948543       | L    | 713.430450  | 357.218863      | 696.403901     | 348.705589       | 695.419885     | 348.213581       | 6  |
| 15 | 1986.958953 | 993.983115      | 1969.932404    | 985.469840       | 1968.948388    | 984.977832       | Q    | 600.346386  | 300.676831      | 583.319837     | 292.163557       | 582.335821     | 291.671549       | 5  |
| 16 | 2100.043017 | 1050.525146     | 2083.016468    | 1042.011872      | 2082.032452    | 1041.519864      | L    | 472.287808  | 236.647542      | 455.261259     | 228.134268       | 454.277243     | 227.642260       | 4  |
| 17 | 2197.095781 | 1099.051528     | 2180.069232    | 1090.538254      | 2179.085216    | 1090.046246      | P    | 359.203744  | 180.105510      | 342.177195     | 171.592236       | 341.193179     | 171.100228       | 3  |
| 18 | 2284.127809 | 1142.567542     | 2267.101260    | 1134.054268      | 2266.117244    | 1133.562260      | S    | 262.150980  | 131.579128      | 245.124431     | 123.065854       | 244.140415     | 122.573846       | 2  |
| 19 |             |                 |                |                  |                |                  | R    | 175.118952  | 88.063114       | 158.092403     | 79.549839        |                |                  | 1  |

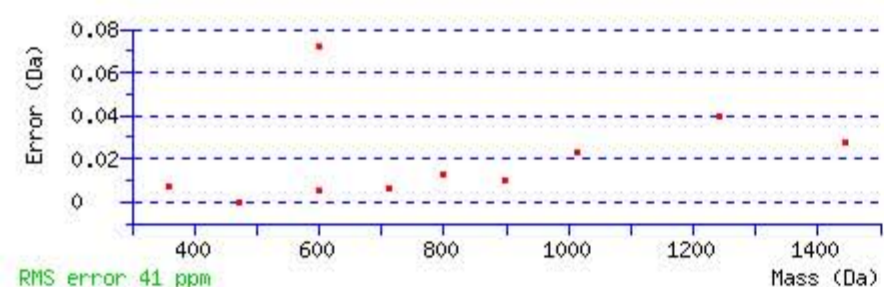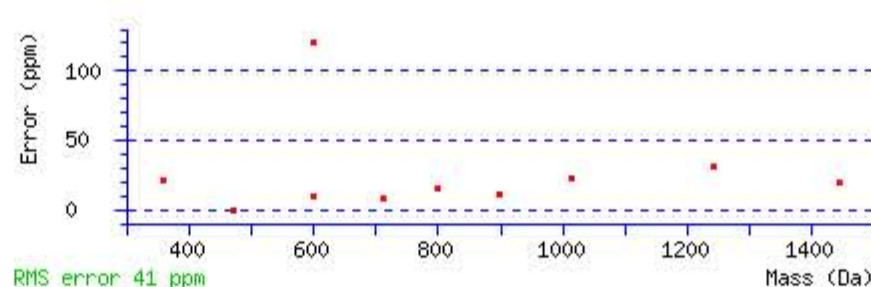

NCBI BLAST search of [DAPDHQELNLDVSLQLPSR](#)

(Parameters: blastp, nr protein database, expect=20000, no filter, PAM30)

Other BLAST [web gateways](#)

All matches to this query

| Score | Mr(calc):   | Delta     | Sequence                              |
|-------|-------------|-----------|---------------------------------------|
| 42.9  | 2457.232193 | 0.007279  | <a href="#">DAPDHQELNLDVSLQLPSR</a>   |
| 13.7  | 2457.243423 | -0.003951 | <a href="#">TGLSDAFMILNPSDPVPESTR</a> |
| 0.6   | 2457.236221 | 0.003251  | <a href="#">QDPELAYISSNFITGHGIGK</a>  |

Mascot: <http://www.matrixscience.com/>



# Mascot Search Results

## Peptide View

MS/MS Fragmentation of **ILLQGPVAQMTEDAVER**  
 Found in **CO3\_HUMAN**, Complement C3 OS=Homo sapiens GN=C3 PE=1 SV=2

Match to Query 58919: 2467.237848 from(1234.626200,2+) rtinseconds(2642) index(42611)  
 Title: Locus:1.1.1.2941.9 File:"2013-07-02 CLN FXIII 30 min 2nd F 3.wiff"  
 Data file C:\Program Files (x86)\Matrix Science\Mascot Daemon\mgf2 FXIII 30 min 2nd\mascot\_daemon\_merge.mgf

Click mouse within plot area to zoom in by factor of two about that point  
 Or, Plot from  to  Da   
 Label all possible matches  Label matches used for scoring

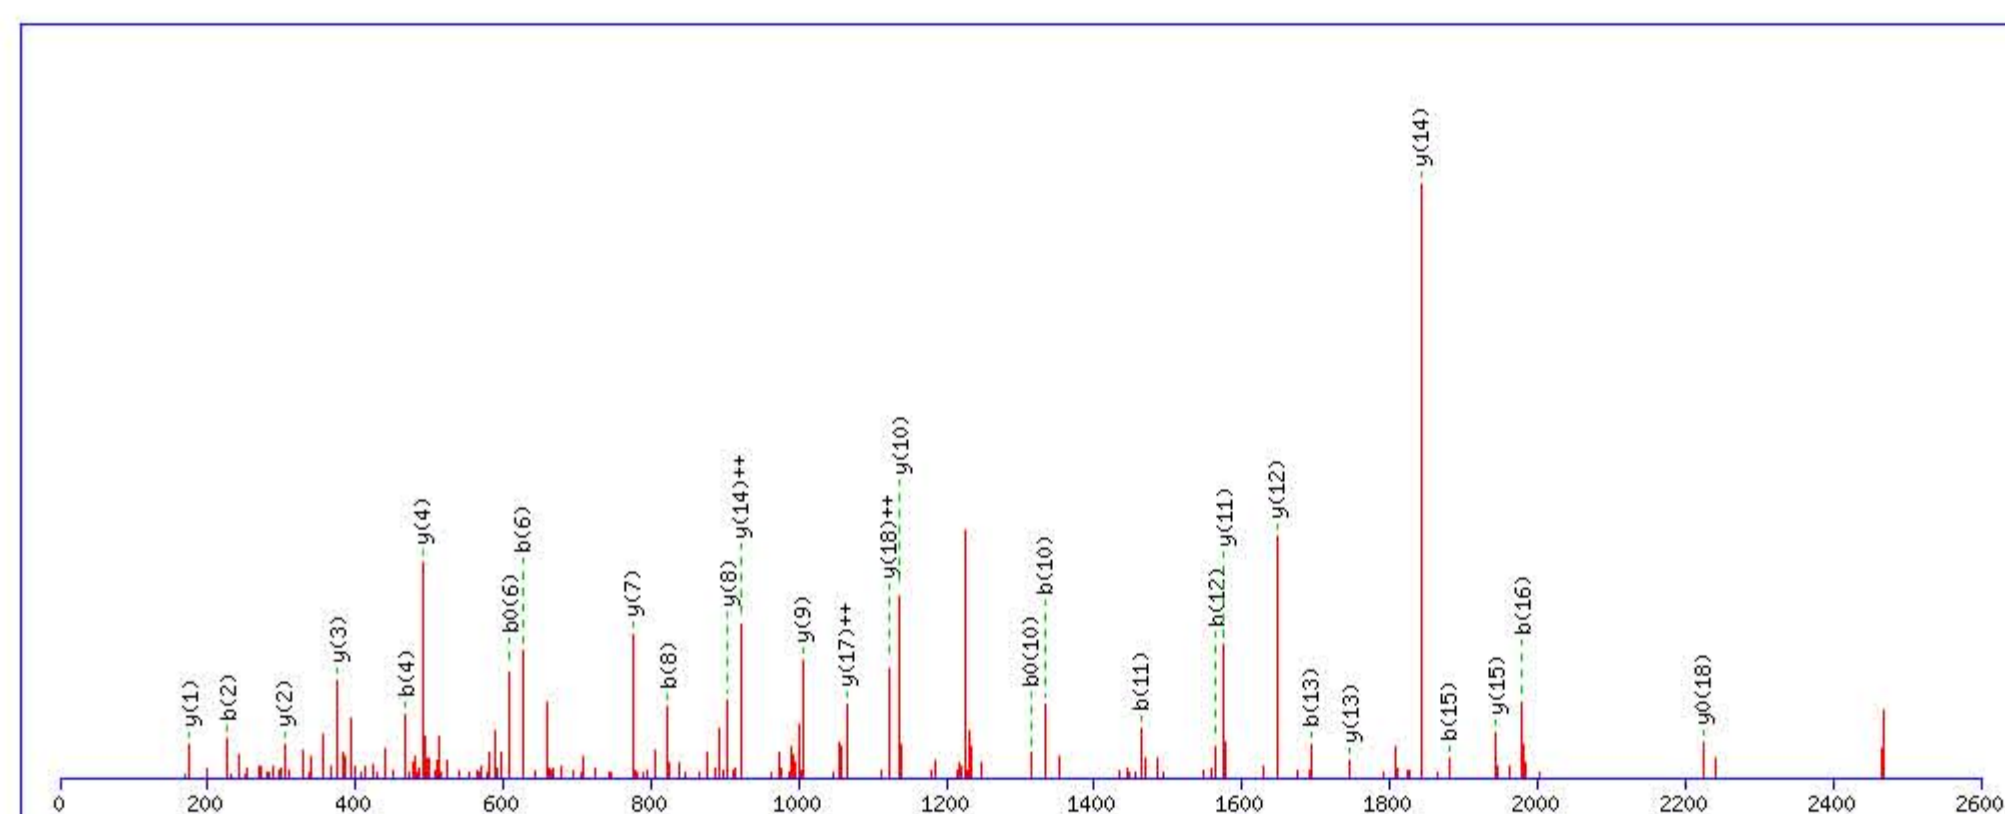

Monoisotopic mass of neutral peptide Mr(calc): 2467.245071  
 Fixed modifications: Carbamidomethyl (C) (apply to specified residues or termini only)  
 Variable modifications:  
 Q10 : Biotin:Thermo-21345 (Q)  
 Ions Score: 107 Expect: 1.1e-010  
 Matches : 29/210 fragment ions using 41 most intense peaks [\(help\)](#)

| #  | b                  | b <sup>++</sup> | b <sup>*</sup> | b <sup>*++</sup> | b <sup>0</sup>     | b <sup>0++</sup> | Seq. | y                  | y <sup>++</sup>    | y <sup>*</sup> | y <sup>*++</sup> | y <sup>0</sup>     | y <sup>0++</sup> | #  |
|----|--------------------|-----------------|----------------|------------------|--------------------|------------------|------|--------------------|--------------------|----------------|------------------|--------------------|------------------|----|
| 1  | 114.091340         | 57.549308       |                |                  |                    |                  | I    |                    |                    |                |                  |                    |                  | 20 |
| 2  | <b>227.175404</b>  | 114.091340      |                |                  |                    |                  | L    | 2355.168297        | 1178.087786        | 2338.141748    | 1169.574512      | 2337.157732        | 1169.082504      | 19 |
| 3  | 340.259468         | 170.633372      |                |                  |                    |                  | L    | 2242.084233        | <b>1121.545754</b> | 2225.057684    | 1113.032480      | <b>2224.073668</b> | 1112.540472      | 18 |
| 4  | <b>468.318046</b>  | 234.662661      | 451.291497     | 226.149386       |                    |                  | Q    | 2129.000169        | <b>1065.003722</b> | 2111.973620    | 1056.490448      | 2110.989604        | 1055.998440      | 17 |
| 5  | 525.339510         | 263.173393      | 508.312961     | 254.660119       |                    |                  | G    | 2000.941591        | 1000.974434        | 1983.915042    | 992.461159       | 1982.931026        | 991.969151       | 16 |
| 6  | <b>626.387189</b>  | 313.697233      | 609.360640     | 305.183958       | <b>608.376624</b>  | 304.691950       | T    | <b>1943.920127</b> | 972.463702         | 1926.893578    | 963.950427       | 1925.909562        | 963.458419       | 15 |
| 7  | 723.439953         | 362.223615      | 706.413404     | 353.710340       | 705.429388         | 353.218332       | P    | <b>1842.872448</b> | <b>921.939862</b>  | 1825.845899    | 913.426588       | 1824.861883        | 912.934580       | 14 |
| 8  | <b>822.508367</b>  | 411.757822      | 805.481818     | 403.244547       | 804.497802         | 402.752539       | V    | <b>1745.819684</b> | 873.413480         | 1728.793135    | 864.900206       | 1727.809119        | 864.408198       | 13 |
| 9  | 893.545481         | 447.276379      | 876.518932     | 438.763104       | 875.534916         | 438.271096       | A    | <b>1646.751270</b> | 823.879273         | 1629.724721    | 815.365999       | 1628.740705        | 814.873991       | 12 |
| 10 | <b>1332.770807</b> | 666.889042      | 1315.744258    | 658.375767       | <b>1314.760242</b> | 657.883759       | Q    | <b>1575.714156</b> | 788.360716         | 1558.687607    | 779.847442       | 1557.703591        | 779.355434       | 11 |
| 11 | <b>1463.811292</b> | 732.409284      | 1446.784743    | 723.896010       | 1445.800727        | 723.404002       | M    | <b>1136.488830</b> | 568.748053         | 1119.462281    | 560.234779       | 1118.478265        | 559.742771       | 10 |
| 12 | <b>1564.858971</b> | 782.933124      | 1547.832422    | 774.419849       | 1546.848406        | 773.927841       | T    | <b>1005.448345</b> | 503.227811         | 988.421796     | 494.714536       | 987.437780         | 494.222528       | 9  |
| 13 | <b>1693.901564</b> | 847.454420      | 1676.875015    | 838.941146       | 1675.890999        | 838.449138       | E    | <b>904.400666</b>  | 452.703971         | 887.374117     | 444.190697       | 886.390101         | 443.698689       | 8  |
| 14 | 1808.928507        | 904.967892      | 1791.901958    | 896.454617       | 1790.917942        | 895.962609       | D    | <b>775.358073</b>  | 388.182675         | 758.331524     | 379.669400       | 757.347508         | 379.177392       | 7  |
| 15 | <b>1879.965621</b> | 940.486449      | 1862.939072    | 931.973174       | 1861.955056        | 931.481166       | A    | 660.331130         | 330.669203         | 643.304581     | 322.155929       | 642.320565         | 321.663921       | 6  |
| 16 | <b>1979.034035</b> | 990.020656      | 1962.007486    | 981.507381       | 1961.023470        | 981.015373       | V    | 589.294016         | 295.150646         | 572.267467     | 286.637372       | 571.283451         | 286.145364       | 5  |
| 17 | 2094.060978        | 1047.534127     | 2077.034429    | 1039.020852      | 2076.050413        | 1038.528844      | D    | <b>490.225602</b>  | 245.616439         | 473.199053     | 237.103165       | 472.215037         | 236.611157       | 4  |
| 18 | 2165.098092        | 1083.052684     | 2148.071543    | 1074.539409      | 2147.087527        | 1074.047402      | A    | <b>375.198659</b>  | 188.102968         | 358.172110     | 179.589693       | 357.188094         | 179.097685       | 3  |
| 19 | 2294.140685        | 1147.573981     | 2277.114136    | 1139.060706      | 2276.130120        | 1138.568698      | E    | <b>304.161545</b>  | 152.584411         | 287.134996     | 144.071136       | 286.150980         | 143.579128       | 2  |
| 20 |                    |                 |                |                  |                    |                  | R    | <b>175.118952</b>  | 88.063114          | 158.092403     | 79.549839        |                    |                  | 1  |

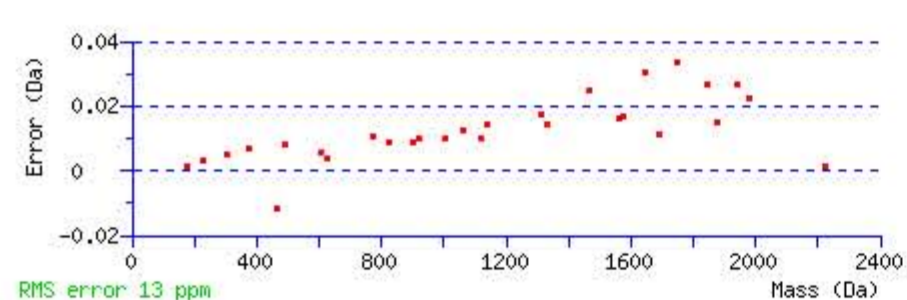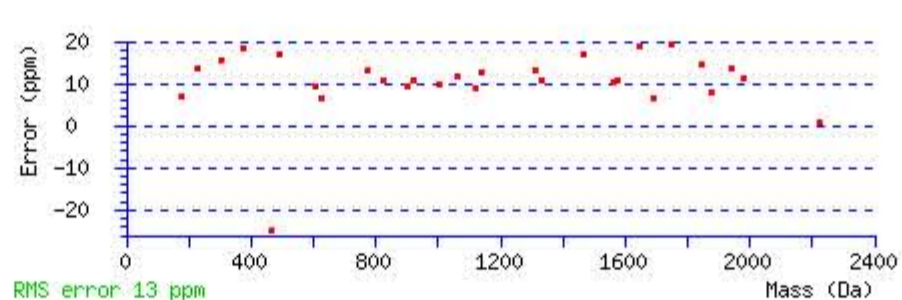

NCBI BLAST search of [ILLQGPVAQMTEDAVER](#)  
 (Parameters: blastp, nr protein database, expect=20000, no filter, PAM30)  
 Other BLAST [web gateways](#)

### All matches to this query

| Score | Mr(calc):   | Delta     | Sequence                          |
|-------|-------------|-----------|-----------------------------------|
| 106.8 | 2467.245071 | -0.007223 | <a href="#">ILLQGPVAQMTEDAVER</a> |
| 38.5  | 2467.245071 | -0.007223 | <a href="#">ILLQGPVAQMTEDAVER</a> |
| 0.5   | 2467.257614 | -0.019766 | <a href="#">DQAIATREELHAQHR</a>   |



# MASCOT Search Results

## Peptide View

MS/MS Fragmentation of **ILLQGTPVAQMTEDAVDAER**

Found in **CO3\_HUMAN**, Complement C3 OS=Homo sapiens GN=C3 PE=1 SV=2

Match to Query 58924: 2467.251342 from(823.424390,3+) rtinseconds(2664) index(42752)

Title: Locus:1.1.1.2949.19 File:"2013-07-02 CLN FXIII 30 min 2nd F 3.wiff"

Data file C:\Program Files (x86)\Matrix Science\Mascot Daemon\mgf2 FXIII 30 min 2nd\mascot\_daemon\_merge.mgf

Click mouse within plot area to zoom in by factor of two about that point

Or, Plot from  to  Da

Label all possible matches  Label matches used for scoring

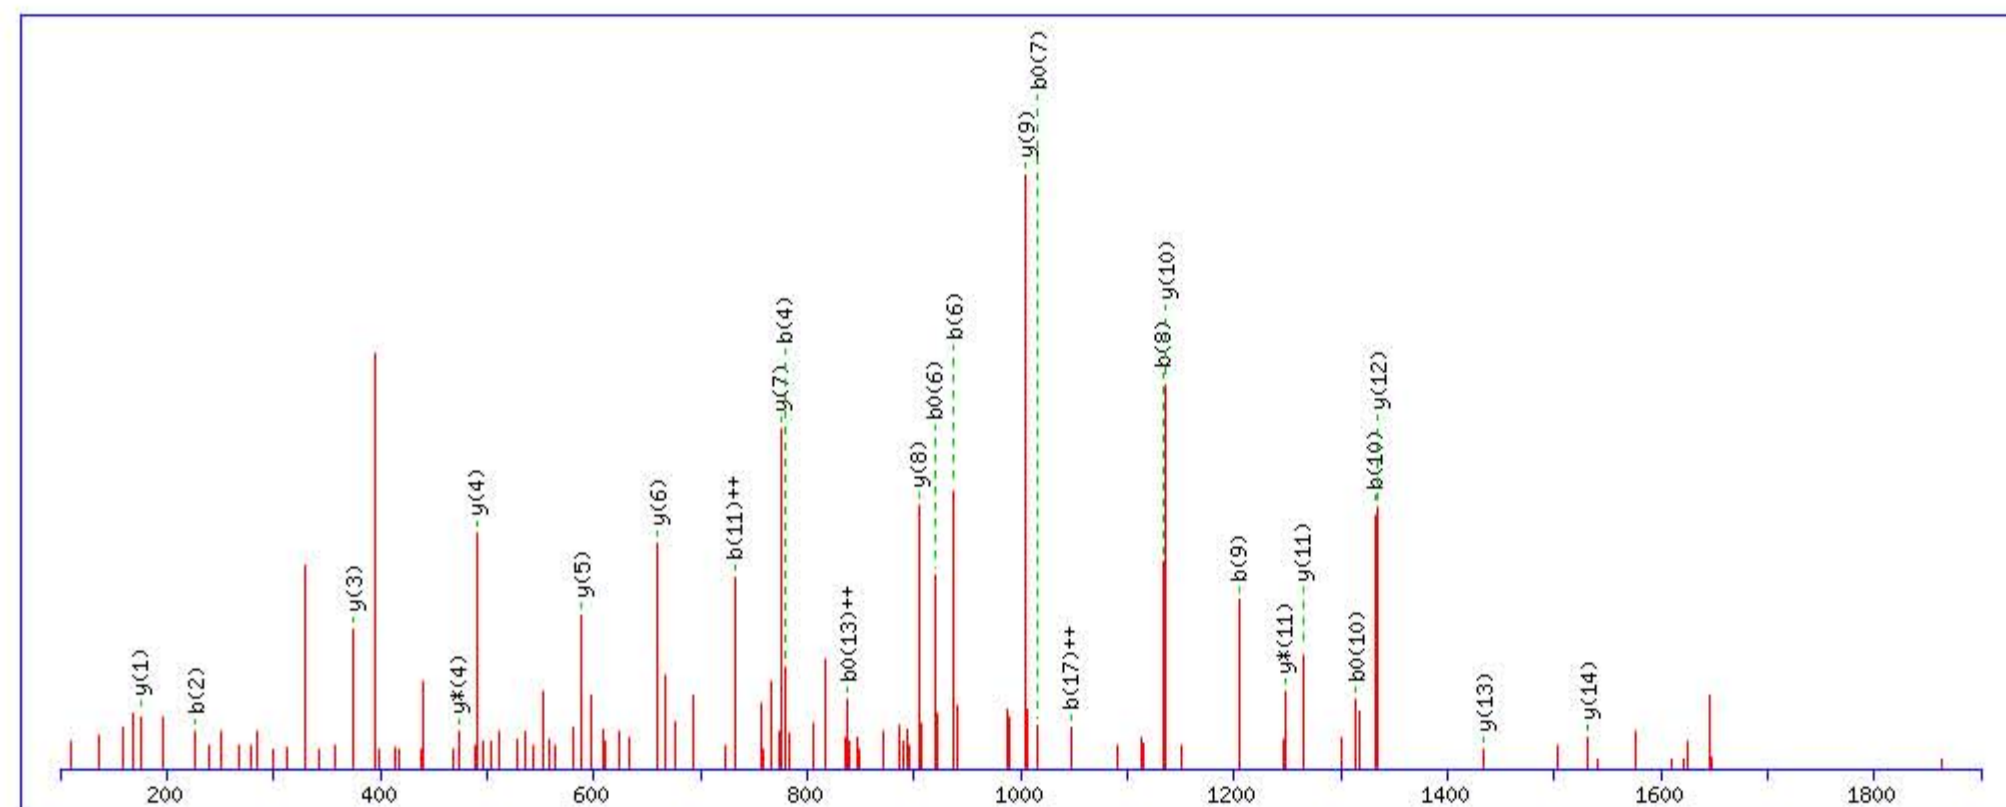

Monoisotopic mass of neutral peptide Mr(calc): 2467.245071

Fixed modifications: Carbamidomethyl (C) (apply to specified residues or termini only)

Variable modifications:

Q4 : Biotin:Thermo-21345 (Q)

Ions Score: 80 Expect: 3.5e-007

Matches : 27/210 fragment ions using 48 most intense peaks [\(help\)](#)

| #  | b                  | b <sup>++</sup>    | b <sup>*</sup> | b <sup>*++</sup> | b <sup>0</sup>     | b <sup>0++</sup>  | Seq. | y                  | y <sup>++</sup> | y <sup>*</sup>     | y <sup>*++</sup> | y <sup>0</sup> | y <sup>0++</sup> | #  |
|----|--------------------|--------------------|----------------|------------------|--------------------|-------------------|------|--------------------|-----------------|--------------------|------------------|----------------|------------------|----|
| 1  | 114.091340         | 57.549308          |                |                  |                    |                   | I    |                    |                 |                    |                  |                |                  | 20 |
| 2  | <b>227.175404</b>  | 114.091340         |                |                  |                    |                   | L    | 2355.168297        | 1178.087786     | 2338.141748        | 1169.574512      | 2337.157732    | 1169.082504      | 19 |
| 3  | 340.259468         | 170.633372         |                |                  |                    |                   | L    | 2242.084233        | 1121.545754     | 2225.057684        | 1113.032480      | 2224.073668    | 1112.540472      | 18 |
| 4  | <b>779.484794</b>  | 390.246035         | 762.458245     | 381.732760       |                    |                   | Q    | 2129.000169        | 1065.003722     | 2111.973620        | 1056.490448      | 2110.989604    | 1055.998440      | 17 |
| 5  | 836.506258         | 418.756767         | 819.479709     | 410.243493       |                    |                   | G    | 1689.774843        | 845.391060      | 1672.748294        | 836.877785       | 1671.764278    | 836.385777       | 16 |
| 6  | <b>937.553937</b>  | 469.280607         | 920.527388     | 460.767332       | <b>919.543372</b>  | 460.275324        | T    | 1632.753379        | 816.880328      | 1615.726830        | 808.367053       | 1614.742814    | 807.875045       | 15 |
| 7  | 1034.606701        | 517.806988         | 1017.580152    | 509.293714       | <b>1016.596136</b> | 508.801706        | P    | <b>1531.705700</b> | 766.356488      | 1514.679151        | 757.843214       | 1513.695135    | 757.351206       | 14 |
| 8  | <b>1133.675115</b> | 567.341196         | 1116.648566    | 558.827921       | 1115.664550        | 558.335913        | V    | <b>1434.652936</b> | 717.830106      | 1417.626387        | 709.316832       | 1416.642371    | 708.824824       | 13 |
| 9  | <b>1204.712229</b> | 602.859753         | 1187.685680    | 594.346478       | 1186.701664        | 593.854470        | A    | <b>1335.584522</b> | 668.295899      | 1318.557973        | 659.782625       | 1317.573957    | 659.290617       | 12 |
| 10 | <b>1332.770807</b> | 666.889042         | 1315.744258    | 658.375767       | <b>1314.760242</b> | 657.883759        | Q    | <b>1264.547408</b> | 632.777342      | <b>1247.520859</b> | 624.264068       | 1246.536843    | 623.772060       | 11 |
| 11 | 1463.811292        | <b>732.409284</b>  | 1446.784743    | 723.896010       | 1445.800727        | 723.404002        | M    | <b>1136.488830</b> | 568.748053      | 1119.462281        | 560.234779       | 1118.478265    | 559.742771       | 10 |
| 12 | 1564.858971        | 782.933124         | 1547.832422    | 774.419849       | 1546.848406        | 773.927841        | T    | <b>1005.448345</b> | 503.227811      | 988.421796         | 494.714536       | 987.437780     | 494.222528       | 9  |
| 13 | 1693.901564        | 847.454420         | 1676.875015    | 838.941146       | 1675.890999        | <b>838.449138</b> | E    | <b>904.400666</b>  | 452.703971      | 887.374117         | 444.190697       | 886.390101     | 443.698689       | 8  |
| 14 | 1808.928507        | 904.967892         | 1791.901958    | 896.454617       | 1790.917942        | 895.962609        | D    | <b>775.358073</b>  | 388.182675      | 758.331524         | 379.669400       | 757.347508     | 379.177392       | 7  |
| 15 | 1879.965621        | 940.486449         | 1862.939072    | 931.973174       | 1861.955056        | 931.481166        | A    | <b>660.331130</b>  | 330.669203      | 643.304581         | 322.155929       | 642.320565     | 321.663921       | 6  |
| 16 | 1979.034035        | 990.020656         | 1962.007486    | 981.507381       | 1961.023470        | 981.015373        | V    | <b>589.294016</b>  | 295.150646      | 572.267467         | 286.637372       | 571.283451     | 286.145364       | 5  |
| 17 | 2094.060978        | <b>1047.534127</b> | 2077.034429    | 1039.020852      | 2076.050413        | 1038.528844       | D    | <b>490.225602</b>  | 245.616439      | <b>473.199053</b>  | 237.103165       | 472.215037     | 236.611157       | 4  |
| 18 | 2165.098092        | 1083.052684        | 2148.071543    | 1074.539409      | 2147.087527        | 1074.047402       | A    | <b>375.198659</b>  | 188.102968      | 358.172110         | 179.589693       | 357.188094     | 179.097685       | 3  |
| 19 | 2294.140685        | 1147.573981        | 2277.114136    | 1139.060706      | 2276.130120        | 1138.568698       | E    | 304.161545         | 152.584411      | 287.134996         | 144.071136       | 286.150980     | 143.579128       | 2  |
| 20 |                    |                    |                |                  |                    |                   | R    | <b>175.118952</b>  | 88.063114       | 158.092403         | 79.549839        |                |                  | 1  |

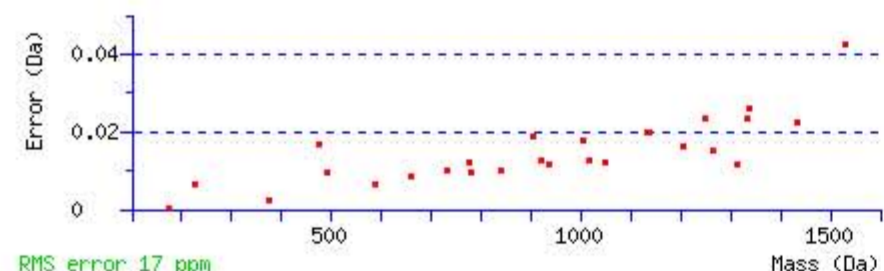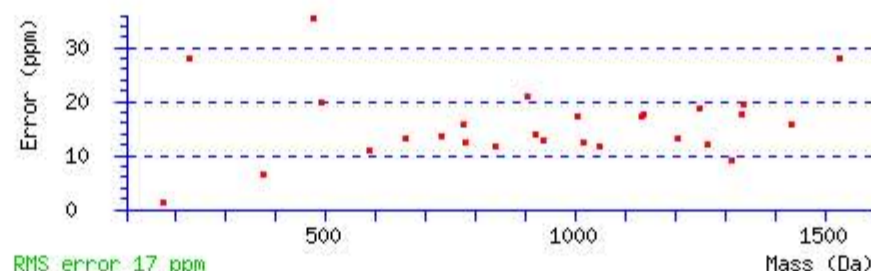

NCBI BLAST search of **ILLQGTPVAQMTEDAVDAER**

(Parameters: blastp, nr protein database, expect=20000, no filter, PAM30)

Other BLAST [web gateways](#)

All matches to this query

| Score | Mr(calc):   | Delta    | Sequence                             |
|-------|-------------|----------|--------------------------------------|
| 79.5  | 2467.245071 | 0.006271 | <a href="#">ILLQGTPVAQMTEDAVDAER</a> |
| 51.5  | 2467.245071 | 0.006271 | <a href="#">ILLQGTPVAQMTEDAVDAER</a> |



**Mascot Search Results**

**Peptide View**

MS/MS Fragmentation of **VPVAVQGEDTVQSLTQGDGVAK**  
 Found in **CO3\_HUMAN**, Complement C3 OS=Homo sapiens GN=C3 PE=1 SV=2

Match to Query 60226: 2508.289122 from(837.103650,3+) rtinseconds(2226) index(57211)  
 Title: Locus:1.1.1.3260.24 File:"2013-07-02 CLN FXIII 30 min 2nd F 4.wiff"  
 Data file C:\Program Files (x86)\Matrix Science\Mascot Daemon\mgf\2 FXIII 30 min 2nd\mascot\_daemon\_merge.mgf

Click mouse within plot area to zoom in by factor of two about that point  
 Or, Plot from  to  Da   
 Label all possible matches  Label matches used for scoring

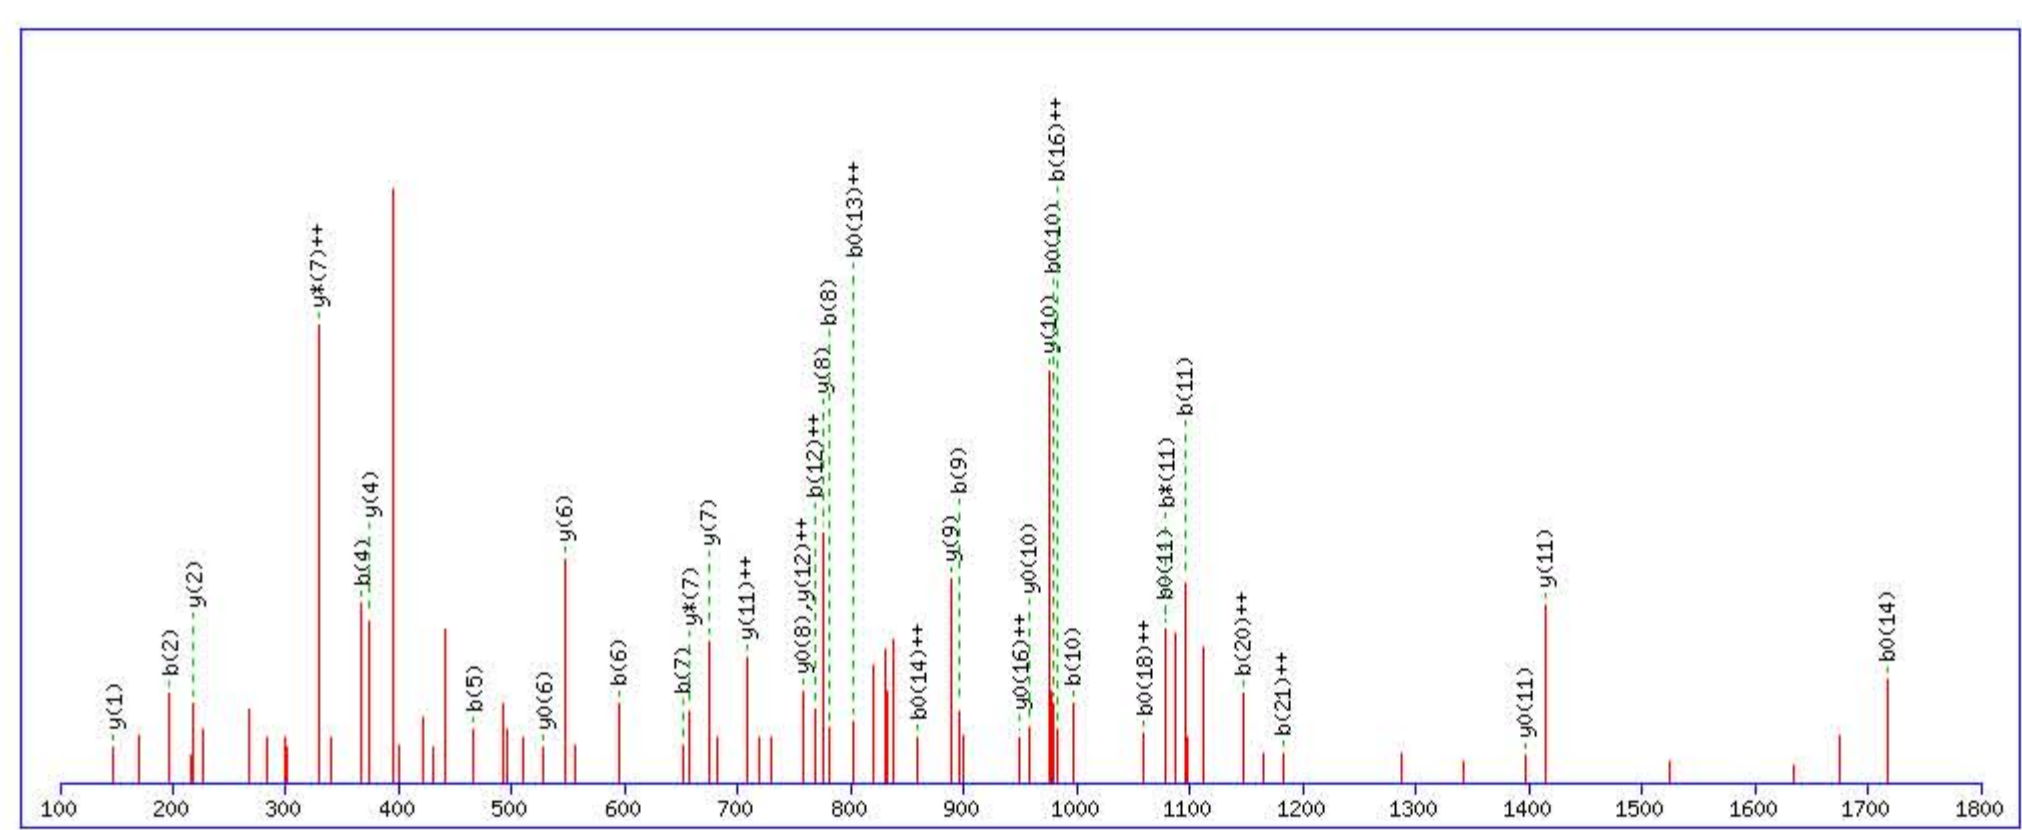

Monoisotopic mass of neutral peptide  $M_r(\text{calc})$ : 2508.289429  
 Fixed modifications: Carbamidomethyl (C) (apply to specified residues or termini only)  
 Variable modifications: Q12 : Biotin:Thermo-21345 (Q)  
 Ions Score: 61 Expect: 2.1e-005  
 Matches : 38/220 fragment ions using 75 most intense peaks [\(help\)](#)

| #  | b                  | b <sup>++</sup>    | b <sup>*</sup>     | b <sup>*++</sup> | b <sup>0</sup>     | b <sup>0++</sup>   | Seq. | y                  | y <sup>++</sup>   | y <sup>*</sup>    | y <sup>*++</sup>  | y <sup>0</sup>     | y <sup>0++</sup>  | #  |
|----|--------------------|--------------------|--------------------|------------------|--------------------|--------------------|------|--------------------|-------------------|-------------------|-------------------|--------------------|-------------------|----|
| 1  | 100.075690         | 50.541483          |                    |                  |                    |                    | V    |                    |                   |                   |                   |                    |                   | 22 |
| 2  | <b>197.128454</b>  | 99.067865          |                    |                  |                    |                    | P    | 2410.228255        | 1205.617765       | 2393.201706       | 1197.104491       | 2392.217690        | 1196.612483       | 21 |
| 3  | 296.196868         | 148.602072         |                    |                  |                    |                    | V    | 2313.175491        | 1157.091383       | 2296.148942       | 1148.578109       | 2295.164926        | 1148.086101       | 20 |
| 4  | <b>367.233982</b>  | 184.120629         |                    |                  |                    |                    | A    | 2214.107077        | 1107.557176       | 2197.080528       | 1099.043902       | 2196.096512        | 1098.551894       | 19 |
| 5  | <b>466.302396</b>  | 233.654836         |                    |                  |                    |                    | V    | 2143.069963        | 1072.038619       | 2126.043414       | 1063.525345       | 2125.059398        | 1063.033337       | 18 |
| 6  | <b>594.360974</b>  | 297.684125         | 577.334425         | 289.170851       |                    |                    | Q    | 2044.001549        | 1022.504413       | 2026.975000       | 1013.991138       | 2025.990984        | 1013.499130       | 17 |
| 7  | <b>651.382438</b>  | 326.194857         | 634.355889         | 317.681583       |                    |                    | G    | 1915.942971        | 958.475124        | 1898.916422       | 949.961849        | 1897.932406        | <b>949.469841</b> | 16 |
| 8  | <b>780.425031</b>  | 390.716154         | 763.398482         | 382.202879       | 762.414466         | 381.710871         | E    | 1858.921507        | 929.964391        | 1841.894958       | 921.451117        | 1840.910942        | 920.959109        | 15 |
| 9  | <b>895.451974</b>  | 448.229625         | 878.425425         | 439.716351       | 877.441409         | 439.224343         | D    | 1729.878914        | 865.443095        | 1712.852365       | 856.929821        | 1711.868349        | 856.437812        | 14 |
| 10 | <b>996.499653</b>  | 498.753465         | 979.473104         | 490.240190       | <b>978.489088</b>  | 489.748182         | T    | 1614.851971        | 807.929623        | 1597.825422       | 799.416349        | 1596.841406        | 798.924341        | 13 |
| 11 | <b>1095.568067</b> | 548.287672         | <b>1078.541518</b> | 539.774397       | <b>1077.557502</b> | 539.282389         | V    | 1513.804292        | <b>757.405784</b> | 1496.777743       | 748.892510        | 1495.793727        | 748.400502        | 12 |
| 12 | 1534.793393        | <b>767.900335</b>  | 1517.766844        | 759.387060       | 1516.782828        | 758.895052         | Q    | <b>1414.735878</b> | <b>707.871577</b> | 1397.709329       | 699.358303        | <b>1396.725313</b> | 698.866294        | 11 |
| 13 | 1621.825421        | 811.416349         | 1604.798872        | 802.903074       | 1603.814856        | <b>802.411066</b>  | S    | <b>975.510552</b>  | 488.258914        | 958.484003        | 479.745639        | <b>957.499987</b>  | 479.253631        | 10 |
| 14 | 1734.909485        | 867.958381         | 1717.882936        | 859.445106       | <b>1716.898920</b> | <b>858.953098</b>  | L    | <b>888.478524</b>  | 444.742900        | 871.451975        | 436.229625        | 870.467959         | 435.737617        | 9  |
| 15 | 1835.957164        | 918.482220         | 1818.930615        | 909.968946       | 1817.946599        | 909.476938         | T    | <b>775.394460</b>  | 388.200868        | 758.367911        | 379.687593        | <b>757.383895</b>  | 379.195585        | 8  |
| 16 | 1964.015742        | <b>982.511509</b>  | 1946.989193        | 973.998235       | 1946.005177        | 973.506227         | Q    | <b>674.346781</b>  | 337.677029        | <b>657.320232</b> | <b>329.163754</b> | 656.336216         | 328.671746        | 7  |
| 17 | 2021.037206        | 1011.022241        | 2004.010657        | 1002.508967      | 2003.026641        | 1002.016959        | G    | <b>546.288203</b>  | 273.647739        | 529.261654        | 265.134465        | <b>528.277638</b>  | 264.642457        | 6  |
| 18 | 2136.064149        | 1068.535712        | 2119.037600        | 1060.022438      | 2118.053584        | <b>1059.530430</b> | D    | 489.266739         | 245.137007        | 472.240190        | 236.623733        | 471.256174         | 236.131725        | 5  |
| 19 | 2193.085613        | 1097.046444        | 2176.059064        | 1088.533170      | 2175.075048        | 1088.041162        | G    | <b>374.239796</b>  | 187.623536        | 357.213247        | 179.110261        |                    |                   | 4  |
| 20 | 2292.154027        | <b>1146.580651</b> | 2275.127478        | 1138.067377      | 2274.143462        | 1137.575369        | V    | 317.218332         | 159.112804        | 300.191783        | 150.599530        |                    |                   | 3  |
| 21 | 2363.191141        | <b>1182.099208</b> | 2346.164592        | 1173.585934      | 2345.180576        | 1173.093926        | A    | <b>218.149918</b>  | 109.578597        | 201.123369        | 101.065323        |                    |                   | 2  |
| 22 |                    |                    |                    |                  |                    |                    | K    | <b>147.112804</b>  | 74.060040         | 130.086255        | 65.546765         |                    |                   | 1  |

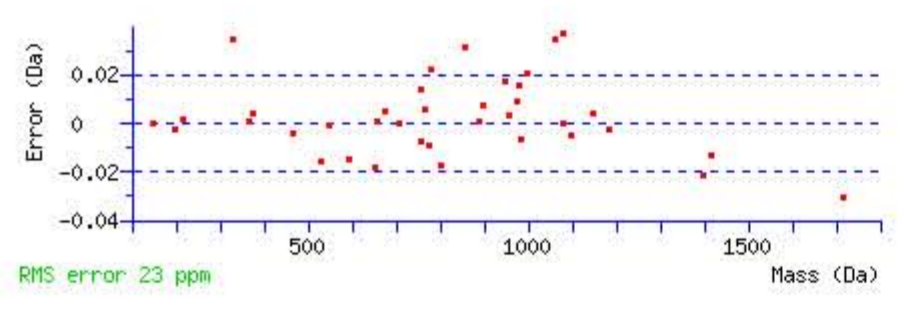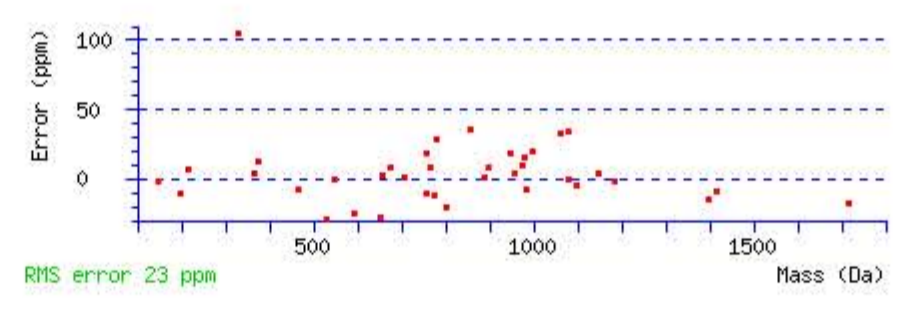

NCBI BLAST search of **VPVAVQGEDTVQSLTQGDGVAK**  
 (Parameters: blastp, nr protein database, expect=20000, no filter, PAM30)  
 Other BLAST [web gateways](#)

**All matches to this query**

| Score | $M_r(\text{calc})$ : | Delta     | Sequence                               |
|-------|----------------------|-----------|----------------------------------------|
| 61.0  | 2508.289429          | -0.000307 | <a href="#">VPVAVQGEDTVQSLTQGDGVAK</a> |
| 44.3  | 2508.289429          | -0.000307 | <a href="#">VPVAVQGEDTVQSLTQGDGVAK</a> |
| 22.4  | 2508.289429          | -0.000307 | <a href="#">VPVAVQGEDTVQSLTQGDGVAK</a> |



# Mascot Search Results

## Peptide View

MS/MS Fragmentation of **QKPDGVFQEDAPVIHQEMIGGLR**

Found in **CO3\_HUMAN**, Complement C3 OS=Homo sapiens GN=C3 PE=1 SV=2

Match to Query 64220: 2874.463776 from(719.623220,4+) rtinseconds(2231) index(40143)

Title: Locus:1.1.1.2799.16 File:"2013-07-02 CLN FXIII 30 min 2nd F 3.wiff"

Data file C:\Program Files (x86)\Matrix Science\Mascot Daemon\mgf2 FXIII 30 min 2nd\mascot\_daemon\_merge.mgf

Click mouse within plot area to zoom in by factor of two about that point

Or, Plot from  to  Da

Label all possible matches  Label matches used for scoring

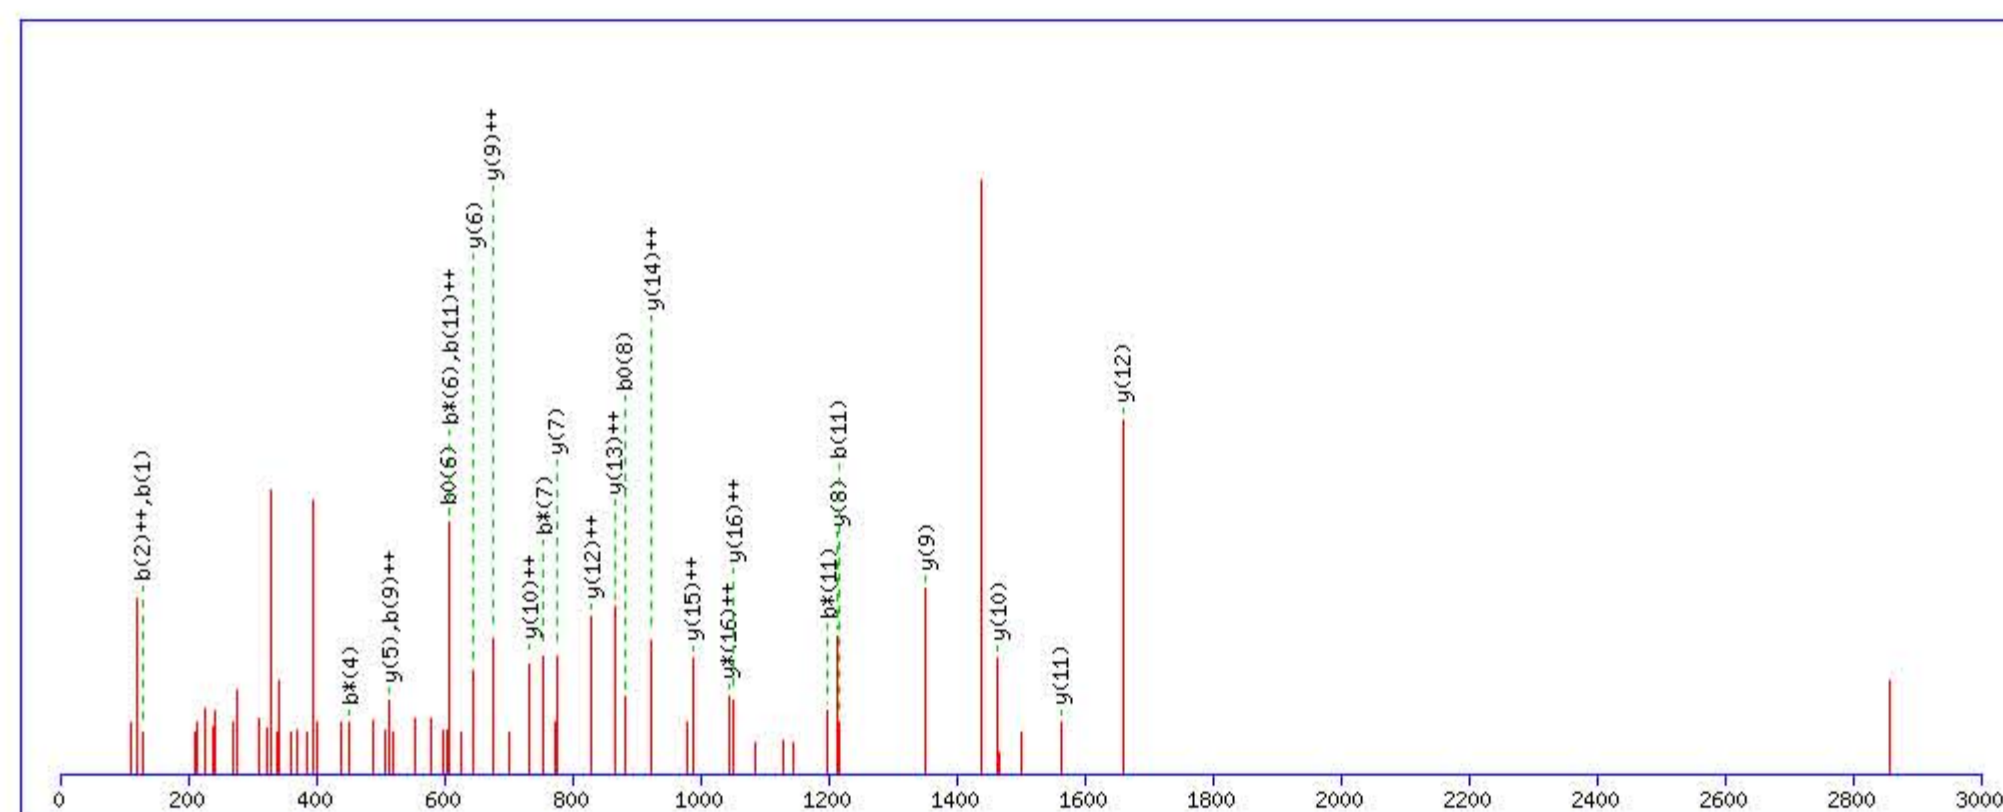

Monoisotopic mass of neutral peptide Mr(calc): 2874.452057

Fixed modifications: Carbamidomethyl (C) (apply to specified residues or termini only)

Variable modifications:

Q16 : Biotin:Thermo-21345 (Q)

Ions Score: 43 Expect: 0.0015

Matches : 27/246 fragment ions using 43 most intense peaks [\(help\)](#)

| #  | b           | b <sup>++</sup> | b <sup>*</sup> | b <sup>*++</sup> | b <sup>0</sup> | b <sup>0++</sup> | Seq. | y           | y <sup>++</sup> | y <sup>*</sup> | y <sup>*++</sup> | y <sup>0</sup> | y <sup>0++</sup> | #  |
|----|-------------|-----------------|----------------|------------------|----------------|------------------|------|-------------|-----------------|----------------|------------------|----------------|------------------|----|
| 1  | 129.065854  | 65.036565       | 112.039305     | 56.523291        |                |                  | Q    |             |                 |                |                  |                |                  | 23 |
| 2  | 257.160817  | 129.084047      | 240.134268     | 120.570772       |                |                  | K    | 2747.400756 | 1374.204016     | 2730.374207    | 1365.690741      | 2729.390191    | 1365.198733      | 22 |
| 3  | 354.213581  | 177.610429      | 337.187032     | 169.097154       |                |                  | P    | 2619.305793 | 1310.156534     | 2602.279244    | 1301.643260      | 2601.295228    | 1301.151252      | 21 |
| 4  | 469.240524  | 235.123900      | 452.213975     | 226.610626       | 451.229959     | 226.118618       | D    | 2522.253029 | 1261.630152     | 2505.226480    | 1253.116878      | 2504.242464    | 1252.624870      | 20 |
| 5  | 526.261988  | 263.634632      | 509.235439     | 255.121358       | 508.251423     | 254.629350       | G    | 2407.226086 | 1204.116681     | 2390.199537    | 1195.603406      | 2389.215521    | 1195.111398      | 19 |
| 6  | 625.330402  | 313.168839      | 608.303853     | 304.655565       | 607.319837     | 304.163557       | V    | 2350.204622 | 1175.605949     | 2333.178073    | 1167.092674      | 2332.194057    | 1166.600666      | 18 |
| 7  | 772.398816  | 386.703046      | 755.372267     | 378.189772       | 754.388251     | 377.697764       | F    | 2251.136208 | 1126.071742     | 2234.109659    | 1117.558467      | 2233.125643    | 1117.066459      | 17 |
| 8  | 900.457394  | 450.732335      | 883.430845     | 442.219061       | 882.446829     | 441.727053       | Q    | 2104.067794 | 1052.537535     | 2087.041245    | 1044.024260      | 2086.057229    | 1043.532252      | 16 |
| 9  | 1029.499987 | 515.253631      | 1012.473438    | 506.740357       | 1011.489422    | 506.248349       | E    | 1976.009216 | 988.508246      | 1958.982667    | 979.994972       | 1957.998651    | 979.502964       | 15 |
| 10 | 1144.526930 | 572.767103      | 1127.500381    | 564.253829       | 1126.516365    | 563.761821       | D    | 1846.966623 | 923.986950      | 1829.940074    | 915.473675       | 1828.956058    | 914.981667       | 14 |
| 11 | 1215.564044 | 608.285660      | 1198.537495    | 599.772386       | 1197.553479    | 599.280377       | A    | 1731.939680 | 866.473478      | 1714.913131    | 857.960204       | 1713.929115    | 857.468196       | 13 |
| 12 | 1312.616808 | 656.812042      | 1295.590259    | 648.298768       | 1294.606243    | 647.806760       | P    | 1660.902566 | 830.954921      | 1643.876017    | 822.441647       | 1642.892001    | 821.949639       | 12 |
| 13 | 1411.685222 | 706.346249      | 1394.658673    | 697.832975       | 1393.674657    | 697.340967       | V    | 1563.849802 | 782.428539      | 1546.823253    | 773.915265       | 1545.839237    | 773.423257       | 11 |
| 14 | 1524.769286 | 762.888281      | 1507.742737    | 754.375007       | 1506.758721    | 753.882998       | I    | 1464.781388 | 732.894332      | 1447.754839    | 724.381058       | 1446.770823    | 723.889050       | 10 |
| 15 | 1661.828198 | 831.417737      | 1644.801649    | 822.904463       | 1643.817633    | 822.412454       | H    | 1351.697324 | 676.352300      | 1334.670775    | 667.839026       | 1333.686759    | 667.347018       | 9  |
| 16 | 2101.053524 | 1051.030400     | 2084.026975    | 1042.517125      | 2083.042959    | 1042.025117      | Q    | 1214.638412 | 607.822844      | 1197.611863    | 599.309570       | 1196.627847    | 598.817562       | 8  |
| 17 | 2230.096117 | 1115.551696     | 2213.069568    | 1107.038422      | 2212.085552    | 1106.546414      | E    | 775.413086  | 388.210181      | 758.386537     | 379.696907       | 757.402521     | 379.204899       | 7  |
| 18 | 2361.136602 | 1181.071939     | 2344.110053    | 1172.558664      | 2343.126037    | 1172.066656      | M    | 646.370493  | 323.688885      | 629.343944     | 315.175610       |                |                  | 6  |
| 19 | 2474.220666 | 1237.613971     | 2457.194117    | 1229.100696      | 2456.210101    | 1228.608689      | I    | 515.330008  | 258.168642      | 498.303459     | 249.655368       |                |                  | 5  |
| 20 | 2531.242130 | 1266.124703     | 2514.215581    | 1257.611428      | 2513.231565    | 1257.119420      | G    | 402.245944  | 201.626610      | 385.219395     | 193.113335       |                |                  | 4  |
| 21 | 2588.263594 | 1294.635435     | 2571.237045    | 1286.122160      | 2570.253029    | 1285.630152      | G    | 345.224480  | 173.115878      | 328.197931     | 164.602603       |                |                  | 3  |
| 22 | 2701.347658 | 1351.177467     | 2684.321109    | 1342.664192      | 2683.337093    | 1342.172185      | L    | 288.203016  | 144.605146      | 271.176467     | 136.091872       |                |                  | 2  |
| 23 |             |                 |                |                  |                |                  | R    | 175.118952  | 88.063114       | 158.092403     | 79.549839        |                |                  | 1  |

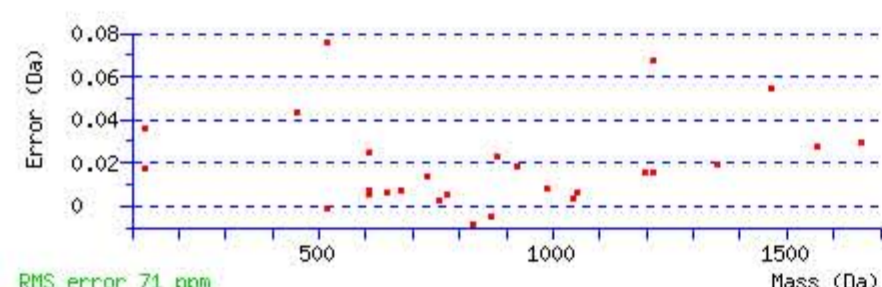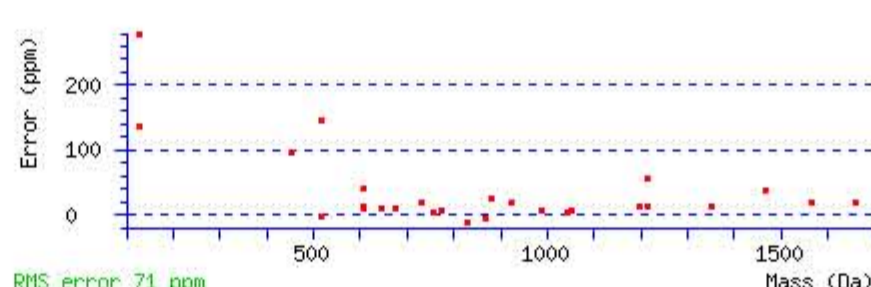

NCBI BLAST search of **QKPDGVFQEDAPVIHQEMIGGLR**  
(Parameters: blastp, nr protein database, expect=20000, no filter, PAM30)

Other BLAST [web gateways](#)

All matches to this query

| Score | Mr(calc):   | Delta    | Sequence                       |
|-------|-------------|----------|--------------------------------|
| 42.8  | 2874.452057 | 0.011719 | <b>QKPDGVFQEDAPVIHQEMIGGLR</b> |



# MASCOT Search Results

## Peptide View

MS/MS Fragmentation of **DTWVEHWPEEDECQDEENQK**

Found in **CO3\_HUMAN**, Complement C3 OS=Homo sapiens GN=C3 PE=1 SV=2

Match to Query 64659: 2913.189792 from(972.070540,3+) rtinseconds(2120) index(39406)

Title: Locus:1.1.1.2760.25 File:"2013-07-02 CLN FXIII 30 min 2nd F 3.wiff"

Data file C:\Program Files (x86)\Matrix Science\Mascot Daemon\mgf2 FXIII 30 min 2nd\mascot\_daemon\_merge.mgf

Click mouse within plot area to zoom in by factor of two about that point

Or, Plot from  to  Da

Label all possible matches  Label matches used for scoring

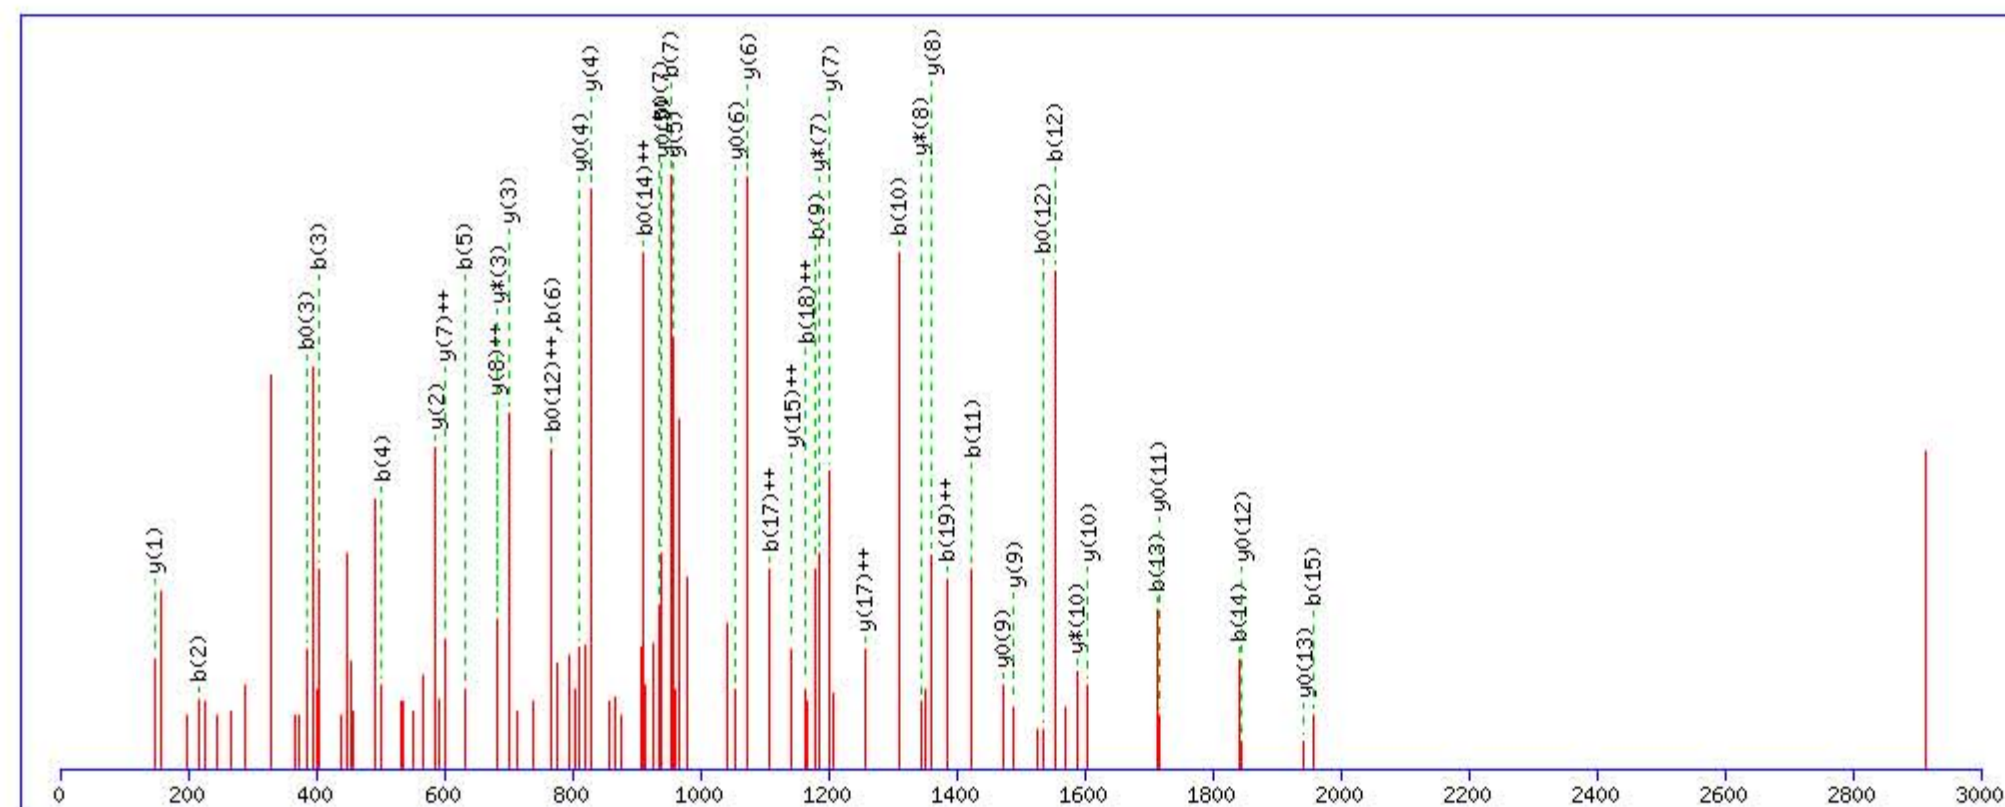

Monoisotopic mass of neutral peptide Mr(calc): 2913.185776

Fixed modifications: Carbamidomethyl (C) (apply to specified residues or termini only)

Variable modifications:

Q19 : Biotin:Thermo-21345 (Q)

Ions Score: 88 Expect: 1.9e-009

Matches : 46/196 fragment ions using 66 most intense peaks [\(help\)](#)

| #  | b                  | b <sup>++</sup>    | b <sup>*</sup> | b <sup>*++</sup> | b <sup>0</sup>     | b <sup>0++</sup>  | Seq. | y                  | y <sup>++</sup>    | y <sup>*</sup>     | y <sup>*++</sup> | y <sup>0</sup>     | y <sup>0++</sup> | #  |
|----|--------------------|--------------------|----------------|------------------|--------------------|-------------------|------|--------------------|--------------------|--------------------|------------------|--------------------|------------------|----|
| 1  | 116.034219         | 58.520748          |                |                  | 98.023654          | 49.515465         | D    |                    |                    |                    |                  |                    |                  | 20 |
| 2  | <b>217.081898</b>  | 109.044587         |                |                  | 199.071333         | 100.039304        | T    | 2799.166123        | 1400.086699        | 2782.139574        | 1391.573425      | 2781.155558        | 1391.081417      | 19 |
| 3  | <b>403.161211</b>  | 202.084244         |                |                  | <b>385.150646</b>  | 193.078961        | W    | 2698.118444        | 1349.562860        | 2681.091895        | 1341.049585      | 2680.107879        | 1340.557577      | 18 |
| 4  | <b>502.229625</b>  | 251.618451         |                |                  | 484.219060         | 242.613168        | V    | 2512.039131        | <b>1256.523203</b> | 2495.012582        | 1248.009929      | 2494.028566        | 1247.517921      | 17 |
| 5  | <b>631.272218</b>  | 316.139747         |                |                  | 613.261653         | 307.134465        | E    | 2412.970717        | 1206.988996        | 2395.944168        | 1198.475722      | 2394.960152        | 1197.983714      | 16 |
| 6  | <b>768.331130</b>  | 384.669203         |                |                  | 750.320565         | 375.663921        | H    | 2283.928124        | <b>1142.467700</b> | 2266.901575        | 1133.954425      | 2265.917559        | 1133.462417      | 15 |
| 7  | <b>954.410443</b>  | 477.708860         |                |                  | <b>936.399878</b>  | 468.703577        | W    | 2146.869212        | 1073.938244        | 2129.842663        | 1065.424969      | 2128.858647        | 1064.932961      | 14 |
| 8  | 1051.463207        | 526.235242         |                |                  | 1033.452642        | 517.229959        | P    | 1960.789899        | 980.898588         | 1943.763350        | 972.385313       | <b>1942.779334</b> | 971.893305       | 13 |
| 9  | <b>1180.505800</b> | 590.756538         |                |                  | 1162.495235        | 581.751256        | E    | 1863.737135        | 932.372206         | 1846.710586        | 923.858931       | <b>1845.726570</b> | 923.366923       | 12 |
| 10 | <b>1309.548393</b> | 655.277835         |                |                  | 1291.537828        | 646.272552        | E    | 1734.694542        | 867.850909         | 1717.667993        | 859.337635       | <b>1716.683977</b> | 858.845627       | 11 |
| 11 | <b>1424.575336</b> | 712.791306         |                |                  | 1406.564771        | 703.786024        | D    | <b>1605.651949</b> | 803.329613         | <b>1588.625400</b> | 794.816338       | 1587.641384        | 794.324330       | 10 |
| 12 | <b>1553.617929</b> | 777.312603         |                |                  | <b>1535.607364</b> | <b>768.307320</b> | E    | <b>1490.625006</b> | 745.816141         | 1473.598457        | 737.302867       | <b>1472.614441</b> | 736.810859       | 9  |
| 13 | <b>1713.648578</b> | 857.327927         |                |                  | 1695.638013        | 848.322645        | C    | <b>1361.582413</b> | <b>681.294845</b>  | <b>1344.555864</b> | 672.781570       | 1343.571848        | 672.289562       | 8  |
| 14 | <b>1841.707156</b> | 921.357216         | 1824.680607    | 912.843942       | 1823.696591        | <b>912.351934</b> | Q    | <b>1201.551764</b> | <b>601.279520</b>  | <b>1184.525215</b> | 592.766246       | 1183.541199        | 592.274238       | 7  |
| 15 | <b>1956.734099</b> | 978.870688         | 1939.707550    | 970.357413       | 1938.723534        | 969.865405        | D    | <b>1073.493186</b> | 537.250231         | 1056.466637        | 528.736957       | <b>1055.482621</b> | 528.244949       | 6  |
| 16 | 2085.776692        | 1043.391984        | 2068.750143    | 1034.878709      | 2067.766127        | 1034.386701       | E    | <b>958.466243</b>  | 479.736760         | 941.439694         | 471.223485       | <b>940.455678</b>  | 470.731477       | 5  |
| 17 | 2214.819285        | <b>1107.913280</b> | 2197.792736    | 1099.400006      | 2196.808720        | 1098.907998       | E    | <b>829.423650</b>  | 415.215463         | 812.397101         | 406.702189       | <b>811.413085</b>  | 406.210181       | 4  |
| 18 | 2328.862212        | <b>1164.934744</b> | 2311.835663    | 1156.421469      | 2310.851647        | 1155.929461       | N    | <b>700.381057</b>  | 350.694167         | <b>683.354508</b>  | 342.180892       |                    |                  | 3  |
| 19 | 2768.087538        | <b>1384.547407</b> | 2751.060989    | 1376.034132      | 2750.076973        | 1375.542125       | Q    | <b>586.338130</b>  | 293.672703         | 569.311581         | 285.159429       |                    |                  | 2  |
| 20 |                    |                    |                |                  |                    |                   | K    | <b>147.112804</b>  | 74.060040          | 130.086255         | 65.546765        |                    |                  | 1  |

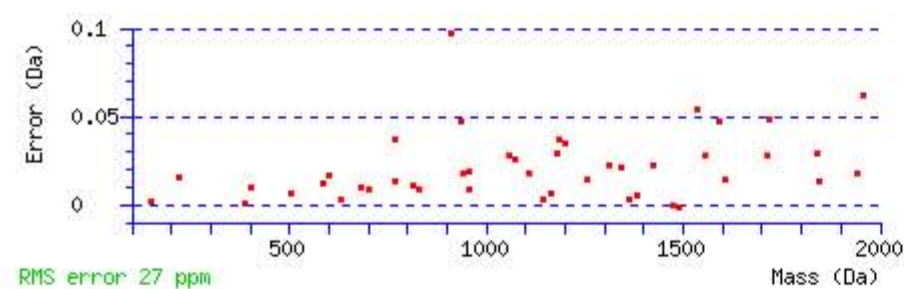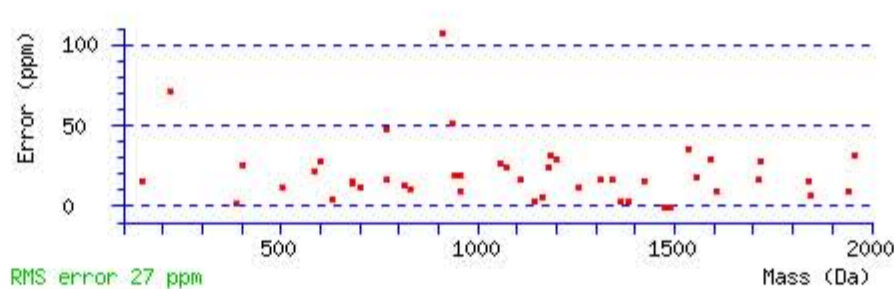

NCBI BLAST search of **DTWVEHWPEEDECQDEENQK**

(Parameters: blastp, nr protein database, expect=20000, no filter, PAM30)

Other BLAST [web gateways](#)

All matches to this query

| Score | Mr(calc):   | Delta    | Sequence                             |
|-------|-------------|----------|--------------------------------------|
| 87.5  | 2913.185776 | 0.004016 | <a href="#">DTWVEHWPEEDECQDEENQK</a> |
| 41.0  | 2913.185776 | 0.004016 | <a href="#">DTWVEHWPEEDECQDEENQK</a> |

Mascot: <http://www.matrixscience.com/>



# **MASCOT** Mascot Search Results

## Peptide View

MS/MS Fragmentation of **GQAGLQR**

Found in **CO4A\_HUMAN**, Complement C4-A OS=Homo sapiens GN=C4A PE=1 SV=2

Match to Query 18516: 1039.549508 from(520.782030,2+) rtinseconds(1408) index(51939)

Title: Locus:1.1.1.2976.22 File:"2013-07-02 CLN FXIII 30 min 2nd F 4.wiff"

Data file C:\Program Files (x86)\Matrix Science\Mascot Daemon\mgf2 FXIII 30 min 2nd\mascot\_daemon\_merge.mgf

Click mouse within plot area to zoom in by factor of two about that point

Or, Plot from  to  Da

Label all possible matches  Label matches used for scoring

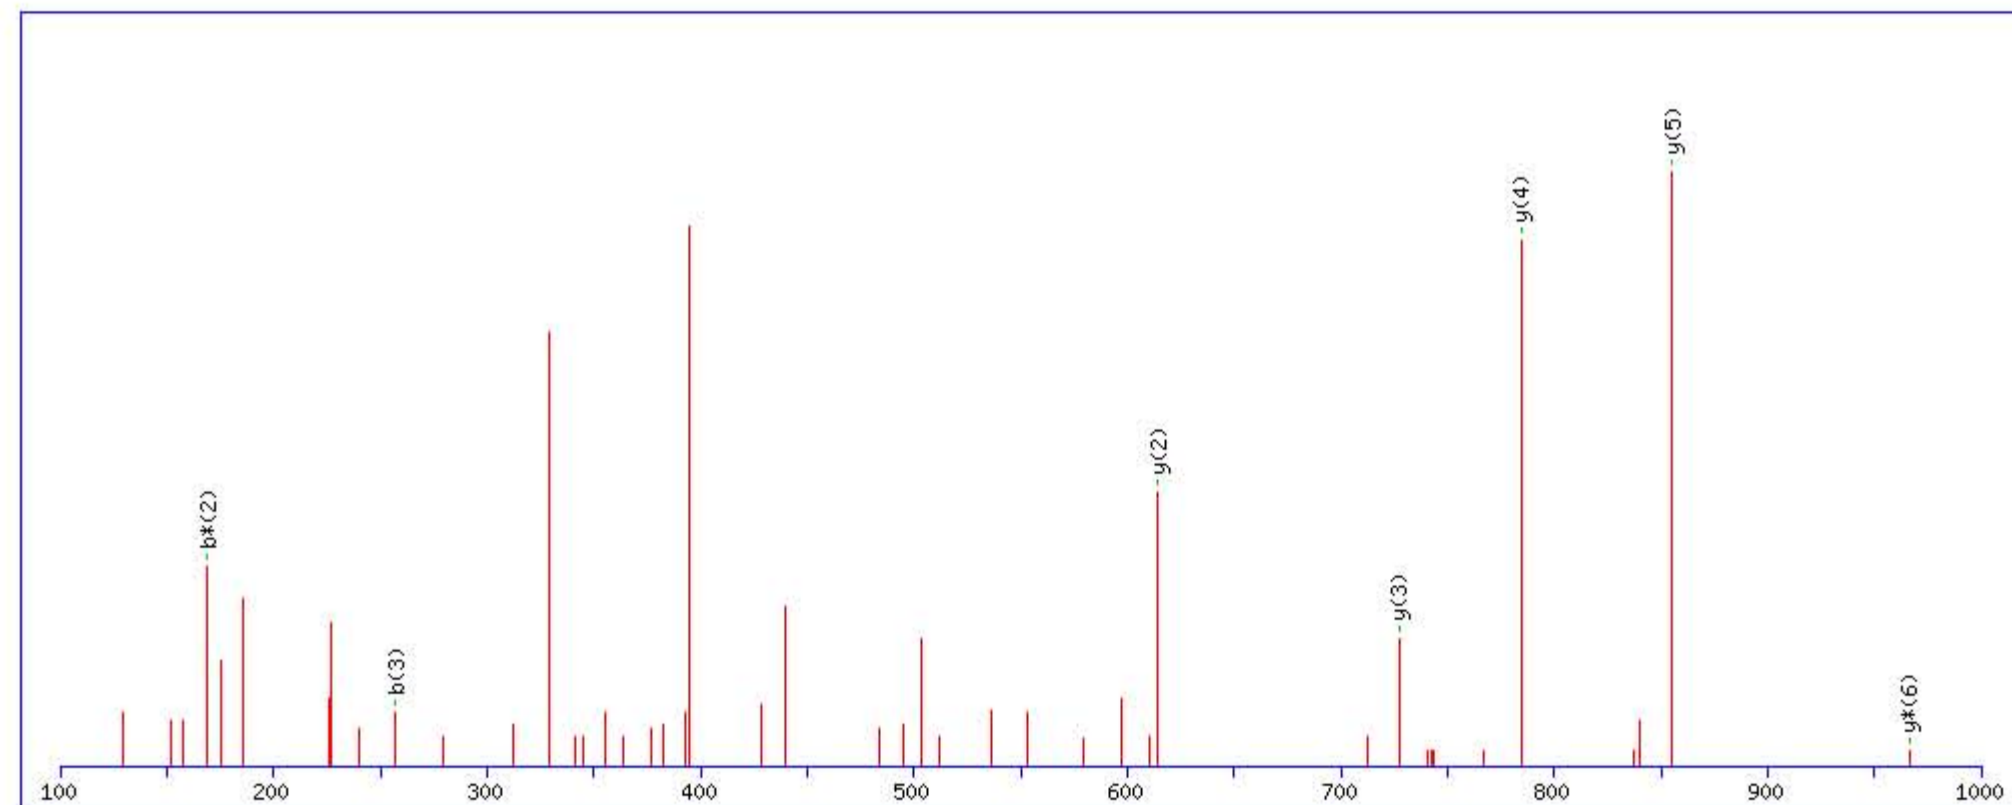

Monoisotopic mass of neutral peptide Mr(calc): 1039.559677

Fixed modifications: Carbamidomethyl (C) (apply to specified residues or termini only)

Variable modifications:

Q6 : Biotin:Thermo-21345 (Q)

Ions Score: 29 Expect: 0.017

Matches : 7/46 fragment ions using 9 most intense peaks [\(help\)](#)

| # | b                 | b <sup>++</sup> | b <sup>*</sup> | b <sup>*++</sup> | Seq.     | y                 | y <sup>++</sup> | y <sup>*</sup> | y <sup>*++</sup> | # |
|---|-------------------|-----------------|----------------|------------------|----------|-------------------|-----------------|----------------|------------------|---|
| 1 | 58.028740         | 29.518008       |                |                  | <b>G</b> |                   |                 |                |                  | 7 |
| 2 | 186.087318        | 93.547297       | 169.060769     | 85.034023        | <b>Q</b> | 983.545498        | 492.276387      | 966.518949     | 483.763113       | 6 |
| 3 | <b>257.124432</b> | 129.065854      | 240.097883     | 120.552580       | <b>A</b> | <b>855.486920</b> | 428.247098      | 838.460371     | 419.733824       | 5 |
| 4 | 314.145896        | 157.576586      | 297.119347     | 149.063312       | <b>G</b> | <b>784.449806</b> | 392.728541      | 767.423257     | 384.215267       | 4 |
| 5 | 427.229960        | 214.118618      | 410.203411     | 205.605344       | <b>L</b> | <b>727.428342</b> | 364.217809      | 710.401793     | 355.704535       | 3 |
| 6 | 866.455286        | 433.731281      | 849.428737     | 425.218007       | <b>Q</b> | <b>614.344278</b> | 307.675777      | 597.317729     | 299.162503       | 2 |
| 7 |                   |                 |                |                  | <b>R</b> | 175.118952        | 88.063114       | 158.092403     | 79.549840        | 1 |

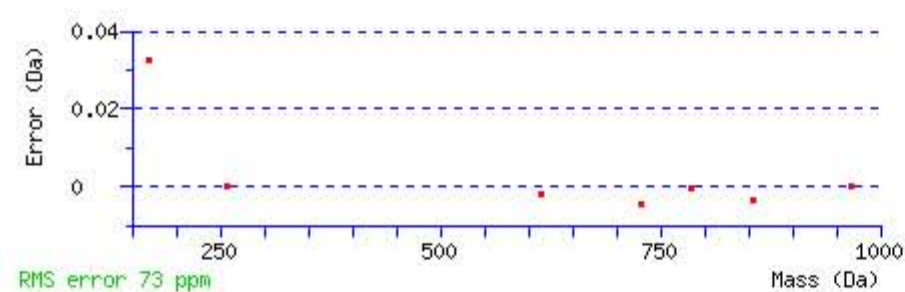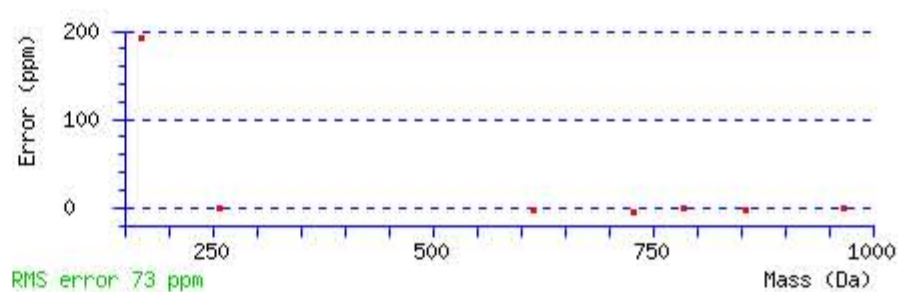

NCBI BLAST search of **GQAGLQR**

(Parameters: blastp, nr protein database, expect=20000, no filter, PAM30)

Other BLAST [web gateways](#)

All matches to this query

| Score | Mr(calc):   | Delta     | Sequence                   |
|-------|-------------|-----------|----------------------------|
| 29.3  | 1039.559677 | -0.010169 | <a href="#">GQAGLQR</a>    |
| 10.4  | 1039.559677 | -0.010169 | <a href="#">GQQIQR</a>     |
| 8.9   | 1039.541061 | 0.008447  | <a href="#">GQGDLLQPGR</a> |
| 4.7   | 1039.563492 | -0.013984 | <a href="#">AEGARARGPR</a> |
| 4.6   | 1039.559677 | -0.010169 | <a href="#">KGGPSQR</a>    |
| 2.1   | 1039.552277 | -0.002769 | <a href="#">QRAALDGGPR</a> |
| 1.6   | 1039.541046 | 0.008462  | <a href="#">GSELTLHQR</a>  |
| 0.8   | 1039.548431 | 0.001077  | <a href="#">LSPEQR</a>     |

Mascot: <http://www.matrixscience.com/>



# MASCOT Search Results

## Peptide View

MS/MS Fragmentation of **VQQPDCR**

Found in **CO4A\_HUMAN**, Complement C4-A OS=Homo sapiens GN=C4A PE=1 SV=2

Match to Query 25568: 1212.570008 from(607.292280,2+) rtinseconds(1273) index(51047)

Title: Locus:1.1.1.2929.18 File:"2013-07-02 CLN FXIII 30 min 2nd F 4.wiff"

Data file C:\Program Files (x86)\Matrix Science\Mascot Daemon\mgf\2 FXIII 30 min 2nd\mascot\_daemon\_merge.mgf

Click mouse within plot area to zoom in by factor of two about that point

Or, Plot from  to  Da

Label all possible matches  Label matches used for scoring

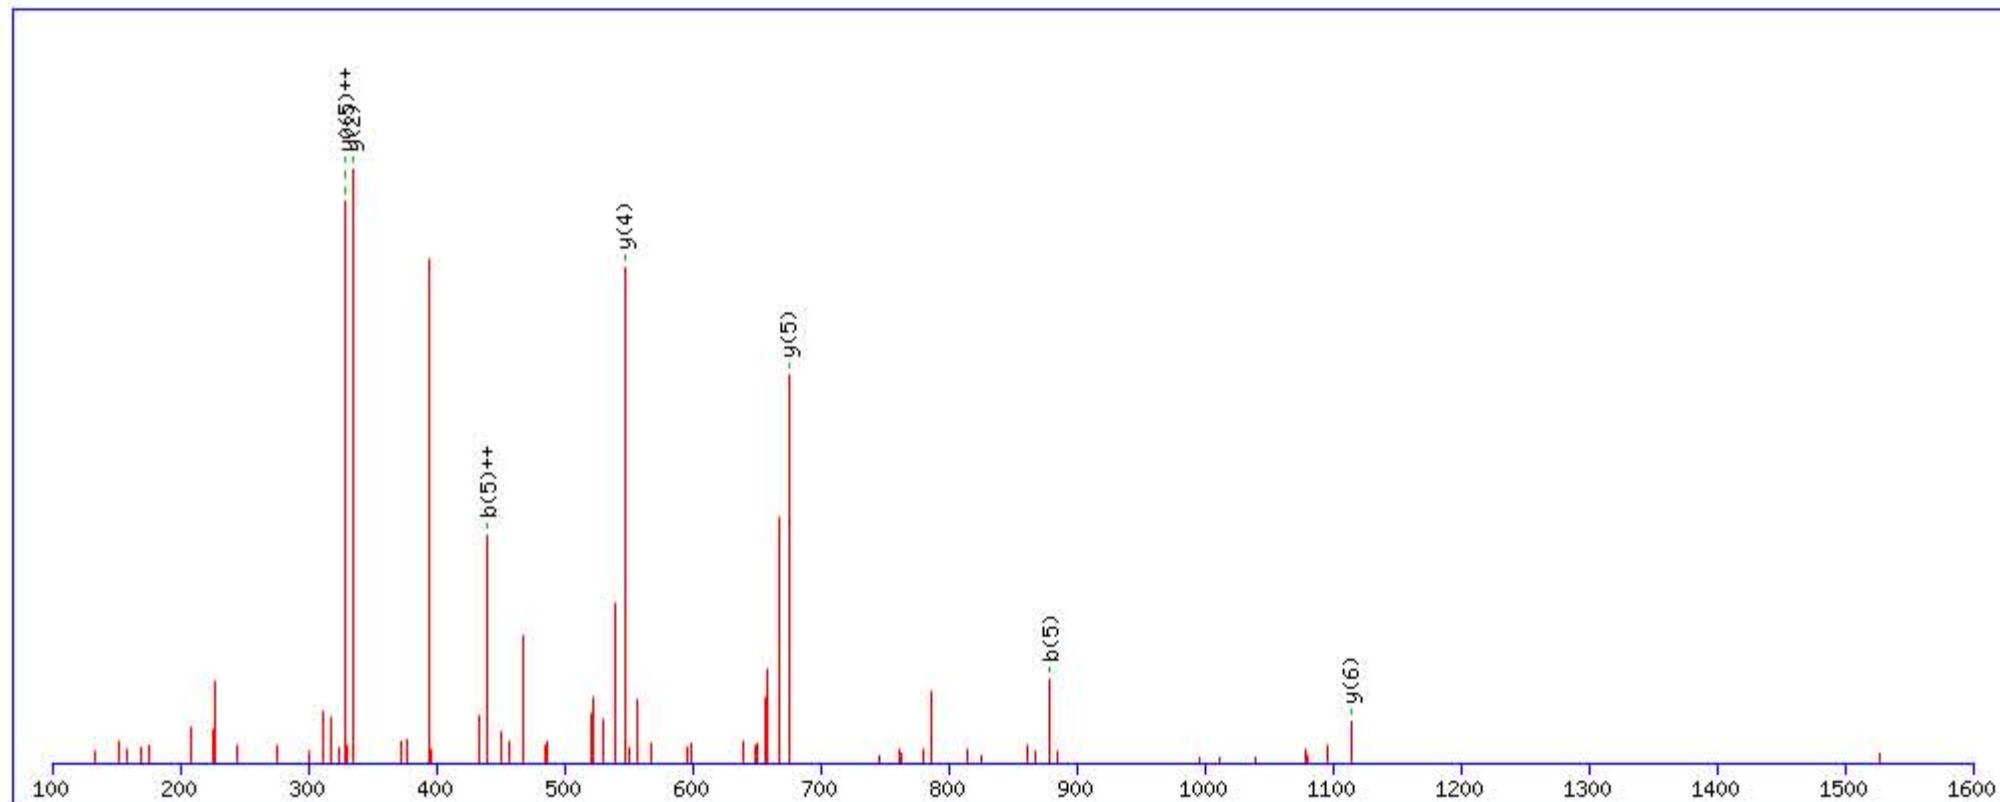

Monoisotopic mass of neutral peptide Mr(calc): 1212.574356

Fixed modifications: Carbamidomethyl (C) (apply to specified residues or termini only)

Variable modifications:

Q2 : Biotin:Thermo-21345 (Q)

Ions Score: 27 Expect: 0.0089

Matches : 7/58 fragment ions using 10 most intense peaks ([help](#))

| # | b           | b <sup>++</sup> | b <sup>*</sup> | b <sup>+++</sup> | b <sup>0</sup> | b <sup>0++</sup> | Seq. | y           | y <sup>++</sup> | y <sup>*</sup> | y <sup>+++</sup> | y <sup>0</sup> | y <sup>0++</sup> | # |
|---|-------------|-----------------|----------------|------------------|----------------|------------------|------|-------------|-----------------|----------------|------------------|----------------|------------------|---|
| 1 | 100.075690  | 50.541483       |                |                  |                |                  | V    |             |                 |                |                  |                |                  | 7 |
| 2 | 539.301016  | 270.154146      | 522.274467     | 261.640872       |                |                  | Q    | 1114.513212 | 557.760244      | 1097.486663    | 549.246970       | 1096.502647    | 548.754962       | 6 |
| 3 | 667.359594  | 334.183435      | 650.333045     | 325.670161       |                |                  | Q    | 675.287886  | 338.147581      | 658.261337     | 329.634307       | 657.277321     | 329.142299       | 5 |
| 4 | 764.412358  | 382.709817      | 747.385809     | 374.196543       |                |                  | P    | 547.229308  | 274.118292      | 530.202759     | 265.605018       | 529.218743     | 265.113010       | 4 |
| 5 | 879.439301  | 440.223289      | 862.412752     | 431.710014       | 861.428736     | 431.218006       | D    | 450.176544  | 225.591910      | 433.149995     | 217.078635       | 432.165979     | 216.586627       | 3 |
| 6 | 1039.469950 | 520.238613      | 1022.443401    | 511.725339       | 1021.459385    | 511.233331       | C    | 335.149601  | 168.078438      | 318.123052     | 159.565164       |                |                  | 2 |
| 7 |             |                 |                |                  |                |                  | R    | 175.118952  | 88.063114       | 158.092403     | 79.549839        |                |                  | 1 |

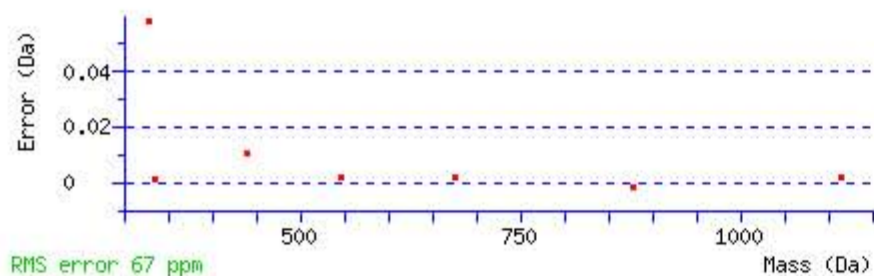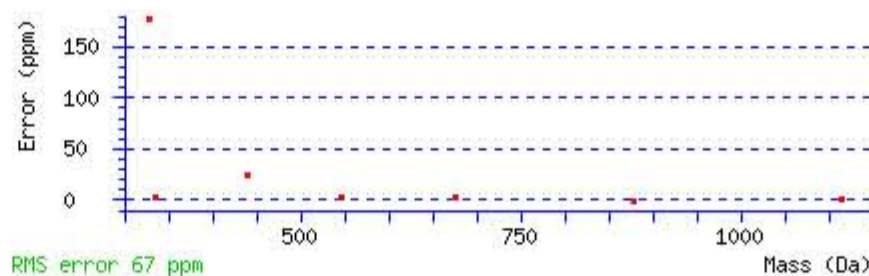

NCBI BLAST search of **VQQPDCR**

(Parameters: blastp, nr protein database, expect=20000, no filter, PAM30)

Other BLAST [web gateways](#)

All matches to this query

| Score | Mr(calc):   | Delta     | Sequence                    |
|-------|-------------|-----------|-----------------------------|
| 27.0  | 1212.574356 | -0.004348 | <a href="#">VQQPDCR</a>     |
| 11.8  | 1212.574356 | -0.004348 | <a href="#">VQQPDCR</a>     |
| 4.9   | 1212.555725 | 0.014283  | <a href="#">QSPGPEPSVCR</a> |
| 1.6   | 1212.562241 | 0.007767  | <a href="#">TTAQYDQASTK</a> |



# MASCOT Search Results

## Peptide View

MS/MS Fragmentation of **VEYGFQVK**

Found in **CO4A\_HUMAN**, Complement C4-A OS=Homo sapiens GN=C4A PE=1 SV=2

Match to Query 27774: 1279.659228 from(640.836890,2+) rtinseconds(1975) index(55660)

Title: Locus:1.1.1.3173.17 File:"2013-07-02 CLN FXIII 30 min 2nd F 4.wiff"

Data file C:\Program Files (x86)\Matrix Science\Mascot Daemon\mgf2 FXIII 30 min 2nd\mascot\_daemon\_merge.mgf

Click mouse within plot area to zoom in by factor of two about that point

Or, Plot from  to  Da

Label all possible matches  Label matches used for scoring

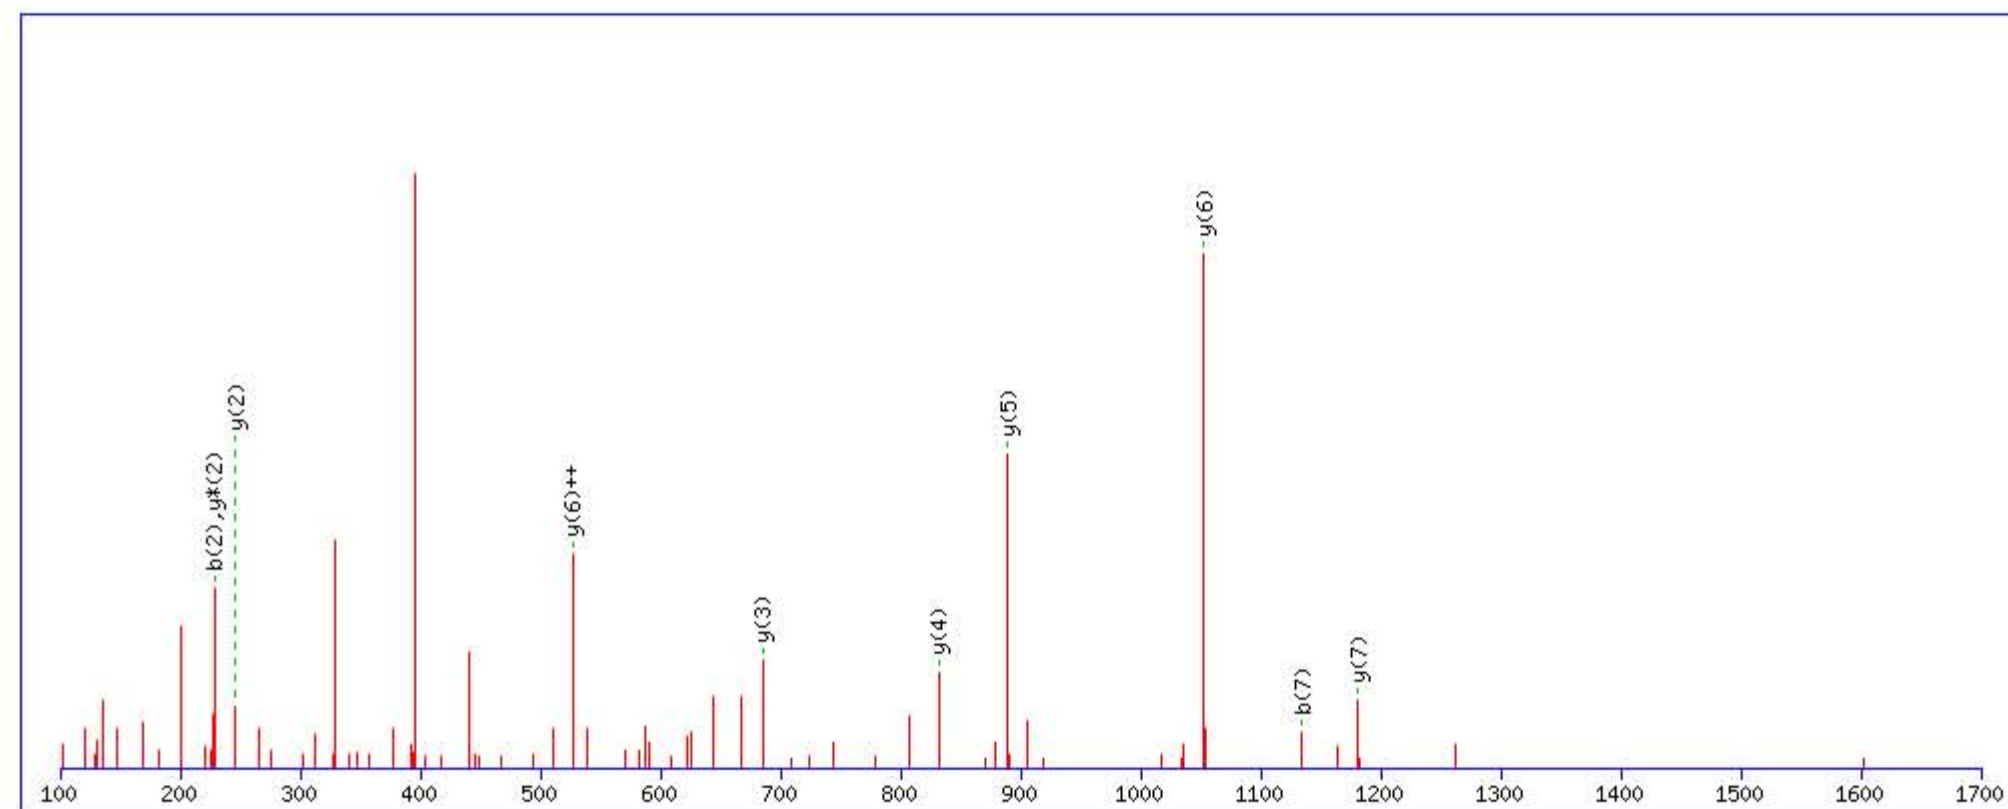

Monoisotopic mass of neutral peptide Mr(calc): 1279.663483

Fixed modifications: Carbamidomethyl (C) (apply to specified residues or termini only)

Variable modifications:

Q6 : Biotin:Thermo-21345 (Q)

Ions Score: 27 Expect: 0.037

Matches : 10/60 fragment ions using 23 most intense peaks [\(help\)](#)

| # | b                  | b <sup>++</sup> | b <sup>*</sup> | b <sup>+++</sup> | b <sup>0</sup> | b <sup>0++</sup> | Seq. | y                  | y <sup>++</sup>   | y <sup>*</sup>    | y <sup>+++</sup> | y <sup>0</sup> | y <sup>0++</sup> | # |
|---|--------------------|-----------------|----------------|------------------|----------------|------------------|------|--------------------|-------------------|-------------------|------------------|----------------|------------------|---|
| 1 | 100.075690         | 50.541483       |                |                  |                |                  | V    |                    |                   |                   |                  |                |                  | 8 |
| 2 | <b>229.118283</b>  | 115.062780      |                |                  | 211.107718     | 106.057497       | E    | <b>1181.602344</b> | 591.304810        | 1164.575795       | 582.791536       | 1163.591779    | 582.299528       | 7 |
| 3 | 392.181612         | 196.594444      |                |                  | 374.171047     | 187.589162       | Y    | <b>1052.559751</b> | <b>526.783514</b> | 1035.533202       | 518.270239       |                |                  | 6 |
| 4 | 449.203076         | 225.105176      |                |                  | 431.192511     | 216.099894       | G    | <b>889.496422</b>  | 445.251849        | 872.469873        | 436.738575       |                |                  | 5 |
| 5 | 596.271490         | 298.639383      |                |                  | 578.260925     | 289.634101       | F    | <b>832.474958</b>  | 416.741117        | 815.448409        | 408.227843       |                |                  | 4 |
| 6 | 1035.496816        | 518.252046      | 1018.470267    | 509.738772       | 1017.486251    | 509.246764       | Q    | <b>685.406544</b>  | 343.206910        | 668.379995        | 334.693636       |                |                  | 3 |
| 7 | <b>1134.565230</b> | 567.786253      | 1117.538681    | 559.272979       | 1116.554665    | 558.780971       | V    | <b>246.181218</b>  | 123.594247        | <b>229.154669</b> | 115.080973       |                |                  | 2 |
| 8 |                    |                 |                |                  |                |                  | K    | 147.112804         | 74.060040         | 130.086255        | 65.546765        |                |                  | 1 |

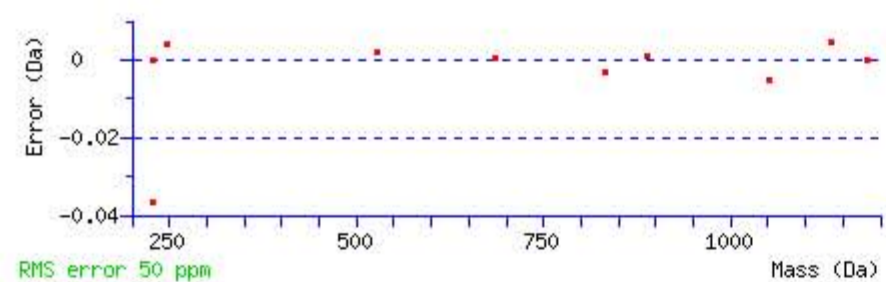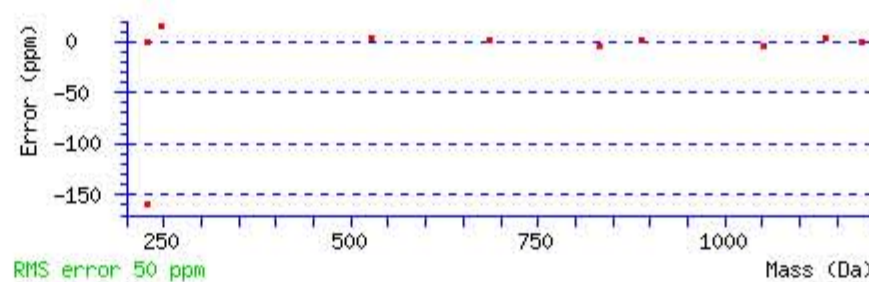

NCBI BLAST search of [VEYGFQVK](#)

(Parameters: blastp, nr protein database, expect=20000, no filter, PAM30)

Other BLAST [web gateways](#)

All matches to this query

| Score | Mr(calc):   | Delta     | Sequence                      |
|-------|-------------|-----------|-------------------------------|
| 27.3  | 1279.663483 | -0.004255 | <a href="#">VEYGFQVK</a>      |
| 12.2  | 1279.663483 | -0.004255 | <a href="#">QFVG YLDK</a>     |
| 10.1  | 1279.659470 | -0.000242 | <a href="#">VCSFGKQVVEK</a>   |
| 3.7   | 1279.670670 | -0.011442 | <a href="#">VEHKS NQK</a>     |
| 2.5   | 1279.677216 | -0.017988 | <a href="#">VFKTEDTQGKK</a>   |
| 1.0   | 1279.652039 | 0.007189  | <a href="#">QAVRSYNSEVK</a>   |
| 0.8   | 1279.677185 | -0.017957 | <a href="#">EARSLS TELFK</a>  |
| 0.5   | 1279.677246 | -0.018018 | <a href="#">TGGFTGNVSIIVK</a> |
| 0.2   | 1279.677200 | -0.017972 | <a href="#">EYVGK TSLVER</a>  |



# MASCOT SCIENCE Mascot Search Results

## Peptide View

MS/MS Fragmentation of **VVEEQESR**

Found in **CO4A\_HUMAN**, Complement C4-A OS=Homo sapiens GN=C4A PE=1 SV=2

Match to Query 28087: 1285.630888 from(643.822720,2+) rtinseconds(1347) index(51504)

Title: Locus:1.1.1.2955.14 File:"2013-07-02 CLN FXIII 30 min 2nd F 4.wiff"

Data file C:\Program Files (x86)\Matrix Science\Mascot Daemon\mgf\2 FXIII 30 min 2nd\mascot\_daemon\_merge.mgf

Click mouse within plot area to zoom in by factor of two about that point

Or, Plot from  to  Da

Label all possible matches  Label matches used for scoring

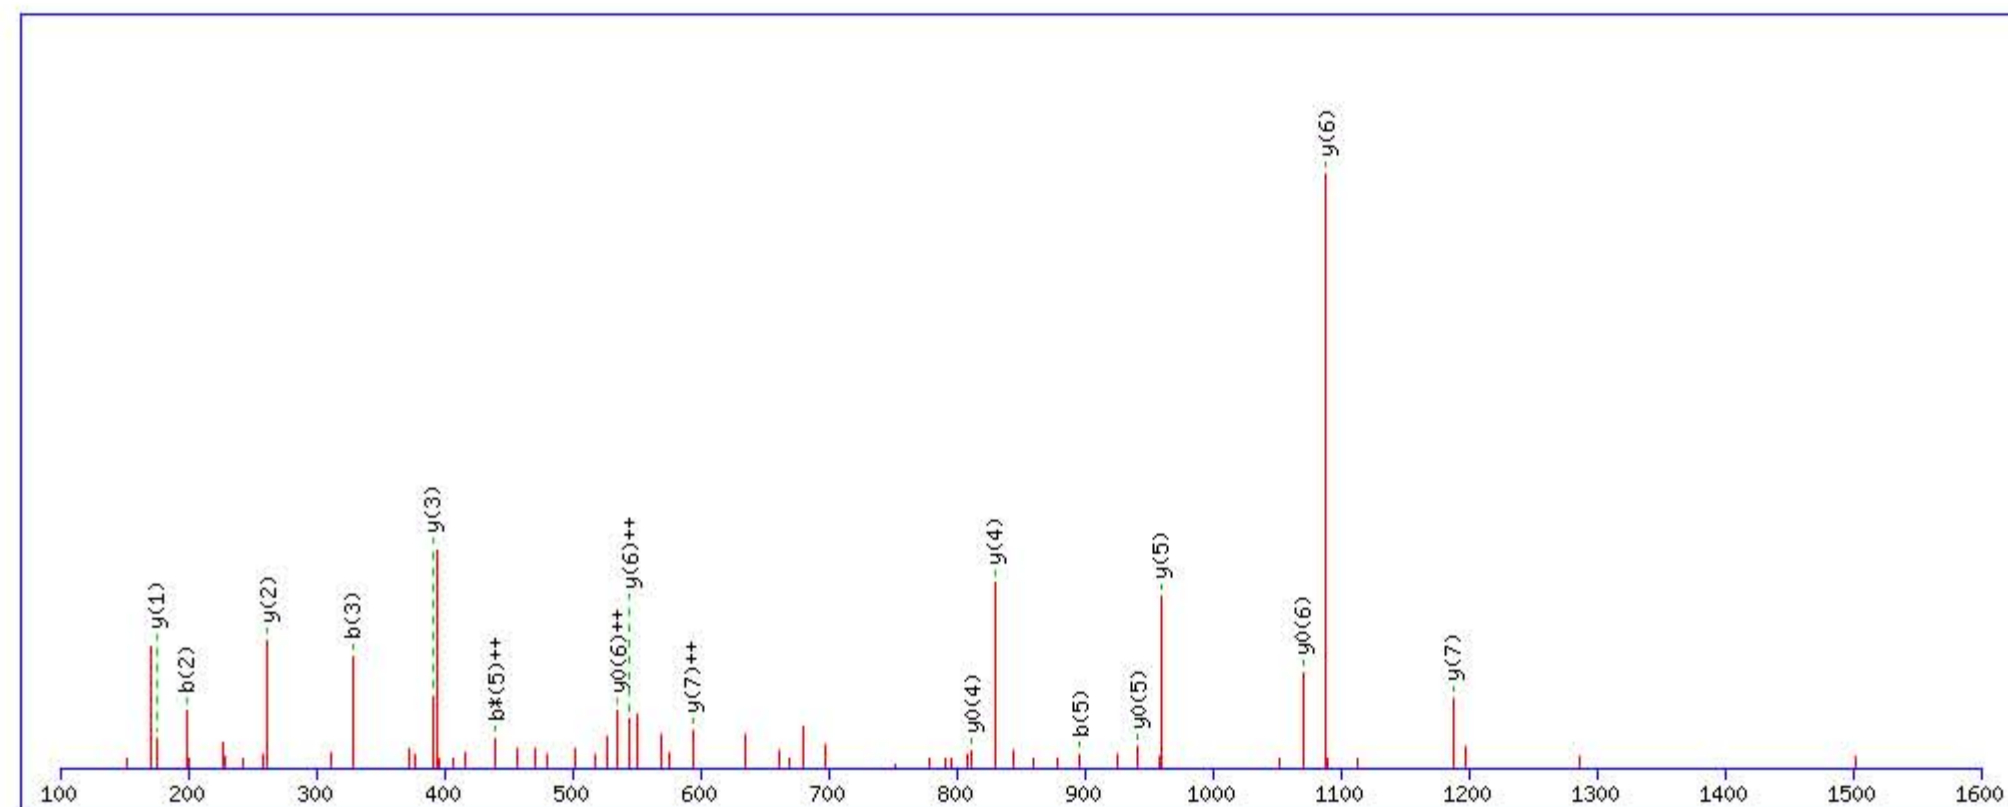

Monoisotopic mass of neutral peptide Mr(calc): 1285.633621

Fixed modifications: Carbamidomethyl (C) (apply to specified residues or termini only)

Variable modifications:

Q5 : Biotin:Thermo-21345 (Q)

Ions Score: 43 Expect: 0.00016

Matches : 17/70 fragment ions using 32 most intense peaks ([help](#))

| # | b                 | b <sup>++</sup> | b <sup>*</sup> | b <sup>***</sup>  | b <sup>0</sup> | b <sup>0++</sup> | Seq. | y                  | y <sup>++</sup>   | y <sup>*</sup> | y <sup>***</sup> | y <sup>0</sup>     | y <sup>0++</sup>  | # |
|---|-------------------|-----------------|----------------|-------------------|----------------|------------------|------|--------------------|-------------------|----------------|------------------|--------------------|-------------------|---|
| 1 | 100.075690        | 50.541483       |                |                   |                |                  | V    |                    |                   |                |                  |                    |                   | 8 |
| 2 | <b>199.144104</b> | 100.075690      |                |                   |                |                  | V    | <b>1187.572499</b> | <b>594.289888</b> | 1170.545950    | 585.776613       | 1169.561934        | 585.284605        | 7 |
| 3 | <b>328.186697</b> | 164.596987      |                |                   | 310.176132     | 155.591704       | E    | <b>1088.504085</b> | <b>544.755681</b> | 1071.477536    | 536.242406       | <b>1070.493520</b> | <b>535.750398</b> | 6 |
| 4 | 457.229290        | 229.118283      |                |                   | 439.218725     | 220.113001       | E    | <b>959.461492</b>  | 480.234384        | 942.434943     | 471.721110       | <b>941.450927</b>  | 471.229102        | 5 |
| 5 | <b>896.454616</b> | 448.730946      | 879.428067     | <b>440.217672</b> | 878.444051     | 439.725664       | Q    | <b>830.418899</b>  | 415.713088        | 813.392350     | 407.199813       | <b>812.408334</b>  | 406.707805        | 4 |
| 6 | 1025.497209       | 513.252243      | 1008.470660    | 504.738968        | 1007.486644    | 504.246960       | E    | <b>391.193573</b>  | 196.100425        | 374.167024     | 187.587150       | 373.183008         | 187.095142        | 3 |
| 7 | 1112.529237       | 556.768257      | 1095.502688    | 548.254982        | 1094.518672    | 547.762974       | S    | <b>262.150980</b>  | 131.579128        | 245.124431     | 123.065854       | 244.140415         | 122.573846        | 2 |
| 8 |                   |                 |                |                   |                |                  | R    | <b>175.118952</b>  | 88.063114         | 158.092403     | 79.549839        |                    |                   | 1 |

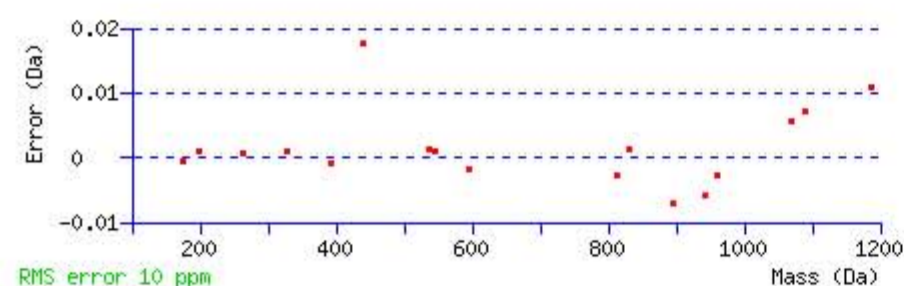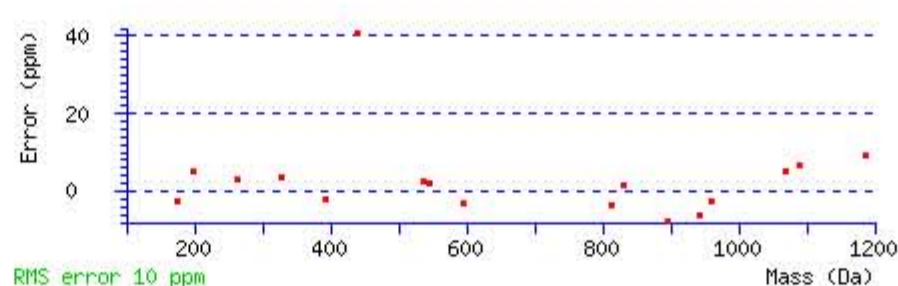

NCBI BLAST search of **VVEEQESR**

(Parameters: blastp, nr protein database, expect=20000, no filter, PAM30)

Other BLAST [web gateways](#)

All matches to this query

| Score | Mr(calc):   | Delta     | Sequence                      |
|-------|-------------|-----------|-------------------------------|
| 42.9  | 1285.633621 | -0.002733 | <a href="#">VVEEQESR</a>      |
| 2.2   | 1285.644867 | -0.013979 | <a href="#">DTLHSAMAVVSR</a>  |
| 1.4   | 1285.637451 | -0.006563 | <a href="#">TAPASGSAPRESR</a> |

Mascot: <http://www.matrixscience.com/>



# MASCOT SEARCH RESULTS

## Peptide View

MS/MS Fragmentation of **LGQYASPTAK**

Found in **CO4A\_HUMAN**, Complement C4-A OS=Homo sapiens GN=C4A PE=1 SV=2

Match to Query 29459: 1345.701308 from(673.857930,2+) rtinseconds(1582) index(53084)

Title: Locus:1.1.1.3037.12 File:"2013-07-02 CLN FXIII 30 min 2nd F 4.wiff"

Data file C:\Program Files (x86)\Matrix Science\Mascot Daemon\mgf2 FXIII 30 min 2nd\mascot\_daemon\_merge.mgf

Click mouse within plot area to zoom in by factor of two about that point

Or, Plot from  to  Da

Label all possible matches  Label matches used for scoring

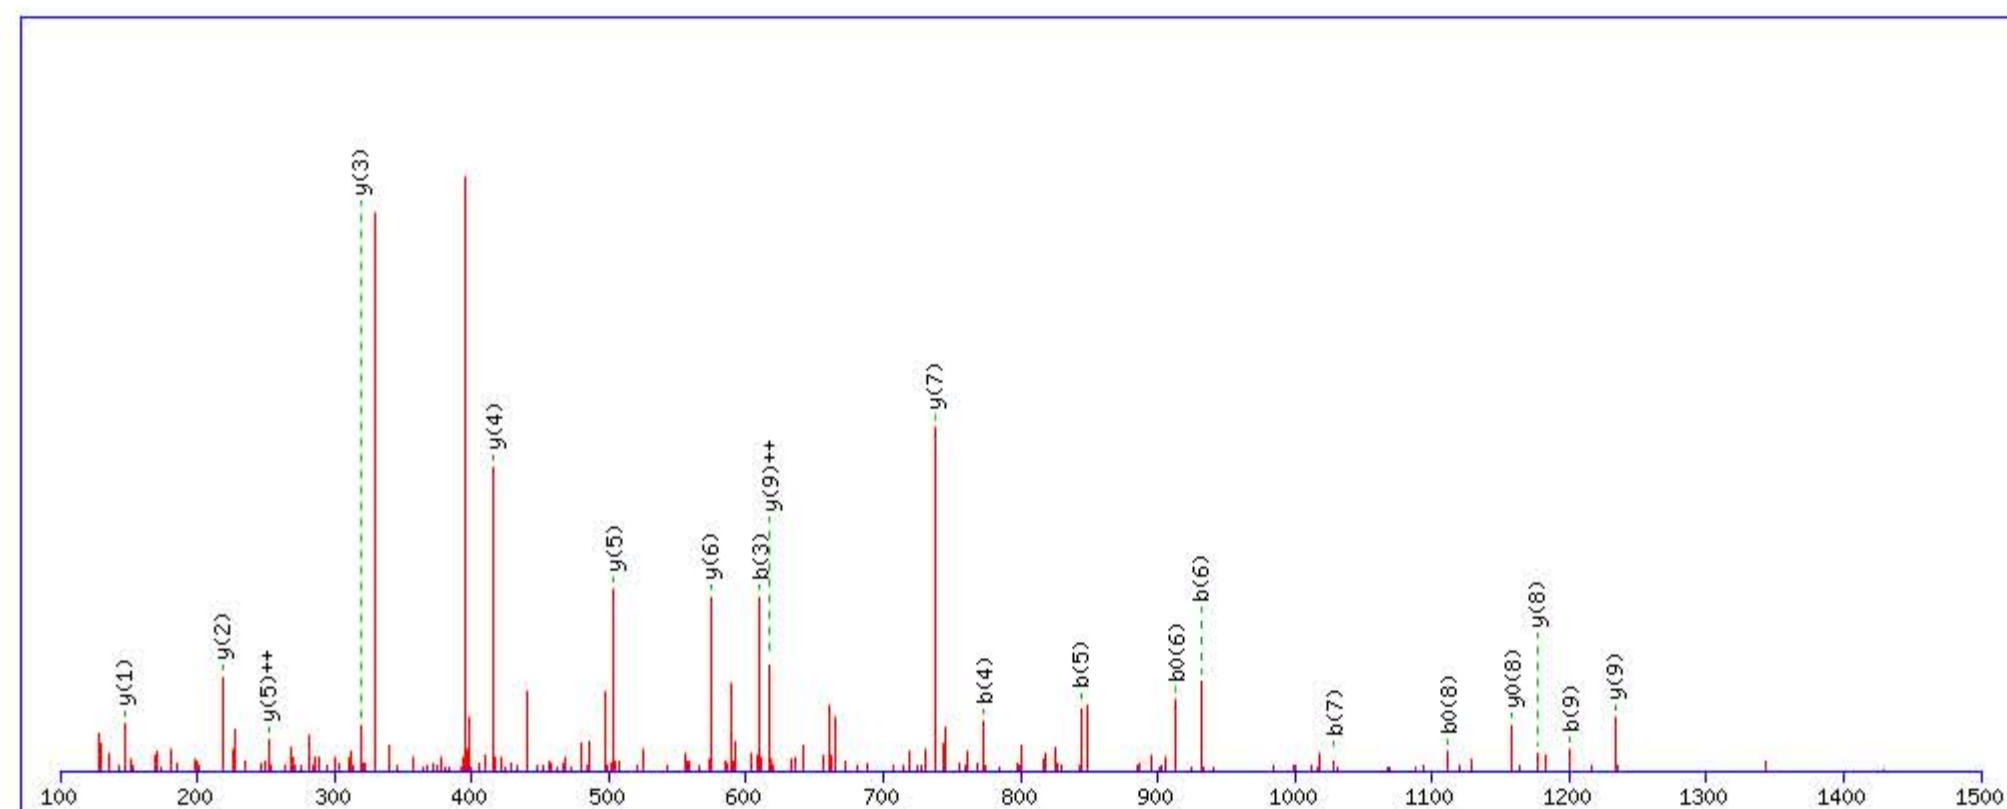

Monoisotopic mass of neutral peptide Mr(calc): 1345.706390

Fixed modifications: Carbamidomethyl (C) (apply to specified residues or termini only)

Variable modifications:

Q3 : Biotin:Thermo-21345 (Q)

Ions Score: 60 Expect: 2e-005

Matches : 20/90 fragment ions using 36 most intense peaks [\(help\)](#)

| #  | b           | b <sup>++</sup> | b <sup>*</sup> | b <sup>*++</sup> | b <sup>0</sup> | b <sup>0++</sup> | Seq. | y           | y <sup>++</sup> | y <sup>*</sup> | y <sup>*++</sup> | y <sup>0</sup> | y <sup>0++</sup> | #  |
|----|-------------|-----------------|----------------|------------------|----------------|------------------|------|-------------|-----------------|----------------|------------------|----------------|------------------|----|
| 1  | 114.091340  | 57.549308       |                |                  |                |                  | L    |             |                 |                |                  |                |                  | 10 |
| 2  | 171.112804  | 86.060040       |                |                  |                |                  | G    | 1233.629622 | 617.318449      | 1216.603073    | 608.805175       | 1215.619057    | 608.313167       | 9  |
| 3  | 610.338130  | 305.672703      | 593.311581     | 297.159429       |                |                  | Q    | 1176.608158 | 588.807717      | 1159.581609    | 580.294443       | 1158.597593    | 579.802435       | 8  |
| 4  | 773.401459  | 387.204368      | 756.374910     | 378.691093       |                |                  | Y    | 737.382832  | 369.195054      | 720.356283     | 360.681780       | 719.372267     | 360.189772       | 7  |
| 5  | 844.438573  | 422.722925      | 827.412024     | 414.209650       |                |                  | A    | 574.319503  | 287.663389      | 557.292954     | 279.150115       | 556.308938     | 278.658107       | 6  |
| 6  | 931.470601  | 466.238939      | 914.444052     | 457.725664       | 913.460036     | 457.233656       | S    | 503.282389  | 252.144832      | 486.255840     | 243.631558       | 485.271824     | 243.139550       | 5  |
| 7  | 1028.523365 | 514.765321      | 1011.496816    | 506.252046       | 1010.512800    | 505.760038       | P    | 416.250361  | 208.628818      | 399.223812     | 200.115544       | 398.239796     | 199.623536       | 4  |
| 8  | 1129.571044 | 565.289160      | 1112.544495    | 556.775886       | 1111.560479    | 556.283878       | T    | 319.197597  | 160.102436      | 302.171048     | 151.589162       | 301.187032     | 151.097154       | 3  |
| 9  | 1200.608158 | 600.807717      | 1183.581609    | 592.294443       | 1182.597593    | 591.802435       | A    | 218.149918  | 109.578597      | 201.123369     | 101.065322       |                |                  | 2  |
| 10 |             |                 |                |                  |                |                  | K    | 147.112804  | 74.060040       | 130.086255     | 65.546765        |                |                  | 1  |

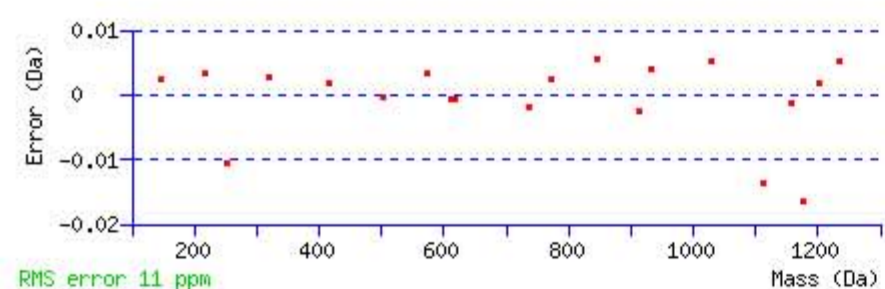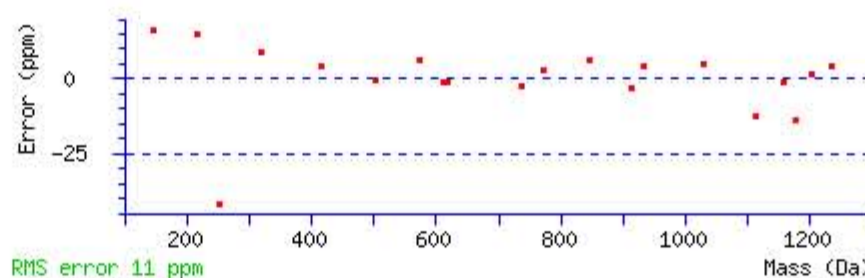

NCBI BLAST search of **LGQYASPTAK**

(Parameters: blastp, nr protein database, expect=20000, no filter, PAM30)

Other BLAST [web gateways](#)

## All matches to this query

| Score | Mr(calc):   | Delta     | Sequence                      |
|-------|-------------|-----------|-------------------------------|
| 60.3  | 1345.706390 | -0.005082 | <a href="#">LGQYASPTAK</a>    |
| 9.4   | 1345.706390 | -0.005082 | <a href="#">LGQYDQALK</a>     |
| 8.1   | 1345.706406 | -0.005098 | <a href="#">QGLYTPQTK</a>     |
| 5.4   | 1345.692474 | 0.008834  | <a href="#">VASCRYPALGPR</a>  |
| 3.0   | 1345.717636 | -0.016328 | <a href="#">QMPQPTFILRK</a>   |
| 1.3   | 1345.691116 | 0.010192  | <a href="#">LIEAVDNMLSNK</a>  |
| 0.5   | 1345.717606 | -0.016298 | <a href="#">EKVKNIHGVMK</a>   |
| 0.1   | 1345.708893 | -0.007585 | <a href="#">IIVGDATEKDASK</a> |
| 0.1   | 1345.717606 | -0.016298 | <a href="#">QLKKCWENIK</a>    |



# MASCOT SCIENCE Mascot Search Results

## Peptide View

MS/MS Fragmentation of **TEQWSTLPPETK**

Found in **CO4A\_HUMAN**, Complement C4-A OS=Homo sapiens GN=C4A PE=1 SV=2

Match to Query 42871: 1726.857928 from(864.436240,2+) rtinseconds(1989) index(55749)

Title: Locus:1.1.1.3178.11 File:"2013-07-02 CLN FXIII 30 min 2nd F 4.wiff"

Data file C:\Program Files (x86)\Matrix Science\Mascot Daemon\mgf2 FXIII 30 min 2nd\mascot\_daemon\_merge.mgf

Click mouse within plot area to zoom in by factor of two about that point

Or, Plot from  to  Da

Label all possible matches  Label matches used for scoring

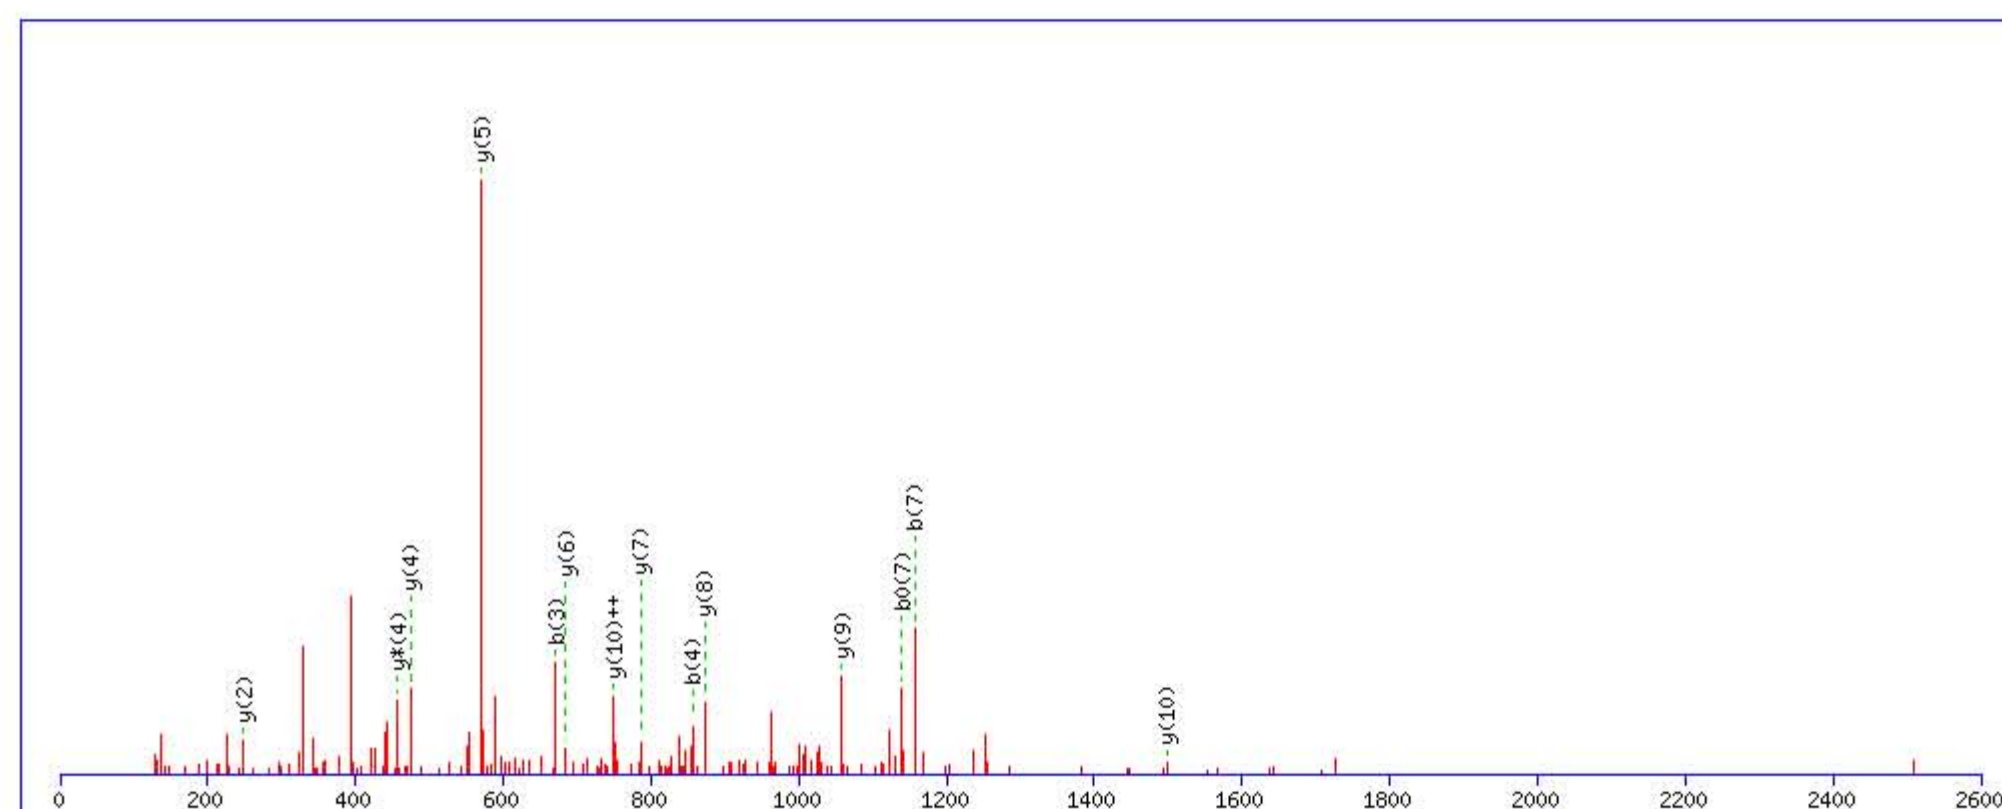

Monoisotopic mass of neutral peptide Mr(calc): 1726.860001

Fixed modifications: Carbamidomethyl (C) (apply to specified residues or termini only)

Variable modifications:

Q3 : Biotin:Thermo-21345 (Q)

Ions Score: 37 Expect: 0.0048

Matches : 14/126 fragment ions using 32 most intense peaks [\(help\)](#)

| #  | b                  | b <sup>++</sup> | b <sup>*</sup> | b <sup>*++</sup> | b <sup>0</sup>     | b <sup>0++</sup> | Seq. | y                  | y <sup>++</sup>   | y <sup>*</sup>    | y <sup>*++</sup> | y <sup>0</sup> | y <sup>0++</sup> | #  |
|----|--------------------|-----------------|----------------|------------------|--------------------|------------------|------|--------------------|-------------------|-------------------|------------------|----------------|------------------|----|
| 1  | 102.054955         | 51.531116       |                |                  | 84.044390          | 42.525833        | T    |                    |                   |                   |                  |                |                  | 12 |
| 2  | 231.097548         | 116.052412      |                |                  | 213.086983         | 107.047130       | E    | 1626.819607        | 813.913442        | 1609.793058       | 805.400167       | 1608.809042    | 804.908159       | 11 |
| 3  | <b>670.322874</b>  | 335.665075      | 653.296325     | 327.151801       | 652.312309         | 326.659793       | Q    | <b>1497.777014</b> | <b>749.392145</b> | 1480.750465       | 740.878871       | 1479.766449    | 740.386863       | 10 |
| 4  | <b>856.402187</b>  | 428.704732      | 839.375638     | 420.191457       | 838.391622         | 419.699449       | W    | <b>1058.551688</b> | 529.779482        | 1041.525139       | 521.266208       | 1040.541123    | 520.774200       | 9  |
| 5  | 943.434215         | 472.220746      | 926.407666     | 463.707471       | 925.423650         | 463.215463       | S    | <b>872.472375</b>  | 436.739826        | 855.445826        | 428.226551       | 854.461810     | 427.734543       | 8  |
| 6  | 1044.481894        | 522.744585      | 1027.455345    | 514.231311       | 1026.471329        | 513.739303       | T    | <b>785.440347</b>  | 393.223812        | 768.413798        | 384.710537       | 767.429782     | 384.218529       | 7  |
| 7  | <b>1157.565958</b> | 579.286617      | 1140.539409    | 570.773343       | <b>1139.555393</b> | 570.281334       | L    | <b>684.392668</b>  | 342.699972        | 667.366119        | 334.186698       | 666.382103     | 333.694690       | 6  |
| 8  | 1254.618722        | 627.812999      | 1237.592173    | 619.299725       | 1236.608157        | 618.807716       | P    | <b>571.308604</b>  | 286.157940        | 554.282055        | 277.644666       | 553.298039     | 277.152658       | 5  |
| 9  | 1351.671486        | 676.339381      | 1334.644937    | 667.826107       | 1333.660921        | 667.334098       | P    | <b>474.255840</b>  | 237.631558        | <b>457.229291</b> | 229.118284       | 456.245275     | 228.626276       | 4  |
| 10 | 1480.714079        | 740.860678      | 1463.687530    | 732.347403       | 1462.703514        | 731.855395       | E    | 377.203076         | 189.105176        | 360.176527        | 180.591902       | 359.192511     | 180.099894       | 3  |
| 11 | 1581.761758        | 791.384517      | 1564.735209    | 782.871243       | 1563.751193        | 782.379235       | T    | <b>248.160483</b>  | 124.583879        | 231.133934        | 116.070605       | 230.149918     | 115.578597       | 2  |
| 12 |                    |                 |                |                  |                    |                  | K    | 147.112804         | 74.060040         | 130.086255        | 65.546765        |                |                  | 1  |

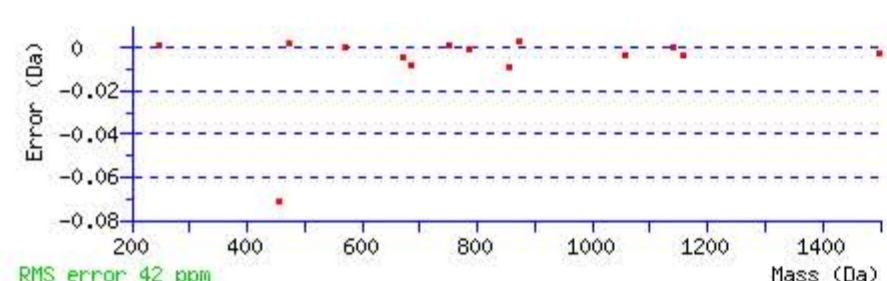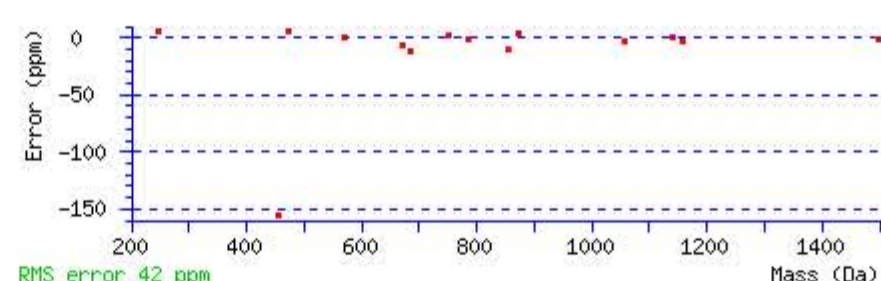

NCBI BLAST search of **TEQWSTLPPETK**

(Parameters: blastp, nr protein database, expect=20000, no filter, PAM30)

Other BLAST [web gateways](#)

All matches to this query

| Score | Mr(calc):   | Delta     | Sequence                           |
|-------|-------------|-----------|------------------------------------|
| 36.6  | 1726.860001 | -0.002073 | <a href="#">TEQWSTLPPETK</a>       |
| 11.2  | 1726.849960 | 0.007968  | <a href="#">TERFGQGGAGPVGGQGPR</a> |
| 1.3   | 1726.853485 | 0.004443  | <a href="#">MASGHAFQPDLVK</a>      |

Mascot: <http://www.matrixscience.com/>



# MATRIX SCIENCE Mascot Search Results

## Peptide View

MS/MS Fragmentation of **GLEEELQFSLGSK**

Found in **CO4A\_HUMAN**, Complement C4-A OS=Homo sapiens GN=C4A PE=1 SV=2

Match to Query 43500: 1746.883392 from(583.301740,3+) rtinseconds(2546) index(58902)

Title: Locus:1.1.1.3372.6 File:"2013-07-02 CLN FXIII 30 min 2nd F 4.wiff"

Data file C:\Program Files (x86)\Matrix Science\Mascot Daemon\mgf2 FXIII 30 min 2nd\mascot\_daemon\_merge.mgf

Click mouse within plot area to zoom in by factor of two about that point

Or, Plot from  to  Da

Label all possible matches  Label matches used for scoring

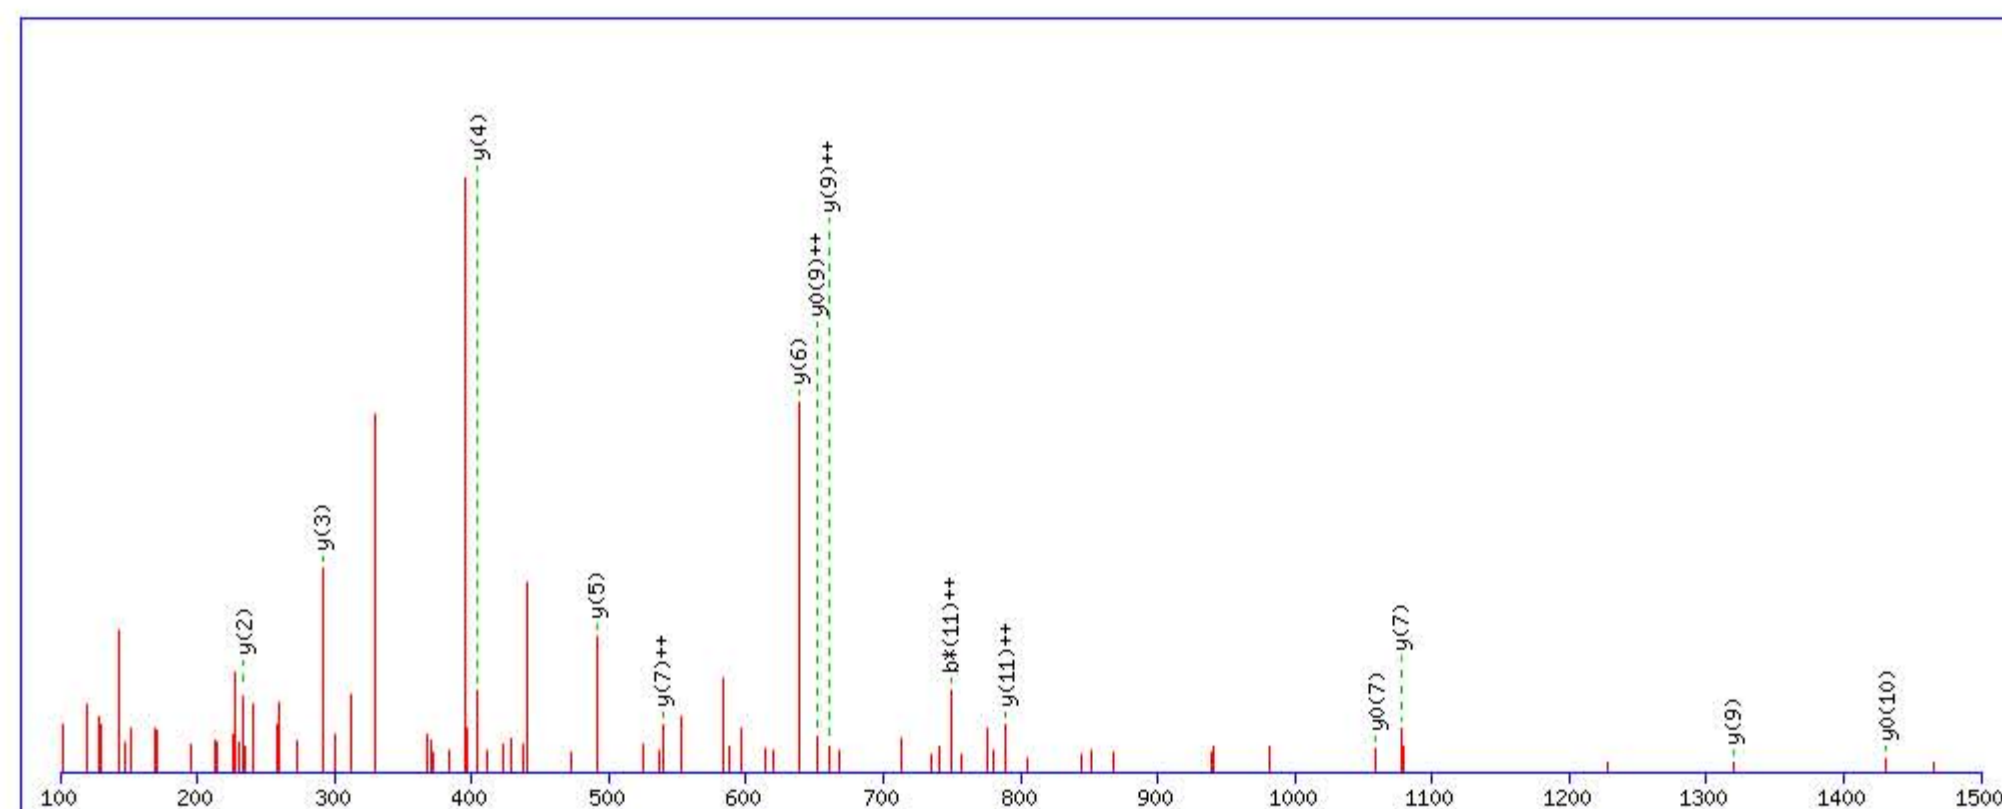

Monoisotopic mass of neutral peptide Mr(calc): 1746.886200

Fixed modifications: Carbamidomethyl (C) (apply to specified residues or termini only)

Variable modifications:

Q7 : Biotin:Thermo-21345 (Q)

Ions Score: 25 Expect: 0.081

Matches : 14/126 fragment ions using 34 most intense peaks [\(help\)](#)

| #  | b           | b <sup>++</sup> | b <sup>*</sup> | b <sup>*++</sup> | b <sup>0</sup> | b <sup>0++</sup> | Seq. | y           | y <sup>++</sup> | y <sup>*</sup> | y <sup>*++</sup> | y <sup>0</sup> | y <sup>0++</sup> | #  |
|----|-------------|-----------------|----------------|------------------|----------------|------------------|------|-------------|-----------------|----------------|------------------|----------------|------------------|----|
| 1  | 58.028740   | 29.518008       |                |                  |                |                  | G    |             |                 |                |                  |                |                  | 13 |
| 2  | 171.112804  | 86.060040       |                |                  |                |                  | L    | 1690.872035 | 845.939656      | 1673.845486    | 837.426381       | 1672.861470    | 836.934373       | 12 |
| 3  | 300.155397  | 150.581336      |                |                  | 282.144832     | 141.576054       | E    | 1577.787971 | 789.397624      | 1560.761422    | 780.884349       | 1559.777406    | 780.392341       | 11 |
| 4  | 429.197990  | 215.102633      |                |                  | 411.187425     | 206.097351       | E    | 1448.745378 | 724.876327      | 1431.718829    | 716.363053       | 1430.734813    | 715.871045       | 10 |
| 5  | 558.240583  | 279.623930      |                |                  | 540.230018     | 270.618647       | E    | 1319.702785 | 660.355031      | 1302.676236    | 651.841756       | 1301.692220    | 651.349748       | 9  |
| 6  | 671.324647  | 336.165962      |                |                  | 653.314082     | 327.160679       | L    | 1190.660192 | 595.833734      | 1173.633643    | 587.320460       | 1172.649627    | 586.828452       | 8  |
| 7  | 1110.549973 | 555.778624      | 1093.523424    | 547.265350       | 1092.539408    | 546.773342       | Q    | 1077.576128 | 539.291702      | 1060.549579    | 530.778428       | 1059.565563    | 530.286419       | 7  |
| 8  | 1257.618387 | 629.312832      | 1240.591838    | 620.799557       | 1239.607822    | 620.307549       | F    | 638.350802  | 319.679039      | 621.324253     | 311.165765       | 620.340237     | 310.673757       | 6  |
| 9  | 1344.650415 | 672.828846      | 1327.623866    | 664.315571       | 1326.639850    | 663.823563       | S    | 491.282388  | 246.144832      | 474.255839     | 237.631557       | 473.271823     | 237.139549       | 5  |
| 10 | 1457.734479 | 729.370878      | 1440.707930    | 720.857603       | 1439.723914    | 720.365595       | L    | 404.250360  | 202.628818      | 387.223811     | 194.115543       | 386.239795     | 193.623535       | 4  |
| 11 | 1514.755943 | 757.881609      | 1497.729394    | 749.368335       | 1496.745378    | 748.876327       | G    | 291.166296  | 146.086786      | 274.139747     | 137.573512       | 273.155731     | 137.081504       | 3  |
| 12 | 1601.787971 | 801.397624      | 1584.761422    | 792.884349       | 1583.777406    | 792.392341       | S    | 234.144832  | 117.576054      | 217.118283     | 109.062780       | 216.134267     | 108.570772       | 2  |
| 13 |             |                 |                |                  |                |                  | K    | 147.112804  | 74.060040       | 130.086255     | 65.546765        |                |                  | 1  |

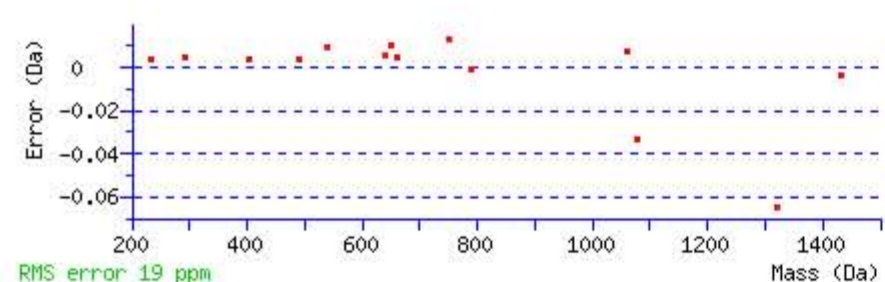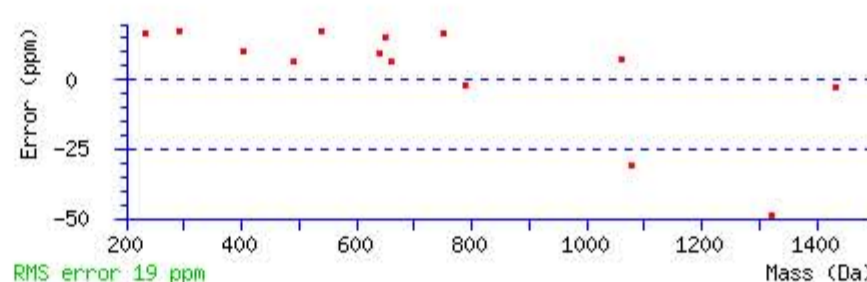

NCBI BLAST search of [GLEEELQFSLGSK](#)

(Parameters: blastp, nr protein database, expect=20000, no filter, PAM30)

Other BLAST [web gateways](#)

All matches to this query

| Score | Mr(calc):   | Delta     | Sequence                      |
|-------|-------------|-----------|-------------------------------|
| 25.2  | 1746.886200 | -0.002808 | <a href="#">GLEEELQFSLGSK</a> |

Mascot: <http://www.matrixscience.com/>



# MASCOT SCIENCE Mascot Search Results

## Peptide View

MS/MS Fragmentation of **EPFLSCCQFAESLR**

Found in **CO4A\_HUMAN**, Complement C4-A OS=Homo sapiens GN=C4A PE=1 SV=2

Match to Query 51142: 2053.944852 from(685.655560,3+) rtinseconds(2474) index(58474)

Title: Locus:1.1.1.3347.14 File:"2013-07-02 CLN FXIII 30 min 2nd F 4.wiff"

Data file C:\Program Files (x86)\Matrix Science\Mascot Daemon\mgf2 FXIII 30 min 2nd\mascot\_daemon\_merge.mgf

Click mouse within plot area to zoom in by factor of two about that point

Or, Plot from  to  Da

Label all possible matches  Label matches used for scoring

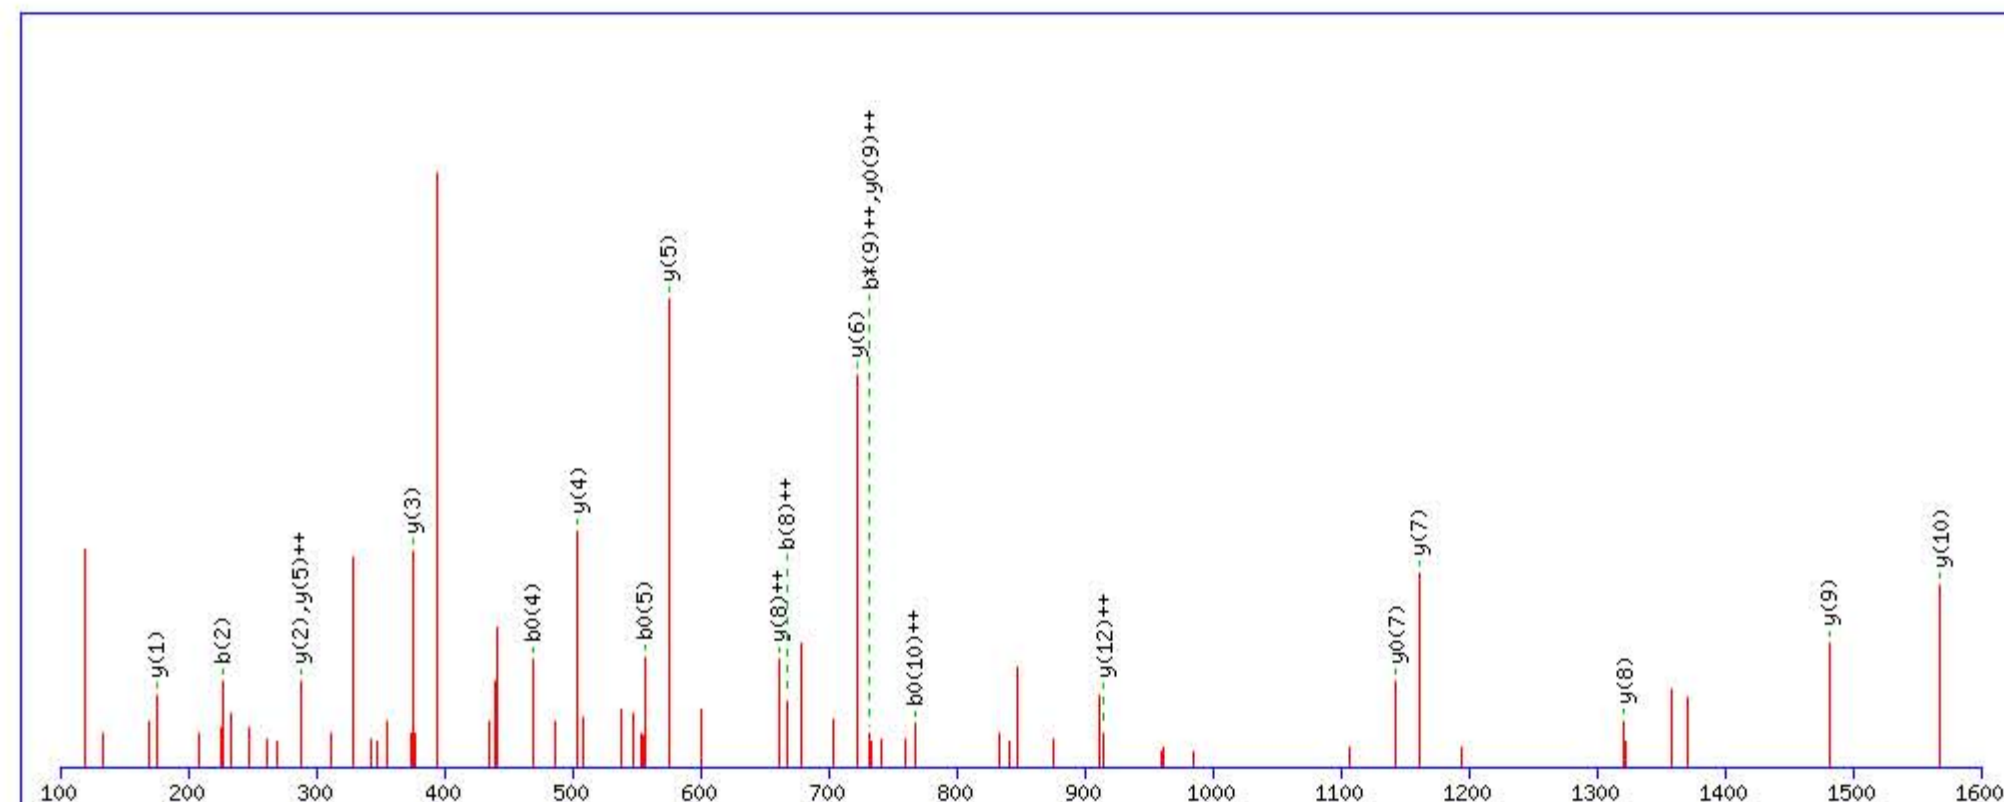

Monoisotopic mass of neutral peptide Mr(calc): 2053.942368

Fixed modifications: Carbamidomethyl (C) (apply to specified residues or termini only)

Variable modifications:

Q8 : Biotin:Thermo-21345 (Q)

Ions Score: 48 Expect: 0.00022

Matches : 21/138 fragment ions using 36 most intense peaks [\(help\)](#)

| #  | b                 | b <sup>++</sup>   | b <sup>*</sup> | b <sup>*++</sup>  | b <sup>0</sup>    | b <sup>0++</sup>  | Seq. | y                  | y <sup>++</sup>   | y <sup>*</sup> | y <sup>*++</sup> | y <sup>0</sup>     | y <sup>0++</sup>  | #  |
|----|-------------------|-------------------|----------------|-------------------|-------------------|-------------------|------|--------------------|-------------------|----------------|------------------|--------------------|-------------------|----|
| 1  | 130.049869        | 65.528572         |                |                   | 112.039304        | 56.523290         | E    |                    |                   |                |                  |                    |                   | 14 |
| 2  | <b>227.102633</b> | 114.054954        |                |                   | 209.092068        | 105.049672        | P    | 1925.907059        | 963.457168        | 1908.880510    | 954.943893       | 1907.896494        | 954.451885        | 13 |
| 3  | 374.171047        | 187.589161        |                |                   | 356.160482        | 178.583879        | F    | 1828.854295        | <b>914.930786</b> | 1811.827746    | 906.417511       | 1810.843730        | 905.925503        | 12 |
| 4  | 487.255111        | 244.131193        |                |                   | <b>469.244546</b> | 235.125911        | L    | 1681.785881        | 841.396579        | 1664.759332    | 832.883304       | 1663.775316        | 832.391296        | 11 |
| 5  | 574.287139        | 287.647208        |                |                   | <b>556.276574</b> | 278.641925        | S    | <b>1568.701817</b> | 784.854547        | 1551.675268    | 776.341272       | 1550.691252        | 775.849264        | 10 |
| 6  | 734.317788        | 367.662532        |                |                   | 716.307223        | 358.657250        | C    | <b>1481.669789</b> | 741.338533        | 1464.643240    | 732.825258       | 1463.659224        | <b>732.333250</b> | 9  |
| 7  | 894.348437        | 447.677857        |                |                   | 876.337872        | 438.672574        | C    | <b>1321.639140</b> | <b>661.323208</b> | 1304.612591    | 652.809934       | 1303.628575        | 652.317926        | 8  |
| 8  | 1333.573763       | <b>667.290520</b> | 1316.547214    | 658.777245        | 1315.563198       | 658.285237        | Q    | <b>1161.608491</b> | 581.307884        | 1144.581942    | 572.794609       | <b>1143.597926</b> | 572.302601        | 7  |
| 9  | 1480.642177       | 740.824727        | 1463.615628    | <b>732.311452</b> | 1462.631612       | 731.819444        | F    | <b>722.383165</b>  | 361.695221        | 705.356616     | 353.181946       | 704.372600         | 352.689938        | 6  |
| 10 | 1551.679291       | 776.343284        | 1534.652742    | 767.830009        | 1533.668726       | <b>767.338001</b> | A    | <b>575.314751</b>  | <b>288.161014</b> | 558.288202     | 279.647739       | 557.304186         | 279.155731        | 5  |
| 11 | 1680.721884       | 840.864580        | 1663.695335    | 832.351306        | 1662.711319       | 831.859298        | E    | <b>504.277637</b>  | 252.642457        | 487.251088     | 244.129182       | 486.267072         | 243.637174        | 4  |
| 12 | 1767.753912       | 884.380594        | 1750.727363    | 875.867320        | 1749.743347       | 875.375312        | S    | <b>375.235044</b>  | 188.121160        | 358.208495     | 179.607885       | 357.224479         | 179.115877        | 3  |
| 13 | 1880.837976       | 940.922626        | 1863.811427    | 932.409352        | 1862.827411       | 931.917344        | L    | <b>288.203016</b>  | 144.605146        | 271.176467     | 136.091871       |                    |                   | 2  |
| 14 |                   |                   |                |                   |                   |                   | R    | <b>175.118952</b>  | 88.063114         | 158.092403     | 79.549839        |                    |                   | 1  |

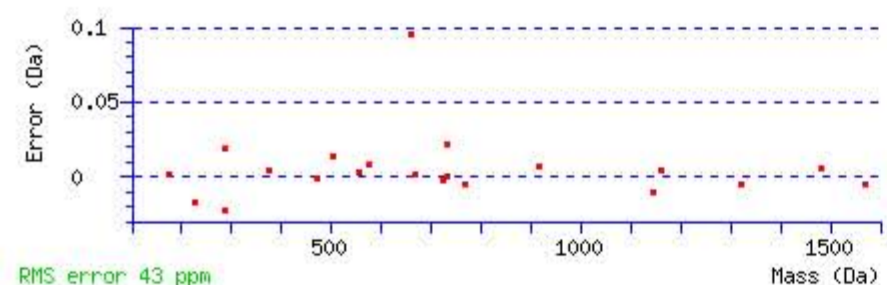

RMS error 43 ppm

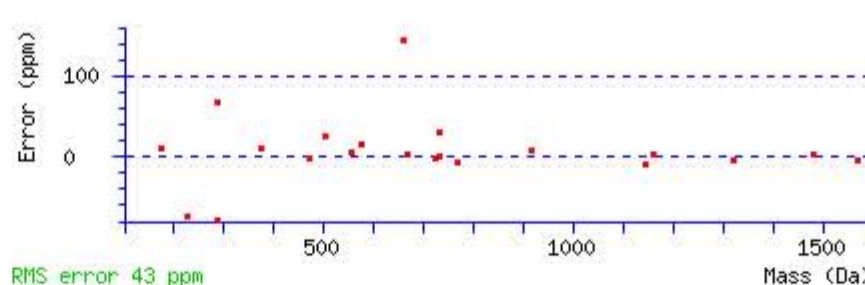

RMS error 43 ppm

NCBI BLAST search of **EPFLSCCQFAESLR**

(Parameters: blastp, nr protein database, expect=20000, no filter, PAM30)

Other BLAST [web gateways](#)

All matches to this query

| Score | Mr(calc):   | Delta    | Sequence                       |
|-------|-------------|----------|--------------------------------|
| 47.5  | 2053.942368 | 0.002484 | <a href="#">EPFLSCCQFAESLR</a> |

Mascot: <http://www.matrixscience.com/>



# MASCOT Search Results

## Peptide View

MS/MS Fragmentation of **LLATLCSAEVCQCAEGK**

Found in **CO4A\_HUMAN**, Complement C4-A OS=Homo sapiens GN=C4A PE=1 SV=2

Match to Query 54392: 2220.035352 from(741.019060,3+) rtinseconds(2119) index(71902)

Title: Locus:1.1.1.3271.14 File:"2013-07-02 CLN FXIII 30 min 2nd FT.wiff"

Data file C:\Program Files (x86)\Matrix Science\Mascot Daemon\mgf2 FXIII 30 min 2nd\mascot\_daemon\_merge.mgf

Click mouse within plot area to zoom in by factor of two about that point

Or, Plot from  to  Da

Label all possible matches  Label matches used for scoring

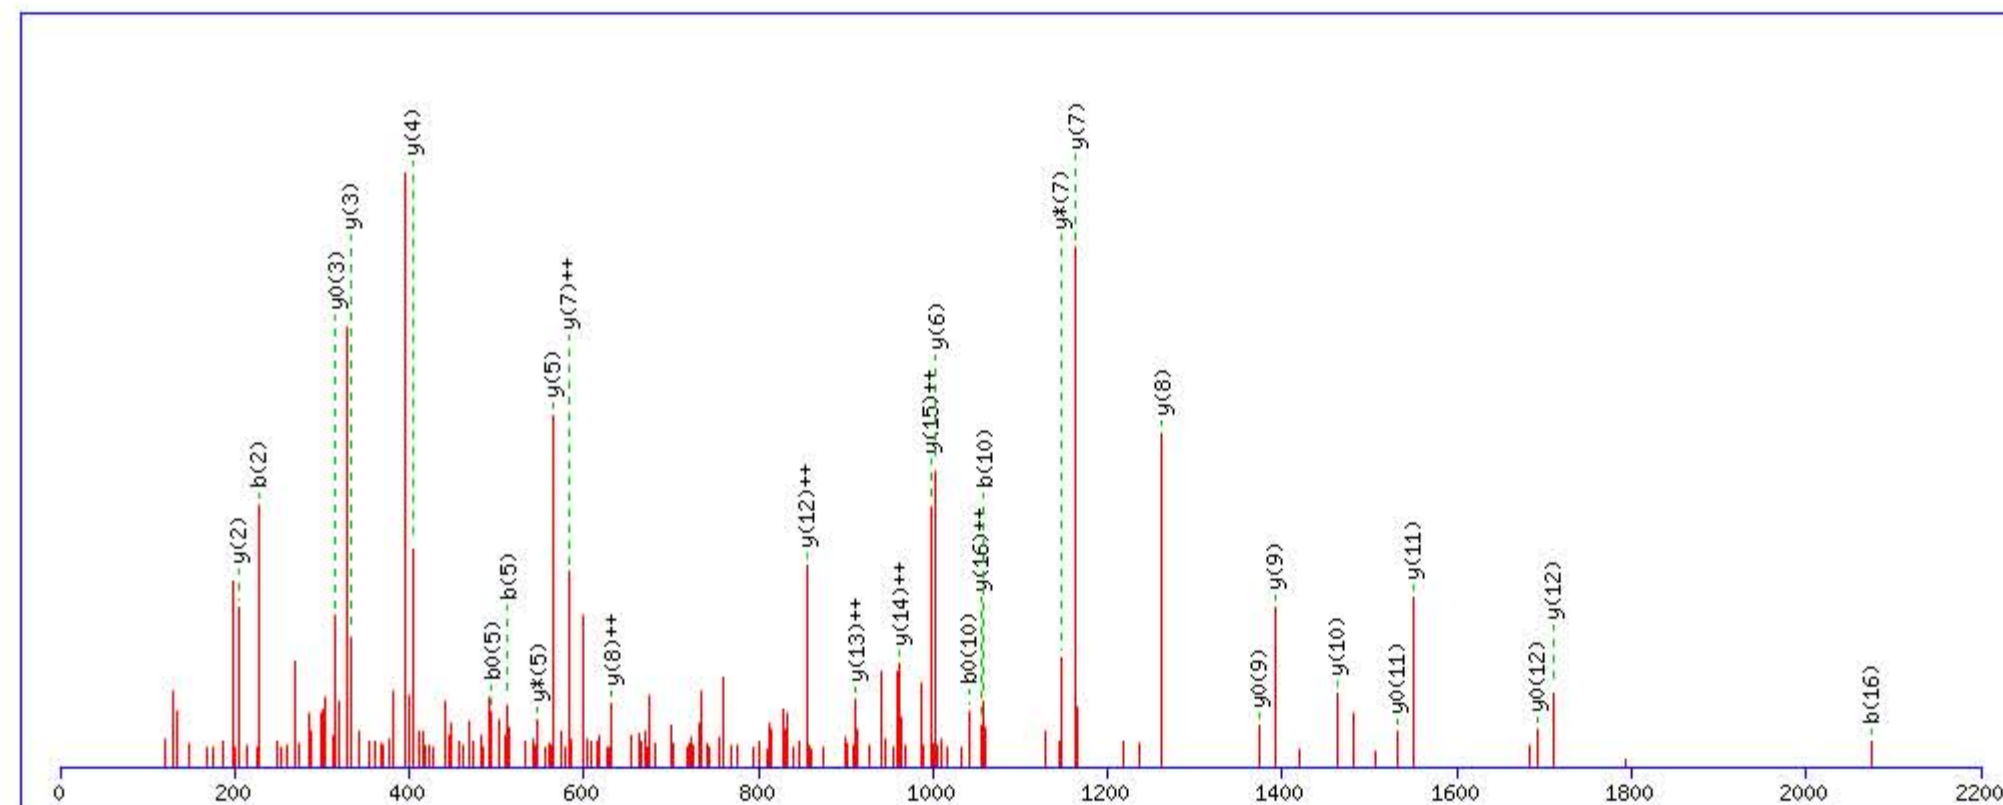

Monoisotopic mass of neutral peptide  $M_r(\text{calc})$ : 2220.041092

Fixed modifications: Carbamidomethyl (C) (apply to specified residues or termini only)

Variable modifications:

Q12 : Biotin:Thermo-21345 (Q)

Ions Score: 57 Expect: 2.7e-005

Matches : 30/160 fragment ions using 62 most intense peaks [\(help\)](#)

| #  | b                  | b <sup>++</sup> | b <sup>*</sup> | b <sup>+++</sup> | b <sup>0</sup>     | b <sup>0++</sup> | Seq. | y                  | y <sup>++</sup>    | y <sup>*</sup>     | y <sup>+++</sup> | y <sup>0</sup>     | y <sup>0++</sup> | #  |
|----|--------------------|-----------------|----------------|------------------|--------------------|------------------|------|--------------------|--------------------|--------------------|------------------|--------------------|------------------|----|
| 1  | 114.091340         | 57.549308       |                |                  |                    |                  | L    |                    |                    |                    |                  |                    |                  | 17 |
| 2  | <b>227.175404</b>  | 114.091340      |                |                  |                    |                  | L    | 2107.964318        | <b>1054.485797</b> | 2090.937769        | 1045.972522      | 2089.953753        | 1045.480514      | 16 |
| 3  | 298.212518         | 149.609897      |                |                  |                    |                  | A    | 1994.880254        | <b>997.943765</b>  | 1977.853705        | 989.430491       | 1976.869689        | 988.938483       | 15 |
| 4  | 399.260197         | 200.133737      |                |                  | 381.249632         | 191.128454       | T    | 1923.843140        | <b>962.425208</b>  | 1906.816591        | 953.911934       | 1905.832575        | 953.419926       | 14 |
| 5  | <b>512.344261</b>  | 256.675769      |                |                  | <b>494.333696</b>  | 247.670486       | L    | 1822.795461        | <b>911.901369</b>  | 1805.768912        | 903.388094       | 1804.784896        | 902.896086       | 13 |
| 6  | 672.374910         | 336.691093      |                |                  | 654.364345         | 327.685811       | C    | <b>1709.711397</b> | <b>855.359337</b>  | 1692.684848        | 846.846062       | <b>1691.700832</b> | 846.354054       | 12 |
| 7  | 759.406938         | 380.207107      |                |                  | 741.396373         | 371.201825       | S    | <b>1549.680748</b> | 775.344012         | 1532.654199        | 766.830738       | <b>1531.670183</b> | 766.338730       | 11 |
| 8  | 830.444052         | 415.725664      |                |                  | 812.433487         | 406.720382       | A    | <b>1462.648720</b> | 731.827998         | 1445.622171        | 723.314724       | 1444.638155        | 722.822716       | 10 |
| 9  | 959.486645         | 480.246961      |                |                  | 941.476080         | 471.241678       | E    | <b>1391.611606</b> | 696.309441         | 1374.585057        | 687.796167       | <b>1373.601041</b> | 687.304159       | 9  |
| 10 | <b>1058.555059</b> | 529.781168      |                |                  | <b>1040.544494</b> | 520.775885       | V    | <b>1262.569013</b> | <b>631.788145</b>  | 1245.542464        | 623.274870       | 1244.558448        | 622.782862       | 8  |
| 11 | 1218.585708        | 609.796492      |                |                  | 1200.575143        | 600.791210       | C    | <b>1163.500599</b> | <b>582.253938</b>  | <b>1146.474050</b> | 573.740663       | 1145.490034        | 573.248655       | 7  |
| 12 | 1657.811034        | 829.409155      | 1640.784485    | 820.895881       | 1639.800469        | 820.403873       | Q    | <b>1003.469950</b> | 502.238613         | 986.443401         | 493.725339       | 985.459385         | 493.233331       | 6  |
| 13 | 1817.841683        | 909.424480      | 1800.815134    | 900.911205       | 1799.831118        | 900.419197       | C    | <b>564.244624</b>  | 282.625950         | <b>547.218075</b>  | 274.112676       | 546.234059         | 273.620668       | 5  |
| 14 | 1888.878797        | 944.943037      | 1871.852248    | 936.429762       | 1870.868232        | 935.937754       | A    | <b>404.213975</b>  | 202.610626         | 387.187426         | 194.097351       | 386.203410         | 193.605343       | 4  |
| 15 | 2017.921390        | 1009.464333     | 2000.894841    | 1000.951059      | 1999.910825        | 1000.459051      | E    | <b>333.176861</b>  | 167.092069         | 316.150312         | 158.578794       | <b>315.166296</b>  | 158.086786       | 3  |
| 16 | <b>2074.942854</b> | 1037.975065     | 2057.916305    | 1029.461790      | 2056.932289        | 1028.969782      | G    | <b>204.134268</b>  | 102.570772         | 187.107719         | 94.057497        |                    |                  | 2  |
| 17 |                    |                 |                |                  |                    |                  | K    | 147.112804         | 74.060040          | 130.086255         | 65.546765        |                    |                  | 1  |

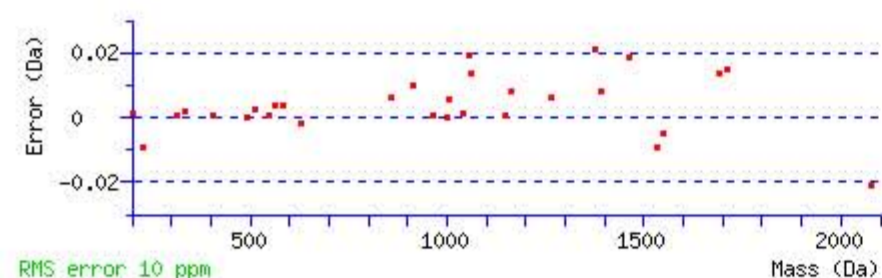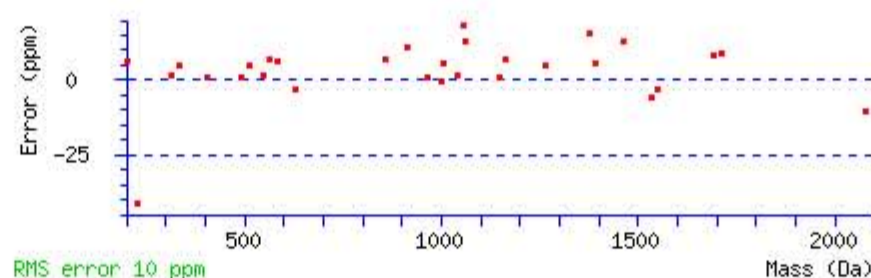

NCBI BLAST search of **LLATLCSAEVCQCAEGK**

(Parameters: blastp, nr protein database, expect=20000, no filter, PAM30)

Other BLAST [web gateways](#)

All matches to this query

| Score | $M_r(\text{calc})$ : | Delta     | Sequence                          |
|-------|----------------------|-----------|-----------------------------------|
| 57.3  | 2220.041092          | -0.005740 | <a href="#">LLATLCSAEVCQCAEGK</a> |

Mascot: <http://www.matrixscience.com/>



# MASCOT Search Results

## Peptide View

MS/MS Fragmentation of **AACAQLNDFLQEYGTQGCQV**

Found in **CO4A\_HUMAN**, Complement C4-A OS=Homo sapiens GN=C4A PE=1 SV=2

Match to Query 60952: 2583.160902 from(862.060910,3+) rtinseconds(2728) index(60118)

Title: Locus:1.1.1.3434.18 File:"2013-07-02 CLN FXIII 30 min 2nd F 4.wiff"

Data file C:\Program Files (x86)\Matrix Science\Mascot Daemon\mgf2 FXIII 30 min 2nd\mascot\_daemon\_merge.mgf

Click mouse within plot area to zoom in by factor of two about that point

Or, Plot from  to  Da

Label all possible matches  Label matches used for scoring

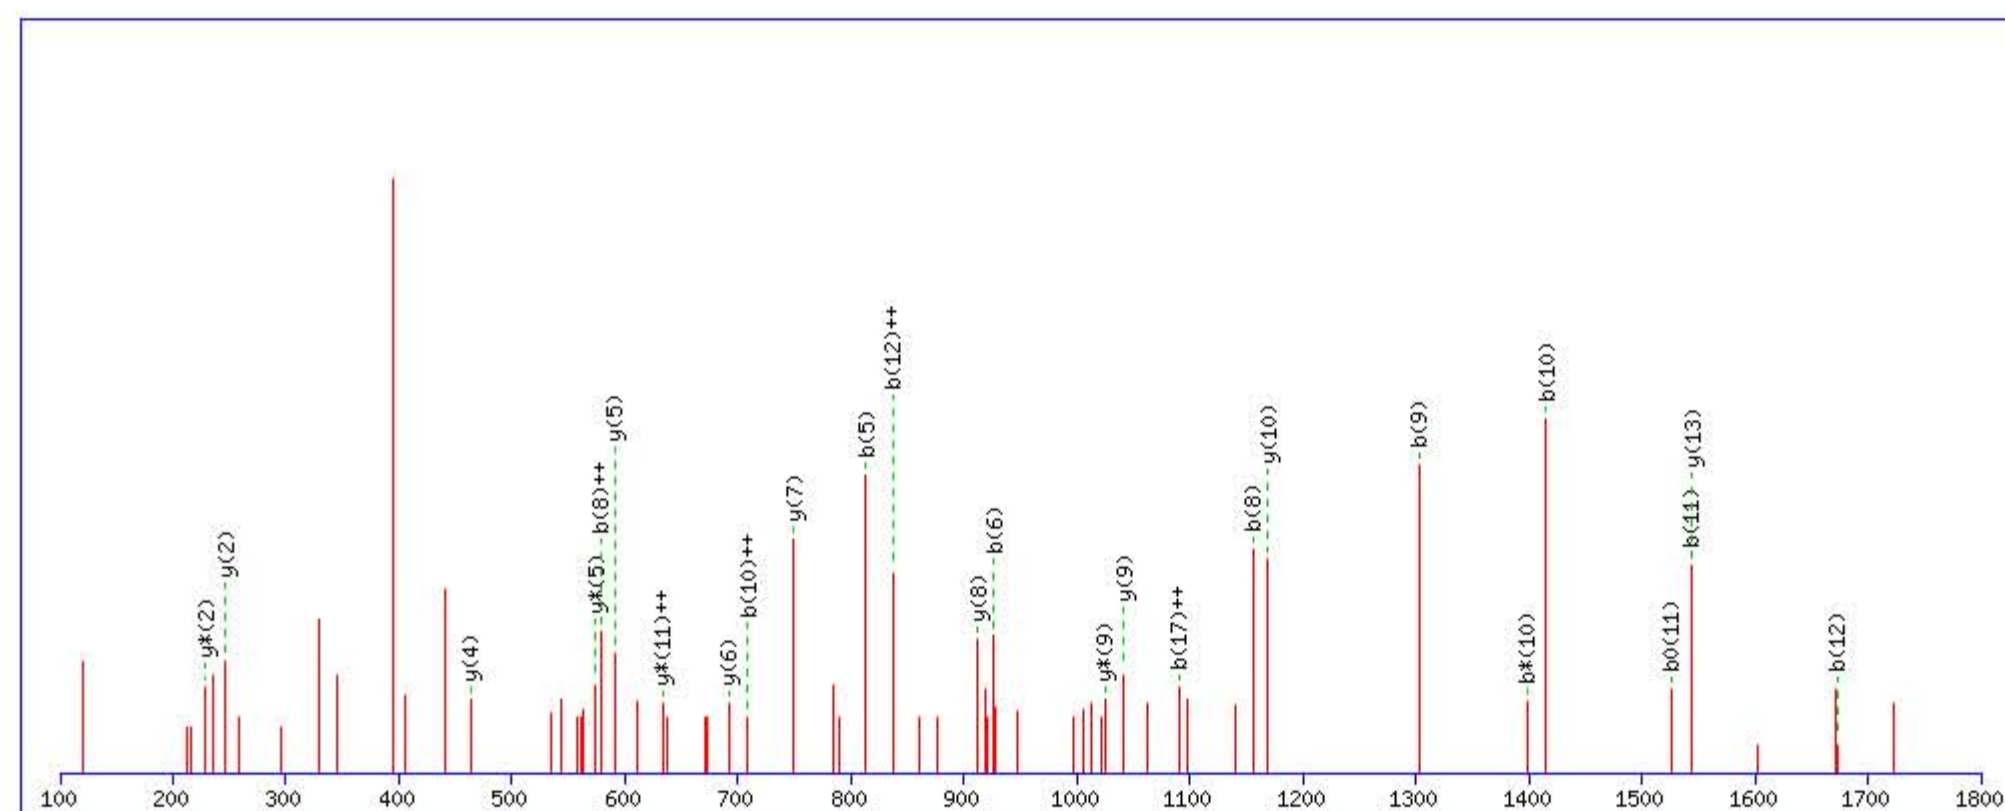

Monoisotopic mass of neutral peptide Mr(calc): 2583.155624

Fixed modifications: Carbamidomethyl (C) (apply to specified residues or termini only)

Variable modifications:

Q5 : Biotin:Thermo-21345 (Q)

Ions Score: 56 Expect: 2.2e-005

Matches : 26/194 fragment ions using 43 most intense peaks [\(help\)](#)

| #  | b                  | b <sup>++</sup>    | b <sup>*</sup>     | b <sup>+++</sup> | b <sup>0</sup>     | b <sup>0++</sup> | Seq. | y                  | y <sup>++</sup> | y <sup>*</sup>     | y <sup>+++</sup>  | y <sup>0</sup> | y <sup>0++</sup> | #  |
|----|--------------------|--------------------|--------------------|------------------|--------------------|------------------|------|--------------------|-----------------|--------------------|-------------------|----------------|------------------|----|
| 1  | 72.044390          | 36.525833          |                    |                  |                    |                  | A    |                    |                 |                    |                   |                |                  | 20 |
| 2  | 143.081504         | 72.044390          |                    |                  |                    |                  | A    | 2513.125782        | 1257.066529     | 2496.099233        | 1248.553254       | 2495.115217    | 1248.061246      | 19 |
| 3  | 303.112153         | 152.059714         |                    |                  |                    |                  | C    | 2442.088668        | 1221.547972     | 2425.062119        | 1213.034697       | 2424.078103    | 1212.542689      | 18 |
| 4  | 374.149267         | 187.578271         |                    |                  |                    |                  | A    | 2282.058019        | 1141.532647     | 2265.031470        | 1133.019373       | 2264.047454    | 1132.527365      | 17 |
| 5  | <b>813.374593</b>  | 407.190935         | 796.348044         | 398.677660       |                    |                  | Q    | 2211.020905        | 1106.014090     | 2193.994356        | 1097.500816       | 2193.010340    | 1097.008808      | 16 |
| 6  | <b>926.458657</b>  | 463.732967         | 909.432108         | 455.219692       |                    |                  | L    | 1771.795579        | 886.401428      | 1754.769030        | 877.888153        | 1753.785014    | 877.396145       | 15 |
| 7  | 1040.501584        | 520.754430         | 1023.475035        | 512.241155       |                    |                  | N    | 1658.711515        | 829.859396      | 1641.684966        | 821.346121        | 1640.700950    | 820.854113       | 14 |
| 8  | <b>1155.528527</b> | <b>578.267902</b>  | 1138.501978        | 569.754627       | 1137.517962        | 569.262619       | D    | <b>1544.668588</b> | 772.837932      | 1527.642039        | 764.324658        | 1526.658023    | 763.832650       | 13 |
| 9  | <b>1302.596941</b> | 651.802109         | 1285.570392        | 643.288834       | 1284.586376        | 642.796826       | F    | 1429.641645        | 715.324460      | 1412.615096        | 706.811186        | 1411.631080    | 706.319178       | 12 |
| 10 | <b>1415.681005</b> | <b>708.344141</b>  | <b>1398.654456</b> | 699.830866       | 1397.670440        | 699.338858       | L    | 1282.573231        | 641.790253      | 1265.546682        | <b>633.276979</b> | 1264.562666    | 632.784971       | 11 |
| 11 | <b>1543.739583</b> | 772.373430         | 1526.713034        | 763.860155       | <b>1525.729018</b> | 763.368147       | Q    | <b>1169.489167</b> | 585.248222      | 1152.462618        | 576.734947        | 1151.478602    | 576.242939       | 10 |
| 12 | <b>1672.782176</b> | <b>836.894726</b>  | 1655.755627        | 828.381452       | 1654.771611        | 827.889444       | E    | <b>1041.430589</b> | 521.218932      | <b>1024.404040</b> | 512.705658        | 1023.420024    | 512.213650       | 9  |
| 13 | 1835.845505        | 918.426391         | 1818.818956        | 909.913116       | 1817.834940        | 909.421108       | Y    | <b>912.387996</b>  | 456.697636      | 895.361447         | 448.184361        | 894.377431     | 447.692353       | 8  |
| 14 | 1892.866969        | 946.937123         | 1875.840420        | 938.423848       | 1874.856404        | 937.931840       | G    | <b>749.324667</b>  | 375.165971      | 732.298118         | 366.652697        | 731.314102     | 366.160689       | 7  |
| 15 | 1993.914648        | 997.460962         | 1976.888099        | 988.947688       | 1975.904083        | 988.455680       | T    | <b>692.303203</b>  | 346.655239      | 675.276654         | 338.141965        | 674.292638     | 337.649957       | 6  |
| 16 | 2121.973226        | 1061.490251        | 2104.946677        | 1052.976976      | 2103.962661        | 1052.484968      | Q    | <b>591.255524</b>  | 296.131400      | <b>574.228975</b>  | 287.618125        |                |                  | 5  |
| 17 | 2178.994690        | <b>1090.000983</b> | 2161.968141        | 1081.487708      | 2160.984125        | 1080.995700      | G    | <b>463.196946</b>  | 232.102111      | 446.170397         | 223.588836        |                |                  | 4  |
| 18 | 2339.025339        | 1170.016307        | 2321.998790        | 1161.503033      | 2321.014774        | 1161.011025      | C    | 406.175482         | 203.591379      | 389.148933         | 195.078104        |                |                  | 3  |
| 19 | 2467.083917        | 1234.045596        | 2450.057368        | 1225.532322      | 2449.073352        | 1225.040314      | Q    | <b>246.144833</b>  | 123.576054      | <b>229.118284</b>  | 115.062780        |                |                  | 2  |
| 20 |                    |                    |                    |                  |                    |                  | V    | 118.086255         | 59.546765       |                    |                   |                |                  | 1  |

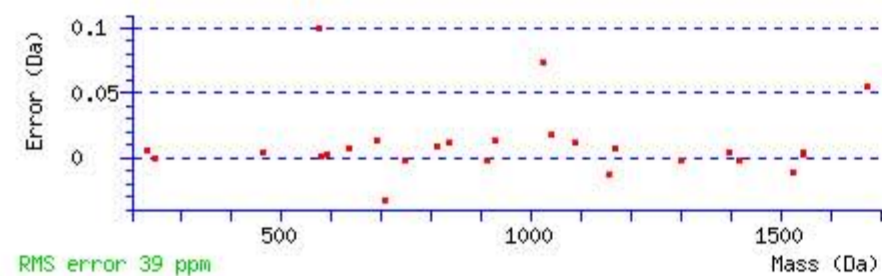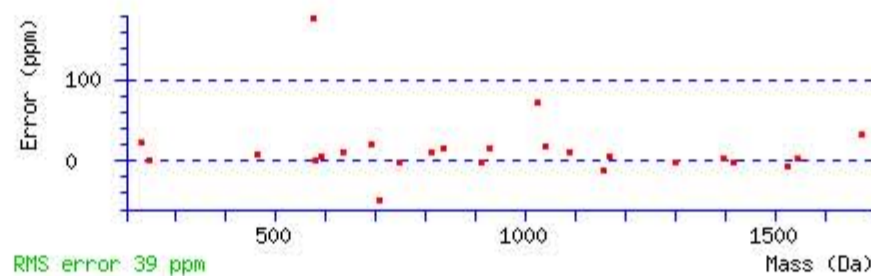

NCBI BLAST search of [AACAQLNDFLQEYGTQGCQV](#)

(Parameters: blastp, nr protein database, expect=20000, no filter, PAM30)

Other BLAST [web gateways](#)

### All matches to this query

| Score | Mr(calc):   | Delta    | Sequence                             |
|-------|-------------|----------|--------------------------------------|
| 55.6  | 2583.155624 | 0.005278 | <a href="#">AACAQLNDFLQEYGTQGCQV</a> |
| 18.2  | 2583.155624 | 0.005278 | <a href="#">AACAQLNDFLQEYGTQGCQV</a> |



# MASCOT Search Results

## Peptide View

MS/MS Fragmentation of **CFSGQCISK**

Found in **CO7\_HUMAN**, Complement component C7 OS=Homo sapiens GN=C7 PE=1 SV=2

Match to Query 32025: 1396.631028 from(699.322790,2+) rtinseconds(1633) index(3606)

Title: Locus:1.1.1.3004.14 File:"2013-07-02 CLN FXIII 30 min 2nd F 1.wiff"

Data file C:\Program Files (x86)\Matrix Science\Mascot Daemon\mgf2 FXIII 30 min 2nd\mascot\_daemon\_merge.mgf

Click mouse within plot area to zoom in by factor of two about that point

Or, Plot from  to  Da

Label all possible matches  Label matches used for scoring

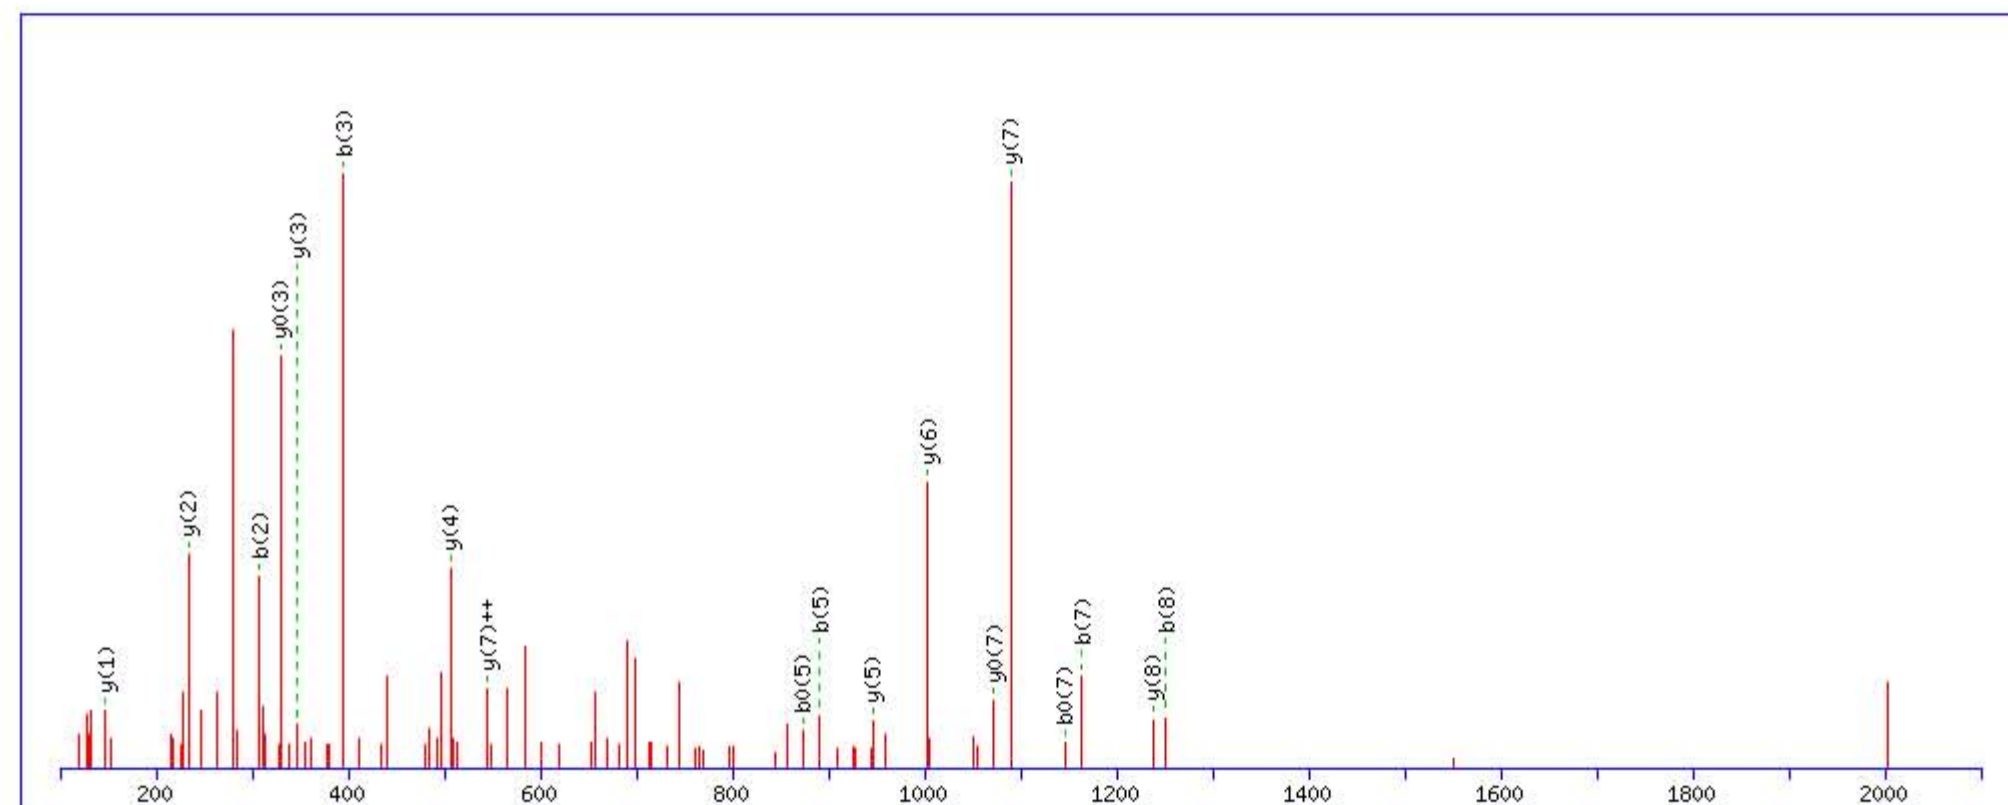

Monoisotopic mass of neutral peptide Mr(calc): 1396.630157

Fixed modifications: Carbamidomethyl (C) (apply to specified residues or termini only)

Variable modifications:

Q5 : Biotin:Thermo-21345 (Q)

Ions Score: 48 Expect: 8.7e-005

Matches : 18/82 fragment ions using 34 most intense peaks ([help](#))

| # | b                  | b <sup>++</sup> | b <sup>*</sup> | b <sup>*++</sup> | b <sup>0</sup>     | b <sup>0++</sup> | Seq. | y                  | y <sup>++</sup>   | y <sup>*</sup> | y <sup>*++</sup> | y <sup>0</sup>     | y <sup>0++</sup> | # |
|---|--------------------|-----------------|----------------|------------------|--------------------|------------------|------|--------------------|-------------------|----------------|------------------|--------------------|------------------|---|
| 1 | 161.037925         | 81.022600       |                |                  |                    |                  | C    |                    |                   |                |                  |                    |                  | 9 |
| 2 | <b>308.106339</b>  | 154.556807      |                |                  |                    |                  | F    | <b>1237.606777</b> | 619.307027        | 1220.580228    | 610.793752       | 1219.596212        | 610.301744       | 8 |
| 3 | <b>395.138367</b>  | 198.072821      |                |                  | 377.127802         | 189.067539       | S    | <b>1090.538363</b> | <b>545.772819</b> | 1073.511814    | 537.259545       | <b>1072.527798</b> | 536.767537       | 7 |
| 4 | 452.159831         | 226.583553      |                |                  | 434.149266         | 217.578271       | G    | <b>1003.506335</b> | 502.256806        | 986.479786     | 493.743531       | 985.495770         | 493.251523       | 6 |
| 5 | <b>891.385157</b>  | 446.196217      | 874.358608     | 437.682942       | <b>873.374592</b>  | 437.190934       | Q    | <b>946.484871</b>  | 473.746074        | 929.458322     | 465.232799       | 928.474306         | 464.740791       | 5 |
| 6 | 1051.415806        | 526.211541      | 1034.389257    | 517.698267       | 1033.405241        | 517.206258       | C    | <b>507.259545</b>  | 254.133410        | 490.232996     | 245.620136       | 489.248980         | 245.128128       | 4 |
| 7 | <b>1164.499870</b> | 582.753573      | 1147.473321    | 574.240298       | <b>1146.489305</b> | 573.748290       | I    | <b>347.228896</b>  | 174.118086        | 330.202347     | 165.604811       | <b>329.218331</b>  | 165.112803       | 3 |
| 8 | <b>1251.531898</b> | 626.269587      | 1234.505349    | 617.756313       | 1233.521333        | 617.264304       | S    | <b>234.144832</b>  | 117.576054        | 217.118283     | 109.062780       | 216.134267         | 108.570772       | 2 |
| 9 |                    |                 |                |                  |                    |                  | K    | <b>147.112804</b>  | 74.060040         | 130.086255     | 65.546765        |                    |                  | 1 |

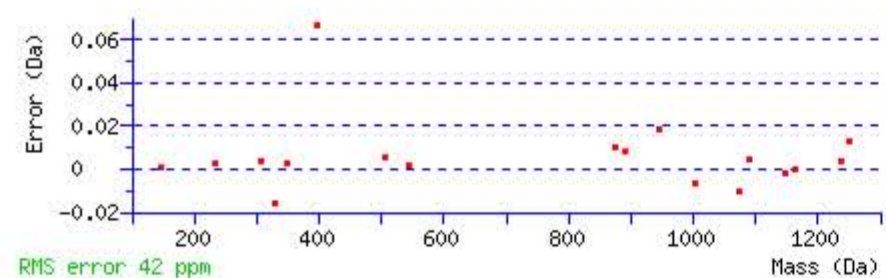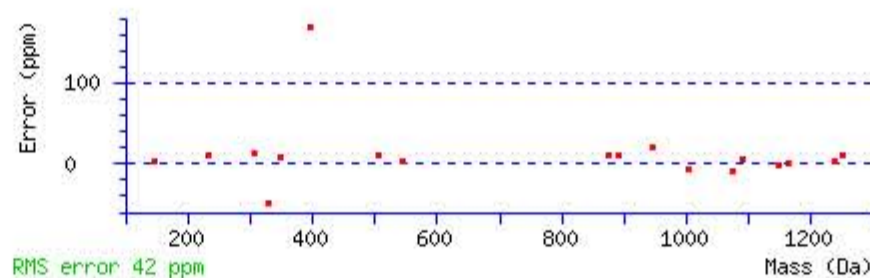

NCBI BLAST search of **CFSGQCISK**

(Parameters: blastp, nr protein database, expect=20000, no filter, PAM30)

Other BLAST [web gateways](#)

## All matches to this query

| Score | Mr(calc):   | Delta     | Sequence                       |
|-------|-------------|-----------|--------------------------------|
| 48.2  | 1396.630157 | 0.000871  | <a href="#">CFSGQCISK</a>      |
| 4.6   | 1396.629272 | 0.001756  | <a href="#">QLSQAQATDFCK</a>   |
| 2.4   | 1396.629257 | 0.001771  | <a href="#">CPSSYNILDNSK</a>   |
| 0.7   | 1396.629303 | 0.001725  | <a href="#">GQTDTSLPGCFKSK</a> |
| 0.2   | 1396.644516 | -0.013488 | <a href="#">NAPYFPCDKASK</a>   |



# MASCOT Search Results

## Peptide View

MS/MS Fragmentation of **WLVGEMHCQK**

Found in **CO7\_HUMAN**, Complement component C7 OS=Homo sapiens GN=C7 PE=1 SV=2

Match to Query 38906: 1597.766202 from(533.596010,3+) rtinseconds(1882) index(5055)

Title: Locus:1.1.1.3091.15 File:"2013-07-02 CLN FXIII 30 min 2nd F 1.wiff"

Data file C:\Program Files (x86)\Matrix Science\Mascot Daemon\mgf2 FXIII 30 min 2nd\mascot\_daemon\_merge.mgf

Click mouse within plot area to zoom in by factor of two about that point

Or, Plot from  to  Da

Label all possible matches  Label matches used for scoring

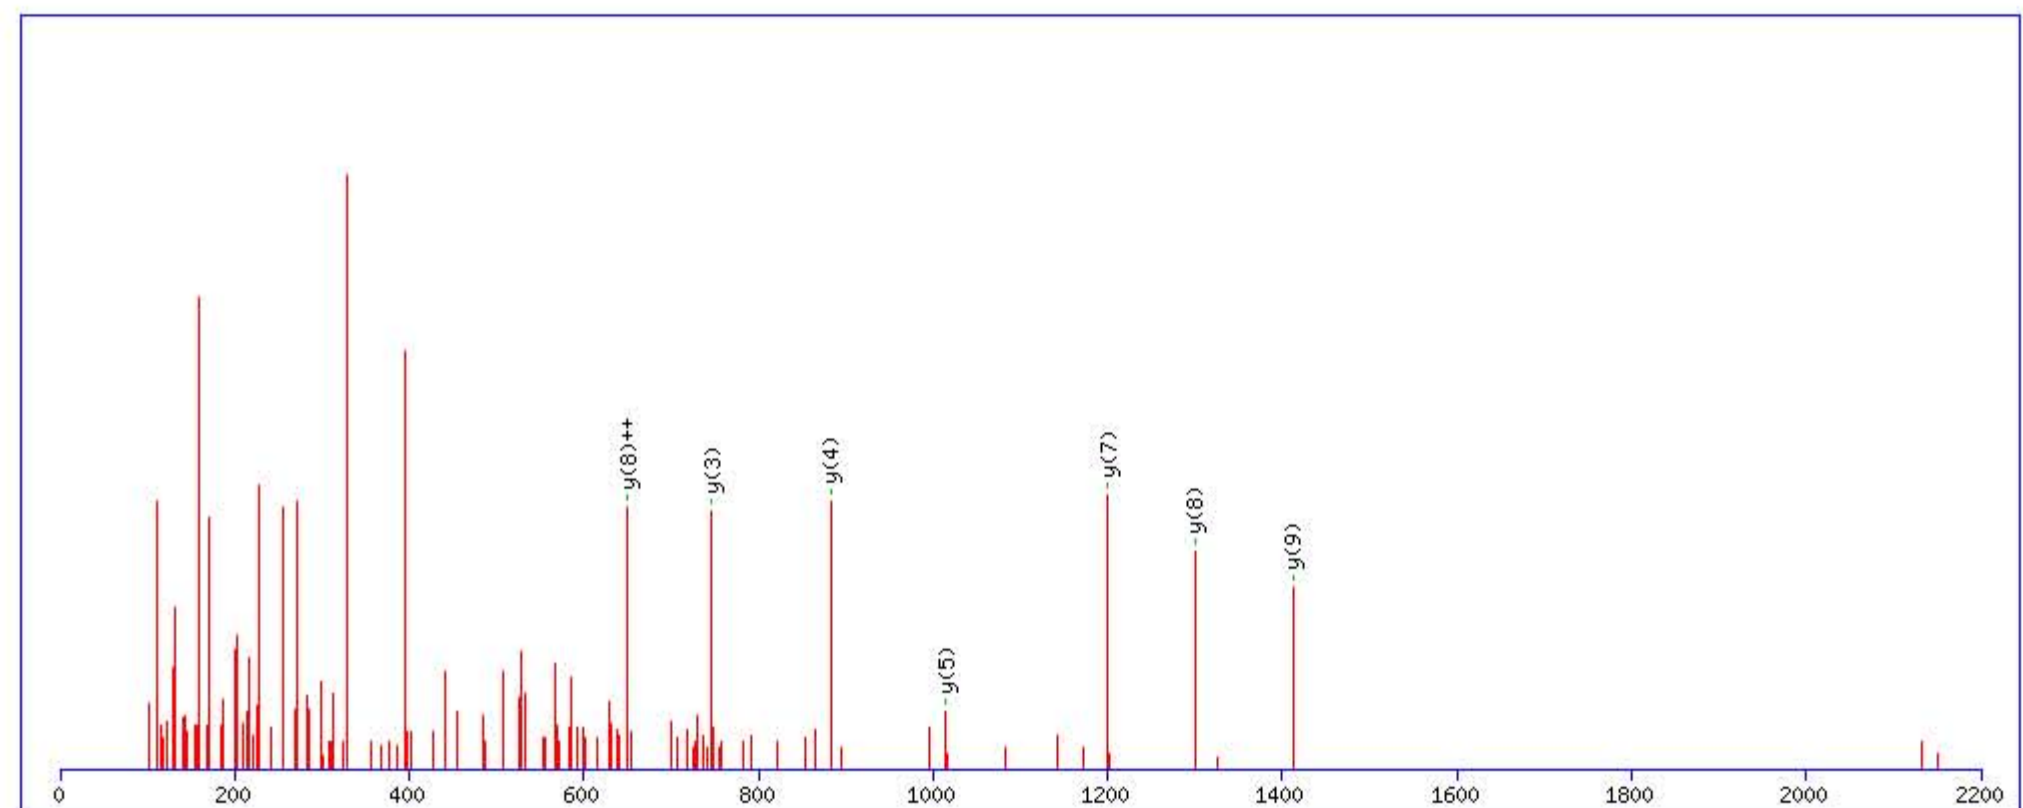

Monoisotopic mass of neutral peptide Mr(calc): 1597.756744

Fixed modifications: Carbamidomethyl (C) (apply to specified residues or termini only)

Variable modifications:

Q9 : Biotin:Thermo-21345 (Q)

Ions Score: 30 Expect: 0.0046

Matches : 7/74 fragment ions using 14 most intense peaks [\(help\)](#)

| #  | b           | b <sup>++</sup> | b <sup>*</sup> | b <sup>*++</sup> | b <sup>0</sup> | b <sup>0++</sup> | Seq. | y           | y <sup>++</sup> | y <sup>*</sup> | y <sup>*++</sup> | y <sup>0</sup> | y <sup>0++</sup> | #  |
|----|-------------|-----------------|----------------|------------------|----------------|------------------|------|-------------|-----------------|----------------|------------------|----------------|------------------|----|
| 1  | 187.086589  | 94.046932       |                |                  |                |                  | W    |             |                 |                |                  |                |                  | 10 |
| 2  | 300.170653  | 150.588965      |                |                  |                |                  | L    | 1412.684711 | 706.845994      | 1395.658162    | 698.332719       | 1394.674146    | 697.840711       | 9  |
| 3  | 399.239067  | 200.123172      |                |                  |                |                  | V    | 1299.600647 | 650.303962      | 1282.574098    | 641.790687       | 1281.590082    | 641.298679       | 8  |
| 4  | 456.260531  | 228.633904      |                |                  |                |                  | G    | 1200.532233 | 600.769755      | 1183.505684    | 592.256480       | 1182.521668    | 591.764472       | 7  |
| 5  | 585.303124  | 293.155200      |                |                  | 567.292559     | 284.149918       | E    | 1143.510769 | 572.259023      | 1126.484220    | 563.745748       | 1125.500204    | 563.253740       | 6  |
| 6  | 716.343609  | 358.675443      |                |                  | 698.333044     | 349.670160       | M    | 1014.468176 | 507.737726      | 997.441627     | 499.224452       |                |                  | 5  |
| 7  | 853.402521  | 427.204899      |                |                  | 835.391956     | 418.199616       | H    | 883.427691  | 442.217484      | 866.401142     | 433.704209       |                |                  | 4  |
| 8  | 1013.433170 | 507.220223      |                |                  | 995.422605     | 498.214941       | C    | 746.368779  | 373.688028      | 729.342230     | 365.174753       |                |                  | 3  |
| 9  | 1452.658496 | 726.832886      | 1435.631947    | 718.319612       | 1434.647931    | 717.827604       | Q    | 586.338130  | 293.672703      | 569.311581     | 285.159429       |                |                  | 2  |
| 10 |             |                 |                |                  |                |                  | K    | 147.112804  | 74.060040       | 130.086255     | 65.546765        |                |                  | 1  |

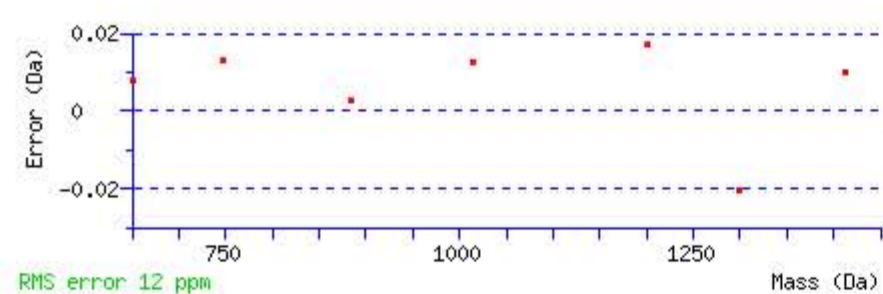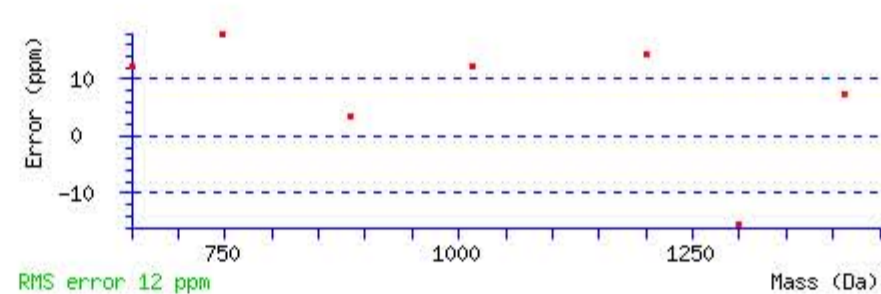

NCBI BLAST search of [WLVGEMHCQK](#)

(Parameters: blastp, nr protein database, expect=20000, no filter, PAM30)

Other BLAST [web gateways](#)

## All matches to this query

| Score | Mr(calc):   | Delta    | Sequence                       |
|-------|-------------|----------|--------------------------------|
| 30.0  | 1597.756744 | 0.009458 | <a href="#">WLVGEMHCQK</a>     |
| 5.0   | 1597.751846 | 0.014356 | <a href="#">NPEDDGCLLKQGPR</a> |



# MASCOT SEARCH RESULTS

## Peptide View

MS/MS Fragmentation of **LSGNVLSYTFQVK**

Found in **CO7\_HUMAN**, Complement component C7 OS=Homo sapiens GN=C7 PE=1 SV=2

Match to Query 43928: 1765.937888 from(883.976220,2+) rtinseconds(2468) index(8571)

Title: Locus:1.1.1.3295.13 File:"2013-07-02 CLN FXIII 30 min 2nd F 1.wiff"

Data file C:\Program Files (x86)\Matrix Science\Mascot Daemon\mgf\2 FXIII 30 min 2nd\mascot\_daemon\_merge.mgf

Click mouse within plot area to zoom in by factor of two about that point

Or, Plot from  to  Da

Label all possible matches  Label matches used for scoring

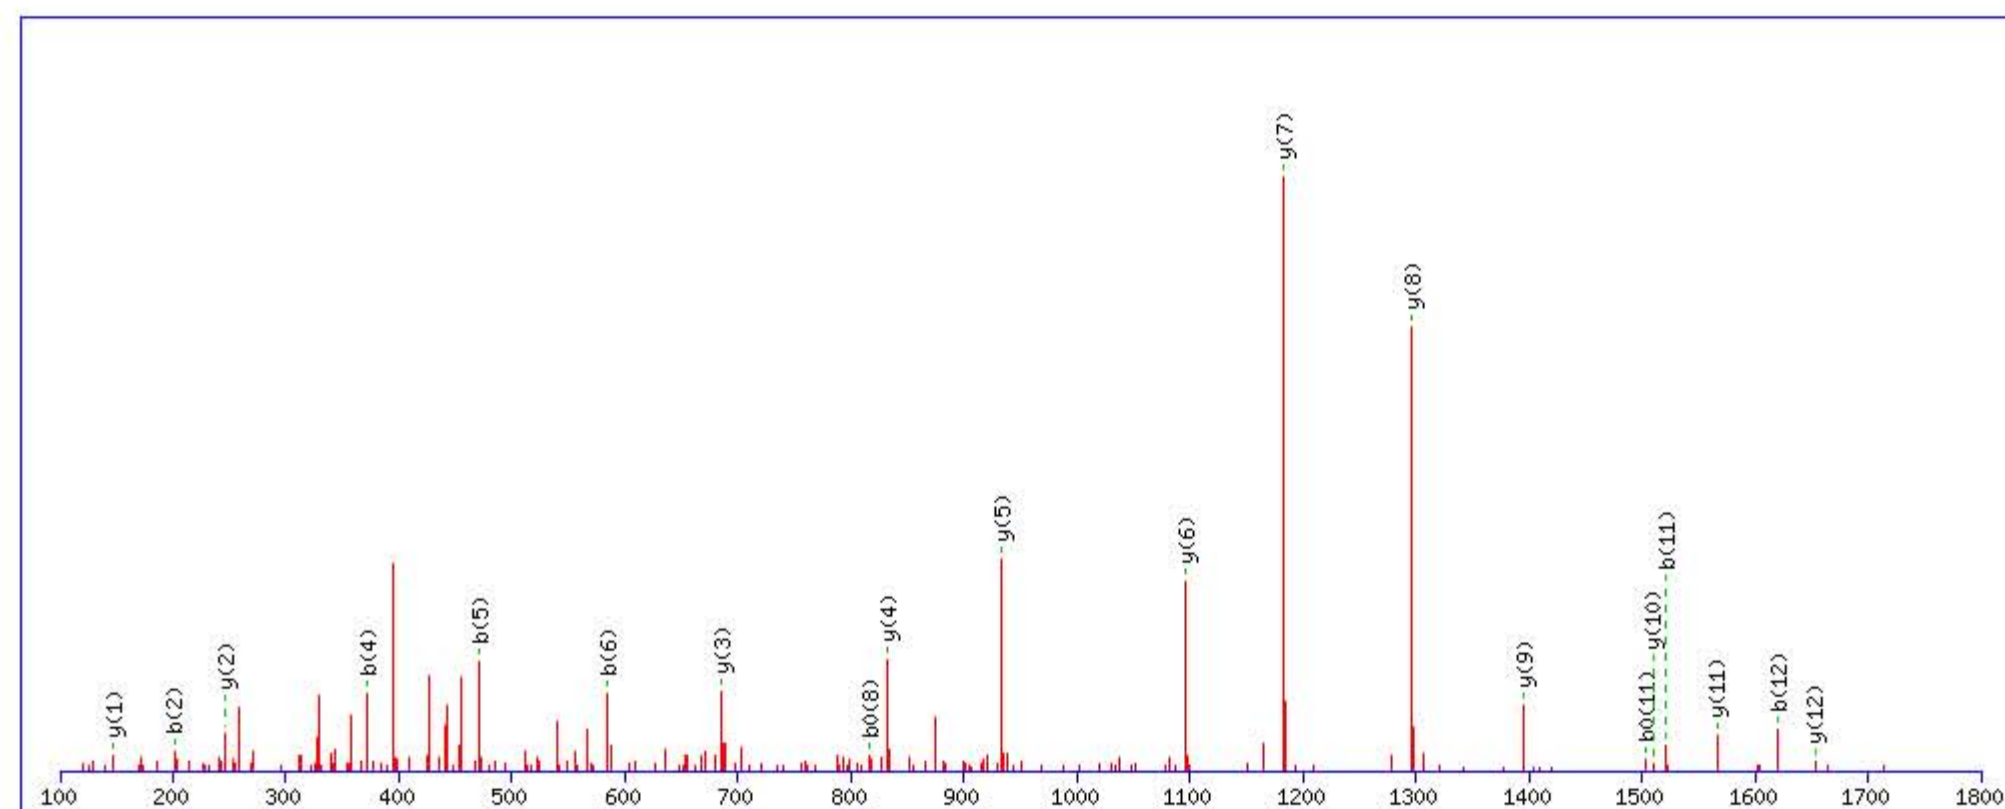

Monoisotopic mass of neutral peptide Mr(calc): 1765.943680

Fixed modifications: Carbamidomethyl (C) (apply to specified residues or termini only)

Variable modifications:

Q11 : Biotin:Thermo-21345 (Q)

Ions Score: 97 Expect: 4.5e-009

Matches : 20/128 fragment ions using 32 most intense peaks [\(help\)](#)

| #  | b                  | b <sup>++</sup> | b <sup>*</sup> | b <sup>*++</sup> | b <sup>0</sup>     | b <sup>0++</sup> | Seq. | y                  | y <sup>++</sup> | y <sup>*</sup> | y <sup>*++</sup> | y <sup>0</sup> | y <sup>0++</sup> | #  |
|----|--------------------|-----------------|----------------|------------------|--------------------|------------------|------|--------------------|-----------------|----------------|------------------|----------------|------------------|----|
| 1  | 114.091340         | 57.549308       |                |                  |                    |                  | L    |                    |                 |                |                  |                |                  | 13 |
| 2  | <b>201.123368</b>  | 101.065322      |                |                  | 183.112803         | 92.060039        | S    | <b>1653.866891</b> | 827.437084      | 1636.840342    | 818.923809       | 1635.856326    | 818.431801       | 12 |
| 3  | 258.144832         | 129.576054      |                |                  | 240.134267         | 120.570771       | G    | <b>1566.834863</b> | 783.921070      | 1549.808314    | 775.407795       | 1548.824298    | 774.915787       | 11 |
| 4  | <b>372.187759</b>  | 186.597517      | 355.161210     | 178.084243       | 354.177194         | 177.592235       | N    | <b>1509.813399</b> | 755.410338      | 1492.786850    | 746.897063       | 1491.802834    | 746.405055       | 10 |
| 5  | <b>471.256173</b>  | 236.131724      | 454.229624     | 227.618450       | 453.245608         | 227.126442       | V    | <b>1395.770472</b> | 698.388874      | 1378.743923    | 689.875600       | 1377.759907    | 689.383592       | 9  |
| 6  | <b>584.340237</b>  | 292.673757      | 567.313688     | 284.160482       | 566.329672         | 283.668474       | L    | <b>1296.702058</b> | 648.854667      | 1279.675509    | 640.341393       | 1278.691493    | 639.849385       | 8  |
| 7  | 671.372265         | 336.189771      | 654.345716     | 327.676496       | 653.361700         | 327.184488       | S    | <b>1183.617994</b> | 592.312635      | 1166.591445    | 583.799361       | 1165.607429    | 583.307353       | 7  |
| 8  | 834.435594         | 417.721435      | 817.409045     | 409.208161       | <b>816.425029</b>  | 408.716153       | Y    | <b>1096.585966</b> | 548.796621      | 1079.559417    | 540.283347       | 1078.575401    | 539.791339       | 6  |
| 9  | 935.483273         | 468.245275      | 918.456724     | 459.732000       | 917.472708         | 459.239992       | T    | <b>933.522637</b>  | 467.264957      | 916.496088     | 458.751682       | 915.512072     | 458.259674       | 5  |
| 10 | 1082.551687        | 541.779482      | 1065.525138    | 533.266207       | 1064.541122        | 532.774199       | F    | <b>832.474958</b>  | 416.741117      | 815.448409     | 408.227843       |                |                  | 4  |
| 11 | <b>1521.777013</b> | 761.392145      | 1504.750464    | 752.878870       | <b>1503.766448</b> | 752.386862       | Q    | <b>685.406544</b>  | 343.206910      | 668.379995     | 334.693636       |                |                  | 3  |
| 12 | <b>1620.845427</b> | 810.926352      | 1603.818878    | 802.413077       | 1602.834862        | 801.921069       | V    | <b>246.181218</b>  | 123.594247      | 229.154669     | 115.080973       |                |                  | 2  |
| 13 |                    |                 |                |                  |                    |                  | K    | <b>147.112804</b>  | 74.060040       | 130.086255     | 65.546765        |                |                  | 1  |

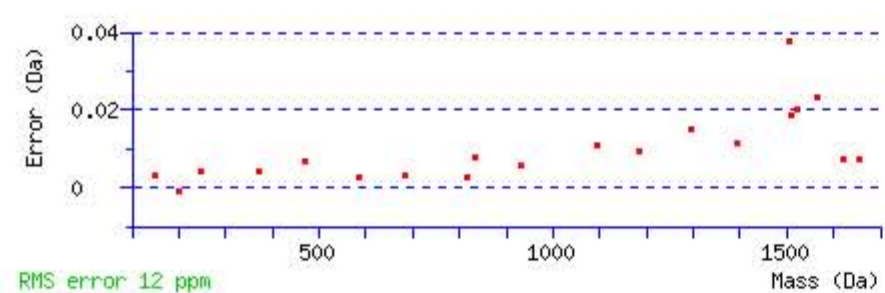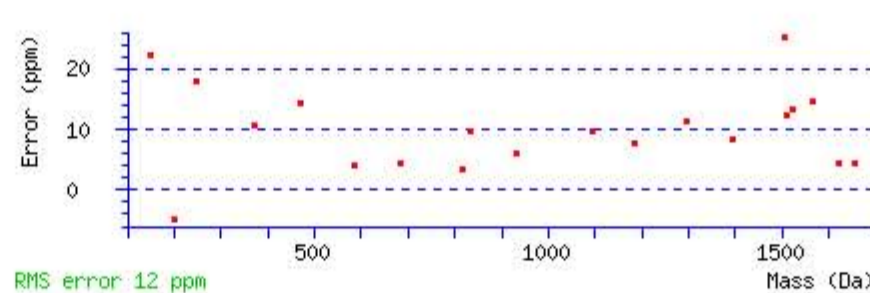

NCBI BLAST search of **LSGNVLSYTFQVK**

(Parameters: blastp, nr protein database, expect=20000, no filter, PAM30)

Other BLAST [web gateways](#)

All matches to this query

| Score | Mr(calc):   | Delta     | Sequence                         |
|-------|-------------|-----------|----------------------------------|
| 97.1  | 1765.943680 | -0.005792 | <a href="#">LSGNVLSYTFQVK</a>    |
| 7.7   | 1765.931763 | 0.006125  | <a href="#">NMIEVVTSEMKTLLK</a>  |
| 3.6   | 1765.950882 | -0.012994 | <a href="#">VTGNVSKKTNLYVMGR</a> |
| 2.5   | 1765.921005 | 0.016883  | <a href="#">VENTLNIHEDLDKVK</a>  |
| 1.4   | 1765.914490 | 0.023398  | <a href="#">KQLTLQSMRVFDER</a>   |



# MASCOT Search Results

## Peptide View

MS/MS Fragmentation of **IACVLPVLM DGIQSH P QKPFYTVG EK**

Found in **CO7\_HUMAN**, Complement component C7 OS=Homo sapiens GN=C7 PE=1 SV=2

Match to Query 68285: 3237.665496 from(810.423650,4+) rtinseconds(2571) index(9150)

Title: Locus:1.1.1.3331.20 File:"2013-07-02 CLN FXIII 30 min 2nd F 1.wiff"

Data file C:\Program Files (x86)\Matrix Science\Mascot Daemon\mgf2 FXIII 30 min 2nd\mascot\_daemon\_merge.mgf

Click mouse within plot area to zoom in by factor of two about that point

Or, Plot from  to  Da

Label all possible matches  Label matches used for scoring

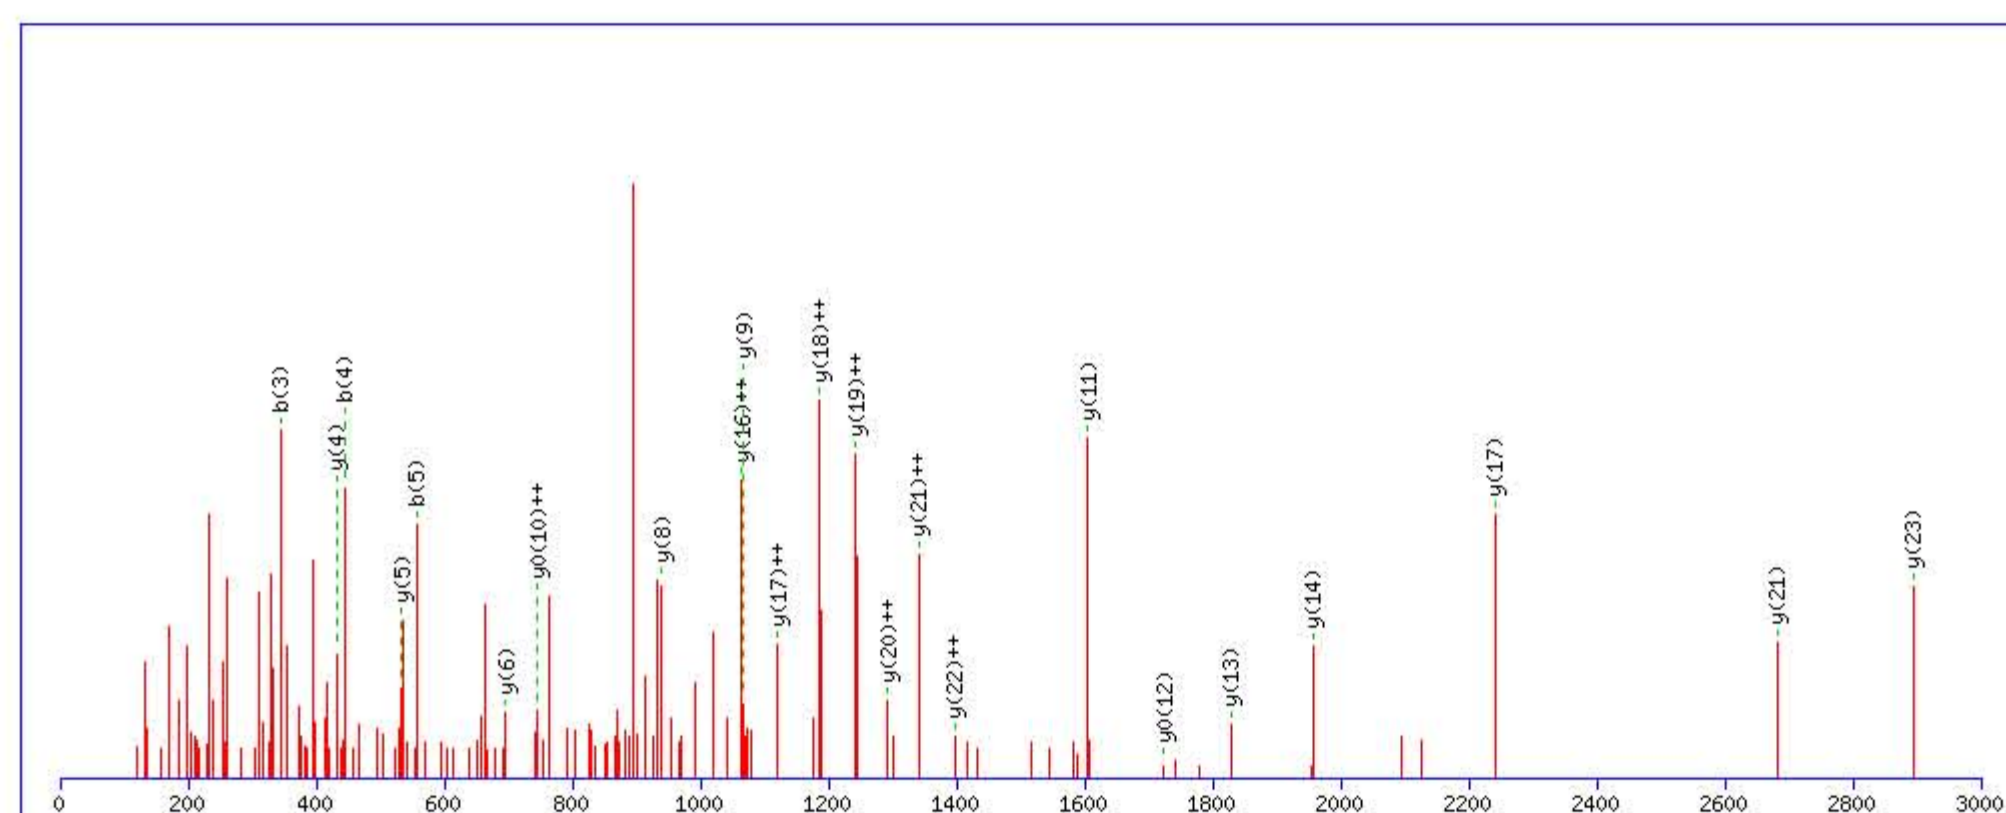

Monoisotopic mass of neutral peptide Mr(calc): 3237.675262

Fixed modifications: Carbamidomethyl (C) (apply to specified residues or termini only)

Variable modifications:

Q17 : Biotin:Thermo-21345 (Q)

Ions Score: 45 Expect: 0.00085

Matches : 23/256 fragment ions using 56 most intense peaks [\(help\)](#)

| #  | b                 | b <sup>++</sup> | b <sup>*</sup> | b <sup>++</sup> | b <sup>0</sup> | b <sup>0++</sup> | Seq. | y                  | y <sup>++</sup>    | y <sup>*</sup> | y <sup>++</sup> | y <sup>0</sup>     | y <sup>0++</sup>  | #  |
|----|-------------------|-----------------|----------------|-----------------|----------------|------------------|------|--------------------|--------------------|----------------|-----------------|--------------------|-------------------|----|
| 1  | 114.091340        | 57.549308       |                |                 |                |                  | I    |                    |                    |                |                 |                    |                   | 26 |
| 2  | 185.128454        | 93.067865       |                |                 |                |                  | A    | 3125.598471        | 1563.302873        | 3108.571922    | 1554.789599     | 3107.587906        | 1554.297591       | 25 |
| 3  | <b>345.159103</b> | 173.083190      |                |                 |                |                  | C    | 3054.561357        | 1527.784316        | 3037.534808    | 1519.271042     | 3036.550792        | 1518.779034       | 24 |
| 4  | <b>444.227517</b> | 222.617397      |                |                 |                |                  | V    | <b>2894.530708</b> | 1447.768992        | 2877.504159    | 1439.255717     | 2876.520143        | 1438.763709       | 23 |
| 5  | <b>557.311581</b> | 279.159429      |                |                 |                |                  | L    | 2795.462294        | <b>1398.234785</b> | 2778.435745    | 1389.721510     | 2777.451729        | 1389.229502       | 22 |
| 6  | 654.364345        | 327.685811      |                |                 |                |                  | P    | <b>2682.378230</b> | <b>1341.692753</b> | 2665.351681    | 1333.179478     | 2664.367665        | 1332.687470       | 21 |
| 7  | 753.432759        | 377.220018      |                |                 |                |                  | V    | 2585.325466        | <b>1293.166371</b> | 2568.298917    | 1284.653096     | 2567.314901        | 1284.161088       | 20 |
| 8  | 866.516823        | 433.762050      |                |                 |                |                  | L    | 2486.257052        | <b>1243.632164</b> | 2469.230503    | 1235.118889     | 2468.246487        | 1234.626881       | 19 |
| 9  | 997.557308        | 499.282292      |                |                 |                |                  | M    | 2373.172988        | <b>1187.090132</b> | 2356.146439    | 1178.576857     | 2355.162423        | 1178.084849       | 18 |
| 10 | 1112.584251       | 556.795764      |                |                 | 1094.573686    | 547.790481       | D    | <b>2242.132503</b> | <b>1121.569889</b> | 2225.105954    | 1113.056615     | 2224.121938        | 1112.564607       | 17 |
| 11 | 1169.605715       | 585.306495      |                |                 | 1151.595150    | 576.301213       | G    | 2127.105560        | <b>1064.056418</b> | 2110.079011    | 1055.543143     | 2109.094995        | 1055.051135       | 16 |
| 12 | 1282.689779       | 641.848527      |                |                 | 1264.679214    | 632.843245       | I    | 2070.084096        | 1035.545686        | 2053.057547    | 1027.032411     | 2052.073531        | 1026.540403       | 15 |
| 13 | 1410.748357       | 705.877816      | 1393.721808    | 697.364542      | 1392.737792    | 696.872534       | Q    | <b>1957.000032</b> | 979.003654         | 1939.973483    | 970.490380      | 1938.989467        | 969.998371        | 14 |
| 14 | 1497.780385       | 749.393830      | 1480.753836    | 740.880556      | 1479.769820    | 740.388548       | S    | <b>1828.941454</b> | 914.974365         | 1811.914905    | 906.461091      | 1810.930889        | 905.969083        | 13 |
| 15 | 1634.839297       | 817.923286      | 1617.812748    | 809.410012      | 1616.828732    | 808.918004       | H    | 1741.909426        | 871.458351         | 1724.882877    | 862.945077      | <b>1723.898861</b> | 862.453068        | 12 |
| 16 | 1731.892061       | 866.449668      | 1714.865512    | 857.936394      | 1713.881496    | 857.444386       | P    | <b>1604.850514</b> | 802.928895         | 1587.823965    | 794.415621      | 1586.839949        | 793.923612        | 11 |
| 17 | 2171.117387       | 1086.062331     | 2154.090838    | 1077.549057     | 2153.106822    | 1077.057049      | Q    | 1507.797750        | 754.402513         | 1490.771201    | 745.889239      | 1489.787185        | <b>745.397230</b> | 10 |
| 18 | 2299.212350       | 1150.109813     | 2282.185801    | 1141.596538     | 2281.201785    | 1141.104530      | K    | <b>1068.572424</b> | 534.789850         | 1051.545875    | 526.276575      | 1050.561859        | 525.784567        | 9  |
| 19 | 2396.265114       | 1198.636195     | 2379.238565    | 1190.122920     | 2378.254549    | 1189.630912      | P    | <b>940.477461</b>  | 470.742368         | 923.450912     | 462.229094      | 922.466896         | 461.737086        | 8  |
| 20 | 2543.333528       | 1272.170402     | 2526.306979    | 1263.657127     | 2525.322963    | 1263.165119      | F    | 843.424697         | 422.215986         | 826.398148     | 413.702712      | 825.414132         | 413.210704        | 7  |
| 21 | 2706.396857       | 1353.702066     | 2689.370308    | 1345.188792     | 2688.386292    | 1344.696784      | Y    | <b>696.356283</b>  | 348.681779         | 679.329734     | 340.168505      | 678.345718         | 339.676497        | 6  |
| 22 | 2807.444536       | 1404.225906     | 2790.417987    | 1395.712631     | 2789.433971    | 1395.220623      | T    | <b>533.292954</b>  | 267.150115         | 516.266405     | 258.636840      | 515.282389         | 258.144832        | 5  |
| 23 | 2906.512950       | 1453.760113     | 2889.486401    | 1445.246838     | 2888.502385    | 1444.754830      | V    | <b>432.245275</b>  | 216.626275         | 415.218726     | 208.113001      | 414.234710         | 207.620993        | 4  |
| 24 | 2963.534414       | 1482.270845     | 2946.507865    | 1473.757570     | 2945.523849    | 1473.265562      | G    | 333.176861         | 167.092069         | 316.150312     | 158.578794      | 315.166296         | 158.086786        | 3  |
| 25 | 3092.577007       | 1546.792141     | 3075.550458    | 1538.278867     | 3074.566442    | 1537.786859      | E    | 276.155397         | 138.581337         | 259.128848     | 130.068062      | 258.144832         | 129.576054        | 2  |
| 26 |                   |                 |                |                 |                |                  | K    | 147.112804         | 74.060040          | 130.086255     | 65.546765       |                    |                   | 1  |

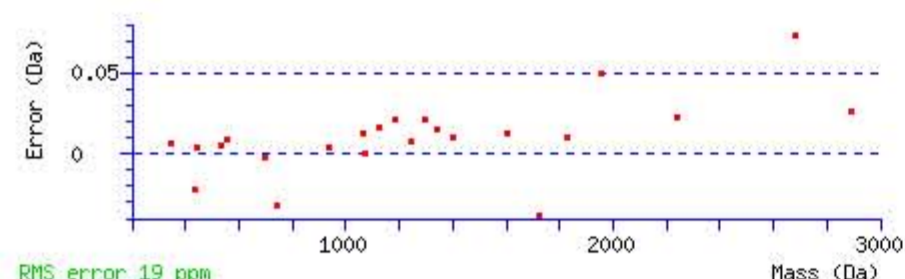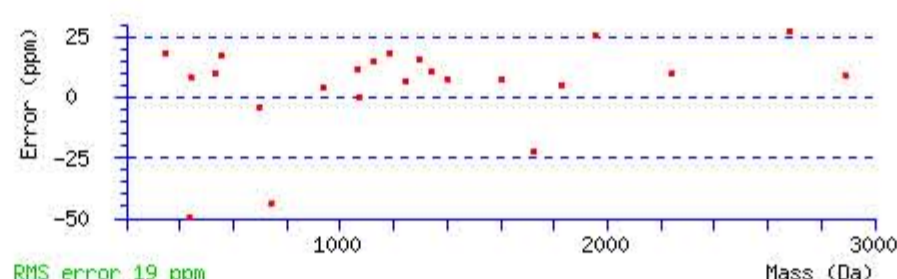

NCBI BLAST search of **IACVLPVLM DGIQSH P QKPFYTVG EK**

(Parameters: blastp, nr protein database, expect=20000, no filter, PAM30)

Other BLAST [web gateways](#)

All matches to this query

| Score | Mr(calc):   | Delta     | Sequence                                       |
|-------|-------------|-----------|------------------------------------------------|
| 45.0  | 3237.675262 | -0.009766 | <a href="#">IACVLPVLM DGIQSH P QKPFYTVG EK</a> |
| 35.2  | 3237.675262 | -0.009766 | <a href="#">IACVLPVLM DGIQSH P QKPFYTVG EK</a> |



**MASCOT** Mascot Search Results

**Peptide View**

MS/MS Fragmentation of **SVAVYGQYGGQPCVGNAFETQSCEPTR**  
 Found in **CO7\_HUMAN**, Complement component C7 OS=Homo sapiens GN=C7 PE=1 SV=2

Match to Query 69156: 3272.435772 from(1091.819200,3+) rtinseconds(2161) index(6791)  
 Title: Locus:1.1.1.3188.22 File:"2013-07-02 CLN FXIII 30 min 2nd F 1.wiff"  
 Data file C:\Program Files (x86)\Matrix Science\Mascot Daemon\mgf2 FXIII 30 min 2nd\mascot\_daemon\_merge.mgf

Click mouse within plot area to zoom in by factor of two about that point  
 Or, Plot from  to  Da   
 Label all possible matches  Label matches used for scoring

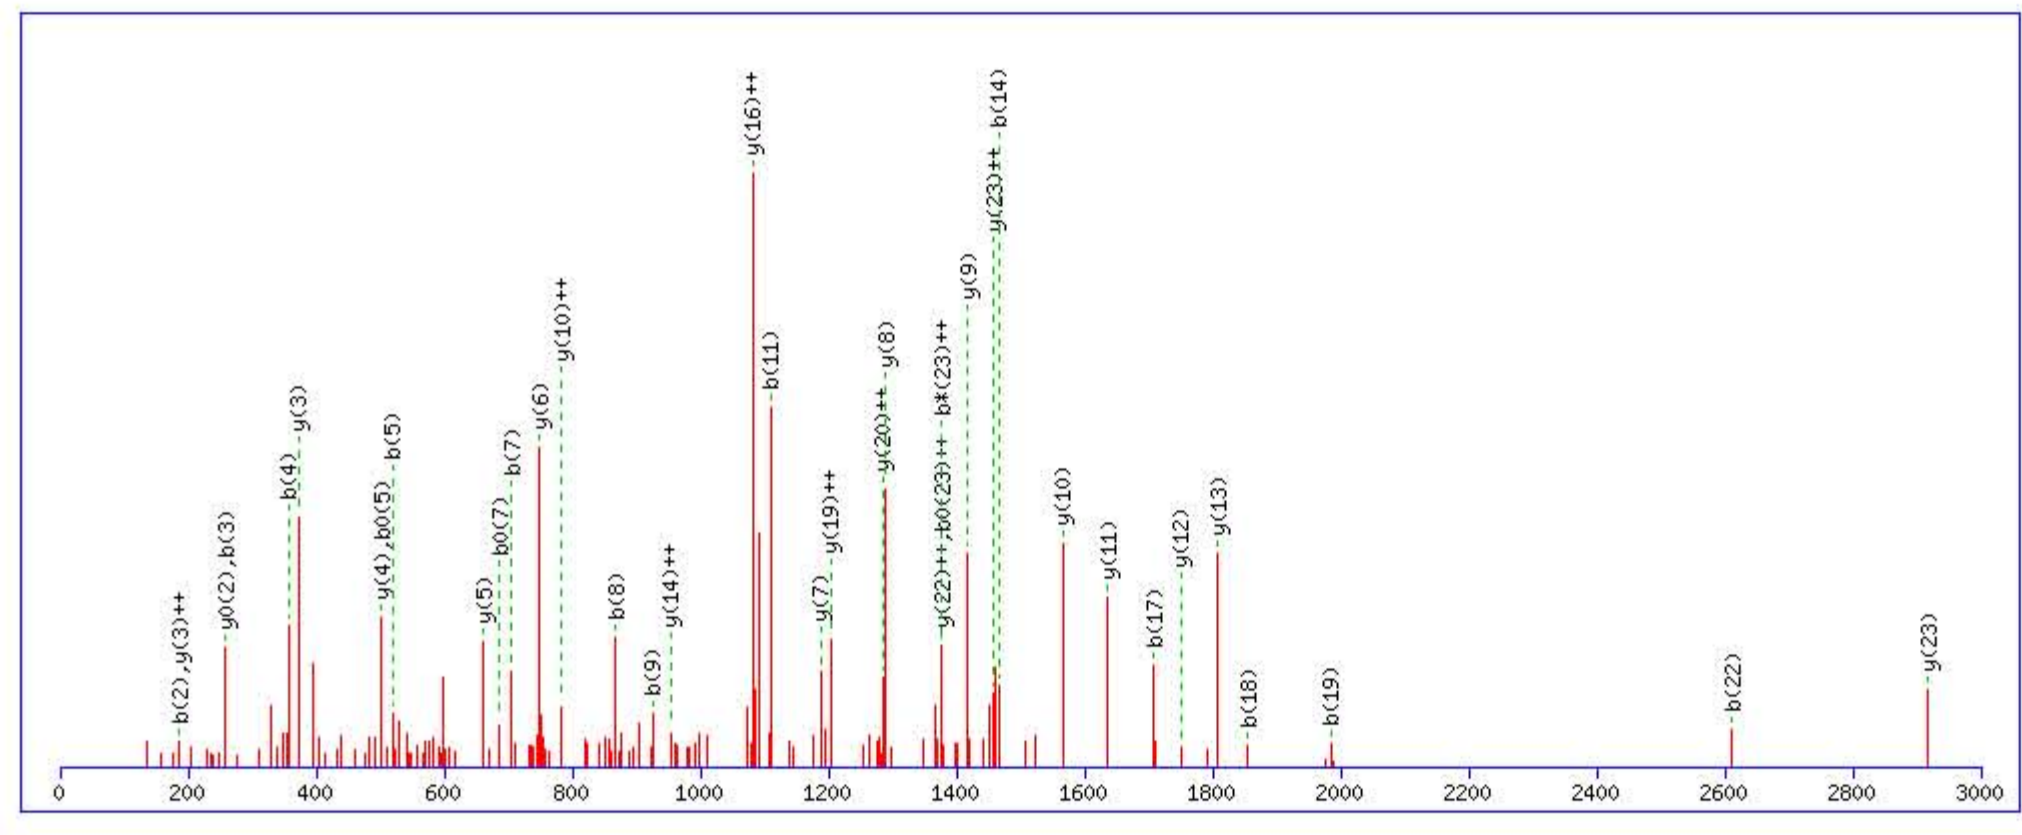

Monoisotopic mass of neutral peptide Mr(calc): 3272.468933  
 Fixed modifications: Carbamidomethyl (C) (apply to specified residues or termini only)  
 Variable modifications:  
 Q21 : Biotin:Thermo-21345 (Q)  
 Ions Score: 95 Expect: 1.6e-009  
 Matches : 38/298 fragment ions using 55 most intense peaks [\(help\)](#)

| #  | b                  | b <sup>++</sup> | b <sup>+</sup> | b <sup>+++</sup>   | b <sup>0</sup>    | b <sup>0++</sup>   | Seq. | y                  | y <sup>++</sup>    | y <sup>+</sup> | y <sup>+++</sup> | y <sup>0</sup>    | y <sup>0++</sup> | #  |
|----|--------------------|-----------------|----------------|--------------------|-------------------|--------------------|------|--------------------|--------------------|----------------|------------------|-------------------|------------------|----|
| 1  | 88.039304          | 44.523290       |                |                    | 70.028739         | 35.518008          | S    |                    |                    |                |                  |                   |                  | 27 |
| 2  | <b>187.107718</b>  | 94.057497       |                |                    | 169.097153        | 85.052214          | V    | 3186.444157        | 1593.725716        | 3169.417608    | 1585.212442      | 3168.433592       | 1584.720434      | 26 |
| 3  | <b>258.144832</b>  | 129.576054      |                |                    | 240.134267        | 120.570772         | A    | 3087.375743        | 1544.191509        | 3070.349194    | 1535.678235      | 3069.365178       | 1535.186227      | 25 |
| 4  | <b>357.213246</b>  | 179.110261      |                |                    | 339.202681        | 170.104979         | V    | 3016.338629        | 1508.672952        | 2999.312080    | 1500.159678      | 2998.328064       | 1499.667670      | 24 |
| 5  | <b>520.276575</b>  | 260.641926      |                |                    | <b>502.266010</b> | 251.636643         | Y    | <b>2917.270215</b> | <b>1459.138745</b> | 2900.243666    | 1450.625471      | 2899.259650       | 1450.133463      | 23 |
| 6  | 577.298039         | 289.152658      |                |                    | 559.287474        | 280.147375         | G    | 2754.206886        | <b>1377.607081</b> | 2737.180337    | 1369.093806      | 2736.196321       | 1368.601798      | 22 |
| 7  | <b>705.356617</b>  | 353.181947      | 688.330068     | 344.668672         | <b>687.346052</b> | 344.176664         | Q    | 2697.185422        | 1349.096349        | 2680.158873    | 1340.583074      | 2679.174857       | 1340.091066      | 21 |
| 8  | <b>868.419946</b>  | 434.713611      | 851.393397     | 426.200337         | 850.409381        | 425.708329         | Y    | 2569.126844        | <b>1285.067060</b> | 2552.100295    | 1276.553785      | 2551.116279       | 1276.061777      | 20 |
| 9  | <b>925.441410</b>  | 463.224343      | 908.414861     | 454.711069         | 907.430845        | 454.219061         | G    | 2406.063515        | <b>1203.535395</b> | 2389.036966    | 1195.022121      | 2388.052950       | 1194.530113      | 19 |
| 10 | 982.462874         | 491.735075      | 965.436325     | 483.221801         | 964.452309        | 482.729793         | G    | 2349.042051        | 1175.024663        | 2332.015502    | 1166.511389      | 2331.031486       | 1166.019381      | 18 |
| 11 | <b>1110.521452</b> | 555.764364      | 1093.494903    | 547.251090         | 1092.510887       | 546.759082         | Q    | 2292.020587        | 1146.513931        | 2274.994038    | 1138.000657      | 2274.010022       | 1137.508649      | 17 |
| 12 | 1207.574216        | 604.290746      | 1190.547667    | 595.777472         | 1189.563651       | 595.285464         | P    | 2163.962009        | <b>1082.484642</b> | 2146.935460    | 1073.971368      | 2145.951444       | 1073.479360      | 16 |
| 13 | 1367.604865        | 684.306071      | 1350.578316    | 675.792796         | 1349.594300       | 675.300788         | C    | 2066.909245        | 1033.958260        | 2049.882696    | 1025.444986      | 2048.898680       | 1024.952978      | 15 |
| 14 | <b>1466.673279</b> | 733.840278      | 1449.646730    | 725.327003         | 1448.662714       | 724.834995         | V    | 1906.878596        | <b>953.942936</b>  | 1889.852047    | 945.429662       | 1888.868031       | 944.937654       | 14 |
| 15 | 1523.694743        | 762.351010      | 1506.668194    | 753.837735         | 1505.684178       | 753.345727         | G    | <b>1807.810182</b> | 904.408729         | 1790.783633    | 895.895455       | 1789.799617       | 895.403446       | 13 |
| 16 | 1637.737670        | 819.372473      | 1620.711121    | 810.859199         | 1619.727105       | 810.367191         | N    | <b>1750.788718</b> | 875.897997         | 1733.762169    | 867.384723       | 1732.778153       | 866.892715       | 12 |
| 17 | <b>1708.774784</b> | 854.891030      | 1691.748235    | 846.377756         | 1690.764219       | 845.885748         | A    | <b>1636.745791</b> | 818.876534         | 1619.719242    | 810.363259       | 1618.735226       | 809.871251       | 11 |
| 18 | <b>1855.843198</b> | 928.425237      | 1838.816649    | 919.911963         | 1837.832633       | 919.419955         | F    | <b>1565.708677</b> | <b>783.357977</b>  | 1548.682128    | 774.844702       | 1547.698112       | 774.352694       | 10 |
| 19 | <b>1984.885791</b> | 992.946534      | 1967.859242    | 984.433259         | 1966.875226       | 983.941251         | E    | <b>1418.640263</b> | 709.823770         | 1401.613714    | 701.310495       | 1400.629698       | 700.818487       | 9  |
| 20 | 2085.933470        | 1043.470373     | 2068.906921    | 1034.957098        | 2067.922905       | 1034.465090        | T    | <b>1289.597670</b> | 645.302473         | 1272.571121    | 636.789199       | 1271.587105       | 636.297190       | 8  |
| 21 | 2525.158796        | 1263.083036     | 2508.132247    | 1254.569761        | 2507.148231       | 1254.077754        | Q    | <b>1188.549991</b> | 594.778634         | 1171.523442    | 586.265359       | 1170.539426       | 585.773351       | 7  |
| 22 | <b>2612.190824</b> | 1306.599050     | 2595.164275    | 1298.085776        | 2594.180259       | 1297.593768        | S    | <b>749.324665</b>  | 375.165970         | 732.298116     | 366.652696       | 731.314100        | 366.160688       | 6  |
| 23 | 2772.221473        | 1386.614374     | 2755.194924    | <b>1378.101100</b> | 2754.210908       | <b>1377.609092</b> | C    | <b>662.292637</b>  | 331.649956         | 645.266088     | 323.136682       | 644.282072        | 322.644674       | 5  |
| 24 | 2901.264066        | 1451.135671     | 2884.237517    | 1442.622396        | 2883.253501       | 1442.130389        | E    | <b>502.261988</b>  | 251.634632         | 485.235439     | 243.121357       | 484.251423        | 242.629349       | 4  |
| 25 | 2998.316830        | 1499.662053     | 2981.290281    | 1491.148778        | 2980.306265       | 1490.656771        | P    | <b>373.219395</b>  | <b>187.113335</b>  | 356.192846     | 178.600061       | 355.208830        | 178.108053       | 3  |
| 26 | 3099.364509        | 1550.185892     | 3082.337960    | 1541.672618        | 3081.353944       | 1541.180610        | T    | 276.166631         | 138.586953         | 259.140082     | 130.073679       | <b>258.156066</b> | 129.581671       | 2  |
| 27 |                    |                 |                |                    |                   |                    | R    | 175.118952         | 88.063114          | 158.092403     | 79.549839        |                   |                  | 1  |

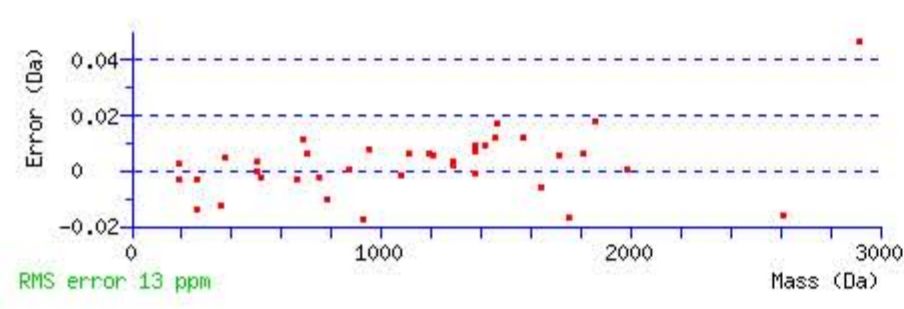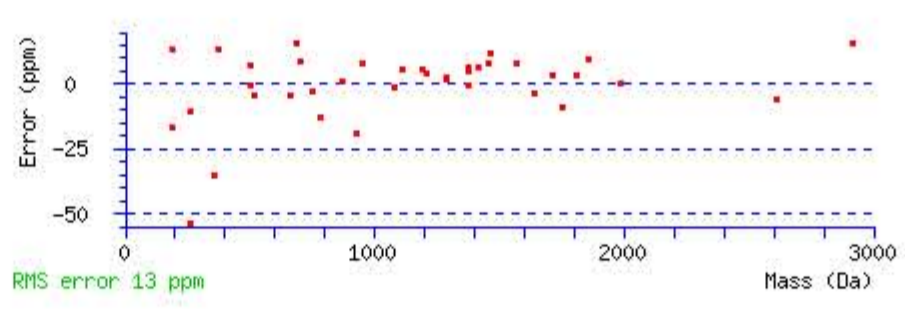

NCBI BLAST search of **SVAVYGQYGGQPCVGNAFETQSCEPTR**  
 (Parameters: blastp, nr protein database, expect=20000, no filter, PAM30)  
 Other BLAST [web gateways](#)

**All matches to this query**

| Score | Mr(calc):   | Delta     | Sequence                                    |
|-------|-------------|-----------|---------------------------------------------|
| 94.9  | 3272.468933 | -0.033161 | <a href="#">SVAVYGQYGGQPCVGNAFETQSCEPTR</a> |
| 30.3  | 3272.468933 | -0.033161 | <a href="#">SVAVYGQYGGQPCVGNAFETQSCEPTR</a> |
| 10.3  | 3272.468933 | -0.033161 | <a href="#">SVAVYGQYGGQPCVGNAFETQSCEPTR</a> |



# MASCOT Search Results

## Peptide View

MS/MS Fragmentation of **AGIQER**

Found in **CO8A\_HUMAN**, Complement component C8 alpha chain OS=Homo sapiens GN=C8A PE=1 SV=2

Match to Query 16495: 983.530228 from(492.772390,2+) rtinseconds(1410) index(18100)

Title: Locus:1.1.1.1372.16 File:"2013-07-02 CLN FXIII 30 min 2nd F 2.wiff"

Data file C:\Program Files (x86)\Matrix Science\Mascot Daemon\mgf2 FXIII 30 min 2nd\mascot\_daemon\_merge.mgf

Click mouse within plot area to zoom in by factor of two about that point

Or, Plot from  to  Da

Label all possible matches  Label matches used for scoring

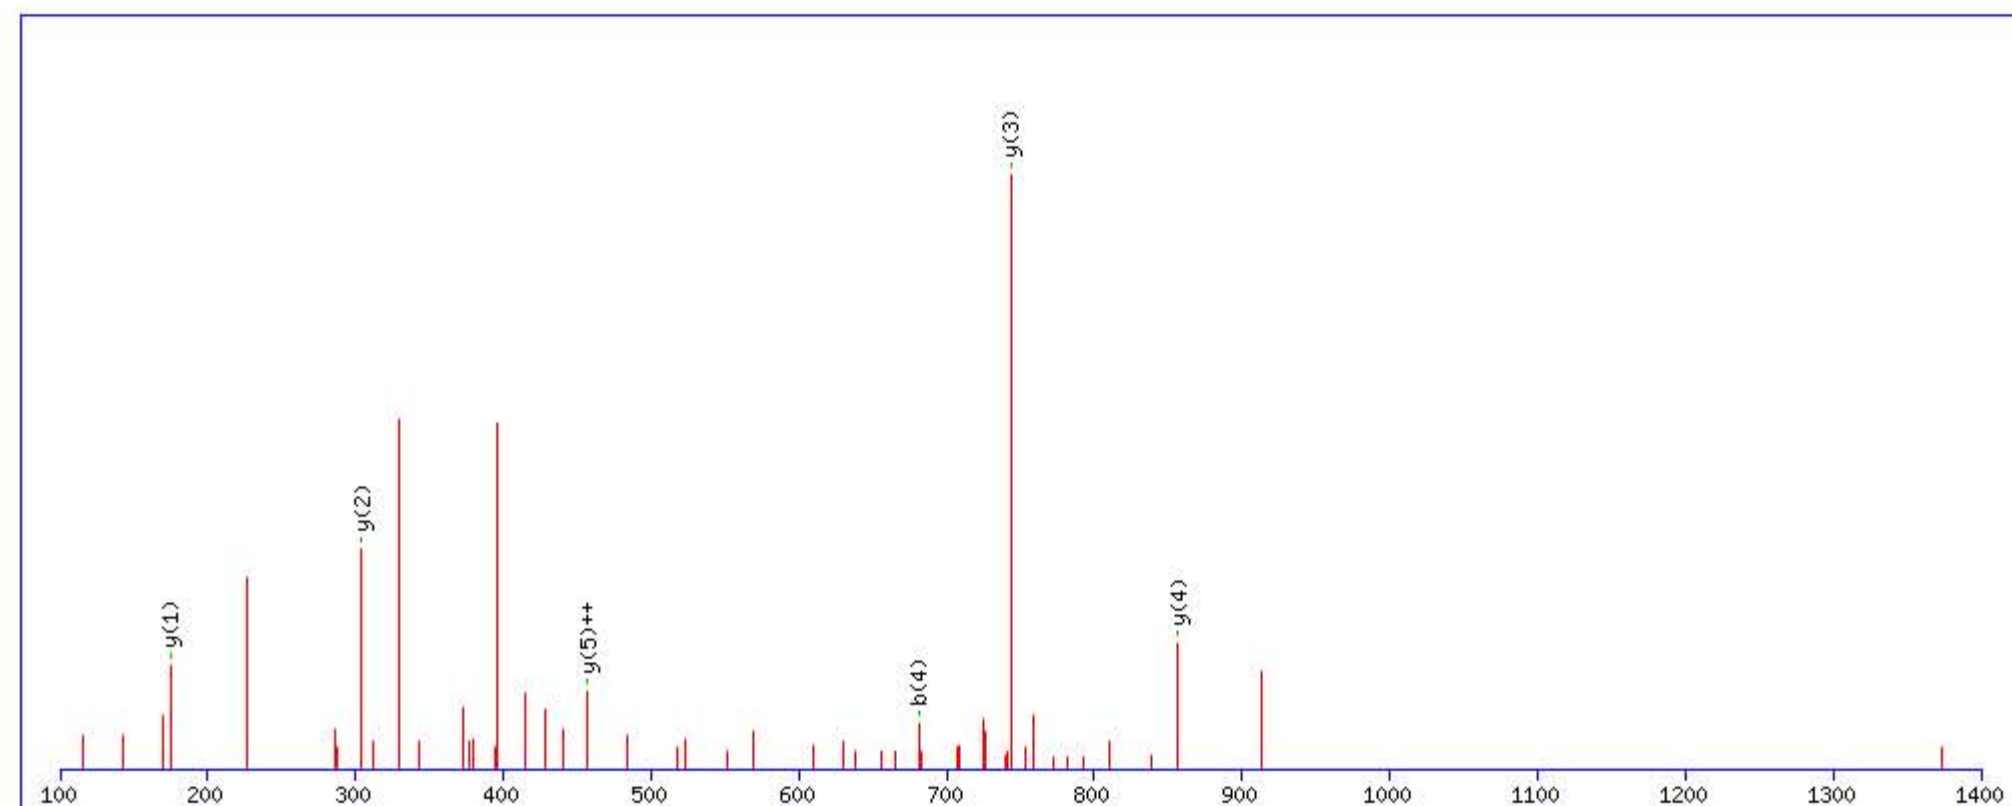

Monoisotopic mass of neutral peptide Mr(calc): 983.522217

Fixed modifications: Carbamidomethyl (C) (apply to specified residues or termini only)

Variable modifications:

Q4 : Biotin:Thermo-21345 (Q)

Ions Score: 30 Expect: 0.022

Matches : 6/44 fragment ions using 8 most intense peaks ([help](#))

| # | b          | b <sup>++</sup> | b <sup>*</sup> | b <sup>+++</sup> | b <sup>0</sup> | b <sup>0++</sup> | Seq. | y          | y <sup>++</sup> | y <sup>*</sup> | y <sup>+++</sup> | y <sup>0</sup> | y <sup>0++</sup> | # |
|---|------------|-----------------|----------------|------------------|----------------|------------------|------|------------|-----------------|----------------|------------------|----------------|------------------|---|
| 1 | 72.044390  | 36.525833       |                |                  |                |                  | A    |            |                 |                |                  |                |                  | 6 |
| 2 | 129.065854 | 65.036565       |                |                  |                |                  | G    | 913.492399 | 457.249838      | 896.465850     | 448.736563       | 895.481834     | 448.244555       | 5 |
| 3 | 242.149918 | 121.578597      |                |                  |                |                  | I    | 856.470935 | 428.739106      | 839.444386     | 420.225831       | 838.460370     | 419.733823       | 4 |
| 4 | 681.375244 | 341.191260      | 664.348695     | 332.677986       |                |                  | Q    | 743.386871 | 372.197074      | 726.360322     | 363.683799       | 725.376306     | 363.191791       | 3 |
| 5 | 810.417837 | 405.712557      | 793.391288     | 397.199282       | 792.407272     | 396.707274       | E    | 304.161545 | 152.584411      | 287.134996     | 144.071136       | 286.150980     | 143.579128       | 2 |
| 6 |            |                 |                |                  |                |                  | R    | 175.118952 | 88.063114       | 158.092403     | 79.549840        |                |                  | 1 |

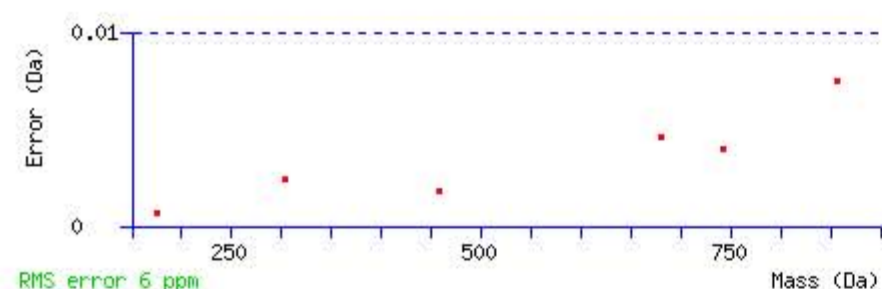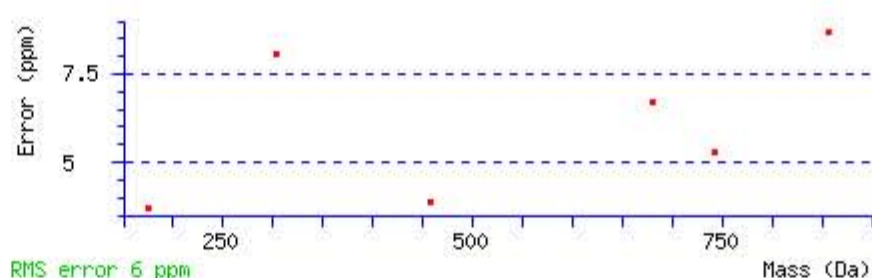

NCBI BLAST search of **AGIQER**

(Parameters: blastp, nr protein database, expect=20000, no filter, PAM30)

Other BLAST [web gateways](#)

## All matches to this query

| Score | Mr(calc):  | Delta    | Sequence                 |
|-------|------------|----------|--------------------------|
| 29.5  | 983.522217 | 0.008011 | <a href="#">AGIQER</a>   |
| 26.1  | 983.522217 | 0.008011 | <a href="#">QIQER</a>    |
| 26.1  | 983.522217 | 0.008011 | <a href="#">QLQER</a>    |
| 15.7  | 983.522217 | 0.008011 | <a href="#">AGLEQR</a>   |
| 13.6  | 983.522217 | 0.008011 | <a href="#">IQQER</a>    |
| 13.6  | 983.522217 | 0.008011 | <a href="#">LQQER</a>    |
| 11.8  | 983.530090 | 0.000138 | <a href="#">QLLNHFGR</a> |
| 10.7  | 983.522217 | 0.008011 | <a href="#">QQLER</a>    |
| 10.6  | 983.522202 | 0.008026 | <a href="#">KLMENPPR</a> |
| 10.6  | 983.522217 | 0.008011 | <a href="#">QLEQR</a>    |

Mascot: <http://www.matrixscience.com/>



# MASCOT SCIENCE Mascot Search Results

## Peptide View

MS/MS Fragmentation of **ALDQYLMEFNACR**

Found in **CO8A\_HUMAN**, Complement component C8 alpha chain OS=Homo sapiens GN=C8A PE=1 SV=2

Match to Query 47785: 1940.895288 from(971.454920,2+) rtinseconds(2554) index(42002)  
 Title: Locus:1.1.1.2911.9 File:"2013-07-02 CLN FXIII 30 min 2nd F 3.wiff"  
 Data file C:\Program Files (x86)\Matrix Science\Mascot Daemon\mgf2 FXIII 30 min 2nd\mascot\_daemon\_merge.mgf

Click mouse within plot area to zoom in by factor of two about that point  
 Or, Plot from  to  Da   
 Label all possible matches  Label matches used for scoring

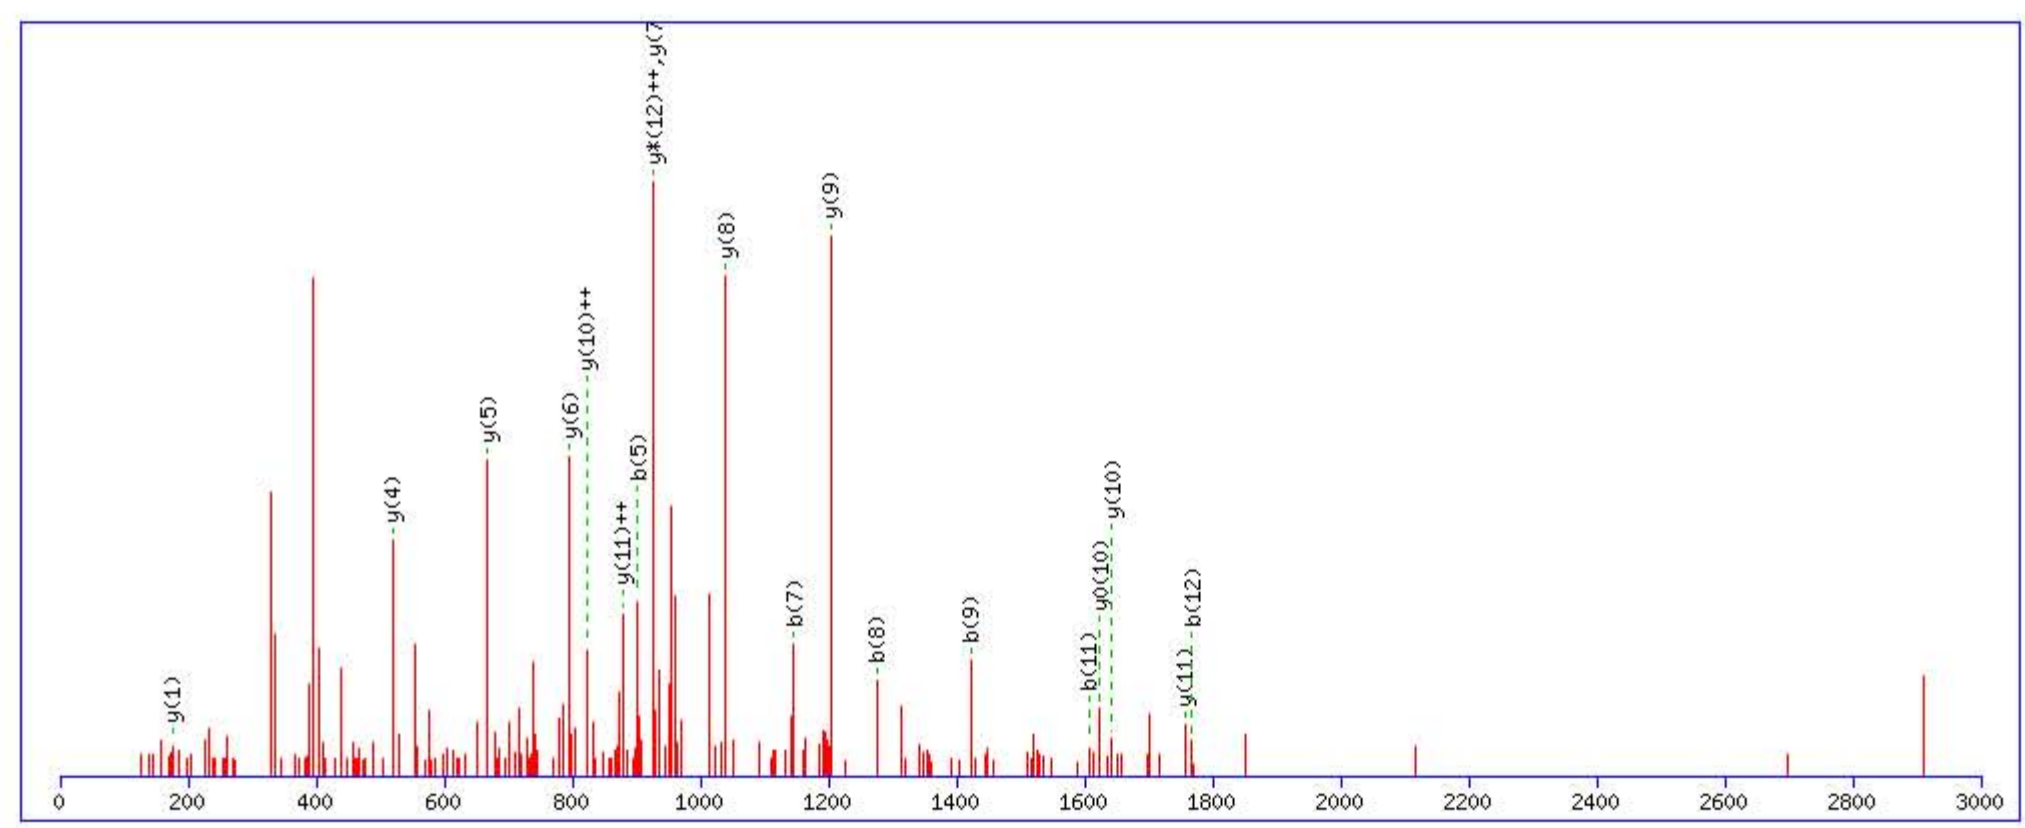

Monoisotopic mass of neutral peptide Mr(calc): 1940.894669  
 Fixed modifications: Carbamidomethyl (C) (apply to specified residues or termini only)  
 Variable modifications:  
 Q4 : Biotin:Thermo-21345 (Q)  
 Ions Score: 47 Expect: 0.00073  
 Matches : 19/124 fragment ions using 35 most intense peaks [\(help\)](#)

| #  | b           | b <sup>++</sup> | b <sup>*</sup> | b <sup>*++</sup> | b <sup>0</sup> | b <sup>0++</sup> | Seq. | y           | y <sup>++</sup> | y <sup>*</sup> | y <sup>*++</sup> | y <sup>0</sup> | y <sup>0++</sup> | #  |
|----|-------------|-----------------|----------------|------------------|----------------|------------------|------|-------------|-----------------|----------------|------------------|----------------|------------------|----|
| 1  | 72.044390   | 36.525833       |                |                  |                |                  | A    |             |                 |                |                  |                |                  | 13 |
| 2  | 185.128454  | 93.067865       |                |                  |                |                  | L    | 1870.864860 | 935.936068      | 1853.838311    | 927.422794       | 1852.854295    | 926.930786       | 12 |
| 3  | 300.155397  | 150.581336      |                |                  | 282.144832     | 141.576054       | D    | 1757.780796 | 879.394036      | 1740.754247    | 870.880762       | 1739.770231    | 870.388754       | 11 |
| 4  | 739.380723  | 370.194000      | 722.354174     | 361.680725       | 721.370158     | 361.188717       | Q    | 1642.753853 | 821.880565      | 1625.727304    | 813.367290       | 1624.743288    | 812.875282       | 10 |
| 5  | 902.444052  | 451.725664      | 885.417503     | 443.212390       | 884.433487     | 442.720382       | Y    | 1203.528527 | 602.267902      | 1186.501978    | 593.754627       | 1185.517962    | 593.262619       | 9  |
| 6  | 1015.528116 | 508.267696      | 998.501567     | 499.754422       | 997.517551     | 499.262414       | L    | 1040.465198 | 520.736237      | 1023.438649    | 512.222963       | 1022.454633    | 511.730955       | 8  |
| 7  | 1146.568601 | 573.787939      | 1129.542052    | 565.274664       | 1128.558036    | 564.782656       | M    | 927.381134  | 464.194205      | 910.354585     | 455.680931       | 909.370569     | 455.188923       | 7  |
| 8  | 1275.611194 | 638.309235      | 1258.584645    | 629.795961       | 1257.600629    | 629.303953       | E    | 796.340649  | 398.673963      | 779.314100     | 390.160688       | 778.330084     | 389.668680       | 6  |
| 9  | 1422.679608 | 711.843442      | 1405.653059    | 703.330168       | 1404.669043    | 702.838160       | F    | 667.298056  | 334.152666      | 650.271507     | 325.639392       |                |                  | 5  |
| 10 | 1536.722535 | 768.864906      | 1519.695986    | 760.351631       | 1518.711970    | 759.859623       | N    | 520.229642  | 260.618459      | 503.203093     | 252.105185       |                |                  | 4  |
| 11 | 1607.759649 | 804.383463      | 1590.733100    | 795.870188       | 1589.749084    | 795.378180       | A    | 406.186715  | 203.596995      | 389.160166     | 195.083721       |                |                  | 3  |
| 12 | 1767.790298 | 884.398787      | 1750.763749    | 875.885513       | 1749.779733    | 875.393505       | C    | 335.149601  | 168.078438      | 318.123052     | 159.565164       |                |                  | 2  |
| 13 |             |                 |                |                  |                |                  | R    | 175.118952  | 88.063114       | 158.092403     | 79.549839        |                |                  | 1  |

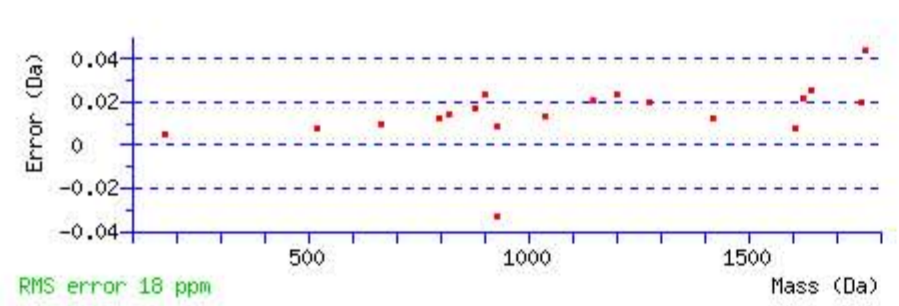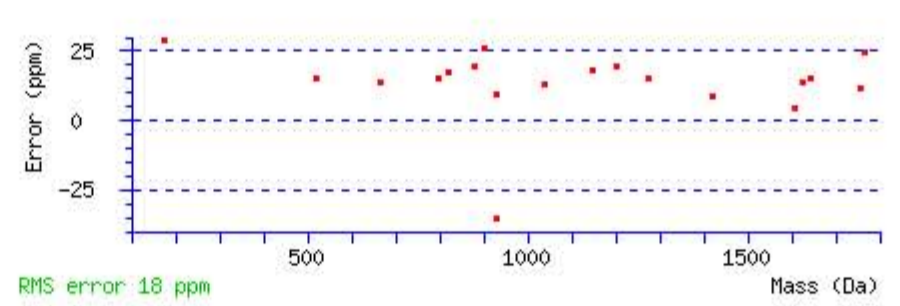

NCBI BLAST search of **ALDQYLMEFNACR**  
 (Parameters: blastp, nr protein database, expect=20000, no filter, PAM30)  
 Other BLAST [web gateways](#)

### All matches to this query

| Score | Mr(calc):   | Delta    | Sequence             |
|-------|-------------|----------|----------------------|
| 47.4  | 1940.894669 | 0.000619 | <b>ALDQYLMEFNACR</b> |



**Mascot Search Results**

**Peptide View**

MS/MS Fragmentation of **FGGTICSGDIWDQASCSSSTTCVR**  
 Found in **CO8A\_HUMAN**, Complement component C8 alpha chain OS=Homo sapiens GN=C8A PE=1 SV=2

Match to Query 48600: 2962.244802 from(988.422210,3+) rtinseconds(2390) index(41098)  
 Title: Locus:1.1.1.2854.26 File:"2013-07-02 CLN FXIII 30 min 2nd F 3.wiff"  
 Data file C:\Program Files (x86)\Matrix Science\Mascot Daemon\mgf\2 FXIII 30 min 2nd\mascot\_daemon\_merge.mgf

Click mouse within plot area to zoom in by factor of two about that point  
 Or, Plot from  to  Da   
 Label all possible matches  Label matches used for scoring

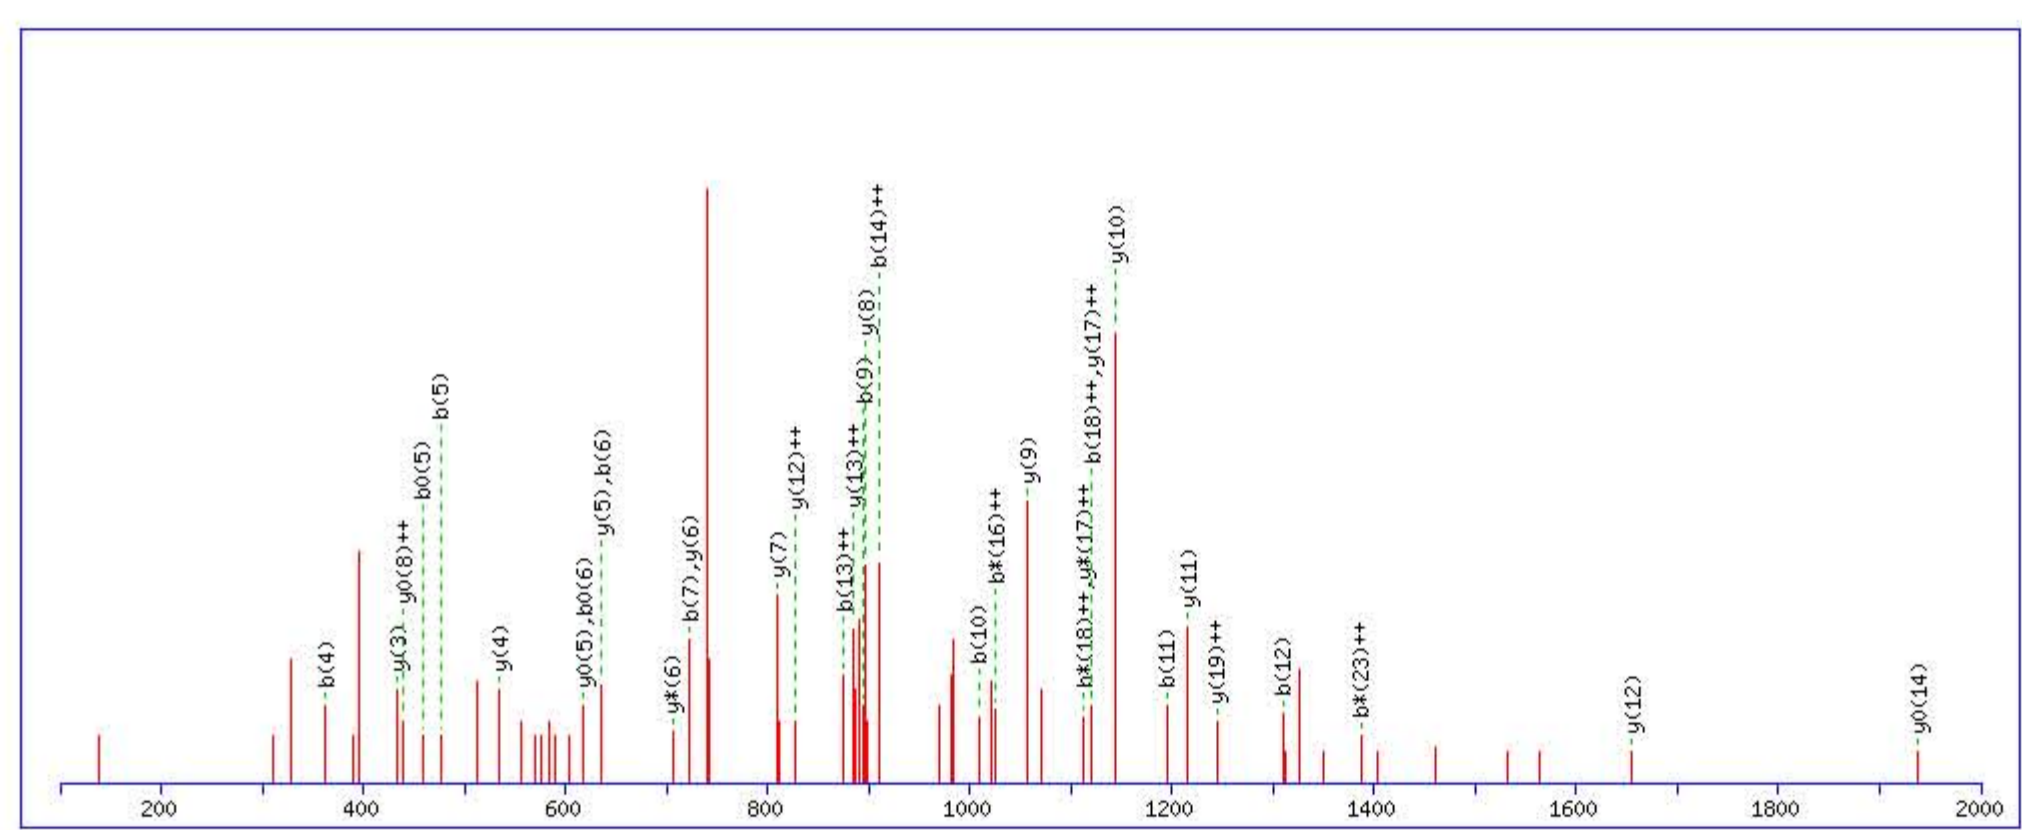

Monoisotopic mass of neutral peptide Mr(calc): 2962.271835  
 Fixed modifications: Carbamidomethyl (C) (apply to specified residues or termini only)  
 Variable modifications:  
 Q13 : Biotin:Thermo-21345 (Q)  
 Ions Score: 47 Expect: 9e-005  
 Matches : 35/240 fragment ions using 65 most intense peaks [\(help\)](#)

| #  | b                  | b <sup>++</sup>    | b <sup>*</sup> | b <sup>*++</sup>   | b <sup>0</sup>    | b <sup>0++</sup> | Seq. | y                  | y <sup>++</sup>    | y <sup>*</sup>    | y <sup>*++</sup>   | y <sup>0</sup>     | y <sup>0++</sup>  | #  |
|----|--------------------|--------------------|----------------|--------------------|-------------------|------------------|------|--------------------|--------------------|-------------------|--------------------|--------------------|-------------------|----|
| 1  | 148.075690         | 74.541483          |                |                    |                   |                  | F    |                    |                    |                   |                    |                    |                   | 24 |
| 2  | 205.097154         | 103.052215         |                |                    |                   |                  | G    | 2816.210649        | 1408.608962        | 2799.184100       | 1400.095688        | 2798.200084        | 1399.603680       | 23 |
| 3  | 262.118618         | 131.562947         |                |                    |                   |                  | G    | 2759.189185        | 1380.098230        | 2742.162636       | 1371.584956        | 2741.178620        | 1371.092948       | 22 |
| 4  | <b>363.166297</b>  | 182.086786         |                |                    | 345.155732        | 173.081504       | T    | 2702.167721        | 1351.587498        | 2685.141172       | 1343.074224        | 2684.157156        | 1342.582216       | 21 |
| 5  | <b>476.250361</b>  | 238.628818         |                |                    | <b>458.239796</b> | 229.623536       | I    | 2601.120042        | 1301.063659        | 2584.093493       | 1292.550384        | 2583.109477        | 1292.058376       | 20 |
| 6  | <b>636.281010</b>  | 318.644143         |                |                    | <b>618.270445</b> | 309.638861       | C    | 2488.035978        | <b>1244.521627</b> | 2471.009429       | 1236.008352        | 2470.025413        | 1235.516344       | 19 |
| 7  | <b>723.313038</b>  | 362.160157         |                |                    | 705.302473        | 353.154875       | S    | 2328.005329        | 1164.506302        | 2310.978780       | 1155.993028        | 2309.994764        | 1155.501020       | 18 |
| 8  | 780.334502         | 390.670889         |                |                    | 762.323937        | 381.665607       | G    | 2240.973301        | <b>1120.990288</b> | 2223.946752       | <b>1112.477014</b> | 2222.962736        | 1111.985006       | 17 |
| 9  | <b>895.361445</b>  | 448.184361         |                |                    | 877.350880        | 439.179078       | D    | 2183.951837        | 1092.479556        | 2166.925288       | 1083.966282        | 2165.941272        | 1083.474274       | 16 |
| 10 | <b>1008.445509</b> | 504.726393         |                |                    | 990.434944        | 495.721110       | I    | 2068.924894        | 1034.966085        | 2051.898345       | 1026.452810        | 2050.914329        | 1025.968082       | 15 |
| 11 | <b>1194.524822</b> | 597.766049         |                |                    | 1176.514257       | 588.760767       | W    | 1955.840830        | 978.424053         | 1938.814281       | 969.910778         | <b>1937.830265</b> | 969.418770        | 14 |
| 12 | <b>1309.551765</b> | 655.279521         |                |                    | 1291.541200       | 646.274238       | D    | 1769.761517        | <b>885.384396</b>  | 1752.734968       | 876.871122         | 1751.750952        | 876.379114        | 13 |
| 13 | 1748.777091        | <b>874.892184</b>  | 1731.750542    | 866.378909         | 1730.766526       | 865.886901       | Q    | <b>1654.734574</b> | <b>827.870925</b>  | 1637.708025       | 819.357650         | 1636.724009        | 818.865642        | 12 |
| 14 | 1819.814205        | <b>910.410741</b>  | 1802.787656    | 901.897466         | 1801.803640       | 901.405458       | A    | <b>1215.509248</b> | 608.258262         | 1198.482699       | 599.744987         | 1197.498683        | 599.252979        | 11 |
| 15 | 1906.846233        | 953.926755         | 1889.819684    | 945.413480         | 1888.835668       | 944.921472       | S    | <b>1144.472134</b> | 572.739705         | 1127.445585       | 564.226430         | 1126.461569        | 563.734422        | 10 |
| 16 | 2066.876882        | 1033.942079        | 2049.850333    | <b>1025.428804</b> | 2048.866317       | 1024.936796      | C    | <b>1057.440106</b> | 529.223691         | 1040.413557       | 520.710416         | 1039.429541        | 520.218408        | 9  |
| 17 | 2153.908910        | 1077.458093        | 2136.882361    | 1068.944818        | 2135.898345       | 1068.452810      | S    | <b>897.409457</b>  | 449.208366         | 880.382908        | 440.695092         | 879.398892         | <b>440.203084</b> | 8  |
| 18 | 2240.940938        | <b>1120.974107</b> | 2223.914389    | <b>1112.460832</b> | 2222.930373       | 1111.968825      | S    | <b>810.377429</b>  | 405.692352         | 793.350880        | 397.179078         | 792.366864         | 396.687070        | 7  |
| 19 | 2327.972966        | 1164.490121        | 2310.96417     | 1155.976847        | 2309.962401       | 1155.484839      | S    | <b>723.345401</b>  | 362.176338         | <b>706.318852</b> | 353.663064         | 705.334836         | 353.171056        | 6  |
| 20 | 2429.020645        | 1215.013960        | 2411.994096    | 1206.500686        | 2411.010080       | 1206.008678      | T    | <b>636.313373</b>  | 318.660324         | 619.286824        | 310.147050         | <b>618.302808</b>  | 309.655042        | 5  |
| 21 | 2530.068324        | 1265.537800        | 2513.041775    | 1257.024525        | 2512.057759       | 1256.532517      | T    | <b>535.265694</b>  | 268.136485         | 518.239145        | 259.623210         | 517.255129         | 259.131202        | 4  |
| 22 | 2690.098973        | 1345.553124        | 2673.072424    | 1337.039850        | 2672.088408       | 1336.547842      | C    | <b>434.218015</b>  | 217.612645         | 417.191466        | 209.099371         |                    |                   | 3  |
| 23 | 2789.167387        | 1395.087331        | 2772.140838    | <b>1386.574057</b> | 2771.156822       | 1386.082049      | V    | 274.187366         | 137.597321         | 257.160817        | 129.084046         |                    |                   | 2  |
| 24 |                    |                    |                |                    |                   |                  | R    | 175.118952         | 88.063114          | 158.092403        | 79.549839          |                    |                   | 1  |

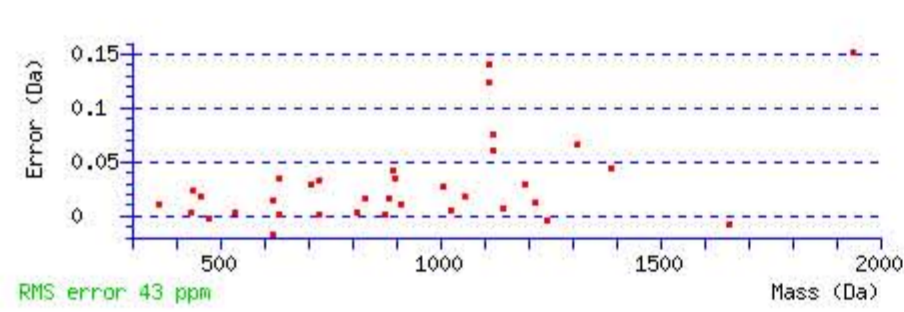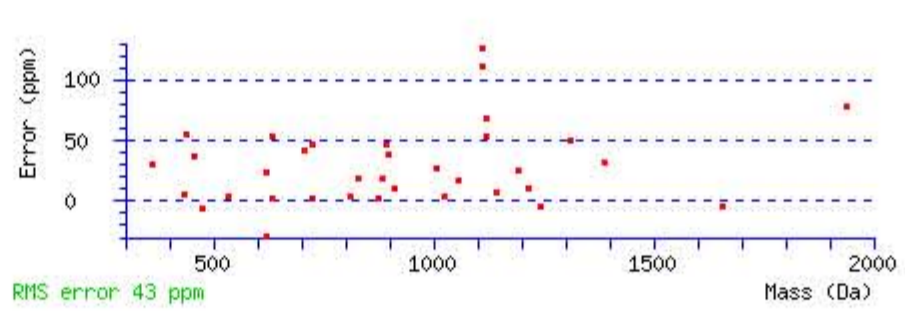

NCBI BLAST search of **FGGTICSGDIWDQASCSSSTTCVR**  
 (Parameters: blastp, nr protein database, expect=20000, no filter, PAM30)  
 Other BLAST [web gateways](#)

**All matches to this query**

| Score | Mr(calc):   | Delta     | Sequence                                 |
|-------|-------------|-----------|------------------------------------------|
| 47.3  | 2962.271835 | -0.027033 | <a href="#">FGGTICSGDIWDQASCSSSTTCVR</a> |



# MASCOT Search Results

## Peptide View

MS/MS Fragmentation of **LGSLGAACEQTQTEGAK**

Found in **CO8A\_HUMAN**, Complement component C8 alpha chain OS=Homo sapiens GN=C8A PE=1 SV=2

Match to Query 50560: 2030.973768 from(1016.494160,2+) rtinseconds(1717) index(36774)

Title: Locus:1.1.1.2620.12 File:"2013-07-02 CLN FXIII 30 min 2nd F 3.wiff"

Data file C:\Program Files (x86)\Matrix Science\Mascot Daemon\mgf2 FXIII 30 min 2nd\mascot\_daemon\_merge.mgf

Click mouse within plot area to zoom in by factor of two about that point

Or, Plot from  to  Da

Label all possible matches  Label matches used for scoring

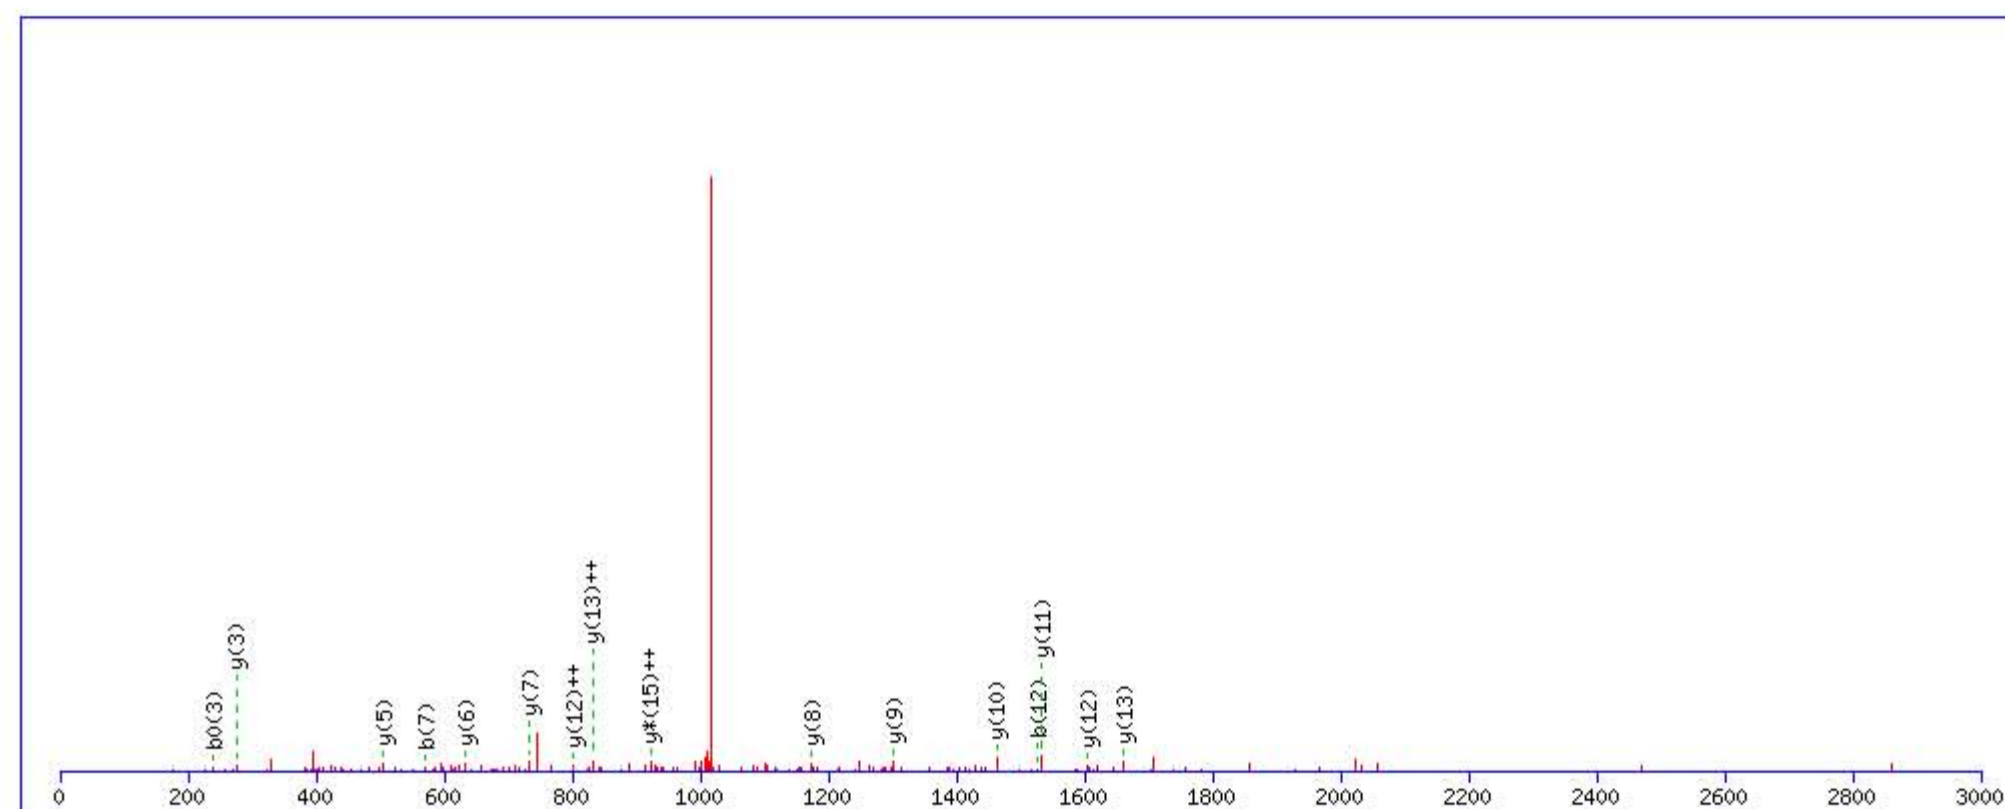

Monoisotopic mass of neutral peptide Mr(calc): 2030.976501

Fixed modifications: Carbamidomethyl (C) (apply to specified residues or termini only)

Variable modifications:

Q10 : Biotin:Thermo-21345 (Q)

Ions Score: 43 Expect: 0.0011

Matches : 16/164 fragment ions using 37 most intense peaks [\(help\)](#)

| #  | b           | b <sup>++</sup> | b <sup>*</sup> | b <sup>*++</sup> | b <sup>0</sup> | b <sup>0++</sup> | Seq. | y           | y <sup>++</sup> | y <sup>*</sup> | y <sup>*++</sup> | y <sup>0</sup> | y <sup>0++</sup> | #  |
|----|-------------|-----------------|----------------|------------------|----------------|------------------|------|-------------|-----------------|----------------|------------------|----------------|------------------|----|
| 1  | 114.091340  | 57.549308       |                |                  |                |                  | L    |             |                 |                |                  |                |                  | 17 |
| 2  | 171.112804  | 86.060040       |                |                  |                |                  | G    | 1918.899727 | 959.953502      | 1901.873178    | 951.440227       | 1900.889162    | 950.948219       | 16 |
| 3  | 258.144832  | 129.576054      |                |                  | 240.134267     | 120.570772       | S    | 1861.878263 | 931.442770      | 1844.851714    | 922.929495       | 1843.867698    | 922.437487       | 15 |
| 4  | 371.228896  | 186.118086      |                |                  | 353.218331     | 177.112804       | L    | 1774.846235 | 887.926756      | 1757.819686    | 879.413481       | 1756.835670    | 878.921473       | 14 |
| 5  | 428.250360  | 214.628818      |                |                  | 410.239795     | 205.623536       | G    | 1661.762171 | 831.384724      | 1644.735622    | 822.871449       | 1643.751606    | 822.379441       | 13 |
| 6  | 499.287474  | 250.147375      |                |                  | 481.276909     | 241.142093       | A    | 1604.740707 | 802.873992      | 1587.714158    | 794.360717       | 1586.730142    | 793.868709       | 12 |
| 7  | 570.324588  | 285.665932      |                |                  | 552.314023     | 276.660650       | A    | 1533.703593 | 767.355435      | 1516.677044    | 758.842160       | 1515.693028    | 758.350152       | 11 |
| 8  | 730.355237  | 365.681257      |                |                  | 712.344672     | 356.675974       | C    | 1462.666479 | 731.836878      | 1445.639930    | 723.323603       | 1444.655914    | 722.831595       | 10 |
| 9  | 859.397830  | 430.202553      |                |                  | 841.387265     | 421.197271       | E    | 1302.635830 | 651.821553      | 1285.609281    | 643.308279       | 1284.625265    | 642.816270       | 9  |
| 10 | 1298.623156 | 649.815216      | 1281.596607    | 641.301942       | 1280.612591    | 640.809934       | Q    | 1173.593237 | 587.300257      | 1156.566688    | 578.786982       | 1155.582672    | 578.294974       | 8  |
| 11 | 1399.670835 | 700.339056      | 1382.644286    | 691.825781       | 1381.660270    | 691.333773       | T    | 734.367911  | 367.687594      | 717.341362     | 359.174319       | 716.357346     | 358.682311       | 7  |
| 12 | 1527.729413 | 764.368345      | 1510.702864    | 755.855070       | 1509.718848    | 755.363062       | Q    | 633.320232  | 317.163754      | 616.293683     | 308.650480       | 615.309667     | 308.158472       | 6  |
| 13 | 1628.777092 | 814.892184      | 1611.750543    | 806.378910       | 1610.766527    | 805.886902       | T    | 505.261654  | 253.134465      | 488.235105     | 244.621190       | 487.251089     | 244.129182       | 5  |
| 14 | 1757.819685 | 879.413481      | 1740.793136    | 870.900206       | 1739.809120    | 870.408198       | E    | 404.213975  | 202.610625      | 387.187426     | 194.097351       | 386.203410     | 193.605343       | 4  |
| 15 | 1814.841149 | 907.924213      | 1797.814600    | 899.410938       | 1796.830584    | 898.918930       | G    | 275.171382  | 138.089329      | 258.144833     | 129.576054       |                |                  | 3  |
| 16 | 1885.878263 | 943.442770      | 1868.851714    | 934.929495       | 1867.867698    | 934.437487       | A    | 218.149918  | 109.578597      | 201.123369     | 101.065322       |                |                  | 2  |
| 17 |             |                 |                |                  |                |                  | K    | 147.112804  | 74.060040       | 130.086255     | 65.546765        |                |                  | 1  |

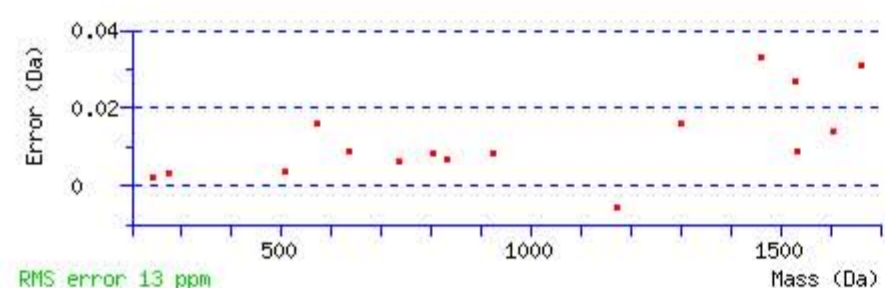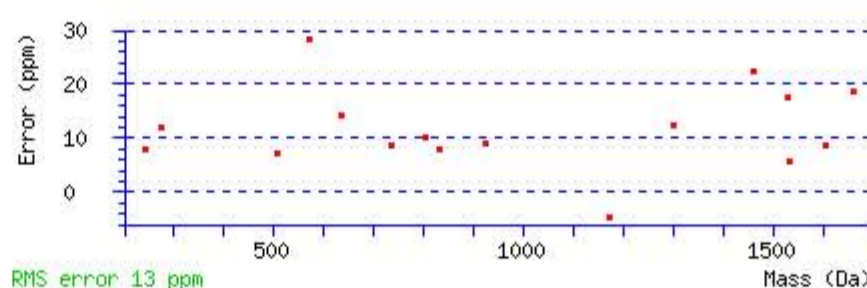

NCBI BLAST search of **LGSLGAACEQTQTEGAK**

(Parameters: blastp, nr protein database, expect=20000, no filter, PAM30)

Other BLAST [web gateways](#)

All matches to this query

| Score | Mr(calc):   | Delta     | Sequence                          |
|-------|-------------|-----------|-----------------------------------|
| 42.7  | 2030.976501 | -0.002733 | <a href="#">LGSLGAACEQTQTEGAK</a> |
| 22.7  | 2030.976501 | -0.002733 | <a href="#">LGSLGAACEQTQTEGAK</a> |



# MASCOT Search Results

## Peptide View

MS/MS Fragmentation of **AIDEDCSQYEPGPSQK**

Found in **CO8A\_HUMAN**, Complement component C8 alpha chain OS=Homo sapiens GN=C8A PE=1 SV=2

Match to Query 54925: 2247.007928 from(1124.511240,2+) rtinseconds(1904) index(37923)

Title: Locus:1.1.1.2685.26 File:"2013-07-02 CLN FXIII 30 min 2nd F 3.wiff"

Data file C:\Program Files (x86)\Matrix Science\Mascot Daemon\mgf\2 FXIII 30 min 2nd\mascot\_daemon\_merge.mgf

Click mouse within plot area to zoom in by factor of two about that point

Or, Plot from  to  Da

Label all possible matches  Label matches used for scoring

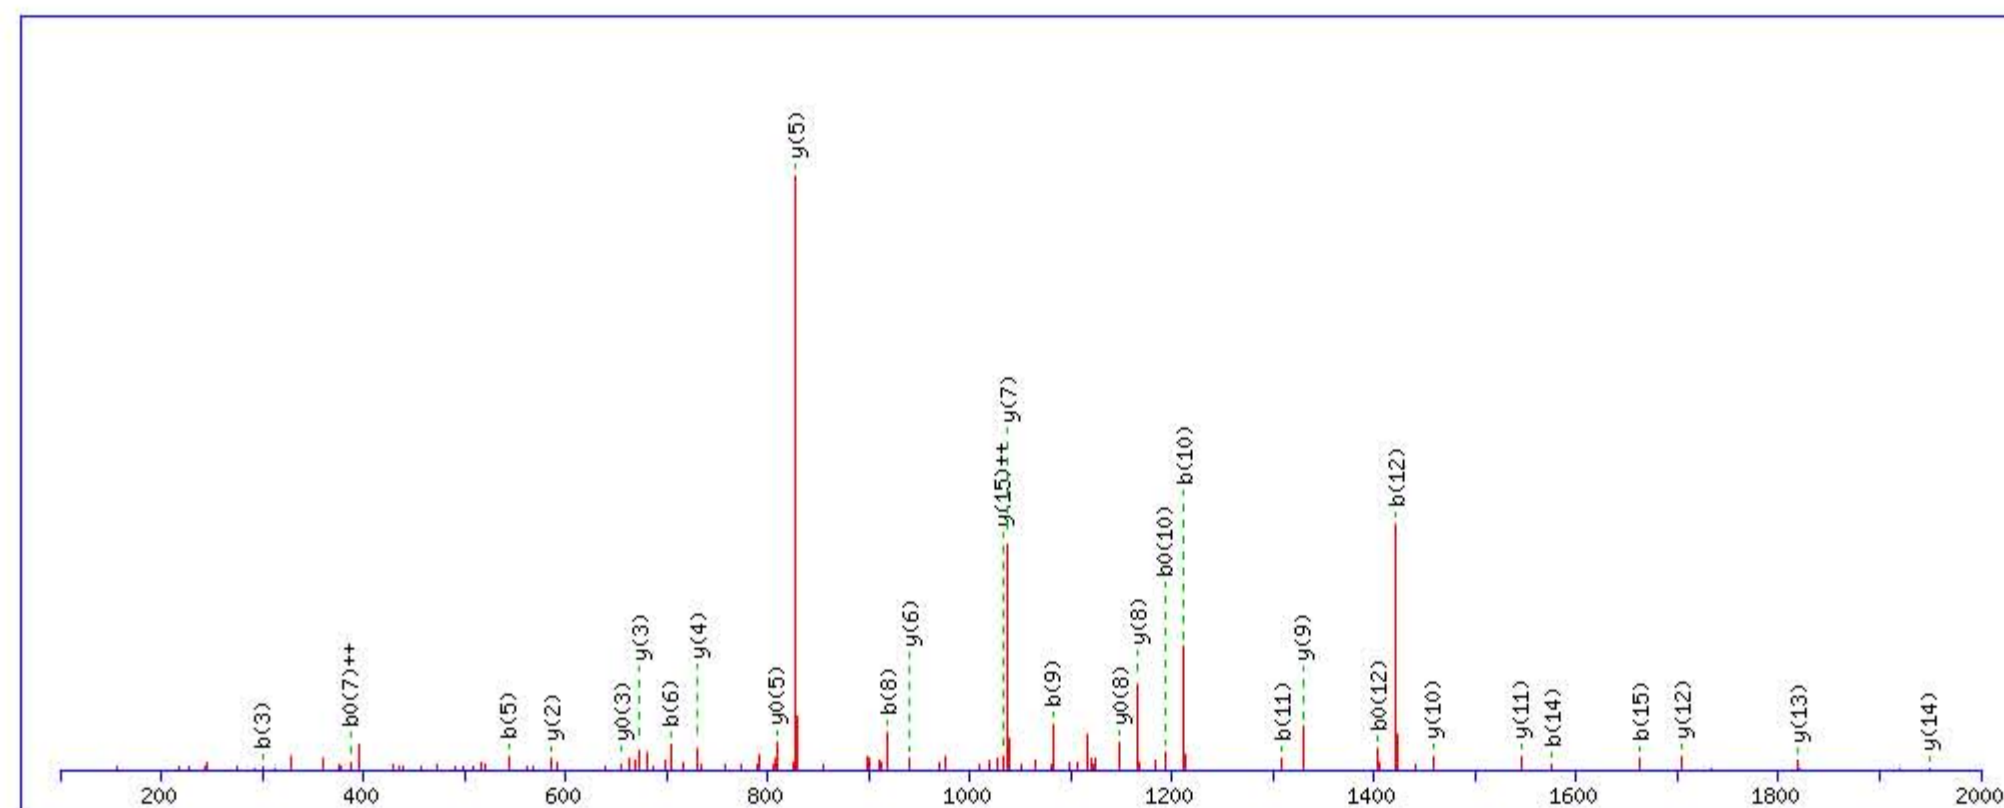

Monoisotopic mass of neutral peptide Mr(calc): 2247.018753

Fixed modifications: Carbamidomethyl (C) (apply to specified residues or termini only)

Variable modifications:

Q16 : Biotin:Thermo-21345 (Q)

Ions Score: 87 Expect: 2.1e-008

Matches : 30/170 fragment ions using 50 most intense peaks [\(help\)](#)

| #  | b                  | b <sup>++</sup> | b <sup>*</sup> | b <sup>***</sup> | b <sup>0</sup>     | b <sup>0++</sup>  | Seq. | y                  | y <sup>++</sup>    | y <sup>*</sup> | y <sup>***</sup> | y <sup>0</sup>     | y <sup>0++</sup> | #  |
|----|--------------------|-----------------|----------------|------------------|--------------------|-------------------|------|--------------------|--------------------|----------------|------------------|--------------------|------------------|----|
| 1  | 72.044390          | 36.525833       |                |                  |                    |                   | A    |                    |                    |                |                  |                    |                  | 17 |
| 2  | 185.128454         | 93.067865       |                |                  |                    |                   | I    | 2176.988934        | 1088.998105        | 2159.962385    | 1080.484830      | 2158.978369        | 1079.992822      | 16 |
| 3  | <b>300.155397</b>  | 150.581336      |                |                  | 282.144832         | 141.576054        | D    | 2063.904870        | <b>1032.456073</b> | 2046.878321    | 1023.942798      | 2045.894305        | 1023.450790      | 15 |
| 4  | 429.197990         | 215.102633      |                |                  | 411.187425         | 206.097351        | E    | <b>1948.877927</b> | 974.942602         | 1931.851378    | 966.429327       | 1930.867362        | 965.937319       | 14 |
| 5  | <b>544.224933</b>  | 272.616105      |                |                  | 526.214368         | 263.610822        | D    | <b>1819.835334</b> | 910.421305         | 1802.808785    | 901.908031       | 1801.824769        | 901.416022       | 13 |
| 6  | <b>704.255582</b>  | 352.631429      |                |                  | 686.245017         | 343.626147        | C    | <b>1704.808391</b> | 852.907833         | 1687.781842    | 844.394559       | 1686.797826        | 843.902551       | 12 |
| 7  | 791.287610         | 396.147443      |                |                  | 773.277045         | <b>387.142161</b> | S    | <b>1544.777742</b> | 772.892509         | 1527.751193    | 764.379235       | 1526.767177        | 763.887227       | 11 |
| 8  | <b>919.346188</b>  | 460.176732      | 902.319639     | 451.663458       | 901.335623         | 451.171450        | Q    | <b>1457.745714</b> | 729.376495         | 1440.719165    | 720.863221       | 1439.735149        | 720.371212       | 10 |
| 9  | <b>1082.409517</b> | 541.708397      | 1065.382968    | 533.195122       | 1064.398952        | 532.703114        | Y    | <b>1329.687136</b> | 665.347206         | 1312.660587    | 656.833931       | 1311.676571        | 656.341923       | 9  |
| 10 | <b>1211.452110</b> | 606.229693      | 1194.425561    | 597.716419       | <b>1193.441545</b> | 597.224410        | E    | <b>1166.623807</b> | 583.815541         | 1149.597258    | 575.302267       | <b>1148.613242</b> | 574.810259       | 8  |
| 11 | <b>1308.504874</b> | 654.756075      | 1291.478325    | 646.242801       | 1290.494309        | 645.750792        | P    | <b>1037.581214</b> | 519.294245         | 1020.554665    | 510.780971       | 1019.570649        | 510.288963       | 7  |
| 12 | <b>1421.588938</b> | 711.298107      | 1404.562389    | 702.784832       | <b>1403.578373</b> | 702.292824        | I    | <b>940.528450</b>  | 470.767863         | 923.501901     | 462.254589       | 922.517885         | 461.762581       | 6  |
| 13 | 1518.641702        | 759.824489      | 1501.615153    | 751.311215       | 1500.631137        | 750.819206        | P    | <b>827.444386</b>  | 414.225831         | 810.417837     | 405.712557       | <b>809.433821</b>  | 405.220549       | 5  |
| 14 | <b>1575.663166</b> | 788.335221      | 1558.636617    | 779.821946       | 1557.652601        | 779.329938        | G    | <b>730.391622</b>  | 365.699449         | 713.365073     | 357.186175       | 712.381057         | 356.694167       | 4  |
| 15 | <b>1662.695194</b> | 831.851235      | 1645.668645    | 823.337961       | 1644.684629        | 822.845952        | S    | <b>673.370158</b>  | 337.188717         | 656.343609     | 328.675443       | <b>655.359593</b>  | 328.183435       | 3  |
| 16 | 2101.920520        | 1051.463898     | 2084.893971    | 1042.950623      | 2083.909955        | 1042.458615       | Q    | <b>586.338130</b>  | 293.672703         | 569.311581     | 285.159429       |                    |                  | 2  |
| 17 |                    |                 |                |                  |                    |                   | K    | 147.112804         | 74.060040          | 130.086255     | 65.546765        |                    |                  | 1  |

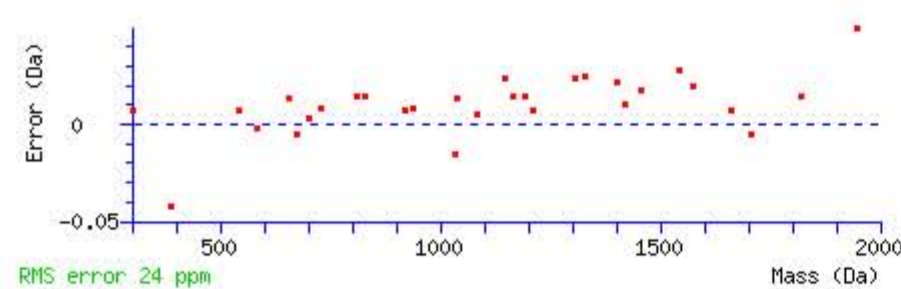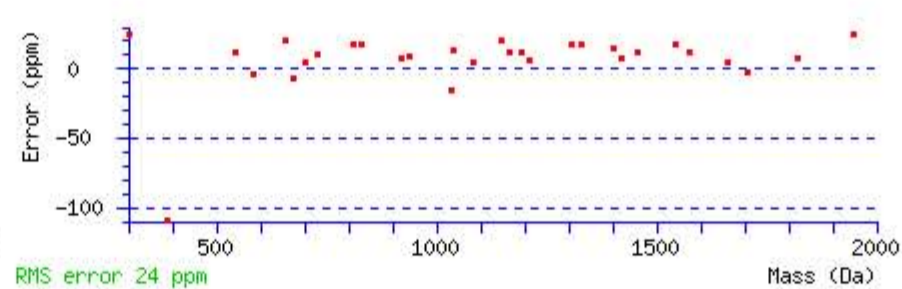

NCBI BLAST search of **AIDEDCSQYEPGPSQK**

(Parameters: blastp, nr protein database, expect=20000, no filter, PAM30)

Other BLAST [web gateways](#)

## All matches to this query

| Score | Mr(calc):   | Delta     | Sequence                         |
|-------|-------------|-----------|----------------------------------|
| 86.7  | 2247.018753 | -0.010825 | <a href="#">AIDEDCSQYEPGPSQK</a> |
| 5.3   | 2247.018753 | -0.010825 | <a href="#">AIDEDCSQYEPGPSQK</a> |



**Peptide View**

MS/MS Fragmentation of **AIDEDCSQYEPIPGSQK**  
 Found in **CO8A\_HUMAN**, Complement component C8 alpha chain OS=Homo sapiens GN=C8A PE=1 SV=2

Match to Query 60761: 2558.191482 from(853.737770,3+) rtinseconds(2151) index(39616)  
 Title: Locus:1.1.1.2771.11 File:"2013-07-02 CLN FXIII 30 min 2nd F 3.wiff"  
 Data file C:\Program Files (x86)\Matrix Science\Mascot Daemon\mgf2 FXIII 30 min 2nd\mascot\_daemon\_merge.mgf

Click mouse within plot area to zoom in by factor of two about that point  
 Or, Plot from  to  Da   
 Label all possible matches  Label matches used for scoring

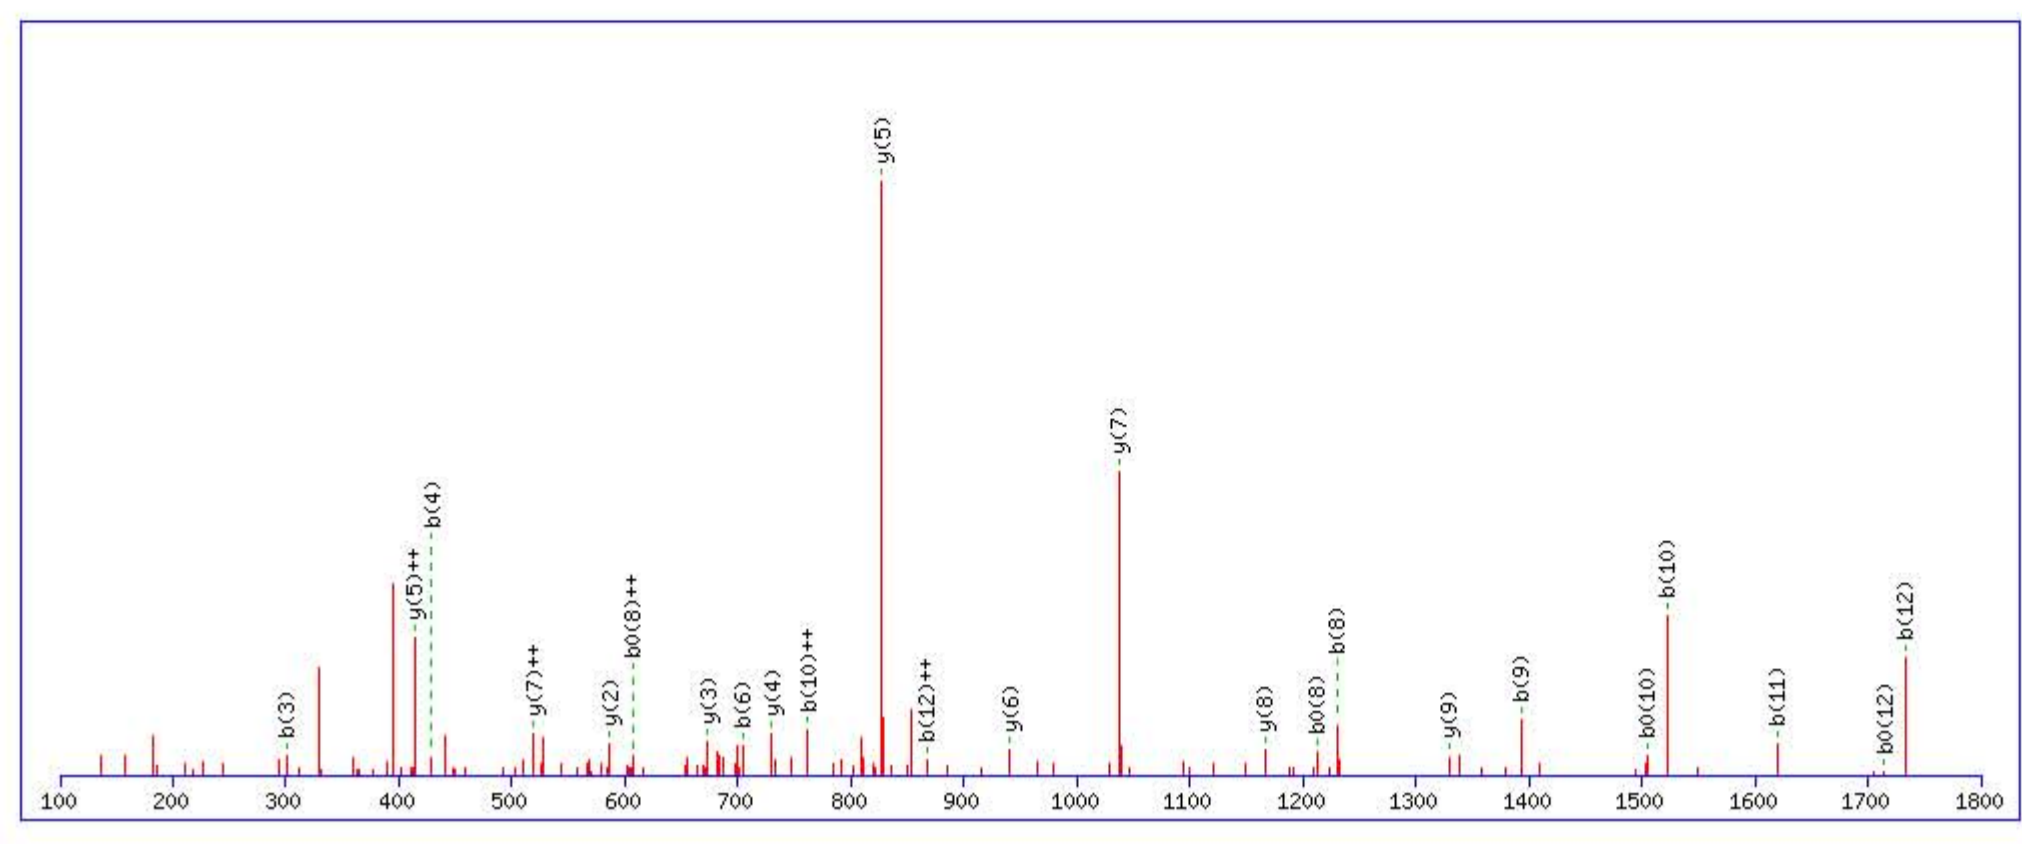

Monoisotopic mass of neutral peptide Mr(calc): 2558.185501  
 Fixed modifications: Carbamidomethyl (C) (apply to specified residues or termini only)  
 Variable modifications:  
 Q8 : Biotin:Thermo-21345 (Q)  
 Q16 : Biotin:Thermo-21345 (Q)  
 Ions Score: 44 Expect: 0.00012  
 Matches : 24/170 fragment ions using 45 most intense peaks [\(help\)](#)

| #  | b                  | b <sup>++</sup>   | b <sup>*</sup> | b <sup>+++</sup> | b <sup>0</sup>     | b <sup>0++</sup>  | Seq. | y                  | y <sup>++</sup>   | y <sup>*</sup> | y <sup>+++</sup> | y <sup>0</sup> | y <sup>0++</sup> | #  |
|----|--------------------|-------------------|----------------|------------------|--------------------|-------------------|------|--------------------|-------------------|----------------|------------------|----------------|------------------|----|
| 1  | 72.044390          | 36.525833         |                |                  |                    |                   | A    |                    |                   |                |                  |                |                  | 17 |
| 2  | 185.128454         | 93.067865         |                |                  |                    |                   | I    | 2488.155682        | 1244.581479       | 2471.129133    | 1236.068204      | 2470.145117    | 1235.576196      | 16 |
| 3  | <b>300.155397</b>  | 150.581336        |                |                  | 282.144832         | 141.576054        | D    | 2375.071618        | 1188.039447       | 2358.045069    | 1179.526172      | 2357.061053    | 1179.034164      | 15 |
| 4  | <b>429.197990</b>  | 215.102633        |                |                  | 411.187425         | 206.097351        | E    | 2260.044675        | 1130.525975       | 2243.018126    | 1122.012701      | 2242.034110    | 1121.520693      | 14 |
| 5  | 544.224933         | 272.616105        |                |                  | 526.214368         | 263.610822        | D    | 2131.002082        | 1066.004679       | 2113.975533    | 1057.491404      | 2112.991517    | 1056.999396      | 13 |
| 6  | <b>704.255582</b>  | 352.631429        |                |                  | 686.245017         | 343.626147        | C    | 2015.975139        | 1008.491208       | 1998.948590    | 999.977933       | 1997.964574    | 999.485925       | 12 |
| 7  | 791.287610         | 396.147443        |                |                  | 773.277045         | 387.142161        | S    | 1855.944490        | 928.475883        | 1838.917941    | 919.962609       | 1837.933925    | 919.470601       | 11 |
| 8  | <b>1230.512936</b> | 615.760106        | 1213.486387    | 607.246832       | <b>1212.502371</b> | <b>606.754824</b> | Q    | 1768.912462        | 884.959869        | 1751.885913    | 876.446595       | 1750.901897    | 875.954587       | 10 |
| 9  | <b>1393.576265</b> | 697.291771        | 1376.549716    | 688.778496       | 1375.565700        | 688.286488        | Y    | <b>1329.687136</b> | 665.347206        | 1312.660587    | 656.833932       | 1311.676571    | 656.341924       | 9  |
| 10 | <b>1522.618858</b> | <b>761.813067</b> | 1505.592309    | 753.299793       | <b>1504.608293</b> | 752.807785        | E    | <b>1166.623807</b> | 583.815541        | 1149.597258    | 575.302267       | 1148.613242    | 574.810259       | 8  |
| 11 | <b>1619.671622</b> | 810.339449        | 1602.645073    | 801.826175       | 1601.661057        | 801.334167        | P    | <b>1037.581214</b> | <b>519.294245</b> | 1020.554665    | 510.780971       | 1019.570649    | 510.288963       | 7  |
| 12 | <b>1732.755686</b> | <b>866.881481</b> | 1715.729137    | 858.368207       | <b>1714.745121</b> | 857.876198        | I    | <b>940.528450</b>  | 470.767863        | 923.501901     | 462.254589       | 922.517885     | 461.762581       | 6  |
| 13 | 1829.808450        | 915.407863        | 1812.781901    | 906.894589       | 1811.797885        | 906.402581        | P    | <b>827.444386</b>  | <b>414.225831</b> | 810.417837     | 405.712557       | 809.433821     | 405.220549       | 5  |
| 14 | 1886.829914        | 943.918595        | 1869.803365    | 935.405321       | 1868.819349        | 934.913312        | G    | <b>730.391622</b>  | 365.699449        | 713.365073     | 357.186175       | 712.381057     | 356.694167       | 4  |
| 15 | 1973.861942        | 987.434609        | 1956.835393    | 978.921335       | 1955.851377        | 978.429327        | S    | <b>673.370158</b>  | 337.188717        | 656.343609     | 328.675443       | 655.359593     | 328.183435       | 3  |
| 16 | 2413.087268        | 1207.047272       | 2396.060719    | 1198.533997      | 2395.076703        | 1198.041989       | Q    | <b>586.338130</b>  | 293.672703        | 569.311581     | 285.159429       |                |                  | 2  |
| 17 |                    |                   |                |                  |                    |                   | K    | 147.112804         | 74.060040         | 130.086255     | 65.546765        |                |                  | 1  |

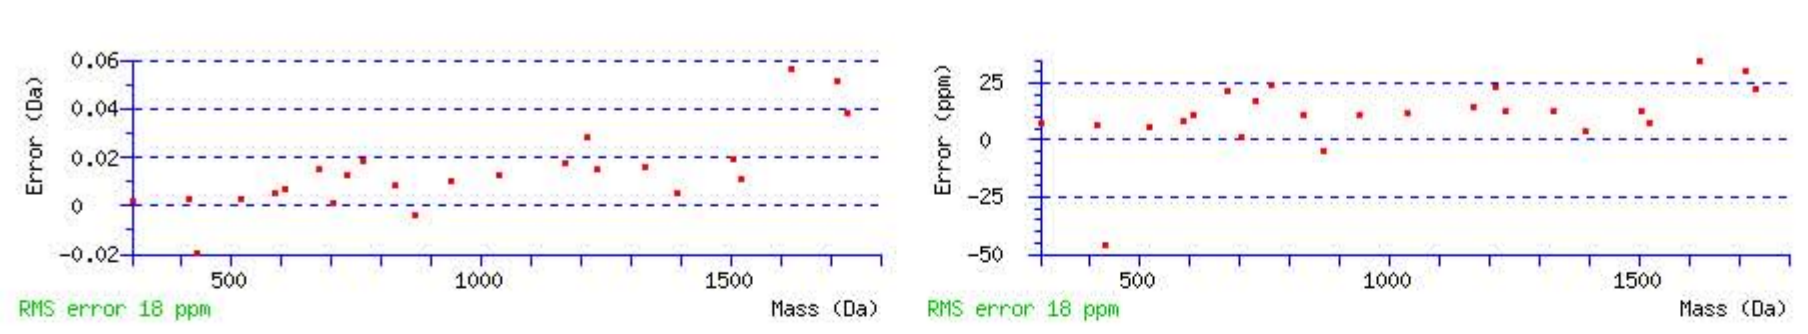

NCBI BLAST search of **AIDEDCSQYEPIPGSQK**  
 (Parameters: blastp, nr protein database, expect=20000, no filter, PAM30)  
 Other BLAST [web gateways](#)

**All matches to this query**

| Score | Mr(calc):   | Delta     | Sequence                                   |
|-------|-------------|-----------|--------------------------------------------|
| 44.0  | 2558.185501 | 0.005981  | <a href="#">AIDEDCSQYEPIPGSQK</a>          |
| 2.3   | 2558.214981 | -0.023499 | <a href="#">TSPQSAPPSSPLSPNWWVSPDHQR</a>   |
| 1.0   | 2558.171906 | 0.019576  | <a href="#">QGSQSGQSPGHGQRGSGSRQSPSYGR</a> |



# MASCOT Search Results

## Peptide View

MS/MS Fragmentation of **CDCICPVGSQGLACEVS<sup>Y</sup>R**  
 Found in **CO8B\_HUMAN**, Complement component C8 beta chain OS=Homo sapiens GN=C8B PE=1 SV=3

Match to Query 60639: 2541.095112 from(848.038980,3+) rtinseconds(2163) index(22823)  
 Title: Locus:1.1.1.1634.23 File:"2013-07-02 CLN FXIII 30 min 2nd F 2.wiff"  
 Data file C:\Program Files (x86)\Matrix Science\Mascot Daemon\mgf2 FXIII 30 min 2nd\mascot\_daemon\_merge.mgf

Click mouse within plot area to zoom in by factor of two about that point  
 Or, Plot from  to  Da   
 Label all possible matches  Label matches used for scoring

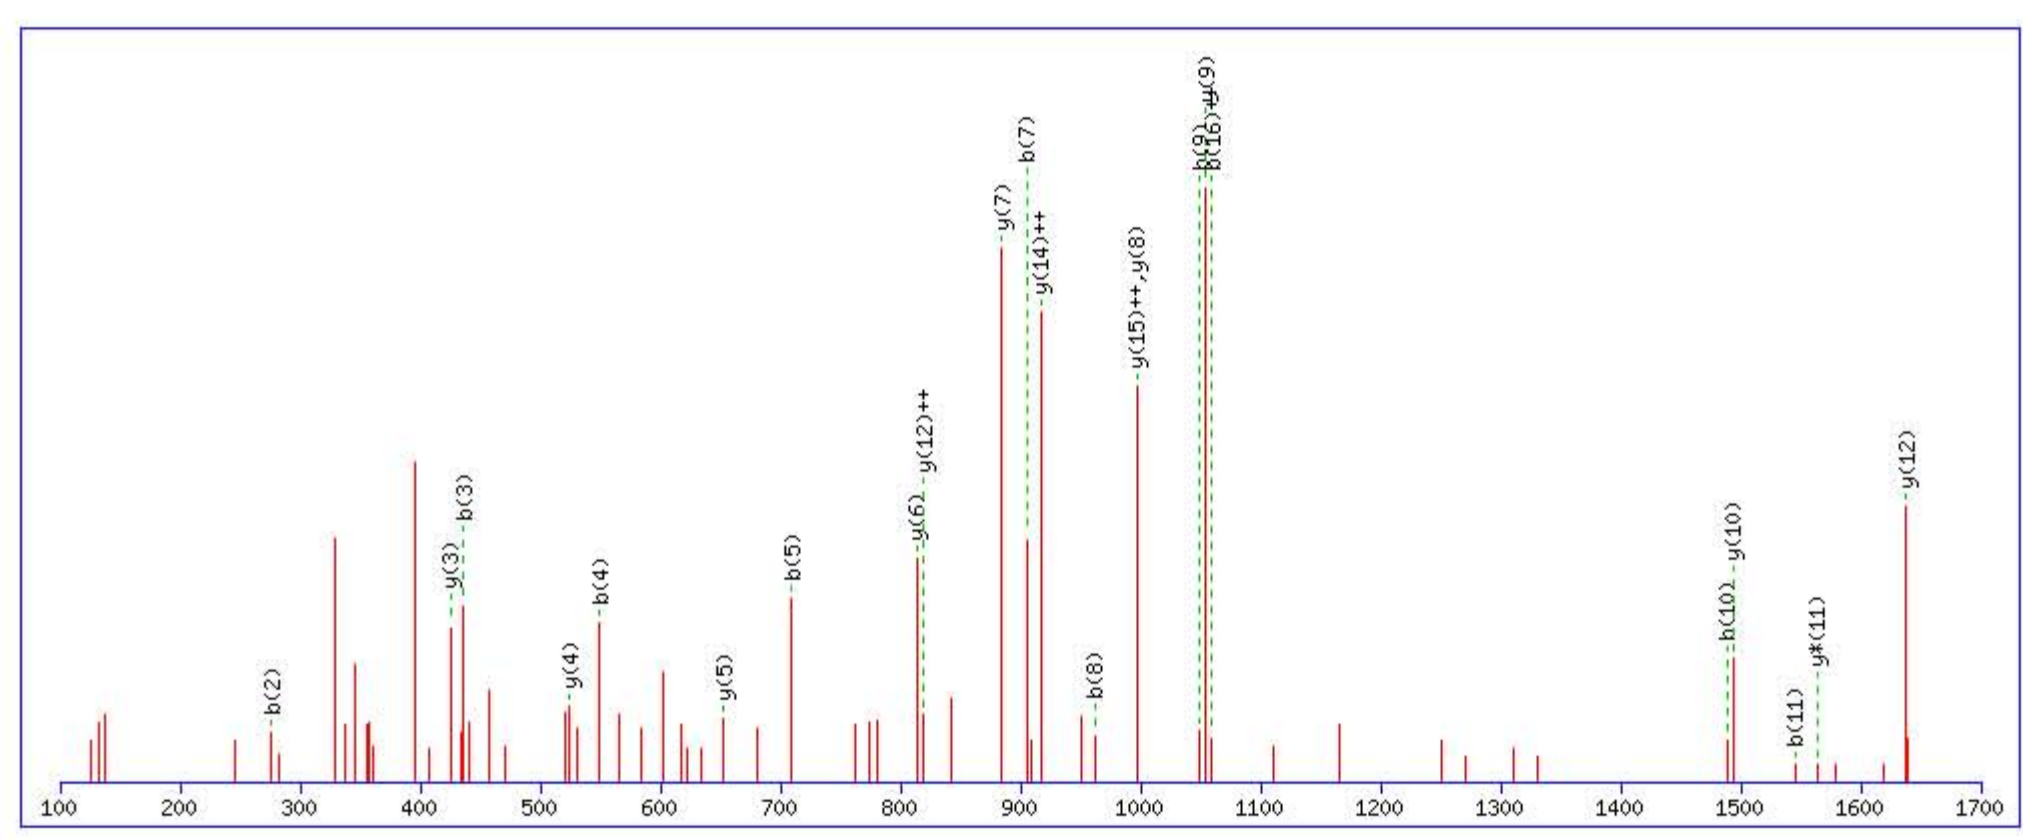

Monoisotopic mass of neutral peptide Mr(calc): 2541.094299  
 Fixed modifications: Carbamidomethyl (C) (apply to specified residues or termini only)  
 Variable modifications:  
 Q10 : Biotin:Thermo-21345 (Q)  
 Ions Score: 59 Expect: 4.5e-006  
 Matches : 23/192 fragment ions using 42 most intense peaks [\(help\)](#)

| #  | b                  | b <sup>++</sup>    | b <sup>*</sup> | b <sup>*++</sup> | b <sup>0</sup> | b <sup>0++</sup> | Seq. | y                  | y <sup>++</sup>   | y <sup>*</sup>     | y <sup>*++</sup> | y <sup>0</sup> | y <sup>0++</sup> | #  |
|----|--------------------|--------------------|----------------|------------------|----------------|------------------|------|--------------------|-------------------|--------------------|------------------|----------------|------------------|----|
| 1  | 161.037925         | 81.022600          |                |                  |                |                  | C    |                    |                   |                    |                  |                |                  | 19 |
| 2  | <b>276.064868</b>  | 138.536072         |                |                  | 258.054303     | 129.530790       | D    | 2382.070908        | 1191.539092       | 2365.044359        | 1183.025817      | 2364.060343    | 1182.533809      | 18 |
| 3  | <b>436.095517</b>  | 218.551397         |                |                  | 418.084952     | 209.546114       | C    | 2267.043965        | 1134.025620       | 2250.017416        | 1125.512346      | 2249.033400    | 1125.020338      | 17 |
| 4  | <b>549.179581</b>  | 275.093429         |                |                  | 531.169016     | 266.088146       | I    | 2107.013316        | 1054.010296       | 2089.986767        | 1045.497021      | 2089.002751    | 1045.005013      | 16 |
| 5  | <b>709.210230</b>  | 355.108753         |                |                  | 691.199665     | 346.103471       | C    | 1993.929252        | <b>997.468264</b> | 1976.902703        | 988.954990       | 1975.918687    | 988.462982       | 15 |
| 6  | 806.262994         | 403.635135         |                |                  | 788.252429     | 394.629853       | P    | 1833.898603        | <b>917.452940</b> | 1816.872054        | 908.939665       | 1815.888038    | 908.447657       | 14 |
| 7  | <b>905.331408</b>  | 453.169342         |                |                  | 887.320843     | 444.164060       | V    | 1736.845839        | 868.926558        | 1719.819290        | 860.413283       | 1718.835274    | 859.921275       | 13 |
| 8  | <b>962.352872</b>  | 481.680074         |                |                  | 944.342307     | 472.674792       | G    | <b>1637.777425</b> | <b>819.392351</b> | 1620.750876        | 810.879076       | 1619.766860    | 810.387068       | 12 |
| 9  | <b>1049.384900</b> | 525.196088         |                |                  | 1031.374335    | 516.190806       | S    | 1580.755961        | 790.881619        | <b>1563.729412</b> | 782.368344       | 1562.745396    | 781.876336       | 11 |
| 10 | <b>1488.610226</b> | 744.808751         | 1471.583677    | 736.295477       | 1470.599661    | 735.803469       | Q    | <b>1493.723933</b> | 747.365605        | 1476.697384        | 738.852330       | 1475.713368    | 738.360322       | 10 |
| 11 | <b>1545.631690</b> | 773.319483         | 1528.605141    | 764.806209       | 1527.621125    | 764.314201       | G    | <b>1054.498607</b> | 527.752941        | 1037.472058        | 519.239667       | 1036.488042    | 518.747659       | 9  |
| 12 | 1658.715754        | 829.861515         | 1641.689205    | 821.348241       | 1640.705189    | 820.856233       | L    | <b>997.477143</b>  | 499.242209        | 980.450594         | 490.728935       | 979.466578     | 490.236927       | 8  |
| 13 | 1729.752868        | 865.380072         | 1712.726319    | 856.866798       | 1711.742303    | 856.374790       | A    | <b>884.393079</b>  | 442.700178        | 867.366530         | 434.186903       | 866.382514     | 433.694895       | 7  |
| 14 | 1889.783517        | 945.395397         | 1872.756968    | 936.882122       | 1871.772952    | 936.390114       | C    | <b>813.355965</b>  | 407.181621        | 796.329416         | 398.668346       | 795.345400     | 398.176338       | 6  |
| 15 | 2018.826110        | 1009.916693        | 2001.799561    | 1001.403419      | 2000.815545    | 1000.911411      | E    | <b>653.325316</b>  | 327.166296        | 636.298767         | 318.653021       | 635.314751     | 318.161013       | 5  |
| 16 | 2117.894524        | <b>1059.450900</b> | 2100.867975    | 1050.937625      | 2099.883959    | 1050.445617      | V    | <b>524.282723</b>  | 262.645000        | 507.256174         | 254.131725       | 506.272158     | 253.639717       | 4  |
| 17 | 2204.926552        | 1102.966914        | 2187.900003    | 1094.453639      | 2186.915987    | 1093.961631      | S    | <b>425.214309</b>  | 213.110793        | 408.187760         | 204.597518       | 407.203744     | 204.105510       | 3  |
| 18 | 2367.989881        | 1184.498578        | 2350.963332    | 1175.985304      | 2349.979316    | 1175.493296      | Y    | 338.182281         | 169.594778        | 321.155732         | 161.081504       |                |                  | 2  |
| 19 |                    |                    |                |                  |                |                  | R    | 175.118952         | 88.063114         | 158.092403         | 79.549839        |                |                  | 1  |

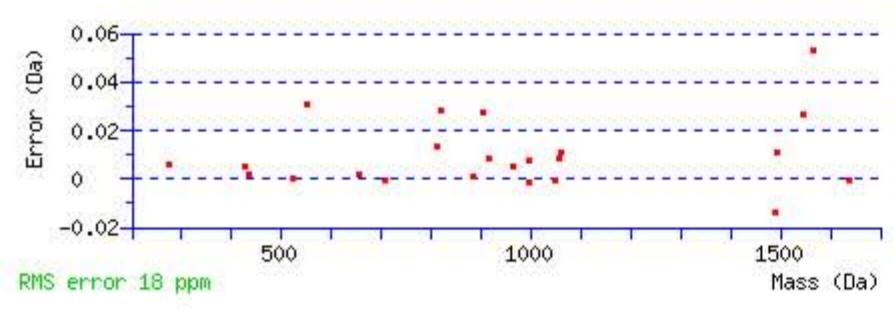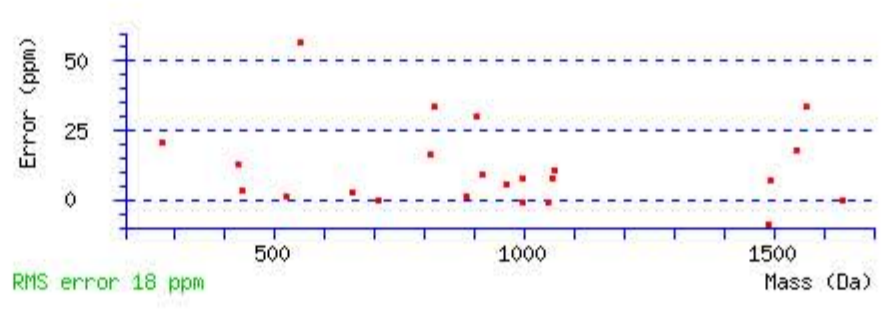

NCBI BLAST search of **CDCICPVGSQGLACEVS<sup>Y</sup>R**  
 (Parameters: blastp, nr protein database, expect=20000, no filter, PAM30)  
 Other BLAST [web gateways](#)

### All matches to this query

| Score | Mr(calc):   | Delta    | Sequence                                       |
|-------|-------------|----------|------------------------------------------------|
| 59.4  | 2541.094299 | 0.000813 | <a href="#">CDCICPVGSQGLACEVS<sup>Y</sup>R</a> |



# MASCOT Search Results

## Peptide View

MS/MS Fragmentation of **SLPVSDSVLSGFQQR**

Found in **CO8G\_HUMAN**, Complement component C8 gamma chain OS=Homo sapiens GN=C8G PE=1 SV=3

Match to Query 47515: 1930.969968 from(966.492260,2+) rtinseconds(2508) index(41778)

Title: Locus:1.1.1.2895.26 File:"2013-07-02 CLN FXIII 30 min 2nd F 3.wiff"

Data file C:\Program Files (x86)\Matrix Science\Mascot Daemon\mgf\2 FXIII 30 min 2nd\mascot\_daemon\_merge.mgf

Click mouse within plot area to zoom in by factor of two about that point

Or, Plot from  to  Da

Label all possible matches  Label matches used for scoring

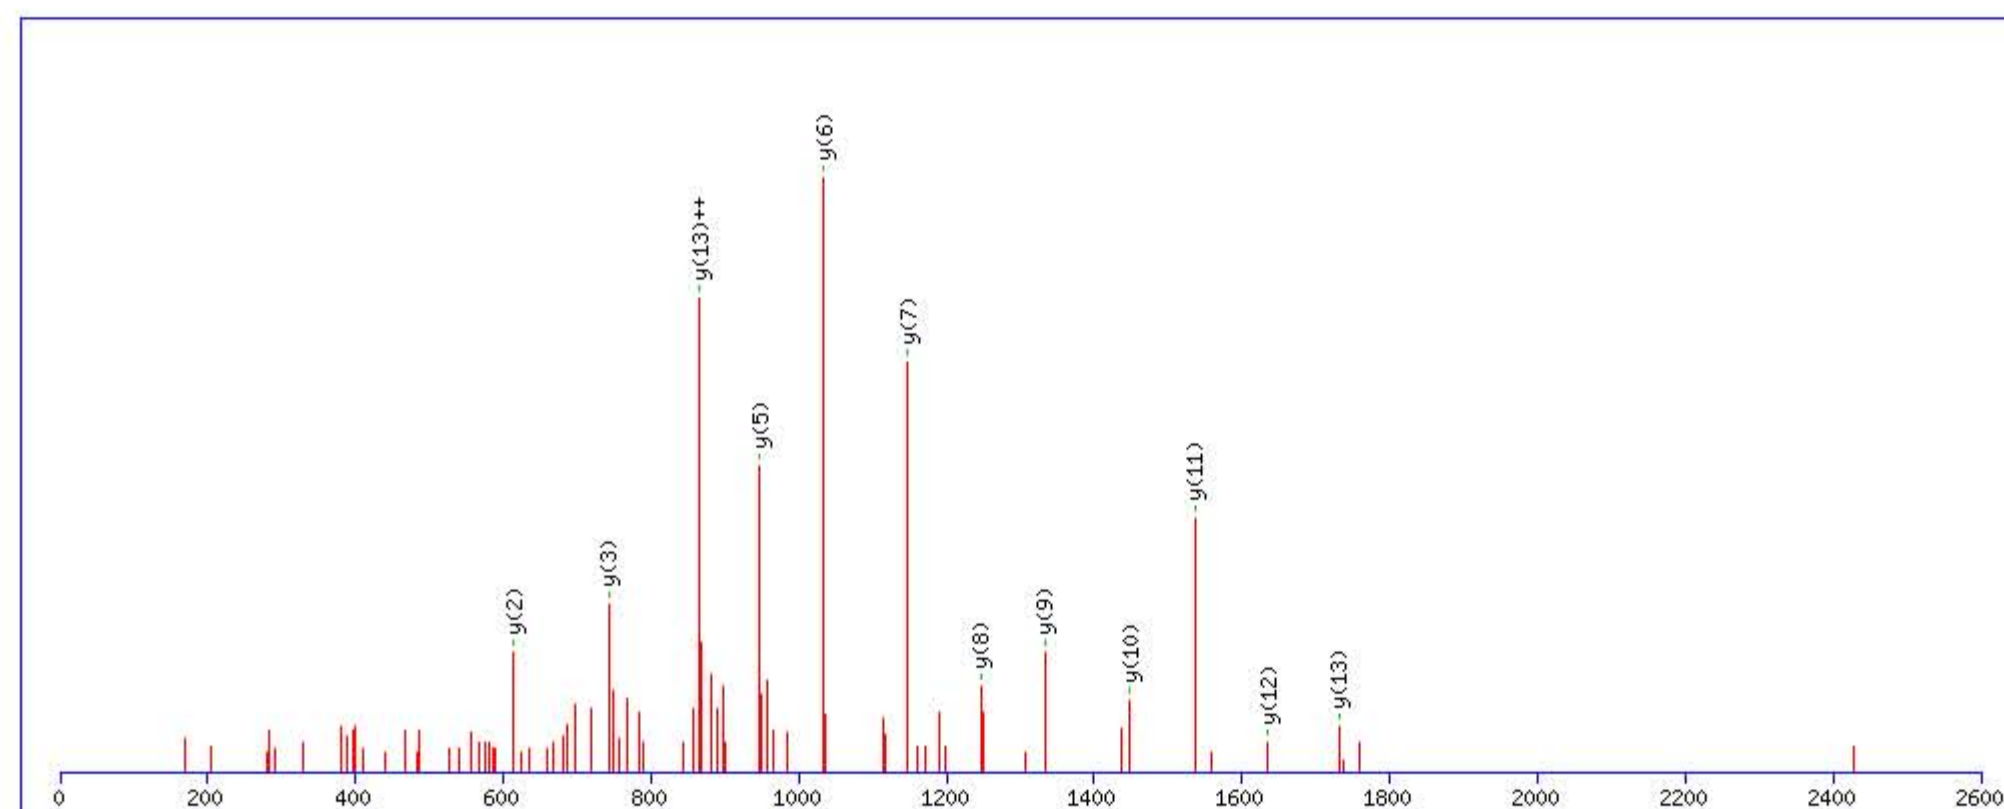

Monoisotopic mass of neutral peptide Mr(calc): 1930.982254

Fixed modifications: Carbamidomethyl (C) (apply to specified residues or termini only)

Variable modifications:

Q14 : Biotin:Thermo-21345 (Q)

Ions Score: 92 Expect: 4.6e-009

Matches : 12/138 fragment ions using 16 most intense peaks [\(help\)](#)

| #  | b           | b <sup>++</sup> | b <sup>*</sup> | b <sup>*++</sup> | b <sup>0</sup> | b <sup>0++</sup> | Seq. | y                  | y <sup>++</sup>   | y <sup>*</sup> | y <sup>*++</sup> | y <sup>0</sup> | y <sup>0++</sup> | #  |
|----|-------------|-----------------|----------------|------------------|----------------|------------------|------|--------------------|-------------------|----------------|------------------|----------------|------------------|----|
| 1  | 88.039304   | 44.523290       |                |                  | 70.028739      | 35.518008        | S    |                    |                   |                |                  |                |                  | 15 |
| 2  | 201.123368  | 101.065322      |                |                  | 183.112803     | 92.060039        | L    | 1844.957496        | 922.982386        | 1827.930947    | 914.469112       | 1826.946931    | 913.977104       | 14 |
| 3  | 298.176132  | 149.591704      |                |                  | 280.165567     | 140.586422       | P    | <b>1731.873432</b> | <b>866.440354</b> | 1714.846883    | 857.927080       | 1713.862867    | 857.435072       | 13 |
| 4  | 397.244546  | 199.125911      |                |                  | 379.233981     | 190.120629       | V    | <b>1634.820668</b> | 817.913972        | 1617.794119    | 809.400698       | 1616.810103    | 808.908690       | 12 |
| 5  | 484.276574  | 242.641925      |                |                  | 466.266009     | 233.636643       | S    | <b>1535.752254</b> | 768.379765        | 1518.725705    | 759.866491       | 1517.741689    | 759.374483       | 11 |
| 6  | 599.303517  | 300.155397      |                |                  | 581.292952     | 291.150114       | D    | <b>1448.720226</b> | 724.863751        | 1431.693677    | 716.350477       | 1430.709661    | 715.858469       | 10 |
| 7  | 686.335545  | 343.671411      |                |                  | 668.324980     | 334.666128       | S    | <b>1333.693283</b> | 667.350280        | 1316.666734    | 658.837005       | 1315.682718    | 658.344997       | 9  |
| 8  | 785.403959  | 393.205618      |                |                  | 767.393394     | 384.200335       | V    | <b>1246.661255</b> | 623.834266        | 1229.634706    | 615.320991       | 1228.650690    | 614.828983       | 8  |
| 9  | 898.488023  | 449.747650      |                |                  | 880.477458     | 440.742367       | L    | <b>1147.592841</b> | 574.300059        | 1130.566292    | 565.786784       | 1129.582276    | 565.294776       | 7  |
| 10 | 985.520051  | 493.263664      |                |                  | 967.509486     | 484.258381       | S    | <b>1034.508777</b> | 517.758027        | 1017.482228    | 509.244752       | 1016.498212    | 508.752744       | 6  |
| 11 | 1042.541515 | 521.774395      |                |                  | 1024.530950    | 512.769113       | G    | <b>947.476749</b>  | 474.242013        | 930.450200     | 465.728738       | 929.466184     | 465.236730       | 5  |
| 12 | 1189.609929 | 595.308603      |                |                  | 1171.599364    | 586.303320       | F    | 890.455285         | 445.731281        | 873.428736     | 437.218006       | 872.444720     | 436.725998       | 4  |
| 13 | 1318.652522 | 659.829899      |                |                  | 1300.641957    | 650.824617       | E    | <b>743.386871</b>  | 372.197074        | 726.360322     | 363.683799       | 725.376306     | 363.191791       | 3  |
| 14 | 1757.877848 | 879.442562      | 1740.851299    | 870.929288       | 1739.867283    | 870.437280       | Q    | <b>614.344278</b>  | 307.675777        | 597.317729     | 299.162503       |                |                  | 2  |
| 15 |             |                 |                |                  |                |                  | R    | 175.118952         | 88.063114         | 158.092403     | 79.549839        |                |                  | 1  |

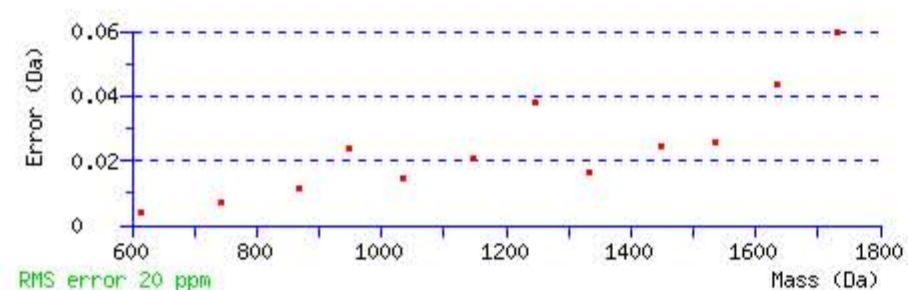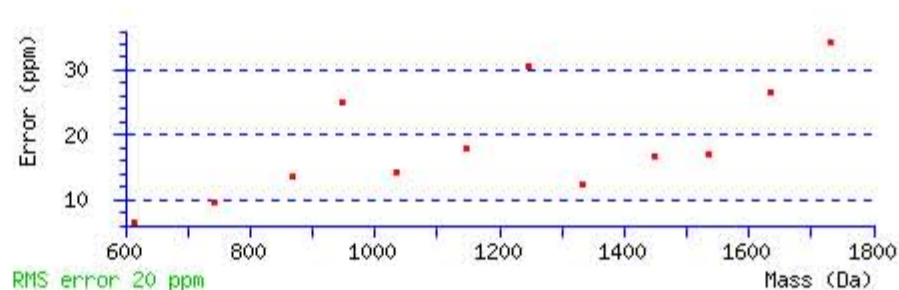

NCBI BLAST search of [SLPVSDSVLSGFQQR](#)

(Parameters: blastp, nr protein database, expect=20000, no filter, PAM30)

Other BLAST [web gateways](#)

All matches to this query

| Score | Mr(calc):   | Delta     | Sequence                          |
|-------|-------------|-----------|-----------------------------------|
| 91.9  | 1930.982254 | -0.012286 | <a href="#">SLPVSDSVLSGFQQR</a>   |
| 3.0   | 1930.989410 | -0.019442 | <a href="#">EAQSQLIKSDEMQLRLR</a> |

Mascot: <http://www.matrixscience.com/>



# MASCOT Search Results

## Peptide View

MS/MS Fragmentation of **VQEAHLTEDQIFYFPK**  
 Found in **CO8G\_HUMAN**, Complement component C8 gamma chain OS=Homo sapiens GN=C8G PE=1 SV=3

Match to Query 55595: 2275.144632 from(759.388820,3+) rtinseconds(2370) index(23979)  
 Title: Locus:1.1.1.1706.25 File:"2013-07-02 CLN FXIII 30 min 2nd F 2.wiff"  
 Data file C:\Program Files (x86)\Matrix Science\Mascot Daemon\mgf2 FXIII 30 min 2nd\mascot\_daemon\_merge.mgf

Click mouse within plot area to zoom in by factor of two about that point  
 Or, Plot from  to  Da   
 Label all possible matches  Label matches used for scoring

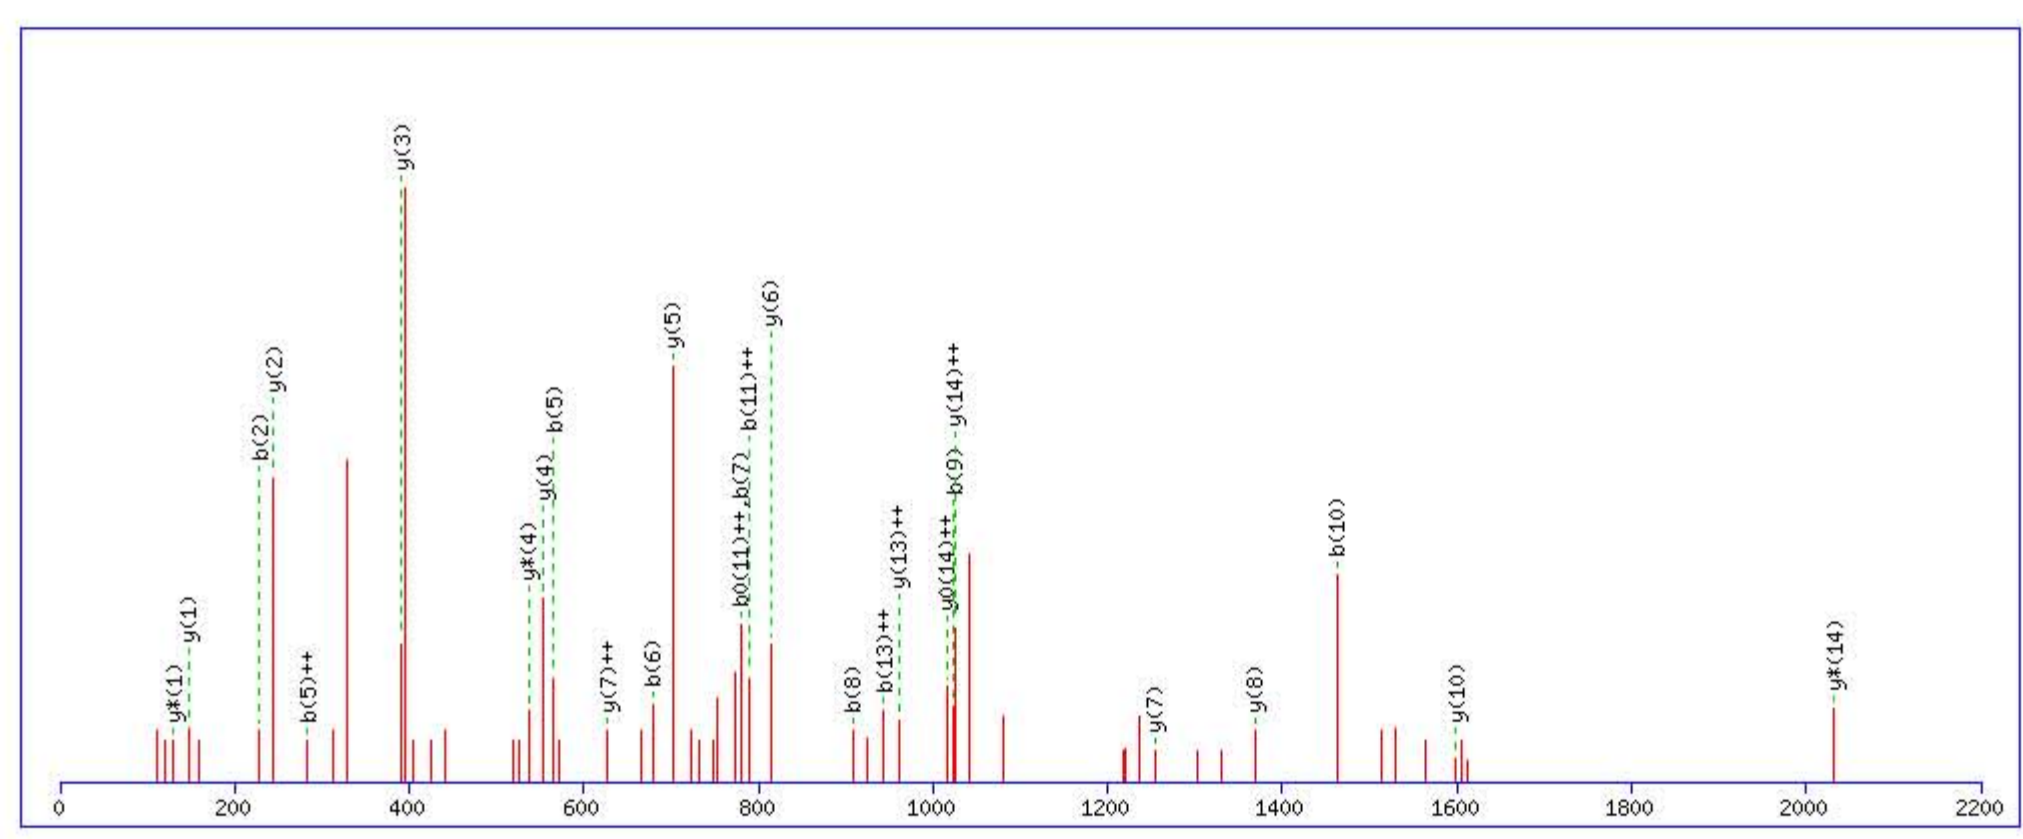

Monoisotopic mass of neutral peptide Mr(calc): 2275.134720  
 Fixed modifications: Carbamidomethyl (C) (apply to specified residues or termini only)  
 Variable modifications:  
 Q10 : Biotin:Thermo-21345 (Q)  
 Ions Score: 42 Expect: 0.00039  
 Matches : 27/160 fragment ions using 55 most intense peaks [\(help\)](#)

| #  | b                  | b <sup>++</sup>   | b <sup>*</sup> | b <sup>*++</sup> | b <sup>0</sup> | b <sup>0++</sup>  | Seq. | y                  | y <sup>++</sup>    | y <sup>*</sup>     | y <sup>*++</sup> | y <sup>0</sup> | y <sup>0++</sup>   | #  |
|----|--------------------|-------------------|----------------|------------------|----------------|-------------------|------|--------------------|--------------------|--------------------|------------------|----------------|--------------------|----|
| 1  | 100.075690         | 50.541483         |                |                  |                |                   | V    |                    |                    |                    |                  |                |                    | 16 |
| 2  | <b>228.134268</b>  | 114.570772        | 211.107719     | 106.057498       |                |                   | Q    | 2177.073591        | 1089.040433        | 2160.047042        | 1080.527159      | 2159.063026    | 1080.035151        | 15 |
| 3  | 357.176861         | 179.092069        | 340.150312     | 170.578794       | 339.166296     | 170.086786        | E    | 2049.015013        | <b>1025.011144</b> | <b>2031.988464</b> | 1016.497870      | 2031.004448    | <b>1016.005862</b> | 14 |
| 4  | 428.213975         | 214.610626        | 411.187426     | 206.097351       | 410.203410     | 205.605343        | A    | 1919.972420        | <b>960.489848</b>  | 1902.945871        | 951.976573       | 1901.961855    | 951.484565         | 13 |
| 5  | <b>565.272887</b>  | <b>283.140082</b> | 548.246338     | 274.626807       | 547.262322     | 274.134799        | H    | 1848.935306        | 924.971291         | 1831.908757        | 916.458016       | 1830.924741    | 915.966008         | 12 |
| 6  | <b>678.356951</b>  | 339.682114        | 661.330402     | 331.168839       | 660.346386     | 330.676831        | L    | 1711.876394        | 856.441835         | 1694.849845        | 847.928561       | 1693.865829    | 847.436552         | 11 |
| 7  | <b>779.404630</b>  | 390.205953        | 762.378081     | 381.692679       | 761.394065     | 381.200671        | T    | <b>1598.792330</b> | 799.899803         | 1581.765781        | 791.386529       | 1580.781765    | 790.894521         | 10 |
| 8  | <b>908.447223</b>  | 454.727250        | 891.420674     | 446.213975       | 890.436658     | 445.721967        | E    | 1497.744651        | 749.375963         | 1480.718102        | 740.862689       | 1479.734086    | 740.370681         | 9  |
| 9  | <b>1023.474166</b> | 512.240721        | 1006.447617    | 503.727447       | 1005.463601    | 503.235439        | D    | <b>1368.702058</b> | 684.854667         | 1351.675509        | 676.341392       | 1350.691493    | 675.849384         | 8  |
| 10 | <b>1462.699492</b> | 731.853384        | 1445.672943    | 723.340110       | 1444.688927    | 722.848101        | Q    | <b>1253.675115</b> | <b>627.341195</b>  | 1236.648566        | 618.827921       |                |                    | 7  |
| 11 | 1575.783556        | <b>788.395416</b> | 1558.757007    | 779.882141       | 1557.772991    | <b>779.390133</b> | I    | <b>814.449789</b>  | 407.728533         | 797.423240         | 399.215258       |                |                    | 6  |
| 12 | 1722.851970        | 861.929623        | 1705.825421    | 853.416349       | 1704.841405    | 852.924340        | F    | <b>701.365725</b>  | 351.186501         | 684.339176         | 342.673226       |                |                    | 5  |
| 13 | 1885.915299        | <b>943.461288</b> | 1868.888750    | 934.948013       | 1867.904734    | 934.456005        | Y    | <b>554.297311</b>  | 277.652294         | <b>537.270762</b>  | 269.139019       |                |                    | 4  |
| 14 | 2032.983713        | 1016.995495       | 2015.957164    | 1008.482220      | 2014.973148    | 1007.990212       | F    | <b>391.233982</b>  | 196.120629         | 374.207433         | 187.607354       |                |                    | 3  |
| 15 | 2130.036477        | 1065.521876       | 2113.009928    | 1057.008602      | 2112.025912    | 1056.516594       | P    | <b>244.165568</b>  | 122.586422         | 227.139019         | 114.073147       |                |                    | 2  |
| 16 |                    |                   |                |                  |                |                   | K    | <b>147.112804</b>  | 74.060040          | <b>130.086255</b>  | 65.546765        |                |                    | 1  |

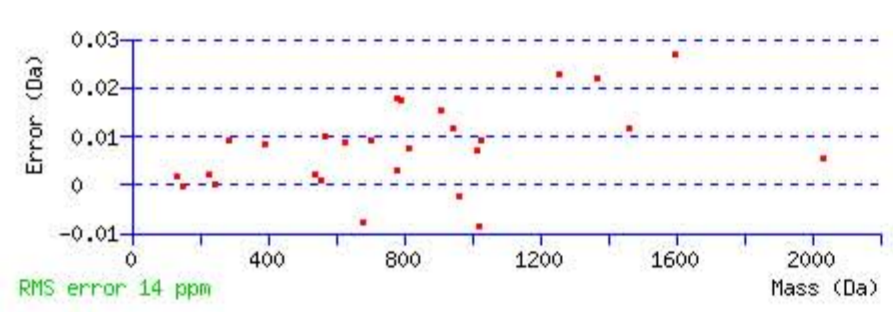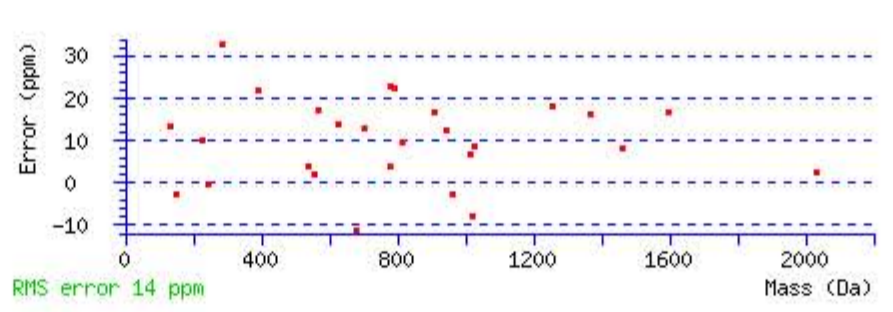

NCBI BLAST search of **VQEAHLTEDQIFYFPK**  
 (Parameters: blastp, nr protein database, expect=20000, no filter, PAM30)  
 Other BLAST [web gateways](#)

### All matches to this query

| Score | Mr(calc):   | Delta     | Sequence                              |
|-------|-------------|-----------|---------------------------------------|
| 42.5  | 2275.134720 | 0.009912  | <a href="#">VQEAHLTEDQIFYFPK</a>      |
| 16.5  | 2275.134720 | 0.009912  | <a href="#">VQEAHLTEDQIFYFPK</a>      |
| 5.9   | 2275.166412 | -0.021780 | <a href="#">AMEKLV RVIDQEMQAIGGQK</a> |
| 3.6   | 2275.160538 | -0.015906 | <a href="#">VLPYCWKGMTPEQQAIRK</a>    |



# MASCOT Search Results

## Peptide View

MS/MS Fragmentation of **YGFCEAADQFHVLDEVR**

Found in **CO8G\_HUMAN**, Complement component C8 gamma chain OS=Homo sapiens GN=C8G PE=1 SV=3

Match to Query 57085: 2366.084472 from(789.702100,3+) rtinseconds(2552) index(58916)

Title: Locus:1.1.1.3374.6 File:"2013-07-02 CLN FXIII 30 min 2nd F 4.wiff"

Data file C:\Program Files (x86)\Matrix Science\Mascot Daemon\mgf2 FXIII 30 min 2nd\mascot\_daemon\_merge.mgf

Click mouse within plot area to zoom in by factor of two about that point

Or, Plot from  to  Da

Label all possible matches  Label matches used for scoring

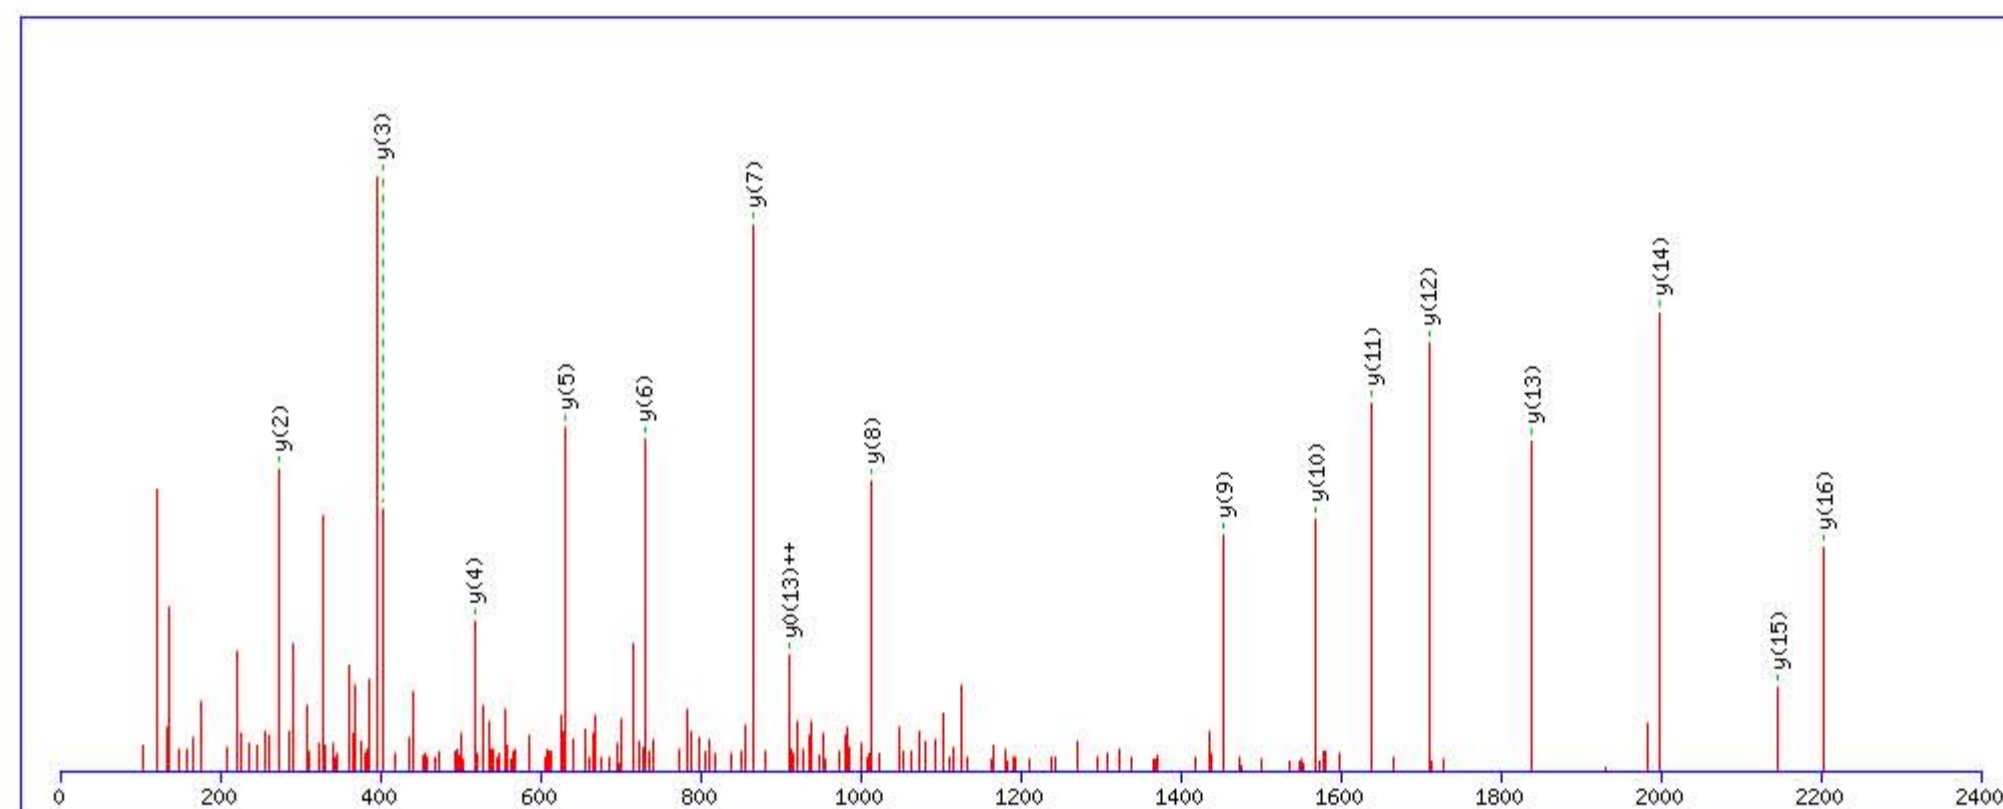

Monoisotopic mass of neutral peptide Mr(calc): 2366.082382

Fixed modifications: Carbamidomethyl (C) (apply to specified residues or termini only)

Variable modifications:

Q9 : Biotin:Thermo-21345 (Q)

Ions Score: 137 Expect: 2.4e-013

Matches : 16/164 fragment ions using 21 most intense peaks [\(help\)](#)

| #  | b           | b <sup>++</sup> | b <sup>*</sup> | b <sup>*++</sup> | b <sup>0</sup> | b <sup>0++</sup> | Seq. | y           | y <sup>++</sup> | y <sup>*</sup> | y <sup>*++</sup> | y <sup>0</sup> | y <sup>0++</sup> | #  |
|----|-------------|-----------------|----------------|------------------|----------------|------------------|------|-------------|-----------------|----------------|------------------|----------------|------------------|----|
| 1  | 164.070605  | 82.538940       |                |                  |                |                  | Y    |             |                 |                |                  |                |                  | 17 |
| 2  | 221.092069  | 111.049673      |                |                  |                |                  | G    | 2204.026323 | 1102.516799     | 2186.999774    | 1094.003525      | 2186.015758    | 1093.511517      | 16 |
| 3  | 368.160483  | 184.583879      |                |                  |                |                  | F    | 2147.004859 | 1074.006067     | 2129.978310    | 1065.492793      | 2128.994294    | 1065.000785      | 15 |
| 4  | 528.191132  | 264.599204      |                |                  |                |                  | C    | 1999.936445 | 1000.471860     | 1982.909896    | 991.958586       | 1981.925880    | 991.466578       | 14 |
| 5  | 657.233725  | 329.120501      |                |                  | 639.223160     | 320.115218       | E    | 1839.905796 | 920.456536      | 1822.879247    | 911.943261       | 1821.895231    | 911.451253       | 13 |
| 6  | 728.270839  | 364.639058      |                |                  | 710.260274     | 355.633775       | A    | 1710.863203 | 855.935239      | 1693.836654    | 847.421965       | 1692.852638    | 846.929957       | 12 |
| 7  | 799.307953  | 400.157615      |                |                  | 781.297388     | 391.152332       | A    | 1639.826089 | 820.416682      | 1622.799540    | 811.903408       | 1621.815524    | 811.411400       | 11 |
| 8  | 914.334896  | 457.671086      |                |                  | 896.324331     | 448.665803       | D    | 1568.788975 | 784.898125      | 1551.762426    | 776.384851       | 1550.778410    | 775.892843       | 10 |
| 9  | 1353.560222 | 677.283749      | 1336.533673    | 668.770474       | 1335.549657    | 668.278466       | Q    | 1453.762032 | 727.384654      | 1436.735483    | 718.871379       | 1435.751467    | 718.379371       | 9  |
| 10 | 1500.628636 | 750.817956      | 1483.602087    | 742.304682       | 1482.618071    | 741.812673       | F    | 1014.536706 | 507.771991      | 997.510157     | 499.258717       | 996.526141     | 498.766709       | 8  |
| 11 | 1637.687548 | 819.347412      | 1620.660999    | 810.834138       | 1619.676983    | 810.342129       | H    | 867.468292  | 434.237784      | 850.441743     | 425.724510       | 849.457727     | 425.232502       | 7  |
| 12 | 1736.755962 | 868.881619      | 1719.729413    | 860.368345       | 1718.745397    | 859.876336       | V    | 730.409380  | 365.708328      | 713.382831     | 357.195054       | 712.398815     | 356.703046       | 6  |
| 13 | 1849.840026 | 925.423651      | 1832.813477    | 916.910376       | 1831.829461    | 916.418368       | L    | 631.340966  | 316.174121      | 614.314417     | 307.660846       | 613.330401     | 307.168838       | 5  |
| 14 | 1964.866969 | 982.937122      | 1947.840420    | 974.423848       | 1946.856404    | 973.931840       | D    | 518.256902  | 259.632089      | 501.230353     | 251.118815       | 500.246337     | 250.626807       | 4  |
| 15 | 2093.909562 | 1047.458419     | 2076.883013    | 1038.945144      | 2075.898997    | 1038.453136      | E    | 403.229959  | 202.118617      | 386.203410     | 193.605343       | 385.219394     | 193.113335       | 3  |
| 16 | 2192.977976 | 1096.992626     | 2175.951427    | 1088.479351      | 2174.967411    | 1087.987343      | V    | 274.187366  | 137.597321      | 257.160817     | 129.084046       |                |                  | 2  |
| 17 |             |                 |                |                  |                |                  | R    | 175.118952  | 88.063114       | 158.092403     | 79.549839        |                |                  | 1  |

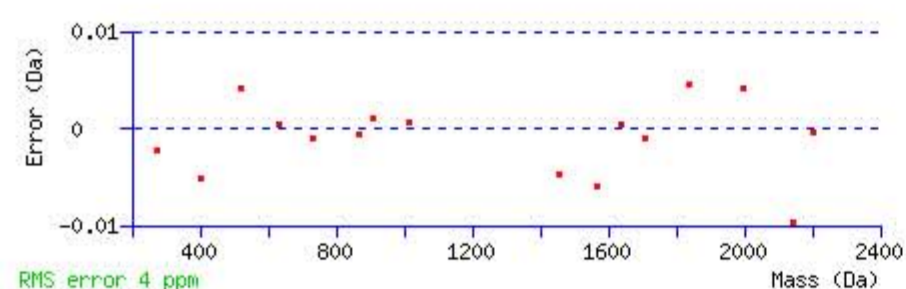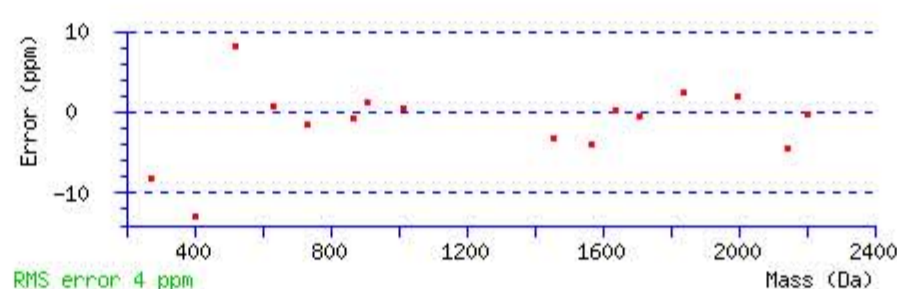

NCBI BLAST search of [YGFCEAADQFHVLDEVR](#)

(Parameters: blastp, nr protein database, expect=20000, no filter, PAM30)

Other BLAST [web gateways](#)

All matches to this query

| Score | Mr(calc):   | Delta    | Sequence                          |
|-------|-------------|----------|-----------------------------------|
| 137.2 | 2366.082382 | 0.002090 | <a href="#">YGFCEAADQFHVLDEVR</a> |

Mascot: <http://www.matrixscience.com/>



# MASCOT Search Results

## Peptide View

MS/MS Fragmentation of **AEQCCEETASSISLHGK**  
 Found in **CO9\_HUMAN**, Complement component C9 OS=Homo sapiens GN=C9 PE=1 SV=2

Match to Query 54318: 2216.987862 from(740.003230,3+) rtinseconds(1571) index(36020)  
 Title: Locus:1.1.1.2569.18 File:"2013-07-02 CLN FXIII 30 min 2nd F 3.wiff"  
 Data file C:\Program Files (x86)\Matrix Science\Mascot Daemon\mgf2 FXIII 30 min 2nd\mascot\_daemon\_merge.mgf

Click mouse within plot area to zoom in by factor of two about that point  
 Or, Plot from  to  Da   
 Label all possible matches  Label matches used for scoring

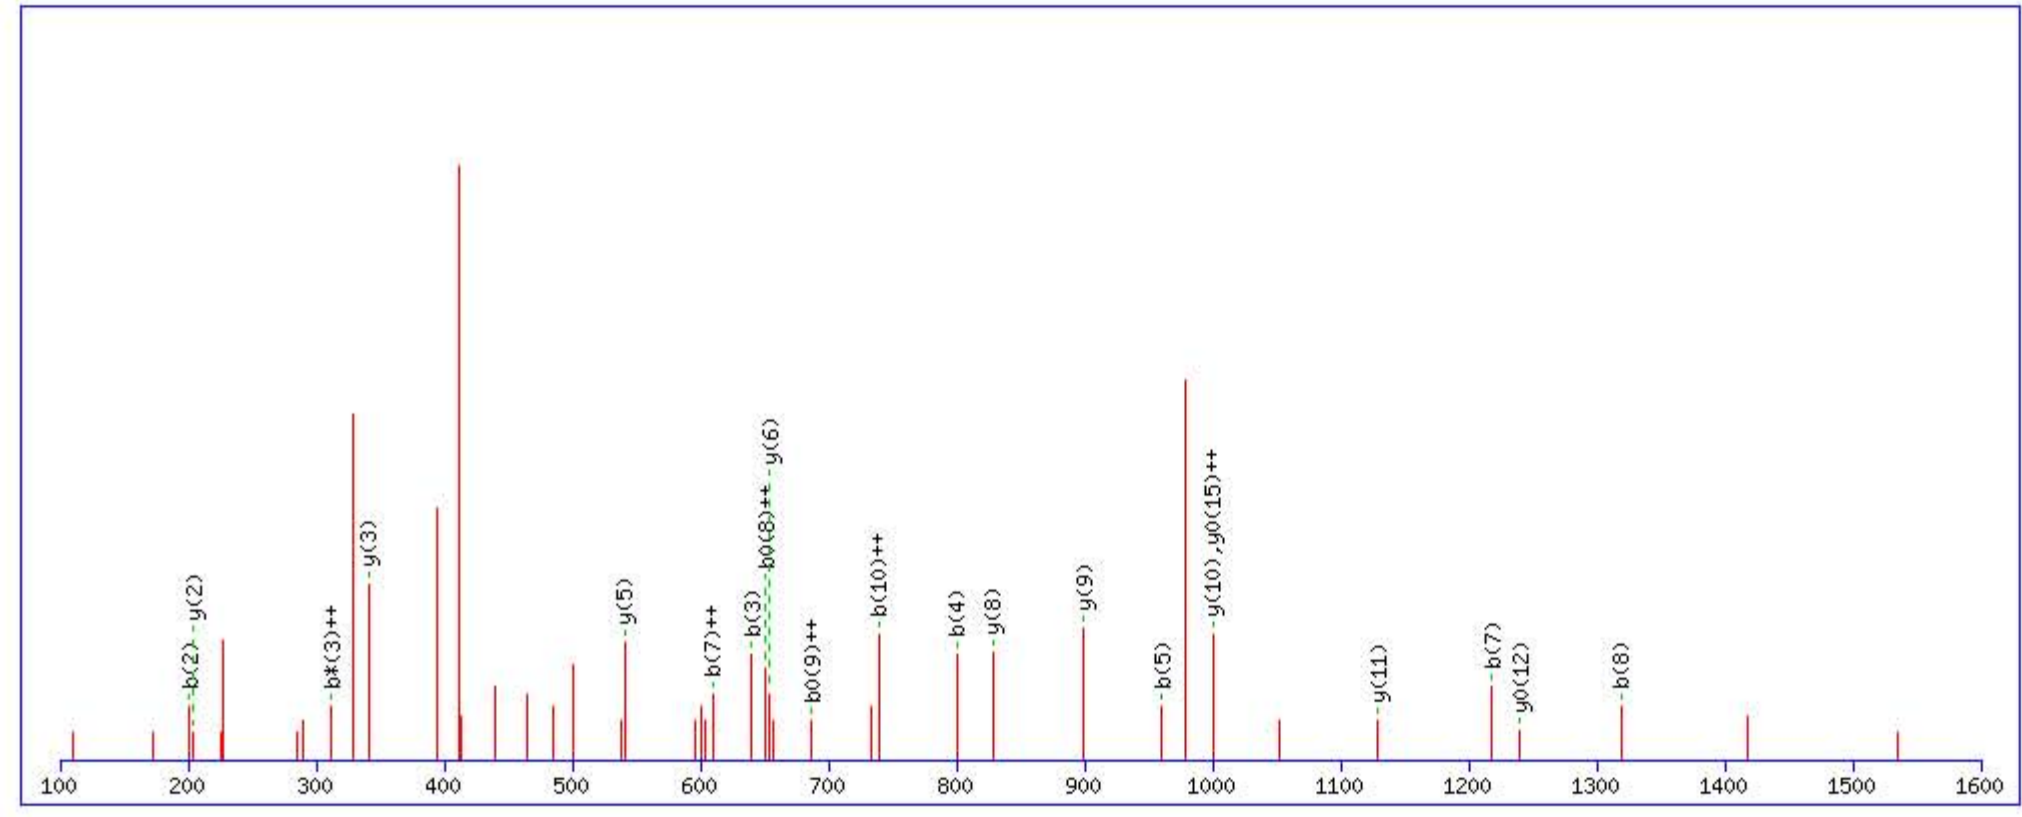

Monoisotopic mass of neutral peptide Mr(calc): 2216.986404  
 Fixed modifications: Carbamidomethyl (C) (apply to specified residues or termini only)  
 Variable modifications:  
 Q3 : Biotin:Thermo-21345 (Q)  
 Ions Score: 44 Expect: 0.00032  
 Matches : 21/178 fragment ions using 40 most intense peaks [\(help\)](#)

| #  | b                  | b <sup>++</sup>   | b <sup>*</sup> | b <sup>*++</sup>  | b <sup>0</sup> | b <sup>0++</sup>  | Seq. | y                  | y <sup>++</sup> | y <sup>*</sup> | y <sup>*++</sup> | y <sup>0</sup>     | y <sup>0++</sup>   | #  |
|----|--------------------|-------------------|----------------|-------------------|----------------|-------------------|------|--------------------|-----------------|----------------|------------------|--------------------|--------------------|----|
| 1  | 72.044390          | 36.525833         |                |                   |                |                   | A    |                    |                 |                |                  |                    |                    | 17 |
| 2  | <b>201.086983</b>  | 101.047130        |                |                   | 183.076418     | 92.041847         | E    | 2146.956588        | 1073.981932     | 2129.930039    | 1065.468657      | 2128.946023        | 1064.976649        | 16 |
| 3  | <b>640.312309</b>  | 320.659793        | 623.285760     | <b>312.146518</b> | 622.301744     | 311.654510        | Q    | 2017.913995        | 1009.460636     | 2000.887446    | 1000.947361      | 1999.903430        | <b>1000.455353</b> | 15 |
| 4  | <b>800.342958</b>  | 400.675117        | 783.316409     | 392.161843        | 782.332393     | 391.669835        | C    | 1578.688669        | 789.847972      | 1561.662120    | 781.334698       | 1560.678104        | 780.842690         | 14 |
| 5  | <b>960.373607</b>  | 480.690442        | 943.347058     | 472.177167        | 942.363042     | 471.685159        | C    | 1418.658020        | 709.832648      | 1401.631471    | 701.319374       | 1400.647455        | 700.827366         | 13 |
| 6  | 1089.416200        | 545.211738        | 1072.389651    | 536.698464        | 1071.405635    | 536.206456        | E    | 1258.627371        | 629.817323      | 1241.600822    | 621.304049       | <b>1240.616806</b> | 620.812041         | 12 |
| 7  | <b>1218.458793</b> | <b>609.733035</b> | 1201.432244    | 601.219760        | 1200.448228    | 600.727752        | E    | <b>1129.584778</b> | 565.296027      | 1112.558229    | 556.782753       | 1111.574213        | 556.290744         | 11 |
| 8  | <b>1319.506472</b> | 660.256874        | 1302.479923    | 651.743600        | 1301.495907    | <b>651.251592</b> | T    | <b>1000.542185</b> | 500.774731      | 983.515636     | 492.261456       | 982.531620         | 491.769448         | 10 |
| 9  | 1390.543586        | 695.775431        | 1373.517037    | 687.262157        | 1372.533021    | <b>686.770149</b> | A    | <b>899.494506</b>  | 450.250891      | 882.467957     | 441.737617       | 881.483941         | 441.245609         | 9  |
| 10 | 1477.575614        | <b>739.291445</b> | 1460.549065    | 730.778171        | 1459.565049    | 730.286163        | S    | <b>828.457392</b>  | 414.732334      | 811.430843     | 406.219060       | 810.446827         | 405.727052         | 8  |
| 11 | 1564.607642        | 782.807459        | 1547.581093    | 774.294185        | 1546.597077    | 773.802177        | S    | 741.425364         | 371.216320      | 724.398815     | 362.703045       | 723.414799         | 362.211037         | 7  |
| 12 | 1677.691706        | 839.349491        | 1660.665157    | 830.836217        | 1659.681141    | 830.344209        | I    | <b>654.393336</b>  | 327.700306      | 637.366787     | 319.187031       | 636.382771         | 318.695023         | 6  |
| 13 | 1764.723734        | 882.865505        | 1747.697185    | 874.352231        | 1746.713169    | 873.860223        | S    | <b>541.309272</b>  | 271.158274      | 524.282723     | 262.644999       | 523.298707         | 262.152991         | 5  |
| 14 | 1877.807798        | 939.407537        | 1860.781249    | 930.894263        | 1859.797233    | 930.402255        | L    | 454.277244         | 227.642260      | 437.250695     | 219.128985       |                    |                    | 4  |
| 15 | 2014.866710        | 1007.936993       | 1997.840161    | 999.423719        | 1996.856145    | 998.931711        | H    | <b>341.193180</b>  | 171.100228      | 324.166631     | 162.586953       |                    |                    | 3  |
| 16 | 2071.888174        | 1036.447725       | 2054.861625    | 1027.934450       | 2053.877609    | 1027.442442       | G    | <b>204.134268</b>  | 102.570772      | 187.107719     | 94.057497        |                    |                    | 2  |
| 17 |                    |                   |                |                   |                |                   | K    | 147.112804         | 74.060040       | 130.086255     | 65.546765        |                    |                    | 1  |

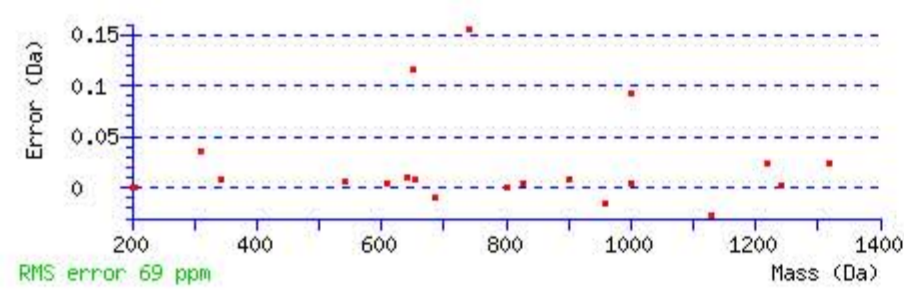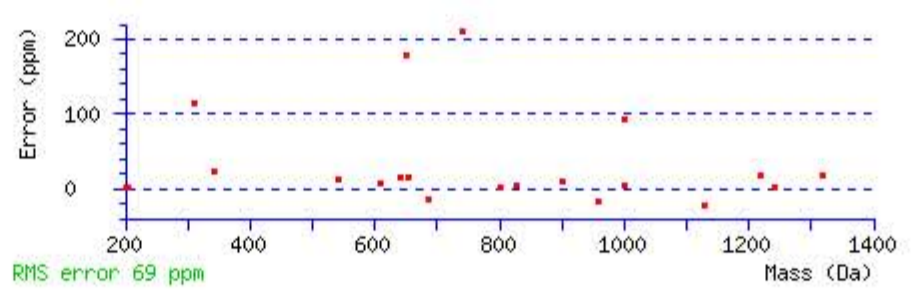

NCBI BLAST search of **AEQCCEETASSISLHGK**  
 (Parameters: blastp, nr protein database, expect=20000, no filter, PAM30)  
 Other BLAST [web gateways](#)

### All matches to this query

| Score | Mr(calc):   | Delta    | Sequence                          |
|-------|-------------|----------|-----------------------------------|
| 44.2  | 2216.986404 | 0.001458 | <a href="#">AEQCCEETASSISLHGK</a> |



# MASCOT Search Results

## Peptide View

MS/MS Fragmentation of **RPDSLQHVLLPVLDR**

Found in **CFAD\_HUMAN**, Complement factor D OS=Homo sapiens GN=CFD PE=1 SV=5

Match to Query 51408: 2068.186016 from(518.053780,4+) rtinseconds(2371) index(40971)

Title: Locus:1.1.1.2848.6 File:"2013-07-02 CLN FXIII 30 min 2nd F 3.wiff"

Data file C:\Program Files (x86)\Matrix Science\Mascot Daemon\mgf\2 FXIII 30 min 2nd\mascot\_daemon\_merge.mgf

Click mouse within plot area to zoom in by factor of two about that point

Or, Plot from  to  Da

Label all possible matches  Label matches used for scoring

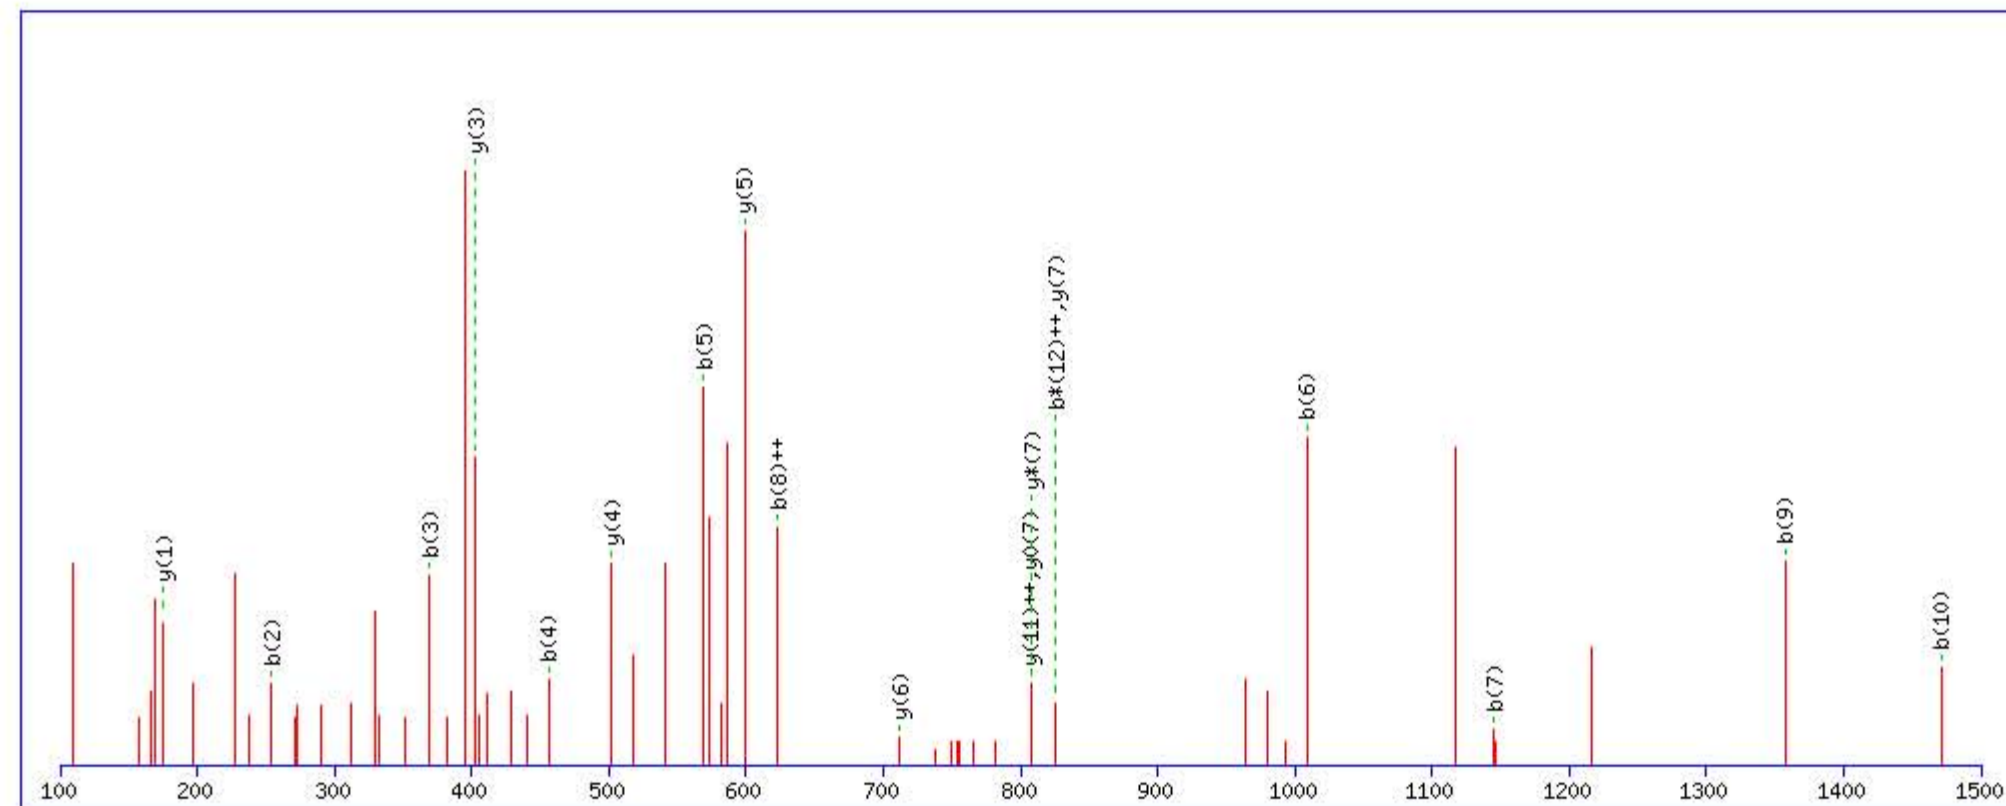

Monoisotopic mass of neutral peptide Mr(calc): 2068.161545

Fixed modifications: Carbamidomethyl (C) (apply to specified residues or termini only)

Variable modifications:

Q6 : Biotin:Thermo-21345 (Q)

Ions Score: 53 Expect: 2.8e-005

Matches : 19/162 fragment ions using 29 most intense peaks [\(help\)](#)

| #  | b                  | b <sup>++</sup>   | b <sup>+</sup> | b <sup>+++</sup>  | b <sup>0</sup> | b <sup>0++</sup> | Seq. | y                 | y <sup>++</sup>   | y <sup>+</sup>    | y <sup>+++</sup> | y <sup>0</sup>    | y <sup>0++</sup> | #  |
|----|--------------------|-------------------|----------------|-------------------|----------------|------------------|------|-------------------|-------------------|-------------------|------------------|-------------------|------------------|----|
| 1  | 157.108387         | 79.057831         | 140.081838     | 70.544557         |                |                  | R    |                   |                   |                   |                  |                   |                  | 15 |
| 2  | <b>254.161151</b>  | 127.584213        | 237.134602     | 119.070939        |                |                  | P    | 1913.067716       | 957.037496        | 1896.041167       | 948.524222       | 1895.057151       | 948.032214       | 14 |
| 3  | <b>369.188094</b>  | 185.097685        | 352.161545     | 176.584410        | 351.177529     | 176.092402       | D    | 1816.014952       | 908.511114        | 1798.988403       | 899.997840       | 1798.004387       | 899.505832       | 13 |
| 4  | <b>456.220122</b>  | 228.613699        | 439.193573     | 220.100425        | 438.209557     | 219.608417       | S    | 1700.988009       | 850.997643        | 1683.961460       | 842.484368       | 1682.977444       | 841.992360       | 12 |
| 5  | <b>569.304186</b>  | 285.155731        | 552.277637     | 276.642457        | 551.293621     | 276.150449       | L    | 1613.955981       | <b>807.481629</b> | 1596.929432       | 798.968354       | 1595.945416       | 798.476346       | 11 |
| 6  | <b>1008.529512</b> | 504.768394        | 991.502963     | 496.255120        | 990.518947     | 495.763112       | Q    | 1500.871917       | 750.939597        | 1483.845368       | 742.426322       | 1482.861352       | 741.934314       | 10 |
| 7  | <b>1145.588424</b> | 573.297850        | 1128.561875    | 564.784576        | 1127.577859    | 564.292568       | H    | 1061.646591       | 531.326934        | 1044.620042       | 522.813659       | 1043.636026       | 522.321651       | 9  |
| 8  | 1244.656838        | <b>622.832057</b> | 1227.630289    | 614.318783        | 1226.646273    | 613.826775       | V    | 924.587679        | 462.797478        | 907.561130        | 454.284203       | 906.577114        | 453.792195       | 8  |
| 9  | <b>1357.740902</b> | 679.374089        | 1340.714353    | 670.860815        | 1339.730337    | 670.368807       | L    | <b>825.519265</b> | 413.263271        | <b>808.492716</b> | 404.749996       | <b>807.508700</b> | 404.257988       | 7  |
| 10 | <b>1470.824966</b> | 735.916121        | 1453.798417    | 727.402847        | 1452.814401    | 726.910838       | L    | <b>712.435201</b> | 356.721239        | 695.408652        | 348.207964       | 694.424636        | 347.715956       | 6  |
| 11 | 1567.877730        | 784.442503        | 1550.851181    | 775.929229        | 1549.867165    | 775.437220       | P    | <b>599.351137</b> | 300.179207        | 582.324588        | 291.665932       | 581.340572        | 291.173924       | 5  |
| 12 | 1666.946144        | 833.976710        | 1649.919595    | <b>825.463436</b> | 1648.935579    | 824.971428       | V    | <b>502.298373</b> | 251.652825        | 485.271824        | 243.139550       | 484.287808        | 242.647542       | 4  |
| 13 | 1780.030208        | 890.518742        | 1763.003659    | 882.005468        | 1762.019643    | 881.513459       | L    | <b>403.229959</b> | 202.118618        | 386.203410        | 193.605343       | 385.219394        | 193.113335       | 3  |
| 14 | 1895.057151        | 948.032214        | 1878.030602    | 939.518939        | 1877.046586    | 939.026931       | D    | 290.145895        | 145.576586        | 273.119346        | 137.063311       | 272.135330        | 136.571303       | 2  |
| 15 |                    |                   |                |                   |                |                  | R    | <b>175.118952</b> | 88.063114         | 158.092403        | 79.549840        |                   |                  | 1  |

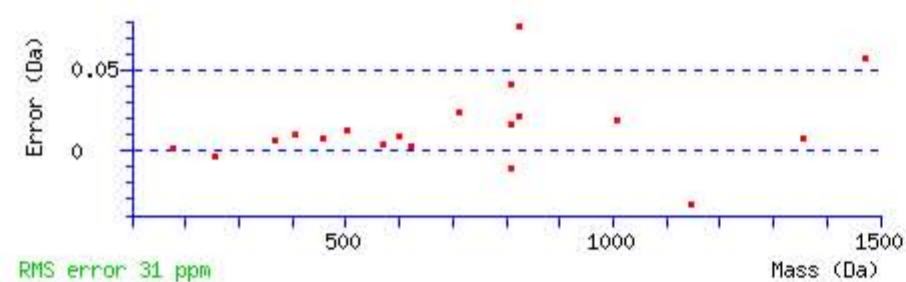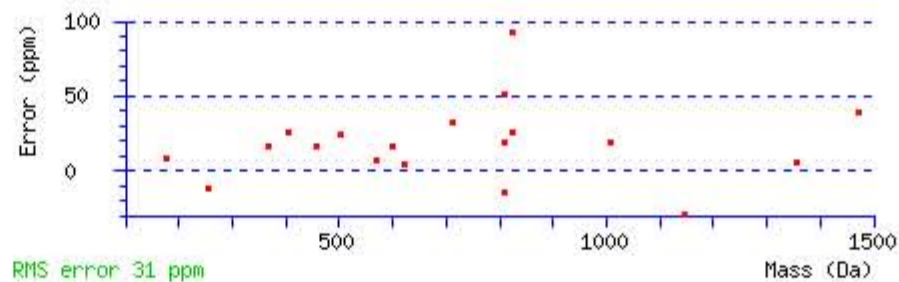

NCBI BLAST search of [RPDSLQHVLLPVLDR](#)

(Parameters: blastp, nr protein database, expect=20000, no filter, PAM30)

Other BLAST [web gateways](#)

All matches to this query

| Score | Mr(calc):   | Delta    | Sequence                        |
|-------|-------------|----------|---------------------------------|
| 53.4  | 2068.161545 | 0.024471 | <a href="#">RPDSLQHVLLPVLDR</a> |

Mascot: <http://www.matrixscience.com/>



# MASCOT Search Results

## Peptide View

MS/MS Fragmentation of **AGEQVITYTCATYYK**

Found in **CFAH\_HUMAN**, Complement factor H OS=Homo sapiens GN=CFH PE=1 SV=4

Match to Query 48357: 1964.892488 from(983.453520,2+) rtinseconds(1873) index(21033)

Title: Locus:1.1.1.1533.24 File:"2013-07-02 CLN FXIII 30 min 2nd F 2.wiff"

Data file C:\Program Files (x86)\Matrix Science\Mascot Daemon\mgf2 FXIII 30 min 2nd\mascot\_daemon\_merge.mgf

Click mouse within plot area to zoom in by factor of two about that point

Or, Plot from  to  Da

Label all possible matches  Label matches used for scoring

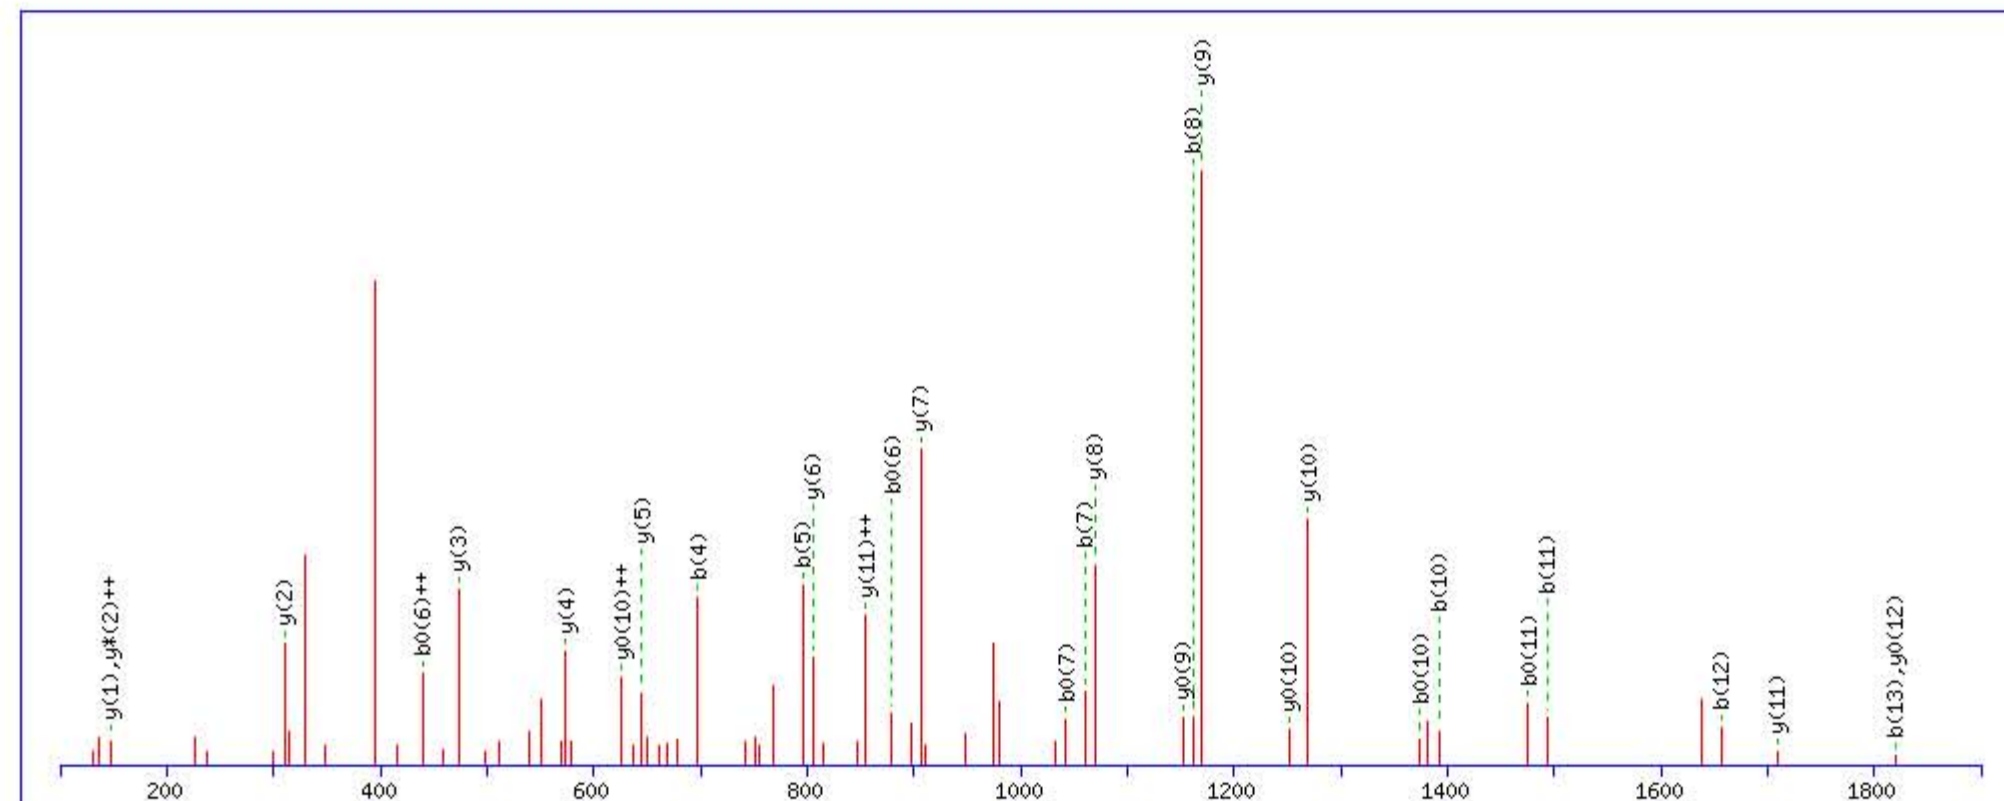

Monoisotopic mass of neutral peptide Mr(calc): 1964.901215

Fixed modifications: Carbamidomethyl (C) (apply to specified residues or termini only)

Variable modifications:

Q4 : Biotin:Thermo-21345 (Q)

Ions Score: 77 Expect: 1.9e-007

Matches : 30/140 fragment ions using 44 most intense peaks [\(help\)](#)

| #  | b           | b <sup>++</sup> | b <sup>+</sup> | b <sup>+++</sup> | b <sup>0</sup> | b <sup>0++</sup> | Seq. | y           | y <sup>++</sup> | y <sup>+</sup> | y <sup>+++</sup> | y <sup>0</sup> | y <sup>0++</sup> | #  |
|----|-------------|-----------------|----------------|------------------|----------------|------------------|------|-------------|-----------------|----------------|------------------|----------------|------------------|----|
| 1  | 72.044390   | 36.525833       |                |                  |                |                  | A    |             |                 |                |                  |                |                  | 14 |
| 2  | 129.065854  | 65.036565       |                |                  |                |                  | G    | 1894.871388 | 947.939332      | 1877.844839    | 939.426058       | 1876.860823    | 938.934050       | 13 |
| 3  | 258.108447  | 129.557862      |                |                  | 240.097882     | 120.552579       | E    | 1837.849924 | 919.428600      | 1820.823375    | 910.915326       | 1819.839359    | 910.423318       | 12 |
| 4  | 697.333773  | 349.170525      | 680.307224     | 340.657250       | 679.323208     | 340.165242       | Q    | 1708.807331 | 854.907304      | 1691.780782    | 846.394029       | 1690.796766    | 845.902021       | 11 |
| 5  | 796.402187  | 398.704732      | 779.375638     | 390.191457       | 778.391622     | 389.699449       | V    | 1269.582005 | 635.294641      | 1252.555456    | 626.781366       | 1251.571440    | 626.289358       | 10 |
| 6  | 897.449866  | 449.228571      | 880.423317     | 440.715297       | 879.439301     | 440.223289       | T    | 1170.513591 | 585.760434      | 1153.487042    | 577.247159       | 1152.503026    | 576.755151       | 9  |
| 7  | 1060.513195 | 530.760236      | 1043.486646    | 522.246961       | 1042.502630    | 521.754953       | Y    | 1069.465912 | 535.236594      | 1052.439363    | 526.723320       | 1051.455347    | 526.231312       | 8  |
| 8  | 1161.560874 | 581.284075      | 1144.534325    | 572.770801       | 1143.550309    | 572.278793       | T    | 906.402583  | 453.704930      | 889.376034     | 445.191655       | 888.392018     | 444.699647       | 7  |
| 9  | 1321.591523 | 661.299400      | 1304.564974    | 652.786125       | 1303.580958    | 652.294117       | C    | 805.354904  | 403.181090      | 788.328355     | 394.667816       | 787.344339     | 394.175808       | 6  |
| 10 | 1392.628637 | 696.817957      | 1375.602088    | 688.304682       | 1374.618072    | 687.812674       | A    | 645.324255  | 323.165766      | 628.297706     | 314.652491       | 627.313690     | 314.160483       | 5  |
| 11 | 1493.676316 | 747.341796      | 1476.649767    | 738.828522       | 1475.665751    | 738.336514       | T    | 574.287141  | 287.647209      | 557.260592     | 279.133934       | 556.276576     | 278.641926       | 4  |
| 12 | 1656.739645 | 828.873461      | 1639.713096    | 820.360186       | 1638.729080    | 819.868178       | Y    | 473.239462  | 237.123369      | 456.212913     | 228.610095       |                |                  | 3  |
| 13 | 1819.802974 | 910.405125      | 1802.776425    | 901.891851       | 1801.792409    | 901.399843       | Y    | 310.176133  | 155.591705      | 293.149584     | 147.078430       |                |                  | 2  |
| 14 |             |                 |                |                  |                |                  | K    | 147.112804  | 74.060040       | 130.086255     | 65.546765        |                |                  | 1  |

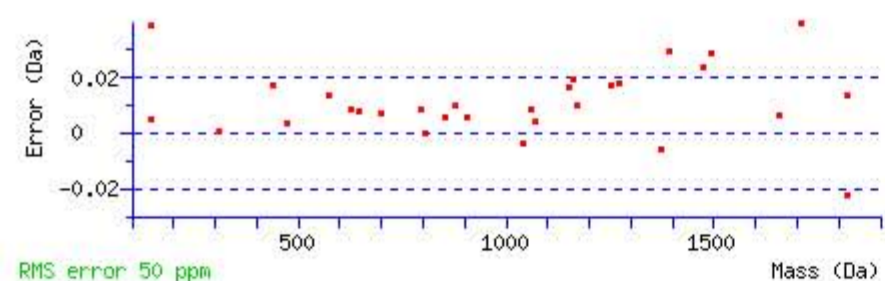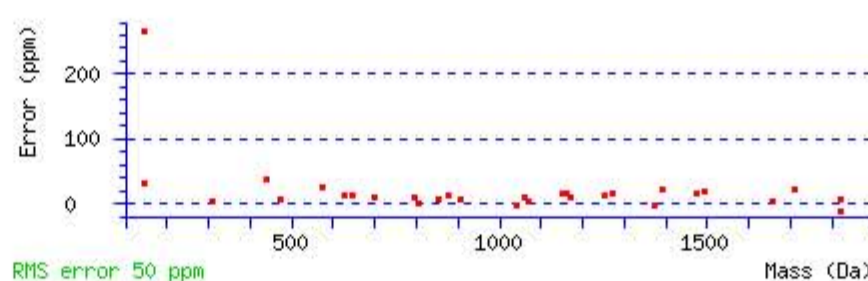

NCBI BLAST search of **AGEQVITYTCATYYK**

(Parameters: blastp, nr protein database, expect=20000, no filter, PAM30)

Other BLAST [web gateways](#)

All matches to this query

| Score | Mr(calc):   | Delta     | Sequence                        |
|-------|-------------|-----------|---------------------------------|
| 77.2  | 1964.901215 | -0.008727 | <a href="#">AGEQVITYTCATYYK</a> |
| 6.6   | 1964.883255 | 0.009233  | <a href="#">RTHSGEKPYECKCGK</a> |

Mascot: <http://www.matrixscience.com/>



# MASCOT Search Results

## Peptide View

MS/MS Fragmentation of **SFPTYCQQK**

Found in **CFAI\_HUMAN**, Complement factor I OS=Homo sapiens GN=CFI PE=1 SV=2

Match to Query 34759: 1468.673108 from(735.343830,2+) rtinseconds(1824) index(70054)

Title: Locus:1.1.1.3168.11 File:"2013-07-02 CLN FXIII 30 min 2nd FT.wiff"

Data file C:\Program Files (x86)\Matrix Science\Mascot Daemon\mgf2 FXIII 30 min 2nd\mascot\_daemon\_merge.mgf

Click mouse within plot area to zoom in by factor of two about that point

Or, Plot from  to  Da

Label all possible matches  Label matches used for scoring

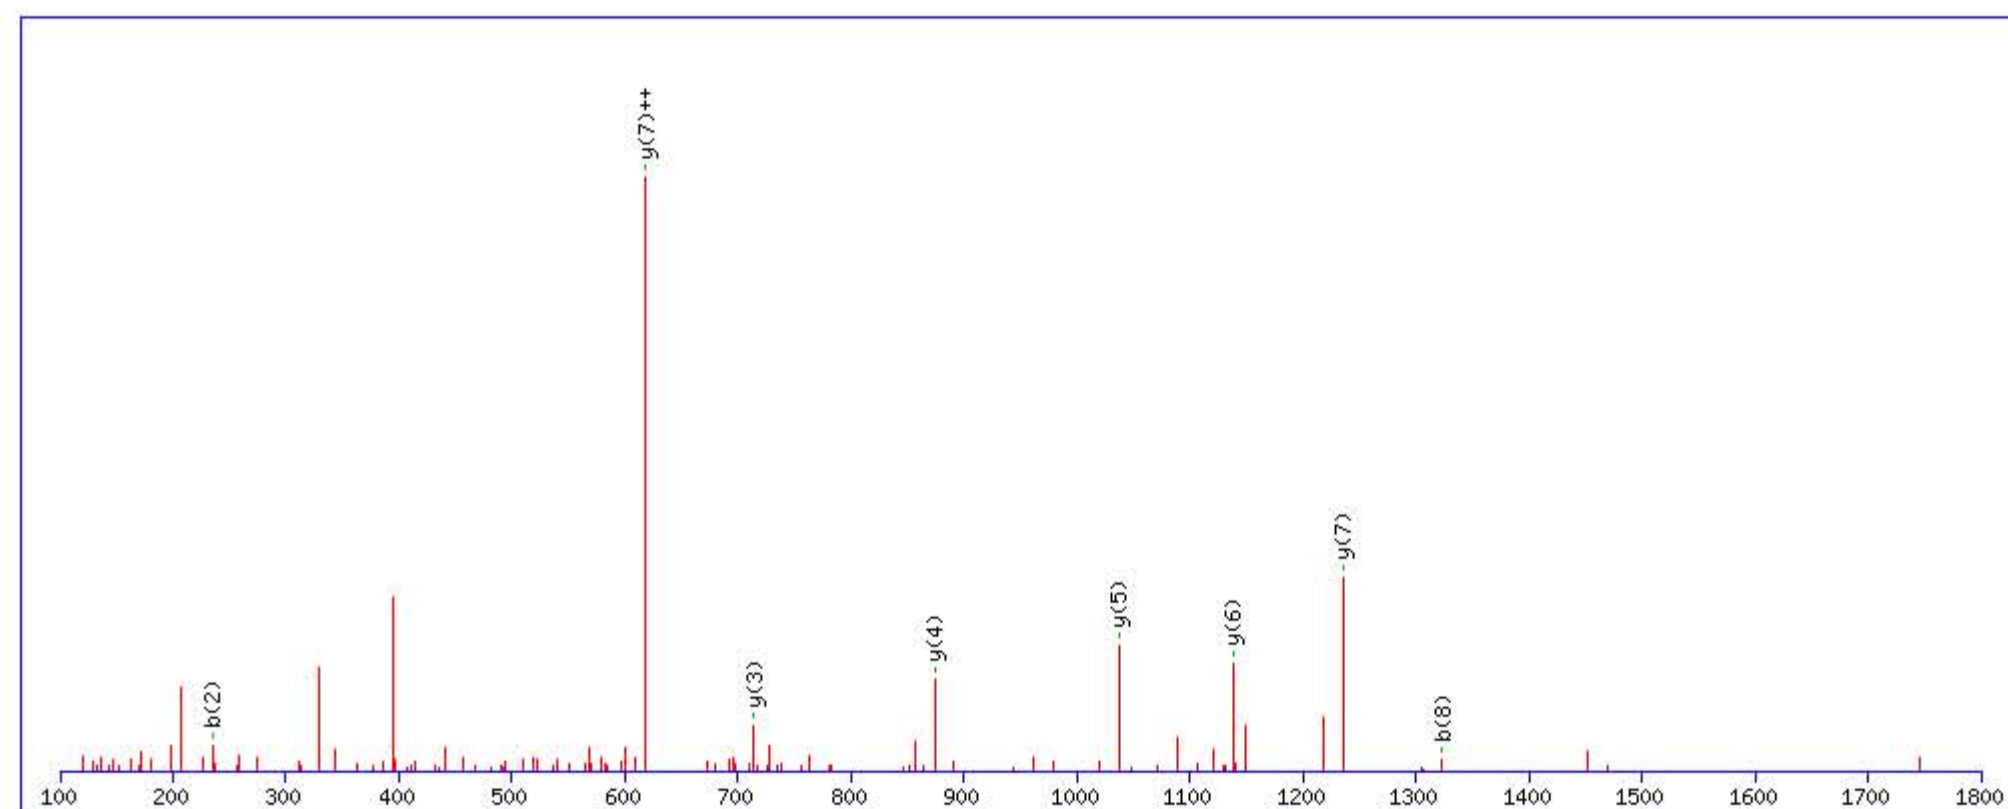

Monoisotopic mass of neutral peptide Mr(calc): 1468.684296

Fixed modifications: Carbamidomethyl (C) (apply to specified residues or termini only)

Variable modifications:

Q8 : Biotin:Thermo-21345 (Q)

Ions Score: 31 Expect: 0.0055

Matches : 8/74 fragment ions using 14 most intense peaks [\(help\)](#)

| # | b                  | b <sup>++</sup> | b <sup>*</sup> | b <sup>*++</sup> | b <sup>0</sup> | b <sup>0++</sup> | Seq. | y                  | y <sup>++</sup>   | y <sup>*</sup> | y <sup>*++</sup> | y <sup>0</sup> | y <sup>0++</sup> | # |
|---|--------------------|-----------------|----------------|------------------|----------------|------------------|------|--------------------|-------------------|----------------|------------------|----------------|------------------|---|
| 1 | 88.039304          | 44.523290       |                |                  | 70.028739      | 35.518008        | S    |                    |                   |                |                  |                |                  | 9 |
| 2 | <b>235.107718</b>  | 118.057497      |                |                  | 217.097153     | 109.052214       | F    | 1382.659543        | 691.833410        | 1365.632994    | 683.320135       | 1364.648978    | 682.828127       | 8 |
| 3 | 332.160482         | 166.583879      |                |                  | 314.149917     | 157.578596       | P    | <b>1235.591129</b> | <b>618.299203</b> | 1218.564580    | 609.785928       | 1217.580564    | 609.293920       | 7 |
| 4 | 433.208161         | 217.107718      |                |                  | 415.197596     | 208.102436       | T    | <b>1138.538365</b> | 569.772821        | 1121.511816    | 561.259546       | 1120.527800    | 560.767538       | 6 |
| 5 | 596.271490         | 298.639383      |                |                  | 578.260925     | 289.634101       | Y    | <b>1037.490686</b> | 519.248981        | 1020.464137    | 510.735707       |                |                  | 5 |
| 6 | 756.302139         | 378.654708      |                |                  | 738.291574     | 369.649425       | C    | <b>874.427357</b>  | 437.717317        | 857.400808     | 429.204042       |                |                  | 4 |
| 7 | 884.360717         | 442.683997      | 867.334168     | 434.170722       | 866.350152     | 433.678714       | Q    | <b>714.396708</b>  | 357.701992        | 697.370159     | 349.188718       |                |                  | 3 |
| 8 | <b>1323.586043</b> | 662.296660      | 1306.559494    | 653.783385       | 1305.575478    | 653.291377       | Q    | 586.338130         | 293.672703        | 569.311581     | 285.159428       |                |                  | 2 |
| 9 |                    |                 |                |                  |                |                  | K    | 147.112804         | 74.060040         | 130.086255     | 65.546765        |                |                  | 1 |

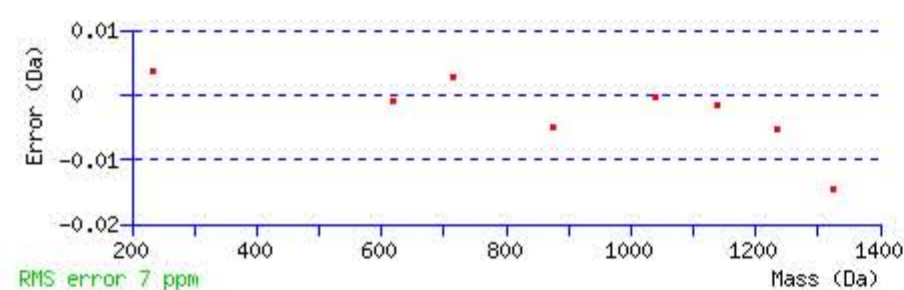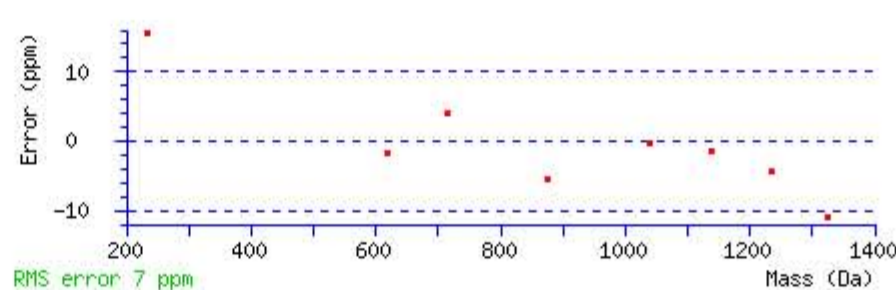

NCBI BLAST search of **SFPTYCQQK**

(Parameters: blastp, nr protein database, expect=20000, no filter, PAM30)

Other BLAST [web gateways](#)

All matches to this query

| Score | Mr(calc):   | Delta     | Sequence                       |
|-------|-------------|-----------|--------------------------------|
| 30.6  | 1468.684296 | -0.011188 | <a href="#">SFPTYCQQK</a>      |
| 30.6  | 1468.684296 | -0.011188 | <a href="#">SFPTYCQQK</a>      |
| 6.0   | 1468.691498 | -0.018390 | <a href="#">ESDCLVCRKFR</a>    |
| 5.5   | 1468.680252 | -0.007144 | <a href="#">YAKGNGDCALLCK</a>  |
| 4.7   | 1468.671524 | 0.001584  | <a href="#">MEAETGSSVETGKK</a> |
| 3.6   | 1468.657593 | 0.015515  | <a href="#">NSCASDKRTSSEK</a>  |
| 1.6   | 1468.688126 | -0.015018 | <a href="#">FSIPSMTEHHAGR</a>  |
| 0.9   | 1468.658966 | 0.014142  | <a href="#">MSPHGDGRGQAQGR</a> |
| 0.2   | 1468.666336 | 0.006772  | <a href="#">SMAQHVHNDKQR</a>   |

Mascot: <http://www.matrixscience.com/>



# MASCOT SCIENCE Mascot Search Results

## Peptide View

MS/MS Fragmentation of **VTYTSQEDLVEK**

Found in **CFAI\_HUMAN**, Complement factor I OS=Homo sapiens GN=CFI PE=1 SV=2

Match to Query 42756: 1721.837288 from(861.925920,2+) rtinseconds(1892) index(70395)

Title: Locus:1.1.1.3192.21 File:"2013-07-02 CLN FXIII 30 min 2nd FT.wiff"

Data file C:\Program Files (x86)\Matrix Science\Mascot Daemon\mgf2 FXIII 30 min 2nd\mascot\_daemon\_merge.mgf

Click mouse within plot area to zoom in by factor of two about that point

Or, Plot from  to  Da

Label all possible matches  Label matches used for scoring

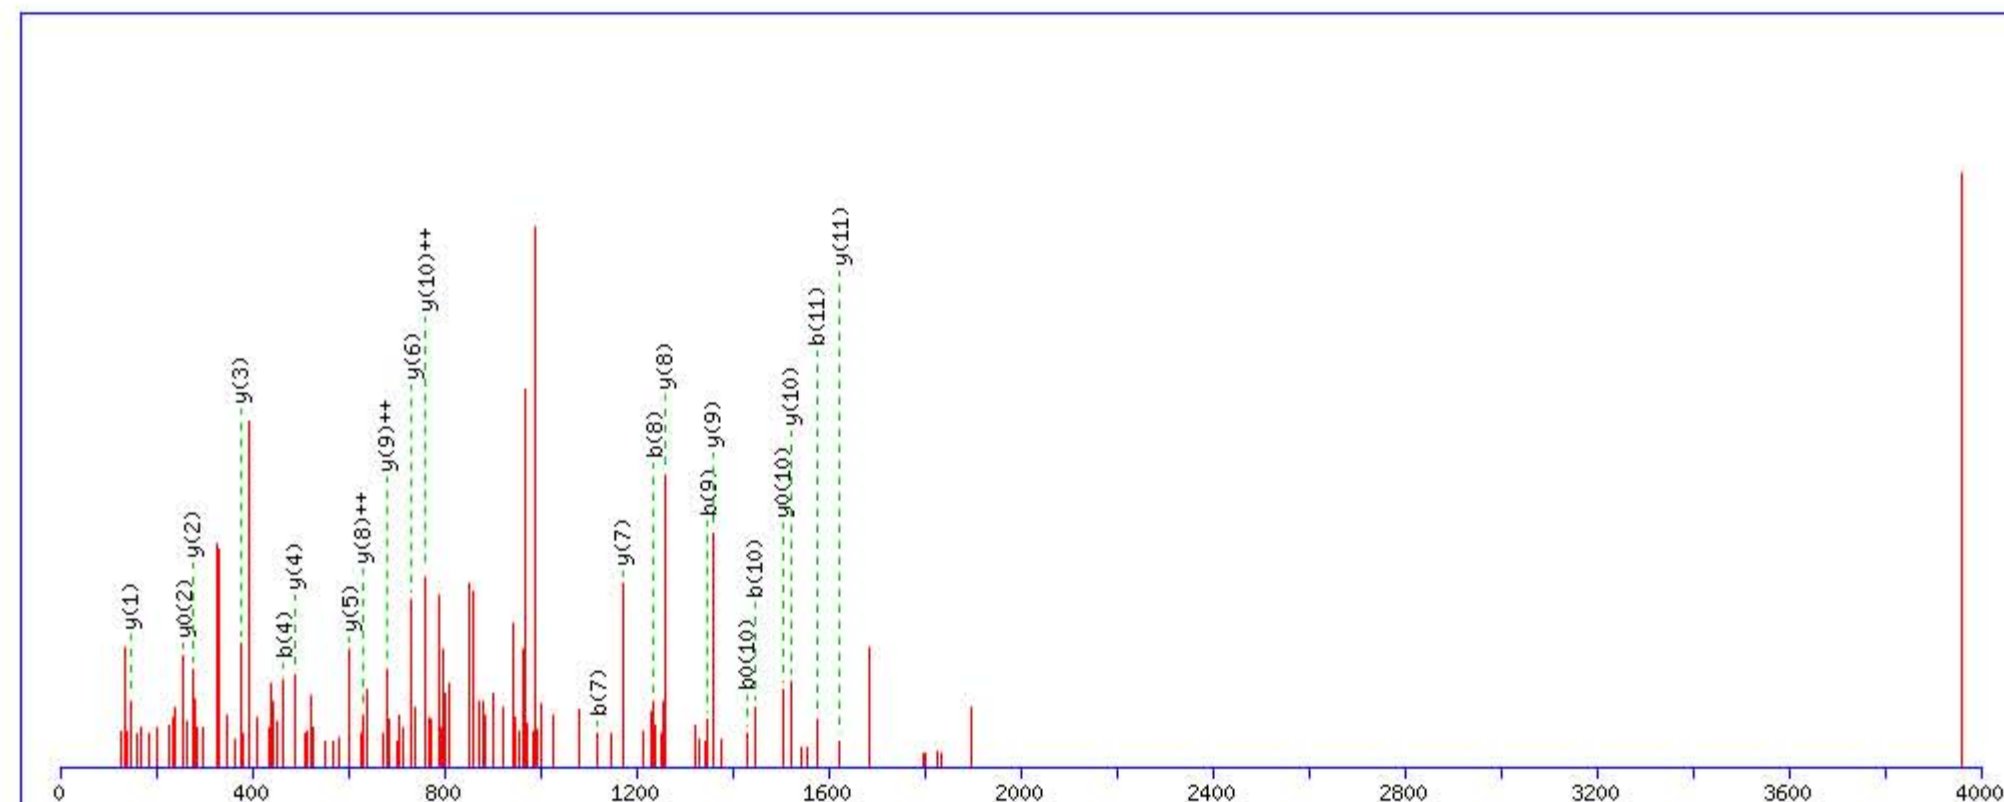

Monoisotopic mass of neutral peptide Mr(calc): 1721.854584

Fixed modifications: Carbamidomethyl (C) (apply to specified residues or termini only)

Variable modifications:

Q6 : Biotin:Thermo-21345 (Q)

Ions Score: 52 Expect: 2.8e-005

Matches : 23/118 fragment ions using 60 most intense peaks [\(help\)](#)

| #  | b           | b <sup>++</sup> | b <sup>*</sup> | b <sup>*++</sup> | b <sup>0</sup> | b <sup>0++</sup> | Seq. | y           | y <sup>++</sup> | y <sup>*</sup> | y <sup>*++</sup> | y <sup>0</sup> | y <sup>0++</sup> | #  |
|----|-------------|-----------------|----------------|------------------|----------------|------------------|------|-------------|-----------------|----------------|------------------|----------------|------------------|----|
| 1  | 100.075690  | 50.541483       |                |                  |                |                  | V    |             |                 |                |                  |                |                  | 12 |
| 2  | 201.123369  | 101.065322      |                |                  | 183.112804     | 92.060040        | T    | 1623.793452 | 812.400364      | 1606.766903    | 803.887090       | 1605.782887    | 803.395081       | 11 |
| 3  | 364.186698  | 182.596987      |                |                  | 346.176133     | 173.591705       | Y    | 1522.745773 | 761.876524      | 1505.719224    | 753.363250       | 1504.735208    | 752.871242       | 10 |
| 4  | 465.234377  | 233.120827      |                |                  | 447.223812     | 224.115544       | T    | 1359.682444 | 680.344860      | 1342.655895    | 671.831585       | 1341.671879    | 671.339577       | 9  |
| 5  | 552.266405  | 276.636841      |                |                  | 534.255840     | 267.631558       | S    | 1258.634765 | 629.821021      | 1241.608216    | 621.307746       | 1240.624200    | 620.815738       | 8  |
| 6  | 991.491731  | 496.249504      | 974.465182     | 487.736229       | 973.481166     | 487.244221       | Q    | 1171.602737 | 586.305006      | 1154.576188    | 577.791732       | 1153.592172    | 577.299724       | 7  |
| 7  | 1120.534324 | 560.770800      | 1103.507775    | 552.257526       | 1102.523759    | 551.765517       | E    | 732.377411  | 366.692343      | 715.350862     | 358.179069       | 714.366846     | 357.687061       | 6  |
| 8  | 1235.561267 | 618.284272      | 1218.534718    | 609.770997       | 1217.550702    | 609.278989       | D    | 603.334818  | 302.171047      | 586.308269     | 293.657773       | 585.324253     | 293.165765       | 5  |
| 9  | 1348.645331 | 674.826303      | 1331.618782    | 666.313029       | 1330.634766    | 665.821021       | L    | 488.307875  | 244.657575      | 471.281326     | 236.144301       | 470.297310     | 235.652293       | 4  |
| 10 | 1447.713745 | 724.360511      | 1430.687196    | 715.847236       | 1429.703180    | 715.355228       | V    | 375.223811  | 188.115543      | 358.197262     | 179.602269       | 357.213246     | 179.110261       | 3  |
| 11 | 1576.756338 | 788.881807      | 1559.729789    | 780.368533       | 1558.745773    | 779.876524       | E    | 276.155397  | 138.581336      | 259.128848     | 130.068062       | 258.144832     | 129.576054       | 2  |
| 12 |             |                 |                |                  |                |                  | K    | 147.112804  | 74.060040       | 130.086255     | 65.546765        |                |                  | 1  |

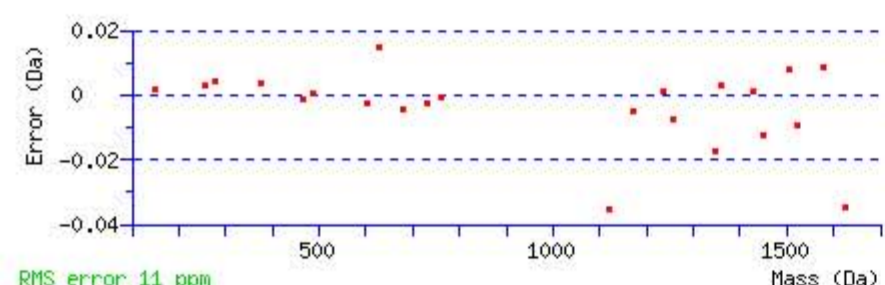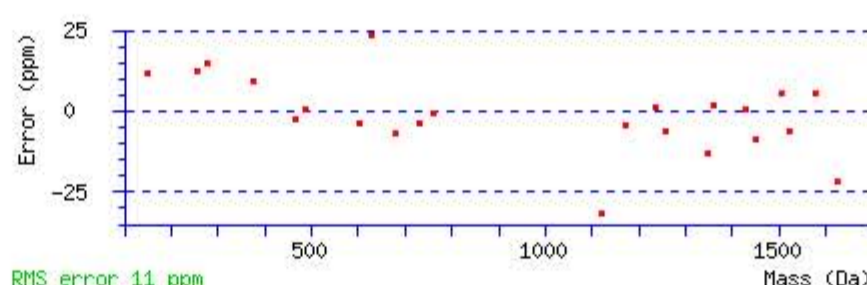

NCBI BLAST search of **VTYTSQEDLVEK**

(Parameters: blastp, nr protein database, expect=20000, no filter, PAM30)

Other BLAST [web gateways](#)

All matches to this query

| Score | Mr(calc):   | Delta     | Sequence                       |
|-------|-------------|-----------|--------------------------------|
| 51.6  | 1721.854584 | -0.017296 | <a href="#">VTYTSQEDLVEK</a>   |
| 2.9   | 1721.830292 | 0.006996  | <a href="#">MQNICNFLVEK</a>    |
| 0.5   | 1721.840637 | -0.003349 | <a href="#">MQFEQREIDAALQK</a> |

Mascot: <http://www.matrixscience.com/>



# MASCOT SEARCH RESULTS

## Peptide View

MS/MS Fragmentation of **LLPAQLPAEK**

Found in **ECM1\_HUMAN**, Extracellular matrix protein 1 OS=Homo sapiens GN=ECM1 PE=1 SV=2

Match to Query 31712: 1389.804468 from(695.909510,2+) rtinseconds(2009) index(5856)

Title: Locus:1.1.1.3135.16 File:"2013-07-02 CLN FXIII 30 min 2nd F 1.wiff"

Data file C:\Program Files (x86)\Matrix Science\Mascot Daemon\mgf2 FXIII 30 min 2nd\mascot\_daemon\_merge.mgf

Click mouse within plot area to zoom in by factor of two about that point

Or, Plot from  to  Da

Label all possible matches  Label matches used for scoring

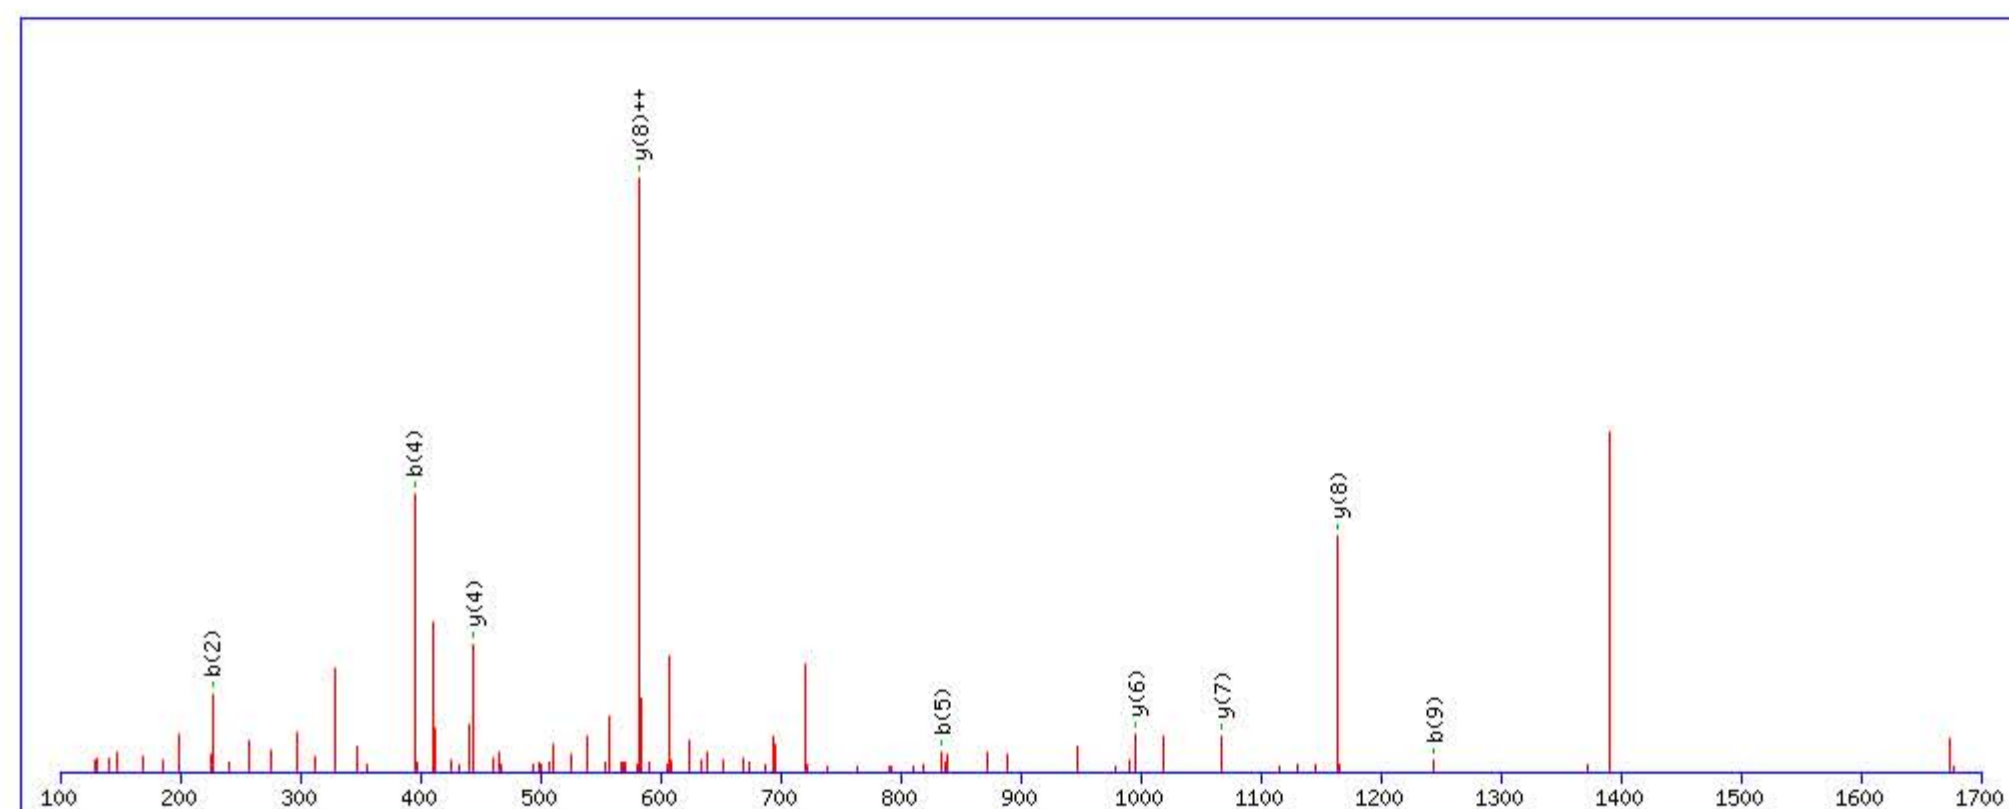

Monoisotopic mass of neutral peptide  $M_r(\text{calc})$ : 1389.805359

Fixed modifications: Carbamidomethyl (C) (apply to specified residues or termini only)

Variable modifications:

Q5 : Biotin:Thermo-21345 (Q)

Ions Score: 35 Expect: 0.0018

Matches : 9/82 fragment ions using 13 most intense peaks [\(help\)](#)

| #  | b                  | b <sup>++</sup> | b <sup>*</sup> | b <sup>*++</sup> | b <sup>0</sup> | b <sup>0++</sup> | Seq. | y                  | y <sup>++</sup>   | y <sup>*</sup> | y <sup>*++</sup> | y <sup>0</sup> | y <sup>0++</sup> | #  |
|----|--------------------|-----------------|----------------|------------------|----------------|------------------|------|--------------------|-------------------|----------------|------------------|----------------|------------------|----|
| 1  | 114.091340         | 57.549308       |                |                  |                |                  | L    |                    |                   |                |                  |                |                  | 10 |
| 2  | <b>227.175404</b>  | 114.091340      |                |                  |                |                  | L    | 1277.728607        | 639.367942        | 1260.702058    | 630.854667       | 1259.718042    | 630.362659       | 9  |
| 3  | 324.228168         | 162.617722      |                |                  |                |                  | P    | <b>1164.644543</b> | <b>582.825909</b> | 1147.617994    | 574.312635       | 1146.633978    | 573.820627       | 8  |
| 4  | <b>395.265282</b>  | 198.136279      |                |                  |                |                  | A    | <b>1067.591779</b> | 534.299527        | 1050.565230    | 525.786253       | 1049.581214    | 525.294245       | 7  |
| 5  | <b>834.490608</b>  | 417.748942      | 817.464059     | 409.235668       |                |                  | Q    | <b>996.554665</b>  | 498.780970        | 979.528116     | 490.267696       | 978.544100     | 489.775688       | 6  |
| 6  | 947.574672         | 474.290974      | 930.548123     | 465.777700       |                |                  | L    | 557.329339         | 279.168307        | 540.302790     | 270.655033       | 539.318774     | 270.163025       | 5  |
| 7  | 1044.627436        | 522.817356      | 1027.600887    | 514.304082       |                |                  | P    | <b>444.245275</b>  | 222.626275        | 427.218726     | 214.113001       | 426.234710     | 213.620993       | 4  |
| 8  | 1115.664550        | 558.335913      | 1098.638001    | 549.822639       |                |                  | A    | 347.192511         | 174.099893        | 330.165962     | 165.586619       | 329.181946     | 165.094611       | 3  |
| 9  | <b>1244.707143</b> | 622.857209      | 1227.680594    | 614.343935       | 1226.696578    | 613.851927       | E    | 276.155397         | 138.581336        | 259.128848     | 130.068062       | 258.144832     | 129.576054       | 2  |
| 10 |                    |                 |                |                  |                |                  | K    | 147.112804         | 74.060040         | 130.086255     | 65.546765        |                |                  | 1  |

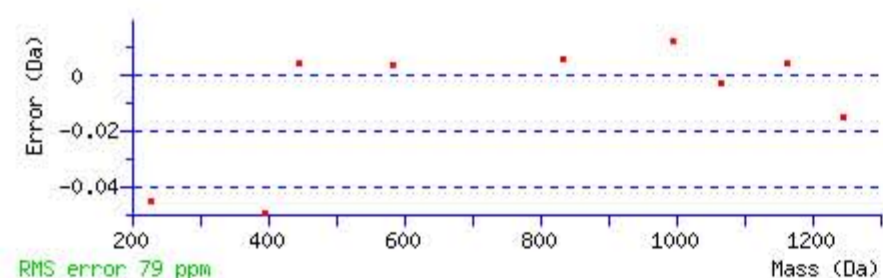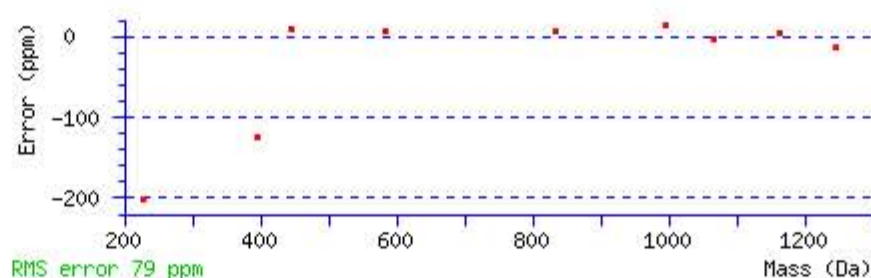

NCBI BLAST search of **LLPAQLPAEK**

(Parameters: blastp, nr protein database, expect=20000, no filter, PAM30)

Other BLAST [web gateways](#)

## All matches to this query

| Score | $M_r(\text{calc})$ : | Delta     | Sequence                      |
|-------|----------------------|-----------|-------------------------------|
| 35.2  | 1389.805359          | -0.000891 | <a href="#">LLPAQLPAEK</a>    |
| 5.5   | 1389.809189          | -0.004721 | <a href="#">LIKRLDLSYNR</a>   |
| 4.1   | 1389.809204          | -0.004736 | <a href="#">IARVPRLPPEDEK</a> |
| 1.3   | 1389.823135          | -0.018667 | <a href="#">ILIVITDGQKYK</a>  |
| 0.5   | 1389.816605          | -0.012137 | <a href="#">ILGPLPKHMIQK</a>  |
| 0.5   | 1389.797974          | 0.006494  | <a href="#">ILLYRGADKDVK</a>  |
| 0.5   | 1389.805359          | -0.000891 | <a href="#">LLSSYLQKK</a>     |

Mascot: <http://www.matrixscience.com/>



# MASCOT SEARCH RESULTS

## Peptide View

MS/MS Fragmentation of **VTPNLMGHLCGNQR**

Found in **ECM1\_HUMAN**, Extracellular matrix protein 1 OS=Homo sapiens GN=ECM1 PE=1 SV=2

Match to Query 46968: 1906.934682 from(636.652170,3+) rtinseconds(1888) index(5109)

Title: Locus:1.1.1.3093.19 File:"2013-07-02 CLN FXIII 30 min 2nd F 1.wiff"

Data file C:\Program Files (x86)\Matrix Science\Mascot Daemon\mgf2 FXIII 30 min 2nd\mascot\_daemon\_merge.mgf

Click mouse within plot area to zoom in by factor of two about that point

Or, Plot from  to  Da

Label all possible matches  Label matches used for scoring

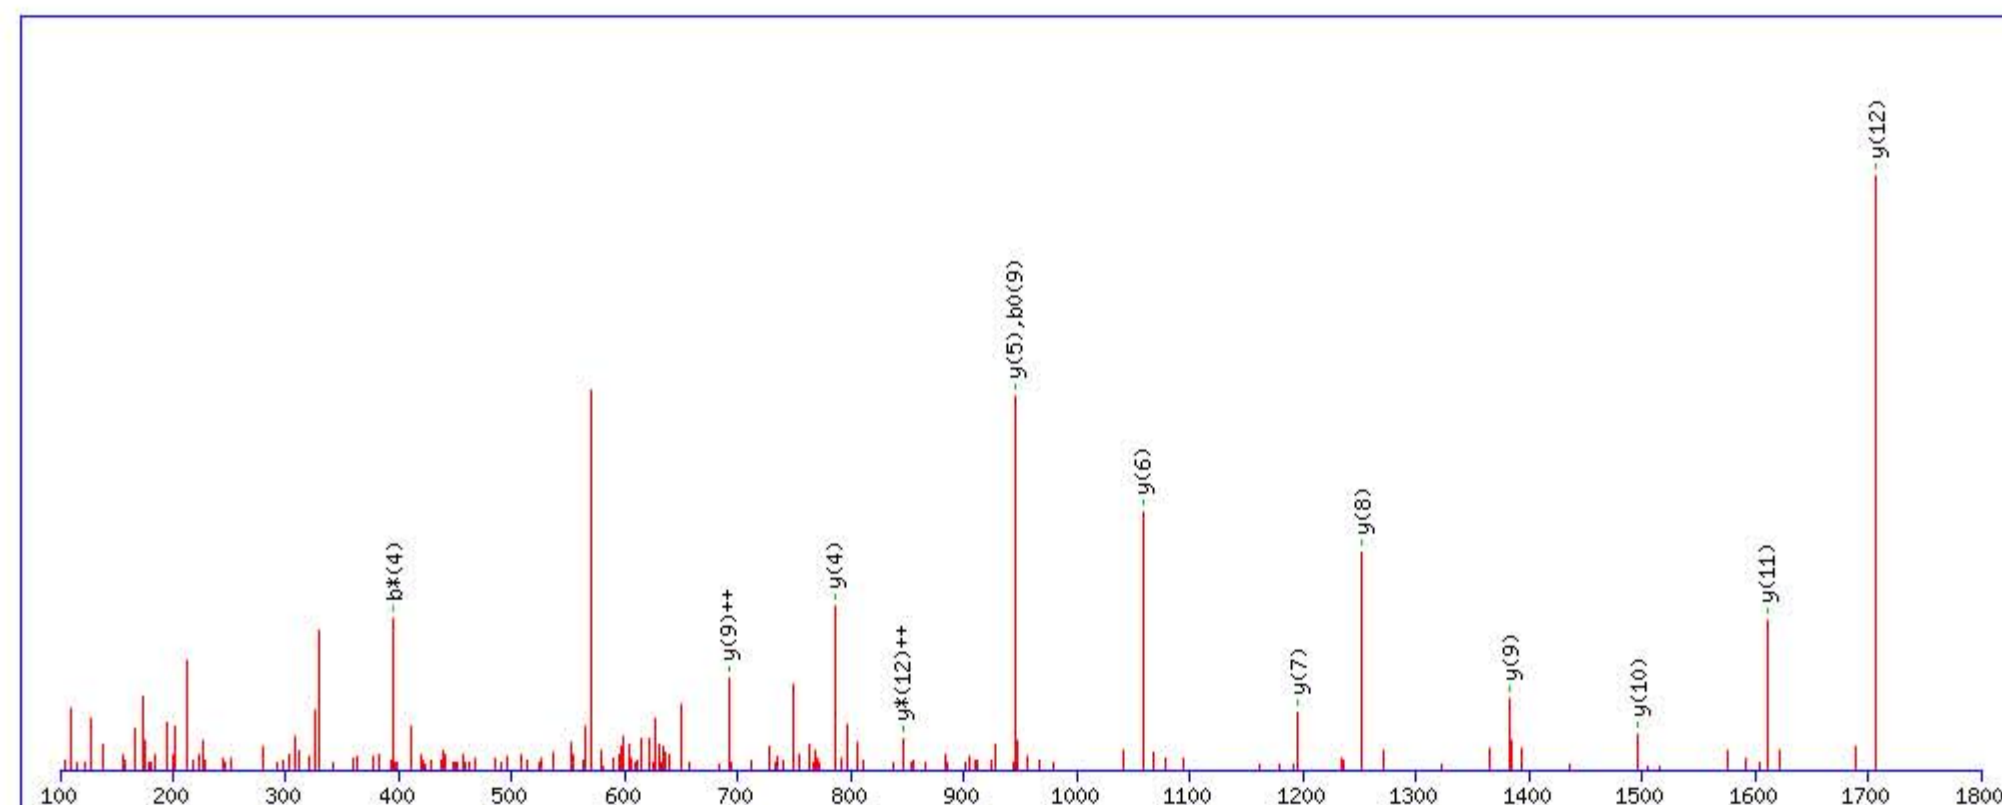

Monoisotopic mass of neutral peptide Mr(calc): 1906.932816

Fixed modifications: Carbamidomethyl (C) (apply to specified residues or termini only)

Variable modifications:

Q13 : Biotin:Thermo-21345 (Q)

Ions Score: 62 Expect: 1.6e-005

Matches : 13/124 fragment ions using 17 most intense peaks [\(help\)](#)

| #  | b           | b <sup>++</sup> | b <sup>*</sup>    | b <sup>*++</sup> | b <sup>0</sup>    | b <sup>0++</sup> | Seq. | y                  | y <sup>++</sup>   | y <sup>*</sup> | y <sup>*++</sup>  | y <sup>0</sup> | y <sup>0++</sup> | #  |
|----|-------------|-----------------|-------------------|------------------|-------------------|------------------|------|--------------------|-------------------|----------------|-------------------|----------------|------------------|----|
| 1  | 100.075690  | 50.541483       |                   |                  |                   |                  | V    |                    |                   |                |                   |                |                  | 14 |
| 2  | 201.123369  | 101.065322      |                   |                  | 183.112804        | 92.060040        | T    | 1808.871677        | 904.939477        | 1791.845128    | 896.426202        | 1790.861112    | 895.934194       | 13 |
| 3  | 298.176133  | 149.591704      |                   |                  | 280.165568        | 140.586422       | P    | <b>1707.823998</b> | 854.415637        | 1690.797449    | <b>845.902363</b> |                |                  | 12 |
| 4  | 412.219060  | 206.613168      | <b>395.192511</b> | 198.099894       | 394.208495        | 197.607886       | N    | <b>1610.771234</b> | 805.889255        | 1593.744685    | 797.375981        |                |                  | 11 |
| 5  | 525.303124  | 263.155200      | 508.276575        | 254.641926       | 507.292559        | 254.149918       | L    | <b>1496.728307</b> | 748.867792        | 1479.701758    | 740.354517        |                |                  | 10 |
| 6  | 656.343609  | 328.675443      | 639.317060        | 320.162168       | 638.333044        | 319.670160       | M    | <b>1383.644243</b> | <b>692.325760</b> | 1366.617694    | 683.812485        |                |                  | 9  |
| 7  | 713.365073  | 357.186175      | 696.338524        | 348.672900       | 695.354508        | 348.180892       | G    | <b>1252.603758</b> | 626.805517        | 1235.577209    | 618.292243        |                |                  | 8  |
| 8  | 850.423985  | 425.715631      | 833.397436        | 417.202356       | 832.413420        | 416.710348       | H    | <b>1195.582294</b> | 598.294785        | 1178.555745    | 589.781511        |                |                  | 7  |
| 9  | 963.508049  | 482.257663      | 946.481500        | 473.744388       | <b>945.497484</b> | 473.252380       | L    | <b>1058.523382</b> | 529.765329        | 1041.496833    | 521.252055        |                |                  | 6  |
| 10 | 1123.538698 | 562.272987      | 1106.512149       | 553.759713       | 1105.528133       | 553.267705       | C    | <b>945.439318</b>  | 473.223297        | 928.412769     | 464.710023        |                |                  | 5  |
| 11 | 1180.560162 | 590.783719      | 1163.533613       | 582.270445       | 1162.549597       | 581.778437       | G    | <b>785.408669</b>  | 393.207973        | 768.382120     | 384.694698        |                |                  | 4  |
| 12 | 1294.603089 | 647.805183      | 1277.576540       | 639.291908       | 1276.592524       | 638.799900       | N    | 728.387205         | 364.697241        | 711.360656     | 356.183966        |                |                  | 3  |
| 13 | 1733.828415 | 867.417846      | 1716.801866       | 858.904571       | 1715.817850       | 858.412563       | Q    | 614.344278         | 307.675777        | 597.317729     | 299.162503        |                |                  | 2  |
| 14 |             |                 |                   |                  |                   |                  | R    | 175.118952         | 88.063114         | 158.092403     | 79.549839         |                |                  | 1  |

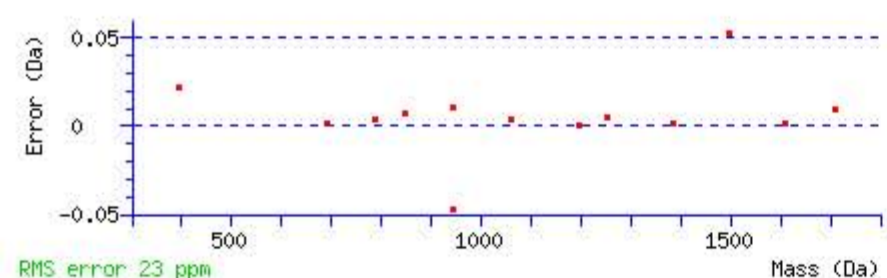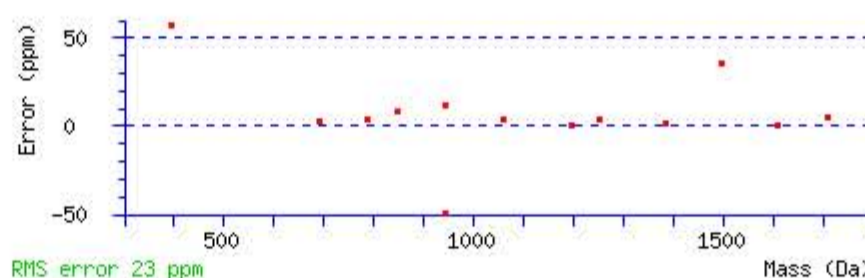

NCBI BLAST search of **VTPNLMGHLCGNQR**

(Parameters: blastp, nr protein database, expect=20000, no filter, PAM30)

Other BLAST [web gateways](#)

## All matches to this query

| Score | Mr(calc):   | Delta    | Sequence                       |
|-------|-------------|----------|--------------------------------|
| 61.5  | 1906.932816 | 0.001866 | <a href="#">VTPNLMGHLCGNQR</a> |

Mascot: <http://www.matrixscience.com/>



# MASCOT Search Results

## Peptide View

MS/MS Fragmentation of **FSCFQEEAPQPHYQLR**

Found in **ECM1\_HUMAN**, Extracellular matrix protein 1 OS=Homo sapiens GN=ECM1 PE=1 SV=2

Match to Query 56846: 2347.074492 from(783.365440,3+) rtinseconds(1935) index(5479)

Title: Locus:1.1.1.3109.14 File:"2013-07-02 CLN FXIII 30 min 2nd F 1.wiff"

Data file C:\Program Files (x86)\Matrix Science\Mascot Daemon\mgf2 FXIII 30 min 2nd\mascot\_daemon\_merge.mgf

Click mouse within plot area to zoom in by factor of two about that point

Or, Plot from  to  Da

Label all possible matches  Label matches used for scoring

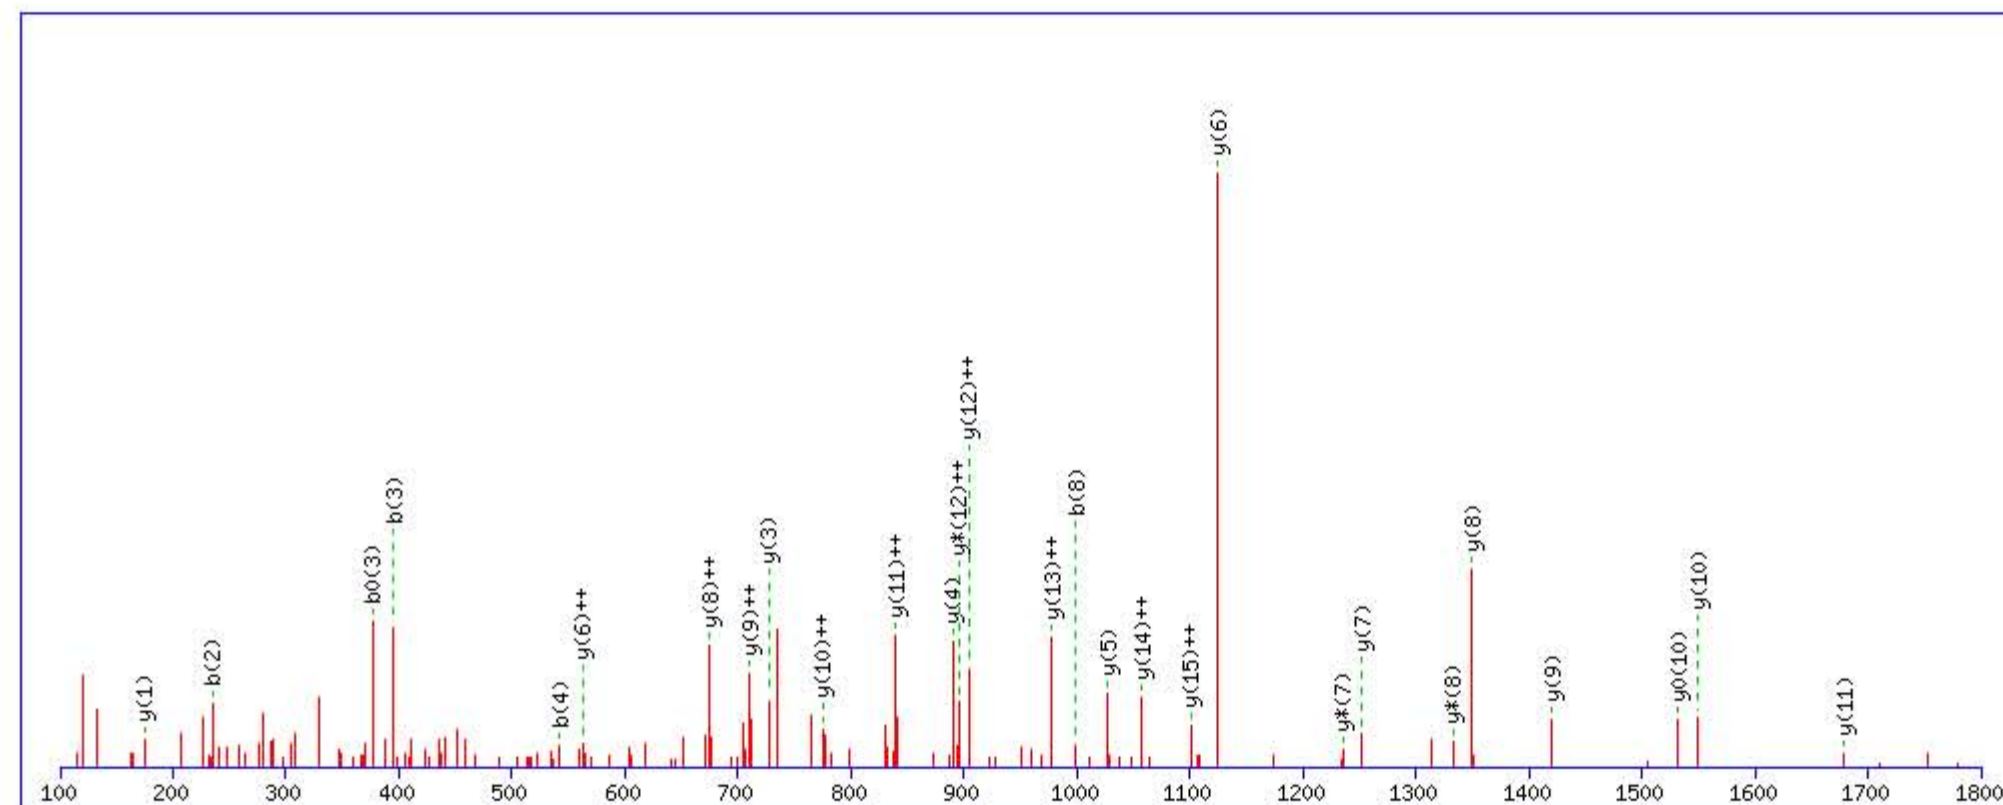

Monoisotopic mass of neutral peptide  $M_r(\text{calc})$ : 2347.087784

Fixed modifications: Carbamidomethyl (C) (apply to specified residues or termini only)

Variable modifications:

Q14 : Biotin:Thermo-21345 (Q)

Ions Score: 58 Expect: 2.1e-005

Matches : 28/152 fragment ions using 57 most intense peaks [\(help\)](#)

| #  | b                 | b <sup>++</sup> | b <sup>*</sup> | b <sup>*++</sup> | b <sup>0</sup>    | b <sup>0++</sup> | Seq. | y                  | y <sup>++</sup>    | y <sup>*</sup>     | y <sup>*++</sup>  | y <sup>0</sup>     | y <sup>0++</sup> | #  |
|----|-------------------|-----------------|----------------|------------------|-------------------|------------------|------|--------------------|--------------------|--------------------|-------------------|--------------------|------------------|----|
| 1  | 148.075690        | 74.541483       |                |                  |                   |                  | F    |                    |                    |                    |                   |                    |                  | 16 |
| 2  | <b>235.107718</b> | 118.057497      |                |                  | 217.097153        | 109.052214       | S    | 2201.026658        | <b>1101.016967</b> | 2184.000109        | 1092.503692       | 2183.016093        | 1092.011684      | 15 |
| 3  | <b>395.138367</b> | 198.072821      |                |                  | <b>377.127802</b> | 189.067539       | C    | 2113.994630        | <b>1057.500953</b> | 2096.968081        | 1048.987678       | 2095.984065        | 1048.495670      | 14 |
| 4  | <b>542.206781</b> | 271.607029      |                |                  | 524.196216        | 262.601746       | F    | 1953.963981        | <b>977.485629</b>  | 1936.937432        | 968.972354        | 1935.953416        | 968.480346       | 13 |
| 5  | 670.265359        | 335.636318      | 653.238810     | 327.123043       | 652.254794        | 326.631035       | Q    | 1806.895567        | <b>903.951422</b>  | 1789.869018        | <b>895.438147</b> | 1788.885002        | 894.946139       | 12 |
| 6  | 799.307952        | 400.157614      | 782.281403     | 391.644340       | 781.297387        | 391.152332       | E    | <b>1678.836989</b> | <b>839.922133</b>  | 1661.810440        | 831.408858        | 1660.826424        | 830.916850       | 11 |
| 7  | 928.350545        | 464.678911      | 911.323996     | 456.165636       | 910.339980        | 455.673628       | E    | <b>1549.794396</b> | <b>775.400836</b>  | 1532.767847        | 766.887562        | <b>1531.783831</b> | 766.395554       | 10 |
| 8  | <b>999.387659</b> | 500.197468      | 982.361110     | 491.684193       | 981.377094        | 491.192185       | A    | <b>1420.751803</b> | <b>710.879540</b>  | 1403.725254        | 702.366265        |                    |                  | 9  |
| 9  | 1096.440423       | 548.723850      | 1079.413874    | 540.210575       | 1078.429858       | 539.718567       | P    | <b>1349.714689</b> | <b>675.360983</b>  | <b>1332.688140</b> | 666.847708        |                    |                  | 8  |
| 10 | 1224.499001       | 612.753138      | 1207.472452    | 604.239864       | 1206.488436       | 603.747856       | Q    | <b>1252.661925</b> | 626.834601         | <b>1235.635376</b> | 618.321326        |                    |                  | 7  |
| 11 | 1321.551765       | 661.279520      | 1304.525216    | 652.766246       | 1303.541200       | 652.274238       | P    | <b>1124.603347</b> | <b>562.805312</b>  | 1107.576798        | 554.292037        |                    |                  | 6  |
| 12 | 1458.610677       | 729.808976      | 1441.584128    | 721.295702       | 1440.600112       | 720.803694       | H    | <b>1027.550583</b> | 514.278930         | 1010.524034        | 505.765655        |                    |                  | 5  |
| 13 | 1621.674006       | 811.340641      | 1604.647457    | 802.827367       | 1603.663441       | 802.335358       | Y    | <b>890.491671</b>  | 445.749474         | 873.465122         | 437.236199        |                    |                  | 4  |
| 14 | 2060.899332       | 1030.953304     | 2043.872783    | 1022.440030      | 2042.888767       | 1021.948022      | Q    | <b>727.428342</b>  | 364.217809         | 710.401793         | 355.704535        |                    |                  | 3  |
| 15 | 2173.983396       | 1087.495336     | 2156.956847    | 1078.982061      | 2155.972831       | 1078.490053      | L    | 288.203016         | 144.605146         | 271.176467         | 136.091872        |                    |                  | 2  |
| 16 |                   |                 |                |                  |                   |                  | R    | <b>175.118952</b>  | 88.063114          | 158.092403         | 79.549839         |                    |                  | 1  |

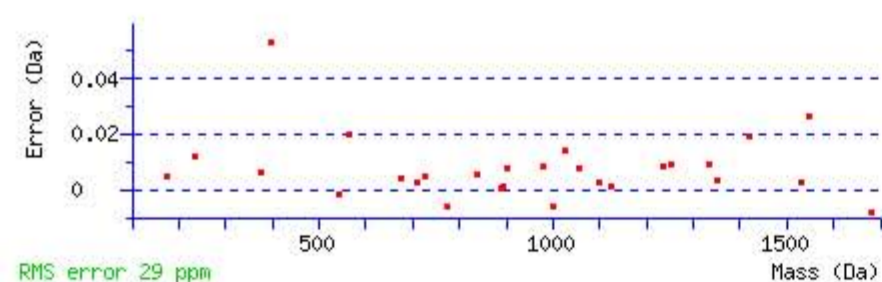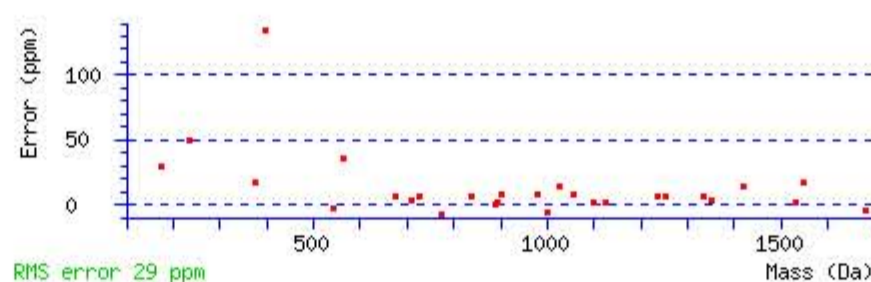

NCBI BLAST search of **FSCFQEEAPQPHYQLR**

(Parameters: blastp, nr protein database, expect=20000, no filter, PAM30)

Other BLAST [web gateways](#)

## All matches to this query

| Score | $M_r(\text{calc})$ : | Delta     | Sequence                         |
|-------|----------------------|-----------|----------------------------------|
| 57.8  | 2347.087784          | -0.013292 | <a href="#">FSCFQEEAPQPHYQLR</a> |
| 27.0  | 2347.087784          | -0.013292 | <a href="#">FSCFQEEAPQPHYQLR</a> |

Mascot: <http://www.matrixscience.com/>



# MASCOT Search Results

## Peptide View

MS/MS Fragmentation of **QLEQVIAK**

Found in **FIBA\_HUMAN**, Fibrinogen alpha chain OS=Homo sapiens GN=FGA PE=1 SV=2

Match to Query 26386: 1238.699928 from(620.357240,2+) rtinseconds(1751) index(54157)

Title: Locus:1.1.1.3096.9 File:"2013-07-02 CLN FXIII 30 min 2nd F 4.wiff"

Data file C:\Program Files (x86)\Matrix Science\Mascot Daemon\mgf2 FXIII 30 min 2nd\mascot\_daemon\_merge.mgf

Click mouse within plot area to zoom in by factor of two about that point

Or, Plot from  to  Da

Label all possible matches  Label matches used for scoring

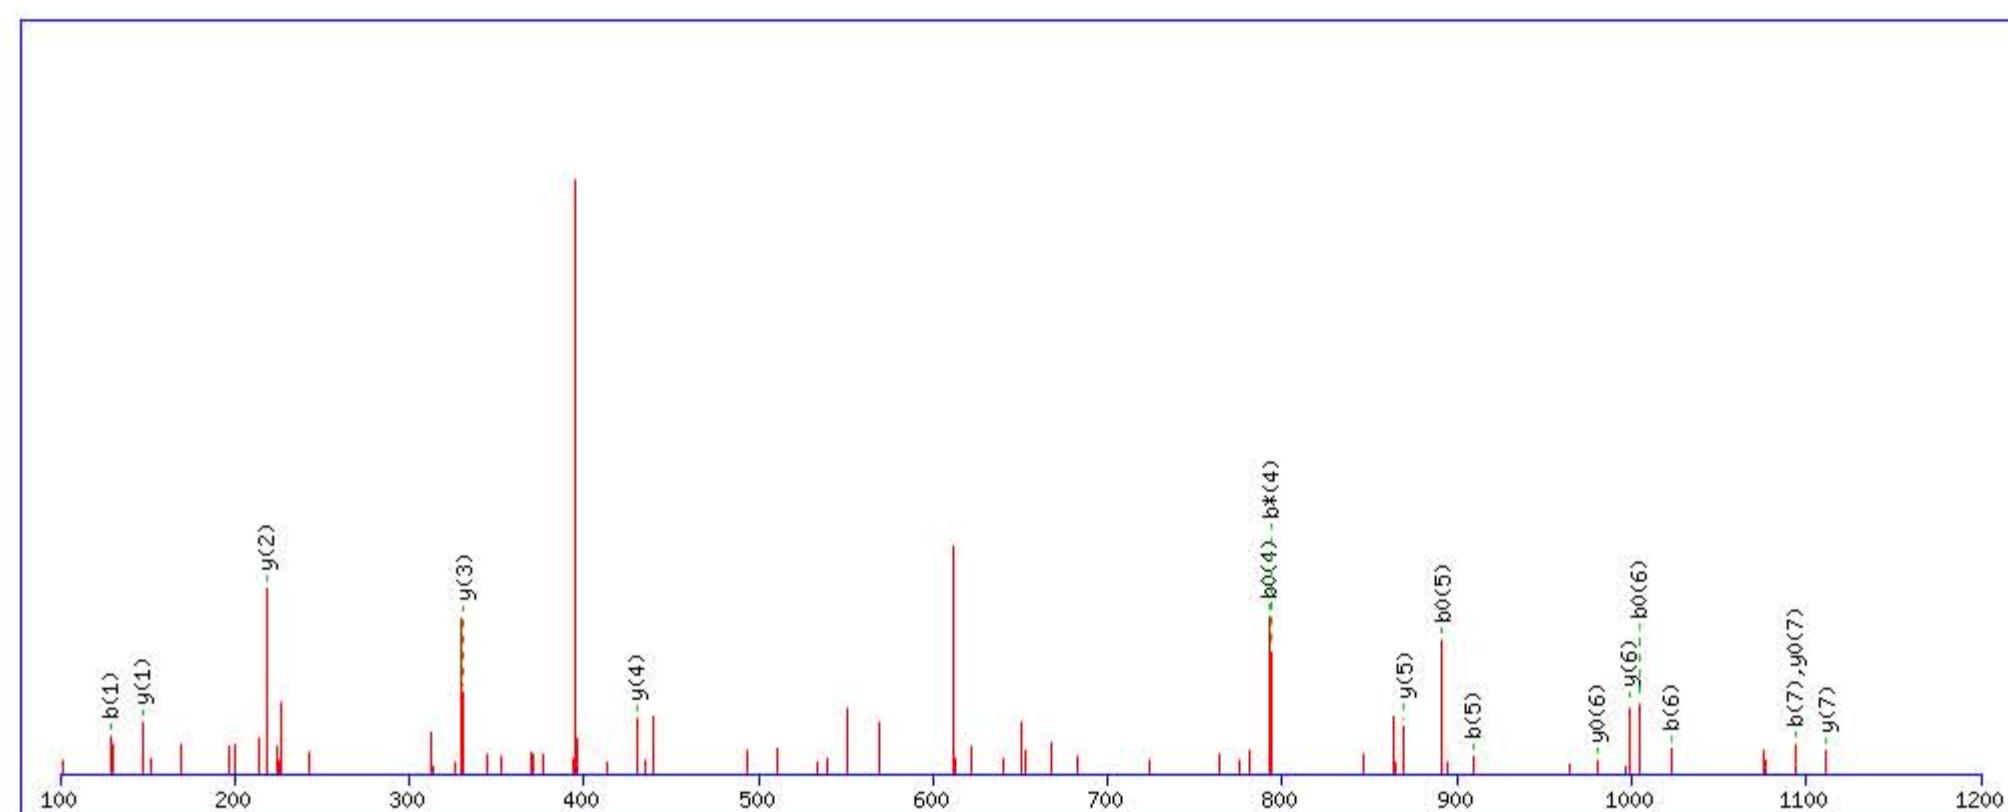

Monoisotopic mass of neutral peptide Mr(calc): 1238.705658

Fixed modifications: Carbamidomethyl (C) (apply to specified residues or termini only)

Variable modifications:

Q4 : Biotin:Thermo-21345 (Q)

Ions Score: 43 Expect: 0.00088

Matches : 17/70 fragment ions using 31 most intense peaks [\(help\)](#)

| # | b           | b <sup>++</sup> | b <sup>*</sup> | b <sup>+++</sup> | b <sup>0</sup> | b <sup>0++</sup> | Seq. | y           | y <sup>++</sup> | y <sup>*</sup> | y <sup>+++</sup> | y <sup>0</sup> | y <sup>0++</sup> | # |
|---|-------------|-----------------|----------------|------------------|----------------|------------------|------|-------------|-----------------|----------------|------------------|----------------|------------------|---|
| 1 | 129.065854  | 65.036565       | 112.039305     | 56.523291        |                |                  | Q    |             |                 |                |                  |                |                  | 8 |
| 2 | 242.149918  | 121.578597      | 225.123369     | 113.065323       |                |                  | L    | 1111.654379 | 556.330828      | 1094.627830    | 547.817553       | 1093.643814    | 547.325545       | 7 |
| 3 | 371.192511  | 186.099894      | 354.165962     | 177.586619       | 353.181946     | 177.094611       | E    | 998.570315  | 499.788796      | 981.543766     | 491.275521       | 980.559750     | 490.783513       | 6 |
| 4 | 810.417837  | 405.712557      | 793.391288     | 397.199282       | 792.407272     | 396.707274       | Q    | 869.527722  | 435.267499      | 852.501173     | 426.754225       |                |                  | 5 |
| 5 | 909.486251  | 455.246764      | 892.459702     | 446.733489       | 891.475686     | 446.241481       | V    | 430.302396  | 215.654836      | 413.275847     | 207.141562       |                |                  | 4 |
| 6 | 1022.570315 | 511.788796      | 1005.543766    | 503.275521       | 1004.559750    | 502.783513       | I    | 331.233982  | 166.120629      | 314.207433     | 157.607355       |                |                  | 3 |
| 7 | 1093.607429 | 547.307353      | 1076.580880    | 538.794078       | 1075.596864    | 538.302070       | A    | 218.149918  | 109.578597      | 201.123369     | 101.065323       |                |                  | 2 |
| 8 |             |                 |                |                  |                |                  | K    | 147.112804  | 74.060040       | 130.086255     | 65.546765        |                |                  | 1 |

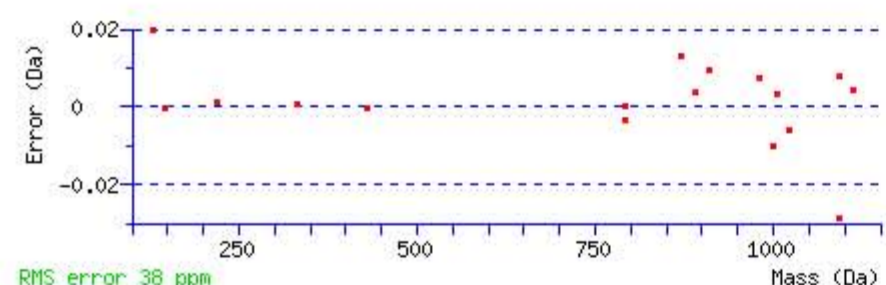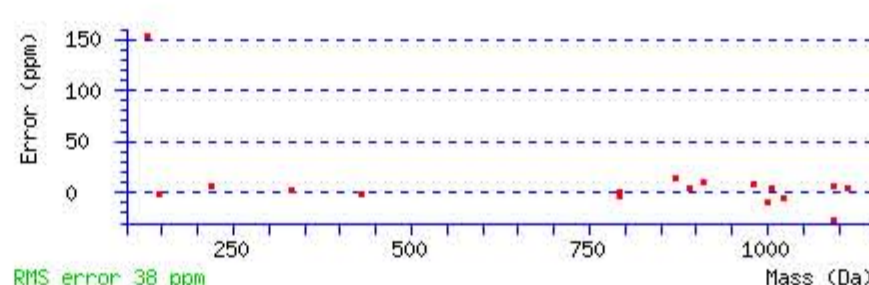

NCBI BLAST search of **QLEQVIAK**

(Parameters: blastp, nr protein database, expect=20000, no filter, PAM30)

Other BLAST [web gateways](#)

All matches to this query

| Score | Mr(calc):   | Delta     | Sequence                     |
|-------|-------------|-----------|------------------------------|
| 42.6  | 1238.705658 | -0.005730 | <a href="#">QLEQVIAK</a>     |
| 16.3  | 1238.705658 | -0.005730 | <a href="#">QLEQVIAK</a>     |
| 13.7  | 1238.687027 | 0.012901  | <a href="#">KEETQPPVALK</a>  |
| 11.7  | 1238.698257 | 0.001671  | <a href="#">IHADASSKVLAK</a> |
| 10.9  | 1238.716904 | -0.016976 | <a href="#">DRVQVAIK</a>     |
| 9.9   | 1238.709473 | -0.009545 | <a href="#">NDLRPANKLAK</a>  |
| 5.9   | 1238.702301 | -0.002373 | <a href="#">DVFKKGFSLAK</a>  |
| 5.4   | 1238.716888 | -0.016960 | <a href="#">KRILCPLDPK</a>   |
| 5.1   | 1238.705658 | -0.005730 | <a href="#">QIAQEIVK</a>     |
| 4.7   | 1238.691742 | 0.008186  | <a href="#">KAVIHERVCK</a>   |



# MASCOT SEARCH RESULTS

## Peptide View

MS/MS Fragmentation of **ALTDMPQMR**

Found in **FIBA\_HUMAN**, Fibrinogen alpha chain OS=Homo sapiens GN=FGA PE=1 SV=2

Match to Query 31546: 1388.655308 from(695.334930,2+) rtinseconds(1656) index(53458)

Title: Locus:1.1.1.3063.6 File:"2013-07-02 CLN FXIII 30 min 2nd F 4.wiff"

Data file C:\Program Files (x86)\Matrix Science\Mascot Daemon\mgf\2 FXIII 30 min 2nd\mascot\_daemon\_merge.mgf

Click mouse within plot area to zoom in by factor of two about that point

Or, Plot from  to  Da

Label all possible matches  Label matches used for scoring

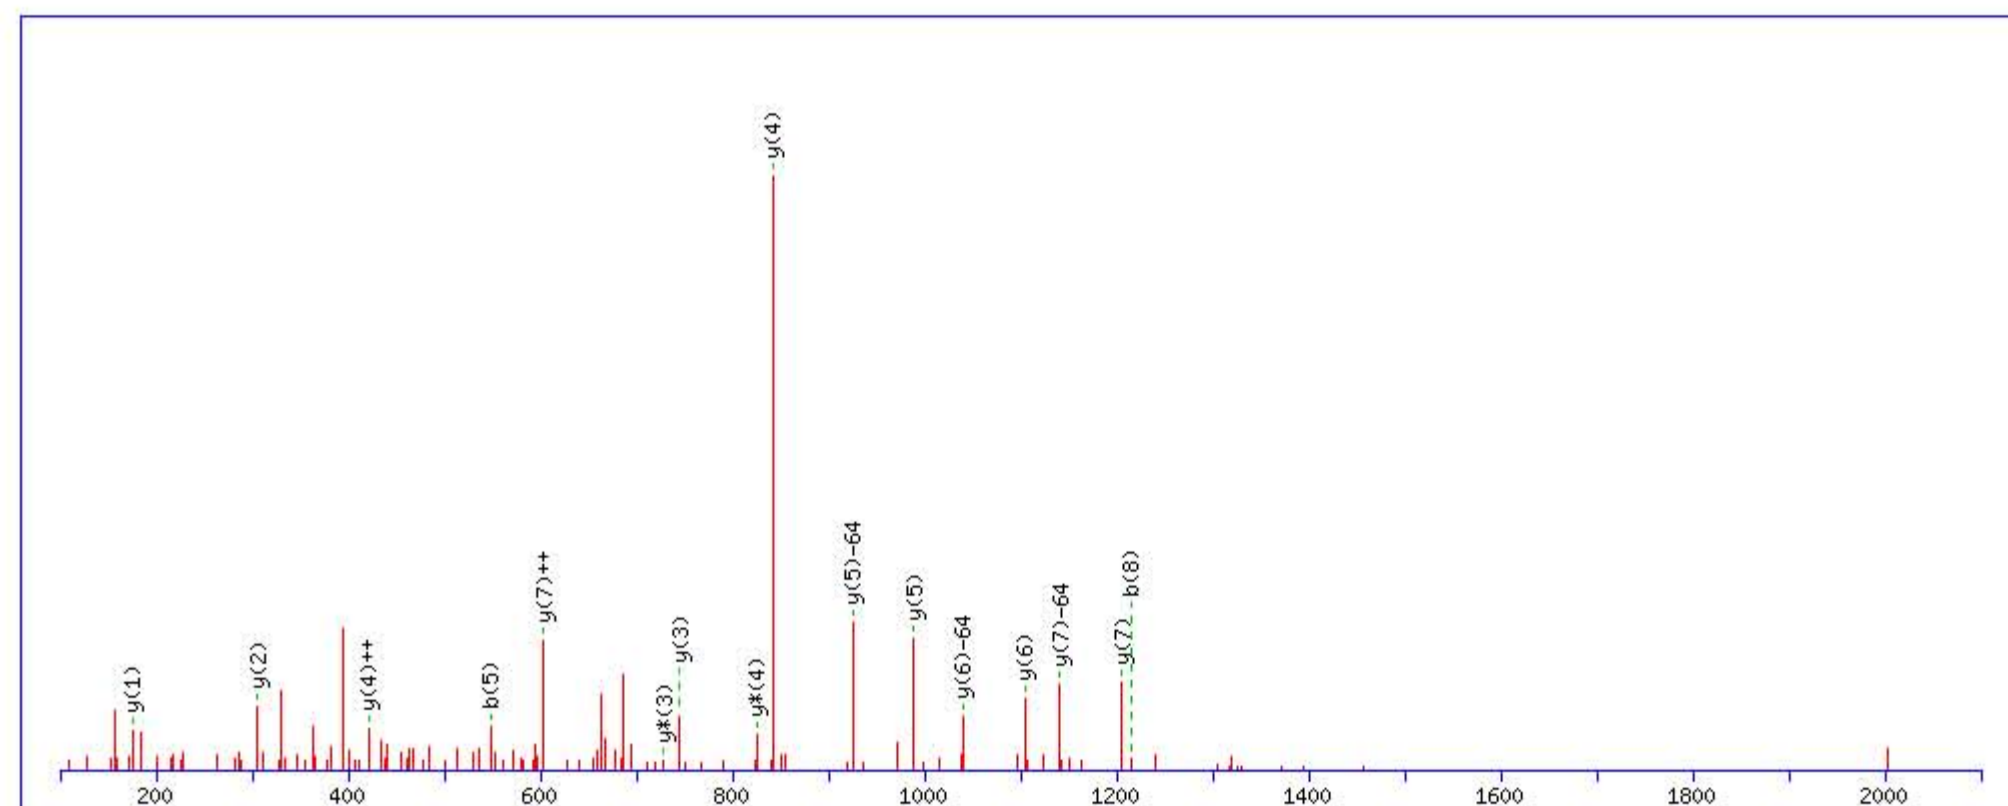

Monoisotopic mass of neutral peptide Mr(calc): 1388.661438

Fixed modifications: Carbamidomethyl (C) (apply to specified residues or termini only)

Variable modifications:

M5 : Oxidation (M), with neutral losses 0.000000 (shown in table), 63.998285

Q7 : Biotin:Thermo-21345 (Q)

Ions Score: 52 Expect: 4.9e-005

Matches : 16/112 fragment ions using 26 most intense peaks [\(help\)](#)

| # | b                  | b <sup>++</sup> | b <sup>*</sup> | b <sup>*++</sup> | b <sup>0</sup> | b <sup>0++</sup> | Seq. | y                  | y <sup>++</sup>   | y <sup>*</sup>    | y <sup>*++</sup> | y <sup>0</sup> | y <sup>0++</sup> | # |
|---|--------------------|-----------------|----------------|------------------|----------------|------------------|------|--------------------|-------------------|-------------------|------------------|----------------|------------------|---|
| 1 | 72.044390          | 36.525833       |                |                  |                |                  | A    |                    |                   |                   |                  |                |                  | 9 |
| 2 | 185.128454         | 93.067865       |                |                  |                |                  | L    | 1318.631613        | 659.819445        | 1301.605064       | 651.306170       | 1300.621048    | 650.814162       | 8 |
| 3 | 286.176133         | 143.591704      |                |                  | 268.165568     | 134.586422       | T    | <b>1205.547549</b> | <b>603.277413</b> | 1188.521000       | 594.764138       | 1187.536984    | 594.272130       | 7 |
| 4 | 401.203076         | 201.105176      |                |                  | 383.192511     | 192.099894       | D    | <b>1104.499870</b> | 552.753573        | 1087.473321       | 544.240298       | 1086.489305    | 543.748290       | 6 |
| 5 | <b>548.238476</b>  | 274.622876      |                |                  | 530.227911     | 265.617594       | M    | <b>989.472927</b>  | 495.240102        | 972.446378        | 486.726827       |                |                  | 5 |
| 6 | 645.291240         | 323.149258      |                |                  | 627.280675     | 314.143976       | P    | <b>842.437527</b>  | <b>421.722402</b> | <b>825.410978</b> | 413.209127       |                |                  | 4 |
| 7 | 1084.516566        | 542.761921      | 1067.490017    | 534.248647       | 1066.506001    | 533.756639       | Q    | <b>745.384763</b>  | 373.196020        | <b>728.358214</b> | 364.682745       |                |                  | 3 |
| 8 | <b>1215.557051</b> | 608.282164      | 1198.530502    | 599.768889       | 1197.546486    | 599.276881       | M    | <b>306.159437</b>  | 153.583356        | 289.132888        | 145.070082       |                |                  | 2 |
| 9 |                    |                 |                |                  |                |                  | R    | <b>175.118952</b>  | 88.063114         | 158.092403        | 79.549839        |                |                  | 1 |

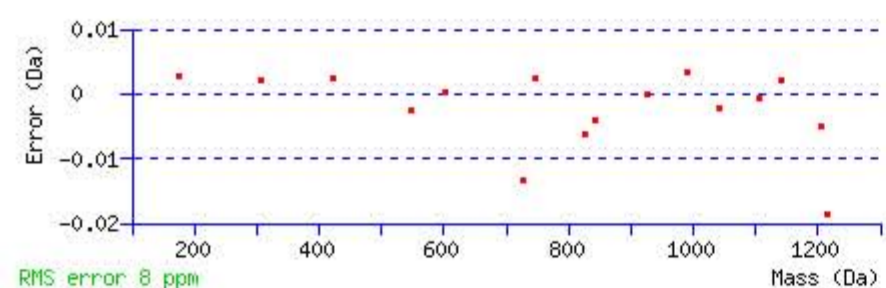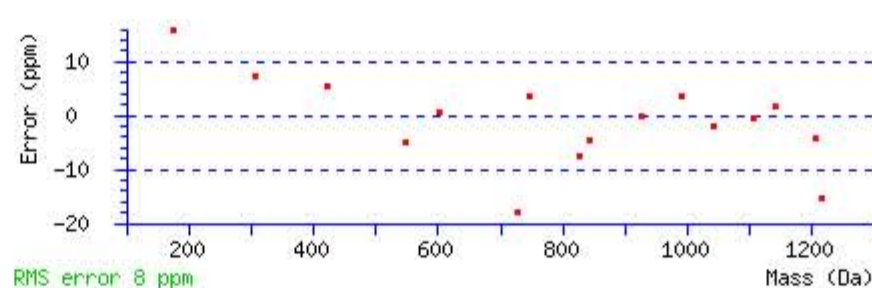

NCBI BLAST search of **ALTDMPQMR**

(Parameters: blastp, nr protein database, expect=20000, no filter, PAM30)

Other BLAST [web gateways](#)

All matches to this query

| Score | Mr(calc):   | Delta     | Sequence                      |
|-------|-------------|-----------|-------------------------------|
| 51.5  | 1388.661438 | -0.006130 | <a href="#">ALTDMPQMR</a>     |
| 14.9  | 1388.661438 | -0.006130 | <a href="#">ALTDMPQMR</a>     |
| 5.5   | 1388.654053 | 0.001255  | <a href="#">SMDTIVGMLHNR</a>  |
| 4.4   | 1388.660568 | -0.005260 | <a href="#">SEMTASPLVGPER</a> |
| 3.8   | 1388.669296 | -0.013988 | <a href="#">DREPFQMR</a>      |

Mascot: <http://www.matrixscience.com/>



# MASCOT Search Results

## Peptide View

MS/MS Fragmentation of **QFTSSTSYNR**

Found in **FIBA\_HUMAN**, Fibrinogen alpha chain OS=Homo sapiens GN=FGA PE=1 SV=2

Match to Query 35634: 1500.696068 from(751.355310,2+) rtinseconds(1561) index(3232)

Title: Locus:1.1.1.2979.16 File:"2013-07-02 CLN FXIII 30 min 2nd F 1.wiff"

Data file C:\Program Files (x86)\Matrix Science\Mascot Daemon\mgf2 FXIII 30 min 2nd\mascot\_daemon\_merge.mgf

Click mouse within plot area to zoom in by factor of two about that point

Or, Plot from  to  Da

Label all possible matches  Label matches used for scoring

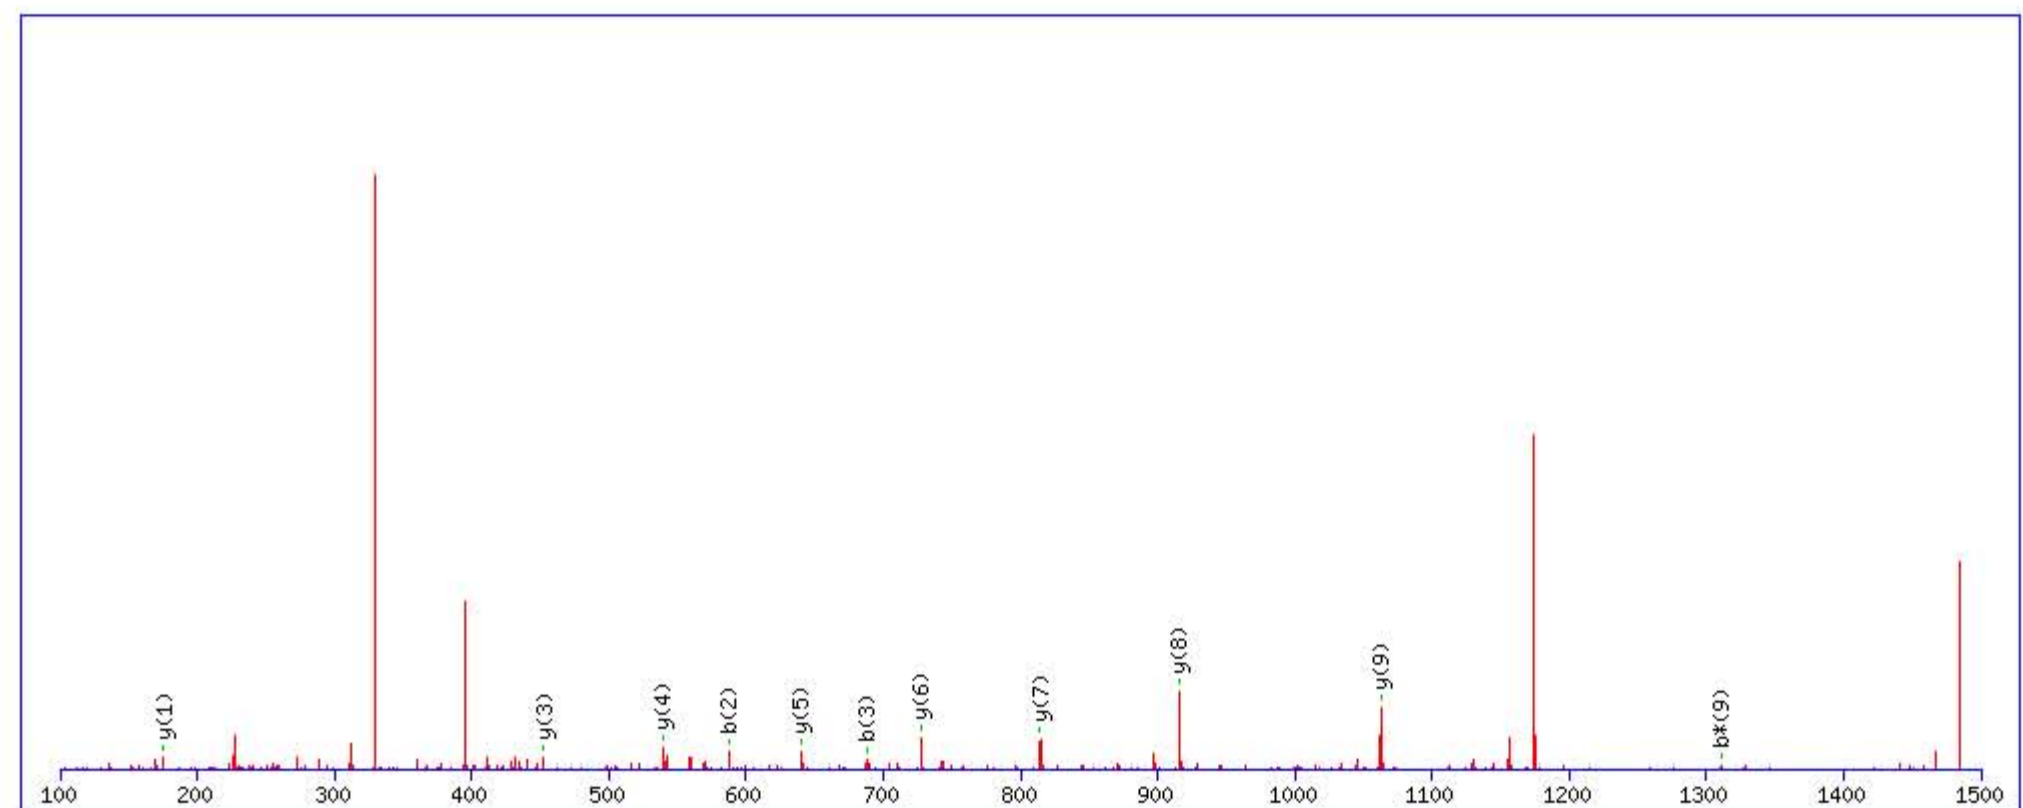

Monoisotopic mass of neutral peptide Mr(calc): 1500.703110

Fixed modifications: Carbamidomethyl (C) (apply to specified residues or termini only)

Variable modifications:

Q1 : Biotin:Thermo-21345 (Q)

Ions Score: 41 Expect: 0.00019

Matches : 11/98 fragment ions using 28 most intense peaks [\(help\)](#)

| #  | b                 | b <sup>++</sup> | b <sup>*</sup>     | b <sup>*++</sup> | b <sup>0</sup> | b <sup>0++</sup> | Seq. | y                  | y <sup>++</sup> | y <sup>*</sup> | y <sup>*++</sup> | y <sup>0</sup> | y <sup>0++</sup> | #  |
|----|-------------------|-----------------|--------------------|------------------|----------------|------------------|------|--------------------|-----------------|----------------|------------------|----------------|------------------|----|
| 1  | 440.232602        | 220.619939      | 423.206053         | 212.106664       |                |                  | Q    |                    |                 |                |                  |                |                  | 10 |
| 2  | <b>587.301016</b> | 294.154146      | 570.274467         | 285.640872       |                |                  | F    | <b>1062.485064</b> | 531.746170      | 1045.458515    | 523.232896       | 1044.474499    | 522.740887       | 9  |
| 3  | <b>688.348695</b> | 344.677986      | 671.322146         | 336.164711       | 670.338130     | 335.672703       | T    | <b>915.416650</b>  | 458.211963      | 898.390101     | 449.698689       | 897.406085     | 449.206681       | 8  |
| 4  | 775.380723        | 388.194000      | 758.354174         | 379.680725       | 757.370158     | 379.188717       | S    | <b>814.368971</b>  | 407.688124      | 797.342422     | 399.174849       | 796.358406     | 398.682841       | 7  |
| 5  | 862.412751        | 431.710014      | 845.386202         | 423.196739       | 844.402186     | 422.704731       | S    | <b>727.336943</b>  | 364.172110      | 710.310394     | 355.658835       | 709.326378     | 355.166827       | 6  |
| 6  | 963.460430        | 482.233853      | 946.433881         | 473.720578       | 945.449865     | 473.228570       | T    | <b>640.304915</b>  | 320.656096      | 623.278366     | 312.142821       | 622.294350     | 311.650813       | 5  |
| 7  | 1050.492458       | 525.749867      | 1033.465909        | 517.236593       | 1032.481893    | 516.744584       | S    | <b>539.257236</b>  | 270.132256      | 522.230687     | 261.618982       | 521.246671     | 261.126974       | 4  |
| 8  | 1213.555787       | 607.281532      | 1196.529238        | 598.768257       | 1195.545222    | 598.276249       | Y    | <b>452.225208</b>  | 226.616242      | 435.198659     | 218.102967       |                |                  | 3  |
| 9  | 1327.598714       | 664.302995      | <b>1310.572165</b> | 655.789721       | 1309.588149    | 655.297712       | N    | 289.161879         | 145.084577      | 272.135330     | 136.571303       |                |                  | 2  |
| 10 |                   |                 |                    |                  |                |                  | R    | <b>175.118952</b>  | 88.063114       | 158.092403     | 79.549839        |                |                  | 1  |

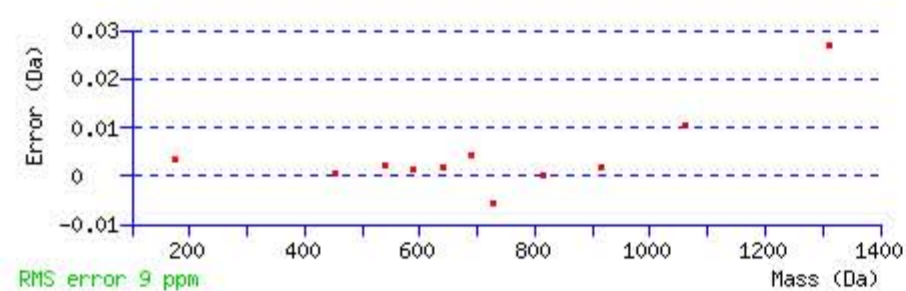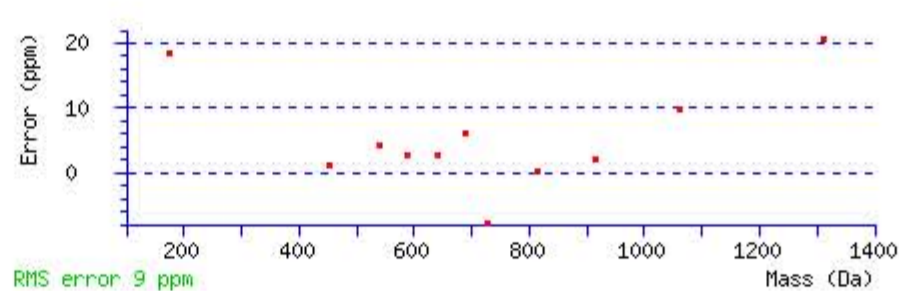

NCBI BLAST search of **QFTSSTSYNR**

(Parameters: blastp, nr protein database, expect=20000, no filter, PAM30)

Other BLAST [web gateways](#)

All matches to this query

| Score | Mr(calc):   | Delta     | Sequence                       |
|-------|-------------|-----------|--------------------------------|
| 40.8  | 1500.703110 | -0.007042 | <a href="#">QFTSSTSYNR</a>     |
| 1.0   | 1500.714355 | -0.018287 | <a href="#">EEIALGGGGFCVHR</a> |

Mascot: <http://www.matrixscience.com/>



# MASCOT SEARCH RESULTS

## Peptide View

MS/MS Fragmentation of **QLEQVIAK**

Found in **FIBA\_HUMAN**, Fibrinogen alpha chain OS=Homo sapiens GN=FGA PE=1 SV=2

Match to Query 36868: 1549.871048 from(775.942800,2+) rtinseconds(2113) index(56543)

Title: Locus:1.1.1.3221.20 File:"2013-07-02 CLN FXIII 30 min 2nd F 4.wiff"

Data file C:\Program Files (x86)\Matrix Science\Mascot Daemon\mgf2 FXIII 30 min 2nd\mascot\_daemon\_merge.mgf

Click mouse within plot area to zoom in by factor of two about that point

Or, Plot from  to  Da

Label all possible matches  Label matches used for scoring

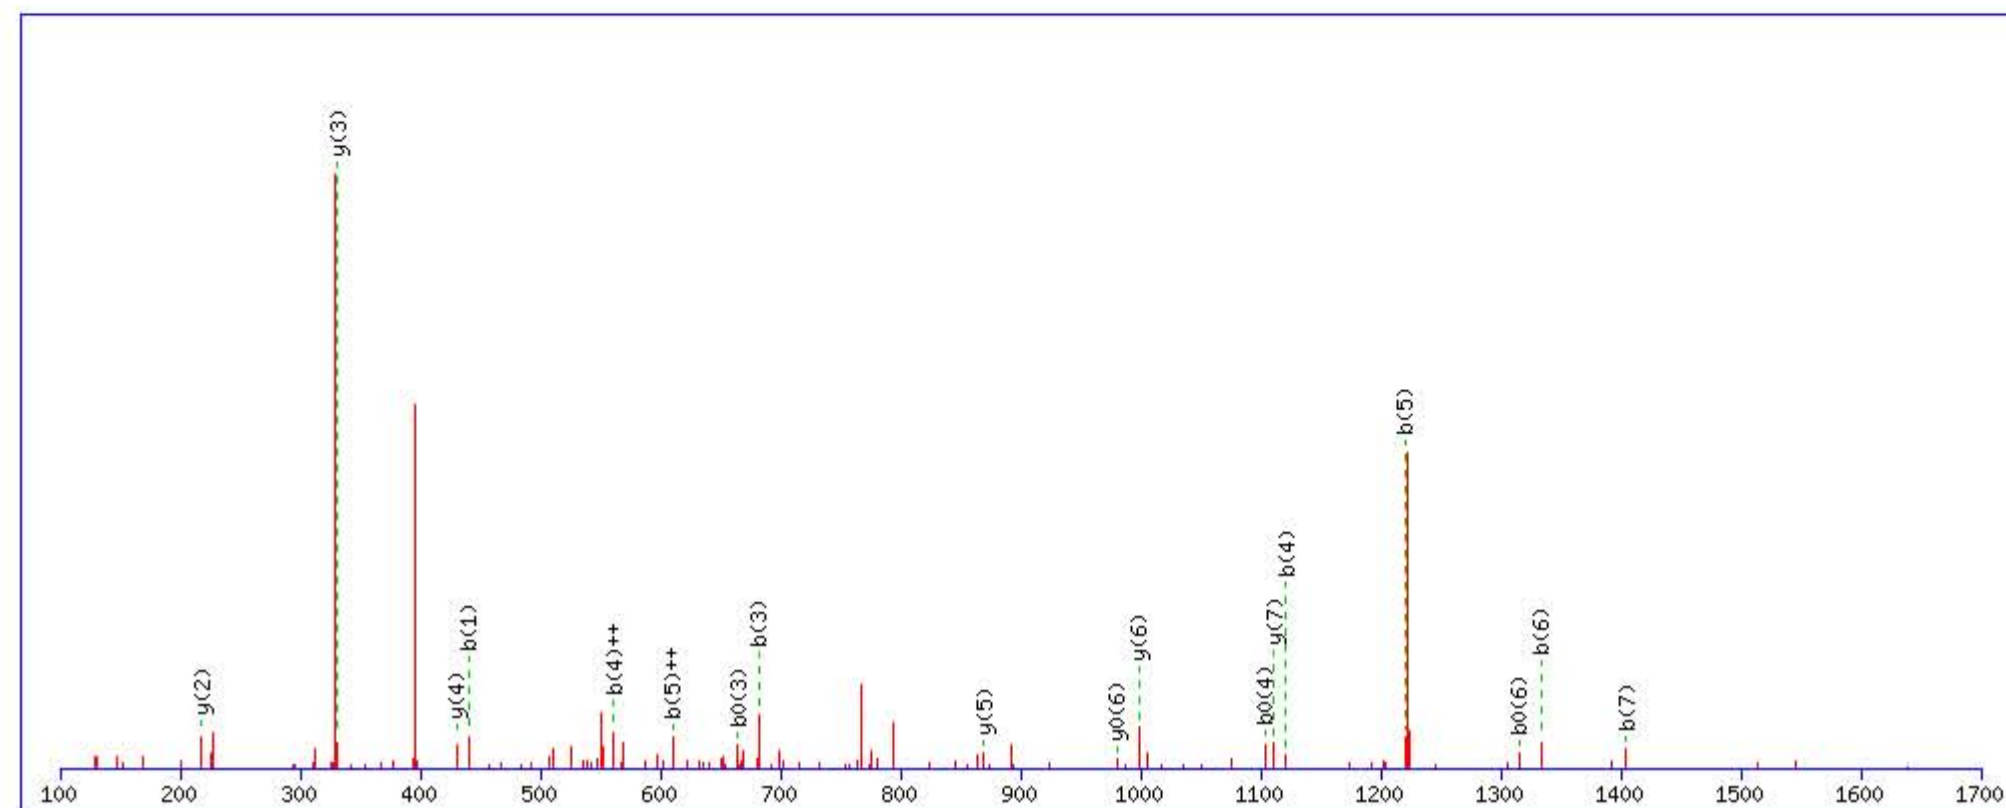

Monoisotopic mass of neutral peptide Mr(calc): 1549.872406

Fixed modifications: Carbamidomethyl (C) (apply to specified residues or termini only)

Variable modifications:

Q1 : Biotin:Thermo-21345 (Q)

Q4 : Biotin:Thermo-21345 (Q)

Ions Score: 26 Expect: 0.037

Matches : 18/70 fragment ions using 41 most intense peaks [\(help\)](#)

| # | b                  | b <sup>++</sup>   | b <sup>*</sup> | b <sup>*++</sup> | b <sup>0</sup>     | b <sup>0++</sup> | Seq. | y                  | y <sup>++</sup> | y <sup>*</sup> | y <sup>*++</sup> | y <sup>0</sup>    | y <sup>0++</sup> | # |
|---|--------------------|-------------------|----------------|------------------|--------------------|------------------|------|--------------------|-----------------|----------------|------------------|-------------------|------------------|---|
| 1 | <b>440.232602</b>  | 220.619939        | 423.206053     | 212.106664       |                    |                  | Q    |                    |                 |                |                  |                   |                  | 8 |
| 2 | 553.316666         | 277.161971        | 536.290117     | 268.648697       |                    |                  | L    | <b>1111.654379</b> | 556.330828      | 1094.627830    | 547.817553       | 1093.643814       | 547.325545       | 7 |
| 3 | <b>682.359259</b>  | 341.683268        | 665.332710     | 333.169993       | <b>664.348694</b>  | 332.677985       | E    | <b>998.570315</b>  | 499.788796      | 981.543766     | 491.275521       | <b>980.559750</b> | 490.783513       | 6 |
| 4 | <b>1121.584585</b> | <b>561.295931</b> | 1104.558036    | 552.782656       | <b>1103.574020</b> | 552.290648       | Q    | <b>869.527722</b>  | 435.267499      | 852.501173     | 426.754225       |                   |                  | 5 |
| 5 | <b>1220.652999</b> | <b>610.830138</b> | 1203.626450    | 602.316863       | 1202.642434        | 601.824855       | V    | <b>430.302396</b>  | 215.654836      | 413.275847     | 207.141561       |                   |                  | 4 |
| 6 | <b>1333.737063</b> | 667.372170        | 1316.710514    | 658.858895       | <b>1315.726498</b> | 658.366887       | I    | <b>331.233982</b>  | 166.120629      | 314.207433     | 157.607354       |                   |                  | 3 |
| 7 | <b>1404.774177</b> | 702.890727        | 1387.747628    | 694.377452       | 1386.763612        | 693.885444       | A    | <b>218.149918</b>  | 109.578597      | 201.123369     | 101.065322       |                   |                  | 2 |
| 8 |                    |                   |                |                  |                    |                  | K    | 147.112804         | 74.060040       | 130.086255     | 65.546765        |                   |                  | 1 |

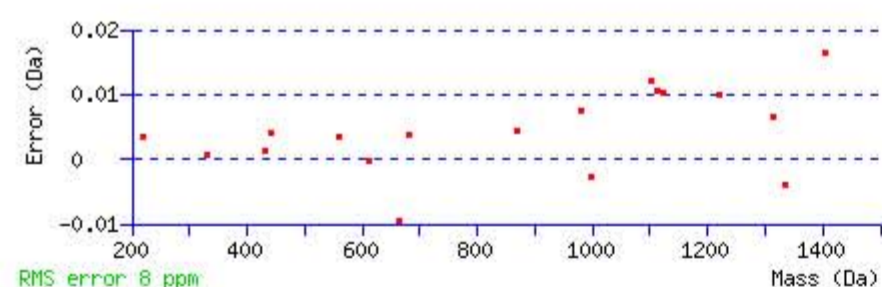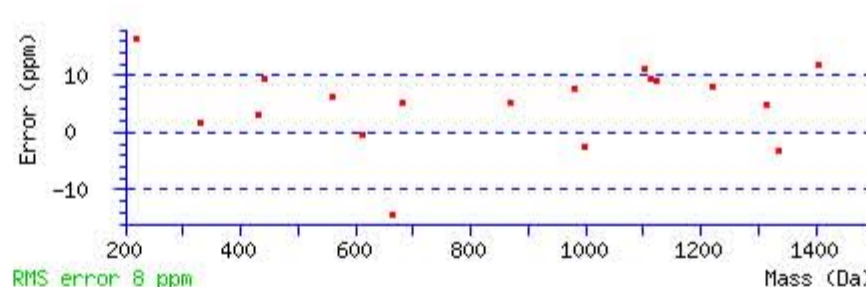

NCBI BLAST search of **QLEQVIAK**

(Parameters: blastp, nr protein database, expect=20000, no filter, PAM30)

Other BLAST [web gateways](#)

## All matches to this query

| Score | Mr(calc):   | Delta     | Sequence                         |
|-------|-------------|-----------|----------------------------------|
| 25.6  | 1549.872406 | -0.001358 | <a href="#">QLEQVIAK</a>         |
| 10.0  | 1549.886810 | -0.015762 | <a href="#">YVIGIGVGAGAYVLAK</a> |
| 6.4   | 1549.861633 | 0.009415  | <a href="#">KLSRPFQSEIFAK</a>    |
| 4.1   | 1549.876251 | -0.005203 | <a href="#">LVDINLVRCHALK</a>    |
| 3.7   | 1549.893967 | -0.022919 | <a href="#">LIRENHELKSAIK</a>    |
| 3.5   | 1549.855148 | 0.015900  | <a href="#">QSFVVPVRPGPR</a>     |
| 3.2   | 1549.861618 | 0.009430  | <a href="#">TAEKLYRTAWIAK</a>    |
| 3.1   | 1549.886795 | -0.015747 | <a href="#">KGNLVYIIDFGLAK</a>   |
| 1.8   | 1549.862991 | 0.008057  | <a href="#">AAWLRVFQHLGPR</a>    |
| 0.2   | 1549.880264 | -0.009216 | <a href="#">LLNLMWLPKPPGR</a>    |



# MASCOT Search Results

## Peptide View

MS/MS Fragmentation of **NPSSSGTGGTATWKPSSGPGSTGSWNSGSSGTGSGNQNPGSPRPGSTGTWNPSSER**  
 Found in **FIBA\_HUMAN**, Fibrinogen alpha chain OS=Homo sapiens GN=FGA PE=1 SV=2

Match to Query 80995: 5844.555970 from(1169.918470,5+) rtinseconds(1764) index(20416)  
 Title: Locus:1.1.1.1495.26 File:"2013-07-02 CLN FXIII 30 min 2nd F 2.wiff"  
 Data file C:\Program Files (x86)\Matrix Science\Mascot Daemon\mgf2 FXIII 30 min 2nd\mascot\_daemon\_merge.mgf

Click mouse within plot area to zoom in by factor of two about that point  
 Or, Plot from  to  Da   
 Label all possible matches  Label matches used for scoring

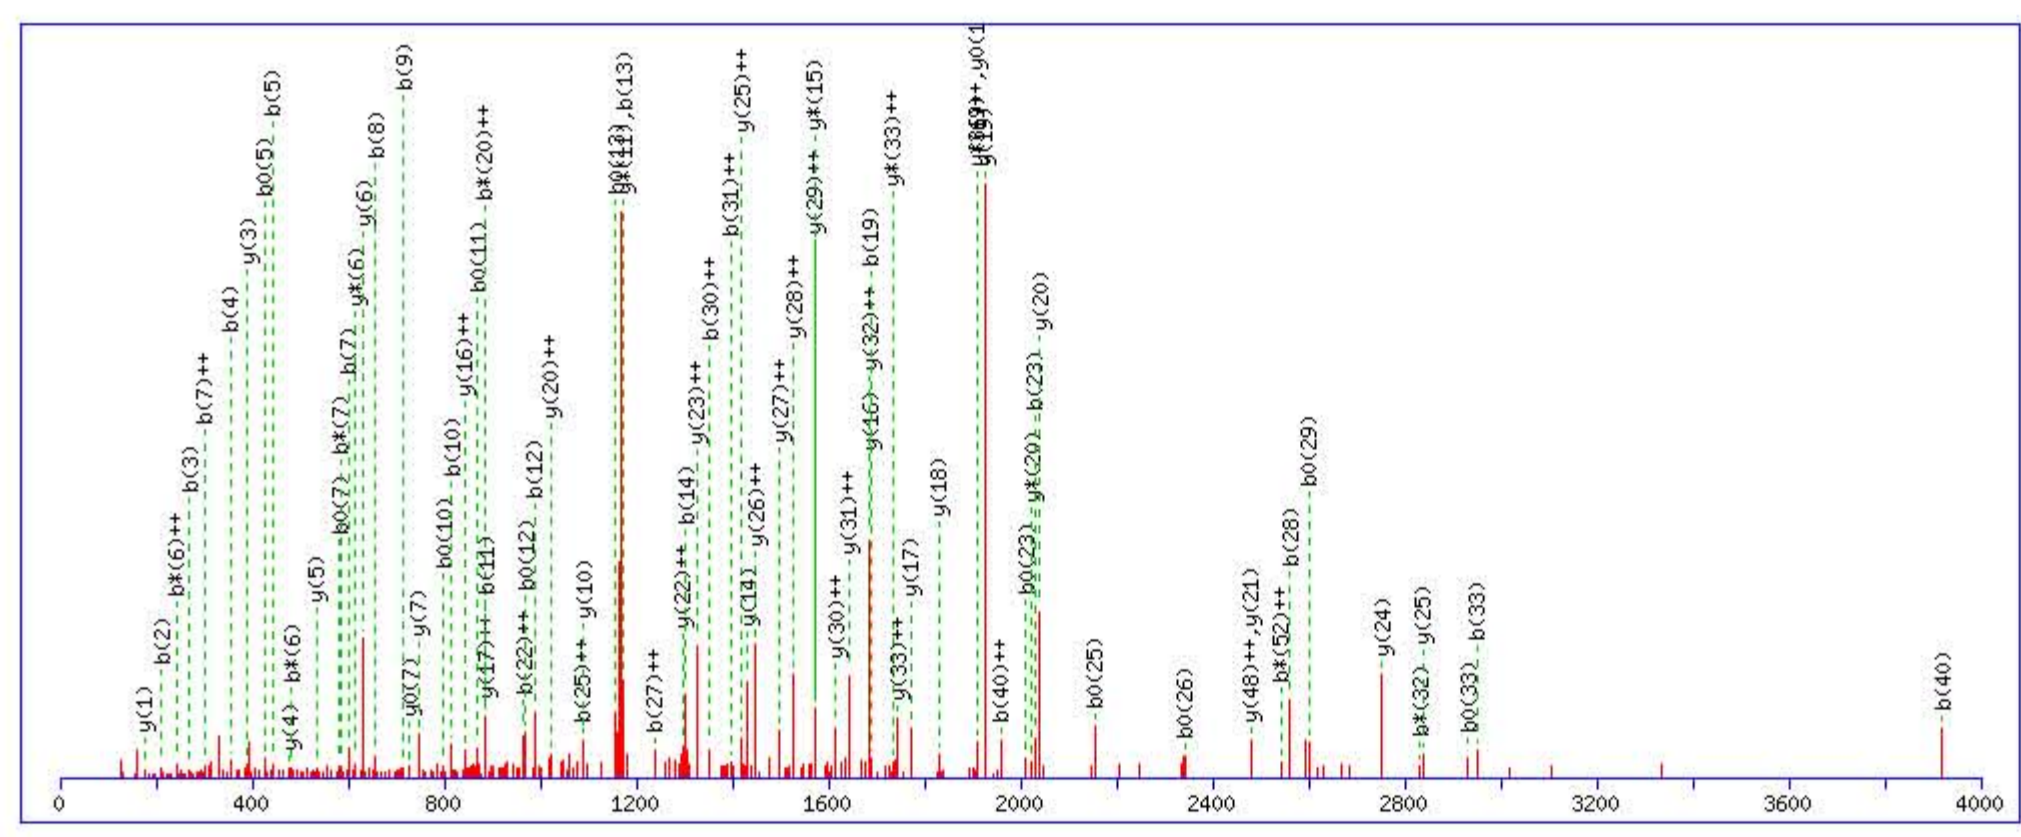

Monoisotopic mass of neutral peptide Mr(calc): 5844.608032  
 Fixed modifications: Carbamidomethyl (C) (apply to specified residues or termini only)  
 Variable modifications:  
 Q39 : Biotin:Thermo-21345 (Q)  
 Ions Score: 107 Expect: 4.8e-011  
 Matches : 81/688 fragment ions using 142 most intense peaks ([help](#))

| #  | b                  | b <sup>++</sup>    | b <sup>+</sup>     | b <sup>+++</sup>   | b <sup>0</sup>     | b <sup>0++</sup> | Seq. | y                  | y <sup>++</sup>    | y <sup>+</sup>     | y <sup>+++</sup>   | y <sup>0</sup>     | y <sup>0++</sup> | #  |
|----|--------------------|--------------------|--------------------|--------------------|--------------------|------------------|------|--------------------|--------------------|--------------------|--------------------|--------------------|------------------|----|
| 1  | 115.050203         | 58.028740          | 98.023654          | 49.515465          |                    |                  | N    |                    |                    |                    |                    |                    |                  | 59 |
| 2  | <b>212.102967</b>  | 106.555121         | 195.076418         | 98.041847          |                    |                  | P    | 5731.572302        | 2866.289789        | 5714.545753        | 2857.776515        | 5713.561737        | 2857.284507      | 58 |
| 3  | <b>269.124431</b>  | 135.065853         | 252.097882         | 126.552579         |                    |                  | G    | 5634.519538        | 2817.763407        | 5617.492989        | 2809.250133        | 5616.508973        | 2808.758125      | 57 |
| 4  | <b>356.156459</b>  | 178.581867         | 339.129910         | 170.068593         | 338.145894         | 169.576585       | S    | 5577.498074        | 2789.252675        | 5560.471525        | 2780.739401        | 5559.487509        | 2780.247393      | 56 |
| 5  | <b>443.188487</b>  | 222.097881         | 426.161938         | 213.584607         | <b>425.177922</b>  | 213.092599       | S    | 5490.466046        | 2745.736661        | 5473.439497        | 2737.223387        | 5472.455481        | 2736.731379      | 55 |
| 6  | 500.209951         | 250.608613         | <b>483.183402</b>  | <b>242.095339</b>  | 482.199386         | 241.603331       | G    | 5403.434018        | 2702.220647        | 5386.407469        | 2693.707373        | 5385.423453        | 2693.215365      | 54 |
| 7  | <b>601.257630</b>  | <b>301.132453</b>  | <b>584.231081</b>  | 292.619178         | <b>583.247065</b>  | 292.127170       | T    | 5346.412554        | 2673.709915        | 5329.386005        | 2665.196641        | 5328.401989        | 2664.704633      | 53 |
| 8  | <b>658.279094</b>  | 329.643185         | 641.252545         | 321.129910         | 640.268529         | 320.637903       | G    | 5245.364875        | 2623.186076        | 5228.338326        | 2614.672801        | 5227.354310        | 2614.180793      | 52 |
| 9  | <b>715.300558</b>  | 358.153917         | 698.274009         | 349.640643         | 697.289993         | 349.148635       | G    | 5188.343411        | 2594.675344        | 5171.316862        | 2586.162069        | 5170.332846        | 2585.670061      | 51 |
| 10 | <b>816.348237</b>  | 408.677757         | 799.321688         | 400.164482         | <b>798.337672</b>  | 399.672474       | T    | 5131.321947        | 2566.164612        | 5114.295398        | 2557.651337        | 5113.311382        | 2557.159329      | 50 |
| 11 | <b>887.385351</b>  | 444.196314         | 870.358802         | 435.683039         | <b>869.374786</b>  | 435.191031       | A    | 5030.274268        | 2515.640772        | 5013.247719        | 2507.127498        | 5012.263703        | 2506.635490      | 49 |
| 12 | <b>988.433030</b>  | 494.720153         | 971.406481         | 486.206879         | <b>970.422465</b>  | 485.714871       | T    | 4959.237154        | <b>2480.122215</b> | 4942.210605        | 2471.608941        | 4941.226589        | 2471.116933      | 48 |
| 13 | <b>1174.512343</b> | 587.759810         | 1157.485794        | 579.246535         | <b>1156.501778</b> | 578.754527       | W    | 4858.189475        | 2429.598376        | 4841.162926        | 2421.085101        | 4840.178910        | 2420.593093      | 47 |
| 14 | <b>1302.607306</b> | 651.807291         | 1285.580757        | 643.294017         | 1284.596741        | 642.802009       | K    | 4672.110162        | 2336.558719        | 4655.083613        | 2328.045445        | 4654.099597        | 2327.553437      | 46 |
| 15 | 1399.660070        | 700.333673         | 1382.633521        | 691.820399         | 1381.649505        | 691.328391       | P    | 4544.015199        | 2272.511238        | 4526.988650        | 2263.997963        | 4526.004634        | 2263.505955      | 45 |
| 16 | 1456.681534        | 728.844405         | 1439.654985        | 720.331131         | 1438.670969        | 719.839123       | G    | 4446.962435        | 2223.984856        | 4429.935886        | 2215.471581        | 4428.951870        | 2214.979573      | 44 |
| 17 | 1543.713562        | 772.360419         | 1526.687013        | 763.847145         | 1525.702997        | 763.355137       | S    | 4389.940971        | 2195.474124        | 4372.914422        | 2186.960849        | 4371.930406        | 2186.468841      | 43 |
| 18 | 1630.745590        | 815.876433         | 1613.719041        | 807.363159         | 1612.735025        | 806.871151       | S    | 4302.908943        | 2151.958110        | 4285.882394        | 2143.444835        | 4284.898378        | 2142.952827      | 42 |
| 19 | <b>1687.767054</b> | 844.387165         | 1670.740505        | 835.873891         | 1669.756489        | 835.381883       | G    | 4215.876915        | 2108.442096        | 4198.850366        | 2099.928821        | 4197.866350        | 2099.436813      | 41 |
| 20 | 1784.819818        | 892.913547         | 1767.793269        | <b>884.400273</b>  | 1766.809253        | 883.908265       | P    | 4158.855451        | 2079.931364        | 4141.828902        | 2071.418089        | 4140.844886        | 2070.926081      | 40 |
| 21 | 1841.841282        | 921.424279         | 1824.814733        | 912.911005         | 1823.830717        | 912.418997       | G    | 4061.802687        | 2031.404982        | 4044.776138        | 2022.891707        | 4043.792122        | 2022.399699      | 39 |
| 22 | 1928.873310        | <b>964.940293</b>  | 1911.846761        | 956.427019         | 1910.862745        | 955.935011       | S    | 4004.781223        | 2002.894250        | 3987.754674        | 1994.380975        | 3986.770658        | 1993.888967      | 38 |
| 23 | <b>2029.920989</b> | 1015.464133        | 2012.894440        | 1006.950858        | <b>2011.910424</b> | 1006.458850      | T    | 3917.749195        | 1959.378236        | 3900.722646        | 1950.864961        | 3899.738630        | 1950.372953      | 37 |
| 24 | 2086.942453        | 1043.974865        | 2069.915904        | 1035.461590        | 2068.931888        | 1034.969582      | G    | 3816.701516        | <b>1908.854396</b> | 3799.674967        | 1900.341122        | 3798.690951        | 1899.849114      | 36 |
| 25 | 2173.974481        | <b>1087.490879</b> | 2156.947932        | 1078.977604        | <b>2155.963916</b> | 1078.485596      | S    | 3759.680052        | 1880.343664        | 3742.653503        | 1871.830389        | 3741.669487        | 1871.338382      | 35 |
| 26 | 2360.053794        | 1180.530535        | 2343.027245        | 1172.017261        | <b>2342.043229</b> | 1171.525253      | W    | 3672.648024        | 1836.827650        | 3655.621475        | 1828.314375        | 3654.637459        | 1827.822367      | 34 |
| 27 | 2474.096721        | <b>1237.551999</b> | 2457.070172        | 1229.038724        | 2456.086156        | 1228.546716      | N    | 3486.568711        | <b>1743.787993</b> | 3469.542162        | <b>1735.274719</b> | 3468.558146        | 1734.782711      | 33 |
| 28 | <b>2561.128749</b> | 1281.068013        | 2544.102200        | 1272.554738        | 2543.118184        | 1272.062730      | S    | 3372.525784        | <b>1686.766530</b> | 3355.499235        | 1678.253255        | 3354.515219        | 1677.761247      | 32 |
| 29 | 2618.150213        | 1309.578745        | 2601.123664        | 1301.065470        | <b>2600.139648</b> | 1300.573462      | G    | 3285.493756        | <b>1643.250516</b> | 3268.467207        | 1634.737241        | 3267.483191        | 1634.245233      | 31 |
| 30 | 2705.182241        | <b>1353.094759</b> | 2688.155692        | 1344.581484        | 2687.171676        | 1344.089476      | S    | 3228.472292        | <b>1614.739784</b> | 3211.445743        | 1606.226509        | 3210.461727        | 1605.734501      | 30 |
| 31 | 2792.214269        | <b>1396.610773</b> | 2775.187720        | 1388.097498        | 2774.203704        | 1387.605490      | S    | 3141.440264        | <b>1571.223770</b> | 3124.413715        | 1562.710495        | 3123.429699        | 1562.218487      | 29 |
| 32 | 2849.235733        | 1425.121505        | <b>2832.209184</b> | 1416.608230        | 2831.225168        | 1416.116222      | G    | 3054.408236        | <b>1527.707756</b> | 3037.381687        | 1519.194481        | 3036.397671        | 1518.702473      | 28 |
| 33 | <b>2950.283412</b> | 1475.645344        | 2933.256863        | 1467.132069        | <b>2932.272847</b> | 1466.640062      | T    | 2997.386772        | <b>1499.197024</b> | 2980.360223        | 1490.683749        | 2979.376207        | 1490.191741      | 27 |
| 34 | 3007.304876        | 1504.156076        | 2990.278327        | 1495.642801        | 2989.294311        | 1495.150794      | G    | 2896.339093        | <b>1448.673184</b> | 2879.312544        | 1440.159910        | 2878.328528        | 1439.667902      | 26 |
| 35 | 3094.336904        | 1547.672090        | 3077.310355        | 1539.158815        | 3076.326339        | 1538.666808      | S    | <b>2839.317629</b> | <b>1420.162453</b> | 2822.291080        | 1411.649178        | 2821.307064        | 1411.157170      | 25 |
| 36 | 3195.384583        | 1598.195929        | 3178.358034        | 1589.682655        | 3177.374018        | 1589.190647      | T    | <b>2752.285601</b> | 1376.646438        | 2735.259052        | 1368.133164        | 2734.275036        | 1367.641156      | 24 |
| 37 | 3252.406047        | 1626.706661        | 3235.379498        | 1618.193387        | 3234.395482        | 1617.701379      | G    | 2651.237922        | <b>1326.122599</b> | 2634.211373        | 1317.609325        | 2633.227357        | 1317.117317      | 23 |
| 38 | 3366.448974        | 1683.728125        | 3349.422425        | 1675.214850        | 3348.438409        | 1674.722842      | N    | 2594.216458        | <b>1297.611867</b> | 2577.189909        | 1289.098593        | 2576.205893        | 1288.606585      | 22 |
| 39 | 3805.674300        | 1903.340788        | 3788.647751        | 1894.827513        | 3787.663735        | 1894.335506      | Q    | <b>2480.173531</b> | 1240.590404        | 2463.146982        | 1232.077129        | 2462.162966        | 1231.585121      | 21 |
| 40 | <b>3919.717227</b> | <b>1960.362252</b> | 3902.690678        | 1951.848977        | 3901.706662        | 1951.356969      | N    | <b>2040.948205</b> | <b>1020.977741</b> | <b>2023.921656</b> | 1012.464466        | 2022.937640        | 1011.972458      | 20 |
| 41 | 4016.769991        | 2008.888634        | 3999.743442        | 2000.375359        | 3998.759426        | 1999.883351      | P    | <b>1926.905278</b> | 963.956277         | <b>1909.878729</b> | 955.443003         | <b>1908.894713</b> | 954.950995       | 19 |
| 42 | 4073.791455        | 2037.399365        | 4056.764906        | 2028.886091        | 4055.780890        | 2028.394083      | G    | <b>1829.852514</b> | 915.429895         | 1812.825965        | 906.916621         | 1811.841949        | 906.424613       | 18 |
| 43 | 4160.823483        | 2080.915380        | 4143.796934        | 2072.402105        | 4142.812918        | 2071.910097      | S    | <b>1772.831050</b> | <b>886.919163</b>  | 1755.804501        | 878.405889         | 1754.820485        | 877.913881       | 17 |
| 44 | 4257.876247        | 2129.441762        | 4240.849698        | 2120.928487        | 4239.865682        | 2120.436479      | P    | <b>1685.799022</b> | <b>843.403149</b>  | 1668.772473        | 834.889875         | 1667.788457        | 834.397867       | 16 |
| 45 | 4413.977358        | 2207.492317        | 4396.950809        | 2198.979043        | 4395.966793        | 2198.487035      | R    | 1588.746258        | 794.876767         | <b>1571.719709</b> | 786.363493         | 1570.735693        | 785.871485       | 15 |
| 46 | 4511.030122        | 2256.018699        | 4494.003573        | 2247.505425        | 4493.019557        | 2247.013417      | P    | <b>1432.645147</b> | 716.826212         | 1415.618598        | 708.312937         | 1414.634582        | 707.820929       | 14 |
| 47 | 4568.051586        | 2284.529431        | 4551.025037        | 2276.016157        | 4550.041021        | 2275.524149      | G    | 1335.592383        | 668.299830         | 1318.565834        | 659.786555         | 1317.581818        | 659.294547       | 13 |
| 48 | 4655.083614        | 2328.045445        | 4638.057065        | 2319.532171        | 4637.073049        | 2319.040163      | S    | 1278.570919        | 639.789098         | 1261.544370        | 631.275823         | 1260.560354        | 630.783815       | 12 |
| 49 | 4756.131293        | 2378.569285        | 4739.104744        | 2370.056010        | 4738.120728        | 2369.564002      | T    | 1191.538891        | 596.273084         | <b>1174.512342</b> | 587.759809         | 1173.528326        | 587.267801       | 11 |
| 50 | 4813.152757        | 2407.080017        | 4796.126208        | 2398.566742        | 4795.142192        | 2398.074734      | G    | <b>1090.491212</b> | 545.749244         | 1073.464663        | 537.235970         | 1072.480647        | 536.743962       | 10 |
| 51 | 4914.200436        | 2457.603856        | 4897.173887        | 2449.090582        | 4896.189871        | 2448.598574      | T    | 1033.469748        | 517.238512         | 1016.443199        | 508.725238         | 1015.459183        | 508.233230       | 9  |
| 52 | 5100.279749        | 2550.643513        | 5083.253200        | <b>2542.130238</b> | 5082.269184        | 2541.638230      | W    | 932.422069         | 466.714673         | 915.395520         | 458.201398         | 914.411504         | 457.709390       | 8  |
| 53 | 5214.322676        | 2607.664976        | 5197.296127        | 2599.151702        | 5196.312111        | 2598.659694      | N    | <b>746.342756</b>  | 373.675016         | 729.316207         | 365.161            |                    |                  |    |



# Mascot Search Results

## Peptide View

MS/MS Fragmentation of **GSAGHWTSESSVSGSTGQWHSESGSFRPDSPGSGNARPNPDWGTFFEEVSGNVSPGTR**  
 Found in **FIBA\_HUMAN**, Fibrinogen alpha chain OS=Homo sapiens GN=FGA PE=1 SV=2

Match to Query 81461: 6284.705664 from(1048.458220,6+) rtinseconds(2065) index(71565)  
 Title: Locus:1.1.1.3252.26 File:"2013-07-02 CLN FXIII 30 min 2nd FT.wiff"  
 Data file C:\Program Files (x86)\Matrix Science\Mascot Daemon\mgf\2 FXIII 30 min 2nd\mascot\_daemon\_merge.mgf

Click mouse within plot area to zoom in by factor of two about that point

Or, Plot from  to  Da

Label all possible matches  Label matches used for scoring

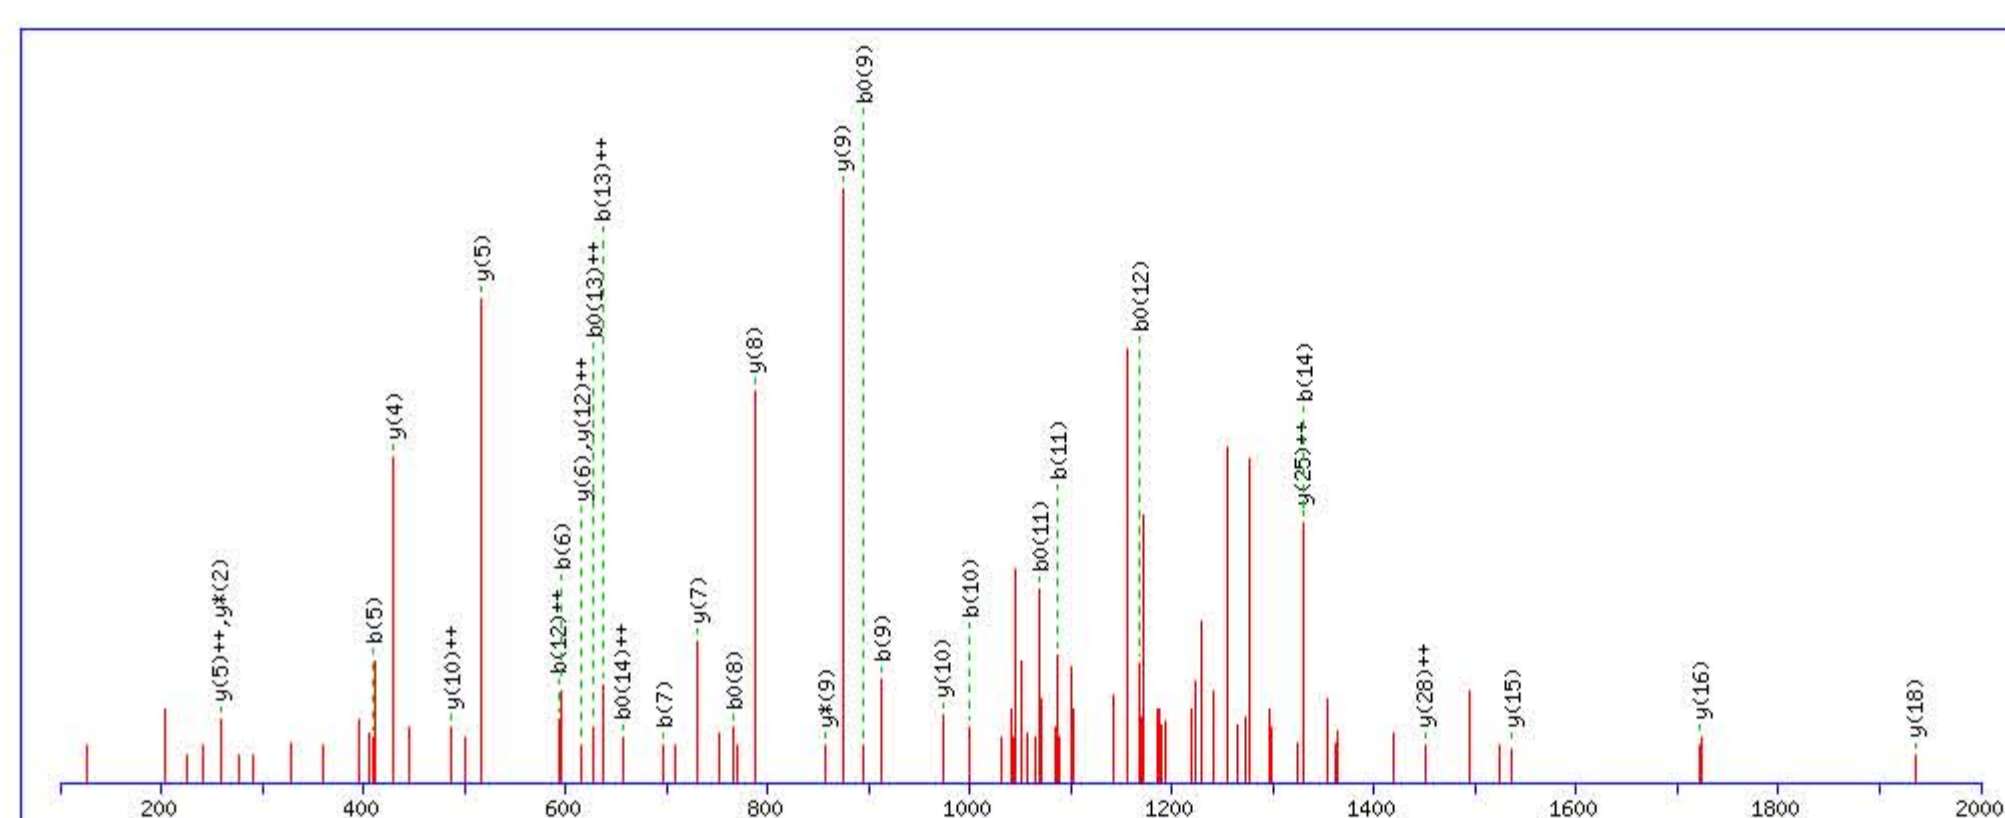

Monoisotopic mass of neutral peptide Mr(calc): 6284.792847  
 Fixed modifications: Carbamidomethyl (C) (apply to specified residues or termini only)  
 Variable modifications:  
 Q18 : Biotin:Thermo-21345 (Q)  
 Ions Score: 39 Expect: 0.00019  
 Matches : 32/646 fragment ions using 55 most intense peaks [\(help\)](#)

| #  | b                  | b <sup>++</sup>   | b <sup>*</sup> | b <sup>+++</sup> | b <sup>0</sup>     | b <sup>0++</sup>  | Seq. | y                  | y <sup>++</sup>    | y <sup>*</sup>    | y <sup>+++</sup> | y <sup>0</sup> | y <sup>0++</sup> | #  |
|----|--------------------|-------------------|----------------|------------------|--------------------|-------------------|------|--------------------|--------------------|-------------------|------------------|----------------|------------------|----|
| 1  | 58.028740          | 29.518008         |                |                  |                    |                   | G    |                    |                    |                   |                  |                |                  | 58 |
| 2  | 145.060768         | 73.034022         |                |                  | 127.050203         | 64.028740         | S    | 6228.778603        | 3114.892940        | 6211.752054       | 3106.379665      | 6210.768038    | 3105.887657      | 57 |
| 3  | 216.097882         | 108.552579        |                |                  | 198.087317         | 99.547296         | A    | 6141.746575        | 3071.376926        | 6124.720026       | 3062.863651      | 6123.736010    | 3062.371643      | 56 |
| 4  | 273.119346         | 137.063311        |                |                  | 255.108781         | 128.058029        | G    | 6070.709461        | 3035.858369        | 6053.682912       | 3027.345094      | 6052.698896    | 3026.853086      | 55 |
| 5  | <b>410.178258</b>  | 205.592767        |                |                  | 392.167693         | 196.587484        | H    | 6013.687997        | 3007.347637        | 5996.661448       | 2998.834362      | 5995.677432    | 2998.342354      | 54 |
| 6  | <b>596.257571</b>  | 298.632424        |                |                  | 578.247006         | 289.627141        | W    | 5876.629085        | 2938.818181        | 5859.602536       | 2930.304906      | 5858.618520    | 2929.812898      | 53 |
| 7  | <b>697.305250</b>  | 349.156263        |                |                  | 679.294685         | 340.150981        | T    | 5690.549772        | 2845.778524        | 5673.523223       | 2837.265250      | 5672.539207    | 2836.773242      | 52 |
| 8  | 784.337278         | 392.672277        |                |                  | <b>766.326713</b>  | 383.666995        | S    | 5589.502093        | 2795.254685        | 5572.475544       | 2786.741410      | 5571.491528    | 2786.249402      | 51 |
| 9  | <b>913.379871</b>  | 457.193574        |                |                  | <b>895.369306</b>  | 448.188291        | E    | 5502.470065        | 2751.738671        | 5485.443516       | 2743.225396      | 5484.459500    | 2742.733388      | 50 |
| 10 | <b>1000.411899</b> | 500.709588        |                |                  | 982.401334         | 491.704305        | S    | 5373.427472        | 2687.217374        | 5356.400923       | 2678.704100      | 5355.416907    | 2678.212092      | 49 |
| 11 | <b>1087.443927</b> | 544.225602        |                |                  | <b>1069.433362</b> | 535.220319        | S    | 5286.395444        | 2643.701360        | 5269.368895       | 2635.188086      | 5268.384879    | 2634.696078      | 48 |
| 12 | 1186.512341        | <b>593.759809</b> |                |                  | <b>1168.501776</b> | 584.754526        | V    | 5199.363416        | 2600.185346        | 5182.336867       | 2591.672072      | 5181.352851    | 2591.180064      | 47 |
| 13 | 1273.544369        | <b>637.275823</b> |                |                  | 1255.533804        | <b>628.270540</b> | S    | 5100.295002        | 2550.651139        | 5083.268453       | 2542.137865      | 5082.284437    | 2541.645857      | 46 |
| 14 | <b>1330.565833</b> | 665.786555        |                |                  | 1312.555268        | <b>656.781272</b> | G    | 5013.262974        | 2507.135125        | 4996.236425       | 2498.621851      | 4995.252409    | 2498.129843      | 45 |
| 15 | 1417.597861        | 709.302569        |                |                  | 1399.587296        | 700.297286        | S    | 4956.241510        | 2478.624393        | 4939.214961       | 2470.111119      | 4938.230945    | 2469.619111      | 44 |
| 16 | 1518.645540        | 759.826408        |                |                  | 1500.634975        | 750.821126        | T    | 4869.209482        | 2435.108379        | 4852.182933       | 2426.595105      | 4851.198917    | 2426.103097      | 43 |
| 17 | 1575.667004        | 788.337140        |                |                  | 1557.656439        | 779.331858        | G    | 4768.161803        | 2384.584540        | 4751.135254       | 2376.071265      | 4750.151238    | 2375.579257      | 42 |
| 18 | 2014.892330        | 1007.949803       | 1997.865781    | 999.436529       | 1996.881765        | 998.944521        | Q    | 4711.140339        | 2356.073808        | 4694.113790       | 2347.560533      | 4693.129774    | 2347.068525      | 41 |
| 19 | 2200.971643        | 1100.989460       | 2183.945094    | 1092.476185      | 2182.961078        | 1091.984177       | W    | 4271.915013        | 2136.461145        | 4254.888464       | 2127.947870      | 4253.904448    | 2127.455862      | 40 |
| 20 | 2338.030555        | 1169.518916       | 2321.004006    | 1161.005641      | 2320.019990        | 1160.513633       | H    | 4085.835700        | 2043.421488        | 4068.809151       | 2034.908214      | 4067.825135    | 2034.416206      | 39 |
| 21 | 2425.062583        | 1213.034930       | 2408.036034    | 1204.521655      | 2407.052018        | 1204.029647       | S    | 3948.776788        | 1974.892032        | 3931.750239       | 1966.378758      | 3930.766223    | 1965.886750      | 38 |
| 22 | 2554.105176        | 1277.556226       | 2537.078627    | 1269.042952      | 2536.094611        | 1268.550944       | E    | 3861.744760        | 1931.376018        | 3844.718211       | 1922.862744      | 3843.734195    | 1922.370736      | 37 |
| 23 | 2641.137204        | 1321.072240       | 2624.110655    | 1312.558966      | 2623.126639        | 1312.066958       | S    | 3732.702167        | 1866.854722        | 3715.675618       | 1858.341447      | 3714.691602    | 1857.849439      | 36 |
| 24 | 2698.158668        | 1349.582972       | 2681.132119    | 1341.069698      | 2680.148103        | 1340.577690       | G    | 3645.670139        | 1823.338708        | 3628.643590       | 1814.825433      | 3627.659574    | 1814.333425      | 35 |
| 25 | 2785.190696        | 1393.098986       | 2768.164147    | 1384.585712      | 2767.180131        | 1384.093704       | S    | 3588.648675        | 1794.827976        | 3571.622126       | 1786.314701      | 3570.638110    | 1785.822693      | 34 |
| 26 | 2932.259110        | 1466.633193       | 2915.232561    | 1458.119919      | 2914.248545        | 1457.627911       | F    | 3501.616647        | 1751.311962        | 3484.590098       | 1742.798687      | 3483.606082    | 1742.306679      | 33 |
| 27 | 3088.360221        | 1544.683749       | 3071.333672    | 1536.170474      | 3070.349656        | 1535.678466       | R    | 3354.548233        | 1677.777755        | 3337.521684       | 1669.264480      | 3336.537668    | 1668.772472      | 32 |
| 28 | 3185.412985        | 1593.210131       | 3168.386436    | 1584.696856      | 3167.402420        | 1584.204848       | P    | 3198.447122        | 1599.727199        | 3181.420573       | 1591.213925      | 3180.436557    | 1590.721917      | 31 |
| 29 | 3300.439928        | 1650.723602       | 3283.413379    | 1642.210327      | 3282.429363        | 1641.718320       | D    | 3101.394358        | 1551.200817        | 3084.367809       | 1542.687543      | 3083.383793    | 1542.195535      | 30 |
| 30 | 3387.471956        | 1694.239616       | 3370.445407    | 1685.726342      | 3369.461391        | 1685.234334       | S    | 2986.367415        | 1493.687346        | 2969.340866       | 1485.174071      | 2968.356850    | 1484.682063      | 29 |
| 31 | 3484.524720        | 1742.765998       | 3467.498171    | 1734.252724      | 3466.514155        | 1733.760716       | P    | 2899.335387        | <b>1450.171332</b> | 2882.308838       | 1441.658057      | 2881.324822    | 1441.166049      | 28 |
| 32 | 3541.546184        | 1771.276730       | 3524.519635    | 1762.763456      | 3523.535619        | 1762.271448       | G    | 2802.282623        | 1401.644950        | 2785.256074       | 1393.131675      | 2784.272058    | 1392.639667      | 27 |
| 33 | 3628.578212        | 1814.792744       | 3611.551663    | 1806.279470      | 3610.567647        | 1805.787462       | S    | 2745.261159        | 1373.134218        | 2728.234610       | 1364.620943      | 2727.250594    | 1364.128935      | 26 |
| 34 | 3685.599676        | 1843.303476       | 3668.573127    | 1834.790202      | 3667.589111        | 1834.298194       | G    | 2658.229131        | <b>1329.618204</b> | 2641.202582       | 1321.104929      | 2640.218566    | 1320.612921      | 25 |
| 35 | 3799.642603        | 1900.324940       | 3782.616054    | 1891.811665      | 3781.632038        | 1891.319657       | N    | 2601.207667        | 1301.107472        | 2584.181118       | 1292.594197      | 2583.197102    | 1292.102189      | 24 |
| 36 | 3870.679717        | 1935.843497       | 3853.653168    | 1927.330222      | 3852.669152        | 1926.838214       | A    | 2487.164740        | 1244.086008        | 2470.138191       | 1235.572734      | 2469.154175    | 1235.080726      | 23 |
| 37 | 4026.780828        | 2013.894052       | 4009.754279    | 2005.380778      | 4008.770263        | 2004.888770       | R    | 2416.127626        | 1208.567451        | 2399.101077       | 1200.054177      | 2398.117061    | 1199.562169      | 22 |
| 38 | 4123.833592        | 2062.420434       | 4106.807043    | 2053.907160      | 4105.823027        | 2053.415152       | P    | 2260.026515        | 1130.516896        | 2242.999966       | 1122.003621      | 2242.019550    | 1121.511613      | 21 |
| 39 | 4237.876519        | 2119.441898       | 4220.849970    | 2110.928623      | 4219.865954        | 2110.436615       | N    | 2162.973751        | 1081.990514        | 2145.947202       | 1073.477239      | 2144.963186    | 1072.985231      | 20 |
| 40 | 4351.919446        | 2176.463361       | 4334.892897    | 2167.950087      | 4333.908881        | 2167.458079       | N    | 2048.930824        | 1024.969050        | 2031.904275       | 1016.455776      | 2030.920259    | 1015.963768      | 19 |
| 41 | 4448.972210        | 2224.989743       | 4431.945661    | 2216.476469      | 4430.961645        | 2215.984461       | P    | <b>1934.887897</b> | 967.947587         | 1917.861348       | 959.434312       | 1916.877332    | 958.942304       | 18 |
| 42 | 4563.999153        | 2282.503215       | 4546.972604    | 2273.989940      | 4545.988588        | 2273.497932       | D    | 1837.835133        | 919.421205         | 1820.808584       | 910.907930       | 1819.824568    | 910.415922       | 17 |
| 43 | 4750.078466        | 2375.542871       | 4733.051917    | 2367.029597      | 4732.067901        | 2366.537589       | W    | <b>1722.808190</b> | 861.907733         | 1705.781641       | 853.394459       | 1704.797625    | 852.902451       | 16 |
| 44 | 4807.099930        | 2404.053603       | 4790.073381    | 2395.540329      | 4789.089365        | 2395.048321       | G    | <b>1536.728877</b> | 768.868077         | 1519.702328       | 760.354802       | 1518.718312    | 759.862794       | 15 |
| 45 | 4908.147609        | 2454.577443       | 4891.121060    | 2446.064168      | 4890.137044        | 2445.572160       | T    | 1479.707413        | 740.357345         | 1462.680864       | 731.844070       | 1461.696848    | 731.352062       | 14 |
| 46 | 5055.216023        | 2528.111650       | 5038.189474    | 2519.598375      | 5037.205458        | 2519.106367       | F    | 1378.659734        | 689.833505         | 1361.633185       | 681.320231       | 1360.649169    | 680.828223       | 13 |
| 47 | 5184.258616        | 2592.632946       | 5167.232067    | 2584.119672      | 5166.248051        | 2583.627664       | E    | 1231.591320        | <b>616.299298</b>  | 1214.564771       | 607.786024       | 1213.580755    | 607.294016       | 12 |
| 48 | 5313.301209        | 2657.154243       | 5296.274660    | 2648.640968      | 5295.290644        | 2648.148960       | E    | 1102.548727        | 551.778002         | 1085.522178       | 543.264727       | 1084.538162    | 542.772719       | 11 |
| 49 | 5412.369623        | 2706.688450       | 5395.343074    | 2698.175175      | 5394.359058        | 2697.683167       | V    | <b>973.506134</b>  | <b>487.256705</b>  | 956.479585        | 478.743431       | 955.495569     | 478.251423       | 10 |
| 50 | 5499.401651        | 2750.204464       | 5482.375102    | 2741.691189      | 5481.391086        | 2741.199181       | S    | <b>874.437720</b>  | 437.722498         | <b>857.411171</b> | 429.209224       | 856.427155     | 428.717216       | 9  |
| 51 | 5556.423115        | 2778.715196       | 5539.396566    | 2770.201921      | 5538.412550        | 2769.709913       | G    | <b>787.405692</b>  | 394.206484         | 770.379143        | 385.693210       | 769.395127     | 385.201202       | 8  |
| 52 | 5670.466042        | 2835.736659       | 5653.439493    | 2827.223385      | 5652.455477        | 2826.731377       | N    | <b>730.384228</b>  | 365.695752         | 713.357679        | 357.182478       | 712.373663     | 356.690470       | 7  |
| 53 | 5769.534456        | 2885.270866       | 5752.507907    | 2876.757592      | 5751.523891        | 2876.265584       | V    | <b>616.341301</b>  | 308.674289         | 599.314752        | 300.161014       | 598.330736     | 299.669006       | 6  |
| 54 | 5856.566484        | 2928.786880       | 5839.539935    | 2920.273606      | 5838.555919        | 2919.781598       | S    | <b>517.272887</b>  | <b>259.140082</b>  | 500.246338        | 250.626807       | 499.262322     | 250.134799       | 5  |
| 55 | 5953.619248        | 2977.313262       | 5936.592699    | 2968             |                    |                   |      |                    |                    |                   |                  |                |                  |    |



# MASCOT Search Results

## Peptide View

MS/MS Fragmentation of **LTIGEGQQHHLGGAK**

Found in **FIBG\_HUMAN**, Fibrinogen gamma chain OS=Homo sapiens GN=FGG PE=1 SV=3

Match to Query 46093: 1855.981542 from(619.667790,3+) rtinseconds(1503) index(35602)

Title: Locus:1.1.1.2545.14 File:"2013-07-02 CLN FXIII 30 min 2nd F 3.wiff"

Data file C:\Program Files (x86)\Matrix Science\Mascot Daemon\mgf\2 FXIII 30 min 2nd\mascot\_daemon\_merge.mgf

Click mouse within plot area to zoom in by factor of two about that point

Or, Plot from  to  Da

Label all possible matches  Label matches used for scoring

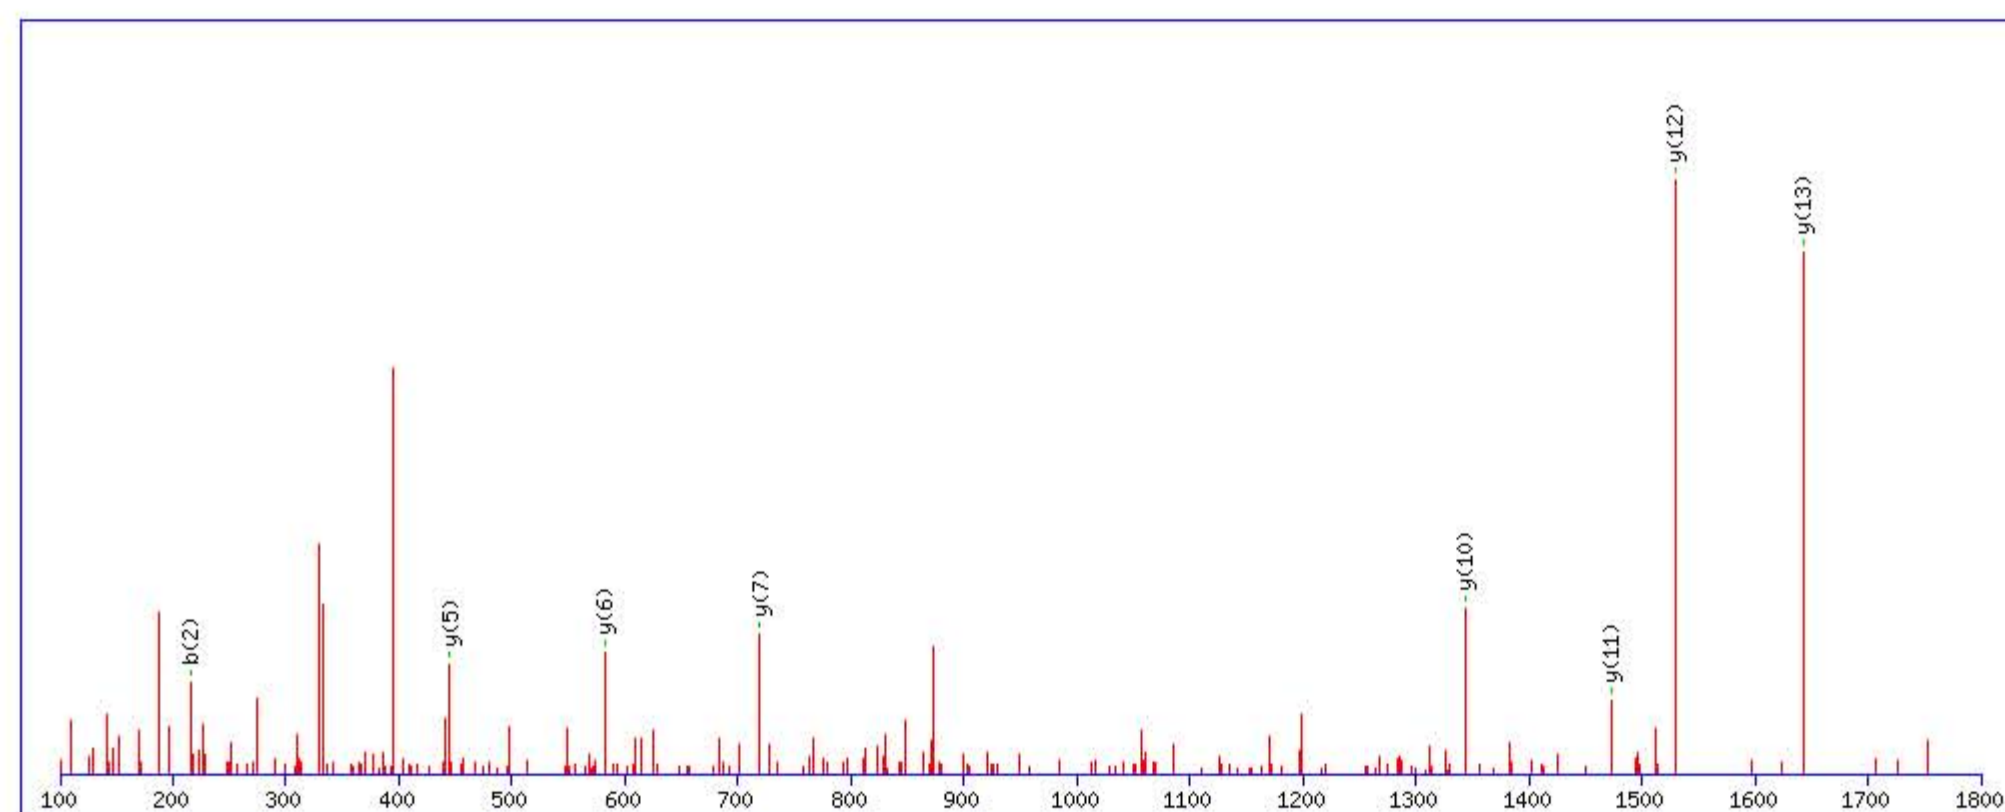

Monoisotopic mass of neutral peptide Mr(calc): 1855.972687

Fixed modifications: Carbamidomethyl (C) (apply to specified residues or termini only)

Variable modifications:

Q8 : Biotin:Thermo-21345 (Q)

Ions Score: 36 Expect: 0.00059

Matches : 8/134 fragment ions using 17 most intense peaks [\(help\)](#)

| #  | b                 | b <sup>++</sup> | b <sup>*</sup> | b <sup>*++</sup> | b <sup>0</sup> | b <sup>0++</sup> | Seq. | y                  | y <sup>++</sup> | y <sup>*</sup> | y <sup>*++</sup> | y <sup>0</sup> | y <sup>0++</sup> | #  |
|----|-------------------|-----------------|----------------|------------------|----------------|------------------|------|--------------------|-----------------|----------------|------------------|----------------|------------------|----|
| 1  | 114.091340        | 57.549308       |                |                  |                |                  | L    |                    |                 |                |                  |                |                  | 15 |
| 2  | <b>215.139019</b> | 108.073147      |                |                  | 197.128454     | 99.067865        | T    | 1743.895902        | 872.451589      | 1726.869353    | 863.938314       | 1725.885337    | 863.446306       | 14 |
| 3  | 328.223083        | 164.615179      |                |                  | 310.212518     | 155.609897       | I    | <b>1642.848223</b> | 821.927749      | 1625.821674    | 813.414475       | 1624.837658    | 812.922467       | 13 |
| 4  | 385.244547        | 193.125911      |                |                  | 367.233982     | 184.120629       | G    | <b>1529.764159</b> | 765.385717      | 1512.737610    | 756.872443       | 1511.753594    | 756.380435       | 12 |
| 5  | 514.287140        | 257.647208      |                |                  | 496.276575     | 248.641926       | E    | <b>1472.742695</b> | 736.874985      | 1455.716146    | 728.361711       | 1454.732130    | 727.869703       | 11 |
| 6  | 571.308604        | 286.157940      |                |                  | 553.298039     | 277.152658       | G    | <b>1343.700102</b> | 672.353689      | 1326.673553    | 663.840414       |                |                  | 10 |
| 7  | 699.367182        | 350.187229      | 682.340633     | 341.673955       | 681.356617     | 341.181947       | Q    | 1286.678638        | 643.842957      | 1269.652089    | 635.329682       |                |                  | 9  |
| 8  | 1138.592508       | 569.799892      | 1121.565959    | 561.286618       | 1120.581943    | 560.794609       | Q    | 1158.620060        | 579.813668      | 1141.593511    | 571.300393       |                |                  | 8  |
| 9  | 1275.651420       | 638.329348      | 1258.624871    | 629.816074       | 1257.640855    | 629.324065       | H    | <b>719.394734</b>  | 360.201005      | 702.368185     | 351.687730       |                |                  | 7  |
| 10 | 1412.710332       | 706.858804      | 1395.683783    | 698.345530       | 1394.699767    | 697.853521       | H    | <b>582.335822</b>  | 291.671549      | 565.309273     | 283.158274       |                |                  | 6  |
| 11 | 1525.794396       | 763.400836      | 1508.767847    | 754.887561       | 1507.783831    | 754.395553       | L    | <b>445.276910</b>  | 223.142093      | 428.250361     | 214.628818       |                |                  | 5  |
| 12 | 1582.815860       | 791.911568      | 1565.789311    | 783.398293       | 1564.805295    | 782.906285       | G    | 332.192846         | 166.600061      | 315.166297     | 158.086786       |                |                  | 4  |
| 13 | 1639.837324       | 820.422300      | 1622.810775    | 811.909025       | 1621.826759    | 811.417017       | G    | 275.171382         | 138.089329      | 258.144833     | 129.576054       |                |                  | 3  |
| 14 | 1710.874438       | 855.940857      | 1693.847889    | 847.427582       | 1692.863873    | 846.935574       | A    | 218.149918         | 109.578597      | 201.123369     | 101.065322       |                |                  | 2  |
| 15 |                   |                 |                |                  |                |                  | K    | 147.112804         | 74.060040       | 130.086255     | 65.546765        |                |                  | 1  |

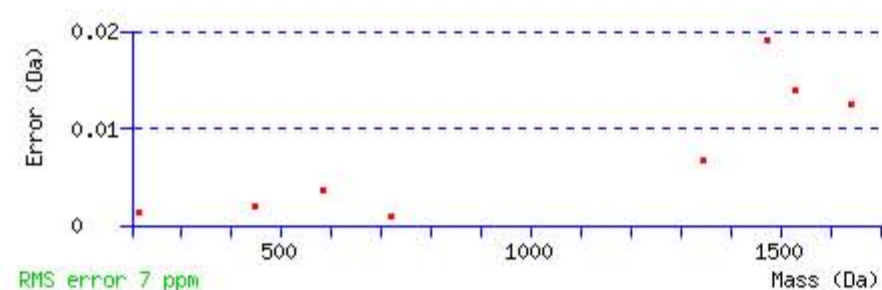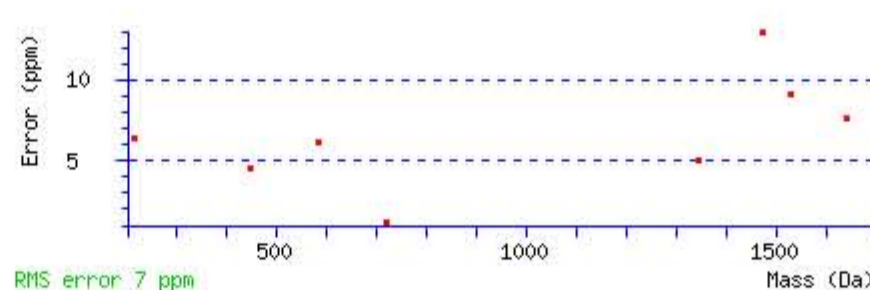

NCBI BLAST search of **LTIGEGQQHHLGGAK**

(Parameters: blastp, nr protein database, expect=20000, no filter, PAM30)

Other BLAST [web gateways](#)

All matches to this query

| Score | Mr(calc):   | Delta     | Sequence                        |
|-------|-------------|-----------|---------------------------------|
| 36.3  | 1855.972687 | 0.008855  | <a href="#">LTIGEGQQHHLGGAK</a> |
| 36.3  | 1855.972687 | 0.008855  | <a href="#">LTIGEGQQHHLGGAK</a> |
| 1.8   | 1856.000519 | -0.018977 | <a href="#">TIVVTILESPYVMYK</a> |
| 0.2   | 1855.989944 | -0.008402 | <a href="#">MLSITPSQLENGKK</a>  |



# MASCOT Search Results

## Peptide View

MS/MS Fragmentation of **LTIGEGQQHHLGGAK**

Found in **FIBG\_HUMAN**, Fibrinogen gamma chain OS=Homo sapiens GN=FGG PE=1 SV=3

Match to Query 46097: 1855.989456 from(465.004640,4+) rtinseconds(1510) index(18880)

Title: Locus:1.1.1.1407.8 File:"2013-07-02 CLN FXIII 30 min 2nd F 2.wiff"

Data file C:\Program Files (x86)\Matrix Science\Mascot Daemon\mgf\2 FXIII 30 min 2nd\mascot\_daemon\_merge.mgf

Click mouse within plot area to zoom in by factor of two about that point

Or, Plot from  to  Da

Label all possible matches  Label matches used for scoring

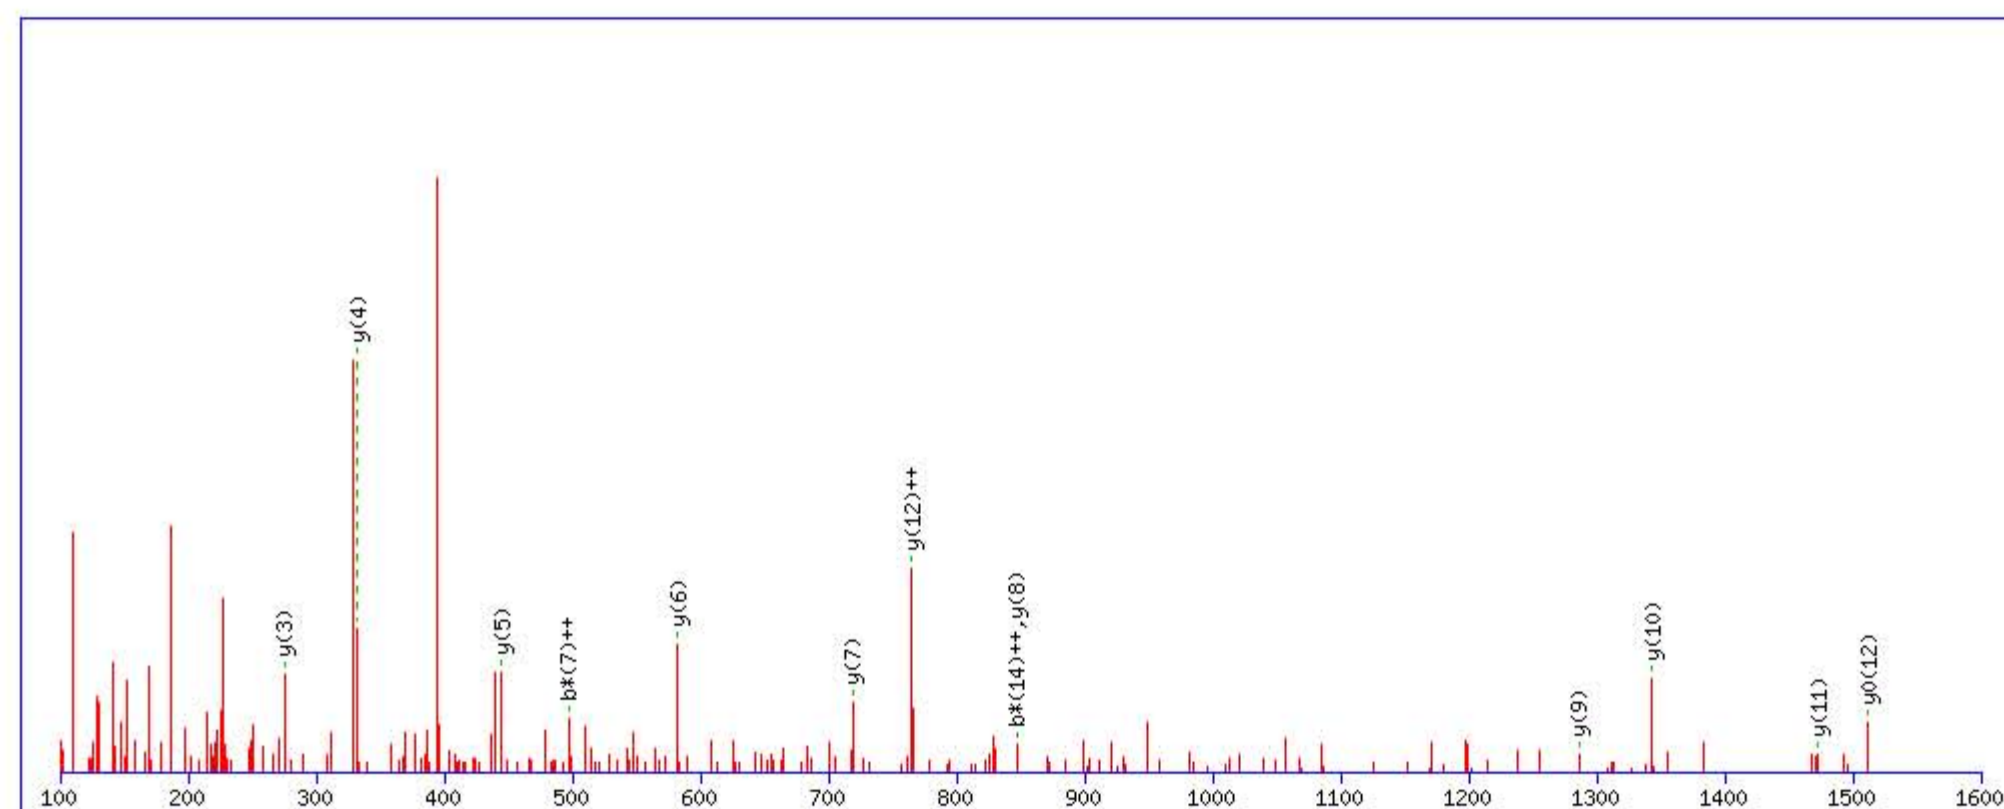

Monoisotopic mass of neutral peptide Mr(calc): 1855.972687

Fixed modifications: Carbamidomethyl (C) (apply to specified residues or termini only)

Variable modifications:

Q7 : Biotin:Thermo-21345 (Q)

Ions Score: 26 Expect: 0.064

Matches : 13/134 fragment ions using 43 most intense peaks [\(help\)](#)

| #  | b           | b <sup>++</sup> | b <sup>*</sup> | b <sup>*++</sup> | b <sup>0</sup> | b <sup>0++</sup> | Seq. | y           | y <sup>++</sup> | y <sup>*</sup> | y <sup>*++</sup> | y <sup>0</sup> | y <sup>0++</sup> | #  |
|----|-------------|-----------------|----------------|------------------|----------------|------------------|------|-------------|-----------------|----------------|------------------|----------------|------------------|----|
| 1  | 114.091340  | 57.549308       |                |                  |                |                  | L    |             |                 |                |                  |                |                  | 15 |
| 2  | 215.139019  | 108.073147      |                |                  | 197.128454     | 99.067865        | T    | 1743.895902 | 872.451589      | 1726.869353    | 863.938314       | 1725.885337    | 863.446306       | 14 |
| 3  | 328.223083  | 164.615179      |                |                  | 310.212518     | 155.609897       | I    | 1642.848223 | 821.927749      | 1625.821674    | 813.414475       | 1624.837658    | 812.922467       | 13 |
| 4  | 385.244547  | 193.125911      |                |                  | 367.233982     | 184.120629       | G    | 1529.764159 | 765.385717      | 1512.737610    | 756.872443       | 1511.753594    | 756.380435       | 12 |
| 5  | 514.287140  | 257.647208      |                |                  | 496.276575     | 248.641926       | E    | 1472.742695 | 736.874985      | 1455.716146    | 728.361711       | 1454.732130    | 727.869703       | 11 |
| 6  | 571.308604  | 286.157940      |                |                  | 553.298039     | 277.152658       | G    | 1343.700102 | 672.353689      | 1326.673553    | 663.840414       |                |                  | 10 |
| 7  | 1010.533930 | 505.770603      | 993.507381     | 497.257329       | 992.523365     | 496.765321       | Q    | 1286.678638 | 643.842957      | 1269.652089    | 635.329682       |                |                  | 9  |
| 8  | 1138.592508 | 569.799892      | 1121.565959    | 561.286618       | 1120.581943    | 560.794609       | Q    | 847.453312  | 424.230294      | 830.426763     | 415.717019       |                |                  | 8  |
| 9  | 1275.651420 | 638.329348      | 1258.624871    | 629.816074       | 1257.640855    | 629.324065       | H    | 719.394734  | 360.201005      | 702.368185     | 351.687730       |                |                  | 7  |
| 10 | 1412.710332 | 706.858804      | 1395.683783    | 698.345530       | 1394.699767    | 697.853521       | H    | 582.335822  | 291.671549      | 565.309273     | 283.158274       |                |                  | 6  |
| 11 | 1525.794396 | 763.400836      | 1508.767847    | 754.887561       | 1507.783831    | 754.395553       | L    | 445.276910  | 223.142093      | 428.250361     | 214.628818       |                |                  | 5  |
| 12 | 1582.815860 | 791.911568      | 1565.789311    | 783.398293       | 1564.805295    | 782.906285       | G    | 332.192846  | 166.600061      | 315.166297     | 158.086786       |                |                  | 4  |
| 13 | 1639.837324 | 820.422300      | 1622.810775    | 811.909025       | 1621.826759    | 811.417017       | G    | 275.171382  | 138.089329      | 258.144833     | 129.576054       |                |                  | 3  |
| 14 | 1710.874438 | 855.940857      | 1693.847889    | 847.427582       | 1692.863873    | 846.935574       | A    | 218.149918  | 109.578597      | 201.123369     | 101.065322       |                |                  | 2  |
| 15 |             |                 |                |                  |                |                  | K    | 147.112804  | 74.060040       | 130.086255     | 65.546765        |                |                  | 1  |

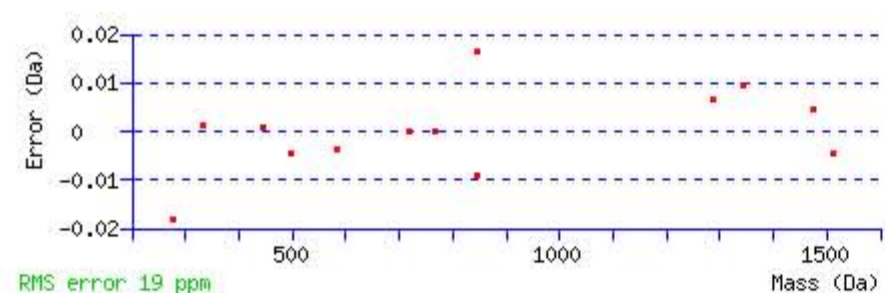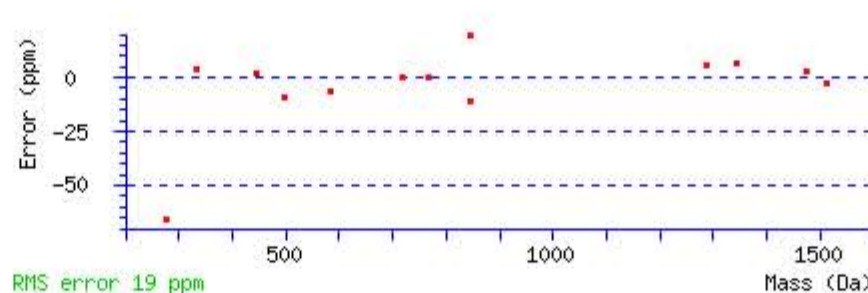

NCBI BLAST search of [LTIGEGQQHHLGGAK](#)

(Parameters: blastp, nr protein database, expect=20000, no filter, PAM30)

Other BLAST [web gateways](#)

All matches to this query

| Score | Mr(calc):   | Delta    | Sequence                        |
|-------|-------------|----------|---------------------------------|
| 25.8  | 1855.972687 | 0.016769 | <a href="#">LTIGEGQQHHLGGAK</a> |
| 17.8  | 1855.972687 | 0.016769 | <a href="#">LTIGEGQQHHLGGAK</a> |

Mascot: <http://www.matrixscience.com/>



# MASCOT Search Results

## Peptide View

MS/MS Fragmentation of **LTIGEGQQHHLGGAK**

Found in **FIBG\_HUMAN**, Fibrinogen gamma chain OS=Homo sapiens GN=FGG PE=1 SV=3

Match to Query 53232: 2167.131896 from(542.790250,4+) rtinseconds(1748) index(54141)

Title: Locus:1.1.1.3095.7 File:"2013-07-02 CLN FXIII 30 min 2nd F 4.wiff"

Data file C:\Program Files (x86)\Matrix Science\Mascot Daemon\mgf2 FXIII 30 min 2nd\mascot\_daemon\_merge.mgf

Click mouse within plot area to zoom in by factor of two about that point

Or, Plot from  to  Da

Label all possible matches  Label matches used for scoring

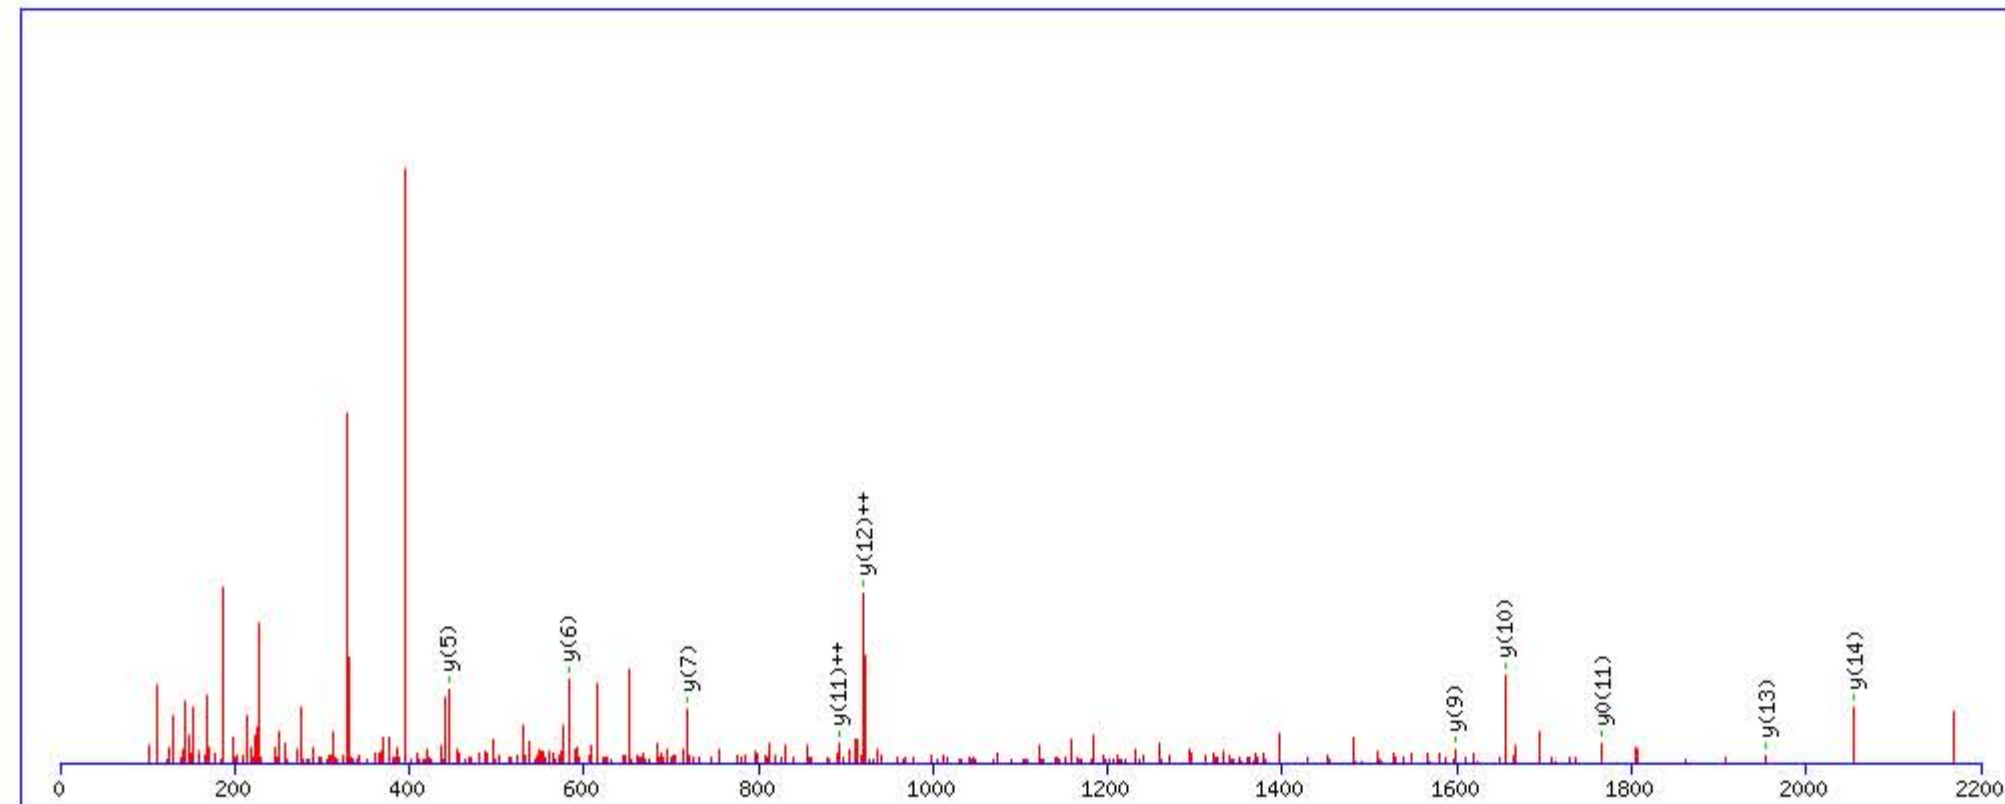

Monoisotopic mass of neutral peptide Mr(calc): 2167.139435

Fixed modifications: Carbamidomethyl (C) (apply to specified residues or termini only)

Variable modifications:

Q7 : Biotin:Thermo-21345 (Q)

Q8 : Biotin:Thermo-21345 (Q)

Ions Score: 30 Expect: 0.026

Matches : 10/134 fragment ions using 20 most intense peaks [\(help\)](#)

| #  | b           | b <sup>++</sup> | b <sup>+</sup> | b <sup>*++</sup> | b <sup>0</sup> | b <sup>0++</sup> | Seq. | y                  | y <sup>++</sup>   | y <sup>+</sup> | y <sup>*++</sup> | y <sup>0</sup>     | y <sup>0++</sup> | #  |
|----|-------------|-----------------|----------------|------------------|----------------|------------------|------|--------------------|-------------------|----------------|------------------|--------------------|------------------|----|
| 1  | 114.091340  | 57.549308       |                |                  |                |                  | L    |                    |                   |                |                  |                    |                  | 15 |
| 2  | 215.139019  | 108.073147      |                |                  | 197.128454     | 99.067865        | T    | <b>2055.062650</b> | 1028.034963       | 2038.036101    | 1019.521688      | 2037.052085        | 1019.029680      | 14 |
| 3  | 328.223083  | 164.615179      |                |                  | 310.212518     | 155.609897       | I    | <b>1954.014971</b> | 977.511123        | 1936.988422    | 968.997849       | 1936.004406        | 968.505841       | 13 |
| 4  | 385.244547  | 193.125911      |                |                  | 367.233982     | 184.120629       | G    | 1840.930907        | <b>920.969091</b> | 1823.904358    | 912.455817       | 1822.920342        | 911.963809       | 12 |
| 5  | 514.287140  | 257.647208      |                |                  | 496.276575     | 248.641926       | E    | 1783.909443        | <b>892.458359</b> | 1766.882894    | 883.945085       | <b>1765.898878</b> | 883.453077       | 11 |
| 6  | 571.308604  | 286.157940      |                |                  | 553.298039     | 277.152658       | G    | <b>1654.866850</b> | 827.937063        | 1637.840301    | 819.423788       |                    |                  | 10 |
| 7  | 1010.533930 | 505.770603      | 993.507381     | 497.257329       | 992.523365     | 496.765321       | Q    | <b>1597.845386</b> | 799.426331        | 1580.818837    | 790.913056       |                    |                  | 9  |
| 8  | 1449.759256 | 725.383266      | 1432.732707    | 716.869992       | 1431.748691    | 716.377984       | Q    | 1158.620060        | 579.813668        | 1141.593511    | 571.300393       |                    |                  | 8  |
| 9  | 1586.818168 | 793.912722      | 1569.791619    | 785.399448       | 1568.807603    | 784.907440       | H    | <b>719.394734</b>  | 360.201005        | 702.368185     | 351.687730       |                    |                  | 7  |
| 10 | 1723.877080 | 862.442178      | 1706.850531    | 853.928904       | 1705.866515    | 853.436895       | H    | <b>582.335822</b>  | 291.671549        | 565.309273     | 283.158274       |                    |                  | 6  |
| 11 | 1836.961144 | 918.984210      | 1819.934595    | 910.470936       | 1818.950579    | 909.978927       | L    | <b>445.276910</b>  | 223.142093        | 428.250361     | 214.628818       |                    |                  | 5  |
| 12 | 1893.982608 | 947.494942      | 1876.956059    | 938.981667       | 1875.972043    | 938.489659       | G    | 332.192846         | 166.600061        | 315.166297     | 158.086786       |                    |                  | 4  |
| 13 | 1951.004072 | 976.005674      | 1933.977523    | 967.492399       | 1932.993507    | 967.000391       | G    | 275.171382         | 138.089329        | 258.144833     | 129.576054       |                    |                  | 3  |
| 14 | 2022.041186 | 1011.524231     | 2005.014637    | 1003.010956      | 2004.030621    | 1002.518948      | A    | 218.149918         | 109.578597        | 201.123369     | 101.065322       |                    |                  | 2  |
| 15 |             |                 |                |                  |                |                  | K    | 147.112804         | 74.060040         | 130.086255     | 65.546765        |                    |                  | 1  |

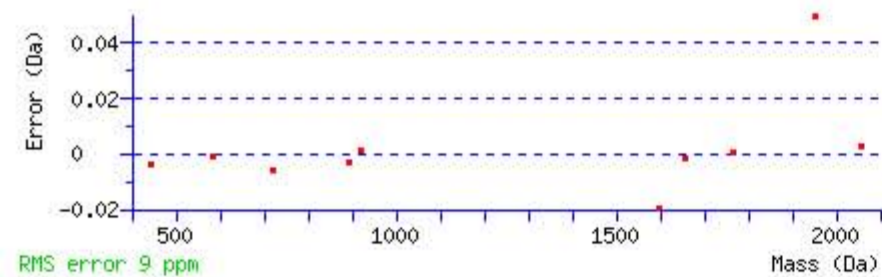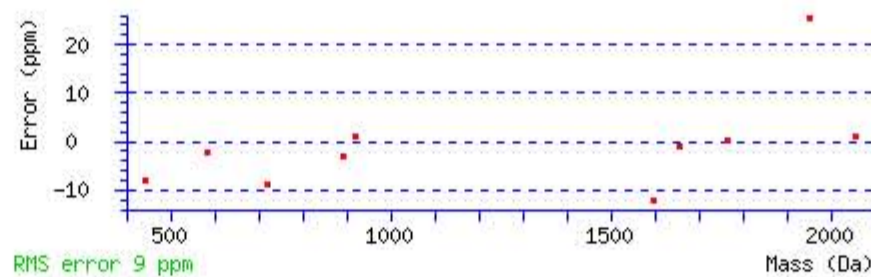

NCBI BLAST search of **LTIGEGQQHHLGGAK**

(Parameters: blastp, nr protein database, expect=20000, no filter, PAM30)

Other BLAST [web gateways](#)

All matches to this query

| Score | Mr(calc):   | Delta     | Sequence                        |
|-------|-------------|-----------|---------------------------------|
| 29.9  | 2167.139435 | -0.007539 | <a href="#">LTIGEGQQHHLGGAK</a> |



**MASCOT** Mascot Search Results

**Peptide View**

MS/MS Fragmentation of **RPGGEPSPGTTGQSYNQYSQR**  
 Found in **FINC\_HUMAN**, Fibronectin OS=Homo sapiens GN=FN1 PE=1 SV=4

Match to Query 61985: 2706.237702 from(903.086510,3+) rtinseconds(1497) index(35580)  
 Title: Locus:1.1.1.2543.26 File:"2013-07-02 CLN FXIII 30 min 2nd F 3.wiff"  
 Data file C:\Program Files (x86)\Matrix Science\Mascot Daemon\mgf\2 FXIII 30 min 2nd\mascot\_daemon\_merge.mgf

Click mouse within plot area to zoom in by factor of two about that point  
 Or, Plot from  to  Da   
 Label all possible matches  Label matches used for scoring

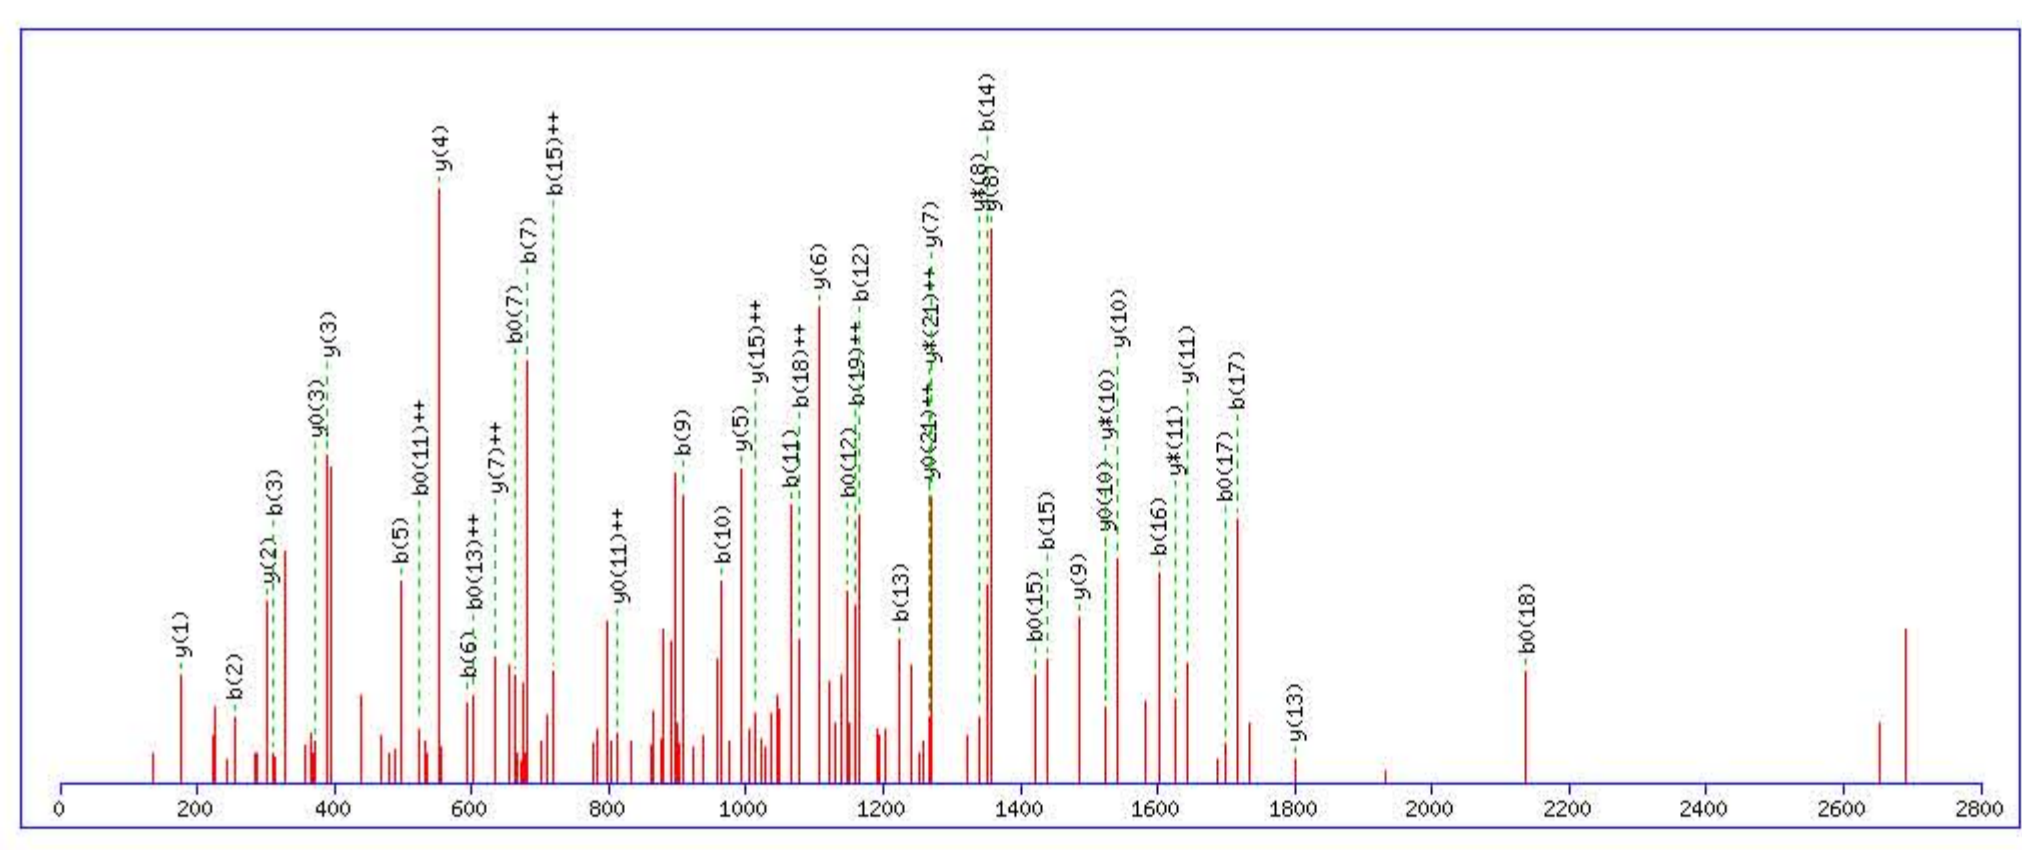

Monoisotopic mass of neutral peptide Mr(calc): 2706.245621  
 Fixed modifications: Carbamidomethyl (C) (apply to specified residues or termini only)  
 Variable modifications:  
 Q18 : Biotin:Thermo-21345 (Q)  
 Ions Score: 102 Expect: 6.8e-010  
 Matches : 47/240 fragment ions using 69 most intense peaks [\(help\)](#)

| #  | b                  | b <sup>++</sup>    | b <sup>*</sup> | b <sup>*++</sup> | b <sup>0</sup>     | b <sup>0++</sup>  | Seq. | y                  | y <sup>++</sup>    | y <sup>*</sup>     | y <sup>*++</sup>   | y <sup>0</sup>     | y <sup>0++</sup>   | #  |
|----|--------------------|--------------------|----------------|------------------|--------------------|-------------------|------|--------------------|--------------------|--------------------|--------------------|--------------------|--------------------|----|
| 1  | 157.108387         | 79.057831          | 140.081838     | 70.544557        |                    |                   | R    |                    |                    |                    |                    |                    |                    | 22 |
| 2  | <b>254.161151</b>  | 127.584213         | 237.134602     | 119.070939       |                    |                   | P    | 2551.151795        | 1276.079535        | 2534.125246        | <b>1267.566261</b> | 2533.141230        | <b>1267.074253</b> | 21 |
| 3  | <b>311.182615</b>  | 156.094945         | 294.156066     | 147.581671       |                    |                   | G    | 2454.099031        | 1227.553153        | 2437.072482        | 1219.039879        | 2436.088466        | 1218.547871        | 20 |
| 4  | 368.204079         | 184.605677         | 351.177530     | 176.092403       |                    |                   | G    | 2397.077567        | 1199.042421        | 2380.051018        | 1190.529147        | 2379.067002        | 1190.037139        | 19 |
| 5  | <b>497.246672</b>  | 249.126974         | 480.220123     | 240.613700       | 479.236107         | 240.121692        | E    | 2340.056103        | 1170.531689        | 2323.029554        | 1162.018415        | 2322.045538        | 1161.526407        | 18 |
| 6  | <b>594.299436</b>  | 297.653356         | 577.272887     | 289.140082       | 576.288871         | 288.648074        | P    | 2211.013510        | 1106.010393        | 2193.986961        | 1097.497118        | 2193.002945        | 1097.005110        | 17 |
| 7  | <b>681.331464</b>  | 341.169370         | 664.304915     | 332.656095       | <b>663.320899</b>  | 332.164087        | S    | 2113.960746        | 1057.484011        | 2096.934197        | 1048.970736        | 2095.950181        | 1048.478728        | 16 |
| 8  | 778.384228         | 389.695752         | 761.357679     | 381.182478       | 760.373663         | 380.690470        | P    | 2026.928718        | <b>1013.967997</b> | 2009.902169        | 1005.454723        | 2008.918153        | 1004.962715        | 15 |
| 9  | <b>907.426821</b>  | 454.217049         | 890.400272     | 445.703774       | 889.416256         | 445.211766        | E    | 1929.875954        | 965.441615         | 1912.849405        | 956.928341         | 1911.865389        | 956.436333         | 14 |
| 10 | <b>964.448285</b>  | 482.727781         | 947.421736     | 474.214506       | 946.437720         | 473.722498        | G    | <b>1800.833361</b> | 900.920319         | 1783.806812        | 892.407044         | 1782.822796        | 891.915036         | 13 |
| 11 | <b>1065.495964</b> | 533.251620         | 1048.469415    | 524.738346       | 1047.485399        | <b>524.246337</b> | T    | 1743.811897        | 872.409587         | 1726.785348        | 863.896312         | 1725.801332        | 863.404304         | 12 |
| 12 | <b>1166.543643</b> | 583.775460         | 1149.517094    | 575.262185       | <b>1148.533078</b> | 574.770177        | T    | <b>1642.764218</b> | 821.885747         | <b>1625.737669</b> | 813.372473         | 1624.753653        | <b>812.880465</b>  | 11 |
| 13 | <b>1223.565107</b> | 612.286191         | 1206.538558    | 603.772917       | 1205.554542        | <b>603.280909</b> | G    | <b>1541.716539</b> | 771.361908         | <b>1524.689990</b> | 762.848633         | <b>1523.705974</b> | 762.356625         | 10 |
| 14 | <b>1351.623685</b> | 676.315480         | 1334.597136    | 667.802206       | 1333.613120        | 667.310198        | Q    | <b>1484.695075</b> | 742.851176         | 1467.668526        | 734.337901         | 1466.684510        | 733.845893         | 9  |
| 15 | <b>1438.655713</b> | <b>719.831494</b>  | 1421.629164    | 711.318220       | <b>1420.645148</b> | 710.826212        | S    | <b>1356.636497</b> | 678.821887         | <b>1339.609948</b> | 670.308612         | 1338.625932        | 669.816604         | 8  |
| 16 | <b>1601.719042</b> | 801.363159         | 1584.692493    | 792.849885       | 1583.708477        | 792.357876        | Y    | <b>1269.604469</b> | <b>635.305873</b>  | 1252.577920        | 626.792598         | 1251.593904        | 626.300590         | 7  |
| 17 | <b>1715.761969</b> | 858.384622         | 1698.735420    | 849.871348       | <b>1697.751404</b> | 849.379340        | N    | <b>1106.541140</b> | 553.774208         | 1089.514591        | 545.260934         | 1088.530575        | 544.768926         | 6  |
| 18 | 2154.987295        | <b>1077.997285</b> | 2137.960746    | 1069.484011      | <b>2136.976730</b> | 1068.992003       | Q    | <b>992.498213</b>  | 496.752745         | 975.471664         | 488.239470         | 974.487648         | 487.747462         | 5  |
| 19 | 2318.050624        | <b>1159.528950</b> | 2301.024075    | 1151.015675      | 2300.040059        | 1150.523667       | Y    | <b>553.272887</b>  | 277.140082         | 536.246338         | 268.626807         | 535.262322         | 268.134799         | 4  |
| 20 | 2405.082652        | 1203.044964        | 2388.056103    | 1194.531689      | 2387.072087        | 1194.039681       | S    | <b>390.209558</b>  | 195.608417         | 373.183009         | 187.095143         | <b>372.198993</b>  | 186.603135         | 3  |
| 21 | 2533.141230        | <b>1267.074253</b> | 2516.114681    | 1258.560978      | 2515.130665        | 1258.068971       | Q    | <b>303.177530</b>  | 152.092403         | 286.150981         | 143.579129         |                    |                    | 2  |
| 22 |                    |                    |                |                  |                    |                   | R    | <b>175.118952</b>  | 88.063114          | 158.092403         | 79.549839          |                    |                    | 1  |

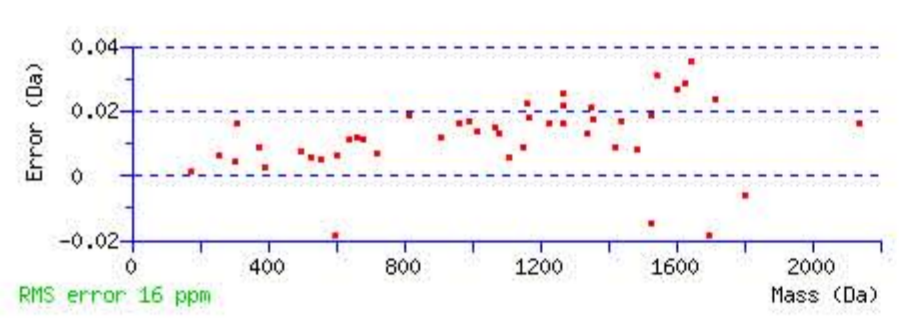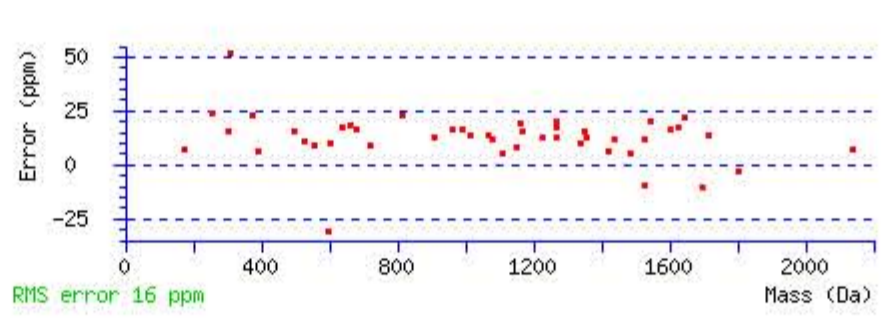

NCBI BLAST search of **RPGGEPSPGTTGQSYNQYSQR**  
 (Parameters: blastp, nr protein database, expect=20000, no filter, PAM30)  
 Other BLAST [web gateways](#)

**All matches to this query**

| Score | Mr(calc):   | Delta     | Sequence                              |
|-------|-------------|-----------|---------------------------------------|
| 102.5 | 2706.245621 | -0.007919 | <a href="#">RPGGEPSPGTTGQSYNQYSQR</a> |
| 81.9  | 2706.245621 | -0.007919 | <a href="#">RPGGEPSPGTTGQSYNQYSQR</a> |
| 50.4  | 2706.245621 | -0.007919 | <a href="#">RPGGEPSPGTTGQSYNQYSQR</a> |



# MASCOT Search Results

## Peptide View

MS/MS Fragmentation of **RPGGEPSPGTTGQSYNQYSQR**  
 Found in **FINC\_HUMAN**, Fibronectin OS=Homo sapiens GN=FN1 PE=1 SV=4

Match to Query 61986: 2706.237702 from(903.086510,3+) rtinseconds(1506) index(35619)  
 Title: Locus:1.1.1.2546.15 File:"2013-07-02 CLN FXIII 30 min 2nd F 3.wiff"  
 Data file C:\Program Files (x86)\Matrix Science\Mascot Daemon\mgf2 FXIII 30 min 2nd\mascot\_daemon\_merge.mgf

Click mouse within plot area to zoom in by factor of two about that point  
 Or, Plot from  to  Da   
 Label all possible matches  Label matches used for scoring

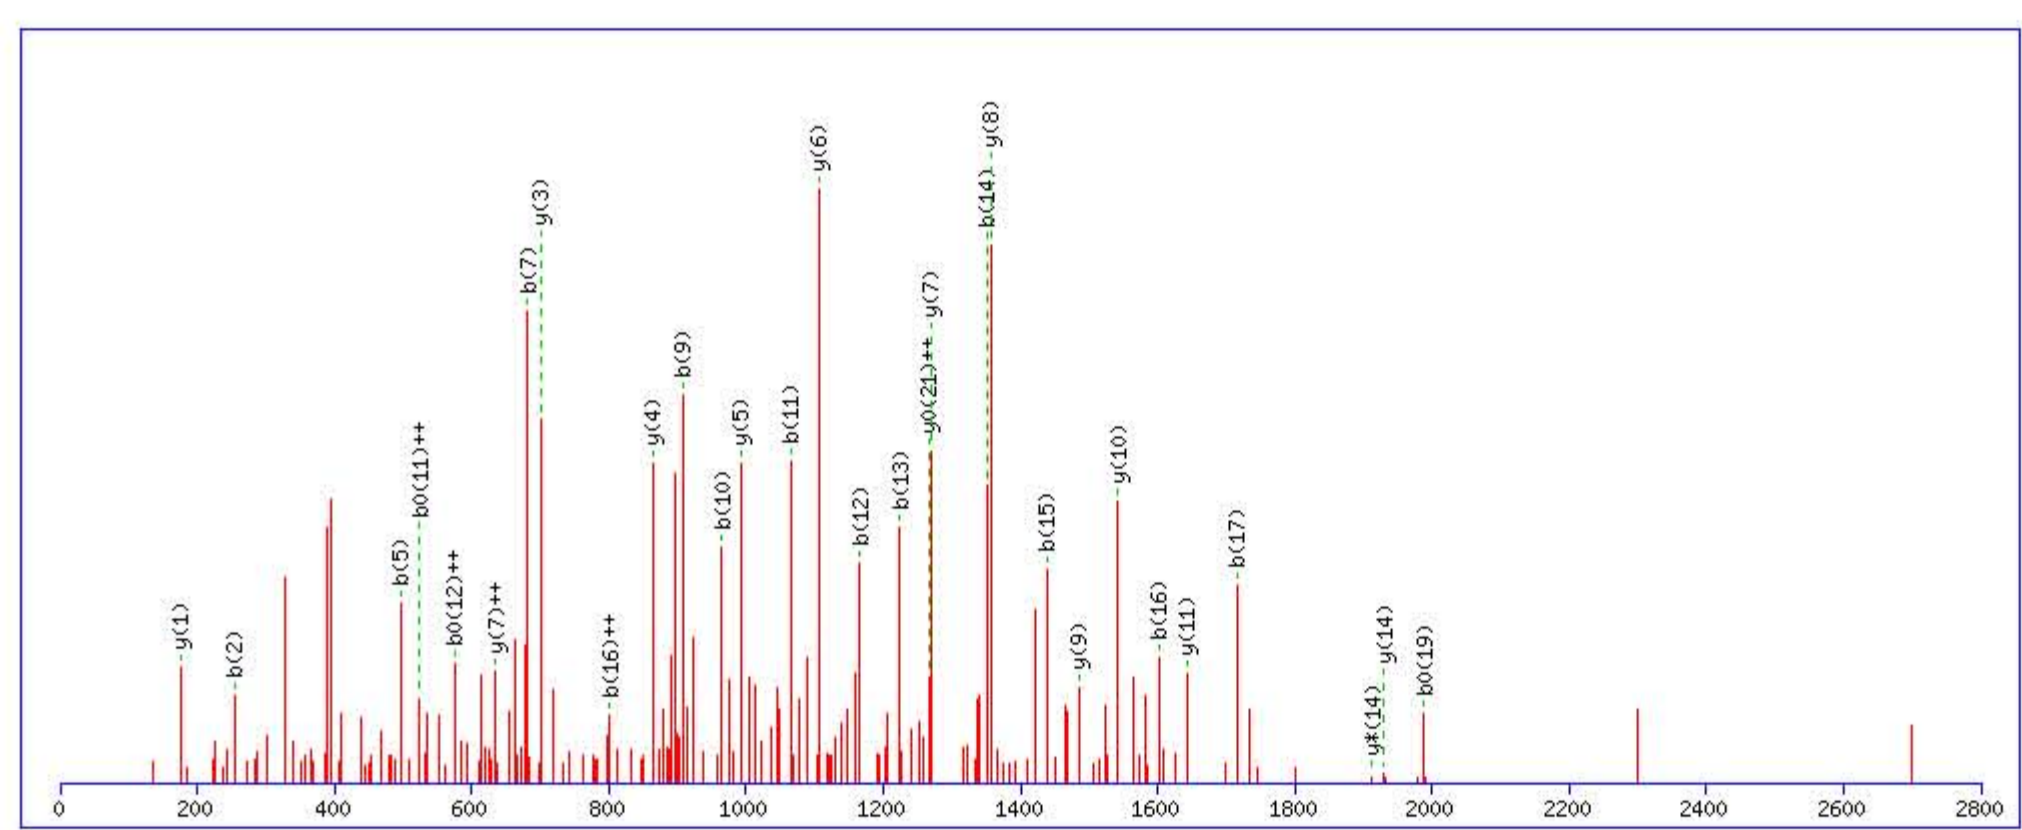

Monoisotopic mass of neutral peptide  $M_r(\text{calc})$ : 2706.245621  
 Fixed modifications: Carbamidomethyl (C) (apply to specified residues or termini only)  
 Variable modifications:  
 Q21 : Biotin:Thermo-21345 (Q)  
 Ions Score: 100 Expect: 1.3e-009  
 Matches : 31/240 fragment ions using 40 most intense peaks [\(help\)](#)

| #  | b                  | b <sup>++</sup>    | b <sup>*</sup> | b <sup>*++</sup> | b <sup>0</sup>     | b <sup>0++</sup>  | Seq. | y                  | y <sup>++</sup>   | y <sup>*</sup>     | y <sup>*++</sup> | y <sup>0</sup> | y <sup>0++</sup>   | #  |
|----|--------------------|--------------------|----------------|------------------|--------------------|-------------------|------|--------------------|-------------------|--------------------|------------------|----------------|--------------------|----|
| 1  | 157.108387         | 79.057831          | 140.081838     | 70.544557        |                    |                   | R    |                    |                   |                    |                  |                |                    | 22 |
| 2  | <b>254.161151</b>  | 127.584213         | 237.134602     | 119.070939       |                    |                   | P    | 2551.151795        | 1276.079535       | 2534.125246        | 1267.566261      | 2533.141230    | <b>1267.074253</b> | 21 |
| 3  | 311.182615         | 156.094945         | 294.156066     | 147.581671       |                    |                   | G    | 2454.099031        | 1227.553153       | 2437.072482        | 1219.039879      | 2436.088466    | 1218.547871        | 20 |
| 4  | 368.204079         | 184.605677         | 351.177530     | 176.092403       |                    |                   | G    | 2397.077567        | 1199.042421       | 2380.051018        | 1190.529147      | 2379.067002    | 1190.037139        | 19 |
| 5  | <b>497.246672</b>  | 249.126974         | 480.220123     | 240.613700       | 479.236107         | 240.121692        | E    | 2340.056103        | 1170.531689       | 2323.029554        | 1162.018415      | 2322.045538    | 1161.526407        | 18 |
| 6  | 594.299436         | 297.653356         | 577.272887     | 289.140082       | 576.288871         | 288.648074        | P    | 2211.013510        | 1106.010393       | 2193.986961        | 1097.497118      | 2193.002945    | 1097.005110        | 17 |
| 7  | <b>681.331464</b>  | 341.169370         | 664.304915     | 332.656095       | 663.320899         | 332.164087        | S    | 2113.960746        | 1057.484011       | 2096.934197        | 1048.970736      | 2095.950181    | 1048.478728        | 16 |
| 8  | 778.384228         | 389.695752         | 761.357679     | 381.182478       | 760.373663         | 380.690470        | P    | 2026.928718        | 1013.967997       | 2009.902169        | 1005.454723      | 2008.918153    | 1004.962715        | 15 |
| 9  | <b>907.426821</b>  | 454.217049         | 890.400272     | 445.703774       | 889.416256         | 445.211766        | E    | <b>1929.875954</b> | 965.441615        | <b>1912.849405</b> | 956.928341       | 1911.865389    | 956.436333         | 14 |
| 10 | <b>964.448285</b>  | 482.727781         | 947.421736     | 474.214506       | 946.437720         | 473.722498        | G    | 1800.833361        | 900.920319        | 1783.806812        | 892.407044       | 1782.822796    | 891.915036         | 13 |
| 11 | <b>1065.495964</b> | 533.251620         | 1048.469415    | 524.738346       | 1047.485399        | <b>524.246337</b> | T    | 1743.811897        | 872.409587        | 1726.785348        | 863.896312       | 1725.801332    | 863.404304         | 12 |
| 12 | <b>1166.543643</b> | 583.775460         | 1149.517094    | 575.262185       | 1148.533078        | <b>574.770177</b> | T    | <b>1642.764218</b> | 821.885747        | 1625.737669        | 813.372473       | 1624.753653    | 812.880465         | 11 |
| 13 | <b>1223.565107</b> | 612.286191         | 1206.538558    | 603.772917       | 1205.554542        | 603.280909        | G    | <b>1541.716539</b> | 771.361908        | 1524.689990        | 762.848633       | 1523.705974    | 762.356625         | 10 |
| 14 | <b>1351.623685</b> | 676.315480         | 1334.597136    | 667.802206       | 1333.613120        | 667.310198        | Q    | <b>1484.695075</b> | 742.851176        | 1467.668526        | 734.337901       | 1466.684510    | 733.845893         | 9  |
| 15 | <b>1438.655713</b> | 719.831494         | 1421.629164    | 711.318220       | 1420.645148        | 710.826212        | S    | <b>1356.636497</b> | 678.821887        | 1339.609948        | 670.308612       | 1338.625932    | 669.816604         | 8  |
| 16 | <b>1601.719042</b> | <b>801.363159</b>  | 1584.692493    | 792.849885       | 1583.708477        | 792.357876        | Y    | <b>1269.604469</b> | <b>635.305873</b> | 1252.577920        | 626.792598       | 1251.593904    | 626.300590         | 7  |
| 17 | <b>1715.761969</b> | 858.384622         | 1698.735420    | 849.871348       | 1697.751404        | 849.379340        | N    | <b>1106.541140</b> | 553.774208        | 1089.514591        | 545.260934       | 1088.530575    | 544.768926         | 6  |
| 18 | 1843.820547        | 922.413912         | 1826.793998    | 913.900637       | 1825.809982        | 913.408629        | Q    | <b>992.498213</b>  | 496.752745        | 975.471664         | 488.239470       | 974.487648     | 487.747462         | 5  |
| 19 | 2006.883876        | 1003.945576        | 1989.857327    | 995.432302       | <b>1988.873311</b> | 994.940294        | Y    | <b>864.439635</b>  | 432.723456        | 847.413086         | 424.210181       | 846.429070     | 423.718173         | 4  |
| 20 | 2093.915904        | 1047.461590        | 2076.889355    | 1038.948315      | 2075.905339        | 1038.456307       | S    | <b>701.376306</b>  | 351.191791        | 684.349757         | 342.678517       | 683.365741     | 342.186509         | 3  |
| 21 | 2533.141230        | <b>1267.074253</b> | 2516.114681    | 1258.560978      | 2515.130665        | 1258.068971       | Q    | 614.344278         | 307.675777        | 597.317729         | 299.162503       |                |                    | 2  |
| 22 |                    |                    |                |                  |                    |                   | R    | <b>175.118952</b>  | 88.063114         | 158.092403         | 79.549839        |                |                    | 1  |

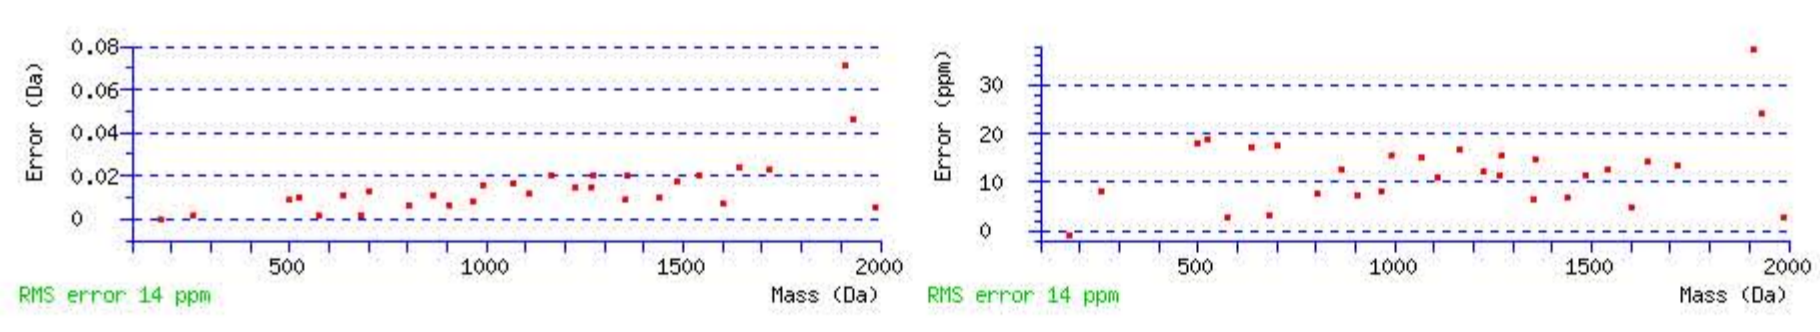

NCBI BLAST search of [RPGGEPSPGTTGQSYNQYSQR](#)  
 (Parameters: blastp, nr protein database, expect=20000, no filter, PAM30)  
 Other BLAST [web gateways](#)

### All matches to this query

| Score | $M_r(\text{calc})$ : | Delta     | Sequence                              |
|-------|----------------------|-----------|---------------------------------------|
| 99.8  | 2706.245621          | -0.007919 | <a href="#">RPGGEPSPGTTGQSYNQYSQR</a> |
| 89.3  | 2706.245621          | -0.007919 | <a href="#">RPGGEPSPGTTGQSYNQYSQR</a> |
| 40.9  | 2706.245621          | -0.007919 | <a href="#">RPGGEPSPGTTGQSYNQYSQR</a> |



# MASCOT Search Results

## Peptide View

MS/MS Fragmentation of **RPGGEPSPGTTGQSYNQYSQR**

Found in **FINC\_HUMAN**, Fibronectin OS=Homo sapiens GN=FN1 PE=1 SV=4

Match to Query 61987: 2706.240372 from(903.087400,3+) rtinseconds(1522) index(35729)

Title: Locus:1.1.1.2552.17 File:"2013-07-02 CLN FXIII 30 min 2nd F 3.wiff"

Data file C:\Program Files (x86)\Matrix Science\Mascot Daemon\mgf2 FXIII 30 min 2nd\mascot\_daemon\_merge.mgf

Click mouse within plot area to zoom in by factor of two about that point

Or, Plot from  to  Da

Label all possible matches  Label matches used for scoring

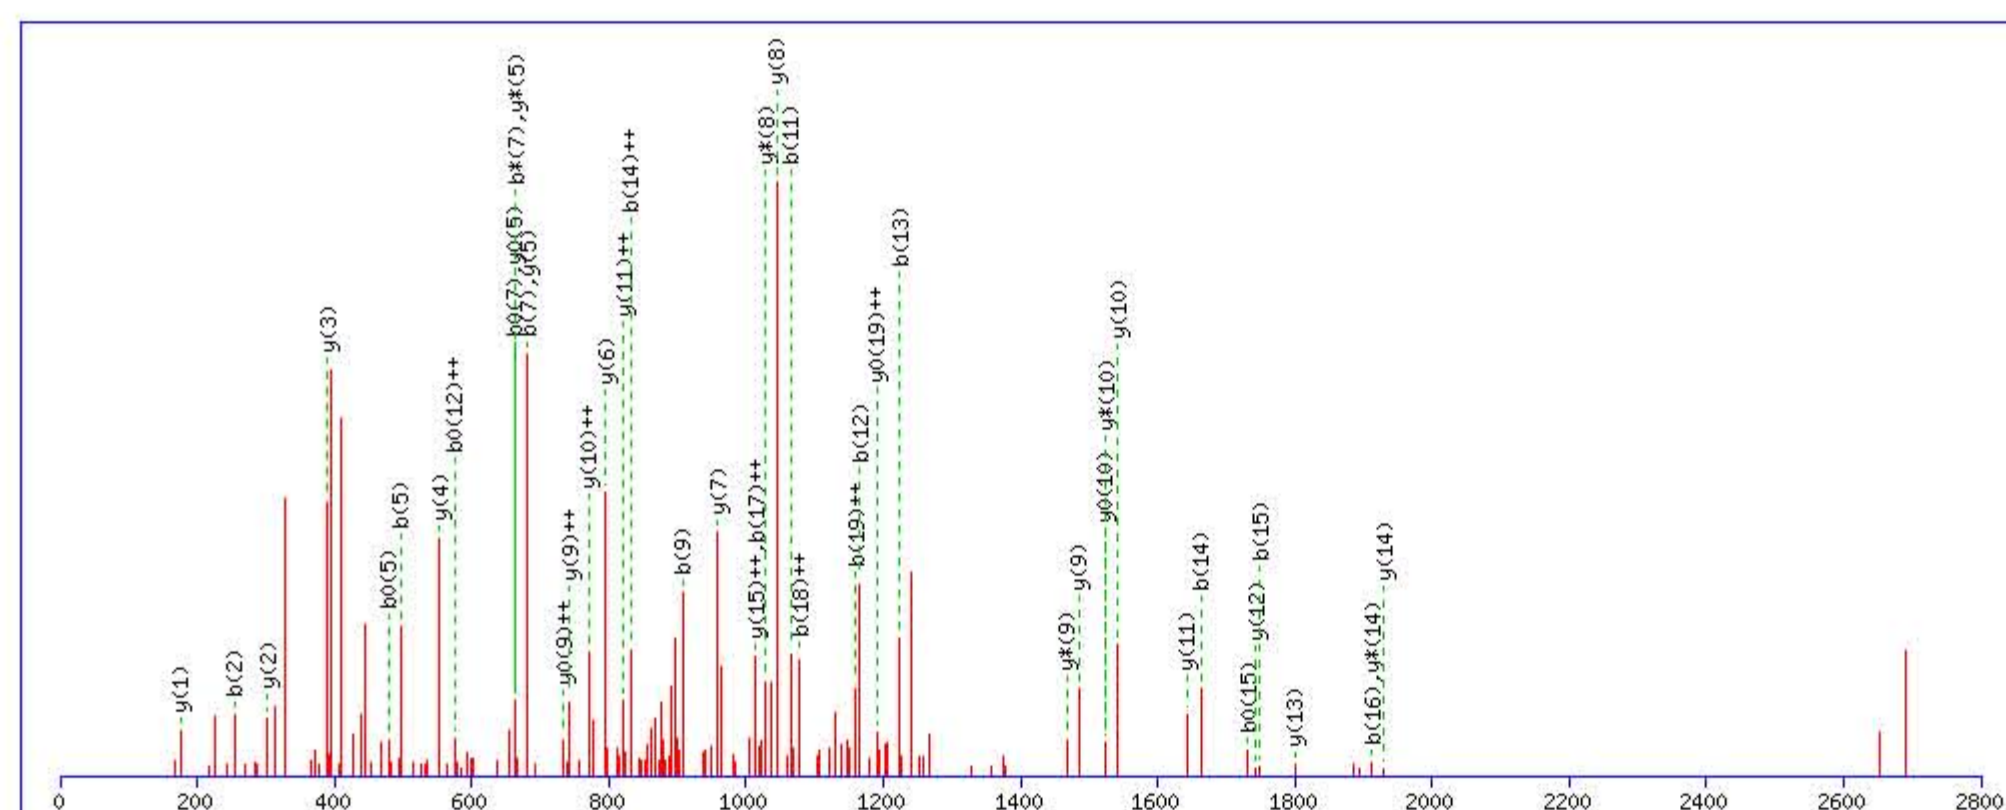

Monoisotopic mass of neutral peptide Mr(calc): 2706.245621

Fixed modifications: Carbamidomethyl (C) (apply to specified residues or termini only)

Variable modifications:

Q14 : Biotin:Thermo-21345 (Q)

Ions Score: 87 Expect: 7.4e-009

Matches : 46/240 fragment ions using 66 most intense peaks [\(help\)](#)

| #  | b                  | b <sup>++</sup>    | b <sup>+</sup>    | b <sup>*++</sup> | b <sup>0</sup>     | b <sup>0++</sup>  | Seq. | y                  | y <sup>++</sup>    | y <sup>+</sup>     | y <sup>*++</sup> | y <sup>0</sup>     | y <sup>0++</sup>   | #  |
|----|--------------------|--------------------|-------------------|------------------|--------------------|-------------------|------|--------------------|--------------------|--------------------|------------------|--------------------|--------------------|----|
| 1  | 157.108387         | 79.057831          | 140.081838        | 70.544557        |                    |                   | R    |                    |                    |                    |                  |                    |                    | 22 |
| 2  | <b>254.161151</b>  | 127.584213         | 237.134602        | 119.070939       |                    |                   | P    | 2551.151795        | 1276.079535        | 2534.125246        | 1267.566261      | 2533.141230        | 1267.074253        | 21 |
| 3  | 311.182615         | 156.094945         | 294.156066        | 147.581671       |                    |                   | G    | 2454.099031        | 1227.553153        | 2437.072482        | 1219.039879      | 2436.088466        | 1218.547871        | 20 |
| 4  | 368.204079         | 184.605677         | 351.177530        | 176.092403       |                    |                   | G    | 2397.077567        | 1199.042421        | 2380.051018        | 1190.529147      | 2379.067002        | <b>1190.037139</b> | 19 |
| 5  | <b>497.246672</b>  | 249.126974         | 480.220123        | 240.613700       | <b>479.236107</b>  | 240.121692        | E    | 2340.056103        | 1170.531689        | 2323.029554        | 1162.018415      | 2322.045538        | 1161.526407        | 18 |
| 6  | 594.299436         | 297.653356         | 577.272887        | 289.140082       | 576.288871         | 288.648074        | P    | 2211.013510        | 1106.010393        | 2193.986961        | 1097.497118      | 2193.002945        | 1097.005110        | 17 |
| 7  | <b>681.331464</b>  | 341.169370         | <b>664.304915</b> | 332.656095       | <b>663.320899</b>  | 332.164087        | S    | 2113.960746        | 1057.484011        | 2096.934197        | 1048.970736      | 2095.950181        | 1048.478728        | 16 |
| 8  | 778.384228         | 389.695752         | 761.357679        | 381.182478       | 760.373663         | 380.690470        | P    | 2026.928718        | <b>1013.967997</b> | 2009.902169        | 1005.454723      | 2008.918153        | 1004.962715        | 15 |
| 9  | <b>907.426821</b>  | 454.217049         | 890.400272        | 445.703774       | 889.416256         | 445.211766        | E    | <b>1929.875954</b> | 965.441615         | <b>1912.849405</b> | 956.928341       | 1911.865389        | 956.436333         | 14 |
| 10 | 964.448285         | 482.727781         | 947.421736        | 474.214506       | 946.437720         | 473.722498        | G    | <b>1800.833361</b> | 900.920319         | 1783.806812        | 892.407044       | 1782.822796        | 891.915036         | 13 |
| 11 | <b>1065.495964</b> | 533.251620         | 1048.469415       | 524.738346       | 1047.485399        | 524.246337        | T    | <b>1743.811897</b> | 872.409587         | 1726.785348        | 863.896312       | 1725.801332        | 863.404304         | 12 |
| 12 | <b>1166.543643</b> | 583.775460         | 1149.517094       | 575.262185       | 1148.533078        | <b>574.770177</b> | T    | <b>1642.764218</b> | <b>821.885747</b>  | 1625.737669        | 813.372473       | 1624.753653        | 812.880465         | 11 |
| 13 | <b>1223.565107</b> | 612.286191         | 1206.538558       | 603.772917       | 1205.554542        | 603.280909        | G    | <b>1541.716539</b> | <b>771.361908</b>  | <b>1524.689990</b> | 762.848633       | <b>1523.705974</b> | 762.356625         | 10 |
| 14 | <b>1662.790433</b> | <b>831.898854</b>  | 1645.763884       | 823.385580       | 1644.779868        | 822.893572        | Q    | <b>1484.695075</b> | <b>742.851176</b>  | <b>1467.668526</b> | 734.337901       | 1466.684510        | <b>733.845893</b>  | 9  |
| 15 | <b>1749.822461</b> | 875.414869         | 1732.795912       | 866.901594       | <b>1731.811896</b> | 866.409586        | S    | <b>1045.469749</b> | 523.238513         | <b>1028.443200</b> | 514.725238       | 1027.459184        | 514.233230         | 8  |
| 16 | <b>1912.885790</b> | 956.946533         | 1895.859241       | 948.433259       | 1894.875225        | 947.941251        | Y    | <b>958.437721</b>  | 479.722499         | 941.411172         | 471.209224       | 940.427156         | 470.717216         | 7  |
| 17 | 2026.928717        | <b>1013.967997</b> | 2009.902168       | 1005.454722      | 2008.918152        | 1004.962714       | N    | <b>795.374392</b>  | 398.190834         | 778.347843         | 389.677560       | 777.363827         | 389.185552         | 6  |
| 18 | 2154.987295        | <b>1077.997285</b> | 2137.960746       | 1069.484011      | 2136.976730        | 1068.992003       | Q    | <b>681.331465</b>  | 341.169371         | <b>664.304916</b>  | 332.656096       | <b>663.320900</b>  | 332.164088         | 5  |
| 19 | 2318.050624        | <b>1159.528950</b> | 2301.024075       | 1151.015675      | 2300.040059        | 1150.523667       | Y    | <b>553.272887</b>  | 277.140082         | 536.246338         | 268.626807       | 535.262322         | 268.134799         | 4  |
| 20 | 2405.082652        | 1203.044964        | 2388.056103       | 1194.531689      | 2387.072087        | 1194.039681       | S    | <b>390.209558</b>  | 195.608417         | 373.183009         | 187.095143       | 372.198993         | 186.603135         | 3  |
| 21 | 2533.141230        | 1267.074253        | 2516.114681       | 1258.560978      | 2515.130665        | 1258.068971       | Q    | <b>303.177530</b>  | 152.092403         | 286.150981         | 143.579129       |                    |                    | 2  |
| 22 |                    |                    |                   |                  |                    |                   | R    | <b>175.118952</b>  | 88.063114          | 158.092403         | 79.549839        |                    |                    | 1  |

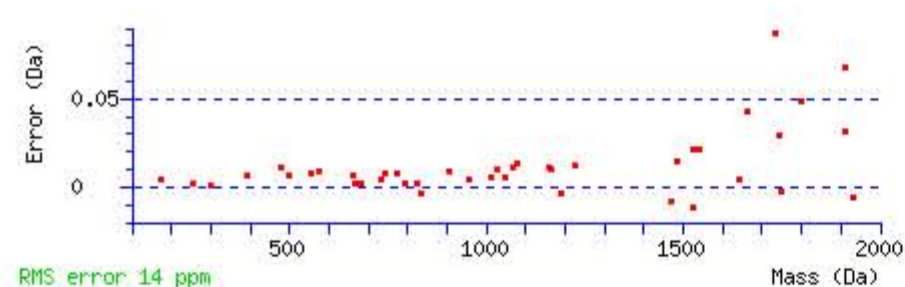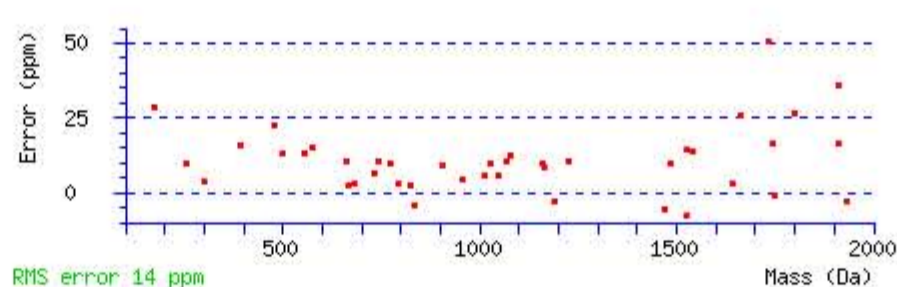

NCBI BLAST search of [RPGGEPSPGTTGQSYNQYSQR](#)

(Parameters: blastp, nr protein database, expect=20000, no filter, PAM30)

Other BLAST [web gateways](#)

All matches to this query

| Score | Mr(calc):   | Delta     | Sequence                              |
|-------|-------------|-----------|---------------------------------------|
| 87.0  | 2706.245621 | -0.005249 | <a href="#">RPGGEPSPGTTGQSYNQYSQR</a> |
| 44.5  | 2706.245621 | -0.005249 | <a href="#">RPGGEPSPGTTGQSYNQYSQR</a> |
| 26.7  | 2706.245621 | -0.005249 | <a href="#">RPGGEPSPGTTGQSYNQYSQR</a> |
| 0.3   | 2706.246658 | -0.006286 | <a href="#">MAQKMSFGFYKYSNMEFVR</a>   |



# Mascot Search Results

## Peptide View

MS/MS Fragmentation of **HRPRPYPPNVGEEIQIGHIPR**  
 Found in **FINC\_HUMAN**, Fibronectin OS=Homo sapiens GN=FN1 PE=1 SV=4

Match to Query 62791: 2772.496370 from(555.506550,5+) rtinseconds(1776) index(37185)  
 Title: Locus:1.1.1.2641.11 File:"2013-07-02 CLN FXIII 30 min 2nd F 3.wiff"  
 Data file C:\Program Files (x86)\Matrix Science\Mascot Daemon\mgf2 FXIII 30 min 2nd\mascot\_daemon\_merge.mgf

Click mouse within plot area to zoom in by factor of two about that point  
 Or, Plot from  to  Da   
 Label all possible matches  Label matches used for scoring

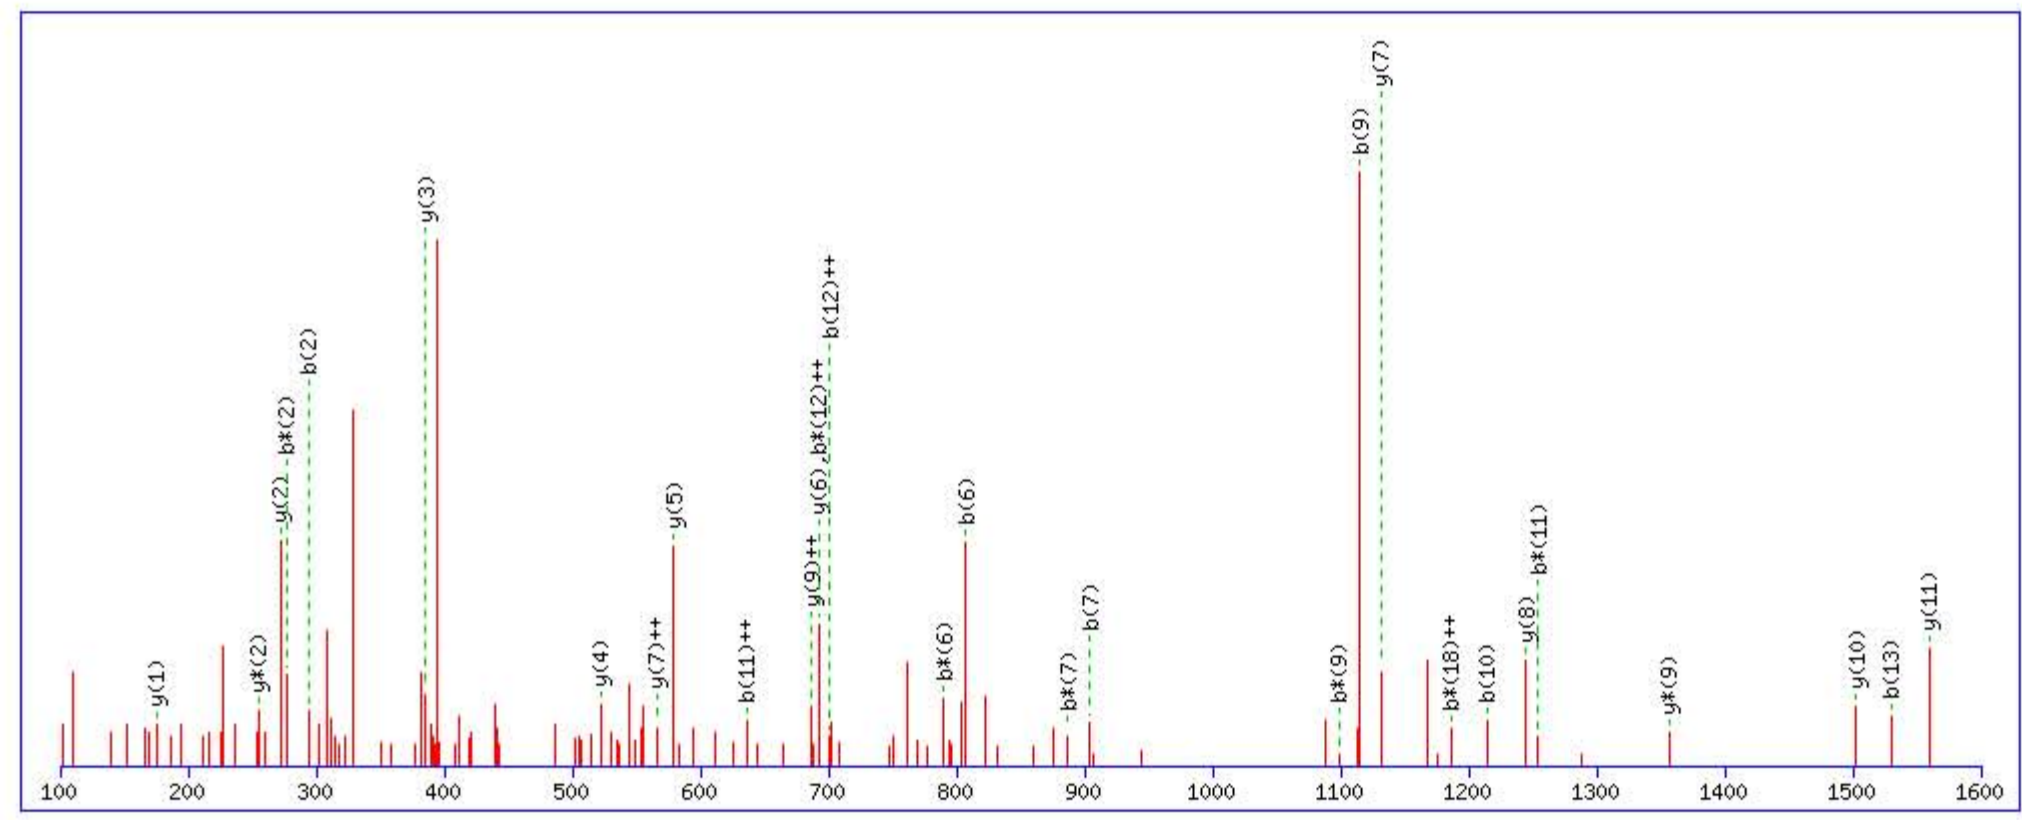

Monoisotopic mass of neutral peptide Mr(calc): 2772.475815  
 Fixed modifications: Carbamidomethyl (C) (apply to specified residues or termini only)  
 Variable modifications:  
 Q15 : Biotin:Thermo-21345 (Q)  
 Ions Score: 45 Expect: 0.00052  
 Matches : 29/200 fragment ions using 58 most intense peaks [\(help\)](#)

| #  | b                  | b <sup>++</sup>   | b <sup>*</sup>     | b <sup>+++</sup>   | b <sup>0</sup> | b <sup>0++</sup> | Seq. | y                  | y <sup>++</sup>   | y <sup>*</sup>     | y <sup>+++</sup> | y <sup>0</sup> | y <sup>0++</sup> | #  |
|----|--------------------|-------------------|--------------------|--------------------|----------------|------------------|------|--------------------|-------------------|--------------------|------------------|----------------|------------------|----|
| 1  | 138.066188         | 69.536732         |                    |                    |                |                  | H    |                    |                   |                    |                  |                |                  | 21 |
| 2  | <b>294.167299</b>  | 147.587288        | <b>277.140750</b>  | 139.074013         |                |                  | R    | 2636.424208        | 1318.715742       | 2619.397659        | 1310.202467      | 2618.413643    | 1309.710459      | 20 |
| 3  | 391.220063         | 196.113670        | 374.193514         | 187.600395         |                |                  | P    | 2480.323097        | 1240.665186       | 2463.296548        | 1232.151912      | 2462.312532    | 1231.659904      | 19 |
| 4  | 547.321174         | 274.164225        | 530.294625         | 265.650951         |                |                  | R    | 2383.270333        | 1192.138804       | 2366.243784        | 1183.625530      | 2365.259768    | 1183.133522      | 18 |
| 5  | 644.373938         | 322.690607        | 627.347389         | 314.177333         |                |                  | P    | 2227.169222        | 1114.088249       | 2210.142673        | 1105.574974      | 2209.158657    | 1105.082966      | 17 |
| 6  | <b>807.437267</b>  | 404.222272        | <b>790.410718</b>  | 395.708997         |                |                  | Y    | 2130.116458        | 1065.561867       | 2113.089909        | 1057.048592      | 2112.105893    | 1056.556584      | 16 |
| 7  | <b>904.490031</b>  | 452.748654        | <b>887.463482</b>  | 444.235379         |                |                  | P    | 1967.053129        | 984.030203        | 1950.026580        | 975.516928       | 1949.042564    | 975.024920       | 15 |
| 8  | 1001.542795        | 501.275036        | 984.516246         | 492.761761         |                |                  | P    | 1870.000365        | 935.503821        | 1852.973816        | 926.990546       | 1851.989800    | 926.498538       | 14 |
| 9  | <b>1115.585722</b> | 558.296499        | <b>1098.559173</b> | 549.783225         |                |                  | N    | 1772.947601        | 886.977439        | 1755.921052        | 878.464164       | 1754.937036    | 877.972156       | 13 |
| 10 | <b>1214.654136</b> | 607.830706        | 1197.627587        | 599.317432         |                |                  | V    | 1658.904674        | 829.955975        | 1641.878125        | 821.442701       | 1640.894109    | 820.950693       | 12 |
| 11 | 1271.675600        | <b>636.341438</b> | <b>1254.649051</b> | 627.828164         |                |                  | G    | <b>1559.836260</b> | 780.421768        | 1542.809711        | 771.908494       | 1541.825695    | 771.416486       | 11 |
| 12 | 1400.718193        | <b>700.862735</b> | 1383.691644        | <b>692.349460</b>  | 1382.707628    | 691.857452       | E    | <b>1502.814796</b> | 751.911036        | 1485.788247        | 743.397762       | 1484.804231    | 742.905754       | 10 |
| 13 | <b>1529.760786</b> | 765.384031        | 1512.734237        | 756.870757         | 1511.750221    | 756.378749       | E    | 1373.772203        | <b>687.389740</b> | <b>1356.745654</b> | 678.876465       | 1355.761638    | 678.384457       | 9  |
| 14 | 1642.844850        | 821.926063        | 1625.818301        | 813.412789         | 1624.834285    | 812.920781       | I    | <b>1244.729610</b> | 622.868443        | 1227.703061        | 614.355169       |                |                  | 8  |
| 15 | 2082.070176        | 1041.538726       | 2065.043627        | 1033.025451        | 2064.059611    | 1032.533444      | Q    | <b>1131.645546</b> | <b>566.326411</b> | 1114.618997        | 557.813137       |                |                  | 7  |
| 16 | 2195.154240        | 1098.080758       | 2178.127691        | 1089.567484        | 2177.143675    | 1089.075476      | I    | <b>692.420220</b>  | 346.713748        | 675.393671         | 338.200474       |                |                  | 6  |
| 17 | 2252.175704        | 1126.591490       | 2235.149155        | 1118.078215        | 2234.165139    | 1117.586208      | G    | <b>579.336156</b>  | 290.171716        | 562.309607         | 281.658442       |                |                  | 5  |
| 18 | 2389.234616        | 1195.120946       | 2372.208067        | <b>1186.607671</b> | 2371.224051    | 1186.115664      | H    | <b>522.314692</b>  | 261.660984        | 505.288143         | 253.147710       |                |                  | 4  |
| 19 | 2502.318680        | 1251.662978       | 2485.292131        | 1243.149704        | 2484.308115    | 1242.657696      | I    | <b>385.255780</b>  | 193.131528        | 368.229231         | 184.618254       |                |                  | 3  |
| 20 | 2599.371444        | 1300.189360       | 2582.344895        | 1291.676086        | 2581.360879    | 1291.184078      | P    | <b>272.171716</b>  | 136.589496        | <b>255.145167</b>  | 128.076221       |                |                  | 2  |
| 21 |                    |                   |                    |                    |                |                  | R    | <b>175.118952</b>  | 88.063114         | 158.092403         | 79.549839        |                |                  | 1  |

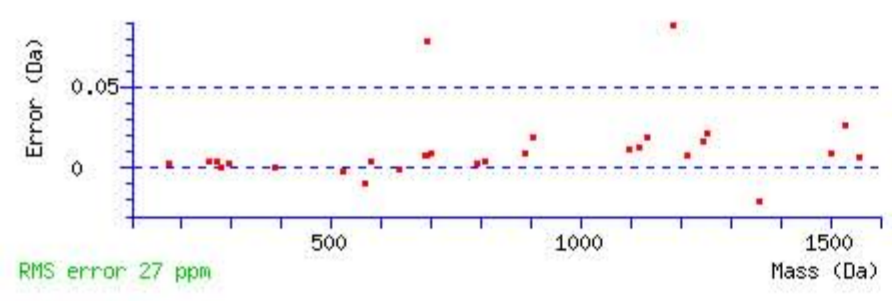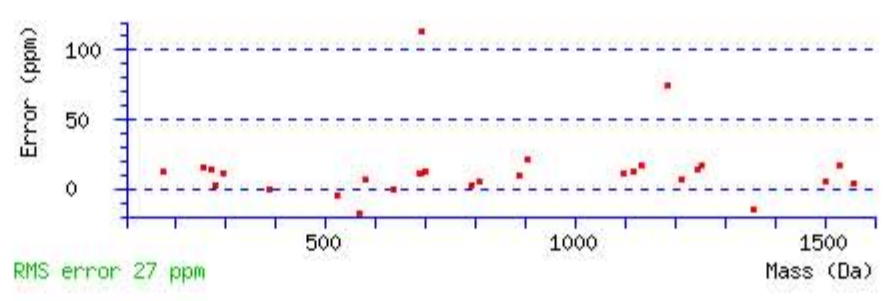

NCBI BLAST search of [HRPRPYPPNVGEEIQIGHIPR](#)  
 (Parameters: blastp, nr protein database, expect=20000, no filter, PAM30)  
 Other BLAST [web gateways](#)

### All matches to this query

| Score | Mr(calc):   | Delta    | Sequence                              |
|-------|-------------|----------|---------------------------------------|
| 45.0  | 2772.475815 | 0.020555 | <a href="#">HRPRPYPPNVGEEIQIGHIPR</a> |



**Peptide View**

MS/MS Fragmentation of **RPGGEPSPGTTGQSYNQYSQR**  
 Found in **FINC\_HUMAN**, Fibronectin OS=Homo sapiens GN=FN1 PE=1 SV=4

Match to Query 65636: 3017.416296 from(755.361350,4+) rtinseconds(1803) index(37363)  
 Title: Locus:1.1.1.2650.13 File:"2013-07-02 CLN FXIII 30 min 2nd F 3.wiff"  
 Data file C:\Program Files (x86)\Matrix Science\Mascot Daemon\mgf\2 FXIII 30 min 2nd\mascot\_daemon\_merge.mgf

Click mouse within plot area to zoom in by factor of two about that point  
 Or, Plot from  to  Da   
 Label all possible matches  Label matches used for scoring

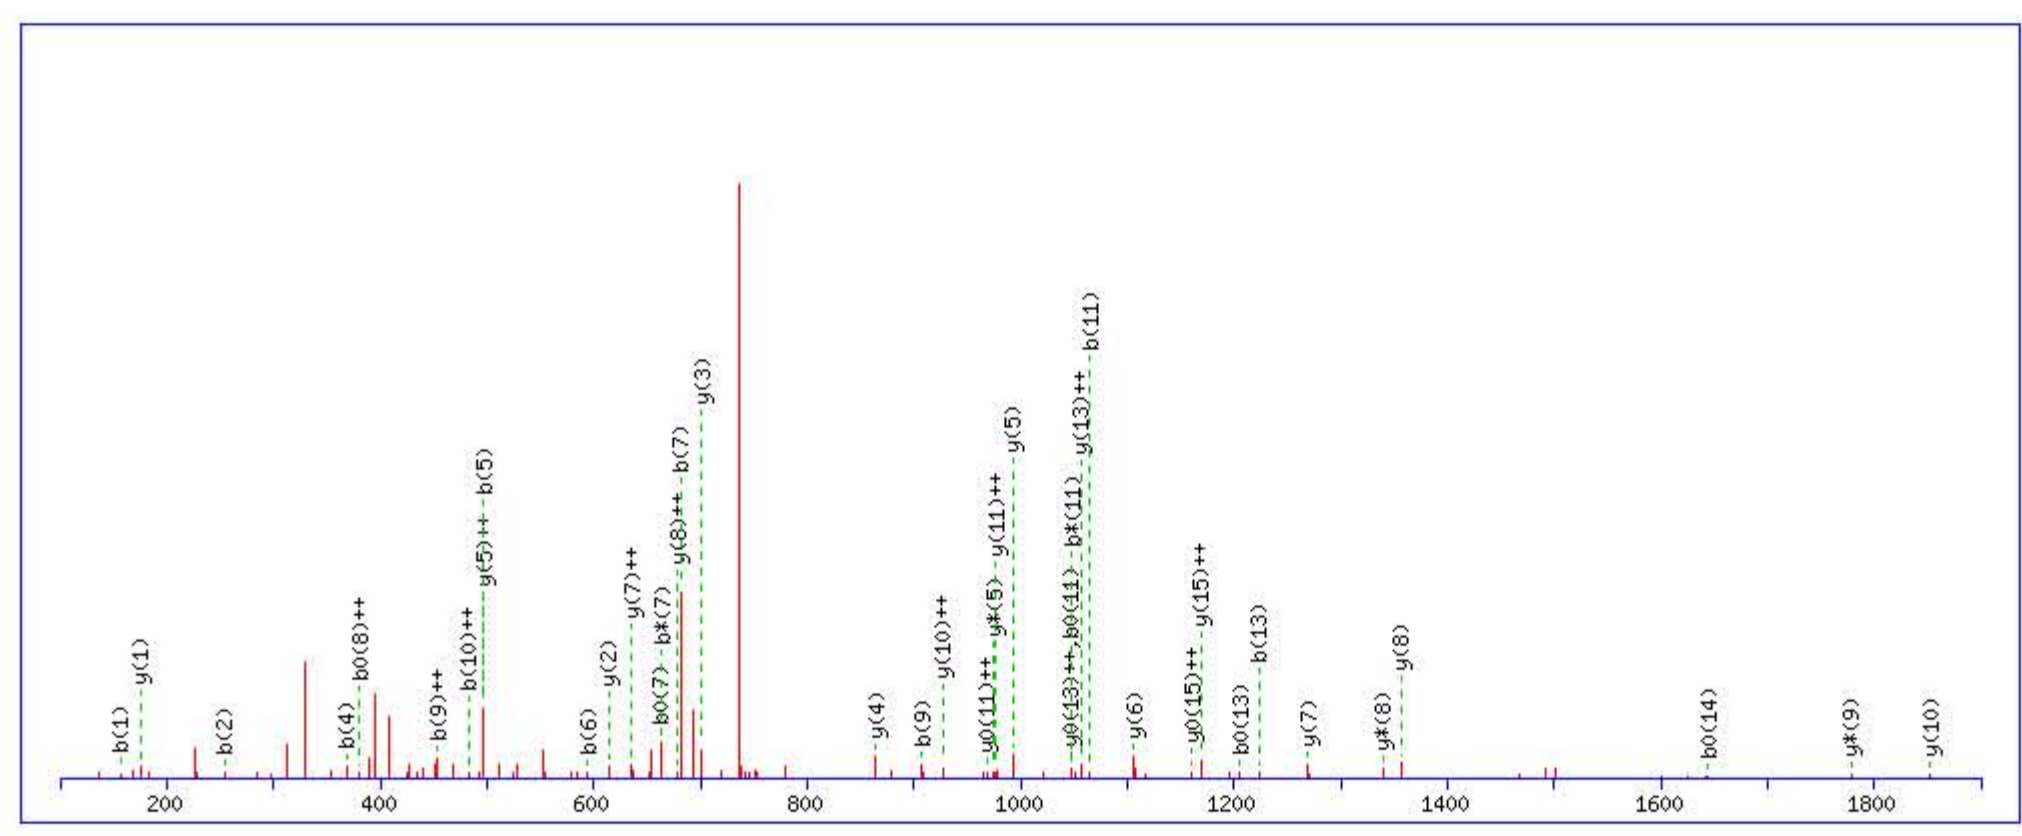

Monoisotopic mass of neutral peptide Mr(calc): 3017.412369  
 Fixed modifications: Carbamidomethyl (C) (apply to specified residues or termini only)  
 Variable modifications:  
 Q14 : Biotin:Thermo-21345 (Q)  
 Q21 : Biotin:Thermo-21345 (Q)  
 Ions Score: 43 Expect: 0.0009  
 Matches : 40/240 fragment ions using 101 most intense peaks [\(help\)](#)

| #  | b                  | b <sup>++</sup>   | b <sup>+</sup>     | b <sup>*++</sup> | b <sup>0</sup>     | b <sup>0++</sup>  | Seq. | y                  | y <sup>++</sup>    | y <sup>+</sup>     | y <sup>*++</sup> | y <sup>0</sup> | y <sup>0++</sup>   | #  |
|----|--------------------|-------------------|--------------------|------------------|--------------------|-------------------|------|--------------------|--------------------|--------------------|------------------|----------------|--------------------|----|
| 1  | <b>157.108387</b>  | 79.057831         | 140.081838         | 70.544557        |                    |                   | R    |                    |                    |                    |                  |                |                    | 22 |
| 2  | <b>254.161151</b>  | 127.584213        | 237.134602         | 119.070939       |                    |                   | P    | 2862.318543        | 1431.662909        | 2845.291994        | 1423.149635      | 2844.307978    | 1422.657627        | 21 |
| 3  | 311.182615         | 156.094945        | 294.156066         | 147.581671       |                    |                   | G    | 2765.265779        | 1383.136527        | 2748.239230        | 1374.623253      | 2747.255214    | 1374.131245        | 20 |
| 4  | <b>368.204079</b>  | 184.605677        | 351.177530         | 176.092403       |                    |                   | G    | 2708.244315        | 1354.625795        | 2691.217766        | 1346.112521      | 2690.233750    | 1345.620513        | 19 |
| 5  | <b>497.246672</b>  | 249.126974        | 480.220123         | 240.613700       | 479.236107         | 240.121692        | E    | 2651.222851        | 1326.115063        | 2634.196302        | 1317.601789      | 2633.212286    | 1317.109781        | 18 |
| 6  | <b>594.299436</b>  | 297.653356        | 577.272887         | 289.140082       | 576.288871         | 288.648074        | P    | 2522.180258        | 1261.593767        | 2505.153709        | 1253.080492      | 2504.169693    | 1252.588484        | 17 |
| 7  | <b>681.331464</b>  | 341.169370        | <b>664.304915</b>  | 332.656095       | <b>663.320899</b>  | 332.164087        | S    | 2425.127494        | 1213.067385        | 2408.100945        | 1204.554110      | 2407.116929    | 1204.062102        | 16 |
| 8  | 778.384228         | 389.695752        | 761.357679         | 381.182478       | 760.373663         | <b>380.690470</b> | P    | 2338.095466        | <b>1169.551371</b> | 2321.068917        | 1161.038096      | 2320.084901    | <b>1160.546088</b> | 15 |
| 9  | <b>907.426821</b>  | <b>454.217049</b> | 890.400272         | 445.703774       | 889.416256         | 445.211766        | E    | 2241.042702        | 1121.024989        | 2224.016153        | 1112.511714      | 2223.032137    | 1112.019706        | 14 |
| 10 | 964.448285         | <b>482.727781</b> | 947.421736         | 474.214506       | 946.437720         | 473.722498        | G    | 2112.000109        | <b>1056.503692</b> | 2094.973560        | 1047.990418      | 2093.989544    | <b>1047.498410</b> | 13 |
| 11 | <b>1065.495964</b> | 533.251620        | <b>1048.469415</b> | 524.738346       | <b>1047.485399</b> | 524.246337        | T    | 2054.978645        | 1027.992960        | 2037.952096        | 1019.479686      | 2036.968080    | 1018.987678        | 12 |
| 12 | 1166.543643        | 583.775460        | 1149.517094        | 575.262185       | 1148.533078        | 574.770177        | T    | 1953.930966        | <b>977.469121</b>  | 1936.904417        | 968.955847       | 1935.920401    | <b>968.463839</b>  | 11 |
| 13 | <b>1223.565107</b> | 612.286191        | 1206.538558        | 603.772917       | <b>1205.554542</b> | 603.280909        | G    | <b>1852.883287</b> | <b>926.945282</b>  | 1835.856738        | 918.432007       | 1834.872722    | 917.939999         | 10 |
| 14 | 1662.790433        | 831.898854        | 1645.763884        | 823.385580       | <b>1644.779868</b> | 822.893572        | Q    | 1795.861823        | 898.434550         | <b>1778.835274</b> | 889.921275       | 1777.851258    | 889.429267         | 9  |
| 15 | 1749.822461        | 875.414869        | 1732.795912        | 866.901594       | 1731.811896        | 866.409586        | S    | <b>1356.636497</b> | <b>678.821887</b>  | <b>1339.609948</b> | 670.308612       | 1338.625932    | 669.816604         | 8  |
| 16 | 1912.885790        | 956.946533        | 1895.859241        | 948.433259       | 1894.875225        | 947.941251        | Y    | <b>1269.604469</b> | <b>635.305873</b>  | 1252.577920        | 626.792598       | 1251.593904    | 626.300590         | 7  |
| 17 | 2026.928717        | 1013.967997       | 2009.902168        | 1005.454722      | 2008.918152        | 1004.962714       | N    | <b>1106.541140</b> | 553.774208         | 1089.514591        | 545.260934       | 1088.530575    | 544.768926         | 6  |
| 18 | 2154.987295        | 1077.997285       | 2137.960746        | 1069.484011      | 2136.976730        | 1068.992003       | Q    | <b>992.498213</b>  | <b>496.752745</b>  | <b>975.471664</b>  | 488.239470       | 974.487648     | 487.747462         | 5  |
| 19 | 2318.050624        | 1159.528950       | 2301.024075        | 1151.015675      | 2300.040059        | 1150.523667       | Y    | <b>864.439635</b>  | 432.723456         | 847.413086         | 424.210181       | 846.429070     | 423.718173         | 4  |
| 20 | 2405.082652        | 1203.044964       | 2388.056103        | 1194.531689      | 2387.072087        | 1194.039681       | S    | <b>701.376306</b>  | 351.191791         | 684.349757         | 342.678517       | 683.365741     | 342.186509         | 3  |
| 21 | 2844.307978        | 1422.657627       | 2827.281429        | 1414.144353      | 2826.297413        | 1413.652345       | Q    | <b>614.344278</b>  | 307.675777         | 597.317729         | 299.162503       |                |                    | 2  |
| 22 |                    |                   |                    |                  |                    |                   | R    | <b>175.118952</b>  | 88.063114          | 158.092403         | 79.549839        |                |                    | 1  |

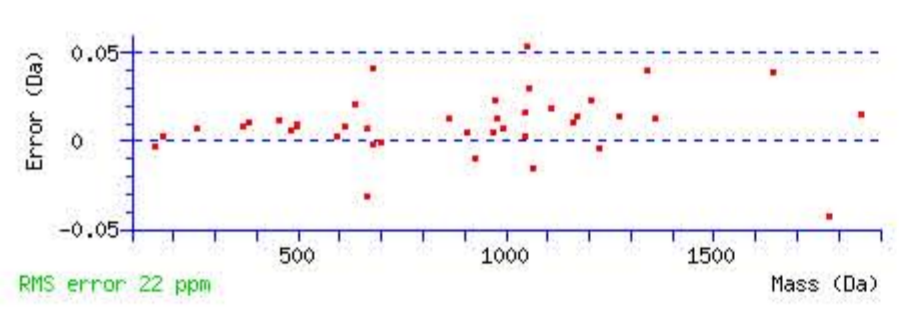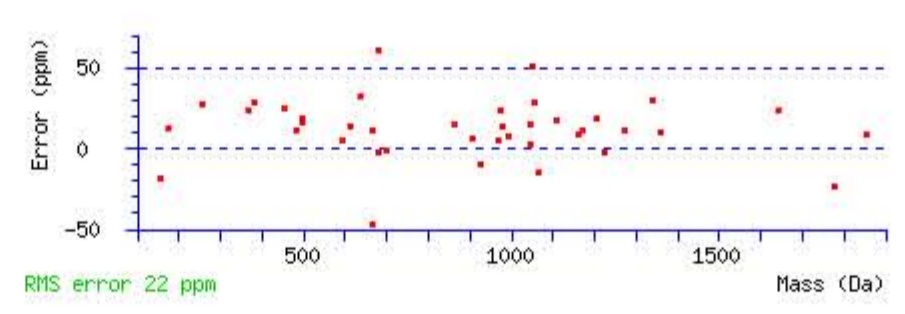

NCBI BLAST search of **RPGGEPSPGTTGQSYNQYSQR**  
 (Parameters: blastp, nr protein database, expect=20000, no filter, PAM30)  
 Other BLAST [web gateways](#)

**All matches to this query**

| Score | Mr(calc):   | Delta    | Sequence                              |
|-------|-------------|----------|---------------------------------------|
| 42.9  | 3017.412369 | 0.003927 | <a href="#">RPGGEPSPGTTGQSYNQYSQR</a> |
| 37.1  | 3017.412369 | 0.003927 | <a href="#">RPGGEPSPGTTGQSYNQYSQR</a> |
| 18.6  | 3017.412369 | 0.003927 | <a href="#">RPGGEPSPGTTGQSYNQYSQR</a> |



# MASCOT Search Results

## Peptide View

MS/MS Fragmentation of **RPGGEPSPGTTGQSYNQYSQR**  
 Found in **FINC\_HUMAN**, Fibronectin OS=Homo sapiens GN=FN1 PE=1 SV=4

Match to Query 65637: 3017.416296 from(755.361350,4+) rtinseconds(1794) index(37307)  
 Title: Locus:1.1.1.2647.20 File:"2013-07-02 CLN FXIII 30 min 2nd F 3.wiff"  
 Data file C:\Program Files (x86)\Matrix Science\Mascot Daemon\mgf\2 FXIII 30 min 2nd\mascot\_daemon\_merge.mgf

Click mouse within plot area to zoom in by factor of two about that point  
 Or, Plot from  to  Da   
 Label all possible matches  Label matches used for scoring

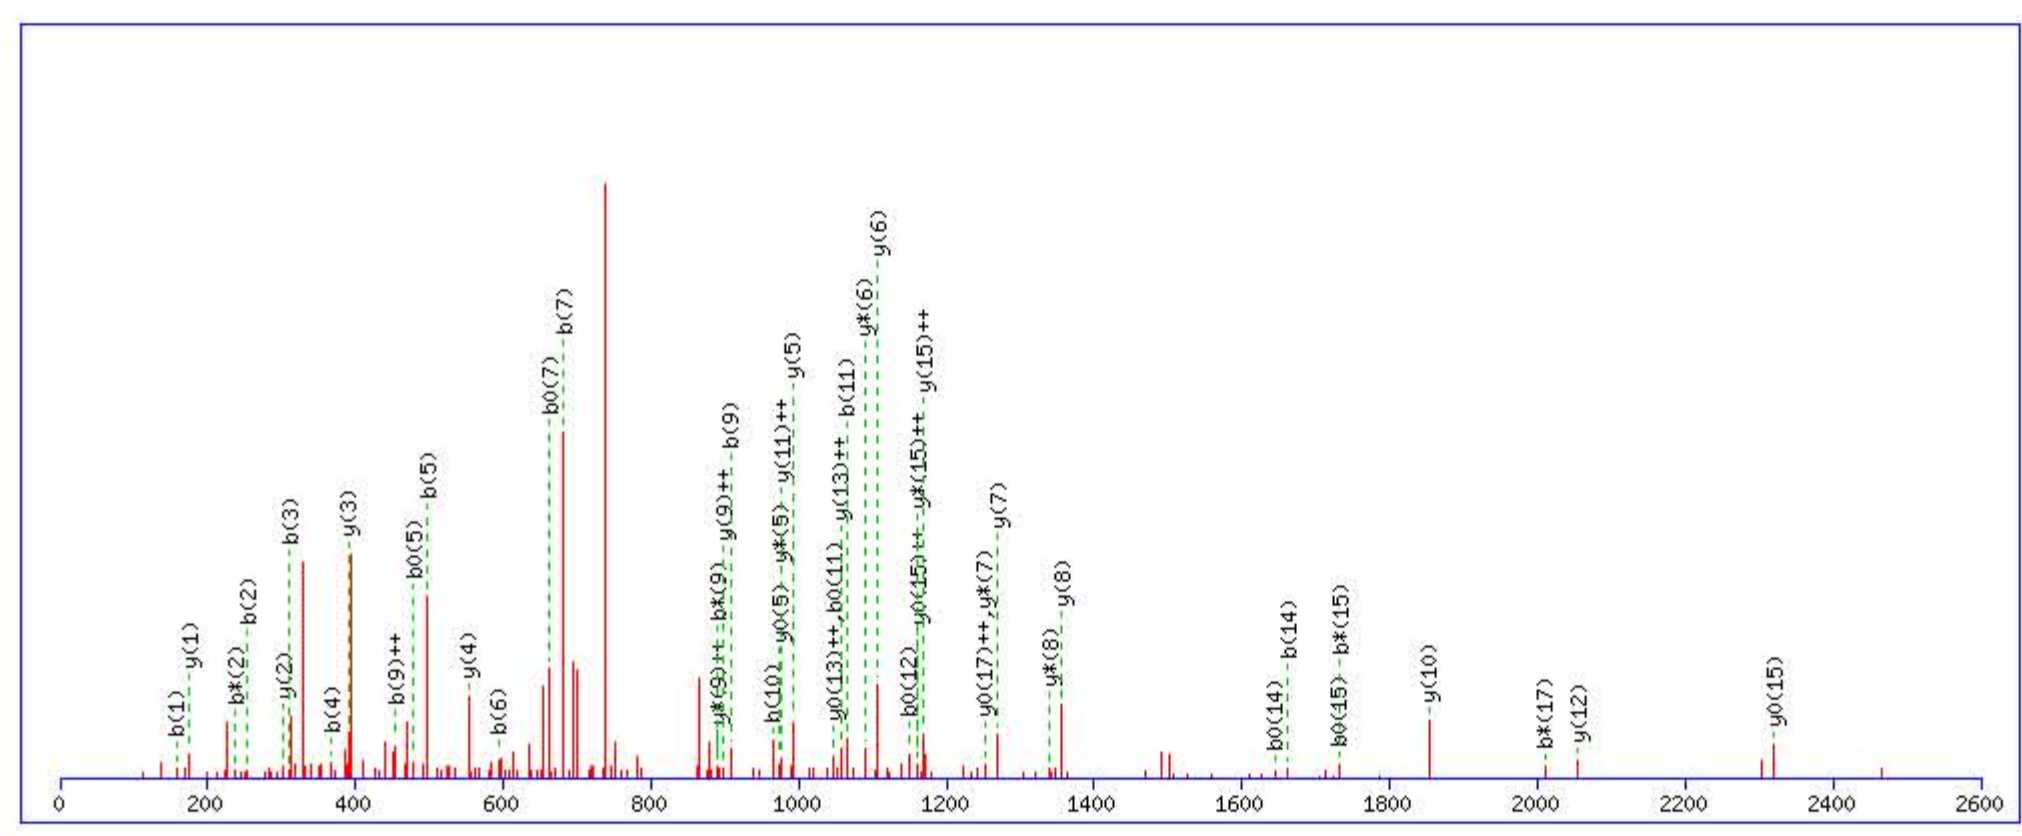

Monoisotopic mass of neutral peptide Mr(calc): 3017.412369  
 Fixed modifications: Carbamidomethyl (C) (apply to specified residues or termini only)  
 Variable modifications:  
 Q14 : Biotin:Thermo-21345 (Q)  
 Q18 : Biotin:Thermo-21345 (Q)  
 Ions Score: 51 Expect: 0.00012  
 Matches : 47/240 fragment ions using 111 most intense peaks [\(help\)](#)

| #  | b           | b <sup>++</sup> | b <sup>+</sup> | b <sup>+++</sup> | b <sup>0</sup> | b <sup>0++</sup> | Seq. | y           | y <sup>++</sup> | y <sup>+</sup> | y <sup>+++</sup> | y <sup>0</sup> | y <sup>0++</sup> | #  |
|----|-------------|-----------------|----------------|------------------|----------------|------------------|------|-------------|-----------------|----------------|------------------|----------------|------------------|----|
| 1  | 157.108387  | 79.057831       | 140.081838     | 70.544557        |                |                  | R    |             |                 |                |                  |                |                  | 22 |
| 2  | 254.161151  | 127.584213      | 237.134602     | 119.070939       |                |                  | P    | 2862.318543 | 1431.662909     | 2845.291994    | 1423.149635      | 2844.307978    | 1422.657627      | 21 |
| 3  | 311.182615  | 156.094945      | 294.156066     | 147.581671       |                |                  | G    | 2765.265779 | 1383.136527     | 2748.239230    | 1374.623253      | 2747.255214    | 1374.131245      | 20 |
| 4  | 368.204079  | 184.605677      | 351.177530     | 176.092403       |                |                  | G    | 2708.244315 | 1354.625795     | 2691.217766    | 1346.112521      | 2690.233750    | 1345.620513      | 19 |
| 5  | 497.246672  | 249.126974      | 480.220123     | 240.613700       | 479.236107     | 240.121692       | E    | 2651.222851 | 1326.115063     | 2634.196302    | 1317.601789      | 2633.212286    | 1317.109781      | 18 |
| 6  | 594.299436  | 297.653356      | 577.272887     | 289.140082       | 576.288871     | 288.648074       | P    | 2522.180258 | 1261.593767     | 2505.153709    | 1253.080492      | 2504.169693    | 1252.588484      | 17 |
| 7  | 681.331464  | 341.169370      | 664.304915     | 332.656095       | 663.320899     | 332.164087       | S    | 2425.127494 | 1213.067385     | 2408.100945    | 1204.554110      | 2407.116929    | 1204.062102      | 16 |
| 8  | 778.384228  | 389.695752      | 761.357679     | 381.182478       | 760.373663     | 380.690470       | P    | 2338.095466 | 1169.551371     | 2321.068917    | 1161.038096      | 2320.084901    | 1160.546088      | 15 |
| 9  | 907.426821  | 454.217049      | 890.400272     | 445.703774       | 889.416256     | 445.211766       | E    | 2241.042702 | 1121.024989     | 2224.016153    | 1112.511714      | 2223.032137    | 1112.019706      | 14 |
| 10 | 964.448285  | 482.727781      | 947.421736     | 474.214506       | 946.437720     | 473.722498       | G    | 2112.000109 | 1056.503692     | 2094.973560    | 1047.990418      | 2093.989544    | 1047.498410      | 13 |
| 11 | 1065.495964 | 533.251620      | 1048.469415    | 524.738346       | 1047.485399    | 524.246337       | T    | 2054.978645 | 1027.992960     | 2037.952096    | 1019.479686      | 2036.968080    | 1018.987678      | 12 |
| 12 | 1166.543643 | 583.775460      | 1149.517094    | 575.262185       | 1148.533078    | 574.770177       | T    | 1953.930966 | 977.469121      | 1936.904417    | 968.955847       | 1935.920401    | 968.463839       | 11 |
| 13 | 1223.565107 | 612.286191      | 1206.538558    | 603.772917       | 1205.554542    | 603.280909       | G    | 1852.883287 | 926.945282      | 1835.856738    | 918.432007       | 1834.872722    | 917.939999       | 10 |
| 14 | 1662.790433 | 831.898854      | 1645.763884    | 823.385580       | 1644.779868    | 822.893572       | Q    | 1795.861823 | 898.434550      | 1778.835274    | 889.921275       | 1777.851258    | 889.429267       | 9  |
| 15 | 1749.822461 | 875.414869      | 1732.795912    | 866.901594       | 1731.811896    | 866.409586       | S    | 1356.636497 | 678.821887      | 1339.609948    | 670.308612       | 1338.625932    | 669.816604       | 8  |
| 16 | 1912.885790 | 956.946533      | 1895.859241    | 948.433259       | 1894.875225    | 947.941251       | Y    | 1269.604469 | 635.305873      | 1252.577920    | 626.792598       | 1251.593904    | 626.300590       | 7  |
| 17 | 2026.928717 | 1013.967997     | 2009.902168    | 1005.454722      | 2008.918152    | 1004.962714      | N    | 1106.541140 | 553.774208      | 1089.514591    | 545.260934       | 1088.530575    | 544.768926       | 6  |
| 18 | 2466.154043 | 1233.580659     | 2449.127494    | 1225.067385      | 2448.143478    | 1224.575377      | Q    | 992.498213  | 496.752745      | 975.471664     | 488.239470       | 974.487648     | 487.747462       | 5  |
| 19 | 2629.217372 | 1315.112324     | 2612.190823    | 1306.599049      | 2611.206807    | 1306.107041      | Y    | 553.272887  | 277.140082      | 536.246338     | 268.626807       | 535.262322     | 268.134799       | 4  |
| 20 | 2716.249400 | 1358.628338     | 2699.222851    | 1350.115063      | 2698.238835    | 1349.623056      | S    | 390.209558  | 195.608417      | 373.183009     | 187.095143       | 372.198993     | 186.603135       | 3  |
| 21 | 2844.307978 | 1422.657627     | 2827.281429    | 1414.144353      | 2826.297413    | 1413.652345      | Q    | 303.177530  | 152.092403      | 286.150981     | 143.579129       |                |                  | 2  |
| 22 |             |                 |                |                  |                |                  | R    | 175.118952  | 88.063114       | 158.092403     | 79.549839        |                |                  | 1  |

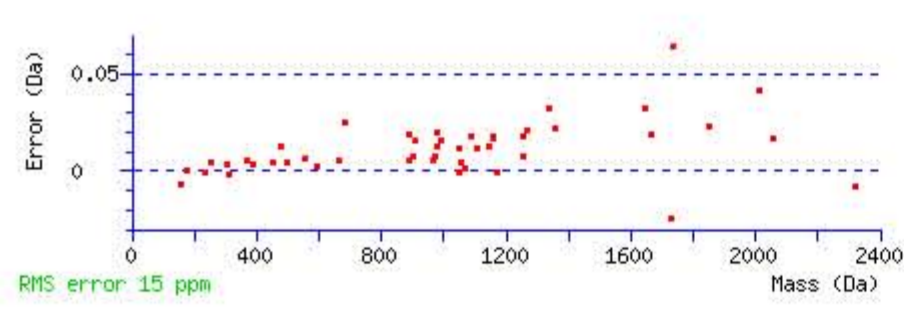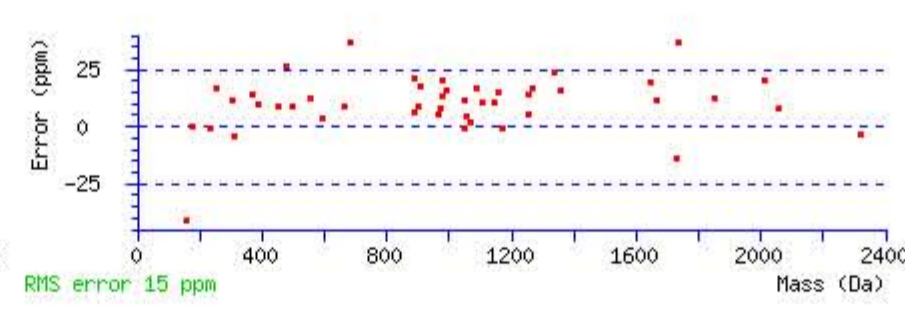

NCBI BLAST search of **RPGGEPSPGTTGQSYNQYSQR**  
 (Parameters: blastp, nr protein database, expect=20000, no filter, PAM30)  
 Other BLAST [web gateways](#)

### All matches to this query

| Score | Mr(calc):   | Delta    | Sequence                              |
|-------|-------------|----------|---------------------------------------|
| 51.5  | 3017.412369 | 0.003927 | <a href="#">RPGGEPSPGTTGQSYNQYSQR</a> |
| 49.4  | 3017.412369 | 0.003927 | <a href="#">RPGGEPSPGTTGQSYNQYSQR</a> |
| 25.9  | 3017.412369 | 0.003927 | <a href="#">RPGGEPSPGTTGQSYNQYSQR</a> |



**MASCOT** Mascot Search Results

**Peptide View**

MS/MS Fragmentation of **TDELPQLVTLPHPNLHGPEILDVPSTVQK**  
 Found in **FINC\_HUMAN**, Fibronectin OS=Homo sapiens GN=FN1 PE=1 SV=4

Match to Query 70849: 3497.862216 from(875.472830,4+) rtinseconds(2602) index(59233)  
 Title: Locus:1.1.1.3391.24 File:"2013-07-02 CLN FXIII 30 min 2nd F 4.wiff"  
 Data file C:\Program Files (x86)\Matrix Science\Mascot Daemon\mgf2 FXIII 30 min 2nd\mascot\_daemon\_merge.mgf

Click mouse within plot area to zoom in by factor of two about that point  
 Or, Plot from  to  Da   
 Label all possible matches  Label matches used for scoring

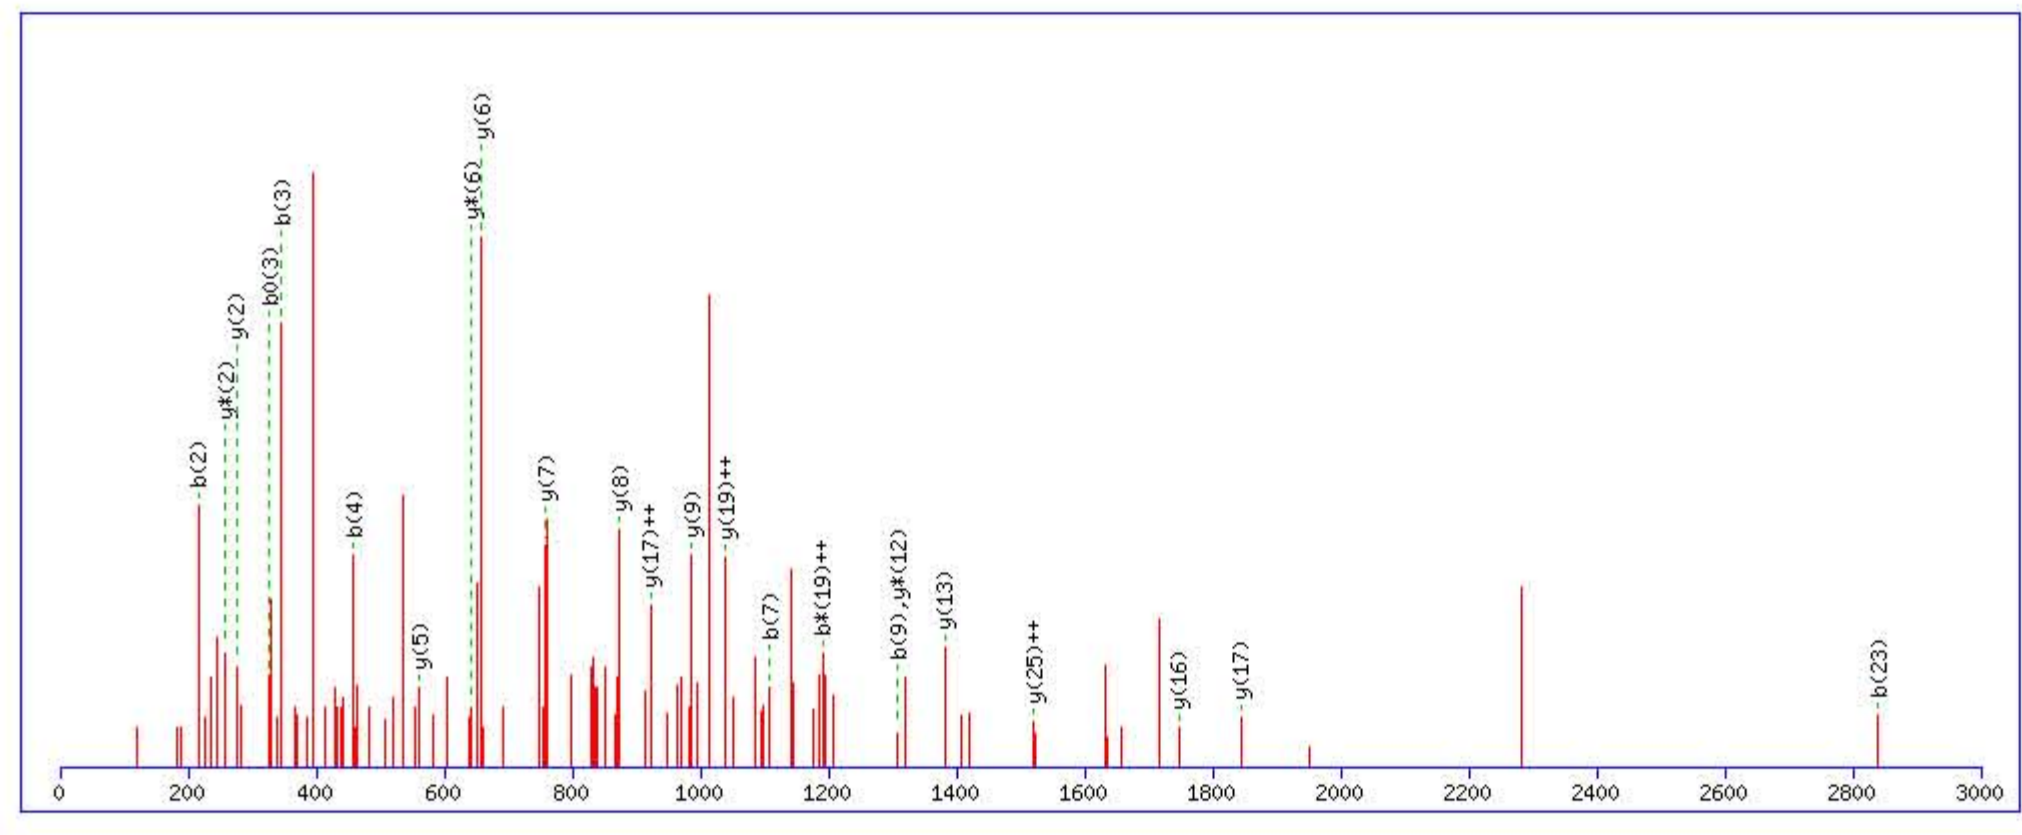

Monoisotopic mass of neutral peptide Mr(calc): 3497.859238  
 Fixed modifications: Carbamidomethyl (C) (apply to specified residues or termini only)  
 Variable modifications:  
 Q6 : Biotin:Thermo-21345 (Q)  
 Ions Score: 27 Expect: 0.031  
 Matches : 23/320 fragment ions using 60 most intense peaks [\(help\)](#)

| #  | b                  | b <sup>++</sup> | b <sup>+</sup> | b <sup>+++</sup>   | b <sup>0</sup>    | b <sup>0++</sup> | Seq. | y                  | y <sup>++</sup>    | y <sup>+</sup>     | y <sup>+++</sup> | y <sup>0</sup> | y <sup>0++</sup> | #  |
|----|--------------------|-----------------|----------------|--------------------|-------------------|------------------|------|--------------------|--------------------|--------------------|------------------|----------------|------------------|----|
| 1  | 102.054955         | 51.531116       |                |                    | 84.044390         | 42.525833        | T    |                    |                    |                    |                  |                |                  | 29 |
| 2  | <b>217.081898</b>  | 109.044587      |                |                    | 199.071333        | 100.039304       | D    | 3397.818827        | 1699.413051        | 3380.792278        | 1690.899777      | 3379.808262    | 1690.407769      | 28 |
| 3  | <b>346.124491</b>  | 173.565883      |                |                    | <b>328.113926</b> | 164.560601       | E    | 3282.791884        | 1641.899580        | 3265.765335        | 1633.386305      | 3264.781319    | 1632.894297      | 27 |
| 4  | <b>459.208555</b>  | 230.107915      |                |                    | 441.197990        | 221.102633       | L    | 3153.749291        | 1577.378283        | 3136.722742        | 1568.865009      | 3135.738726    | 1568.373001      | 26 |
| 5  | 556.261319         | 278.634298      |                |                    | 538.250754        | 269.629015       | P    | 3040.665227        | <b>1520.836251</b> | 3023.638678        | 1512.322977      | 3022.654662    | 1511.830969      | 25 |
| 6  | 995.486645         | 498.246961      | 978.460096     | 489.733686         | 977.476080        | 489.241678       | Q    | 2943.612463        | 1472.309869        | 2926.585914        | 1463.796595      | 2925.601898    | 1463.304587      | 24 |
| 7  | <b>1108.570709</b> | 554.788993      | 1091.544160    | 546.275718         | 1090.560144       | 545.783710       | L    | 2504.387137        | 1252.697206        | 2487.360588        | 1244.183932      | 2486.376572    | 1243.691924      | 23 |
| 8  | 1207.639123        | 604.323200      | 1190.612574    | 595.809925         | 1189.628558       | 595.317917       | V    | 2391.303073        | 1196.155174        | 2374.276524        | 1187.641900      | 2373.292508    | 1187.149892      | 22 |
| 9  | <b>1308.686802</b> | 654.847039      | 1291.660253    | 646.333765         | 1290.676237       | 645.841757       | T    | 2292.234659        | 1146.620967        | 2275.208110        | 1138.107693      | 2274.224094    | 1137.615685      | 21 |
| 10 | 1421.770866        | 711.389071      | 1404.744317    | 702.875797         | 1403.760301       | 702.383789       | L    | 2191.186980        | 1096.097128        | 2174.160431        | 1087.583853      | 2173.176415    | 1087.091845      | 20 |
| 11 | 1518.823630        | 759.915453      | 1501.797081    | 751.402179         | 1500.813065       | 750.910171       | P    | 2078.102916        | <b>1039.555096</b> | 2061.076367        | 1031.041821      | 2060.092351    | 1030.549813      | 19 |
| 12 | 1655.882542        | 828.444909      | 1638.855993    | 819.931635         | 1637.871977       | 819.439627       | H    | 1981.050152        | 991.028714         | 1964.023603        | 982.515440       | 1963.039587    | 982.023432       | 18 |
| 13 | 1752.935306        | 876.971291      | 1735.908757    | 868.458017         | 1734.924741       | 867.966009       | P    | <b>1843.991240</b> | <b>922.499258</b>  | 1826.964691        | 913.985984       | 1825.980675    | 913.493976       | 17 |
| 14 | 1866.978233        | 933.992755      | 1849.951684    | 925.479480         | 1848.967668       | 924.987472       | N    | <b>1746.938476</b> | 873.972876         | 1729.911927        | 865.459602       | 1728.927911    | 864.967594       | 16 |
| 15 | 1980.062297        | 990.534787      | 1963.035748    | 982.021512         | 1962.051732       | 981.529504       | L    | 1632.895549        | 816.951413         | 1615.869000        | 808.438138       | 1614.884984    | 807.946130       | 15 |
| 16 | 2117.121209        | 1059.064242     | 2100.094660    | 1050.550968        | 2099.110644       | 1050.058960      | H    | 1519.811485        | 760.409381         | 1502.784936        | 751.896106       | 1501.800920    | 751.404098       | 14 |
| 17 | 2174.142673        | 1087.574974     | 2157.116124    | 1079.061700        | 2156.132108       | 1078.569692      | G    | <b>1382.752573</b> | 691.879925         | 1365.726024        | 683.366650       | 1364.742008    | 682.874642       | 13 |
| 18 | 2271.195437        | 1136.101356     | 2254.168888    | 1127.588082        | 2253.184872       | 1127.096074      | P    | 1325.731109        | 663.369193         | <b>1308.704560</b> | 654.855918       | 1307.720544    | 654.363910       | 12 |
| 19 | 2400.238030        | 1200.622653     | 2383.211481    | <b>1192.109378</b> | 2382.227465       | 1191.617370      | E    | 1228.678345        | 614.842811         | 1211.651796        | 606.329536       | 1210.667780    | 605.837528       | 11 |
| 20 | 2513.322094        | 1257.164685     | 2496.295545    | 1248.651410        | 2495.311529       | 1248.159402      | I    | 1099.635752        | 550.321514         | 1082.609203        | 541.808240       | 1081.625187    | 541.316231       | 10 |
| 21 | 2626.406158        | 1313.706717     | 2609.379609    | 1305.193442        | 2608.395593       | 1304.701435      | L    | <b>986.551688</b>  | 493.779482         | 969.525139         | 485.266207       | 968.541123     | 484.774199       | 9  |
| 22 | 2741.433101        | 1371.220188     | 2724.406552    | 1362.706914        | 2723.422536       | 1362.214906      | D    | <b>873.467624</b>  | 437.237450         | 856.441075         | 428.724175       | 855.457059     | 428.232167       | 8  |
| 23 | <b>2840.501515</b> | 1420.754395     | 2823.474966    | 1412.241121        | 2822.490950       | 1411.749113      | V    | <b>758.440681</b>  | 379.723978         | 741.414132         | 371.210704       | 740.430116     | 370.718696       | 7  |
| 24 | 2937.554279        | 1469.280777     | 2920.527730    | 1460.767503        | 2919.543714       | 1460.275495      | P    | <b>659.372267</b>  | 330.189772         | <b>642.345718</b>  | 321.676497       | 641.361702     | 321.184489       | 6  |
| 25 | 3024.586307        | 1512.796791     | 3007.559758    | 1504.283517        | 3006.575742       | 1503.791509      | S    | <b>562.319503</b>  | 281.663389         | 545.292954         | 273.150115       | 544.308938     | 272.658107       | 5  |
| 26 | 3125.633986        | 1563.320631     | 3108.607437    | 1554.807356        | 3107.623421       | 1554.315348      | T    | 475.287475         | 238.147375         | 458.260926         | 229.634101       | 457.276910     | 229.142093       | 4  |
| 27 | 3224.702400        | 1612.854838     | 3207.675851    | 1604.341563        | 3206.691835       | 1603.849555      | V    | 374.239796         | 187.623536         | 357.213247         | 179.110261       |                |                  | 3  |
| 28 | 3352.760978        | 1676.884127     | 3335.734429    | 1668.370852        | 3334.750413       | 1667.878844      | Q    | <b>275.171382</b>  | 138.089329         | <b>258.144833</b>  | 129.576055       |                |                  | 2  |
| 29 |                    |                 |                |                    |                   |                  | K    | 147.112804         | 74.060040          | 130.086255         | 65.546765        |                |                  | 1  |

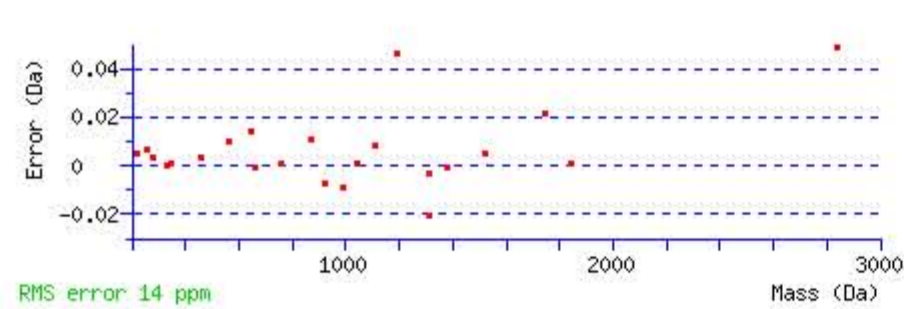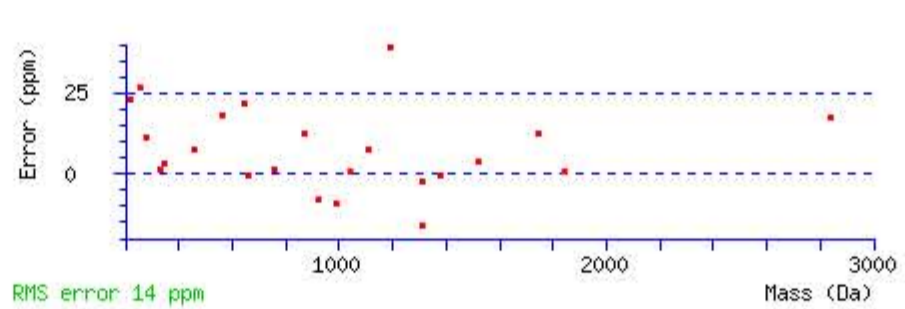

NCBI BLAST search of **TDELPQLVTLPHPNLHGPEILDVPSTVQK**  
 (Parameters: blastp, nr protein database, expect=20000, no filter, PAM30)  
 Other BLAST [web gateways](#)

**All matches to this query**

| Score | Mr(calc):   | Delta    | Sequence                                      |
|-------|-------------|----------|-----------------------------------------------|
| 27.4  | 3497.859238 | 0.002978 | <a href="#">TDELPQLVTLPHPNLHGPEILDVPSTVQK</a> |



# MASCOT Search Results

## Peptide View

MS/MS Fragmentation of **SAATLQQEK**

Found in **FBLN1\_HUMAN**, Fibulin-1 OS=Homo sapiens GN=FBLN1 PE=1 SV=4

Match to Query 28088: 1285.664288 from(643.839420,2+) rtinseconds(1480) index(52439)

Title: Locus:1.1.1.3001.20 File:"2013-07-02 CLN FXIII 30 min 2nd F 4.wiff"

Data file C:\Program Files (x86)\Matrix Science\Mascot Daemon\mgf2 FXIII 30 min 2nd\mascot\_daemon\_merge.mgf

Click mouse within plot area to zoom in by factor of two about that point

Or, Plot from  to  Da

Label all possible matches  Label matches used for scoring

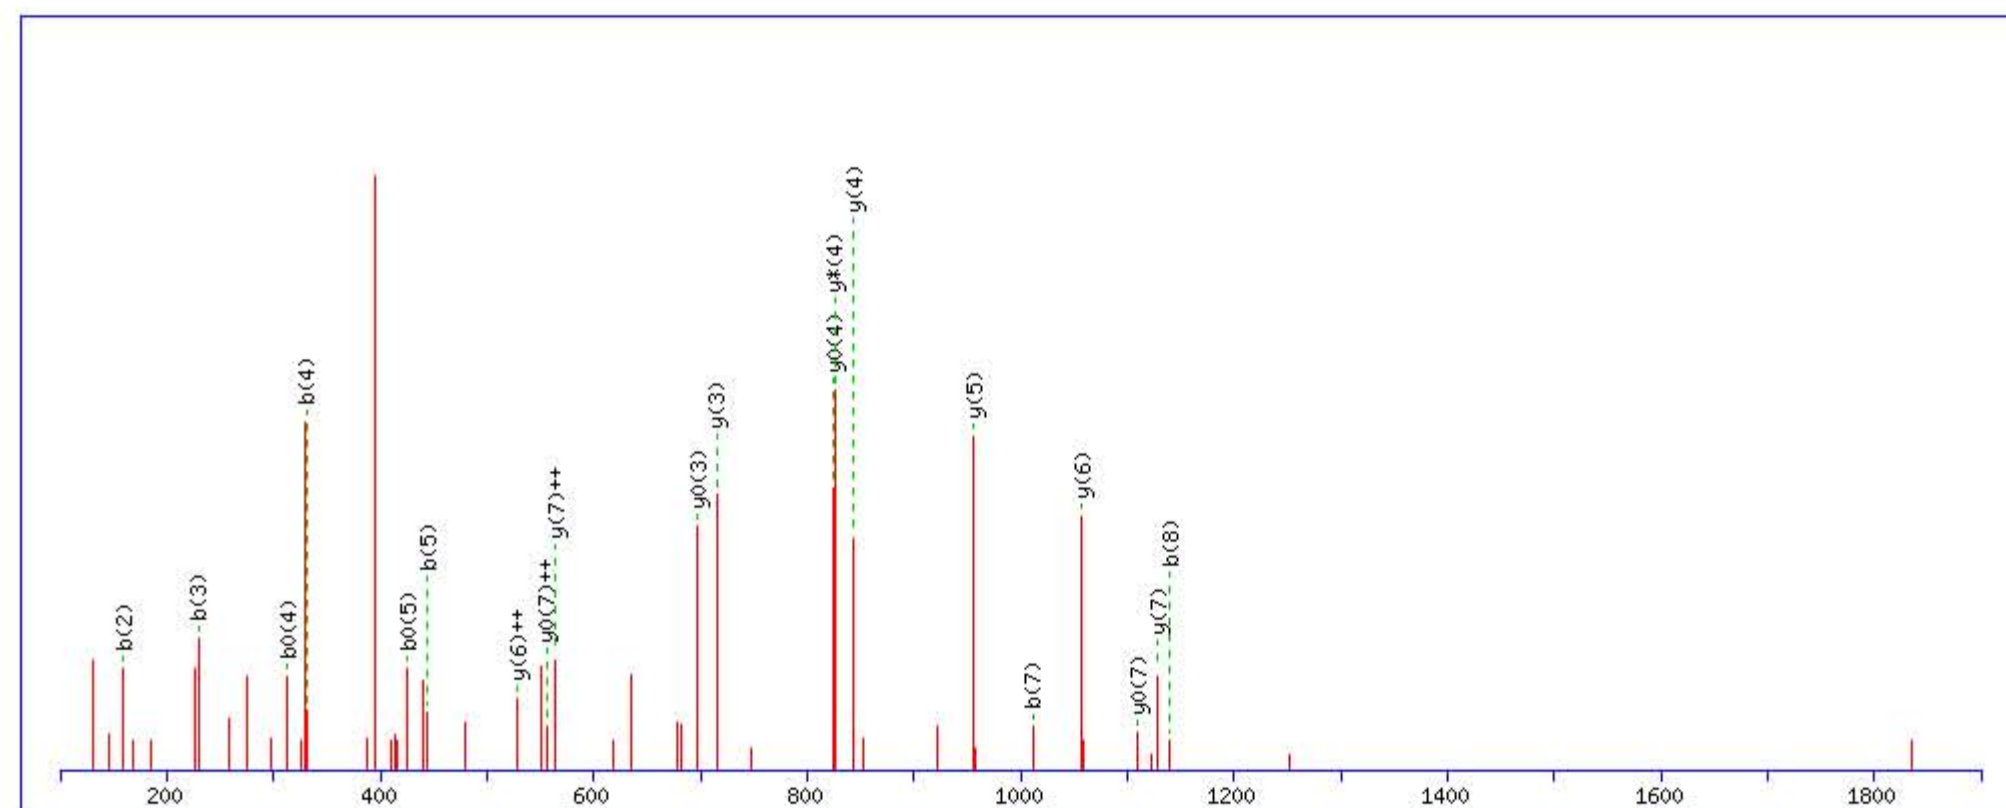

Monoisotopic mass of neutral peptide Mr(calc): 1285.669998

Fixed modifications: Carbamidomethyl (C) (apply to specified residues or termini only)

Variable modifications:

Q7 : Biotin:Thermo-21345 (Q)

Ions Score: 38 Expect: 0.0027

Matches : 20/84 fragment ions using 32 most intense peaks [\(help\)](#)

| # | b                  | b <sup>++</sup> | b <sup>*</sup> | b <sup>*++</sup> | b <sup>0</sup>    | b <sup>0++</sup> | Seq. | y                  | y <sup>++</sup>   | y <sup>*</sup>    | y <sup>*++</sup> | y <sup>0</sup>     | y <sup>0++</sup>  | # |
|---|--------------------|-----------------|----------------|------------------|-------------------|------------------|------|--------------------|-------------------|-------------------|------------------|--------------------|-------------------|---|
| 1 | 88.039304          | 44.523290       |                |                  | 70.028739         | 35.518008        | S    |                    |                   |                   |                  |                    |                   | 9 |
| 2 | <b>159.076418</b>  | 80.041847       |                |                  | 141.065853        | 71.036564        | A    | 1199.645272        | 600.326274        | 1182.618723       | 591.813000       | 1181.634707        | 591.320991        | 8 |
| 3 | <b>230.113532</b>  | 115.560404      |                |                  | 212.102967        | 106.555121       | A    | <b>1128.608158</b> | <b>564.807717</b> | 1111.581609       | 556.294443       | <b>1110.597593</b> | <b>555.802435</b> | 7 |
| 4 | <b>331.161211</b>  | 166.084243      |                |                  | <b>313.150646</b> | 157.078961       | T    | <b>1057.571044</b> | <b>529.289160</b> | 1040.544495       | 520.775886       | 1039.560479        | 520.283878        | 6 |
| 5 | <b>444.245275</b>  | 222.626275      |                |                  | <b>426.234710</b> | 213.620993       | L    | <b>956.523365</b>  | 478.765321        | 939.496816        | 470.252046       | 938.512800         | 469.760038        | 5 |
| 6 | 572.303853         | 286.655565      | 555.277304     | 278.142290       | 554.293288        | 277.650282       | Q    | <b>843.439301</b>  | 422.223289        | <b>826.412752</b> | 413.710014       | <b>825.428736</b>  | 413.218006        | 4 |
| 7 | <b>1011.529179</b> | 506.268228      | 994.502630     | 497.754953       | 993.518614        | 497.262945       | Q    | <b>715.380723</b>  | 358.194000        | 698.354174        | 349.680725       | <b>697.370158</b>  | 349.188717        | 3 |
| 8 | <b>1140.571772</b> | 570.789524      | 1123.545223    | 562.276250       | 1122.561207       | 561.784242       | E    | 276.155397         | 138.581336        | 259.128848        | 130.068062       | 258.144832         | 129.576054        | 2 |
| 9 |                    |                 |                |                  |                   |                  | K    | 147.112804         | 74.060040         | 130.086255        | 65.546765        |                    |                   | 1 |

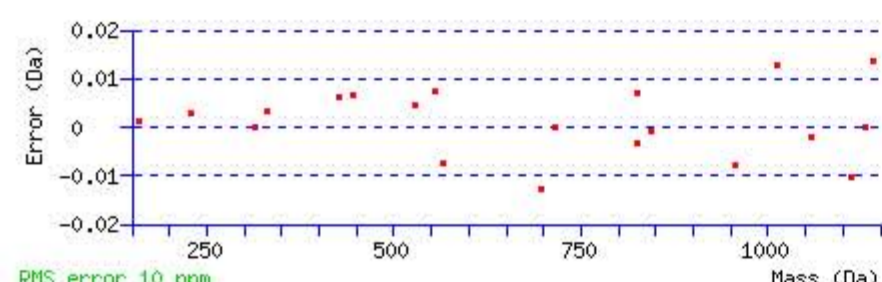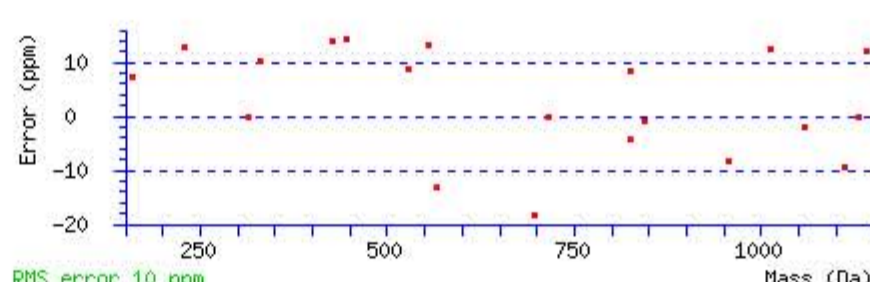

NCBI BLAST search of **SAATLQQEK**

(Parameters: blastp, nr protein database, expect=20000, no filter, PAM30)

Other BLAST [web gateways](#)

## All matches to this query

| Score | Mr(calc):   | Delta     | Sequence                     |
|-------|-------------|-----------|------------------------------|
| 38.1  | 1285.669998 | -0.005710 | <a href="#">SAATLQQEK</a>    |
| 33.6  | 1285.669998 | -0.005710 | <a href="#">SAATLQQEK</a>    |
| 10.2  | 1285.669998 | -0.005710 | <a href="#">ASLDQGKEK</a>    |
| 8.2   | 1285.651367 | 0.012921  | <a href="#">LLQAVENGDAEK</a> |
| 8.2   | 1285.652237 | 0.012051  | <a href="#">AMQIQEQK</a>     |
| 5.6   | 1285.662598 | 0.001690  | <a href="#">EARSQVVKPEK</a>  |
| 4.3   | 1285.673859 | -0.009571 | <a href="#">NDVGGQRSLVNK</a> |
| 3.2   | 1285.652252 | 0.012036  | <a href="#">VCALEQQK</a>     |
| 2.7   | 1285.652237 | 0.012051  | <a href="#">AMQIQEQK</a>     |
| 0.8   | 1285.681213 | -0.016925 | <a href="#">EKQRSEAK</a>     |



# MASCOT Search Results

## Peptide View

MS/MS Fragmentation of **MVQEQCCHSQLEELHCATGISLANEQDR**  
 Found in **FBLN1\_HUMAN**, Fibulin-1 OS=Homo sapiens GN=FBLN1 PE=1 SV=4

Match to Query 71857: 3653.614656 from(914.410940,4+) rtinseconds(1985) index(38595)  
 Title: Locus:1.1.1.2713.24 File:"2013-07-02 CLN FXIII 30 min 2nd F 3.wiff"  
 Data file C:\Program Files (x86)\Matrix Science\Mascot Daemon\mgf2 FXIII 30 min 2nd\mascot\_daemon\_merge.mgf

Click mouse within plot area to zoom in by factor of two about that point

Or, Plot from  to  Da

Label all possible matches  Label matches used for scoring

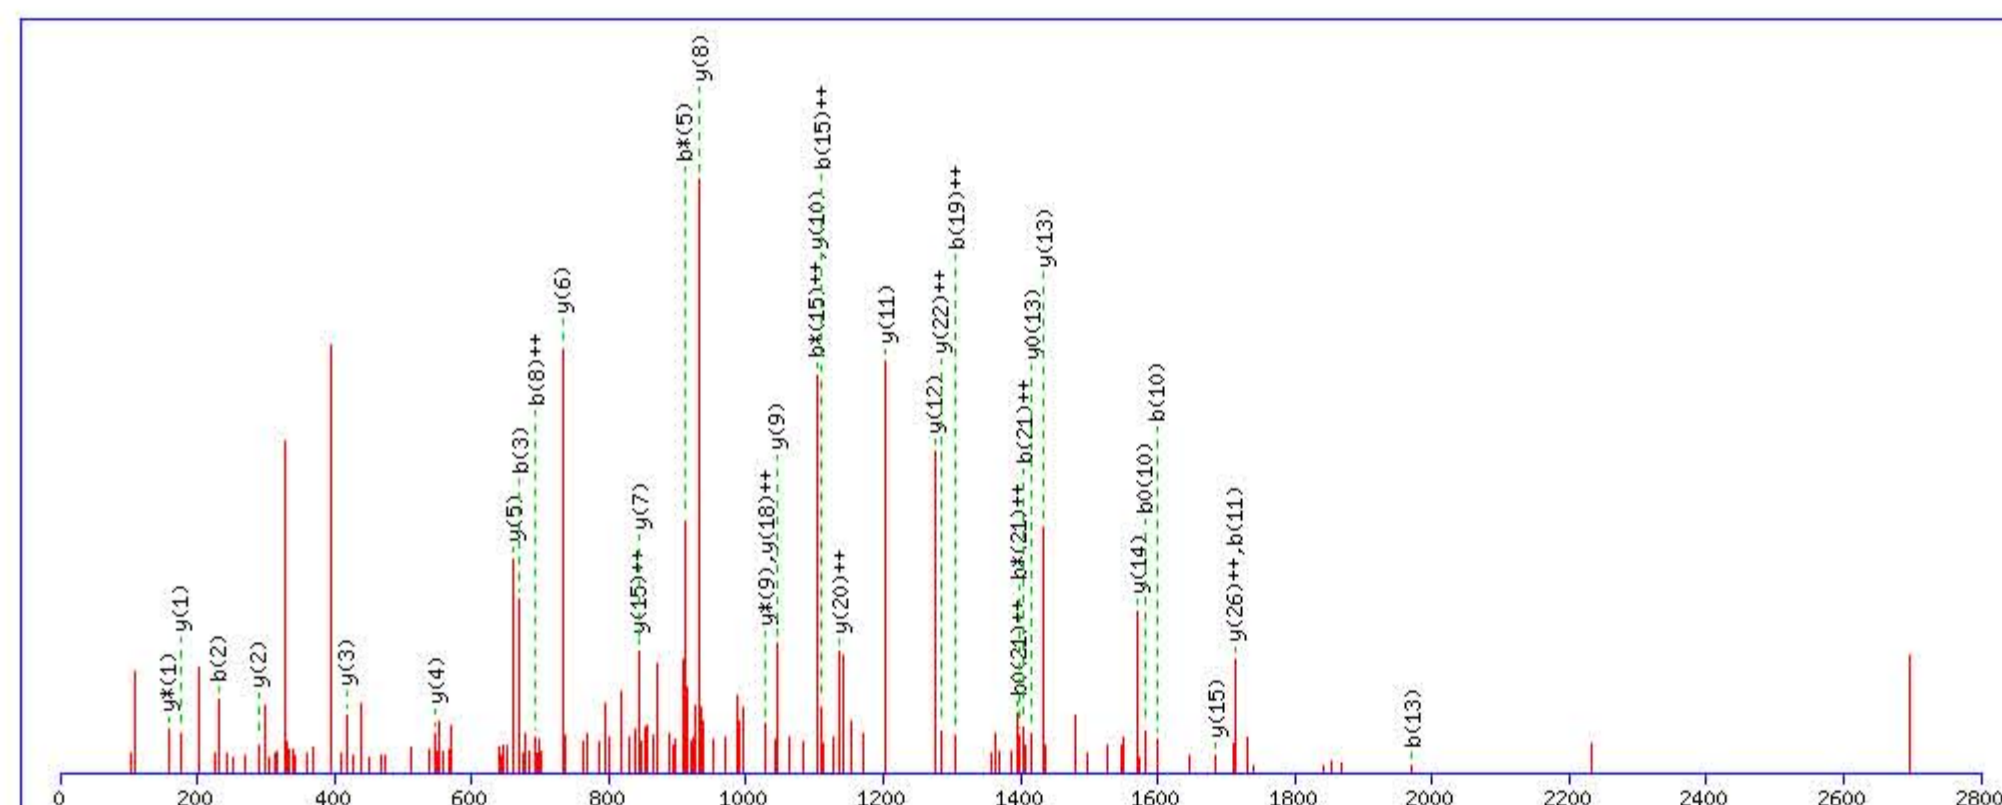

Monoisotopic mass of neutral peptide Mr(calc): 3653.615311  
 Fixed modifications: Carbamidomethyl (C) (apply to specified residues or termini only)  
 Variable modifications:  
 Q3 : Biotin:Thermo-21345 (Q)  
 Ions Score: 68 Expect: 1.1e-006  
 Matches : 37/312 fragment ions using 71 most intense peaks [\(help\)](#)

| #  | b                  | b <sup>++</sup>    | b <sup>*</sup>    | b <sup>*++</sup>   | b <sup>0</sup>     | b <sup>0++</sup>   | Seq. | y                  | y <sup>++</sup>    | y <sup>*</sup>     | y <sup>*++</sup> | y <sup>0</sup>     | y <sup>0++</sup> | #  |
|----|--------------------|--------------------|-------------------|--------------------|--------------------|--------------------|------|--------------------|--------------------|--------------------|------------------|--------------------|------------------|----|
| 1  | 132.047761         | 66.527518          |                   |                    |                    |                    | M    |                    |                    |                    |                  |                    |                  | 28 |
| 2  | <b>231.116175</b>  | 116.061725         |                   |                    |                    |                    | V    | 3523.582122        | 1762.294699        | 3506.555573        | 1753.781424      | 3505.571557        | 1753.289416      | 27 |
| 3  | <b>670.341501</b>  | 335.674389         | 653.314952        | 327.161114         |                    |                    | Q    | 3424.513708        | <b>1712.760492</b> | 3407.487159        | 1704.247217      | 3406.503143        | 1703.755209      | 26 |
| 4  | 799.384094         | 400.195685         | 782.357545        | 391.682411         | 781.373529         | 391.190403         | E    | 2985.288382        | 1493.147829        | 2968.261833        | 1484.634554      | 2967.277817        | 1484.142546      | 25 |
| 5  | 927.442672         | 464.224974         | <b>910.416123</b> | 455.711700         | 909.432107         | 455.219692         | Q    | 2856.245789        | 1428.626532        | 2839.219240        | 1420.113258      | 2838.235224        | 1419.621250      | 24 |
| 6  | 1087.473321        | 544.240299         | 1070.446772       | 535.727024         | 1069.462756        | 535.235016         | C    | 2728.187211        | 1364.597243        | 2711.160662        | 1356.083969      | 2710.176646        | 1355.591961      | 23 |
| 7  | 1247.503970        | 624.255623         | 1230.477421       | 615.742349         | 1229.493405        | 615.250341         | C    | 2568.156562        | <b>1284.581919</b> | 2551.130013        | 1276.068644      | 2550.145997        | 1275.576636      | 22 |
| 8  | 1384.562882        | <b>692.785079</b>  | 1367.536333       | 684.271805         | 1366.552317        | 683.779797         | H    | 2408.125913        | 1204.566594        | 2391.099364        | 1196.053320      | 2390.115348        | 1195.561312      | 21 |
| 9  | 1471.594910        | 736.301093         | 1454.568361       | 727.787819         | 1453.584345        | 727.295811         | S    | 2271.067001        | <b>1136.037138</b> | 2254.040452        | 1127.523864      | 2253.056436        | 1127.031856      | 20 |
| 10 | <b>1599.653488</b> | 800.330382         | 1582.626939       | 791.817108         | <b>1581.642923</b> | 791.325100         | Q    | 2184.034973        | 1092.521124        | 2167.008424        | 1084.007850      | 2166.024408        | 1083.515842      | 19 |
| 11 | <b>1712.737552</b> | 856.872414         | 1695.711003       | 848.359140         | 1694.726987        | 847.867132         | L    | 2055.976395        | <b>1028.491835</b> | 2038.949846        | 1019.978561      | 2037.965830        | 1019.486553      | 18 |
| 12 | 1841.780145        | 921.393711         | 1824.753596       | 912.880436         | 1823.769580        | 912.388428         | E    | 1942.892331        | 971.949804         | 1925.865782        | 963.436529       | 1924.881766        | 962.944521       | 17 |
| 13 | <b>1970.822738</b> | 985.915007         | 1953.796189       | 977.401733         | 1952.812173        | 976.909725         | E    | 1813.849738        | 907.428507         | 1796.823189        | 898.915233       | 1795.839173        | 898.423225       | 16 |
| 14 | 2083.906802        | 1042.457039        | 2066.880253       | 1033.943764        | 2065.896237        | 1033.451756        | L    | <b>1684.807145</b> | <b>842.907211</b>  | 1667.780596        | 834.393936       | 1666.796580        | 833.901928       | 15 |
| 15 | 2220.965714        | <b>1110.986495</b> | 2203.939165       | <b>1102.473220</b> | 2202.955149        | 1101.981212        | H    | <b>1571.723081</b> | 786.365179         | 1554.696532        | 777.851904       | 1553.712516        | 777.359896       | 14 |
| 16 | 2380.996363        | 1191.001819        | 2363.969814       | 1182.488545        | 2362.985798        | 1181.996537        | C    | <b>1434.664169</b> | 717.835723         | 1417.637620        | 709.322448       | <b>1416.653604</b> | 708.830440       | 13 |
| 17 | 2452.033477        | 1226.520376        | 2435.006928       | 1218.007102        | 2434.022912        | 1217.515094        | A    | <b>1274.633520</b> | 637.820398         | 1257.606971        | 629.307124       | 1256.622955        | 628.815116       | 12 |
| 18 | 2553.081156        | 1277.044216        | 2536.054607       | 1268.530941        | 2535.070591        | 1268.038933        | T    | <b>1203.596406</b> | 602.301841         | 1186.569857        | 593.788567       | 1185.585841        | 593.296559       | 11 |
| 19 | 2610.102620        | <b>1305.554948</b> | 2593.076071       | 1297.041673        | 2592.092055        | 1296.549665        | G    | <b>1102.548727</b> | 551.778002         | 1085.522178        | 543.264727       | 1084.538162        | 542.772719       | 10 |
| 20 | 2723.186684        | 1362.096980        | 2706.160135       | 1353.583705        | 2705.176119        | 1353.091697        | I    | <b>1045.527263</b> | 523.267270         | <b>1028.500714</b> | 514.753995       | 1027.516698        | 514.261987       | 9  |
| 21 | 2810.218712        | <b>1405.612994</b> | 2793.192163       | <b>1397.099719</b> | 2792.208147        | <b>1396.607711</b> | S    | <b>932.443199</b>  | 466.725238         | 915.416650         | 458.211963       | 914.432634         | 457.719955       | 8  |
| 22 | 2923.302776        | 1462.155026        | 2906.276227       | 1453.641751        | 2905.292211        | 1453.149743        | L    | <b>845.411171</b>  | 423.209224         | 828.384622         | 414.695949       | 827.400606         | 414.203941       | 7  |
| 23 | 2994.339890        | 1497.673583        | 2977.313341       | 1489.160308        | 2976.329325        | 1488.668301        | A    | <b>732.327107</b>  | 366.667192         | 715.300558         | 358.153917       | 714.316542         | 357.661909       | 6  |
| 24 | 3108.382817        | 1554.695047        | 3091.356268       | 1546.181772        | 3090.372252        | 1545.689764        | N    | <b>661.289993</b>  | 331.148635         | 644.263444         | 322.635360       | 643.279428         | 322.143352       | 5  |
| 25 | 3237.425410        | 1619.216343        | 3220.398861       | 1610.703069        | 3219.414845        | 1610.211061        | E    | <b>547.247066</b>  | 274.127171         | 530.220517         | 265.613897       | 529.236501         | 265.121889       | 4  |
| 26 | 3365.483988        | 1683.245632        | 3348.457439       | 1674.732358        | 3347.473423        | 1674.240350        | Q    | <b>418.204473</b>  | 209.605874         | 401.177924         | 201.092600       | 400.193908         | 200.600592       | 3  |
| 27 | 3480.510931        | 1740.759104        | 3463.484382       | 1732.245829        | 3462.500366        | 1731.753821        | D    | <b>290.145895</b>  | 145.576585         | 273.119346         | 137.063311       | 272.135330         | 136.571303       | 2  |
| 28 |                    |                    |                   |                    |                    |                    | R    | <b>175.118952</b>  | 88.063114          | <b>158.092403</b>  | 79.549839        |                    |                  | 1  |

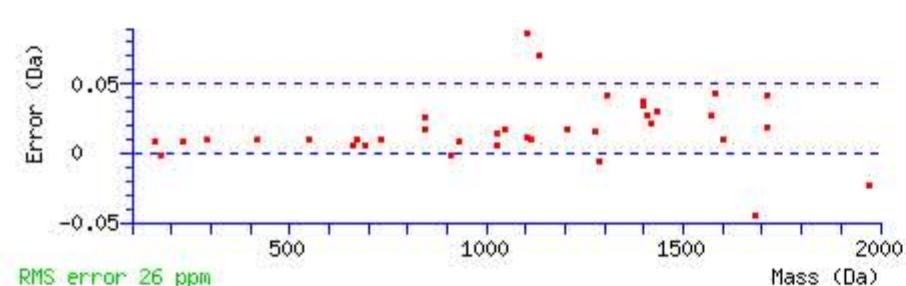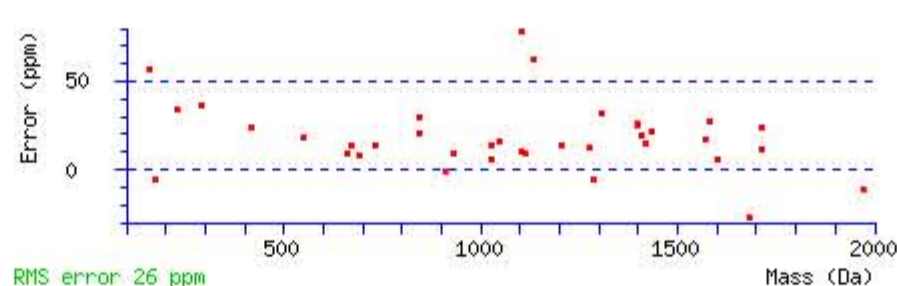

NCBI BLAST search of **MVQEQCCHSQLEELHCATGISLANEQDR**  
 (Parameters: blastp, nr protein database, expect=20000, no filter, PAM30)  
 Other BLAST [web gateways](#)

## All matches to this query

| Score | Mr(calc):   | Delta     | Sequence                                     |
|-------|-------------|-----------|----------------------------------------------|
| 67.9  | 3653.615311 | -0.000655 | <a href="#">MVQEQCCHSQLEELHCATGISLANEQDR</a> |
| 66.3  | 3653.615311 | -0.000655 | <a href="#">MVQEQCCHSQLEELHCATGISLANEQDR</a> |
| 61.7  | 3653.615311 | -0.000655 | <a href="#">MVQEQCCHSQLEELHCATGISLANEQDR</a> |



# MASCOT Search Results

## Peptide View

MS/MS Fragmentation of **MVQEQCCHSQLEELHLCATGISLANEQDR**  
 Found in **FBLN1\_HUMAN**, Fibulin-1 OS=Homo sapiens GN=FBLN1 PE=1 SV=4

Match to Query 71858: 3653.622856 from(914.412990,4+) rtinseconds(1975) index(55667)  
 Title: Locus:1.1.1.3173.24 File:"2013-07-02 CLN FXIII 30 min 2nd F 4.wiff"  
 Data file C:\Program Files (x86)\Matrix Science\Mascot Daemon\mgf\2 FXIII 30 min 2nd\mascot\_daemon\_merge.mgf

Click mouse within plot area to zoom in by factor of two about that point

Or, Plot from  to  Da

Label all possible matches  Label matches used for scoring

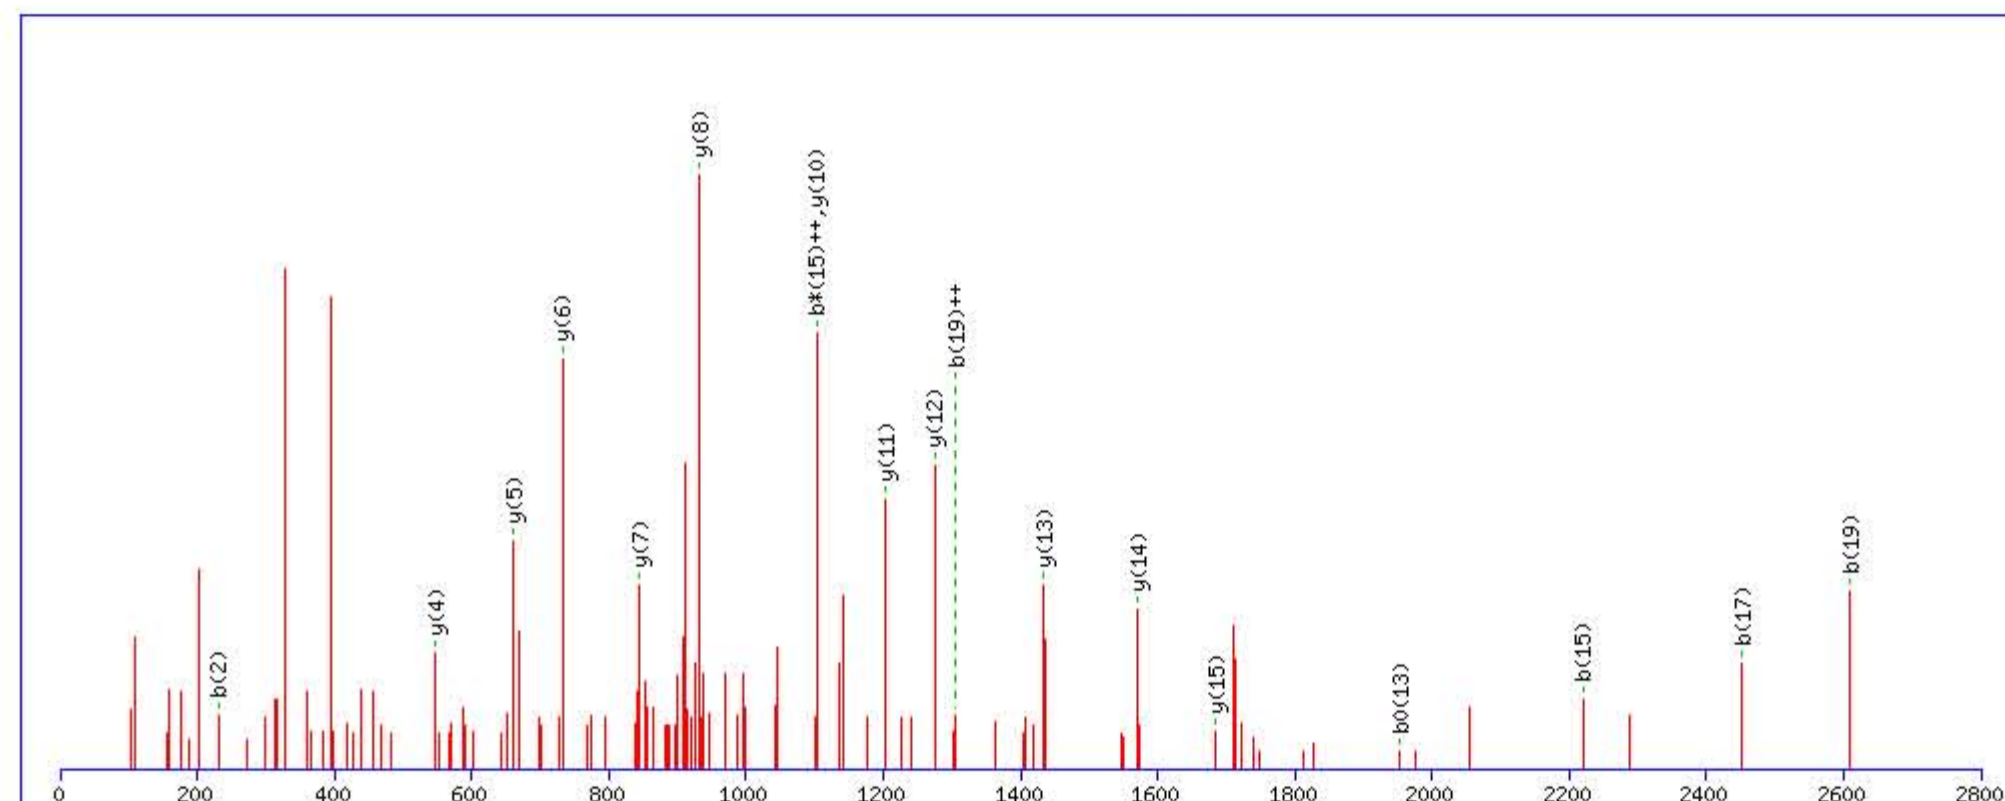

Monoisotopic mass of neutral peptide Mr(calc): 3653.615311  
 Fixed modifications: Carbamidomethyl (C) (apply to specified residues or termini only)  
 Variable modifications:  
 Q10 : Biotin:Thermo-21345 (Q)  
 Ions Score: 70 Expect: 7.7e-007  
 Matches : 18/312 fragment ions using 23 most intense peaks [\(help\)](#)

| #  | b                  | b <sup>++</sup>    | b <sup>*</sup> | b <sup>*++</sup>   | b <sup>0</sup>     | b <sup>0++</sup> | Seq. | y                  | y <sup>++</sup> | y <sup>*</sup> | y <sup>*++</sup> | y <sup>0</sup> | y <sup>0++</sup> | #  |
|----|--------------------|--------------------|----------------|--------------------|--------------------|------------------|------|--------------------|-----------------|----------------|------------------|----------------|------------------|----|
| 1  | 132.047761         | 66.527518          |                |                    |                    |                  | M    |                    |                 |                |                  |                |                  | 28 |
| 2  | <b>231.116175</b>  | 116.061725         |                |                    |                    |                  | V    | 3523.582122        | 1762.294699     | 3506.555573    | 1753.781424      | 3505.571557    | 1753.289416      | 27 |
| 3  | 359.174753         | 180.091015         | 342.148204     | 171.577740         |                    |                  | Q    | 3424.513708        | 1712.760492     | 3407.487159    | 1704.247217      | 3406.503143    | 1703.755209      | 26 |
| 4  | 488.217346         | 244.612311         | 471.190797     | 236.099037         | 470.206781         | 235.607029       | E    | 3296.455130        | 1648.731203     | 3279.428581    | 1640.217928      | 3278.444565    | 1639.725920      | 25 |
| 5  | 616.275924         | 308.641600         | 599.249375     | 300.128326         | 598.265359         | 299.636318       | Q    | 3167.412537        | 1584.209906     | 3150.385988    | 1575.696632      | 3149.401972    | 1575.204624      | 24 |
| 6  | 776.306573         | 388.656925         | 759.280024     | 380.143650         | 758.296008         | 379.651642       | C    | 3039.353959        | 1520.180617     | 3022.327410    | 1511.667343      | 3021.343394    | 1511.175335      | 23 |
| 7  | 936.337222         | 468.672249         | 919.310673     | 460.158975         | 918.326657         | 459.666967       | C    | 2879.323310        | 1440.165293     | 2862.296761    | 1431.652018      | 2861.312745    | 1431.160010      | 22 |
| 8  | 1073.396134        | 537.201705         | 1056.369585    | 528.688431         | 1055.385569        | 528.196423       | H    | 2719.292661        | 1360.149968     | 2702.266112    | 1351.636694      | 2701.282096    | 1351.144686      | 21 |
| 9  | 1160.428162        | 580.717719         | 1143.401613    | 572.204445         | 1142.417597        | 571.712437       | S    | 2582.233749        | 1291.620512     | 2565.207200    | 1283.107238      | 2564.223184    | 1282.615230      | 20 |
| 10 | 1599.653488        | 800.330382         | 1582.626939    | 791.817108         | 1581.642923        | 791.325100       | Q    | 2495.201721        | 1248.104498     | 2478.175172    | 1239.591224      | 2477.191156    | 1239.099216      | 19 |
| 11 | 1712.737552        | 856.872414         | 1695.711003    | 848.359140         | 1694.726987        | 847.867132       | L    | 2055.976395        | 1028.491835     | 2038.949846    | 1019.978561      | 2037.965830    | 1019.486553      | 18 |
| 12 | 1841.780145        | 921.393711         | 1824.753596    | 912.880436         | 1823.769580        | 912.388428       | E    | 1942.892331        | 971.949804      | 1925.865782    | 963.436529       | 1924.881766    | 962.944521       | 17 |
| 13 | 1970.822738        | 985.915007         | 1953.796189    | 977.401733         | <b>1952.812173</b> | 976.909725       | E    | 1813.849738        | 907.428507      | 1796.823189    | 898.915233       | 1795.839173    | 898.423225       | 16 |
| 14 | 2083.906802        | 1042.457039        | 2066.880253    | 1033.943764        | 2065.896237        | 1033.451756      | L    | <b>1684.807145</b> | 842.907211      | 1667.780596    | 834.393936       | 1666.796580    | 833.901928       | 15 |
| 15 | <b>2220.965714</b> | 1110.986495        | 2203.939165    | <b>1102.473220</b> | 2202.955149        | 1101.981212      | H    | <b>1571.723081</b> | 786.365179      | 1554.696532    | 777.851904       | 1553.712516    | 777.359896       | 14 |
| 16 | 2380.996363        | 1191.001819        | 2363.969814    | 1182.488545        | 2362.985798        | 1181.996537      | C    | <b>1434.664169</b> | 717.835723      | 1417.637620    | 709.322448       | 1416.653604    | 708.830440       | 13 |
| 17 | <b>2452.033477</b> | 1226.520376        | 2435.006928    | 1218.007102        | 2434.022912        | 1217.515094      | A    | <b>1274.633520</b> | 637.820398      | 1257.606971    | 629.307124       | 1256.622955    | 628.815116       | 12 |
| 18 | 2553.081156        | 1277.044216        | 2536.054607    | 1268.530941        | 2535.070591        | 1268.038933      | T    | <b>1203.596406</b> | 602.301841      | 1186.569857    | 593.788567       | 1185.585841    | 593.296559       | 11 |
| 19 | <b>2610.102620</b> | <b>1305.554948</b> | 2593.076071    | 1297.041673        | 2592.092055        | 1296.549665      | G    | <b>1102.548727</b> | 551.778002      | 1085.522178    | 543.264727       | 1084.538162    | 542.772719       | 10 |
| 20 | 2723.186684        | 1362.096980        | 2706.160135    | 1353.583705        | 2705.176119        | 1353.091697      | I    | 1045.527263        | 523.267270      | 1028.500714    | 514.753995       | 1027.516698    | 514.261987       | 9  |
| 21 | 2810.218712        | 1405.612994        | 2793.192163    | 1397.099719        | 2792.208147        | 1396.607711      | S    | <b>932.443199</b>  | 466.725238      | 915.416650     | 458.211963       | 914.432634     | 457.719955       | 8  |
| 22 | 2923.302776        | 1462.155026        | 2906.276227    | 1453.641751        | 2905.292211        | 1453.149743      | L    | <b>845.411171</b>  | 423.209224      | 828.384622     | 414.695949       | 827.400606     | 414.203941       | 7  |
| 23 | 2994.339890        | 1497.673583        | 2977.313341    | 1489.160308        | 2976.329325        | 1488.668301      | A    | <b>732.327107</b>  | 366.667192      | 715.300558     | 358.153917       | 714.316542     | 357.661909       | 6  |
| 24 | 3108.382817        | 1554.695047        | 3091.356268    | 1546.181772        | 3090.372252        | 1545.689764      | N    | <b>661.289993</b>  | 331.148635      | 644.263444     | 322.635360       | 643.279428     | 322.143352       | 5  |
| 25 | 3237.425410        | 1619.216343        | 3220.398861    | 1610.703069        | 3219.414845        | 1610.211061      | E    | <b>547.247066</b>  | 274.127171      | 530.220517     | 265.613897       | 529.236501     | 265.121889       | 4  |
| 26 | 3365.483988        | 1683.245632        | 3348.457439    | 1674.732358        | 3347.473423        | 1674.240350      | Q    | 418.204473         | 209.605874      | 401.177924     | 201.092600       | 400.193908     | 200.600592       | 3  |
| 27 | 3480.510931        | 1740.759104        | 3463.484382    | 1732.245829        | 3462.500366        | 1731.753821      | D    | 290.145895         | 145.576585      | 273.119346     | 137.063311       | 272.135330     | 136.571303       | 2  |
| 28 |                    |                    |                |                    |                    |                  | R    | 175.118952         | 88.063114       | 158.092403     | 79.549839        |                |                  | 1  |

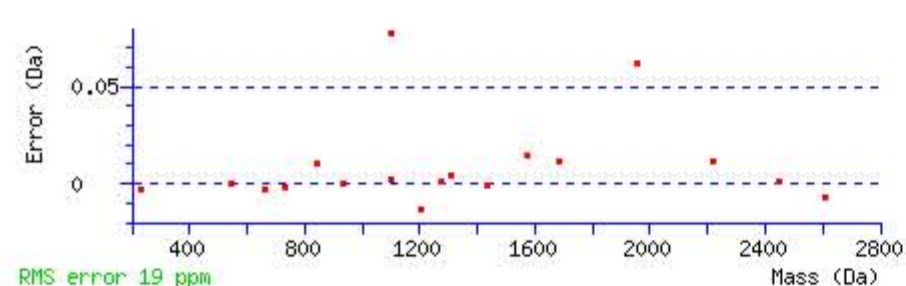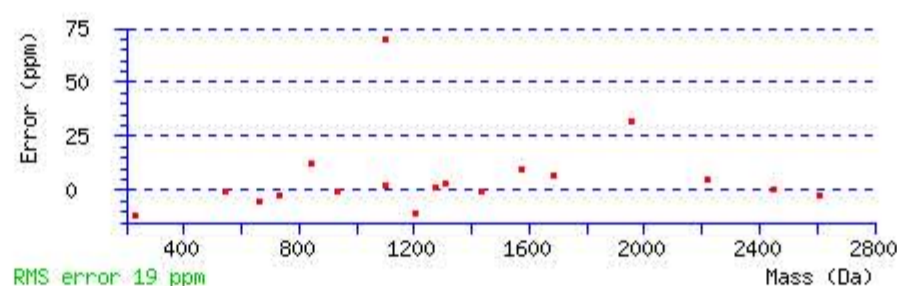

NCBI BLAST search of **MVQEQCCHSQLEELHLCATGISLANEQDR**  
 (Parameters: blastp, nr protein database, expect=20000, no filter, PAM30)  
 Other BLAST [web gateways](#)

### All matches to this query

| Score | Mr(calc):   | Delta    | Sequence                                      |
|-------|-------------|----------|-----------------------------------------------|
| 69.9  | 3653.615311 | 0.007545 | <a href="#">MVQEQCCHSQLEELHLCATGISLANEQDR</a> |
| 69.9  | 3653.615311 | 0.007545 | <a href="#">MVQEQCCHSQLEELHLCATGISLANEQDR</a> |
| 69.9  | 3653.615311 | 0.007545 | <a href="#">MVQEQCCHSQLEELHLCATGISLANEQDR</a> |



# MASCOT Search Results

## Peptide View

MS/MS Fragmentation of **KSQLVYQSR**

Found in **LG3BP\_HUMAN**, Galectin-3-binding protein OS=Homo sapiens GN=LGALS3BP PE=1 SV=1

Match to Query 33129: 1418.766108 from(710.390330,2+) rtinseconds(1482) index(52454)

Title: Locus:1.1.1.3002.10 File:"2013-07-02 CLN FXIII 30 min 2nd F 4.wiff"

Data file C:\Program Files (x86)\Matrix Science\Mascot Daemon\mgf2 FXIII 30 min 2nd\mascot\_daemon\_merge.mgf

Click mouse within plot area to zoom in by factor of two about that point

Or, Plot from  to  Da

Label all possible matches  Label matches used for scoring

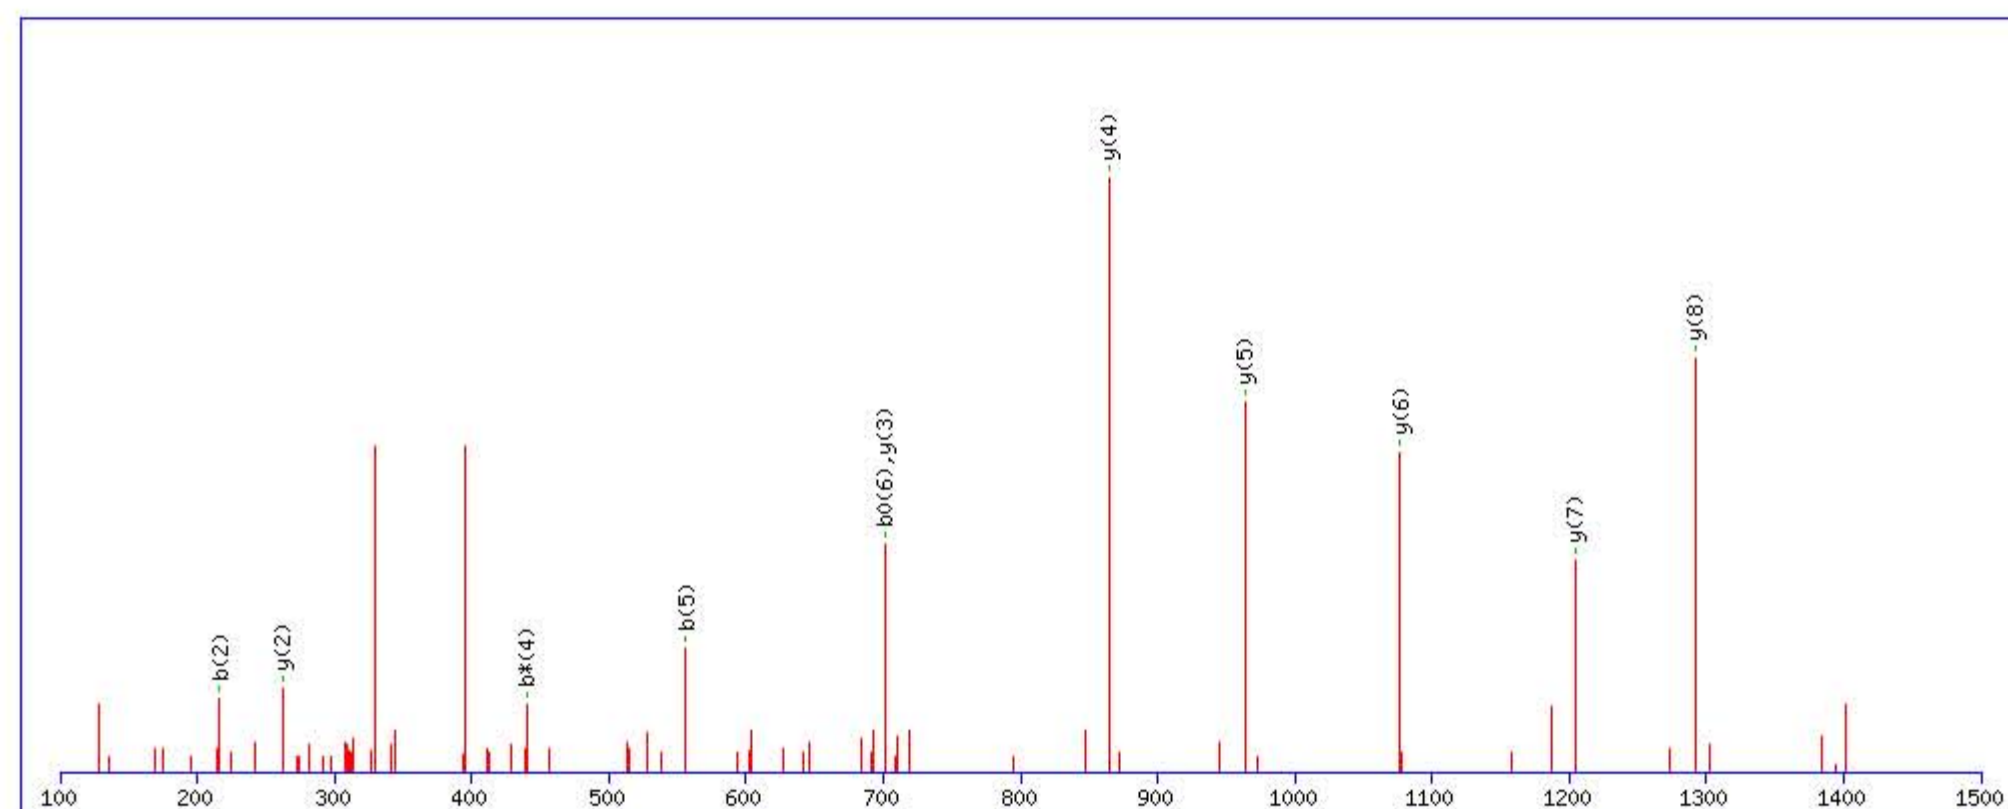

Monoisotopic mass of neutral peptide Mr(calc): 1418.770386

Fixed modifications: Carbamidomethyl (C) (apply to specified residues or termini only)

Variable modifications:

Q7 : Biotin:Thermo-21345 (Q)

Ions Score: 63 Expect: 1e-005

Matches : 11/92 fragment ions using 13 most intense peaks ([help](#))

| # | b                 | b <sup>++</sup> | b <sup>*</sup>    | b <sup>*++</sup> | b <sup>0</sup>    | b <sup>0++</sup> | Seq. | y                  | y <sup>++</sup> | y <sup>*</sup> | y <sup>*++</sup> | y <sup>0</sup> | y <sup>0++</sup> | # |
|---|-------------------|-----------------|-------------------|------------------|-------------------|------------------|------|--------------------|-----------------|----------------|------------------|----------------|------------------|---|
| 1 | 129.102239        | 65.054757       | 112.075690        | 56.541483        |                   |                  | K    |                    |                 |                |                  |                |                  | 9 |
| 2 | <b>216.134267</b> | 108.570771      | 199.107718        | 100.057497       | 198.123702        | 99.565489        | S    | <b>1291.682719</b> | 646.344998      | 1274.656170    | 637.831723       | 1273.672154    | 637.339715       | 8 |
| 3 | 344.192845        | 172.600060      | 327.166296        | 164.086786       | 326.182280        | 163.594778       | Q    | <b>1204.650691</b> | 602.828984      | 1187.624142    | 594.315709       | 1186.640126    | 593.823701       | 7 |
| 4 | 457.276909        | 229.142092      | <b>440.250360</b> | 220.628818       | 439.266344        | 220.136810       | L    | <b>1076.592113</b> | 538.799695      | 1059.565564    | 530.286420       | 1058.581548    | 529.794412       | 6 |
| 5 | <b>556.345323</b> | 278.676300      | 539.318774        | 270.163025       | 538.334758        | 269.671017       | V    | <b>963.508049</b>  | 482.257663      | 946.481500     | 473.744388       | 945.497484     | 473.252380       | 5 |
| 6 | 719.408652        | 360.207964      | 702.382103        | 351.694690       | <b>701.398087</b> | 351.202682       | Y    | <b>864.439635</b>  | 432.723456      | 847.413086     | 424.210181       | 846.429070     | 423.718173       | 4 |
| 7 | 1158.633978       | 579.820627      | 1141.607429       | 571.307353       | 1140.623413       | 570.815345       | Q    | <b>701.376306</b>  | 351.191791      | 684.349757     | 342.678517       | 683.365741     | 342.186509       | 3 |
| 8 | 1245.666006       | 623.336641      | 1228.639457       | 614.823367       | 1227.655441       | 614.331359       | S    | <b>262.150980</b>  | 131.579128      | 245.124431     | 123.065854       | 244.140415     | 122.573846       | 2 |
| 9 |                   |                 |                   |                  |                   |                  | R    | 175.118952         | 88.063114       | 158.092403     | 79.549839        |                |                  | 1 |

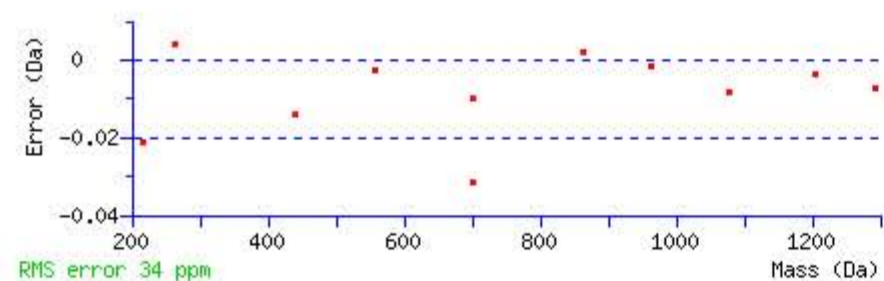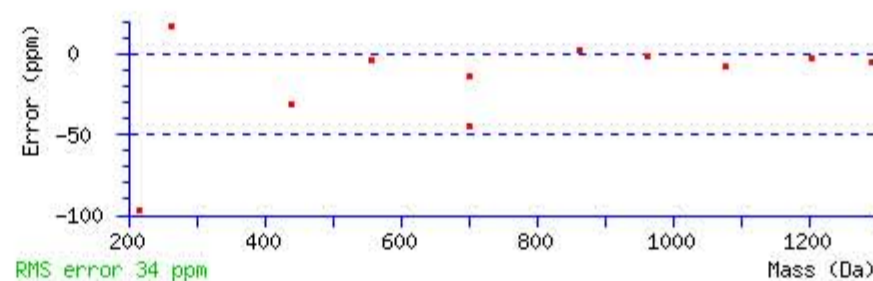

NCBI BLAST search of **KSQLVYQSR**

(Parameters: blastp, nr protein database, expect=20000, no filter, PAM30)

Other BLAST [web gateways](#)

All matches to this query

| Score | Mr(calc):   | Delta     | Sequence                       |
|-------|-------------|-----------|--------------------------------|
| 62.9  | 1418.770386 | -0.004278 | <a href="#">KSQLVYQSR</a>      |
| 10.4  | 1418.780273 | -0.014165 | <a href="#">TNQLMETLTKTIK</a>  |
| 8.2   | 1418.770386 | -0.004278 | <a href="#">KSQLVYQSR</a>      |
| 7.0   | 1418.763000 | 0.003108  | <a href="#">IKGEQGAPGLQGHK</a> |
| 5.9   | 1418.767044 | -0.000936 | <a href="#">SQGLAGLFAGVFPR</a> |

Mascot: <http://www.matrixscience.com/>



# MASCOT Search Results

## Peptide View

MS/MS Fragmentation of **KSQLVYQSR**

Found in **LG3BP\_HUMAN**, Galectin-3-binding protein OS=Homo sapiens GN=LGALS3BP PE=1 SV=1

Match to Query 42951: 1729.953252 from(577.658360,3+) rtinseconds(1845) index(37561)

Title: Locus:1.1.1.2665.12 File:"2013-07-02 CLN FXIII 30 min 2nd F 3.wiff"

Data file C:\Program Files (x86)\Matrix Science\Mascot Daemon\mgf\2 FXIII 30 min 2nd\mascot\_daemon\_merge.mgf

Click mouse within plot area to zoom in by factor of two about that point

Or, Plot from  to  Da

Label all possible matches  Label matches used for scoring

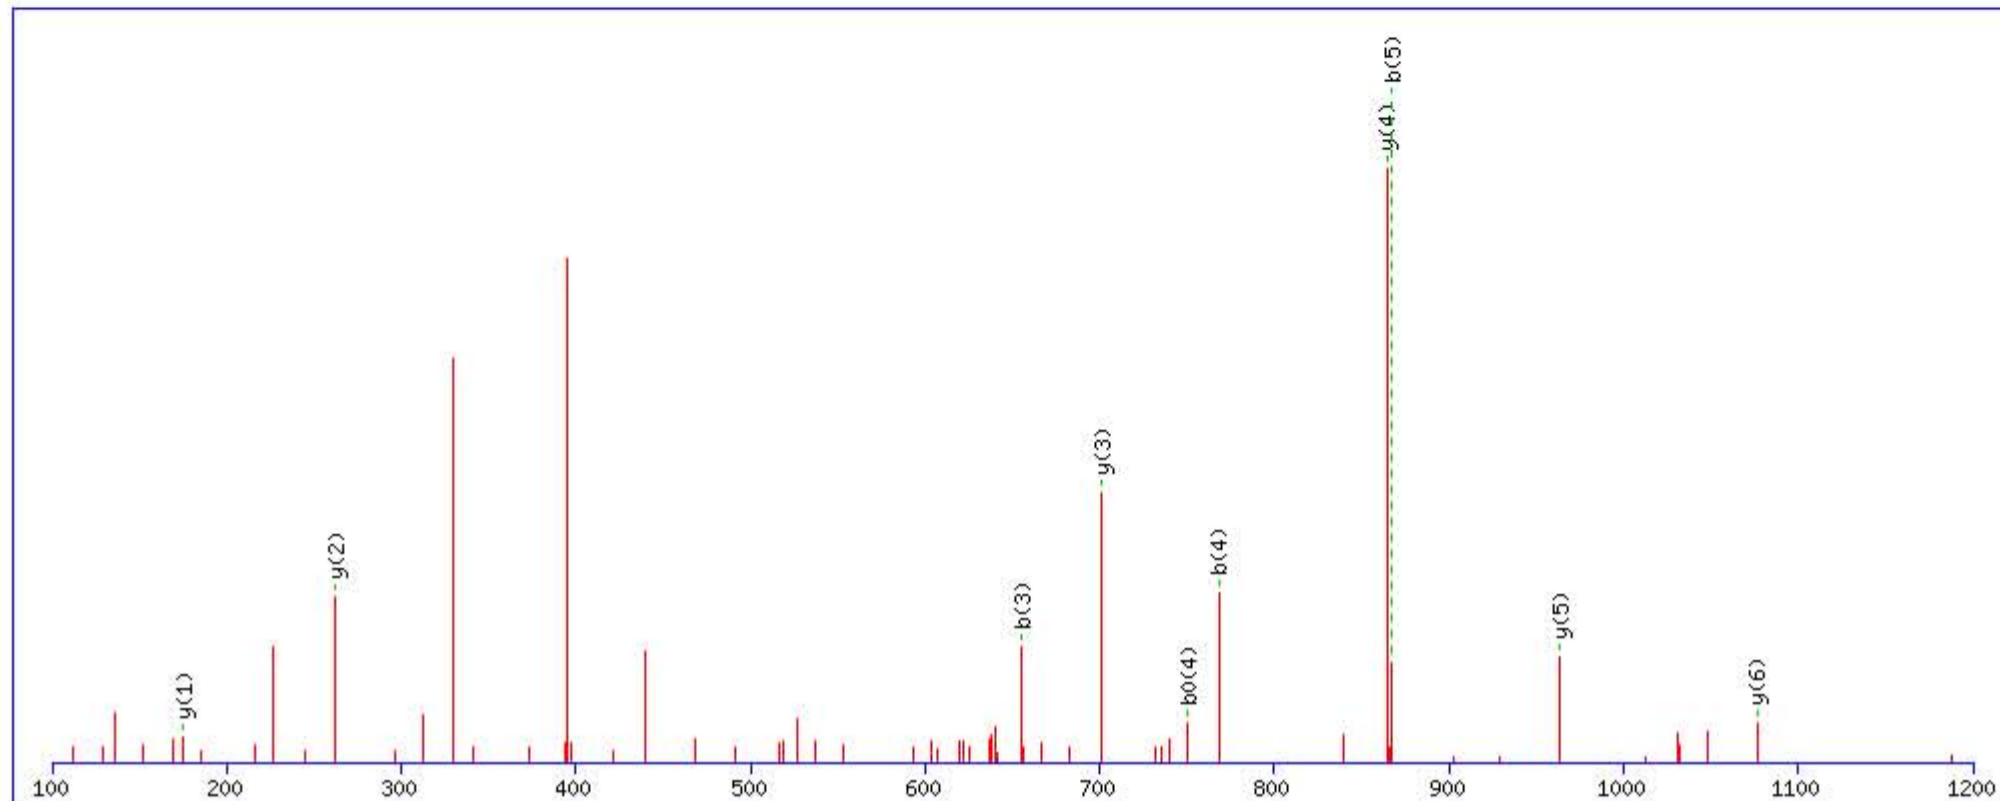

Monoisotopic mass of neutral peptide Mr(calc): 1729.937134

Fixed modifications: Carbamidomethyl (C) (apply to specified residues or termini only)

Variable modifications:

Q3 : Biotin:Thermo-21345 (Q)

Q7 : Biotin:Thermo-21345 (Q)

Ions Score: 28 Expect: 0.026

Matches : 10/92 fragment ions using 21 most intense peaks [\(help\)](#)

| # | b                 | b <sup>++</sup> | b <sup>*</sup> | b <sup>***</sup> | b <sup>0</sup>    | b <sup>0++</sup> | Seq.     | y                  | y <sup>++</sup> | y <sup>*</sup> | y <sup>***</sup> | y <sup>0</sup> | y <sup>0++</sup> | #        |
|---|-------------------|-----------------|----------------|------------------|-------------------|------------------|----------|--------------------|-----------------|----------------|------------------|----------------|------------------|----------|
| 1 | 129.102239        | 65.054757       | 112.075690     | 56.541483        |                   |                  | <b>K</b> |                    |                 |                |                  |                |                  | <b>9</b> |
| 2 | 216.134267        | 108.570771      | 199.107718     | 100.057497       | 198.123702        | 99.565489        | <b>S</b> | 1602.849467        | 801.928372      | 1585.822918    | 793.415097       | 1584.838902    | 792.923089       | <b>8</b> |
| 3 | <b>655.359593</b> | 328.183435      | 638.333044     | 319.670160       | 637.349028        | 319.178152       | <b>Q</b> | 1515.817439        | 758.412358      | 1498.790890    | 749.899083       | 1497.806874    | 749.407075       | <b>7</b> |
| 4 | <b>768.443657</b> | 384.725467      | 751.417108     | 376.212192       | <b>750.433092</b> | 375.720184       | <b>L</b> | <b>1076.592113</b> | 538.799695      | 1059.565564    | 530.286420       | 1058.581548    | 529.794412       | <b>6</b> |
| 5 | <b>867.512071</b> | 434.259674      | 850.485522     | 425.746399       | 849.501506        | 425.254391       | <b>V</b> | <b>963.508049</b>  | 482.257663      | 946.481500     | 473.744388       | 945.497484     | 473.252380       | <b>5</b> |
| 6 | 1030.575400       | 515.791338      | 1013.548851    | 507.278063       | 1012.564835       | 506.786055       | <b>Y</b> | <b>864.439635</b>  | 432.723456      | 847.413086     | 424.210181       | 846.429070     | 423.718173       | <b>4</b> |
| 7 | 1469.800726       | 735.404001      | 1452.774177    | 726.890727       | 1451.790161       | 726.398719       | <b>Q</b> | <b>701.376306</b>  | 351.191791      | 684.349757     | 342.678517       | 683.365741     | 342.186509       | <b>3</b> |
| 8 | 1556.832754       | 778.920015      | 1539.806205    | 770.406741       | 1538.822189       | 769.914733       | <b>S</b> | <b>262.150980</b>  | 131.579128      | 245.124431     | 123.065854       | 244.140415     | 122.573846       | <b>2</b> |
| 9 |                   |                 |                |                  |                   |                  | <b>R</b> | <b>175.118952</b>  | 88.063114       | 158.092403     | 79.549839        |                |                  | <b>1</b> |

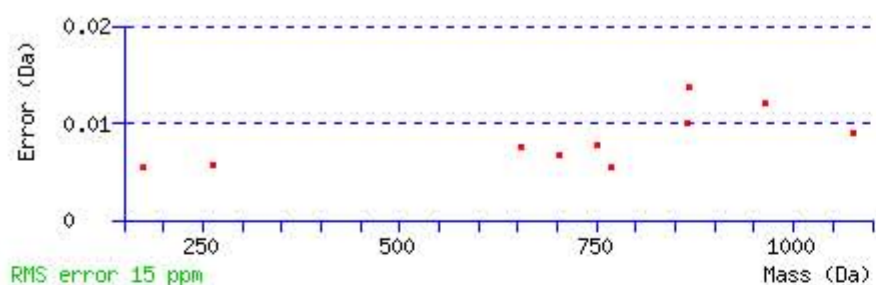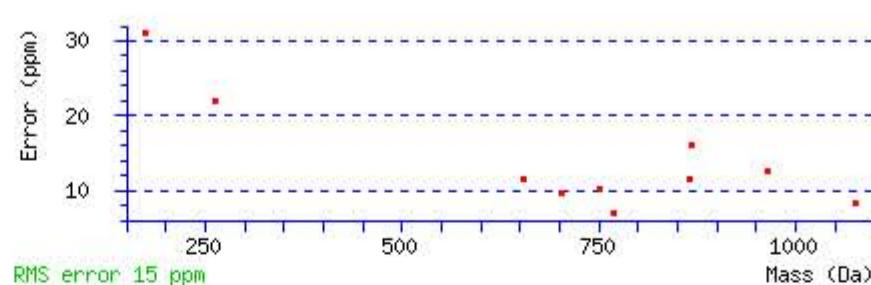

NCBI BLAST search of [KSQLVYQSR](#)

(Parameters: blastp, nr protein database, expect=20000, no filter, PAM30)

Other BLAST [web gateways](#)

All matches to this query

| Score | Mr(calc):   | Delta    | Sequence                  |
|-------|-------------|----------|---------------------------|
| 28.5  | 1729.937134 | 0.016118 | <a href="#">KSQLVYQSR</a> |

Mascot: <http://www.matrixscience.com/>



# MATRIX SCIENCE Mascot Search Results

## Peptide View

MS/MS Fragmentation of **YSSDYFQAPSDYR**

Found in **LG3BP\_HUMAN**, Galectin-3-binding protein OS=Homo sapiens GN=LGALS3BP PE=1 SV=1

Match to Query 47007: 1908.834072 from(637.285300,3+) rtinseconds(2077) index(56285)

Title: Locus:1.1.1.3209.8 File:"2013-07-02 CLN FXIII 30 min 2nd F 4.wiff"

Data file C:\Program Files (x86)\Matrix Science\Mascot Daemon\mgf2 FXIII 30 min 2nd\mascot\_daemon\_merge.mgf

Click mouse within plot area to zoom in by factor of two about that point

Or, Plot from  to  Da

Label all possible matches  Label matches used for scoring

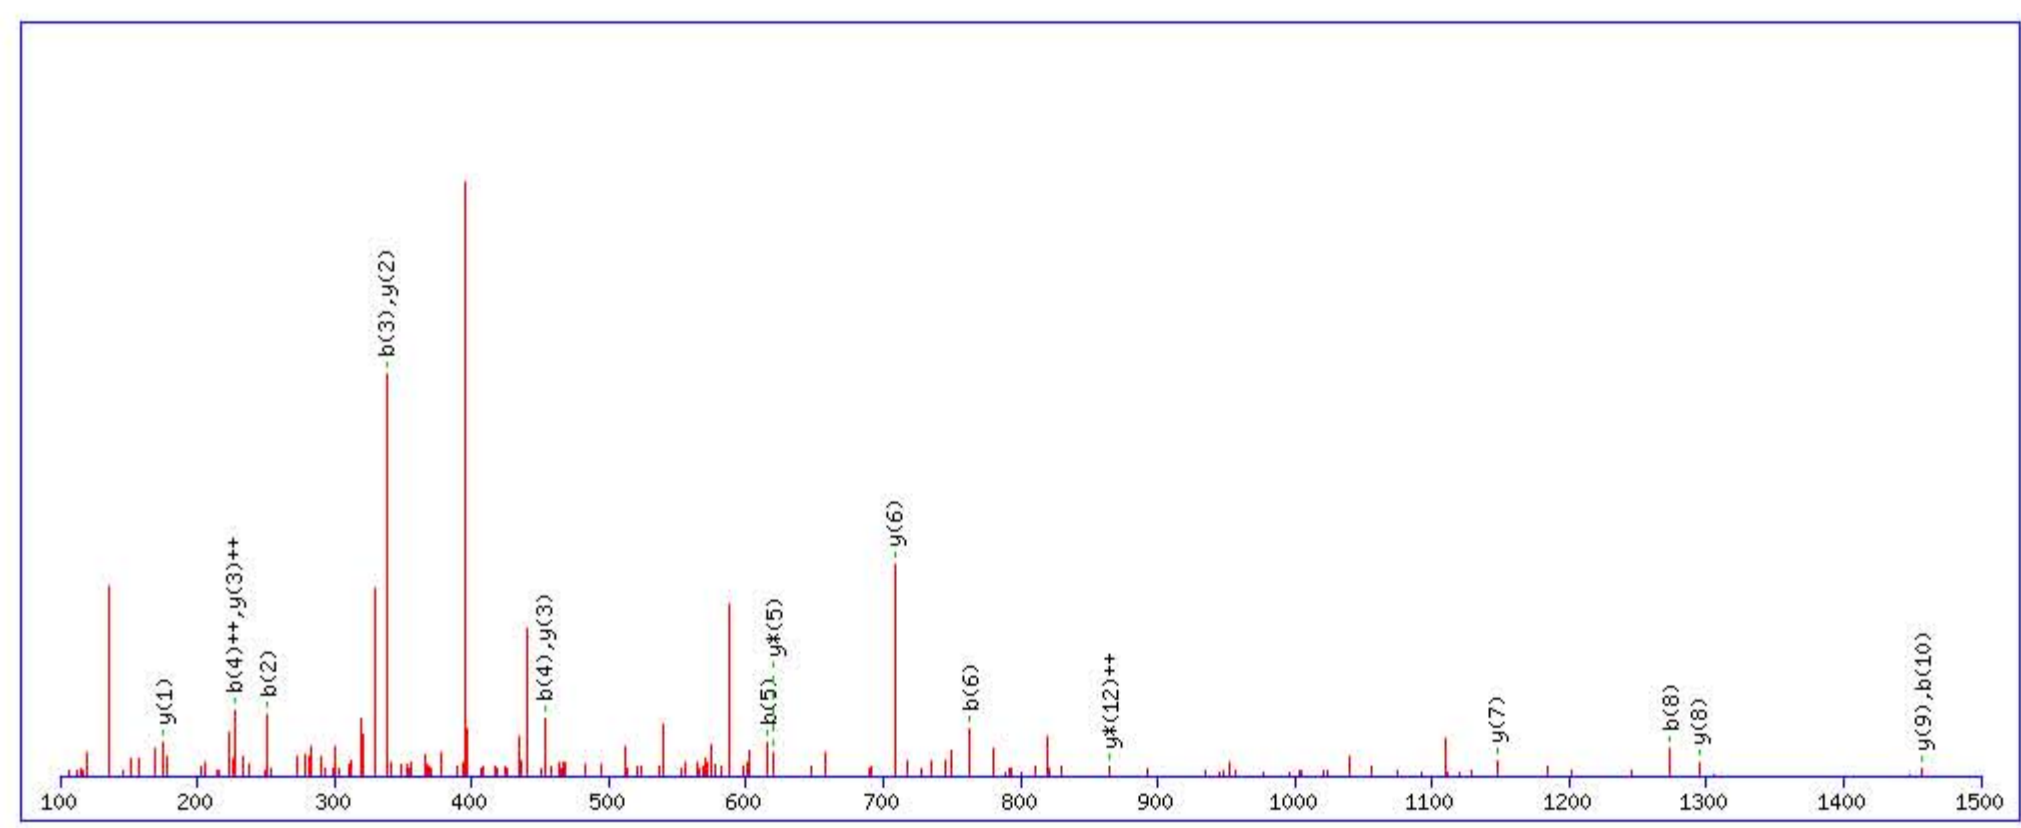

Monoisotopic mass of neutral peptide Mr(calc): 1908.835236

Fixed modifications: Carbamidomethyl (C) (apply to specified residues or termini only)

Variable modifications:

Q7 : Biotin:Thermo-21345 (Q)

Ions Score: 40 Expect: 0.0005

Matches : 18/126 fragment ions using 26 most intense peaks [\(help\)](#)

| #  | b                  | b <sup>++</sup>   | b <sup>*</sup> | b <sup>*++</sup> | b <sup>0</sup> | b <sup>0++</sup> | Seq. | y                  | y <sup>++</sup>   | y <sup>*</sup>    | y <sup>*++</sup>  | y <sup>0</sup> | y <sup>0++</sup> | #  |
|----|--------------------|-------------------|----------------|------------------|----------------|------------------|------|--------------------|-------------------|-------------------|-------------------|----------------|------------------|----|
| 1  | 164.070605         | 82.538940         |                |                  |                |                  | Y    |                    |                   |                   |                   |                |                  | 13 |
| 2  | <b>251.102633</b>  | 126.054954        |                |                  | 233.092068     | 117.049672       | S    | 1746.779198        | 873.893237        | 1729.752649       | <b>865.379963</b> | 1728.768633    | 864.887955       | 12 |
| 3  | <b>338.134661</b>  | 169.570968        |                |                  | 320.124096     | 160.565686       | S    | 1659.747170        | 830.377223        | 1642.720621       | 821.863949        | 1641.736605    | 821.371941       | 11 |
| 4  | <b>453.161604</b>  | <b>227.084440</b> |                |                  | 435.151039     | 218.079158       | D    | 1572.715142        | 786.861209        | 1555.688593       | 778.347935        | 1554.704577    | 777.855927       | 10 |
| 5  | <b>616.224933</b>  | 308.616105        |                |                  | 598.214368     | 299.610822       | Y    | <b>1457.688199</b> | 729.347738        | 1440.661650       | 720.834463        | 1439.677634    | 720.342455       | 9  |
| 6  | <b>763.293347</b>  | 382.150312        |                |                  | 745.282782     | 373.145029       | F    | <b>1294.624870</b> | 647.816073        | 1277.598321       | 639.302799        | 1276.614305    | 638.810791       | 8  |
| 7  | 1202.518673        | 601.762975        | 1185.492124    | 593.249700       | 1184.508108    | 592.757692       | Q    | <b>1147.556456</b> | 574.281866        | 1130.529907       | 565.768592        | 1129.545891    | 565.276584       | 7  |
| 8  | <b>1273.555787</b> | 637.281532        | 1256.529238    | 628.768257       | 1255.545222    | 628.276249       | A    | <b>708.331130</b>  | 354.669203        | 691.304581        | 346.155929        | 690.320565     | 345.663921       | 6  |
| 9  | 1370.608551        | 685.807914        | 1353.582002    | 677.294639       | 1352.597986    | 676.802631       | P    | 637.294016         | 319.150646        | <b>620.267467</b> | 310.637372        | 619.283451     | 310.145364       | 5  |
| 10 | <b>1457.640579</b> | 729.323928        | 1440.614030    | 720.810653       | 1439.630014    | 720.318645       | S    | 540.241252         | 270.624264        | 523.214703        | 262.110990        | 522.230687     | 261.618982       | 4  |
| 11 | 1572.667522        | 786.837399        | 1555.640973    | 778.324125       | 1554.656957    | 777.832117       | D    | <b>453.209224</b>  | <b>227.108250</b> | 436.182675        | 218.594976        | 435.198659     | 218.102968       | 3  |
| 12 | 1735.730851        | 868.369064        | 1718.704302    | 859.855789       | 1717.720286    | 859.363781       | Y    | <b>338.182281</b>  | 169.594778        | 321.155732        | 161.081504        |                |                  | 2  |
| 13 |                    |                   |                |                  |                |                  | R    | <b>175.118952</b>  | 88.063114         | 158.092403        | 79.549839         |                |                  | 1  |

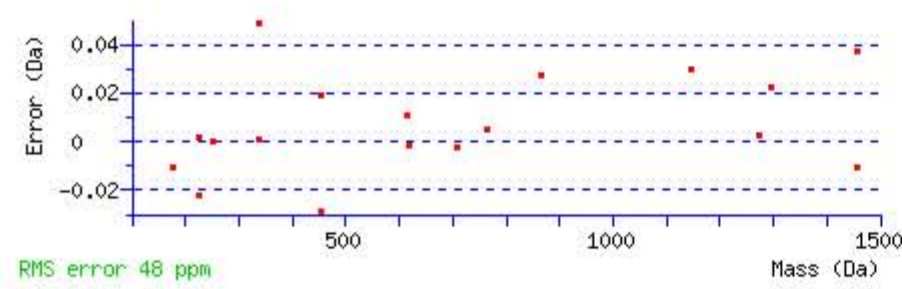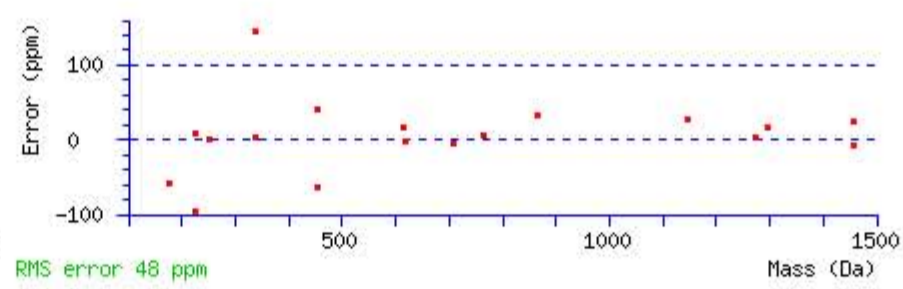

NCBI BLAST search of [YSSDYFQAPSDYR](#)

(Parameters: blastp, nr protein database, expect=20000, no filter, PAM30)

Other BLAST [web gateways](#)

### All matches to this query

| Score | Mr(calc):   | Delta     | Sequence                      |
|-------|-------------|-----------|-------------------------------|
| 40.1  | 1908.835236 | -0.001164 | <a href="#">YSSDYFQAPSDYR</a> |



# MASCOT Search Results

## Peptide View

MS/MS Fragmentation of **GASQAGAPQGR**

Found in **GELS\_HUMAN**, Gelsolin OS=Homo sapiens GN=GSN PE=1 SV=1

Match to Query 28660: 1309.671372 from(437.564400,3+) rtinseconds(1253) index(1195)

Title: Locus:1.1.1.2872.5 File:"2013-07-02 CLN FXIII 30 min 2nd F 1.wiff"

Data file C:\Program Files (x86)\Matrix Science\Mascot Daemon\mgf2 FXIII 30 min 2nd\mascot\_daemon\_merge.mgf

Click mouse within plot area to zoom in by factor of two about that point

Or, Plot from  to  Da

Label all possible matches  Label matches used for scoring

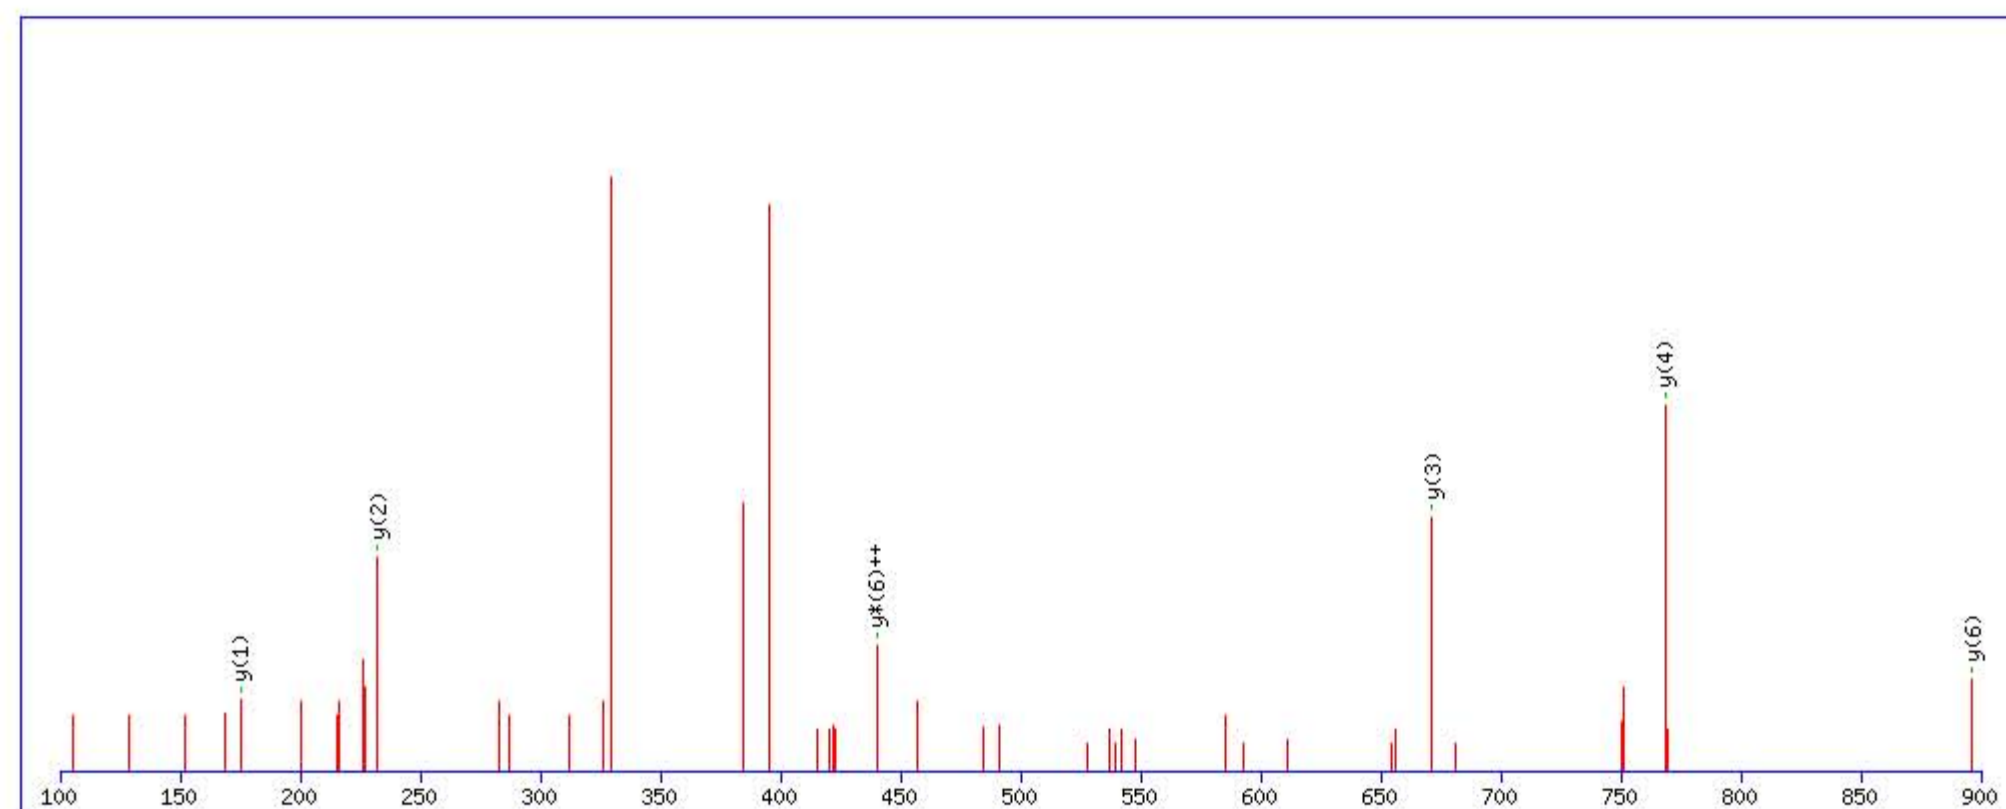

Monoisotopic mass of neutral peptide Mr(calc): 1309.656097

Fixed modifications: Carbamidomethyl (C) (apply to specified residues or termini only)

Variable modifications:

Q9 : Biotin:Thermo-21345 (Q)

Ions Score: 36 Expect: 0.0048

Matches : 6/94 fragment ions using 8 most intense peaks [\(help\)](#)

| #  | b           | b <sup>++</sup> | b <sup>+</sup> | b <sup>+++</sup> | b <sup>0</sup> | b <sup>0++</sup> | Seq. | y                 | y <sup>++</sup> | y <sup>+</sup> | y <sup>+++</sup>  | y <sup>0</sup> | y <sup>0++</sup> | #  |
|----|-------------|-----------------|----------------|------------------|----------------|------------------|------|-------------------|-----------------|----------------|-------------------|----------------|------------------|----|
| 1  | 58.028740   | 29.518008       |                |                  |                |                  | G    |                   |                 |                |                   |                |                  | 11 |
| 2  | 129.065854  | 65.036565       |                |                  |                |                  | A    | 1253.641918       | 627.324597      | 1236.615369    | 618.811323        | 1235.631353    | 618.319315       | 10 |
| 3  | 216.097882  | 108.552579      |                |                  | 198.087317     | 99.547296        | S    | 1182.604804       | 591.806040      | 1165.578255    | 583.292765        | 1164.594239    | 582.800757       | 9  |
| 4  | 344.156460  | 172.581868      | 327.129911     | 164.068593       | 326.145895     | 163.576585       | Q    | 1095.572776       | 548.290026      | 1078.546227    | 539.776752        |                |                  | 8  |
| 5  | 415.193574  | 208.100425      | 398.167025     | 199.587150       | 397.183009     | 199.095142       | A    | 967.514198        | 484.260737      | 950.487649     | 475.747462        |                |                  | 7  |
| 6  | 472.215038  | 236.611157      | 455.188489     | 228.097882       | 454.204473     | 227.605874       | G    | <b>896.477084</b> | 448.742180      | 879.450535     | <b>440.228906</b> |                |                  | 6  |
| 7  | 543.252152  | 272.129714      | 526.225603     | 263.616440       | 525.241587     | 263.124432       | A    | 839.455620        | 420.231448      | 822.429071     | 411.718173        |                |                  | 5  |
| 8  | 640.304916  | 320.656096      | 623.278367     | 312.142822       | 622.294351     | 311.650814       | P    | <b>768.418506</b> | 384.712891      | 751.391957     | 376.199616        |                |                  | 4  |
| 9  | 1079.530242 | 540.268759      | 1062.503693    | 531.755485       | 1061.519677    | 531.263477       | Q    | <b>671.365742</b> | 336.186509      | 654.339193     | 327.673234        |                |                  | 3  |
| 10 | 1136.551706 | 568.779491      | 1119.525157    | 560.266217       | 1118.541141    | 559.774208       | G    | <b>232.140416</b> | 116.573846      | 215.113867     | 108.060571        |                |                  | 2  |
| 11 |             |                 |                |                  |                |                  | R    | <b>175.118952</b> | 88.063114       | 158.092403     | 79.549839         |                |                  | 1  |

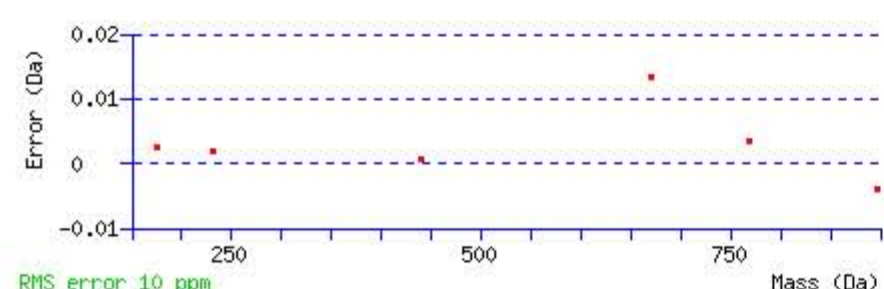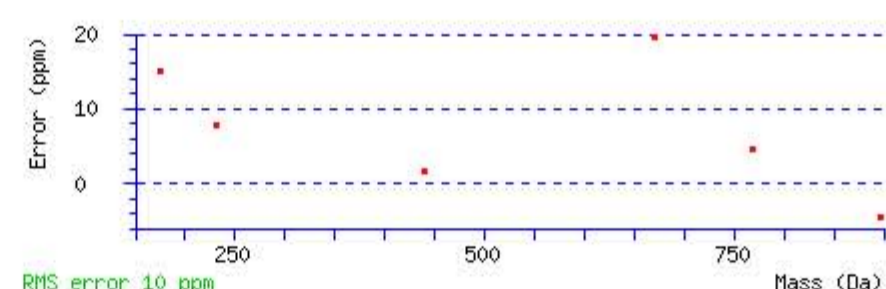

NCBI BLAST search of **GASQAGAPQGR**

(Parameters: blastp, nr protein database, expect=20000, no filter, PAM30)

Other BLAST [web gateways](#)

## All matches to this query

| Score | Mr(calc):   | Delta     | Sequence                    |
|-------|-------------|-----------|-----------------------------|
| 36.2  | 1309.656097 | 0.015275  | <a href="#">GASQAGAPQGR</a> |
| 18.4  | 1309.656097 | 0.015275  | <a href="#">GASQAGAPQGR</a> |
| 10.8  | 1309.656082 | 0.015290  | <a href="#">EKNPGNQGR</a>   |
| 8.6   | 1309.677887 | -0.006515 | <a href="#">HPEIVGYVPGR</a> |
| 8.6   | 1309.681259 | -0.009887 | <a href="#">LVGSDQAPGR</a>  |
| 6.5   | 1309.663483 | 0.007889  | <a href="#">AEQQGR</a>      |
| 0.1   | 1309.685272 | -0.013900 | <a href="#">MLKPAFIFDGR</a> |
| 0.1   | 1309.689102 | -0.017730 | <a href="#">SQLFVAYRNGR</a> |



# MASCOT Search Results

## Peptide View

MS/MS Fragmentation of **GASQAGAPQGR**

Found in **GELS\_HUMAN**, Gelsolin OS=Homo sapiens GN=GSN PE=1 SV=1

Match to Query 39663: 1620.833592 from(541.285140,3+) rtinseconds(1666) index(3749)

Title: Locus:1.1.1.3016.6 File:"2013-07-02 CLN FXIII 30 min 2nd F 1.wiff"

Data file C:\Program Files (x86)\Matrix Science\Mascot Daemon\mgf2 FXIII 30 min 2nd\mascot\_daemon\_merge.mgf

Click mouse within plot area to zoom in by factor of two about that point

Or, Plot from  to  Da

Label all possible matches  Label matches used for scoring

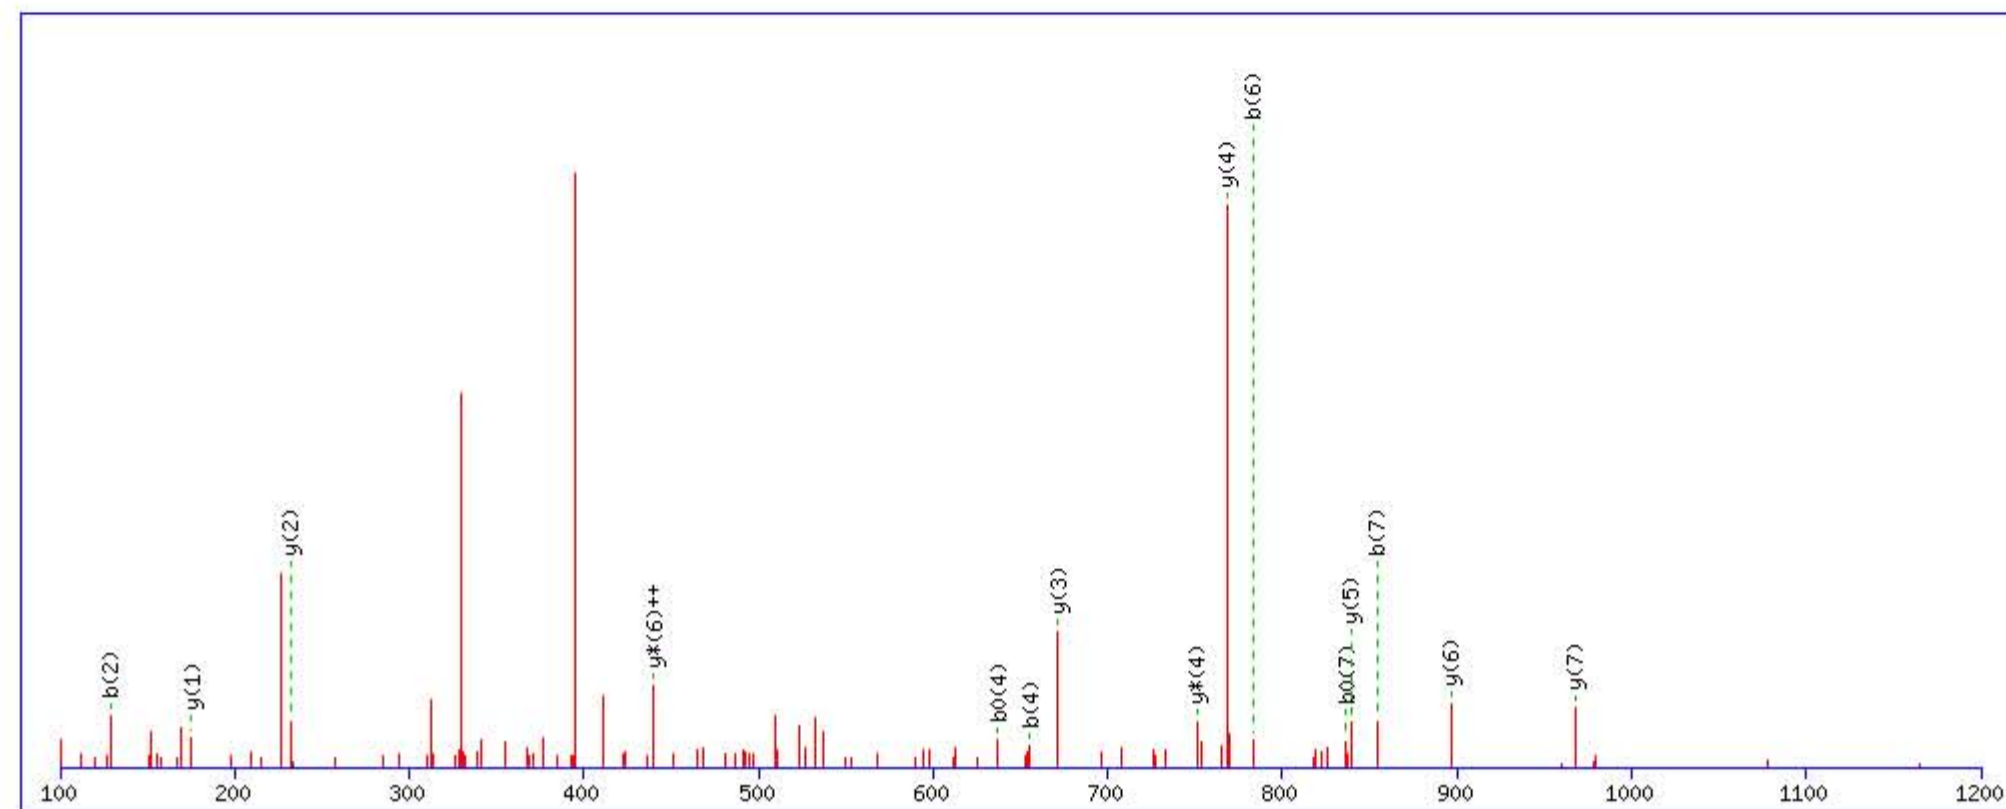

Monoisotopic mass of neutral peptide Mr(calc): 1620.822845

Fixed modifications: Carbamidomethyl (C) (apply to specified residues or termini only)

Variable modifications:

Q4 : Biotin:Thermo-21345 (Q)

Q9 : Biotin:Thermo-21345 (Q)

Ions Score: 26 Expect: 0.022

Matches : 15/94 fragment ions using 38 most intense peaks [\(help\)](#)

| #  | b                 | b <sup>++</sup> | b <sup>*</sup> | b <sup>*++</sup> | b <sup>0</sup>    | b <sup>0++</sup> | Seq. | y                 | y <sup>++</sup> | y <sup>*</sup>    | y <sup>*++</sup>  | y <sup>0</sup> | y <sup>0++</sup> | #  |
|----|-------------------|-----------------|----------------|------------------|-------------------|------------------|------|-------------------|-----------------|-------------------|-------------------|----------------|------------------|----|
| 1  | 58.028740         | 29.518008       |                |                  |                   |                  | G    |                   |                 |                   |                   |                |                  | 11 |
| 2  | <b>129.065854</b> | 65.036565       |                |                  |                   |                  | A    | 1564.808666       | 782.907971      | 1547.782117       | 774.394697        | 1546.798101    | 773.902689       | 10 |
| 3  | 216.097882        | 108.552579      |                |                  | 198.087317        | 99.547296        | S    | 1493.771552       | 747.389414      | 1476.745003       | 738.876140        | 1475.760987    | 738.384131       | 9  |
| 4  | <b>655.323208</b> | 328.165242      | 638.296659     | 319.651968       | <b>637.312643</b> | 319.159960       | Q    | 1406.739524       | 703.873400      | 1389.712975       | 695.360126        |                |                  | 8  |
| 5  | 726.360322        | 363.683799      | 709.333773     | 355.170525       | 708.349757        | 354.678517       | A    | <b>967.514198</b> | 484.260737      | 950.487649        | 475.747463        |                |                  | 7  |
| 6  | <b>783.381786</b> | 392.194531      | 766.355237     | 383.681257       | 765.371221        | 383.189249       | G    | <b>896.477084</b> | 448.742180      | 879.450535        | <b>440.228906</b> |                |                  | 6  |
| 7  | <b>854.418900</b> | 427.713088      | 837.392351     | 419.199814       | <b>836.408335</b> | 418.707806       | A    | <b>839.455620</b> | 420.231448      | 822.429071        | 411.718174        |                |                  | 5  |
| 8  | 951.471664        | 476.239470      | 934.445115     | 467.726196       | 933.461099        | 467.234188       | P    | <b>768.418506</b> | 384.712891      | <b>751.391957</b> | 376.199617        |                |                  | 4  |
| 9  | 1390.696990       | 695.852133      | 1373.670441    | 687.338859       | 1372.686425       | 686.846851       | Q    | <b>671.365742</b> | 336.186509      | 654.339193        | 327.673235        |                |                  | 3  |
| 10 | 1447.718454       | 724.362865      | 1430.691905    | 715.849591       | 1429.707889       | 715.357583       | G    | <b>232.140416</b> | 116.573846      | 215.113867        | 108.060571        |                |                  | 2  |
| 11 |                   |                 |                |                  |                   |                  | R    | <b>175.118952</b> | 88.063114       | 158.092403        | 79.549839         |                |                  | 1  |

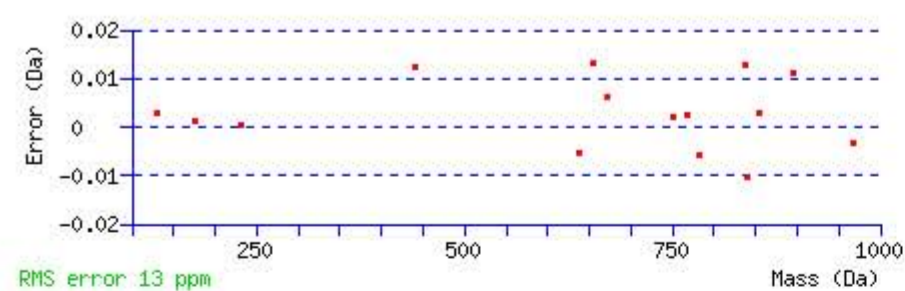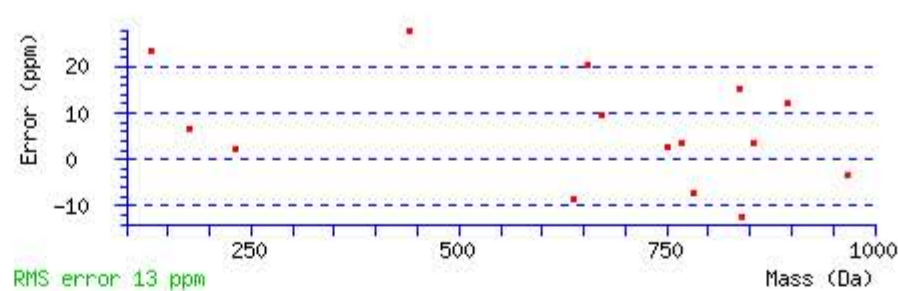

NCBI BLAST search of **GASQAGAPQGR**

(Parameters: blastp, nr protein database, expect=20000, no filter, PAM30)

Other BLAST [web gateways](#)

All matches to this query

| Score | Mr(calc):   | Delta     | Sequence                      |
|-------|-------------|-----------|-------------------------------|
| 26.5  | 1620.822845 | 0.010747  | <a href="#">GASQAGAPQGR</a>   |
| 8.6   | 1620.841248 | -0.007656 | <a href="#">SRVTNPINPWYFK</a> |
| 4.3   | 1620.815430 | 0.018162  | <a href="#">SLQAQEDARHR</a>   |
| 4.0   | 1620.841232 | -0.007640 | <a href="#">YYFAVRAKDIYGR</a> |

Mascot: <http://www.matrixscience.com/>



# MASCOT SCIENCE Mascot Search Results

## Peptide View

MS/MS Fragmentation of **QTQVSVLPEGGETPLFK**

Found in **GELS\_HUMAN**, Gelsolin OS=Homo sapiens GN=GSN PE=1 SV=1

Match to Query 58502: 2451.284472 from(818.102100,3+) rtinseconds(2610) index(59300)

Title: Locus:1.1.1.3394.16 File:"2013-07-02 CLN FXIII 30 min 2nd F 4.wiff"

Data file C:\Program Files (x86)\Matrix Science\Mascot Daemon\mgf2 FXIII 30 min 2nd\mascot\_daemon\_merge.mgf

Click mouse within plot area to zoom in by factor of two about that point

Or, Plot from  to  Da

Label all possible matches  Label matches used for scoring

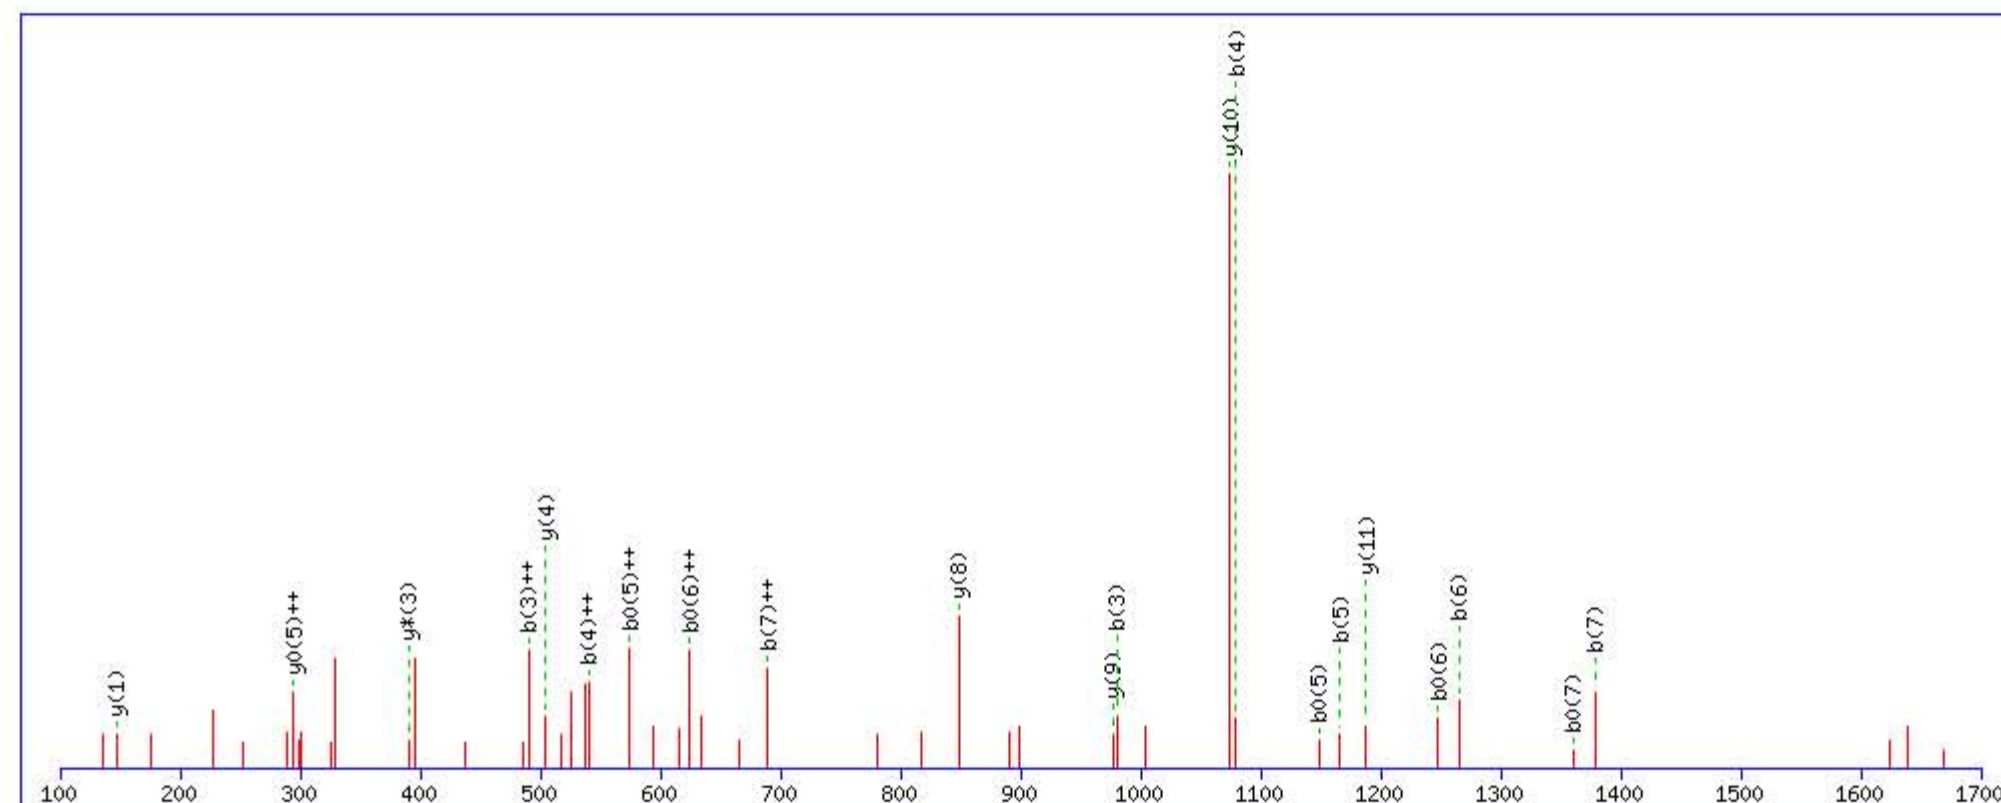

Monoisotopic mass of neutral peptide Mr(calc): 2451.290588

Fixed modifications: Carbamidomethyl (C) (apply to specified residues or termini only)

Variable modifications:

Q1 : Biotin:Thermo-21345 (Q)

Q3 : Biotin:Thermo-21345 (Q)

Ions Score: 35 Expect: 0.00067

Matches : 22/182 fragment ions using 38 most intense peaks [\(help\)](#)

| #  | b                  | b <sup>++</sup>   | b <sup>*</sup> | b <sup>+++</sup> | b <sup>0</sup>     | b <sup>0++</sup>  | Seq. | y                  | y <sup>++</sup> | y <sup>*</sup>    | y <sup>+++</sup> | y <sup>0</sup> | y <sup>0++</sup>  | #  |
|----|--------------------|-------------------|----------------|------------------|--------------------|-------------------|------|--------------------|-----------------|-------------------|------------------|----------------|-------------------|----|
| 1  | 440.232602         | 220.619939        | 423.206053     | 212.106664       |                    |                   | Q    |                    |                 |                   |                  |                |                   | 17 |
| 2  | 541.280281         | 271.143779        | 524.253732     | 262.630504       | 523.269716         | 262.138496        | T    | 2013.072528        | 1007.039902     | 1996.045979       | 998.526628       | 1995.061963    | 998.034620        | 16 |
| 3  | <b>980.505607</b>  | <b>490.756442</b> | 963.479058     | 482.243167       | 962.495042         | 481.751159        | Q    | 1912.024849        | 956.516063      | 1894.998300       | 948.002788       | 1894.014284    | 947.510780        | 15 |
| 4  | <b>1079.574021</b> | <b>540.290649</b> | 1062.547472    | 531.777374       | 1061.563456        | 531.285366        | V    | 1472.799523        | 736.903400      | 1455.772974       | 728.390125       | 1454.788958    | 727.898117        | 14 |
| 5  | <b>1166.606049</b> | 583.806663        | 1149.579500    | 575.293388       | <b>1148.595484</b> | <b>574.801380</b> | S    | 1373.731109        | 687.369193      | 1356.704560       | 678.855918       | 1355.720544    | 678.363910        | 13 |
| 6  | <b>1265.674463</b> | 633.340870        | 1248.647914    | 624.827595       | <b>1247.663898</b> | <b>624.335587</b> | V    | 1286.699081        | 643.853179      | 1269.672532       | 635.339904       | 1268.688516    | 634.847896        | 12 |
| 7  | <b>1378.758527</b> | <b>689.882902</b> | 1361.731978    | 681.369627       | <b>1360.747962</b> | 680.877619        | L    | <b>1187.630667</b> | 594.318971      | 1170.604118       | 585.805697       | 1169.620102    | 585.313689        | 11 |
| 8  | 1475.811291        | 738.409284        | 1458.784742    | 729.896009       | 1457.800726        | 729.404001        | P    | <b>1074.546603</b> | 537.776940      | 1057.520054       | 529.263665       | 1056.536038    | 528.771657        | 10 |
| 9  | 1604.853884        | 802.930580        | 1587.827335    | 794.417306       | 1586.843319        | 793.925298        | E    | <b>977.493839</b>  | 489.250558      | 960.467290        | 480.737283       | 959.483274     | 480.245275        | 9  |
| 10 | 1661.875348        | 831.441312        | 1644.848799    | 822.928038       | 1643.864783        | 822.436030        | G    | <b>848.451246</b>  | 424.729261      | 831.424697        | 416.215986       | 830.440681     | 415.723978        | 8  |
| 11 | 1718.896812        | 859.952044        | 1701.870263    | 851.438770       | 1700.886247        | 850.946762        | G    | 791.429782         | 396.218529      | 774.403233        | 387.705254       | 773.419217     | 387.213246        | 7  |
| 12 | 1847.939405        | 924.473341        | 1830.912856    | 915.960066       | 1829.928840        | 915.468058        | E    | 734.408318         | 367.707797      | 717.381769        | 359.194523       | 716.397753     | 358.702515        | 6  |
| 13 | 1948.987084        | 974.997180        | 1931.960535    | 966.483906       | 1930.976519        | 965.991898        | T    | 605.365725         | 303.186500      | 588.339176        | 294.673226       | 587.355160     | <b>294.181218</b> | 5  |
| 14 | 2046.039848        | 1023.523562       | 2029.013299    | 1015.010288      | 2028.029283        | 1014.518280       | P    | <b>504.318046</b>  | 252.662661      | 487.291497        | 244.149386       |                |                   | 4  |
| 15 | 2159.123912        | 1080.065594       | 2142.097363    | 1071.552319      | 2141.113347        | 1071.060311       | L    | 407.265282         | 204.136279      | <b>390.238733</b> | 195.623004       |                |                   | 3  |
| 16 | 2306.192326        | 1153.599801       | 2289.165777    | 1145.086526      | 2288.181761        | 1144.594518       | F    | <b>294.181218</b>  | 147.594247      | 277.154669        | 139.080972       |                |                   | 2  |
| 17 |                    |                   |                |                  |                    |                   | K    | <b>147.112804</b>  | 74.060040       | 130.086255        | 65.546765        |                |                   | 1  |

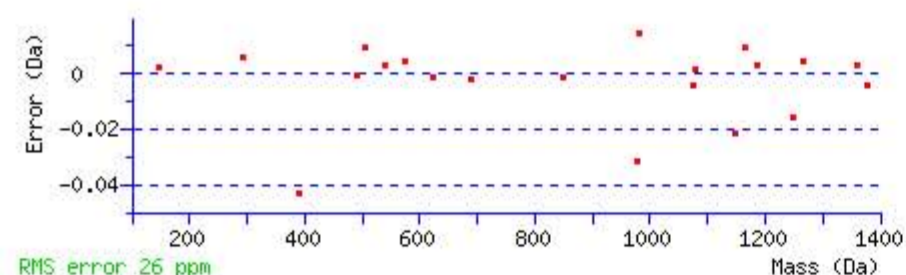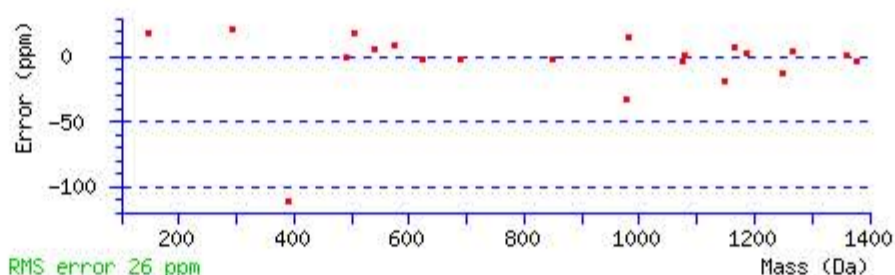

NCBI BLAST search of **QTQVSVLPEGGETPLFK**

(Parameters: blastp, nr protein database, expect=20000, no filter, PAM30)

Other BLAST [web gateways](#)

All matches to this query

| Score | Mr(calc):   | Delta     | Sequence                                   |
|-------|-------------|-----------|--------------------------------------------|
| 35.5  | 2451.290588 | -0.006116 | <a href="#">QTQVSVLPEGGETPLFK</a>          |
| 1.5   | 2451.277130 | 0.007342  | <a href="#">GFPSDTQLLDLRRNHFPSVPR</a>      |
| 0.1   | 2451.279114 | 0.005358  | <a href="#">KIQTQISSGMTNNASLLQNYLK</a>     |
| 0.0   | 2451.256516 | 0.027956  | <a href="#">SGSKSTQTVAKTTTAAAVASTGPSSR</a> |



# Mascot Search Results

## Peptide View

MS/MS Fragmentation of **DPDQTDGLGLSYLSSHIANVER**  
 Found in **GELS\_HUMAN**, Gelsolin OS=Homo sapiens GN=GSN PE=1 SV=1

Match to Query 61944: 2697.296112 from(900.105980,3+) rtinseconds(2557) index(9029)  
 Title: Locus:1.1.1.3326.11 File:"2013-07-02 CLN FXIII 30 min 2nd F 1.wiff"  
 Data file C:\Program Files (x86)\Matrix Science\Mascot Daemon\mgf2 FXIII 30 min 2nd\mascot\_daemon\_merge.mgf

Click mouse within plot area to zoom in by factor of two about that point  
 Or, Plot from  to  Da   
 Label all possible matches  Label matches used for scoring

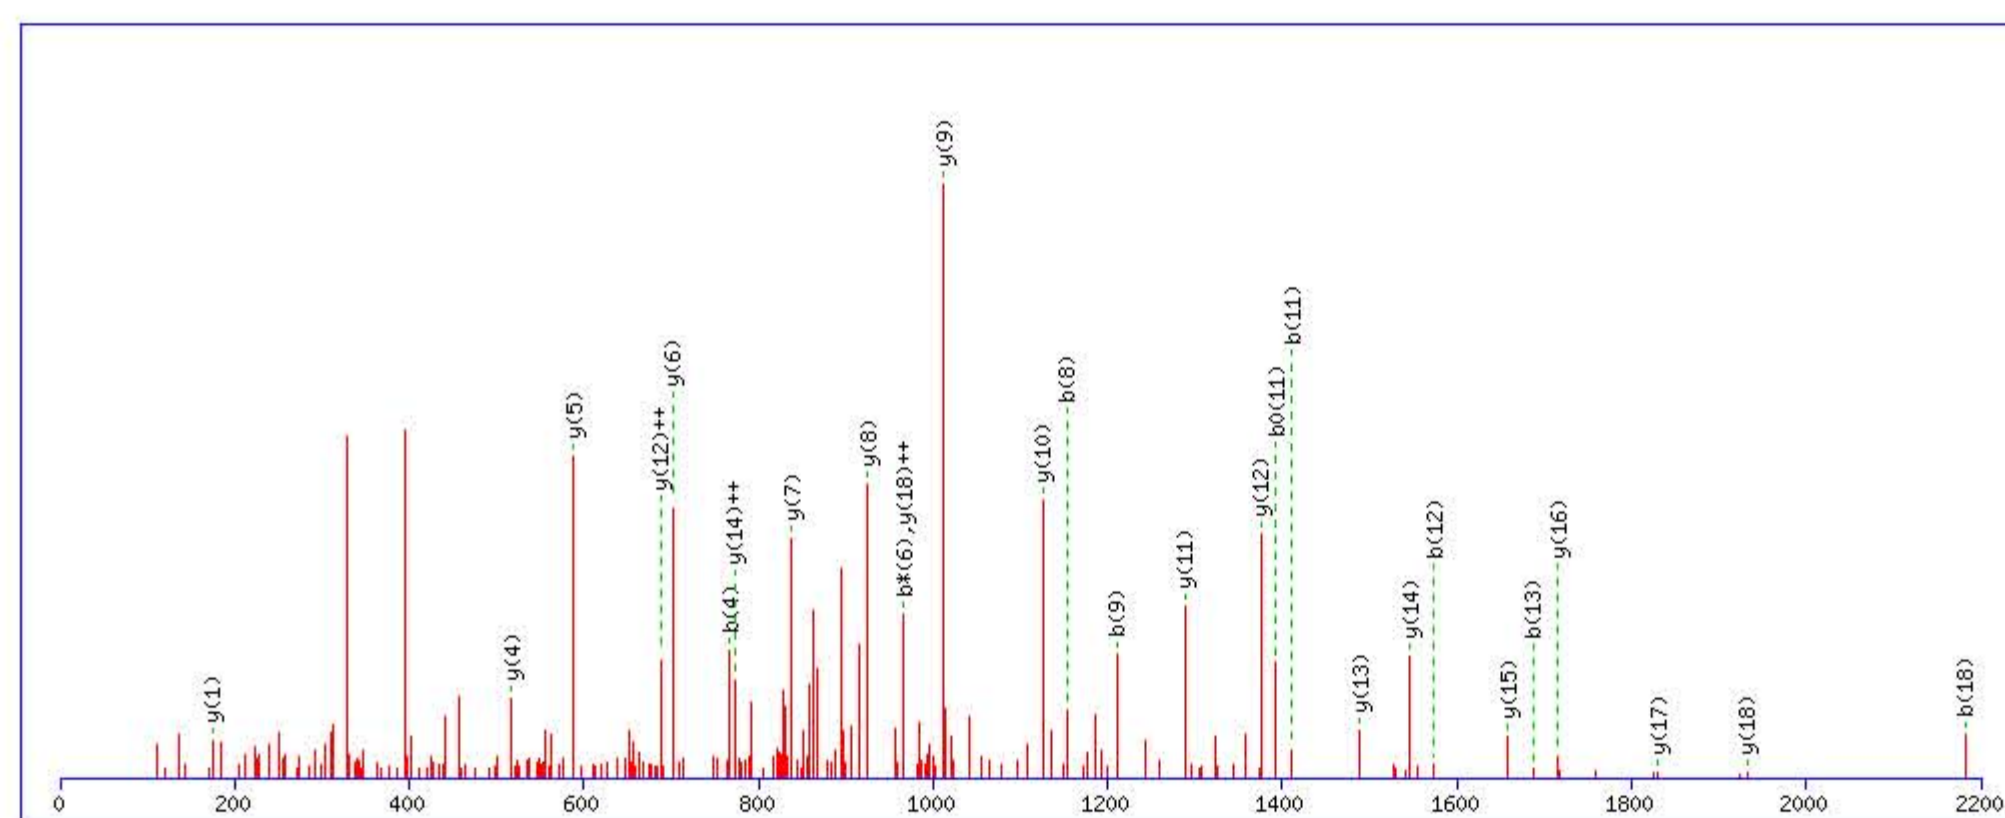

Monoisotopic mass of neutral peptide Mr(calc): 2697.306824  
 Fixed modifications: Carbamidomethyl (C) (apply to specified residues or termini only)  
 Variable modifications:  
 Q4 : Biotin:Thermo-21345 (Q)  
 Ions Score: 125 Expect: 6.7e-012  
 Matches : 28/244 fragment ions using 39 most intense peaks [\(help\)](#)

| #  | b                  | b <sup>++</sup> | b <sup>*</sup>    | b <sup>*++</sup> | b <sup>0</sup>     | b <sup>0++</sup> | Seq. | y                  | y <sup>++</sup>   | y <sup>*</sup> | y <sup>*++</sup> | y <sup>0</sup> | y <sup>0++</sup> | #  |
|----|--------------------|-----------------|-------------------|------------------|--------------------|------------------|------|--------------------|-------------------|----------------|------------------|----------------|------------------|----|
| 1  | 116.034219         | 58.520748       |                   |                  | 98.023654          | 49.515465        | D    |                    |                   |                |                  |                |                  | 22 |
| 2  | 213.086983         | 107.047129      |                   |                  | 195.076418         | 98.041847        | P    | 2583.287164        | 1292.147220       | 2566.260615    | 1283.633945      | 2565.276599    | 1283.141937      | 21 |
| 3  | 328.113926         | 164.560601      |                   |                  | 310.103361         | 155.555319       | D    | 2486.234400        | 1243.620838       | 2469.207851    | 1235.107563      | 2468.223835    | 1234.615555      | 20 |
| 4  | <b>767.339252</b>  | 384.173264      | 750.312703        | 375.659989       | 749.328687         | 375.167982       | Q    | 2371.207457        | 1186.107366       | 2354.180908    | 1177.594092      | 2353.196892    | 1177.102084      | 19 |
| 5  | 868.386931         | 434.697104      | 851.360382        | 426.183829       | 850.376366         | 425.691821       | T    | <b>1931.982131</b> | <b>966.494704</b> | 1914.955582    | 957.981429       | 1913.971566    | 957.489421       | 18 |
| 6  | 983.413874         | 492.210575      | <b>966.387325</b> | 483.697300       | 965.403309         | 483.205292       | D    | <b>1830.934452</b> | 915.970864        | 1813.907903    | 907.457590       | 1812.923887    | 906.965581       | 17 |
| 7  | 1040.435338        | 520.721307      | 1023.408789       | 512.208032       | 1022.424773        | 511.716025       | G    | <b>1715.907509</b> | 858.457392        | 1698.880960    | 849.944118       | 1697.896944    | 849.452110       | 16 |
| 8  | <b>1153.519402</b> | 577.263339      | 1136.492853       | 568.750065       | 1135.508837        | 568.258056       | L    | <b>1658.886045</b> | 829.946661        | 1641.859496    | 821.433386       | 1640.875480    | 820.941378       | 15 |
| 9  | <b>1210.540866</b> | 605.774071      | 1193.514317       | 597.260796       | 1192.530301        | 596.768788       | G    | <b>1545.801981</b> | <b>773.404629</b> | 1528.775432    | 764.891354       | 1527.791416    | 764.399346       | 14 |
| 10 | 1323.624930        | 662.316103      | 1306.598381       | 653.802828       | 1305.614365        | 653.310820       | L    | <b>1488.780517</b> | 744.893897        | 1471.753968    | 736.380622       | 1470.769952    | 735.888614       | 13 |
| 11 | <b>1410.656958</b> | 705.832117      | 1393.630409       | 697.318842       | <b>1392.646393</b> | 696.826834       | S    | <b>1375.696453</b> | <b>688.351865</b> | 1358.669904    | 679.838590       | 1357.685888    | 679.346582       | 12 |
| 12 | <b>1573.720287</b> | 787.363781      | 1556.693738       | 778.850507       | 1555.709722        | 778.358499       | Y    | <b>1288.664425</b> | 644.835851        | 1271.637876    | 636.322576       | 1270.653860    | 635.830568       | 11 |
| 13 | <b>1686.804351</b> | 843.905813      | 1669.777802       | 835.392539       | 1668.793786        | 834.900531       | L    | <b>1125.601096</b> | 563.304186        | 1108.574547    | 554.790912       | 1107.590531    | 554.298904       | 10 |
| 14 | 1773.836379        | 887.421827      | 1756.809830       | 878.908553       | 1755.825814        | 878.416545       | S    | <b>1012.517032</b> | 506.762154        | 995.490483     | 498.248880       | 994.506467     | 497.756872       | 9  |
| 15 | 1860.868407        | 930.937841      | 1843.841858       | 922.424567       | 1842.857842        | 921.932559       | S    | <b>925.485004</b>  | 463.246140        | 908.458455     | 454.732866       | 907.474439     | 454.240858       | 8  |
| 16 | 1997.927319        | 999.467297      | 1980.900770       | 990.954023       | 1979.916754        | 990.462015       | H    | <b>838.452976</b>  | 419.730126        | 821.426427     | 411.216852       | 820.442411     | 410.724844       | 7  |
| 17 | 2111.011383        | 1056.009329     | 2093.984834       | 1047.496055      | 2093.000818        | 1047.004047      | I    | <b>701.394064</b>  | 351.200670        | 684.367515     | 342.687396       | 683.383499     | 342.195388       | 6  |
| 18 | <b>2182.048497</b> | 1091.527886     | 2165.021948       | 1083.014612      | 2164.037932        | 1082.522604      | A    | <b>588.310000</b>  | 294.658638        | 571.283451     | 286.145364       | 570.299435     | 285.653356       | 5  |
| 19 | 2296.091424        | 1148.549350     | 2279.064875       | 1140.036075      | 2278.080859        | 1139.544067      | N    | <b>517.272886</b>  | 259.140081        | 500.246337     | 250.626806       | 499.262321     | 250.134798       | 4  |
| 20 | 2395.159838        | 1198.083557     | 2378.133289       | 1189.570282      | 2377.149273        | 1189.078274      | V    | 403.229959         | 202.118617        | 386.203410     | 193.605343       | 385.219394     | 193.113335       | 3  |
| 21 | 2524.202431        | 1262.604853     | 2507.175882       | 1254.091579      | 2506.191866        | 1253.599571      | E    | 304.161545         | 152.584411        | 287.134996     | 144.071136       | 286.150980     | 143.579128       | 2  |
| 22 |                    |                 |                   |                  |                    |                  | R    | <b>175.118952</b>  | 88.063114         | 158.092403     | 79.549839        |                |                  | 1  |

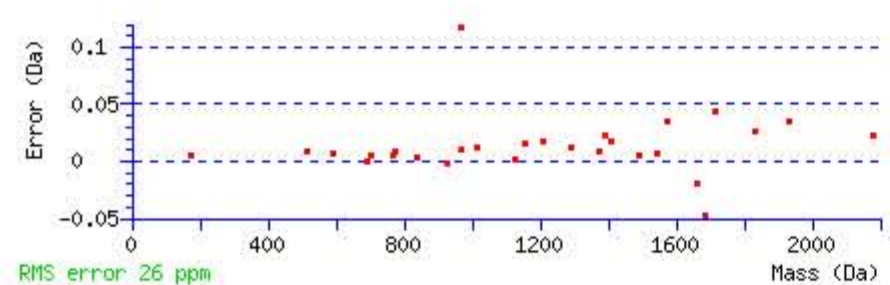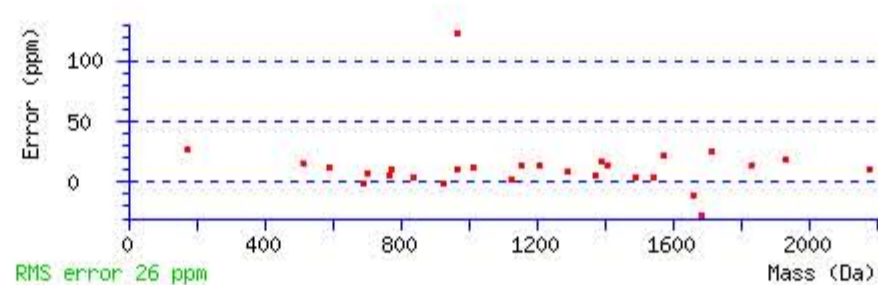

NCBI BLAST search of **DPDQTDGLGLSYLSSHIANVER**  
 (Parameters: blastp, nr protein database, expect=20000, no filter, PAM30)  
 Other BLAST [web gateways](#)

### All matches to this query

| Score | Mr(calc):   | Delta     | Sequence                      |
|-------|-------------|-----------|-------------------------------|
| 125.5 | 2697.306824 | -0.010712 | <b>DPDQTDGLGLSYLSSHIANVER</b> |



# MASCOT Search Results

## Peptide View

MS/MS Fragmentation of **VPFDAATLHTSTAMAAQHGMDDDDGTGQK**  
 Found in **GELS\_HUMAN**, Gelsolin OS=Homo sapiens GN=GSN PE=1 SV=1

Match to Query 67110: 3183.427736 from(796.864210,4+) rtinseconds(1960) index(5617)  
 Title: Locus:1.1.1.3118.10 File:"2013-07-02 CLN FXIII 30 min 2nd F 1.wiff"  
 Data file C:\Program Files (x86)\Matrix Science\Mascot Daemon\mgf2 FXIII 30 min 2nd\mascot\_daemon\_merge.mgf

Click mouse within plot area to zoom in by factor of two about that point

Or, Plot from  to  Da

Label all possible matches  Label matches used for scoring

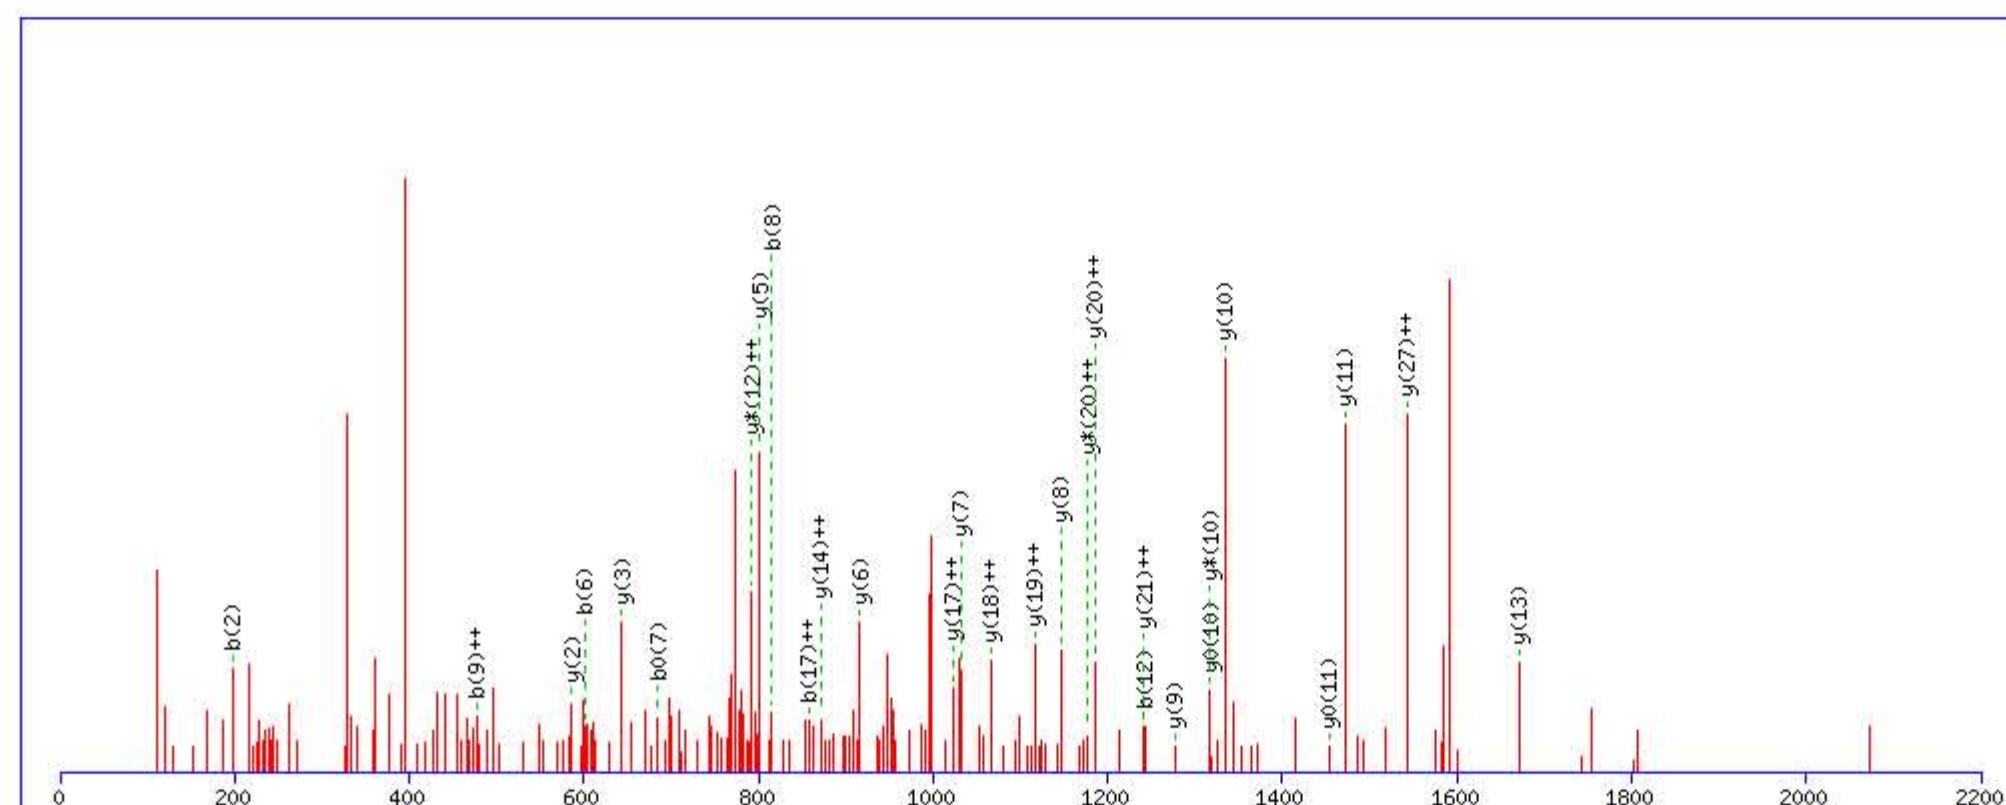

Monoisotopic mass of neutral peptide Mr(calc): 3183.442383  
 Fixed modifications: Carbamidomethyl (C) (apply to specified residues or termini only)  
 Variable modifications:  
 Q27 : Biotin:Thermo-21345 (Q)  
 Ions Score: 33 Expect: 0.0043  
 Matches : 29/280 fragment ions using 94 most intense peaks [\(help\)](#)

| #  | b                  | b <sup>++</sup>   | b <sup>*</sup> | b <sup>+++</sup> | b <sup>0</sup>    | b <sup>0++</sup> | Seq. | y                  | y <sup>++</sup>    | y <sup>*</sup>     | y <sup>+++</sup>   | y <sup>0</sup>     | y <sup>0++</sup> | #  |
|----|--------------------|-------------------|----------------|------------------|-------------------|------------------|------|--------------------|--------------------|--------------------|--------------------|--------------------|------------------|----|
| 1  | 100.075690         | 50.541483         |                |                  |                   |                  | V    |                    |                    |                    |                    |                    |                  | 28 |
| 2  | <b>197.128454</b>  | 99.067865         |                |                  |                   |                  | P    | 3085.381222        | <b>1543.194249</b> | 3068.354673        | 1534.680974        | 3067.370657        | 1534.188966      | 27 |
| 3  | 344.196868         | 172.602072        |                |                  |                   |                  | F    | 2988.328458        | 1494.667867        | 2971.301909        | 1486.154592        | 2970.317893        | 1485.662584      | 26 |
| 4  | 459.223811         | 230.115543        |                |                  | 441.213246        | 221.110261       | D    | 2841.260044        | 1421.133660        | 2824.233495        | 1412.620385        | 2823.249479        | 1412.128377      | 25 |
| 5  | 530.260925         | 265.634101        |                |                  | 512.250360        | 256.628818       | A    | 2726.233101        | 1363.620188        | 2709.206552        | 1355.106914        | 2708.222536        | 1354.614906      | 24 |
| 6  | <b>601.298039</b>  | 301.152658        |                |                  | 583.287474        | 292.147375       | A    | 2655.195987        | 1328.101631        | 2638.169438        | 1319.588357        | 2637.185422        | 1319.096349      | 23 |
| 7  | 702.345718         | 351.676497        |                |                  | <b>684.335153</b> | 342.671215       | T    | 2584.158873        | 1292.583074        | 2567.132324        | 1284.069800        | 2566.148308        | 1283.577792      | 22 |
| 8  | <b>815.429782</b>  | 408.218529        |                |                  | 797.419217        | 399.213247       | L    | 2483.111194        | <b>1242.059235</b> | 2466.084645        | 1233.545960        | 2465.100629        | 1233.053952      | 21 |
| 9  | 952.488694         | <b>476.747985</b> |                |                  | 934.478129        | 467.742703       | H    | 2370.027130        | <b>1185.517203</b> | 2353.000581        | <b>1177.003928</b> | 2352.016565        | 1176.511920      | 20 |
| 10 | 1053.536373        | 527.271824        |                |                  | 1035.525808       | 518.266542       | T    | 2232.968218        | <b>1116.987747</b> | 2215.941669        | 1108.474472        | 2214.957653        | 1107.982464      | 19 |
| 11 | 1140.568401        | 570.787839        |                |                  | 1122.557836       | 561.782556       | S    | 2131.920539        | <b>1066.463907</b> | 2114.893990        | 1057.950633        | 2113.909974        | 1057.458625      | 18 |
| 12 | <b>1241.616080</b> | 621.311678        |                |                  | 1223.605515       | 612.306396       | T    | 2044.888511        | <b>1022.947893</b> | 2027.861962        | 1014.434619        | 2026.877946        | 1013.942611      | 17 |
| 13 | 1312.653194        | 656.830235        |                |                  | 1294.642629       | 647.824952       | A    | 1943.840832        | 972.424054         | 1926.814283        | 963.910779         | 1925.830267        | 963.418771       | 16 |
| 14 | 1443.693679        | 722.350478        |                |                  | 1425.683114       | 713.345195       | M    | 1872.803718        | 936.905497         | 1855.777169        | 928.392222         | 1854.793153        | 927.900214       | 15 |
| 15 | 1514.730793        | 757.869035        |                |                  | 1496.720228       | 748.863752       | A    | 1741.763233        | <b>871.385254</b>  | 1724.736684        | 862.871980         | 1723.752668        | 862.379972       | 14 |
| 16 | 1585.767907        | 793.387591        |                |                  | 1567.757342       | 784.382309       | A    | <b>1670.726119</b> | 835.866697         | 1653.699570        | 827.353423         | 1652.715554        | 826.861415       | 13 |
| 17 | 1713.826485        | <b>857.416880</b> | 1696.799936    | 848.903606       | 1695.815920       | 848.411598       | Q    | 1599.689005        | 800.348140         | 1582.662456        | <b>791.834866</b>  | 1581.678440        | 791.342858       | 12 |
| 18 | 1850.885397        | 925.946336        | 1833.858848    | 917.433062       | 1832.874832       | 916.941054       | H    | <b>1471.630427</b> | 736.318851         | 1454.603878        | 727.805577         | <b>1453.619862</b> | 727.313569       | 11 |
| 19 | 1907.906861        | 954.457068        | 1890.880312    | 945.943794       | 1889.896296       | 945.451786       | G    | <b>1334.571515</b> | 667.789395         | <b>1317.544966</b> | 659.276121         | <b>1316.560950</b> | 658.784113       | 10 |
| 20 | 2038.947346        | 1019.977311       | 2021.920797    | 1011.464036      | 2020.936781       | 1010.972028      | M    | <b>1277.550051</b> | 639.278663         | 1260.523502        | 630.765389         | 1259.539486        | 630.273381       | 9  |
| 21 | 2153.974289        | 1077.490782       | 2136.947740    | 1068.977508      | 2135.963724       | 1068.485500      | D    | <b>1146.509566</b> | 573.758421         | 1129.483017        | 565.245146         | 1128.499001        | 564.753138       | 8  |
| 22 | 2269.001232        | 1135.004254       | 2251.974683    | 1126.490979      | 2250.990667       | 1125.998971      | D    | <b>1031.482623</b> | 516.244949         | 1014.456074        | 507.731675         | 1013.472058        | 507.239667       | 7  |
| 23 | 2384.028175        | 1192.517725       | 2367.001626    | 1184.004451      | 2366.017610       | 1183.512443      | D    | <b>916.455680</b>  | 458.731478         | 899.429131         | 450.218203         | 898.445115         | 449.726195       | 6  |
| 24 | 2441.049639        | 1221.028457       | 2424.023090    | 1212.515183      | 2423.039074       | 1212.023175      | G    | <b>801.428737</b>  | 401.218007         | 784.402188         | 392.704732         | 783.418172         | 392.212724       | 5  |
| 25 | 2542.097318        | 1271.552297       | 2525.070769    | 1263.039022      | 2524.086753       | 1262.547014      | T    | 744.407273         | 372.707275         | 727.380724         | 364.194000         | 726.396708         | 363.701992       | 4  |
| 26 | 2599.118782        | 1300.063029       | 2582.092233    | 1291.549754      | 2581.108217       | 1291.057746      | G    | <b>643.359594</b>  | 322.183435         | 626.333045         | 313.670161         |                    |                  | 3  |
| 27 | 3038.344108        | 1519.675692       | 3021.317559    | 1511.162417      | 3020.333543       | 1510.670409      | Q    | <b>586.338130</b>  | 293.672703         | 569.311581         | 285.159429         |                    |                  | 2  |
| 28 |                    |                   |                |                  |                   |                  | K    | 147.112804         | 74.060040          | 130.086255         | 65.546765          |                    |                  | 1  |

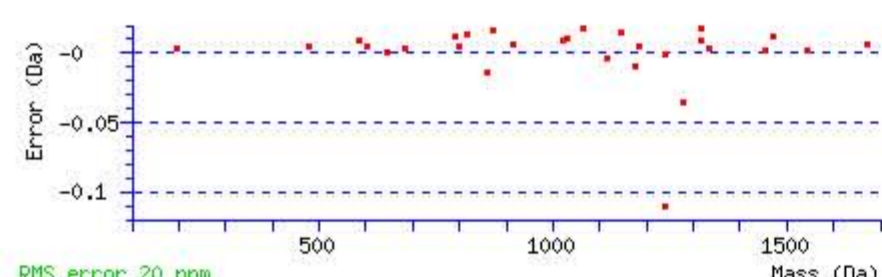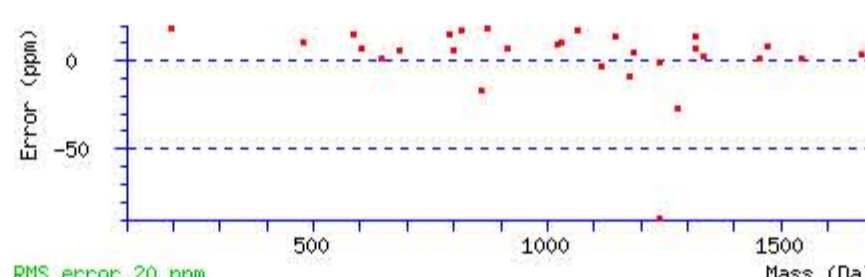

NCBI BLAST search of **VPFDAATLHTSTAMAAQHGMDDDDGTGQK**  
 (Parameters: blastp, nr protein database, expect=20000, no filter, PAM30)  
 Other BLAST [web gateways](#)

### All matches to this query

| Score | Mr(calc):   | Delta     | Sequence                                      |
|-------|-------------|-----------|-----------------------------------------------|
| 32.9  | 3183.442383 | -0.014647 | <a href="#">VPFDAATLHTSTAMAAQHGMDDDDGTGQK</a> |
| 3.9   | 3183.442383 | -0.014647 | <a href="#">VPFDAATLHTSTAMAAQHGMDDDDGTGQK</a> |



# MASCOT Search Results

## Peptide View

MS/MS Fragmentation of **TYFPHFDSLHGSAQVK**

Found in **HBA\_HUMAN**, Hemoglobin subunit alpha OS=Homo sapiens GN=HBA1 PE=1 SV=2

Match to Query 52723: 2144.040492 from(715.687440,3+) rtinseconds(2074) index(6251)

Title: Locus:1.1.1.3158.9 File:"2013-07-02 CLN FXIII 30 min 2nd F 1.wiff"

Data file C:\Program Files (x86)\Matrix Science\Mascot Daemon\mgf\2 FXIII 30 min 2nd\mascot\_daemon\_merge.mgf

Click mouse within plot area to zoom in by factor of two about that point

Or, Plot from  to  Da

Label all possible matches  Label matches used for scoring

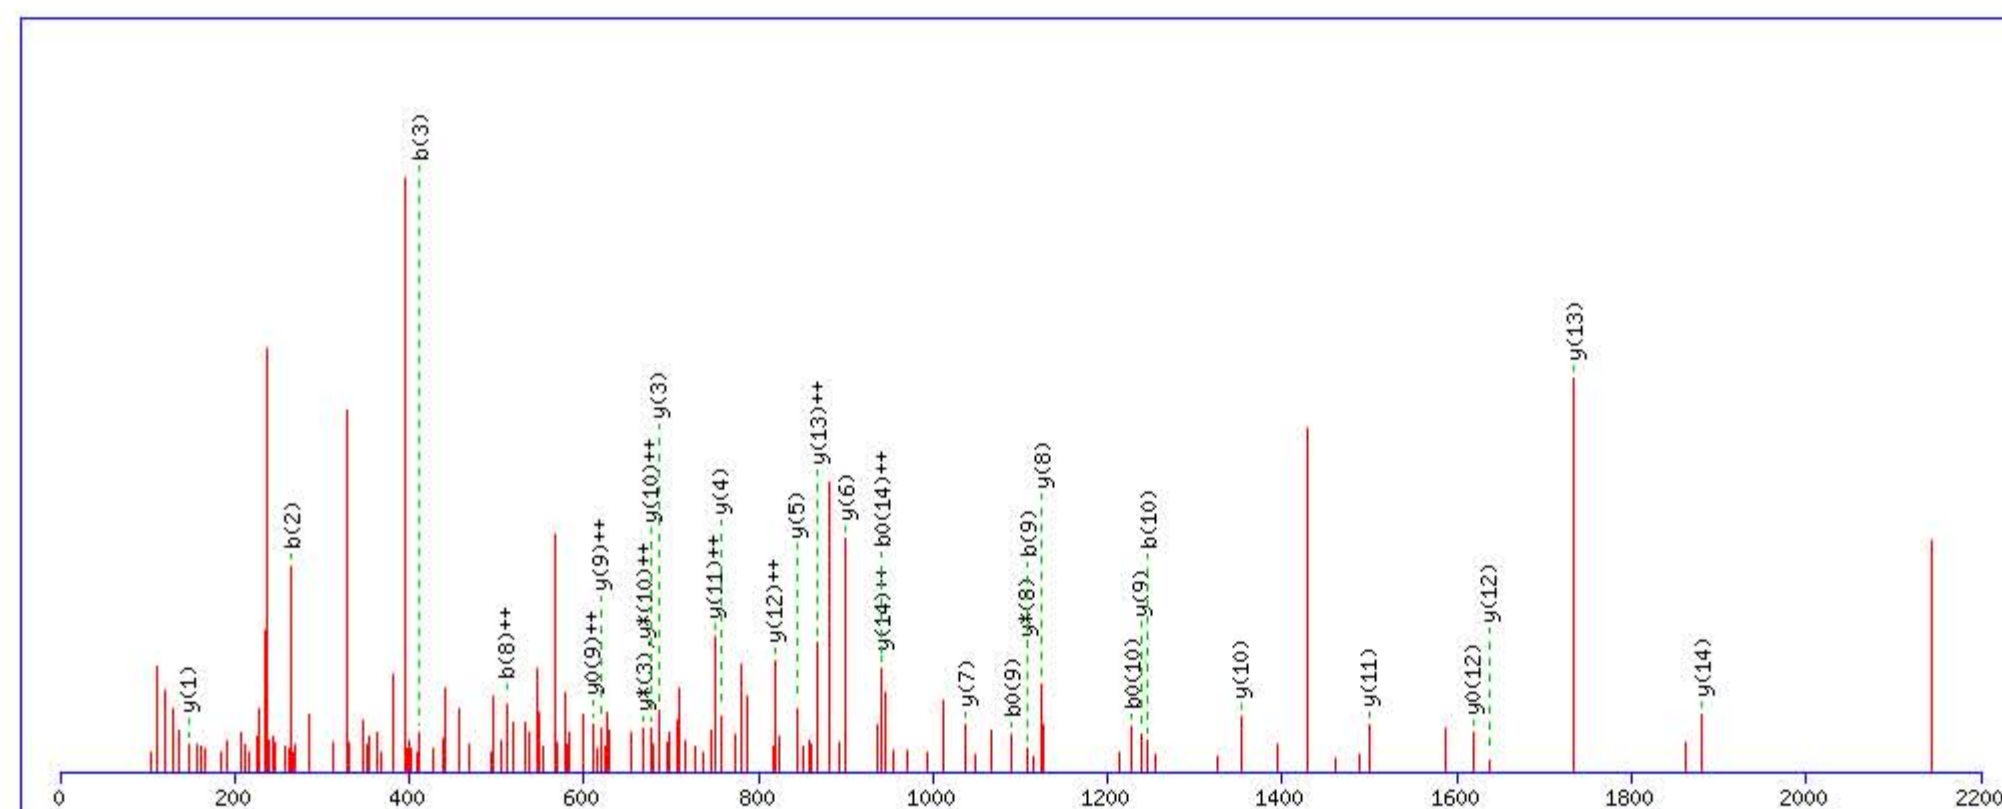

Monoisotopic mass of neutral peptide Mr(calc): 2144.051346

Fixed modifications: Carbamidomethyl (C) (apply to specified residues or termini only)

Variable modifications:

Q14 : Biotin:Thermo-21345 (Q)

Ions Score: 51 Expect: 0.00016

Matches : 32/146 fragment ions using 84 most intense peaks [\(help\)](#)

| #  | b                  | b <sup>++</sup>   | b <sup>*</sup> | b <sup>*++</sup> | b <sup>0</sup>     | b <sup>0++</sup>  | Seq. | y                  | y <sup>++</sup>   | y <sup>*</sup>     | y <sup>*++</sup>  | y <sup>0</sup>     | y <sup>0++</sup>  | #  |
|----|--------------------|-------------------|----------------|------------------|--------------------|-------------------|------|--------------------|-------------------|--------------------|-------------------|--------------------|-------------------|----|
| 1  | 102.054955         | 51.531116         |                |                  | 84.044390          | 42.525833         | T    |                    |                   |                    |                   |                    |                   | 16 |
| 2  | <b>265.118284</b>  | 133.062780        |                |                  | 247.107719         | 124.057498        | Y    | 2044.010930        | 1022.509103       | 2026.984381        | 1013.995829       | 2026.000365        | 1013.503821       | 15 |
| 3  | <b>412.186698</b>  | 206.596987        |                |                  | 394.176133         | 197.591705        | F    | <b>1880.947601</b> | <b>940.977438</b> | 1863.921052        | 932.464164        | 1862.937036        | 931.972156        | 14 |
| 4  | 509.239462         | 255.123369        |                |                  | 491.228897         | 246.118087        | P    | <b>1733.879187</b> | <b>867.443231</b> | 1716.852638        | 858.929957        | 1715.868622        | 858.437949        | 13 |
| 5  | 646.298374         | 323.652825        |                |                  | 628.287809         | 314.647543        | H    | <b>1636.826423</b> | <b>818.916849</b> | 1619.799874        | 810.403575        | <b>1618.815858</b> | 809.911567        | 12 |
| 6  | 793.366788         | 397.187032        |                |                  | 775.356223         | 388.181750        | F    | <b>1499.767511</b> | <b>750.387393</b> | 1482.740962        | 741.874119        | 1481.756946        | 741.382111        | 11 |
| 7  | 908.393731         | 454.700504        |                |                  | 890.383166         | 445.695221        | D    | <b>1352.699097</b> | <b>676.853186</b> | 1335.672548        | <b>668.339912</b> | 1334.688532        | 667.847904        | 10 |
| 8  | 1021.477795        | <b>511.242536</b> |                |                  | 1003.467230        | 502.237253        | L    | <b>1237.672154</b> | <b>619.339715</b> | 1220.645605        | 610.826441        | 1219.661589        | <b>610.334433</b> | 9  |
| 9  | <b>1108.509823</b> | 554.758550        |                |                  | <b>1090.499258</b> | 545.753267        | S    | <b>1124.588090</b> | 562.797683        | <b>1107.561541</b> | 554.284409        | 1106.577525        | 553.792400        | 8  |
| 10 | <b>1245.568735</b> | 623.288006        |                |                  | <b>1227.558170</b> | 614.282723        | H    | <b>1037.556062</b> | 519.281669        | 1020.529513        | 510.768394        | 1019.545497        | 510.276386        | 7  |
| 11 | 1302.590199        | 651.798738        |                |                  | 1284.579634        | 642.793455        | G    | <b>900.497150</b>  | 450.752213        | 883.470601         | 442.238938        | 882.486585         | 441.746930        | 6  |
| 12 | 1389.622227        | 695.314752        |                |                  | 1371.611662        | 686.309469        | S    | <b>843.475686</b>  | 422.241481        | 826.449137         | 413.728207        | 825.465121         | 413.236199        | 5  |
| 13 | 1460.659341        | 730.833309        |                |                  | 1442.648776        | 721.828026        | A    | <b>756.443658</b>  | 378.725467        | 739.417109         | 370.212192        |                    |                   | 4  |
| 14 | 1899.884667        | 950.445972        | 1882.858118    | 941.932697       | 1881.874102        | <b>941.440689</b> | Q    | <b>685.406544</b>  | 343.206910        | <b>668.379995</b>  | 334.693635        |                    |                   | 3  |
| 15 | 1998.953081        | 999.980179        | 1981.926532    | 991.466904       | 1980.942516        | 990.974896        | V    | 246.181218         | 123.594247        | 229.154669         | 115.080972        |                    |                   | 2  |
| 16 |                    |                   |                |                  |                    |                   | K    | <b>147.112804</b>  | 74.060040         | 130.086255         | 65.546765         |                    |                   | 1  |

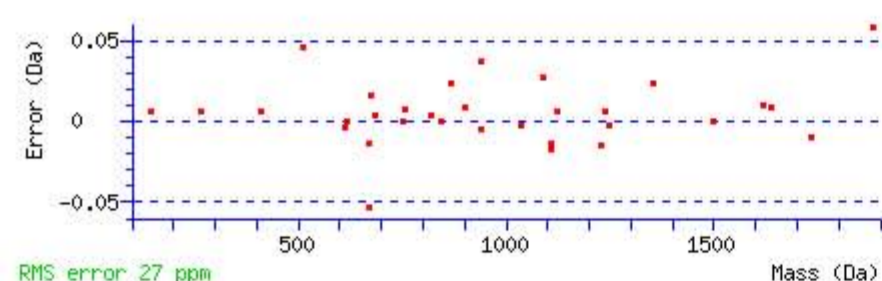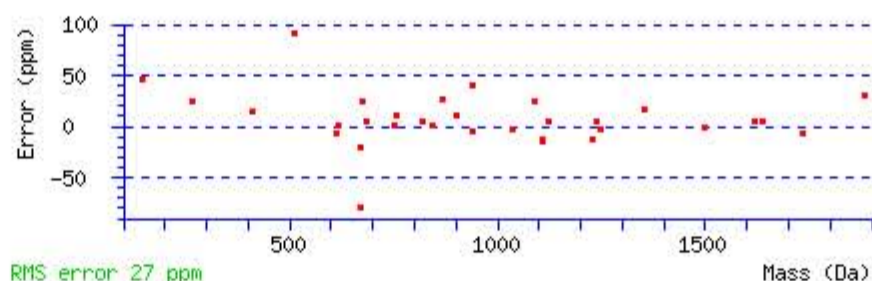

NCBI BLAST search of [TYFPHFDSLHGSAQVK](#)

(Parameters: blastp, nr protein database, expect=20000, no filter, PAM30)

Other BLAST [web gateways](#)

All matches to this query

| Score | Mr(calc):   | Delta     | Sequence                         |
|-------|-------------|-----------|----------------------------------|
| 51.4  | 2144.051346 | -0.010854 | <a href="#">TYFPHFDSLHGSAQVK</a> |

Mascot: <http://www.matrixscience.com/>



# MASCOT Search Results

## Peptide View

MS/MS Fragmentation of **LLQDEFPGIPSPLDAAVECHR**

Found in **HEMO\_HUMAN**, Hemopexin OS=Homo sapiens GN=HPX PE=1 SV=2

Match to Query 61700: 2674.300122 from(892.440650,3+) rtinseconds(2669) index(75280)

Title: Locus:1.1.1.3462.13 File:"2013-07-02 CLN FXIII 30 min 2nd FT.wiff"

Data file C:\Program Files (x86)\Matrix Science\Mascot Daemon\mgf2 FXIII 30 min 2nd\mascot\_daemon\_merge.mgf

Click mouse within plot area to zoom in by factor of two about that point

Or, Plot from  to  Da

Label all possible matches  Label matches used for scoring

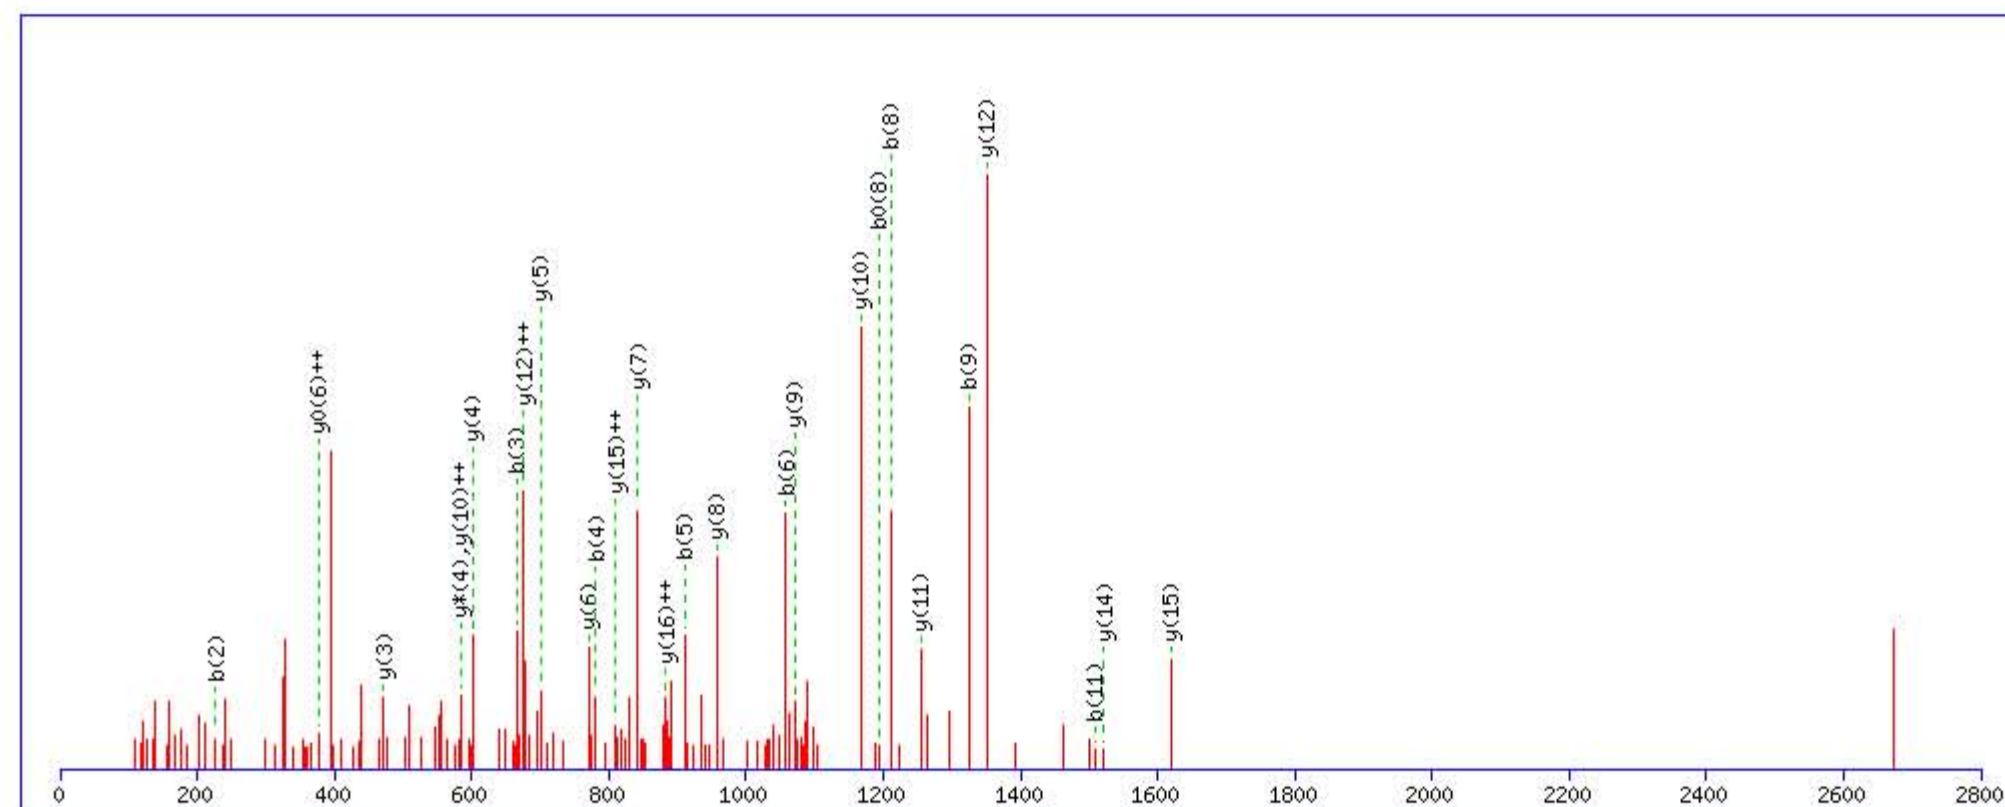

Monoisotopic mass of neutral peptide Mr(calc): 2674.324722

Fixed modifications: Carbamidomethyl (C) (apply to specified residues or termini only)

Variable modifications:

Q3 : Biotin:Thermo-21345 (Q)

Ions Score: 65 Expect: 7.6e-006

Matches : 27/224 fragment ions using 56 most intense peaks [\(help\)](#)

| #  | b                  | b <sup>++</sup> | b <sup>*</sup> | b <sup>*++</sup> | b <sup>0</sup>     | b <sup>0++</sup> | Seq. | y                  | y <sup>++</sup>   | y <sup>*</sup>    | y <sup>*++</sup> | y <sup>0</sup> | y <sup>0++</sup>  | #  |
|----|--------------------|-----------------|----------------|------------------|--------------------|------------------|------|--------------------|-------------------|-------------------|------------------|----------------|-------------------|----|
| 1  | 114.091340         | 57.549308       |                |                  |                    |                  | L    |                    |                   |                   |                  |                |                   | 21 |
| 2  | <b>227.175404</b>  | 114.091340      |                |                  |                    |                  | L    | 2562.247943        | 1281.627609       | 2545.221394       | 1273.114335      | 2544.237378    | 1272.622327       | 20 |
| 3  | <b>666.400730</b>  | 333.704003      | 649.374181     | 325.190729       |                    |                  | Q    | 2449.163879        | 1225.085577       | 2432.137330       | 1216.572303      | 2431.153314    | 1216.080295       | 19 |
| 4  | <b>781.427673</b>  | 391.217475      | 764.401124     | 382.704200       | 763.417108         | 382.212192       | D    | 2009.938553        | 1005.472914       | 1992.912004       | 996.959640       | 1991.927988    | 996.467632        | 18 |
| 5  | <b>910.470266</b>  | 455.738771      | 893.443717     | 447.225497       | 892.459701         | 446.733489       | E    | 1894.911610        | 947.959443        | 1877.885061       | 939.446169       | 1876.901045    | 938.954160        | 17 |
| 6  | <b>1057.538680</b> | 529.272978      | 1040.512131    | 520.759704       | 1039.528115        | 520.267696       | F    | 1765.869017        | <b>883.438146</b> | 1748.842468       | 874.924872       | 1747.858452    | 874.432864        | 16 |
| 7  | 1154.591444        | 577.799360      | 1137.564895    | 569.286086       | 1136.580879        | 568.794078       | P    | <b>1618.800603</b> | <b>809.903939</b> | 1601.774054       | 801.390665       | 1600.790038    | 800.898657        | 15 |
| 8  | <b>1211.612908</b> | 606.310092      | 1194.586359    | 597.796818       | <b>1193.602343</b> | 597.304810       | G    | <b>1521.747839</b> | 761.377557        | 1504.721290       | 752.864283       | 1503.737274    | 752.372275        | 14 |
| 9  | <b>1324.696972</b> | 662.852124      | 1307.670423    | 654.338850       | 1306.686407        | 653.846841       | I    | 1464.726375        | 732.866825        | 1447.699826       | 724.353551       | 1446.715810    | 723.861543        | 13 |
| 10 | 1421.749736        | 711.378506      | 1404.723187    | 702.865232       | 1403.739171        | 702.373223       | P    | <b>1351.642311</b> | <b>676.324793</b> | 1334.615762       | 667.811519       | 1333.631746    | 667.319511        | 12 |
| 11 | <b>1508.781764</b> | 754.894520      | 1491.755215    | 746.381246       | 1490.771199        | 745.889238       | S    | <b>1254.589547</b> | 627.798411        | 1237.562998       | 619.285137       | 1236.578982    | 618.793129        | 11 |
| 12 | 1605.834528        | 803.420902      | 1588.807979    | 794.907628       | 1587.823963        | 794.415620       | P    | <b>1167.557519</b> | <b>584.282397</b> | 1150.530970       | 575.769123       | 1149.546954    | 575.277115        | 10 |
| 13 | 1718.918592        | 859.962934      | 1701.892043    | 851.449660       | 1700.908027        | 850.957652       | L    | <b>1070.504755</b> | 535.756015        | 1053.478206       | 527.242741       | 1052.494190    | 526.750733        | 9  |
| 14 | 1833.945535        | 917.476406      | 1816.918986    | 908.963131       | 1815.934970        | 908.471123       | D    | <b>957.420691</b>  | 479.213983        | 940.394142        | 470.700709       | 939.410126     | 470.208701        | 8  |
| 15 | 1904.982649        | 952.994963      | 1887.956100    | 944.481688       | 1886.972084        | 943.989680       | A    | <b>842.393748</b>  | 421.700512        | 825.367199        | 413.187237       | 824.383183     | 412.695229        | 7  |
| 16 | 1976.019763        | 988.513520      | 1958.993214    | 980.000245       | 1958.009198        | 979.508237       | A    | <b>771.356634</b>  | 386.181955        | 754.330085        | 377.668680       | 753.346069     | <b>377.176672</b> | 6  |
| 17 | 2075.088177        | 1038.047726     | 2058.061628    | 1029.534452      | 2057.077612        | 1029.042444      | V    | <b>700.319520</b>  | 350.663398        | 683.292971        | 342.150123       | 682.308955     | 341.658115        | 5  |
| 18 | 2204.130770        | 1102.569023     | 2187.104221    | 1094.055748      | 2186.120205        | 1093.563740      | E    | <b>601.251106</b>  | 301.129191        | <b>584.224557</b> | 292.615916       | 583.240541     | 292.123908        | 4  |
| 19 | 2364.161419        | 1182.584347     | 2347.134870    | 1174.071073      | 2346.150854        | 1173.579065      | C    | <b>472.208513</b>  | 236.607894        | 455.181964        | 228.094620       |                |                   | 3  |
| 20 | 2501.220331        | 1251.113803     | 2484.193782    | 1242.600529      | 2483.209766        | 1242.108521      | H    | 312.177864         | 156.592570        | 295.151315        | 148.079295       |                |                   | 2  |
| 21 |                    |                 |                |                  |                    |                  | R    | 175.118952         | 88.063114         | 158.092403        | 79.549839        |                |                   | 1  |

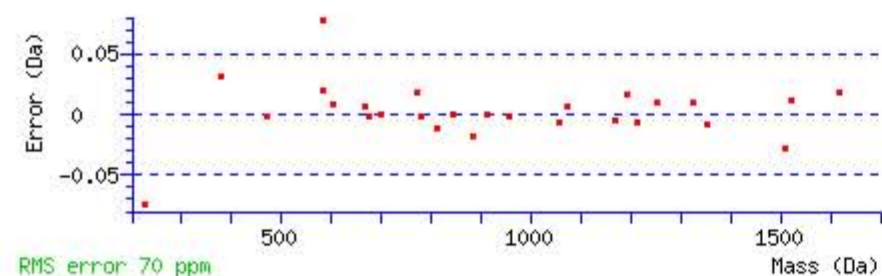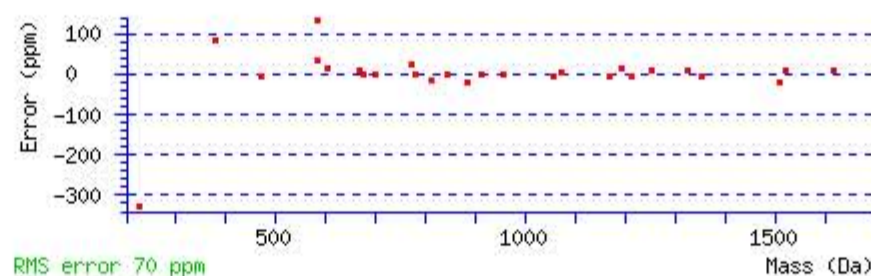

NCBI BLAST search of [LLQDEFPGIPSPLDAAVECHR](#)

(Parameters: blastp, nr protein database, expect=20000, no filter, PAM30)

Other BLAST [web gateways](#)

All matches to this query

| Score | Mr(calc):   | Delta     | Sequence                              |
|-------|-------------|-----------|---------------------------------------|
| 65.1  | 2674.324722 | -0.024600 | <a href="#">LLQDEFPGIPSPLDAAVECHR</a> |

Mascot: <http://www.matrixscience.com/>



# MASCOT Search Results

## Peptide View

MS/MS Fragmentation of **GGETAQSADPQWEQLNKK**  
 Found in **HEP2\_HUMAN**, Heparin cofactor 2 OS=Homo sapiens GN=SERPIND1 PE=1 SV=3

Match to Query 55748: 2283.060882 from(762.027570,3+) rtinseconds(1930) index(38121)  
 Title: Locus:1.1.1.2694.25 File:"2013-07-02 CLN FXIII 30 min 2nd F 3.wiff"  
 Data file C:\Program Files (x86)\Matrix Science\Mascot Daemon\mgf2 FXIII 30 min 2nd\mascot\_daemon\_merge.mgf

Click mouse within plot area to zoom in by factor of two about that point  
 Or, Plot from  to  Da   
 Label all possible matches  Label matches used for scoring

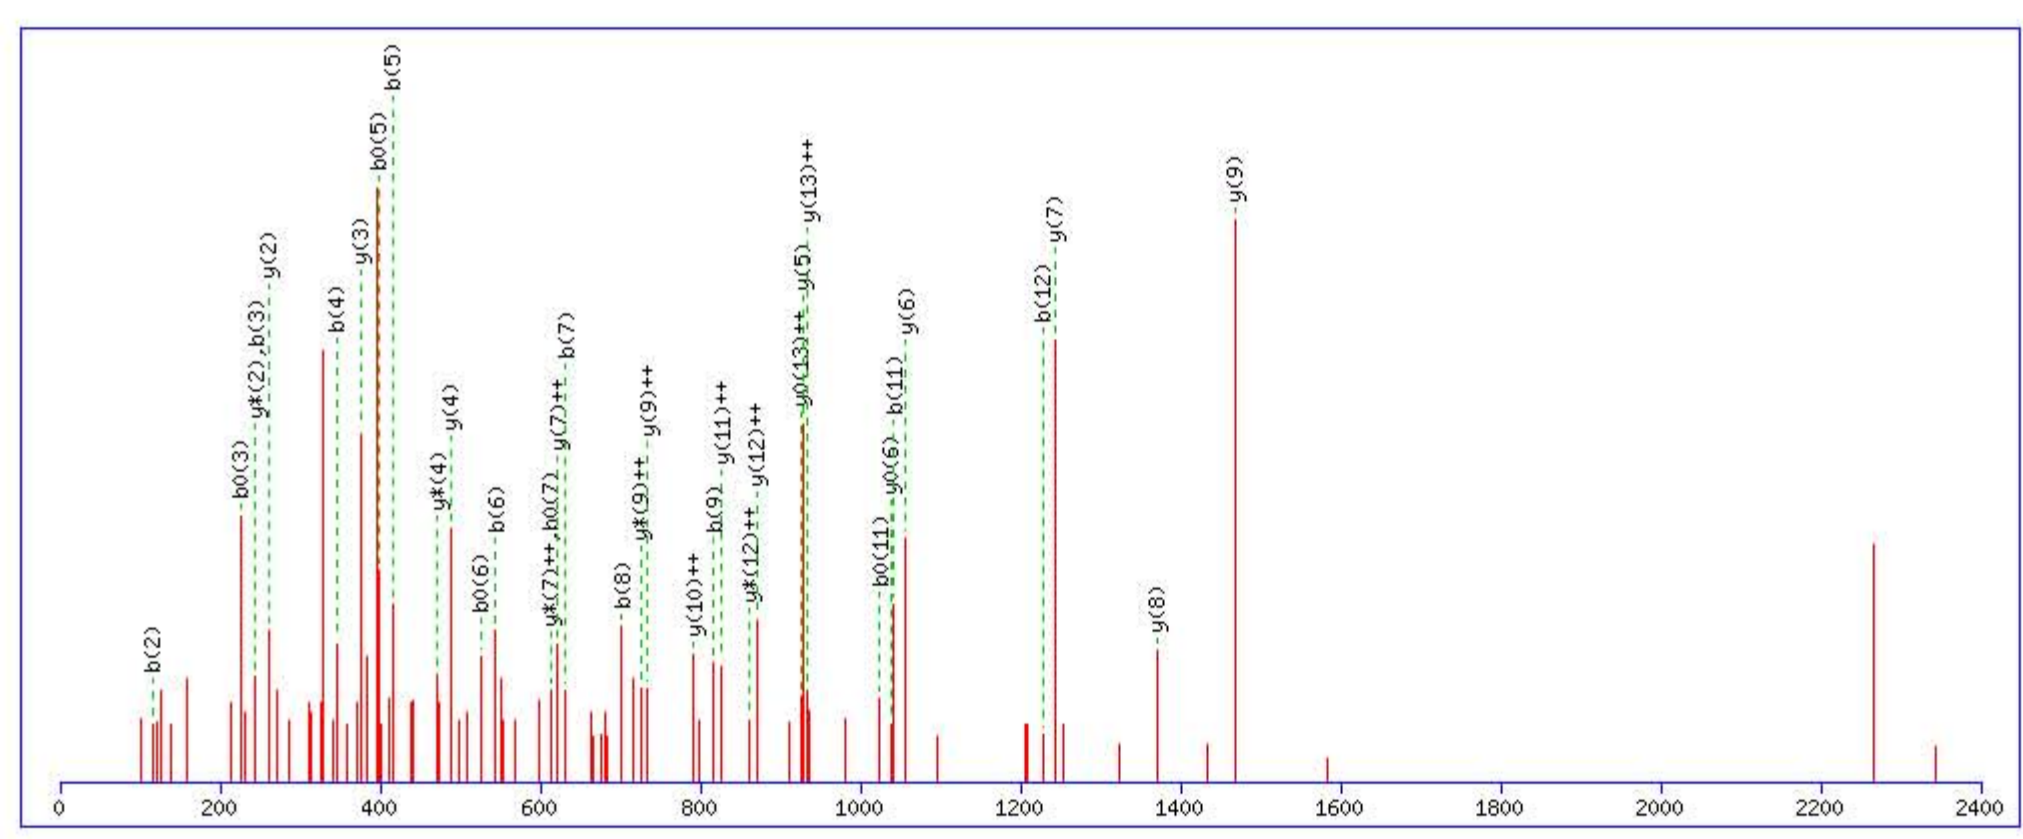

Monoisotopic mass of neutral peptide Mr(calc): 2283.058975  
 Fixed modifications: Carbamidomethyl (C) (apply to specified residues or termini only)  
 Variable modifications:  
 Q14 : Biotin:Thermo-21345 (Q)  
 Ions Score: 65 Expect: 4e-006  
 Matches : 36/180 fragment ions using 61 most intense peaks [\(help\)](#)

| #  | b                  | b <sup>++</sup> | b <sup>*</sup> | b <sup>*++</sup> | b <sup>0</sup>     | b <sup>0++</sup> | Seq. | y                  | y <sup>++</sup>   | y <sup>*</sup>    | y <sup>*++</sup>  | y <sup>0</sup>     | y <sup>0++</sup>  | #  |
|----|--------------------|-----------------|----------------|------------------|--------------------|------------------|------|--------------------|-------------------|-------------------|-------------------|--------------------|-------------------|----|
| 1  | 58.028740          | 29.518008       |                |                  |                    |                  | G    |                    |                   |                   |                   |                    |                   | 18 |
| 2  | <b>115.050204</b>  | 58.028740       |                |                  |                    |                  | G    | 2227.044809        | 1114.026042       | 2210.018260       | 1105.512768       | 2209.034244        | 1105.020760       | 17 |
| 3  | <b>244.092797</b>  | 122.550037      |                |                  | <b>226.082232</b>  | 113.544754       | E    | 2170.023345        | 1085.515310       | 2152.996796       | 1077.002036       | 2152.012780        | 1076.510028       | 16 |
| 4  | <b>345.140476</b>  | 173.073876      |                |                  | 327.129911         | 164.068594       | T    | 2040.980752        | 1020.994014       | 2023.954203       | 1012.480740       | 2022.970187        | 1011.988732       | 15 |
| 5  | <b>416.177590</b>  | 208.592433      |                |                  | <b>398.167025</b>  | 199.587151       | A    | 1939.933073        | 970.470175        | 1922.906524       | 961.956900        | 1921.922508        | 961.464892        | 14 |
| 6  | <b>544.236168</b>  | 272.621722      | 527.209619     | 264.108448       | <b>526.225603</b>  | 263.616440       | Q    | 1868.895959        | <b>934.951618</b> | 1851.869410       | 926.438343        | 1850.885394        | <b>925.946335</b> | 13 |
| 7  | <b>631.268196</b>  | 316.137736      | 614.241647     | 307.624462       | <b>613.257631</b>  | 307.132454       | S    | 1740.837381        | <b>870.922329</b> | 1723.810832       | <b>862.409054</b> | 1722.826816        | 861.917046        | 12 |
| 8  | <b>702.305310</b>  | 351.656293      | 685.278761     | 343.143019       | 684.294745         | 342.651011       | A    | 1653.805353        | <b>827.406315</b> | 1636.778804       | 818.893040        | 1635.794788        | 818.401032        | 11 |
| 9  | <b>817.332253</b>  | 409.169765      | 800.305704     | 400.656490       | 799.321688         | 400.164482       | D    | 1582.768239        | <b>791.887758</b> | 1565.741690       | 783.374483        | 1564.757674        | 782.882475        | 10 |
| 10 | 914.385017         | 457.696147      | 897.358468     | 449.182872       | 896.374452         | 448.690864       | P    | <b>1467.741296</b> | <b>734.374286</b> | 1450.714747       | <b>725.861012</b> | 1449.730731        | 725.369004        | 9  |
| 11 | <b>1042.443595</b> | 521.725436      | 1025.417046    | 513.212161       | <b>1024.433030</b> | 512.720153       | Q    | <b>1370.688532</b> | 685.847904        | 1353.661983       | 677.334630        | 1352.677967        | 676.842622        | 8  |
| 12 | <b>1228.522908</b> | 614.765092      | 1211.496359    | 606.251818       | 1210.512343        | 605.759809       | W    | <b>1242.629954</b> | <b>621.818615</b> | 1225.603405       | <b>613.305341</b> | 1224.619389        | 612.813333        | 7  |
| 13 | 1357.565501        | 679.286388      | 1340.538952    | 670.773114       | 1339.554936        | 670.281106       | E    | <b>1056.550641</b> | 528.778959        | 1039.524092       | 520.265684        | <b>1038.540076</b> | 519.773676        | 6  |
| 14 | 1796.790827        | 898.899052      | 1779.764278    | 890.385777       | 1778.780262        | 889.893769       | Q    | <b>927.508048</b>  | 464.257662        | 910.481499        | 455.744388        |                    |                   | 5  |
| 15 | 1909.874891        | 955.441083      | 1892.848342    | 946.927809       | 1891.864326        | 946.435801       | L    | <b>488.282722</b>  | 244.644999        | <b>471.256173</b> | 236.131725        |                    |                   | 4  |
| 16 | 2023.917818        | 1012.462547     | 2006.891269    | 1003.949273      | 2005.907253        | 1003.457265      | N    | <b>375.198658</b>  | 188.102967        | 358.172109        | 179.589693        |                    |                   | 3  |
| 17 | 2137.960745        | 1069.484010     | 2120.934196    | 1060.970736      | 2119.950180        | 1060.478728      | N    | <b>261.155731</b>  | 131.081504        | <b>244.129182</b> | 122.568229        |                    |                   | 2  |
| 18 |                    |                 |                |                  |                    |                  | K    | 147.112804         | 74.060040         | 130.086255        | 65.546765         |                    |                   | 1  |

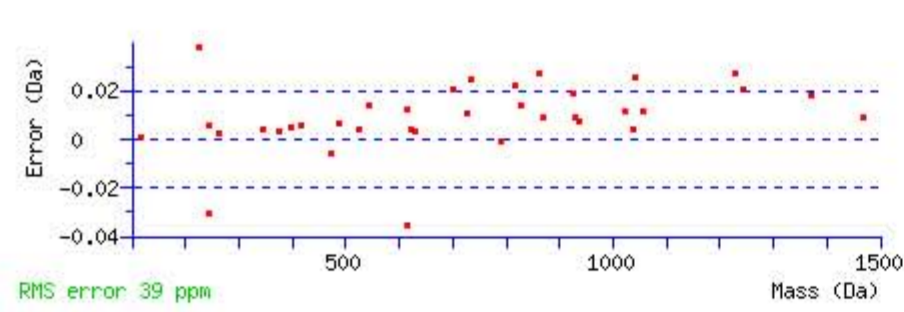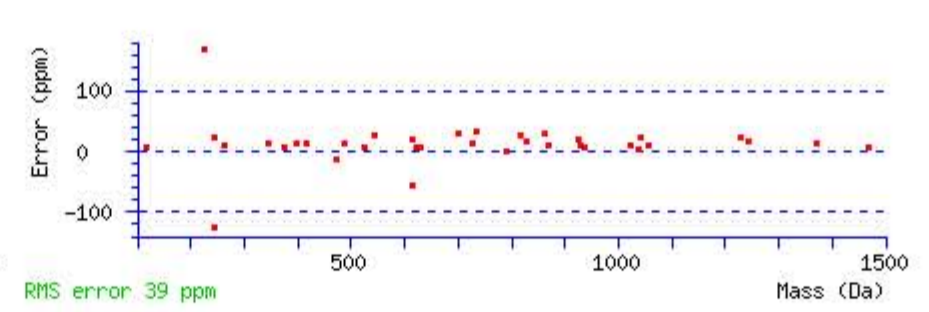

NCBI BLAST search of **GGETAQSADPQWEQLNKK**  
 (Parameters: blastp, nr protein database, expect=20000, no filter, PAM30)  
 Other BLAST [web gateways](#)

### All matches to this query

| Score | Mr(calc):   | Delta    | Sequence                           |
|-------|-------------|----------|------------------------------------|
| 65.3  | 2283.058975 | 0.001907 | <a href="#">GGETAQSADPQWEQLNKK</a> |
| 33.8  | 2283.058975 | 0.001907 | <a href="#">GGETAQSADPQWEQLNKK</a> |



# MASCOT Search Results

## Peptide View

MS/MS Fragmentation of **GGETAQSADPQWEQLNNK**

Found in **HEP2\_HUMAN**, Heparin cofactor 2 OS=Homo sapiens GN=SERPIND1 PE=1 SV=3

Match to Query 55749: 2283.065952 from(762.029260,3+) rtinseconds(1912) index(37980)

Title: Locus:1.1.1.2688.24 File:"2013-07-02 CLN FXIII 30 min 2nd F 3.wiff"

Data file C:\Program Files (x86)\Matrix Science\Mascot Daemon\mgf2 FXIII 30 min 2nd\mascot\_daemon\_merge.mgf

Click mouse within plot area to zoom in by factor of two about that point

Or, Plot from  to  Da

Label all possible matches  Label matches used for scoring

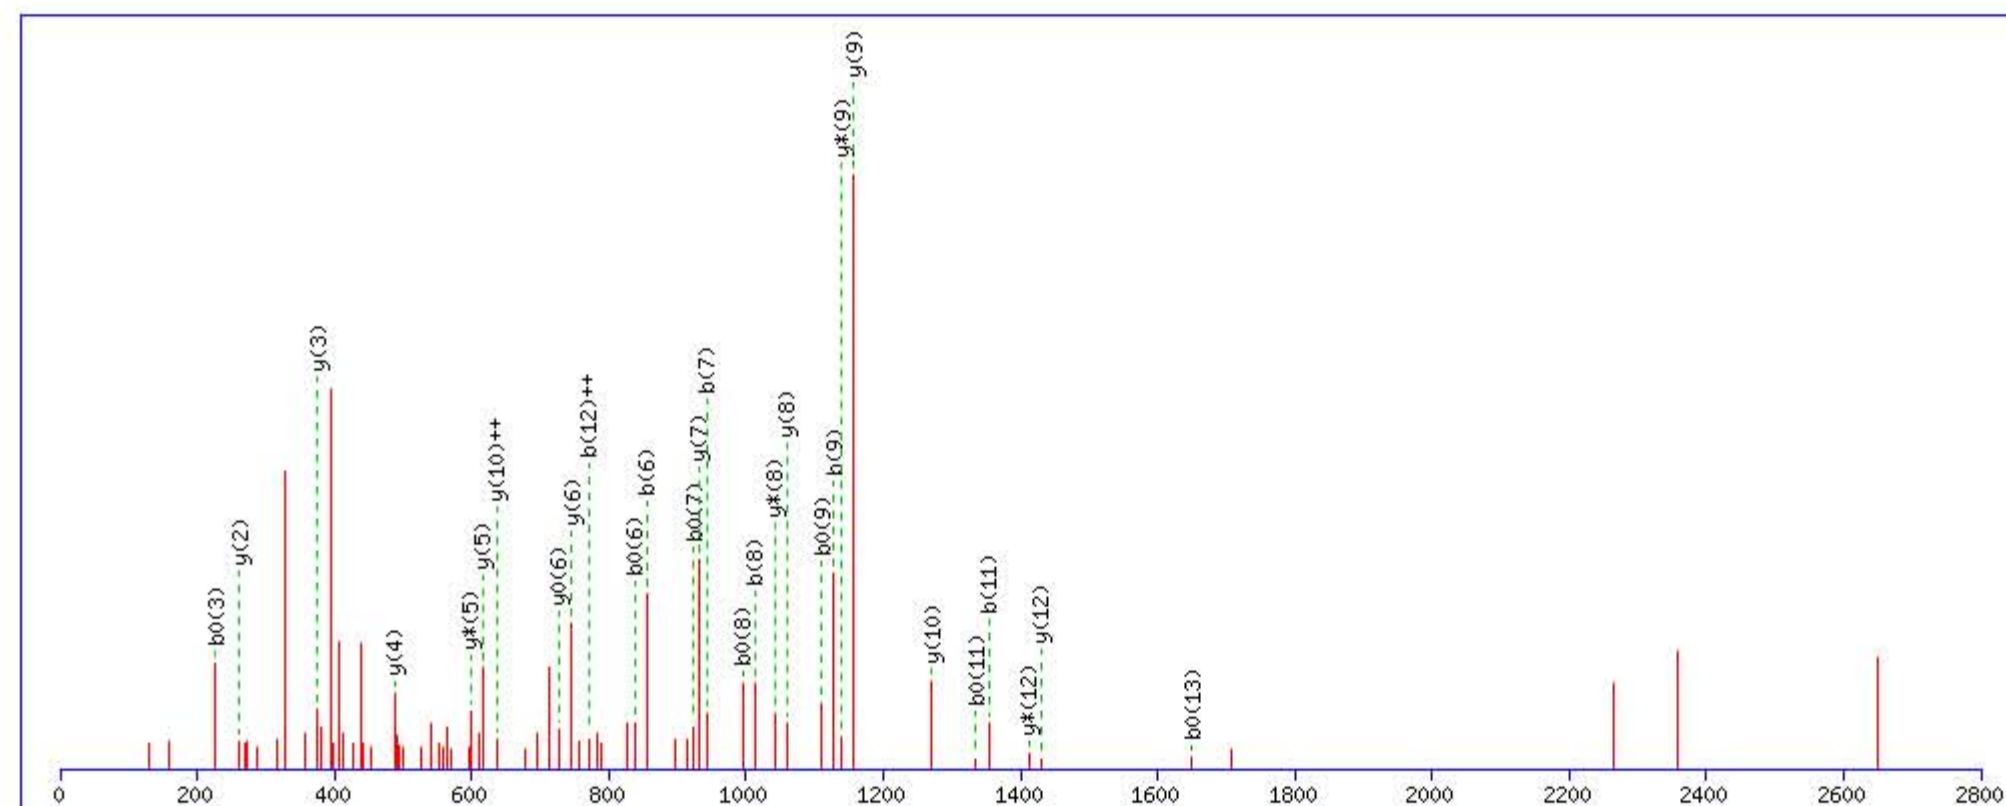

Monoisotopic mass of neutral peptide Mr(calc): 2283.058975

Fixed modifications: Carbamidomethyl (C) (apply to specified residues or termini only)

Variable modifications:

Q6 : Biotin:Thermo-21345 (Q)

Ions Score: 53 Expect: 7.6e-005

Matches : 29/180 fragment ions using 50 most intense peaks [\(help\)](#)

| #  | b                  | b <sup>++</sup>   | b <sup>+</sup> | b <sup>+++</sup> | b <sup>0</sup>     | b <sup>0++</sup> | Seq.     | y                  | y <sup>++</sup>   | y <sup>+</sup>     | y <sup>+++</sup> | y <sup>0</sup>    | y <sup>0++</sup> | #  |
|----|--------------------|-------------------|----------------|------------------|--------------------|------------------|----------|--------------------|-------------------|--------------------|------------------|-------------------|------------------|----|
| 1  | 58.028740          | 29.518008         |                |                  |                    |                  | <b>G</b> |                    |                   |                    |                  |                   |                  | 18 |
| 2  | 115.050204         | 58.028740         |                |                  |                    |                  | <b>G</b> | 2227.044809        | 1114.026042       | 2210.018260        | 1105.512768      | 2209.034244       | 1105.020760      | 17 |
| 3  | 244.092797         | 122.550037        |                |                  | 226.082232         | 113.544754       | <b>E</b> | 2170.023345        | 1085.515310       | 2152.996796        | 1077.002036      | 2152.012780       | 1076.510028      | 16 |
| 4  | 345.140476         | 173.073876        |                |                  | 327.129911         | 164.068594       | <b>T</b> | 2040.980752        | 1020.994014       | 2023.954203        | 1012.480740      | 2022.970187       | 1011.988732      | 15 |
| 5  | 416.177590         | 208.592433        |                |                  | 398.167025         | 199.587151       | <b>A</b> | 1939.933073        | 970.470175        | 1922.906524        | 961.956900       | 1921.922508       | 961.464892       | 14 |
| 6  | <b>855.402916</b>  | 428.205096        | 838.376367     | 419.691822       | <b>837.392351</b>  | 419.199814       | <b>Q</b> | 1868.895959        | 934.951618        | 1851.869410        | 926.438343       | 1850.885394       | 925.946335       | 13 |
| 7  | <b>942.434944</b>  | 471.721110        | 925.408395     | 463.207836       | <b>924.424379</b>  | 462.715828       | <b>S</b> | <b>1429.670633</b> | 715.338955        | <b>1412.644084</b> | 706.825680       | 1411.660068       | 706.333672       | 12 |
| 8  | <b>1013.472058</b> | 507.239667        | 996.445509     | 498.726393       | <b>995.461493</b>  | 498.234385       | <b>A</b> | 1342.638605        | 671.822941        | 1325.612056        | 663.309666       | 1324.628040       | 662.817658       | 11 |
| 9  | <b>1128.499001</b> | 564.753139        | 1111.472452    | 556.239864       | <b>1110.488436</b> | 555.747856       | <b>D</b> | <b>1271.601491</b> | <b>636.304384</b> | 1254.574942        | 627.791109       | 1253.590926       | 627.299101       | 10 |
| 10 | 1225.551765        | 613.279521        | 1208.525216    | 604.766246       | 1207.541200        | 604.274238       | <b>P</b> | <b>1156.574548</b> | 578.790912        | <b>1139.547999</b> | 570.277638       | 1138.563983       | 569.785630       | 9  |
| 11 | <b>1353.610343</b> | 677.308810        | 1336.583794    | 668.795535       | <b>1335.599778</b> | 668.303527       | <b>Q</b> | <b>1059.521784</b> | 530.264530        | <b>1042.495235</b> | 521.751256       | 1041.511219       | 521.259248       | 8  |
| 12 | 1539.689656        | <b>770.348466</b> | 1522.663107    | 761.835192       | 1521.679091        | 761.343184       | <b>W</b> | <b>931.463206</b>  | 466.235241        | 914.436657         | 457.721967       | 913.452641        | 457.229959       | 7  |
| 13 | 1668.732249        | 834.869762        | 1651.705700    | 826.356488       | <b>1650.721684</b> | 825.864480       | <b>E</b> | <b>745.383893</b>  | 373.195585        | 728.357344         | 364.682310       | <b>727.373328</b> | 364.190302       | 6  |
| 14 | 1796.790827        | 898.899052        | 1779.764278    | 890.385777       | 1778.780262        | 889.893769       | <b>Q</b> | <b>616.341300</b>  | 308.674288        | <b>599.314751</b>  | 300.161014       |                   |                  | 5  |
| 15 | 1909.874891        | 955.441083        | 1892.848342    | 946.927809       | 1891.864326        | 946.435801       | <b>L</b> | <b>488.282722</b>  | 244.644999        | 471.256173         | 236.131725       |                   |                  | 4  |
| 16 | 2023.917818        | 1012.462547       | 2006.891269    | 1003.949273      | 2005.907253        | 1003.457265      | <b>N</b> | <b>375.198658</b>  | 188.102967        | 358.172109         | 179.589693       |                   |                  | 3  |
| 17 | 2137.960745        | 1069.484010       | 2120.934196    | 1060.970736      | 2119.950180        | 1060.478728      | <b>N</b> | <b>261.155731</b>  | 131.081504        | 244.129182         | 122.568229       |                   |                  | 2  |
| 18 |                    |                   |                |                  |                    |                  | <b>K</b> | 147.112804         | 74.060040         | 130.086255         | 65.546765        |                   |                  | 1  |

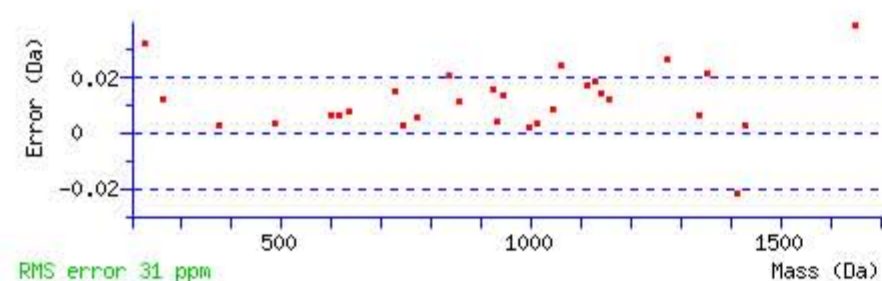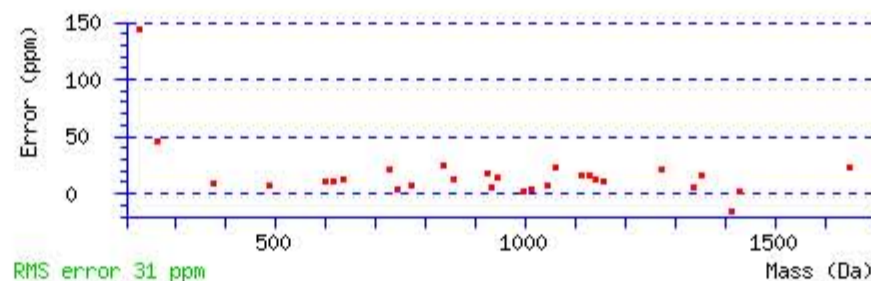

NCBI BLAST search of [GGETAQSADPQWEQLNNK](#)

(Parameters: blastp, nr protein database, expect=20000, no filter, PAM30)

Other BLAST [web gateways](#)

All matches to this query

| Score | Mr(calc):   | Delta    | Sequence                           |
|-------|-------------|----------|------------------------------------|
| 52.8  | 2283.058975 | 0.006977 | <a href="#">GGETAQSADPQWEQLNNK</a> |
| 8.3   | 2283.058975 | 0.006977 | <a href="#">GGETAQSADPQWEQLNNK</a> |

Mascot: <http://www.matrixscience.com/>



# MASCOT Search Results

## Peptide View

MS/MS Fragmentation of **VQLSPDLLATLPEPASPGR**

Found in **HGFA\_HUMAN**, Hepatocyte growth factor activator OS=Homo sapiens GN=HGFA PE=1 SV=1

Match to Query 55504: 2271.228792 from(758.083540,3+) rtinseconds(2659) index(9658)  
 Title: Locus:1.1.1.3361.24 File:"2013-07-02 CLN FXIII 30 min 2nd F 1.wiff"  
 Data file C:\Program Files (x86)\Matrix Science\Mascot Daemon\mgf2 FXIII 30 min 2nd\mascot\_daemon\_merge.mgf

Click mouse within plot area to zoom in by factor of two about that point  
 Or, Plot from  to  Da   
 Label all possible matches  Label matches used for scoring

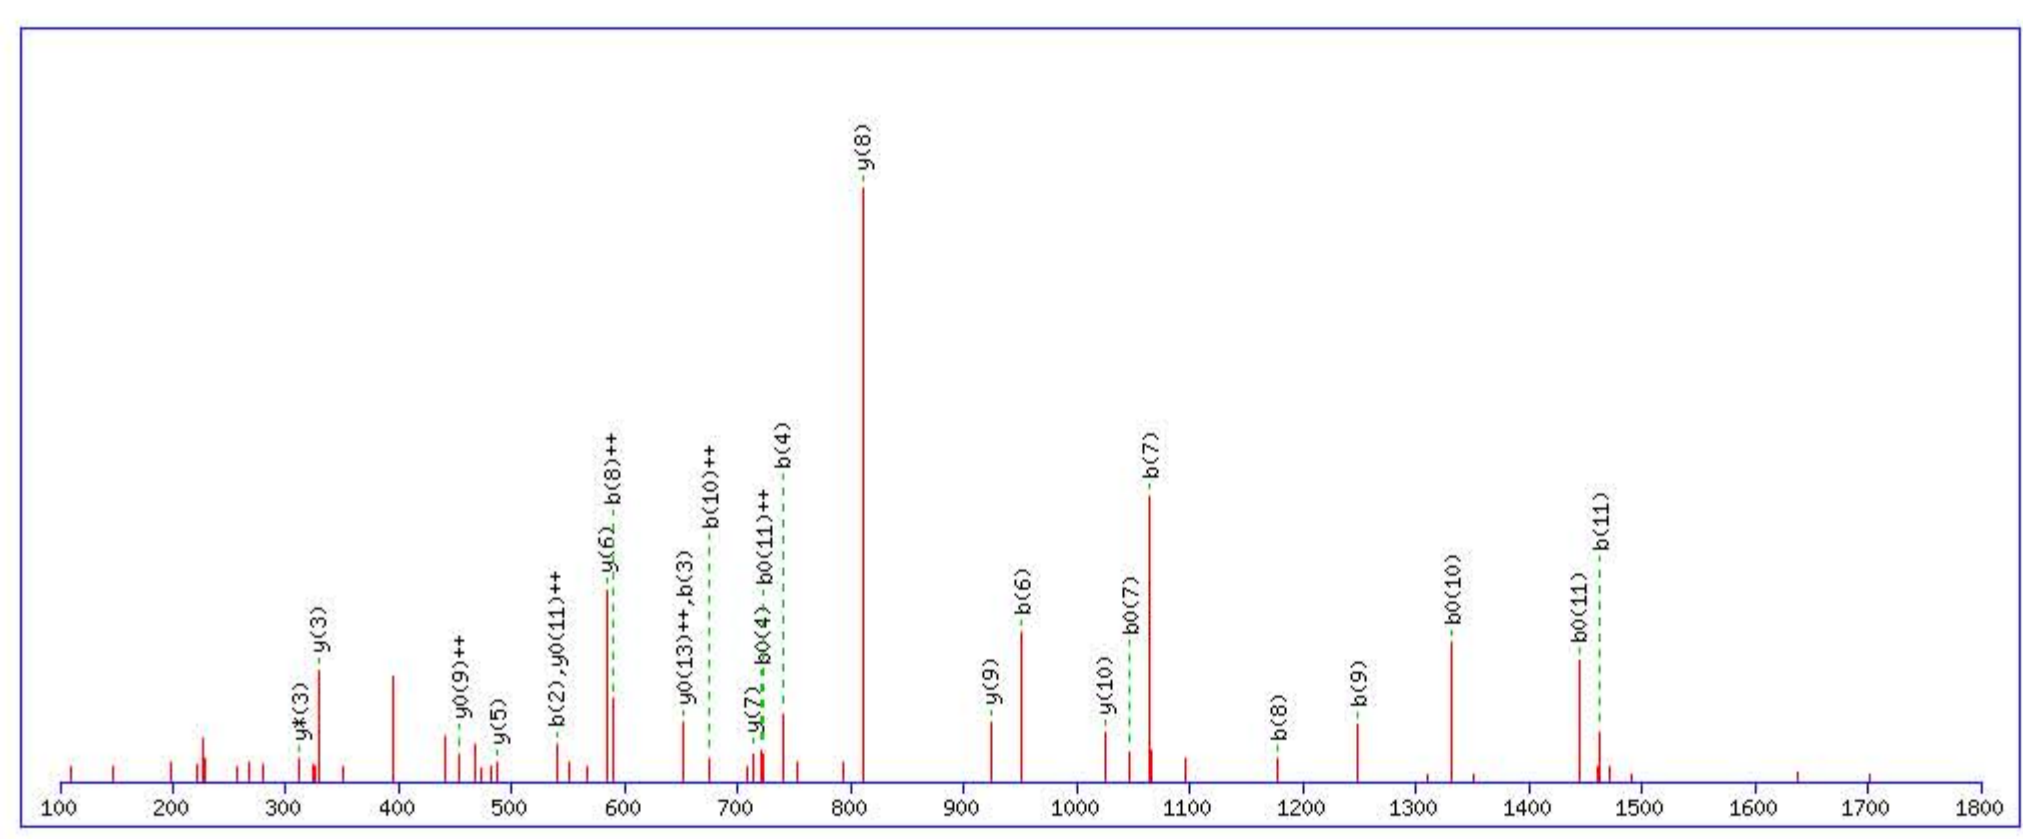

Monoisotopic mass of neutral peptide Mr(calc): 2271.229675  
 Fixed modifications: Carbamidomethyl (C) (apply to specified residues or termini only)  
 Variable modifications:  
 Q2 : Biotin:Thermo-21345 (Q)  
 Ions Score: 53 Expect: 0.00011  
 Matches : 26/202 fragment ions using 45 most intense peaks [\(help\)](#)

| #  | b                  | b <sup>++</sup>   | b <sup>*</sup> | b <sup>*++</sup> | b <sup>0</sup>     | b <sup>0++</sup>  | Seq. | y                  | y <sup>++</sup> | y <sup>*</sup>    | y <sup>*++</sup> | y <sup>0</sup> | y <sup>0++</sup>  | #  |
|----|--------------------|-------------------|----------------|------------------|--------------------|-------------------|------|--------------------|-----------------|-------------------|------------------|----------------|-------------------|----|
| 1  | 100.075690         | 50.541483         |                |                  |                    |                   | V    |                    |                 |                   |                  |                |                   | 19 |
| 2  | <b>539.301016</b>  | 270.154146        | 522.274467     | 261.640872       |                    |                   | Q    | 2173.168553        | 1087.087914     | 2156.142004       | 1078.574640      | 2155.157988    | 1078.082632       | 18 |
| 3  | <b>652.385080</b>  | 326.696178        | 635.358531     | 318.182904       |                    |                   | L    | 1733.943227        | 867.475252      | 1716.916678       | 858.961977       | 1715.932662    | 858.469969        | 17 |
| 4  | <b>739.417108</b>  | 370.212192        | 722.390559     | 361.698918       | <b>721.406543</b>  | 361.206910        | S    | 1620.859163        | 810.933219      | 1603.832614       | 802.419945       | 1602.848598    | 801.927937        | 16 |
| 5  | 836.469872         | 418.738574        | 819.443323     | 410.225300       | 818.459307         | 409.733292        | P    | 1533.827135        | 767.417206      | 1516.800586       | 758.903931       | 1515.816570    | 758.411923        | 15 |
| 6  | <b>951.496815</b>  | 476.252046        | 934.470266     | 467.738771       | 933.486250         | 467.246763        | D    | 1436.774371        | 718.890824      | 1419.747822       | 710.377549       | 1418.763806    | 709.885541        | 14 |
| 7  | <b>1064.580879</b> | 532.794078        | 1047.554330    | 524.280803       | <b>1046.570314</b> | 523.788795        | L    | 1321.747428        | 661.377352      | 1304.720879       | 652.864078       | 1303.736863    | <b>652.372069</b> | 13 |
| 8  | <b>1177.664943</b> | <b>589.336110</b> | 1160.638394    | 580.822835       | 1159.654378        | 580.330827        | L    | 1208.663364        | 604.835320      | 1191.636815       | 596.322046       | 1190.652799    | 595.830038        | 12 |
| 9  | <b>1248.702057</b> | 624.854667        | 1231.675508    | 616.341392       | 1230.691492        | 615.849384        | A    | 1095.579300        | 548.293288      | 1078.552751       | 539.780014       | 1077.568735    | <b>539.288006</b> | 11 |
| 10 | 1349.749736        | <b>675.378506</b> | 1332.723187    | 666.865232       | <b>1331.739171</b> | 666.373223        | T    | <b>1024.542186</b> | 512.774731      | 1007.515637       | 504.261456       | 1006.531621    | 503.769448        | 10 |
| 11 | <b>1462.833800</b> | 731.920538        | 1445.807251    | 723.407264       | <b>1444.823235</b> | <b>722.915255</b> | L    | <b>923.494507</b>  | 462.250892      | 906.467958        | 453.737617       | 905.483942     | <b>453.245609</b> | 9  |
| 12 | 1559.886564        | 780.446920        | 1542.860015    | 771.933646       | 1541.875999        | 771.441637        | P    | <b>810.410443</b>  | 405.708860      | 793.383894        | 397.195585       | 792.399878     | 396.703577        | 8  |
| 13 | 1688.929157        | 844.968216        | 1671.902608    | 836.454942       | 1670.918592        | 835.962934        | E    | <b>713.357679</b>  | 357.182478      | 696.331130        | 348.669203       | 695.347114     | 348.177195        | 7  |
| 14 | 1785.981921        | 893.494598        | 1768.955372    | 884.981324       | 1767.971356        | 884.489316        | P    | <b>584.315086</b>  | 292.661181      | 567.288537        | 284.147907       | 566.304521     | 283.655899        | 6  |
| 15 | 1857.019035        | 929.013155        | 1839.992486    | 920.499881       | 1839.008470        | 920.007873        | A    | <b>487.262322</b>  | 244.134799      | 470.235773        | 235.621525       | 469.251757     | 235.129517        | 5  |
| 16 | 1944.051063        | 972.529169        | 1927.024514    | 964.015895       | 1926.040498        | 963.523887        | S    | 416.225208         | 208.616242      | 399.198659        | 200.102968       | 398.214643     | 199.610960        | 4  |
| 17 | 2041.103827        | 1021.055552       | 2024.077278    | 1012.542277      | 2023.093262        | 1012.050269       | P    | <b>329.193180</b>  | 165.100228      | <b>312.166631</b> | 156.586954       |                |                   | 3  |
| 18 | 2098.125291        | 1049.566283       | 2081.098742    | 1041.053009      | 2080.114726        | 1040.561001       | G    | 232.140416         | 116.573846      | 215.113867        | 108.060572       |                |                   | 2  |
| 19 |                    |                   |                |                  |                    |                   | R    | 175.118952         | 88.063114       | 158.092403        | 79.549839        |                |                   | 1  |

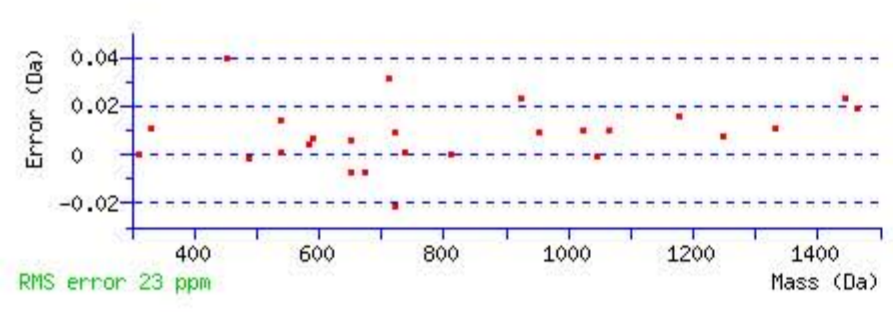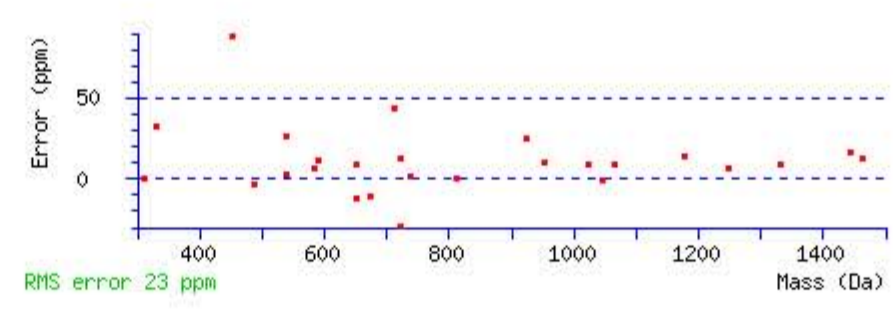

NCBI BLAST search of **VQLSPDLLATLPEPASPGR**  
 (Parameters: blastp, nr protein database, expect=20000, no filter, PAM30)  
 Other BLAST [web gateways](#)

### All matches to this query

| Score | Mr(calc):   | Delta     | Sequence                            |
|-------|-------------|-----------|-------------------------------------|
| 52.5  | 2271.229675 | -0.000883 | <a href="#">VQLSPDLLATLPEPASPGR</a> |



# MASCOT Search Results

## Peptide View

MS/MS Fragmentation of **QEATTVSCFR**

Found in **HGFL\_HUMAN**, Hepatocyte growth factor-like protein OS=Homo sapiens GN=MST1 PE=1 SV=2

Match to Query 35962: 1508.702588 from(755.358570,2+) rtinseconds(1754) index(69629)

Title: Locus:1.1.1.3144.12 File:"2013-07-02 CLN FXIII 30 min 2nd FT.wiff"

Data file C:\Program Files (x86)\Matrix Science\Mascot Daemon\mgf\2 FXIII 30 min 2nd\mascot\_daemon\_merge.mgf

Click mouse within plot area to zoom in by factor of two about that point

Or, Plot from  to  Da

Label all possible matches  Label matches used for scoring

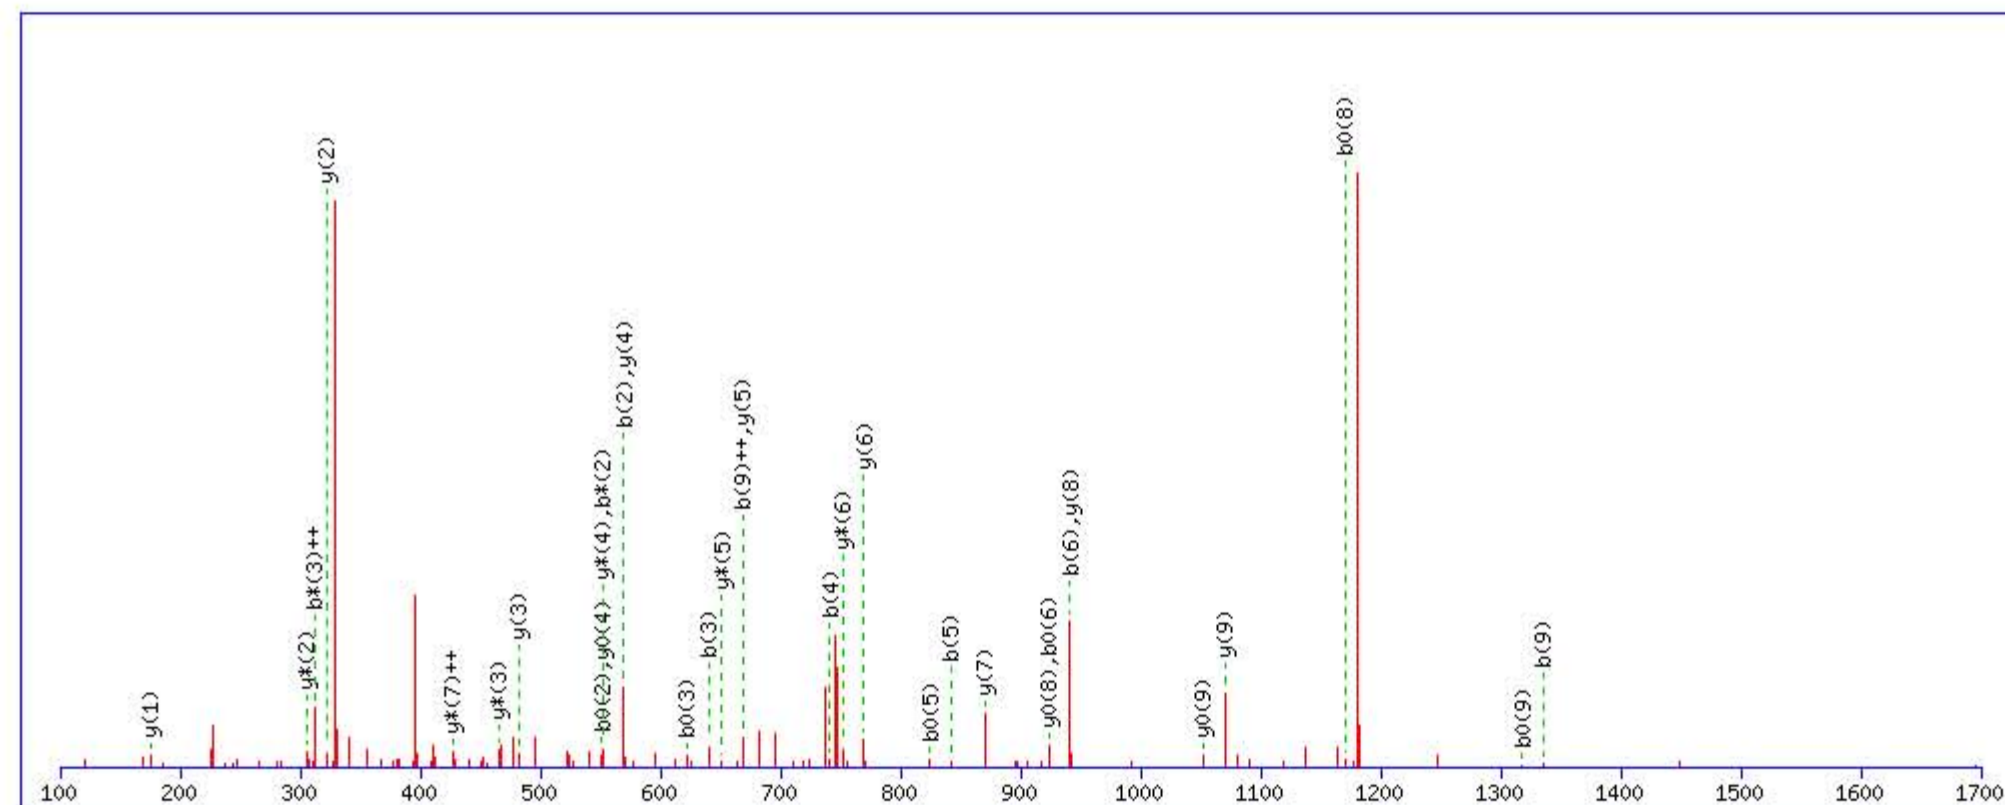

Monoisotopic mass of neutral peptide Mr(calc): 1508.711578

Fixed modifications: Carbamidomethyl (C) (apply to specified residues or termini only)

Variable modifications:

Q1 : Biotin:Thermo-21345 (Q)

Ions Score: 33 Expect: 0.0032

Matches : 33/100 fragment ions using 81 most intense peaks [\(help\)](#)

| #  | b           | b <sup>++</sup> | b <sup>*</sup> | b <sup>*++</sup> | b <sup>0</sup> | b <sup>0++</sup> | Seq. | y           | y <sup>++</sup> | y <sup>*</sup> | y <sup>*++</sup> | y <sup>0</sup> | y <sup>0++</sup> | #  |
|----|-------------|-----------------|----------------|------------------|----------------|------------------|------|-------------|-----------------|----------------|------------------|----------------|------------------|----|
| 1  | 440.232602  | 220.619939      | 423.206053     | 212.106664       |                |                  | Q    |             |                 |                |                  |                |                  | 10 |
| 2  | 569.275195  | 285.141236      | 552.248646     | 276.627961       | 551.264630     | 276.135953       | E    | 1070.493522 | 535.750399      | 1053.466973    | 527.237125       | 1052.482957    | 526.745117       | 9  |
| 3  | 640.312309  | 320.659793      | 623.285760     | 312.146518       | 622.301744     | 311.654510       | A    | 941.450929  | 471.229103      | 924.424380     | 462.715828       | 923.440364     | 462.223820       | 8  |
| 4  | 741.359988  | 371.183632      | 724.333439     | 362.670358       | 723.349423     | 362.178350       | T    | 870.413815  | 435.710546      | 853.387266     | 427.197271       | 852.403250     | 426.705263       | 7  |
| 5  | 842.407667  | 421.707472      | 825.381118     | 413.194197       | 824.397102     | 412.702189       | T    | 769.366136  | 385.186706      | 752.339587     | 376.673432       | 751.355571     | 376.181424       | 6  |
| 6  | 941.476081  | 471.241679      | 924.449532     | 462.728404       | 923.465516     | 462.236396       | V    | 668.318457  | 334.662867      | 651.291908     | 326.149592       | 650.307892     | 325.657584       | 5  |
| 7  | 1028.508109 | 514.757693      | 1011.481560    | 506.244418       | 1010.497544    | 505.752410       | S    | 569.250043  | 285.128660      | 552.223494     | 276.615385       | 551.239478     | 276.123377       | 4  |
| 8  | 1188.538758 | 594.773017      | 1171.512209    | 586.259743       | 1170.528193    | 585.767735       | C    | 482.218015  | 241.612646      | 465.191466     | 233.099371       |                |                  | 3  |
| 9  | 1335.607172 | 668.307224      | 1318.580623    | 659.793950       | 1317.596607    | 659.301942       | F    | 322.187366  | 161.597321      | 305.160817     | 153.084047       |                |                  | 2  |
| 10 |             |                 |                |                  |                |                  | R    | 175.118952  | 88.063114       | 158.092403     | 79.549839        |                |                  | 1  |

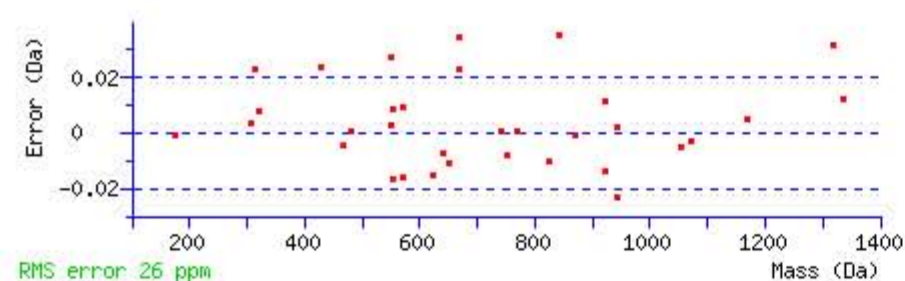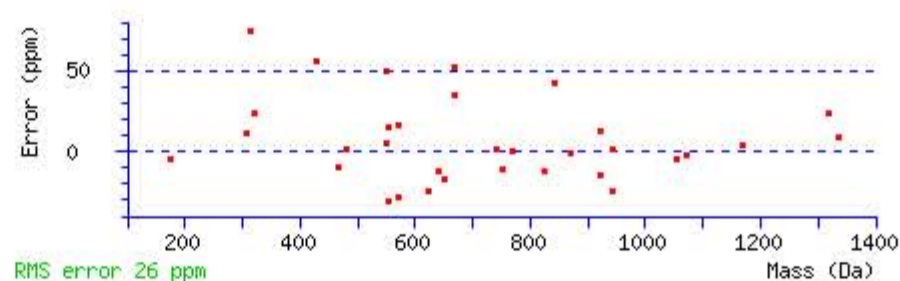

NCBI BLAST search of **QEATTVSCFR**

(Parameters: blastp, nr protein database, expect=20000, no filter, PAM30)

Other BLAST [web gateways](#)

All matches to this query

| Score | Mr(calc):   | Delta     | Sequence                       |
|-------|-------------|-----------|--------------------------------|
| 32.6  | 1508.711578 | -0.008990 | <a href="#">QEATTVSCFR</a>     |
| 5.7   | 1508.711380 | -0.008792 | <a href="#">RTASGGRTEQGMSR</a> |
| 4.6   | 1508.715408 | -0.012820 | <a href="#">DHKSVDECKVHR</a>   |
| 4.6   | 1508.708191 | -0.005603 | <a href="#">EYGSMYTVHLGPR</a>  |
| 3.4   | 1508.683044 | 0.019544  | <a href="#">AFGHSSSLTYHMR</a>  |
| 2.7   | 1508.703461 | -0.000873 | <a href="#">LKSFTYEYEDSK</a>   |
| 0.3   | 1508.711548 | -0.008960 | <a href="#">QMSKYPSEGER</a>    |
| 0.1   | 1508.719437 | -0.016849 | <a href="#">TFSWKSSLTCHR</a>   |



# MASCOT Search Results

## Peptide View

MS/MS Fragmentation of **WSAETPHKQFTFTSEPHAQLEENFCR**

Found in **HGFL\_HUMAN**, Hepatocyte growth factor-like protein OS=Homo sapiens GN=MST1 PE=1 SV=2

Match to Query 71592: 3584.629016 from(897.164530,4+) rtinseconds(2039) index(71408)

Title: Locus:1.1.1.3243.15 File:"2013-07-02 CLN FXIII 30 min 2nd FT.wiff"

Data file C:\Program Files (x86)\Matrix Science\Mascot Daemon\mgf2 FXIII 30 min 2nd\mascot\_daemon\_merge.mgf

Click mouse within plot area to zoom in by factor of two about that point

Or, Plot from  to  Da

Label all possible matches  Label matches used for scoring

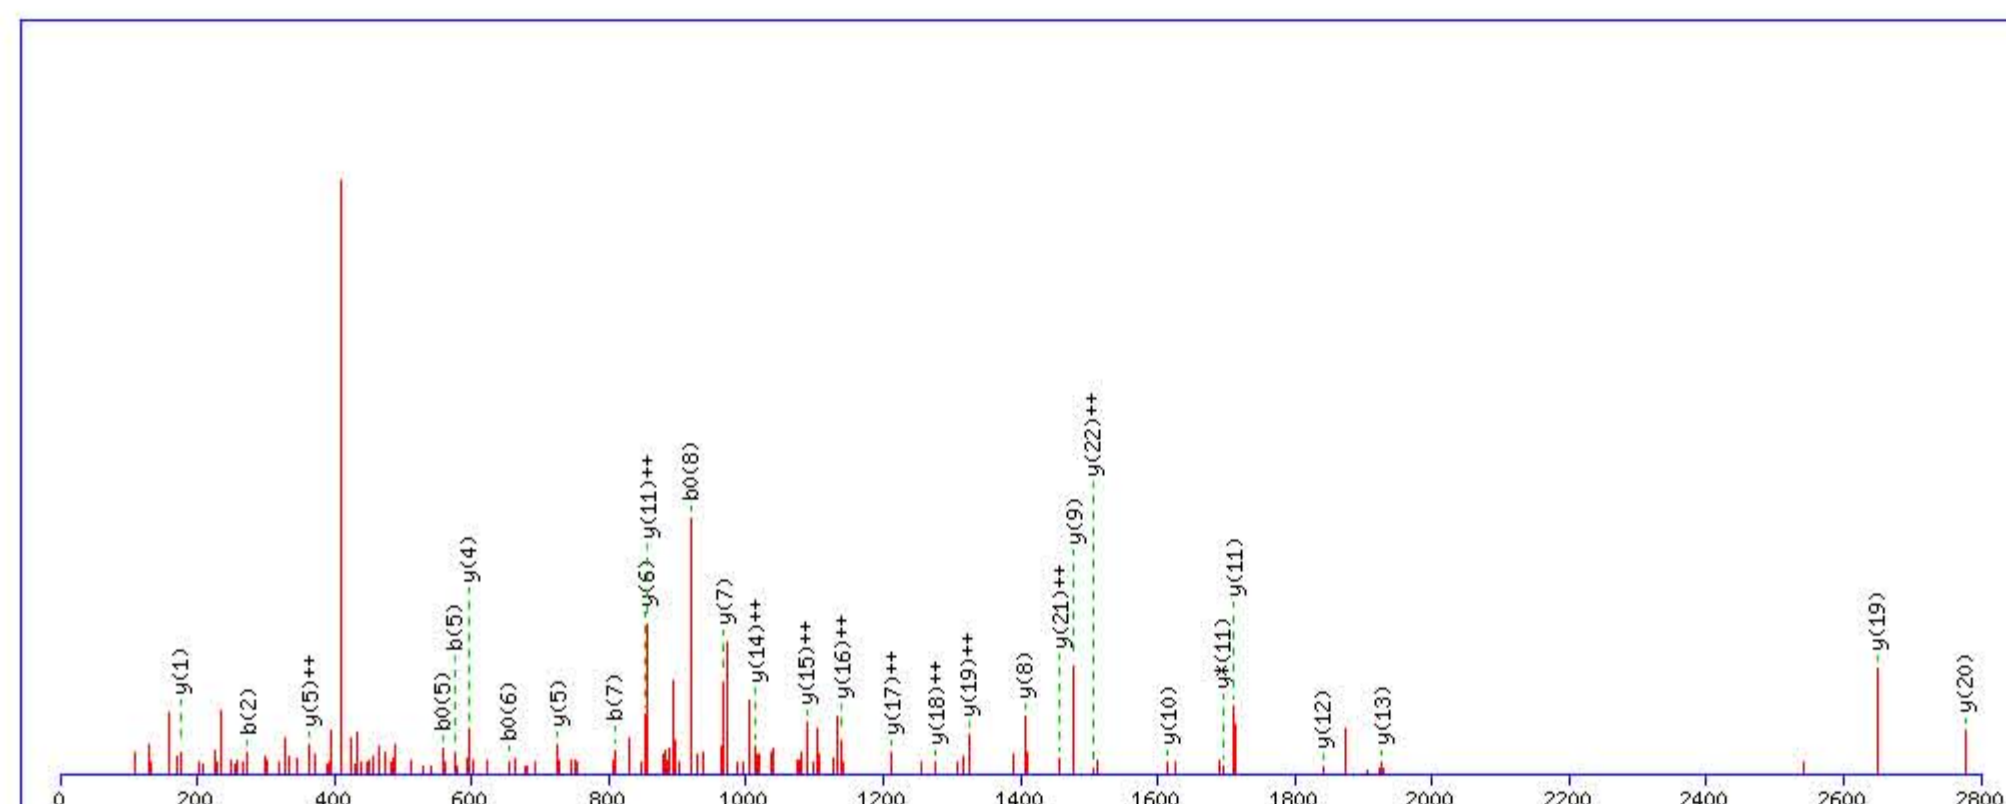

Monoisotopic mass of neutral peptide Mr(calc): 3584.660538

Fixed modifications: Carbamidomethyl (C) (apply to specified residues or termini only)

Variable modifications:

Q20 : Biotin:Thermo-21345 (Q)

Ions Score: 62 Expect: 7.3e-006

Matches : 30/288 fragment ions using 71 most intense peaks [\(help\)](#)

| #  | b                 | b <sup>++</sup> | b <sup>*</sup> | b <sup>*++</sup> | b <sup>0</sup>    | b <sup>0++</sup> | Seq. | y                  | y <sup>++</sup>    | y <sup>*</sup>     | y <sup>*++</sup> | y <sup>0</sup> | y <sup>0++</sup> | #  |
|----|-------------------|-----------------|----------------|------------------|-------------------|------------------|------|--------------------|--------------------|--------------------|------------------|----------------|------------------|----|
| 1  | 187.086589        | 94.046932       |                |                  |                   |                  | W    |                    |                    |                    |                  |                |                  | 27 |
| 2  | <b>274.118617</b> | 137.562947      |                |                  | 256.108052        | 128.557664       | S    | 3399.588510        | 1700.297893        | 3382.561961        | 1691.784618      | 3381.577945    | 1691.292610      | 26 |
| 3  | 345.155731        | 173.081504      |                |                  | 327.145166        | 164.076221       | A    | 3312.556482        | 1656.781879        | 3295.529933        | 1648.268605      | 3294.545917    | 1647.776597      | 25 |
| 4  | 474.198324        | 237.602800      |                |                  | 456.187759        | 228.597518       | E    | 3241.519368        | 1621.263322        | 3224.492819        | 1612.750047      | 3223.508803    | 1612.258040      | 24 |
| 5  | <b>575.246003</b> | 288.126640      |                |                  | <b>557.235438</b> | 279.121357       | T    | 3112.476775        | 1556.742026        | 3095.450226        | 1548.228751      | 3094.466210    | 1547.736743      | 23 |
| 6  | 672.298767        | 336.653022      |                |                  | <b>654.288202</b> | 327.647739       | P    | 3011.429096        | <b>1506.218186</b> | 2994.402547        | 1497.704912      | 2993.418531    | 1497.212904      | 22 |
| 7  | <b>809.357679</b> | 405.182478      |                |                  | 791.347114        | 396.177195       | H    | 2914.376332        | <b>1457.691804</b> | 2897.349783        | 1449.178530      | 2896.365767    | 1448.686522      | 21 |
| 8  | 937.452642        | 469.229959      | 920.426093     | 460.716685       | <b>919.442077</b> | 460.224677       | K    | <b>2777.317420</b> | 1389.162348        | 2760.290871        | 1380.649074      | 2759.306855    | 1380.157066      | 20 |
| 9  | 1034.505406       | 517.756341      | 1017.478857    | 509.243067       | 1016.494841       | 508.751059       | P    | <b>2649.222457</b> | <b>1325.114867</b> | 2632.195908        | 1316.601592      | 2631.211892    | 1316.109584      | 19 |
| 10 | 1162.563984       | 581.785630      | 1145.537435    | 573.272356       | 1144.553419       | 572.780348       | Q    | 2552.169693        | <b>1276.588485</b> | 2535.143144        | 1268.075210      | 2534.159128    | 1267.583202      | 18 |
| 11 | 1309.632398       | 655.319837      | 1292.605849    | 646.806563       | 1291.621833       | 646.314555       | F    | 2424.111115        | <b>1212.559196</b> | 2407.084566        | 1204.045921      | 2406.100550    | 1203.553913      | 17 |
| 12 | 1410.680077       | 705.843677      | 1393.653528    | 697.330402       | 1392.669512       | 696.838394       | T    | 2277.042701        | <b>1139.024988</b> | 2260.016152        | 1130.511714      | 2259.032136    | 1130.019706      | 16 |
| 13 | 1557.748491       | 779.377884      | 1540.721942    | 770.864609       | 1539.737926       | 770.372601       | F    | 2175.995022        | <b>1088.501149</b> | 2158.968473        | 1079.987874      | 2157.984457    | 1079.495866      | 15 |
| 14 | 1658.796170       | 829.901723      | 1641.769621    | 821.388449       | 1640.785605       | 820.896441       | T    | 2028.926608        | <b>1014.966942</b> | 2011.900059        | 1006.453668      | 2010.916043    | 1005.961660      | 14 |
| 15 | 1745.828198       | 873.417737      | 1728.801649    | 864.904463       | 1727.817633       | 864.412455       | S    | <b>1927.878929</b> | 964.443103         | 1910.852380        | 955.929828       | 1909.868364    | 955.437820       | 13 |
| 16 | 1874.870791       | 937.939034      | 1857.844242    | 929.425759       | 1856.860226       | 928.933751       | E    | <b>1840.846901</b> | 920.927089         | 1823.820352        | 912.413814       | 1822.836336    | 911.921806       | 12 |
| 17 | 1971.923555       | 986.465416      | 1954.897006    | 977.952141       | 1953.912990       | 977.460133       | P    | <b>1711.804308</b> | <b>856.405792</b>  | <b>1694.777759</b> | 847.892518       | 1693.793743    | 847.400510       | 11 |
| 18 | 2108.982467       | 1054.994872     | 2091.955918    | 1046.481597      | 2090.971902       | 1045.989589      | H    | <b>1614.751544</b> | 807.879410         | 1597.724995        | 799.366136       | 1596.740979    | 798.874128       | 10 |
| 19 | 2180.019581       | 1090.513429     | 2162.993032    | 1082.000154      | 2162.009016       | 1081.508146      | A    | <b>1477.692632</b> | 739.349954         | 1460.666083        | 730.836680       | 1459.682067    | 730.344672       | 9  |
| 20 | 2619.244907       | 1310.126092     | 2602.218358    | 1301.612817      | 2601.234342       | 1301.120809      | Q    | <b>1406.655518</b> | 703.831397         | 1389.628969        | 695.318123       | 1388.644953    | 694.826115       | 8  |
| 21 | 2732.328971       | 1366.668124     | 2715.302422    | 1358.154849      | 2714.318406       | 1357.662841      | L    | <b>967.430192</b>  | 484.218734         | 950.403643         | 475.705460       | 949.419627     | 475.213452       | 7  |
| 22 | 2861.371564       | 1431.189420     | 2844.345015    | 1422.676146      | 2843.360999       | 1422.184138      | E    | <b>854.346128</b>  | 427.676702         | 837.319579         | 419.163427       | 836.335563     | 418.671419       | 6  |
| 23 | 2990.414157       | 1495.710717     | 2973.387608    | 1487.197442      | 2972.403592       | 1486.705434      | E    | <b>725.303535</b>  | <b>363.155405</b>  | 708.276986         | 354.642131       | 707.292970     | 354.150123       | 5  |
| 24 | 3104.457084       | 1552.732180     | 3087.430535    | 1544.218906      | 3086.446519       | 1543.726898      | N    | <b>596.260942</b>  | 298.634109         | 579.234393         | 290.120834       |                |                  | 4  |
| 25 | 3251.525498       | 1626.266387     | 3234.498949    | 1617.753113      | 3233.514933       | 1617.261105      | F    | 482.218015         | 241.612645         | 465.191466         | 233.099371       |                |                  | 3  |
| 26 | 3411.556147       | 1706.281712     | 3394.529598    | 1697.768437      | 3393.545582       | 1697.276429      | C    | 335.149601         | 168.078438         | 318.123052         | 159.565164       |                |                  | 2  |
| 27 |                   |                 |                |                  |                   |                  | R    | <b>175.118952</b>  | 88.063114          | 158.092403         | 79.549839        |                |                  | 1  |

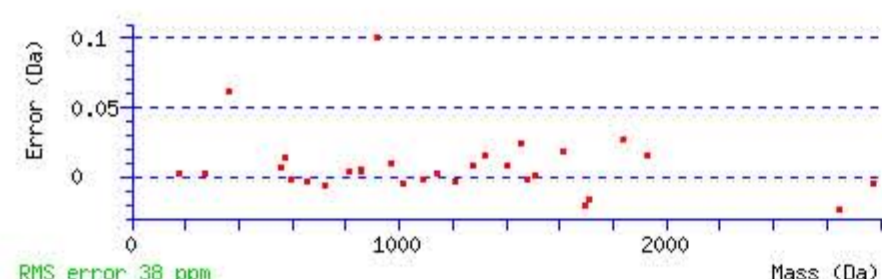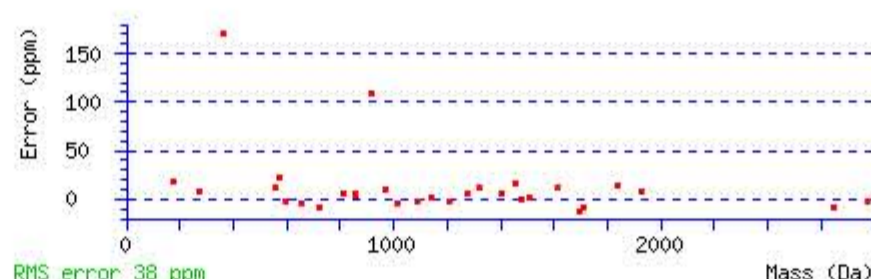

NCBI BLAST search of [WSAETPHKQFTFTSEPHAQLEENFCR](#)

(Parameters: blastp, nr protein database, expect=20000, no filter, PAM30)

Other BLAST [web gateways](#)

All matches to this query

| Score | Mr(calc):   | Delta     | Sequence                                   |
|-------|-------------|-----------|--------------------------------------------|
| 61.9  | 3584.660538 | -0.031522 | <a href="#">WSAETPHKQFTFTSEPHAQLEENFCR</a> |
| 8.0   | 3584.660538 | -0.031522 | <a href="#">WSAETPHKQFTFTSEPHAQLEENFCR</a> |



# MASCOT Search Results

## Peptide View

MS/MS Fragmentation of **FTCACPDQFK**

Found in **HABP2\_HUMAN**, Hyaluronan-binding protein 2 OS=Homo sapiens GN=HABP2 PE=1 SV=1

Match to Query 38217: 1583.691428 from(792.852990,2+) rtinseconds(1858) index(54709)

Title: Locus:1.1.1.3133.19 File:"2013-07-02 CLN FXIII 30 min 2nd F 4.wiff"

Data file C:\Program Files (x86)\Matrix Science\Mascot Daemon\mgf2 FXIII 30 min 2nd\mascot\_daemon\_merge.mgf

Click mouse within plot area to zoom in by factor of two about that point

Or, Plot from  to  Da

Label all possible matches  Label matches used for scoring

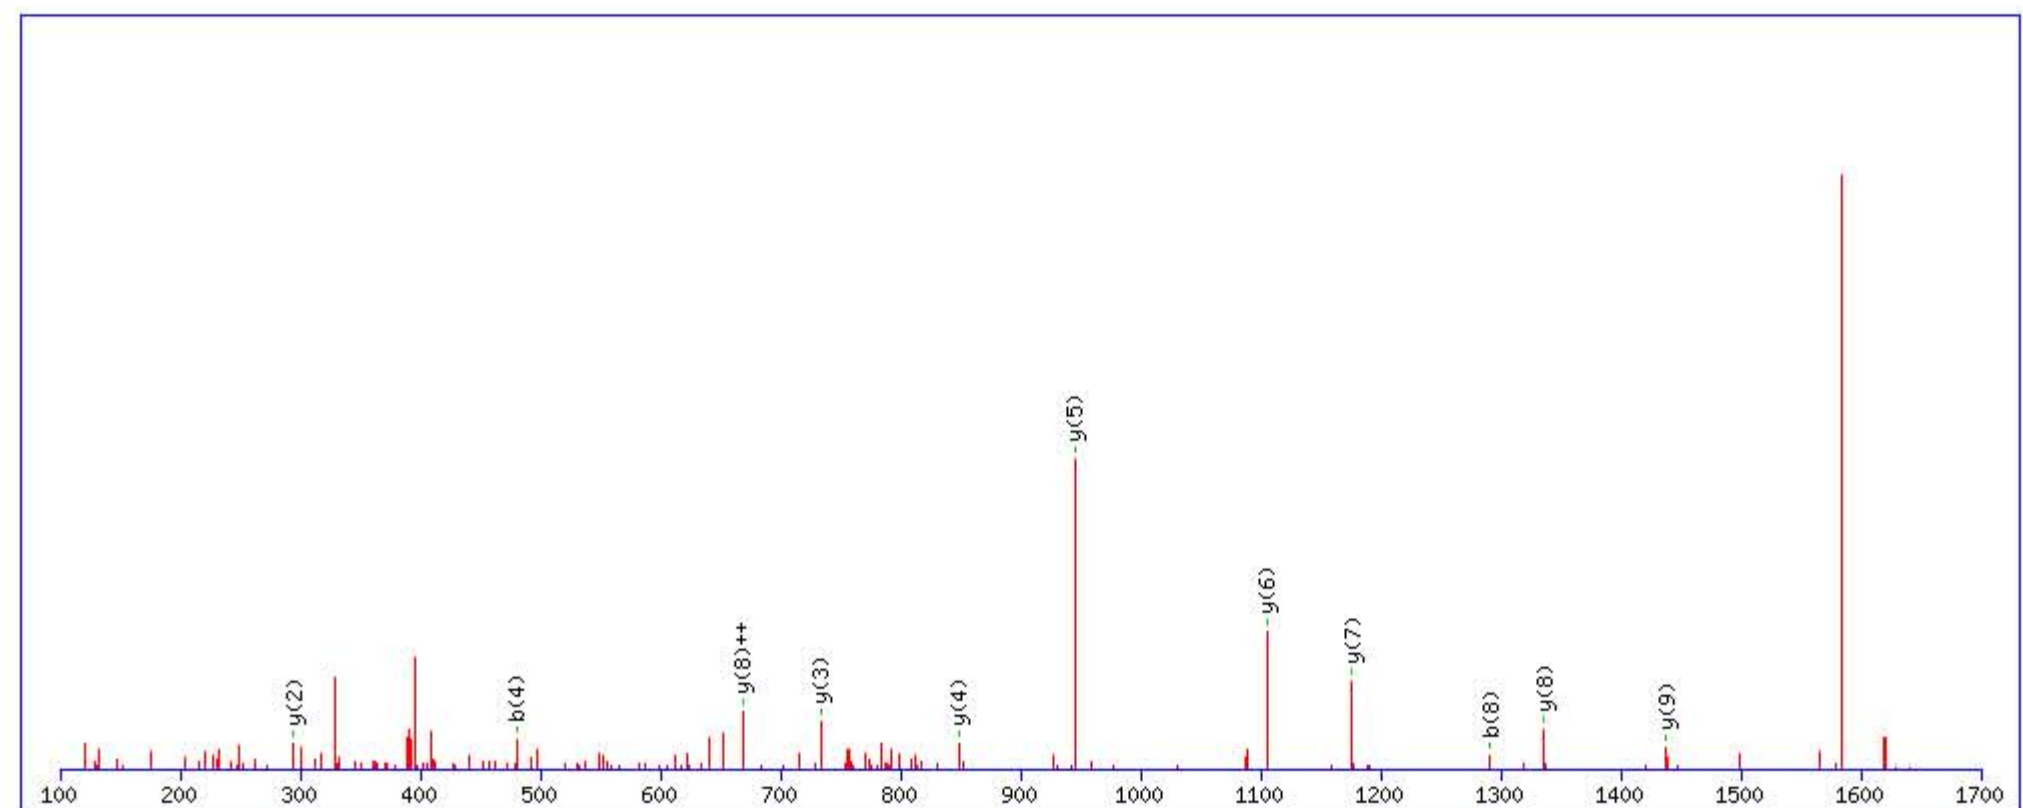

Monoisotopic mass of neutral peptide  $M_r(\text{calc})$ : 1583.693497

Fixed modifications: Carbamidomethyl (C) (apply to specified residues or termini only)

Variable modifications:

Q8 : Biotin:Thermo-21345 (Q)

Ions Score: 64 Expect: 2.6e-006

Matches : 11/86 fragment ions using 15 most intense peaks [\(help\)](#)

| #  | b           | b <sup>++</sup> | b <sup>*</sup> | b <sup>*++</sup> | b <sup>0</sup> | b <sup>0++</sup> | Seq. | y           | y <sup>++</sup> | y <sup>*</sup> | y <sup>*++</sup> | y <sup>0</sup> | y <sup>0++</sup> | #  |
|----|-------------|-----------------|----------------|------------------|----------------|------------------|------|-------------|-----------------|----------------|------------------|----------------|------------------|----|
| 1  | 148.075690  | 74.541483       |                |                  |                |                  | F    |             |                 |                |                  |                |                  | 10 |
| 2  | 249.123369  | 125.065322      |                |                  | 231.112804     | 116.060040       | T    | 1437.632342 | 719.319809      | 1420.605793    | 710.806535       | 1419.621777    | 710.314527       | 9  |
| 3  | 409.154018  | 205.080647      |                |                  | 391.143453     | 196.075365       | C    | 1336.584663 | 668.795970      | 1319.558114    | 660.282695       | 1318.574098    | 659.790687       | 8  |
| 4  | 480.191132  | 240.599204      |                |                  | 462.180567     | 231.593921       | A    | 1176.554014 | 588.780645      | 1159.527465    | 580.267371       | 1158.543449    | 579.775363       | 7  |
| 5  | 640.221781  | 320.614529      |                |                  | 622.211216     | 311.609246       | C    | 1105.516900 | 553.262088      | 1088.490351    | 544.748814       | 1087.506335    | 544.256806       | 6  |
| 6  | 737.274545  | 369.140911      |                |                  | 719.263980     | 360.135628       | P    | 945.486251  | 473.246764      | 928.459702     | 464.733489       | 927.475686     | 464.241481       | 5  |
| 7  | 852.301488  | 426.654382      |                |                  | 834.290923     | 417.649100       | D    | 848.433487  | 424.720382      | 831.406938     | 416.207107       | 830.422922     | 415.715099       | 4  |
| 8  | 1291.526814 | 646.267045      | 1274.500265    | 637.753771       | 1273.516249    | 637.261763       | Q    | 733.406544  | 367.206910      | 716.379995     | 358.693636       |                |                  | 3  |
| 9  | 1438.595228 | 719.801252      | 1421.568679    | 711.287978       | 1420.584663    | 710.795970       | F    | 294.181218  | 147.594247      | 277.154669     | 139.080973       |                |                  | 2  |
| 10 |             |                 |                |                  |                |                  | K    | 147.112804  | 74.060040       | 130.086255     | 65.546765        |                |                  | 1  |

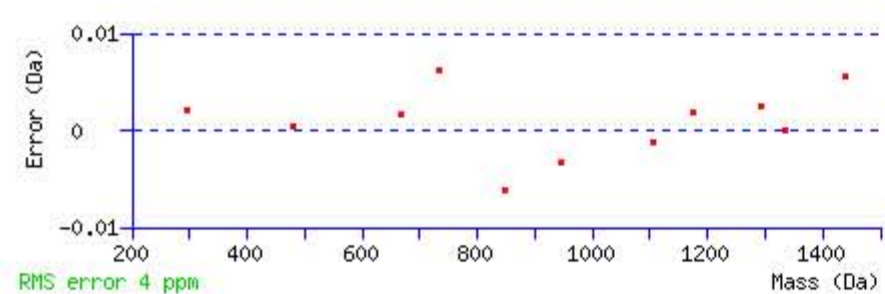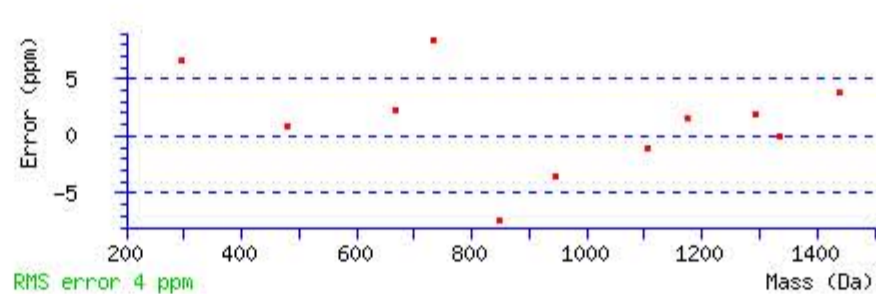

NCBI BLAST search of **FTCACPDQFK**

(Parameters: blastp, nr protein database, expect=20000, no filter, PAM30)

Other BLAST [web gateways](#)

## All matches to this query

| Score | $M_r(\text{calc})$ : | Delta     | Sequence                      |
|-------|----------------------|-----------|-------------------------------|
| 63.6  | 1583.693497          | -0.002069 | <a href="#">FTCACPDQFK</a>    |
| 4.5   | 1583.703827          | -0.012399 | <a href="#">FKDACGKSEDWNK</a> |



# MASCOT Search Results

## Peptide View

MS/MS Fragmentation of **GQCLITQSPYYR**

Found in **HABP2\_HUMAN**, Hyaluronan-binding protein 2 OS=Homo sapiens GN=HABP2 PE=1 SV=1

Match to Query 46666: 1892.931188 from(947.472870,2+) rtinseconds(2084) index(56322)  
 Title: Locus:1.1.1.3211.12 File:"2013-07-02 CLN FXIII 30 min 2nd F 4.wiff"  
 Data file C:\Program Files (x86)\Matrix Science\Mascot Daemon\mgf\2 FXIII 30 min 2nd\mascot\_daemon\_merge.mgf

Click mouse within plot area to zoom in by factor of two about that point  
 Or, Plot from  to  Da   
 Label all possible matches  Label matches used for scoring

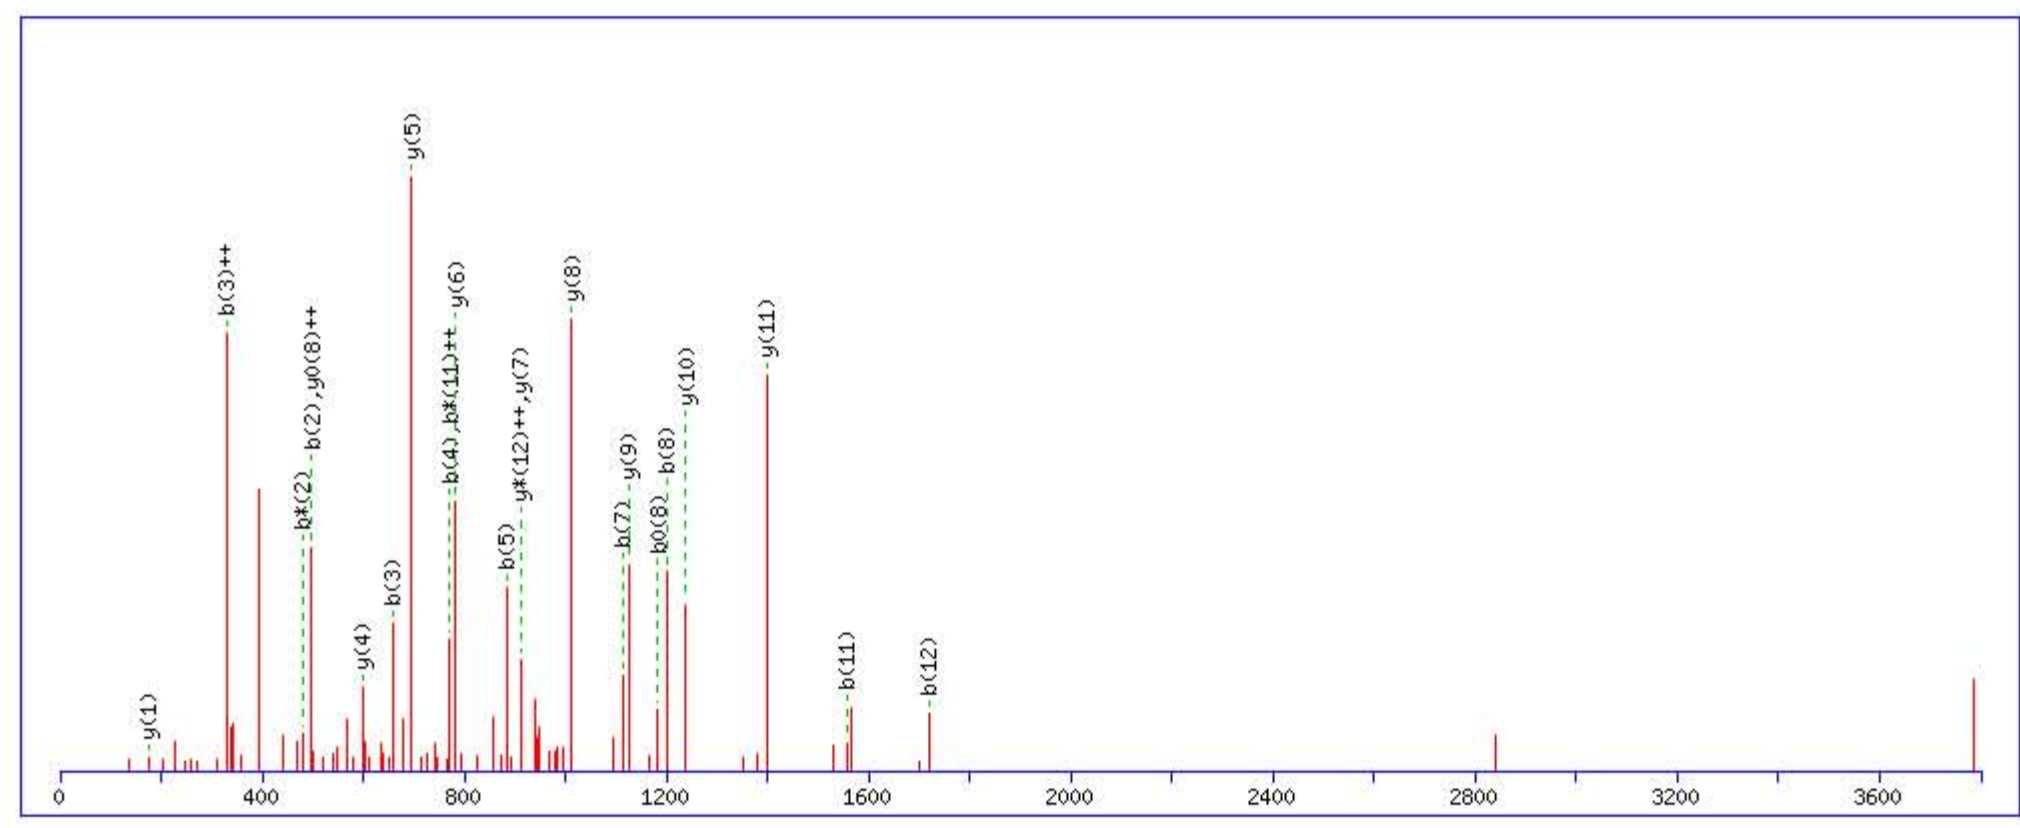

Monoisotopic mass of neutral peptide Mr(calc): 1892.927704  
 Fixed modifications: Carbamidomethyl (C) (apply to specified residues or termini only)  
 Variable modifications:  
 Q2 : Biotin:Thermo-21345 (Q)  
 Ions Score: 64 Expect: 3.5e-006  
 Matches : 23/122 fragment ions using 30 most intense peaks [\(help\)](#)

| #  | b                  | b <sup>++</sup>   | b <sup>*</sup>    | b <sup>+++</sup>  | b <sup>0</sup>     | b <sup>0++</sup> | Seq. | y                  | y <sup>++</sup> | y <sup>*</sup> | y <sup>+++</sup>  | y <sup>0</sup> | y <sup>0++</sup>  | #  |
|----|--------------------|-------------------|-------------------|-------------------|--------------------|------------------|------|--------------------|-----------------|----------------|-------------------|----------------|-------------------|----|
| 1  | 58.028740          | 29.518008         |                   |                   |                    |                  | G    |                    |                 |                |                   |                |                   | 13 |
| 2  | <b>497.254066</b>  | 249.130671        | <b>480.227517</b> | 240.617397        |                    |                  | Q    | 1836.913526        | 918.960401      | 1819.886977    | <b>910.447127</b> | 1818.902961    | 909.955119        | 12 |
| 3  | <b>657.284715</b>  | <b>329.145996</b> | 640.258166        | 320.632721        |                    |                  | C    | <b>1397.688200</b> | 699.347738      | 1380.661651    | 690.834464        | 1379.677635    | 690.342456        | 11 |
| 4  | <b>770.368779</b>  | 385.688028        | 753.342230        | 377.174753        |                    |                  | L    | <b>1237.657551</b> | 619.332414      | 1220.631002    | 610.819139        | 1219.646986    | 610.327131        | 10 |
| 5  | <b>883.452843</b>  | 442.230060        | 866.426294        | 433.716785        |                    |                  | I    | <b>1124.573487</b> | 562.790382      | 1107.546938    | 554.277107        | 1106.562922    | 553.785099        | 9  |
| 6  | 984.500522         | 492.753899        | 967.473973        | 484.240625        | 966.489957         | 483.748617       | T    | <b>1011.489423</b> | 506.248350      | 994.462874     | 497.735075        | 993.478858     | <b>497.243067</b> | 8  |
| 7  | <b>1112.559100</b> | 556.783188        | 1095.532551       | 548.269914        | 1094.548535        | 547.777906       | Q    | <b>910.441744</b>  | 455.724510      | 893.415195     | 447.211236        | 892.431179     | 446.719228        | 7  |
| 8  | <b>1199.591128</b> | 600.299202        | 1182.564579       | 591.785928        | <b>1181.580563</b> | 591.293920       | S    | <b>782.383166</b>  | 391.695221      | 765.356617     | 383.181947        | 764.372601     | 382.689939        | 6  |
| 9  | 1296.643892        | 648.825584        | 1279.617343       | 640.312310        | 1278.633327        | 639.820302       | P    | <b>695.351138</b>  | 348.179207      | 678.324589     | 339.665933        |                |                   | 5  |
| 10 | 1393.696656        | 697.351966        | 1376.670107       | 688.838692        | 1375.686091        | 688.346684       | P    | <b>598.298374</b>  | 299.652825      | 581.271825     | 291.139551        |                |                   | 4  |
| 11 | <b>1556.759985</b> | 778.883631        | 1539.733436       | <b>770.370356</b> | 1538.749420        | 769.878348       | Y    | 501.245610         | 251.126443      | 484.219061     | 242.613169        |                |                   | 3  |
| 12 | <b>1719.823314</b> | 860.415295        | 1702.796765       | 851.902021        | 1701.812749        | 851.410013       | Y    | 338.182281         | 169.594778      | 321.155732     | 161.081504        |                |                   | 2  |
| 13 |                    |                   |                   |                   |                    |                  | R    | <b>175.118952</b>  | 88.063114       | 158.092403     | 79.549839         |                |                   | 1  |

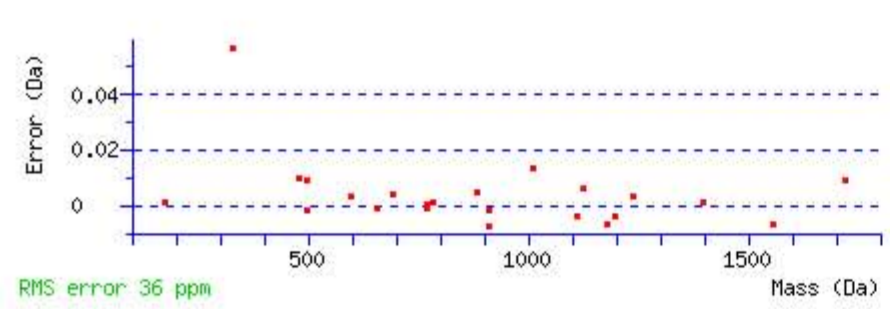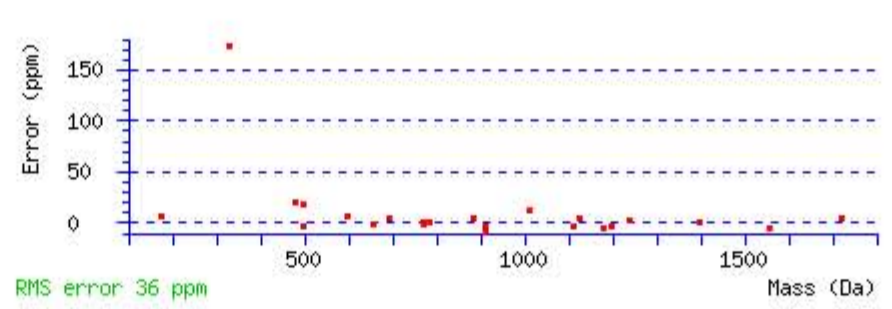

NCBI BLAST search of **GQCLITQSPYYR**  
 (Parameters: blastp, nr protein database, expect=20000, no filter, PAM30)  
 Other BLAST [web gateways](#)

### All matches to this query

| Score | Mr(calc):   | Delta     | Sequence                           |
|-------|-------------|-----------|------------------------------------|
| 64.3  | 1892.927704 | 0.003484  | <a href="#">GQCLITQSPYYR</a>       |
| 13.4  | 1892.927704 | 0.003484  | <a href="#">GQCLITQSPYYR</a>       |
| 5.7   | 1892.934921 | -0.003733 | <a href="#">QGSQAGPGPQLAQQMR</a>   |
| 1.4   | 1892.910400 | 0.020788  | <a href="#">SSRNYFGAQPBYR</a>      |
| 0.8   | 1892.909073 | 0.022115  | <a href="#">LSYCGGGEALAVPFEPAR</a> |
| 0.2   | 1892.938065 | -0.006877 | <a href="#">AQESVGFDPAPAANPGPR</a> |



# MASCOT Search Results

## Peptide View

MS/MS Fragmentation of **KGDTFSCMVGHEALPLAFTQK**

Found in **IGHA1\_HUMAN**, Ig alpha-1 chain C region OS=Homo sapiens GN=IGHA1 PE=1 SV=2

Match to Query 61485: 2647.306016 from(662.833780,4+) rtinseconds(2341) index(7842)

Title: Locus:1.1.1.3251.17 File:"2013-07-02 CLN FXIII 30 min 2nd F 1.wiff"

Data file C:\Program Files (x86)\Matrix Science\Mascot Daemon\mgf2 FXIII 30 min 2nd\mascot\_daemon\_merge.mgf

Click mouse within plot area to zoom in by factor of two about that point

Or, Plot from  to  Da

Label all possible matches  Label matches used for scoring

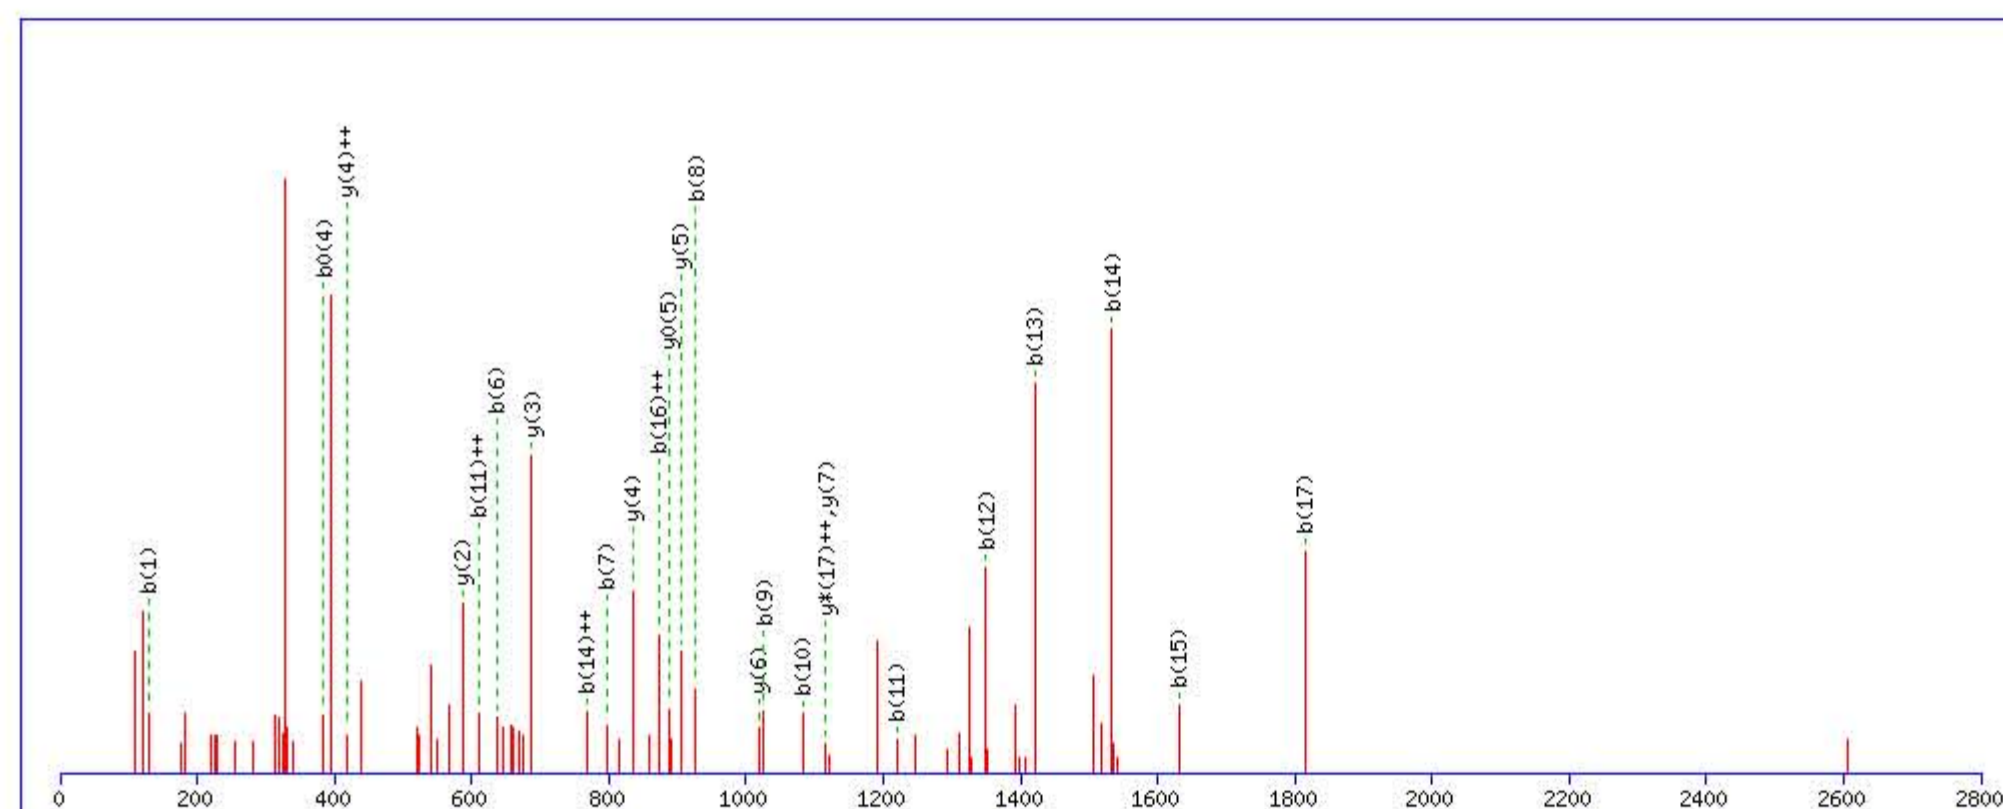

Monoisotopic mass of neutral peptide Mr(calc): 2647.296082

Fixed modifications: Carbamidomethyl (C) (apply to specified residues or termini only)

Variable modifications:

Q20 : Biotin:Thermo-21345 (Q)

Ions Score: 56 Expect: 1e-005

Matches : 25/232 fragment ions using 52 most intense peaks [\(help\)](#)

| #  | b                  | b <sup>++</sup>   | b <sup>*</sup> | b <sup>*++</sup> | b <sup>0</sup>    | b <sup>0++</sup> | Seq.     | y                  | y <sup>++</sup>   | y <sup>*</sup> | y <sup>*++</sup>   | y <sup>0</sup>    | y <sup>0++</sup> | #         |
|----|--------------------|-------------------|----------------|------------------|-------------------|------------------|----------|--------------------|-------------------|----------------|--------------------|-------------------|------------------|-----------|
| 1  | <b>129.102239</b>  | 65.054757         | 112.075690     | 56.541483        |                   |                  | <b>K</b> |                    |                   |                |                    |                   |                  | <b>21</b> |
| 2  | 186.123703         | 93.565489         | 169.097154     | 85.052215        |                   |                  | <b>G</b> | 2520.208388        | 1260.607832       | 2503.181839    | 1252.094557        | 2502.197823       | 1251.602549      | <b>20</b> |
| 3  | 301.150646         | 151.078961        | 284.124097     | 142.565687       | 283.140081        | 142.073679       | <b>D</b> | 2463.186924        | 1232.097100       | 2446.160375    | 1223.583825        | 2445.176359       | 1223.091817      | <b>19</b> |
| 4  | 402.198325         | 201.602801        | 385.171776     | 193.089526       | <b>384.187760</b> | 192.597518       | <b>T</b> | 2348.159981        | 1174.583628       | 2331.133432    | 1166.070354        | 2330.149416       | 1165.578346      | <b>18</b> |
| 5  | 549.266739         | 275.137008        | 532.240190     | 266.623733       | 531.256174        | 266.131725       | <b>F</b> | 2247.112302        | 1124.059789       | 2230.085753    | <b>1115.546514</b> | 2229.101737       | 1115.054506      | <b>17</b> |
| 6  | <b>636.298767</b>  | 318.653022        | 619.272218     | 310.139747       | 618.288202        | 309.647739       | <b>S</b> | 2100.043888        | 1050.525582       | 2083.017339    | 1042.012307        | 2082.033323       | 1041.520299      | <b>16</b> |
| 7  | <b>796.329416</b>  | 398.668346        | 779.302867     | 390.155072       | 778.318851        | 389.663064       | <b>C</b> | 2013.011860        | 1007.009568       | 1995.985311    | 998.496294         | 1995.001295       | 998.004286       | <b>15</b> |
| 8  | <b>927.369901</b>  | 464.188589        | 910.343352     | 455.675314       | 909.359336        | 455.183306       | <b>M</b> | 1852.981211        | 926.994244        | 1835.954662    | 918.480969         | 1834.970646       | 917.988961       | <b>14</b> |
| 9  | <b>1026.438315</b> | 513.722796        | 1009.411766    | 505.209521       | 1008.427750       | 504.717513       | <b>V</b> | 1721.940726        | 861.474001        | 1704.914177    | 852.960727         | 1703.930161       | 852.468719       | <b>13</b> |
| 10 | <b>1083.459779</b> | 542.233528        | 1066.433230    | 533.720253       | 1065.449214       | 533.228245       | <b>G</b> | 1622.872312        | 811.939794        | 1605.845763    | 803.426520         | 1604.861747       | 802.934512       | <b>12</b> |
| 11 | <b>1220.518691</b> | <b>610.762984</b> | 1203.492142    | 602.249709       | 1202.508126       | 601.757701       | <b>H</b> | 1565.850848        | 783.429062        | 1548.824299    | 774.915788         | 1547.840283       | 774.423780       | <b>11</b> |
| 12 | <b>1349.561284</b> | 675.284280        | 1332.534735    | 666.771006       | 1331.550719       | 666.278998       | <b>E</b> | 1428.791936        | 714.899606        | 1411.765387    | 706.386332         | 1410.781371       | 705.894324       | <b>10</b> |
| 13 | <b>1420.598398</b> | 710.802837        | 1403.571849    | 702.289563       | 1402.587833       | 701.797555       | <b>A</b> | 1299.749343        | 650.378310        | 1282.722794    | 641.865035         | 1281.738778       | 641.373027       | <b>9</b>  |
| 14 | <b>1533.682462</b> | <b>767.344869</b> | 1516.655913    | 758.831595       | 1515.671897       | 758.339587       | <b>L</b> | 1228.712229        | 614.859753        | 1211.685680    | 606.346478         | 1210.701664       | 605.854470       | <b>8</b>  |
| 15 | <b>1630.735226</b> | 815.871251        | 1613.708677    | 807.357977       | 1612.724661       | 806.865969       | <b>P</b> | <b>1115.628165</b> | 558.317721        | 1098.601616    | 549.804446         | 1097.617600       | 549.312438       | <b>7</b>  |
| 16 | 1743.819290        | <b>872.413283</b> | 1726.792741    | 863.900009       | 1725.808725       | 863.408000       | <b>L</b> | <b>1018.575401</b> | 509.791339        | 1001.548852    | 501.278064         | 1000.564836       | 500.786056       | <b>6</b>  |
| 17 | <b>1814.856404</b> | 907.931840        | 1797.829855    | 899.418566       | 1796.845839       | 898.926557       | <b>A</b> | <b>905.491337</b>  | 453.249307        | 888.464788     | 444.736032         | <b>887.480772</b> | 444.244024       | <b>5</b>  |
| 18 | 1961.924818        | 981.466047        | 1944.898269    | 972.952773       | 1943.914253       | 972.460764       | <b>F</b> | <b>834.454223</b>  | <b>417.730750</b> | 817.427674     | 409.217475         | 816.443658        | 408.725467       | <b>4</b>  |
| 19 | 2062.972497        | 1031.989886       | 2045.945948    | 1023.476612      | 2044.961932       | 1022.984604      | <b>T</b> | <b>687.385809</b>  | 344.196543        | 670.359260     | 335.683268         | 669.375244        | 335.191260       | <b>3</b>  |
| 20 | 2502.197823        | 1251.602549       | 2485.171274    | 1243.089275      | 2484.187258       | 1242.597267      | <b>Q</b> | <b>586.338130</b>  | 293.672703        | 569.311581     | 285.159429         |                   |                  | <b>2</b>  |
| 21 |                    |                   |                |                  |                   |                  | <b>K</b> | 147.112804         | 74.060040         | 130.086255     | 65.546765          |                   |                  | <b>1</b>  |

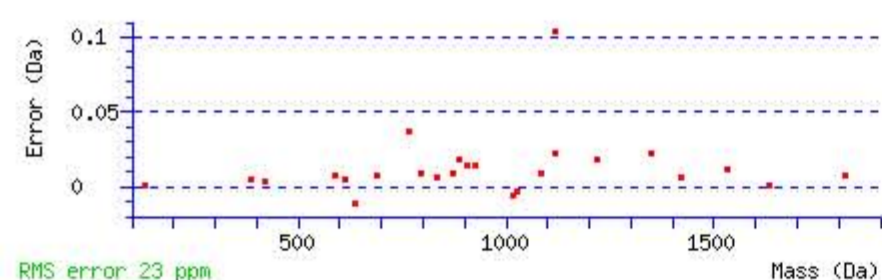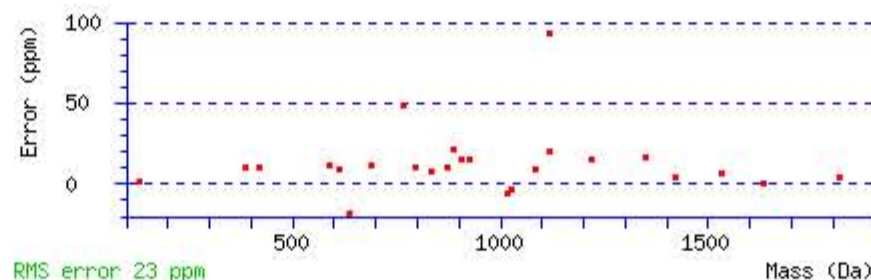

NCBI BLAST search of **KGDTFSCMVGHEALPLAFTQK**

(Parameters: blastp, nr protein database, expect=20000, no filter, PAM30)

Other BLAST [web gateways](#)

All matches to this query

| Score | Mr(calc):   | Delta    | Sequence                               |
|-------|-------------|----------|----------------------------------------|
| 56.3  | 2647.296082 | 0.009934 | <a href="#">KGDTFSCMVGHEALPLAFTQK</a>  |
| 3.0   | 2647.281662 | 0.024354 | <a href="#">AAVLACQACMLAIFLSMLVSYR</a> |



# **MASCOT** Mascot Search Results

## Peptide View

MS/MS Fragmentation of **EPAAQAPVK**

Found in **IGHD\_HUMAN**, Ig delta chain C region OS=Homo sapiens GN=IGHD PE=1 SV=2

Match to Query 25758: 1220.652568 from(611.333560,2+) rtinseconds(1448) index(67710)

Title: Locus:1.1.1.3037.23 File:"2013-07-02 CLN FXIII 30 min 2nd FT.wiff"

Data file C:\Program Files (x86)\Matrix Science\Mascot Daemon\mgf2 FXIII 30 min 2nd\mascot\_daemon\_merge.mgf

Click mouse within plot area to zoom in by factor of two about that point

Or, Plot from  to  Da

Label all possible matches  Label matches used for scoring

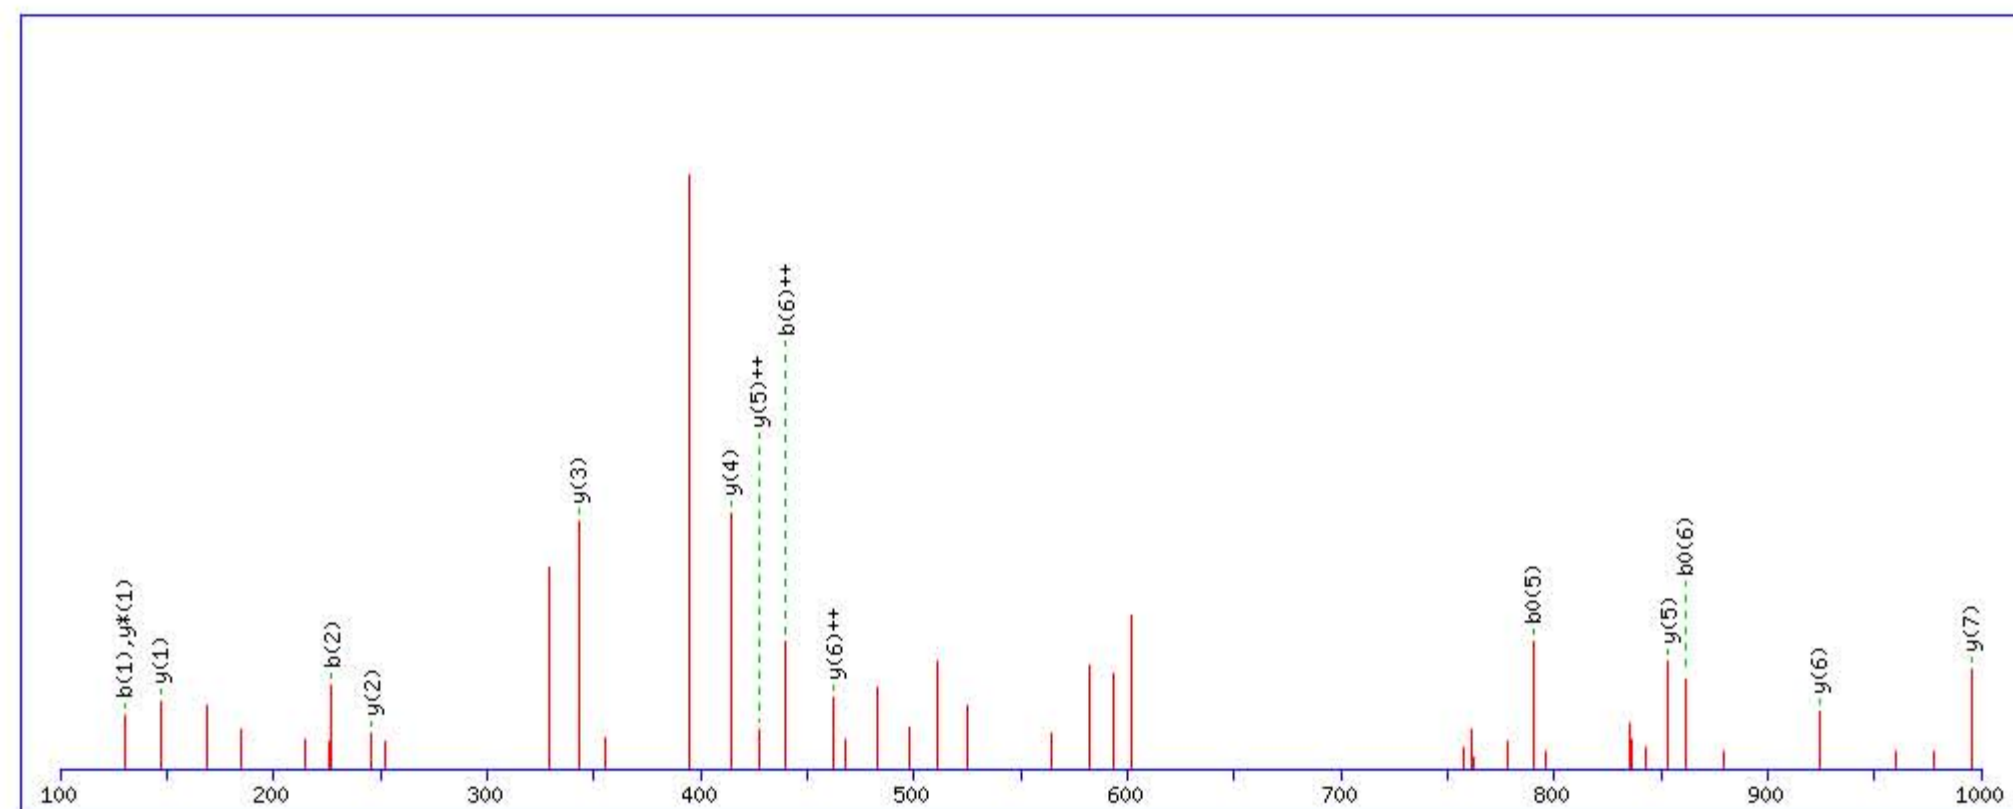

Monoisotopic mass of neutral peptide Mr(calc): 1220.658707

Fixed modifications: Carbamidomethyl (C) (apply to specified residues or termini only)

Variable modifications:

Q5 : Biotin:Thermo-21345 (Q)

Ions Score: 41 Expect: 0.00048

Matches : 15/72 fragment ions using 30 most intense peaks [\(help\)](#)

| # | b                 | b <sup>++</sup>   | b <sup>*</sup> | b <sup>*++</sup> | b <sup>0</sup>    | b <sup>0++</sup> | Seq. | y                 | y <sup>++</sup>   | y <sup>*</sup>    | y <sup>*++</sup> | # |
|---|-------------------|-------------------|----------------|------------------|-------------------|------------------|------|-------------------|-------------------|-------------------|------------------|---|
| 1 | <b>130.049869</b> | 65.528572         |                |                  | 112.039304        | 56.523290        | E    |                   |                   |                   |                  | 9 |
| 2 | <b>227.102633</b> | 114.054954        |                |                  | 209.092068        | 105.049672       | P    | 1092.623414       | 546.815345        | 1075.596865       | 538.302071       | 8 |
| 3 | 298.139747        | 149.573512        |                |                  | 280.129182        | 140.568229       | A    | <b>995.570650</b> | 498.288963        | 978.544101        | 489.775689       | 7 |
| 4 | 369.176861        | 185.092068        |                |                  | 351.166296        | 176.086786       | A    | <b>924.533536</b> | <b>462.770406</b> | 907.506987        | 454.257132       | 6 |
| 5 | 808.402187        | 404.704732        | 791.375638     | 396.191457       | <b>790.391622</b> | 395.699449       | Q    | <b>853.496422</b> | <b>427.251849</b> | 836.469873        | 418.738575       | 5 |
| 6 | 879.439301        | <b>440.223289</b> | 862.412752     | 431.710014       | <b>861.428736</b> | 431.218006       | A    | <b>414.271096</b> | 207.639186        | 397.244547        | 199.125911       | 4 |
| 7 | 976.492065        | 488.749671        | 959.465516     | 480.236396       | 958.481500        | 479.744388       | P    | <b>343.233982</b> | 172.120629        | 326.207433        | 163.607354       | 3 |
| 8 | 1075.560479       | 538.283878        | 1058.533930    | 529.770603       | 1057.549914       | 529.278595       | V    | <b>246.181218</b> | 123.594247        | 229.154669        | 115.080972       | 2 |
| 9 |                   |                   |                |                  |                   |                  | K    | <b>147.112804</b> | 74.060040         | <b>130.086255</b> | 65.546765        | 1 |

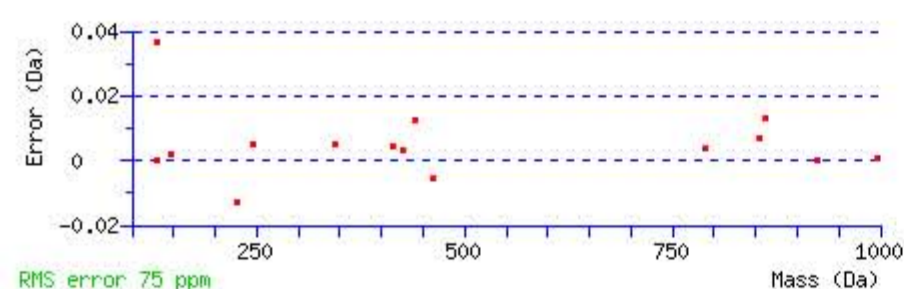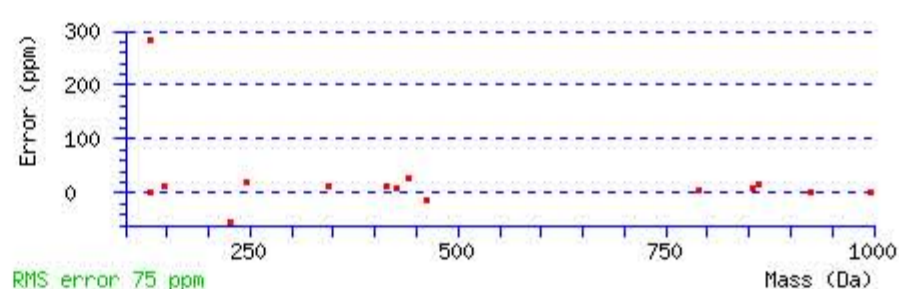

NCBI BLAST search of [EPAAQAPVK](#)

(Parameters: blastp, nr protein database, expect=20000, no filter, PAM30)

Other BLAST [web gateways](#)

### All matches to this query

| Score | Mr(calc):   | Delta     | Sequence                    |
|-------|-------------|-----------|-----------------------------|
| 41.3  | 1220.658707 | -0.006139 | <a href="#">EPAAQAPVK</a>   |
| 5.5   | 1220.655350 | -0.002782 | <a href="#">LLFSTVEWAR</a>  |
| 4.2   | 1220.644119 | 0.008449  | <a href="#">SFPEISFLGPK</a> |
| 3.0   | 1220.640076 | 0.012492  | <a href="#">LLAEYTGAQQK</a> |
| 2.4   | 1220.658722 | -0.006154 | <a href="#">QPNLPDVK</a>    |
| 1.1   | 1220.666580 | -0.014012 | <a href="#">EPAIVRFFSR</a>  |
| 0.4   | 1220.667267 | -0.014699 | <a href="#">LLRGHPGRCR</a>  |



# MASCOT Search Results

## Peptide View

MS/MS Fragmentation of **SLWNAGTSVTCTLNHPSLPPQR**

Found in **IGHD\_HUMAN**, Ig delta chain C region OS=Homo sapiens GN=IGHD PE=1 SV=2

Match to Query 62442: 2746.352652 from(916.458160,3+) rtinseconds(2250) index(7374)

Title: Locus:1.1.1.3219.25 File:"2013-07-02 CLN FXIII 30 min 2nd F 1.wiff"

Data file C:\Program Files (x86)\Matrix Science\Mascot Daemon\mgf\2 FXIII 30 min 2nd\mascot\_daemon\_merge.mgf

Click mouse within plot area to zoom in by factor of two about that point

Or, Plot from  to  Da

Label all possible matches  Label matches used for scoring

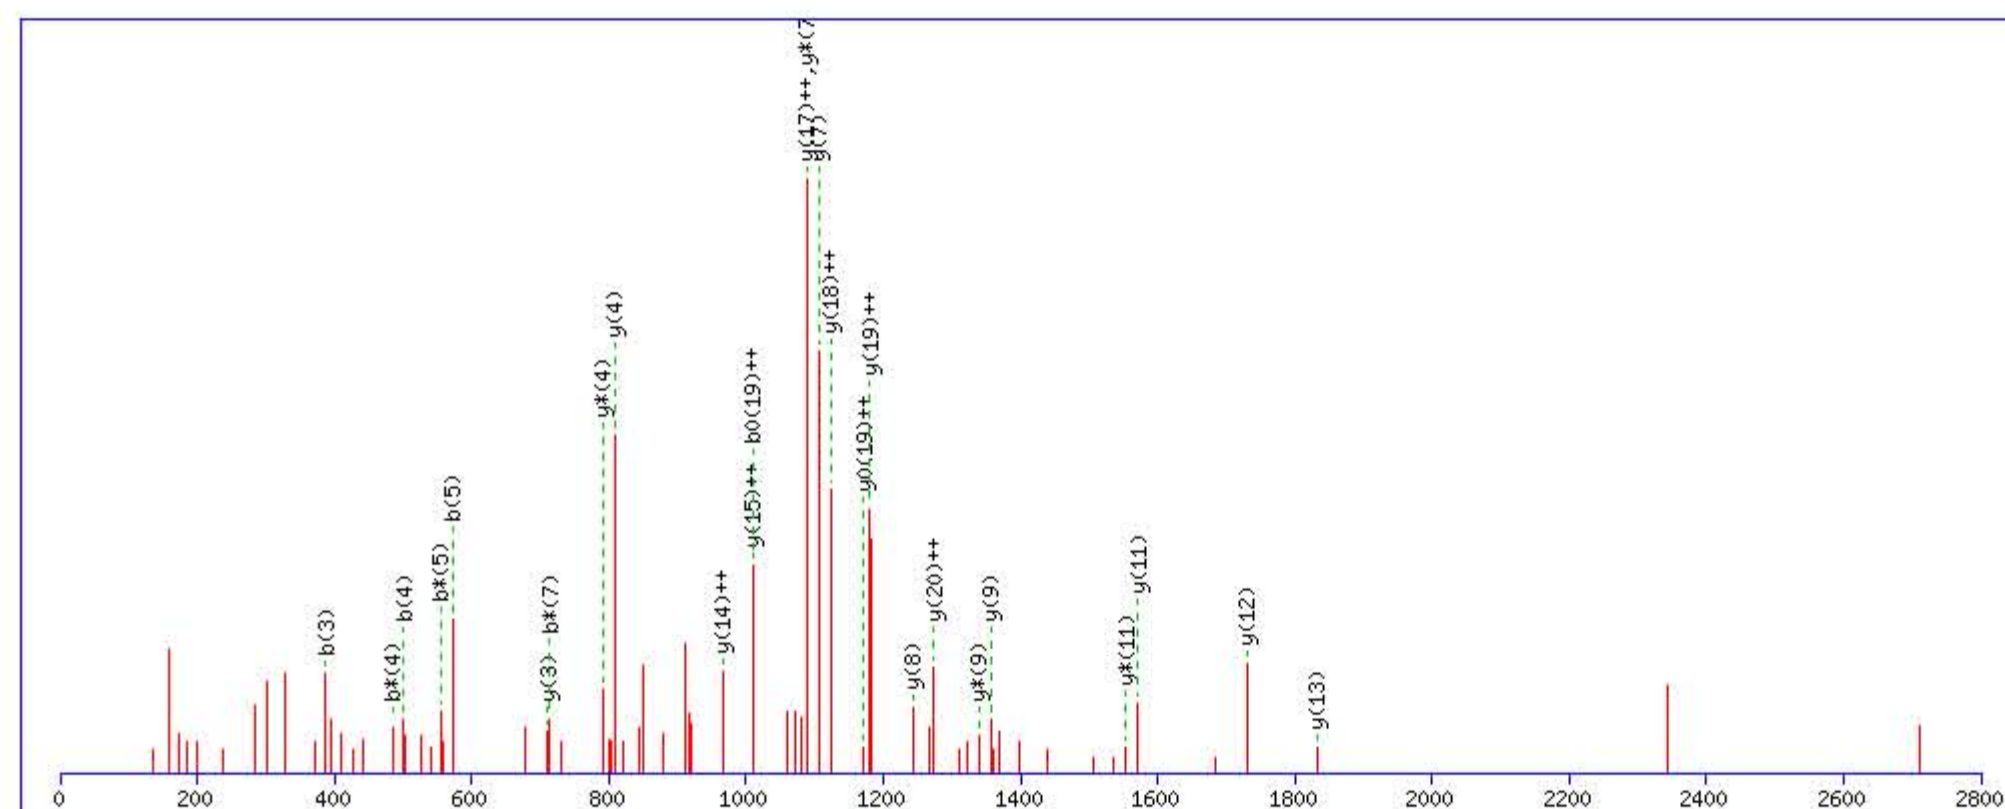

Monoisotopic mass of neutral peptide Mr(calc): 2746.368332

Fixed modifications: Carbamidomethyl (C) (apply to specified residues or termini only)

Variable modifications:

Q21 : Biotin:Thermo-21345 (Q)

Ions Score: 47 Expect: 0.00061

Matches : 26/236 fragment ions using 49 most intense peaks [\(help\)](#)

| #  | b                 | b <sup>++</sup> | b <sup>*</sup>    | b <sup>*++</sup> | b <sup>0</sup> | b <sup>0++</sup>   | Seq. | y                  | y <sup>++</sup>    | y <sup>*</sup>     | y <sup>*++</sup> | y <sup>0</sup> | y <sup>0++</sup>   | #  |
|----|-------------------|-----------------|-------------------|------------------|----------------|--------------------|------|--------------------|--------------------|--------------------|------------------|----------------|--------------------|----|
| 1  | 88.039304         | 44.523290       |                   |                  | 70.028739      | 35.518008          | S    |                    |                    |                    |                  |                |                    | 22 |
| 2  | 201.123368        | 101.065322      |                   |                  | 183.112803     | 92.060039          | L    | 2660.343575        | 1330.675425        | 2643.317026        | 1322.162151      | 2642.333010    | 1321.670143        | 21 |
| 3  | <b>387.202681</b> | 194.104978      |                   |                  | 369.192116     | 185.099696         | W    | 2547.259511        | <b>1274.133393</b> | 2530.232962        | 1265.620119      | 2529.248946    | 1265.128111        | 20 |
| 4  | <b>501.245608</b> | 251.126442      | <b>484.219059</b> | 242.613168       | 483.235043     | 242.121160         | N    | 2361.180198        | <b>1181.093737</b> | 2344.153649        | 1172.580462      | 2343.169633    | <b>1172.088454</b> | 19 |
| 5  | <b>572.282722</b> | 286.644999      | <b>555.256173</b> | 278.131725       | 554.272157     | 277.639717         | A    | 2247.137271        | <b>1124.072273</b> | 2230.110722        | 1115.558999      | 2229.126706    | 1115.066991        | 18 |
| 6  | 629.304186        | 315.155731      | 612.277637        | 306.642457       | 611.293621     | 306.150449         | G    | 2176.100157        | <b>1088.553716</b> | 2159.073608        | 1080.040442      | 2158.089592    | 1079.548434        | 17 |
| 7  | 730.351865        | 365.679571      | <b>713.325316</b> | 357.166296       | 712.341300     | 356.674288         | T    | 2119.078693        | 1060.042984        | 2102.052144        | 1051.529710      | 2101.068128    | 1051.037702        | 16 |
| 8  | 817.383893        | 409.195585      | 800.357344        | 400.682310       | 799.373328     | 400.190302         | S    | 2018.031014        | <b>1009.519145</b> | 2001.004465        | 1001.005871      | 2000.020449    | 1000.513863        | 15 |
| 9  | 916.452307        | 458.729792      | 899.425758        | 450.216517       | 898.441742     | 449.724509         | V    | 1930.998986        | <b>966.003131</b>  | 1913.972437        | 957.489857       | 1912.988421    | 956.997849         | 14 |
| 10 | 1017.499986       | 509.253631      | 1000.473437       | 500.740357       | 999.489421     | 500.248349         | T    | <b>1831.930572</b> | 916.468924         | 1814.904023        | 907.955650       | 1813.920007    | 907.463642         | 13 |
| 11 | 1177.530635       | 589.268956      | 1160.504086       | 580.755681       | 1159.520070    | 580.263673         | C    | <b>1730.882893</b> | 865.945085         | 1713.856344        | 857.431810       | 1712.872328    | 856.939802         | 12 |
| 12 | 1278.578314       | 639.792795      | 1261.551765       | 631.279521       | 1260.567749    | 630.787513         | T    | <b>1570.852244</b> | 785.929760         | <b>1553.825695</b> | 777.416486       | 1552.841679    | 776.924478         | 11 |
| 13 | 1391.662378       | 696.334827      | 1374.635829       | 687.821553       | 1373.651813    | 687.329545         | L    | 1469.804565        | 735.405921         | 1452.778016        | 726.892646       | 1451.794000    | 726.400638         | 10 |
| 14 | 1505.705305       | 753.356291      | 1488.678756       | 744.843016       | 1487.694740    | 744.351008         | N    | <b>1356.720501</b> | 678.863889         | <b>1339.693952</b> | 670.350614       | 1338.709936    | 669.858606         | 9  |
| 15 | 1642.764217       | 821.885746      | 1625.737668       | 813.372472       | 1624.753652    | 812.880464         | H    | <b>1242.677574</b> | 621.842425         | 1225.651025        | 613.329151       | 1224.667009    | 612.837143         | 8  |
| 16 | 1739.816981       | 870.412128      | 1722.790432       | 861.898854       | 1721.806416    | 861.406846         | P    | <b>1105.618662</b> | 553.312969         | <b>1088.592113</b> | 544.799695       | 1087.608097    | 544.307687         | 7  |
| 17 | 1826.849009       | 913.928143      | 1809.822460       | 905.414868       | 1808.838444    | 904.922860         | S    | 1008.565898        | 504.786587         | 991.539349         | 496.273313       | 990.555333     | 495.781305         | 6  |
| 18 | 1939.933073       | 970.470174      | 1922.906524       | 961.956900       | 1921.922508    | 961.464892         | L    | 921.533870         | 461.270573         | 904.507321         | 452.757299       |                |                    | 5  |
| 19 | 2036.985837       | 1018.996557     | 2019.959288       | 1010.483282      | 2018.975272    | <b>1009.991274</b> | P    | <b>808.449806</b>  | 404.728541         | <b>791.423257</b>  | 396.215267       |                |                    | 4  |
| 20 | 2134.038601       | 1067.522938     | 2117.012052       | 1059.009664      | 2116.028036    | 1058.517656        | P    | <b>711.397042</b>  | 356.202159         | 694.370493         | 347.688885       |                |                    | 3  |
| 21 | 2573.263927       | 1287.135601     | 2556.237378       | 1278.622327      | 2555.253362    | 1278.130319        | Q    | 614.344278         | 307.675777         | 597.317729         | 299.162503       |                |                    | 2  |
| 22 |                   |                 |                   |                  |                |                    | R    | 175.118952         | 88.063114          | 158.092403         | 79.549839        |                |                    | 1  |

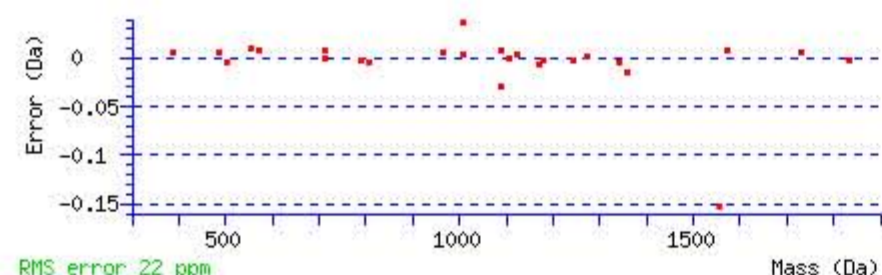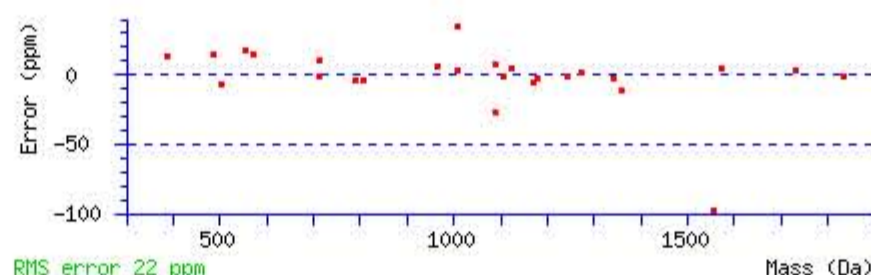

NCBI BLAST search of **SLWNAGTSVTCTLNHPSLPPQR**

(Parameters: blastp, nr protein database, expect=20000, no filter, PAM30)

Other BLAST [web gateways](#)

All matches to this query

| Score | Mr(calc):   | Delta     | Sequence                      |
|-------|-------------|-----------|-------------------------------|
| 46.7  | 2746.368332 | -0.015680 | <b>SLWNAGTSVTCTLNHPSLPPQR</b> |



# MASCOT SCIENCE Mascot Search Results

## Peptide View

MS/MS Fragmentation of **NQVSLTCLVK**

Found in **IGHG1\_HUMAN**, Ig gamma-1 chain C region OS=Homo sapiens GN=IGHG1 PE=1 SV=1

Match to Query 34873: 1471.781848 from(736.898200,2+) rtinseconds(2230) index(72630)

Title: Locus:1.1.1.3310.19 File:"2013-07-02 CLN FXIII 30 min 2nd FT.wiff"

Data file C:\Program Files (x86)\Matrix Science\Mascot Daemon\mgf\2 FXIII 30 min 2nd\mascot\_daemon\_merge.mgf

Click mouse within plot area to zoom in by factor of two about that point

Or, Plot from  to  Da

Label all possible matches  Label matches used for scoring

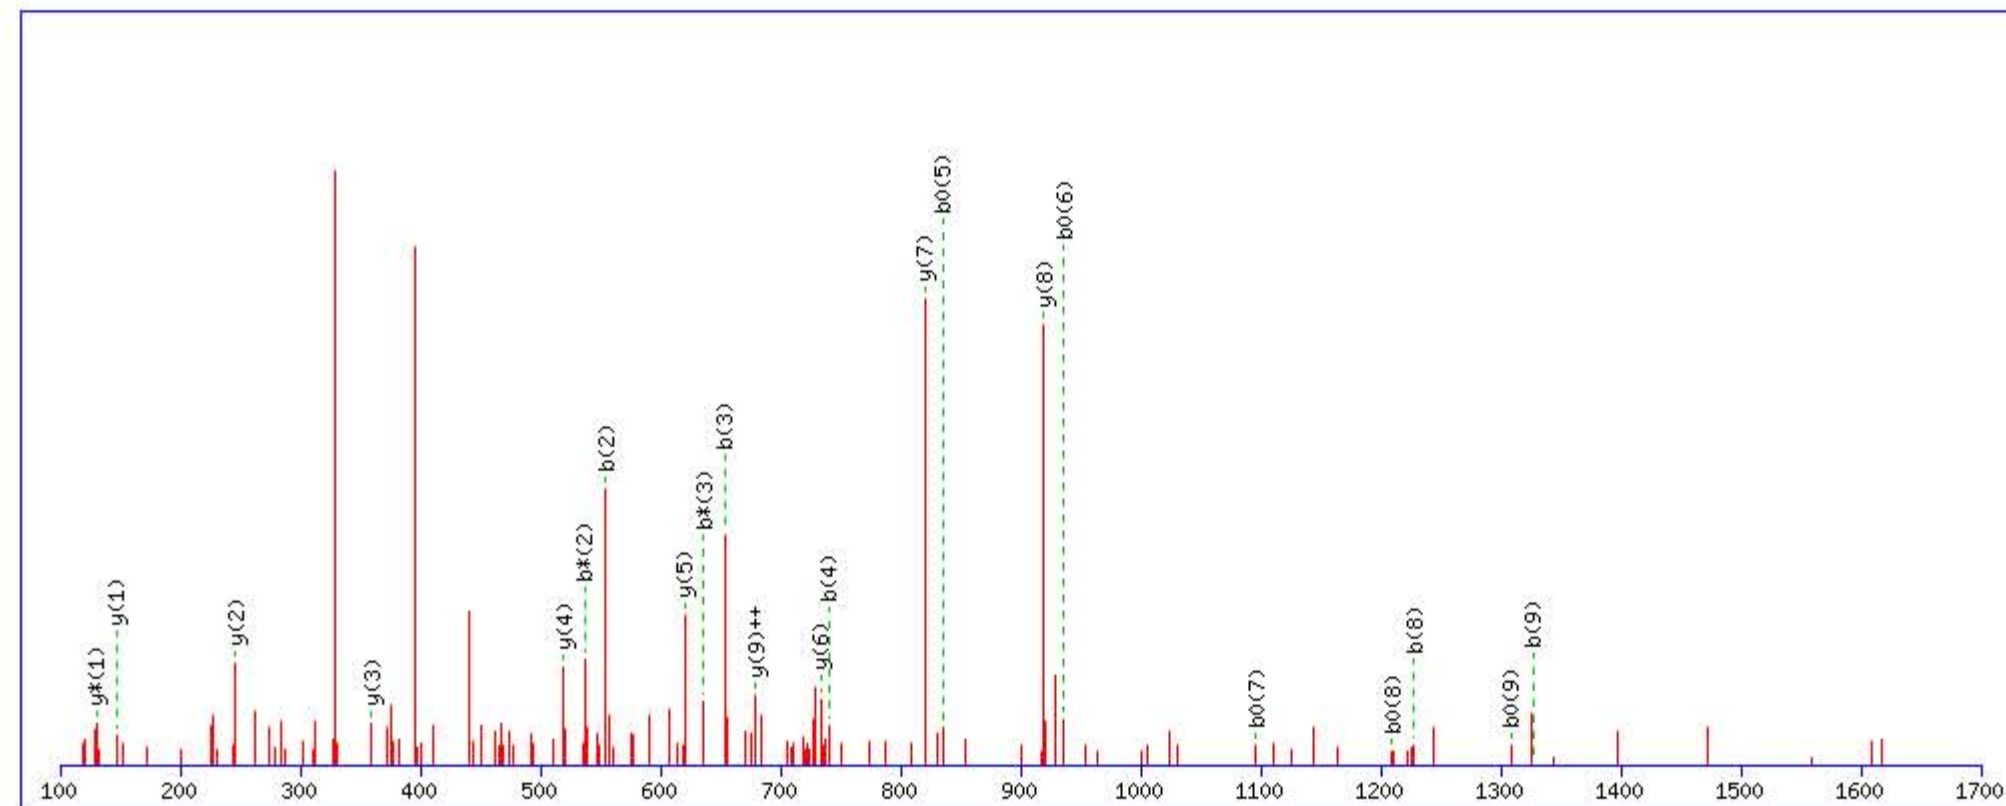

Monoisotopic mass of neutral peptide Mr(calc): 1471.789093

Fixed modifications: Carbamidomethyl (C) (apply to specified residues or termini only)

Variable modifications:

Q2 : Biotin:Thermo-21345 (Q)

Ions Score: 36 Expect: 0.0022

Matches : 22/94 fragment ions using 51 most intense peaks [\(help\)](#)

| #  | b                  | b <sup>++</sup> | b <sup>+</sup>    | b <sup>+++</sup> | b <sup>0</sup>     | b <sup>0++</sup> | Seq. | y                 | y <sup>++</sup>   | y <sup>+</sup>    | y <sup>+++</sup> | y <sup>0</sup> | y <sup>0++</sup> | #  |
|----|--------------------|-----------------|-------------------|------------------|--------------------|------------------|------|-------------------|-------------------|-------------------|------------------|----------------|------------------|----|
| 1  | 115.050203         | 58.028740       | 98.023654         | 49.515465        |                    |                  | N    |                   |                   |                   |                  |                |                  | 10 |
| 2  | <b>554.275529</b>  | 277.641403      | <b>537.248980</b> | 269.128128       |                    |                  | Q    | 1358.753442       | <b>679.880359</b> | 1341.726893       | 671.367085       | 1340.742877    | 670.875076       | 9  |
| 3  | <b>653.343943</b>  | 327.175610      | <b>636.317394</b> | 318.662335       |                    |                  | V    | <b>919.528116</b> | 460.267696        | 902.501567        | 451.754421       | 901.517551     | 451.262413       | 8  |
| 4  | <b>740.375971</b>  | 370.691623      | 723.349422        | 362.178349       | 722.365406         | 361.686341       | S    | <b>820.459702</b> | 410.733489        | 803.433153        | 402.220215       | 802.449137     | 401.728207       | 7  |
| 5  | 853.460035         | 427.233656      | 836.433486        | 418.720381       | <b>835.449470</b>  | 418.228373       | L    | <b>733.427674</b> | 367.217475        | 716.401125        | 358.704201       | 715.417109     | 358.212193       | 6  |
| 6  | 954.507714         | 477.757495      | 937.481165        | 469.244220       | <b>936.497149</b>  | 468.752212       | T    | <b>620.343610</b> | 310.675443        | 603.317061        | 302.162169       | 602.333045     | 301.670161       | 5  |
| 7  | 1114.538363        | 557.772819      | 1097.511814       | 549.259545       | <b>1096.527798</b> | 548.767537       | C    | <b>519.295931</b> | 260.151604        | 502.269382        | 251.638329       |                |                  | 4  |
| 8  | <b>1227.622427</b> | 614.314851      | 1210.595878       | 605.801577       | <b>1209.611862</b> | 605.309569       | L    | <b>359.265282</b> | 180.136279        | 342.238733        | 171.623004       |                |                  | 3  |
| 9  | <b>1326.690841</b> | 663.849058      | 1309.664292       | 655.335784       | <b>1308.680276</b> | 654.843776       | V    | <b>246.181218</b> | 123.594247        | 229.154669        | 115.080973       |                |                  | 2  |
| 10 |                    |                 |                   |                  |                    |                  | K    | <b>147.112804</b> | 74.060040         | <b>130.086255</b> | 65.546765        |                |                  | 1  |

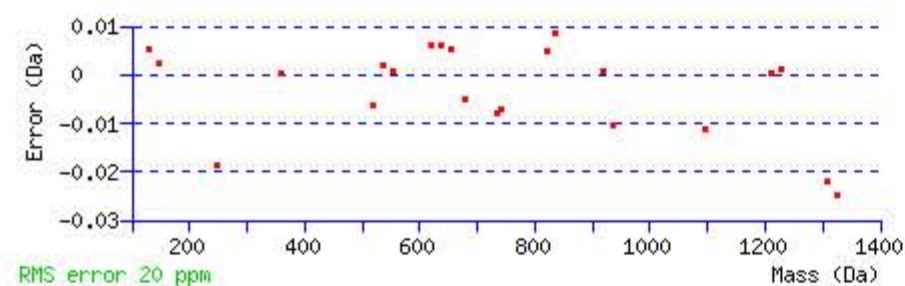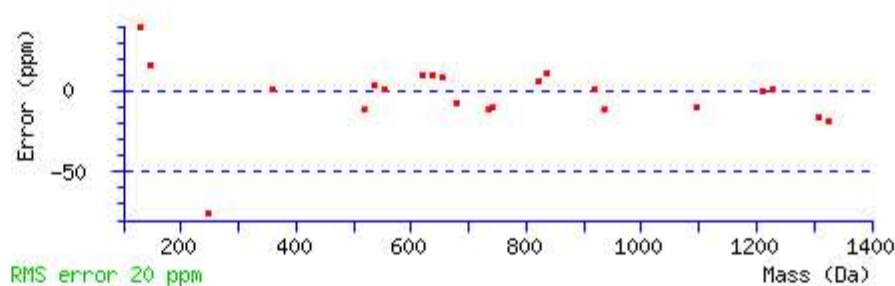

NCBI BLAST search of **NQVSLTCLVK**

(Parameters: blastp, nr protein database, expect=20000, no filter, PAM30)

Other BLAST [web gateways](#)

All matches to this query

| Score | Mr(calc):   | Delta     | Sequence                       |
|-------|-------------|-----------|--------------------------------|
| 36.2  | 1471.789093 | -0.007245 | <a href="#">NQVSLTCLVK</a>     |
| 7.5   | 1471.797592 | -0.015744 | <a href="#">KYFWDR AFLVK</a>   |
| 4.6   | 1471.803467 | -0.021619 | <a href="#">EKQG PLLDLFGQK</a> |
| 3.6   | 1471.799438 | -0.017590 | <a href="#">EVELDRLRDTVK</a>   |
| 2.0   | 1471.770447 | 0.011401  | <a href="#">QPTTAEKSATK</a>    |
| 0.1   | 1471.770432 | 0.011416  | <a href="#">KDKAEQLDSK</a>     |



# MASCOT SEARCH RESULTS

## Peptide View

MS/MS Fragmentation of **EPQVYTLPPSR**

Found in **IGHG1\_HUMAN**, Ig gamma-1 chain C region OS=Homo sapiens GN=IGHG1 PE=1 SV=1

Match to Query 38884: 1596.829782 from(533.283870,3+) rtinseconds(1961) index(70968)

Title: Locus:1.1.1.3216.18 File:"2013-07-02 CLN FXIII 30 min 2nd FT.wiff"

Data file C:\Program Files (x86)\Matrix Science\Mascot Daemon\mgf2 FXIII 30 min 2nd\mascot\_daemon\_merge.mgf

Click mouse within plot area to zoom in by factor of two about that point

Or, Plot from  to  Da

Label all possible matches  Label matches used for scoring

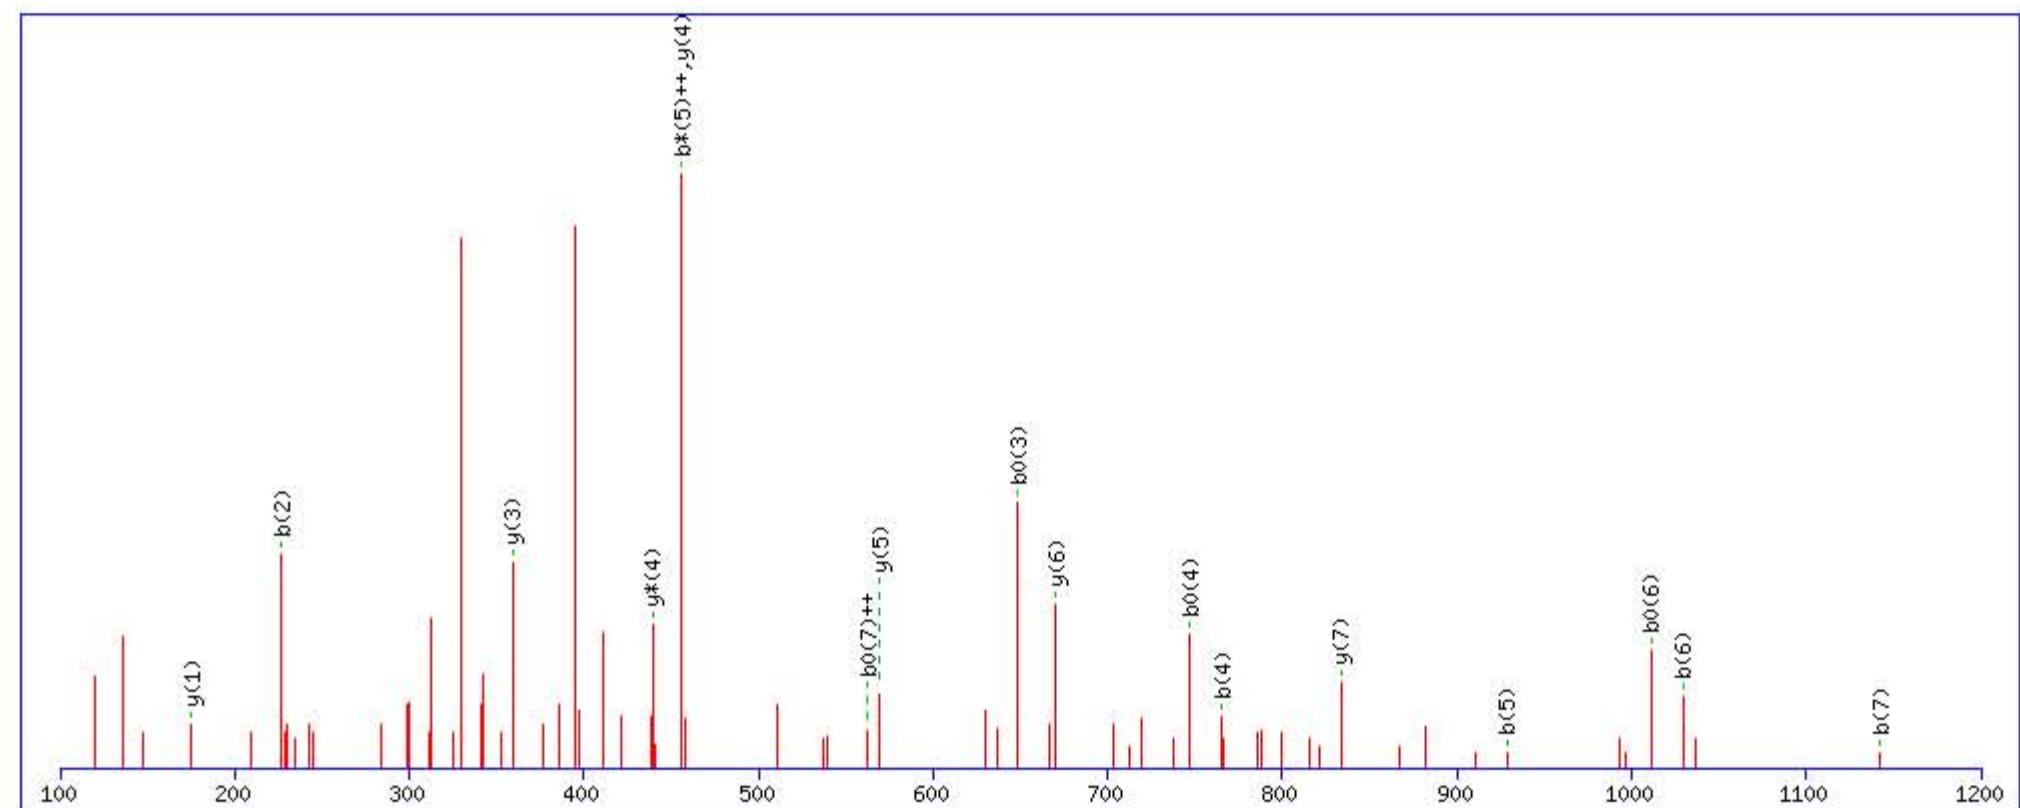

Monoisotopic mass of neutral peptide Mr(calc): 1596.833389

Fixed modifications: Carbamidomethyl (C) (apply to specified residues or termini only)

Variable modifications:

Q3 : Biotin:Thermo-21345 (Q)

Ions Score: 29 Expect: 0.0096

Matches : 17/114 fragment ions using 30 most intense peaks [\(help\)](#)

| #  | b                  | b <sup>++</sup> | b <sup>*</sup> | b <sup>*++</sup>  | b <sup>0</sup>     | b <sup>0++</sup>  | Seq. | y                 | y <sup>++</sup> | y <sup>*</sup>    | y <sup>*++</sup> | y <sup>0</sup> | y <sup>0++</sup> | #  |
|----|--------------------|-----------------|----------------|-------------------|--------------------|-------------------|------|-------------------|-----------------|-------------------|------------------|----------------|------------------|----|
| 1  | 130.049869         | 65.528572       |                |                   | 112.039304         | 56.523290         | E    |                   |                 |                   |                  |                |                  | 11 |
| 2  | <b>227.102633</b>  | 114.054954      |                |                   | 209.092068         | 105.049672        | P    | 1468.798084       | 734.902680      | 1451.771535       | 726.389406       | 1450.787519    | 725.897398       | 10 |
| 3  | 666.327959         | 333.667618      | 649.301410     | 325.154343        | <b>648.317394</b>  | 324.662335        | Q    | 1371.745320       | 686.376298      | 1354.718771       | 677.863024       | 1353.734755    | 677.371016       | 9  |
| 4  | <b>765.396373</b>  | 383.201825      | 748.369824     | 374.688550        | <b>747.385808</b>  | 374.196542        | V    | 932.519994        | 466.763635      | 915.493445        | 458.250361       | 914.509429     | 457.758353       | 8  |
| 5  | <b>928.459702</b>  | 464.733489      | 911.433153     | <b>456.220215</b> | 910.449137         | 455.728207        | Y    | <b>833.451580</b> | 417.229428      | 816.425031        | 408.716154       | 815.441015     | 408.224146       | 7  |
| 6  | <b>1029.507381</b> | 515.257329      | 1012.480832    | 506.744054        | <b>1011.496816</b> | 506.252046        | T    | <b>670.388251</b> | 335.697764      | 653.361702        | 327.184489       | 652.377686     | 326.692481       | 6  |
| 7  | <b>1142.591445</b> | 571.799361      | 1125.564896    | 563.286086        | 1124.580880        | <b>562.794078</b> | L    | <b>569.340572</b> | 285.173924      | 552.314023        | 276.660650       | 551.330007     | 276.168642       | 5  |
| 8  | 1239.644209        | 620.325743      | 1222.617660    | 611.812468        | 1221.633644        | 611.320460        | P    | <b>456.256508</b> | 228.631892      | <b>439.229959</b> | 220.118618       | 438.245943     | 219.626610       | 4  |
| 9  | 1336.696973        | 668.852125      | 1319.670424    | 660.338850        | 1318.686408        | 659.846842        | P    | <b>359.203744</b> | 180.105510      | 342.177195        | 171.592236       | 341.193179     | 171.100228       | 3  |
| 10 | 1423.729001        | 712.368139      | 1406.702452    | 703.854864        | 1405.718436        | 703.362856        | S    | 262.150980        | 131.579128      | 245.124431        | 123.065854       | 244.140415     | 122.573846       | 2  |
| 11 |                    |                 |                |                   |                    |                   | R    | <b>175.118952</b> | 88.063114       | 158.092403        | 79.549839        |                |                  | 1  |

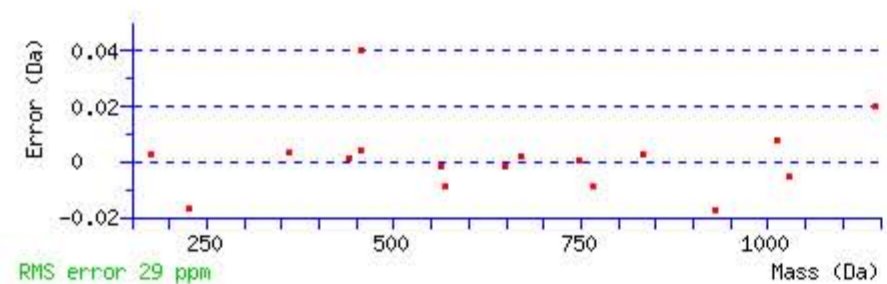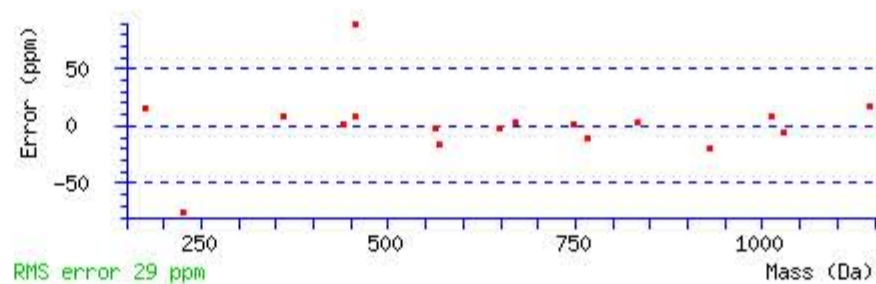

NCBI BLAST search of **EPQVYTLPPSR**

(Parameters: blastp, nr protein database, expect=20000, no filter, PAM30)

Other BLAST [web gateways](#)

All matches to this query

| Score | Mr(calc):   | Delta     | Sequence                          |
|-------|-------------|-----------|-----------------------------------|
| 29.2  | 1596.833389 | -0.003607 | <a href="#">EPQVYTLPPSR</a>       |
| 7.3   | 1596.847122 | -0.017340 | <a href="#">ATPSSSPGTATALPALR</a> |
| 1.0   | 1596.825974 | 0.003808  | <a href="#">KLSLDLEAQWAPSPR</a>   |

Mascot: <http://www.matrixscience.com/>



# MASCOT Search Results

## Peptide View

MS/MS Fragmentation of **WQQGNVFSCSVMEALHNHYTQK**

Found in **IGHG1\_HUMAN**, Ig gamma-1 chain C region OS=Homo sapiens GN=IGHG1 PE=1 SV=1

Match to Query 66351: 3111.425020 from(623.292280,5+) rtinseconds(2058) index(71511)

Title: Locus:1.1.1.3250.11 File:"2013-07-02 CLN FXIII 30 min 2nd FT.wiff"

Data file C:\Program Files (x86)\Matrix Science\Mascot Daemon\mgf2 FXIII 30 min 2nd\mascot\_daemon\_merge.mgf

Click mouse within plot area to zoom in by factor of two about that point

Or, Plot from  to  Da

Label all possible matches  Label matches used for scoring

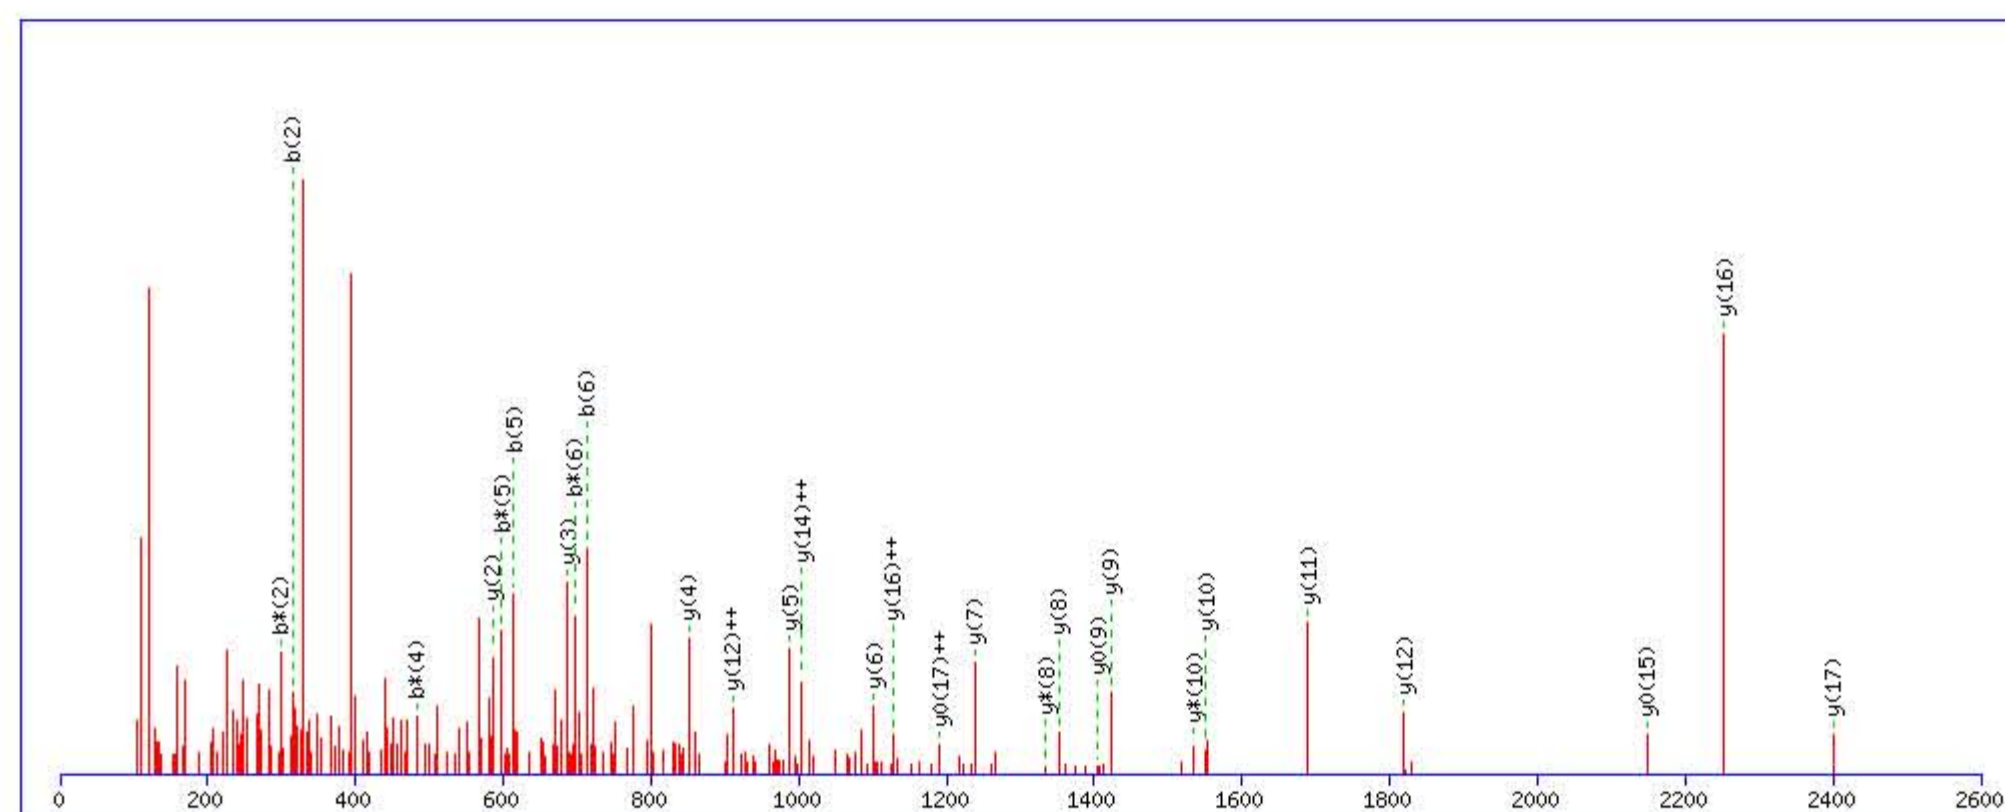

Monoisotopic mass of neutral peptide Mr(calc): 3111.426590

Fixed modifications: Carbamidomethyl (C) (apply to specified residues or termini only)

Variable modifications:

Q22 : Biotin:Thermo-21345 (Q)

Ions Score: 66 Expect: 3.7e-006

Matches : 28/244 fragment ions using 52 most intense peaks [\(help\)](#)

| #  | b                 | b <sup>++</sup> | b <sup>*</sup>    | b <sup>*++</sup> | b <sup>0</sup> | b <sup>0++</sup> | Seq. | y                  | y <sup>++</sup>    | y <sup>*</sup>     | y <sup>*++</sup> | y <sup>0</sup>     | y <sup>0++</sup>   | #  |
|----|-------------------|-----------------|-------------------|------------------|----------------|------------------|------|--------------------|--------------------|--------------------|------------------|--------------------|--------------------|----|
| 1  | 187.086589        | 94.046932       |                   |                  |                |                  | W    |                    |                    |                    |                  |                    |                    | 23 |
| 2  | <b>315.145167</b> | 158.076222      | <b>298.118618</b> | 149.562947       |                |                  | Q    | 2926.354551        | 1463.680913        | 2909.328002        | 1455.167639      | 2908.343986        | 1454.675631        | 22 |
| 3  | 443.203745        | 222.105511      | 426.177196        | 213.592236       |                |                  | Q    | 2798.295973        | 1399.651624        | 2781.269424        | 1391.138350      | 2780.285408        | 1390.646342        | 21 |
| 4  | 500.225209        | 250.616243      | <b>483.198660</b> | 242.102968       |                |                  | G    | 2670.237395        | 1335.622335        | 2653.210846        | 1327.109061      | 2652.226830        | 1326.617053        | 20 |
| 5  | <b>614.268136</b> | 307.637706      | <b>597.241587</b> | 299.124432       |                |                  | N    | 2613.215931        | 1307.111603        | 2596.189382        | 1298.598329      | 2595.205366        | 1298.106321        | 19 |
| 6  | <b>713.336550</b> | 357.171913      | <b>696.310001</b> | 348.658639       |                |                  | V    | 2499.173004        | 1250.090140        | 2482.146455        | 1241.576865      | 2481.162439        | 1241.084857        | 18 |
| 7  | 860.404964        | 430.706120      | 843.378415        | 422.192845       |                |                  | F    | <b>2400.104590</b> | 1200.555933        | 2383.078041        | 1192.042658      | 2382.094025        | <b>1191.550650</b> | 17 |
| 8  | 947.436992        | 474.222134      | 930.410443        | 465.708859       | 929.426427     | 465.216851       | S    | <b>2253.036176</b> | <b>1127.021726</b> | 2236.009627        | 1118.508451      | 2235.025611        | 1118.016443        | 16 |
| 9  | 1107.467641       | 554.237459      | 1090.441092       | 545.724184       | 1089.457076    | 545.232176       | C    | 2166.004148        | 1083.505712        | 2148.977599        | 1074.992437      | <b>2147.993583</b> | 1074.500429        | 15 |
| 10 | 1194.499669       | 597.753473      | 1177.473120       | 589.240198       | 1176.489104    | 588.748190       | S    | 2005.973499        | <b>1003.490388</b> | 1988.946950        | 994.977113       | 1987.962934        | 994.485105         | 14 |
| 11 | 1293.568083       | 647.287680      | 1276.541534       | 638.774405       | 1275.557518    | 638.282397       | V    | 1918.941471        | 959.974373         | 1901.914922        | 951.461099       | 1900.930906        | 950.969091         | 13 |
| 12 | 1424.608568       | 712.807922      | 1407.582019       | 704.294648       | 1406.598003    | 703.802640       | M    | <b>1819.873057</b> | <b>910.440166</b>  | 1802.846508        | 901.926892       | 1801.862492        | 901.434884         | 12 |
| 13 | 1561.667480       | 781.337378      | 1544.640931       | 772.824104       | 1543.656915    | 772.332096       | H    | <b>1688.832572</b> | 844.919924         | 1671.806023        | 836.406649       | 1670.822007        | 835.914641         | 11 |
| 14 | 1690.710073       | 845.858675      | 1673.683524       | 837.345400       | 1672.699508    | 836.853392       | E    | <b>1551.773660</b> | 776.390468         | <b>1534.747111</b> | 767.877193       | 1533.763095        | 767.385185         | 10 |
| 15 | 1761.747187       | 881.377231      | 1744.720638       | 872.863957       | 1743.736622    | 872.371949       | A    | <b>1422.731067</b> | 711.869171         | 1405.704518        | 703.355897       | <b>1404.720502</b> | 702.863889         | 9  |
| 16 | 1874.831251       | 937.919263      | 1857.804702       | 929.405989       | 1856.820686    | 928.913981       | L    | <b>1351.693953</b> | 676.350615         | <b>1334.667404</b> | 667.837340       | 1333.683388        | 667.345332         | 8  |
| 17 | 2011.890163       | 1006.448719     | 1994.863614       | 997.935445       | 1993.879598    | 997.443437       | H    | <b>1238.609889</b> | 619.808583         | 1221.583340        | 611.295308       | 1220.599324        | 610.803300         | 7  |
| 18 | 2125.933090       | 1063.470183     | 2108.906541       | 1054.956908      | 2107.922525    | 1054.464900      | N    | <b>1101.550977</b> | 551.279127         | 1084.524428        | 542.765852       | 1083.540412        | 542.273844         | 6  |
| 19 | 2262.992002       | 1131.999639     | 2245.965453       | 1123.486364      | 2244.981437    | 1122.994356      | H    | <b>987.508050</b>  | 494.257663         | 970.481501         | 485.744389       | 969.497485         | 485.252381         | 5  |
| 20 | 2426.055331       | 1213.531303     | 2409.028782       | 1205.018029      | 2408.044766    | 1204.526021      | Y    | <b>850.449138</b>  | 425.728207         | 833.422589         | 417.214933       | 832.438573         | 416.722925         | 4  |
| 21 | 2527.103010       | 1264.055143     | 2510.076461       | 1255.541868      | 2509.092445    | 1255.049860      | T    | <b>687.385809</b>  | 344.196543         | 670.359260         | 335.683268       | 669.375244         | 335.191260         | 3  |
| 22 | 2966.328336       | 1483.667806     | 2949.301787       | 1475.154531      | 2948.317771    | 1474.662523      | Q    | <b>586.338130</b>  | 293.672703         | 569.311581         | 285.159429       |                    |                    | 2  |
| 23 |                   |                 |                   |                  |                |                  | K    | 147.112804         | 74.060040          | 130.086255         | 65.546765        |                    |                    | 1  |

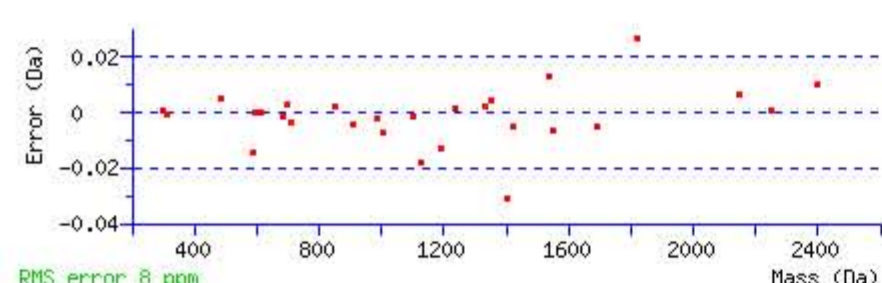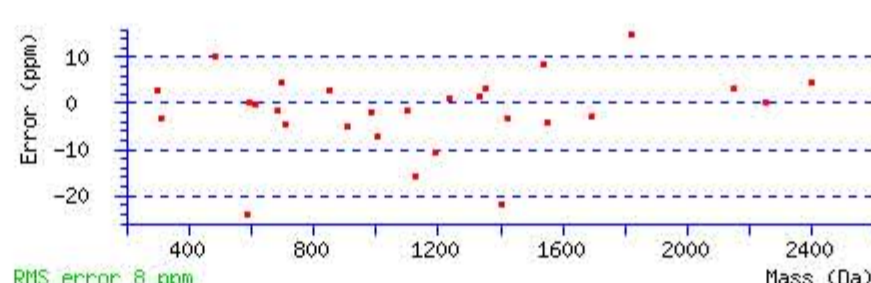

NCBI BLAST search of **WQQGNVFSCSVMEALHNHYTQK**

(Parameters: blastp, nr protein database, expect=20000, no filter, PAM30)

Other BLAST [web gateways](#)

All matches to this query

| Score | Mr(calc):   | Delta     | Sequence                      |
|-------|-------------|-----------|-------------------------------|
| 65.6  | 3111.426590 | -0.001570 | <b>WQQGNVFSCSVMEALHNHYTQK</b> |



# MASCOT SCIENCE Mascot Search Results

## Peptide View

MS/MS Fragmentation of **NQVSLTCLVK**

Found in **IGHG1\_HUMAN**, Ig gamma-1 chain C region OS=Homo sapiens GN=IGHG1 PE=1 SV=1

Match to Query 34873: 1471.781848 from(736.898200,2+) rtinseconds(2230) index(72630)

Title: Locus:1.1.1.3310.19 File:"2013-07-02 CLN FXIII 30 min 2nd FT.wiff"

Data file C:\Program Files (x86)\Matrix Science\Mascot Daemon\mgf\2 FXIII 30 min 2nd\mascot\_daemon\_merge.mgf

Click mouse within plot area to zoom in by factor of two about that point

Or, Plot from  to  Da

Label all possible matches  Label matches used for scoring



Monoisotopic mass of neutral peptide Mr(calc): 1471.789093

Fixed modifications: Carbamidomethyl (C) (apply to specified residues or termini only)

Variable modifications:

Q2 : Biotin:Thermo-21345 (Q)

Ions Score: 36 Expect: 0.0022

Matches : 22/94 fragment ions using 51 most intense peaks [\(help\)](#)

| #  | b                  | b <sup>++</sup> | b <sup>+</sup>    | b <sup>+++</sup> | b <sup>0</sup>     | b <sup>0++</sup> | Seq. | y                 | y <sup>++</sup>   | y <sup>+</sup>    | y <sup>+++</sup> | y <sup>0</sup> | y <sup>0++</sup> | #  |
|----|--------------------|-----------------|-------------------|------------------|--------------------|------------------|------|-------------------|-------------------|-------------------|------------------|----------------|------------------|----|
| 1  | 115.050203         | 58.028740       | 98.023654         | 49.515465        |                    |                  | N    |                   |                   |                   |                  |                |                  | 10 |
| 2  | <b>554.275529</b>  | 277.641403      | <b>537.248980</b> | 269.128128       |                    |                  | Q    | 1358.753442       | <b>679.880359</b> | 1341.726893       | 671.367085       | 1340.742877    | 670.875076       | 9  |
| 3  | <b>653.343943</b>  | 327.175610      | <b>636.317394</b> | 318.662335       |                    |                  | V    | <b>919.528116</b> | 460.267696        | 902.501567        | 451.754421       | 901.517551     | 451.262413       | 8  |
| 4  | <b>740.375971</b>  | 370.691623      | 723.349422        | 362.178349       | 722.365406         | 361.686341       | S    | <b>820.459702</b> | 410.733489        | 803.433153        | 402.220215       | 802.449137     | 401.728207       | 7  |
| 5  | 853.460035         | 427.233656      | 836.433486        | 418.720381       | <b>835.449470</b>  | 418.228373       | L    | <b>733.427674</b> | 367.217475        | 716.401125        | 358.704201       | 715.417109     | 358.212193       | 6  |
| 6  | 954.507714         | 477.757495      | 937.481165        | 469.244220       | <b>936.497149</b>  | 468.752212       | T    | <b>620.343610</b> | 310.675443        | 603.317061        | 302.162169       | 602.333045     | 301.670161       | 5  |
| 7  | 1114.538363        | 557.772819      | 1097.511814       | 549.259545       | <b>1096.527798</b> | 548.767537       | C    | <b>519.295931</b> | 260.151604        | 502.269382        | 251.638329       |                |                  | 4  |
| 8  | <b>1227.622427</b> | 614.314851      | 1210.595878       | 605.801577       | <b>1209.611862</b> | 605.309569       | L    | <b>359.265282</b> | 180.136279        | 342.238733        | 171.623004       |                |                  | 3  |
| 9  | <b>1326.690841</b> | 663.849058      | 1309.664292       | 655.335784       | <b>1308.680276</b> | 654.843776       | V    | <b>246.181218</b> | 123.594247        | 229.154669        | 115.080973       |                |                  | 2  |
| 10 |                    |                 |                   |                  |                    |                  | K    | <b>147.112804</b> | 74.060040         | <b>130.086255</b> | 65.546765        |                |                  | 1  |



NCBI BLAST search of **NQVSLTCLVK**

(Parameters: blastp, nr protein database, expect=20000, no filter, PAM30)

Other BLAST [web gateways](#)

All matches to this query

| Score | Mr(calc):   | Delta     | Sequence                      |
|-------|-------------|-----------|-------------------------------|
| 36.2  | 1471.789093 | -0.007245 | <a href="#">NQVSLTCLVK</a>    |
| 7.5   | 1471.797592 | -0.015744 | <a href="#">KYFWDRAFLVK</a>   |
| 4.6   | 1471.803467 | -0.021619 | <a href="#">EKQGPLLDLFGQK</a> |
| 3.6   | 1471.799438 | -0.017590 | <a href="#">EVELDRLRDTVK</a>  |
| 2.0   | 1471.770447 | 0.011401  | <a href="#">QPTTAEKSATK</a>   |
| 0.1   | 1471.770432 | 0.011416  | <a href="#">KDKAEQLDSK</a>    |



# MASCOT SEARCH RESULTS

## Peptide View

MS/MS Fragmentation of **EPQVYTLPPSR**

Found in **IGHG1\_HUMAN**, Ig gamma-1 chain C region OS=Homo sapiens GN=IGHG1 PE=1 SV=1

Match to Query 38884: 1596.829782 from(533.283870,3+) rtinseconds(1961) index(70968)

Title: Locus:1.1.1.3216.18 File:"2013-07-02 CLN FXIII 30 min 2nd FT.wiff"

Data file C:\Program Files (x86)\Matrix Science\Mascot Daemon\mgf2 FXIII 30 min 2nd\mascot\_daemon\_merge.mgf

Click mouse within plot area to zoom in by factor of two about that point

Or, Plot from  to  Da

Label all possible matches  Label matches used for scoring

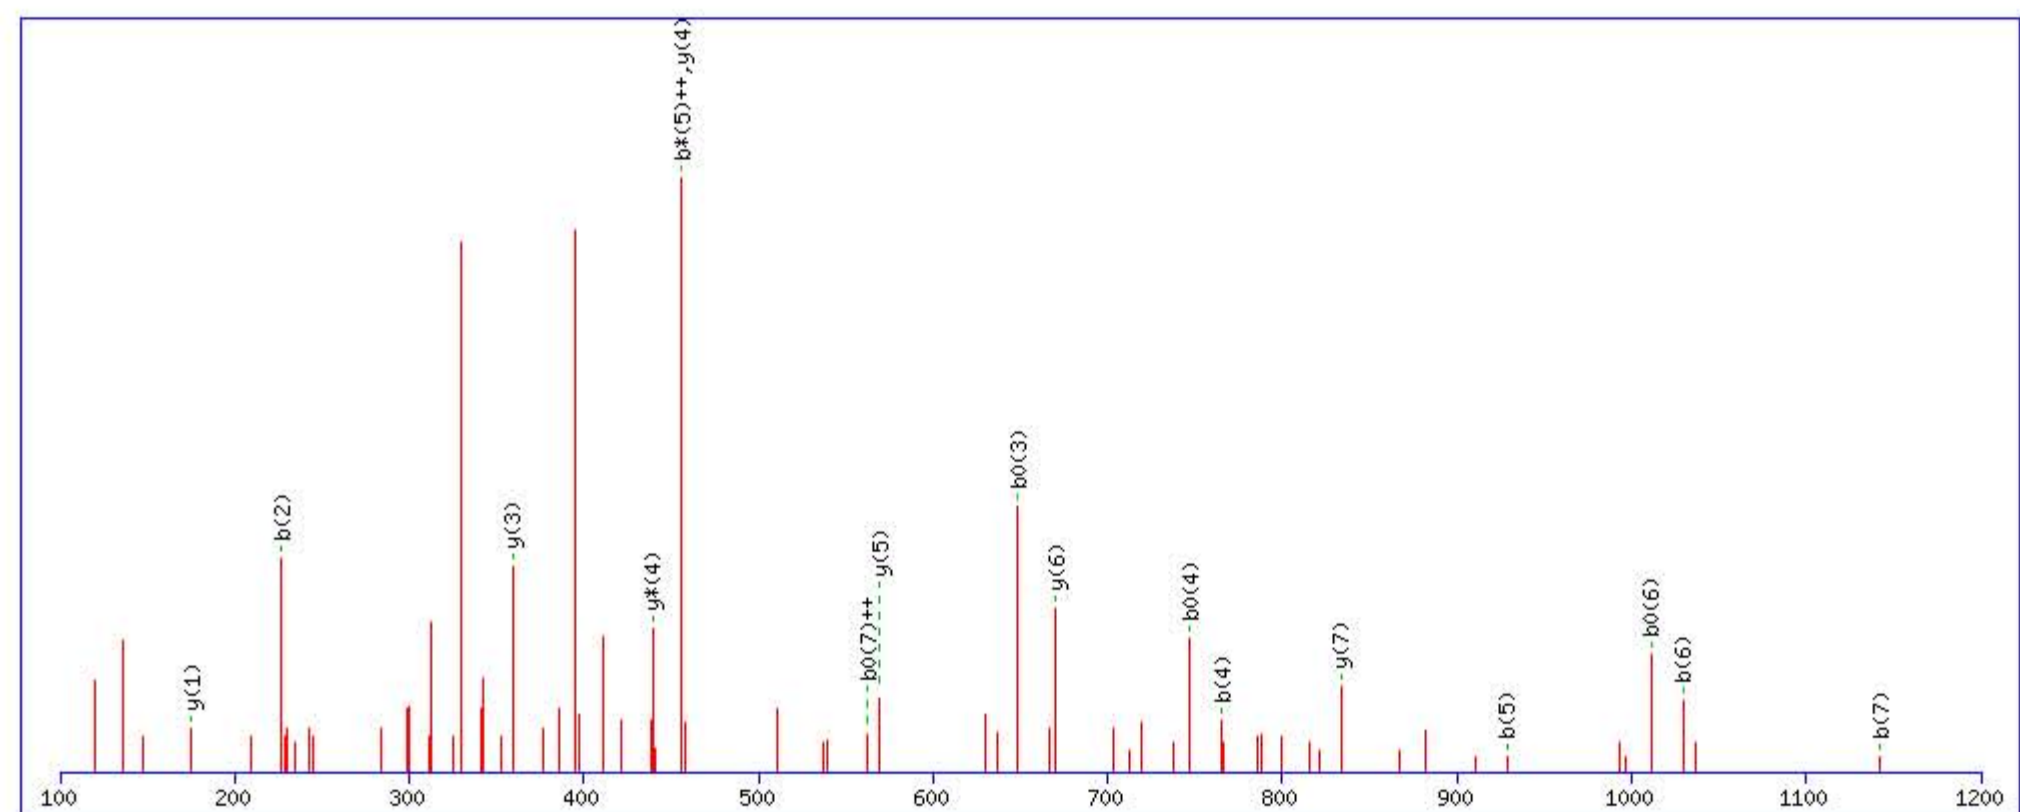

Monoisotopic mass of neutral peptide Mr(calc): 1596.833389

Fixed modifications: Carbamidomethyl (C) (apply to specified residues or termini only)

Variable modifications:

Q3 : Biotin:Thermo-21345 (Q)

Ions Score: 29 Expect: 0.0096

Matches : 17/114 fragment ions using 30 most intense peaks [\(help\)](#)

| #  | b                  | b <sup>++</sup> | b <sup>*</sup> | b <sup>*++</sup>  | b <sup>0</sup>     | b <sup>0++</sup>  | Seq. | y                 | y <sup>++</sup> | y <sup>*</sup>    | y <sup>*++</sup> | y <sup>0</sup> | y <sup>0++</sup> | #  |
|----|--------------------|-----------------|----------------|-------------------|--------------------|-------------------|------|-------------------|-----------------|-------------------|------------------|----------------|------------------|----|
| 1  | 130.049869         | 65.528572       |                |                   | 112.039304         | 56.523290         | E    |                   |                 |                   |                  |                |                  | 11 |
| 2  | <b>227.102633</b>  | 114.054954      |                |                   | 209.092068         | 105.049672        | P    | 1468.798084       | 734.902680      | 1451.771535       | 726.389406       | 1450.787519    | 725.897398       | 10 |
| 3  | 666.327959         | 333.667618      | 649.301410     | 325.154343        | <b>648.317394</b>  | 324.662335        | Q    | 1371.745320       | 686.376298      | 1354.718771       | 677.863024       | 1353.734755    | 677.371016       | 9  |
| 4  | <b>765.396373</b>  | 383.201825      | 748.369824     | 374.688550        | <b>747.385808</b>  | 374.196542        | V    | 932.519994        | 466.763635      | 915.493445        | 458.250361       | 914.509429     | 457.758353       | 8  |
| 5  | <b>928.459702</b>  | 464.733489      | 911.433153     | <b>456.220215</b> | 910.449137         | 455.728207        | Y    | <b>833.451580</b> | 417.229428      | 816.425031        | 408.716154       | 815.441015     | 408.224146       | 7  |
| 6  | <b>1029.507381</b> | 515.257329      | 1012.480832    | 506.744054        | <b>1011.496816</b> | 506.252046        | T    | <b>670.388251</b> | 335.697764      | 653.361702        | 327.184489       | 652.377686     | 326.692481       | 6  |
| 7  | <b>1142.591445</b> | 571.799361      | 1125.564896    | 563.286086        | 1124.580880        | <b>562.794078</b> | L    | <b>569.340572</b> | 285.173924      | 552.314023        | 276.660650       | 551.330007     | 276.168642       | 5  |
| 8  | 1239.644209        | 620.325743      | 1222.617660    | 611.812468        | 1221.633644        | 611.320460        | P    | <b>456.256508</b> | 228.631892      | <b>439.229959</b> | 220.118618       | 438.245943     | 219.626610       | 4  |
| 9  | 1336.696973        | 668.852125      | 1319.670424    | 660.338850        | 1318.686408        | 659.846842        | P    | <b>359.203744</b> | 180.105510      | 342.177195        | 171.592236       | 341.193179     | 171.100228       | 3  |
| 10 | 1423.729001        | 712.368139      | 1406.702452    | 703.854864        | 1405.718436        | 703.362856        | S    | 262.150980        | 131.579128      | 245.124431        | 123.065854       | 244.140415     | 122.573846       | 2  |
| 11 |                    |                 |                |                   |                    |                   | R    | <b>175.118952</b> | 88.063114       | 158.092403        | 79.549839        |                |                  | 1  |



NCBI BLAST search of [EPQVYTLPPSR](#)

(Parameters: blastp, nr protein database, expect=20000, no filter, PAM30)

Other BLAST [web gateways](#)

All matches to this query

| Score | Mr(calc):   | Delta     | Sequence                          |
|-------|-------------|-----------|-----------------------------------|
| 29.2  | 1596.833389 | -0.003607 | <a href="#">EPQVYTLPPSR</a>       |
| 7.3   | 1596.847122 | -0.017340 | <a href="#">ATPSSSPGTATALPALR</a> |
| 1.0   | 1596.825974 | 0.003808  | <a href="#">KLSLDLEAQWAPSPR</a>   |

Mascot: <http://www.matrixscience.com/>



# MASCOT Search Results

## Peptide View

MS/MS Fragmentation of **WQQGNVFSCSVMEALHNHYTQK**

Found in **IGHG1\_HUMAN**, Ig gamma-1 chain C region OS=Homo sapiens GN=IGHG1 PE=1 SV=1

Match to Query 66351: 3111.425020 from(623.292280,5+) rtinseconds(2058) index(71511)

Title: Locus:1.1.1.3250.11 File:"2013-07-02 CLN FXIII 30 min 2nd FT.wiff"

Data file C:\Program Files (x86)\Matrix Science\Mascot Daemon\mgf2 FXIII 30 min 2nd\mascot\_daemon\_merge.mgf

Click mouse within plot area to zoom in by factor of two about that point

Or, Plot from  to  Da

Label all possible matches  Label matches used for scoring



Monoisotopic mass of neutral peptide Mr(calc): 3111.426590

Fixed modifications: Carbamidomethyl (C) (apply to specified residues or termini only)

Variable modifications:

Q22 : Biotin:Thermo-21345 (Q)

Ions Score: 66 Expect: 3.7e-006

Matches : 28/244 fragment ions using 52 most intense peaks [\(help\)](#)

| #  | b                 | b <sup>++</sup> | b <sup>*</sup>    | b <sup>*++</sup> | b <sup>0</sup> | b <sup>0++</sup> | Seq. | y                  | y <sup>++</sup>    | y <sup>*</sup>     | y <sup>*++</sup> | y <sup>0</sup>     | y <sup>0++</sup>   | #  |
|----|-------------------|-----------------|-------------------|------------------|----------------|------------------|------|--------------------|--------------------|--------------------|------------------|--------------------|--------------------|----|
| 1  | 187.086589        | 94.046932       |                   |                  |                |                  | W    |                    |                    |                    |                  |                    |                    | 23 |
| 2  | <b>315.145167</b> | 158.076222      | <b>298.118618</b> | 149.562947       |                |                  | Q    | 2926.354551        | 1463.680913        | 2909.328002        | 1455.167639      | 2908.343986        | 1454.675631        | 22 |
| 3  | 443.203745        | 222.105511      | 426.177196        | 213.592236       |                |                  | Q    | 2798.295973        | 1399.651624        | 2781.269424        | 1391.138350      | 2780.285408        | 1390.646342        | 21 |
| 4  | 500.225209        | 250.616243      | <b>483.198660</b> | 242.102968       |                |                  | G    | 2670.237395        | 1335.622335        | 2653.210846        | 1327.109061      | 2652.226830        | 1326.617053        | 20 |
| 5  | <b>614.268136</b> | 307.637706      | <b>597.241587</b> | 299.124432       |                |                  | N    | 2613.215931        | 1307.111603        | 2596.189382        | 1298.598329      | 2595.205366        | 1298.106321        | 19 |
| 6  | <b>713.336550</b> | 357.171913      | <b>696.310001</b> | 348.658639       |                |                  | V    | 2499.173004        | 1250.090140        | 2482.146455        | 1241.576865      | 2481.162439        | 1241.084857        | 18 |
| 7  | 860.404964        | 430.706120      | 843.378415        | 422.192845       |                |                  | F    | <b>2400.104590</b> | 1200.555933        | 2383.078041        | 1192.042658      | 2382.094025        | <b>1191.550650</b> | 17 |
| 8  | 947.436992        | 474.222134      | 930.410443        | 465.708859       | 929.426427     | 465.216851       | S    | <b>2253.036176</b> | <b>1127.021726</b> | 2236.009627        | 1118.508451      | 2235.025611        | 1118.016443        | 16 |
| 9  | 1107.467641       | 554.237459      | 1090.441092       | 545.724184       | 1089.457076    | 545.232176       | C    | 2166.004148        | 1083.505712        | 2148.977599        | 1074.992437      | <b>2147.993583</b> | 1074.500429        | 15 |
| 10 | 1194.499669       | 597.753473      | 1177.473120       | 589.240198       | 1176.489104    | 588.748190       | S    | 2005.973499        | <b>1003.490388</b> | 1988.946950        | 994.977113       | 1987.962934        | 994.485105         | 14 |
| 11 | 1293.568083       | 647.287680      | 1276.541534       | 638.774405       | 1275.557518    | 638.282397       | V    | 1918.941471        | 959.974373         | 1901.914922        | 951.461099       | 1900.930906        | 950.969091         | 13 |
| 12 | 1424.608568       | 712.807922      | 1407.582019       | 704.294648       | 1406.598003    | 703.802640       | M    | <b>1819.873057</b> | <b>910.440166</b>  | 1802.846508        | 901.926892       | 1801.862492        | 901.434884         | 12 |
| 13 | 1561.667480       | 781.337378      | 1544.640931       | 772.824104       | 1543.656915    | 772.332096       | H    | <b>1688.832572</b> | 844.919924         | 1671.806023        | 836.406649       | 1670.822007        | 835.914641         | 11 |
| 14 | 1690.710073       | 845.858675      | 1673.683524       | 837.345400       | 1672.699508    | 836.853392       | E    | <b>1551.773660</b> | 776.390468         | <b>1534.747111</b> | 767.877193       | 1533.763095        | 767.385185         | 10 |
| 15 | 1761.747187       | 881.377231      | 1744.720638       | 872.863957       | 1743.736622    | 872.371949       | A    | <b>1422.731067</b> | 711.869171         | 1405.704518        | 703.355897       | <b>1404.720502</b> | 702.863889         | 9  |
| 16 | 1874.831251       | 937.919263      | 1857.804702       | 929.405989       | 1856.820686    | 928.913981       | L    | <b>1351.693953</b> | 676.350615         | <b>1334.667404</b> | 667.837340       | 1333.683388        | 667.345332         | 8  |
| 17 | 2011.890163       | 1006.448719     | 1994.863614       | 997.935445       | 1993.879598    | 997.443437       | H    | <b>1238.609889</b> | 619.808583         | 1221.583340        | 611.295308       | 1220.599324        | 610.803300         | 7  |
| 18 | 2125.933090       | 1063.470183     | 2108.906541       | 1054.956908      | 2107.922525    | 1054.464900      | N    | <b>1101.550977</b> | 551.279127         | 1084.524428        | 542.765852       | 1083.540412        | 542.273844         | 6  |
| 19 | 2262.992002       | 1131.999639     | 2245.965453       | 1123.486364      | 2244.981437    | 1122.994356      | H    | <b>987.508050</b>  | 494.257663         | 970.481501         | 485.744389       | 969.497485         | 485.252381         | 5  |
| 20 | 2426.055331       | 1213.531303     | 2409.028782       | 1205.018029      | 2408.044766    | 1204.526021      | Y    | <b>850.449138</b>  | 425.728207         | 833.422589         | 417.214933       | 832.438573         | 416.722925         | 4  |
| 21 | 2527.103010       | 1264.055143     | 2510.076461       | 1255.541868      | 2509.092445    | 1255.049860      | T    | <b>687.385809</b>  | 344.196543         | 670.359260         | 335.683268       | 669.375244         | 335.191260         | 3  |
| 22 | 2966.328336       | 1483.667806     | 2949.301787       | 1475.154531      | 2948.317771    | 1474.662523      | Q    | <b>586.338130</b>  | 293.672703         | 569.311581         | 285.159429       |                    |                    | 2  |
| 23 |                   |                 |                   |                  |                |                  | K    | 147.112804         | 74.060040          | 130.086255         | 65.546765        |                    |                    | 1  |



NCBI BLAST search of **WQQGNVFSCSVMEALHNHYTQK**

(Parameters: blastp, nr protein database, expect=20000, no filter, PAM30)

Other BLAST [web gateways](#)

All matches to this query

| Score | Mr(calc):   | Delta     | Sequence                      |
|-------|-------------|-----------|-------------------------------|
| 65.6  | 3111.426590 | -0.001570 | <b>WQQGNVFSCSVMEALHNHYTQK</b> |



# MASCOT SCIENCE Mascot Search Results

## Peptide View

MS/MS Fragmentation of **NQVSLTCLVK**

Found in **IGHG1\_HUMAN**, Ig gamma-1 chain C region OS=Homo sapiens GN=IGHG1 PE=1 SV=1

Match to Query 34873: 1471.781848 from(736.898200,2+) rtinseconds(2230) index(72630)

Title: Locus:1.1.1.3310.19 File:"2013-07-02 CLN FXIII 30 min 2nd FT.wiff"

Data file C:\Program Files (x86)\Matrix Science\Mascot Daemon\mgf\2 FXIII 30 min 2nd\mascot\_daemon\_merge.mgf

Click mouse within plot area to zoom in by factor of two about that point

Or, Plot from  to  Da

Label all possible matches  Label matches used for scoring



Monoisotopic mass of neutral peptide Mr(calc): 1471.789093

Fixed modifications: Carbamidomethyl (C) (apply to specified residues or termini only)

Variable modifications:

Q2 : Biotin:Thermo-21345 (Q)

Ions Score: 36 Expect: 0.0022

Matches : 22/94 fragment ions using 51 most intense peaks [\(help\)](#)

| #  | b                  | b <sup>++</sup> | b <sup>+</sup>    | b <sup>+++</sup> | b <sup>0</sup>     | b <sup>0++</sup> | Seq. | y                 | y <sup>++</sup>   | y <sup>+</sup>    | y <sup>+++</sup> | y <sup>0</sup> | y <sup>0++</sup> | #  |
|----|--------------------|-----------------|-------------------|------------------|--------------------|------------------|------|-------------------|-------------------|-------------------|------------------|----------------|------------------|----|
| 1  | 115.050203         | 58.028740       | 98.023654         | 49.515465        |                    |                  | N    |                   |                   |                   |                  |                |                  | 10 |
| 2  | <b>554.275529</b>  | 277.641403      | <b>537.248980</b> | 269.128128       |                    |                  | Q    | 1358.753442       | <b>679.880359</b> | 1341.726893       | 671.367085       | 1340.742877    | 670.875076       | 9  |
| 3  | <b>653.343943</b>  | 327.175610      | <b>636.317394</b> | 318.662335       |                    |                  | V    | <b>919.528116</b> | 460.267696        | 902.501567        | 451.754421       | 901.517551     | 451.262413       | 8  |
| 4  | <b>740.375971</b>  | 370.691623      | 723.349422        | 362.178349       | 722.365406         | 361.686341       | S    | <b>820.459702</b> | 410.733489        | 803.433153        | 402.220215       | 802.449137     | 401.728207       | 7  |
| 5  | 853.460035         | 427.233656      | 836.433486        | 418.720381       | <b>835.449470</b>  | 418.228373       | L    | <b>733.427674</b> | 367.217475        | 716.401125        | 358.704201       | 715.417109     | 358.212193       | 6  |
| 6  | 954.507714         | 477.757495      | 937.481165        | 469.244220       | <b>936.497149</b>  | 468.752212       | T    | <b>620.343610</b> | 310.675443        | 603.317061        | 302.162169       | 602.333045     | 301.670161       | 5  |
| 7  | 1114.538363        | 557.772819      | 1097.511814       | 549.259545       | <b>1096.527798</b> | 548.767537       | C    | <b>519.295931</b> | 260.151604        | 502.269382        | 251.638329       |                |                  | 4  |
| 8  | <b>1227.622427</b> | 614.314851      | 1210.595878       | 605.801577       | <b>1209.611862</b> | 605.309569       | L    | <b>359.265282</b> | 180.136279        | 342.238733        | 171.623004       |                |                  | 3  |
| 9  | <b>1326.690841</b> | 663.849058      | 1309.664292       | 655.335784       | <b>1308.680276</b> | 654.843776       | V    | <b>246.181218</b> | 123.594247        | 229.154669        | 115.080973       |                |                  | 2  |
| 10 |                    |                 |                   |                  |                    |                  | K    | <b>147.112804</b> | 74.060040         | <b>130.086255</b> | 65.546765        |                |                  | 1  |



NCBI BLAST search of **NQVSLTCLVK**

(Parameters: blastp, nr protein database, expect=20000, no filter, PAM30)

Other BLAST [web gateways](#)

All matches to this query

| Score | Mr(calc):   | Delta     | Sequence                      |
|-------|-------------|-----------|-------------------------------|
| 36.2  | 1471.789093 | -0.007245 | <a href="#">NQVSLTCLVK</a>    |
| 7.5   | 1471.797592 | -0.015744 | <a href="#">KYFWDRAFLVK</a>   |
| 4.6   | 1471.803467 | -0.021619 | <a href="#">EKQGPLLDLFGQK</a> |
| 3.6   | 1471.799438 | -0.017590 | <a href="#">EVELDRLRDTVK</a>  |
| 2.0   | 1471.770447 | 0.011401  | <a href="#">QPTTAEKSATK</a>   |
| 0.1   | 1471.770432 | 0.011416  | <a href="#">KDKAEQLDSK</a>    |



# MASCOT SEARCH RESULTS

## Peptide View

MS/MS Fragmentation of **EPQVYTLPPSR**

Found in **IGHG1\_HUMAN**, Ig gamma-1 chain C region OS=Homo sapiens GN=IGHG1 PE=1 SV=1

Match to Query 38884: 1596.829782 from(533.283870,3+) rtinseconds(1961) index(70968)

Title: Locus:1.1.1.3216.18 File:"2013-07-02 CLN FXIII 30 min 2nd FT.wiff"

Data file C:\Program Files (x86)\Matrix Science\Mascot Daemon\mgf2 FXIII 30 min 2nd\mascot\_daemon\_merge.mgf

Click mouse within plot area to zoom in by factor of two about that point

Or, Plot from  to  Da

Label all possible matches  Label matches used for scoring

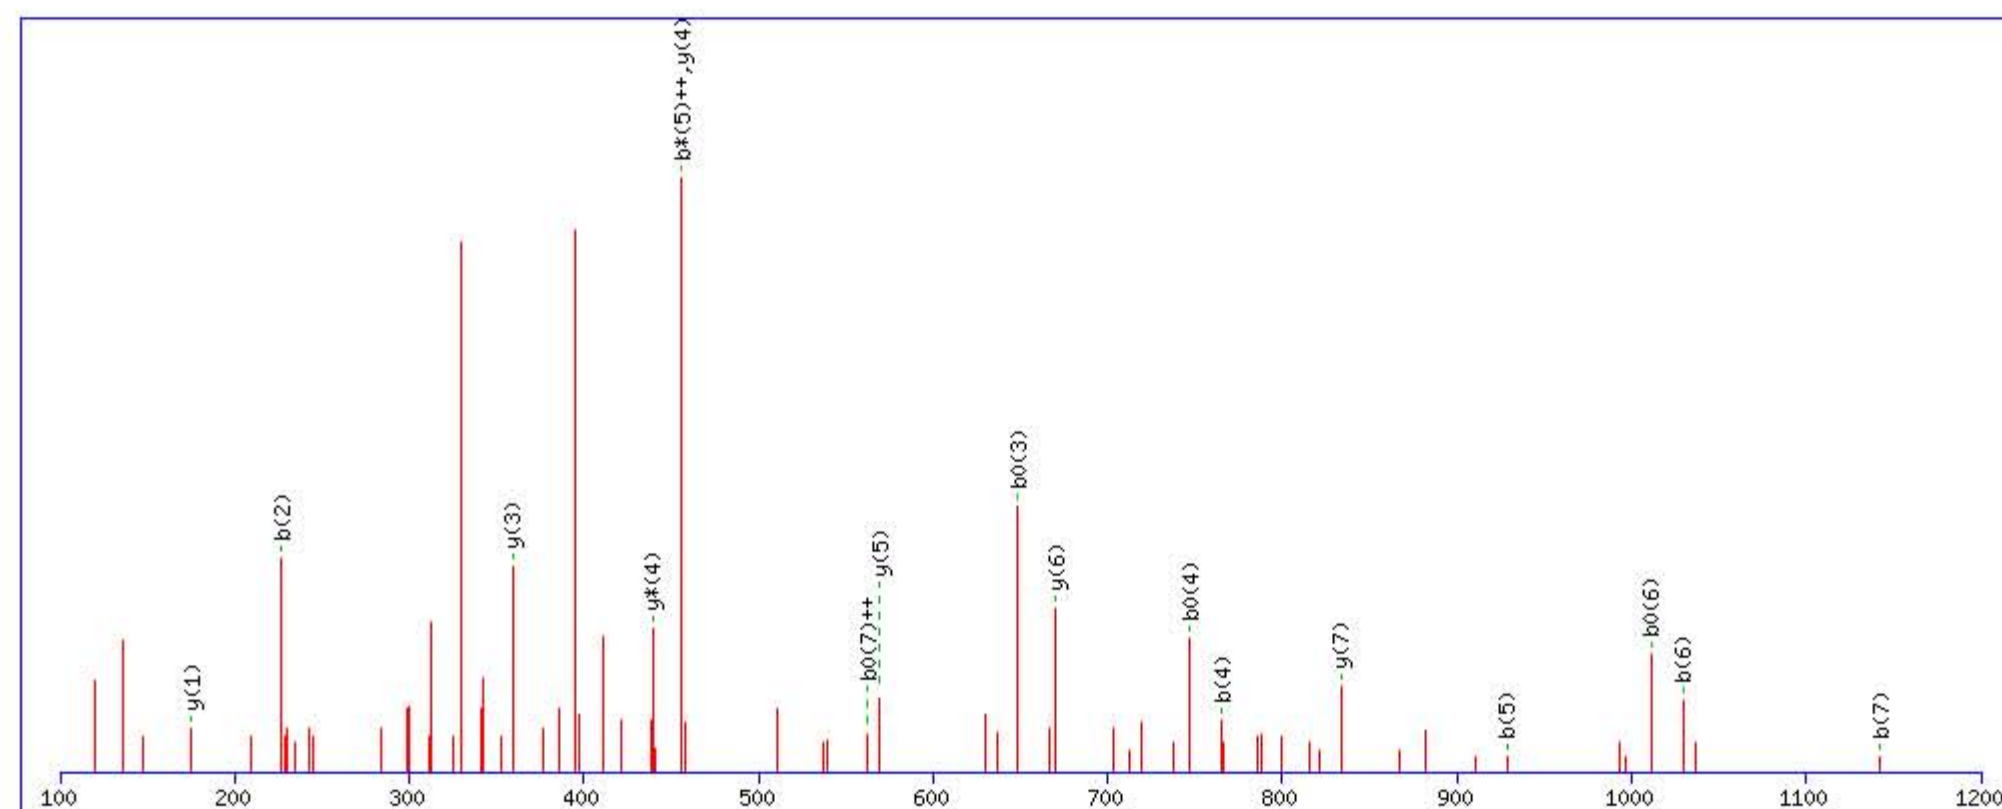

Monoisotopic mass of neutral peptide Mr(calc): 1596.833389

Fixed modifications: Carbamidomethyl (C) (apply to specified residues or termini only)

Variable modifications:

Q3 : Biotin:Thermo-21345 (Q)

Ions Score: 29 Expect: 0.0096

Matches : 17/114 fragment ions using 30 most intense peaks [\(help\)](#)

| #  | b                  | b <sup>++</sup> | b <sup>*</sup> | b <sup>*++</sup>  | b <sup>0</sup>     | b <sup>0++</sup>  | Seq. | y                 | y <sup>++</sup> | y <sup>*</sup>    | y <sup>*++</sup> | y <sup>0</sup> | y <sup>0++</sup> | #  |
|----|--------------------|-----------------|----------------|-------------------|--------------------|-------------------|------|-------------------|-----------------|-------------------|------------------|----------------|------------------|----|
| 1  | 130.049869         | 65.528572       |                |                   | 112.039304         | 56.523290         | E    |                   |                 |                   |                  |                |                  | 11 |
| 2  | <b>227.102633</b>  | 114.054954      |                |                   | 209.092068         | 105.049672        | P    | 1468.798084       | 734.902680      | 1451.771535       | 726.389406       | 1450.787519    | 725.897398       | 10 |
| 3  | 666.327959         | 333.667618      | 649.301410     | 325.154343        | <b>648.317394</b>  | 324.662335        | Q    | 1371.745320       | 686.376298      | 1354.718771       | 677.863024       | 1353.734755    | 677.371016       | 9  |
| 4  | <b>765.396373</b>  | 383.201825      | 748.369824     | 374.688550        | <b>747.385808</b>  | 374.196542        | V    | 932.519994        | 466.763635      | 915.493445        | 458.250361       | 914.509429     | 457.758353       | 8  |
| 5  | <b>928.459702</b>  | 464.733489      | 911.433153     | <b>456.220215</b> | 910.449137         | 455.728207        | Y    | <b>833.451580</b> | 417.229428      | 816.425031        | 408.716154       | 815.441015     | 408.224146       | 7  |
| 6  | <b>1029.507381</b> | 515.257329      | 1012.480832    | 506.744054        | <b>1011.496816</b> | 506.252046        | T    | <b>670.388251</b> | 335.697764      | 653.361702        | 327.184489       | 652.377686     | 326.692481       | 6  |
| 7  | <b>1142.591445</b> | 571.799361      | 1125.564896    | 563.286086        | 1124.580880        | <b>562.794078</b> | L    | <b>569.340572</b> | 285.173924      | 552.314023        | 276.660650       | 551.330007     | 276.168642       | 5  |
| 8  | 1239.644209        | 620.325743      | 1222.617660    | 611.812468        | 1221.633644        | 611.320460        | P    | <b>456.256508</b> | 228.631892      | <b>439.229959</b> | 220.118618       | 438.245943     | 219.626610       | 4  |
| 9  | 1336.696973        | 668.852125      | 1319.670424    | 660.338850        | 1318.686408        | 659.846842        | P    | <b>359.203744</b> | 180.105510      | 342.177195        | 171.592236       | 341.193179     | 171.100228       | 3  |
| 10 | 1423.729001        | 712.368139      | 1406.702452    | 703.854864        | 1405.718436        | 703.362856        | S    | 262.150980        | 131.579128      | 245.124431        | 123.065854       | 244.140415     | 122.573846       | 2  |
| 11 |                    |                 |                |                   |                    |                   | R    | <b>175.118952</b> | 88.063114       | 158.092403        | 79.549839        |                |                  | 1  |

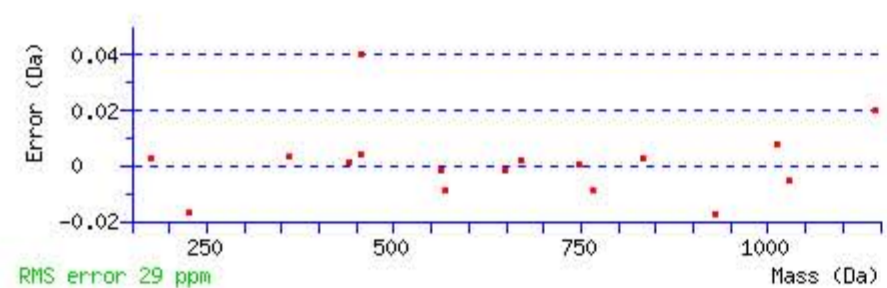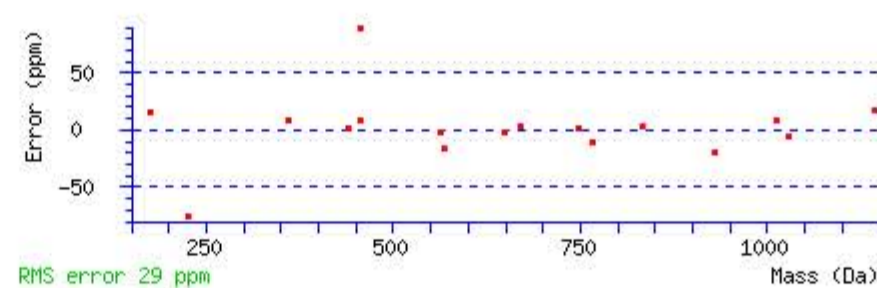

NCBI BLAST search of **EPQVYTLPPSR**

(Parameters: blastp, nr protein database, expect=20000, no filter, PAM30)

Other BLAST [web gateways](#)

All matches to this query

| Score | Mr(calc):   | Delta     | Sequence                          |
|-------|-------------|-----------|-----------------------------------|
| 29.2  | 1596.833389 | -0.003607 | <a href="#">EPQVYTLPPSR</a>       |
| 7.3   | 1596.847122 | -0.017340 | <a href="#">ATPSSSPGTATALPALR</a> |
| 1.0   | 1596.825974 | 0.003808  | <a href="#">KLSLDLEAQWAPSPR</a>   |

Mascot: <http://www.matrixscience.com/>



# MASCOT SEARCH RESULTS

## Peptide View

MS/MS Fragmentation of **VYACEVTHQGLSSPVTK**

Found in **IGKC\_HUMAN**, Ig kappa chain C region OS=Homo sapiens GN=IGKC PE=1 SV=1

Match to Query 53676: 2186.079492 from(729.700440,3+) rtinseconds(1780) index(69819)

Title: Locus:1.1.1.3153.22 File:"2013-07-02 CLN FXIII 30 min 2nd FT.wiff"

Data file C:\Program Files (x86)\Matrix Science\Mascot Daemon\mgf2 FXIII 30 min 2nd\mascot\_daemon\_merge.mgf

Click mouse within plot area to zoom in by factor of two about that point

Or, Plot from  to  Da

Label all possible matches  Label matches used for scoring

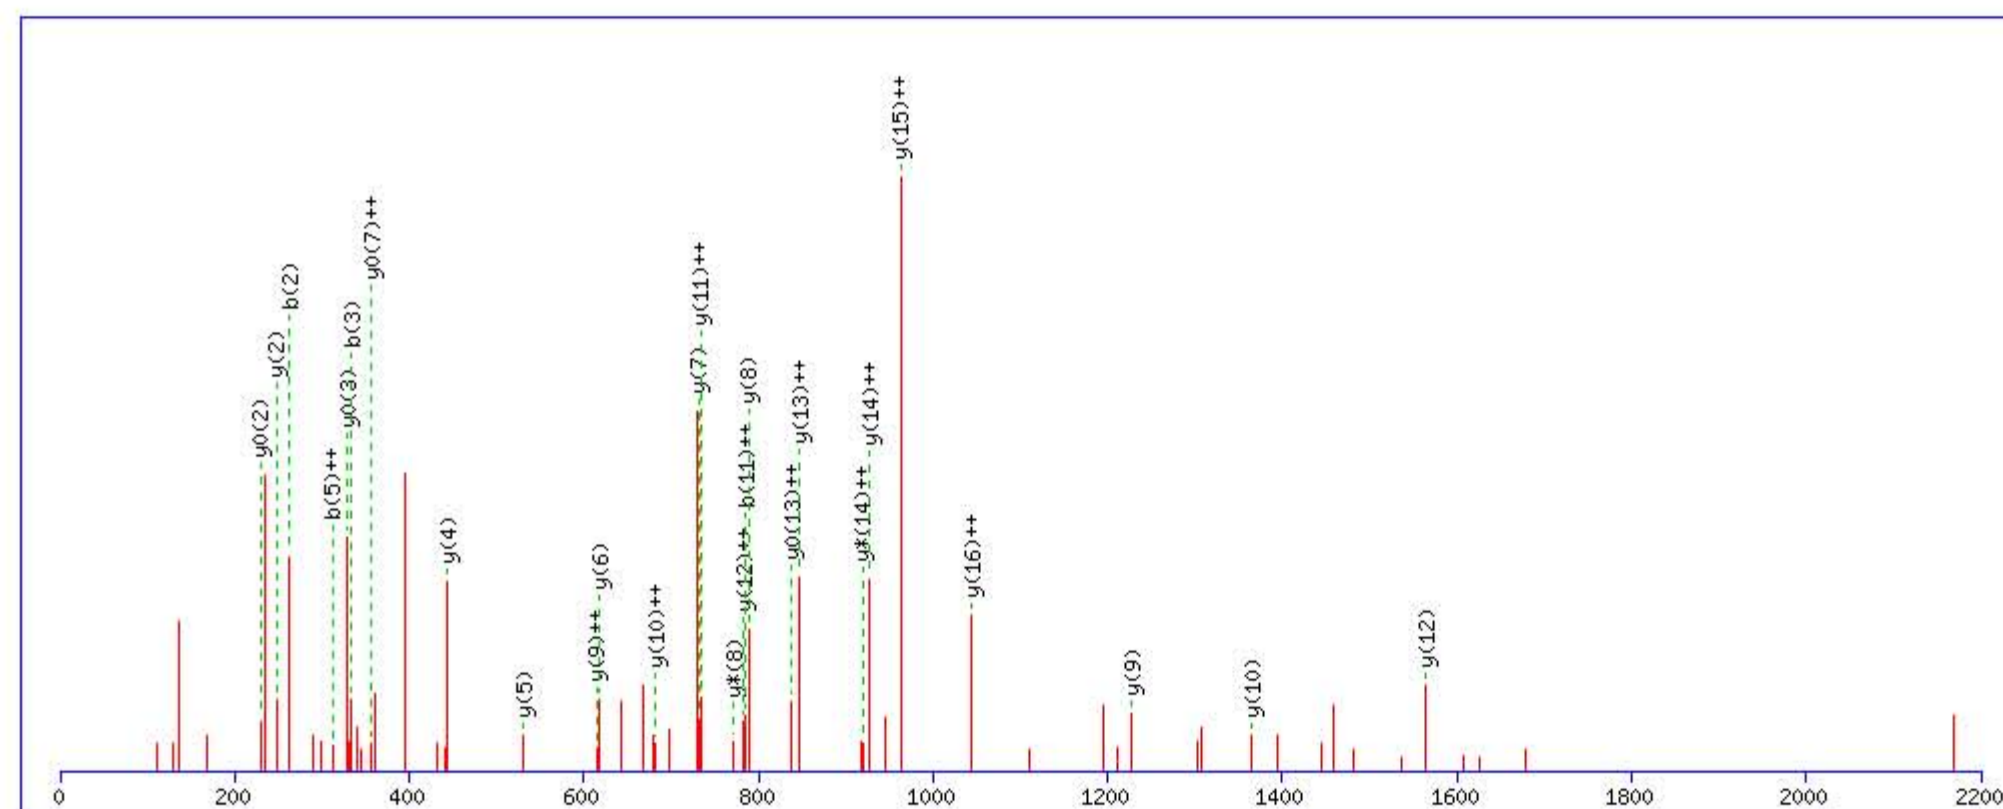

Monoisotopic mass of neutral peptide  $M_r(\text{calc})$ : 2186.086411

Fixed modifications: Carbamidomethyl (C) (apply to specified residues or termini only)

Variable modifications:

Q9 : Biotin:Thermo-21345 (Q)

Ions Score: 45 Expect: 0.00085

Matches : 27/166 fragment ions using 69 most intense peaks [\(help\)](#)

| #  | b                 | b <sup>++</sup>   | b <sup>*</sup> | b <sup>+++</sup> | b <sup>0</sup> | b <sup>0++</sup> | Seq. | y                  | y <sup>++</sup>    | y <sup>*</sup>    | y <sup>+++</sup>  | y <sup>0</sup>    | y <sup>0++</sup>  | #  |
|----|-------------------|-------------------|----------------|------------------|----------------|------------------|------|--------------------|--------------------|-------------------|-------------------|-------------------|-------------------|----|
| 1  | 100.075690        | 50.541483         |                |                  |                |                  | V    |                    |                    |                   |                   |                   |                   | 17 |
| 2  | <b>263.139019</b> | 132.073148        |                |                  |                |                  | Y    | 2088.025261        | <b>1044.516268</b> | 2070.998712       | 1036.002994       | 2070.014696       | 1035.510986       | 16 |
| 3  | <b>334.176133</b> | 167.591704        |                |                  |                |                  | A    | 1924.961932        | <b>962.984604</b>  | 1907.935383       | 954.471330        | 1906.951367       | 953.979322        | 15 |
| 4  | 494.206782        | 247.607029        |                |                  |                |                  | C    | 1853.924818        | <b>927.466047</b>  | 1836.898269       | <b>918.952773</b> | 1835.914253       | 918.460765        | 14 |
| 5  | 623.249375        | <b>312.128326</b> |                |                  | 605.238810     | 303.123043       | E    | 1693.894169        | <b>847.450723</b>  | 1676.867620       | 838.937448        | 1675.883604       | <b>838.445440</b> | 13 |
| 6  | 722.317789        | 361.662533        |                |                  | 704.307224     | 352.657250       | V    | <b>1564.851576</b> | <b>782.929426</b>  | 1547.825027       | 774.416152        | 1546.841011       | 773.924144        | 12 |
| 7  | 823.365468        | 412.186372        |                |                  | 805.354903     | 403.181090       | T    | 1465.783162        | <b>733.395219</b>  | 1448.756613       | 724.881945        | 1447.772597       | 724.389937        | 11 |
| 8  | 960.424380        | 480.715828        |                |                  | 942.413815     | 471.710546       | H    | <b>1364.735483</b> | <b>682.871380</b>  | 1347.708934       | 674.358105        | 1346.724918       | 673.866097        | 10 |
| 9  | 1399.649706       | 700.328491        | 1382.623157    | 691.815217       | 1381.639141    | 691.323208       | Q    | <b>1227.676571</b> | <b>614.341924</b>  | 1210.650022       | 605.828649        | 1209.666006       | 605.336641        | 9  |
| 10 | 1456.671170       | 728.839223        | 1439.644621    | 720.325948       | 1438.660605    | 719.833940       | G    | <b>788.451245</b>  | 394.729261         | <b>771.424696</b> | 386.215986        | 770.440680        | 385.723978        | 8  |
| 11 | 1569.755234       | <b>785.381255</b> | 1552.728685    | 776.867980       | 1551.744669    | 776.375972       | L    | <b>731.429781</b>  | 366.218529         | 714.403232        | 357.705254        | 713.419216        | <b>357.213246</b> | 7  |
| 12 | 1656.787262       | 828.897269        | 1639.760713    | 820.383994       | 1638.776697    | 819.891986       | S    | <b>618.345717</b>  | 309.676497         | 601.319168        | 301.163222        | 600.335152        | 300.671214        | 6  |
| 13 | 1743.819290       | 872.413283        | 1726.792741    | 863.900009       | 1725.808725    | 863.408000       | S    | <b>531.313689</b>  | 266.160483         | 514.287140        | 257.647208        | 513.303124        | 257.155200        | 5  |
| 14 | 1840.872054       | 920.939665        | 1823.845505    | 912.426391       | 1822.861489    | 911.934382       | P    | <b>444.281661</b>  | 222.644469         | 427.255112        | 214.131194        | 426.271096        | 213.639186        | 4  |
| 15 | 1939.940468       | 970.473872        | 1922.913919    | 961.960598       | 1921.929903    | 961.468590       | V    | 347.228897         | 174.118087         | 330.202348        | 165.604812        | <b>329.218332</b> | 165.112804        | 3  |
| 16 | 2040.988147       | 1020.997712       | 2023.961598    | 1012.484437      | 2022.977582    | 1011.992429      | T    | <b>248.160483</b>  | 124.583880         | 231.133934        | 116.070605        | <b>230.149918</b> | 115.578597        | 2  |
| 17 |                   |                   |                |                  |                |                  | K    | 147.112804         | 74.060040          | 130.086255        | 65.546766         |                   |                   | 1  |

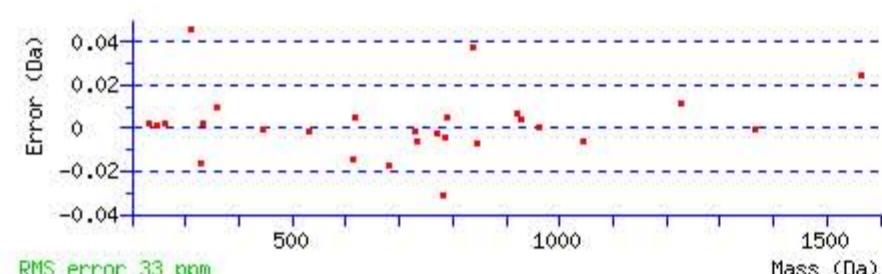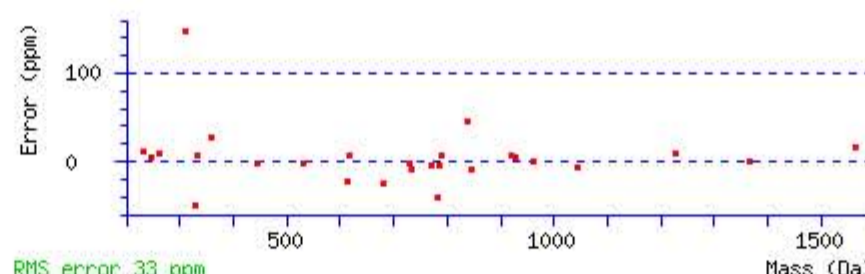

NCBI BLAST search of **VYACEVTHQGLSSPVTK**

(Parameters: blastp, nr protein database, expect=20000, no filter, PAM30)

Other BLAST [web gateways](#)

All matches to this query

| Score | $M_r(\text{calc})$ : | Delta     | Sequence                          |
|-------|----------------------|-----------|-----------------------------------|
| 45.0  | 2186.086411          | -0.006919 | <a href="#">VYACEVTHQGLSSPVTK</a> |

Mascot: <http://www.matrixscience.com/>



# MASCOT SEARCH RESULTS

## Peptide View

MS/MS Fragmentation of **LICQATGFSPR**

Found in **IGHM\_HUMAN**, Ig mu chain C region OS=Homo sapiens GN=IGHM PE=1 SV=3

Match to Query 37081: 1559.798648 from(780.906600,2+) rtinseconds(1982) index(38568)  
 Title: Locus:1.1.1.2712.22 File:"2013-07-02 CLN FXIII 30 min 2nd F 3.wiff"  
 Data file C:\Program Files (x86)\Matrix Science\Mascot Daemon\mgf2 FXIII 30 min 2nd\mascot\_daemon\_merge.mgf

Click mouse within plot area to zoom in by factor of two about that point  
 Or, Plot from  to  Da   
 Label all possible matches  Label matches used for scoring

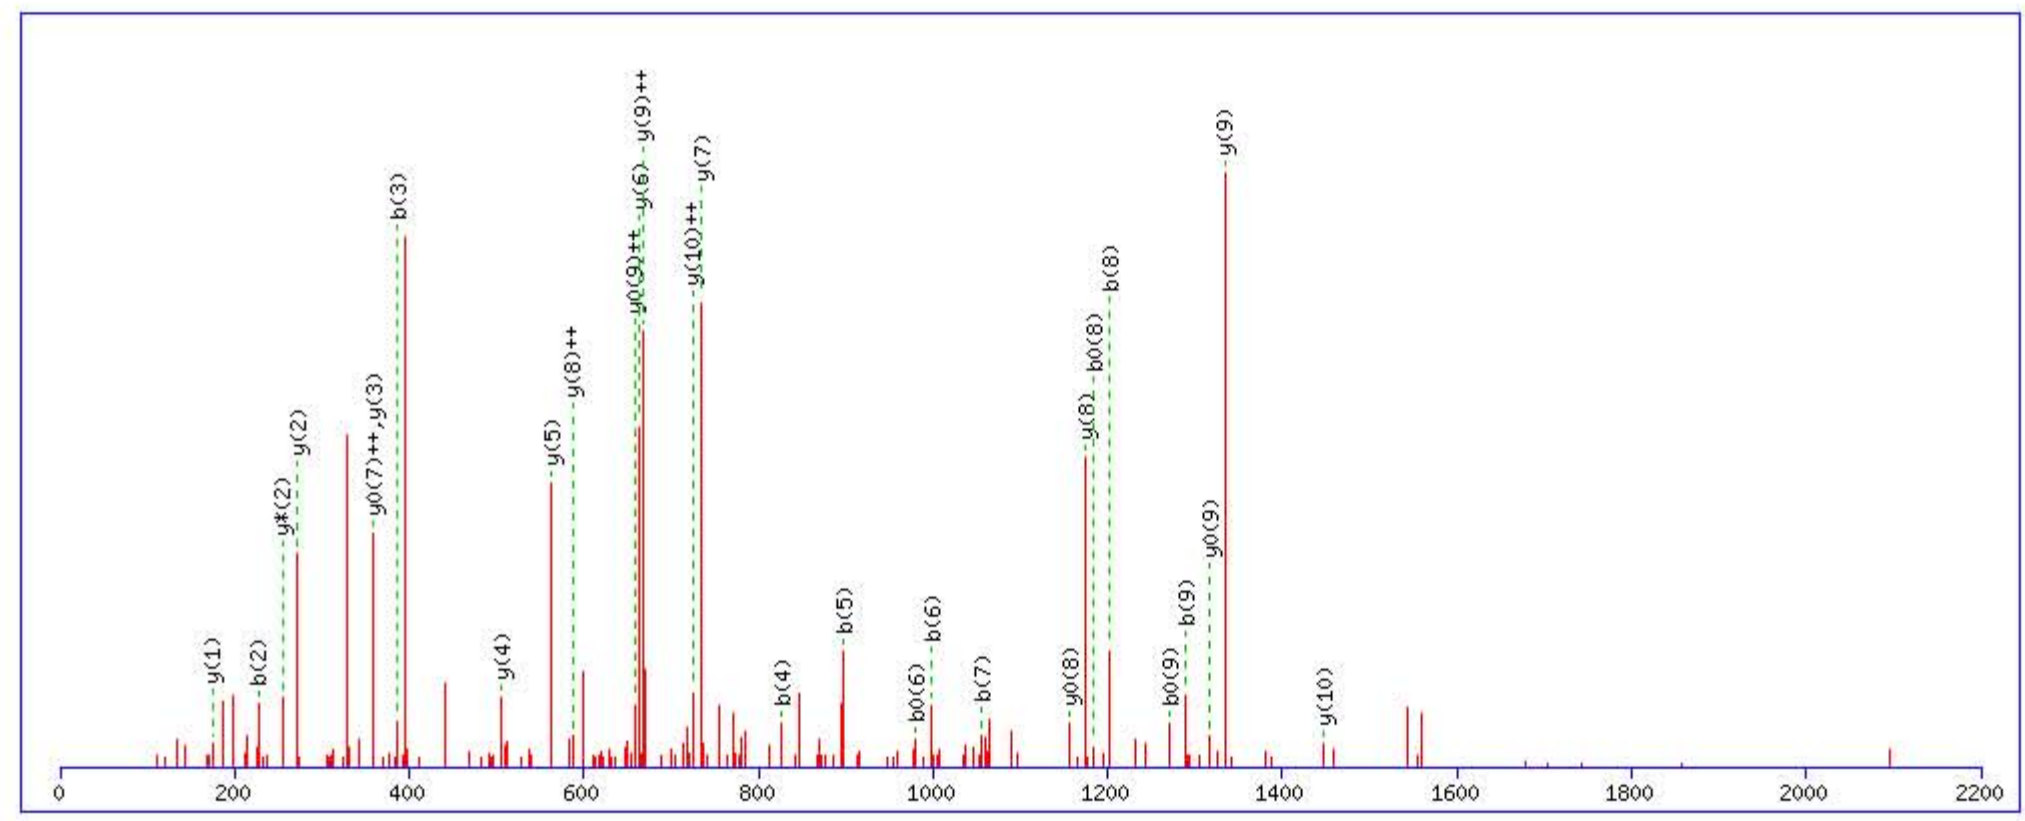

Monoisotopic mass of neutral peptide Mr(calc): 1559.795242  
 Fixed modifications: Carbamidomethyl (C) (apply to specified residues or termini only)  
 Variable modifications:  
 Q4 : Biotin:Thermo-21345 (Q)  
 Ions Score: 59 Expect: 1.2e-005  
 Matches : 29/100 fragment ions using 56 most intense peaks [\(help\)](#)

| #  | b           | b <sup>++</sup> | b <sup>*</sup> | b <sup>*++</sup> | b <sup>0</sup> | b <sup>0++</sup> | Seq. | y           | y <sup>++</sup> | y <sup>*</sup> | y <sup>*++</sup> | y <sup>0</sup> | y <sup>0++</sup> | #  |
|----|-------------|-----------------|----------------|------------------|----------------|------------------|------|-------------|-----------------|----------------|------------------|----------------|------------------|----|
| 1  | 114.091340  | 57.549308       |                |                  |                |                  | L    |             |                 |                |                  |                |                  | 11 |
| 2  | 227.175404  | 114.091340      |                |                  |                |                  | I    | 1447.718454 | 724.362865      | 1430.691905    | 715.849591       | 1429.707889    | 715.357583       | 10 |
| 3  | 387.206053  | 194.106664      |                |                  |                |                  | C    | 1334.634390 | 667.820833      | 1317.607841    | 659.307559       | 1316.623825    | 658.815551       | 9  |
| 4  | 826.431379  | 413.719328      | 809.404830     | 405.206053       |                |                  | Q    | 1174.603741 | 587.805509      | 1157.577192    | 579.292234       | 1156.593176    | 578.800226       | 8  |
| 5  | 897.468493  | 449.237885      | 880.441944     | 440.724610       |                |                  | A    | 735.378415  | 368.192846      | 718.351866     | 359.679571       | 717.367850     | 359.187563       | 7  |
| 6  | 998.516172  | 499.761724      | 981.489623     | 491.248449       | 980.505607     | 490.756441       | T    | 664.341301  | 332.674289      | 647.314752     | 324.161014       | 646.330736     | 323.669006       | 6  |
| 7  | 1055.537636 | 528.272456      | 1038.511087    | 519.759182       | 1037.527071    | 519.267174       | G    | 563.293622  | 282.150449      | 546.267073     | 273.637175       | 545.283057     | 273.145167       | 5  |
| 8  | 1202.606050 | 601.806663      | 1185.579501    | 593.293389       | 1184.595485    | 592.801381       | F    | 506.272158  | 253.639717      | 489.245609     | 245.126443       | 488.261593     | 244.634435       | 4  |
| 9  | 1289.638078 | 645.322677      | 1272.611529    | 636.809403       | 1271.627513    | 636.317395       | S    | 359.203744  | 180.105510      | 342.177195     | 171.592236       | 341.193179     | 171.100228       | 3  |
| 10 | 1386.690842 | 693.849059      | 1369.664293    | 685.335785       | 1368.680277    | 684.843777       | P    | 272.171716  | 136.589496      | 255.145167     | 128.076221       |                |                  | 2  |
| 11 |             |                 |                |                  |                |                  | R    | 175.118952  | 88.063114       | 158.092403     | 79.549839        |                |                  | 1  |

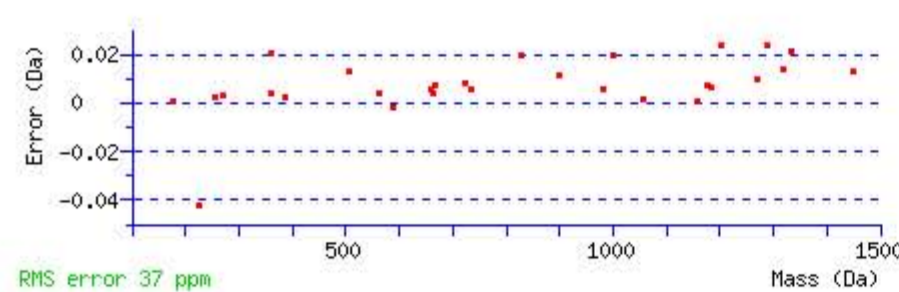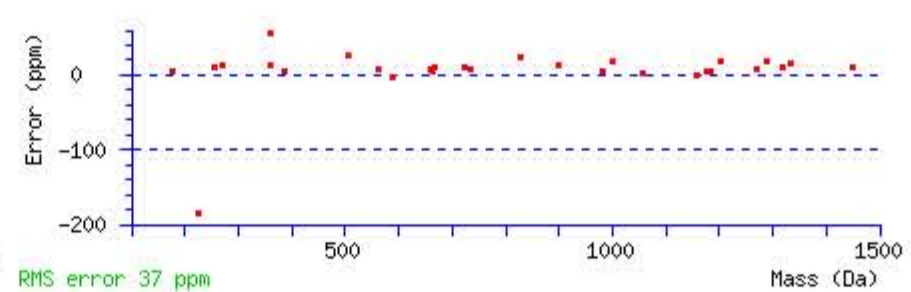

NCBI BLAST search of **LICQATGFSPR**  
 (Parameters: blastp, nr protein database, expect=20000, no filter, PAM30)  
 Other BLAST [web gateways](#)

### All matches to this query

| Score | Mr(calc):   | Delta     | Sequence                       |
|-------|-------------|-----------|--------------------------------|
| 58.6  | 1559.795242 | 0.003406  | <a href="#">LICQATGFSPR</a>    |
| 5.8   | 1559.820190 | -0.021542 | <a href="#">MTRSATQAAKQVPR</a> |
| 5.2   | 1559.808960 | -0.010312 | <a href="#">LDRLSGLADQMVAR</a> |
| 0.1   | 1559.808975 | -0.010327 | <a href="#">LLDRDACDITVRVK</a> |



# MASCOT Search Results

## Peptide View

MS/MS Fragmentation of **YAATSQVLLPSK**

Found in **IGHM\_HUMAN**, Ig mu chain C region OS=Homo sapiens GN=IGHM PE=1 SV=3

Match to Query 38354: 1587.875208 from(794.944880,2+) rtinseconds(2054) index(39004)

Title: Locus:1.1.1.2737.16 File:"2013-07-02 CLN FXIII 30 min 2nd F 3.wiff"

Data file C:\Program Files (x86)\Matrix Science\Mascot Daemon\mgf\2 FXIII 30 min 2nd\mascot\_daemon\_merge.mgf

Click mouse within plot area to zoom in by factor of two about that point

Or, Plot from  to  Da

Label all possible matches  Label matches used for scoring

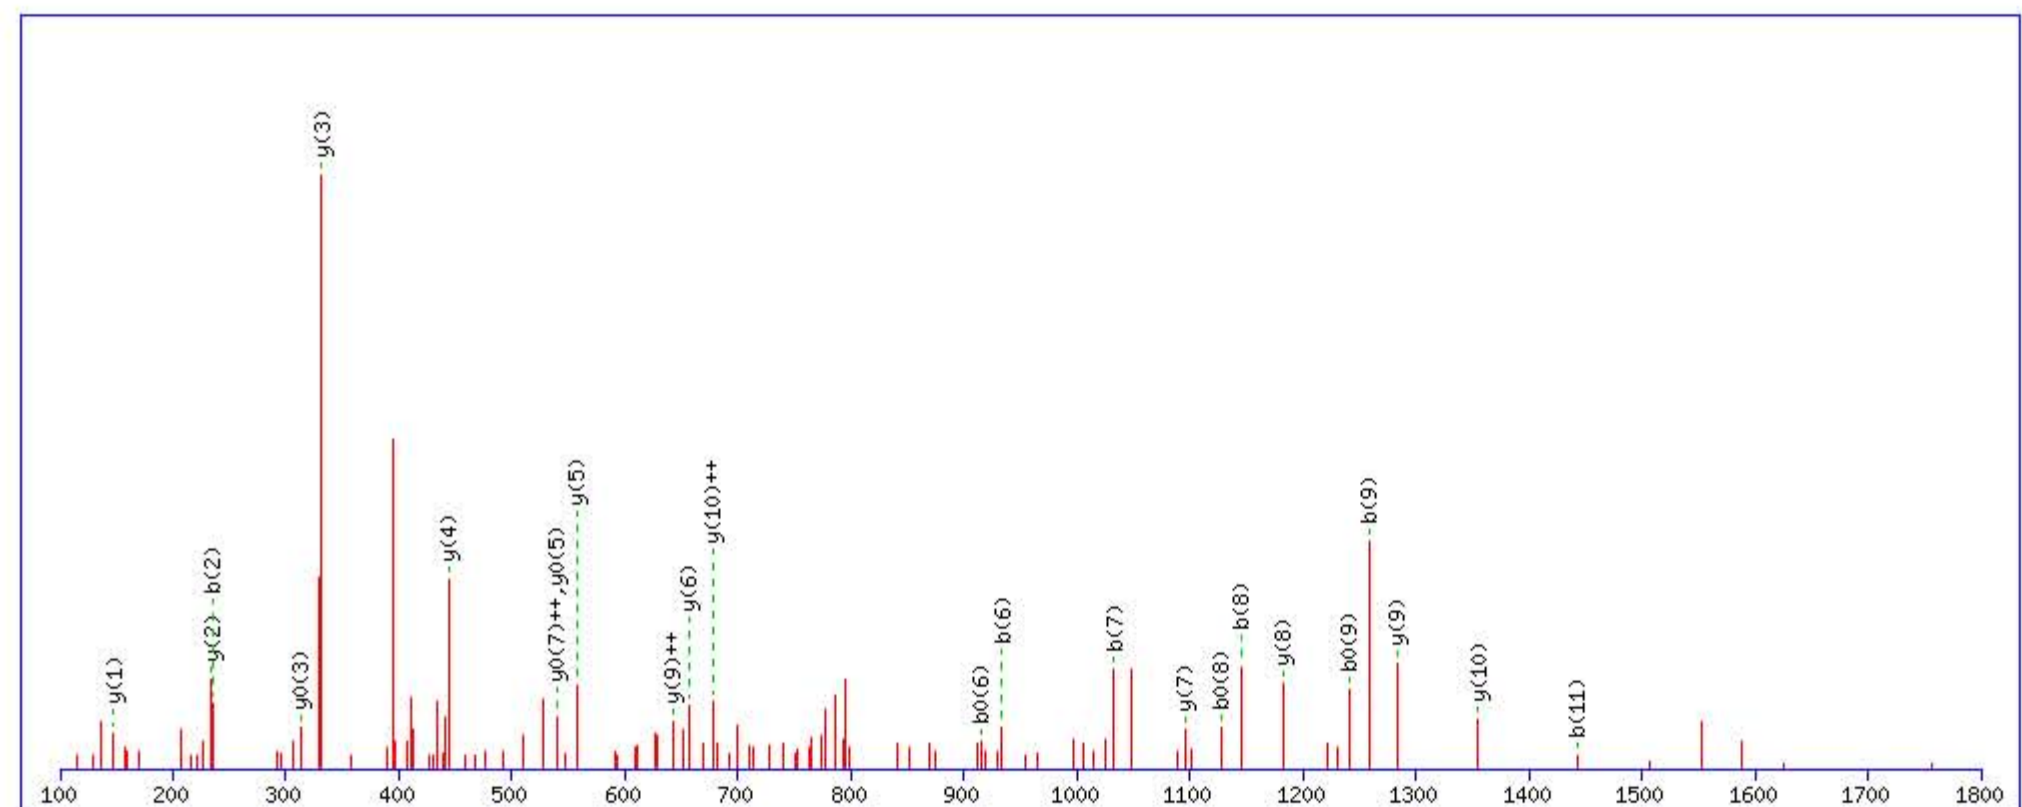

Monoisotopic mass of neutral peptide  $M_r(\text{calc})$ : 1587.869431

Fixed modifications: Carbamidomethyl (C) (apply to specified residues or termini only)

Variable modifications:

Q6 : Biotin:Thermo-21345 (Q)

Ions Score: 71 Expect: 1.5e-006

Matches : 24/114 fragment ions using 40 most intense peaks [\(help\)](#)

| #  | b                  | b <sup>++</sup> | b <sup>*</sup> | b <sup>*++</sup> | b <sup>0</sup>     | b <sup>0++</sup> | Seq. | y                  | y <sup>++</sup>   | y <sup>*</sup> | y <sup>*++</sup> | y <sup>0</sup>    | y <sup>0++</sup>  | #  |
|----|--------------------|-----------------|----------------|------------------|--------------------|------------------|------|--------------------|-------------------|----------------|------------------|-------------------|-------------------|----|
| 1  | 164.070605         | 82.538940       |                |                  |                    |                  | Y    |                    |                   |                |                  |                   |                   | 12 |
| 2  | <b>235.107719</b>  | 118.057498      |                |                  |                    |                  | A    | 1425.813399        | 713.410337        | 1408.786850    | 704.897063       | 1407.802834       | 704.405055        | 11 |
| 3  | 306.144833         | 153.576055      |                |                  |                    |                  | A    | <b>1354.776285</b> | <b>677.891780</b> | 1337.749736    | 669.378506       | 1336.765720       | 668.886498        | 10 |
| 4  | 407.192512         | 204.099894      |                |                  | 389.181947         | 195.094612       | T    | <b>1283.739171</b> | <b>642.373223</b> | 1266.712622    | 633.859949       | 1265.728606       | 633.367941        | 9  |
| 5  | 494.224540         | 247.615908      |                |                  | 476.213975         | 238.610626       | S    | <b>1182.691492</b> | 591.849384        | 1165.664943    | 583.336110       | 1164.680927       | 582.844101        | 8  |
| 6  | <b>933.449866</b>  | 467.228571      | 916.423317     | 458.715297       | <b>915.439301</b>  | 458.223289       | Q    | <b>1095.659464</b> | 548.333370        | 1078.632915    | 539.820096       | 1077.648899       | <b>539.328088</b> | 7  |
| 7  | <b>1032.518280</b> | 516.762778      | 1015.491731    | 508.249504       | 1014.507715        | 507.757496       | V    | <b>656.434138</b>  | 328.720707        | 639.407589     | 320.207432       | 638.423573        | 319.715424        | 6  |
| 8  | <b>1145.602344</b> | 573.304810      | 1128.575795    | 564.791536       | <b>1127.591779</b> | 564.299527       | L    | <b>557.365724</b>  | 279.186500        | 540.339175     | 270.673226       | <b>539.355159</b> | 270.181218        | 5  |
| 9  | <b>1258.686408</b> | 629.846842      | 1241.659859    | 621.333567       | <b>1240.675843</b> | 620.841559       | L    | <b>444.281660</b>  | 222.644468        | 427.255111     | 214.131193       | 426.271095        | 213.639186        | 4  |
| 10 | 1355.739172        | 678.373224      | 1338.712623    | 669.859949       | 1337.728607        | 669.367941       | P    | <b>331.197596</b>  | 166.102436        | 314.171047     | 157.589162       | <b>313.187031</b> | 157.097154        | 3  |
| 11 | <b>1442.771200</b> | 721.889238      | 1425.744651    | 713.375964       | 1424.760635        | 712.883955       | S    | <b>234.144832</b>  | 117.576054        | 217.118283     | 109.062780       | 216.134267        | 108.570772        | 2  |
| 12 |                    |                 |                |                  |                    |                  | K    | <b>147.112804</b>  | 74.060040         | 130.086255     | 65.546765        |                   |                   | 1  |

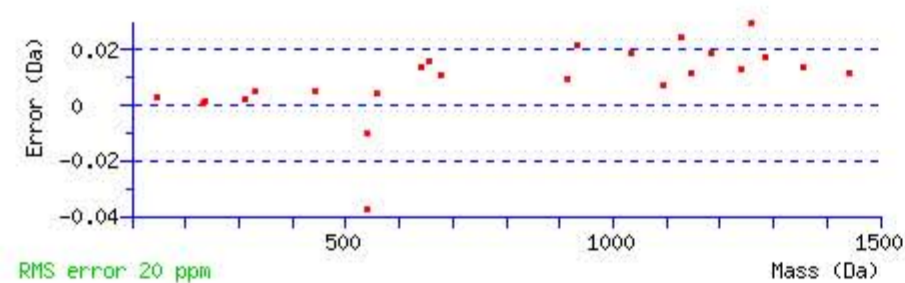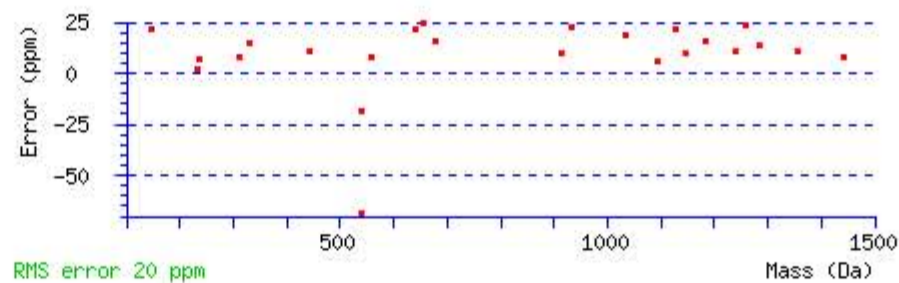

NCBI BLAST search of **YAATSQVLLPSK**

(Parameters: blastp, nr protein database, expect=20000, no filter, PAM30)

Other BLAST [web gateways](#)

## All matches to this query

| Score | $M_r(\text{calc})$ : | Delta     | Sequence                        |
|-------|----------------------|-----------|---------------------------------|
| 71.2  | 1587.869431          | 0.005777  | <a href="#">YAATSQVLLPSK</a>    |
| 19.5  | 1587.862045          | 0.013163  | <a href="#">VTGQNQEQLLLAK</a>   |
| 7.4   | 1587.891220          | -0.016012 | <a href="#">TIQTIVFLYSLYK</a>   |
| 6.4   | 1587.862045          | 0.013163  | <a href="#">SKDLTAADVVKQWK</a>  |
| 2.9   | 1587.862030          | 0.013178  | <a href="#">EDAKLSFKHVSSLK</a>  |
| 2.7   | 1587.888062          | -0.012854 | <a href="#">AMAAFQIVVLAK</a>    |
| 1.9   | 1587.884018          | -0.008810 | <a href="#">TKTKMSAAQALK</a>    |
| 1.0   | 1587.862045          | 0.013163  | <a href="#">DGASLSPATLFIQIR</a> |
| 0.5   | 1587.873276          | 0.001932  | <a href="#">DLLTGEQFIQLRR</a>   |
| 0.5   | 1587.855499          | 0.019709  | <a href="#">LCGLRILQPYAER</a>   |



# MASCOT Search Results

## Peptide View

MS/MS Fragmentation of **LICQATGFSPR**

Found in **IGHM\_HUMAN**, Ig mu chain C region OS=Homo sapiens GN=IGHM PE=1 SV=3

Match to Query 37081: 1559.798648 from(780.906600,2+) rtinseconds(1982) index(38568)  
 Title: Locus:1.1.1.2712.22 File:"2013-07-02 CLN FXIII 30 min 2nd F 3.wiff"  
 Data file C:\Program Files (x86)\Matrix Science\Mascot Daemon\mgf2 FXIII 30 min 2nd\mascot\_daemon\_merge.mgf

Click mouse within plot area to zoom in by factor of two about that point  
 Or, Plot from  to  Da   
 Label all possible matches  Label matches used for scoring



Monoisotopic mass of neutral peptide Mr(calc): 1559.795242  
 Fixed modifications: Carbamidomethyl (C) (apply to specified residues or termini only)  
 Variable modifications:  
 Q4 : Biotin:Thermo-21345 (Q)  
 Ions Score: 59 Expect: 1.2e-005  
 Matches : 29/100 fragment ions using 56 most intense peaks [\(help\)](#)

| #  | b                  | b <sup>++</sup> | b <sup>*</sup> | b <sup>*++</sup> | b <sup>0</sup>     | b <sup>0++</sup> | Seq. | y                  | y <sup>++</sup>   | y <sup>*</sup>    | y <sup>*++</sup> | y <sup>0</sup>     | y <sup>0++</sup>  | #  |
|----|--------------------|-----------------|----------------|------------------|--------------------|------------------|------|--------------------|-------------------|-------------------|------------------|--------------------|-------------------|----|
| 1  | 114.091340         | 57.549308       |                |                  |                    |                  | L    |                    |                   |                   |                  |                    |                   | 11 |
| 2  | <b>227.175404</b>  | 114.091340      |                |                  |                    |                  | I    | <b>1447.718454</b> | <b>724.362865</b> | 1430.691905       | 715.849591       | 1429.707889        | 715.357583        | 10 |
| 3  | <b>387.206053</b>  | 194.106664      |                |                  |                    |                  | C    | <b>1334.634390</b> | <b>667.820833</b> | 1317.607841       | 659.307559       | <b>1316.623825</b> | <b>658.815551</b> | 9  |
| 4  | <b>826.431379</b>  | 413.719328      | 809.404830     | 405.206053       |                    |                  | Q    | <b>1174.603741</b> | <b>587.805509</b> | 1157.577192       | 579.292234       | <b>1156.593176</b> | 578.800226        | 8  |
| 5  | <b>897.468493</b>  | 449.237885      | 880.441944     | 440.724610       |                    |                  | A    | <b>735.378415</b>  | 368.192846        | 718.351866        | 359.679571       | 717.367850         | <b>359.187563</b> | 7  |
| 6  | <b>998.516172</b>  | 499.761724      | 981.489623     | 491.248449       | <b>980.505607</b>  | 490.756441       | T    | <b>664.341301</b>  | 332.674289        | 647.314752        | 324.161014       | 646.330736         | 323.669006        | 6  |
| 7  | <b>1055.537636</b> | 528.272456      | 1038.511087    | 519.759182       | 1037.527071        | 519.267174       | G    | <b>563.293622</b>  | 282.150449        | 546.267073        | 273.637175       | 545.283057         | 273.145167        | 5  |
| 8  | <b>1202.606050</b> | 601.806663      | 1185.579501    | 593.293389       | <b>1184.595485</b> | 592.801381       | F    | <b>506.272158</b>  | 253.639717        | 489.245609        | 245.126443       | 488.261593         | 244.634435        | 4  |
| 9  | <b>1289.638078</b> | 645.322677      | 1272.611529    | 636.809403       | <b>1271.627513</b> | 636.317395       | S    | <b>359.203744</b>  | 180.105510        | 342.177195        | 171.592236       | 341.193179         | 171.100228        | 3  |
| 10 | 1386.690842        | 693.849059      | 1369.664293    | 685.335785       | 1368.680277        | 684.843777       | P    | <b>272.171716</b>  | 136.589496        | <b>255.145167</b> | 128.076221       |                    |                   | 2  |
| 11 |                    |                 |                |                  |                    |                  | R    | <b>175.118952</b>  | 88.063114         | 158.092403        | 79.549839        |                    |                   | 1  |



NCBI BLAST search of **LICQATGFSPR**  
 (Parameters: blastp, nr protein database, expect=20000, no filter, PAM30)  
 Other BLAST [web gateways](#)

### All matches to this query

| Score | Mr(calc):   | Delta     | Sequence                       |
|-------|-------------|-----------|--------------------------------|
| 58.6  | 1559.795242 | 0.003406  | <a href="#">LICQATGFSPR</a>    |
| 5.8   | 1559.820190 | -0.021542 | <a href="#">MTRSATQAAKQVPR</a> |
| 5.2   | 1559.808960 | -0.010312 | <a href="#">LDRLSGLADQMVAR</a> |
| 0.1   | 1559.808975 | -0.010327 | <a href="#">LLDRDACDITVRVK</a> |



# MASCOT Search Results

## Peptide View

MS/MS Fragmentation of **SFEGLGQLEVLTLTDHNLQLEVK**

Found in **ALS\_HUMAN**, Insulin-like growth factor-binding protein complex acid labile subunit OS=Homo sapiens GN=IGFALS PE=1 SV=1

Match to Query 46389: 2807.457222 from(936.826350,3+) rtinseconds(2700) index(43052)

Title: Locus:1.1.1.2961.19 File:"2013-07-02 CLN FXIII 30 min 2nd F 3.wiff"

Data file C:\Program Files (x86)\Matrix Science\Mascot Daemon\mgf2 FXIII 30 min 2nd\mascot\_daemon\_merge.mgf

Click mouse within plot area to zoom in by factor of two about that point

Or, Plot from  to  Da

Label all possible matches  Label matches used for scoring

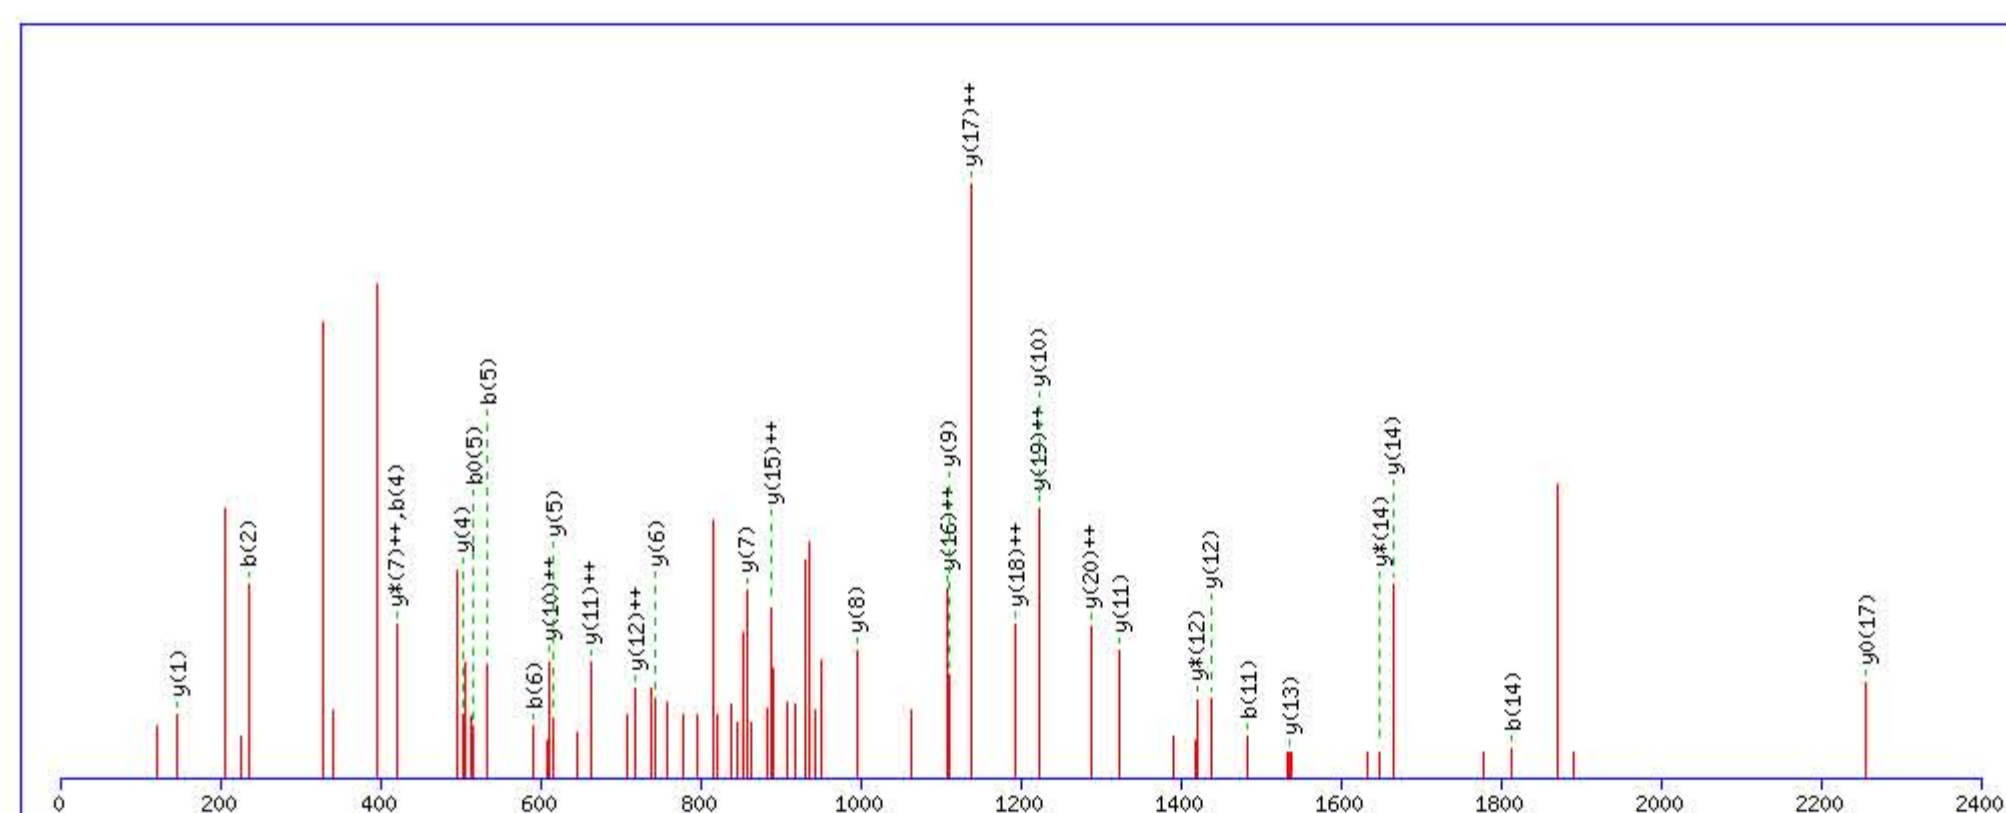

Monoisotopic mass of neutral peptide Mr(calc): 2807.452759

Fixed modifications: Carbamidomethyl (C) (apply to specified residues or termini only)

Variable modifications:

Q7 : Biotin:Thermo-21345 (Q)

Ions Score: 59 Expect: 3.1e-005

Matches : 32/236 fragment ions using 74 most intense peaks [\(help\)](#)

| #  | b                  | b <sup>++</sup> | b <sup>*</sup> | b <sup>+++</sup> | b <sup>0</sup>    | b <sup>0++</sup> | Seq. | y                  | y <sup>++</sup>    | y <sup>*</sup>     | y <sup>+++</sup>  | y <sup>0</sup>     | y <sup>0++</sup> | #  |
|----|--------------------|-----------------|----------------|------------------|-------------------|------------------|------|--------------------|--------------------|--------------------|-------------------|--------------------|------------------|----|
| 1  | 88.039304          | 44.523290       |                |                  | 70.028739         | 35.518008        | S    |                    |                    |                    |                   |                    |                  | 22 |
| 2  | <b>235.107718</b>  | 118.057497      |                |                  | 217.097153        | 109.052214       | F    | 2721.428016        | 1361.217646        | 2704.401467        | 1352.704371       | 2703.417451        | 1352.212363      | 21 |
| 3  | 364.150311         | 182.578793      |                |                  | 346.139746        | 173.573511       | E    | 2574.359602        | <b>1287.683439</b> | 2557.333053        | 1279.170164       | 2556.349037        | 1278.678156      | 20 |
| 4  | <b>421.171775</b>  | 211.089525      |                |                  | 403.161210        | 202.084243       | G    | 2445.317009        | <b>1223.162142</b> | 2428.290460        | 1214.648868       | 2427.306444        | 1214.156860      | 19 |
| 5  | <b>534.255839</b>  | 267.631558      |                |                  | <b>516.245274</b> | 258.626275       | L    | 2388.295545        | <b>1194.651410</b> | 2371.268996        | 1186.138136       | 2370.284980        | 1185.646128      | 18 |
| 6  | <b>591.277303</b>  | 296.142290      |                |                  | 573.266738        | 287.137007       | G    | 2275.211481        | <b>1138.109378</b> | 2258.184932        | 1129.596104       | <b>2257.200916</b> | 1129.104096      | 17 |
| 7  | 1030.502629        | 515.754953      | 1013.476080    | 507.241678       | 1012.492064       | 506.749670       | Q    | 2218.190017        | <b>1109.598646</b> | 2201.163468        | 1101.085372       | 2200.179452        | 1100.593364      | 16 |
| 8  | 1143.586693        | 572.296985      | 1126.560144    | 563.783710       | 1125.576128       | 563.291702       | L    | 1778.964691        | <b>889.985984</b>  | 1761.938142        | 881.472709        | 1760.954126        | 880.980701       | 15 |
| 9  | 1272.629286        | 636.818281      | 1255.602737    | 628.305007       | 1254.618721       | 627.812999       | E    | <b>1665.880627</b> | 833.443952         | <b>1648.854078</b> | 824.930677        | 1647.870062        | 824.438669       | 14 |
| 10 | 1371.697700        | 686.352488      | 1354.671151    | 677.839214       | 1353.687135       | 677.347206       | V    | <b>1536.838034</b> | 768.922655         | 1519.811485        | 760.409381        | 1518.827469        | 759.917373       | 13 |
| 11 | <b>1484.781764</b> | 742.894520      | 1467.755215    | 734.381246       | 1466.771199       | 733.889238       | L    | <b>1437.769620</b> | <b>719.388448</b>  | <b>1420.743071</b> | 710.875174        | 1419.759055        | 710.383166       | 12 |
| 12 | 1585.829443        | 793.418360      | 1568.802894    | 784.905085       | 1567.818878       | 784.413077       | T    | <b>1324.685556</b> | <b>662.846416</b>  | 1307.659007        | 654.333142        | 1306.674991        | 653.841134       | 11 |
| 13 | 1698.913507        | 849.960392      | 1681.886958    | 841.447117       | 1680.902942       | 840.955109       | L    | <b>1223.637877</b> | <b>612.322577</b>  | 1206.611328        | 603.809302        | 1205.627312        | 603.317294       | 10 |
| 14 | <b>1813.940450</b> | 907.473863      | 1796.913901    | 898.960589       | 1795.929885       | 898.468581       | D    | <b>1110.553813</b> | 555.780545         | 1093.527264        | 547.267270        | 1092.543248        | 546.775262       | 9  |
| 15 | 1950.999362        | 976.003319      | 1933.972813    | 967.490045       | 1932.988797       | 966.998037       | H    | <b>995.526870</b>  | 498.267073         | 978.500321         | 489.753799        | 977.516305         | 489.261791       | 8  |
| 16 | 2065.042289        | 1033.024782     | 2048.015740    | 1024.511508      | 2047.031724       | 1024.019500      | N    | <b>858.467958</b>  | 429.737617         | 841.441409         | <b>421.224343</b> | 840.457393         | 420.732335       | 7  |
| 17 | 2193.100867        | 1097.054072     | 2176.074318    | 1088.540797      | 2175.090302       | 1088.048789      | Q    | <b>744.425031</b>  | 372.716154         | 727.398482         | 364.202879        | 726.414466         | 363.710871       | 6  |
| 18 | 2306.184931        | 1153.596104     | 2289.158382    | 1145.082829      | 2288.174366       | 1144.590821      | L    | <b>616.366453</b>  | 308.686865         | 599.339904         | 300.173590        | 598.355888         | 299.681582       | 5  |
| 19 | 2434.243509        | 1217.625393     | 2417.216960    | 1209.112118      | 2416.232944       | 1208.620110      | Q    | <b>503.282389</b>  | 252.144833         | 486.255840         | 243.631558        | 485.271824         | 243.139550       | 4  |
| 20 | 2563.286102        | 1282.146689     | 2546.259553    | 1273.633415      | 2545.275537       | 1273.141407      | E    | 375.223811         | 188.115543         | 358.197262         | 179.602269        | 357.213246         | 179.110261       | 3  |
| 21 | 2662.354516        | 1331.680896     | 2645.327967    | 1323.167622      | 2644.343951       | 1322.675614      | V    | 246.181218         | 123.594247         | 229.154669         | 115.080972        |                    |                  | 2  |
| 22 |                    |                 |                |                  |                   |                  | K    | <b>147.112804</b>  | 74.060040          | 130.086255         | 65.546765         |                    |                  | 1  |

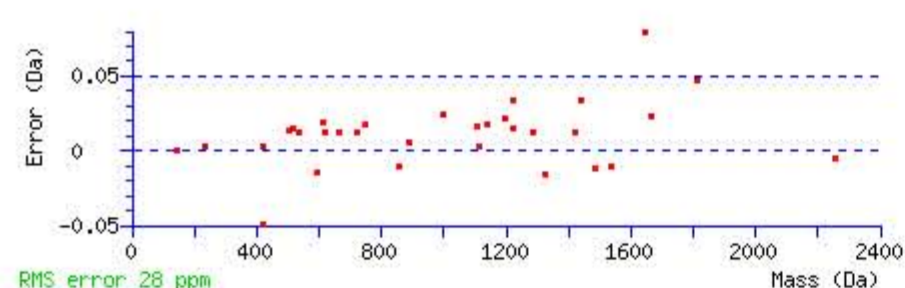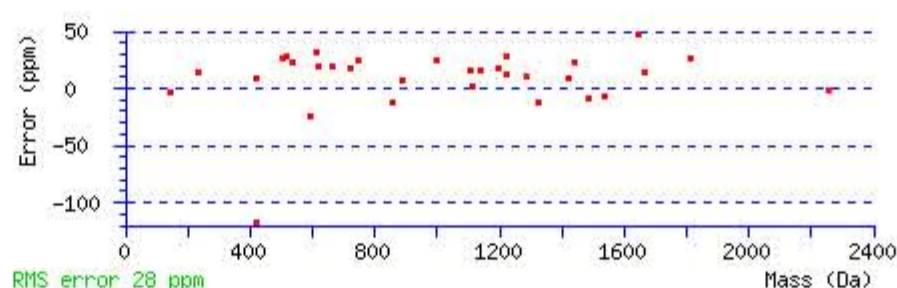

NCBI BLAST search of [SFEGLGQLEVLTLTDHNLQLEVK](#)

(Parameters: blastp, nr protein database, expect=20000, no filter, PAM30)

Other BLAST [web gateways](#)

All matches to this query

| Score | Mr(calc):   | Delta    | Sequence                                |
|-------|-------------|----------|-----------------------------------------|
| 58.9  | 2807.452759 | 0.004463 | <a href="#">SFEGLGQLEVLTLTDHNLQLEVK</a> |
| 1.6   | 2807.452759 | 0.004463 | <a href="#">SFEGLGQLEVLTLTDHNLQLEVK</a> |
| 0.6   | 2807.452759 | 0.004463 | <a href="#">SFEGLGQLEVLTLTDHNLQLEVK</a> |

Mascot: <http://www.matrixscience.com/>



# MASCOT SEARCH RESULTS

## Peptide View

MS/MS Fragmentation of **ELAAQTIK**

Found in **ITIH1\_HUMAN**, Inter-alpha-trypsin inhibitor heavy chain H1 OS=Homo sapiens GN=ITIH1 PE=1 SV=3

Match to Query 24753: 1183.659888 from(592.837220,2+) rtinseconds(1708) index(53837)

Title: Locus:1.1.1.3081.7 File:"2013-07-02 CLN FXIII 30 min 2nd F 4.wiff"

Data file C:\Program Files (x86)\Matrix Science\Mascot Daemon\mgf2 FXIII 30 min 2nd\mascot\_daemon\_merge.mgf

Click mouse within plot area to zoom in by factor of two about that point

Or, Plot from  to  Da

Label all possible matches  Label matches used for scoring

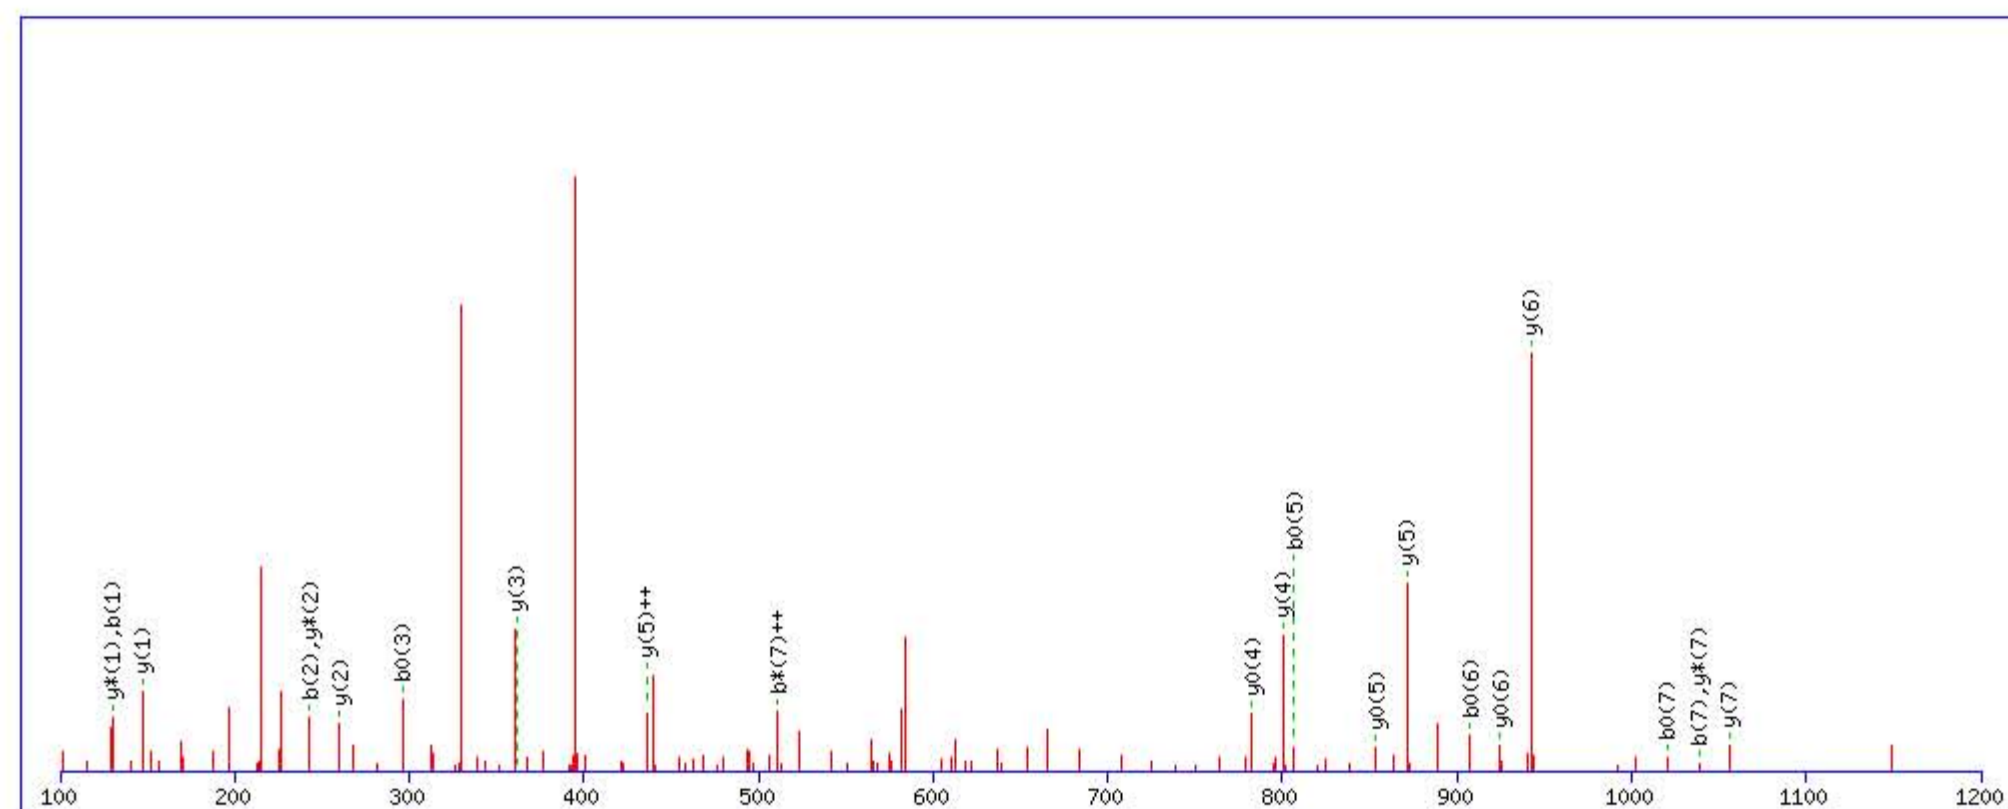

Monoisotopic mass of neutral peptide Mr(calc): 1183.663452

Fixed modifications: Carbamidomethyl (C) (apply to specified residues or termini only)

Variable modifications:

Q5 : Biotin:Thermo-21345 (Q)

Ions Score: 30 Expect: 0.023

Matches : 22/72 fragment ions using 50 most intense peaks [\(help\)](#)

| # | b           | b <sup>++</sup> | b <sup>*</sup> | b <sup>***</sup> | b <sup>0</sup> | b <sup>0++</sup> | Seq. | y           | y <sup>++</sup> | y <sup>*</sup> | y <sup>***</sup> | y <sup>0</sup> | y <sup>0++</sup> | # |
|---|-------------|-----------------|----------------|------------------|----------------|------------------|------|-------------|-----------------|----------------|------------------|----------------|------------------|---|
| 1 | 130.049869  | 65.528572       |                |                  | 112.039304     | 56.523290        | E    |             |                 |                |                  |                |                  | 8 |
| 2 | 243.133933  | 122.070605      |                |                  | 225.123368     | 113.065322       | L    | 1055.628165 | 528.317720      | 1038.601616    | 519.804446       | 1037.617600    | 519.312438       | 7 |
| 3 | 314.171047  | 157.589161      |                |                  | 296.160482     | 148.583879       | A    | 942.544101  | 471.775689      | 925.517552     | 463.262414       | 924.533536     | 462.770406       | 6 |
| 4 | 385.208161  | 193.107718      |                |                  | 367.197596     | 184.102436       | A    | 871.506987  | 436.257132      | 854.480438     | 427.743857       | 853.496422     | 427.251849       | 5 |
| 5 | 824.433487  | 412.720382      | 807.406938     | 404.207107       | 806.422922     | 403.715099       | Q    | 800.469873  | 400.738575      | 783.443324     | 392.225300       | 782.459308     | 391.733292       | 4 |
| 6 | 925.481166  | 463.244221      | 908.454617     | 454.730947       | 907.470601     | 454.238939       | T    | 361.244547  | 181.125911      | 344.217998     | 172.612637       | 343.233982     | 172.120629       | 3 |
| 7 | 1038.565230 | 519.786253      | 1021.538681    | 511.272978       | 1020.554665    | 510.780970       | I    | 260.196868  | 130.602072      | 243.170319     | 122.088797       |                |                  | 2 |
| 8 |             |                 |                |                  |                |                  | K    | 147.112804  | 74.060040       | 130.086255     | 65.546765        |                |                  | 1 |

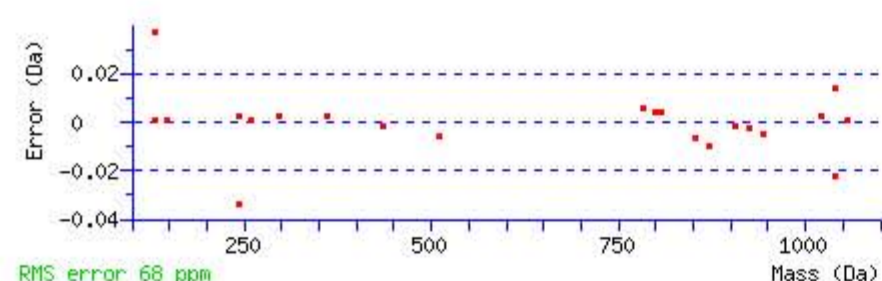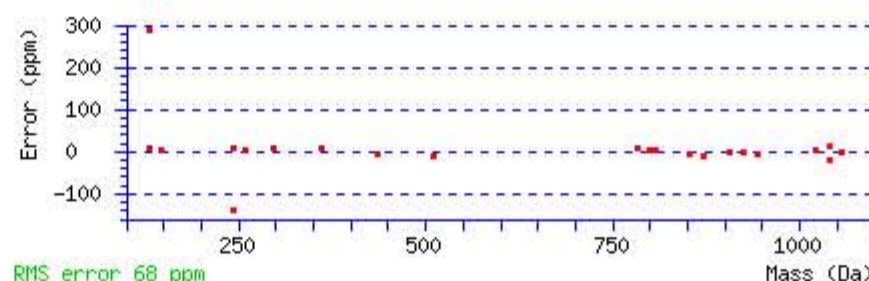

NCBI BLAST search of **ELAAQTIK**

(Parameters: blastp, nr protein database, expect=20000, no filter, PAM30)

Other BLAST [web gateways](#)

All matches to this query

| Score | Mr(calc):   | Delta     | Sequence                    |
|-------|-------------|-----------|-----------------------------|
| 29.8  | 1183.663452 | -0.003564 | <a href="#">ELAAQTIK</a>    |
| 28.6  | 1183.663452 | -0.003564 | <a href="#">ELAAQTIK</a>    |
| 13.2  | 1183.663467 | -0.003579 | <a href="#">TQLSPSIK</a>    |
| 7.4   | 1183.667282 | -0.007394 | <a href="#">ELAERQGLLR</a>  |
| 6.8   | 1183.649551 | 0.010337  | <a href="#">KVCGHKQSLK</a>  |
| 6.3   | 1183.674683 | -0.014795 | <a href="#">ELIQRK</a>      |
| 6.3   | 1183.674683 | -0.014795 | <a href="#">ELLSRQK</a>     |
| 6.3   | 1183.667282 | -0.007394 | <a href="#">ELQRLQAAQK</a>  |
| 6.3   | 1183.674683 | -0.014795 | <a href="#">ELRQLSK</a>     |
| 5.5   | 1183.660080 | -0.000192 | <a href="#">AIEAVAISPWK</a> |



# MASCOT Search Results

## Peptide View

MS/MS Fragmentation of **LDAQASFLPK**

Found in **ITIH1\_HUMAN**, Inter-alpha-trypsin inhibitor heavy chain H1 OS=Homo sapiens GN=ITIH1 PE=1 SV=3

Match to Query 32091: 1399.753548 from(700.884050,2+) rtinseconds(2216) index(57131)

Title: Locus:1.1.1.3257.14 File:"2013-07-02 CLN FXIII 30 min 2nd F 4.wiff"

Data file C:\Program Files (x86)\Matrix Science\Mascot Daemon\mgf2 FXIII 30 min 2nd\mascot\_daemon\_merge.mgf

Click mouse within plot area to zoom in by factor of two about that point

Or, Plot from  to  Da

Label all possible matches  Label matches used for scoring

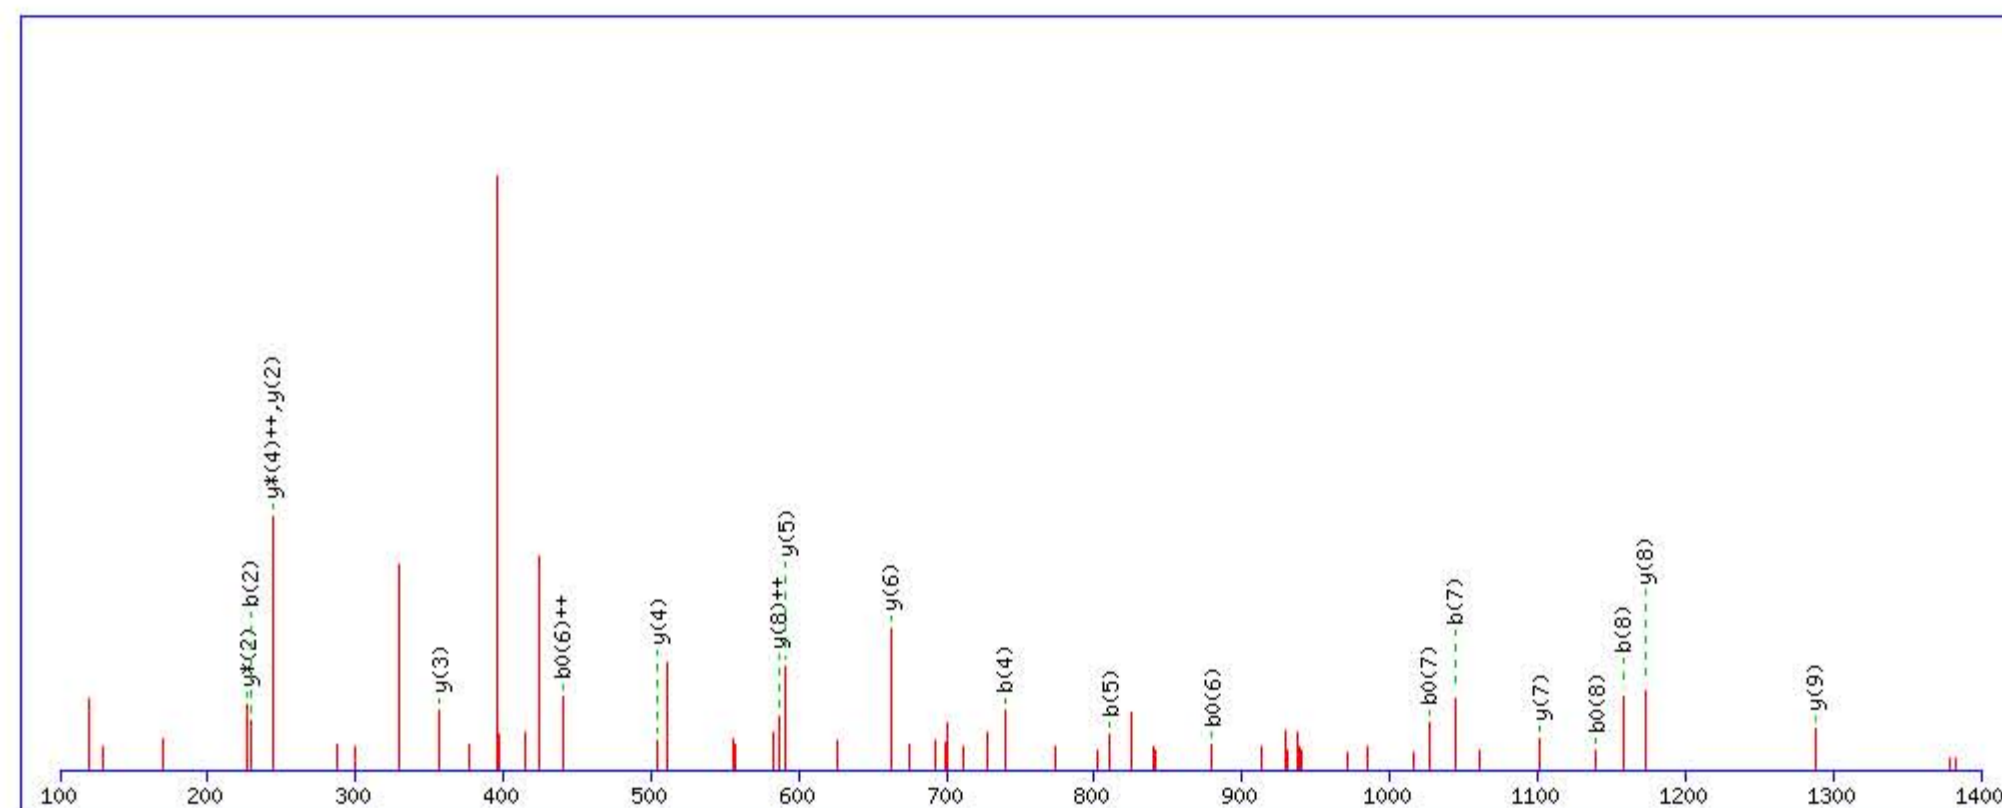

Monoisotopic mass of neutral peptide  $M_r(\text{calc})$ : 1399.753342

Fixed modifications: Carbamidomethyl (C) (apply to specified residues or termini only)

Variable modifications:

Q4 : Biotin:Thermo-21345 (Q)

Ions Score: 39 Expect: 0.0022

Matches : 20/92 fragment ions using 45 most intense peaks [\(help\)](#)

| #  | b                  | b <sup>++</sup> | b <sup>+</sup> | b <sup>*++</sup> | b <sup>0</sup>     | b <sup>0++</sup>  | Seq. | y                  | y <sup>++</sup>   | y <sup>+</sup>    | y <sup>*++</sup>  | y <sup>0</sup> | y <sup>0++</sup> | #  |
|----|--------------------|-----------------|----------------|------------------|--------------------|-------------------|------|--------------------|-------------------|-------------------|-------------------|----------------|------------------|----|
| 1  | 114.091340         | 57.549308       |                |                  |                    |                   | L    |                    |                   |                   |                   |                |                  | 10 |
| 2  | <b>229.118283</b>  | 115.062779      |                |                  | 211.107718         | 106.057497        | D    | <b>1287.676571</b> | 644.341924        | 1270.650022       | 635.828649        | 1269.666006    | 635.336641       | 9  |
| 3  | 300.155397         | 150.581336      |                |                  | 282.144832         | 141.576054        | A    | <b>1172.649628</b> | <b>586.828452</b> | 1155.623079       | 578.315178        | 1154.639063    | 577.823169       | 8  |
| 4  | <b>739.380723</b>  | 370.194000      | 722.354174     | 361.680725       | 721.370158         | 361.188717        | Q    | <b>1101.612514</b> | 551.309895        | 1084.585965       | 542.796621        | 1083.601949    | 542.304612       | 7  |
| 5  | <b>810.417837</b>  | 405.712557      | 793.391288     | 397.199282       | 792.407272         | 396.707274        | A    | <b>662.387188</b>  | 331.697232        | 645.360639        | 323.183957        | 644.376623     | 322.691949       | 6  |
| 6  | 897.449865         | 449.228570      | 880.423316     | 440.715296       | <b>879.439300</b>  | <b>440.223288</b> | S    | <b>591.350074</b>  | 296.178675        | 574.323525        | 287.665400        | 573.339509     | 287.173392       | 5  |
| 7  | <b>1044.518279</b> | 522.762777      | 1027.491730    | 514.249503       | <b>1026.507714</b> | 513.757495        | F    | <b>504.318046</b>  | 252.662661        | 487.291497        | <b>244.149386</b> |                |                  | 4  |
| 8  | <b>1157.602343</b> | 579.304809      | 1140.575794    | 570.791535       | <b>1139.591778</b> | 570.299527        | L    | <b>357.249632</b>  | 179.128454        | 340.223083        | 170.615179        |                |                  | 3  |
| 9  | 1254.655107        | 627.831191      | 1237.628558    | 619.317917       | 1236.644542        | 618.825909        | P    | <b>244.165568</b>  | 122.586422        | <b>227.139019</b> | 114.073148        |                |                  | 2  |
| 10 |                    |                 |                |                  |                    |                   | K    | 147.112804         | 74.060040         | 130.086255        | 65.546765         |                |                  | 1  |

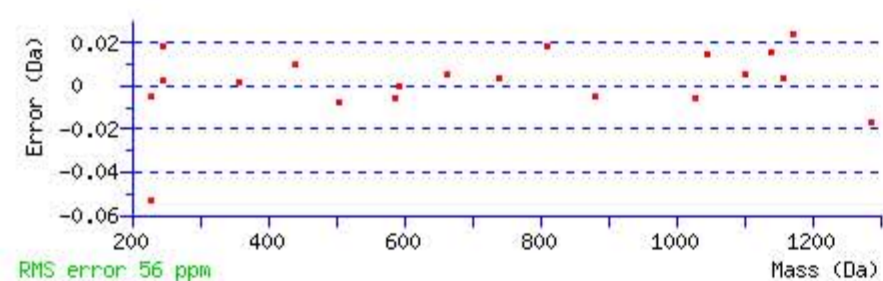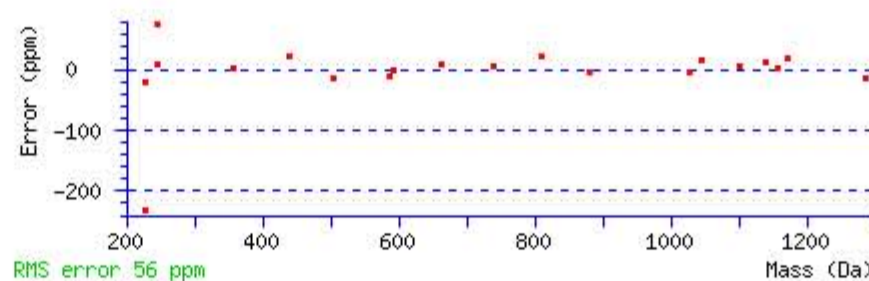

NCBI BLAST search of **LDAQASFLPK**

(Parameters: blastp, nr protein database, expect=20000, no filter, PAM30)

Other BLAST [web gateways](#)

All matches to this query

| Score | $M_r(\text{calc})$ : | Delta    | Sequence                      |
|-------|----------------------|----------|-------------------------------|
| 38.5  | 1399.753342          | 0.000206 | <a href="#">LDAQASFLPK</a>    |
| 9.6   | 1399.745972          | 0.007576 | <a href="#">IDAATGIPVTTWR</a> |
| 1.8   | 1399.738083          | 0.015465 | <a href="#">QASDLSLIDK</a>    |

Mascot: <http://www.matrixscience.com/>



# MASCOT Search Results

## Peptide View

MS/MS Fragmentation of **GSLVQASEANLQAAQDFVR**

Found in **ITIH1\_HUMAN**, Inter-alpha-trypsin inhibitor heavy chain H1 OS=Homo sapiens GN=ITIH1 PE=1 SV=3

Match to Query 56358: 2314.177452 from(772.399760,3+) rtinseconds(2484) index(58542)

Title: Locus:1.1.1.3350.20 File:"2013-07-02 CLN FXIII 30 min 2nd F 4.wiff"

Data file C:\Program Files (x86)\Matrix Science\Mascot Daemon\mgf2 FXIII 30 min 2nd\mascot\_daemon\_merge.mgf

Click mouse within plot area to zoom in by factor of two about that point

Or, Plot from  to  Da

Label all possible matches  Label matches used for scoring

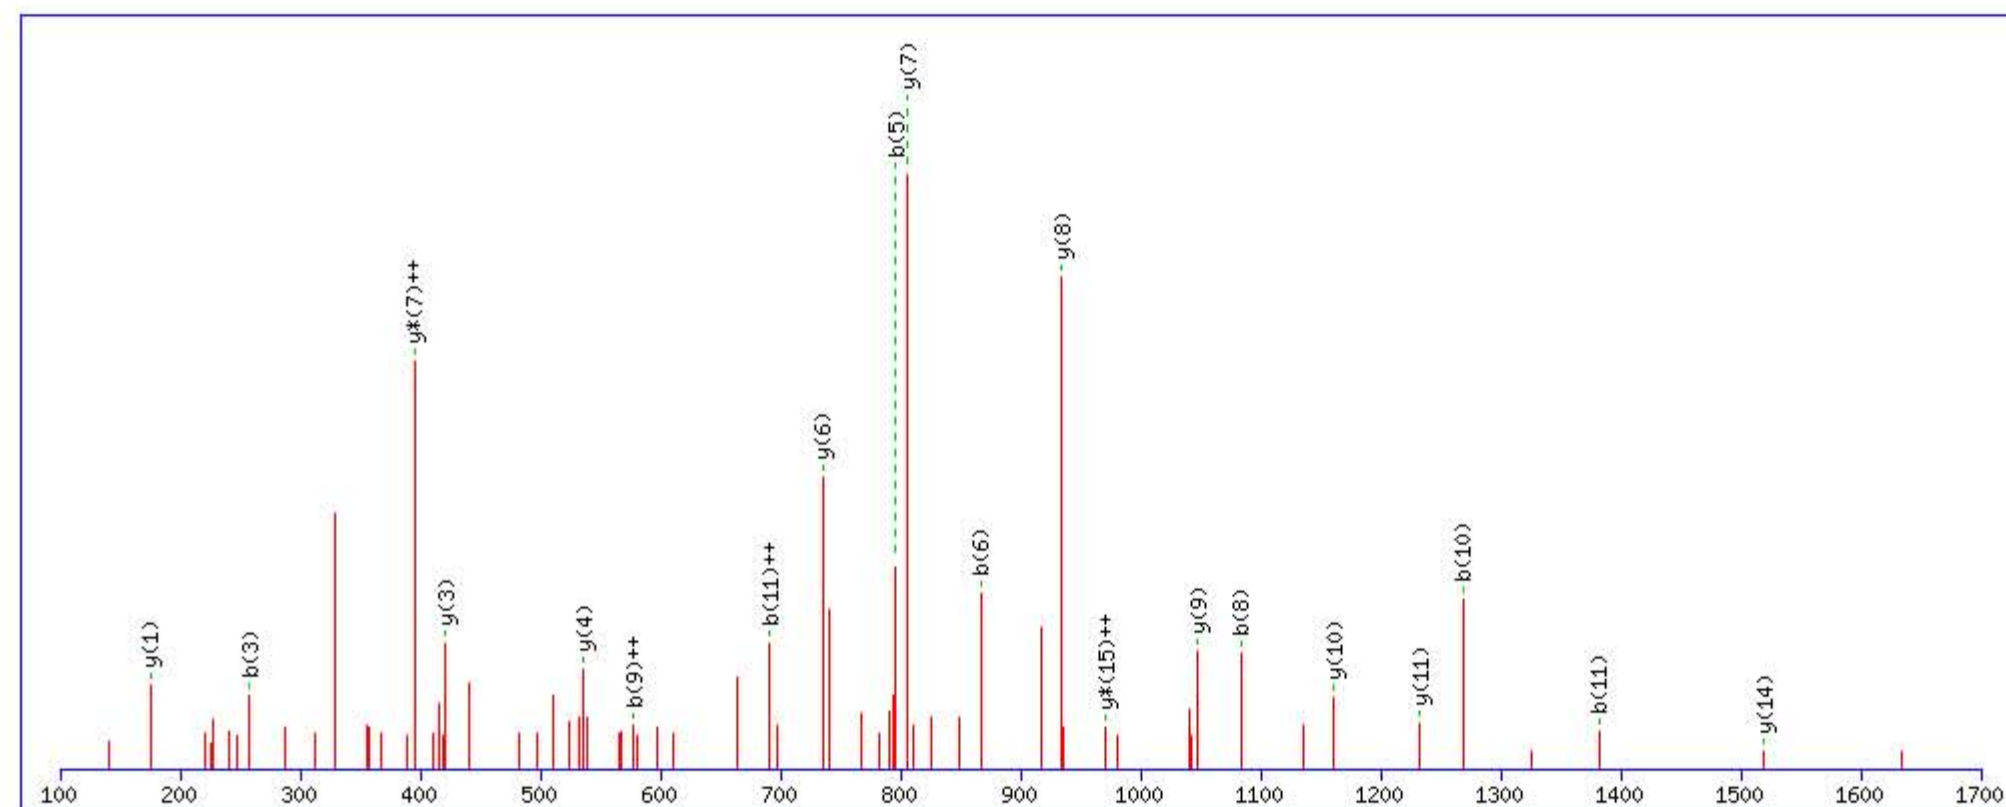

Monoisotopic mass of neutral peptide Mr(calc): 2314.173950

Fixed modifications: Carbamidomethyl (C) (apply to specified residues or termini only)

Variable modifications:

Q5 : Biotin:Thermo-21345 (Q)

Ions Score: 74 Expect: 1.8e-007

Matches : 20/200 fragment ions using 27 most intense peaks [\(help\)](#)

| #  | b                  | b <sup>++</sup>   | b <sup>*</sup> | b <sup>*++</sup> | b <sup>0</sup> | b <sup>0++</sup> | Seq. | y                  | y <sup>++</sup> | y <sup>*</sup> | y <sup>*++</sup>  | y <sup>0</sup> | y <sup>0++</sup> | #  |
|----|--------------------|-------------------|----------------|------------------|----------------|------------------|------|--------------------|-----------------|----------------|-------------------|----------------|------------------|----|
| 1  | 58.028740          | 29.518008         |                |                  |                |                  | G    |                    |                 |                |                   |                |                  | 19 |
| 2  | 145.060768         | 73.034022         |                |                  | 127.050203     | 64.028740        | S    | 2258.159779        | 1129.583527     | 2241.133230    | 1121.070253       | 2240.149214    | 1120.578245      | 18 |
| 3  | <b>258.144832</b>  | 129.576054        |                |                  | 240.134267     | 120.570772       | L    | 2171.127751        | 1086.067513     | 2154.101202    | 1077.554239       | 2153.117186    | 1077.062231      | 17 |
| 4  | 357.213246         | 179.110261        |                |                  | 339.202681     | 170.104979       | V    | 2058.043687        | 1029.525481     | 2041.017138    | 1021.012207       | 2040.033122    | 1020.520199      | 16 |
| 5  | <b>796.438572</b>  | 398.722924        | 779.412023     | 390.209650       | 778.428007     | 389.717642       | Q    | 1958.975273        | 979.991274      | 1941.948724    | <b>971.478000</b> | 1940.964708    | 970.985992       | 15 |
| 6  | <b>867.475686</b>  | 434.241481        | 850.449137     | 425.728207       | 849.465121     | 425.236199       | A    | <b>1519.749947</b> | 760.378611      | 1502.723398    | 751.865337        | 1501.739382    | 751.373329       | 14 |
| 7  | 954.507714         | 477.757495        | 937.481165     | 469.244220       | 936.497149     | 468.752212       | S    | 1448.712833        | 724.860054      | 1431.686284    | 716.346780        | 1430.702268    | 715.854772       | 13 |
| 8  | <b>1083.550307</b> | 542.278792        | 1066.523758    | 533.765517       | 1065.539742    | 533.273509       | E    | 1361.680805        | 681.344040      | 1344.654256    | 672.830766        | 1343.670240    | 672.338758       | 12 |
| 9  | 1154.587421        | <b>577.797349</b> | 1137.560872    | 569.284074       | 1136.576856    | 568.792066       | A    | <b>1232.638212</b> | 616.822744      | 1215.611663    | 608.309469        | 1214.627647    | 607.817461       | 11 |
| 10 | <b>1268.630348</b> | 634.818812        | 1251.603799    | 626.305538       | 1250.619783    | 625.813529       | N    | <b>1161.601098</b> | 581.304187      | 1144.574549    | 572.790912        | 1143.590533    | 572.298904       | 10 |
| 11 | <b>1381.714412</b> | <b>691.360844</b> | 1364.687863    | 682.847569       | 1363.703847    | 682.355561       | L    | <b>1047.558171</b> | 524.282723      | 1030.531622    | 515.769449        | 1029.547606    | 515.277441       | 9  |
| 12 | 1509.772990        | 755.390133        | 1492.746441    | 746.876858       | 1491.762425    | 746.384850       | Q    | <b>934.474107</b>  | 467.740692      | 917.447558     | 459.227417        | 916.463542     | 458.735409       | 8  |
| 13 | 1580.810104        | 790.908690        | 1563.783555    | 782.395415       | 1562.799539    | 781.903407       | A    | <b>806.415529</b>  | 403.711403      | 789.388980     | <b>395.198128</b> | 788.404964     | 394.706120       | 7  |
| 14 | 1651.847218        | 826.427247        | 1634.820669    | 817.913972       | 1633.836653    | 817.421964       | A    | <b>735.378415</b>  | 368.192846      | 718.351866     | 359.679571        | 717.367850     | 359.187563       | 6  |
| 15 | 1779.905796        | 890.456536        | 1762.879247    | 881.943261       | 1761.895231    | 881.451253       | Q    | 664.341301         | 332.674289      | 647.314752     | 324.161014        | 646.330736     | 323.669006       | 5  |
| 16 | 1894.932739        | 947.970007        | 1877.906190    | 939.456733       | 1876.922174    | 938.964725       | D    | <b>536.282723</b>  | 268.645000      | 519.256174     | 260.131725        | 518.272158     | 259.639717       | 4  |
| 17 | 2042.001153        | 1021.504215       | 2024.974604    | 1012.990940      | 2023.990588    | 1012.498932      | F    | <b>421.255780</b>  | 211.131528      | 404.229231     | 202.618253        |                |                  | 3  |
| 18 | 2141.069567        | 1071.038421       | 2124.043018    | 1062.525147      | 2123.059002    | 1062.033139      | V    | 274.187366         | 137.597321      | 257.160817     | 129.084046        |                |                  | 2  |
| 19 |                    |                   |                |                  |                |                  | R    | <b>175.118952</b>  | 88.063114       | 158.092403     | 79.549839         |                |                  | 1  |

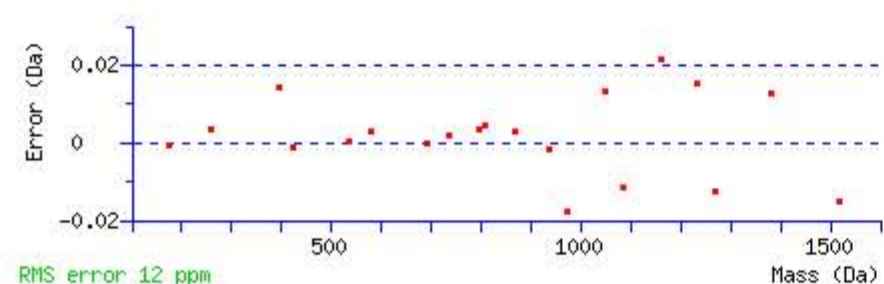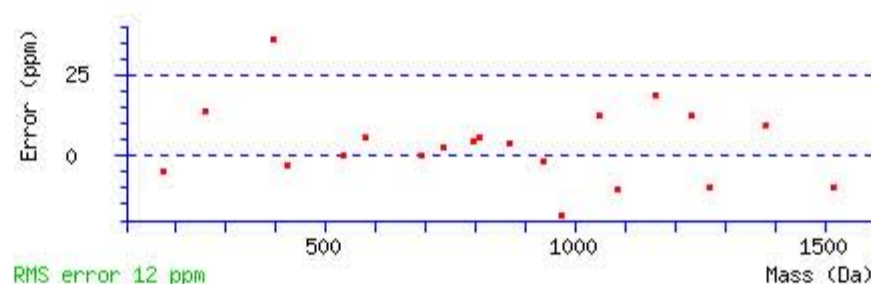

NCBI BLAST search of **GSLVQASEANLQAAQDFVR**

(Parameters: blastp, nr protein database, expect=20000, no filter, PAM30)

Other BLAST [web gateways](#)

All matches to this query

| Score | Mr(calc):   | Delta     | Sequence                            |
|-------|-------------|-----------|-------------------------------------|
| 74.3  | 2314.173950 | 0.003502  | <a href="#">GSLVQASEANLQAAQDFVR</a> |
| 10.2  | 2314.173950 | 0.003502  | <a href="#">GSLVQASEANLQAAQDFVR</a> |
| 2.5   | 2314.178635 | -0.001183 | <a href="#">NKDRPAMQLYQPGARSR</a>   |

Mascot: <http://www.matrixscience.com/>



# MASCOT Search Results

## Peptide View

MS/MS Fragmentation of **GSLVQASEANLQAAQDFVR**

Found in **ITIH1\_HUMAN**, Inter-alpha-trypsin inhibitor heavy chain H1 OS=Homo sapiens GN=ITIH1 PE=1 SV=3

Match to Query 56359: 2314.179548 from(1158.097050,2+) rtinseconds(2530) index(58858)

Title: Locus:1.1.1.3366.19 File:"2013-07-02 CLN FXIII 30 min 2nd F 4.wiff"

Data file C:\Program Files (x86)\Matrix Science\Mascot Daemon\mgf2 FXIII 30 min 2nd\mascot\_daemon\_merge.mgf

Click mouse within plot area to zoom in by factor of two about that point

Or, Plot from  to  Da

Label all possible matches  Label matches used for scoring

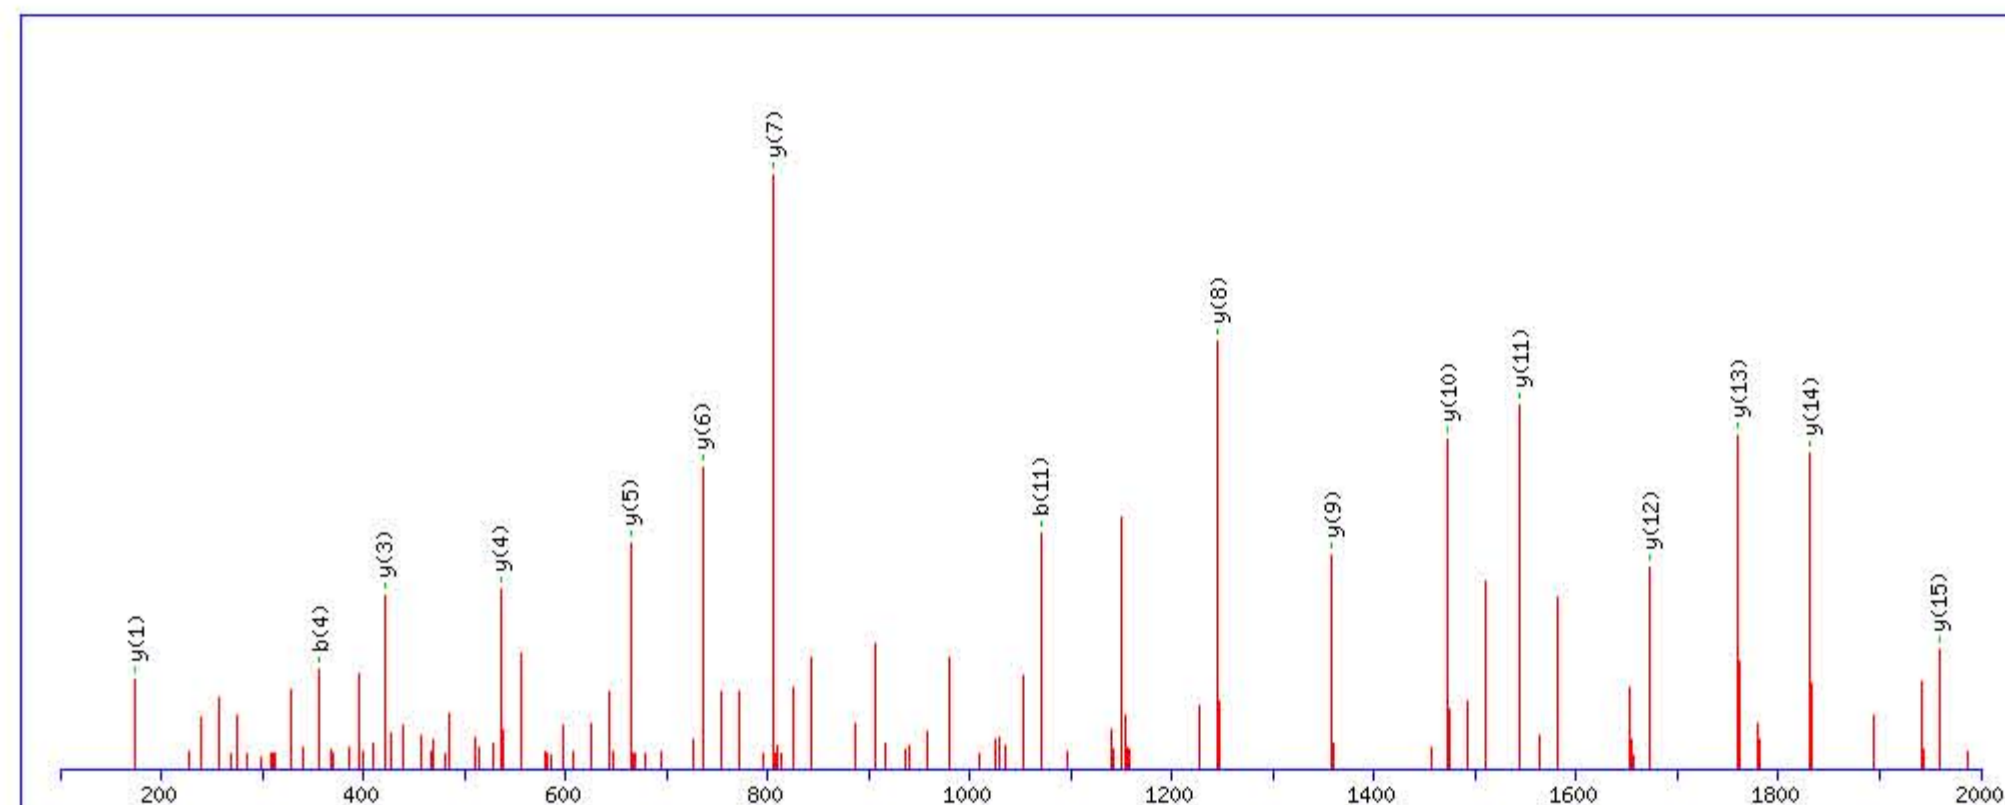

Monoisotopic mass of neutral peptide Mr(calc): 2314.173950

Fixed modifications: Carbamidomethyl (C) (apply to specified residues or termini only)

Variable modifications:

Q12 : Biotin:Thermo-21345 (Q)

Ions Score: 141 Expect: 1.7e-013

Matches : 16/200 fragment ions using 19 most intense peaks [\(help\)](#)

| #  | b                  | b <sup>++</sup> | b <sup>*</sup> | b <sup>*++</sup> | b <sup>0</sup> | b <sup>0++</sup> | Seq. | y                  | y <sup>++</sup> | y <sup>*</sup> | y <sup>*++</sup> | y <sup>0</sup> | y <sup>0++</sup> | #  |
|----|--------------------|-----------------|----------------|------------------|----------------|------------------|------|--------------------|-----------------|----------------|------------------|----------------|------------------|----|
| 1  | 58.028740          | 29.518008       |                |                  |                |                  | G    |                    |                 |                |                  |                |                  | 19 |
| 2  | 145.060768         | 73.034022       |                |                  | 127.050203     | 64.028740        | S    | 2258.159779        | 1129.583527     | 2241.133230    | 1121.070253      | 2240.149214    | 1120.578245      | 18 |
| 3  | 258.144832         | 129.576054      |                |                  | 240.134267     | 120.570772       | L    | 2171.127751        | 1086.067513     | 2154.101202    | 1077.554239      | 2153.117186    | 1077.062231      | 17 |
| 4  | <b>357.213246</b>  | 179.110261      |                |                  | 339.202681     | 170.104979       | V    | 2058.043687        | 1029.525481     | 2041.017138    | 1021.012207      | 2040.033122    | 1020.520199      | 16 |
| 5  | 485.271824         | 243.139550      | 468.245275     | 234.626276       | 467.261259     | 234.134268       | Q    | <b>1958.975273</b> | 979.991275      | 1941.948724    | 971.478000       | 1940.964708    | 970.985992       | 15 |
| 6  | 556.308938         | 278.658107      | 539.282389     | 270.144833       | 538.298373     | 269.652825       | A    | <b>1830.916695</b> | 915.961986      | 1813.890146    | 907.448711       | 1812.906130    | 906.956703       | 14 |
| 7  | 643.340966         | 322.174121      | 626.314417     | 313.660847       | 625.330401     | 313.168839       | S    | <b>1759.879581</b> | 880.443429      | 1742.853032    | 871.930154       | 1741.869016    | 871.438146       | 13 |
| 8  | 772.383559         | 386.695418      | 755.357010     | 378.182143       | 754.372994     | 377.690135       | E    | <b>1672.847553</b> | 836.927415      | 1655.821004    | 828.414140       | 1654.836988    | 827.922132       | 12 |
| 9  | 843.420673         | 422.213975      | 826.394124     | 413.700700       | 825.410108     | 413.208692       | A    | <b>1543.804960</b> | 772.406118      | 1526.778411    | 763.892844       | 1525.794395    | 763.400836       | 11 |
| 10 | 957.463600         | 479.235438      | 940.437051     | 470.722164       | 939.453035     | 470.230156       | N    | <b>1472.767846</b> | 736.887561      | 1455.741297    | 728.374287       | 1454.757281    | 727.882279       | 10 |
| 11 | <b>1070.547664</b> | 535.777470      | 1053.521115    | 527.264196       | 1052.537099    | 526.772187       | L    | <b>1358.724919</b> | 679.866098      | 1341.698370    | 671.352823       | 1340.714354    | 670.860815       | 9  |
| 12 | 1509.772990        | 755.390133      | 1492.746441    | 746.876859       | 1491.762425    | 746.384851       | Q    | <b>1245.640855</b> | 623.324066      | 1228.614306    | 614.810791       | 1227.630290    | 614.318783       | 8  |
| 13 | 1580.810104        | 790.908690      | 1563.783555    | 782.395416       | 1562.799539    | 781.903408       | A    | <b>806.415529</b>  | 403.711403      | 789.388980     | 395.198128       | 788.404964     | 394.706120       | 7  |
| 14 | 1651.847218        | 826.427247      | 1634.820669    | 817.913973       | 1633.836653    | 817.421965       | A    | <b>735.378415</b>  | 368.192846      | 718.351866     | 359.679571       | 717.367850     | 359.187563       | 6  |
| 15 | 1779.905796        | 890.456536      | 1762.879247    | 881.943262       | 1761.895231    | 881.451254       | Q    | <b>664.341301</b>  | 332.674289      | 647.314752     | 324.161014       | 646.330736     | 323.669006       | 5  |
| 16 | 1894.932739        | 947.970008      | 1877.906190    | 939.456733       | 1876.922174    | 938.964725       | D    | <b>536.282723</b>  | 268.645000      | 519.256174     | 260.131725       | 518.272158     | 259.639717       | 4  |
| 17 | 2042.001153        | 1021.504215     | 2024.974604    | 1012.990940      | 2023.990588    | 1012.498932      | F    | <b>421.255780</b>  | 211.131528      | 404.229231     | 202.618253       |                |                  | 3  |
| 18 | 2141.069567        | 1071.038421     | 2124.043018    | 1062.525147      | 2123.059002    | 1062.033139      | V    | 274.187366         | 137.597321      | 257.160817     | 129.084046       |                |                  | 2  |
| 19 |                    |                 |                |                  |                |                  | R    | <b>175.118952</b>  | 88.063114       | 158.092403     | 79.549839        |                |                  | 1  |

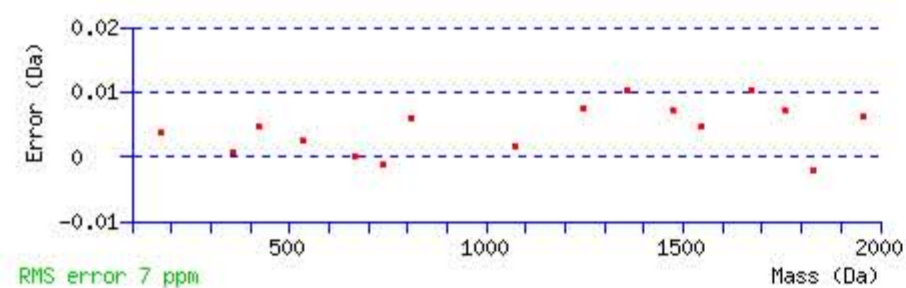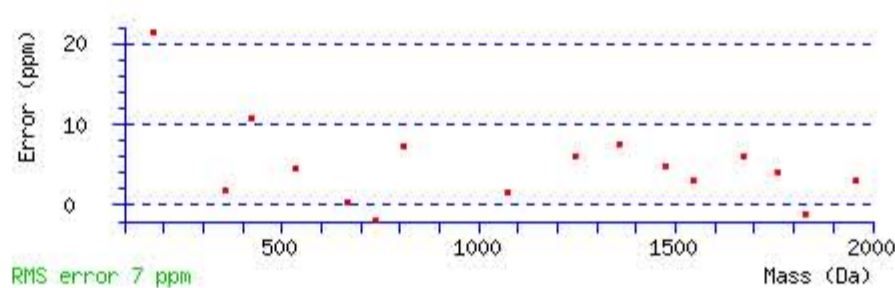

NCBI BLAST search of [GSLVQASEANLQAAQDFVR](#)

(Parameters: blastp, nr protein database, expect=20000, no filter, PAM30)

Other BLAST [web gateways](#)

## All matches to this query

| Score | Mr(calc):   | Delta    | Sequence                            |
|-------|-------------|----------|-------------------------------------|
| 140.9 | 2314.173950 | 0.005598 | <a href="#">GSLVQASEANLQAAQDFVR</a> |
| 87.5  | 2314.173950 | 0.005598 | <a href="#">GSLVQASEANLQAAQDFVR</a> |
| 28.6  | 2314.173950 | 0.005598 | <a href="#">GSLVQASEANLQAAQDFVR</a> |
| 4.7   | 2314.178635 | 0.000913 | <a href="#">NKDRPAMQLYQPGARSR</a>   |



# MASCOT Search Results

## Peptide View

MS/MS Fragmentation of **FAHYVVTSQVVNTANEAR**

Found in **ITIH1\_HUMAN**, Inter-alpha-trypsin inhibitor heavy chain H1 OS=Homo sapiens GN=ITIH1 PE=1 SV=3

Match to Query 56384: 2316.164562 from(773.062130,3+) rtinseconds(1937) index(55340)

Title: Locus:1.1.1.3160.22 File:"2013-07-02 CLN FXIII 30 min 2nd F 4.wiff"

Data file C:\Program Files (x86)\Matrix Science\Mascot Daemon\mgf2 FXIII 30 min 2nd\mascot\_daemon\_merge.mgf

Click mouse within plot area to zoom in by factor of two about that point

Or, Plot from  to  Da

Label all possible matches  Label matches used for scoring

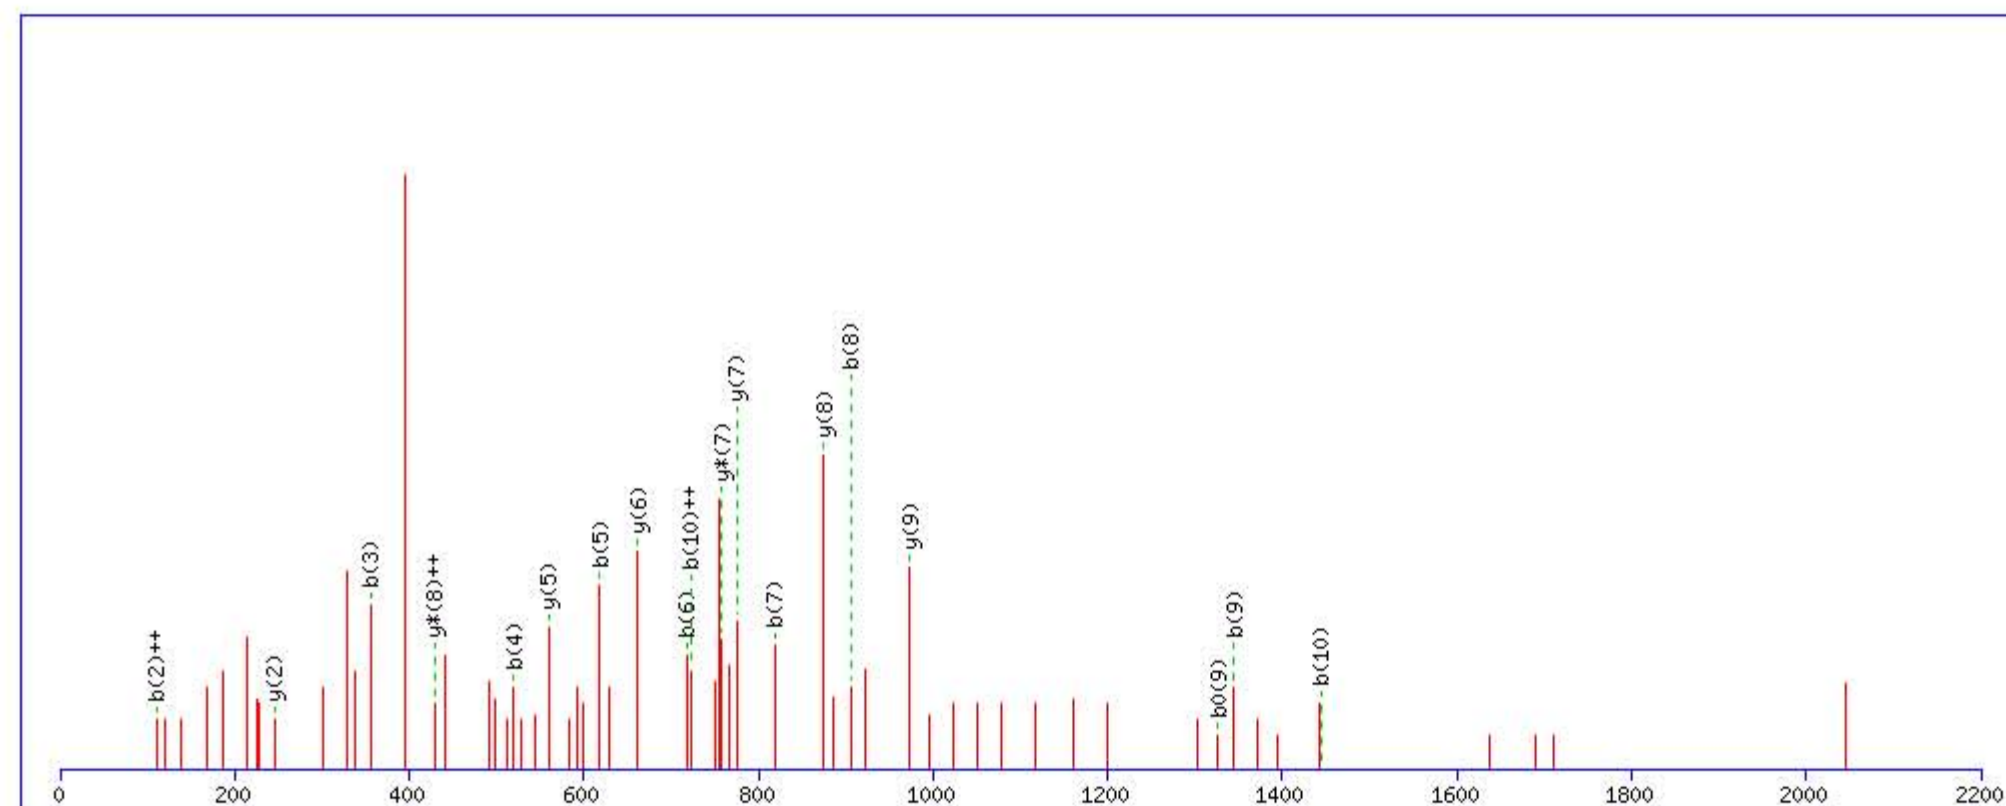

Monoisotopic mass of neutral peptide Mr(calc): 2316.168488

Fixed modifications: Carbamidomethyl (C) (apply to specified residues or termini only)

Variable modifications:

Q9 : Biotin:Thermo-21345 (Q)

Ions Score: 29 Expect: 0.0069

Matches : 19/172 fragment ions using 56 most intense peaks [\(help\)](#)

| #  | b                  | b <sup>++</sup>   | b <sup>*</sup> | b <sup>*++</sup> | b <sup>0</sup>     | b <sup>0++</sup> | Seq. | y                 | y <sup>++</sup> | y <sup>*</sup>    | y <sup>*++</sup>  | y <sup>0</sup> | y <sup>0++</sup> | #  |
|----|--------------------|-------------------|----------------|------------------|--------------------|------------------|------|-------------------|-----------------|-------------------|-------------------|----------------|------------------|----|
| 1  | 148.075690         | 74.541483         |                |                  |                    |                  | F    |                   |                 |                   |                   |                |                  | 18 |
| 2  | 219.112804         | <b>110.060040</b> |                |                  |                    |                  | A    | 2170.107350       | 1085.557313     | 2153.080801       | 1077.044038       | 2152.096785    | 1076.552030      | 17 |
| 3  | <b>356.171716</b>  | 178.589496        |                |                  |                    |                  | H    | 2099.070236       | 1050.038756     | 2082.043687       | 1041.525481       | 2081.059671    | 1041.033473      | 16 |
| 4  | <b>519.235045</b>  | 260.121161        |                |                  |                    |                  | Y    | 1962.011324       | 981.509300      | 1944.984775       | 972.996026        | 1944.000759    | 972.504018       | 15 |
| 5  | <b>618.303459</b>  | 309.655368        |                |                  |                    |                  | V    | 1798.947995       | 899.977636      | 1781.921446       | 891.464361        | 1780.937430    | 890.972353       | 14 |
| 6  | <b>717.371873</b>  | 359.189575        |                |                  |                    |                  | V    | 1699.879581       | 850.443429      | 1682.853032       | 841.930154        | 1681.869016    | 841.438146       | 13 |
| 7  | <b>818.419552</b>  | 409.713414        |                |                  | 800.408987         | 400.708132       | T    | 1600.811167       | 800.909222      | 1583.784618       | 792.395947        | 1582.800602    | 791.903939       | 12 |
| 8  | <b>905.451580</b>  | 453.229428        |                |                  | 887.441015         | 444.224146       | S    | 1499.763488       | 750.385382      | 1482.736939       | 741.872108        | 1481.752923    | 741.380100       | 11 |
| 9  | <b>1344.676906</b> | 672.842091        | 1327.650357    | 664.328817       | <b>1326.666341</b> | 663.836808       | Q    | 1412.731460       | 706.869368      | 1395.704911       | 698.356094        | 1394.720895    | 697.864086       | 10 |
| 10 | <b>1443.745320</b> | <b>722.376298</b> | 1426.718771    | 713.863024       | 1425.734755        | 713.371016       | V    | <b>973.506134</b> | 487.256705      | 956.479585        | 478.743431        | 955.495569     | 478.251423       | 9  |
| 11 | 1542.813734        | 771.910505        | 1525.787185    | 763.397231       | 1524.803169        | 762.905223       | V    | <b>874.437720</b> | 437.722498      | 857.411171        | <b>429.209224</b> | 856.427155     | 428.717216       | 8  |
| 12 | 1656.856661        | 828.931969        | 1639.830112    | 820.418694       | 1638.846096        | 819.926686       | N    | <b>775.369306</b> | 388.188291      | <b>758.342757</b> | 379.675017        | 757.358741     | 379.183009       | 7  |
| 13 | 1757.904340        | 879.455808        | 1740.877791    | 870.942534       | 1739.893775        | 870.450526       | T    | <b>661.326379</b> | 331.166828      | 644.299830        | 322.653553        | 643.315814     | 322.161545       | 6  |
| 14 | 1828.941454        | 914.974365        | 1811.914905    | 906.461091       | 1810.930889        | 905.969083       | A    | <b>560.278700</b> | 280.642988      | 543.252151        | 272.129714        | 542.268135     | 271.637706       | 5  |
| 15 | 1942.984381        | 971.995829        | 1925.957832    | 963.482554       | 1924.973816        | 962.990546       | N    | 489.241586        | 245.124431      | 472.215037        | 236.611157        | 471.231021     | 236.119149       | 4  |
| 16 | 2072.026974        | 1036.517125       | 2055.000425    | 1028.003850      | 2054.016409        | 1027.511842      | E    | 375.198659        | 188.102968      | 358.172110        | 179.589693        | 357.188094     | 179.097685       | 3  |
| 17 | 2143.064088        | 1072.035682       | 2126.037539    | 1063.522407      | 2125.053523        | 1063.030399      | A    | <b>246.156066</b> | 123.581671      | 229.129517        | 115.068397        |                |                  | 2  |
| 18 |                    |                   |                |                  |                    |                  | R    | 175.118952        | 88.063114       | 158.092403        | 79.549839         |                |                  | 1  |

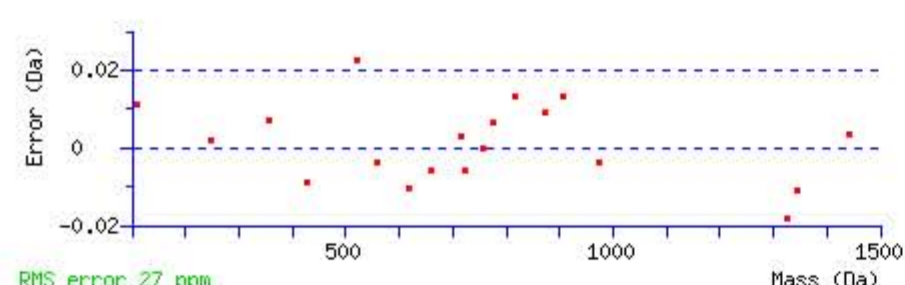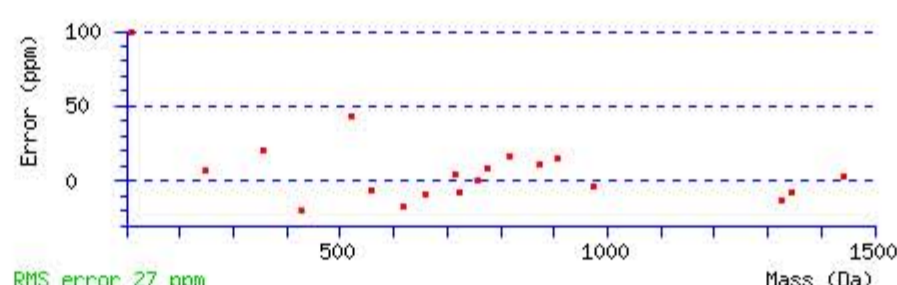

NCBI BLAST search of [FAHYVVTSQVVNTANEAR](#)

(Parameters: blastp, nr protein database, expect=20000, no filter, PAM30)

Other BLAST [web gateways](#)

All matches to this query

| Score | Mr(calc):   | Delta     | Sequence                           |
|-------|-------------|-----------|------------------------------------|
| 28.7  | 2316.168488 | -0.003926 | <a href="#">FAHYVVTSQVVNTANEAR</a> |
| 5.7   | 2316.168442 | -0.003880 | <a href="#">KPWSQQDPYANLMTRKEK</a> |



# MASCOT Search Results

## Peptide View

MS/MS Fragmentation of **GMADQDGLKPTIDKPSEDSPPLEMLGPR**  
 Found in **ITIH1\_HUMAN**, Inter-alpha-trypsin inhibitor heavy chain H1 OS=Homo sapiens GN=ITIH1 PE=1 SV=3

Match to Query 69452: 3304.617776 from(827.161720,4+) rtinseconds(2232) index(57233)  
 Title: Locus:1.1.1.3262.15 File:"2013-07-02 CLN FXIII 30 min 2nd F 4.wiff"  
 Data file C:\Program Files (x86)\Matrix Science\Mascot Daemon\mgf2 FXIII 30 min 2nd\mascot\_daemon\_merge.mgf

Click mouse within plot area to zoom in by factor of two about that point

Or, Plot from  to  Da

Label all possible matches  Label matches used for scoring

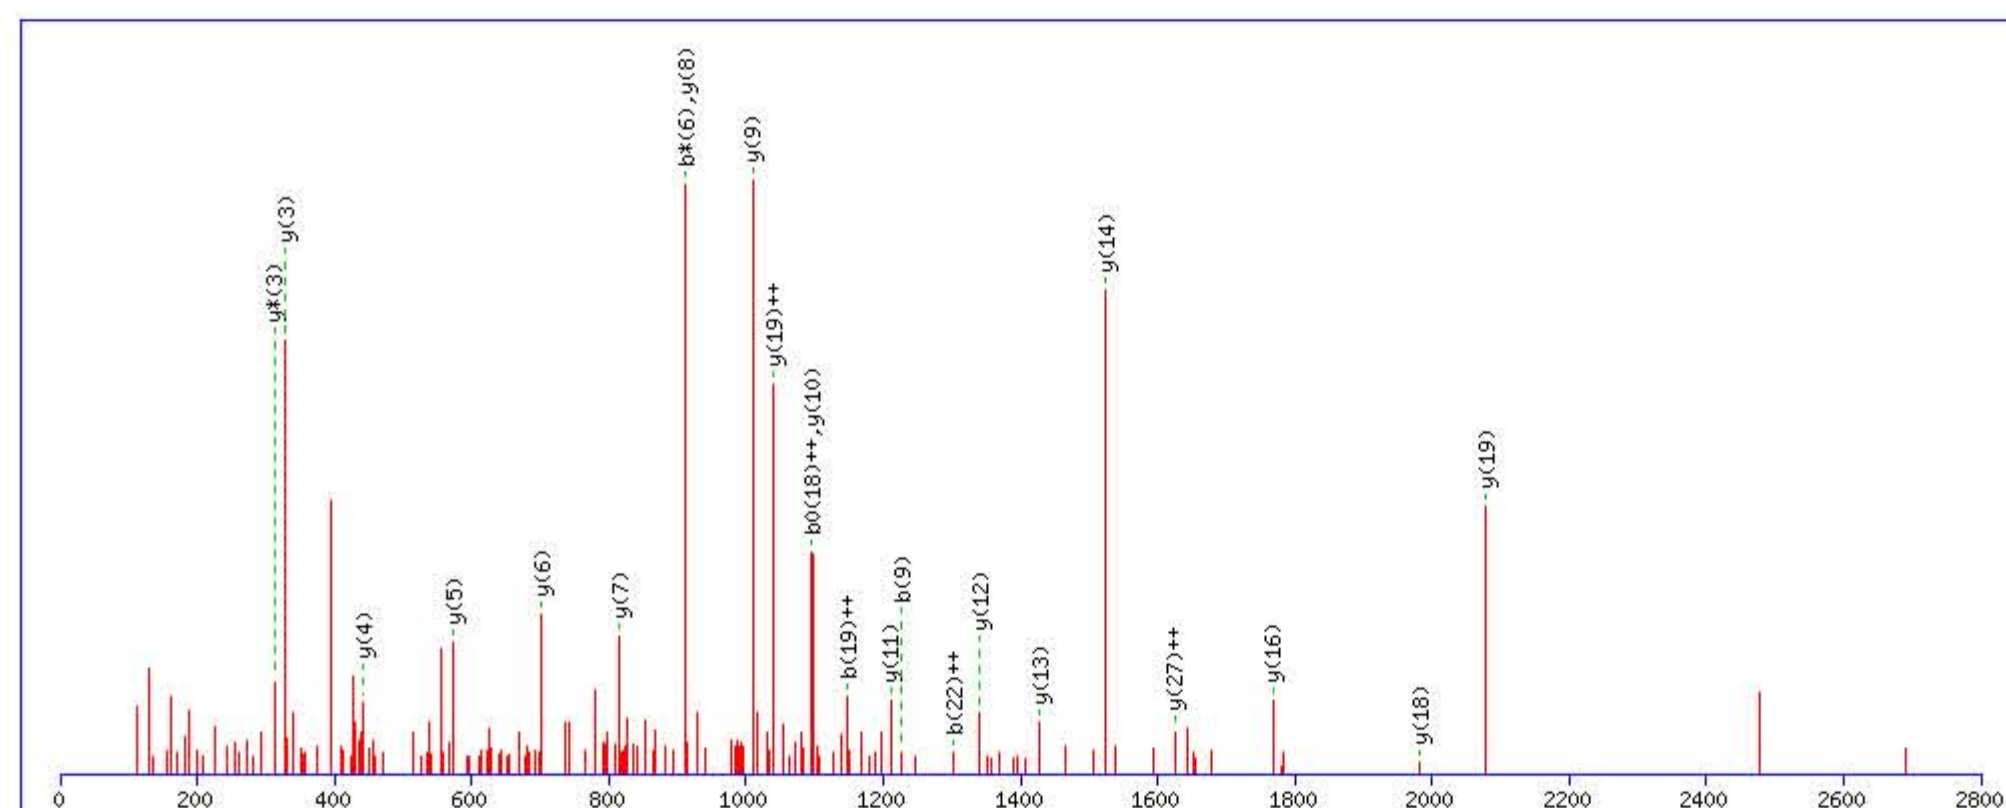

Monoisotopic mass of neutral peptide Mr(calc): 3304.614151  
 Fixed modifications: Carbamidomethyl (C) (apply to specified residues or termini only)  
 Variable modifications:  
 Q5 : Biotin:Thermo-21345 (Q)  
 Ions Score: 93 Expect: 1.4e-008  
 Matches : 23/300 fragment ions using 38 most intense peaks [\(help\)](#)

| #  | b           | b <sup>++</sup> | b <sup>*</sup> | b <sup>+++</sup> | b <sup>0</sup> | b <sup>0++</sup> | Seq. | y           | y <sup>++</sup> | y <sup>*</sup> | y <sup>+++</sup> | y <sup>0</sup> | y <sup>0++</sup> | #  |
|----|-------------|-----------------|----------------|------------------|----------------|------------------|------|-------------|-----------------|----------------|------------------|----------------|------------------|----|
| 1  | 58.028740   | 29.518008       |                |                  |                |                  | G    |             |                 |                |                  |                |                  | 28 |
| 2  | 189.069225  | 95.038250       |                |                  |                |                  | M    | 3248.599985 | 1624.803630     | 3231.573436    | 1616.290356      | 3230.589420    | 1615.798348      | 27 |
| 3  | 260.106339  | 130.556807      |                |                  |                |                  | A    | 3117.559500 | 1559.283388     | 3100.532951    | 1550.770113      | 3099.548935    | 1550.278105      | 26 |
| 4  | 375.133282  | 188.070279      |                |                  | 357.122717     | 179.064997       | D    | 3046.522386 | 1523.764831     | 3029.495837    | 1515.251556      | 3028.511821    | 1514.759548      | 25 |
| 5  | 814.358608  | 407.682942      | 797.332059     | 399.169668       | 796.348043     | 398.677660       | Q    | 2931.495443 | 1466.251359     | 2914.468894    | 1457.738085      | 2913.484878    | 1457.246077      | 24 |
| 6  | 929.385551  | 465.196414      | 912.359002     | 456.683139       | 911.374986     | 456.191131       | D    | 2492.270117 | 1246.638696     | 2475.243568    | 1238.125422      | 2474.259552    | 1237.633414      | 23 |
| 7  | 986.407015  | 493.707146      | 969.380466     | 485.193871       | 968.396450     | 484.701863       | G    | 2377.243174 | 1189.125225     | 2360.216625    | 1180.611950      | 2359.232609    | 1180.119942      | 22 |
| 8  | 1099.491079 | 550.249177      | 1082.464530    | 541.735903       | 1081.480514    | 541.243895       | L    | 2320.221710 | 1160.614493     | 2303.195161    | 1152.101218      | 2302.211145    | 1151.609210      | 21 |
| 9  | 1227.586042 | 614.296659      | 1210.559493    | 605.783385       | 1209.575477    | 605.291376       | K    | 2207.137646 | 1104.072461     | 2190.111097    | 1095.559186      | 2189.127081    | 1095.067178      | 20 |
| 10 | 1324.638806 | 662.823041      | 1307.612257    | 654.309767       | 1306.628241    | 653.817758       | P    | 2079.042683 | 1040.024980     | 2062.016134    | 1031.511705      | 2061.032118    | 1031.019697      | 19 |
| 11 | 1425.686485 | 713.346881      | 1408.659936    | 704.833606       | 1407.675920    | 704.341598       | T    | 1981.989919 | 991.498598      | 1964.963370    | 982.985323       | 1963.979354    | 982.493315       | 18 |
| 12 | 1538.770549 | 769.888912      | 1521.744000    | 761.375638       | 1520.759984    | 760.883630       | I    | 1880.942240 | 940.974758      | 1863.915691    | 932.461484       | 1862.931675    | 931.969476       | 17 |
| 13 | 1653.797492 | 827.402384      | 1636.770943    | 818.889110       | 1635.786927    | 818.397101       | D    | 1767.858176 | 884.432726      | 1750.831627    | 875.919452       | 1749.847611    | 875.427444       | 16 |
| 14 | 1781.892455 | 891.449865      | 1764.865906    | 882.936591       | 1763.881890    | 882.444583       | K    | 1652.831233 | 826.919255      | 1635.804684    | 818.405980       | 1634.820668    | 817.913972       | 15 |
| 15 | 1878.945219 | 939.976248      | 1861.918670    | 931.462973       | 1860.934654    | 930.970965       | P    | 1524.736270 | 762.871773      | 1507.709721    | 754.358499       | 1506.725705    | 753.866491       | 14 |
| 16 | 1965.977247 | 983.492262      | 1948.950698    | 974.978987       | 1947.966682    | 974.486979       | S    | 1427.683506 | 714.345391      | 1410.656957    | 705.832117       | 1409.672941    | 705.340109       | 13 |
| 17 | 2095.019840 | 1048.013558     | 2077.993291    | 1039.500283      | 2077.009275    | 1039.008275      | E    | 1340.651478 | 670.829377      | 1323.624929    | 662.316103       | 1322.640913    | 661.824095       | 12 |
| 18 | 2210.046783 | 1105.527029     | 2193.020234    | 1097.013755      | 2192.036218    | 1096.521747      | D    | 1211.608885 | 606.308081      | 1194.582336    | 597.794806       | 1193.598320    | 597.302798       | 11 |
| 19 | 2297.078811 | 1149.043043     | 2280.052262    | 1140.529769      | 2279.068246    | 1140.037761      | S    | 1096.581942 | 548.794609      | 1079.555393    | 540.281335       | 1078.571377    | 539.789327       | 10 |
| 20 | 2394.131575 | 1197.569425     | 2377.105026    | 1189.056151      | 2376.121010    | 1188.564143      | P    | 1009.549914 | 505.278595      | 992.523365     | 496.765321       | 991.539349     | 496.273313       | 9  |
| 21 | 2491.184339 | 1246.095807     | 2474.157790    | 1237.582533      | 2473.173774    | 1237.090525      | P    | 912.497150  | 456.752213      | 895.470601     | 448.238939       | 894.486585     | 447.746931       | 8  |
| 22 | 2604.268403 | 1302.637839     | 2587.241854    | 1294.124565      | 2586.257838    | 1293.632557      | L    | 815.444386  | 408.225831      | 798.417837     | 399.712557       | 797.433821     | 399.220549       | 7  |
| 23 | 2733.310996 | 1367.159136     | 2716.284447    | 1358.645861      | 2715.300431    | 1358.153854      | E    | 702.360322  | 351.683799      | 685.333773     | 343.170525       | 684.349757     | 342.678517       | 6  |
| 24 | 2864.351481 | 1432.679379     | 2847.324932    | 1424.166104      | 2846.340916    | 1423.674096      | M    | 573.317729  | 287.162503      | 556.291180     | 278.649228       |                |                  | 5  |
| 25 | 2977.435545 | 1489.221411     | 2960.408996    | 1480.708136      | 2959.424980    | 1480.216128      | L    | 442.277244  | 221.642260      | 425.250695     | 213.128986       |                |                  | 4  |
| 26 | 3034.457009 | 1517.732143     | 3017.430460    | 1509.218868      | 3016.446444    | 1508.726860      | G    | 329.193180  | 165.100228      | 312.166631     | 156.586953       |                |                  | 3  |
| 27 | 3131.509773 | 1566.258525     | 3114.483224    | 1557.745250      | 3113.499208    | 1557.253242      | P    | 272.171716  | 136.589496      | 255.145167     | 128.076221       |                |                  | 2  |
| 28 |             |                 |                |                  |                |                  | R    | 175.118952  | 88.063114       | 158.092403     | 79.549839        |                |                  | 1  |

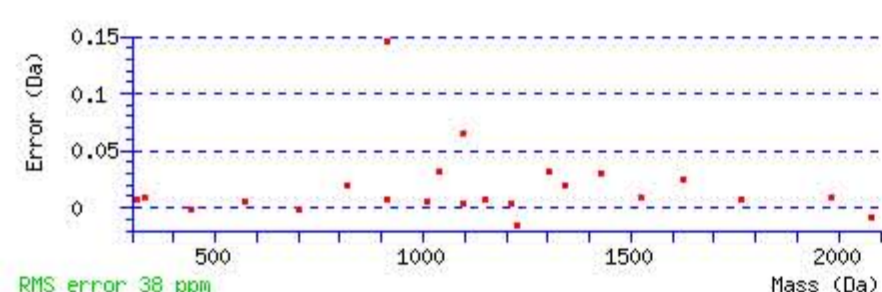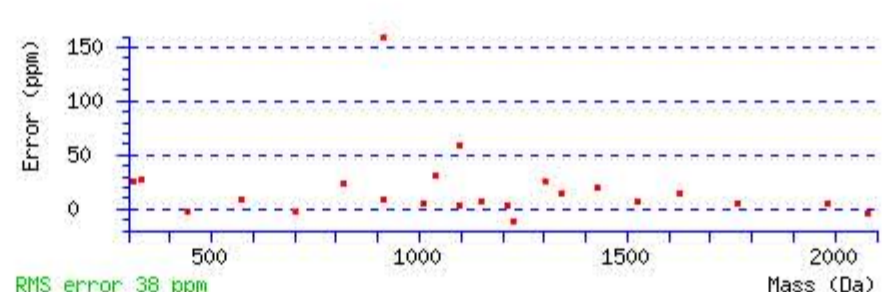

NCBI BLAST search of **GMADQDGLKPTIDKPSEDSPPLEMLGPR**  
 (Parameters: blastp, nr protein database, expect=20000, no filter, PAM30)  
 Other BLAST [web gateways](#)

## All matches to this query

| Score | Mr(calc):   | Delta    | Sequence                                     |
|-------|-------------|----------|----------------------------------------------|
| 92.7  | 3304.614151 | 0.003625 | <a href="#">GMADQDGLKPTIDKPSEDSPPLEMLGPR</a> |



# MASCOT Search Results

## Peptide View

MS/MS Fragmentation of **TQVADAK**

Found in **ITIH2\_HUMAN**, Inter-alpha-trypsin inhibitor heavy chain H2 OS=Homo sapiens GN=ITIH2 PE=1 SV=2

Match to Query 18588: 1042.542028 from(522.278290,2+) rtinseconds(1281) index(51095)

Title: Locus:1.1.1.2932.20 File:"2013-07-02 CLN FXIII 30 min 2nd F 4.wiff"

Data file C:\Program Files (x86)\Matrix Science\Mascot Daemon\mgf\2 FXIII 30 min 2nd\mascot\_daemon\_merge.mgf

Click mouse within plot area to zoom in by factor of two about that point

Or, Plot from  to  Da

Label all possible matches  Label matches used for scoring

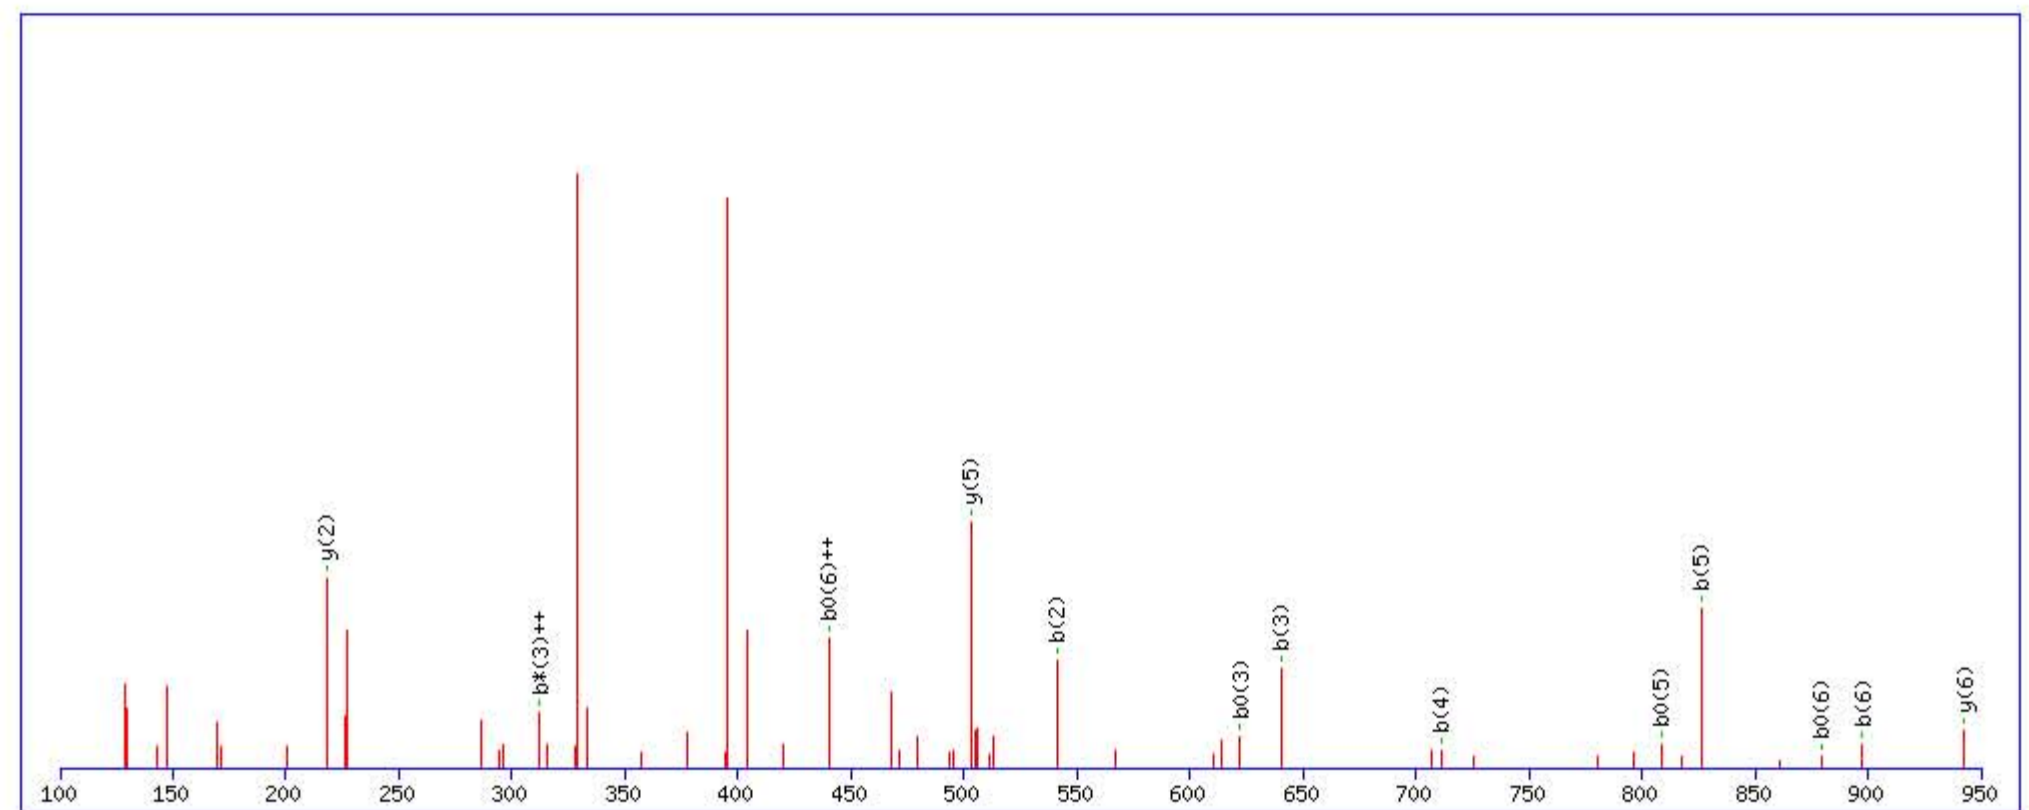

Monoisotopic mass of neutral peptide Mr(calc): 1042.548111

Fixed modifications: Carbamidomethyl (C) (apply to specified residues or termini only)

Variable modifications:

Q2 : Biotin:Thermo-21345 (Q)

Ions Score: 36 Expect: 0.0067

Matches : 13/66 fragment ions using 17 most intense peaks [\(help\)](#)

| # | b                 | b <sup>++</sup> | b <sup>*</sup> | b <sup>*++</sup>  | b <sup>0</sup>    | b <sup>0++</sup>  | Seq. | y                 | y <sup>++</sup> | y <sup>*</sup> | y <sup>*++</sup> | y <sup>0</sup> | y <sup>0++</sup> | # |
|---|-------------------|-----------------|----------------|-------------------|-------------------|-------------------|------|-------------------|-----------------|----------------|------------------|----------------|------------------|---|
| 1 | 102.054955        | 51.531116       |                |                   | 84.044390         | 42.525833         | T    |                   |                 |                |                  |                |                  | 7 |
| 2 | <b>541.280281</b> | 271.143779      | 524.253732     | 262.630504        | 523.269716        | 262.138496        | Q    | <b>942.507715</b> | 471.757496      | 925.481166     | 463.244221       | 924.497150     | 462.752213       | 6 |
| 3 | <b>640.348695</b> | 320.677986      | 623.322146     | <b>312.164711</b> | <b>622.338130</b> | 311.672703        | V    | <b>503.282389</b> | 252.144832      | 486.255840     | 243.631558       | 485.271824     | 243.139550       | 5 |
| 4 | <b>711.385809</b> | 356.196543      | 694.359260     | 347.683268        | 693.375244        | 347.191260        | A    | 404.213975        | 202.610625      | 387.187426     | 194.097351       | 386.203410     | 193.605343       | 4 |
| 5 | <b>826.412752</b> | 413.710014      | 809.386203     | 405.196739        | <b>808.402187</b> | 404.704731        | D    | 333.176861        | 167.092068      | 316.150312     | 158.578794       | 315.166296     | 158.086786       | 3 |
| 6 | <b>897.449866</b> | 449.228571      | 880.423317     | 440.715296        | <b>879.439301</b> | <b>440.223288</b> | A    | <b>218.149918</b> | 109.578597      | 201.123369     | 101.065322       |                |                  | 2 |
| 7 |                   |                 |                |                   |                   |                   | K    | 147.112804        | 74.060040       | 130.086255     | 65.546765        |                |                  | 1 |

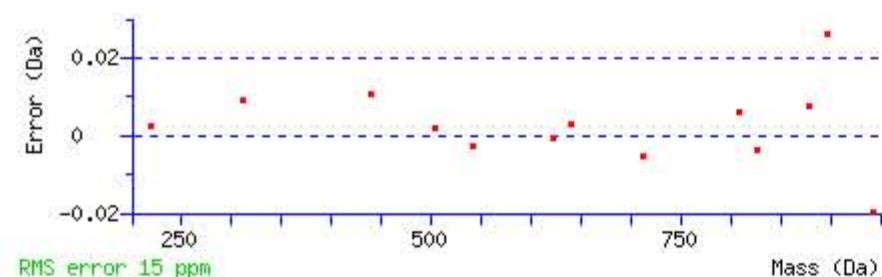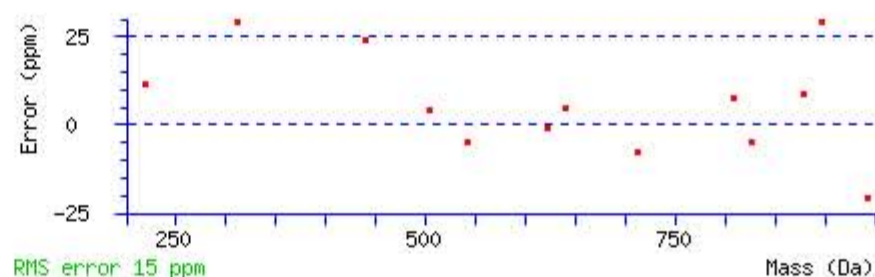

NCBI BLAST search of **TQVADAK**

(Parameters: blastp, nr protein database, expect=20000, no filter, PAM30)

Other BLAST [web gateways](#)

All matches to this query

| Score | Mr(calc):   | Delta     | Sequence                    |
|-------|-------------|-----------|-----------------------------|
| 35.7  | 1042.548111 | -0.006083 | <a href="#">TQVADAK</a>     |
| 16.7  | 1042.548096 | -0.006068 | <a href="#">SLQADAK</a>     |
| 10.2  | 1042.540726 | 0.001302  | <a href="#">KPVSEVGDGR</a>  |
| 6.7   | 1042.548096 | -0.006068 | <a href="#">QEAGLSK</a>     |
| 6.1   | 1042.548080 | -0.006052 | <a href="#">EKEQAK</a>      |
| 6.1   | 1042.544724 | -0.002696 | <a href="#">WKGIEPGEK</a>   |
| 5.1   | 1042.529465 | 0.012563  | <a href="#">TEAGAALPEGK</a> |
| 5.1   | 1042.540680 | 0.001348  | <a href="#">EAEKRPADK</a>   |
| 4.4   | 1042.529480 | 0.012548  | <a href="#">TSPQPESGIK</a>  |
| 4.4   | 1042.548096 | -0.006068 | <a href="#">ISAQDAK</a>     |

Mascot: <http://www.matrixscience.com/>



# **MASCOT** Mascot Search Results

## Peptide View

MS/MS Fragmentation of **ALYAQAR**

Found in **ITIH2\_HUMAN**, Inter-alpha-trypsin inhibitor heavy chain H2 OS=Homo sapiens GN=ITIH2 PE=1 SV=2

Match to Query 20365: 1102.589708 from(552.302130,2+) rtinseconds(1642) index(53390)

Title: Locus:1.1.1.3058.6 File:"2013-07-02 CLN FXIII 30 min 2nd F 4.wiff"

Data file C:\Program Files (x86)\Matrix Science\Mascot Daemon\mgf2 FXIII 30 min 2nd\mascot\_daemon\_merge.mgf

Click mouse within plot area to zoom in by factor of two about that point

Or, Plot from  to  Da

Label all possible matches  Label matches used for scoring

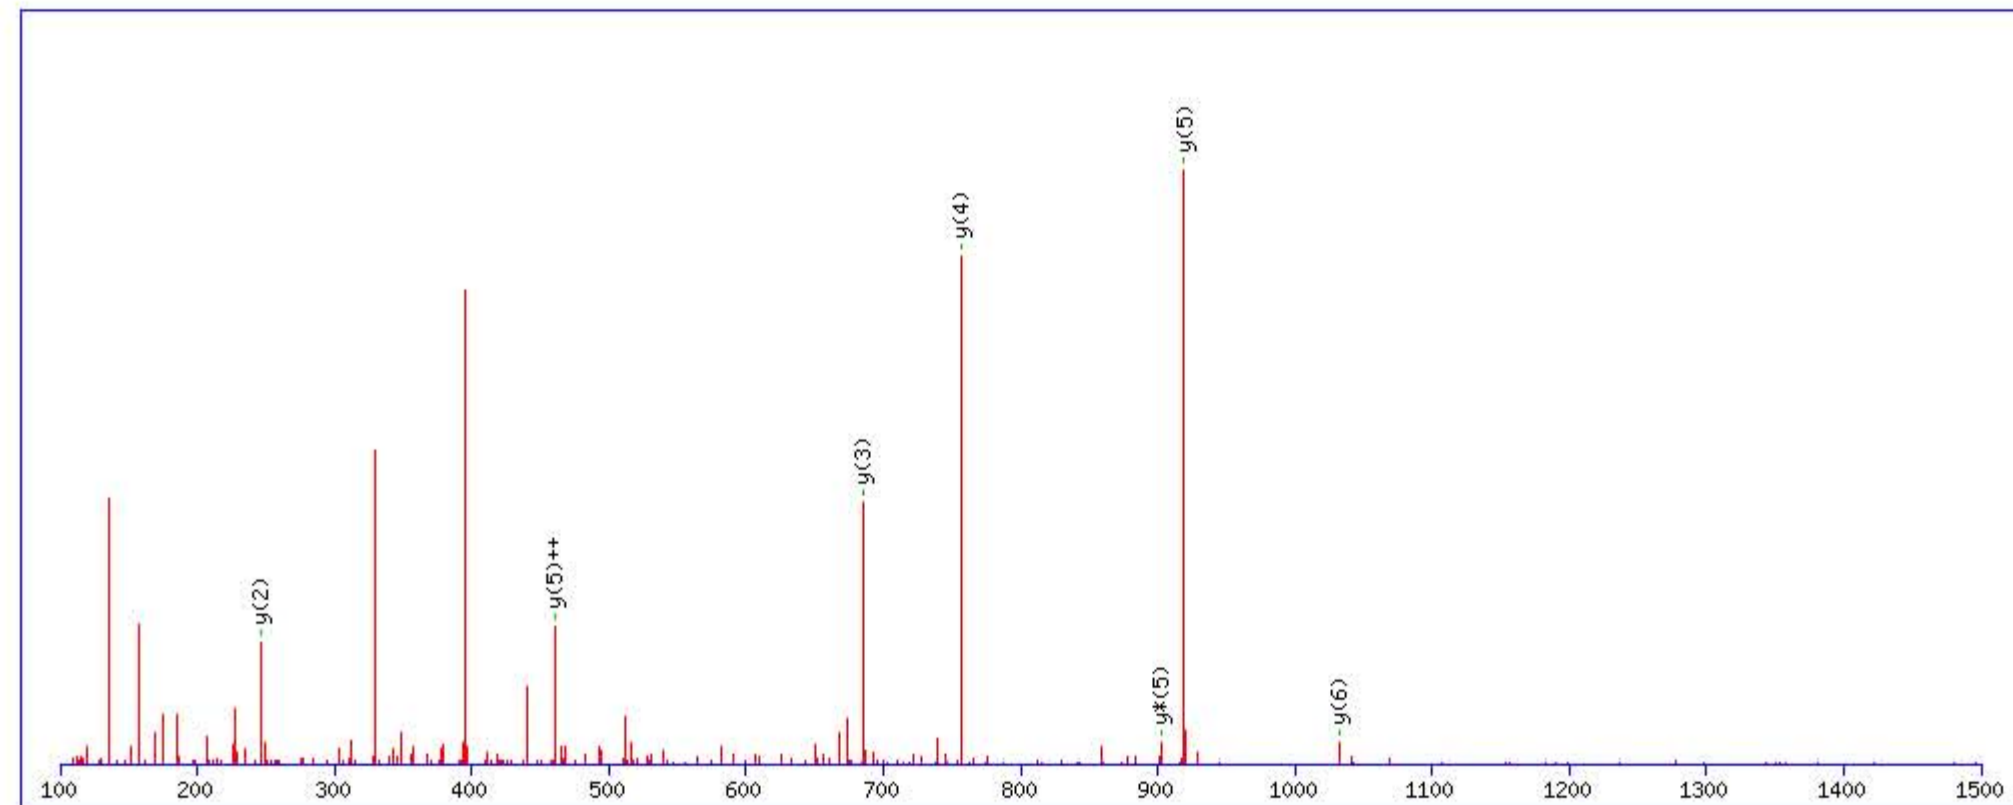

Monoisotopic mass of neutral peptide Mr(calc): 1102.595703

Fixed modifications: Carbamidomethyl (C) (apply to specified residues or termini only)

Variable modifications:

Q5 : Biotin:Thermo-21345 (Q)

Ions Score: 38 Expect: 0.0036

Matches : 7/40 fragment ions using 10 most intense peaks [\(help\)](#)

| # | b          | b <sup>++</sup> | b <sup>*</sup> | b <sup>*++</sup> | Seq. | y                  | y <sup>++</sup>   | y <sup>*</sup>    | y <sup>*++</sup> | # |
|---|------------|-----------------|----------------|------------------|------|--------------------|-------------------|-------------------|------------------|---|
| 1 | 72.044390  | 36.525833       |                |                  | A    |                    |                   |                   |                  | 7 |
| 2 | 185.128454 | 93.067865       |                |                  | L    | <b>1032.565899</b> | 516.786588        | 1015.539350       | 508.273313       | 6 |
| 3 | 348.191783 | 174.599529      |                |                  | Y    | <b>919.481835</b>  | <b>460.244556</b> | <b>902.455286</b> | 451.731281       | 5 |
| 4 | 419.228897 | 210.118087      |                |                  | A    | <b>756.418506</b>  | 378.712891        | 739.391957        | 370.199617       | 4 |
| 5 | 858.454223 | 429.730750      | 841.427674     | 421.217475       | Q    | <b>685.381392</b>  | 343.194334        | 668.354843        | 334.681060       | 3 |
| 6 | 929.491337 | 465.249307      | 912.464788     | 456.736032       | A    | <b>246.156066</b>  | 123.581671        | 229.129517        | 115.068397       | 2 |
| 7 |            |                 |                |                  | R    | 175.118952         | 88.063114         | 158.092403        | 79.549840        | 1 |

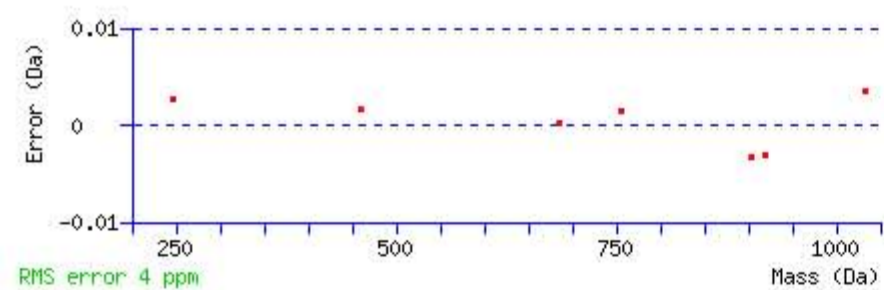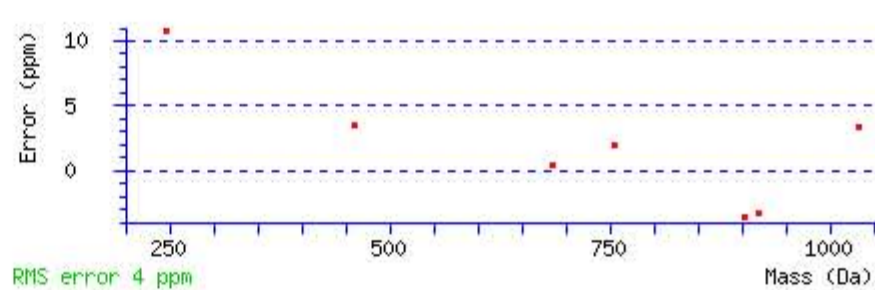

NCBI BLAST search of **ALYAQAR**

(Parameters: blastp, nr protein database, expect=20000, no filter, PAM30)

Other BLAST [web gateways](#)

## All matches to this query

| Score | Mr(calc):   | Delta     | Sequence                    |
|-------|-------------|-----------|-----------------------------|
| 37.6  | 1102.595703 | -0.005995 | <a href="#">ALYAQAR</a>     |
| 10.9  | 1102.602234 | -0.012526 | <a href="#">AIELGYNPVK</a>  |
| 5.2   | 1102.580460 | 0.009248  | <a href="#">AMVENVTLAR</a>  |
| 4.7   | 1102.588333 | 0.001375  | <a href="#">SPYGLTPRGR</a>  |
| 3.6   | 1102.580475 | 0.009233  | <a href="#">SPQMVSAIVR</a>  |
| 3.4   | 1102.591660 | -0.001952 | <a href="#">AMKRLEEAR</a>   |
| 2.8   | 1102.598221 | -0.008513 | <a href="#">LAGSLATDLSR</a> |
| 1.0   | 1102.598221 | -0.008513 | <a href="#">DDLKATLTAR</a>  |
| 1.0   | 1102.584305 | 0.005403  | <a href="#">QSSQRGLTAR</a>  |
| 0.5   | 1102.602921 | -0.013213 | <a href="#">LLRQRMDR</a>    |



# MASCOT Search Results

## Peptide View

MS/MS Fragmentation of **VQSTITSR**

Found in **ITIH2\_HUMAN**, Inter-alpha-trypsin inhibitor heavy chain H2 OS=Homo sapiens GN=ITIH2 PE=1 SV=2

Match to Query 25265: 1201.642988 from(601.828770,2+) rtinseconds(1473) index(52384)

Title: Locus:1.1.1.2999.15 File:"2013-07-02 CLN FXIII 30 min 2nd F 4.wiff"

Data file C:\Program Files (x86)\Matrix Science\Mascot Daemon\mgf2 FXIII 30 min 2nd\mascot\_daemon\_merge.mgf

Click mouse within plot area to zoom in by factor of two about that point

Or, Plot from  to  Da

Label all possible matches  Label matches used for scoring

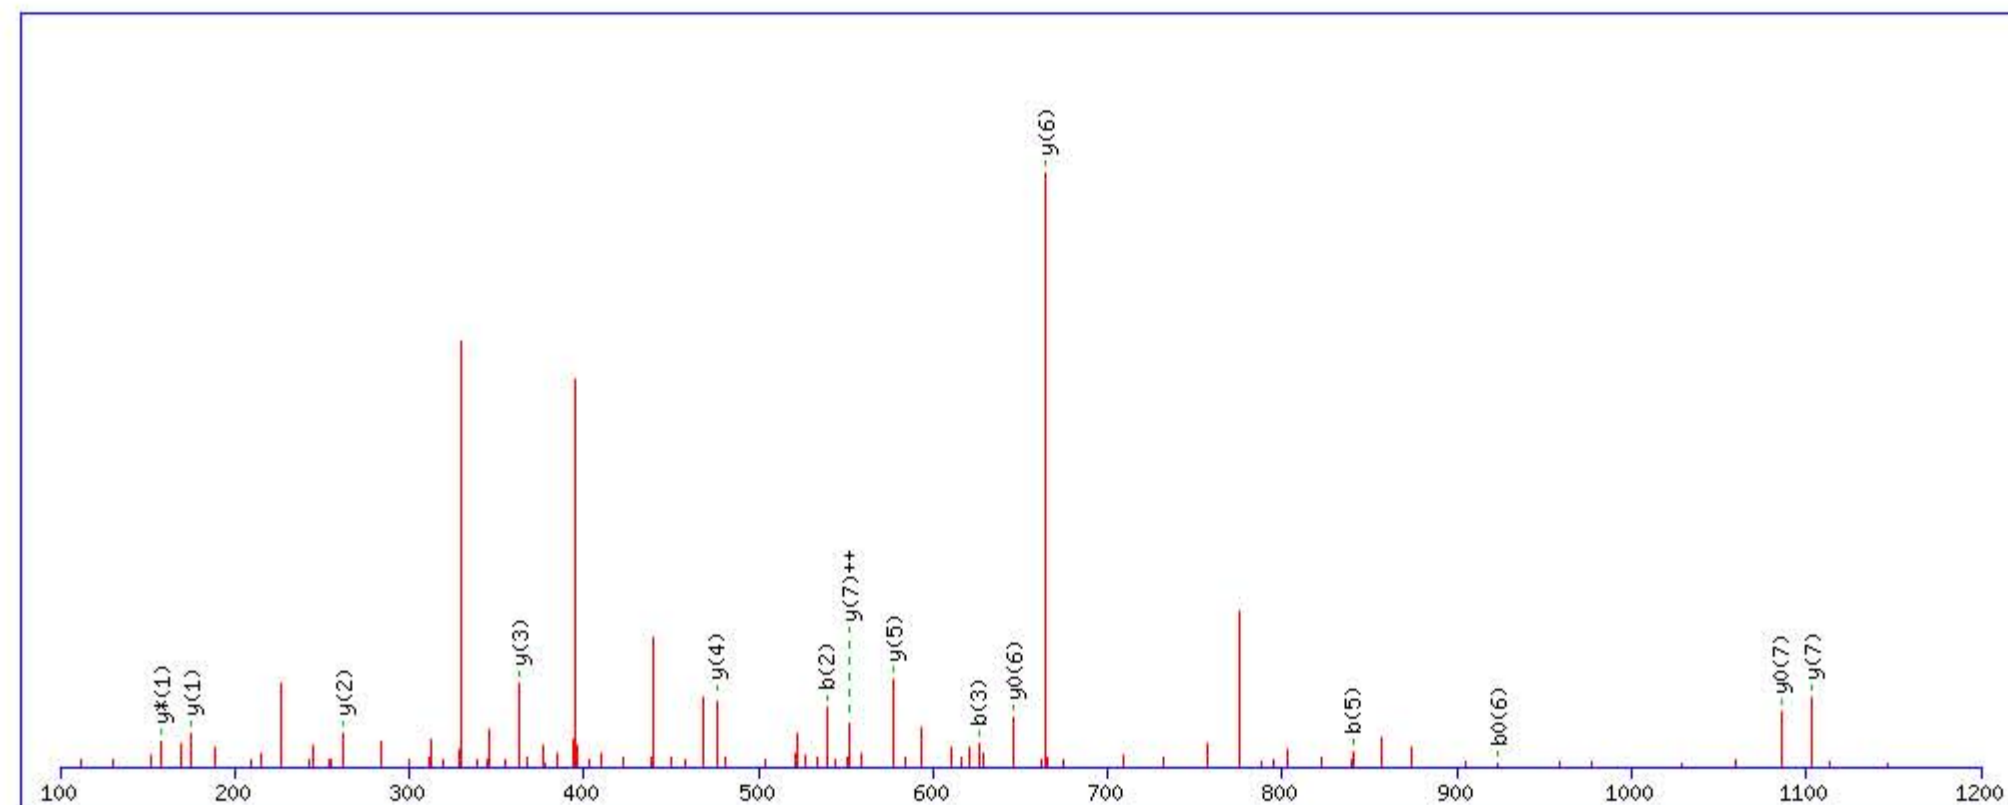

Monoisotopic mass of neutral peptide Mr(calc): 1201.648895

Fixed modifications: Carbamidomethyl (C) (apply to specified residues or termini only)

Variable modifications:

Q2 : Biotin:Thermo-21345 (Q)

Ions Score: 36 Expect: 0.0024

Matches : 15/76 fragment ions using 32 most intense peaks [\(help\)](#)

| # | b                 | b <sup>++</sup> | b <sup>+</sup> | b <sup>*++</sup> | b <sup>0</sup>    | b <sup>0++</sup> | Seq. | y                  | y <sup>++</sup>   | y <sup>+</sup>    | y <sup>*++</sup> | y <sup>0</sup>     | y <sup>0++</sup> | # |
|---|-------------------|-----------------|----------------|------------------|-------------------|------------------|------|--------------------|-------------------|-------------------|------------------|--------------------|------------------|---|
| 1 | 100.075690        | 50.541483       |                |                  |                   |                  | V    |                    |                   |                   |                  |                    |                  | 8 |
| 2 | <b>539.301016</b> | 270.154146      | 522.274467     | 261.640872       |                   |                  | Q    | <b>1103.587756</b> | <b>552.297516</b> | 1086.561207       | 543.784242       | <b>1085.577191</b> | 543.292234       | 7 |
| 3 | <b>626.333044</b> | 313.670160      | 609.306495     | 305.156886       | 608.322479        | 304.664878       | S    | <b>664.362430</b>  | 332.684853        | 647.335881        | 324.171579       | <b>646.351865</b>  | 323.679571       | 6 |
| 4 | 727.380723        | 364.194000      | 710.354174     | 355.680725       | 709.370158        | 355.188717       | T    | <b>577.330402</b>  | 289.168839        | 560.303853        | 280.655565       | 559.319837         | 280.163557       | 5 |
| 5 | <b>840.464787</b> | 420.736032      | 823.438238     | 412.222757       | 822.454222        | 411.730749       | I    | <b>476.282723</b>  | 238.645000        | 459.256174        | 230.131725       | 458.272158         | 229.639717       | 4 |
| 6 | 941.512466        | 471.259871      | 924.485917     | 462.746597       | <b>923.501901</b> | 462.254589       | T    | <b>363.198659</b>  | 182.102968        | 346.172110        | 173.589693       | 345.188094         | 173.097685       | 3 |
| 7 | 1028.544494       | 514.775885      | 1011.517945    | 506.262611       | 1010.533929       | 505.770603       | S    | <b>262.150980</b>  | 131.579128        | 245.124431        | 123.065854       | 244.140415         | 122.573846       | 2 |
| 8 |                   |                 |                |                  |                   |                  | R    | <b>175.118952</b>  | 88.063114         | <b>158.092403</b> | 79.549839        |                    |                  | 1 |

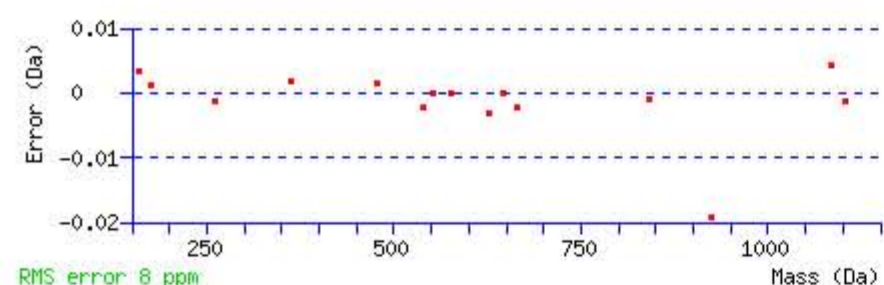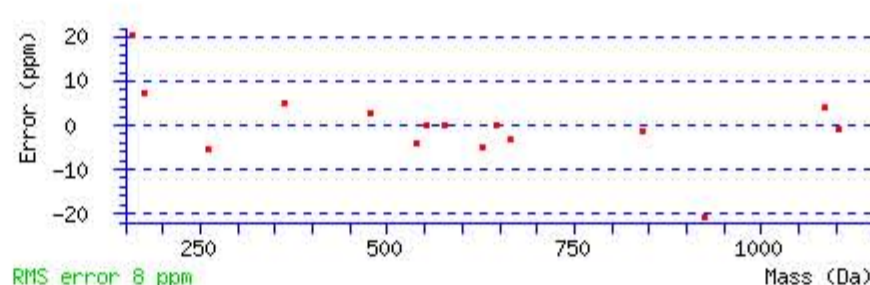

NCBI BLAST search of **VQSTITSR**

(Parameters: blastp, nr protein database, expect=20000, no filter, PAM30)

Other BLAST [web gateways](#)

All matches to this query

| Score | Mr(calc):   | Delta     | Sequence                    |
|-------|-------------|-----------|-----------------------------|
| 36.3  | 1201.648895 | -0.005907 | <a href="#">VQSTITSR</a>    |
| 8.1   | 1201.638992 | 0.003996  | <a href="#">VQPPSHAR</a>    |
| 7.5   | 1201.641479 | 0.001509  | <a href="#">VSIKDNQKDR</a>  |
| 5.2   | 1201.630249 | 0.012739  | <a href="#">KLDAEDVIGSR</a> |
| 2.6   | 1201.638992 | 0.003996  | <a href="#">VQGREFR</a>     |

Mascot: <http://www.matrixscience.com/>



# MASCOT Search Results

## Peptide View

MS/MS Fragmentation of **MATTMIQSK**

Found in **ITIH2\_HUMAN**, Inter-alpha-trypsin inhibitor heavy chain H2 OS=Homo sapiens GN=ITIH2 PE=1 SV=2

Match to Query 28828: 1320.663328 from(661.338940,2+) rtinseconds(1714) index(53889)

Title: Locus:1.1.1.3083.9 File:"2013-07-02 CLN FXIII 30 min 2nd F 4.wiff"

Data file C:\Program Files (x86)\Matrix Science\Mascot Daemon\mgf2 FXIII 30 min 2nd\mascot\_daemon\_merge.mgf

Click mouse within plot area to zoom in by factor of two about that point

Or, Plot from  to  Da

Label all possible matches  Label matches used for scoring

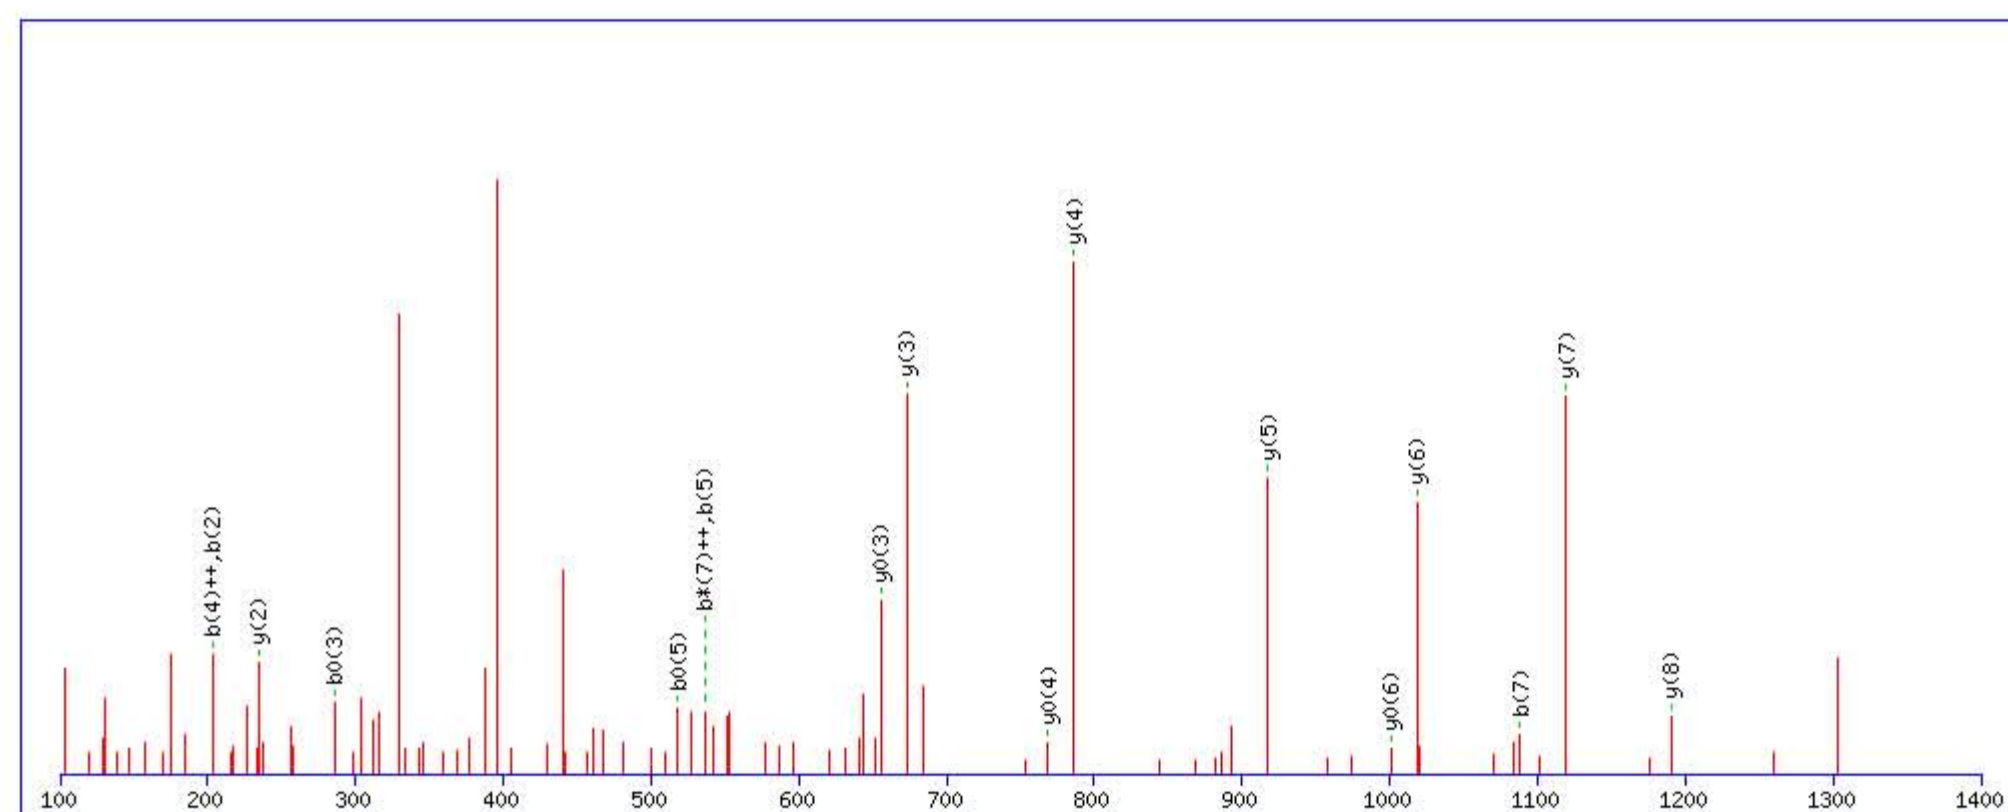

Monoisotopic mass of neutral peptide Mr(calc): 1320.660370

Fixed modifications: Carbamidomethyl (C) (apply to specified residues or termini only)

Variable modifications:

Q7 : Biotin:Thermo-21345 (Q)

Ions Score: 49 Expect: 0.00017

Matches : 17/78 fragment ions using 24 most intense peaks [\(help\)](#)

| # | b           | b <sup>++</sup> | b <sup>*</sup> | b <sup>+++</sup> | b <sup>0</sup> | b <sup>0++</sup> | Seq. | y           | y <sup>++</sup> | y <sup>*</sup> | y <sup>+++</sup> | y <sup>0</sup> | y <sup>0++</sup> | # |
|---|-------------|-----------------|----------------|------------------|----------------|------------------|------|-------------|-----------------|----------------|------------------|----------------|------------------|---|
| 1 | 132.047761  | 66.527518       |                |                  |                |                  | M    |             |                 |                |                  |                |                  | 9 |
| 2 | 203.084875  | 102.046075      |                |                  |                |                  | A    | 1190.627179 | 595.817228      | 1173.600630    | 587.303953       | 1172.616614    | 586.811945       | 8 |
| 3 | 304.132554  | 152.569915      |                |                  | 286.121989     | 143.564632       | T    | 1119.590065 | 560.298671      | 1102.563516    | 551.785396       | 1101.579500    | 551.293388       | 7 |
| 4 | 405.180233  | 203.093754      |                |                  | 387.169668     | 194.088472       | T    | 1018.542386 | 509.774831      | 1001.515837    | 501.261557       | 1000.531821    | 500.769549       | 6 |
| 5 | 536.220718  | 268.613997      |                |                  | 518.210153     | 259.608715       | M    | 917.494707  | 459.250992      | 900.468158     | 450.737717       | 899.484142     | 450.245709       | 5 |
| 6 | 649.304782  | 325.156029      |                |                  | 631.294217     | 316.150747       | I    | 786.454222  | 393.730749      | 769.427673     | 385.217475       | 768.443657     | 384.725467       | 4 |
| 7 | 1088.530108 | 544.768692      | 1071.503559    | 536.255418       | 1070.519543    | 535.763410       | Q    | 673.370158  | 337.188717      | 656.343609     | 328.675443       | 655.359593     | 328.183435       | 3 |
| 8 | 1175.562136 | 588.284706      | 1158.535587    | 579.771432       | 1157.551571    | 579.279424       | S    | 234.144832  | 117.576054      | 217.118283     | 109.062780       | 216.134267     | 108.570772       | 2 |
| 9 |             |                 |                |                  |                |                  | K    | 147.112804  | 74.060040       | 130.086255     | 65.546765        |                |                  | 1 |

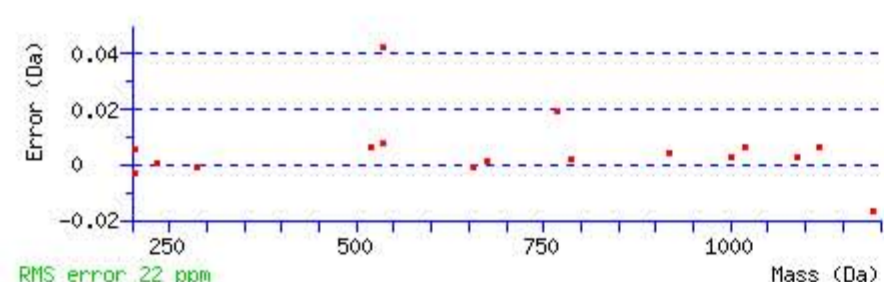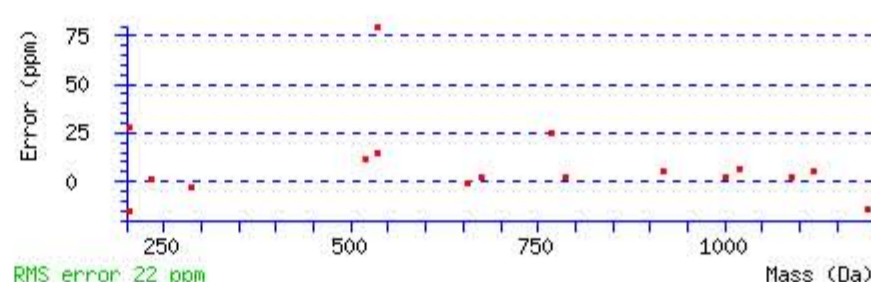

NCBI BLAST search of **MATTMIQSK**

(Parameters: blastp, nr protein database, expect=20000, no filter, PAM30)

Other BLAST [web gateways](#)

### All matches to this query

| Score | Mr(calc):   | Delta     | Sequence                       |
|-------|-------------|-----------|--------------------------------|
| 49.3  | 1320.660370 | 0.002958  | <a href="#">MATTMIQSK</a>      |
| 8.5   | 1320.670715 | -0.007387 | <a href="#">IAPKASMAGASSSK</a> |
| 3.9   | 1320.654785 | 0.008543  | <a href="#">HNLGHGHKHER</a>    |
| 2.7   | 1320.663330 | -0.000002 | <a href="#">QSGNTEQKSKSK</a>   |
| 2.3   | 1320.675461 | -0.012133 | <a href="#">RMRLVVDGMGR</a>    |
| 1.3   | 1320.678604 | -0.015276 | <a href="#">TERHPPVSPSSK</a>   |
| 1.1   | 1320.660858 | 0.002470  | <a href="#">FLDCVVRAGER</a>    |
| 0.9   | 1320.678574 | -0.015246 | <a href="#">EKQLRSEFER</a>     |
| 0.6   | 1320.678574 | -0.015246 | <a href="#">SFRAAAAETLER</a>   |



# MASCOT Search Results

## Peptide View

MS/MS Fragmentation of **LSNENHGIAQR**

Found in **ITIH2\_HUMAN**, Inter-alpha-trypsin inhibitor heavy chain H2 OS=Homo sapiens GN=ITIH2 PE=1 SV=2

Match to Query 36816: 1548.772962 from(517.264930,3+) rtinseconds(1375) index(67098)

Title: Locus:1.1.1.3012.20 File:"2013-07-02 CLN FXIII 30 min 2nd FT.wiff"

Data file C:\Program Files (x86)\Matrix Science\Mascot Daemon\mgf2 FXIII 30 min 2nd\mascot\_daemon\_merge.mgf

Click mouse within plot area to zoom in by factor of two about that point

Or, Plot from  to  Da

Label all possible matches  Label matches used for scoring

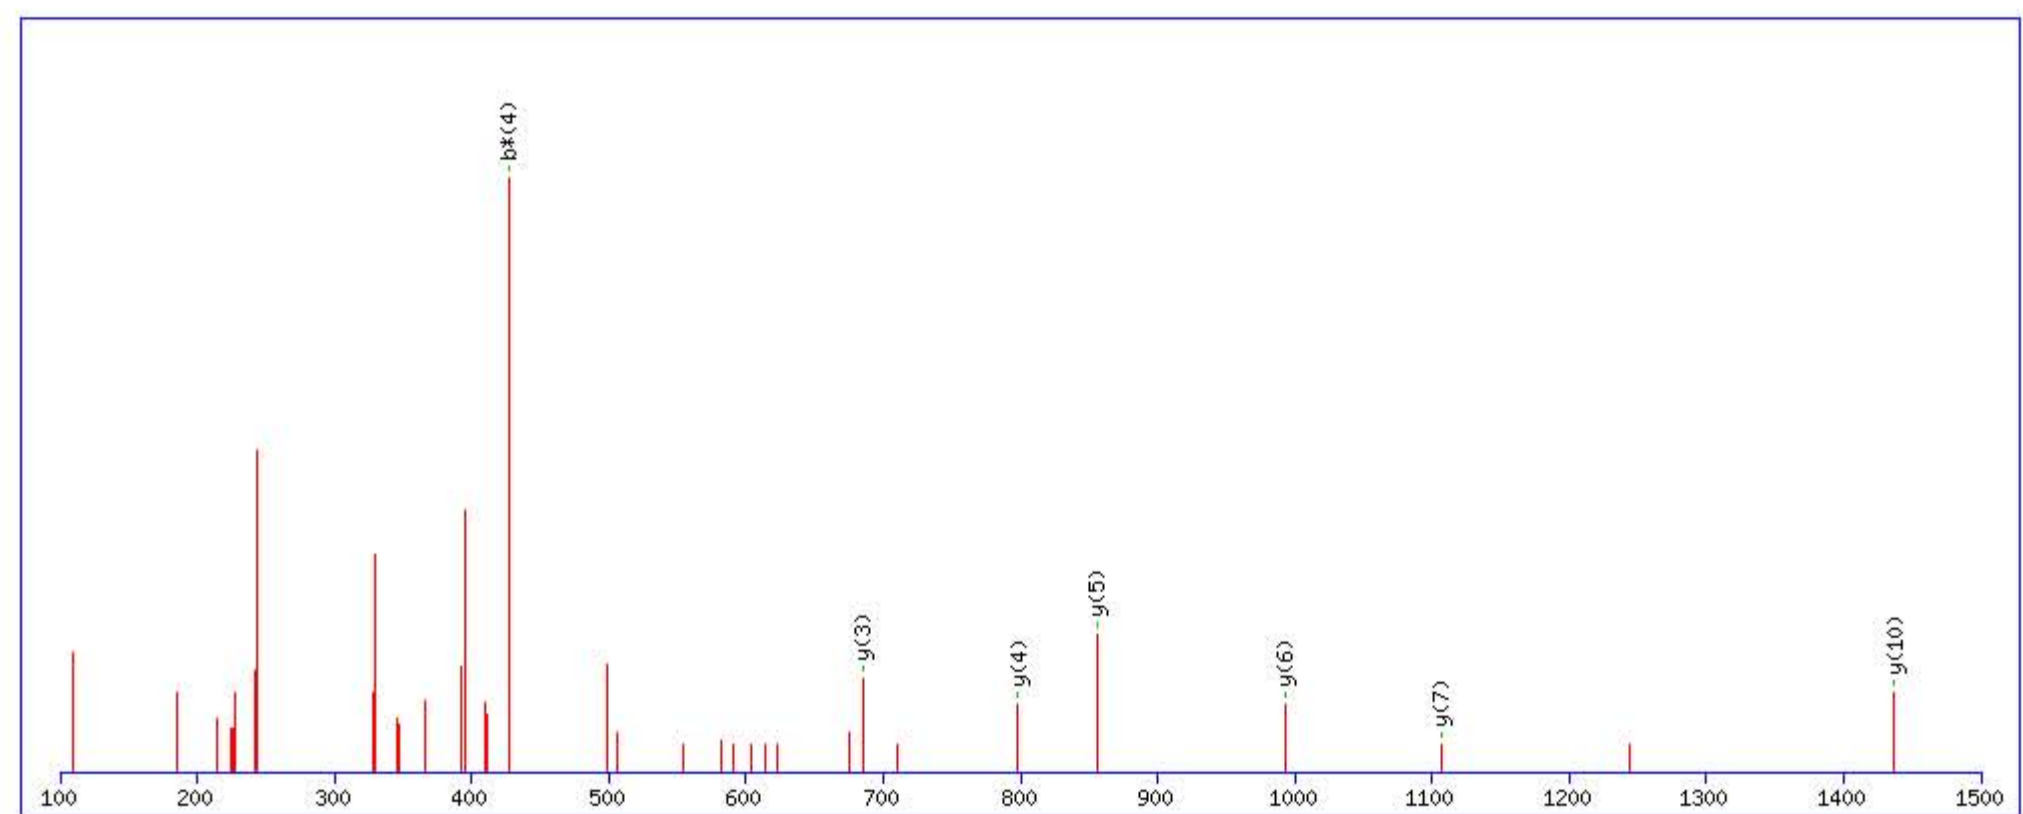

Monoisotopic mass of neutral peptide  $M_r(\text{calc})$ : 1548.783066

Fixed modifications: Carbamidomethyl (C) (apply to specified residues or termini only)

Variable modifications:

Q10 : Biotin:Thermo-21345 (Q)

Ions Score: 31 Expect: 0.019

Matches : 7/100 fragment ions using 12 most intense peaks [\(help\)](#)

| #  | b           | b <sup>++</sup> | b <sup>*</sup> | b <sup>*++</sup> | b <sup>0</sup> | b <sup>0++</sup> | Seq. | y           | y <sup>++</sup> | y <sup>*</sup> | y <sup>*++</sup> | y <sup>0</sup> | y <sup>0++</sup> | #  |
|----|-------------|-----------------|----------------|------------------|----------------|------------------|------|-------------|-----------------|----------------|------------------|----------------|------------------|----|
| 1  | 114.091340  | 57.549308       |                |                  |                |                  | L    |             |                 |                |                  |                |                  | 11 |
| 2  | 201.123368  | 101.065322      |                |                  | 183.112803     | 92.060039        | S    | 1436.706307 | 718.856792      | 1419.679758    | 710.343517       | 1418.695742    | 709.851509       | 10 |
| 3  | 315.166295  | 158.086785      | 298.139746     | 149.573511       | 297.155730     | 149.081503       | N    | 1349.674279 | 675.340778      | 1332.647730    | 666.827503       | 1331.663714    | 666.335495       | 9  |
| 4  | 444.208888  | 222.608082      | 427.182339     | 214.094808       | 426.198323     | 213.602800       | E    | 1235.631352 | 618.319314      | 1218.604803    | 609.806040       | 1217.620787    | 609.314032       | 8  |
| 5  | 558.251815  | 279.629546      | 541.225266     | 271.116271       | 540.241250     | 270.624263       | N    | 1106.588759 | 553.798018      | 1089.562210    | 545.284743       |                |                  | 7  |
| 6  | 695.310727  | 348.159002      | 678.284178     | 339.645727       | 677.300162     | 339.153719       | H    | 992.545832  | 496.776554      | 975.519283     | 488.263280       |                |                  | 6  |
| 7  | 752.332191  | 376.669734      | 735.305642     | 368.156459       | 734.321626     | 367.664451       | G    | 855.486920  | 428.247098      | 838.460371     | 419.733824       |                |                  | 5  |
| 8  | 865.416255  | 433.211766      | 848.389706     | 424.698491       | 847.405690     | 424.206483       | I    | 798.465456  | 399.736366      | 781.438907     | 391.223092       |                |                  | 4  |
| 9  | 936.453369  | 468.730323      | 919.426820     | 460.217048       | 918.442804     | 459.725040       | A    | 685.381392  | 343.194334      | 668.354843     | 334.681060       |                |                  | 3  |
| 10 | 1375.678695 | 688.342986      | 1358.652146    | 679.829711       | 1357.668130    | 679.337703       | Q    | 614.344278  | 307.675777      | 597.317729     | 299.162503       |                |                  | 2  |
| 11 |             |                 |                |                  |                |                  | R    | 175.118952  | 88.063114       | 158.092403     | 79.549839        |                |                  | 1  |

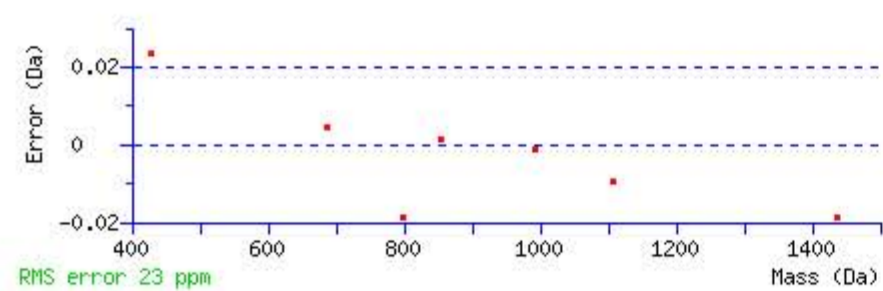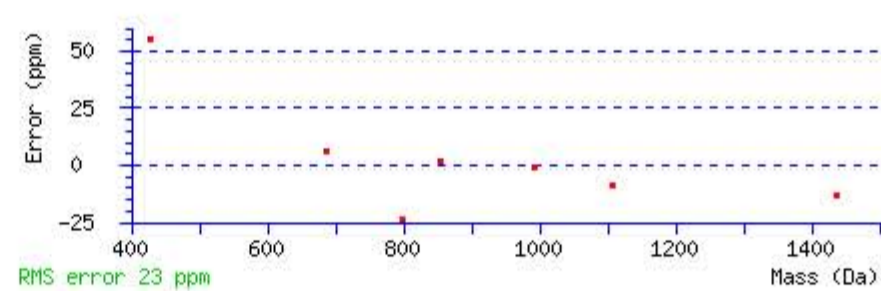

NCBI BLAST search of [LSNENHGIAQR](#)

(Parameters: blastp, nr protein database, expect=20000, no filter, PAM30)

Other BLAST [web gateways](#)

All matches to this query

| Score | $M_r(\text{calc})$ : | Delta     | Sequence                    |
|-------|----------------------|-----------|-----------------------------|
| 30.8  | 1548.783066          | -0.010104 | <a href="#">LSNENHGIAQR</a> |

Mascot: <http://www.matrixscience.com/>



# MASCOT SEARCH RESULTS

## Peptide View

MS/MS Fragmentation of **FYNQVSTPLLR**

Found in **ITIH2\_HUMAN**, Inter-alpha-trypsin inhibitor heavy chain H2 OS=Homo sapiens GN=ITIH2 PE=1 SV=2

Match to Query 41095: 1647.869908 from(824.942230,2+) rtinseconds(2288) index(40473)

Title: Locus:1.1.1.2819.12 File:"2013-07-02 CLN FXIII 30 min 2nd F 3.wiff"

Data file C:\Program Files (x86)\Matrix Science\Mascot Daemon\mgf2 FXIII 30 min 2nd\mascot\_daemon\_merge.mgf

Click mouse within plot area to zoom in by factor of two about that point

Or, Plot from  to  Da

Label all possible matches  Label matches used for scoring

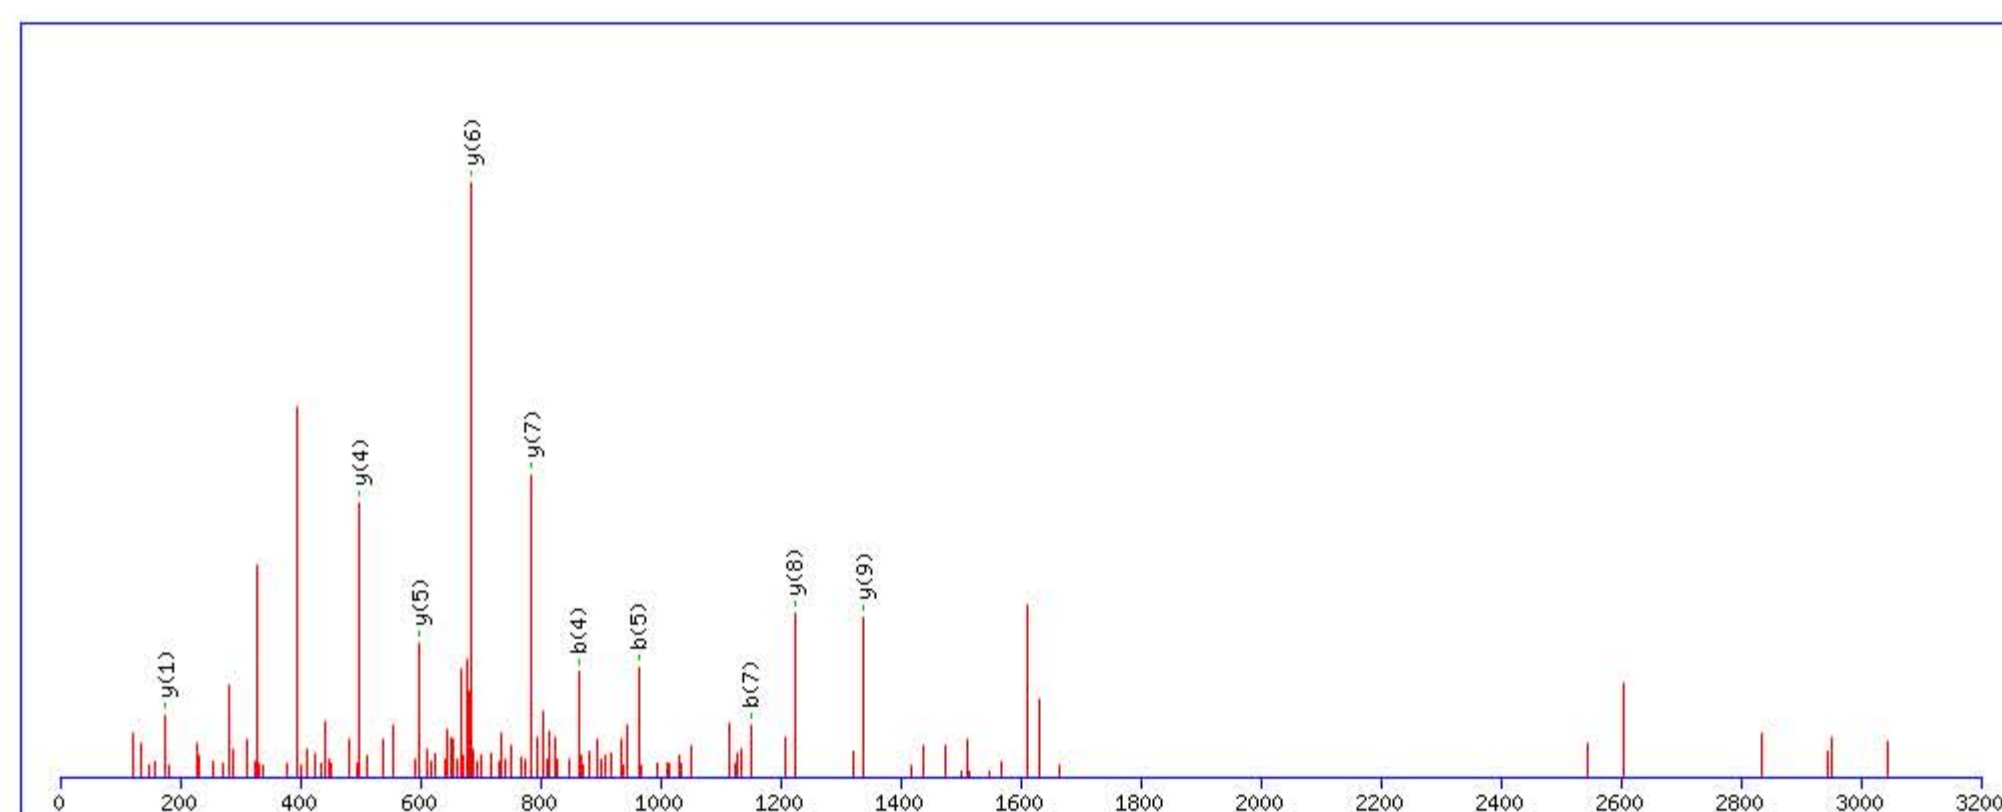

Monoisotopic mass of neutral peptide Mr(calc): 1647.880676

Fixed modifications: Carbamidomethyl (C) (apply to specified residues or termini only)

Variable modifications:

Q4 : Biotin:Thermo-21345 (Q)

Ions Score: 49 Expect: 0.00013

Matches : 10/98 fragment ions using 16 most intense peaks [\(help\)](#)

| #  | b                  | b <sup>++</sup> | b <sup>*</sup> | b <sup>*++</sup> | b <sup>0</sup> | b <sup>0++</sup> | Seq. | y                  | y <sup>++</sup> | y <sup>*</sup> | y <sup>*++</sup> | y <sup>0</sup> | y <sup>0++</sup> | #  |
|----|--------------------|-----------------|----------------|------------------|----------------|------------------|------|--------------------|-----------------|----------------|------------------|----------------|------------------|----|
| 1  | 148.075690         | 74.541483       |                |                  |                |                  | F    |                    |                 |                |                  |                |                  | 11 |
| 2  | 311.139019         | 156.073148      |                |                  |                |                  | Y    | 1501.819547        | 751.413411      | 1484.792998    | 742.900137       | 1483.808982    | 742.408129       | 10 |
| 3  | 425.181946         | 213.094611      | 408.155397     | 204.581337       |                |                  | N    | <b>1338.756218</b> | 669.881747      | 1321.729669    | 661.368472       | 1320.745653    | 660.876464       | 9  |
| 4  | <b>864.407272</b>  | 432.707274      | 847.380723     | 424.194000       |                |                  | Q    | <b>1224.713291</b> | 612.860283      | 1207.686742    | 604.347009       | 1206.702726    | 603.855001       | 8  |
| 5  | <b>963.475686</b>  | 482.241481      | 946.449137     | 473.728207       |                |                  | V    | <b>785.487965</b>  | 393.247620      | 768.461416     | 384.734346       | 767.477400     | 384.242338       | 7  |
| 6  | 1050.507714        | 525.757495      | 1033.481165    | 517.244221       | 1032.497149    | 516.752213       | S    | <b>686.419551</b>  | 343.713414      | 669.393002     | 335.200139       | 668.408986     | 334.708131       | 6  |
| 7  | <b>1151.555393</b> | 576.281335      | 1134.528844    | 567.768060       | 1133.544828    | 567.276052       | T    | <b>599.387523</b>  | 300.197399      | 582.360974     | 291.684125       | 581.376958     | 291.192117       | 5  |
| 8  | 1248.608157        | 624.807717      | 1231.581608    | 616.294442       | 1230.597592    | 615.802434       | P    | <b>498.339844</b>  | 249.673560      | 481.313295     | 241.160285       |                |                  | 4  |
| 9  | 1361.692221        | 681.349749      | 1344.665672    | 672.836474       | 1343.681656    | 672.344466       | L    | 401.287080         | 201.147178      | 384.260531     | 192.633903       |                |                  | 3  |
| 10 | 1474.776285        | 737.891780      | 1457.749736    | 729.378506       | 1456.765720    | 728.886498       | L    | 288.203016         | 144.605146      | 271.176467     | 136.091871       |                |                  | 2  |
| 11 |                    |                 |                |                  |                |                  | R    | <b>175.118952</b>  | 88.063114       | 158.092403     | 79.549839        |                |                  | 1  |

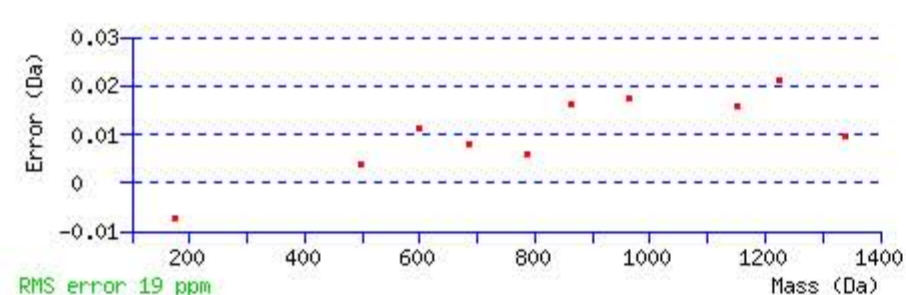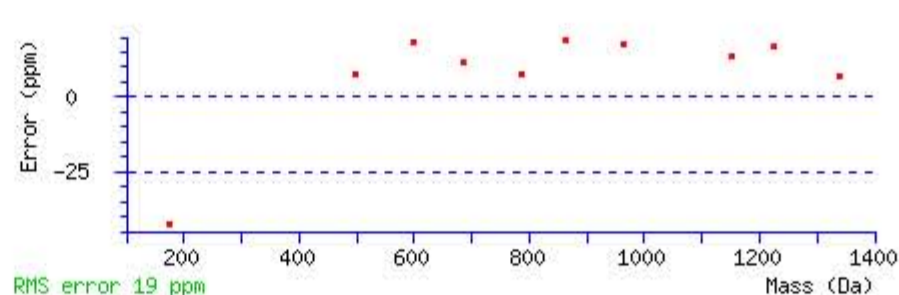

NCBI BLAST search of **FYNQVSTPLLR**

(Parameters: blastp, nr protein database, expect=20000, no filter, PAM30)

Other BLAST [web gateways](#)

All matches to this query

| Score | Mr(calc):   | Delta     | Sequence                       |
|-------|-------------|-----------|--------------------------------|
| 49.3  | 1647.880676 | -0.010768 | <a href="#">FYNQVSTPLLR</a>    |
| 7.8   | 1647.887878 | -0.017970 | <a href="#">TLNQQLTNHIR</a>    |
| 5.5   | 1647.873260 | -0.003352 | <a href="#">AFKELPVNAQNYVR</a> |
| 3.1   | 1647.887878 | -0.017970 | <a href="#">TLNQQLTNHIR</a>    |

Mascot: <http://www.matrixscience.com/>



# MASCOT SCIENCE Mascot Search Results

## Peptide View

MS/MS Fragmentation of **IYGNQDTSSQLK**

Found in **ITIH2\_HUMAN**, Inter-alpha-trypsin inhibitor heavy chain H2 OS=Homo sapiens GN=ITIH2 PE=1 SV=2

Match to Query 41411: 1663.815792 from(555.612540,3+) rtinseconds(1629) index(53332)

Title: Locus:1.1.1.3053.8 File:"2013-07-02 CLN FXIII 30 min 2nd F 4.wiff"

Data file C:\Program Files (x86)\Matrix Science\Mascot Daemon\mgf2 FXIII 30 min 2nd\mascot\_daemon\_merge.mgf

Click mouse within plot area to zoom in by factor of two about that point

Or, Plot from  to  Da

Label all possible matches  Label matches used for scoring

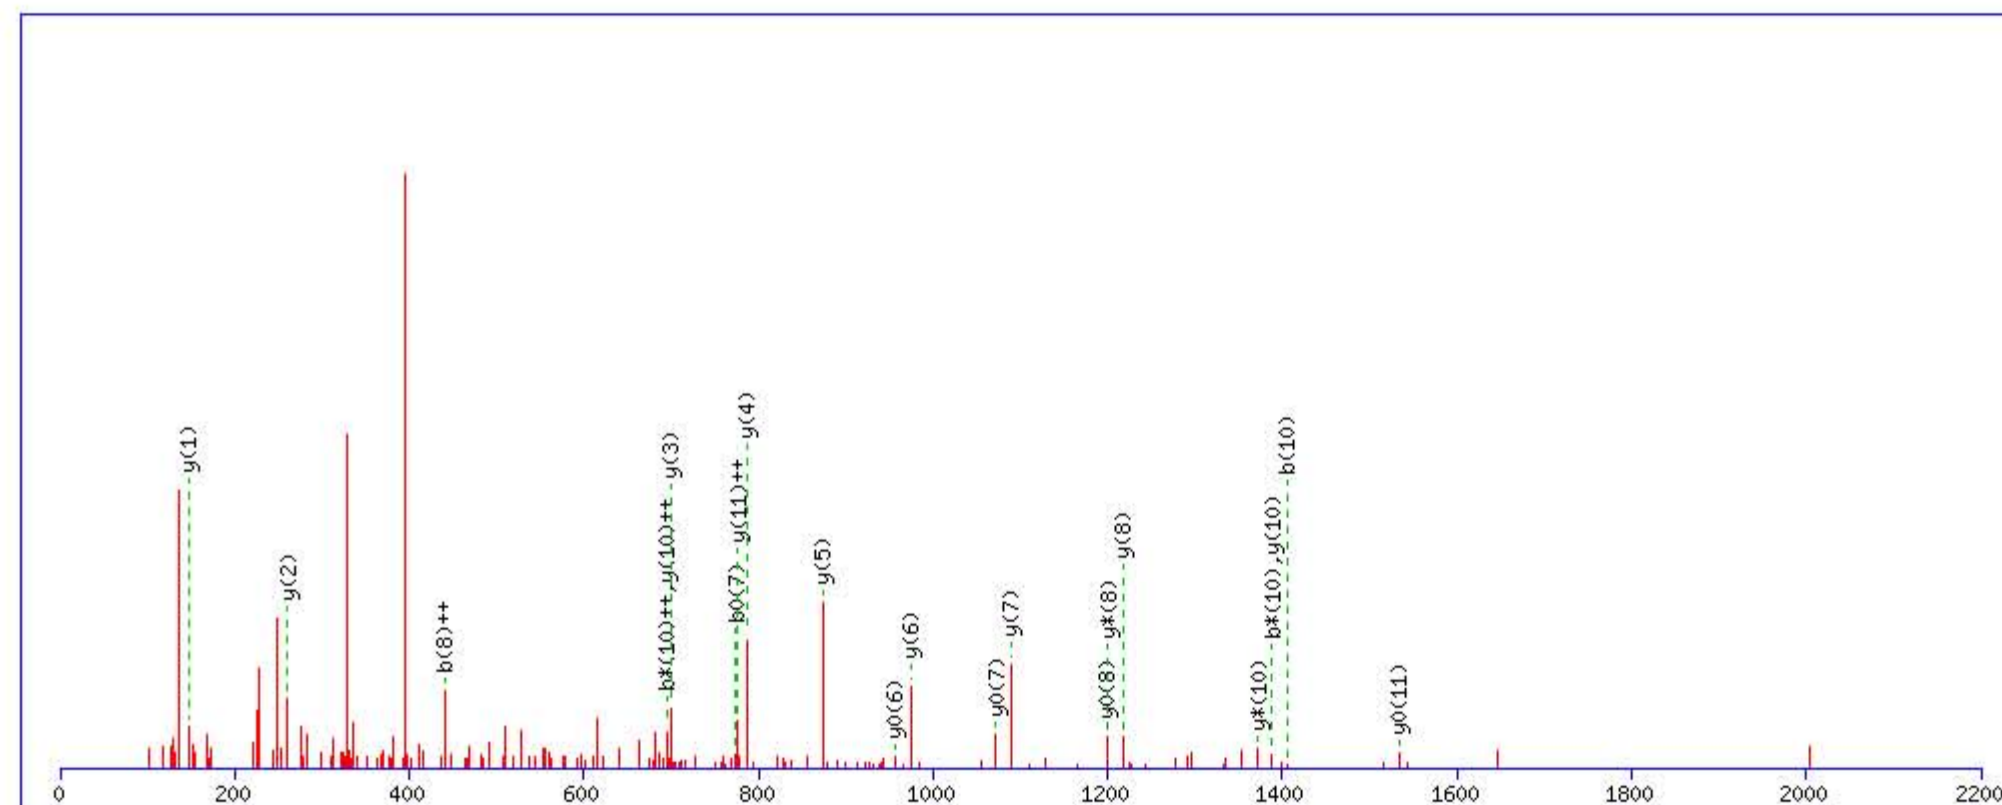

Monoisotopic mass of neutral peptide Mr(calc): 1663.823944

Fixed modifications: Carbamidomethyl (C) (apply to specified residues or termini only)

Variable modifications:

Q10 : Biotin:Thermo-21345 (Q)

Ions Score: 41 Expect: 0.0019

Matches : 22/110 fragment ions using 44 most intense peaks [\(help\)](#)

| #  | b           | b <sup>++</sup> | b <sup>*</sup> | b <sup>*++</sup> | b <sup>0</sup> | b <sup>0++</sup> | Seq. | y           | y <sup>++</sup> | y <sup>*</sup> | y <sup>*++</sup> | y <sup>0</sup> | y <sup>0++</sup> | #  |
|----|-------------|-----------------|----------------|------------------|----------------|------------------|------|-------------|-----------------|----------------|------------------|----------------|------------------|----|
| 1  | 114.091340  | 57.549308       |                |                  |                |                  | I    |             |                 |                |                  |                |                  | 12 |
| 2  | 277.154669  | 139.080973      |                |                  |                |                  | Y    | 1551.747170 | 776.377223      | 1534.720621    | 767.863948       | 1533.736605    | 767.371940       | 11 |
| 3  | 334.176133  | 167.591704      |                |                  |                |                  | G    | 1388.683841 | 694.845558      | 1371.657292    | 686.332284       | 1370.673276    | 685.840276       | 10 |
| 4  | 448.219060  | 224.613168      | 431.192511     | 216.099894       |                |                  | N    | 1331.662377 | 666.334826      | 1314.635828    | 657.821552       | 1313.651812    | 657.329544       | 9  |
| 5  | 576.277638  | 288.642457      | 559.251089     | 280.129183       |                |                  | Q    | 1217.619450 | 609.313363      | 1200.592901    | 600.800088       | 1199.608885    | 600.308080       | 8  |
| 6  | 691.304581  | 346.155929      | 674.278032     | 337.642654       | 673.294016     | 337.150646       | D    | 1089.560872 | 545.284074      | 1072.534323    | 536.770799       | 1071.550307    | 536.278791       | 7  |
| 7  | 792.352260  | 396.679768      | 775.325711     | 388.166494       | 774.341695     | 387.674486       | T    | 974.533929  | 487.770602      | 957.507380     | 479.257328       | 956.523364     | 478.765320       | 6  |
| 8  | 879.384288  | 440.195782      | 862.357739     | 431.682507       | 861.373723     | 431.190499       | S    | 873.486250  | 437.246763      | 856.459701     | 428.733488       | 855.475685     | 428.241480       | 5  |
| 9  | 966.416316  | 483.711796      | 949.389767     | 475.198521       | 948.405751     | 474.706513       | S    | 786.454222  | 393.730749      | 769.427673     | 385.217474       | 768.443657     | 384.725466       | 4  |
| 10 | 1405.641642 | 703.324459      | 1388.615093    | 694.811184       | 1387.631077    | 694.319176       | Q    | 699.422194  | 350.214735      | 682.395645     | 341.701460       |                |                  | 3  |
| 11 | 1518.725706 | 759.866491      | 1501.699157    | 751.353216       | 1500.715141    | 750.861208       | L    | 260.196868  | 130.602072      | 243.170319     | 122.088797       |                |                  | 2  |
| 12 |             |                 |                |                  |                |                  | K    | 147.112804  | 74.060040       | 130.086255     | 65.546765        |                |                  | 1  |

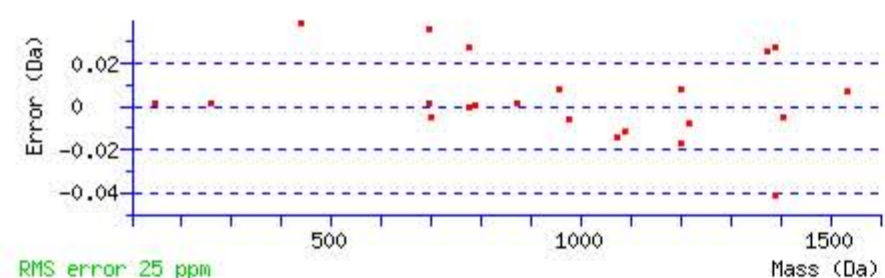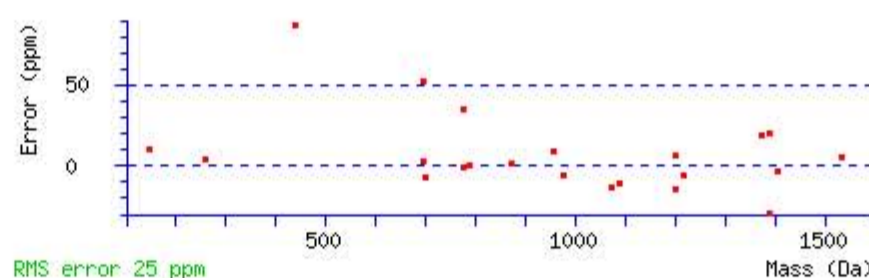

NCBI BLAST search of **IYGNQDTSSQLK**

(Parameters: blastp, nr protein database, expect=20000, no filter, PAM30)

Other BLAST [web gateways](#)

All matches to this query

| Score | Mr(calc):   | Delta     | Sequence                     |
|-------|-------------|-----------|------------------------------|
| 40.5  | 1663.823944 | -0.008152 | <a href="#">IYGNQDTSSQLK</a> |
| 2.5   | 1663.823944 | -0.008152 | <a href="#">IYGNQDTSSQLK</a> |



# MASCOT SEARCH RESULTS

## Peptide View

MS/MS Fragmentation of **AHVSFKPTVAQQR**

Found in **ITIH2\_HUMAN**, Inter-alpha-trypsin inhibitor heavy chain H2 OS=Homo sapiens GN=ITIH2 PE=1 SV=2

Match to Query 44315: 1778.952096 from(445.745300,4+) rtinseconds(1484) index(52465)

Title: Locus:1.1.1.3003.5 File:"2013-07-02 CLN FXIII 30 min 2nd F 4.wiff"

Data file C:\Program Files (x86)\Matrix Science\Mascot Daemon\mgf2 FXIII 30 min 2nd\mascot\_daemon\_merge.mgf

Click mouse within plot area to zoom in by factor of two about that point

Or, Plot from  to  Da

Label all possible matches  Label matches used for scoring

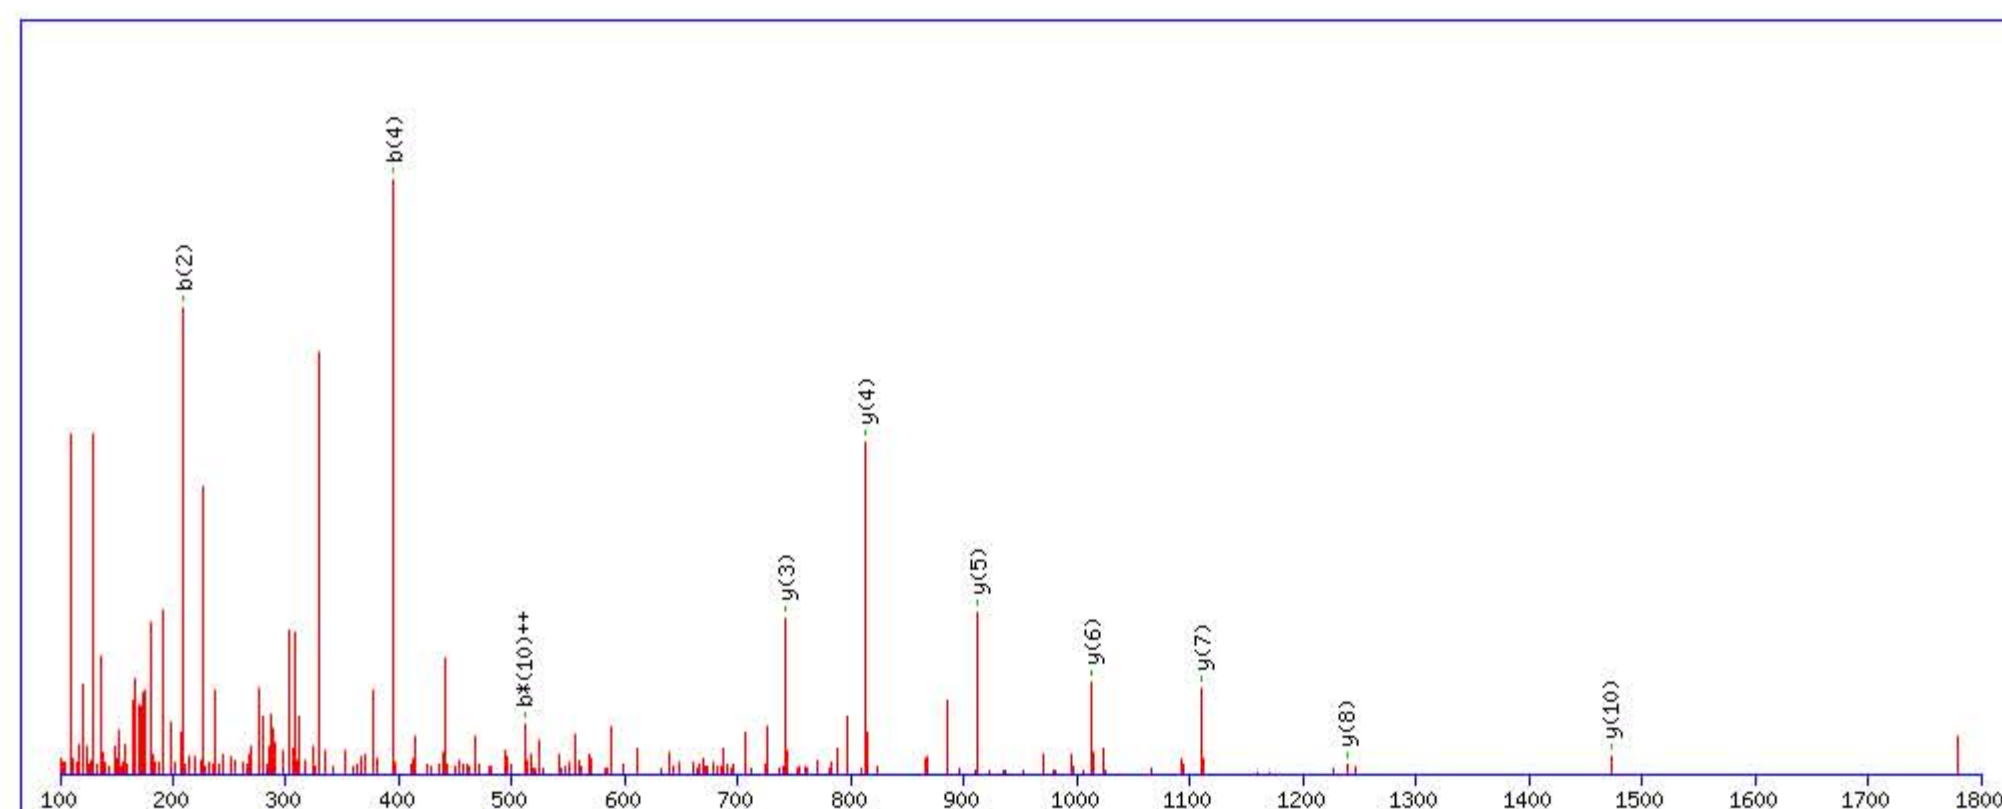

Monoisotopic mass of neutral peptide Mr(calc): 1778.961395

Fixed modifications: Carbamidomethyl (C) (apply to specified residues or termini only)

Variable modifications:

Q12 : Biotin:Thermo-21345 (Q)

Ions Score: 52 Expect: 0.00014

Matches : 10/118 fragment ions using 13 most intense peaks [\(help\)](#)

| #  | b                 | b <sup>++</sup> | b <sup>*</sup> | b <sup>*++</sup>  | b <sup>0</sup> | b <sup>0++</sup> | Seq. | y                  | y <sup>++</sup> | y <sup>*</sup> | y <sup>*++</sup> | y <sup>0</sup> | y <sup>0++</sup> | #  |
|----|-------------------|-----------------|----------------|-------------------|----------------|------------------|------|--------------------|-----------------|----------------|------------------|----------------|------------------|----|
| 1  | 72.044390         | 36.525833       |                |                   |                |                  | A    |                    |                 |                |                  |                |                  | 13 |
| 2  | <b>209.103302</b> | 105.055289      |                |                   |                |                  | H    | 1708.931558        | 854.969417      | 1691.905009    | 846.456143       | 1690.920993    | 845.964135       | 12 |
| 3  | 308.171716        | 154.589496      |                |                   |                |                  | V    | 1571.872646        | 786.439961      | 1554.846097    | 777.926687       | 1553.862081    | 777.434679       | 11 |
| 4  | <b>395.203744</b> | 198.105510      |                |                   | 377.193179     | 189.100227       | S    | <b>1472.804232</b> | 736.905754      | 1455.777683    | 728.392480       | 1454.793667    | 727.900472       | 10 |
| 5  | 542.272158        | 271.639717      |                |                   | 524.261593     | 262.634435       | F    | 1385.772204        | 693.389740      | 1368.745655    | 684.876466       | 1367.761639    | 684.384458       | 9  |
| 6  | 670.367121        | 335.687199      | 653.340572     | 327.173924        | 652.356556     | 326.681916       | K    | <b>1238.703790</b> | 619.855533      | 1221.677241    | 611.342259       | 1220.693225    | 610.850251       | 8  |
| 7  | 767.419885        | 384.213581      | 750.393336     | 375.700306        | 749.409320     | 375.208298       | P    | <b>1110.608827</b> | 555.808052      | 1093.582278    | 547.294777       | 1092.598262    | 546.802769       | 7  |
| 8  | 868.467564        | 434.737420      | 851.441015     | 426.224146        | 850.456999     | 425.732138       | T    | <b>1013.556063</b> | 507.281670      | 996.529514     | 498.768395       | 995.545498     | 498.276387       | 6  |
| 9  | 967.535978        | 484.271627      | 950.509429     | 475.758353        | 949.525413     | 475.266345       | V    | <b>912.508384</b>  | 456.757830      | 895.481835     | 448.244556       |                |                  | 5  |
| 10 | 1038.573092       | 519.790184      | 1021.546543    | <b>511.276910</b> | 1020.562527    | 510.784902       | A    | <b>813.439970</b>  | 407.223623      | 796.413421     | 398.710349       |                |                  | 4  |
| 11 | 1166.631670       | 583.819473      | 1149.605121    | 575.306199        | 1148.621105    | 574.814191       | Q    | <b>742.402856</b>  | 371.705066      | 725.376307     | 363.191792       |                |                  | 3  |
| 12 | 1605.856996       | 803.432136      | 1588.830447    | 794.918862        | 1587.846431    | 794.426854       | Q    | 614.344278         | 307.675777      | 597.317729     | 299.162503       |                |                  | 2  |
| 13 |                   |                 |                |                   |                |                  | R    | 175.118952         | 88.063114       | 158.092403     | 79.549839        |                |                  | 1  |

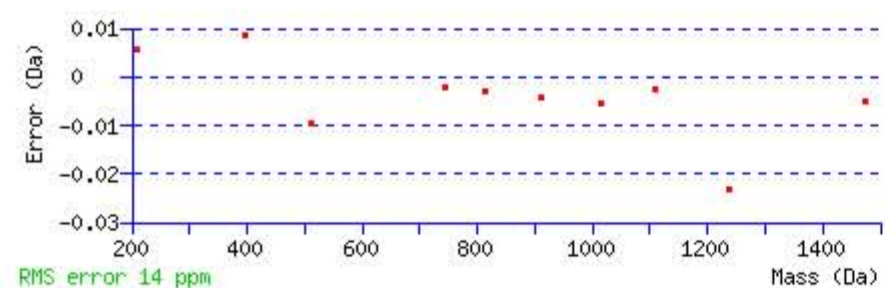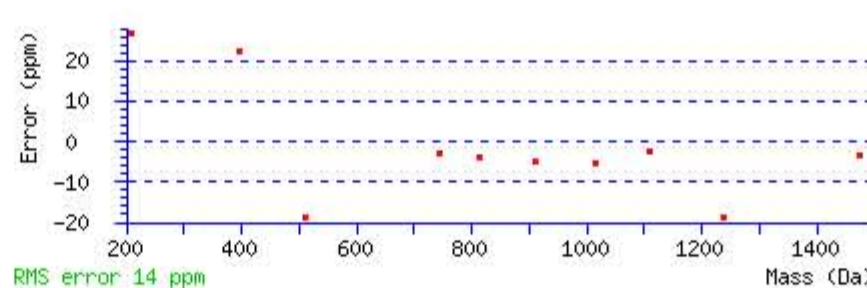

NCBI BLAST search of **AHVSFKPTVAQQR**

(Parameters: blastp, nr protein database, expect=20000, no filter, PAM30)

Other BLAST [web gateways](#)

All matches to this query

| Score | Mr(calc):   | Delta     | Sequence                      |
|-------|-------------|-----------|-------------------------------|
| 51.8  | 1778.961395 | -0.009299 | <a href="#">AHVSFKPTVAQQR</a> |
| 51.8  | 1778.961395 | -0.009299 | <a href="#">AHVSFKPTVAQQR</a> |

Mascot: <http://www.matrixscience.com/>



# MASCOT SCIENCE Mascot Search Results

## Peptide View

MS/MS Fragmentation of **IYGNQDTSSQLK**

Found in **ITIH2\_HUMAN**, Inter-alpha-trypsin inhibitor heavy chain H2 OS=Homo sapiens GN=ITIH2 PE=1 SV=2

Match to Query 48610: 1974.981608 from(988.498080,2+) rtinseconds(1989) index(55752)

Title: Locus:1.1.1.3178.14 File:"2013-07-02 CLN FXIII 30 min 2nd F 4.wiff"

Data file C:\Program Files (x86)\Matrix Science\Mascot Daemon\mgf2 FXIII 30 min 2nd\mascot\_daemon\_merge.mgf

Click mouse within plot area to zoom in by factor of two about that point

Or, Plot from  to  Da

Label all possible matches  Label matches used for scoring

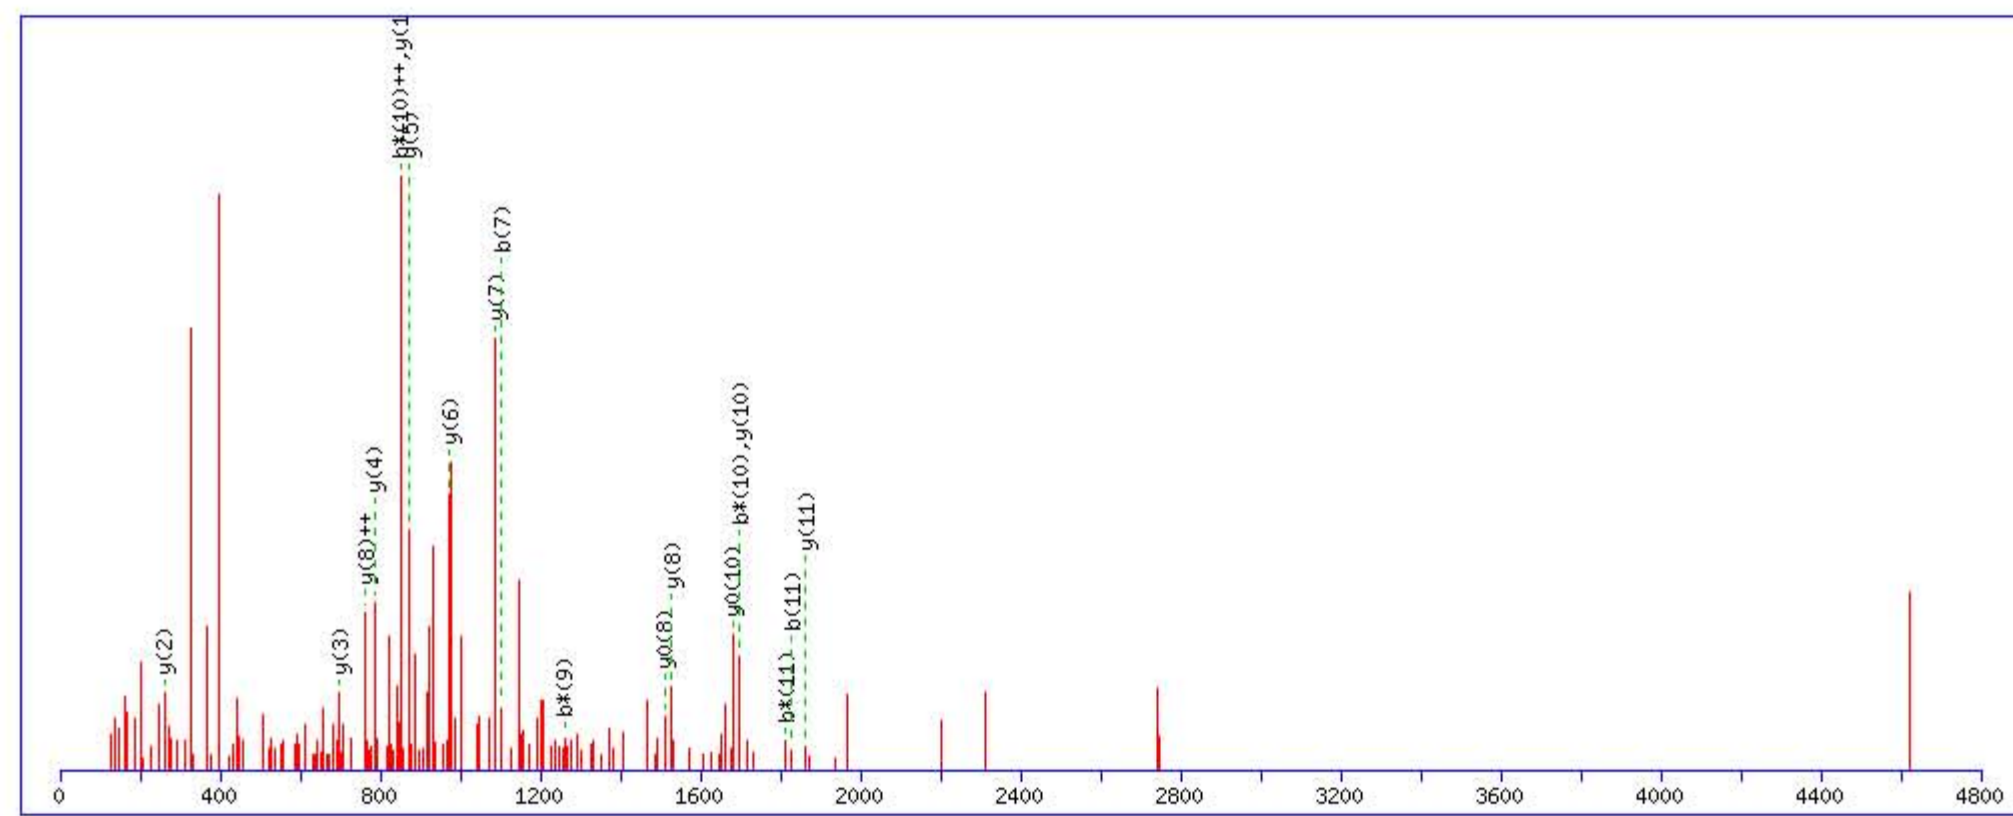

Monoisotopic mass of neutral peptide Mr(calc): 1974.990692

Fixed modifications: Carbamidomethyl (C) (apply to specified residues or termini only)

Variable modifications:

Q5 : Biotin:Thermo-21345 (Q)

Q10 : Biotin:Thermo-21345 (Q)

Ions Score: 45 Expect: 0.00026

Matches : 19/110 fragment ions using 38 most intense peaks [\(help\)](#)

| #  | b           | b <sup>++</sup> | b <sup>*</sup> | b <sup>*++</sup> | b <sup>0</sup> | b <sup>0++</sup> | Seq. | y           | y <sup>++</sup> | y <sup>*</sup> | y <sup>*++</sup> | y <sup>0</sup> | y <sup>0++</sup> | #  |
|----|-------------|-----------------|----------------|------------------|----------------|------------------|------|-------------|-----------------|----------------|------------------|----------------|------------------|----|
| 1  | 114.091340  | 57.549308       |                |                  |                |                  | I    |             |                 |                |                  |                |                  | 12 |
| 2  | 277.154669  | 139.080973      |                |                  |                |                  | Y    | 1862.913918 | 931.960597      | 1845.887369    | 923.447323       | 1844.903353    | 922.955315       | 11 |
| 3  | 334.176133  | 167.591704      |                |                  |                |                  | G    | 1699.850589 | 850.428933      | 1682.824040    | 841.915658       | 1681.840024    | 841.423650       | 10 |
| 4  | 448.219060  | 224.613168      | 431.192511     | 216.099894       |                |                  | N    | 1642.829125 | 821.918201      | 1625.802576    | 813.404926       | 1624.818560    | 812.912918       | 9  |
| 5  | 887.444386  | 444.225831      | 870.417837     | 435.712557       |                |                  | Q    | 1528.786198 | 764.896737      | 1511.759649    | 756.383463       | 1510.775633    | 755.891455       | 8  |
| 6  | 1002.471329 | 501.739303      | 985.444780     | 493.226028       | 984.460764     | 492.734020       | D    | 1089.560872 | 545.284074      | 1072.534323    | 536.770800       | 1071.550307    | 536.278792       | 7  |
| 7  | 1103.519008 | 552.263142      | 1086.492459    | 543.749868       | 1085.508443    | 543.257860       | T    | 974.533929  | 487.770603      | 957.507380     | 479.257328       | 956.523364     | 478.765320       | 6  |
| 8  | 1190.551036 | 595.779156      | 1173.524487    | 587.265882       | 1172.540471    | 586.773874       | S    | 873.486250  | 437.246763      | 856.459701     | 428.733489       | 855.475685     | 428.241481       | 5  |
| 9  | 1277.583064 | 639.295170      | 1260.556515    | 630.781896       | 1259.572499    | 630.289888       | S    | 786.454222  | 393.730749      | 769.427673     | 385.217475       | 768.443657     | 384.725467       | 4  |
| 10 | 1716.808390 | 858.907833      | 1699.781841    | 850.394559       | 1698.797825    | 849.902551       | Q    | 699.422194  | 350.214735      | 682.395645     | 341.701461       |                |                  | 3  |
| 11 | 1829.892454 | 915.449865      | 1812.865905    | 906.936591       | 1811.881889    | 906.444583       | L    | 260.196868  | 130.602072      | 243.170319     | 122.088797       |                |                  | 2  |
| 12 |             |                 |                |                  |                |                  | K    | 147.112804  | 74.060040       | 130.086255     | 65.546765        |                |                  | 1  |

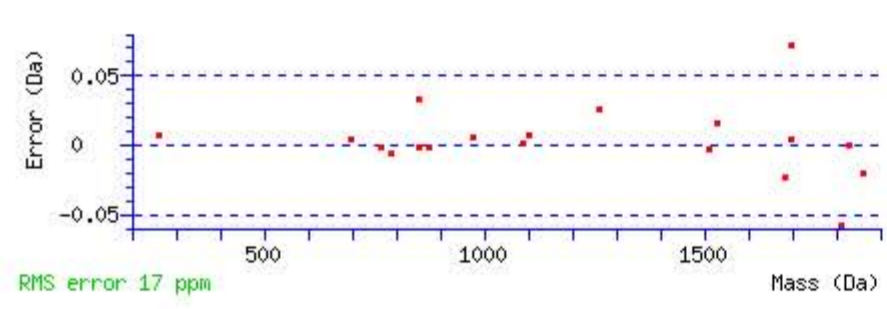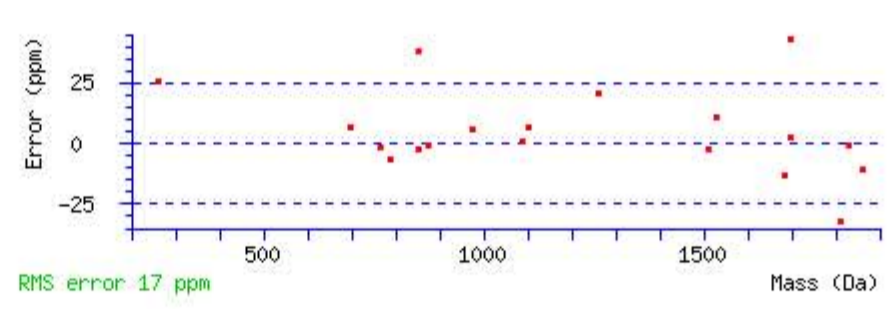

NCBI BLAST search of **IYGNQDTSSQLK**

(Parameters: blastp, nr protein database, expect=20000, no filter, PAM30)

Other BLAST [web gateways](#)

All matches to this query

| Score | Mr(calc):   | Delta     | Sequence                         |
|-------|-------------|-----------|----------------------------------|
| 44.8  | 1974.990692 | -0.009084 | <a href="#">IYGNQDTSSQLK</a>     |
| 6.6   | 1974.993820 | -0.012212 | <a href="#">VVQYNINTEELYSYLK</a> |



# MASCOT SEARCH RESULTS

## Peptide View

MS/MS Fragmentation of **AHVSFKPTVAQQR**

Found in **ITIH2\_HUMAN**, Inter-alpha-trypsin inhibitor heavy chain H2 OS=Homo sapiens GN=ITIH2 PE=1 SV=2

Match to Query 51803: 2090.117736 from(523.536710,4+) rtinseconds(1745) index(54118)

Title: Locus:1.1.1.3094.8 File:"2013-07-02 CLN FXIII 30 min 2nd F 4.wiff"

Data file C:\Program Files (x86)\Matrix Science\Mascot Daemon\mgf2 FXIII 30 min 2nd\mascot\_daemon\_merge.mgf

Click mouse within plot area to zoom in by factor of two about that point

Or, Plot from  to  Da

Label all possible matches  Label matches used for scoring

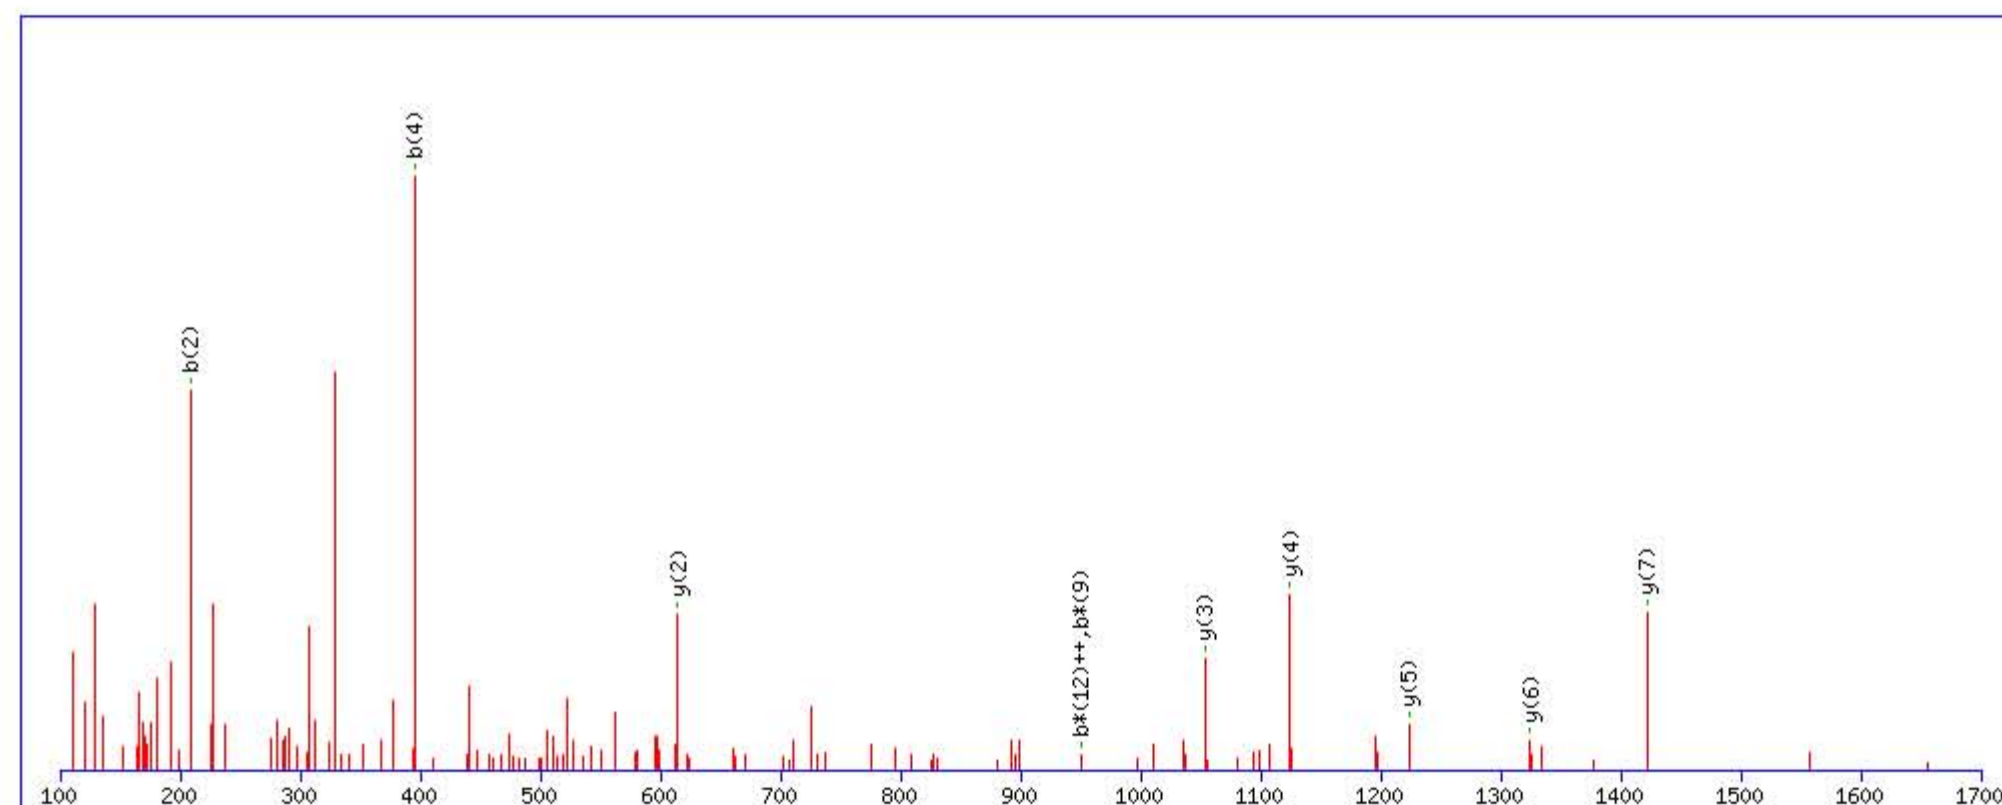

Monoisotopic mass of neutral peptide Mr(calc): 2090.128143

Fixed modifications: Carbamidomethyl (C) (apply to specified residues or termini only)

Variable modifications:

Q11 : Biotin:Thermo-21345 (Q)

Q12 : Biotin:Thermo-21345 (Q)

Ions Score: 31 Expect: 0.02

Matches : 10/118 fragment ions using 16 most intense peaks ([help](#))

| #  | b                 | b <sup>++</sup> | b <sup>*</sup>    | b <sup>+++</sup>  | b <sup>0</sup> | b <sup>0++</sup> | Seq. | y                  | y <sup>++</sup> | y <sup>*</sup> | y <sup>+++</sup> | y <sup>0</sup> | y <sup>0++</sup> | #  |
|----|-------------------|-----------------|-------------------|-------------------|----------------|------------------|------|--------------------|-----------------|----------------|------------------|----------------|------------------|----|
| 1  | 72.044390         | 36.525833       |                   |                   |                |                  | A    |                    |                 |                |                  |                |                  | 13 |
| 2  | <b>209.103302</b> | 105.055289      |                   |                   |                |                  | H    | 2020.098306        | 1010.552791     | 2003.071757    | 1002.039517      | 2002.087741    | 1001.547509      | 12 |
| 3  | 308.171716        | 154.589496      |                   |                   |                |                  | V    | 1883.039394        | 942.023335      | 1866.012845    | 933.510061       | 1865.028829    | 933.018053       | 11 |
| 4  | <b>395.203744</b> | 198.105510      |                   |                   | 377.193179     | 189.100227       | S    | 1783.970980        | 892.489128      | 1766.944431    | 883.975854       | 1765.960415    | 883.483846       | 10 |
| 5  | 542.272158        | 271.639717      |                   |                   | 524.261593     | 262.634435       | F    | 1696.938952        | 848.973114      | 1679.912403    | 840.459840       | 1678.928387    | 839.967832       | 9  |
| 6  | 670.367121        | 335.687199      | 653.340572        | 327.173924        | 652.356556     | 326.681916       | K    | 1549.870538        | 775.438907      | 1532.843989    | 766.925633       | 1531.859973    | 766.433625       | 8  |
| 7  | 767.419885        | 384.213581      | 750.393336        | 375.700306        | 749.409320     | 375.208298       | P    | <b>1421.775575</b> | 711.391426      | 1404.749026    | 702.878151       | 1403.765010    | 702.386143       | 7  |
| 8  | 868.467564        | 434.737420      | 851.441015        | 426.224146        | 850.456999     | 425.732138       | T    | <b>1324.722811</b> | 662.865044      | 1307.696262    | 654.351769       | 1306.712246    | 653.859761       | 6  |
| 9  | 967.535978        | 484.271627      | <b>950.509429</b> | 475.758353        | 949.525413     | 475.266345       | V    | <b>1223.675132</b> | 612.341204      | 1206.648583    | 603.827930       |                |                  | 5  |
| 10 | 1038.573092       | 519.790184      | 1021.546543       | 511.276910        | 1020.562527    | 510.784902       | A    | <b>1124.606718</b> | 562.806997      | 1107.580169    | 554.293723       |                |                  | 4  |
| 11 | 1477.798418       | 739.402847      | 1460.771869       | 730.889573        | 1459.787853    | 730.397565       | Q    | <b>1053.569604</b> | 527.288440      | 1036.543055    | 518.775166       |                |                  | 3  |
| 12 | 1917.023744       | 959.015510      | 1899.997195       | <b>950.502236</b> | 1899.013179    | 950.010228       | Q    | <b>614.344278</b>  | 307.675777      | 597.317729     | 299.162503       |                |                  | 2  |
| 13 |                   |                 |                   |                   |                |                  | R    | 175.118952         | 88.063114       | 158.092403     | 79.549839        |                |                  | 1  |

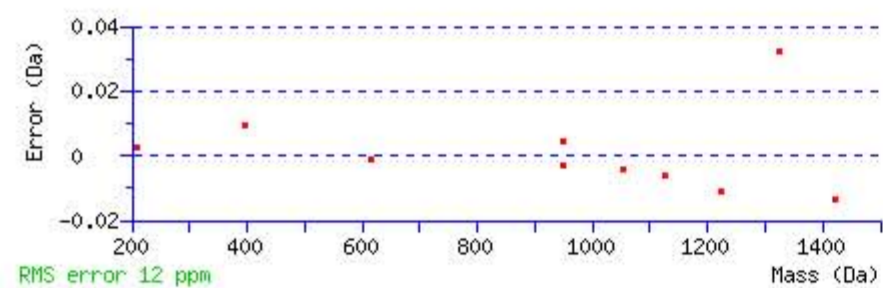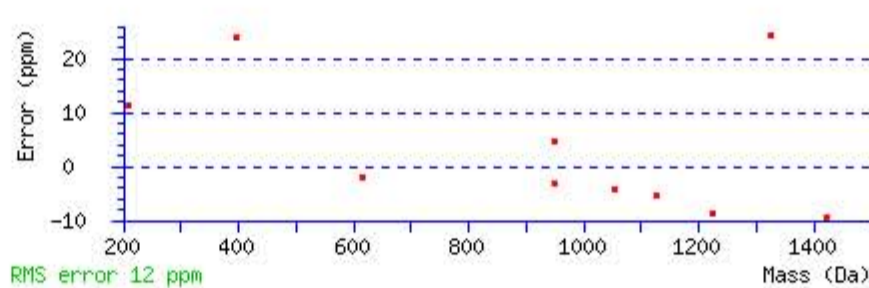

NCBI BLAST search of **AHVSFKPTVAQQR**

(Parameters: blastp, nr protein database, expect=20000, no filter, PAM30)

Other BLAST [web gateways](#)

All matches to this query

| Score | Mr(calc):   | Delta     | Sequence                      |
|-------|-------------|-----------|-------------------------------|
| 30.8  | 2090.128143 | -0.010407 | <a href="#">AHVSFKPTVAQQR</a> |

Mascot: <http://www.matrixscience.com/>



# MASCOT Search Results

## Peptide View

MS/MS Fragmentation of **AEDHFSVIDFNQNR**

Found in **ITIH2\_HUMAN**, Inter-alpha-trypsin inhibitor heavy chain H2 OS=Homo sapiens GN=ITIH2 PE=1 SV=2

Match to Query 52228: 2115.029388 from(1058.521970,2+) rtinseconds(2274) index(57484)

Title: Locus:1.1.1.3277.7 File:"2013-07-02 CLN FXIII 30 min 2nd F 4.wiff"

Data file C:\Program Files (x86)\Matrix Science\Mascot Daemon\mgf2 FXIII 30 min 2nd\mascot\_daemon\_merge.mgf

Click mouse within plot area to zoom in by factor of two about that point

Or, Plot from  to  Da

Label all possible matches  Label matches used for scoring

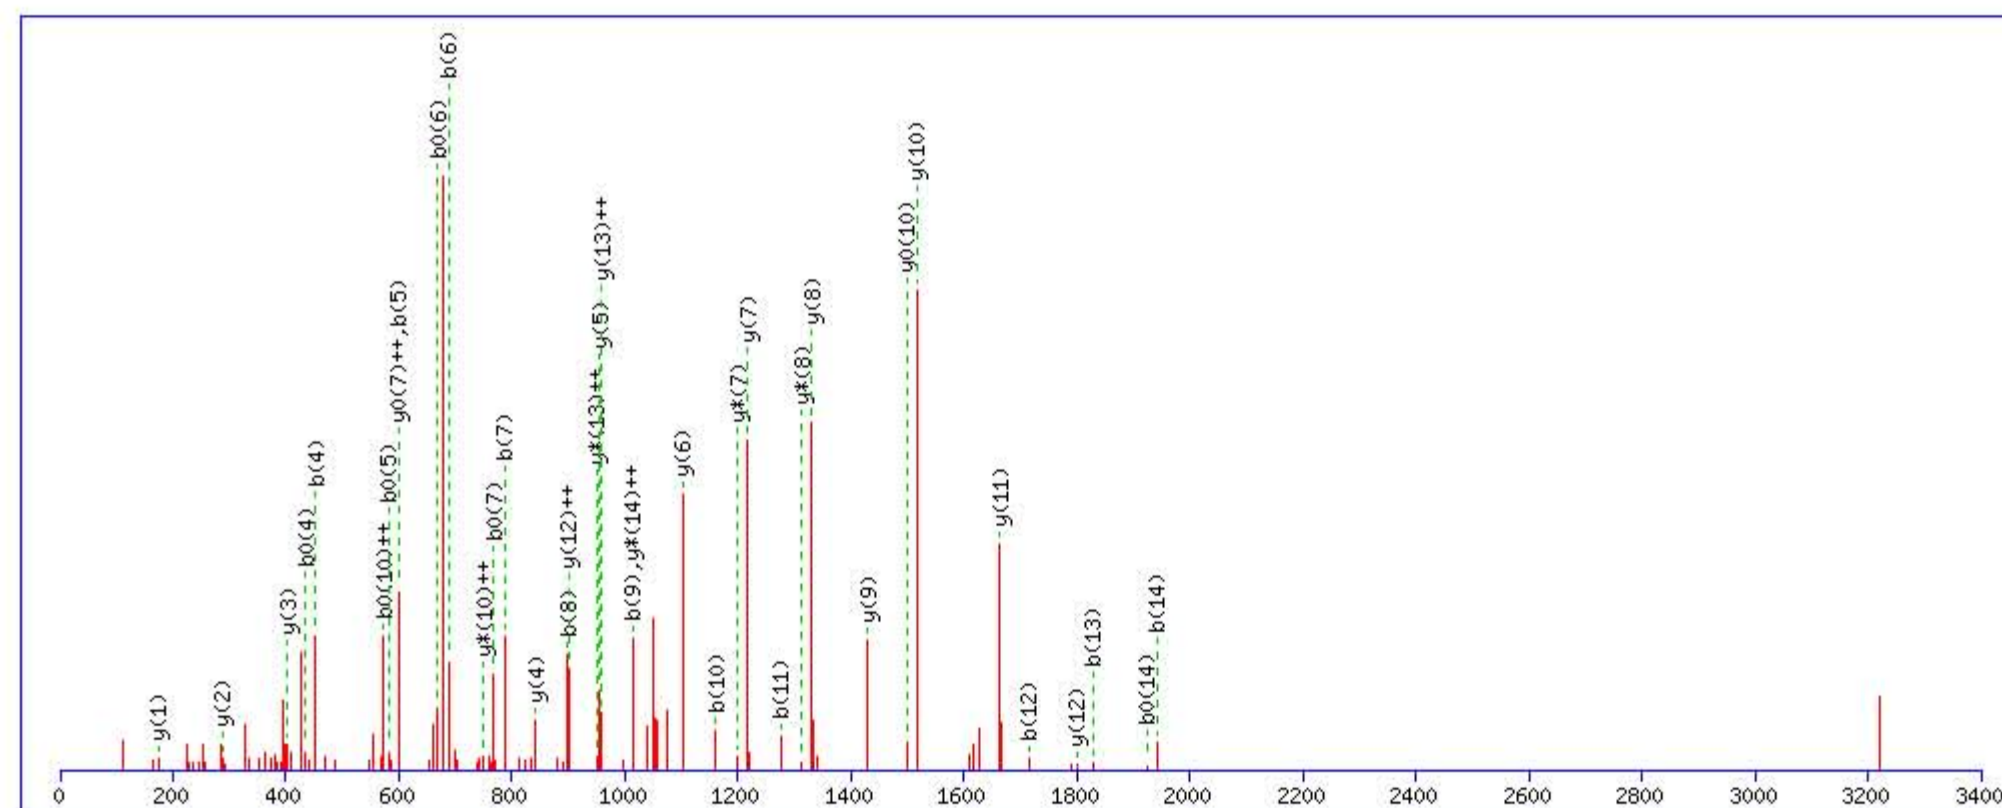

Monoisotopic mass of neutral peptide Mr(calc): 2115.020752

Fixed modifications: Carbamidomethyl (C) (apply to specified residues or termini only)

Variable modifications:

Q12 : Biotin:Thermo-21345 (Q)

Ions Score: 69 Expect: 2.2e-006

Matches : 38/134 fragment ions using 67 most intense peaks [\(help\)](#)

| #  | b           | b <sup>++</sup> | b <sup>*</sup> | b <sup>+++</sup> | b <sup>0</sup> | b <sup>0++</sup> | Seq. | y           | y <sup>++</sup> | y <sup>*</sup> | y <sup>+++</sup> | y <sup>0</sup> | y <sup>0++</sup> | #  |
|----|-------------|-----------------|----------------|------------------|----------------|------------------|------|-------------|-----------------|----------------|------------------|----------------|------------------|----|
| 1  | 72.044390   | 36.525833       |                |                  |                |                  | A    |             |                 |                |                  |                |                  | 15 |
| 2  | 201.086983  | 101.047130      |                |                  | 183.076418     | 92.041847        | E    | 2044.990921 | 1022.999099     | 2027.964372    | 1014.485824      | 2026.980356    | 1013.993816      | 14 |
| 3  | 316.113926  | 158.560601      |                |                  | 298.103361     | 149.555319       | D    | 1915.948328 | 958.477802      | 1898.921779    | 949.964528       | 1897.937763    | 949.472519       | 13 |
| 4  | 453.172838  | 227.090057      |                |                  | 435.162273     | 218.084775       | H    | 1800.921385 | 900.964331      | 1783.894836    | 892.451056       | 1782.910820    | 891.959048       | 12 |
| 5  | 600.241252  | 300.624264      |                |                  | 582.230687     | 291.618982       | F    | 1663.862473 | 832.434874      | 1646.835924    | 823.921600       | 1645.851908    | 823.429592       | 11 |
| 6  | 687.273280  | 344.140278      |                |                  | 669.262715     | 335.134996       | S    | 1516.794059 | 758.900668      | 1499.767510    | 750.387393       | 1498.783494    | 749.895385       | 10 |
| 7  | 786.341694  | 393.674485      |                |                  | 768.331129     | 384.669202       | V    | 1429.762031 | 715.384654      | 1412.735482    | 706.871379       | 1411.751466    | 706.379371       | 9  |
| 8  | 899.425758  | 450.216517      |                |                  | 881.415193     | 441.211234       | I    | 1330.693617 | 665.850447      | 1313.667068    | 657.337172       | 1312.683052    | 656.845164       | 8  |
| 9  | 1014.452701 | 507.729988      |                |                  | 996.442136     | 498.724706       | D    | 1217.609553 | 609.308415      | 1200.583004    | 600.795140       | 1199.598988    | 600.303132       | 7  |
| 10 | 1161.521115 | 581.264196      |                |                  | 1143.510550    | 572.258913       | F    | 1102.582610 | 551.794943      | 1085.556061    | 543.281669       |                |                  | 6  |
| 11 | 1275.564042 | 638.285659      | 1258.537493    | 629.772385       | 1257.553477    | 629.280376       | N    | 955.514196  | 478.260736      | 938.487647     | 469.747462       |                |                  | 5  |
| 12 | 1714.789368 | 857.898322      | 1697.762819    | 849.385048       | 1696.778803    | 848.893039       | Q    | 841.471269  | 421.239273      | 824.444720     | 412.725998       |                |                  | 4  |
| 13 | 1828.832295 | 914.919785      | 1811.805746    | 906.406511       | 1810.821730    | 905.914503       | N    | 402.245943  | 201.626610      | 385.219394     | 193.113335       |                |                  | 3  |
| 14 | 1941.916359 | 971.461817      | 1924.889810    | 962.948543       | 1923.905794    | 962.456535       | I    | 288.203016  | 144.605146      | 271.176467     | 136.091872       |                |                  | 2  |
| 15 |             |                 |                |                  |                |                  | R    | 175.118952  | 88.063114       | 158.092403     | 79.549840        |                |                  | 1  |

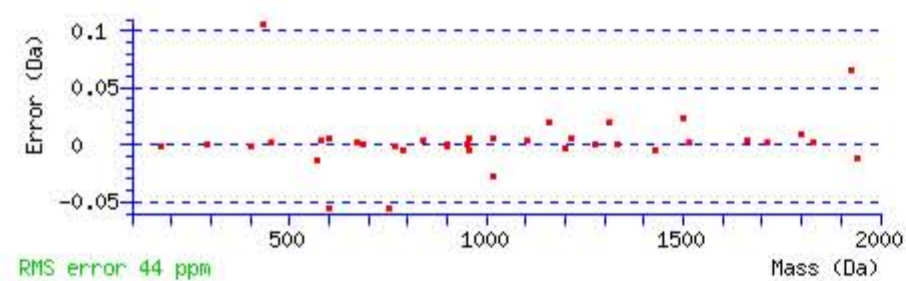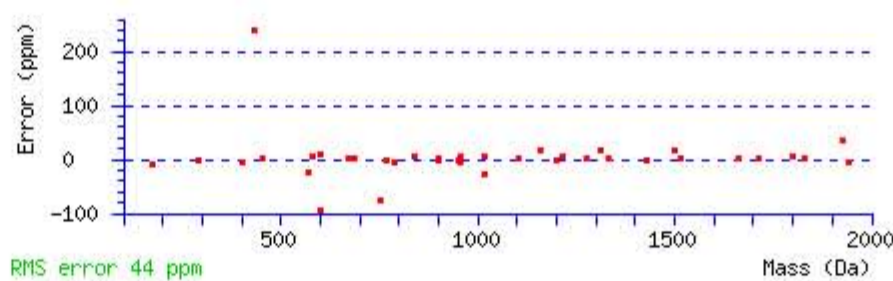

NCBI BLAST search of [AEDHFSVIDFNQNR](#)

(Parameters: blastp, nr protein database, expect=20000, no filter, PAM30)

Other BLAST [web gateways](#)

All matches to this query

| Score | Mr(calc):   | Delta     | Sequence                           |
|-------|-------------|-----------|------------------------------------|
| 69.1  | 2115.020752 | 0.008636  | <a href="#">AEDHFSVIDFNQNR</a>     |
| 8.3   | 2115.033981 | -0.004593 | <a href="#">ESADRQVLMQEEIHK</a>    |
| 5.1   | 2115.060501 | -0.031113 | <a href="#">NNKVNVLQNFMYTMLR</a>   |
| 2.1   | 2115.027237 | 0.002151  | <a href="#">KYSDYIKGSNLDAPEPYR</a> |

Mascot: <http://www.matrixscience.com/>



# MASCOT Search Results

## Peptide View

MS/MS Fragmentation of **MLADAPPQDPSCCSGALYYGSK**  
 Found in **ITIH2\_HUMAN**, Inter-alpha-trypsin inhibitor heavy chain H2 OS=Homo sapiens GN=ITIH2 PE=1 SV=2

Match to Query 62124: 2714.188002 from(905.736610,3+) rtinseconds(1994) index(55781)  
 Title: Locus:1.1.1.3180.10 File:"2013-07-02 CLN FXIII 30 min 2nd F 4.wiff"  
 Data file C:\Program Files (x86)\Matrix Science\Mascot Daemon\mgf2 FXIII 30 min 2nd\mascot\_daemon\_merge.mgf

Click mouse within plot area to zoom in by factor of two about that point  
 Or, Plot from  to  Da   
 Label all possible matches  Label matches used for scoring

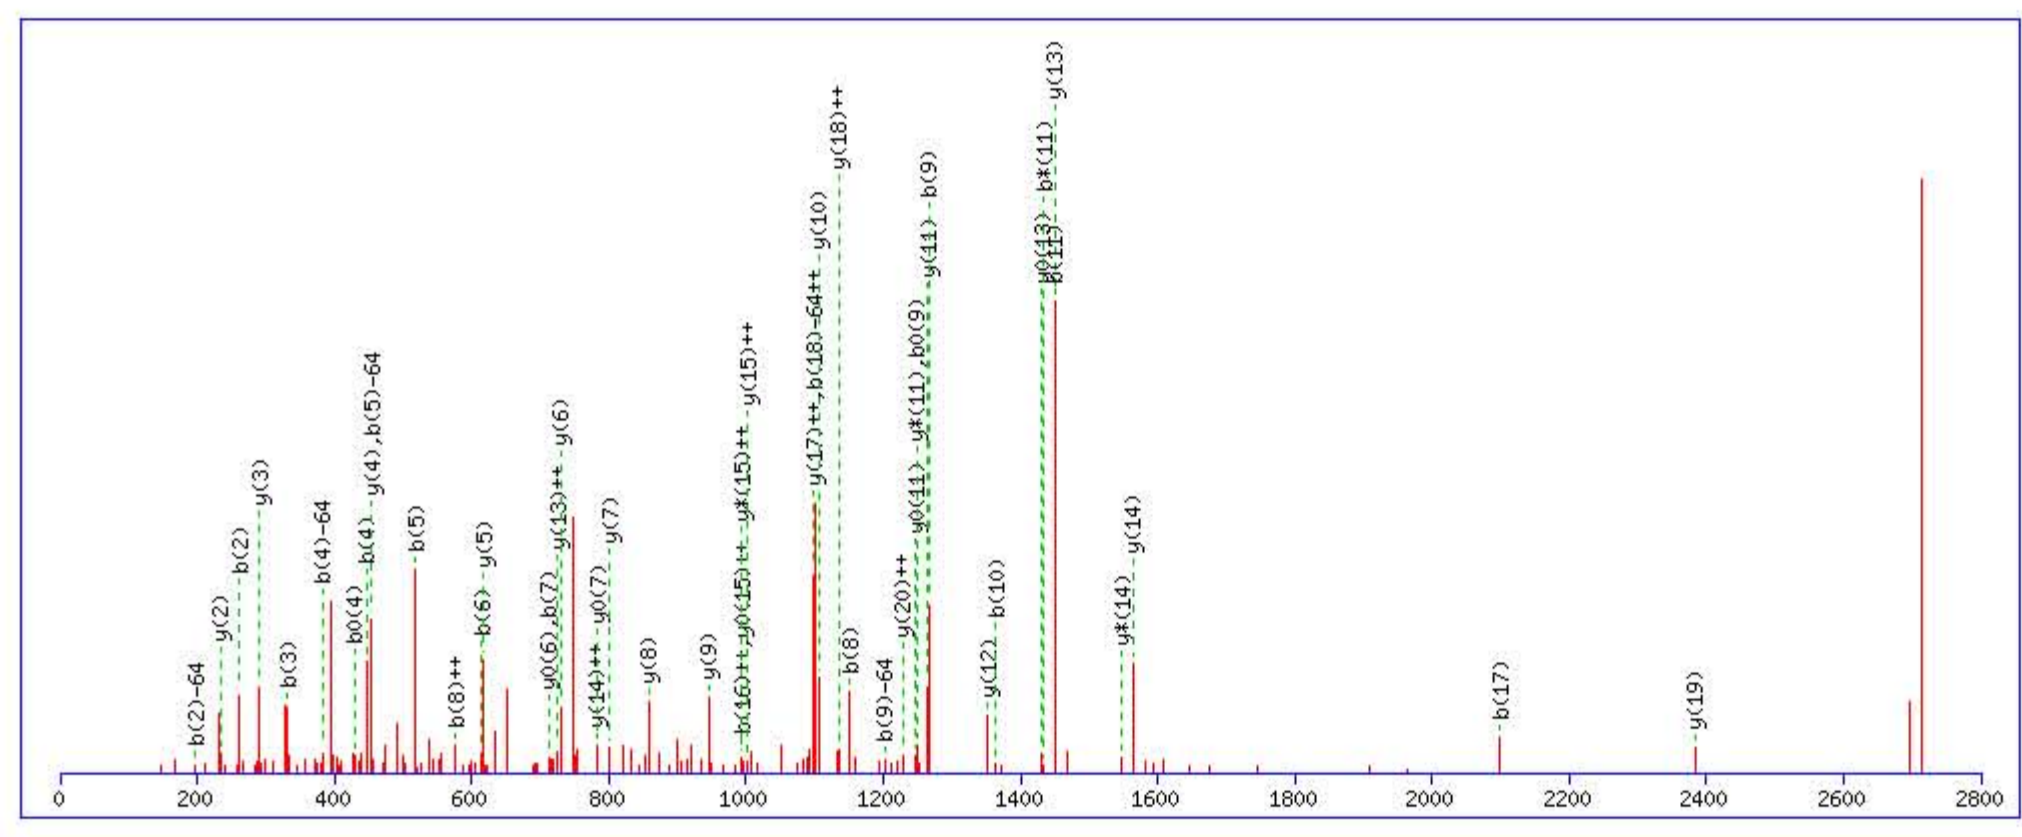

Monoisotopic mass of neutral peptide Mr(calc): 2714.184860  
 Fixed modifications: Carbamidomethyl (C) (apply to specified residues or termini only)  
 Variable modifications:  
 M1 : Oxidation (M), with neutral losses 0.000000 (shown in table), 63.998285  
 Q8 : Biotin:Thermo-21345 (Q)  
 Ions Score: 83 Expect: 2.9e-008  
 Matches : 49/336 fragment ions using 85 most intense peaks [\(help\)](#)

| #  | b                  | b <sup>++</sup>   | b <sup>*</sup>     | b <sup>*++</sup> | b <sup>0</sup>     | b <sup>0++</sup> | Seq. | y                  | y <sup>++</sup>    | y <sup>*</sup>     | y <sup>*++</sup>  | y <sup>0</sup>     | y <sup>0++</sup>  | #  |
|----|--------------------|-------------------|--------------------|------------------|--------------------|------------------|------|--------------------|--------------------|--------------------|-------------------|--------------------|-------------------|----|
| 1  | 148.042676         | 74.524976         |                    |                  |                    |                  | M    |                    |                    |                    |                   |                    |                   | 22 |
| 2  | <b>261.126740</b>  | 131.067008        |                    |                  |                    |                  | L    | 2568.156746        | 1284.582011        | 2551.130197        | 1276.068736       | 2550.146181        | 1275.576728       | 21 |
| 3  | <b>332.163854</b>  | 166.585565        |                    |                  |                    |                  | A    | 2455.072682        | <b>1228.039979</b> | 2438.046133        | 1219.526704       | 2437.062117        | 1219.034696       | 20 |
| 4  | <b>447.190797</b>  | 224.099036        |                    |                  | <b>429.180232</b>  | 215.093754       | D    | <b>2384.035568</b> | 1192.521422        | 2367.009019        | 1184.008147       | 2366.025003        | 1183.516139       | 19 |
| 5  | <b>518.227911</b>  | 259.617594        |                    |                  | 500.217346         | 250.612311       | A    | 2269.008625        | <b>1135.007950</b> | 2251.982076        | 1126.494676       | 2250.998060        | 1126.002668       | 18 |
| 6  | <b>615.280675</b>  | 308.143976        |                    |                  | 597.270110         | 299.138693       | P    | 2197.971511        | <b>1099.489393</b> | 2180.944962        | 1090.976119       | 2179.960946        | 1090.484111       | 17 |
| 7  | <b>712.333439</b>  | 356.670358        |                    |                  | 694.322874         | 347.665075       | P    | 2100.918747        | 1050.963011        | 2083.892198        | 1042.449737       | 2082.908182        | 1041.957729       | 16 |
| 8  | <b>1151.558765</b> | <b>576.283021</b> | 1134.532216        | 567.769746       | 1133.548200        | 567.277738       | Q    | 2003.865983        | <b>1002.436630</b> | 1986.839434        | <b>993.923355</b> | 1985.855418        | <b>993.431347</b> | 15 |
| 9  | <b>1266.585708</b> | 633.796492        | 1249.559159        | 625.283218       | <b>1248.575143</b> | 624.791210       | D    | <b>1564.640657</b> | <b>782.823967</b>  | <b>1547.614108</b> | 774.310692        | 1546.630092        | 773.818684        | 14 |
| 10 | <b>1363.638472</b> | 682.322874        | 1346.611923        | 673.809600       | 1345.627907        | 673.317592       | P    | <b>1449.613714</b> | <b>725.310495</b>  | 1432.587165        | 716.797221        | <b>1431.603149</b> | 716.305213        | 13 |
| 11 | <b>1450.670500</b> | 725.838888        | <b>1433.643951</b> | 717.325614       | 1432.659935        | 716.833606       | S    | <b>1352.560950</b> | 676.784113         | 1335.534401        | 668.270839        | 1334.550385        | 667.778831        | 12 |
| 12 | 1610.701149        | 805.854213        | 1593.674600        | 797.340938       | 1592.690584        | 796.848930       | C    | <b>1265.528922</b> | 633.268099         | <b>1248.502373</b> | 624.754825        | <b>1247.518357</b> | 624.262817        | 11 |
| 13 | 1770.731798        | 885.869537        | 1753.705249        | 877.356263       | 1752.721233        | 876.864255       | C    | <b>1105.498273</b> | 553.252775         | 1088.471724        | 544.739500        | 1087.487708        | 544.247492        | 10 |
| 14 | 1857.763826        | 929.385551        | 1840.737277        | 920.872277       | 1839.753261        | 920.380269       | S    | <b>945.467624</b>  | 473.237450         | 928.441075         | 464.724176        | 927.457059         | 464.232168        | 9  |
| 15 | 1914.785290        | 957.896283        | 1897.758741        | 949.383009       | 1896.774725        | 948.891001       | G    | <b>858.435596</b>  | 429.721436         | 841.409047         | 421.208162        | 840.425031         | 420.716154        | 8  |
| 16 | 1985.822404        | <b>993.414840</b> | 1968.795855        | 984.901566       | 1967.811839        | 984.409558       | A    | <b>801.414132</b>  | 401.210704         | 784.387583         | 392.697430        | <b>783.403567</b>  | 392.205422        | 7  |
| 17 | <b>2098.906468</b> | 1049.956872       | 2081.879919        | 1041.443597      | 2080.895903        | 1040.951590      | L    | <b>730.377018</b>  | 365.692147         | 713.350469         | 357.178873        | <b>712.366453</b>  | 356.686865        | 6  |
| 18 | 2261.969797        | 1131.488537       | 2244.943248        | 1122.975262      | 2243.959232        | 1122.483254      | Y    | <b>617.292954</b>  | 309.150115         | 600.266405         | 300.636841        | 599.282389         | 300.144833        | 5  |
| 19 | 2425.033126        | 1213.020201       | 2408.006577        | 1204.506927      | 2407.022561        | 1204.014919      | Y    | <b>454.229625</b>  | 227.618451         | 437.203076         | 219.105176        | 436.219060         | 218.613168        | 4  |
| 20 | 2482.054590        | 1241.530933       | 2465.028041        | 1233.017658      | 2464.044025        | 1232.525651      | G    | <b>291.166296</b>  | 146.086786         | 274.139747         | 137.573512        | 273.155731         | 137.081504        | 3  |
| 21 | 2569.086618        | 1285.046947       | 2552.060069        | 1276.533673      | 2551.076053        | 1276.041665      | S    | <b>234.144832</b>  | 117.576054         | 217.118283         | 109.062780        | 216.134267         | 108.570772        | 2  |
| 22 |                    |                   |                    |                  |                    |                  | K    | 147.112804         | 74.060040          | 130.086255         | 65.546765         |                    |                   | 1  |

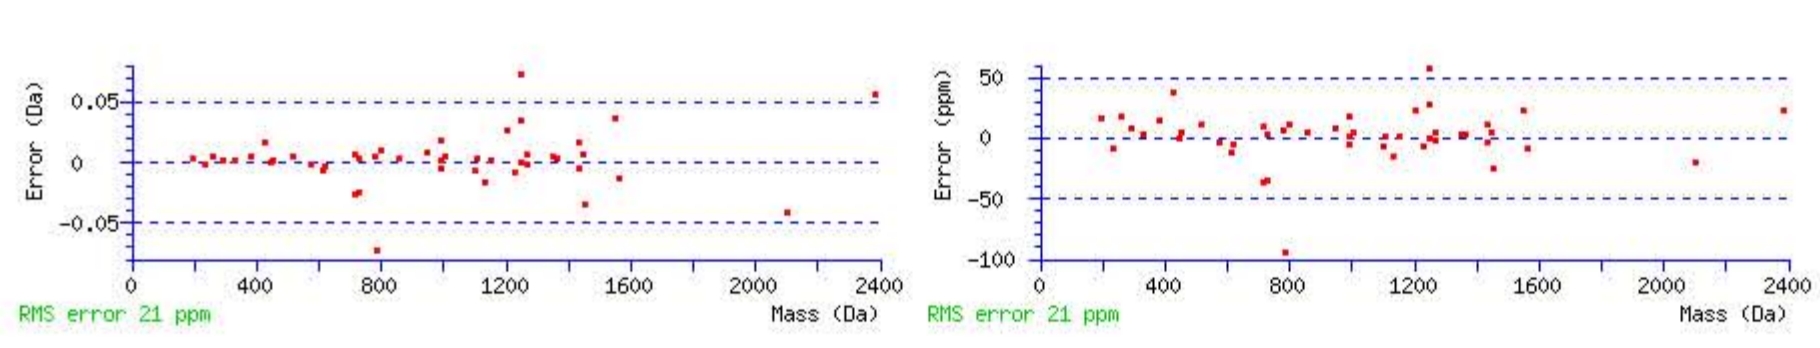

NCBI BLAST search of **MLADAPPQDPSCCSGALYYGSK**  
 (Parameters: blastp, nr protein database, expect=20000, no filter, PAM30)  
 Other BLAST [web gateways](#)

### All matches to this query

| Score | Mr(calc):   | Delta    | Sequence                               |
|-------|-------------|----------|----------------------------------------|
| 82.7  | 2714.184860 | 0.003142 | <a href="#">MLADAPPQDPSCCSGALYYGSK</a> |



**MASCOT** Mascot Search Results

**Peptide View**

MS/MS Fragmentation of **SILQMSLDHHIVTPLTSLVIENEAGDER**  
 Found in **ITIH2\_HUMAN**, Inter-alpha-trypsin inhibitor heavy chain H2 OS=Homo sapiens GN=ITIH2 PE=1 SV=2

Match to Query 70424: 3443.751976 from(861.945270,4+) rtinseconds(2654) index(59508)  
 Title: Locus:1.1.1.3409.12 File:"2013-07-02 CLN FXIII 30 min 2nd F 4.wiff"  
 Data file C:\Program Files (x86)\Matrix Science\Mascot Daemon\mgf2 FXIII 30 min 2nd\mascot\_daemon\_merge.mgf

Click mouse within plot area to zoom in by factor of two about that point  
 Or, Plot from  to  Da   
 Label all possible matches  Label matches used for scoring

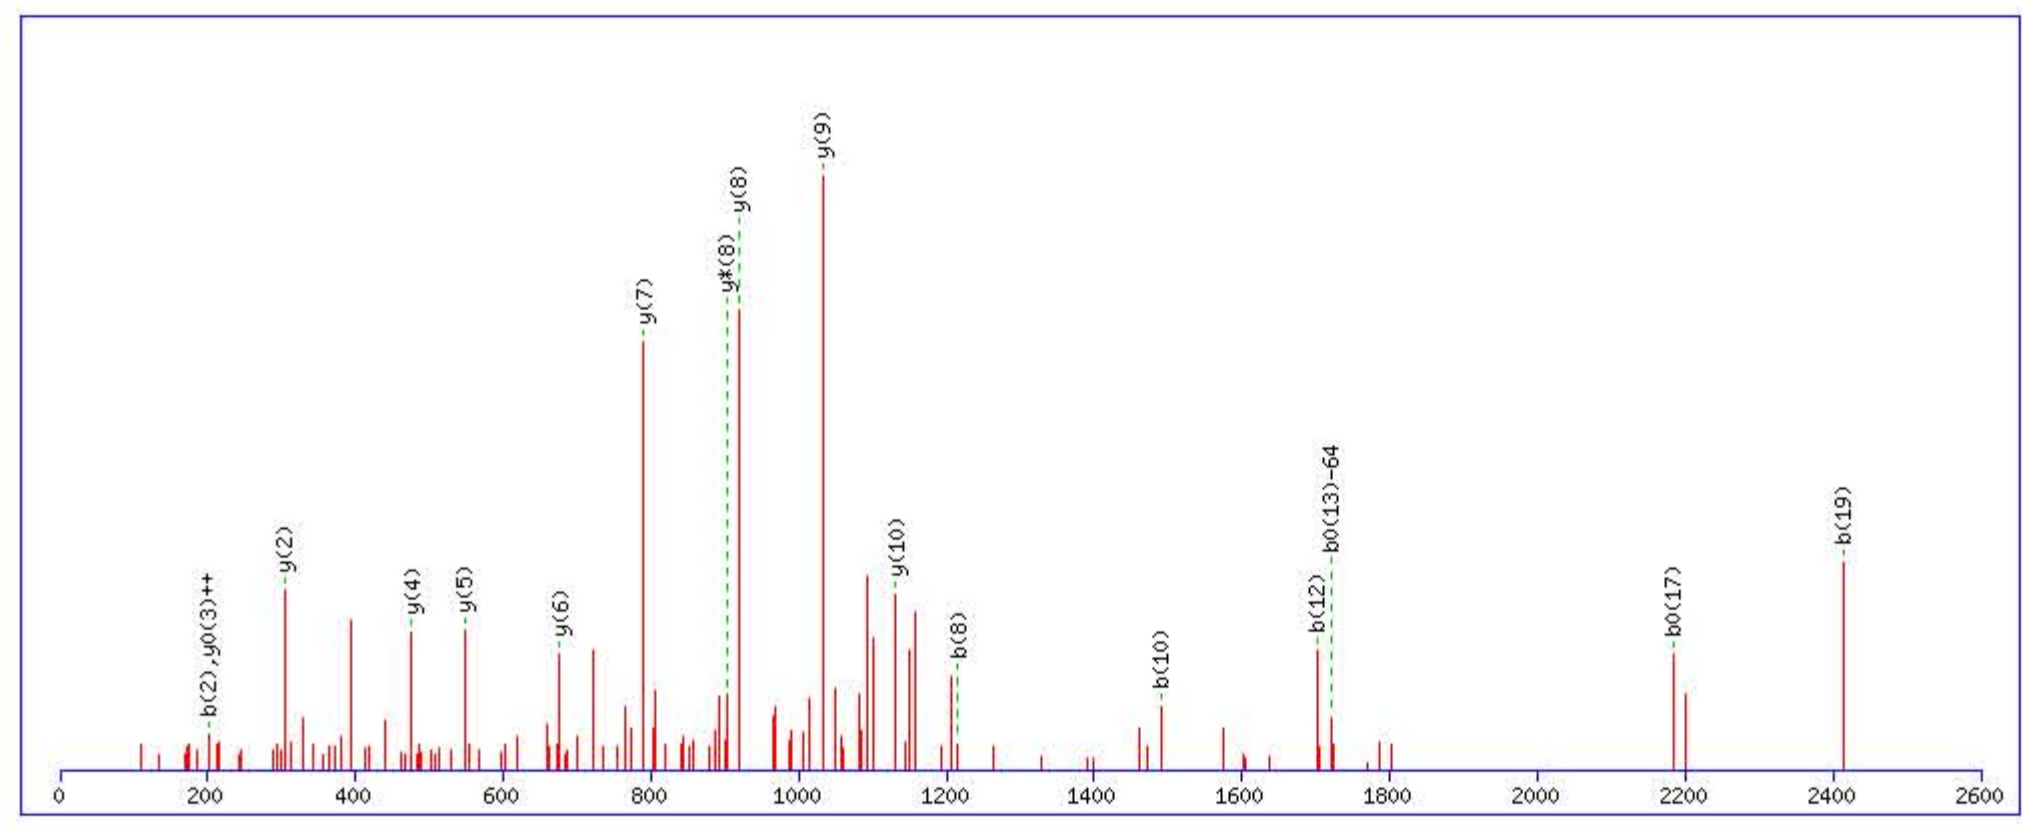

Monoisotopic mass of neutral peptide Mr(calc): 3443.742859  
 Fixed modifications: Carbamidomethyl (C) (apply to specified residues or termini only)  
 Variable modifications:  
 Q4 : Biotin:Thermo-21345 (Q)  
 M5 : Oxidation (M), with neutral losses 0.000000 (shown in table), 63.998285  
 Ions Score: 59 Expect: 3.5e-005  
 Matches : 17/478 fragment ions using 19 most intense peaks [\(help\)](#)

| #  | b                  | b <sup>++</sup> | b*          | b <sup>+++</sup> | b <sup>0</sup>     | b <sup>0++</sup> | Seq. | y                  | y <sup>++</sup> | y*                | y <sup>+++</sup> | y <sup>0</sup> | y <sup>0++</sup>  | #  |
|----|--------------------|-----------------|-------------|------------------|--------------------|------------------|------|--------------------|-----------------|-------------------|------------------|----------------|-------------------|----|
| 1  | 88.039304          | 44.523290       |             |                  | 70.028739          | 35.518008        | S    |                    |                 |                   |                  |                |                   | 28 |
| 2  | <b>201.123368</b>  | 101.065322      |             |                  | 183.112803         | 92.060039        | I    | 3357.718126        | 1679.362701     | 3340.691577       | 1670.849426      | 3339.707561    | 1670.357418       | 27 |
| 3  | 314.207432         | 157.607354      |             |                  | 296.196867         | 148.602071       | L    | 3244.634062        | 1622.820669     | 3227.607513       | 1614.307394      | 3226.623497    | 1613.815386       | 26 |
| 4  | 753.432758         | 377.220017      | 736.406209  | 368.706743       | 735.422193         | 368.214735       | Q    | 3131.549998        | 1566.278637     | 3114.523449       | 1557.765362      | 3113.539433    | 1557.273354       | 25 |
| 5  | 900.468158         | 450.737717      | 883.441609  | 442.224443       | 882.457593         | 441.732435       | M    | 2692.324672        | 1346.665974     | 2675.298123       | 1338.152699      | 2674.314107    | 1337.660691       | 24 |
| 6  | 987.500186         | 494.253731      | 970.473637  | 485.740456       | 969.489621         | 485.248448       | S    | 2545.289272        | 1273.148274     | 2528.262723       | 1264.634999      | 2527.278707    | 1264.142991       | 23 |
| 7  | 1100.584250        | 550.795763      | 1083.557701 | 542.282489       | 1082.573685        | 541.790480       | L    | 2458.257244        | 1229.632260     | 2441.230695       | 1221.118985      | 2440.246679    | 1220.626977       | 22 |
| 8  | <b>1215.611193</b> | 608.309235      | 1198.584644 | 599.795960       | 1197.600628        | 599.303952       | D    | 2345.173180        | 1173.090228     | 2328.146631       | 1164.576953      | 2327.162615    | 1164.084945       | 21 |
| 9  | 1352.670105        | 676.838690      | 1335.643556 | 668.325416       | 1334.659540        | 667.833408       | H    | 2230.146237        | 1115.576756     | 2213.119688       | 1107.063482      | 2212.135672    | 1106.571474       | 20 |
| 10 | <b>1489.729017</b> | 745.368146      | 1472.702468 | 736.854872       | 1471.718452        | 736.362864       | H    | 2093.087325        | 1047.047300     | 2076.060776       | 1038.534026      | 2075.076760    | 1038.042018       | 19 |
| 11 | 1602.813081        | 801.910178      | 1585.786532 | 793.396904       | 1584.802516        | 792.904896       | I    | 1956.028413        | 978.517845      | 1939.001864       | 970.004570       | 1938.017848    | 969.512562        | 18 |
| 12 | <b>1701.881495</b> | 851.444385      | 1684.854946 | 842.931111       | 1683.870930        | 842.439103       | V    | 1842.944349        | 921.975813      | 1825.917800       | 913.462538       | 1824.933784    | 912.970530        | 17 |
| 13 | 1802.929174        | 901.968225      | 1785.902625 | 893.454951       | 1784.918609        | 892.962942       | T    | 1743.875935        | 872.441606      | 1726.849386       | 863.928331       | 1725.865370    | 863.436323        | 16 |
| 14 | 1899.981938        | 950.494607      | 1882.955389 | 941.981333       | 1881.971373        | 941.489324       | P    | 1642.828256        | 821.917766      | 1625.801707       | 813.404492       | 1624.817691    | 812.912484        | 15 |
| 15 | 2013.066002        | 1007.036639     | 1996.039453 | 998.523364       | 1995.055437        | 998.031356       | L    | 1545.775492        | 773.391384      | 1528.748943       | 764.878110       | 1527.764927    | 764.386102        | 14 |
| 16 | 2114.113681        | 1057.560478     | 2097.087132 | 1049.047204      | 2096.103116        | 1048.555196      | T    | 1432.691428        | 716.849352      | 1415.664879       | 708.336078       | 1414.680863    | 707.844070        | 13 |
| 17 | 2201.145709        | 1101.076492     | 2184.119160 | 1092.563218      | <b>2183.135144</b> | 1092.071210      | S    | 1331.643749        | 666.325513      | 1314.617200       | 657.812238       | 1313.633184    | 657.320230        | 12 |
| 18 | 2314.229773        | 1157.618524     | 2297.203224 | 1149.105250      | 2296.219208        | 1148.613242      | L    | 1244.611721        | 622.809499      | 1227.585172       | 614.296224       | 1226.601156    | 613.804216        | 11 |
| 19 | <b>2413.298187</b> | 1207.152731     | 2396.271638 | 1198.639457      | 2395.287622        | 1198.147449      | V    | <b>1131.527657</b> | 566.267467      | 1114.501108       | 557.754192       | 1113.517092    | 557.262184        | 10 |
| 20 | 2526.382251        | 1263.694763     | 2509.355702 | 1255.181489      | 2508.371686        | 1254.689481      | I    | <b>1032.459243</b> | 516.733260      | 1015.432694       | 508.219985       | 1014.448678    | 507.727977        | 9  |
| 21 | 2655.424844        | 1328.216060     | 2638.398295 | 1319.702785      | 2637.414279        | 1319.210777      | E    | <b>919.375179</b>  | 460.191228      | <b>902.348630</b> | 451.677953       | 901.364614     | 451.185945        | 8  |
| 22 | 2769.467771        | 1385.237523     | 2752.441222 | 1376.724249      | 2751.457206        | 1376.232241      | N    | <b>790.332586</b>  | 395.669931      | 773.306037        | 387.156657       | 772.322021     | 386.664649        | 7  |
| 23 | 2898.510364        | 1449.758820     | 2881.483815 | 1441.245545      | 2880.499799        | 1440.753537      | E    | <b>676.289659</b>  | 338.648468      | 659.263110        | 330.135193       | 658.279094     | 329.643185        | 6  |
| 24 | 2969.547478        | 1485.277377     | 2952.520929 | 1476.764102      | 2951.536913        | 1476.272094      | A    | <b>547.247066</b>  | 274.127171      | 530.220517        | 265.613897       | 529.236501     | 265.121889        | 5  |
| 25 | 3026.568942        | 1513.788109     | 3009.542393 | 1505.274834      | 3008.558377        | 1504.782826      | G    | <b>476.209952</b>  | 238.608614      | 459.183403        | 230.095339       | 458.199387     | 229.603331        | 4  |
| 26 | 3141.595885        | 1571.301580     | 3124.569336 | 1562.788306      | 3123.585320        | 1562.296298      | D    | 419.188488         | 210.097882      | 402.161939        | 201.584607       | 401.177923     | <b>201.092599</b> | 3  |
| 27 | 3270.638478        | 1635.822877     | 3253.611929 | 1627.309602      | 3252.627913        | 1626.817594      | E    | <b>304.161545</b>  | 152.584411      | 287.134996        | 144.071136       | 286.150980     | 143.579128        | 2  |
| 28 |                    |                 |             |                  |                    |                  | R    | 175.118952         | 88.063114       | 158.092403        | 79.549839        |                |                   | 1  |

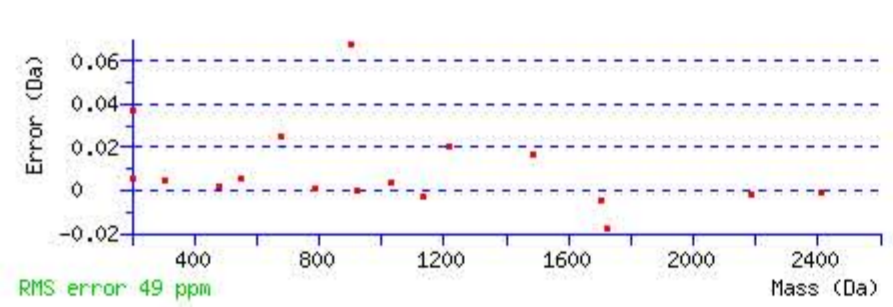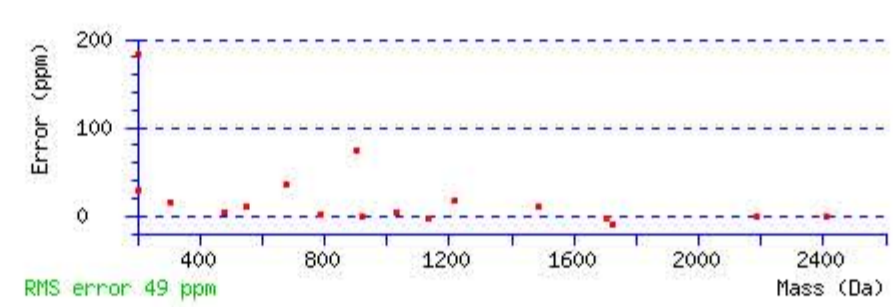

NCBI BLAST search of **SILQMSLDHHIVTPLTSLVIENEAGDER**  
 (Parameters: blastp, nr protein database, expect=20000, no filter, PAM30)  
 Other BLAST [web gateways](#)

**All matches to this query**

| Score | Mr(calc):   | Delta    | Sequence                                     |
|-------|-------------|----------|----------------------------------------------|
| 58.9  | 3443.742859 | 0.009117 | <a href="#">SILQMSLDHHIVTPLTSLVIENEAGDER</a> |



# MASCOT Search Results

## Peptide View

MS/MS Fragmentation of **NVQFNYPHTSVTDVDTQNNFHNHYFGGSEIVVAGK**

Found in **ITIH2\_HUMAN**, Inter-alpha-trypsin inhibitor heavy chain H2 OS=Homo sapiens GN=ITIH2 PE=1 SV=2

Match to Query 73518: 3993.916776 from(999.486470,4+) rtinseconds(2378) index(58030)

Title: Locus:1.1.1.3313.18 File:"2013-07-02 CLN FXIII 30 min 2nd F 4.wiff"

Data file C:\Program Files (x86)\Matrix Science\Mascot Daemon\mgf\2 FXIII 30 min 2nd\mascot\_daemon\_merge.mgf

Click mouse within plot area to zoom in by factor of two about that point

Or, Plot from  to  Da

Label all possible matches  Label matches used for scoring

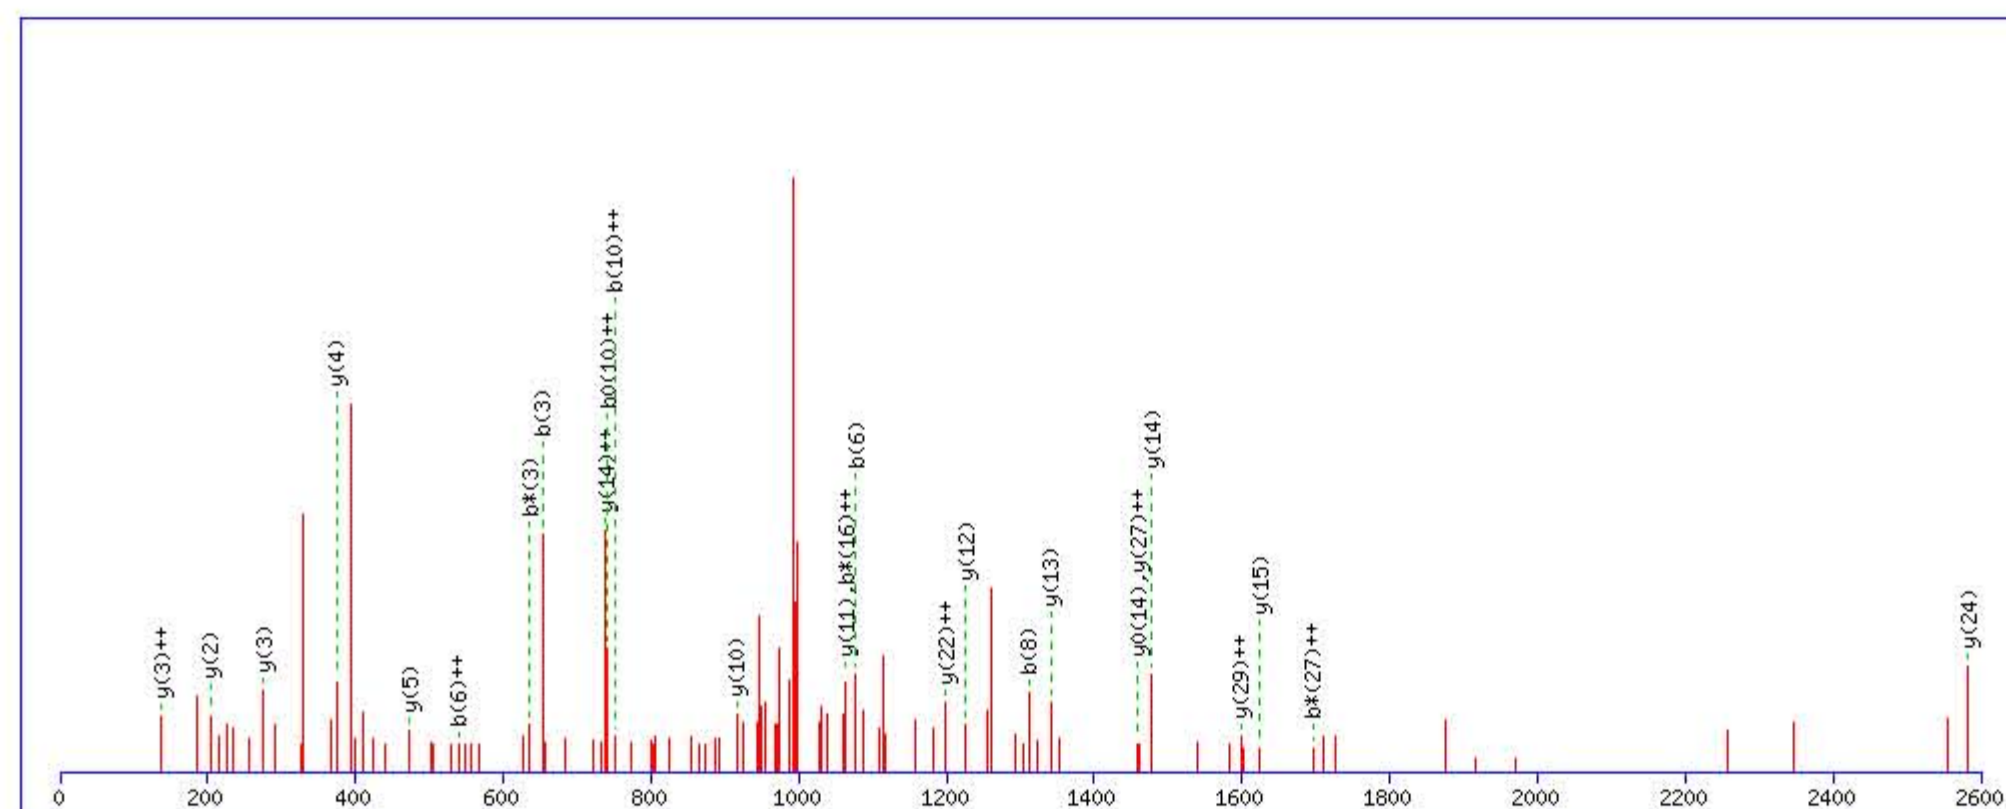

Monoisotopic mass of neutral peptide Mr(calc): 3993.910858

Fixed modifications: Carbamidomethyl (C) (apply to specified residues or termini only)

Variable modifications:

Q3 : Biotin:Thermo-21345 (Q)

Ions Score: 25 Expect: 0.061

Matches : 26/356 fragment ions using 69 most intense peaks [\(help\)](#)

| #  | b                  | b <sup>++</sup>   | b <sup>*</sup>    | b <sup>+++</sup>   | b <sup>0</sup> | b <sup>0++</sup>  | Seq. | y                  | y <sup>++</sup>    | y <sup>*</sup> | y <sup>+++</sup> | y <sup>0</sup>     | y <sup>0++</sup> | #  |
|----|--------------------|-------------------|-------------------|--------------------|----------------|-------------------|------|--------------------|--------------------|----------------|------------------|--------------------|------------------|----|
| 1  | 115.050203         | 58.028740         | 98.023654         | 49.515465          |                |                   | N    |                    |                    |                |                  |                    |                  | 33 |
| 2  | 214.118617         | 107.562947        | 197.092068        | 99.049672          |                |                   | V    | 3880.875173        | 1940.941224        | 3863.848624    | 1932.427950      | 3862.864608        | 1931.935942      | 32 |
| 3  | <b>653.343943</b>  | 327.175610        | <b>636.317394</b> | 318.662335         |                |                   | Q    | 3781.806759        | 1891.407017        | 3764.780210    | 1882.893743      | 3763.796194        | 1882.401735      | 31 |
| 4  | 800.412357         | 400.709817        | 783.385808        | 392.196542         |                |                   | F    | 3342.581433        | 1671.794354        | 3325.554884    | 1663.281080      | 3324.570868        | 1662.789072      | 30 |
| 5  | 914.455284         | 457.731280        | 897.428735        | 449.218006         |                |                   | N    | 3195.513019        | <b>1598.260147</b> | 3178.486470    | 1589.746873      | 3177.502454        | 1589.254865      | 29 |
| 6  | <b>1077.518613</b> | <b>539.262945</b> | 1060.492064       | 530.749670         |                |                   | Y    | 3081.470092        | 1541.238684        | 3064.443543    | 1532.725409      | 3063.459527        | 1532.233401      | 28 |
| 7  | 1174.571377        | 587.789327        | 1157.544828       | 579.276052         |                |                   | P    | 2918.406763        | <b>1459.707019</b> | 2901.380214    | 1451.193745      | 2900.396198        | 1450.701737      | 27 |
| 8  | <b>1311.630289</b> | 656.318783        | 1294.603740       | 647.805508         |                |                   | H    | 2821.353999        | 1411.180637        | 2804.327450    | 1402.667363      | 2803.343434        | 1402.175355      | 26 |
| 9  | 1412.677968        | 706.842622        | 1395.651419       | 698.329348         | 1394.667403    | 697.837339        | T    | 2684.295087        | 1342.651181        | 2667.268538    | 1334.137907      | 2666.284522        | 1333.645899      | 25 |
| 10 | 1499.709996        | <b>750.358636</b> | 1482.683447       | 741.845362         | 1481.699431    | <b>741.353354</b> | S    | <b>2583.247408</b> | 1292.127342        | 2566.220859    | 1283.614067      | 2565.236843        | 1283.122059      | 24 |
| 11 | 1598.778410        | 799.892843        | 1581.751861       | 791.379569         | 1580.767845    | 790.887561        | V    | 2496.215380        | 1248.611328        | 2479.188831    | 1240.098053      | 2478.204815        | 1239.606045      | 23 |
| 12 | 1699.826089        | 850.416683        | 1682.799540       | 841.903408         | 1681.815524    | 841.411400        | T    | 2397.146966        | <b>1199.077121</b> | 2380.120417    | 1190.563846      | 2379.136401        | 1190.071838      | 22 |
| 13 | 1814.853032        | 907.930154        | 1797.826483       | 899.416880         | 1796.842467    | 898.924872        | D    | 2296.099287        | 1148.553281        | 2279.072738    | 1140.040007      | 2278.088722        | 1139.547999      | 21 |
| 14 | 1913.921446        | 957.464361        | 1896.894897       | 948.951087         | 1895.910881    | 948.459079        | V    | 2181.072344        | 1091.039810        | 2164.045795    | 1082.526535      | 2163.061779        | 1082.034527      | 20 |
| 15 | 2014.969125        | 1007.988201       | 1997.942576       | 999.474926         | 1996.958560    | 998.982918        | T    | 2082.003930        | 1041.505603        | 2064.977381    | 1032.992328      | 2063.993365        | 1032.500320      | 19 |
| 16 | 2143.027703        | 1072.017490       | 2126.001154       | <b>1063.504215</b> | 2125.017138    | 1063.012207       | Q    | 1980.956251        | 990.981763         | 1963.929702    | 982.468489       | 1962.945686        | 981.976481       | 18 |
| 17 | 2257.070630        | 1129.038953       | 2240.044081       | 1120.525678        | 2239.060065    | 1120.033671       | N    | 1852.897673        | 926.952474         | 1835.871124    | 918.439200       | 1834.887108        | 917.947192       | 17 |
| 18 | 2371.113557        | 1186.060417       | 2354.087008       | 1177.547142        | 2353.102992    | 1177.055134       | N    | 1738.854746        | 869.931011         | 1721.828197    | 861.417736       | 1720.844181        | 860.925728       | 16 |
| 19 | 2518.181971        | 1259.594623       | 2501.155422       | 1251.081349        | 2500.171406    | 1250.589341       | F    | <b>1624.811819</b> | 812.909547         | 1607.785270    | 804.396273       | 1606.801254        | 803.904265       | 15 |
| 20 | 2655.240883        | 1328.124079       | 2638.214334       | 1319.610805        | 2637.230318    | 1319.118797       | H    | <b>1477.743405</b> | <b>739.375340</b>  | 1460.716856    | 730.862066       | <b>1459.732840</b> | 730.370058       | 14 |
| 21 | 2769.283810        | 1385.145543       | 2752.257261       | 1376.632268        | 2751.273245    | 1376.140260       | N    | <b>1340.684493</b> | 670.845885         | 1323.657944    | 662.332610       | 1322.673928        | 661.840602       | 13 |
| 22 | 2932.347139        | 1466.677207       | 2915.320590       | 1458.163933        | 2914.336574    | 1457.671925       | Y    | <b>1226.641566</b> | 613.824421         | 1209.615017    | 605.311147       | 1208.631001        | 604.819139       | 12 |
| 23 | 3079.415553        | 1540.211414       | 3062.389004       | 1531.698140        | 3061.404988    | 1531.206132       | F    | <b>1063.578237</b> | 532.292757         | 1046.551688    | 523.779482       | 1045.567672        | 523.287474       | 11 |
| 24 | 3136.437017        | 1568.722146       | 3119.410468       | 1560.208872        | 3118.426452    | 1559.716864       | G    | <b>916.509823</b>  | 458.758550         | 899.483274     | 450.245275       | 898.499258         | 449.753267       | 10 |
| 25 | 3193.458481        | 1597.232878       | 3176.431932       | 1588.719604        | 3175.447916    | 1588.227596       | G    | 859.488359         | 430.247818         | 842.461810     | 421.734543       | 841.477794         | 421.242535       | 9  |
| 26 | 3280.490509        | 1640.748892       | 3263.463960       | 1632.235618        | 3262.479944    | 1631.743610       | S    | 802.466895         | 401.737086         | 785.440346     | 393.223811       | 784.456330         | 392.731803       | 8  |
| 27 | 3409.533102        | 1705.270189       | 3392.506553       | <b>1696.756914</b> | 3391.522537    | 1696.264906       | E    | 715.434867         | 358.221072         | 698.408318     | 349.707797       | 697.424302         | 349.215789       | 7  |
| 28 | 3522.617166        | 1761.812221       | 3505.590617       | 1753.298946        | 3504.606601    | 1752.806938       | I    | 586.392274         | 293.699775         | 569.365725     | 285.186501       |                    |                  | 6  |
| 29 | 3621.685580        | 1811.346428       | 3604.659031       | 1802.833153        | 3603.675015    | 1802.341145       | V    | <b>473.308210</b>  | 237.157743         | 456.281661     | 228.644468       |                    |                  | 5  |
| 30 | 3720.753994        | 1860.880635       | 3703.727445       | 1852.367360        | 3702.743429    | 1851.875352       | V    | <b>374.239796</b>  | 187.623536         | 357.213247     | 179.110261       |                    |                  | 4  |
| 31 | 3791.791108        | 1896.399192       | 3774.764559       | 1887.885917        | 3773.780543    | 1887.393909       | A    | <b>275.171382</b>  | <b>138.089329</b>  | 258.144833     | 129.576055       |                    |                  | 3  |
| 32 | 3848.812572        | 1924.909924       | 3831.786023       | 1916.396649        | 3830.802007    | 1915.904641       | G    | <b>204.134268</b>  | 102.570772         | 187.107719     | 94.057497        |                    |                  | 2  |
| 33 |                    |                   |                   |                    |                |                   | K    | 147.112804         | 74.060040          | 130.086255     | 65.546765        |                    |                  | 1  |

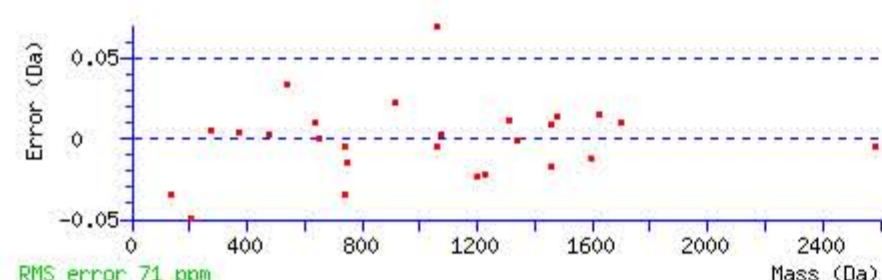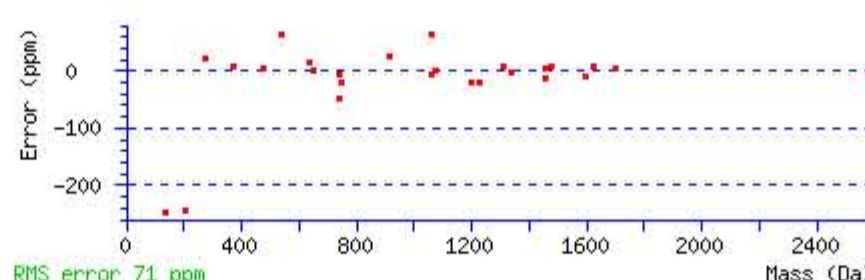

NCBI BLAST search of [NVQFNYPHTSVTDVDTQNNFHNHYFGGSEIVVAGK](#)

(Parameters: blastp, nr protein database, expect=20000, no filter, PAM30)

Other BLAST [web gateways](#)

All matches to this query

| Score | Mr(calc):   | Delta    | Sequence                                            |
|-------|-------------|----------|-----------------------------------------------------|
| 25.3  | 3993.910858 | 0.005918 | <a href="#">NVQFNYPHTSVTDVDTQNNFHNHYFGGSEIVVAGK</a> |
| 10.6  | 3993.910858 | 0.005918 | <a href="#">NVQFNYPHTSVTDVDTQNNFHNHYFGGSEIVVAGK</a> |



# MASCOT SEARCH RESULTS

## Peptide View

MS/MS Fragmentation of **GHVSFKPSLDQQR**

Found in **ITIH3\_HUMAN**, Inter-alpha-trypsin inhibitor heavy chain H3 OS=Homo sapiens GN=ITIH3 PE=1 SV=2

Match to Query 44911: 1808.928042 from(603.983290,3+) rtinseconds(1584) index(53098)

Title: Locus:1.1.1.3038.6 File:"2013-07-02 CLN FXIII 30 min 2nd F 4.wiff"

Data file C:\Program Files (x86)\Matrix Science\Mascot Daemon\mgf2 FXIII 30 min 2nd\mascot\_daemon\_merge.mgf

Click mouse within plot area to zoom in by factor of two about that point

Or, Plot from  to  Da

Label all possible matches  Label matches used for scoring

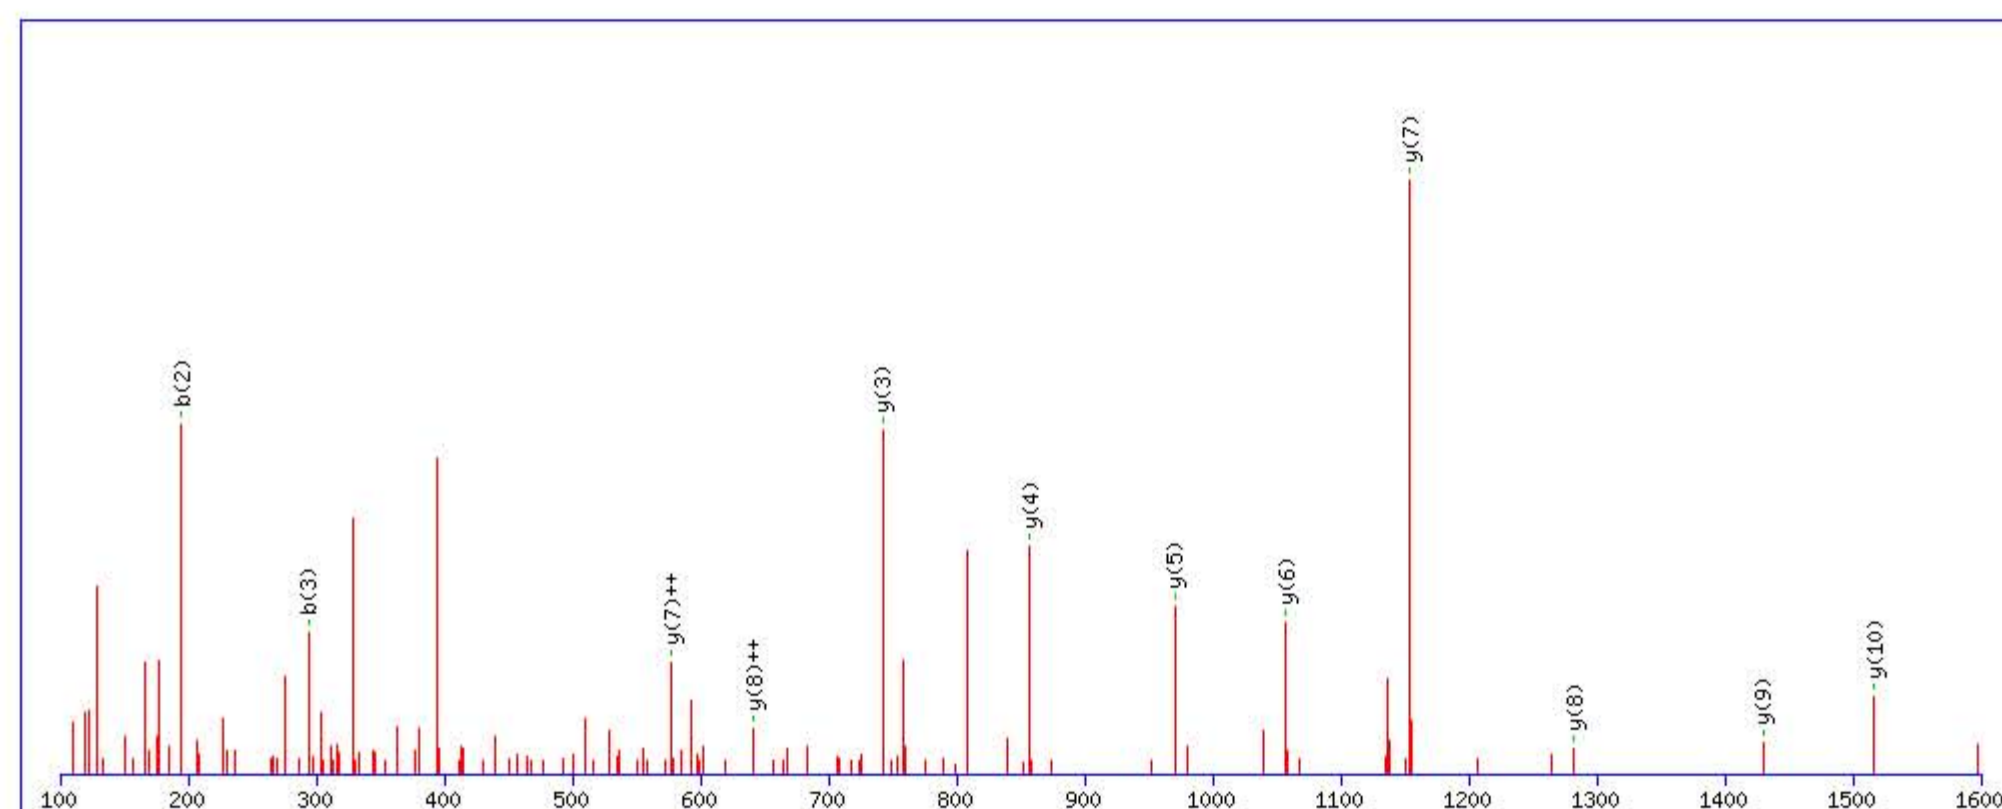

Monoisotopic mass of neutral peptide Mr(calc): 1808.935577

Fixed modifications: Carbamidomethyl (C) (apply to specified residues or termini only)

Variable modifications:

Q12 : Biotin:Thermo-21345 (Q)

Ions Score: 69 Expect: 3.5e-006

Matches : 12/122 fragment ions using 14 most intense peaks [\(help\)](#)

| #  | b                 | b <sup>++</sup> | b <sup>*</sup> | b <sup>*++</sup> | b <sup>0</sup> | b <sup>0++</sup> | Seq. | y                  | y <sup>++</sup>   | y <sup>*</sup> | y <sup>*++</sup> | y <sup>0</sup> | y <sup>0++</sup> | #  |
|----|-------------------|-----------------|----------------|------------------|----------------|------------------|------|--------------------|-------------------|----------------|------------------|----------------|------------------|----|
| 1  | 58.028740         | 29.518008       |                |                  |                |                  | G    |                    |                   |                |                  |                |                  | 13 |
| 2  | <b>195.087652</b> | 98.047464       |                |                  |                |                  | H    | 1752.921386        | 876.964331        | 1735.894837    | 868.451057       | 1734.910821    | 867.959049       | 12 |
| 3  | <b>294.156066</b> | 147.581671      |                |                  |                |                  | V    | 1615.862474        | 808.434875        | 1598.835925    | 799.921601       | 1597.851909    | 799.429593       | 11 |
| 4  | 381.188094        | 191.097685      |                |                  | 363.177529     | 182.092403       | S    | <b>1516.794060</b> | 758.900668        | 1499.767511    | 750.387394       | 1498.783495    | 749.895386       | 10 |
| 5  | 528.256508        | 264.631892      |                |                  | 510.245943     | 255.626610       | F    | <b>1429.762032</b> | 715.384654        | 1412.735483    | 706.871380       | 1411.751467    | 706.379372       | 9  |
| 6  | 656.351471        | 328.679374      | 639.324922     | 320.166099       | 638.340906     | 319.674091       | K    | <b>1282.693618</b> | <b>641.850447</b> | 1265.667069    | 633.337173       | 1264.683053    | 632.845165       | 8  |
| 7  | 753.404235        | 377.205756      | 736.377686     | 368.692481       | 735.393670     | 368.200473       | P    | <b>1154.598655</b> | <b>577.802966</b> | 1137.572106    | 569.289691       | 1136.588090    | 568.797683       | 7  |
| 8  | 840.436263        | 420.721770      | 823.409714     | 412.208495       | 822.425698     | 411.716487       | S    | <b>1057.545891</b> | 529.276584        | 1040.519342    | 520.763309       | 1039.535326    | 520.271301       | 6  |
| 9  | 953.520327        | 477.263802      | 936.493778     | 468.750527       | 935.509762     | 468.258519       | L    | <b>970.513863</b>  | 485.760570        | 953.487314     | 477.247295       | 952.503298     | 476.755287       | 5  |
| 10 | 1068.547270       | 534.777273      | 1051.520721    | 526.263999       | 1050.536705    | 525.771991       | D    | <b>857.429799</b>  | 429.218538        | 840.403250     | 420.705263       | 839.419234     | 420.213255       | 4  |
| 11 | 1196.605848       | 598.806562      | 1179.579299    | 590.293288       | 1178.595283    | 589.801279       | Q    | <b>742.402856</b>  | 371.705066        | 725.376307     | 363.191792       |                |                  | 3  |
| 12 | 1635.831174       | 818.419225      | 1618.804625    | 809.905951       | 1617.820609    | 809.413943       | Q    | 614.344278         | 307.675777        | 597.317729     | 299.162503       |                |                  | 2  |
| 13 |                   |                 |                |                  |                |                  | R    | 175.118952         | 88.063114         | 158.092403     | 79.549839        |                |                  | 1  |

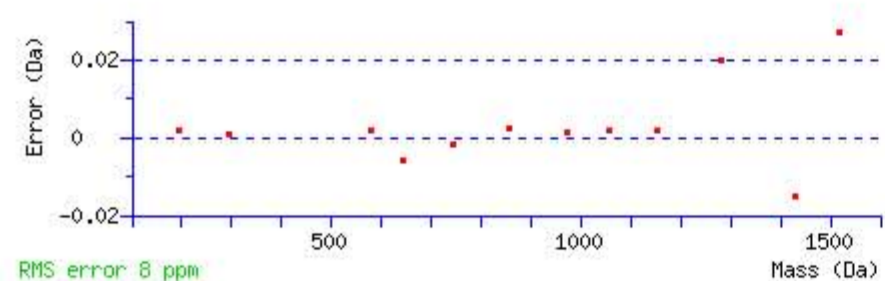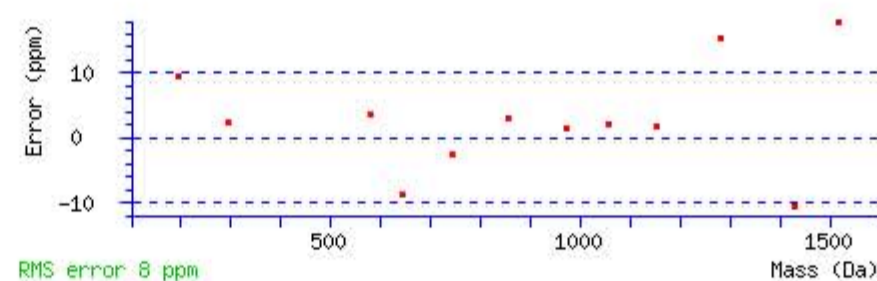

NCBI BLAST search of **GHVSFKPSLDQQR**

(Parameters: blastp, nr protein database, expect=20000, no filter, PAM30)

Other BLAST [web gateways](#)

All matches to this query

| Score | Mr(calc):   | Delta     | Sequence                      |
|-------|-------------|-----------|-------------------------------|
| 68.5  | 1808.935577 | -0.007535 | <a href="#">GHVSFKPSLDQQR</a> |
| 68.5  | 1808.935577 | -0.007535 | <a href="#">GHVSFKPSLDQQR</a> |

Mascot: <http://www.matrixscience.com/>



# MASCOT Search Results

## Peptide View

MS/MS Fragmentation of **QLGLPGPPDVPDHAAYHPFR**

Found in **ITIH4\_HUMAN**, Inter-alpha-trypsin inhibitor heavy chain H4 OS=Homo sapiens GN=ITIH4 PE=1 SV=4

Match to Query 59865: 2494.256296 from(624.571350,4+) rtinseconds(2160) index(6787)

Title: Locus:1.1.1.3188.18 File:"2013-07-02 CLN FXIII 30 min 2nd F 1.wiff"

Data file C:\Program Files (x86)\Matrix Science\Mascot Daemon\mgf2 FXIII 30 min 2nd\mascot\_daemon\_merge.mgf

Click mouse within plot area to zoom in by factor of two about that point

Or, Plot from  to  Da

Label all possible matches  Label matches used for scoring

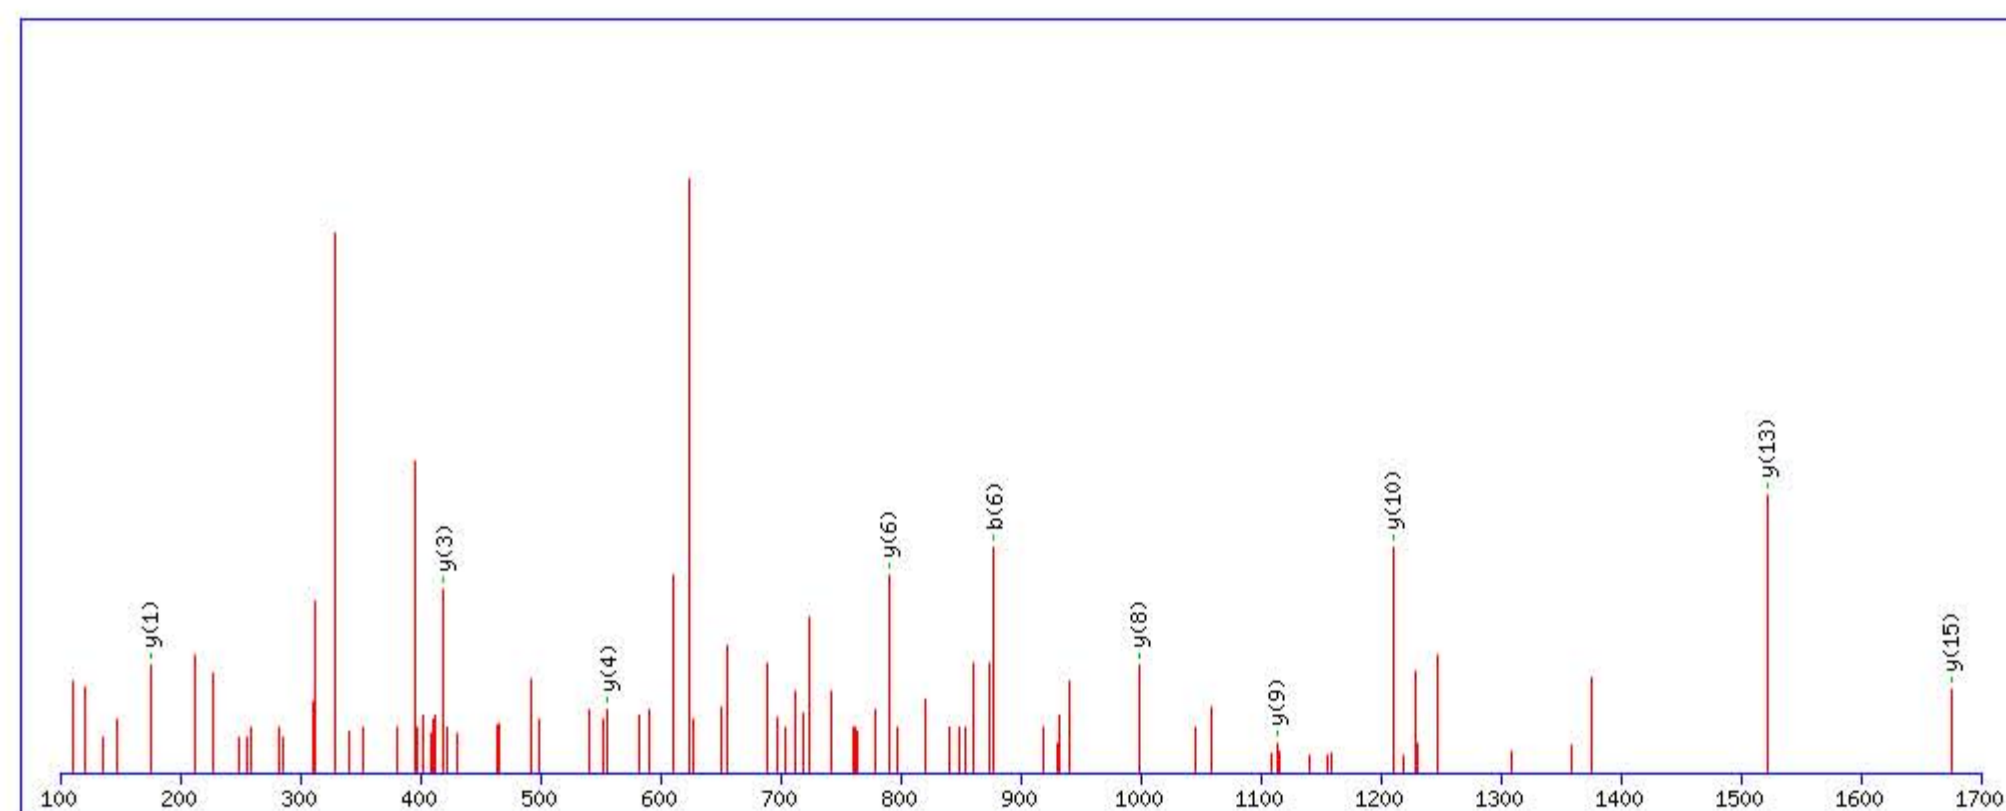

Monoisotopic mass of neutral peptide Mr(calc): 2494.257980

Fixed modifications: Carbamidomethyl (C) (apply to specified residues or termini only)

Variable modifications:

Q1 : Biotin:Thermo-21345 (Q)

Ions Score: 55 Expect: 2.9e-005

Matches : 10/196 fragment ions using 15 most intense peaks [\(help\)](#)

| #  | b                 | b <sup>++</sup> | b <sup>*</sup> | b <sup>*++</sup> | b <sup>0</sup> | b <sup>0++</sup> | Seq. | y                  | y <sup>++</sup> | y <sup>*</sup> | y <sup>*++</sup> | y <sup>0</sup> | y <sup>0++</sup> | #  |
|----|-------------------|-----------------|----------------|------------------|----------------|------------------|------|--------------------|-----------------|----------------|------------------|----------------|------------------|----|
| 1  | 440.232602        | 220.619939      | 423.206053     | 212.106664       |                |                  | Q    |                    |                 |                |                  |                |                  | 20 |
| 2  | 553.316666        | 277.161971      | 536.290117     | 268.648697       |                |                  | L    | 2056.039923        | 1028.523599     | 2039.013374    | 1020.010325      | 2038.029358    | 1019.518317      | 19 |
| 3  | 610.338130        | 305.672703      | 593.311581     | 297.159429       |                |                  | G    | 1942.955859        | 971.981568      | 1925.929310    | 963.468293       | 1924.945294    | 962.976285       | 18 |
| 4  | 723.422194        | 362.214735      | 706.395645     | 353.701461       |                |                  | L    | 1885.934395        | 943.470836      | 1868.907846    | 934.957561       | 1867.923830    | 934.465553       | 17 |
| 5  | 820.474958        | 410.741117      | 803.448409     | 402.227843       |                |                  | P    | 1772.850331        | 886.928804      | 1755.823782    | 878.415529       | 1754.839766    | 877.923521       | 16 |
| 6  | <b>877.496422</b> | 439.251849      | 860.469873     | 430.738575       |                |                  | G    | <b>1675.797567</b> | 838.402422      | 1658.771018    | 829.889147       | 1657.787002    | 829.397139       | 15 |
| 7  | 974.549186        | 487.778231      | 957.522637     | 479.264957       |                |                  | P    | 1618.776103        | 809.891690      | 1601.749554    | 801.378415       | 1600.765538    | 800.886407       | 14 |
| 8  | 1071.601950       | 536.304613      | 1054.575401    | 527.791339       |                |                  | P    | <b>1521.723339</b> | 761.365308      | 1504.696790    | 752.852033       | 1503.712774    | 752.360025       | 13 |
| 9  | 1186.628893       | 593.818085      | 1169.602344    | 585.304810       | 1168.618328    | 584.812802       | D    | 1424.670575        | 712.838926      | 1407.644026    | 704.325651       | 1406.660010    | 703.833643       | 12 |
| 10 | 1285.697307       | 643.352292      | 1268.670758    | 634.839017       | 1267.686742    | 634.347009       | V    | 1309.643632        | 655.325454      | 1292.617083    | 646.812180       | 1291.633067    | 646.320172       | 11 |
| 11 | 1382.750071       | 691.878674      | 1365.723522    | 683.365399       | 1364.739506    | 682.873391       | P    | <b>1210.575218</b> | 605.791247      | 1193.548669    | 597.277973       | 1192.564653    | 596.785964       | 10 |
| 12 | 1497.777014       | 749.392145      | 1480.750465    | 740.878871       | 1479.766449    | 740.386863       | D    | <b>1113.522454</b> | 557.264865      | 1096.495905    | 548.751591       | 1095.511889    | 548.259582       | 9  |
| 13 | 1634.835926       | 817.921601      | 1617.809377    | 809.408327       | 1616.825361    | 808.916319       | H    | <b>998.495511</b>  | 499.751393      | 981.468962     | 491.238119       |                |                  | 8  |
| 14 | 1705.873040       | 853.440158      | 1688.846491    | 844.926884       | 1687.862475    | 844.434876       | A    | 861.436599         | 431.221937      | 844.410050     | 422.708663       |                |                  | 7  |
| 15 | 1776.910154       | 888.958715      | 1759.883605    | 880.445441       | 1758.899589    | 879.953433       | A    | <b>790.399485</b>  | 395.703380      | 773.372936     | 387.190106       |                |                  | 6  |
| 16 | 1939.973483       | 970.490380      | 1922.946934    | 961.977105       | 1921.962918    | 961.485097       | Y    | 719.362371         | 360.184823      | 702.335822     | 351.671549       |                |                  | 5  |
| 17 | 2077.032395       | 1039.019836     | 2060.005846    | 1030.506561      | 2059.021830    | 1030.014553      | H    | <b>556.299042</b>  | 278.653159      | 539.272493     | 270.139884       |                |                  | 4  |
| 18 | 2174.085159       | 1087.546218     | 2157.058610    | 1079.032943      | 2156.074594    | 1078.540935      | P    | <b>419.240130</b>  | 210.123703      | 402.213581     | 201.610428       |                |                  | 3  |
| 19 | 2321.153573       | 1161.080424     | 2304.127024    | 1152.567150      | 2303.143008    | 1152.075142      | F    | 322.187366         | 161.597321      | 305.160817     | 153.084046       |                |                  | 2  |
| 20 |                   |                 |                |                  |                |                  | R    | <b>175.118952</b>  | 88.063114       | 158.092403     | 79.549839        |                |                  | 1  |

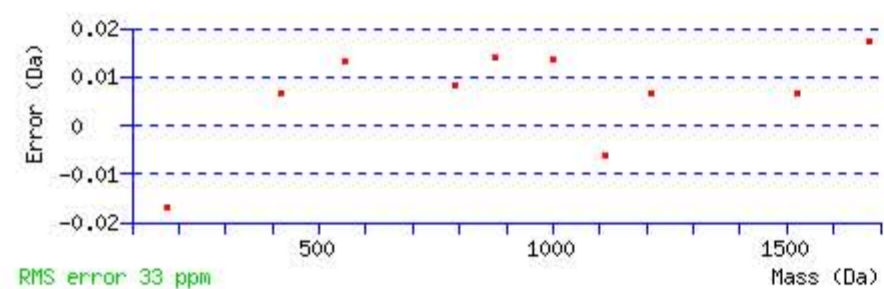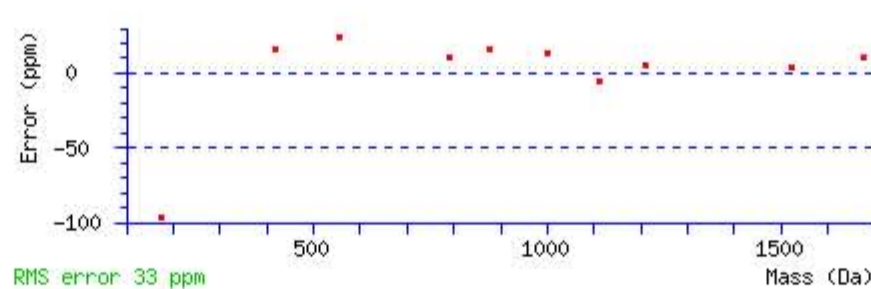

NCBI BLAST search of **QLGLPGPPDVPDHAAYHPFR**

(Parameters: blastp, nr protein database, expect=20000, no filter, PAM30)

Other BLAST [web gateways](#)

All matches to this query

| Score | Mr(calc):   | Delta     | Sequence                                 |
|-------|-------------|-----------|------------------------------------------|
| 55.3  | 2494.257980 | -0.001684 | <a href="#">QLGLPGPPDVPDHAAYHPFR</a>     |
| 7.0   | 2494.256424 | -0.000128 | <a href="#">SPHRESLPGLSSTATPGNPALYSR</a> |

Mascot: <http://www.matrixscience.com/>



# MASCOT Search Results

## Peptide View

MS/MS Fragmentation of **YNSQNQSNNQFVLYR**

Found in **KNG1\_HUMAN**, Kininogen-1 OS=Homo sapiens GN=KNG1 PE=1 SV=2

Match to Query 53636: 2185.040228 from(1093.527390,2+) rtinseconds(2134) index(39516)

Title: Locus:1.1.1.2765.16 File:"2013-07-02 CLN FXIII 30 min 2nd F 3.wiff"

Data file C:\Program Files (x86)\Matrix Science\Mascot Daemon\mgf2 FXIII 30 min 2nd\mascot\_daemon\_merge.mgf

Click mouse within plot area to zoom in by factor of two about that point

Or, Plot from  to  Da

Label all possible matches  Label matches used for scoring

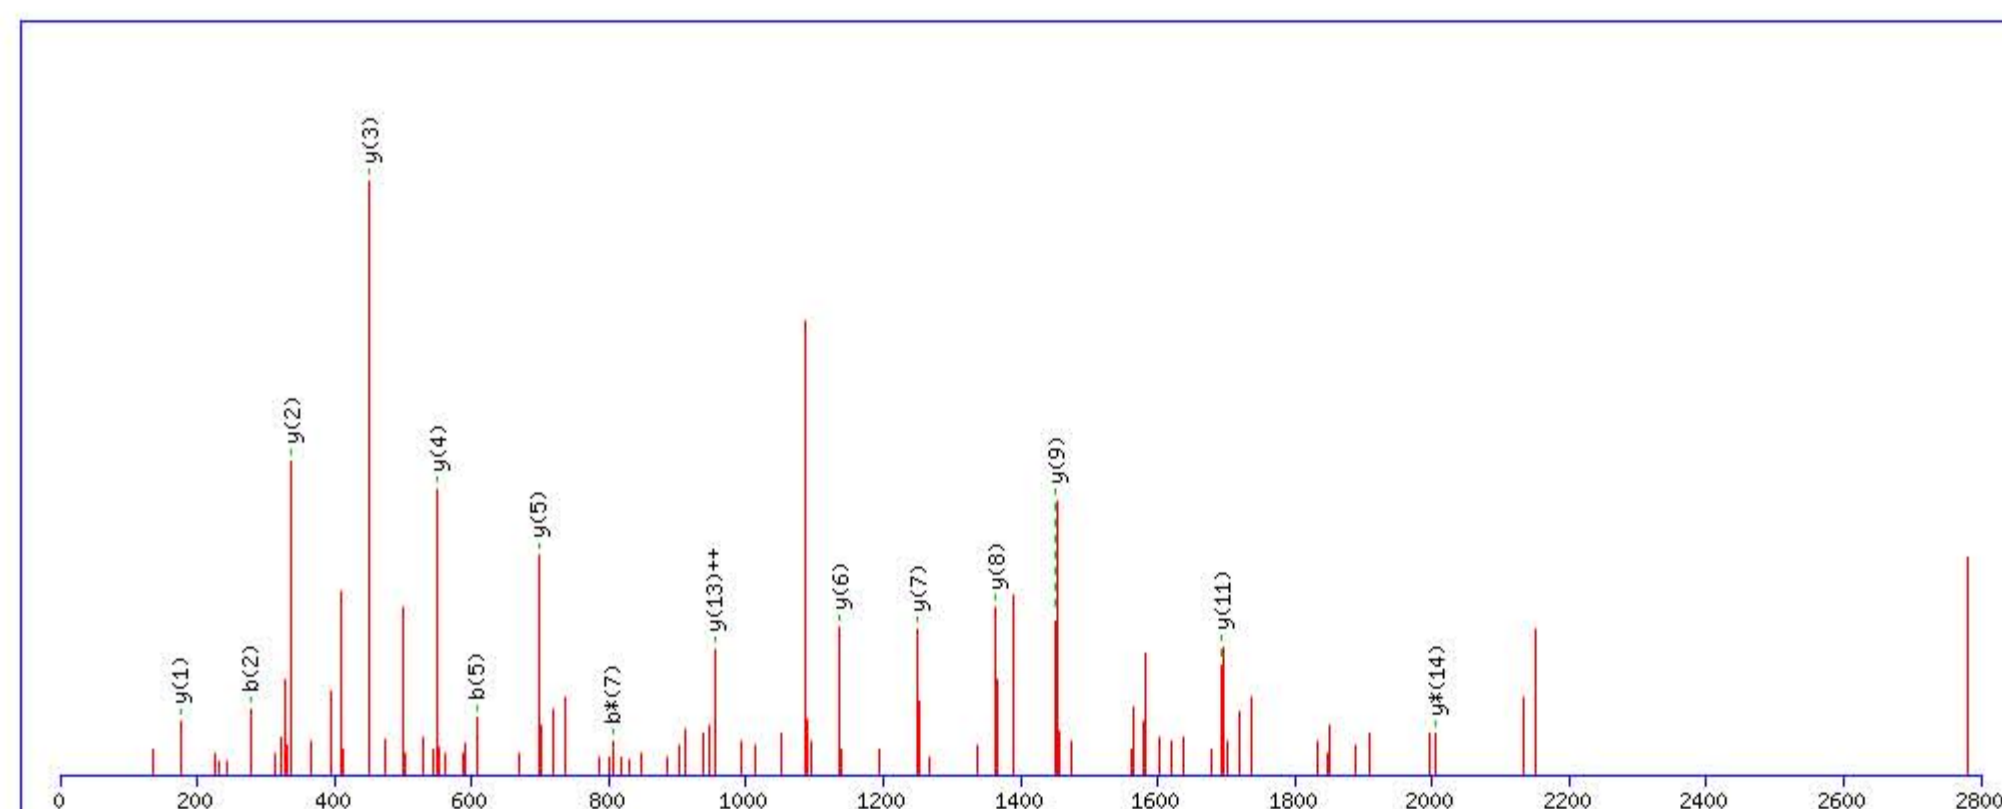

Monoisotopic mass of neutral peptide Mr(calc): 2185.037445

Fixed modifications: Carbamidomethyl (C) (apply to specified residues or termini only)

Variable modifications:

Q10 : Biotin:Thermo-21345 (Q)

Ions Score: 42 Expect: 0.0011

Matches : 15/146 fragment ions using 40 most intense peaks [\(help\)](#)

| #  | b                 | b <sup>++</sup> | b <sup>*</sup>    | b <sup>*++</sup> | b <sup>0</sup> | b <sup>0++</sup> | Seq. | y                  | y <sup>++</sup>   | y <sup>*</sup>     | y <sup>*++</sup> | y <sup>0</sup> | y <sup>0++</sup> | #  |
|----|-------------------|-----------------|-------------------|------------------|----------------|------------------|------|--------------------|-------------------|--------------------|------------------|----------------|------------------|----|
| 1  | 164.070605        | 82.538940       |                   |                  |                |                  | Y    |                    |                   |                    |                  |                |                  | 15 |
| 2  | <b>278.113532</b> | 139.560404      | 261.086983        | 131.047130       |                |                  | N    | 2022.981419        | 1011.994348       | <b>2005.954870</b> | 1003.481073      | 2004.970854    | 1002.989065      | 14 |
| 3  | 365.145560        | 183.076418      | 348.119011        | 174.563144       | 347.134995     | 174.071136       | S    | 1908.938492        | <b>954.972884</b> | 1891.911943        | 946.459610       | 1890.927927    | 945.967602       | 13 |
| 4  | 493.204138        | 247.105707      | 476.177589        | 238.592433       | 475.193573     | 238.100425       | Q    | 1821.906464        | 911.456870        | 1804.879915        | 902.943596       | 1803.895899    | 902.451588       | 12 |
| 5  | <b>607.247065</b> | 304.127171      | 590.220516        | 295.613896       | 589.236500     | 295.121888       | N    | <b>1693.847886</b> | 847.427581        | 1676.821337        | 838.914307       | 1675.837321    | 838.422299       | 11 |
| 6  | 735.305643        | 368.156460      | 718.279094        | 359.643185       | 717.295078     | 359.151177       | Q    | 1579.804959        | 790.406118        | 1562.778410        | 781.892843       | 1561.794394    | 781.400835       | 10 |
| 7  | 822.337671        | 411.672474      | <b>805.311122</b> | 403.159199       | 804.327106     | 402.667191       | S    | <b>1451.746381</b> | 726.376829        | 1434.719832        | 717.863554       | 1433.735816    | 717.371546       | 9  |
| 8  | 936.380598        | 468.693937      | 919.354049        | 460.180662       | 918.370033     | 459.688654       | N    | <b>1364.714353</b> | 682.860815        | 1347.687804        | 674.347540       |                |                  | 8  |
| 9  | 1050.423525       | 525.715400      | 1033.396976       | 517.202126       | 1032.412960    | 516.710118       | N    | <b>1250.671426</b> | 625.839351        | 1233.644877        | 617.326077       |                |                  | 7  |
| 10 | 1489.648851       | 745.328064      | 1472.622302       | 736.814789       | 1471.638286    | 736.322781       | Q    | <b>1136.628499</b> | 568.817888        | 1119.601950        | 560.304613       |                |                  | 6  |
| 11 | 1636.717265       | 818.862271      | 1619.690716       | 810.348996       | 1618.706700    | 809.856988       | F    | <b>697.403173</b>  | 349.205225        | 680.376624         | 340.691950       |                |                  | 5  |
| 12 | 1735.785679       | 868.396478      | 1718.759130       | 859.883203       | 1717.775114    | 859.391195       | V    | <b>550.334759</b>  | 275.671018        | 533.308210         | 267.157743       |                |                  | 4  |
| 13 | 1848.869743       | 924.938510      | 1831.843194       | 916.425235       | 1830.859178    | 915.933227       | L    | <b>451.266345</b>  | 226.136811        | 434.239796         | 217.623536       |                |                  | 3  |
| 14 | 2011.933072       | 1006.470174     | 1994.906523       | 997.956900       | 1993.922507    | 997.464892       | Y    | <b>338.182281</b>  | 169.594779        | 321.155732         | 161.081504       |                |                  | 2  |
| 15 |                   |                 |                   |                  |                |                  | R    | <b>175.118952</b>  | 88.063114         | 158.092403         | 79.549840        |                |                  | 1  |

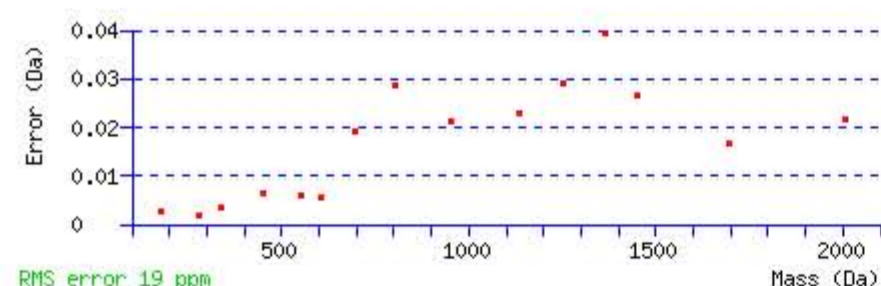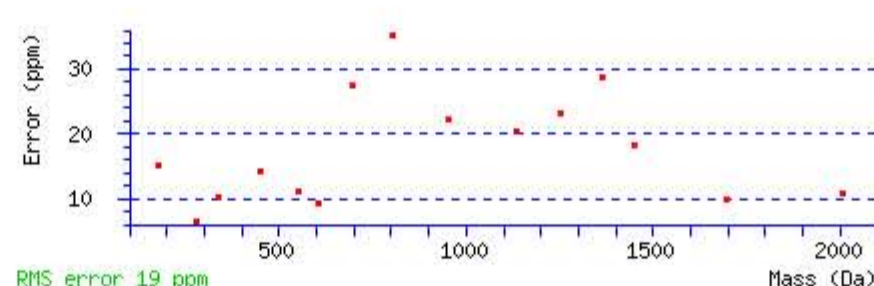

NCBI BLAST search of **YNSQNQSNNQFVLYR**

(Parameters: blastp, nr protein database, expect=20000, no filter, PAM30)

Other BLAST [web gateways](#)

All matches to this query

| Score | Mr(calc):   | Delta    | Sequence                        |
|-------|-------------|----------|---------------------------------|
| 42.4  | 2185.037445 | 0.002783 | <a href="#">YNSQNQSNNQFVLYR</a> |
| 12.1  | 2185.037445 | 0.002783 | <a href="#">YNSQNQSNNQFVLYR</a> |
| 10.6  | 2185.037445 | 0.002783 | <a href="#">YNSQNQSNNQFVLYR</a> |



# MASCOT Search Results

## Peptide View

MS/MS Fragmentation of **FSVATQTCQITPAEGPVVTAQYDCLGCVHPISTQSPDLEPILR**  
 Found in **KNG1\_HUMAN**, Kininogen-1 OS=Homo sapiens GN=KNG1 PE=1 SV=2

Match to Query 79777: 5066.434620 from(1014.294200,5+) rtinseconds(2647) index(9574)  
 Title: Locus:1.1.1.3357.7 File:"2013-07-02 CLN FXIII 30 min 2nd F 1.wiff"  
 Data file C:\Program Files (x86)\Matrix Science\Mascot Daemon\mgf\2 FXIII 30 min 2nd\mascot\_daemon\_merge.mgf

Click mouse within plot area to zoom in by factor of two about that point  
 Or, Plot from  to  Da   
 Label all possible matches  Label matches used for scoring

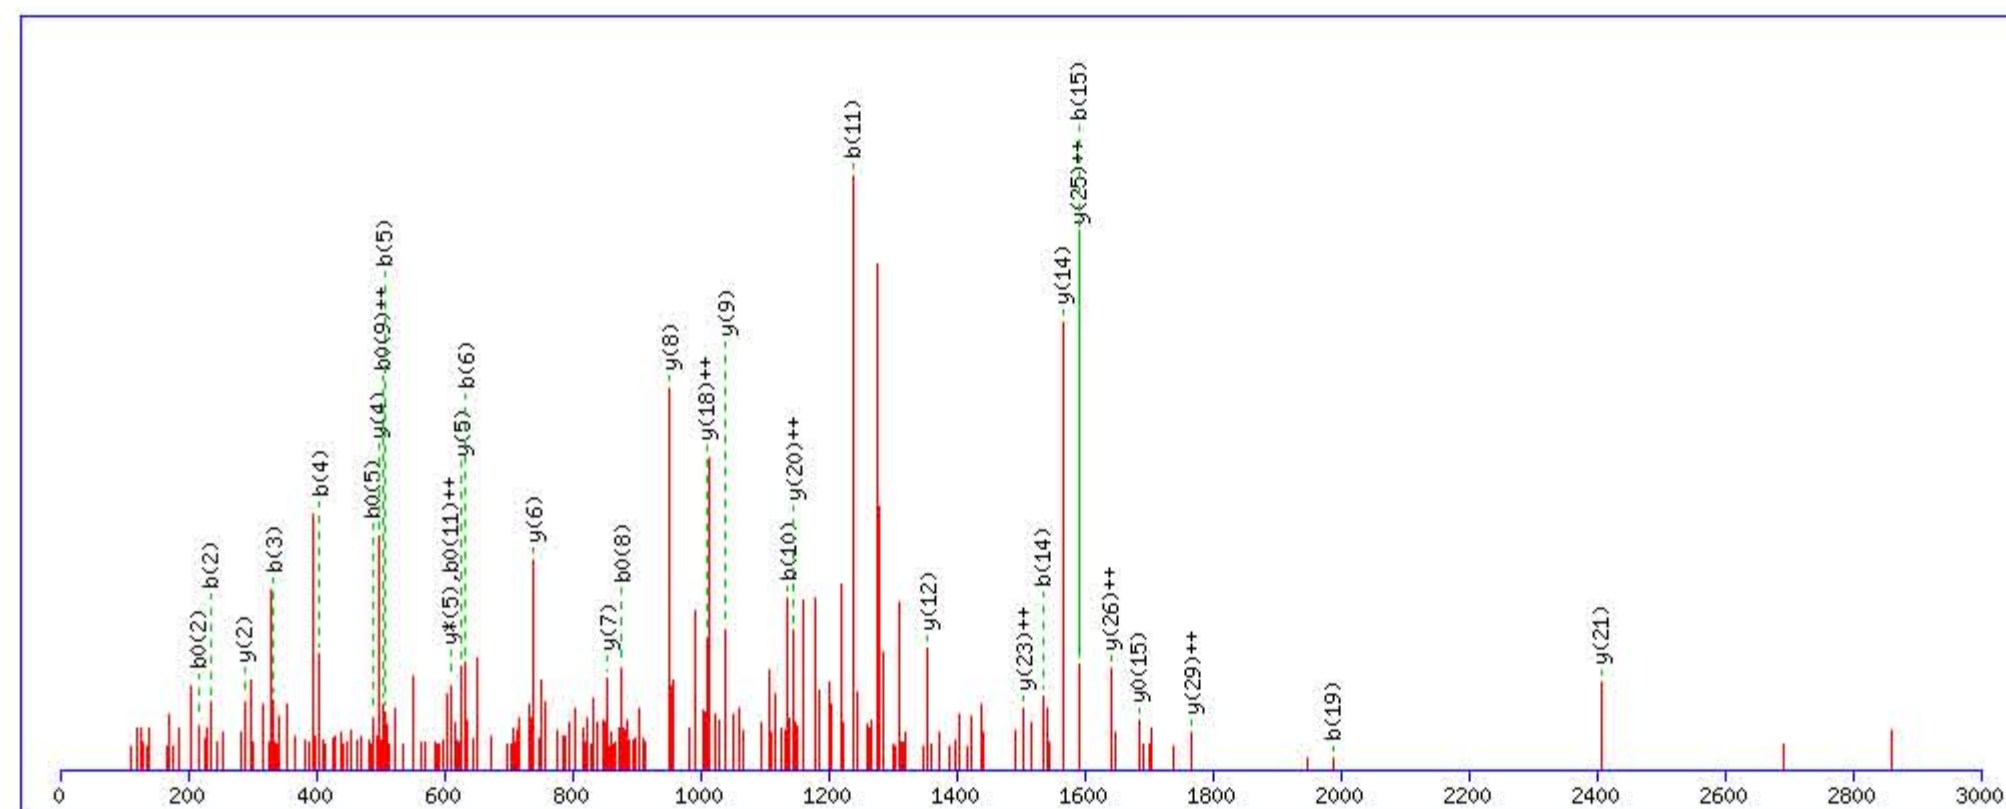

Monoisotopic mass of neutral peptide Mr(calc): 5066.465057  
 Fixed modifications: Carbamidomethyl (C) (apply to specified residues or termini only)  
 Variable modifications:  
 Q21 : Biotin:Thermo-21345 (Q)  
 Ions Score: 48 Expect: 0.00027  
 Matches : 33/484 fragment ions using 73 most intense peaks [\(help\)](#)

| #  | b                  | b <sup>++</sup> | b <sup>*</sup> | b <sup>*++</sup> | b <sup>0</sup> | b <sup>0++</sup> | Seq. | y                  | y <sup>++</sup> | y <sup>*</sup> | y <sup>*++</sup> | y <sup>0</sup> | y <sup>0++</sup> | #  |
|----|--------------------|-----------------|----------------|------------------|----------------|------------------|------|--------------------|-----------------|----------------|------------------|----------------|------------------|----|
| 1  | 148.075690         | 74.541483       |                |                  |                |                  | F    |                    |                 |                |                  |                |                  | 43 |
| 2  | <b>235.107718</b>  | 118.057497      |                |                  | 217.097153     | 109.052214       | S    | 4920.403881        | 2460.705578     | 4903.377332    | 2452.192304      | 4902.393316    | 2451.700296      | 42 |
| 3  | <b>334.176132</b>  | 167.591704      |                |                  | 316.165567     | 158.586422       | V    | 4833.371853        | 2417.189565     | 4816.345304    | 2408.676290      | 4815.361288    | 2408.184282      | 41 |
| 4  | <b>405.213246</b>  | 203.110261      |                |                  | 387.202681     | 194.104978       | A    | 4734.303439        | 2367.655357     | 4717.276890    | 2359.142083      | 4716.292874    | 2358.650075      | 40 |
| 5  | <b>506.260925</b>  | 253.634100      |                |                  | 488.250360     | 244.628818       | T    | 4663.266325        | 2332.136800     | 4646.239776    | 2323.623526      | 4645.255760    | 2323.131518      | 39 |
| 6  | <b>634.319503</b>  | 317.663390      | 617.292954     | 309.150115       | 616.308938     | 308.658107       | Q    | 4562.218646        | 2281.612961     | 4545.192097    | 2273.099686      | 4544.208081    | 2272.607679      | 38 |
| 7  | 735.367182         | 368.187229      | 718.340633     | 359.673955       | 717.356617     | 359.181947       | T    | 4434.160068        | 2217.583672     | 4417.133519    | 2209.070397      | 4416.149503    | 2208.578390      | 37 |
| 8  | 895.397831         | 448.202554      | 878.371282     | 439.689279       | 877.387266     | 439.197271       | C    | 4333.112389        | 2167.059833     | 4316.085840    | 2158.546558      | 4315.101824    | 2158.054550      | 36 |
| 9  | 1023.456409        | 512.231843      | 1006.429860    | 503.718568       | 1005.445844    | 503.226560       | Q    | 4173.081740        | 2087.044508     | 4156.055191    | 2078.531233      | 4155.071175    | 2078.039226      | 35 |
| 10 | <b>1136.540473</b> | 568.773875      | 1119.513924    | 560.260600       | 1118.529908    | 559.768592       | I    | 4045.023162        | 2023.015219     | 4027.996613    | 2014.501944      | 4027.012597    | 2014.009936      | 34 |
| 11 | <b>1237.588152</b> | 619.297714      | 1220.561603    | 610.784440       | 1219.577587    | 610.292432       | T    | 3931.939098        | 1966.473187     | 3914.912549    | 1957.959912      | 3913.928533    | 1957.467904      | 33 |
| 12 | 1334.640916        | 667.824096      | 1317.614367    | 659.310822       | 1316.630351    | 658.818814       | P    | 3830.891419        | 1915.949347     | 3813.864870    | 1907.436073      | 3812.880854    | 1906.944065      | 32 |
| 13 | 1405.678030        | 703.342653      | 1388.651481    | 694.829379       | 1387.667465    | 694.337371       | A    | 3733.838655        | 1867.422965     | 3716.812106    | 1858.909691      | 3715.828090    | 1858.417683      | 31 |
| 14 | <b>1534.720623</b> | 767.863949      | 1517.694074    | 759.350675       | 1516.710058    | 758.858667       | E    | 3662.801541        | 1831.904408     | 3645.774992    | 1823.391134      | 3644.790976    | 1822.899126      | 30 |
| 15 | <b>1591.742087</b> | 796.374681      | 1574.715538    | 787.861407       | 1573.731522    | 787.369399       | G    | 3533.758948        | 1767.383112     | 3516.732399    | 1758.869837      | 3515.748383    | 1758.377829      | 29 |
| 16 | 1688.794851        | 844.901063      | 1671.768302    | 836.387789       | 1670.784286    | 835.895781       | P    | 3476.737484        | 1738.872380     | 3459.710935    | 1730.359105      | 3458.726919    | 1729.867097      | 28 |
| 17 | 1787.863265        | 894.435271      | 1770.836716    | 885.921996       | 1769.852700    | 885.429988       | V    | 3379.684720        | 1690.345998     | 3362.658171    | 1681.832723      | 3361.674155    | 1681.340715      | 27 |
| 18 | 1886.931679        | 943.969478      | 1869.905130    | 935.456203       | 1868.921114    | 934.964195       | V    | 3280.616306        | 1640.811791     | 3263.589757    | 1632.298516      | 3262.605741    | 1631.806508      | 26 |
| 19 | <b>1987.979358</b> | 994.493317      | 1970.952809    | 985.980043       | 1969.968793    | 985.488035       | T    | 3181.547892        | 1591.277584     | 3164.521343    | 1582.764309      | 3163.537327    | 1582.272301      | 25 |
| 20 | 2059.016472        | 1030.011874     | 2041.989923    | 1021.498600      | 2041.005907    | 1021.006591      | A    | 3080.500213        | 1540.753744     | 3063.473664    | 1532.240470      | 3062.489648    | 1531.748462      | 24 |
| 21 | 2498.241798        | 1249.624537     | 2481.215249    | 1241.111262      | 2480.231233    | 1240.619254      | Q    | 3009.463099        | 1505.235187     | 2992.436550    | 1496.721913      | 2991.452534    | 1496.229905      | 23 |
| 22 | 2661.305127        | 1331.156202     | 2644.278578    | 1322.642927      | 2643.294562    | 1322.150919      | Y    | 2570.237773        | 1285.622524     | 2553.211224    | 1277.109250      | 2552.227208    | 1276.617242      | 22 |
| 23 | 2776.332070        | 1388.669673     | 2759.305521    | 1380.156398      | 2758.321505    | 1379.664390      | D    | <b>2407.174444</b> | 1204.090860     | 2390.147895    | 1195.577585      | 2389.163879    | 1195.085577      | 21 |
| 24 | 2936.362719        | 1468.684997     | 2919.336170    | 1460.171723      | 2918.352154    | 1459.679715      | C    | 2292.147501        | 1146.577388     | 2275.120952    | 1138.064114      | 2274.136936    | 1137.572106      | 20 |
| 25 | 3049.446783        | 1525.227029     | 3032.420234    | 1516.713755      | 3031.436218    | 1516.221747      | L    | 2132.116852        | 1066.562064     | 2115.090303    | 1058.048789      | 2114.106287    | 1057.556781      | 19 |
| 26 | 3106.468247        | 1553.737761     | 3089.441698    | 1545.224487      | 3088.457682    | 1544.732479      | G    | 2019.032788        | 1010.020032     | 2002.006239    | 1001.506757      | 2001.022223    | 1001.014749      | 18 |
| 27 | 3266.498896        | 1633.753086     | 3249.472347    | 1625.239811      | 3248.488331    | 1624.747803      | C    | 1962.011324        | 981.509300      | 1944.984775    | 972.996025       | 1944.000759    | 972.504017       | 17 |
| 28 | 3365.567310        | 1683.287293     | 3348.540761    | 1674.774018      | 3347.556745    | 1674.282010      | V    | 1801.980675        | 901.493975      | 1784.954126    | 892.980701       | 1783.970110    | 892.488693       | 16 |
| 29 | 3502.626222        | 1751.816749     | 3485.599673    | 1743.303474      | 3484.615657    | 1742.811466      | H    | 1702.912261        | 851.959768      | 1685.885712    | 843.446494       | 1684.901696    | 842.954486       | 15 |
| 30 | 3599.678986        | 1800.343131     | 3582.652437    | 1791.829856      | 3581.668421    | 1791.337848      | P    | <b>1565.853349</b> | 783.430312      | 1548.826800    | 774.917038       | 1547.842784    | 774.425030       | 14 |
| 31 | 3712.763050        | 1856.885163     | 3695.736501    | 1848.371888      | 3694.752485    | 1847.879880      | I    | 1468.800585        | 734.903930      | 1451.774036    | 726.390656       | 1450.790020    | 725.898648       | 13 |
| 32 | 3799.795078        | 1900.401177     | 3782.768529    | 1891.887902      | 3781.784513    | 1891.395894      | S    | <b>1355.716521</b> | 678.361898      | 1338.689972    | 669.848624       | 1337.705956    | 669.356616       | 12 |
| 33 | 3900.842757        | 1950.925016     | 3883.816208    | 1942.411742      | 3882.832192    | 1941.919734      | T    | 1268.684493        | 634.845884      | 1251.657944    | 626.332610       | 1250.673928    | 625.840602       | 11 |
| 34 | 4028.901335        | 2014.954305     | 4011.874786    | 2006.441031      | 4010.890770    | 2005.949023      | Q    | 1167.636814        | 584.322045      | 1150.610265    | 575.808770       | 1149.626249    | 575.316762       | 10 |
| 35 | 4115.933363        | 2058.470320     | 4098.906814    | 2049.957045      | 4097.922798    | 2049.465037      | S    | <b>1039.578236</b> | 520.292756      | 1022.551687    | 511.779481       | 1021.567671    | 511.287473       | 9  |
| 36 | 4212.986127        | 2106.996702     | 4195.959578    | 2098.483427      | 4194.975562    | 2097.991419      | P    | <b>952.546208</b>  | 476.776742      | 935.519659     | 468.263467       | 934.535643     | 467.771459       | 8  |
| 37 | 4328.013070        | 2164.510173     | 4310.986521    | 2155.996899      | 4310.002505    | 2155.504891      | D    | <b>855.493444</b>  | 428.250360      | 838.466895     | 419.737085       | 837.482879     | 419.245077       | 7  |
| 38 | 4441.097134        | 2221.052205     | 4424.070585    | 2212.538930      | 4423.086569    | 2212.046923      | L    | <b>740.466501</b>  | 370.736888      | 723.439952     | 362.223614       | 722.455936     | 361.731606       | 6  |
| 39 | 4570.139727        | 2285.573502     | 4553.113178    | 2277.060227      | 4552.129162    | 2276.568219      | E    | <b>627.382437</b>  | 314.194856      | 610.355888     | 305.681582       | 609.371872     | 305.189574       | 5  |
| 40 | 4667.192491        | 2334.099884     | 4650.165942    | 2325.586609      | 4649.181926    | 2325.094601      | P    | <b>498.339844</b>  | 249.673560      | 481.313295     | 241.160285       |                |                  | 4  |
| 41 | 4780.276555        | 2390.641915     | 4763.250006    | 2382.128641      | 4762.265990    | 2381.636633      | I    | 401.287080         | 201.147178      | 384.260531     | 192.633903       |                |                  | 3  |
| 42 | 4893.360619        | 2447.183947     | 4876.334070    | 2438.670673      | 4875.350054    | 2438.178665      | L    | <b>288.203016</b>  | 144.605146      | 271.176467     | 136.091871       |                |                  | 2  |
| 43 |                    |                 |                |                  |                |                  | R    | 175.118952         | 88.063114       | 158.092403     | 79.549839        |                |                  | 1  |

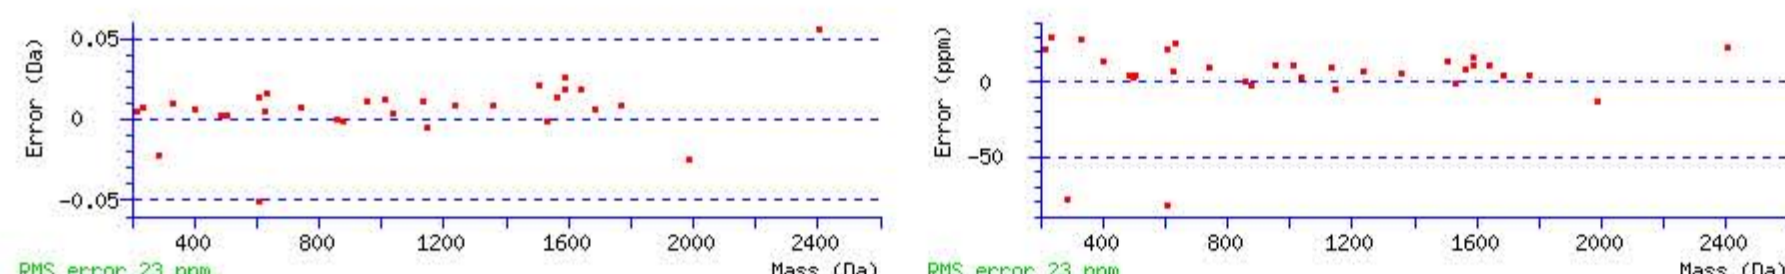

NCBI BLAST search of **FSVATQTCQITPAEGPVVTAQYDCLGCVHPISTQSPDLEPILR**  
 (Parameters: blastp, nr protein database, expect=20000, no filter, PAM30)  
 Other BLAST [web gateways](#)

## All matches to this query

| Score | Mr(calc):   | Delta     | Sequence                                                    |
|-------|-------------|-----------|-------------------------------------------------------------|
| 47.8  | 5066.465057 | -0.030437 | <a href="#">FSVATQTCQITPAEGPVVTAQYDCLGCVHPISTQSPDLEPILR</a> |
| 25.9  | 5066.465057 | -0.030437 | <a href="#">FSVATQTCQITPAEGPVVTAQYDCLGCVHPISTQSPDLEPILR</a> |
| 17.0  | 5066.465057 | -0.030437 | <a href="#">FSVATQTCQITPAEGPVVTAQYDCLGCVHPISTQSPDLEPILR</a> |
| 13.7  | 5066.465057 | -0.030437 | <a href="#">FSVATQTCQITPAEGPVVTAQYDCLGCVHPISTQSPDLEPILR</a> |



# MASCOT Search Results

## Peptide View

MS/MS Fragmentation of **VECSDNLF<sup>T</sup>Q<sup>R</sup>**

Found in **MASP1\_HUMAN**, Mannan-binding lectin serine protease 1 OS=Homo sapiens GN=MASP1 PE=1 SV=3

Match to Query 41766: 1678.776402 from(560.599410,3+) rtinseconds(2083) index(56315)

Title: Locus:1.1.1.3211.5 File:"2013-07-02 CLN FXIII 30 min 2nd F 4.wiff"

Data file C:\Program Files (x86)\Matrix Science\Mascot Daemon\mgf2 FXIII 30 min 2nd\mascot\_daemon\_merge.mgf

Click mouse within plot area to zoom in by factor of two about that point

Or, Plot from  to  Da

Label all possible matches  Label matches used for scoring

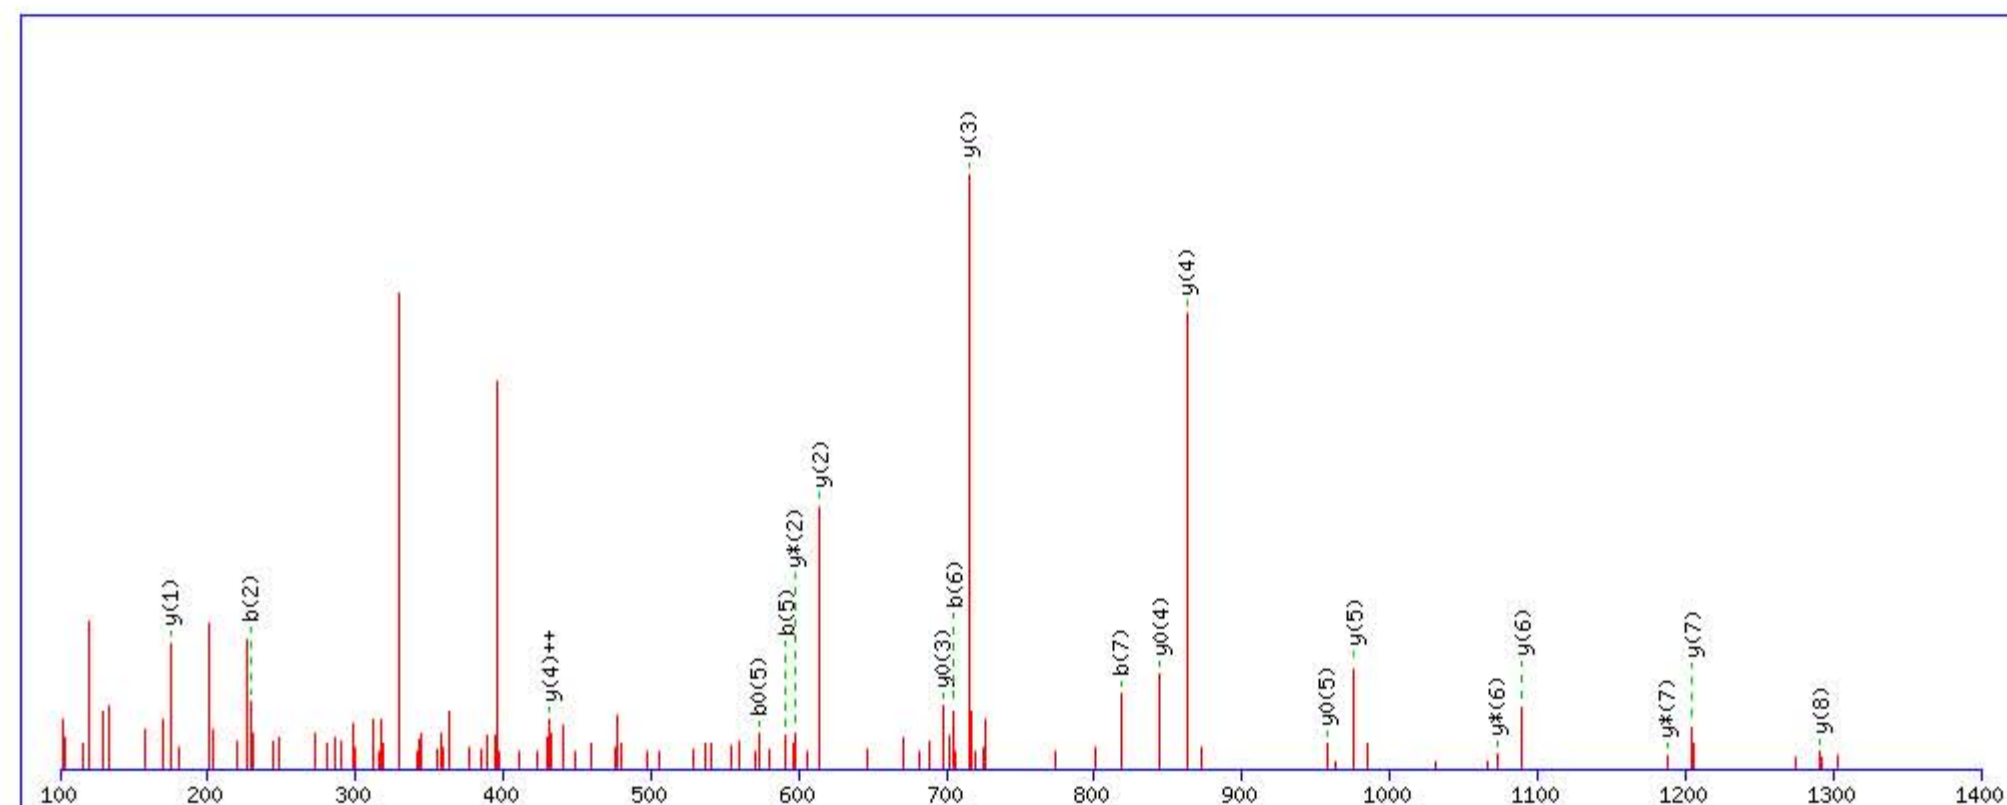

Monoisotopic mass of neutral peptide Mr(calc): 1678.780716

Fixed modifications: Carbamidomethyl (C) (apply to specified residues or termini only)

Variable modifications:

Q10 : Biotin:Thermo-21345 (Q)

Ions Score: 43 Expect: 0.00062

Matches : 20/104 fragment ions using 35 most intense peaks [\(help\)](#)

| #  | b                 | b <sup>++</sup> | b <sup>*</sup> | b <sup>*++</sup> | b <sup>0</sup>    | b <sup>0++</sup> | Seq. | y                  | y <sup>++</sup>   | y <sup>*</sup>     | y <sup>*++</sup> | y <sup>0</sup>    | y <sup>0++</sup> | #  |
|----|-------------------|-----------------|----------------|------------------|-------------------|------------------|------|--------------------|-------------------|--------------------|------------------|-------------------|------------------|----|
| 1  | 100.075690        | 50.541483       |                |                  |                   |                  | V    |                    |                   |                    |                  |                   |                  | 11 |
| 2  | <b>229.118283</b> | 115.062780      |                |                  | 211.107718        | 106.057497       | E    | 1580.719575        | 790.863426        | 1563.693026        | 782.350151       | 1562.709010       | 781.858143       | 10 |
| 3  | 389.148932        | 195.078104      |                |                  | 371.138367        | 186.072822       | C    | 1451.676982        | 726.342129        | 1434.650433        | 717.828855       | 1433.666417       | 717.336847       | 9  |
| 4  | 476.180960        | 238.594118      |                |                  | 458.170395        | 229.588835       | S    | <b>1291.646333</b> | 646.326805        | 1274.619784        | 637.813530       | 1273.635768       | 637.321522       | 8  |
| 5  | <b>591.207903</b> | 296.107590      |                |                  | <b>573.197338</b> | 287.102307       | D    | <b>1204.614305</b> | 602.810791        | <b>1187.587756</b> | 594.297516       | 1186.603740       | 593.805508       | 7  |
| 6  | <b>705.250830</b> | 353.129053      | 688.224281     | 344.615778       | 687.240265        | 344.123770       | N    | <b>1089.587362</b> | 545.297319        | <b>1072.560813</b> | 536.784045       | 1071.576797       | 536.292037       | 6  |
| 7  | <b>818.334894</b> | 409.671085      | 801.308345     | 401.157810       | 800.324329        | 400.665802       | L    | <b>975.544435</b>  | 488.275856        | 958.517886         | 479.762581       | <b>957.533870</b> | 479.270573       | 5  |
| 8  | 965.403308        | 483.205292      | 948.376759     | 474.692017       | 947.392743        | 474.200009       | F    | <b>862.460371</b>  | <b>431.733824</b> | 845.433822         | 423.220549       | <b>844.449806</b> | 422.728541       | 4  |
| 9  | 1066.450987       | 533.729131      | 1049.424438    | 525.215857       | 1048.440422       | 524.723849       | T    | <b>715.391957</b>  | 358.199617        | 698.365408         | 349.686342       | <b>697.381392</b> | 349.194334       | 3  |
| 10 | 1505.676313       | 753.341795      | 1488.649764    | 744.828520       | 1487.665748       | 744.336512       | Q    | <b>614.344278</b>  | 307.675777        | <b>597.317729</b>  | 299.162503       |                   |                  | 2  |
| 11 |                   |                 |                |                  |                   |                  | R    | <b>175.118952</b>  | 88.063114         | 158.092403         | 79.549839        |                   |                  | 1  |

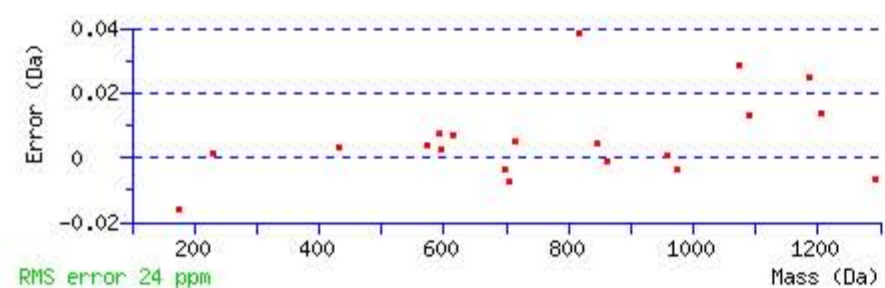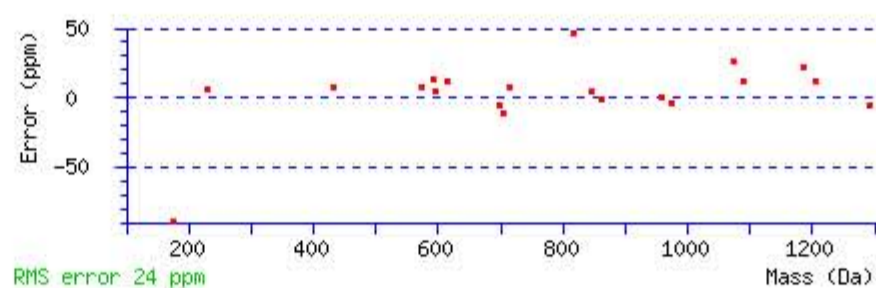

NCBI BLAST search of [VECSDNLF<sup>T</sup>Q<sup>R</sup>](#)

(Parameters: blastp, nr protein database, expect=20000, no filter, PAM30)

Other BLAST [web gateways](#)

All matches to this query

| Score | Mr(calc):   | Delta     | Sequence                                          |
|-------|-------------|-----------|---------------------------------------------------|
| 43.1  | 1678.780716 | -0.004314 | <a href="#">VECSDNLF<sup>T</sup>Q<sup>R</sup></a> |

Mascot: <http://www.matrixscience.com/>



**Peptide View**

MS/MS Fragmentation of **FPETLMEIEIPIVDHSTCQK**

Found in **MASP1\_HUMAN**, Mannan-binding lectin serine protease 1 OS=Homo sapiens GN=MASP1 PE=1 SV=3

Match to Query 61950: 2697.326922 from(900.116250,3+) rtinseconds(2752) index(60321)

Title: Locus:1.1.1.3442.21 File:"2013-07-02 CLN FXIII 30 min 2nd F 4.wiff"

Data file C:\Program Files (x86)\Matrix Science\Mascot Daemon\mgf2 FXIII 30 min 2nd\mascot\_daemon\_merge.mgf

Click mouse within plot area to zoom in by factor of two about that point

Or, Plot from  to  Da

Label all possible matches  Label matches used for scoring

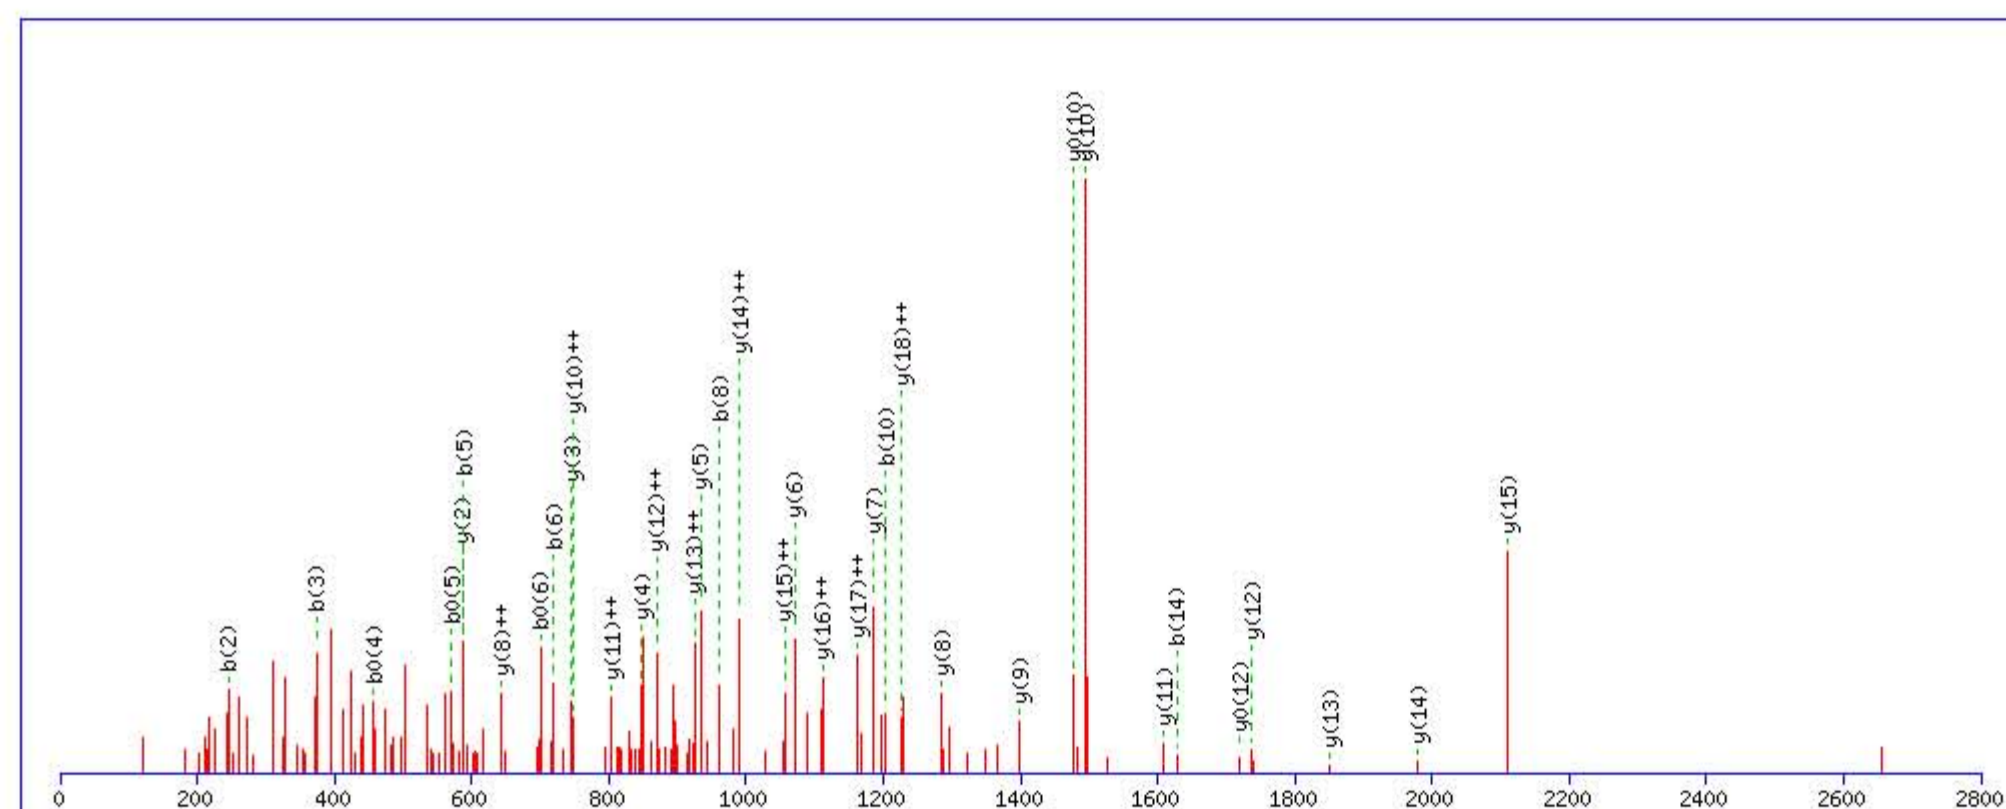

Monoisotopic mass of neutral peptide Mr(calc): 2697.321609

Fixed modifications: Carbamidomethyl (C) (apply to specified residues or termini only)

Variable modifications:

Q19 : Biotin:Thermo-21345 (Q)

Ions Score: 80 Expect: 2.9e-007

Matches : 36/182 fragment ions using 66 most intense peaks [\(help\)](#)

| #  | b                  | b <sup>++</sup> | b <sup>*</sup> | b <sup>+++</sup> | b <sup>0</sup>    | b <sup>0++</sup> | Seq. | y                  | y <sup>++</sup>    | y <sup>*</sup> | y <sup>+++</sup> | y <sup>0</sup>     | y <sup>0++</sup> | #  |
|----|--------------------|-----------------|----------------|------------------|-------------------|------------------|------|--------------------|--------------------|----------------|------------------|--------------------|------------------|----|
| 1  | 148.075690         | 74.541483       |                |                  |                   |                  | F    |                    |                    |                |                  |                    |                  | 20 |
| 2  | <b>245.128454</b>  | 123.067865      |                |                  |                   |                  | P    | 2551.260482        | 1276.133879        | 2534.233933    | 1267.620604      | 2533.249917        | 1267.128596      | 19 |
| 3  | <b>374.171047</b>  | 187.589161      |                |                  | 356.160482        | 178.583879       | E    | 2454.207718        | <b>1227.607497</b> | 2437.181169    | 1219.094222      | 2436.197153        | 1218.602214      | 18 |
| 4  | 475.218726         | 238.113001      |                |                  | <b>457.208161</b> | 229.107719       | T    | 2325.165125        | <b>1163.086200</b> | 2308.138576    | 1154.572926      | 2307.154560        | 1154.080918      | 17 |
| 5  | <b>588.302790</b>  | 294.655033      |                |                  | <b>570.292225</b> | 285.649751       | L    | 2224.117446        | <b>1112.562361</b> | 2207.090897    | 1104.049086      | 2206.106881        | 1103.557078      | 16 |
| 6  | <b>719.343275</b>  | 360.175276      |                |                  | <b>701.332710</b> | 351.169993       | M    | <b>2111.033382</b> | <b>1056.020329</b> | 2094.006833    | 1047.507054      | 2093.022817        | 1047.015046      | 15 |
| 7  | 848.385868         | 424.696572      |                |                  | 830.375303        | 415.691290       | E    | <b>1979.992897</b> | <b>990.500087</b>  | 1962.966348    | 981.986812       | 1961.982332        | 981.494804       | 14 |
| 8  | <b>961.469932</b>  | 481.238604      |                |                  | 943.459367        | 472.233322       | I    | <b>1850.950304</b> | <b>925.978790</b>  | 1833.923755    | 917.465516       | 1832.939739        | 916.973508       | 13 |
| 9  | 1090.512525        | 545.759901      |                |                  | 1072.501960       | 536.754618       | E    | <b>1737.866240</b> | <b>869.436758</b>  | 1720.839691    | 860.923484       | <b>1719.855675</b> | 860.431476       | 12 |
| 10 | <b>1203.596589</b> | 602.301933      |                |                  | 1185.586024       | 593.296650       | I    | <b>1608.823647</b> | <b>804.915462</b>  | 1591.797098    | 796.402187       | 1590.813082        | 795.910179       | 11 |
| 11 | 1300.649353        | 650.828315      |                |                  | 1282.638788       | 641.823032       | P    | <b>1495.739583</b> | <b>748.373430</b>  | 1478.713034    | 739.860155       | <b>1477.729018</b> | 739.368147       | 10 |
| 12 | 1413.733417        | 707.370346      |                |                  | 1395.722852       | 698.365064       | I    | <b>1398.686819</b> | 699.847048         | 1381.660270    | 691.333773       | 1380.676254        | 690.841765       | 9  |
| 13 | 1512.801831        | 756.904554      |                |                  | 1494.791266       | 747.899271       | V    | <b>1285.602755</b> | <b>643.305016</b>  | 1268.576206    | 634.791741       | 1267.592190        | 634.299733       | 8  |
| 14 | <b>1627.828774</b> | 814.418025      |                |                  | 1609.818209       | 805.412743       | D    | <b>1186.534341</b> | 593.770809         | 1169.507792    | 585.257534       | 1168.523776        | 584.765526       | 7  |
| 15 | 1764.887686        | 882.947481      |                |                  | 1746.877121       | 873.942199       | H    | <b>1071.507398</b> | 536.257337         | 1054.480849    | 527.744063       | 1053.496833        | 527.252055       | 6  |
| 16 | 1851.919714        | 926.463495      |                |                  | 1833.909149       | 917.458213       | S    | <b>934.448486</b>  | 467.727881         | 917.421937     | 459.214607       | 916.437921         | 458.722599       | 5  |
| 17 | 1952.967393        | 976.987335      |                |                  | 1934.956828       | 967.982052       | T    | <b>847.416458</b>  | 424.211867         | 830.389909     | 415.698593       | 829.405893         | 415.206585       | 4  |
| 18 | 2112.998042        | 1057.002659     |                |                  | 2094.987477       | 1047.997376      | C    | <b>746.368779</b>  | 373.688028         | 729.342230     | 365.174753       |                    |                  | 3  |
| 19 | 2552.223368        | 1276.615322     | 2535.196819    | 1268.102047      | 2534.212803       | 1267.610039      | Q    | <b>586.338130</b>  | 293.672703         | 569.311581     | 285.159429       |                    |                  | 2  |
| 20 |                    |                 |                |                  |                   |                  | K    | 147.112804         | 74.060040          | 130.086255     | 65.546765        |                    |                  | 1  |

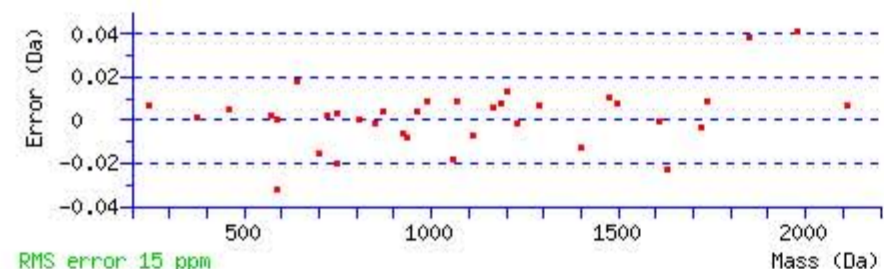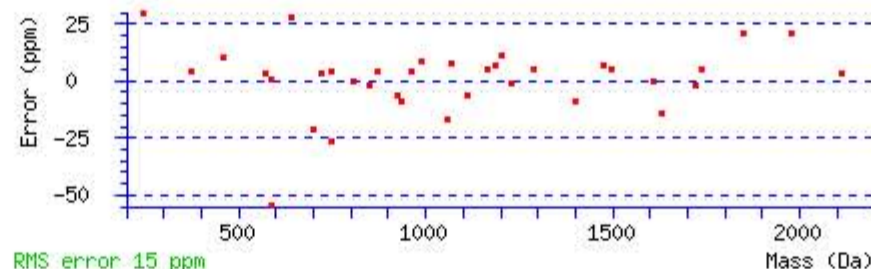

NCBI BLAST search of **FPETLMEIEIPIVDHSTCQK**

(Parameters: blastp, nr protein database, expect=20000, no filter, PAM30)

Other BLAST [web gateways](#)

**All matches to this query**

| Score | Mr(calc):   | Delta    | Sequence                             |
|-------|-------------|----------|--------------------------------------|
| 79.9  | 2697.321609 | 0.005313 | <a href="#">FPETLMEIEIPIVDHSTCQK</a> |



# Mascot Search Results

## Peptide View

MS/MS Fragmentation of **APEPISTQSHSVLILFHSDNSGENR**

Found in **MASPI\_HUMAN**, Mannan-binding lectin serine protease 1 OS=Homo sapiens GN=MASPI PE=1 SV=3

Match to Query 65896: 3045.494336 from(762.380860,4+) rtinseconds(2245) index(57328)

Title: Locus:1.1.1.3267.13 File:"2013-07-02 CLN FXIII 30 min 2nd F 4.wiff"

Data file C:\Program Files (x86)\Matrix Science\Mascot Daemon\mgf2 FXIII 30 min 2nd\mascot\_daemon\_merge.mgf

Click mouse within plot area to zoom in by factor of two about that point

Or, Plot from  to  Da

Label all possible matches  Label matches used for scoring

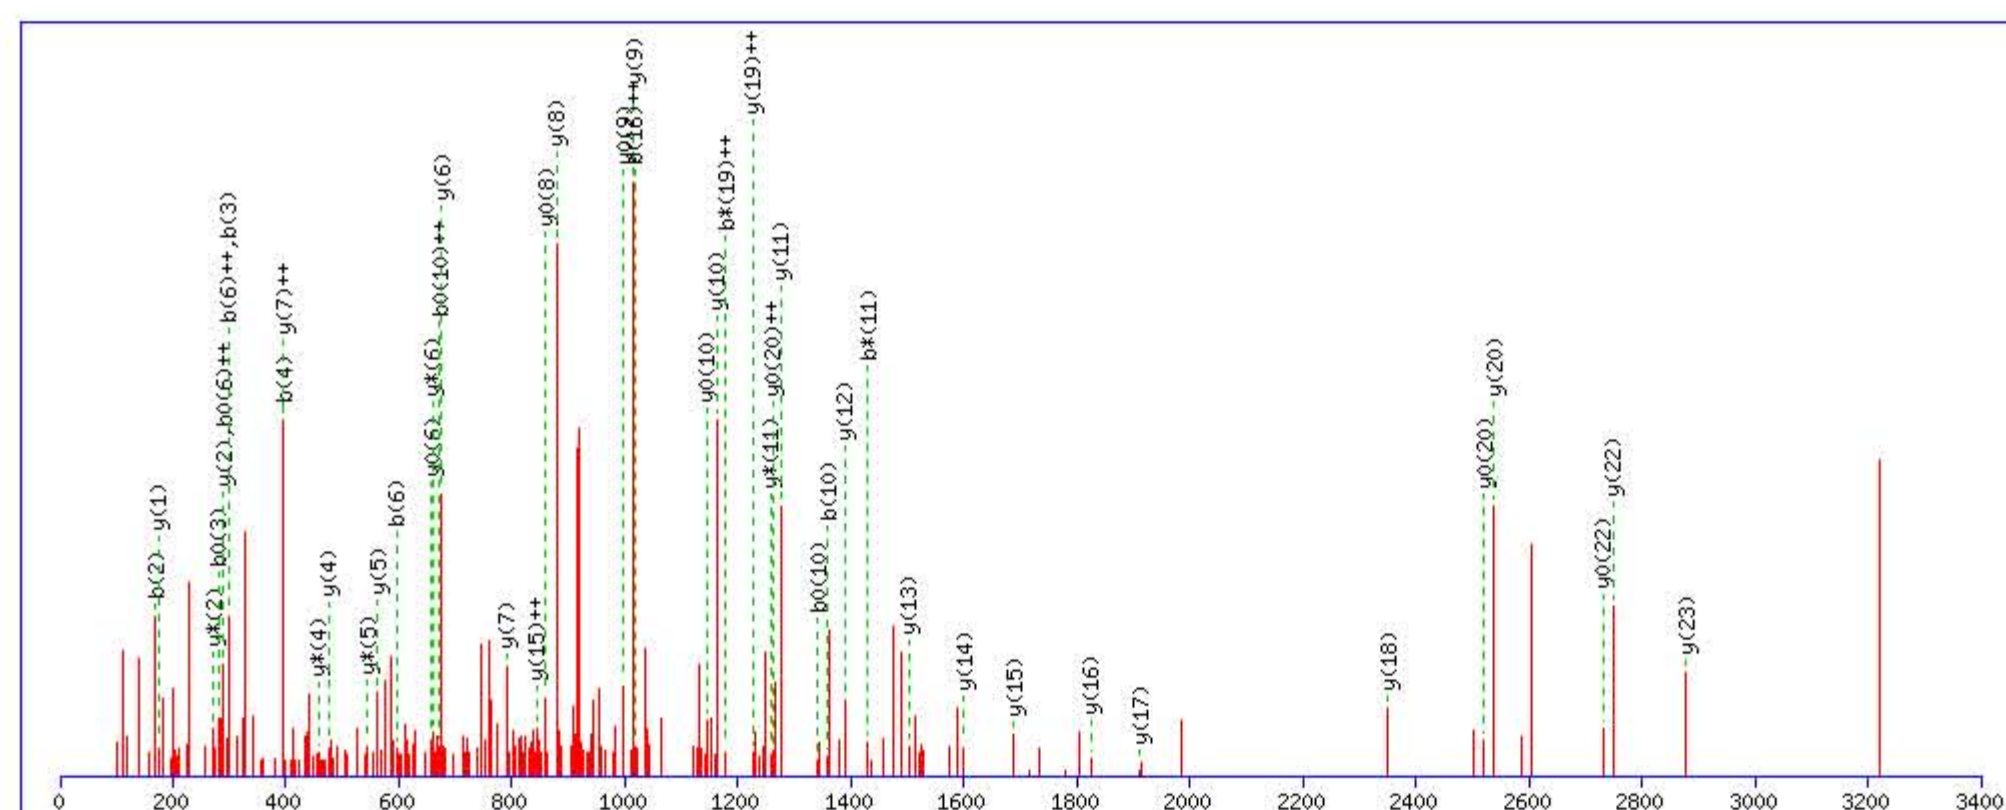

Monoisotopic mass of neutral peptide Mr(calc): 3045.497803

Fixed modifications: Carbamidomethyl (C) (apply to specified residues or termini only)

Variable modifications:

Q8 : Biotin:Thermo-21345 (Q)

Ions Score: 73 Expect: 1.3e-006

Matches : 48/266 fragment ions using 150 most intense peaks [\(help\)](#)

| #  | b                  | b <sup>++</sup>    | b <sup>+</sup>     | b <sup>*++</sup>   | b <sup>0</sup>     | b <sup>0++</sup>  | Seq. | y                  | y <sup>++</sup>    | y <sup>+</sup>     | y <sup>*++</sup> | y <sup>0</sup>     | y <sup>0++</sup>   | #  |
|----|--------------------|--------------------|--------------------|--------------------|--------------------|-------------------|------|--------------------|--------------------|--------------------|------------------|--------------------|--------------------|----|
| 1  | 72.044390          | 36.525833          |                    |                    |                    |                   | A    |                    |                    |                    |                  |                    |                    | 25 |
| 2  | <b>169.097154</b>  | 85.052215          |                    |                    |                    |                   | P    | 2975.467980        | 1488.237628        | 2958.441431        | 1479.724353      | 2957.457415        | 1479.232345        | 24 |
| 3  | <b>298.139747</b>  | 149.573512         |                    |                    | <b>280.129182</b>  | 140.568229        | E    | <b>2878.415216</b> | 1439.711246        | 2861.388667        | 1431.197971      | 2860.404651        | 1430.705963        | 23 |
| 4  | <b>395.192511</b>  | 198.099894         |                    |                    | 377.181946         | 189.094611        | P    | <b>2749.372623</b> | 1375.189949        | 2732.346074        | 1366.676675      | <b>2731.362058</b> | 1366.184667        | 22 |
| 5  | 508.276575         | 254.641926         |                    |                    | 490.266010         | 245.636643        | I    | 2652.319859        | 1326.663567        | 2635.293310        | 1318.150293      | 2634.309294        | 1317.658285        | 21 |
| 6  | <b>595.308603</b>  | <b>298.157940</b>  |                    |                    | 577.298038         | <b>289.152657</b> | S    | <b>2539.235795</b> | 1270.121535        | 2522.209246        | 1261.608261      | <b>2521.225230</b> | <b>1261.116253</b> | 20 |
| 7  | 696.356282         | 348.681779         |                    |                    | 678.345717         | 339.676497        | T    | 2452.203767        | <b>1226.605521</b> | 2435.177218        | 1218.092247      | 2434.193202        | 1217.600239        | 19 |
| 8  | 1135.581608        | 568.294442         | 1118.555059        | 559.781168         | 1117.571043        | 559.289160        | Q    | <b>2351.156088</b> | 1176.081682        | 2334.129539        | 1167.568407      | 2333.145523        | 1167.076399        | 18 |
| 9  | 1222.613636        | 611.810456         | 1205.587087        | 603.297182         | 1204.603071        | 602.805174        | S    | <b>1911.930762</b> | 956.469019         | 1894.904213        | 947.955745       | 1893.920197        | 947.463737         | 17 |
| 10 | <b>1359.672548</b> | 680.339912         | 1342.645999        | 671.826638         | <b>1341.661983</b> | <b>671.334630</b> | H    | <b>1824.898734</b> | 912.953005         | 1807.872185        | 904.439731       | 1806.888169        | 903.947723         | 16 |
| 11 | 1446.704576        | 723.855926         | <b>1429.678027</b> | 715.342652         | 1428.694011        | 714.850644        | S    | <b>1687.839822</b> | <b>844.423549</b>  | 1670.813273        | 835.910275       | 1669.829257        | 835.418267         | 15 |
| 12 | 1545.772990        | 773.390133         | 1528.746441        | 764.876859         | 1527.762425        | 764.384851        | V    | <b>1600.807794</b> | 800.907535         | 1583.781245        | 792.394261       | 1582.797229        | 791.902253         | 14 |
| 13 | 1658.857054        | 829.932165         | 1641.830505        | 821.418891         | 1640.846489        | 820.926883        | L    | <b>1501.739380</b> | 751.373328         | 1484.712831        | 742.860054       | 1483.728815        | 742.368045         | 13 |
| 14 | 1771.941118        | 886.474197         | 1754.914569        | 877.960923         | 1753.930553        | 877.468915        | I    | <b>1388.655316</b> | 694.831296         | 1371.628767        | 686.318022       | 1370.644751        | 685.826014         | 12 |
| 15 | 1885.025182        | 943.016229         | 1867.998633        | 934.502955         | 1867.014617        | 934.010947        | L    | <b>1275.571252</b> | 638.289264         | <b>1258.544703</b> | 629.775990       | 1257.560687        | 629.283982         | 11 |
| 16 | 2032.093596        | <b>1016.550436</b> | 2015.067047        | 1008.037162        | 2014.083031        | 1007.545154       | F    | <b>1162.487188</b> | 581.747232         | 1145.460639        | 573.233958       | <b>1144.476623</b> | 572.741950         | 10 |
| 17 | 2169.152508        | 1085.079892        | 2152.125959        | 1076.566617        | 2151.141943        | 1076.074610       | H    | <b>1015.418774</b> | 508.213025         | 998.392225         | 499.699751       | <b>997.408209</b>  | 499.207743         | 9  |
| 18 | 2256.184536        | 1128.595906        | 2239.157987        | 1120.082631        | 2238.173971        | 1119.590624       | S    | <b>878.359862</b>  | 439.683569         | 861.333313         | 431.170295       | <b>860.349297</b>  | 430.678287         | 8  |
| 19 | 2371.211479        | 1186.109377        | 2354.184930        | <b>1177.596103</b> | 2353.200914        | 1177.104095       | D    | <b>791.327834</b>  | <b>396.167555</b>  | 774.301285         | 387.654280       | 773.317269         | 387.162272         | 7  |
| 20 | 2485.254406        | 1243.130841        | 2468.227857        | 1234.617566        | 2467.243841        | 1234.125558       | N    | <b>676.300891</b>  | 338.654084         | <b>659.274342</b>  | 330.140809       | <b>658.290326</b>  | 329.648801         | 6  |
| 21 | 2572.286434        | 1286.646855        | 2555.259885        | 1278.133580        | 2554.275869        | 1277.641572       | S    | <b>562.257964</b>  | 281.632620         | <b>545.231415</b>  | 273.119346       | 544.247399         | 272.627338         | 5  |
| 22 | 2629.307898        | 1315.157587        | 2612.281349        | 1306.644312        | 2611.297333        | 1306.152304       | G    | <b>475.225936</b>  | 238.116606         | <b>458.199387</b>  | 229.603331       | 457.215371         | 229.111323         | 4  |
| 23 | 2758.350491        | 1379.678884        | 2741.323942        | 1371.165609        | 2740.339926        | 1370.673601       | E    | 418.204472         | 209.605874         | 401.177923         | 201.092600       | 400.193907         | 200.600592         | 3  |
| 24 | 2872.393418        | 1436.700347        | 2855.366869        | 1428.187072        | 2854.382853        | 1427.695064       | N    | <b>289.161879</b>  | 145.084577         | <b>272.135330</b>  | 136.571303       |                    |                    | 2  |
| 25 |                    |                    |                    |                    |                    |                   | R    | <b>175.118952</b>  | 88.063114          | 158.092403         | 79.549839        |                    |                    | 1  |

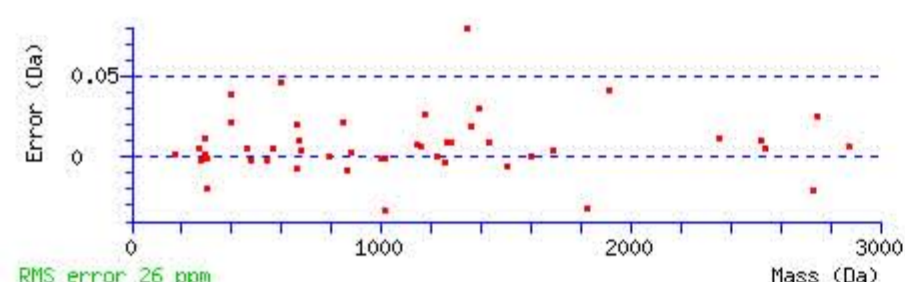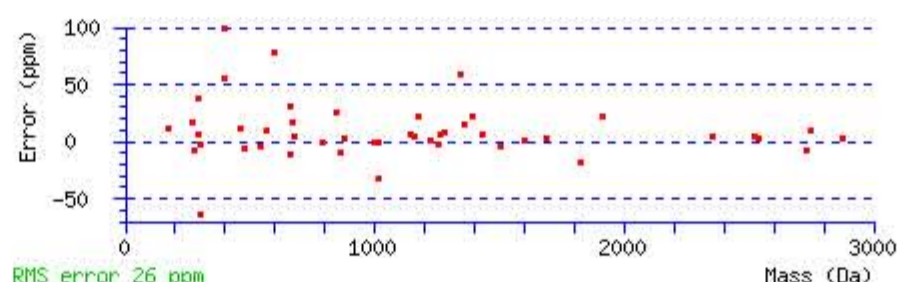

NCBI BLAST search of [APEPISTQSHSVLILFHSDNSGENR](#)

(Parameters: blastp, nr protein database, expect=20000, no filter, PAM30)

Other BLAST [web gateways](#)

All matches to this query

| Score | Mr(calc):   | Delta     | Sequence                                  |
|-------|-------------|-----------|-------------------------------------------|
| 73.2  | 3045.497803 | -0.003467 | <a href="#">APEPISTQSHSVLILFHSDNSGENR</a> |

Mascot: <http://www.matrixscience.com/>



# MASCOT Search Results

## Peptide View

MS/MS Fragmentation of **LCQPVLSPACQLVLHQILK**  
 Found in **PMEL\_HUMAN**, Melanocyte protein PMEL OS=Homo sapiens GN=PMEL PE=1 SV=2

Match to Query 61326: 2624.436462 from(875.819430,3+) rtinseconds(2660) index(59545)  
 Title: Locus:1.1.1.3411.20 File:"2013-07-02 CLN FXIII 30 min 2nd F 4.wiff"  
 Data file C:\Program Files (x86)\Matrix Science\Mascot Daemon\mgf2 FXIII 30 min 2nd\mascot\_daemon\_merge.mgf

Click mouse within plot area to zoom in by factor of two about that point  
 Or, Plot from  to  Da   
 Label all possible matches  Label matches used for scoring

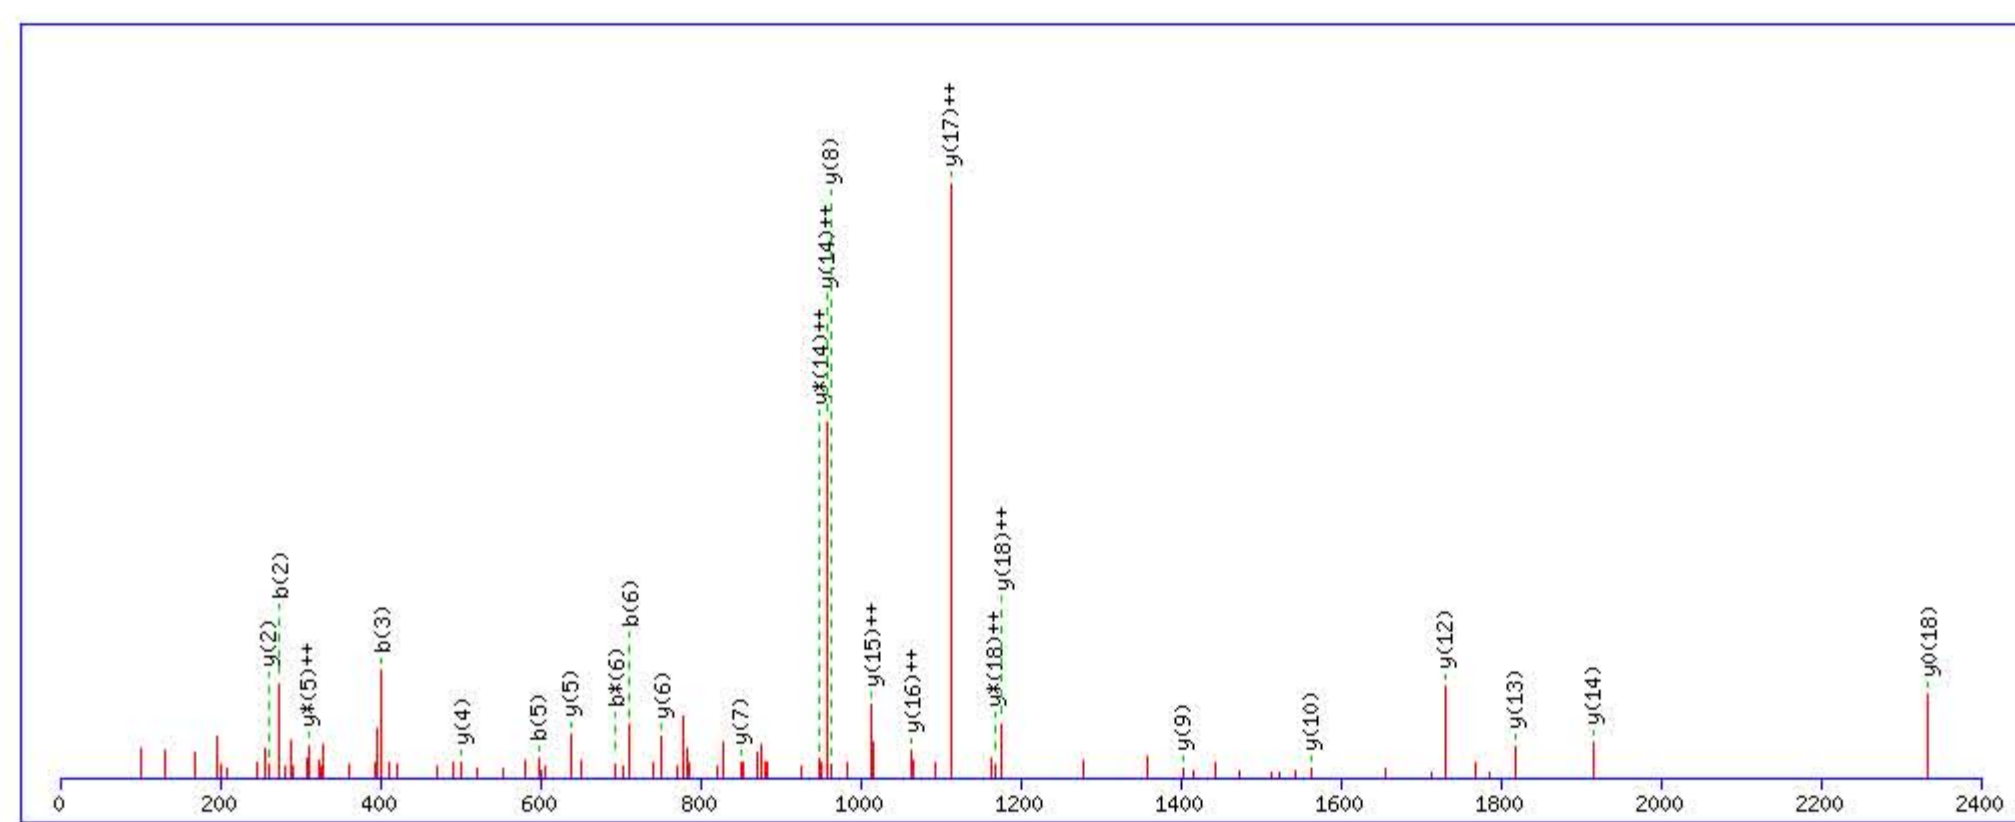

Monoisotopic mass of neutral peptide Mr(calc): 2624.436859  
 Fixed modifications: Carbamidomethyl (C) (apply to specified residues or termini only)  
 Variable modifications:  
 Q12 : Biotin:Thermo-21345 (Q)  
 Ions Score: 32 Expect: 0.0019  
 Matches : 25/186 fragment ions using 83 most intense peaks [\(help\)](#)

| #  | b                 | b <sup>++</sup> | b <sup>*</sup>    | b <sup>*++</sup> | b <sup>0</sup> | b <sup>0++</sup> | Seq. | y                  | y <sup>++</sup>    | y <sup>*</sup> | y <sup>*++</sup>   | y <sup>0</sup>     | y <sup>0++</sup> | #  |
|----|-------------------|-----------------|-------------------|------------------|----------------|------------------|------|--------------------|--------------------|----------------|--------------------|--------------------|------------------|----|
| 1  | 114.091340        | 57.549308       |                   |                  |                |                  | L    |                    |                    |                |                    |                    |                  | 20 |
| 2  | <b>274.121989</b> | 137.564632      |                   |                  |                |                  | C    | 2512.360078        | 1256.683677        | 2495.333529    | 1248.170402        | 2494.349513        | 1247.678394      | 19 |
| 3  | <b>402.180567</b> | 201.593921      | 385.154018        | 193.080647       |                |                  | Q    | 2352.329429        | <b>1176.668352</b> | 2335.302880    | <b>1168.155078</b> | <b>2334.318864</b> | 1167.663070      | 18 |
| 4  | 499.233331        | 250.120303      | 482.206782        | 241.607029       |                |                  | P    | 2224.270851        | <b>1112.639063</b> | 2207.244302    | 1104.125789        | 2206.260286        | 1103.633781      | 17 |
| 5  | <b>598.301745</b> | 299.654511      | 581.275196        | 291.141236       |                |                  | V    | 2127.218087        | <b>1064.112681</b> | 2110.191538    | 1055.599407        | 2109.207522        | 1055.107399      | 16 |
| 6  | <b>711.385809</b> | 356.196543      | <b>694.359260</b> | 347.683268       |                |                  | L    | 2028.149673        | <b>1014.578475</b> | 2011.123124    | 1006.065200        | 2010.139108        | 1005.573192      | 15 |
| 7  | 808.438573        | 404.722925      | 791.412024        | 396.209650       |                |                  | P    | <b>1915.065609</b> | <b>958.036443</b>  | 1898.039060    | <b>949.523168</b>  | 1897.055044        | 949.031160       | 14 |
| 8  | 895.470601        | 448.238939      | 878.444052        | 439.725664       | 877.460036     | 439.233656       | S    | <b>1818.012845</b> | 909.510061         | 1800.986296    | 900.996786         | 1800.002280        | 900.504778       | 13 |
| 9  | 992.523365        | 496.765321      | 975.496816        | 488.252046       | 974.512800     | 487.760038       | P    | <b>1730.980817</b> | 865.994047         | 1713.954268    | 857.480772         |                    |                  | 12 |
| 10 | 1063.560479       | 532.283878      | 1046.533930       | 523.770603       | 1045.549914    | 523.278595       | A    | 1633.928053        | 817.467665         | 1616.901504    | 808.954390         |                    |                  | 11 |
| 11 | 1223.591128       | 612.299202      | 1206.564579       | 603.785928       | 1205.580563    | 603.293920       | C    | <b>1562.890939</b> | 781.949108         | 1545.864390    | 773.435833         |                    |                  | 10 |
| 12 | 1662.816454       | 831.911865      | 1645.789905       | 823.398591       | 1644.805889    | 822.906583       | Q    | <b>1402.860290</b> | 701.933783         | 1385.833741    | 693.420509         |                    |                  | 9  |
| 13 | 1775.900518       | 888.453897      | 1758.873969       | 879.940623       | 1757.889953    | 879.448614       | L    | <b>963.634964</b>  | 482.321120         | 946.608415     | 473.807846         |                    |                  | 8  |
| 14 | 1874.968932       | 937.988104      | 1857.942383       | 929.474830       | 1856.958367    | 928.982822       | V    | <b>850.550900</b>  | 425.779088         | 833.524351     | 417.265814         |                    |                  | 7  |
| 15 | 1988.052996       | 994.530136      | 1971.026447       | 986.016862       | 1970.042431    | 985.524853       | L    | <b>751.482486</b>  | 376.244881         | 734.455937     | 367.731607         |                    |                  | 6  |
| 16 | 2125.111908       | 1063.059592     | 2108.085359       | 1054.546317      | 2107.101343    | 1054.054309      | H    | <b>638.398422</b>  | 319.702849         | 621.371873     | <b>311.189575</b>  |                    |                  | 5  |
| 17 | 2253.170486       | 1127.088881     | 2236.143937       | 1118.575606      | 2235.159921    | 1118.083598      | Q    | <b>501.339510</b>  | 251.173393         | 484.312961     | 242.660119         |                    |                  | 4  |
| 18 | 2366.254550       | 1183.630913     | 2349.228001       | 1175.117638      | 2348.243985    | 1174.625630      | I    | 373.280932         | 187.144104         | 356.254383     | 178.630830         |                    |                  | 3  |
| 19 | 2479.338614       | 1240.172945     | 2462.312065       | 1231.659670      | 2461.328049    | 1231.167663      | L    | <b>260.196868</b>  | 130.602072         | 243.170319     | 122.088798         |                    |                  | 2  |
| 20 |                   |                 |                   |                  |                |                  | K    | 147.112804         | 74.060040          | 130.086255     | 65.546765          |                    |                  | 1  |

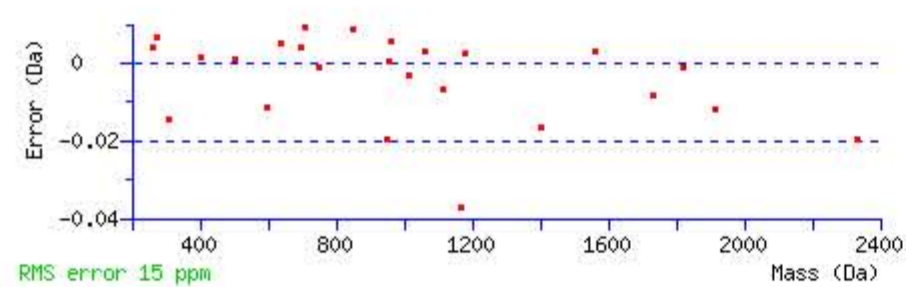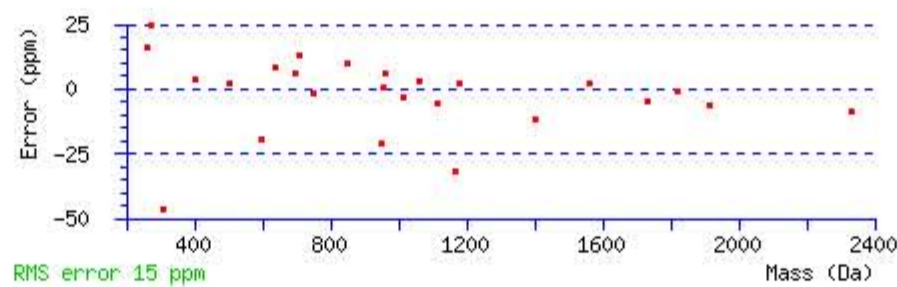

NCBI BLAST search of **LCQPVLSPACQLVLHQILK**  
 (Parameters: blastp, nr protein database, expect=20000, no filter, PAM30)  
 Other BLAST [web gateways](#)

### All matches to this query

| Score | Mr(calc):   | Delta     | Sequence                            |
|-------|-------------|-----------|-------------------------------------|
| 32.3  | 2624.436859 | -0.000397 | <a href="#">LCQPVLSPACQLVLHQILK</a> |
| 18.7  | 2624.436859 | -0.000397 | <a href="#">LCQPVLSPACQLVLHQILK</a> |
| 3.3   | 2624.454590 | -0.018128 | <a href="#">ASQILASRGAELFQATIVK</a> |



# MASCOT Search Results

## Peptide View

MS/MS Fragmentation of **IIGLDQVAGMSETALPGAFK**

Found in **MYH9\_HUMAN**, Myosin-9 OS=Homo sapiens GN=MYH9 PE=1 SV=4

Match to Query 56571: 2328.207222 from(777.076350,3+) rtinseconds(2845) index(61087)

Title: Locus:1.1.1.3474.13 File:"2013-07-02 CLN FXIII 30 min 2nd F 4.wiff"

Data file C:\Program Files (x86)\Matrix Science\Mascot Daemon\mgf2 FXIII 30 min 2nd\mascot\_daemon\_merge.mgf

Click mouse within plot area to zoom in by factor of two about that point

Or, Plot from  to  Da

Label all possible matches  Label matches used for scoring

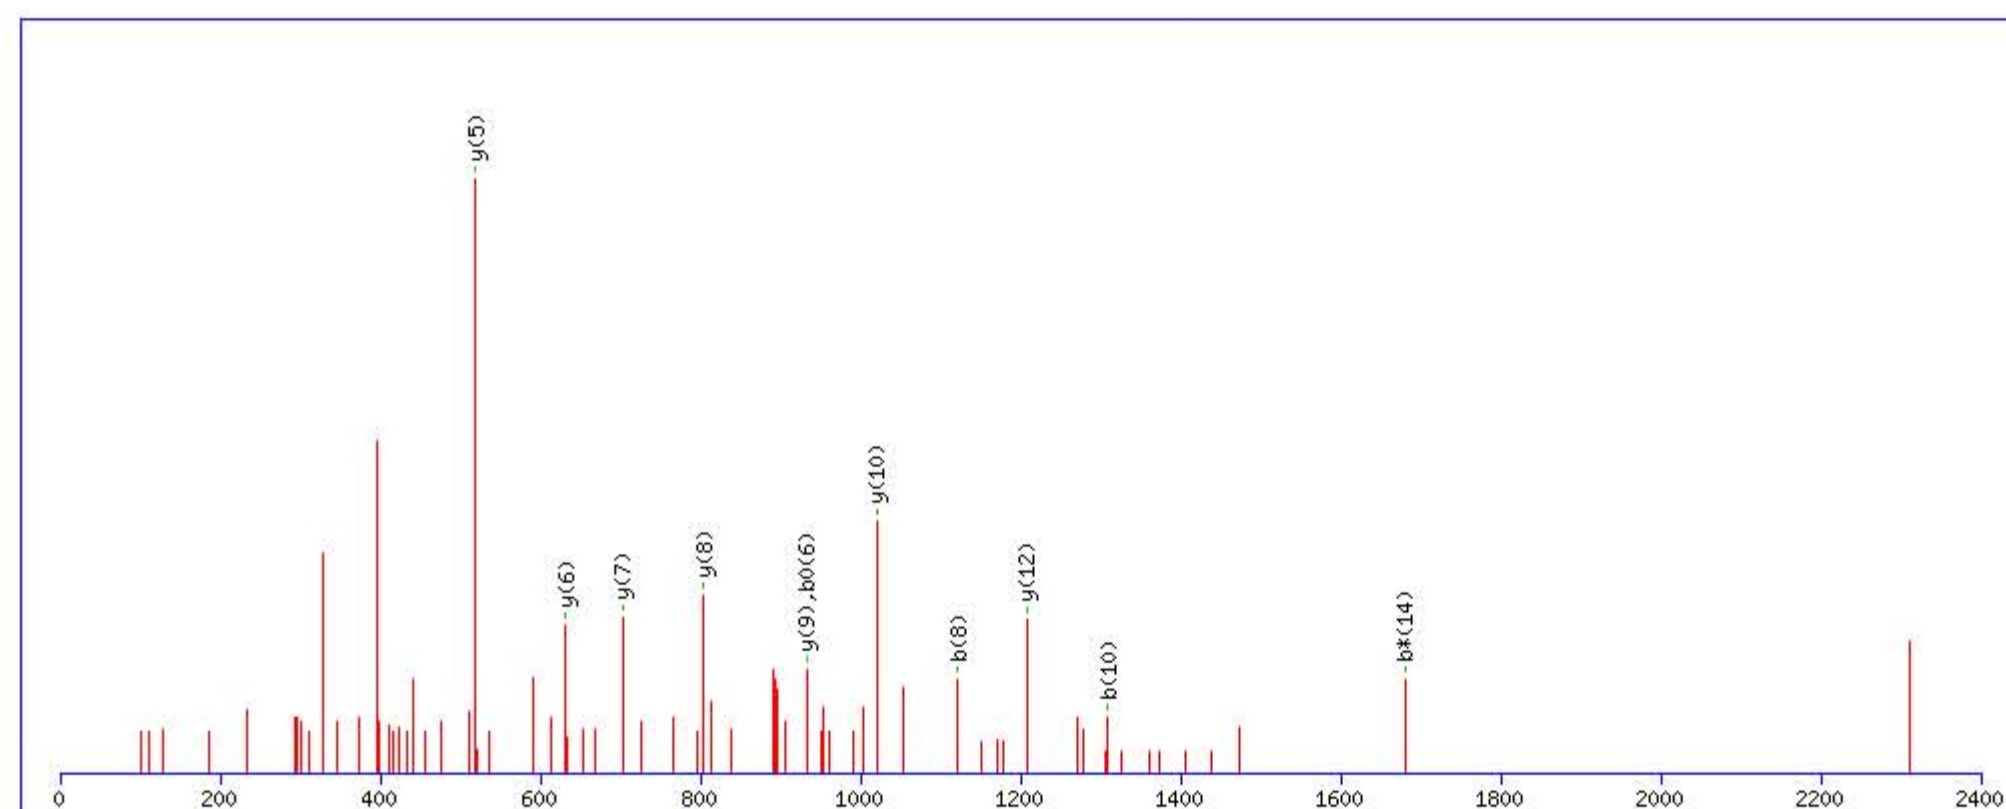

Monoisotopic mass of neutral peptide Mr(calc): 2328.222153

Fixed modifications: Carbamidomethyl (C) (apply to specified residues or termini only)

Variable modifications:

Q6 : Biotin:Thermo-21345 (Q)

Ions Score: 44 Expect: 0.0011

Matches : 11/196 fragment ions using 16 most intense peaks [\(help\)](#)

| #  | b           | b <sup>++</sup> | b <sup>*</sup> | b <sup>*++</sup> | b <sup>0</sup> | b <sup>0++</sup> | Seq. | y           | y <sup>++</sup> | y <sup>*</sup> | y <sup>*++</sup> | y <sup>0</sup> | y <sup>0++</sup> | #  |
|----|-------------|-----------------|----------------|------------------|----------------|------------------|------|-------------|-----------------|----------------|------------------|----------------|------------------|----|
| 1  | 114.091340  | 57.549308       |                |                  |                |                  | I    |             |                 |                |                  |                |                  | 20 |
| 2  | 227.175404  | 114.091340      |                |                  |                |                  | I    | 2216.145376 | 1108.576326     | 2199.118827    | 1100.063051      | 2198.134811    | 1099.571043      | 19 |
| 3  | 284.196868  | 142.602072      |                |                  |                |                  | G    | 2103.061312 | 1052.034294     | 2086.034763    | 1043.521019      | 2085.050747    | 1043.029011      | 18 |
| 4  | 397.280932  | 199.144104      |                |                  |                |                  | L    | 2046.039848 | 1023.523562     | 2029.013299    | 1015.010288      | 2028.029283    | 1014.518279      | 17 |
| 5  | 512.307875  | 256.657576      |                |                  | 494.297310     | 247.652293       | D    | 1932.955784 | 966.981530      | 1915.929235    | 958.468255       | 1914.945219    | 957.976247       | 16 |
| 6  | 951.533201  | 476.270239      | 934.506652     | 467.756964       | 933.522636     | 467.264956       | Q    | 1817.928841 | 909.468058      | 1800.902292    | 900.954784       | 1799.918276    | 900.462776       | 15 |
| 7  | 1050.601615 | 525.804446      | 1033.575066    | 517.291171       | 1032.591050    | 516.799163       | V    | 1378.703515 | 689.855395      | 1361.676966    | 681.342121       | 1360.692950    | 680.850113       | 14 |
| 8  | 1121.638729 | 561.323003      | 1104.612180    | 552.809728       | 1103.628164    | 552.317720       | A    | 1279.635101 | 640.321188      | 1262.608552    | 631.807914       | 1261.624536    | 631.315906       | 13 |
| 9  | 1178.660193 | 589.833734      | 1161.633644    | 581.320460       | 1160.649628    | 580.828452       | G    | 1208.597987 | 604.802631      | 1191.571438    | 596.289357       | 1190.587422    | 595.797349       | 12 |
| 10 | 1309.700678 | 655.353977      | 1292.674129    | 646.840703       | 1291.690113    | 646.348694       | M    | 1151.576523 | 576.291900      | 1134.549974    | 567.778625       | 1133.565958    | 567.286617       | 11 |
| 11 | 1396.732706 | 698.869991      | 1379.706157    | 690.356717       | 1378.722141    | 689.864709       | S    | 1020.536038 | 510.771657      | 1003.509489    | 502.258382       | 1002.525473    | 501.766374       | 10 |
| 12 | 1525.775299 | 763.391288      | 1508.748750    | 754.878013       | 1507.764734    | 754.386005       | E    | 933.504010  | 467.255643      | 916.477461     | 458.742368       | 915.493445     | 458.250360       | 9  |
| 13 | 1626.822978 | 813.915127      | 1609.796429    | 805.401853       | 1608.812413    | 804.909845       | T    | 804.461417  | 402.734346      | 787.434868     | 394.221072       | 786.450852     | 393.729064       | 8  |
| 14 | 1697.860092 | 849.433684      | 1680.833543    | 840.920410       | 1679.849527    | 840.428402       | A    | 703.413738  | 352.210507      | 686.387189     | 343.697232       |                |                  | 7  |
| 15 | 1810.944156 | 905.975716      | 1793.917607    | 897.462442       | 1792.933591    | 896.970434       | L    | 632.376624  | 316.691950      | 615.350075     | 308.178675       |                |                  | 6  |
| 16 | 1907.996920 | 954.502098      | 1890.970371    | 945.988824       | 1889.986355    | 945.496816       | P    | 519.292560  | 260.149918      | 502.266011     | 251.636643       |                |                  | 5  |
| 17 | 1965.018384 | 983.012830      | 1947.991835    | 974.499556       | 1947.007819    | 974.007547       | G    | 422.239796  | 211.623536      | 405.213247     | 203.110261       |                |                  | 4  |
| 18 | 2036.055498 | 1018.531387     | 2019.028949    | 1010.018113      | 2018.044933    | 1009.526105      | A    | 365.218332  | 183.112804      | 348.191783     | 174.599529       |                |                  | 3  |
| 19 | 2183.123912 | 1092.065594     | 2166.097363    | 1083.552319      | 2165.113347    | 1083.060311      | F    | 294.181218  | 147.594247      | 277.154669     | 139.080972       |                |                  | 2  |
| 20 |             |                 |                |                  |                |                  | K    | 147.112804  | 74.060040       | 130.086255     | 65.546765        |                |                  | 1  |

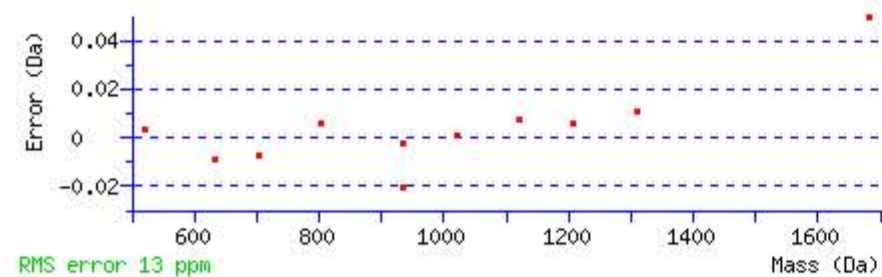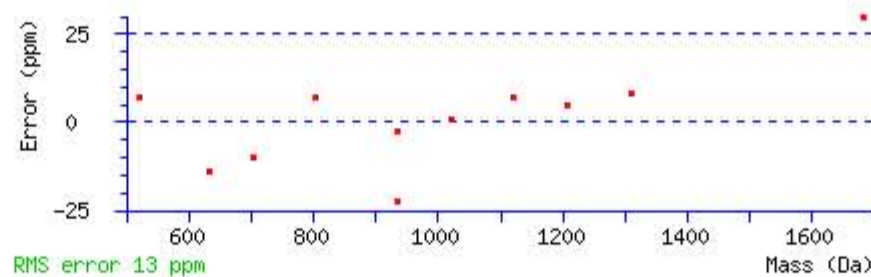

NCBI BLAST search of **IIGLDQVAGMSETALPGAFK**

(Parameters: blastp, nr protein database, expect=20000, no filter, PAM30)

Other BLAST [web gateways](#)

All matches to this query

| Score | Mr(calc):   | Delta     | Sequence                             |
|-------|-------------|-----------|--------------------------------------|
| 44.0  | 2328.222153 | -0.014931 | <a href="#">IIGLDQVAGMSETALPGAFK</a> |

Mascot: <http://www.matrixscience.com/>



# MASCOT Search Results

## Peptide View

MS/MS Fragmentation of **QVLLVGAPTYDDVSK**

Found in **PHLD\_HUMAN**, Phosphatidylinositol-glycan-specific phospholipase D OS=Homo sapiens GN=GPLD1 PE=1 SV=3

Match to Query 47167: 1915.008348 from(958.511450,2+) rtinseconds(2303) index(57616)

Title: Locus:1.1.1.3287.12 File:"2013-07-02 CLN FXIII 30 min 2nd F 4.wiff"

Data file C:\Program Files (x86)\Matrix Science\Mascot Daemon\mgf\2 FXIII 30 min 2nd\mascot\_daemon\_merge.mgf

Click mouse within plot area to zoom in by factor of two about that point

Or, Plot from  to  Da

Label all possible matches  Label matches used for scoring

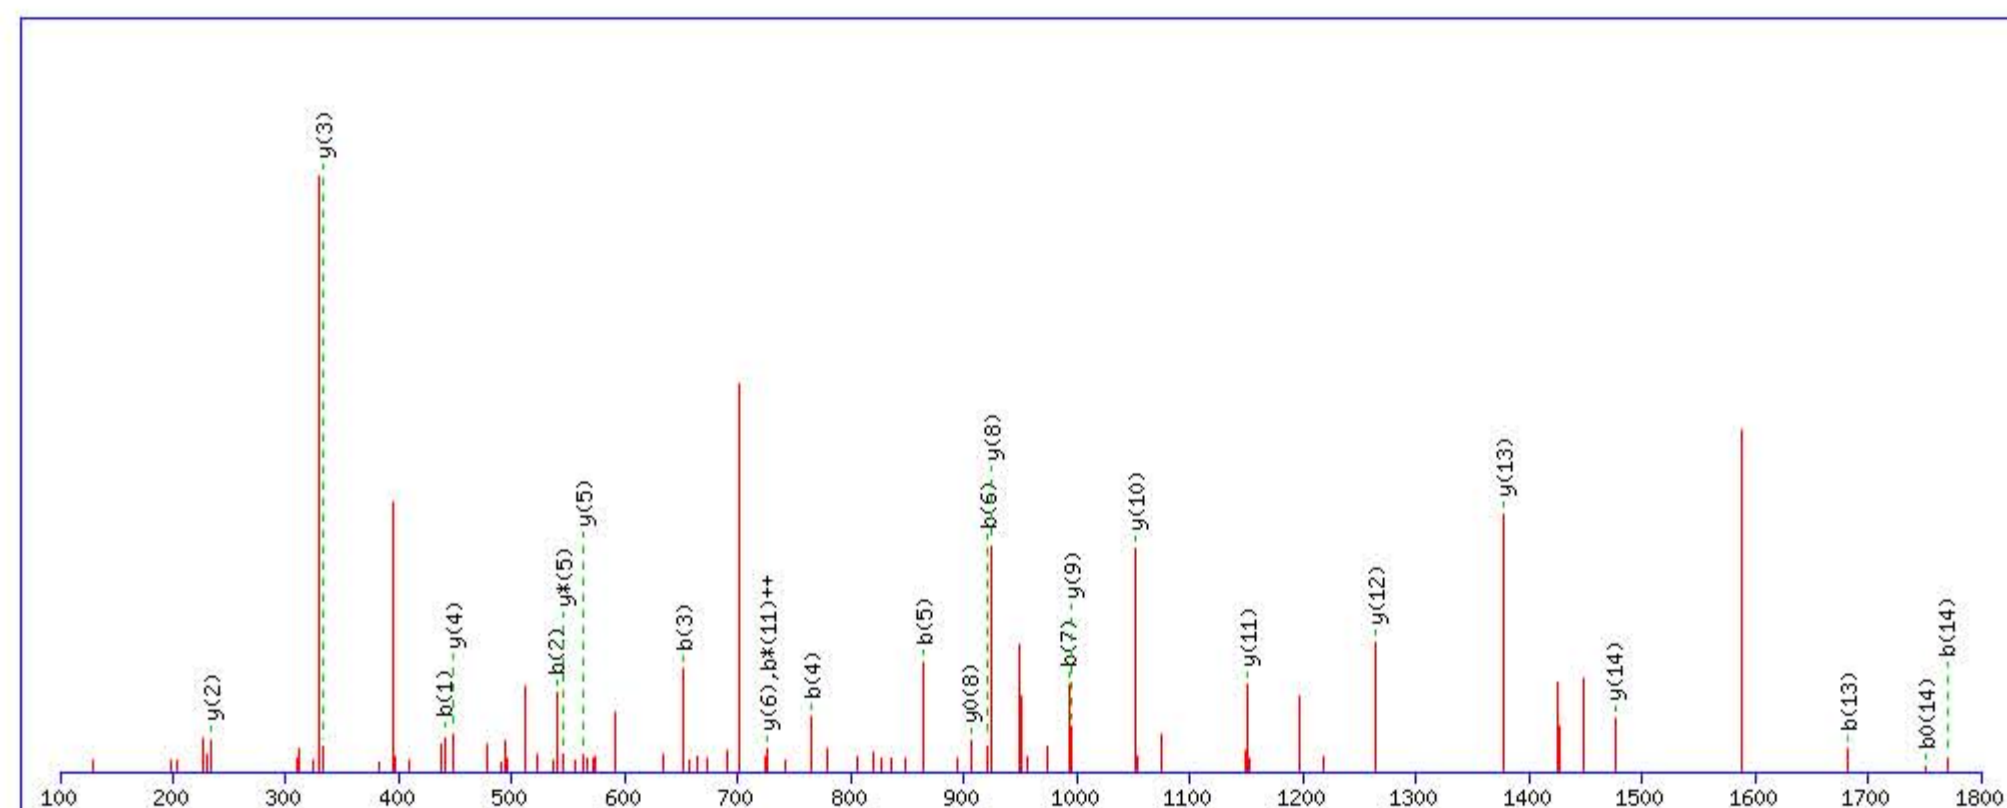

Monoisotopic mass of neutral peptide Mr(calc): 1915.012497

Fixed modifications: Carbamidomethyl (C) (apply to specified residues or termini only)

Variable modifications:

Q1 : Biotin:Thermo-21345 (Q)

Ions Score: 66 Expect: 6.2e-006

Matches : 25/150 fragment ions using 55 most intense peaks [\(help\)](#)

| #  | b                  | b <sup>++</sup> | b <sup>+</sup> | b <sup>+++</sup>  | b <sup>0</sup>     | b <sup>0++</sup> | Seq. | y                  | y <sup>++</sup> | y <sup>+</sup>    | y <sup>+++</sup> | y <sup>0</sup>    | y <sup>0++</sup> | #  |
|----|--------------------|-----------------|----------------|-------------------|--------------------|------------------|------|--------------------|-----------------|-------------------|------------------|-------------------|------------------|----|
| 1  | <b>440.232602</b>  | 220.619939      | 423.206053     | 212.106664        |                    |                  | Q    |                    |                 |                   |                  |                   |                  | 15 |
| 2  | <b>539.301016</b>  | 270.154146      | 522.274467     | 261.640872        |                    |                  | V    | <b>1476.794438</b> | 738.900857      | 1459.767889       | 730.387583       | 1458.783873       | 729.895575       | 14 |
| 3  | <b>652.385080</b>  | 326.696178      | 635.358531     | 318.182904        |                    |                  | L    | <b>1377.726024</b> | 689.366650      | 1360.699475       | 680.853376       | 1359.715459       | 680.361368       | 13 |
| 4  | <b>765.469144</b>  | 383.238210      | 748.442595     | 374.724936        |                    |                  | L    | <b>1264.641960</b> | 632.824618      | 1247.615411       | 624.311344       | 1246.631395       | 623.819336       | 12 |
| 5  | <b>864.537558</b>  | 432.772417      | 847.511009     | 424.259143        |                    |                  | V    | <b>1151.557896</b> | 576.282586      | 1134.531347       | 567.769312       | 1133.547331       | 567.277304       | 11 |
| 6  | <b>921.559022</b>  | 461.283149      | 904.532473     | 452.769875        |                    |                  | G    | <b>1052.489482</b> | 526.748379      | 1035.462933       | 518.235105       | 1034.478917       | 517.743097       | 10 |
| 7  | <b>992.596136</b>  | 496.801706      | 975.569587     | 488.288432        |                    |                  | A    | <b>995.468018</b>  | 498.237647      | 978.441469        | 489.724373       | 977.457453        | 489.232365       | 9  |
| 8  | 1089.648900        | 545.328088      | 1072.622351    | 536.814814        |                    |                  | P    | <b>924.430904</b>  | 462.719090      | 907.404355        | 454.205816       | <b>906.420339</b> | 453.713808       | 8  |
| 9  | 1190.696579        | 595.851927      | 1173.670030    | 587.338653        | 1172.686014        | 586.846645       | T    | 827.378140         | 414.192708      | 810.351591        | 405.679434       | 809.367575        | 405.187426       | 7  |
| 10 | 1353.759908        | 677.383592      | 1336.733359    | 668.870318        | 1335.749343        | 668.378310       | Y    | <b>726.330461</b>  | 363.668869      | 709.303912        | 355.155594       | 708.319896        | 354.663586       | 6  |
| 11 | 1468.786851        | 734.897064      | 1451.760302    | <b>726.383789</b> | 1450.776286        | 725.891781       | D    | <b>563.267132</b>  | 282.137204      | <b>546.240583</b> | 273.623930       | 545.256567        | 273.131922       | 5  |
| 12 | 1583.813794        | 792.410535      | 1566.787245    | 783.897261        | 1565.803229        | 783.405253       | D    | <b>448.240189</b>  | 224.623733      | 431.213640        | 216.110458       | 430.229624        | 215.618450       | 4  |
| 13 | <b>1682.882208</b> | 841.944742      | 1665.855659    | 833.431468        | 1664.871643        | 832.939460       | V    | <b>333.213246</b>  | 167.110261      | 316.186697        | 158.596987       | 315.202681        | 158.104979       | 3  |
| 14 | <b>1769.914236</b> | 885.460756      | 1752.887687    | 876.947482        | <b>1751.903671</b> | 876.455474       | S    | <b>234.144832</b>  | 117.576054      | 217.118283        | 109.062780       | 216.134267        | 108.570772       | 2  |
| 15 |                    |                 |                |                   |                    |                  | K    | 147.112804         | 74.060040       | 130.086255        | 65.546765        |                   |                  | 1  |

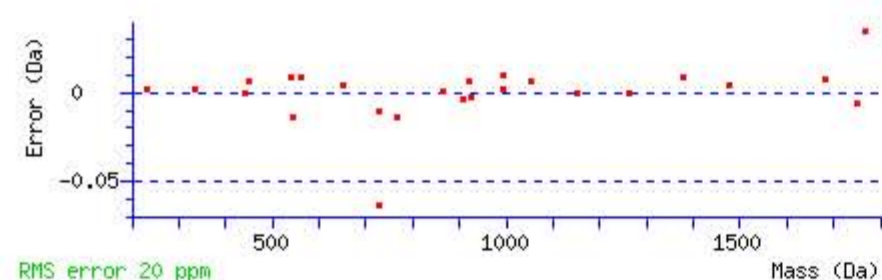

RMS error 20 ppm

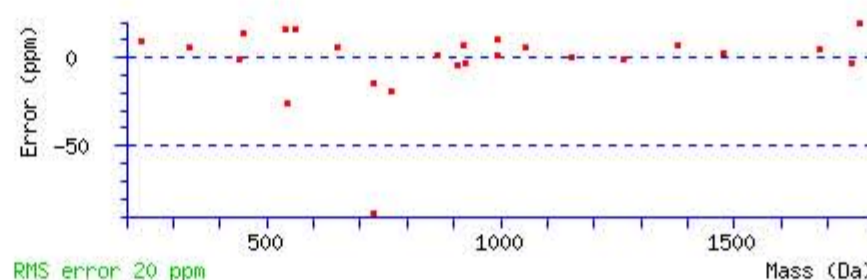

RMS error 20 ppm

NCBI BLAST search of **QVLLVGAPTYDDVSK**

(Parameters: blastp, nr protein database, expect=20000, no filter, PAM30)

Other BLAST [web gateways](#)

All matches to this query

| Score | Mr(calc):   | Delta     | Sequence                        |
|-------|-------------|-----------|---------------------------------|
| 66.3  | 1915.012497 | -0.004149 | <a href="#">QVLLVGAPTYDDVSK</a> |
| 10.1  | 1915.027710 | -0.019362 | <a href="#">DYPIYLLKFKQCLSK</a> |
| 8.7   | 1915.008438 | -0.000090 | <a href="#">VIQKNQEETTSISK</a>  |
| 8.5   | 1915.008438 | -0.000090 | <a href="#">VIQKNQEETTSISK</a>  |
| 4.6   | 1915.009323 | -0.000975 | <a href="#">MTQLVLPGMVERSK</a>  |

Mascot: <http://www.matrixscience.com/>



# Mascot Search Results

## Peptide View

MS/MS Fragmentation of **VSSVEECQK**

Found in **KLKB1\_HUMAN**, Plasma kallikrein OS=Homo sapiens GN=KLKB1 PE=1 SV=1

Match to Query 31276: 1375.655802 from(459.559210,3+) rtinseconds(1395) index(67266)

Title: Locus:1.1.1.3019.13 File:"2013-07-02 CLN FXIII 30 min 2nd FT.wiff"

Data file C:\Program Files (x86)\Matrix Science\Mascot Daemon\mgf\2 FXIII 30 min 2nd\mascot\_daemon\_merge.mgf

Click mouse within plot area to zoom in by factor of two about that point

Or, Plot from  to  Da

Label all possible matches  Label matches used for scoring

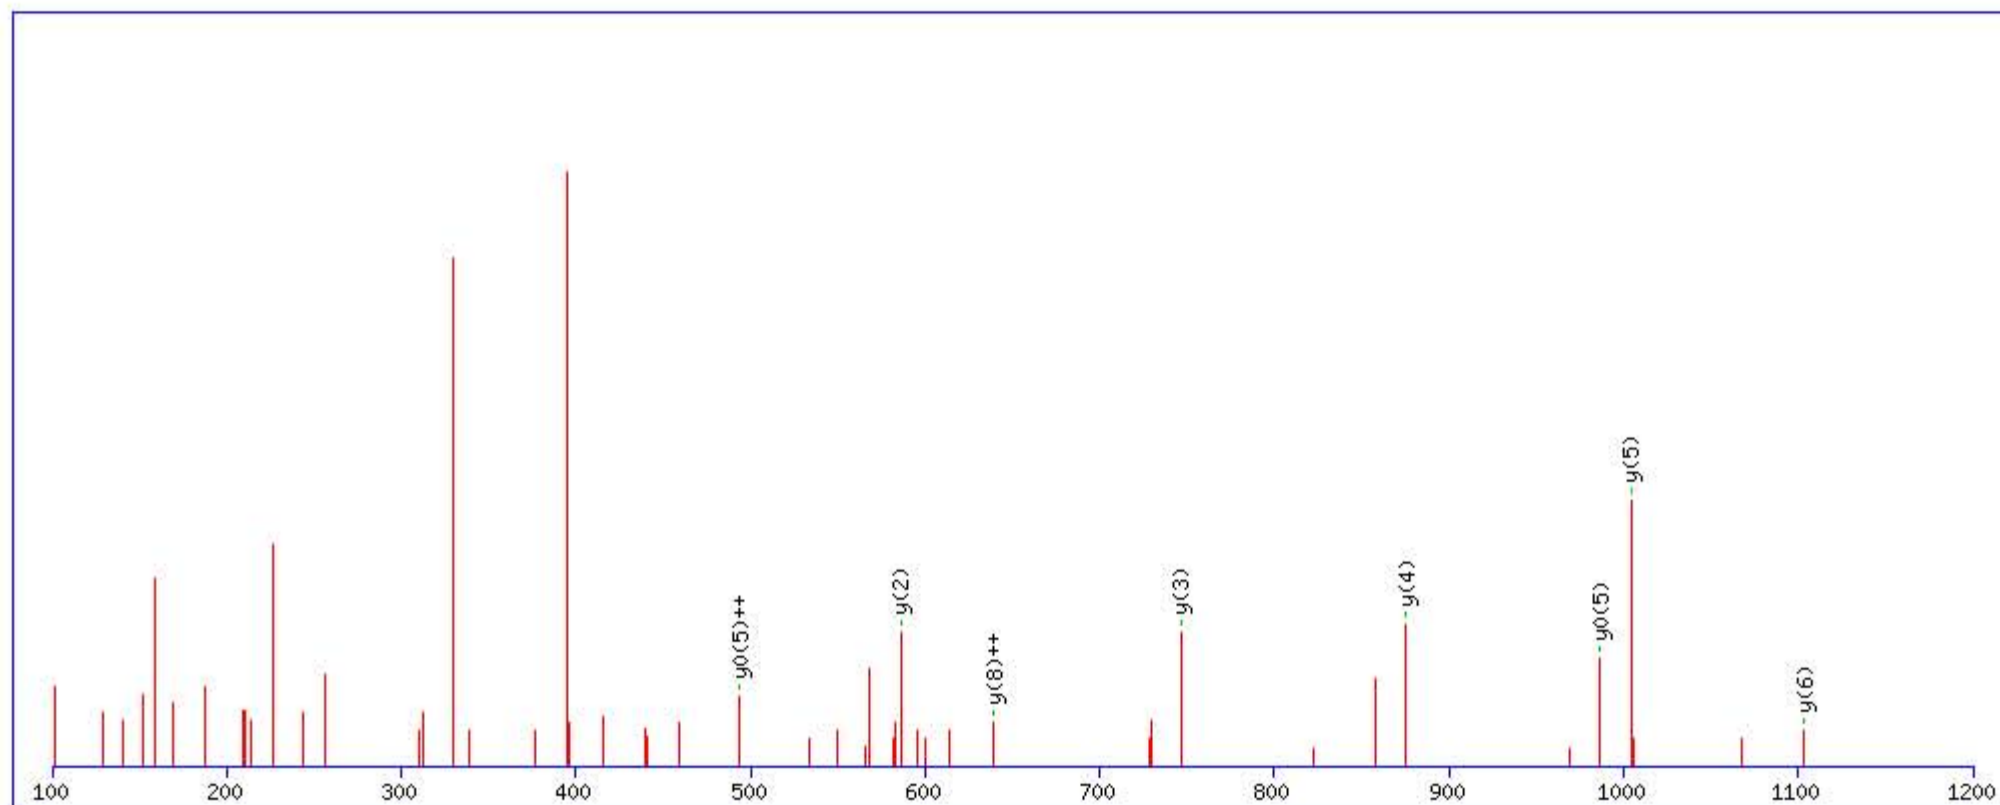

Monoisotopic mass of neutral peptide Mr(calc): 1375.647568

Fixed modifications: Carbamidomethyl (C) (apply to specified residues or termini only)

Variable modifications:

Q8 : Biotin:Thermo-21345 (Q)

Ions Score: 32 Expect: 0.0085

Matches : 8/74 fragment ions using 11 most intense peaks [\(help\)](#)

| # | b           | b <sup>++</sup> | b <sup>*</sup> | b <sup>*++</sup> | b <sup>0</sup> | b <sup>0++</sup> | Seq. | y           | y <sup>++</sup> | y <sup>*</sup> | y <sup>*++</sup> | y <sup>0</sup> | y <sup>0++</sup> | # |
|---|-------------|-----------------|----------------|------------------|----------------|------------------|------|-------------|-----------------|----------------|------------------|----------------|------------------|---|
| 1 | 100.075690  | 50.541483       |                |                  |                |                  | V    |             |                 |                |                  |                |                  | 9 |
| 2 | 187.107718  | 94.057497       |                |                  | 169.097153     | 85.052214        | S    | 1277.586435 | 639.296856      | 1260.559886    | 630.783581       | 1259.575870    | 630.291573       | 8 |
| 3 | 274.139746  | 137.573511      |                |                  | 256.129181     | 128.568229       | S    | 1190.554407 | 595.780842      | 1173.527858    | 587.267567       | 1172.543842    | 586.775559       | 7 |
| 4 | 373.208160  | 187.107718      |                |                  | 355.197595     | 178.102436       | V    | 1103.522379 | 552.264828      | 1086.495830    | 543.751553       | 1085.511814    | 543.259545       | 6 |
| 5 | 502.250753  | 251.629015      |                |                  | 484.240188     | 242.623732       | E    | 1004.453965 | 502.730621      | 987.427416     | 494.217346       | 986.443400     | 493.725338       | 5 |
| 6 | 631.293346  | 316.150311      |                |                  | 613.282781     | 307.145029       | E    | 875.411372  | 438.209324      | 858.384823     | 429.696050       | 857.400807     | 429.204042       | 4 |
| 7 | 791.323995  | 396.165636      |                |                  | 773.313430     | 387.160353       | C    | 746.368779  | 373.688028      | 729.342230     | 365.174753       |                |                  | 3 |
| 8 | 1230.549321 | 615.778299      | 1213.522772    | 607.265024       | 1212.538756    | 606.773016       | Q    | 586.338130  | 293.672703      | 569.311581     | 285.159429       |                |                  | 2 |
| 9 |             |                 |                |                  |                |                  | K    | 147.112804  | 74.060040       | 130.086255     | 65.546765        |                |                  | 1 |

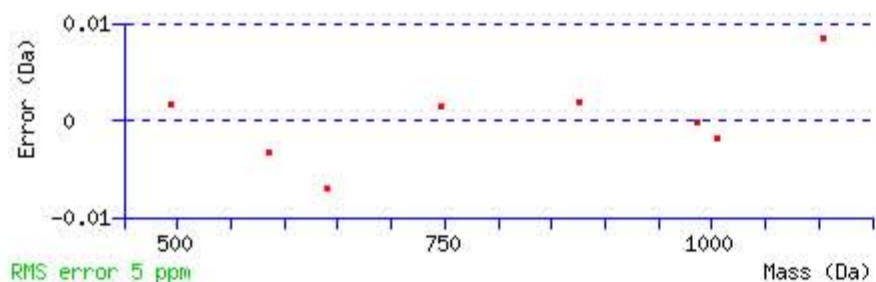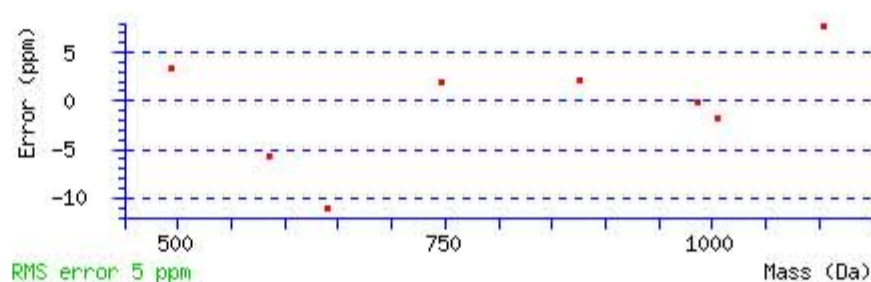

NCBI BLAST search of **VSSVEECQK**

(Parameters: blastp, nr protein database, expect=20000, no filter, PAM30)

Other BLAST [web gateways](#)

All matches to this query

| Score | Mr(calc):   | Delta    | Sequence                  |
|-------|-------------|----------|---------------------------|
| 32.3  | 1375.647568 | 0.008234 | <a href="#">VSSVEECQK</a> |

Mascot: <http://www.matrixscience.com/>



# MASCOT SEARCH RESULTS

## Peptide View

MS/MS Fragmentation of **VNIPLVTNEECQK**

Found in **KLKB1\_HUMAN**, Plasma kallikrein OS=Homo sapiens GN=KLKB1 PE=1 SV=1

Match to Query 45962: 1853.942742 from(618.988190,3+) rtinseconds(2147) index(72071)

Title: Locus:1.1.1.3281.13 File:"2013-07-02 CLN FXIII 30 min 2nd FT.wiff"

Data file C:\Program Files (x86)\Matrix Science\Mascot Daemon\mgf2 FXIII 30 min 2nd\mascot\_daemon\_merge.mgf

Click mouse within plot area to zoom in by factor of two about that point

Or, Plot from  to  Da

Label all possible matches  Label matches used for scoring

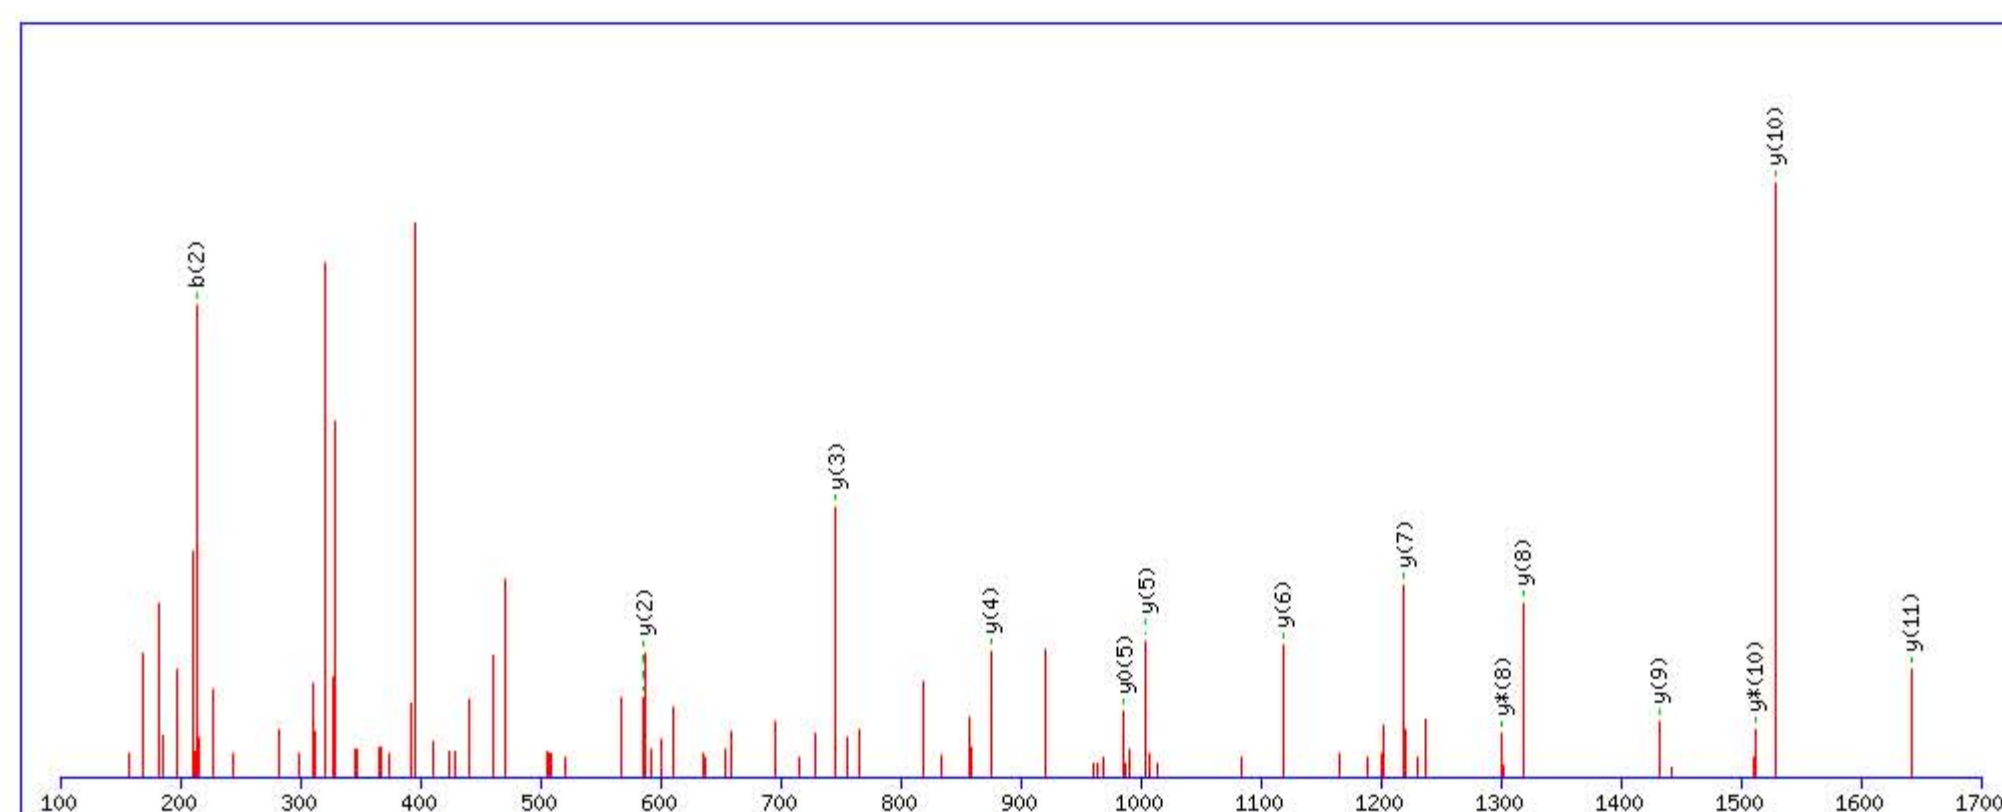

Monoisotopic mass of neutral peptide Mr(calc): 1853.937927

Fixed modifications: Carbamidomethyl (C) (apply to specified residues or termini only)

Variable modifications:

Q12 : Biotin:Thermo-21345 (Q)

Ions Score: 56 Expect: 1.4e-005

Matches : 14/124 fragment ions using 29 most intense peaks [\(help\)](#)

| #  | b                 | b <sup>++</sup> | b <sup>*</sup> | b <sup>*++</sup> | b <sup>0</sup> | b <sup>0++</sup> | Seq. | y                  | y <sup>++</sup> | y <sup>*</sup>     | y <sup>*++</sup> | y <sup>0</sup>    | y <sup>0++</sup> | #  |
|----|-------------------|-----------------|----------------|------------------|----------------|------------------|------|--------------------|-----------------|--------------------|------------------|-------------------|------------------|----|
| 1  | 100.075690        | 50.541483       |                |                  |                |                  | V    |                    |                 |                    |                  |                   |                  | 13 |
| 2  | <b>214.118617</b> | 107.562947      | 197.092068     | 99.049672        |                |                  | N    | 1755.876804        | 878.442040      | 1738.850255        | 869.928766       | 1737.866239       | 869.436758       | 12 |
| 3  | 327.202681        | 164.104978      | 310.176132     | 155.591704       |                |                  | I    | <b>1641.833877</b> | 821.420577      | 1624.807328        | 812.907302       | 1623.823312       | 812.415294       | 11 |
| 4  | 424.255445        | 212.631360      | 407.228896     | 204.118086       |                |                  | P    | <b>1528.749813</b> | 764.878545      | <b>1511.723264</b> | 756.365270       | 1510.739248       | 755.873262       | 10 |
| 5  | 537.339509        | 269.173393      | 520.312960     | 260.660118       |                |                  | L    | <b>1431.697049</b> | 716.352163      | 1414.670500        | 707.838888       | 1413.686484       | 707.346880       | 9  |
| 6  | 636.407923        | 318.707600      | 619.381374     | 310.194325       |                |                  | V    | <b>1318.612985</b> | 659.810131      | <b>1301.586436</b> | 651.296856       | 1300.602420       | 650.804848       | 8  |
| 7  | 737.455602        | 369.231439      | 720.429053     | 360.718165       | 719.445037     | 360.226157       | T    | <b>1219.544571</b> | 610.275924      | 1202.518022        | 601.762649       | 1201.534006       | 601.270641       | 7  |
| 8  | 851.498529        | 426.252903      | 834.471980     | 417.739628       | 833.487964     | 417.247620       | N    | <b>1118.496892</b> | 559.752084      | 1101.470343        | 551.238810       | 1100.486327       | 550.746802       | 6  |
| 9  | 980.541122        | 490.774199      | 963.514573     | 482.260924       | 962.530557     | 481.768916       | E    | <b>1004.453965</b> | 502.730621      | 987.427416         | 494.217346       | <b>986.443400</b> | 493.725338       | 5  |
| 10 | 1109.583715       | 555.295496      | 1092.557166    | 546.782221       | 1091.573150    | 546.290213       | E    | <b>875.411372</b>  | 438.209324      | 858.384823         | 429.696050       | 857.400807        | 429.204042       | 4  |
| 11 | 1269.614364       | 635.310820      | 1252.587815    | 626.797546       | 1251.603799    | 626.305538       | C    | <b>746.368779</b>  | 373.688028      | 729.342230         | 365.174753       |                   |                  | 3  |
| 12 | 1708.839690       | 854.923483      | 1691.813141    | 846.410209       | 1690.829125    | 845.918201       | Q    | <b>586.338130</b>  | 293.672703      | 569.311581         | 285.159429       |                   |                  | 2  |
| 13 |                   |                 |                |                  |                |                  | K    | 147.112804         | 74.060040       | 130.086255         | 65.546765        |                   |                  | 1  |

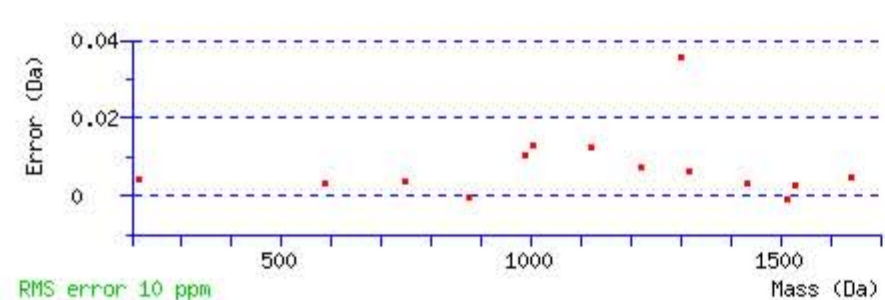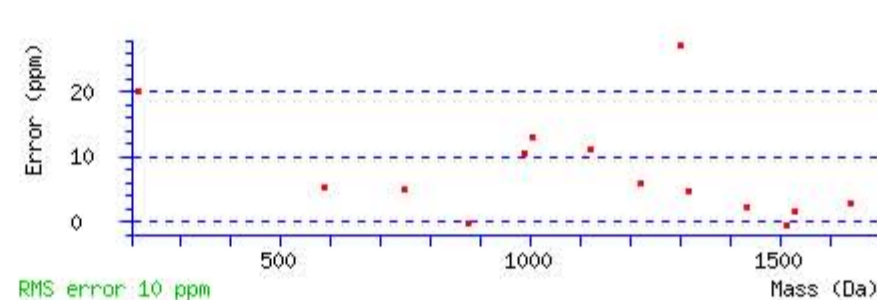

NCBI BLAST search of **VNIPLVTNEECQK**

(Parameters: blastp, nr protein database, expect=20000, no filter, PAM30)

Other BLAST [web gateways](#)

All matches to this query

| Score | Mr(calc):   | Delta    | Sequence                         |
|-------|-------------|----------|----------------------------------|
| 56.4  | 1853.937927 | 0.004815 | <a href="#">VNIPLVTNEECQK</a>    |
| 4.8   | 1853.934341 | 0.008401 | <a href="#">RGLSNPNELQAIDSNR</a> |

Mascot: <http://www.matrixscience.com/>



# MASCOT Search Results

## Peptide View

MS/MS Fragmentation of **QCGHQISACHR**

Found in **KLKB1\_HUMAN**, Plasma kallikrein OS=Homo sapiens GN=KLKB1 PE=1 SV=1

Match to Query 48606: 1974.935056 from(494.741040,4+) rtinseconds(1456) index(18490)

Title: Locus:1.1.1.1388.18 File:"2013-07-02 CLN FXIII 30 min 2nd F 2.wiff"

Data file C:\Program Files (x86)\Matrix Science\Mascot Daemon\mgf2 FXIII 30 min 2nd\mascot\_daemon\_merge.mgf

Click mouse within plot area to zoom in by factor of two about that point

Or, Plot from  to  Da

Label all possible matches  Label matches used for scoring

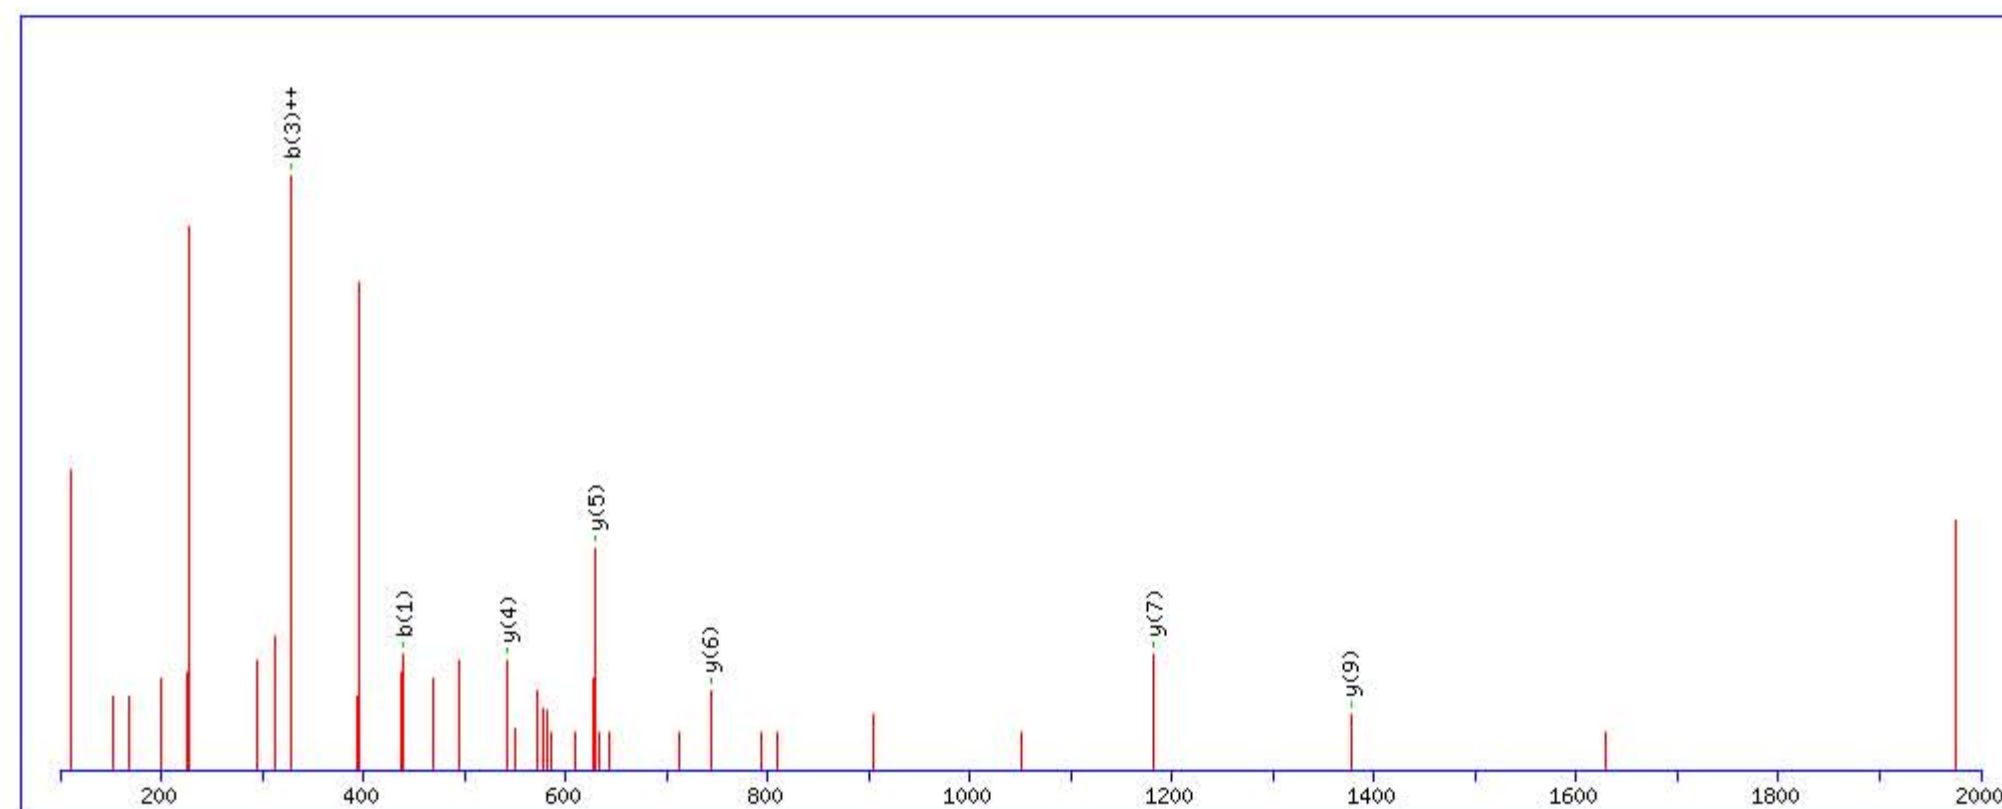

Monoisotopic mass of neutral peptide  $M_r(\text{calc})$ : 1974.916122

Fixed modifications: Carbamidomethyl (C) (apply to specified residues or termini only)

Variable modifications:

Q1 : Biotin:Thermo-21345 (Q)

Q5 : Biotin:Thermo-21345 (Q)

Ions Score: 25 Expect: 0.049

Matches : 7/100 fragment ions using 12 most intense peaks [\(help\)](#)

| #  | b                 | b <sup>++</sup>   | b <sup>*</sup> | b <sup>*++</sup> | b <sup>0</sup> | b <sup>0++</sup> | Seq. | y                  | y <sup>++</sup> | y <sup>*</sup> | y <sup>*++</sup> | y <sup>0</sup> | y <sup>0++</sup> | #  |
|----|-------------------|-------------------|----------------|------------------|----------------|------------------|------|--------------------|-----------------|----------------|------------------|----------------|------------------|----|
| 1  | <b>440.232602</b> | 220.619939        | 423.206053     | 212.106664       |                |                  | Q    |                    |                 |                |                  |                |                  | 11 |
| 2  | 600.263251        | 300.635264        | 583.236702     | 292.121989       |                |                  | C    | 1536.698070        | 768.852673      | 1519.671521    | 760.339399       | 1518.687505    | 759.847391       | 10 |
| 3  | 657.284715        | <b>329.145996</b> | 640.258166     | 320.632721       |                |                  | G    | <b>1376.667421</b> | 688.837349      | 1359.640872    | 680.324074       | 1358.656856    | 679.832066       | 9  |
| 4  | 794.343627        | 397.675452        | 777.317078     | 389.162177       |                |                  | H    | 1319.645957        | 660.326617      | 1302.619408    | 651.813342       | 1301.635392    | 651.321334       | 8  |
| 5  | 1233.568953       | 617.288115        | 1216.542404    | 608.774840       |                |                  | Q    | <b>1182.587045</b> | 591.797161      | 1165.560496    | 583.283886       | 1164.576480    | 582.791878       | 7  |
| 6  | 1346.653017       | 673.830147        | 1329.626468    | 665.316872       |                |                  | I    | <b>743.361719</b>  | 372.184498      | 726.335170     | 363.671223       | 725.351154     | 363.179215       | 6  |
| 7  | 1433.685045       | 717.346161        | 1416.658496    | 708.832886       | 1415.674480    | 708.340878       | S    | <b>630.277655</b>  | 315.642466      | 613.251106     | 307.129191       | 612.267090     | 306.637183       | 5  |
| 8  | 1504.722159       | 752.864718        | 1487.695610    | 744.351443       | 1486.711594    | 743.859435       | A    | <b>543.245627</b>  | 272.126452      | 526.219078     | 263.613177       |                |                  | 4  |
| 9  | 1664.752808       | 832.880042        | 1647.726259    | 824.366768       | 1646.742243    | 823.874760       | C    | 472.208513         | 236.607894      | 455.181964     | 228.094620       |                |                  | 3  |
| 10 | 1801.811720       | 901.409498        | 1784.785171    | 892.896224       | 1783.801155    | 892.404216       | H    | 312.177864         | 156.592570      | 295.151315     | 148.079295       |                |                  | 2  |
| 11 |                   |                   |                |                  |                |                  | R    | 175.118952         | 88.063114       | 158.092403     | 79.549839        |                |                  | 1  |

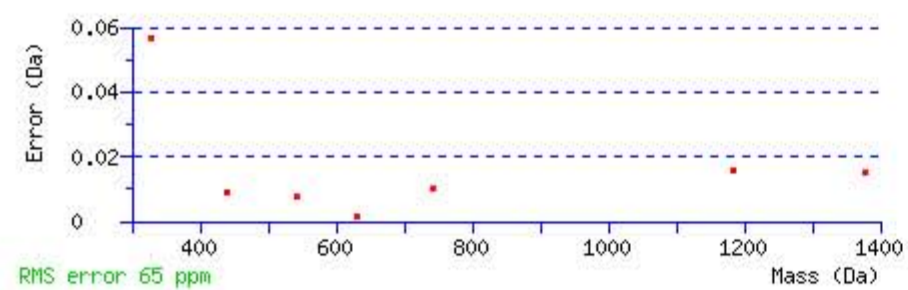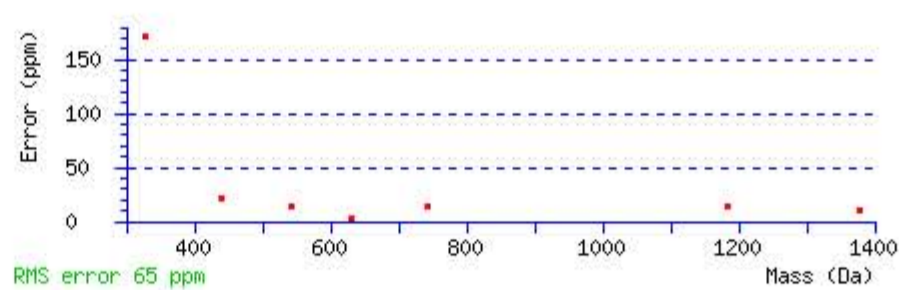

NCBI BLAST search of **QCGHQISACHR**

(Parameters: blastp, nr protein database, expect=20000, no filter, PAM30)

Other BLAST [web gateways](#)

All matches to this query

| Score | $M_r(\text{calc})$ : | Delta    | Sequence           |
|-------|----------------------|----------|--------------------|
| 25.3  | 1974.916122          | 0.018934 | <b>QCGHQISACHR</b> |

Mascot: <http://www.matrixscience.com/>



# MASCOT Search Results

## Peptide View

MS/MS Fragmentation of **EAQLPVIENK**

Found in **PLMN\_HUMAN**, Plasminogen OS=Homo sapiens GN=PLG PE=1 SV=2

Match to Query 34309: 1450.778448 from(726.396500,2+) rtinseconds(1979) index(71105)

Title: Locus:1.1.1.3222.13 File:"2013-07-02 CLN FXIII 30 min 2nd FT.wiff"

Data file C:\Program Files (x86)\Matrix Science\Mascot Daemon\mgf\2 FXIII 30 min 2nd\mascot\_daemon\_merge.mgf

Click mouse within plot area to zoom in by factor of two about that point

Or, Plot from  to  Da

Label all possible matches  Label matches used for scoring

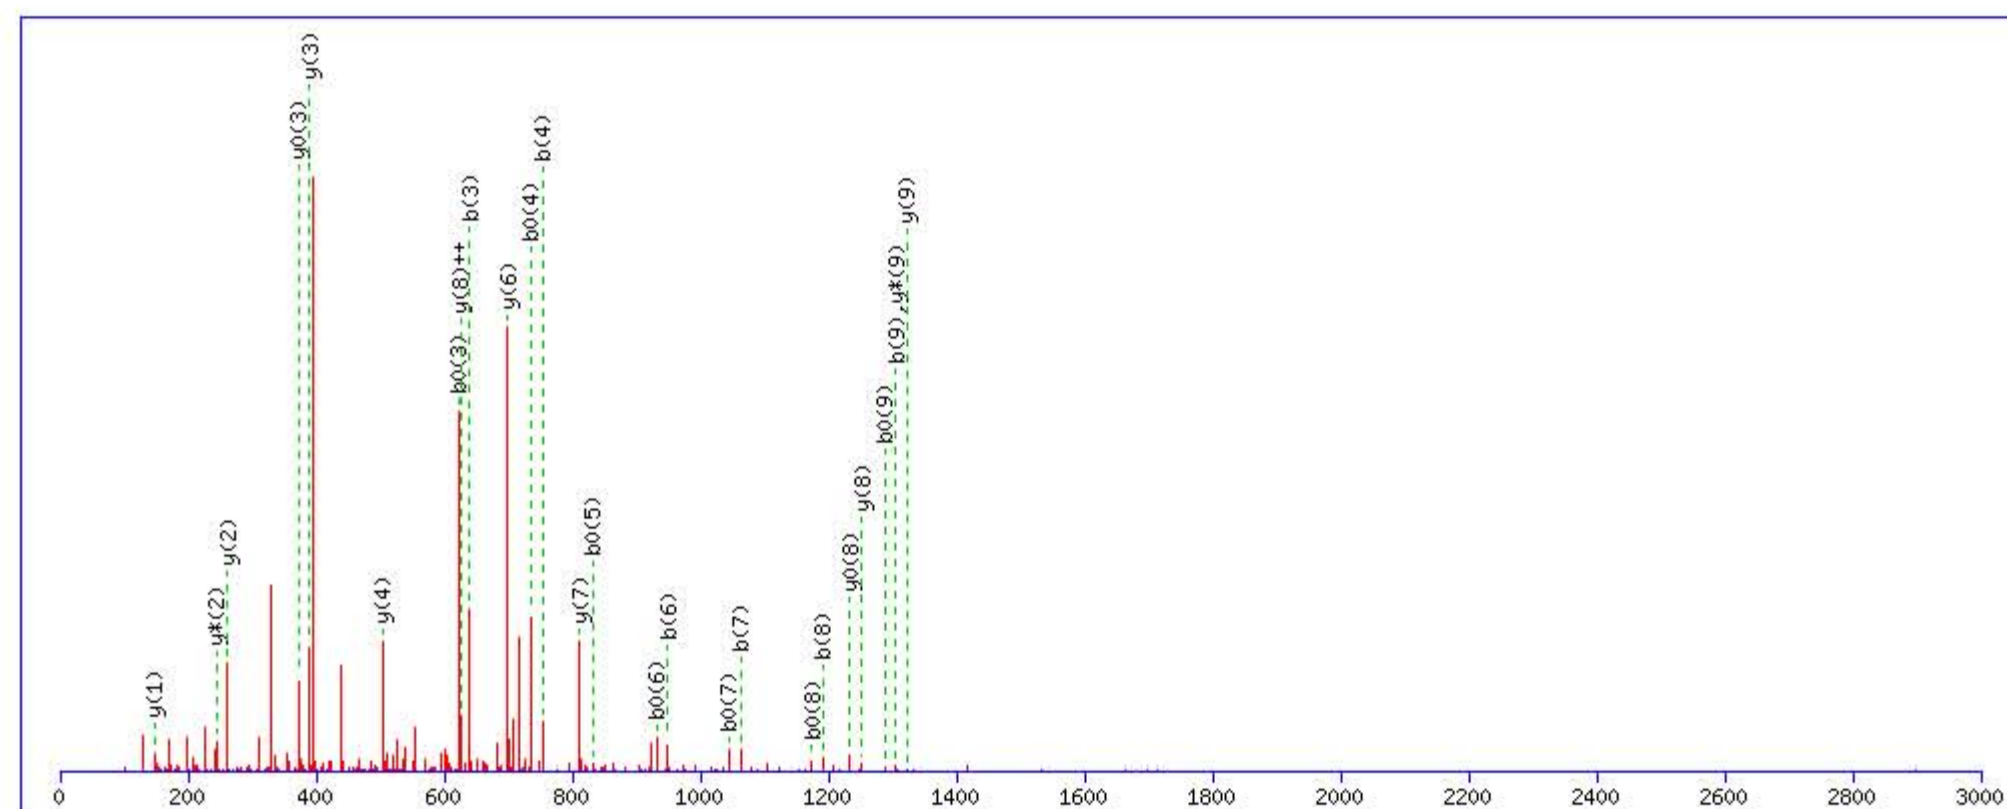

Monoisotopic mass of neutral peptide Mr(calc): 1450.785355

Fixed modifications: Carbamidomethyl (C) (apply to specified residues or termini only)

Variable modifications:

Q3 : Biotin:Thermo-21345 (Q)

Ions Score: 39 Expect: 0.00085

Matches : 26/100 fragment ions using 53 most intense peaks [\(help\)](#)

| #  | b           | b <sup>++</sup> | b <sup>*</sup> | b <sup>*++</sup> | b <sup>0</sup> | b <sup>0++</sup> | Seq. | y           | y <sup>++</sup> | y <sup>*</sup> | y <sup>*++</sup> | y <sup>0</sup> | y <sup>0++</sup> | #  |
|----|-------------|-----------------|----------------|------------------|----------------|------------------|------|-------------|-----------------|----------------|------------------|----------------|------------------|----|
| 1  | 130.049869  | 65.528572       |                |                  | 112.039304     | 56.523290        | E    |             |                 |                |                  |                |                  | 10 |
| 2  | 201.086983  | 101.047130      |                |                  | 183.076418     | 92.041847        | A    | 1322.750070 | 661.878673      | 1305.723521    | 653.365398       | 1304.739505    | 652.873390       | 9  |
| 3  | 640.312309  | 320.659793      | 623.285760     | 312.146518       | 622.301744     | 311.654510       | Q    | 1251.712956 | 626.360116      | 1234.686407    | 617.846841       | 1233.702391    | 617.354833       | 8  |
| 4  | 753.396373  | 377.201825      | 736.369824     | 368.688550       | 735.385808     | 368.196542       | L    | 812.487630  | 406.747453      | 795.461081     | 398.234178       | 794.477065     | 397.742170       | 7  |
| 5  | 850.449137  | 425.728207      | 833.422588     | 417.214932       | 832.438572     | 416.722924       | P    | 699.403566  | 350.205421      | 682.377017     | 341.692146       | 681.393001     | 341.200138       | 6  |
| 6  | 949.517551  | 475.262414      | 932.491002     | 466.749139       | 931.506986     | 466.257131       | V    | 602.350802  | 301.679039      | 585.324253     | 293.165764       | 584.340237     | 292.673756       | 5  |
| 7  | 1062.601615 | 531.804446      | 1045.575066    | 523.291171       | 1044.591050    | 522.799163       | I    | 503.282388  | 252.144832      | 486.255839     | 243.631557       | 485.271823     | 243.139549       | 4  |
| 8  | 1191.644208 | 596.325742      | 1174.617659    | 587.812468       | 1173.633643    | 587.320459       | E    | 390.198324  | 195.602800      | 373.171775     | 187.089525       | 372.187759     | 186.597517       | 3  |
| 9  | 1305.687135 | 653.347205      | 1288.660586    | 644.833931       | 1287.676570    | 644.341923       | N    | 261.155731  | 131.081503      | 244.129182     | 122.568229       |                |                  | 2  |
| 10 |             |                 |                |                  |                |                  | K    | 147.112804  | 74.060040       | 130.086255     | 65.546765        |                |                  | 1  |

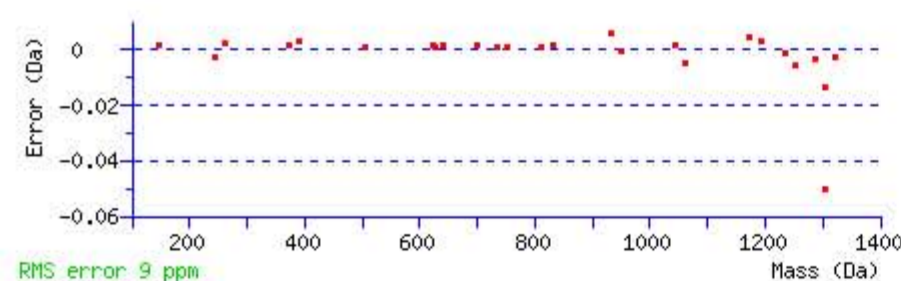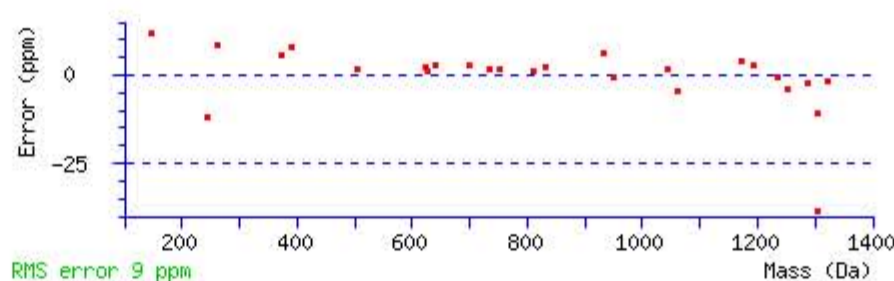

NCBI BLAST search of [EAQLPVIENK](#)

(Parameters: blastp, nr protein database, expect=20000, no filter, PAM30)

Other BLAST [web gateways](#)

## All matches to this query

| Score | Mr(calc):   | Delta     | Sequence                      |
|-------|-------------|-----------|-------------------------------|
| 39.0  | 1450.785355 | -0.006907 | <a href="#">EAQLPVIENK</a>    |
| 5.9   | 1450.764236 | 0.014212  | <a href="#">EIFHPEIQK</a>     |
| 4.0   | 1450.777985 | 0.000463  | <a href="#">TVKGGFSETRIEK</a> |
| 4.0   | 1450.790527 | -0.012079 | <a href="#">QNIWRHNRLSK</a>   |
| 3.0   | 1450.775467 | 0.002981  | <a href="#">QAPAPTKWNK</a>    |
| 2.5   | 1450.785355 | -0.006907 | <a href="#">TLQIFNIEMKSK</a>  |
| 0.9   | 1450.789429 | -0.010981 | <a href="#">VIIAFGFMVPDVK</a> |
| 0.4   | 1450.764252 | 0.014196  | <a href="#">QKFSEQVFK</a>     |
| 0.3   | 1450.764236 | 0.014212  | <a href="#">AEPPTWAQLK</a>    |



# MASCOT Search Results

## Peptide View

MS/MS Fragmentation of **EQQCVIMAENR**

Found in **PLGB\_HUMAN**, Plasminogen-like protein B OS=Homo sapiens GN=PLGLB1 PE=1 SV=1

Match to Query 41983: 1687.785372 from(563.602400,3+) rtinseconds(1802) index(69946)

Title: Locus:1.1.1.3161.10 File:"2013-07-02 CLN FXIII 30 min 2nd FT.wiff"

Data file C:\Program Files (x86)\Matrix Science\Mascot Daemon\mgf\2 FXIII 30 min 2nd\mascot\_daemon\_merge.mgf

Click mouse within plot area to zoom in by factor of two about that point

Or, Plot from  to  Da

Label all possible matches  Label matches used for scoring

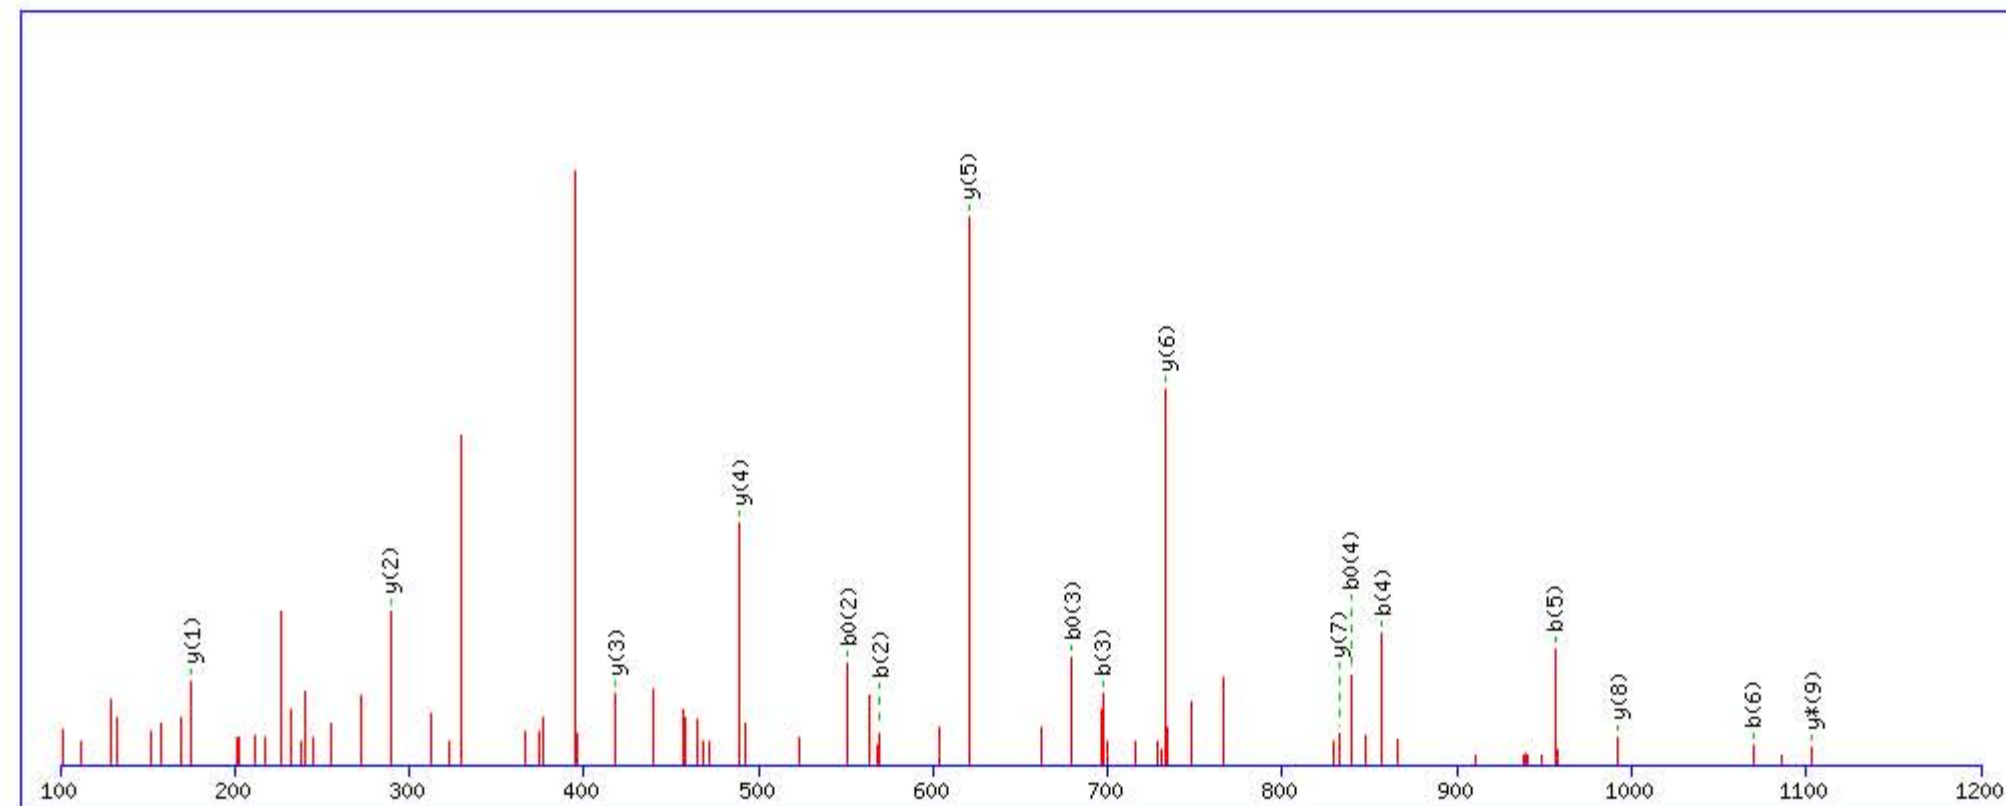

Monoisotopic mass of neutral peptide Mr(calc): 1687.784393

Fixed modifications: Carbamidomethyl (C) (apply to specified residues or termini only)

Variable modifications:

Q2 : Biotin:Thermo-21345 (Q)

Ions Score: 45 Expect: 0.00015

Matches : 17/114 fragment ions using 31 most intense peaks [\(help\)](#)

| #  | b                  | b <sup>++</sup> | b <sup>+</sup> | b <sup>+++</sup> | b <sup>0</sup>    | b <sup>0++</sup> | Seq. | y                 | y <sup>++</sup> | y <sup>+</sup>     | y <sup>+++</sup> | y <sup>0</sup> | y <sup>0++</sup> | #  |
|----|--------------------|-----------------|----------------|------------------|-------------------|------------------|------|-------------------|-----------------|--------------------|------------------|----------------|------------------|----|
| 1  | 130.049869         | 65.528572       |                |                  | 112.039304        | 56.523290        | E    |                   |                 |                    |                  |                |                  | 11 |
| 2  | <b>569.275195</b>  | 285.141236      | 552.248646     | 276.627961       | <b>551.264630</b> | 276.135953       | Q    | 1559.749102       | 780.378189      | 1542.722553        | 771.864915       | 1541.738537    | 771.372907       | 10 |
| 3  | <b>697.333773</b>  | 349.170525      | 680.307224     | 340.657250       | <b>679.323208</b> | 340.165242       | Q    | 1120.523776       | 560.765526      | <b>1103.497227</b> | 552.252252       | 1102.513211    | 551.760244       | 9  |
| 4  | <b>857.364422</b>  | 429.185849      | 840.337873     | 420.672575       | <b>839.353857</b> | 420.180567       | C    | <b>992.465198</b> | 496.736237      | 975.438649         | 488.222963       | 974.454633     | 487.730955       | 8  |
| 5  | <b>956.432836</b>  | 478.720056      | 939.406287     | 470.206782       | 938.422271        | 469.714774       | V    | <b>832.434549</b> | 416.720913      | 815.408000         | 408.207638       | 814.423984     | 407.715630       | 7  |
| 6  | <b>1069.516900</b> | 535.262088      | 1052.490351    | 526.748814       | 1051.506335       | 526.256806       | I    | <b>733.366135</b> | 367.186706      | 716.339586         | 358.673431       | 715.355570     | 358.181423       | 6  |
| 7  | 1200.557385        | 600.782331      | 1183.530836    | 592.269056       | 1182.546820       | 591.777048       | M    | <b>620.282071</b> | 310.644674      | 603.255522         | 302.131399       | 602.271506     | 301.639391       | 5  |
| 8  | 1271.594499        | 636.300888      | 1254.567950    | 627.787613       | 1253.583934       | 627.295605       | A    | <b>489.241586</b> | 245.124431      | 472.215037         | 236.611156       | 471.231021     | 236.119148       | 4  |
| 9  | 1400.637092        | 700.822184      | 1383.610543    | 692.308910       | 1382.626527       | 691.816902       | E    | <b>418.204472</b> | 209.605874      | 401.177923         | 201.092600       | 400.193907     | 200.600592       | 3  |
| 10 | 1514.680019        | 757.843648      | 1497.653470    | 749.330373       | 1496.669454       | 748.838365       | N    | <b>289.161879</b> | 145.084577      | 272.135330         | 136.571303       |                |                  | 2  |
| 11 |                    |                 |                |                  |                   |                  | R    | <b>175.118952</b> | 88.063114       | 158.092403         | 79.549839        |                |                  | 1  |

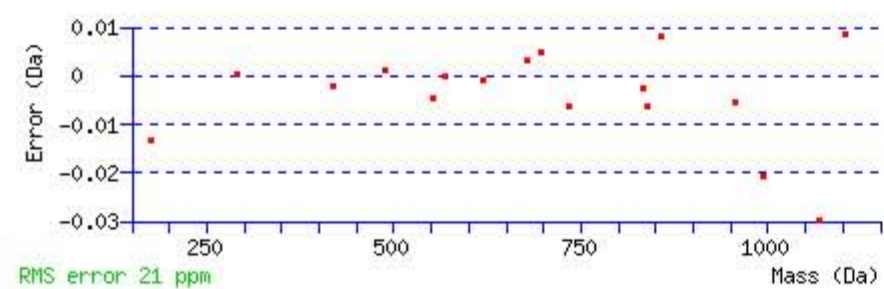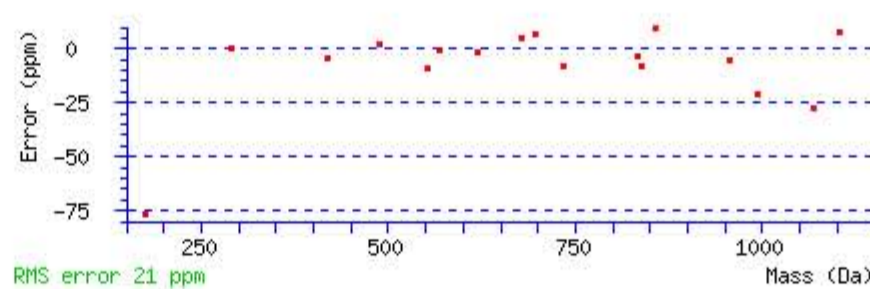

NCBI BLAST search of [EQQCVIMAENR](#)

(Parameters: blastp, nr protein database, expect=20000, no filter, PAM30)

Other BLAST [web gateways](#)

All matches to this query

| Score | Mr(calc):   | Delta     | Sequence                         |
|-------|-------------|-----------|----------------------------------|
| 45.0  | 1687.784393 | 0.000979  | <a href="#">EQQCVIMAENR</a>      |
| 41.3  | 1687.784393 | 0.000979  | <a href="#">EQQCVIMAENR</a>      |
| 4.1   | 1687.773666 | 0.011706  | <a href="#">TTGPPSGQMPDNPPHR</a> |
| 1.5   | 1687.776093 | 0.009279  | <a href="#">QQEEAQAASAAESAER</a> |
| 1.0   | 1687.787552 | -0.002180 | <a href="#">GASEDGEYFLMIRGK</a>  |



# MASCOT SCIENCE Mascot Search Results

## Peptide View

MS/MS Fragmentation of **APWCHTTNSQVR**

Found in **PLMN\_HUMAN**, Plasminogen OS=Homo sapiens GN=PLG PE=1 SV=2

Match to Query 43981: 1766.830392 from(589.950740,3+) rtinseconds(1528) index(68317)

Title: Locus:1.1.1.3065.14 File:"2013-07-02 CLN FXIII 30 min 2nd FT.wiff"

Data file C:\Program Files (x86)\Matrix Science\Mascot Daemon\mgf2 FXIII 30 min 2nd\mascot\_daemon\_merge.mgf

Click mouse within plot area to zoom in by factor of two about that point

Or, Plot from  to  Da

Label all possible matches  Label matches used for scoring

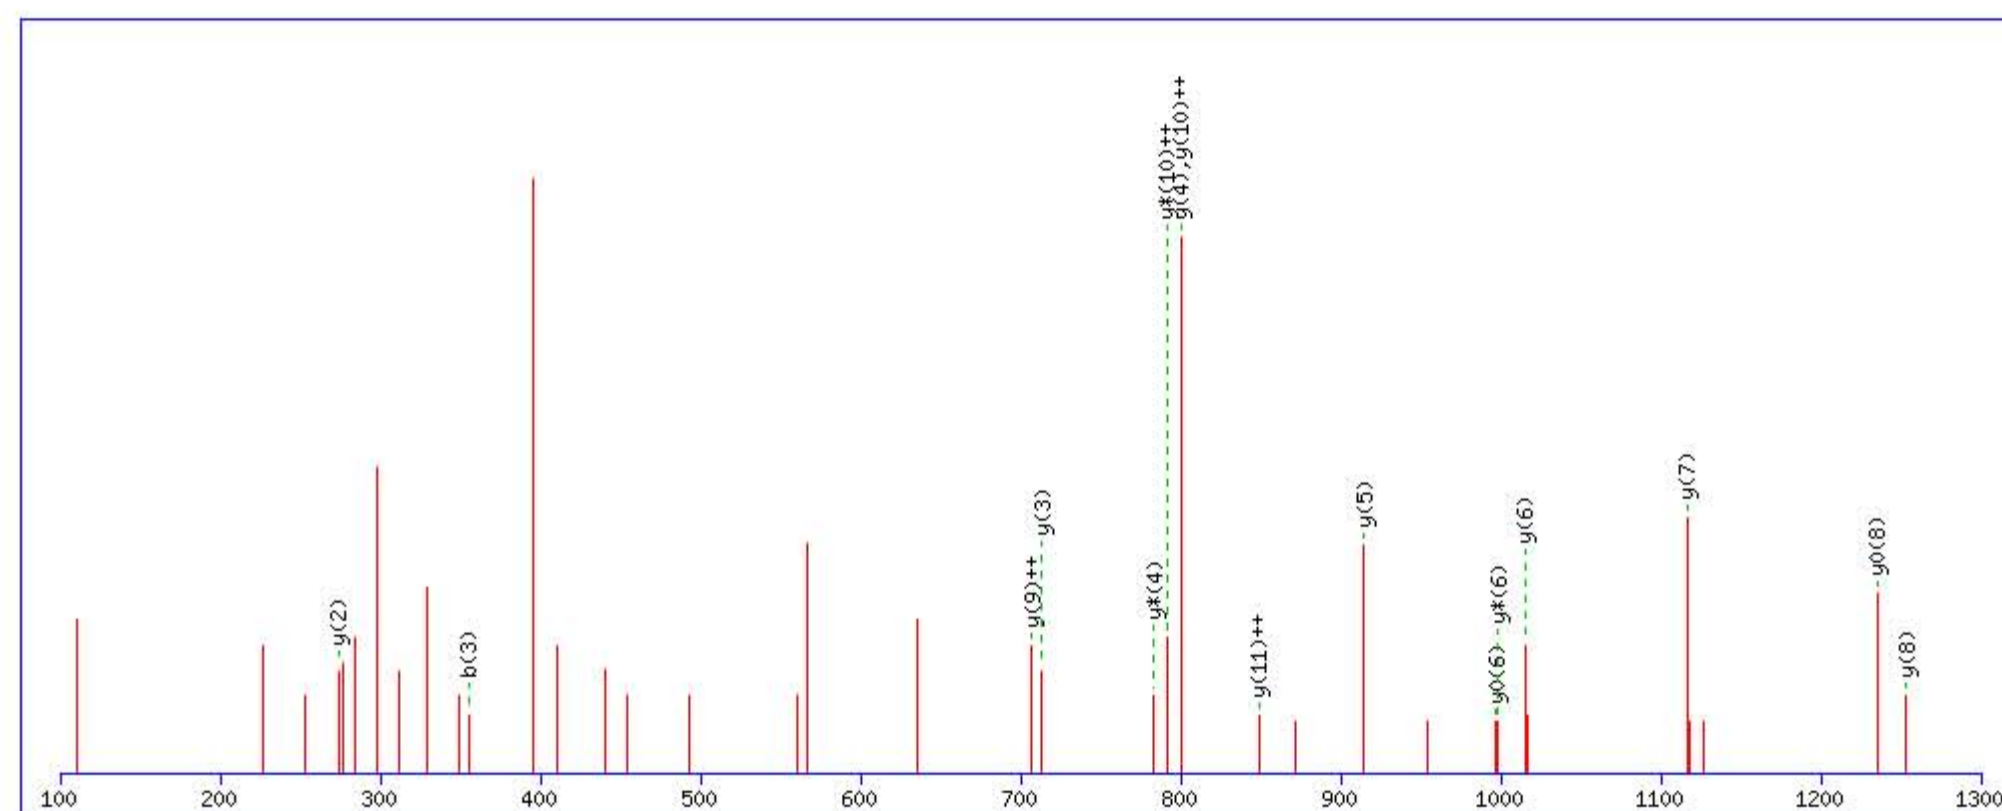

Monoisotopic mass of neutral peptide Mr(calc): 1766.834488

Fixed modifications: Carbamidomethyl (C) (apply to specified residues or termini only)

Variable modifications:

Q10 : Biotin:Thermo-21345 (Q)

Ions Score: 26 Expect: 0.042

Matches : 16/102 fragment ions using 37 most intense peaks [\(help\)](#)

| #  | b           | b <sup>++</sup> | b <sup>+</sup> | b <sup>*++</sup> | b <sup>0</sup> | b <sup>0++</sup> | Seq. | y           | y <sup>++</sup> | y <sup>+</sup> | y <sup>*++</sup> | y <sup>0</sup> | y <sup>0++</sup> | #  |
|----|-------------|-----------------|----------------|------------------|----------------|------------------|------|-------------|-----------------|----------------|------------------|----------------|------------------|----|
| 1  | 72.044390   | 36.525833       |                |                  |                |                  | A    |             |                 |                |                  |                |                  | 12 |
| 2  | 169.097154  | 85.052215       |                |                  |                |                  | P    | 1696.804643 | 848.905960      | 1679.778094    | 840.392685       | 1678.794078    | 839.900677       | 11 |
| 3  | 355.176467  | 178.091872      |                |                  |                |                  | W    | 1599.751879 | 800.379578      | 1582.725330    | 791.866303       | 1581.741314    | 791.374295       | 10 |
| 4  | 515.207116  | 258.107196      |                |                  |                |                  | C    | 1413.672566 | 707.339921      | 1396.646017    | 698.826647       | 1395.662001    | 698.334639       | 9  |
| 5  | 652.266028  | 326.636652      |                |                  |                |                  | H    | 1253.641917 | 627.324597      | 1236.615368    | 618.811322       | 1235.631352    | 618.319314       | 8  |
| 6  | 753.313707  | 377.160492      |                |                  | 735.303142     | 368.155209       | T    | 1116.583005 | 558.795141      | 1099.556456    | 550.281866       | 1098.572440    | 549.789858       | 7  |
| 7  | 854.361386  | 427.684331      |                |                  | 836.350821     | 418.679049       | T    | 1015.535326 | 508.271301      | 998.508777     | 499.758027       | 997.524761     | 499.266019       | 6  |
| 8  | 968.404313  | 484.705795      | 951.377764     | 476.192520       | 950.393748     | 475.700512       | N    | 914.487647  | 457.747462      | 897.461098     | 449.234187       | 896.477082     | 448.742179       | 5  |
| 9  | 1055.436341 | 528.221809      | 1038.409792    | 519.708534       | 1037.425776    | 519.216526       | S    | 800.444720  | 400.725998      | 783.418171     | 392.212724       | 782.434155     | 391.720716       | 4  |
| 10 | 1494.661667 | 747.834472      | 1477.635118    | 739.321197       | 1476.651102    | 738.829189       | Q    | 713.412692  | 357.209984      | 696.386143     | 348.696710       |                |                  | 3  |
| 11 | 1593.730081 | 797.368679      | 1576.703532    | 788.855404       | 1575.719516    | 788.363396       | V    | 274.187366  | 137.597321      | 257.160817     | 129.084047       |                |                  | 2  |
| 12 |             |                 |                |                  |                |                  | R    | 175.118952  | 88.063114       | 158.092403     | 79.549839        |                |                  | 1  |

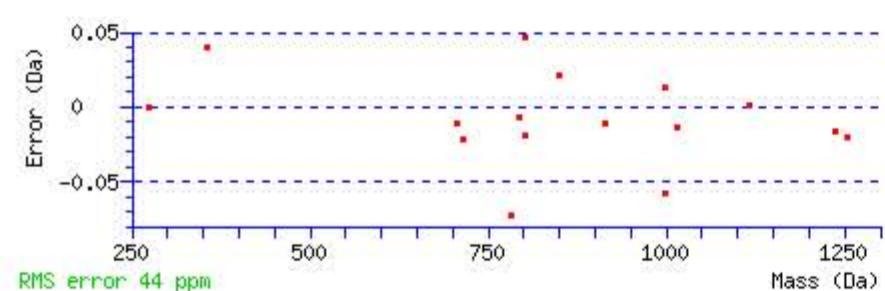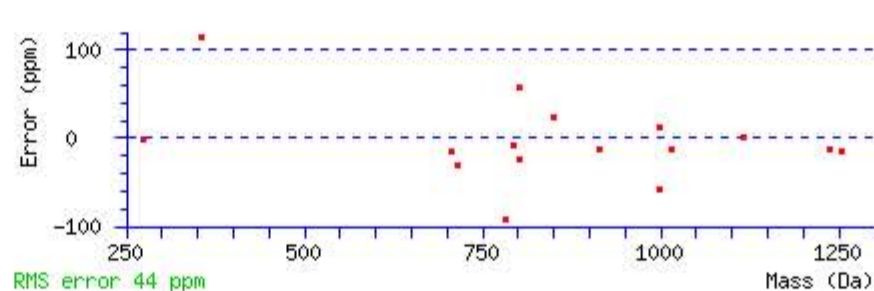

NCBI BLAST search of **APWCHTTNSQVR**

(Parameters: blastp, nr protein database, expect=20000, no filter, PAM30)

Other BLAST [web gateways](#)

All matches to this query

| Score | Mr(calc):   | Delta     | Sequence                     |
|-------|-------------|-----------|------------------------------|
| 25.8  | 1766.834488 | -0.004096 | <a href="#">APWCHTTNSQVR</a> |

Mascot: <http://www.matrixscience.com/>



# MASCOT SEARCH RESULTS

## Peptide View

MS/MS Fragmentation of **EQQCIVMAENR**

Found in **PLGB\_HUMAN**, Plasminogen-like protein B OS=Homo sapiens GN=PLGLB1 PE=1 SV=1

Match to Query 49050: 1998.946152 from(667.322660,3+) rtinseconds(2118) index(71897)

Title: Locus:1.1.1.3271.9 File:"2013-07-02 CLN FXIII 30 min 2nd FT.wiff"

Data file C:\Program Files (x86)\Matrix Science\Mascot Daemon\mgf\2 FXIII 30 min 2nd\mascot\_daemon\_merge.mgf

Click mouse within plot area to zoom in by factor of two about that point

Or, Plot from  to  Da

Label all possible matches  Label matches used for scoring

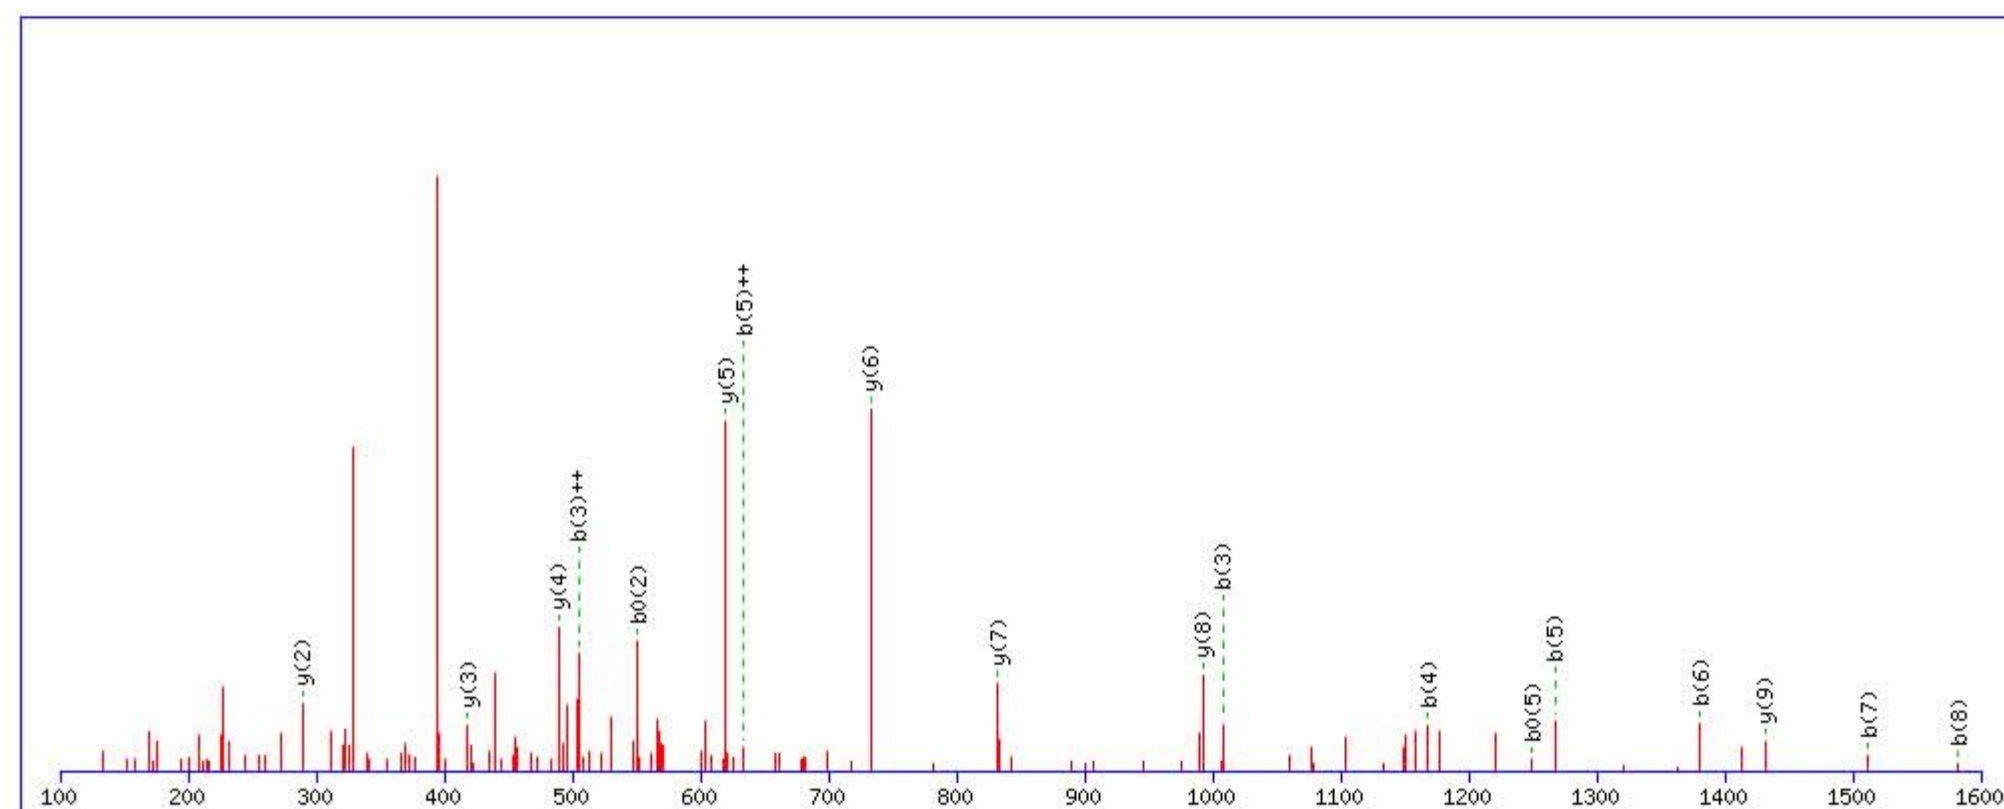

Monoisotopic mass of neutral peptide Mr(calc): 1998.951141

Fixed modifications: Carbamidomethyl (C) (apply to specified residues or termini only)

Variable modifications:

Q2 : Biotin:Thermo-21345 (Q)

Q3 : Biotin:Thermo-21345 (Q)

Ions Score: 47 Expect: 8.6e-005

Matches : 18/114 fragment ions using 28 most intense peaks [\(help\)](#)

| #  | b           | b <sup>++</sup> | b <sup>+</sup> | b <sup>+++</sup> | b <sup>0</sup> | b <sup>0++</sup> | Seq. | y           | y <sup>++</sup> | y <sup>+</sup> | y <sup>+++</sup> | y <sup>0</sup> | y <sup>0++</sup> | #  |
|----|-------------|-----------------|----------------|------------------|----------------|------------------|------|-------------|-----------------|----------------|------------------|----------------|------------------|----|
| 1  | 130.049869  | 65.528572       |                |                  | 112.039304     | 56.523290        | E    |             |                 |                |                  |                |                  | 11 |
| 2  | 569.275195  | 285.141236      | 552.248646     | 276.627961       | 551.264630     | 276.135953       | Q    | 1870.915850 | 935.961563      | 1853.889301    | 927.448288       | 1852.905285    | 926.956280       | 10 |
| 3  | 1008.500521 | 504.753899      | 991.473972     | 496.240624       | 990.489956     | 495.748616       | Q    | 1431.690524 | 716.348900      | 1414.663975    | 707.835625       | 1413.679959    | 707.343617       | 9  |
| 4  | 1168.531170 | 584.769223      | 1151.504621    | 576.255949       | 1150.520605    | 575.763940       | C    | 992.465198  | 496.736237      | 975.438649     | 488.222962       | 974.454633     | 487.730954       | 8  |
| 5  | 1267.599584 | 634.303430      | 1250.573035    | 625.790156       | 1249.589019    | 625.298148       | V    | 832.434549  | 416.720912      | 815.408000     | 408.207638       | 814.423984     | 407.715630       | 7  |
| 6  | 1380.683648 | 690.845462      | 1363.657099    | 682.332188       | 1362.673083    | 681.840179       | I    | 733.366135  | 367.186705      | 716.339586     | 358.673431       | 715.355570     | 358.181423       | 6  |
| 7  | 1511.724133 | 756.365704      | 1494.697584    | 747.852430       | 1493.713568    | 747.360422       | M    | 620.282071  | 310.644673      | 603.255522     | 302.131399       | 602.271506     | 301.639391       | 5  |
| 8  | 1582.761247 | 791.884261      | 1565.734698    | 783.370987       | 1564.750682    | 782.878979       | A    | 489.241586  | 245.124431      | 472.215037     | 236.611156       | 471.231021     | 236.119148       | 4  |
| 9  | 1711.803840 | 856.405558      | 1694.777291    | 847.892283       | 1693.793275    | 847.400275       | E    | 418.204472  | 209.605874      | 401.177923     | 201.092599       | 400.193907     | 200.600591       | 3  |
| 10 | 1825.846767 | 913.427021      | 1808.820218    | 904.913747       | 1807.836202    | 904.421739       | N    | 289.161879  | 145.084577      | 272.135330     | 136.571303       |                |                  | 2  |
| 11 |             |                 |                |                  |                |                  | R    | 175.118952  | 88.063114       | 158.092403     | 79.549839        |                |                  | 1  |

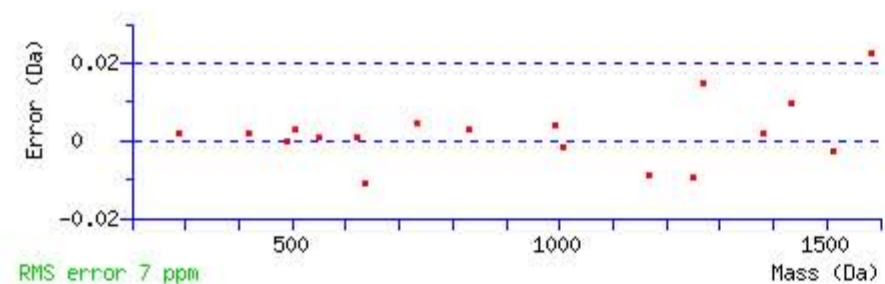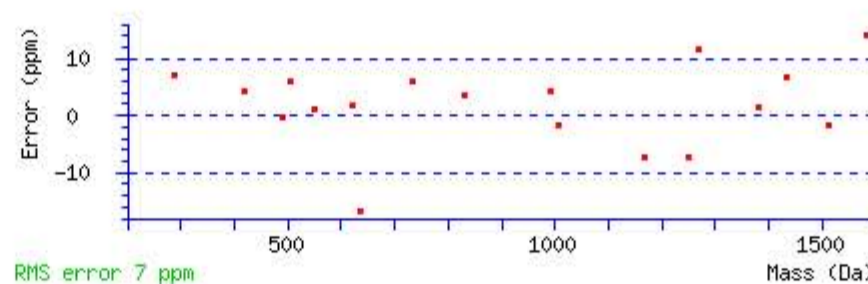

NCBI BLAST search of [EQQCIVMAENR](#)

(Parameters: blastp, nr protein database, expect=20000, no filter, PAM30)

Other BLAST [web gateways](#)

All matches to this query

| Score | Mr(calc):   | Delta     | Sequence                          |
|-------|-------------|-----------|-----------------------------------|
| 47.5  | 1998.951141 | -0.004989 | <a href="#">EQQCIVMAENR</a>       |
| 3.8   | 1998.942841 | 0.003311  | <a href="#">QQEEAQAAAAAASAESR</a> |
| 3.8   | 1998.942841 | 0.003311  | <a href="#">QQEEAQAAAAAASAESR</a> |
| 3.0   | 1998.921280 | 0.024872  | <a href="#">LSQMCLNTEWVEMKSK</a>  |
| 0.3   | 1998.950912 | -0.004760 | <a href="#">YEAQQLRTFYQMYDK</a>   |



# Mascot Search Results

## Peptide View

MS/MS Fragmentation of **CTTPPPSSGPTYQCLK**

Found in **PLMN\_HUMAN**, Plasminogen OS=Homo sapiens GN=PLG PE=1 SV=2

Match to Query 52058: 2103.966852 from(702.329560,3+) rtinseconds(1757) index(69654)

Title: Locus:1.1.1.3145.20 File:"2013-07-02 CLN FXIII 30 min 2nd FT.wiff"

Data file C:\Program Files (x86)\Matrix Science\Mascot Daemon\mgf2 FXIII 30 min 2nd\mascot\_daemon\_merge.mgf

Click mouse within plot area to zoom in by factor of two about that point

Or, Plot from  to  Da

Label all possible matches  Label matches used for scoring

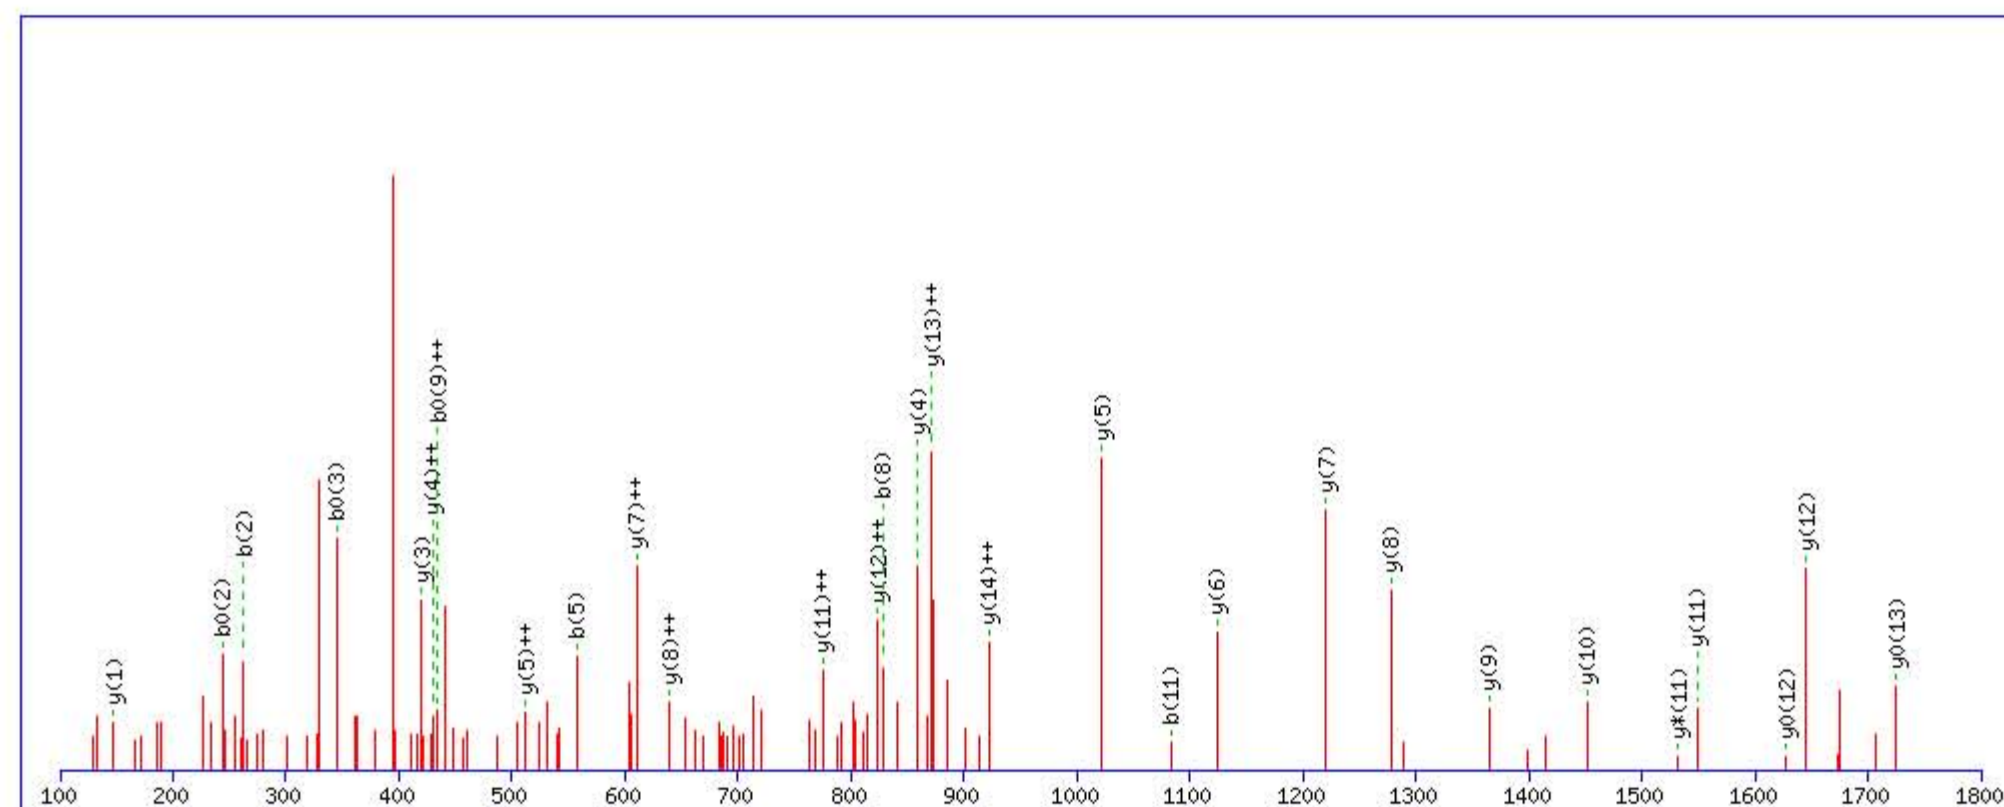

Monoisotopic mass of neutral peptide Mr(calc): 2103.979172

Fixed modifications: Carbamidomethyl (C) (apply to specified residues or termini only)

Variable modifications:

Q13 : Biotin:Thermo-21345 (Q)

Ions Score: 66 Expect: 3.6e-006

Matches : 29/144 fragment ions using 50 most intense peaks [\(help\)](#)

| #  | b                  | b <sup>++</sup> | b <sup>+</sup> | b <sup>+++</sup> | b <sup>0</sup>    | b <sup>0++</sup>  | Seq. | y                  | y <sup>++</sup>   | y <sup>+</sup>     | y <sup>+++</sup> | y <sup>0</sup>     | y <sup>0++</sup> | #  |
|----|--------------------|-----------------|----------------|------------------|-------------------|-------------------|------|--------------------|-------------------|--------------------|------------------|--------------------|------------------|----|
| 1  | 161.037925         | 81.022600       |                |                  |                   |                   | C    |                    |                   |                    |                  |                    |                  | 16 |
| 2  | <b>262.085604</b>  | 131.546440      |                |                  | 244.075039        | 122.541158        | T    | 1944.955785        | 972.981531        | 1927.929236        | 964.468256       | 1926.945220        | 963.976248       | 15 |
| 3  | 363.133283         | 182.070280      |                |                  | <b>345.122718</b> | 173.064997        | T    | 1843.908106        | <b>922.457691</b> | 1826.881557        | 913.944417       | 1825.897541        | 913.452409       | 14 |
| 4  | 460.186047         | 230.596661      |                |                  | 442.175482        | 221.591379        | P    | 1742.860427        | <b>871.933852</b> | 1725.833878        | 863.420577       | <b>1724.849862</b> | 862.928569       | 13 |
| 5  | <b>557.238811</b>  | 279.123044      |                |                  | 539.228246        | 270.117761        | P    | <b>1645.807663</b> | <b>823.407470</b> | 1628.781114        | 814.894195       | <b>1627.797098</b> | 814.402187       | 12 |
| 6  | 654.291575         | 327.649426      |                |                  | 636.281010        | 318.644143        | P    | <b>1548.754899</b> | <b>774.881088</b> | <b>1531.728350</b> | 766.367813       | 1530.744334        | 765.875805       | 11 |
| 7  | 741.323603         | 371.165440      |                |                  | 723.313038        | 362.160157        | S    | <b>1451.702135</b> | 726.354706        | 1434.675586        | 717.841431       | 1433.691570        | 717.349423       | 10 |
| 8  | <b>828.355631</b>  | 414.681454      |                |                  | 810.345066        | 405.676171        | S    | <b>1364.670107</b> | 682.838692        | 1347.643558        | 674.325417       | 1346.659542        | 673.833409       | 9  |
| 9  | 885.377095         | 443.192186      |                |                  | 867.366530        | <b>434.186903</b> | G    | <b>1277.638079</b> | <b>639.322678</b> | 1260.611530        | 630.809403       | 1259.627514        | 630.317395       | 8  |
| 10 | 982.429859         | 491.718568      |                |                  | 964.419294        | 482.713285        | P    | <b>1220.616615</b> | <b>610.811946</b> | 1203.590066        | 602.298671       | 1202.606050        | 601.806663       | 7  |
| 11 | <b>1083.477538</b> | 542.242407      |                |                  | 1065.466973       | 533.237125        | T    | <b>1123.563851</b> | 562.285564        | 1106.537302        | 553.772289       | 1105.553286        | 553.280281       | 6  |
| 12 | 1246.540867        | 623.774072      |                |                  | 1228.530302       | 614.768789        | Y    | <b>1022.516172</b> | <b>511.761724</b> | 1005.489623        | 503.248450       |                    |                  | 5  |
| 13 | 1685.766193        | 843.386735      | 1668.739644    | 834.873460       | 1667.755628       | 834.381452        | Q    | <b>859.452843</b>  | <b>430.230060</b> | 842.426294         | 421.716785       |                    |                  | 4  |
| 14 | 1845.796842        | 923.402059      | 1828.770293    | 914.888785       | 1827.786277       | 914.396777        | C    | <b>420.227517</b>  | 210.617396        | 403.200968         | 202.104122       |                    |                  | 3  |
| 15 | 1958.880906        | 979.944091      | 1941.854357    | 971.430817       | 1940.870341       | 970.938809        | L    | 260.196868         | 130.602072        | 243.170319         | 122.088797       |                    |                  | 2  |
| 16 |                    |                 |                |                  |                   |                   | K    | <b>147.112804</b>  | 74.060040         | 130.086255         | 65.546765        |                    |                  | 1  |

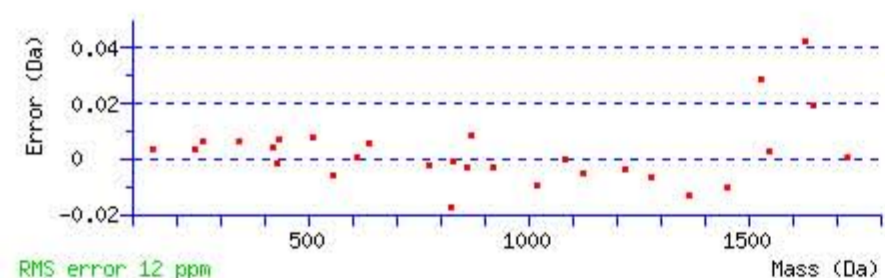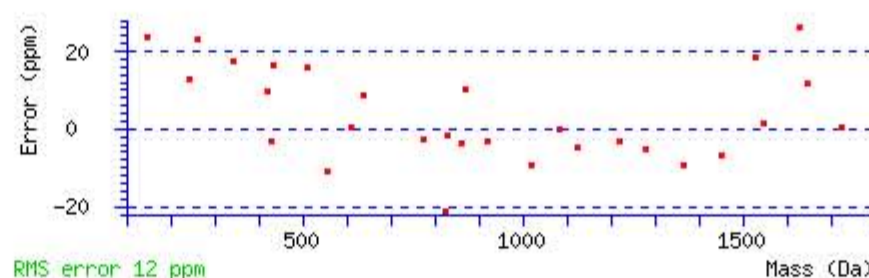

NCBI BLAST search of **CTTPPPSSGPTYQCLK**

(Parameters: blastp, nr protein database, expect=20000, no filter, PAM30)

Other BLAST [web gateways](#)

All matches to this query

| Score | Mr(calc):   | Delta     | Sequence                            |
|-------|-------------|-----------|-------------------------------------|
| 65.7  | 2103.979172 | -0.012320 | <a href="#">CTTPPPSSGPTYQCLK</a>    |
| 7.6   | 2103.964554 | 0.002298  | <a href="#">TAADTPAIMNWDLFFTMK</a>  |
| 3.3   | 2103.937866 | 0.028986  | <a href="#">ASSVSKQSSCESITDEFSR</a> |
| 1.8   | 2103.975754 | -0.008902 | <a href="#">AEVEQMHSYQELK</a>       |



# Mascot Search Results

## Peptide View

MS/MS Fragmentation of **ATTVTGTPCQDWAAQEPHR**

Found in **PLMN\_HUMAN**, Plasminogen OS=Homo sapiens GN=PLG PE=1 SV=2

Match to Query 58272: 2436.110682 from(813.044170,3+) rtinseconds(1858) index(70203)

Title: Locus:1.1.1.3180.12 File:"2013-07-02 CLN FXIII 30 min 2nd FT.wiff"

Data file C:\Program Files (x86)\Matrix Science\Mascot Daemon\mgf2 FXIII 30 min 2nd\mascot\_daemon\_merge.mgf

Click mouse within plot area to zoom in by factor of two about that point

Or, Plot from  to  Da

Label all possible matches  Label matches used for scoring

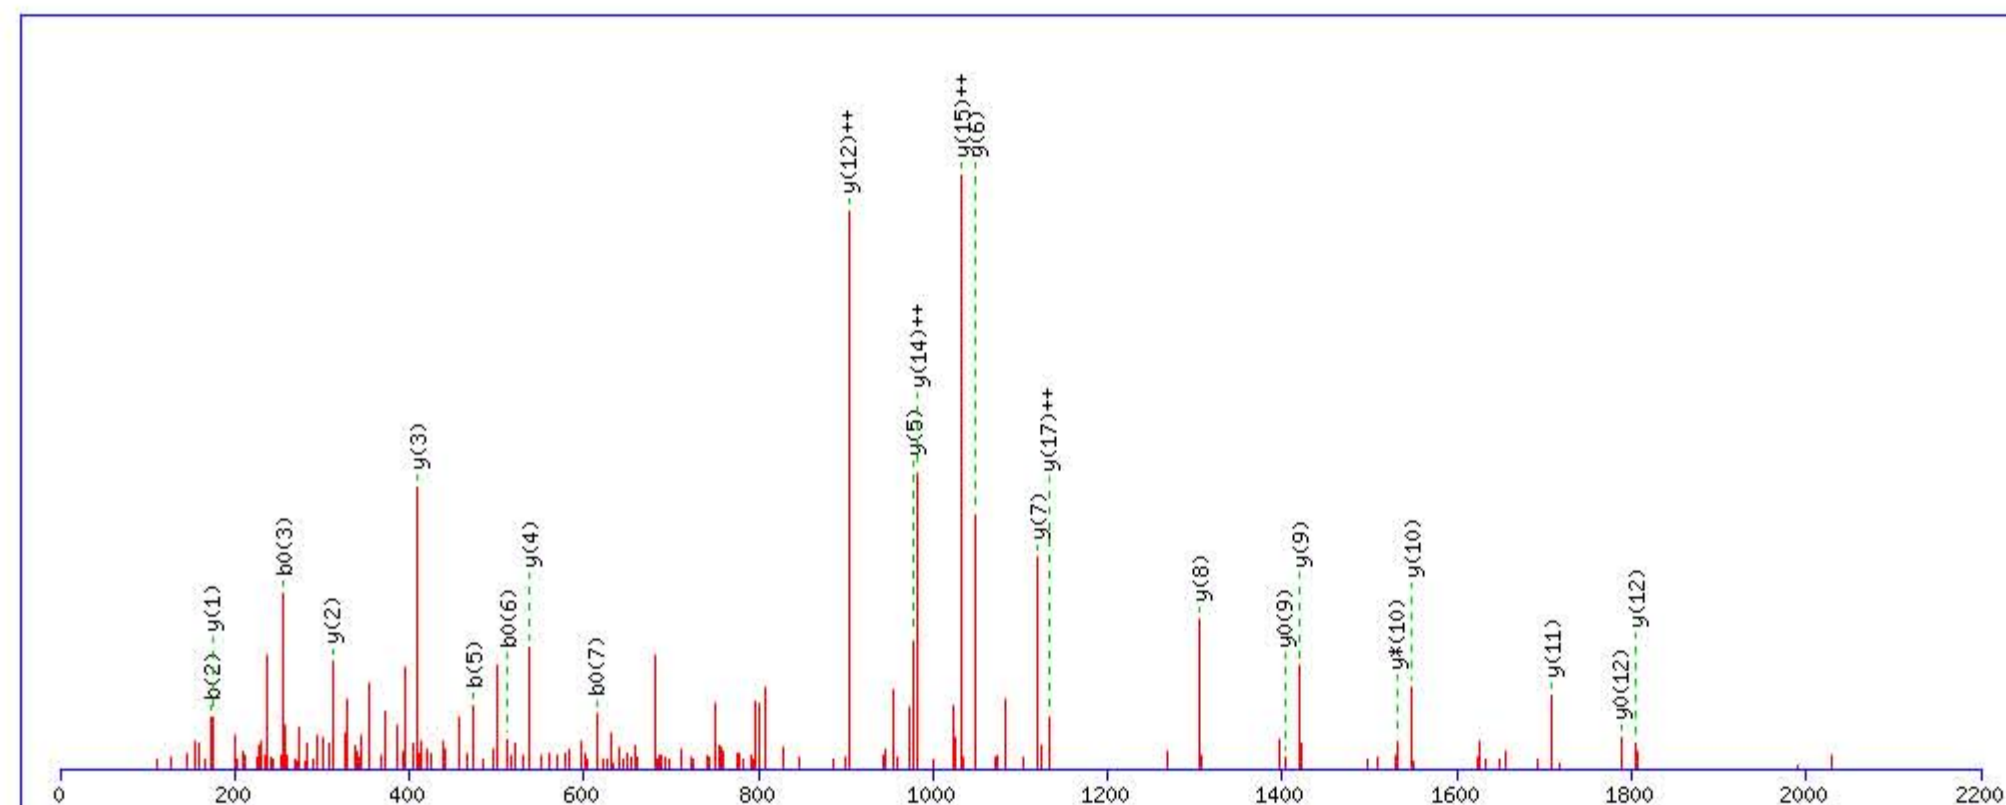

Monoisotopic mass of neutral peptide Mr(calc): 2436.131470

Fixed modifications: Carbamidomethyl (C) (apply to specified residues or termini only)

Variable modifications:

Q15 : Biotin:Thermo-21345 (Q)

Ions Score: 84 Expect: 4.4e-008

Matches : 24/190 fragment ions using 36 most intense peaks [\(help\)](#)

| #  | b                 | b <sup>++</sup> | b <sup>*</sup> | b <sup>*++</sup> | b <sup>0</sup>    | b <sup>0++</sup> | Seq. | y                  | y <sup>++</sup>    | y <sup>*</sup>     | y <sup>*++</sup> | y <sup>0</sup>     | y <sup>0++</sup> | #  |
|----|-------------------|-----------------|----------------|------------------|-------------------|------------------|------|--------------------|--------------------|--------------------|------------------|--------------------|------------------|----|
| 1  | 72.044390         | 36.525833       |                |                  |                   |                  | A    |                    |                    |                    |                  |                    |                  | 19 |
| 2  | <b>173.092069</b> | 87.049672       |                |                  | 155.081504        | 78.044390        | T    | 2366.101616        | 1183.554446        | 2349.075067        | 1175.041171      | 2348.091051        | 1174.549163      | 18 |
| 3  | 274.139748        | 137.573512      |                |                  | <b>256.129183</b> | 128.568230       | T    | 2265.053937        | <b>1133.030606</b> | 2248.027388        | 1124.517332      | 2247.043372        | 1124.025324      | 17 |
| 4  | 373.208162        | 187.107719      |                |                  | 355.197597        | 178.102437       | V    | 2164.006258        | 1082.506767        | 2146.979709        | 1073.993492      | 2145.995693        | 1073.501484      | 16 |
| 5  | <b>474.255841</b> | 237.631559      |                |                  | 456.245276        | 228.626276       | T    | 2064.937844        | <b>1032.972560</b> | 2047.911295        | 1024.459285      | 2046.927279        | 1023.967277      | 15 |
| 6  | 531.277305        | 266.142291      |                |                  | <b>513.266740</b> | 257.137008       | G    | 1963.890165        | <b>982.448721</b>  | 1946.863616        | 973.935446       | 1945.879600        | 973.443438       | 14 |
| 7  | 632.324984        | 316.666130      |                |                  | <b>614.314419</b> | 307.660848       | T    | 1906.868701        | 953.937989         | 1889.842152        | 945.424714       | 1888.858136        | 944.932706       | 13 |
| 8  | 729.377748        | 365.192512      |                |                  | 711.367183        | 356.187230       | P    | <b>1805.821022</b> | <b>903.414149</b>  | 1788.794473        | 894.900875       | <b>1787.810457</b> | 894.408867       | 12 |
| 9  | 889.408397        | 445.207837      |                |                  | 871.397832        | 436.202554       | C    | <b>1708.768258</b> | 854.887767         | 1691.741709        | 846.374493       | 1690.757693        | 845.882485       | 11 |
| 10 | 1017.466975       | 509.237126      | 1000.440426    | 500.723851       | 999.456410        | 500.231843       | Q    | <b>1548.737609</b> | 774.872443         | <b>1531.711060</b> | 766.359168       | 1530.727044        | 765.867160       | 10 |
| 11 | 1132.493918       | 566.750597      | 1115.467369    | 558.237323       | 1114.483353       | 557.745315       | D    | <b>1420.679031</b> | 710.843154         | 1403.652482        | 702.329879       | <b>1402.668466</b> | 701.837871       | 9  |
| 12 | 1318.573231       | 659.790254      | 1301.546682    | 651.276979       | 1300.562666       | 650.784971       | W    | <b>1305.652088</b> | 653.329682         | 1288.625539        | 644.816408       | 1287.641523        | 644.324400       | 8  |
| 13 | 1389.610345       | 695.308811      | 1372.583796    | 686.795536       | 1371.599780       | 686.303528       | A    | <b>1119.572775</b> | 560.290026         | 1102.546226        | 551.776751       | 1101.562210        | 551.284743       | 7  |
| 14 | 1460.647459       | 730.827368      | 1443.620910    | 722.314093       | 1442.636894       | 721.822085       | A    | <b>1048.535661</b> | 524.771469         | 1031.509112        | 516.258194       | 1030.525096        | 515.766186       | 6  |
| 15 | 1899.872785       | 950.440031      | 1882.846236    | 941.926756       | 1881.862220       | 941.434748       | Q    | <b>977.498547</b>  | 489.252912         | 960.471998         | 480.739637       | 959.487982         | 480.247629       | 5  |
| 16 | 2028.915378       | 1014.961327     | 2011.888829    | 1006.448053      | 2010.904813       | 1005.956045      | E    | <b>538.273221</b>  | 269.640249         | 521.246672         | 261.126974       | 520.262656         | 260.634966       | 4  |
| 17 | 2125.968142       | 1063.487709     | 2108.941593    | 1054.974434      | 2107.957577       | 1054.482427      | P    | <b>409.230628</b>  | 205.118952         | 392.204079         | 196.605677       |                    |                  | 3  |
| 18 | 2263.027054       | 1132.017165     | 2246.000505    | 1123.503890      | 2245.016489       | 1123.011883      | H    | <b>312.177864</b>  | 156.592570         | 295.151315         | 148.079295       |                    |                  | 2  |
| 19 |                   |                 |                |                  |                   |                  | R    | <b>175.118952</b>  | 88.063114          | 158.092403         | 79.549839        |                    |                  | 1  |

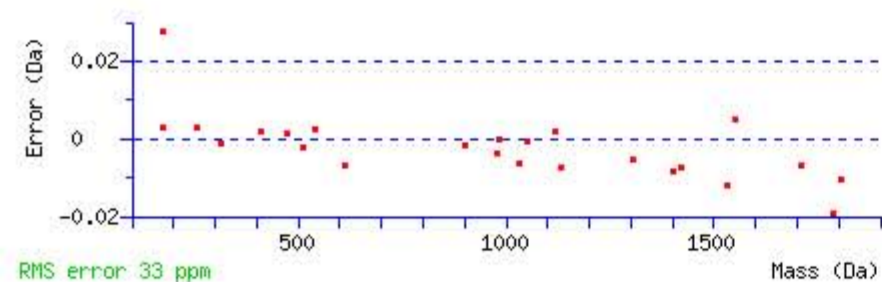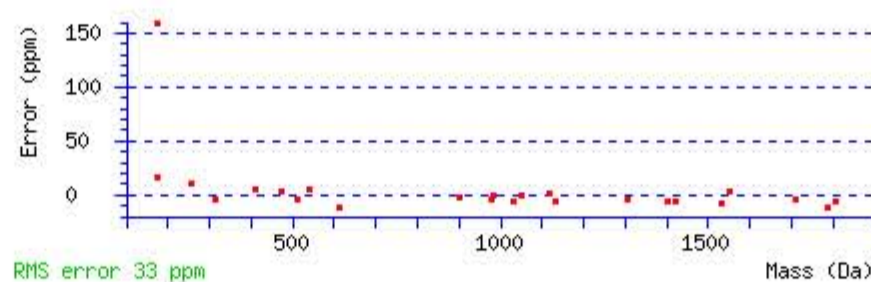

NCBI BLAST search of [ATTVTGTPCQDWAAQEPHR](#)

(Parameters: blastp, nr protein database, expect=20000, no filter, PAM30)

Other BLAST [web gateways](#)

All matches to this query

| Score | Mr(calc):   | Delta     | Sequence                            |
|-------|-------------|-----------|-------------------------------------|
| 84.2  | 2436.131470 | -0.020788 | <a href="#">ATTVTGTPCQDWAAQEPHR</a> |
| 32.9  | 2436.131470 | -0.020788 | <a href="#">ATTVTGTPCQDWAAQEPHR</a> |



# MASCOT Search Results

## Peptide View

MS/MS Fragmentation of **VVGGCVAHPHSWPWQVSLR**

Found in **PLMN\_HUMAN**, Plasminogen OS=Homo sapiens GN=PLG PE=1 SV=2

Match to Query 59350: 2482.232742 from(828.418190,3+) rtinseconds(2207) index(72489)

Title: Locus:1.1.1.3302.15 File:"2013-07-02 CLN FXIII 30 min 2nd FT.wiff"

Data file C:\Program Files (x86)\Matrix Science\Mascot Daemon\mgf2 FXIII 30 min 2nd\mascot\_daemon\_merge.mgf

Click mouse within plot area to zoom in by factor of two about that point

Or, Plot from  to  Da

Label all possible matches  Label matches used for scoring

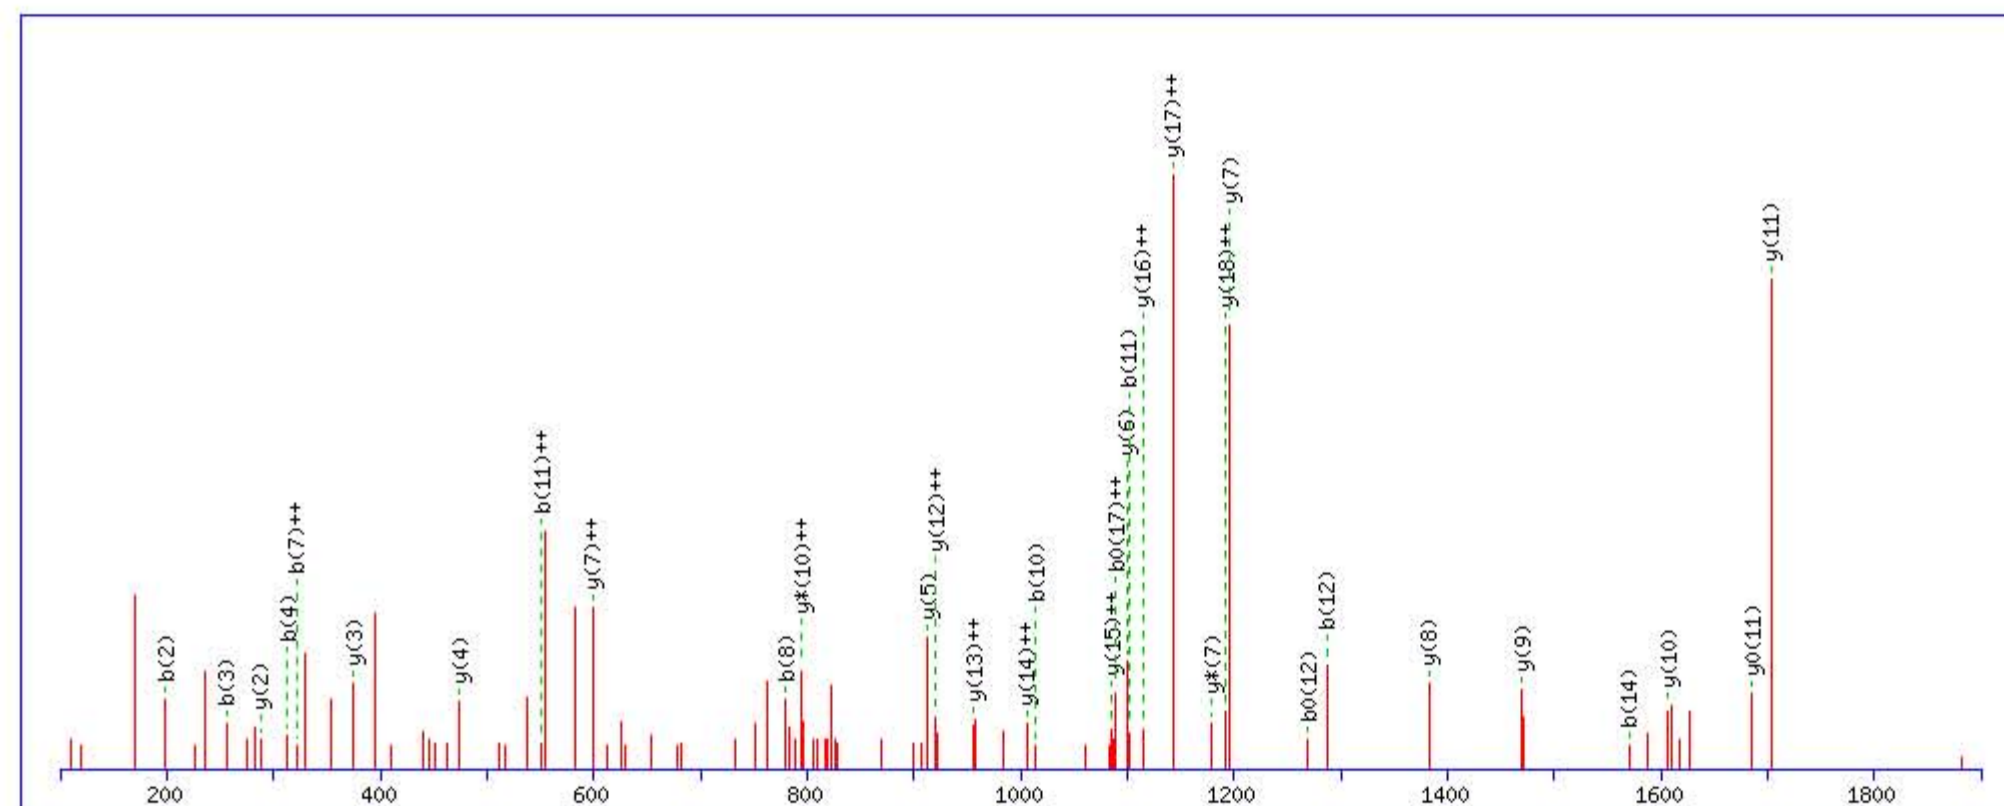

Monoisotopic mass of neutral peptide Mr(calc): 2482.251480

Fixed modifications: Carbamidomethyl (C) (apply to specified residues or termini only)

Variable modifications:

Q15 : Biotin:Thermo-21345 (Q)

Ions Score: 49 Expect: 0.00039

Matches : 33/164 fragment ions using 86 most intense peaks [\(help\)](#)

| #  | b                  | b <sup>++</sup>   | b <sup>+</sup> | b <sup>+++</sup> | b <sup>0</sup>     | b <sup>0++</sup>   | Seq. | y                  | y <sup>++</sup>    | y <sup>+</sup>     | y <sup>+++</sup>  | y <sup>0</sup>     | y <sup>0++</sup> | #  |
|----|--------------------|-------------------|----------------|------------------|--------------------|--------------------|------|--------------------|--------------------|--------------------|-------------------|--------------------|------------------|----|
| 1  | 100.075690         | 50.541483         |                |                  |                    |                    | V    |                    |                    |                    |                   |                    |                  | 19 |
| 2  | <b>199.144104</b>  | 100.075690        |                |                  |                    |                    | V    | 2384.190309        | <b>1192.598792</b> | 2367.163760        | 1184.085518       | 2366.179744        | 1183.593510      | 18 |
| 3  | <b>256.165568</b>  | 128.586422        |                |                  |                    |                    | G    | 2285.121895        | <b>1143.064585</b> | 2268.095346        | 1134.551311       | 2267.111330        | 1134.059303      | 17 |
| 4  | <b>313.187032</b>  | 157.097154        |                |                  |                    |                    | G    | 2228.100431        | <b>1114.553853</b> | 2211.073882        | 1106.040579       | 2210.089866        | 1105.548571      | 16 |
| 5  | 473.217681         | 237.112479        |                |                  |                    |                    | C    | 2171.078967        | <b>1086.043121</b> | 2154.052418        | 1077.529847       | 2153.068402        | 1077.037839      | 15 |
| 6  | 572.286095         | 286.646686        |                |                  |                    |                    | V    | 2011.048318        | <b>1006.027797</b> | 1994.021769        | 997.514523        | 1993.037753        | 997.022515       | 14 |
| 7  | 643.323209         | <b>322.165243</b> |                |                  |                    |                    | A    | 1911.979904        | <b>956.493590</b>  | 1894.953355        | 947.980316        | 1893.969339        | 947.488308       | 13 |
| 8  | <b>780.382121</b>  | 390.694699        |                |                  |                    |                    | H    | 1840.942790        | <b>920.975033</b>  | 1823.916241        | 912.461759        | 1822.932225        | 911.969751       | 12 |
| 9  | 877.434885         | 439.221081        |                |                  |                    |                    | P    | <b>1703.883878</b> | 852.445577         | 1686.857329        | 843.932303        | <b>1685.873313</b> | 843.440295       | 11 |
| 10 | <b>1014.493797</b> | 507.750537        |                |                  |                    |                    | H    | <b>1606.831114</b> | 803.919195         | 1589.804565        | <b>795.405921</b> | 1588.820549        | 794.913913       | 10 |
| 11 | <b>1101.525825</b> | <b>551.266550</b> |                |                  | 1083.515260        | 542.261268         | S    | <b>1469.772202</b> | 735.389739         | 1452.745653        | 726.876465        | 1451.761637        | 726.384457       | 9  |
| 12 | <b>1287.605138</b> | 644.306207        |                |                  | <b>1269.594573</b> | 635.300924         | W    | <b>1382.740174</b> | 691.873725         | 1365.713625        | 683.360451        | 1364.729609        | 682.868443       | 8  |
| 13 | 1384.657902        | 692.832589        |                |                  | 1366.647337        | 683.827306         | P    | <b>1196.660861</b> | <b>598.834069</b>  | <b>1179.634312</b> | 590.320794        | 1178.650296        | 589.828786       | 7  |
| 14 | <b>1570.737215</b> | 785.872245        |                |                  | 1552.726650        | 776.866963         | W    | <b>1099.608097</b> | 550.307687         | 1082.581548        | 541.794412        | 1081.597532        | 541.302404       | 6  |
| 15 | 2009.962541        | 1005.484909       | 1992.935992    | 996.971634       | 1991.951976        | 996.479626         | Q    | <b>913.528784</b>  | 457.268030         | 896.502235         | 448.754756        | 895.518219         | 448.262748       | 5  |
| 16 | 2109.030955        | 1055.019115       | 2092.004406    | 1046.505841      | 2091.020390        | 1046.013833        | V    | <b>474.303458</b>  | 237.655367         | 457.276909         | 229.142092        | 456.292893         | 228.650084       | 4  |
| 17 | 2196.062983        | 1098.535129       | 2179.036434    | 1090.021855      | 2178.052418        | <b>1089.529847</b> | S    | <b>375.235044</b>  | 188.121160         | 358.208495         | 179.607886        | 357.224479         | 179.115878       | 3  |
| 18 | 2309.147047        | 1155.077161       | 2292.120498    | 1146.563887      | 2291.136482        | 1146.071879        | L    | <b>288.203016</b>  | 144.605146         | 271.176467         | 136.091872        |                    |                  | 2  |
| 19 |                    |                   |                |                  |                    |                    | R    | 175.118952         | 88.063114          | 158.092403         | 79.549839         |                    |                  | 1  |

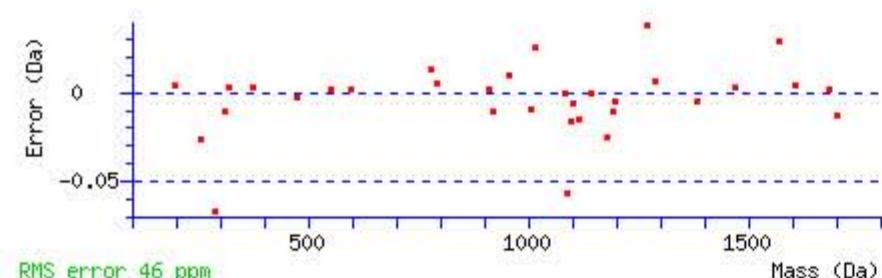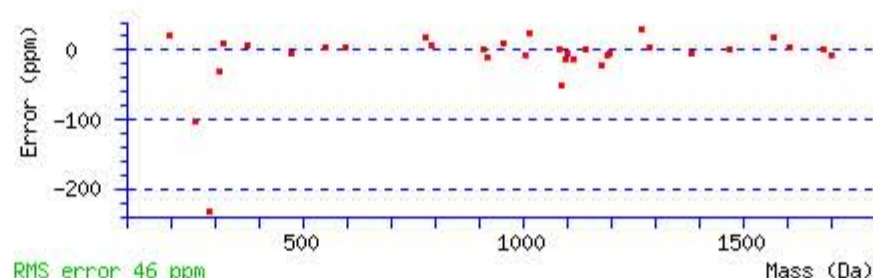

NCBI BLAST search of [VVGGCVAHPHSWPWQVSLR](#)

(Parameters: blastp, nr protein database, expect=20000, no filter, PAM30)

Other BLAST [web gateways](#)

All matches to this query

| Score | Mr(calc):   | Delta     | Sequence                            |
|-------|-------------|-----------|-------------------------------------|
| 48.8  | 2482.251480 | -0.018738 | <a href="#">VVGGCVAHPHSWPWQVSLR</a> |

Mascot: <http://www.matrixscience.com/>



# MASCOT Search Results

## Peptide View

MS/MS Fragmentation of **NPDNDPQGPWCYTIDPEKR**  
 Found in **PLMN\_HUMAN**, Plasminogen OS=Homo sapiens GN=PLG PE=1 SV=2

Match to Query 61164: 2600.115822 from(867.712550,3+) rtinseconds(1956) index(70925)  
 Title: Locus:1.1.1.3214.25 File:"2013-07-02 CLN FXIII 30 min 2nd FT.wiff"  
 Data file C:\Program Files (x86)\Matrix Science\Mascot Daemon\mgf2 FXIII 30 min 2nd\mascot\_daemon\_merge.mgf

Click mouse within plot area to zoom in by factor of two about that point

Or, Plot from  to  Da

Label all possible matches  Label matches used for scoring

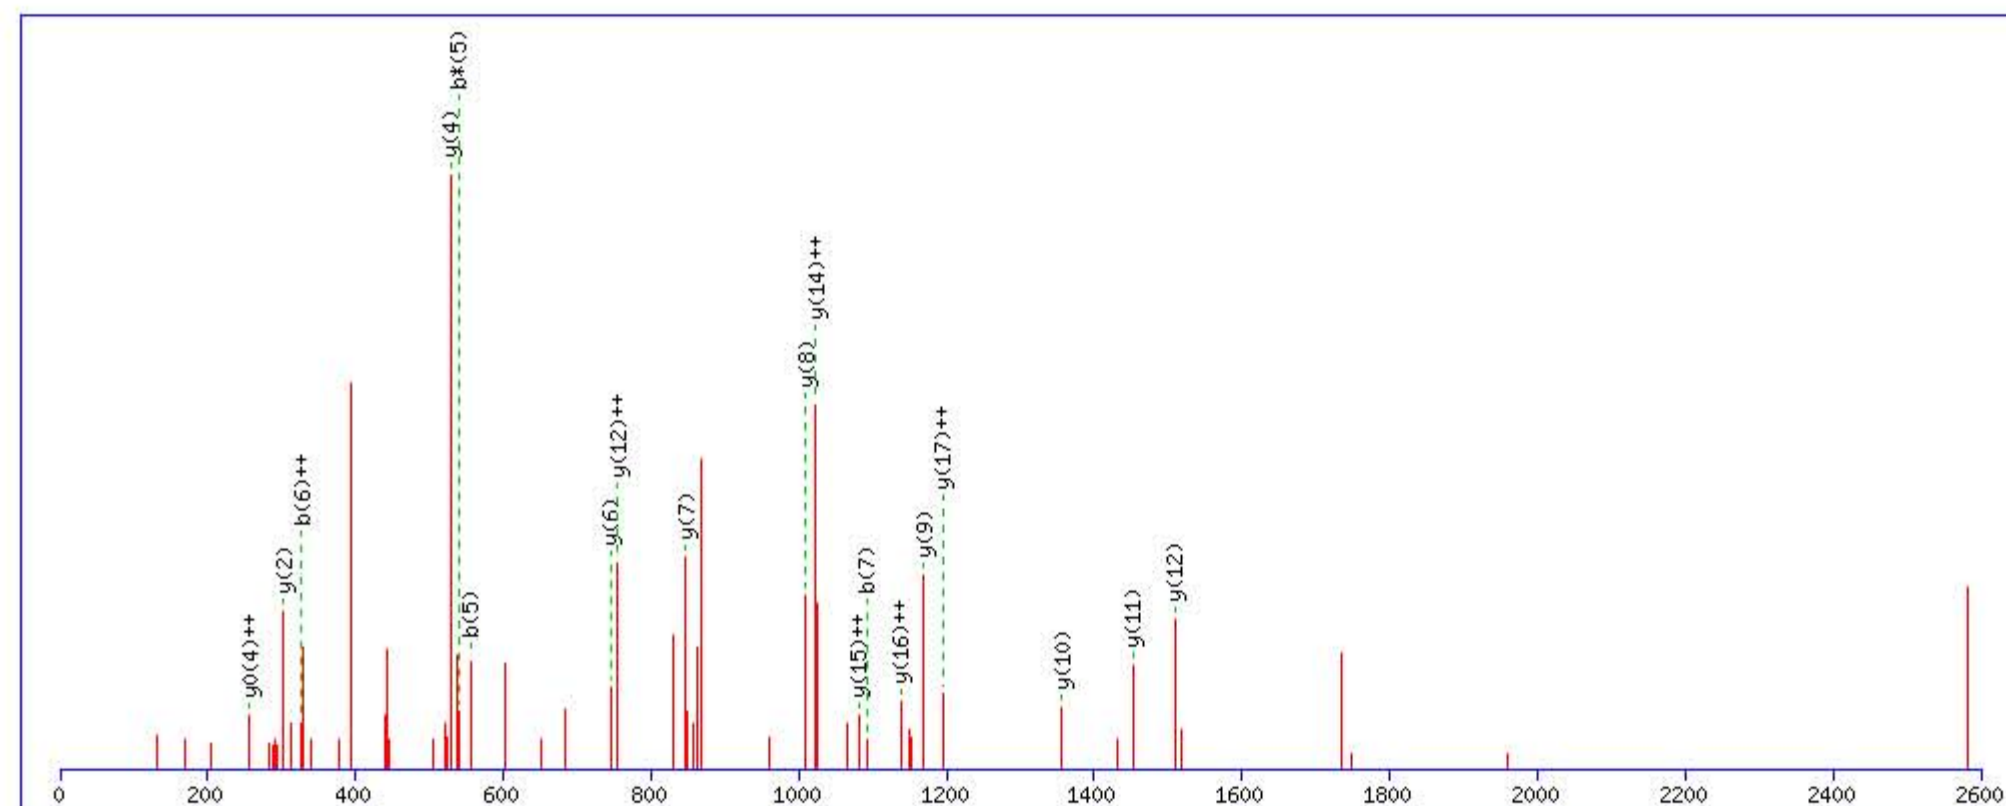

Monoisotopic mass of neutral peptide Mr(calc): 2600.142410  
 Fixed modifications: Carbamidomethyl (C) (apply to specified residues or termini only)  
 Variable modifications:  
 Q7 : Biotin:Thermo-21345 (Q)  
 Ions Score: 37 Expect: 0.00065  
 Matches : 20/208 fragment ions using 48 most intense peaks ([help](#))

| #  | b                  | b <sup>++</sup>   | b <sup>+</sup>    | b <sup>+++</sup> | b <sup>0</sup> | b <sup>0++</sup> | Seq. | y                  | y <sup>++</sup>    | y <sup>+</sup> | y <sup>+++</sup> | y <sup>0</sup> | y <sup>0++</sup>  | #  |
|----|--------------------|-------------------|-------------------|------------------|----------------|------------------|------|--------------------|--------------------|----------------|------------------|----------------|-------------------|----|
| 1  | 115.050203         | 58.028740         | 98.023654         | 49.515465        |                |                  | N    |                    |                    |                |                  |                |                   | 19 |
| 2  | 212.102967         | 106.555121        | 195.076418        | 98.041847        |                |                  | P    | 2487.106759        | 1244.057017        | 2470.080210    | 1235.543743      | 2469.096194    | 1235.051735       | 18 |
| 3  | <b>327.129910</b>  | 164.068593        | 310.103361        | 155.555319       | 309.119345     | 155.063311       | D    | 2390.053995        | <b>1195.530635</b> | 2373.027446    | 1187.017361      | 2372.043430    | 1186.525353       | 17 |
| 4  | 441.172837         | 221.090057        | 424.146288        | 212.576782       | 423.162272     | 212.084774       | N    | 2275.027052        | <b>1138.017164</b> | 2258.000503    | 1129.503889      | 2257.016487    | 1129.011881       | 16 |
| 5  | <b>556.199780</b>  | 278.603528        | <b>539.173231</b> | 270.090254       | 538.189215     | 269.598246       | D    | 2160.984125        | <b>1080.995700</b> | 2143.957576    | 1072.482426      | 2142.973560    | 1071.990418       | 15 |
| 6  | 653.252544         | <b>327.129910</b> | 636.225995        | 318.616636       | 635.241979     | 318.124628       | P    | 2045.957182        | <b>1023.482229</b> | 2028.930633    | 1014.968955      | 2027.946617    | 1014.476946       | 14 |
| 7  | <b>1092.477870</b> | 546.742573        | 1075.451321       | 538.229299       | 1074.467305    | 537.737290       | Q    | 1948.904418        | 974.955847         | 1931.877869    | 966.442572       | 1930.893853    | 965.950564        | 13 |
| 8  | 1149.499334        | 575.253305        | 1132.472785       | 566.740030       | 1131.488769    | 566.248022       | G    | <b>1509.679092</b> | <b>755.343184</b>  | 1492.652543    | 746.829910       | 1491.668527    | 746.337902        | 12 |
| 9  | 1246.552098        | 623.779687        | 1229.525549       | 615.266413       | 1228.541533    | 614.774404       | P    | <b>1452.657628</b> | 726.832452         | 1435.631079    | 718.319178       | 1434.647063    | 717.827170        | 11 |
| 10 | 1432.631411        | 716.819343        | 1415.604862       | 708.306069       | 1414.620846    | 707.814061       | W    | <b>1355.604864</b> | 678.306070         | 1338.578315    | 669.792796       | 1337.594299    | 669.300788        | 10 |
| 11 | 1592.662060        | 796.834668        | 1575.635511       | 788.321394       | 1574.651495    | 787.829385       | C    | <b>1169.525551</b> | 585.266414         | 1152.499002    | 576.753139       | 1151.514986    | 576.261131        | 9  |
| 12 | 1755.725389        | 878.366333        | 1738.698840       | 869.853058       | 1737.714824    | 869.361050       | Y    | <b>1009.494902</b> | 505.251089         | 992.468353     | 496.737815       | 991.484337     | 496.245807        | 8  |
| 13 | 1856.773068        | 928.890172        | 1839.746519       | 920.376898       | 1838.762503    | 919.884889       | T    | <b>846.431573</b>  | 423.719425         | 829.405024     | 415.206150       | 828.421008     | 414.714142        | 7  |
| 14 | 1957.820747        | 979.414012        | 1940.794198       | 970.900737       | 1939.810182    | 970.408729       | T    | <b>745.383894</b>  | 373.195585         | 728.357345     | 364.682311       | 727.373329     | 364.190303        | 6  |
| 15 | 2072.847690        | 1036.927483       | 2055.821141       | 1028.414208      | 2054.837125    | 1027.922200      | D    | 644.336215         | 322.671746         | 627.309666     | 314.158471       | 626.325650     | 313.666463        | 5  |
| 16 | 2169.900454        | 1085.453865       | 2152.873905       | 1076.940590      | 2151.889889    | 1076.448582      | P    | <b>529.309272</b>  | 265.158274         | 512.282723     | 256.645000       | 511.298707     | <b>256.152992</b> | 4  |
| 17 | 2298.943047        | 1149.975161       | 2281.916498       | 1141.461887      | 2280.932482    | 1140.969879      | E    | 432.256508         | 216.631892         | 415.229959     | 208.118618       | 414.245943     | 207.626610        | 3  |
| 18 | 2427.038010        | 1214.022643       | 2410.011461       | 1205.509368      | 2409.027445    | 1205.017360      | K    | <b>303.213915</b>  | 152.110595         | 286.187366     | 143.597321       |                |                   | 2  |
| 19 |                    |                   |                   |                  |                |                  | R    | 175.118952         | 88.063114          | 158.092403     | 79.549839        |                |                   | 1  |

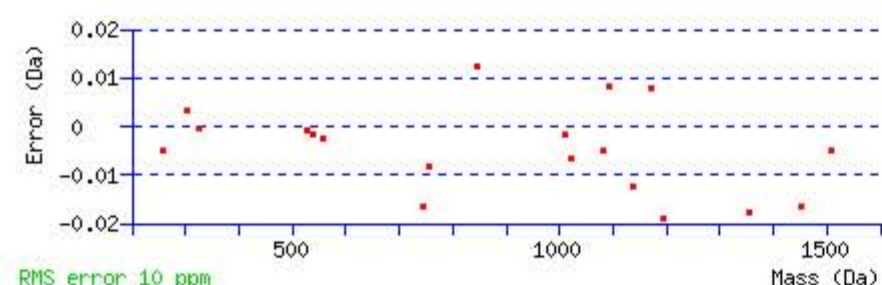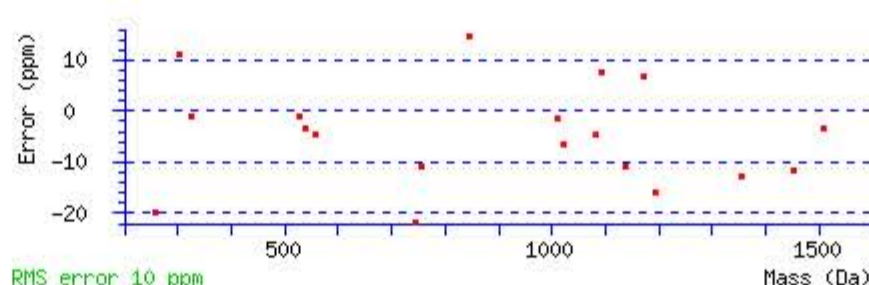

NCBI BLAST search of [NPDNDPQGPWCYTIDPEKR](#)  
 (Parameters: blastp, nr protein database, expect=20000, no filter, PAM30)  
 Other BLAST [web gateways](#)

## All matches to this query

| Score | Mr(calc):   | Delta     | Sequence                            |
|-------|-------------|-----------|-------------------------------------|
| 37.4  | 2600.142410 | -0.026588 | <a href="#">NPDNDPQGPWCYTIDPEKR</a> |



# MASCOT Search Results

## Peptide View

MS/MS Fragmentation of **VILGAHQEVNLEPHVQEIEVSR**

Found in **PLMN\_HUMAN**, Plasminogen OS=Homo sapiens GN=PLG PE=1 SV=2

Match to Query 63164: 2806.463576 from(702.623170,4+) rtinseconds(2093) index(71740)

Title: Locus:1.1.1.3262.17 File:"2013-07-02 CLN FXIII 30 min 2nd FT.wiff"

Data file C:\Program Files (x86)\Matrix Science\Mascot Daemon\mgf2 FXIII 30 min 2nd\mascot\_daemon\_merge.mgf

Click mouse within plot area to zoom in by factor of two about that point

Or, Plot from  to  Da

Label all possible matches  Label matches used for scoring

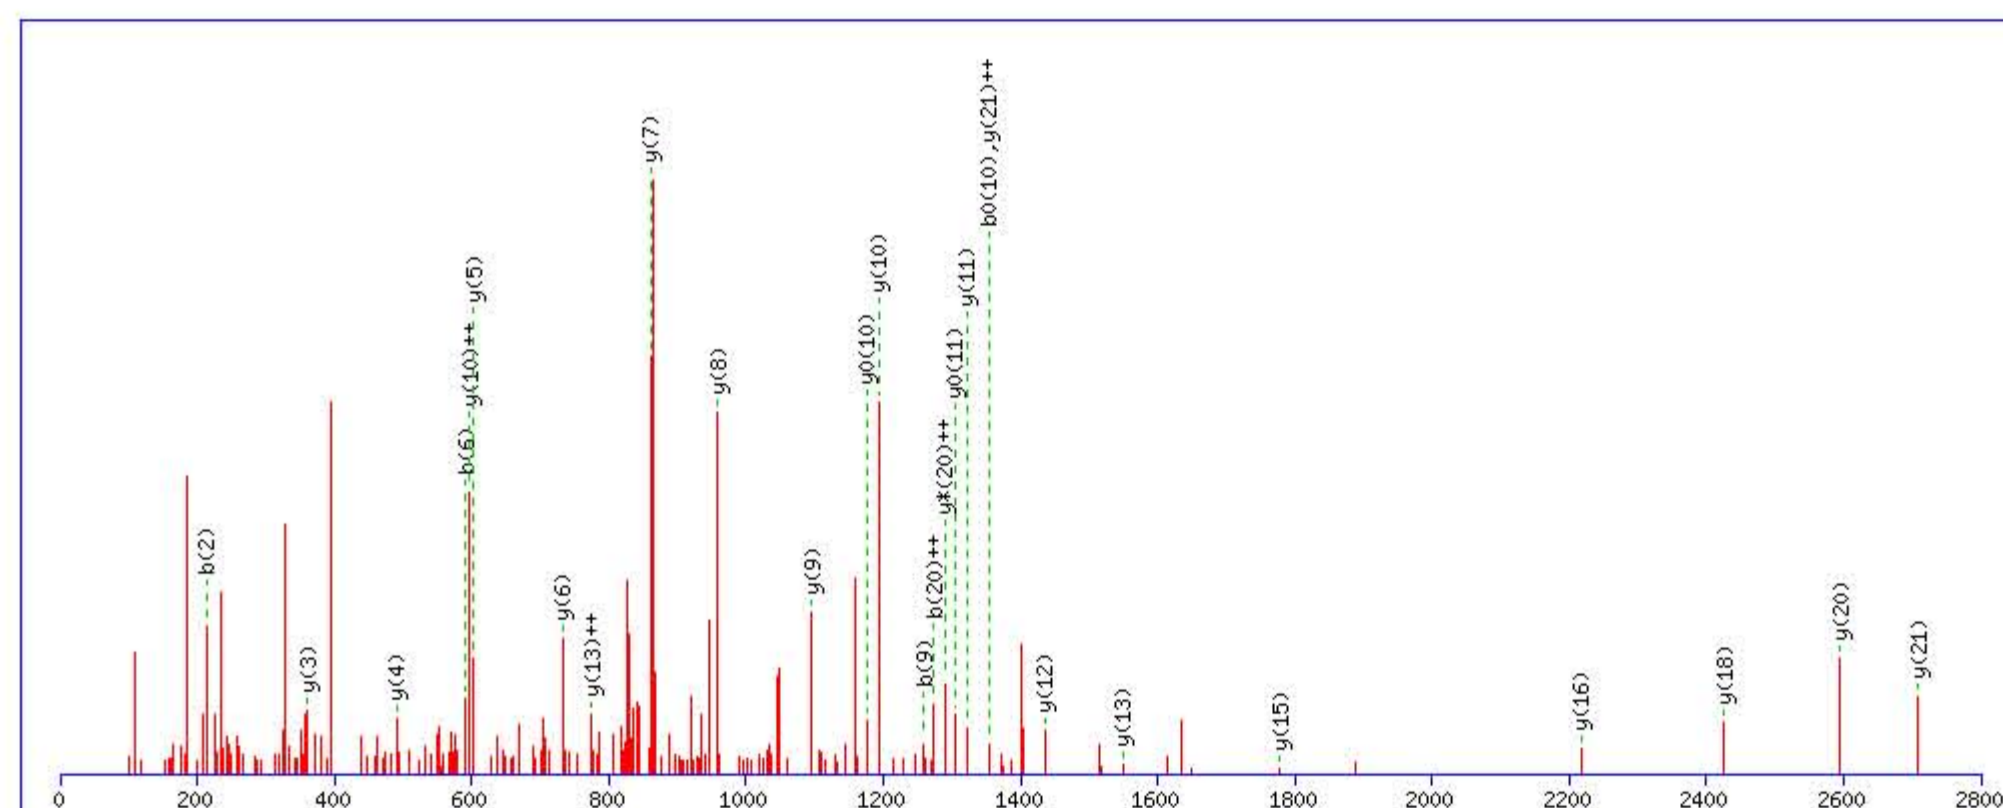

Monoisotopic mass of neutral peptide Mr(calc): 2806.479965

Fixed modifications: Carbamidomethyl (C) (apply to specified residues or termini only)

Variable modifications:

Q7 : Biotin:Thermo-21345 (Q)

Ions Score: 88 Expect: 6.4e-009

Matches : 27/224 fragment ions using 55 most intense peaks [\(help\)](#)

| #  | b                  | b <sup>++</sup>    | b <sup>*</sup> | b <sup>*++</sup> | b <sup>0</sup>     | b <sup>0++</sup> | Seq. | y                  | y <sup>++</sup>    | y <sup>*</sup> | y <sup>*++</sup>   | y <sup>0</sup>     | y <sup>0++</sup> | #  |
|----|--------------------|--------------------|----------------|------------------|--------------------|------------------|------|--------------------|--------------------|----------------|--------------------|--------------------|------------------|----|
| 1  | 100.075690         | 50.541483          |                |                  |                    |                  | V    |                    |                    |                |                    |                    |                  | 22 |
| 2  | <b>213.159754</b>  | 107.083515         |                |                  |                    |                  | I    | <b>2708.418847</b> | <b>1354.713061</b> | 2691.392298    | 1346.199787        | 2690.408282        | 1345.707779      | 21 |
| 3  | 326.243818         | 163.625547         |                |                  |                    |                  | L    | <b>2595.334783</b> | 1298.171029        | 2578.308234    | <b>1289.657755</b> | 2577.324218        | 1289.165747      | 20 |
| 4  | 383.265282         | 192.136279         |                |                  |                    |                  | G    | 2482.250719        | 1241.628997        | 2465.224170    | 1233.115723        | 2464.240154        | 1232.623715      | 19 |
| 5  | 454.302396         | 227.654836         |                |                  |                    |                  | A    | <b>2425.229255</b> | 1213.118265        | 2408.202706    | 1204.604991        | 2407.218690        | 1204.112983      | 18 |
| 6  | <b>591.361308</b>  | 296.184292         |                |                  |                    |                  | H    | 2354.192141        | 1177.599708        | 2337.165592    | 1169.086434        | 2336.181576        | 1168.594426      | 17 |
| 7  | 1030.586634        | 515.796955         | 1013.560085    | 507.283681       |                    |                  | Q    | <b>2217.133229</b> | 1109.070252        | 2200.106680    | 1100.556978        | 2199.122664        | 1100.064970      | 16 |
| 8  | 1159.629227        | 580.318252         | 1142.602678    | 571.804977       | 1141.618662        | 571.312969       | E    | <b>1777.907903</b> | 889.457590         | 1760.881354    | 880.944315         | 1759.897338        | 880.452307       | 15 |
| 9  | <b>1258.697641</b> | 629.852459         | 1241.671092    | 621.339184       | 1240.687076        | 620.847176       | V    | 1648.865310        | 824.936293         | 1631.838761    | 816.423019         | 1630.854745        | 815.931011       | 14 |
| 10 | 1372.740568        | 686.873922         | 1355.714019    | 678.360648       | <b>1354.730003</b> | 677.868640       | N    | <b>1549.796896</b> | <b>775.402086</b>  | 1532.770347    | 766.888812         | 1531.786331        | 766.396804       | 13 |
| 11 | 1485.824632        | 743.415954         | 1468.798083    | 734.902680       | 1467.814067        | 734.410672       | L    | <b>1435.753969</b> | 718.380623         | 1418.727420    | 709.867348         | 1417.743404        | 709.375340       | 12 |
| 12 | 1614.867225        | 807.937251         | 1597.840676    | 799.423976       | 1596.856660        | 798.931968       | E    | <b>1322.669905</b> | 661.838591         | 1305.643356    | 653.325316         | <b>1304.659340</b> | 652.833308       | 11 |
| 13 | 1711.919989        | 856.463633         | 1694.893440    | 847.950358       | 1693.909424        | 847.458350       | P    | <b>1193.627312</b> | <b>597.317294</b>  | 1176.600763    | 588.804020         | <b>1175.616747</b> | 588.312012       | 10 |
| 14 | 1848.978901        | 924.993089         | 1831.952352    | 916.479814       | 1830.968336        | 915.987806       | H    | <b>1096.574548</b> | 548.790912         | 1079.547999    | 540.277638         | 1078.563983        | 539.785630       | 9  |
| 15 | 1948.047315        | 974.527296         | 1931.020766    | 966.014021       | 1930.036750        | 965.522013       | V    | <b>959.515636</b>  | 480.261456         | 942.489087     | 471.748182         | 941.505071         | 471.256174       | 8  |
| 16 | 2076.105893        | 1038.556584        | 2059.079344    | 1030.043310      | 2058.095328        | 1029.551302      | Q    | <b>860.447222</b>  | 430.727249         | 843.420673     | 422.213975         | 842.436657         | 421.721967       | 7  |
| 17 | 2205.148486        | 1103.077881        | 2188.121937    | 1094.564606      | 2187.137921        | 1094.072598      | E    | <b>732.388644</b>  | 366.697960         | 715.362095     | 358.184686         | 714.378079         | 357.692678       | 6  |
| 18 | 2318.232550        | 1159.619913        | 2301.206001    | 1151.106638      | 2300.221985        | 1150.614631      | I    | <b>603.346051</b>  | 302.176664         | 586.319502     | 293.663389         | 585.335486         | 293.171381       | 5  |
| 19 | 2447.275143        | 1224.141210        | 2430.248594    | 1215.627935      | 2429.264578        | 1215.135927      | E    | <b>490.261987</b>  | 245.634631         | 473.235438     | 237.121357         | 472.251422         | 236.629349       | 4  |
| 20 | 2546.343557        | <b>1273.675417</b> | 2529.317008    | 1265.162142      | 2528.332992        | 1264.670134      | V    | <b>361.219394</b>  | 181.113335         | 344.192845     | 172.600060         | 343.208829         | 172.108052       | 3  |
| 21 | 2633.375585        | 1317.191431        | 2616.349036    | 1308.678156      | 2615.365020        | 1308.186148      | S    | 262.150980         | 131.579128         | 245.124431     | 123.065854         | 244.140415         | 122.573846       | 2  |
| 22 |                    |                    |                |                  |                    |                  | R    | 175.118952         | 88.063114          | 158.092403     | 79.549839          |                    |                  | 1  |

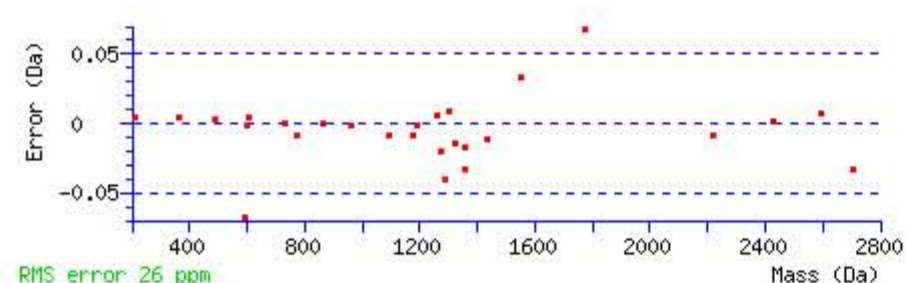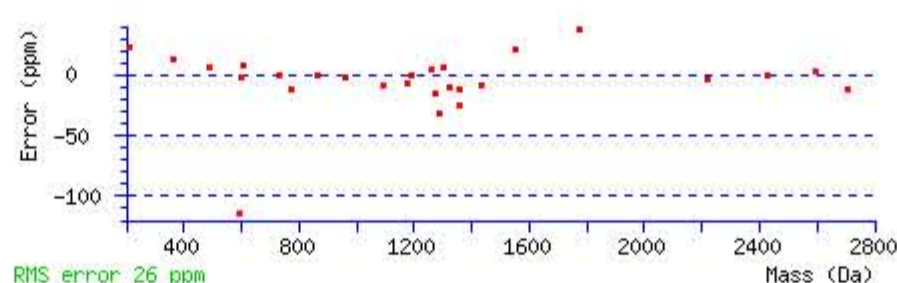

NCBI BLAST search of [VILGAHQEVNLEPHVQEIEVSR](#)

(Parameters: blastp, nr protein database, expect=20000, no filter, PAM30)

Other BLAST [web gateways](#)

### All matches to this query

| Score | Mr(calc):   | Delta     | Sequence                                 |
|-------|-------------|-----------|------------------------------------------|
| 87.9  | 2806.479965 | -0.016389 | <a href="#">VILGAHQEVNLEPHVQEIEVSR</a>   |
| 17.4  | 2806.479965 | -0.016389 | <a href="#">VILGAHQEVNLEPHVQEIEVSR</a>   |
| 0.6   | 2806.424484 | 0.039092  | <a href="#">VAQGIMKLCLEELFADVTISVEGR</a> |



# MASCOT Search Results

## Peptide View

MS/MS Fragmentation of **VILGAHQEVNLEPHVQEIIVSR**

Found in **PLMN\_HUMAN**, Plasminogen OS=Homo sapiens GN=PLG PE=1 SV=2

Match to Query 63165: 2806.466856 from(702.623990,4+) rtinseconds(2067) index(71584)

Title: Locus:1.1.1.3253.20 File:"2013-07-02 CLN FXIII 30 min 2nd FT.wiff"

Data file C:\Program Files (x86)\Matrix Science\Mascot Daemon\mgf2 FXIII 30 min 2nd\mascot\_daemon\_merge.mgf

Click mouse within plot area to zoom in by factor of two about that point

Or, Plot from  to  Da

Label all possible matches  Label matches used for scoring

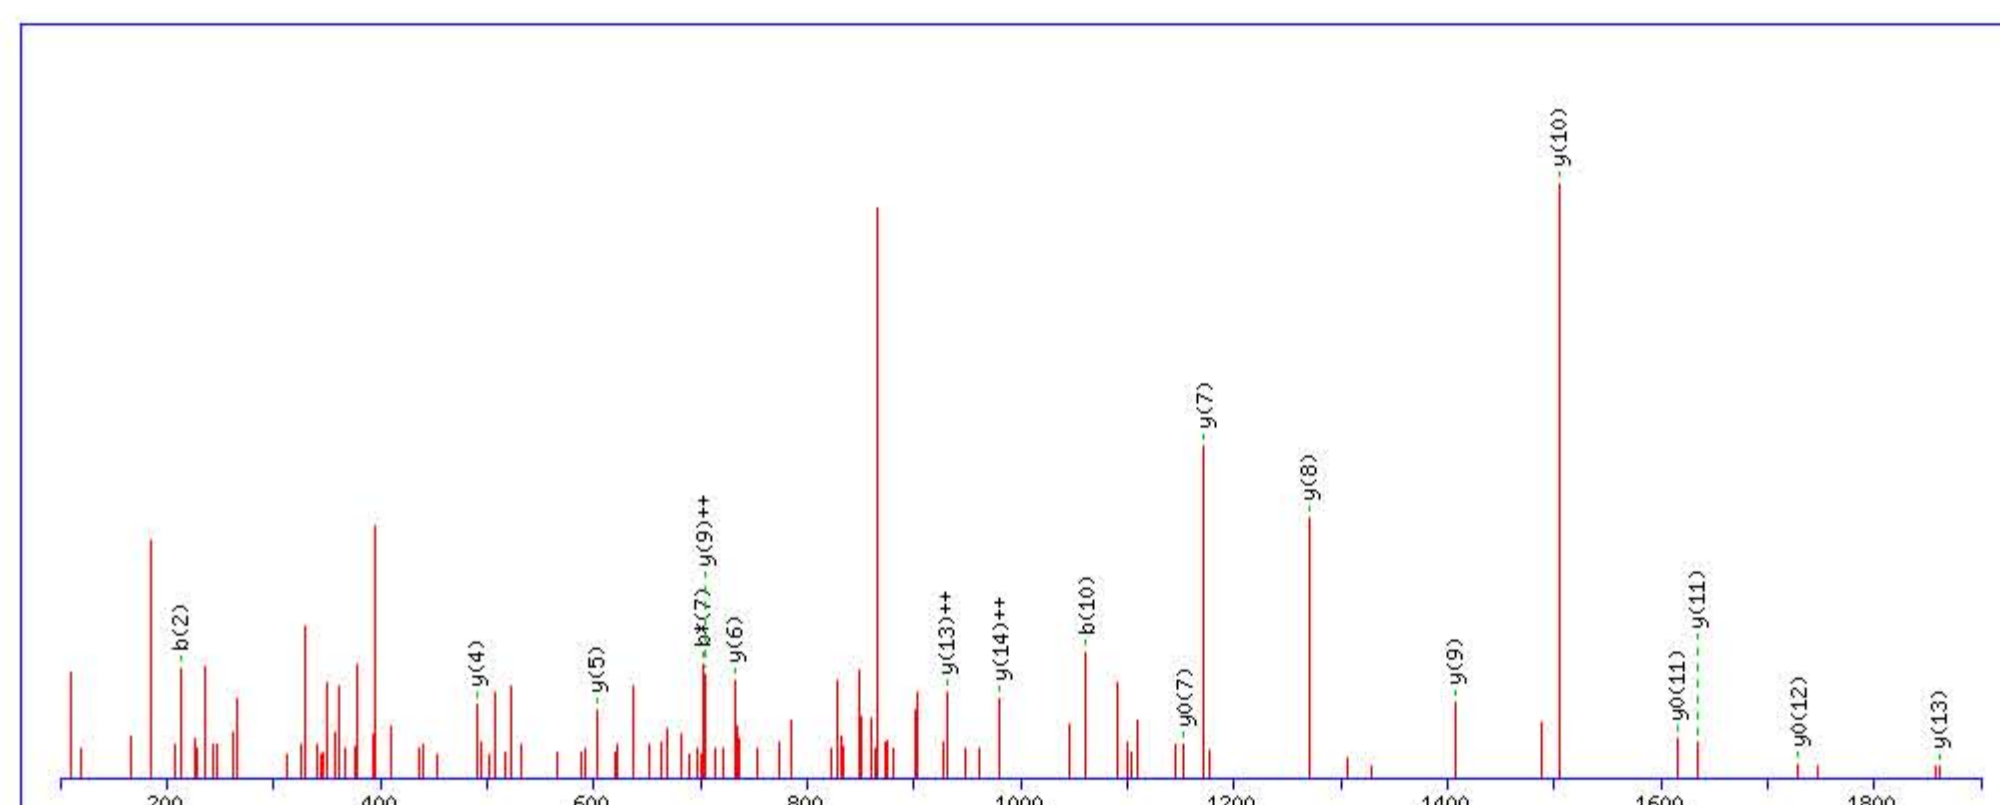

Monoisotopic mass of neutral peptide Mr(calc): 2806.479965

Fixed modifications: Carbamidomethyl (C) (apply to specified residues or termini only)

Variable modifications:

Q16 : Biotin:Thermo-21345 (Q)

Ions Score: 41 Expect: 0.0021

Matches : 18/224 fragment ions using 34 most intense peaks [\(help\)](#)

| #  | b                  | b <sup>++</sup> | b <sup>*</sup>    | b <sup>*++</sup> | b <sup>0</sup> | b <sup>0++</sup> | Seq. | y                  | y <sup>++</sup>   | y <sup>*</sup> | y <sup>*++</sup> | y <sup>0</sup>     | y <sup>0++</sup> | #  |
|----|--------------------|-----------------|-------------------|------------------|----------------|------------------|------|--------------------|-------------------|----------------|------------------|--------------------|------------------|----|
| 1  | 100.075690         | 50.541483       |                   |                  |                |                  | V    |                    |                   |                |                  |                    |                  | 22 |
| 2  | <b>213.159754</b>  | 107.083515      |                   |                  |                |                  | I    | 2708.418847        | 1354.713061       | 2691.392298    | 1346.199787      | 2690.408282        | 1345.707779      | 21 |
| 3  | 326.243818         | 163.625547      |                   |                  |                |                  | L    | 2595.334783        | 1298.171029       | 2578.308234    | 1289.657755      | 2577.324218        | 1289.165747      | 20 |
| 4  | 383.265282         | 192.136279      |                   |                  |                |                  | G    | 2482.250719        | 1241.628997       | 2465.224170    | 1233.115723      | 2464.240154        | 1232.623715      | 19 |
| 5  | 454.302396         | 227.654836      |                   |                  |                |                  | A    | 2425.229255        | 1213.118265       | 2408.202706    | 1204.604991      | 2407.218690        | 1204.112983      | 18 |
| 6  | 591.361308         | 296.184292      |                   |                  |                |                  | H    | 2354.192141        | 1177.599708       | 2337.165592    | 1169.086434      | 2336.181576        | 1168.594426      | 17 |
| 7  | 719.419886         | 360.213581      | <b>702.393337</b> | 351.700307       |                |                  | Q    | 2217.133229        | 1109.070252       | 2200.106680    | 1100.556978      | 2199.122664        | 1100.064970      | 16 |
| 8  | 848.462479         | 424.734878      | 831.435930        | 416.221603       | 830.451914     | 415.729595       | E    | 2089.074651        | 1045.040963       | 2072.048102    | 1036.527689      | 2071.064086        | 1036.035681      | 15 |
| 9  | 947.530893         | 474.269085      | 930.504344        | 465.755810       | 929.520328     | 465.263802       | V    | 1960.032058        | <b>980.519667</b> | 1943.005509    | 972.006393       | 1942.021493        | 971.514385       | 14 |
| 10 | <b>1061.573820</b> | 531.290548      | 1044.547271       | 522.777274       | 1043.563255    | 522.285266       | N    | <b>1860.963644</b> | <b>930.985460</b> | 1843.937095    | 922.472186       | 1842.953079        | 921.980178       | 13 |
| 11 | 1174.657884        | 587.832580      | 1157.631335       | 579.319306       | 1156.647319    | 578.827297       | L    | 1746.920717        | 873.963997        | 1729.894168    | 865.450722       | <b>1728.910152</b> | 864.958714       | 12 |
| 12 | 1303.700477        | 652.353877      | 1286.673928       | 643.840602       | 1285.689912    | 643.348594       | E    | <b>1633.836653</b> | 817.421965        | 1616.810104    | 808.908690       | <b>1615.826088</b> | 808.416682       | 11 |
| 13 | 1400.753241        | 700.880259      | 1383.726692       | 692.366984       | 1382.742676    | 691.874976       | P    | <b>1504.794060</b> | 752.900668        | 1487.767511    | 744.387394       | 1486.783495        | 743.895386       | 10 |
| 14 | 1537.812153        | 769.409715      | 1520.785604       | 760.896440       | 1519.801588    | 760.404432       | H    | <b>1407.741296</b> | <b>704.374286</b> | 1390.714747    | 695.861012       | 1389.730731        | 695.369004       | 9  |
| 15 | 1636.880567        | 818.943922      | 1619.854018       | 810.430647       | 1618.870002    | 809.938639       | V    | <b>1270.682384</b> | 635.844830        | 1253.655835    | 627.331556       | 1252.671819        | 626.839548       | 8  |
| 16 | 2076.105893        | 1038.556584     | 2059.079344       | 1030.043310      | 2058.095328    | 1029.551302      | Q    | <b>1171.613970</b> | 586.310623        | 1154.587421    | 577.797349       | <b>1153.603405</b> | 577.305341       | 7  |
| 17 | 2205.148486        | 1103.077881     | 2188.121937       | 1094.564606      | 2187.137921    | 1094.072598      | E    | <b>732.388644</b>  | 366.697960        | 715.362095     | 358.184686       | 714.378079         | 357.692678       | 6  |
| 18 | 2318.232550        | 1159.619913     | 2301.206001       | 1151.106638      | 2300.221985    | 1150.614631      | I    | <b>603.346051</b>  | 302.176664        | 586.319502     | 293.663389       | 585.335486         | 293.171381       | 5  |
| 19 | 2447.275143        | 1224.141210     | 2430.248594       | 1215.627935      | 2429.264578    | 1215.135927      | E    | <b>490.261987</b>  | 245.634631        | 473.235438     | 237.121357       | 472.251422         | 236.629349       | 4  |
| 20 | 2546.343557        | 1273.675417     | 2529.317008       | 1265.162142      | 2528.332992    | 1264.670134      | V    | 361.219394         | 181.113335        | 344.192845     | 172.600060       | 343.208829         | 172.108052       | 3  |
| 21 | 2633.375585        | 1317.191431     | 2616.349036       | 1308.678156      | 2615.365020    | 1308.186148      | S    | 262.150980         | 131.579128        | 245.124431     | 123.065854       | 244.140415         | 122.573846       | 2  |
| 22 |                    |                 |                   |                  |                |                  | R    | 175.118952         | 88.063114         | 158.092403     | 79.549839        |                    |                  | 1  |

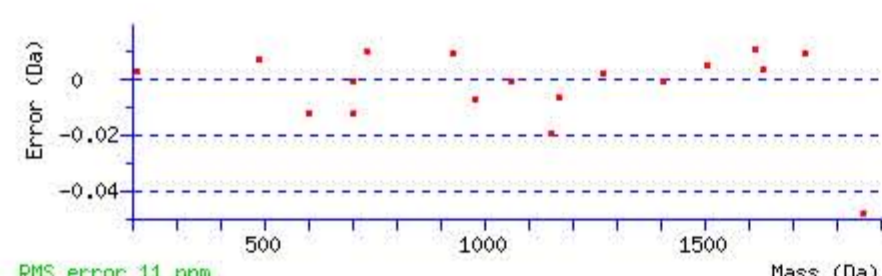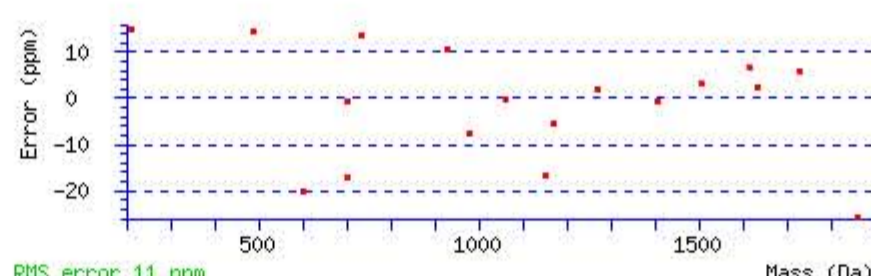

NCBI BLAST search of [VILGAHQEVNLEPHVQEIIVSR](#)

(Parameters: blastp, nr protein database, expect=20000, no filter, PAM30)

Other BLAST [web gateways](#)

All matches to this query

| Score | Mr(calc):   | Delta     | Sequence                               |
|-------|-------------|-----------|----------------------------------------|
| 40.8  | 2806.479965 | -0.013109 | <a href="#">VILGAHQEVNLEPHVQEIIVSR</a> |

Mascot: <http://www.matrixscience.com/>



# MASCOT Search Results

## Peptide View

MS/MS Fragmentation of **TMSGLECAWDSQSPHAHGYIPSK**

Found in **PLMN\_HUMAN**, Plasminogen OS=Homo sapiens GN=PLG PE=1 SV=2

Match to Query 65483: 2997.335416 from(750.341130,4+) rtinseconds(1931) index(70719)

Title: Locus:1.1.1.3206.13 File:"2013-07-02 CLN FXIII 30 min 2nd FT.wiff"

Data file C:\Program Files (x86)\Matrix Science\Mascot Daemon\mgf2 FXIII 30 min 2nd\mascot\_daemon\_merge.mgf

Click mouse within plot area to zoom in by factor of two about that point

Or, Plot from  to  Da

Label all possible matches  Label matches used for scoring

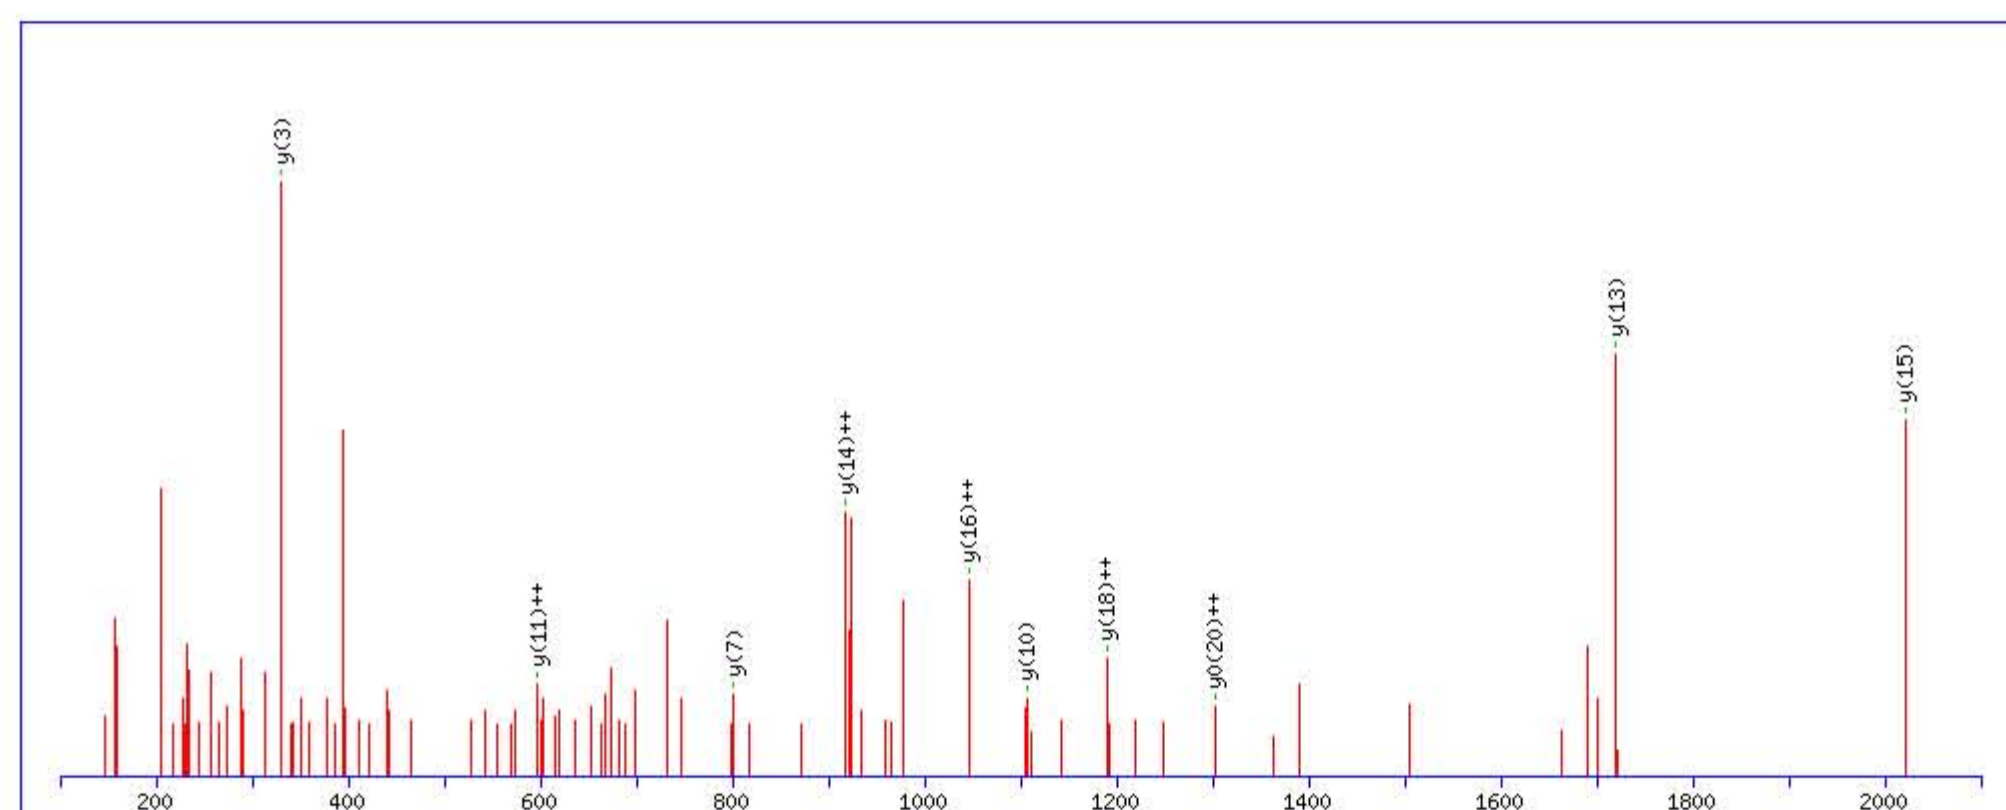

Monoisotopic mass of neutral peptide Mr(calc): 2997.357162

Fixed modifications: Carbamidomethyl (C) (apply to specified residues or termini only)

Variable modifications:

Q13 : Biotin:Thermo-21345 (Q)

Ions Score: 30 Expect: 0.0076

Matches : 10/260 fragment ions using 16 most intense peaks [\(help\)](#)

| #  | b           | b <sup>++</sup> | b <sup>+</sup> | b <sup>+++</sup> | b <sup>0</sup> | b <sup>0++</sup> | Seq. | y           | y <sup>++</sup> | y <sup>+</sup> | y <sup>+++</sup> | y <sup>0</sup> | y <sup>0++</sup> | #  |
|----|-------------|-----------------|----------------|------------------|----------------|------------------|------|-------------|-----------------|----------------|------------------|----------------|------------------|----|
| 1  | 102.054955  | 51.531116       |                |                  | 84.044390      | 42.525833        | T    |             |                 |                |                  |                |                  | 24 |
| 2  | 233.095440  | 117.051358      |                |                  | 215.084875     | 108.046076       | M    | 2897.316768 | 1449.162022     | 2880.290219    | 1440.648748      | 2879.306203    | 1440.156740      | 23 |
| 3  | 320.127468  | 160.567372      |                |                  | 302.116903     | 151.562089       | S    | 2766.276283 | 1383.641780     | 2749.249734    | 1375.128505      | 2748.265718    | 1374.636497      | 22 |
| 4  | 377.148932  | 189.078104      |                |                  | 359.138367     | 180.072821       | G    | 2679.244255 | 1340.125766     | 2662.217706    | 1331.612491      | 2661.233690    | 1331.120483      | 21 |
| 5  | 490.232996  | 245.620136      |                |                  | 472.222431     | 236.614853       | L    | 2622.222791 | 1311.615034     | 2605.196242    | 1303.101759      | 2604.212226    | 1302.609751      | 20 |
| 6  | 619.275589  | 310.141433      |                |                  | 601.265024     | 301.136150       | E    | 2509.138727 | 1255.073002     | 2492.112178    | 1246.559727      | 2491.128162    | 1246.067719      | 19 |
| 7  | 779.306238  | 390.156757      |                |                  | 761.295673     | 381.151475       | C    | 2380.096134 | 1190.551705     | 2363.069585    | 1182.038431      | 2362.085569    | 1181.546423      | 18 |
| 8  | 907.364816  | 454.186046      | 890.338267     | 445.672772       | 889.354251     | 445.180764       | Q    | 2220.065485 | 1110.536381     | 2203.038936    | 1102.023106      | 2202.054920    | 1101.531098      | 17 |
| 9  | 978.401930  | 489.704603      | 961.375381     | 481.191329       | 960.391365     | 480.699321       | A    | 2092.006907 | 1046.507092     | 2074.980358    | 1037.993817      | 2073.996342    | 1037.501809      | 16 |
| 10 | 1164.481243 | 582.744260      | 1147.454694    | 574.230985       | 1146.470678    | 573.738977       | W    | 2020.969793 | 1010.988535     | 2003.943244    | 1002.475260      | 2002.959228    | 1001.983252      | 15 |
| 11 | 1279.508186 | 640.257731      | 1262.481637    | 631.744457       | 1261.497621    | 631.252449       | D    | 1834.890480 | 917.948878      | 1817.863931    | 909.435604       | 1816.879915    | 908.943596       | 14 |
| 12 | 1366.540214 | 683.773745      | 1349.513665    | 675.260471       | 1348.529649    | 674.768463       | S    | 1719.863537 | 860.435407      | 1702.836988    | 851.922132       | 1701.852972    | 851.430124       | 13 |
| 13 | 1805.765540 | 903.386408      | 1788.738991    | 894.873134       | 1787.754975    | 894.381126       | Q    | 1632.831509 | 816.919393      | 1615.804960    | 808.406118       | 1614.820944    | 807.914110       | 12 |
| 14 | 1892.797568 | 946.902422      | 1875.771019    | 938.389148       | 1874.787003    | 937.897140       | S    | 1193.606183 | 597.306730      | 1176.579634    | 588.793455       | 1175.595618    | 588.301447       | 11 |
| 15 | 1989.850332 | 995.428804      | 1972.823783    | 986.915530       | 1971.839767    | 986.423522       | P    | 1106.574155 | 553.790716      | 1089.547606    | 545.277441       | 1088.563590    | 544.785433       | 10 |
| 16 | 2126.909244 | 1063.958260     | 2109.882695    | 1055.444986      | 2108.898679    | 1054.952978      | H    | 1009.521391 | 505.264334      | 992.494842     | 496.751059       | 991.510826     | 496.259051       | 9  |
| 17 | 2197.946358 | 1099.476817     | 2180.919809    | 1090.963543      | 2179.935793    | 1090.471535      | A    | 872.462479  | 436.734878      | 855.435930     | 428.221603       | 854.451914     | 427.729595       | 8  |
| 18 | 2335.005270 | 1168.006273     | 2317.978721    | 1159.492999      | 2316.994705    | 1159.000991      | H    | 801.425365  | 401.216321      | 784.398816     | 392.703046       | 783.414800     | 392.211038       | 7  |
| 19 | 2392.026734 | 1196.517005     | 2375.000185    | 1188.003731      | 2374.016169    | 1187.511723      | G    | 664.366453  | 332.686865      | 647.339904     | 324.173590       | 646.355888     | 323.681582       | 6  |
| 20 | 2555.090063 | 1278.048670     | 2538.063514    | 1269.535395      | 2537.079498    | 1269.043387      | Y    | 607.344989  | 304.176133      | 590.318440     | 295.662858       | 589.334424     | 295.170850       | 5  |
| 21 | 2668.174127 | 1334.590702     | 2651.147578    | 1326.077427      | 2650.163562    | 1325.585419      | I    | 444.281660  | 222.644468      | 427.255111     | 214.131194       | 426.271095     | 213.639186       | 4  |
| 22 | 2765.226891 | 1383.117084     | 2748.200342    | 1374.603809      | 2747.216326    | 1374.111801      | P    | 331.197596  | 166.102436      | 314.171047     | 157.589162       | 313.187031     | 157.097154       | 3  |
| 23 | 2852.258919 | 1426.633098     | 2835.232370    | 1418.119823      | 2834.248354    | 1417.627815      | S    | 234.144832  | 117.576054      | 217.118283     | 109.062780       | 216.134267     | 108.570772       | 2  |
| 24 |             |                 |                |                  |                |                  | K    | 147.112804  | 74.060040       | 130.086255     | 65.546765        |                |                  | 1  |

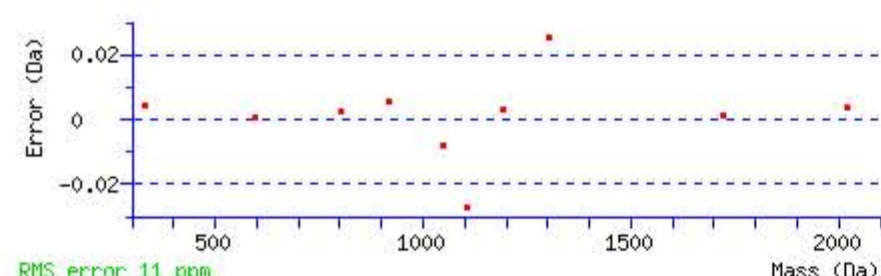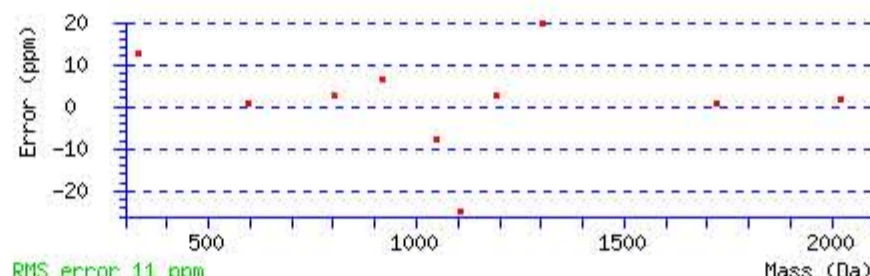

NCBI BLAST search of **TMSGLECAWDSQSPHAHGYIPSK**

(Parameters: blastp, nr protein database, expect=20000, no filter, PAM30)

Other BLAST [web gateways](#)

All matches to this query

| Score | Mr(calc):   | Delta     | Sequence                                |
|-------|-------------|-----------|-----------------------------------------|
| 29.7  | 2997.357162 | -0.021746 | <a href="#">TMSGLECAWDSQSPHAHGYIPSK</a> |
| 2.3   | 2997.357162 | -0.021746 | <a href="#">TMSGLECAWDSQSPHAHGYIPSK</a> |



# Mascot Search Results

## Peptide View

MS/MS Fragmentation of **GNVAVTVSGHTCQHWSAQTPHTHNR**  
 Found in **PLMN\_HUMAN**, Plasminogen OS=Homo sapiens GN=PLG PE=1 SV=2

Match to Query 66223: 3092.444820 from(619.496240,5+) rtinseconds(1451) index(67735)  
 Title: Locus:1.1.1.3038.23 File:"2013-07-02 CLN FXIII 30 min 2nd FT.wiff"  
 Data file C:\Program Files (x86)\Matrix Science\Mascot Daemon\mgf2 FXIII 30 min 2nd\mascot\_daemon\_merge.mgf

Click mouse within plot area to zoom in by factor of two about that point  
 Or, Plot from  to  Da   
 Label all possible matches  Label matches used for scoring

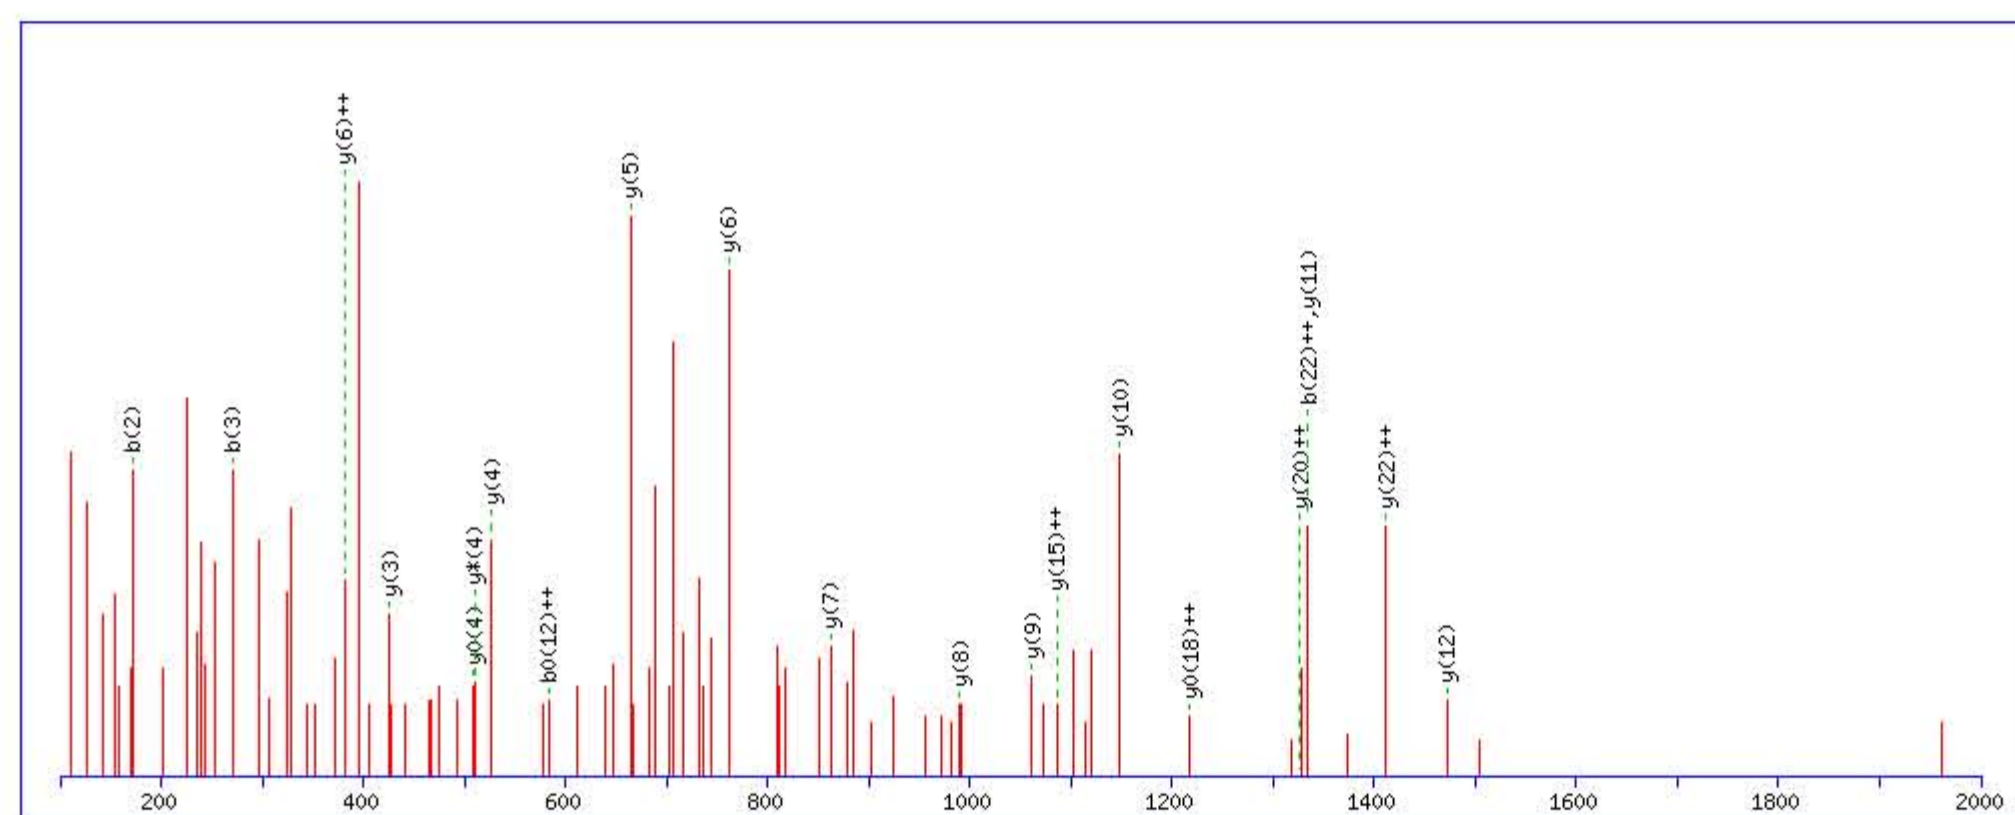

Monoisotopic mass of neutral peptide Mr(calc): 3092.457016  
 Fixed modifications: Carbamidomethyl (C) (apply to specified residues or termini only)  
 Variable modifications:  
 Q13 : Biotin:Thermo-21345 (Q)  
 Ions Score: 42 Expect: 0.0011  
 Matches : 21/270 fragment ions using 41 most intense peaks [\(help\)](#)

| #  | b                 | b <sup>++</sup>    | b <sup>+</sup> | b <sup>+++</sup> | b <sup>0</sup> | b <sup>0++</sup>  | Seq. | y                  | y <sup>++</sup>    | y <sup>+</sup>    | y <sup>+++</sup> | y <sup>0</sup>    | y <sup>0++</sup>   | #  |
|----|-------------------|--------------------|----------------|------------------|----------------|-------------------|------|--------------------|--------------------|-------------------|------------------|-------------------|--------------------|----|
| 1  | 58.028740         | 29.518008          |                |                  |                |                   | G    |                    |                    |                   |                  |                   |                    | 25 |
| 2  | <b>172.071667</b> | 86.539471          | 155.045118     | 78.026197        |                |                   | N    | 3036.442790        | 1518.725033        | 3019.416241       | 1510.211758      | 3018.432225       | 1509.719750        | 24 |
| 3  | <b>271.140081</b> | 136.073679         | 254.113532     | 127.560404       |                |                   | V    | 2922.399863        | 1461.703569        | 2905.373314       | 1453.190295      | 2904.389298       | 1452.698287        | 23 |
| 4  | 342.177195        | 171.592236         | 325.150646     | 163.078961       |                |                   | A    | 2823.331449        | <b>1412.169362</b> | 2806.304900       | 1403.656088      | 2805.320884       | 1403.164080        | 22 |
| 5  | 441.245609        | 221.126443         | 424.219060     | 212.613168       |                |                   | V    | 2752.294335        | 1376.650805        | 2735.267786       | 1368.137531      | 2734.283770       | 1367.645523        | 21 |
| 6  | 542.293288        | 271.650282         | 525.266739     | 263.137008       | 524.282723     | 262.645000        | T    | 2653.225921        | <b>1327.116598</b> | 2636.199372       | 1318.603324      | 2635.215356       | 1318.111316        | 20 |
| 7  | 641.361702        | 321.184489         | 624.335153     | 312.671215       | 623.351137     | 312.179207        | V    | 2552.178242        | 1276.592759        | 2535.151693       | 1268.079484      | 2534.167677       | 1267.587476        | 19 |
| 8  | 728.393730        | 364.700503         | 711.367181     | 356.187229       | 710.383165     | 355.695221        | S    | 2453.109828        | 1227.058552        | 2436.083279       | 1218.545277      | 2435.099263       | <b>1218.053269</b> | 18 |
| 9  | 785.415194        | 393.211235         | 768.388645     | 384.697961       | 767.404629     | 384.205953        | G    | 2366.077800        | 1183.542538        | 2349.051251       | 1175.029263      | 2348.067235       | 1174.537255        | 17 |
| 10 | 922.474106        | 461.740691         | 905.447557     | 453.227417       | 904.463541     | 452.735409        | H    | 2309.056336        | 1155.031806        | 2292.029787       | 1146.518531      | 2291.045771       | 1146.026523        | 16 |
| 11 | 1023.521785       | 512.264530         | 1006.495236    | 503.751256       | 1005.511220    | 503.259248        | T    | 2171.997424        | <b>1086.502350</b> | 2154.970875       | 1077.989075      | 2153.986859       | 1077.497067        | 15 |
| 12 | 1183.552434       | 592.279855         | 1166.525885    | 583.766581       | 1165.541869    | <b>583.274572</b> | C    | 2070.949745        | 1035.978510        | 2053.923196       | 1027.465236      | 2052.939180       | 1026.973228        | 14 |
| 13 | 1622.777760       | 811.892518         | 1605.751211    | 803.379244       | 1604.767195    | 802.887236        | Q    | 1910.919096        | 955.963186         | 1893.892547       | 947.449911       | 1892.908531       | 946.957903         | 13 |
| 14 | 1759.836672       | 880.421974         | 1742.810123    | 871.908700       | 1741.826107    | 871.416692        | H    | <b>1471.693770</b> | 736.350523         | 1454.667221       | 727.837248       | 1453.683205       | 727.345240         | 12 |
| 15 | 1945.915985       | 973.461631         | 1928.889436    | 964.948356       | 1927.905420    | 964.456348        | W    | <b>1334.634858</b> | 667.821067         | 1317.608309       | 659.307792       | 1316.624293       | 658.815784         | 11 |
| 16 | 2032.948013       | 1016.977645        | 2015.921464    | 1008.464370      | 2014.937448    | 1007.972362       | S    | <b>1148.555545</b> | 574.781410         | 1131.528996       | 566.268136       | 1130.544980       | 565.776128         | 10 |
| 17 | 2103.985127       | 1052.496201        | 2086.958578    | 1043.982927      | 2085.974562    | 1043.490919       | A    | <b>1061.523517</b> | 531.265396         | 1044.496968       | 522.752122       | 1043.512952       | 522.260114         | 9  |
| 18 | 2232.043705       | 1116.525490        | 2215.017156    | 1108.012216      | 2214.033140    | 1107.520208       | Q    | <b>990.486403</b>  | 495.746839         | 973.459854        | 487.233565       | 972.475838        | 486.741557         | 8  |
| 19 | 2333.091384       | 1167.049330        | 2316.064835    | 1158.536055      | 2315.080819    | 1158.044047       | T    | <b>862.427825</b>  | 431.717550         | 845.401276        | 423.204276       | 844.417260        | 422.712268         | 7  |
| 20 | 2430.144148       | 1215.575712        | 2413.117599    | 1207.062437      | 2412.133583    | 1206.570429       | P    | <b>761.380146</b>  | <b>381.193711</b>  | 744.353597        | 372.680436       | 743.369581        | 372.188428         | 6  |
| 21 | 2567.203060       | 1284.105168        | 2550.176511    | 1275.591893      | 2549.192495    | 1275.099885       | H    | <b>664.327382</b>  | 332.667329         | 647.300833        | 324.154054       | 646.316817        | 323.662046         | 5  |
| 22 | 2668.250739       | <b>1334.629007</b> | 2651.224190    | 1326.115733      | 2650.240174    | 1325.623725       | T    | <b>527.268470</b>  | 264.137873         | <b>510.241921</b> | 255.624598       | <b>509.257905</b> | 255.132590         | 4  |
| 23 | 2805.309651       | 1403.158463        | 2788.283102    | 1394.645189      | 2787.299086    | 1394.153181       | H    | <b>426.220791</b>  | 213.614033         | 409.194242        | 205.100759       |                   |                    | 3  |
| 24 | 2919.352578       | 1460.179927        | 2902.326029    | 1451.666652      | 2901.342013    | 1451.174644       | N    | 289.161879         | 145.084577         | 272.135330        | 136.571303       |                   |                    | 2  |
| 25 |                   |                    |                |                  |                |                   | R    | 175.118952         | 88.063114          | 158.092403        | 79.549839        |                   |                    | 1  |

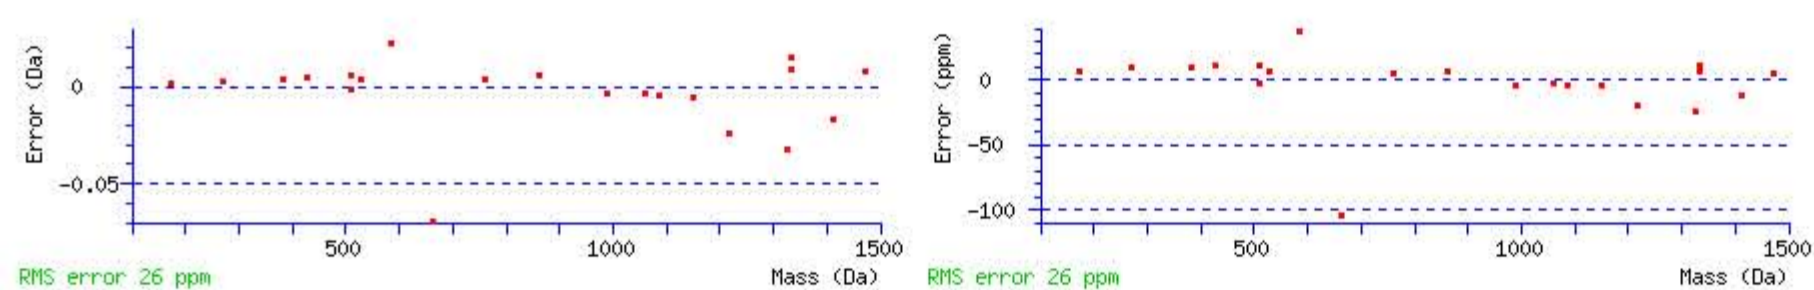

NCBI BLAST search of **GNVAVTVSGHTCQHWSAQTPHTHNR**  
 (Parameters: blastp, nr protein database, expect=20000, no filter, PAM30)  
 Other BLAST [web gateways](#)

### All matches to this query

| Score | Mr(calc):   | Delta     | Sequence                                  |
|-------|-------------|-----------|-------------------------------------------|
| 42.0  | 3092.457016 | -0.012196 | <a href="#">GNVAVTVSGHTCQHWSAQTPHTHNR</a> |
| 10.4  | 3092.457016 | -0.012196 | <a href="#">GNVAVTVSGHTCQHWSAQTPHTHNR</a> |



# Mascot Search Results

## Peptide View

MS/MS Fragmentation of **GNVAVTVSGHTCQHWSAQTPHTHNR**  
 Found in **PLMN\_HUMAN**, Plasminogen OS=Homo sapiens GN=PLG PE=1 SV=2

Match to Query 66229: 3092.465244 from(516.418150,6+) rtinseconds(1412) index(67412)  
 Title: Locus:1.1.1.3025.15 File:"2013-07-02 CLN FXIII 30 min 2nd FT.wiff"  
 Data file C:\Program Files (x86)\Matrix Science\Mascot Daemon\mgf2 FXIII 30 min 2nd\mascot\_daemon\_merge.mgf

Click mouse within plot area to zoom in by factor of two about that point  
 Or, Plot from  to  Da   
 Label all possible matches  Label matches used for scoring

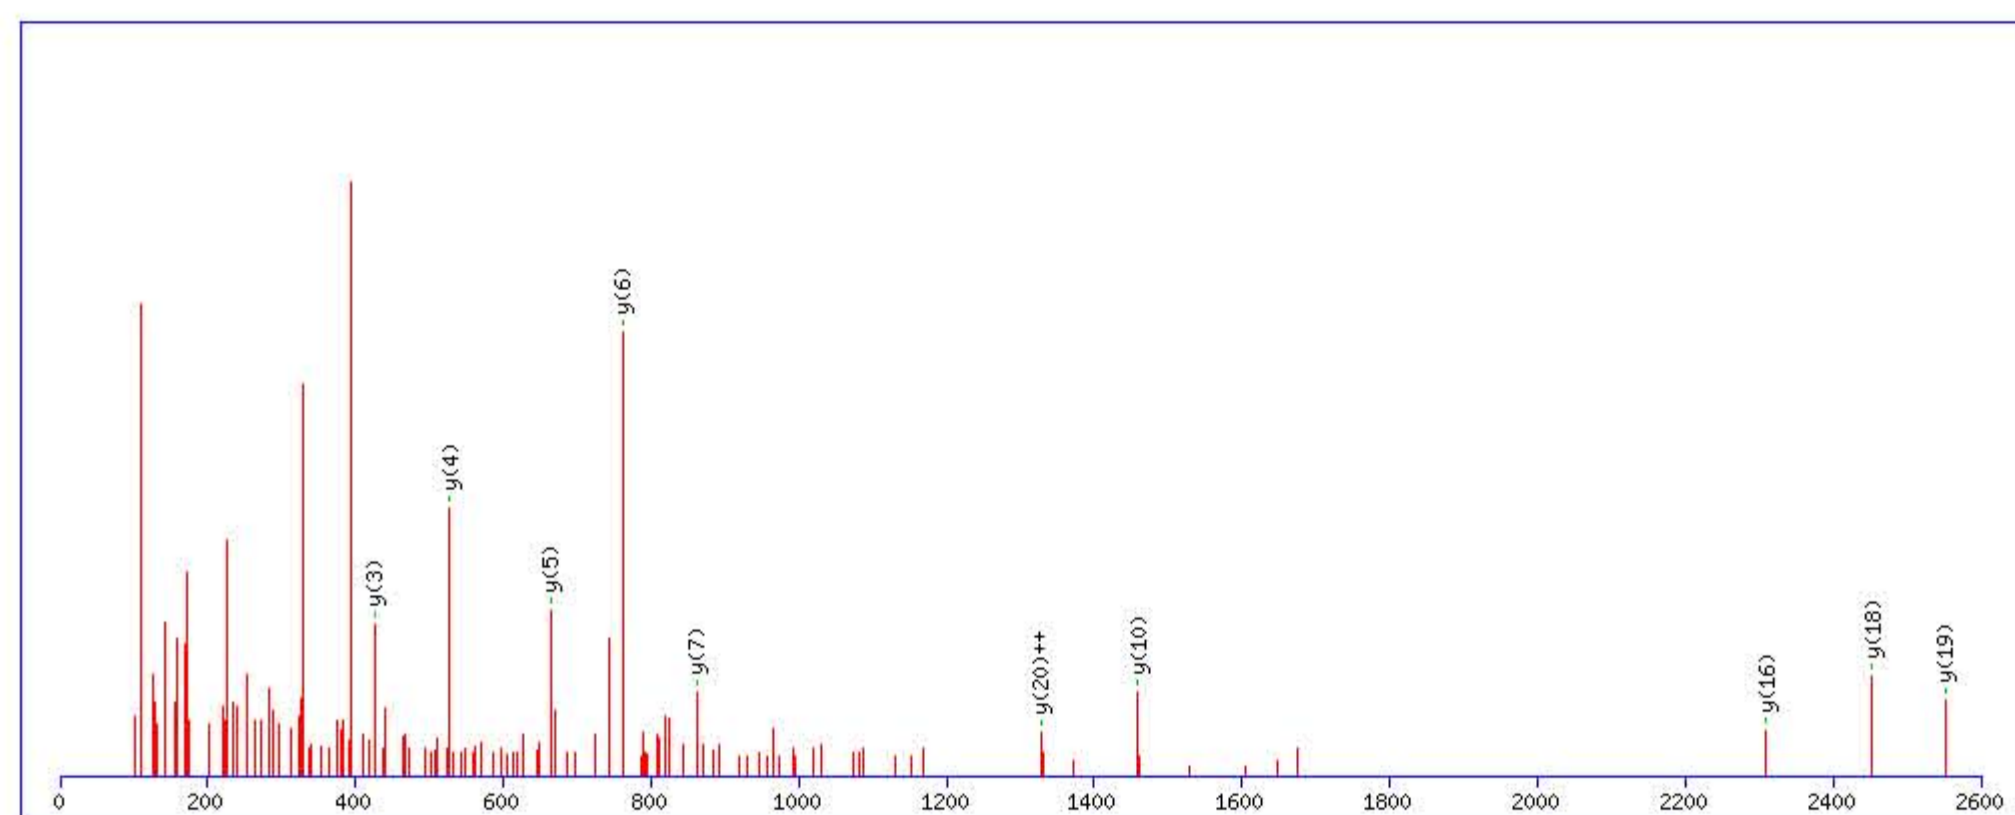

Monoisotopic mass of neutral peptide Mr(calc): 3092.457016  
 Fixed modifications: Carbamidomethyl (C) (apply to specified residues or termini only)  
 Variable modifications:  
 Q18 : Biotin:Thermo-21345 (Q)  
 Ions Score: 44 Expect: 0.0008  
 Matches : 10/270 fragment ions using 18 most intense peaks [\(help\)](#)

| #  | b           | b <sup>++</sup> | b <sup>+</sup> | b <sup>+++</sup> | b <sup>0</sup> | b <sup>0++</sup> | Seq. | y           | y <sup>++</sup> | y <sup>+</sup> | y <sup>+++</sup> | y <sup>0</sup> | y <sup>0++</sup> | #  |
|----|-------------|-----------------|----------------|------------------|----------------|------------------|------|-------------|-----------------|----------------|------------------|----------------|------------------|----|
| 1  | 58.028740   | 29.518008       |                |                  |                |                  | G    |             |                 |                |                  |                |                  | 25 |
| 2  | 172.071667  | 86.539471       | 155.045118     | 78.026197        |                |                  | N    | 3036.442790 | 1518.725033     | 3019.416241    | 1510.211758      | 3018.432225    | 1509.719750      | 24 |
| 3  | 271.140081  | 136.073679      | 254.113532     | 127.560404       |                |                  | V    | 2922.399863 | 1461.703569     | 2905.373314    | 1453.190295      | 2904.389298    | 1452.698287      | 23 |
| 4  | 342.177195  | 171.592236      | 325.150646     | 163.078961       |                |                  | A    | 2823.331449 | 1412.169362     | 2806.304900    | 1403.656088      | 2805.320884    | 1403.164080      | 22 |
| 5  | 441.245609  | 221.126443      | 424.219060     | 212.613168       |                |                  | V    | 2752.294335 | 1376.650805     | 2735.267786    | 1368.137531      | 2734.283770    | 1367.645523      | 21 |
| 6  | 542.293288  | 271.650282      | 525.266739     | 263.137008       | 524.282723     | 262.645000       | T    | 2653.225921 | 1327.116598     | 2636.199372    | 1318.603324      | 2635.215356    | 1318.111316      | 20 |
| 7  | 641.361702  | 321.184489      | 624.335153     | 312.671215       | 623.351137     | 312.179207       | V    | 2552.178242 | 1276.592759     | 2535.151693    | 1268.079484      | 2534.167677    | 1267.587476      | 19 |
| 8  | 728.393730  | 364.700503      | 711.367181     | 356.187229       | 710.383165     | 355.695221       | S    | 2453.109828 | 1227.058552     | 2436.083279    | 1218.545277      | 2435.099263    | 1218.053269      | 18 |
| 9  | 785.415194  | 393.211235      | 768.388645     | 384.697961       | 767.404629     | 384.205953       | G    | 2366.077800 | 1183.542538     | 2349.051251    | 1175.029263      | 2348.067235    | 1174.537255      | 17 |
| 10 | 922.474106  | 461.740691      | 905.447557     | 453.227417       | 904.463541     | 452.735409       | H    | 2309.056336 | 1155.031806     | 2292.029787    | 1146.518531      | 2291.045771    | 1146.026523      | 16 |
| 11 | 1023.521785 | 512.264530      | 1006.495236    | 503.751256       | 1005.511220    | 503.259248       | T    | 2171.997424 | 1086.502350     | 2154.970875    | 1077.989075      | 2153.986859    | 1077.497067      | 15 |
| 12 | 1183.552434 | 592.279855      | 1166.525885    | 583.766581       | 1165.541869    | 583.274572       | C    | 2070.949745 | 1035.978510     | 2053.923196    | 1027.465236      | 2052.939180    | 1026.973228      | 14 |
| 13 | 1311.611012 | 656.309144      | 1294.584463    | 647.795870       | 1293.600447    | 647.303862       | Q    | 1910.919096 | 955.963186      | 1893.892547    | 947.449911       | 1892.908531    | 946.957903       | 13 |
| 14 | 1448.669924 | 724.838600      | 1431.643375    | 716.325326       | 1430.659359    | 715.833318       | H    | 1782.860518 | 891.933897      | 1765.833969    | 883.420622       | 1764.849953    | 882.928614       | 12 |
| 15 | 1634.749237 | 817.878257      | 1617.722688    | 809.364982       | 1616.738672    | 808.872974       | W    | 1645.801606 | 823.404441      | 1628.775057    | 814.891166       | 1627.791041    | 814.399158       | 11 |
| 16 | 1721.781265 | 861.394271      | 1704.754716    | 852.880996       | 1703.770700    | 852.388988       | S    | 1459.722293 | 730.364784      | 1442.695744    | 721.851510       | 1441.711728    | 721.359502       | 10 |
| 17 | 1792.818379 | 896.912828      | 1775.791830    | 888.399553       | 1774.807814    | 887.907545       | A    | 1372.690265 | 686.848770      | 1355.663716    | 678.335496       | 1354.679700    | 677.843488       | 9  |
| 18 | 2232.043705 | 1116.525490     | 2215.017156    | 1108.012216      | 2214.033140    | 1107.520208      | Q    | 1301.653151 | 651.330213      | 1284.626602    | 642.816939       | 1283.642586    | 642.324931       | 8  |
| 19 | 2333.091384 | 1167.049330     | 2316.064835    | 1158.536055      | 2315.080819    | 1158.044047      | T    | 862.427825  | 431.717550      | 845.401276     | 423.204276       | 844.417260     | 422.712268       | 7  |
| 20 | 2430.144148 | 1215.575712     | 2413.117599    | 1207.062437      | 2412.133583    | 1206.570429      | P    | 761.380146  | 381.193711      | 744.353597     | 372.680436       | 743.369581     | 372.188428       | 6  |
| 21 | 2567.203060 | 1284.105168     | 2550.176511    | 1275.591893      | 2549.192495    | 1275.099885      | H    | 664.327382  | 332.667329      | 647.300833     | 324.154054       | 646.316817     | 323.662046       | 5  |
| 22 | 2668.250739 | 1334.629007     | 2651.224190    | 1326.115733      | 2650.240174    | 1325.623725      | T    | 527.268470  | 264.137873      | 510.241921     | 255.624598       | 509.257905     | 255.132590       | 4  |
| 23 | 2805.309651 | 1403.158463     | 2788.283102    | 1394.645189      | 2787.299086    | 1394.153181      | H    | 426.220791  | 213.614033      | 409.194242     | 205.100759       |                |                  | 3  |
| 24 | 2919.352578 | 1460.179927     | 2902.326029    | 1451.666652      | 2901.342013    | 1451.174644      | N    | 289.161879  | 145.084577      | 272.135330     | 136.571303       |                |                  | 2  |
| 25 |             |                 |                |                  |                |                  | R    | 175.118952  | 88.063114       | 158.092403     | 79.549839        |                |                  | 1  |

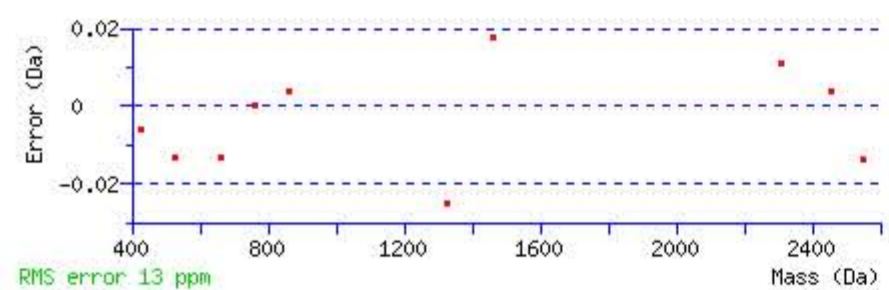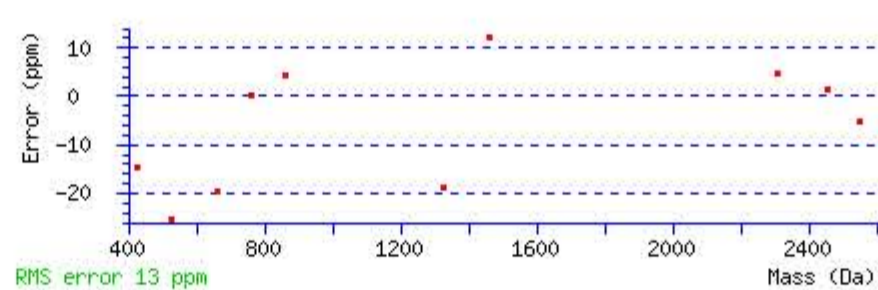

NCBI BLAST search of **GNVAVTVSGHTCQHWSAQTPHTHNR**  
 (Parameters: blastp, nr protein database, expect=20000, no filter, PAM30)  
 Other BLAST [web gateways](#)

## All matches to this query

| Score | Mr(calc):   | Delta    | Sequence                                  |
|-------|-------------|----------|-------------------------------------------|
| 44.1  | 3092.457016 | 0.008228 | <a href="#">GNVAVTVSGHTCQHWSAQTPHTHNR</a> |
| 33.2  | 3092.457016 | 0.008228 | <a href="#">GNVAVTVSGHTCQHWSAQTPHTHNR</a> |



# MASCOT Search Results

## Peptide View

MS/MS Fragmentation of **KLYDYCDVPQCAAPSFDCGKQVEPK**  
 Found in **PLMN\_HUMAN**, Plasminogen OS=Homo sapiens GN=PLG PE=1 SV=2

Match to Query 69888: 3382.520736 from(846.637460,4+) rtinseconds(1982) index(71119)  
 Title: Locus:1.1.1.3223.14 File:"2013-07-02 CLN FXIII 30 min 2nd FT.wiff"  
 Data file C:\Program Files (x86)\Matrix Science\Mascot Daemon\mgf2 FXIII 30 min 2nd\mascot\_daemon\_merge.mgf

Click mouse within plot area to zoom in by factor of two about that point  
 Or, Plot from  to  Da   
 Label all possible matches  Label matches used for scoring

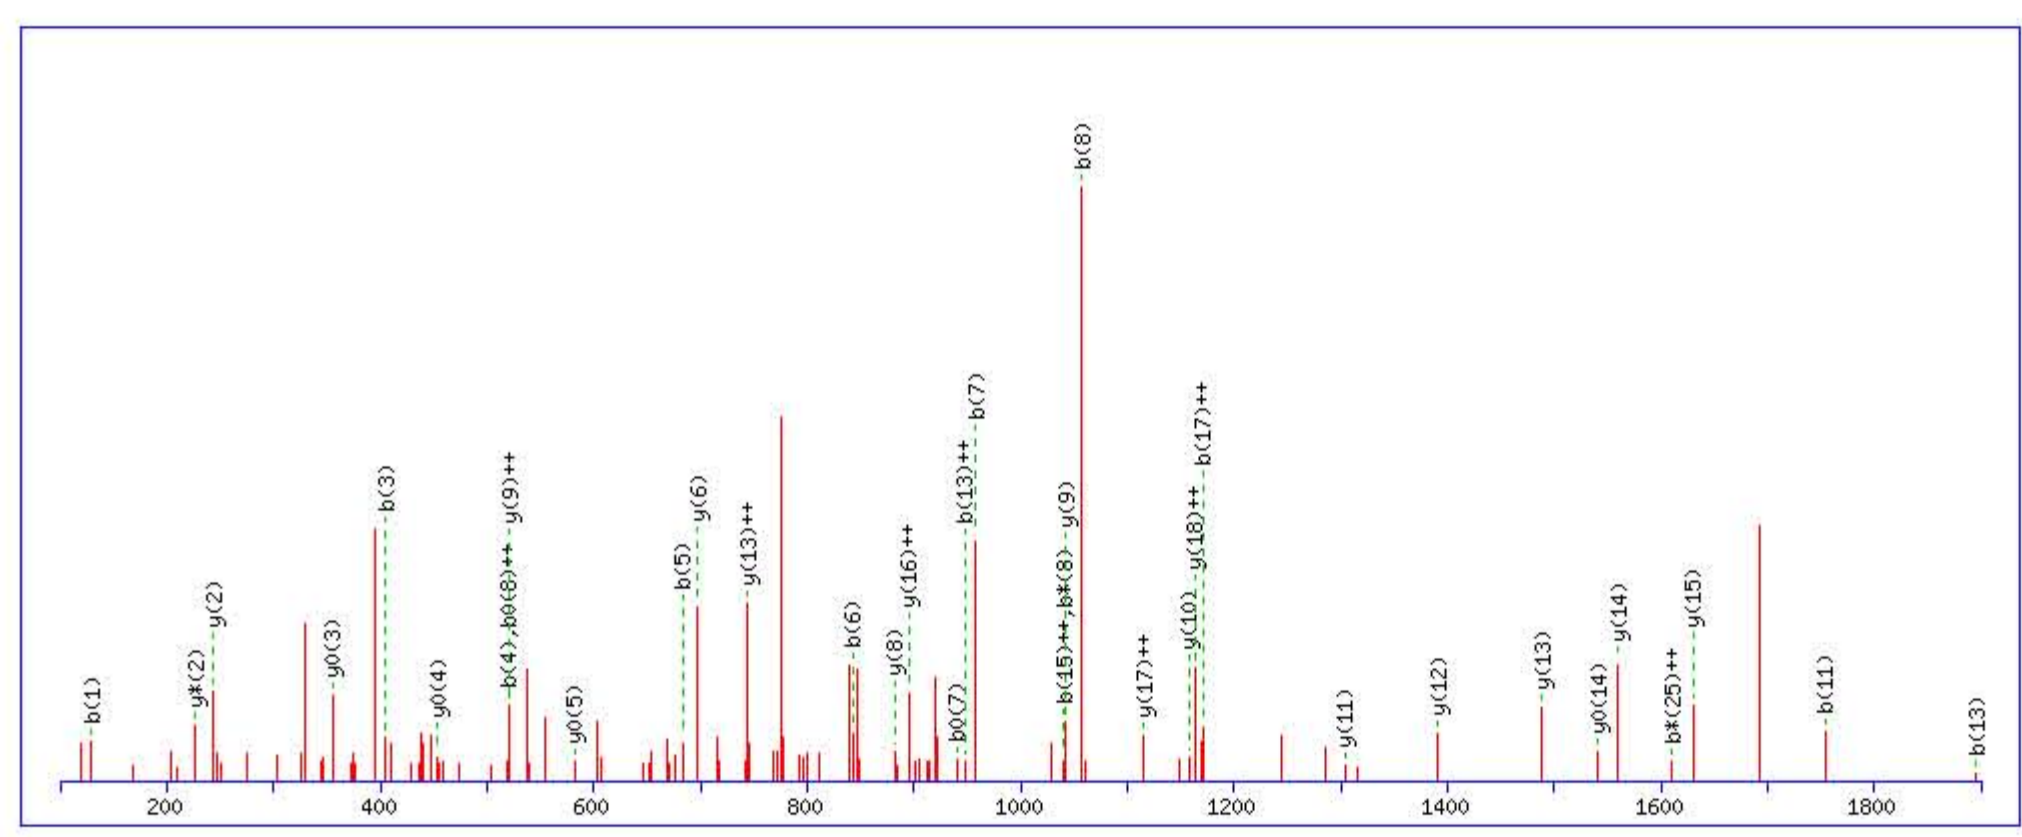

Monoisotopic mass of neutral peptide Mr(calc): 3382.549469  
 Fixed modifications: Carbamidomethyl (C) (apply to specified residues or termini only)  
 Variable modifications:  
 Q10 : Biotin:Thermo-21345 (Q)  
 Ions Score: 44 Expect: 0.00034  
 Matches : 36/290 fragment ions using 84 most intense peaks [\(help\)](#)

| #  | b                  | b <sup>++</sup>    | b <sup>*</sup>     | b <sup>+++</sup>   | b <sup>0</sup>    | b <sup>0++</sup>  | Seq.     | y                  | y <sup>++</sup>    | y <sup>*</sup>    | y <sup>+++</sup> | y <sup>0</sup>     | y <sup>0++</sup> | #         |
|----|--------------------|--------------------|--------------------|--------------------|-------------------|-------------------|----------|--------------------|--------------------|-------------------|------------------|--------------------|------------------|-----------|
| 1  | <b>129.102239</b>  | 65.054757          | 112.075690         | 56.541483          |                   |                   | <b>K</b> |                    |                    |                   |                  |                    |                  | <b>26</b> |
| 2  | 242.186303         | 121.596790         | 225.159754         | 113.083515         |                   |                   | <b>L</b> | 3255.461780        | 1628.234528        | 3238.435231       | 1619.721253      | 3237.451215        | 1619.229245      | <b>25</b> |
| 3  | <b>405.249632</b>  | 203.128454         | 388.223083         | 194.615180         |                   |                   | <b>Y</b> | 3142.377716        | 1571.692496        | 3125.351167       | 1563.179221      | 3124.367151        | 1562.687213      | <b>24</b> |
| 4  | <b>520.276575</b>  | 260.641926         | 503.250026         | 252.128651         | 502.266010        | 251.636643        | <b>D</b> | 2979.314387        | 1490.160831        | 2962.287838       | 1481.647557      | 2961.303822        | 1481.155549      | <b>23</b> |
| 5  | <b>683.339904</b>  | 342.173590         | 666.313355         | 333.660316         | 665.329339        | 333.168308        | <b>Y</b> | 2864.287444        | 1432.647360        | 2847.260895       | 1424.134085      | 2846.276879        | 1423.642077      | <b>22</b> |
| 6  | <b>843.370553</b>  | 422.188915         | 826.344004         | 413.675640         | 825.359988        | 413.183632        | <b>C</b> | 2701.224115        | 1351.115695        | 2684.197566       | 1342.602421      | 2683.213550        | 1342.110413      | <b>21</b> |
| 7  | <b>958.397496</b>  | 479.702386         | 941.370947         | 471.189112         | <b>940.386931</b> | 470.697104        | <b>D</b> | 2541.193466        | 1271.100371        | 2524.166917       | 1262.587096      | 2523.182901        | 1262.095088      | <b>20</b> |
| 8  | <b>1057.465910</b> | 529.236593         | <b>1040.439361</b> | 520.723319         | 1039.455345       | <b>520.231311</b> | <b>V</b> | 2426.166523        | 1213.586899        | 2409.139974       | 1205.073625      | 2408.155958        | 1204.581617      | <b>19</b> |
| 9  | 1154.518674        | 577.762975         | 1137.492125        | 569.249701         | 1136.508109       | 568.757693        | <b>P</b> | 2327.098109        | <b>1164.052692</b> | 2310.071560       | 1155.539418      | 2309.087544        | 1155.047410      | <b>18</b> |
| 10 | 1593.744000        | 797.375638         | 1576.717451        | 788.862364         | 1575.733435       | 788.370356        | <b>Q</b> | 2230.045345        | <b>1115.526310</b> | 2213.018796       | 1107.013036      | 2212.034780        | 1106.521028      | <b>17</b> |
| 11 | <b>1753.774649</b> | 877.390963         | 1736.748100        | 868.877688         | 1735.764084       | 868.385680        | <b>C</b> | 1790.820019        | <b>895.913647</b>  | 1773.793470       | 887.400373       | 1772.809454        | 886.908365       | <b>16</b> |
| 12 | 1824.811763        | 912.909520         | 1807.785214        | 904.396245         | 1806.801198       | 903.904237        | <b>A</b> | <b>1630.789370</b> | 815.898323         | 1613.762821       | 807.385048       | 1612.778805        | 806.893040       | <b>15</b> |
| 13 | <b>1895.848877</b> | <b>948.428077</b>  | 1878.822328        | 939.914802         | 1877.838312       | 939.422794        | <b>A</b> | <b>1559.752256</b> | 780.379766         | 1542.725707       | 771.866491       | <b>1541.741691</b> | 771.374483       | <b>14</b> |
| 14 | 1992.901641        | 996.954459         | 1975.875092        | 988.441184         | 1974.891076       | 987.949176        | <b>P</b> | <b>1488.715142</b> | <b>744.861209</b>  | 1471.688593       | 736.347934       | 1470.704577        | 735.855926       | <b>13</b> |
| 15 | 2079.933669        | <b>1040.470472</b> | 2062.907120        | 1031.957198        | 2061.923104       | 1031.465190       | <b>S</b> | <b>1391.662378</b> | 696.334827         | 1374.635829       | 687.821552       | 1373.651813        | 687.329544       | <b>12</b> |
| 16 | 2227.002083        | 1114.004679        | 2209.975534        | 1105.491405        | 2208.991518       | 1104.999397       | <b>F</b> | <b>1304.630350</b> | 652.818813         | 1287.603801       | 644.305538       | 1286.619785        | 643.813530       | <b>11</b> |
| 17 | 2342.029026        | <b>1171.518151</b> | 2325.002477        | 1163.004876        | 2324.018461       | 1162.512868       | <b>D</b> | <b>1157.561936</b> | 579.284606         | 1140.535387       | 570.771331       | 1139.551371        | 570.279323       | <b>10</b> |
| 18 | 2502.059675        | 1251.533475        | 2485.033126        | 1243.020201        | 2484.049110       | 1242.528193       | <b>C</b> | <b>1042.534993</b> | <b>521.771135</b>  | 1025.508444       | 513.257860       | 1024.524428        | 512.765852       | <b>9</b>  |
| 19 | 2559.081139        | 1280.044207        | 2542.054590        | 1271.530933        | 2541.070574       | 1271.038925       | <b>G</b> | <b>882.504344</b>  | 441.755810         | 865.477795        | 433.242536       | 864.493779         | 432.750528       | <b>8</b>  |
| 20 | 2687.176102        | 1344.091689        | 2670.149553        | 1335.578414        | 2669.165537       | 1335.086406       | <b>K</b> | 825.482880         | 413.245078         | 808.456331        | 404.731804       | 807.472315         | 404.239796       | <b>7</b>  |
| 21 | 2784.228866        | 1392.618071        | 2767.202317        | 1384.104796        | 2766.218301       | 1383.612788       | <b>P</b> | <b>697.387917</b>  | 349.197597         | 680.361368        | 340.684322       | 679.377352         | 340.192314       | <b>6</b>  |
| 22 | 2912.287444        | 1456.647360        | 2895.260895        | 1448.134085        | 2894.276879       | 1447.642077       | <b>Q</b> | 600.335153         | 300.671215         | 583.308604        | 292.157940       | <b>582.324588</b>  | 291.665932       | <b>5</b>  |
| 23 | 3011.355858        | 1506.181567        | 2994.329309        | 1497.668292        | 2993.345293       | 1497.176284       | <b>V</b> | 472.276575         | 236.641925         | 455.250026        | 228.128651       | <b>454.266010</b>  | 227.636643       | <b>4</b>  |
| 24 | 3140.398451        | 1570.702863        | 3123.371902        | 1562.189589        | 3122.387886       | 1561.697581       | <b>E</b> | 373.208161         | 187.107719         | 356.181612        | 178.594444       | <b>355.197596</b>  | 178.102436       | <b>3</b>  |
| 25 | 3237.451215        | 1619.229245        | 3220.424666        | <b>1610.715971</b> | 3219.440650       | 1610.223963       | <b>P</b> | <b>244.165568</b>  | 122.586422         | <b>227.139019</b> | 114.073148       |                    |                  | <b>2</b>  |
| 26 |                    |                    |                    |                    |                   |                   | <b>K</b> | 147.112804         | 74.060040          | 130.086255        | 65.546765        |                    |                  | <b>1</b>  |

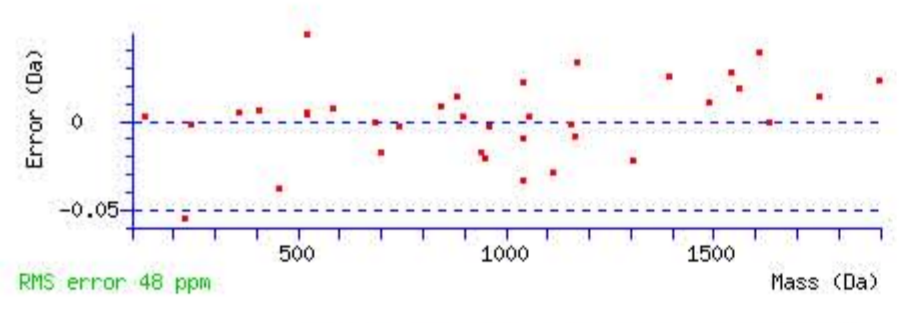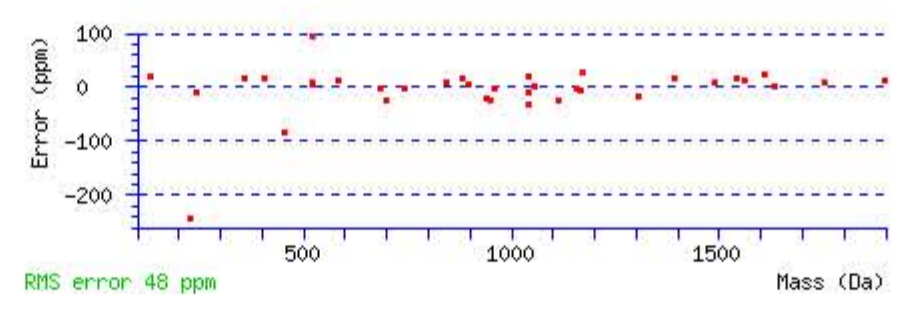

NCBI BLAST search of **KLYDYCDVPQCAAPSFDCGKQVEPK**  
 (Parameters: blastp, nr protein database, expect=20000, no filter, PAM30)  
 Other BLAST [web gateways](#)

### All matches to this query

| Score | Mr(calc):   | Delta     | Sequence                                  |
|-------|-------------|-----------|-------------------------------------------|
| 43.5  | 3382.549469 | -0.028733 | <a href="#">KLYDYCDVPQCAAPSFDCGKQVEPK</a> |
| 1.7   | 3382.549469 | -0.028733 | <a href="#">KLYDYCDVPQCAAPSFDCGKQVEPK</a> |



# MASCOT Search Results

## Peptide View

MS/MS Fragmentation of **GNVAVTVSGHTCQHWSAQTPHTHNR**

Found in **PLMN\_HUMAN**, Plasminogen OS=Homo sapiens GN=PLG PE=1 SV=2

Match to Query 70131: 3403.606320 from(681.728540,5+) rtinseconds(1663) index(69050)

Title: Locus:1.1.1.3112.9 File:"2013-07-02 CLN FXIII 30 min 2nd FT.wiff"

Data file C:\Program Files (x86)\Matrix Science\Mascot Daemon\mgf2 FXIII 30 min 2nd\mascot\_daemon\_merge.mgf

Click mouse within plot area to zoom in by factor of two about that point

Or, Plot from  to  Da

Label all possible matches  Label matches used for scoring

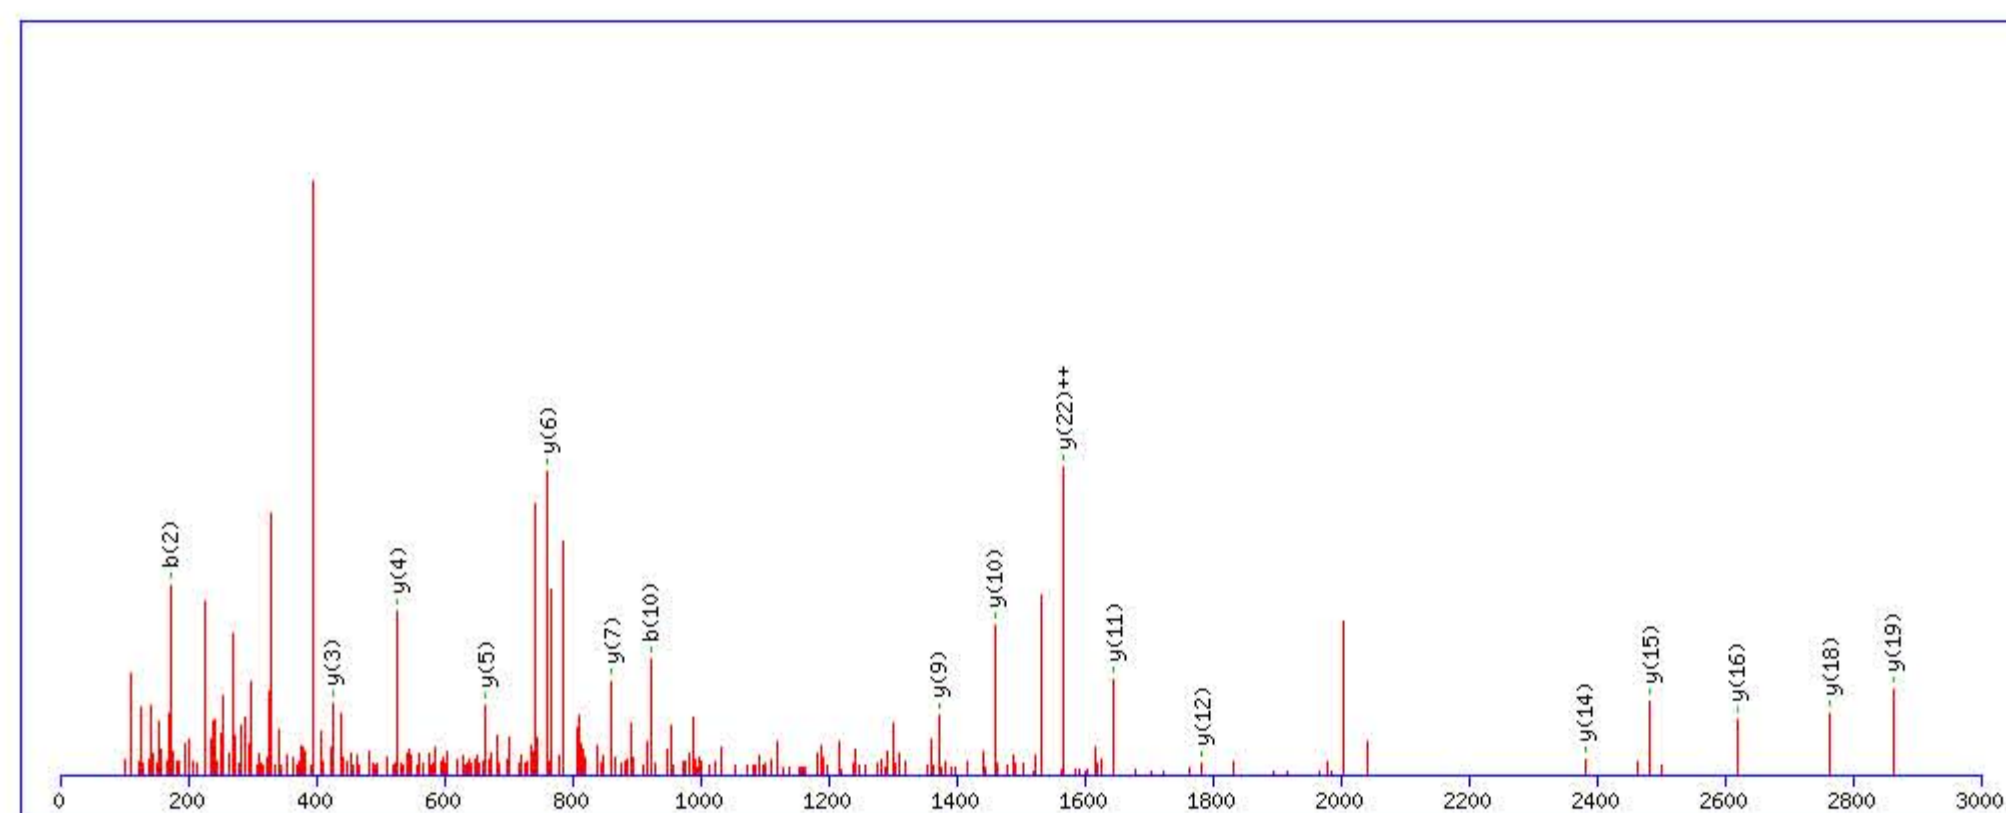

Monoisotopic mass of neutral peptide Mr(calc): 3403.623764

Fixed modifications: Carbamidomethyl (C) (apply to specified residues or termini only)

Variable modifications:

Q13 : Biotin:Thermo-21345 (Q)

Q18 : Biotin:Thermo-21345 (Q)

Ions Score: 92 Expect: 1.5e-008

Matches : 17/270 fragment ions using 26 most intense peaks [\(help\)](#)

| #  | b                 | b <sup>++</sup> | b <sup>+</sup> | b <sup>+++</sup> | b <sup>0</sup> | b <sup>0++</sup> | Seq. | y                  | y <sup>++</sup>    | y <sup>+</sup> | y <sup>+++</sup> | y <sup>0</sup> | y <sup>0++</sup> | #  |
|----|-------------------|-----------------|----------------|------------------|----------------|------------------|------|--------------------|--------------------|----------------|------------------|----------------|------------------|----|
| 1  | 58.028740         | 29.518008       |                |                  |                |                  | G    |                    |                    |                |                  |                |                  | 25 |
| 2  | <b>172.071667</b> | 86.539471       | 155.045118     | 78.026197        |                |                  | N    | 3347.609538        | 1674.308407        | 3330.582989    | 1665.795132      | 3329.598973    | 1665.303124      | 24 |
| 3  | 271.140081        | 136.073679      | 254.113532     | 127.560404       |                |                  | V    | 3233.566611        | 1617.286943        | 3216.540062    | 1608.773669      | 3215.556046    | 1608.281661      | 23 |
| 4  | 342.177195        | 171.592236      | 325.150646     | 163.078961       |                |                  | A    | 3134.498197        | <b>1567.752736</b> | 3117.471648    | 1559.239462      | 3116.487632    | 1558.747454      | 22 |
| 5  | 441.245609        | 221.126443      | 424.219060     | 212.613168       |                |                  | V    | 3063.461083        | 1532.234179        | 3046.434534    | 1523.720905      | 3045.450518    | 1523.228897      | 21 |
| 6  | 542.293288        | 271.650282      | 525.266739     | 263.137008       | 524.282723     | 262.645000       | T    | 2964.392669        | 1482.699972        | 2947.366120    | 1474.186698      | 2946.382104    | 1473.694690      | 20 |
| 7  | 641.361702        | 321.184489      | 624.335153     | 312.671215       | 623.351137     | 312.179207       | V    | <b>2863.344990</b> | 1432.176133        | 2846.318441    | 1423.662858      | 2845.334425    | 1423.170850      | 19 |
| 8  | 728.393730        | 364.700503      | 711.367181     | 356.187229       | 710.383165     | 355.695221       | S    | <b>2764.276576</b> | 1382.641926        | 2747.250027    | 1374.128651      | 2746.266011    | 1373.636643      | 18 |
| 9  | 785.415194        | 393.211235      | 768.388645     | 384.697961       | 767.404629     | 384.205953       | G    | 2677.244548        | 1339.125912        | 2660.217999    | 1330.612637      | 2659.233983    | 1330.120629      | 17 |
| 10 | <b>922.474106</b> | 461.740691      | 905.447557     | 453.227417       | 904.463541     | 452.735409       | H    | <b>2620.223084</b> | 1310.615180        | 2603.196535    | 1302.101905      | 2602.212519    | 1301.609897      | 16 |
| 11 | 1023.521785       | 512.264530      | 1006.495236    | 503.751256       | 1005.511220    | 503.259248       | T    | <b>2483.164172</b> | 1242.085724        | 2466.137623    | 1233.572449      | 2465.153607    | 1233.080441      | 15 |
| 12 | 1183.552434       | 592.279855      | 1166.525885    | 583.766581       | 1165.541869    | 583.274572       | C    | <b>2382.116493</b> | 1191.561884        | 2365.089944    | 1183.048610      | 2364.105928    | 1182.556602      | 14 |
| 13 | 1622.777760       | 811.892518      | 1605.751211    | 803.379244       | 1604.767195    | 802.887236       | Q    | 2222.085844        | 1111.546560        | 2205.059295    | 1103.033285      | 2204.075279    | 1102.541277      | 13 |
| 14 | 1759.836672       | 880.421974      | 1742.810123    | 871.908700       | 1741.826107    | 871.416692       | H    | <b>1782.860518</b> | 891.933897         | 1765.833969    | 883.420622       | 1764.849953    | 882.928614       | 12 |
| 15 | 1945.915985       | 973.461631      | 1928.889436    | 964.948356       | 1927.905420    | 964.456348       | W    | <b>1645.801606</b> | 823.404441         | 1628.775057    | 814.891166       | 1627.791041    | 814.399158       | 11 |
| 16 | 2032.948013       | 1016.977645     | 2015.921464    | 1008.464370      | 2014.937448    | 1007.972362      | S    | <b>1459.722293</b> | 730.364784         | 1442.695744    | 721.851510       | 1441.711728    | 721.359502       | 10 |
| 17 | 2103.985127       | 1052.496201     | 2086.958578    | 1043.982927      | 2085.974562    | 1043.490919      | A    | <b>1372.690265</b> | 686.848770         | 1355.663716    | 678.335496       | 1354.679700    | 677.843488       | 9  |
| 18 | 2543.210453       | 1272.108865     | 2526.183904    | 1263.595590      | 2525.199888    | 1263.103582      | Q    | 1301.653151        | 651.330213         | 1284.626602    | 642.816939       | 1283.642586    | 642.324931       | 8  |
| 19 | 2644.258132       | 1322.632704     | 2627.231583    | 1314.119429      | 2626.247567    | 1313.627421      | T    | <b>862.427825</b>  | 431.717550         | 845.401276     | 423.204276       | 844.417260     | 422.712268       | 7  |
| 20 | 2741.310896       | 1371.159086     | 2724.284347    | 1362.645811      | 2723.300331    | 1362.153803      | P    | <b>761.380146</b>  | 381.193711         | 744.353597     | 372.680436       | 743.369581     | 372.188428       | 6  |
| 21 | 2878.369808       | 1439.688542     | 2861.343259    | 1431.175267      | 2860.359243    | 1430.683259      | H    | <b>664.327382</b>  | 332.667329         | 647.300833     | 324.154054       | 646.316817     | 323.662046       | 5  |
| 22 | 2979.417487       | 1490.212381     | 2962.390938    | 1481.699107      | 2961.406922    | 1481.207099      | T    | <b>527.268470</b>  | 264.137873         | 510.241921     | 255.624598       | 509.257905     | 255.132590       | 4  |
| 23 | 3116.476399       | 1558.741837     | 3099.449850    | 1550.228563      | 3098.465834    | 1549.736555      | H    | <b>426.220791</b>  | 213.614033         | 409.194242     | 205.100759       |                |                  | 3  |
| 24 | 3230.519326       | 1615.763301     | 3213.492777    | 1607.250026      | 3212.508761    | 1606.758018      | N    | 289.161879         | 145.084577         | 272.135330     | 136.571303       |                |                  | 2  |
| 25 |                   |                 |                |                  |                |                  | R    | 175.118952         | 88.063114          | 158.092403     | 79.549839        |                |                  | 1  |

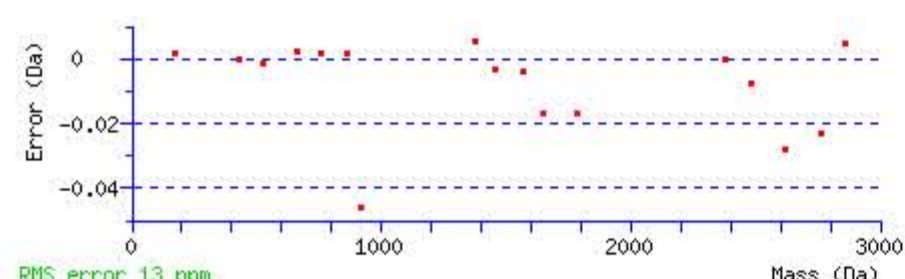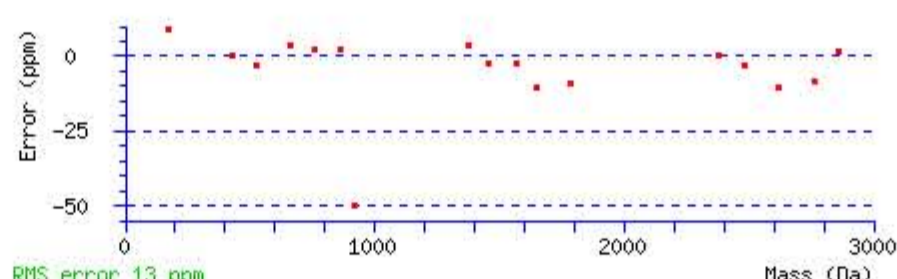

NCBI BLAST search of **GNVAVTVSGHTCQHWSAQTPHTHNR**

(Parameters: blastp, nr protein database, expect=20000, no filter, PAM30)

Other BLAST [web gateways](#)

All matches to this query

| Score | Mr(calc):   | Delta     | Sequence                                  |
|-------|-------------|-----------|-------------------------------------------|
| 91.7  | 3403.623764 | -0.017444 | <a href="#">GNVAVTVSGHTCQHWSAQTPHTHNR</a> |

Mascot: <http://www.matrixscience.com/>



**MASCOT SEARCH RESULTS**

**Peptide View**

MS/MS Fragmentation of **VQSTELCAGHLAGGTDSCQGDSGGPLVCFEK**  
 Found in **PLMN\_HUMAN**, Plasminogen OS=Homo sapiens GN=PLG PE=1 SV=2

Match to Query 71182: 3547.553096 from(887.895550,4+) rtinseconds(2168) index(72223)  
 Title: Locus:1.1.1.3288.25 File:"2013-07-02 CLN FXIII 30 min 2nd FT.wiff"  
 Data file C:\Program Files (x86)\Matrix Science\Mascot Daemon\mgf2 FXIII 30 min 2nd\mascot\_daemon\_merge.mgf

Click mouse within plot area to zoom in by factor of two about that point  
 Or, Plot from  to  Da   
 Label all possible matches  Label matches used for scoring

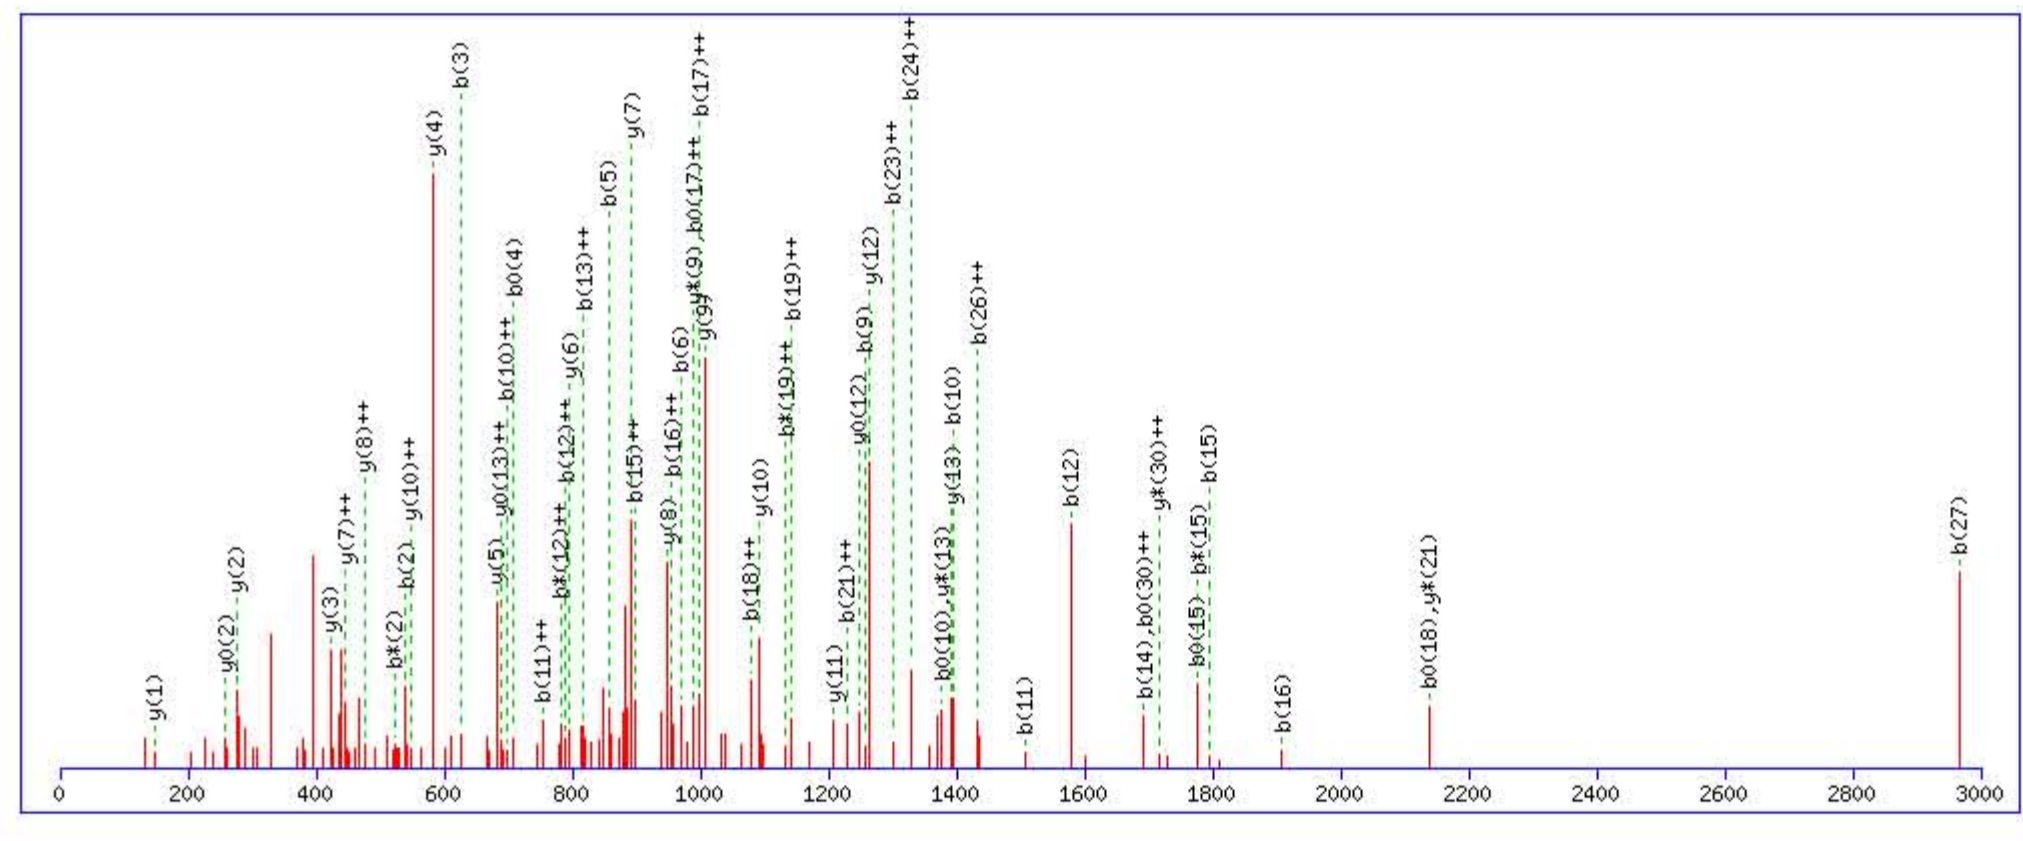

Monoisotopic mass of neutral peptide Mr(calc): 3547.584061  
 Fixed modifications: Carbamidomethyl (C) (apply to specified residues or termini only)  
 Variable modifications:  
 Q2 : Biotin:Thermo-21345 (Q)  
 Ions Score: 88 Expect: 5.7e-009  
 Matches : 58/352 fragment ions using 104 most intense peaks ([help](#))

| #  | b                  | b <sup>++</sup>    | b <sup>*</sup>     | b <sup>*++</sup>   | b <sup>0</sup>     | b <sup>0++</sup>   | Seq. | y                  | y <sup>++</sup>   | y <sup>*</sup>     | y <sup>*++</sup>   | y <sup>0</sup>     | y <sup>0++</sup>  | #  |
|----|--------------------|--------------------|--------------------|--------------------|--------------------|--------------------|------|--------------------|-------------------|--------------------|--------------------|--------------------|-------------------|----|
| 1  | 100.075690         | 50.541483          |                    |                    |                    |                    | V    |                    |                   |                    |                    |                    |                   | 31 |
| 2  | <b>539.301016</b>  | 270.154146         | <b>522.274467</b>  | 261.640872         |                    |                    | Q    | 3449.522877        | 1725.265076       | 3432.496328        | <b>1716.751802</b> | 3431.512312        | 1716.259794       | 30 |
| 3  | <b>626.333044</b>  | 313.670160         | 609.306495         | 305.156886         | 608.322479         | 304.664878         | S    | 3010.297551        | 1505.652413       | 2993.271002        | 1497.139139        | 2992.286986        | 1496.647131       | 29 |
| 4  | 727.380723         | 364.194000         | 710.354174         | 355.680725         | <b>709.370158</b>  | 355.188717         | T    | 2923.265523        | 1462.136399       | 2906.238974        | 1453.623125        | 2905.254958        | 1453.131117       | 28 |
| 5  | <b>856.423316</b>  | 428.715296         | 839.396767         | 420.202022         | 838.412751         | 419.710014         | E    | 2822.217844        | 1411.612560       | 2805.191295        | 1403.099285        | 2804.207279        | 1402.607277       | 27 |
| 6  | <b>969.507380</b>  | 485.257328         | 952.480831         | 476.744054         | 951.496815         | 476.252046         | L    | 2693.175251        | 1347.091263       | 2676.148702        | 1338.577989        | 2675.164686        | 1338.085981       | 26 |
| 7  | 1129.538029        | 565.272653         | 1112.511480        | 556.759378         | 1111.527464        | 556.267370         | C    | 2580.091187        | 1290.549231       | 2563.064638        | 1282.035957        | 2562.080622        | 1281.543949       | 25 |
| 8  | 1200.575143        | 600.791210         | 1183.548594        | 592.277935         | 1182.564578        | 591.785927         | A    | 2420.060538        | 1210.533907       | 2403.033989        | 1202.020632        | 2402.049973        | 1201.528624       | 24 |
| 9  | <b>1257.596607</b> | 629.301942         | 1240.570058        | 620.788667         | 1239.586042        | 620.296659         | G    | 2349.023424        | 1175.015350       | 2331.996875        | 1166.502075        | 2331.012859        | 1166.010067       | 23 |
| 10 | <b>1394.655519</b> | <b>697.831397</b>  | 1377.628970        | 689.318123         | <b>1376.644954</b> | 688.826115         | H    | 2292.001960        | 1146.504618       | 2274.975411        | 1137.991343        | 2273.991395        | 1137.499335       | 22 |
| 11 | <b>1507.739583</b> | <b>754.373429</b>  | 1490.713034        | 745.860155         | 1489.729018        | 745.368147         | L    | 2154.943048        | 1077.975162       | <b>2137.916499</b> | 1069.461887        | 2136.932483        | 1068.969879       | 21 |
| 12 | <b>1578.776697</b> | <b>789.891986</b>  | 1561.750148        | <b>781.378712</b>  | 1560.766132        | 780.886704         | A    | 2041.858984        | 1021.433130       | 2024.832435        | 1012.919855        | 2023.848419        | 1012.427847       | 20 |
| 13 | 1635.798161        | <b>818.402718</b>  | 1618.771612        | 809.889444         | 1617.787596        | 809.397436         | G    | 1970.821870        | 985.914573        | 1953.795321        | 977.401298         | 1952.811305        | 976.909290        | 19 |
| 14 | <b>1692.819625</b> | 846.913450         | 1675.793076        | 838.400176         | 1674.809060        | 837.908168         | G    | 1913.800406        | 957.403841        | 1896.773857        | 948.890566         | 1895.789841        | 948.398558        | 18 |
| 15 | <b>1793.867304</b> | <b>897.437290</b>  | <b>1776.840755</b> | 888.924015         | <b>1775.856739</b> | 888.432007         | T    | 1856.778942        | 928.893109        | 1839.752393        | 920.379835         | 1838.768377        | 919.887826        | 17 |
| 16 | <b>1908.894247</b> | <b>954.950761</b>  | 1891.867698        | 946.437487         | 1890.883682        | 945.945479         | D    | 1755.731263        | 878.369269        | 1738.704714        | 869.855995         | 1737.720698        | 869.363987        | 16 |
| 17 | 1995.926275        | <b>998.466775</b>  | 1978.899726        | 989.953501         | 1977.915710        | <b>989.461493</b>  | S    | 1640.704320        | 820.855798        | 1623.677771        | 812.342523         | 1622.693755        | 811.850515        | 15 |
| 18 | 2155.956924        | <b>1078.482100</b> | 2138.930375        | 1069.968825        | <b>2137.946359</b> | 1069.476817        | C    | 1553.672292        | 777.339784        | 1536.645743        | 768.826509         | 1535.661727        | 768.334501        | 14 |
| 19 | 2284.015502        | <b>1142.511389</b> | 2266.988953        | <b>1133.998114</b> | 2266.004937        | 1133.506106        | Q    | <b>1393.641643</b> | 697.324459        | <b>1376.615094</b> | 688.811185         | 1375.631078        | <b>688.319177</b> | 13 |
| 20 | 2341.036966        | 1171.022121        | 2324.010417        | 1162.508846        | 2323.026401        | 1162.016838        | G    | <b>1265.583065</b> | 633.295170        | 1248.556516        | 624.781896         | <b>1247.572500</b> | 624.289888        | 12 |
| 21 | 2456.063909        | <b>1228.535592</b> | 2439.037360        | 1220.022318        | 2438.053344        | 1219.530310        | D    | <b>1208.561601</b> | 604.784438        | 1191.535052        | 596.271164         | 1190.551036        | 595.779156        | 11 |
| 22 | 2543.095937        | 1272.051606        | 2526.069388        | 1263.538332        | 2525.085372        | 1263.046324        | S    | <b>1093.534658</b> | <b>547.270967</b> | 1076.508109        | 538.757692         | 1075.524093        | 538.265684        | 10 |
| 23 | 2600.117401        | <b>1300.562338</b> | 2583.090852        | 1292.049064        | 2582.106836        | 1291.557056        | G    | <b>1006.502630</b> | 503.754953        | <b>989.476081</b>  | 495.241678         | 988.492065         | 494.749670        | 9  |
| 24 | 2657.138865        | <b>1329.073070</b> | 2640.112316        | 1320.559796        | 2639.128300        | 1320.067788        | G    | <b>949.481166</b>  | <b>475.244221</b> | 932.454617         | 466.730946         | 931.470601         | 466.238938        | 8  |
| 25 | 2754.191629        | 1377.599452        | 2737.165080        | 1369.086178        | 2736.181064        | 1368.594170        | P    | <b>892.459702</b>  | <b>446.733489</b> | 875.433153         | 438.220214         | 874.449137         | 437.728206        | 7  |
| 26 | 2867.275693        | <b>1434.141484</b> | 2850.249144        | 1425.628210        | 2849.265128        | 1425.136202        | L    | <b>795.406938</b>  | 398.207107        | 778.380389         | 389.693832         | 777.396373         | 389.201824        | 6  |
| 27 | <b>2966.344107</b> | 1483.675691        | 2949.317558        | 1475.162417        | 2948.333542        | 1474.670409        | V    | <b>682.322874</b>  | 341.665075        | 665.296325         | 333.151800         | 664.312309         | 332.659792        | 5  |
| 28 | 3126.374756        | 1563.691016        | 3109.348207        | 1555.177741        | 3108.364191        | 1554.685733        | C    | <b>583.254460</b>  | 292.130868        | 566.227911         | 283.617593         | 565.243895         | 283.125585        | 4  |
| 29 | 3273.443170        | 1637.225223        | 3256.416621        | 1628.711948        | 3255.432605        | 1628.219940        | F    | <b>423.223811</b>  | 212.115543        | 406.197262         | 203.602269         | 405.213246         | 203.110261        | 3  |
| 30 | 3402.485763        | 1701.746519        | 3385.459214        | 1693.233245        | 3384.475198        | <b>1692.741237</b> | E    | <b>276.155397</b>  | 138.581337        | 259.128848         | 130.068062         | <b>258.144832</b>  | 129.576054        | 2  |
| 31 |                    |                    |                    |                    |                    |                    | K    | <b>147.112804</b>  | 74.060040         | 130.086255         | 65.546765          |                    |                   | 1  |

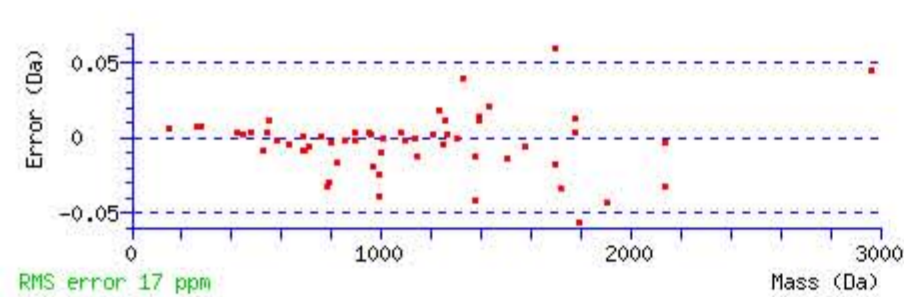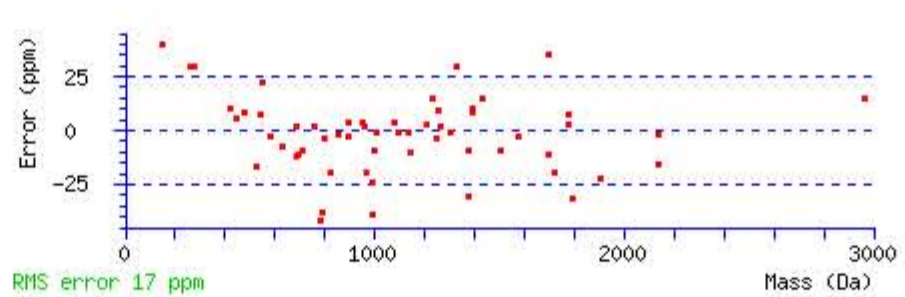

NCBI BLAST search of **VQSTELCAGHLAGGTDSCQGDSGGPLVCFEK**  
 (Parameters: blastp, nr protein database, expect=20000, no filter, PAM30)  
 Other BLAST [web gateways](#)

**All matches to this query**

| Score | Mr(calc):   | Delta     | Sequence                                        |
|-------|-------------|-----------|-------------------------------------------------|
| 88.2  | 3547.584061 | -0.030965 | <a href="#">VQSTELCAGHLAGGTDSCQGDSGGPLVCFEK</a> |
| 33.3  | 3547.584061 | -0.030965 | <a href="#">VQSTELCAGHLAGGTDSCQGDSGGPLVCFEK</a> |



# MASCOT SCIENCE Mascot Search Results

## Peptide View

MS/MS Fragmentation of **ECLQTCR**

Found in **AMBP\_HUMAN**, Protein AMBP OS=Homo sapiens GN=AMBP PE=1 SV=1

Match to Query 27657: 1276.565848 from(639.290200,2+) rtinseconds(1474) index(52388)

Title: Locus:1.1.1.2999.19 File:"2013-07-02 CLN FXIII 30 min 2nd F 4.wiff"

Data file C:\Program Files (x86)\Matrix Science\Mascot Daemon\mgf\2 FXIII 30 min 2nd\mascot\_daemon\_merge.mgf

Click mouse within plot area to zoom in by factor of two about that point

Or, Plot from  to  Da

Label all possible matches  Label matches used for scoring

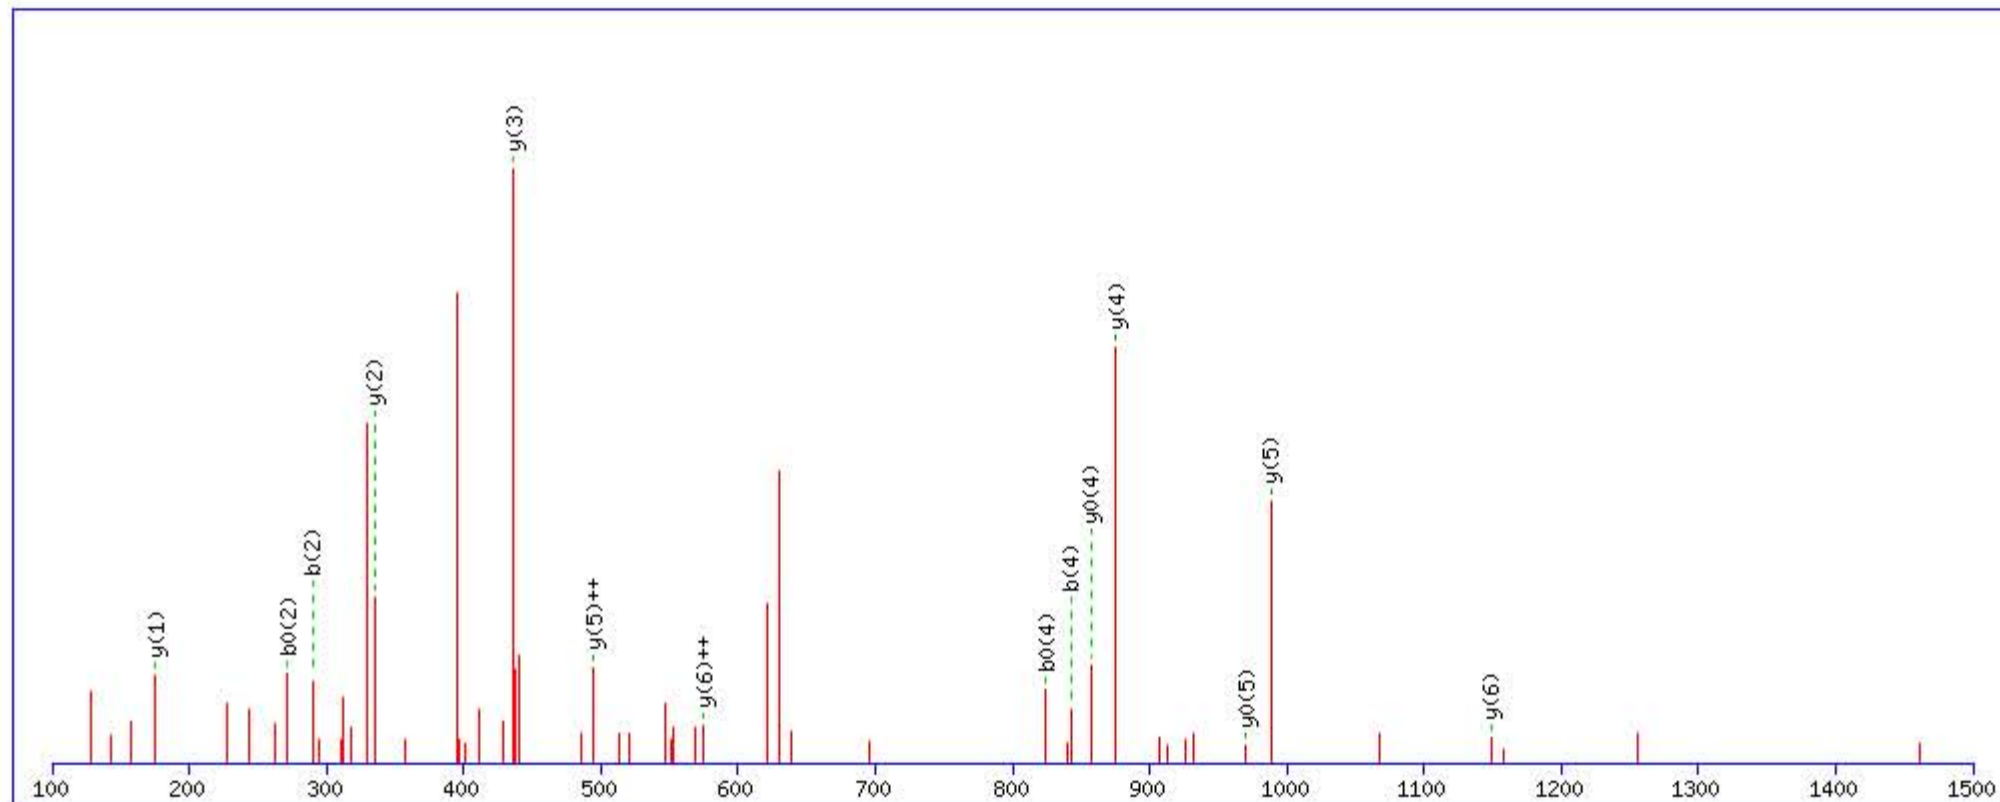

Monoisotopic mass of neutral peptide Mr(calc): 1276.572632

Fixed modifications: Carbamidomethyl (C) (apply to specified residues or termini only)

Variable modifications:

Q4 : Biotin:Thermo-21345 (Q)

Ions Score: 33 Expect: 0.0024

Matches : 14/62 fragment ions using 29 most intense peaks ([help](#))

| # | b                 | b <sup>++</sup> | b <sup>*</sup> | b <sup>+++</sup> | b <sup>0</sup>    | b <sup>0++</sup> | Seq. | y                  | y <sup>++</sup>   | y <sup>*</sup> | y <sup>+++</sup> | y <sup>0</sup>    | y <sup>0++</sup> | # |
|---|-------------------|-----------------|----------------|------------------|-------------------|------------------|------|--------------------|-------------------|----------------|------------------|-------------------|------------------|---|
| 1 | 130.049869        | 65.528572       |                |                  | 112.039304        | 56.523290        | E    |                    |                   |                |                  |                   |                  | 7 |
| 2 | <b>290.080518</b> | 145.543897      |                |                  | <b>272.069953</b> | 136.538615       | C    | <b>1148.537319</b> | <b>574.772298</b> | 1131.510770    | 566.259023       | 1130.526754       | 565.767015       | 6 |
| 3 | 403.164582        | 202.085929      |                |                  | 385.154017        | 193.080647       | L    | <b>988.506670</b>  | <b>494.756973</b> | 971.480121     | 486.243699       | <b>970.496105</b> | 485.751691       | 5 |
| 4 | <b>842.389908</b> | 421.698592      | 825.363359     | 413.185318       | <b>824.379343</b> | 412.693310       | Q    | <b>875.422606</b>  | 438.214941        | 858.396057     | 429.701667       | <b>857.412041</b> | 429.209659       | 4 |
| 5 | 943.437587        | 472.222432      | 926.411038     | 463.709157       | 925.427022        | 463.217149       | T    | <b>436.197280</b>  | 218.602278        | 419.170731     | 210.089003       | 418.186715        | 209.596995       | 3 |
| 6 | 1103.468236       | 552.237756      | 1086.441687    | 543.724482       | 1085.457671       | 543.232474       | C    | <b>335.149601</b>  | 168.078438        | 318.123052     | 159.565164       |                   |                  | 2 |
| 7 |                   |                 |                |                  |                   |                  | R    | <b>175.118952</b>  | 88.063114         | 158.092403     | 79.549839        |                   |                  | 1 |

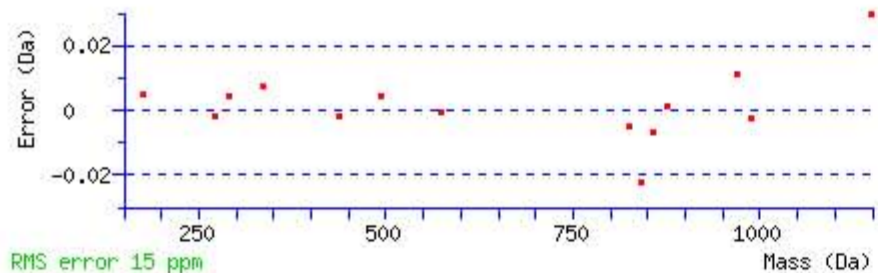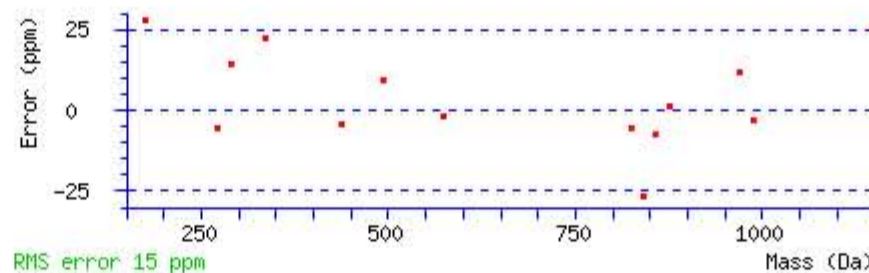

NCBI BLAST search of **ECLQTCR**

(Parameters: blastp, nr protein database, expect=20000, no filter, PAM30)

Other BLAST [web gateways](#)

All matches to this query

| Score | Mr(calc):   | Delta     | Sequence                     |
|-------|-------------|-----------|------------------------------|
| 33.4  | 1276.572632 | -0.006784 | <a href="#">ECLQTCR</a>      |
| 7.1   | 1276.579605 | -0.013757 | <a href="#">EEQRSPFNDR</a>   |
| 2.9   | 1276.583862 | -0.018014 | <a href="#">KMSLSCHVCR</a>   |
| 1.2   | 1276.560516 | 0.005332  | <a href="#">QQVPSSEDSMEK</a> |



# MASCOT Search Results

## Peptide View

MS/MS Fragmentation of **KEDSCQLGYSAGPCMGMTSR**

Found in **AMBP\_HUMAN**, Protein AMBP OS=Homo sapiens GN=AMBP PE=1 SV=1

Match to Query 60688: 2545.113702 from(849.378510,3+) rtinseconds(1872) index(54791)

Title: Locus:1.1.1.3138.18 File:"2013-07-02 CLN FXIII 30 min 2nd F 4.wiff"

Data file C:\Program Files (x86)\Matrix Science\Mascot Daemon\mgf2 FXIII 30 min 2nd\mascot\_daemon\_merge.mgf

Click mouse within plot area to zoom in by factor of two about that point

Or, Plot from  to  Da

Label all possible matches  Label matches used for scoring

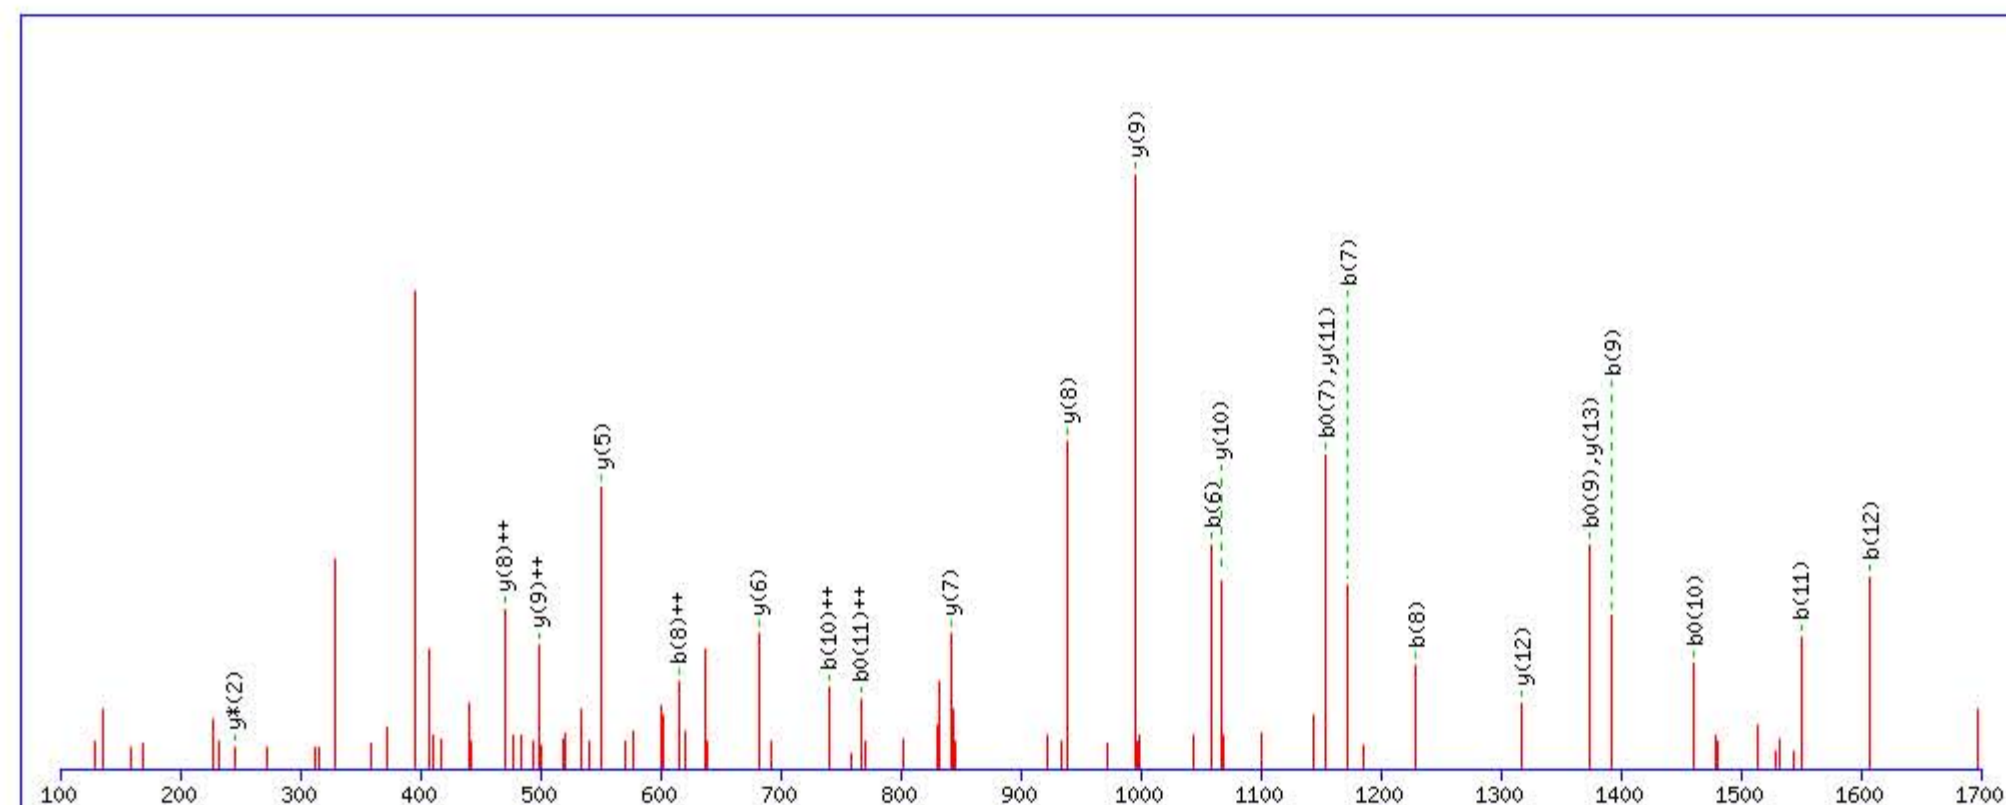

Monoisotopic mass of neutral peptide Mr(calc): 2545.089188

Fixed modifications: Carbamidomethyl (C) (apply to specified residues or termini only)

Variable modifications:

Q6 : Biotin:Thermo-21345 (Q)

Ions Score: 58 Expect: 8.2e-006

Matches : 24/224 fragment ions using 31 most intense peaks [\(help\)](#)

| #  | b                  | b <sup>++</sup>   | b <sup>*</sup> | b <sup>*++</sup> | b <sup>0</sup>     | b <sup>0++</sup>  | Seq.     | y                  | y <sup>++</sup>   | y <sup>*</sup>    | y <sup>*++</sup> | y <sup>0</sup> | y <sup>0++</sup> | #         |
|----|--------------------|-------------------|----------------|------------------|--------------------|-------------------|----------|--------------------|-------------------|-------------------|------------------|----------------|------------------|-----------|
| 1  | 129.102239         | 65.054757         | 112.075690     | 56.541483        |                    |                   | <b>K</b> |                    |                   |                   |                  |                |                  | <b>20</b> |
| 2  | 258.144832         | 129.576054        | 241.118283     | 121.062780       | 240.134267         | 120.570772        | <b>E</b> | 2418.001508        | 1209.504392       | 2400.974959       | 1200.991117      | 2399.990943    | 1200.499109      | <b>19</b> |
| 3  | 373.171775         | 187.089526        | 356.145226     | 178.576251       | 355.161210         | 178.084243        | <b>D</b> | 2288.958915        | 1144.983095       | 2271.932366       | 1136.469821      | 2270.948350    | 1135.977813      | <b>18</b> |
| 4  | 460.203803         | 230.605540        | 443.177254     | 222.092265       | 442.193238         | 221.600257        | <b>S</b> | 2173.931972        | 1087.469624       | 2156.905423       | 1078.956349      | 2155.921407    | 1078.464341      | <b>17</b> |
| 5  | 620.234452         | 310.620864        | 603.207903     | 302.107590       | 602.223887         | 301.615582        | <b>C</b> | 2086.899944        | 1043.953610       | 2069.873395       | 1035.440335      | 2068.889379    | 1034.948327      | <b>16</b> |
| 6  | <b>1059.459778</b> | 530.233527        | 1042.433229    | 521.720253       | 1041.449213        | 521.228245        | <b>Q</b> | 1926.869295        | 963.938286        | 1909.842746       | 955.425011       | 1908.858730    | 954.933003       | <b>15</b> |
| 7  | <b>1172.543842</b> | 586.775559        | 1155.517293    | 578.262285       | <b>1154.533277</b> | 577.770277        | <b>L</b> | 1487.643969        | 744.325623        | 1470.617420       | 735.812348       | 1469.633404    | 735.320340       | <b>14</b> |
| 8  | <b>1229.565306</b> | <b>615.286291</b> | 1212.538757    | 606.773017       | 1211.554741        | 606.281008        | <b>G</b> | <b>1374.559905</b> | 687.783591        | 1357.533356       | 679.270316       | 1356.549340    | 678.778308       | <b>13</b> |
| 9  | <b>1392.628635</b> | 696.817956        | 1375.602086    | 688.304681       | <b>1374.618070</b> | 687.812673        | <b>Y</b> | <b>1317.538441</b> | 659.272859        | 1300.511892       | 650.759584       | 1299.527876    | 650.267576       | <b>12</b> |
| 10 | 1479.660663        | <b>740.333970</b> | 1462.634114    | 731.820695       | <b>1461.650098</b> | 731.328687        | <b>S</b> | <b>1154.475112</b> | 577.741194        | 1137.448563       | 569.227920       | 1136.464547    | 568.735912       | <b>11</b> |
| 11 | <b>1550.697777</b> | 775.852527        | 1533.671228    | 767.339252       | 1532.687212        | <b>766.847244</b> | <b>A</b> | <b>1067.443084</b> | 534.225180        | 1050.416535       | 525.711906       | 1049.432519    | 525.219898       | <b>10</b> |
| 12 | <b>1607.719241</b> | 804.363259        | 1590.692692    | 795.849984       | 1589.708676        | 795.357976        | <b>G</b> | <b>996.405970</b>  | <b>498.706623</b> | 979.379421        | 490.193349       | 978.395405     | 489.701341       | <b>9</b>  |
| 13 | 1704.772005        | 852.889641        | 1687.745456    | 844.376366       | 1686.761440        | 843.884358        | <b>P</b> | <b>939.384506</b>  | <b>470.195891</b> | 922.357957        | 461.682617       | 921.373941     | 461.190609       | <b>8</b>  |
| 14 | 1864.802654        | 932.904965        | 1847.776105    | 924.391691       | 1846.792089        | 923.899683        | <b>C</b> | <b>842.331742</b>  | 421.669509        | 825.305193        | 413.156235       | 824.321177     | 412.664227       | <b>7</b>  |
| 15 | 1995.843139        | 998.425208        | 1978.816590    | 989.911933       | 1977.832574        | 989.419925        | <b>M</b> | <b>682.301093</b>  | 341.654185        | 665.274544        | 333.140910       | 664.290528     | 332.648902       | <b>6</b>  |
| 16 | 2052.864603        | 1026.935939       | 2035.838054    | 1018.422665      | 2034.854038        | 1017.930657       | <b>G</b> | <b>551.260608</b>  | 276.133942        | 534.234059        | 267.620668       | 533.250043     | 267.128660       | <b>5</b>  |
| 17 | 2183.905088        | 1092.456182       | 2166.878539    | 1083.942907      | 2165.894523        | 1083.450899       | <b>M</b> | 494.239144         | 247.623210        | 477.212595        | 239.109935       | 476.228579     | 238.617927       | <b>4</b>  |
| 18 | 2284.952767        | 1142.980021       | 2267.926218    | 1134.466747      | 2266.942202        | 1133.974739       | <b>T</b> | 363.198659         | 182.102967        | 346.172110        | 173.589693       | 345.188094     | 173.097685       | <b>3</b>  |
| 19 | 2371.984795        | 1186.496035       | 2354.958246    | 1177.982761      | 2353.974230        | 1177.490753       | <b>S</b> | 262.150980         | 131.579128        | <b>245.124431</b> | 123.065854       | 244.140415     | 122.573846       | <b>2</b>  |
| 20 |                    |                   |                |                  |                    |                   | <b>R</b> | 175.118952         | 88.063114         | 158.092403        | 79.549839        |                |                  | <b>1</b>  |

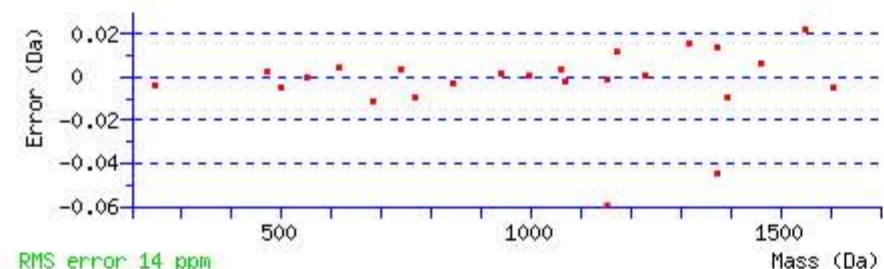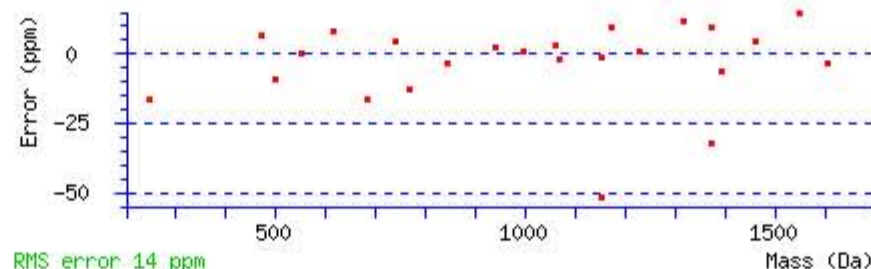

NCBI BLAST search of **KEDSCQLGYSAGPCMGMTSR**

(Parameters: blastp, nr protein database, expect=20000, no filter, PAM30)

Other BLAST [web gateways](#)

All matches to this query

| Score | Mr(calc):   | Delta    | Sequence                             |
|-------|-------------|----------|--------------------------------------|
| 58.1  | 2545.089188 | 0.024514 | <a href="#">KEDSCQLGYSAGPCMGMTSR</a> |

Mascot: <http://www.matrixscience.com/>



# MASCOT Search Results

## Peptide View

MS/MS Fragmentation of **VGALSQLR**

Found in **MENT\_HUMAN**, Protein MENT OS=Homo sapiens GN=MENT PE=2 SV=1

Match to Query 23551: 1153.657448 from(577.836000,2+) rtinseconds(1924) index(55228)

Title: Locus:1.1.1.3156.10 File:"2013-07-02 CLN FXIII 30 min 2nd F 4.wiff"

Data file C:\Program Files (x86)\Matrix Science\Mascot Daemon\mgf2 FXIII 30 min 2nd\mascot\_daemon\_merge.mgf

Click mouse within plot area to zoom in by factor of two about that point

Or, Plot from  to  Da

Label all possible matches  Label matches used for scoring

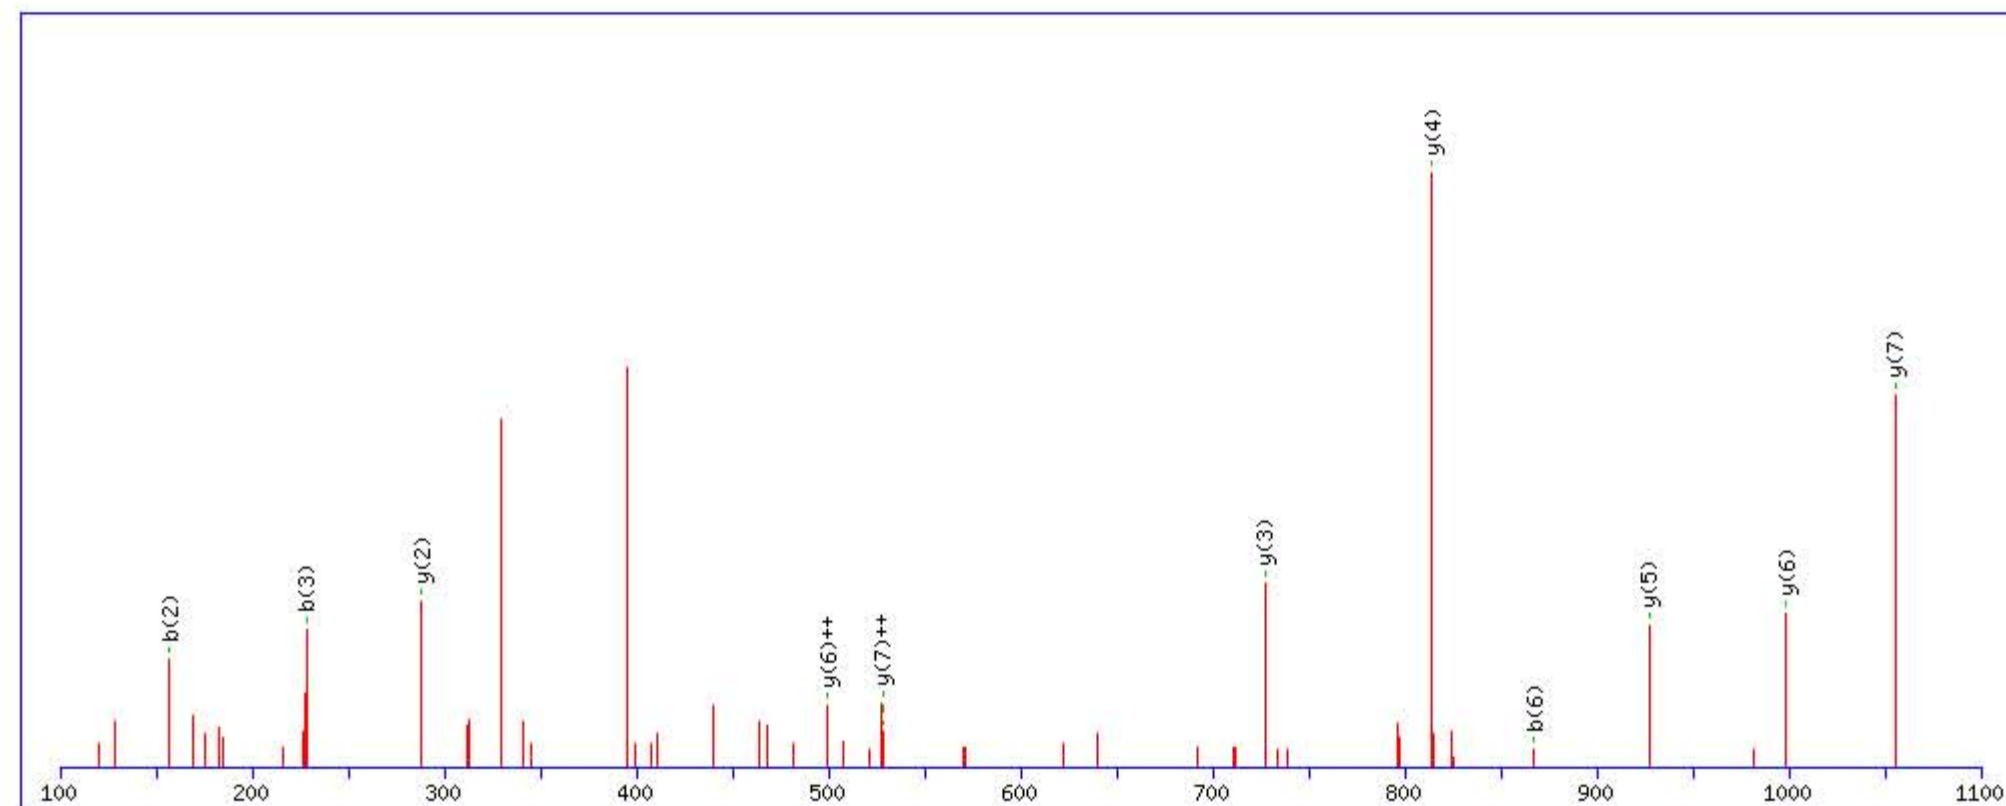

Monoisotopic mass of neutral peptide Mr(calc): 1153.664139

Fixed modifications: Carbamidomethyl (C) (apply to specified residues or termini only)

Variable modifications:

Q6 : Biotin:Thermo-21345 (Q)

Ions Score: 39 Expect: 0.0018

Matches : 11/60 fragment ions using 19 most intense peaks [\(help\)](#)

| # | b                 | b <sup>++</sup> | b <sup>+</sup> | b <sup>+++</sup> | b <sup>0</sup> | b <sup>0++</sup> | Seq. | y                  | y <sup>++</sup>   | y <sup>+</sup> | y <sup>+++</sup> | y <sup>0</sup> | y <sup>0++</sup> | # |
|---|-------------------|-----------------|----------------|------------------|----------------|------------------|------|--------------------|-------------------|----------------|------------------|----------------|------------------|---|
| 1 | 100.075690        | 50.541483       |                |                  |                |                  | V    |                    |                   |                |                  |                |                  | 8 |
| 2 | <b>157.097154</b> | 79.052215       |                |                  |                |                  | G    | <b>1055.603012</b> | <b>528.305144</b> | 1038.576463    | 519.791870       | 1037.592447    | 519.299862       | 7 |
| 3 | <b>228.134268</b> | 114.570772      |                |                  |                |                  | A    | <b>998.581548</b>  | <b>499.794412</b> | 981.554999     | 491.281138       | 980.570983     | 490.789130       | 6 |
| 4 | 341.218332        | 171.112804      |                |                  |                |                  | L    | <b>927.544434</b>  | 464.275855        | 910.517885     | 455.762581       | 909.533869     | 455.270573       | 5 |
| 5 | 428.250360        | 214.628818      |                |                  | 410.239795     | 205.623535       | S    | <b>814.460370</b>  | 407.733823        | 797.433821     | 399.220549       | 796.449805     | 398.728541       | 4 |
| 6 | <b>867.475686</b> | 434.241481      | 850.449137     | 425.728207       | 849.465121     | 425.236199       | Q    | <b>727.428342</b>  | 364.217809        | 710.401793     | 355.704535       |                |                  | 3 |
| 7 | 980.559750        | 490.783513      | 963.533201     | 482.270239       | 962.549185     | 481.778231       | L    | <b>288.203016</b>  | 144.605146        | 271.176467     | 136.091872       |                |                  | 2 |
| 8 |                   |                 |                |                  |                |                  | R    | 175.118952         | 88.063114         | 158.092403     | 79.549840        |                |                  | 1 |

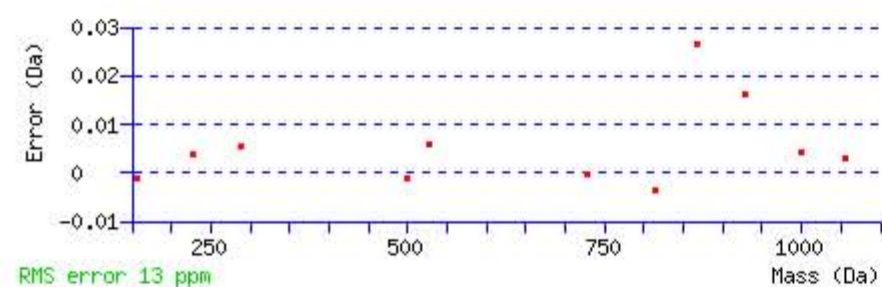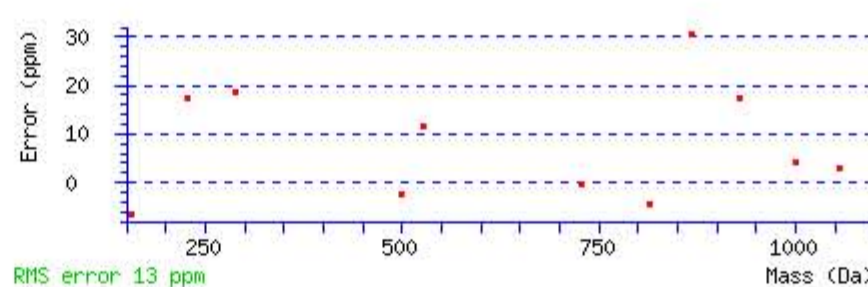

NCBI BLAST search of [VGALSQLR](#)

(Parameters: blastp, nr protein database, expect=20000, no filter, PAM30)

Other BLAST [web gateways](#)

All matches to this query

| Score | Mr(calc):   | Delta     | Sequence                    |
|-------|-------------|-----------|-----------------------------|
| 39.0  | 1153.664139 | -0.006691 | <a href="#">VGALSQLR</a>    |
| 10.8  | 1153.645477 | 0.011971  | <a href="#">RALAAPVAEEK</a> |
| 8.3   | 1153.656723 | 0.000725  | <a href="#">RPSADPGKKAK</a> |
| 4.8   | 1153.664124 | -0.006676 | <a href="#">VKQEALR</a>     |
| 3.4   | 1153.667953 | -0.010505 | <a href="#">RANPNSIRVK</a>  |

Mascot: <http://www.matrixscience.com/>



# MASCOT Search Results

## Peptide View

MS/MS Fragmentation of **ETAASLLQAGYK**

Found in **THRB\_HUMAN**, Prothrombin OS=Homo sapiens GN=F2 PE=1 SV=2

Match to Query 37149: 1561.819488 from(781.917020,2+) rtinseconds(2122) index(56593)

Title: Locus:1.1.1.3224.21 File:"2013-07-02 CLN FXIII 30 min 2nd F 4.wiff"

Data file C:\Program Files (x86)\Matrix Science\Mascot Daemon\mgf2 FXIII 30 min 2nd\mascot\_daemon\_merge.mgf

Click mouse within plot area to zoom in by factor of two about that point

Or, Plot from  to  Da

Label all possible matches  Label matches used for scoring

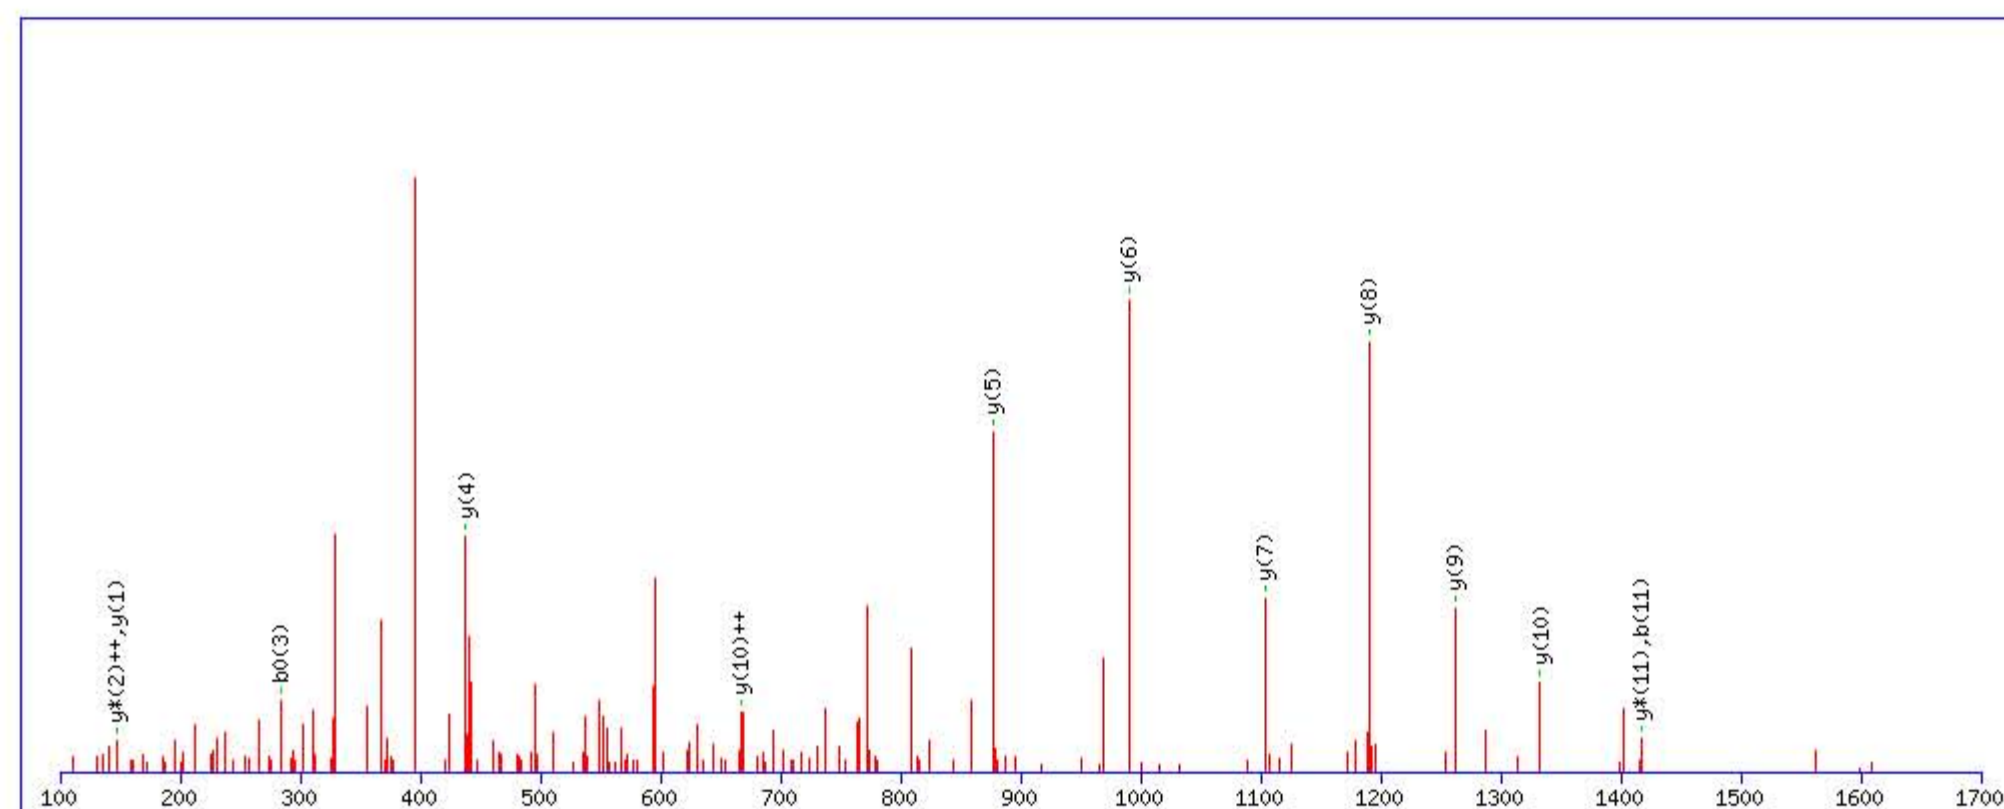

Monoisotopic mass of neutral peptide Mr(calc): 1561.817383

Fixed modifications: Carbamidomethyl (C) (apply to specified residues or termini only)

Variable modifications:

Q8 : Biotin:Thermo-21345 (Q)

Ions Score: 70 Expect: 5.7e-007

Matches : 13/104 fragment ions using 14 most intense peaks [\(help\)](#)

| #  | b           | b <sup>++</sup> | b <sup>*</sup> | b <sup>*++</sup> | b <sup>0</sup> | b <sup>0++</sup> | Seq. | y           | y <sup>++</sup> | y <sup>*</sup> | y <sup>*++</sup> | y <sup>0</sup> | y <sup>0++</sup> | #  |
|----|-------------|-----------------|----------------|------------------|----------------|------------------|------|-------------|-----------------|----------------|------------------|----------------|------------------|----|
| 1  | 130.049869  | 65.528572       |                |                  | 112.039304     | 56.523290        | E    |             |                 |                |                  |                |                  | 12 |
| 2  | 231.097548  | 116.052412      |                |                  | 213.086983     | 107.047130       | T    | 1433.782100 | 717.394688      | 1416.755551    | 708.881414       | 1415.771535    | 708.389406       | 11 |
| 3  | 302.134662  | 151.570969      |                |                  | 284.124097     | 142.565687       | A    | 1332.734421 | 666.870848      | 1315.707872    | 658.357574       | 1314.723856    | 657.865566       | 10 |
| 4  | 373.171776  | 187.089526      |                |                  | 355.161211     | 178.084243       | A    | 1261.697307 | 631.352292      | 1244.670758    | 622.839017       | 1243.686742    | 622.347009       | 9  |
| 5  | 460.203804  | 230.605540      |                |                  | 442.193239     | 221.600257       | S    | 1190.660193 | 595.833734      | 1173.633644    | 587.320460       | 1172.649628    | 586.828452       | 8  |
| 6  | 573.287868  | 287.147572      |                |                  | 555.277303     | 278.142290       | L    | 1103.628165 | 552.317721      | 1086.601616    | 543.804446       |                |                  | 7  |
| 7  | 686.371932  | 343.689604      |                |                  | 668.361367     | 334.684322       | L    | 990.544101  | 495.775689      | 973.517552     | 487.262414       |                |                  | 6  |
| 8  | 1125.597258 | 563.302267      | 1108.570709    | 554.788993       | 1107.586693    | 554.296985       | Q    | 877.460037  | 439.233657      | 860.433488     | 430.720382       |                |                  | 5  |
| 9  | 1196.634372 | 598.820824      | 1179.607823    | 590.307550       | 1178.623807    | 589.815541       | A    | 438.234711  | 219.620993      | 421.208162     | 211.107719       |                |                  | 4  |
| 10 | 1253.655836 | 627.331556      | 1236.629287    | 618.818282       | 1235.645271    | 618.326273       | G    | 367.197597  | 184.102436      | 350.171048     | 175.589162       |                |                  | 3  |
| 11 | 1416.719165 | 708.863221      | 1399.692616    | 700.349946       | 1398.708600    | 699.857938       | Y    | 310.176133  | 155.591705      | 293.149584     | 147.078430       |                |                  | 2  |
| 12 |             |                 |                |                  |                |                  | K    | 147.112804  | 74.060040       | 130.086255     | 65.546765        |                |                  | 1  |

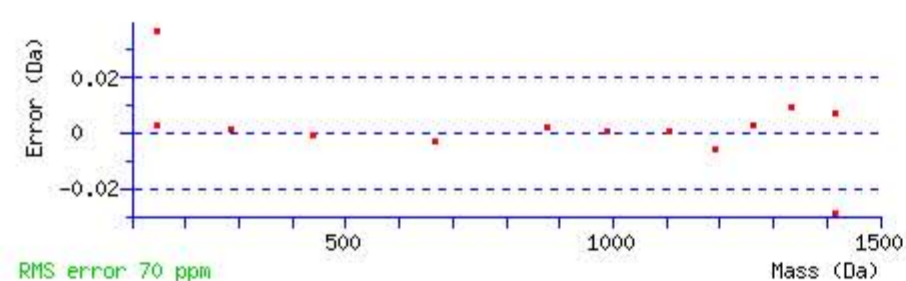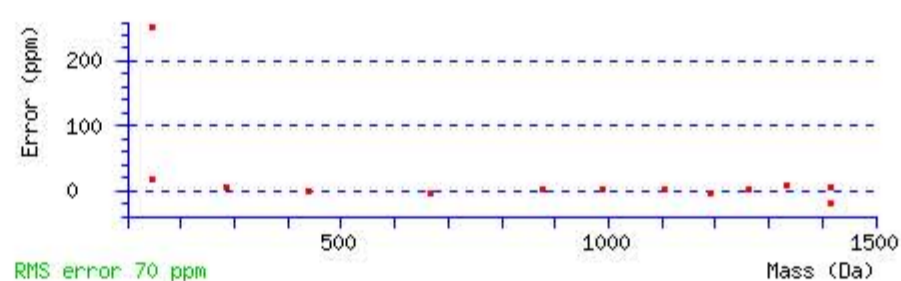

NCBI BLAST search of [ETAASLLQAGYK](#)

(Parameters: blastp, nr protein database, expect=20000, no filter, PAM30)

Other BLAST [web gateways](#)

## All matches to this query

| Score | Mr(calc):   | Delta     | Sequence                       |
|-------|-------------|-----------|--------------------------------|
| 70.5  | 1561.817383 | 0.002105  | <a href="#">ETAASLLQAGYK</a>   |
| 3.7   | 1561.817398 | 0.002090  | <a href="#">VLPEVLEKQCGYK</a>  |
| 1.0   | 1561.835129 | -0.015641 | <a href="#">TEEALQLYNQIIK</a>  |
| 0.0   | 1561.828613 | -0.009125 | <a href="#">QLASRYASVEK</a>    |
| 0.0   | 1561.809998 | 0.009490  | <a href="#">SASDLTWDNLKGGK</a> |

Mascot: <http://www.matrixscience.com/>



# MASCOT SCIENCE Mascot Search Results

## Peptide View

MS/MS Fragmentation of **TATSEYQTFNPR**

Found in **THRB\_HUMAN**, Prothrombin OS=Homo sapiens GN=F2 PE=1 SV=2

Match to Query 46392: 1871.893728 from(936.954140,2+) rtinseconds(2262) index(57432)

Title: Locus:1.1.1.3273.13 File:"2013-07-02 CLN FXIII 30 min 2nd F 4.wiff"

Data file C:\Program Files (x86)\Matrix Science\Mascot Daemon\mgf2 FXIII 30 min 2nd\mascot\_daemon\_merge.mgf

Click mouse within plot area to zoom in by factor of two about that point

Or, Plot from  to  Da

Label all possible matches  Label matches used for scoring

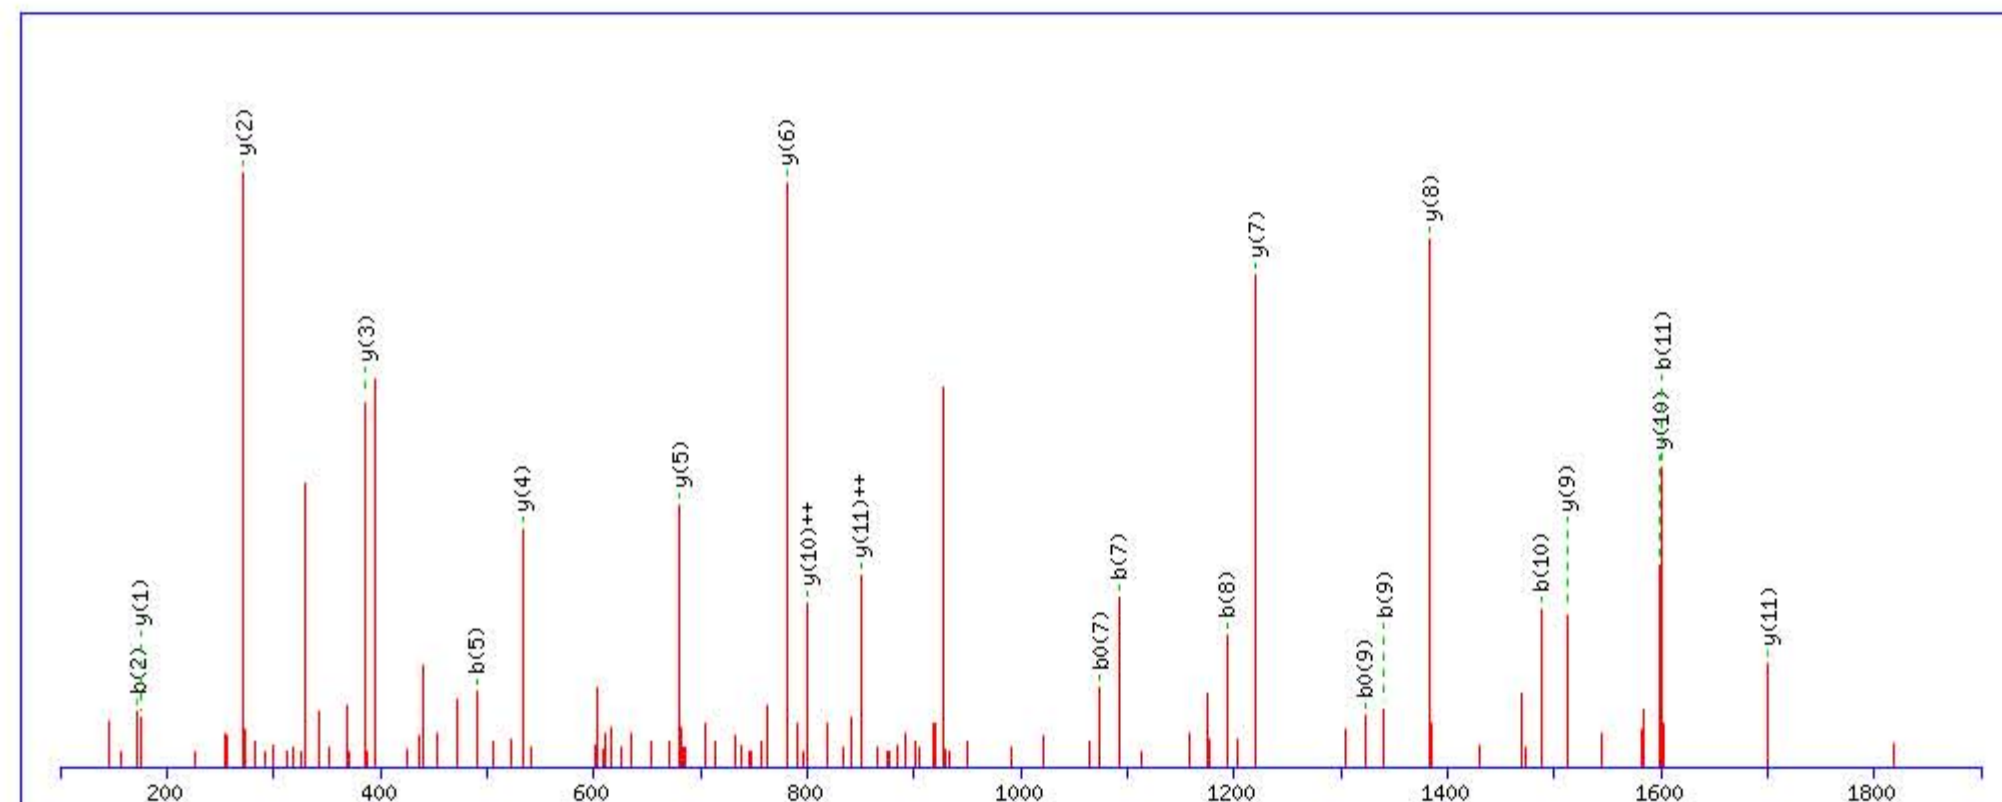

Monoisotopic mass of neutral peptide Mr(calc): 1871.887619

Fixed modifications: Carbamidomethyl (C) (apply to specified residues or termini only)

Variable modifications:

Q7 : Biotin:Thermo-21345 (Q)

Ions Score: 88 Expect: 1.4e-008

Matches : 22/122 fragment ions using 32 most intense peaks [\(help\)](#)

| #  | b                  | b <sup>++</sup> | b <sup>*</sup> | b <sup>*++</sup> | b <sup>0</sup>     | b <sup>0++</sup> | Seq. | y                  | y <sup>++</sup>   | y <sup>*</sup> | y <sup>*++</sup> | y <sup>0</sup> | y <sup>0++</sup> | #  |
|----|--------------------|-----------------|----------------|------------------|--------------------|------------------|------|--------------------|-------------------|----------------|------------------|----------------|------------------|----|
| 1  | 102.054955         | 51.531116       |                |                  | 84.044390          | 42.525833        | T    |                    |                   |                |                  |                |                  | 13 |
| 2  | <b>173.092069</b>  | 87.049672       |                |                  | 155.081504         | 78.044390        | A    | 1771.847219        | 886.427248        | 1754.820670    | 877.913973       | 1753.836654    | 877.421965       | 12 |
| 3  | 274.139748         | 137.573512      |                |                  | 256.129183         | 128.568230       | T    | <b>1700.810105</b> | <b>850.908691</b> | 1683.783556    | 842.395416       | 1682.799540    | 841.903408       | 11 |
| 4  | 361.171776         | 181.089526      |                |                  | 343.161211         | 172.084243       | S    | <b>1599.762426</b> | <b>800.384851</b> | 1582.735877    | 791.871577       | 1581.751861    | 791.379569       | 10 |
| 5  | <b>490.214369</b>  | 245.610822      |                |                  | 472.203804         | 236.605540       | E    | <b>1512.730398</b> | 756.868837        | 1495.703849    | 748.355563       | 1494.719833    | 747.863555       | 9  |
| 6  | 653.277698         | 327.142487      |                |                  | 635.267133         | 318.137205       | Y    | <b>1383.687805</b> | 692.347541        | 1366.661256    | 683.834266       | 1365.677240    | 683.342258       | 8  |
| 7  | <b>1092.503024</b> | 546.755150      | 1075.476475    | 538.241876       | <b>1074.492459</b> | 537.749868       | Q    | <b>1220.624476</b> | 610.815876        | 1203.597927    | 602.302602       | 1202.613911    | 601.810594       | 7  |
| 8  | <b>1193.550703</b> | 597.278990      | 1176.524154    | 588.765715       | 1175.540138        | 588.273707       | T    | <b>781.399150</b>  | 391.203213        | 764.372601     | 382.689939       | 763.388585     | 382.197931       | 6  |
| 9  | <b>1340.619117</b> | 670.813197      | 1323.592568    | 662.299922       | <b>1322.608552</b> | 661.807914       | F    | <b>680.351471</b>  | 340.679374        | 663.324922     | 332.166099       |                |                  | 5  |
| 10 | <b>1487.687531</b> | 744.347404      | 1470.660982    | 735.834129       | 1469.676966        | 735.342121       | F    | <b>533.283057</b>  | 267.145167        | 516.256508     | 258.631892       |                |                  | 4  |
| 11 | <b>1601.730458</b> | 801.368867      | 1584.703909    | 792.855593       | 1583.719893        | 792.363585       | N    | <b>386.214643</b>  | 193.610959        | 369.188094     | 185.097685       |                |                  | 3  |
| 12 | 1698.783222        | 849.895249      | 1681.756673    | 841.381975       | 1680.772657        | 840.889967       | P    | <b>272.171716</b>  | 136.589496        | 255.145167     | 128.076221       |                |                  | 2  |
| 13 |                    |                 |                |                  |                    |                  | R    | <b>175.118952</b>  | 88.063114         | 158.092403     | 79.549839        |                |                  | 1  |

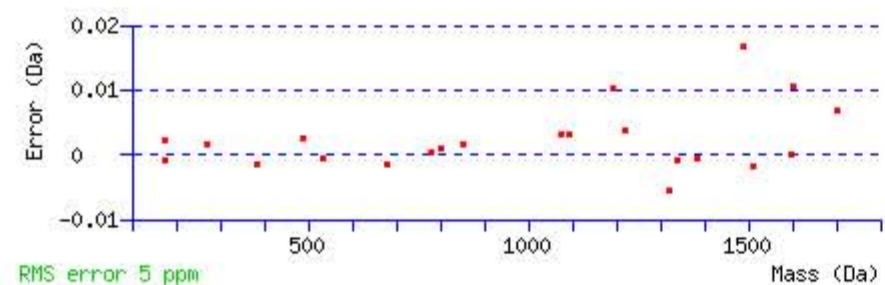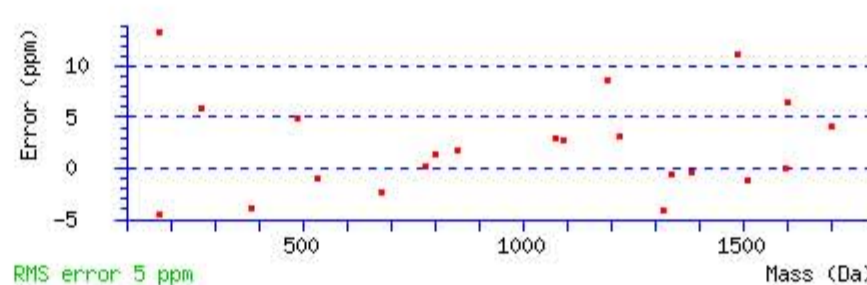

NCBI BLAST search of **TATSEYQTFNPR**

(Parameters: blastp, nr protein database, expect=20000, no filter, PAM30)

Other BLAST [web gateways](#)

All matches to this query

| Score | Mr(calc):   | Delta     | Sequence                        |
|-------|-------------|-----------|---------------------------------|
| 88.3  | 1871.887619 | 0.006109  | <a href="#">TATSEYQTFNPR</a>    |
| 4.4   | 1871.921310 | -0.027582 | <a href="#">QHFRKLCYQDAPGPR</a> |

Mascot: <http://www.matrixscience.com/>



# MASCOT SEARCH RESULTS

## Peptide View

MS/MS Fragmentation of **SPQELLCGASLISDR**

Found in **THRB\_HUMAN**, Prothrombin OS=Homo sapiens GN=F2 PE=1 SV=2

Match to Query 48094: 1955.992188 from(979.003370,2+) rtinseconds(2473) index(58461)

Title: Locus:1.1.1.3346.26 File:"2013-07-02 CLN FXIII 30 min 2nd F 4.wiff"

Data file C:\Program Files (x86)\Matrix Science\Mascot Daemon\mgf\2 FXIII 30 min 2nd\mascot\_daemon\_merge.mgf

Click mouse within plot area to zoom in by factor of two about that point

Or, Plot from  to  Da

Label all possible matches  Label matches used for scoring

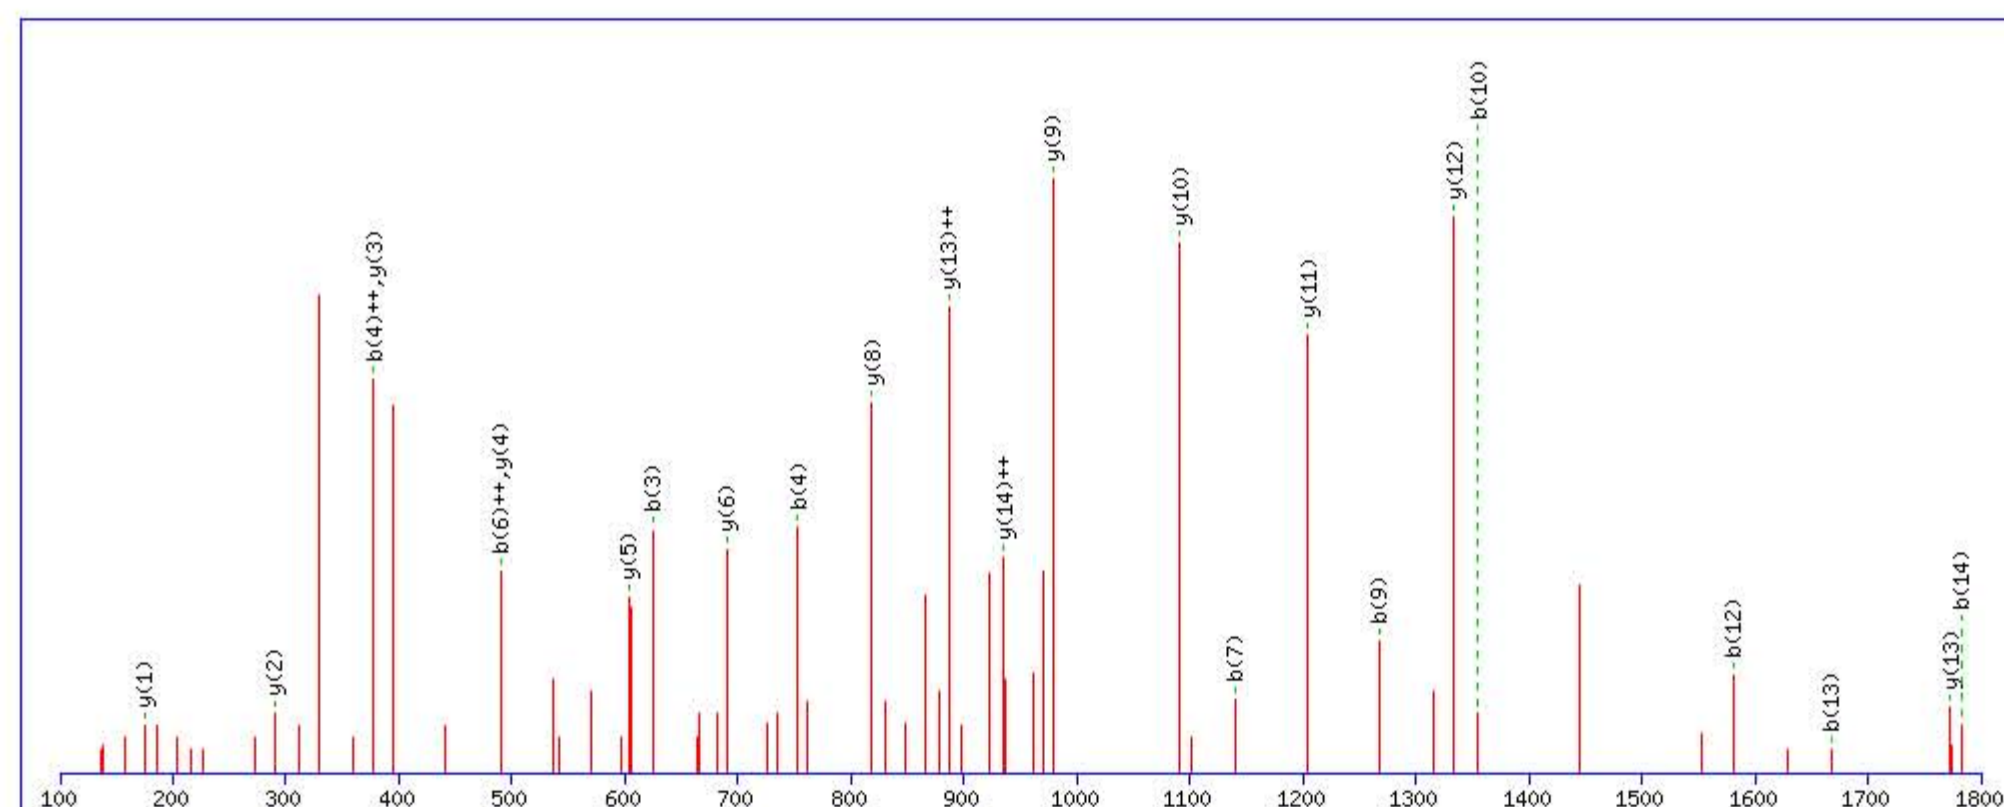

Monoisotopic mass of neutral peptide Mr(calc): 1955.980850

Fixed modifications: Carbamidomethyl (C) (apply to specified residues or termini only)

Variable modifications:

Q3 : Biotin:Thermo-21345 (Q)

Ions Score: 101 Expect: 2.2e-009

Matches : 24/162 fragment ions using 31 most intense peaks [\(help\)](#)

| #  | b                  | b <sup>++</sup>   | b <sup>*</sup> | b <sup>+++</sup> | b <sup>0</sup> | b <sup>0++</sup> | Seq. | y                  | y <sup>++</sup>   | y <sup>*</sup> | y <sup>+++</sup> | y <sup>0</sup> | y <sup>0++</sup> | #  |
|----|--------------------|-------------------|----------------|------------------|----------------|------------------|------|--------------------|-------------------|----------------|------------------|----------------|------------------|----|
| 1  | 88.039304          | 44.523290         |                |                  | 70.028739      | 35.518008        | S    |                    |                   |                |                  |                |                  | 15 |
| 2  | 185.092068         | 93.049672         |                |                  | 167.081503     | 84.044389        | P    | 1869.956117        | 935.481697        | 1852.929568    | 926.968422       | 1851.945552    | 926.476414       | 14 |
| 3  | <b>624.317394</b>  | 312.662335        | 607.290845     | 304.149061       | 606.306829     | 303.657053       | Q    | <b>1772.903353</b> | <b>886.955314</b> | 1755.876804    | 878.442040       | 1754.892788    | 877.950032       | 13 |
| 4  | <b>753.359987</b>  | <b>377.183632</b> | 736.333438     | 368.670357       | 735.349422     | 368.178349       | E    | <b>1333.678027</b> | 667.342652        | 1316.651478    | 658.829377       | 1315.667462    | 658.337369       | 12 |
| 5  | 866.444051         | 433.725664        | 849.417502     | 425.212389       | 848.433486     | 424.720381       | L    | <b>1204.635434</b> | 602.821355        | 1187.608885    | 594.308081       | 1186.624869    | 593.816073       | 11 |
| 6  | 979.528115         | <b>490.267696</b> | 962.501566     | 481.754421       | 961.517550     | 481.262413       | L    | <b>1091.551370</b> | 546.279323        | 1074.524821    | 537.766049       | 1073.540805    | 537.274040       | 10 |
| 7  | <b>1139.558764</b> | 570.283020        | 1122.532215    | 561.769746       | 1121.548199    | 561.277738       | C    | <b>978.467306</b>  | 489.737291        | 961.440757     | 481.224017       | 960.456741     | 480.732009       | 9  |
| 8  | 1196.580228        | 598.793752        | 1179.553679    | 590.280478       | 1178.569663    | 589.788470       | G    | <b>818.436657</b>  | 409.721967        | 801.410108     | 401.208692       | 800.426092     | 400.716684       | 8  |
| 9  | <b>1267.617342</b> | 634.312309        | 1250.590793    | 625.799035       | 1249.606777    | 625.307027       | A    | 761.415193         | 381.211235        | 744.388644     | 372.697960       | 743.404628     | 372.205952       | 7  |
| 10 | <b>1354.649370</b> | 677.828323        | 1337.622821    | 669.315049       | 1336.638805    | 668.823041       | S    | <b>690.378079</b>  | 345.692678        | 673.351530     | 337.179403       | 672.367514     | 336.687395       | 6  |
| 11 | 1467.733434        | 734.370355        | 1450.706885    | 725.857081       | 1449.722869    | 725.365073       | L    | <b>603.346051</b>  | 302.176664        | 586.319502     | 293.663389       | 585.335486     | 293.171381       | 5  |
| 12 | <b>1580.817498</b> | 790.912387        | 1563.790949    | 782.399113       | 1562.806933    | 781.907104       | I    | <b>490.261987</b>  | 245.634631        | 473.235438     | 237.121357       | 472.251422     | 236.629349       | 4  |
| 13 | <b>1667.849526</b> | 834.428401        | 1650.822977    | 825.915127       | 1649.838961    | 825.423118       | S    | <b>377.177923</b>  | 189.092600        | 360.151374     | 180.579325       | 359.167358     | 180.087317       | 3  |
| 14 | <b>1782.876469</b> | 891.941873        | 1765.849920    | 883.428598       | 1764.865904    | 882.936590       | D    | <b>290.145895</b>  | 145.576585        | 273.119346     | 137.063311       | 272.135330     | 136.571303       | 2  |
| 15 |                    |                   |                |                  |                |                  | R    | <b>175.118952</b>  | 88.063114         | 158.092403     | 79.549839        |                |                  | 1  |

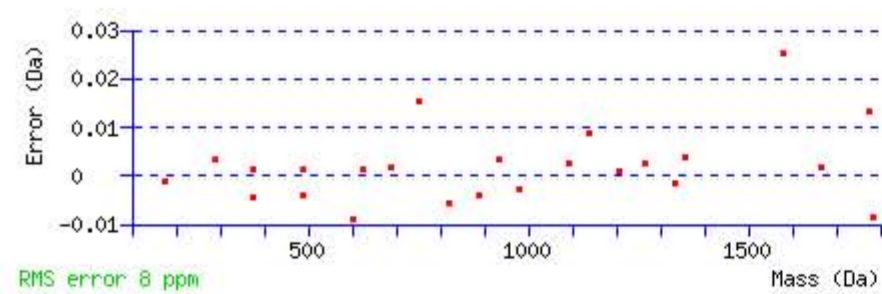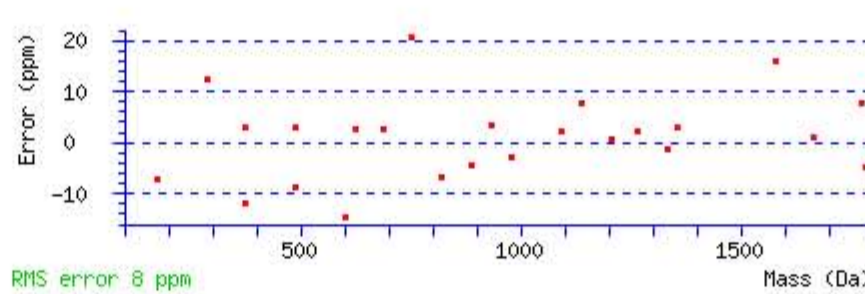

NCBI BLAST search of **SPQELLCGASLISDR**

(Parameters: blastp, nr protein database, expect=20000, no filter, PAM30)

Other BLAST [web gateways](#)

## All matches to this query

| Score | Mr(calc):   | Delta     | Sequence                          |
|-------|-------------|-----------|-----------------------------------|
| 100.9 | 1955.980850 | 0.011338  | <a href="#">SPQELLCGASLISDR</a>   |
| 19.6  | 1956.006470 | -0.014282 | <a href="#">AILRVAELSSDDFHLDR</a> |
| 4.7   | 1956.003342 | -0.011154 | <a href="#">GTLPLSRICAMVTTQHR</a> |
| 4.2   | 1955.975464 | 0.016724  | <a href="#">QHSLHSAQWFAGAFILR</a> |
| 1.4   | 1955.963531 | 0.028657  | <a href="#">AEGPLREEFRHEAMLR</a>  |
| 1.1   | 1955.985565 | 0.006623  | <a href="#">RAAQLCGAGMAAVVDR</a>  |
| 0.1   | 1955.974335 | 0.017853  | <a href="#">LVHSMQVAKMQSDR</a>    |



**Peptide View**

MS/MS Fragmentation of **HQDFNSAVQLVENFCR**  
 Found in **THRB\_HUMAN**, Prothrombin OS=Homo sapiens GN=F2 PE=1 SV=2

Match to Query 55553: 2274.073608 from(1138.044080,2+) rtinseconds(2450) index(58337)  
 Title: Locus:1.1.1.3338.10 File:"2013-07-02 CLN FXIII 30 min 2nd F 4.wiff"  
 Data file C:\Program Files (x86)\Matrix Science\Mascot Daemon\mgf2 FXIII 30 min 2nd\mascot\_daemon\_merge.mgf

Click mouse within plot area to zoom in by factor of two about that point  
 Or, Plot from  to  Da   
 Label all possible matches  Label matches used for scoring

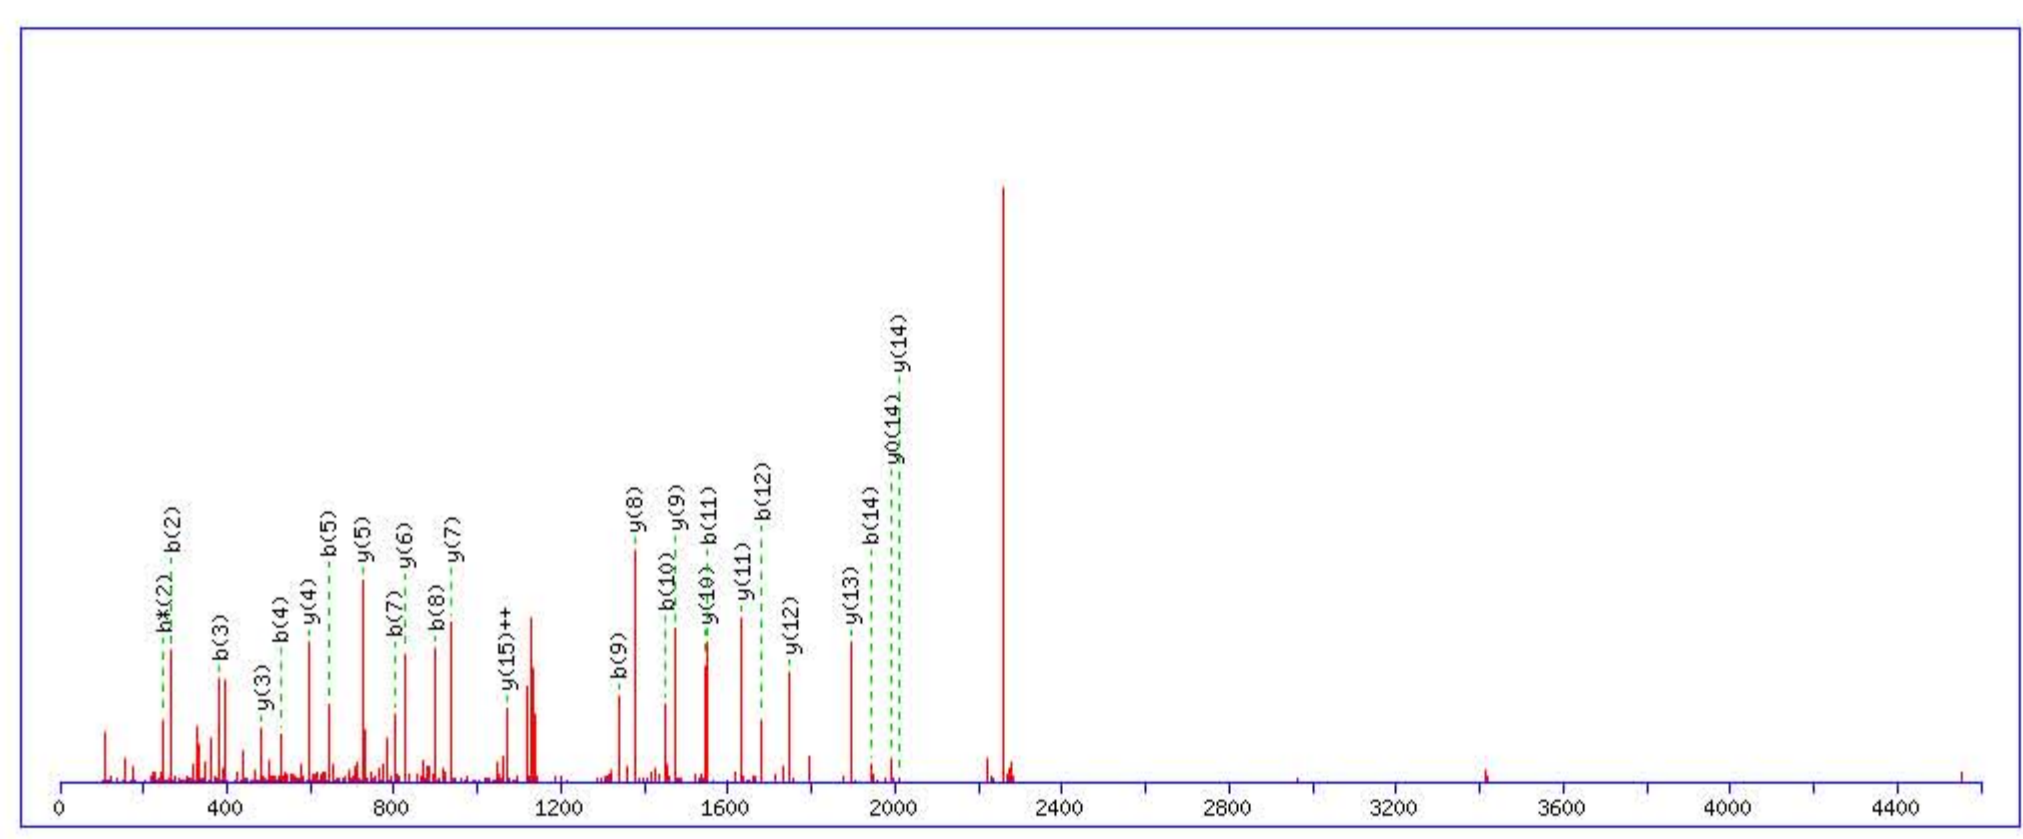

Monoisotopic mass of neutral peptide Mr(calc): 2274.067398  
 Fixed modifications: Carbamidomethyl (C) (apply to specified residues or termini only)  
 Variable modifications:  
 Q9 : Biotin:Thermo-21345 (Q)  
 Ions Score: 86 Expect: 2.8e-008  
 Matches : 26/166 fragment ions using 41 most intense peaks [\(help\)](#)

| #  | b                  | b <sup>++</sup> | b <sup>*</sup>    | b <sup>*++</sup> | b <sup>0</sup> | b <sup>0++</sup> | Seq. | y                  | y <sup>++</sup>    | y <sup>*</sup> | y <sup>*++</sup> | y <sup>0</sup>     | y <sup>0++</sup> | #  |
|----|--------------------|-----------------|-------------------|------------------|----------------|------------------|------|--------------------|--------------------|----------------|------------------|--------------------|------------------|----|
| 1  | 138.066188         | 69.536732       |                   |                  |                |                  | H    |                    |                    |                |                  |                    |                  | 16 |
| 2  | <b>266.124766</b>  | 133.566021      | <b>249.098217</b> | 125.052746       |                |                  | Q    | 2138.015757        | <b>1069.511516</b> | 2120.989208    | 1060.998242      | 2120.005192        | 1060.506234      | 15 |
| 3  | <b>381.151709</b>  | 191.079492      | 364.125160        | 182.566218       | 363.141144     | 182.074210       | D    | <b>2009.957179</b> | 1005.482228        | 1992.930630    | 996.968953       | <b>1991.946614</b> | 996.476945       | 14 |
| 4  | <b>528.220123</b>  | 264.613700      | 511.193574        | 256.100425       | 510.209558     | 255.608417       | F    | <b>1894.930236</b> | 947.968756         | 1877.903687    | 939.455482       | 1876.919671        | 938.963474       | 13 |
| 5  | <b>642.263050</b>  | 321.635163      | 625.236501        | 313.121889       | 624.252485     | 312.629881       | N    | <b>1747.861822</b> | 874.434549         | 1730.835273    | 865.921275       | 1729.851257        | 865.429267       | 12 |
| 6  | 729.295078         | 365.151177      | 712.268529        | 356.637903       | 711.284513     | 356.145895       | S    | <b>1633.818895</b> | 817.413086         | 1616.792346    | 808.899811       | 1615.808330        | 808.407803       | 11 |
| 7  | <b>800.332192</b>  | 400.669734      | 783.305643        | 392.156459       | 782.321627     | 391.664451       | A    | <b>1546.786867</b> | 773.897072         | 1529.760318    | 765.383797       | 1528.776302        | 764.891789       | 10 |
| 8  | <b>899.400606</b>  | 450.203941      | 882.374057        | 441.690666       | 881.390041     | 441.198658       | V    | <b>1475.749753</b> | 738.378515         | 1458.723204    | 729.865240       | 1457.739188        | 729.373232       | 9  |
| 9  | <b>1338.625932</b> | 669.816604      | 1321.599383       | 661.303330       | 1320.615367    | 660.811322       | Q    | <b>1376.681339</b> | 688.844308         | 1359.654790    | 680.331033       | 1358.670774        | 679.839025       | 8  |
| 10 | <b>1451.709996</b> | 726.358636      | 1434.683447       | 717.845362       | 1433.699431    | 717.353354       | L    | <b>937.456013</b>  | 469.231645         | 920.429464     | 460.718370       | 919.445448         | 460.226362       | 7  |
| 11 | <b>1550.778410</b> | 775.892843      | 1533.751861       | 767.379569       | 1532.767845    | 766.887561       | V    | <b>824.371949</b>  | 412.689613         | 807.345400     | 404.176338       | 806.361384         | 403.684330       | 6  |
| 12 | <b>1679.821003</b> | 840.414140      | 1662.794454       | 831.900865       | 1661.810438    | 831.408857       | E    | <b>725.303535</b>  | 363.155406         | 708.276986     | 354.642131       | 707.292970         | 354.150123       | 5  |
| 13 | 1793.863930        | 897.435603      | 1776.837381       | 888.922329       | 1775.853365    | 888.430321       | N    | <b>596.260942</b>  | 298.634109         | 579.234393     | 290.120835       |                    |                  | 4  |
| 14 | <b>1940.932344</b> | 970.969810      | 1923.905795       | 962.456536       | 1922.921779    | 961.964528       | F    | <b>482.218015</b>  | 241.612646         | 465.191466     | 233.099371       |                    |                  | 3  |
| 15 | 2100.962993        | 1050.985135     | 2083.936444       | 1042.471860      | 2082.952428    | 1041.979852      | C    | 335.149601         | 168.078438         | 318.123052     | 159.565164       |                    |                  | 2  |
| 16 |                    |                 |                   |                  |                |                  | R    | 175.118952         | 88.063114          | 158.092403     | 79.549839        |                    |                  | 1  |

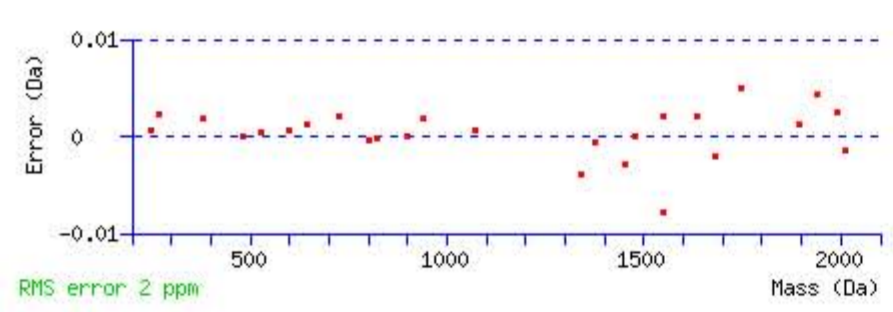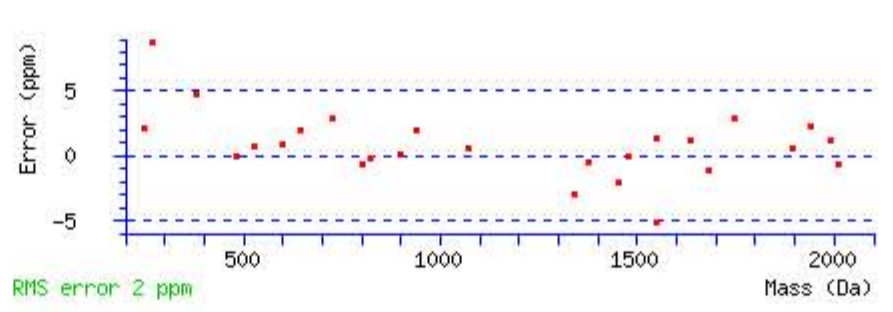

NCBI BLAST search of [HQDFNSAVQLVENFCR](#)  
 (Parameters: blastp, nr protein database, expect=20000, no filter, PAM30)  
 Other BLAST [web gateways](#)

**All matches to this query**

| Score | Mr(calc):   | Delta    | Sequence                          |
|-------|-------------|----------|-----------------------------------|
| 85.8  | 2274.067398 | 0.006210 | <a href="#">HQDFNSAVQLVENFCR</a>  |
| 11.2  | 2274.067398 | 0.006210 | <a href="#">HQDFNSAVQLVENFCR</a>  |
| 5.2   | 2274.055481 | 0.018127 | <a href="#">HQDSMSKSEM QVKEQR</a> |
| 0.1   | 2274.055481 | 0.018127 | <a href="#">HQDSMSKSEM QVKEQR</a> |



# Mascot Search Results

## Peptide View

MS/MS Fragmentation of **LAVTTHGLPCLAWASAQAK**

Found in **THRB\_HUMAN**, Prothrombin OS=Homo sapiens GN=F2 PE=1 SV=2

Match to Query 56208: 2305.209762 from(769.410530,3+) rtinseconds(2360) index(57939)

Title: Locus:1.1.1.3307.18 File:"2013-07-02 CLN FXIII 30 min 2nd F 4.wiff"

Data file C:\Program Files (x86)\Matrix Science\Mascot Daemon\mgf2 FXIII 30 min 2nd\mascot\_daemon\_merge.mgf

Click mouse within plot area to zoom in by factor of two about that point

Or, Plot from  to  Da

Label all possible matches  Label matches used for scoring

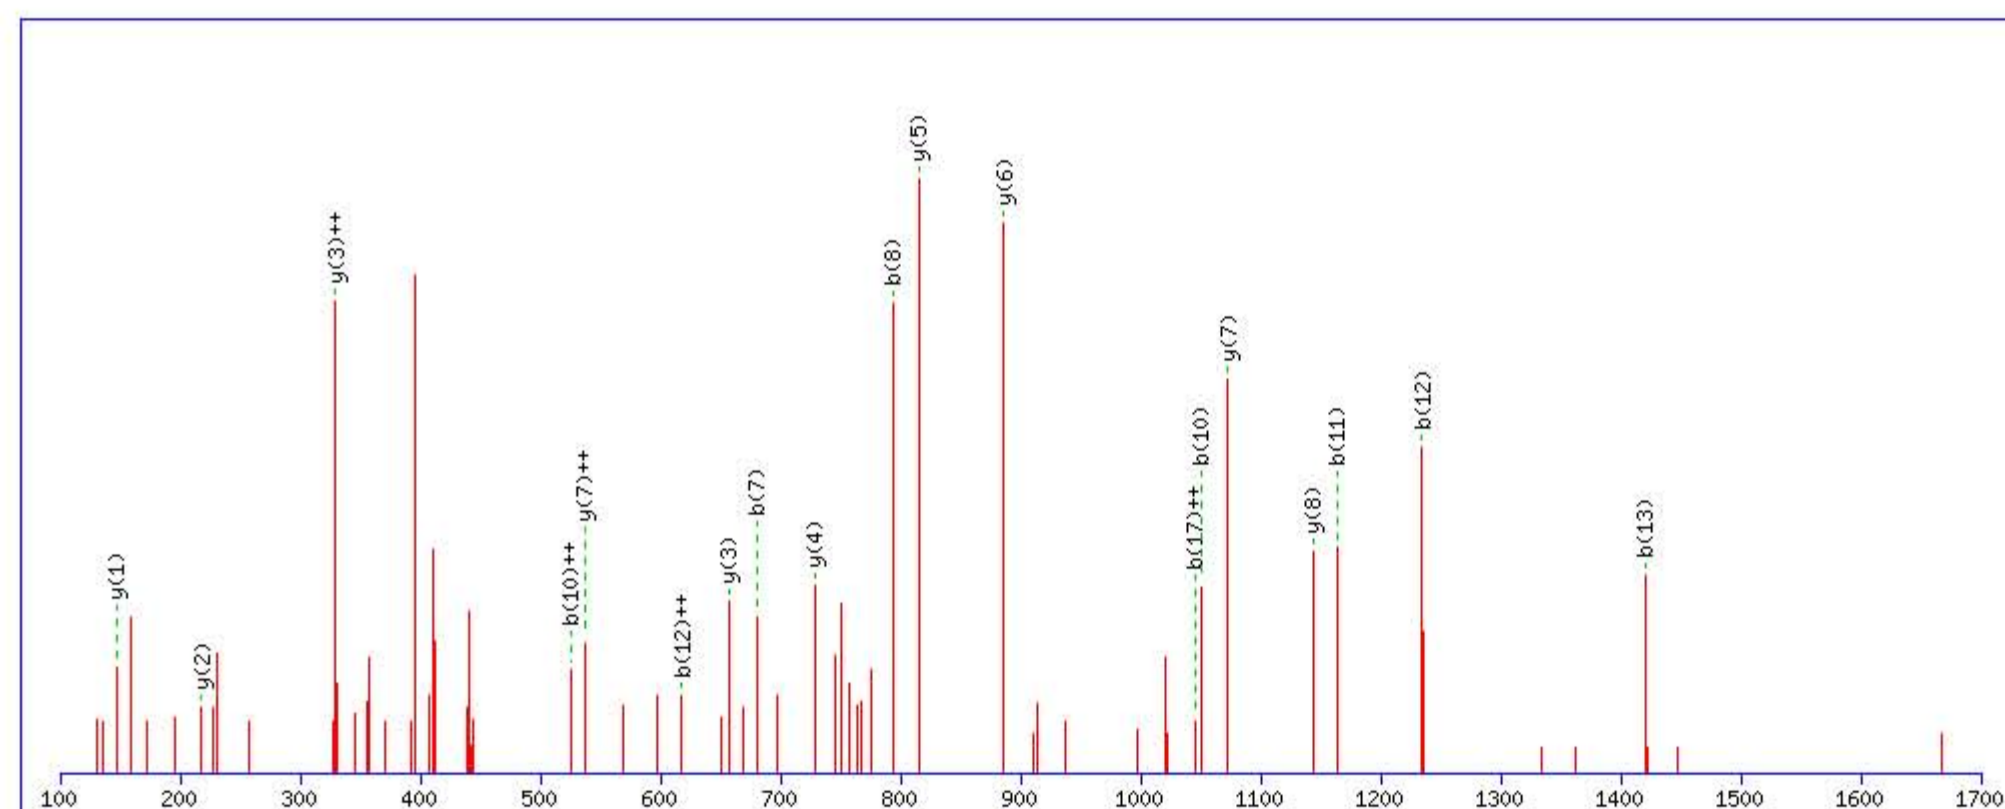

Monoisotopic mass of neutral peptide Mr(calc): 2305.207504

Fixed modifications: Carbamidomethyl (C) (apply to specified residues or termini only)

Variable modifications:

Q17 : Biotin:Thermo-21345 (Q)

Ions Score: 41 Expect: 0.00018

Matches : 19/170 fragment ions using 39 most intense peaks [\(help\)](#)

| #  | b                  | b <sup>++</sup>    | b <sup>*</sup> | b <sup>+++</sup> | b <sup>0</sup> | b <sup>0++</sup> | Seq. | y                  | y <sup>++</sup>   | y <sup>*</sup> | y <sup>+++</sup> | y <sup>0</sup> | y <sup>0++</sup> | #  |
|----|--------------------|--------------------|----------------|------------------|----------------|------------------|------|--------------------|-------------------|----------------|------------------|----------------|------------------|----|
| 1  | 114.091340         | 57.549308          |                |                  |                |                  | L    |                    |                   |                |                  |                |                  | 19 |
| 2  | 185.128454         | 93.067865          |                |                  |                |                  | A    | 2193.130730        | 1097.069003       | 2176.104181    | 1088.555728      | 2175.120165    | 1088.063720      | 18 |
| 3  | 284.196868         | 142.602072         |                |                  |                |                  | V    | 2122.093616        | 1061.550446       | 2105.067067    | 1053.037171      | 2104.083051    | 1052.545163      | 17 |
| 4  | 385.244547         | 193.125912         |                |                  | 367.233982     | 184.120629       | T    | 2023.025202        | 1012.016239       | 2005.998653    | 1003.502965      | 2005.014637    | 1003.010957      | 16 |
| 5  | 486.292226         | 243.649751         |                |                  | 468.281661     | 234.644469       | T    | 1921.977523        | 961.492400        | 1904.950974    | 952.979125       | 1903.966958    | 952.487117       | 15 |
| 6  | 623.351138         | 312.179207         |                |                  | 605.340573     | 303.173925       | H    | 1820.929844        | 910.968560        | 1803.903295    | 902.455286       | 1802.919279    | 901.963278       | 14 |
| 7  | <b>680.372602</b>  | 340.689939         |                |                  | 662.362037     | 331.684657       | G    | 1683.870932        | 842.439104        | 1666.844383    | 833.925830       | 1665.860367    | 833.433822       | 13 |
| 8  | <b>793.456666</b>  | 397.231971         |                |                  | 775.446101     | 388.226689       | L    | 1626.849468        | 813.928372        | 1609.822919    | 805.415098       | 1608.838903    | 804.923090       | 12 |
| 9  | 890.509430         | 445.758353         |                |                  | 872.498865     | 436.753071       | P    | 1513.765404        | 757.386340        | 1496.738855    | 748.873066       | 1495.754839    | 748.381058       | 11 |
| 10 | <b>1050.540079</b> | <b>525.773678</b>  |                |                  | 1032.529514    | 516.768395       | C    | 1416.712640        | 708.859958        | 1399.686091    | 700.346684       | 1398.702075    | 699.854675       | 10 |
| 11 | <b>1163.624143</b> | 582.315710         |                |                  | 1145.613578    | 573.310427       | L    | 1256.681991        | 628.844634        | 1239.655442    | 620.331359       | 1238.671426    | 619.839351       | 9  |
| 12 | <b>1234.661257</b> | <b>617.834267</b>  |                |                  | 1216.650692    | 608.828984       | A    | <b>1143.597927</b> | 572.302602        | 1126.571378    | 563.789327       | 1125.587362    | 563.297319       | 8  |
| 13 | <b>1420.740570</b> | 710.873923         |                |                  | 1402.730005    | 701.868640       | W    | <b>1072.560813</b> | <b>536.784045</b> | 1055.534264    | 528.270770       | 1054.550248    | 527.778762       | 7  |
| 14 | 1491.777684        | 746.392480         |                |                  | 1473.767119    | 737.387197       | A    | <b>886.481500</b>  | 443.744388        | 869.454951     | 435.231114       | 868.470935     | 434.739106       | 6  |
| 15 | 1578.809712        | 789.908494         |                |                  | 1560.799147    | 780.903212       | S    | <b>815.444386</b>  | 408.225831        | 798.417837     | 399.712557       | 797.433821     | 399.220549       | 5  |
| 16 | 1649.846826        | 825.427051         |                |                  | 1631.836261    | 816.421768       | A    | <b>728.412358</b>  | 364.709817        | 711.385809     | 356.196543       |                |                  | 4  |
| 17 | 2089.072152        | <b>1045.039714</b> | 2072.045603    | 1036.526439      | 2071.061587    | 1036.034431      | Q    | <b>657.375244</b>  | <b>329.191260</b> | 640.348695     | 320.677986       |                |                  | 3  |
| 18 | 2160.109266        | 1080.558271        | 2143.082717    | 1072.044996      | 2142.098701    | 1071.552988      | A    | <b>218.149918</b>  | 109.578597        | 201.123369     | 101.065323       |                |                  | 2  |
| 19 |                    |                    |                |                  |                |                  | K    | <b>147.112804</b>  | 74.060040         | 130.086255     | 65.546765        |                |                  | 1  |

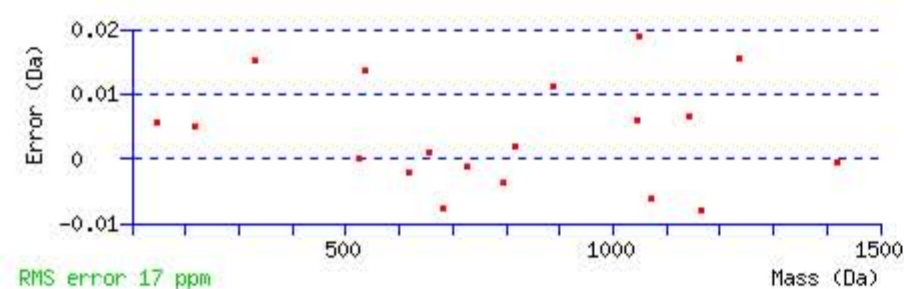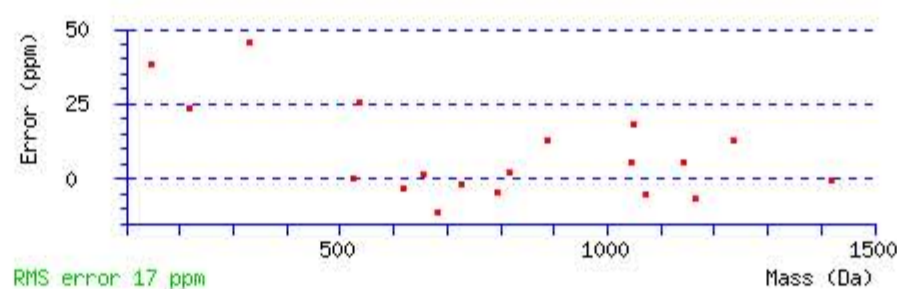

NCBI BLAST search of **LAVTTHGLPCLAWASAQAK**

(Parameters: blastp, nr protein database, expect=20000, no filter, PAM30)

Other BLAST [web gateways](#)

All matches to this query

| Score | Mr(calc):   | Delta    | Sequence                   |
|-------|-------------|----------|----------------------------|
| 40.7  | 2305.207504 | 0.002258 | <b>LAVTTHGLPCLAWASAQAK</b> |
| 0.8   | 2305.189545 | 0.020217 | <b>RSKSIRPPQSPQNC</b>      |

Mascot: <http://www.matrixscience.com/>



# MASCOT Search Results

## Peptide View

MS/MS Fragmentation of **SEGSSVNLSPPLEQVPDR**  
 Found in **THRB\_HUMAN**, Prothrombin OS=Homo sapiens GN=F2 PE=1 SV=2

Match to Query 57208: 2381.136162 from(794.719330,3+) rtinseconds(2157) index(56817)  
 Title: Locus:1.1.1.3236.25 File:"2013-07-02 CLN FXIII 30 min 2nd F 4.wiff"  
 Data file C:\Program Files (x86)\Matrix Science\Mascot Daemon\mgf2 FXIII 30 min 2nd\mascot\_daemon\_merge.mgf

Click mouse within plot area to zoom in by factor of two about that point  
 Or, Plot from  to  Da   
 Label all possible matches  Label matches used for scoring

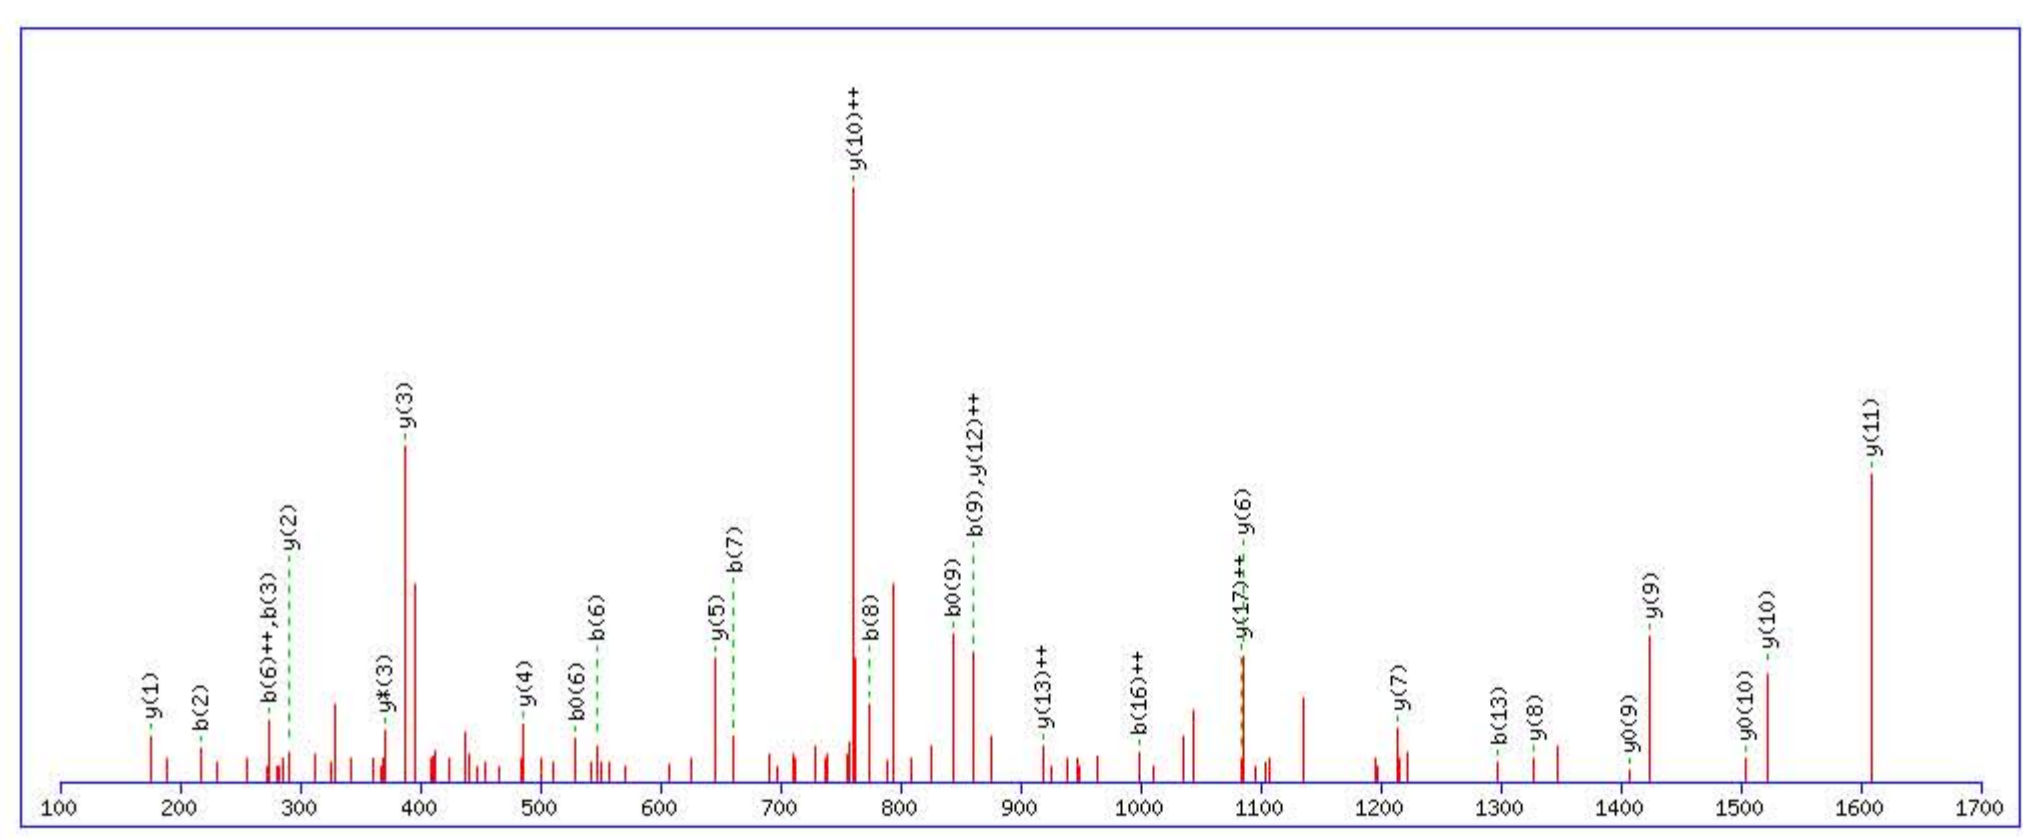

Monoisotopic mass of neutral peptide Mr(calc): 2381.135529  
 Fixed modifications: Carbamidomethyl (C) (apply to specified residues or termini only)  
 Variable modifications:  
 Q14 : Biotin:Thermo-21345 (Q)  
 Ions Score: 78 Expect: 3.2e-007  
 Matches : 29/202 fragment ions using 41 most intense peaks [\(help\)](#)

| #  | b                  | b <sup>++</sup>   | b <sup>*</sup> | b <sup>*++</sup> | b <sup>0</sup>    | b <sup>0++</sup> | Seq. | y                  | y <sup>++</sup>    | y <sup>*</sup>    | y <sup>*++</sup> | y <sup>0</sup>     | y <sup>0++</sup> | #  |
|----|--------------------|-------------------|----------------|------------------|-------------------|------------------|------|--------------------|--------------------|-------------------|------------------|--------------------|------------------|----|
| 1  | 88.039304          | 44.523290         |                |                  | 70.028739         | 35.518008        | S    |                    |                    |                   |                  |                    |                  | 19 |
| 2  | <b>217.081897</b>  | 109.044586        |                |                  | 199.071332        | 100.039304       | E    | 2295.110779        | 1148.059027        | 2278.084230       | 1139.545753      | 2277.100214        | 1139.053745      | 18 |
| 3  | <b>274.103361</b>  | 137.555319        |                |                  | 256.092796        | 128.550036       | G    | 2166.068186        | <b>1083.537731</b> | 2149.041637       | 1075.024456      | 2148.057621        | 1074.532448      | 17 |
| 4  | 361.135389         | 181.071332        |                |                  | 343.124824        | 172.066050       | S    | 2109.046722        | 1055.026999        | 2092.020173       | 1046.513724      | 2091.036157        | 1046.021716      | 16 |
| 5  | 448.167417         | 224.587346        |                |                  | 430.156852        | 215.582064       | S    | 2022.014694        | 1011.510985        | 2004.988145       | 1002.997711      | 2004.004129        | 1002.505703      | 15 |
| 6  | <b>547.235831</b>  | <b>274.121554</b> |                |                  | <b>529.225266</b> | 265.116271       | V    | 1934.982666        | 967.994971         | 1917.956117       | 959.481697       | 1916.972101        | 958.989689       | 14 |
| 7  | <b>661.278758</b>  | 331.143017        | 644.252209     | 322.629742       | 643.268193        | 322.137734       | N    | 1835.914252        | <b>918.460764</b>  | 1818.887703       | 909.947490       | 1817.903687        | 909.455482       | 13 |
| 8  | <b>774.362822</b>  | 387.685049        | 757.336273     | 379.171774       | 756.352257        | 378.679766       | L    | 1721.871325        | <b>861.439301</b>  | 1704.844776       | 852.926026       | 1703.860760        | 852.434018       | 12 |
| 9  | <b>861.394850</b>  | 431.201063        | 844.368301     | 422.687788       | <b>843.384285</b> | 422.195780       | S    | <b>1608.787261</b> | 804.897269         | 1591.760712       | 796.383994       | 1590.776696        | 795.891986       | 11 |
| 10 | 958.447614         | 479.727445        | 941.421065     | 471.214170       | 940.437049        | 470.722162       | P    | <b>1521.755233</b> | <b>761.381255</b>  | 1504.728684       | 752.867980       | <b>1503.744668</b> | 752.375972       | 10 |
| 11 | 1055.500378        | 528.253827        | 1038.473829    | 519.740553       | 1037.489813       | 519.248544       | P    | <b>1424.702469</b> | 712.854873         | 1407.675920       | 704.341598       | <b>1406.691904</b> | 703.849590       | 9  |
| 12 | 1168.584442        | 584.795859        | 1151.557893    | 576.282584       | 1150.573877       | 575.790576       | L    | <b>1327.649705</b> | 664.328491         | 1310.623156       | 655.815216       | 1309.639140        | 655.323208       | 8  |
| 13 | <b>1297.627035</b> | 649.317155        | 1280.600486    | 640.803881       | 1279.616470       | 640.311873       | E    | <b>1214.565641</b> | 607.786459         | 1197.539092       | 599.273184       | 1196.555076        | 598.781176       | 7  |
| 14 | 1736.852361        | 868.929819        | 1719.825812    | 860.416544       | 1718.841796       | 859.924536       | Q    | <b>1085.523048</b> | 543.265162         | 1068.496499       | 534.751888       | 1067.512483        | 534.259880       | 6  |
| 15 | 1896.883010        | 948.945143        | 1879.856461    | 940.431869       | 1878.872445       | 939.939861       | C    | <b>646.297722</b>  | 323.652499         | 629.271173        | 315.139225       | 628.287157         | 314.647217       | 5  |
| 16 | 1995.951424        | <b>998.479350</b> | 1978.924875    | 989.966076       | 1977.940859       | 989.474068       | V    | <b>486.267073</b>  | 243.637174         | 469.240524        | 235.123900       | 468.256508         | 234.631892       | 4  |
| 17 | 2093.004188        | 1047.005732       | 2075.977639    | 1038.492457      | 2074.993623       | 1038.000449      | P    | <b>387.198659</b>  | 194.102967         | <b>370.172110</b> | 185.589693       | 369.188094         | 185.097685       | 3  |
| 18 | 2208.031131        | 1104.519203       | 2191.004582    | 1096.005929      | 2190.020566       | 1095.513921      | D    | <b>290.145895</b>  | 145.576585         | 273.119346        | 137.063311       | 272.135330         | 136.571303       | 2  |
| 19 |                    |                   |                |                  |                   |                  | R    | <b>175.118952</b>  | 88.063114          | 158.092403        | 79.549839        |                    |                  | 1  |

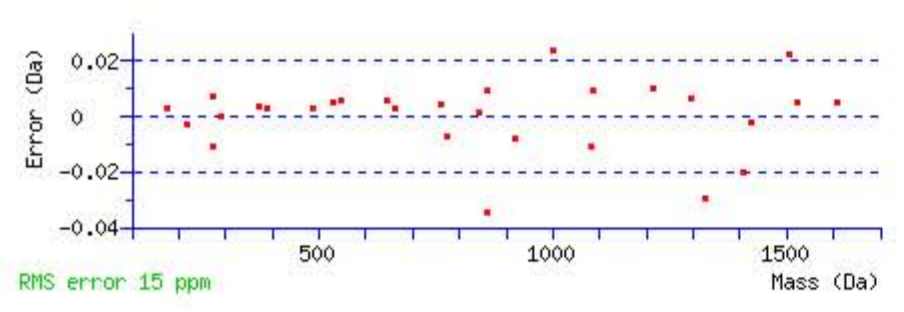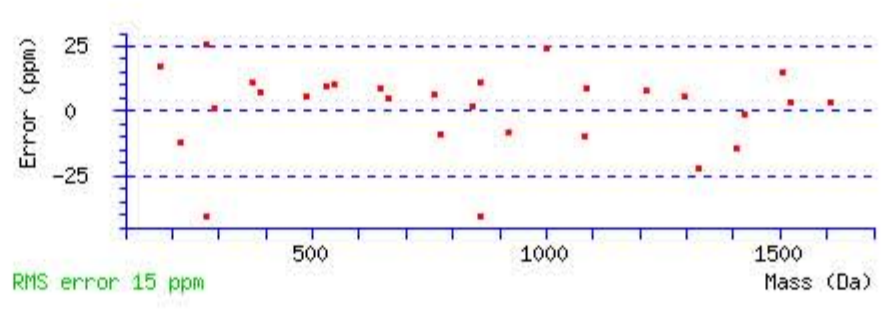

NCBI BLAST search of [SEGSSVNLSPPLEQVPDR](#)  
 (Parameters: blastp, nr protein database, expect=20000, no filter, PAM30)  
 Other BLAST [web gateways](#)

### All matches to this query

| Score | Mr(calc):   | Delta    | Sequence                           |
|-------|-------------|----------|------------------------------------|
| 77.8  | 2381.135529 | 0.000633 | <a href="#">SEGSSVNLSPPLEQVPDR</a> |



# MASCOT Search Results

## Peptide View

MS/MS Fragmentation of **GQPSVLQVVNLPIVERPVCK**

Found in **THRB\_HUMAN**, Prothrombin OS=Homo sapiens GN=F2 PE=1 SV=2

Match to Query 60656: 2542.415742 from(848.479190,3+) rtinseconds(2501) index(58687)

Title: Locus:1.1.1.3356.22 File:"2013-07-02 CLN FXIII 30 min 2nd F 4.wiff"

Data file C:\Program Files (x86)\Matrix Science\Mascot Daemon\mgf2 FXIII 30 min 2nd\mascot\_daemon\_merge.mgf

Click mouse within plot area to zoom in by factor of two about that point

Or, Plot from  to  Da

Label all possible matches  Label matches used for scoring

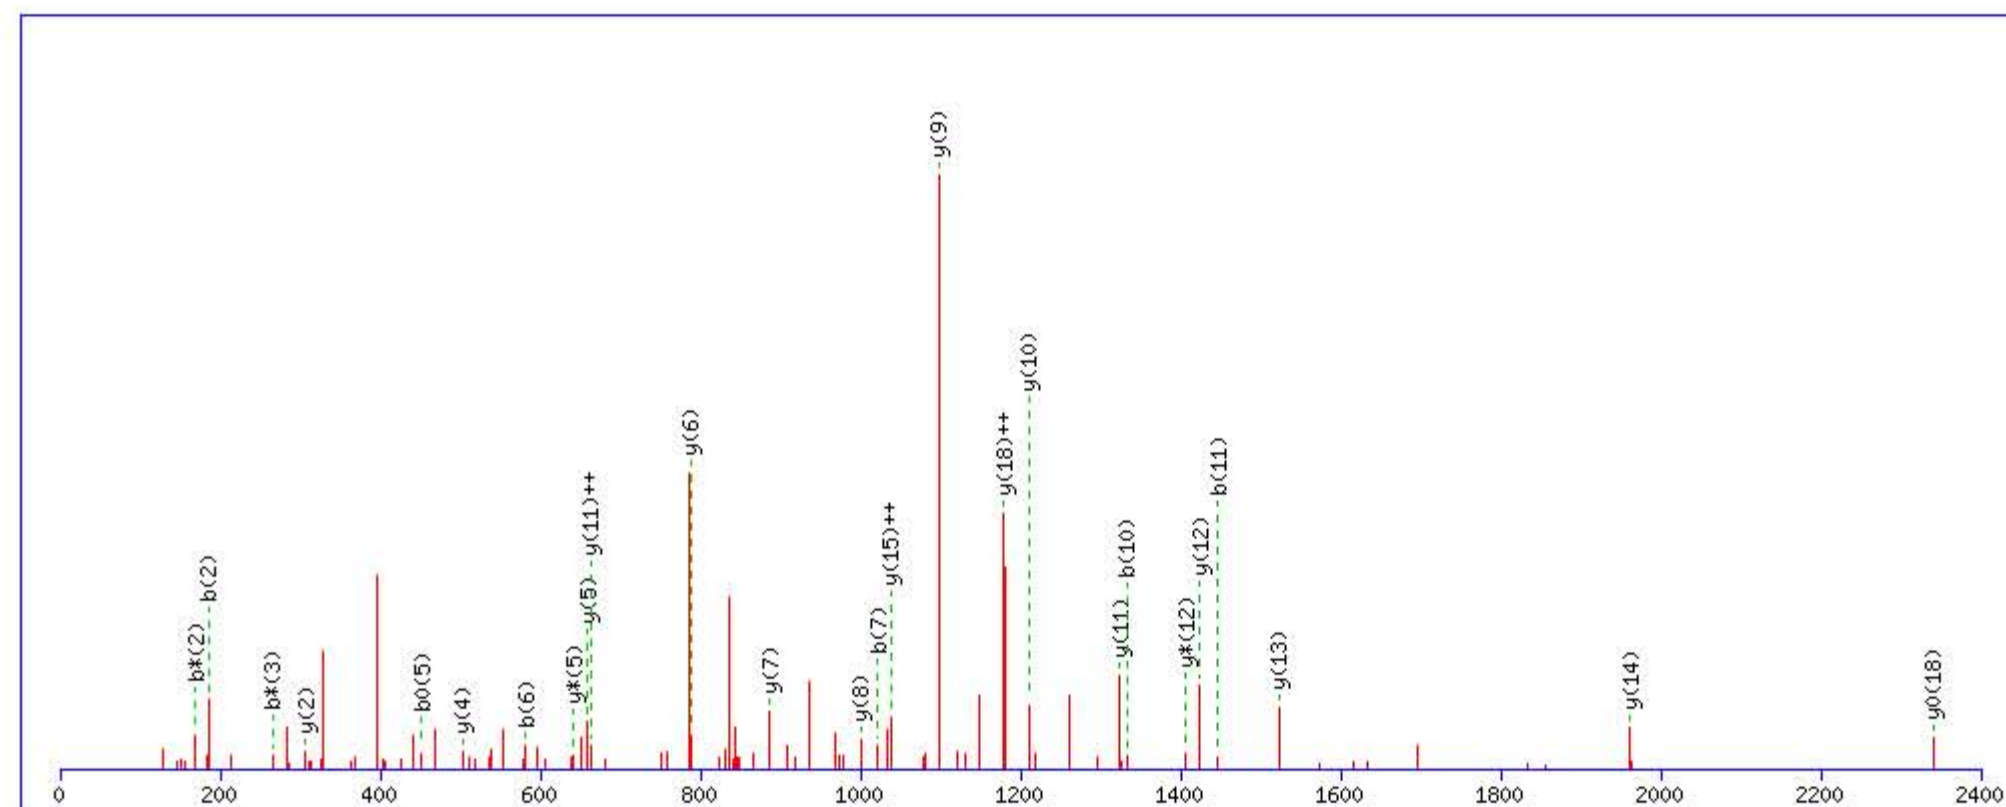

Monoisotopic mass of neutral peptide Mr(calc): 2542.412766

Fixed modifications: Carbamidomethyl (C) (apply to specified residues or termini only)

Variable modifications:

Q7 : Biotin:Thermo-21345 (Q)

Ions Score: 48 Expect: 0.00014

Matches : 26/210 fragment ions using 66 most intense peaks [\(help\)](#)

| #  | b                  | b <sup>++</sup> | b <sup>*</sup>    | b <sup>*++</sup> | b <sup>0</sup>    | b <sup>0++</sup> | Seq. | y                  | y <sup>++</sup>    | y <sup>*</sup>     | y <sup>*++</sup> | y <sup>0</sup>     | y <sup>0++</sup> | #  |
|----|--------------------|-----------------|-------------------|------------------|-------------------|------------------|------|--------------------|--------------------|--------------------|------------------|--------------------|------------------|----|
| 1  | 58.028740          | 29.518008       |                   |                  |                   |                  | G    |                    |                    |                    |                  |                    |                  | 20 |
| 2  | <b>186.087318</b>  | 93.547297       | <b>169.060769</b> | 85.034023        |                   |                  | Q    | 2486.398570        | 1243.702923        | 2469.372021        | 1235.189648      | 2468.388005        | 1234.697640      | 19 |
| 3  | 283.140082         | 142.073679      | <b>266.113533</b> | 133.560405       |                   |                  | P    | 2358.339992        | <b>1179.673634</b> | 2341.313443        | 1171.160359      | <b>2340.329427</b> | 1170.668351      | 18 |
| 4  | 370.172110         | 185.589693      | 353.145561        | 177.076419       | 352.161545        | 176.584411       | S    | 2261.287228        | 1131.147252        | 2244.260679        | 1122.633977      | 2243.276663        | 1122.141969      | 17 |
| 5  | 469.240524         | 235.123900      | 452.213975        | 226.610626       | <b>451.229959</b> | 226.118618       | V    | 2174.255200        | 1087.631238        | 2157.228651        | 1079.117963      | 2156.244635        | 1078.625955      | 16 |
| 6  | <b>582.324588</b>  | 291.665932      | 565.298039        | 283.152658       | 564.314023        | 282.660650       | L    | 2075.186786        | <b>1038.097031</b> | 2058.160237        | 1029.583756      | 2057.176221        | 1029.091748      | 15 |
| 7  | <b>1021.549914</b> | 511.278595      | 1004.523365       | 502.765321       | 1003.539349       | 502.273313       | Q    | <b>1962.102722</b> | 981.554999         | 1945.076173        | 973.041724       | 1944.092157        | 972.549716       | 14 |
| 8  | 1120.618328        | 560.812802      | 1103.591779       | 552.299528       | 1102.607763       | 551.807520       | V    | <b>1522.877396</b> | 761.942336         | 1505.850847        | 753.429061       | 1504.866831        | 752.937053       | 13 |
| 9  | 1219.686742        | 610.347009      | 1202.660193       | 601.833735       | 1201.676177       | 601.341727       | V    | <b>1423.808982</b> | 712.408129         | <b>1406.782433</b> | 703.894854       | 1405.798417        | 703.402846       | 12 |
| 10 | <b>1333.729669</b> | 667.368473      | 1316.703120       | 658.855198       | 1315.719104       | 658.363190       | N    | <b>1324.740568</b> | <b>662.873922</b>  | 1307.714019        | 654.360647       | 1306.730003        | 653.868639       | 11 |
| 11 | <b>1446.813733</b> | 723.910505      | 1429.787184       | 715.397230       | 1428.803168       | 714.905222       | L    | <b>1210.697641</b> | 605.852458         | 1193.671092        | 597.339184       | 1192.687076        | 596.847176       | 10 |
| 12 | 1543.866497        | 772.436887      | 1526.839948       | 763.923612       | 1525.855932       | 763.431604       | P    | <b>1097.613577</b> | 549.310426         | 1080.587028        | 540.797152       | 1079.603012        | 540.305144       | 9  |
| 13 | 1656.950561        | 828.978918      | 1639.924012       | 820.465644       | 1638.939996       | 819.973636       | I    | <b>1000.560813</b> | 500.784044         | 983.534264         | 492.270770       | 982.550248         | 491.778762       | 8  |
| 14 | 1756.018975        | 878.513126      | 1738.992426       | 869.999851       | 1738.008410       | 869.507843       | V    | <b>887.476749</b>  | 444.242012         | 870.450200         | 435.728738       | 869.466184         | 435.236730       | 7  |
| 15 | 1885.061568        | 943.034422      | 1868.035019       | 934.521147       | 1867.051003       | 934.029139       | E    | <b>788.408335</b>  | 394.707805         | 771.381786         | 386.194531       | 770.397770         | 385.702523       | 6  |
| 16 | 2041.162679        | 1021.084977     | 2024.136130       | 1012.571703      | 2023.152114       | 1012.079695      | R    | <b>659.365742</b>  | 330.186509         | <b>642.339193</b>  | 321.673234       |                    |                  | 5  |
| 17 | 2138.215443        | 1069.611359     | 2121.188894       | 1061.098085      | 2120.204878       | 1060.606077      | P    | <b>503.264631</b>  | 252.135953         | 486.238082         | 243.622679       |                    |                  | 4  |
| 18 | 2237.283857        | 1119.145566     | 2220.257308       | 1110.632292      | 2219.273292       | 1110.140284      | V    | 406.211867         | 203.609571         | 389.185318         | 195.096297       |                    |                  | 3  |
| 19 | 2397.314506        | 1199.160891     | 2380.287957       | 1190.647616      | 2379.303941       | 1190.155608      | C    | <b>307.143453</b>  | 154.075364         | 290.116904         | 145.562090       |                    |                  | 2  |
| 20 |                    |                 |                   |                  |                   |                  | K    | 147.112804         | 74.060040          | 130.086255         | 65.546765        |                    |                  | 1  |

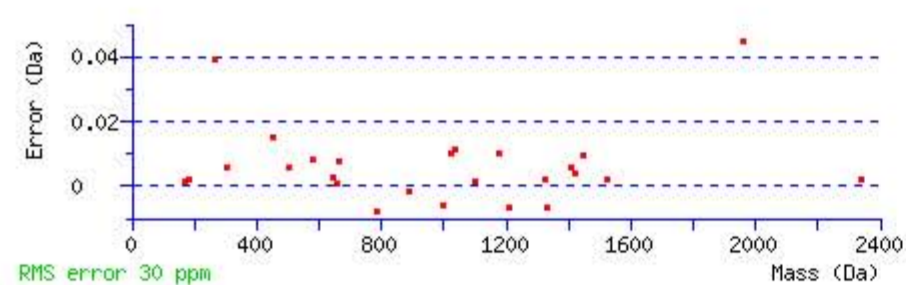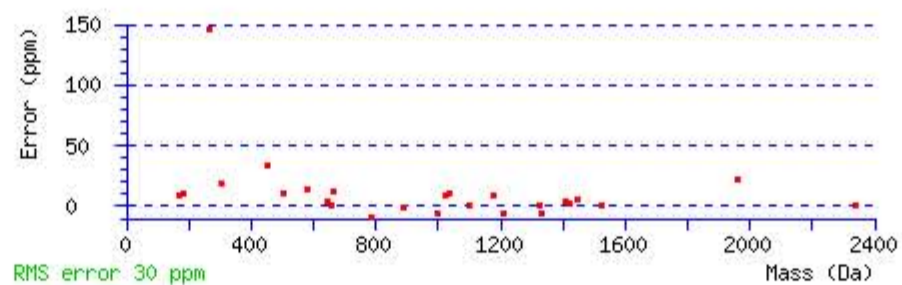

NCBI BLAST search of **GQPSVLQVVNLPIVERPVCK**

(Parameters: blastp, nr protein database, expect=20000, no filter, PAM30)

Other BLAST [web gateways](#)

All matches to this query

| Score | Mr(calc):   | Delta    | Sequence                             |
|-------|-------------|----------|--------------------------------------|
| 48.4  | 2542.412766 | 0.002976 | <a href="#">GQPSVLQVVNLPIVERPVCK</a> |
| 27.9  | 2542.412766 | 0.002976 | <a href="#">GQPSVLQVVNLPIVERPVCK</a> |



# MASCOT Search Results

## Peptide View

MS/MS Fragmentation of **RQEC SIPVCGQDQVT VAMTPR**

Found in **THRB\_HUMAN**, Prothrombin OS=Homo sapiens GN=F2 PE=1 SV=2

Match to Query 62398: 2742.307662 from(915.109830,3+) rtinseconds(1963) index(55564)

Title: Locus:1.1.1.3169.21 File:"2013-07-02 CLN FXIII 30 min 2nd F 4.wiff"

Data file C:\Program Files (x86)\Matrix Science\Mascot Daemon\mgf2 FXIII 30 min 2nd\mascot\_daemon\_merge.mgf

Click mouse within plot area to zoom in by factor of two about that point

Or, Plot from  to  Da

Label all possible matches  Label matches used for scoring

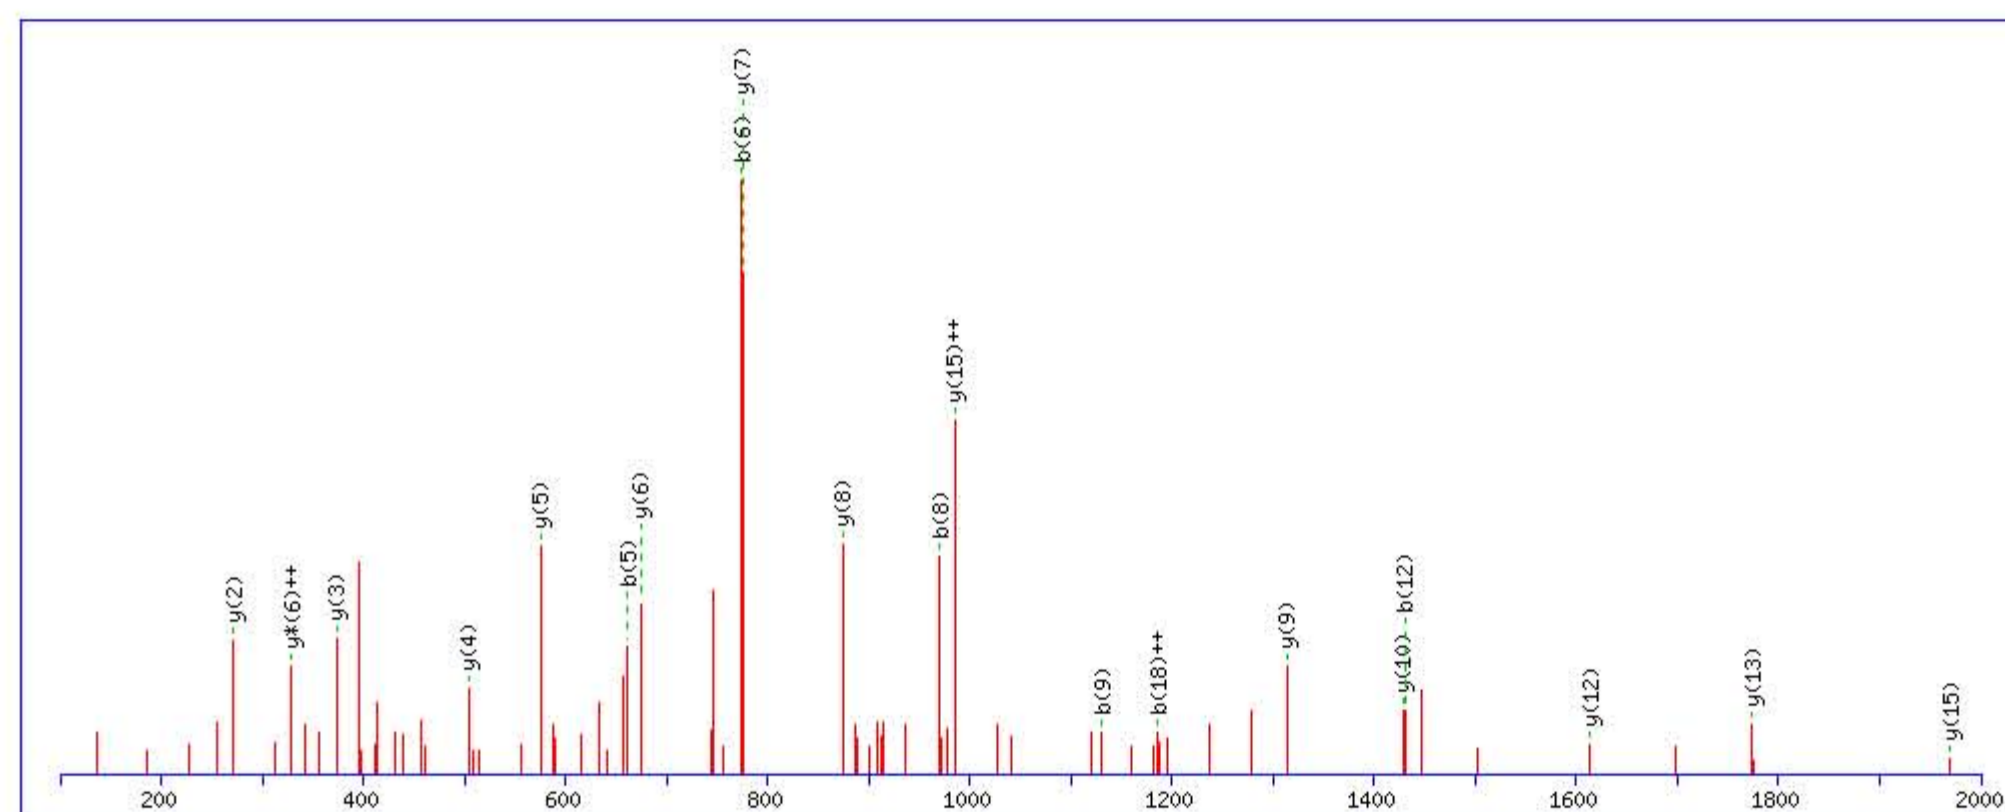

Monoisotopic mass of neutral peptide Mr(calc): 2742.307404

Fixed modifications: Carbamidomethyl (C) (apply to specified residues or termini only)

Variable modifications:

Q13 : Biotin:Thermo-21345 (Q)

Ions Score: 72 Expect: 1.4e-006

Matches : 20/232 fragment ions using 33 most intense peaks [\(help\)](#)

| #  | b                  | b <sup>++</sup>    | b <sup>*</sup> | b <sup>*++</sup> | b <sup>0</sup> | b <sup>0++</sup> | Seq. | y                  | y <sup>++</sup>   | y <sup>*</sup> | y <sup>*++</sup>  | y <sup>0</sup> | y <sup>0++</sup> | #  |
|----|--------------------|--------------------|----------------|------------------|----------------|------------------|------|--------------------|-------------------|----------------|-------------------|----------------|------------------|----|
| 1  | 157.108387         | 79.057831          | 140.081838     | 70.544557        |                |                  | R    |                    |                   |                |                   |                |                  | 21 |
| 2  | 285.166965         | 143.087121         | 268.140416     | 134.573846       |                |                  | Q    | 2587.213551        | 1294.110413       | 2570.187002    | 1285.597139       | 2569.202986    | 1285.105131      | 20 |
| 3  | 414.209558         | 207.608417         | 397.183009     | 199.095143       | 396.198993     | 198.603135       | E    | 2459.154973        | 1230.081124       | 2442.128424    | 1221.567850       | 2441.144408    | 1221.075842      | 19 |
| 4  | 574.240207         | 287.623742         | 557.213658     | 279.110467       | 556.229642     | 278.618459       | C    | 2330.112380        | 1165.559828       | 2313.085831    | 1157.046553       | 2312.101815    | 1156.554545      | 18 |
| 5  | <b>661.272235</b>  | 331.139756         | 644.245686     | 322.626481       | 643.261670     | 322.134473       | S    | 2170.081731        | 1085.544503       | 2153.055182    | 1077.031229       | 2152.071166    | 1076.539221      | 17 |
| 6  | <b>774.356299</b>  | 387.681788         | 757.329750     | 379.168513       | 756.345734     | 378.676505       | I    | 2083.049703        | 1042.028489       | 2066.023154    | 1033.515215       | 2065.039138    | 1033.023207      | 16 |
| 7  | 871.409063         | 436.208170         | 854.382514     | 427.694895       | 853.398498     | 427.202887       | P    | <b>1969.965639</b> | <b>985.486458</b> | 1952.939090    | 976.973183        | 1951.955074    | 976.481175       | 15 |
| 8  | <b>970.477477</b>  | 485.742377         | 953.450928     | 477.229102       | 952.466912     | 476.737094       | V    | 1872.912875        | 936.960076        | 1855.886326    | 928.446801        | 1854.902310    | 927.954793       | 14 |
| 9  | <b>1130.508126</b> | 565.757701         | 1113.481577    | 557.244427       | 1112.497561    | 556.752418       | C    | <b>1773.844461</b> | 887.425868        | 1756.817912    | 878.912594        | 1755.833896    | 878.420586       | 13 |
| 10 | 1187.529590        | 594.268433         | 1170.503041    | 585.755158       | 1169.519025    | 585.263150       | G    | <b>1613.813812</b> | 807.410544        | 1596.787263    | 798.897270        | 1595.803247    | 798.405262       | 12 |
| 11 | 1315.588168        | 658.297722         | 1298.561619    | 649.784448       | 1297.577603    | 649.292440       | Q    | 1556.792348        | 778.899812        | 1539.765799    | 770.386538        | 1538.781783    | 769.894530       | 11 |
| 12 | <b>1430.615111</b> | 715.811194         | 1413.588562    | 707.297919       | 1412.604546    | 706.805911       | D    | <b>1428.733770</b> | 714.870523        | 1411.707221    | 706.357249        | 1410.723205    | 705.865241       | 10 |
| 13 | 1869.840437        | 935.423857         | 1852.813888    | 926.910582       | 1851.829872    | 926.418574       | Q    | <b>1313.706827</b> | 657.357052        | 1296.680278    | 648.843777        | 1295.696262    | 648.351769       | 9  |
| 14 | 1968.908851        | 984.958064         | 1951.882302    | 976.444789       | 1950.898286    | 975.952781       | V    | <b>874.481501</b>  | 437.744389        | 857.454952     | 429.231114        | 856.470936     | 428.739106       | 8  |
| 15 | 2069.956530        | 1035.481903        | 2052.929981    | 1026.968628      | 2051.945965    | 1026.476620      | T    | <b>775.413087</b>  | 388.210181        | 758.386538     | 379.696907        | 757.402522     | 379.204899       | 7  |
| 16 | 2169.024944        | 1085.016110        | 2151.998395    | 1076.502835      | 2151.014379    | 1076.010827      | V    | <b>674.365408</b>  | 337.686342        | 657.338859     | <b>329.173067</b> | 656.354843     | 328.681059       | 6  |
| 17 | 2240.062058        | 1120.534667        | 2223.035509    | 1112.021392      | 2222.051493    | 1111.529384      | A    | <b>575.296994</b>  | 288.152135        | 558.270445     | 279.638861        | 557.286429     | 279.146853       | 5  |
| 18 | 2371.102543        | <b>1186.054909</b> | 2354.075994    | 1177.541635      | 2353.091978    | 1177.049627      | M    | <b>504.259880</b>  | 252.633578        | 487.233331     | 244.120303        | 486.249315     | 243.628295       | 4  |
| 19 | 2472.150222        | 1236.578749        | 2455.123673    | 1228.065474      | 2454.139657    | 1227.573466      | T    | <b>373.219395</b>  | 187.113335        | 356.192846     | 178.600061        | 355.208830     | 178.108053       | 3  |
| 20 | 2569.202986        | 1285.105131        | 2552.176437    | 1276.591856      | 2551.192421    | 1276.099848      | P    | <b>272.171716</b>  | 136.589496        | 255.145167     | 128.076221        |                |                  | 2  |
| 21 |                    |                    |                |                  |                |                  | R    | 175.118952         | 88.063114         | 158.092403     | 79.549839         |                |                  | 1  |

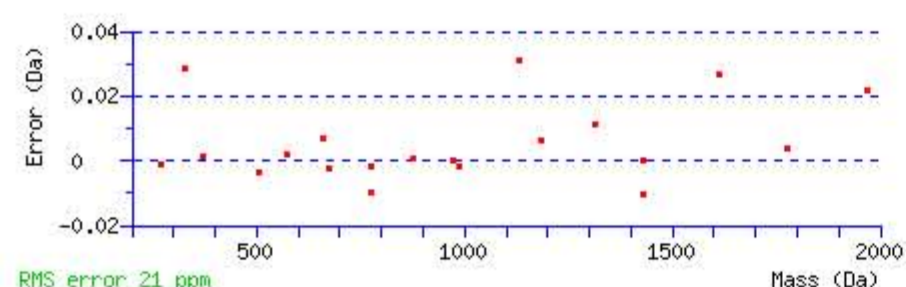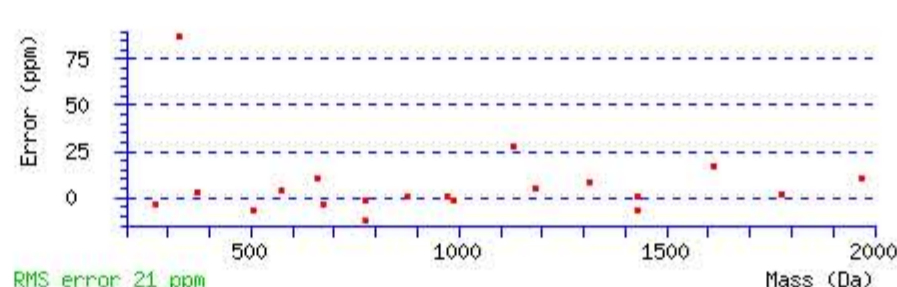

NCBI BLAST search of [RQEC SIPVCGQDQVT VAMTPR](#)

(Parameters: blastp, nr protein database, expect=20000, no filter, PAM30)

Other BLAST [web gateways](#)

All matches to this query

| Score | Mr(calc):   | Delta    | Sequence                                |
|-------|-------------|----------|-----------------------------------------|
| 72.2  | 2742.307404 | 0.000258 | <a href="#">RQEC SIPVCGQDQVT VAMTPR</a> |
| 49.6  | 2742.307404 | 0.000258 | <a href="#">RQEC SIPVCGQDQVT VAMTPR</a> |
| 16.6  | 2742.307404 | 0.000258 | <a href="#">RQEC SIPVCGQDQVT VAMTPR</a> |



# MASCOT SEARCH RESULTS

## Peptide View

MS/MS Fragmentation of **HQTVPQNTGGK**

Found in **TRFE\_HUMAN**, Serotransferrin OS=Homo sapiens GN=TF PE=1 SV=3

Match to Query 35026: 1476.757662 from(493.259830,3+) rtinseconds(1217) index(66179)

Title: Locus:1.1.1.2957.11 File:"2013-07-02 CLN FXIII 30 min 2nd FT.wiff"

Data file C:\Program Files (x86)\Matrix Science\Mascot Daemon\mgf2 FXIII 30 min 2nd\mascot\_daemon\_merge.mgf

Click mouse within plot area to zoom in by factor of two about that point

Or, Plot from  to  Da

Label all possible matches  Label matches used for scoring

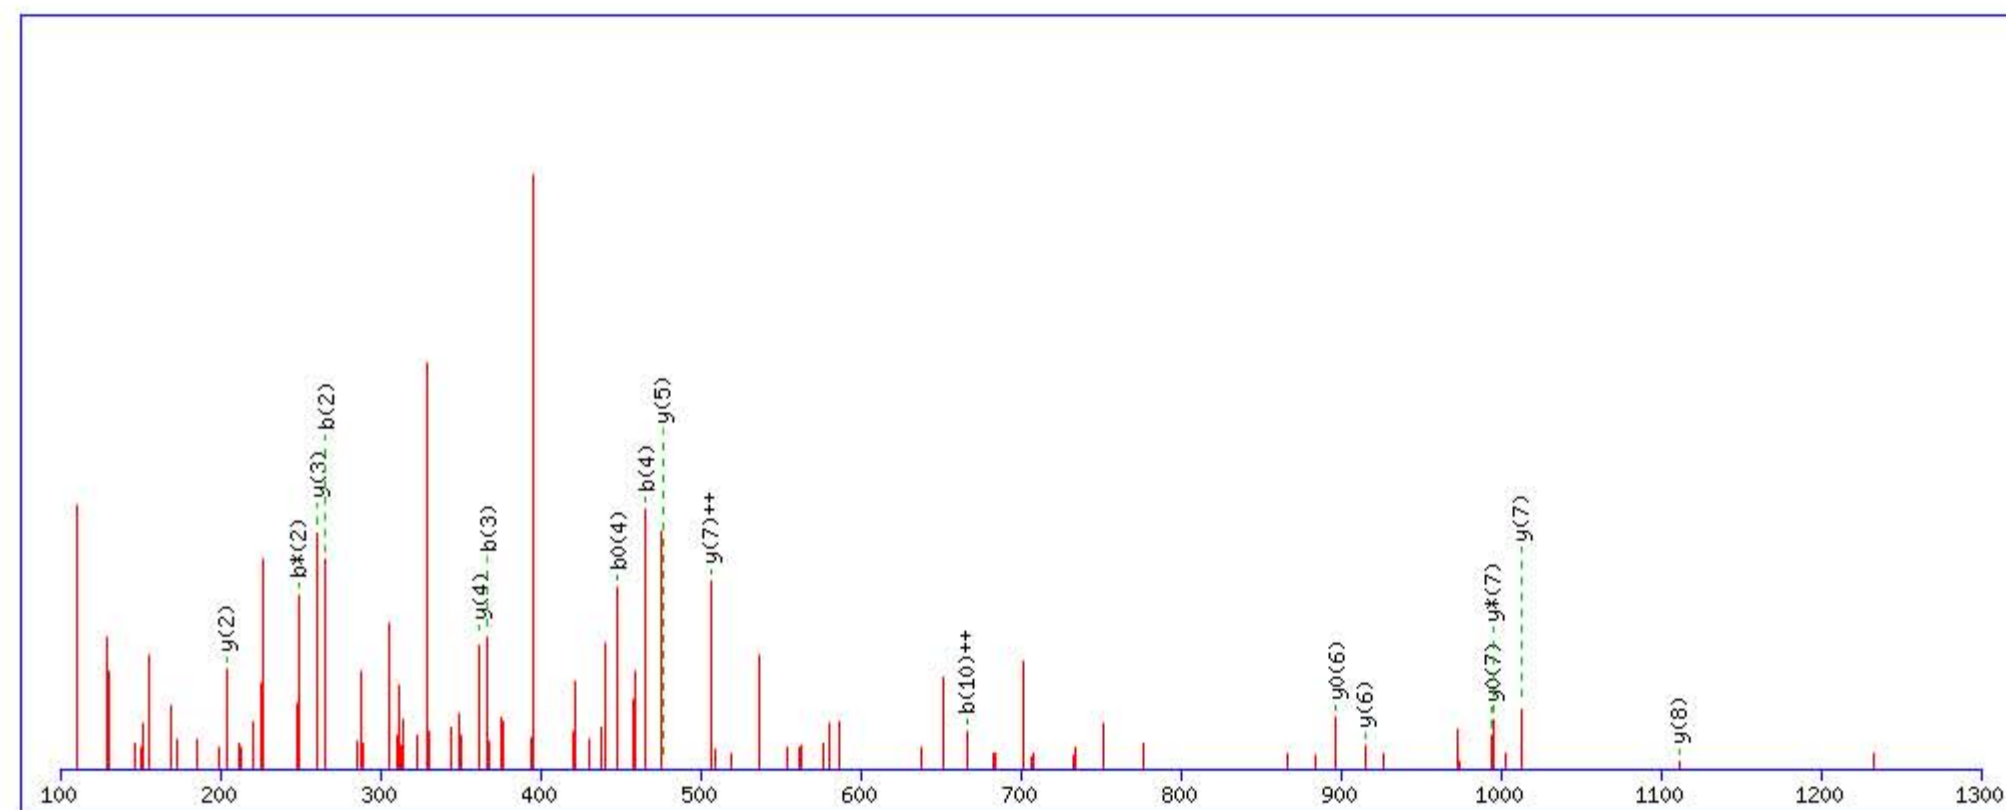

Monoisotopic mass of neutral peptide Mr(calc): 1476.750748

Fixed modifications: Carbamidomethyl (C) (apply to specified residues or termini only)

Variable modifications:

Q6 : Biotin:Thermo-21345 (Q)

Ions Score: 27 Expect: 0.013

Matches : 17/108 fragment ions using 39 most intense peaks [\(help\)](#)

| #  | b                 | b <sup>++</sup>   | b <sup>*</sup>    | b <sup>*++</sup> | b <sup>0</sup>    | b <sup>0++</sup> | Seq. | y                  | y <sup>++</sup>   | y <sup>*</sup>    | y <sup>*++</sup> | y <sup>0</sup>    | y <sup>0++</sup> | #  |
|----|-------------------|-------------------|-------------------|------------------|-------------------|------------------|------|--------------------|-------------------|-------------------|------------------|-------------------|------------------|----|
| 1  | 138.066188        | 69.536732         |                   |                  |                   |                  | H    |                    |                   |                   |                  |                   |                  | 11 |
| 2  | <b>266.124766</b> | 133.566021        | <b>249.098217</b> | 125.052746       |                   |                  | Q    | 1340.699099        | 670.853187        | 1323.672550       | 662.339913       | 1322.688534       | 661.847905       | 10 |
| 3  | <b>367.172445</b> | 184.089860        | 350.145896        | 175.576586       | 349.161880        | 175.084578       | T    | 1212.640521        | 606.823899        | 1195.613972       | 598.310624       | 1194.629956       | 597.818616       | 9  |
| 4  | <b>466.240859</b> | 233.624068        | 449.214310        | 225.110793       | <b>448.230294</b> | 224.618785       | V    | <b>1111.592842</b> | 556.300059        | 1094.566293       | 547.786784       | 1093.582277       | 547.294776       | 8  |
| 5  | 563.293623        | 282.150450        | 546.267074        | 273.637175       | 545.283058        | 273.145167       | P    | <b>1012.524428</b> | <b>506.765852</b> | <b>995.497879</b> | 498.252577       | <b>994.513863</b> | 497.760569       | 7  |
| 6  | 1002.518949       | 501.763113        | 985.492400        | 493.249838       | 984.508384        | 492.757830       | Q    | <b>915.471664</b>  | 458.239470        | 898.445115        | 449.726195       | <b>897.461099</b> | 449.234187       | 6  |
| 7  | 1116.561876       | 558.784576        | 1099.535327       | 550.271302       | 1098.551311       | 549.779293       | N    | <b>476.246338</b>  | 238.626807        | 459.219789        | 230.113532       | 458.235773        | 229.621524       | 5  |
| 8  | 1217.609555       | 609.308416        | 1200.583006       | 600.795141       | 1199.598990       | 600.303133       | T    | <b>362.203411</b>  | 181.605343        | 345.176862        | 173.092069       | 344.192846        | 172.600061       | 4  |
| 9  | 1274.631019       | 637.819147        | 1257.604470       | 629.305873       | 1256.620454       | 628.813865       | G    | <b>261.155732</b>  | 131.081504        | 244.129183        | 122.568229       |                   |                  | 3  |
| 10 | 1331.652483       | <b>666.329879</b> | 1314.625934       | 657.816605       | 1313.641918       | 657.324597       | G    | <b>204.134268</b>  | 102.570772        | 187.107719        | 94.057497        |                   |                  | 2  |
| 11 |                   |                   |                   |                  |                   |                  | K    | 147.112804         | 74.060040         | 130.086255        | 65.546765        |                   |                  | 1  |

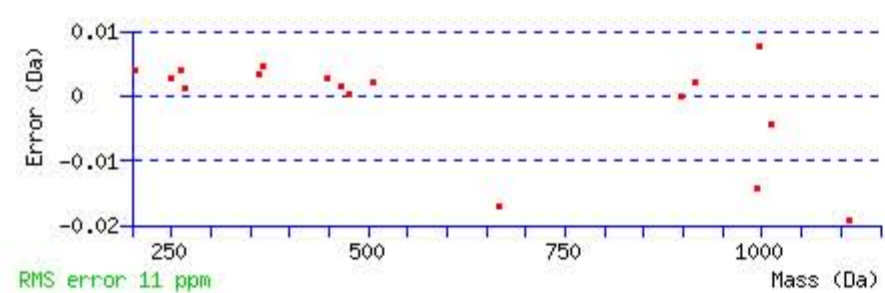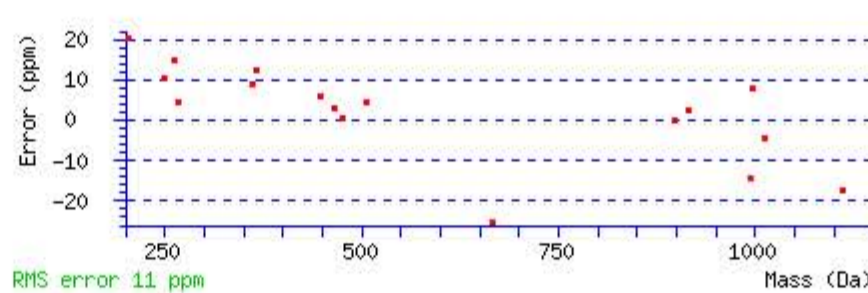

NCBI BLAST search of **HQTVPQNTGGK**

(Parameters: blastp, nr protein database, expect=20000, no filter, PAM30)

Other BLAST [web gateways](#)

All matches to this query

| Score | Mr(calc):   | Delta     | Sequence                       |
|-------|-------------|-----------|--------------------------------|
| 26.8  | 1476.750748 | 0.006914  | <a href="#">HQTVPQNTGGK</a>    |
| 6.9   | 1476.750748 | 0.006914  | <a href="#">HQTVPQNTGGK</a>    |
| 6.3   | 1476.736115 | 0.021547  | <a href="#">HQEALIGQSFY GK</a> |
| 4.4   | 1476.739487 | 0.018175  | <a href="#">GPEVMAFIEQGKR</a>  |
| 3.5   | 1476.758102 | -0.000440 | <a href="#">KEAFSIGMQR</a>     |

Mascot: <http://www.matrixscience.com/>



# MASCOT Search Results

## Peptide View

MS/MS Fragmentation of **EFQLFSSPHGK**

Found in **TRFE\_HUMAN**, Serotransferrin OS=Homo sapiens GN=TF PE=1 SV=3

Match to Query 38331: 1586.795982 from(529.939270,3+) rtinseconds(2103) index(71803)

Title: Locus:1.1.1.3266.5 File:"2013-07-02 CLN FXIII 30 min 2nd FT.wiff"

Data file C:\Program Files (x86)\Matrix Science\Mascot Daemon\mgf2 FXIII 30 min 2nd\mascot\_daemon\_merge.mgf

Click mouse within plot area to zoom in by factor of two about that point

Or, Plot from  to  Da

Label all possible matches  Label matches used for scoring

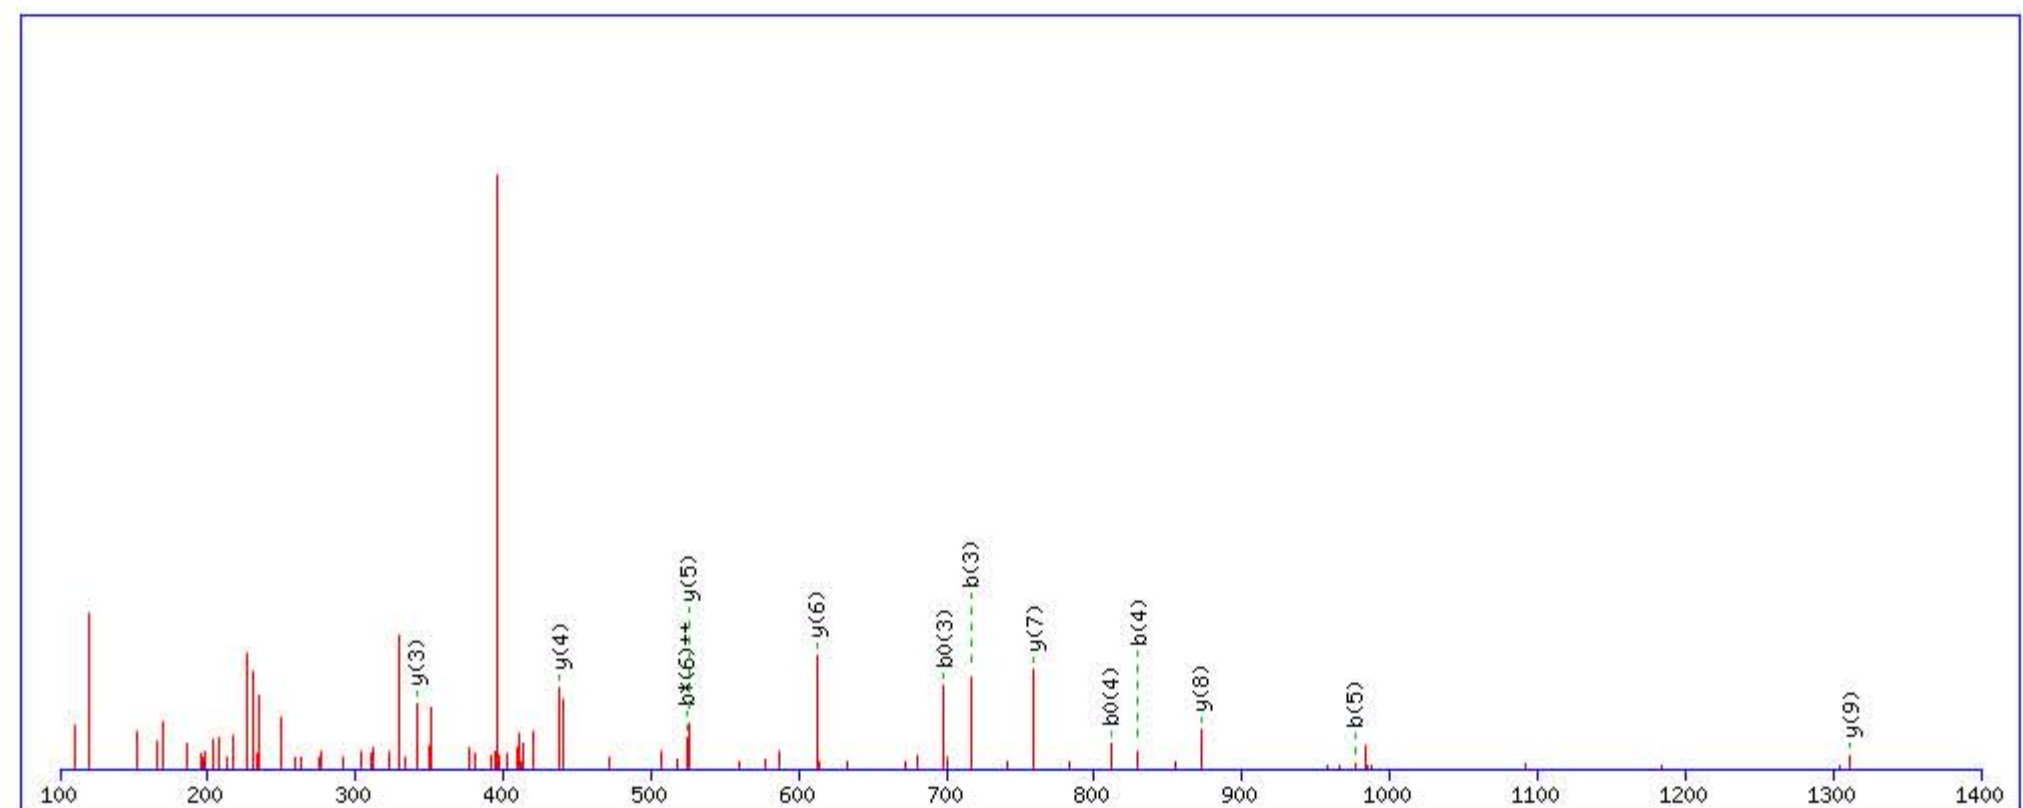

Monoisotopic mass of neutral peptide Mr(calc): 1586.791534

Fixed modifications: Carbamidomethyl (C) (apply to specified residues or termini only)

Variable modifications:

Q3 : Biotin:Thermo-21345 (Q)

Ions Score: 28 Expect: 0.037

Matches : 13/108 fragment ions using 31 most intense peaks [\(help\)](#)

| #  | b                 | b <sup>++</sup> | b <sup>*</sup> | b <sup>*++</sup>  | b <sup>0</sup>    | b <sup>0++</sup> | Seq. | y                  | y <sup>++</sup> | y <sup>*</sup> | y <sup>*++</sup> | y <sup>0</sup> | y <sup>0++</sup> | #  |
|----|-------------------|-----------------|----------------|-------------------|-------------------|------------------|------|--------------------|-----------------|----------------|------------------|----------------|------------------|----|
| 1  | 130.049869        | 65.528572       |                |                   | 112.039304        | 56.523290        | E    |                    |                 |                |                  |                |                  | 11 |
| 2  | 277.118283        | 139.062779      |                |                   | 259.107718        | 130.057497       | F    | 1458.756218        | 729.881747      | 1441.729669    | 721.368473       | 1440.745653    | 720.876465       | 10 |
| 3  | <b>716.343609</b> | 358.675443      | 699.317060     | 350.162168        | <b>698.333044</b> | 349.670160       | Q    | <b>1311.687804</b> | 656.347540      | 1294.661255    | 647.834266       | 1293.677239    | 647.342258       | 9  |
| 4  | <b>829.427673</b> | 415.217475      | 812.401124     | 406.704200        | <b>811.417108</b> | 406.212192       | L    | <b>872.462478</b>  | 436.734877      | 855.435929     | 428.221603       | 854.451913     | 427.729595       | 8  |
| 5  | <b>976.496087</b> | 488.751682      | 959.469538     | 480.238407        | 958.485522        | 479.746399       | F    | <b>759.378414</b>  | 380.192845      | 742.351865     | 371.679571       | 741.367849     | 371.187563       | 7  |
| 6  | 1063.528115       | 532.267696      | 1046.501566    | <b>523.754421</b> | 1045.517550       | 523.262413       | S    | <b>612.310000</b>  | 306.658638      | 595.283451     | 298.145364       | 594.299435     | 297.653356       | 6  |
| 7  | 1150.560143       | 575.783710      | 1133.533594    | 567.270435        | 1132.549578       | 566.778427       | S    | <b>525.277972</b>  | 263.142624      | 508.251423     | 254.629350       | 507.267407     | 254.137342       | 5  |
| 8  | 1247.612907       | 624.310092      | 1230.586358    | 615.796817        | 1229.602342       | 615.304809       | P    | <b>438.245944</b>  | 219.626610      | 421.219395     | 211.113335       |                |                  | 4  |
| 9  | 1384.671819       | 692.839548      | 1367.645270    | 684.326273        | 1366.661254       | 683.834265       | H    | <b>341.193180</b>  | 171.100228      | 324.166631     | 162.586953       |                |                  | 3  |
| 10 | 1441.693283       | 721.350280      | 1424.666734    | 712.837005        | 1423.682718       | 712.344997       | G    | 204.134268         | 102.570772      | 187.107719     | 94.057497        |                |                  | 2  |
| 11 |                   |                 |                |                   |                   |                  | K    | 147.112804         | 74.060040       | 130.086255     | 65.546765        |                |                  | 1  |

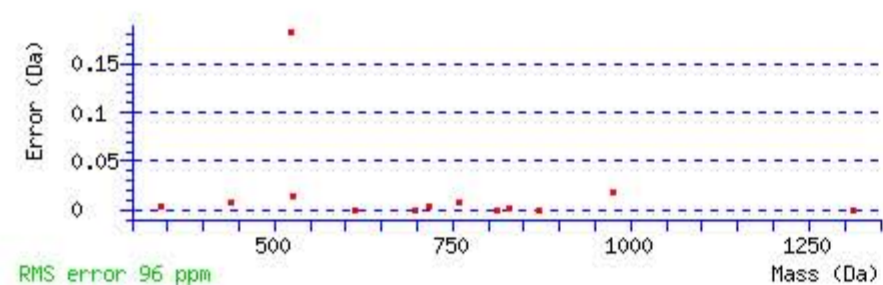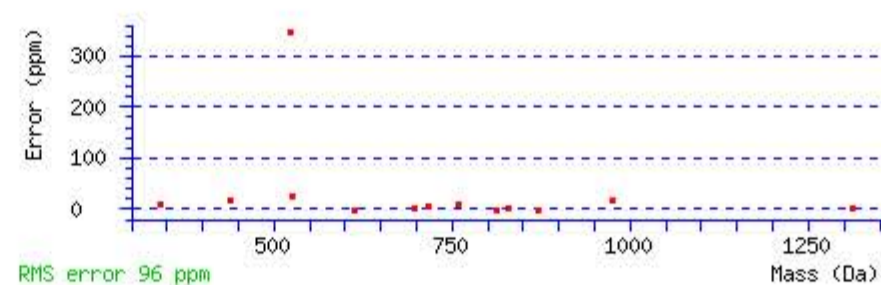

NCBI BLAST search of **EFQLFSSPHGK**

(Parameters: blastp, nr protein database, expect=20000, no filter, PAM30)

Other BLAST [web gateways](#)

All matches to this query

| Score | Mr(calc):   | Delta    | Sequence           |
|-------|-------------|----------|--------------------|
| 28.4  | 1586.791534 | 0.004448 | <b>EFQLFSSPHGK</b> |

Mascot: <http://www.matrixscience.com/>



# MASCOT Search Results

## Peptide View

MS/MS Fragmentation of **KDSGFQMNQLR**

Found in **TRFE\_HUMAN**, Serotransferrin OS=Homo sapiens GN=TF PE=1 SV=3

Match to Query 40646: 1633.787448 from(817.901000,2+) rtinseconds(1754) index(69631)

Title: Locus:1.1.1.3144.14 File:"2013-07-02 CLN FXIII 30 min 2nd FT.wiff"

Data file C:\Program Files (x86)\Matrix Science\Mascot Daemon\mgf\2 FXIII 30 min 2nd\mascot\_daemon\_merge.mgf

Click mouse within plot area to zoom in by factor of two about that point

Or, Plot from  to  Da

Label all possible matches  Label matches used for scoring

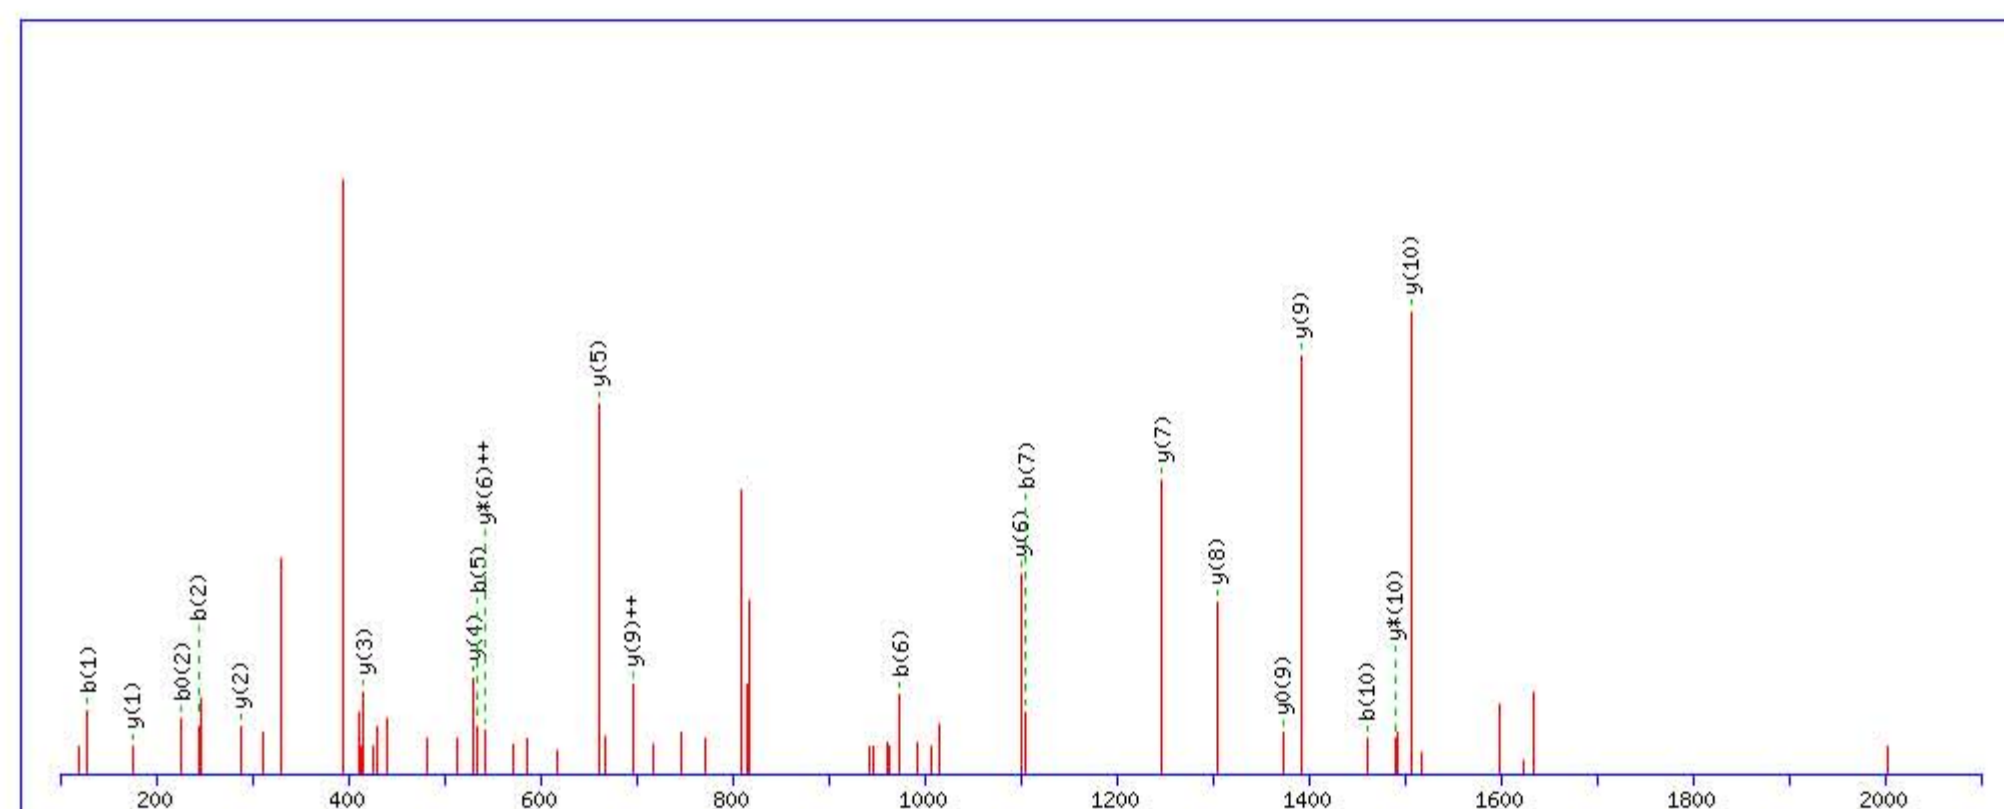

Monoisotopic mass of neutral peptide Mr(calc): 1633.806854

Fixed modifications: Carbamidomethyl (C) (apply to specified residues or termini only)

Variable modifications:

Q6 : Biotin:Thermo-21345 (Q)

Ions Score: 63 Expect: 1.3e-005

Matches : 21/102 fragment ions using 43 most intense peaks [\(help\)](#)

| #  | b                  | b <sup>++</sup> | b <sup>*</sup> | b <sup>+++</sup> | b <sup>0</sup>    | b <sup>0++</sup> | Seq.     | y                  | y <sup>++</sup>   | y <sup>*</sup>     | y <sup>+++</sup>  | y <sup>0</sup>     | y <sup>0++</sup> | #         |
|----|--------------------|-----------------|----------------|------------------|-------------------|------------------|----------|--------------------|-------------------|--------------------|-------------------|--------------------|------------------|-----------|
| 1  | <b>129.102239</b>  | 65.054757       | 112.075690     | 56.541483        |                   |                  | <b>K</b> |                    |                   |                    |                   |                    |                  | <b>11</b> |
| 2  | <b>244.129182</b>  | 122.568229      | 227.102633     | 114.054955       | <b>226.118617</b> | 113.562947       | <b>D</b> | <b>1506.719181</b> | 753.863228        | <b>1489.692632</b> | 745.349954        | 1488.708616        | 744.857946       | <b>10</b> |
| 3  | 331.161210         | 166.084243      | 314.134661     | 157.570969       | 313.150645        | 157.078961       | <b>S</b> | <b>1391.692238</b> | <b>696.349757</b> | 1374.665689        | 687.836482        | <b>1373.681673</b> | 687.344474       | <b>9</b>  |
| 4  | 388.182674         | 194.594975      | 371.156125     | 186.081701       | 370.172109        | 185.589693       | <b>G</b> | <b>1304.660210</b> | 652.833743        | 1287.633661        | 644.320468        |                    |                  | <b>8</b>  |
| 5  | <b>535.251088</b>  | 268.129182      | 518.224539     | 259.615908       | 517.240523        | 259.123900       | <b>F</b> | <b>1247.638746</b> | 624.323011        | 1230.612197        | 615.809736        |                    |                  | <b>7</b>  |
| 6  | <b>974.476414</b>  | 487.741845      | 957.449865     | 479.228571       | 956.465849        | 478.736563       | <b>Q</b> | <b>1100.570332</b> | 550.788804        | 1083.543783        | <b>542.275530</b> |                    |                  | <b>6</b>  |
| 7  | <b>1105.516899</b> | 553.262088      | 1088.490350    | 544.748813       | 1087.506334       | 544.256805       | <b>M</b> | <b>661.345006</b>  | 331.176141        | 644.318457         | 322.662866        |                    |                  | <b>5</b>  |
| 8  | 1219.559826        | 610.283551      | 1202.533277    | 601.770277       | 1201.549261       | 601.278268       | <b>N</b> | <b>530.304521</b>  | 265.655899        | 513.277972         | 257.142624        |                    |                  | <b>4</b>  |
| 9  | 1347.618404        | 674.312840      | 1330.591855    | 665.799566       | 1329.607839       | 665.307558       | <b>Q</b> | <b>416.261594</b>  | 208.634435        | 399.235045         | 200.121160        |                    |                  | <b>3</b>  |
| 10 | <b>1460.702468</b> | 730.854872      | 1443.675919    | 722.341598       | 1442.691903       | 721.849589       | <b>L</b> | <b>288.203016</b>  | 144.605146        | 271.176467         | 136.091871        |                    |                  | <b>2</b>  |
| 11 |                    |                 |                |                  |                   |                  | <b>R</b> | <b>175.118952</b>  | 88.063114         | 158.092403         | 79.549839         |                    |                  | <b>1</b>  |

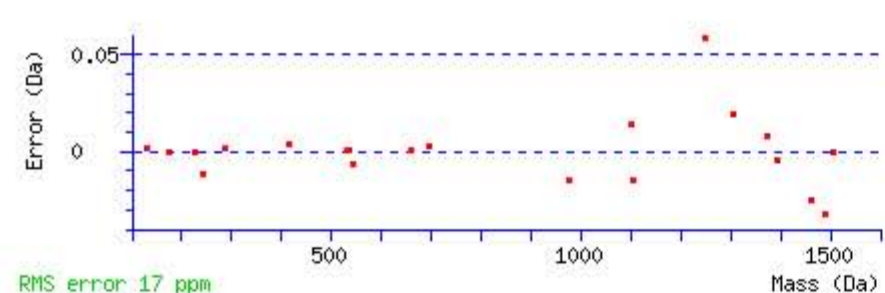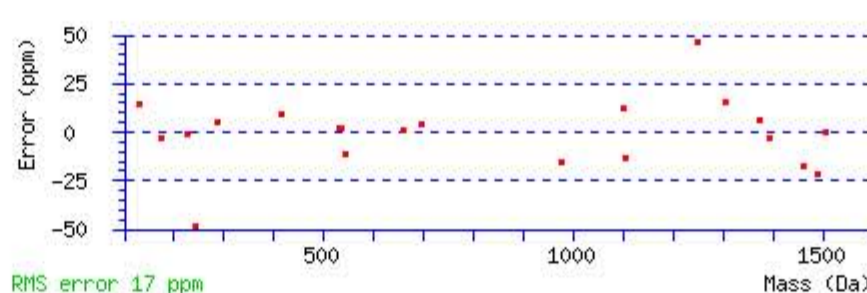

NCBI BLAST search of **KDSGFQMNQLR**

(Parameters: blastp, nr protein database, expect=20000, no filter, PAM30)

Other BLAST [web gateways](#)

All matches to this query

| Score | Mr(calc):   | Delta     | Sequence                        |
|-------|-------------|-----------|---------------------------------|
| 62.7  | 1633.806854 | -0.019406 | <a href="#">KDSGFQMNQLR</a>     |
| 27.9  | 1633.806854 | -0.019406 | <a href="#">KDSGFQMNQLR</a>     |
| 9.9   | 1633.769608 | 0.017840  | <a href="#">AGDGSSVKEVETYHR</a> |
| 7.3   | 1633.774307 | 0.013141  | <a href="#">DQWTSVANMRDRR</a>   |
| 6.9   | 1633.803482 | -0.016034 | <a href="#">QLFERDWSSR</a>      |
| 6.4   | 1633.809998 | -0.022550 | <a href="#">KQYDSFTYRAEVK</a>   |
| 6.0   | 1633.798096 | -0.010648 | <a href="#">QDQEKDNMIEKLK</a>   |
| 4.3   | 1633.810715 | -0.023267 | <a href="#">QPVEPHMGVGRQQR</a>  |
| 2.0   | 1633.798111 | -0.010663 | <a href="#">CTTVDEAEKAIELR</a>  |
| 1.1   | 1633.784180 | 0.003268  | <a href="#">QEESVQKQAMRR</a>    |



# MASCOT Search Results

## Peptide View

MS/MS Fragmentation of **KDSGFQMNQLR**

Found in **TRFE\_HUMAN**, Serotransferrin OS=Homo sapiens GN=TF PE=1 SV=3

Match to Query 40650: 1633.807302 from(545.609710,3+) rtinseconds(1840) index(70124)

Title: Locus:1.1.1.3174.6 File:"2013-07-02 CLN FXIII 30 min 2nd FT.wiff"

Data file C:\Program Files (x86)\Matrix Science\Mascot Daemon\mgf2 FXIII 30 min 2nd\mascot\_daemon\_merge.mgf

Click mouse within plot area to zoom in by factor of two about that point

Or, Plot from  to  Da

Label all possible matches  Label matches used for scoring

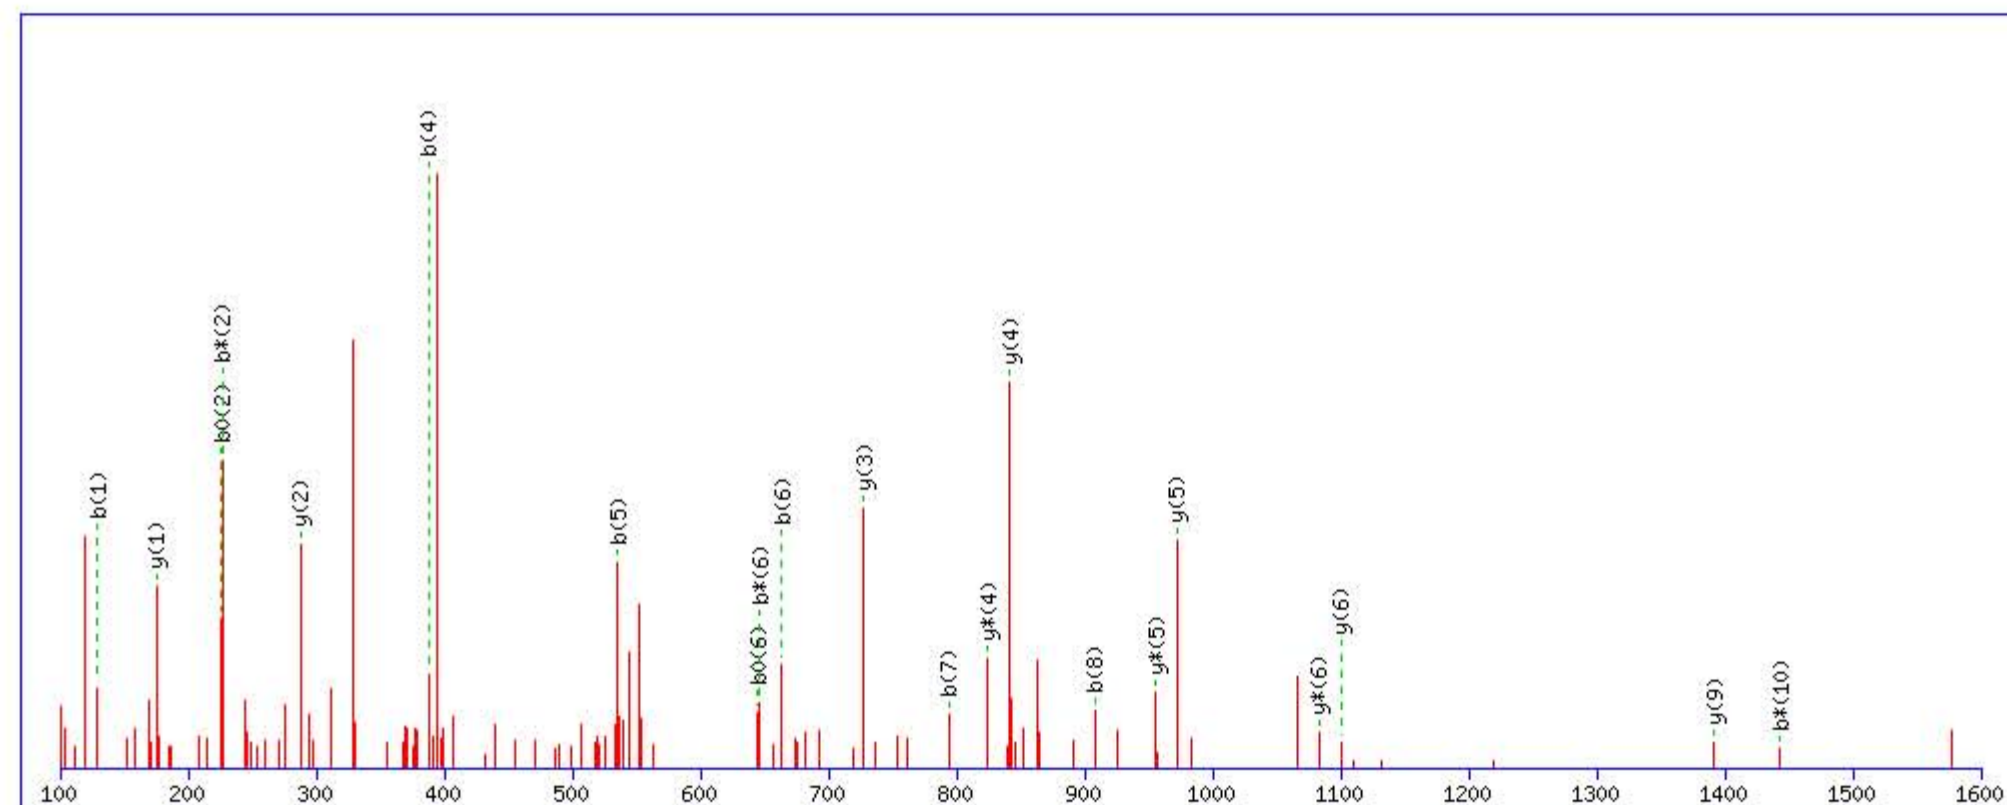

Monoisotopic mass of neutral peptide Mr(calc): 1633.806854

Fixed modifications: Carbamidomethyl (C) (apply to specified residues or termini only)

Variable modifications:

Q9 : Biotin:Thermo-21345 (Q)

Ions Score: 42 Expect: 0.00015

Matches : 21/102 fragment ions using 36 most intense peaks [\(help\)](#)

| #  | b                 | b <sup>++</sup> | b <sup>*</sup>     | b <sup>*++</sup> | b <sup>0</sup>    | b <sup>0++</sup> | Seq.     | y                  | y <sup>++</sup> | y <sup>*</sup>     | y <sup>*++</sup> | y <sup>0</sup> | y <sup>0++</sup> | #         |
|----|-------------------|-----------------|--------------------|------------------|-------------------|------------------|----------|--------------------|-----------------|--------------------|------------------|----------------|------------------|-----------|
| 1  | <b>129.102239</b> | 65.054757       | 112.075690         | 56.541483        |                   |                  | <b>K</b> |                    |                 |                    |                  |                |                  | <b>11</b> |
| 2  | 244.129182        | 122.568229      | <b>227.102633</b>  | 114.054955       | <b>226.118617</b> | 113.562947       | <b>D</b> | 1506.719181        | 753.863228      | 1489.692632        | 745.349954       | 1488.708616    | 744.857946       | <b>10</b> |
| 3  | 331.161210        | 166.084243      | 314.134661         | 157.570969       | 313.150645        | 157.078961       | <b>S</b> | <b>1391.692238</b> | 696.349757      | 1374.665689        | 687.836482       | 1373.681673    | 687.344474       | <b>9</b>  |
| 4  | <b>388.182674</b> | 194.594975      | 371.156125         | 186.081701       | 370.172109        | 185.589693       | <b>G</b> | 1304.660210        | 652.833743      | 1287.633661        | 644.320468       |                |                  | <b>8</b>  |
| 5  | <b>535.251088</b> | 268.129182      | 518.224539         | 259.615908       | 517.240523        | 259.123900       | <b>F</b> | 1247.638746        | 624.323011      | 1230.612197        | 615.809736       |                |                  | <b>7</b>  |
| 6  | <b>663.309666</b> | 332.158471      | <b>646.283117</b>  | 323.645197       | <b>645.299101</b> | 323.153189       | <b>Q</b> | <b>1100.570332</b> | 550.788804      | <b>1083.543783</b> | 542.275530       |                |                  | <b>6</b>  |
| 7  | <b>794.350151</b> | 397.678714      | 777.323602         | 389.165439       | 776.339586        | 388.673431       | <b>M</b> | <b>972.511754</b>  | 486.759515      | <b>955.485205</b>  | 478.246240       |                |                  | <b>5</b>  |
| 8  | <b>908.393078</b> | 454.700177      | 891.366529         | 446.186903       | 890.382513        | 445.694895       | <b>N</b> | <b>841.471269</b>  | 421.239272      | <b>824.444720</b>  | 412.725998       |                |                  | <b>4</b>  |
| 9  | 1347.618404       | 674.312840      | 1330.591855        | 665.799566       | 1329.607839       | 665.307558       | <b>Q</b> | <b>727.428342</b>  | 364.217809      | 710.401793         | 355.704534       |                |                  | <b>3</b>  |
| 10 | 1460.702468       | 730.854872      | <b>1443.675919</b> | 722.341598       | 1442.691903       | 721.849589       | <b>L</b> | <b>288.203016</b>  | 144.605146      | 271.176467         | 136.091871       |                |                  | <b>2</b>  |
| 11 |                   |                 |                    |                  |                   |                  | <b>R</b> | <b>175.118952</b>  | 88.063114       | 158.092403         | 79.549839        |                |                  | <b>1</b>  |

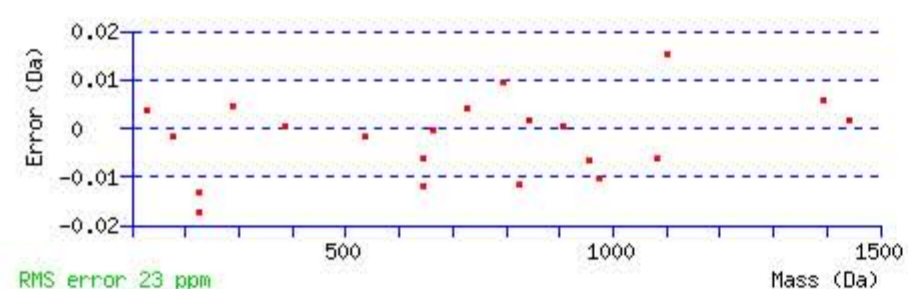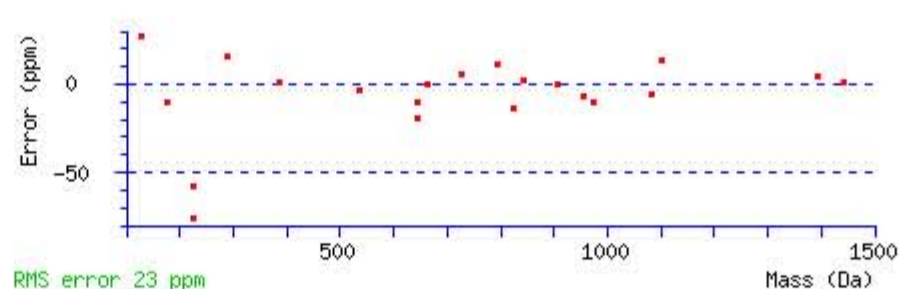

NCBI BLAST search of [KDSGFQMNQLR](#)

(Parameters: blastp, nr protein database, expect=20000, no filter, PAM30)

Other BLAST [web gateways](#)

All matches to this query

| Score | Mr(calc):   | Delta    | Sequence                    |
|-------|-------------|----------|-----------------------------|
| 42.0  | 1633.806854 | 0.000448 | <a href="#">KDSGFQMNQLR</a> |
| 11.0  | 1633.806854 | 0.000448 | <a href="#">KDSGFQMNQLR</a> |
| 1.4   | 1633.799454 | 0.007848 | <a href="#">DANSFKSRDQR</a> |

Mascot: <http://www.matrixscience.com/>



# MASCOT Search Results

## Peptide View

MS/MS Fragmentation of **ADDRDQYELLCLDNTR**  
 Found in **TRFE\_HUMAN**, Serotransferrin OS=Homo sapiens GN=TF PE=1 SV=3

Match to Query 53778: 2192.048322 from(731.690050,3+) rtinseconds(2201) index(72449)  
 Title: Locus:1.1.1.3300.11 File:"2013-07-02 CLN FXIII 30 min 2nd FT.wiff"  
 Data file C:\Program Files (x86)\Matrix Science\Mascot Daemon\mgf2 FXIII 30 min 2nd\mascot\_daemon\_merge.mgf

Click mouse within plot area to zoom in by factor of two about that point  
 Or, Plot from  to  Da   
 Label all possible matches  Label matches used for scoring

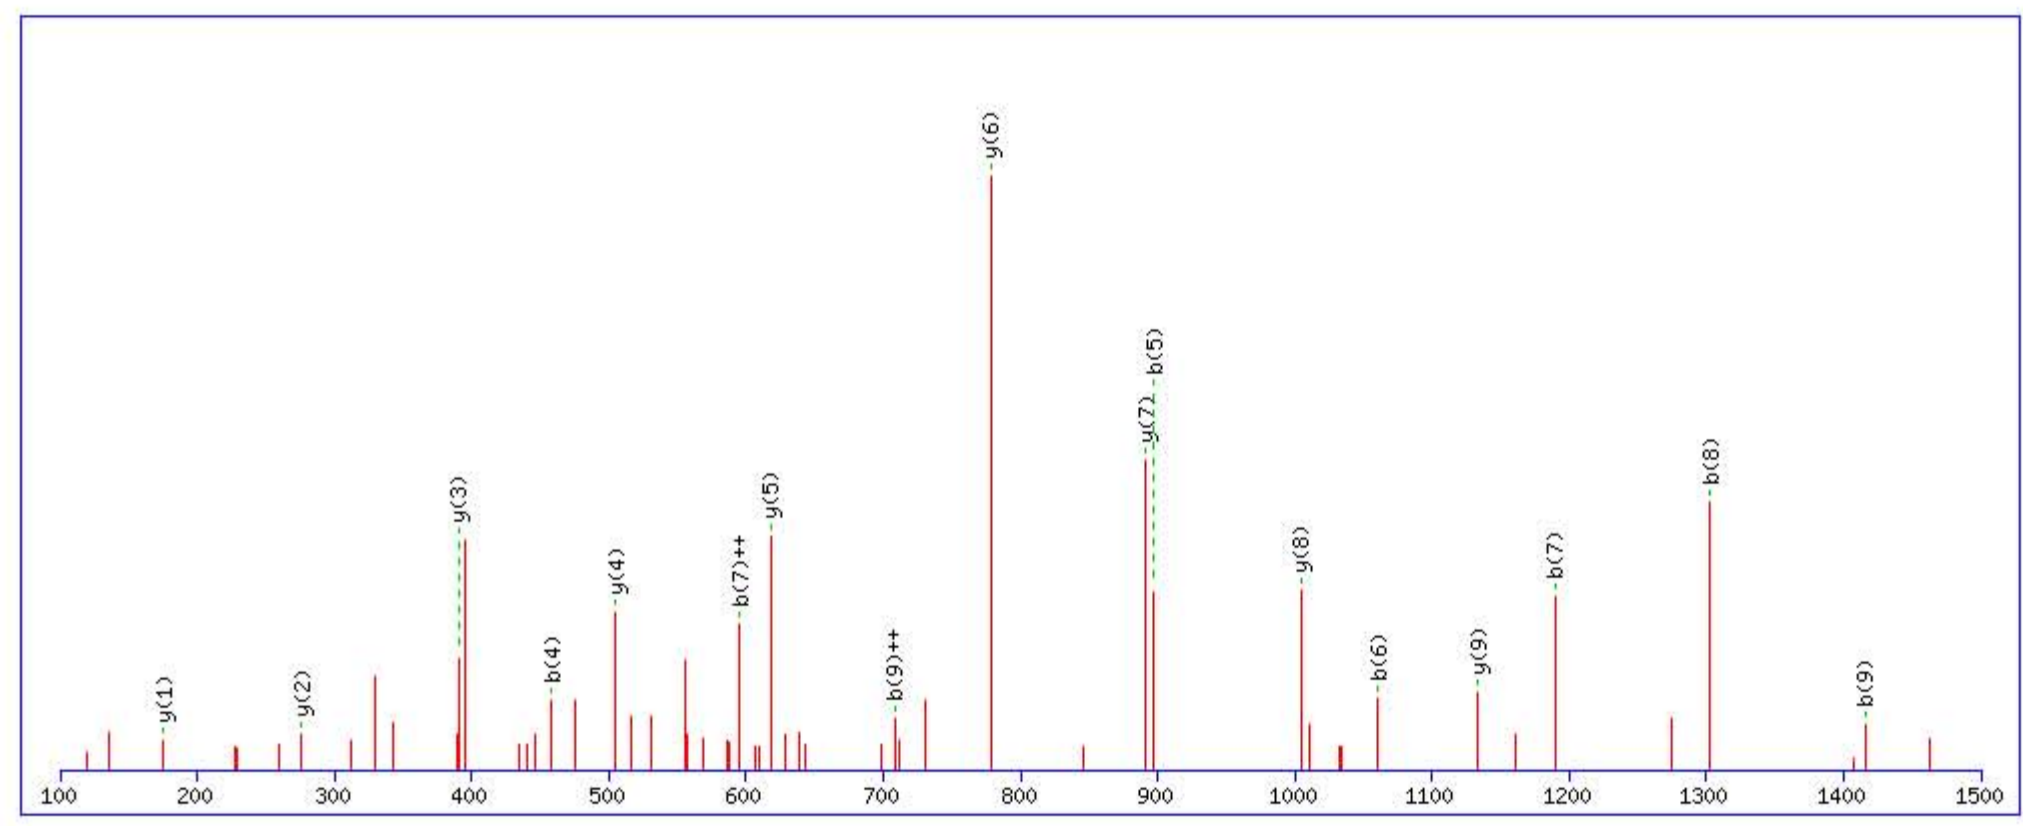

Monoisotopic mass of neutral peptide Mr(calc): 2192.035400  
 Fixed modifications: Carbamidomethyl (C) (apply to specified residues or termini only)  
 Variable modifications:  
 Q5 : Biotin:Thermo-21345 (Q)  
 Ions Score: 59 Expect: 5.1e-006  
 Matches : 17/160 fragment ions using 27 most intense peaks [\(help\)](#)

| #  | b                  | b <sup>++</sup>   | b <sup>*</sup> | b <sup>+++</sup> | b <sup>0</sup> | b <sup>0++</sup> | Seq. | y                  | y <sup>++</sup> | y <sup>*</sup> | y <sup>+++</sup> | y <sup>0</sup> | y <sup>0++</sup> | #  |
|----|--------------------|-------------------|----------------|------------------|----------------|------------------|------|--------------------|-----------------|----------------|------------------|----------------|------------------|----|
| 1  | 72.044390          | 36.525833         |                |                  |                |                  | A    |                    |                 |                |                  |                |                  | 15 |
| 2  | 187.071333         | 94.039304         |                |                  | 169.060768     | 85.034022        | D    | 2122.005587        | 1061.506431     | 2104.979038    | 1052.993157      | 2103.995022    | 1052.501149      | 14 |
| 3  | 343.172444         | 172.089860        | 326.145895     | 163.576585       | 325.161879     | 163.084577       | R    | 2006.978644        | 1003.992960     | 1989.952095    | 995.479685       | 1988.968079    | 994.987677       | 13 |
| 4  | <b>458.199387</b>  | 229.603332        | 441.172838     | 221.090057       | 440.188822     | 220.598049       | D    | 1850.877533        | 925.942404      | 1833.850984    | 917.429130       | 1832.866968    | 916.937122       | 12 |
| 5  | <b>897.424713</b>  | 449.215995        | 880.398164     | 440.702720       | 879.414148     | 440.210712       | Q    | 1735.850590        | 868.428933      | 1718.824041    | 859.915658       | 1717.840025    | 859.423650       | 11 |
| 6  | <b>1060.488042</b> | 530.747659        | 1043.461493    | 522.234385       | 1042.477477    | 521.742376       | Y    | 1296.625264        | 648.816270      | 1279.598715    | 640.302995       | 1278.614699    | 639.810987       | 10 |
| 7  | <b>1189.530635</b> | <b>595.268955</b> | 1172.504086    | 586.755681       | 1171.520070    | 586.263673       | E    | <b>1133.561935</b> | 567.284605      | 1116.535386    | 558.771331       | 1115.551370    | 558.279323       | 9  |
| 8  | <b>1302.614699</b> | 651.810987        | 1285.588150    | 643.297713       | 1284.604134    | 642.805705       | L    | <b>1004.519342</b> | 502.763309      | 987.492793     | 494.250034       | 986.508777     | 493.758026       | 8  |
| 9  | <b>1415.698763</b> | <b>708.353019</b> | 1398.672214    | 699.839745       | 1397.688198    | 699.347737       | L    | <b>891.435278</b>  | 446.221277      | 874.408729     | 437.708002       | 873.424713     | 437.215994       | 7  |
| 10 | 1575.729412        | 788.368344        | 1558.702863    | 779.855069       | 1557.718847    | 779.363061       | C    | <b>778.351214</b>  | 389.679245      | 761.324665     | 381.165971       | 760.340649     | 380.673963       | 6  |
| 11 | 1688.813476        | 844.910376        | 1671.786927    | 836.397101       | 1670.802911    | 835.905093       | L    | <b>618.320565</b>  | 309.663921      | 601.294016     | 301.150646       | 600.310000     | 300.658638       | 5  |
| 12 | 1803.840419        | 902.423847        | 1786.813870    | 893.910573       | 1785.829854    | 893.418565       | D    | <b>505.236501</b>  | 253.121888      | 488.209952     | 244.608614       | 487.225936     | 244.116606       | 4  |
| 13 | 1917.883346        | 959.445311        | 1900.856797    | 950.932036       | 1899.872781    | 950.440028       | N    | <b>390.209558</b>  | 195.608417      | 373.183009     | 187.095142       | 372.198993     | 186.603134       | 3  |
| 14 | 2018.931025        | 1009.969150       | 2001.904476    | 1001.455876      | 2000.920460    | 1000.963868      | T    | <b>276.166631</b>  | 138.586953      | 259.140082     | 130.073679       | 258.156066     | 129.581671       | 2  |
| 15 |                    |                   |                |                  |                |                  | R    | <b>175.118952</b>  | 88.063114       | 158.092403     | 79.549839        |                |                  | 1  |

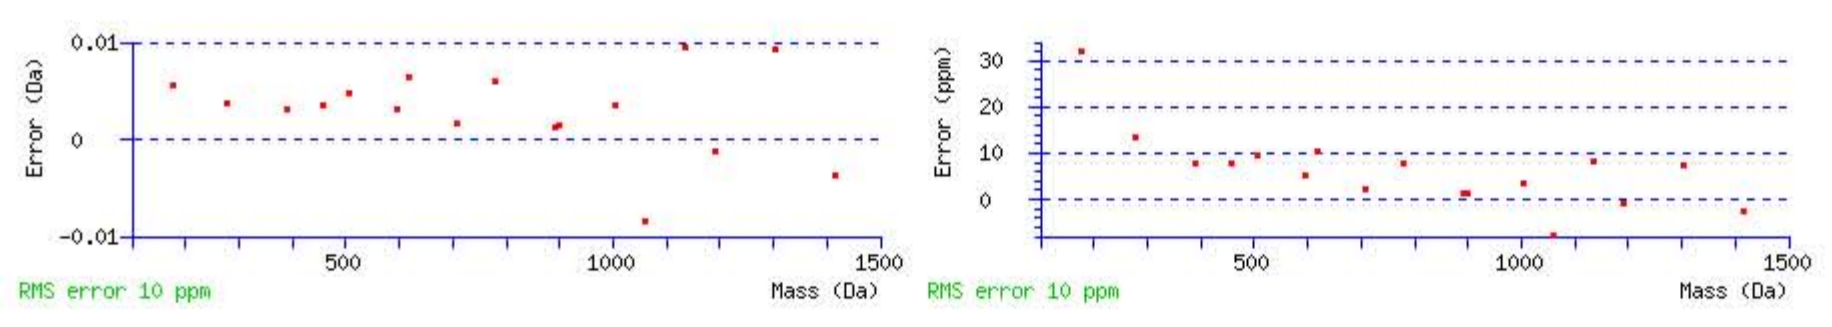

NCBI BLAST search of **ADDRDQYELLCLDNTR**  
 (Parameters: blastp, nr protein database, expect=20000, no filter, PAM30)  
 Other BLAST [web gateways](#)

### All matches to this query

| Score | Mr(calc):   | Delta    | Sequence                            |
|-------|-------------|----------|-------------------------------------|
| 58.9  | 2192.035400 | 0.012922 | <a href="#">ADDRDQYELLCLDNTR</a>    |
| 2.3   | 2192.021027 | 0.027295 | <a href="#">AQRDVIEDCLMSLCR</a>     |
| 0.8   | 2192.017639 | 0.030683 | <a href="#">QGMMSARGDFLNYALSLMR</a> |
| 0.8   | 2192.017639 | 0.030683 | <a href="#">QGMMSARGDFLNYALSLMR</a> |



# MASCOT Search Results

## Peptide View

MS/MS Fragmentation of **EDLIWELLNQAQEHFGK**

Found in **TRFE\_HUMAN**, Serotransferrin OS=Homo sapiens GN=TF PE=1 SV=3

Match to Query 57197: 2380.174512 from(794.398780,3+) rtinseconds(3238) index(79566)

Title: Locus:1.1.1.3657.11 File:"2013-07-02 CLN FXIII 30 min 2nd FT.wiff"

Data file C:\Program Files (x86)\Matrix Science\Mascot Daemon\mgf2 FXIII 30 min 2nd\mascot\_daemon\_merge.mgf

Click mouse within plot area to zoom in by factor of two about that point

Or, Plot from  to  Da

Label all possible matches  Label matches used for scoring

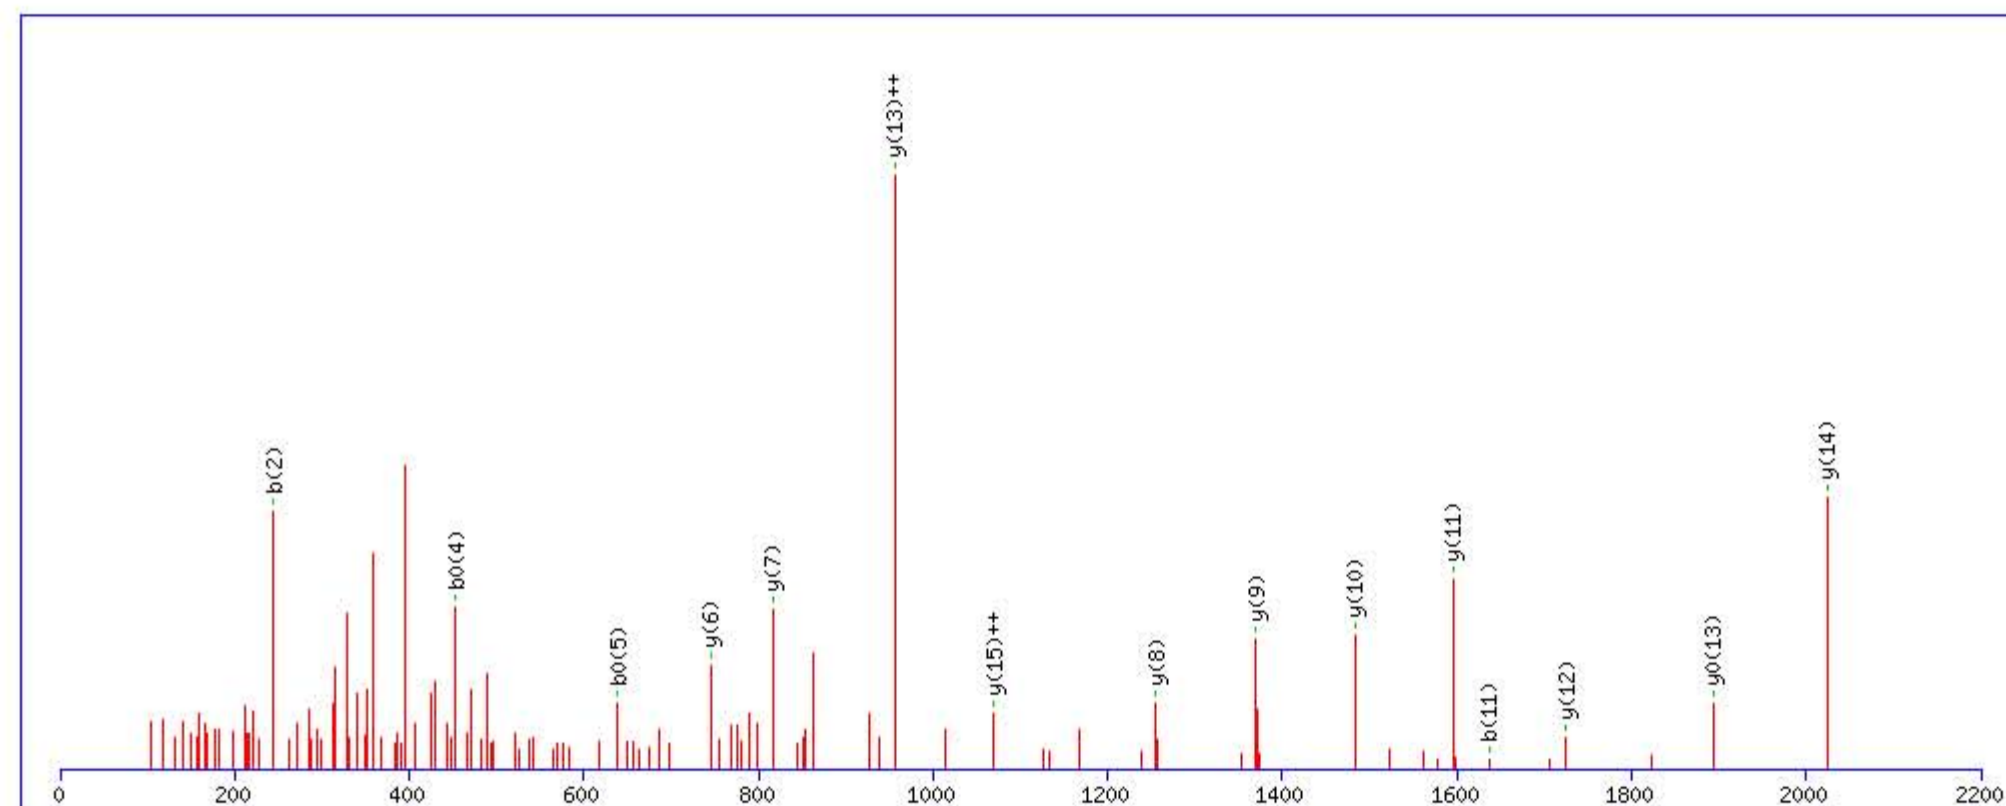

Monoisotopic mass of neutral peptide Mr(calc): 2380.188522

Fixed modifications: Carbamidomethyl (C) (apply to specified residues or termini only)

Variable modifications:

Q10 : Biotin:Thermo-21345 (Q)

Ions Score: 57 Expect: 4.9e-006

Matches : 15/168 fragment ions using 19 most intense peaks [\(help\)](#)

| #  | b                  | b <sup>++</sup> | b <sup>+</sup> | b <sup>+++</sup> | b <sup>0</sup>    | b <sup>0++</sup> | Seq. | y                  | y <sup>++</sup>    | y <sup>+</sup> | y <sup>+++</sup> | y <sup>0</sup>     | y <sup>0++</sup> | #  |
|----|--------------------|-----------------|----------------|------------------|-------------------|------------------|------|--------------------|--------------------|----------------|------------------|--------------------|------------------|----|
| 1  | 130.049869         | 65.528572       |                |                  | 112.039304        | 56.523290        | E    |                    |                    |                |                  |                    |                  | 17 |
| 2  | <b>245.076812</b>  | 123.042044      |                |                  | 227.066247        | 114.036762       | D    | 2252.153237        | 1126.580256        | 2235.126688    | 1118.066982      | 2234.142672        | 1117.574974      | 16 |
| 3  | 358.160876         | 179.584076      |                |                  | 340.150311        | 170.578794       | L    | 2137.126294        | <b>1069.066785</b> | 2120.099745    | 1060.553510      | 2119.115729        | 1060.061502      | 15 |
| 4  | 471.244940         | 236.126108      |                |                  | <b>453.234375</b> | 227.120826       | I    | <b>2024.042230</b> | 1012.524753        | 2007.015681    | 1004.011479      | 2006.031665        | 1003.519470      | 14 |
| 5  | 657.324253         | 329.165765      |                |                  | <b>639.313688</b> | 320.160482       | W    | 1910.958166        | <b>955.982721</b>  | 1893.931617    | 947.469447       | <b>1892.947601</b> | 946.977438       | 13 |
| 6  | 786.366846         | 393.687061      |                |                  | 768.356281        | 384.681779       | E    | <b>1724.878853</b> | 862.943064         | 1707.852304    | 854.429790       | 1706.868288        | 853.937782       | 12 |
| 7  | 899.450910         | 450.229093      |                |                  | 881.440345        | 441.223811       | L    | <b>1595.836260</b> | 798.421768         | 1578.809711    | 789.908493       | 1577.825695        | 789.416485       | 11 |
| 8  | 1012.534974        | 506.771125      |                |                  | 994.524409        | 497.765843       | L    | <b>1482.752196</b> | 741.879736         | 1465.725647    | 733.366461       | 1464.741631        | 732.874453       | 10 |
| 9  | 1126.577901        | 563.792589      | 1109.551352    | 555.279314       | 1108.567336       | 554.787306       | N    | <b>1369.668132</b> | 685.337704         | 1352.641583    | 676.824429       | 1351.657567        | 676.332421       | 9  |
| 10 | 1565.803227        | 783.405252      | 1548.776678    | 774.891977       | 1547.792662       | 774.399969       | Q    | <b>1255.625205</b> | 628.316240         | 1238.598656    | 619.802966       | 1237.614640        | 619.310958       | 8  |
| 11 | <b>1636.840341</b> | 818.923809      | 1619.813792    | 810.410534       | 1618.829776       | 809.918526       | A    | <b>816.399879</b>  | 408.703577         | 799.373330     | 400.190303       | 798.389314         | 399.698295       | 7  |
| 12 | 1764.898919        | 882.953098      | 1747.872370    | 874.439823       | 1746.888354       | 873.947815       | Q    | <b>745.362765</b>  | 373.185020         | 728.336216     | 364.671746       | 727.352200         | 364.179738       | 6  |
| 13 | 1893.941512        | 947.474394      | 1876.914963    | 938.961120       | 1875.930947       | 938.469112       | E    | 617.304187         | 309.155732         | 600.277638     | 300.642457       | 599.293622         | 300.150449       | 5  |
| 14 | 2031.000424        | 1016.003850     | 2013.973875    | 1007.490576      | 2012.989859       | 1006.998568      | H    | 488.261594         | 244.634435         | 471.235045     | 236.121160       |                    |                  | 4  |
| 15 | 2178.068838        | 1089.538057     | 2161.042289    | 1081.024782      | 2160.058273       | 1080.532774      | F    | 351.202682         | 176.104979         | 334.176133     | 167.591704       |                    |                  | 3  |
| 16 | 2235.090302        | 1118.048789     | 2218.063753    | 1109.535514      | 2217.079737       | 1109.043506      | G    | 204.134268         | 102.570772         | 187.107719     | 94.057497        |                    |                  | 2  |
| 17 |                    |                 |                |                  |                   |                  | K    | 147.112804         | 74.060040          | 130.086255     | 65.546765        |                    |                  | 1  |

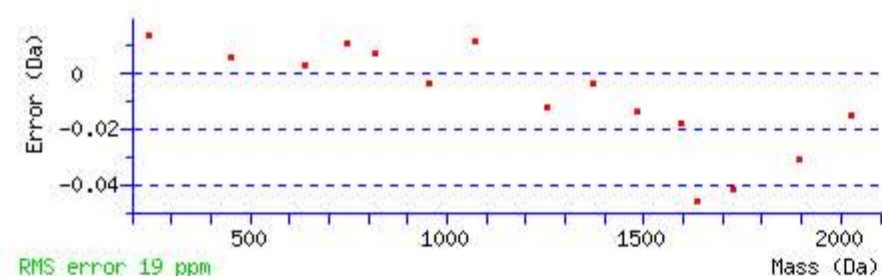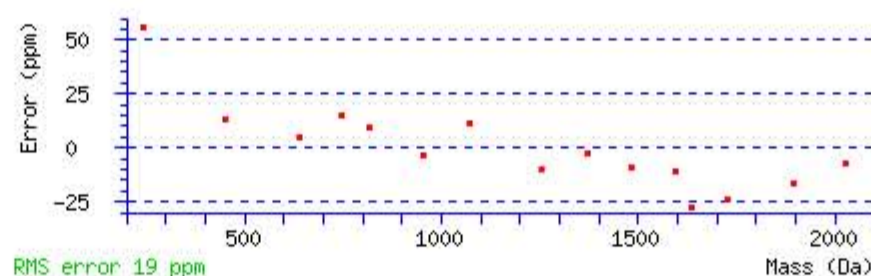

NCBI BLAST search of **EDLIWELLNQAQEHFGK**

(Parameters: blastp, nr protein database, expect=20000, no filter, PAM30)

Other BLAST [web gateways](#)

## All matches to this query

| Score | Mr(calc):   | Delta     | Sequence                              |
|-------|-------------|-----------|---------------------------------------|
| 56.7  | 2380.188522 | -0.014010 | <a href="#">EDLIWELLNQAQEHFGK</a>     |
| 29.9  | 2380.188522 | -0.014010 | <a href="#">EDLIWELLNQAQEHFGK</a>     |
| 0.1   | 2380.158020 | 0.016492  | <a href="#">DELLTNQLIDHLLGENDGMPK</a> |



**Peptide View**

MS/MS Fragmentation of **KPVDEYKDCHLAQVPSHTVVAR**  
 Found in **TRFE\_HUMAN**, Serotransferrin OS=Homo sapiens GN=TF PE=1 SV=3

Match to Query 64001: 2859.447220 from(572.896720,5+) rtinseconds(1527) index(68316)  
 Title: Locus:1.1.1.3065.13 File:"2013-07-02 CLN FXIII 30 min 2nd FT.wiff"  
 Data file C:\Program Files (x86)\Matrix Science\Mascot Daemon\mgf\2 FXIII 30 min 2nd\mascot\_daemon\_merge.mgf

Click mouse within plot area to zoom in by factor of two about that point

Or, Plot from  to  Da

Label all possible matches  Label matches used for scoring

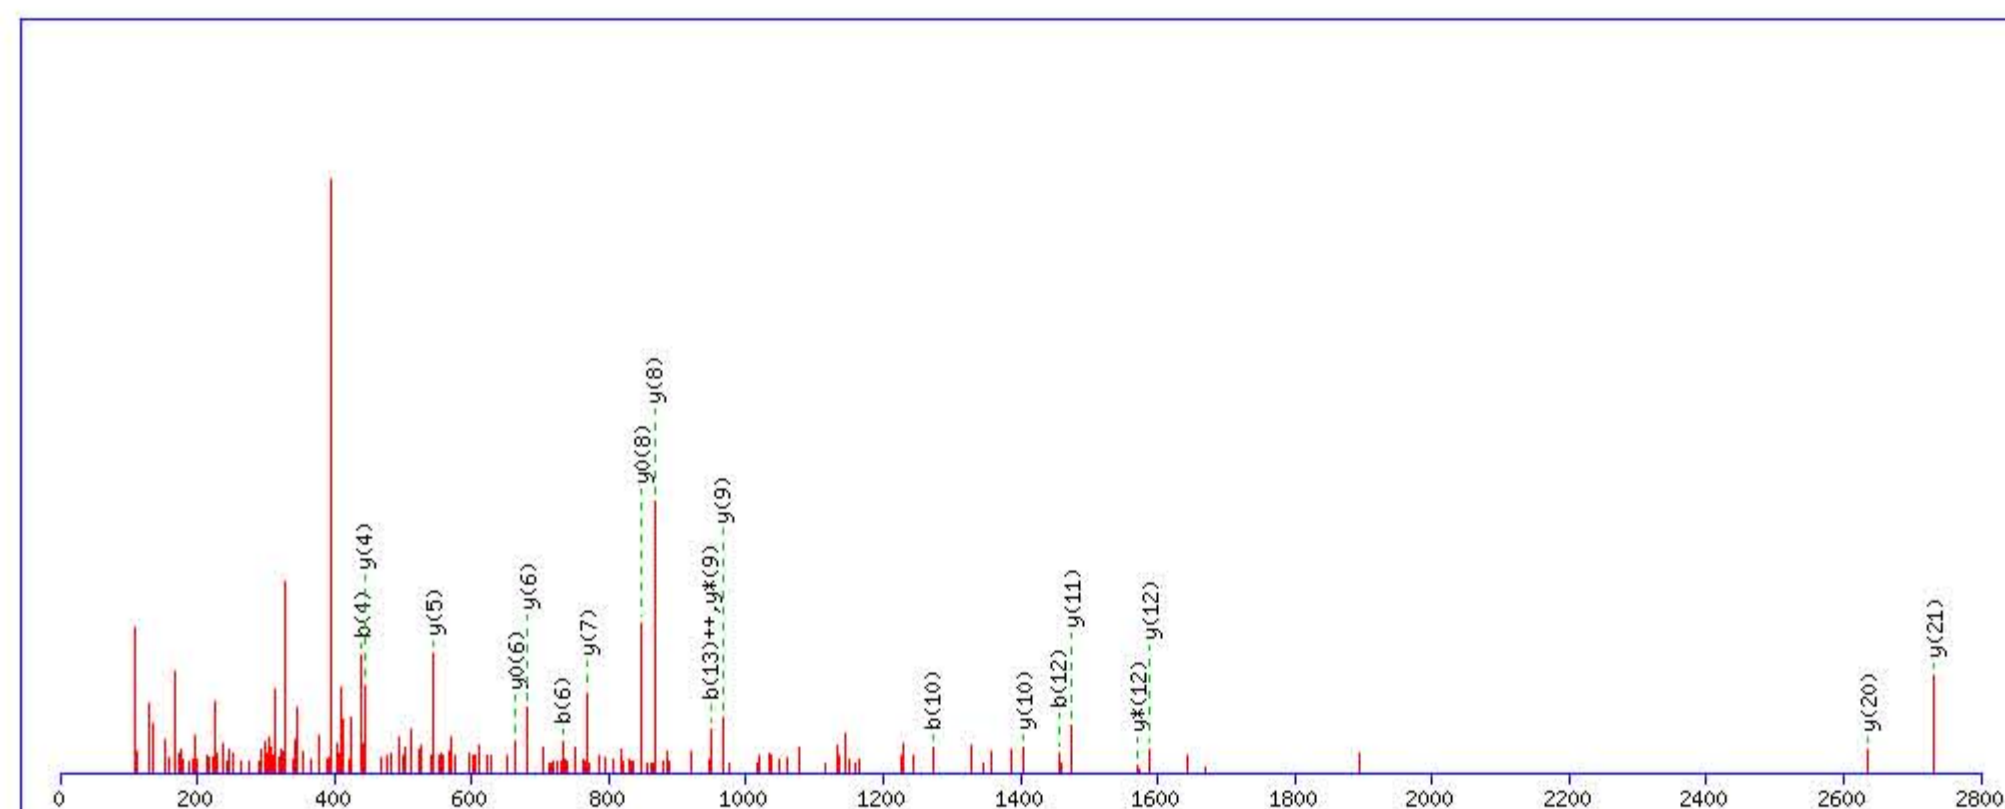

Monoisotopic mass of neutral peptide Mr(calc): 2859.452393  
 Fixed modifications: Carbamidomethyl (C) (apply to specified residues or termini only)  
 Variable modifications:  
 Q13 : Biotin:Thermo-21345 (Q)  
 Ions Score: 58 Expect: 5e-005  
 Matches : 20/238 fragment ions using 35 most intense peaks [\(help\)](#)

| #  | b                  | b <sup>++</sup>   | b <sup>*</sup> | b <sup>*++</sup> | b <sup>0</sup> | b <sup>0++</sup> | Seq.     | y                  | y <sup>++</sup> | y <sup>*</sup>     | y <sup>*++</sup> | y <sup>0</sup>    | y <sup>0++</sup> | #  |
|----|--------------------|-------------------|----------------|------------------|----------------|------------------|----------|--------------------|-----------------|--------------------|------------------|-------------------|------------------|----|
| 1  | 129.102239         | 65.054757         | 112.075690     | 56.541483        |                |                  | <b>K</b> |                    |                 |                    |                  |                   |                  | 22 |
| 2  | 226.155003         | 113.581139        | 209.128454     | 105.067865       |                |                  | <b>P</b> | <b>2732.364705</b> | 1366.685990     | 2715.338156        | 1358.172716      | 2714.354140       | 1357.680708      | 21 |
| 3  | 325.223417         | 163.115346        | 308.196868     | 154.602072       |                |                  | <b>V</b> | <b>2635.311941</b> | 1318.159608     | 2618.285392        | 1309.646334      | 2617.301376       | 1309.154326      | 20 |
| 4  | <b>440.250360</b>  | 220.628818        | 423.223811     | 212.115544       | 422.239795     | 211.623536       | <b>D</b> | 2536.243527        | 1268.625401     | 2519.216978        | 1260.112127      | 2518.232962       | 1259.620119      | 19 |
| 5  | 569.292953         | 285.150115        | 552.266404     | 276.636840       | 551.282388     | 276.144832       | <b>E</b> | 2421.216584        | 1211.111930     | 2404.190035        | 1202.598655      | 2403.206019       | 1202.106647      | 18 |
| 6  | <b>732.356282</b>  | 366.681779        | 715.329733     | 358.168505       | 714.345717     | 357.676497       | <b>Y</b> | 2292.173991        | 1146.590633     | 2275.147442        | 1138.077359      | 2274.163426       | 1137.585351      | 17 |
| 7  | 860.451245         | 430.729261        | 843.424696     | 422.215986       | 842.440680     | 421.723978       | <b>K</b> | 2129.110662        | 1065.058969     | 2112.084113        | 1056.545694      | 2111.100097       | 1056.053686      | 16 |
| 8  | 975.478188         | 488.242732        | 958.451639     | 479.729458       | 957.467623     | 479.237450       | <b>D</b> | 2001.015699        | 1001.011487     | 1983.989150        | 992.498213       | 1983.005134       | 992.006205       | 15 |
| 9  | 1135.508837        | 568.258057        | 1118.482288    | 559.744782       | 1117.498272    | 559.252774       | <b>C</b> | 1885.988756        | 943.498016      | 1868.962207        | 934.984741       | 1867.978191       | 934.492733       | 14 |
| 10 | <b>1272.567749</b> | 636.787513        | 1255.541200    | 628.274238       | 1254.557184    | 627.782230       | <b>H</b> | 1725.958107        | 863.482691      | 1708.931558        | 854.969417       | 1707.947542       | 854.477409       | 13 |
| 11 | 1385.651813        | 693.329545        | 1368.625264    | 684.816270       | 1367.641248    | 684.324262       | <b>L</b> | <b>1588.899195</b> | 794.953235      | <b>1571.872646</b> | 786.439961       | 1570.888630       | 785.947953       | 12 |
| 12 | <b>1456.688927</b> | 728.848101        | 1439.662378    | 720.334827       | 1438.678362    | 719.842819       | <b>A</b> | <b>1475.815131</b> | 738.411203      | 1458.788582        | 729.897929       | 1457.804566       | 729.405921       | 11 |
| 13 | 1895.914253        | <b>948.460765</b> | 1878.887704    | 939.947490       | 1877.903688    | 939.455482       | <b>Q</b> | <b>1404.778017</b> | 702.892646      | 1387.751468        | 694.379372       | 1386.767452       | 693.887364       | 10 |
| 14 | 1994.982667        | 997.994972        | 1977.956118    | 989.481697       | 1976.972102    | 988.989689       | <b>V</b> | <b>965.552691</b>  | 483.279983      | <b>948.526142</b>  | 474.766709       | 947.542126        | 474.274701       | 9  |
| 15 | 2092.035431        | 1046.521353       | 2075.008882    | 1038.008079      | 2074.024866    | 1037.516071      | <b>P</b> | <b>866.484277</b>  | 433.745776      | 849.457728         | 425.232502       | <b>848.473712</b> | 424.740494       | 8  |
| 16 | 2179.067459        | 1090.037367       | 2162.040910    | 1081.524093      | 2161.056894    | 1081.032085      | <b>S</b> | <b>769.431513</b>  | 385.219394      | 752.404964         | 376.706120       | 751.420948        | 376.214112       | 7  |
| 17 | 2316.126371        | 1158.566823       | 2299.099822    | 1150.053549      | 2298.115806    | 1149.561541      | <b>H</b> | <b>682.399485</b>  | 341.703380      | 665.372936         | 333.190106       | <b>664.388920</b> | 332.698098       | 6  |
| 18 | 2417.174050        | 1209.090663       | 2400.147501    | 1200.577388      | 2399.163485    | 1200.085380      | <b>T</b> | <b>545.340573</b>  | 273.173924      | 528.314024         | 264.660650       | 527.330008        | 264.168642       | 5  |
| 19 | 2516.242464        | 1258.624870       | 2499.215915    | 1250.111595      | 2498.231899    | 1249.619587      | <b>V</b> | <b>444.292894</b>  | 222.650085      | 427.266345         | 214.136810       |                   |                  | 4  |
| 20 | 2615.310878        | 1308.159077       | 2598.284329    | 1299.645802      | 2597.300313    | 1299.153794      | <b>V</b> | 345.224480         | 173.115878      | 328.197931         | 164.602603       |                   |                  | 3  |
| 21 | 2686.347992        | 1343.677634       | 2669.321443    | 1335.164359      | 2668.337427    | 1334.672351      | <b>A</b> | 246.156066         | 123.581671      | 229.129517         | 115.068397       |                   |                  | 2  |
| 22 |                    |                   |                |                  |                |                  | <b>R</b> | 175.118952         | 88.063114       | 158.092403         | 79.549839        |                   |                  | 1  |

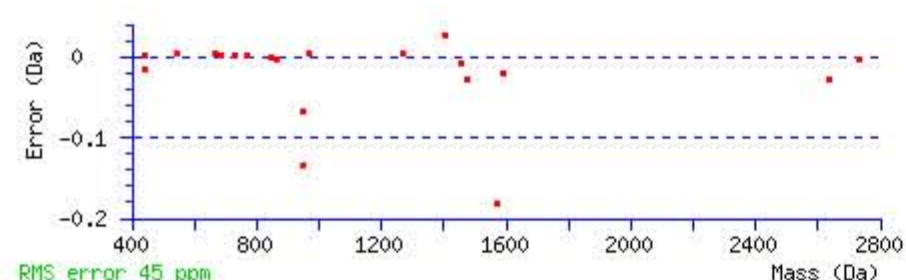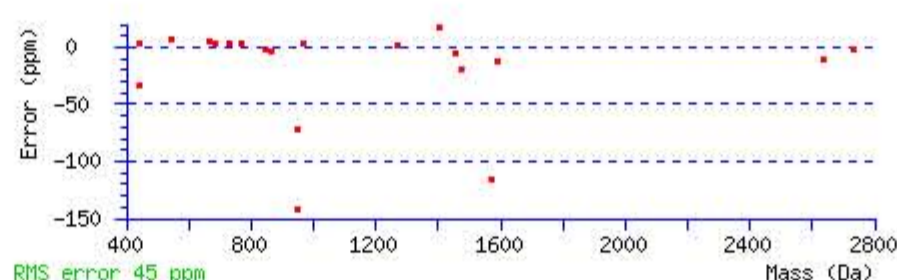

NCBI BLAST search of **KPVDEYKDCHLAQVPSHTVVAR**  
 (Parameters: blastp, nr protein database, expect=20000, no filter, PAM30)  
 Other BLAST [web gateways](#)

**All matches to this query**

| Score | Mr(calc):   | Delta     | Sequence                      |
|-------|-------------|-----------|-------------------------------|
| 57.8  | 2859.452393 | -0.005173 | <b>KPVDEYKDCHLAQVPSHTVVAR</b> |



# MASCOT Search Results

## Peptide View

MS/MS Fragmentation of **AKLIALTLLGMGLALFRNHQSSYQTR**

Found in **PON1\_HUMAN**, Serum paraoxonase/arylesterase 1 OS=Homo sapiens GN=PON1 PE=1 SV=3

Match to Query 67319: 3212.772016 from(804.200280,4+) rtinseconds(3183) index(63184)

Title: Locus:1.1.1.3589.9 File:"2013-07-02 CLN FXIII 30 min 2nd F 4.wiff"

Data file C:\Program Files (x86)\Matrix Science\Mascot Daemon\mgf2 FXIII 30 min 2nd\mascot\_daemon\_merge.mgf

Click mouse within plot area to zoom in by factor of two about that point

Or, Plot from  to  Da

Label all possible matches  Label matches used for scoring

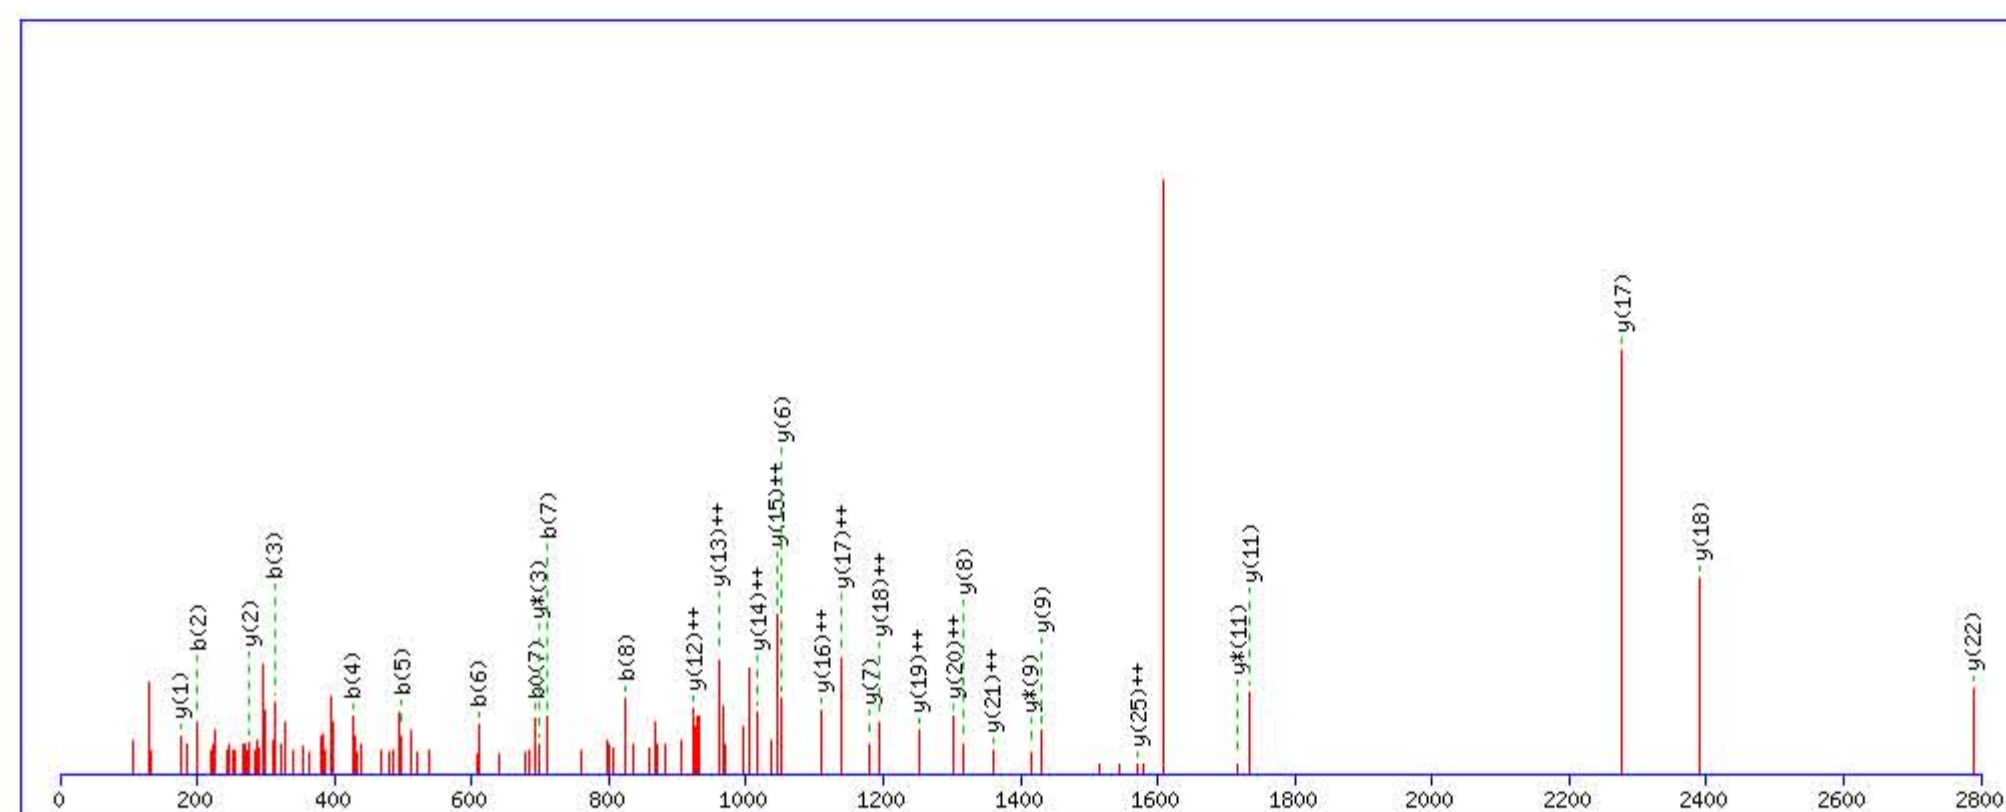



# MASCOT SCIENCE Mascot Search Results

## Peptide View

MS/MS Fragmentation of **GHQLQLDYFGACK**

Found in **SPRL1\_HUMAN**, SPARC-like protein 1 OS=Homo sapiens GN=SPARCL1 PE=1 SV=2

Match to Query 45744: 1846.882182 from(616.634670,3+) rtinseconds(2109) index(56509)

Title: Locus:1.1.1.3220.11 File:"2013-07-02 CLN FXIII 30 min 2nd F 4.wiff"

Data file C:\Program Files (x86)\Matrix Science\Mascot Daemon\mgf\2 FXIII 30 min 2nd\mascot\_daemon\_merge.mgf

Click mouse within plot area to zoom in by factor of two about that point

Or, Plot from 0 to 2600 Da Full range

Label all possible matches  Label matches used for scoring

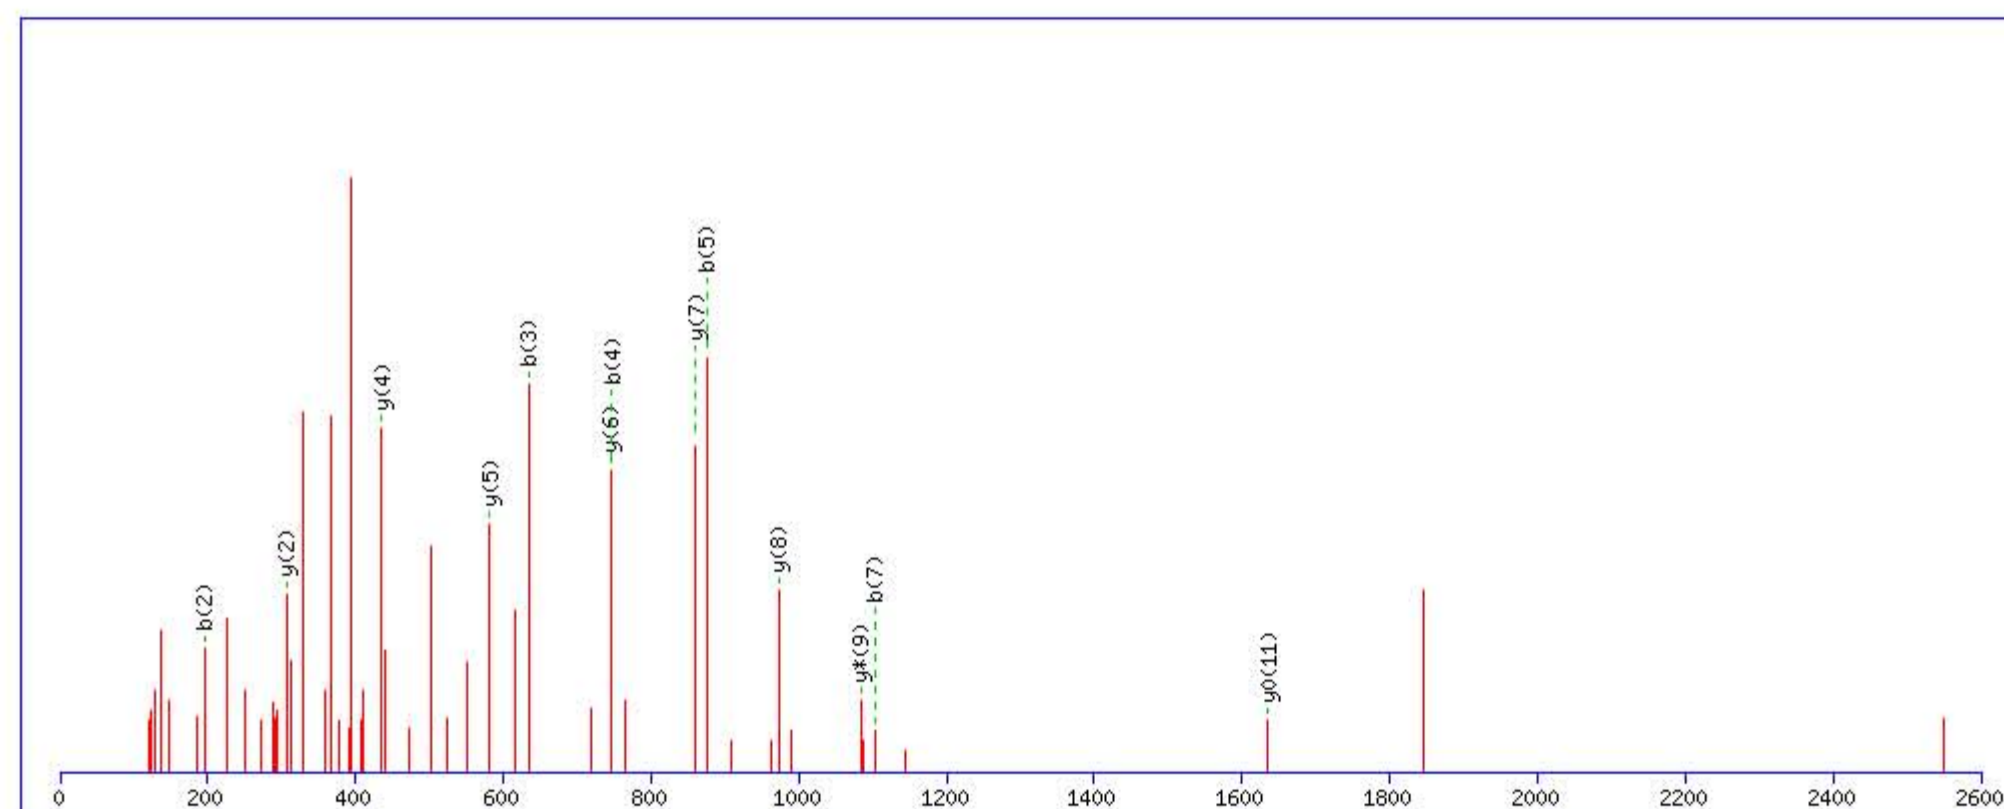

Monoisotopic mass of neutral peptide Mr(calc): 1846.885849

Fixed modifications: Carbamidomethyl (C) (apply to specified residues or termini only)

Variable modifications:

Q3 : Biotin:Thermo-21345 (Q)

Ions Score: 40 Expect: 0.00027

Matches : 13/116 fragment ions using 22 most intense peaks [\(help\)](#)

| #  | b                  | b <sup>++</sup> | b <sup>*</sup> | b <sup>*++</sup> | b <sup>0</sup> | b <sup>0++</sup> | Seq. | y                 | y <sup>++</sup> | y <sup>*</sup>     | y <sup>*++</sup> | y <sup>0</sup>     | y <sup>0++</sup> | #  |
|----|--------------------|-----------------|----------------|------------------|----------------|------------------|------|-------------------|-----------------|--------------------|------------------|--------------------|------------------|----|
| 1  | 58.028740          | 29.518008       |                |                  |                |                  | G    |                   |                 |                    |                  |                    |                  | 13 |
| 2  | <b>195.087652</b>  | 98.047464       |                |                  |                |                  | H    | 1790.871661       | 895.939469      | 1773.845112        | 887.426194       | 1772.861096        | 886.934186       | 12 |
| 3  | <b>634.312978</b>  | 317.660127      | 617.286429     | 309.146853       |                |                  | Q    | 1653.812749       | 827.410013      | 1636.786200        | 818.896738       | <b>1635.802184</b> | 818.404730       | 11 |
| 4  | <b>747.397042</b>  | 374.202159      | 730.370493     | 365.688885       |                |                  | L    | 1214.587423       | 607.797350      | 1197.560874        | 599.284075       | 1196.576858        | 598.792067       | 10 |
| 5  | <b>875.455620</b>  | 438.231448      | 858.429071     | 429.718174       |                |                  | Q    | 1101.503359       | 551.255318      | <b>1084.476810</b> | 542.742043       | 1083.492794        | 542.250035       | 9  |
| 6  | 988.539684         | 494.773480      | 971.513135     | 486.260206       |                |                  | L    | <b>973.444781</b> | 487.226029      | 956.418232         | 478.712754       | 955.434216         | 478.220746       | 8  |
| 7  | <b>1103.566627</b> | 552.286952      | 1086.540078    | 543.773677       | 1085.556062    | 543.281669       | D    | <b>860.360717</b> | 430.683997      | 843.334168         | 422.170722       | 842.350152         | 421.678714       | 7  |
| 8  | 1266.629956        | 633.818616      | 1249.603407    | 625.305342       | 1248.619391    | 624.813334       | Y    | <b>745.333774</b> | 373.170525      | 728.307225         | 364.657251       |                    |                  | 6  |
| 9  | 1413.698370        | 707.352823      | 1396.671821    | 698.839549       | 1395.687805    | 698.347541       | F    | <b>582.270445</b> | 291.638861      | 565.243896         | 283.125586       |                    |                  | 5  |
| 10 | 1470.719834        | 735.863555      | 1453.693285    | 727.350281       | 1452.709269    | 726.858273       | G    | <b>435.202031</b> | 218.104653      | 418.175482         | 209.591379       |                    |                  | 4  |
| 11 | 1541.756948        | 771.382112      | 1524.730399    | 762.868838       | 1523.746383    | 762.376830       | A    | 378.180567        | 189.593921      | 361.154018         | 181.080647       |                    |                  | 3  |
| 12 | 1701.787597        | 851.397437      | 1684.761048    | 842.884162       | 1683.777032    | 842.392154       | C    | <b>307.143453</b> | 154.075365      | 290.116904         | 145.562090       |                    |                  | 2  |
| 13 |                    |                 |                |                  |                |                  | K    | 147.112804        | 74.060040       | 130.086255         | 65.546765        |                    |                  | 1  |

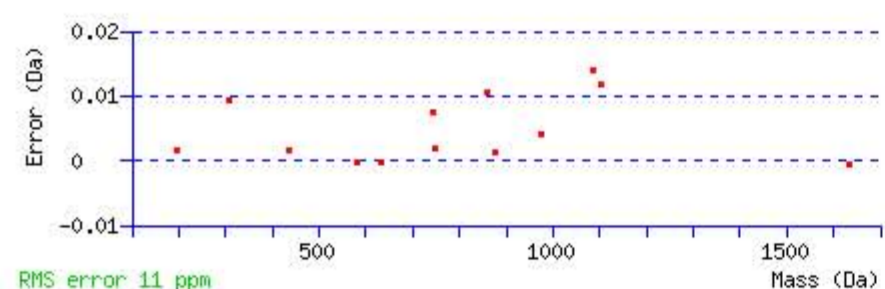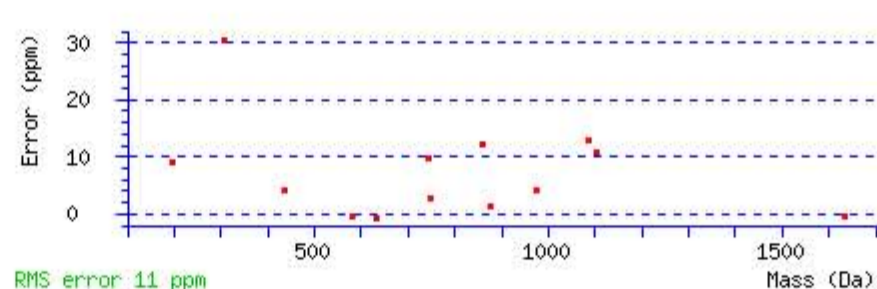

NCBI BLAST search of **GHQLQLDYFGACK**

(Parameters: blastp, nr protein database, expect=20000, no filter, PAM30)

Other BLAST [web gateways](#)

All matches to this query

| Score | Mr(calc):   | Delta     | Sequence                         |
|-------|-------------|-----------|----------------------------------|
| 40.2  | 1846.885849 | -0.003667 | <a href="#">GHQLQLDYFGACK</a>    |
| 24.9  | 1846.885849 | -0.003667 | <a href="#">GHQLQLDYFGACK</a>    |
| 2.1   | 1846.906082 | -0.023900 | <a href="#">DLNTGVFNNQENEILK</a> |
| 2.0   | 1846.899063 | -0.016881 | <a href="#">MQLKPEINPEMLNK</a>   |

Mascot: <http://www.matrixscience.com/>



# MASCOT SEARCH RESULTS

## Peptide View

MS/MS Fragmentation of **SPYQLVLQHSR**

Found in **BGH3\_HUMAN**, Transforming growth factor-beta-induced protein ig-h3 OS=Homo sapiens GN=TGFBI PE=1 SV=1

Match to Query 40787: 1637.864502 from(546.962110,3+) rtinseconds(1895) index(54982)

Title: Locus:1.1.1.3146.14 File:"2013-07-02 CLN FXIII 30 min 2nd F 4.wiff"

Data file C:\Program Files (x86)\Matrix Science\Mascot Daemon\mgf2 FXIII 30 min 2nd\mascot\_daemon\_merge.mgf

Click mouse within plot area to zoom in by factor of two about that point

Or, Plot from  to  Da

Label all possible matches  Label matches used for scoring

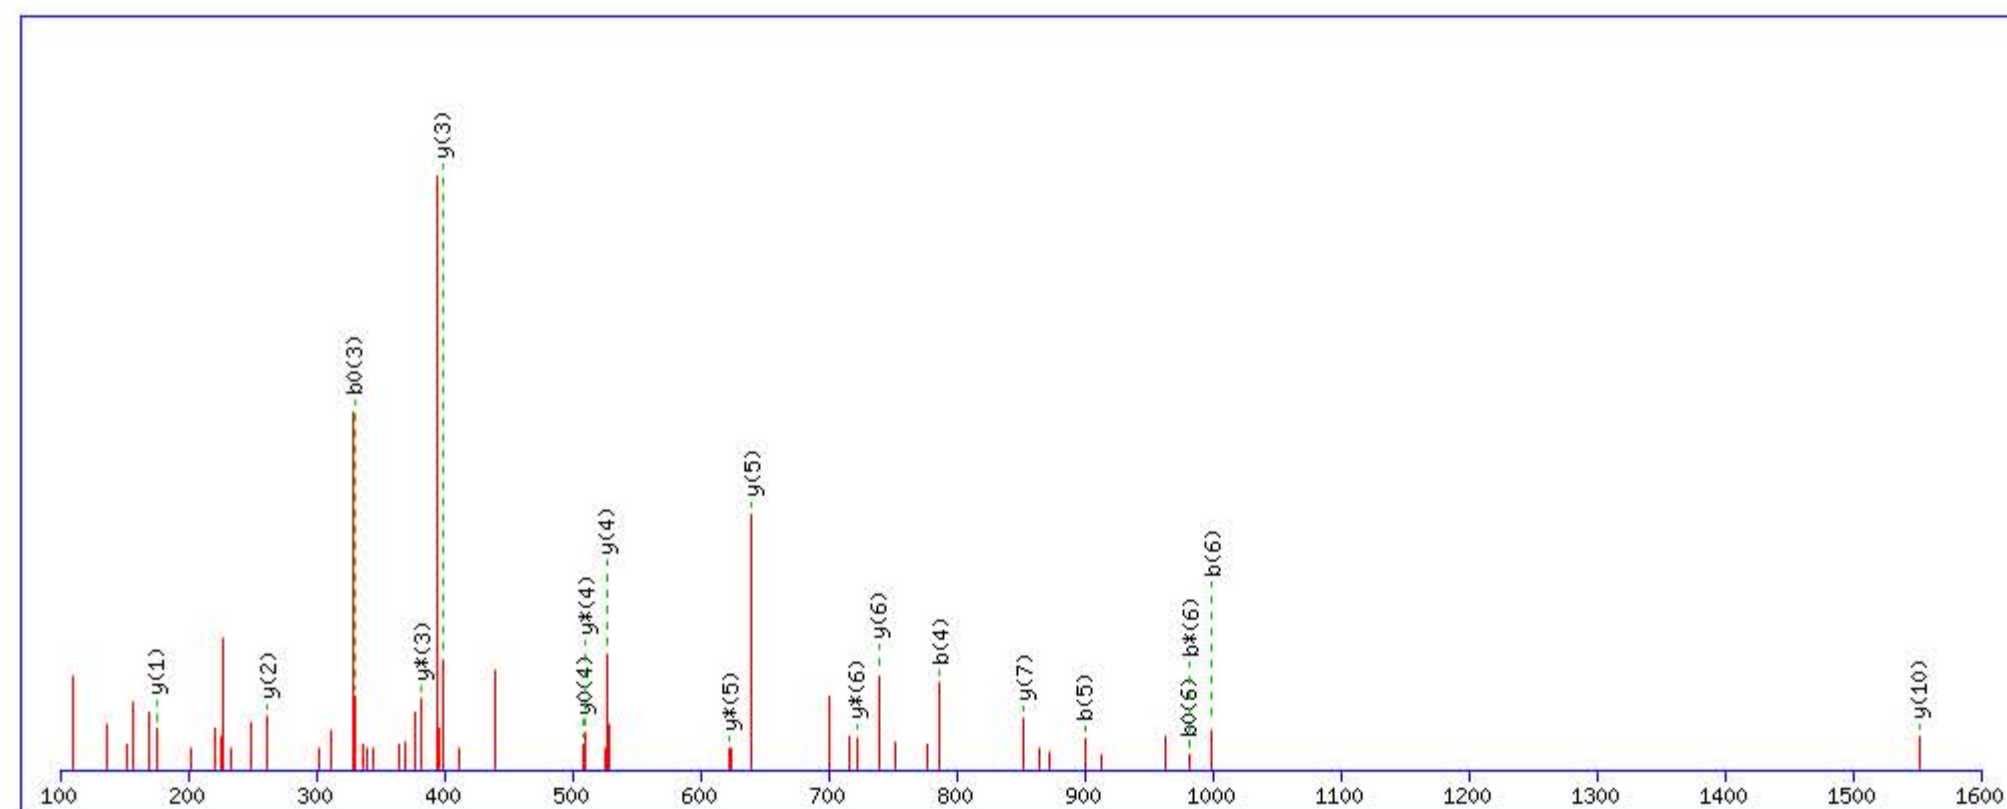

Monoisotopic mass of neutral peptide Mr(calc): 1637.871170

Fixed modifications: Carbamidomethyl (C) (apply to specified residues or termini only)

Variable modifications:

Q4 : Biotin:Thermo-21345 (Q)

Ions Score: 36 Expect: 0.00052

Matches : 19/112 fragment ions using 42 most intense peaks [\(help\)](#)

| #  | b           | b <sup>++</sup> | b <sup>+</sup> | b <sup>+++</sup> | b <sup>0</sup> | b <sup>0++</sup> | Seq. | y           | y <sup>++</sup> | y <sup>+</sup> | y <sup>+++</sup> | y <sup>0</sup> | y <sup>0++</sup> | #  |
|----|-------------|-----------------|----------------|------------------|----------------|------------------|------|-------------|-----------------|----------------|------------------|----------------|------------------|----|
| 1  | 88.039304   | 44.523290       |                |                  | 70.028739      | 35.518008        | S    |             |                 |                |                  |                |                  | 11 |
| 2  | 185.092068  | 93.049672       |                |                  | 167.081503     | 84.044389        | P    | 1551.846431 | 776.426853      | 1534.819882    | 767.913579       | 1533.835866    | 767.421571       | 10 |
| 3  | 348.155397  | 174.581336      |                |                  | 330.144832     | 165.576054       | Y    | 1454.793667 | 727.900471      | 1437.767118    | 719.387197       | 1436.783102    | 718.895189       | 9  |
| 4  | 787.380723  | 394.194000      | 770.354174     | 385.680725       | 769.370158     | 385.188717       | Q    | 1291.730338 | 646.368807      | 1274.703789    | 637.855532       | 1273.719773    | 637.363524       | 8  |
| 5  | 900.464787  | 450.736032      | 883.438238     | 442.222757       | 882.454222     | 441.730749       | L    | 852.505012  | 426.756144      | 835.478463     | 418.242869       | 834.494447     | 417.750861       | 7  |
| 6  | 999.533201  | 500.270239      | 982.506652     | 491.756964       | 981.522636     | 491.264956       | V    | 739.420948  | 370.214112      | 722.394399     | 361.700837       | 721.410383     | 361.208829       | 6  |
| 7  | 1112.617265 | 556.812270      | 1095.590716    | 548.298996       | 1094.606700    | 547.806988       | L    | 640.352534  | 320.679905      | 623.325985     | 312.166630       | 622.341969     | 311.674622       | 5  |
| 8  | 1240.675843 | 620.841559      | 1223.649294    | 612.328285       | 1222.665278    | 611.836277       | Q    | 527.268470  | 264.137873      | 510.241921     | 255.624598       | 509.257905     | 255.132590       | 4  |
| 9  | 1377.734755 | 689.371015      | 1360.708206    | 680.857741       | 1359.724190    | 680.365733       | H    | 399.209892  | 200.108584      | 382.183343     | 191.595309       | 381.199327     | 191.103301       | 3  |
| 10 | 1464.766783 | 732.887029      | 1447.740234    | 724.373755       | 1446.756218    | 723.881747       | S    | 262.150980  | 131.579128      | 245.124431     | 123.065854       | 244.140415     | 122.573846       | 2  |
| 11 |             |                 |                |                  |                |                  | R    | 175.118952  | 88.063114       | 158.092403     | 79.549839        |                |                  | 1  |

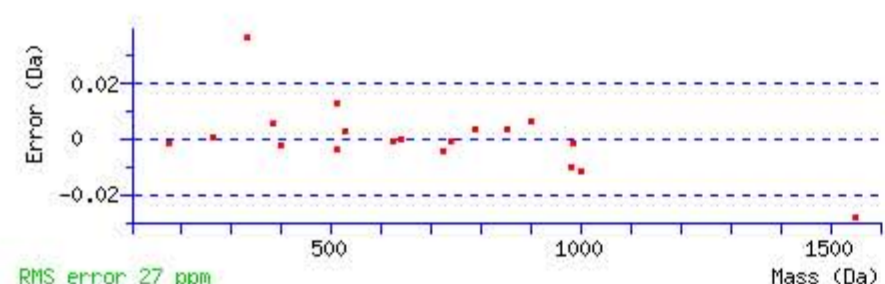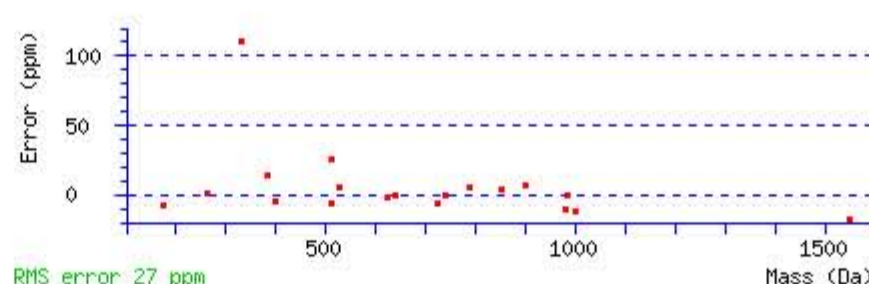

NCBI BLAST search of **SPYQLVLQHSR**

(Parameters: blastp, nr protein database, expect=20000, no filter, PAM30)

Other BLAST [web gateways](#)

All matches to this query

| Score | Mr(calc):   | Delta     | Sequence                       |
|-------|-------------|-----------|--------------------------------|
| 36.4  | 1637.871170 | -0.006668 | <a href="#">SPYQLVLQHSR</a>    |
| 1.4   | 1637.855911 | 0.008591  | <a href="#">RTAYSGVPMILSSR</a> |

Mascot: <http://www.matrixscience.com/>



# MATRIX SCIENCE Mascot Search Results

## Peptide View

MS/MS Fragmentation of **LGDDLLQCHPAVK**

Found in **PROC\_HUMAN**, Vitamin K-dependent protein C OS=Homo sapiens GN=PROC PE=1 SV=1

Match to Query 44249: 1775.900322 from(592.974050,3+) rtinseconds(1951) index(55457)

Title: Locus:1.1.1.3165.14 File:"2013-07-02 CLN FXIII 30 min 2nd F 4.wiff"

Data file C:\Program Files (x86)\Matrix Science\Mascot Daemon\mgf2 FXIII 30 min 2nd\mascot\_daemon\_merge.mgf

Click mouse within plot area to zoom in by factor of two about that point

Or, Plot from  to  Da

Label all possible matches  Label matches used for scoring

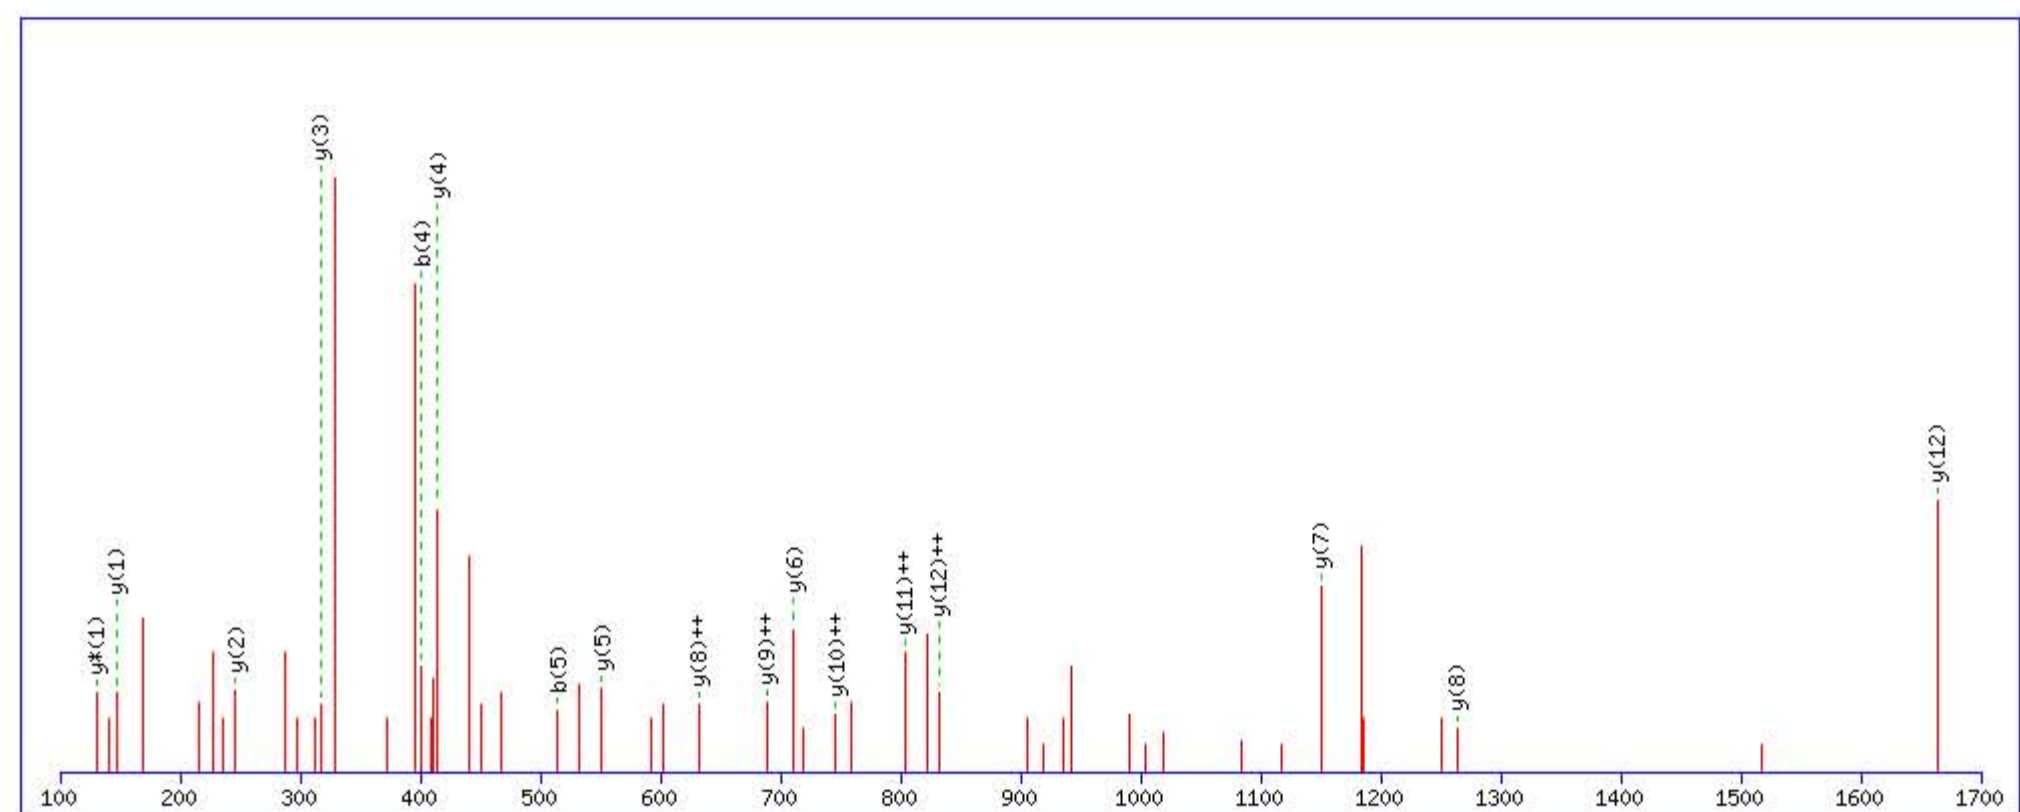

Monoisotopic mass of neutral peptide Mr(calc): 1775.906250

Fixed modifications: Carbamidomethyl (C) (apply to specified residues or termini only)

Variable modifications:

Q7 : Biotin:Thermo-21345 (Q)

Ions Score: 41 Expect: 0.002

Matches : 17/110 fragment ions using 44 most intense peaks [\(help\)](#)

| #  | b           | b <sup>++</sup> | b <sup>*</sup> | b <sup>*++</sup> | b <sup>0</sup> | b <sup>0++</sup> | Seq. | y           | y <sup>++</sup> | y <sup>*</sup> | y <sup>*++</sup> | y <sup>0</sup> | y <sup>0++</sup> | #  |
|----|-------------|-----------------|----------------|------------------|----------------|------------------|------|-------------|-----------------|----------------|------------------|----------------|------------------|----|
| 1  | 114.091340  | 57.549308       |                |                  |                |                  | L    |             |                 |                |                  |                |                  | 13 |
| 2  | 171.112804  | 86.060040       |                |                  |                |                  | G    | 1663.829461 | 832.418369      | 1646.802912    | 823.905094       | 1645.818896    | 823.413086       | 12 |
| 3  | 286.139747  | 143.573512      |                |                  | 268.129182     | 134.568229       | D    | 1606.807997 | 803.907637      | 1589.781448    | 795.394362       | 1588.797432    | 794.902354       | 11 |
| 4  | 401.166690  | 201.086983      |                |                  | 383.156125     | 192.081701       | D    | 1491.781054 | 746.394165      | 1474.754505    | 737.880891       | 1473.770489    | 737.388883       | 10 |
| 5  | 514.250754  | 257.629015      |                |                  | 496.240189     | 248.623733       | L    | 1376.754111 | 688.880694      | 1359.727562    | 680.367419       |                |                  | 9  |
| 6  | 627.334818  | 314.171047      |                |                  | 609.324253     | 305.165765       | L    | 1263.670047 | 632.338662      | 1246.643498    | 623.825387       |                |                  | 8  |
| 7  | 1066.560144 | 533.783710      | 1049.533595    | 525.270436       | 1048.549579    | 524.778428       | Q    | 1150.585983 | 575.796630      | 1133.559434    | 567.283355       |                |                  | 7  |
| 8  | 1226.590793 | 613.799035      | 1209.564244    | 605.285760       | 1208.580228    | 604.793752       | C    | 711.360657  | 356.183967      | 694.334108     | 347.670692       |                |                  | 6  |
| 9  | 1363.649705 | 682.328491      | 1346.623156    | 673.815216       | 1345.639140    | 673.323208       | H    | 551.330008  | 276.168642      | 534.303459     | 267.655368       |                |                  | 5  |
| 10 | 1460.702469 | 730.854873      | 1443.675920    | 722.341598       | 1442.691904    | 721.849590       | P    | 414.271096  | 207.639186      | 397.244547     | 199.125912       |                |                  | 4  |
| 11 | 1531.739583 | 766.373430      | 1514.713034    | 757.860155       | 1513.729018    | 757.368147       | A    | 317.218332  | 159.112804      | 300.191783     | 150.599530       |                |                  | 3  |
| 12 | 1630.807997 | 815.907637      | 1613.781448    | 807.394362       | 1612.797432    | 806.902354       | V    | 246.181218  | 123.594247      | 229.154669     | 115.080973       |                |                  | 2  |
| 13 |             |                 |                |                  |                |                  | K    | 147.112804  | 74.060040       | 130.086255     | 65.546765        |                |                  | 1  |

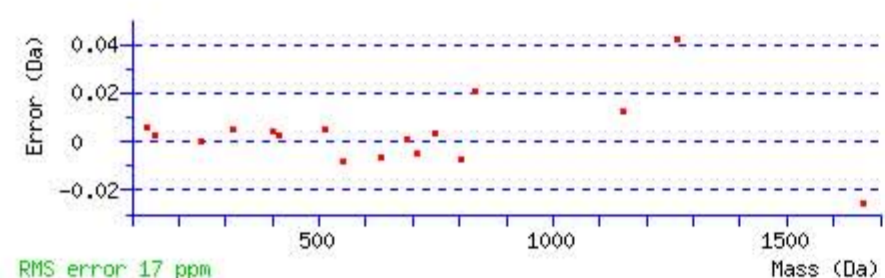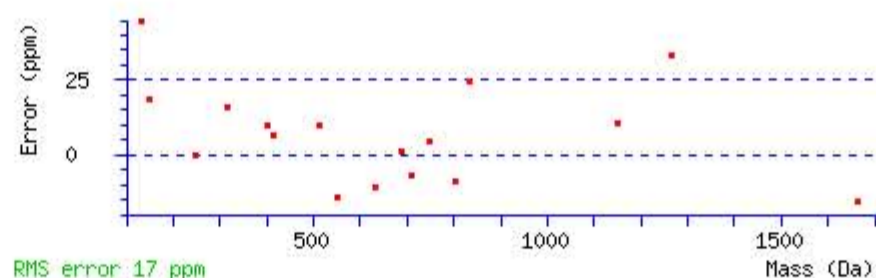

NCBI BLAST search of **LGDDLLQCHPAVK**

(Parameters: blastp, nr protein database, expect=20000, no filter, PAM30)

Other BLAST [web gateways](#)

All matches to this query

| Score | Mr(calc):   | Delta     | Sequence                      |
|-------|-------------|-----------|-------------------------------|
| 41.2  | 1775.906250 | -0.005928 | <a href="#">LGDDLLQCHPAVK</a> |

Mascot: <http://www.matrixscience.com/>



# MASCOT Search Results

## Peptide View

MS/MS Fragmentation of **QLAVLDK**

Found in **PROS\_HUMAN**, Vitamin K-dependent protein S OS=Homo sapiens GN=PROS1 PE=1 SV=1

Match to Query 20267: 1096.623868 from(549.319210,2+) rtinseconds(1953) index(55479)

Title: Locus:1.1.1.3166.11 File:"2013-07-02 CLN FXIII 30 min 2nd F 4.wiff"

Data file C:\Program Files (x86)\Matrix Science\Mascot Daemon\mgf\2 FXIII 30 min 2nd\mascot\_daemon\_merge.mgf

Click mouse within plot area to zoom in by factor of two about that point

Or, Plot from  to  Da

Label all possible matches  Label matches used for scoring

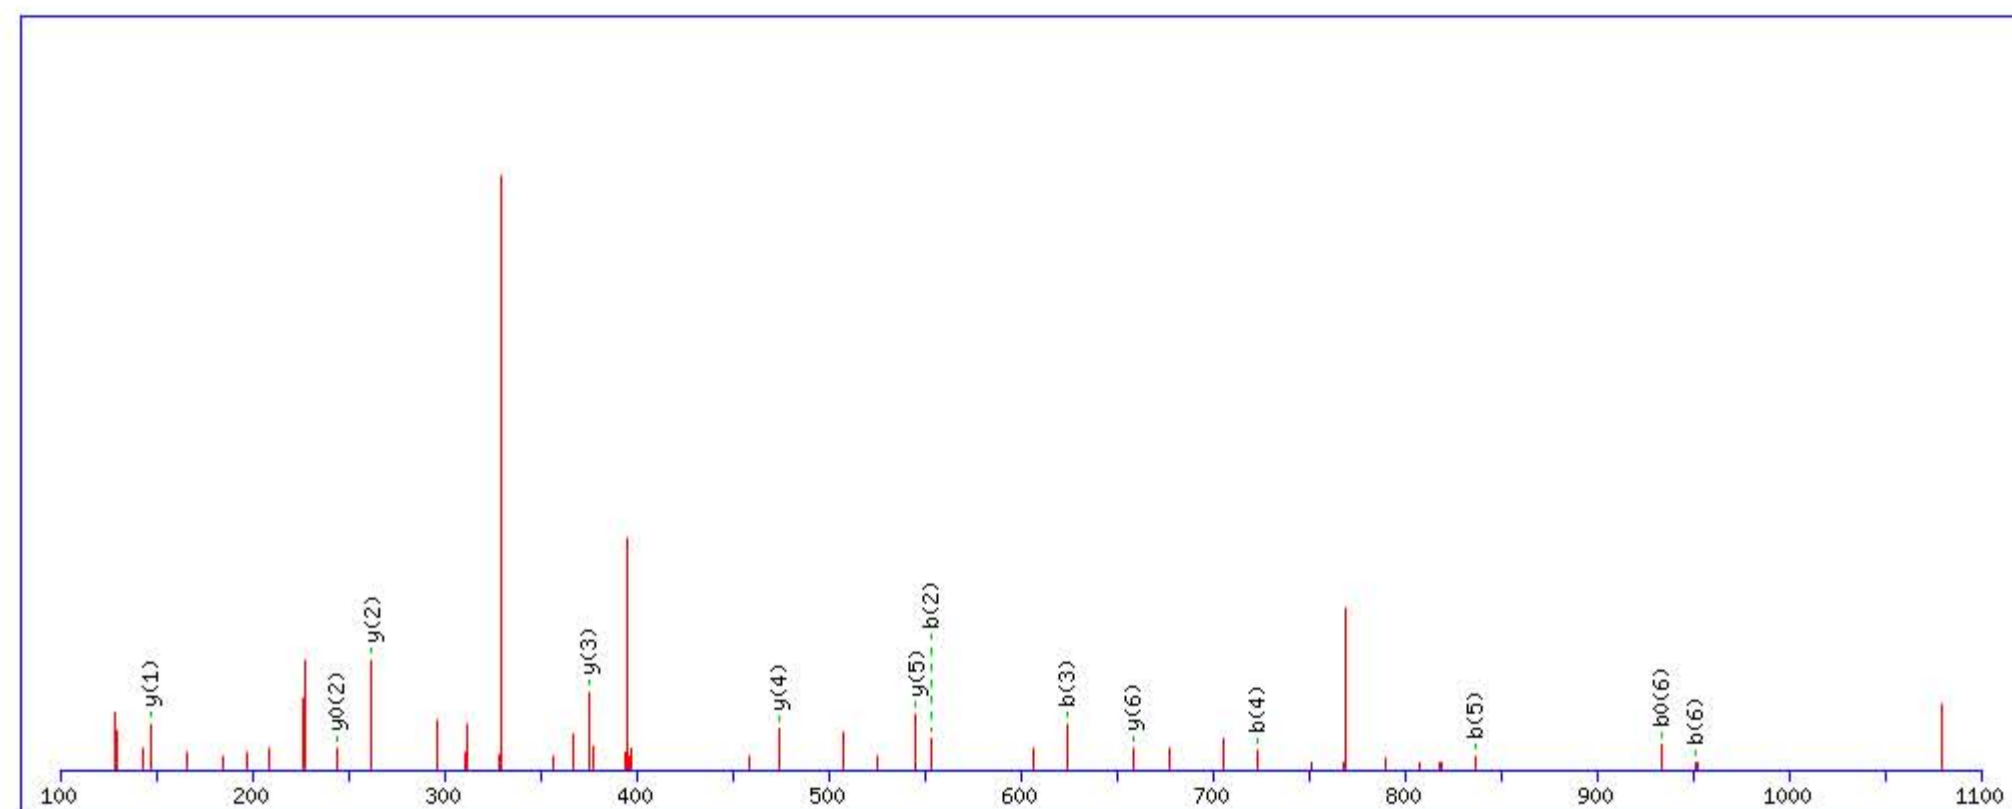

Monoisotopic mass of neutral peptide Mr(calc): 1096.631439

Fixed modifications: Carbamidomethyl (C) (apply to specified residues or termini only)

Variable modifications:

Q1 : Biotin:Thermo-21345 (Q)

Ions Score: 26 Expect: 0.03

Matches : 13/60 fragment ions using 33 most intense peaks [\(help\)](#)

| # | b                 | b <sup>++</sup> | b <sup>+</sup> | b <sup>+++</sup> | b <sup>0</sup>    | b <sup>0++</sup> | Seq. | y                 | y <sup>++</sup> | y <sup>+</sup> | y <sup>+++</sup> | y <sup>0</sup>    | y <sup>0++</sup> | # |
|---|-------------------|-----------------|----------------|------------------|-------------------|------------------|------|-------------------|-----------------|----------------|------------------|-------------------|------------------|---|
| 1 | 440.232602        | 220.619939      | 423.206053     | 212.106664       |                   |                  | Q    |                   |                 |                |                  |                   |                  | 7 |
| 2 | <b>553.316666</b> | 277.161971      | 536.290117     | 268.648697       |                   |                  | L    | <b>658.413403</b> | 329.710340      | 641.386854     | 321.197065       | 640.402838        | 320.705057       | 6 |
| 3 | <b>624.353780</b> | 312.680528      | 607.327231     | 304.167254       |                   |                  | A    | <b>545.329339</b> | 273.168308      | 528.302790     | 264.655033       | 527.318774        | 264.163025       | 5 |
| 4 | <b>723.422194</b> | 362.214735      | 706.395645     | 353.701461       |                   |                  | V    | <b>474.292225</b> | 237.649750      | 457.265676     | 229.136476       | 456.281660        | 228.644468       | 4 |
| 5 | <b>836.506258</b> | 418.756767      | 819.479709     | 410.243493       |                   |                  | L    | <b>375.223811</b> | 188.115543      | 358.197262     | 179.602269       | 357.213246        | 179.110261       | 3 |
| 6 | <b>951.533201</b> | 476.270239      | 934.506652     | 467.756964       | <b>933.522636</b> | 467.264956       | D    | <b>262.139747</b> | 131.573511      | 245.113198     | 123.060237       | <b>244.129182</b> | 122.568229       | 2 |
| 7 |                   |                 |                |                  |                   |                  | K    | <b>147.112804</b> | 74.060040       | 130.086255     | 65.546765        |                   |                  | 1 |

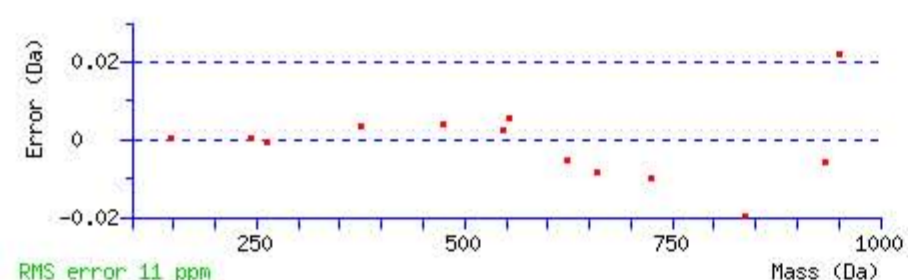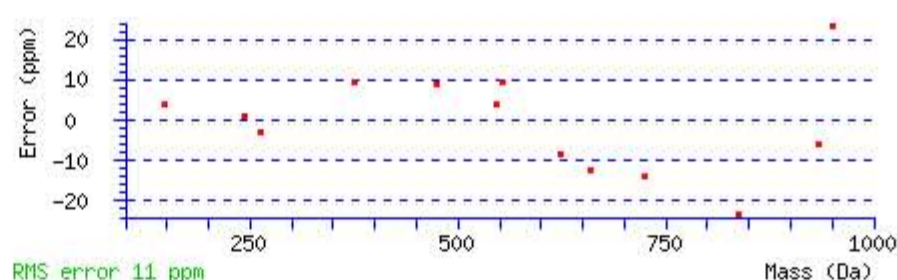

NCBI BLAST search of **QLAVLDK**

(Parameters: blastp, nr protein database, expect=20000, no filter, PAM30)

Other BLAST [web gateways](#)

All matches to this query

| Score | Mr(calc):   | Delta     | Sequence                   |
|-------|-------------|-----------|----------------------------|
| 25.9  | 1096.631439 | -0.007571 | <a href="#">QLAVLDK</a>    |
| 11.2  | 1096.624054 | -0.000186 | <a href="#">KPVDSVPLSR</a> |
| 8.1   | 1096.624023 | -0.000155 | <a href="#">IPRENLLDK</a>  |
| 7.5   | 1096.639297 | -0.015429 | <a href="#">AHVSPLFKAK</a> |
| 2.8   | 1096.612793 | 0.011075  | <a href="#">QPILDAIEAK</a> |
| 1.0   | 1096.631439 | -0.007571 | <a href="#">GILQLDK</a>    |

Mascot: <http://www.matrixscience.com/>



# MASCOT Search Results

## Peptide View

MS/MS Fragmentation of **QSTNAYPDLR**

Found in **PROS\_HUMAN**, Vitamin K-dependent protein S OS=Homo sapiens GN=PROS1 PE=1 SV=1

Match to Query 34942: 1474.724508 from(738.369530,2+) rtinseconds(1746) index(54126)

Title: Locus:1.1.1.3094.16 File:"2013-07-02 CLN FXIII 30 min 2nd F 4.wiff"

Data file C:\Program Files (x86)\Matrix Science\Mascot Daemon\mgf\2 FXIII 30 min 2nd\mascot\_daemon\_merge.mgf

Click mouse within plot area to zoom in by factor of two about that point

Or, Plot from  to  Da

Label all possible matches  Label matches used for scoring

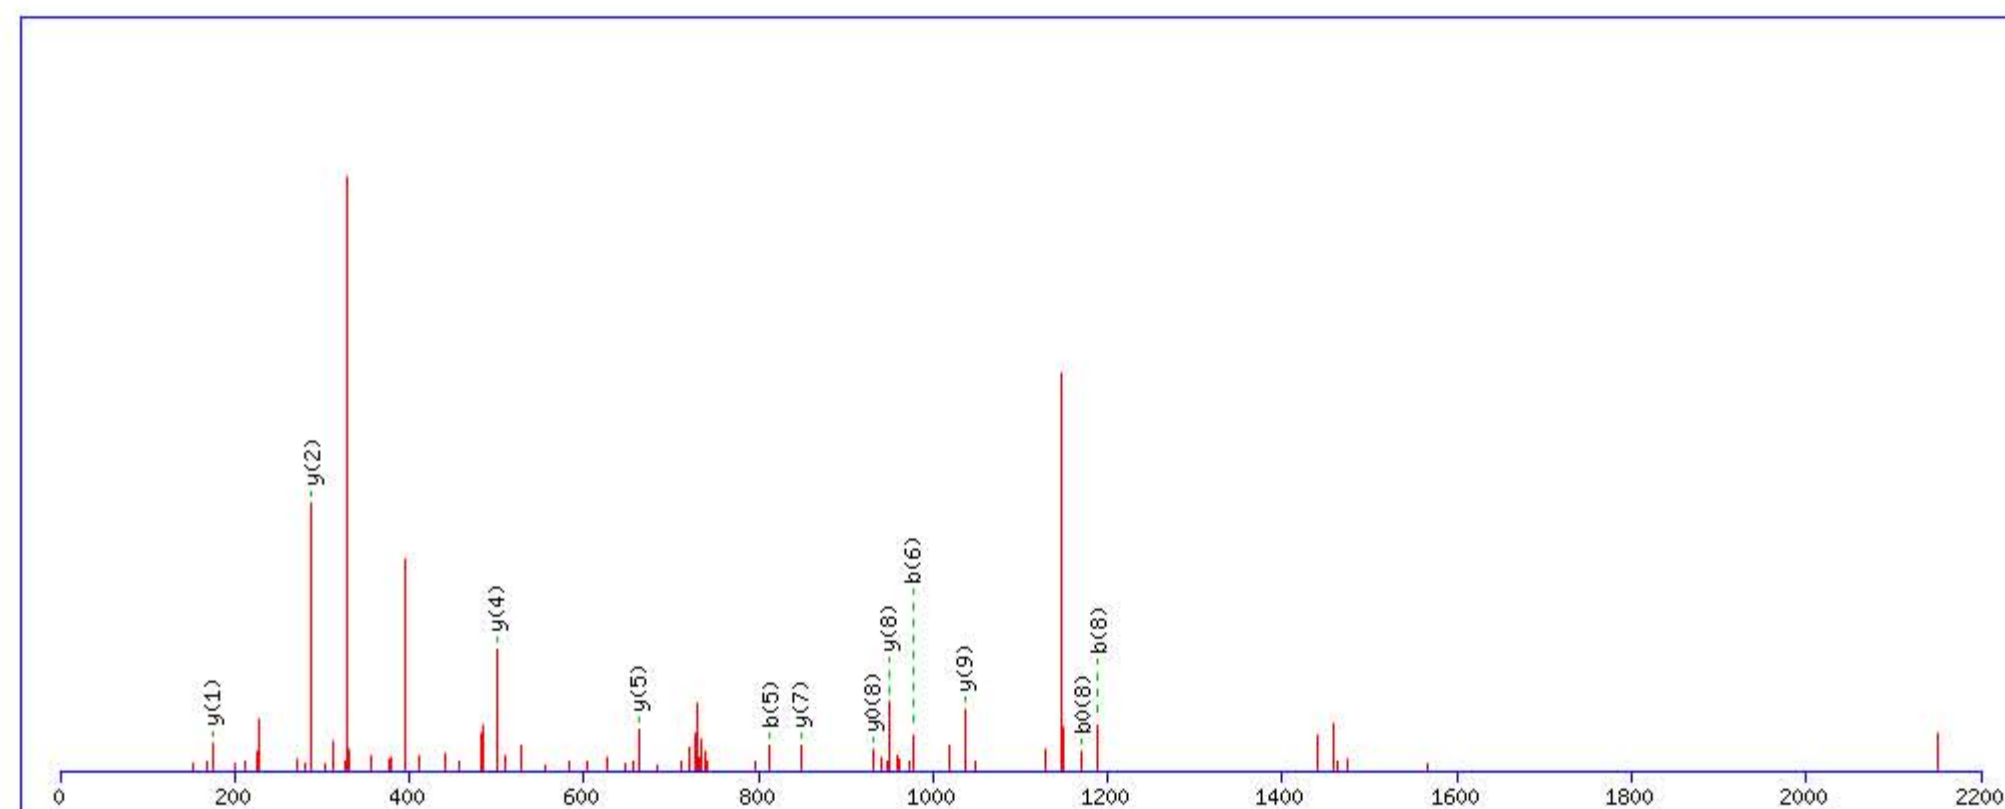

Monoisotopic mass of neutral peptide  $M_r(\text{calc})$ : 1474.723831

Fixed modifications: Carbamidomethyl (C) (apply to specified residues or termini only)

Variable modifications:

Q1 : Biotin:Thermo-21345 (Q)

Ions Score: 41 Expect: 0.0013

Matches : 12/102 fragment ions using 25 most intense peaks [\(help\)](#)

| #  | b           | b <sup>++</sup> | b <sup>*</sup> | b <sup>*++</sup> | b <sup>0</sup> | b <sup>0++</sup> | Seq. | y           | y <sup>++</sup> | y <sup>*</sup> | y <sup>*++</sup> | y <sup>0</sup> | y <sup>0++</sup> | #  |
|----|-------------|-----------------|----------------|------------------|----------------|------------------|------|-------------|-----------------|----------------|------------------|----------------|------------------|----|
| 1  | 440.232602  | 220.619939      | 423.206053     | 212.106664       |                |                  | Q    |             |                 |                |                  |                |                  | 10 |
| 2  | 527.264630  | 264.135953      | 510.238081     | 255.622679       | 509.254065     | 255.130671       | S    | 1036.505800 | 518.756538      | 1019.479251    | 510.243263       | 1018.495235    | 509.751255       | 9  |
| 3  | 628.312309  | 314.659793      | 611.285760     | 306.146518       | 610.301744     | 305.654510       | T    | 949.473772  | 475.240524      | 932.447223     | 466.727249       | 931.463207     | 466.235241       | 8  |
| 4  | 742.355236  | 371.681256      | 725.328687     | 363.167982       | 724.344671     | 362.675974       | N    | 848.426093  | 424.716684      | 831.399544     | 416.203410       | 830.415528     | 415.711402       | 7  |
| 5  | 813.392350  | 407.199813      | 796.365801     | 398.686538       | 795.381785     | 398.194530       | A    | 734.383166  | 367.695221      | 717.356617     | 359.181946       | 716.372601     | 358.689938       | 6  |
| 6  | 976.455679  | 488.731477      | 959.429130     | 480.218203       | 958.445114     | 479.726195       | Y    | 663.346052  | 332.176664      | 646.319503     | 323.663389       | 645.335487     | 323.171382       | 5  |
| 7  | 1073.508443 | 537.257860      | 1056.481894    | 528.744585       | 1055.497878    | 528.252577       | P    | 500.282723  | 250.644999      | 483.256174     | 242.131725       | 482.272158     | 241.639717       | 4  |
| 8  | 1188.535386 | 594.771331      | 1171.508837    | 586.258057       | 1170.524821    | 585.766049       | D    | 403.229959  | 202.118617      | 386.203410     | 193.605343       | 385.219394     | 193.113335       | 3  |
| 9  | 1301.619450 | 651.313363      | 1284.592901    | 642.800089       | 1283.608885    | 642.308080       | L    | 288.203016  | 144.605146      | 271.176467     | 136.091871       |                |                  | 2  |
| 10 |             |                 |                |                  |                |                  | R    | 175.118952  | 88.063114       | 158.092403     | 79.549839        |                |                  | 1  |

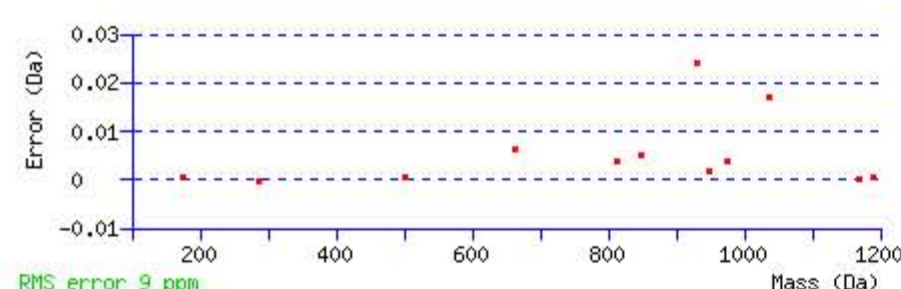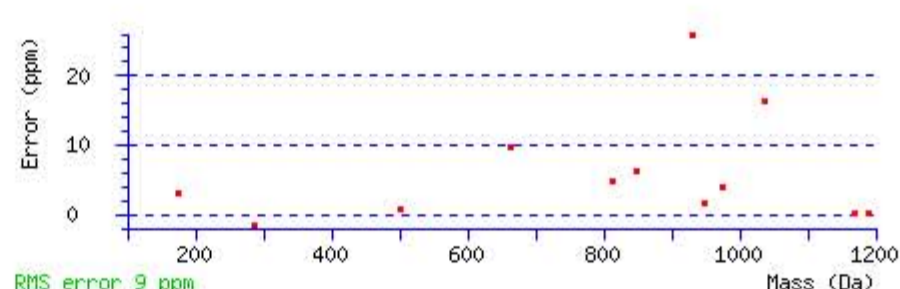

NCBI BLAST search of **QSTNAYPDLR**

(Parameters: blastp, nr protein database, expect=20000, no filter, PAM30)

Other BLAST [web gateways](#)

## All matches to this query

| Score | $M_r(\text{calc})$ : | Delta     | Sequence                        |
|-------|----------------------|-----------|---------------------------------|
| 41.4  | 1474.723831          | 0.000677  | <a href="#">QSTNAYPDLR</a>      |
| 9.9   | 1474.741592          | -0.017084 | <a href="#">SSLEHGSDVYLLR</a>   |
| 9.6   | 1474.744934          | -0.020426 | <a href="#">LSKEELIQNMDR</a>    |
| 9.1   | 1474.721161          | 0.003347  | <a href="#">QSTHGERGHR</a>      |
| 6.2   | 1474.745605          | -0.021097 | <a href="#">EPWEELFSIGLR</a>    |
| 1.8   | 1474.731033          | -0.006525 | <a href="#">RGDGGKMAAAGALER</a> |
| 1.6   | 1474.746307          | -0.021799 | <a href="#">DAVQHERGPR</a>      |
| 0.5   | 1474.726303          | -0.001795 | <a href="#">VQTEKEEKEEAR</a>    |



# MASCOT Search Results

## Peptide View

MS/MS Fragmentation of **SFQTGLFTAAR**

Found in **PROS\_HUMAN**, Vitamin K-dependent protein S OS=Homo sapiens GN=PROS1 PE=1 SV=1

Match to Query 35997: 1508.780408 from(755.397480,2+) rtinseconds(2294) index(57570)

Title: Locus:1.1.1.3284.8 File:"2013-07-02 CLN FXIII 30 min 2nd F 4.wiff"

Data file C:\Program Files (x86)\Matrix Science\Mascot Daemon\mgf2 FXIII 30 min 2nd\mascot\_daemon\_merge.mgf

Click mouse within plot area to zoom in by factor of two about that point

Or, Plot from  to  Da

Label all possible matches  Label matches used for scoring

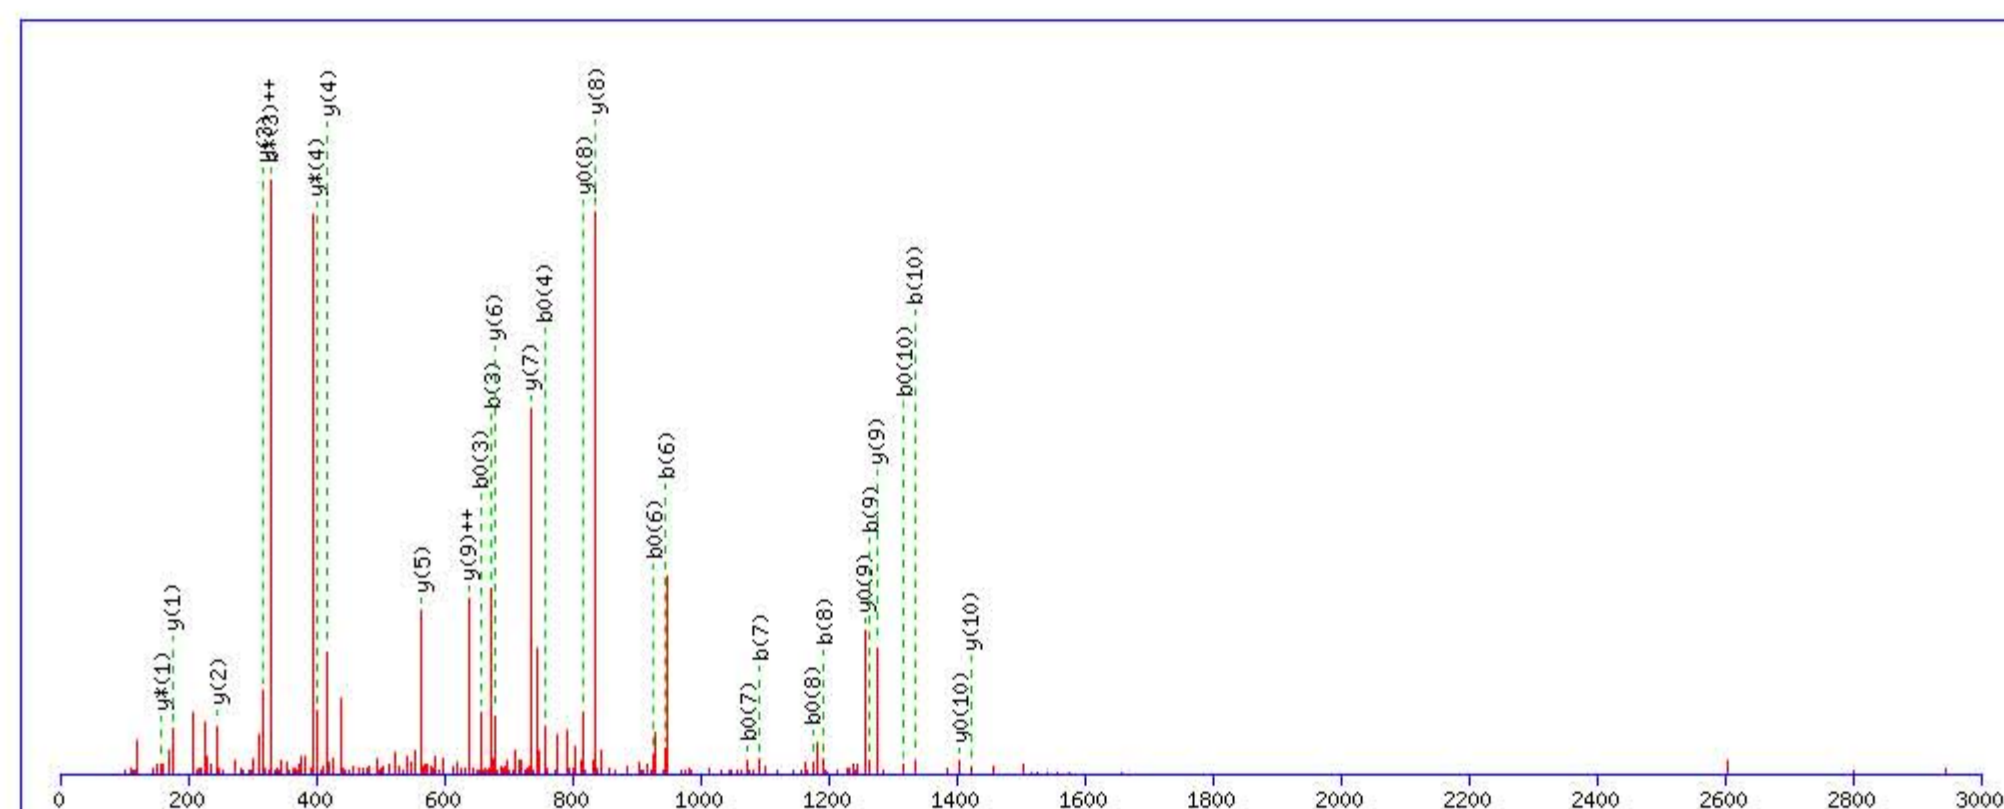

Monoisotopic mass of neutral peptide Mr(calc): 1508.780975

Fixed modifications: Carbamidomethyl (C) (apply to specified residues or termini only)

Variable modifications:

Q3 : Biotin:Thermo-21345 (Q)

Ions Score: 59 Expect: 1.9e-005

Matches : 29/110 fragment ions using 57 most intense peaks [\(help\)](#)

| #  | b           | b <sup>++</sup> | b <sup>*</sup> | b <sup>+++</sup> | b <sup>0</sup> | b <sup>0++</sup> | Seq. | y           | y <sup>++</sup> | y <sup>*</sup> | y <sup>+++</sup> | y <sup>0</sup> | y <sup>0++</sup> | #  |
|----|-------------|-----------------|----------------|------------------|----------------|------------------|------|-------------|-----------------|----------------|------------------|----------------|------------------|----|
| 1  | 88.039304   | 44.523290       |                |                  | 70.028739      | 35.518008        | S    |             |                 |                |                  |                |                  | 11 |
| 2  | 235.107718  | 118.057497      |                |                  | 217.097153     | 109.052214       | F    | 1422.756220 | 711.881748      | 1405.729671    | 703.368474       | 1404.745655    | 702.876465       | 10 |
| 3  | 674.333044  | 337.670160      | 657.306495     | 329.156885       | 656.322479     | 328.664877       | Q    | 1275.687806 | 638.347541      | 1258.661257    | 629.834267       | 1257.677241    | 629.342259       | 9  |
| 4  | 775.380723  | 388.194000      | 758.354174     | 379.680725       | 757.370158     | 379.188717       | T    | 836.462480  | 418.734878      | 819.435931     | 410.221604       | 818.451915     | 409.729596       | 8  |
| 5  | 832.402187  | 416.704732      | 815.375638     | 408.191457       | 814.391622     | 407.699449       | G    | 735.414801  | 368.211039      | 718.388252     | 359.697764       | 717.404236     | 359.205756       | 7  |
| 6  | 945.486251  | 473.246764      | 928.459702     | 464.733489       | 927.475686     | 464.241481       | L    | 678.393337  | 339.700307      | 661.366788     | 331.187032       | 660.382772     | 330.695024       | 6  |
| 7  | 1092.554665 | 546.780971      | 1075.528116    | 538.267696       | 1074.544100    | 537.775688       | F    | 565.309273  | 283.158275      | 548.282724     | 274.645000       | 547.298708     | 274.152992       | 5  |
| 8  | 1193.602344 | 597.304810      | 1176.575795    | 588.791536       | 1175.591779    | 588.299528       | T    | 418.240859  | 209.624067      | 401.214310     | 201.110793       | 400.230294     | 200.618785       | 4  |
| 9  | 1264.639458 | 632.823367      | 1247.612909    | 624.310093       | 1246.628893    | 623.818085       | A    | 317.193180  | 159.100228      | 300.166631     | 150.586953       |                |                  | 3  |
| 10 | 1335.676572 | 668.341924      | 1318.650023    | 659.828650       | 1317.666007    | 659.336642       | A    | 246.156066  | 123.581671      | 229.129517     | 115.068396       |                |                  | 2  |
| 11 |             |                 |                |                  |                |                  | R    | 175.118952  | 88.063114       | 158.092403     | 79.549839        |                |                  | 1  |

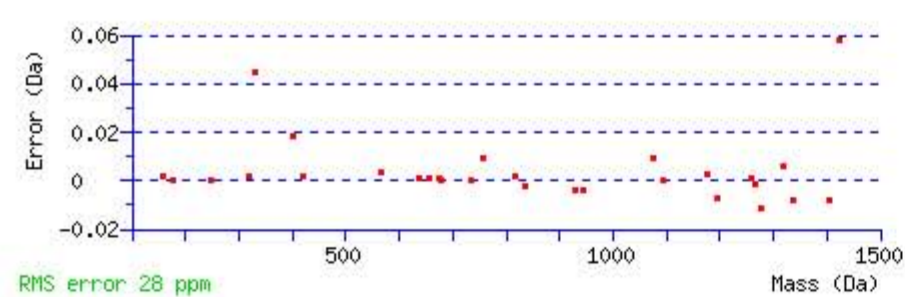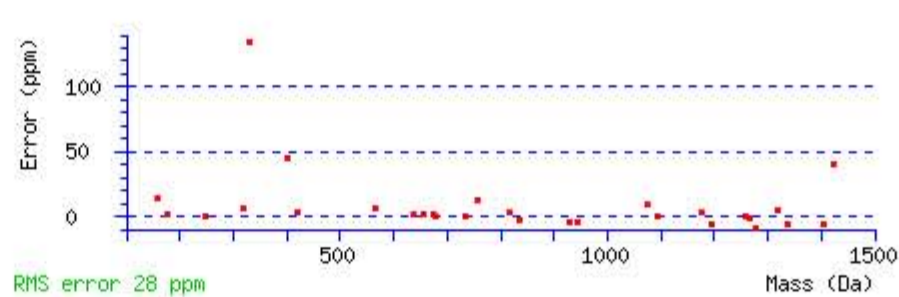

NCBI BLAST search of **SFQTGLFTAAR**

(Parameters: blastp, nr protein database, expect=20000, no filter, PAM30)

Other BLAST [web gateways](#)

All matches to this query

| Score | Mr(calc):   | Delta     | Sequence                       |
|-------|-------------|-----------|--------------------------------|
| 58.7  | 1508.780975 | -0.000567 | <a href="#">SFQTGLFTAAR</a>    |
| 7.9   | 1508.762344 | 0.018064  | <a href="#">EDFVPFTGEKKGR</a>  |
| 4.1   | 1508.798721 | -0.018313 | <a href="#">SSYGVAAPVDFLRK</a> |
| 3.2   | 1508.776932 | 0.003476  | <a href="#">LMGADSLQLFRSR</a>  |
| 1.8   | 1508.776917 | 0.003491  | <a href="#">MYLDLLSQSQRR</a>   |
| 1.8   | 1508.765686 | 0.014722  | <a href="#">TKAFQIMQEELR</a>   |
| 1.6   | 1508.759201 | 0.021207  | <a href="#">HPVTTQVCIMPAR</a>  |
| 1.3   | 1508.759186 | 0.021222  | <a href="#">QVHCGSEILR</a>     |
| 1.3   | 1508.759171 | 0.021237  | <a href="#">SQMITYQRR</a>      |
| 1.2   | 1508.780960 | -0.000552 | <a href="#">TQPPPENLFR</a>     |



# MASCOT Search Results

## Peptide View

MS/MS Fragmentation of **IETISHEDLQR**

Found in **PROS\_HUMAN**, Vitamin K-dependent protein S OS=Homo sapiens GN=PROS1 PE=1 SV=1

Match to Query 41153: 1650.831702 from(551.284510,3+) rtinseconds(1625) index(53318)

Title: Locus:1.1.1.3052.9 File:"2013-07-02 CLN FXIII 30 min 2nd F 4.wiff"

Data file C:\Program Files (x86)\Matrix Science\Mascot Daemon\mgf2 FXIII 30 min 2nd\mascot\_daemon\_merge.mgf

Click mouse within plot area to zoom in by factor of two about that point

Or, Plot from  to  Da

Label all possible matches  Label matches used for scoring

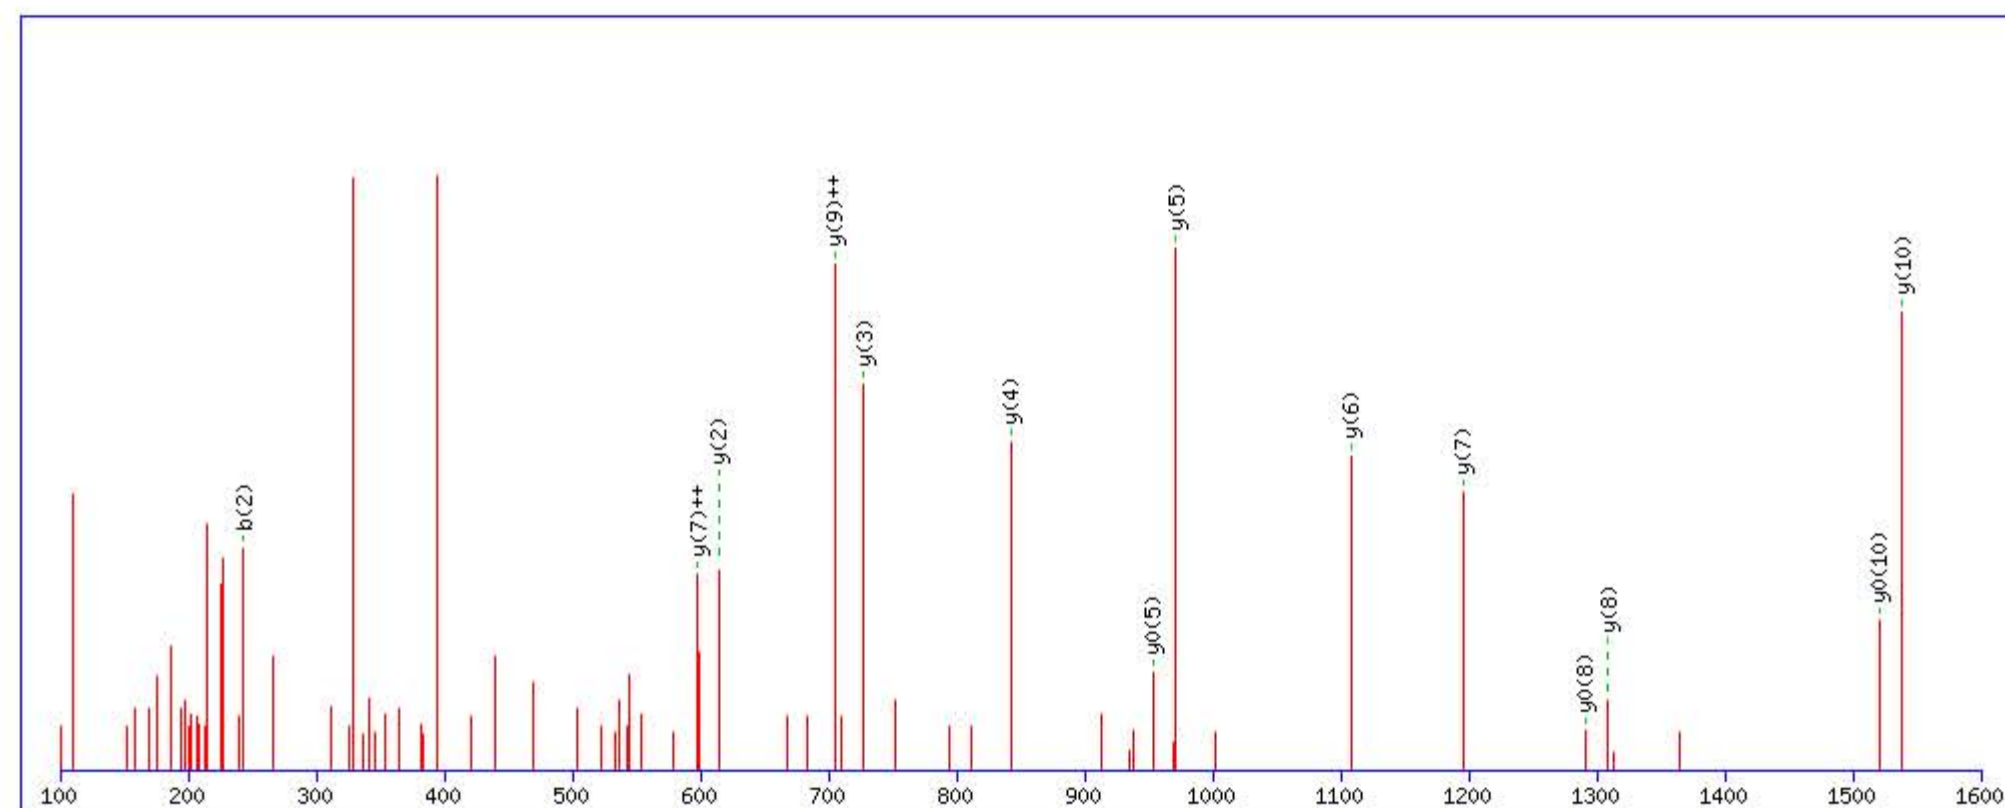

Monoisotopic mass of neutral peptide Mr(calc): 1650.839920

Fixed modifications: Carbamidomethyl (C) (apply to specified residues or termini only)

Variable modifications:

Q10 : Biotin:Thermo-21345 (Q)

Ions Score: 46 Expect: 7.2e-005

Matches : 14/94 fragment ions using 26 most intense peaks [\(help\)](#)

| #  | b           | b <sup>++</sup> | b <sup>+</sup> | b <sup>*++</sup> | b <sup>0</sup> | b <sup>0++</sup> | Seq. | y           | y <sup>++</sup> | y <sup>+</sup> | y <sup>*++</sup> | y <sup>0</sup> | y <sup>0++</sup> | #  |
|----|-------------|-----------------|----------------|------------------|----------------|------------------|------|-------------|-----------------|----------------|------------------|----------------|------------------|----|
| 1  | 114.091340  | 57.549308       |                |                  |                |                  | I    |             |                 |                |                  |                |                  | 11 |
| 2  | 243.133933  | 122.070605      |                |                  | 225.123368     | 113.065322       | E    | 1538.763154 | 769.885215      | 1521.736605    | 761.371941       | 1520.752589    | 760.879933       | 10 |
| 3  | 344.181612  | 172.594444      |                |                  | 326.171047     | 163.589162       | T    | 1409.720561 | 705.363919      | 1392.694012    | 696.850644       | 1391.709996    | 696.358636       | 9  |
| 4  | 457.265676  | 229.136476      |                |                  | 439.255111     | 220.131194       | I    | 1308.672882 | 654.840079      | 1291.646333    | 646.326805       | 1290.662317    | 645.834797       | 8  |
| 5  | 544.297704  | 272.652490      |                |                  | 526.287139     | 263.647208       | S    | 1195.588818 | 598.298047      | 1178.562269    | 589.784773       | 1177.578253    | 589.292764       | 7  |
| 6  | 681.356616  | 341.181946      |                |                  | 663.346051     | 332.176664       | H    | 1108.556790 | 554.782033      | 1091.530241    | 546.268759       | 1090.546225    | 545.776751       | 6  |
| 7  | 810.399209  | 405.703243      |                |                  | 792.388644     | 396.697960       | E    | 971.497878  | 486.252577      | 954.471329     | 477.739303       | 953.487313     | 477.247295       | 5  |
| 8  | 925.426152  | 463.216714      |                |                  | 907.415587     | 454.211432       | D    | 842.455285  | 421.731281      | 825.428736     | 413.218006       | 824.444720     | 412.725998       | 4  |
| 9  | 1038.510216 | 519.758746      |                |                  | 1020.499651    | 510.753463       | L    | 727.428342  | 364.217809      | 710.401793     | 355.704535       |                |                  | 3  |
| 10 | 1477.735542 | 739.371409      | 1460.708993    | 730.858135       | 1459.724977    | 730.366127       | Q    | 614.344278  | 307.675777      | 597.317729     | 299.162503       |                |                  | 2  |
| 11 |             |                 |                |                  |                |                  | R    | 175.118952  | 88.063114       | 158.092403     | 79.549839        |                |                  | 1  |

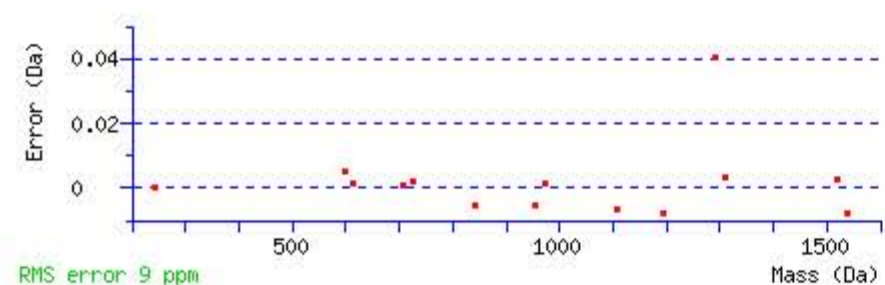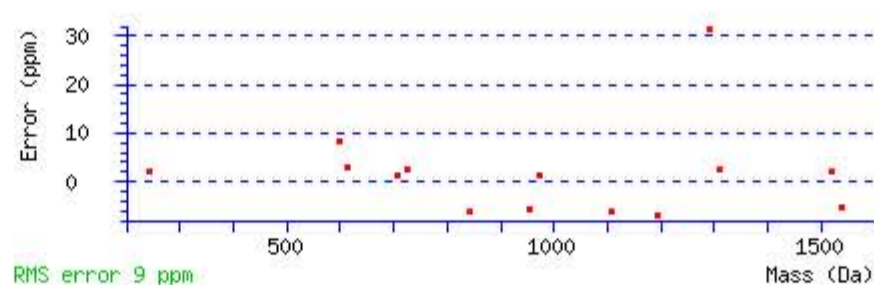

NCBI BLAST search of [IETISHEDLQR](#)

(Parameters: blastp, nr protein database, expect=20000, no filter, PAM30)

Other BLAST [web gateways](#)

All matches to this query

| Score | Mr(calc):   | Delta     | Sequence                    |
|-------|-------------|-----------|-----------------------------|
| 45.7  | 1650.839920 | -0.008218 | <a href="#">IETISHEDLQR</a> |
| 1.5   | 1650.833389 | -0.001687 | <a href="#">QQLEHIMATNR</a> |

Mascot: <http://www.matrixscience.com/>



# MASCOT Search Results

## Peptide View

MS/MS Fragmentation of **IQALSLCSDQQSHLEFR**

Found in **PROS\_HUMAN**, Vitamin K-dependent protein S OS=Homo sapiens GN=PROS1 PE=1 SV=1

Match to Query 56795: 2342.136942 from(781.719590,3+) rtinseconds(2174) index(72274)

Title: Locus:1.1.1.3290.26 File:"2013-07-02 CLN FXIII 30 min 2nd FT.wiff"

Data file C:\Program Files (x86)\Matrix Science\Mascot Daemon\mgf2 FXIII 30 min 2nd\mascot\_daemon\_merge.mgf

Click mouse within plot area to zoom in by factor of two about that point

Or, Plot from  to  Da

Label all possible matches  Label matches used for scoring

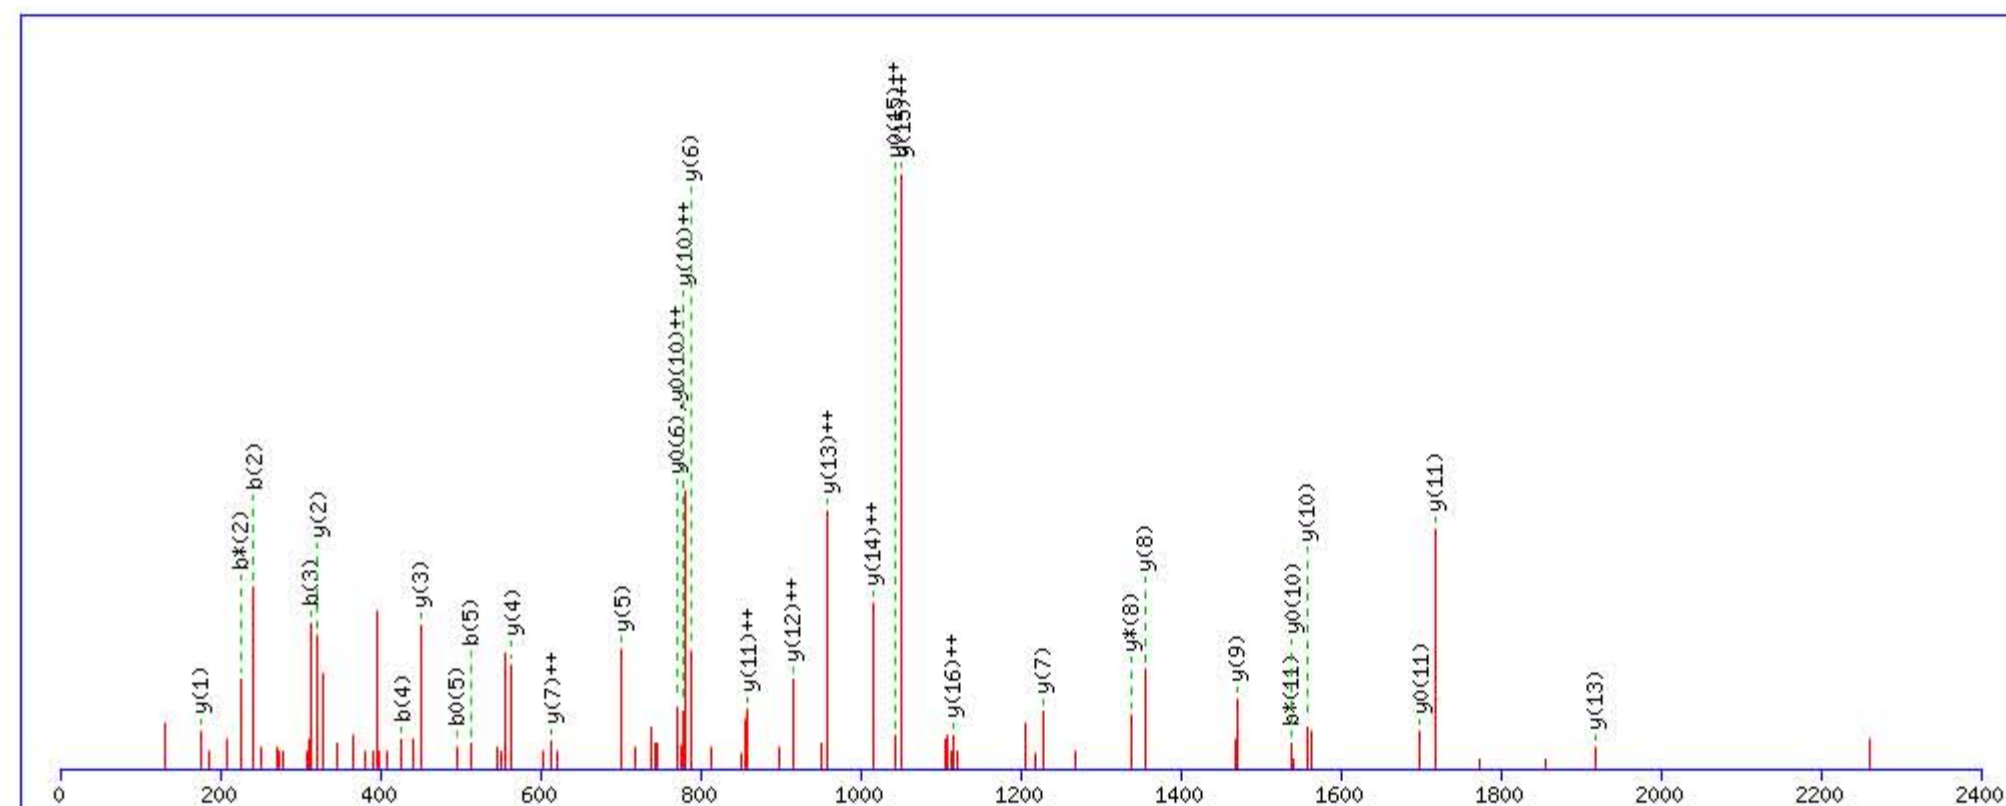

Monoisotopic mass of neutral peptide Mr(calc): 2342.151108

Fixed modifications: Carbamidomethyl (C) (apply to specified residues or termini only)

Variable modifications:

Q11 : Biotin:Thermo-21345 (Q)

Ions Score: 74 Expect: 1.1e-006

Matches : 33/178 fragment ions using 57 most intense peaks [\(help\)](#)

| #  | b                 | b <sup>++</sup> | b <sup>+</sup>     | b <sup>+++</sup> | b <sup>0</sup>    | b <sup>0++</sup> | Seq. | y                  | y <sup>++</sup>    | y <sup>+</sup>     | y <sup>+++</sup> | y <sup>0</sup>     | y <sup>0++</sup>   | #  |
|----|-------------------|-----------------|--------------------|------------------|-------------------|------------------|------|--------------------|--------------------|--------------------|------------------|--------------------|--------------------|----|
| 1  | 114.091340        | 57.549308       |                    |                  |                   |                  | I    |                    |                    |                    |                  |                    |                    | 17 |
| 2  | <b>242.149918</b> | 121.578597      | <b>225.123369</b>  | 113.065323       |                   |                  | Q    | 2230.074335        | <b>1115.540805</b> | 2213.047786        | 1107.027531      | 2212.063770        | 1106.535523        | 16 |
| 3  | <b>313.187032</b> | 157.097154      | 296.160483         | 148.583879       |                   |                  | A    | 2102.015757        | <b>1051.511516</b> | 2084.989208        | 1042.998242      | 2084.005192        | <b>1042.506234</b> | 15 |
| 4  | <b>426.271096</b> | 213.639186      | 409.244547         | 205.125912       |                   |                  | L    | 2030.978643        | <b>1015.992959</b> | 2013.952094        | 1007.479685      | 2012.968078        | 1006.987677        | 14 |
| 5  | <b>513.303124</b> | 257.155200      | 496.276575         | 248.641926       | <b>495.292559</b> | 248.149918       | S    | <b>1917.894579</b> | <b>959.450927</b>  | 1900.868030        | 950.937653       | 1899.884014        | 950.445645         | 13 |
| 6  | 626.387188        | 313.697232      | 609.360639         | 305.183958       | 608.376623        | 304.691950       | L    | 1830.862551        | <b>915.934913</b>  | 1813.836002        | 907.421639       | 1812.851986        | 906.929631         | 12 |
| 7  | 786.417837        | 393.712557      | 769.391288         | 385.199282       | 768.407272        | 384.707274       | C    | <b>1717.778487</b> | <b>859.392881</b>  | 1700.751938        | 850.879607       | <b>1699.767922</b> | 850.387599         | 11 |
| 8  | 873.449865        | 437.228571      | 856.423316         | 428.715296       | 855.439300        | 428.223288       | S    | <b>1557.747838</b> | <b>779.377557</b>  | 1540.721289        | 770.864282       | <b>1539.737273</b> | <b>770.372274</b>  | 10 |
| 9  | 988.476808        | 494.742042      | 971.450259         | 486.228768       | 970.466243        | 485.736760       | D    | <b>1470.715810</b> | 735.861543         | 1453.689261        | 727.348268       | 1452.705245        | 726.856260         | 9  |
| 10 | 1116.535386       | 558.771331      | 1099.508837        | 550.258057       | 1098.524821       | 549.766049       | Q    | <b>1355.688867</b> | 678.348071         | <b>1338.662318</b> | 669.834797       | 1337.678302        | 669.342789         | 8  |
| 11 | 1555.760712       | 778.383994      | <b>1538.734163</b> | 769.870720       | 1537.750147       | 769.378712       | Q    | <b>1227.630289</b> | <b>614.318782</b>  | 1210.603740        | 605.805508       | 1209.619724        | 605.313500         | 7  |
| 12 | 1642.792740       | 821.900008      | 1625.766191        | 813.386734       | 1624.782175       | 812.894726       | S    | <b>788.404963</b>  | 394.706119         | 771.378414         | 386.192845       | <b>770.394398</b>  | 385.700837         | 6  |
| 13 | 1779.851652       | 890.429464      | 1762.825103        | 881.916190       | 1761.841087       | 881.424182       | H    | <b>701.372935</b>  | 351.190105         | 684.346386         | 342.676831       | 683.362370         | 342.184823         | 5  |
| 14 | 1892.935716       | 946.971496      | 1875.909167        | 938.458222       | 1874.925151       | 937.966213       | L    | <b>564.314023</b>  | 282.660649         | 547.287474         | 274.147375       | 546.303458         | 273.655367         | 4  |
| 15 | 2021.978309       | 1011.492793     | 2004.951760        | 1002.979518      | 2003.967744       | 1002.487510      | E    | <b>451.229959</b>  | 226.118617         | 434.203410         | 217.605343       | 433.219394         | 217.113335         | 3  |
| 16 | 2169.046723       | 1085.026999     | 2152.020174        | 1076.513725      | 2151.036158       | 1076.021717      | F    | <b>322.187366</b>  | 161.597321         | 305.160817         | 153.084046       |                    |                    | 2  |
| 17 |                   |                 |                    |                  |                   |                  | R    | <b>175.118952</b>  | 88.063114          | 158.092403         | 79.549839        |                    |                    | 1  |

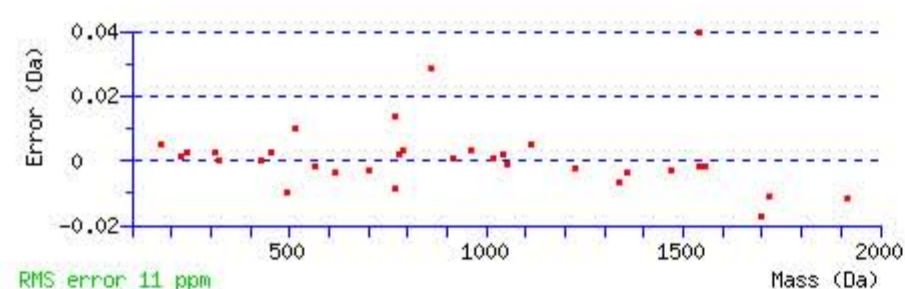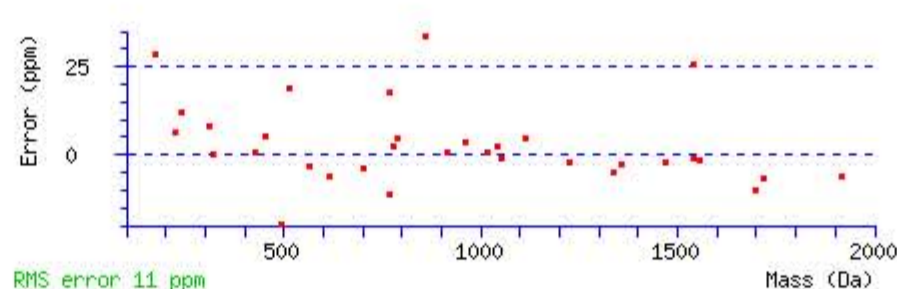

NCBI BLAST search of **IQALSLCSDQQSHLEFR**

(Parameters: blastp, nr protein database, expect=20000, no filter, PAM30)

Other BLAST [web gateways](#)

All matches to this query

| Score | Mr(calc):   | Delta     | Sequence                          |
|-------|-------------|-----------|-----------------------------------|
| 73.7  | 2342.151108 | -0.014166 | <a href="#">IQALSLCSDQQSHLEFR</a> |
| 69.9  | 2342.151108 | -0.014166 | <a href="#">IQALSLCSDQQSHLEFR</a> |
| 0.7   | 2342.151108 | -0.014166 | <a href="#">IQALSLCSDQQSHLEFR</a> |

Mascot: <http://www.matrixscience.com/>



# Mascot Search Results

## Peptide View

MS/MS Fragmentation of **TDGCQHFCLPGQESYTCSCAQGYR**

Found in **PROZ\_HUMAN**, Vitamin K-dependent protein Z OS=Homo sapiens GN=PROZ PE=1 SV=2

Match to Query 67170: 3192.301302 from(1065.107710,3+) rtinseconds(2030) index(55972)

Title: Locus:1.1.1.3192.13 File:"2013-07-02 CLN FXIII 30 min 2nd F 4.wiff"

Data file C:\Program Files (x86)\Matrix Science\Mascot Daemon\mgf2 FXIII 30 min 2nd\mascot\_daemon\_merge.mgf

Click mouse within plot area to zoom in by factor of two about that point

Or, Plot from  to  Da

Label all possible matches  Label matches used for scoring

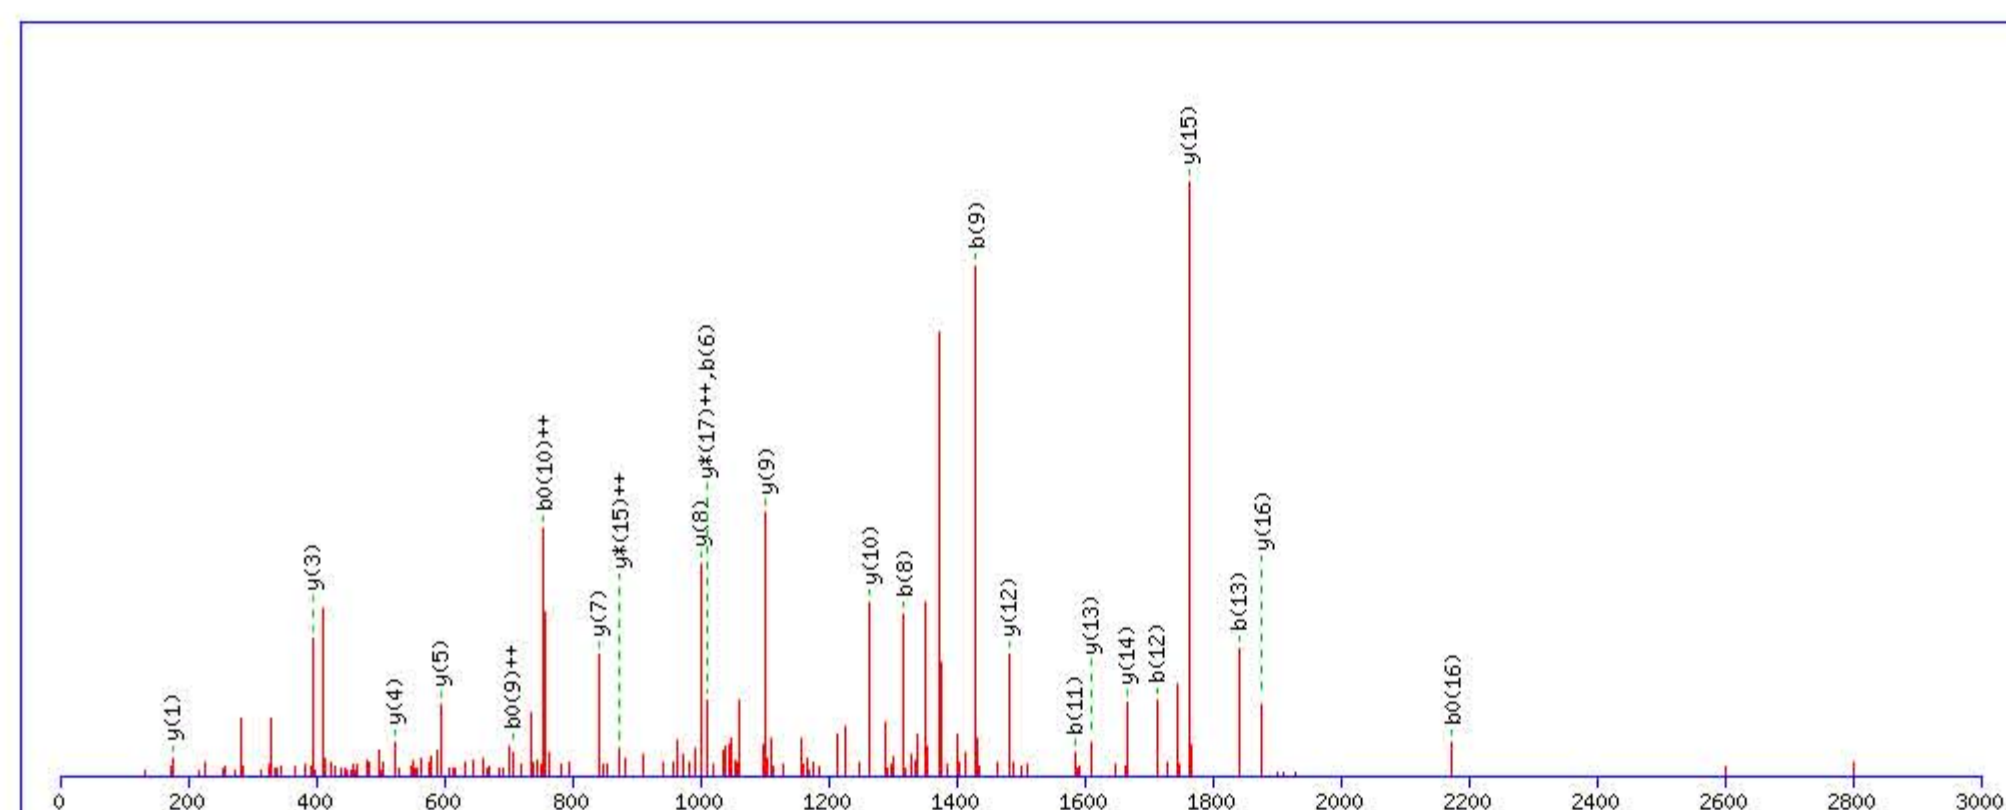

Monoisotopic mass of neutral peptide Mr(calc): 3192.298050

Fixed modifications: Carbamidomethyl (C) (apply to specified residues or termini only)

Variable modifications:

Q5 : Biotin:Thermo-21345 (Q)

Ions Score: 77 Expect: 1.9e-008

Matches : 24/256 fragment ions using 39 most intense peaks [\(help\)](#)

| #  | b                  | b <sup>++</sup> | b <sup>+</sup> | b <sup>+++</sup> | b <sup>0</sup>     | b <sup>0++</sup>  | Seq. | y                  | y <sup>++</sup> | y <sup>+</sup> | y <sup>+++</sup>   | y <sup>0</sup> | y <sup>0++</sup> | #  |
|----|--------------------|-----------------|----------------|------------------|--------------------|-------------------|------|--------------------|-----------------|----------------|--------------------|----------------|------------------|----|
| 1  | 102.054955         | 51.531116       |                |                  | 84.044390          | 42.525833         | T    |                    |                 |                |                    |                |                  | 24 |
| 2  | 217.081898         | 109.044587      |                |                  | 199.071333         | 100.039304        | D    | 3092.257619        | 1546.632447     | 3075.231070    | 1538.119173        | 3074.247054    | 1537.627165      | 23 |
| 3  | 274.103362         | 137.555319      |                |                  | 256.092797         | 128.550037        | G    | 2977.230676        | 1489.118976     | 2960.204127    | 1480.605701        | 2959.220111    | 1480.113693      | 22 |
| 4  | 434.134011         | 217.570644      |                |                  | 416.123446         | 208.565361        | C    | 2920.209212        | 1460.608244     | 2903.182663    | 1452.094969        | 2902.198647    | 1451.602961      | 21 |
| 5  | 873.359337         | 437.183307      | 856.332788     | 428.670032       | 855.348772         | 428.178024        | Q    | 2760.178563        | 1380.592919     | 2743.152014    | 1372.079645        | 2742.167998    | 1371.587637      | 20 |
| 6  | <b>1010.418249</b> | 505.712763      | 993.391700     | 497.199488       | 992.407684         | 496.707480        | H    | 2320.953237        | 1160.980256     | 2303.926688    | 1152.466982        | 2302.942672    | 1151.974974      | 19 |
| 7  | 1157.486663        | 579.246970      | 1140.460114    | 570.733695       | 1139.476098        | 570.241687        | F    | 2183.894325        | 1092.450800     | 2166.867776    | 1083.937526        | 2165.883760    | 1083.445518      | 18 |
| 8  | <b>1317.517312</b> | 659.262294      | 1300.490763    | 650.749020       | 1299.506747        | 650.257012        | C    | 2036.825911        | 1018.916594     | 2019.799362    | <b>1010.403319</b> | 2018.815346    | 1009.911311      | 17 |
| 9  | <b>1430.601376</b> | 715.804326      | 1413.574827    | 707.291052       | 1412.590811        | <b>706.799044</b> | L    | <b>1876.795262</b> | 938.901269      | 1859.768713    | 930.387994         | 1858.784697    | 929.895986       | 16 |
| 10 | 1527.654140        | 764.330708      | 1510.627591    | 755.817434       | 1509.643575        | <b>755.325426</b> | P    | <b>1763.711198</b> | 882.359237      | 1746.684649    | <b>873.845963</b>  | 1745.700633    | 873.353954       | 15 |
| 11 | <b>1584.675604</b> | 792.841440      | 1567.649055    | 784.328166       | 1566.665039        | 783.836158        | G    | <b>1666.658434</b> | 833.832855      | 1649.631885    | 825.319581         | 1648.647869    | 824.827572       | 14 |
| 12 | <b>1712.734182</b> | 856.870729      | 1695.707633    | 848.357455       | 1694.723617        | 847.865446        | Q    | <b>1609.636970</b> | 805.322123      | 1592.610421    | 796.808849         | 1591.626405    | 796.316841       | 13 |
| 13 | <b>1841.776775</b> | 921.392026      | 1824.750226    | 912.878751       | 1823.766210        | 912.386743        | E    | <b>1481.578392</b> | 741.292834      | 1464.551843    | 732.779560         | 1463.567827    | 732.287552       | 12 |
| 14 | 1928.808803        | 964.908040      | 1911.782254    | 956.394765       | 1910.798238        | 955.902757        | S    | 1352.535799        | 676.771538      | 1335.509250    | 668.258263         | 1334.525234    | 667.766255       | 11 |
| 15 | 2091.872132        | 1046.439704     | 2074.845583    | 1037.926429      | 2073.861567        | 1037.434421       | Y    | <b>1265.503771</b> | 633.255523      | 1248.477222    | 624.742249         | 1247.493206    | 624.250241       | 10 |
| 16 | 2192.919811        | 1096.963543     | 2175.893262    | 1088.450269      | <b>2174.909246</b> | 1087.958261       | T    | <b>1102.440442</b> | 551.723859      | 1085.413893    | 543.210584         | 1084.429877    | 542.718576       | 9  |
| 17 | 2352.950460        | 1176.978868     | 2335.923911    | 1168.465593      | 2334.939895        | 1167.973585       | C    | <b>1001.392763</b> | 501.200020      | 984.366214     | 492.686745         | 983.382198     | 492.194737       | 8  |
| 18 | 2439.982488        | 1220.494882     | 2422.955939    | 1211.981607      | 2421.971923        | 1211.489599       | S    | <b>841.362114</b>  | 421.184695      | 824.335565     | 412.671421         | 823.351549     | 412.179413       | 7  |
| 19 | 2600.013137        | 1300.510206     | 2582.986588    | 1291.996932      | 2582.002572        | 1291.504924       | C    | 754.330086         | 377.668681      | 737.303537     | 369.155407         |                |                  | 6  |
| 20 | 2671.050251        | 1336.028763     | 2654.023702    | 1327.515489      | 2653.039686        | 1327.023481       | A    | <b>594.299437</b>  | 297.653357      | 577.272888     | 289.140082         |                |                  | 5  |
| 21 | 2799.108829        | 1400.058052     | 2782.082280    | 1391.544778      | 2781.098264        | 1391.052770       | Q    | <b>523.262323</b>  | 262.134800      | 506.235774     | 253.621525         |                |                  | 4  |
| 22 | 2856.130293        | 1428.568784     | 2839.103744    | 1420.055510      | 2838.119728        | 1419.563502       | G    | <b>395.203745</b>  | 198.105510      | 378.177196     | 189.592236         |                |                  | 3  |
| 23 | 3019.193622        | 1510.100449     | 3002.167073    | 1501.587174      | 3001.183057        | 1501.095166       | Y    | 338.182281         | 169.594778      | 321.155732     | 161.081504         |                |                  | 2  |
| 24 |                    |                 |                |                  |                    |                   | R    | <b>175.118952</b>  | 88.063114       | 158.092403     | 79.549839          |                |                  | 1  |

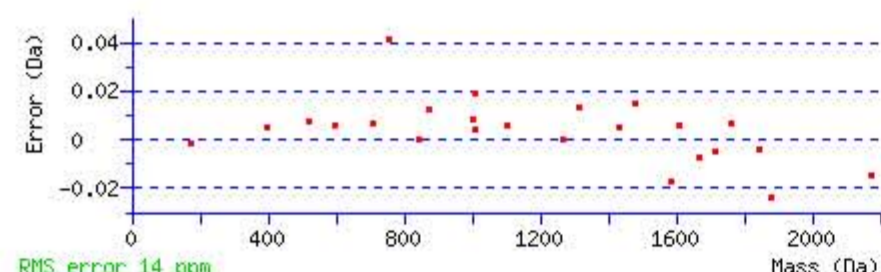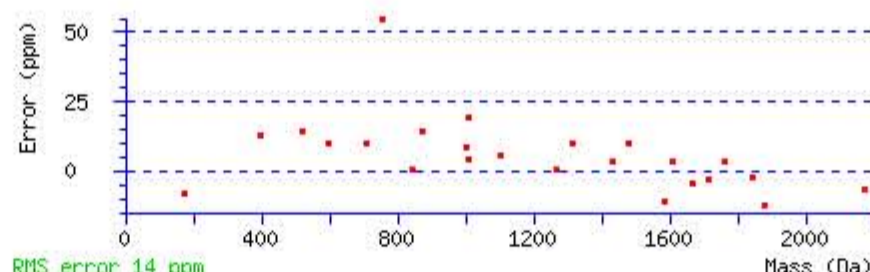

NCBI BLAST search of **TDGCQHFCLPGQESYTCSCAQGYR**

(Parameters: blastp, nr protein database, expect=20000, no filter, PAM30)

Other BLAST [web gateways](#)

All matches to this query

| Score | Mr(calc):   | Delta    | Sequence                                 |
|-------|-------------|----------|------------------------------------------|
| 77.3  | 3192.298050 | 0.003252 | <a href="#">TDGCQHFCLPGQESYTCSCAQGYR</a> |
| 34.6  | 3192.298050 | 0.003252 | <a href="#">TDGCQHFCLPGQESYTCSCAQGYR</a> |



# MASCOT SEARCH RESULTS

## Peptide View

MS/MS Fragmentation of **GQYCYELDEK**

Found in **VTNC\_HUMAN**, Vitronectin OS=Homo sapiens GN=VTN PE=1 SV=1

Match to Query 39408: 1614.706308 from(808.360430,2+) rtinseconds(1861) index(54727)

Title: Locus:1.1.1.3134.17 File:"2013-07-02 CLN FXIII 30 min 2nd F 4.wiff"

Data file C:\Program Files (x86)\Matrix Science\Mascot Daemon\mgf2 FXIII 30 min 2nd\mascot\_daemon\_merge.mgf

Click mouse within plot area to zoom in by factor of two about that point

Or, Plot from  to  Da

Label all possible matches  Label matches used for scoring

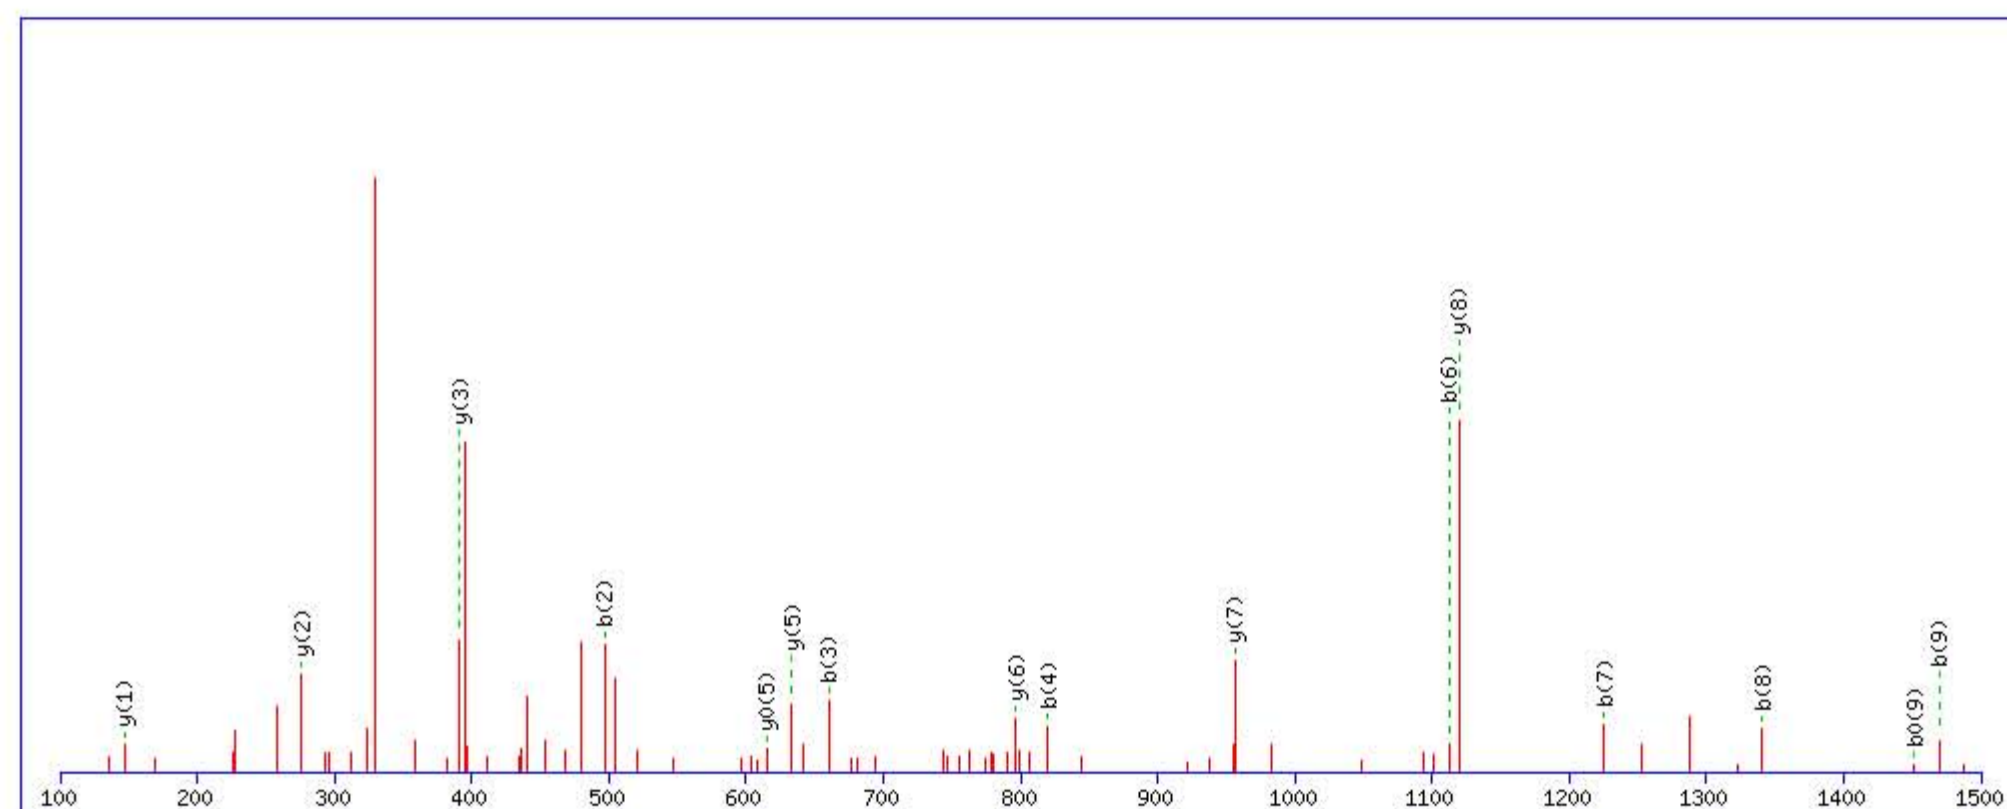

Monoisotopic mass of neutral peptide Mr(calc): 1614.705795

Fixed modifications: Carbamidomethyl (C) (apply to specified residues or termini only)

Variable modifications:

Q2 : Biotin:Thermo-21345 (Q)

Ions Score: 46 Expect: 9e-005

Matches : 16/94 fragment ions using 26 most intense peaks ([help](#))

| #  | b                  | b <sup>++</sup> | b <sup>*</sup> | b <sup>*++</sup> | b <sup>0</sup>     | b <sup>0++</sup> | Seq.     | y                  | y <sup>++</sup> | y <sup>*</sup> | y <sup>*++</sup> | y <sup>0</sup>    | y <sup>0++</sup> | #         |
|----|--------------------|-----------------|----------------|------------------|--------------------|------------------|----------|--------------------|-----------------|----------------|------------------|-------------------|------------------|-----------|
| 1  | 58.028740          | 29.518008       |                |                  |                    |                  | <b>G</b> |                    |                 |                |                  |                   |                  | <b>10</b> |
| 2  | <b>497.254066</b>  | 249.130671      | 480.227517     | 240.617397       |                    |                  | <b>Q</b> | 1558.691630        | 779.849453      | 1541.665081    | 771.336179       | 1540.681065       | 770.844171       | <b>9</b>  |
| 3  | <b>660.317395</b>  | 330.662336      | 643.290846     | 322.149061       |                    |                  | <b>Y</b> | <b>1119.466304</b> | 560.236790      | 1102.439755    | 551.723516       | 1101.455739       | 551.231508       | <b>8</b>  |
| 4  | <b>820.348044</b>  | 410.677660      | 803.321495     | 402.164386       |                    |                  | <b>C</b> | <b>956.402975</b>  | 478.705126      | 939.376426     | 470.191851       | 938.392410        | 469.699843       | <b>7</b>  |
| 5  | 983.411373         | 492.209325      | 966.384824     | 483.696050       |                    |                  | <b>Y</b> | <b>796.372326</b>  | 398.689801      | 779.345777     | 390.176527       | 778.361761        | 389.684519       | <b>6</b>  |
| 6  | <b>1112.453966</b> | 556.730621      | 1095.427417    | 548.217347       | 1094.443401        | 547.725339       | <b>E</b> | <b>633.308997</b>  | 317.158137      | 616.282448     | 308.644862       | <b>615.298432</b> | 308.152854       | <b>5</b>  |
| 7  | <b>1225.538030</b> | 613.272653      | 1208.511481    | 604.759379       | 1207.527465        | 604.267371       | <b>L</b> | 504.266404         | 252.636840      | 487.239855     | 244.123566       | 486.255839        | 243.631558       | <b>4</b>  |
| 8  | <b>1340.564973</b> | 670.786125      | 1323.538424    | 662.272850       | 1322.554408        | 661.780842       | <b>D</b> | <b>391.182340</b>  | 196.094808      | 374.155791     | 187.581534       | 373.171775        | 187.089526       | <b>3</b>  |
| 9  | <b>1469.607566</b> | 735.307421      | 1452.581017    | 726.794147       | <b>1451.597001</b> | 726.302139       | <b>E</b> | <b>276.155397</b>  | 138.581337      | 259.128848     | 130.068062       | 258.144832        | 129.576054       | <b>2</b>  |
| 10 |                    |                 |                |                  |                    |                  | <b>K</b> | <b>147.112804</b>  | 74.060040       | 130.086255     | 65.546765        |                   |                  | <b>1</b>  |

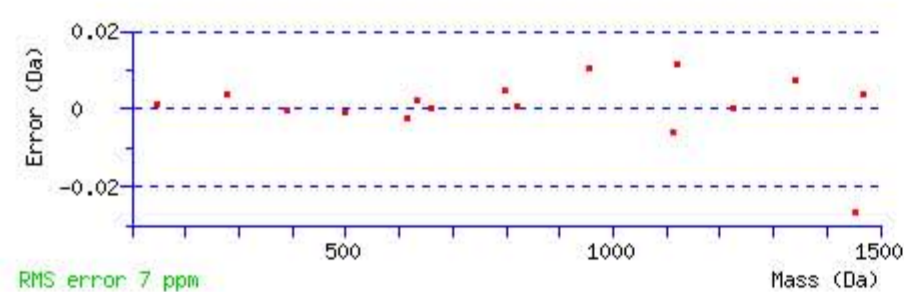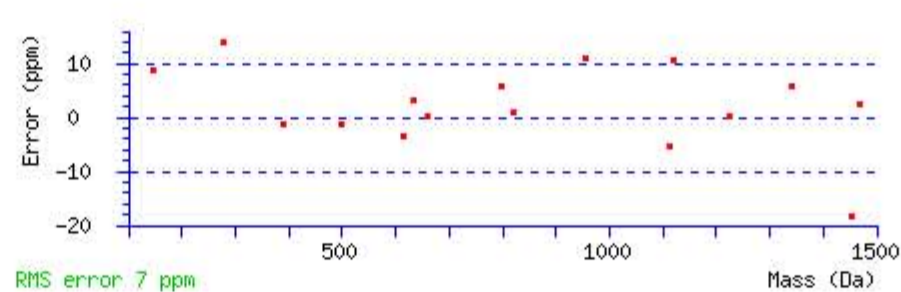

NCBI BLAST search of **GQYCYELDEK**

(Parameters: blastp, nr protein database, expect=20000, no filter, PAM30)

Other BLAST [web gateways](#)

All matches to this query

| Score | Mr(calc):   | Delta     | Sequence                       |
|-------|-------------|-----------|--------------------------------|
| 46.3  | 1614.705795 | 0.000513  | <a href="#">GQYCYELDEK</a>     |
| 3.5   | 1614.717010 | -0.010702 | <a href="#">EYFRMELMHAEK</a>   |
| 2.7   | 1614.683167 | 0.023141  | <a href="#">YQVSSLCGTDNEDK</a> |
| 1.1   | 1614.702667 | 0.003641  | <a href="#">LWCCTGNSIMVMK</a>  |

Mascot: <http://www.matrixscience.com/>



# MASCOT Search Results

## Peptide View

MS/MS Fragmentation of **DWHGVPGQVDAAMAGR**

Found in **VTNC\_HUMAN**, Vitronectin OS=Homo sapiens GN=VTN PE=1 SV=1

Match to Query 48622: 1976.931342 from(659.984390,3+) rtinseconds(2165) index(56888)

Title: Locus:1.1.1.3239.21 File:"2013-07-02 CLN FXIII 30 min 2nd F 4.wiff"

Data file C:\Program Files (x86)\Matrix Science\Mascot Daemon\mgf\2 FXIII 30 min 2nd\mascot\_daemon\_merge.mgf

Click mouse within plot area to zoom in by factor of two about that point

Or, Plot from  to  Da

Label all possible matches  Label matches used for scoring

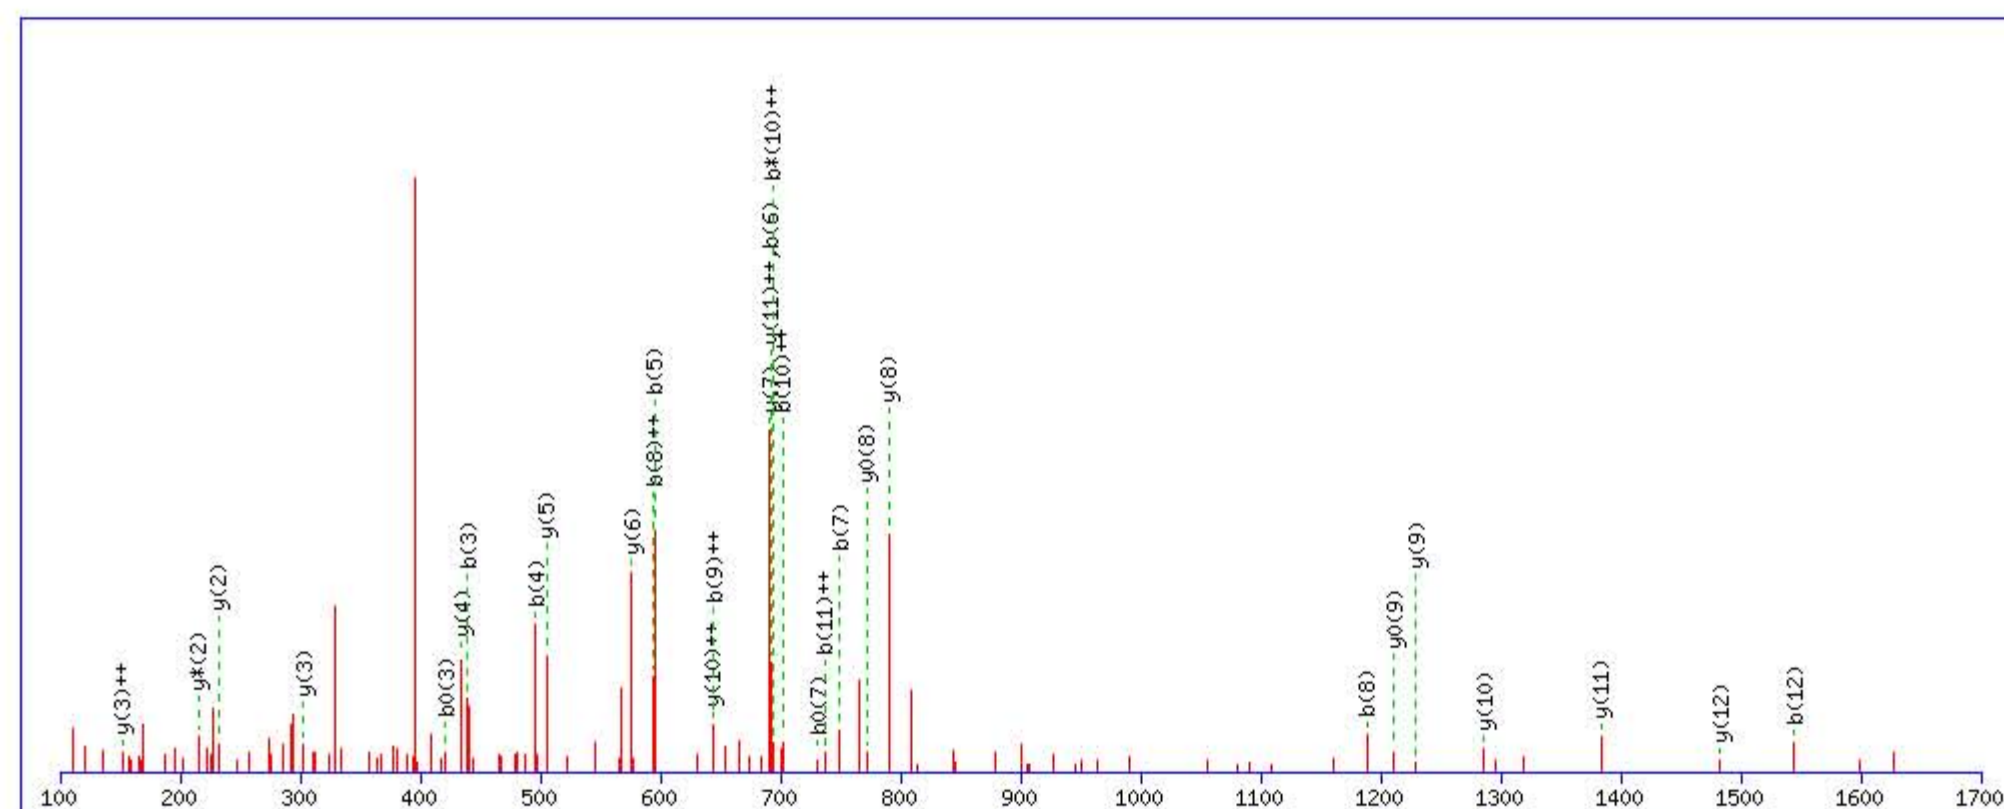

Monoisotopic mass of neutral peptide Mr(calc): 1976.934937

Fixed modifications: Carbamidomethyl (C) (apply to specified residues or termini only)

Variable modifications:

Q8 : Biotin:Thermo-21345 (Q)

Ions Score: 45 Expect: 0.00054

Matches : 31/154 fragment ions using 77 most intense peaks [\(help\)](#)

| #  | b                  | b <sup>++</sup>   | b <sup>*</sup> | b <sup>*++</sup>  | b <sup>0</sup>    | b <sup>0++</sup> | Seq. | y                  | y <sup>++</sup>   | y <sup>*</sup>    | y <sup>*++</sup> | y <sup>0</sup>     | y <sup>0++</sup> | #  |
|----|--------------------|-------------------|----------------|-------------------|-------------------|------------------|------|--------------------|-------------------|-------------------|------------------|--------------------|------------------|----|
| 1  | 116.034219         | 58.520748         |                |                   | 98.023654         | 49.515465        | D    |                    |                   |                   |                  |                    |                  | 16 |
| 2  | 302.113532         | 151.560404        |                |                   | 284.102967        | 142.555122       | W    | 1862.915257        | 931.961266        | 1845.888708       | 923.447992       | 1844.904692        | 922.955984       | 15 |
| 3  | <b>439.172444</b>  | 220.089860        |                |                   | <b>421.161879</b> | 211.084577       | H    | 1676.835944        | 838.921610        | 1659.809395       | 830.408336       | 1658.825379        | 829.916327       | 14 |
| 4  | <b>496.193908</b>  | 248.600592        |                |                   | 478.183343        | 239.595309       | G    | 1539.777032        | 770.392154        | 1522.750483       | 761.878880       | 1521.766467        | 761.386871       | 13 |
| 5  | <b>595.262322</b>  | 298.134799        |                |                   | 577.251757        | 289.129517       | V    | <b>1482.755568</b> | 741.881422        | 1465.729019       | 733.368148       | 1464.745003        | 732.876140       | 12 |
| 6  | <b>692.315086</b>  | 346.661181        |                |                   | 674.304521        | 337.655899       | P    | <b>1383.687154</b> | <b>692.347215</b> | 1366.660605       | 683.833941       | 1365.676589        | 683.341932       | 11 |
| 7  | <b>749.336550</b>  | 375.171913        |                |                   | <b>731.325985</b> | 366.166631       | G    | <b>1286.634390</b> | <b>643.820833</b> | 1269.607841       | 635.307559       | 1268.623825        | 634.815550       | 10 |
| 8  | <b>1188.561876</b> | <b>594.784576</b> | 1171.535327    | 586.271302        | 1170.551311       | 585.779293       | Q    | <b>1229.612926</b> | 615.310101        | 1212.586377       | 606.796827       | <b>1211.602361</b> | 606.304819       | 9  |
| 9  | 1287.630290        | <b>644.318783</b> | 1270.603741    | 635.805509        | 1269.619725       | 635.313501       | V    | <b>790.387600</b>  | 395.697438        | 773.361051        | 387.184164       | <b>772.377035</b>  | 386.692156       | 8  |
| 10 | 1402.657233        | <b>701.832255</b> | 1385.630684    | <b>693.318980</b> | 1384.646668       | 692.826972       | D    | <b>691.319186</b>  | 346.163231        | 674.292637        | 337.649956       | 673.308621         | 337.157948       | 7  |
| 11 | 1473.694347        | <b>737.350812</b> | 1456.667798    | 728.837537        | 1455.683782       | 728.345529       | A    | <b>576.292243</b>  | 288.649759        | 559.265694        | 280.136485       |                    |                  | 6  |
| 12 | <b>1544.731461</b> | 772.869369        | 1527.704912    | 764.356094        | 1526.720896       | 763.864086       | A    | <b>505.255129</b>  | 253.131202        | 488.228580        | 244.617928       |                    |                  | 5  |
| 13 | 1675.771946        | 838.389611        | 1658.745397    | 829.876337        | 1657.761381       | 829.384329       | M    | <b>434.218015</b>  | 217.612645        | 417.191466        | 209.099371       |                    |                  | 4  |
| 14 | 1746.809060        | 873.908168        | 1729.782511    | 865.394894        | 1728.798495       | 864.902886       | A    | <b>303.177530</b>  | <b>152.092403</b> | 286.150981        | 143.579128       |                    |                  | 3  |
| 15 | 1803.830524        | 902.418900        | 1786.803975    | 893.905626        | 1785.819959       | 893.413617       | G    | <b>232.140416</b>  | 116.573846        | <b>215.113867</b> | 108.060571       |                    |                  | 2  |
| 16 |                    |                   |                |                   |                   |                  | R    | 175.118952         | 88.063114         | 158.092403        | 79.549839        |                    |                  | 1  |

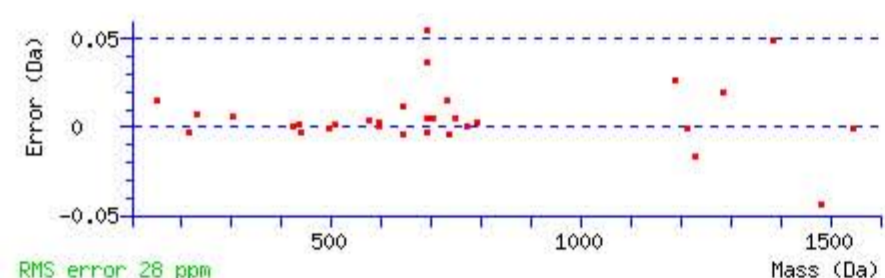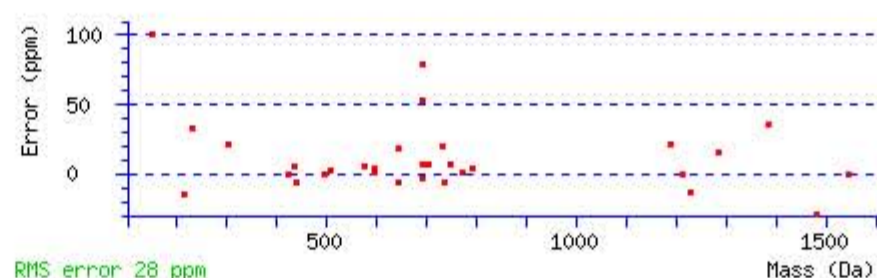

NCBI BLAST search of **DWHGVPGQVDAAMAGR**

(Parameters: blastp, nr protein database, expect=20000, no filter, PAM30)

Other BLAST [web gateways](#)

All matches to this query

| Score | Mr(calc):   | Delta     | Sequence                         |
|-------|-------------|-----------|----------------------------------|
| 45.3  | 1976.934937 | -0.003595 | <a href="#">DWHGVPGQVDAAMAGR</a> |

Mascot: <http://www.matrixscience.com/>



# Mascot Search Results

## Peptide View

MS/MS Fragmentation of **GNPEQTPVLKPEEEAPAVEVGASKPEGIDSRPETLHPGRPQPPAEELCSGKPFDAFTDLK**  
 Found in **VTNC\_HUMAN**, Vitronectin OS=Homo sapiens GN=VTN PE=1 SV=1

Match to Query 81986: 6883.387392 from(861.430700,8+) rtinseconds(2061) index(56185)  
 Title: Locus:1.1.1.3203.8 File:"2013-07-02 CLN FXIII 30 min 2nd F 4.wiff"  
 Data file C:\Program Files (x86)\Matrix Science\Mascot Daemon\mgf2 FXIII 30 min 2nd\mascot\_daemon\_merge.mgf

Click mouse within plot area to zoom in by factor of two about that point

Or, Plot from  to  Da

Label all possible matches  Label matches used for scoring

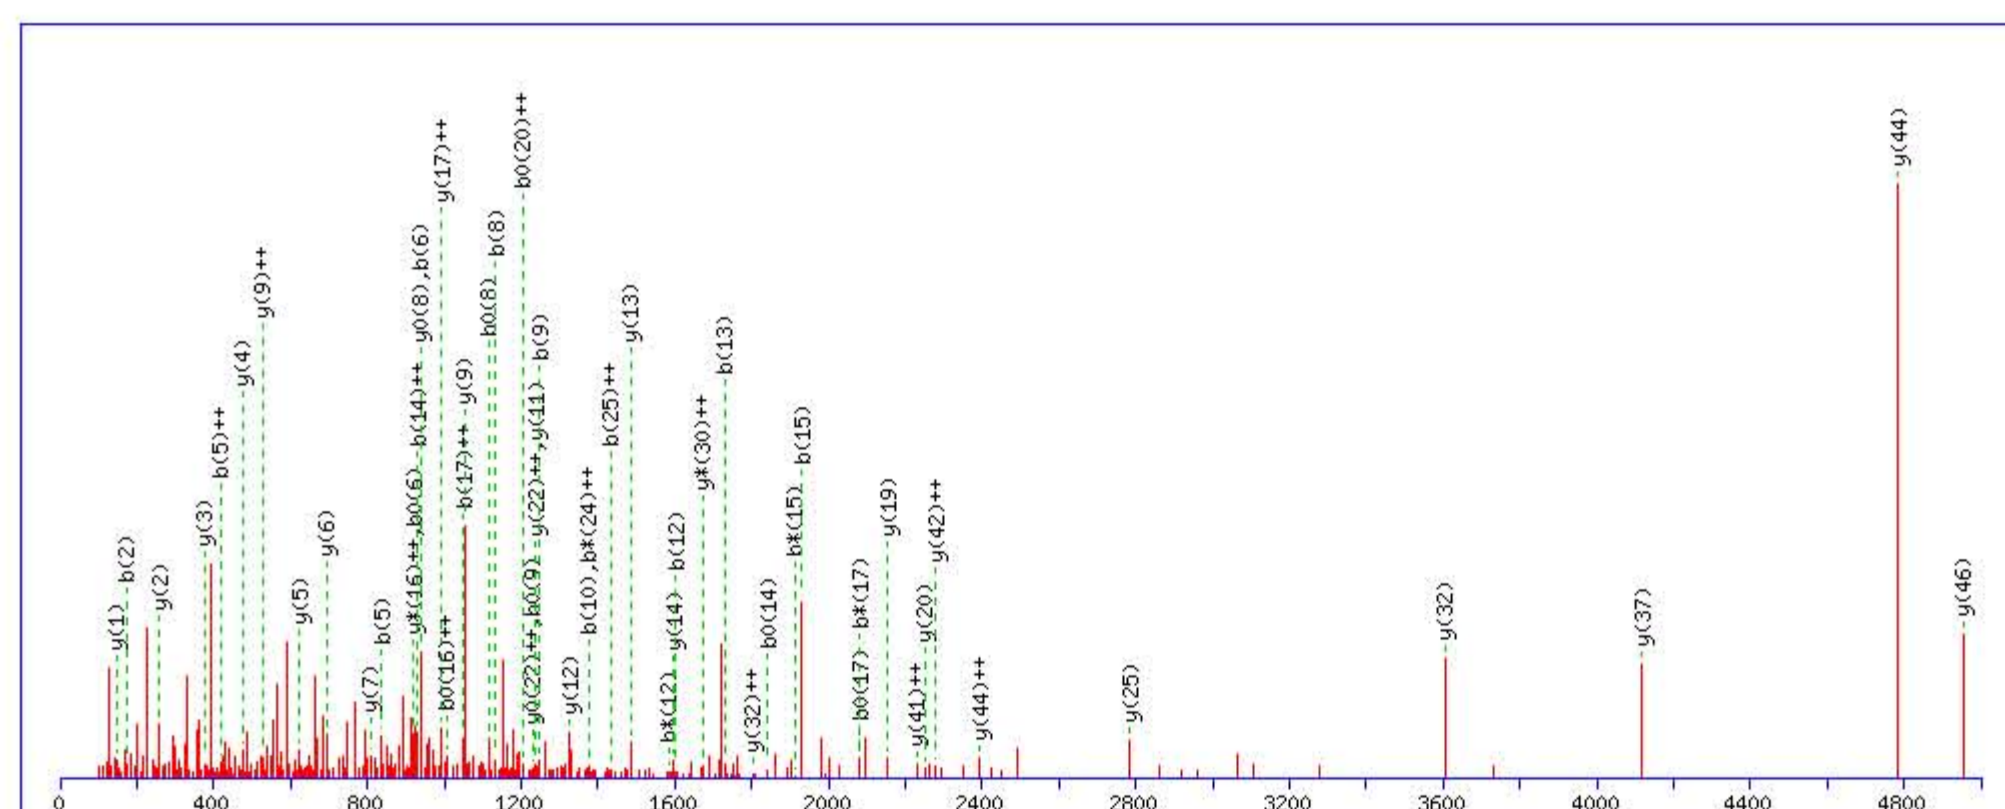

Monoisotopic mass of neutral peptide Mr(calc): 6883.374893  
 Fixed modifications: Carbamidomethyl (C) (apply to specified residues or termini only)  
 Variable modifications:  
 Q5 : Biotin:Thermo-21345 (Q)  
 Ions Score: 28 Expect: 0.021  
 Matches : 54/708 fragment ions using 181 most intense peaks [\(help\)](#)

| #  | b                  | b <sup>++</sup>    | b <sup>+</sup>     | b <sup>+++</sup>   | b <sup>0</sup>     | b <sup>0++</sup>   | Seq. | y                  | y <sup>++</sup>    | y <sup>+</sup> | y <sup>+++</sup>   | y <sup>0</sup> | y <sup>0++</sup>   | #  |
|----|--------------------|--------------------|--------------------|--------------------|--------------------|--------------------|------|--------------------|--------------------|----------------|--------------------|----------------|--------------------|----|
| 1  | 58.028740          | 29.518008          |                    |                    |                    |                    | G    |                    |                    |                |                    |                |                    | 61 |
| 2  | <b>172.071667</b>  | 86.539471          | 155.045118         | 78.026197          |                    |                    | N    | 6827.360757        | 3414.184017        | 6810.334208    | 3405.670742        | 6809.350192    | 3405.178734        | 60 |
| 3  | 269.124431         | 135.065854         | 252.097882         | 126.552579         |                    |                    | P    | 6713.317830        | 3357.162553        | 6696.291281    | 3348.649279        | 6695.307265    | 3348.157271        | 59 |
| 4  | 398.167024         | 199.587150         | 381.140475         | 191.073876         | 380.156459         | 190.581868         | E    | 6616.265066        | 3308.636171        | 6599.238517    | 3300.122897        | 6598.254501    | 3299.630889        | 58 |
| 5  | <b>837.392350</b>  | <b>419.199813</b>  | 820.365801         | 410.686539         | 819.381785         | 410.194531         | Q    | 6487.222473        | 3244.114875        | 6470.195924    | 3235.601600        | 6469.211908    | 3235.109592        | 57 |
| 6  | <b>938.440029</b>  | 469.723653         | 921.413480         | 461.210378         | <b>920.429464</b>  | 460.718370         | T    | 6047.997147        | 3024.502212        | 6030.970598    | 3015.988937        | 6029.986582    | 3015.496929        | 56 |
| 7  | 1035.492793        | 518.250035         | 1018.466244        | 509.736760         | 1017.482228        | 509.244752         | P    | 5946.949468        | 2973.978372        | 5929.922919    | 2965.465098        | 5928.938903    | 2964.973090        | 55 |
| 8  | <b>1134.561207</b> | 567.784242         | 1117.534658        | 559.270967         | <b>1116.550642</b> | 558.778959         | V    | 5849.896704        | 2925.451990        | 5832.870155    | 2916.938716        | 5831.886139    | 2916.446708        | 54 |
| 9  | <b>1247.645271</b> | 624.326274         | 1230.618722        | 615.812999         | <b>1229.634706</b> | 615.320991         | L    | 5750.828290        | 2875.917783        | 5733.801741    | 2867.404509        | 5732.817725    | 2866.912501        | 53 |
| 10 | <b>1375.740234</b> | 688.373755         | 1358.713685        | 679.860481         | 1357.729669        | 679.368473         | K    | 5637.744226        | 2819.375751        | 5620.717677    | 2810.862477        | 5619.733661    | 2810.370469        | 52 |
| 11 | 1472.792998        | 736.900137         | 1455.766449        | 728.386863         | 1454.782433        | 727.894855         | P    | 5509.649263        | 2755.328270        | 5492.622714    | 2746.814995        | 5491.638698    | 2746.322987        | 51 |
| 12 | <b>1601.835591</b> | 801.421434         | <b>1584.809042</b> | 792.908159         | 1583.825026        | 792.416151         | E    | 5412.596499        | 2706.801888        | 5395.569950    | 2698.288613        | 5394.585934    | 2697.796605        | 50 |
| 13 | <b>1730.878184</b> | 865.942730         | 1713.851635        | 857.429456         | 1712.867619        | 856.937448         | E    | 5283.553906        | 2642.280591        | 5266.527357    | 2633.767317        | 5265.543341    | 2633.275309        | 49 |
| 14 | 1859.920777        | <b>930.464027</b>  | 1842.894228        | 921.950752         | <b>1841.910212</b> | 921.458744         | E    | 5154.511313        | 2577.759295        | 5137.484764    | 2569.246020        | 5136.500748    | 2568.754012        | 48 |
| 15 | <b>1930.957891</b> | 965.982584         | <b>1913.931342</b> | 957.469309         | 1912.947326        | 956.977301         | A    | 5025.468720        | 2513.237998        | 5008.442171    | 2504.724724        | 5007.458155    | 2504.232716        | 47 |
| 16 | 2028.010655        | 1014.508966        | 2010.984106        | 1005.995691        | 2010.000090        | <b>1005.503683</b> | P    | <b>4954.431606</b> | 2477.719441        | 4937.405057    | 2469.206167        | 4936.421041    | 2468.714159        | 46 |
| 17 | 2099.047769        | <b>1050.027523</b> | <b>2082.021220</b> | 1041.514248        | <b>2081.037204</b> | 1041.022240        | A    | 4857.378842        | 2429.193059        | 4840.352293    | 2420.679785        | 4839.368277    | 2420.187777        | 45 |
| 18 | 2196.100533        | 1098.553905        | 2179.073984        | 1090.040630        | 2178.089968        | 1089.548622        | P    | <b>4786.341728</b> | <b>2393.674502</b> | 4769.315179    | 2385.161228        | 4768.331163    | 2384.669220        | 44 |
| 19 | 2325.143126        | 1163.075201        | 2308.116577        | 1154.561927        | 2307.132561        | 1154.069919        | E    | 4689.288964        | 2345.148120        | 4672.262415    | 2336.634846        | 4671.278399    | 2336.142838        | 43 |
| 20 | 2424.211540        | 1212.609408        | 2407.184991        | 1204.096134        | 2406.200975        | <b>1203.604126</b> | V    | 4560.246371        | <b>2280.626824</b> | 4543.219822    | 2272.113549        | 4542.235806    | 2271.621541        | 42 |
| 21 | 2481.233004        | 1241.120140        | 2464.206455        | 1232.606865        | 2463.222439        | 1232.114858        | G    | 4461.177957        | <b>2231.092617</b> | 4444.151408    | 2222.579342        | 4443.167392    | 2222.087334        | 41 |
| 22 | 2552.270118        | 1276.638697        | 2535.243569        | 1268.125423        | 2534.259553        | 1267.633415        | A    | 4404.156493        | 2202.581885        | 4387.129944    | 2194.068610        | 4386.145928    | 2193.576602        | 40 |
| 23 | 2639.302146        | 1320.154711        | 2622.275597        | 1311.641437        | 2621.291581        | 1311.149429        | S    | 4333.119379        | 2167.063328        | 4316.092830    | 2158.550053        | 4315.108814    | 2158.058045        | 39 |
| 24 | 2767.397109        | 1384.202193        | 2750.370560        | <b>1375.688918</b> | 2749.386544        | 1375.196910        | K    | 4246.087351        | 2123.547314        | 4229.060802    | 2115.034039        | 4228.076786    | 2114.542031        | 38 |
| 25 | 2864.449873        | <b>1432.728575</b> | 2847.423324        | 1424.215300        | 2846.439308        | 1423.723292        | P    | <b>4117.992388</b> | 2059.499832        | 4100.965839    | 2050.986558        | 4099.981823    | 2050.494550        | 37 |
| 26 | 2993.492466        | 1497.249871        | 2976.465917        | 1488.736597        | 2975.481901        | 1488.244589        | E    | 4020.939624        | 2010.973450        | 4003.913075    | 2002.460176        | 4002.929059    | 2001.968168        | 36 |
| 27 | 3050.513930        | 1525.760603        | 3033.487381        | 1517.247329        | 3032.503365        | 1516.755321        | G    | 3891.897031        | 1946.452154        | 3874.870482    | 1937.938879        | 3873.886466    | 1937.446871        | 35 |
| 28 | 3163.597994        | 1582.302635        | 3146.571445        | 1573.789361        | 3145.587429        | 1573.297353        | I    | 3834.875567        | 1917.941422        | 3817.849018    | 1909.428147        | 3816.865002    | 1908.936139        | 34 |
| 29 | 3278.624937        | 1639.816107        | 3261.598388        | 1631.302832        | 3260.614372        | 1630.810824        | D    | 3721.791503        | 1861.399390        | 3704.764954    | 1852.886115        | 3703.780938    | 1852.394107        | 33 |
| 30 | 3365.656965        | 1683.332121        | 3348.630416        | 1674.818846        | 3347.646400        | 1674.326838        | S    | <b>3606.764560</b> | <b>1803.885918</b> | 3589.738011    | 1795.372644        | 3588.753995    | 1794.880636        | 32 |
| 31 | 3521.758076        | 1761.382676        | 3504.731527        | 1752.869402        | 3503.747511        | 1752.377394        | R    | 3519.732532        | 1760.369904        | 3502.705983    | 1751.856630        | 3501.721967    | 1751.364622        | 31 |
| 32 | 3618.810840        | 1809.909058        | 3601.784291        | 1801.395784        | 3600.800275        | 1800.903776        | P    | 3363.631421        | 1682.319349        | 3346.604872    | <b>1673.806074</b> | 3345.620856    | 1673.314066        | 30 |
| 33 | 3747.853433        | 1874.430355        | 3730.826884        | 1865.917080        | 3729.842868        | 1865.425072        | E    | 3266.578657        | 1633.792967        | 3249.552108    | 1625.279692        | 3248.568092    | 1624.787684        | 29 |
| 34 | 3848.901112        | 1924.954194        | 3831.874563        | 1916.440920        | 3830.890547        | 1915.948912        | T    | 3137.536064        | 1569.271670        | 3120.509515    | 1560.758396        | 3119.525499    | 1560.266388        | 28 |
| 35 | 3961.985176        | 1981.496226        | 3944.958627        | 1972.982952        | 3943.974611        | 1972.490944        | L    | 3036.488385        | 1518.747831        | 3019.461836    | 1510.234556        | 3018.477820    | 1509.742548        | 27 |
| 36 | 4099.044088        | 2050.025682        | 4082.017539        | 2041.512408        | 4081.033523        | 2041.020400        | H    | 2923.404321        | 1462.205799        | 2906.377772    | 1453.692524        | 2905.393756    | 1453.200516        | 26 |
| 37 | 4196.096852        | 2098.552064        | 4179.070303        | 2090.038790        | 4178.086287        | 2089.546782        | P    | <b>2786.345409</b> | 1393.676343        | 2769.318860    | 1385.163068        | 2768.334844    | 1384.671060        | 25 |
| 38 | 4253.118316        | 2127.062796        | 4236.091767        | 2118.549522        | 4235.107751        | 2118.057514        | G    | 2689.292645        | 1345.149961        | 2672.266096    | 1336.636686        | 2671.282080    | 1336.144678        | 24 |
| 39 | 4409.219427        | 2205.113352        | 4392.192878        | 2196.600077        | 4391.208862        | 2196.108069        | R    | 2632.271181        | 1316.639229        | 2615.244632    | 1308.125954        | 2614.260616    | 1307.633946        | 23 |
| 40 | 4506.272191        | 2253.639734        | 4489.245642        | 2245.126459        | 4488.261626        | 2244.634451        | P    | 2476.170070        | <b>1238.588673</b> | 2459.143521    | 1230.075399        | 2458.159505    | <b>1229.583391</b> | 22 |
| 41 | 4634.330769        | 2317.669023        | 4617.304220        | 2309.155748        | 4616.320204        | 2308.663740        | Q    | 2379.117306        | 1190.062291        | 2362.090757    | 1181.549017        | 2361.106741    | 1181.057009        | 21 |
| 42 | 4731.383533        | 2366.195405        | 4714.356984        | 2357.682130        | 4713.372968        | 2357.190122        | P    | <b>2251.058728</b> | 1126.033002        | 2234.032179    | 1117.519728        | 2233.048163    | 1117.027720        | 20 |
| 43 | 4828.436297        | 2414.721787        | 4811.409748        | 2406.208512        | 4810.425732        | 2405.716504        | P    | <b>2154.005964</b> | 1077.506620        | 2136.979415    | 1068.993346        | 2135.995399    | 1068.501338        | 19 |
| 44 | 4899.473411        | 2450.240344        | 4882.446862        | 2441.727069        | 4881.462846        | 2441.235061        | A    | 2056.953200        | 1028.980238        | 2039.926651    | 1020.466964        | 2038.942635    | 1019.974956        | 18 |
| 45 | 5028.516004        | 2514.761640        | 5011.489455        | 2506.248366        | 5010.505439        | 2505.756358        | E    | 1985.916086        | <b>993.461681</b>  | 1968.889537    | 984.948407         | 1967.905521    | 984.456399         | 17 |
| 46 | 5157.558597        | 2579.282937        | 5140.532048        | 2570.769662        | 5139.548032        | 2570.277654        | E    | 1856.873493        | 928.940385         | 1839.846944    | <b>920.427110</b>  | 1838.862928    | 919.935102         | 16 |
| 47 | 5286.601190        | 2643.804233        | 5269.574641        | 2635.290959        | 5268.590625        | 2634.798951        | E    | 1727.830900        | 864.419088         | 1710.804351    | 855.905814         | 1709.820335    | 855.413806         | 15 |
| 48 | 5399.685254        | 2700.346265        | 5382.658705        | 2691.832991        | 5381.674689        | 2691.340983        | L    | <b>1598.788307</b> | 799.897792         | 1581.761758    | 791.384517         | 1580.777742    | 790.892509         | 14 |
| 49 | 5559.715903        | 2780.361590        | 5542.689354        | 2771.848315        | 5541.705338        | 2771.356307        | C    | <b>1485.704243</b> | 743.355760         | 1468.677694    | 734.842485         | 1467.693678    | 734.350477         | 13 |
| 50 | 5646.747931        | 2823.877604        | 5629.721382        | 2815.364329        | 5628.737366        | 2814.872321        | S    | <b>1325.673594</b> | 663.340435         | 1308.647045    | 654.827161         | 1307.663029    | 654.335153         | 12 |
| 51 | 5703.769395        | 2852.388336        | 5686.742846        | 2843.875061        | 5685.758830        | 2843.383053        | G    | <b>1238.641566</b> | 619.824421         | 1221.615017    | 611.311147         | 1220.631001    | 610.819139         | 11 |
| 52 | 5831.864358        | 2916.435817        | 5814.837809        | 2907.922543        | 5813.853793        | 2907.430535        | K    | 1181.620102        | 591.313689         | 1164.593553    | 582.800415         |                |                    |    |



# MASCOT Search Results

## Peptide View

MS/MS Fragmentation of **GGQIMTLK**

Found in **VWF\_HUMAN**, von Willebrand factor OS=Homo sapiens GN=VWF PE=1 SV=4

Match to Query 23647: 1157.640348 from(579.827450,2+) rtinseconds(1920) index(38038)

Title: Locus:1.1.1.2691.17 File:"2013-07-02 CLN FXIII 30 min 2nd F 3.wiff"

Data file C:\Program Files (x86)\Matrix Science\Mascot Daemon\mgf2 FXIII 30 min 2nd\mascot\_daemon\_merge.mgf

Click mouse within plot area to zoom in by factor of two about that point

Or, Plot from  to  Da

Label all possible matches  Label matches used for scoring

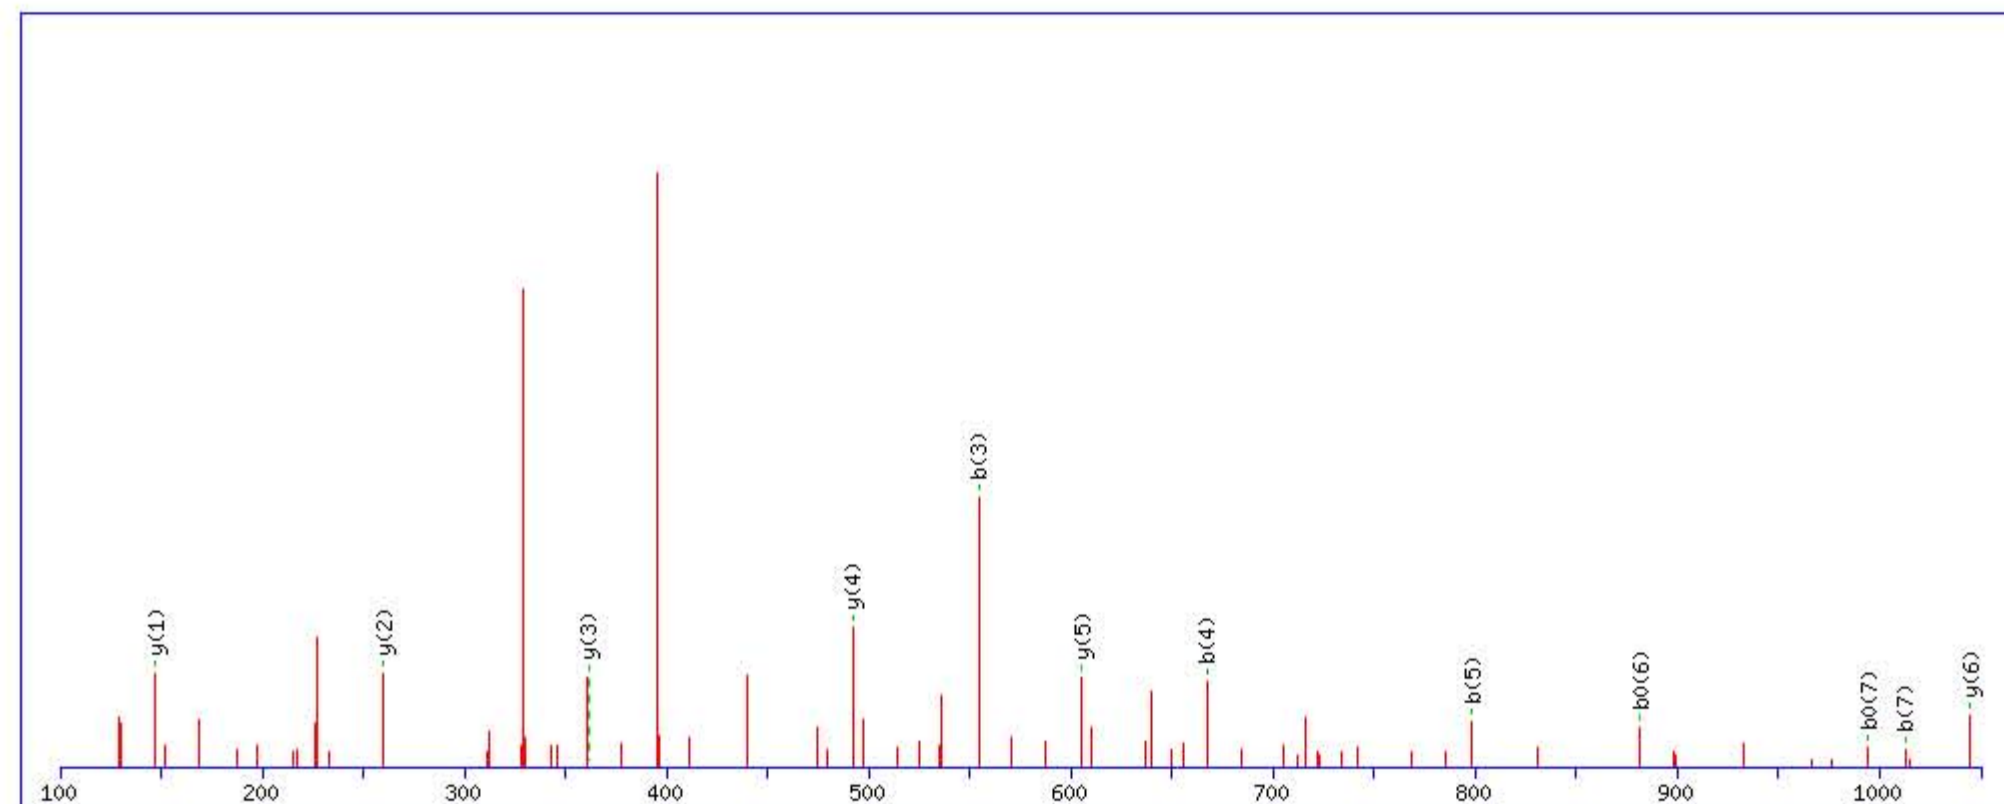

Monoisotopic mass of neutral peptide Mr(calc): 1157.630066

Fixed modifications: Carbamidomethyl (C) (apply to specified residues or termini only)

Variable modifications:

Q3 : Biotin:Thermo-21345 (Q)

Ions Score: 27 Expect: 0.043

Matches : 12/66 fragment ions using 28 most intense peaks [\(help\)](#)

| # | b                  | b <sup>++</sup> | b <sup>*</sup> | b <sup>*++</sup> | b <sup>0</sup>    | b <sup>0++</sup> | Seq. | y                  | y <sup>++</sup> | y <sup>*</sup> | y <sup>*++</sup> | y <sup>0</sup> | y <sup>0++</sup> | # |
|---|--------------------|-----------------|----------------|------------------|-------------------|------------------|------|--------------------|-----------------|----------------|------------------|----------------|------------------|---|
| 1 | 58.028740          | 29.518008       |                |                  |                   |                  | G    |                    |                 |                |                  |                |                  | 8 |
| 2 | 115.050204         | 58.028740       |                |                  |                   |                  | G    | 1101.615886        | 551.311581      | 1084.589337    | 542.798307       | 1083.605321    | 542.306299       | 7 |
| 3 | <b>554.275530</b>  | 277.641403      | 537.248981     | 269.128129       |                   |                  | Q    | <b>1044.594422</b> | 522.800849      | 1027.567873    | 514.287575       | 1026.583857    | 513.795567       | 6 |
| 4 | <b>667.359594</b>  | 334.183435      | 650.333045     | 325.670161       |                   |                  | I    | <b>605.369096</b>  | 303.188186      | 588.342547     | 294.674912       | 587.358531     | 294.182904       | 5 |
| 5 | <b>798.400079</b>  | 399.703678      | 781.373530     | 391.190403       |                   |                  | M    | <b>492.285032</b>  | 246.646154      | 475.258483     | 238.132880       | 474.274467     | 237.640872       | 4 |
| 6 | 899.447758         | 450.227517      | 882.421209     | 441.714243       | <b>881.437193</b> | 441.222235       | T    | <b>361.244547</b>  | 181.125912      | 344.217998     | 172.612637       | 343.233982     | 172.120629       | 3 |
| 7 | <b>1012.531822</b> | 506.769549      | 995.505273     | 498.256275       | <b>994.521257</b> | 497.764267       | L    | <b>260.196868</b>  | 130.602072      | 243.170319     | 122.088798       |                |                  | 2 |
| 8 |                    |                 |                |                  |                   |                  | K    | <b>147.112804</b>  | 74.060040       | 130.086255     | 65.546765        |                |                  | 1 |

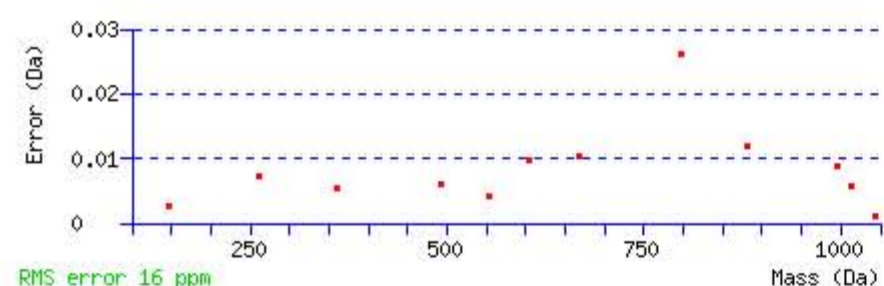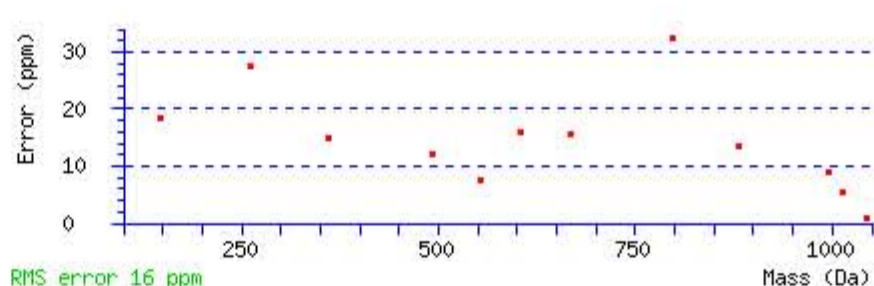

NCBI BLAST search of [GGQIMTLK](#)

(Parameters: blastp, nr protein database, expect=20000, no filter, PAM30)

Other BLAST [web gateways](#)

## All matches to this query

| Score | Mr(calc):   | Delta     | Sequence                     |
|-------|-------------|-----------|------------------------------|
| 27.0  | 1157.630066 | 0.010282  | <a href="#">GGQIMTLK</a>     |
| 11.7  | 1157.640411 | -0.000063 | <a href="#">AQQLLSSGNLK</a>  |
| 11.2  | 1157.630051 | 0.010297  | <a href="#">QLSQMLK</a>      |
| 6.4   | 1157.647827 | -0.007479 | <a href="#">ALVGGTAPMTIK</a> |
| 5.3   | 1157.636566 | 0.003782  | <a href="#">LLAIMPDELK</a>   |
| 3.6   | 1157.637924 | 0.002424  | <a href="#">NQLGFLR</a>      |
| 2.6   | 1157.630051 | 0.010297  | <a href="#">QLSQMLK</a>      |
| 2.0   | 1157.630081 | 0.010267  | <a href="#">CVTLVQK</a>      |
| 1.8   | 1157.630051 | 0.010297  | <a href="#">QIKSMLQ</a>      |
| 1.3   | 1157.629196 | 0.011152  | <a href="#">EPQITQLTK</a>    |



# MASCOT SCIENCE Mascot Search Results

## Peptide View

MS/MS Fragmentation of **VKEEVFIQQR**

Found in **VWF\_HUMAN**, von Willebrand factor OS=Homo sapiens GN=VWF PE=1 SV=4

Match to Query 38320: 1585.875102 from(529.632310,3+) rtinseconds(1791) index(37278)

Title: Locus:1.1.1.2646.16 File:"2013-07-02 CLN FXIII 30 min 2nd F 3.wiff"

Data file C:\Program Files (x86)\Matrix Science\Mascot Daemon\mgf2 FXIII 30 min 2nd\mascot\_daemon\_merge.mgf

Click mouse within plot area to zoom in by factor of two about that point

Or, Plot from  to  Da

Label all possible matches  Label matches used for scoring

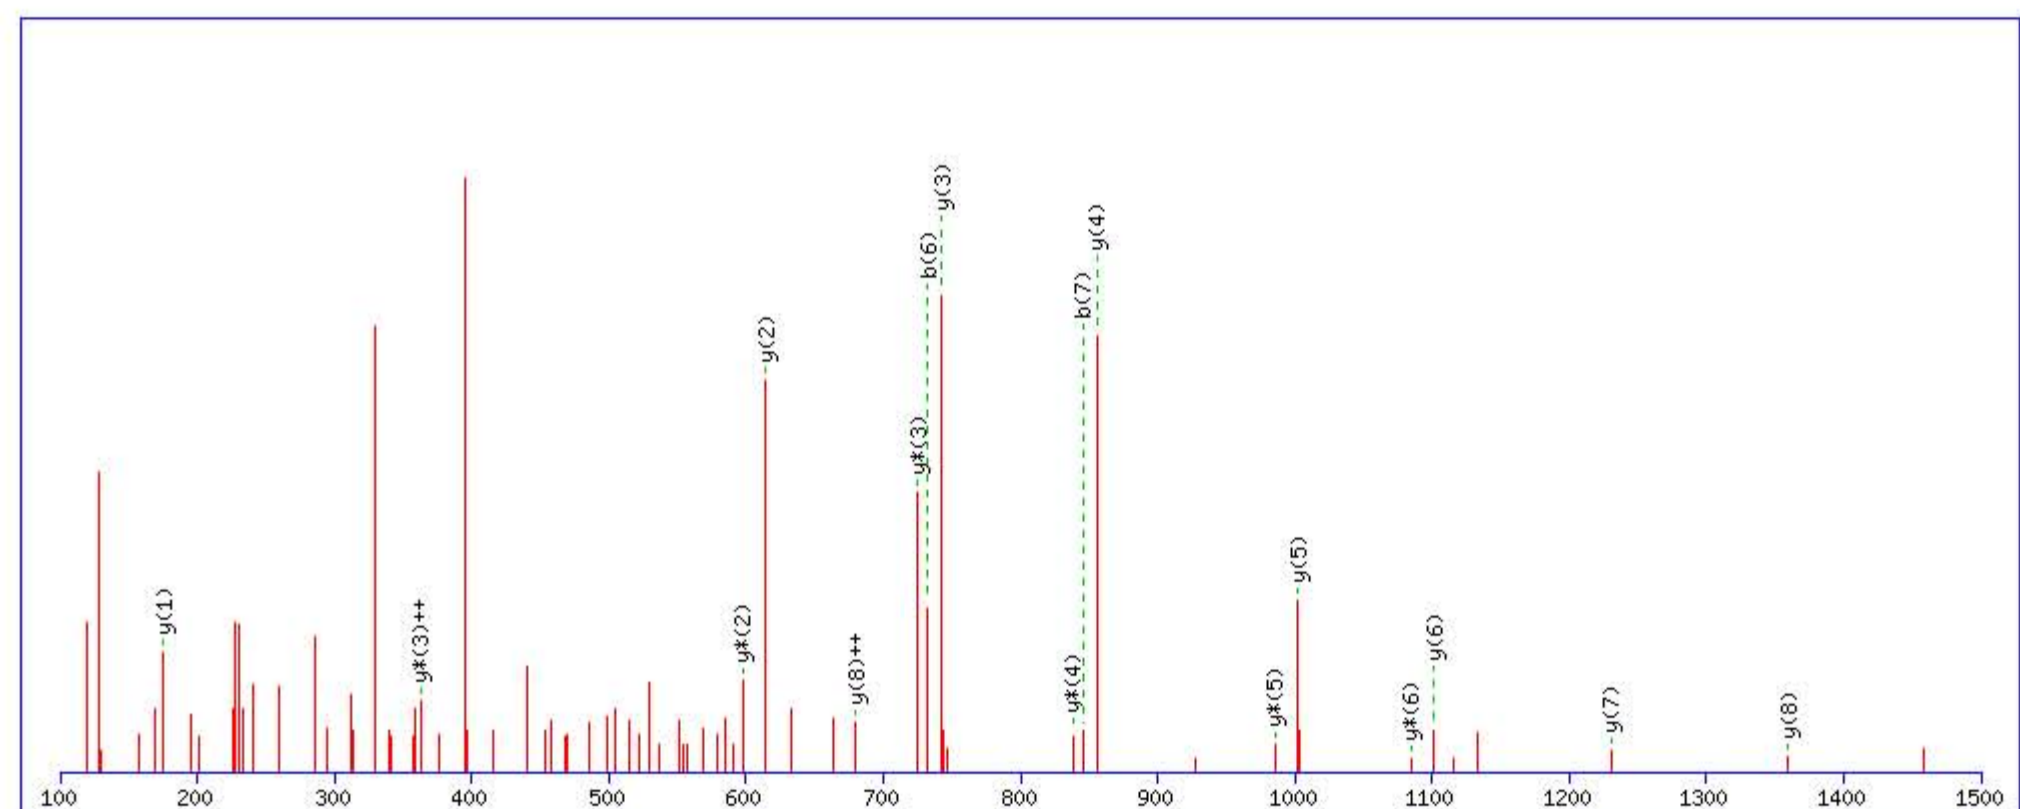

Monoisotopic mass of neutral peptide Mr(calc): 1585.865021

Fixed modifications: Carbamidomethyl (C) (apply to specified residues or termini only)

Variable modifications:

Q9 : Biotin:Thermo-21345 (Q)

Ions Score: 40 Expect: 0.00026

Matches : 17/90 fragment ions using 34 most intense peaks ([help](#))

| #  | b                 | b <sup>++</sup> | b <sup>*</sup> | b <sup>*++</sup> | b <sup>0</sup> | b <sup>0++</sup> | Seq. | y                  | y <sup>++</sup>   | y <sup>*</sup>     | y <sup>*++</sup>  | y <sup>0</sup> | y <sup>0++</sup> | #  |
|----|-------------------|-----------------|----------------|------------------|----------------|------------------|------|--------------------|-------------------|--------------------|-------------------|----------------|------------------|----|
| 1  | 100.075690        | 50.541483       |                |                  |                |                  | V    |                    |                   |                    |                   |                |                  | 10 |
| 2  | 228.170653        | 114.588965      | 211.144104     | 106.075690       |                |                  | K    | 1487.803897        | 744.405587        | 1470.777348        | 735.892312        | 1469.793332    | 735.400304       | 9  |
| 3  | 357.213246        | 179.110261      | 340.186697     | 170.596987       | 339.202681     | 170.104979       | E    | <b>1359.708934</b> | <b>680.358105</b> | 1342.682385        | 671.844831        | 1341.698369    | 671.352823       | 8  |
| 4  | 486.255839        | 243.631558      | 469.229290     | 235.118283       | 468.245274     | 234.626275       | E    | <b>1230.666341</b> | 615.836809        | 1213.639792        | 607.323534        | 1212.655776    | 606.831526       | 7  |
| 5  | 585.324253        | 293.165765      | 568.297704     | 284.652490       | 567.313688     | 284.160482       | V    | <b>1101.623748</b> | 551.315512        | <b>1084.597199</b> | 542.802238        |                |                  | 6  |
| 6  | <b>732.392667</b> | 366.699972      | 715.366118     | 358.186697       | 714.382102     | 357.694689       | F    | <b>1002.555334</b> | 501.781305        | <b>985.528785</b>  | 493.268031        |                |                  | 5  |
| 7  | <b>845.476731</b> | 423.242004      | 828.450182     | 414.728729       | 827.466166     | 414.236721       | I    | <b>855.486920</b>  | 428.247098        | <b>838.460371</b>  | 419.733824        |                |                  | 4  |
| 8  | 973.535309        | 487.271293      | 956.508760     | 478.758018       | 955.524744     | 478.266010       | Q    | <b>742.402856</b>  | 371.705066        | <b>725.376307</b>  | <b>363.191792</b> |                |                  | 3  |
| 9  | 1412.760635       | 706.883956      | 1395.734086    | 698.370681       | 1394.750070    | 697.878673       | Q    | <b>614.344278</b>  | 307.675777        | <b>597.317729</b>  | 299.162503        |                |                  | 2  |
| 10 |                   |                 |                |                  |                |                  | R    | <b>175.118952</b>  | 88.063114         | 158.092403         | 79.549839         |                |                  | 1  |

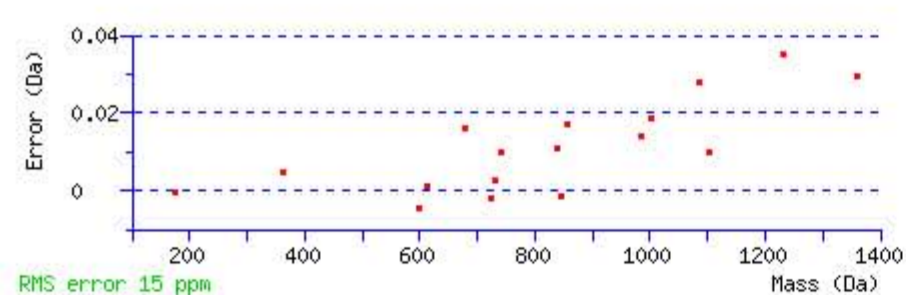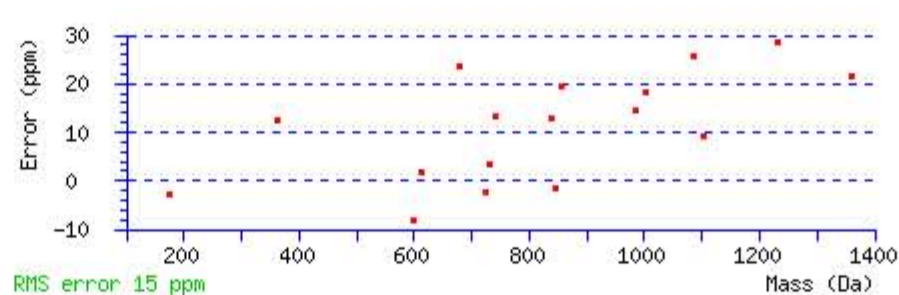

NCBI BLAST search of **VKEEVFIQQR**

(Parameters: blastp, nr protein database, expect=20000, no filter, PAM30)

Other BLAST [web gateways](#)

All matches to this query

| Score | Mr(calc):   | Delta     | Sequence                       |
|-------|-------------|-----------|--------------------------------|
| 40.3  | 1585.865021 | 0.010081  | <a href="#">VKEEVFIQQR</a>     |
| 29.6  | 1585.865021 | 0.010081  | <a href="#">VKEEVFIQQR</a>     |
| 2.1   | 1585.893524 | -0.018422 | <a href="#">QDLIKSLAMLK</a>    |
| 2.1   | 1585.857605 | 0.017497  | <a href="#">QEEVAGIRAKFPNK</a> |

Mascot: <http://www.matrixscience.com/>
