# Supplementary material
Source: PubMed Central journal article supplement (PMC3945317)
Supplement: supp_M113.517904_jbc.M113.517904-6.pdf [file supp_M113.517904_jbc.M113.517904-6.pdf]

# MASCOT Search Results

## Peptide View

MS/MS Fragmentation of **DSYVGDEAQS**K

Found in **ACTA\_HUMAN**, Actin, aortic smooth muscle OS=Homo sapiens GN=ACTA2 PE=1 SV=1

Match to Query 31183: 1508.680588 from(755.347570,2+) rtinseconds(1613) index(48754)

Title: Locus:1.1.1.3205.18 File:"2013-07-02 CLN FXIII 30 min 3rd F 4.wiff"

Data file C:\Program Files (x86)\Matrix Science\Mascot Daemon\mgf\3 FXIII 30 min 3rd\mascot\_daemon\_merge.mgf

Click mouse within plot area to zoom in by factor of two about that point

Or, Plot from  to  Da

Label all possible matches  Label matches used for scoring

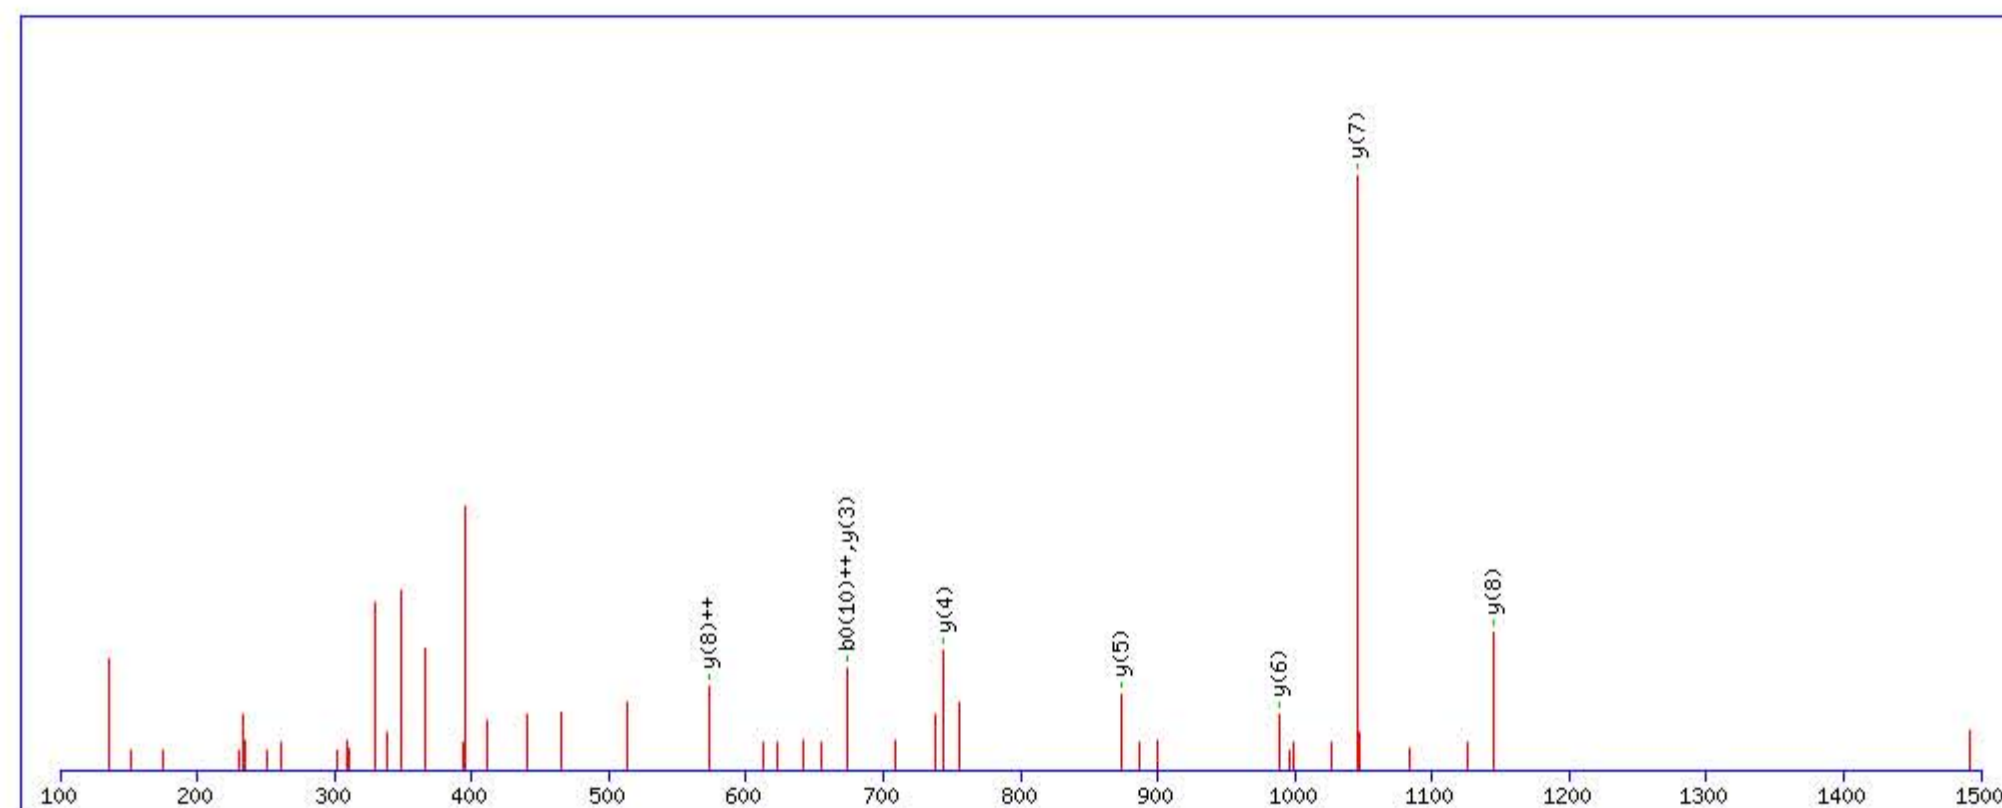

Monoisotopic mass of neutral peptide Mr(calc): 1508.681702

Fixed modifications: Carbamidomethyl (C) (apply to specified residues or termini only)

Variable modifications:

Q9 : Biotin:Thermo-21345 (Q)

Ions Score: 41 Expect: 0.00015

Matches : 8/102 fragment ions using 12 most intense peaks [\(help\)](#)

| #  | b           | b <sup>++</sup> | b <sup>+</sup> | b <sup>*++</sup> | b <sup>0</sup> | b <sup>0++</sup>  | Seq. | y                  | y <sup>++</sup>   | y <sup>+</sup> | y <sup>*++</sup> | y <sup>0</sup> | y <sup>0++</sup> | #  |
|----|-------------|-----------------|----------------|------------------|----------------|-------------------|------|--------------------|-------------------|----------------|------------------|----------------|------------------|----|
| 1  | 116.034219  | 58.520748       |                |                  | 98.023654      | 49.515465         | D    |                    |                   |                |                  |                |                  | 11 |
| 2  | 203.066247  | 102.036761      |                |                  | 185.055682     | 93.031479         | S    | 1394.662043        | 697.834660        | 1377.635494    | 689.321385       | 1376.651478    | 688.829377       | 10 |
| 3  | 366.129576  | 183.568426      |                |                  | 348.119011     | 174.563144        | Y    | 1307.630015        | 654.318646        | 1290.603466    | 645.805371       | 1289.619450    | 645.313363       | 9  |
| 4  | 465.197990  | 233.102633      |                |                  | 447.187425     | 224.097351        | V    | <b>1144.566686</b> | <b>572.786981</b> | 1127.540137    | 564.273707       | 1126.556121    | 563.781699       | 8  |
| 5  | 522.219454  | 261.613365      |                |                  | 504.208889     | 252.608083        | G    | <b>1045.498272</b> | 523.252774        | 1028.471723    | 514.739500       | 1027.487707    | 514.247492       | 7  |
| 6  | 637.246397  | 319.126837      |                |                  | 619.235832     | 310.121554        | D    | <b>988.476808</b>  | 494.742042        | 971.450259     | 486.228768       | 970.466243     | 485.736760       | 6  |
| 7  | 766.288990  | 383.648133      |                |                  | 748.278425     | 374.642851        | E    | <b>873.449865</b>  | 437.228571        | 856.423316     | 428.715296       | 855.439300     | 428.223288       | 5  |
| 8  | 837.326104  | 419.166690      |                |                  | 819.315539     | 410.161408        | A    | <b>744.407272</b>  | 372.707274        | 727.380723     | 364.194000       | 726.396707     | 363.701992       | 4  |
| 9  | 1276.551430 | 638.779353      | 1259.524881    | 630.266079       | 1258.540865    | 629.774070        | Q    | <b>673.370158</b>  | 337.188717        | 656.343609     | 328.675443       | 655.359593     | 328.183435       | 3  |
| 10 | 1363.583458 | 682.295367      | 1346.556909    | 673.782093       | 1345.572893    | <b>673.290085</b> | S    | 234.144832         | 117.576054        | 217.118283     | 109.062780       | 216.134267     | 108.570772       | 2  |
| 11 |             |                 |                |                  |                |                   | K    | 147.112804         | 74.060040         | 130.086255     | 65.546765        |                |                  | 1  |

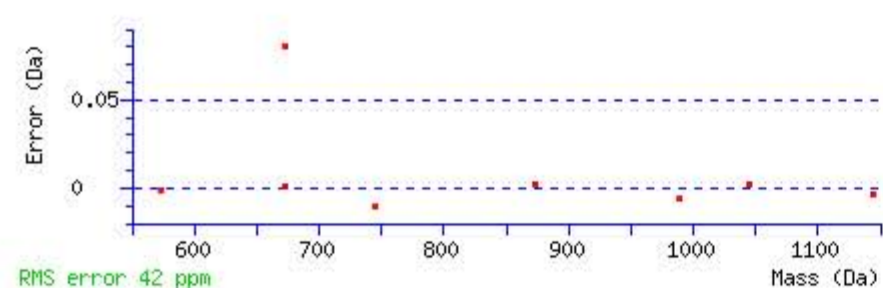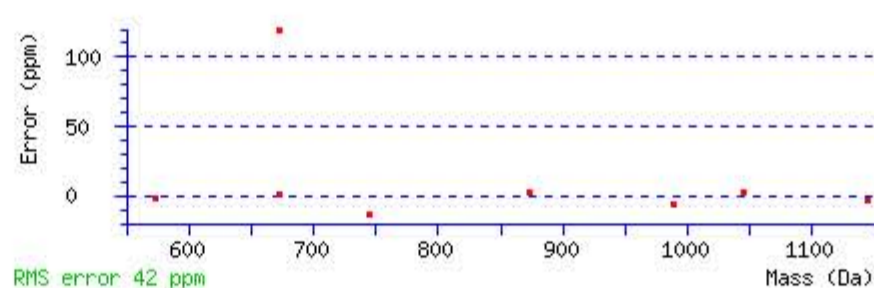

NCBI BLAST search of **DSYVGDEAQS**K

(Parameters: blastp, nr protein database, expect=20000, no filter, PAM30)

Other BLAST [web gateways](#)

All matches to this query

| Score | Mr(calc):   | Delta     | Sequence                          |
|-------|-------------|-----------|-----------------------------------|
| 41.4  | 1508.681702 | -0.001114 | <a href="#">DSYVGDEAQS</a> K      |
| 0.6   | 1508.690277 | -0.009689 | <a href="#">GGRGGMGGSDRGGF</a> NK |

Mascot: <http://www.matrixscience.com/>



# MASCOT Search Results

## Peptide View

MS/MS Fragmentation of **SYELPDGQVITIGNER**

Found in **ACTA\_HUMAN**, Actin, aortic smooth muscle OS=Homo sapiens GN=ACTA2 PE=1 SV=1

Match to Query 45556: 2101.053972 from(701.358600,3+) rtinseconds(2633) index(54278)

Title: Locus:1.1.1.3559.6 File:"2013-07-02 CLN FXIII 30 min 3rd F 4.wiff"

Data file C:\Program Files (x86)\Matrix Science\Mascot Daemon\mgf3 FXIII 30 min 3rd\mascot\_daemon\_merge.mgf

Click mouse within plot area to zoom in by factor of two about that point

Or, Plot from  to  Da

Label all possible matches  Label matches used for scoring

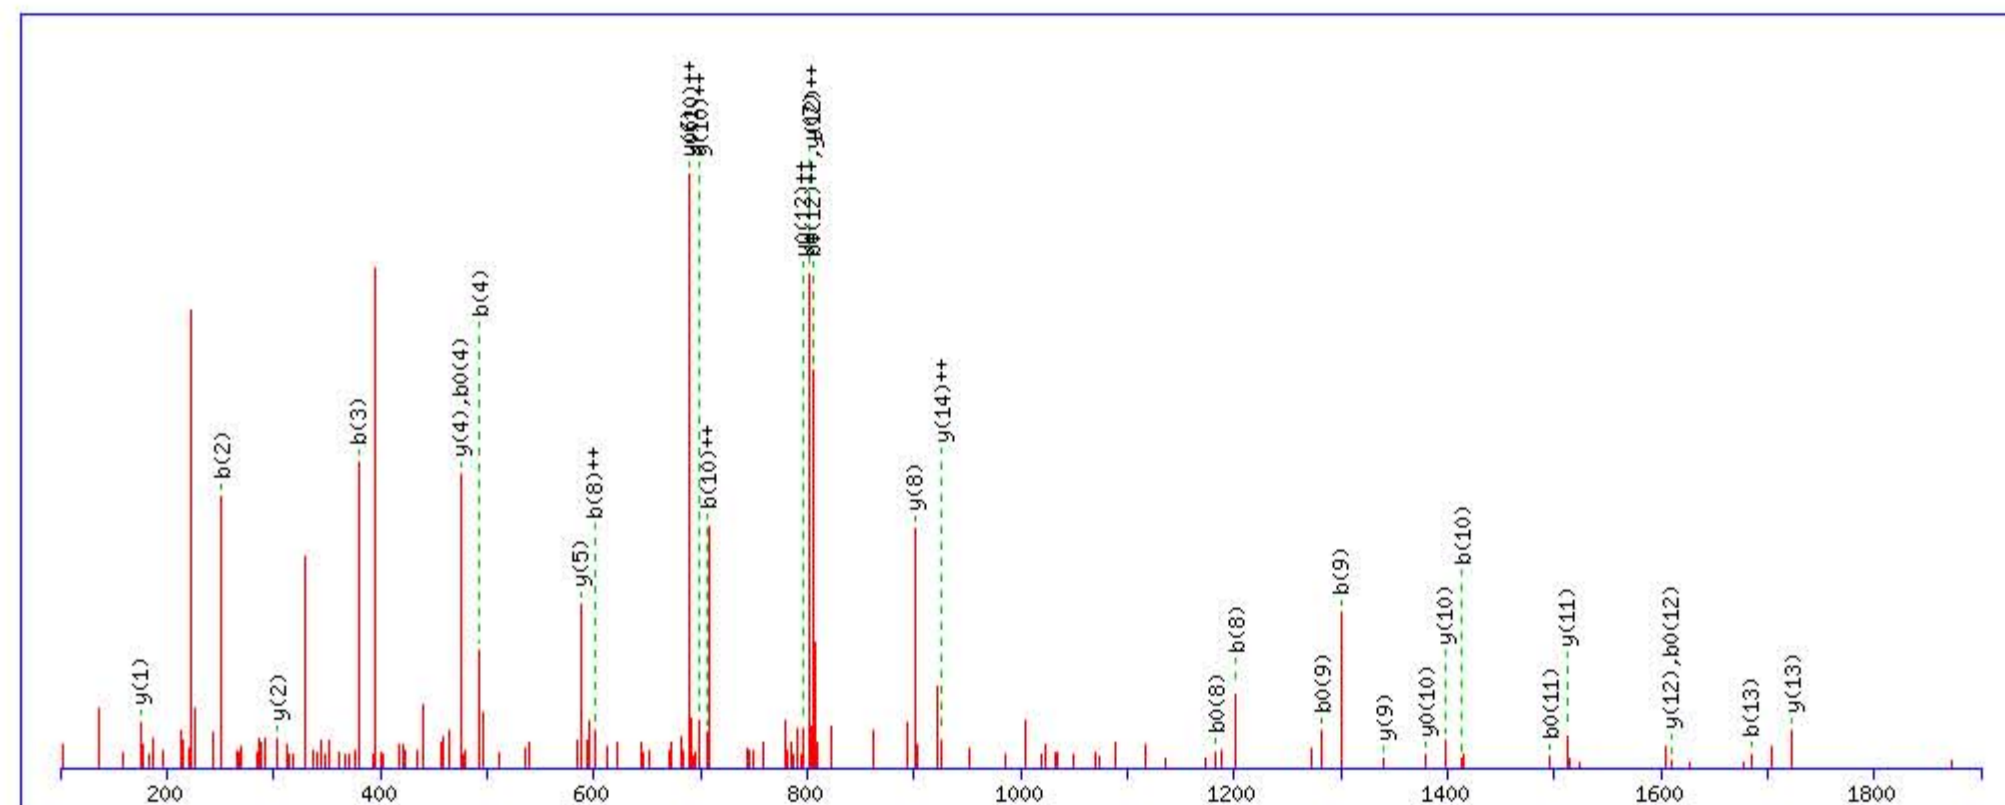

Monoisotopic mass of neutral peptide Mr(calc): 2101.051376

Fixed modifications: Carbamidomethyl (C) (apply to specified residues or termini only)

Variable modifications:

Q8 : Biotin:Thermo-21345 (Q)

Ions Score: 54 Expect: 0.00012

Matches : 34/164 fragment ions using 76 most intense peaks [\(help\)](#)

| #  | b                  | b <sup>++</sup>   | b <sup>+</sup> | b <sup>+++</sup>  | b <sup>0</sup>     | b <sup>0++</sup>  | Seq. | y                  | y <sup>++</sup>   | y <sup>+</sup> | y <sup>+++</sup> | y <sup>0</sup>     | y <sup>0++</sup>  | #  |
|----|--------------------|-------------------|----------------|-------------------|--------------------|-------------------|------|--------------------|-------------------|----------------|------------------|--------------------|-------------------|----|
| 1  | 88.039304          | 44.523290         |                |                   | 70.028739          | 35.518008         | S    |                    |                   |                |                  |                    |                   | 16 |
| 2  | <b>251.102633</b>  | 126.054954        |                |                   | 233.092068         | 117.049672        | Y    | 2015.026640        | 1008.016958       | 1998.000091    | 999.503683       | 1997.016075        | 999.011675        | 15 |
| 3  | <b>380.145226</b>  | 190.576251        |                |                   | 362.134661         | 181.570969        | E    | 1851.963311        | <b>926.485294</b> | 1834.936762    | 917.972019       | 1833.952746        | 917.480011        | 14 |
| 4  | <b>493.229290</b>  | 247.118283        |                |                   | <b>475.218725</b>  | 238.113001        | L    | <b>1722.920718</b> | 861.963997        | 1705.894169    | 853.450722       | 1704.910153        | 852.958714        | 13 |
| 5  | 590.282054         | 295.644665        |                |                   | 572.271489         | 286.639383        | P    | <b>1609.836654</b> | <b>805.421965</b> | 1592.810105    | 796.908691       | 1591.826089        | <b>796.416682</b> | 12 |
| 6  | 705.308997         | 353.158137        |                |                   | 687.298432         | 344.152854        | D    | <b>1512.783890</b> | 756.895583        | 1495.757341    | 748.382309       | 1494.773325        | 747.890300        | 11 |
| 7  | 762.330461         | 381.668869        |                |                   | 744.319896         | 372.663586        | G    | <b>1397.756947</b> | <b>699.382111</b> | 1380.730398    | 690.868837       | <b>1379.746382</b> | <b>690.376829</b> | 10 |
| 8  | <b>1201.555787</b> | <b>601.281532</b> | 1184.529238    | 592.768257        | <b>1183.545222</b> | 592.276249        | Q    | <b>1340.735483</b> | 670.871379        | 1323.708934    | 662.358105       | 1322.724918        | 661.866097        | 9  |
| 9  | <b>1300.624201</b> | 650.815739        | 1283.597652    | 642.302464        | <b>1282.613636</b> | 641.810456        | V    | <b>901.510157</b>  | 451.258716        | 884.483608     | 442.745442       | 883.499592         | 442.253434        | 8  |
| 10 | <b>1413.708265</b> | <b>707.357771</b> | 1396.681716    | 698.844496        | 1395.697700        | 698.352488        | I    | <b>802.441743</b>  | 401.724509        | 785.415194     | 393.211235       | 784.431178         | 392.719227        | 7  |
| 11 | 1514.755944        | 757.881610        | 1497.729395    | 749.368336        | <b>1496.745379</b> | 748.876328        | T    | <b>689.357679</b>  | 345.182478        | 672.331130     | 336.669203       | 671.347114         | 336.177195        | 6  |
| 12 | 1627.840008        | 814.423642        | 1610.813459    | <b>805.910368</b> | <b>1609.829443</b> | <b>805.418359</b> | I    | <b>588.310000</b>  | 294.658638        | 571.283451     | 286.145363       | 570.299435         | 285.653355        | 5  |
| 13 | <b>1684.861472</b> | 842.934374        | 1667.834923    | 834.421099        | 1666.850907        | 833.929091        | G    | <b>475.225936</b>  | 238.116606        | 458.199387     | 229.603331       | 457.215371         | 229.111323        | 4  |
| 14 | 1798.904399        | 899.955837        | 1781.877850    | 891.442563        | 1780.893834        | 890.950555        | N    | 418.204472         | 209.605874        | 401.177923     | 201.092600       | 400.193907         | 200.600592        | 3  |
| 15 | 1927.946992        | 964.477134        | 1910.920443    | 955.963860        | 1909.936427        | 955.471851        | E    | <b>304.161545</b>  | 152.584411        | 287.134996     | 144.071136       | 286.150980         | 143.579128        | 2  |
| 16 |                    |                   |                |                   |                    |                   | R    | <b>175.118952</b>  | 88.063114         | 158.092403     | 79.549839        |                    |                   | 1  |

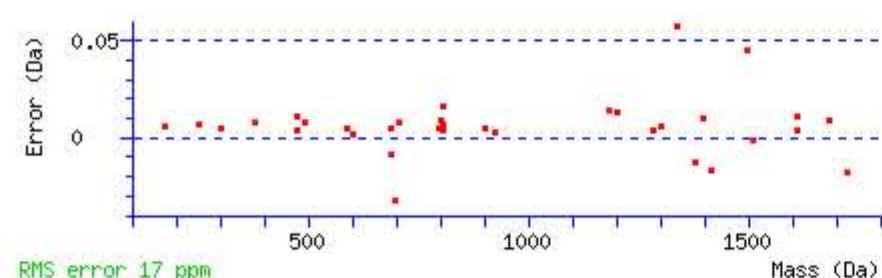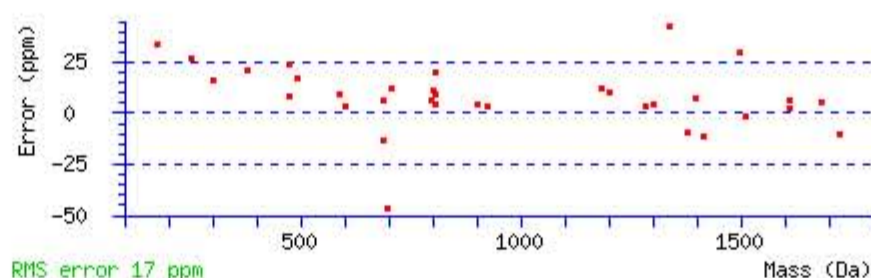

NCBI BLAST search of [SYELPDGQVITIGNER](#)

(Parameters: blastp, nr protein database, expect=20000, no filter, PAM30)

Other BLAST [web gateways](#)

All matches to this query

| Score | Mr(calc):   | Delta    | Sequence                         |
|-------|-------------|----------|----------------------------------|
| 53.9  | 2101.051376 | 0.002596 | <a href="#">SYELPDGQVITIGNER</a> |

Mascot: <http://www.matrixscience.com/>



# MASCOT SEARCH RESULTS

## Peptide View

MS/MS Fragmentation of **VNCLQTR**

Found in **AFAM\_HUMAN**, Afamin OS=Homo sapiens GN=AFM PE=1 SV=1

Match to Query 21766: 1200.613808 from(601.314180,2+) rtinseconds(1506) index(2416)

Title: Locus:1.1.1.3094.9 File:"2013-07-02 CLN FXIII 30 min 3rd F 1.wiff"

Data file C:\Program Files (x86)\Matrix Science\Mascot Daemon\mgf3 FXIII 30 min 3rd\mascot\_daemon\_merge.mgf

Click mouse within plot area to zoom in by factor of two about that point

Or, Plot from  to  Da

Label all possible matches  Label matches used for scoring

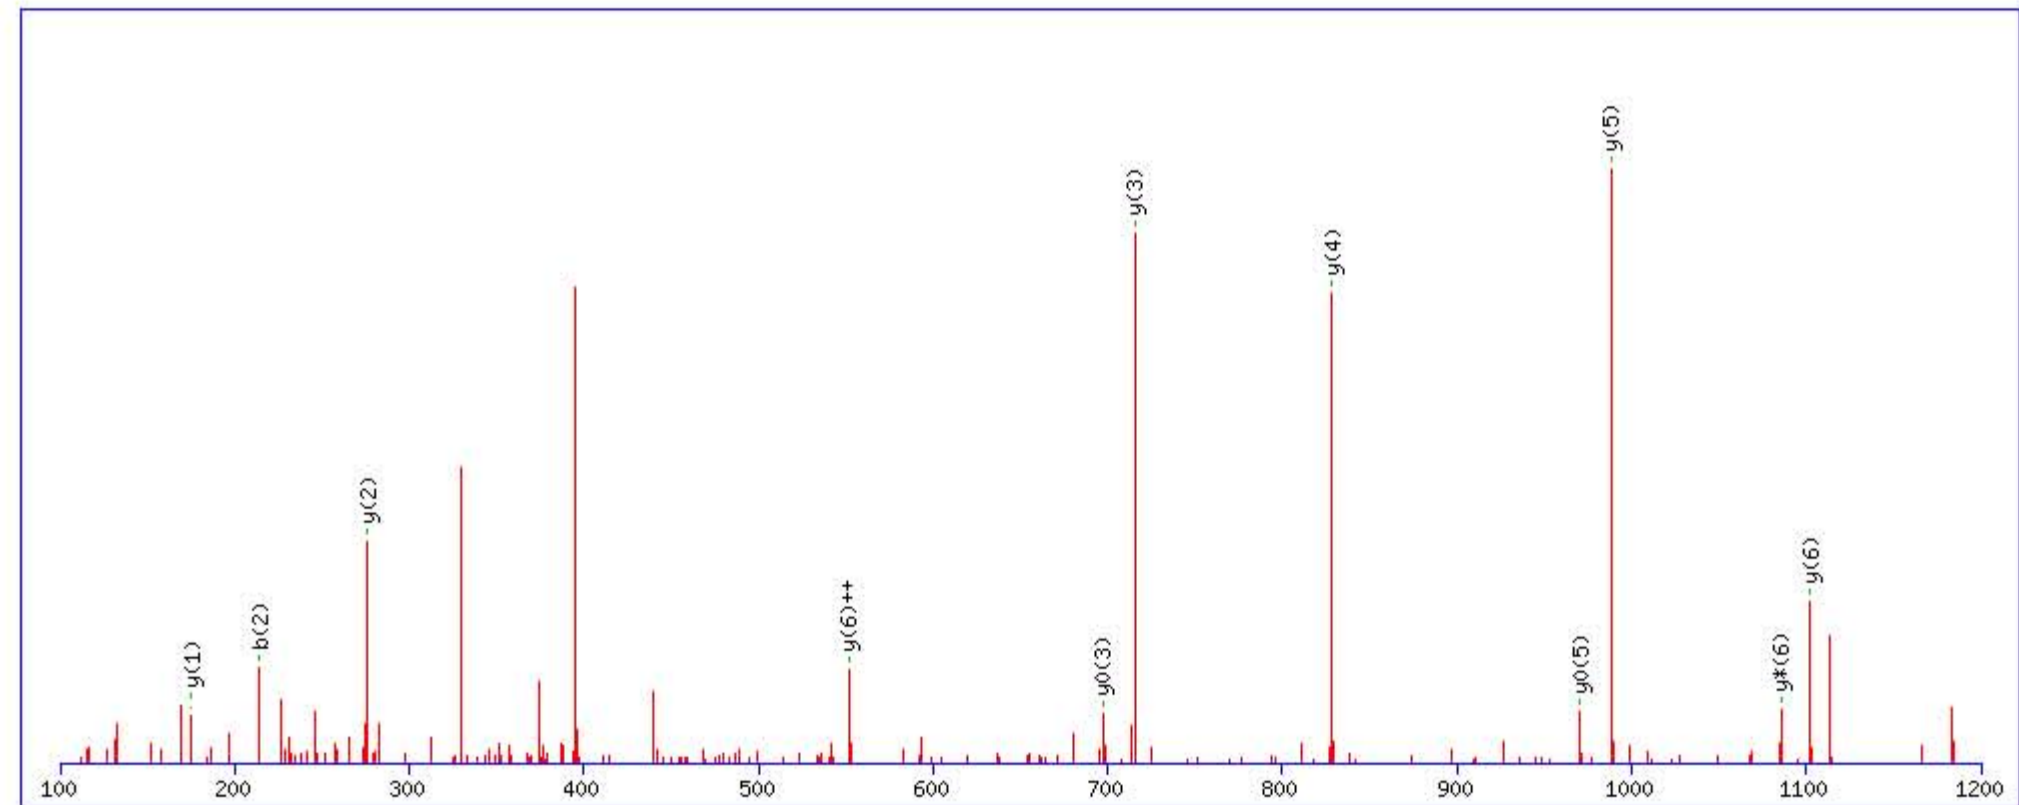

Monoisotopic mass of neutral peptide Mr(calc): 1200.610733

Fixed modifications: Carbamidomethyl (C) (apply to specified residues or termini only)

Variable modifications:

Q5 : Biotin:Thermo-21345 (Q)

Ions Score: 35 Expect: 0.0037

Matches : 11/58 fragment ions using 22 most intense peaks [\(help\)](#)

| # | b           | b <sup>++</sup> | b <sup>+</sup> | b <sup>*++</sup> | b <sup>0</sup> | b <sup>0++</sup> | Seq. | y           | y <sup>++</sup> | y <sup>+</sup> | y <sup>*++</sup> | y <sup>0</sup> | y <sup>0++</sup> | # |
|---|-------------|-----------------|----------------|------------------|----------------|------------------|------|-------------|-----------------|----------------|------------------|----------------|------------------|---|
| 1 | 100.075690  | 50.541483       |                |                  |                |                  | V    |             |                 |                |                  |                |                  | 7 |
| 2 | 214.118617  | 107.562947      | 197.092068     | 99.049672        |                |                  | N    | 1102.549597 | 551.778437      | 1085.523048    | 543.265162       | 1084.539032    | 542.773154       | 6 |
| 3 | 374.149266  | 187.578271      | 357.122717     | 179.064997       |                |                  | C    | 988.506670  | 494.756973      | 971.480121     | 486.243698       | 970.496105     | 485.751691       | 5 |
| 4 | 487.233330  | 244.120303      | 470.206781     | 235.607029       |                |                  | L    | 828.476021  | 414.741649      | 811.449472     | 406.228374       | 810.465456     | 405.736366       | 4 |
| 5 | 926.458656  | 463.732966      | 909.432107     | 455.219692       |                |                  | Q    | 715.391957  | 358.199617      | 698.365408     | 349.686342       | 697.381392     | 349.194334       | 3 |
| 6 | 1027.506335 | 514.256806      | 1010.479786    | 505.743531       | 1009.495770    | 505.251523       | T    | 276.166631  | 138.586953      | 259.140082     | 130.073679       | 258.156066     | 129.581671       | 2 |
| 7 |             |                 |                |                  |                |                  | R    | 175.118952  | 88.063114       | 158.092403     | 79.549839        |                |                  | 1 |

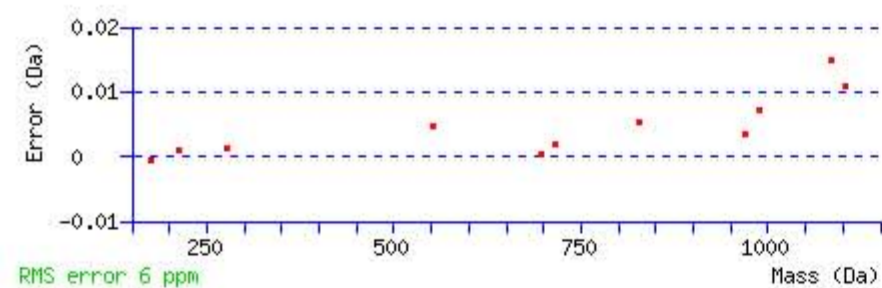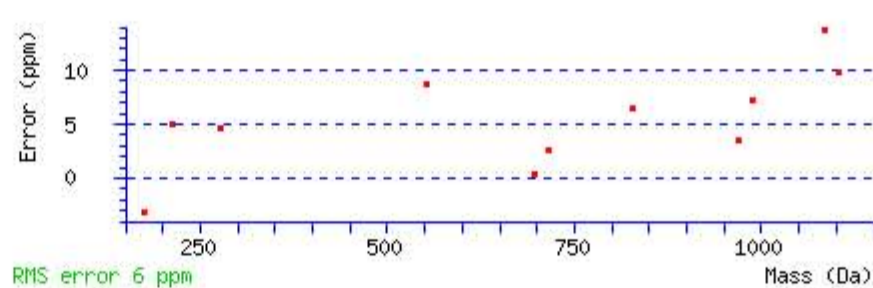

NCBI BLAST search of **VNCLQTR**

(Parameters: blastp, nr protein database, expect=20000, no filter, PAM30)

Other BLAST [web gateways](#)

## All matches to this query

| Score | Mr(calc):   | Delta     | Sequence                      |
|-------|-------------|-----------|-------------------------------|
| 34.6  | 1200.610733 | 0.003075  | <a href="#">VNCLQTR</a>       |
| 8.2   | 1200.628479 | -0.014671 | <a href="#">MVAALLGGGGEAR</a> |
| 2.5   | 1200.603333 | 0.010475  | <a href="#">GRIAEPSVCGR</a>   |
| 2.4   | 1200.617233 | -0.003425 | <a href="#">VMEETPNILR</a>    |
| 1.6   | 1200.611191 | 0.002617  | <a href="#">HDSLAKHTR</a>     |
| 1.2   | 1200.603333 | 0.010475  | <a href="#">SQEGRGTR</a>      |

Mascot: <http://www.matrixscience.com/>



# MASCOT Search Results

## Peptide View

MS/MS Fragmentation of **GQCIINSNK**

Found in **AFAM\_HUMAN**, Afamin OS=Homo sapiens GN=AFM PE=1 SV=1

Match to Query 25333: 1343.669708 from(672.842130,2+) rtinseconds(1588) index(2895)

Title: Locus:1.1.1.3122.24 File:"2013-07-02 CLN FXIII 30 min 3rd F 1.wiff"

Data file C:\Program Files (x86)\Matrix Science\Mascot Daemon\mgf3 FXIII 30 min 3rd\mascot\_daemon\_merge.mgf

Click mouse within plot area to zoom in by factor of two about that point

Or, Plot from  to  Da

Label all possible matches  Label matches used for scoring

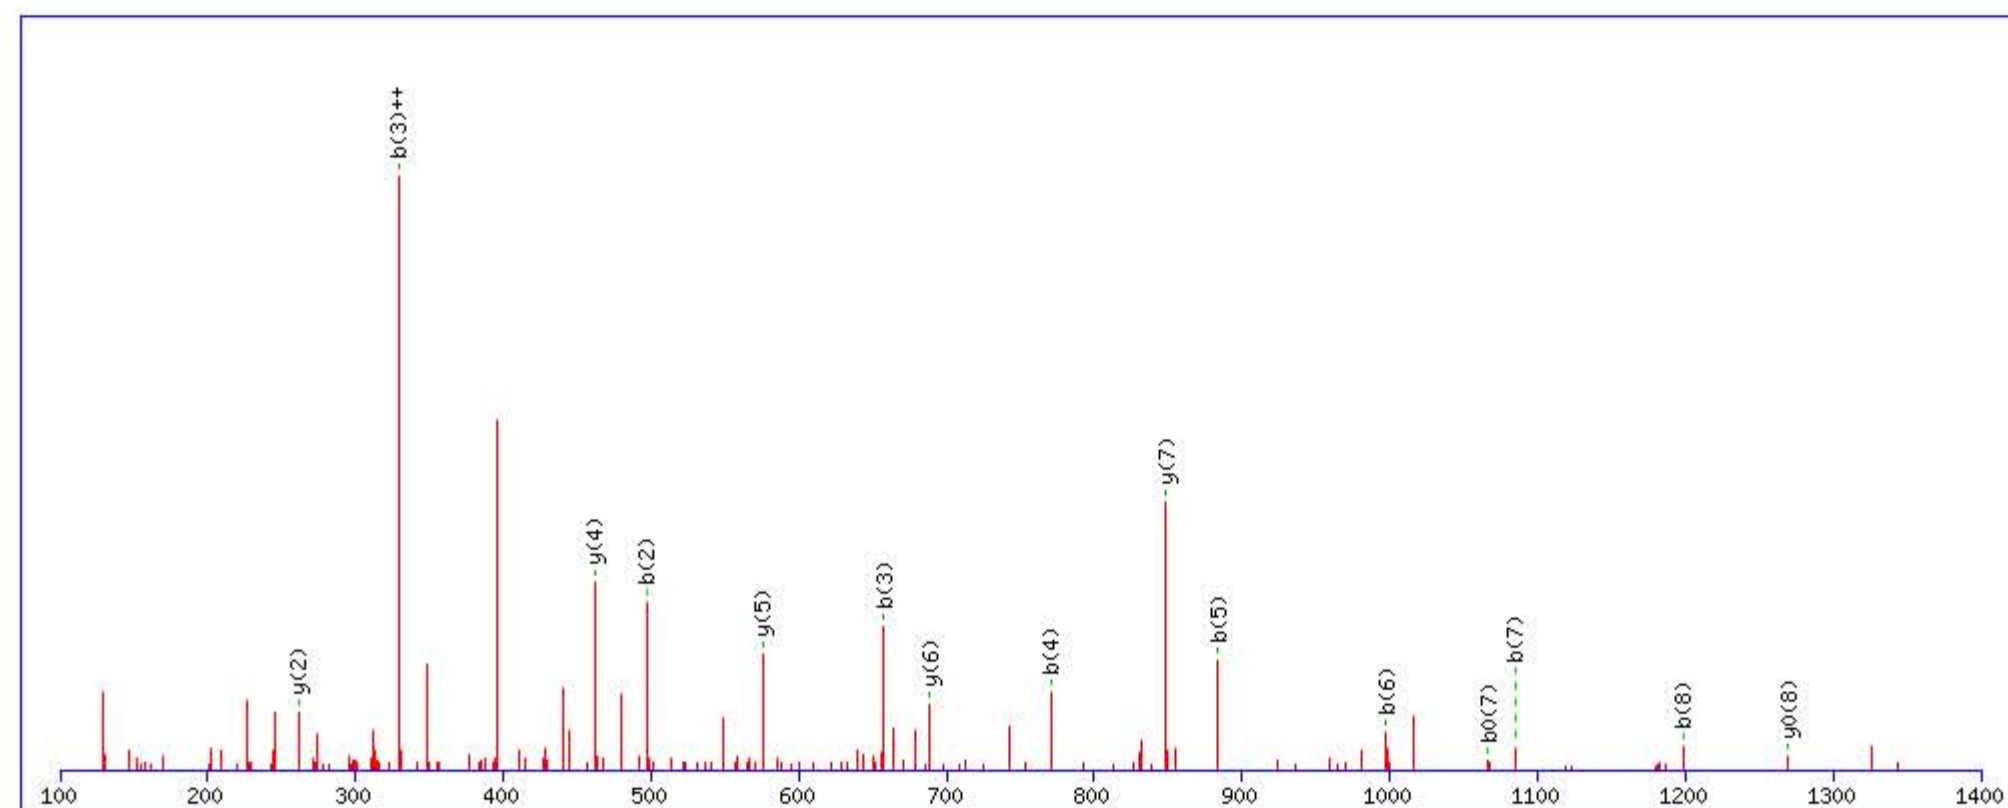

Monoisotopic mass of neutral peptide Mr(calc): 1343.668961

Fixed modifications: Carbamidomethyl (C) (apply to specified residues or termini only)

Variable modifications:

Q2 : Biotin:Thermo-21345 (Q)

Ions Score: 46 Expect: 0.00043

Matches : 15/78 fragment ions using 24 most intense peaks [\(help\)](#)

| # | b                  | b <sup>++</sup>   | b <sup>*</sup> | b <sup>*++</sup> | b <sup>0</sup>     | b <sup>0++</sup> | Seq. | y                 | y <sup>++</sup> | y <sup>*</sup> | y <sup>*++</sup> | y <sup>0</sup>     | y <sup>0++</sup> | # |
|---|--------------------|-------------------|----------------|------------------|--------------------|------------------|------|-------------------|-----------------|----------------|------------------|--------------------|------------------|---|
| 1 | 58.028740          | 29.518008         |                |                  |                    |                  | G    |                   |                 |                |                  |                    |                  | 9 |
| 2 | <b>497.254066</b>  | 249.130671        | 480.227517     | 240.617397       |                    |                  | Q    | 1287.654789       | 644.331033      | 1270.628240    | 635.817758       | <b>1269.644224</b> | 635.325750       | 8 |
| 3 | <b>657.284715</b>  | <b>329.145996</b> | 640.258166     | 320.632721       |                    |                  | C    | <b>848.429463</b> | 424.718370      | 831.402914     | 416.205095       | 830.418898         | 415.713087       | 7 |
| 4 | <b>770.368779</b>  | 385.688028        | 753.342230     | 377.174753       |                    |                  | I    | <b>688.398814</b> | 344.703045      | 671.372265     | 336.189771       | 670.388249         | 335.697763       | 6 |
| 5 | <b>883.452843</b>  | 442.230060        | 866.426294     | 433.716785       |                    |                  | I    | <b>575.314750</b> | 288.161013      | 558.288201     | 279.647739       | 557.304185         | 279.155731       | 5 |
| 6 | <b>997.495770</b>  | 499.251523        | 980.469221     | 490.738249       |                    |                  | N    | <b>462.230686</b> | 231.618981      | 445.204137     | 223.105706       | 444.220121         | 222.613698       | 4 |
| 7 | <b>1084.527798</b> | 542.767537        | 1067.501249    | 534.254263       | <b>1066.517233</b> | 533.762255       | S    | 348.187759        | 174.597517      | 331.161210     | 166.084243       | 330.177194         | 165.592235       | 3 |
| 8 | <b>1198.570725</b> | 599.789001        | 1181.544176    | 591.275726       | 1180.560160        | 590.783718       | N    | <b>261.155731</b> | 131.081503      | 244.129182     | 122.568229       |                    |                  | 2 |
| 9 |                    |                   |                |                  |                    |                  | K    | 147.112804        | 74.060040       | 130.086255     | 65.546765        |                    |                  | 1 |

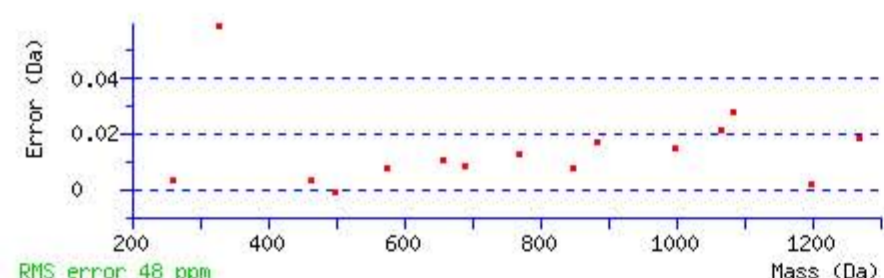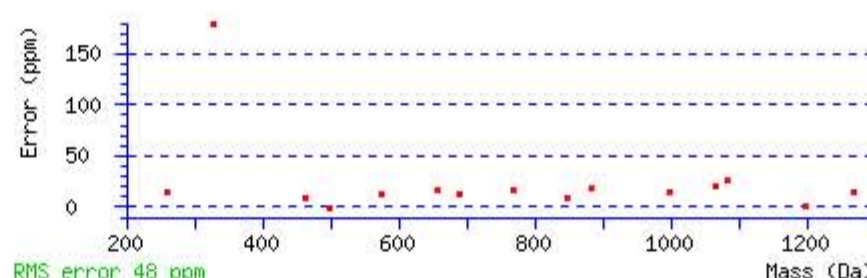

NCBI BLAST search of [GQCIINSNK](#)

(Parameters: blastp, nr protein database, expect=20000, no filter, PAM30)

Other BLAST [web gateways](#)

## All matches to this query

| Score | Mr(calc):   | Delta     | Sequence                       |
|-------|-------------|-----------|--------------------------------|
| 46.4  | 1343.668961 | 0.000747  | <a href="#">GQCIINSNK</a>      |
| 9.8   | 1343.654358 | 0.015350  | <a href="#">QSLNQFMAVYK</a>    |
| 7.2   | 1343.661575 | 0.008133  | <a href="#">KISSKGHCQGDK</a>   |
| 6.6   | 1343.661591 | 0.008117  | <a href="#">GIGTGHTSMNKGKK</a> |
| 3.7   | 1343.656876 | 0.012832  | <a href="#">TNLDES DVQPVK</a>  |
| 3.3   | 1343.679306 | -0.009598 | <a href="#">QAQSRAQEALDK</a>   |
| 2.6   | 1343.687378 | -0.017670 | <a href="#">KGFEFNLSFQK</a>    |
| 2.3   | 1343.665604 | 0.004104  | <a href="#">GTSQLSAWHMVK</a>   |
| 1.7   | 1343.686707 | -0.016999 | <a href="#">QPSSAKSSNK</a>     |
| 1.7   | 1343.657745 | 0.011963  | <a href="#">QGGE PVSTMK</a>    |



# MASCOT SCIENCE Mascot Search Results

## Peptide View

MS/MS Fragmentation of **EQQDSPGNK**

Found in **A2AP\_HUMAN**, Alpha-2-antiplasmin OS=Homo sapiens GN=SERPINF2 PE=1 SV=3

Match to Query 24735: 1312.610848 from(657.312700,2+) rtinseconds(1162) index(575)

Title: Locus:1.1.1.2974.11 File:"2013-07-02 CLN FXIII 30 min 3rd F 1.wiff"

Data file C:\Program Files (x86)\Matrix Science\Mascot Daemon\mgf3 FXIII 30 min 3rd\mascot\_daemon\_merge.mgf

Click mouse within plot area to zoom in by factor of two about that point

Or, Plot from  to  Da

Label all possible matches  Label matches used for scoring

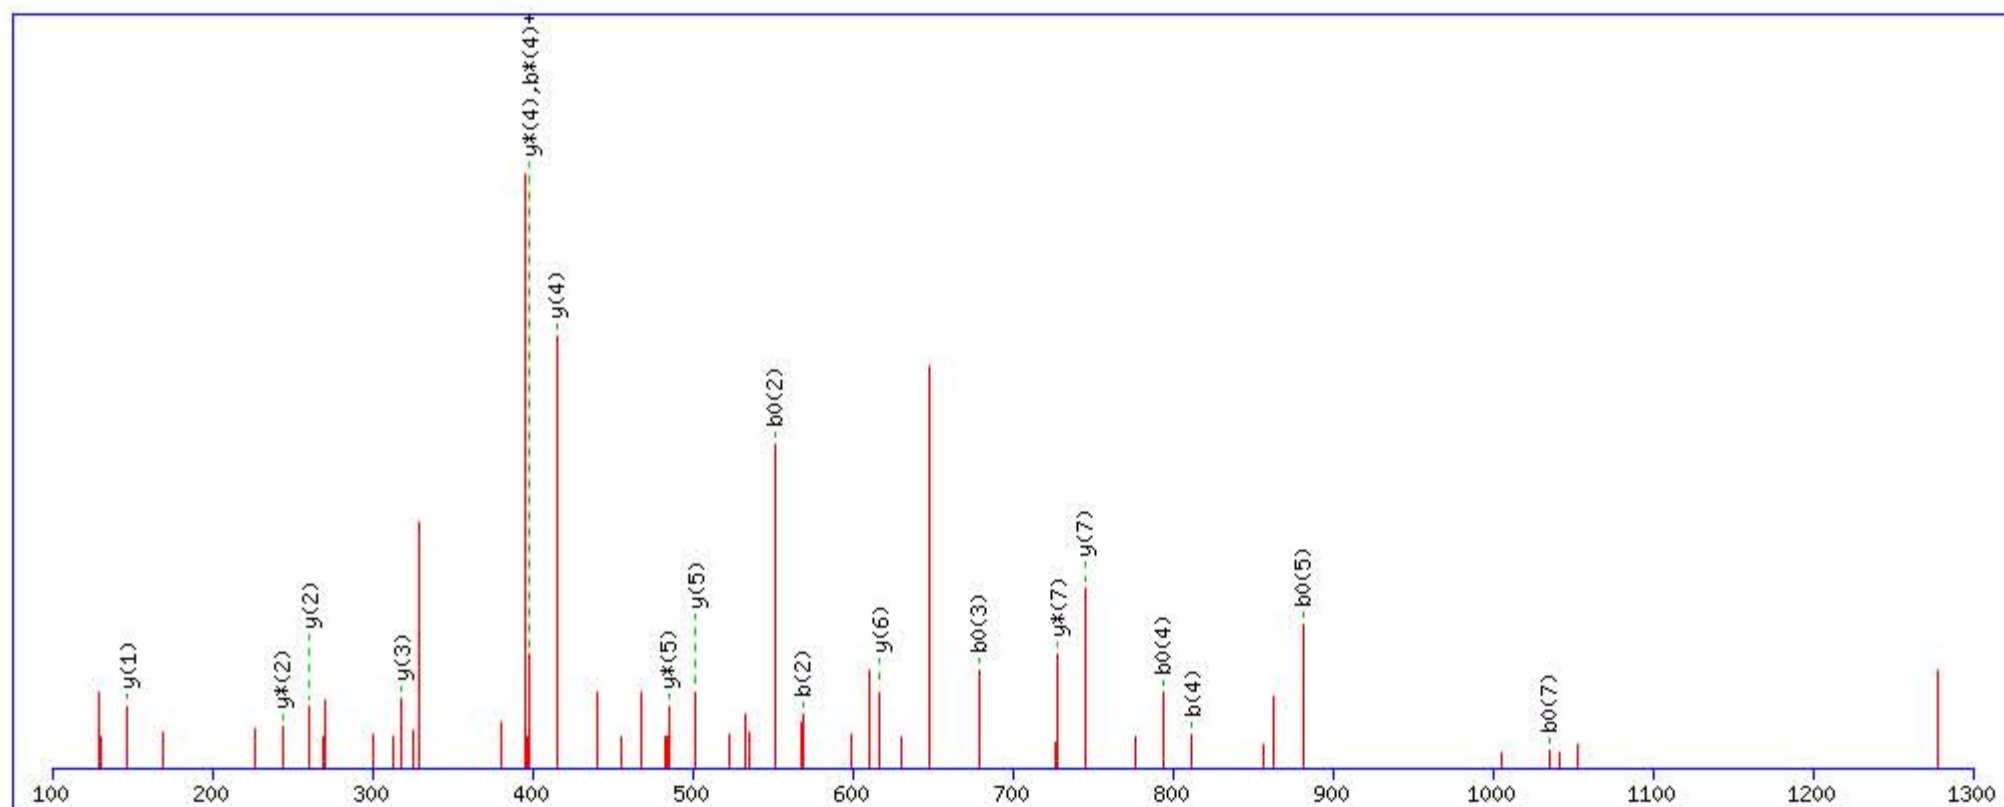

Monoisotopic mass of neutral peptide Mr(calc): 1312.608139

Fixed modifications: Carbamidomethyl (C) (apply to specified residues or termini only)

Variable modifications:

Q2 : Biotin:Thermo-21345 (Q)

Ions Score: 41 Expect: 0.00086

Matches : 19/86 fragment ions using 36 most intense peaks ([help](#))

| # | b                 | b <sup>++</sup> | b <sup>*</sup> | b <sup>+++</sup>  | b <sup>0</sup>     | b <sup>0++</sup> | Seq. | y                 | y <sup>++</sup> | y <sup>*</sup>    | y <sup>+++</sup> | y <sup>0</sup> | y <sup>0++</sup> | # |
|---|-------------------|-----------------|----------------|-------------------|--------------------|------------------|------|-------------------|-----------------|-------------------|------------------|----------------|------------------|---|
| 1 | 130.049869        | 65.528572       |                |                   | 112.039304         | 56.523290        | E    |                   |                 |                   |                  |                |                  | 9 |
| 2 | <b>569.275195</b> | 285.141236      | 552.248646     | 276.627961        | <b>551.264630</b>  | 276.135953       | Q    | 1184.572834       | 592.790055      | 1167.546285       | 584.276780       | 1166.562269    | 583.784772       | 8 |
| 3 | 697.333773        | 349.170525      | 680.307224     | 340.657250        | <b>679.323208</b>  | 340.165242       | Q    | <b>745.347508</b> | 373.177392      | <b>728.320959</b> | 364.664117       | 727.336943     | 364.172109       | 7 |
| 4 | <b>812.360716</b> | 406.683996      | 795.334167     | <b>398.170722</b> | <b>794.350151</b>  | 397.678714       | D    | <b>617.288930</b> | 309.148103      | 600.262381        | 300.634828       | 599.278365     | 300.142820       | 6 |
| 5 | 899.392744        | 450.200010      | 882.366195     | 441.686736        | <b>881.382179</b>  | 441.194728       | S    | <b>502.261987</b> | 251.634631      | <b>485.235438</b> | 243.121357       | 484.251422     | 242.629349       | 5 |
| 6 | 996.445508        | 498.726392      | 979.418959     | 490.213118        | 978.434943         | 489.721110       | P    | <b>415.229959</b> | 208.118617      | <b>398.203410</b> | 199.605343       |                |                  | 4 |
| 7 | 1053.466972       | 527.237124      | 1036.440423    | 518.723850        | <b>1035.456407</b> | 518.231841       | G    | <b>318.177195</b> | 159.592235      | 301.150646        | 151.078961       |                |                  | 3 |
| 8 | 1167.509899       | 584.258587      | 1150.483350    | 575.745313        | 1149.499334        | 575.253305       | N    | <b>261.155731</b> | 131.081503      | <b>244.129182</b> | 122.568229       |                |                  | 2 |
| 9 |                   |                 |                |                   |                    |                  | K    | <b>147.112804</b> | 74.060040       | 130.086255        | 65.546765        |                |                  | 1 |

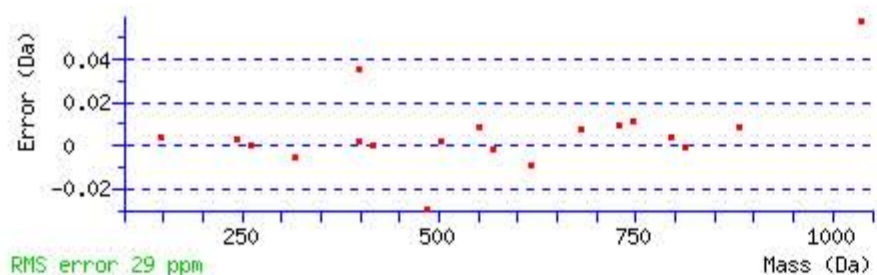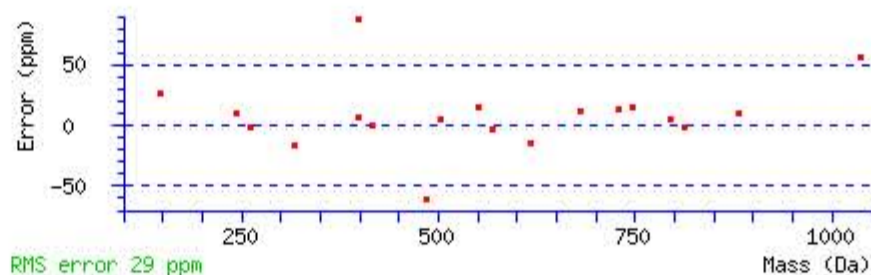

NCBI BLAST search of [EQQDSPGNK](#)

(Parameters: blastp, nr protein database, expect=20000, no filter, PAM30)

Other BLAST [web gateways](#)

All matches to this query

| Score | Mr(calc):   | Delta    | Sequence                  |
|-------|-------------|----------|---------------------------|
| 40.8  | 1312.608139 | 0.002709 | <a href="#">EQQDSPGNK</a> |
| 22.7  | 1312.608139 | 0.002709 | <a href="#">EQQDSPGNK</a> |

Mascot: <http://www.matrixscience.com/>



# MASCOT Search Results

## Peptide View

MS/MS Fragmentation of **LG NQEPGGQTALK**

Found in **A2AP\_HUMAN**, Alpha-2-antiplasmin OS=Homo sapiens GN=SERPINF2 PE=1 SV=3

Match to Query 35000: 1622.824388 from(812.419470,2+) rtinseconds(1609) index(61697)

Title: Locus:1.1.1.3039.15 File:"2013-07-02 CLN FXIII 30 min 3rd FT.wiff"

Data file C:\Program Files (x86)\Matrix Science\Mascot Daemon\mgf\3 FXIII 30 min 3rd\mascot\_daemon\_merge.mgf

Click mouse within plot area to zoom in by factor of two about that point

Or, Plot from  to  Da

Label all possible matches  Label matches used for scoring

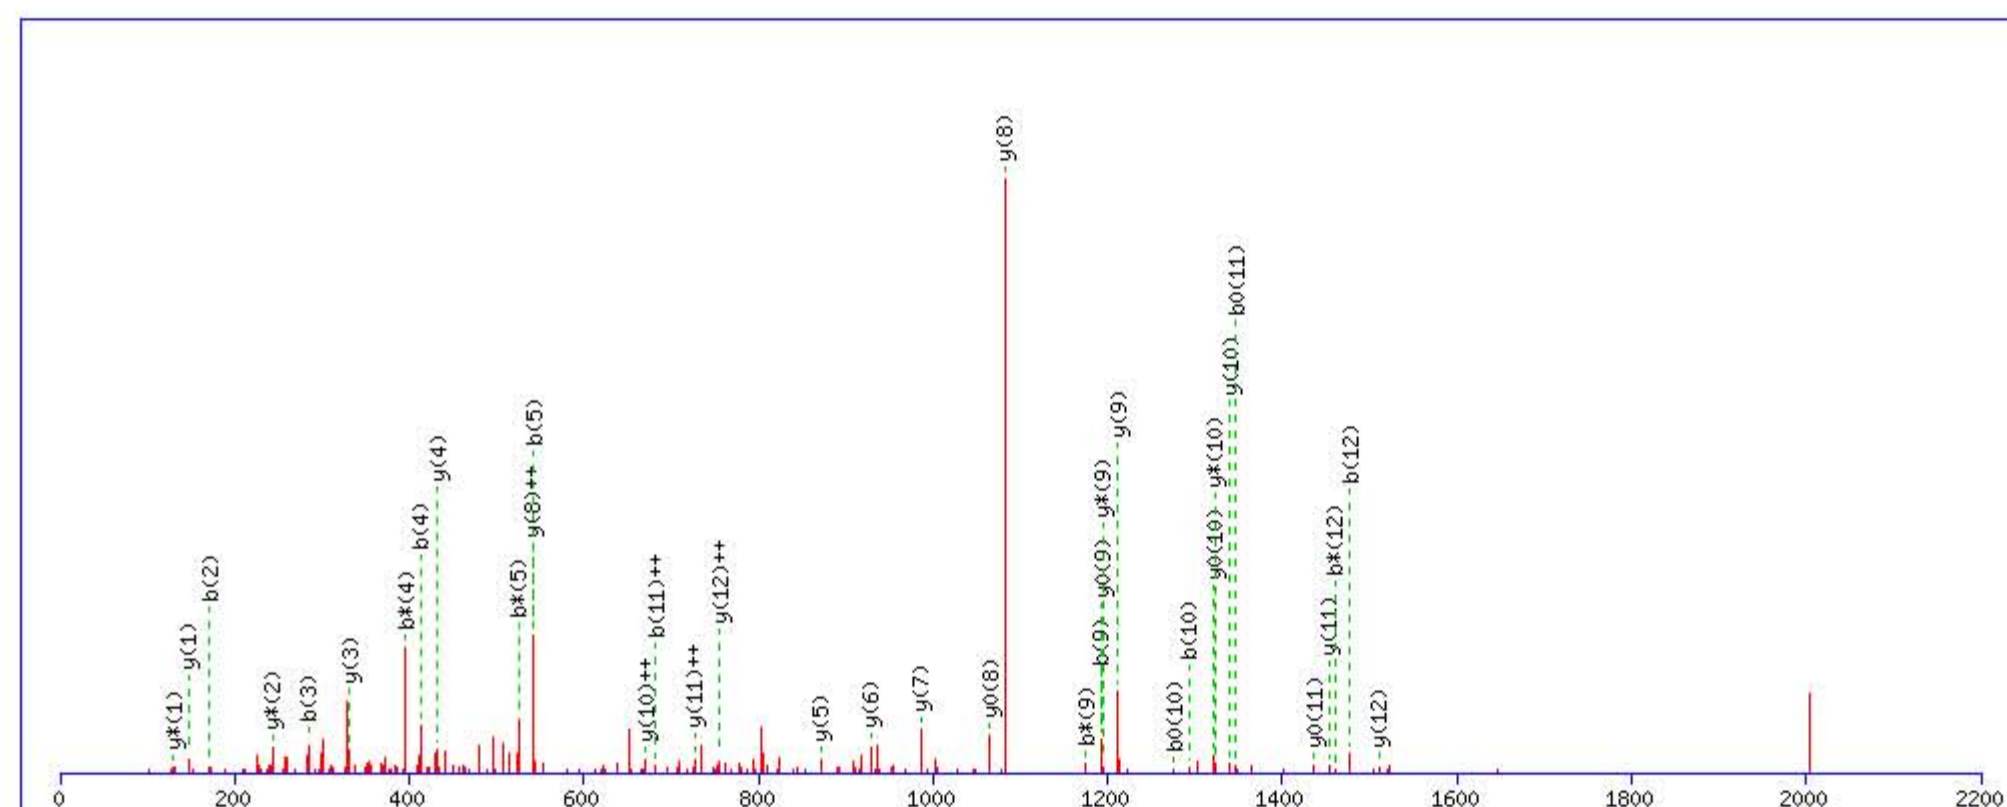

Monoisotopic mass of neutral peptide Mr(calc): 1622.845016

Fixed modifications: Carbamidomethyl (C) (apply to specified residues or termini only)

Variable modifications:

Q9 : Biotin:Thermo-21345 (Q)

Ions Score: 64 Expect: 8.6e-006

Matches : 37/126 fragment ions using 74 most intense peaks [\(help\)](#)

| #  | b                  | b <sup>++</sup>   | b <sup>*</sup>     | b <sup>+++</sup> | b <sup>0</sup>     | b <sup>0++</sup> | Seq. | y                  | y <sup>++</sup>   | y <sup>*</sup>     | y <sup>+++</sup> | y <sup>0</sup>     | y <sup>0++</sup> | #  |
|----|--------------------|-------------------|--------------------|------------------|--------------------|------------------|------|--------------------|-------------------|--------------------|------------------|--------------------|------------------|----|
| 1  | 114.091340         | 57.549308         |                    |                  |                    |                  | L    |                    |                   |                    |                  |                    |                  | 13 |
| 2  | <b>171.112804</b>  | 86.060040         |                    |                  |                    |                  | G    | <b>1510.768241</b> | <b>755.887759</b> | 1493.741692        | 747.374484       | 1492.757676        | 746.882476       | 12 |
| 3  | <b>285.155731</b>  | 143.081504        | 268.129182         | 134.568229       |                    |                  | N    | <b>1453.746777</b> | <b>727.377027</b> | 1436.720228        | 718.863752       | <b>1435.736212</b> | 718.371744       | 11 |
| 4  | <b>413.214309</b>  | 207.110793        | <b>396.187760</b>  | 198.597518       |                    |                  | Q    | <b>1339.703850</b> | <b>670.355563</b> | <b>1322.677301</b> | 661.842289       | <b>1321.693285</b> | 661.350281       | 10 |
| 5  | <b>542.256902</b>  | 271.632089        | <b>525.230353</b>  | 263.118815       | 524.246337         | 262.626807       | E    | <b>1211.645272</b> | 606.326274        | <b>1194.618723</b> | 597.813000       | <b>1193.634707</b> | 597.320991       | 9  |
| 6  | 639.309666         | 320.158471        | 622.283117         | 311.645197       | 621.299101         | 311.153189       | P    | <b>1082.602679</b> | <b>541.804978</b> | 1065.576130        | 533.291703       | <b>1064.592114</b> | 532.799695       | 8  |
| 7  | 696.331130         | 348.669203        | 679.304581         | 340.155929       | 678.320565         | 339.663921       | G    | <b>985.549915</b>  | 493.278596        | 968.523366         | 484.765321       | 967.539350         | 484.273313       | 7  |
| 8  | 753.352594         | 377.179935        | 736.326045         | 368.666661       | 735.342029         | 368.174653       | G    | <b>928.528451</b>  | 464.767864        | 911.501902         | 456.254589       | 910.517886         | 455.762581       | 6  |
| 9  | <b>1192.577920</b> | 596.792598        | <b>1175.551371</b> | 588.279324       | 1174.567355        | 587.787316       | Q    | <b>871.506987</b>  | 436.257132        | 854.480438         | 427.743857       | 853.496422         | 427.251849       | 5  |
| 10 | <b>1293.625599</b> | 647.316438        | 1276.599050        | 638.803163       | <b>1275.615034</b> | 638.311155       | T    | <b>432.281661</b>  | 216.644468        | 415.255112         | 208.131194       | 414.271096         | 207.639186       | 4  |
| 11 | 1364.662713        | <b>682.834995</b> | 1347.636164        | 674.321720       | <b>1346.652148</b> | 673.829712       | A    | <b>331.233982</b>  | 166.120629        | 314.207433         | 157.607354       |                    |                  | 3  |
| 12 | <b>1477.746777</b> | 739.377027        | <b>1460.720228</b> | 730.863752       | 1459.736212        | 730.371744       | L    | 260.196868         | 130.602072        | <b>243.170319</b>  | 122.088797       |                    |                  | 2  |
| 13 |                    |                   |                    |                  |                    |                  | K    | <b>147.112804</b>  | 74.060040         | <b>130.086255</b>  | 65.546765        |                    |                  | 1  |

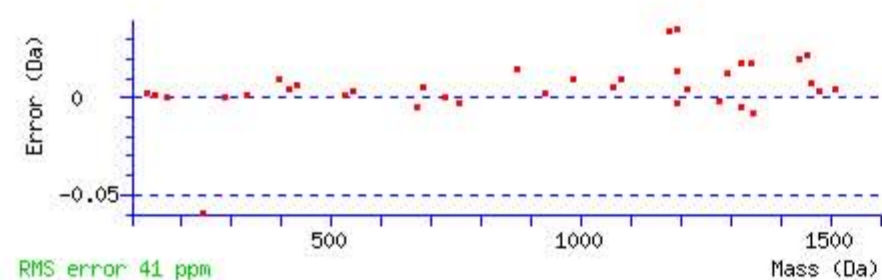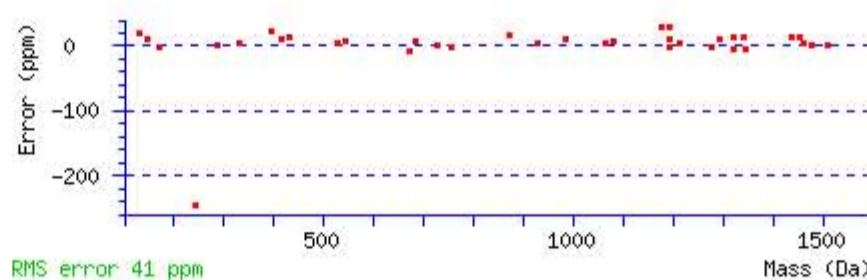

NCBI BLAST search of **LG NQEPGGQTALK**

(Parameters: blastp, nr protein database, expect=20000, no filter, PAM30)

Other BLAST [web gateways](#)

All matches to this query

| Score | Mr(calc):   | Delta     | Sequence                        |
|-------|-------------|-----------|---------------------------------|
| 63.7  | 1622.845016 | -0.020628 | <a href="#">LG NQEPGGQTALK</a>  |
| 16.2  | 1622.845016 | -0.020628 | <a href="#">LG NQEPGGQTALK</a>  |
| 9.2   | 1622.802094 | 0.022294  | <a href="#">MAPPEPAGSRQR</a>    |
| 9.2   | 1622.813324 | 0.011064  | <a href="#">NGLAQRMSHGK</a>     |
| 7.9   | 1622.800751 | 0.023637  | <a href="#">MAVQESAAQLSMTLK</a> |
| 7.0   | 1622.820511 | 0.003877  | <a href="#">FPPEASGYLHIGHAK</a> |
| 5.6   | 1622.831085 | -0.006697 | <a href="#">GLNPNPESHQMTKRK</a> |
| 3.8   | 1622.837601 | -0.013213 | <a href="#">SQSEKQTYLEVRR</a>   |
| 1.6   | 1622.819855 | 0.004533  | <a href="#">NSSPRMPHLAVATDK</a> |



# Mascot Search Results

## Peptide View

MS/MS Fragmentation of **QLTSGPNQEQVSPLTLK**

Found in **A2AP\_HUMAN**, Alpha-2-antiplasmin OS=Homo sapiens GN=SERPINF2 PE=1 SV=3

Match to Query 48425: 2263.217202 from(755.413010,3+) rtinseconds(2582) index(8287)

Title: Locus:1.1.1.3469.8 File:"2013-07-02 CLN FXIII 30 min 3rd F 1.wiff"

Data file C:\Program Files (x86)\Matrix Science\Mascot Daemon\mgf3 FXIII 30 min 3rd\mascot\_daemon\_merge.mgf

Click mouse within plot area to zoom in by factor of two about that point

Or, Plot from  to  Da

Label all possible matches  Label matches used for scoring

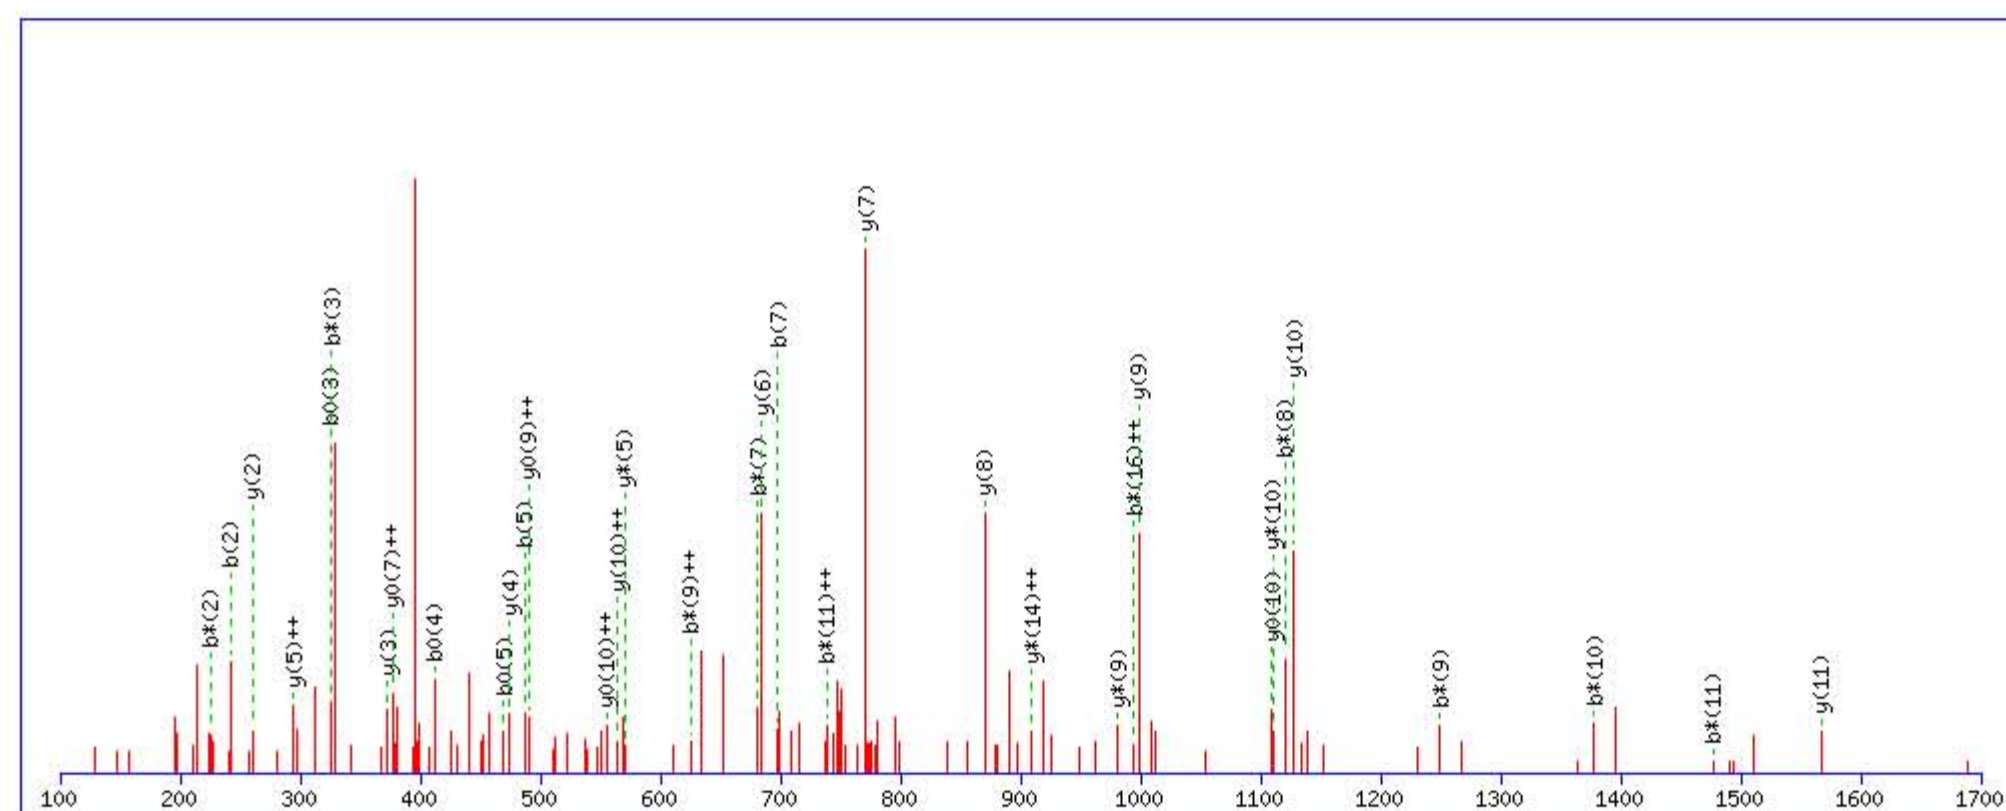

Monoisotopic mass of neutral peptide Mr(calc): 2263.224594

Fixed modifications: Carbamidomethyl (C) (apply to specified residues or termini only)

Variable modifications:

Q8 : Biotin:Thermo-21345 (Q)

Ions Score: 28 Expect: 0.0047

Matches : 35/194 fragment ions using 83 most intense peaks [\(help\)](#)

| #  | b                 | b <sup>++</sup> | b <sup>*</sup>     | b <sup>*++</sup>  | b <sup>0</sup>    | b <sup>0++</sup> | Seq. | y                  | y <sup>++</sup>   | y <sup>*</sup>     | y <sup>*++</sup>  | y <sup>0</sup>     | y <sup>0++</sup>  | #  |
|----|-------------------|-----------------|--------------------|-------------------|-------------------|------------------|------|--------------------|-------------------|--------------------|-------------------|--------------------|-------------------|----|
| 1  | 129.065854        | 65.036565       | 112.039305         | 56.523291         |                   |                  | Q    |                    |                   |                    |                   |                    |                   | 18 |
| 2  | <b>242.149918</b> | 121.578597      | <b>225.123369</b>  | 113.065323        |                   |                  | L    | 2136.173304        | 1068.590290       | 2119.146755        | 1060.077015       | 2118.162739        | 1059.585007       | 17 |
| 3  | 343.197597        | 172.102437      | <b>326.171048</b>  | 163.589162        | <b>325.187032</b> | 163.097154       | T    | 2023.089240        | 1012.048258       | 2006.062691        | 1003.534984       | 2005.078675        | 1003.042976       | 16 |
| 4  | 430.229625        | 215.618450      | 413.203076         | 207.105176        | <b>412.219060</b> | 206.613168       | S    | 1922.041561        | 961.524419        | 1905.015012        | 953.011144        | 1904.030996        | 952.519136        | 15 |
| 5  | <b>487.251089</b> | 244.129182      | 470.224540         | 235.615908        | <b>469.240524</b> | 235.123900       | G    | 1835.009533        | 918.008405        | 1817.982984        | <b>909.495130</b> | 1816.998968        | 909.003122        | 14 |
| 6  | 584.303853        | 292.655565      | 567.277304         | 284.142290        | 566.293288        | 283.650282       | P    | 1777.988069        | 889.497673        | 1760.961520        | 880.984398        | 1759.977504        | 880.492390        | 13 |
| 7  | <b>698.346780</b> | 349.677028      | <b>681.320231</b>  | 341.163753        | 680.336215        | 340.671745       | N    | 1680.935305        | 840.971291        | 1663.908756        | 832.458016        | 1662.924740        | 831.966008        | 12 |
| 8  | 1137.572106       | 569.289691      | <b>1120.545557</b> | 560.776416        | 1119.561541       | 560.284408       | Q    | <b>1566.892378</b> | 783.949827        | 1549.865829        | 775.436553        | 1548.881813        | 774.944545        | 11 |
| 9  | 1266.614699       | 633.810988      | <b>1249.588150</b> | <b>625.297713</b> | 1248.604134       | 624.805705       | E    | <b>1127.667052</b> | <b>564.337164</b> | <b>1110.640503</b> | 555.823890        | <b>1109.656487</b> | <b>555.331882</b> | 10 |
| 10 | 1394.673277       | 697.840277      | <b>1377.646728</b> | 689.327002        | 1376.662712       | 688.834994       | Q    | <b>998.624459</b>  | 499.815868        | <b>981.597910</b>  | 491.302593        | 980.613894         | <b>490.810585</b> | 9  |
| 11 | 1493.741691       | 747.374484      | <b>1476.715142</b> | <b>738.861209</b> | 1475.731126       | 738.369201       | V    | <b>870.565881</b>  | 435.786579        | 853.539332         | 427.273304        | 852.555316         | 426.781296        | 8  |
| 12 | 1580.773719       | 790.890498      | 1563.747170        | 782.377223        | 1562.763154       | 781.885215       | S    | <b>771.497467</b>  | 386.252372        | 754.470918         | 377.739097        | 753.486902         | <b>377.247089</b> | 7  |
| 13 | 1677.826483       | 839.416880      | 1660.799934        | 830.903605        | 1659.815918       | 830.411597       | P    | <b>684.465439</b>  | 342.736358        | 667.438890         | 334.223083        | 666.454874         | 333.731075        | 6  |
| 14 | 1790.910547       | 895.958912      | 1773.883998        | 887.445637        | 1772.899982       | 886.953629       | L    | 587.412675         | <b>294.209976</b> | <b>570.386126</b>  | 285.696701        | 569.402110         | 285.204693        | 5  |
| 15 | 1891.958226       | 946.482751      | 1874.931677        | 937.969477        | 1873.947661       | 937.477469       | T    | <b>474.328611</b>  | 237.667944        | 457.302062         | 229.154669        | 456.318046         | 228.662661        | 4  |
| 16 | 2005.042290       | 1003.024783     | 1988.015741        | <b>994.511509</b> | 1987.031725       | 994.019501       | L    | <b>373.280932</b>  | 187.144104        | 356.254383         | 178.630830        |                    |                   | 3  |
| 17 | 2118.126354       | 1059.566815     | 2101.099805        | 1051.053540       | 2100.115789       | 1050.561532      | L    | <b>260.196868</b>  | 130.602072        | 243.170319         | 122.088798        |                    |                   | 2  |
| 18 |                   |                 |                    |                   |                   |                  | K    | 147.112804         | 74.060040         | 130.086255         | 65.546765         |                    |                   | 1  |

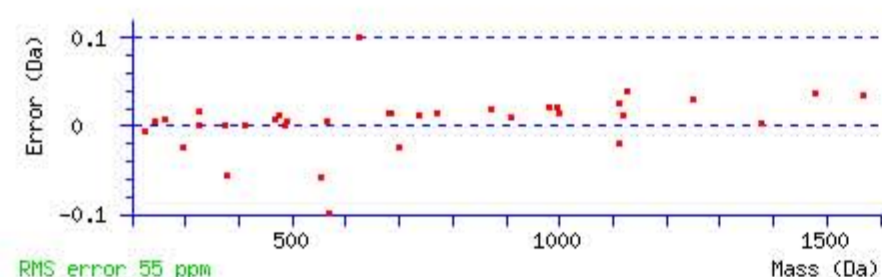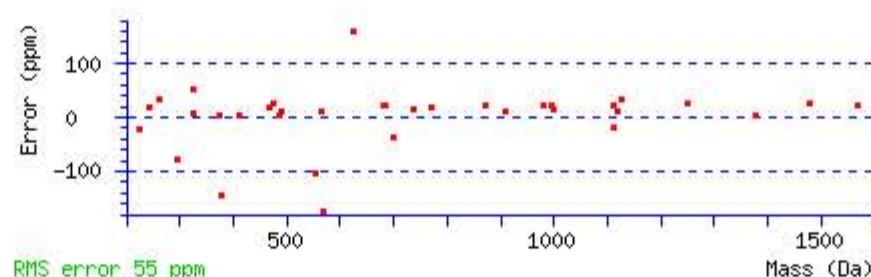

NCBI BLAST search of **QLTSGPNQEQVSPLTLK**

(Parameters: blastp, nr protein database, expect=20000, no filter, PAM30)

Other BLAST [web gateways](#)

All matches to this query

| Score | Mr(calc):   | Delta     | Sequence                            |
|-------|-------------|-----------|-------------------------------------|
| 28.1  | 2263.224594 | -0.007392 | <a href="#">QLTSGPNQEQVSPLTLK</a>   |
| 13.4  | 2263.224594 | -0.007392 | <a href="#">QLTSGPNQEQVSPLTLK</a>   |
| 9.6   | 2263.224594 | -0.007392 | <a href="#">QLTSGPNQEQVSPLTLK</a>   |
| 3.2   | 2263.224594 | -0.007392 | <a href="#">GLALSSNKVKSVMVVDNEK</a> |



# MASCOT Search Results

## Peptide View

MS/MS Fragmentation of **ELKEQQDSPGNKDFLQSLK**

Found in **A2AP\_HUMAN**, Alpha-2-antiplasmin OS=Homo sapiens GN=SERPINF2 PE=1 SV=3

Match to Query 52691: 2514.291496 from(629.580150,4+) rtinseconds(1911) index(4686)

Title: Locus:1.1.1.3235.24 File:"2013-07-02 CLN FXIII 30 min 3rd F 1.wiff"

Data file C:\Program Files (x86)\Matrix Science\Mascot Daemon\mgf\3 FXIII 30 min 3rd\mascot\_daemon\_merge.mgf

Click mouse within plot area to zoom in by factor of two about that point

Or, Plot from  to  Da

Label all possible matches  Label matches used for scoring

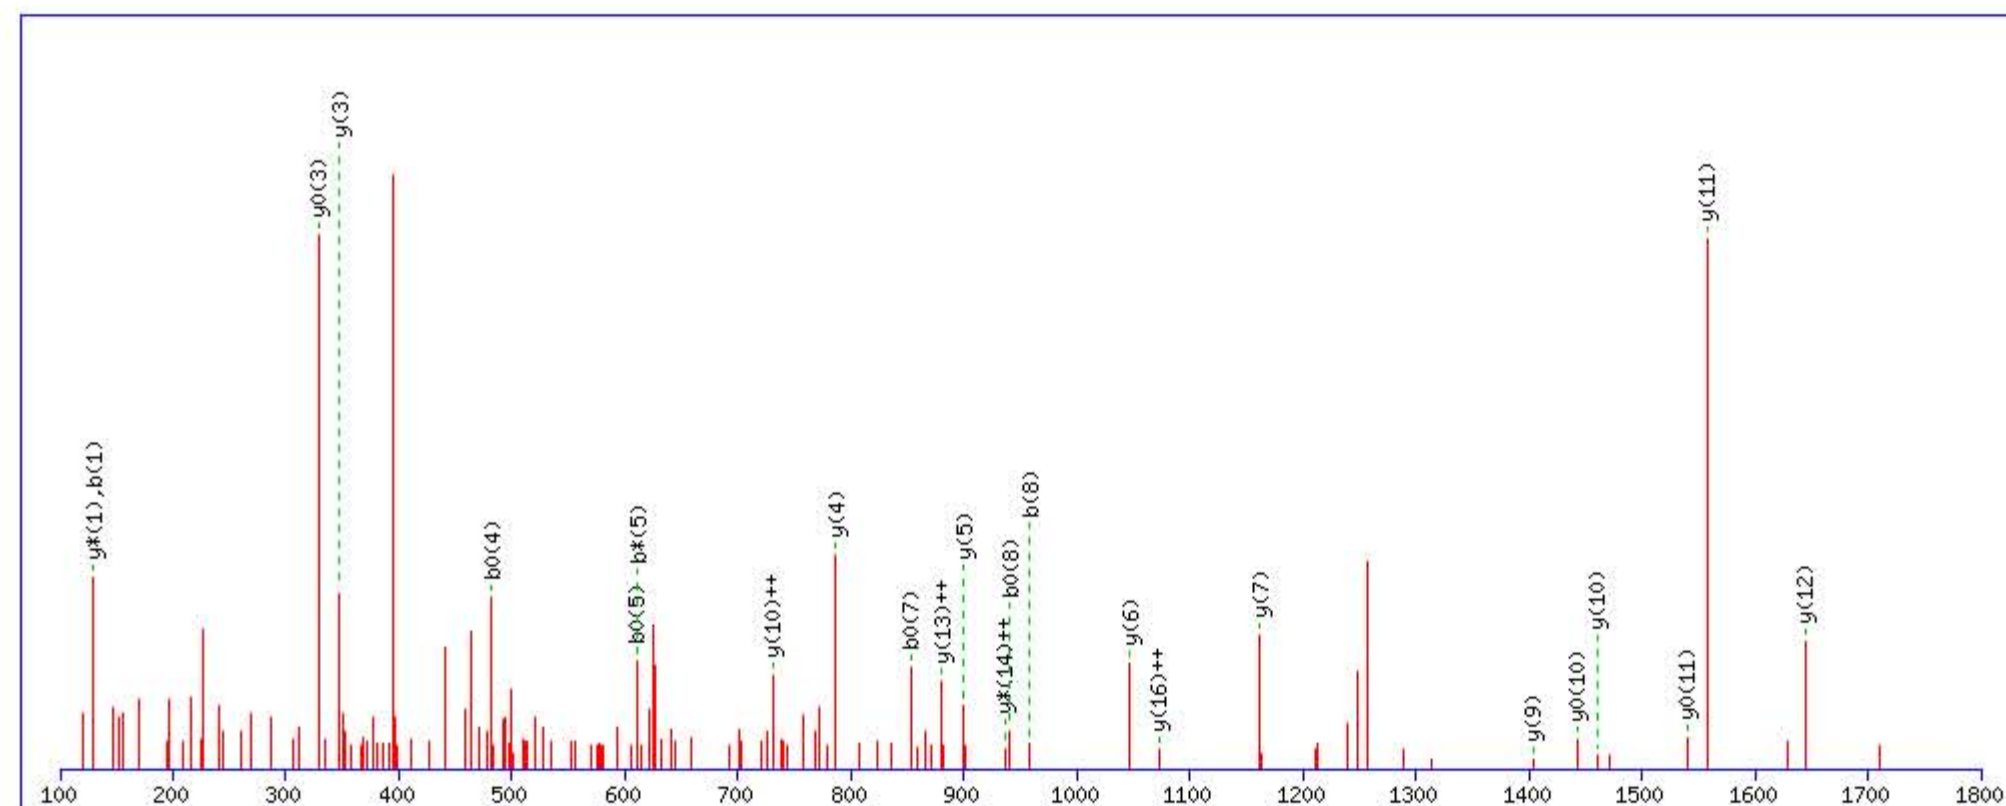

Monoisotopic mass of neutral peptide Mr(calc): 2514.278793

Fixed modifications: Carbamidomethyl (C) (apply to specified residues or termini only)

Variable modifications:

Q16 : Biotin:Thermo-21345 (Q)

Ions Score: 43 Expect: 0.0014

Matches : 24/208 fragment ions using 44 most intense peaks [\(help\)](#)

| #  | b                 | b <sup>++</sup> | b <sup>+</sup>    | b <sup>+++</sup> | b <sup>0</sup>    | b <sup>0++</sup> | Seq. | y                  | y <sup>++</sup>    | y <sup>+</sup>    | y <sup>+++</sup>  | y <sup>0</sup>     | y <sup>0++</sup> | #  |
|----|-------------------|-----------------|-------------------|------------------|-------------------|------------------|------|--------------------|--------------------|-------------------|-------------------|--------------------|------------------|----|
| 1  | <b>130.049869</b> | 65.528572       |                   |                  | 112.039304        | 56.523290        | E    |                    |                    |                   |                   |                    |                  | 19 |
| 2  | 243.133933        | 122.070605      |                   |                  | 225.123368        | 113.065322       | L    | 2386.243508        | 1193.625392        | 2369.216959       | 1185.112117       | 2368.232943        | 1184.620109      | 18 |
| 3  | 371.228896        | 186.118086      | 354.202347        | 177.604812       | 353.218331        | 177.112804       | K    | 2273.159444        | 1137.083360        | 2256.132895       | 1128.570085       | 2255.148879        | 1128.078077      | 17 |
| 4  | 500.271489        | 250.639383      | 483.244940        | 242.126108       | <b>482.260924</b> | 241.634100       | E    | 2145.064481        | <b>1073.035878</b> | 2128.037932       | 1064.522604       | 2127.053916        | 1064.030596      | 16 |
| 5  | 628.330067        | 314.668672      | <b>611.303518</b> | 306.155397       | <b>610.319502</b> | 305.663389       | Q    | 2016.021888        | 1008.514582        | 1998.995339       | 1000.001308       | 1998.011323        | 999.509300       | 15 |
| 6  | 756.388645        | 378.697961      | 739.362096        | 370.184686       | 738.378080        | 369.692678       | Q    | 1887.963310        | 944.485293         | 1870.936761       | <b>935.972019</b> | 1869.952745        | 935.480011       | 14 |
| 7  | 871.415588        | 436.211432      | 854.389039        | 427.698158       | <b>853.405023</b> | 427.206150       | D    | 1759.904732        | <b>880.456004</b>  | 1742.878183       | 871.942730        | 1741.894167        | 871.450722       | 13 |
| 8  | <b>958.447616</b> | 479.727446      | 941.421067        | 471.214172       | <b>940.437051</b> | 470.722164       | S    | <b>1644.877789</b> | 822.942533         | 1627.851240       | 814.429258        | 1626.867224        | 813.937250       | 12 |
| 9  | 1055.500380       | 528.253828      | 1038.473831       | 519.740554       | 1037.489815       | 519.248545       | P    | <b>1557.845761</b> | 779.426519         | 1540.819212       | 770.913244        | <b>1539.835196</b> | 770.421236       | 11 |
| 10 | 1112.521844       | 556.764560      | 1095.495295       | 548.251285       | 1094.511279       | 547.759277       | G    | <b>1460.792997</b> | <b>730.900137</b>  | 1443.766448       | 722.386862        | <b>1442.782432</b> | 721.894854       | 10 |
| 11 | 1226.564771       | 613.786023      | 1209.538222       | 605.272749       | 1208.554206       | 604.780741       | N    | <b>1403.771533</b> | 702.389405         | 1386.744984       | 693.876130        | 1385.760968        | 693.384122       | 9  |
| 12 | 1354.659734       | 677.833505      | 1337.633185       | 669.320230       | 1336.649169       | 668.828222       | K    | 1289.728606        | 645.367941         | 1272.702057       | 636.854667        | 1271.718041        | 636.362659       | 8  |
| 13 | 1469.686677       | 735.346976      | 1452.660128       | 726.833702       | 1451.676112       | 726.341694       | D    | <b>1161.633643</b> | 581.320460         | 1144.607094       | 572.807185        | 1143.623078        | 572.315177       | 7  |
| 14 | 1616.755091       | 808.881184      | 1599.728542       | 800.367909       | 1598.744526       | 799.875901       | F    | <b>1046.606700</b> | 523.806988         | 1029.580151       | 515.293714        | 1028.596135        | 514.801706       | 6  |
| 15 | 1729.839155       | 865.423215      | 1712.812606       | 856.909941       | 1711.828590       | 856.417933       | L    | <b>899.538286</b>  | 450.272781         | 882.511737        | 441.759507        | 881.527721         | 441.267499       | 5  |
| 16 | 2169.064481       | 1085.035878     | 2152.037932       | 1076.522604      | 2151.053916       | 1076.030596      | Q    | <b>786.454222</b>  | 393.730749         | 769.427673        | 385.217475        | 768.443657         | 384.725467       | 4  |
| 17 | 2256.096509       | 1128.551892     | 2239.069960       | 1120.038618      | 2238.085944       | 1119.546610      | S    | <b>347.228896</b>  | 174.118086         | 330.202347        | 165.604812        | <b>329.218331</b>  | 165.112804       | 3  |
| 18 | 2369.180573       | 1185.093925     | 2352.154024       | 1176.580650      | 2351.170008       | 1176.088642      | L    | 260.196868         | 130.602072         | 243.170319        | 122.088798        |                    |                  | 2  |
| 19 |                   |                 |                   |                  |                   |                  | K    | 147.112804         | 74.060040          | <b>130.086255</b> | 65.546765         |                    |                  | 1  |

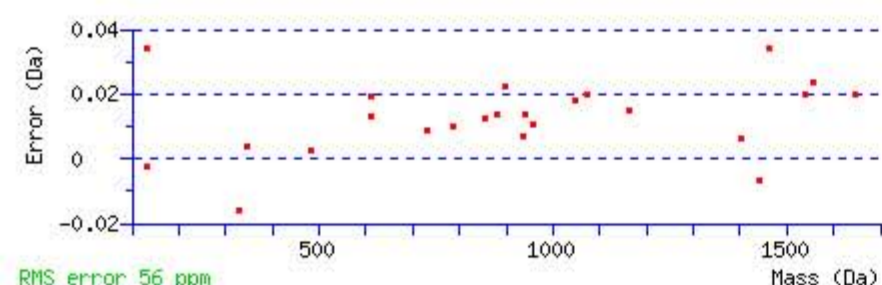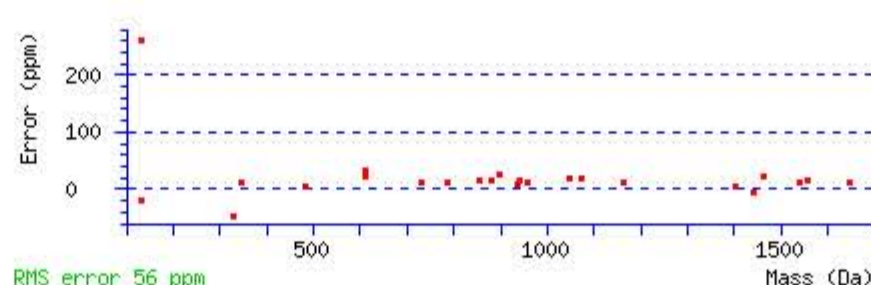

NCBI BLAST search of [ELKEQQDSPGNKDFLQSLK](#)

(Parameters: blastp, nr protein database, expect=20000, no filter, PAM30)

Other BLAST [web gateways](#)

All matches to this query

| Score | Mr(calc):   | Delta    | Sequence                            |
|-------|-------------|----------|-------------------------------------|
| 43.1  | 2514.278793 | 0.012703 | <a href="#">ELKEQQDSPGNKDFLQSLK</a> |

Mascot: <http://www.matrixscience.com/>



# Mascot Search Results

## Peptide View

MS/MS Fragmentation of **QLTSGPNQEQVSPLTLK**

Found in **A2AP\_HUMAN**, Alpha-2-antiplasmin OS=Homo sapiens GN=SERPINF2 PE=1 SV=3

Match to Query 53209: 2574.394182 from(859.138670,3+) rtinseconds(2712) index(9086)

Title: Locus:1.1.1.3514.21 File:"2013-07-02 CLN FXIII 30 min 3rd F 1.wiff"

Data file C:\Program Files (x86)\Matrix Science\Mascot Daemon\mgf3 FXIII 30 min 3rd\mascot\_daemon\_merge.mgf

Click mouse within plot area to zoom in by factor of two about that point

Or, Plot from  to  Da

Label all possible matches  Label matches used for scoring

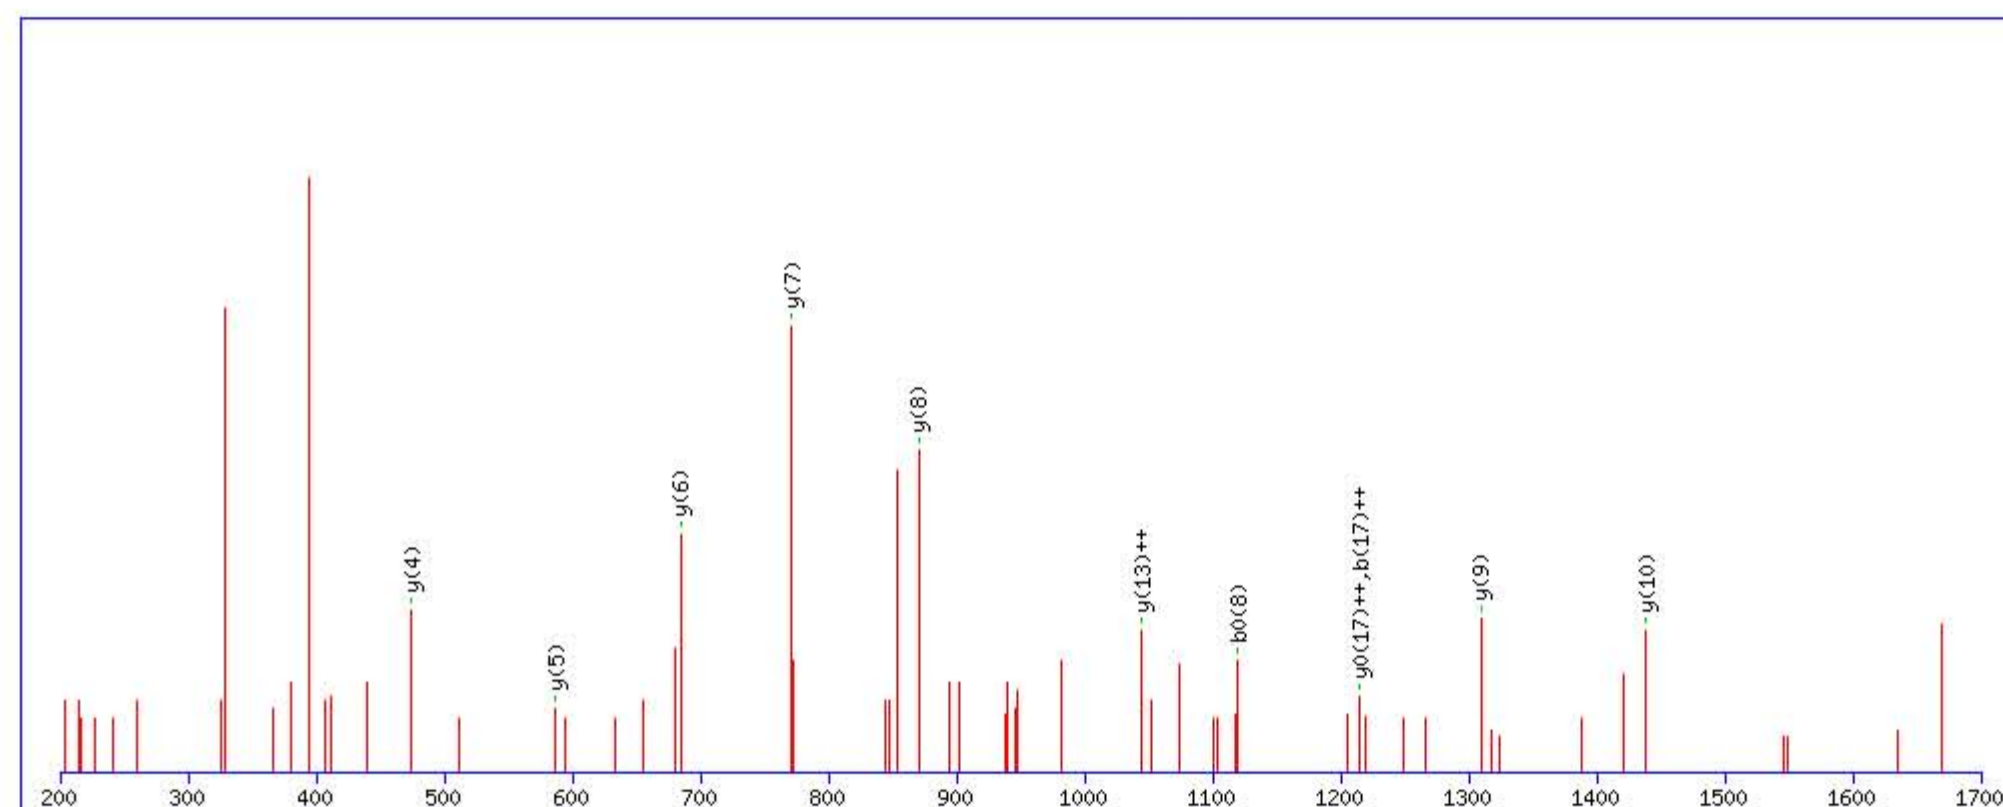

Monoisotopic mass of neutral peptide Mr(calc): 2574.391342

Fixed modifications: Carbamidomethyl (C) (apply to specified residues or termini only)

Variable modifications:

Q8 : Biotin:Thermo-21345 (Q)

Q10 : Biotin:Thermo-21345 (Q)

Ions Score: 35 Expect: 0.0054

Matches : 11/194 fragment ions using 15 most intense peaks [\(help\)](#)

| #  | b           | b <sup>++</sup> | b <sup>*</sup> | b <sup>+++</sup> | b <sup>0</sup> | b <sup>0++</sup> | Seq. | y           | y <sup>++</sup> | y <sup>*</sup> | y <sup>+++</sup> | y <sup>0</sup> | y <sup>0++</sup> | #  |
|----|-------------|-----------------|----------------|------------------|----------------|------------------|------|-------------|-----------------|----------------|------------------|----------------|------------------|----|
| 1  | 129.065854  | 65.036565       | 112.039305     | 56.523291        |                |                  | Q    |             |                 |                |                  |                |                  | 18 |
| 2  | 242.149918  | 121.578597      | 225.123369     | 113.065323       |                |                  | L    | 2447.340052 | 1224.173664     | 2430.313503    | 1215.660389      | 2429.329487    | 1215.168381      | 17 |
| 3  | 343.197597  | 172.102437      | 326.171048     | 163.589162       | 325.187032     | 163.097154       | T    | 2334.255988 | 1167.631632     | 2317.229439    | 1159.118357      | 2316.245423    | 1158.626349      | 16 |
| 4  | 430.229625  | 215.618450      | 413.203076     | 207.105176       | 412.219060     | 206.613168       | S    | 2233.208309 | 1117.107792     | 2216.181760    | 1108.594518      | 2215.197744    | 1108.102510      | 15 |
| 5  | 487.251089  | 244.129182      | 470.224540     | 235.615908       | 469.240524     | 235.123900       | G    | 2146.176281 | 1073.591778     | 2129.149732    | 1065.078504      | 2128.165716    | 1064.586496      | 14 |
| 6  | 584.303853  | 292.655565      | 567.277304     | 284.142290       | 566.293288     | 283.650282       | P    | 2089.154817 | 1045.081046     | 2072.128268    | 1036.567772      | 2071.144252    | 1036.075764      | 13 |
| 7  | 698.346780  | 349.677028      | 681.320231     | 341.163753       | 680.336215     | 340.671745       | N    | 1992.102053 | 996.554665      | 1975.075504    | 988.041390       | 1974.091488    | 987.549382       | 12 |
| 8  | 1137.572106 | 569.289691      | 1120.545557    | 560.776416       | 1119.561541    | 560.284408       | Q    | 1878.059126 | 939.533201      | 1861.032577    | 931.019927       | 1860.048561    | 930.527919       | 11 |
| 9  | 1266.614699 | 633.810988      | 1249.588150    | 625.297713       | 1248.604134    | 624.805705       | E    | 1438.833800 | 719.920538      | 1421.807251    | 711.407264       | 1420.823235    | 710.915256       | 10 |
| 10 | 1705.840025 | 853.423651      | 1688.813476    | 844.910376       | 1687.829460    | 844.418368       | Q    | 1309.791207 | 655.399242      | 1292.764658    | 646.885967       | 1291.780642    | 646.393959       | 9  |
| 11 | 1804.908439 | 902.957858      | 1787.881890    | 894.444583       | 1786.897874    | 893.952575       | V    | 870.565881  | 435.786579      | 853.539332     | 427.273304       | 852.555316     | 426.781296       | 8  |
| 12 | 1891.940467 | 946.473872      | 1874.913918    | 937.960597       | 1873.929902    | 937.468589       | S    | 771.497467  | 386.252372      | 754.470918     | 377.739097       | 753.486902     | 377.247089       | 7  |
| 13 | 1988.993231 | 995.000254      | 1971.966682    | 986.486979       | 1970.982666    | 985.994971       | P    | 684.465439  | 342.736358      | 667.438890     | 334.223083       | 666.454874     | 333.731075       | 6  |
| 14 | 2102.077295 | 1051.542285     | 2085.050746    | 1043.029011      | 2084.066730    | 1042.537003      | L    | 587.412675  | 294.209976      | 570.386126     | 285.696701       | 569.402110     | 285.204693       | 5  |
| 15 | 2203.124974 | 1102.066125     | 2186.098425    | 1093.552850      | 2185.114409    | 1093.060842      | T    | 474.328611  | 237.667944      | 457.302062     | 229.154669       | 456.318046     | 228.662661       | 4  |
| 16 | 2316.209038 | 1158.608157     | 2299.182489    | 1150.094882      | 2298.198473    | 1149.602874      | L    | 373.280932  | 187.144104      | 356.254383     | 178.630830       |                |                  | 3  |
| 17 | 2429.293102 | 1215.150189     | 2412.266553    | 1206.636914      | 2411.282537    | 1206.144906      | L    | 260.196868  | 130.602072      | 243.170319     | 122.088798       |                |                  | 2  |
| 18 |             |                 |                |                  |                |                  | K    | 147.112804  | 74.060040       | 130.086255     | 65.546765        |                |                  | 1  |

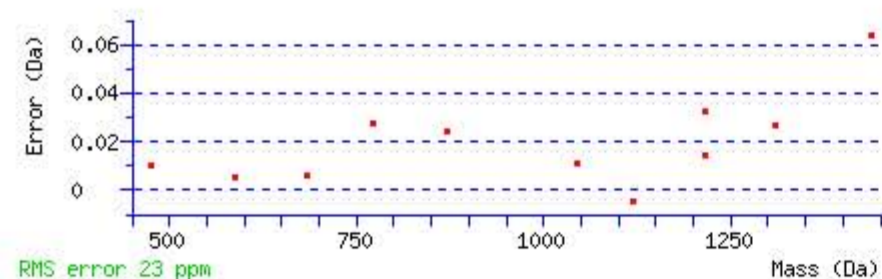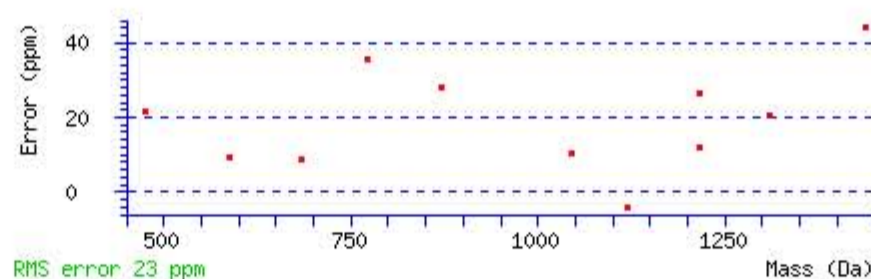

NCBI BLAST search of **QLTSGPNQEQVSPLTLK**

(Parameters: blastp, nr protein database, expect=20000, no filter, PAM30)

Other BLAST [web gateways](#)

## All matches to this query

| Score | Mr(calc):   | Delta    | Sequence                          |
|-------|-------------|----------|-----------------------------------|
| 34.9  | 2574.391342 | 0.002840 | <a href="#">QLTSGPNQEQVSPLTLK</a> |
| 31.8  | 2574.391342 | 0.002840 | <a href="#">QLTSGPNQEQVSPLTLK</a> |
| 15.2  | 2574.391342 | 0.002840 | <a href="#">QLTSGPNQEQVSPLTLK</a> |



# Mascot Search Results

## Peptide View

MS/MS Fragmentation of **GFPIKEDFLEQSEQLFGAKPVSLTGK**

Found in **A2AP\_HUMAN**, Alpha-2-antiplasmin OS=Homo sapiens GN=SERPINF2 PE=1 SV=3

Match to Query 58680: 3175.702176 from(794.932820,4+) rtinseconds(2771) index(39743)

Title: Locus:1.1.1.3597.17 File:"2013-07-02 CLN FXIII 30 min 3rd F 3.wiff"

Data file C:\Program Files (x86)\Matrix Science\Mascot Daemon\mgf3 FXIII 30 min 3rd\mascot\_daemon\_merge.mgf

Click mouse within plot area to zoom in by factor of two about that point

Or, Plot from  to  Da

Label all possible matches  Label matches used for scoring

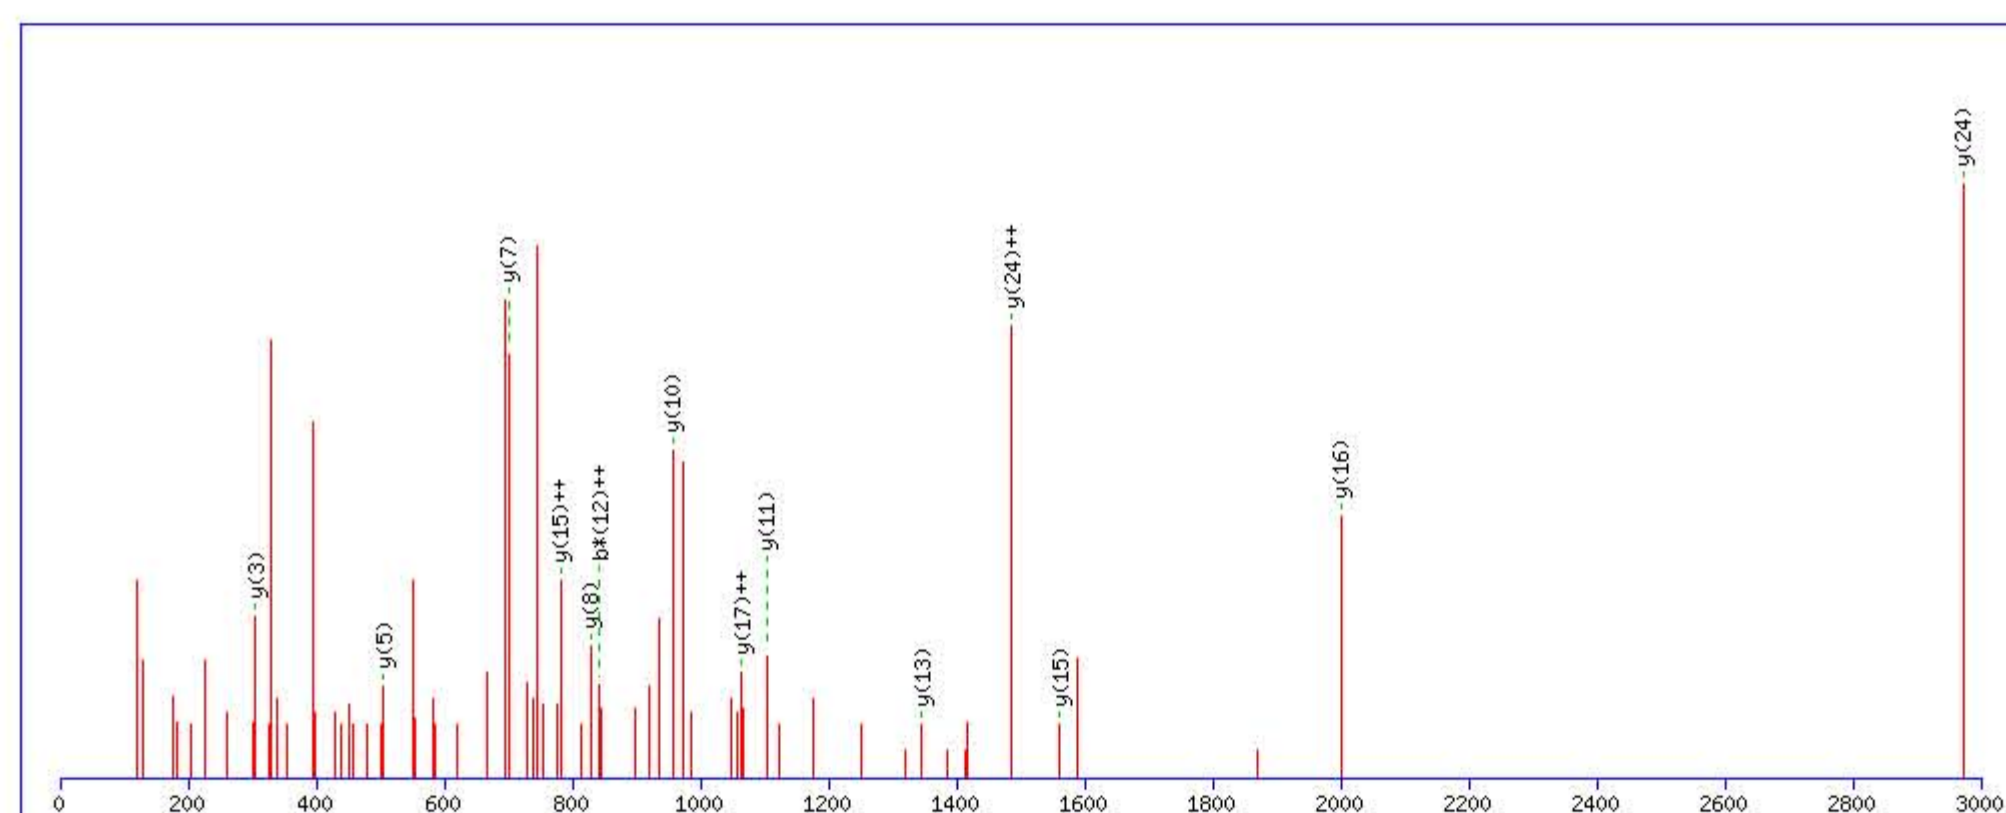

Monoisotopic mass of neutral peptide Mr(calc): 3175.662750

Fixed modifications: Carbamidomethyl (C) (apply to specified residues or termini only)

Variable modifications:

Q11 : Biotin:Thermo-21345 (Q)

Ions Score: 40 Expect: 0.0016

Matches : 14/278 fragment ions using 32 most intense peaks [\(help\)](#)

| #  | b           | b <sup>++</sup> | b <sup>*</sup> | b <sup>*++</sup>  | b <sup>0</sup> | b <sup>0++</sup> | Seq. | y                  | y <sup>++</sup>    | y <sup>*</sup> | y <sup>*++</sup> | y <sup>0</sup> | y <sup>0++</sup> | #  |
|----|-------------|-----------------|----------------|-------------------|----------------|------------------|------|--------------------|--------------------|----------------|------------------|----------------|------------------|----|
| 1  | 58.028740   | 29.518008       |                |                   |                |                  | G    |                    |                    |                |                  |                |                  | 26 |
| 2  | 205.097154  | 103.052215      |                |                   |                |                  | F    | 3119.648573        | 1560.327924        | 3102.622024    | 1551.814650      | 3101.638008    | 1551.322642      | 25 |
| 3  | 302.149918  | 151.578597      |                |                   |                |                  | P    | <b>2972.580159</b> | <b>1486.793717</b> | 2955.553610    | 1478.280443      | 2954.569594    | 1477.788435      | 24 |
| 4  | 415.233982  | 208.120629      |                |                   |                |                  | I    | 2875.527395        | 1438.267335        | 2858.500846    | 1429.754061      | 2857.516830    | 1429.262053      | 23 |
| 5  | 543.328945  | 272.168111      | 526.302396     | 263.654836        |                |                  | K    | 2762.443331        | 1381.725303        | 2745.416782    | 1373.212029      | 2744.432766    | 1372.720021      | 22 |
| 6  | 672.371538  | 336.689407      | 655.344989     | 328.176133        | 654.360973     | 327.684125       | E    | 2634.348368        | 1317.677822        | 2617.321819    | 1309.164547      | 2616.337803    | 1308.672539      | 21 |
| 7  | 787.398481  | 394.202879      | 770.371932     | 385.689604        | 769.387916     | 385.197596       | D    | 2505.305775        | 1253.156525        | 2488.279226    | 1244.643251      | 2487.295210    | 1244.151243      | 20 |
| 8  | 934.466895  | 467.737086      | 917.440346     | 459.223811        | 916.456330     | 458.731803       | F    | 2390.278832        | 1195.643054        | 2373.252283    | 1187.129779      | 2372.268267    | 1186.637771      | 19 |
| 9  | 1047.550959 | 524.279117      | 1030.524410    | 515.765843        | 1029.540394    | 515.273835       | L    | 2243.210418        | 1122.108847        | 2226.183869    | 1113.595572      | 2225.199853    | 1113.103564      | 18 |
| 10 | 1176.593552 | 588.800414      | 1159.567003    | 580.287140        | 1158.582987    | 579.795132       | E    | 2130.126354        | <b>1065.566815</b> | 2113.099805    | 1057.053540      | 2112.115789    | 1056.561532      | 17 |
| 11 | 1615.818878 | 808.413077      | 1598.792329    | 799.899803        | 1597.808313    | 799.407795       | Q    | <b>2001.083761</b> | 1001.045519        | 1984.057212    | 992.532244       | 1983.073196    | 992.040236       | 16 |
| 12 | 1702.850906 | 851.929091      | 1685.824357    | <b>843.415817</b> | 1684.840341    | 842.923809       | S    | <b>1561.858435</b> | <b>781.432856</b>  | 1544.831886    | 772.919581       | 1543.847870    | 772.427573       | 15 |
| 13 | 1831.893499 | 916.450388      | 1814.866950    | 907.937113        | 1813.882934    | 907.445105       | E    | 1474.826407        | 737.916842         | 1457.799858    | 729.403567       | 1456.815842    | 728.911559       | 14 |
| 14 | 1959.952077 | 980.479677      | 1942.925528    | 971.966402        | 1941.941512    | 971.474394       | Q    | <b>1345.783814</b> | 673.395545         | 1328.757265    | 664.882271       | 1327.773249    | 664.390263       | 13 |
| 15 | 2073.036141 | 1037.021709     | 2056.009592    | 1028.508434       | 2055.025576    | 1028.016426      | L    | 1217.725236        | 609.366256         | 1200.698687    | 600.852982       | 1199.714671    | 600.360974       | 12 |
| 16 | 2220.104555 | 1110.555916     | 2203.078006    | 1102.042641       | 2202.093990    | 1101.550633      | F    | <b>1104.641172</b> | 552.824224         | 1087.614623    | 544.310949       | 1086.630607    | 543.818941       | 11 |
| 17 | 2277.126019 | 1139.066648     | 2260.099470    | 1130.553373       | 2259.115454    | 1130.061365      | G    | <b>957.572758</b>  | 479.290017         | 940.546209     | 470.776743       | 939.562193     | 470.284735       | 10 |
| 18 | 2348.163133 | 1174.585205     | 2331.136584    | 1166.071930       | 2330.152568    | 1165.579922      | A    | 900.551294         | 450.779285         | 883.524745     | 442.266011       | 882.540729     | 441.774003       | 9  |
| 19 | 2476.258096 | 1238.632686     | 2459.231547    | 1230.119412       | 2458.247531    | 1229.627404      | K    | <b>829.514180</b>  | 415.260728         | 812.487631     | 406.747453       | 811.503615     | 406.255445       | 8  |
| 20 | 2573.310860 | 1287.159068     | 2556.284311    | 1278.645794       | 2555.300295    | 1278.153786      | P    | <b>701.419217</b>  | 351.213246         | 684.392668     | 342.699972       | 683.408652     | 342.207964       | 7  |
| 21 | 2672.379274 | 1336.693275     | 2655.352725    | 1328.180001       | 2654.368709    | 1327.687993      | V    | 604.366453         | 302.686864         | 587.339904     | 294.173590       | 586.355888     | 293.681582       | 6  |
| 22 | 2759.411302 | 1380.209289     | 2742.384753    | 1371.696015       | 2741.400737    | 1371.204007      | S    | <b>505.298039</b>  | 253.152657         | 488.271490     | 244.639383       | 487.287474     | 244.147375       | 5  |
| 23 | 2872.495366 | 1436.751321     | 2855.468817    | 1428.238047       | 2854.484801    | 1427.746039      | L    | 418.266011         | 209.636643         | 401.239462     | 201.123369       | 400.255446     | 200.631361       | 4  |
| 24 | 2973.543045 | 1487.275161     | 2956.516496    | 1478.761886       | 2955.532480    | 1478.269878      | T    | <b>305.181947</b>  | 153.094611         | 288.155398     | 144.581337       | 287.171382     | 144.089329       | 3  |
| 25 | 3030.564509 | 1515.785893     | 3013.537960    | 1507.272618       | 3012.553944    | 1506.780610      | G    | 204.134268         | 102.570772         | 187.107719     | 94.057497        |                |                  | 2  |
| 26 |             |                 |                |                   |                |                  | K    | 147.112804         | 74.060040          | 130.086255     | 65.546765        |                |                  | 1  |

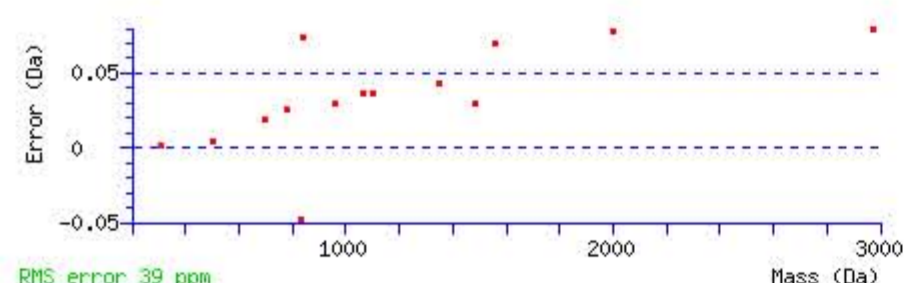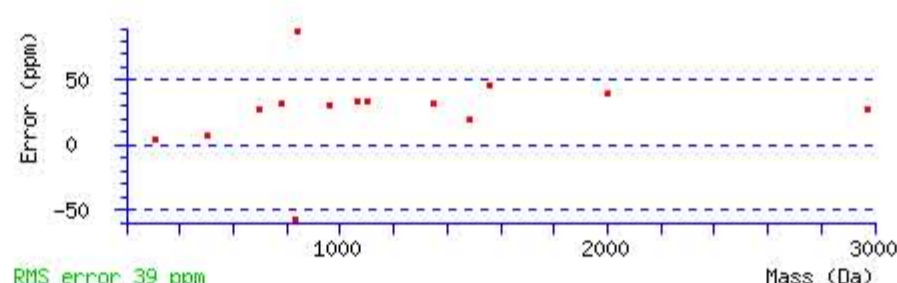

NCBI BLAST search of **GFPIKEDFLEQSEQLFGAKPVSLTGK**

(Parameters: blastp, nr protein database, expect=20000, no filter, PAM30)

Other BLAST [web gateways](#)

All matches to this query

| Score | Mr(calc):   | Delta    | Sequence                                   |
|-------|-------------|----------|--------------------------------------------|
| 40.3  | 3175.662750 | 0.039426 | <a href="#">GFPIKEDFLEQSEQLFGAKPVSLTGK</a> |
| 24.7  | 3175.662750 | 0.039426 | <a href="#">GFPIKEDFLEQSEQLFGAKPVSLTGK</a> |

Mascot: <http://www.matrixscience.com/>



# MASCOT SEARCH RESULTS

## Peptide View

MS/MS Fragmentation of **EHAVEGDCDFQLLK**

Found in **FETUA\_HUMAN**, Alpha-2-HS-glycoprotein OS=Homo sapiens GN=AHSG PE=1 SV=1

Match to Query 42427: 1970.919162 from(657.980330,3+) rtinseconds(2109) index(51732)

Title: Locus:1.1.1.3377.16 File:"2013-07-02 CLN FXIII 30 min 3rd F 4.wiff"

Data file C:\Program Files (x86)\Matrix Science\Mascot Daemon\mgf3 FXIII 30 min 3rd\mascot\_daemon\_merge.mgf

Click mouse within plot area to zoom in by factor of two about that point

Or, Plot from  to  Da

Label all possible matches  Label matches used for scoring

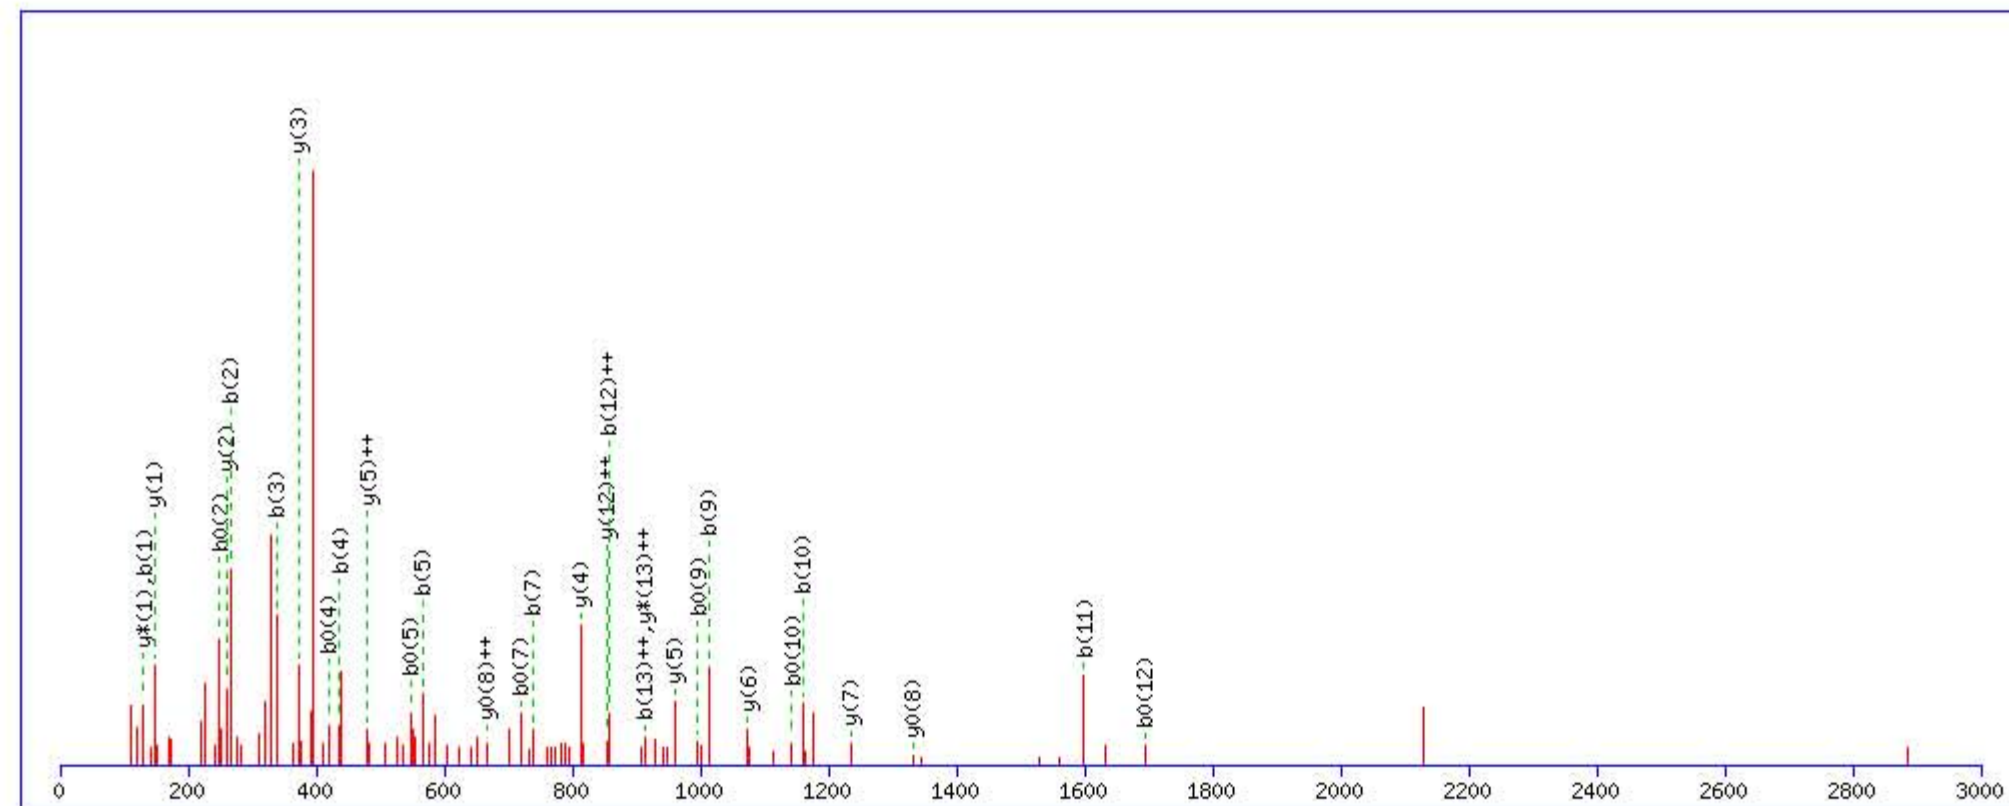

Monoisotopic mass of neutral peptide Mr(calc): 1970.923019

Fixed modifications: Carbamidomethyl (C) (apply to specified residues or termini only)

Variable modifications:

Q11 : Biotin:Thermo-21345 (Q)

Ions Score: 51 Expect: 1.9e-005

Matches : 31/126 fragment ions using 52 most intense peaks [\(help\)](#)

| #  | b           | b <sup>++</sup> | b <sup>*</sup> | b <sup>*++</sup> | b <sup>0</sup> | b <sup>0++</sup> | Seq. | y           | y <sup>++</sup> | y <sup>*</sup> | y <sup>*++</sup> | y <sup>0</sup> | y <sup>0++</sup> | #  |
|----|-------------|-----------------|----------------|------------------|----------------|------------------|------|-------------|-----------------|----------------|------------------|----------------|------------------|----|
| 1  | 130.049869  | 65.528572       |                |                  | 112.039304     | 56.523290        | E    |             |                 |                |                  |                |                  | 14 |
| 2  | 267.108781  | 134.058028      |                |                  | 249.098216     | 125.052746       | H    | 1842.887704 | 921.947490      | 1825.861155    | 913.434216       | 1824.877139    | 912.942207       | 13 |
| 3  | 338.145895  | 169.576585      |                |                  | 320.135330     | 160.571303       | A    | 1705.828792 | 853.418034      | 1688.802243    | 844.904760       | 1687.818227    | 844.412752       | 12 |
| 4  | 437.214309  | 219.110792      |                |                  | 419.203744     | 210.105510       | V    | 1634.791678 | 817.899477      | 1617.765129    | 809.386203       | 1616.781113    | 808.894195       | 11 |
| 5  | 566.256902  | 283.632089      |                |                  | 548.246337     | 274.626807       | E    | 1535.723264 | 768.365270      | 1518.696715    | 759.851996       | 1517.712699    | 759.359988       | 10 |
| 6  | 623.278366  | 312.142821      |                |                  | 605.267801     | 303.137539       | G    | 1406.680671 | 703.843974      | 1389.654122    | 695.330699       | 1388.670106    | 694.838691       | 9  |
| 7  | 738.305309  | 369.656293      |                |                  | 720.294744     | 360.651010       | D    | 1349.659207 | 675.333241      | 1332.632658    | 666.819967       | 1331.648642    | 666.327959       | 8  |
| 8  | 898.335958  | 449.671617      |                |                  | 880.325393     | 440.666335       | C    | 1234.632264 | 617.819770      | 1217.605715    | 609.306496       | 1216.621699    | 608.814488       | 7  |
| 9  | 1013.362901 | 507.185089      |                |                  | 995.352336     | 498.179806       | D    | 1074.601615 | 537.804446      | 1057.575066    | 529.291171       | 1056.591050    | 528.799163       | 6  |
| 10 | 1160.431315 | 580.719296      |                |                  | 1142.420750    | 571.714013       | F    | 959.574672  | 480.290974      | 942.548123     | 471.777700       |                |                  | 5  |
| 11 | 1599.656641 | 800.331959      | 1582.630092    | 791.818684       | 1581.646076    | 791.326676       | Q    | 812.506258  | 406.756767      | 795.479709     | 398.243493       |                |                  | 4  |
| 12 | 1712.740705 | 856.873991      | 1695.714156    | 848.360716       | 1694.730140    | 847.868708       | L    | 373.280932  | 187.144104      | 356.254383     | 178.630829       |                |                  | 3  |
| 13 | 1825.824769 | 913.416023      | 1808.798220    | 904.902748       | 1807.814204    | 904.410740       | L    | 260.196868  | 130.602072      | 243.170319     | 122.088797       |                |                  | 2  |
| 14 |             |                 |                |                  |                |                  | K    | 147.112804  | 74.060040       | 130.086255     | 65.546765        |                |                  | 1  |

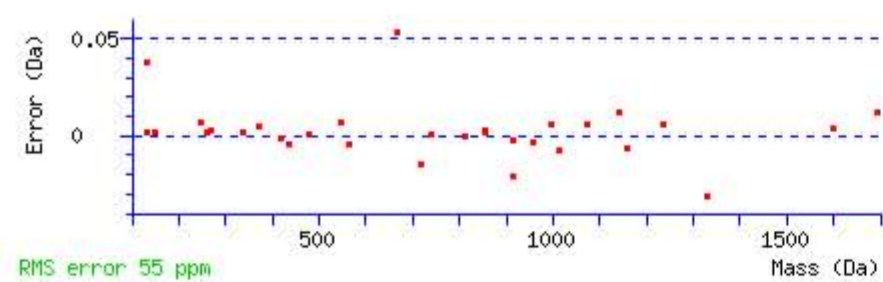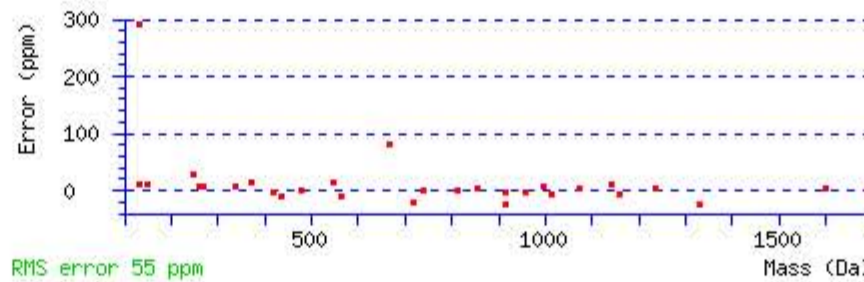

NCBI BLAST search of **EHAVEGDCDFQLLK**

(Parameters: blastp, nr protein database, expect=20000, no filter, PAM30)

Other BLAST [web gateways](#)

All matches to this query

| Score | Mr(calc):   | Delta     | Sequence                            |
|-------|-------------|-----------|-------------------------------------|
| 51.5  | 1970.923019 | -0.003857 | <a href="#">EHAVEGDCDFQLLK</a>      |
| 1.1   | 1970.892975 | 0.026187  | <a href="#">QEPENDQGVVVSQAGKDDR</a> |

Mascot: <http://www.matrixscience.com/>



# Mascot Search Results

## Peptide View

MS/MS Fragmentation of **LLLQQVSLPELPGEYSMK**

Found in **A2MG\_HUMAN**, Alpha-2-macroglobulin OS=Homo sapiens GN=A2M PE=1 SV=3

Match to Query 32709: 2355.271752 from(786.097860,3+) rtinseconds(2844) index(24757)

Title: Locus:1.1.1.3552.8 File:"2013-07-02 CLN FXIII 30 min 3rd F 2.wiff"

Data file C:\Program Files (x86)\Matrix Science\Mascot Daemon\mgf\3 FXIII 30 min 3rd\mascot\_daemon\_merge.mgf

Click mouse within plot area to zoom in by factor of two about that point

Or, Plot from  to  Da

Label all possible matches  Label matches used for scoring

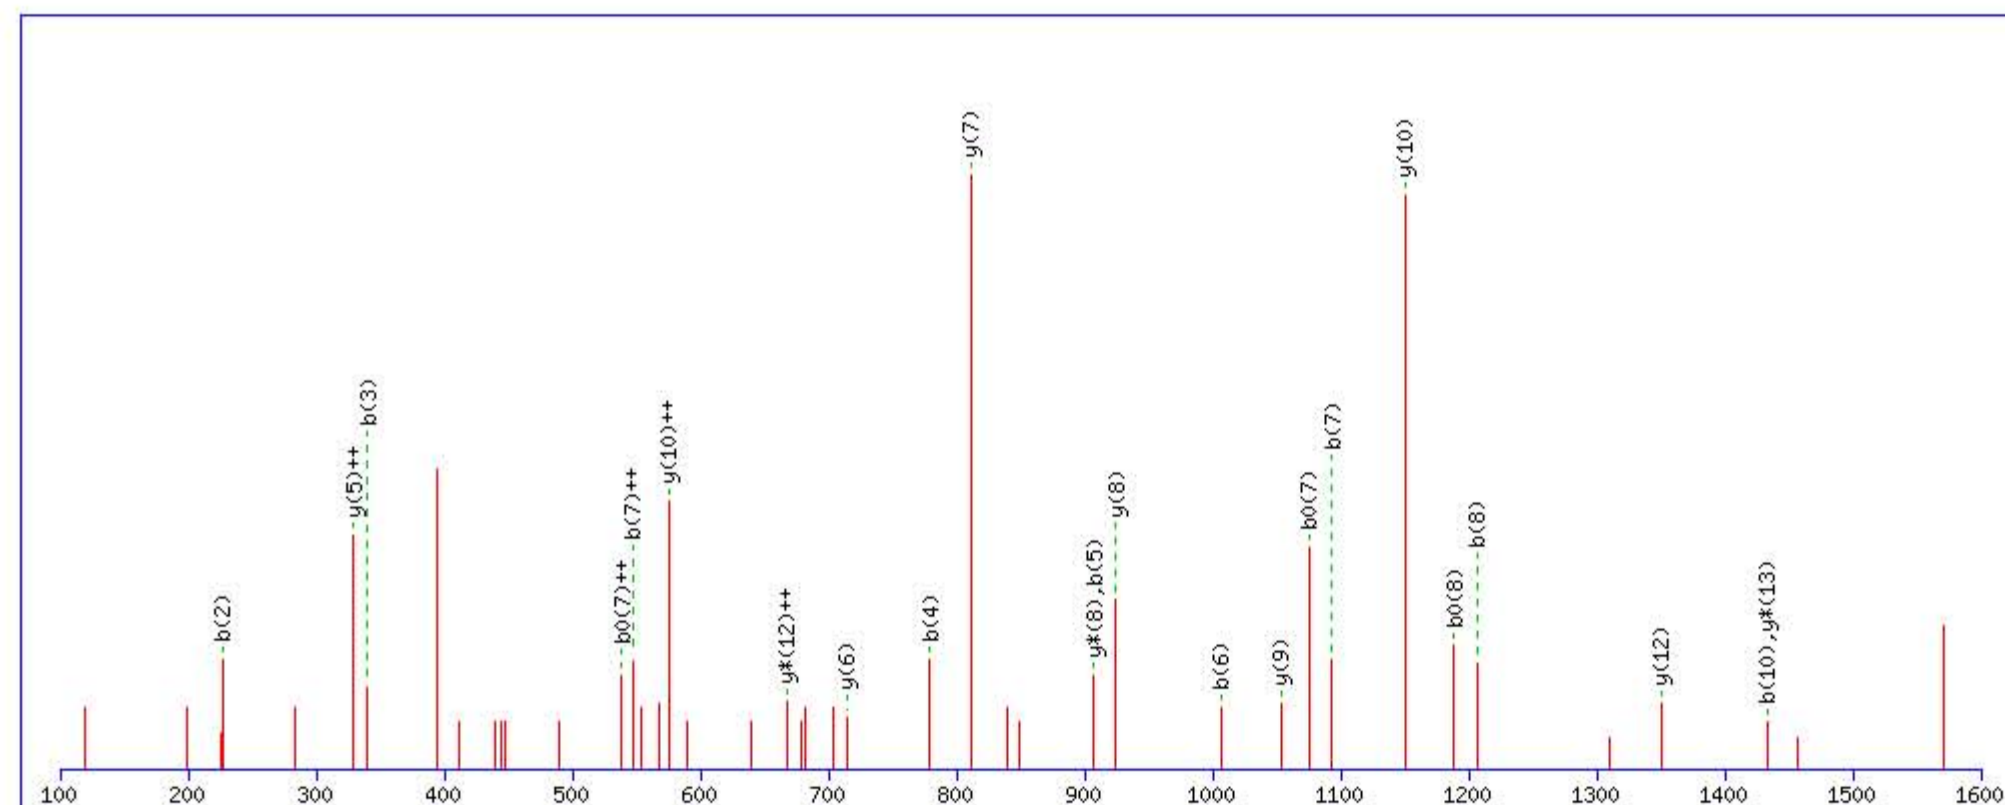

Monoisotopic mass of neutral peptide Mr(calc): 2355.258179

Fixed modifications: Carbamidomethyl (C) (apply to specified residues or termini only)

Variable modifications:

Q4 : Biotin:Thermo-21345 (Q)

Ions Score: 42 Expect: 0.00012

Matches : 23/182 fragment ions using 39 most intense peaks [\(help\)](#)

| #  | b                  | b <sup>++</sup>   | b <sup>+</sup> | b <sup>+++</sup> | b <sup>0</sup>     | b <sup>0++</sup>  | Seq. | y                  | y <sup>++</sup>   | y <sup>+</sup>     | y <sup>+++</sup>  | y <sup>0</sup> | y <sup>0++</sup> | #  |
|----|--------------------|-------------------|----------------|------------------|--------------------|-------------------|------|--------------------|-------------------|--------------------|-------------------|----------------|------------------|----|
| 1  | 114.091340         | 57.549308         |                |                  |                    |                   | L    |                    |                   |                    |                   |                |                  | 18 |
| 2  | <b>227.175404</b>  | 114.091340        |                |                  |                    |                   | L    | 2243.181426        | 1122.094351       | 2226.154877        | 1113.581076       | 2225.170861    | 1113.089068      | 17 |
| 3  | <b>340.259468</b>  | 170.633372        |                |                  |                    |                   | L    | 2130.097362        | 1065.552319       | 2113.070813        | 1057.039044       | 2112.086797    | 1056.547036      | 16 |
| 4  | <b>779.484794</b>  | 390.246035        | 762.458245     | 381.732760       |                    |                   | Q    | 2017.013298        | 1009.010287       | 1999.986749        | 1000.497013       | 1999.002733    | 1000.005005      | 15 |
| 5  | <b>907.543372</b>  | 454.275324        | 890.516823     | 445.762049       |                    |                   | Q    | 1577.787972        | 789.397624        | 1560.761423        | 780.884350        | 1559.777407    | 780.392342       | 14 |
| 6  | <b>1006.611786</b> | 503.809531        | 989.585237     | 495.296256       |                    |                   | V    | 1449.729394        | 725.368335        | <b>1432.702845</b> | 716.855061        | 1431.718829    | 716.363053       | 13 |
| 7  | <b>1093.643814</b> | <b>547.325545</b> | 1076.617265    | 538.812271       | <b>1075.633249</b> | <b>538.320263</b> | S    | <b>1350.660980</b> | 675.834128        | 1333.634431        | <b>667.320854</b> | 1332.650415    | 666.828846       | 12 |
| 8  | <b>1206.727878</b> | 603.867577        | 1189.701329    | 595.354303       | <b>1188.717313</b> | 594.862294        | L    | 1263.628952        | 632.318114        | 1246.602403        | 623.804840        | 1245.618387    | 623.312832       | 11 |
| 9  | 1303.780642        | 652.393959        | 1286.754093    | 643.880685       | 1285.770077        | 643.388676        | P    | <b>1150.544888</b> | <b>575.776082</b> | 1133.518339        | 567.262808        | 1132.534323    | 566.770800       | 10 |
| 10 | <b>1432.823235</b> | 716.915256        | 1415.796686    | 708.401981       | 1414.812670        | 707.909973        | E    | <b>1053.492124</b> | 527.249700        | 1036.465575        | 518.736426        | 1035.481559    | 518.244418       | 9  |
| 11 | 1545.907299        | 773.457288        | 1528.880750    | 764.944013       | 1527.896734        | 764.452005        | L    | <b>924.449531</b>  | 462.728404        | <b>907.422982</b>  | 454.215129        | 906.438966     | 453.723121       | 8  |
| 12 | 1642.960063        | 821.983670        | 1625.933514    | 813.470395       | 1624.949498        | 812.978387        | P    | <b>811.365467</b>  | 406.186372        | 794.338918         | 397.673097        | 793.354902     | 397.181089       | 7  |
| 13 | 1699.981527        | 850.494401        | 1682.954978    | 841.981127       | 1681.970962        | 841.489119        | G    | <b>714.312703</b>  | 357.659990        | 697.286154         | 349.146715        | 696.302138     | 348.654707       | 6  |
| 14 | 1829.024120        | 915.015698        | 1811.997571    | 906.502423       | 1811.013555        | 906.010415        | E    | 657.291239         | <b>329.149258</b> | 640.264690         | 320.635983        | 639.280674     | 320.143975       | 5  |
| 15 | 1992.087449        | 996.547362        | 1975.060900    | 988.034088       | 1974.076884        | 987.542080        | Y    | 528.248646         | 264.627961        | 511.222097         | 256.114687        | 510.238081     | 255.622679       | 4  |
| 16 | 2079.119477        | 1040.063376       | 2062.092928    | 1031.550102      | 2061.108912        | 1031.058094       | S    | 365.185317         | 183.096297        | 348.158768         | 174.583022        | 347.174752     | 174.091014       | 3  |
| 17 | 2210.159962        | 1105.583619       | 2193.133413    | 1097.070344      | 2192.149397        | 1096.578336       | M    | 278.153289         | 139.580282        | 261.126740         | 131.067008        |                |                  | 2  |
| 18 |                    |                   |                |                  |                    |                   | K    | 147.112804         | 74.060040         | 130.086255         | 65.546765         |                |                  | 1  |

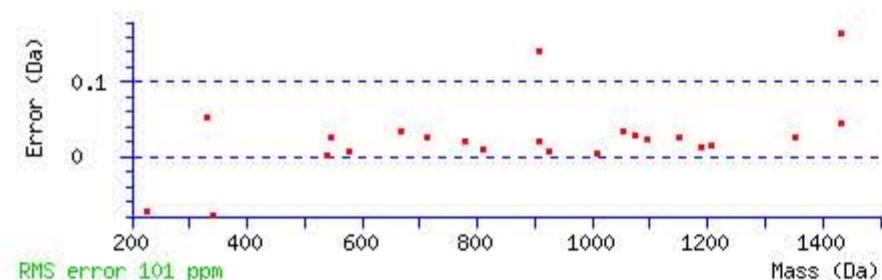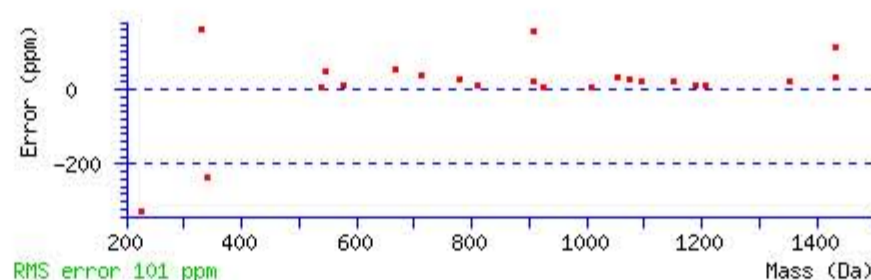

NCBI BLAST search of [LLLQQVSLPELPGEYSMK](#)

(Parameters: blastp, nr protein database, expect=20000, no filter, PAM30)

Other BLAST [web gateways](#)

## All matches to this query

| Score | Mr(calc):   | Delta    | Sequence                           |
|-------|-------------|----------|------------------------------------|
| 42.5  | 2355.258179 | 0.013573 | <a href="#">LLLQQVSLPELPGEYSMK</a> |
| 36.7  | 2355.258179 | 0.013573 | <a href="#">LLLQQVSLPELPGEYSMK</a> |
| 0.6   | 2355.259354 | 0.012398 | <a href="#">SQPRASGPPRSIQPVSPR</a> |



# Mascot Search Results

## Peptide View

MS/MS Fragmentation of **FSGQLNSHGCFYQQVK**

Found in **A2MG\_HUMAN**, Alpha-2-macroglobulin OS=Homo sapiens GN=A2M PE=1 SV=3

Match to Query 47282: 2210.051052 from(737.690960,3+) rtinseconds(1876) index(19050)

Title: Locus:1.1.1.3216.6 File:"2013-07-02 CLN FXIII 30 min 3rd F 2.wiff"

Data file C:\Program Files (x86)\Matrix Science\Mascot Daemon\mgf3 FXIII 30 min 3rd\mascot\_daemon\_merge.mgf

Click mouse within plot area to zoom in by factor of two about that point

Or, Plot from  to  Da

Label all possible matches  Label matches used for scoring

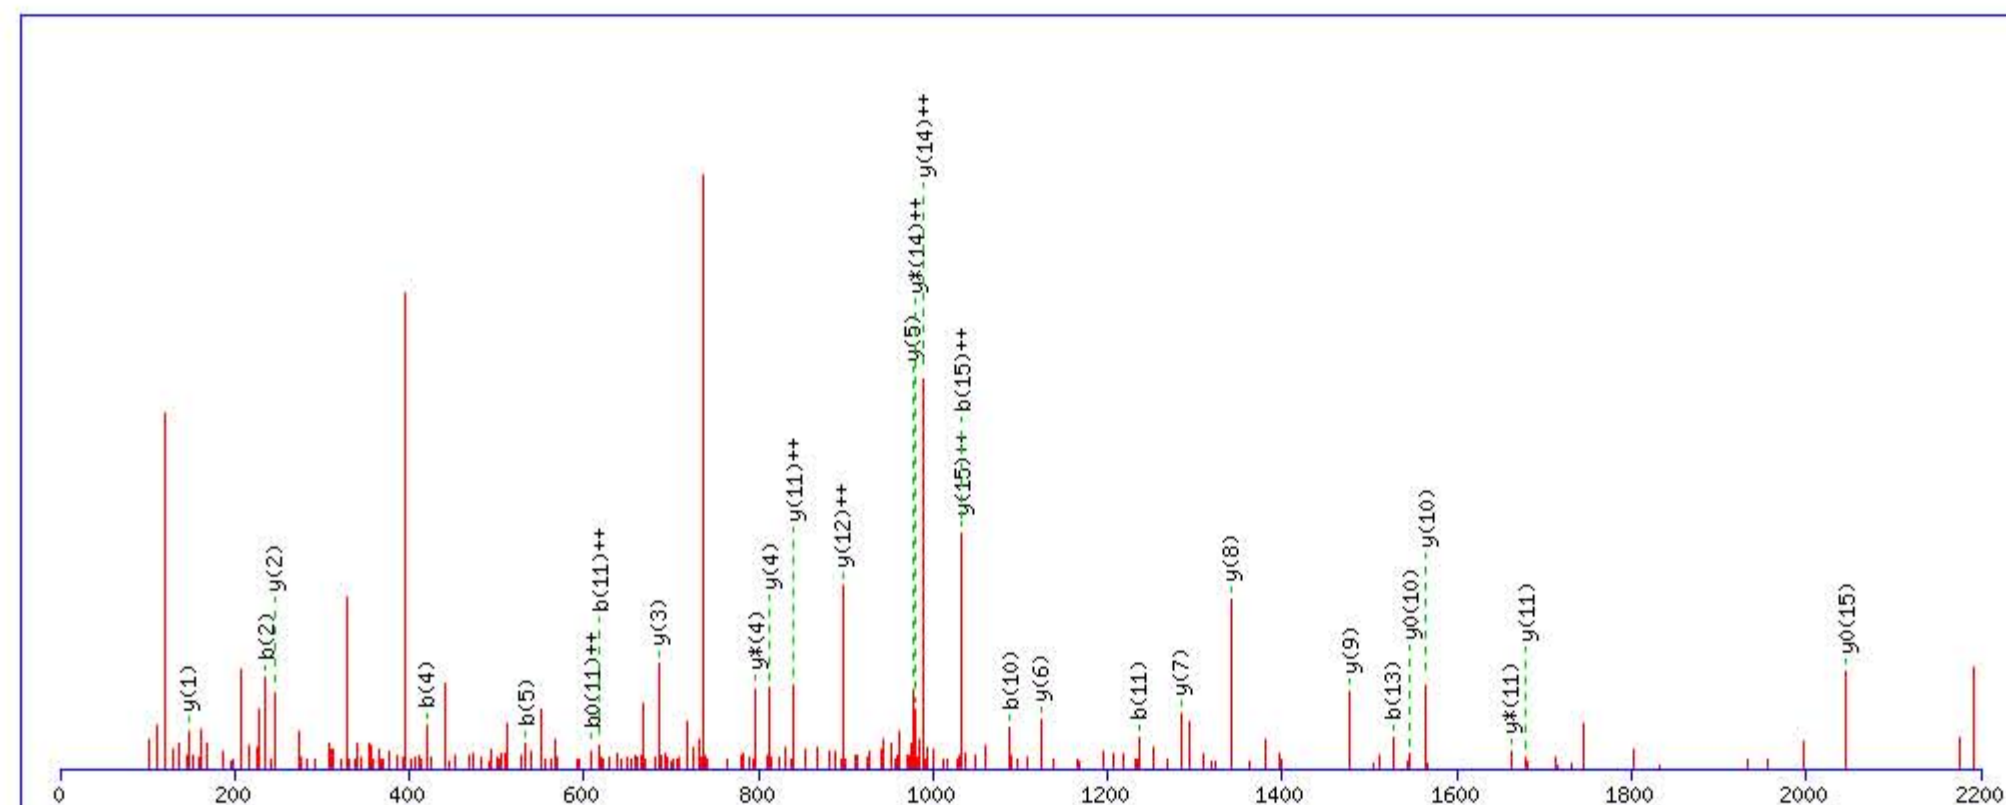

Monoisotopic mass of neutral peptide Mr(calc): 2210.040131

Fixed modifications: Carbamidomethyl (C) (apply to specified residues or termini only)

Variable modifications:

Q14 : Biotin:Thermo-21345 (Q)

Ions Score: 45 Expect: 0.00015

Matches : 29/154 fragment ions using 73 most intense peaks [\(help\)](#)

| #  | b                  | b <sup>++</sup>    | b <sup>*</sup> | b <sup>*++</sup> | b <sup>0</sup> | b <sup>0++</sup>  | Seq. | y                  | y <sup>++</sup>    | y <sup>*</sup>     | y <sup>*++</sup>  | y <sup>0</sup>     | y <sup>0++</sup> | #  |
|----|--------------------|--------------------|----------------|------------------|----------------|-------------------|------|--------------------|--------------------|--------------------|-------------------|--------------------|------------------|----|
| 1  | 148.075690         | 74.541483          |                |                  |                |                   | F    |                    |                    |                    |                   |                    |                  | 16 |
| 2  | <b>235.107718</b>  | 118.057497         |                |                  | 217.097153     | 109.052214        | S    | 2063.978979        | <b>1032.493127</b> | 2046.952430        | 1023.979853       | <b>2045.968414</b> | 1023.487845      | 15 |
| 3  | 292.129182         | 146.568229         |                |                  | 274.118617     | 137.562946        | G    | 1976.946951        | <b>988.977114</b>  | 1959.920402        | <b>980.463839</b> | 1958.936386        | 979.971831       | 14 |
| 4  | <b>420.187760</b>  | 210.597518         | 403.161211     | 202.084243       | 402.177195     | 201.592235        | Q    | 1919.925487        | 960.466382         | 1902.898938        | 951.953107        | 1901.914922        | 951.461099       | 13 |
| 5  | <b>533.271824</b>  | 267.139550         | 516.245275     | 258.626276       | 515.261259     | 258.134268        | L    | 1791.866909        | <b>896.437093</b>  | 1774.840360        | 887.923818        | 1773.856344        | 887.431810       | 12 |
| 6  | 647.314751         | 324.161014         | 630.288202     | 315.647739       | 629.304186     | 315.155731        | N    | <b>1678.782845</b> | <b>839.895061</b>  | <b>1661.756296</b> | 831.381786        | 1660.772280        | 830.889778       | 11 |
| 7  | 734.346779         | 367.677028         | 717.320230     | 359.163753       | 716.336214     | 358.671745        | S    | <b>1564.739918</b> | 782.873597         | 1547.713369        | 774.360323        | <b>1546.729353</b> | 773.868315       | 10 |
| 8  | 871.405691         | 436.206483         | 854.379142     | 427.693209       | 853.395126     | 427.201201        | H    | <b>1477.707890</b> | 739.357583         | 1460.681341        | 730.844309        |                    |                  | 9  |
| 9  | 928.427155         | 464.717216         | 911.400606     | 456.203941       | 910.416590     | 455.711933        | G    | <b>1340.648978</b> | 670.828127         | 1323.622429        | 662.314853        |                    |                  | 8  |
| 10 | <b>1088.457804</b> | 544.732540         | 1071.431255    | 536.219266       | 1070.447239    | 535.727257        | C    | <b>1283.627514</b> | 642.317395         | 1266.600965        | 633.804121        |                    |                  | 7  |
| 11 | <b>1235.526218</b> | <b>618.266747</b>  | 1218.499669    | 609.753473       | 1217.515653    | <b>609.261464</b> | F    | <b>1123.596865</b> | 562.302071         | 1106.570316        | 553.788796        |                    |                  | 6  |
| 12 | 1398.589547        | 699.798412         | 1381.562998    | 691.285137       | 1380.578982    | 690.793129        | Y    | <b>976.528451</b>  | 488.767864         | 959.501902         | 480.254589        |                    |                  | 5  |
| 13 | <b>1526.648125</b> | 763.827700         | 1509.621576    | 755.314426       | 1508.637560    | 754.822418        | Q    | <b>813.465122</b>  | 407.236199         | <b>796.438573</b>  | 398.722925        |                    |                  | 4  |
| 14 | 1965.873451        | 983.440364         | 1948.846902    | 974.927089       | 1947.862886    | 974.435081        | Q    | <b>685.406544</b>  | 343.206910         | 668.379995         | 334.693636        |                    |                  | 3  |
| 15 | 2064.941865        | <b>1032.974570</b> | 2047.915316    | 1024.461296      | 2046.931300    | 1023.969288       | V    | <b>246.181218</b>  | 123.594247         | 229.154669         | 115.080972        |                    |                  | 2  |
| 16 |                    |                    |                |                  |                |                   | K    | <b>147.112804</b>  | 74.060040          | 130.086255         | 65.546765         |                    |                  | 1  |

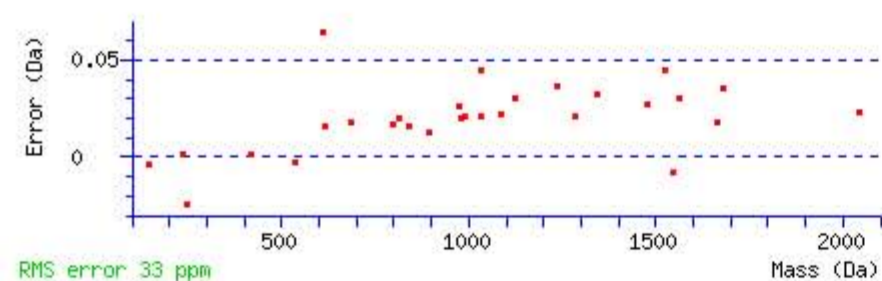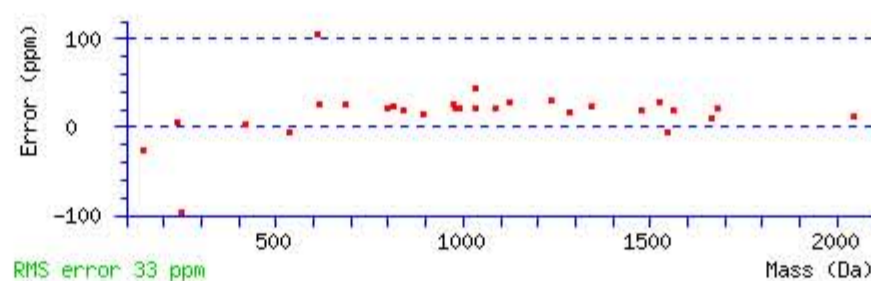

NCBI BLAST search of **FSGQLNSHGCFYQQVK**

(Parameters: blastp, nr protein database, expect=20000, no filter, PAM30)

Other BLAST [web gateways](#)

## All matches to this query

| Score | Mr(calc):   | Delta     | Sequence                         |
|-------|-------------|-----------|----------------------------------|
| 45.0  | 2210.040131 | 0.010921  | <a href="#">FSGQLNSHGCFYQQVK</a> |
| 35.1  | 2210.040131 | 0.010921  | <a href="#">FSGQLNSHGCFYQQVK</a> |
| 4.0   | 2210.058075 | -0.007023 | <a href="#">FSHLSRNMTMQRTMK</a>  |
| 4.0   | 2210.058075 | -0.007023 | <a href="#">FSHLSRNMTMQRTMK</a>  |
| 2.1   | 2210.045486 | 0.005566  | <a href="#">MSMKEVDEQMLAIQSK</a> |



# MASCOT Search Results

## Peptide View

MS/MS Fragmentation of **MCPQLQQYEMHGPEGLR**

Found in **A2MG\_HUMAN**, Alpha-2-macroglobulin OS=Homo sapiens GN=A2M PE=1 SV=3

Match to Query 50005: 2384.093772 from(795.705200,3+) rtinseconds(2020) index(19945)

Title: Locus:1.1.1.3266.16 File:"2013-07-02 CLN FXIII 30 min 3rd F 2.wiff"

Data file C:\Program Files (x86)\Matrix Science\Mascot Daemon\mgf3 FXIII 30 min 3rd\mascot\_daemon\_merge.mgf

Click mouse within plot area to zoom in by factor of two about that point

Or, Plot from  to  Da

Label all possible matches  Label matches used for scoring

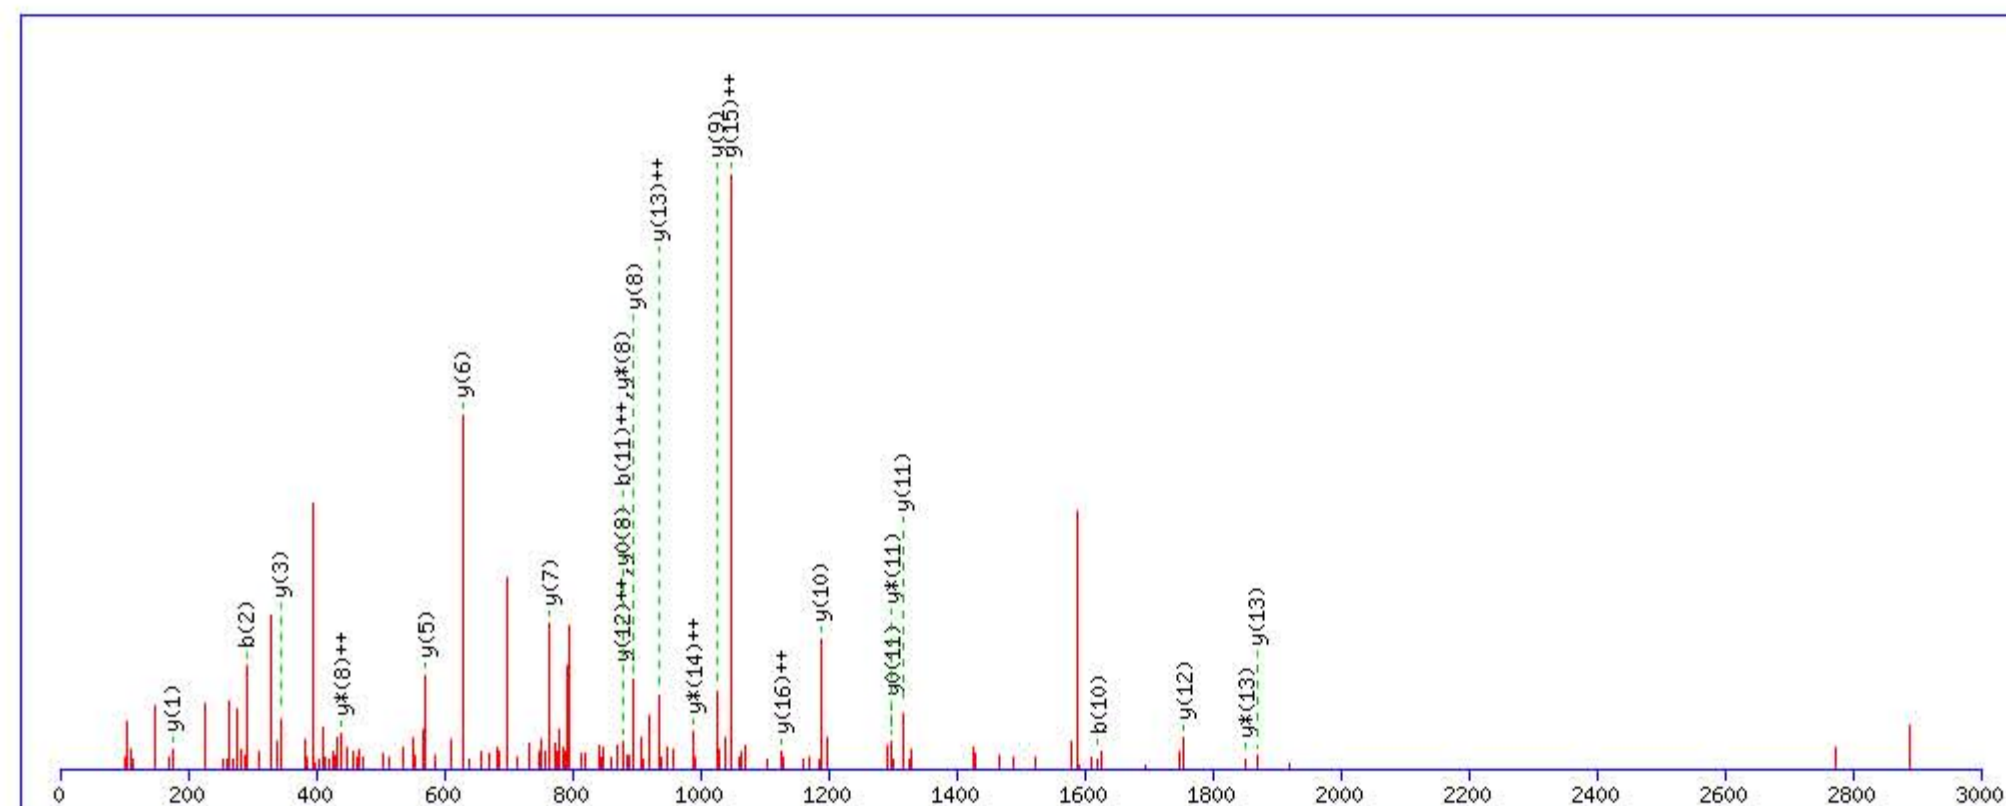

Monoisotopic mass of neutral peptide Mr(calc): 2384.089767

Fixed modifications: Carbamidomethyl (C) (apply to specified residues or termini only)

Variable modifications:

Q6 : Biotin:Thermo-21345 (Q)

Ions Score: 47 Expect: 0.00023

Matches : 25/164 fragment ions using 54 most intense peaks [\(help\)](#)

| #  | b                  | b <sup>++</sup>   | b <sup>+</sup> | b <sup>+++</sup> | b <sup>0</sup> | b <sup>0++</sup> | Seq. | y                  | y <sup>++</sup>    | y <sup>+</sup>     | y <sup>+++</sup>  | y <sup>0</sup>     | y <sup>0++</sup> | #  |
|----|--------------------|-------------------|----------------|------------------|----------------|------------------|------|--------------------|--------------------|--------------------|-------------------|--------------------|------------------|----|
| 1  | 132.047761         | 66.527518         |                |                  |                |                  | M    |                    |                    |                    |                   |                    |                  | 17 |
| 2  | <b>292.078410</b>  | 146.542843        |                |                  |                |                  | C    | 2254.056579        | <b>1127.531927</b> | 2237.030030        | 1119.018653       | 2236.046014        | 1118.526645      | 16 |
| 3  | 389.131174         | 195.069225        |                |                  |                |                  | P    | 2094.025930        | <b>1047.516603</b> | 2076.999381        | 1039.003328       | 2076.015365        | 1038.511320      | 15 |
| 4  | 517.189752         | 259.098514        | 500.163203     | 250.585240       |                |                  | Q    | 1996.973166        | 998.990221         | 1979.946617        | <b>990.476947</b> | 1978.962601        | 989.984939       | 14 |
| 5  | 630.273816         | 315.640546        | 613.247267     | 307.127272       |                |                  | L    | <b>1868.914588</b> | <b>934.960932</b>  | <b>1851.888039</b> | 926.447658        | 1850.904023        | 925.955650       | 13 |
| 6  | 1069.499142        | 535.253209        | 1052.472593    | 526.739935       |                |                  | Q    | <b>1755.830524</b> | <b>878.418900</b>  | 1738.803975        | 869.905626        | 1737.819959        | 869.413618       | 12 |
| 7  | 1197.557720        | 599.282498        | 1180.531171    | 590.769224       |                |                  | Q    | <b>1316.605198</b> | 658.806237         | <b>1299.578649</b> | 650.292963        | <b>1298.594633</b> | 649.800955       | 11 |
| 8  | 1360.621049        | 680.814163        | 1343.594500    | 672.300888       |                |                  | Y    | <b>1188.546620</b> | 594.776948         | 1171.520071        | 586.263674        | 1170.536055        | 585.771666       | 10 |
| 9  | 1489.663642        | 745.335459        | 1472.637093    | 736.822185       | 1471.653077    | 736.330177       | E    | <b>1025.483291</b> | 513.245284         | 1008.456742        | 504.732009        | 1007.472726        | 504.240001       | 9  |
| 10 | <b>1620.704127</b> | 810.855702        | 1603.677578    | 802.342427       | 1602.693562    | 801.850419       | M    | <b>896.440698</b>  | 448.723987         | <b>879.414149</b>  | <b>440.210713</b> | <b>878.430133</b>  | 439.718705       | 8  |
| 11 | 1757.763039        | <b>879.385158</b> | 1740.736490    | 870.871883       | 1739.752474    | 870.379875       | H    | <b>765.400213</b>  | 383.203745         | 748.373664         | 374.690470        | 747.389648         | 374.198462       | 7  |
| 12 | 1814.784503        | 907.895890        | 1797.757954    | 899.382615       | 1796.773938    | 898.890607       | G    | <b>628.341301</b>  | 314.674289         | 611.314752         | 306.161014        | 610.330736         | 305.669006       | 6  |
| 13 | 1911.837267        | 956.422272        | 1894.810718    | 947.908997       | 1893.826702    | 947.416989       | P    | <b>571.319837</b>  | 286.163557         | 554.293288         | 277.650282        | 553.309272         | 277.158274       | 5  |
| 14 | 2040.879860        | 1020.943568       | 2023.853311    | 1012.430294      | 2022.869295    | 1011.938286      | E    | 474.267073         | 237.637175         | 457.240524         | 229.123900        | 456.256508         | 228.631892       | 4  |
| 15 | 2097.901324        | 1049.454300       | 2080.874775    | 1040.941025      | 2079.890759    | 1040.449017      | G    | <b>345.224480</b>  | 173.115878         | 328.197931         | 164.602603        |                    |                  | 3  |
| 16 | 2210.985388        | 1105.996332       | 2193.958839    | 1097.483057      | 2192.974823    | 1096.991049      | L    | 288.203016         | 144.605146         | 271.176467         | 136.091872        |                    |                  | 2  |
| 17 |                    |                   |                |                  |                |                  | R    | <b>175.118952</b>  | 88.063114          | 158.092403         | 79.549839         |                    |                  | 1  |

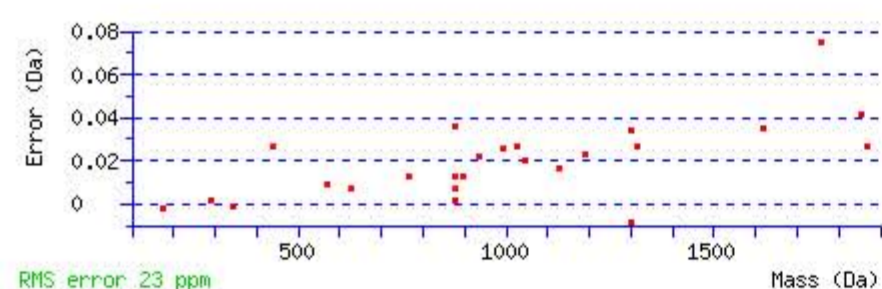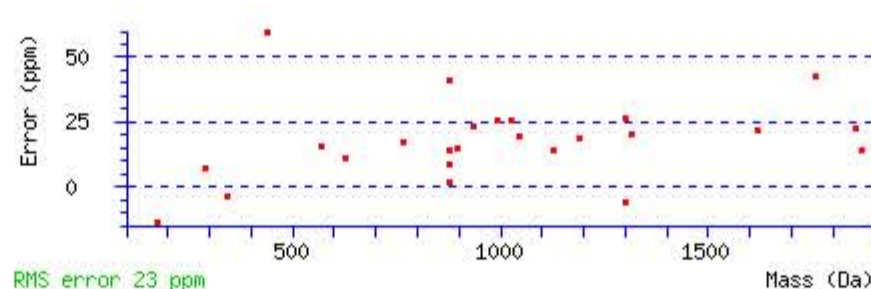

NCBI BLAST search of **MCPQLQQYEMHGPEGLR**

(Parameters: blastp, nr protein database, expect=20000, no filter, PAM30)

Other BLAST [web gateways](#)

## All matches to this query

| Score | Mr(calc):   | Delta    | Sequence                          |
|-------|-------------|----------|-----------------------------------|
| 47.3  | 2384.089767 | 0.004005 | <a href="#">MCPQLQQYEMHGPEGLR</a> |
| 45.6  | 2384.089767 | 0.004005 | <a href="#">MCPQLQQYEMHGPEGLR</a> |
| 28.6  | 2384.089767 | 0.004005 | <a href="#">MCPQLQQYEMHGPEGLR</a> |



# MASCOT Search Results

## Peptide View

MS/MS Fragmentation of **MCPQLQQYEMHGPEGLR**

Found in **A2MG\_HUMAN**, Alpha-2-macroglobulin OS=Homo sapiens GN=A2M PE=1 SV=3

Match to Query 50009: 2384.100656 from(597.032440,4+) rtinseconds(2043) index(5461)

Title: Locus:1.1.1.3281.16 File:"2013-07-02 CLN FXIII 30 min 3rd F 1.wiff"

Data file C:\Program Files (x86)\Matrix Science\Mascot Daemon\mgf\3 FXIII 30 min 3rd\mascot\_daemon\_merge.mgf

Click mouse within plot area to zoom in by factor of two about that point

Or, Plot from  to  Da

Label all possible matches  Label matches used for scoring

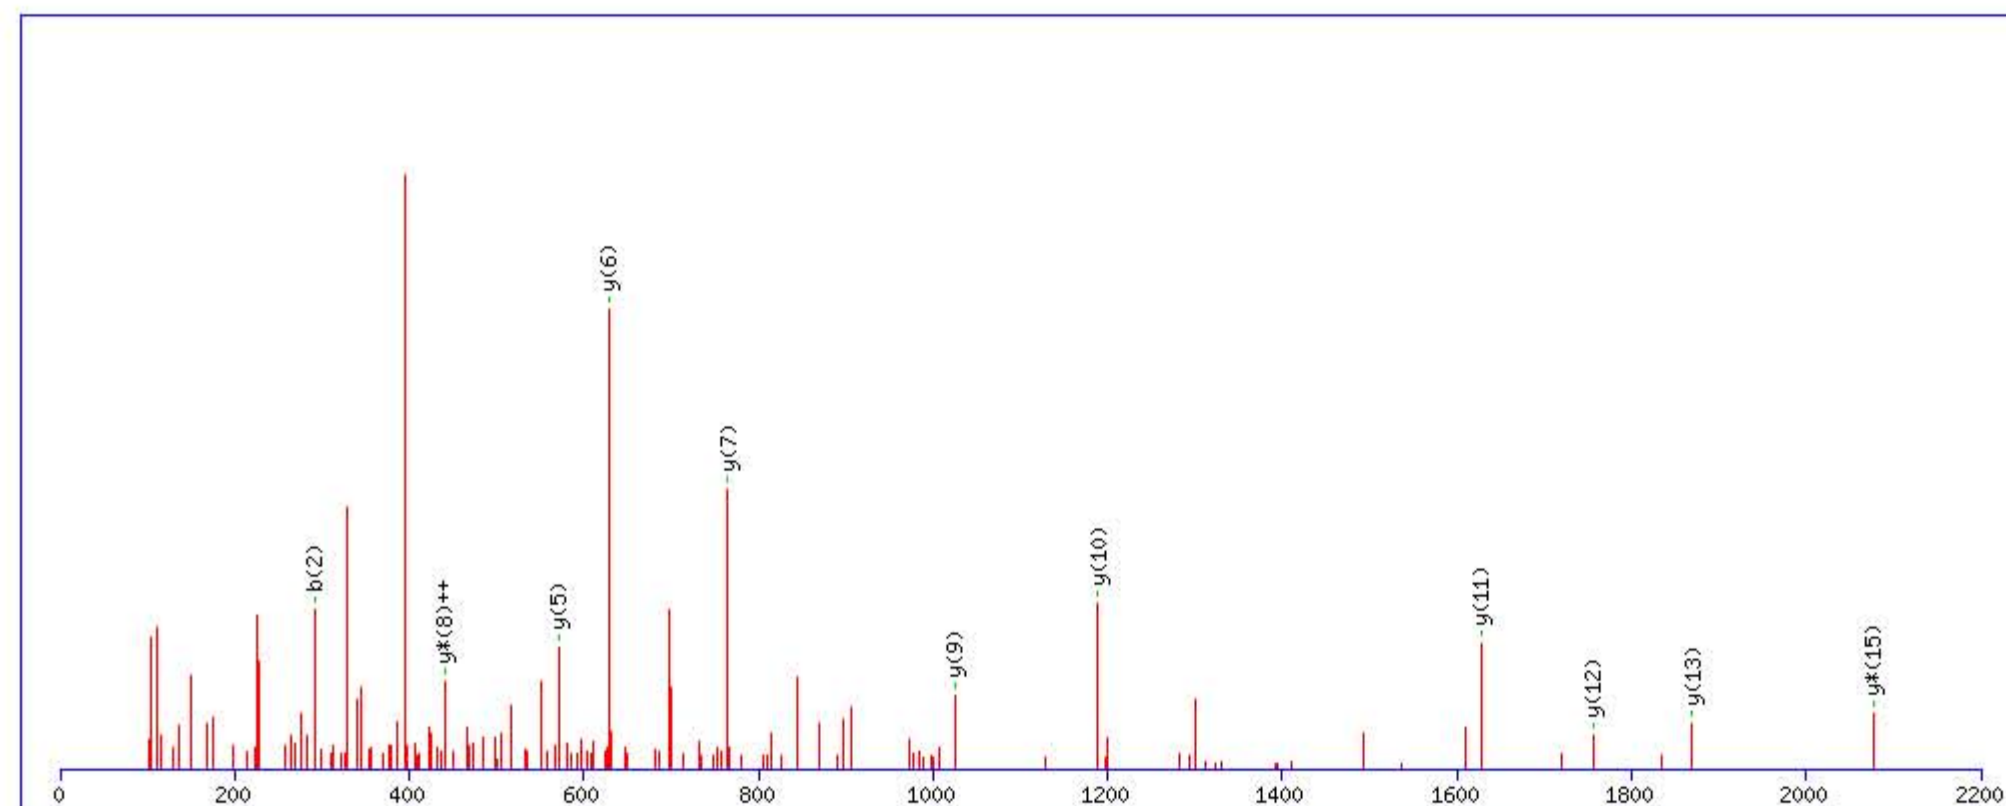

Monoisotopic mass of neutral peptide Mr(calc): 2384.089767

Fixed modifications: Carbamidomethyl (C) (apply to specified residues or termini only)

Variable modifications:

Q7 : Biotin:Thermo-21345 (Q)

Ions Score: 42 Expect: 0.00088

Matches : 11/164 fragment ions using 19 most intense peaks [\(help\)](#)

| #  | b                 | b <sup>++</sup> | b <sup>+</sup> | b <sup>+++</sup> | b <sup>0</sup> | b <sup>0++</sup> | Seq. | y                  | y <sup>++</sup> | y <sup>+</sup>     | y <sup>+++</sup>  | y <sup>0</sup> | y <sup>0++</sup> | #  |
|----|-------------------|-----------------|----------------|------------------|----------------|------------------|------|--------------------|-----------------|--------------------|-------------------|----------------|------------------|----|
| 1  | 132.047761        | 66.527518       |                |                  |                |                  | M    |                    |                 |                    |                   |                |                  | 17 |
| 2  | <b>292.078410</b> | 146.542843      |                |                  |                |                  | C    | 2254.056579        | 1127.531927     | 2237.030030        | 1119.018653       | 2236.046014    | 1118.526645      | 16 |
| 3  | 389.131174        | 195.069225      |                |                  |                |                  | P    | 2094.025930        | 1047.516603     | <b>2076.999381</b> | 1039.003328       | 2076.015365    | 1038.511320      | 15 |
| 4  | 517.189752        | 259.098514      | 500.163203     | 250.585240       |                |                  | Q    | 1996.973166        | 998.990221      | 1979.946617        | 990.476947        | 1978.962601    | 989.984939       | 14 |
| 5  | 630.273816        | 315.640546      | 613.247267     | 307.127272       |                |                  | L    | <b>1868.914588</b> | 934.960932      | 1851.888039        | 926.447658        | 1850.904023    | 925.955650       | 13 |
| 6  | 758.332394        | 379.669835      | 741.305845     | 371.156561       |                |                  | Q    | <b>1755.830524</b> | 878.418900      | 1738.803975        | 869.905626        | 1737.819959    | 869.413618       | 12 |
| 7  | 1197.557720       | 599.282498      | 1180.531171    | 590.769224       |                |                  | Q    | <b>1627.771946</b> | 814.389611      | 1610.745397        | 805.876337        | 1609.761381    | 805.384329       | 11 |
| 8  | 1360.621049       | 680.814163      | 1343.594500    | 672.300888       |                |                  | Y    | <b>1188.546620</b> | 594.776948      | 1171.520071        | 586.263674        | 1170.536055    | 585.771666       | 10 |
| 9  | 1489.663642       | 745.335459      | 1472.637093    | 736.822185       | 1471.653077    | 736.330177       | E    | <b>1025.483291</b> | 513.245284      | 1008.456742        | 504.732009        | 1007.472726    | 504.240001       | 9  |
| 10 | 1620.704127       | 810.855702      | 1603.677578    | 802.342427       | 1602.693562    | 801.850419       | M    | 896.440698         | 448.723987      | 879.414149         | <b>440.210713</b> | 878.430133     | 439.718705       | 8  |
| 11 | 1757.763039       | 879.385158      | 1740.736490    | 870.871883       | 1739.752474    | 870.379875       | H    | <b>765.400213</b>  | 383.203745      | 748.373664         | 374.690470        | 747.389648     | 374.198462       | 7  |
| 12 | 1814.784503       | 907.895890      | 1797.757954    | 899.382615       | 1796.773938    | 898.890607       | G    | <b>628.341301</b>  | 314.674289      | 611.314752         | 306.161014        | 610.330736     | 305.669006       | 6  |
| 13 | 1911.837267       | 956.422272      | 1894.810718    | 947.908997       | 1893.826702    | 947.416989       | P    | <b>571.319837</b>  | 286.163557      | 554.293288         | 277.650282        | 553.309272     | 277.158274       | 5  |
| 14 | 2040.879860       | 1020.943568     | 2023.853311    | 1012.430294      | 2022.869295    | 1011.938286      | E    | 474.267073         | 237.637175      | 457.240524         | 229.123900        | 456.256508     | 228.631892       | 4  |
| 15 | 2097.901324       | 1049.454300     | 2080.874775    | 1040.941025      | 2079.890759    | 1040.449017      | G    | 345.224480         | 173.115878      | 328.197931         | 164.602603        |                |                  | 3  |
| 16 | 2210.985388       | 1105.996332     | 2193.958839    | 1097.483057      | 2192.974823    | 1096.991049      | L    | 288.203016         | 144.605146      | 271.176467         | 136.091872        |                |                  | 2  |
| 17 |                   |                 |                |                  |                |                  | R    | 175.118952         | 88.063114       | 158.092403         | 79.549839         |                |                  | 1  |

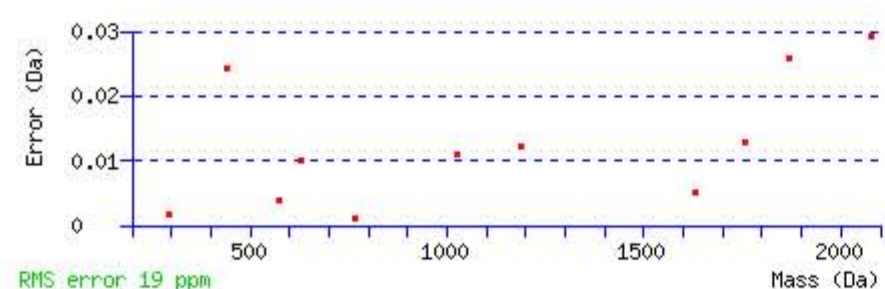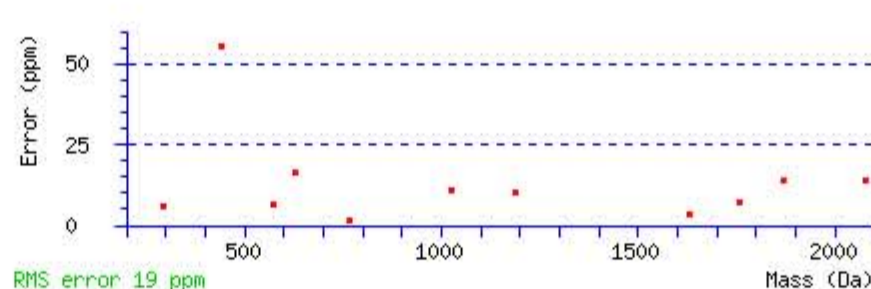

NCBI BLAST search of [MCPQLQQYEMHGPEGLR](#)

(Parameters: blastp, nr protein database, expect=20000, no filter, PAM30)

Other BLAST [web gateways](#)

## All matches to this query

| Score | Mr(calc):   | Delta    | Sequence                          |
|-------|-------------|----------|-----------------------------------|
| 41.8  | 2384.089767 | 0.010889 | <a href="#">MCPQLQQYEMHGPEGLR</a> |
| 33.3  | 2384.089767 | 0.010889 | <a href="#">MCPQLQQYEMHGPEGLR</a> |
| 15.2  | 2384.089767 | 0.010889 | <a href="#">MCPQLQQYEMHGPEGLR</a> |



**Peptide View**

MS/MS Fragmentation of **MCPQLQQYEMHGPEGLR**

Found in **A2MG\_HUMAN**, Alpha-2-macroglobulin OS=Homo sapiens GN=A2M PE=1 SV=3

Match to Query 50260: 2400.098188 from(1201.056370,2+) rtinseconds(1926) index(34593)  
 Title: Locus:1.1.1.3304.19 File:"2013-07-02 CLN FXIII 30 min 3rd F 3.wiff"  
 Data file C:\Program Files (x86)\Matrix Science\Mascot Daemon\mgf3 FXIII 30 min 3rd\mascot\_daemon\_merge.mgf

Click mouse within plot area to zoom in by factor of two about that point

Or, Plot from  to  Da

Label all possible matches  Label matches used for scoring

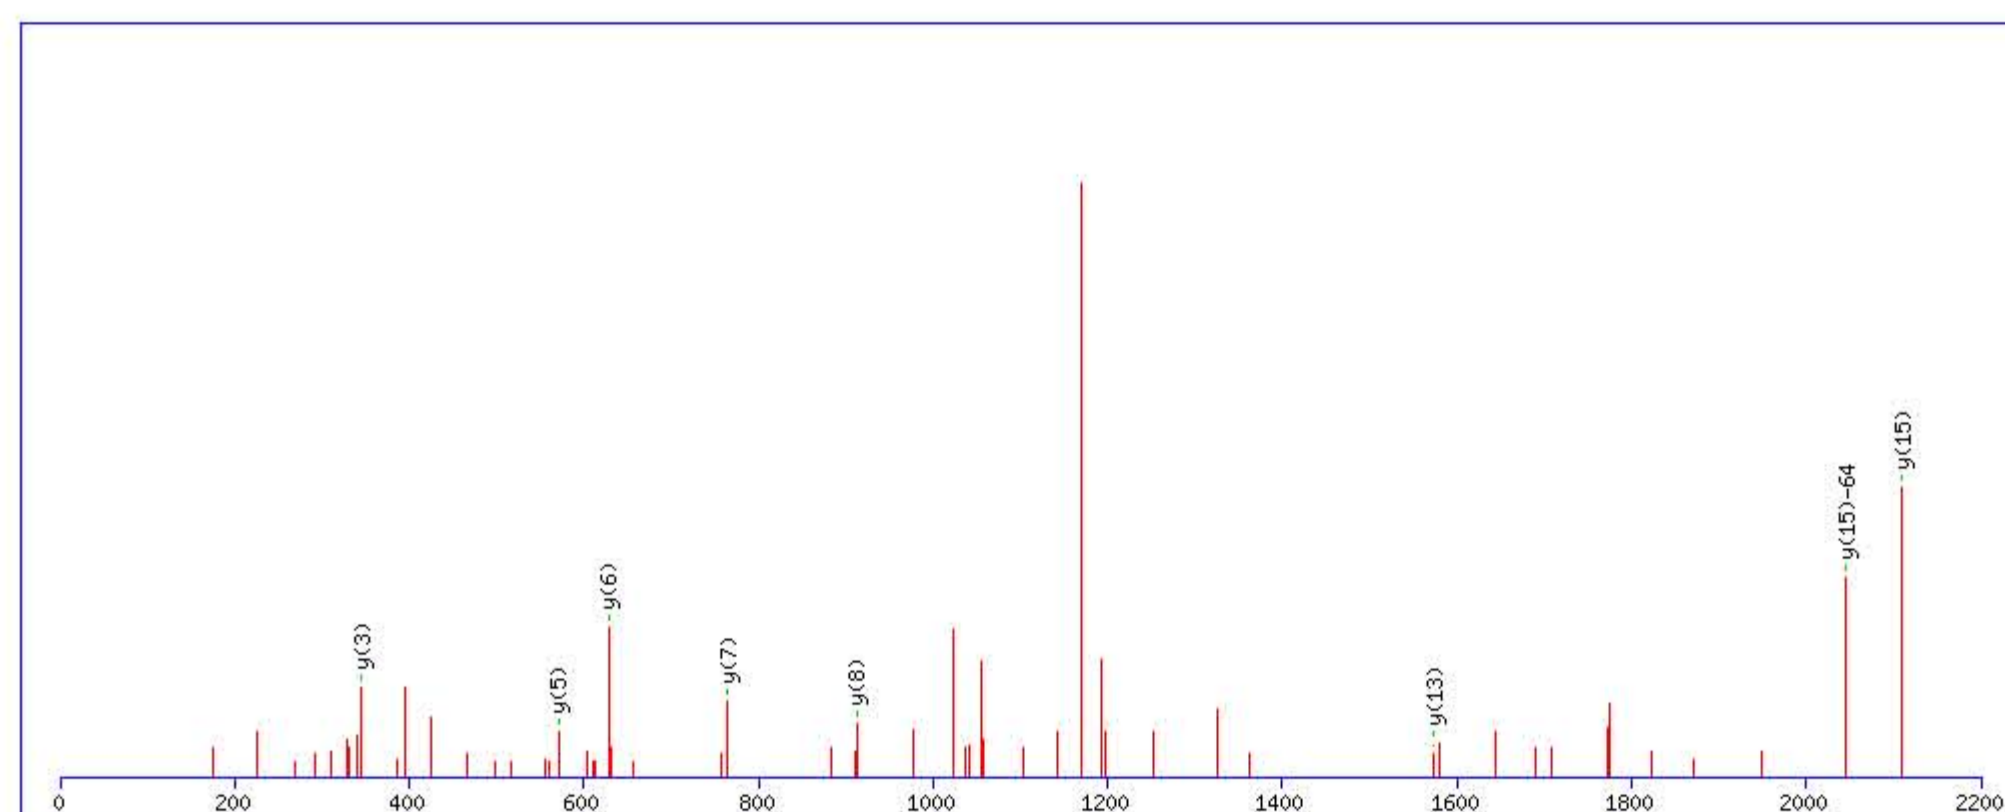

Monoisotopic mass of neutral peptide Mr(calc): 2400.084686  
 Fixed modifications: Carbamidomethyl (C) (apply to specified residues or termini only)  
 Variable modifications:  
 Q4 : Biotin:Thermo-21345 (Q)  
 M10 : Oxidation (M), with neutral losses 0.000000 (shown in table), 63.998285  
 Ions Score: 33 Expect: 0.0059  
 Matches : 8/260 fragment ions using 18 most intense peaks [\(help\)](#)

| #  | b           | b <sup>++</sup> | b <sup>*</sup> | b <sup>*++</sup> | b <sup>0</sup> | b <sup>0++</sup> | Seq. | y                  | y <sup>++</sup> | y <sup>*</sup> | y <sup>*++</sup> | y <sup>0</sup> | y <sup>0++</sup> | #  |
|----|-------------|-----------------|----------------|------------------|----------------|------------------|------|--------------------|-----------------|----------------|------------------|----------------|------------------|----|
| 1  | 132.047761  | 66.527518       |                |                  |                |                  | M    |                    |                 |                |                  |                |                  | 17 |
| 2  | 292.078410  | 146.542843      |                |                  |                |                  | C    | 2270.051494        | 1135.529385     | 2253.024945    | 1127.016110      | 2252.040929    | 1126.524102      | 16 |
| 3  | 389.131174  | 195.069225      |                |                  |                |                  | P    | <b>2110.020845</b> | 1055.514060     | 2092.994296    | 1047.000786      | 2092.010280    | 1046.508778      | 15 |
| 4  | 828.356500  | 414.681888      | 811.329951     | 406.168614       |                |                  | Q    | 2012.968081        | 1006.987679     | 1995.941532    | 998.474404       | 1994.957516    | 997.982396       | 14 |
| 5  | 941.440564  | 471.223920      | 924.414015     | 462.710646       |                |                  | L    | <b>1573.742755</b> | 787.375016      | 1556.716206    | 778.861741       | 1555.732190    | 778.369733       | 13 |
| 6  | 1069.499142 | 535.253209      | 1052.472593    | 526.739935       |                |                  | Q    | 1460.658691        | 730.832983      | 1443.632142    | 722.319709       | 1442.648126    | 721.827701       | 12 |
| 7  | 1197.557720 | 599.282498      | 1180.531171    | 590.769224       |                |                  | Q    | 1332.600113        | 666.803695      | 1315.573564    | 658.290420       | 1314.589548    | 657.798412       | 11 |
| 8  | 1360.621049 | 680.814163      | 1343.594500    | 672.300888       |                |                  | Y    | 1204.541535        | 602.774406      | 1187.514986    | 594.261131       | 1186.530970    | 593.769123       | 10 |
| 9  | 1489.663642 | 745.335459      | 1472.637093    | 736.822185       | 1471.653077    | 736.330177       | E    | 1041.478206        | 521.242741      | 1024.451657    | 512.729467       | 1023.467641    | 512.237459       | 9  |
| 10 | 1636.699042 | 818.853159      | 1619.672493    | 810.339885       | 1618.688477    | 809.847877       | M    | <b>912.435613</b>  | 456.721444      | 895.409064     | 448.208170       | 894.425048     | 447.716162       | 8  |
| 11 | 1773.757954 | 887.382615      | 1756.731405    | 878.869341       | 1755.747389    | 878.377333       | H    | <b>765.400213</b>  | 383.203744      | 748.373664     | 374.690470       | 747.389648     | 374.198462       | 7  |
| 12 | 1830.779418 | 915.893347      | 1813.752869    | 907.380073       | 1812.768853    | 906.888065       | G    | <b>628.341301</b>  | 314.674288      | 611.314752     | 306.161014       | 610.330736     | 305.669006       | 6  |
| 13 | 1927.832182 | 964.419729      | 1910.805633    | 955.906455       | 1909.821617    | 955.414447       | P    | <b>571.319837</b>  | 286.163557      | 554.293288     | 277.650282       | 553.309272     | 277.158274       | 5  |
| 14 | 2056.874775 | 1028.941025     | 2039.848226    | 1020.427751      | 2038.864210    | 1019.935743      | E    | 474.267073         | 237.637174      | 457.240524     | 229.123900       | 456.256508     | 228.631892       | 4  |
| 15 | 2113.896239 | 1057.451757     | 2096.869690    | 1048.938483      | 2095.885674    | 1048.446475      | G    | <b>345.224480</b>  | 173.115878      | 328.197931     | 164.602603       |                |                  | 3  |
| 16 | 2226.980303 | 1113.993789     | 2209.953754    | 1105.480515      | 2208.969738    | 1104.988507      | L    | 288.203016         | 144.605146      | 271.176467     | 136.091872       |                |                  | 2  |
| 17 |             |                 |                |                  |                |                  | R    | 175.118952         | 88.063114       | 158.092403     | 79.549839        |                |                  | 1  |

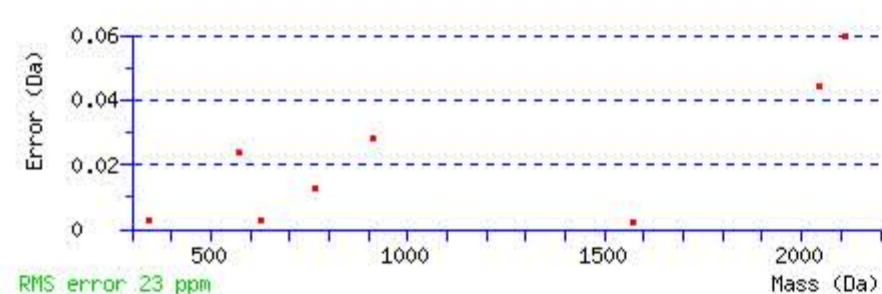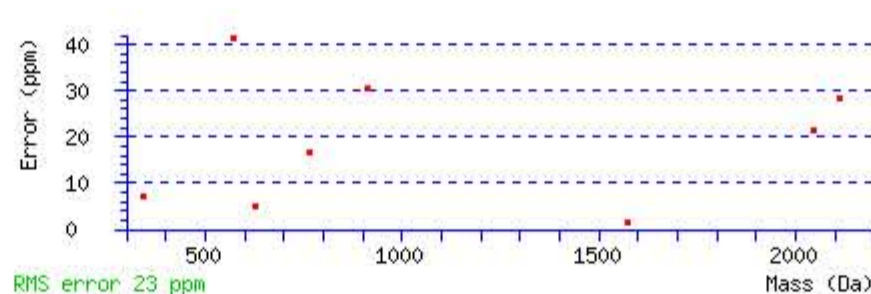

NCBI BLAST search of [MCPQLQQYEMHGPEGLR](#)  
 (Parameters: blastp, nr protein database, expect=20000, no filter, PAM30)  
 Other BLAST [web gateways](#)

**All matches to this query**

| Score | Mr(calc):   | Delta    | Sequence                          |
|-------|-------------|----------|-----------------------------------|
| 33.1  | 2400.084686 | 0.013502 | <a href="#">MCPQLQQYEMHGPEGLR</a> |
| 23.4  | 2400.084686 | 0.013502 | <a href="#">MCPQLQQYEMHGPEGLR</a> |
| 23.4  | 2400.084686 | 0.013502 | <a href="#">MCPQLQQYEMHGPEGLR</a> |
| 1.8   | 2400.084686 | 0.013502 | <a href="#">MCPQLQQYEMHGPEGLR</a> |
| 1.8   | 2400.084686 | 0.013502 | <a href="#">MCPQLQQYEMHGPEGLR</a> |
| 1.8   | 2400.084686 | 0.013502 | <a href="#">MCPQLQQYEMHGPEGLR</a> |



# Mascot Search Results

## Peptide View

MS/MS Fragmentation of **MCPQLQQYEMHGPEGLR**

Found in **A2MG\_HUMAN**, Alpha-2-macroglobulin OS=Homo sapiens GN=A2M PE=1 SV=3

Match to Query 54112: 2695.254462 from(899.425430,3+) rtinseconds(2231) index(21157)

Title: Locus:1.1.1.3339.9 File:"2013-07-02 CLN FXIII 30 min 3rd F 2.wiff"

Data file C:\Program Files (x86)\Matrix Science\Mascot Daemon\mgf3 FXIII 30 min 3rd\mascot\_daemon\_merge.mgf

Click mouse within plot area to zoom in by factor of two about that point

Or, Plot from  to  Da

Label all possible matches  Label matches used for scoring

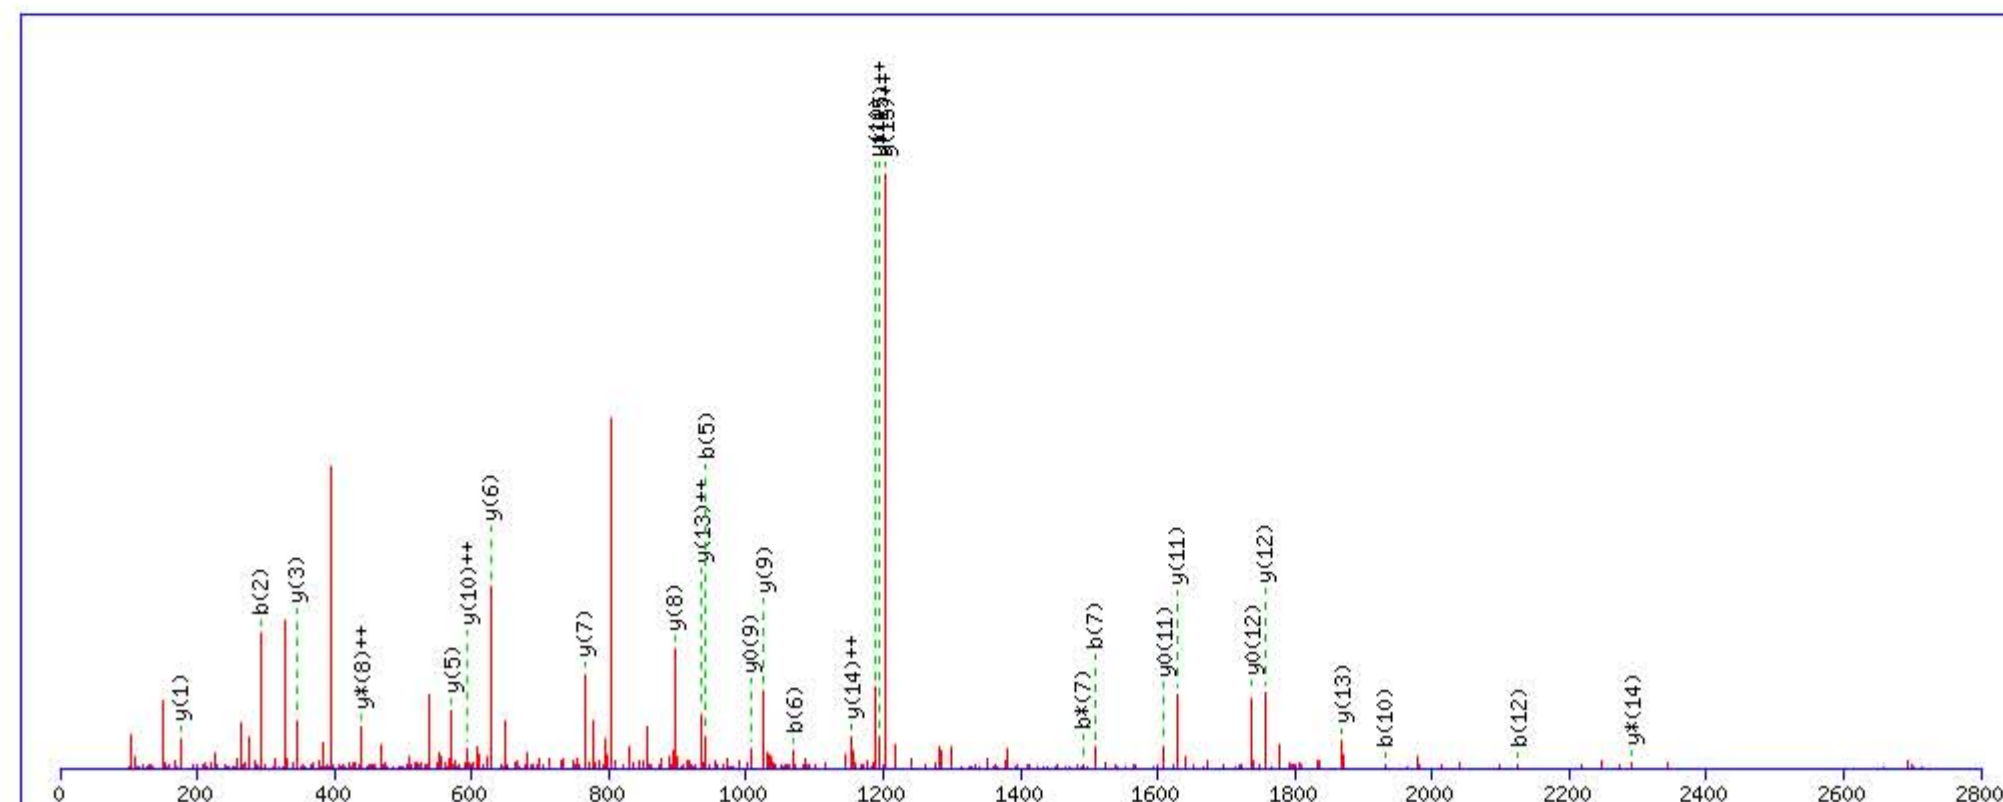

Monoisotopic mass of neutral peptide Mr(calc): 2695.256516

Fixed modifications: Carbamidomethyl (C) (apply to specified residues or termini only)

Variable modifications:

Q4 : Biotin:Thermo-21345 (Q)

Q7 : Biotin:Thermo-21345 (Q)

Ions Score: 40 Expect: 0.0014

Matches : 28/164 fragment ions using 67 most intense peaks [\(help\)](#)

| #  | b                  | b <sup>++</sup> | b <sup>*</sup>     | b <sup>*++</sup> | b <sup>0</sup> | b <sup>0++</sup> | Seq. | y                  | y <sup>++</sup>    | y <sup>*</sup>     | y <sup>*++</sup>   | y <sup>0</sup>     | y <sup>0++</sup> | #  |
|----|--------------------|-----------------|--------------------|------------------|----------------|------------------|------|--------------------|--------------------|--------------------|--------------------|--------------------|------------------|----|
| 1  | 132.047761         | 66.527518       |                    |                  |                |                  | M    |                    |                    |                    |                    |                    |                  | 17 |
| 2  | <b>292.078410</b>  | 146.542843      |                    |                  |                |                  | C    | 2565.223327        | 1283.115301        | 2548.196778        | 1274.602027        | 2547.212762        | 1274.110019      | 16 |
| 3  | 389.131174         | 195.069225      |                    |                  |                |                  | P    | 2405.192678        | <b>1203.099977</b> | 2388.166129        | <b>1194.586702</b> | 2387.182113        | 1194.094694      | 15 |
| 4  | 828.356500         | 414.681888      | 811.329951         | 406.168614       |                |                  | Q    | 2308.139914        | <b>1154.573595</b> | <b>2291.113365</b> | 1146.060320        | 2290.129349        | 1145.568312      | 14 |
| 5  | <b>941.440564</b>  | 471.223920      | 924.414015         | 462.710646       |                |                  | L    | <b>1868.914588</b> | <b>934.960932</b>  | 1851.888039        | 926.447658         | 1850.904023        | 925.955650       | 13 |
| 6  | <b>1069.499142</b> | 535.253209      | 1052.472593        | 526.739935       |                |                  | Q    | <b>1755.830524</b> | 878.418900         | 1738.803975        | 869.905626         | <b>1737.819959</b> | 869.413618       | 12 |
| 7  | <b>1508.724468</b> | 754.865872      | <b>1491.697919</b> | 746.352598       |                |                  | Q    | <b>1627.771946</b> | 814.389611         | 1610.745397        | 805.876337         | <b>1609.761381</b> | 805.384329       | 11 |
| 8  | 1671.787797        | 836.397537      | 1654.761248        | 827.884262       |                |                  | Y    | <b>1188.546620</b> | <b>594.776948</b>  | 1171.520071        | 586.263674         | 1170.536055        | 585.771666       | 10 |
| 9  | 1800.830390        | 900.918833      | 1783.803841        | 892.405559       | 1782.819825    | 891.913551       | E    | <b>1025.483291</b> | 513.245284         | 1008.456742        | 504.732009         | <b>1007.472726</b> | 504.240001       | 9  |
| 10 | <b>1931.870875</b> | 966.439076      | 1914.844326        | 957.925801       | 1913.860310    | 957.433793       | M    | <b>896.440698</b>  | 448.723987         | 879.414149         | <b>440.210713</b>  | 878.430133         | 439.718705       | 8  |
| 11 | 2068.929787        | 1034.968531     | 2051.903238        | 1026.455257      | 2050.919222    | 1025.963249      | H    | <b>765.400213</b>  | 383.203745         | 748.373664         | 374.690470         | 747.389648         | 374.198462       | 7  |
| 12 | <b>2125.951251</b> | 1063.479263     | 2108.924702        | 1054.965989      | 2107.940686    | 1054.473981      | G    | <b>628.341301</b>  | 314.674289         | 611.314752         | 306.161014         | 610.330736         | 305.669006       | 6  |
| 13 | 2223.004015        | 1112.005645     | 2205.977466        | 1103.492371      | 2204.993450    | 1103.000363      | P    | <b>571.319837</b>  | 286.163557         | 554.293288         | 277.650282         | 553.309272         | 277.158274       | 5  |
| 14 | 2352.046608        | 1176.526942     | 2335.020059        | 1168.013667      | 2334.036043    | 1167.521659      | E    | 474.267073         | 237.637175         | 457.240524         | 229.123900         | 456.256508         | 228.631892       | 4  |
| 15 | 2409.068072        | 1205.037674     | 2392.041523        | 1196.524399      | 2391.057507    | 1196.032391      | G    | <b>345.224480</b>  | 173.115878         | 328.197931         | 164.602603         |                    |                  | 3  |
| 16 | 2522.152136        | 1261.579706     | 2505.125587        | 1253.066431      | 2504.141571    | 1252.574424      | L    | 288.203016         | 144.605146         | 271.176467         | 136.091872         |                    |                  | 2  |
| 17 |                    |                 |                    |                  |                |                  | R    | <b>175.118952</b>  | 88.063114          | 158.092403         | 79.549839          |                    |                  | 1  |

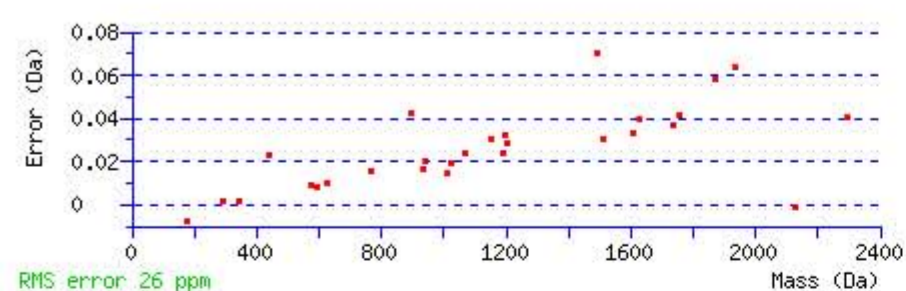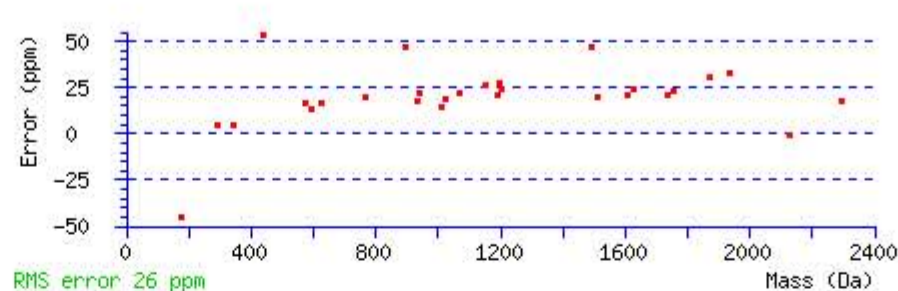

NCBI BLAST search of [MCPQLQQYEMHGPEGLR](#)

(Parameters: blastp, nr protein database, expect=20000, no filter, PAM30)

Other BLAST [web gateways](#)

## All matches to this query

| Score | Mr(calc):   | Delta     | Sequence                          |
|-------|-------------|-----------|-----------------------------------|
| 40.3  | 2695.256516 | -0.002054 | <a href="#">MCPQLQQYEMHGPEGLR</a> |
| 32.4  | 2695.256516 | -0.002054 | <a href="#">MCPQLQQYEMHGPEGLR</a> |
| 22.1  | 2695.256516 | -0.002054 | <a href="#">MCPQLQQYEMHGPEGLR</a> |



# MASCOT Search Results

## Peptide View

MS/MS Fragmentation of **MCPQLQQYEMHGPEGLR**

Found in **A2MG\_HUMAN**, Alpha-2-macroglobulin OS=Homo sapiens GN=A2M PE=1 SV=3

Match to Query 54113: 2695.266936 from(674.824010,4+) rtinseconds(2203) index(6377)

Title: Locus:1.1.1.3337.13 File:"2013-07-02 CLN FXIII 30 min 3rd F 1.wiff"

Data file C:\Program Files (x86)\Matrix Science\Mascot Daemon\mgf3 FXIII 30 min 3rd\mascot\_daemon\_merge.mgf

Click mouse within plot area to zoom in by factor of two about that point

Or, Plot from  to  Da

Label all possible matches  Label matches used for scoring

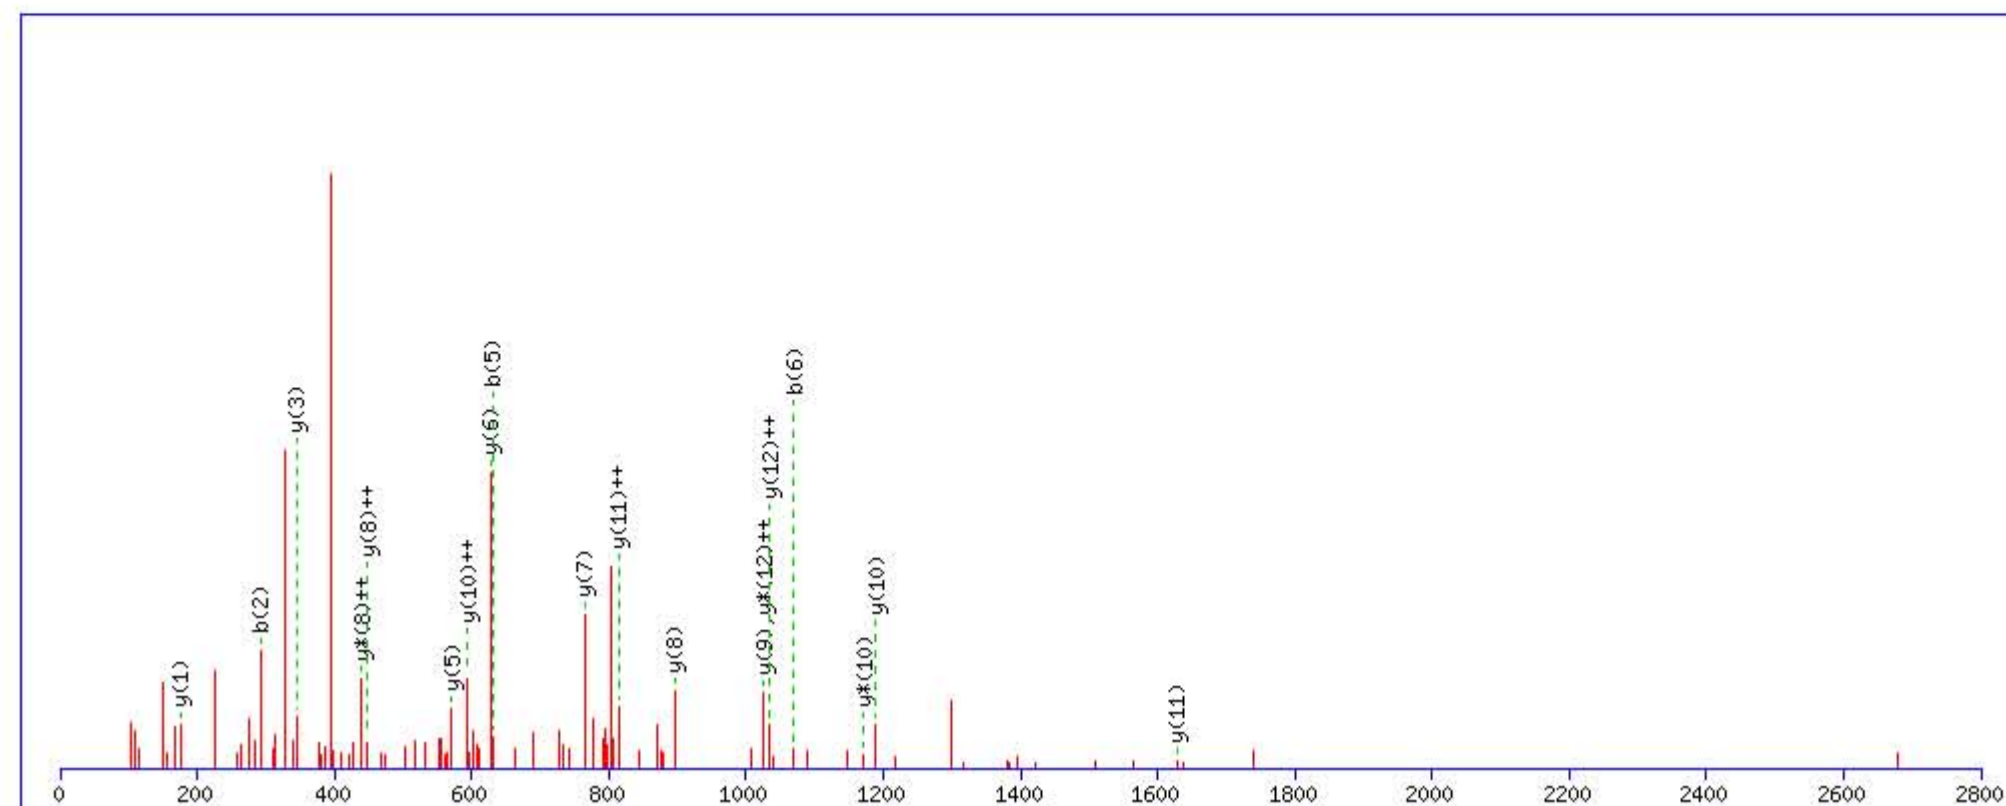

Monoisotopic mass of neutral peptide Mr(calc): 2695.256516

Fixed modifications: Carbamidomethyl (C) (apply to specified residues or termini only)

Variable modifications:

Q6 : Biotin:Thermo-21345 (Q)

Q7 : Biotin:Thermo-21345 (Q)

Ions Score: 31 Expect: 0.013

Matches : 19/164 fragment ions using 45 most intense peaks [\(help\)](#)

| #  | b                  | b <sup>++</sup> | b <sup>+</sup> | b <sup>+++</sup> | b <sup>0</sup> | b <sup>0++</sup> | Seq. | y                  | y <sup>++</sup>    | y <sup>+</sup>     | y <sup>+++</sup>   | y <sup>0</sup> | y <sup>0++</sup> | #  |
|----|--------------------|-----------------|----------------|------------------|----------------|------------------|------|--------------------|--------------------|--------------------|--------------------|----------------|------------------|----|
| 1  | 132.047761         | 66.527518       |                |                  |                |                  | M    |                    |                    |                    |                    |                |                  | 17 |
| 2  | <b>292.078410</b>  | 146.542843      |                |                  |                |                  | C    | 2565.223327        | 1283.115301        | 2548.196778        | 1274.602027        | 2547.212762    | 1274.110019      | 16 |
| 3  | 389.131174         | 195.069225      |                |                  |                |                  | P    | 2405.192678        | 1203.099977        | 2388.166129        | 1194.586702        | 2387.182113    | 1194.094694      | 15 |
| 4  | 517.189752         | 259.098514      | 500.163203     | 250.585240       |                |                  | Q    | 2308.139914        | 1154.573595        | 2291.113365        | 1146.060320        | 2290.129349    | 1145.568312      | 14 |
| 5  | <b>630.273816</b>  | 315.640546      | 613.247267     | 307.127272       |                |                  | L    | 2180.081336        | 1090.544306        | 2163.054787        | 1082.031031        | 2162.070771    | 1081.539023      | 13 |
| 6  | <b>1069.499142</b> | 535.253209      | 1052.472593    | 526.739935       |                |                  | Q    | 2066.997272        | <b>1034.002274</b> | 2049.970723        | <b>1025.488999</b> | 2048.986707    | 1024.996991      | 12 |
| 7  | 1508.724468        | 754.865872      | 1491.697919    | 746.352598       |                |                  | Q    | <b>1627.771946</b> | <b>814.389611</b>  | 1610.745397        | 805.876337         | 1609.761381    | 805.384329       | 11 |
| 8  | 1671.787797        | 836.397537      | 1654.761248    | 827.884262       |                |                  | Y    | <b>1188.546620</b> | <b>594.776948</b>  | <b>1171.520071</b> | 586.263674         | 1170.536055    | 585.771666       | 10 |
| 9  | 1800.830390        | 900.918833      | 1783.803841    | 892.405559       | 1782.819825    | 891.913551       | E    | <b>1025.483291</b> | 513.245284         | 1008.456742        | 504.732009         | 1007.472726    | 504.240001       | 9  |
| 10 | 1931.870875        | 966.439076      | 1914.844326    | 957.925801       | 1913.860310    | 957.433793       | M    | <b>896.440698</b>  | <b>448.723987</b>  | 879.414149         | <b>440.210713</b>  | 878.430133     | 439.718705       | 8  |
| 11 | 2068.929787        | 1034.968531     | 2051.903238    | 1026.455257      | 2050.919222    | 1025.963249      | H    | <b>765.400213</b>  | 383.203745         | 748.373664         | 374.690470         | 747.389648     | 374.198462       | 7  |
| 12 | 2125.951251        | 1063.479263     | 2108.924702    | 1054.965989      | 2107.940686    | 1054.473981      | G    | <b>628.341301</b>  | 314.674289         | 611.314752         | 306.161014         | 610.330736     | 305.669006       | 6  |
| 13 | 2223.004015        | 1112.005645     | 2205.977466    | 1103.492371      | 2204.993450    | 1103.000363      | P    | <b>571.319837</b>  | 286.163557         | 554.293288         | 277.650282         | 553.309272     | 277.158274       | 5  |
| 14 | 2352.046608        | 1176.526942     | 2335.020059    | 1168.013667      | 2334.036043    | 1167.521659      | E    | 474.267073         | 237.637175         | 457.240524         | 229.123900         | 456.256508     | 228.631892       | 4  |
| 15 | 2409.068072        | 1205.037674     | 2392.041523    | 1196.524399      | 2391.057507    | 1196.032391      | G    | <b>345.224480</b>  | 173.115878         | 328.197931         | 164.602603         |                |                  | 3  |
| 16 | 2522.152136        | 1261.579706     | 2505.125587    | 1253.066431      | 2504.141571    | 1252.574424      | L    | 288.203016         | 144.605146         | 271.176467         | 136.091872         |                |                  | 2  |
| 17 |                    |                 |                |                  |                |                  | R    | <b>175.118952</b>  | 88.063114          | 158.092403         | 79.549839          |                |                  | 1  |

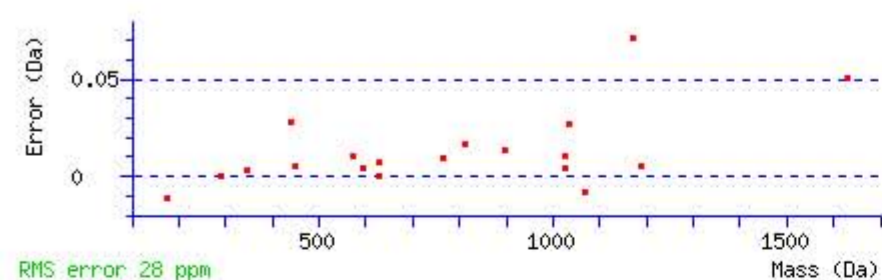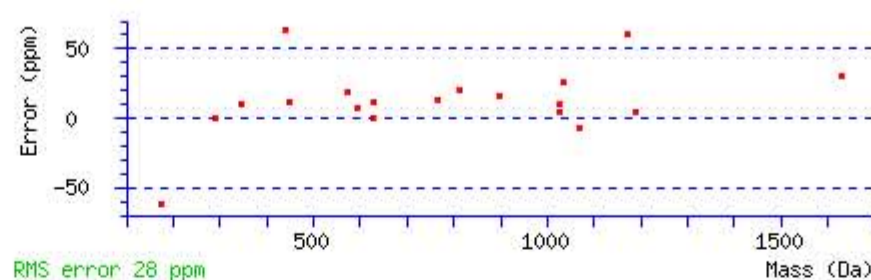

NCBI BLAST search of [MCPQLQQYEMHGPEGLR](#)

(Parameters: blastp, nr protein database, expect=20000, no filter, PAM30)

Other BLAST [web gateways](#)

## All matches to this query

| Score | Mr(calc):   | Delta    | Sequence                          |
|-------|-------------|----------|-----------------------------------|
| 31.4  | 2695.256516 | 0.010420 | <a href="#">MCPQLQQYEMHGPEGLR</a> |
| 31.3  | 2695.256516 | 0.010420 | <a href="#">MCPQLQQYEMHGPEGLR</a> |
| 23.6  | 2695.256516 | 0.010420 | <a href="#">MCPQLQQYEMHGPEGLR</a> |



# MASCOT Search Results

## Peptide View

MS/MS Fragmentation of **MCPQLQQYEMHGPEGLR**

Found in **A2MG\_HUMAN**, Alpha-2-macroglobulin OS=Homo sapiens GN=A2M PE=1 SV=3

Match to Query 57407: 3006.438296 from(752.616850,4+) rtinseconds(2333) index(21643)

Title: Locus:1.1.1.3375.11 File:"2013-07-02 CLN FXIII 30 min 3rd F 2.wiff"

Data file C:\Program Files (x86)\Matrix Science\Mascot Daemon\mgf\3 FXIII 30 min 3rd\mascot\_daemon\_merge.mgf

Click mouse within plot area to zoom in by factor of two about that point

Or, Plot from  to  Da

Label all possible matches  Label matches used for scoring

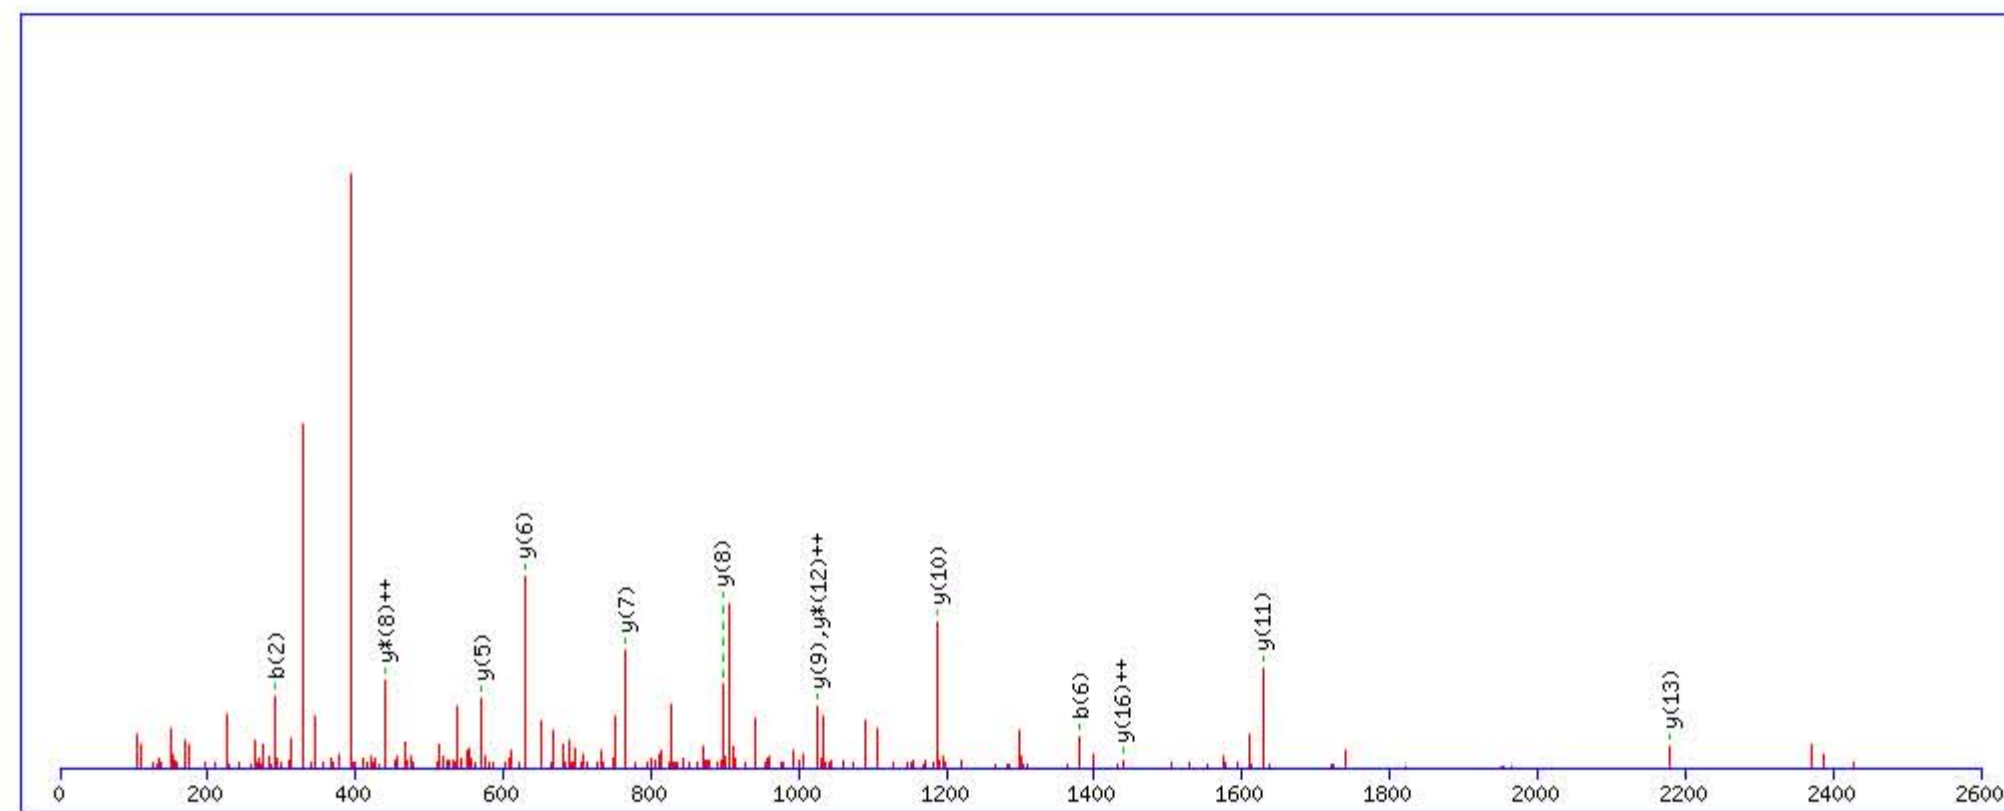

Monoisotopic mass of neutral peptide Mr(calc): 3006.423264

Fixed modifications: Carbamidomethyl (C) (apply to specified residues or termini only)

Variable modifications:

Q4 : Biotin:Thermo-21345 (Q)

Q6 : Biotin:Thermo-21345 (Q)

Q7 : Biotin:Thermo-21345 (Q)

Ions Score: 35 Expect: 0.0082

Matches : 13/164 fragment ions using 22 most intense peaks [\(help\)](#)

| #  | b                  | b <sup>++</sup> | b <sup>*</sup> | b <sup>+++</sup> | b <sup>0</sup> | b <sup>0++</sup> | Seq. | y                  | y <sup>++</sup>    | y <sup>*</sup> | y <sup>+++</sup>   | y <sup>0</sup> | y <sup>0++</sup> | #  |
|----|--------------------|-----------------|----------------|------------------|----------------|------------------|------|--------------------|--------------------|----------------|--------------------|----------------|------------------|----|
| 1  | 132.047761         | 66.527518       |                |                  |                |                  | M    |                    |                    |                |                    |                |                  | 17 |
| 2  | <b>292.078410</b>  | 146.542843      |                |                  |                |                  | C    | 2876.390075        | <b>1438.698675</b> | 2859.363526    | 1430.185401        | 2858.379510    | 1429.693393      | 16 |
| 3  | 389.131174         | 195.069225      |                |                  |                |                  | P    | 2716.359426        | 1358.683351        | 2699.332877    | 1350.170076        | 2698.348861    | 1349.678068      | 15 |
| 4  | 828.356500         | 414.681888      | 811.329951     | 406.168614       |                |                  | Q    | 2619.306662        | 1310.156969        | 2602.280113    | 1301.643694        | 2601.296097    | 1301.151686      | 14 |
| 5  | 941.440564         | 471.223920      | 924.414015     | 462.710646       |                |                  | L    | <b>2180.081336</b> | 1090.544306        | 2163.054787    | 1082.031031        | 2162.070771    | 1081.539023      | 13 |
| 6  | <b>1380.665890</b> | 690.836583      | 1363.639341    | 682.323309       |                |                  | Q    | 2066.997272        | 1034.002274        | 2049.970723    | <b>1025.488999</b> | 2048.986707    | 1024.996991      | 12 |
| 7  | 1819.891216        | 910.449246      | 1802.864667    | 901.935972       |                |                  | Q    | <b>1627.771946</b> | 814.389611         | 1610.745397    | 805.876337         | 1609.761381    | 805.384329       | 11 |
| 8  | 1982.954545        | 991.980911      | 1965.927996    | 983.467636       |                |                  | Y    | <b>1188.546620</b> | 594.776948         | 1171.520071    | 586.263674         | 1170.536055    | 585.771666       | 10 |
| 9  | 2111.997138        | 1056.502207     | 2094.970589    | 1047.988932      | 2093.986573    | 1047.496925      | E    | <b>1025.483291</b> | 513.245284         | 1008.456742    | 504.732009         | 1007.472726    | 504.240001       | 9  |
| 10 | 2243.037623        | 1122.022450     | 2226.011074    | 1113.509175      | 2225.027058    | 1113.017167      | M    | <b>896.440698</b>  | 448.723987         | 879.414149     | <b>440.210713</b>  | 878.430133     | 439.718705       | 8  |
| 11 | 2380.096535        | 1190.551906     | 2363.069986    | 1182.038631      | 2362.085970    | 1181.546623      | H    | <b>765.400213</b>  | 383.203745         | 748.373664     | 374.690470         | 747.389648     | 374.198462       | 7  |
| 12 | 2437.117999        | 1219.062637     | 2420.091450    | 1210.549363      | 2419.107434    | 1210.057355      | G    | <b>628.341301</b>  | 314.674289         | 611.314752     | 306.161014         | 610.330736     | 305.669006       | 6  |
| 13 | 2534.170763        | 1267.589019     | 2517.144214    | 1259.075745      | 2516.160198    | 1258.583737      | P    | <b>571.319837</b>  | 286.163557         | 554.293288     | 277.650282         | 553.309272     | 277.158274       | 5  |
| 14 | 2663.213356        | 1332.110316     | 2646.186807    | 1323.597041      | 2645.202791    | 1323.105034      | E    | 474.267073         | 237.637175         | 457.240524     | 229.123900         | 456.256508     | 228.631892       | 4  |
| 15 | 2720.234820        | 1360.621048     | 2703.208271    | 1352.107773      | 2702.224255    | 1351.615766      | G    | 345.224480         | 173.115878         | 328.197931     | 164.602603         |                |                  | 3  |
| 16 | 2833.318884        | 1417.163080     | 2816.292335    | 1408.649806      | 2815.308319    | 1408.157798      | L    | 288.203016         | 144.605146         | 271.176467     | 136.091872         |                |                  | 2  |
| 17 |                    |                 |                |                  |                |                  | R    | 175.118952         | 88.063114          | 158.092403     | 79.549839          |                |                  | 1  |

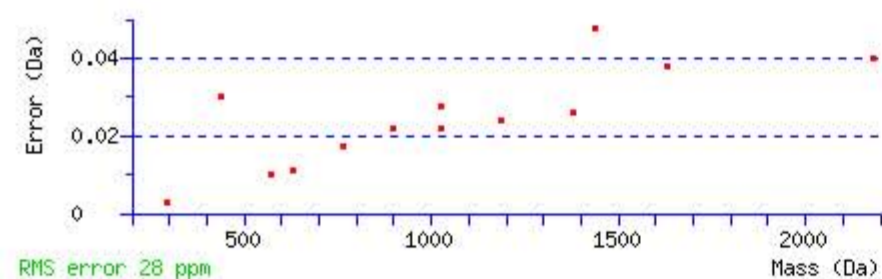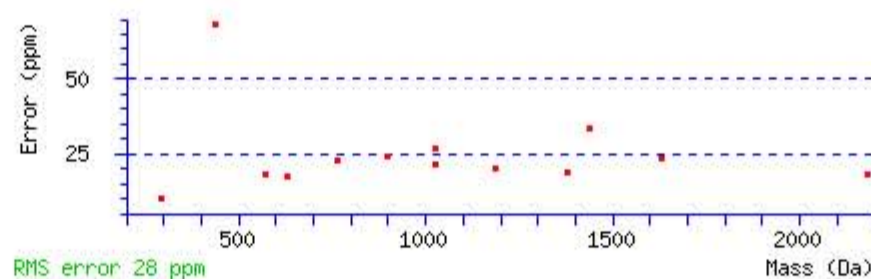

NCBI BLAST search of [MCPQLQQYEMHGPEGLR](#)

(Parameters: blastp, nr protein database, expect=20000, no filter, PAM30)

Other BLAST [web gateways](#)

## All matches to this query

| Score | Mr(calc):   | Delta    | Sequence                          |
|-------|-------------|----------|-----------------------------------|
| 34.5  | 3006.423264 | 0.015032 | <a href="#">MCPQLQQYEMHGPEGLR</a> |

Mascot: <http://www.matrixscience.com/>



# MASCOT Search Results

## Peptide View

MS/MS Fragmentation of **AVDQSVLLMKPDAELSASSVYNLLPEK**  
 Found in **A2MG\_HUMAN**, Alpha-2-macroglobulin OS=Homo sapiens GN=A2M PE=1 SV=3

Match to Query 59691: 3227.701976 from(807.932770,4+) rtinseconds(2746) index(24138)  
 Title: Locus:1.1.1.3518.16 File:"2013-07-02 CLN FXIII 30 min 3rd F 2.wiff"  
 Data file C:\Program Files (x86)\Matrix Science\Mascot Daemon\mgf3 FXIII 30 min 3rd\mascot\_daemon\_merge.mgf

Click mouse within plot area to zoom in by factor of two about that point  
 Or, Plot from  to  Da   
 Label all possible matches  Label matches used for scoring

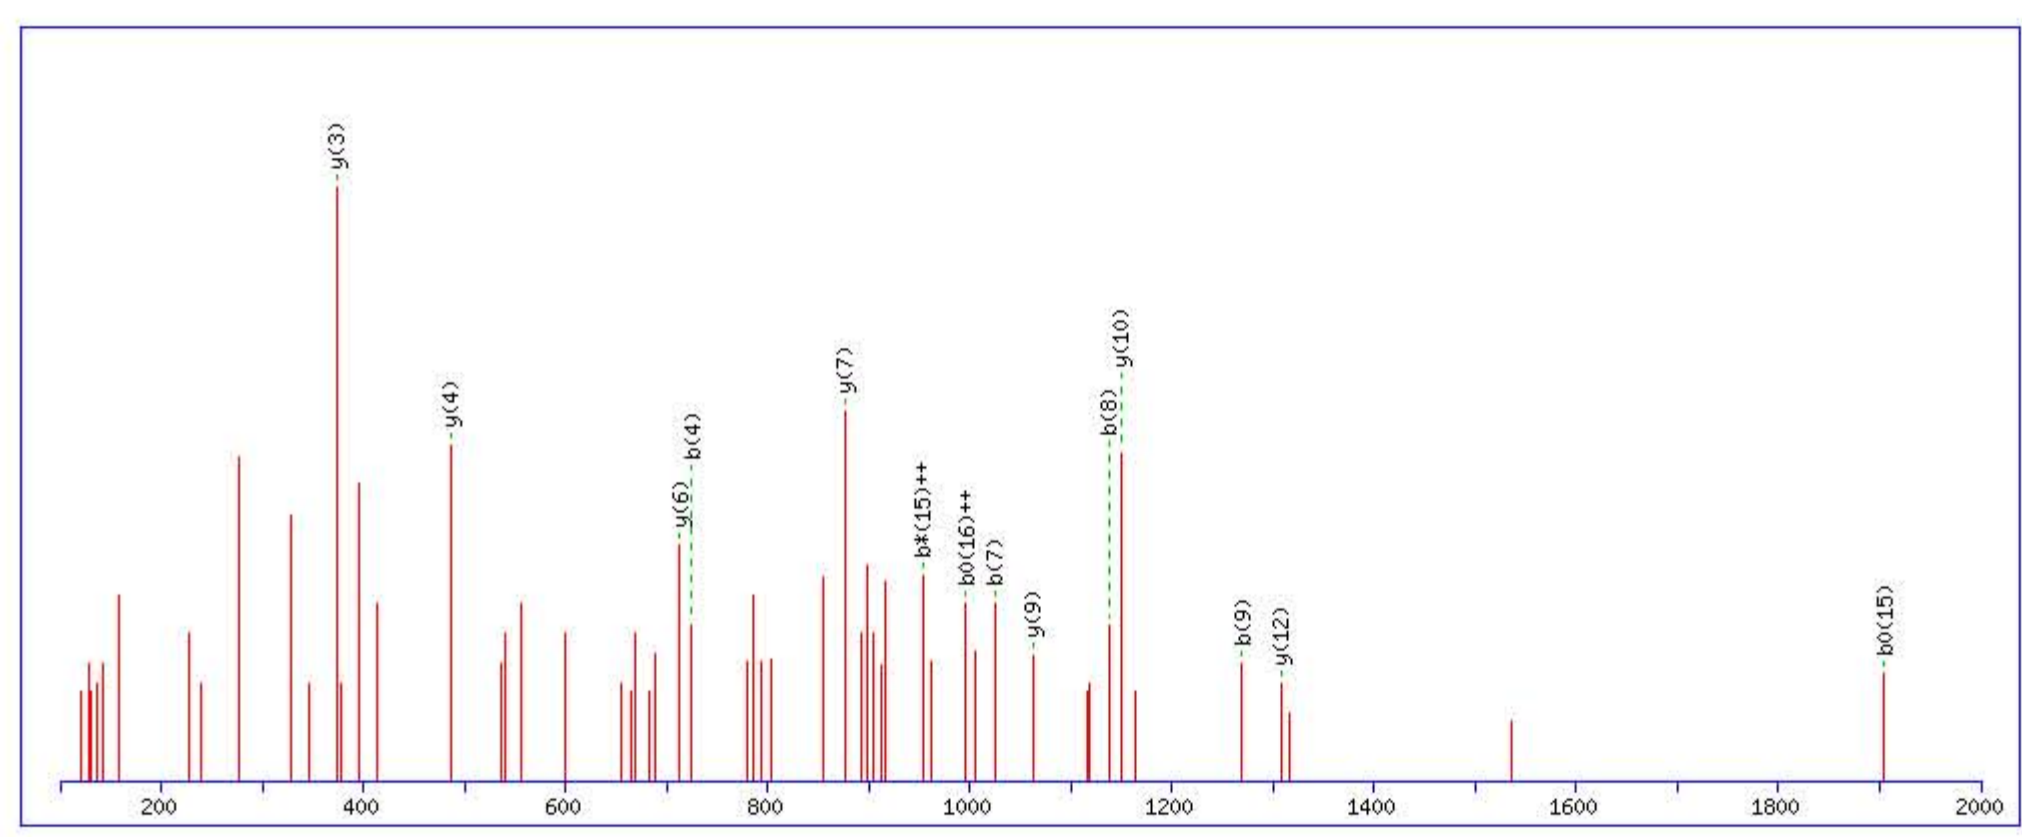

Monoisotopic mass of neutral peptide Mr(calc): 3227.682129  
 Fixed modifications: Carbamidomethyl (C) (apply to specified residues or termini only)  
 Variable modifications:  
 Q4 : Biotin:Thermo-21345 (Q)  
 Ions Score: 34 Expect: 0.0076  
 Matches : 14/300 fragment ions using 25 most intense peaks [\(help\)](#)

| #  | b                  | b <sup>++</sup> | b <sup>*</sup> | b <sup>+++</sup>  | b <sup>0</sup>     | b <sup>0++</sup>  | Seq. | y                  | y <sup>++</sup> | y <sup>*</sup> | y <sup>+++</sup> | y <sup>0</sup> | y <sup>0++</sup> | #  |
|----|--------------------|-----------------|----------------|-------------------|--------------------|-------------------|------|--------------------|-----------------|----------------|------------------|----------------|------------------|----|
| 1  | 72.044390          | 36.525833       |                |                   |                    |                   | A    |                    |                 |                |                  |                |                  | 27 |
| 2  | 171.112804         | 86.060040       |                |                   |                    |                   | V    | 3157.652336        | 1579.329806     | 3140.625787    | 1570.816531      | 3139.641771    | 1570.324523      | 26 |
| 3  | 286.139747         | 143.573512      |                |                   | 268.129182         | 134.568229        | D    | 3058.583922        | 1529.795599     | 3041.557373    | 1521.282324      | 3040.573357    | 1520.790316      | 25 |
| 4  | <b>725.365073</b>  | 363.186175      | 708.338524     | 354.672900        | 707.354508         | 354.180892        | Q    | 2943.556979        | 1472.282127     | 2926.530430    | 1463.768853      | 2925.546414    | 1463.276845      | 24 |
| 5  | 812.397101         | 406.702189      | 795.370552     | 398.188914        | 794.386536         | 397.696906        | S    | 2504.331653        | 1252.669464     | 2487.305104    | 1244.156190      | 2486.321088    | 1243.664182      | 23 |
| 6  | 911.465515         | 456.236396      | 894.438966     | 447.723121        | 893.454950         | 447.231113        | V    | 2417.299625        | 1209.153451     | 2400.273076    | 1200.640176      | 2399.289060    | 1200.148168      | 22 |
| 7  | <b>1024.549579</b> | 512.778427      | 1007.523030    | 504.265153        | 1006.539014        | 503.773145        | L    | 2318.231211        | 1159.619243     | 2301.204662    | 1151.105969      | 2300.220646    | 1150.613961      | 21 |
| 8  | <b>1137.633643</b> | 569.320459      | 1120.607094    | 560.807185        | 1119.623078        | 560.315177        | L    | 2205.147147        | 1103.077212     | 2188.120598    | 1094.563937      | 2187.136582    | 1094.071929      | 20 |
| 9  | <b>1268.674128</b> | 634.840702      | 1251.647579    | 626.327428        | 1250.663563        | 625.835419        | M    | 2092.063083        | 1046.535179     | 2075.036534    | 1038.021905      | 2074.052518    | 1037.529897      | 19 |
| 10 | 1396.769091        | 698.888183      | 1379.742542    | 690.374909        | 1378.758526        | 689.882901        | K    | 1961.022598        | 981.014937      | 1943.996049    | 972.501663       | 1943.012033    | 972.009655       | 18 |
| 11 | 1493.821855        | 747.414565      | 1476.795306    | 738.901291        | 1475.811290        | 738.409283        | P    | 1832.927635        | 916.967456      | 1815.901086    | 908.454181       | 1814.917070    | 907.962173       | 17 |
| 12 | 1608.848798        | 804.928037      | 1591.822249    | 796.414763        | 1590.838233        | 795.922755        | D    | 1735.874871        | 868.441074      | 1718.848322    | 859.927799       | 1717.864306    | 859.435791       | 16 |
| 13 | 1679.885912        | 840.446594      | 1662.859363    | 831.933320        | 1661.875347        | 831.441311        | A    | 1620.847928        | 810.927602      | 1603.821379    | 802.414328       | 1602.837363    | 801.922320       | 15 |
| 14 | 1808.928505        | 904.967891      | 1791.901956    | 896.454616        | 1790.917940        | 895.962608        | E    | 1549.810814        | 775.409045      | 1532.784265    | 766.895771       | 1531.800249    | 766.403763       | 14 |
| 15 | 1922.012569        | 961.509923      | 1904.986020    | <b>952.996648</b> | <b>1904.002004</b> | 952.504640        | L    | 1420.768221        | 710.887749      | 1403.741672    | 702.374474       | 1402.757656    | 701.882466       | 13 |
| 16 | 2009.044597        | 1005.025937     | 1992.018048    | 996.512662        | 1991.034032        | <b>996.020654</b> | S    | <b>1307.684157</b> | 654.345717      | 1290.657608    | 645.832442       | 1289.673592    | 645.340434       | 12 |
| 17 | 2080.081711        | 1040.544493     | 2063.055162    | 1032.031219       | 2062.071146        | 1031.539211       | A    | 1220.652129        | 610.829703      | 1203.625580    | 602.316428       | 1202.641564    | 601.824420       | 11 |
| 18 | 2167.113739        | 1084.060507     | 2150.087190    | 1075.547233       | 2149.103174        | 1075.055225       | S    | <b>1149.615015</b> | 575.311146      | 1132.588466    | 566.797871       | 1131.604450    | 566.305863       | 10 |
| 19 | 2254.145767        | 1127.576521     | 2237.119218    | 1119.063247       | 2236.135202        | 1118.571239       | S    | <b>1062.582987</b> | 531.795132      | 1045.556438    | 523.281857       | 1044.572422    | 522.789849       | 9  |
| 20 | 2353.214181        | 1177.110728     | 2336.187632    | 1168.597454       | 2335.203616        | 1168.105446       | V    | 975.550959         | 488.279118      | 958.524410     | 479.765843       | 957.540394     | 479.273835       | 8  |
| 21 | 2516.277510        | 1258.642393     | 2499.250961    | 1250.129118       | 2498.266945        | 1249.637110       | Y    | <b>876.482545</b>  | 438.744911      | 859.455996     | 430.231636       | 858.471980     | 429.739628       | 7  |
| 22 | 2630.320437        | 1315.663856     | 2613.293888    | 1307.150582       | 2612.309872        | 1306.658574       | N    | <b>713.419216</b>  | 357.213246      | 696.392667     | 348.699972       | 695.408651     | 348.207964       | 6  |
| 23 | 2743.404501        | 1372.205888     | 2726.377952    | 1363.692614       | 2725.393936        | 1363.200606       | L    | 599.376289         | 300.191783      | 582.349740     | 291.678508       | 581.365724     | 291.186500       | 5  |
| 24 | 2856.488565        | 1428.747921     | 2839.462016    | 1420.234646       | 2838.478000        | 1419.742638       | L    | <b>486.292225</b>  | 243.649751      | 469.265676     | 235.136476       | 468.281660     | 234.644468       | 4  |
| 25 | 2953.541329        | 1477.274303     | 2936.514780    | 1468.761028       | 2935.530764        | 1468.269020       | P    | <b>373.208161</b>  | 187.107719      | 356.181612     | 178.594444       | 355.197596     | 178.102436       | 3  |
| 26 | 3082.583922        | 1541.795599     | 3065.557373    | 1533.282325       | 3064.573357        | 1532.790317       | E    | 276.155397         | 138.581337      | 259.128848     | 130.068062       | 258.144832     | 129.576054       | 2  |
| 27 |                    |                 |                |                   |                    |                   | K    | 147.112804         | 74.060040       | 130.086255     | 65.546765        |                |                  | 1  |

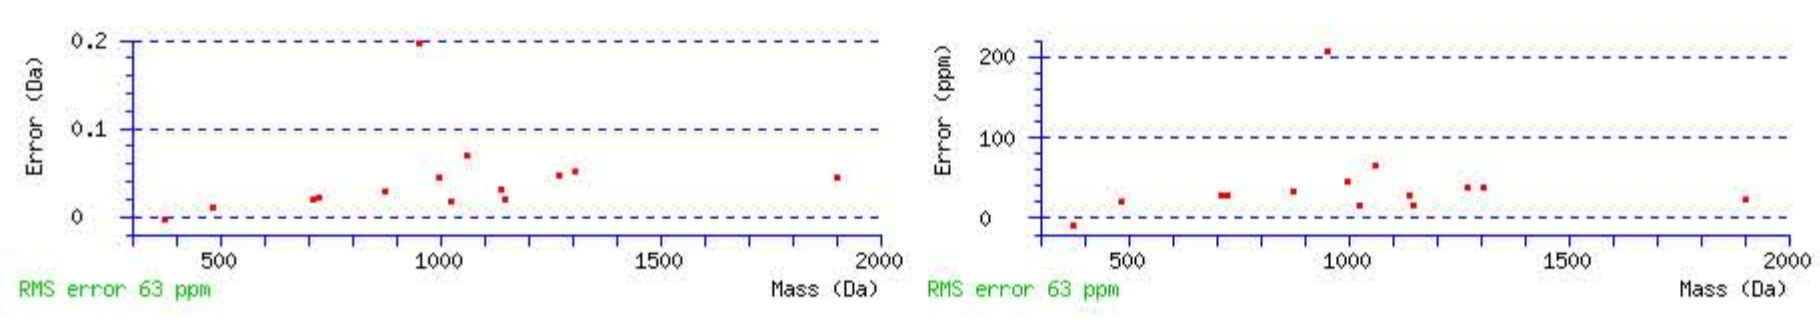

NCBI BLAST search of **AVDQSVLLMKPDAELSASSVYNLLPEK**  
 (Parameters: blastp, nr protein database, expect=20000, no filter, PAM30)  
 Other BLAST [web gateways](#)

### All matches to this query

| Score | Mr(calc):   | Delta    | Sequence                                    |
|-------|-------------|----------|---------------------------------------------|
| 34.3  | 3227.682129 | 0.019847 | <a href="#">AVDQSVLLMKPDAELSASSVYNLLPEK</a> |



# MASCOT Search Results

## Peptide View

MS/MS Fragmentation of **ENAEQSR**

Found in **ANT3\_HUMAN**, Antithrombin-III OS=Homo sapiens GN=SERPINC1 PE=1 SV=1

Match to Query 20013: 1143.544148 from(572.779350,2+) rtinseconds(1147) index(15314)

Title: Locus:1.1.1.2962.7 File:"2013-07-02 CLN FXIII 30 min 3rd F 2.wiff"

Data file C:\Program Files (x86)\Matrix Science\Mascot Daemon\mgf3 FXIII 30 min 3rd\mascot\_daemon\_merge.mgf

Click mouse within plot area to zoom in by factor of two about that point

Or, Plot from  to  Da

Label all possible matches  Label matches used for scoring

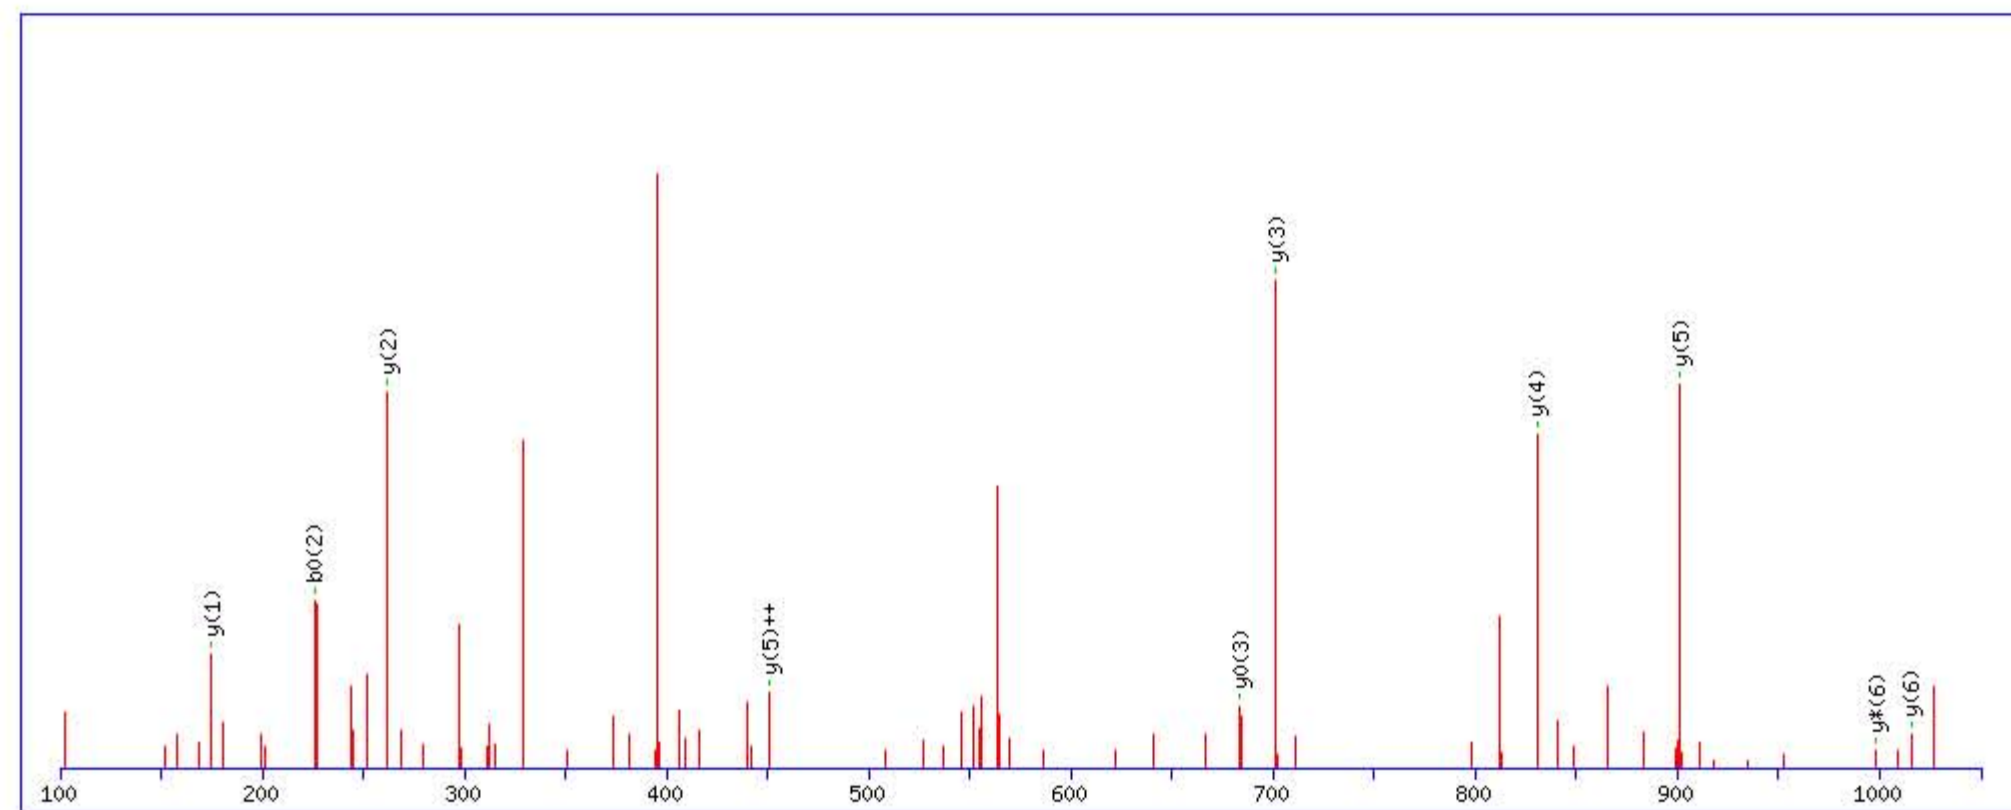

Monoisotopic mass of neutral peptide  $M_r(\text{calc})$ : 1143.534225

Fixed modifications: Carbamidomethyl (C) (apply to specified residues or termini only)

Variable modifications:

Q5 : Biotin:Thermo-21345 (Q)

Ions Score: 33 Expect: 0.007

Matches : 10/68 fragment ions using 20 most intense peaks [\(help\)](#)

| # | b          | b <sup>++</sup> | b <sup>*</sup> | b <sup>*++</sup> | b <sup>0</sup>    | b <sup>0++</sup> | Seq. | y                  | y <sup>++</sup>   | y <sup>*</sup>    | y <sup>*++</sup> | y <sup>0</sup>    | y <sup>0++</sup> | # |
|---|------------|-----------------|----------------|------------------|-------------------|------------------|------|--------------------|-------------------|-------------------|------------------|-------------------|------------------|---|
| 1 | 130.049869 | 65.528572       |                |                  | 112.039304        | 56.523290        | E    |                    |                   |                   |                  |                   |                  | 7 |
| 2 | 244.092796 | 122.550036      | 227.066247     | 114.036762       | <b>226.082231</b> | 113.544754       | N    | <b>1015.498940</b> | 508.253108        | <b>998.472391</b> | 499.739834       | 997.488375        | 499.247826       | 6 |
| 3 | 315.129910 | 158.068593      | 298.103361     | 149.555319       | 297.119345        | 149.063311       | A    | <b>901.456013</b>  | <b>451.231645</b> | 884.429464        | 442.718370       | 883.445448        | 442.226362       | 5 |
| 4 | 444.172503 | 222.589890      | 427.145954     | 214.076615       | 426.161938        | 213.584607       | E    | <b>830.418899</b>  | 415.713088        | 813.392350        | 407.199813       | 812.408334        | 406.707805       | 4 |
| 5 | 883.397829 | 442.202553      | 866.371280     | 433.689278       | 865.387264        | 433.197270       | Q    | <b>701.376306</b>  | 351.191791        | 684.349757        | 342.678517       | <b>683.365741</b> | 342.186509       | 3 |
| 6 | 970.429857 | 485.718567      | 953.403308     | 477.205292       | 952.419292        | 476.713284       | S    | <b>262.150980</b>  | 131.579128        | 245.124431        | 123.065853       | 244.140415        | 122.573845       | 2 |
| 7 |            |                 |                |                  |                   |                  | R    | <b>175.118952</b>  | 88.063114         | 158.092403        | 79.549839        |                   |                  | 1 |

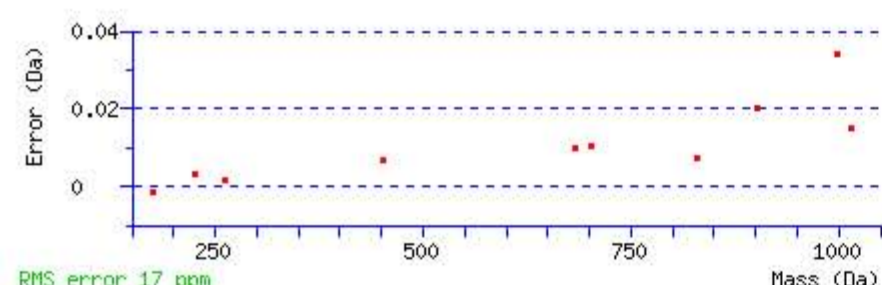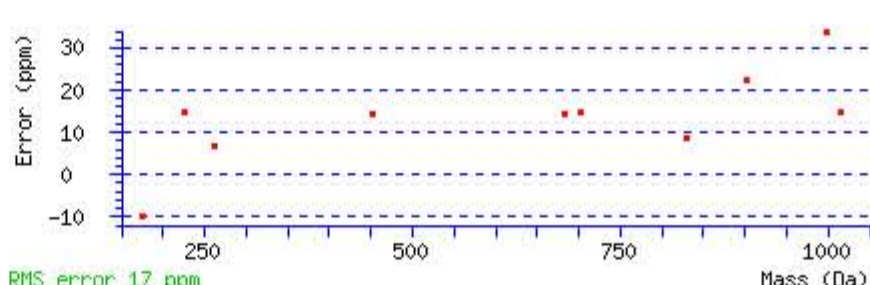

NCBI BLAST search of **ENAEQSR**

(Parameters: blastp, nr protein database, expect=20000, no filter, PAM30)

Other BLAST [web gateways](#)

## All matches to this query

| Score | $M_r(\text{calc})$ : | Delta     | Sequence                     |
|-------|----------------------|-----------|------------------------------|
| 32.6  | 1143.534225          | 0.009923  | <a href="#">ENAEQSR</a>      |
| 11.5  | 1143.552017          | -0.007869 | <a href="#">VDDGTGREAPK</a>  |
| 10.7  | 1143.549500          | -0.005352 | <a href="#">WQEQSR</a>       |
| 5.8   | 1143.552002          | -0.007854 | <a href="#">SSSALDSPAGPR</a> |
| 5.2   | 1143.549316          | -0.005168 | <a href="#">SRSRSHSGDR</a>   |
| 4.1   | 1143.551987          | -0.007839 | <a href="#">ELNGSEAATPR</a>  |
| 3.1   | 1143.552017          | -0.007869 | <a href="#">GREDGDAPVTK</a>  |
| 3.1   | 1143.549500          | -0.005352 | <a href="#">EQWSQR</a>       |
| 2.2   | 1143.559418          | -0.015270 | <a href="#">TQVGDEGK</a>     |
| 2.0   | 1143.530899          | 0.013249  | <a href="#">TPFPDSSTHR</a>   |



# MASCOT SEARCH RESULTS

## Peptide View

MS/MS Fragmentation of **QGLLPVLESFK**

Found in **APOA1\_HUMAN**, Apolipoprotein A-I OS=Homo sapiens GN=APOA1 PE=1 SV=1

Match to Query 31967: 1540.861928 from(771.438240,2+) rtinseconds(2838) index(68846)

Title: Locus:1.1.1.3466.9 File:"2013-07-02 CLN FXIII 30 min 3rd FT.wiff"

Data file C:\Program Files (x86)\Matrix Science\Mascot Daemon\mgf3 FXIII 30 min 3rd\mascot\_daemon\_merge.mgf

Click mouse within plot area to zoom in by factor of two about that point

Or, Plot from  to  Da

Label all possible matches  Label matches used for scoring

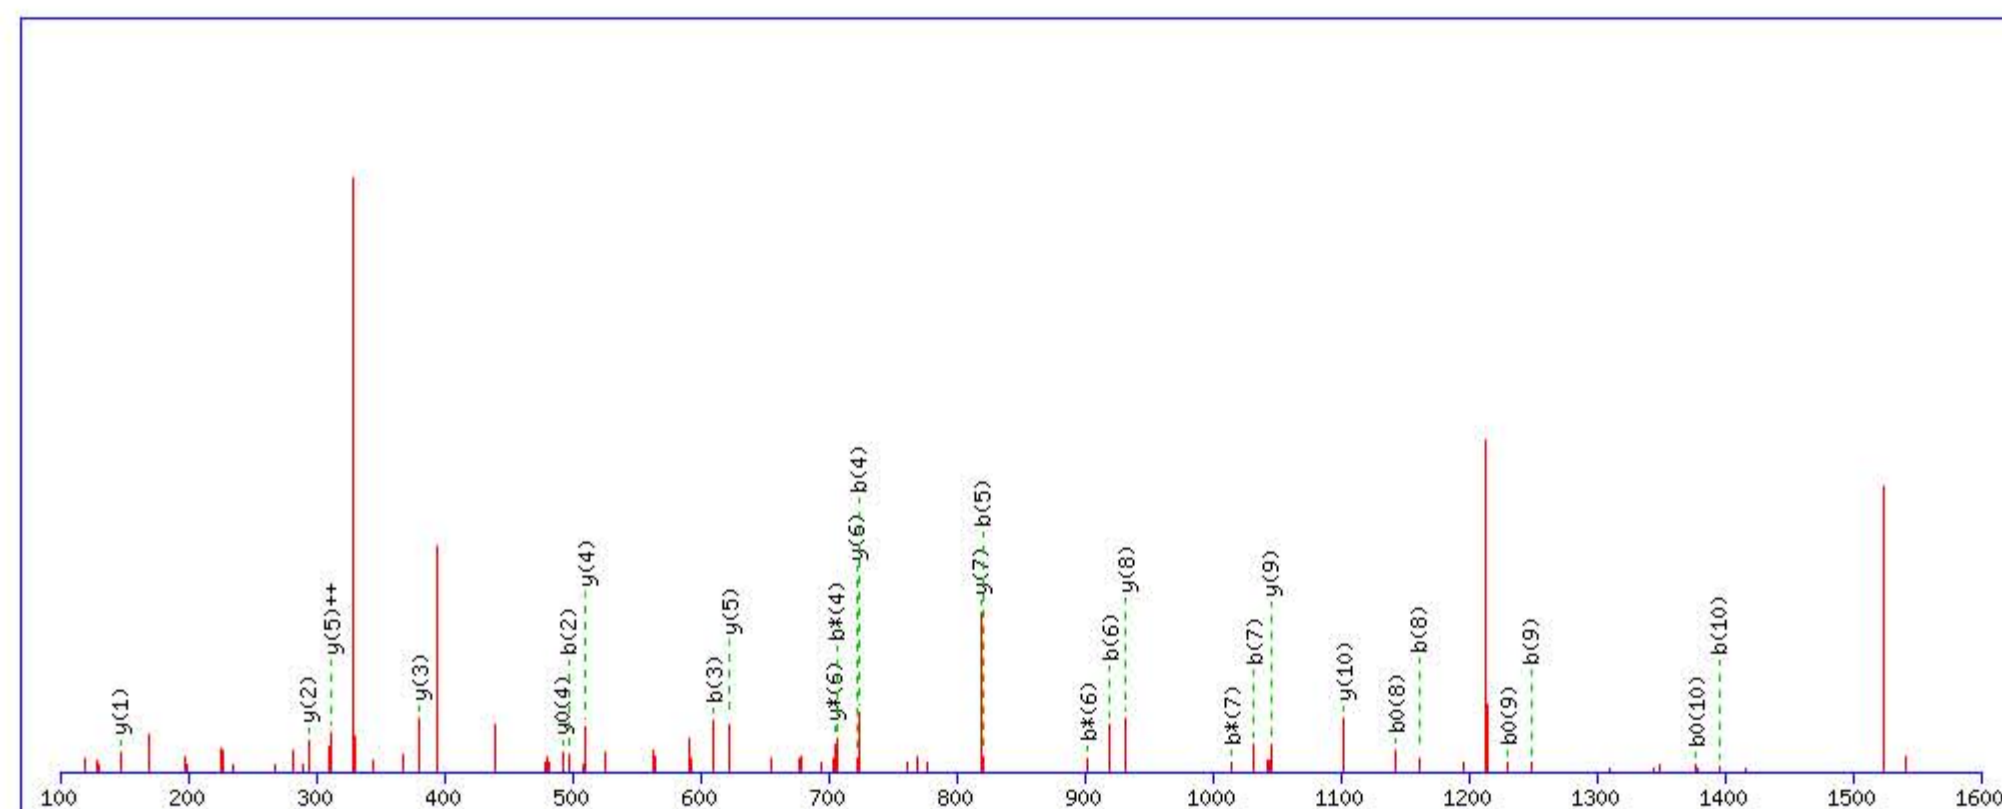

Monoisotopic mass of neutral peptide Mr(calc): 1540.868713

Fixed modifications: Carbamidomethyl (C) (apply to specified residues or termini only)

Variable modifications:

Q1 : Biotin:Thermo-21345 (Q)

Ions Score: 61 Expect: 2e-006

Matches : 28/102 fragment ions using 51 most intense peaks [\(help\)](#)

| #  | b                  | b <sup>++</sup> | b*                 | b <sup>+++</sup> | b <sup>0</sup>     | b <sup>0++</sup> | Seq. | y                  | y <sup>++</sup>   | y*                | y <sup>+++</sup> | y <sup>0</sup>    | y <sup>0++</sup> | #  |
|----|--------------------|-----------------|--------------------|------------------|--------------------|------------------|------|--------------------|-------------------|-------------------|------------------|-------------------|------------------|----|
| 1  | 440.232602         | 220.619939      | 423.206053         | 212.106664       |                    |                  | Q    |                    |                   |                   |                  |                   |                  | 11 |
| 2  | <b>497.254066</b>  | 249.130671      | 480.227517         | 240.617396       |                    |                  | G    | <b>1102.650673</b> | 551.828975        | 1085.624124       | 543.315700       | 1084.640108       | 542.823692       | 10 |
| 3  | <b>610.338130</b>  | 305.672703      | 593.311581         | 297.159428       |                    |                  | L    | <b>1045.629209</b> | 523.318243        | 1028.602660       | 514.804968       | 1027.618644       | 514.312960       | 9  |
| 4  | <b>723.422194</b>  | 362.214735      | <b>706.395645</b>  | 353.701461       |                    |                  | L    | <b>932.545145</b>  | 466.776211        | 915.518596        | 458.262936       | 914.534580        | 457.770928       | 8  |
| 5  | <b>820.474958</b>  | 410.741117      | 803.448409         | 402.227843       |                    |                  | P    | <b>819.461081</b>  | 410.234179        | 802.434532        | 401.720904       | 801.450516        | 401.228896       | 7  |
| 6  | <b>919.543372</b>  | 460.275324      | <b>902.516823</b>  | 451.762049       |                    |                  | V    | <b>722.408317</b>  | 361.707797        | <b>705.381768</b> | 353.194522       | 704.397752        | 352.702514       | 6  |
| 7  | <b>1032.627436</b> | 516.817356      | <b>1015.600887</b> | 508.304082       |                    |                  | L    | <b>623.339903</b>  | <b>312.173590</b> | 606.313354        | 303.660315       | 605.329338        | 303.168307       | 5  |
| 8  | <b>1161.670029</b> | 581.338653      | 1144.643480        | 572.825378       | <b>1143.659464</b> | 572.333370       | E    | <b>510.255839</b>  | 255.631558        | 493.229290        | 247.118283       | <b>492.245274</b> | 246.626275       | 4  |
| 9  | <b>1248.702057</b> | 624.854667      | 1231.675508        | 616.341392       | <b>1230.691492</b> | 615.849384       | S    | <b>381.213246</b>  | 191.110261        | 364.186697        | 182.596987       | 363.202681        | 182.104979       | 3  |
| 10 | <b>1395.770471</b> | 698.388874      | 1378.743922        | 689.875599       | <b>1377.759906</b> | 689.383591       | F    | <b>294.181218</b>  | 147.594247        | 277.154669        | 139.080973       |                   |                  | 2  |
| 11 |                    |                 |                    |                  |                    |                  | K    | <b>147.112804</b>  | 74.060040         | 130.086255        | 65.546765        |                   |                  | 1  |

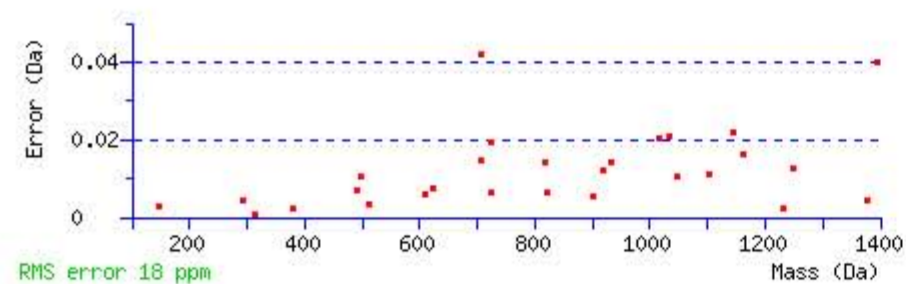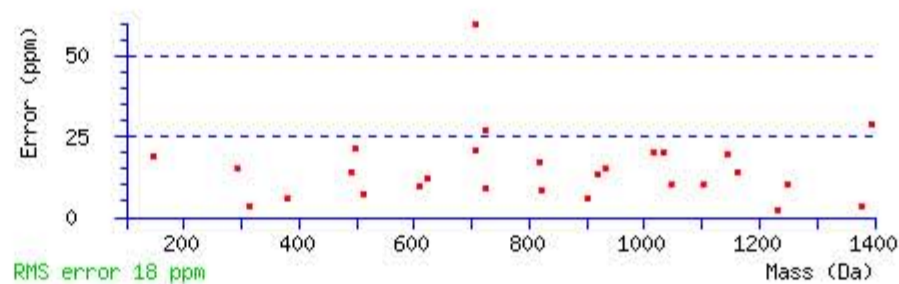

NCBI BLAST search of **QGLLPVLESFK**

(Parameters: blastp, nr protein database, expect=20000, no filter, PAM30)

Other BLAST [web gateways](#)

All matches to this query

| Score | Mr(calc):   | Delta     | Sequence                      |
|-------|-------------|-----------|-------------------------------|
| 61.5  | 1540.868713 | -0.006785 | <a href="#">QGLLPVLESFK</a>   |
| 0.7   | 1540.872559 | -0.010631 | <a href="#">ELSRVLHTNVVFK</a> |
| 0.6   | 1540.872559 | -0.010631 | <a href="#">GALHKTQNLVFSK</a> |

Mascot: <http://www.matrixscience.com/>



# MASCOT Search Results

## Peptide View

MS/MS Fragmentation of **VQPYLDDDFQK**

Found in **APOA1\_HUMAN**, Apolipoprotein A-I OS=Homo sapiens GN=APOA1 PE=1 SV=1

Match to Query 32441: 1562.795068 from(782.404810,2+) rtinseconds(2204) index(36412)

Title: Locus:1.1.1.3401.11 File:"2013-07-02 CLN FXIII 30 min 3rd F 3.wiff"

Data file C:\Program Files (x86)\Matrix Science\Mascot Daemon\mgf\3 FXIII 30 min 3rd\mascot\_daemon\_merge.mgf

Click mouse within plot area to zoom in by factor of two about that point

Or, Plot from  to  Da

Label all possible matches  Label matches used for scoring

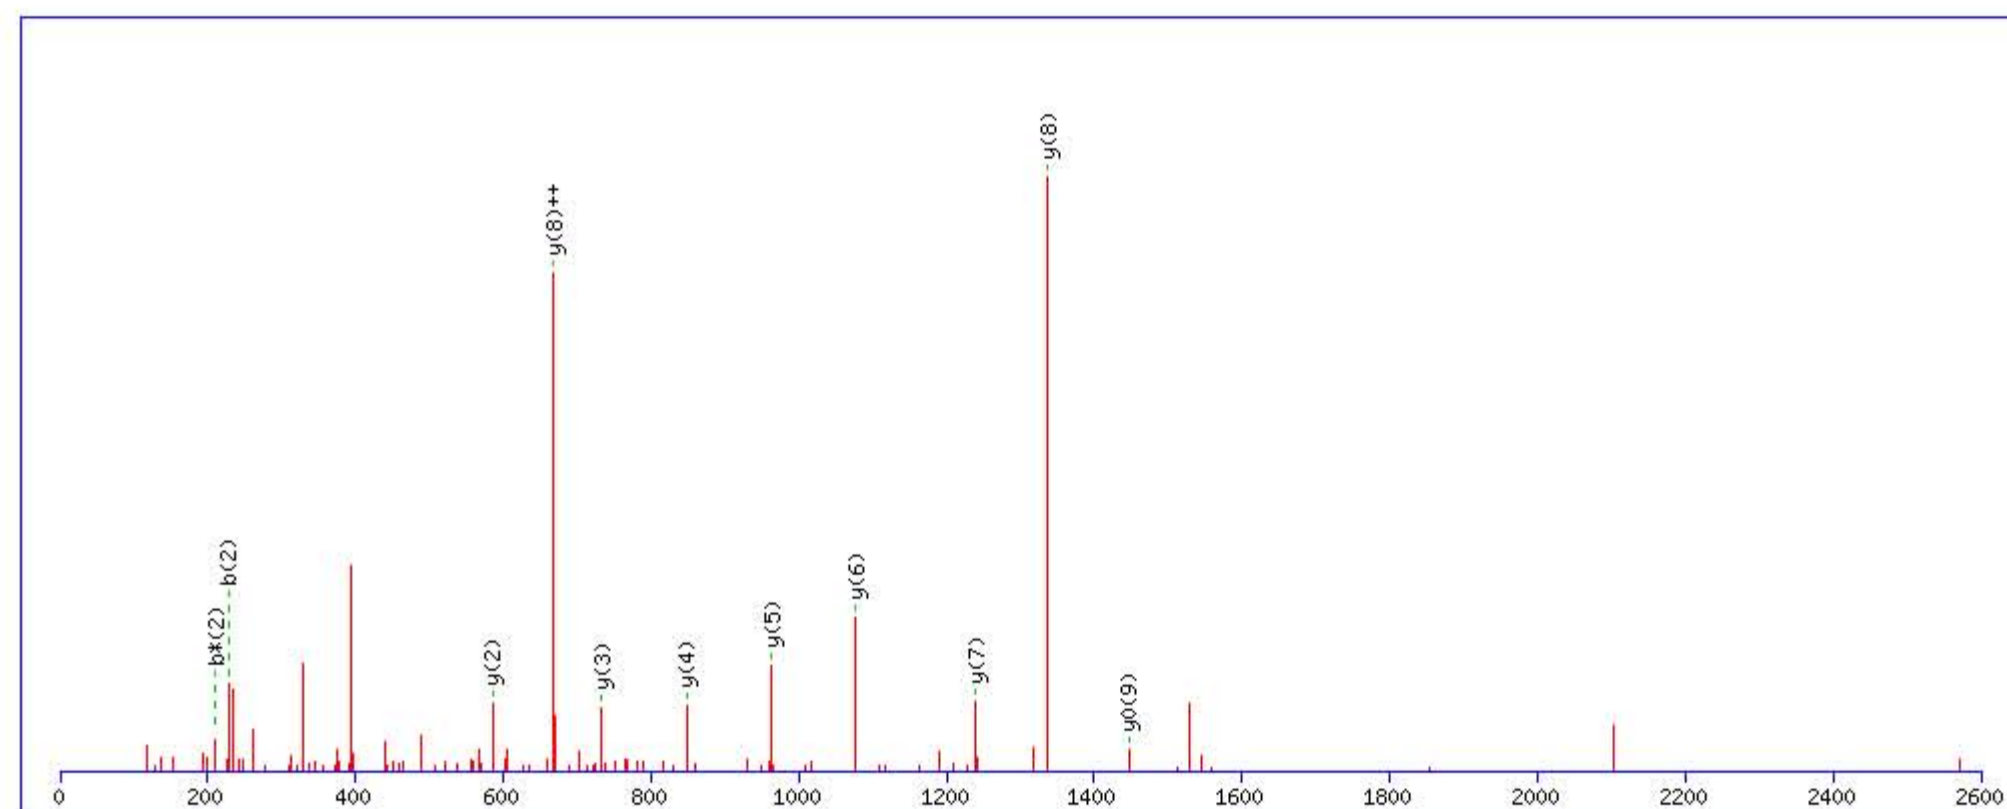

Monoisotopic mass of neutral peptide Mr(calc): 1562.780304

Fixed modifications: Carbamidomethyl (C) (apply to specified residues or termini only)

Variable modifications:

Q9 : Biotin:Thermo-21345 (Q)

Ions Score: 45 Expect: 0.00028

Matches : 11/90 fragment ions using 15 most intense peaks [\(help\)](#)

| #  | b           | b <sup>++</sup> | b <sup>*</sup> | b <sup>*++</sup> | b <sup>0</sup> | b <sup>0++</sup> | Seq. | y           | y <sup>++</sup> | y <sup>*</sup> | y <sup>*++</sup> | y <sup>0</sup> | y <sup>0++</sup> | #  |
|----|-------------|-----------------|----------------|------------------|----------------|------------------|------|-------------|-----------------|----------------|------------------|----------------|------------------|----|
| 1  | 100.075690  | 50.541483       |                |                  |                |                  | V    |             |                 |                |                  |                |                  | 10 |
| 2  | 228.134268  | 114.570772      | 211.107719     | 106.057498       |                |                  | Q    | 1464.719165 | 732.863221      | 1447.692616    | 724.349946       | 1446.708600    | 723.857938       | 9  |
| 3  | 325.187032  | 163.097154      | 308.160483     | 154.583879       |                |                  | P    | 1336.660587 | 668.833932      | 1319.634038    | 660.320657       | 1318.650022    | 659.828649       | 8  |
| 4  | 488.250361  | 244.628818      | 471.223812     | 236.115544       |                |                  | Y    | 1239.607823 | 620.307550      | 1222.581274    | 611.794275       | 1221.597258    | 611.302267       | 7  |
| 5  | 601.334425  | 301.170851      | 584.307876     | 292.657576       |                |                  | L    | 1076.544494 | 538.775885      | 1059.517945    | 530.262611       | 1058.533929    | 529.770603       | 6  |
| 6  | 716.361368  | 358.684322      | 699.334819     | 350.171047       | 698.350803     | 349.679039       | D    | 963.460430  | 482.233853      | 946.433881     | 473.720579       | 945.449865     | 473.228571       | 5  |
| 7  | 831.388311  | 416.197793      | 814.361762     | 407.684519       | 813.377746     | 407.192511       | D    | 848.433487  | 424.720382      | 831.406938     | 416.207107       | 830.422922     | 415.715099       | 4  |
| 8  | 978.456725  | 489.732000      | 961.430176     | 481.218726       | 960.446160     | 480.726718       | F    | 733.406544  | 367.206910      | 716.379995     | 358.693636       |                |                  | 3  |
| 9  | 1417.682051 | 709.344664      | 1400.655502    | 700.831389       | 1399.671486    | 700.339381       | Q    | 586.338130  | 293.672703      | 569.311581     | 285.159429       |                |                  | 2  |
| 10 |             |                 |                |                  |                |                  | K    | 147.112804  | 74.060040       | 130.086255     | 65.546765        |                |                  | 1  |

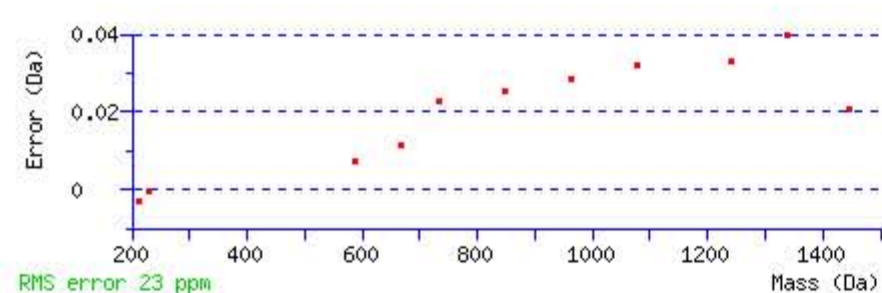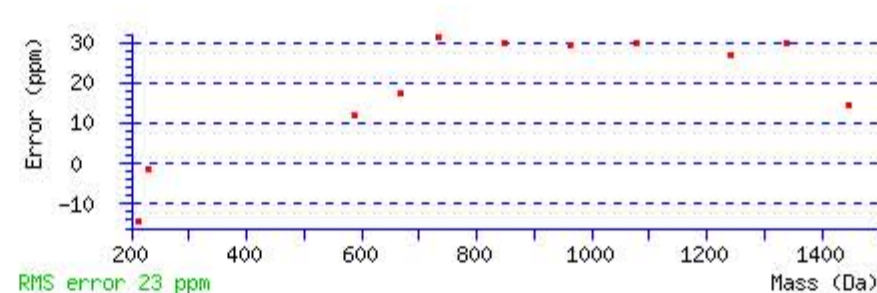

NCBI BLAST search of **VQPYLDDDFQK**

(Parameters: blastp, nr protein database, expect=20000, no filter, PAM30)

Other BLAST [web gateways](#)

## All matches to this query

| Score | Mr(calc):   | Delta     | Sequence                        |
|-------|-------------|-----------|---------------------------------|
| 44.9  | 1562.780304 | 0.014764  | <a href="#">VQPYLDDDFQK</a>     |
| 6.6   | 1562.804764 | -0.009696 | <a href="#">QVEELLMAMEKVK</a>   |
| 6.3   | 1562.787521 | 0.007547  | <a href="#">VQLVDNVYCIGQR</a>   |
| 2.1   | 1562.808624 | -0.013556 | <a href="#">LNSPTTTSQIMARK</a>  |
| 1.8   | 1562.804764 | -0.009696 | <a href="#">QVEELLMAMEKVK</a>   |
| 1.1   | 1562.787476 | 0.007592  | <a href="#">KVEMWQKELNSR</a>    |
| 0.9   | 1562.787521 | 0.007547  | <a href="#">GEKGDVGFMGPRGLK</a> |
| 0.8   | 1562.779633 | 0.015435  | <a href="#">QQTGKLSMSEK</a>     |

Mascot: <http://www.matrixscience.com/>



# MASCOT Search Results

## Peptide View

MS/MS Fragmentation of **EPCVESLVSQYFQTVTDYGK**

Found in **APOA2\_HUMAN**, Apolipoprotein A-II OS=Homo sapiens GN=APOA2 PE=1 SV=1

Match to Query 53829: 2660.244312 from(887.755380,3+) rtinseconds(3150) index(57118)

Title: Locus:1.1.1.3735.11 File:"2013-07-02 CLN FXIII 30 min 3rd F 4.wiff"

Data file C:\Program Files (x86)\Matrix Science\Mascot Daemon\mgf3 FXIII 30 min 3rd\mascot\_daemon\_merge.mgf

Click mouse within plot area to zoom in by factor of two about that point

Or, Plot from  to  Da

Label all possible matches  Label matches used for scoring

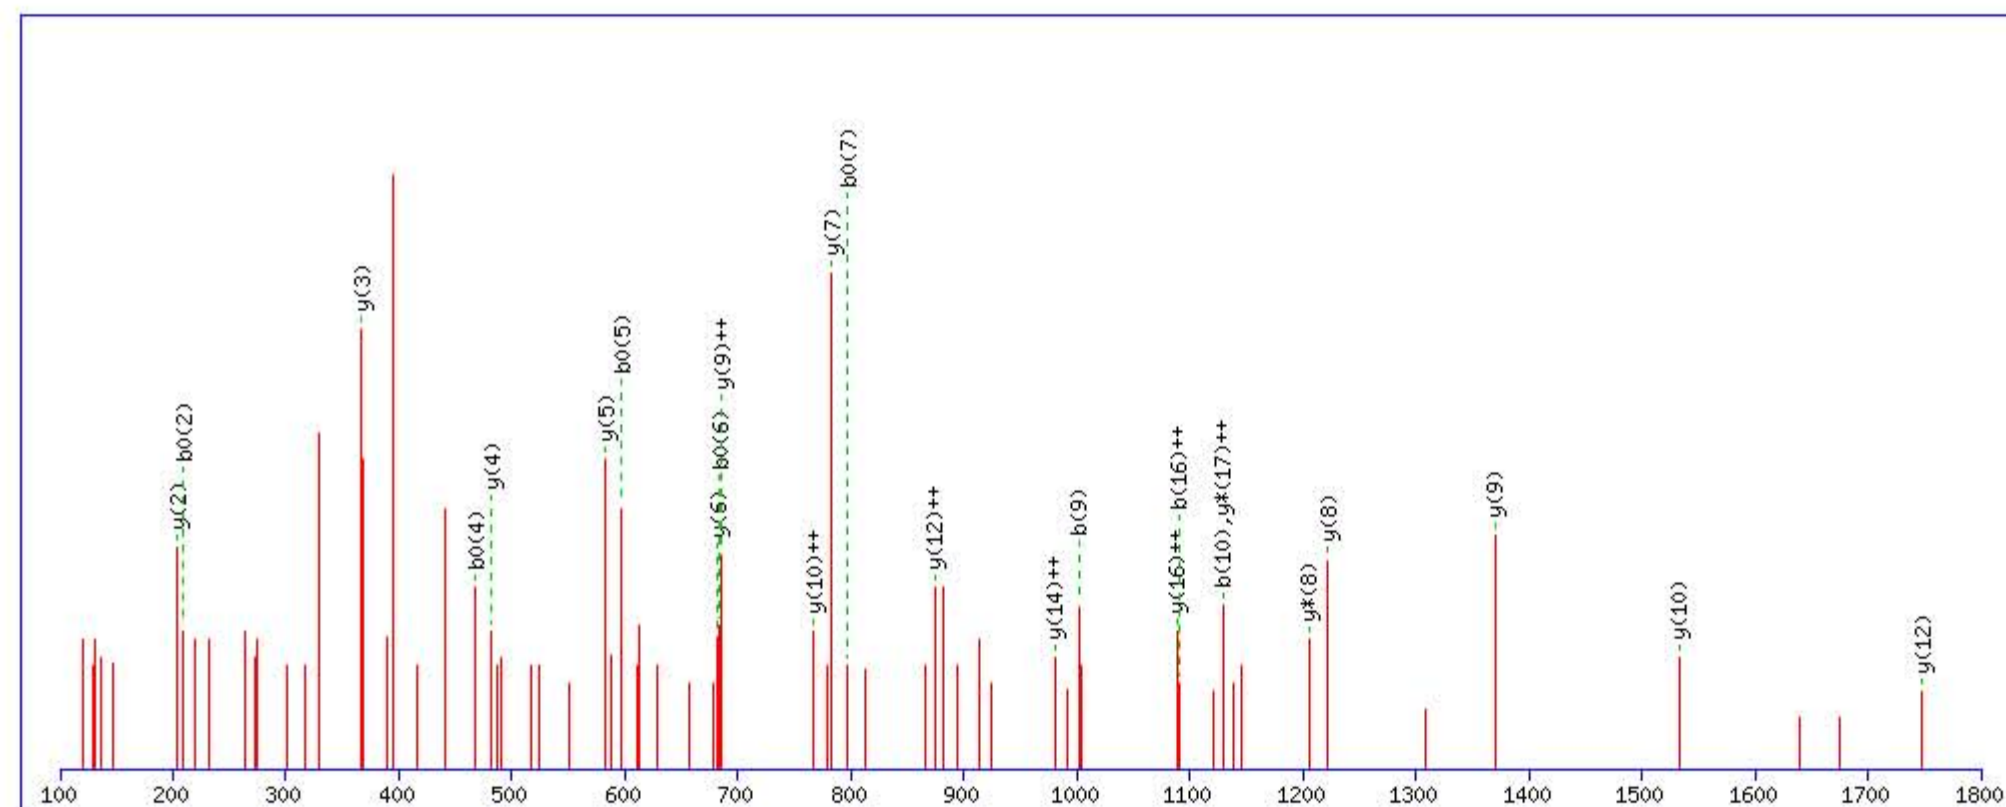

Monoisotopic mass of neutral peptide Mr(calc): 2660.250244

Fixed modifications: Carbamidomethyl (C) (apply to specified residues or termini only)

Variable modifications:

Q13 : Biotin:Thermo-21345 (Q)

Ions Score: 54 Expect: 7.4e-005

Matches : 25/204 fragment ions using 39 most intense peaks [\(help\)](#)

| #  | b           | b <sup>++</sup> | b <sup>*</sup> | b <sup>*++</sup> | b <sup>0</sup> | b <sup>0++</sup> | Seq. | y           | y <sup>++</sup> | y <sup>*</sup> | y <sup>*++</sup> | y <sup>0</sup> | y <sup>0++</sup> | #  |
|----|-------------|-----------------|----------------|------------------|----------------|------------------|------|-------------|-----------------|----------------|------------------|----------------|------------------|----|
| 1  | 130.049869  | 65.528572       |                |                  | 112.039304     | 56.523290        | E    |             |                 |                |                  |                |                  | 20 |
| 2  | 227.102633  | 114.054954      |                |                  | 209.092068     | 105.049672       | P    | 2532.214913 | 1266.611094     | 2515.188364    | 1258.097820      | 2514.204348    | 1257.605812      | 19 |
| 3  | 387.133282  | 194.070279      |                |                  | 369.122717     | 185.064997       | C    | 2435.162149 | 1218.084712     | 2418.135600    | 1209.571438      | 2417.151584    | 1209.079430      | 18 |
| 4  | 486.201696  | 243.604486      |                |                  | 468.191131     | 234.599204       | V    | 2275.131500 | 1138.069388     | 2258.104951    | 1129.556113      | 2257.120935    | 1129.064105      | 17 |
| 5  | 615.244289  | 308.125783      |                |                  | 597.233724     | 299.120500       | E    | 2176.063086 | 1088.535181     | 2159.036537    | 1080.021906      | 2158.052521    | 1079.529898      | 16 |
| 6  | 702.276317  | 351.641797      |                |                  | 684.265752     | 342.636514       | S    | 2047.020493 | 1024.013885     | 2029.993944    | 1015.500610      | 2029.009928    | 1015.008602      | 15 |
| 7  | 815.360381  | 408.183829      |                |                  | 797.349816     | 399.178546       | L    | 1959.988465 | 980.497871      | 1942.961916    | 971.984596       | 1941.977900    | 971.492588       | 14 |
| 8  | 914.428795  | 457.718036      |                |                  | 896.418230     | 448.712753       | V    | 1846.904401 | 923.955839      | 1829.877852    | 915.442564       | 1828.893836    | 914.950556       | 13 |
| 9  | 1001.460823 | 501.234050      |                |                  | 983.450258     | 492.228767       | S    | 1747.835987 | 874.421632      | 1730.809438    | 865.908357       | 1729.825422    | 865.416349       | 12 |
| 10 | 1129.519401 | 565.263339      | 1112.492852    | 556.750064       | 1111.508836    | 556.258056       | Q    | 1660.803959 | 830.905618      | 1643.777410    | 822.392343       | 1642.793394    | 821.900335       | 11 |
| 11 | 1292.582730 | 646.795003      | 1275.556181    | 638.281729       | 1274.572165    | 637.789721       | Y    | 1532.745381 | 766.876329      | 1515.718832    | 758.363054       | 1514.734816    | 757.871046       | 10 |
| 12 | 1439.651144 | 720.329210      | 1422.624595    | 711.815936       | 1421.640579    | 711.323928       | F    | 1369.682052 | 685.344664      | 1352.655503    | 676.831390       | 1351.671487    | 676.339382       | 9  |
| 13 | 1878.876470 | 939.941873      | 1861.849921    | 931.428599       | 1860.865905    | 930.936591       | Q    | 1222.613638 | 611.810457      | 1205.587089    | 603.297183       | 1204.603073    | 602.805175       | 8  |
| 14 | 1979.924149 | 990.465713      | 1962.897600    | 981.952438       | 1961.913584    | 981.460430       | T    | 783.388312  | 392.197794      | 766.361763     | 383.684519       | 765.377747     | 383.192511       | 7  |
| 15 | 2078.992563 | 1039.999920     | 2061.966014    | 1031.486645      | 2060.981998    | 1030.994637      | V    | 682.340633  | 341.673954      | 665.314084     | 333.160680       | 664.330068     | 332.668672       | 6  |
| 16 | 2180.040242 | 1090.523759     | 2163.013693    | 1082.010484      | 2162.029677    | 1081.518476      | T    | 583.272219  | 292.139747      | 566.245670     | 283.626473       | 565.261654     | 283.134465       | 5  |
| 17 | 2295.067185 | 1148.037230     | 2278.040636    | 1139.523956      | 2277.056620    | 1139.031948      | D    | 482.224540  | 241.615908      | 465.197991     | 233.102633       | 464.213975     | 232.610625       | 4  |
| 18 | 2458.130514 | 1229.568895     | 2441.103965    | 1221.055620      | 2440.119949    | 1220.563612      | Y    | 367.197597  | 184.102436      | 350.171048     | 175.589162       |                |                  | 3  |
| 19 | 2515.151978 | 1258.079627     | 2498.125429    | 1249.566352      | 2497.141413    | 1249.074344      | G    | 204.134268  | 102.570772      | 187.107719     | 94.057497        |                |                  | 2  |
| 20 |             |                 |                |                  |                |                  | K    | 147.112804  | 74.060040       | 130.086255     | 65.546765        |                |                  | 1  |

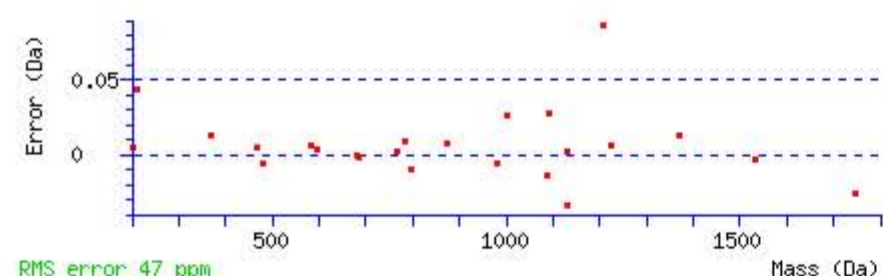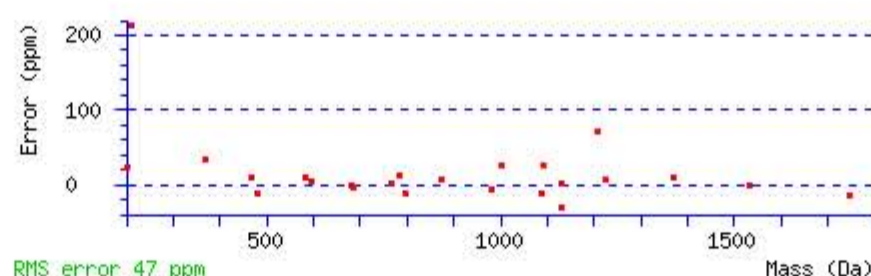

NCBI BLAST search of [EPCVESLVSQYFQTVTDYGK](#)

(Parameters: blastp, nr protein database, expect=20000, no filter, PAM30)

Other BLAST [web gateways](#)

All matches to this query

| Score | Mr(calc):   | Delta     | Sequence                             |
|-------|-------------|-----------|--------------------------------------|
| 54.3  | 2660.250244 | -0.005932 | <a href="#">EPCVESLVSQYFQTVTDYGK</a> |
| 23.3  | 2660.250244 | -0.005932 | <a href="#">EPCVESLVSQYFQTVTDYGK</a> |



# Mascot Search Results

## Peptide View

MS/MS Fragmentation of **EPCVESLVSQYFQTVTDYGK**

Found in **APOA2\_HUMAN**, Apolipoprotein A-II OS=Homo sapiens GN=APOA2 PE=1 SV=1

Match to Query 53831: 2660.247552 from(887.756460,3+) rtinseconds(3181) index(12028)

Title: Locus:1.1.1.3675.17 File:"2013-07-02 CLN FXIII 30 min 3rd F 1.wiff"

Data file C:\Program Files (x86)\Matrix Science\Mascot Daemon\mgf3 FXIII 30 min 3rd\mascot\_daemon\_merge.mgf

Click mouse within plot area to zoom in by factor of two about that point

Or, Plot from  to  Da

Label all possible matches  Label matches used for scoring

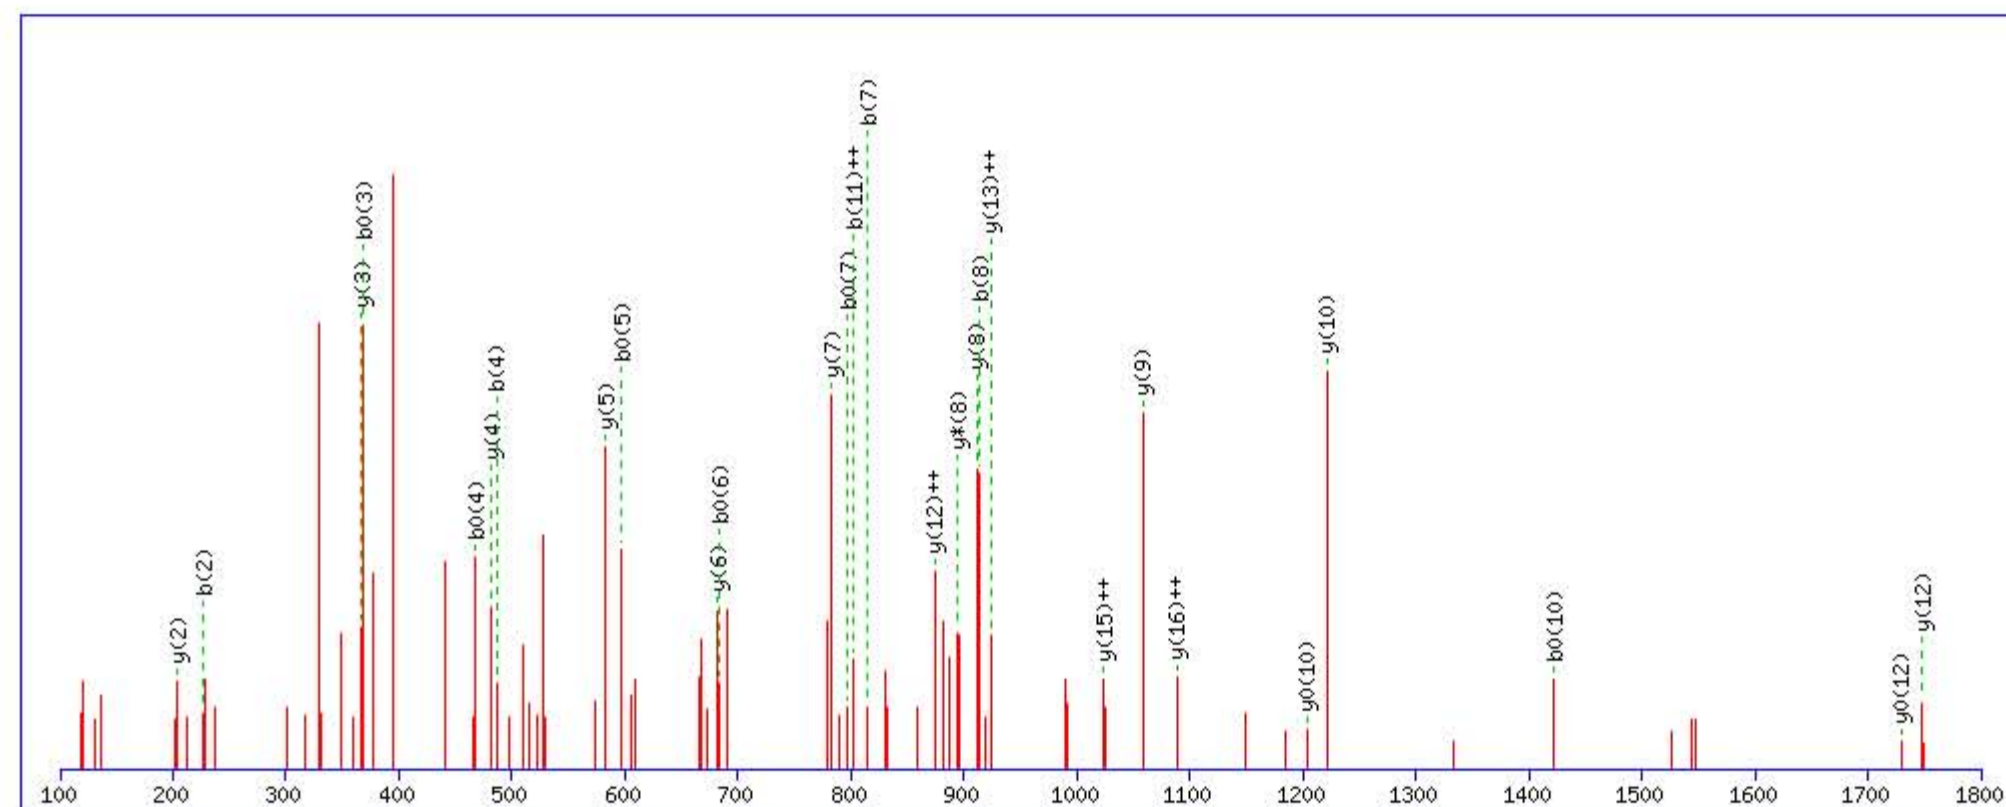

Monoisotopic mass of neutral peptide Mr(calc): 2660.250244

Fixed modifications: Carbamidomethyl (C) (apply to specified residues or termini only)

Variable modifications:

Q10 : Biotin:Thermo-21345 (Q)

Ions Score: 38 Expect: 0.0031

Matches : 28/204 fragment ions using 61 most intense peaks [\(help\)](#)

| #  | b                 | b <sup>++</sup>   | b <sup>*</sup> | b <sup>*++</sup> | b <sup>0</sup>     | b <sup>0++</sup> | Seq. | y                  | y <sup>++</sup>    | y <sup>*</sup>    | y <sup>*++</sup> | y <sup>0</sup>     | y <sup>0++</sup> | #  |
|----|-------------------|-------------------|----------------|------------------|--------------------|------------------|------|--------------------|--------------------|-------------------|------------------|--------------------|------------------|----|
| 1  | 130.049869        | 65.528572         |                |                  | 112.039304         | 56.523290        | E    |                    |                    |                   |                  |                    |                  | 20 |
| 2  | <b>227.102633</b> | 114.054954        |                |                  | 209.092068         | 105.049672       | P    | 2532.214913        | 1266.611094        | 2515.188364       | 1258.097820      | 2514.204348        | 1257.605812      | 19 |
| 3  | 387.133282        | 194.070279        |                |                  | <b>369.122717</b>  | 185.064997       | C    | 2435.162149        | 1218.084712        | 2418.135600       | 1209.571438      | 2417.151584        | 1209.079430      | 18 |
| 4  | <b>486.201696</b> | 243.604486        |                |                  | <b>468.191131</b>  | 234.599204       | V    | 2275.131500        | 1138.069388        | 2258.104951       | 1129.556113      | 2257.120935        | 1129.064105      | 17 |
| 5  | 615.244289        | 308.125783        |                |                  | <b>597.233724</b>  | 299.120500       | E    | 2176.063086        | <b>1088.535181</b> | 2159.036537       | 1080.021906      | 2158.052521        | 1079.529898      | 16 |
| 6  | 702.276317        | 351.641797        |                |                  | <b>684.265752</b>  | 342.636514       | S    | 2047.020493        | <b>1024.013884</b> | 2029.993944       | 1015.500610      | 2029.009928        | 1015.008602      | 15 |
| 7  | <b>815.360381</b> | 408.183829        |                |                  | <b>797.349816</b>  | 399.178546       | L    | 1959.988465        | 980.497870         | 1942.961916       | 971.984596       | 1941.977900        | 971.492588       | 14 |
| 8  | <b>914.428795</b> | 457.718036        |                |                  | 896.418230         | 448.712753       | V    | 1846.904401        | <b>923.955838</b>  | 1829.877852       | 915.442564       | 1828.893836        | 914.950556       | 13 |
| 9  | 1001.460823       | 501.234050        |                |                  | 983.450258         | 492.228767       | S    | <b>1747.835987</b> | <b>874.421631</b>  | 1730.809438       | 865.908357       | <b>1729.825422</b> | 865.416349       | 12 |
| 10 | 1440.686149       | 720.846712        | 1423.659600    | 712.333438       | <b>1422.675584</b> | 711.841430       | Q    | 1660.803959        | 830.905617         | 1643.777410       | 822.392343       | 1642.793394        | 821.900335       | 11 |
| 11 | 1603.749478       | <b>802.378377</b> | 1586.722929    | 793.865103       | 1585.738913        | 793.373094       | Y    | <b>1221.578633</b> | 611.292954         | 1204.552084       | 602.779680       | <b>1203.568068</b> | 602.287672       | 10 |
| 12 | 1750.817892       | 875.912584        | 1733.791343    | 867.399310       | 1732.807327        | 866.907302       | F    | <b>1058.515304</b> | 529.761290         | 1041.488755       | 521.248015       | 1040.504739        | 520.756007       | 9  |
| 13 | 1878.876470       | 939.941873        | 1861.849921    | 931.428599       | 1860.865905        | 930.936590       | Q    | <b>911.446890</b>  | 456.227083         | <b>894.420341</b> | 447.713808       | 893.436325         | 447.221800       | 8  |
| 14 | 1979.924149       | 990.465713        | 1962.897600    | 981.952438       | 1961.913584        | 981.460430       | T    | <b>783.388312</b>  | 392.197794         | 766.361763        | 383.684519       | 765.377747         | 383.192511       | 7  |
| 15 | 2078.992563       | 1039.999919       | 2061.966014    | 1031.486645      | 2060.981998        | 1030.994637      | V    | <b>682.340633</b>  | 341.673954         | 665.314084        | 333.160680       | 664.330068         | 332.668672       | 6  |
| 16 | 2180.040242       | 1090.523759       | 2163.013693    | 1082.010484      | 2162.029677        | 1081.518476      | T    | <b>583.272219</b>  | 292.139747         | 566.245670        | 283.626473       | 565.261654         | 283.134465       | 5  |
| 17 | 2295.067185       | 1148.037230       | 2278.040636    | 1139.523956      | 2277.056620        | 1139.031948      | D    | <b>482.224540</b>  | 241.615908         | 465.197991        | 233.102633       | 464.213975         | 232.610625       | 4  |
| 18 | 2458.130514       | 1229.568895       | 2441.103965    | 1221.055620      | 2440.119949        | 1220.563612      | Y    | <b>367.197597</b>  | 184.102436         | 350.171048        | 175.589162       |                    |                  | 3  |
| 19 | 2515.151978       | 1258.079627       | 2498.125429    | 1249.566352      | 2497.141413        | 1249.074344      | G    | <b>204.134268</b>  | 102.570772         | 187.107719        | 94.057497        |                    |                  | 2  |
| 20 |                   |                   |                |                  |                    |                  | K    | 147.112804         | 74.060040          | 130.086255        | 65.546765        |                    |                  | 1  |

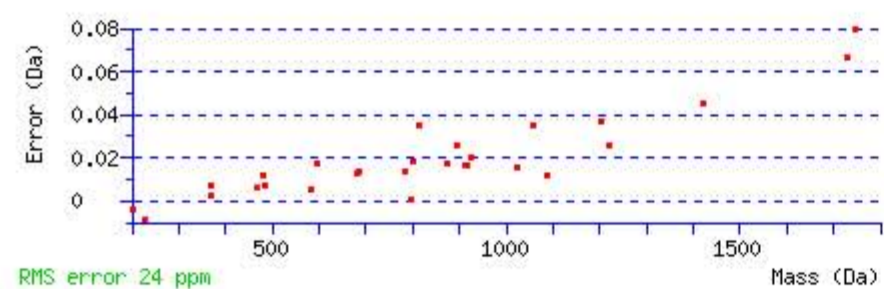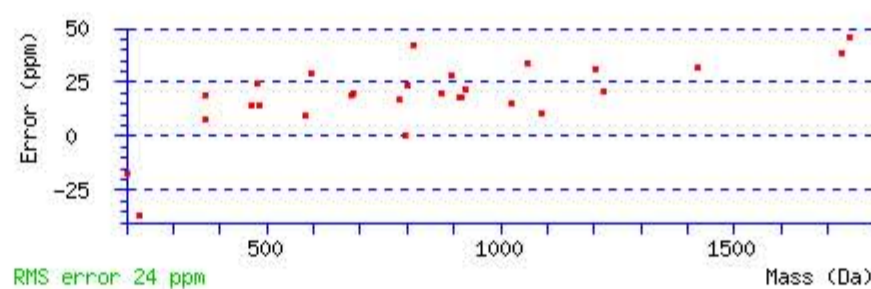

NCBI BLAST search of [EPCVESLVSQYFQTVTDYGK](#)

(Parameters: blastp, nr protein database, expect=20000, no filter, PAM30)

Other BLAST [web gateways](#)

All matches to this query

| Score | Mr(calc):   | Delta     | Sequence                             |
|-------|-------------|-----------|--------------------------------------|
| 38.1  | 2660.250244 | -0.002692 | <a href="#">EPCVESLVSQYFQTVTDYGK</a> |
| 21.6  | 2660.250244 | -0.002692 | <a href="#">EPCVESLVSQYFQTVTDYGK</a> |



# **MASCOT** Mascot Search Results

## Peptide View

MS/MS Fragmentation of **GNTEGLQK**

Found in **APOA4\_HUMAN**, Apolipoprotein A-IV OS=Homo sapiens GN=APOA4 PE=1 SV=3

Match to Query 20357: 1156.590708 from(579.302630,2+) rtinseconds(1432) index(60529)

Title: Locus:1.1.1.2977.17 File:"2013-07-02 CLN FXIII 30 min 3rd FT.wiff"

Data file C:\Program Files (x86)\Matrix Science\Mascot Daemon\mgf\3 FXIII 30 min 3rd\mascot\_daemon\_merge.mgf

Click mouse within plot area to zoom in by factor of two about that point

Or, Plot from  to  Da

Label all possible matches  Label matches used for scoring

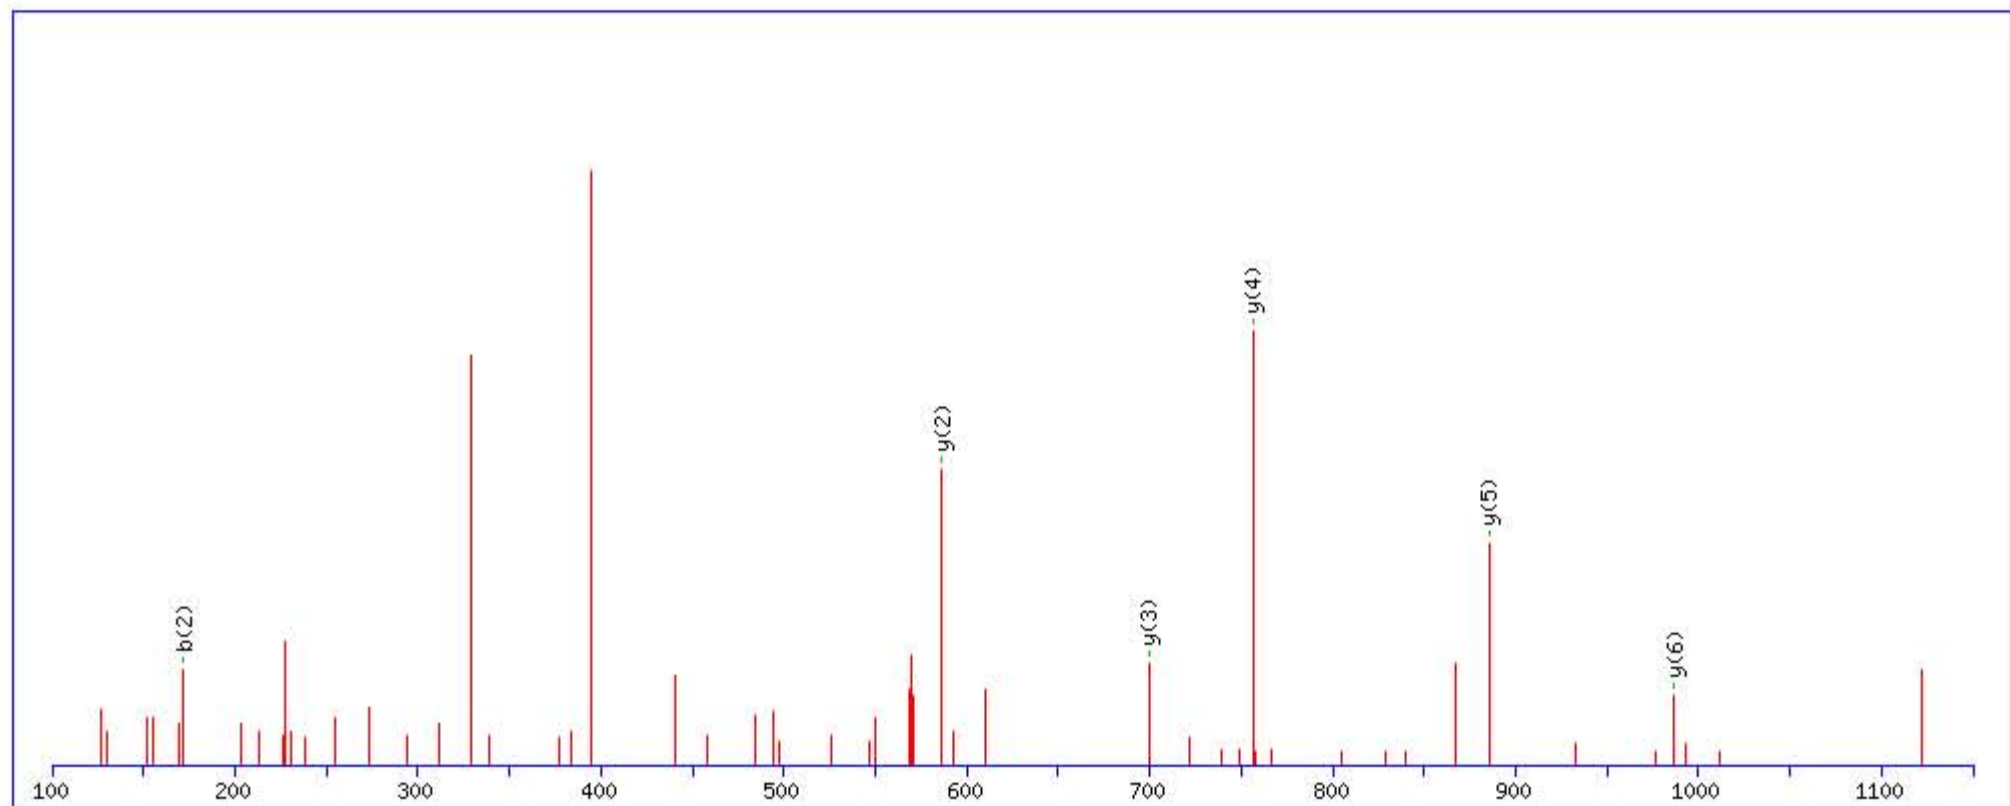

Monoisotopic mass of neutral peptide Mr(calc): 1156.591034

Fixed modifications: Carbamidomethyl (C) (apply to specified residues or termini only)

Variable modifications:

Q7 : Biotin:Thermo-21345 (Q)

Ions Score: 35 Expect: 0.0053

Matches : 6/70 fragment ions using 10 most intense peaks [\(help\)](#)

| # | b                 | b <sup>++</sup> | b <sup>*</sup> | b <sup>+++</sup> | b <sup>0</sup> | b <sup>0++</sup> | Seq.     | y                 | y <sup>++</sup> | y <sup>*</sup> | y <sup>+++</sup> | y <sup>0</sup> | y <sup>0++</sup> | #        |
|---|-------------------|-----------------|----------------|------------------|----------------|------------------|----------|-------------------|-----------------|----------------|------------------|----------------|------------------|----------|
| 1 | 58.028740         | 29.518008       |                |                  |                |                  | <b>G</b> |                   |                 |                |                  |                |                  | <b>8</b> |
| 2 | <b>172.071667</b> | 86.539471       | 155.045118     | 78.026197        |                |                  | <b>N</b> | 1100.576857       | 550.792067      | 1083.550308    | 542.278792       | 1082.566292    | 541.786784       | <b>7</b> |
| 3 | 273.119346        | 137.063311      | 256.092797     | 128.550037       | 255.108781     | 128.058029       | <b>T</b> | <b>986.533930</b> | 493.770603      | 969.507381     | 485.257329       | 968.523365     | 484.765321       | <b>6</b> |
| 4 | 402.161939        | 201.584608      | 385.135390     | 193.071333       | 384.151374     | 192.579325       | <b>E</b> | <b>885.486251</b> | 443.246764      | 868.459702     | 434.733489       | 867.475686     | 434.241481       | <b>5</b> |
| 5 | 459.183403        | 230.095339      | 442.156854     | 221.582065       | 441.172838     | 221.090057       | <b>G</b> | <b>756.443658</b> | 378.725467      | 739.417109     | 370.212193       |                |                  | <b>4</b> |
| 6 | 572.267467        | 286.637372      | 555.240918     | 278.124097       | 554.256902     | 277.632089       | <b>L</b> | <b>699.422194</b> | 350.214735      | 682.395645     | 341.701461       |                |                  | <b>3</b> |
| 7 | 1011.492793       | 506.250035      | 994.466244     | 497.736760       | 993.482228     | 497.244752       | <b>Q</b> | <b>586.338130</b> | 293.672703      | 569.311581     | 285.159429       |                |                  | <b>2</b> |
| 8 |                   |                 |                |                  |                |                  | <b>K</b> | 147.112804        | 74.060040       | 130.086255     | 65.546766        |                |                  | <b>1</b> |

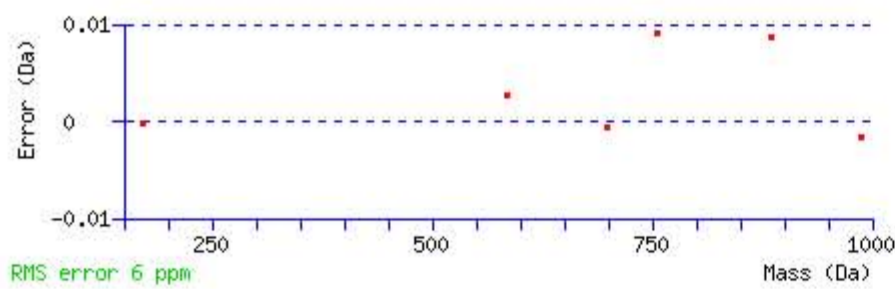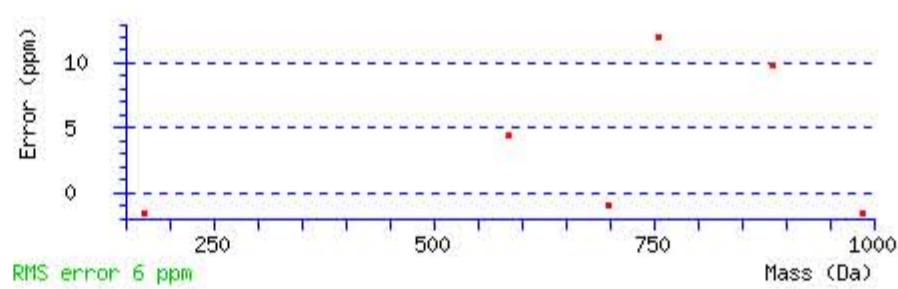

NCBI BLAST search of **GNTEGLQK**

(Parameters: blastp, nr protein database, expect=20000, no filter, PAM30)

Other BLAST [web gateways](#)

All matches to this query

| Score | Mr(calc):   | Delta     | Sequence                 |
|-------|-------------|-----------|--------------------------|
| 35.4  | 1156.591034 | -0.000326 | <a href="#">GNTEGLQK</a> |

Mascot: <http://www.matrixscience.com/>



# MASCOT Search Results

## Peptide View

MS/MS Fragmentation of **IDQNVEELK**

Found in **APOA4\_HUMAN**, Apolipoprotein A-IV OS=Homo sapiens GN=APOA4 PE=1 SV=3

Match to Query 27605: 1397.718328 from(699.866440,2+) rtinseconds(1835) index(62873)

Title: Locus:1.1.1.3118.4 File:"2013-07-02 CLN FXIII 30 min 3rd FT.wiff"

Data file C:\Program Files (x86)\Matrix Science\Mascot Daemon\mgf3 FXIII 30 min 3rd\mascot\_daemon\_merge.mgf

Click mouse within plot area to zoom in by factor of two about that point

Or, Plot from  to  Da

Label all possible matches  Label matches used for scoring

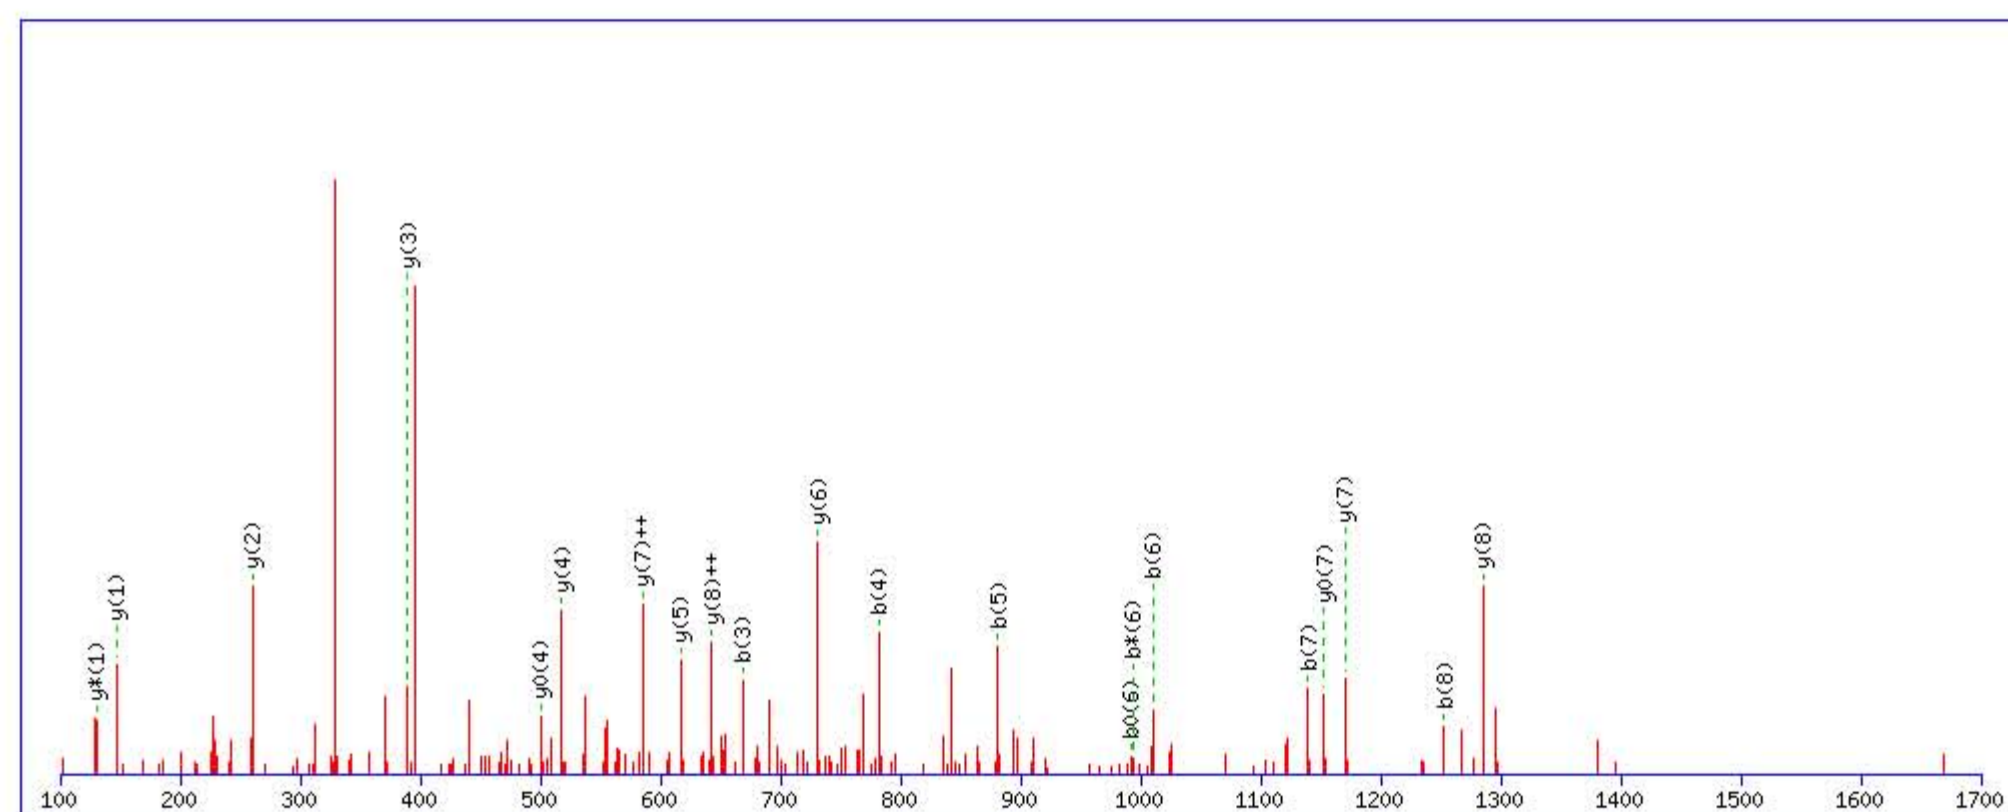

Monoisotopic mass of neutral peptide Mr(calc): 1397.722427

Fixed modifications: Carbamidomethyl (C) (apply to specified residues or termini only)

Variable modifications:

Q3 : Biotin:Thermo-21345 (Q)

Ions Score: 48 Expect: 0.00035

Matches : 21/86 fragment ions using 38 most intense peaks [\(help\)](#)

| # | b           | b <sup>++</sup> | b <sup>*</sup> | b <sup>*++</sup> | b <sup>0</sup> | b <sup>0++</sup> | Seq. | y           | y <sup>++</sup> | y <sup>*</sup> | y <sup>*++</sup> | y <sup>0</sup> | y <sup>0++</sup> | # |
|---|-------------|-----------------|----------------|------------------|----------------|------------------|------|-------------|-----------------|----------------|------------------|----------------|------------------|---|
| 1 | 114.091340  | 57.549308       |                |                  |                |                  | I    |             |                 |                |                  |                |                  | 9 |
| 2 | 229.118283  | 115.062779      |                |                  | 211.107718     | 106.057497       | D    | 1285.645664 | 643.326470      | 1268.619115    | 634.813196       | 1267.635099    | 634.321187       | 8 |
| 3 | 668.343609  | 334.675443      | 651.317060     | 326.162168       | 650.333044     | 325.670160       | Q    | 1170.618721 | 585.812998      | 1153.592172    | 577.299724       | 1152.608156    | 576.807716       | 7 |
| 4 | 782.386536  | 391.696906      | 765.359987     | 383.183631       | 764.375971     | 382.691623       | N    | 731.393395  | 366.200335      | 714.366846     | 357.687061       | 713.382830     | 357.195053       | 6 |
| 5 | 881.454950  | 441.231113      | 864.428401     | 432.717838       | 863.444385     | 432.225830       | V    | 617.350468  | 309.178872      | 600.323919     | 300.665597       | 599.339903     | 300.173589       | 5 |
| 6 | 1010.497543 | 505.752410      | 993.470994     | 497.239135       | 992.486978     | 496.747127       | E    | 518.282054  | 259.644665      | 501.255505     | 251.131390       | 500.271489     | 250.639382       | 4 |
| 7 | 1139.540136 | 570.273706      | 1122.513587    | 561.760431       | 1121.529571    | 561.268423       | E    | 389.239461  | 195.123368      | 372.212912     | 186.610094       | 371.228896     | 186.118086       | 3 |
| 8 | 1252.624200 | 626.815738      | 1235.597651    | 618.302463       | 1234.613635    | 617.810455       | L    | 260.196868  | 130.602072      | 243.170319     | 122.088797       |                |                  | 2 |
| 9 |             |                 |                |                  |                |                  | K    | 147.112804  | 74.060040       | 130.086255     | 65.546765        |                |                  | 1 |

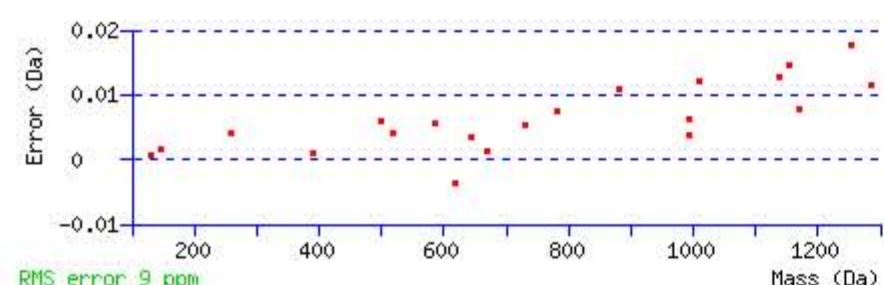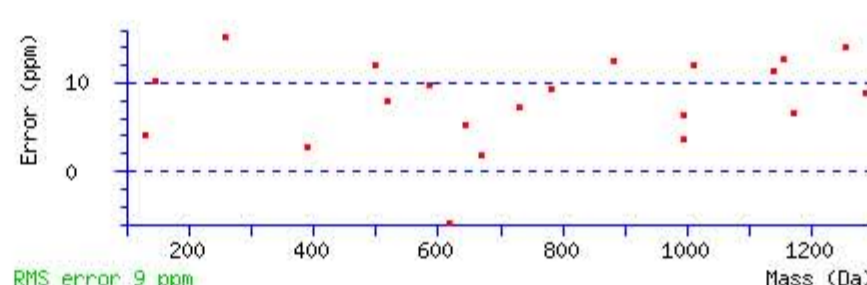

NCBI BLAST search of **IDQNVEELK**

(Parameters: blastp, nr protein database, expect=20000, no filter, PAM30)

Other BLAST [web gateways](#)

## All matches to this query

| Score | Mr(calc):   | Delta     | Sequence                      |
|-------|-------------|-----------|-------------------------------|
| 48.3  | 1397.722427 | -0.004099 | <a href="#">IDQNVEELK</a>     |
| 11.2  | 1397.733688 | -0.015360 | <a href="#">LCDVTLKIGDHK</a>  |
| 7.1   | 1397.733658 | -0.015330 | <a href="#">QNITNQLEK</a>     |
| 5.5   | 1397.715057 | 0.003271  | <a href="#">LEDGSHLTGQTLK</a> |
| 5.5   | 1397.726456 | -0.008128 | <a href="#">LEIMEFVNFLK</a>   |
| 5.2   | 1397.701309 | 0.017019  | <a href="#">LLFNFVEQNMK</a>   |
| 5.0   | 1397.737686 | -0.019358 | <a href="#">LKEFCGEFLKK</a>   |
| 4.1   | 1397.704651 | 0.013677  | <a href="#">QLEKQMYSIMK</a>   |
| 3.9   | 1397.715042 | 0.003286  | <a href="#">LQESQPGNAVIDK</a> |
| 3.8   | 1397.722427 | -0.004099 | <a href="#">LENDVEQLK</a>     |



# MASCOT Search Results

## Peptide View

MS/MS Fragmentation of **IDQTVLEELR**

Found in **APOA4\_HUMAN**, Apolipoprotein A-IV OS=Homo sapiens GN=APOA4 PE=1 SV=3

Match to Query 28471: 1412.727448 from(707.371000,2+) rtinseconds(1919) index(63328)

Title: Locus:1.1.1.3147.26 File:"2013-07-02 CLN FXIII 30 min 3rd FT.wiff"

Data file C:\Program Files (x86)\Matrix Science\Mascot Daemon\mgf3 FXIII 30 min 3rd\mascot\_daemon\_merge.mgf

Click mouse within plot area to zoom in by factor of two about that point

Or, Plot from  to  Da

Label all possible matches  Label matches used for scoring

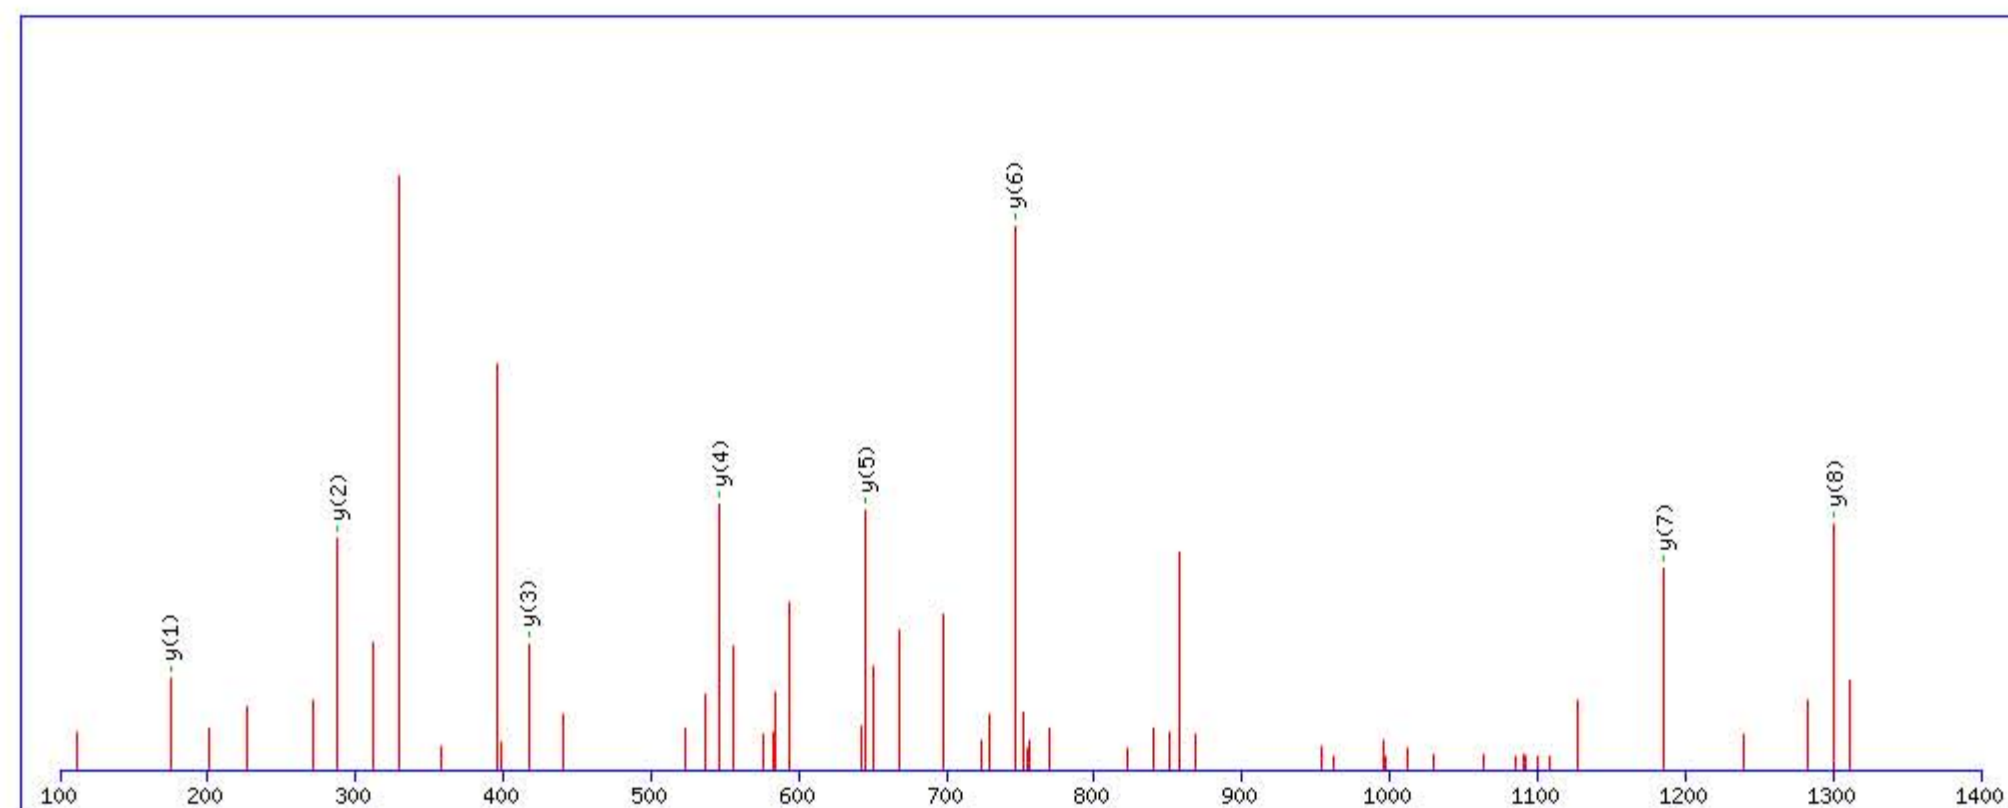

Monoisotopic mass of neutral peptide Mr(calc): 1412.733337

Fixed modifications: Carbamidomethyl (C) (apply to specified residues or termini only)

Variable modifications:

Q3 : Biotin:Thermo-21345 (Q)

Ions Score: 65 Expect: 8.7e-006

Matches : 8/86 fragment ions using 12 most intense peaks [\(help\)](#)

| # | b           | b <sup>++</sup> | b <sup>*</sup> | b <sup>*++</sup> | b <sup>0</sup> | b <sup>0++</sup> | Seq. | y                  | y <sup>++</sup> | y <sup>*</sup> | y <sup>*++</sup> | y <sup>0</sup> | y <sup>0++</sup> | # |
|---|-------------|-----------------|----------------|------------------|----------------|------------------|------|--------------------|-----------------|----------------|------------------|----------------|------------------|---|
| 1 | 114.091340  | 57.549308       |                |                  |                |                  | I    |                    |                 |                |                  |                |                  | 9 |
| 2 | 229.118283  | 115.062779      |                |                  | 211.107718     | 106.057497       | D    | <b>1300.656564</b> | 650.831920      | 1283.630015    | 642.318646       | 1282.645999    | 641.826638       | 8 |
| 3 | 668.343609  | 334.675443      | 651.317060     | 326.162168       | 650.333044     | 325.670160       | Q    | <b>1185.629621</b> | 593.318449      | 1168.603072    | 584.805174       | 1167.619056    | 584.313166       | 7 |
| 4 | 769.391288  | 385.199282      | 752.364739     | 376.686008       | 751.380723     | 376.194000       | T    | <b>746.404295</b>  | 373.705786      | 729.377746     | 365.192511       | 728.393730     | 364.700503       | 6 |
| 5 | 868.459702  | 434.733489      | 851.433153     | 426.220215       | 850.449137     | 425.728207       | V    | <b>645.356616</b>  | 323.181946      | 628.330067     | 314.668672       | 627.346051     | 314.176664       | 5 |
| 6 | 997.502295  | 499.254786      | 980.475746     | 490.741511       | 979.491730     | 490.249503       | E    | <b>546.288202</b>  | 273.647739      | 529.261653     | 265.134465       | 528.277637     | 264.642457       | 4 |
| 7 | 1126.544888 | 563.776082      | 1109.518339    | 555.262808       | 1108.534323    | 554.770800       | E    | <b>417.245609</b>  | 209.126442      | 400.219060     | 200.613168       | 399.235044     | 200.121160       | 3 |
| 8 | 1239.628952 | 620.318114      | 1222.602403    | 611.804840       | 1221.618387    | 611.312832       | L    | <b>288.203016</b>  | 144.605146      | 271.176467     | 136.091871       |                |                  | 2 |
| 9 |             |                 |                |                  |                |                  | R    | <b>175.118952</b>  | 88.063114       | 158.092403     | 79.549839        |                |                  | 1 |

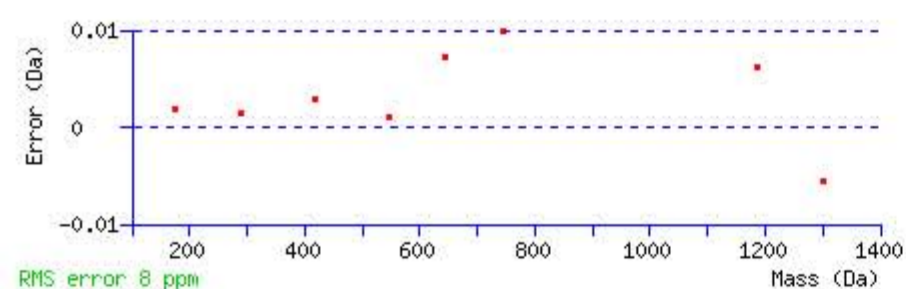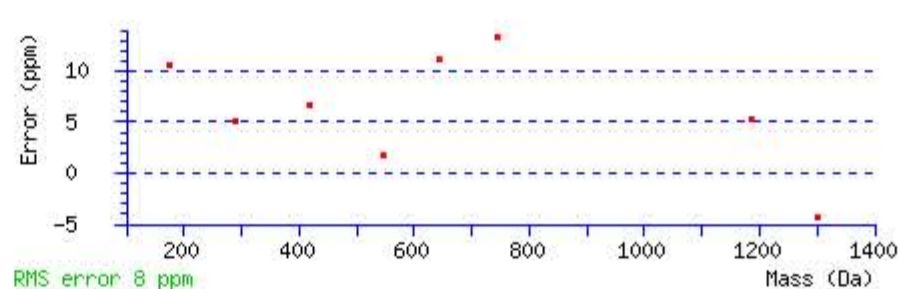

NCBI BLAST search of **IDQTVLEELR**

(Parameters: blastp, nr protein database, expect=20000, no filter, PAM30)

Other BLAST [web gateways](#)

## All matches to this query

| Score | Mr(calc):   | Delta     | Sequence                       |
|-------|-------------|-----------|--------------------------------|
| 64.7  | 1412.733337 | -0.005889 | <a href="#">IDQTVLEELR</a>     |
| 13.0  | 1412.744537 | -0.017089 | <a href="#">IPPEKMRELER</a>    |
| 12.1  | 1412.708191 | 0.019257  | <a href="#">LQESASGTGPR</a>    |
| 10.3  | 1412.734665 | -0.007217 | <a href="#">MPADWRQQLR</a>     |
| 6.2   | 1412.712006 | 0.015442  | <a href="#">LRGAGEGSEEREPR</a> |
| 6.0   | 1412.734665 | -0.007217 | <a href="#">QRYRMIDFLR</a>     |
| 5.1   | 1412.741196 | -0.013748 | <a href="#">SSLHYKPTPDLR</a>   |
| 4.9   | 1412.733322 | -0.005874 | <a href="#">LSEEIDQLR</a>      |
| 3.9   | 1412.719391 | 0.008057  | <a href="#">LKAEMDEHRLR</a>    |
| 2.8   | 1412.741211 | -0.013763 | <a href="#">KVTIYSFTGNQR</a>   |



# MASCOT SEARCH RESULTS

## Peptide View

MS/MS Fragmentation of **LEPYADQLR**

Found in **APOA4\_HUMAN**, Apolipoprotein A-IV OS=Homo sapiens GN=APOA4 PE=1 SV=3

Match to Query 28498: 1414.718948 from(708.366750,2+) rtinseconds(1990) index(63887)

Title: Locus:1.1.1.3172.16 File:"2013-07-02 CLN FXIII 30 min 3rd FT.wiff"

Data file C:\Program Files (x86)\Matrix Science\Mascot Daemon\mgf3 FXIII 30 min 3rd\mascot\_daemon\_merge.mgf

Click mouse within plot area to zoom in by factor of two about that point

Or, Plot from  to  Da

Label all possible matches  Label matches used for scoring

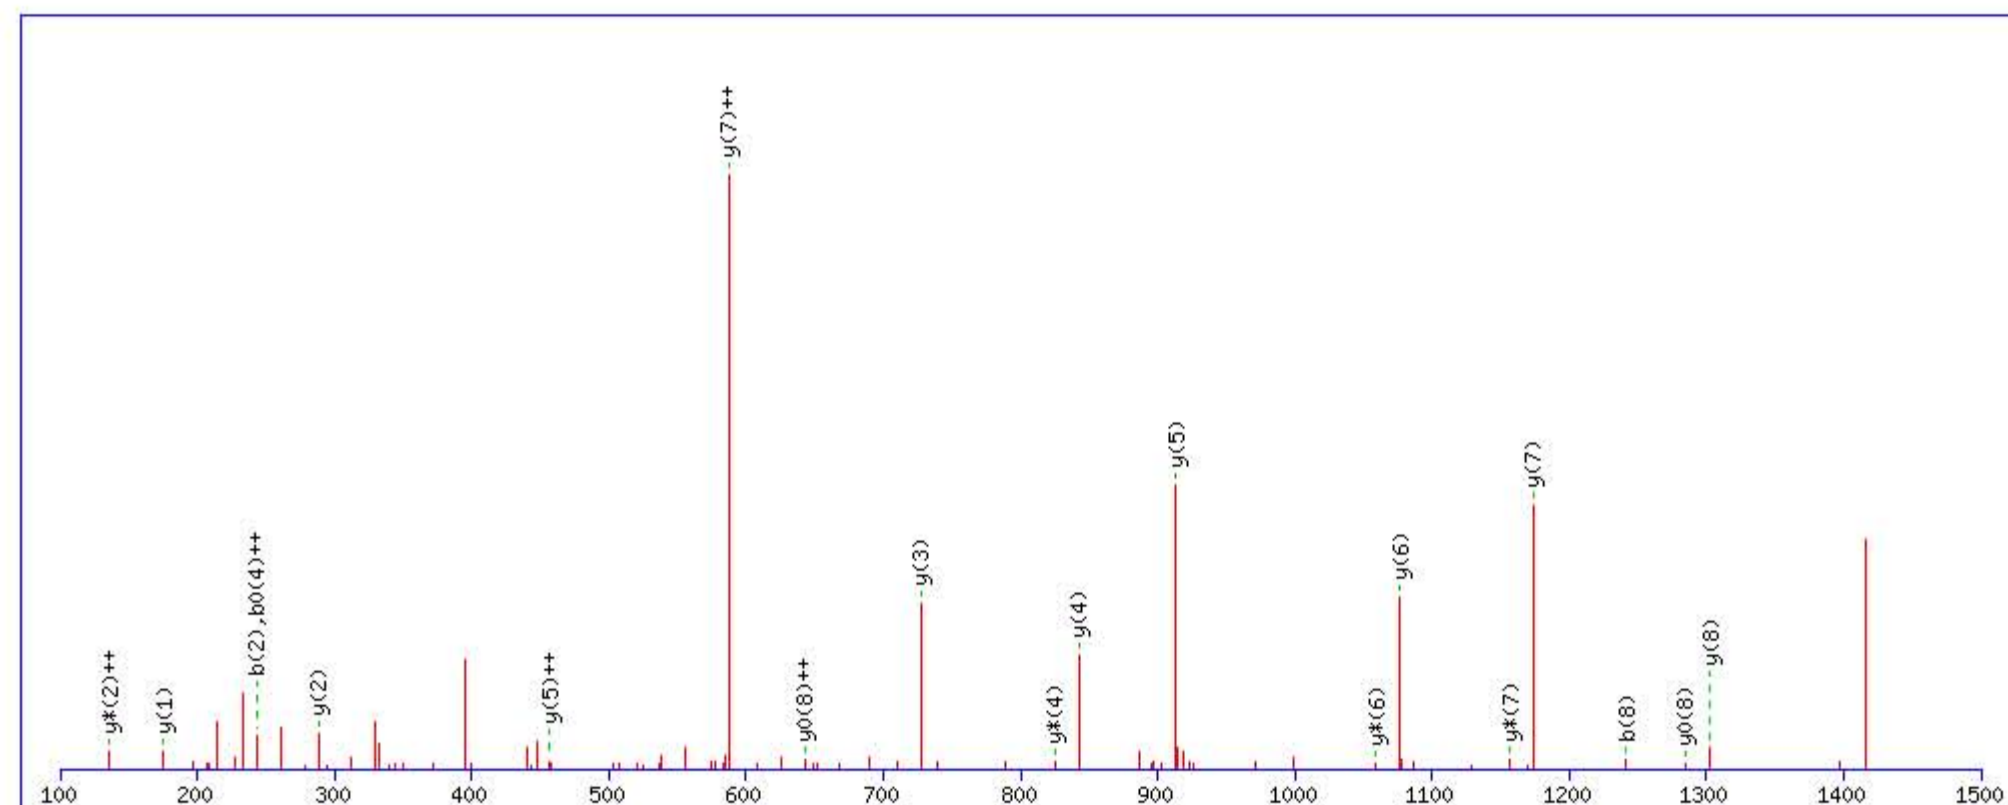

Monoisotopic mass of neutral peptide Mr(calc): 1414.727844

Fixed modifications: Carbamidomethyl (C) (apply to specified residues or termini only)

Variable modifications:

Q7 : Biotin:Thermo-21345 (Q)

Ions Score: 41 Expect: 0.0013

Matches : 19/76 fragment ions using 45 most intense peaks [\(help\)](#)

| # | b                  | b <sup>++</sup> | b <sup>+</sup> | b <sup>+++</sup> | b <sup>0</sup> | b <sup>0++</sup>  | Seq. | y                  | y <sup>++</sup>   | y <sup>+</sup>     | y <sup>+++</sup>  | y <sup>0</sup>     | y <sup>0++</sup>  | # |
|---|--------------------|-----------------|----------------|------------------|----------------|-------------------|------|--------------------|-------------------|--------------------|-------------------|--------------------|-------------------|---|
| 1 | 114.091340         | 57.549308       |                |                  |                |                   | L    |                    |                   |                    |                   |                    |                   | 9 |
| 2 | <b>243.133933</b>  | 122.070605      |                |                  | 225.123368     | 113.065322        | E    | <b>1302.651085</b> | 651.829181        | 1285.624536        | 643.315906        | <b>1284.640520</b> | <b>642.823898</b> | 8 |
| 3 | 340.186697         | 170.596987      |                |                  | 322.176132     | 161.591704        | P    | <b>1173.608492</b> | <b>587.307884</b> | <b>1156.581943</b> | 578.794610        | 1155.597927        | 578.302602        | 7 |
| 4 | 503.250026         | 252.128651      |                |                  | 485.239461     | <b>243.123369</b> | Y    | <b>1076.555728</b> | 538.781502        | <b>1059.529179</b> | 530.268228        | 1058.545163        | 529.776220        | 6 |
| 5 | 574.287140         | 287.647208      |                |                  | 556.276575     | 278.641926        | A    | <b>913.492399</b>  | <b>457.249838</b> | 896.465850         | 448.736563        | 895.481834         | 448.244555        | 5 |
| 6 | 689.314083         | 345.160680      |                |                  | 671.303518     | 336.155397        | D    | <b>842.455285</b>  | 421.731281        | <b>825.428736</b>  | 413.218006        | 824.444720         | 412.725998        | 4 |
| 7 | 1128.539409        | 564.773343      | 1111.512860    | 556.260068       | 1110.528844    | 555.768060        | Q    | <b>727.428342</b>  | 364.217809        | 710.401793         | 355.704535        |                    |                   | 3 |
| 8 | <b>1241.623473</b> | 621.315375      | 1224.596924    | 612.802100       | 1223.612908    | 612.310092        | L    | <b>288.203016</b>  | 144.605146        | 271.176467         | <b>136.091871</b> |                    |                   | 2 |
| 9 |                    |                 |                |                  |                |                   | R    | <b>175.118952</b>  | 88.063114         | 158.092403         | 79.549839         |                    |                   | 1 |

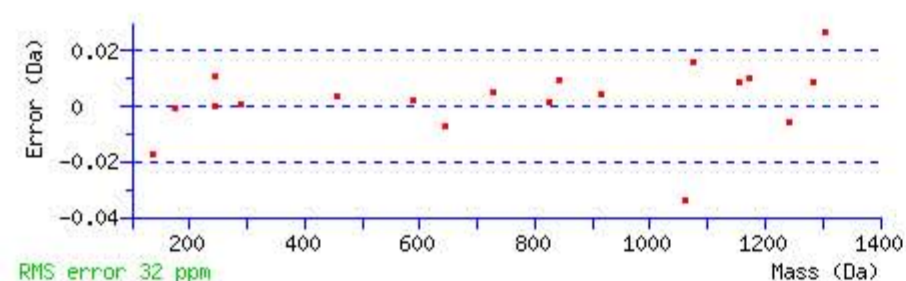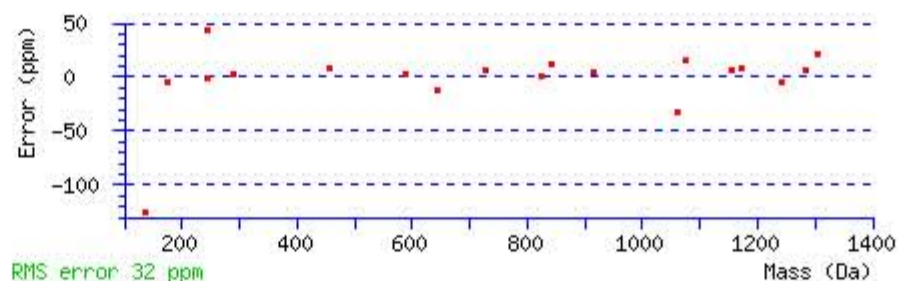

NCBI BLAST search of **LEPYADQLR**

(Parameters: blastp, nr protein database, expect=20000, no filter, PAM30)

Other BLAST [web gateways](#)

All matches to this query

| Score | Mr(calc):   | Delta     | Sequence                      |
|-------|-------------|-----------|-------------------------------|
| 41.0  | 1414.727844 | -0.008896 | <a href="#">LEPYADQLR</a>     |
| 9.5   | 1414.712585 | 0.006363  | <a href="#">EISTEEQLR</a>     |
| 6.1   | 1414.735931 | -0.016983 | <a href="#">LMRGLLHCMIR</a>   |
| 3.7   | 1414.698715 | 0.020233  | <a href="#">GQGSPQQTIVGMR</a> |
| 2.0   | 1414.735062 | -0.016114 | <a href="#">IQLMQEVDQR</a>    |
| 0.5   | 1414.716400 | 0.002548  | <a href="#">LEEDARLEERR</a>   |
| 0.1   | 1414.731689 | -0.012741 | <a href="#">NKAEFHQSVISR</a>  |



# MASCOT Search Results

## Peptide View

MS/MS Fragmentation of **ALVQQMEQLR**

Found in **APOA4\_HUMAN**, Apolipoprotein A-IV OS=Homo sapiens GN=APOA4 PE=1 SV=3

Match to Query 31691: 1525.802608 from(763.908580,2+) rtinseconds(2125) index(64570)

Title: Locus:1.1.1.3219.12 File:"2013-07-02 CLN FXIII 30 min 3rd FT.wiff"

Data file C:\Program Files (x86)\Matrix Science\Mascot Daemon\mgf\3 FXIII 30 min 3rd\mascot\_daemon\_merge.mgf

Click mouse within plot area to zoom in by factor of two about that point

Or, Plot from  to  Da

Label all possible matches  Label matches used for scoring

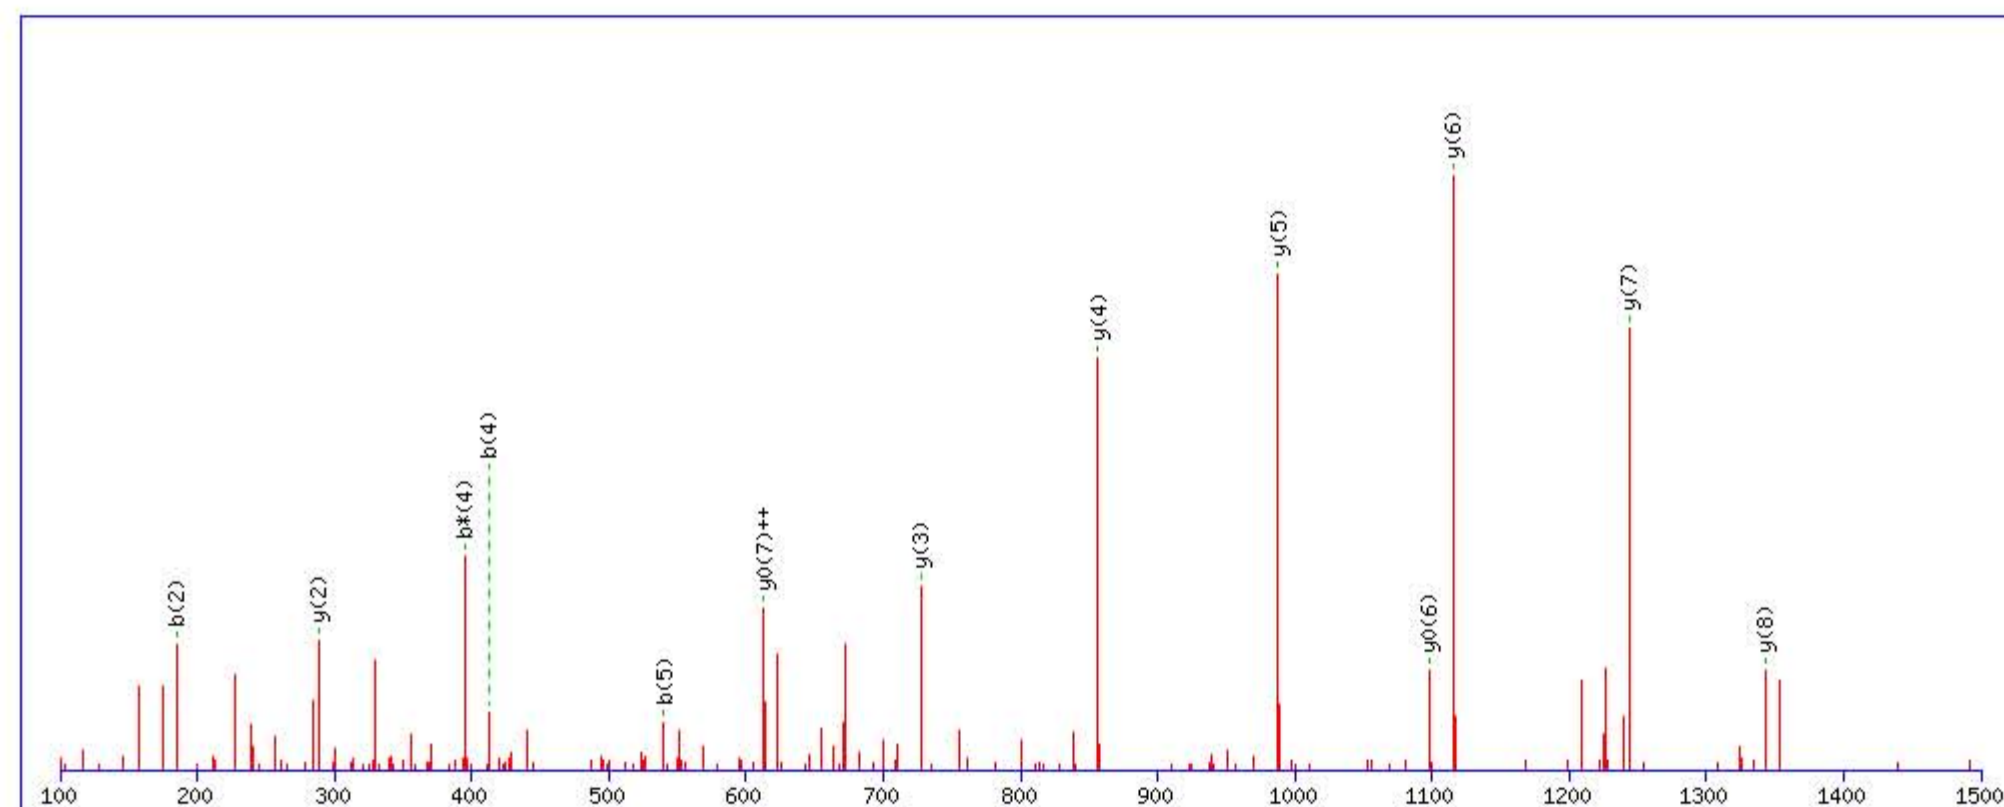

Monoisotopic mass of neutral peptide Mr(calc): 1525.810867

Fixed modifications: Carbamidomethyl (C) (apply to specified residues or termini only)

Variable modifications:

Q8 : Biotin:Thermo-21345 (Q)

Ions Score: 71 Expect: 2e-006

Matches : 13/84 fragment ions using 14 most intense peaks [\(help\)](#)

| #  | b                 | b <sup>++</sup> | b <sup>+</sup>    | b <sup>+++</sup> | b <sup>0</sup> | b <sup>0++</sup> | Seq. | y                  | y <sup>++</sup> | y <sup>+</sup> | y <sup>+++</sup> | y <sup>0</sup>     | y <sup>0++</sup>  | #  |
|----|-------------------|-----------------|-------------------|------------------|----------------|------------------|------|--------------------|-----------------|----------------|------------------|--------------------|-------------------|----|
| 1  | 72.044390         | 36.525833       |                   |                  |                |                  | A    |                    |                 |                |                  |                    |                   | 10 |
| 2  | <b>185.128454</b> | 93.067865       |                   |                  |                |                  | L    | 1455.781054        | 728.394165      | 1438.754505    | 719.880890       | 1437.770489        | 719.388882        | 9  |
| 3  | 284.196868        | 142.602072      |                   |                  |                |                  | V    | <b>1342.696990</b> | 671.852133      | 1325.670441    | 663.338858       | 1324.686425        | 662.846850        | 8  |
| 4  | <b>412.255446</b> | 206.631361      | <b>395.228897</b> | 198.118087       |                |                  | Q    | <b>1243.628576</b> | 622.317926      | 1226.602027    | 613.804651       | 1225.618011        | <b>613.312643</b> | 7  |
| 5  | <b>540.314024</b> | 270.660650      | 523.287475        | 262.147376       |                |                  | Q    | <b>1115.569998</b> | 558.288637      | 1098.543449    | 549.775362       | <b>1097.559433</b> | 549.283354        | 6  |
| 6  | 671.354509        | 336.180893      | 654.327960        | 327.667618       |                |                  | M    | <b>987.511420</b>  | 494.259348      | 970.484871     | 485.746073       | 969.500855         | 485.254065        | 5  |
| 7  | 800.397102        | 400.702189      | 783.370553        | 392.188915       | 782.386537     | 391.696907       | E    | <b>856.470935</b>  | 428.739105      | 839.444386     | 420.225831       | 838.460370         | 419.733823        | 4  |
| 8  | 1239.622428       | 620.314852      | 1222.595879       | 611.801578       | 1221.611863    | 611.309569       | Q    | <b>727.428342</b>  | 364.217809      | 710.401793     | 355.704534       |                    |                   | 3  |
| 9  | 1352.706492       | 676.856884      | 1335.679943       | 668.343609       | 1334.695927    | 667.851601       | L    | <b>288.203016</b>  | 144.605146      | 271.176467     | 136.091871       |                    |                   | 2  |
| 10 |                   |                 |                   |                  |                |                  | R    | 175.118952         | 88.063114       | 158.092403     | 79.549839        |                    |                   | 1  |

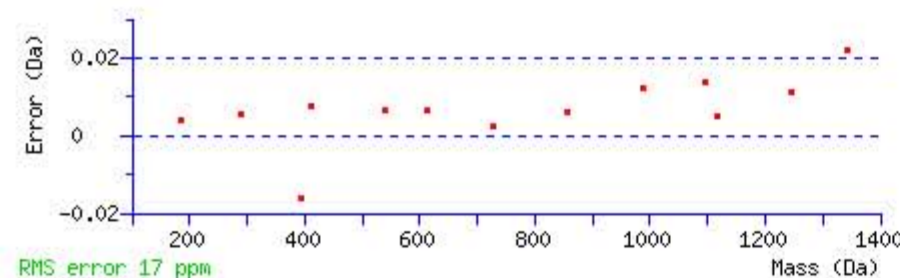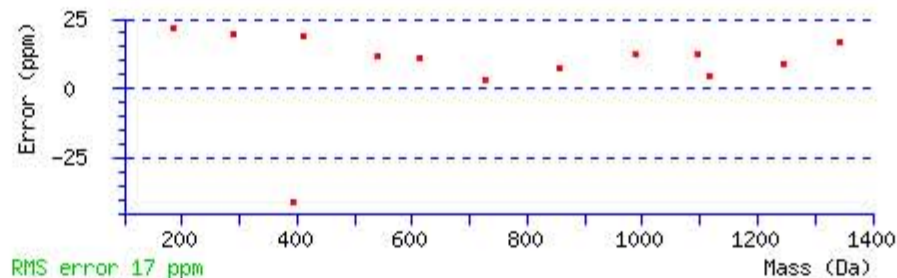

NCBI BLAST search of **ALVQQMEQLR**

(Parameters: blastp, nr protein database, expect=20000, no filter, PAM30)

Other BLAST [web gateways](#)

## All matches to this query

| Score | Mr(calc):   | Delta     | Sequence                        |
|-------|-------------|-----------|---------------------------------|
| 71.3  | 1525.810867 | -0.008259 | <a href="#">ALVQQMEQLR</a>      |
| 22.9  | 1525.810867 | -0.008259 | <a href="#">ALVQQMEQLR</a>      |
| 14.5  | 1525.792236 | 0.010372  | <a href="#">ALTEQQEQLR</a>      |
| 12.0  | 1525.798752 | 0.003856  | <a href="#">SPVKKEEKPEVK</a>    |
| 11.8  | 1525.800064 | 0.002544  | <a href="#">ARALQSYEAKAR</a>    |
| 8.7   | 1525.810867 | -0.008259 | <a href="#">ALVQQMEQLR</a>      |
| 7.5   | 1525.807495 | -0.004887 | <a href="#">WPPQQLMLSAALR</a>   |
| 6.0   | 1525.803467 | -0.000859 | <a href="#">SPPSPRSSMAAVALR</a> |
| 5.7   | 1525.803482 | -0.000874 | <a href="#">VNTPAGSSQKAR</a>    |
| 5.2   | 1525.784836 | 0.017772  | <a href="#">LAQVATEEPERQR</a>   |



# MASCOT Search Results

## Peptide View

MS/MS Fragmentation of **LLPHANEVSQK**

Found in **APOA4\_HUMAN**, Apolipoprotein A-IV OS=Homo sapiens GN=APOA4 PE=1 SV=3

Match to Query 32042: 1545.840972 from(516.287600,3+) rtinseconds(1543) index(61275)

Title: Locus:1.1.1.3016.12 File:"2013-07-02 CLN FXIII 30 min 3rd FT.wiff"

Data file C:\Program Files (x86)\Matrix Science\Mascot Daemon\mgf3 FXIII 30 min 3rd\mascot\_daemon\_merge.mgf

Click mouse within plot area to zoom in by factor of two about that point

Or, Plot from  to  Da

Label all possible matches  Label matches used for scoring

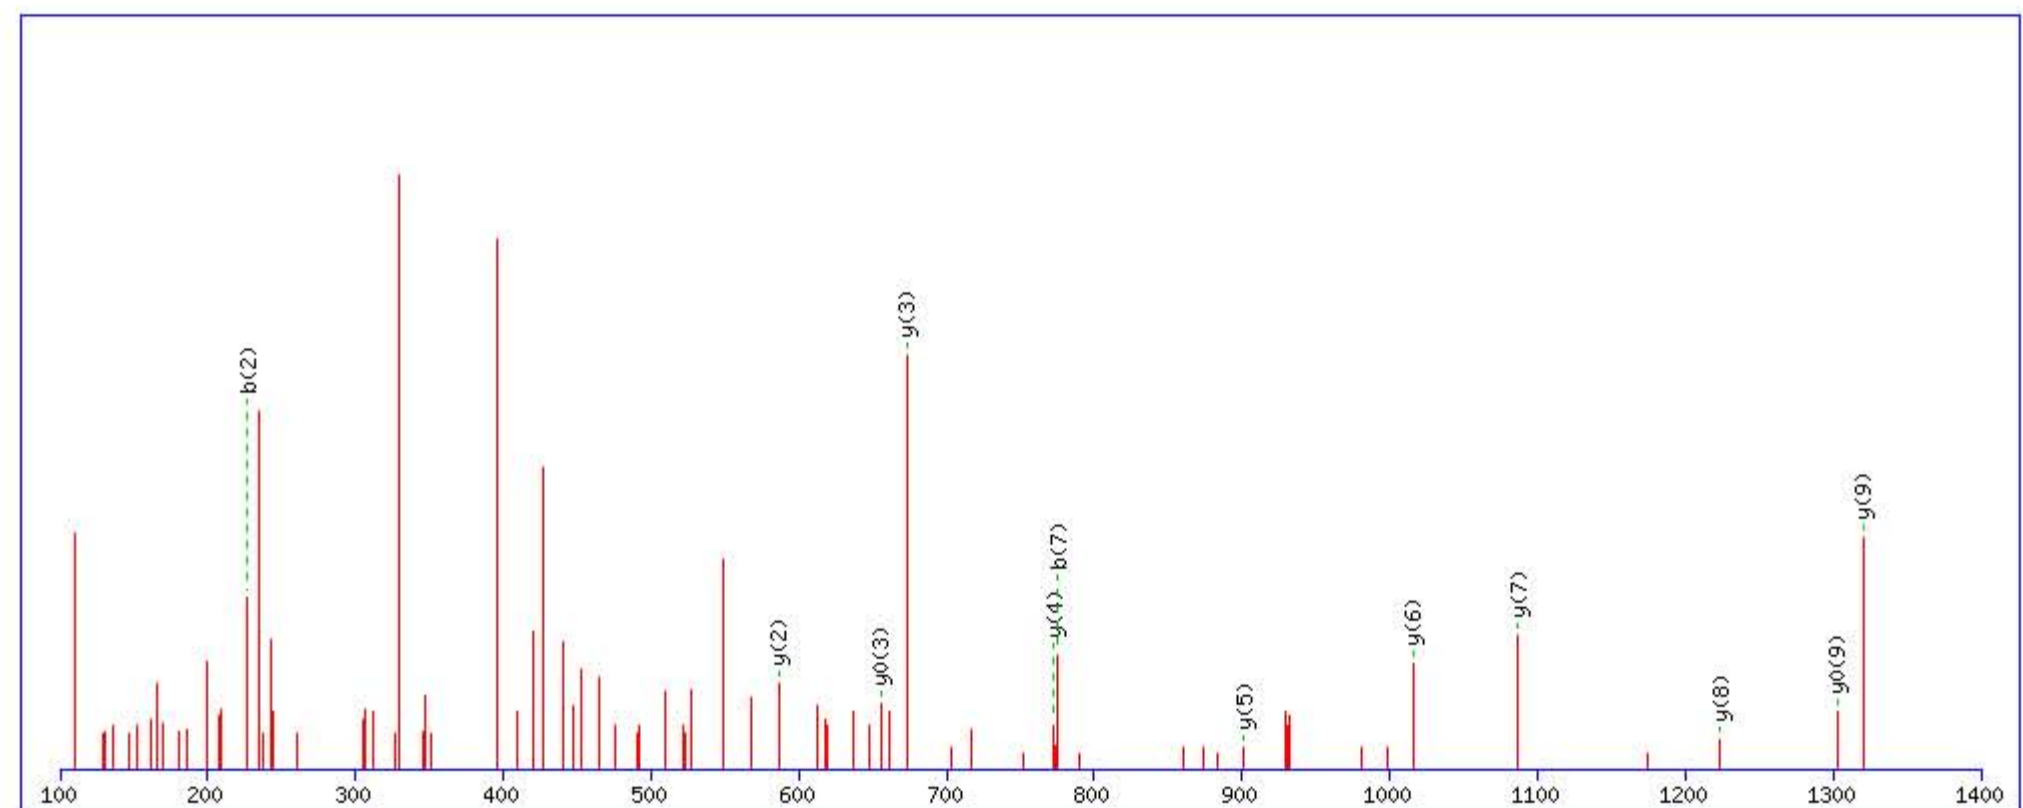

Monoisotopic mass of neutral peptide Mr(calc): 1545.833710

Fixed modifications: Carbamidomethyl (C) (apply to specified residues or termini only)

Variable modifications:

Q10 : Biotin:Thermo-21345 (Q)

Ions Score: 45 Expect: 0.00067

Matches : 12/94 fragment ions using 24 most intense peaks [\(help\)](#)

| #  | b                 | b <sup>++</sup> | b <sup>*</sup> | b <sup>*++</sup> | b <sup>0</sup> | b <sup>0++</sup> | Seq. | y                  | y <sup>++</sup> | y <sup>*</sup> | y <sup>*++</sup> | y <sup>0</sup>     | y <sup>0++</sup> | #  |
|----|-------------------|-----------------|----------------|------------------|----------------|------------------|------|--------------------|-----------------|----------------|------------------|--------------------|------------------|----|
| 1  | 114.091340        | 57.549308       |                |                  |                |                  | L    |                    |                 |                |                  |                    |                  | 11 |
| 2  | <b>227.175404</b> | 114.091340      |                |                  |                |                  | L    | 1433.756946        | 717.382111      | 1416.730397    | 708.868837       | 1415.746381        | 708.376828       | 10 |
| 3  | 324.228168        | 162.617722      |                |                  |                |                  | P    | <b>1320.672882</b> | 660.840079      | 1303.646333    | 652.326804       | <b>1302.662317</b> | 651.834796       | 9  |
| 4  | 461.287080        | 231.147178      |                |                  |                |                  | H    | <b>1223.620118</b> | 612.313697      | 1206.593569    | 603.800422       | 1205.609553        | 603.308414       | 8  |
| 5  | 532.324194        | 266.665735      |                |                  |                |                  | A    | <b>1086.561206</b> | 543.784241      | 1069.534657    | 535.270966       | 1068.550641        | 534.778958       | 7  |
| 6  | 646.367121        | 323.687199      | 629.340572     | 315.173924       |                |                  | N    | <b>1015.524092</b> | 508.265684      | 998.497543     | 499.752409       | 997.513527         | 499.260401       | 6  |
| 7  | <b>775.409714</b> | 388.208495      | 758.383165     | 379.695221       | 757.399149     | 379.203213       | E    | <b>901.481165</b>  | 451.244220      | 884.454616     | 442.730946       | 883.470600         | 442.238938       | 5  |
| 8  | 874.478128        | 437.742702      | 857.451579     | 429.229427       | 856.467563     | 428.737419       | V    | <b>772.438572</b>  | 386.722924      | 755.412023     | 378.209649       | 754.428007         | 377.717641       | 4  |
| 9  | 961.510156        | 481.258716      | 944.483607     | 472.745441       | 943.499591     | 472.253433       | S    | <b>673.370158</b>  | 337.188717      | 656.343609     | 328.675442       | <b>655.359593</b>  | 328.183434       | 3  |
| 10 | 1400.735482       | 700.871379      | 1383.708933    | 692.358104       | 1382.724917    | 691.866096       | Q    | <b>586.338130</b>  | 293.672703      | 569.311581     | 285.159428       |                    |                  | 2  |
| 11 |                   |                 |                |                  |                |                  | K    | 147.112804         | 74.060040       | 130.086255     | 65.546765        |                    |                  | 1  |

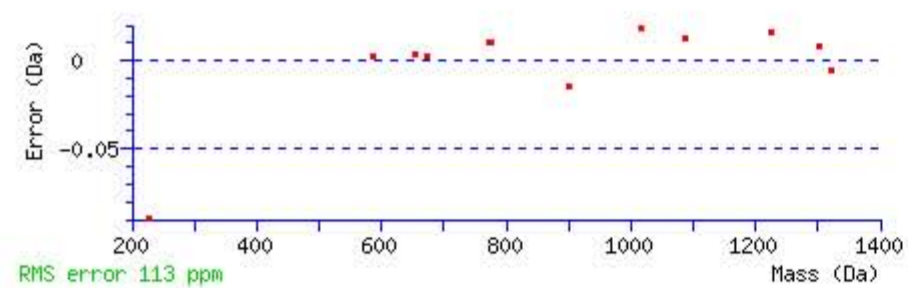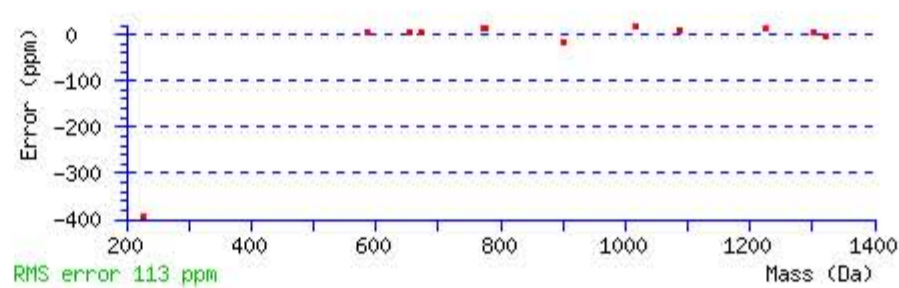

NCBI BLAST search of **LLPHANEVSQK**

(Parameters: blastp, nr protein database, expect=20000, no filter, PAM30)

Other BLAST [web gateways](#)

All matches to this query

| Score | Mr(calc):   | Delta    | Sequence                    |
|-------|-------------|----------|-----------------------------|
| 45.2  | 1545.833710 | 0.007262 | <a href="#">LLPHANEVSQK</a> |

Mascot: <http://www.matrixscience.com/>



# MASCOT SEARCH RESULTS

## Peptide View

MS/MS Fragmentation of **TQVNTQAEQLR**

Found in **APOA4\_HUMAN**, Apolipoprotein A-IV OS=Homo sapiens GN=APOA4 PE=1 SV=3

Match to Query 34027: 1597.825482 from(533.615770,3+) rtinseconds(1597) index(61610)

Title: Locus:1.1.1.3035.10 File:"2013-07-02 CLN FXIII 30 min 3rd FT.wiff"

Data file C:\Program Files (x86)\Matrix Science\Mascot Daemon\mgf3 FXIII 30 min 3rd\mascot\_daemon\_merge.mgf

Click mouse within plot area to zoom in by factor of two about that point

Or, Plot from  to  Da

Label all possible matches  Label matches used for scoring

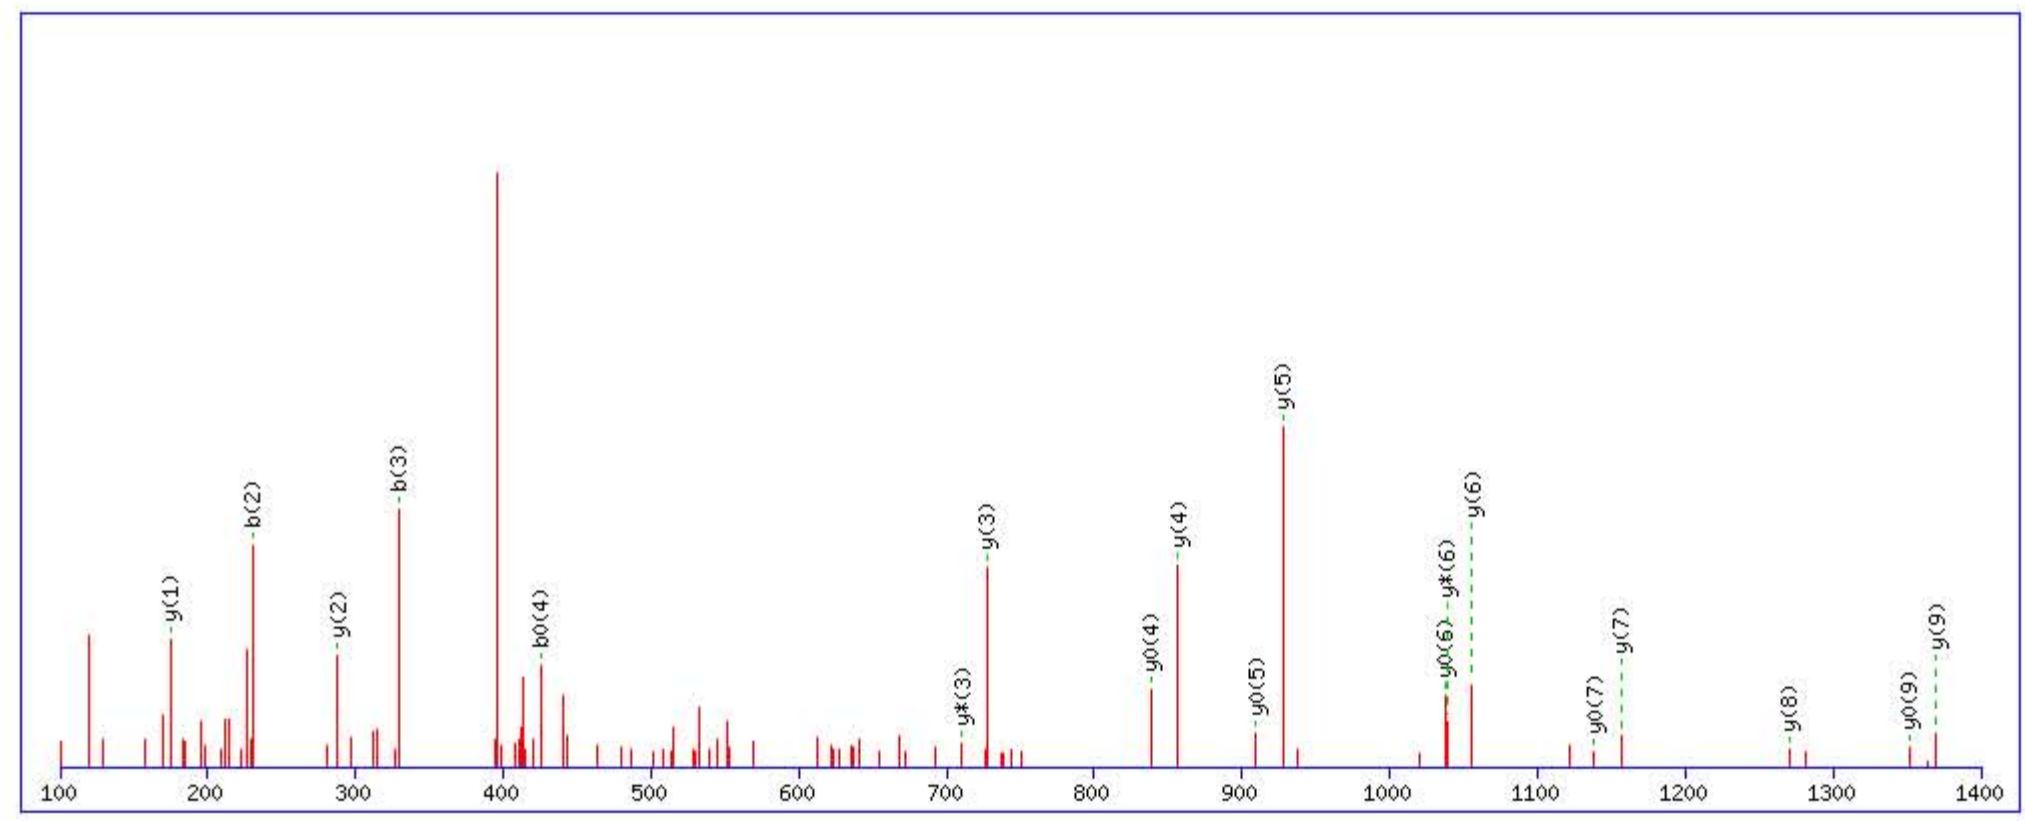

Monoisotopic mass of neutral peptide Mr(calc): 1597.824615

Fixed modifications: Carbamidomethyl (C) (apply to specified residues or termini only)

Variable modifications:

Q9 : Biotin:Thermo-21345 (Q)

Ions Score: 52 Expect: 0.00015

Matches : 19/112 fragment ions using 37 most intense peaks [\(help\)](#)

| #  | b                 | b <sup>++</sup> | b <sup>*</sup> | b <sup>*++</sup> | b <sup>0</sup>    | b <sup>0++</sup> | Seq. | y                  | y <sup>++</sup> | y <sup>*</sup>     | y <sup>*++</sup> | y <sup>0</sup>     | y <sup>0++</sup> | #  |
|----|-------------------|-----------------|----------------|------------------|-------------------|------------------|------|--------------------|-----------------|--------------------|------------------|--------------------|------------------|----|
| 1  | 102.054955        | 51.531116       |                |                  | 84.044390         | 42.525833        | T    |                    |                 |                    |                  |                    |                  | 11 |
| 2  | <b>230.113533</b> | 115.560405      | 213.086984     | 107.047130       | 212.102968        | 106.555122       | Q    | 1497.784225        | 749.395751      | 1480.757676        | 740.882476       | 1479.773660        | 740.390468       | 10 |
| 3  | <b>329.181947</b> | 165.094612      | 312.155398     | 156.581337       | 311.171382        | 156.089329       | V    | <b>1369.725647</b> | 685.366462      | 1352.699098        | 676.853187       | <b>1351.715082</b> | 676.361179       | 9  |
| 4  | 443.224874        | 222.116075      | 426.198325     | 213.602801       | <b>425.214309</b> | 213.110793       | N    | <b>1270.657233</b> | 635.832255      | 1253.630684        | 627.318980       | 1252.646668        | 626.826972       | 8  |
| 5  | 544.272553        | 272.639915      | 527.246004     | 264.126640       | 526.261988        | 263.634632       | T    | <b>1156.614306</b> | 578.810791      | 1139.587757        | 570.297517       | <b>1138.603741</b> | 569.805509       | 7  |
| 6  | 672.331131        | 336.669204      | 655.304582     | 328.155929       | 654.320566        | 327.663921       | Q    | <b>1055.566627</b> | 528.286951      | <b>1038.540078</b> | 519.773677       | <b>1037.556062</b> | 519.281669       | 6  |
| 7  | 743.368245        | 372.187761      | 726.341696     | 363.674486       | 725.357680        | 363.182478       | A    | <b>927.508049</b>  | 464.257663      | 910.481500         | 455.744388       | <b>909.497484</b>  | 455.252380       | 5  |
| 8  | 872.410838        | 436.709057      | 855.384289     | 428.195783       | 854.400273        | 427.703775       | E    | <b>856.470935</b>  | 428.739106      | 839.444386         | 420.225831       | <b>838.460370</b>  | 419.733823       | 4  |
| 9  | 1311.636164       | 656.321720      | 1294.609615    | 647.808446       | 1293.625599       | 647.316438       | Q    | <b>727.428342</b>  | 364.217809      | <b>710.401793</b>  | 355.704535       |                    |                  | 3  |
| 10 | 1424.720228       | 712.863752      | 1407.693679    | 704.350478       | 1406.709663       | 703.858470       | L    | <b>288.203016</b>  | 144.605146      | 271.176467         | 136.091871       |                    |                  | 2  |
| 11 |                   |                 |                |                  |                   |                  | R    | <b>175.118952</b>  | 88.063114       | 158.092403         | 79.549839        |                    |                  | 1  |

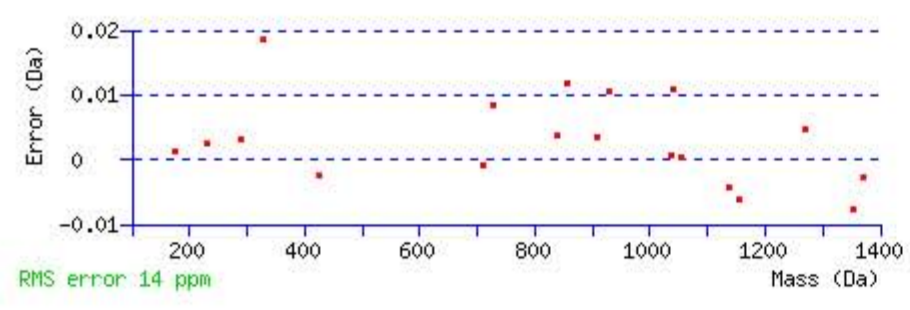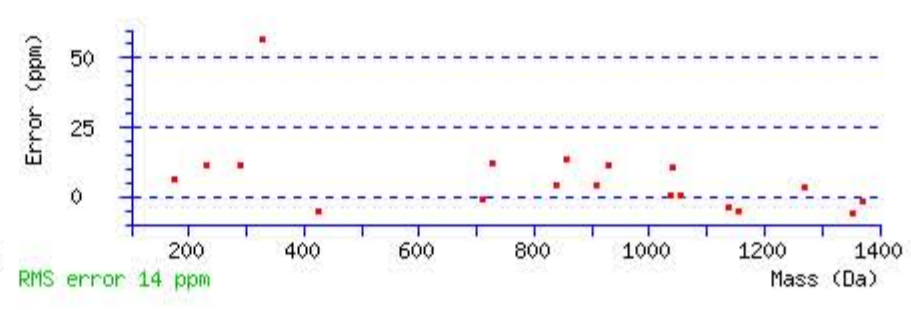

NCBI BLAST search of **TQVNTQAEQLR**

(Parameters: blastp, nr protein database, expect=20000, no filter, PAM30)

Other BLAST [web gateways](#)

### All matches to this query

| Score | Mr(calc):   | Delta     | Sequence                       |
|-------|-------------|-----------|--------------------------------|
| 51.9  | 1597.824615 | 0.000867  | <a href="#">TQVNTQAEQLR</a>    |
| 16.6  | 1597.824615 | 0.000867  | <a href="#">TQVNTQAEQLR</a>    |
| 14.9  | 1597.835846 | -0.010364 | <a href="#">TKAAATAGGQGAAR</a> |
| 2.1   | 1597.803513 | 0.021969  | <a href="#">TQVVHESFQGR</a>    |



# MASCOT Search Results

## Peptide View

MS/MS Fragmentation of **SLAPYAQDTQEK**

Found in **APOA4\_HUMAN**, Apolipoprotein A-IV OS=Homo sapiens GN=APOA4 PE=1 SV=3

Match to Query 36260: 1660.803108 from(831.408830,2+) rtinseconds(1724) index(3664)

Title: Locus:1.1.1.3170.13 File:"2013-07-02 CLN FXIII 30 min 3rd F 1.wiff"

Data file C:\Program Files (x86)\Matrix Science\Mascot Daemon\mgf\3 FXIII 30 min 3rd\mascot\_daemon\_merge.mgf

Click mouse within plot area to zoom in by factor of two about that point

Or, Plot from  to  Da

Label all possible matches  Label matches used for scoring

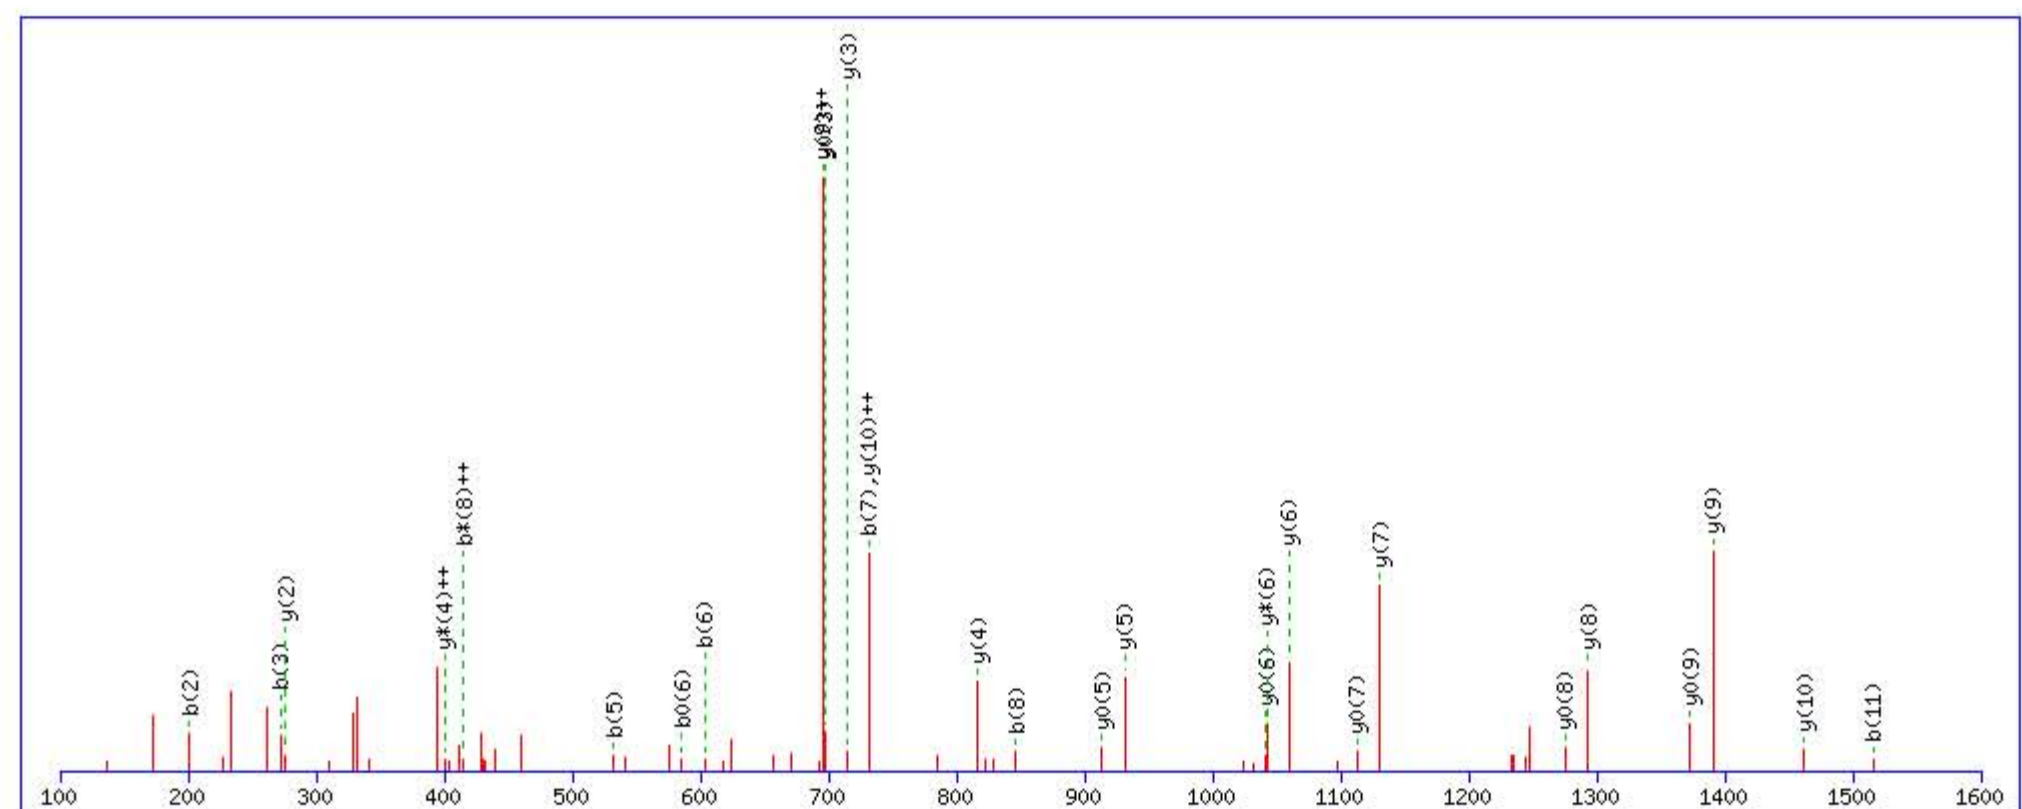

Monoisotopic mass of neutral peptide  $M_r(\text{calc})$ : 1660.813034

Fixed modifications: Carbamidomethyl (C) (apply to specified residues or termini only)

Variable modifications:

Q10 : Biotin:Thermo-21345 (Q)

Ions Score: 46 Expect: 0.00033

Matches : 28/118 fragment ions using 59 most intense peaks [\(help\)](#)

| #  | b                  | b <sup>++</sup> | b <sup>*</sup> | b <sup>*++</sup>  | b <sup>0</sup>    | b <sup>0++</sup> | Seq. | y                  | y <sup>++</sup>   | y <sup>*</sup>     | y <sup>*++</sup>  | y <sup>0</sup>     | y <sup>0++</sup> | #  |
|----|--------------------|-----------------|----------------|-------------------|-------------------|------------------|------|--------------------|-------------------|--------------------|-------------------|--------------------|------------------|----|
| 1  | 88.039304          | 44.523290       |                |                   | 70.028739         | 35.518008        | S    |                    |                   |                    |                   |                    |                  | 12 |
| 2  | <b>201.123368</b>  | 101.065322      |                |                   | 183.112803        | 92.060039        | L    | 1574.788308        | 787.897792        | 1557.761759        | 779.384518        | 1556.777743        | 778.892510       | 11 |
| 3  | <b>272.160482</b>  | 136.583879      |                |                   | 254.149917        | 127.578596       | A    | <b>1461.704244</b> | <b>731.355760</b> | 1444.677695        | 722.842486        | 1443.693679        | 722.350478       | 10 |
| 4  | 369.213246         | 185.110261      |                |                   | 351.202681        | 176.104978       | P    | <b>1390.667130</b> | <b>695.837203</b> | 1373.640581        | 687.323929        | <b>1372.656565</b> | 686.831921       | 9  |
| 5  | <b>532.276575</b>  | 266.641926      |                |                   | 514.266010        | 257.636643       | Y    | <b>1293.614366</b> | 647.310821        | 1276.587817        | 638.797547        | <b>1275.603801</b> | 638.305539       | 8  |
| 6  | <b>603.313689</b>  | 302.160483      |                |                   | <b>585.303124</b> | 293.155200       | A    | <b>1130.551037</b> | 565.779157        | 1113.524488        | 557.265882        | <b>1112.540472</b> | 556.773874       | 7  |
| 7  | <b>731.372267</b>  | 366.189772      | 714.345718     | 357.676497        | 713.361702        | 357.184489       | Q    | <b>1059.513923</b> | 530.260600        | <b>1042.487374</b> | 521.747325        | <b>1041.503358</b> | 521.255317       | 6  |
| 8  | <b>846.399210</b>  | 423.703243      | 829.372661     | <b>415.189969</b> | 828.388645        | 414.697961       | D    | <b>931.455345</b>  | 466.231311        | 914.428796         | 457.718036        | <b>913.444780</b>  | 457.226028       | 5  |
| 9  | 947.446889         | 474.227083      | 930.420340     | 465.713808        | 929.436324        | 465.221800       | T    | <b>816.428402</b>  | 408.717839        | 799.401853         | <b>400.204565</b> | 798.417837         | 399.712557       | 4  |
| 10 | 1386.672215        | 693.839746      | 1369.645666    | 685.326471        | 1368.661650       | 684.834463       | Q    | <b>715.380723</b>  | 358.194000        | 698.354174         | 349.680725        | <b>697.370158</b>  | 349.188717       | 3  |
| 11 | <b>1515.714808</b> | 758.361042      | 1498.688259    | 749.847768        | 1497.704243       | 749.355760       | E    | <b>276.155397</b>  | 138.581337        | 259.128848         | 130.068062        | 258.144832         | 129.576054       | 2  |
| 12 |                    |                 |                |                   |                   |                  | K    | 147.112804         | 74.060040         | 130.086255         | 65.546765         |                    |                  | 1  |

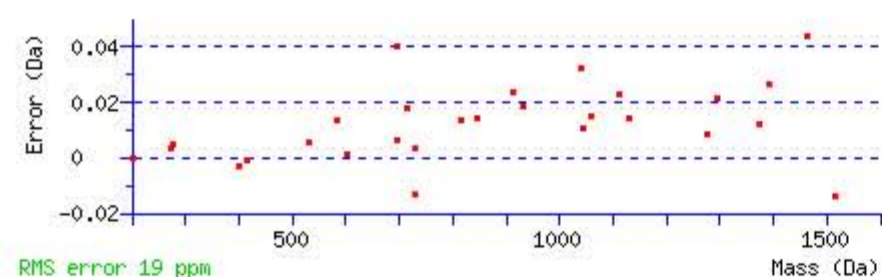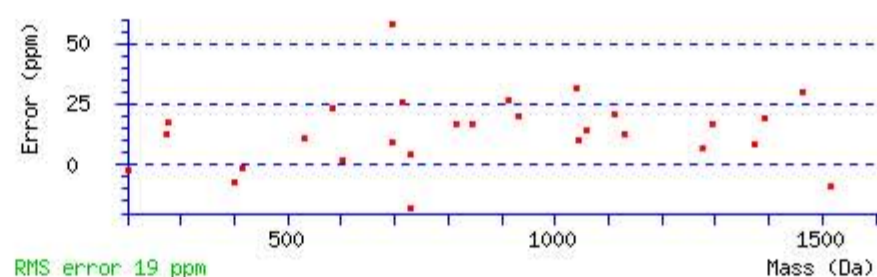

NCBI BLAST search of **SLAPYAQDTQEK**

(Parameters: blastp, nr protein database, expect=20000, no filter, PAM30)

Other BLAST [web gateways](#)

All matches to this query

| Score | $M_r(\text{calc})$ : | Delta     | Sequence                          |
|-------|----------------------|-----------|-----------------------------------|
| 46.0  | 1660.813034          | -0.009926 | <a href="#">SLAPYAQDTQEK</a>      |
| 23.5  | 1660.813034          | -0.009926 | <a href="#">SLAPYAQDTQEK</a>      |
| 8.3   | 1660.820908          | -0.017800 | <a href="#">SLARAGFYITGVNDK</a>   |
| 5.6   | 1660.826782          | -0.023674 | <a href="#">EAATQAQQTLGSTITDK</a> |
| 1.5   | 1660.820236          | -0.017128 | <a href="#">MALSGEGQEKGKASPR</a>  |
| 0.5   | 1660.783844          | 0.019264  | <a href="#">RDAMPDANLNSINK</a>    |
| 0.2   | 1660.780518          | 0.022590  | <a href="#">HSSTPDHTSTLEPPR</a>   |



# MASCOT Search Results

## Peptide View

MS/MS Fragmentation of **LGEVNTYAGDLQK**

Found in **APOA4\_HUMAN**, Apolipoprotein A-IV OS=Homo sapiens GN=APOA4 PE=1 SV=3

Match to Query 37388: 1717.854808 from(859.934680,2+) rtinseconds(2004) index(63944)

Title: Locus:1.1.1.3177.13 File:"2013-07-02 CLN FXIII 30 min 3rd FT.wiff"

Data file C:\Program Files (x86)\Matrix Science\Mascot Daemon\mgf\3 FXIII 30 min 3rd\mascot\_daemon\_merge.mgf

Click mouse within plot area to zoom in by factor of two about that point

Or, Plot from  to  Da

Label all possible matches  Label matches used for scoring

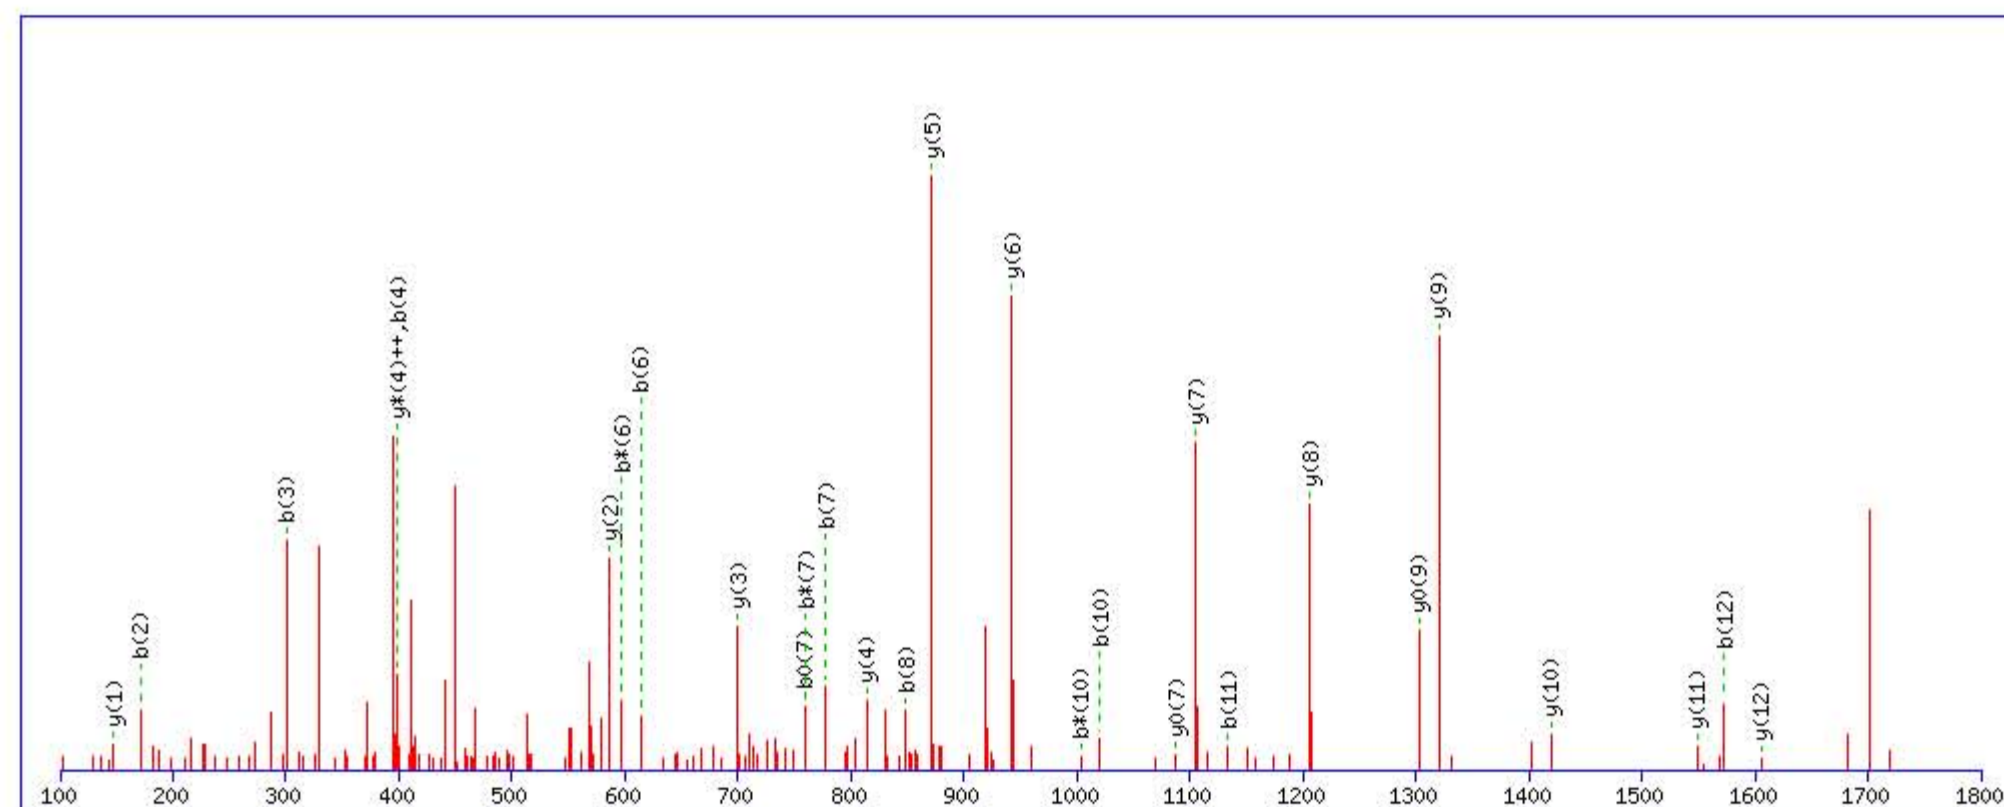

Monoisotopic mass of neutral peptide Mr(calc): 1717.870895

Fixed modifications: Carbamidomethyl (C) (apply to specified residues or termini only)

Variable modifications:

Q12 : Biotin:Thermo-21345 (Q)

Ions Score: 89 Expect: 2.5e-008

Matches : 28/126 fragment ions using 46 most intense peaks [\(help\)](#)

| #  | b                  | b <sup>++</sup> | b <sup>+</sup>     | b <sup>+++</sup> | b <sup>0</sup>    | b <sup>0++</sup> | Seq. | y                  | y <sup>++</sup> | y <sup>+</sup> | y <sup>+++</sup>  | y <sup>0</sup>     | y <sup>0++</sup> | #  |
|----|--------------------|-----------------|--------------------|------------------|-------------------|------------------|------|--------------------|-----------------|----------------|-------------------|--------------------|------------------|----|
| 1  | 114.091340         | 57.549308       |                    |                  |                   |                  | L    |                    |                 |                |                   |                    |                  | 13 |
| 2  | <b>171.112804</b>  | 86.060040       |                    |                  |                   |                  | G    | <b>1605.794121</b> | 803.400699      | 1588.767572    | 794.887424        | 1587.783556        | 794.395416       | 12 |
| 3  | <b>300.155397</b>  | 150.581336      |                    |                  | 282.144832        | 141.576054       | E    | <b>1548.772657</b> | 774.889967      | 1531.746108    | 766.376692        | 1530.762092        | 765.884684       | 11 |
| 4  | <b>399.223811</b>  | 200.115544      |                    |                  | 381.213246        | 191.110261       | V    | <b>1419.730064</b> | 710.368670      | 1402.703515    | 701.855396        | 1401.719499        | 701.363388       | 10 |
| 5  | 513.266738         | 257.137007      | 496.240189         | 248.623733       | 495.256173        | 248.131725       | N    | <b>1320.661650</b> | 660.834463      | 1303.635101    | 652.321189        | <b>1302.651085</b> | 651.829181       | 9  |
| 6  | <b>614.314417</b>  | 307.660847      | <b>597.287868</b>  | 299.147572       | 596.303852        | 298.655564       | T    | <b>1206.618723</b> | 603.813000      | 1189.592174    | 595.299725        | 1188.608158        | 594.807717       | 8  |
| 7  | <b>777.377746</b>  | 389.192511      | <b>760.351197</b>  | 380.679237       | <b>759.367181</b> | 380.187229       | Y    | <b>1105.571044</b> | 553.289160      | 1088.544495    | 544.775886        | <b>1087.560479</b> | 544.283878       | 7  |
| 8  | <b>848.414860</b>  | 424.711068      | 831.388311         | 416.197794       | 830.404295        | 415.705786       | A    | <b>942.507715</b>  | 471.757496      | 925.481166     | 463.244221        | 924.497150         | 462.752213       | 6  |
| 9  | 905.436324         | 453.221800      | 888.409775         | 444.708526       | 887.425759        | 444.216518       | G    | <b>871.470601</b>  | 436.238939      | 854.444052     | 427.725664        | 853.460036         | 427.233656       | 5  |
| 10 | <b>1020.463267</b> | 510.735272      | <b>1003.436718</b> | 502.221997       | 1002.452702       | 501.729989       | D    | <b>814.449137</b>  | 407.728207      | 797.422588     | <b>399.214932</b> | 796.438572         | 398.722924       | 4  |
| 11 | <b>1133.547331</b> | 567.277304      | 1116.520782        | 558.764029       | 1115.536766       | 558.272021       | L    | <b>699.422194</b>  | 350.214735      | 682.395645     | 341.701461        |                    |                  | 3  |
| 12 | <b>1572.772657</b> | 786.889967      | 1555.746108        | 778.376692       | 1554.762092       | 777.884684       | Q    | <b>586.338130</b>  | 293.672703      | 569.311581     | 285.159429        |                    |                  | 2  |
| 13 |                    |                 |                    |                  |                   |                  | K    | <b>147.112804</b>  | 74.060040       | 130.086255     | 65.546765         |                    |                  | 1  |

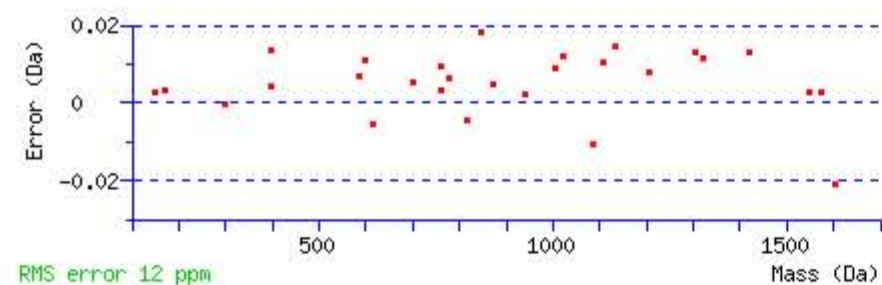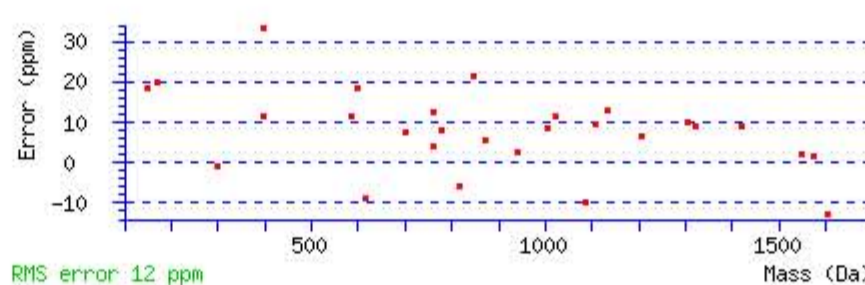

NCBI BLAST search of **LGEVNTYAGDLQK**

(Parameters: blastp, nr protein database, expect=20000, no filter, PAM30)

Other BLAST [web gateways](#)

## All matches to this query

| Score | Mr(calc):   | Delta     | Sequence                            |
|-------|-------------|-----------|-------------------------------------|
| 88.9  | 1717.870895 | -0.016087 | <a href="#">LGEVNTYAGDLQK</a>       |
| 7.3   | 1717.866867 | -0.012059 | <a href="#">IDAVNAETIREVCTK</a>     |
| 5.6   | 1717.878067 | -0.023259 | <a href="#">RATEKEINNMGNTLK</a>     |
| 2.7   | 1717.878754 | -0.023946 | <a href="#">IDAVAWNTTPYQLAR</a>     |
| 2.2   | 1717.834351 | 0.020457  | <a href="#">ESKPAATTRSSGGGGGGGK</a> |
| 0.9   | 1717.837860 | 0.016948  | <a href="#">MENKPTSSELQK</a>        |
| 0.5   | 1717.856476 | -0.001668 | <a href="#">GNMEQAILEMCK</a>        |



# MASCOT Search Results

## Peptide View

MS/MS Fragmentation of **TQVNTQAEQLR**

Found in **APOA4\_HUMAN**, Apolipoprotein A-IV OS=Homo sapiens GN=APOA4 PE=1 SV=3

Match to Query 41178: 1908.987072 from(637.336300,3+) rtinseconds(1938) index(63496)

Title: Locus:1.1.1.3154.19 File:"2013-07-02 CLN FXIII 30 min 3rd FT.wiff"

Data file C:\Program Files (x86)\Matrix Science\Mascot Daemon\mgf\3 FXIII 30 min 3rd\mascot\_daemon\_merge.mgf

Click mouse within plot area to zoom in by factor of two about that point

Or, Plot from  to  Da

Label all possible matches  Label matches used for scoring

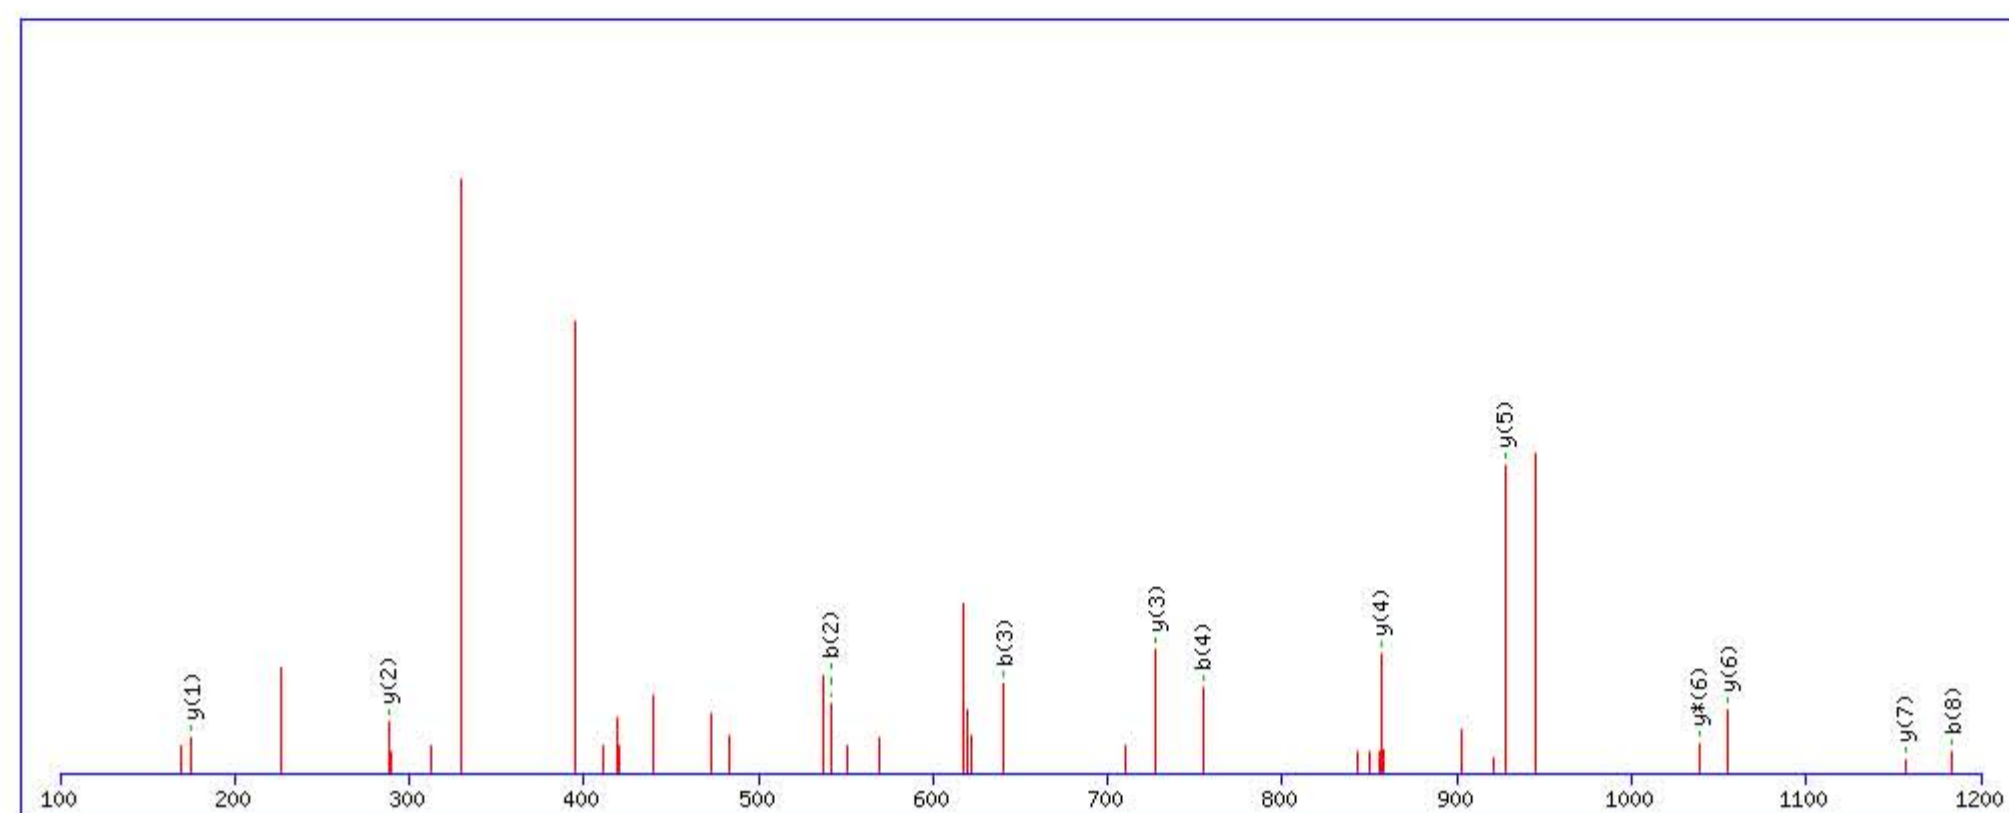

Monoisotopic mass of neutral peptide  $M_r(\text{calc})$ : 1908.991364

Fixed modifications: Carbamidomethyl (C) (apply to specified residues or termini only)

Variable modifications:

Q2 : Biotin:Thermo-21345 (Q)

Q9 : Biotin:Thermo-21345 (Q)

Ions Score: 40 Expect: 0.00024

Matches : 12/112 fragment ions using 20 most intense peaks [\(help\)](#)

| #  | b                  | b <sup>++</sup> | b <sup>*</sup> | b <sup>*++</sup> | b <sup>0</sup> | b <sup>0++</sup> | Seq. | y                  | y <sup>++</sup> | y <sup>*</sup>     | y <sup>*++</sup> | y <sup>0</sup> | y <sup>0++</sup> | #  |
|----|--------------------|-----------------|----------------|------------------|----------------|------------------|------|--------------------|-----------------|--------------------|------------------|----------------|------------------|----|
| 1  | 102.054955         | 51.531116       |                |                  | 84.044390      | 42.525833        | T    |                    |                 |                    |                  |                |                  | 11 |
| 2  | <b>541.280281</b>  | 271.143779      | 524.253732     | 262.630504       | 523.269716     | 262.138496       | Q    | 1808.950973        | 904.979125      | 1791.924424        | 896.465850       | 1790.940408    | 895.973842       | 10 |
| 3  | <b>640.348695</b>  | 320.677986      | 623.322146     | 312.164711       | 622.338130     | 311.672703       | V    | 1369.725647        | 685.366462      | 1352.699098        | 676.853187       | 1351.715082    | 676.361179       | 9  |
| 4  | <b>754.391622</b>  | 377.699449      | 737.365073     | 369.186174       | 736.381057     | 368.694166       | N    | 1270.657233        | 635.832255      | 1253.630684        | 627.318980       | 1252.646668    | 626.826972       | 8  |
| 5  | 855.439301         | 428.223289      | 838.412752     | 419.710014       | 837.428736     | 419.218006       | T    | <b>1156.614306</b> | 578.810791      | 1139.587757        | 570.297517       | 1138.603741    | 569.805509       | 7  |
| 6  | 983.497879         | 492.252578      | 966.471330     | 483.739303       | 965.487314     | 483.247295       | Q    | <b>1055.566627</b> | 528.286952      | <b>1038.540078</b> | 519.773677       | 1037.556062    | 519.281669       | 6  |
| 7  | 1054.534993        | 527.771135      | 1037.508444    | 519.257860       | 1036.524428    | 518.765852       | A    | <b>927.508049</b>  | 464.257663      | 910.481500         | 455.744388       | 909.497484     | 455.252380       | 5  |
| 8  | <b>1183.577586</b> | 592.292431      | 1166.551037    | 583.779157       | 1165.567021    | 583.287149       | E    | <b>856.470935</b>  | 428.739106      | 839.444386         | 420.225831       | 838.460370     | 419.733823       | 4  |
| 9  | 1622.802912        | 811.905094      | 1605.776363    | 803.391820       | 1604.792347    | 802.899812       | Q    | <b>727.428342</b>  | 364.217809      | 710.401793         | 355.704535       |                |                  | 3  |
| 10 | 1735.886976        | 868.447126      | 1718.860427    | 859.933852       | 1717.876411    | 859.441844       | L    | <b>288.203016</b>  | 144.605146      | 271.176467         | 136.091871       |                |                  | 2  |
| 11 |                    |                 |                |                  |                |                  | R    | <b>175.118952</b>  | 88.063114       | 158.092403         | 79.549839        |                |                  | 1  |

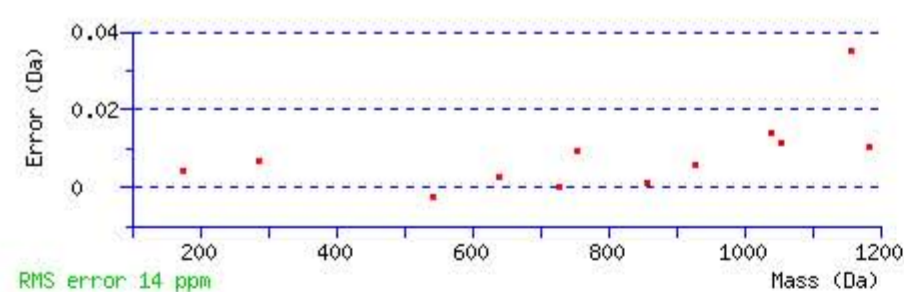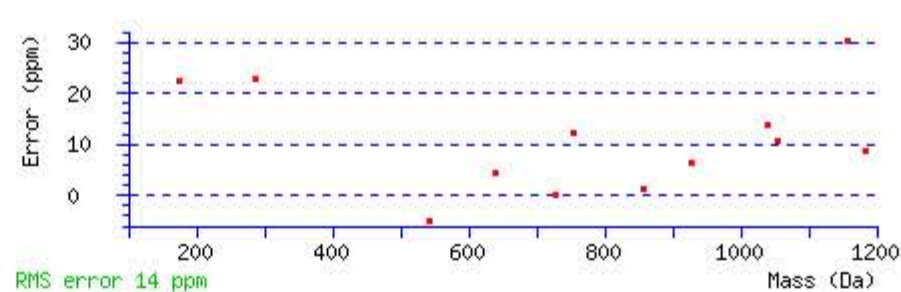

NCBI BLAST search of **TQVNTQAEQLR**

(Parameters: blastp, nr protein database, expect=20000, no filter, PAM30)

Other BLAST [web gateways](#)

All matches to this query

| Score | $M_r(\text{calc})$ | Delta     | Sequence                            |
|-------|--------------------|-----------|-------------------------------------|
| 39.6  | 1908.991364        | -0.004292 | <a href="#">TQVNTQAEQLR</a>         |
| 15.6  | 1908.991364        | -0.004292 | <a href="#">TQVNTQAEQLR</a>         |
| 9.5   | 1908.991364        | -0.004292 | <a href="#">TQVNTQAEQLR</a>         |
| 1.0   | 1909.015610        | -0.028538 | <a href="#">SSIALTAPDAAADPKEKPK</a> |
| 0.9   | 1908.974045        | 0.013027  | <a href="#">SAQWAINRVAMEIQHR</a>    |
| 0.3   | 1908.980591        | 0.006481  | <a href="#">QAHHTDKFSSQELLR</a>     |
| 0.1   | 1909.002579        | -0.015507 | <a href="#">QQLETARNATR</a>         |



# MASCOT Search Results

## Peptide View

MS/MS Fragmentation of **SLAELGGHLDQQVEEFR**  
 Found in **APOA4\_HUMAN**, Apolipoprotein A-IV OS=Homo sapiens GN=APOA4 PE=1 SV=3

Match to Query 47900: 2238.099432 from(747.040420,3+) rtinseconds(2259) index(65315)  
 Title: Locus:1.1.1.3266.14 File:"2013-07-02 CLN FXIII 30 min 3rd FT.wiff"  
 Data file C:\Program Files (x86)\Matrix Science\Mascot Daemon\mgf3 FXIII 30 min 3rd\mascot\_daemon\_merge.mgf

Click mouse within plot area to zoom in by factor of two about that point

Or, Plot from  to  Da

Label all possible matches  Label matches used for scoring

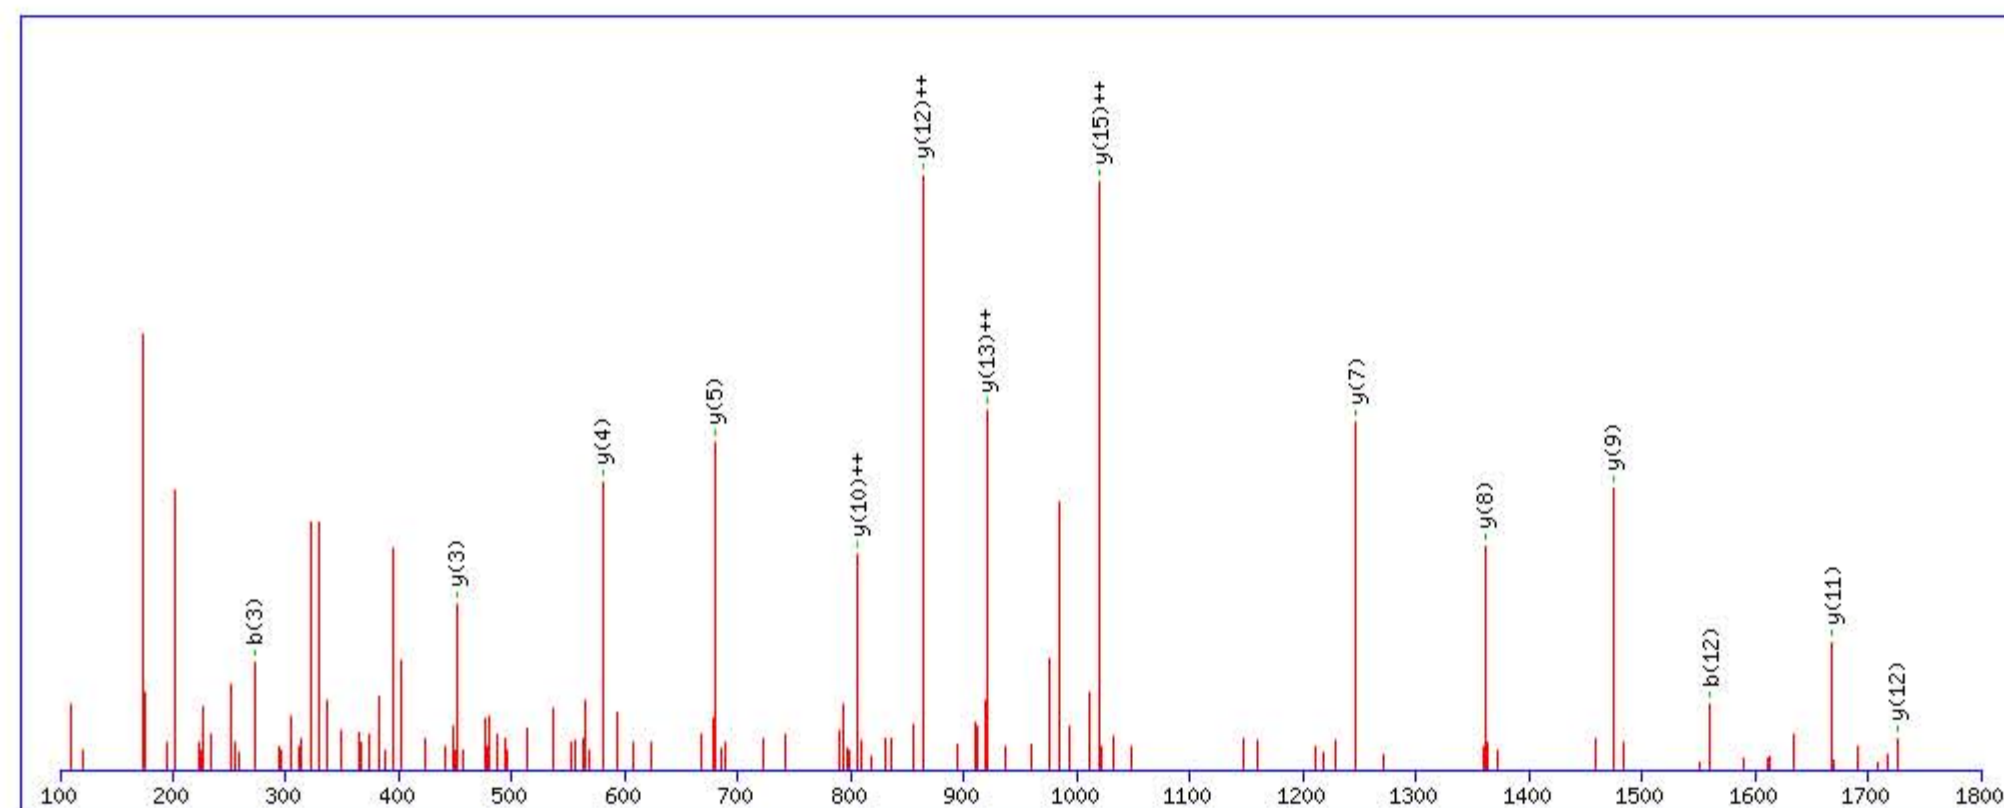

Monoisotopic mass of neutral peptide Mr(calc): 2238.110291  
 Fixed modifications: Carbamidomethyl (C) (apply to specified residues or termini only)  
 Variable modifications:  
 Q12 : Biotin:Thermo-21345 (Q)  
 Ions Score: 63 Expect: 1.4e-005  
 Matches : 14/168 fragment ions using 17 most intense peaks [\(help\)](#)

| #  | b                  | b <sup>++</sup> | b <sup>*</sup> | b <sup>***</sup> | b <sup>0</sup> | b <sup>0++</sup> | Seq. | y                  | y <sup>++</sup>    | y <sup>*</sup> | y <sup>***</sup> | y <sup>0</sup> | y <sup>0++</sup> | #  |
|----|--------------------|-----------------|----------------|------------------|----------------|------------------|------|--------------------|--------------------|----------------|------------------|----------------|------------------|----|
| 1  | 88.039304          | 44.523290       |                |                  | 70.028739      | 35.518008        | S    |                    |                    |                |                  |                |                  | 17 |
| 2  | 201.123368         | 101.065322      |                |                  | 183.112803     | 92.060039        | L    | 2152.085552        | 1076.546414        | 2135.059003    | 1068.033139      | 2134.074987    | 1067.541131      | 16 |
| 3  | <b>272.160482</b>  | 136.583879      |                |                  | 254.149917     | 127.578596       | A    | 2039.001488        | <b>1020.004382</b> | 2021.974939    | 1011.491108      | 2020.990923    | 1010.999100      | 15 |
| 4  | 401.203075         | 201.105175      |                |                  | 383.192510     | 192.099893       | E    | 1967.964374        | 984.485825         | 1950.937825    | 975.972551       | 1949.953809    | 975.480543       | 14 |
| 5  | 514.287139         | 257.647208      |                |                  | 496.276574     | 248.641925       | L    | 1838.921781        | <b>919.964529</b>  | 1821.895232    | 911.451254       | 1820.911216    | 910.959246       | 13 |
| 6  | 571.308603         | 286.157940      |                |                  | 553.298038     | 277.152657       | G    | <b>1725.837717</b> | <b>863.422497</b>  | 1708.811168    | 854.909222       | 1707.827152    | 854.417214       | 12 |
| 7  | 628.330067         | 314.668672      |                |                  | 610.319502     | 305.663389       | G    | <b>1668.816253</b> | 834.911765         | 1651.789704    | 826.398490       | 1650.805688    | 825.906482       | 11 |
| 8  | 765.388979         | 383.198128      |                |                  | 747.378414     | 374.192845       | H    | 1611.794789        | <b>806.401033</b>  | 1594.768240    | 797.887758       | 1593.784224    | 797.395750       | 10 |
| 9  | 878.473043         | 439.740160      |                |                  | 860.462478     | 430.734877       | L    | <b>1474.735877</b> | 737.871577         | 1457.709328    | 729.358302       | 1456.725312    | 728.866294       | 9  |
| 10 | 993.499986         | 497.253631      |                |                  | 975.489421     | 488.248349       | D    | <b>1361.651813</b> | 681.329545         | 1344.625264    | 672.816270       | 1343.641248    | 672.324262       | 8  |
| 11 | 1121.558564        | 561.282920      | 1104.532015    | 552.769646       | 1103.547999    | 552.277638       | Q    | <b>1246.624870</b> | 623.816073         | 1229.598321    | 615.302799       | 1228.614305    | 614.810791       | 7  |
| 12 | <b>1560.783890</b> | 780.895583      | 1543.757341    | 772.382309       | 1542.773325    | 771.890301       | Q    | 1118.566292        | 559.786784         | 1101.539743    | 551.273510       | 1100.555727    | 550.781502       | 6  |
| 13 | 1659.852304        | 830.429790      | 1642.825755    | 821.916516       | 1641.841739    | 821.424508       | V    | <b>679.340966</b>  | 340.174121         | 662.314417     | 331.660846       | 661.330401     | 331.168838       | 5  |
| 14 | 1788.894897        | 894.951087      | 1771.868348    | 886.437812       | 1770.884332    | 885.945804       | E    | <b>580.272552</b>  | 290.639914         | 563.246003     | 282.126639       | 562.261987     | 281.634631       | 4  |
| 15 | 1917.937490        | 959.472383      | 1900.910941    | 950.959109       | 1899.926925    | 950.467101       | E    | <b>451.229959</b>  | 226.118617         | 434.203410     | 217.605343       | 433.219394     | 217.113335       | 3  |
| 16 | 2065.005904        | 1033.006590     | 2047.979355    | 1024.493316      | 2046.995339    | 1024.001307      | F    | 322.187366         | 161.597321         | 305.160817     | 153.084046       |                |                  | 2  |
| 17 |                    |                 |                |                  |                |                  | R    | 175.118952         | 88.063114          | 158.092403     | 79.549839        |                |                  | 1  |

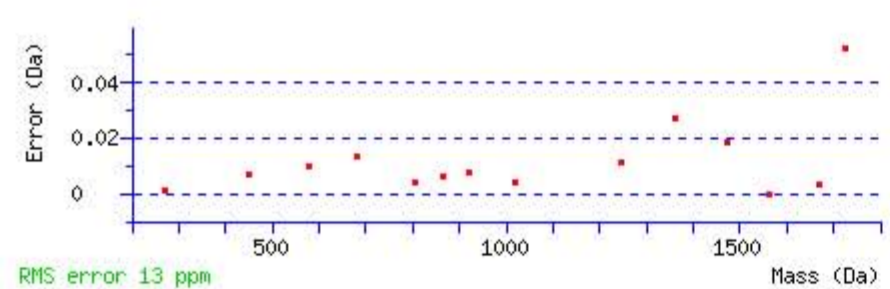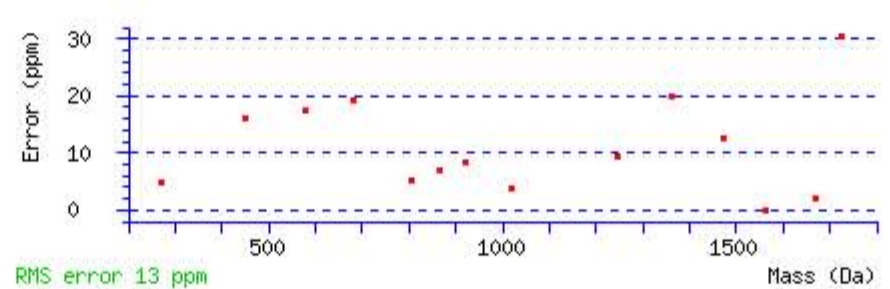

NCBI BLAST search of **SLAELGGHLDQQVEEFR**  
 (Parameters: blastp, nr protein database, expect=20000, no filter, PAM30)  
 Other BLAST [web gateways](#)

### All matches to this query

| Score | Mr(calc):   | Delta     | Sequence                          |
|-------|-------------|-----------|-----------------------------------|
| 62.8  | 2238.110291 | -0.010859 | <a href="#">SLAELGGHLDQQVEEFR</a> |
| 62.8  | 2238.110291 | -0.010859 | <a href="#">SLAELGGHLDQQVEEFR</a> |



**Peptide View**

MS/MS Fragmentation of **SLAELGGHLDQQVEEFR**

Found in **APOA4\_HUMAN**, Apolipoprotein A-IV OS=Homo sapiens GN=APOA4 PE=1 SV=3

Match to Query 47903: 2238.117492 from(747.046440,3+) rtinseconds(2287) index(52690)

Title: Locus:1.1.1.3439.11 File:"2013-07-02 CLN FXIII 30 min 3rd F 4.wiff"

Data file C:\Program Files (x86)\Matrix Science\Mascot Daemon\mgf3 FXIII 30 min 3rd\mascot\_daemon\_merge.mgf

Click mouse within plot area to zoom in by factor of two about that point

Or, Plot from  to  Da

Label all possible matches  Label matches used for scoring

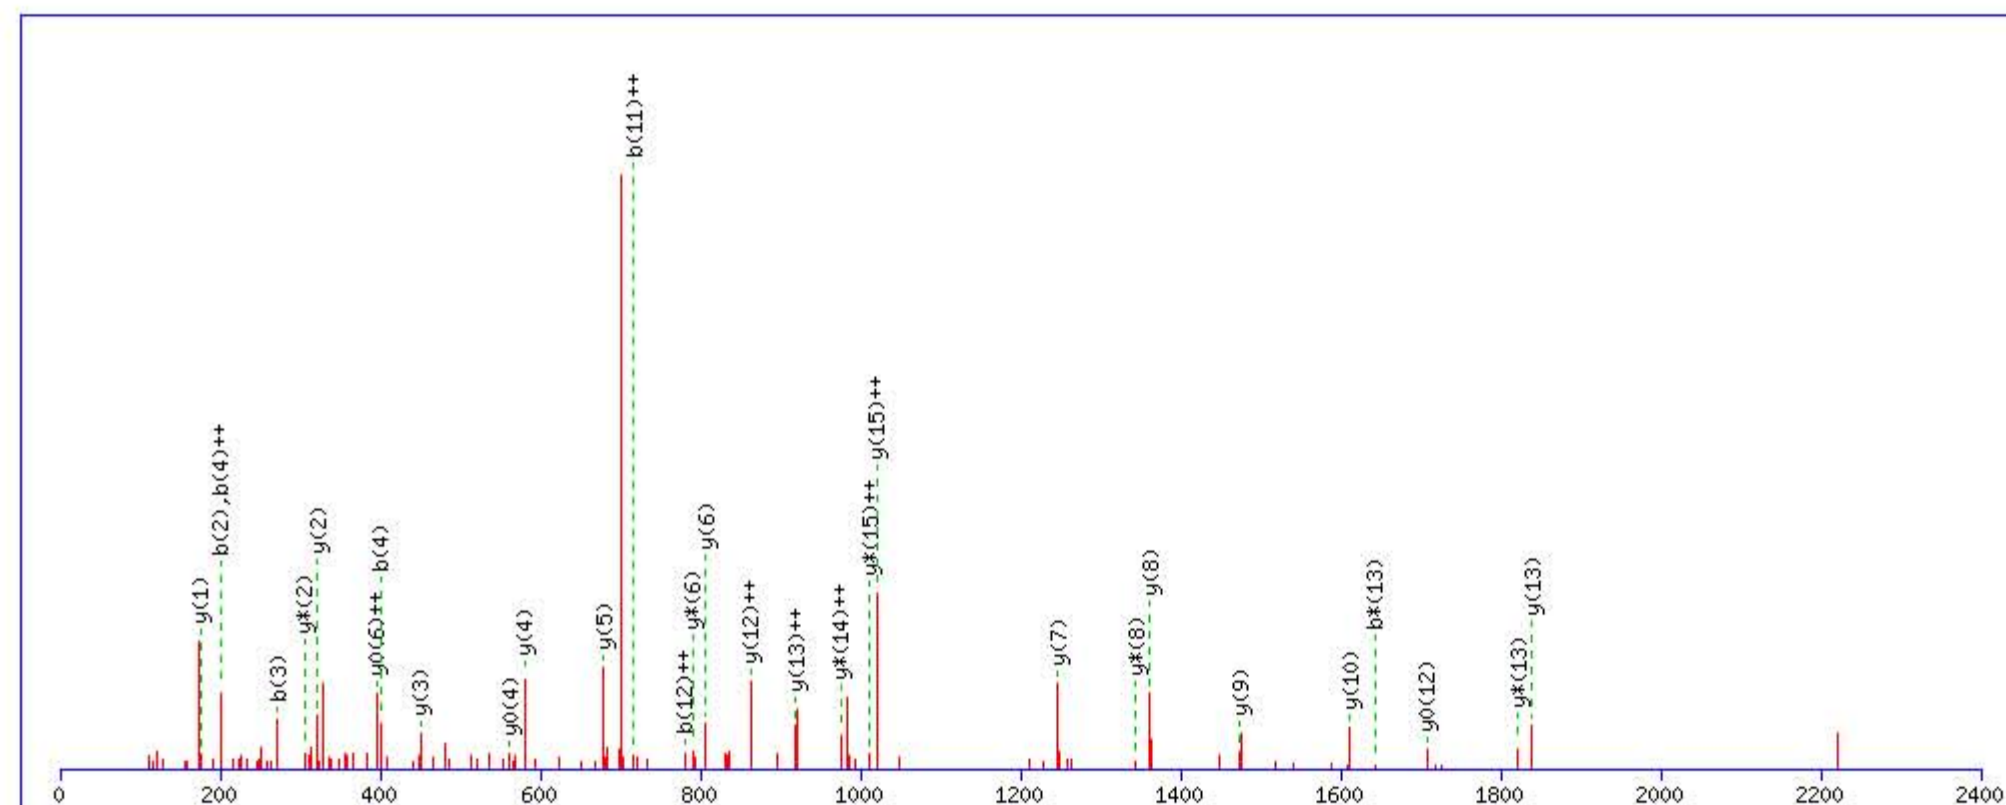

Monoisotopic mass of neutral peptide Mr(calc): 2238.110291

Fixed modifications: Carbamidomethyl (C) (apply to specified residues or termini only)

Variable modifications:

Q11 : Biotin:Thermo-21345 (Q)

Ions Score: 49 Expect: 0.0001

Matches : 30/168 fragment ions using 64 most intense peaks [\(help\)](#)

| #  | b                 | b <sup>++</sup>   | b <sup>*</sup>     | b <sup>*++</sup> | b <sup>0</sup> | b <sup>0++</sup> | Seq. | y                  | y <sup>++</sup>    | y <sup>*</sup>     | y <sup>*++</sup>   | y <sup>0</sup>     | y <sup>0++</sup>  | #  |
|----|-------------------|-------------------|--------------------|------------------|----------------|------------------|------|--------------------|--------------------|--------------------|--------------------|--------------------|-------------------|----|
| 1  | 88.039304         | 44.523290         |                    |                  | 70.028739      | 35.518008        | S    |                    |                    |                    |                    |                    |                   | 17 |
| 2  | <b>201.123368</b> | 101.065322        |                    |                  | 183.112803     | 92.060039        | L    | 2152.085552        | 1076.546414        | 2135.059003        | 1068.033139        | 2134.074987        | 1067.541131       | 16 |
| 3  | <b>272.160482</b> | 136.583879        |                    |                  | 254.149917     | 127.578596       | A    | 2039.001488        | <b>1020.004382</b> | 2021.974939        | <b>1011.491108</b> | 2020.990923        | 1010.999100       | 15 |
| 4  | <b>401.203075</b> | <b>201.105175</b> |                    |                  | 383.192510     | 192.099893       | E    | 1967.964374        | 984.485825         | 1950.937825        | <b>975.972551</b>  | 1949.953809        | 975.480543        | 14 |
| 5  | 514.287139        | 257.647208        |                    |                  | 496.276574     | 248.641925       | L    | <b>1838.921781</b> | <b>919.964529</b>  | <b>1821.895232</b> | 911.451254         | 1820.911216        | 910.959246        | 13 |
| 6  | 571.308603        | 286.157940        |                    |                  | 553.298038     | 277.152657       | G    | 1725.837717        | <b>863.422497</b>  | 1708.811168        | 854.909222         | <b>1707.827152</b> | 854.417214        | 12 |
| 7  | 628.330067        | 314.668672        |                    |                  | 610.319502     | 305.663389       | G    | 1668.816253        | 834.911765         | 1651.789704        | 826.398490         | 1650.805688        | 825.906482        | 11 |
| 8  | 765.388979        | 383.198128        |                    |                  | 747.378414     | 374.192845       | H    | <b>1611.794789</b> | 806.401033         | 1594.768240        | 797.887758         | 1593.784224        | 797.395750        | 10 |
| 9  | 878.473043        | 439.740160        |                    |                  | 860.462478     | 430.734877       | L    | <b>1474.735877</b> | 737.871577         | 1457.709328        | 729.358302         | 1456.725312        | 728.866294        | 9  |
| 10 | 993.499986        | 497.253631        |                    |                  | 975.489421     | 488.248349       | D    | <b>1361.651813</b> | 681.329545         | <b>1344.625264</b> | 672.816270         | 1343.641248        | 672.324262        | 8  |
| 11 | 1432.725312       | <b>716.866294</b> | 1415.698763        | 708.353020       | 1414.714747    | 707.861012       | Q    | <b>1246.624870</b> | 623.816073         | 1229.598321        | 615.302799         | 1228.614305        | 614.810791        | 7  |
| 12 | 1560.783890       | <b>780.895583</b> | 1543.757341        | 772.382309       | 1542.773325    | 771.890301       | Q    | <b>807.399544</b>  | 404.203410         | <b>790.372995</b>  | 395.690136         | 789.388979         | <b>395.198128</b> | 6  |
| 13 | 1659.852304       | 830.429790        | <b>1642.825755</b> | 821.916516       | 1641.841739    | 821.424508       | V    | <b>679.340966</b>  | 340.174121         | 662.314417         | 331.660846         | 661.330401         | 331.168838        | 5  |
| 14 | 1788.894897       | 894.951087        | 1771.868348        | 886.437812       | 1770.884332    | 885.945804       | E    | <b>580.272552</b>  | 290.639914         | 563.246003         | 282.126639         | <b>562.261987</b>  | 281.634631        | 4  |
| 15 | 1917.937490       | 959.472383        | 1900.910941        | 950.959109       | 1899.926925    | 950.467101       | E    | <b>451.229959</b>  | 226.118617         | 434.203410         | 217.605343         | 433.219394         | 217.113335        | 3  |
| 16 | 2065.005904       | 1033.006590       | 2047.979355        | 1024.493316      | 2046.995339    | 1024.001307      | F    | <b>322.187366</b>  | 161.597321         | <b>305.160817</b>  | 153.084046         |                    |                   | 2  |
| 17 |                   |                   |                    |                  |                |                  | R    | <b>175.118952</b>  | 88.063114          | 158.092403         | 79.549839          |                    |                   | 1  |

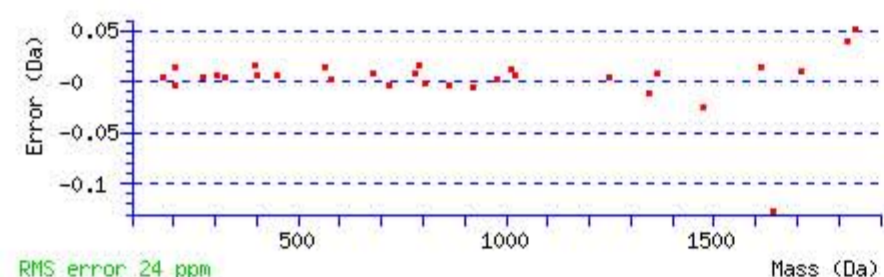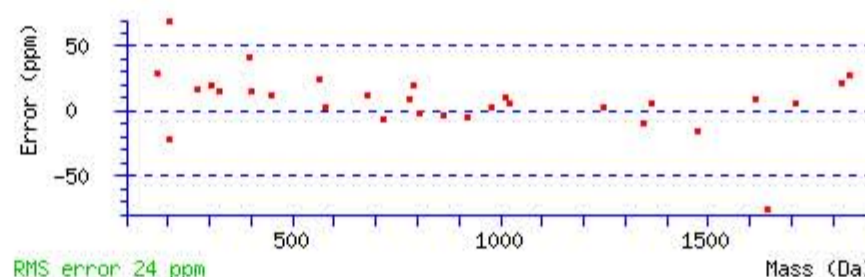

NCBI BLAST search of **SLAELGGHLDQQVEEFR**

(Parameters: blastp, nr protein database, expect=20000, no filter, PAM30)

Other BLAST [web gateways](#)

**All matches to this query**

| Score | Mr(calc):   | Delta     | Sequence                             |
|-------|-------------|-----------|--------------------------------------|
| 49.2  | 2238.110291 | 0.007201  | <a href="#">SLAELGGHLDQQVEEFR</a>    |
| 36.3  | 2238.110291 | 0.007201  | <a href="#">SLAELGGHLDQQVEEFR</a>    |
| 6.5   | 2238.095001 | 0.022491  | <a href="#">HAEILQEVLGVEVMEENKDR</a> |
| 3.9   | 2238.146637 | -0.029145 | <a href="#">AYGCGRTELAIKLLEYEPR</a>  |



# Mascot Search Results

## Peptide View

MS/MS Fragmentation of **STAAMSTYTGIFTDQVLSVLK**

Found in **APOC2\_HUMAN**, Apolipoprotein C-II OS=Homo sapiens GN=APOC2 PE=1 SV=1

Match to Query 53008: 2543.296182 from(848.772670,3+) rtinseconds(3237) index(57345)

Title: Locus:1.1.1.3764.3 File:"2013-07-02 CLN FXIII 30 min 3rd F 4.wiff"

Data file C:\Program Files (x86)\Matrix Science\Mascot Daemon\mgf3 FXIII 30 min 3rd\mascot\_daemon\_merge.mgf

Click mouse within plot area to zoom in by factor of two about that point

Or, Plot from  to  Da

Label all possible matches  Label matches used for scoring

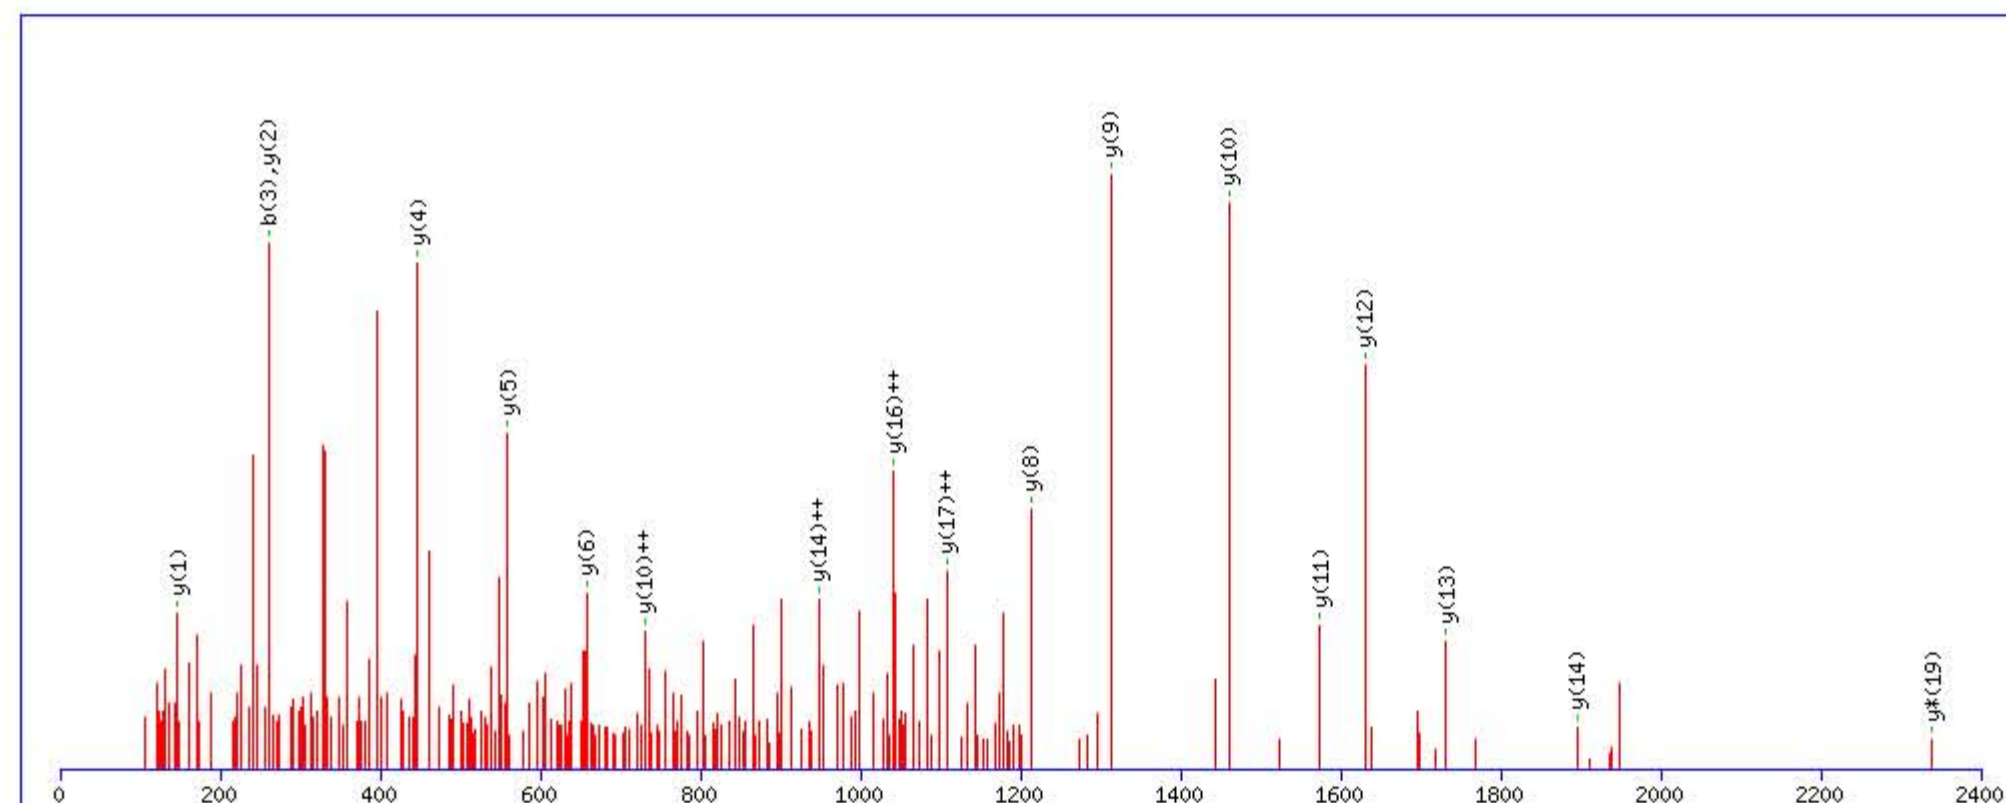

Monoisotopic mass of neutral peptide Mr(calc): 2543.301544

Fixed modifications: Carbamidomethyl (C) (apply to specified residues or termini only)

Variable modifications:

Q15 : Biotin:Thermo-21345 (Q)

Ions Score: 105 Expect: 1.1e-009

Matches : 18/206 fragment ions using 20 most intense peaks [\(help\)](#)

| #  | b                 | b <sup>++</sup> | b <sup>*</sup> | b <sup>*++</sup> | b <sup>0</sup> | b <sup>0++</sup> | Seq. | y                  | y <sup>++</sup>    | y <sup>*</sup>     | y <sup>*++</sup> | y <sup>0</sup> | y <sup>0++</sup> | #  |
|----|-------------------|-----------------|----------------|------------------|----------------|------------------|------|--------------------|--------------------|--------------------|------------------|----------------|------------------|----|
| 1  | 88.039304         | 44.523290       |                |                  | 70.028739      | 35.518008        | S    |                    |                    |                    |                  |                |                  | 21 |
| 2  | 189.086983        | 95.047129       |                |                  | 171.076418     | 86.041847        | T    | 2457.276785        | 1229.142030        | 2440.250236        | 1220.628756      | 2439.266220    | 1220.136748      | 20 |
| 3  | <b>260.124097</b> | 130.565686      |                |                  | 242.113532     | 121.560404       | A    | 2356.229106        | 1178.618191        | <b>2339.202557</b> | 1170.104916      | 2338.218541    | 1169.612908      | 19 |
| 4  | 331.161211        | 166.084243      |                |                  | 313.150646     | 157.078961       | A    | 2285.191992        | 1143.099634        | 2268.165443        | 1134.586359      | 2267.181427    | 1134.094351      | 18 |
| 5  | 462.201696        | 231.604486      |                |                  | 444.191131     | 222.599203       | M    | 2214.154878        | <b>1107.581077</b> | 2197.128329        | 1099.067802      | 2196.144313    | 1098.575794      | 17 |
| 6  | 549.233724        | 275.120500      |                |                  | 531.223159     | 266.115217       | S    | 2083.114393        | <b>1042.060834</b> | 2066.087844        | 1033.547560      | 2065.103828    | 1033.055552      | 16 |
| 7  | 650.281403        | 325.644340      |                |                  | 632.270838     | 316.639057       | T    | 1996.082365        | 998.544821         | 1979.055816        | 990.031546       | 1978.071800    | 989.539538       | 15 |
| 8  | 813.344732        | 407.176004      |                |                  | 795.334167     | 398.170722       | Y    | <b>1895.034686</b> | <b>948.020981</b>  | 1878.008137        | 939.507707       | 1877.024121    | 939.015699       | 14 |
| 9  | 914.392411        | 457.699844      |                |                  | 896.381846     | 448.694561       | T    | <b>1731.971357</b> | 866.489317         | 1714.944808        | 857.976042       | 1713.960792    | 857.484034       | 13 |
| 10 | 971.413875        | 486.210576      |                |                  | 953.403310     | 477.205293       | G    | <b>1630.923678</b> | 815.965477         | 1613.897129        | 807.452203       | 1612.913113    | 806.960195       | 12 |
| 11 | 1084.497939       | 542.752608      |                |                  | 1066.487374    | 533.747325       | I    | <b>1573.902214</b> | 787.454745         | 1556.875665        | 778.941471       | 1555.891649    | 778.449463       | 11 |
| 12 | 1231.566353       | 616.286815      |                |                  | 1213.555788    | 607.281532       | F    | <b>1460.818150</b> | <b>730.912713</b>  | 1443.791601        | 722.399439       | 1442.807585    | 721.907431       | 10 |
| 13 | 1332.614032       | 666.810654      |                |                  | 1314.603467    | 657.805372       | T    | <b>1313.749736</b> | 657.378506         | 1296.723187        | 648.865232       | 1295.739171    | 648.373224       | 9  |
| 14 | 1447.640975       | 724.324126      |                |                  | 1429.630410    | 715.318843       | D    | <b>1212.702057</b> | 606.854667         | 1195.675508        | 598.341392       | 1194.691492    | 597.849384       | 8  |
| 15 | 1886.866301       | 943.936789      | 1869.839752    | 935.423514       | 1868.855736    | 934.931506       | Q    | 1097.675114        | 549.341195         | 1080.648565        | 540.827921       | 1079.664549    | 540.335913       | 7  |
| 16 | 1985.934715       | 993.470996      | 1968.908166    | 984.957721       | 1967.924150    | 984.465713       | V    | <b>658.449788</b>  | 329.728532         | 641.423239         | 321.215258       | 640.439223     | 320.723250       | 6  |
| 17 | 2099.018779       | 1050.013027     | 2081.992230    | 1041.499753      | 2081.008214    | 1041.007745      | L    | <b>559.381374</b>  | 280.194325         | 542.354825         | 271.681051       | 541.370809     | 271.189043       | 5  |
| 18 | 2186.050807       | 1093.529041     | 2169.024258    | 1085.015767      | 2168.040242    | 1084.523759      | S    | <b>446.297310</b>  | 223.652293         | 429.270761         | 215.139019       | 428.286745     | 214.647011       | 4  |
| 19 | 2285.119221       | 1143.063248     | 2268.092672    | 1134.549974      | 2267.108656    | 1134.057966      | V    | 359.265282         | 180.136279         | 342.238733         | 171.623004       |                |                  | 3  |
| 20 | 2398.203285       | 1199.605280     | 2381.176736    | 1191.092006      | 2380.192720    | 1190.599998      | L    | <b>260.196868</b>  | 130.602072         | 243.170319         | 122.088798       |                |                  | 2  |
| 21 |                   |                 |                |                  |                |                  | K    | <b>147.112804</b>  | 74.060040          | 130.086255         | 65.546765        |                |                  | 1  |

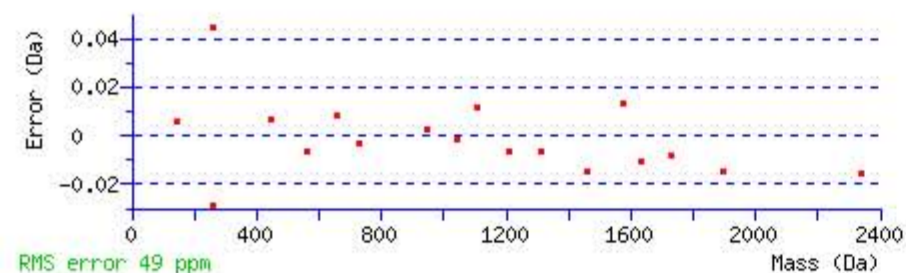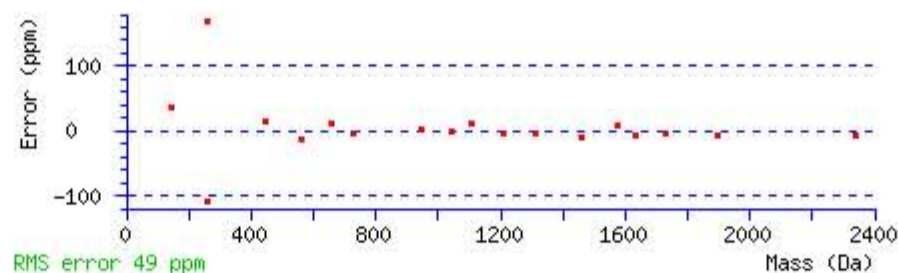

NCBI BLAST search of **STAAMSTYTGIFTDQVLSVLK**

(Parameters: blastp, nr protein database, expect=20000, no filter, PAM30)

Other BLAST [web gateways](#)

All matches to this query

| Score | Mr(calc):   | Delta     | Sequence                              |
|-------|-------------|-----------|---------------------------------------|
| 104.5 | 2543.301544 | -0.005362 | <a href="#">STAAMSTYTGIFTDQVLSVLK</a> |

Mascot: <http://www.matrixscience.com/>



# MASCOT Search Results

## Peptide View

MS/MS Fragmentation of **DALSSVQESQVAQQAR**

Found in **APOC3\_HUMAN**, Apolipoprotein C-III OS=Homo sapiens GN=APOC3 PE=1 SV=1

Match to Query 44209: 2027.002992 from(676.674940,3+) rtinseconds(1955) index(50812)

Title: Locus:1.1.1.3324.13 File:"2013-07-02 CLN FXIII 30 min 3rd F 4.wiff"

Data file C:\Program Files (x86)\Matrix Science\Mascot Daemon\mgf\3 FXIII 30 min 3rd\mascot\_daemon\_merge.mgf

Click mouse within plot area to zoom in by factor of two about that point

Or, Plot from  to  Da

Label all possible matches  Label matches used for scoring

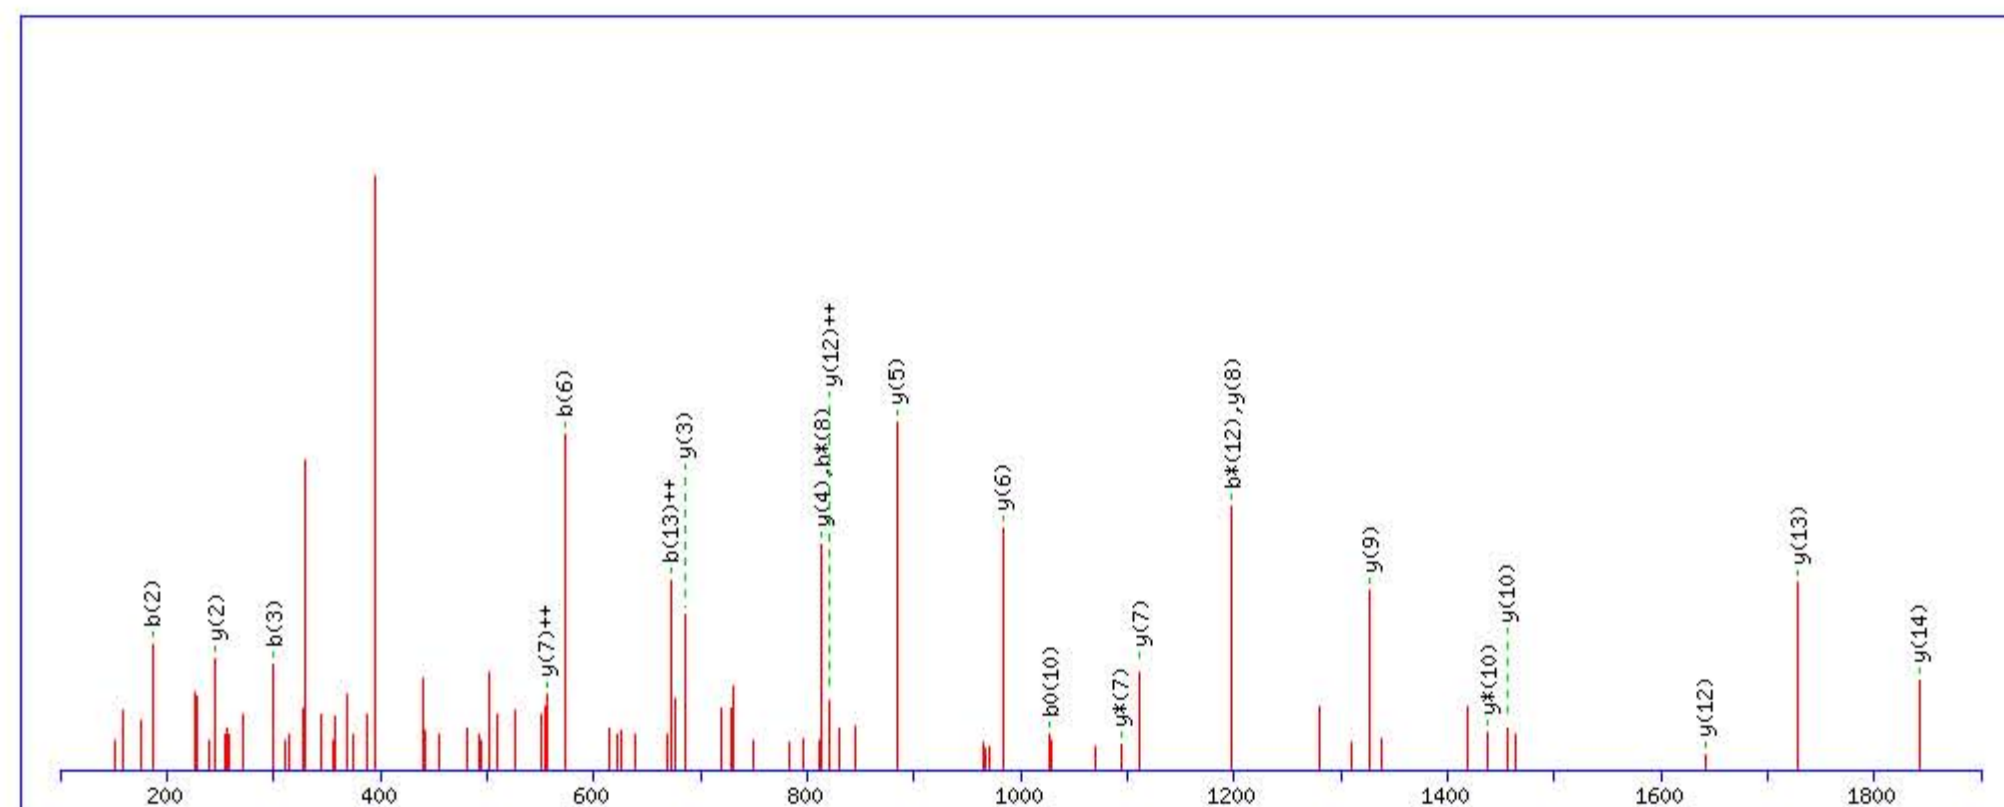

Monoisotopic mass of neutral peptide Mr(calc): 2027.010574

Fixed modifications: Carbamidomethyl (C) (apply to specified residues or termini only)

Variable modifications:

Q14 : Biotin:Thermo-21345 (Q)

Ions Score: 94 Expect: 9.4e-009

Matches : 23/154 fragment ions using 29 most intense peaks [\(help\)](#)

| #  | b                 | b <sup>++</sup>   | b <sup>+</sup>     | b <sup>+++</sup> | b <sup>0</sup>     | b <sup>0++</sup> | Seq. | y                  | y <sup>++</sup>   | y <sup>+</sup>     | y <sup>+++</sup> | y <sup>0</sup> | y <sup>0++</sup> | #  |
|----|-------------------|-------------------|--------------------|------------------|--------------------|------------------|------|--------------------|-------------------|--------------------|------------------|----------------|------------------|----|
| 1  | 116.034219        | 58.520748         |                    |                  | 98.023654          | 49.515465        | D    |                    |                   |                    |                  |                |                  | 16 |
| 2  | <b>187.071333</b> | 94.039304         |                    |                  | 169.060768         | 85.034022        | A    | 1912.990923        | 956.999100        | 1895.964374        | 948.485825       | 1894.980358    | 947.993817       | 15 |
| 3  | <b>300.155397</b> | 150.581336        |                    |                  | 282.144832         | 141.576054       | L    | <b>1841.953809</b> | 921.480543        | 1824.927260        | 912.967268       | 1823.943244    | 912.475260       | 14 |
| 4  | 387.187425        | 194.097351        |                    |                  | 369.176860         | 185.092068       | S    | <b>1728.869745</b> | 864.938511        | 1711.843196        | 856.425236       | 1710.859180    | 855.933228       | 13 |
| 5  | 474.219453        | 237.613364        |                    |                  | 456.208888         | 228.608082       | S    | <b>1641.837717</b> | <b>821.422497</b> | 1624.811168        | 812.909222       | 1623.827152    | 812.417214       | 12 |
| 6  | <b>573.287867</b> | 287.147572        |                    |                  | 555.277302         | 278.142289       | V    | 1554.805689        | 777.906483        | 1537.779140        | 769.393208       | 1536.795124    | 768.901200       | 11 |
| 7  | 701.346445        | 351.176861        | 684.319896         | 342.663586       | 683.335880         | 342.171578       | Q    | <b>1455.737275</b> | 728.372276        | <b>1438.710726</b> | 719.859001       | 1437.726710    | 719.366993       | 10 |
| 8  | 830.389038        | 415.698157        | <b>813.362489</b>  | 407.184883       | 812.378473         | 406.692875       | E    | <b>1327.678697</b> | 664.342987        | 1310.652148        | 655.829712       | 1309.668132    | 655.337704       | 9  |
| 9  | 917.421066        | 459.214171        | 900.394517         | 450.700897       | 899.410501         | 450.208889       | S    | <b>1198.636104</b> | 599.821690        | 1181.609555        | 591.308416       | 1180.625539    | 590.816408       | 8  |
| 10 | 1045.479644       | 523.243460        | 1028.453095        | 514.730186       | <b>1027.469079</b> | 514.238178       | Q    | <b>1111.604076</b> | <b>556.305676</b> | <b>1094.577527</b> | 547.792402       |                |                  | 7  |
| 11 | 1144.548058       | 572.777667        | 1127.521509        | 564.264393       | 1126.537493        | 563.772385       | V    | <b>983.545498</b>  | 492.276387        | 966.518949         | 483.763113       |                |                  | 6  |
| 12 | 1215.585172       | 608.296224        | <b>1198.558623</b> | 599.782950       | 1197.574607        | 599.290942       | A    | <b>884.477084</b>  | 442.742180        | 867.450535         | 434.228906       |                |                  | 5  |
| 13 | 1343.643750       | <b>672.325513</b> | 1326.617201        | 663.812239       | 1325.633185        | 663.320230       | Q    | <b>813.439970</b>  | 407.223623        | 796.413421         | 398.710349       |                |                  | 4  |
| 14 | 1782.869076       | 891.938176        | 1765.842527        | 883.424902       | 1764.858511        | 882.932894       | Q    | <b>685.381392</b>  | 343.194334        | 668.354843         | 334.681060       |                |                  | 3  |
| 15 | 1853.906190       | 927.456733        | 1836.879641        | 918.943459       | 1835.895625        | 918.451451       | A    | <b>246.156066</b>  | 123.581671        | 229.129517         | 115.068396       |                |                  | 2  |
| 16 |                   |                   |                    |                  |                    |                  | R    | 175.118952         | 88.063114         | 158.092403         | 79.549839        |                |                  | 1  |

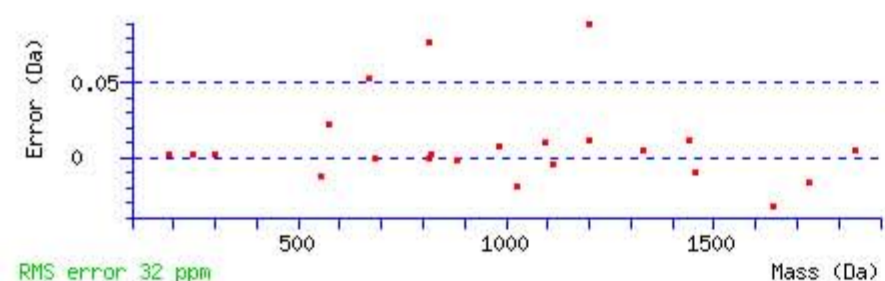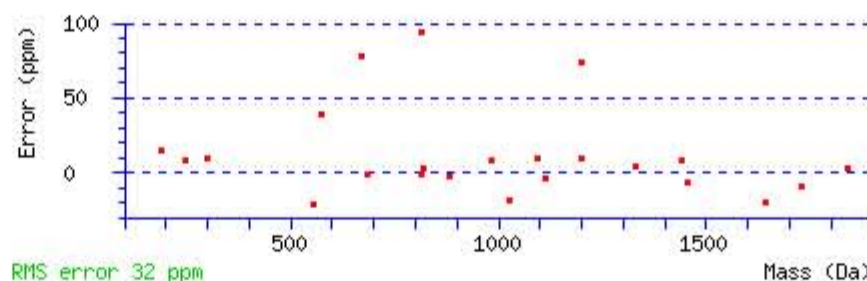

NCBI BLAST search of **DALSSVQESQVAQQAR**

(Parameters: blastp, nr protein database, expect=20000, no filter, PAM30)

Other BLAST [web gateways](#)

All matches to this query

| Score | Mr(calc):   | Delta     | Sequence                         |
|-------|-------------|-----------|----------------------------------|
| 94.2  | 2027.010574 | -0.007582 | <a href="#">DALSSVQESQVAQQAR</a> |
| 79.4  | 2027.010574 | -0.007582 | <a href="#">DALSSVQESQVAQQAR</a> |
| 76.8  | 2027.010574 | -0.007582 | <a href="#">DALSSVQESQVAQQAR</a> |
| 34.1  | 2027.010574 | -0.007582 | <a href="#">DALSSVQESQVAQQAR</a> |



# MASCOT Search Results

## Peptide View

MS/MS Fragmentation of **DALSSVQESQVAQQAR**

Found in **APOC3\_HUMAN**, Apolipoprotein C-III OS=Homo sapiens GN=APOC3 PE=1 SV=1

Match to Query 44210: 2027.002992 from(676.674940,3+) rtinseconds(1964) index(50890)

Title: Locus:1.1.1.3327.16 File:"2013-07-02 CLN FXIII 30 min 3rd F 4.wiff"

Data file C:\Program Files (x86)\Matrix Science\Mascot Daemon\mgf\3 FXIII 30 min 3rd\mascot\_daemon\_merge.mgf

Click mouse within plot area to zoom in by factor of two about that point

Or, Plot from  to  Da

Label all possible matches  Label matches used for scoring

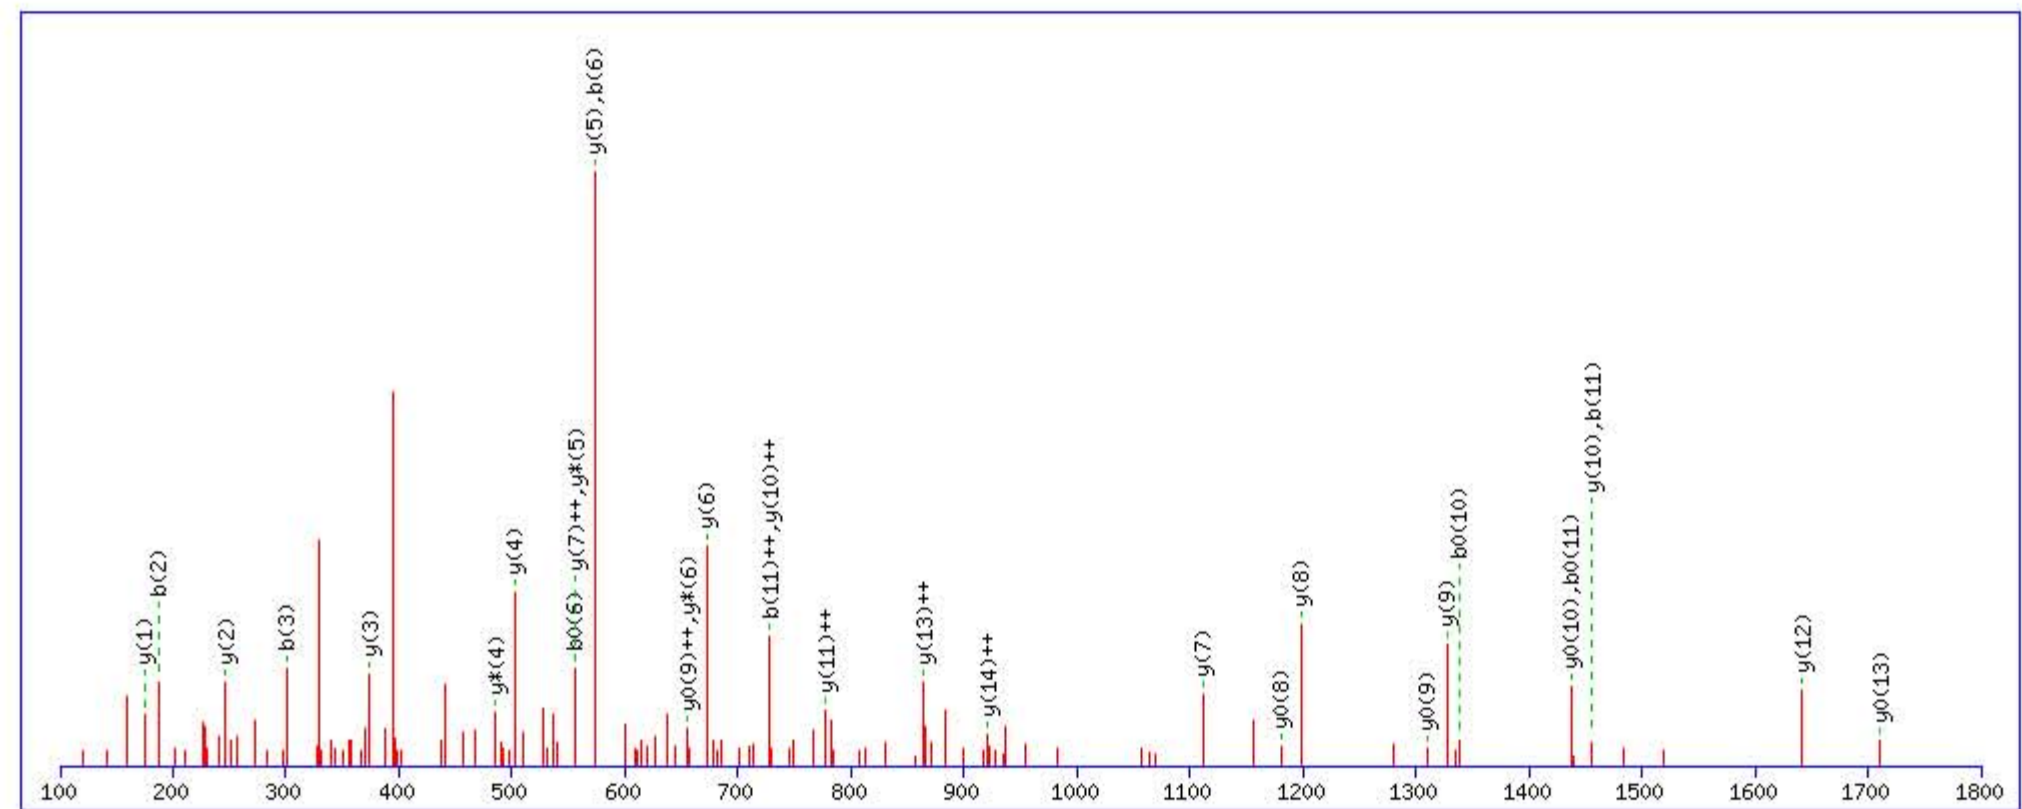

Monoisotopic mass of neutral peptide Mr(calc): 2027.010574

Fixed modifications: Carbamidomethyl (C) (apply to specified residues or termini only)

Variable modifications:

Q10 : Biotin:Thermo-21345 (Q)

Ions Score: 70 Expect: 3.2e-007

Matches : 32/154 fragment ions using 43 most intense peaks [\(help\)](#)

| #  | b                  | b <sup>++</sup>   | b <sup>*</sup> | b <sup>*++</sup> | b <sup>0</sup>     | b <sup>0++</sup> | Seq. | y                  | y <sup>++</sup>   | y <sup>*</sup>    | y <sup>*++</sup> | y <sup>0</sup>     | y <sup>0++</sup>  | #  |
|----|--------------------|-------------------|----------------|------------------|--------------------|------------------|------|--------------------|-------------------|-------------------|------------------|--------------------|-------------------|----|
| 1  | 116.034219         | 58.520748         |                |                  | 98.023654          | 49.515465        | D    |                    |                   |                   |                  |                    |                   | 16 |
| 2  | <b>187.071333</b>  | 94.039304         |                |                  | 169.060768         | 85.034022        | A    | 1912.990923        | 956.999100        | 1895.964374       | 948.485825       | 1894.980358        | 947.993817        | 15 |
| 3  | <b>300.155397</b>  | 150.581336        |                |                  | 282.144832         | 141.576054       | L    | 1841.953809        | <b>921.480543</b> | 1824.927260       | 912.967268       | 1823.943244        | 912.475260        | 14 |
| 4  | 387.187425         | 194.097351        |                |                  | 369.176860         | 185.092068       | S    | 1728.869745        | <b>864.938511</b> | 1711.843196       | 856.425236       | <b>1710.859180</b> | 855.933228        | 13 |
| 5  | 474.219453         | 237.613364        |                |                  | 456.208888         | 228.608082       | S    | <b>1641.837717</b> | 821.422497        | 1624.811168       | 812.909222       | 1623.827152        | 812.417214        | 12 |
| 6  | <b>573.287867</b>  | 287.147572        |                |                  | <b>555.277302</b>  | 278.142289       | V    | 1554.805689        | <b>777.906483</b> | 1537.779140       | 769.393208       | 1536.795124        | 768.901200        | 11 |
| 7  | 701.346445         | 351.176861        | 684.319896     | 342.663586       | 683.335880         | 342.171578       | Q    | <b>1455.737275</b> | <b>728.372276</b> | 1438.710726       | 719.859001       | <b>1437.726710</b> | 719.366993        | 10 |
| 8  | 830.389038         | 415.698157        | 813.362489     | 407.184883       | 812.378473         | 406.692875       | E    | <b>1327.678697</b> | 664.342987        | 1310.652148       | 655.829712       | <b>1309.668132</b> | <b>655.337704</b> | 9  |
| 9  | 917.421066         | 459.214171        | 900.394517     | 450.700897       | 899.410501         | 450.208889       | S    | <b>1198.636104</b> | 599.821690        | 1181.609555       | 591.308416       | <b>1180.625539</b> | 590.816408        | 8  |
| 10 | 1356.646392        | 678.826834        | 1339.619843    | 670.313560       | <b>1338.635827</b> | 669.821551       | Q    | <b>1111.604076</b> | <b>556.305676</b> | 1094.577527       | 547.792402       |                    |                   | 7  |
| 11 | <b>1455.714806</b> | <b>728.361041</b> | 1438.688257    | 719.847767       | <b>1437.704241</b> | 719.355758       | V    | <b>672.378750</b>  | 336.693013        | <b>655.352201</b> | 328.179739       |                    |                   | 6  |
| 12 | 1526.751920        | 763.879598        | 1509.725371    | 755.366324       | 1508.741355        | 754.874315       | A    | <b>573.310336</b>  | 287.158806        | <b>556.283787</b> | 278.645532       |                    |                   | 5  |
| 13 | 1654.810498        | 827.908887        | 1637.783949    | 819.395613       | 1636.799933        | 818.903605       | Q    | <b>502.273222</b>  | 251.640249        | <b>485.246673</b> | 243.126975       |                    |                   | 4  |
| 14 | 1782.869076        | 891.938176        | 1765.842527    | 883.424902       | 1764.858511        | 882.932894       | Q    | <b>374.214644</b>  | 187.610960        | 357.188095        | 179.097686       |                    |                   | 3  |
| 15 | 1853.906190        | 927.456733        | 1836.879641    | 918.943459       | 1835.895625        | 918.451451       | A    | <b>246.156066</b>  | 123.581671        | 229.129517        | 115.068396       |                    |                   | 2  |
| 16 |                    |                   |                |                  |                    |                  | R    | <b>175.118952</b>  | 88.063114         | 158.092403        | 79.549839        |                    |                   | 1  |

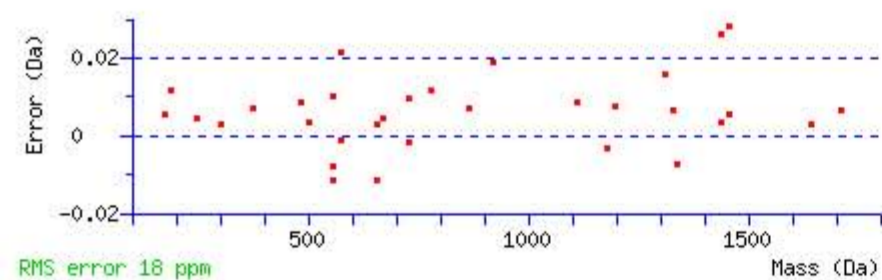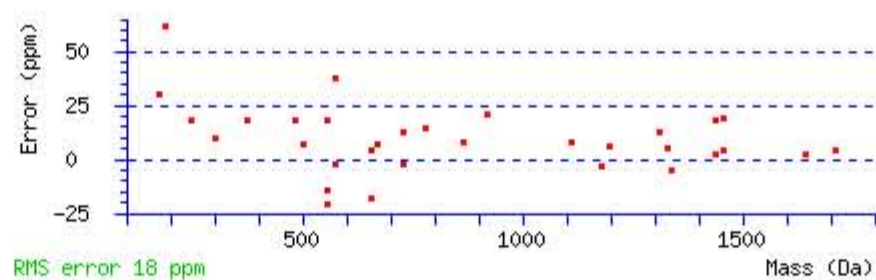

NCBI BLAST search of **DALSSVQESQVAQQAR**

(Parameters: blastp, nr protein database, expect=20000, no filter, PAM30)

Other BLAST [web gateways](#)

## All matches to this query

| Score | Mr(calc):   | Delta     | Sequence                          |
|-------|-------------|-----------|-----------------------------------|
| 70.3  | 2027.010574 | -0.007582 | <a href="#">DALSSVQESQVAQQAR</a>  |
| 47.2  | 2027.010574 | -0.007582 | <a href="#">DALSSVQESQVAQQAR</a>  |
| 42.6  | 2027.010574 | -0.007582 | <a href="#">DALSSVQESQVAQQAR</a>  |
| 36.0  | 2027.010574 | -0.007582 | <a href="#">DALSSVQESQVAQQAR</a>  |
| 0.9   | 2027.029633 | -0.026641 | <a href="#">QEESHSHKHLIELRR</a>   |
| 0.7   | 2027.017960 | -0.014968 | <a href="#">MFELTLRGMSEALVDKR</a> |



# MASCOT Search Results

## Peptide View

MS/MS Fragmentation of **DALSSVQESQVAQQAR**  
 Found in **APOC3\_HUMAN**, Apolipoprotein C-III OS=Homo sapiens GN=APOC3 PE=1 SV=1

Match to Query 44212: 2027.006892 from(676.676240,3+) rtinseconds(1915) index(50468)  
 Title: Locus:1.1.1.3310.19 File:"2013-07-02 CLN FXIII 30 min 3rd F 4.wiff"  
 Data file C:\Program Files (x86)\Matrix Science\Mascot Daemon\mgf\3 FXIII 30 min 3rd\mascot\_daemon\_merge.mgf

Click mouse within plot area to zoom in by factor of two about that point  
 Or, Plot from  to  Da   
 Label all possible matches  Label matches used for scoring

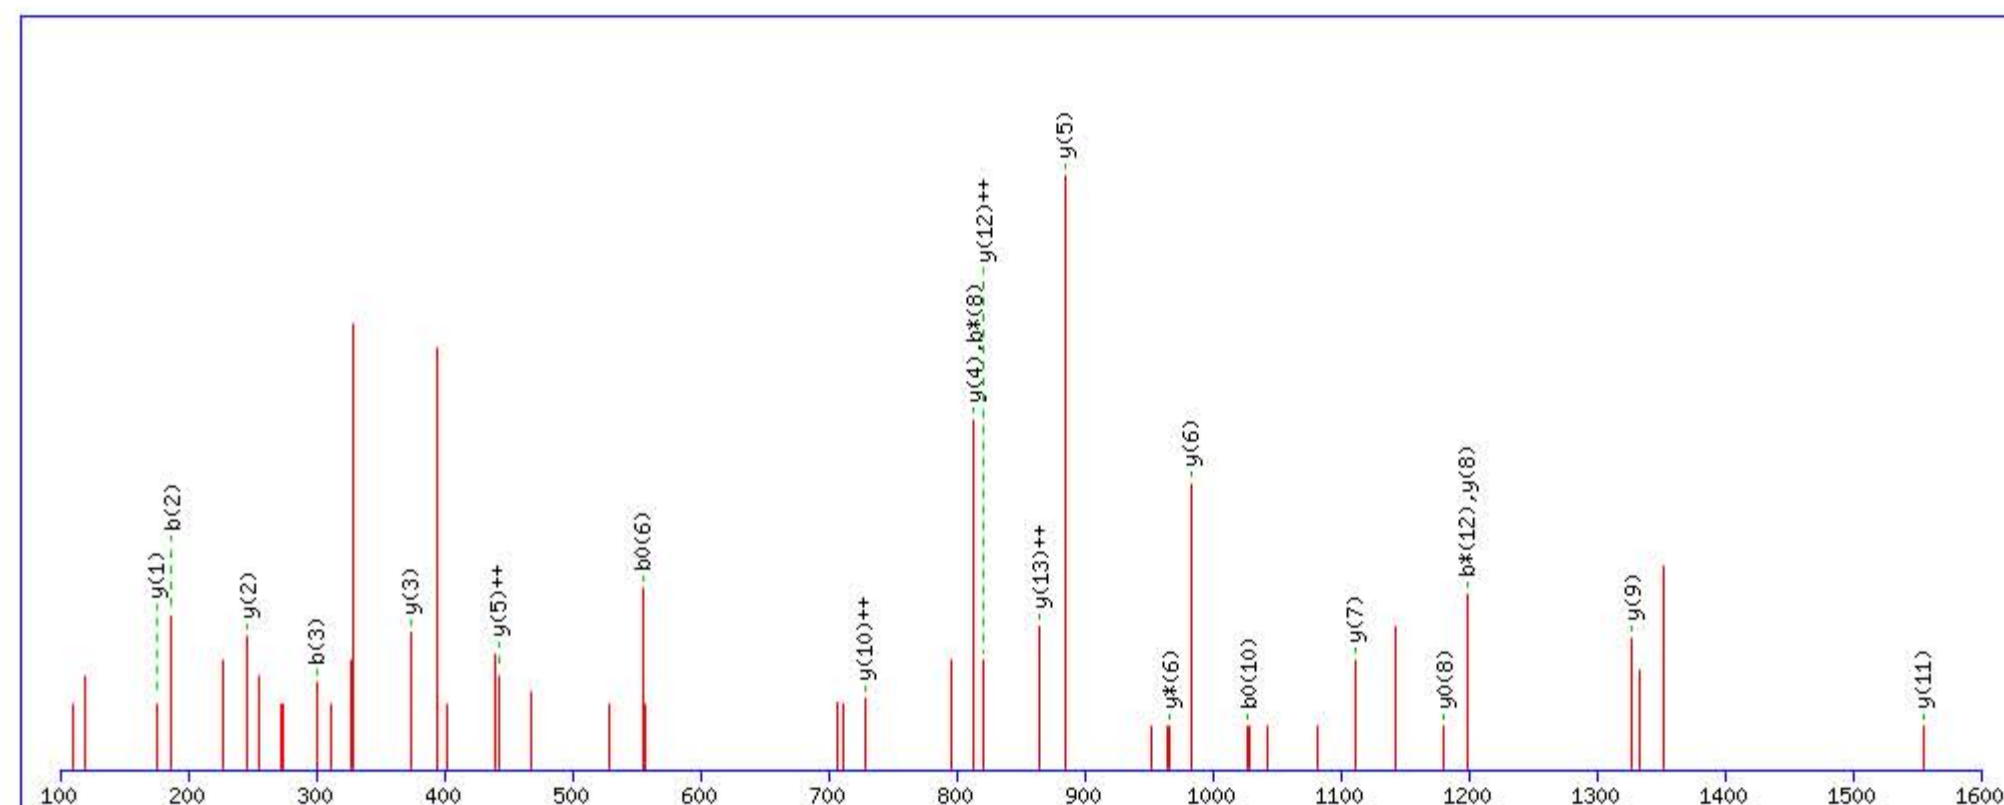

Monoisotopic mass of neutral peptide Mr(calc): 2027.010574  
 Fixed modifications: Carbamidomethyl (C) (apply to specified residues or termini only)  
 Variable modifications:  
 Q13 : Biotin:Thermo-21345 (Q)  
 Ions Score: 48 Expect: 4.8e-005  
 Matches : 22/154 fragment ions using 45 most intense peaks [\(help\)](#)

| #  | b                 | b <sup>++</sup> | b <sup>*</sup>     | b <sup>+++</sup> | b <sup>0</sup>     | b <sup>0++</sup> | Seq. | y                  | y <sup>++</sup>   | y <sup>*</sup>    | y <sup>+++</sup> | y <sup>0</sup>     | y <sup>0++</sup> | #  |
|----|-------------------|-----------------|--------------------|------------------|--------------------|------------------|------|--------------------|-------------------|-------------------|------------------|--------------------|------------------|----|
| 1  | 116.034219        | 58.520748       |                    |                  | 98.023654          | 49.515465        | D    |                    |                   |                   |                  |                    |                  | 16 |
| 2  | <b>187.071333</b> | 94.039304       |                    |                  | 169.060768         | 85.034022        | A    | 1912.990923        | 956.999100        | 1895.964374       | 948.485825       | 1894.980358        | 947.993817       | 15 |
| 3  | <b>300.155397</b> | 150.581336      |                    |                  | 282.144832         | 141.576054       | L    | 1841.953809        | 921.480543        | 1824.927260       | 912.967268       | 1823.943244        | 912.475260       | 14 |
| 4  | 387.187425        | 194.097351      |                    |                  | 369.176860         | 185.092068       | S    | 1728.869745        | <b>864.938511</b> | 1711.843196       | 856.425236       | 1710.859180        | 855.933228       | 13 |
| 5  | 474.219453        | 237.613364      |                    |                  | 456.208888         | 228.608082       | S    | 1641.837717        | <b>821.422497</b> | 1624.811168       | 812.909222       | 1623.827152        | 812.417214       | 12 |
| 6  | 573.287867        | 287.147572      |                    |                  | <b>555.277302</b>  | 278.142289       | V    | <b>1554.805689</b> | 777.906483        | 1537.779140       | 769.393208       | 1536.795124        | 768.901200       | 11 |
| 7  | 701.346445        | 351.176861      | 684.319896         | 342.663586       | 683.335880         | 342.171578       | Q    | 1455.737275        | <b>728.372276</b> | 1438.710726       | 719.859001       | 1437.726710        | 719.366993       | 10 |
| 8  | 830.389038        | 415.698157      | <b>813.362489</b>  | 407.184883       | 812.378473         | 406.692875       | E    | <b>1327.678697</b> | 664.342987        | 1310.652148       | 655.829712       | 1309.668132        | 655.337704       | 9  |
| 9  | 917.421066        | 459.214171      | 900.394517         | 450.700897       | 899.410501         | 450.208889       | S    | <b>1198.636104</b> | 599.821690        | 1181.609555       | 591.308416       | <b>1180.625539</b> | 590.816408       | 8  |
| 10 | 1045.479644       | 523.243460      | 1028.453095        | 514.730186       | <b>1027.469079</b> | 514.238178       | Q    | <b>1111.604076</b> | 556.305676        | 1094.577527       | 547.792402       |                    |                  | 7  |
| 11 | 1144.548058       | 572.777667      | 1127.521509        | 564.264393       | 1126.537493        | 563.772385       | V    | <b>983.545498</b>  | 492.276387        | <b>966.518949</b> | 483.763113       |                    |                  | 6  |
| 12 | 1215.585172       | 608.296224      | <b>1198.558623</b> | 599.782950       | 1197.574607        | 599.290942       | A    | <b>884.477084</b>  | <b>442.742180</b> | 867.450535        | 434.228906       |                    |                  | 5  |
| 13 | 1654.810498       | 827.908887      | 1637.783949        | 819.395613       | 1636.799933        | 818.903605       | Q    | <b>813.439970</b>  | 407.223623        | 796.413421        | 398.710349       |                    |                  | 4  |
| 14 | 1782.869076       | 891.938176      | 1765.842527        | 883.424902       | 1764.858511        | 882.932894       | Q    | <b>374.214644</b>  | 187.610960        | 357.188095        | 179.097686       |                    |                  | 3  |
| 15 | 1853.906190       | 927.456733      | 1836.879641        | 918.943459       | 1835.895625        | 918.451451       | A    | <b>246.156066</b>  | 123.581671        | 229.129517        | 115.068396       |                    |                  | 2  |
| 16 |                   |                 |                    |                  |                    |                  | R    | <b>175.118952</b>  | 88.063114         | 158.092403        | 79.549839        |                    |                  | 1  |

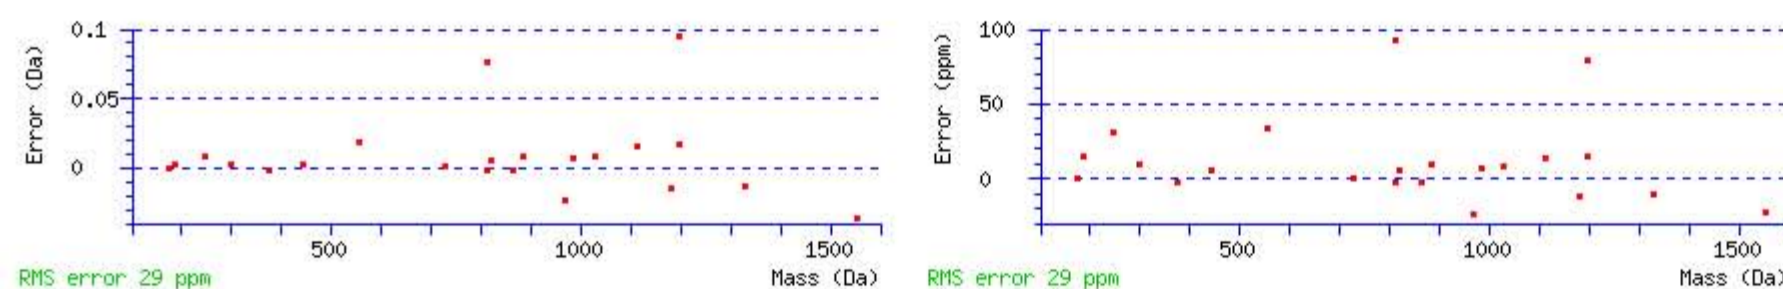

NCBI BLAST search of **DALSSVQESQVAQQAR**  
 (Parameters: blastp, nr protein database, expect=20000, no filter, PAM30)  
 Other BLAST [web gateways](#)

## All matches to this query

| Score | Mr(calc):   | Delta     | Sequence                             |
|-------|-------------|-----------|--------------------------------------|
| 48.4  | 2027.010574 | -0.003682 | <a href="#">DALSSVQESQVAQQAR</a>     |
| 38.7  | 2027.010574 | -0.003682 | <a href="#">DALSSVQESQVAQQAR</a>     |
| 18.4  | 2027.010574 | -0.003682 | <a href="#">DALSSVQESQVAQQAR</a>     |
| 2.3   | 2026.978012 | 0.028880  | <a href="#">AEGAQNQGQKGEQAQNQGKK</a> |
| 1.8   | 2027.010574 | -0.003682 | <a href="#">DALSSVQESQVAQQAR</a>     |



# MASCOT SEARCH RESULTS

## Peptide View

MS/MS Fragmentation of **DALSSVQESQVAQQAR**

Found in **APOC3\_HUMAN**, Apolipoprotein C-III OS=Homo sapiens GN=APOC3 PE=1 SV=1

Match to Query 44217: 2027.031762 from(676.684530,3+) rtinseconds(1989) index(35123)

Title: Locus:1.1.1.3326.21 File:"2013-07-02 CLN FXIII 30 min 3rd F 3.wiff"

Data file C:\Program Files (x86)\Matrix Science\Mascot Daemon\mgf\3 FXIII 30 min 3rd\mascot\_daemon\_merge.mgf

Click mouse within plot area to zoom in by factor of two about that point

Or, Plot from 100 to 1800 Da Full range

Label all possible matches  Label matches used for scoring

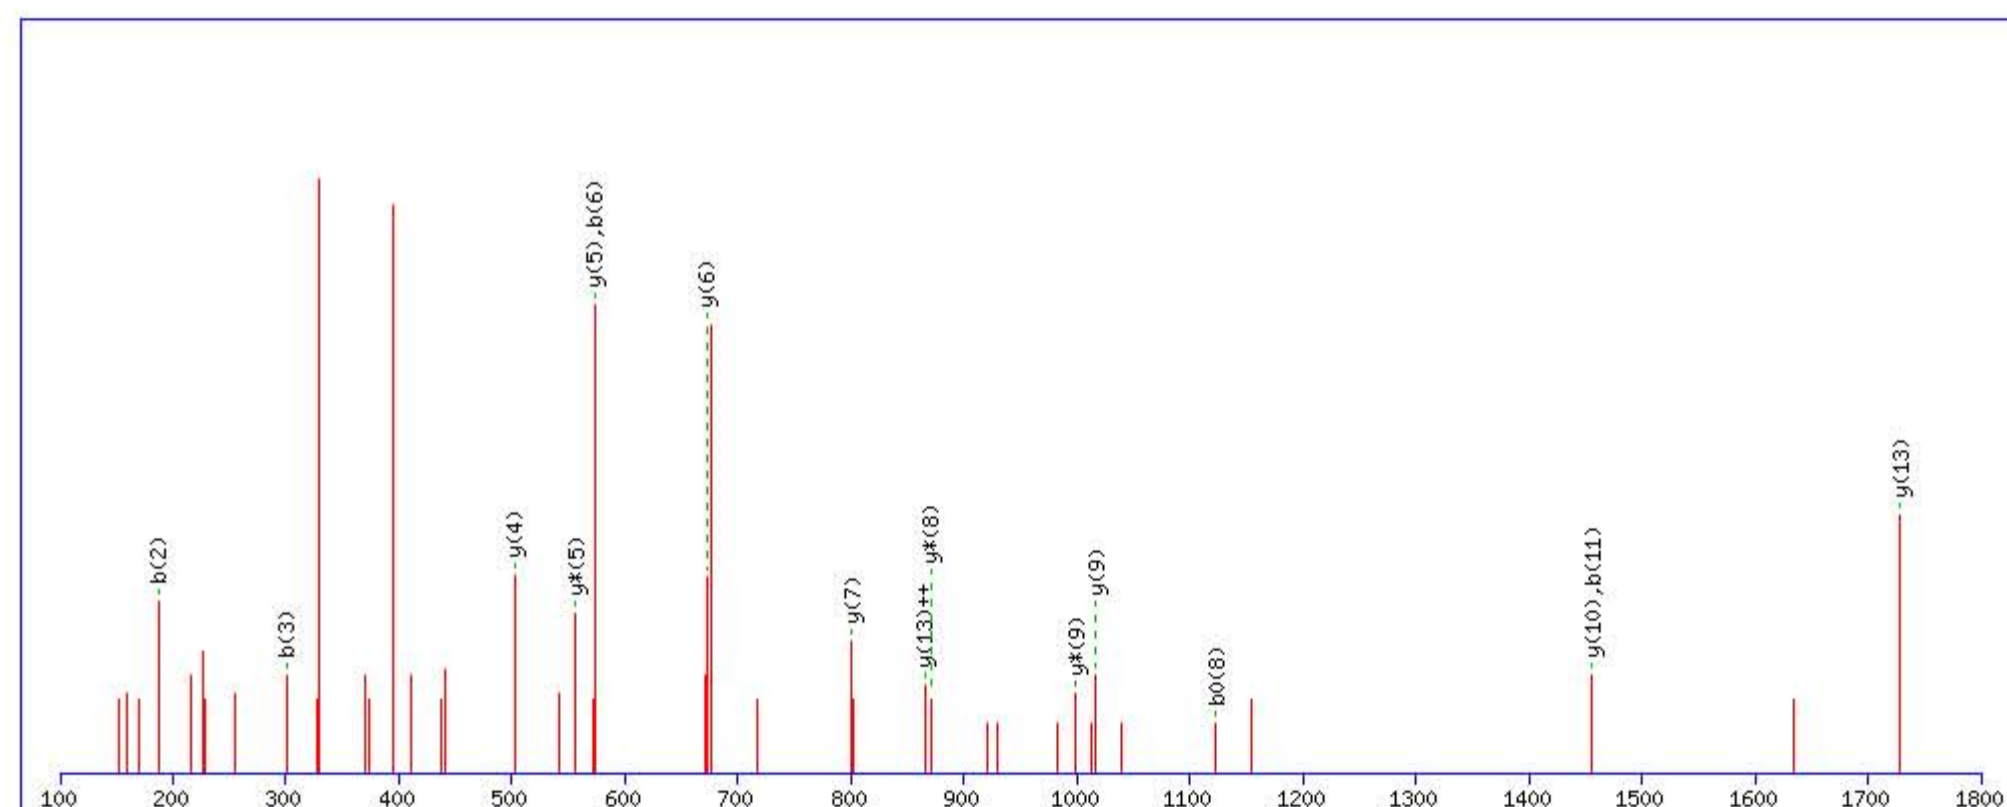

Monoisotopic mass of neutral peptide Mr(calc): 2027.010574

Fixed modifications: Carbamidomethyl (C) (apply to specified residues or termini only)

Variable modifications:

Q7 : Biotin:Thermo-21345 (Q)

Ions Score: 37 Expect: 0.00065

Matches : 16/154 fragment ions using 23 most intense peaks [\(help\)](#)

| #  | b                  | b <sup>++</sup> | b <sup>*</sup> | b <sup>+++</sup> | b <sup>0</sup>     | b <sup>0++</sup> | Seq. | y                  | y <sup>++</sup>   | y <sup>*</sup>    | y <sup>+++</sup> | y <sup>0</sup> | y <sup>0++</sup> | #  |
|----|--------------------|-----------------|----------------|------------------|--------------------|------------------|------|--------------------|-------------------|-------------------|------------------|----------------|------------------|----|
| 1  | 116.034219         | 58.520748       |                |                  | 98.023654          | 49.515465        | D    |                    |                   |                   |                  |                |                  | 16 |
| 2  | <b>187.071333</b>  | 94.039304       |                |                  | 169.060768         | 85.034022        | A    | 1912.990923        | 956.999100        | 1895.964374       | 948.485825       | 1894.980358    | 947.993817       | 15 |
| 3  | <b>300.155397</b>  | 150.581336      |                |                  | 282.144832         | 141.576054       | L    | 1841.953809        | 921.480543        | 1824.927260       | 912.967268       | 1823.943244    | 912.475260       | 14 |
| 4  | 387.187425         | 194.097351      |                |                  | 369.176860         | 185.092068       | S    | <b>1728.869745</b> | <b>864.938511</b> | 1711.843196       | 856.425236       | 1710.859180    | 855.933228       | 13 |
| 5  | 474.219453         | 237.613364      |                |                  | 456.208888         | 228.608082       | S    | 1641.837717        | 821.422497        | 1624.811168       | 812.909222       | 1623.827152    | 812.417214       | 12 |
| 6  | <b>573.287867</b>  | 287.147572      |                |                  | 555.277302         | 278.142289       | V    | 1554.805689        | 777.906483        | 1537.779140       | 769.393208       | 1536.795124    | 768.901200       | 11 |
| 7  | 1012.513193        | 506.760235      | 995.486644     | 498.246960       | 994.502628         | 497.754952       | Q    | <b>1455.737275</b> | 728.372276        | 1438.710726       | 719.859001       | 1437.726710    | 719.366993       | 10 |
| 8  | 1141.555786        | 571.281531      | 1124.529237    | 562.768257       | <b>1123.545221</b> | 562.276249       | E    | <b>1016.511949</b> | 508.759613        | <b>999.485400</b> | 500.246338       | 998.501384     | 499.754330       | 9  |
| 9  | 1228.587814        | 614.797545      | 1211.561265    | 606.284271       | 1210.577249        | 605.792263       | S    | 887.469356         | 444.238316        | <b>870.442807</b> | 435.725042       | 869.458791     | 435.233034       | 8  |
| 10 | 1356.646392        | 678.826834      | 1339.619843    | 670.313560       | 1338.635827        | 669.821552       | Q    | <b>800.437328</b>  | 400.722302        | 783.410779        | 392.209028       |                |                  | 7  |
| 11 | <b>1455.714806</b> | 728.361041      | 1438.688257    | 719.847767       | 1437.704241        | 719.355759       | V    | <b>672.378750</b>  | 336.693013        | 655.352201        | 328.179739       |                |                  | 6  |
| 12 | 1526.751920        | 763.879598      | 1509.725371    | 755.366324       | 1508.741355        | 754.874316       | A    | <b>573.310336</b>  | 287.158806        | <b>556.283787</b> | 278.645532       |                |                  | 5  |
| 13 | 1654.810498        | 827.908887      | 1637.783949    | 819.395613       | 1636.799933        | 818.903605       | Q    | <b>502.273222</b>  | 251.640249        | 485.246673        | 243.126975       |                |                  | 4  |
| 14 | 1782.869076        | 891.938176      | 1765.842527    | 883.424902       | 1764.858511        | 882.932894       | Q    | 374.214644         | 187.610960        | 357.188095        | 179.097686       |                |                  | 3  |
| 15 | 1853.906190        | 927.456733      | 1836.879641    | 918.943459       | 1835.895625        | 918.451451       | A    | 246.156066         | 123.581671        | 229.129517        | 115.068396       |                |                  | 2  |
| 16 |                    |                 |                |                  |                    |                  | R    | 175.118952         | 88.063114         | 158.092403        | 79.549839        |                |                  | 1  |

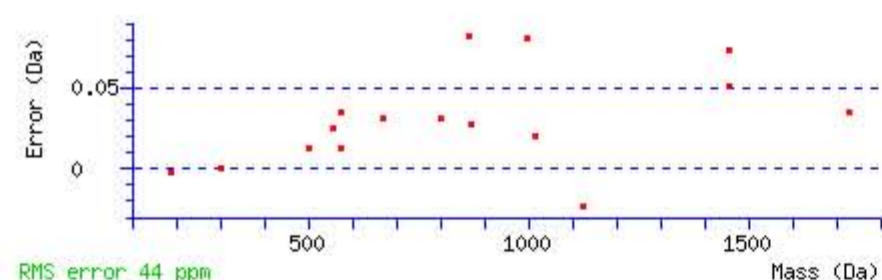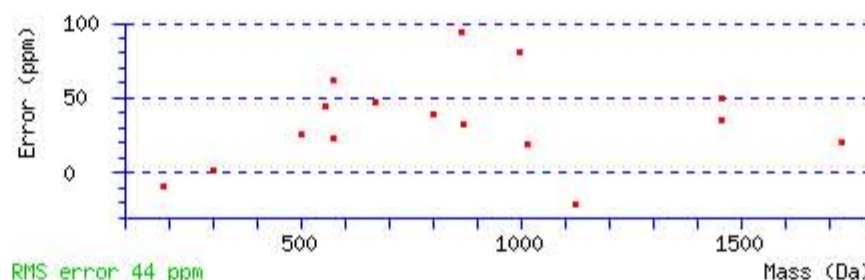

NCBI BLAST search of **DALSSVQESQVAQQAR**

(Parameters: blastp, nr protein database, expect=20000, no filter, PAM30)

Other BLAST [web gateways](#)

## All matches to this query

| Score | Mr(calc):   | Delta     | Sequence                            |
|-------|-------------|-----------|-------------------------------------|
| 36.6  | 2027.010574 | 0.021188  | <a href="#">DALSSVQESQVAQQAR</a>    |
| 16.3  | 2027.010574 | 0.021188  | <a href="#">DALSSVQESQVAQQAR</a>    |
| 5.8   | 2027.010574 | 0.021188  | <a href="#">DALSSVQESQVAQQAR</a>    |
| 3.8   | 2027.010574 | 0.021188  | <a href="#">DALSSVQESQVAQQAR</a>    |
| 2.5   | 2027.053482 | -0.021720 | <a href="#">EGLGQGQSLEQLEALVQTK</a> |
| 0.1   | 2027.021805 | 0.009957  | <a href="#">VASVESQSQEISGNRR</a>    |



# MASCOT SCIENCE Mascot Search Results

## Peptide View

MS/MS Fragmentation of **LGPLVEQGR**

Found in **APOE\_HUMAN**, Apolipoprotein E OS=Homo sapiens GN=APOE PE=1 SV=1

Match to Query 23865: 1278.707588 from(640.361070,2+) rtinseconds(1987) index(51085)

Title: Locus:1.1.1.3335.11 File:"2013-07-02 CLN FXIII 30 min 3rd F 4.wiff"

Data file C:\Program Files (x86)\Matrix Science\Mascot Daemon\mgf\3 FXIII 30 min 3rd\mascot\_daemon\_merge.mgf

Click mouse within plot area to zoom in by factor of two about that point

Or, Plot from  to  Da

Label all possible matches  Label matches used for scoring

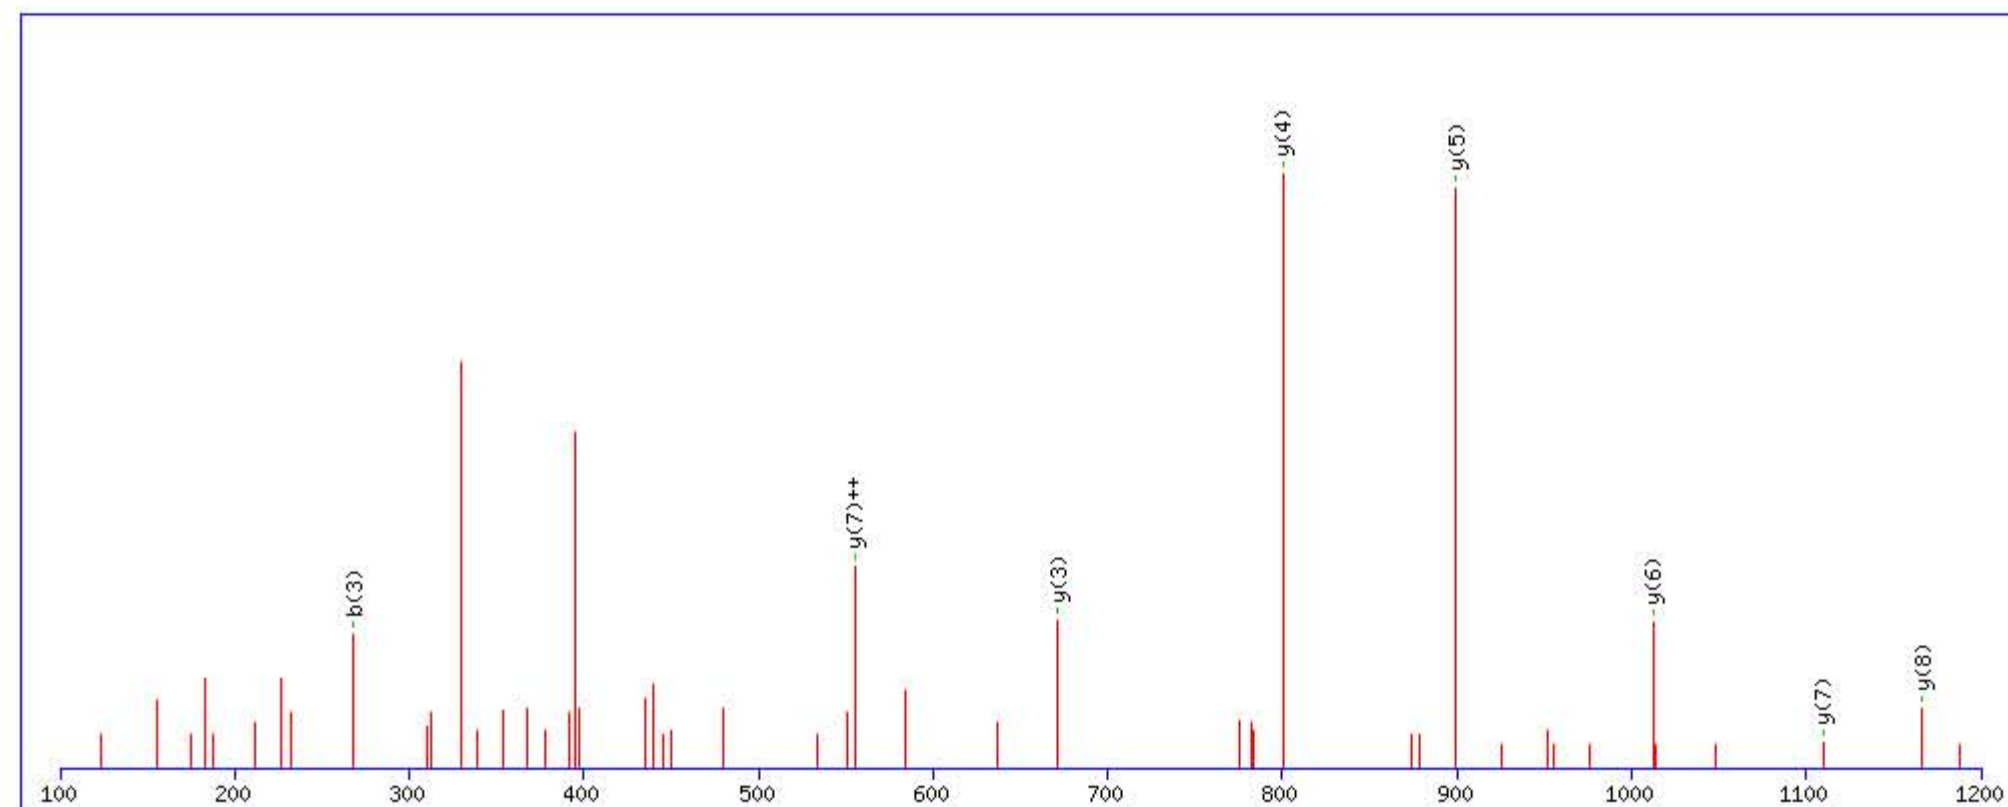

Monoisotopic mass of neutral peptide Mr(calc): 1278.711823

Fixed modifications: Carbamidomethyl (C) (apply to specified residues or termini only)

Variable modifications:

Q7 : Biotin:Thermo-21345 (Q)

Ions Score: 47 Expect: 7.6e-005

Matches : 8/68 fragment ions using 11 most intense peaks ([help](#))

| # | b           | b <sup>++</sup> | b <sup>*</sup> | b <sup>+++</sup> | b <sup>0</sup> | b <sup>0++</sup> | Seq. | y           | y <sup>++</sup> | y <sup>*</sup> | y <sup>+++</sup> | y <sup>0</sup> | y <sup>0++</sup> | # |
|---|-------------|-----------------|----------------|------------------|----------------|------------------|------|-------------|-----------------|----------------|------------------|----------------|------------------|---|
| 1 | 114.091340  | 57.549308       |                |                  |                |                  | L    |             |                 |                |                  |                |                  | 9 |
| 2 | 171.112804  | 86.060040       |                |                  |                |                  | G    | 1166.635041 | 583.821159      | 1149.608492    | 575.307884       | 1148.624476    | 574.815876       | 8 |
| 3 | 268.165568  | 134.586422      |                |                  |                |                  | P    | 1109.613577 | 555.310426      | 1092.587028    | 546.797152       | 1091.603012    | 546.305144       | 7 |
| 4 | 381.249632  | 191.128454      |                |                  |                |                  | L    | 1012.560813 | 506.784044      | 995.534264     | 498.270770       | 994.550248     | 497.778762       | 6 |
| 5 | 480.318046  | 240.662661      |                |                  |                |                  | V    | 899.476749  | 450.242012      | 882.450200     | 441.728738       | 881.466184     | 441.236730       | 5 |
| 6 | 609.360639  | 305.183958      |                |                  | 591.350074     | 296.178675       | E    | 800.408335  | 400.707805      | 783.381786     | 392.194531       | 782.397770     | 391.702523       | 4 |
| 7 | 1048.585965 | 524.796621      | 1031.559416    | 516.283346       | 1030.575400    | 515.791338       | Q    | 671.365742  | 336.186509      | 654.339193     | 327.673234       |                |                  | 3 |
| 8 | 1105.607429 | 553.307352      | 1088.580880    | 544.794078       | 1087.596864    | 544.302070       | G    | 232.140416  | 116.573846      | 215.113867     | 108.060571       |                |                  | 2 |
| 9 |             |                 |                |                  |                |                  | R    | 175.118952  | 88.063114       | 158.092403     | 79.549839        |                |                  | 1 |

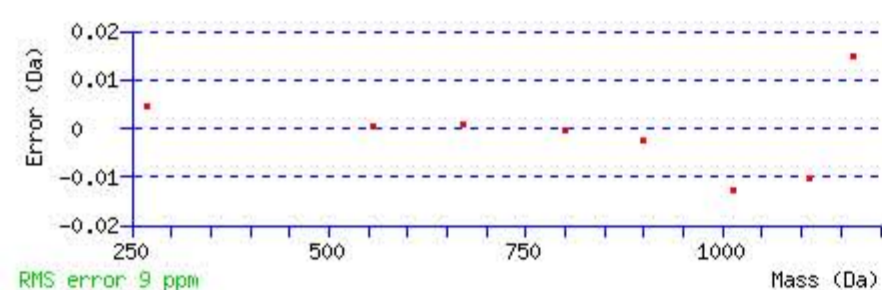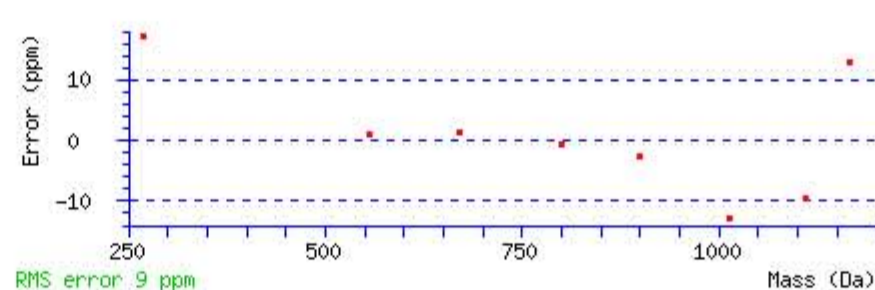

NCBI BLAST search of **LGPLVEQGR**

(Parameters: blastp, nr protein database, expect=20000, no filter, PAM30)

Other BLAST [web gateways](#)

All matches to this query

| Score | Mr(calc):   | Delta     | Sequence                   |
|-------|-------------|-----------|----------------------------|
| 47.1  | 1278.711823 | -0.004235 | <a href="#">LGPLVEQGR</a>  |
| 3.1   | 1278.690506 | 0.017082  | <a href="#">ITNIQRHQGR</a> |

Mascot: <http://www.matrixscience.com/>



# MASCOT Search Results

## Peptide View

MS/MS Fragmentation of **LEEQAQQIR**

Found in **APOE\_HUMAN**, Apolipoprotein E OS=Homo sapiens GN=APOE PE=1 SV=1

Match to Query 28988: 1424.747088 from(713.380820,2+) rtinseconds(1596) index(32817)

Title: Locus:1.1.1.3189.16 File:"2013-07-02 CLN FXIII 30 min 3rd F 3.wiff"

Data file C:\Program Files (x86)\Matrix Science\Mascot Daemon\mgf3 FXIII 30 min 3rd\mascot\_daemon\_merge.mgf

Click mouse within plot area to zoom in by factor of two about that point

Or, Plot from  to  Da

Label all possible matches  Label matches used for scoring

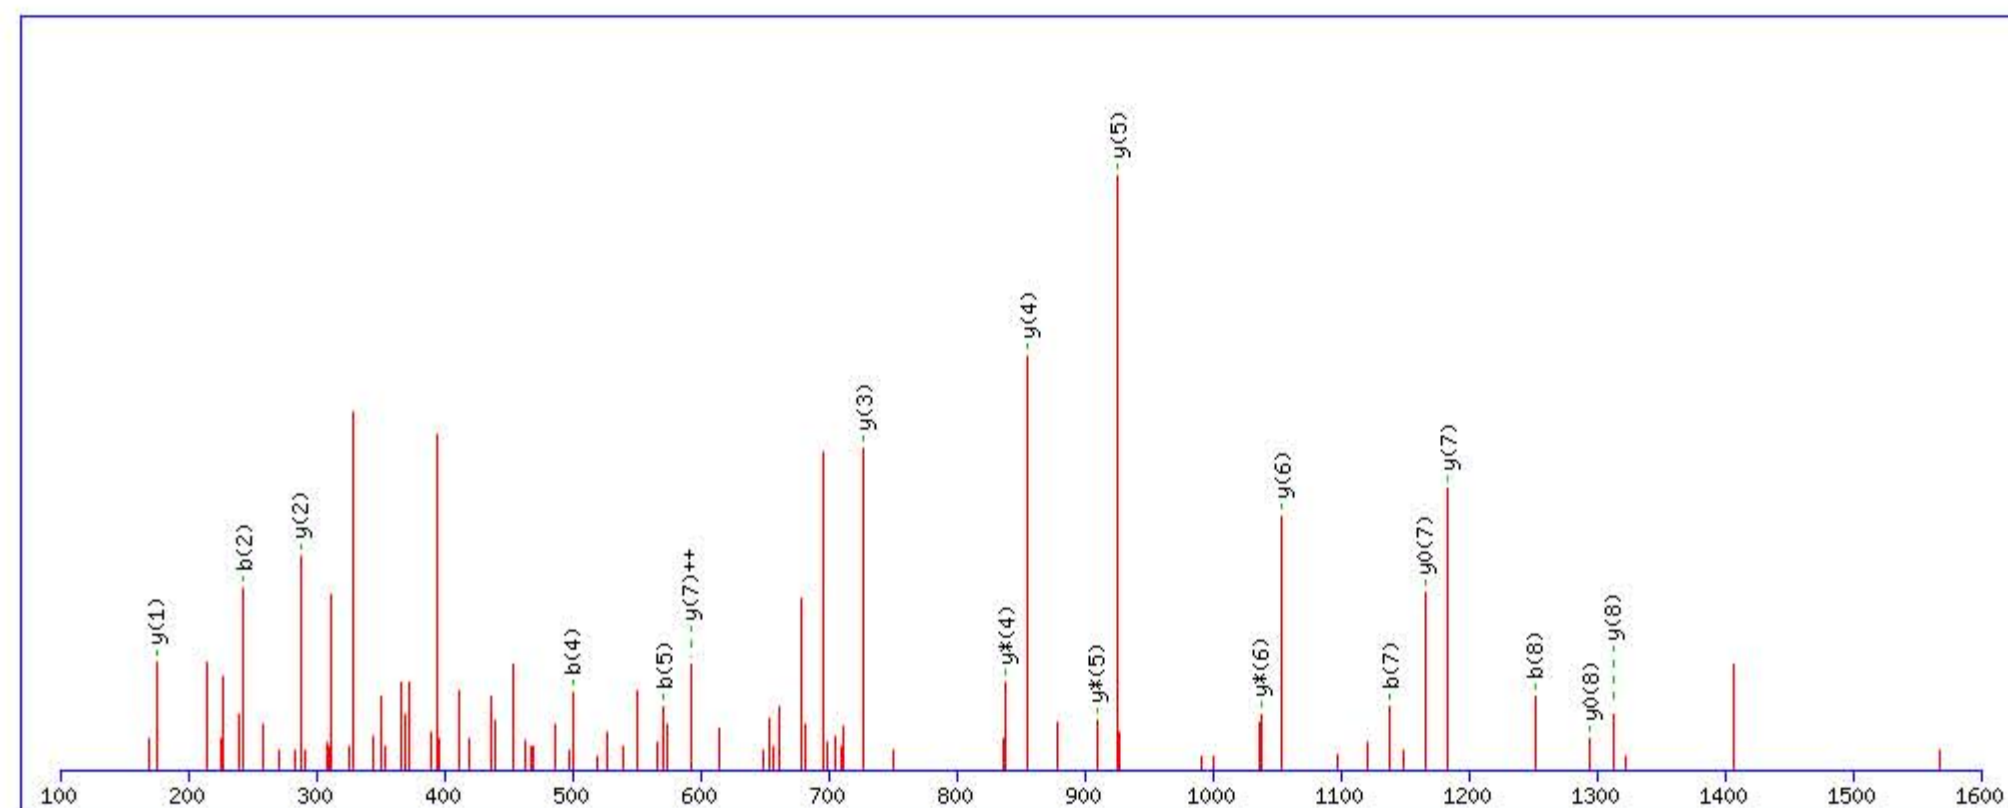

Monoisotopic mass of neutral peptide Mr(calc): 1424.744553

Fixed modifications: Carbamidomethyl (C) (apply to specified residues or termini only)

Variable modifications:

Q7 : Biotin:Thermo-21345 (Q)

Ions Score: 67 Expect: 8.9e-006

Matches : 19/76 fragment ions using 25 most intense peaks [\(help\)](#)

| # | b                  | b <sup>++</sup> | b <sup>*</sup> | b <sup>*++</sup> | b <sup>0</sup> | b <sup>0++</sup> | Seq. | y                  | y <sup>++</sup>   | y <sup>*</sup>     | y <sup>*++</sup> | y <sup>0</sup>     | y <sup>0++</sup> | # |
|---|--------------------|-----------------|----------------|------------------|----------------|------------------|------|--------------------|-------------------|--------------------|------------------|--------------------|------------------|---|
| 1 | 114.091340         | 57.549308       |                |                  |                |                  | L    |                    |                   |                    |                  |                    |                  | 9 |
| 2 | <b>243.133933</b>  | 122.070605      |                |                  | 225.123368     | 113.065322       | E    | <b>1312.667798</b> | 656.837537        | 1295.641249        | 648.324263       | <b>1294.657233</b> | 647.832255       | 8 |
| 3 | 372.176526         | 186.591901      |                |                  | 354.165961     | 177.586619       | E    | <b>1183.625205</b> | <b>592.316241</b> | 1166.598656        | 583.802966       | <b>1165.614640</b> | 583.310958       | 7 |
| 4 | <b>500.235104</b>  | 250.621190      | 483.208555     | 242.107916       | 482.224539     | 241.615908       | Q    | <b>1054.582612</b> | 527.794944        | <b>1037.556063</b> | 519.281670       |                    |                  | 6 |
| 5 | <b>571.272218</b>  | 286.139747      | 554.245669     | 277.626473       | 553.261653     | 277.134465       | A    | <b>926.524034</b>  | 463.765655        | <b>909.497485</b>  | 455.252381       |                    |                  | 5 |
| 6 | 699.330796         | 350.169036      | 682.304247     | 341.655762       | 681.320231     | 341.163754       | Q    | <b>855.486920</b>  | 428.247098        | <b>838.460371</b>  | 419.733824       |                    |                  | 4 |
| 7 | <b>1138.556122</b> | 569.781699      | 1121.529573    | 561.268425       | 1120.545557    | 560.776417       | Q    | <b>727.428342</b>  | 364.217809        | 710.401793         | 355.704535       |                    |                  | 3 |
| 8 | <b>1251.640186</b> | 626.323731      | 1234.613637    | 617.810457       | 1233.629621    | 617.318449       | I    | <b>288.203016</b>  | 144.605146        | 271.176467         | 136.091871       |                    |                  | 2 |
| 9 |                    |                 |                |                  |                |                  | R    | <b>175.118952</b>  | 88.063114         | 158.092403         | 79.549839        |                    |                  | 1 |

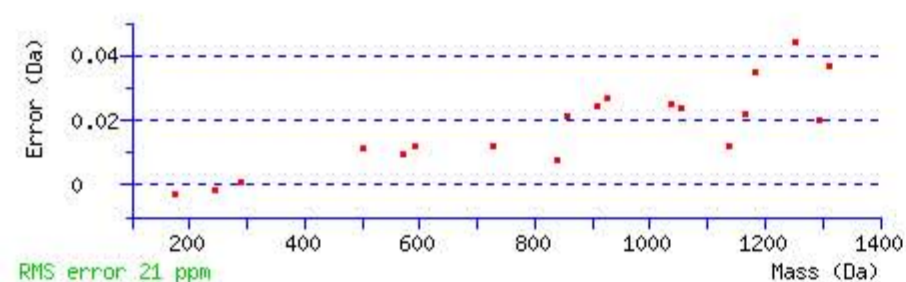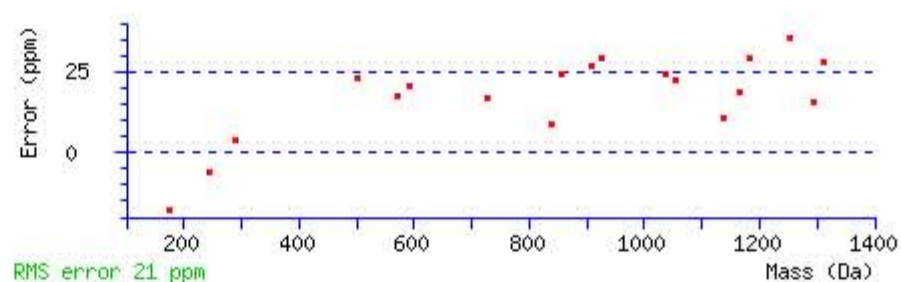

NCBI BLAST search of **LEEQAQQIR**

(Parameters: blastp, nr protein database, expect=20000, no filter, PAM30)

Other BLAST [web gateways](#)

## All matches to this query

| Score | Mr(calc):   | Delta     | Sequence                     |
|-------|-------------|-----------|------------------------------|
| 67.5  | 1424.744553 | 0.002535  | <a href="#">LEEQAQQIR</a>    |
| 52.8  | 1424.744553 | 0.002535  | <a href="#">LEEQAQQIR</a>    |
| 21.1  | 1424.744553 | 0.002535  | <a href="#">LEEQAQQIR</a>    |
| 12.7  | 1424.733322 | 0.013766  | <a href="#">LEQETEPLR</a>    |
| 10.2  | 1424.767014 | -0.019926 | <a href="#">EERRQQLR</a>     |
| 8.3   | 1424.745438 | 0.001650  | <a href="#">QMQQIR</a>       |
| 6.9   | 1424.744583 | 0.002505  | <a href="#">QLSGDQPTIR</a>   |
| 6.3   | 1424.734680 | 0.012408  | <a href="#">WVLTAAHCLAQR</a> |
| 6.2   | 1424.767029 | -0.019941 | <a href="#">RVQNNNTLR</a>    |
| 5.4   | 1424.744553 | 0.002535  | <a href="#">IEIAHALCLTER</a> |



# MASCOT Search Results

## Peptide View

MS/MS Fragmentation of **QQTEWQSGQR**

Found in **APOE\_HUMAN**, Apolipoprotein E OS=Homo sapiens GN=APOE PE=1 SV=1

Match to Query 32221: 1557.730368 from(779.872460,2+) rtinseconds(1607) index(48701)

Title: Locus:1.1.1.3203.15 File:"2013-07-02 CLN FXIII 30 min 3rd F 4.wiff"

Data file C:\Program Files (x86)\Matrix Science\Mascot Daemon\mgf3 FXIII 30 min 3rd\mascot\_daemon\_merge.mgf

Click mouse within plot area to zoom in by factor of two about that point

Or, Plot from  to  Da

Label all possible matches  Label matches used for scoring

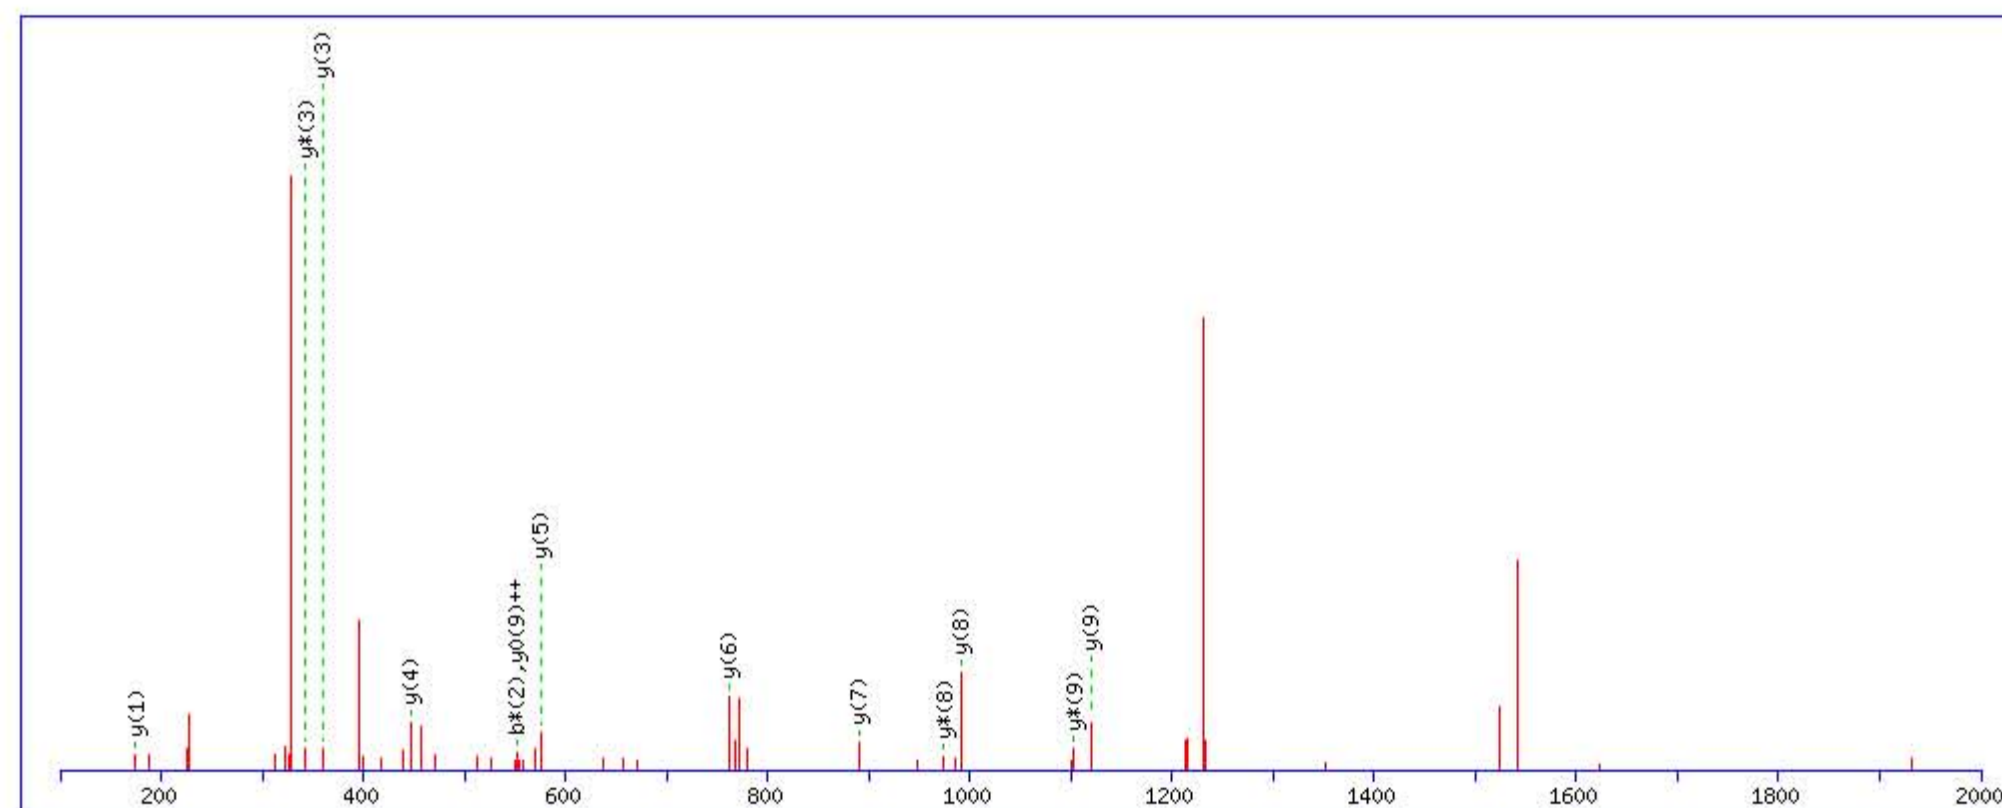

Monoisotopic mass of neutral peptide Mr(calc): 1557.735809

Fixed modifications: Carbamidomethyl (C) (apply to specified residues or termini only)

Variable modifications:

Q1 : Biotin:Thermo-21345 (Q)

Ions Score: 26 Expect: 0.0096

Matches : 13/98 fragment ions using 44 most intense peaks [\(help\)](#)

| #  | b           | b <sup>++</sup> | b <sup>+</sup> | b <sup>*++</sup> | b <sup>0</sup> | b <sup>0++</sup> | Seq. | y           | y <sup>++</sup> | y <sup>+</sup> | y <sup>*++</sup> | y <sup>0</sup> | y <sup>0++</sup> | #  |
|----|-------------|-----------------|----------------|------------------|----------------|------------------|------|-------------|-----------------|----------------|------------------|----------------|------------------|----|
| 1  | 440.232602  | 220.619939      | 423.206053     | 212.106664       |                |                  | Q    |             |                 |                |                  |                |                  | 10 |
| 2  | 568.291180  | 284.649228      | 551.264631     | 276.135954       |                |                  | Q    | 1119.517763 | 560.262520      | 1102.491214    | 551.749245       | 1101.507198    | 551.257237       | 9  |
| 3  | 669.338859  | 335.173068      | 652.312310     | 326.659793       | 651.328294     | 326.167785       | T    | 991.459185  | 496.233231      | 974.432636     | 487.719956       | 973.448620     | 487.227948       | 8  |
| 4  | 798.381452  | 399.694364      | 781.354903     | 391.181090       | 780.370887     | 390.689082       | E    | 890.411506  | 445.709391      | 873.384957     | 437.196117       | 872.400941     | 436.704109       | 7  |
| 5  | 984.460765  | 492.734021      | 967.434216     | 484.220746       | 966.450200     | 483.728738       | W    | 761.368913  | 381.188095      | 744.342364     | 372.674820       | 743.358348     | 372.182812       | 6  |
| 6  | 1112.519343 | 556.763310      | 1095.492794    | 548.250035       | 1094.508778    | 547.758027       | Q    | 575.289600  | 288.148438      | 558.263051     | 279.635164       | 557.279035     | 279.143156       | 5  |
| 7  | 1199.551371 | 600.279324      | 1182.524822    | 591.766049       | 1181.540806    | 591.274041       | S    | 447.231022  | 224.119149      | 430.204473     | 215.605875       | 429.220457     | 215.113867       | 4  |
| 8  | 1256.572835 | 628.790056      | 1239.546286    | 620.276781       | 1238.562270    | 619.784773       | G    | 360.198994  | 180.603135      | 343.172445     | 172.089860       |                |                  | 3  |
| 9  | 1384.631413 | 692.819345      | 1367.604864    | 684.306070       | 1366.620848    | 683.814062       | Q    | 303.177530  | 152.092403      | 286.150981     | 143.579129       |                |                  | 2  |
| 10 |             |                 |                |                  |                |                  | R    | 175.118952  | 88.063114       | 158.092403     | 79.549839        |                |                  | 1  |

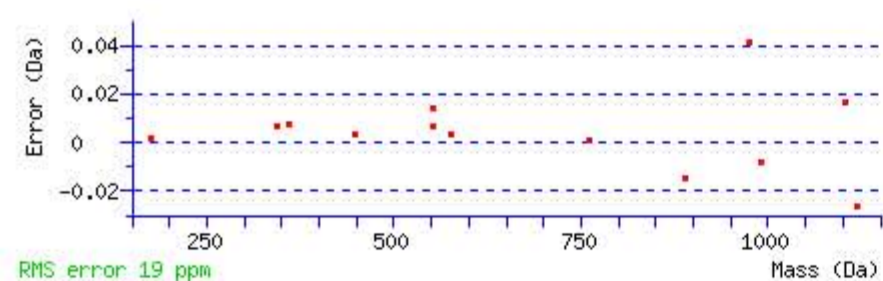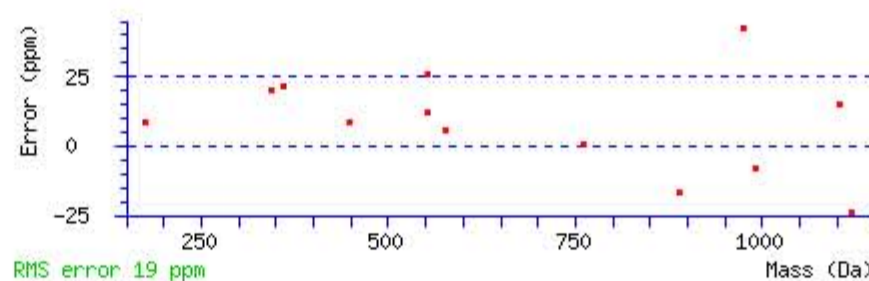

NCBI BLAST search of **QQTEWQSGQR**

(Parameters: blastp, nr protein database, expect=20000, no filter, PAM30)

Other BLAST [web gateways](#)

All matches to this query

| Score | Mr(calc):   | Delta     | Sequence                      |
|-------|-------------|-----------|-------------------------------|
| 26.2  | 1557.735809 | -0.005441 | <a href="#">QQTEWQSGQR</a>    |
| 15.1  | 1557.735809 | -0.005441 | <a href="#">QQTEWQSGQR</a>    |
| 4.7   | 1557.710663 | 0.019705  | <a href="#">ATQRPPYCDGTHR</a> |



# MASCOT Search Results

## Peptide View

MS/MS Fragmentation of **AATVGS LAGQPLQER**

Found in **APOE\_HUMAN**, Apolipoprotein E OS=Homo sapiens GN=APOE PE=1 SV=1

Match to Query 39310: 1807.985832 from(603.669220,3+) rtinseconds(1968) index(34946)

Title: Locus:1.1.1.3319.19 File:"2013-07-02 CLN FXIII 30 min 3rd F 3.wiff"

Data file C:\Program Files (x86)\Matrix Science\Mascot Daemon\mgf\3 FXIII 30 min 3rd\mascot\_daemon\_merge.mgf

Click mouse within plot area to zoom in by factor of two about that point

Or, Plot from  to  Da

Label all possible matches  Label matches used for scoring

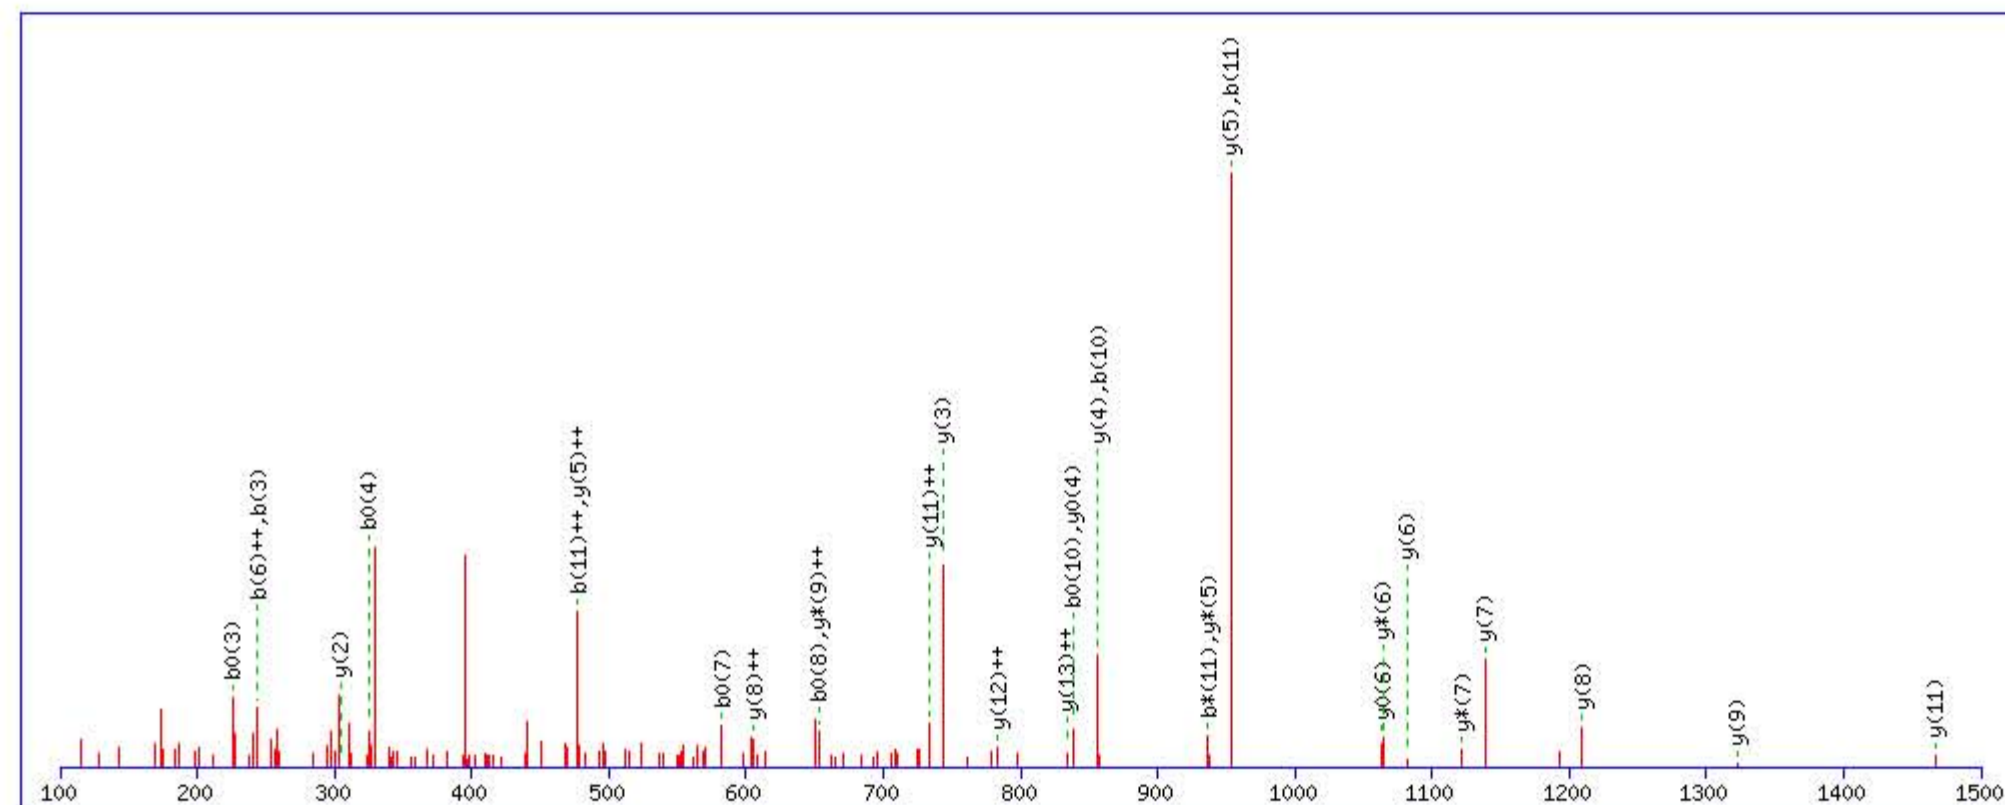

Monoisotopic mass of neutral peptide Mr(calc): 1807.961441

Fixed modifications: Carbamidomethyl (C) (apply to specified residues or termini only)

Variable modifications:

Q13 : Biotin:Thermo-21345 (Q)

Ions Score: 61 Expect: 1.9e-006

Matches : 31/144 fragment ions using 35 most intense peaks [\(help\)](#)

| #  | b                 | b <sup>++</sup>   | b <sup>*</sup>    | b <sup>*++</sup> | b <sup>0</sup> | b <sup>0++</sup> | Seq. | y                  | y <sup>++</sup>   | y <sup>*</sup>     | y <sup>*++</sup>  | y <sup>0</sup>     | y <sup>0++</sup> | #  |
|----|-------------------|-------------------|-------------------|------------------|----------------|------------------|------|--------------------|-------------------|--------------------|-------------------|--------------------|------------------|----|
| 1  | 72.044390         | 36.525833         |                   |                  |                |                  | A    |                    |                   |                    |                   |                    |                  | 15 |
| 2  | 143.081504        | 72.044390         |                   |                  |                |                  | A    | 1737.931618        | 869.469447        | 1720.905069        | 860.956173        | 1719.921053        | 860.464165       | 14 |
| 3  | <b>244.129183</b> | 122.568230        |                   |                  | 226.118618     | 113.562947       | T    | 1666.894504        | <b>833.950890</b> | 1649.867955        | 825.437616        | 1648.883939        | 824.945608       | 13 |
| 4  | 343.197597        | 172.102437        |                   |                  | 325.187032     | 163.097154       | V    | 1565.846825        | <b>783.427051</b> | 1548.820276        | 774.913776        | 1547.836260        | 774.421768       | 12 |
| 5  | 400.219061        | 200.613169        |                   |                  | 382.208496     | 191.607886       | G    | <b>1466.778411</b> | <b>733.892844</b> | 1449.751862        | 725.379569        | 1448.767846        | 724.887561       | 11 |
| 6  | 487.251089        | <b>244.129183</b> |                   |                  | 469.240524     | 235.123900       | S    | 1409.756947        | 705.382112        | 1392.730398        | 696.868837        | 1391.746382        | 696.376829       | 10 |
| 7  | 600.335153        | 300.671215        |                   |                  | 582.324588     | 291.665932       | L    | <b>1322.724919</b> | 661.866098        | 1305.698370        | <b>653.352823</b> | 1304.714354        | 652.860815       | 9  |
| 8  | 671.372267        | 336.189772        |                   |                  | 653.361702     | 327.184489       | A    | <b>1209.640855</b> | <b>605.324066</b> | 1192.614306        | 596.810791        | 1191.630290        | 596.318783       | 8  |
| 9  | 728.393731        | 364.700504        |                   |                  | 710.383166     | 355.695221       | G    | <b>1138.603741</b> | 569.805509        | <b>1121.577192</b> | 561.292234        | 1120.593176        | 560.800226       | 7  |
| 10 | <b>856.452309</b> | 428.729793        | 839.425760        | 420.216518       | 838.441744     | 419.724510       | Q    | <b>1081.582277</b> | 541.294777        | <b>1064.555728</b> | 532.781502        | <b>1063.571712</b> | 532.289494       | 6  |
| 11 | <b>953.505073</b> | <b>477.256175</b> | <b>936.478524</b> | 468.742900       | 935.494508     | 468.250892       | P    | <b>953.523699</b>  | <b>477.265488</b> | <b>936.497150</b>  | 468.752213        | 935.513134         | 468.260205       | 5  |
| 12 | 1066.589137       | 533.798207        | 1049.562588       | 525.284932       | 1048.578572    | 524.792924       | L    | <b>856.470935</b>  | 428.739106        | 839.444386         | 420.225831        | <b>838.460370</b>  | 419.733823       | 4  |
| 13 | 1505.814463       | 753.410870        | 1488.787914       | 744.897595       | 1487.803898    | 744.405587       | Q    | <b>743.386871</b>  | 372.197074        | 726.360322         | 363.683799        | 725.376306         | 363.191791       | 3  |
| 14 | 1634.857056       | 817.932166        | 1617.830507       | 809.418892       | 1616.846491    | 808.926884       | E    | <b>304.161545</b>  | 152.584411        | 287.134996         | 144.071136        | 286.150980         | 143.579128       | 2  |
| 15 |                   |                   |                   |                  |                |                  | R    | 175.118952         | 88.063114         | 158.092403         | 79.549839         |                    |                  | 1  |

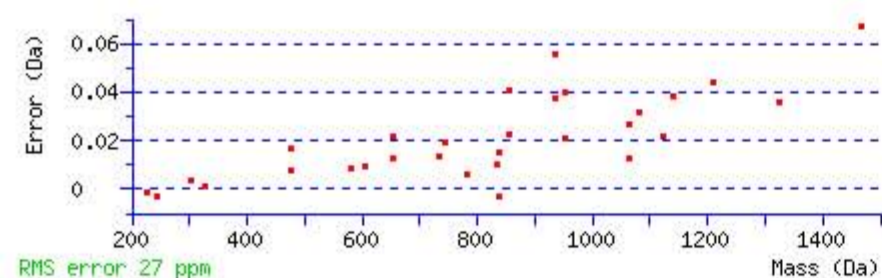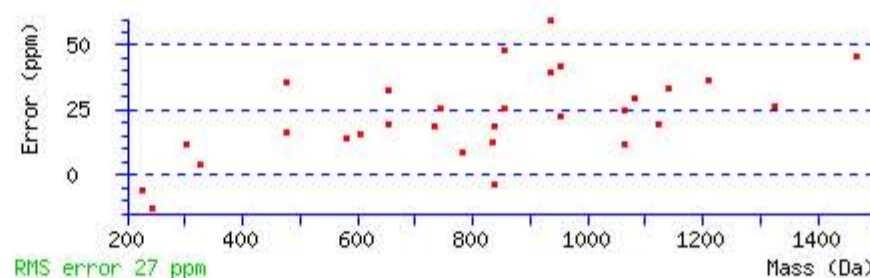

NCBI BLAST search of **AATVGS LAGQPLQER**

(Parameters: blastp, nr protein database, expect=20000, no filter, PAM30)

Other BLAST [web gateways](#)

All matches to this query

| Score | Mr(calc):   | Delta     | Sequence                          |
|-------|-------------|-----------|-----------------------------------|
| 61.2  | 1807.961441 | 0.024391  | <a href="#">AATVGS LAGQPLQER</a>  |
| 27.0  | 1807.961441 | 0.024391  | <a href="#">AATVGS LAGQPLQER</a>  |
| 0.2   | 1808.009018 | -0.023186 | <a href="#">MKLHLDKAI AQLAANR</a> |

Mascot: <http://www.matrixscience.com/>



# MASCOT Search Results

## Peptide View

MS/MS Fragmentation of **SGVQQLIQYYQDQK**

Found in **APOF\_HUMAN**, Apolipoprotein F OS=Homo sapiens GN=APOF PE=1 SV=2

Match to Query 43915: 2008.007742 from(670.343190,3+) rtinseconds(2518) index(53688)

Title: Locus:1.1.1.3520.10 File:"2013-07-02 CLN FXIII 30 min 3rd F 4.wiff"

Data file C:\Program Files (x86)\Matrix Science\Mascot Daemon\mgf\3 FXIII 30 min 3rd\mascot\_daemon\_merge.mgf

Click mouse within plot area to zoom in by factor of two about that point

Or, Plot from  to  Da

Label all possible matches  Label matches used for scoring

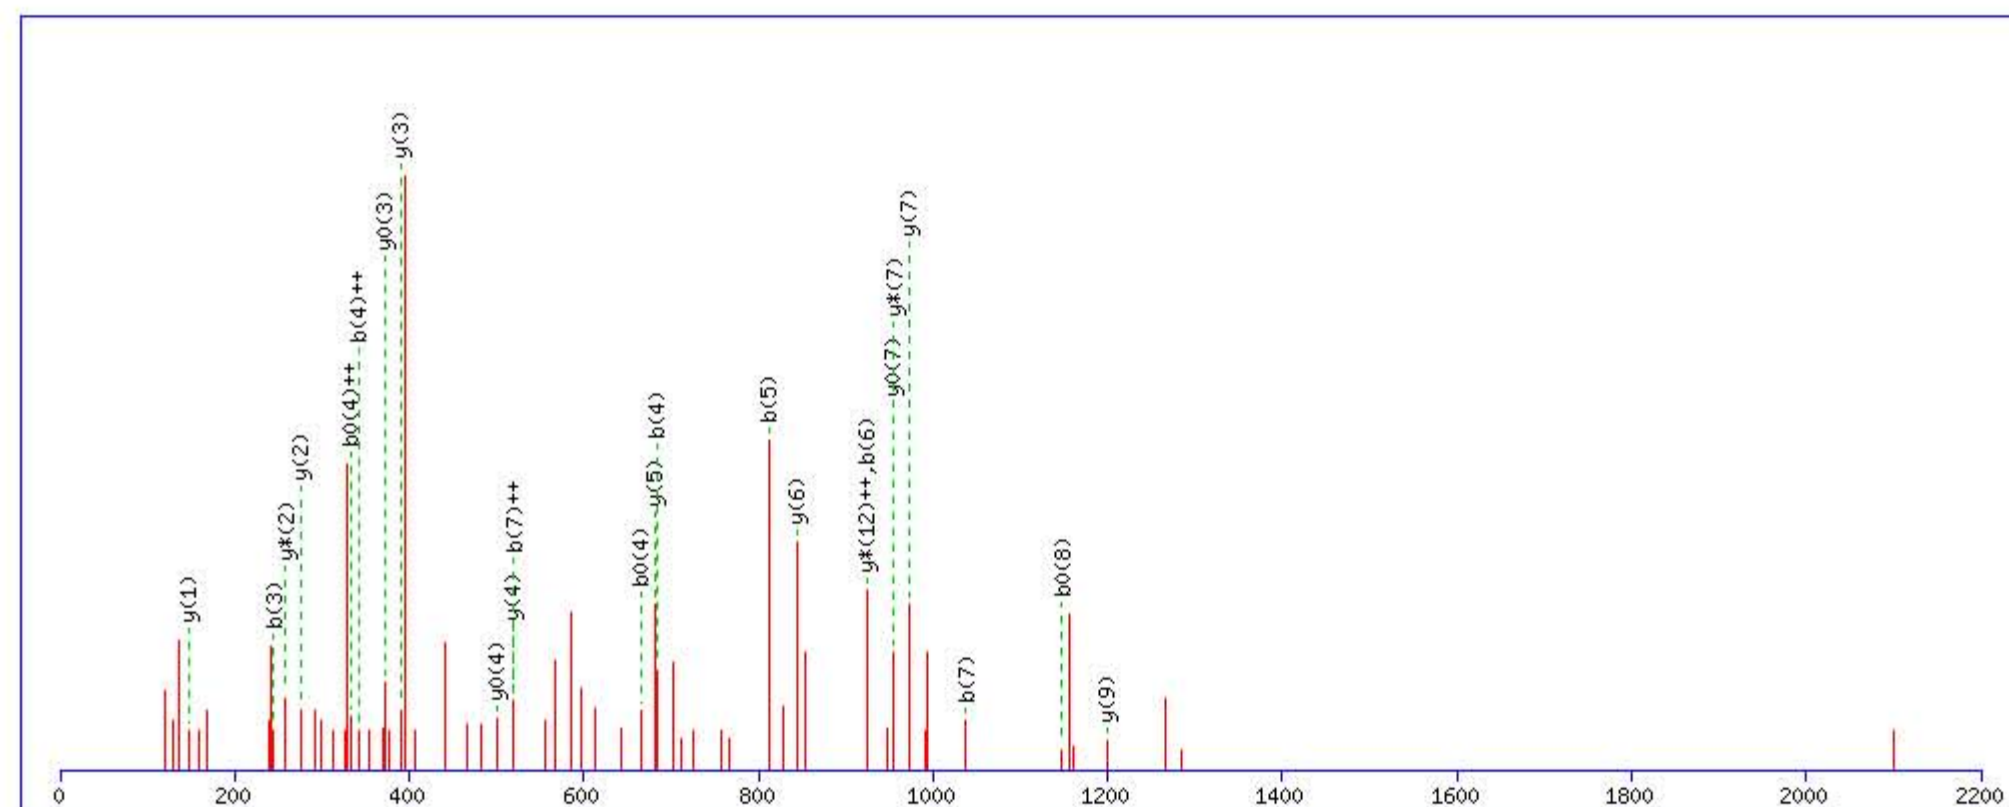

Monoisotopic mass of neutral peptide Mr(calc): 2008.008789

Fixed modifications: Carbamidomethyl (C) (apply to specified residues or termini only)

Variable modifications:

Q4 : Biotin:Thermo-21345 (Q)

Ions Score: 27 Expect: 0.004

Matches : 24/146 fragment ions using 61 most intense peaks [\(help\)](#)

| #  | b                  | b <sup>++</sup>   | b <sup>+</sup> | b <sup>+++</sup> | b <sup>0</sup>     | b <sup>0++</sup>  | Seq. | y                  | y <sup>++</sup> | y <sup>+</sup>    | y <sup>+++</sup>  | y <sup>0</sup>    | y <sup>0++</sup> | #  |
|----|--------------------|-------------------|----------------|------------------|--------------------|-------------------|------|--------------------|-----------------|-------------------|-------------------|-------------------|------------------|----|
| 1  | 88.039304          | 44.523290         |                |                  | 70.028739          | 35.518008         | S    |                    |                 |                   |                   |                   |                  | 14 |
| 2  | 145.060768         | 73.034022         |                |                  | 127.050203         | 64.028740         | G    | 1921.984049        | 961.495663      | 1904.957500       | 952.982388        | 1903.973484       | 952.490380       | 13 |
| 3  | <b>244.129182</b>  | 122.568229        |                |                  | 226.118617         | 113.562947        | V    | 1864.962585        | 932.984931      | 1847.936036       | <b>924.471656</b> | 1846.952020       | 923.979648       | 12 |
| 4  | <b>683.354508</b>  | <b>342.180892</b> | 666.327959     | 333.667618       | <b>665.343943</b>  | <b>333.175610</b> | Q    | 1765.894171        | 883.450724      | 1748.867622       | 874.937449        | 1747.883606       | 874.445441       | 11 |
| 5  | <b>811.413086</b>  | 406.210181        | 794.386537     | 397.696907       | 793.402521         | 397.204899        | Q    | 1326.668845        | 663.838061      | 1309.642296       | 655.324786        | 1308.658280       | 654.832778       | 10 |
| 6  | <b>924.497150</b>  | 462.752213        | 907.470601     | 454.238939       | 906.486585         | 453.746931        | L    | <b>1198.610267</b> | 599.808772      | 1181.583718       | 591.295497        | 1180.599702       | 590.803489       | 9  |
| 7  | <b>1037.581214</b> | <b>519.294245</b> | 1020.554665    | 510.780971       | 1019.570649        | 510.288963        | I    | 1085.526203        | 543.266740      | 1068.499654       | 534.753465        | 1067.515638       | 534.261457       | 8  |
| 8  | 1165.639792        | 583.323534        | 1148.613243    | 574.810260       | <b>1147.629227</b> | 574.318252        | Q    | <b>972.442139</b>  | 486.724708      | <b>955.415590</b> | 478.211433        | <b>954.431574</b> | 477.719425       | 7  |
| 9  | 1328.703121        | 664.855199        | 1311.676572    | 656.341924       | 1310.692556        | 655.849916        | Y    | <b>844.383561</b>  | 422.695419      | 827.357012        | 414.182144        | 826.372996        | 413.690136       | 6  |
| 10 | 1491.766450        | 746.386863        | 1474.739901    | 737.873589       | 1473.755885        | 737.381581        | Y    | <b>681.320232</b>  | 341.163754      | 664.293683        | 332.650480        | 663.309667        | 332.158472       | 5  |
| 11 | 1619.825028        | 810.416152        | 1602.798479    | 801.902878       | 1601.814463        | 801.410870        | Q    | <b>518.256903</b>  | 259.632090      | 501.230354        | 251.118815        | <b>500.246338</b> | 250.626807       | 4  |
| 12 | 1734.851971        | 867.929624        | 1717.825422    | 859.416349       | 1716.841406        | 858.924341        | D    | <b>390.198325</b>  | 195.602800      | 373.171776        | 187.089526        | <b>372.187760</b> | 186.597518       | 3  |
| 13 | 1862.910549        | 931.958913        | 1845.884000    | 923.445638       | 1844.899984        | 922.953630        | Q    | <b>275.171382</b>  | 138.089329      | <b>258.144833</b> | 129.576054        |                   |                  | 2  |
| 14 |                    |                   |                |                  |                    |                   | K    | <b>147.112804</b>  | 74.060040       | 130.086255        | 65.546765         |                   |                  | 1  |

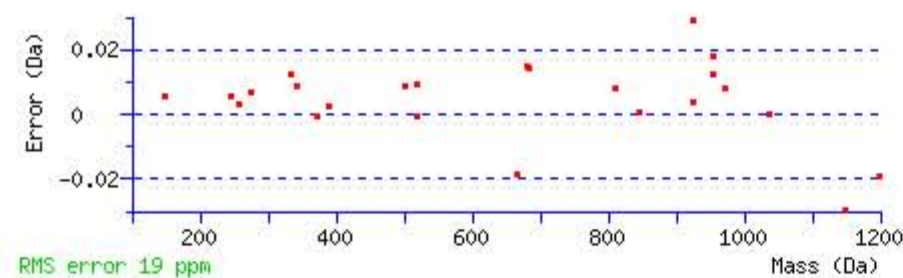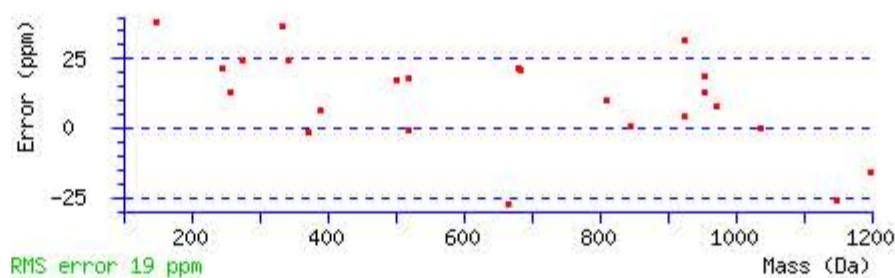

NCBI BLAST search of [SGVQQLIQYYQDQK](#)

(Parameters: blastp, nr protein database, expect=20000, no filter, PAM30)

Other BLAST [web gateways](#)

## All matches to this query

| Score | Mr(calc):   | Delta     | Sequence                          |
|-------|-------------|-----------|-----------------------------------|
| 27.3  | 2008.008789 | -0.001047 | <a href="#">SGVQQLIQYYQDQK</a>    |
| 25.6  | 2008.008789 | -0.001047 | <a href="#">SGVQQLIQYYQDQK</a>    |
| 25.1  | 2008.008789 | -0.001047 | <a href="#">SGVQQLIQYYQDQK</a>    |
| 23.0  | 2008.008789 | -0.001047 | <a href="#">SGVQQLIQYYQDQK</a>    |
| 21.9  | 2008.008789 | -0.001047 | <a href="#">SGVQQLIQYYQDQK</a>    |
| 1.8   | 2008.037308 | -0.029566 | <a href="#">VVPVLSSELYLLQCNMK</a> |



**MASCOT** SCIENCE } Mascot Search Results

**Peptide View**

MS/MS Fragmentation of **GYILVGQAK**

Found in **C4BPA\_HUMAN**, C4b-binding protein alpha chain OS=Homo sapiens GN=C4BPA PE=1 SV=2

Match to Query 23287: 1258.709148 from(630.361850,2+) rtinseconds(2065) index(51522)

Title: Locus:1.1.1.3362.11 File:"2013-07-02 CLN FXIII 30 min 3rd F 4.wiff"

Data file C:\Program Files (x86)\Matrix Science\Mascot Daemon\mgf3 FXIII 30 min 3rd\mascot\_daemon\_merge.mgf

Click mouse within plot area to zoom in by factor of two about that point

Or, Plot from  to  Da

Label all possible matches  Label matches used for scoring

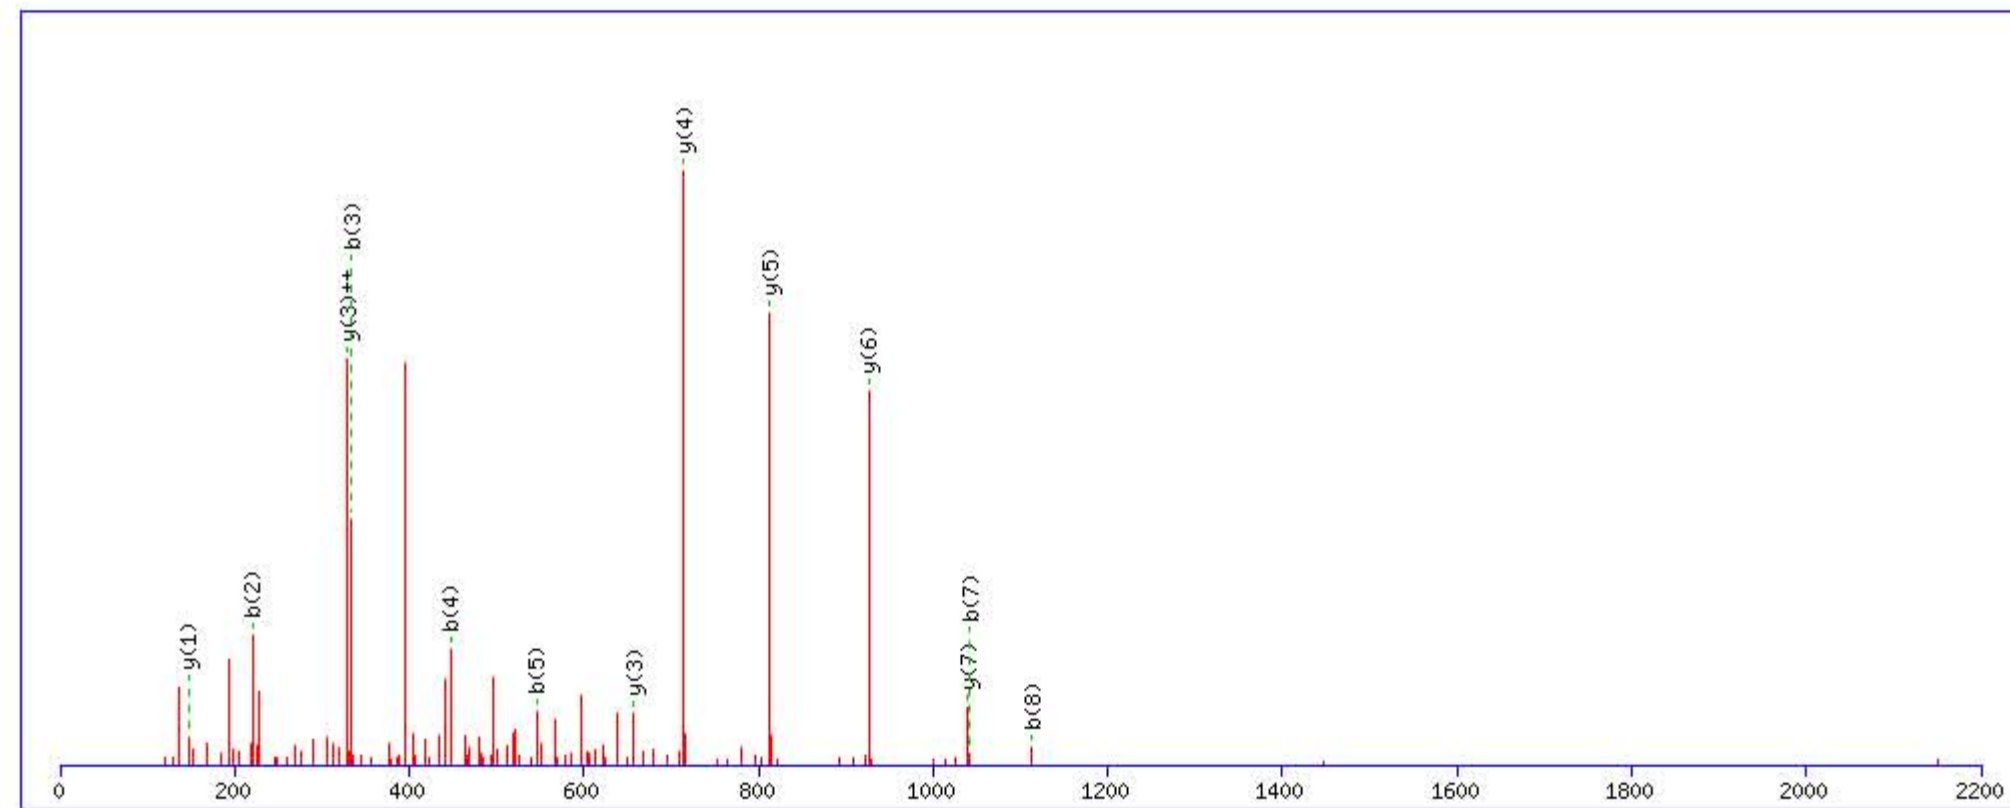

Monoisotopic mass of neutral peptide Mr(calc): 1258.710754

Fixed modifications: Carbamidomethyl (C) (apply to specified residues or termini only)

Variable modifications:

Q7 : Biotin:Thermo-21345 (Q)

Ions Score: 30 Expect: 0.014

Matches : 13/52 fragment ions using 30 most intense peaks [\(help\)](#)

| # | b                  | b <sup>++</sup> | b <sup>*</sup> | b <sup>*++</sup> | Seq.     | y                  | y <sup>++</sup>   | y <sup>*</sup> | y <sup>*++</sup> | #        |
|---|--------------------|-----------------|----------------|------------------|----------|--------------------|-------------------|----------------|------------------|----------|
| 1 | 58.028740          | 29.518008       |                |                  | <b>G</b> |                    |                   |                |                  | <b>9</b> |
| 2 | <b>221.092069</b>  | 111.049673      |                |                  | <b>Y</b> | 1202.696579        | 601.851928        | 1185.670030    | 593.338653       | <b>8</b> |
| 3 | <b>334.176133</b>  | 167.591704      |                |                  | <b>I</b> | <b>1039.633250</b> | 520.320263        | 1022.606701    | 511.806989       | <b>7</b> |
| 4 | <b>447.260197</b>  | 224.133737      |                |                  | <b>L</b> | <b>926.549186</b>  | 463.778231        | 909.522637     | 455.264957       | <b>6</b> |
| 5 | <b>546.328611</b>  | 273.667944      |                |                  | <b>V</b> | <b>813.465122</b>  | 407.236199        | 796.438573     | 398.722925       | <b>5</b> |
| 6 | 603.350075         | 302.178676      |                |                  | <b>G</b> | <b>714.396708</b>  | 357.701992        | 697.370159     | 349.188718       | <b>4</b> |
| 7 | <b>1042.575401</b> | 521.791339      | 1025.548852    | 513.278064       | <b>Q</b> | <b>657.375244</b>  | <b>329.191260</b> | 640.348695     | 320.677986       | <b>3</b> |
| 8 | <b>1113.612515</b> | 557.309896      | 1096.585966    | 548.796621       | <b>A</b> | 218.149918         | 109.578597        | 201.123369     | 101.065322       | <b>2</b> |
| 9 |                    |                 |                |                  | <b>K</b> | <b>147.112804</b>  | 74.060040         | 130.086255     | 65.546765        | <b>1</b> |

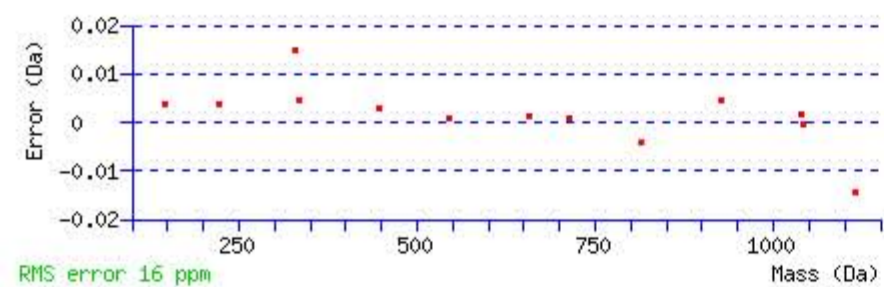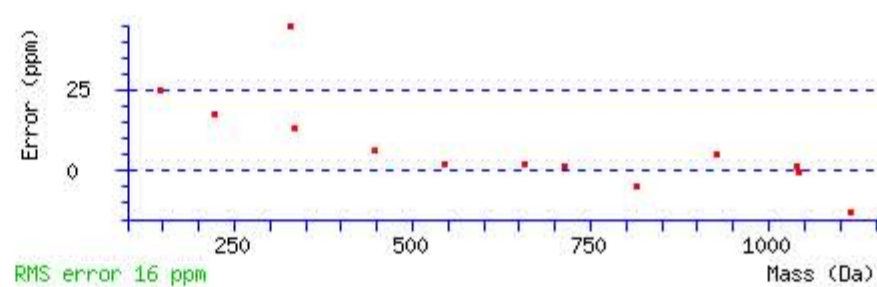

NCBI BLAST search of [GYILVGQAK](#)

(Parameters: blastp, nr protein database, expect=20000, no filter, PAM30)

Other BLAST [web gateways](#)

All matches to this query

| Score | Mr(calc):   | Delta     | Sequence                   |
|-------|-------------|-----------|----------------------------|
| 30.4  | 1258.710754 | -0.001606 | <a href="#">GYILVGQAK</a>  |
| 10.7  | 1258.721970 | -0.012822 | <a href="#">GYILQAKR</a>   |
| 10.0  | 1258.717941 | -0.008793 | <a href="#">RILAKVQEMR</a> |

Mascot: <http://www.matrixscience.com/>



# MASCOT Search Results

## Peptide View

MS/MS Fragmentation of **QSSYSFFK**

Found in **C4BPA\_HUMAN**, C4b-binding protein alpha chain OS=Homo sapiens GN=C4BPA PE=1 SV=2

Match to Query 27298: 1390.676248 from(696.345400,2+) rtinseconds(2162) index(36162)

Title: Locus:1.1.1.3386.15 File:"2013-07-02 CLN FXIII 30 min 3rd F 3.wiff"

Data file C:\Program Files (x86)\Matrix Science\Mascot Daemon\mgf3 FXIII 30 min 3rd\mascot\_daemon\_merge.mgf

Click mouse within plot area to zoom in by factor of two about that point

Or, Plot from  to  Da

Label all possible matches  Label matches used for scoring

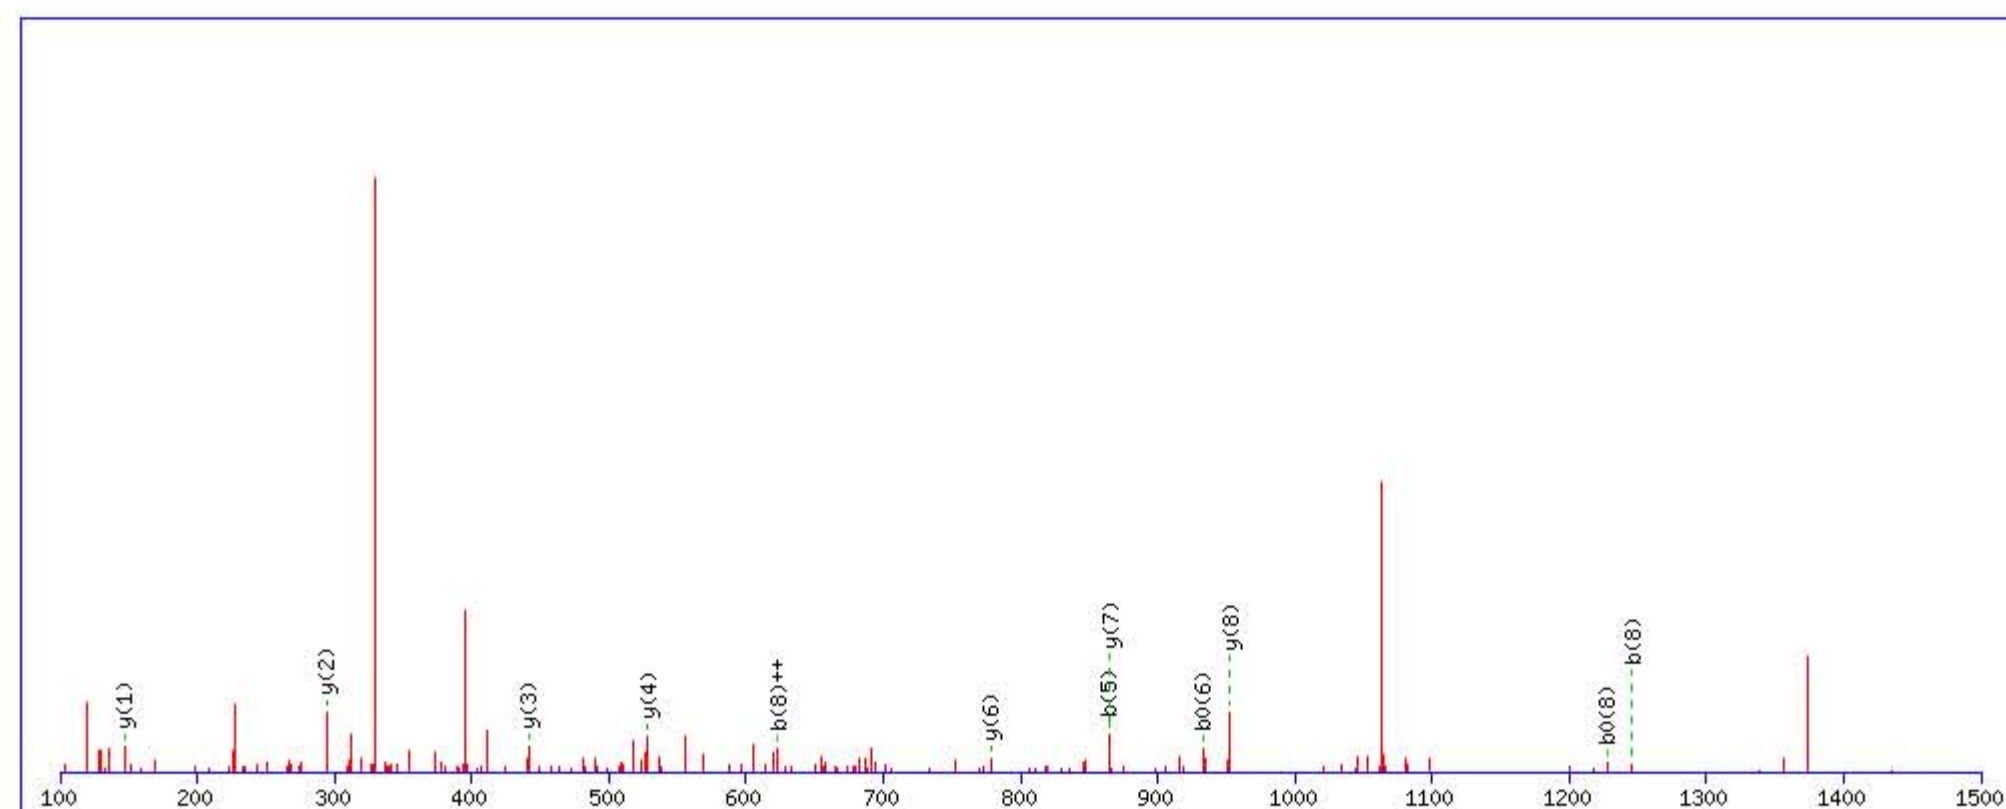

Monoisotopic mass of neutral peptide  $M_r(\text{calc})$ : 1390.659119

Fixed modifications: Carbamidomethyl (C) (apply to specified residues or termini only)

Variable modifications:

Q1 : Biotin:Thermo-21345 (Q)

Ions Score: 36 Expect: 0.0021

Matches : 12/88 fragment ions using 25 most intense peaks [\(help\)](#)

| # | b                  | b <sup>++</sup>   | b <sup>*</sup> | b <sup>*++</sup> | b <sup>0</sup>     | b <sup>0++</sup> | Seq. | y                 | y <sup>++</sup> | y <sup>*</sup> | y <sup>*++</sup> | y <sup>0</sup> | y <sup>0++</sup> | # |
|---|--------------------|-------------------|----------------|------------------|--------------------|------------------|------|-------------------|-----------------|----------------|------------------|----------------|------------------|---|
| 1 | 440.232602         | 220.619939        | 423.206053     | 212.106664       |                    |                  | Q    |                   |                 |                |                  |                |                  | 9 |
| 2 | 527.264630         | 264.135953        | 510.238081     | 255.622679       | 509.254065         | 255.130671       | S    | <b>952.441073</b> | 476.724175      | 935.414524     | 468.210900       | 934.430508     | 467.718892       | 8 |
| 3 | 614.296658         | 307.651967        | 597.270109     | 299.138692       | 596.286093         | 298.646684       | S    | <b>865.409045</b> | 433.208161      | 848.382496     | 424.694886       | 847.398480     | 424.202878       | 7 |
| 4 | 701.328686         | 351.167981        | 684.302137     | 342.654706       | 683.318121         | 342.162698       | S    | <b>778.377017</b> | 389.692147      | 761.350468     | 381.178872       | 760.366452     | 380.686864       | 6 |
| 5 | <b>864.392015</b>  | 432.699645        | 847.365466     | 424.186371       | 846.381450         | 423.694363       | Y    | 691.344989        | 346.176133      | 674.318440     | 337.662858       | 673.334424     | 337.170850       | 5 |
| 6 | 951.424043         | 476.215659        | 934.397494     | 467.702385       | <b>933.413478</b>  | 467.210377       | S    | <b>528.281660</b> | 264.644468      | 511.255111     | 256.131194       | 510.271095     | 255.639186       | 4 |
| 7 | 1098.492457        | 549.749866        | 1081.465908    | 541.236592       | 1080.481892        | 540.744584       | F    | <b>441.249632</b> | 221.128454      | 424.223083     | 212.615180       |                |                  | 3 |
| 8 | <b>1245.560871</b> | <b>623.284073</b> | 1228.534322    | 614.770799       | <b>1227.550306</b> | 614.278791       | F    | <b>294.181218</b> | 147.594247      | 277.154669     | 139.080973       |                |                  | 2 |
| 9 |                    |                   |                |                  |                    |                  | K    | <b>147.112804</b> | 74.060040       | 130.086255     | 65.546765        |                |                  | 1 |

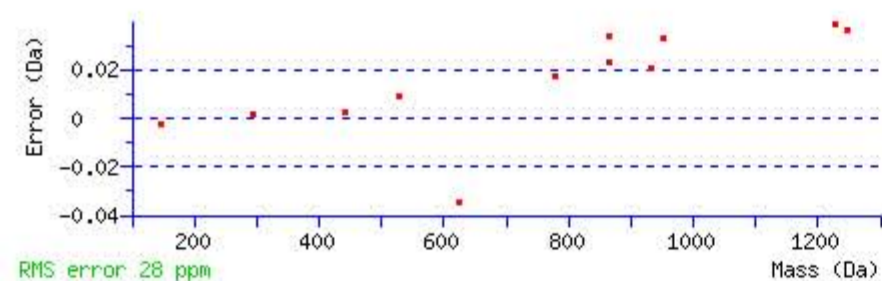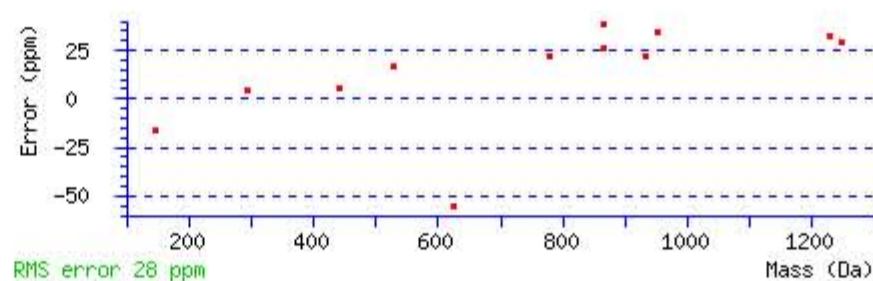

NCBI BLAST search of **QSSYSFFK**

(Parameters: blastp, nr protein database, expect=20000, no filter, PAM30)

Other BLAST [web gateways](#)

All matches to this query

| Score | $M_r(\text{calc})$ : | Delta     | Sequence                     |
|-------|----------------------|-----------|------------------------------|
| 36.5  | 1390.659119          | 0.017129  | <a href="#">QSSYSFFK</a>     |
| 7.4   | 1390.691467          | -0.015219 | <a href="#">VTKEMNEFIHK</a>  |
| 1.8   | 1390.676208          | 0.000040  | <a href="#">AEKSSSTDQK</a>   |
| 1.4   | 1390.669678          | 0.006570  | <a href="#">CAPASIRLMDNK</a> |
| 0.1   | 1390.688797          | -0.012549 | <a href="#">ISVNCGHPSRHK</a> |



# MASCOT Search Results

## Peptide View

MS/MS Fragmentation of **LSCSYSHWSAPAPQCK**

Found in **C4BPA\_HUMAN**, C4b-binding protein alpha chain OS=Homo sapiens GN=C4BPA PE=1 SV=2

Match to Query 46998: 2188.982502 from(730.668110,3+) rtinseconds(1794) index(49862)

Title: Locus:1.1.1.3268.10 File:"2013-07-02 CLN FXIII 30 min 3rd F 4.wiff"

Data file C:\Program Files (x86)\Matrix Science\Mascot Daemon\mgf3 FXIII 30 min 3rd\mascot\_daemon\_merge.mgf

Click mouse within plot area to zoom in by factor of two about that point

Or, Plot from  to  Da

Label all possible matches  Label matches used for scoring

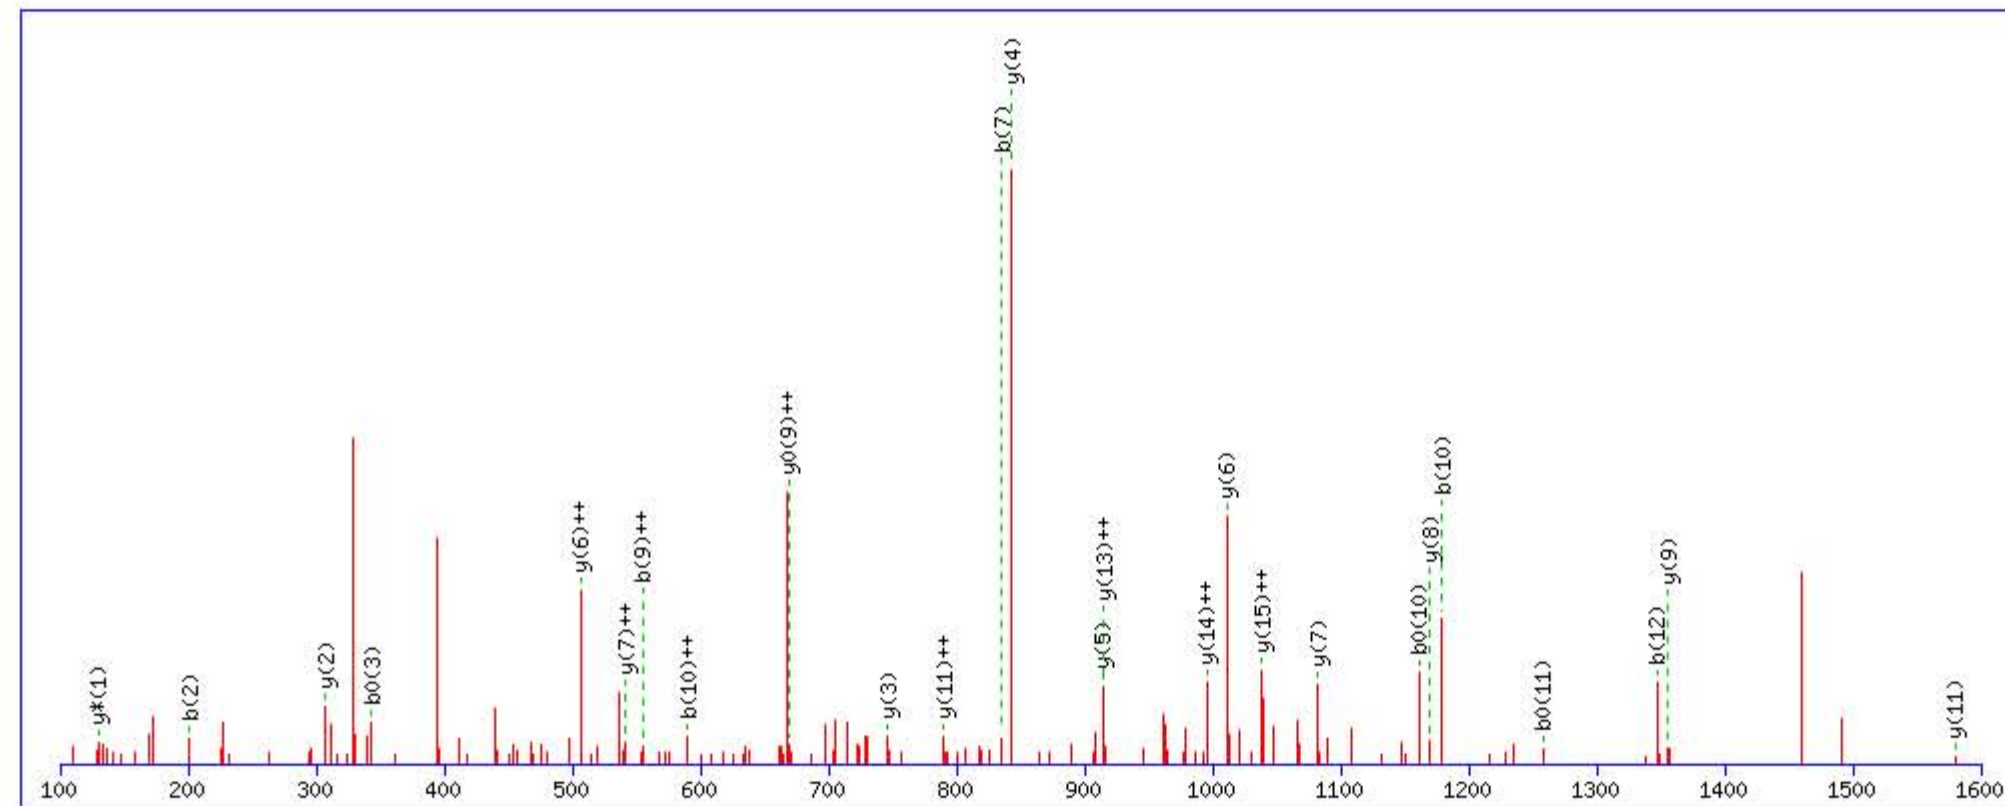

Monoisotopic mass of neutral peptide Mr(calc): 2188.985626

Fixed modifications: Carbamidomethyl (C) (apply to specified residues or termini only)

Variable modifications:

Q14 : Biotin:Thermo-21345 (Q)

Ions Score: 41 Expect: 0.00082

Matches : 26/138 fragment ions using 55 most intense peaks [\(help\)](#)

| #  | b                  | b <sup>++</sup>   | b <sup>*</sup> | b <sup>+++</sup> | b <sup>0</sup>     | b <sup>0++</sup> | Seq. | y                  | y <sup>++</sup>    | y <sup>*</sup>    | y <sup>+++</sup> | y <sup>0</sup> | y <sup>0++</sup>  | #  |
|----|--------------------|-------------------|----------------|------------------|--------------------|------------------|------|--------------------|--------------------|-------------------|------------------|----------------|-------------------|----|
| 1  | 114.091340         | 57.549308         |                |                  |                    |                  | L    |                    |                    |                   |                  |                |                   | 16 |
| 2  | <b>201.123368</b>  | 101.065322        |                |                  | 183.112803         | 92.060039        | S    | 2076.908850        | <b>1038.958063</b> | 2059.882301       | 1030.444788      | 2058.898285    | 1029.952780       | 15 |
| 3  | 361.154017         | 181.080647        |                |                  | <b>343.143452</b>  | 172.075364       | C    | 1989.876822        | <b>995.442049</b>  | 1972.850273       | 986.928775       | 1971.866257    | 986.436767        | 14 |
| 4  | 448.186045         | 224.596660        |                |                  | 430.175480         | 215.591378       | S    | 1829.846173        | <b>915.426725</b>  | 1812.819624       | 906.913450       | 1811.835608    | 906.421442        | 13 |
| 5  | 611.249374         | 306.128325        |                |                  | 593.238809         | 297.123043       | Y    | 1742.814145        | 871.910711         | 1725.787596       | 863.397436       | 1724.803580    | 862.905428        | 12 |
| 6  | 698.281402         | 349.644339        |                |                  | 680.270837         | 340.639056       | S    | <b>1579.750816</b> | <b>790.379046</b>  | 1562.724267       | 781.865772       | 1561.740251    | 781.373764        | 11 |
| 7  | <b>835.340314</b>  | 418.173795        |                |                  | 817.329749         | 409.168512       | H    | 1492.718788        | 746.863032         | 1475.692239       | 738.349758       | 1474.708223    | 737.857750        | 10 |
| 8  | 1021.419627        | 511.213452        |                |                  | 1003.409062        | 502.208169       | W    | <b>1355.659876</b> | 678.333576         | 1338.633327       | 669.820302       | 1337.649311    | <b>669.328294</b> | 9  |
| 9  | 1108.451655        | <b>554.729466</b> |                |                  | 1090.441090        | 545.724183       | S    | <b>1169.580563</b> | 585.293920         | 1152.554014       | 576.780645       | 1151.569998    | 576.288637        | 8  |
| 10 | <b>1179.488769</b> | <b>590.248023</b> |                |                  | <b>1161.478204</b> | 581.242740       | A    | <b>1082.548535</b> | <b>541.777906</b>  | 1065.521986       | 533.264631       |                |                   | 7  |
| 11 | 1276.541533        | 638.774405        |                |                  | <b>1258.530968</b> | 629.769122       | P    | <b>1011.511421</b> | <b>506.259349</b>  | 994.484872        | 497.746074       |                |                   | 6  |
| 12 | <b>1347.578647</b> | 674.292962        |                |                  | 1329.568082        | 665.287679       | A    | <b>914.458657</b>  | 457.732967         | 897.432108        | 449.219692       |                |                   | 5  |
| 13 | 1444.631411        | 722.819344        |                |                  | 1426.620846        | 713.814061       | P    | <b>843.421543</b>  | 422.214410         | 826.394994        | 413.701135       |                |                   | 4  |
| 14 | 1883.856737        | 942.432007        | 1866.830188    | 933.918732       | 1865.846172        | 933.426724       | Q    | <b>746.368779</b>  | 373.688028         | 729.342230        | 365.174753       |                |                   | 3  |
| 15 | 2043.887386        | 1022.447331       | 2026.860837    | 1013.934057      | 2025.876821        | 1013.442049      | C    | <b>307.143453</b>  | 154.075365         | 290.116904        | 145.562090       |                |                   | 2  |
| 16 |                    |                   |                |                  |                    |                  | K    | 147.112804         | 74.060040          | <b>130.086255</b> | 65.546766        |                |                   | 1  |

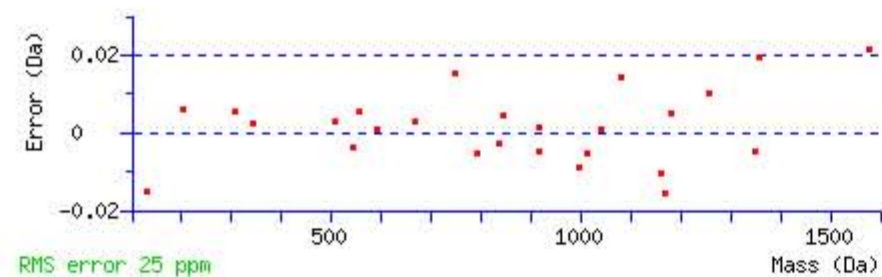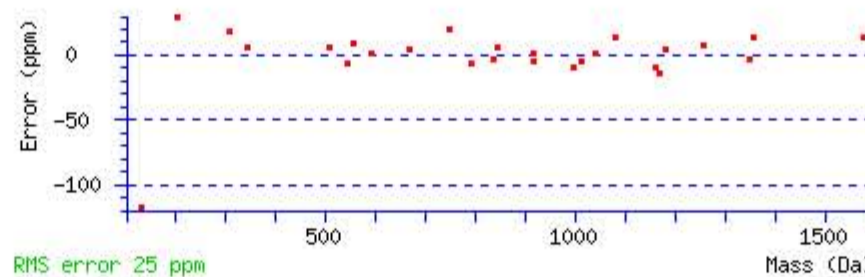

NCBI BLAST search of **LSCSYSHWSAPAPQCK**

(Parameters: blastp, nr protein database, expect=20000, no filter, PAM30)

Other BLAST [web gateways](#)

## All matches to this query

| Score | Mr(calc):   | Delta     | Sequence                         |
|-------|-------------|-----------|----------------------------------|
| 40.7  | 2188.985626 | -0.003124 | <a href="#">LSCSYSHWSAPAPQCK</a> |

Mascot: <http://www.matrixscience.com/>



# MASCOT Search Results

## Peptide View

MS/MS Fragmentation of **DHLGFQVTWPDESK**

Found in **CPN2\_HUMAN**, Carboxypeptidase N subunit 2 OS=Homo sapiens GN=CPN2 PE=1 SV=3

Match to Query 42378: 1968.964362 from(657.328730,3+) rtinseconds(2339) index(37070)

Title: Locus:1.1.1.3448.11 File:"2013-07-02 CLN FXIII 30 min 3rd F 3.wiff"

Data file C:\Program Files (x86)\Matrix Science\Mascot Daemon\mgf3 FXIII 30 min 3rd\mascot\_daemon\_merge.mgf

Click mouse within plot area to zoom in by factor of two about that point

Or, Plot from  to  Da

Label all possible matches  Label matches used for scoring

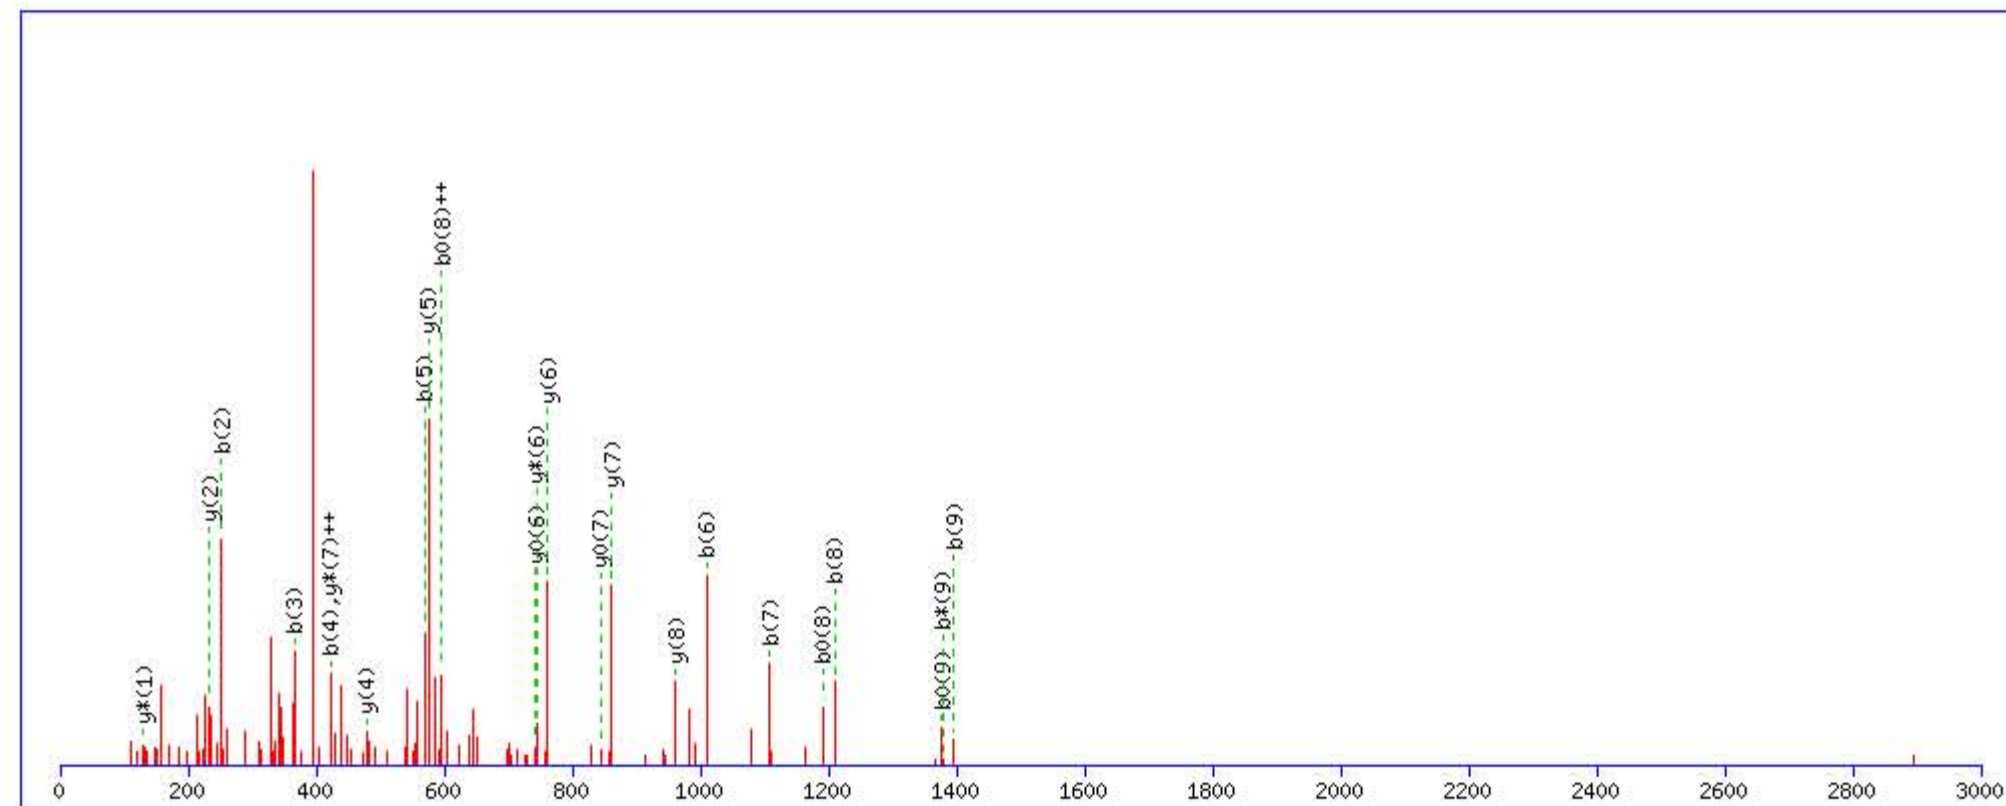

Monoisotopic mass of neutral peptide Mr(calc): 1968.940399

Fixed modifications: Carbamidomethyl (C) (apply to specified residues or termini only)

Variable modifications:

Q6 : Biotin:Thermo-21345 (Q)

Ions Score: 47 Expect: 0.00039

Matches : 23/144 fragment ions using 36 most intense peaks [\(help\)](#)

| #  | b                  | b <sup>++</sup> | b <sup>+</sup>     | b <sup>+++</sup> | b <sup>0</sup>     | b <sup>0++</sup>  | Seq. | y                 | y <sup>++</sup> | y <sup>+</sup>    | y <sup>+++</sup>  | y <sup>0</sup>    | y <sup>0++</sup> | #  |
|----|--------------------|-----------------|--------------------|------------------|--------------------|-------------------|------|-------------------|-----------------|-------------------|-------------------|-------------------|------------------|----|
| 1  | 116.034219         | 58.520748       |                    |                  | 98.023654          | 49.515465         | D    |                   |                 |                   |                   |                   |                  | 14 |
| 2  | <b>253.093131</b>  | 127.050203      |                    |                  | 235.082566         | 118.044921        | H    | 1854.920718       | 927.963997      | 1837.894169       | 919.450723        | 1836.910153       | 918.958715       | 13 |
| 3  | <b>366.177195</b>  | 183.592235      |                    |                  | 348.166630         | 174.586953        | L    | 1717.861806       | 859.434541      | 1700.835257       | 850.921267        | 1699.851241       | 850.429259       | 12 |
| 4  | <b>423.198659</b>  | 212.102967      |                    |                  | 405.188094         | 203.097685        | G    | 1604.777742       | 802.892509      | 1587.751193       | 794.379235        | 1586.767177       | 793.887227       | 11 |
| 5  | <b>570.267073</b>  | 285.637175      |                    |                  | 552.256508         | 276.631892        | F    | 1547.756278       | 774.381777      | 1530.729729       | 765.868503        | 1529.745713       | 765.376495       | 10 |
| 6  | <b>1009.492399</b> | 505.249838      | 992.465850         | 496.736563       | 991.481834         | 496.244555        | Q    | 1400.687864       | 700.847570      | 1383.661315       | 692.334296        | 1382.677299       | 691.842288       | 9  |
| 7  | <b>1108.560813</b> | 554.784045      | 1091.534264        | 546.270770       | 1090.550248        | 545.778762        | V    | <b>961.462538</b> | 481.234907      | 944.435989        | 472.721633        | 943.451973        | 472.229625       | 8  |
| 8  | <b>1209.608492</b> | 605.307884      | 1192.581943        | 596.794610       | <b>1191.597927</b> | <b>596.302602</b> | T    | <b>862.394124</b> | 431.700700      | 845.367575        | <b>423.187426</b> | <b>844.383559</b> | 422.695418       | 7  |
| 9  | <b>1395.687805</b> | 698.347541      | <b>1378.661256</b> | 689.834266       | <b>1377.677240</b> | 689.342258        | W    | <b>761.346445</b> | 381.176861      | <b>744.319896</b> | 372.663586        | <b>743.335880</b> | 372.171578       | 6  |
| 10 | 1492.740569        | 746.873923      | 1475.714020        | 738.360648       | 1474.730004        | 737.868640        | P    | <b>575.267132</b> | 288.137204      | 558.240583        | 279.623930        | 557.256567        | 279.131922       | 5  |
| 11 | 1607.767512        | 804.387394      | 1590.740963        | 795.874120       | 1589.756947        | 795.382112        | D    | <b>478.214368</b> | 239.610822      | 461.187819        | 231.097548        | 460.203803        | 230.605540       | 4  |
| 12 | 1736.810105        | 868.908691      | 1719.783556        | 860.395416       | 1718.799540        | 859.903408        | E    | 363.187425        | 182.097351      | 346.160876        | 173.584076        | 345.176860        | 173.092068       | 3  |
| 13 | 1823.842133        | 912.424705      | 1806.815584        | 903.911430       | 1805.831568        | 903.419422        | S    | <b>234.144832</b> | 117.576054      | 217.118283        | 109.062780        | 216.134267        | 108.570772       | 2  |
| 14 |                    |                 |                    |                  |                    |                   | K    | 147.112804        | 74.060040       | <b>130.086255</b> | 65.546765         |                   |                  | 1  |

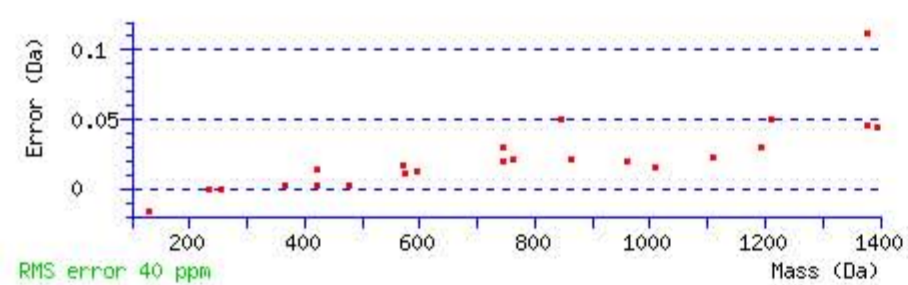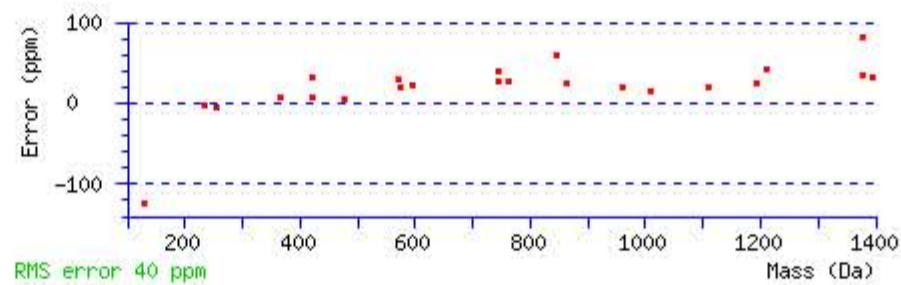

NCBI BLAST search of **DHLGFQVTWPDESK**

(Parameters: blastp, nr protein database, expect=20000, no filter, PAM30)

Other BLAST [web gateways](#)

All matches to this query

| Score | Mr(calc):   | Delta    | Sequence                           |
|-------|-------------|----------|------------------------------------|
| 47.4  | 1968.940399 | 0.023963 | <a href="#">DHLGFQVTWPDESK</a>     |
| 11.0  | 1968.949585 | 0.014777 | <a href="#">EGQMESVEAAMSSKTLKK</a> |

Mascot: <http://www.matrixscience.com/>



# MASCOT SEARCH RESULTS

## Peptide View

MS/MS Fragmentation of **NALWHTGDTESQVR**

Found in **COMP\_HUMAN**, Cartilage oligomeric matrix protein OS=Homo sapiens GN=COMP PE=1 SV=2

Match to Query 41469: 1923.919872 from(642.313900,3+) rtinseconds(1794) index(49860)

Title: Locus:1.1.1.3268.8 File:"2013-07-02 CLN FXIII 30 min 3rd F 4.wiff"

Data file C:\Program Files (x86)\Matrix Science\Mascot Daemon\mgf3 FXIII 30 min 3rd\mascot\_daemon\_merge.mgf

Click mouse within plot area to zoom in by factor of two about that point

Or, Plot from  to  Da

Label all possible matches  Label matches used for scoring

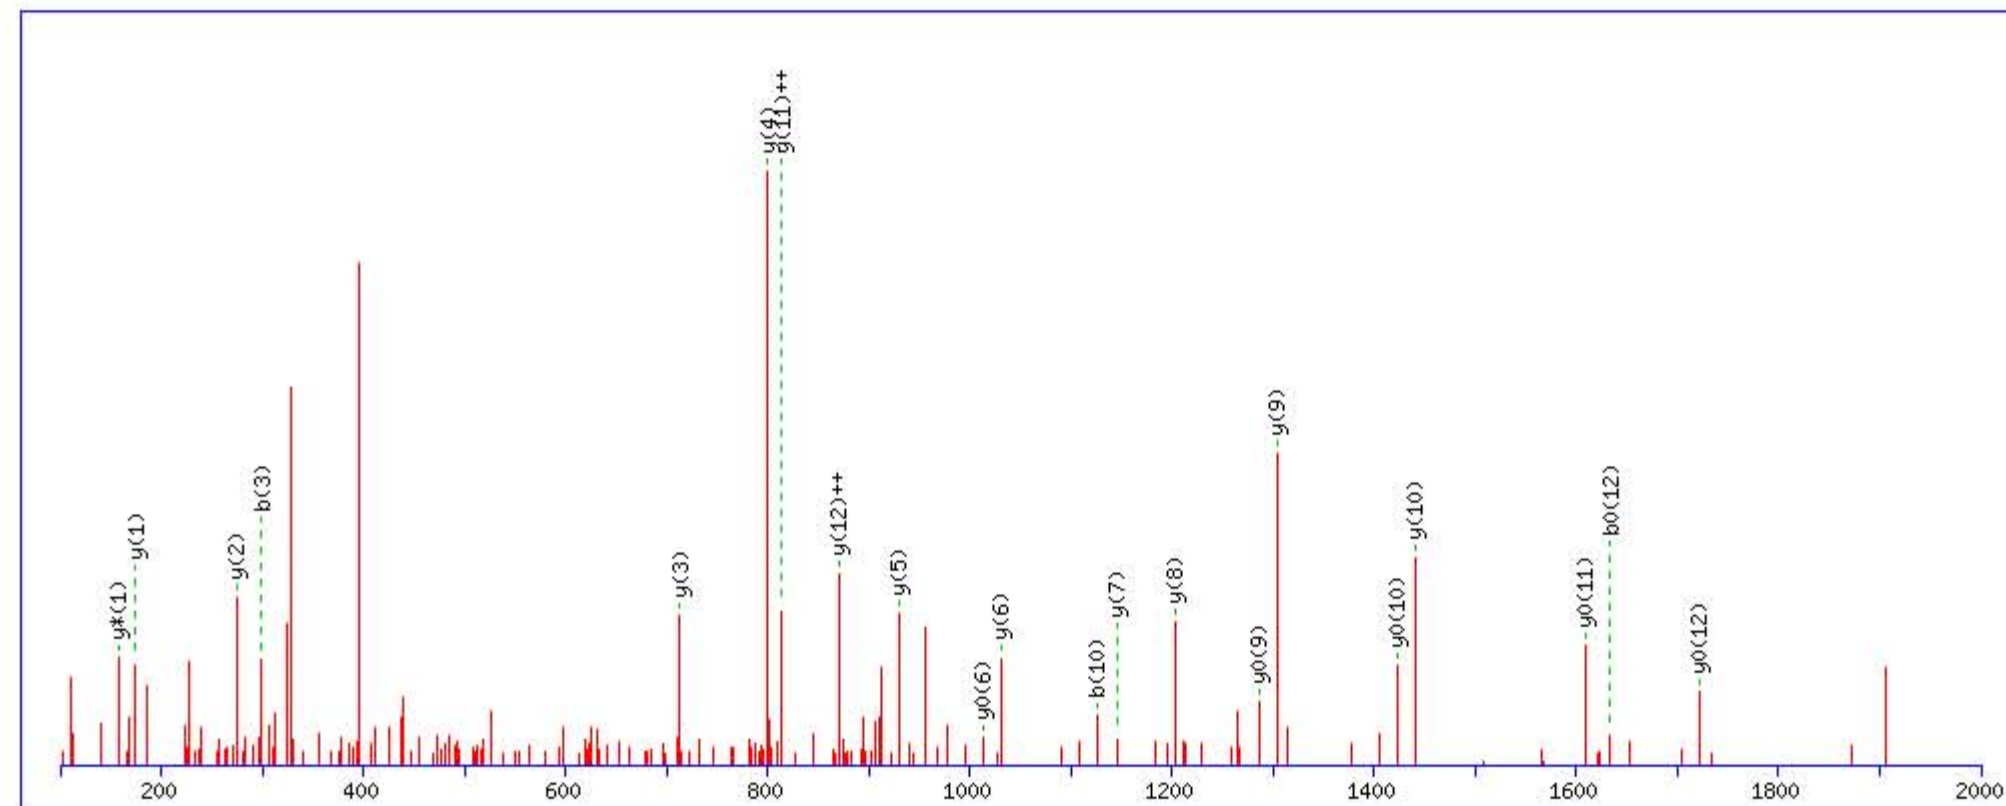

Monoisotopic mass of neutral peptide Mr(calc): 1923.926132

Fixed modifications: Carbamidomethyl (C) (apply to specified residues or termini only)

Variable modifications:

Q12 : Biotin:Thermo-21345 (Q)

Ions Score: 62 Expect: 1.7e-006

Matches : 21/140 fragment ions using 37 most intense peaks [\(help\)](#)

| #  | b                  | b <sup>++</sup> | b <sup>+</sup> | b <sup>+++</sup> | b <sup>0</sup>     | b <sup>0++</sup> | Seq. | y                  | y <sup>++</sup>   | y <sup>+</sup>    | y <sup>+++</sup> | y <sup>0</sup>     | y <sup>0++</sup> | #  |
|----|--------------------|-----------------|----------------|------------------|--------------------|------------------|------|--------------------|-------------------|-------------------|------------------|--------------------|------------------|----|
| 1  | 115.050203         | 58.028740       | 98.023654      | 49.515465        |                    |                  | N    |                    |                   |                   |                  |                    |                  | 14 |
| 2  | 186.087317         | 93.547296       | 169.060768     | 85.034022        |                    |                  | A    | 1810.890481        | 905.948879        | 1793.863932       | 897.435604       | 1792.879916        | 896.943596       | 13 |
| 3  | <b>299.171381</b>  | 150.089328      | 282.144832     | 141.576054       |                    |                  | L    | 1739.853367        | <b>870.430322</b> | 1722.826818       | 861.917047       | <b>1721.842802</b> | 861.425039       | 12 |
| 4  | 485.250694         | 243.128985      | 468.224145     | 234.615711       |                    |                  | W    | 1626.769303        | <b>813.888290</b> | 1609.742754       | 805.375015       | <b>1608.758738</b> | 804.883007       | 11 |
| 5  | 622.309606         | 311.658441      | 605.283057     | 303.145167       |                    |                  | H    | <b>1440.689990</b> | 720.848633        | 1423.663441       | 712.335359       | <b>1422.679425</b> | 711.843351       | 10 |
| 6  | 723.357285         | 362.182281      | 706.330736     | 353.669006       | 705.346720         | 353.176998       | T    | <b>1303.631078</b> | 652.319177        | 1286.604529       | 643.805903       | <b>1285.620513</b> | 643.313895       | 9  |
| 7  | 780.378749         | 390.693013      | 763.352200     | 382.179738       | 762.368184         | 381.687730       | G    | <b>1202.583399</b> | 601.795338        | 1185.556850       | 593.282063       | 1184.572834        | 592.790055       | 8  |
| 8  | 895.405692         | 448.206484      | 878.379143     | 439.693210       | 877.395127         | 439.201202       | D    | <b>1145.561935</b> | 573.284606        | 1128.535386       | 564.771331       | 1127.551370        | 564.279323       | 7  |
| 9  | 996.453371         | 498.730324      | 979.426822     | 490.217049       | 978.442806         | 489.725041       | T    | <b>1030.534992</b> | 515.771134        | 1013.508443       | 507.257860       | <b>1012.524427</b> | 506.765852       | 6  |
| 10 | <b>1125.495964</b> | 563.251620      | 1108.469415    | 554.738346       | 1107.485399        | 554.246337       | E    | <b>929.487313</b>  | 465.247295        | 912.460764        | 456.734020       | 911.476748         | 456.242012       | 5  |
| 11 | 1212.527992        | 606.767634      | 1195.501443    | 598.254360       | 1194.517427        | 597.762352       | S    | <b>800.444720</b>  | 400.725998        | 783.418171        | 392.212724       | 782.434155         | 391.720716       | 4  |
| 12 | 1651.753318        | 826.380297      | 1634.726769    | 817.867023       | <b>1633.742753</b> | 817.375015       | Q    | <b>713.412692</b>  | 357.209984        | 696.386143        | 348.696710       |                    |                  | 3  |
| 13 | 1750.821732        | 875.914504      | 1733.795183    | 867.401230       | 1732.811167        | 866.909222       | V    | <b>274.187366</b>  | 137.597321        | 257.160817        | 129.084047       |                    |                  | 2  |
| 14 |                    |                 |                |                  |                    |                  | R    | <b>175.118952</b>  | 88.063114         | <b>158.092403</b> | 79.549839        |                    |                  | 1  |

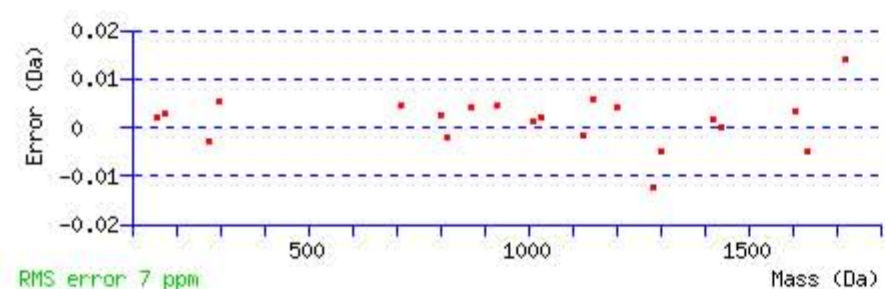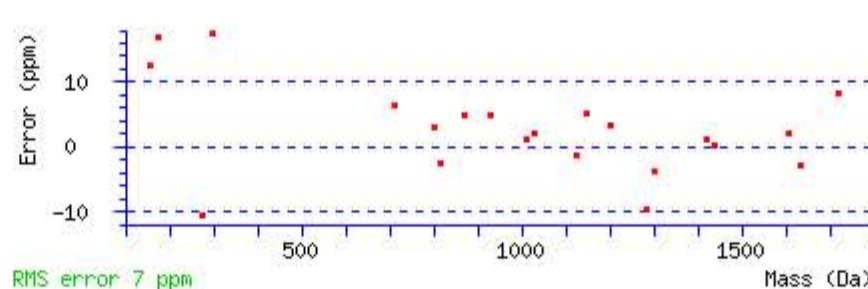

NCBI BLAST search of **NALWHTGDTESQVR**

(Parameters: blastp, nr protein database, expect=20000, no filter, PAM30)

Other BLAST [web gateways](#)

All matches to this query

| Score | Mr(calc):   | Delta     | Sequence                           |
|-------|-------------|-----------|------------------------------------|
| 62.4  | 1923.926132 | -0.006260 | <a href="#">NALWHTGDTESQVR</a>     |
| 0.8   | 1923.909531 | 0.010341  | <a href="#">NLEAVETLGSTSTICSDK</a> |

Mascot: <http://www.matrixscience.com/>



# MASCOT Search Results

## Peptide View

MS/MS Fragmentation of **ELDESLQVAER**

Found in **CLUS\_HUMAN**, Clusterin OS=Homo sapiens GN=CLU PE=1 SV=1

Match to Query 34043: 1598.791568 from(800.403060,2+) rtinseconds(1973) index(50968)

Title: Locus:1.1.1.3330.19 File:"2013-07-02 CLN FXIII 30 min 3rd F 4.wiff"

Data file C:\Program Files (x86)\Matrix Science\Mascot Daemon\mgf\3 FXIII 30 min 3rd\mascot\_daemon\_merge.mgf

Click mouse within plot area to zoom in by factor of two about that point

Or, Plot from  to  Da

Label all possible matches  Label matches used for scoring

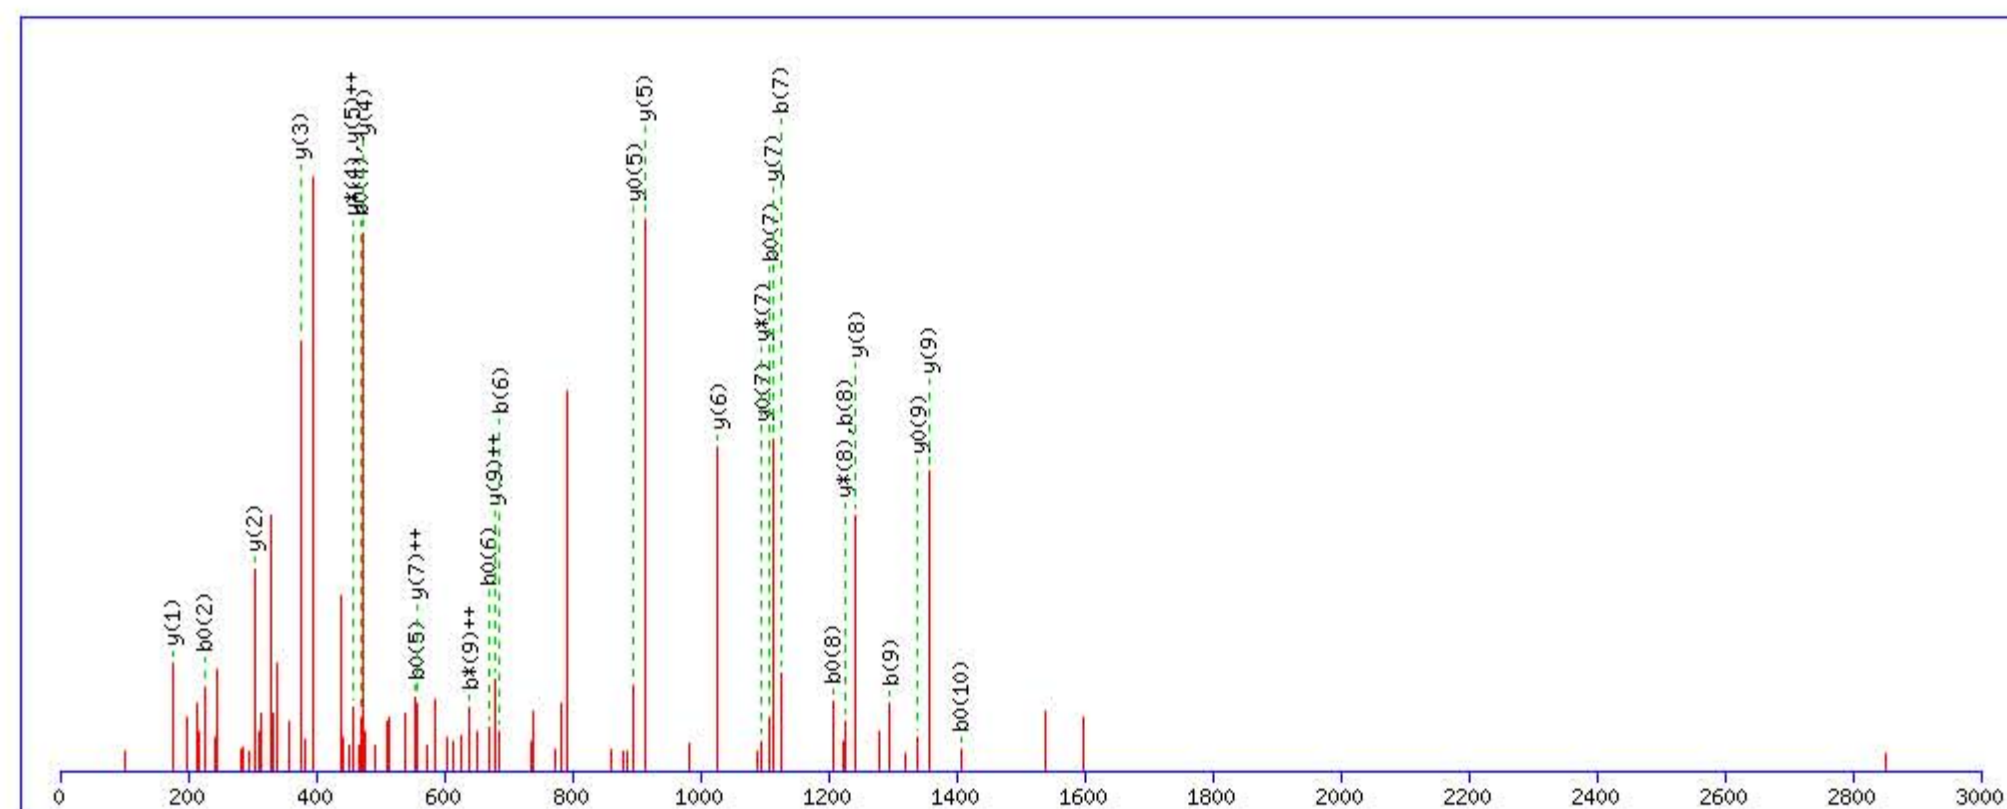

Monoisotopic mass of neutral peptide Mr(calc): 1598.797379

Fixed modifications: Carbamidomethyl (C) (apply to specified residues or termini only)

Variable modifications:

Q7 : Biotin:Thermo-21345 (Q)

Ions Score: 55 Expect: 2.7e-005

Matches : 30/106 fragment ions using 51 most intense peaks [\(help\)](#)

| #  | b           | b <sup>++</sup> | b <sup>*</sup> | b <sup>*++</sup> | b <sup>0</sup> | b <sup>0++</sup> | Seq. | y           | y <sup>++</sup> | y <sup>*</sup> | y <sup>*++</sup> | y <sup>0</sup> | y <sup>0++</sup> | #  |
|----|-------------|-----------------|----------------|------------------|----------------|------------------|------|-------------|-----------------|----------------|------------------|----------------|------------------|----|
| 1  | 130.049869  | 65.528572       |                |                  | 112.039304     | 56.523290        | E    |             |                 |                |                  |                |                  | 11 |
| 2  | 243.133933  | 122.070605      |                |                  | 225.123368     | 113.065322       | L    | 1470.762091 | 735.884684      | 1453.735542    | 727.371409       | 1452.751526    | 726.879401       | 10 |
| 3  | 358.160876  | 179.584076      |                |                  | 340.150311     | 170.578794       | D    | 1357.678027 | 679.342652      | 1340.651478    | 670.829377       | 1339.667462    | 670.337369       | 9  |
| 4  | 487.203469  | 244.105373      |                |                  | 469.192904     | 235.100090       | E    | 1242.651084 | 621.829180      | 1225.624535    | 613.315906       | 1224.640519    | 612.823898       | 8  |
| 5  | 574.235497  | 287.621387      |                |                  | 556.224932     | 278.616104       | S    | 1113.608491 | 557.307884      | 1096.581942    | 548.794609       | 1095.597926    | 548.302601       | 7  |
| 6  | 687.319561  | 344.163419      |                |                  | 669.308996     | 335.158136       | L    | 1026.576463 | 513.791870      | 1009.549914    | 505.278595       | 1008.565898    | 504.786587       | 6  |
| 7  | 1126.544887 | 563.776082      | 1109.518338    | 555.262807       | 1108.534322    | 554.770799       | Q    | 913.492399  | 457.249838      | 896.465850     | 448.736563       | 895.481834     | 448.244555       | 5  |
| 8  | 1225.613301 | 613.310289      | 1208.586752    | 604.797014       | 1207.602736    | 604.305006       | V    | 474.267073  | 237.637175      | 457.240524     | 229.123900       | 456.256508     | 228.631892       | 4  |
| 9  | 1296.650415 | 648.828846      | 1279.623866    | 640.315571       | 1278.639850    | 639.823563       | A    | 375.198659  | 188.102968      | 358.172110     | 179.589693       | 357.188094     | 179.097685       | 3  |
| 10 | 1425.693008 | 713.350142      | 1408.666459    | 704.836868       | 1407.682443    | 704.344860       | E    | 304.161545  | 152.584411      | 287.134996     | 144.071136       | 286.150980     | 143.579128       | 2  |
| 11 |             |                 |                |                  |                |                  | R    | 175.118952  | 88.063114       | 158.092403     | 79.549839        |                |                  | 1  |

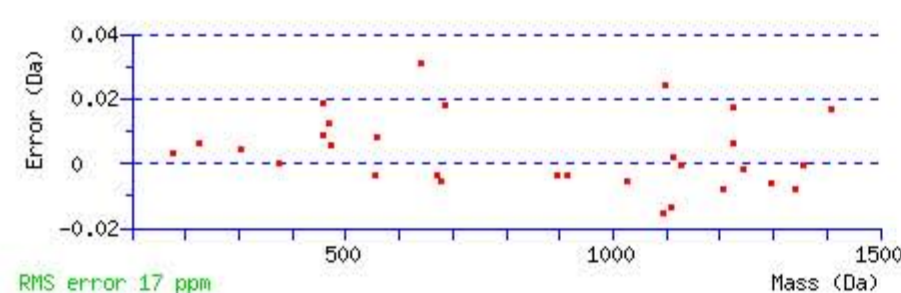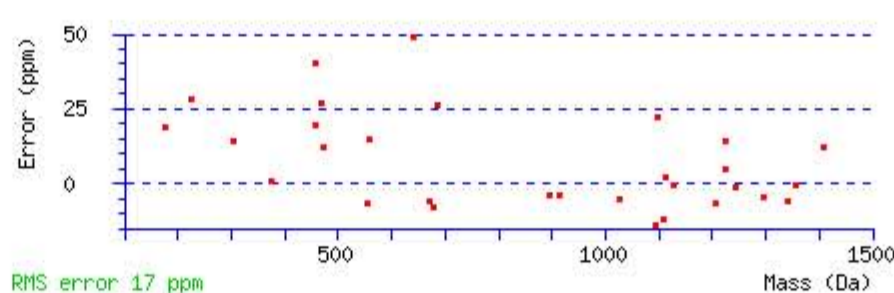

NCBI BLAST search of **ELDESLQVAER**

(Parameters: blastp, nr protein database, expect=20000, no filter, PAM30)

Other BLAST [web gateways](#)

All matches to this query

| Score | Mr(calc):   | Delta     | Sequence                         |
|-------|-------------|-----------|----------------------------------|
| 55.0  | 1598.797379 | -0.005811 | <a href="#">ELDESLQVAER</a>      |
| 5.9   | 1598.790024 | 0.001544  | <a href="#">VTAEGDSHTEVVISR</a>  |
| 3.5   | 1598.787506 | 0.004062  | <a href="#">AGGSWDLAVQER</a>     |
| 3.2   | 1598.768875 | 0.022693  | <a href="#">TSDYYRVSADLPGR</a>   |
| 2.6   | 1598.797379 | -0.005811 | <a href="#">LEESDVLQEAR</a>      |
| 1.7   | 1598.789993 | 0.001575  | <a href="#">AGATSGELPVVEAENR</a> |
| 1.7   | 1598.797409 | -0.005841 | <a href="#">EDVDDLVSQLR</a>      |
| 0.4   | 1598.783478 | 0.008090  | <a href="#">EDSVQRSTPNR</a>      |



# MASCOT SEARCH RESULTS

## Peptide View

MS/MS Fragmentation of **ASSIDELFQDR**

Found in **CLUS\_HUMAN**, Clusterin OS=Homo sapiens GN=CLU PE=1 SV=1

Match to Query 37142: 1703.853912 from(568.958580,3+) rtinseconds(2837) index(55609)

Title: Locus:1.1.1.3629.4 File:"2013-07-02 CLN FXIII 30 min 3rd F 4.wiff"

Data file C:\Program Files (x86)\Matrix Science\Mascot Daemon\mgf3 FXIII 30 min 3rd\mascot\_daemon\_merge.mgf

Click mouse within plot area to zoom in by factor of two about that point

Or, Plot from  to  Da

Label all possible matches  Label matches used for scoring

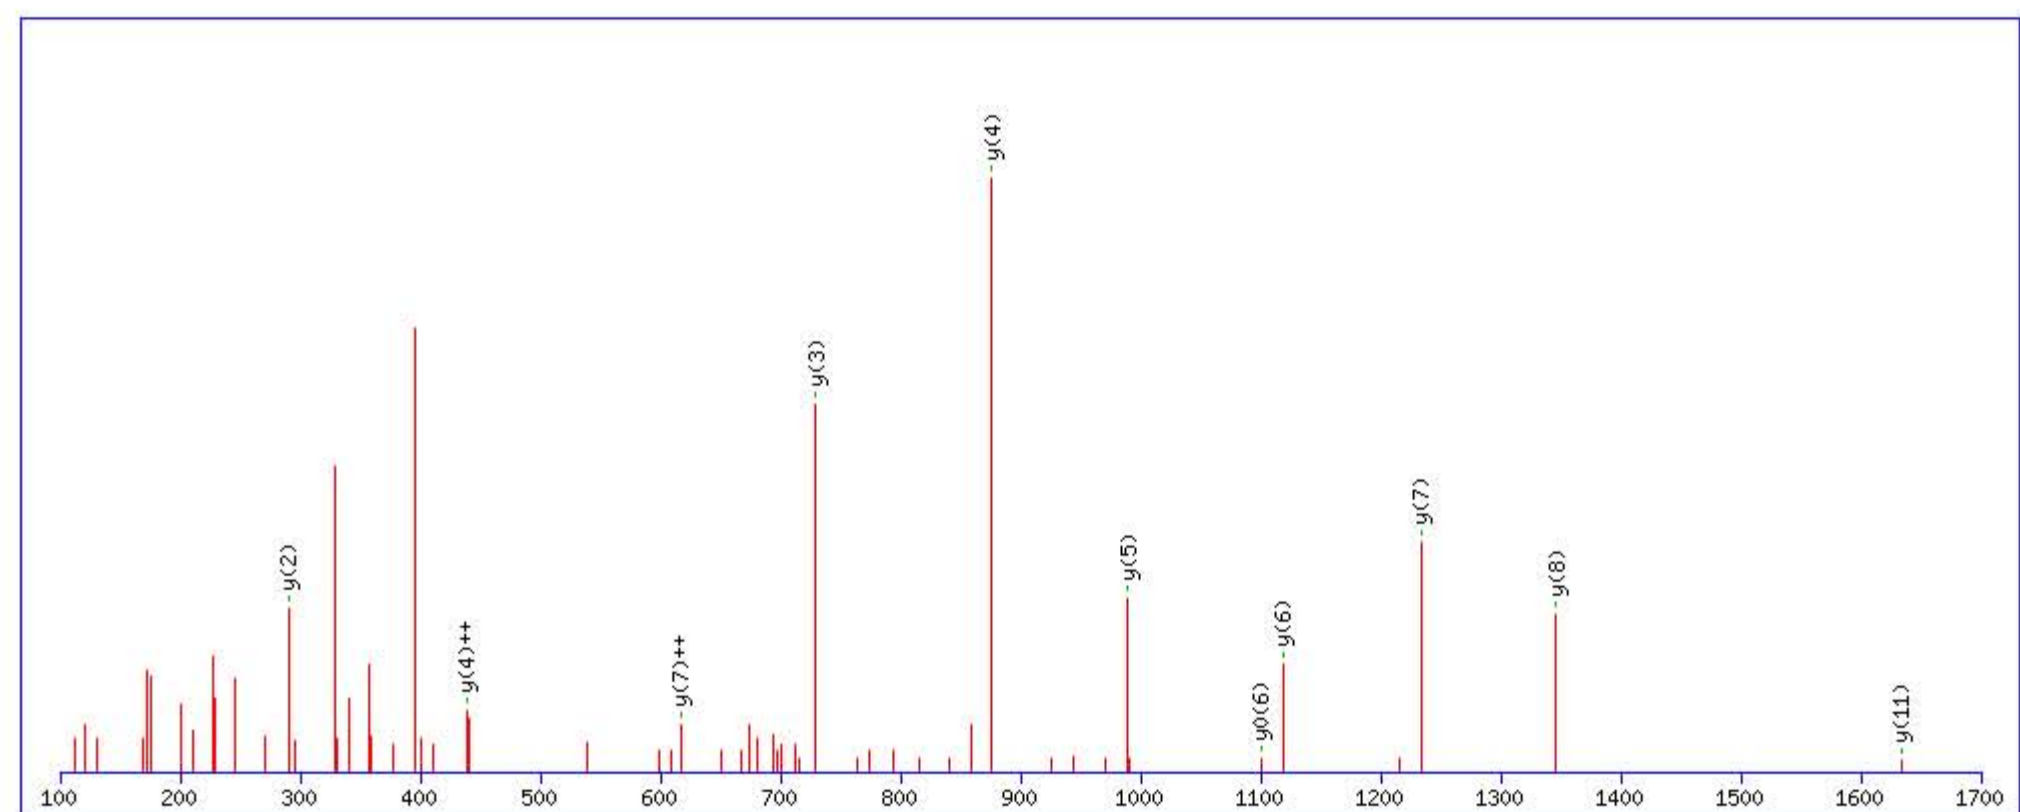

Monoisotopic mass of neutral peptide Mr(calc): 1703.855240

Fixed modifications: Carbamidomethyl (C) (apply to specified residues or termini only)

Variable modifications:

Q10 : Biotin:Thermo-21345 (Q)

Ions Score: 66 Expect: 6.6e-007

Matches : 11/110 fragment ions using 14 most intense peaks [\(help\)](#)

| #  | b           | b <sup>++</sup> | b <sup>*</sup> | b <sup>+++</sup> | b <sup>0</sup> | b <sup>0++</sup> | Seq. | y           | y <sup>++</sup> | y <sup>*</sup> | y <sup>+++</sup> | y <sup>0</sup> | y <sup>0++</sup> | #  |
|----|-------------|-----------------|----------------|------------------|----------------|------------------|------|-------------|-----------------|----------------|------------------|----------------|------------------|----|
| 1  | 72.044390   | 36.525833       |                |                  |                |                  | A    |             |                 |                |                  |                |                  | 12 |
| 2  | 159.076418  | 80.041847       |                |                  | 141.065853     | 71.036564        | S    | 1633.825419 | 817.416348      | 1616.798870    | 808.903073       | 1615.814854    | 808.411065       | 11 |
| 3  | 246.108446  | 123.557861      |                |                  | 228.097881     | 114.552578       | S    | 1546.793391 | 773.900333      | 1529.766842    | 765.387059       | 1528.782826    | 764.895051       | 10 |
| 4  | 359.192510  | 180.099893      |                |                  | 341.181945     | 171.094610       | I    | 1459.761363 | 730.384320      | 1442.734814    | 721.871045       | 1441.750798    | 721.379037       | 9  |
| 5  | 472.276574  | 236.641925      |                |                  | 454.266009     | 227.636642       | I    | 1346.677299 | 673.842288      | 1329.650750    | 665.329013       | 1328.666734    | 664.837005       | 8  |
| 6  | 587.303517  | 294.155397      |                |                  | 569.292952     | 285.150114       | D    | 1233.593235 | 617.300256      | 1216.566686    | 608.786981       | 1215.582670    | 608.294973       | 7  |
| 7  | 716.346110  | 358.676693      |                |                  | 698.335545     | 349.671411       | E    | 1118.566292 | 559.786784      | 1101.539743    | 551.273510       | 1100.555727    | 550.781501       | 6  |
| 8  | 829.430174  | 415.218725      |                |                  | 811.419609     | 406.213443       | L    | 989.523699  | 495.265488      | 972.497150     | 486.752213       | 971.513134     | 486.260205       | 5  |
| 9  | 976.498588  | 488.752932      |                |                  | 958.488023     | 479.747650       | F    | 876.439635  | 438.723456      | 859.413086     | 430.210181       | 858.429070     | 429.718173       | 4  |
| 10 | 1415.723914 | 708.365595      | 1398.697365    | 699.852321       | 1397.713349    | 699.360312       | Q    | 729.371221  | 365.189249      | 712.344672     | 356.675974       | 711.360656     | 356.183966       | 3  |
| 11 | 1530.750857 | 765.879067      | 1513.724308    | 757.365792       | 1512.740292    | 756.873784       | D    | 290.145895  | 145.576585      | 273.119346     | 137.063311       | 272.135330     | 136.571303       | 2  |
| 12 |             |                 |                |                  |                |                  | R    | 175.118952  | 88.063114       | 158.092403     | 79.549839        |                |                  | 1  |

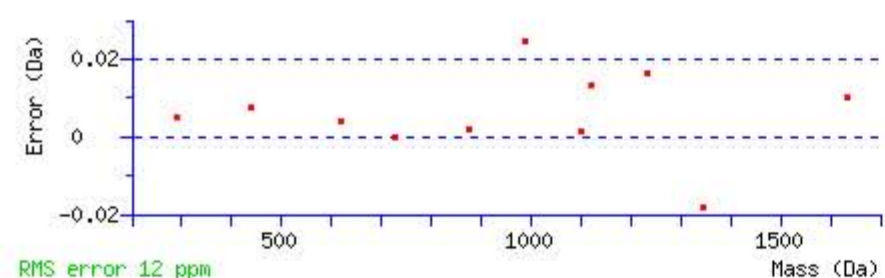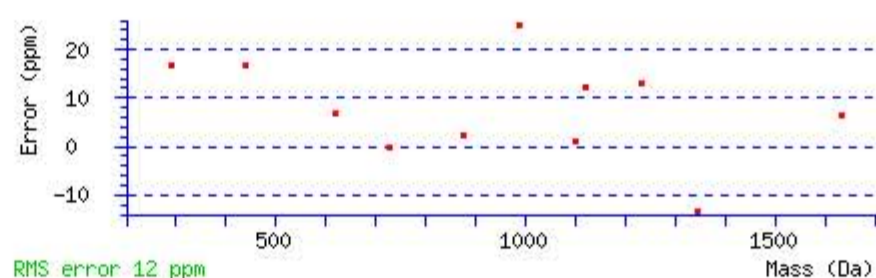

NCBI BLAST search of [ASSIDELFQDR](#)

(Parameters: blastp, nr protein database, expect=20000, no filter, PAM30)

Other BLAST [web gateways](#)

All matches to this query

| Score | Mr(calc):   | Delta     | Sequence                       |
|-------|-------------|-----------|--------------------------------|
| 65.9  | 1703.855240 | -0.001328 | <a href="#">ASSIDELFQDR</a>    |
| 0.0   | 1703.859070 | -0.005158 | <a href="#">RWDELETTTQAKAR</a> |

Mascot: <http://www.matrixscience.com/>



# MASCOT Search Results

## Peptide View

MS/MS Fragmentation of **EILSVDCSTNNPSQAK**

Found in **CLUS\_HUMAN**, Clusterin OS=Homo sapiens GN=CLU PE=1 SV=1

Match to Query 45129: 2072.979428 from(1037.496990,2+) rtinseconds(1797) index(18686)

Title: Locus:1.1.1.3188.14 File:"2013-07-02 CLN FXIII 30 min 3rd F 2.wiff"

Data file C:\Program Files (x86)\Matrix Science\Mascot Daemon\mgf\3 FXIII 30 min 3rd\mascot\_daemon\_merge.mgf

Click mouse within plot area to zoom in by factor of two about that point

Or, Plot from  to  Da

Label all possible matches  Label matches used for scoring

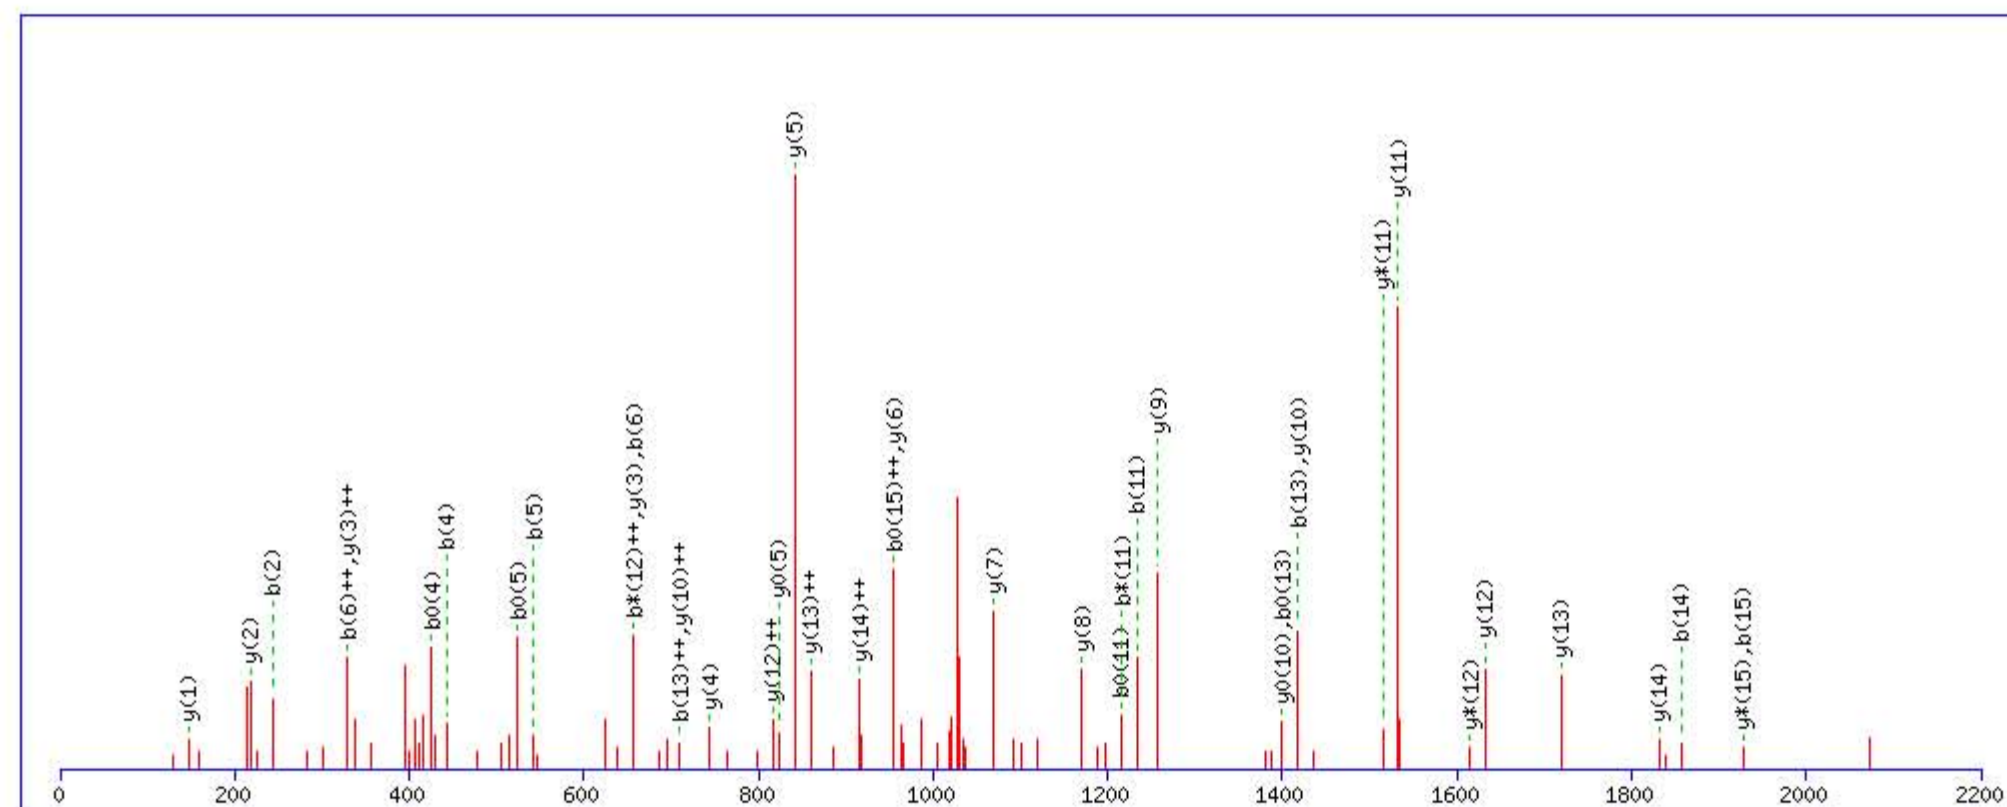

Monoisotopic mass of neutral peptide Mr(calc): 2072.987061

Fixed modifications: Carbamidomethyl (C) (apply to specified residues or termini only)

Variable modifications:

Q14 : Biotin:Thermo-21345 (Q)

Ions Score: 116 Expect: 3.9e-011

Matches : 41/156 fragment ions using 48 most intense peaks [\(help\)](#)

| #  | b                  | b <sup>++</sup>   | b <sup>*</sup>     | b <sup>*++</sup>  | b <sup>0</sup>     | b <sup>0++</sup> | Seq. | y                  | y <sup>++</sup>   | y <sup>*</sup>     | y <sup>*++</sup> | y <sup>0</sup>     | y <sup>0++</sup> | #  |
|----|--------------------|-------------------|--------------------|-------------------|--------------------|------------------|------|--------------------|-------------------|--------------------|------------------|--------------------|------------------|----|
| 1  | 130.049869         | 65.528572         |                    |                   | 112.039304         | 56.523290        | E    |                    |                   |                    |                  |                    |                  | 16 |
| 2  | <b>243.133933</b>  | 122.070605        |                    |                   | 225.123368         | 113.065322       | I    | 1944.951759        | 972.979517        | <b>1927.925210</b> | 964.466243       | 1926.941194        | 963.974235       | 15 |
| 3  | 356.217997         | 178.612637        |                    |                   | 338.207432         | 169.607354       | L    | <b>1831.867695</b> | <b>916.437485</b> | 1814.841146        | 907.924211       | 1813.857130        | 907.432203       | 14 |
| 4  | <b>443.250025</b>  | 222.128650        |                    |                   | <b>425.239460</b>  | 213.123368       | S    | <b>1718.783631</b> | <b>859.895454</b> | 1701.757082        | 851.382179       | 1700.773066        | 850.890171       | 13 |
| 5  | <b>542.318439</b>  | 271.662858        |                    |                   | <b>524.307874</b>  | 262.657575       | V    | <b>1631.751603</b> | <b>816.379439</b> | <b>1614.725054</b> | 807.866165       | 1613.741038        | 807.374157       | 12 |
| 6  | <b>657.345382</b>  | <b>329.176329</b> |                    |                   | 639.334817         | 320.171046       | D    | <b>1532.683189</b> | 766.845233        | <b>1515.656640</b> | 758.331958       | 1514.672624        | 757.839950       | 11 |
| 7  | 817.376031         | 409.191654        |                    |                   | 799.365466         | 400.186371       | C    | <b>1417.656246</b> | <b>709.331761</b> | 1400.629697        | 700.818487       | <b>1399.645681</b> | 700.326479       | 10 |
| 8  | 904.408059         | 452.707668        |                    |                   | 886.397494         | 443.702385       | S    | <b>1257.625597</b> | 629.316437        | 1240.599048        | 620.803162       | 1239.615032        | 620.311154       | 9  |
| 9  | 1005.455738        | 503.231507        |                    |                   | 987.445173         | 494.226225       | T    | <b>1170.593569</b> | 585.800422        | 1153.567020        | 577.287148       | 1152.583004        | 576.795140       | 8  |
| 10 | 1119.498665        | 560.252971        | 1102.472116        | 551.739696        | 1101.488100        | 551.247688       | N    | <b>1069.545890</b> | 535.276583        | 1052.519341        | 526.763309       | 1051.535325        | 526.271301       | 7  |
| 11 | <b>1233.541592</b> | 617.274434        | <b>1216.515043</b> | 608.761160        | <b>1215.531027</b> | 608.269152       | N    | <b>955.502963</b>  | 478.255119        | 938.476414         | 469.741845       | 937.492398         | 469.249837       | 6  |
| 12 | 1330.594356        | 665.800816        | 1313.567807        | <b>657.287542</b> | 1312.583791        | 656.795534       | P    | <b>841.460036</b>  | 421.233656        | 824.433487         | 412.720381       | <b>823.449471</b>  | 412.228373       | 5  |
| 13 | <b>1417.626384</b> | <b>709.316830</b> | 1400.599835        | 700.803556        | <b>1399.615819</b> | 700.311548       | S    | <b>744.407272</b>  | 372.707274        | 727.380723         | 364.193999       | 726.396707         | 363.701991       | 4  |
| 14 | <b>1856.851710</b> | 928.929493        | 1839.825161        | 920.416219        | 1838.841145        | 919.924211       | Q    | <b>657.375244</b>  | <b>329.191260</b> | 640.348695         | 320.677985       |                    |                  | 3  |
| 15 | <b>1927.888824</b> | 964.448050        | 1910.862275        | 955.934776        | 1909.878259        | 955.442768       | A    | <b>218.149918</b>  | 109.578597        | 201.123369         | 101.065322       |                    |                  | 2  |
| 16 |                    |                   |                    |                   |                    |                  | K    | <b>147.112804</b>  | 74.060040         | 130.086255         | 65.546765        |                    |                  | 1  |

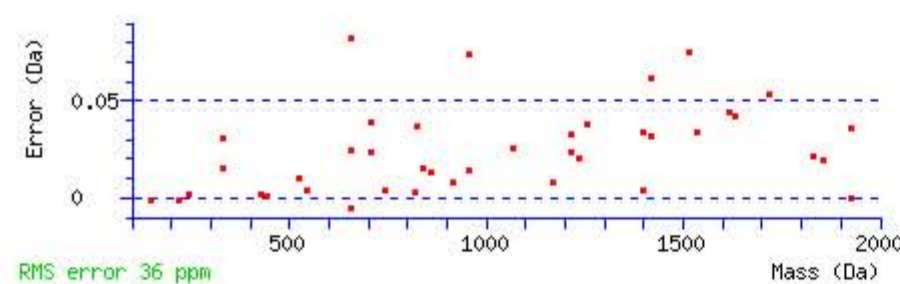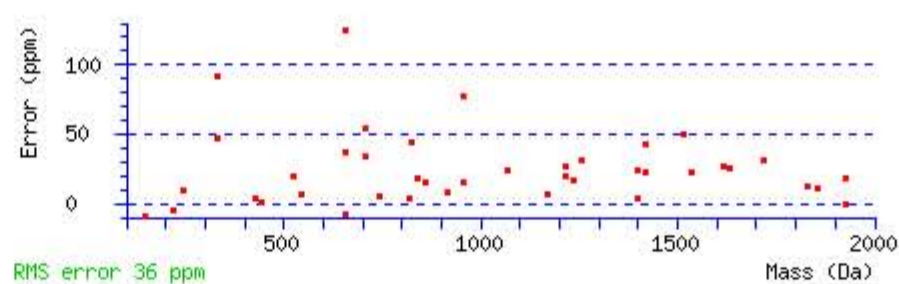

NCBI BLAST search of [EILSVDCSTNNPSQAK](#)

(Parameters: blastp, nr protein database, expect=20000, no filter, PAM30)

Other BLAST [web gateways](#)

## All matches to this query

| Score | Mr(calc):   | Delta     | Sequence                            |
|-------|-------------|-----------|-------------------------------------|
| 116.4 | 2072.987061 | -0.007633 | <a href="#">EILSVDCSTNNPSQAK</a>    |
| 5.6   | 2072.994492 | -0.015064 | <a href="#">ELVKSGLGADGVCMTFMK</a>  |
| 3.3   | 2072.961884 | 0.017544  | <a href="#">KNVSQENMCSASAAFKSSK</a> |
| 2.9   | 2072.998291 | -0.018863 | <a href="#">QNVSTNSGSMPLAQAQ</a>    |
| 0.4   | 2072.994904 | -0.015476 | <a href="#">MQDPNADTEWDLRKK</a>     |
| 0.1   | 2072.970642 | 0.008786  | <a href="#">THRGEKPYACGQCAK</a>     |



# MASCOT Search Results

## Peptide View

MS/MS Fragmentation of **QQTHMLDVMQDHF**SR

Found in **CLUS\_HUMAN**, Clusterin OS=Homo sapiens GN=CLU PE=1 SV=1

Match to Query 46880: 2183.014062 from(728.678630,3+) rtinseconds(2017) index(19923)

Title: Locus:1.1.1.3265.6 File:"2013-07-02 CLN FXIII 30 min 3rd F 2.wiff"

Data file C:\Program Files (x86)\Matrix Science\Mascot Daemon\mgf3 FXIII 30 min 3rd\mascot\_daemon\_merge.mgf

Click mouse within plot area to zoom in by factor of two about that point

Or, Plot from  to  Da

Label all possible matches  Label matches used for scoring

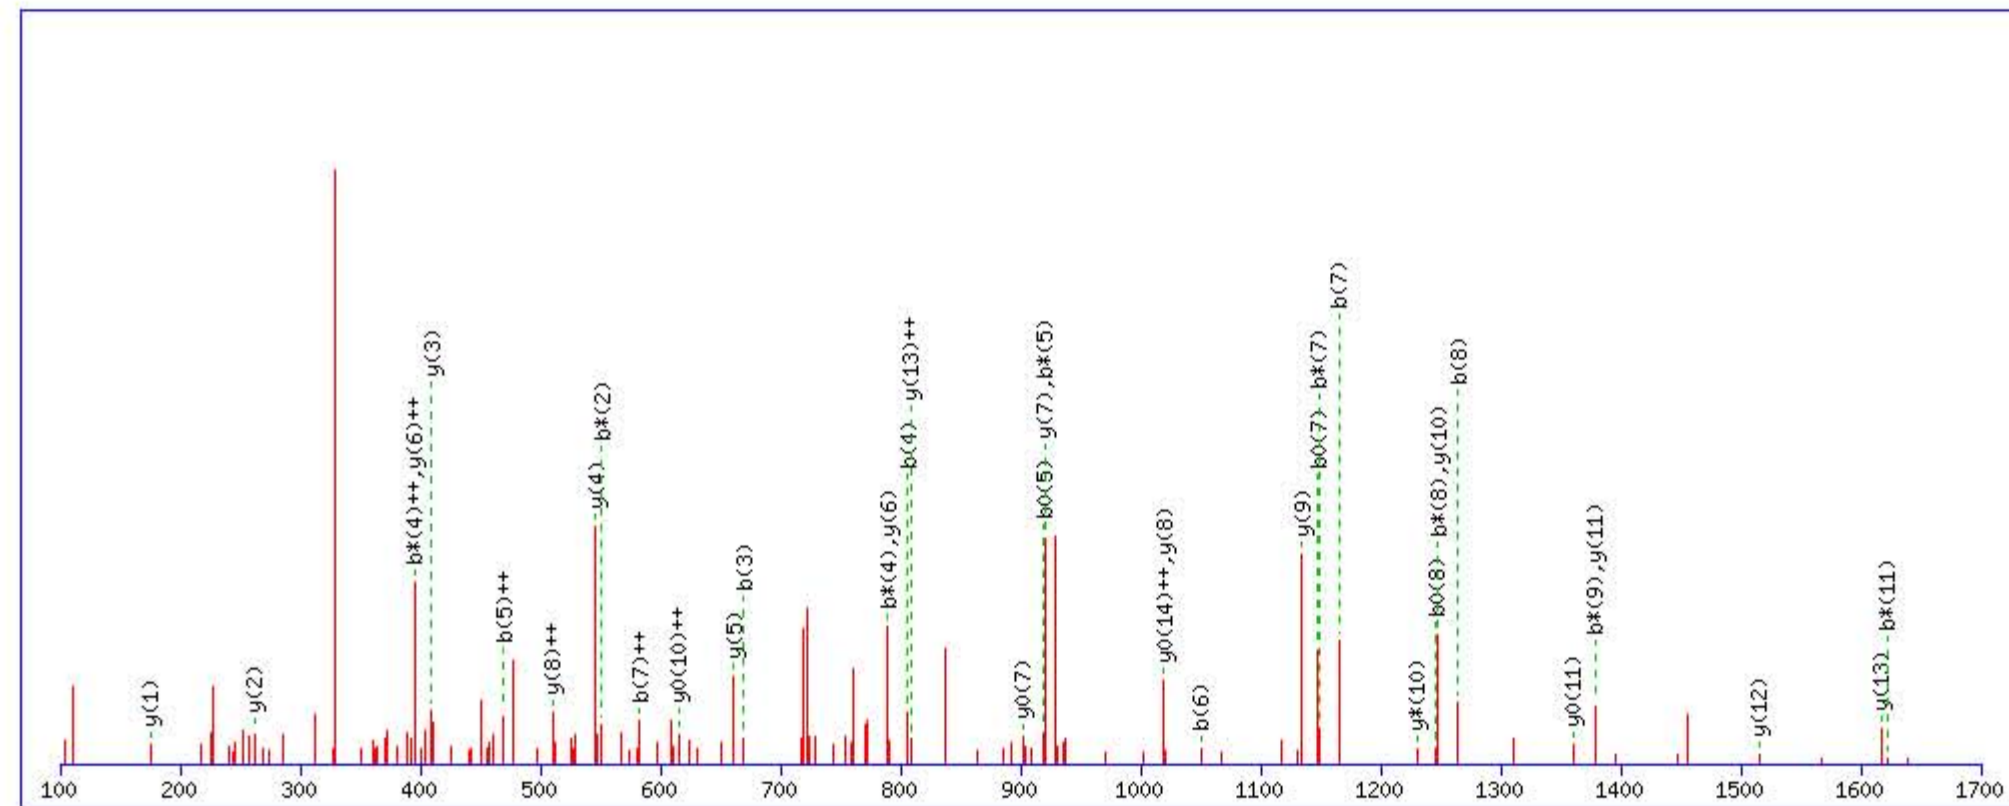

Monoisotopic mass of neutral peptide Mr(calc): 2183.007446

Fixed modifications: Carbamidomethyl (C) (apply to specified residues or termini only)

Variable modifications:

Q2 : Biotin:Thermo-21345 (Q)

Ions Score: 80 Expect: 1.3e-007

Matches : 39/162 fragment ions using 58 most intense peaks [\(help\)](#)

| #  | b           | b <sup>++</sup> | b <sup>*</sup> | b <sup>+++</sup> | b <sup>0</sup> | b <sup>0++</sup> | Seq. | y           | y <sup>++</sup> | y <sup>*</sup> | y <sup>+++</sup> | y <sup>0</sup> | y <sup>0++</sup> | #  |
|----|-------------|-----------------|----------------|------------------|----------------|------------------|------|-------------|-----------------|----------------|------------------|----------------|------------------|----|
| 1  | 129.065854  | 65.036565       | 112.039305     | 56.523291        |                |                  | Q    |             |                 |                |                  |                |                  | 15 |
| 2  | 568.291180  | 284.649228      | 551.264631     | 276.135954       |                |                  | Q    | 2055.956135 | 1028.481705     | 2038.929586    | 1019.968431      | 2037.945570    | 1019.476423      | 14 |
| 3  | 669.338859  | 335.173068      | 652.312310     | 326.659793       | 651.328294     | 326.167785       | T    | 1616.730809 | 808.869043      | 1599.704260    | 800.355768       | 1598.720244    | 799.863760       | 13 |
| 4  | 806.397771  | 403.702524      | 789.371222     | 395.189249       | 788.387206     | 394.697241       | H    | 1515.683130 | 758.345203      | 1498.656581    | 749.831929       | 1497.672565    | 749.339921       | 12 |
| 5  | 937.438256  | 469.222766      | 920.411707     | 460.709492       | 919.427691     | 460.217484       | M    | 1378.624218 | 689.815747      | 1361.597669    | 681.302473       | 1360.613653    | 680.810465       | 11 |
| 6  | 1050.522320 | 525.764798      | 1033.495771    | 517.251524       | 1032.511755    | 516.759516       | L    | 1247.583733 | 624.295505      | 1230.557184    | 615.782230       | 1229.573168    | 615.290222       | 10 |
| 7  | 1165.549263 | 583.278270      | 1148.522714    | 574.764995       | 1147.538698    | 574.272987       | D    | 1134.499669 | 567.753473      | 1117.473120    | 559.240198       | 1116.489104    | 558.748190       | 9  |
| 8  | 1264.617677 | 632.812477      | 1247.591128    | 624.299202       | 1246.607112    | 623.807194       | V    | 1019.472726 | 510.240001      | 1002.446177    | 501.726727       | 1001.462161    | 501.234719       | 8  |
| 9  | 1395.658162 | 698.332719      | 1378.631613    | 689.819445       | 1377.647597    | 689.327437       | M    | 920.404312  | 460.705794      | 903.377763     | 452.192520       | 902.393747     | 451.700512       | 7  |
| 10 | 1523.716740 | 762.362008      | 1506.690191    | 753.848734       | 1505.706175    | 753.356726       | Q    | 789.363827  | 395.185552      | 772.337278     | 386.672277       | 771.353262     | 386.180269       | 6  |
| 11 | 1638.743683 | 819.875480      | 1621.717134    | 811.362205       | 1620.733118    | 810.870197       | D    | 661.305249  | 331.156263      | 644.278700     | 322.642988       | 643.294684     | 322.150980       | 5  |
| 12 | 1775.802595 | 888.404936      | 1758.776046    | 879.891661       | 1757.792030    | 879.399653       | H    | 546.278306  | 273.642791      | 529.251757     | 265.129517       | 528.267741     | 264.637509       | 4  |
| 13 | 1922.871009 | 961.939143      | 1905.844460    | 953.425868       | 1904.860444    | 952.933860       | F    | 409.219394  | 205.113335      | 392.192845     | 196.600061       | 391.208829     | 196.108053       | 3  |
| 14 | 2009.903037 | 1005.455157     | 1992.876488    | 996.941882       | 1991.892472    | 996.449874       | S    | 262.150980  | 131.579128      | 245.124431     | 123.065854       | 244.140415     | 122.573846       | 2  |
| 15 |             |                 |                |                  |                |                  | R    | 175.118952  | 88.063114       | 158.092403     | 79.549839        |                |                  | 1  |

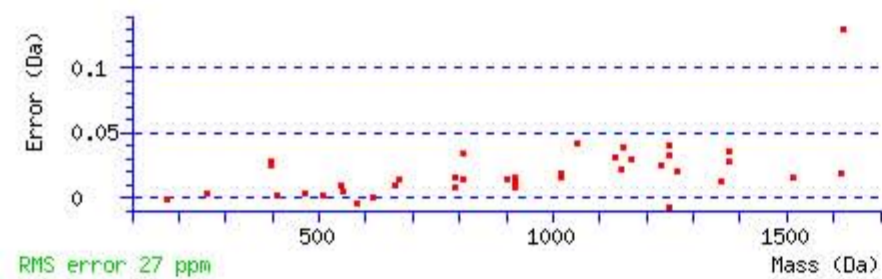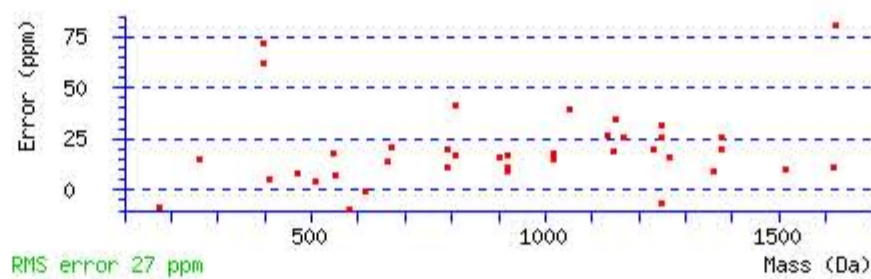

NCBI BLAST search of **QQTHMLDVMQDHF**SR

(Parameters: blastp, nr protein database, expect=20000, no filter, PAM30)

Other BLAST [web gateways](#)

All matches to this query

| Score | Mr(calc):   | Delta    | Sequence                         |
|-------|-------------|----------|----------------------------------|
| 80.2  | 2183.007446 | 0.006616 | <a href="#">QQTHMLDVMQDHF</a> SR |
| 80.2  | 2183.007446 | 0.006616 | <a href="#">QQTHMLDVMQDHF</a> SR |



# MASCOT Search Results

## Peptide View

MS/MS Fragmentation of **QQTHMLDVMQDHFSR**

Found in **CLUS\_HUMAN**, Clusterin OS=Homo sapiens GN=CLU PE=1 SV=1

Match to Query 46881: 2183.028016 from(546.764280,4+) rtinseconds(2019) index(19937)

Title: Locus:1.1.1.3266.8 File:"2013-07-02 CLN FXIII 30 min 3rd F 2.wiff"

Data file C:\Program Files (x86)\Matrix Science\Mascot Daemon\mgf3 FXIII 30 min 3rd\mascot\_daemon\_merge.mgf

Click mouse within plot area to zoom in by factor of two about that point

Or, Plot from  to  Da

Label all possible matches  Label matches used for scoring

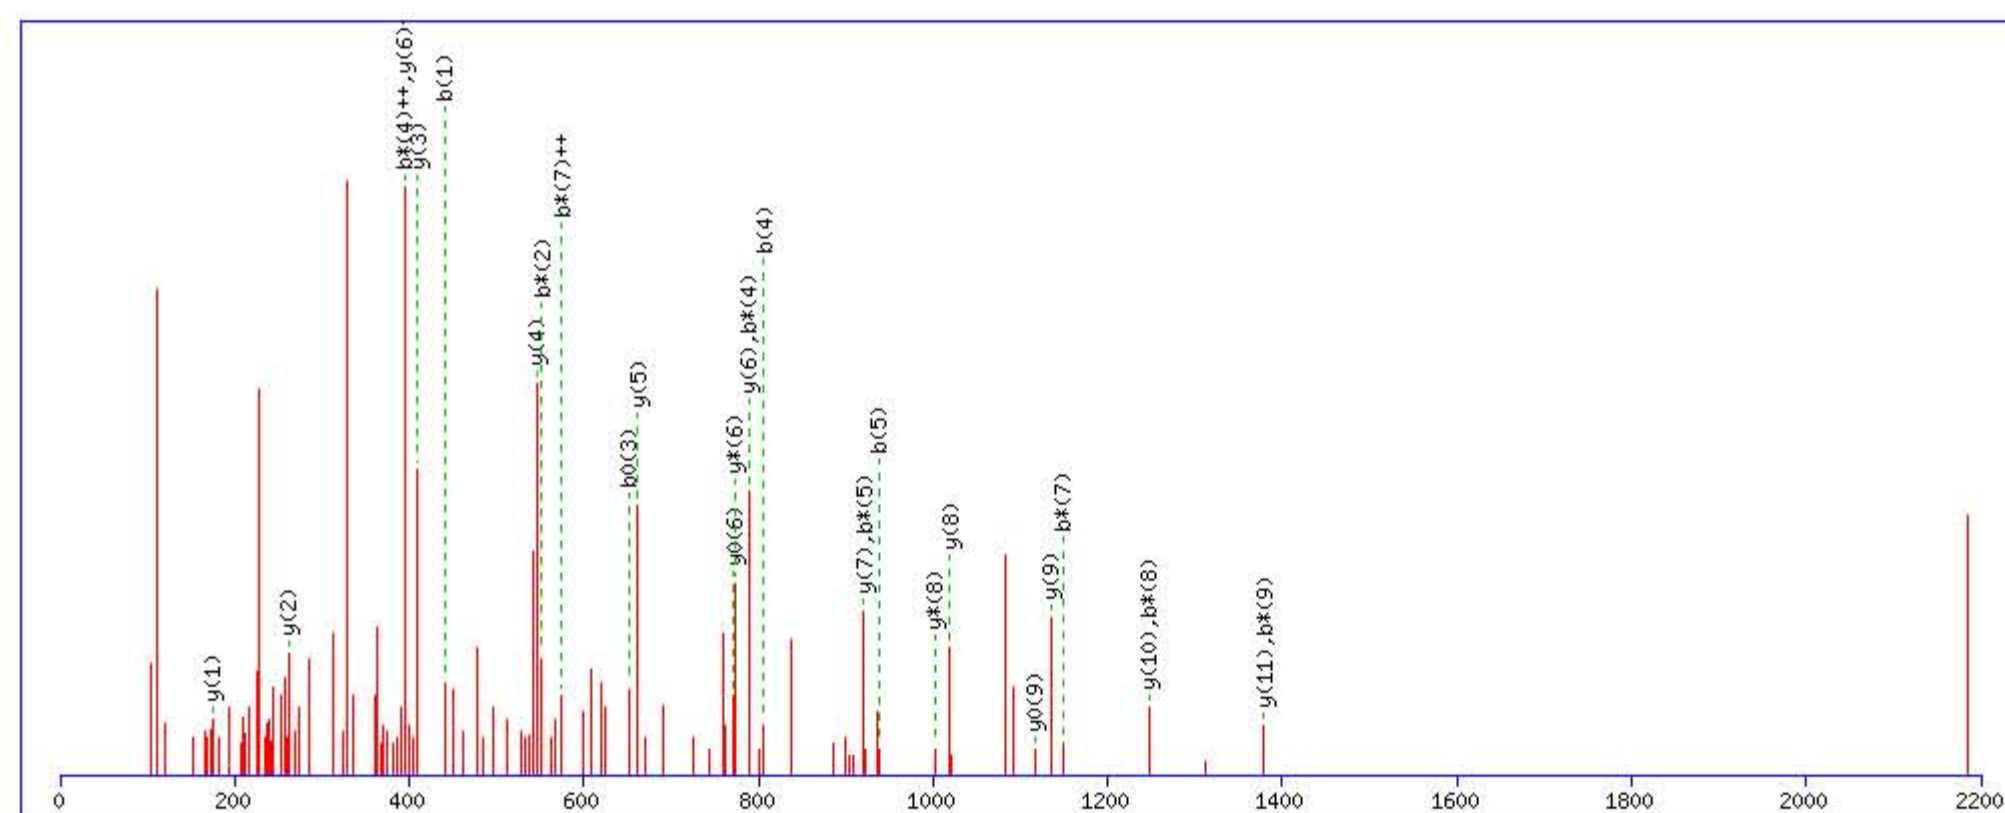

Monoisotopic mass of neutral peptide Mr(calc): 2183.007446

Fixed modifications: Carbamidomethyl (C) (apply to specified residues or termini only)

Variable modifications:

Q1 : Biotin:Thermo-21345 (Q)

Ions Score: 60 Expect: 1.5e-005

Matches : 28/162 fragment ions using 46 most intense peaks [\(help\)](#)

| #  | b                 | b <sup>++</sup> | b <sup>*</sup>     | b <sup>*++</sup>  | b <sup>0</sup>    | b <sup>0++</sup> | Seq. | y                  | y <sup>++</sup>   | y <sup>*</sup>     | y <sup>*++</sup> | y <sup>0</sup>     | y <sup>0++</sup> | #  |
|----|-------------------|-----------------|--------------------|-------------------|-------------------|------------------|------|--------------------|-------------------|--------------------|------------------|--------------------|------------------|----|
| 1  | <b>440.232602</b> | 220.619939      | 423.206053         | 212.106664        |                   |                  | Q    |                    |                   |                    |                  |                    |                  | 15 |
| 2  | 568.291180        | 284.649228      | <b>551.264631</b>  | 276.135954        |                   |                  | Q    | 1744.789387        | 872.898332        | 1727.762838        | 864.385057       | 1726.778822        | 863.893049       | 14 |
| 3  | 669.338859        | 335.173068      | 652.312310         | 326.659793        | <b>651.328294</b> | 326.167785       | T    | 1616.730809        | 808.869043        | 1599.704260        | 800.355768       | 1598.720244        | 799.863760       | 13 |
| 4  | <b>806.397771</b> | 403.702524      | <b>789.371222</b>  | <b>395.189249</b> | 788.387206        | 394.697241       | H    | 1515.683130        | 758.345203        | 1498.656581        | 749.831929       | 1497.672565        | 749.339921       | 12 |
| 5  | <b>937.438256</b> | 469.222766      | <b>920.411707</b>  | 460.709492        | 919.427691        | 460.217484       | M    | <b>1378.624218</b> | 689.815747        | 1361.597669        | 681.302473       | 1360.613653        | 680.810465       | 11 |
| 6  | 1050.522320       | 525.764798      | 1033.495771        | 517.251524        | 1032.511755       | 516.759516       | L    | <b>1247.583733</b> | 624.295505        | 1230.557184        | 615.782230       | 1229.573168        | 615.290222       | 10 |
| 7  | 1165.549263       | 583.278270      | <b>1148.522714</b> | <b>574.764995</b> | 1147.538698       | 574.272987       | D    | <b>1134.499669</b> | 567.753473        | 1117.473120        | 559.240198       | <b>1116.489104</b> | 558.748190       | 9  |
| 8  | 1264.617677       | 632.812477      | <b>1247.591128</b> | 624.299202        | 1246.607112       | 623.807194       | V    | <b>1019.472726</b> | 510.240001        | <b>1002.446177</b> | 501.726727       | 1001.462161        | 501.234719       | 8  |
| 9  | 1395.658162       | 698.332719      | <b>1378.631613</b> | 689.819445        | 1377.647597       | 689.327437       | M    | <b>920.404312</b>  | 460.705794        | 903.377763         | 452.192520       | 902.393747         | 451.700512       | 7  |
| 10 | 1523.716740       | 762.362008      | 1506.690191        | 753.848734        | 1505.706175       | 753.356726       | Q    | <b>789.363827</b>  | <b>395.185552</b> | <b>772.337278</b>  | 386.672277       | <b>771.353262</b>  | 386.180269       | 6  |
| 11 | 1638.743683       | 819.875480      | 1621.717134        | 811.362205        | 1620.733118       | 810.870197       | D    | <b>661.305249</b>  | 331.156263        | 644.278700         | 322.642988       | 643.294684         | 322.150980       | 5  |
| 12 | 1775.802595       | 888.404936      | 1758.776046        | 879.891661        | 1757.792030       | 879.399653       | H    | <b>546.278306</b>  | 273.642791        | 529.251757         | 265.129517       | 528.267741         | 264.637509       | 4  |
| 13 | 1922.871009       | 961.939143      | 1905.844460        | 953.425868        | 1904.860444       | 952.933860       | F    | <b>409.219394</b>  | 205.113335        | 392.192845         | 196.600061       | 391.208829         | 196.108053       | 3  |
| 14 | 2009.903037       | 1005.455157     | 1992.876488        | 996.941882        | 1991.892472       | 996.449874       | S    | <b>262.150980</b>  | 131.579128        | 245.124431         | 123.065854       | 244.140415         | 122.573846       | 2  |
| 15 |                   |                 |                    |                   |                   |                  | R    | <b>175.118952</b>  | 88.063114         | 158.092403         | 79.549839        |                    |                  | 1  |

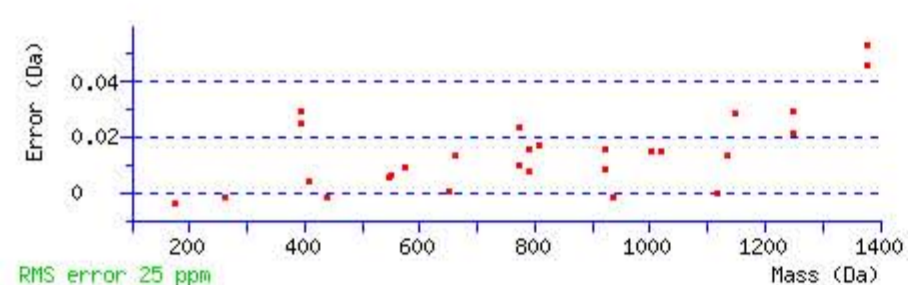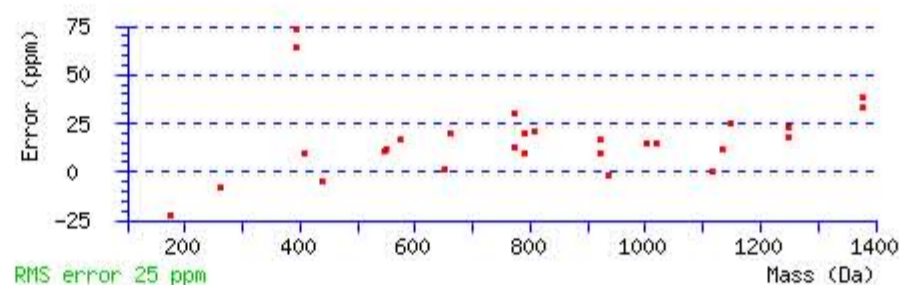

NCBI BLAST search of [QQTHMLDVMQDHFSR](#)

(Parameters: blastp, nr protein database, expect=20000, no filter, PAM30)

Other BLAST [web gateways](#)

All matches to this query

| Score | Mr(calc):   | Delta    | Sequence                        |
|-------|-------------|----------|---------------------------------|
| 60.4  | 2183.007446 | 0.020570 | <a href="#">QQTHMLDVMQDHFSR</a> |
| 58.6  | 2183.007446 | 0.020570 | <a href="#">QQTHMLDVMQDHFSR</a> |
| 0.4   | 2183.007446 | 0.020570 | <a href="#">QQTHMLDVMQDHFSR</a> |

Mascot: <http://www.matrixscience.com/>



# **MASCOT** Mascot Search Results

## Peptide View

MS/MS Fragmentation of **VSVSQTSK**

Found in **FA9\_HUMAN**, Coagulation factor IX OS=Homo sapiens GN=F9 PE=1 SV=2

Match to Query 20051: 1145.606028 from(573.810290,2+) rtinseconds(1447) index(47690)

Title: Locus:1.1.1.3147.19 File:"2013-07-02 CLN FXIII 30 min 3rd F 4.wiff"

Data file C:\Program Files (x86)\Matrix Science\Mascot Daemon\mgf3 FXIII 30 min 3rd\mascot\_daemon\_merge.mgf

Click mouse within plot area to zoom in by factor of two about that point

Or, Plot from  to  Da

Label all possible matches  Label matches used for scoring

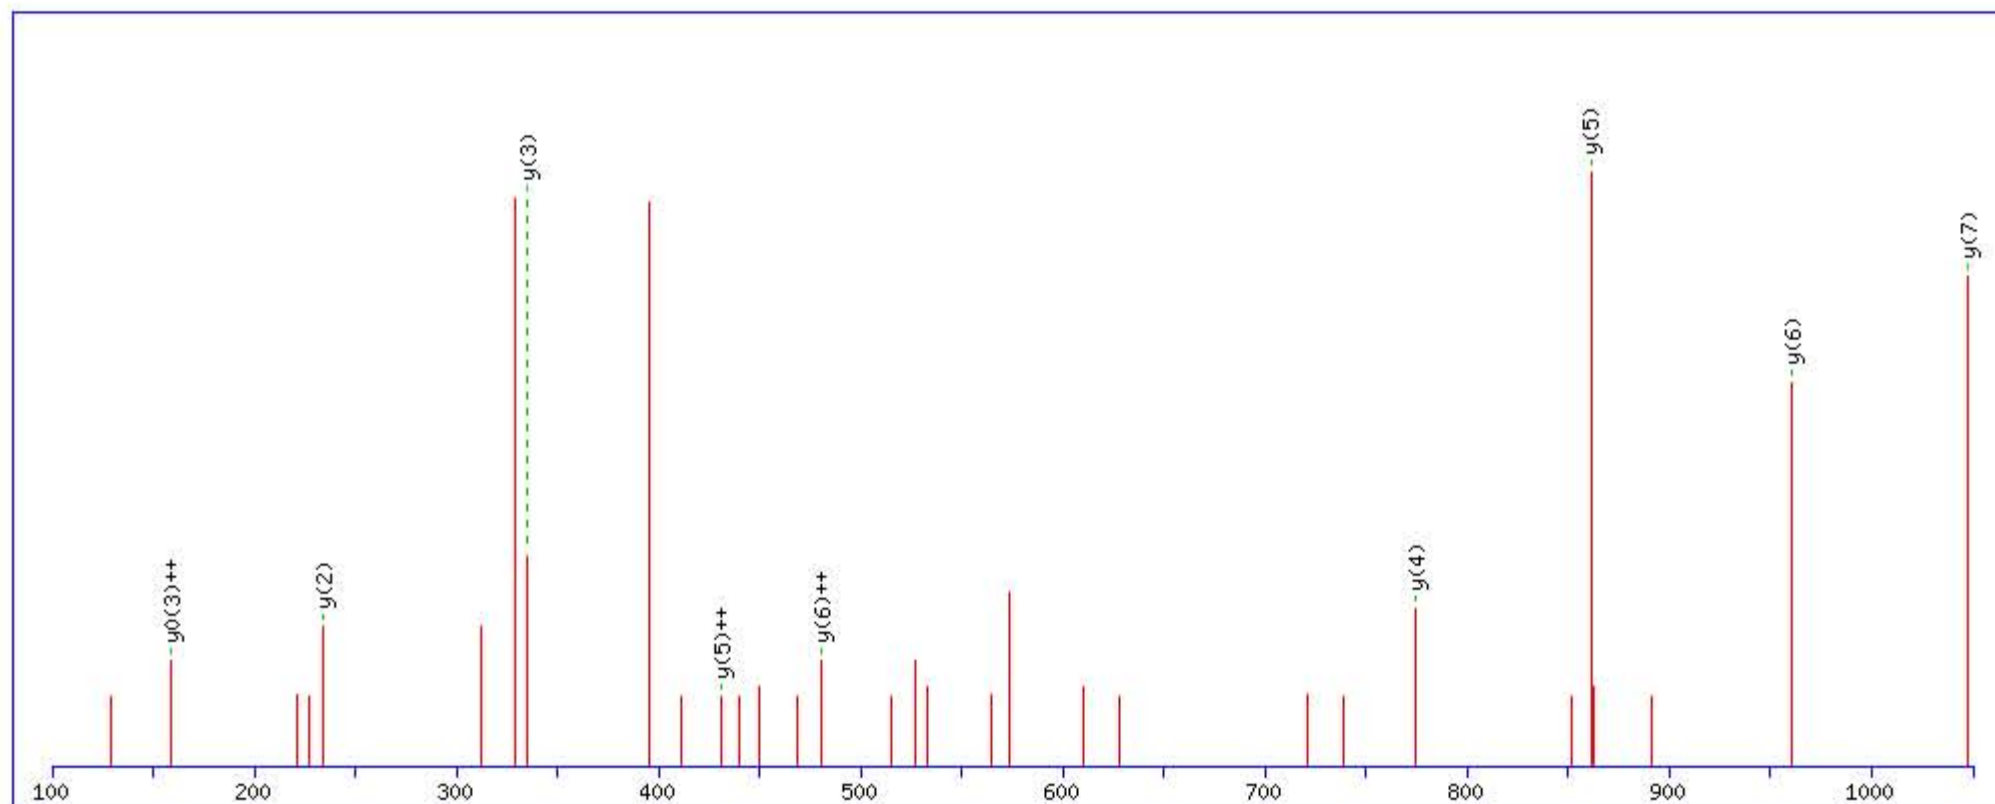

Monoisotopic mass of neutral peptide Mr(calc): 1145.611450

Fixed modifications: Carbamidomethyl (C) (apply to specified residues or termini only)

Variable modifications:

Q5 : Biotin:Thermo-21345 (Q)

Ions Score: 27 Expect: 0.0036

Matches : 9/72 fragment ions using 27 most intense peaks [\(help\)](#)

| # | b           | b <sup>++</sup> | b <sup>*</sup> | b <sup>*++</sup> | b <sup>0</sup> | b <sup>0++</sup> | Seq. | y                  | y <sup>++</sup>   | y <sup>*</sup> | y <sup>*++</sup> | y <sup>0</sup> | y <sup>0++</sup>  | # |
|---|-------------|-----------------|----------------|------------------|----------------|------------------|------|--------------------|-------------------|----------------|------------------|----------------|-------------------|---|
| 1 | 100.075690  | 50.541483       |                |                  |                |                  | V    |                    |                   |                |                  |                |                   | 8 |
| 2 | 187.107718  | 94.057497       |                |                  | 169.097153     | 85.052214        | S    | <b>1047.550307</b> | 524.278792        | 1030.523758    | 515.765517       | 1029.539742    | 515.273509        | 7 |
| 3 | 286.176132  | 143.591704      |                |                  | 268.165567     | 134.586422       | V    | <b>960.518279</b>  | <b>480.762778</b> | 943.491730     | 472.249503       | 942.507714     | 471.757495        | 6 |
| 4 | 373.208160  | 187.107718      |                |                  | 355.197595     | 178.102435       | S    | <b>861.449865</b>  | <b>431.228571</b> | 844.423316     | 422.715296       | 843.439300     | 422.223288        | 5 |
| 5 | 812.433486  | 406.720381      | 795.406937     | 398.207107       | 794.422921     | 397.715099       | Q    | <b>774.417837</b>  | 387.712557        | 757.391288     | 379.199282       | 756.407272     | 378.707274        | 4 |
| 6 | 913.481165  | 457.244221      | 896.454616     | 448.730946       | 895.470600     | 448.238938       | T    | <b>335.192511</b>  | 168.099893        | 318.165962     | 159.586619       | 317.181946     | <b>159.094611</b> | 3 |
| 7 | 1000.513193 | 500.760235      | 983.486644     | 492.246960       | 982.502628     | 491.754952       | S    | <b>234.144832</b>  | 117.576054        | 217.118283     | 109.062779       | 216.134267     | 108.570771        | 2 |
| 8 |             |                 |                |                  |                |                  | K    | 147.112804         | 74.060040         | 130.086255     | 65.546765        |                |                   | 1 |

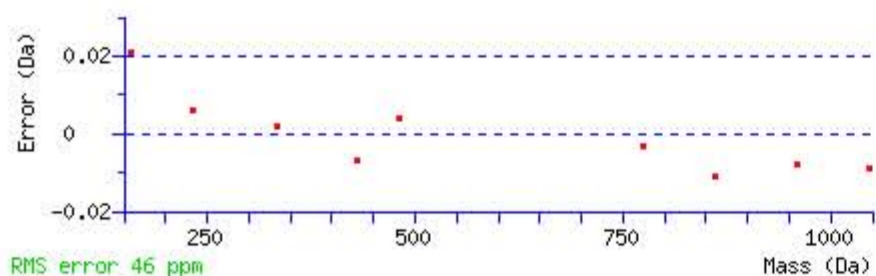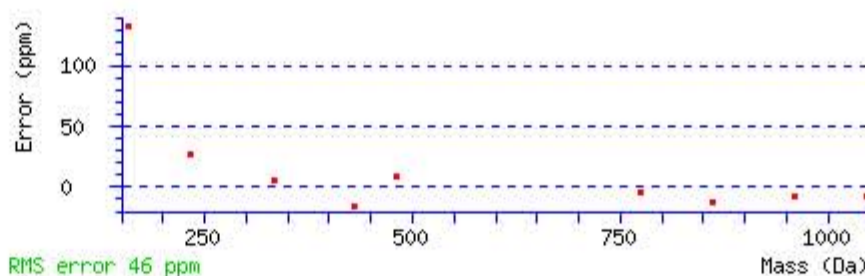

NCBI BLAST search of [VSVSQTSK](#)

(Parameters: blastp, nr protein database, expect=20000, no filter, PAM30)

Other BLAST [web gateways](#)

All matches to this query

| Score | Mr(calc):   | Delta     | Sequence                  |
|-------|-------------|-----------|---------------------------|
| 26.8  | 1145.611450 | -0.005422 | <a href="#">VSVSQTSK</a>  |
| 0.7   | 1145.622650 | -0.016622 | <a href="#">VDNAMSRLK</a> |

Mascot: <http://www.matrixscience.com/>



# MASCOT Search Results

## Peptide View

MS/MS Fragmentation of **ITVVAGEHNIETEHTQK**

Found in **FA9\_HUMAN**, Coagulation factor IX OS=Homo sapiens GN=F9 PE=1 SV=2

Match to Query 51615: 2474.203456 from(619.558140,4+) rtinseconds(1638) index(48929)

Title: Locus:1.1.1.3214.5 File:"2013-07-02 CLN FXIII 30 min 3rd F 4.wiff"

Data file C:\Program Files (x86)\Matrix Science\Mascot Daemon\mgf\3 FXIII 30 min 3rd\mascot\_daemon\_merge.mgf

Click mouse within plot area to zoom in by factor of two about that point

Or, Plot from  to  Da

Label all possible matches  Label matches used for scoring

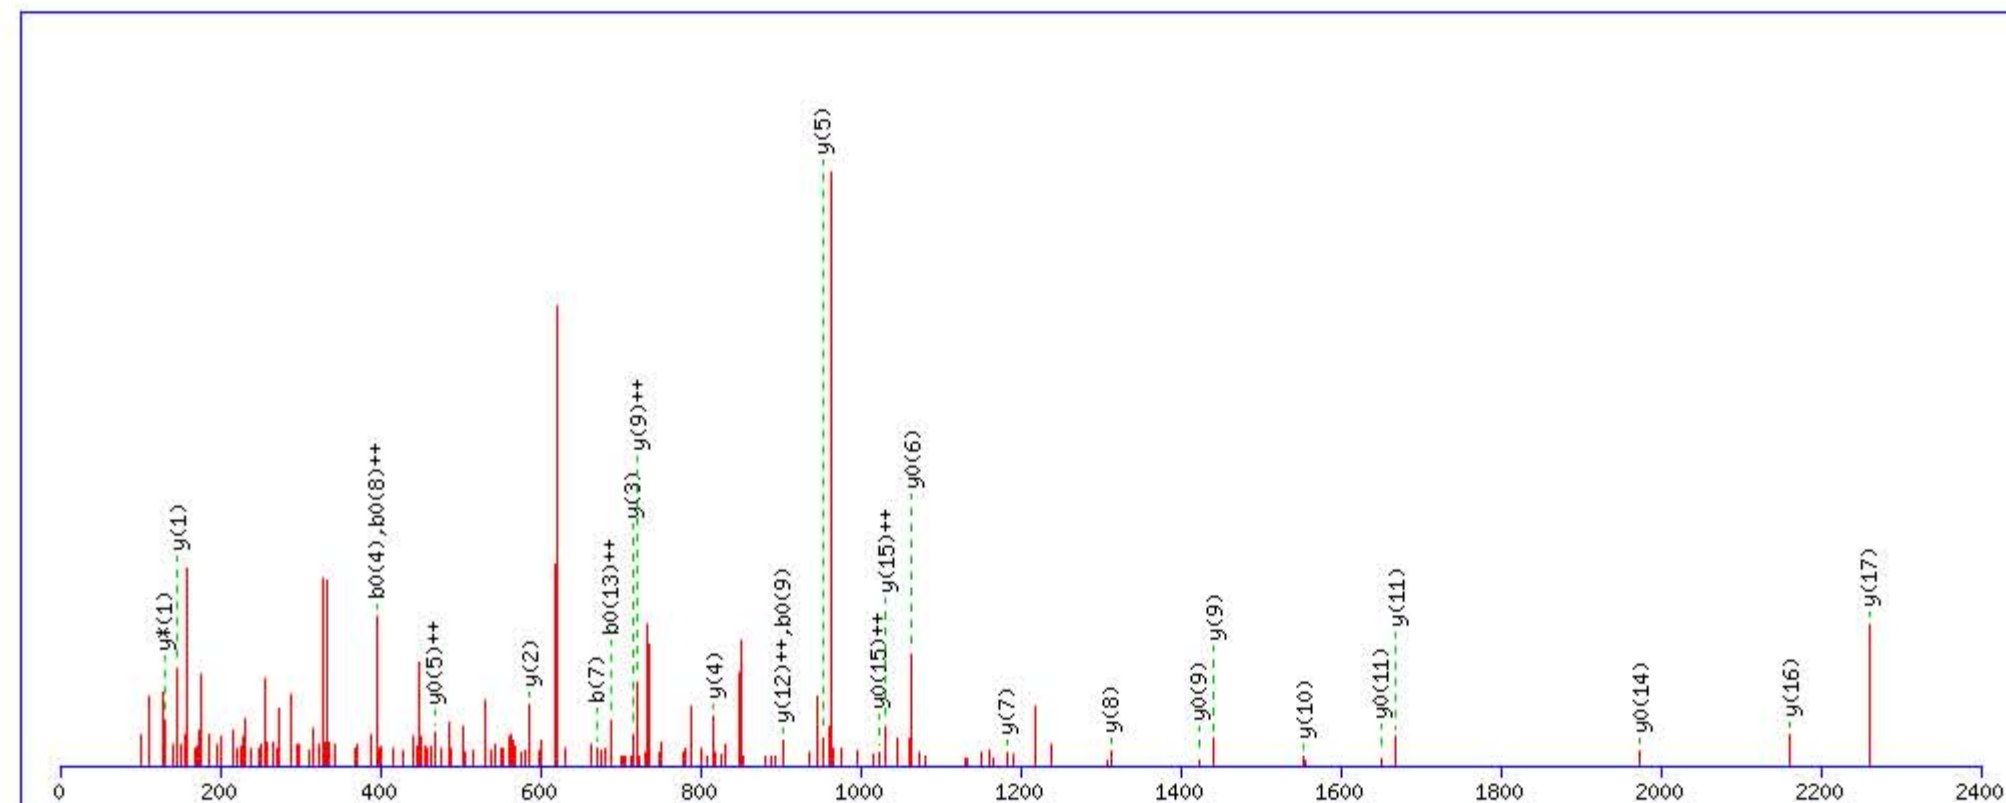

Monoisotopic mass of neutral peptide Mr(calc): 2474.211121

Fixed modifications: Carbamidomethyl (C) (apply to specified residues or termini only)

Variable modifications:

Q18 : Biotin:Thermo-21345 (Q)

Ions Score: 31 Expect: 0.021

Matches : 27/194 fragment ions using 81 most intense peaks [\(help\)](#)

| #  | b                 | b <sup>++</sup> | b <sup>+</sup> | b <sup>+++</sup> | b <sup>0</sup>    | b <sup>0++</sup>  | Seq. | y                  | y <sup>++</sup>    | y <sup>+</sup>    | y <sup>+++</sup> | y <sup>0</sup>     | y <sup>0++</sup>   | #  |
|----|-------------------|-----------------|----------------|------------------|-------------------|-------------------|------|--------------------|--------------------|-------------------|------------------|--------------------|--------------------|----|
| 1  | 114.091340        | 57.549308       |                |                  |                   |                   | I    |                    |                    |                   |                  |                    |                    | 19 |
| 2  | 215.139019        | 108.073147      |                |                  | 197.128454        | 99.067865         | T    | 2362.134353        | 1181.570814        | 2345.107804       | 1173.057540      | 2344.123788        | 1172.565532        | 18 |
| 3  | 314.207433        | 157.607354      |                |                  | 296.196868        | 148.602072        | V    | <b>2261.086674</b> | 1131.046975        | 2244.060125       | 1122.533700      | 2243.076109        | 1122.041692        | 17 |
| 4  | 413.275847        | 207.141561      |                |                  | <b>395.265282</b> | 198.136279        | V    | <b>2162.018260</b> | 1081.512768        | 2144.991711       | 1072.999493      | 2144.007695        | 1072.507485        | 16 |
| 5  | 484.312961        | 242.660119      |                |                  | 466.302396        | 233.654836        | A    | 2062.949846        | <b>1031.978561</b> | 2045.923297       | 1023.465286      | 2044.939281        | <b>1022.973278</b> | 15 |
| 6  | 541.334425        | 271.170851      |                |                  | 523.323860        | 262.165568        | G    | 1991.912732        | 996.460004         | 1974.886183       | 987.946730       | <b>1973.902167</b> | 987.454722         | 14 |
| 7  | <b>670.377018</b> | 335.692147      |                |                  | 652.366453        | 326.686865        | E    | 1934.891268        | 967.949272         | 1917.864719       | 959.435998       | 1916.880703        | 958.943990         | 13 |
| 8  | 807.435930        | 404.221603      |                |                  | 789.425365        | <b>395.216321</b> | H    | 1805.848675        | <b>903.427976</b>  | 1788.822126       | 894.914701       | 1787.838110        | 894.422693         | 12 |
| 9  | 921.478857        | 461.243067      | 904.452308     | 452.729792       | <b>903.468292</b> | 452.237784        | N    | <b>1668.789763</b> | 834.898520         | 1651.763214       | 826.385245       | <b>1650.779198</b> | 825.893237         | 11 |
| 10 | 1034.562921       | 517.785099      | 1017.536372    | 509.271824       | 1016.552356       | 508.779816        | I    | <b>1554.746836</b> | 777.877056         | 1537.720287       | 769.363782       | 1536.736271        | 768.871774         | 10 |
| 11 | 1163.605514       | 582.306395      | 1146.578965    | 573.793121       | 1145.594949       | 573.301113        | E    | <b>1441.662772</b> | <b>721.335024</b>  | 1424.636223       | 712.821750       | <b>1423.652207</b> | 712.329742         | 9  |
| 12 | 1292.648107       | 646.827692      | 1275.621558    | 638.314417       | 1274.637542       | 637.822409        | E    | <b>1312.620179</b> | 656.813728         | 1295.593630       | 648.300453       | 1294.609614        | 647.808445         | 8  |
| 13 | 1393.695786       | 697.351531      | 1376.669237    | 688.838257       | 1375.685221       | <b>688.346249</b> | T    | <b>1183.577586</b> | 592.292431         | 1166.551037       | 583.779157       | 1165.567021        | 583.287149         | 7  |
| 14 | 1522.738379       | 761.872828      | 1505.711830    | 753.359553       | 1504.727814       | 752.867545        | E    | 1082.529907        | 541.768592         | 1065.503358       | 533.255317       | <b>1064.519342</b> | 532.763309         | 6  |
| 15 | 1659.797291       | 830.402284      | 1642.770742    | 821.889009       | 1641.786726       | 821.397001        | H    | <b>953.487314</b>  | 477.247295         | 936.460765        | 468.734021       | 935.476749         | <b>468.242013</b>  | 5  |
| 16 | 1760.844970       | 880.926123      | 1743.818421    | 872.412849       | 1742.834405       | 871.920841        | T    | <b>816.428402</b>  | 408.717839         | 799.401853        | 400.204565       | 798.417837         | 399.712557         | 4  |
| 17 | 1889.887563       | 945.447420      | 1872.861014    | 936.934145       | 1871.876998       | 936.442137        | E    | <b>715.380723</b>  | 358.194000         | 698.354174        | 349.680725       | 697.370158         | 349.188717         | 3  |
| 18 | 2329.112889       | 1165.060082     | 2312.086340    | 1156.546808      | 2311.102324       | 1156.054800       | Q    | <b>586.338130</b>  | 293.672703         | 569.311581        | 285.159429       |                    |                    | 2  |
| 19 |                   |                 |                |                  |                   |                   | K    | <b>147.112804</b>  | 74.060040          | <b>130.086255</b> | 65.546765        |                    |                    | 1  |

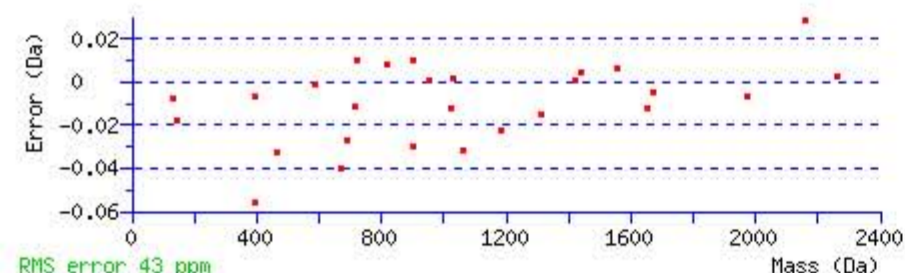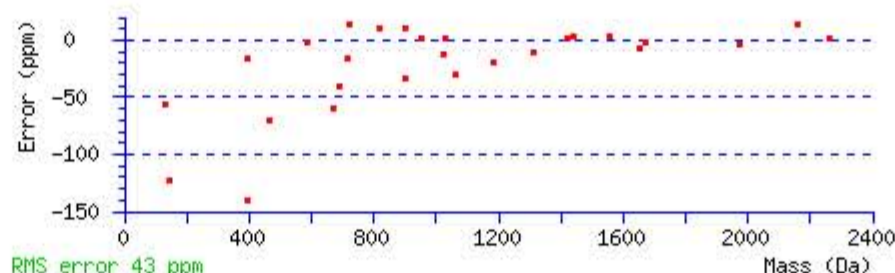

NCBI BLAST search of [ITVVAGEHNIETEHTQK](#)

(Parameters: blastp, nr protein database, expect=20000, no filter, PAM30)

Other BLAST [web gateways](#)

All matches to this query

| Score | Mr(calc):   | Delta     | Sequence                          |
|-------|-------------|-----------|-----------------------------------|
| 30.7  | 2474.211121 | -0.007665 | <a href="#">ITVVAGEHNIETEHTQK</a> |

Mascot: <http://www.matrixscience.com/>



# MATRIX SCIENCE Mascot Search Results

## Peptide View

MS/MS Fragmentation of **SQHLDNFSNQIGK**

Found in **FA5\_HUMAN**, Coagulation factor V OS=Homo sapiens GN=F5 PE=1 SV=4

Match to Query 39125: 1797.879072 from(600.300300,3+) rtinseconds(1797) index(49880)  
 Title: Locus:1.1.1.3269.14 File:"2013-07-02 CLN FXIII 30 min 3rd F 4.wiff"

Data file C:\Program Files (x86)\Matrix Science\Mascot Daemon\mgf3 FXIII 30 min 3rd\mascot\_daemon\_merge.mgf

Click mouse within plot area to zoom in by factor of two about that point

Or, Plot from  to  Da

Label all possible matches  Label matches used for scoring

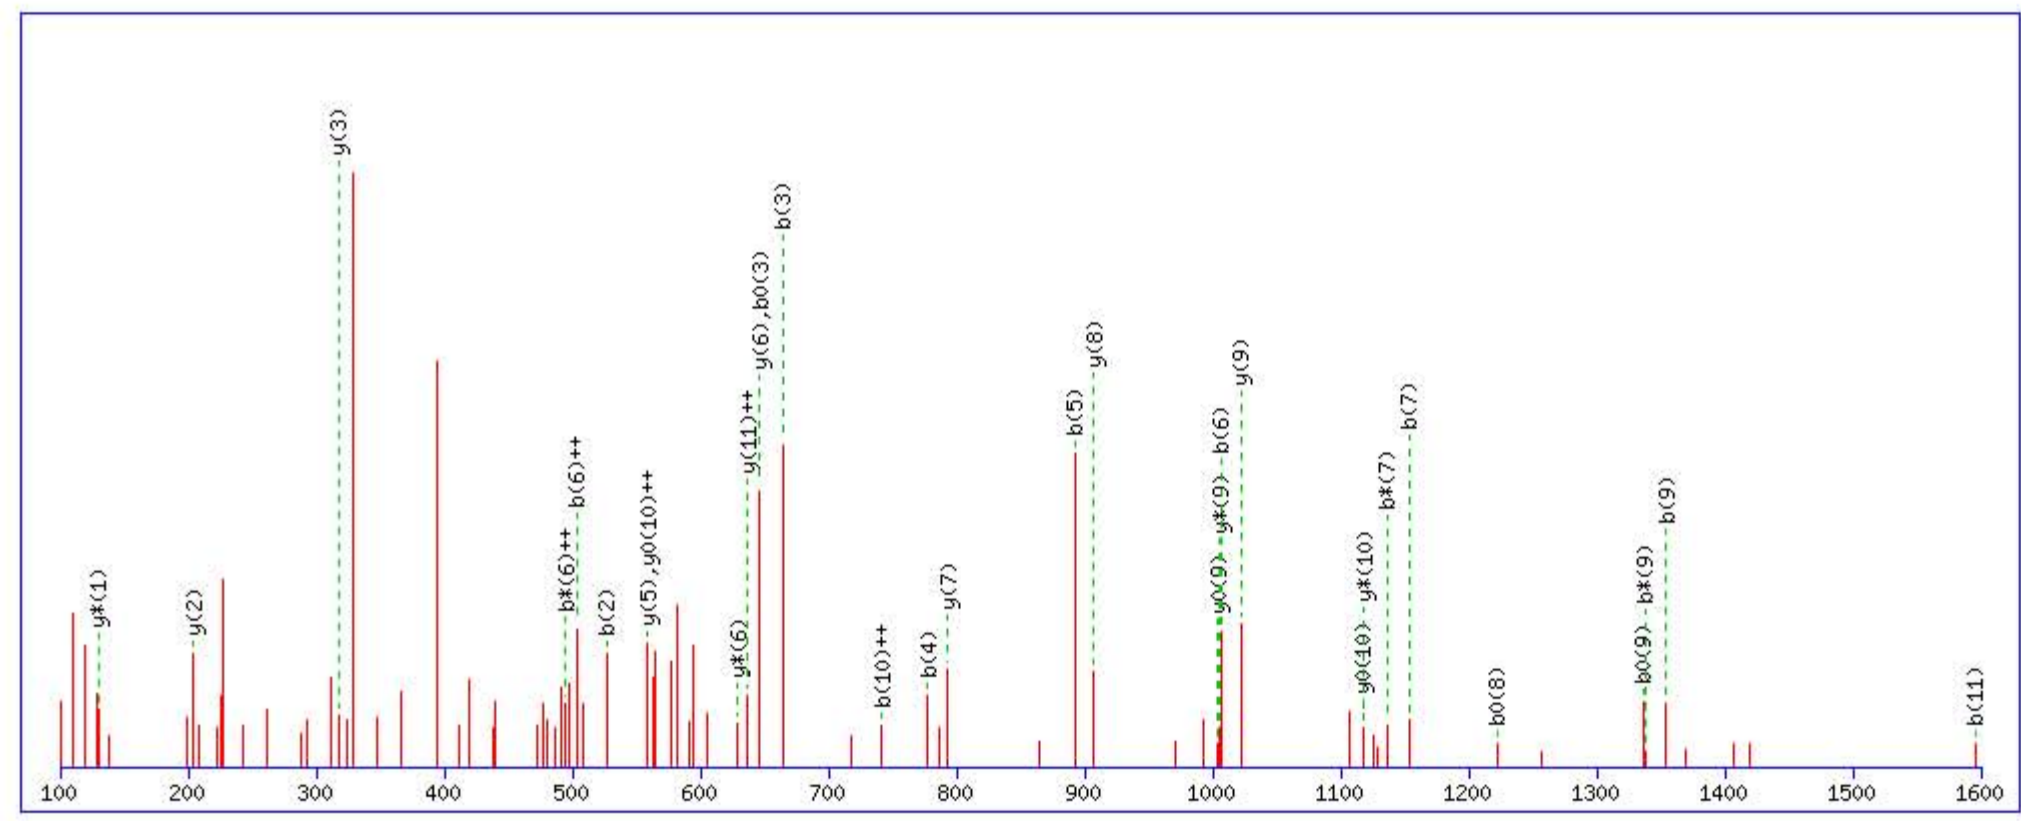

Monoisotopic mass of neutral peptide Mr(calc): 1797.883194

Fixed modifications: Carbamidomethyl (C) (apply to specified residues or termini only)

Variable modifications:

Q2 : Biotin:Thermo-21345 (Q)

Ions Score: 32 Expect: 0.0018

Matches : 31/132 fragment ions using 64 most intense peaks [\(help\)](#)

| #  | b                  | b <sup>++</sup>   | b <sup>*</sup>     | b <sup>***</sup>  | b <sup>0</sup>     | b <sup>0++</sup> | Seq. | y                  | y <sup>++</sup>   | y <sup>*</sup>     | y <sup>***</sup> | y <sup>0</sup>     | y <sup>0++</sup>  | #  |
|----|--------------------|-------------------|--------------------|-------------------|--------------------|------------------|------|--------------------|-------------------|--------------------|------------------|--------------------|-------------------|----|
| 1  | 88.039304          | 44.523290         |                    |                   | 70.028739          | 35.518008        | S    |                    |                   |                    |                  |                    |                   | 13 |
| 2  | <b>527.264630</b>  | 264.135953        | 510.238081         | 255.622679        | 509.254065         | 255.130671       | Q    | 1711.858451        | 856.432863        | 1694.831902        | 847.919589       | 1693.847886        | 847.427581        | 12 |
| 3  | <b>664.323542</b>  | 332.665409        | 647.296993         | 324.152134        | <b>646.312977</b>  | 323.660126       | H    | 1272.633125        | <b>636.820200</b> | 1255.606576        | 628.306926       | 1254.622560        | 627.814918        | 11 |
| 4  | <b>777.407606</b>  | 389.207441        | 760.381057         | 380.694166        | 759.397041         | 380.202159       | L    | 1135.574213        | 568.290744        | <b>1118.547664</b> | 559.777470       | <b>1117.563648</b> | <b>559.285462</b> | 10 |
| 5  | <b>892.434549</b>  | 446.720913        | 875.408000         | 438.207638        | 874.423984         | 437.715630       | D    | <b>1022.490149</b> | 511.748712        | <b>1005.463600</b> | 503.235438       | <b>1004.479584</b> | 502.743430        | 9  |
| 6  | <b>1006.477476</b> | <b>503.742376</b> | 989.450927         | <b>495.229101</b> | 988.466911         | 494.737093       | N    | <b>907.463206</b>  | 454.235241        | 890.436657         | 445.721966       | 889.452641         | 445.229958        | 8  |
| 7  | <b>1153.545890</b> | 577.276583        | <b>1136.519341</b> | 568.763308        | 1135.535325        | 568.271300       | F    | <b>793.420279</b>  | 397.213777        | 776.393730         | 388.700503       | 775.409714         | 388.208495        | 7  |
| 8  | 1240.577918        | 620.792597        | 1223.551369        | 612.279323        | <b>1222.567353</b> | 611.787314       | S    | <b>646.351865</b>  | 323.679570        | <b>629.325316</b>  | 315.166296       | 628.341300         | 314.674288        | 6  |
| 9  | <b>1354.620845</b> | 677.814060        | <b>1337.594296</b> | 669.300786        | <b>1336.610280</b> | 668.808778       | N    | <b>559.319837</b>  | 280.163556        | 542.293288         | 271.650282       |                    |                   | 5  |
| 10 | 1482.679423        | <b>741.843349</b> | 1465.652874        | 733.330075        | 1464.668858        | 732.838067       | Q    | 445.276910         | 223.142093        | 428.250361         | 214.628818       |                    |                   | 4  |
| 11 | <b>1595.763487</b> | 798.385381        | 1578.736938        | 789.872107        | 1577.752922        | 789.380099       | I    | <b>317.218332</b>  | 159.112804        | 300.191783         | 150.599529       |                    |                   | 3  |
| 12 | 1652.784951        | 826.896113        | 1635.758402        | 818.382839        | 1634.774386        | 817.890831       | G    | <b>204.134268</b>  | 102.570772        | 187.107719         | 94.057497        |                    |                   | 2  |
| 13 |                    |                   |                    |                   |                    |                  | K    | 147.112804         | 74.060040         | <b>130.086255</b>  | 65.546765        |                    |                   | 1  |

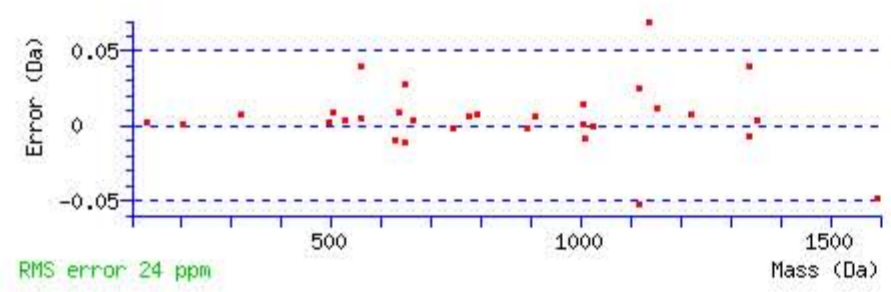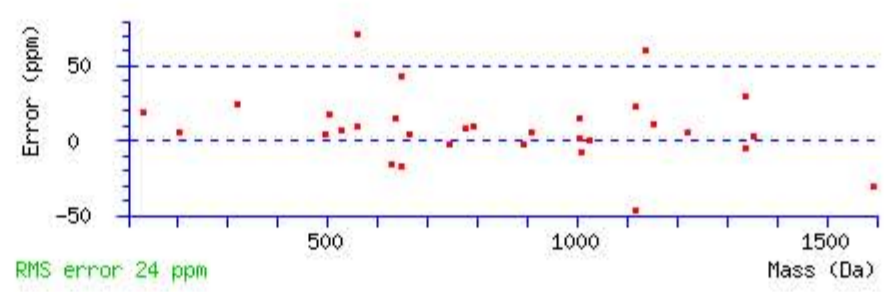

NCBI BLAST search of **SQHLDNFSNQIGK**

(Parameters: blastp, nr protein database, expect=20000, no filter, PAM30)

Other BLAST [web gateways](#)

All matches to this query

| Score | Mr(calc):   | Delta     | Sequence                       |
|-------|-------------|-----------|--------------------------------|
| 32.2  | 1797.883194 | -0.004122 | <a href="#">SQHLDNFSNQIGK</a>  |
| 3.0   | 1797.872604 | 0.006468  | <a href="#">KWDFSKYYVSNFSK</a> |

Mascot: <http://www.matrixscience.com/>



# MASCOT SEARCH RESULTS

## Peptide View

MS/MS Fragmentation of **MPMGLSTGHSDSQIK**

Found in **FA5\_HUMAN**, Coagulation factor V OS=Homo sapiens GN=F5 PE=1 SV=4

Match to Query 42676: 1988.018262 from(663.680030,3+) rtinseconds(2481) index(53491)

Title: Locus:1.1.1.3507.5 File:"2013-07-02 CLN FXIII 30 min 3rd F 4.wiff"

Data file C:\Program Files (x86)\Matrix Science\Mascot Daemon\mgf3 FXIII 30 min 3rd\mascot\_daemon\_merge.mgf

Click mouse within plot area to zoom in by factor of two about that point

Or, Plot from  to  Da

Label all possible matches  Label matches used for scoring

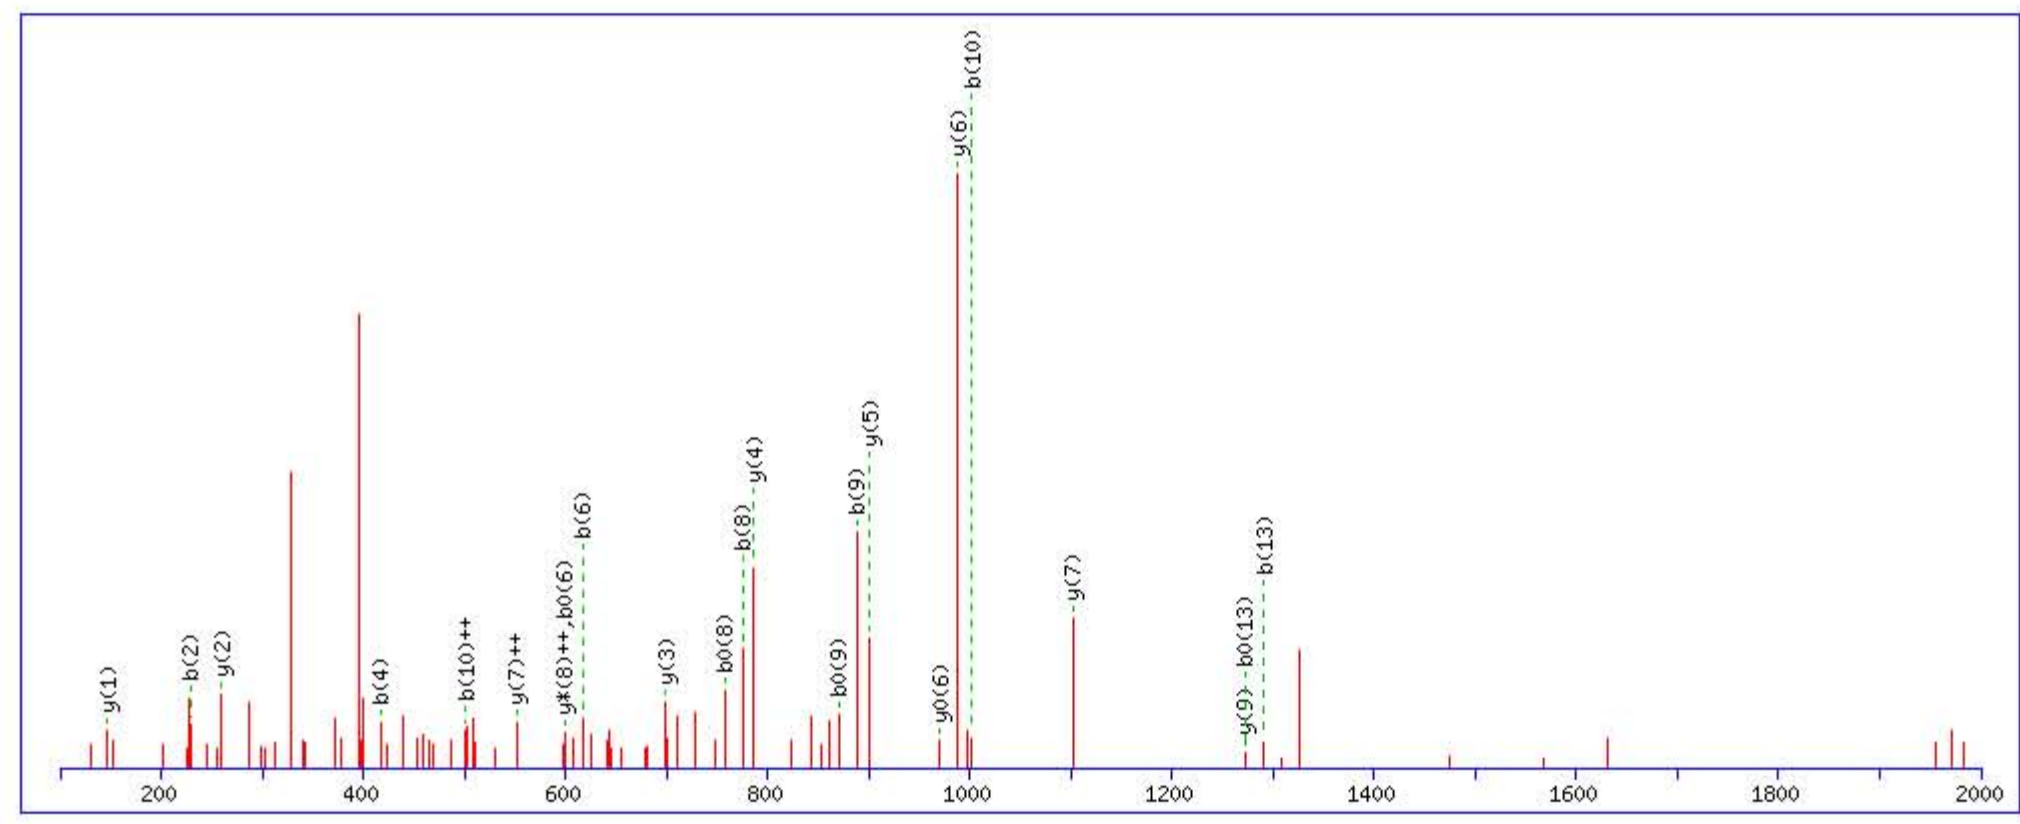

Monoisotopic mass of neutral peptide Mr(calc): 1988.014465

Fixed modifications: Carbamidomethyl (C) (apply to specified residues or termini only)

Variable modifications:

Q14 : Biotin:Thermo-21345 (Q)

Ions Score: 44 Expect: 0.0012

Matches : 23/138 fragment ions using 47 most intense peaks [\(help\)](#)

| #  | b                  | b <sup>++</sup>   | b <sup>*</sup> | b <sup>*++</sup> | b <sup>0</sup>     | b <sup>0++</sup> | Seq. | y                  | y <sup>++</sup>   | y <sup>*</sup> | y <sup>*++</sup>  | y <sup>0</sup>    | y <sup>0++</sup> | #  |
|----|--------------------|-------------------|----------------|------------------|--------------------|------------------|------|--------------------|-------------------|----------------|-------------------|-------------------|------------------|----|
| 1  | 132.047761         | 66.527518         |                |                  |                    |                  | M    |                    |                   |                |                   |                   |                  | 16 |
| 2  | <b>229.100525</b>  | 115.053900        |                |                  |                    |                  | P    | 1857.981269        | 929.494273        | 1840.954720    | 920.980998        | 1839.970704       | 920.488990       | 15 |
| 3  | 360.141010         | 180.574143        |                |                  |                    |                  | M    | 1760.928505        | 880.967891        | 1743.901956    | 872.454616        | 1742.917940       | 871.962608       | 14 |
| 4  | <b>417.162474</b>  | 209.084875        |                |                  |                    |                  | G    | 1629.888020        | 815.447648        | 1612.861471    | 806.934374        | 1611.877455       | 806.442366       | 13 |
| 5  | 530.246538         | 265.626907        |                |                  |                    |                  | L    | 1572.866556        | 786.936916        | 1555.840007    | 778.423642        | 1554.855991       | 777.931634       | 12 |
| 6  | <b>617.278566</b>  | 309.142921        |                |                  | <b>599.268001</b>  | 300.137638       | S    | 1459.782492        | 730.394884        | 1442.755943    | 721.881610        | 1441.771927       | 721.389602       | 11 |
| 7  | 718.326245         | 359.666761        |                |                  | 700.315680         | 350.661478       | T    | 1372.750464        | 686.878870        | 1355.723915    | 678.365596        | 1354.739899       | 677.873588       | 10 |
| 8  | <b>775.347709</b>  | 388.177493        |                |                  | <b>757.337144</b>  | 379.172210       | G    | <b>1271.702785</b> | 636.355031        | 1254.676236    | 627.841756        | 1253.692220       | 627.349748       | 9  |
| 9  | <b>888.431773</b>  | 444.719525        |                |                  | <b>870.421208</b>  | 435.714242       | I    | 1214.681321        | 607.844299        | 1197.654772    | <b>599.331024</b> | 1196.670756       | 598.839016       | 8  |
| 10 | <b>1001.515837</b> | <b>501.261557</b> |                |                  | 983.505272         | 492.256274       | I    | <b>1101.597257</b> | <b>551.302267</b> | 1084.570708    | 542.788992        | 1083.586692       | 542.296984       | 7  |
| 11 | 1088.547865        | 544.777571        |                |                  | 1070.537300        | 535.772288       | S    | <b>988.513193</b>  | 494.760235        | 971.486644     | 486.246960        | <b>970.502628</b> | 485.754952       | 6  |
| 12 | 1203.574808        | 602.291042        |                |                  | 1185.564243        | 593.285760       | D    | <b>901.481165</b>  | 451.244221        | 884.454616     | 442.730946        | 883.470600        | 442.238938       | 5  |
| 13 | <b>1290.606836</b> | 645.807056        |                |                  | <b>1272.596271</b> | 636.801774       | S    | <b>786.454222</b>  | 393.730749        | 769.427673     | 385.217475        | 768.443657        | 384.725467       | 4  |
| 14 | 1729.832162        | 865.419719        | 1712.805613    | 856.906445       | 1711.821597        | 856.414437       | Q    | <b>699.422194</b>  | 350.214735        | 682.395645     | 341.701461        |                   |                  | 3  |
| 15 | 1842.916226        | 921.961751        | 1825.889677    | 913.448477       | 1824.905661        | 912.956469       | I    | <b>260.196868</b>  | 130.602072        | 243.170319     | 122.088797        |                   |                  | 2  |
| 16 |                    |                   |                |                  |                    |                  | K    | <b>147.112804</b>  | 74.060040         | 130.086255     | 65.546765         |                   |                  | 1  |

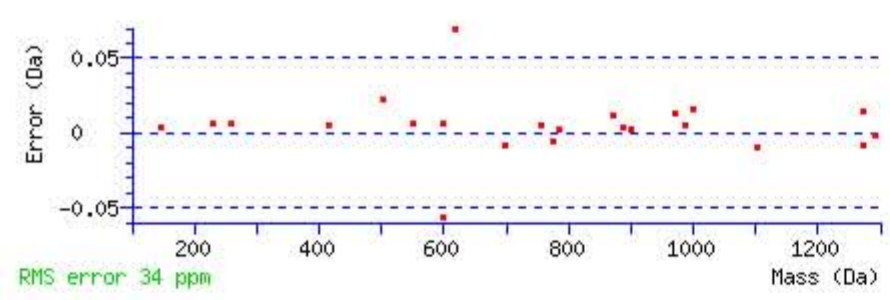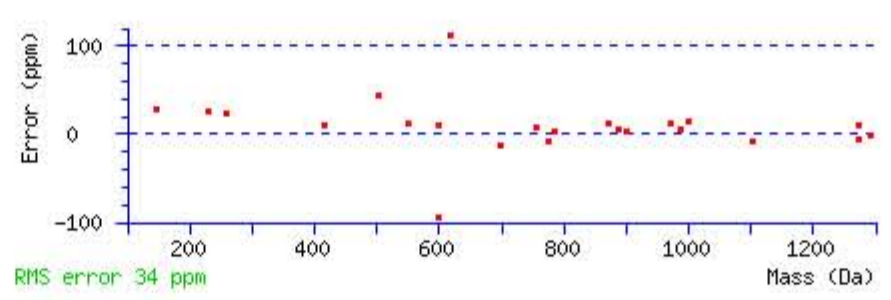

NCBI BLAST search of **MPMGLSTGHSDSQIK**

(Parameters: blastp, nr protein database, expect=20000, no filter, PAM30)

Other BLAST [web gateways](#)

### All matches to this query

| Score | Mr(calc):   | Delta    | Sequence                        |
|-------|-------------|----------|---------------------------------|
| 44.0  | 1988.014465 | 0.003797 | <a href="#">MPMGLSTGHSDSQIK</a> |

Mascot: <http://www.matrixscience.com/>



# MASCOT Search Results

## Peptide View

MS/MS Fragmentation of **IVGGQECK**

Found in **FA10\_HUMAN**, Coagulation factor X OS=Homo sapiens GN=F10 PE=1 SV=2

Match to Query 21765: 1200.593268 from(601.303910,2+) rtinseconds(1441) index(47637)

Title: Locus:1.1.1.3145.15 File:"2013-07-02 CLN FXIII 30 min 3rd F 4.wiff"

Data file C:\Program Files (x86)\Matrix Science\Mascot Daemon\mgf3 FXIII 30 min 3rd\mascot\_daemon\_merge.mgf

Click mouse within plot area to zoom in by factor of two about that point

Or, Plot from  to  Da

Label all possible matches  Label matches used for scoring

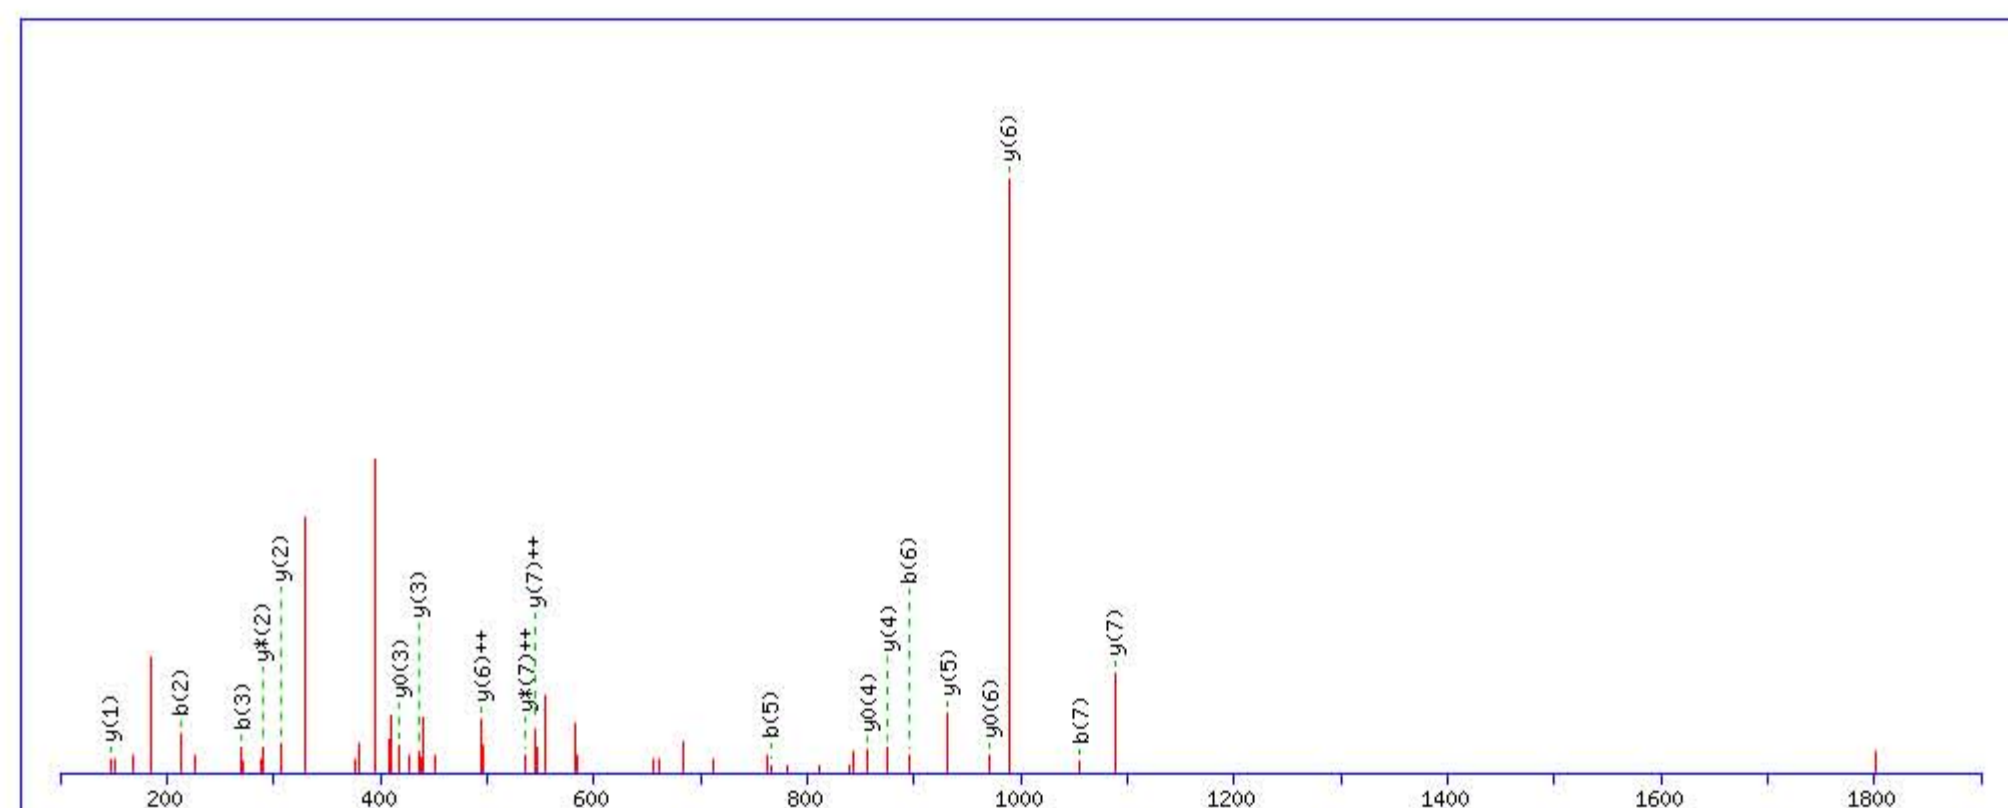

Monoisotopic mass of neutral peptide Mr(calc): 1200.599503

Fixed modifications: Carbamidomethyl (C) (apply to specified residues or termini only)

Variable modifications:

Q5 : Biotin:Thermo-21345 (Q)

Ions Score: 34 Expect: 0.0022

Matches : 19/62 fragment ions using 47 most intense peaks [\(help\)](#)

| # | b           | b <sup>++</sup> | b <sup>+</sup> | b <sup>*++</sup> | b <sup>0</sup> | b <sup>0++</sup> | Seq. | y           | y <sup>++</sup> | y <sup>+</sup> | y <sup>*++</sup> | y <sup>0</sup> | y <sup>0++</sup> | # |
|---|-------------|-----------------|----------------|------------------|----------------|------------------|------|-------------|-----------------|----------------|------------------|----------------|------------------|---|
| 1 | 114.091340  | 57.549308       |                |                  |                |                  | I    |             |                 |                |                  |                |                  | 8 |
| 2 | 213.159754  | 107.083515      |                |                  |                |                  | V    | 1088.522714 | 544.764995      | 1071.496165    | 536.251721       | 1070.512149    | 535.759713       | 7 |
| 3 | 270.181218  | 135.594247      |                |                  |                |                  | G    | 989.454300  | 495.230788      | 972.427751     | 486.717514       | 971.443735     | 486.225506       | 6 |
| 4 | 327.202682  | 164.104979      |                |                  |                |                  | G    | 932.432836  | 466.720056      | 915.406287     | 458.206782       | 914.422271     | 457.714774       | 5 |
| 5 | 766.428008  | 383.717642      | 749.401459     | 375.204368       |                |                  | Q    | 875.411372  | 438.209324      | 858.384823     | 429.696050       | 857.400807     | 429.204042       | 4 |
| 6 | 895.470601  | 448.238939      | 878.444052     | 439.725664       | 877.460036     | 439.233656       | E    | 436.186046  | 218.596661      | 419.159497     | 210.083386       | 418.175481     | 209.591378       | 3 |
| 7 | 1055.501250 | 528.254263      | 1038.474701    | 519.740989       | 1037.490685    | 519.248981       | C    | 307.143453  | 154.075364      | 290.116904     | 145.562090       |                |                  | 2 |
| 8 |             |                 |                |                  |                |                  | K    | 147.112804  | 74.060040       | 130.086255     | 65.546765        |                |                  | 1 |

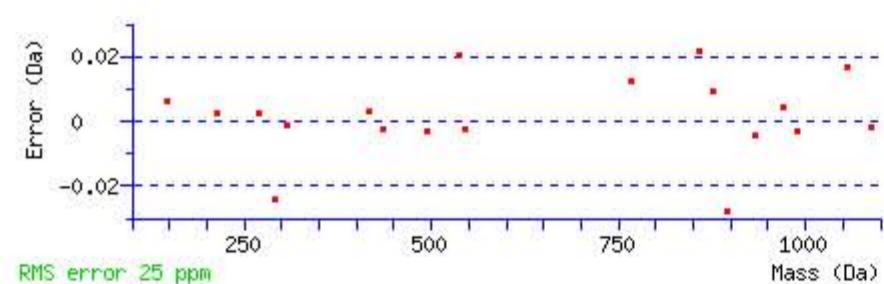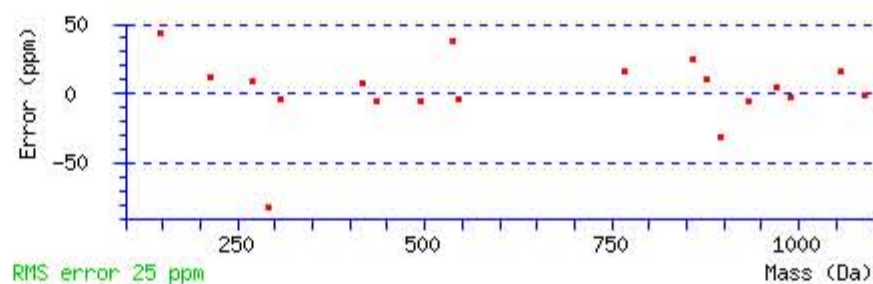

NCBI BLAST search of **IVGGQECK**

(Parameters: blastp, nr protein database, expect=20000, no filter, PAM30)

Other BLAST [web gateways](#)

All matches to this query

| Score | Mr(calc):   | Delta     | Sequence                  |
|-------|-------------|-----------|---------------------------|
| 33.9  | 1200.599503 | -0.006235 | <a href="#">IVGGQECK</a>  |
| 5.2   | 1200.598587 | -0.005319 | <a href="#">ILADLEENR</a> |
| 3.6   | 1200.599503 | -0.006235 | <a href="#">LIQGDGCK</a>  |
| 1.4   | 1200.596100 | -0.002832 | <a href="#">LVKMYDNR</a>  |
| 0.4   | 1200.599487 | -0.006219 | <a href="#">LLNDQCK</a>   |



# MASCOT SCIENCE Mascot Search Results

## Peptide View

MS/MS Fragmentation of **DWAESTLMTQK**

Found in **FA10\_HUMAN**, Coagulation factor X OS=Homo sapiens GN=F10 PE=1 SV=2

Match to Query 34792: 1619.765712 from(540.929180,3+) rtinseconds(2297) index(52746)

Title: Locus:1.1.1.3443.2 File:"2013-07-02 CLN FXIII 30 min 3rd F 4.wiff"

Data file C:\Program Files (x86)\Matrix Science\Mascot Daemon\mgf3 FXIII 30 min 3rd\mascot\_daemon\_merge.mgf

Click mouse within plot area to zoom in by factor of two about that point

Or, Plot from  to  Da

Label all possible matches  Label matches used for scoring

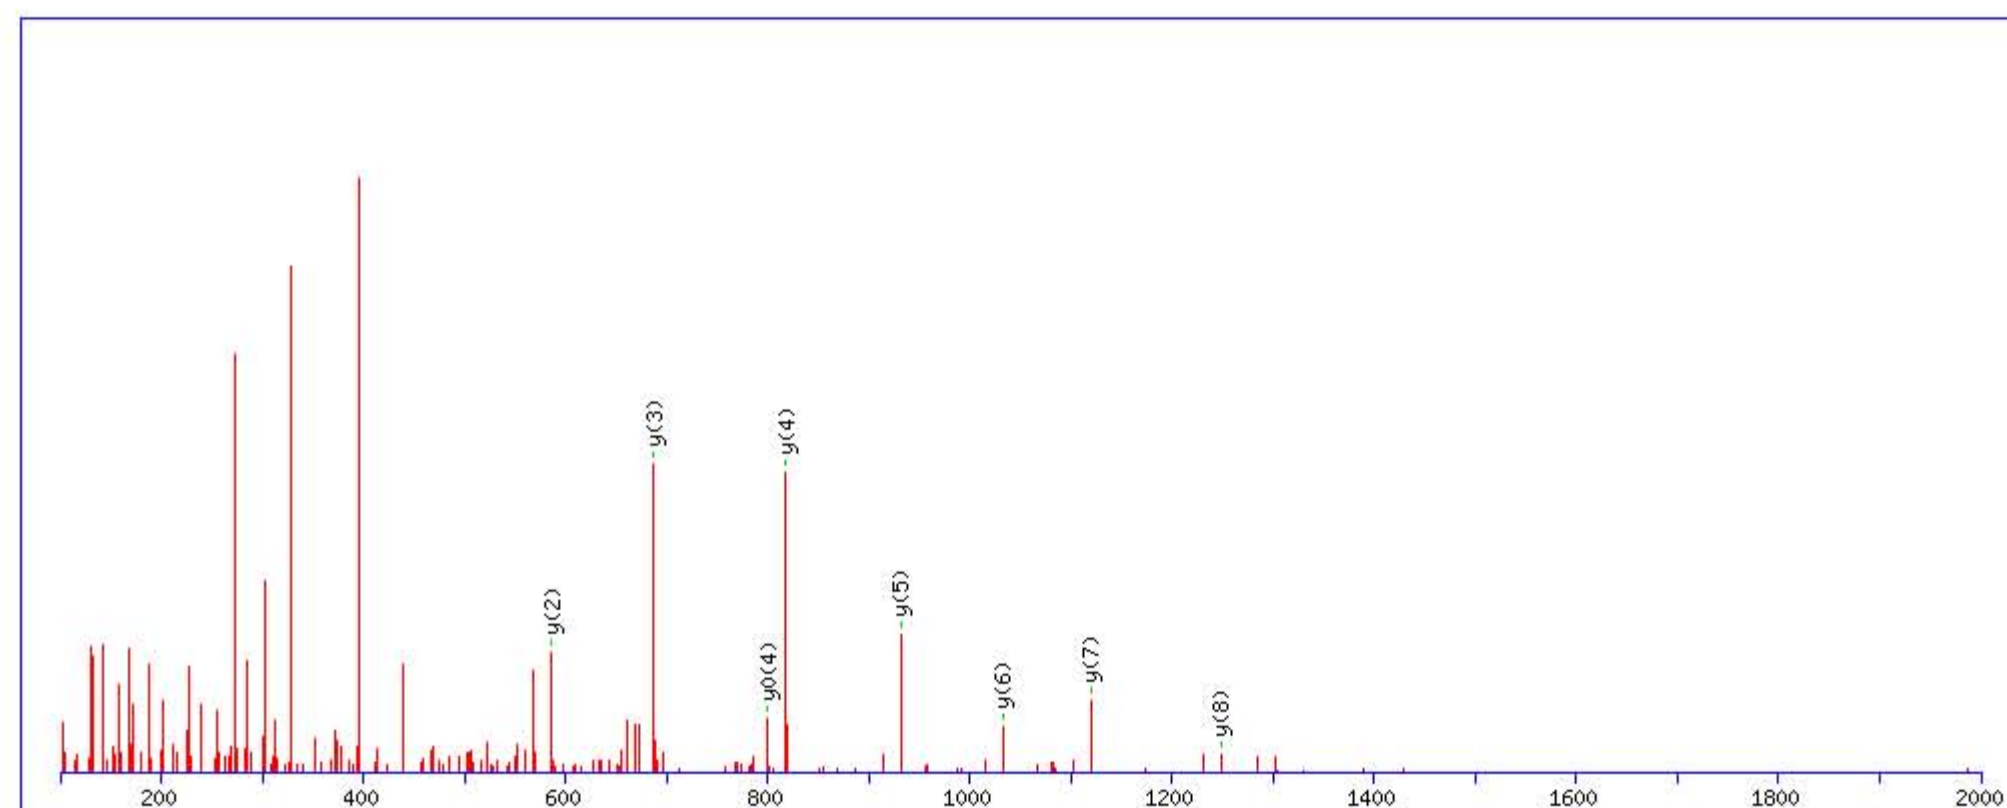

Monoisotopic mass of neutral peptide  $M_r(\text{calc})$ : 1619.768738

Fixed modifications: Carbamidomethyl (C) (apply to specified residues or termini only)

Variable modifications:

Q10 : Biotin:Thermo-21345 (Q)

Ions Score: 42 Expect: 0.00097

Matches : 8/98 fragment ions using 14 most intense peaks [\(help\)](#)

| #  | b           | b <sup>++</sup> | b <sup>*</sup> | b <sup>*++</sup> | b <sup>0</sup> | b <sup>0++</sup> | Seq. | y                  | y <sup>++</sup> | y <sup>*</sup> | y <sup>*++</sup> | y <sup>0</sup>    | y <sup>0++</sup> | #  |
|----|-------------|-----------------|----------------|------------------|----------------|------------------|------|--------------------|-----------------|----------------|------------------|-------------------|------------------|----|
| 1  | 116.034219  | 58.520748       |                |                  | 98.023654      | 49.515465        | D    |                    |                 |                |                  |                   |                  | 11 |
| 2  | 302.113532  | 151.560404      |                |                  | 284.102967     | 142.555122       | W    | 1505.749085        | 753.378180      | 1488.722536    | 744.864906       | 1487.738520       | 744.372898       | 10 |
| 3  | 373.150646  | 187.078961      |                |                  | 355.140081     | 178.073679       | A    | 1319.669772        | 660.338524      | 1302.643223    | 651.825250       | 1301.659207       | 651.333241       | 9  |
| 4  | 502.193239  | 251.600258      |                |                  | 484.182674     | 242.594975       | E    | <b>1248.632658</b> | 624.819967      | 1231.606109    | 616.306693       | 1230.622093       | 615.814685       | 8  |
| 5  | 589.225267  | 295.116272      |                |                  | 571.214702     | 286.110989       | S    | <b>1119.590065</b> | 560.298671      | 1102.563516    | 551.785396       | 1101.579500       | 551.293388       | 7  |
| 6  | 690.272946  | 345.640111      |                |                  | 672.262381     | 336.634829       | T    | <b>1032.558037</b> | 516.782657      | 1015.531488    | 508.269382       | 1014.547472       | 507.777374       | 6  |
| 7  | 803.357010  | 402.182143      |                |                  | 785.346445     | 393.176861       | L    | <b>931.510358</b>  | 466.258817      | 914.483809     | 457.745543       | 913.499793        | 457.253535       | 5  |
| 8  | 934.397495  | 467.702386      |                |                  | 916.386930     | 458.697103       | M    | <b>818.426294</b>  | 409.716785      | 801.399745     | 401.203510       | <b>800.415729</b> | 400.711502       | 4  |
| 9  | 1035.445174 | 518.226225      |                |                  | 1017.434609    | 509.220942       | T    | <b>687.385809</b>  | 344.196543      | 670.359260     | 335.683268       | 669.375244        | 335.191260       | 3  |
| 10 | 1474.670500 | 737.838888      | 1457.643951    | 729.325614       | 1456.659935    | 728.833605       | Q    | <b>586.338130</b>  | 293.672703      | 569.311581     | 285.159429       |                   |                  | 2  |
| 11 |             |                 |                |                  |                |                  | K    | 147.112804         | 74.060040       | 130.086255     | 65.546765        |                   |                  | 1  |

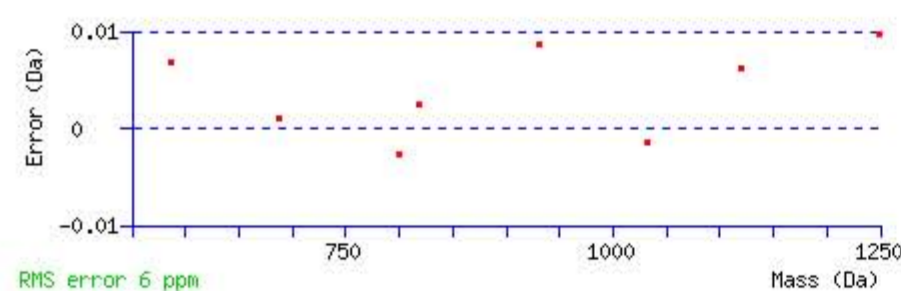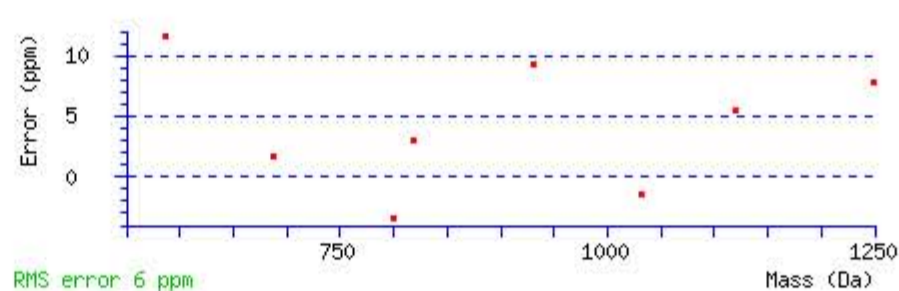

NCBI BLAST search of [DWAESTLMTQK](#)

(Parameters: blastp, nr protein database, expect=20000, no filter, PAM30)

Other BLAST [web gateways](#)

All matches to this query

| Score | $M_r(\text{calc})$ : | Delta     | Sequence                    |
|-------|----------------------|-----------|-----------------------------|
| 42.4  | 1619.768738          | -0.003026 | <a href="#">DWAESTLMTQK</a> |

Mascot: <http://www.matrixscience.com/>



# MASCOT Search Results

## Peptide View

MS/MS Fragmentation of **QEDACQGDSSGGPHVTR**

Found in **FA10\_HUMAN**, Coagulation factor X OS=Homo sapiens GN=F10 PE=1 SV=2

Match to Query 44141: 2023.874202 from(675.632010,3+) rtinseconds(1330) index(47088)

Title: Locus:1.1.1.3106.17 File:"2013-07-02 CLN FXIII 30 min 3rd F 4.wiff"

Data file C:\Program Files (x86)\Matrix Science\Mascot Daemon\mgf\3 FXIII 30 min 3rd\mascot\_daemon\_merge.mgf

Click mouse within plot area to zoom in by factor of two about that point

Or, Plot from  to  Da

Label all possible matches  Label matches used for scoring

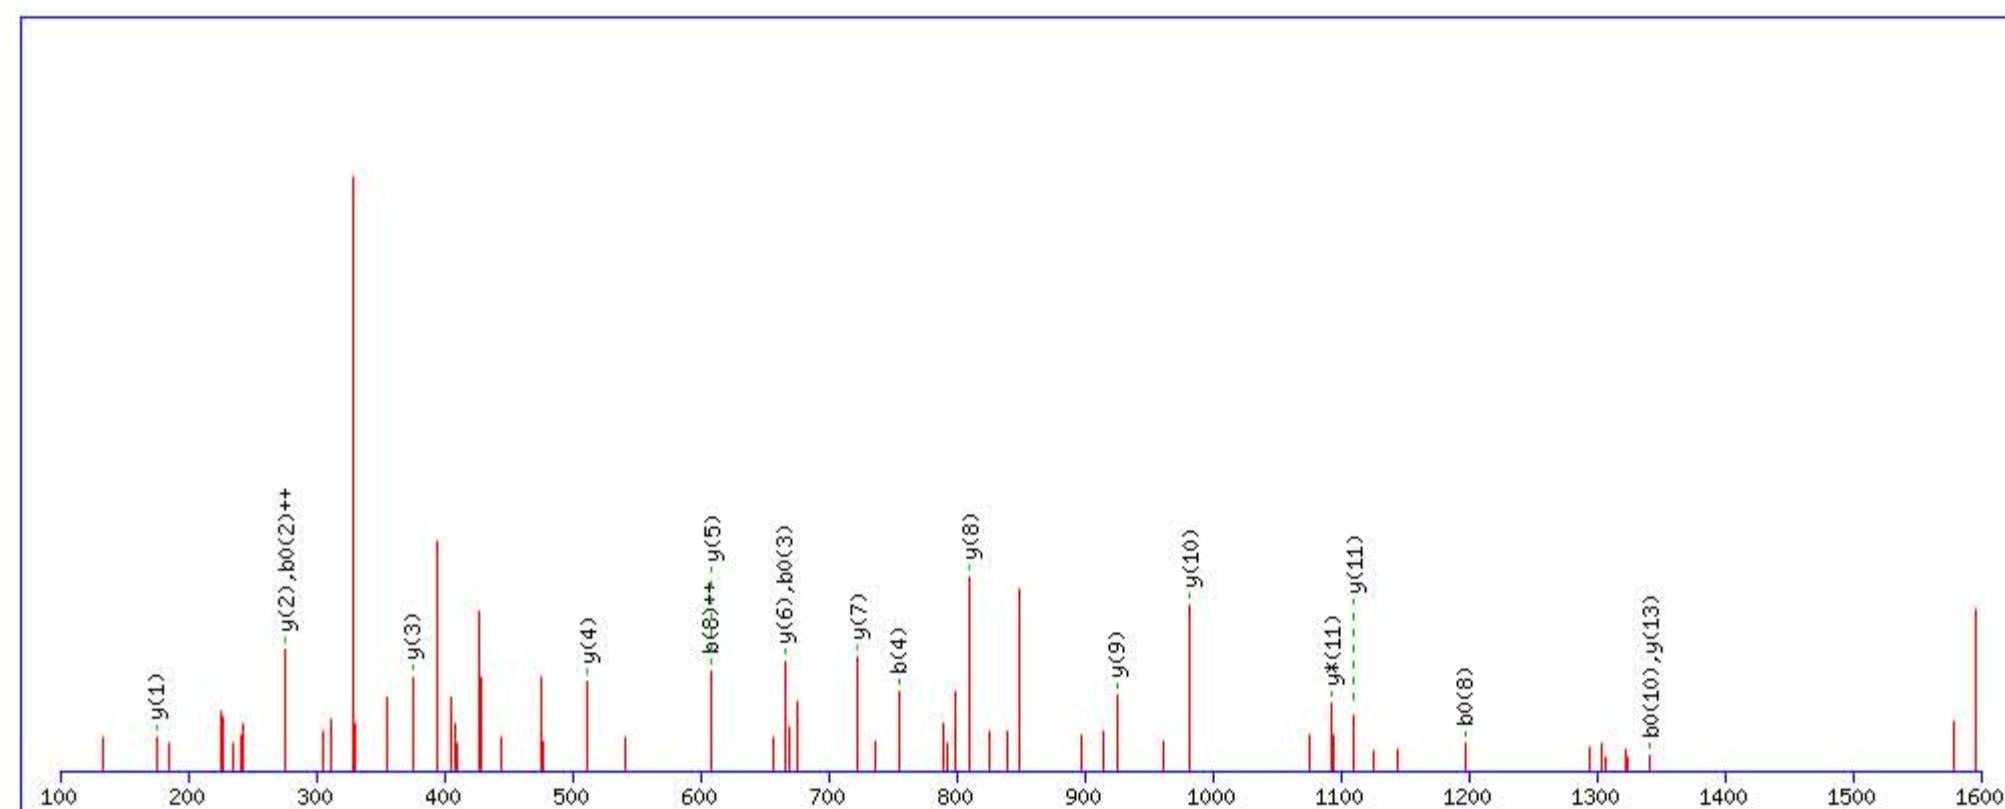

Monoisotopic mass of neutral peptide Mr(calc): 2023.884033

Fixed modifications: Carbamidomethyl (C) (apply to specified residues or termini only)

Variable modifications:

Q1 : Biotin:Thermo-21345 (Q)

Ions Score: 58 Expect: 6.5e-006

Matches : 19/176 fragment ions using 38 most intense peaks [\(help\)](#)

| #  | b           | b <sup>++</sup> | b <sup>*</sup> | b <sup>*++</sup> | b <sup>0</sup> | b <sup>0++</sup> | Seq. | y           | y <sup>++</sup> | y <sup>*</sup> | y <sup>*++</sup> | y <sup>0</sup> | y <sup>0++</sup> | #  |
|----|-------------|-----------------|----------------|------------------|----------------|------------------|------|-------------|-----------------|----------------|------------------|----------------|------------------|----|
| 1  | 440.232602  | 220.619939      | 423.206053     | 212.106664       |                |                  | Q    |             |                 |                |                  |                |                  | 16 |
| 2  | 569.275195  | 285.141236      | 552.248646     | 276.627961       | 551.264630     | 276.135953       | E    | 1585.665961 | 793.336618      | 1568.639412    | 784.823344       | 1567.655396    | 784.331336       | 15 |
| 3  | 684.302138  | 342.654707      | 667.275589     | 334.141433       | 666.291573     | 333.649425       | D    | 1456.623368 | 728.815322      | 1439.596819    | 720.302047       | 1438.612803    | 719.810039       | 14 |
| 4  | 755.339252  | 378.173264      | 738.312703     | 369.659989       | 737.328687     | 369.167982       | A    | 1341.596425 | 671.301851      | 1324.569876    | 662.788576       | 1323.585860    | 662.296568       | 13 |
| 5  | 915.369901  | 458.188589      | 898.343352     | 449.675314       | 897.359336     | 449.183306       | C    | 1270.559311 | 635.783294      | 1253.532762    | 627.270019       | 1252.548746    | 626.778011       | 12 |
| 6  | 1043.428479 | 522.217877      | 1026.401930    | 513.704603       | 1025.417914    | 513.212595       | Q    | 1110.528662 | 555.767969      | 1093.502113    | 547.254695       | 1092.518097    | 546.762686       | 11 |
| 7  | 1100.449943 | 550.728609      | 1083.423394    | 542.215335       | 1082.439378    | 541.723327       | G    | 982.470084  | 491.738680      | 965.443535     | 483.225406       | 964.459519     | 482.733398       | 10 |
| 8  | 1215.476886 | 608.242081      | 1198.450337    | 599.728807       | 1197.466321    | 599.236798       | D    | 925.448620  | 463.227948      | 908.422071     | 454.714674       | 907.438055     | 454.222666       | 9  |
| 9  | 1302.508914 | 651.758095      | 1285.482365    | 643.244821       | 1284.498349    | 642.752813       | S    | 810.421677  | 405.714477      | 793.395128     | 397.201202       | 792.411112     | 396.709194       | 8  |
| 10 | 1359.530378 | 680.268827      | 1342.503829    | 671.755553       | 1341.519813    | 671.263544       | G    | 723.389649  | 362.198463      | 706.363100     | 353.685188       | 705.379084     | 353.193180       | 7  |
| 11 | 1416.551842 | 708.779559      | 1399.525293    | 700.266284       | 1398.541277    | 699.774276       | G    | 666.368185  | 333.687731      | 649.341636     | 325.174456       | 648.357620     | 324.682448       | 6  |
| 12 | 1513.604606 | 757.305941      | 1496.578057    | 748.792667       | 1495.594041    | 748.300658       | P    | 609.346721  | 305.176999      | 592.320172     | 296.663724       | 591.336156     | 296.171716       | 5  |
| 13 | 1650.663518 | 825.835397      | 1633.636969    | 817.322122       | 1632.652953    | 816.830114       | H    | 512.293957  | 256.650617      | 495.267408     | 248.137342       | 494.283392     | 247.645334       | 4  |
| 14 | 1749.731932 | 875.369604      | 1732.705383    | 866.856330       | 1731.721367    | 866.364321       | V    | 375.235045  | 188.121161      | 358.208496     | 179.607886       | 357.224480     | 179.115878       | 3  |
| 15 | 1850.779611 | 925.893443      | 1833.753062    | 917.380169       | 1832.769046    | 916.888161       | T    | 276.166631  | 138.586953      | 259.140082     | 130.073679       | 258.156066     | 129.581671       | 2  |
| 16 |             |                 |                |                  |                |                  | R    | 175.118952  | 88.063114       | 158.092403     | 79.549839        |                |                  | 1  |

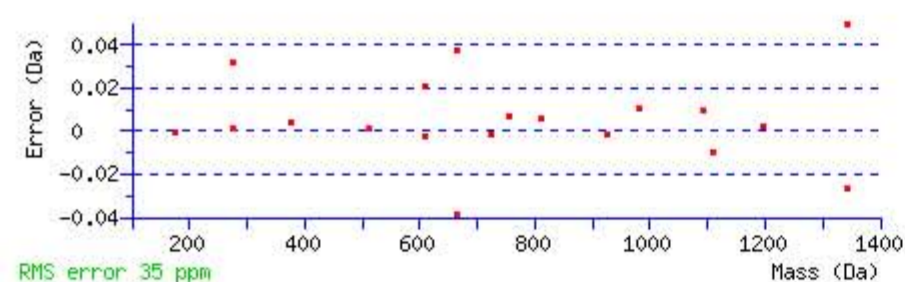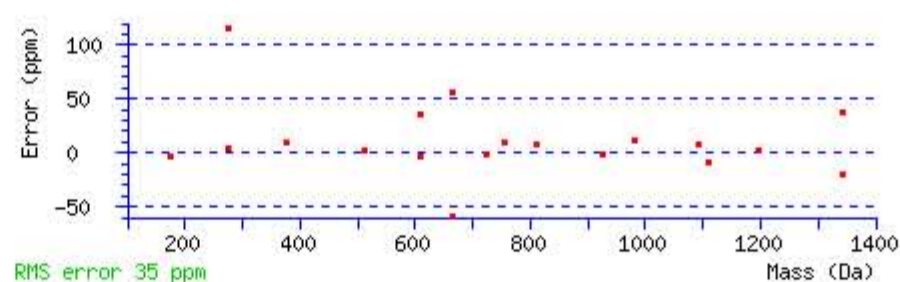

NCBI BLAST search of **QEDACQGDSSGGPHVTR**

(Parameters: blastp, nr protein database, expect=20000, no filter, PAM30)

Other BLAST [web gateways](#)

All matches to this query

| Score | Mr(calc):   | Delta     | Sequence                          |
|-------|-------------|-----------|-----------------------------------|
| 57.9  | 2023.884033 | -0.009831 | <a href="#">QEDACQGDSSGGPHVTR</a> |
| 33.7  | 2023.884033 | -0.009831 | <a href="#">QEDACQGDSSGGPHVTR</a> |

Mascot: <http://www.matrixscience.com/>



# MASCOT Search Results

## Peptide View

MS/MS Fragmentation of **YKDGDCETSPCQNQGK**

Found in **FA10\_HUMAN**, Coagulation factor X OS=Homo sapiens GN=F10 PE=1 SV=2

Match to Query 49416: 2324.973102 from(775.998310,3+) rtinseconds(1293) index(46923)  
 Title: Locus:1.1.1.3093.10 File:"2013-07-02 CLN FXIII 30 min 3rd F 4.wiff"  
 Data file C:\Program Files (x86)\Matrix Science\Mascot Daemon\mgf3 FXIII 30 min 3rd\mascot\_daemon\_merge.mgf

Click mouse within plot area to zoom in by factor of two about that point

Or, Plot from  to  Da

Label all possible matches  Label matches used for scoring

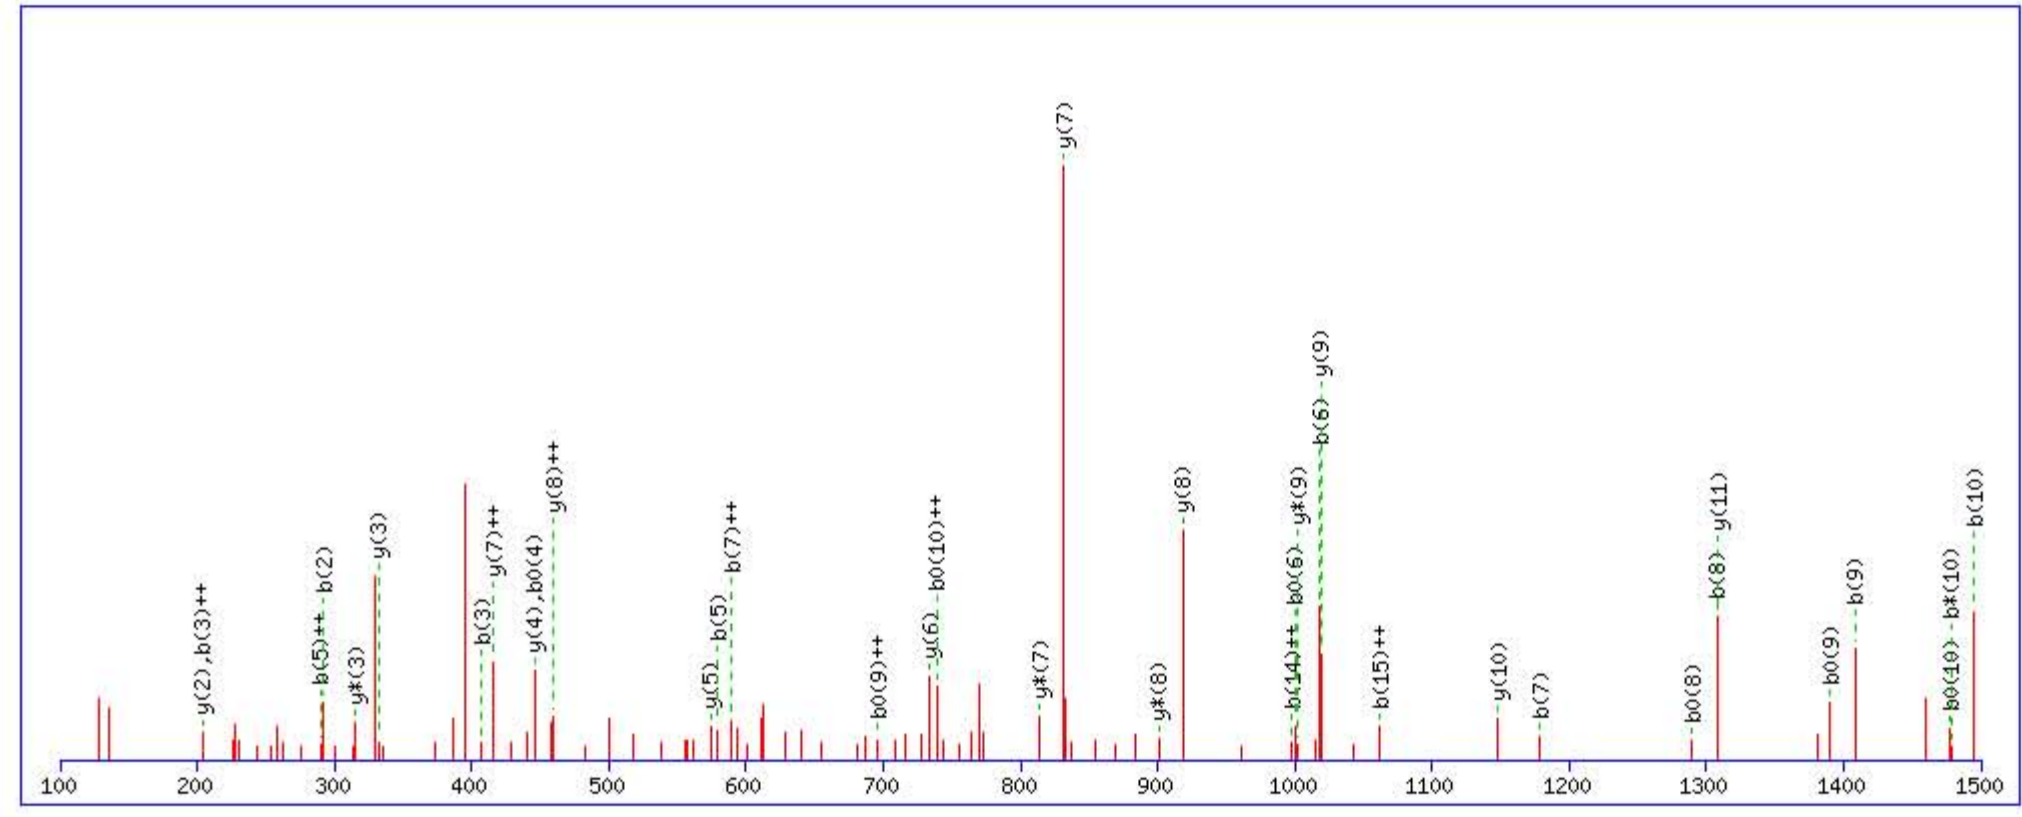

Monoisotopic mass of neutral peptide  $M_r(\text{calc})$ : 2324.982407  
 Fixed modifications: Carbamidomethyl (C) (apply to specified residues or termini only)  
 Variable modifications: Q6 : Biotin:Thermo-21345 (Q)  
 Ions Score: 47 Expect: 3.8e-005  
 Matches : 37/172 fragment ions using 67 most intense peaks [\(help\)](#)

| #  | b                  | b <sup>++</sup>    | b <sup>*</sup>     | b <sup>*++</sup> | b <sup>0</sup>     | b <sup>0++</sup>  | Seq. | y                  | y <sup>++</sup>   | y <sup>*</sup>     | y <sup>*++</sup> | y <sup>0</sup> | y <sup>0++</sup> | #  |
|----|--------------------|--------------------|--------------------|------------------|--------------------|-------------------|------|--------------------|-------------------|--------------------|------------------|----------------|------------------|----|
| 1  | 164.070605         | 82.538940          |                    |                  |                    |                   | Y    |                    |                   |                    |                  |                |                  | 17 |
| 2  | <b>292.165568</b>  | 146.586422         | 275.139019         | 138.073148       |                    |                   | K    | 2162.926352        | 1081.966814       | 2145.899803        | 1073.453539      | 2144.915787    | 1072.961531      | 16 |
| 3  | <b>407.192511</b>  | <b>204.099894</b>  | 390.165962         | 195.586619       | 389.181946         | 195.094611        | D    | 2034.831389        | 1017.919333       | 2017.804840        | 1009.406058      | 2016.820824    | 1008.914050      | 15 |
| 4  | 464.213975         | 232.610626         | 447.187426         | 224.097351       | <b>446.203410</b>  | 223.605343        | G    | 1919.804446        | 960.405861        | 1902.777897        | 951.892587       | 1901.793881    | 951.400579       | 14 |
| 5  | <b>579.240918</b>  | <b>290.124097</b>  | 562.214369         | 281.610823       | 561.230353         | 281.118815        | D    | 1862.782982        | 931.895129        | 1845.756433        | 923.381855       | 1844.772417    | 922.889847       | 13 |
| 6  | <b>1018.466244</b> | 509.736760         | 1001.439695        | 501.223486       | <b>1000.455679</b> | 500.731478        | Q    | 1747.756039        | 874.381658        | 1730.729490        | 865.868383       | 1729.745474    | 865.376375       | 12 |
| 7  | <b>1178.496893</b> | <b>589.752085</b>  | 1161.470344        | 581.238810       | 1160.486328        | 580.746802        | C    | <b>1308.530713</b> | 654.768995        | 1291.504164        | 646.255720       | 1290.520148    | 645.763712       | 11 |
| 8  | <b>1307.539486</b> | 654.273381         | 1290.512937        | 645.760107       | <b>1289.528921</b> | 645.268098        | E    | <b>1148.500064</b> | 574.753670        | 1131.473515        | 566.240396       | 1130.489499    | 565.748388       | 10 |
| 9  | <b>1408.587165</b> | 704.797220         | 1391.560616        | 696.283946       | <b>1390.576600</b> | 695.791938        | T    | <b>1019.457471</b> | 510.232374        | <b>1002.430922</b> | 501.719099       | 1001.446906    | 501.227091       | 9  |
| 10 | <b>1495.619193</b> | 748.313235         | <b>1478.592644</b> | 739.799960       | <b>1477.608628</b> | <b>739.307952</b> | S    | <b>918.409792</b>  | <b>459.708534</b> | <b>901.383243</b>  | 451.195260       | 900.399227     | 450.703252       | 8  |
| 11 | 1592.671957        | 796.839617         | 1575.645408        | 788.326342       | 1574.661392        | 787.834334        | P    | <b>831.377764</b>  | <b>416.192520</b> | <b>814.351215</b>  | 407.679246       |                |                  | 7  |
| 12 | 1752.702606        | 876.854941         | 1735.676057        | 868.341667       | 1734.692041        | 867.849659        | C    | <b>734.325000</b>  | 367.666138        | 717.298451         | 359.152864       |                |                  | 6  |
| 13 | 1880.761184        | 940.884230         | 1863.734635        | 932.370956       | 1862.750619        | 931.878948        | Q    | <b>574.294351</b>  | 287.650814        | 557.267802         | 279.137539       |                |                  | 5  |
| 14 | 1994.804111        | <b>997.905694</b>  | 1977.777562        | 989.392419       | 1976.793546        | 988.900411        | N    | <b>446.235773</b>  | 223.621524        | 429.209224         | 215.108250       |                |                  | 4  |
| 15 | 2122.862689        | <b>1061.934982</b> | 2105.836140        | 1053.421708      | 2104.852124        | 1052.929700       | Q    | <b>332.192846</b>  | 166.600061        | <b>315.166297</b>  | 158.086787       |                |                  | 3  |
| 16 | 2179.884153        | 1090.445714        | 2162.857604        | 1081.932440      | 2161.873588        | 1081.440432       | G    | <b>204.134268</b>  | 102.570772        | 187.107719         | 94.057497        |                |                  | 2  |
| 17 |                    |                    |                    |                  |                    |                   | K    | 147.112804         | 74.060040         | 130.086255         | 65.546765        |                |                  | 1  |

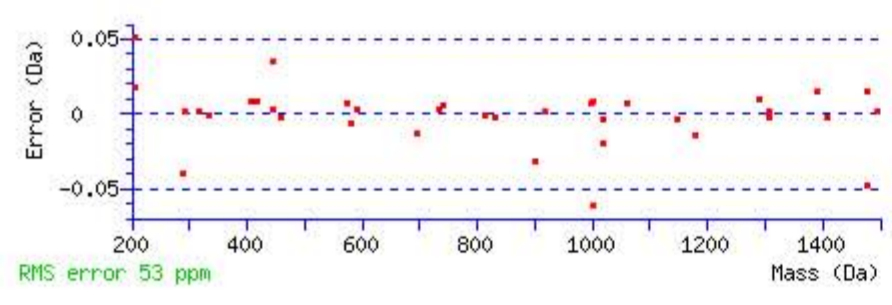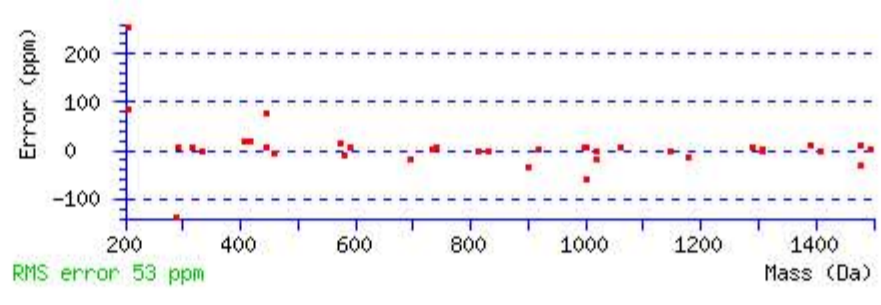

NCBI BLAST search of **YKDGDCETSPCQNQGK**  
 (Parameters: blastp, nr protein database, expect=20000, no filter, PAM30)  
 Other BLAST [web gateways](#)

### All matches to this query

| Score | $M_r(\text{calc})$ : | Delta     | Sequence                         |
|-------|----------------------|-----------|----------------------------------|
| 47.3  | 2324.982407          | -0.009305 | <a href="#">YKDGDCETSPCQNQGK</a> |

Mascot: <http://www.matrixscience.com/>



# MASCOT SEARCH RESULTS

## Peptide View

MS/MS Fragmentation of **TEQAAVAR**

Found in **FA12\_HUMAN**, Coagulation factor XII OS=Homo sapiens GN=F12 PE=1 SV=3

Match to Query 20341: 1155.606328 from(578.810440,2+) rtinseconds(1400) index(60356)

Title: Locus:1.1.1.2966.17 File:"2013-07-02 CLN FXIII 30 min 3rd FT.wiff"

Data file C:\Program Files (x86)\Matrix Science\Mascot Daemon\mgf3 FXIII 30 min 3rd\mascot\_daemon\_merge.mgf

Click mouse within plot area to zoom in by factor of two about that point

Or, Plot from  to  Da

Label all possible matches  Label matches used for scoring

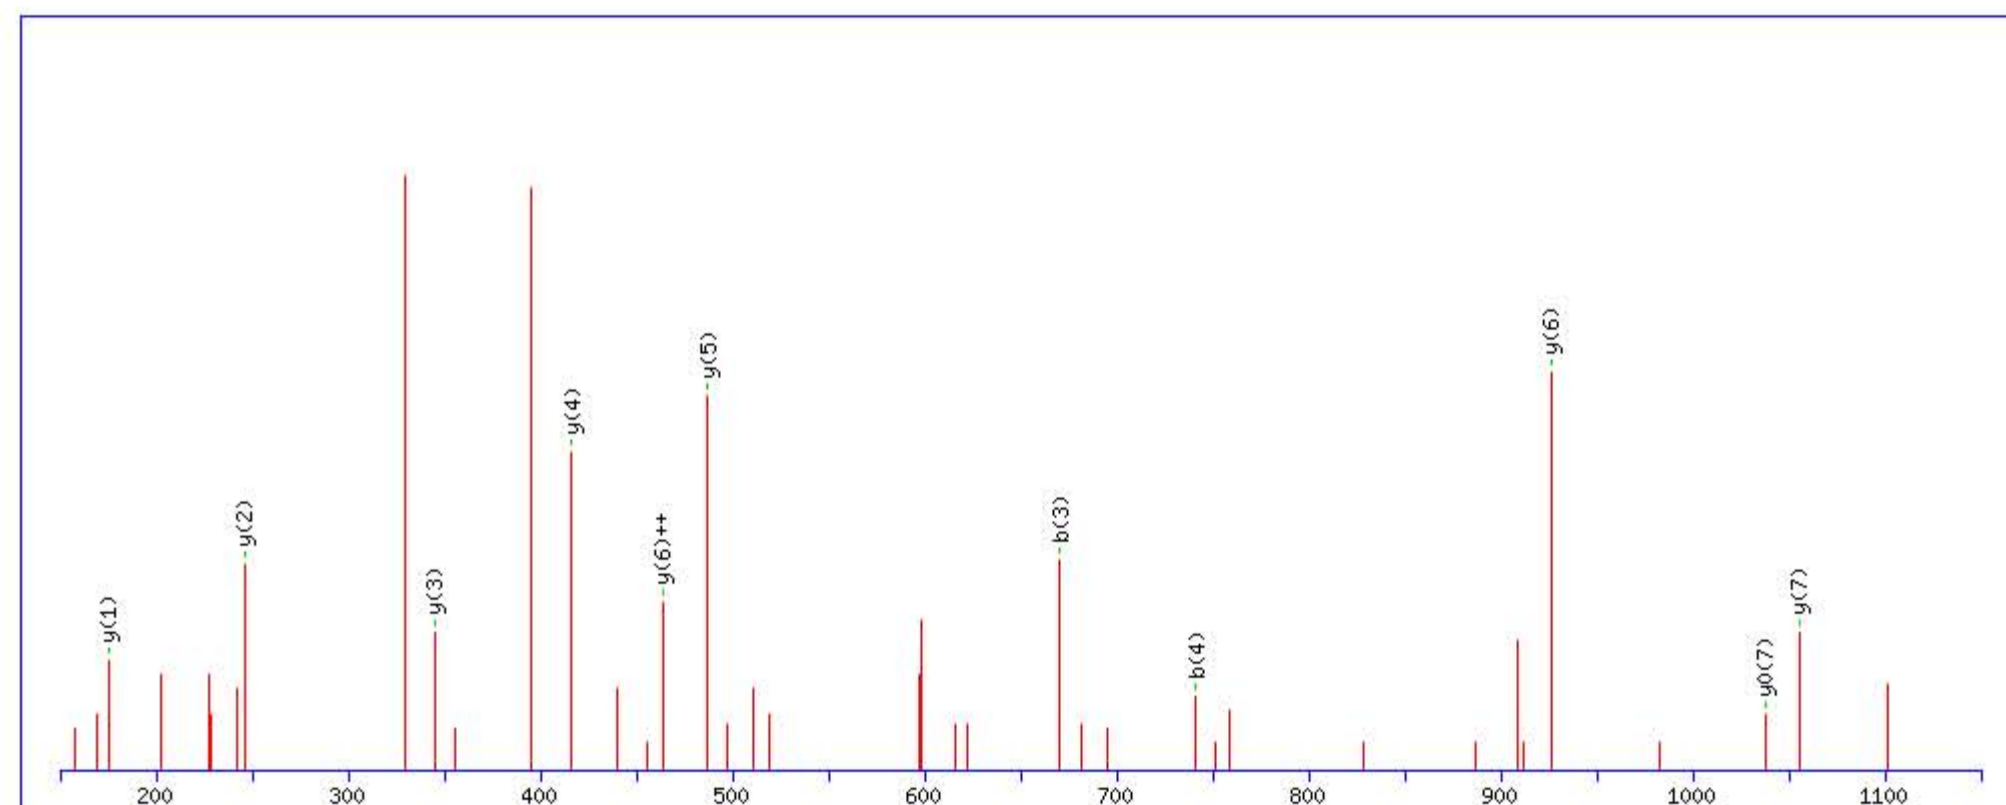

Monoisotopic mass of neutral peptide Mr(calc): 1155.607010

Fixed modifications: Carbamidomethyl (C) (apply to specified residues or termini only)

Variable modifications:

Q3 : Biotin:Thermo-21345 (Q)

Ions Score: 47 Expect: 0.00019

Matches : 11/68 fragment ions using 19 most intense peaks [\(help\)](#)

| # | b          | b <sup>++</sup> | b <sup>*</sup> | b <sup>*++</sup> | b <sup>0</sup> | b <sup>0++</sup> | Seq. | y           | y <sup>++</sup> | y <sup>*</sup> | y <sup>*++</sup> | y <sup>0</sup> | y <sup>0++</sup> | # |
|---|------------|-----------------|----------------|------------------|----------------|------------------|------|-------------|-----------------|----------------|------------------|----------------|------------------|---|
| 1 | 102.054955 | 51.531116       |                |                  | 84.044390      | 42.525833        | T    |             |                 |                |                  |                |                  | 8 |
| 2 | 231.097548 | 116.052412      |                |                  | 213.086983     | 107.047130       | E    | 1055.566627 | 528.286951      | 1038.540078    | 519.773677       | 1037.556062    | 519.281669       | 7 |
| 3 | 670.322874 | 335.665075      | 653.296325     | 327.151801       | 652.312309     | 326.659793       | Q    | 926.524034  | 463.765655      | 909.497485     | 455.252380       |                |                  | 6 |
| 4 | 741.359988 | 371.183632      | 724.333439     | 362.670358       | 723.349423     | 362.178350       | A    | 487.298708  | 244.152992      | 470.272159     | 235.639717       |                |                  | 5 |
| 5 | 812.397102 | 406.702189      | 795.370553     | 398.188915       | 794.386537     | 397.696907       | A    | 416.261594  | 208.634435      | 399.235045     | 200.121160       |                |                  | 4 |
| 6 | 911.465516 | 456.236396      | 894.438967     | 447.723121       | 893.454951     | 447.231113       | V    | 345.224480  | 173.115878      | 328.197931     | 164.602603       |                |                  | 3 |
| 7 | 982.502630 | 491.754953      | 965.476081     | 483.241678       | 964.492065     | 482.749670       | A    | 246.156066  | 123.581671      | 229.129517     | 115.068396       |                |                  | 2 |
| 8 |            |                 |                |                  |                |                  | R    | 175.118952  | 88.063114       | 158.092403     | 79.549839        |                |                  | 1 |

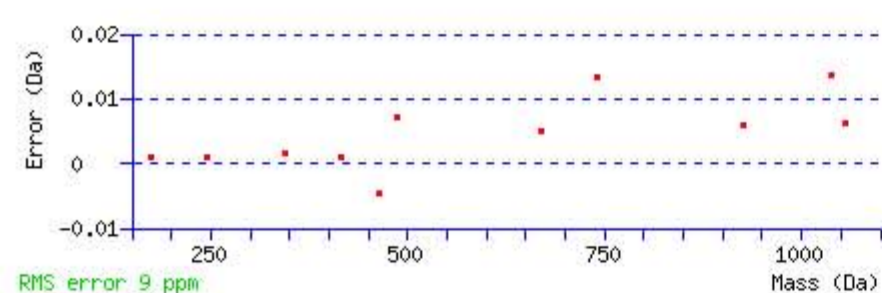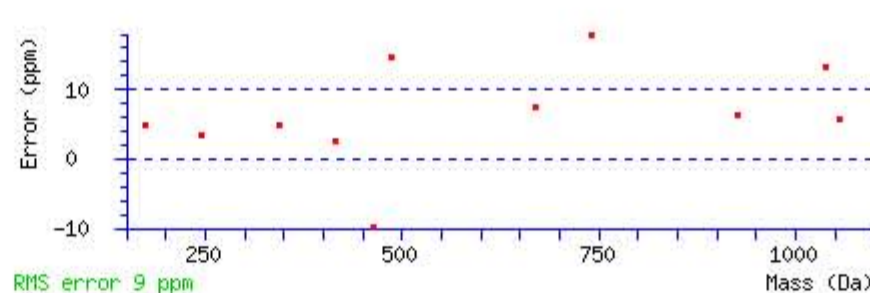

NCBI BLAST search of **TEQAAVAR**

(Parameters: blastp, nr protein database, expect=20000, no filter, PAM30)

Other BLAST [web gateways](#)

## All matches to this query

| Score | Mr(calc):   | Delta     | Sequence                    |
|-------|-------------|-----------|-----------------------------|
| 46.7  | 1155.607010 | -0.000682 | <a href="#">TEQAAVAR</a>    |
| 6.6   | 1155.622269 | -0.015941 | <a href="#">QAWLTAR</a>     |
| 6.5   | 1155.607010 | -0.000682 | <a href="#">QQLETAR</a>     |
| 6.0   | 1155.607025 | -0.000697 | <a href="#">VQDSAVAR</a>    |
| 5.2   | 1155.614883 | -0.008555 | <a href="#">RSGDWLLPGR</a>  |
| 1.5   | 1155.607040 | -0.000712 | <a href="#">TPACVPVSIQR</a> |
| 1.3   | 1155.589249 | 0.017079  | <a href="#">MQLPPALCAR</a>  |



# MASCOT Search Results

## Peptide View

MS/MS Fragmentation of **AEHTVVLTVTGEPCHFPPQYHR**

Found in **FA12\_HUMAN**, Coagulation factor XII OS=Homo sapiens GN=F12 PE=1 SV=3

Match to Query 57753: 3064.465256 from(767.123590,4+) rtinseconds(2162) index(64768)

Title: Locus:1.1.1.3232.17 File:"2013-07-02 CLN FXIII 30 min 3rd FT.wiff"

Data file C:\Program Files (x86)\Matrix Science\Mascot Daemon\mgf3 FXIII 30 min 3rd\mascot\_daemon\_merge.mgf

Click mouse within plot area to zoom in by factor of two about that point

Or, Plot from  to  Da

Label all possible matches  Label matches used for scoring

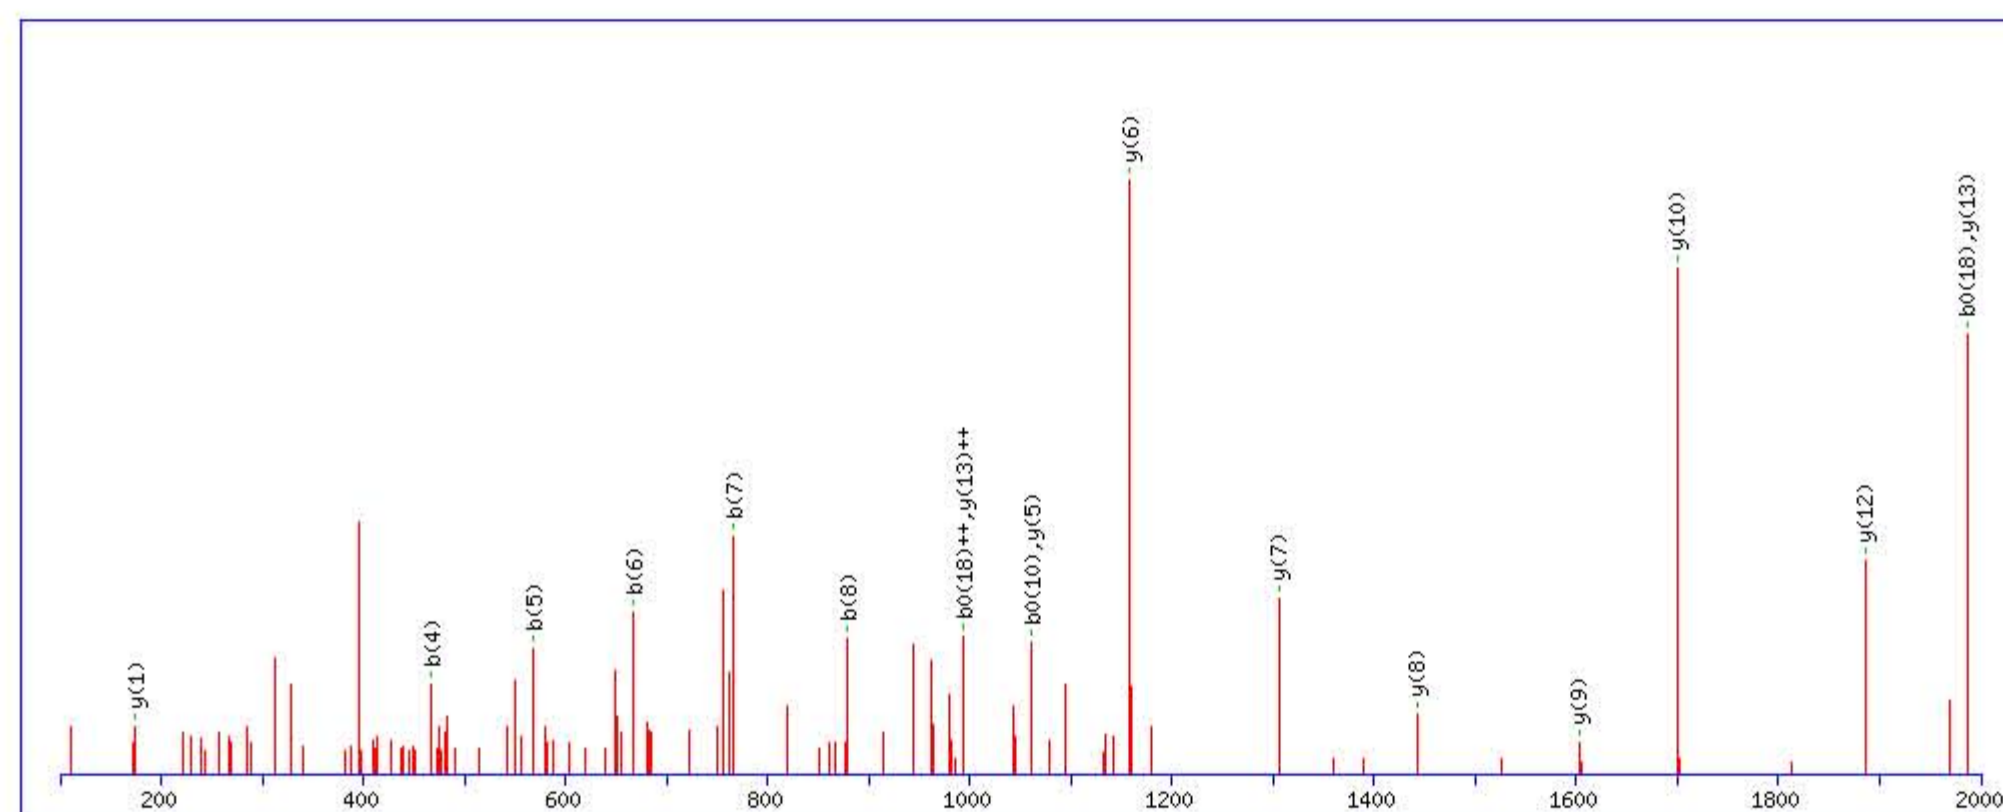

Monoisotopic mass of neutral peptide Mr(calc): 3064.468796

Fixed modifications: Carbamidomethyl (C) (apply to specified residues or termini only)

Variable modifications:

Q20 : Biotin:Thermo-21345 (Q)

Ions Score: 77 Expect: 4.8e-007

Matches : 18/204 fragment ions using 18 most intense peaks [\(help\)](#)

| #  | b                 | b <sup>++</sup> | b <sup>*</sup> | b <sup>*++</sup> | b <sup>0</sup>     | b <sup>0++</sup>  | Seq. | y                  | y <sup>++</sup>   | y <sup>*</sup> | y <sup>*++</sup> | y <sup>0</sup> | y <sup>0++</sup> | #  |
|----|-------------------|-----------------|----------------|------------------|--------------------|-------------------|------|--------------------|-------------------|----------------|------------------|----------------|------------------|----|
| 1  | 72.044390         | 36.525833       |                |                  |                    |                   | A    |                    |                   |                |                  |                |                  | 23 |
| 2  | 201.086983        | 101.047130      |                |                  | 183.076418         | 92.041847         | E    | 2994.438934        | 1497.723105       | 2977.412385    | 1489.209830      | 2976.428369    | 1488.717822      | 22 |
| 3  | 330.129576        | 165.568426      |                |                  | 312.119011         | 156.563144        | E    | 2865.396341        | 1433.201808       | 2848.369792    | 1424.688534      | 2847.385776    | 1424.196526      | 21 |
| 4  | <b>467.188488</b> | 234.097882      |                |                  | 449.177923         | 225.092599        | H    | 2736.353748        | 1368.680512       | 2719.327199    | 1360.167237      | 2718.343183    | 1359.675229      | 20 |
| 5  | <b>568.236167</b> | 284.621722      |                |                  | 550.225602         | 275.616439        | T    | 2599.294836        | 1300.151056       | 2582.268287    | 1291.637781      | 2581.284271    | 1291.145773      | 19 |
| 6  | <b>667.304581</b> | 334.155929      |                |                  | 649.294016         | 325.150646        | V    | 2498.247157        | 1249.627216       | 2481.220608    | 1241.113942      | 2480.236592    | 1240.621934      | 18 |
| 7  | <b>766.372995</b> | 383.690136      |                |                  | 748.362430         | 374.684853        | V    | 2399.178743        | 1200.093009       | 2382.152194    | 1191.579735      | 2381.168178    | 1191.087727      | 17 |
| 8  | <b>879.457059</b> | 440.232168      |                |                  | 861.446494         | 431.226885        | L    | 2300.110329        | 1150.558802       | 2283.083780    | 1142.045528      | 2282.099764    | 1141.553520      | 16 |
| 9  | 980.504738        | 490.756007      |                |                  | 962.494173         | 481.750724        | T    | 2187.026265        | 1094.016770       | 2169.999716    | 1085.503496      | 2169.015700    | 1085.011488      | 15 |
| 10 | 1079.573152       | 540.290214      |                |                  | <b>1061.562587</b> | 531.284931        | V    | 2085.978586        | 1043.492931       | 2068.952037    | 1034.979656      | 2067.968021    | 1034.487648      | 14 |
| 11 | 1180.620831       | 590.814054      |                |                  | 1162.610266        | 581.808771        | T    | <b>1986.910172</b> | <b>993.958724</b> | 1969.883623    | 985.445450       | 1968.899607    | 984.953442       | 13 |
| 12 | 1237.642295       | 619.324785      |                |                  | 1219.631730        | 610.319503        | G    | <b>1885.862493</b> | 943.434885        | 1868.835944    | 934.921610       | 1867.851928    | 934.429602       | 12 |
| 13 | 1366.684888       | 683.846082      |                |                  | 1348.674323        | 674.840800        | E    | 1828.841029        | 914.924153        | 1811.814480    | 906.410878       | 1810.830464    | 905.918870       | 11 |
| 14 | 1463.737652       | 732.372464      |                |                  | 1445.727087        | 723.367182        | P    | <b>1699.798436</b> | 850.402856        | 1682.771887    | 841.889582       |                |                  | 10 |
| 15 | 1623.768301       | 812.387789      |                |                  | 1605.757736        | 803.382506        | C    | <b>1602.745672</b> | 801.876474        | 1585.719123    | 793.363200       |                |                  | 9  |
| 16 | 1760.827213       | 880.917245      |                |                  | 1742.816648        | 871.911962        | H    | <b>1442.715023</b> | 721.861150        | 1425.688474    | 713.347875       |                |                  | 8  |
| 17 | 1907.895627       | 954.451452      |                |                  | 1889.885062        | 945.446169        | F    | <b>1305.656111</b> | 653.331694        | 1288.629562    | 644.818419       |                |                  | 7  |
| 18 | 2004.948391       | 1002.977834     |                |                  | <b>1986.937826</b> | <b>993.972551</b> | P    | <b>1158.587697</b> | 579.797487        | 1141.561148    | 571.284212       |                |                  | 6  |
| 19 | 2152.016805       | 1076.512040     |                |                  | 2134.006240        | 1067.506758       | F    | <b>1061.534933</b> | 531.271105        | 1044.508384    | 522.757830       |                |                  | 5  |
| 20 | 2591.242131       | 1296.124703     | 2574.215582    | 1287.611429      | 2573.231566        | 1287.119421       | Q    | 914.466519         | 457.736898        | 897.439970     | 449.223623       |                |                  | 4  |
| 21 | 2754.305460       | 1377.656368     | 2737.278911    | 1369.143093      | 2736.294895        | 1368.651085       | Y    | 475.241193         | 238.124234        | 458.214644     | 229.610960       |                |                  | 3  |
| 22 | 2891.364372       | 1446.185824     | 2874.337823    | 1437.672549      | 2873.353807        | 1437.180541       | H    | 312.177864         | 156.592570        | 295.151315     | 148.079295       |                |                  | 2  |
| 23 |                   |                 |                |                  |                    |                   | R    | <b>175.118952</b>  | 88.063114         | 158.092403     | 79.549839        |                |                  | 1  |

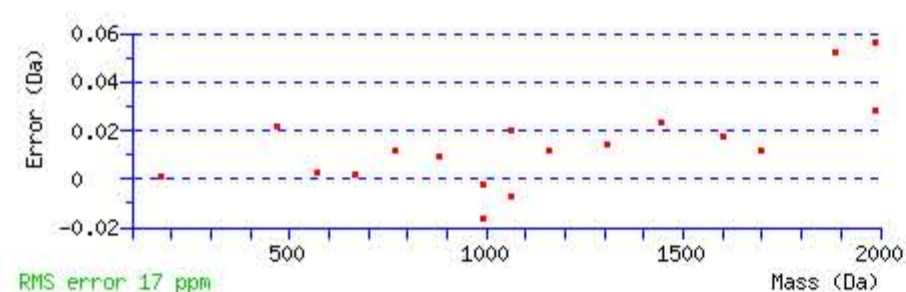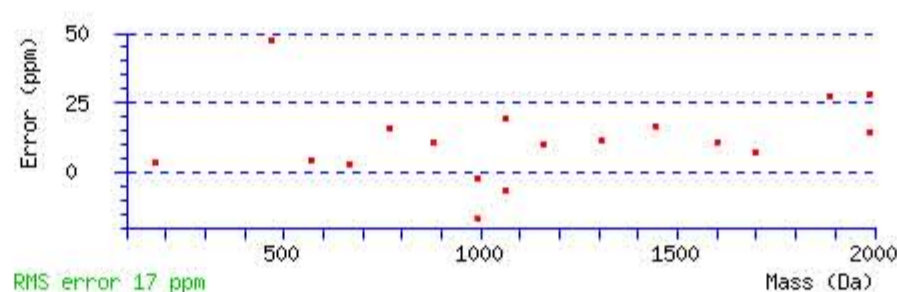

NCBI BLAST search of [AEHTVVLTVTGEPCHFPPQYHR](#)  
(Parameters: blastp, nr protein database, expect=20000, no filter, PAM30)

Other BLAST [web gateways](#)

All matches to this query

| Score | Mr(calc):   | Delta     | Sequence                               |
|-------|-------------|-----------|----------------------------------------|
| 76.7  | 3064.468796 | -0.003540 | <a href="#">AEHTVVLTVTGEPCHFPPQYHR</a> |



# MASCOT Search Results

## Peptide View

MS/MS Fragmentation of **AQMDLSGR**

Found in **F13A\_HUMAN**, Coagulation factor XIII A chain OS=Homo sapiens GN=F13A1 PE=1 SV=4

Match to Query 21450: 1187.574208 from(594.794380,2+) rtinseconds(1762) index(49679)

Title: Locus:1.1.1.3257.7 File:"2013-07-02 CLN FXIII 30 min 3rd F 4.wiff"

Data file C:\Program Files (x86)\Matrix Science\Mascot Daemon\mgf3 FXIII 30 min 3rd\mascot\_daemon\_merge.mgf

Click mouse within plot area to zoom in by factor of two about that point

Or, Plot from  to  Da

Label all possible matches  Label matches used for scoring

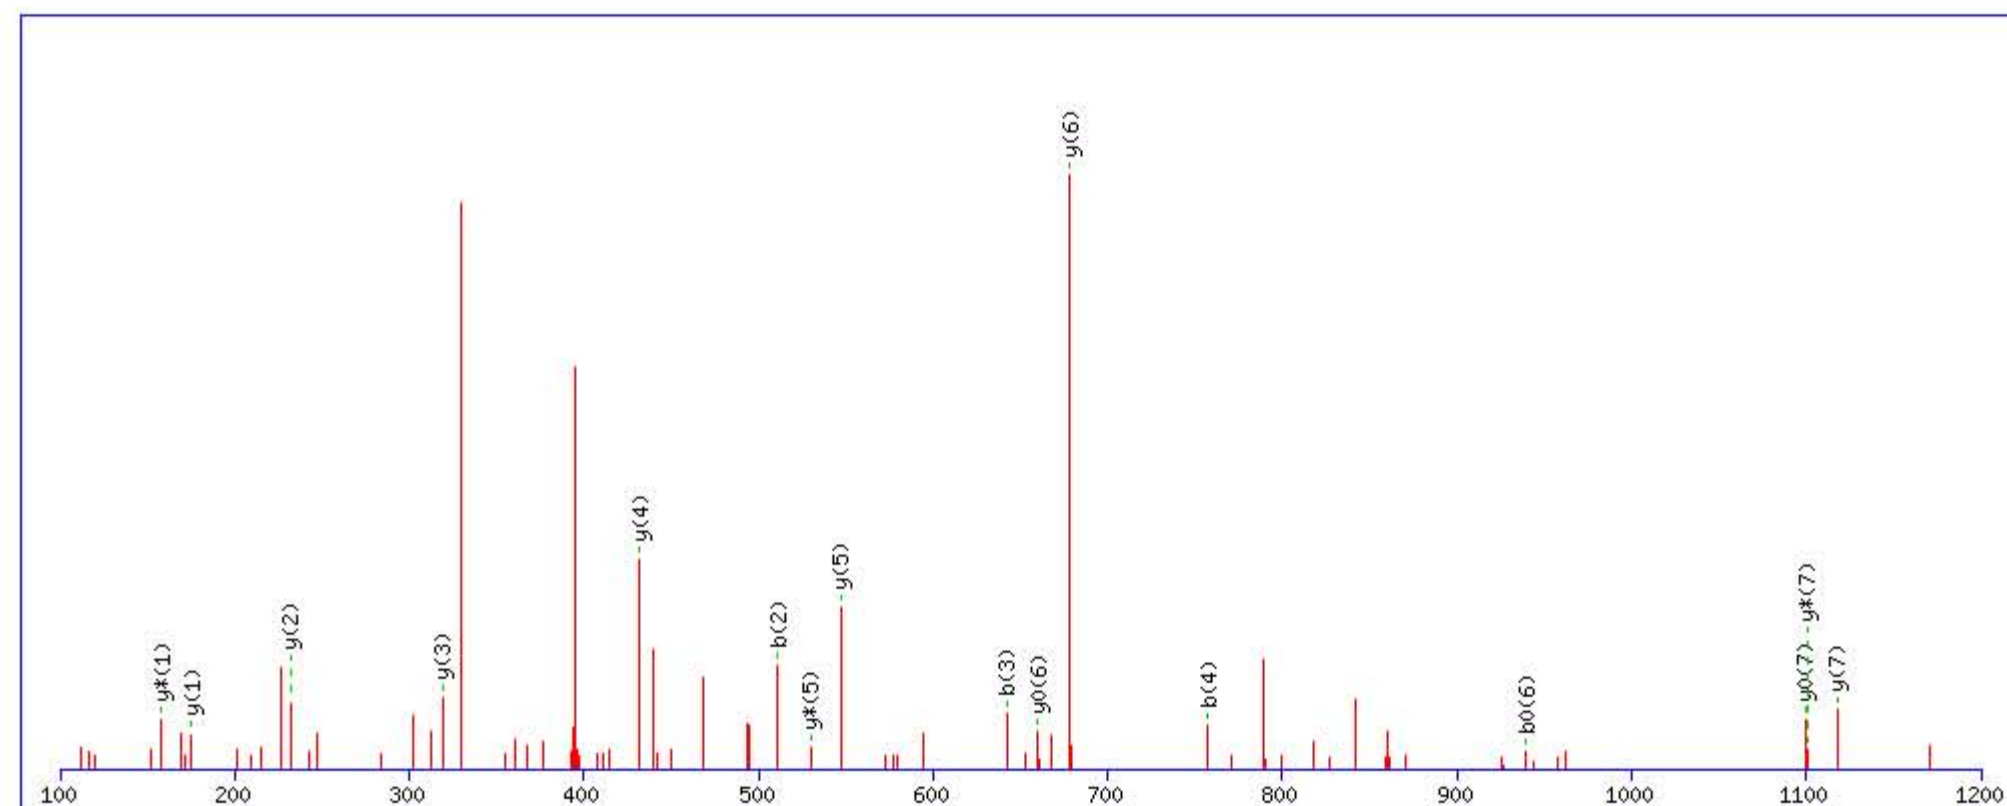

Monoisotopic mass of neutral peptide Mr(calc): 1187.579086

Fixed modifications: Carbamidomethyl (C) (apply to specified residues or termini only)

Variable modifications:

Q2 : Biotin:Thermo-21345 (Q)

Ions Score: 42 Expect: 0.00033

Matches : 16/72 fragment ions using 31 most intense peaks [\(help\)](#)

| # | b                 | b <sup>++</sup> | b <sup>*</sup> | b <sup>*++</sup> | b <sup>0</sup>    | b <sup>0++</sup> | Seq. | y                  | y <sup>++</sup> | y <sup>*</sup>     | y <sup>*++</sup> | y <sup>0</sup>     | y <sup>0++</sup> | # |
|---|-------------------|-----------------|----------------|------------------|-------------------|------------------|------|--------------------|-----------------|--------------------|------------------|--------------------|------------------|---|
| 1 | 72.044390         | 36.525833       |                |                  |                   |                  | A    |                    |                 |                    |                  |                    |                  | 8 |
| 2 | <b>511.269716</b> | 256.138496      | 494.243167     | 247.625221       |                   |                  | Q    | <b>1117.549262</b> | 559.278269      | <b>1100.522713</b> | 550.764995       | <b>1099.538697</b> | 550.272987       | 7 |
| 3 | <b>642.310201</b> | 321.658739      | 625.283652     | 313.145464       |                   |                  | M    | <b>678.323936</b>  | 339.665606      | 661.297387         | 331.152332       | <b>660.313371</b>  | 330.660324       | 6 |
| 4 | <b>757.337144</b> | 379.172210      | 740.310595     | 370.658935       | 739.326579        | 370.166927       | D    | <b>547.283451</b>  | 274.145364      | <b>530.256902</b>  | 265.632089       | 529.272886         | 265.140081       | 5 |
| 5 | 870.421208        | 435.714242      | 853.394659     | 427.200967       | 852.410643        | 426.708959       | L    | <b>432.256508</b>  | 216.631892      | 415.229959         | 208.118617       | 414.245943         | 207.626609       | 4 |
| 6 | 957.453236        | 479.230256      | 940.426687     | 470.716981       | <b>939.442671</b> | 470.224973       | S    | <b>319.172444</b>  | 160.089860      | 302.145895         | 151.576585       | 301.161879         | 151.084577       | 3 |
| 7 | 1014.474700       | 507.740988      | 997.448151     | 499.227713       | 996.464135        | 498.735705       | G    | <b>232.140416</b>  | 116.573846      | 215.113867         | 108.060571       |                    |                  | 2 |
| 8 |                   |                 |                |                  |                   |                  | R    | <b>175.118952</b>  | 88.063114       | <b>158.092403</b>  | 79.549839        |                    |                  | 1 |

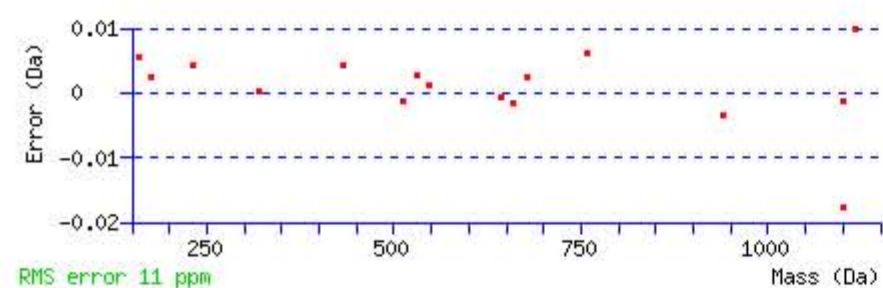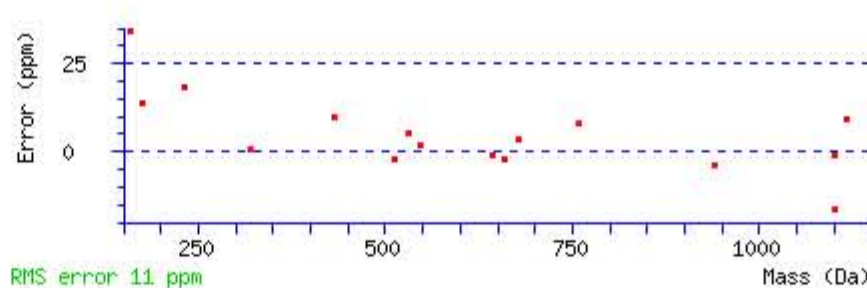

NCBI BLAST search of [AQMDLSGR](#)

(Parameters: blastp, nr protein database, expect=20000, no filter, PAM30)

Other BLAST [web gateways](#)

## All matches to this query

| Score | Mr(calc):   | Delta     | Sequence                    |
|-------|-------------|-----------|-----------------------------|
| 42.3  | 1187.579086 | -0.004878 | <a href="#">AQMDLSGR</a>    |
| 4.8   | 1187.568314 | 0.005894  | <a href="#">QREDIWEGR</a>   |
| 3.4   | 1187.578201 | -0.003993 | <a href="#">SSLENEPSLGR</a> |
| 3.2   | 1187.568344 | 0.005864  | <a href="#">DHGFKVSADGR</a> |
| 2.8   | 1187.579086 | -0.004878 | <a href="#">QAAEVMGR</a>    |
| 0.4   | 1187.568314 | 0.005894  | <a href="#">QYLEQHASGR</a>  |



# MASCOT Search Results

## Peptide View

MS/MS Fragmentation of **FQEGQEEER**

Found in **F13A\_HUMAN**, Coagulation factor XIII A chain OS=Homo sapiens GN=F13A1 PE=1 SV=4

Match to Query 29933: 1461.650648 from(731.832600,2+) rtinseconds(1493) index(48033)

Title: Locus:1.1.1.3163.16 File:"2013-07-02 CLN FXIII 30 min 3rd F 4.wiff"

Data file C:\Program Files (x86)\Matrix Science\Mascot Daemon\mgf3 FXIII 30 min 3rd\mascot\_daemon\_merge.mgf

Click mouse within plot area to zoom in by factor of two about that point

Or, Plot from  to  Da

Label all possible matches  Label matches used for scoring

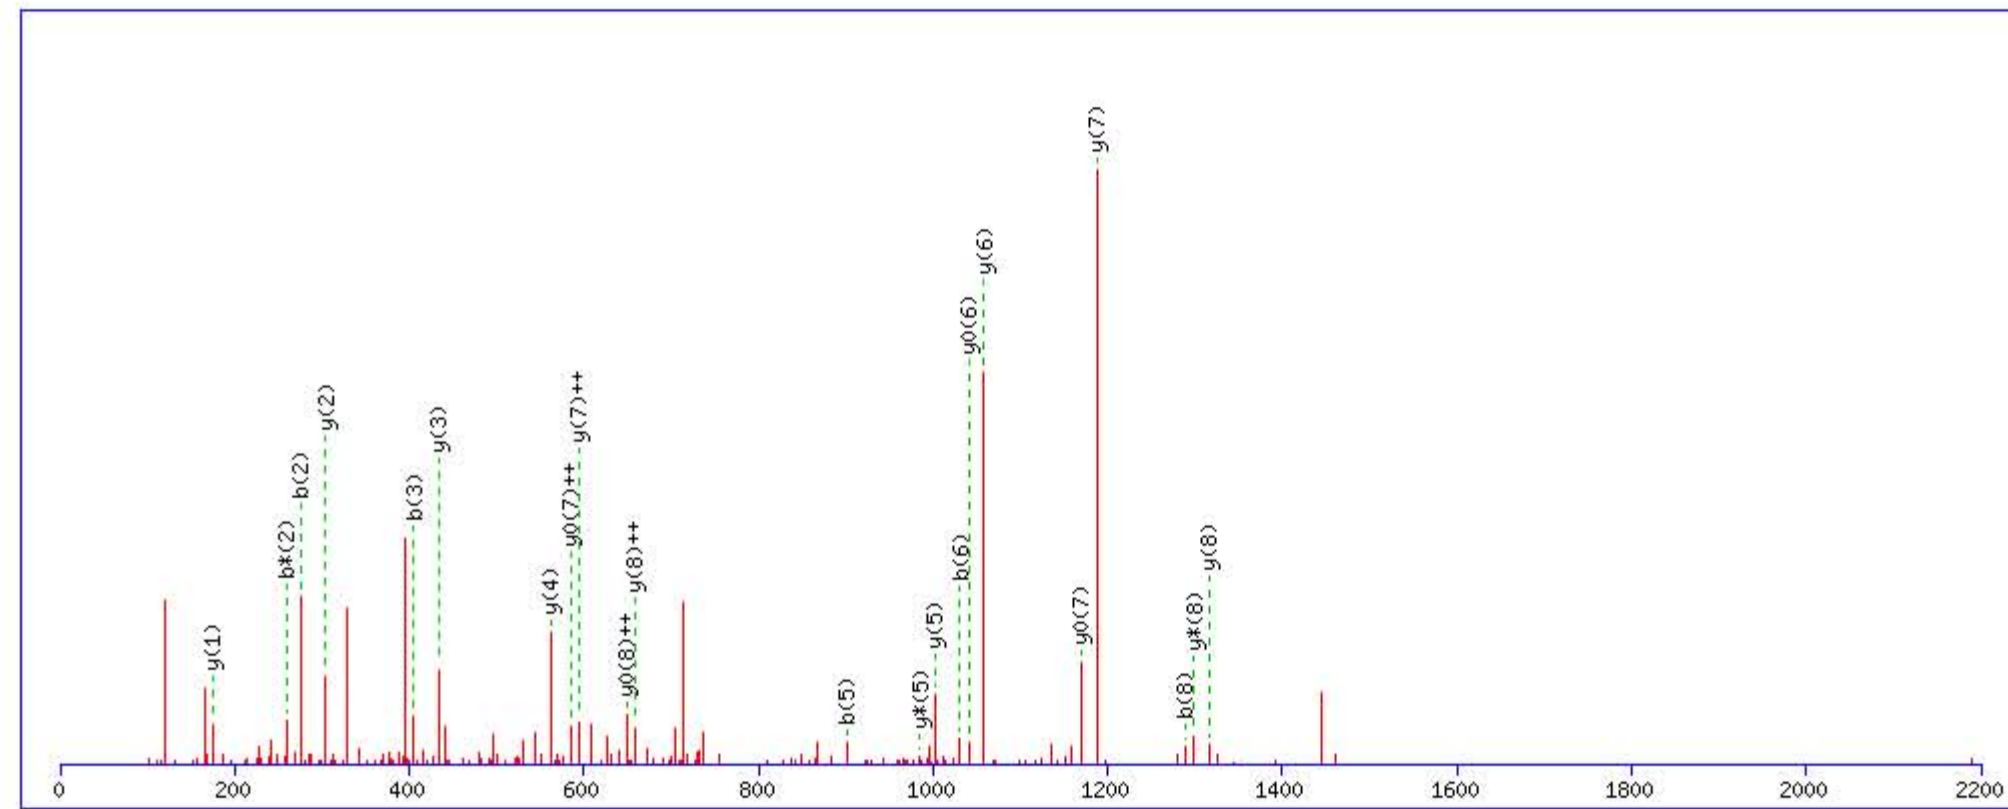

Monoisotopic mass of neutral peptide Mr(calc): 1461.655807

Fixed modifications: Carbamidomethyl (C) (apply to specified residues or termini only)

Variable modifications:

Q5 : Biotin:Thermo-21345 (Q)

Ions Score: 48 Expect: 0.0001

Matches : 22/88 fragment ions using 41 most intense peaks [\(help\)](#)

| # | b                  | b <sup>++</sup> | b <sup>*</sup>    | b <sup>+++</sup> | b <sup>0</sup> | b <sup>0++</sup> | Seq. | y                  | y <sup>++</sup>   | y <sup>*</sup>     | y <sup>+++</sup> | y <sup>0</sup>     | y <sup>0++</sup>  | # |
|---|--------------------|-----------------|-------------------|------------------|----------------|------------------|------|--------------------|-------------------|--------------------|------------------|--------------------|-------------------|---|
| 1 | 148.075690         | 74.541483       |                   |                  |                |                  | F    |                    |                   |                    |                  |                    |                   | 9 |
| 2 | <b>276.134268</b>  | 138.570772      | <b>259.107719</b> | 130.057497       |                |                  | Q    | <b>1315.594692</b> | 658.300984        | <b>1298.568143</b> | 649.787710       | 1297.584127        | <b>649.295702</b> | 8 |
| 3 | <b>405.176861</b>  | 203.092068      | 388.150312        | 194.578794       | 387.166296     | 194.086786       | E    | <b>1187.536114</b> | <b>594.271695</b> | 1170.509565        | 585.758421       | <b>1169.525549</b> | <b>585.266413</b> | 7 |
| 4 | 462.198325         | 231.602800      | 445.171776        | 223.089526       | 444.187760     | 222.597518       | G    | <b>1058.493521</b> | 529.750399        | 1041.466972        | 521.237124       | <b>1040.482956</b> | 520.745116        | 6 |
| 5 | <b>901.423651</b>  | 451.215464      | 884.397102        | 442.702189       | 883.413086     | 442.210181       | Q    | <b>1001.472057</b> | 501.239667        | <b>984.445508</b>  | 492.726392       | 983.461492         | 492.234384        | 5 |
| 6 | <b>1030.466244</b> | 515.736760      | 1013.439695       | 507.223485       | 1012.455679    | 506.731477       | E    | <b>562.246731</b>  | 281.627004        | 545.220182         | 273.113729       | 544.236166         | 272.621721        | 4 |
| 7 | 1159.508837        | 580.258057      | 1142.482288       | 571.744782       | 1141.498272    | 571.252774       | E    | <b>433.204138</b>  | 217.105707        | 416.177589         | 208.592433       | 415.193573         | 208.100425        | 3 |
| 8 | <b>1288.551430</b> | 644.779353      | 1271.524881       | 636.266079       | 1270.540865    | 635.774071       | E    | <b>304.161545</b>  | 152.584411        | 287.134996         | 144.071136       | 286.150980         | 143.579128        | 2 |
| 9 |                    |                 |                   |                  |                |                  | R    | <b>175.118952</b>  | 88.063114         | 158.092403         | 79.549839        |                    |                   | 1 |

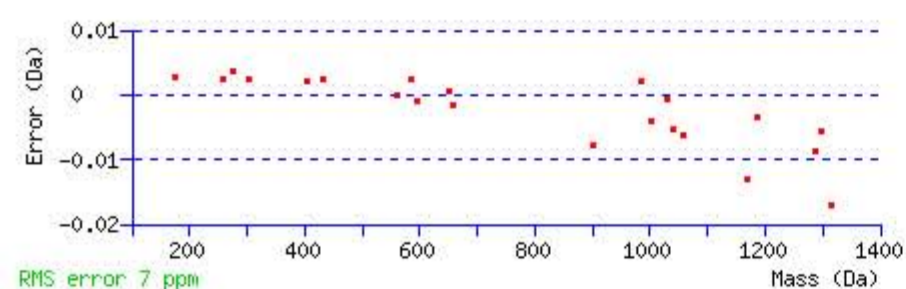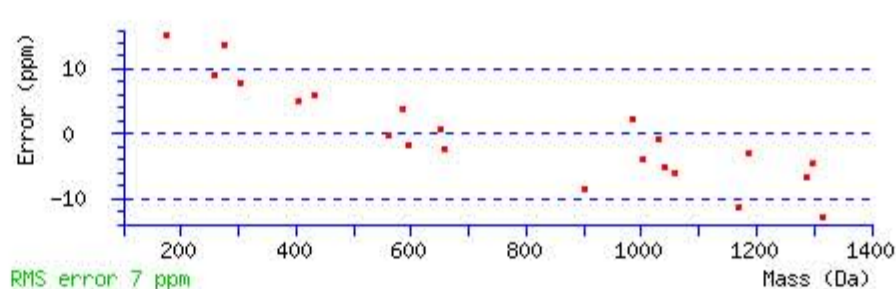

NCBI BLAST search of **FQEGQEEER**

(Parameters: blastp, nr protein database, expect=20000, no filter, PAM30)

Other BLAST [web gateways](#)

All matches to this query

| Score | Mr(calc):   | Delta     | Sequence                      |
|-------|-------------|-----------|-------------------------------|
| 48.0  | 1461.655807 | -0.005159 | <a href="#">FQEGQEEER</a>     |
| 11.6  | 1461.648392 | 0.002256  | <a href="#">HREELSDYEER</a>   |
| 11.4  | 1461.640564 | 0.010084  | <a href="#">NSGTQSDGEEK</a>   |
| 7.9   | 1461.655807 | -0.005159 | <a href="#">FQEGQEEER</a>     |
| 5.7   | 1461.640564 | 0.010084  | <a href="#">VMTDVAGNPEEER</a> |
| 2.7   | 1461.637161 | 0.013487  | <a href="#">ESELQWQEEER</a>   |
| 2.1   | 1461.651794 | -0.001146 | <a href="#">ATSQHECSSSQLK</a> |
| 0.2   | 1461.665695 | -0.015047 | <a href="#">LEQLECLDDAEK</a>  |



# MASCOT Search Results

## Peptide View

MS/MS Fragmentation of **HVYGELDVQIQR**

Found in **F13A\_HUMAN**, Coagulation factor XIII A chain OS=Homo sapiens GN=F13A1 PE=1 SV=4

Match to Query 38511: 1766.907642 from(589.976490,3+) rtinseconds(1993) index(51139)

Title: Locus:1.1.1.3337.15 File:"2013-07-02 CLN FXIII 30 min 3rd F 4.wiff"

Data file C:\Program Files (x86)\Matrix Science\Mascot Daemon\mgf3 FXIII 30 min 3rd\mascot\_daemon\_merge.mgf

Click mouse within plot area to zoom in by factor of two about that point

Or, Plot from  to  Da

Label all possible matches  Label matches used for scoring

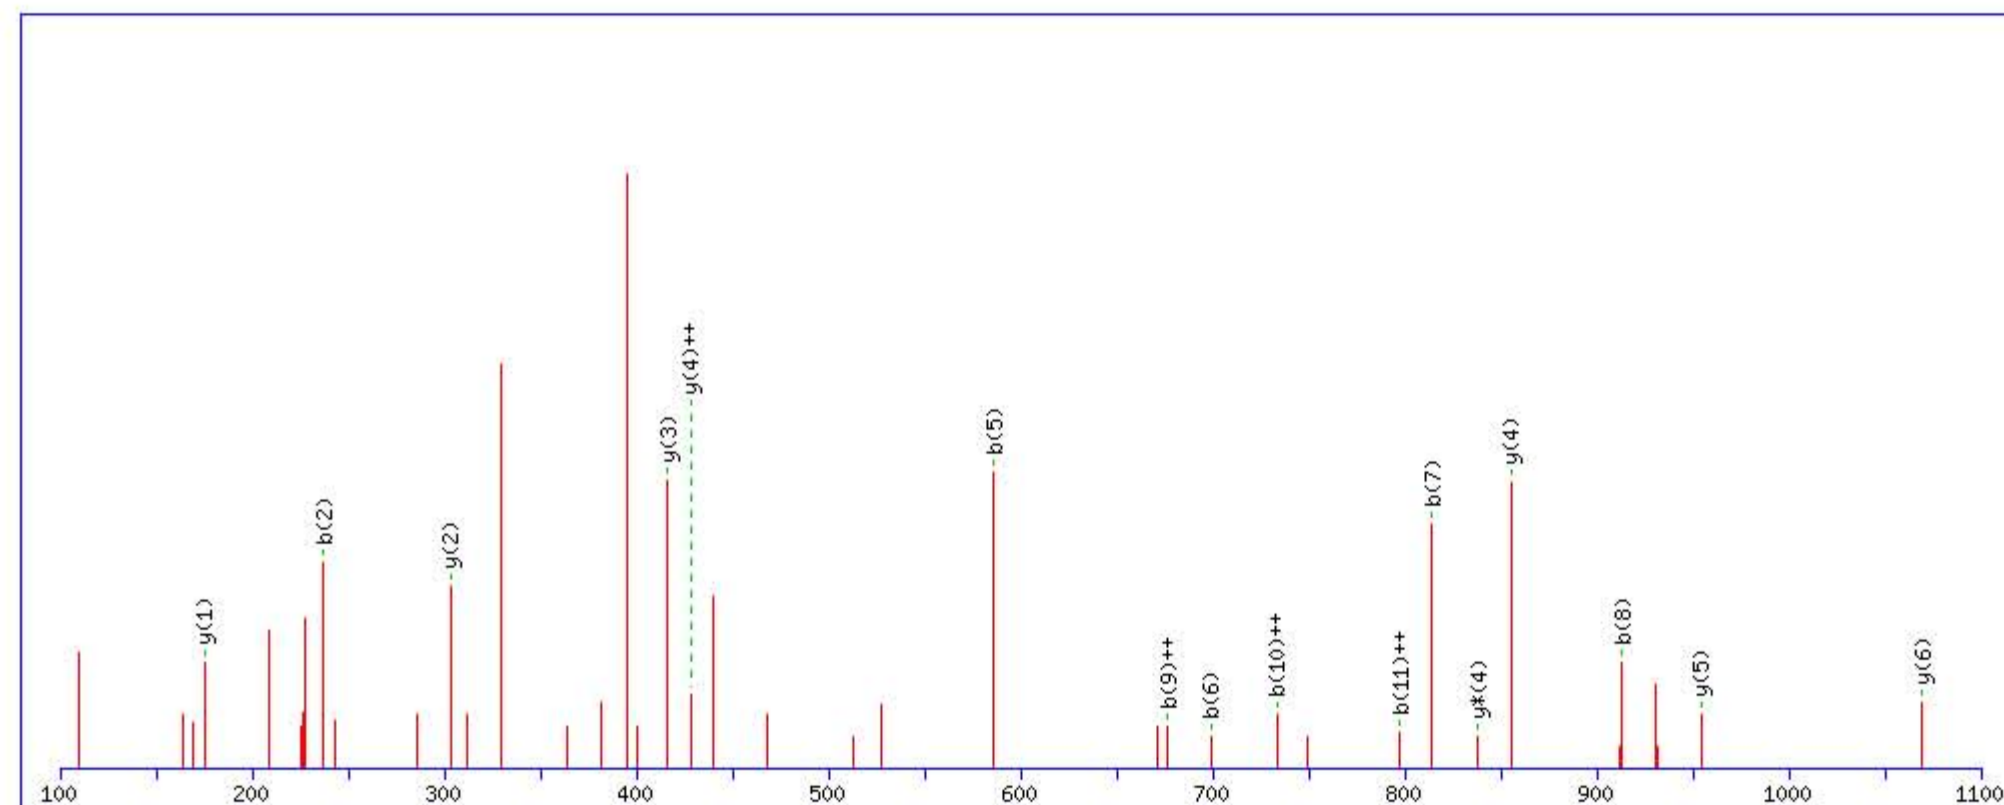

Monoisotopic mass of neutral peptide Mr(calc): 1766.913773

Fixed modifications: Carbamidomethyl (C) (apply to specified residues or termini only)

Variable modifications:

Q9 : Biotin:Thermo-21345 (Q)

Ions Score: 33 Expect: 0.0032

Matches : 16/98 fragment ions using 28 most intense peaks [\(help\)](#)

| #  | b                 | b <sup>++</sup>   | b <sup>+</sup> | b <sup>+++</sup> | b <sup>0</sup> | b <sup>0++</sup> | Seq. | y                  | y <sup>++</sup>   | y <sup>+</sup>    | y <sup>+++</sup> | y <sup>0</sup> | y <sup>0++</sup> | #  |
|----|-------------------|-------------------|----------------|------------------|----------------|------------------|------|--------------------|-------------------|-------------------|------------------|----------------|------------------|----|
| 1  | 138.066188        | 69.536732         |                |                  |                |                  | H    |                    |                   |                   |                  |                |                  | 12 |
| 2  | <b>237.134602</b> | 119.070939        |                |                  |                |                  | V    | 1630.862141        | 815.934708        | 1613.835592       | 807.421434       | 1612.851576    | 806.929426       | 11 |
| 3  | 400.197931        | 200.602603        |                |                  |                |                  | Y    | 1531.793727        | 766.400501        | 1514.767178       | 757.887227       | 1513.783162    | 757.395219       | 10 |
| 4  | 457.219395        | 229.113335        |                |                  |                |                  | G    | 1368.730398        | 684.868837        | 1351.703849       | 676.355563       | 1350.719833    | 675.863554       | 9  |
| 5  | <b>586.261988</b> | 293.634632        |                |                  | 568.251423     | 284.629349       | E    | 1311.708934        | 656.358105        | 1294.682385       | 647.844830       | 1293.698369    | 647.352822       | 8  |
| 6  | <b>699.346052</b> | 350.176664        |                |                  | 681.335487     | 341.171382       | L    | 1182.666341        | 591.836808        | 1165.639792       | 583.323534       | 1164.655776    | 582.831526       | 7  |
| 7  | <b>814.372995</b> | 407.690136        |                |                  | 796.362430     | 398.684853       | D    | <b>1069.582277</b> | 535.294776        | 1052.555728       | 526.781502       | 1051.571712    | 526.289494       | 6  |
| 8  | <b>913.441409</b> | 457.224342        |                |                  | 895.430844     | 448.219060       | V    | <b>954.555334</b>  | 477.781305        | 937.528785        | 469.268030       |                |                  | 5  |
| 9  | 1352.666735       | <b>676.837006</b> | 1335.640186    | 668.323731       | 1334.656170    | 667.831723       | Q    | <b>855.486920</b>  | <b>428.247098</b> | <b>838.460371</b> | 419.733823       |                |                  | 4  |
| 10 | 1465.750799       | <b>733.379037</b> | 1448.724250    | 724.865763       | 1447.740234    | 724.373755       | I    | <b>416.261594</b>  | 208.634435        | 399.235045        | 200.121160       |                |                  | 3  |
| 11 | 1593.809377       | <b>797.408326</b> | 1576.782828    | 788.895052       | 1575.798812    | 788.403044       | Q    | <b>303.177530</b>  | 152.092403        | 286.150981        | 143.579128       |                |                  | 2  |
| 12 |                   |                   |                |                  |                |                  | R    | <b>175.118952</b>  | 88.063114         | 158.092403        | 79.549839        |                |                  | 1  |

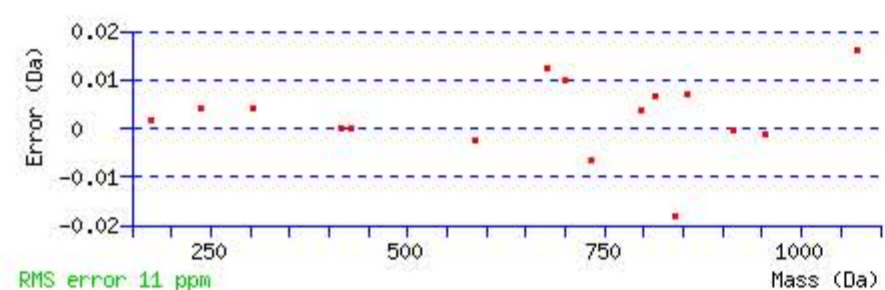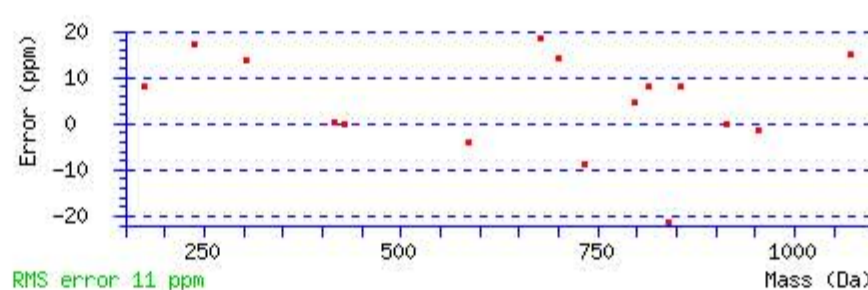

NCBI BLAST search of **HVYGELDVQIQR**

(Parameters: blastp, nr protein database, expect=20000, no filter, PAM30)

Other BLAST [web gateways](#)

All matches to this query

| Score | Mr(calc):   | Delta     | Sequence                      |
|-------|-------------|-----------|-------------------------------|
| 33.3  | 1766.913773 | -0.006131 | <a href="#">HVYGELDVQIQR</a>  |
| 16.4  | 1766.913773 | -0.006131 | <a href="#">HVYGELDVQIQR</a>  |
| 6.2   | 1766.888138 | 0.019504  | <a href="#">IMQNGTILYTMR</a>  |
| 0.3   | 1766.917130 | -0.009488 | <a href="#">KLSSQLVEHCQK</a>  |
| 0.3   | 1766.913757 | -0.006115 | <a href="#">AVWEAEQLGGLQR</a> |

Mascot: <http://www.matrixscience.com/>



# MASCOT Search Results

## Peptide View

MS/MS Fragmentation of **FQEGQEEER**

Found in **F13A\_HUMAN**, Coagulation factor XIII A chain OS=Homo sapiens GN=F13A1 PE=1 SV=4

Match to Query 38668: 1772.840548 from(887.427550,2+) rtinseconds(1863) index(50209)

Title: Locus:1.1.1.3292.9 File:"2013-07-02 CLN FXIII 30 min 3rd F 4.wiff"

Data file C:\Program Files (x86)\Matrix Science\Mascot Daemon\mgf3 FXIII 30 min 3rd\mascot\_daemon\_merge.mgf

Click mouse within plot area to zoom in by factor of two about that point

Or, Plot from  to  Da

Label all possible matches  Label matches used for scoring

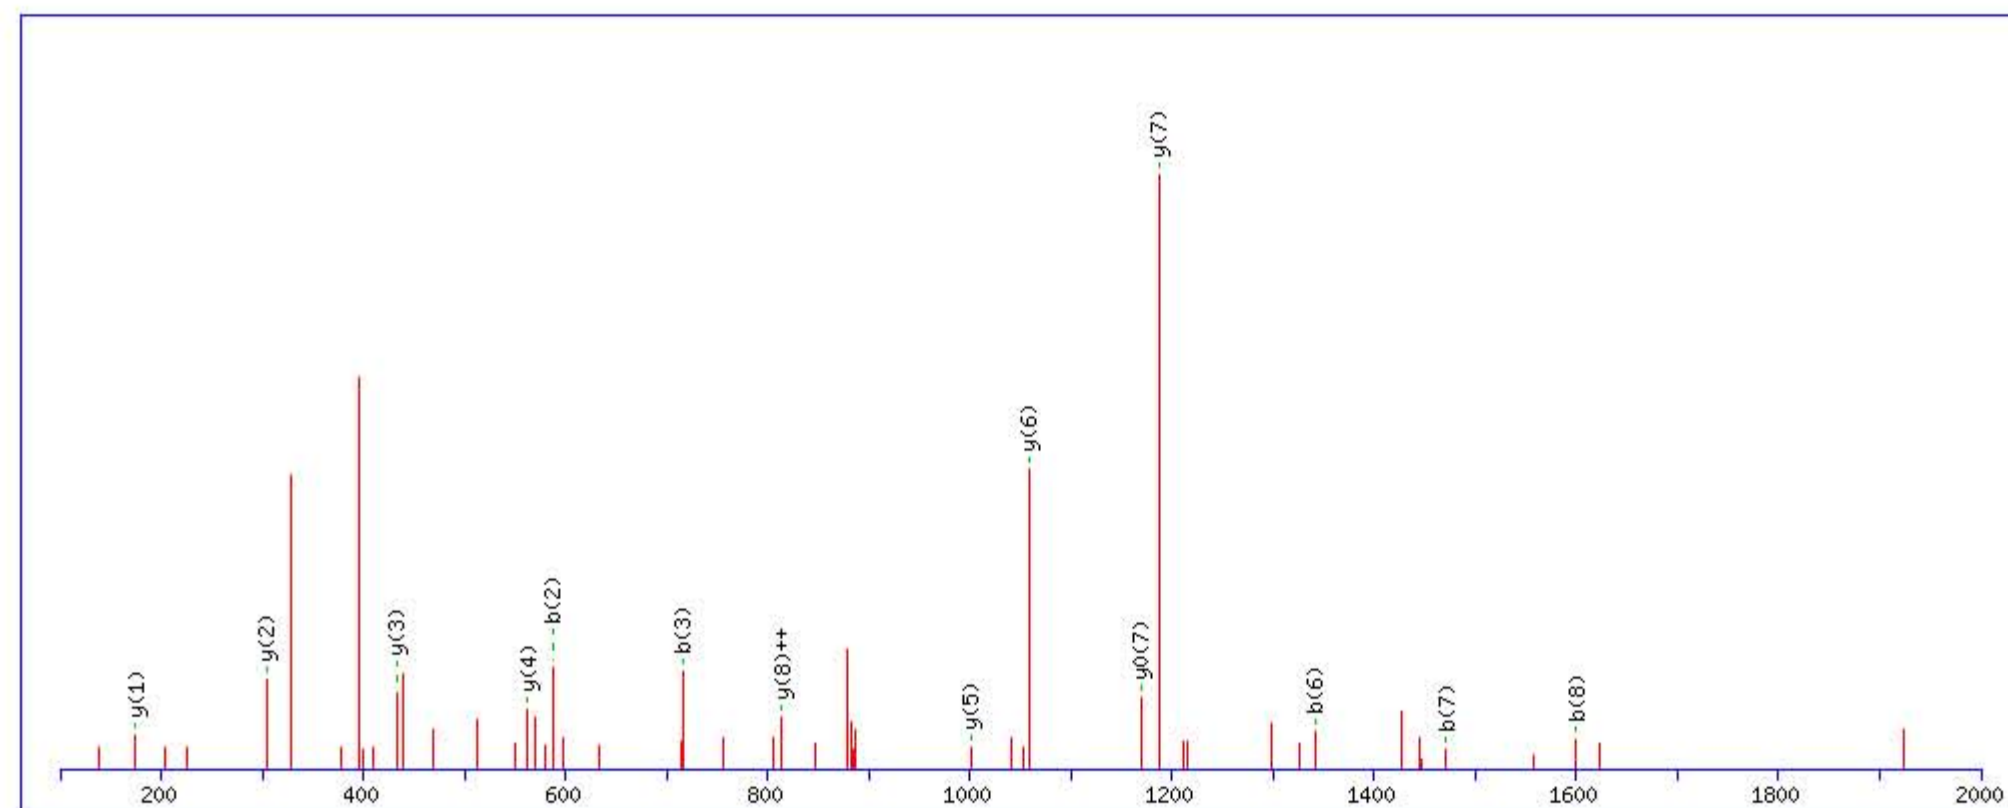

Monoisotopic mass of neutral peptide Mr(calc): 1772.822556

Fixed modifications: Carbamidomethyl (C) (apply to specified residues or termini only)

Variable modifications:

Q2 : Biotin:Thermo-21345 (Q)

Q5 : Biotin:Thermo-21345 (Q)

Ions Score: 35 Expect: 0.004

Matches : 14/88 fragment ions using 30 most intense peaks [\(help\)](#)

| # | b                  | b <sup>++</sup> | b <sup>*</sup> | b <sup>*++</sup> | b <sup>0</sup> | b <sup>0++</sup> | Seq. | y                  | y <sup>++</sup>   | y <sup>*</sup> | y <sup>*++</sup> | y <sup>0</sup>     | y <sup>0++</sup> | # |
|---|--------------------|-----------------|----------------|------------------|----------------|------------------|------|--------------------|-------------------|----------------|------------------|--------------------|------------------|---|
| 1 | 148.075690         | 74.541483       |                |                  |                |                  | F    |                    |                   |                |                  |                    |                  | 9 |
| 2 | <b>587.301016</b>  | 294.154146      | 570.274467     | 285.640872       |                |                  | Q    | 1626.761440        | <b>813.884358</b> | 1609.734891    | 805.371084       | 1608.750875        | 804.879076       | 8 |
| 3 | <b>716.343609</b>  | 358.675443      | 699.317060     | 350.162168       | 698.333044     | 349.670160       | E    | <b>1187.536114</b> | 594.271695        | 1170.509565    | 585.758421       | <b>1169.525549</b> | 585.266413       | 7 |
| 4 | 773.365073         | 387.186175      | 756.338524     | 378.672900       | 755.354508     | 378.180892       | G    | <b>1058.493521</b> | 529.750399        | 1041.466972    | 521.237124       | 1040.482956        | 520.745116       | 6 |
| 5 | 1212.590399        | 606.798837      | 1195.563850    | 598.285563       | 1194.579834    | 597.793555       | Q    | <b>1001.472057</b> | 501.239667        | 984.445508     | 492.726392       | 983.461492         | 492.234384       | 5 |
| 6 | <b>1341.632992</b> | 671.320134      | 1324.606443    | 662.806860       | 1323.622427    | 662.314852       | E    | <b>562.246731</b>  | 281.627004        | 545.220182     | 273.113729       | 544.236166         | 272.621721       | 4 |
| 7 | <b>1470.675585</b> | 735.841431      | 1453.649036    | 727.328156       | 1452.665020    | 726.836148       | E    | <b>433.204138</b>  | 217.105707        | 416.177589     | 208.592433       | 415.193573         | 208.100425       | 3 |
| 8 | <b>1599.718178</b> | 800.362727      | 1582.691629    | 791.849453       | 1581.707613    | 791.357445       | E    | <b>304.161545</b>  | 152.584411        | 287.134996     | 144.071136       | 286.150980         | 143.579128       | 2 |
| 9 |                    |                 |                |                  |                |                  | R    | <b>175.118952</b>  | 88.063114         | 158.092403     | 79.549839        |                    |                  | 1 |

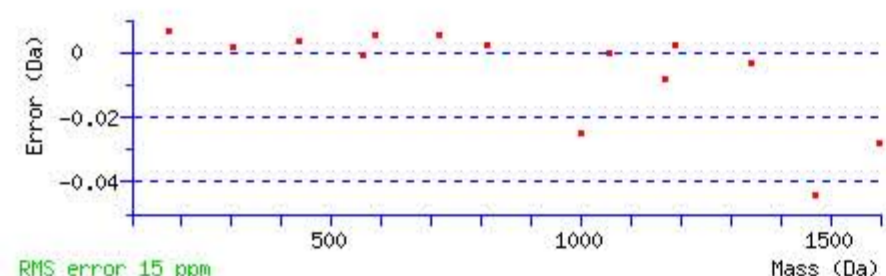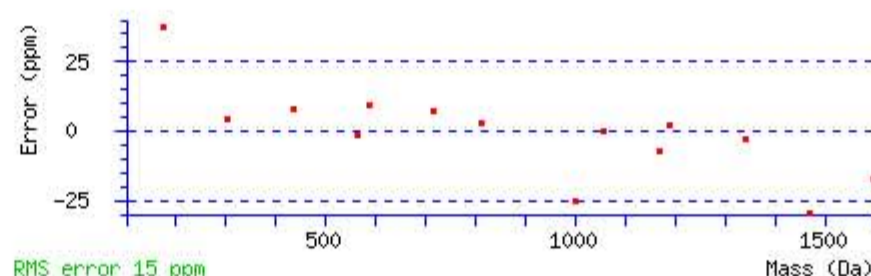

NCBI BLAST search of **FQEGQEEER**

(Parameters: blastp, nr protein database, expect=20000, no filter, PAM30)

Other BLAST [web gateways](#)

All matches to this query

| Score | Mr(calc):   | Delta     | Sequence                         |
|-------|-------------|-----------|----------------------------------|
| 34.5  | 1772.822556 | 0.017992  | <a href="#">FQEGQEEER</a>        |
| 8.5   | 1772.862793 | -0.022245 | <a href="#">DGGERISMPLDFKHR</a>  |
| 8.0   | 1772.842789 | -0.002241 | <a href="#">ESSPPEKEEAQEKTGK</a> |
| 7.1   | 1772.862808 | -0.022260 | <a href="#">FQVPDSEGGRAGSR</a>   |
| 4.8   | 1772.856262 | -0.015714 | <a href="#">CFSRSDHLALHMKR</a>   |
| 4.7   | 1772.847549 | -0.007001 | <a href="#">SSEGLGQNSGIGGR</a>   |
| 4.6   | 1772.859650 | -0.019102 | <a href="#">QGLQCKVCKMNVHR</a>   |
| 3.6   | 1772.828873 | 0.011675  | <a href="#">QAEQEATVAREEQER</a>  |
| 1.7   | 1772.851532 | -0.010984 | <a href="#">YEMFLNQARKNTDK</a>   |
| 1.6   | 1772.862778 | -0.022230 | <a href="#">DAAAPAEPQAQHTR</a>   |



# MASCOT Search Results

## Peptide View

MS/MS Fragmentation of **GTYPVPIVSELQSGK**

Found in **F13A\_HUMAN**, Coagulation factor XIII A chain OS=Homo sapiens GN=F13A1 PE=1 SV=4

Match to Query 42893: 1998.071048 from(1000.042800,2+) rtinseconds(2771) index(9455)

Title: Locus:1.1.1.3534.6 File:"2013-07-02 CLN FXIII 30 min 3rd F 1.wiff"

Data file C:\Program Files (x86)\Matrix Science\Mascot Daemon\mgf\3 FXIII 30 min 3rd\mascot\_daemon\_merge.mgf

Click mouse within plot area to zoom in by factor of two about that point

Or, Plot from  to  Da

Label all possible matches  Label matches used for scoring

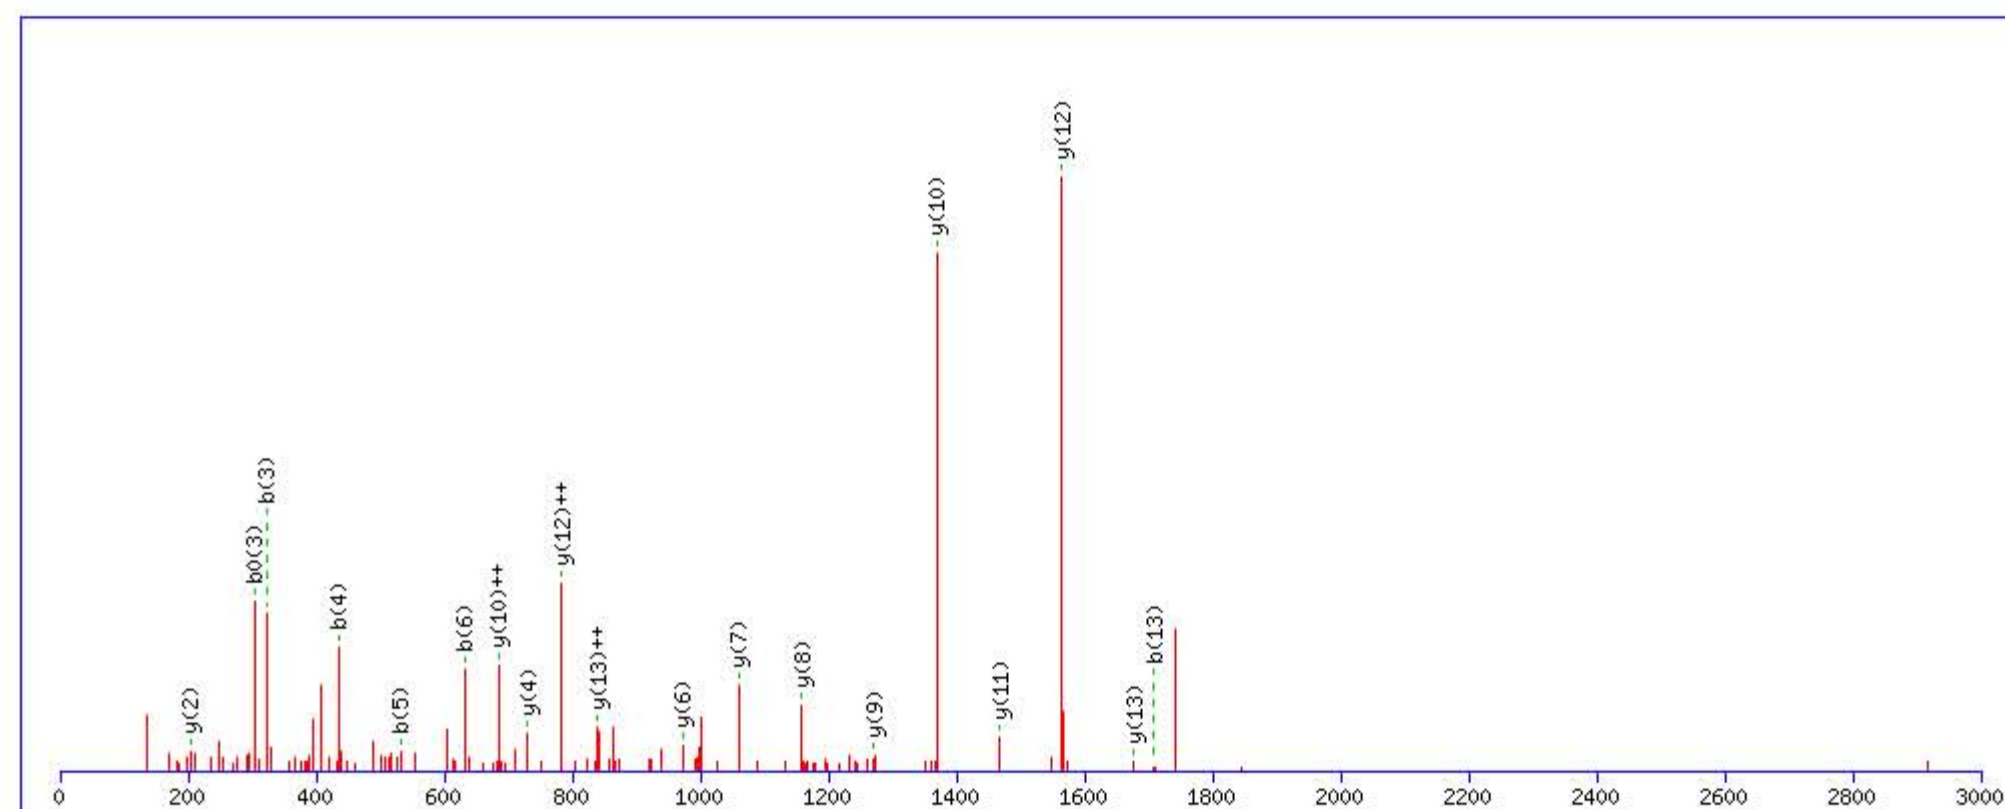

Monoisotopic mass of neutral peptide Mr(calc): 1998.085983

Fixed modifications: Carbamidomethyl (C) (apply to specified residues or termini only)

Variable modifications:

Q13 : Biotin:Thermo-21345 (Q)

Ions Score: 63 Expect: 2.7e-006

Matches : 19/150 fragment ions using 33 most intense peaks [\(help\)](#)

| #  | b                  | b <sup>++</sup> | b <sup>*</sup> | b <sup>*++</sup> | b <sup>0</sup>    | b <sup>0++</sup> | Seq. | y                  | y <sup>++</sup>   | y <sup>*</sup> | y <sup>*++</sup> | y <sup>0</sup> | y <sup>0++</sup> | #  |
|----|--------------------|-----------------|----------------|------------------|-------------------|------------------|------|--------------------|-------------------|----------------|------------------|----------------|------------------|----|
| 1  | 58.028740          | 29.518008       |                |                  |                   |                  | G    |                    |                   |                |                  |                |                  | 16 |
| 2  | 159.076419         | 80.041847       |                |                  | 141.065854        | 71.036565        | T    | 1942.071799        | 971.539538        | 1925.045250    | 963.026263       | 1924.061234    | 962.534255       | 15 |
| 3  | <b>322.139748</b>  | 161.573512      |                |                  | <b>304.129183</b> | 152.568230       | Y    | 1841.024120        | 921.015698        | 1823.997571    | 912.502424       | 1823.013555    | 912.010416       | 14 |
| 4  | <b>435.223812</b>  | 218.115544      |                |                  | 417.213247        | 209.110262       | I    | <b>1677.960791</b> | <b>839.484034</b> | 1660.934242    | 830.970759       | 1659.950226    | 830.478751       | 13 |
| 5  | <b>532.276576</b>  | 266.641926      |                |                  | 514.266011        | 257.636644       | P    | <b>1564.876727</b> | <b>782.942002</b> | 1547.850178    | 774.428727       | 1546.866162    | 773.936719       | 12 |
| 6  | <b>631.344990</b>  | 316.176133      |                |                  | 613.334425        | 307.170851       | V    | <b>1467.823963</b> | 734.415620        | 1450.797414    | 725.902345       | 1449.813398    | 725.410337       | 11 |
| 7  | 728.397754         | 364.702515      |                |                  | 710.387189        | 355.697233       | P    | <b>1368.755549</b> | <b>684.881413</b> | 1351.729000    | 676.368138       | 1350.744984    | 675.876130       | 10 |
| 8  | 841.481818         | 421.244547      |                |                  | 823.471253        | 412.239265       | I    | <b>1271.702785</b> | 636.355031        | 1254.676236    | 627.841756       | 1253.692220    | 627.349748       | 9  |
| 9  | 940.550232         | 470.778754      |                |                  | 922.539667        | 461.773472       | V    | <b>1158.618721</b> | 579.812999        | 1141.592172    | 571.299724       | 1140.608156    | 570.807716       | 8  |
| 10 | 1027.582260        | 514.294768      |                |                  | 1009.571695       | 505.289486       | S    | <b>1059.550307</b> | 530.278792        | 1042.523758    | 521.765517       | 1041.539742    | 521.273509       | 7  |
| 11 | 1156.624853        | 578.816065      |                |                  | 1138.614288       | 569.810782       | E    | <b>972.518279</b>  | 486.762777        | 955.491730     | 478.249503       | 954.507714     | 477.757495       | 6  |
| 12 | 1269.708917        | 635.358096      |                |                  | 1251.698352       | 626.352814       | L    | 843.475686         | 422.241481        | 826.449137     | 413.728207       | 825.465121     | 413.236199       | 5  |
| 13 | <b>1708.934243</b> | 854.970759      | 1691.907694    | 846.457485       | 1690.923678       | 845.965477       | Q    | <b>730.391622</b>  | 365.699449        | 713.365073     | 357.186175       | 712.381057     | 356.694167       | 4  |
| 14 | 1795.966271        | 898.486774      | 1778.939722    | 889.973499       | 1777.955706       | 889.481491       | S    | 291.166296         | 146.086786        | 274.139747     | 137.573512       | 273.155731     | 137.081504       | 3  |
| 15 | 1852.987735        | 926.997505      | 1835.961186    | 918.484231       | 1834.977170       | 917.992223       | G    | <b>204.134268</b>  | 102.570772        | 187.107719     | 94.057497        |                |                  | 2  |
| 16 |                    |                 |                |                  |                   |                  | K    | 147.112804         | 74.060040         | 130.086255     | 65.546765        |                |                  | 1  |

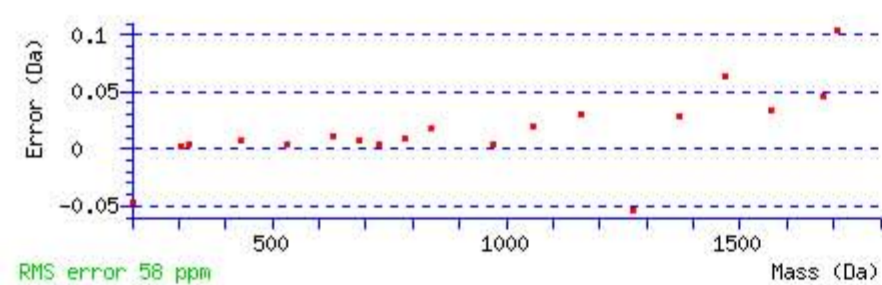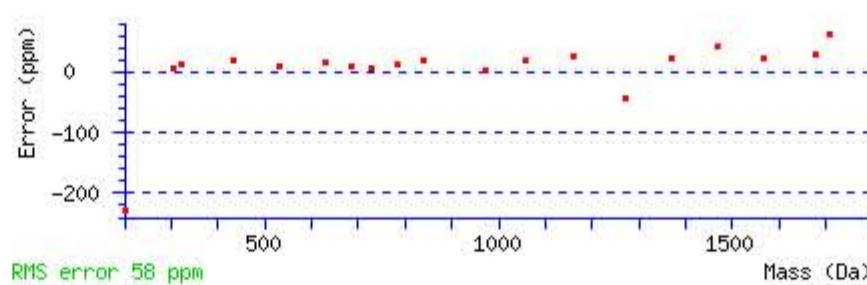

NCBI BLAST search of **GTYPVPIVSELQSGK**

(Parameters: blastp, nr protein database, expect=20000, no filter, PAM30)

Other BLAST [web gateways](#)

### All matches to this query

| Score | Mr(calc):   | Delta     | Sequence                            |
|-------|-------------|-----------|-------------------------------------|
| 62.7  | 1998.085983 | -0.014935 | <a href="#">GTYPVPIVSELQSGK</a>     |
| 3.4   | 1998.060593 | 0.010455  | <a href="#">SQKASERLLVQNLNNER</a>   |
| 2.7   | 1998.099731 | -0.028683 | <a href="#">GDEVVVELVENGKKVTVGK</a> |



# MASCOT Search Results

## Peptide View

MS/MS Fragmentation of **GVNLQEFLNVTSVHLFK**  
 Found in **F13A\_HUMAN**, Coagulation factor XIII A chain OS=Homo sapiens GN=F13A1 PE=1 SV=4

Match to Query 48213: 2255.224752 from(752.748860,3+) rtinseconds(3018) index(11022)  
 Title: Locus:1.1.1.3619.14 File:"2013-07-02 CLN FXIII 30 min 3rd F 1.wiff"  
 Data file C:\Program Files (x86)\Matrix Science\Mascot Daemon\mgf3 FXIII 30 min 3rd\mascot\_daemon\_merge.mgf

Click mouse within plot area to zoom in by factor of two about that point  
 Or, Plot from  to  Da   
 Label all possible matches  Label matches used for scoring

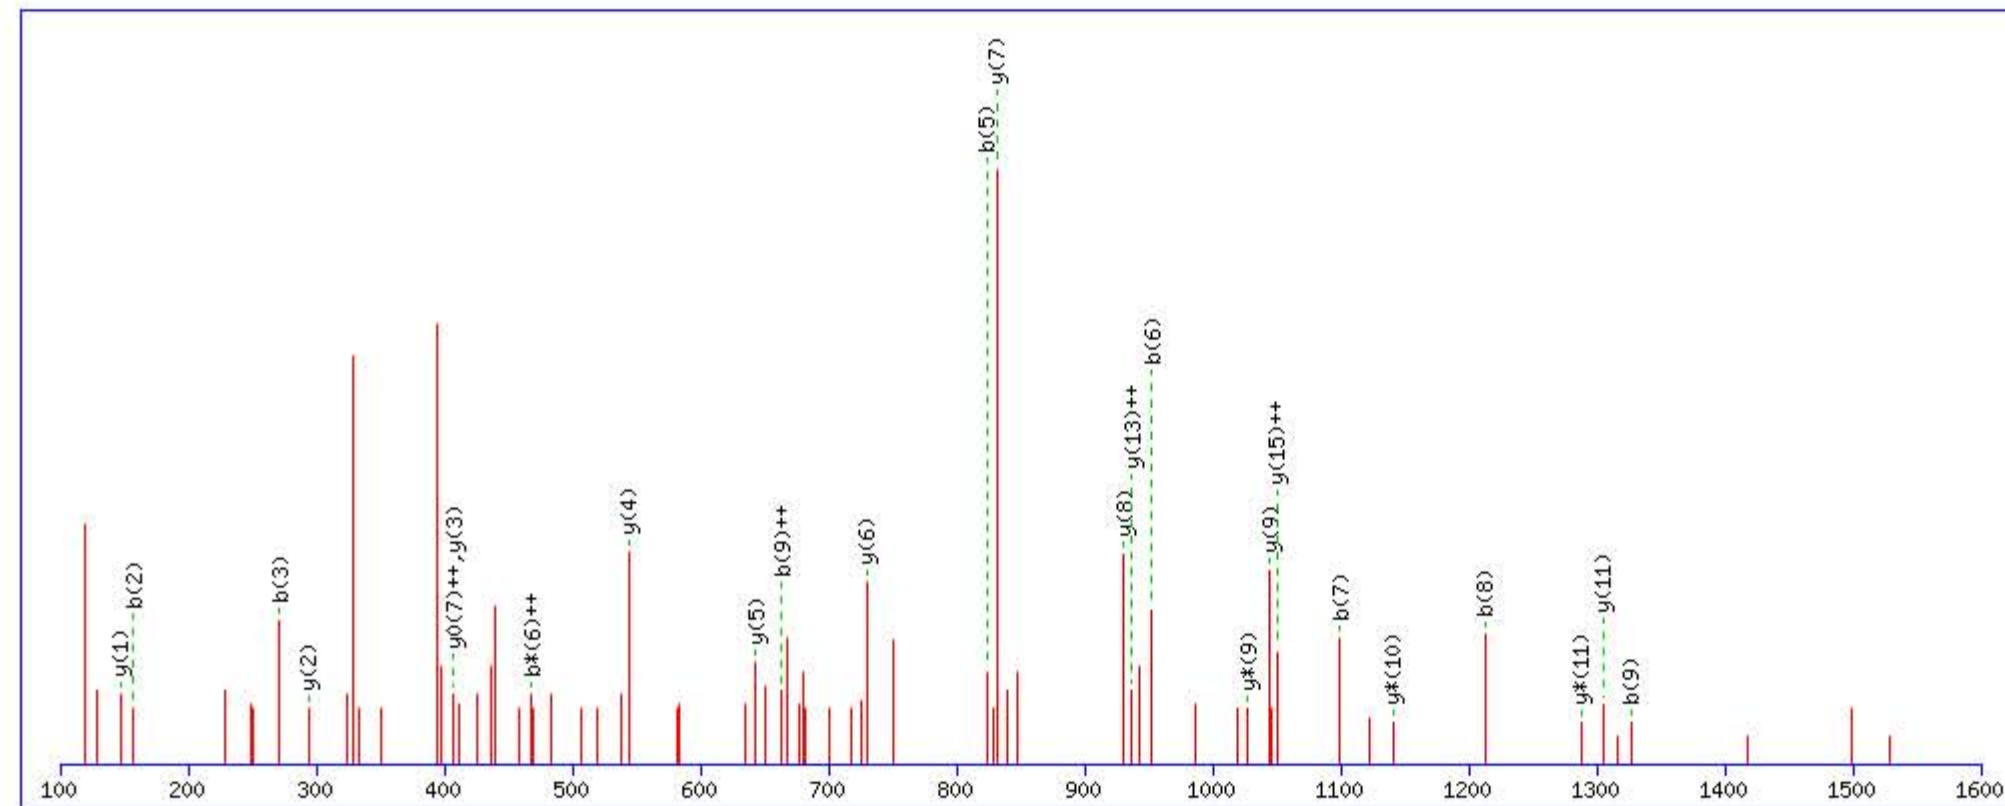

Monoisotopic mass of neutral peptide  $M_r(\text{calc})$ : 2255.213654  
 Fixed modifications: Carbamidomethyl (C) (apply to specified residues or termini only)  
 Variable modifications:  
 Q5 : Biotin:Thermo-21345 (Q)  
 Ions Score: 47 Expect: 0.00039  
 Matches : 25/168 fragment ions using 56 most intense peaks [\(help\)](#)

| #  | b                  | b <sup>++</sup>   | b <sup>*</sup> | b <sup>*++</sup>  | b <sup>0</sup> | b <sup>0++</sup> | Seq. | y                  | y <sup>++</sup>    | y <sup>*</sup>     | y <sup>*++</sup> | y <sup>0</sup> | y <sup>0++</sup>  | #  |
|----|--------------------|-------------------|----------------|-------------------|----------------|------------------|------|--------------------|--------------------|--------------------|------------------|----------------|-------------------|----|
| 1  | 58.028740          | 29.518008         |                |                   |                |                  | G    |                    |                    |                    |                  |                |                   | 17 |
| 2  | <b>157.097154</b>  | 79.052215         |                |                   |                |                  | V    | 2199.199458        | 1100.103367        | 2182.172909        | 1091.590092      | 2181.188893    | 1091.098084       | 16 |
| 3  | <b>271.140081</b>  | 136.073679        | 254.113532     | 127.560404        |                |                  | N    | 2100.131044        | <b>1050.569160</b> | 2083.104495        | 1042.055885      | 2082.120479    | 1041.563877       | 15 |
| 4  | 384.224145         | 192.615711        | 367.197596     | 184.102436        |                |                  | L    | 1986.088117        | 993.547697         | 1969.061568        | 985.034422       | 1968.077552    | 984.542414        | 14 |
| 5  | <b>823.449471</b>  | 412.228374        | 806.422922     | 403.715099        |                |                  | Q    | 1873.004053        | <b>937.005665</b>  | 1855.977504        | 928.492390       | 1854.993488    | 928.000382        | 13 |
| 6  | <b>952.492064</b>  | 476.749670        | 935.465515     | <b>468.236396</b> | 934.481499     | 467.744388       | E    | 1433.778727        | 717.393002         | 1416.752178        | 708.879727       | 1415.768162    | 708.387719        | 12 |
| 7  | <b>1099.560478</b> | 550.283877        | 1082.533929    | 541.770603        | 1081.549913    | 541.278595       | F    | <b>1304.736134</b> | 652.871705         | <b>1287.709585</b> | 644.358431       | 1286.725569    | 643.866423        | 11 |
| 8  | <b>1212.644542</b> | 606.825909        | 1195.617993    | 598.312635        | 1194.633977    | 597.820627       | L    | 1157.667720        | 579.337498         | <b>1140.641171</b> | 570.824224       | 1139.657155    | 570.332216        | 10 |
| 9  | <b>1326.687469</b> | <b>663.847373</b> | 1309.660920    | 655.334098        | 1308.676904    | 654.842090       | N    | <b>1044.583656</b> | 522.795466         | <b>1027.557107</b> | 514.282192       | 1026.573091    | 513.790184        | 9  |
| 10 | 1425.755883        | 713.381580        | 1408.729334    | 704.868305        | 1407.745318    | 704.376297       | V    | <b>930.540729</b>  | 465.774003         | 913.514180         | 457.260728       | 912.530164     | 456.768720        | 8  |
| 11 | 1526.803562        | 763.905419        | 1509.777013    | 755.392145        | 1508.792997    | 754.900137       | T    | <b>831.472315</b>  | 416.239796         | 814.445766         | 407.726521       | 813.461750     | <b>407.234513</b> | 7  |
| 12 | 1613.835590        | 807.421433        | 1596.809041    | 798.908159        | 1595.825025    | 798.416151       | S    | <b>730.424636</b>  | 365.715956         | 713.398087         | 357.202682       | 712.414071     | 356.710674        | 6  |
| 13 | 1712.904004        | 856.955640        | 1695.877455    | 848.442366        | 1694.893439    | 847.950358       | V    | <b>643.392608</b>  | 322.199942         | 626.366059         | 313.686668       |                |                   | 5  |
| 14 | 1849.962916        | 925.485096        | 1832.936367    | 916.971822        | 1831.952351    | 916.479814       | H    | <b>544.324194</b>  | 272.665735         | 527.297645         | 264.152461       |                |                   | 4  |
| 15 | 1963.046980        | 982.027128        | 1946.020431    | 973.513854        | 1945.036415    | 973.021846       | L    | <b>407.265282</b>  | 204.136279         | 390.238733         | 195.623004       |                |                   | 3  |
| 16 | 2110.115394        | 1055.561335       | 2093.088845    | 1047.048060       | 2092.104829    | 1046.556052      | F    | <b>294.181218</b>  | 147.594247         | 277.154669         | 139.080973       |                |                   | 2  |
| 17 |                    |                   |                |                   |                |                  | K    | <b>147.112804</b>  | 74.060040          | 130.086255         | 65.546765        |                |                   | 1  |

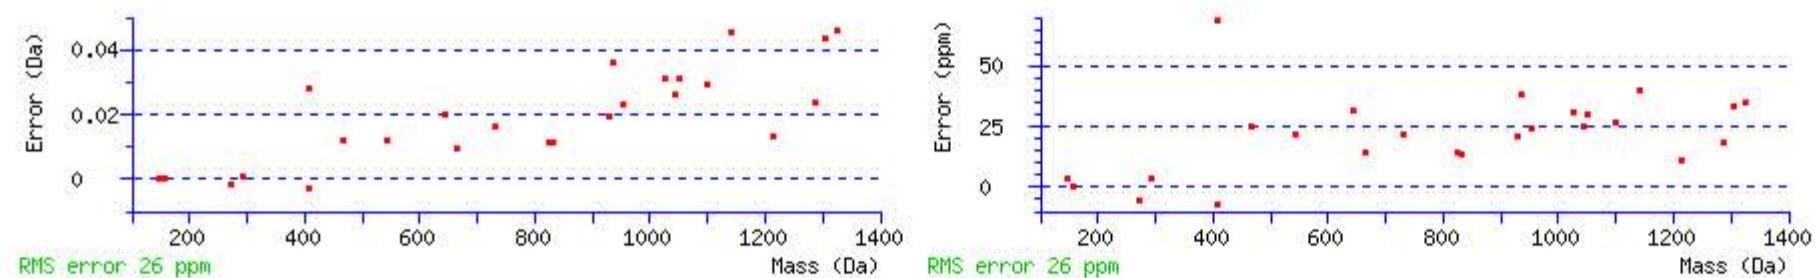

NCBI BLAST search of [GVNLQEFLNVTSVHLFK](#)  
 (Parameters: blastp, nr protein database, expect=20000, no filter, PAM30)  
 Other BLAST [web gateways](#)

### All matches to this query

| Score | $M_r(\text{calc})$ : | Delta    | Sequence                          |
|-------|----------------------|----------|-----------------------------------|
| 46.8  | 2255.213654          | 0.011098 | <a href="#">GVNLQEFLNVTSVHLFK</a> |



# Mascot Search Results

## Peptide View

MS/MS Fragmentation of **AVPPNNSNAEDDLPTVELQGVVPR**

Found in **F13A\_HUMAN**, Coagulation factor XIII A chain OS=Homo sapiens GN=F13A1 PE=1 SV=4

Match to Query 56520: 2912.440902 from(971.820910,3+) rtinseconds(2489) index(66452)

Title: Locus:1.1.1.3346.24 File:"2013-07-02 CLN FXIII 30 min 3rd FT.wiff"

Data file C:\Program Files (x86)\Matrix Science\Mascot Daemon\mgf3 FXIII 30 min 3rd\mascot\_daemon\_merge.mgf

Click mouse within plot area to zoom in by factor of two about that point

Or, Plot from  to  Da

Label all possible matches  Label matches used for scoring

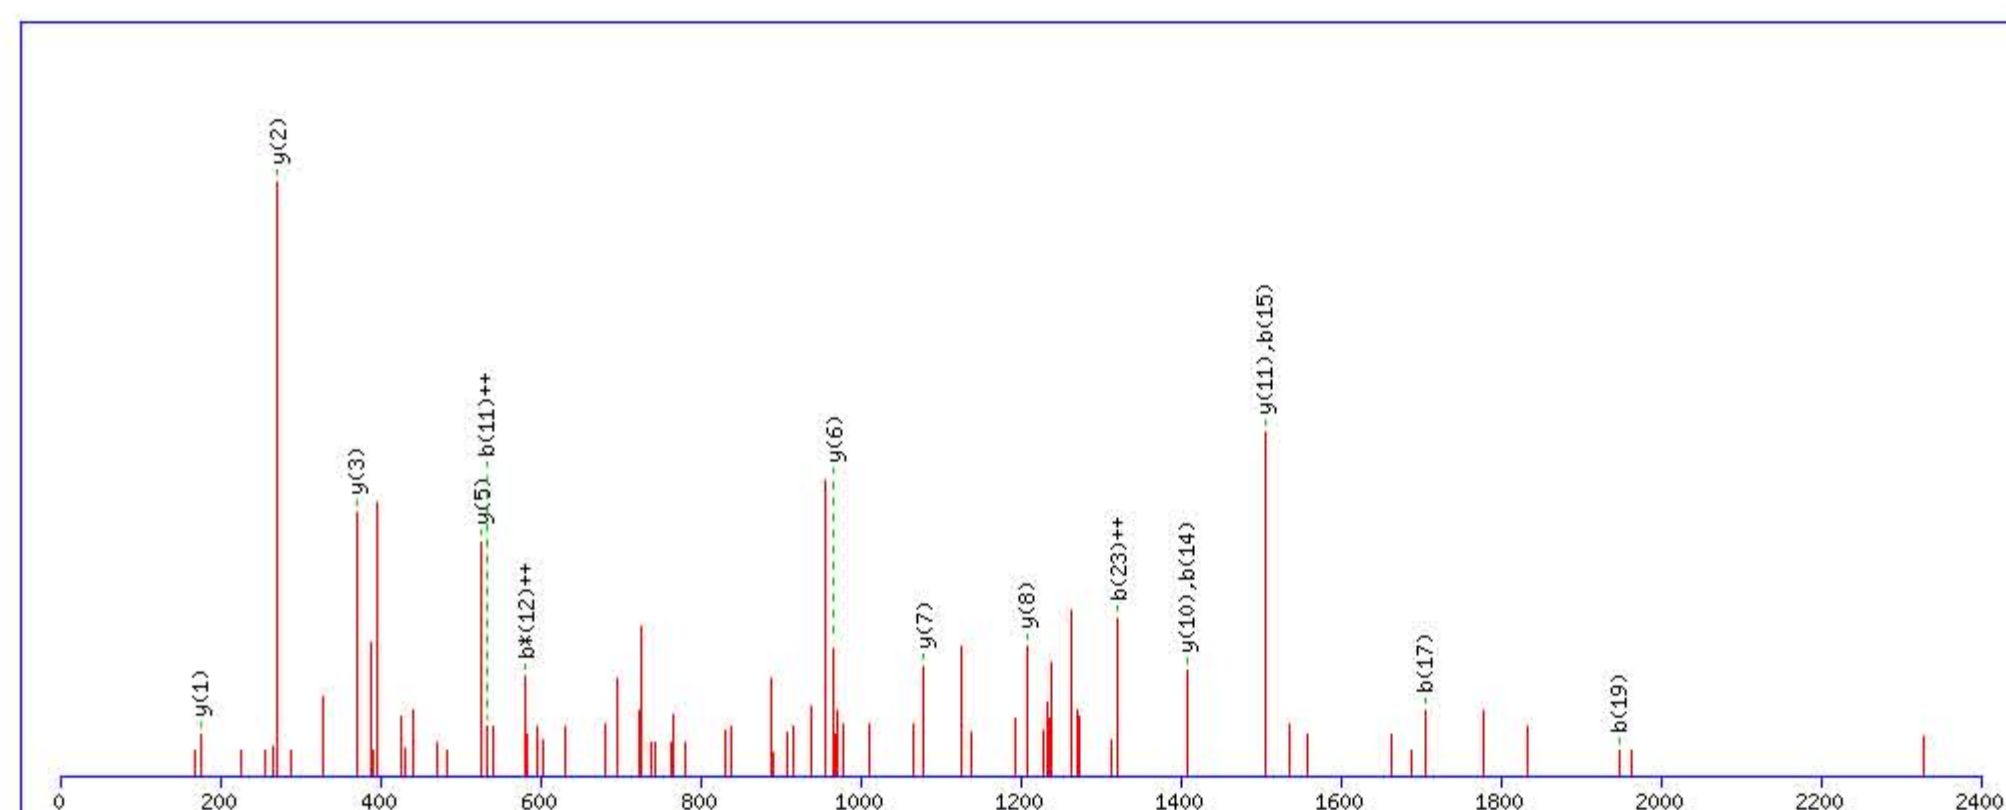

Monoisotopic mass of neutral peptide Mr(calc): 2912.470200

Fixed modifications: Carbamidomethyl (C) (apply to specified residues or termini only)

Variable modifications:

Q20 : Biotin:Thermo-21345 (Q)

Ions Score: 33 Expect: 0.015

Matches : 16/254 fragment ions using 35 most intense peaks [\(help\)](#)

| #  | b                  | b <sup>++</sup>    | b <sup>+</sup> | b <sup>+++</sup>  | b <sup>0</sup> | b <sup>0++</sup> | Seq. | y                  | y <sup>++</sup> | y <sup>+</sup> | y <sup>+++</sup> | y <sup>0</sup> | y <sup>0++</sup> | #  |
|----|--------------------|--------------------|----------------|-------------------|----------------|------------------|------|--------------------|-----------------|----------------|------------------|----------------|------------------|----|
| 1  | 72.044390          | 36.525833          |                |                   |                |                  | A    |                    |                 |                |                  |                |                  | 25 |
| 2  | 171.112804         | 86.060040          |                |                   |                |                  | V    | 2842.440370        | 1421.723823     | 2825.413821    | 1413.210548      | 2824.429805    | 1412.718540      | 24 |
| 3  | 268.165568         | 134.586422         |                |                   |                |                  | P    | 2743.371956        | 1372.189616     | 2726.345407    | 1363.676341      | 2725.361391    | 1363.184333      | 23 |
| 4  | 365.218332         | 183.112804         |                |                   |                |                  | P    | 2646.319192        | 1323.663234     | 2629.292643    | 1315.149959      | 2628.308627    | 1314.657951      | 22 |
| 5  | 479.261259         | 240.134267         | 462.234710     | 231.620993        |                |                  | N    | 2549.266428        | 1275.136852     | 2532.239879    | 1266.623577      | 2531.255863    | 1266.131569      | 21 |
| 6  | 593.304186         | 297.155731         | 576.277637     | 288.642457        |                |                  | N    | 2435.223501        | 1218.115388     | 2418.196952    | 1209.602114      | 2417.212936    | 1209.110106      | 20 |
| 7  | 680.336214         | 340.671745         | 663.309665     | 332.158471        | 662.325649     | 331.666463       | S    | 2321.180574        | 1161.093925     | 2304.154025    | 1152.580650      | 2303.170009    | 1152.088642      | 19 |
| 8  | 794.379141         | 397.693209         | 777.352592     | 389.179934        | 776.368576     | 388.687926       | N    | 2234.148546        | 1117.577911     | 2217.121997    | 1109.064636      | 2216.137981    | 1108.572628      | 18 |
| 9  | 865.416255         | 433.211766         | 848.389706     | 424.698491        | 847.405690     | 424.206483       | A    | 2120.105619        | 1060.556447     | 2103.079070    | 1052.043173      | 2102.095054    | 1051.551165      | 17 |
| 10 | 936.453369         | 468.730323         | 919.426820     | 460.217048        | 918.442804     | 459.725040       | A    | 2049.068505        | 1025.037890     | 2032.041956    | 1016.524616      | 2031.057940    | 1016.032608      | 16 |
| 11 | 1065.495962        | <b>533.251619</b>  | 1048.469413    | 524.738345        | 1047.485397    | 524.246336       | E    | 1978.031391        | 989.519333      | 1961.004842    | 981.006059       | 1960.020826    | 980.514051       | 15 |
| 12 | 1180.522905        | 590.765091         | 1163.496356    | <b>582.251816</b> | 1162.512340    | 581.759808       | D    | 1848.988798        | 924.998037      | 1831.962249    | 916.484762       | 1830.978233    | 915.992754       | 14 |
| 13 | 1295.549848        | 648.278562         | 1278.523299    | 639.765288        | 1277.539283    | 639.273280       | D    | 1733.961855        | 867.484565      | 1716.935306    | 858.971291       | 1715.951290    | 858.479283       | 13 |
| 14 | <b>1408.633912</b> | 704.820594         | 1391.607363    | 696.307320        | 1390.623347    | 695.815312       | L    | 1618.934912        | 809.971094      | 1601.908363    | 801.457819       | 1600.924347    | 800.965811       | 12 |
| 15 | <b>1505.686676</b> | 753.346976         | 1488.660127    | 744.833702        | 1487.676111    | 744.341694       | P    | <b>1505.850848</b> | 753.429062      | 1488.824299    | 744.915787       | 1487.840283    | 744.423779       | 11 |
| 16 | 1606.734355        | 803.870816         | 1589.707806    | 795.357541        | 1588.723790    | 794.865533       | T    | <b>1408.798084</b> | 704.902680      | 1391.771535    | 696.389405       | 1390.787519    | 695.897397       | 10 |
| 17 | <b>1705.802769</b> | 853.405023         | 1688.776220    | 844.891748        | 1687.792204    | 844.399740       | V    | 1307.750405        | 654.378840      | 1290.723856    | 645.865566       | 1289.739840    | 645.373558       | 9  |
| 18 | 1834.845362        | 917.926319         | 1817.818813    | 909.413045        | 1816.834797    | 908.921037       | E    | <b>1208.681991</b> | 604.844633      | 1191.655442    | 596.331359       | 1190.671426    | 595.839351       | 8  |
| 19 | <b>1947.929426</b> | 974.468351         | 1930.902877    | 965.955077        | 1929.918861    | 965.463069       | L    | <b>1079.639398</b> | 540.323337      | 1062.612849    | 531.810062       |                |                  | 7  |
| 20 | 2387.154752        | 1194.081014        | 2370.128203    | 1185.567739       | 2369.144187    | 1185.075731      | Q    | <b>966.555334</b>  | 483.781305      | 949.528785     | 475.268030       |                |                  | 6  |
| 21 | 2444.176216        | 1222.591746        | 2427.149667    | 1214.078471       | 2426.165651    | 1213.586463      | G    | <b>527.330008</b>  | 264.168642      | 510.303459     | 255.655367       |                |                  | 5  |
| 22 | 2543.244630        | 1272.125953        | 2526.218081    | 1263.612678       | 2525.234065    | 1263.120670      | V    | 470.308544         | 235.657910      | 453.281995     | 227.144635       |                |                  | 4  |
| 23 | 2642.313044        | <b>1321.660160</b> | 2625.286495    | 1313.146885       | 2624.302479    | 1312.654877      | V    | <b>371.240130</b>  | 186.123703      | 354.213581     | 177.610428       |                |                  | 3  |
| 24 | 2739.365808        | 1370.186542        | 2722.339259    | 1361.673267       | 2721.355243    | 1361.181259      | P    | <b>272.171716</b>  | 136.589496      | 255.145167     | 128.076221       |                |                  | 2  |
| 25 |                    |                    |                |                   |                |                  | R    | <b>175.118952</b>  | 88.063114       | 158.092403     | 79.549839        |                |                  | 1  |

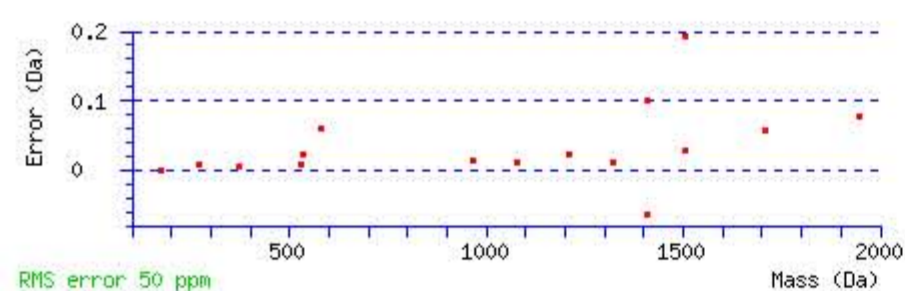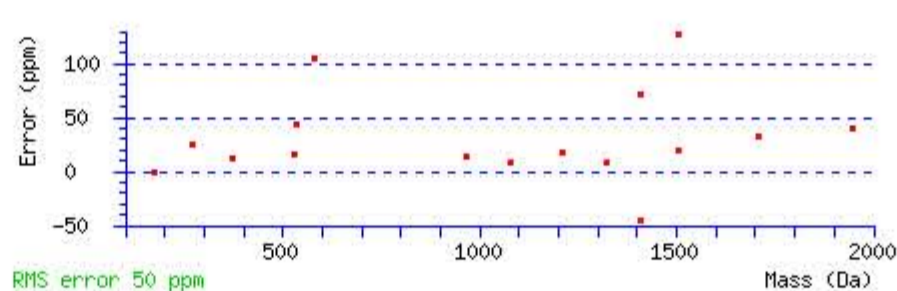

NCBI BLAST search of [AVPPNNSNAEDDLPTVELQGVVPR](#)

(Parameters: blastp, nr protein database, expect=20000, no filter, PAM30)

Other BLAST [web gateways](#)

All matches to this query

| Score | Mr(calc):   | Delta     | Sequence                                 |
|-------|-------------|-----------|------------------------------------------|
| 33.0  | 2912.470200 | -0.029298 | <a href="#">AVPPNNSNAEDDLPTVELQGVVPR</a> |

Mascot: <http://www.matrixscience.com/>



# MASCOT Search Results

## Peptide View

MS/MS Fragmentation of **TGLQEVEVK**

Found in **CO3\_HUMAN**, Complement C3 OS=Homo sapiens GN=C3 PE=1 SV=2

Match to Query 24740: 1312.721808 from(657.368180,2+) rtinseconds(1842) index(34163)

Title: Locus:1.1.1.3275.9 File:"2013-07-02 CLN FXIII 30 min 3rd F 3.wiff"

Data file C:\Program Files (x86)\Matrix Science\Mascot Daemon\mgf3 FXIII 30 min 3rd\mascot\_daemon\_merge.mgf

Click mouse within plot area to zoom in by factor of two about that point

Or, Plot from  to  Da

Label all possible matches  Label matches used for scoring

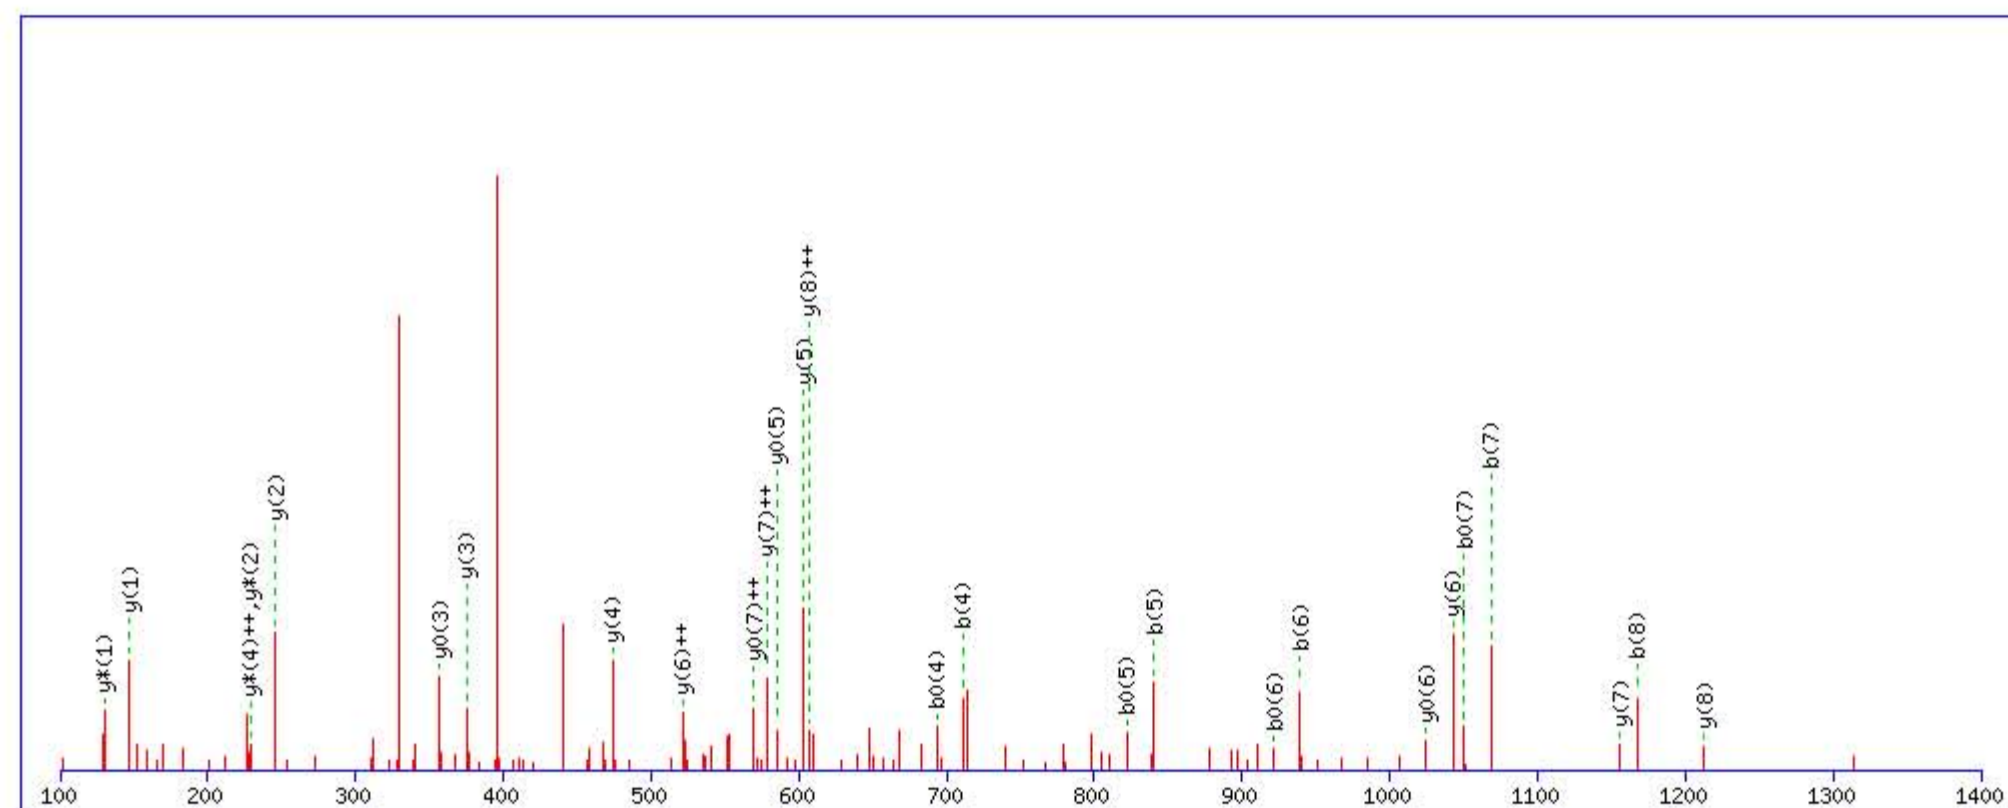

Monoisotopic mass of neutral peptide Mr(calc): 1312.706070

Fixed modifications: Carbamidomethyl (C) (apply to specified residues or termini only)

Variable modifications:

Q4 : Biotin:Thermo-21345 (Q)

Ions Score: 52 Expect: 9.2e-005

Matches : 27/86 fragment ions using 43 most intense peaks [\(help\)](#)

| # | b           | b <sup>++</sup> | b <sup>*</sup> | b <sup>*++</sup> | b <sup>0</sup> | b <sup>0++</sup> | Seq. | y           | y <sup>++</sup> | y <sup>*</sup> | y <sup>*++</sup> | y <sup>0</sup> | y <sup>0++</sup> | # |
|---|-------------|-----------------|----------------|------------------|----------------|------------------|------|-------------|-----------------|----------------|------------------|----------------|------------------|---|
| 1 | 102.054955  | 51.531116       |                |                  | 84.044390      | 42.525833        | T    |             |                 |                |                  |                |                  | 9 |
| 2 | 159.076419  | 80.041847       |                |                  | 141.065854     | 71.036565        | G    | 1212.665672 | 606.836474      | 1195.639123    | 598.323200       | 1194.655107    | 597.831192       | 8 |
| 3 | 272.160483  | 136.583879      |                |                  | 254.149918     | 127.578597       | L    | 1155.644208 | 578.325742      | 1138.617659    | 569.812468       | 1137.633643    | 569.320460       | 7 |
| 4 | 711.385809  | 356.196543      | 694.359260     | 347.683268       | 693.375244     | 347.191260       | Q    | 1042.560144 | 521.783710      | 1025.533595    | 513.270436       | 1024.549579    | 512.778428       | 6 |
| 5 | 840.428402  | 420.717839      | 823.401853     | 412.204565       | 822.417837     | 411.712557       | E    | 603.334818  | 302.171047      | 586.308269     | 293.657773       | 585.324253     | 293.165765       | 5 |
| 6 | 939.496816  | 470.252046      | 922.470267     | 461.738772       | 921.486251     | 461.246764       | V    | 474.292225  | 237.649751      | 457.265676     | 229.136476       | 456.281660     | 228.644468       | 4 |
| 7 | 1068.539409 | 534.773343      | 1051.512860    | 526.260068       | 1050.528844    | 525.768060       | E    | 375.223811  | 188.115544      | 358.197262     | 179.602269       | 357.213246     | 179.110261       | 3 |
| 8 | 1167.607823 | 584.307550      | 1150.581274    | 575.794275       | 1149.597258    | 575.302267       | V    | 246.181218  | 123.594247      | 229.154669     | 115.080973       |                |                  | 2 |
| 9 |             |                 |                |                  |                |                  | K    | 147.112804  | 74.060040       | 130.086255     | 65.546765        |                |                  | 1 |

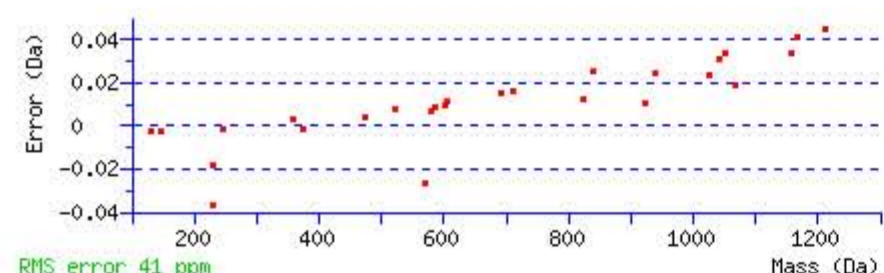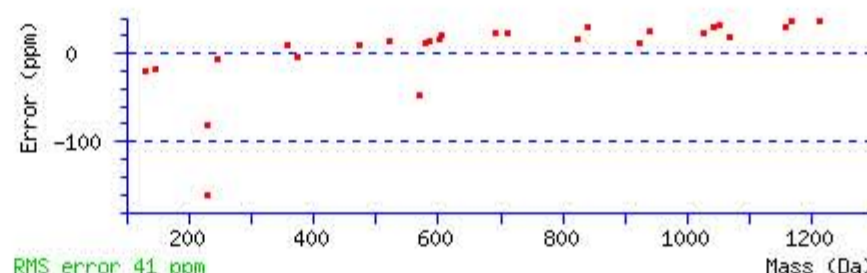

NCBI BLAST search of **TGLQEVEVK**

(Parameters: blastp, nr protein database, expect=20000, no filter, PAM30)

Other BLAST [web gateways](#)

## All matches to this query

| Score | Mr(calc):   | Delta     | Sequence                       |
|-------|-------------|-----------|--------------------------------|
| 52.0  | 1312.706070 | 0.015738  | <a href="#">TGLQEVEVK</a>      |
| 8.5   | 1312.735031 | -0.013223 | <a href="#">DIALQIREDIK</a>    |
| 7.5   | 1312.709869 | 0.011939  | <a href="#">QAEEAVAKLQAR</a>   |
| 7.4   | 1312.728516 | -0.006708 | <a href="#">KPQRGMPKVEK</a>    |
| 7.0   | 1312.735077 | -0.013269 | <a href="#">TSQGGAGVSPLLVK</a> |
| 6.3   | 1312.713913 | 0.007895  | <a href="#">KVFEKYTTAAR</a>    |
| 5.7   | 1312.728546 | -0.006738 | <a href="#">QGSRGTAIVK</a>     |
| 2.6   | 1312.739059 | -0.017251 | <a href="#">SNIYSKFLITK</a>    |
| 2.5   | 1312.728516 | -0.006708 | <a href="#">EKVSRMVHAIK</a>    |
| 2.1   | 1312.706055 | 0.015753  | <a href="#">QSAEEVIVK</a>      |



# Mascot Search Results

## Peptide View

MS/MS Fragmentation of **KVEGTAFVIFGIQDGEQR**

Found in **CO3\_HUMAN**, Complement C3 OS=Homo sapiens GN=C3 PE=1 SV=2

Match to Query 31874: 2304.221382 from(769.081070,3+) rtinseconds(2482) index(37714)

Title: Locus:1.1.1.3498.8 File:"2013-07-02 CLN FXIII 30 min 3rd F 3.wiff"

Data file C:\Program Files (x86)\Matrix Science\Mascot Daemon\mgf\3 FXIII 30 min 3rd\mascot\_daemon\_merge.mgf

Click mouse within plot area to zoom in by factor of two about that point

Or, Plot from  to  Da

Label all possible matches  Label matches used for scoring

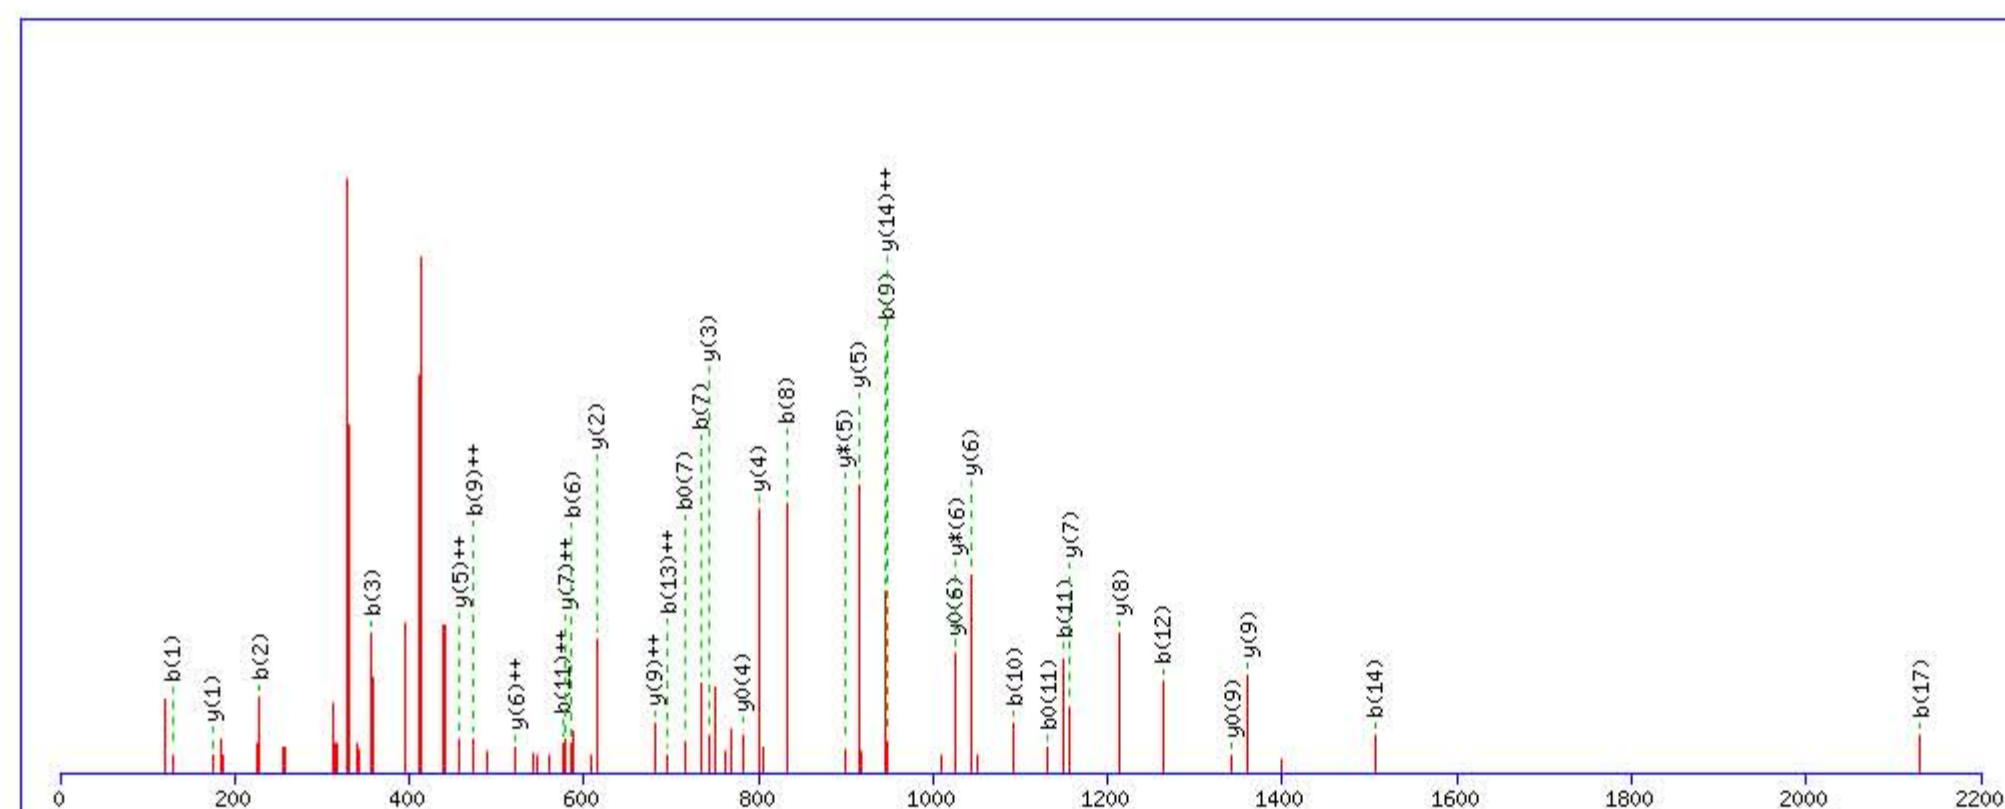

Monoisotopic mass of neutral peptide Mr(calc): 2304.193649

Fixed modifications: Carbamidomethyl (C) (apply to specified residues or termini only)

Variable modifications:

Q17 : Biotin:Thermo-21345 (Q)

Ions Score: 67 Expect: 5.3e-007

Matches : 36/196 fragment ions using 66 most intense peaks [\(help\)](#)

| #  | b                  | b <sup>++</sup>   | b <sup>+</sup> | b <sup>+++</sup> | b <sup>0</sup>     | b <sup>0++</sup> | Seq.     | y                  | y <sup>++</sup>   | y <sup>+</sup>     | y <sup>+++</sup> | y <sup>0</sup>     | y <sup>0++</sup> | #  |
|----|--------------------|-------------------|----------------|------------------|--------------------|------------------|----------|--------------------|-------------------|--------------------|------------------|--------------------|------------------|----|
| 1  | <b>129.102239</b>  | 65.054757         | 112.075690     | 56.541483        |                    |                  | <b>K</b> |                    |                   |                    |                  |                    |                  | 18 |
| 2  | <b>228.170653</b>  | 114.588965        | 211.144104     | 106.075690       |                    |                  | <b>V</b> | 2177.105954        | 1089.056615       | 2160.079405        | 1080.543340      | 2159.095389        | 1080.051332      | 17 |
| 3  | <b>357.213246</b>  | 179.110261        | 340.186697     | 170.596987       | 339.202681         | 170.104979       | <b>E</b> | 2078.037540        | 1039.522408       | 2061.010991        | 1031.009133      | 2060.026975        | 1030.517125      | 16 |
| 4  | 414.234710         | 207.620993        | 397.208161     | 199.107719       | 396.224145         | 198.615711       | <b>G</b> | 1948.994947        | 975.001111        | 1931.968398        | 966.487837       | 1930.984382        | 965.995829       | 15 |
| 5  | 515.282389         | 258.144833        | 498.255840     | 249.631558       | 497.271824         | 249.139550       | <b>T</b> | 1891.973483        | <b>946.490380</b> | 1874.946934        | 937.977105       | 1873.962918        | 937.485097       | 14 |
| 6  | <b>586.319503</b>  | 293.663390        | 569.292954     | 285.150115       | 568.308938         | 284.658107       | <b>A</b> | 1790.925804        | 895.966540        | 1773.899255        | 887.453265       | 1772.915239        | 886.961257       | 13 |
| 7  | <b>733.387917</b>  | 367.197597        | 716.361368     | 358.684322       | <b>715.377352</b>  | 358.192314       | <b>F</b> | 1719.888690        | 860.447983        | 1702.862141        | 851.934709       | 1701.878125        | 851.442701       | 12 |
| 8  | <b>832.456331</b>  | 416.731804        | 815.429782     | 408.218529       | 814.445766         | 407.726521       | <b>V</b> | 1572.820276        | 786.913776        | 1555.793727        | 778.400502       | 1554.809711        | 777.908493       | 11 |
| 9  | <b>945.540395</b>  | <b>473.273836</b> | 928.513846     | 464.760561       | 927.529830         | 464.268553       | <b>I</b> | 1473.751862        | 737.379569        | 1456.725313        | 728.866294       | 1455.741297        | 728.374286       | 10 |
| 10 | <b>1092.608809</b> | 546.808043        | 1075.582260    | 538.294768       | 1074.598244        | 537.802760       | <b>F</b> | <b>1360.667798</b> | <b>680.837537</b> | 1343.641249        | 672.324263       | <b>1342.657233</b> | 671.832254       | 9  |
| 11 | <b>1149.630273</b> | <b>575.318775</b> | 1132.603724    | 566.805500       | <b>1131.619708</b> | 566.313492       | <b>G</b> | <b>1213.599384</b> | 607.303330        | 1196.572835        | 598.790055       | 1195.588819        | 598.298047       | 8  |
| 12 | <b>1262.714337</b> | 631.860806        | 1245.687788    | 623.347532       | 1244.703772        | 622.855524       | <b>I</b> | <b>1156.577920</b> | <b>578.792598</b> | 1139.551371        | 570.279324       | 1138.567355        | 569.787315       | 7  |
| 13 | 1390.772915        | <b>695.890095</b> | 1373.746366    | 687.376821       | 1372.762350        | 686.884813       | <b>Q</b> | <b>1043.493856</b> | <b>522.250566</b> | <b>1026.467307</b> | 513.737292       | <b>1025.483291</b> | 513.245284       | 6  |
| 14 | <b>1505.799858</b> | 753.403567        | 1488.773309    | 744.890292       | 1487.789293        | 744.398284       | <b>D</b> | <b>915.435278</b>  | <b>458.221277</b> | <b>898.408729</b>  | 449.708003       | 897.424713         | 449.215995       | 5  |
| 15 | 1562.821322        | 781.914299        | 1545.794773    | 773.401024       | 1544.810757        | 772.909016       | <b>G</b> | <b>800.408335</b>  | 400.707806        | 783.381786         | 392.194531       | <b>782.397770</b>  | 391.702523       | 4  |
| 16 | 1691.863915        | 846.435595        | 1674.837366    | 837.922321       | 1673.853350        | 837.430313       | <b>E</b> | <b>743.386871</b>  | 372.197074        | 726.360322         | 363.683799       | 725.376306         | 363.191791       | 3  |
| 17 | <b>2131.089241</b> | 1066.048258       | 2114.062692    | 1057.534984      | 2113.078676        | 1057.042976      | <b>Q</b> | <b>614.344278</b>  | 307.675777        | 597.317729         | 299.162503       |                    |                  | 2  |
| 18 |                    |                   |                |                  |                    |                  | <b>R</b> | <b>175.118952</b>  | 88.063114         | 158.092403         | 79.549839        |                    |                  | 1  |

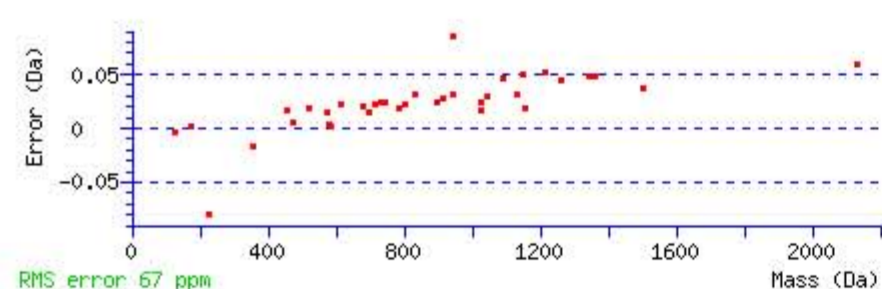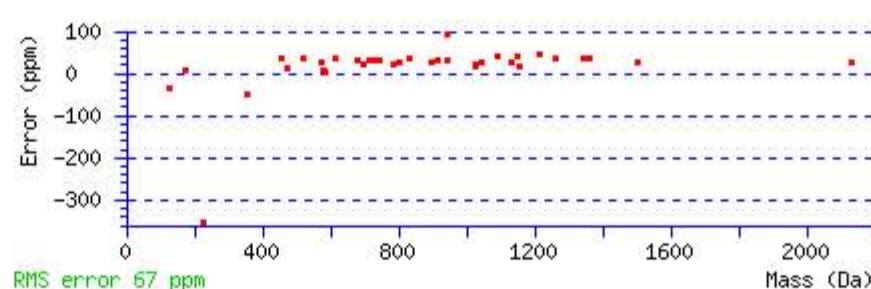

NCBI BLAST search of **KVEGTAFVIFGIQDGEQR**

(Parameters: blastp, nr protein database, expect=20000, no filter, PAM30)

Other BLAST [web gateways](#)

All matches to this query

| Score | Mr(calc):   | Delta    | Sequence                           |
|-------|-------------|----------|------------------------------------|
| 67.5  | 2304.193649 | 0.027733 | <a href="#">KVEGTAFVIFGIQDGEQR</a> |
| 44.3  | 2304.193649 | 0.027733 | <a href="#">KVEGTAFVIFGIQDGEQR</a> |
| 0.5   | 2304.205536 | 0.015846 | <a href="#">LLQMQDEGRRQPRPGGR</a>  |



# MASCOT Search Results

## Peptide View

MS/MS Fragmentation of **SGSDEVQVGQQR**

Found in **CO3\_HUMAN**, Complement C3 OS=Homo sapiens GN=C3 PE=1 SV=2

Match to Query 34069: 1599.777648 from(800.896100,2+) rtinseconds(1570) index(32649)

Title: Locus:1.1.1.3180.14 File:"2013-07-02 CLN FXIII 30 min 3rd F 3.wiff"

Data file C:\Program Files (x86)\Matrix Science\Mascot Daemon\mgf\3 FXIII 30 min 3rd\mascot\_daemon\_merge.mgf

Click mouse within plot area to zoom in by factor of two about that point

Or, Plot from  to  Da

Label all possible matches  Label matches used for scoring

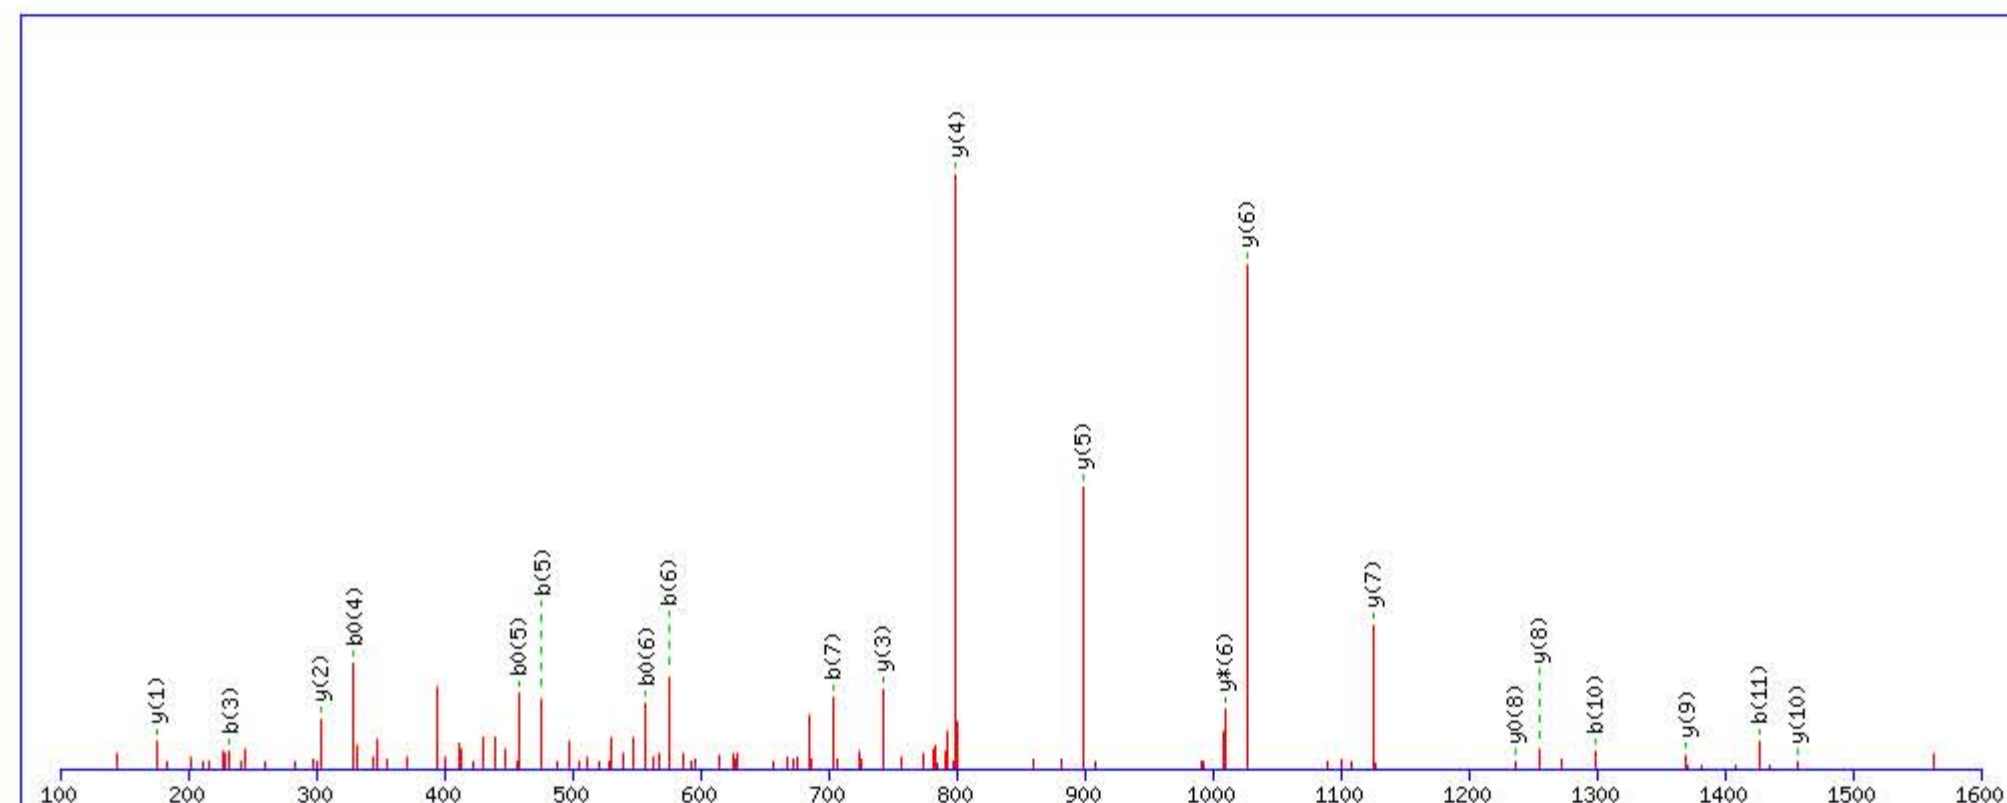

Monoisotopic mass of neutral peptide Mr(calc): 1599.767517

Fixed modifications: Carbamidomethyl (C) (apply to specified residues or termini only)

Variable modifications:

Q10 : Biotin:Thermo-21345 (Q)

Ions Score: 87 Expect: 2.9e-008

Matches : 21/106 fragment ions using 27 most intense peaks [\(help\)](#)

| #  | b                  | b <sup>++</sup> | b <sup>*</sup> | b <sup>+++</sup> | b <sup>0</sup>    | b <sup>0++</sup> | Seq. | y                  | y <sup>++</sup> | y <sup>*</sup>     | y <sup>+++</sup> | y <sup>0</sup>     | y <sup>0++</sup> | #  |
|----|--------------------|-----------------|----------------|------------------|-------------------|------------------|------|--------------------|-----------------|--------------------|------------------|--------------------|------------------|----|
| 1  | 88.039304          | 44.523290       |                |                  | 70.028739         | 35.518008        | S    |                    |                 |                    |                  |                    |                  | 12 |
| 2  | 145.060768         | 73.034022       |                |                  | 127.050203        | 64.028740        | G    | 1513.742754        | 757.375015      | 1496.716205        | 748.861741       | 1495.732189        | 748.369733       | 11 |
| 3  | <b>232.092796</b>  | 116.550036      |                |                  | 214.082231        | 107.544753       | S    | <b>1456.721290</b> | 728.864283      | 1439.694741        | 720.351009       | 1438.710725        | 719.859001       | 10 |
| 4  | 347.119739         | 174.063507      |                |                  | <b>329.109174</b> | 165.058225       | D    | <b>1369.689262</b> | 685.348269      | 1352.662713        | 676.834995       | 1351.678697        | 676.342987       | 9  |
| 5  | <b>476.162332</b>  | 238.584804      |                |                  | <b>458.151767</b> | 229.579522       | E    | <b>1254.662319</b> | 627.834798      | 1237.635770        | 619.321523       | <b>1236.651754</b> | 618.829515       | 8  |
| 6  | <b>575.230746</b>  | 288.119011      |                |                  | <b>557.220181</b> | 279.113729       | V    | <b>1125.619726</b> | 563.313501      | 1108.593177        | 554.800227       |                    |                  | 7  |
| 7  | <b>703.289324</b>  | 352.148300      | 686.262775     | 343.635026       | 685.278759        | 343.143018       | Q    | <b>1026.551312</b> | 513.779294      | <b>1009.524763</b> | 505.266020       |                    |                  | 6  |
| 8  | 802.357738         | 401.682507      | 785.331189     | 393.169233       | 784.347173        | 392.677225       | V    | <b>898.492734</b>  | 449.750005      | 881.466185         | 441.236731       |                    |                  | 5  |
| 9  | 859.379202         | 430.193239      | 842.352653     | 421.679965       | 841.368637        | 421.187957       | G    | <b>799.424320</b>  | 400.215798      | 782.397771         | 391.702524       |                    |                  | 4  |
| 10 | <b>1298.604528</b> | 649.805902      | 1281.577979    | 641.292628       | 1280.593963       | 640.800620       | Q    | <b>742.402856</b>  | 371.705066      | 725.376307         | 363.191792       |                    |                  | 3  |
| 11 | <b>1426.663106</b> | 713.835191      | 1409.636557    | 705.321917       | 1408.652541       | 704.829909       | Q    | <b>303.177530</b>  | 152.092403      | 286.150981         | 143.579129       |                    |                  | 2  |
| 12 |                    |                 |                |                  |                   |                  | R    | <b>175.118952</b>  | 88.063114       | 158.092403         | 79.549839        |                    |                  | 1  |

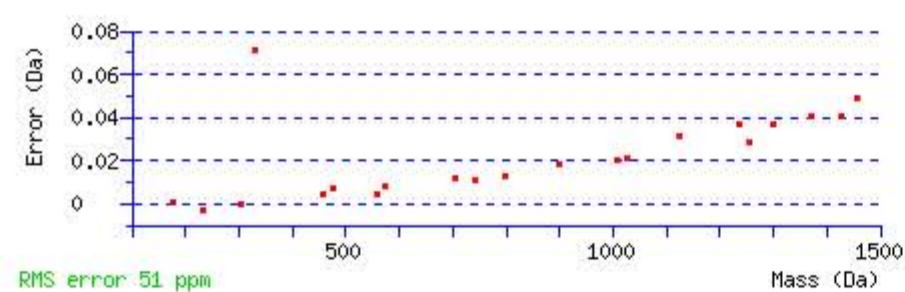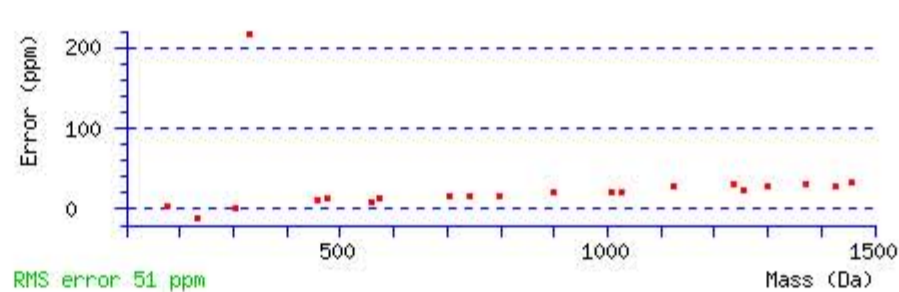

NCBI BLAST search of **SGSDEVQVGQQR**

(Parameters: blastp, nr protein database, expect=20000, no filter, PAM30)

Other BLAST [web gateways](#)

All matches to this query

| Score | Mr(calc):   | Delta     | Sequence                        |
|-------|-------------|-----------|---------------------------------|
| 87.3  | 1599.767517 | 0.010131  | <a href="#">SGSDEVQVGQQR</a>    |
| 72.8  | 1599.767517 | 0.010131  | <a href="#">SGSDEVQVGQQR</a>    |
| 42.9  | 1599.767517 | 0.010131  | <a href="#">SGSDEVQVGQQR</a>    |
| 6.5   | 1599.767502 | 0.010146  | <a href="#">LHMLSSVDLNGQDR</a>  |
| 5.5   | 1599.790634 | -0.012986 | <a href="#">DPWRFGNTPVQQR</a>   |
| 5.1   | 1599.767471 | 0.010177  | <a href="#">AMNAANLNIPPSDTR</a> |
| 3.3   | 1599.792648 | -0.015000 | <a href="#">SSAEVTPDLQSR</a>    |
| 2.9   | 1599.789291 | -0.011643 | <a href="#">DPVFEITGAPGNVER</a> |
| 2.3   | 1599.789261 | -0.011613 | <a href="#">SSILWNTPN SQPEK</a> |
| 2.3   | 1599.796677 | -0.019029 | <a href="#">DINDNPPIFPMTVK</a>  |



# MASCOT Search Results

## Peptide View

MS/MS Fragmentation of **KQELSEAEQATR**

Found in **CO3\_HUMAN**, Complement C3 OS=Homo sapiens GN=C3 PE=1 SV=2

Match to Query 37040: 1699.848372 from(567.623400,3+) rtinseconds(1430) index(47557)

Title: Locus:1.1.1.3141.19 File:"2013-07-02 CLN FXIII 30 min 3rd F 4.wiff"

Data file C:\Program Files (x86)\Matrix Science\Mascot Daemon\mgf\3 FXIII 30 min 3rd\mascot\_daemon\_merge.mgf

Click mouse within plot area to zoom in by factor of two about that point

Or, Plot from  to  Da

Label all possible matches  Label matches used for scoring

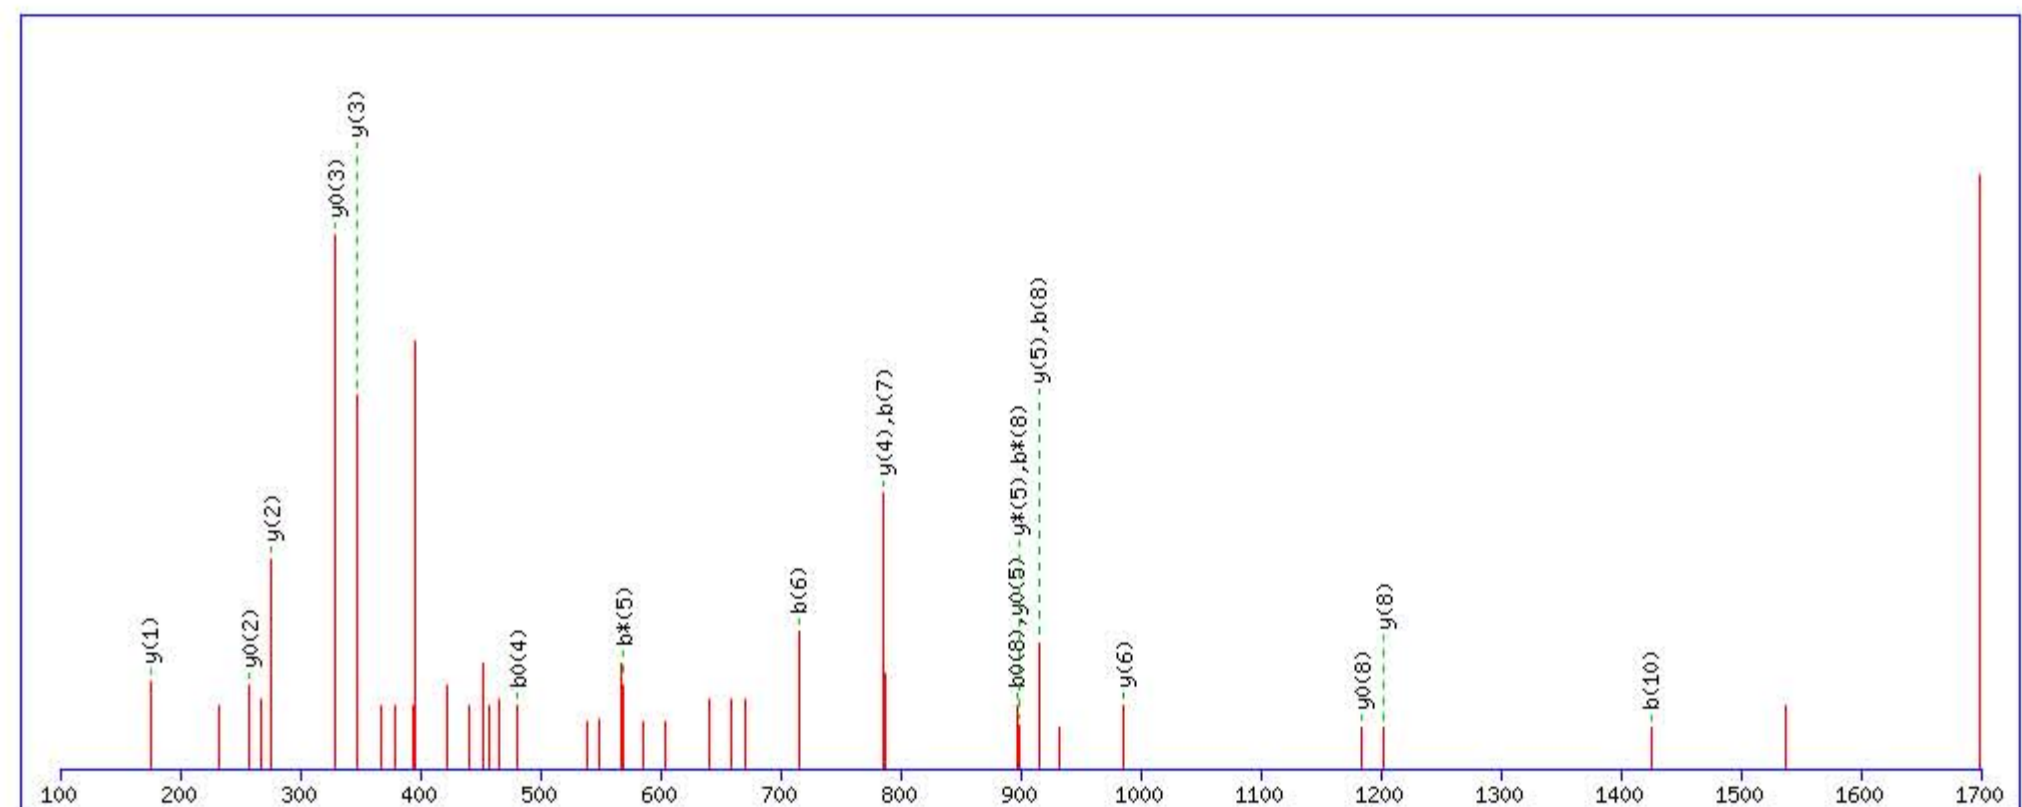

Monoisotopic mass of neutral peptide Mr(calc): 1699.856277

Fixed modifications: Carbamidomethyl (C) (apply to specified residues or termini only)

Variable modifications:

Q9 : Biotin:Thermo-21345 (Q)

Ions Score: 42 Expect: 0.00063

Matches : 20/126 fragment ions using 26 most intense peaks [\(help\)](#)

| #  | b                  | b <sup>++</sup> | b <sup>*</sup>    | b <sup>+++</sup> | b <sup>0</sup>    | b <sup>0++</sup> | Seq.     | y                  | y <sup>++</sup> | y <sup>*</sup>    | y <sup>+++</sup> | y <sup>0</sup>     | y <sup>0++</sup> | #         |
|----|--------------------|-----------------|-------------------|------------------|-------------------|------------------|----------|--------------------|-----------------|-------------------|------------------|--------------------|------------------|-----------|
| 1  | 129.102239         | 65.054757       | 112.075690        | 56.541483        |                   |                  | <b>K</b> |                    |                 |                   |                  |                    |                  | <b>12</b> |
| 2  | 257.160817         | 129.084047      | 240.134268        | 120.570772       |                   |                  | <b>Q</b> | 1572.768634        | 786.887955      | 1555.742085       | 778.374681       | 1554.758069        | 777.882673       | <b>11</b> |
| 3  | 386.203410         | 193.605343      | 369.176861        | 185.092069       | 368.192845        | 184.600061       | <b>E</b> | 1444.710056        | 722.858666      | 1427.683507       | 714.345392       | 1426.699491        | 713.853384       | <b>10</b> |
| 4  | 499.287474         | 250.147375      | 482.260925        | 241.634101       | <b>481.276909</b> | 241.142093       | <b>L</b> | 1315.667463        | 658.337370      | 1298.640914       | 649.824095       | 1297.656898        | 649.332087       | <b>9</b>  |
| 5  | 586.319502         | 293.663389      | <b>569.292953</b> | 285.150115       | 568.308937        | 284.658107       | <b>S</b> | <b>1202.583399</b> | 601.795338      | 1185.556850       | 593.282063       | <b>1184.572834</b> | 592.790055       | <b>8</b>  |
| 6  | <b>715.362095</b>  | 358.184686      | 698.335546        | 349.671411       | 697.351530        | 349.179403       | <b>E</b> | 1115.551371        | 558.279324      | 1098.524822       | 549.766049       | 1097.540806        | 549.274041       | <b>7</b>  |
| 7  | <b>786.399209</b>  | 393.703243      | 769.372660        | 385.189968       | 768.388644        | 384.697960       | <b>A</b> | <b>986.508778</b>  | 493.758027      | 969.482229        | 485.244753       | 968.498213         | 484.752745       | <b>6</b>  |
| 8  | <b>915.441802</b>  | 458.224539      | <b>898.415253</b> | 449.711265       | <b>897.431237</b> | 449.219257       | <b>E</b> | <b>915.471664</b>  | 458.239470      | <b>898.445115</b> | 449.726196       | <b>897.461099</b>  | 449.234188       | <b>5</b>  |
| 9  | 1354.667128        | 677.837202      | 1337.640579       | 669.323928       | 1336.656563       | 668.831920       | <b>Q</b> | <b>786.429071</b>  | 393.718174      | 769.402522        | 385.204899       | 768.418506         | 384.712891       | <b>4</b>  |
| 10 | <b>1425.704242</b> | 713.355759      | 1408.677693       | 704.842485       | 1407.693677       | 704.350477       | <b>A</b> | <b>347.203745</b>  | 174.105510      | 330.177196        | 165.592236       | <b>329.193180</b>  | 165.100228       | <b>3</b>  |
| 11 | 1526.751921        | 763.879599      | 1509.725372       | 755.366324       | 1508.741356       | 754.874316       | <b>T</b> | <b>276.166631</b>  | 138.586953      | 259.140082        | 130.073679       | <b>258.156066</b>  | 129.581671       | <b>2</b>  |
| 12 |                    |                 |                   |                  |                   |                  | <b>R</b> | <b>175.118952</b>  | 88.063114       | 158.092403        | 79.549839        |                    |                  | <b>1</b>  |

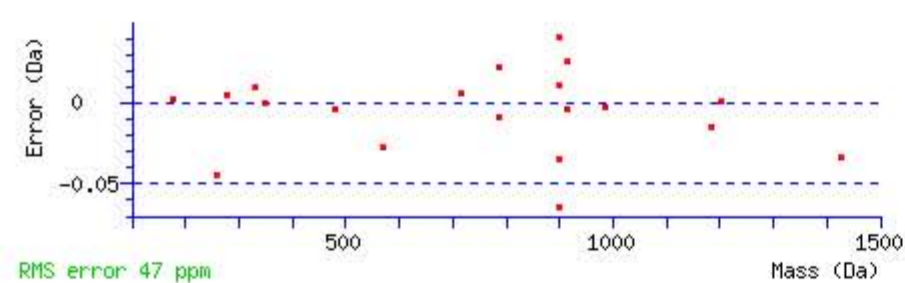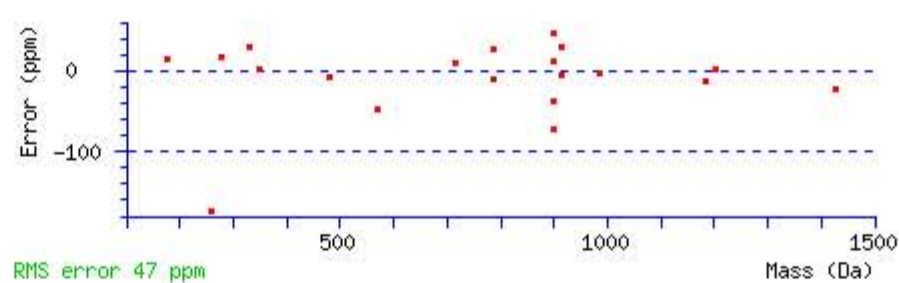

NCBI BLAST search of **KQELSEAEQATR**

(Parameters: blastp, nr protein database, expect=20000, no filter, PAM30)

Other BLAST [web gateways](#)

All matches to this query

| Score | Mr(calc):   | Delta     | Sequence                        |
|-------|-------------|-----------|---------------------------------|
| 42.1  | 1699.856277 | -0.007905 | <a href="#">KQELSEAEQATR</a>    |
| 9.9   | 1699.856277 | -0.007905 | <a href="#">KQELSEAEQATR</a>    |
| 7.5   | 1699.845078 | 0.003294  | <a href="#">INTDVQLDSQEK</a>    |
| 6.8   | 1699.843735 | 0.004637  | <a href="#">QFNRQRGVSHAMGGR</a> |
| 6.0   | 1699.843063 | 0.005309  | <a href="#">GKVSEGIDFVHHYGR</a> |
| 4.6   | 1699.845932 | 0.002440  | <a href="#">QAMQEQLSK</a>       |
| 4.1   | 1699.849792 | -0.001420 | <a href="#">QEMRTTQLGPGR</a>    |
| 2.8   | 1699.845932 | 0.002440  | <a href="#">QAMQEQLSK</a>       |
| 2.3   | 1699.849792 | -0.001420 | <a href="#">QEMRTTQLGPGR</a>    |
| 1.1   | 1699.832031 | 0.016341  | <a href="#">QMQSTRDGR</a>       |



# MASCOT SEARCH RESULTS

## Peptide View

MS/MS Fragmentation of **HQQTVTIPPK**

Found in **CO3\_HUMAN**, Complement C3 OS=Homo sapiens GN=C3 PE=1 SV=2

Match to Query 38627: 1769.990862 from(591.004230,3+) rtinseconds(1868) index(34255)

Title: Locus:1.1.1.3284.8 File:"2013-07-02 CLN FXIII 30 min 3rd F 3.wiff"

Data file C:\Program Files (x86)\Matrix Science\Mascot Daemon\mgf3 FXIII 30 min 3rd\mascot\_daemon\_merge.mgf

Click mouse within plot area to zoom in by factor of two about that point

Or, Plot from  to  Da

Label all possible matches  Label matches used for scoring

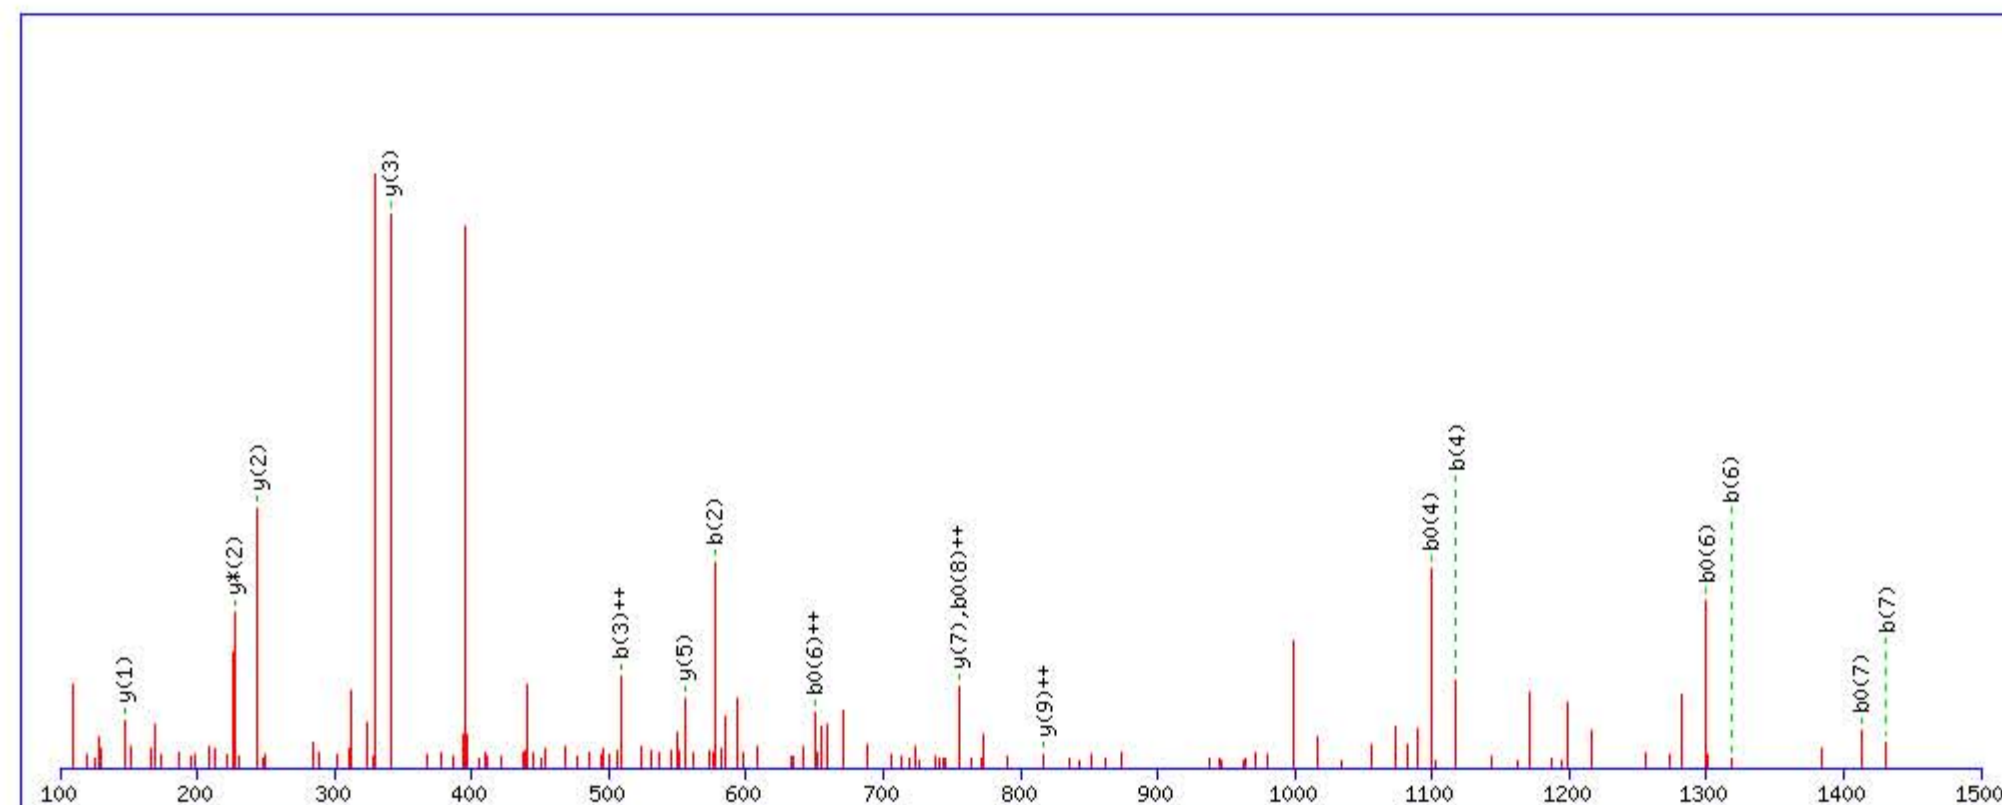

Monoisotopic mass of neutral peptide Mr(calc): 1769.968460

Fixed modifications: Carbamidomethyl (C) (apply to specified residues or termini only)

Variable modifications:

Q2 : Biotin:Thermo-21345 (Q)

Q3 : Biotin:Thermo-21345 (Q)

Ions Score: 26 Expect: 0.0073

Matches : 17/92 fragment ions using 28 most intense peaks [\(help\)](#)

| #  | b                  | b <sup>++</sup>   | b <sup>*</sup> | b <sup>*++</sup> | b <sup>0</sup>     | b <sup>0++</sup>  | Seq. | y                 | y <sup>++</sup>   | y <sup>*</sup>    | y <sup>*++</sup> | y <sup>0</sup> | y <sup>0++</sup> | #  |
|----|--------------------|-------------------|----------------|------------------|--------------------|-------------------|------|-------------------|-------------------|-------------------|------------------|----------------|------------------|----|
| 1  | 138.066188         | 69.536732         |                |                  |                    |                   | H    |                   |                   |                   |                  |                |                  | 10 |
| 2  | <b>577.291514</b>  | 289.149395        | 560.264965     | 280.636121       |                    |                   | Q    | 1633.916820       | <b>817.462048</b> | 1616.890271       | 808.948774       | 1615.906255    | 808.456766       | 9  |
| 3  | 1016.516840        | <b>508.762058</b> | 999.490291     | 500.248784       |                    |                   | Q    | 1194.691494       | 597.849385        | 1177.664945       | 589.336111       | 1176.680929    | 588.844103       | 8  |
| 4  | <b>1117.564519</b> | 559.285898        | 1100.537970    | 550.772623       | <b>1099.553954</b> | 550.280615        | T    | <b>755.466168</b> | 378.236722        | 738.439619        | 369.723448       | 737.455603     | 369.231440       | 7  |
| 5  | 1216.632933        | 608.820105        | 1199.606384    | 600.306830       | 1198.622368        | 599.814822        | V    | 654.418489        | 327.712883        | 637.391940        | 319.199608       | 636.407924     | 318.707600       | 6  |
| 6  | <b>1317.680612</b> | 659.343944        | 1300.654063    | 650.830670       | <b>1299.670047</b> | <b>650.338662</b> | T    | <b>555.350075</b> | 278.178676        | 538.323526        | 269.665401       | 537.339510     | 269.173393       | 5  |
| 7  | <b>1430.764676</b> | 715.885976        | 1413.738127    | 707.372702       | <b>1412.754111</b> | 706.880694        | I    | 454.302396        | 227.654836        | 437.275847        | 219.141561       |                |                  | 4  |
| 8  | 1527.817440        | 764.412358        | 1510.790891    | 755.899084       | 1509.806875        | <b>755.407076</b> | P    | <b>341.218332</b> | 171.112804        | 324.191783        | 162.599530       |                |                  | 3  |
| 9  | 1624.870204        | 812.938740        | 1607.843655    | 804.425466       | 1606.859639        | 803.933458        | P    | <b>244.165568</b> | 122.586422        | <b>227.139019</b> | 114.073148       |                |                  | 2  |
| 10 |                    |                   |                |                  |                    |                   | K    | <b>147.112804</b> | 74.060040         | 130.086255        | 65.546765        |                |                  | 1  |

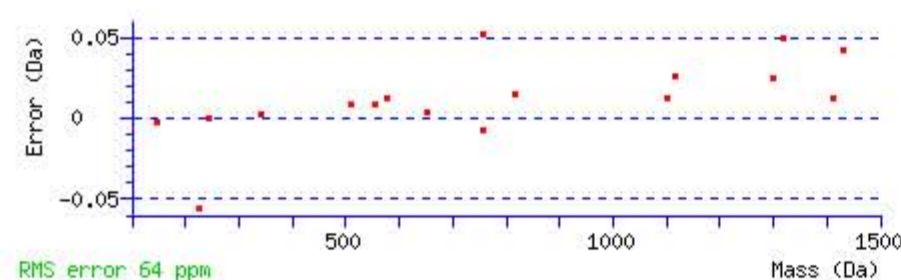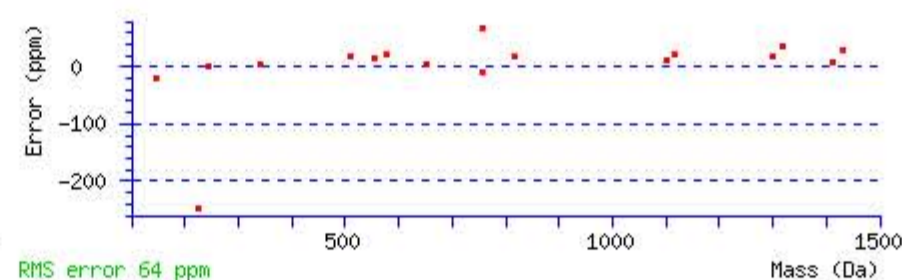

NCBI BLAST search of [HQQTVTIPPK](#)

(Parameters: blastp, nr protein database, expect=20000, no filter, PAM30)

Other BLAST [web gateways](#)

All matches to this query

| Score | Mr(calc):   | Delta     | Sequence                           |
|-------|-------------|-----------|------------------------------------|
| 25.7  | 1769.968460 | 0.022402  | <a href="#">HQQTVTIPPK</a>         |
| 2.8   | 1770.015167 | -0.024305 | <a href="#">AAAVDPTPAAPARKLPPK</a> |
| 0.9   | 1769.997437 | -0.006575 | <a href="#">AVPPRMPAVNLGQVPPK</a>  |

Mascot: <http://www.matrixscience.com/>



# MASCOT Search Results

## Peptide View

MS/MS Fragmentation of **QGGLSVVTMYHAK**

Found in **CO3\_HUMAN**, Complement C3 OS=Homo sapiens GN=C3 PE=1 SV=2

Match to Query 39584: 1817.938092 from(606.986640,3+) rtinseconds(1853) index(34201)

Title: Locus:1.1.1.3279.8 File:"2013-07-02 CLN FXIII 30 min 3rd F 3.wiff"

Data file C:\Program Files (x86)\Matrix Science\Mascot Daemon\mgf\3 FXIII 30 min 3rd\mascot\_daemon\_merge.mgf

Click mouse within plot area to zoom in by factor of two about that point

Or, Plot from  to  Da

Label all possible matches  Label matches used for scoring

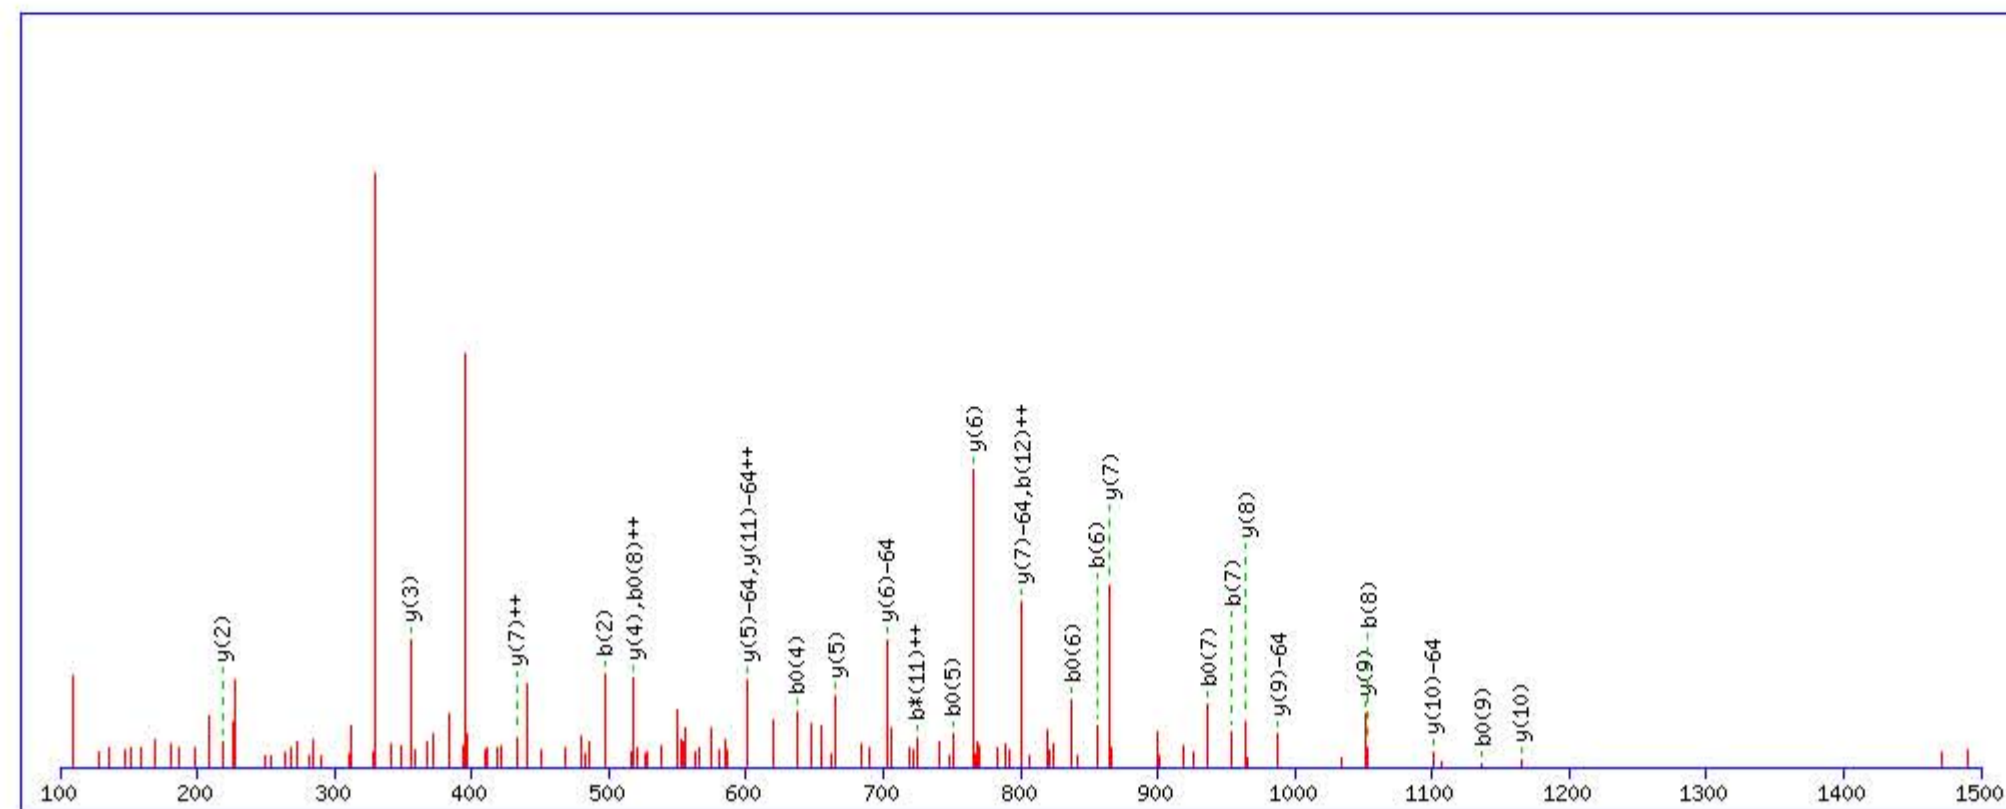

Monoisotopic mass of neutral peptide Mr(calc): 1817.916824

Fixed modifications: Carbamidomethyl (C) (apply to specified residues or termini only)

Variable modifications:

Q2 : Biotin:Thermo-21345 (Q)

M10 : Oxidation (M), with neutral losses 0.000000 (shown in table), 63.998285

Ions Score: 48 Expect: 0.00045

Matches : 28/214 fragment ions using 44 most intense peaks [\(help\)](#)

| #  | b                  | b <sup>++</sup>   | b <sup>*</sup> | b <sup>+++</sup>  | b <sup>0</sup>     | b <sup>0++</sup>  | Seq. | y                  | y <sup>++</sup>   | y <sup>*</sup> | y <sup>+++</sup> | y <sup>0</sup> | y <sup>0++</sup> | #  |
|----|--------------------|-------------------|----------------|-------------------|--------------------|-------------------|------|--------------------|-------------------|----------------|------------------|----------------|------------------|----|
| 1  | 58.028740          | 29.518008         |                |                   |                    |                   | G    |                    |                   |                |                  |                |                  | 14 |
| 2  | <b>497.254066</b>  | 249.130671        | 480.227517     | 240.617397        |                    |                   | Q    | 1761.902627        | 881.454952        | 1744.876078    | 872.941677       | 1743.892062    | 872.449669       | 13 |
| 3  | 554.275530         | 277.641403        | 537.248981     | 269.128129        |                    |                   | G    | 1322.677301        | 661.842289        | 1305.650752    | 653.329014       | 1304.666736    | 652.837006       | 12 |
| 4  | 655.323209         | 328.165243        | 638.296660     | 319.651968        | <b>637.312644</b>  | 319.159960        | T    | 1265.655837        | 633.331557        | 1248.629288    | 624.818282       | 1247.645272    | 624.326274       | 11 |
| 5  | 768.407273         | 384.707275        | 751.380724     | 376.194000        | <b>750.396708</b>  | 375.701992        | L    | <b>1164.608158</b> | 582.807717        | 1147.581609    | 574.294443       | 1146.597593    | 573.802435       | 10 |
| 6  | <b>855.439301</b>  | 428.223289        | 838.412752     | 419.710014        | <b>837.428736</b>  | 419.218006        | S    | <b>1051.524094</b> | 526.265685        | 1034.497545    | 517.752411       | 1033.513529    | 517.260403       | 9  |
| 7  | <b>954.507715</b>  | 477.757496        | 937.481166     | 469.244221        | <b>936.497150</b>  | 468.752213        | V    | <b>964.492066</b>  | 482.749671        | 947.465517     | 474.236397       | 946.481501     | 473.744389       | 8  |
| 8  | <b>1053.576129</b> | 527.291703        | 1036.549580    | 518.778428        | 1035.565564        | <b>518.286420</b> | V    | <b>865.423652</b>  | <b>433.215464</b> | 848.397103     | 424.702190       | 847.413087     | 424.210182       | 7  |
| 9  | 1154.623808        | 577.815542        | 1137.597259    | 569.302268        | <b>1136.613243</b> | 568.810260        | T    | <b>766.355238</b>  | 383.681257        | 749.328689     | 375.167983       | 748.344673     | 374.675975       | 6  |
| 10 | 1301.659208        | 651.333242        | 1284.632659    | 642.819968        | 1283.648643        | 642.327960        | M    | <b>665.307559</b>  | 333.157418        | 648.281010     | 324.644143       |                |                  | 5  |
| 11 | 1464.722537        | 732.864907        | 1447.695988    | <b>724.351632</b> | 1446.711972        | 723.859624        | Y    | <b>518.272159</b>  | 259.639718        | 501.245610     | 251.126443       |                |                  | 4  |
| 12 | 1601.781449        | <b>801.394363</b> | 1584.754900    | 792.881088        | 1583.770884        | 792.389080        | H    | <b>355.208830</b>  | 178.108053        | 338.182281     | 169.594778       |                |                  | 3  |
| 13 | 1672.818563        | 836.912920        | 1655.792014    | 828.399645        | 1654.807998        | 827.907637        | A    | <b>218.149918</b>  | 109.578597        | 201.123369     | 101.065322       |                |                  | 2  |
| 14 |                    |                   |                |                   |                    |                   | K    | 147.112804         | 74.060040         | 130.086255     | 65.546765        |                |                  | 1  |

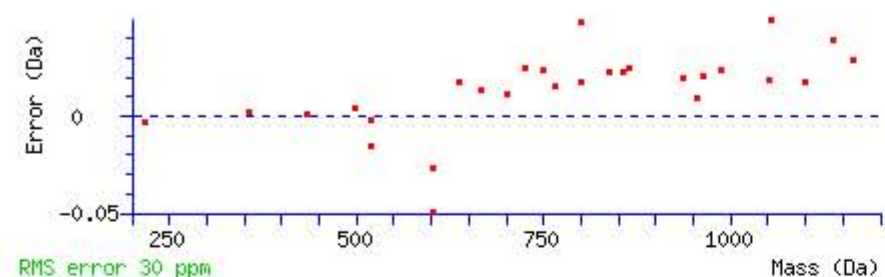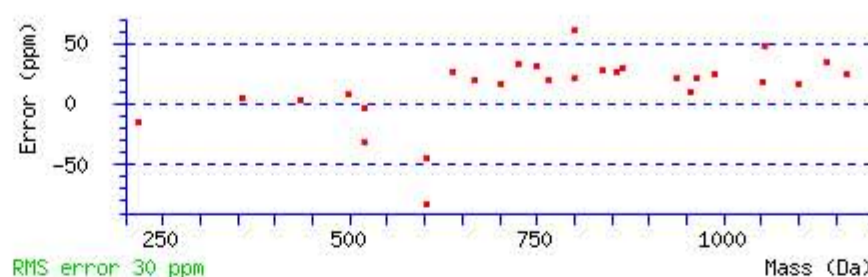

NCBI BLAST search of [QGGLSVVTMYHAK](#)

(Parameters: blastp, nr protein database, expect=20000, no filter, PAM30)

Other BLAST [web gateways](#)

All matches to this query

| Score | Mr(calc):   | Delta    | Sequence                      |
|-------|-------------|----------|-------------------------------|
| 47.9  | 1817.916824 | 0.021268 | <a href="#">QGGLSVVTMYHAK</a> |

Mascot: <http://www.matrixscience.com/>



# MASCOT SEARCH RESULTS

## Peptide View

MS/MS Fragmentation of **SGSDEVQVGQQR**

Found in **CO3\_HUMAN**, Complement C3 OS=Homo sapiens GN=C3 PE=1 SV=2

Match to Query 41222: 1910.958522 from(637.993450,3+) rtinseconds(1931) index(34628)

Title: Locus:1.1.1.3306.15 File:"2013-07-02 CLN FXIII 30 min 3rd F 3.wiff"

Data file C:\Program Files (x86)\Matrix Science\Mascot Daemon\mgf3 FXIII 30 min 3rd\mascot\_daemon\_merge.mgf

Click mouse within plot area to zoom in by factor of two about that point

Or, Plot from  to  Da

Label all possible matches  Label matches used for scoring

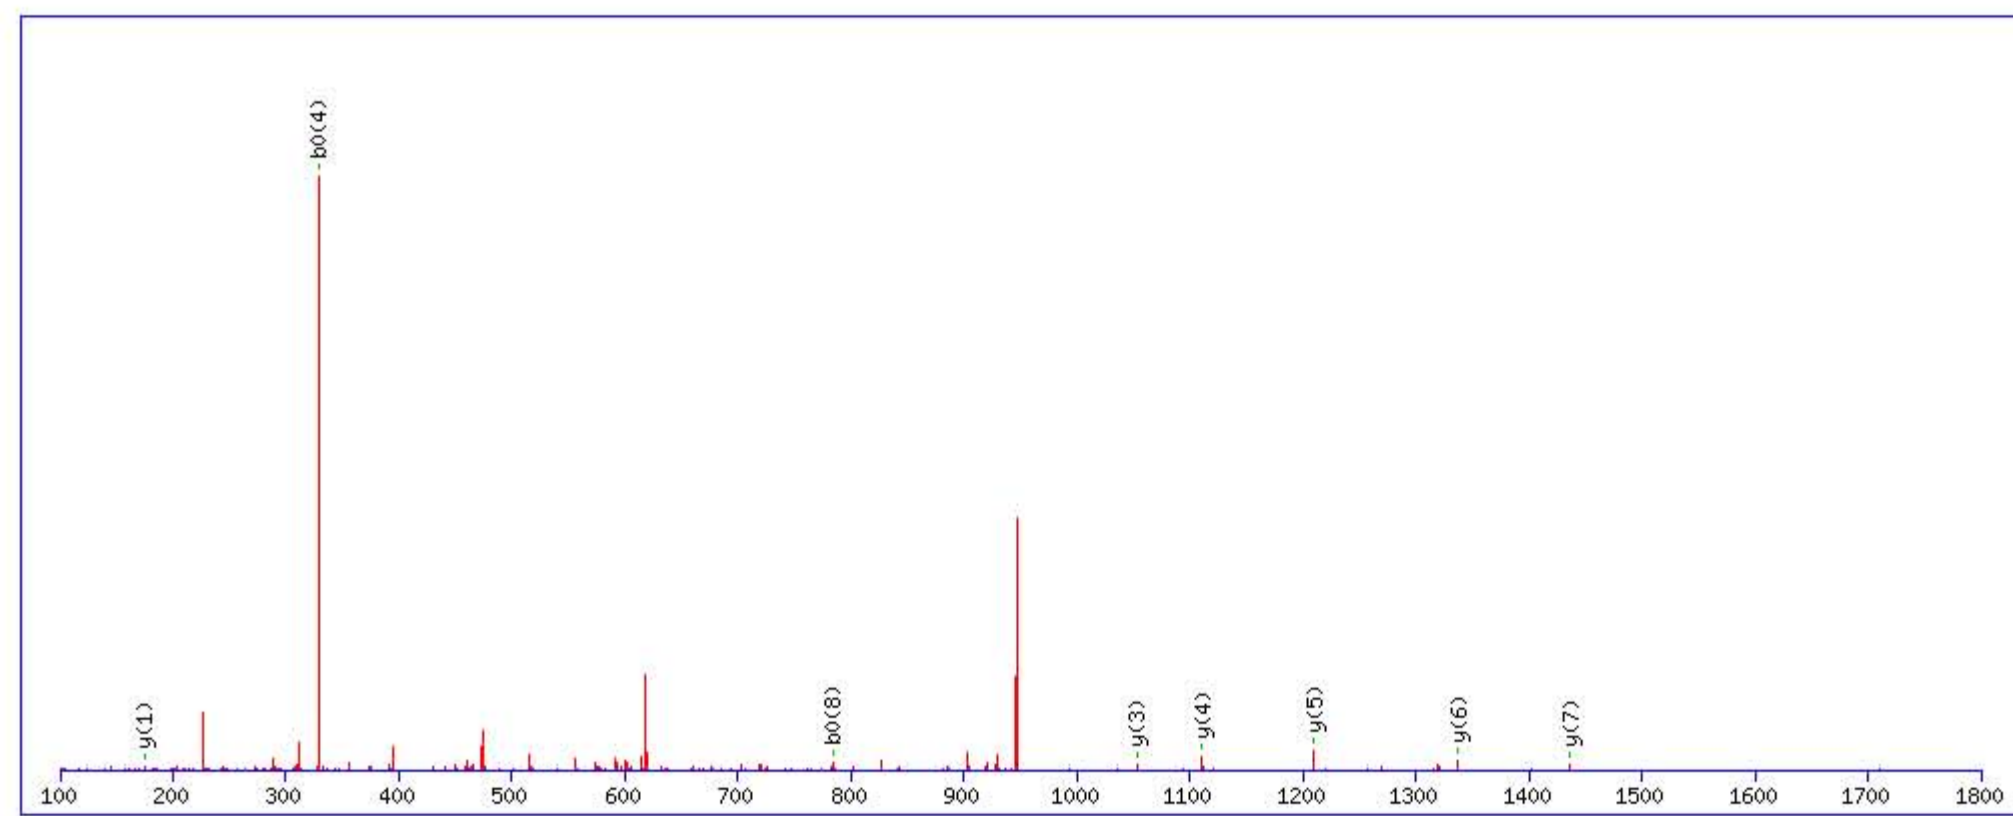

Monoisotopic mass of neutral peptide Mr(calc): 1910.934265

Fixed modifications: Carbamidomethyl (C) (apply to specified residues or termini only)

Variable modifications:

Q10 : Biotin:Thermo-21345 (Q)

Q11 : Biotin:Thermo-21345 (Q)

Ions Score: 26 Expect: 0.0063

Matches : 8/106 fragment ions using 15 most intense peaks [\(help\)](#)

| #  | b           | b <sup>++</sup> | b <sup>*</sup> | b <sup>*++</sup> | b <sup>0</sup> | b <sup>0++</sup> | Seq. | y           | y <sup>++</sup> | y <sup>*</sup> | y <sup>*++</sup> | y <sup>0</sup> | y <sup>0++</sup> | #  |
|----|-------------|-----------------|----------------|------------------|----------------|------------------|------|-------------|-----------------|----------------|------------------|----------------|------------------|----|
| 1  | 88.039304   | 44.523290       |                |                  | 70.028739      | 35.518008        | S    |             |                 |                |                  |                |                  | 12 |
| 2  | 145.060768  | 73.034022       |                |                  | 127.050203     | 64.028740        | G    | 1824.909502 | 912.958389      | 1807.882953    | 904.445115       | 1806.898937    | 903.953107       | 11 |
| 3  | 232.092796  | 116.550036      |                |                  | 214.082231     | 107.544753       | S    | 1767.888038 | 884.447657      | 1750.861489    | 875.934383       | 1749.877473    | 875.442375       | 10 |
| 4  | 347.119739  | 174.063507      |                |                  | 329.109174     | 165.058225       | D    | 1680.856010 | 840.931643      | 1663.829461    | 832.418369       | 1662.845445    | 831.926361       | 9  |
| 5  | 476.162332  | 238.584804      |                |                  | 458.151767     | 229.579522       | E    | 1565.829067 | 783.418172      | 1548.802518    | 774.904897       | 1547.818502    | 774.412889       | 8  |
| 6  | 575.230746  | 288.119011      |                |                  | 557.220181     | 279.113729       | V    | 1436.786474 | 718.896875      | 1419.759925    | 710.383601       |                |                  | 7  |
| 7  | 703.289324  | 352.148300      | 686.262775     | 343.635026       | 685.278759     | 343.143018       | Q    | 1337.718060 | 669.362668      | 1320.691511    | 660.849394       |                |                  | 6  |
| 8  | 802.357738  | 401.682507      | 785.331189     | 393.169233       | 784.347173     | 392.677225       | V    | 1209.659482 | 605.333379      | 1192.632933    | 596.820105       |                |                  | 5  |
| 9  | 859.379202  | 430.193239      | 842.352653     | 421.679965       | 841.368637     | 421.187957       | G    | 1110.591068 | 555.799172      | 1093.564519    | 547.285898       |                |                  | 4  |
| 10 | 1298.604528 | 649.805902      | 1281.577979    | 641.292628       | 1280.593963    | 640.800620       | Q    | 1053.569604 | 527.288440      | 1036.543055    | 518.775166       |                |                  | 3  |
| 11 | 1737.829854 | 869.418565      | 1720.803305    | 860.905291       | 1719.819289    | 860.413283       | Q    | 614.344278  | 307.675777      | 597.317729     | 299.162503       |                |                  | 2  |
| 12 |             |                 |                |                  |                |                  | R    | 175.118952  | 88.063114       | 158.092403     | 79.549839        |                |                  | 1  |

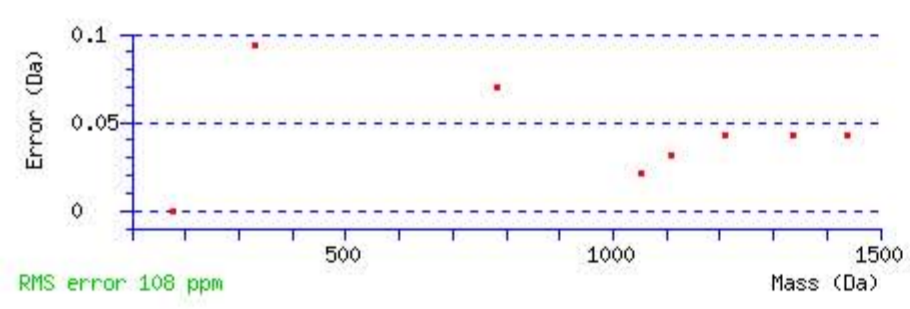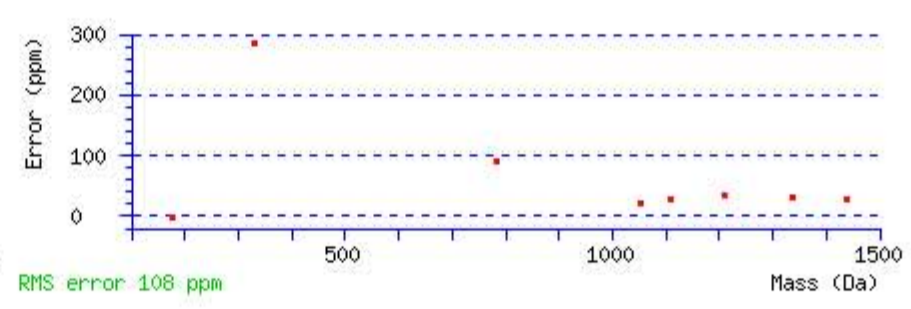

NCBI BLAST search of [SGSDEVQVGQQR](#)

(Parameters: blastp, nr protein database, expect=20000, no filter, PAM30)

Other BLAST [web gateways](#)

All matches to this query

| Score | Mr(calc):   | Delta     | Sequence                        |
|-------|-------------|-----------|---------------------------------|
| 26.2  | 1910.934265 | 0.024257  | <a href="#">SGSDEVQVGQQR</a>    |
| 2.7   | 1910.960709 | -0.002187 | <a href="#">VGAPAWREAAQAMAR</a> |



# MASCOT SCIENCE Mascot Search Results

## Peptide View

MS/MS Fragmentation of **SGIPIVTSPYQIHFTK**

Found in **CO3\_HUMAN**, Complement C3 OS=Homo sapiens GN=C3 PE=1 SV=2

Match to Query 45513: 2098.151742 from(700.391190,3+) rtinseconds(2355) index(37150)

Title: Locus:1.1.1.3454.14 File:"2013-07-02 CLN FXIII 30 min 3rd F 3.wiff"

Data file C:\Program Files (x86)\Matrix Science\Mascot Daemon\mgf3 FXIII 30 min 3rd\mascot\_daemon\_merge.mgf

Click mouse within plot area to zoom in by factor of two about that point

Or, Plot from  to  Da

Label all possible matches  Label matches used for scoring

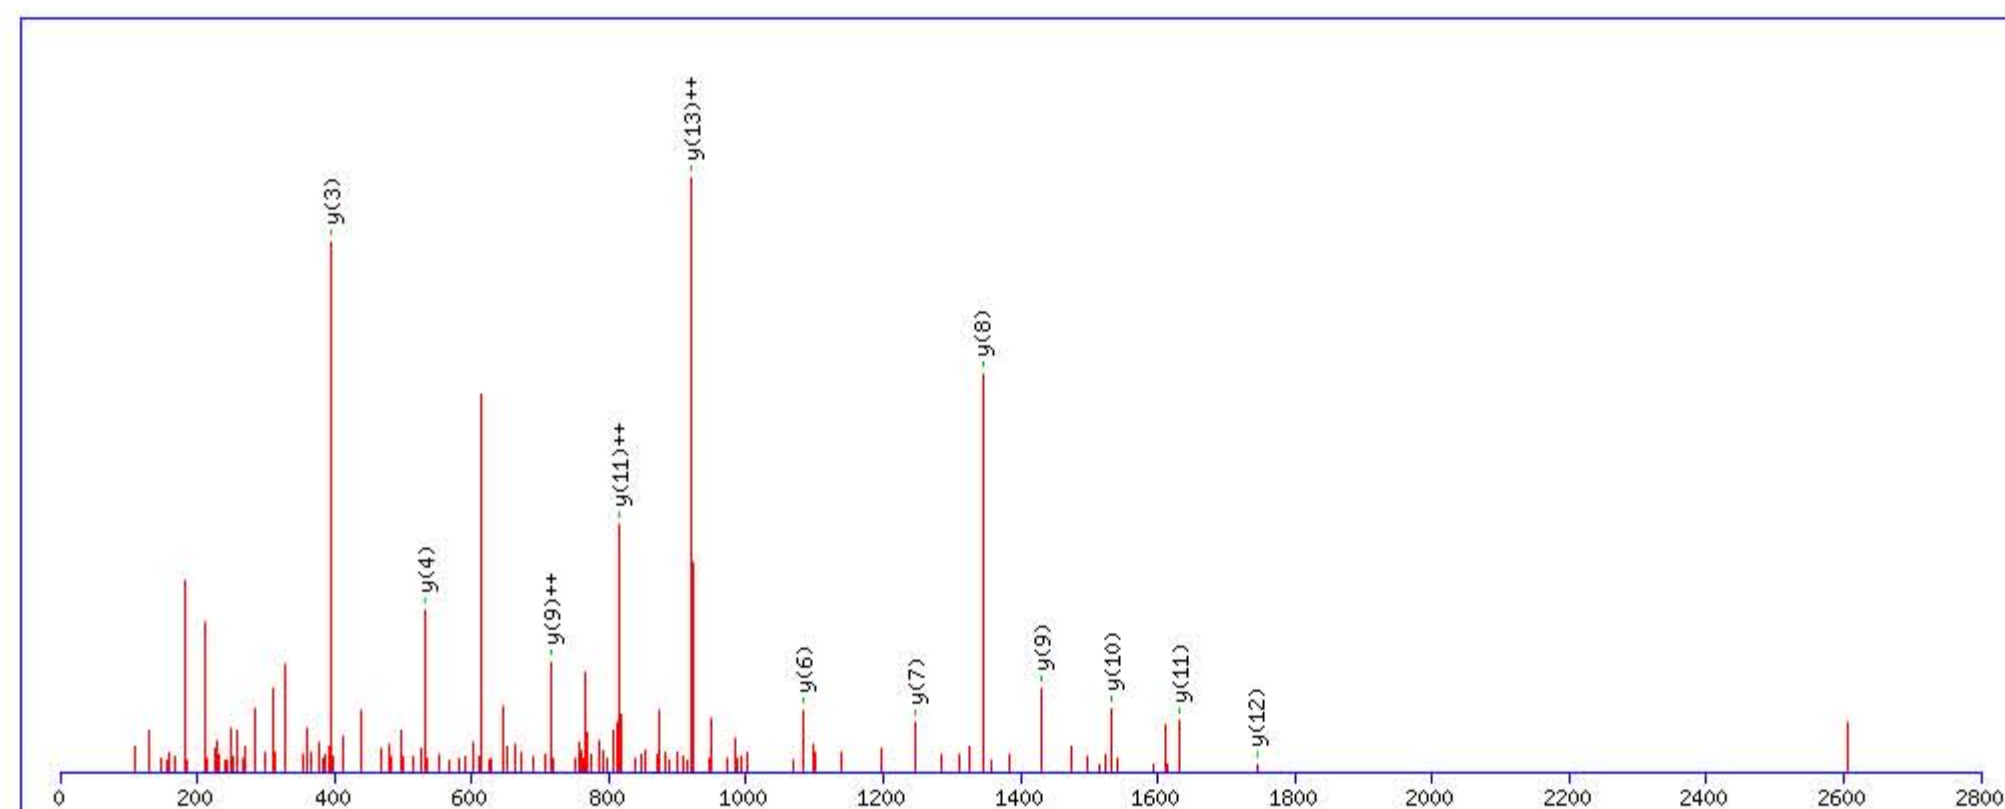

Monoisotopic mass of neutral peptide Mr(calc): 2098.128525

Fixed modifications: Carbamidomethyl (C) (apply to specified residues or termini only)

Variable modifications:

Q11 : Biotin:Thermo-21345 (Q)

Ions Score: 67 Expect: 3.2e-006

Matches : 12/158 fragment ions using 17 most intense peaks [\(help\)](#)

| #  | b           | b <sup>++</sup> | b <sup>+</sup> | b <sup>+++</sup> | b <sup>0</sup> | b <sup>0++</sup> | Seq. | y           | y <sup>++</sup> | y <sup>+</sup> | y <sup>+++</sup> | y <sup>0</sup> | y <sup>0++</sup> | #  |
|----|-------------|-----------------|----------------|------------------|----------------|------------------|------|-------------|-----------------|----------------|------------------|----------------|------------------|----|
| 1  | 88.039304   | 44.523290       |                |                  | 70.028739      | 35.518008        | S    |             |                 |                |                  |                |                  | 16 |
| 2  | 145.060768  | 73.034022       |                |                  | 127.050203     | 64.028740        | G    | 2012.103769 | 1006.555523     | 1995.077220    | 998.042248       | 1994.093204    | 997.550240       | 15 |
| 3  | 258.144832  | 129.576054      |                |                  | 240.134267     | 120.570772       | I    | 1955.082305 | 978.044791      | 1938.055756    | 969.531516       | 1937.071740    | 969.039508       | 14 |
| 4  | 355.197596  | 178.102436      |                |                  | 337.187031     | 169.097154       | P    | 1841.998241 | 921.502759      | 1824.971692    | 912.989484       | 1823.987676    | 912.497476       | 13 |
| 5  | 468.281660  | 234.644468      |                |                  | 450.271095     | 225.639186       | I    | 1744.945477 | 872.976377      | 1727.918928    | 864.463102       | 1726.934912    | 863.971094       | 12 |
| 6  | 567.350074  | 284.178675      |                |                  | 549.339509     | 275.173393       | V    | 1631.861413 | 816.434345      | 1614.834864    | 807.921070       | 1613.850848    | 807.429062       | 11 |
| 7  | 668.397753  | 334.702515      |                |                  | 650.387188     | 325.697232       | T    | 1532.792999 | 766.900138      | 1515.766450    | 758.386863       | 1514.782434    | 757.894855       | 10 |
| 8  | 755.429781  | 378.218529      |                |                  | 737.419216     | 369.213246       | S    | 1431.745320 | 716.376298      | 1414.718771    | 707.863024       | 1413.734755    | 707.371016       | 9  |
| 9  | 852.482545  | 426.744911      |                |                  | 834.471980     | 417.739628       | P    | 1344.713292 | 672.860284      | 1327.686743    | 664.347010       | 1326.702727    | 663.855002       | 8  |
| 10 | 1015.545874 | 508.276575      |                |                  | 997.535309     | 499.271293       | Y    | 1247.660528 | 624.333902      | 1230.633979    | 615.820628       | 1229.649963    | 615.328620       | 7  |
| 11 | 1454.771200 | 727.889238      | 1437.744651    | 719.375964       | 1436.760635    | 718.883956       | Q    | 1084.597199 | 542.802238      | 1067.570650    | 534.288963       | 1066.586634    | 533.796955       | 6  |
| 12 | 1567.855264 | 784.431270      | 1550.828715    | 775.917996       | 1549.844699    | 775.425988       | I    | 645.371873  | 323.189574      | 628.345324     | 314.676300       | 627.361308     | 314.184292       | 5  |
| 13 | 1704.914176 | 852.960726      | 1687.887627    | 844.447452       | 1686.903611    | 843.955444       | H    | 532.287809  | 266.647542      | 515.261260     | 258.134268       | 514.277244     | 257.642260       | 4  |
| 14 | 1851.982590 | 926.494933      | 1834.956041    | 917.981659       | 1833.972025    | 917.489651       | F    | 395.228897  | 198.118086      | 378.202348     | 189.604812       | 377.218332     | 189.112804       | 3  |
| 15 | 1953.030269 | 977.018773      | 1936.003720    | 968.505498       | 1935.019704    | 968.013490       | T    | 248.160483  | 124.583879      | 231.133934     | 116.070605       | 230.149918     | 115.578597       | 2  |
| 16 |             |                 |                |                  |                |                  | K    | 147.112804  | 74.060040       | 130.086255     | 65.546765        |                |                  | 1  |

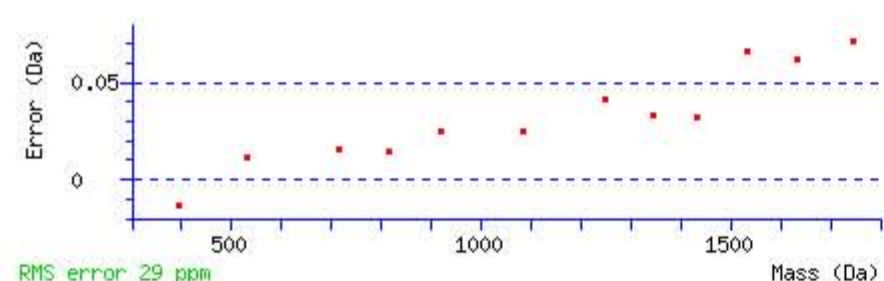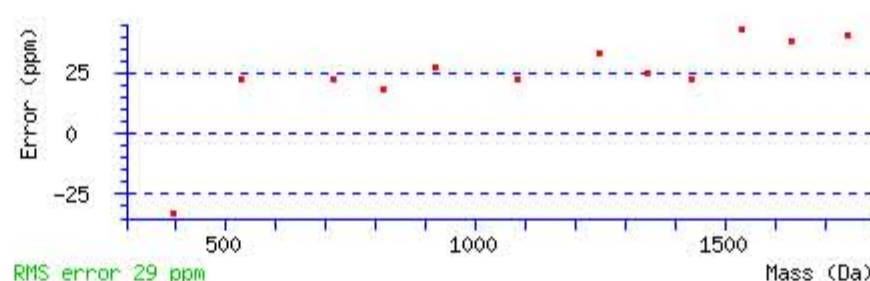

NCBI BLAST search of [SGIPIVTSPYQIHFTK](#)

(Parameters: blastp, nr protein database, expect=20000, no filter, PAM30)

Other BLAST [web gateways](#)

All matches to this query

| Score | Mr(calc):   | Delta    | Sequence                         |
|-------|-------------|----------|----------------------------------|
| 67.0  | 2098.128525 | 0.023217 | <a href="#">SGIPIVTSPYQIHFTK</a> |

Mascot: <http://www.matrixscience.com/>



# MASCOT SEARCH RESULTS

## Peptide View

MS/MS Fragmentation of **LSINTHPSQKPLSITVR**

Found in **CO3\_HUMAN**, Complement C3 OS=Homo sapiens GN=C3 PE=1 SV=2

Match to Query 47182: 2201.230696 from(551.314950,4+) rtinseconds(1911) index(50439)

Title: Locus:1.1.1.3309.15 File:"2013-07-02 CLN FXIII 30 min 3rd F 4.wiff"

Data file C:\Program Files (x86)\Matrix Science\Mascot Daemon\mgf3 FXIII 30 min 3rd\mascot\_daemon\_merge.mgf

Click mouse within plot area to zoom in by factor of two about that point

Or, Plot from  to  Da

Label all possible matches  Label matches used for scoring

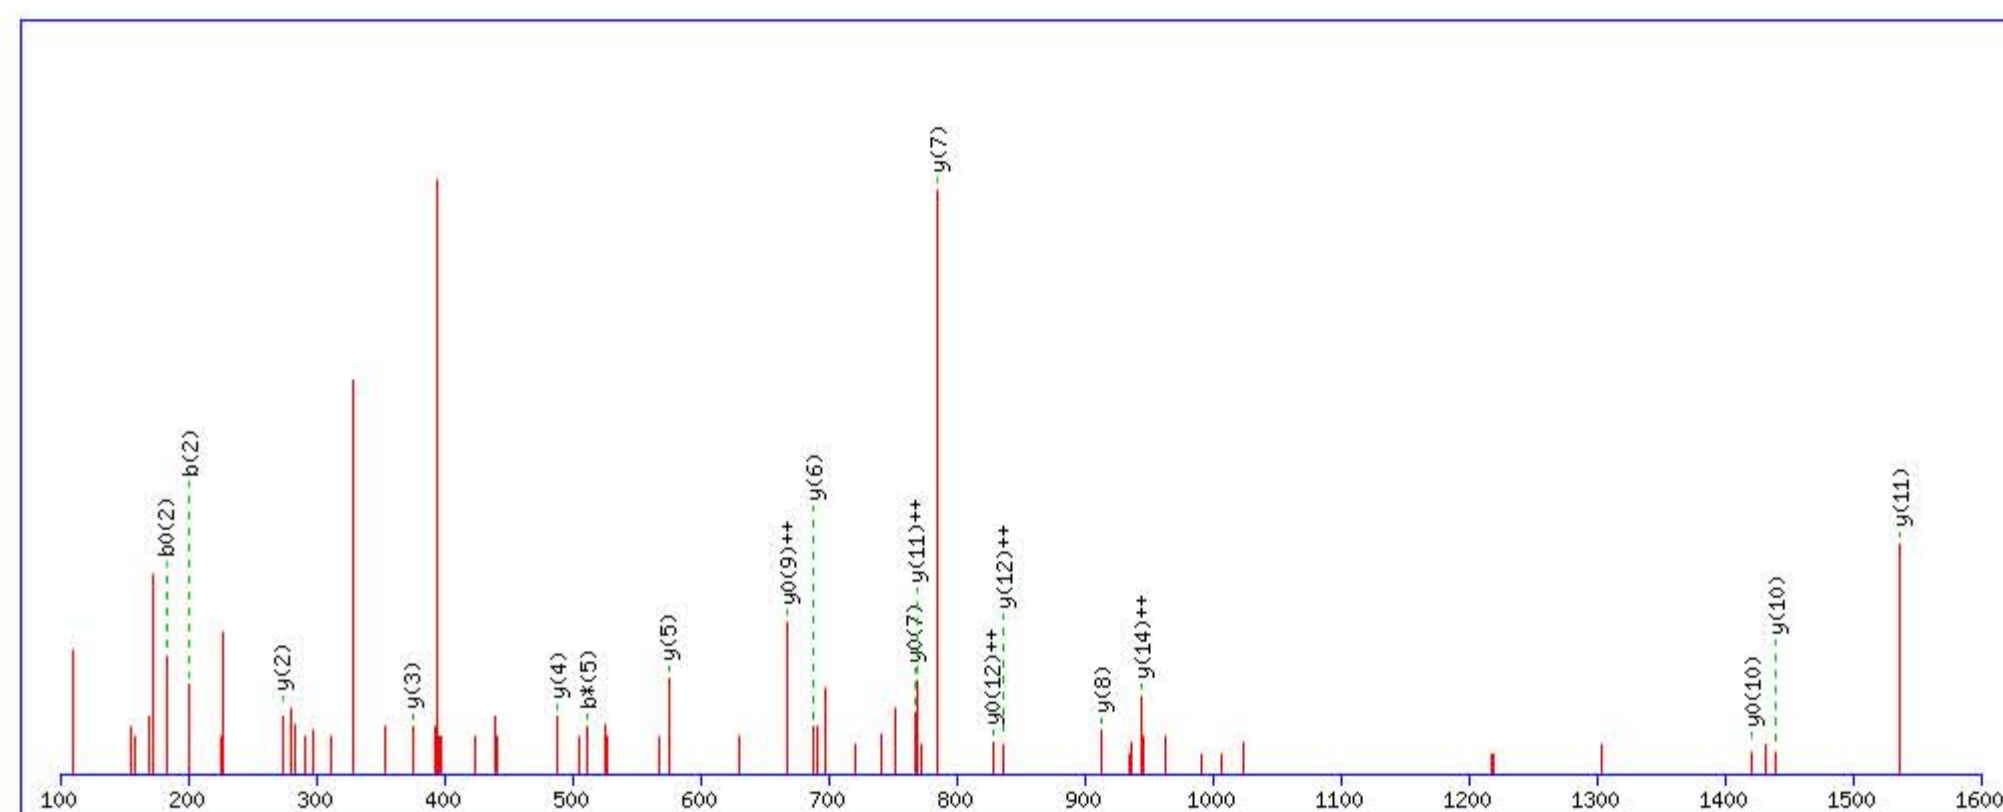

Monoisotopic mass of neutral peptide  $M_r(\text{calc})$ : 2201.235428

Fixed modifications: Carbamidomethyl (C) (apply to specified residues or termini only)

Variable modifications:

Q9 : Biotin:Thermo-21345 (Q)

Ions Score: 34 Expect: 0.0033

Matches : 19/180 fragment ions using 42 most intense peaks [\(help\)](#)

| #  | b                 | b <sup>++</sup> | b <sup>*</sup>    | b <sup>+++</sup> | b <sup>0</sup>    | b <sup>0++</sup> | Seq. | y                  | y <sup>++</sup>   | y <sup>*</sup> | y <sup>+++</sup> | y <sup>0</sup>     | y <sup>0++</sup>  | #  |
|----|-------------------|-----------------|-------------------|------------------|-------------------|------------------|------|--------------------|-------------------|----------------|------------------|--------------------|-------------------|----|
| 1  | 114.091340        | 57.549308       |                   |                  |                   |                  | L    |                    |                   |                |                  |                    |                   | 17 |
| 2  | <b>201.123368</b> | 101.065322      |                   |                  | <b>183.112803</b> | 92.060039        | S    | 2089.158656        | 1045.082966       | 2072.132107    | 1036.569691      | 2071.148091        | 1036.077683       | 16 |
| 3  | 314.207432        | 157.607354      |                   |                  | 296.196867        | 148.602071       | I    | 2002.126628        | 1001.566952       | 1985.100079    | 993.053678       | 1984.116063        | 992.561669        | 15 |
| 4  | 428.250359        | 214.628818      | 411.223810        | 206.115543       | 410.239794        | 205.623535       | N    | 1889.042564        | <b>945.024920</b> | 1872.016015    | 936.511646       | 1871.031999        | 936.019638        | 14 |
| 5  | 529.298038        | 265.152657      | <b>512.271489</b> | 256.639383       | 511.287473        | 256.147375       | T    | 1774.999637        | 888.003456        | 1757.973088    | 879.490182       | 1756.989072        | 878.998174        | 13 |
| 6  | 666.356950        | 333.682113      | 649.330401        | 325.168838       | 648.346385        | 324.676830       | H    | 1673.951958        | <b>837.479617</b> | 1656.925409    | 828.966343       | 1655.941393        | <b>828.474334</b> | 12 |
| 7  | 763.409714        | 382.208495      | 746.383165        | 373.695221       | 745.399149        | 373.203213       | P    | <b>1536.893046</b> | <b>768.950161</b> | 1519.866497    | 760.436887       | 1518.882481        | 759.944878        | 11 |
| 8  | 850.441742        | 425.724509      | 833.415193        | 417.211234       | 832.431177        | 416.719226       | S    | <b>1439.840282</b> | 720.423779        | 1422.813733    | 711.910505       | <b>1421.829717</b> | 711.418496        | 10 |
| 9  | 1289.667068       | 645.337172      | 1272.640519       | 636.823898       | 1271.656503       | 636.331889       | Q    | 1352.808254        | 676.907765        | 1335.781705    | 668.394491       | 1334.797689        | <b>667.902483</b> | 9  |
| 10 | 1417.762031       | 709.384654      | 1400.735482       | 700.871379       | 1399.751466       | 700.379371       | K    | <b>913.582928</b>  | 457.295102        | 896.556379     | 448.781828       | 895.572363         | 448.289820        | 8  |
| 11 | 1514.814795       | 757.911036      | 1497.788246       | 749.397761       | 1496.804230       | 748.905753       | P    | <b>785.487965</b>  | 393.247621        | 768.461416     | 384.734346       | <b>767.477400</b>  | 384.242338        | 7  |
| 12 | 1627.898859       | 814.453067      | 1610.872310       | 805.939793       | 1609.888294       | 805.447785       | L    | <b>688.435201</b>  | 344.721239        | 671.408652     | 336.207964       | 670.424636         | 335.715956        | 6  |
| 13 | 1714.930887       | 857.969082      | 1697.904338       | 849.455807       | 1696.920322       | 848.963799       | S    | <b>575.351137</b>  | 288.179207        | 558.324588     | 279.665932       | 557.340572         | 279.173924        | 5  |
| 14 | 1828.014951       | 914.511113      | 1810.988402       | 905.997839       | 1810.004386       | 905.505831       | I    | <b>488.319109</b>  | 244.663192        | 471.292560     | 236.149918       | 470.308544         | 235.657910        | 4  |
| 15 | 1929.062630       | 965.034953      | 1912.036081       | 956.521679       | 1911.052065       | 956.029670       | T    | <b>375.235045</b>  | 188.121161        | 358.208496     | 179.607886       | 357.224480         | 179.115878        | 3  |
| 16 | 2028.131044       | 1014.569160     | 2011.104495       | 1006.055886      | 2010.120479       | 1005.563878      | V    | <b>274.187366</b>  | 137.597321        | 257.160817     | 129.084047       |                    |                   | 2  |
| 17 |                   |                 |                   |                  |                   |                  | R    | 175.118952         | 88.063114         | 158.092403     | 79.549839        |                    |                   | 1  |

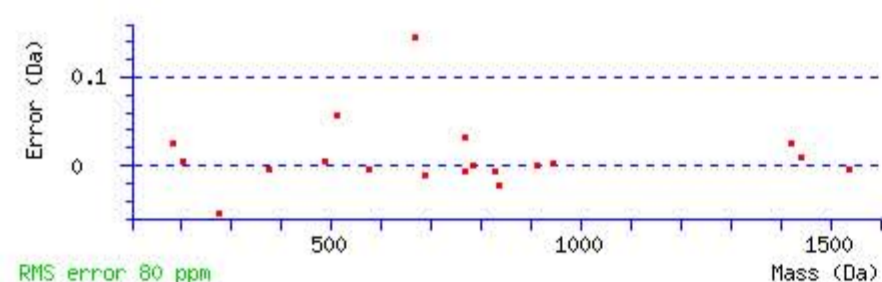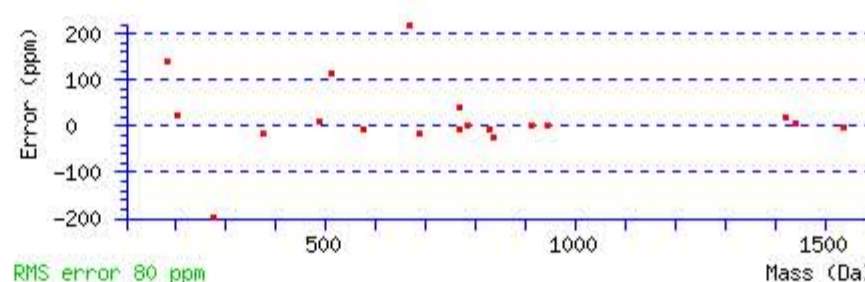

NCBI BLAST search of [LSINTHPSQKPLSITVR](#)

(Parameters: blastp, nr protein database, expect=20000, no filter, PAM30)

Other BLAST [web gateways](#)

All matches to this query

| Score | $M_r(\text{calc})$ : | Delta     | Sequence                          |
|-------|----------------------|-----------|-----------------------------------|
| 34.4  | 2201.235428          | -0.004732 | <a href="#">LSINTHPSQKPLSITVR</a> |

Mascot: <http://www.matrixscience.com/>



# Mascot Search Results

## Peptide View

MS/MS Fragmentation of **DAPDHQELNLDVSLQLPSR**

Found in **CO3\_HUMAN**, Complement C3 OS=Homo sapiens GN=C3 PE=1 SV=2

Match to Query 51140: 2457.262812 from(820.094880,3+) rtinseconds(2517) index(38010)

Title: Locus:1.1.1.3510.18 File:"2013-07-02 CLN FXIII 30 min 3rd F 3.wiff"

Data file C:\Program Files (x86)\Matrix Science\Mascot Daemon\mgf3 FXIII 30 min 3rd\mascot\_daemon\_merge.mgf

Click mouse within plot area to zoom in by factor of two about that point

Or, Plot from  to  Da

Label all possible matches  Label matches used for scoring

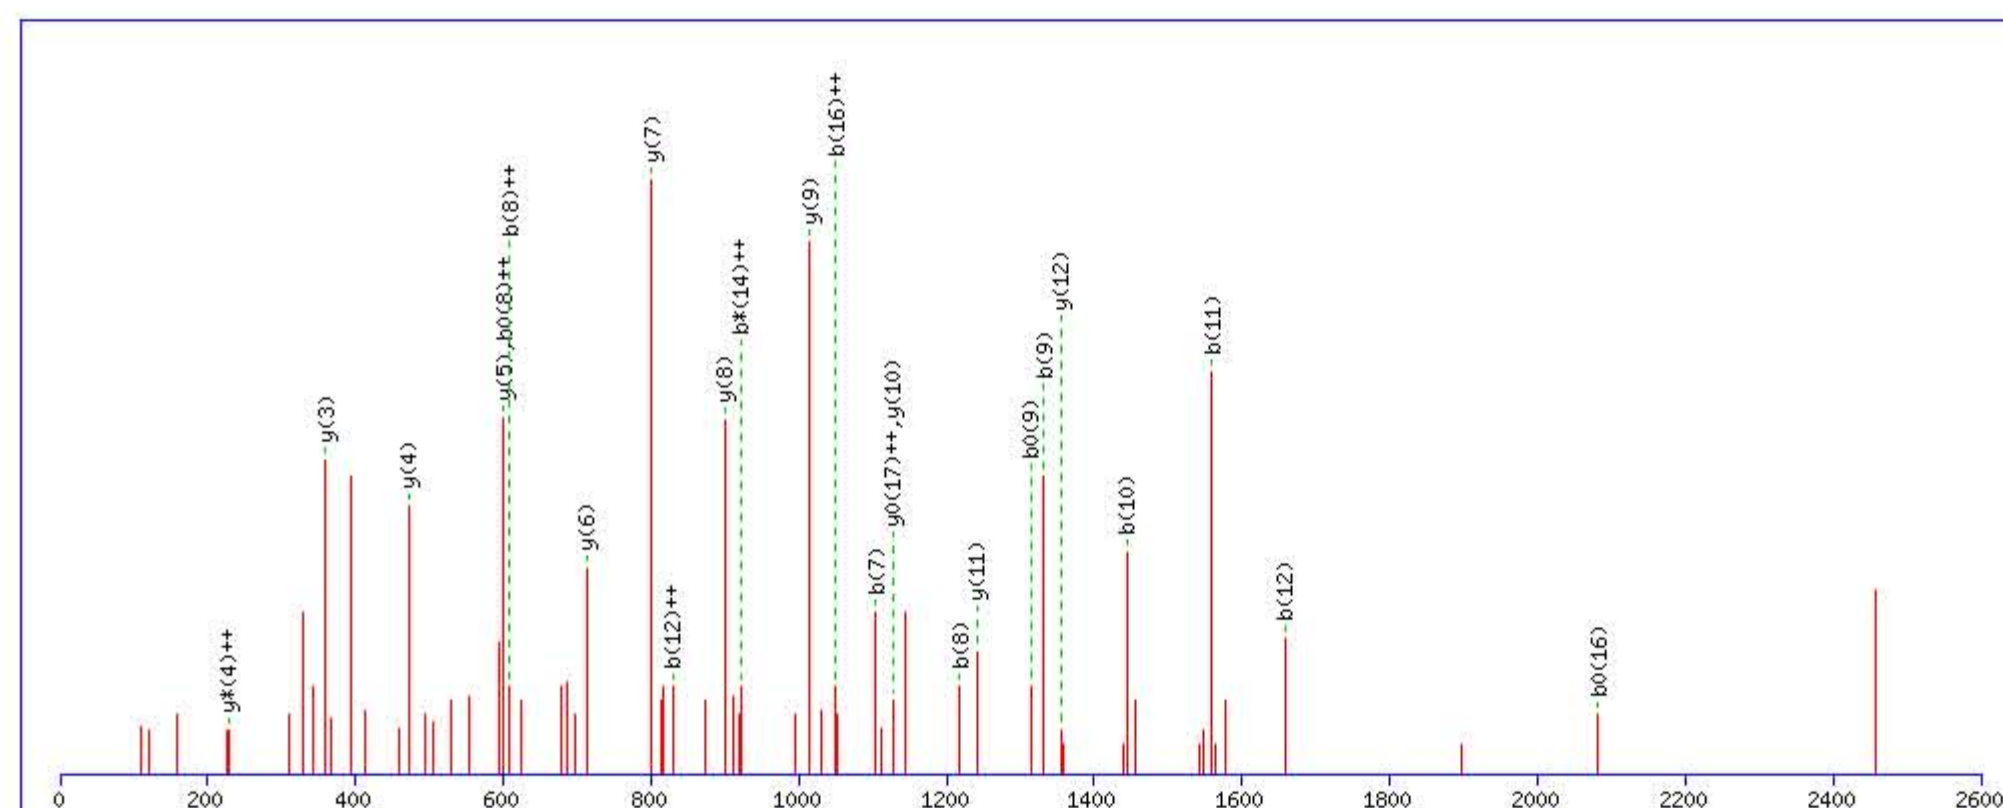

Monoisotopic mass of neutral peptide Mr(calc): 2457.232193

Fixed modifications: Carbamidomethyl (C) (apply to specified residues or termini only)

Variable modifications:

Q6 : Biotin:Thermo-21345 (Q)

Ions Score: 49 Expect: 0.00032

Matches : 25/204 fragment ions using 45 most intense peaks [\(help\)](#)

| #  | b                  | b <sup>++</sup>    | b <sup>*</sup> | b <sup>*++</sup>  | b <sup>0</sup>     | b <sup>0++</sup>  | Seq. | y                  | y <sup>++</sup> | y <sup>*</sup> | y <sup>*++</sup>  | y <sup>0</sup> | y <sup>0++</sup> | #  |
|----|--------------------|--------------------|----------------|-------------------|--------------------|-------------------|------|--------------------|-----------------|----------------|-------------------|----------------|------------------|----|
| 1  | 116.034219         | 58.520748          |                |                   | 98.023654          | 49.515465         | D    |                    |                 |                |                   |                |                  | 19 |
| 2  | 187.071333         | 94.039304          |                |                   | 169.060768         | 85.034022         | A    | 2343.212542        | 1172.109909     | 2326.185993    | 1163.596634       | 2325.201977    | 1163.104626      | 18 |
| 3  | 284.124097         | 142.565686         |                |                   | 266.113532         | 133.560404        | P    | 2272.175428        | 1136.591352     | 2255.148879    | 1128.078077       | 2254.164863    | 1127.586069      | 17 |
| 4  | 399.151040         | 200.079158         |                |                   | 381.140475         | 191.073875        | D    | 2175.122664        | 1088.064970     | 2158.096115    | 1079.551695       | 2157.112099    | 1079.059687      | 16 |
| 5  | 536.209952         | 268.608614         |                |                   | 518.199387         | 259.603332        | H    | 2060.095721        | 1030.551498     | 2043.069172    | 1022.038224       | 2042.085156    | 1021.546216      | 15 |
| 6  | 975.435278         | 488.221277         | 958.408729     | 479.708003        | 957.424713         | 479.215995        | Q    | 1923.036809        | 962.022043      | 1906.010260    | 953.508768        | 1905.026244    | 953.016760       | 14 |
| 7  | <b>1104.477871</b> | 552.742574         | 1087.451322    | 544.229299        | 1086.467306        | 543.737291        | E    | 1483.811483        | 742.409380      | 1466.784934    | 733.896105        | 1465.800918    | 733.404097       | 13 |
| 8  | <b>1217.561935</b> | <b>609.284606</b>  | 1200.535386    | 600.771331        | 1199.551370        | <b>600.279323</b> | L    | <b>1354.768890</b> | 677.888083      | 1337.742341    | 669.374809        | 1336.758325    | 668.882801       | 12 |
| 9  | <b>1331.604862</b> | 666.306069         | 1314.578313    | 657.792795        | <b>1313.594297</b> | 657.300786        | N    | <b>1241.684826</b> | 621.346051      | 1224.658277    | 612.832777        | 1223.674261    | 612.340769       | 11 |
| 10 | <b>1444.688926</b> | 722.848101         | 1427.662377    | 714.334826        | 1426.678361        | 713.842818        | L    | <b>1127.641899</b> | 564.324588      | 1110.615350    | 555.811313        | 1109.631334    | 555.319305       | 10 |
| 11 | <b>1559.715869</b> | 780.361572         | 1542.689320    | 771.848298        | 1541.705304        | 771.356290        | D    | <b>1014.557835</b> | 507.782556      | 997.531286     | 499.269281        | 996.547270     | 498.777273       | 9  |
| 12 | <b>1658.784283</b> | <b>829.895780</b>  | 1641.757734    | 821.382505        | 1640.773718        | 820.890497        | V    | <b>899.530892</b>  | 450.269084      | 882.504343     | 441.755810        | 881.520327     | 441.263802       | 8  |
| 13 | 1745.816311        | 873.411794         | 1728.789762    | 864.898519        | 1727.805746        | 864.406511        | S    | <b>800.462478</b>  | 400.734877      | 783.435929     | 392.221603        | 782.451913     | 391.729595       | 7  |
| 14 | 1858.900375        | 929.953825         | 1841.873826    | <b>921.440551</b> | 1840.889810        | 920.948543        | L    | <b>713.430450</b>  | 357.218863      | 696.403901     | 348.705589        | 695.419885     | 348.213581       | 6  |
| 15 | 1986.958953        | 993.983115         | 1969.932404    | 985.469840        | 1968.948388        | 984.977832        | Q    | <b>600.346386</b>  | 300.676831      | 583.319837     | 292.163557        | 582.335821     | 291.671549       | 5  |
| 16 | 2100.043017        | <b>1050.525146</b> | 2083.016468    | 1042.011872       | <b>2082.032452</b> | 1041.519864       | L    | <b>472.287808</b>  | 236.647542      | 455.261259     | <b>228.134268</b> | 454.277243     | 227.642260       | 4  |
| 17 | 2197.095781        | 1099.051528        | 2180.069232    | 1090.538254       | 2179.085216        | 1090.046246       | P    | <b>359.203744</b>  | 180.105510      | 342.177195     | 171.592236        | 341.193179     | 171.100228       | 3  |
| 18 | 2284.127809        | 1142.567542        | 2267.101260    | 1134.054268       | 2266.117244        | 1133.562260       | S    | 262.150980         | 131.579128      | 245.124431     | 123.065854        | 244.140415     | 122.573846       | 2  |
| 19 |                    |                    |                |                   |                    |                   | R    | 175.118952         | 88.063114       | 158.092403     | 79.549839         |                |                  | 1  |

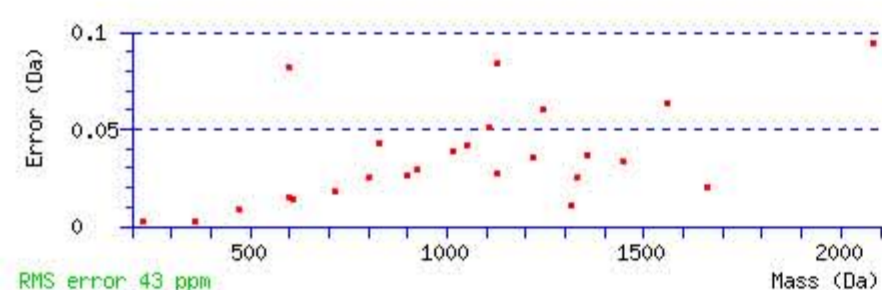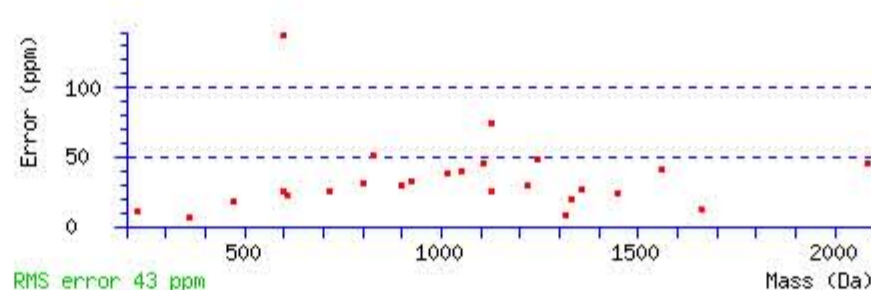

NCBI BLAST search of **DAPDHQELNLDVSLQLPSR**

(Parameters: blastp, nr protein database, expect=20000, no filter, PAM30)

Other BLAST [web gateways](#)

## All matches to this query

| Score | Mr(calc):   | Delta     | Sequence                                 |
|-------|-------------|-----------|------------------------------------------|
| 49.4  | 2457.232193 | 0.030619  | <a href="#">DAPDHQELNLDVSLQLPSR</a>      |
| 20.8  | 2457.243423 | 0.019389  | <a href="#">TGLSDAFMILNPSDPVPSRRR</a>    |
| 2.5   | 2457.278442 | -0.015630 | <a href="#">EPVSNVTAEGMEALTKILAE LR</a>  |
| 0.3   | 2457.287201 | -0.024389 | <a href="#">KPCTFGSQNLERILAVADK</a>      |
| 0.3   | 2457.244080 | 0.018732  | <a href="#">AKFHQTEGDHLTLLAVYNSWK</a>    |
| 0.1   | 2457.289688 | -0.026876 | <a href="#">VNVTLRESMELLD S AVQNLQAK</a> |



# MASCOT Search Results

## Peptide View

MS/MS Fragmentation of **ILLQGTPVAQMTEDAVDAER**

Found in **CO3\_HUMAN**, Complement C3 OS=Homo sapiens GN=C3 PE=1 SV=2

Match to Query 51404: 2467.242792 from(823.421540,3+) rtinseconds(2670) index(54466)

Title: Locus:1.1.1.3572.16 File:"2013-07-02 CLN FXIII 30 min 3rd F 4.wiff"

Data file C:\Program Files (x86)\Matrix Science\Mascot Daemon\mgf3 FXIII 30 min 3rd\mascot\_daemon\_merge.mgf

Click mouse within plot area to zoom in by factor of two about that point

Or, Plot from  to  Da

Label all possible matches  Label matches used for scoring

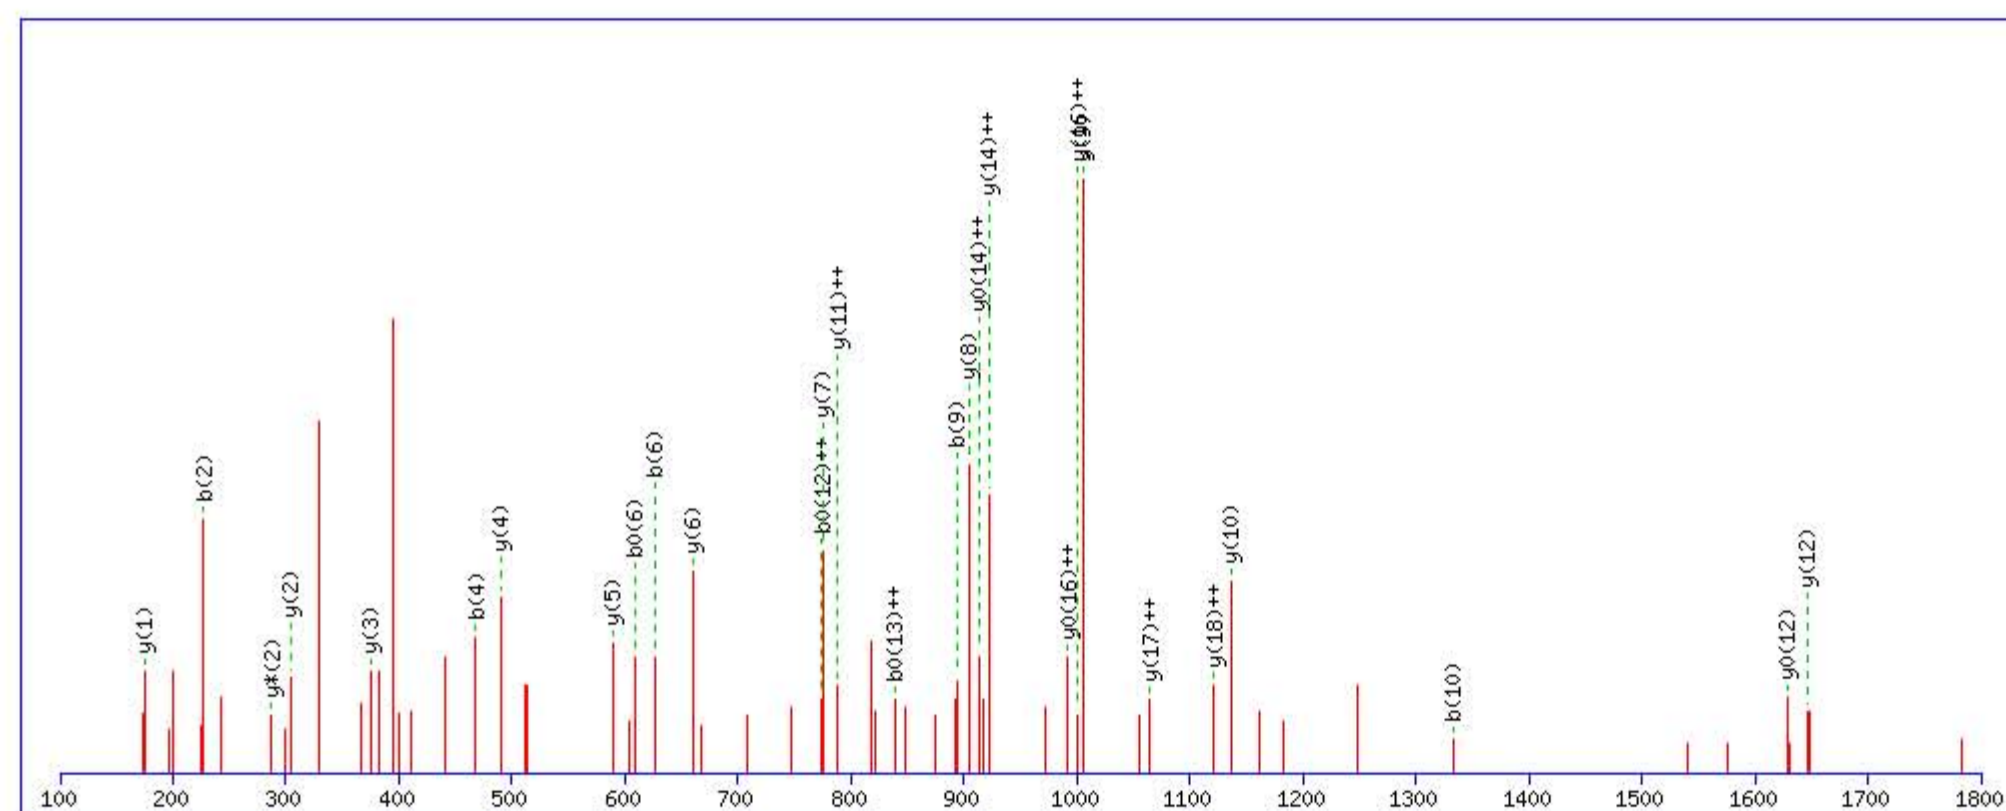

Monoisotopic mass of neutral peptide Mr(calc): 2467.245071

Fixed modifications: Carbamidomethyl (C) (apply to specified residues or termini only)

Variable modifications:

Q10 : Biotin:Thermo-21345 (Q)

Ions Score: 62 Expect: 2.2e-005

Matches : 28/210 fragment ions using 53 most intense peaks [\(help\)](#)

| #  | b                  | b <sup>++</sup> | b <sup>*</sup> | b <sup>*++</sup> | b <sup>0</sup>    | b <sup>0++</sup>  | Seq. | y                  | y <sup>++</sup>    | y <sup>*</sup>    | y <sup>*++</sup> | y <sup>0</sup>     | y <sup>0++</sup>  | #  |
|----|--------------------|-----------------|----------------|------------------|-------------------|-------------------|------|--------------------|--------------------|-------------------|------------------|--------------------|-------------------|----|
| 1  | 114.091340         | 57.549308       |                |                  |                   |                   | I    |                    |                    |                   |                  |                    |                   | 20 |
| 2  | <b>227.175404</b>  | 114.091340      |                |                  |                   |                   | L    | 2355.168297        | 1178.087786        | 2338.141748       | 1169.574512      | 2337.157732        | 1169.082504       | 19 |
| 3  | 340.259468         | 170.633372      |                |                  |                   |                   | L    | 2242.084233        | <b>1121.545754</b> | 2225.057684       | 1113.032480      | 2224.073668        | 1112.540472       | 18 |
| 4  | <b>468.318046</b>  | 234.662661      | 451.291497     | 226.149386       |                   |                   | Q    | 2129.000169        | <b>1065.003722</b> | 2111.973620       | 1056.490448      | 2110.989604        | 1055.998440       | 17 |
| 5  | 525.339510         | 263.173393      | 508.312961     | 254.660119       |                   |                   | G    | 2000.941591        | <b>1000.974434</b> | 1983.915042       | 992.461159       | 1982.931026        | <b>991.969151</b> | 16 |
| 6  | <b>626.387189</b>  | 313.697233      | 609.360640     | 305.183958       | <b>608.376624</b> | 304.691950        | T    | 1943.920127        | 972.463702         | 1926.893578       | 963.950427       | 1925.909562        | 963.458419        | 15 |
| 7  | 723.439953         | 362.223615      | 706.413404     | 353.710340       | 705.429388        | 353.218332        | P    | 1842.872448        | <b>921.939862</b>  | 1825.845899       | 913.426588       | 1824.861883        | <b>912.934580</b> | 14 |
| 8  | 822.508367         | 411.757822      | 805.481818     | 403.244547       | 804.497802        | 402.752539        | V    | 1745.819684        | 873.413480         | 1728.793135       | 864.900206       | 1727.809119        | 864.408198        | 13 |
| 9  | <b>893.545481</b>  | 447.276379      | 876.518932     | 438.763104       | 875.534916        | 438.271096        | A    | <b>1646.751270</b> | 823.879273         | 1629.724721       | 815.365999       | <b>1628.740705</b> | 814.873991        | 12 |
| 10 | <b>1332.770807</b> | 666.889042      | 1315.744258    | 658.375767       | 1314.760242       | 657.883759        | Q    | 1575.714156        | <b>788.360716</b>  | 1558.687607       | 779.847442       | 1557.703591        | 779.355434        | 11 |
| 11 | 1463.811292        | 732.409284      | 1446.784743    | 723.896010       | 1445.800727       | 723.404002        | M    | <b>1136.488830</b> | 568.748053         | 1119.462281       | 560.234779       | 1118.478265        | 559.742771        | 10 |
| 12 | 1564.858971        | 782.933124      | 1547.832422    | 774.419849       | 1546.848406       | <b>773.927841</b> | T    | <b>1005.448345</b> | 503.227811         | 988.421796        | 494.714536       | 987.437780         | 494.222528        | 9  |
| 13 | 1693.901564        | 847.454420      | 1676.875015    | 838.941146       | 1675.890999       | <b>838.449138</b> | E    | <b>904.400666</b>  | 452.703971         | 887.374117        | 444.190697       | 886.390101         | 443.698689        | 8  |
| 14 | 1808.928507        | 904.967892      | 1791.901958    | 896.454617       | 1790.917942       | 895.962609        | D    | <b>775.358073</b>  | 388.182675         | 758.331524        | 379.669400       | 757.347508         | 379.177392        | 7  |
| 15 | 1879.965621        | 940.486449      | 1862.939072    | 931.973174       | 1861.955056       | 931.481166        | A    | <b>660.331130</b>  | 330.669203         | 643.304581        | 322.155929       | 642.320565         | 321.663921        | 6  |
| 16 | 1979.034035        | 990.020656      | 1962.007486    | 981.507381       | 1961.023470       | 981.015373        | V    | <b>589.294016</b>  | 295.150646         | 572.267467        | 286.637372       | 571.283451         | 286.145364        | 5  |
| 17 | 2094.060978        | 1047.534127     | 2077.034429    | 1039.020852      | 2076.050413       | 1038.528844       | D    | <b>490.225602</b>  | 245.616439         | 473.199053        | 237.103165       | 472.215037         | 236.611157        | 4  |
| 18 | 2165.098092        | 1083.052684     | 2148.071543    | 1074.539409      | 2147.087527       | 1074.047402       | A    | <b>375.198659</b>  | 188.102968         | 358.172110        | 179.589693       | 357.188094         | 179.097685        | 3  |
| 19 | 2294.140685        | 1147.573981     | 2277.114136    | 1139.060706      | 2276.130120       | 1138.568698       | E    | <b>304.161545</b>  | 152.584411         | <b>287.134996</b> | 144.071136       | 286.150980         | 143.579128        | 2  |
| 20 |                    |                 |                |                  |                   |                   | R    | <b>175.118952</b>  | 88.063114          | 158.092403        | 79.549839        |                    |                   | 1  |

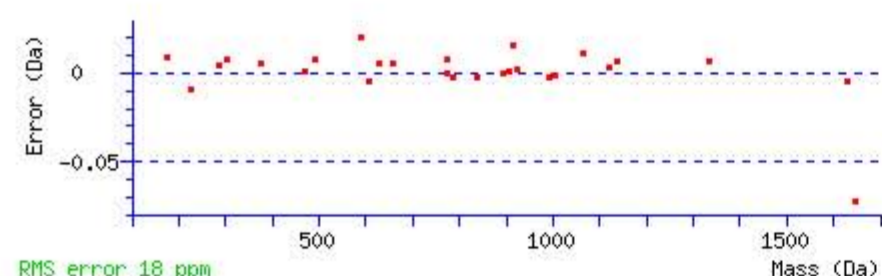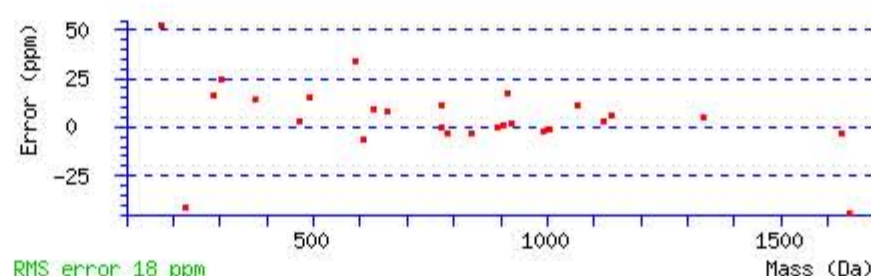

NCBI BLAST search of [ILLQGTPVAQMTEDAVDAER](#)

(Parameters: blastp, nr protein database, expect=20000, no filter, PAM30)

Other BLAST [web gateways](#)

All matches to this query

| Score | Mr(calc):   | Delta     | Sequence                             |
|-------|-------------|-----------|--------------------------------------|
| 61.5  | 2467.245071 | -0.002279 | <a href="#">ILLQGTPVAQMTEDAVDAER</a> |
| 41.5  | 2467.245071 | -0.002279 | <a href="#">ILLQGTPVAQMTEDAVDAER</a> |



# MASCOT Search Results

## Peptide View

MS/MS Fragmentation of **ILLQGTPVAQMTEDAVER**

Found in **CO3\_HUMAN**, Complement C3 OS=Homo sapiens GN=C3 PE=1 SV=2

Match to Query 51408: 2467.273602 from(823.431810,3+) rtinseconds(2680) index(38977)

Title: Locus:1.1.1.3566.26 File:"2013-07-02 CLN FXIII 30 min 3rd F 3.wiff"

Data file C:\Program Files (x86)\Matrix Science\Mascot Daemon\mgf3 FXIII 30 min 3rd\mascot\_daemon\_merge.mgf

Click mouse within plot area to zoom in by factor of two about that point

Or, Plot from  to  Da

Label all possible matches  Label matches used for scoring

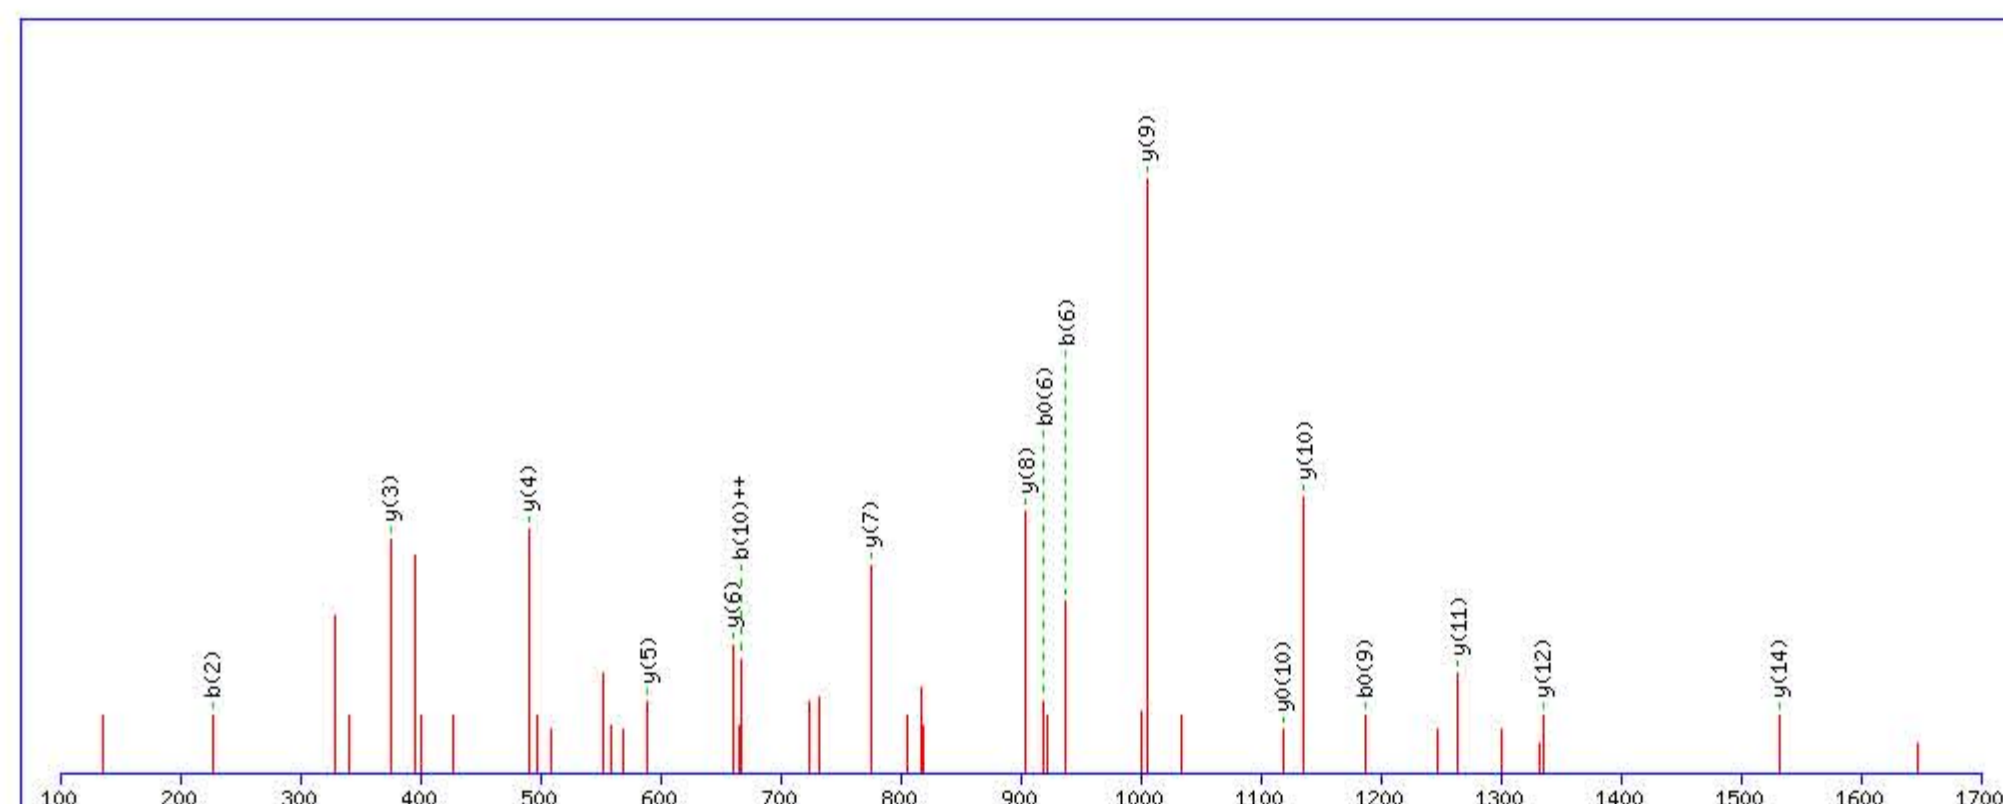

Monoisotopic mass of neutral peptide Mr(calc): 2467.245071

Fixed modifications: Carbamidomethyl (C) (apply to specified residues or termini only)

Variable modifications:

Q4 : Biotin:Thermo-21345 (Q)

Ions Score: 79 Expect: 4.2e-008

Matches : 17/210 fragment ions using 24 most intense peaks [\(help\)](#)

| #  | b                 | b <sup>++</sup>   | b <sup>*</sup> | b <sup>*++</sup> | b <sup>0</sup>     | b <sup>0++</sup> | Seq. | y                  | y <sup>++</sup> | y <sup>*</sup> | y <sup>*++</sup> | y <sup>0</sup>     | y <sup>0++</sup> | #  |
|----|-------------------|-------------------|----------------|------------------|--------------------|------------------|------|--------------------|-----------------|----------------|------------------|--------------------|------------------|----|
| 1  | 114.091340        | 57.549308         |                |                  |                    |                  | I    |                    |                 |                |                  |                    |                  | 20 |
| 2  | <b>227.175404</b> | 114.091340        |                |                  |                    |                  | L    | 2355.168297        | 1178.087786     | 2338.141748    | 1169.574512      | 2337.157732        | 1169.082504      | 19 |
| 3  | 340.259468        | 170.633372        |                |                  |                    |                  | L    | 2242.084233        | 1121.545754     | 2225.057684    | 1113.032480      | 2224.073668        | 1112.540472      | 18 |
| 4  | 779.484794        | 390.246035        | 762.458245     | 381.732760       |                    |                  | Q    | 2129.000169        | 1065.003722     | 2111.973620    | 1056.490448      | 2110.989604        | 1055.998440      | 17 |
| 5  | 836.506258        | 418.756767        | 819.479709     | 410.243493       |                    |                  | G    | 1689.774843        | 845.391060      | 1672.748294    | 836.877785       | 1671.764278        | 836.385777       | 16 |
| 6  | <b>937.553937</b> | 469.280607        | 920.527388     | 460.767332       | <b>919.543372</b>  | 460.275324       | T    | 1632.753379        | 816.880328      | 1615.726830    | 808.367053       | 1614.742814        | 807.875045       | 15 |
| 7  | 1034.606701       | 517.806988        | 1017.580152    | 509.293714       | 1016.596136        | 508.801706       | P    | <b>1531.705700</b> | 766.356488      | 1514.679151    | 757.843214       | 1513.695135        | 757.351206       | 14 |
| 8  | 1133.675115       | 567.341196        | 1116.648566    | 558.827921       | 1115.664550        | 558.335913       | V    | 1434.652936        | 717.830106      | 1417.626387    | 709.316832       | 1416.642371        | 708.824824       | 13 |
| 9  | 1204.712229       | 602.859753        | 1187.685680    | 594.346478       | <b>1186.701664</b> | 593.854470       | A    | <b>1335.584522</b> | 668.295899      | 1318.557973    | 659.782625       | 1317.573957        | 659.290617       | 12 |
| 10 | 1332.770807       | <b>666.889042</b> | 1315.744258    | 658.375767       | 1314.760242        | 657.883759       | Q    | <b>1264.547408</b> | 632.777342      | 1247.520859    | 624.264068       | 1246.536843        | 623.772060       | 11 |
| 11 | 1463.811292       | 732.409284        | 1446.784743    | 723.896010       | 1445.800727        | 723.404002       | M    | <b>1136.488830</b> | 568.748053      | 1119.462281    | 560.234779       | <b>1118.478265</b> | 559.742771       | 10 |
| 12 | 1564.858971       | 782.933124        | 1547.832422    | 774.419849       | 1546.848406        | 773.927841       | T    | <b>1005.448345</b> | 503.227811      | 988.421796     | 494.714536       | 987.437780         | 494.222528       | 9  |
| 13 | 1693.901564       | 847.454420        | 1676.875015    | 838.941146       | 1675.890999        | 838.449138       | E    | <b>904.400666</b>  | 452.703971      | 887.374117     | 444.190697       | 886.390101         | 443.698689       | 8  |
| 14 | 1808.928507       | 904.967892        | 1791.901958    | 896.454617       | 1790.917942        | 895.962609       | D    | <b>775.358073</b>  | 388.182675      | 758.331524     | 379.669400       | 757.347508         | 379.177392       | 7  |
| 15 | 1879.965621       | 940.486449        | 1862.939072    | 931.973174       | 1861.955056        | 931.481166       | A    | <b>660.331130</b>  | 330.669203      | 643.304581     | 322.155929       | 642.320565         | 321.663921       | 6  |
| 16 | 1979.034035       | 990.020656        | 1962.007486    | 981.507381       | 1961.023470        | 981.015373       | V    | <b>589.294016</b>  | 295.150646      | 572.267467     | 286.637372       | 571.283451         | 286.145364       | 5  |
| 17 | 2094.060978       | 1047.534127       | 2077.034429    | 1039.020852      | 2076.050413        | 1038.528844      | D    | <b>490.225602</b>  | 245.616439      | 473.199053     | 237.103165       | 472.215037         | 236.611157       | 4  |
| 18 | 2165.098092       | 1083.052684       | 2148.071543    | 1074.539409      | 2147.087527        | 1074.047402      | A    | <b>375.198659</b>  | 188.102968      | 358.172110     | 179.589693       | 357.188094         | 179.097685       | 3  |
| 19 | 2294.140685       | 1147.573981       | 2277.114136    | 1139.060706      | 2276.130120        | 1138.568698      | E    | 304.161545         | 152.584411      | 287.134996     | 144.071136       | 286.150980         | 143.579128       | 2  |
| 20 |                   |                   |                |                  |                    |                  | R    | 175.118952         | 88.063114       | 158.092403     | 79.549839        |                    |                  | 1  |

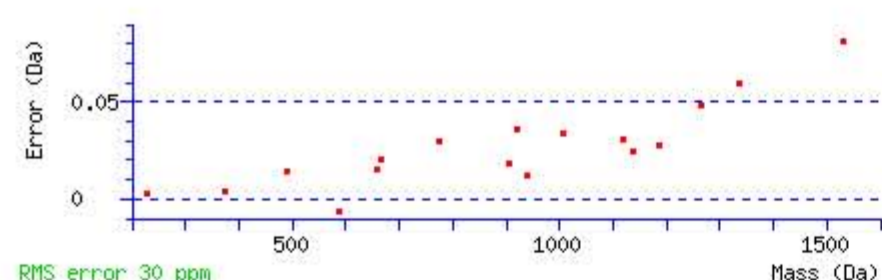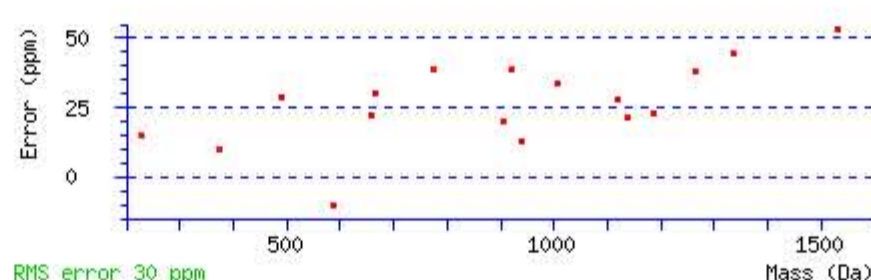

NCBI BLAST search of [ILLQGTPVAQMTEDAVER](#)

(Parameters: blastp, nr protein database, expect=20000, no filter, PAM30)

Other BLAST [web gateways](#)

### All matches to this query

| Score | Mr(calc):   | Delta    | Sequence                                 |
|-------|-------------|----------|------------------------------------------|
| 79.0  | 2467.245071 | 0.028531 | <a href="#">ILLQGTPVAQMTEDAVER</a>       |
| 51.9  | 2467.245071 | 0.028531 | <a href="#">ILLQGTPVAQMTEDAVER</a>       |
| 0.2   | 2467.237686 | 0.035916 | <a href="#">ASDGKTCLALDGHQLLAGGEVDLK</a> |



# MASCOT Search Results

## Peptide View

MS/MS Fragmentation of **VPVAVQGEDTVQSLTQGDGVAK**

Found in **CO3\_HUMAN**, Complement C3 OS=Homo sapiens GN=C3 PE=1 SV=2

Match to Query 52589: 2508.305922 from(837.109250,3+) rtinseconds(2248) index(36655)

Title: Locus:1.1.1.3416.14 File:"2013-07-02 CLN FXIII 30 min 3rd F 3.wiff"

Data file C:\Program Files (x86)\Matrix Science\Mascot Daemon\mgf\3 FXIII 30 min 3rd\mascot\_daemon\_merge.mgf

Click mouse within plot area to zoom in by factor of two about that point

Or, Plot from  to  Da

Label all possible matches  Label matches used for scoring

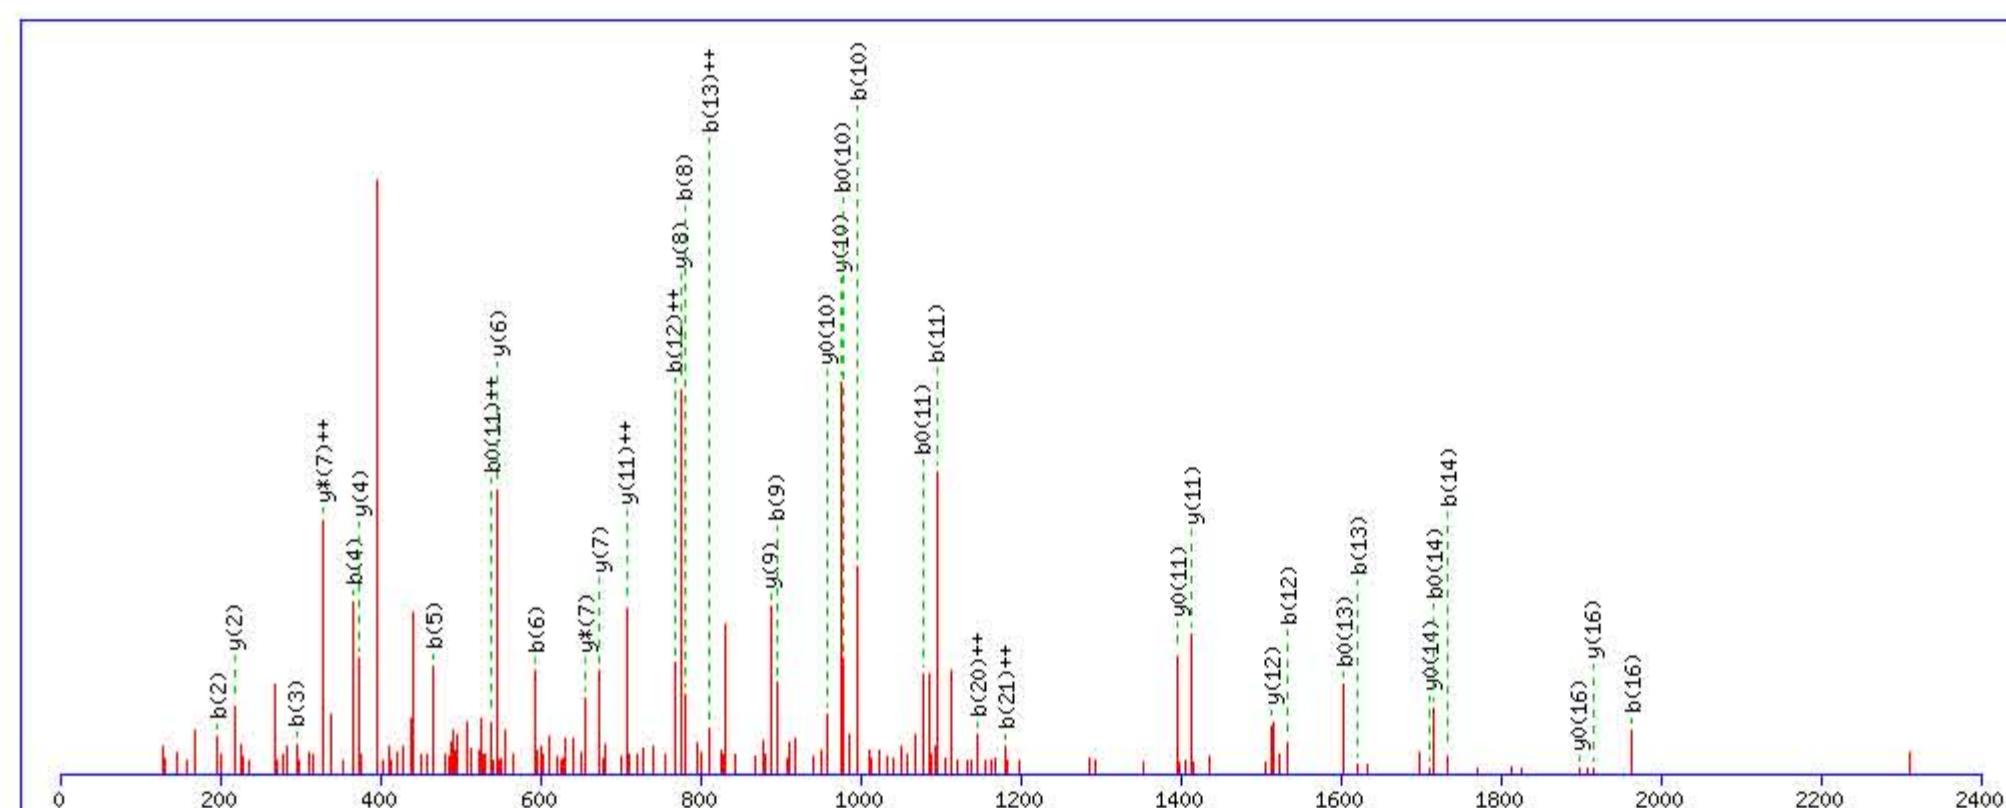

Monoisotopic mass of neutral peptide Mr(calc): 2508.289429

Fixed modifications: Carbamidomethyl (C) (apply to specified residues or termini only)

Variable modifications:

Q12 : Biotin:Thermo-21345 (Q)

Ions Score: 73 Expect: 1.3e-006

Matches : 39/220 fragment ions using 70 most intense peaks [\(help\)](#)

| #  | b                  | b <sup>++</sup>    | b <sup>*</sup> | b <sup>*++</sup> | b <sup>0</sup>     | b <sup>0++</sup>  | Seq. | y                  | y <sup>++</sup>   | y <sup>*</sup>    | y <sup>*++</sup>  | y <sup>0</sup>     | y <sup>0++</sup> | #  |
|----|--------------------|--------------------|----------------|------------------|--------------------|-------------------|------|--------------------|-------------------|-------------------|-------------------|--------------------|------------------|----|
| 1  | 100.075690         | 50.541483          |                |                  |                    |                   | V    |                    |                   |                   |                   |                    |                  | 22 |
| 2  | <b>197.128454</b>  | 99.067865          |                |                  |                    |                   | P    | 2410.228255        | 1205.617765       | 2393.201706       | 1197.104491       | 2392.217690        | 1196.612483      | 21 |
| 3  | <b>296.196868</b>  | 148.602072         |                |                  |                    |                   | V    | 2313.175491        | 1157.091383       | 2296.148942       | 1148.578109       | 2295.164926        | 1148.086101      | 20 |
| 4  | <b>367.233982</b>  | 184.120629         |                |                  |                    |                   | A    | 2214.107077        | 1107.557176       | 2197.080528       | 1099.043902       | 2196.096512        | 1098.551894      | 19 |
| 5  | <b>466.302396</b>  | 233.654836         |                |                  |                    |                   | V    | 2143.069963        | 1072.038619       | 2126.043414       | 1063.525345       | 2125.059398        | 1063.033337      | 18 |
| 6  | <b>594.360974</b>  | 297.684125         | 577.334425     | 289.170851       |                    |                   | Q    | 2044.001549        | 1022.504413       | 2026.975000       | 1013.991138       | 2025.990984        | 1013.499130      | 17 |
| 7  | 651.382438         | 326.194857         | 634.355889     | 317.681583       |                    |                   | G    | <b>1915.942971</b> | 958.475124        | 1898.916422       | 949.961849        | <b>1897.932406</b> | 949.469841       | 16 |
| 8  | <b>780.425031</b>  | 390.716154         | 763.398482     | 382.202879       | 762.414466         | 381.710871        | E    | 1858.921507        | 929.964391        | 1841.894958       | 921.451117        | 1840.910942        | 920.959109       | 15 |
| 9  | <b>895.451974</b>  | 448.229625         | 878.425425     | 439.716351       | 877.441409         | 439.224343        | D    | 1729.878914        | 865.443095        | 1712.852365       | 856.929821        | <b>1711.868349</b> | 856.437812       | 14 |
| 10 | <b>996.499653</b>  | 498.753465         | 979.473104     | 490.240190       | <b>978.489088</b>  | 489.748182        | T    | 1614.851971        | 807.929623        | 1597.825422       | 799.416349        | 1596.841406        | 798.924341       | 13 |
| 11 | <b>1095.568067</b> | 548.287672         | 1078.541518    | 539.774397       | <b>1077.557502</b> | <b>539.282389</b> | V    | <b>1513.804292</b> | 757.405784        | 1496.777743       | 748.892510        | 1495.793727        | 748.400502       | 12 |
| 12 | <b>1534.793393</b> | <b>767.900335</b>  | 1517.766844    | 759.387060       | 1516.782828        | 758.895052        | Q    | <b>1414.735878</b> | <b>707.871577</b> | 1397.709329       | 699.358303        | <b>1396.725313</b> | 698.866294       | 11 |
| 13 | <b>1621.825421</b> | <b>811.416349</b>  | 1604.798872    | 802.903074       | <b>1603.814856</b> | 802.411066        | S    | <b>975.510552</b>  | 488.258914        | 958.484003        | 479.745639        | <b>957.499987</b>  | 479.253631       | 10 |
| 14 | <b>1734.909485</b> | 867.958381         | 1717.882936    | 859.445106       | <b>1716.898920</b> | 858.953098        | L    | <b>888.478524</b>  | 444.742900        | 871.451975        | 436.229625        | 870.467959         | 435.737617       | 9  |
| 15 | 1835.957164        | 918.482220         | 1818.930615    | 909.968946       | 1817.946599        | 909.476938        | T    | <b>775.394460</b>  | 388.200868        | 758.367911        | 379.687593        | 757.383895         | 379.195585       | 8  |
| 16 | <b>1964.015742</b> | 982.511509         | 1946.989193    | 973.998235       | 1946.005177        | 973.506227        | Q    | <b>674.346781</b>  | 337.677029        | <b>657.320232</b> | <b>329.163754</b> | 656.336216         | 328.671746       | 7  |
| 17 | 2021.037206        | 1011.022241        | 2004.010657    | 1002.508967      | 2003.026641        | 1002.016959       | G    | <b>546.288203</b>  | 273.647739        | 529.261654        | 265.134465        | 528.277638         | 264.642457       | 6  |
| 18 | 2136.064149        | 1068.535712        | 2119.037600    | 1060.022438      | 2118.053584        | 1059.530430       | D    | 489.266739         | 245.137007        | 472.240190        | 236.623733        | 471.256174         | 236.131725       | 5  |
| 19 | 2193.085613        | 1097.046444        | 2176.059064    | 1088.533170      | 2175.075048        | 1088.041162       | G    | <b>374.239796</b>  | 187.623536        | 357.213247        | 179.110261        |                    |                  | 4  |
| 20 | 2292.154027        | <b>1146.580651</b> | 2275.127478    | 1138.067377      | 2274.143462        | 1137.575369       | V    | 317.218332         | 159.112804        | 300.191783        | 150.599530        |                    |                  | 3  |
| 21 | 2363.191141        | <b>1182.099208</b> | 2346.164592    | 1173.585934      | 2345.180576        | 1173.093926       | A    | <b>218.149918</b>  | 109.578597        | 201.123369        | 101.065323        |                    |                  | 2  |
| 22 |                    |                    |                |                  |                    |                   | K    | 147.112804         | 74.060040         | 130.086255        | 65.546765         |                    |                  | 1  |

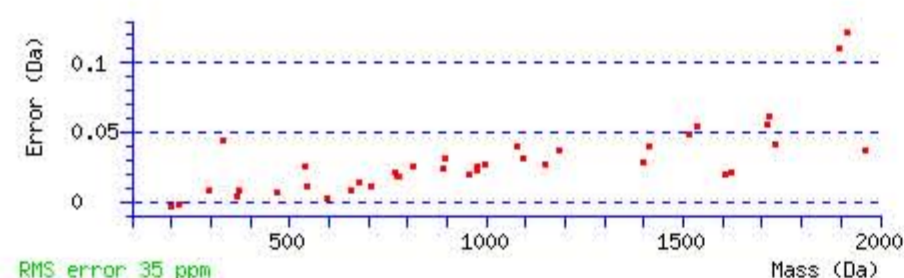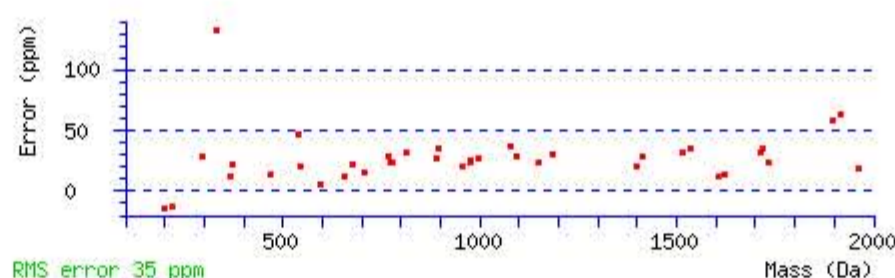

NCBI BLAST search of **VPVAVQGEDTVQSLTQGDGVAK**

(Parameters: blastp, nr protein database, expect=20000, no filter, PAM30)

Other BLAST [web gateways](#)

All matches to this query

| Score | Mr(calc):   | Delta    | Sequence                               |
|-------|-------------|----------|----------------------------------------|
| 73.2  | 2508.289429 | 0.016493 | <a href="#">VPVAVQGEDTVQSLTQGDGVAK</a> |
| 52.0  | 2508.289429 | 0.016493 | <a href="#">VPVAVQGEDTVQSLTQGDGVAK</a> |
| 31.6  | 2508.289429 | 0.016493 | <a href="#">VPVAVQGEDTVQSLTQGDGVAK</a> |







# MASCOT Search Results

## Peptide View

MS/MS Fragmentation of **DTWVEHWPEEDECQDEENQK**

Found in **CO3\_HUMAN**, Complement C3 OS=Homo sapiens GN=C3 PE=1 SV=2

Match to Query 56540: 2913.196152 from(972.072660,3+) rtinseconds(2124) index(35962)

Title: Locus:1.1.1.3373.18 File:"2013-07-02 CLN FXIII 30 min 3rd F 3.wiff"

Data file C:\Program Files (x86)\Matrix Science\Mascot Daemon\mgf3 FXIII 30 min 3rd\mascot\_daemon\_merge.mgf

Click mouse within plot area to zoom in by factor of two about that point

Or, Plot from  to  Da

Label all possible matches  Label matches used for scoring

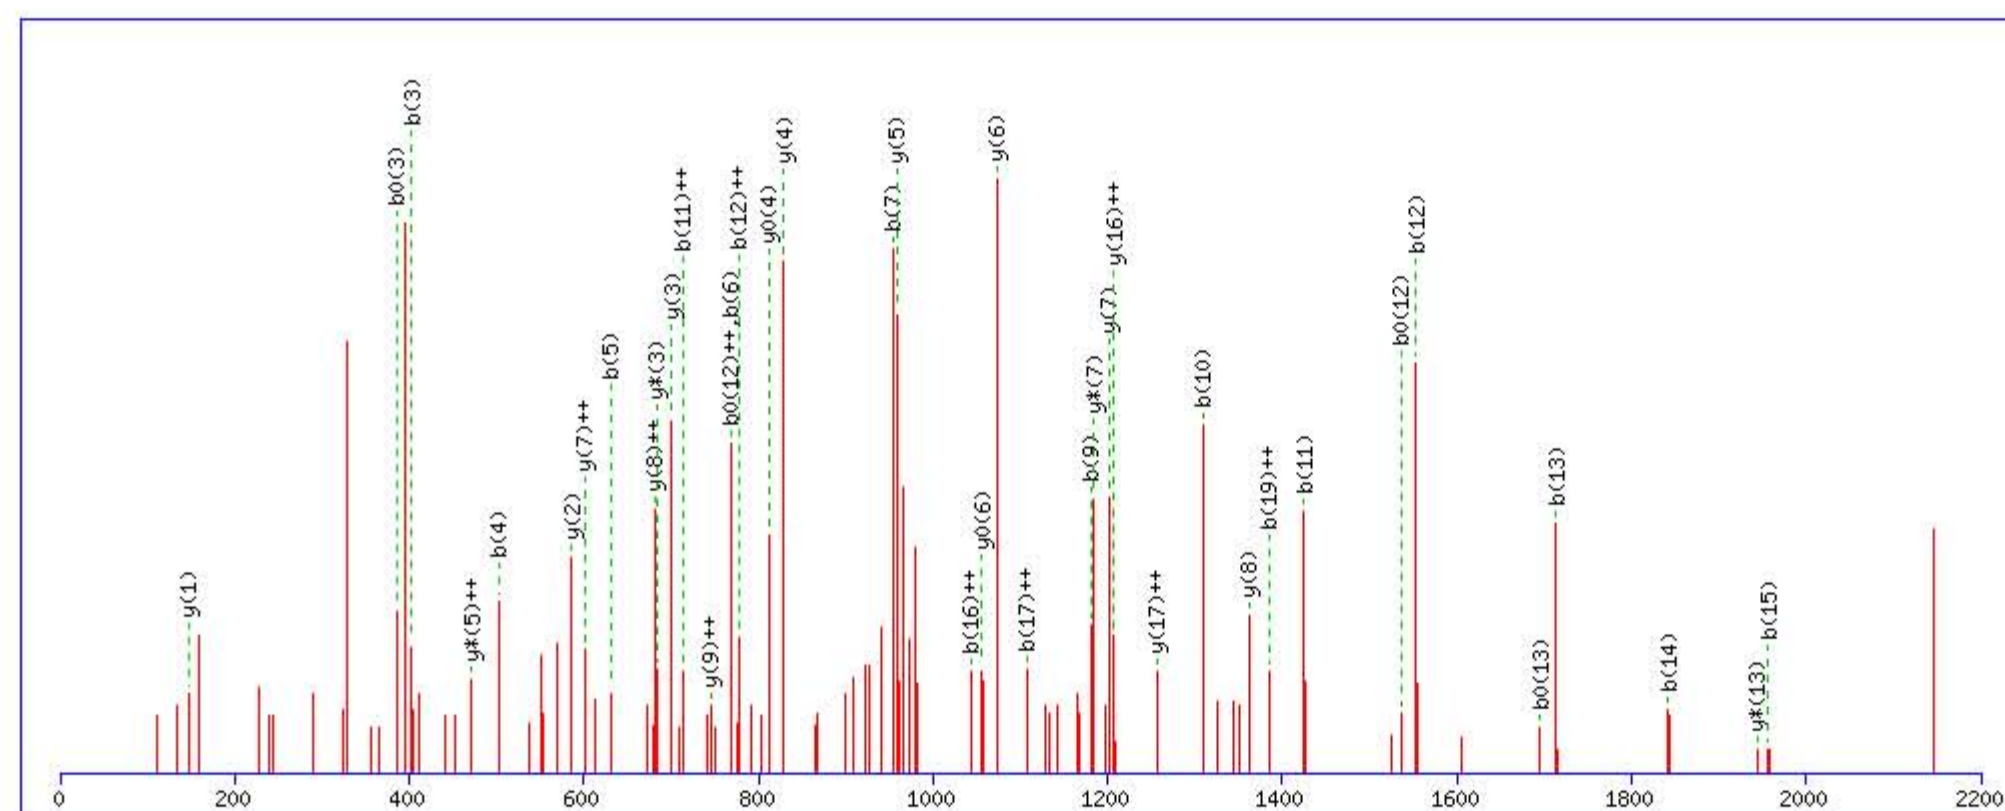

Monoisotopic mass of neutral peptide  $M_r(\text{calc})$ : 2913.185776

Fixed modifications: Carbamidomethyl (C) (apply to specified residues or termini only)

Variable modifications:

Q19 : Biotin:Thermo-21345 (Q)

Ions Score: 66 Expect: 3e-007

Matches : 40/196 fragment ions using 66 most intense peaks [\(help\)](#)

| #  | b                  | b <sup>++</sup>    | b <sup>*</sup> | b <sup>*++</sup> | b <sup>0</sup>     | b <sup>0++</sup>  | Seq. | y                  | y <sup>++</sup>    | y <sup>*</sup>     | y <sup>*++</sup>  | y <sup>0</sup>     | y <sup>0++</sup> | #  |
|----|--------------------|--------------------|----------------|------------------|--------------------|-------------------|------|--------------------|--------------------|--------------------|-------------------|--------------------|------------------|----|
| 1  | 116.034219         | 58.520748          |                |                  | 98.023654          | 49.515465         | D    |                    |                    |                    |                   |                    |                  | 20 |
| 2  | 217.081898         | 109.044587         |                |                  | 199.071333         | 100.039304        | T    | 2799.166123        | 1400.086699        | 2782.139574        | 1391.573425       | 2781.155558        | 1391.081417      | 19 |
| 3  | <b>403.161211</b>  | 202.084244         |                |                  | <b>385.150646</b>  | 193.078961        | W    | 2698.118444        | 1349.562860        | 2681.091895        | 1341.049585       | 2680.107879        | 1340.557577      | 18 |
| 4  | <b>502.229625</b>  | 251.618451         |                |                  | 484.219060         | 242.613168        | V    | 2512.039131        | <b>1256.523203</b> | 2495.012582        | 1248.009929       | 2494.028566        | 1247.517921      | 17 |
| 5  | <b>631.272218</b>  | 316.139747         |                |                  | 613.261653         | 307.134465        | E    | 2412.970717        | <b>1206.988996</b> | 2395.944168        | 1198.475722       | 2394.960152        | 1197.983714      | 16 |
| 6  | <b>768.331130</b>  | 384.669203         |                |                  | 750.320565         | 375.663921        | H    | 2283.928124        | 1142.467700        | 2266.901575        | 1133.954425       | 2265.917559        | 1133.462417      | 15 |
| 7  | <b>954.410443</b>  | 477.708860         |                |                  | 936.399878         | 468.703577        | W    | 2146.869212        | 1073.938244        | 2129.842663        | 1065.424969       | 2128.858647        | 1064.932961      | 14 |
| 8  | 1051.463207        | 526.235242         |                |                  | 1033.452642        | 517.229959        | P    | 1960.789899        | 980.898588         | <b>1943.763350</b> | 972.385313        | 1942.779334        | 971.893305       | 13 |
| 9  | <b>1180.505800</b> | 590.756538         |                |                  | 1162.495235        | 581.751256        | E    | 1863.737135        | 932.372206         | 1846.710586        | 923.858931        | 1845.726570        | 923.366923       | 12 |
| 10 | <b>1309.548393</b> | 655.277835         |                |                  | 1291.537828        | 646.272552        | E    | 1734.694542        | 867.850909         | 1717.667993        | 859.337635        | 1716.683977        | 858.845627       | 11 |
| 11 | <b>1424.575336</b> | <b>712.791306</b>  |                |                  | 1406.564771        | 703.786024        | D    | 1605.651949        | 803.329613         | 1588.625400        | 794.816338        | 1587.641384        | 794.324330       | 10 |
| 12 | <b>1553.617929</b> | <b>777.312603</b>  |                |                  | <b>1535.607364</b> | <b>768.307320</b> | E    | 1490.625006        | <b>745.816141</b>  | 1473.598457        | 737.302867        | 1472.614441        | 736.810859       | 9  |
| 13 | <b>1713.648578</b> | 857.327927         |                |                  | <b>1695.638013</b> | 848.322645        | C    | <b>1361.582413</b> | <b>681.294845</b>  | 1344.555864        | 672.781570        | 1343.571848        | 672.289562       | 8  |
| 14 | <b>1841.707156</b> | 921.357216         | 1824.680607    | 912.843942       | 1823.696591        | 912.351934        | Q    | <b>1201.551764</b> | <b>601.279520</b>  | <b>1184.525215</b> | 592.766246        | 1183.541199        | 592.274238       | 7  |
| 15 | <b>1956.734099</b> | 978.870688         | 1939.707550    | 970.357413       | 1938.723534        | 969.865405        | D    | <b>1073.493186</b> | 537.250231         | 1056.466637        | 528.736957        | <b>1055.482621</b> | 528.244949       | 6  |
| 16 | 2085.776692        | <b>1043.391984</b> | 2068.750143    | 1034.878709      | 2067.766127        | 1034.386701       | E    | <b>958.466243</b>  | 479.736760         | 941.439694         | <b>471.223485</b> | 940.455678         | 470.731477       | 5  |
| 17 | 2214.819285        | <b>1107.913280</b> | 2197.792736    | 1099.400006      | 2196.808720        | 1098.907998       | E    | <b>829.423650</b>  | 415.215463         | 812.397101         | 406.702189        | <b>811.413085</b>  | 406.210181       | 4  |
| 18 | 2328.862212        | 1164.934744        | 2311.835663    | 1156.421469      | 2310.851647        | 1155.929461       | N    | <b>700.381057</b>  | 350.694167         | <b>683.354508</b>  | 342.180892        |                    |                  | 3  |
| 19 | 2768.087538        | <b>1384.547407</b> | 2751.060989    | 1376.034132      | 2750.076973        | 1375.542125       | Q    | <b>586.338130</b>  | 293.672703         | 569.311581         | 285.159429        |                    |                  | 2  |
| 20 |                    |                    |                |                  |                    |                   | K    | <b>147.112804</b>  | 74.060040          | 130.086255         | 65.546765         |                    |                  | 1  |

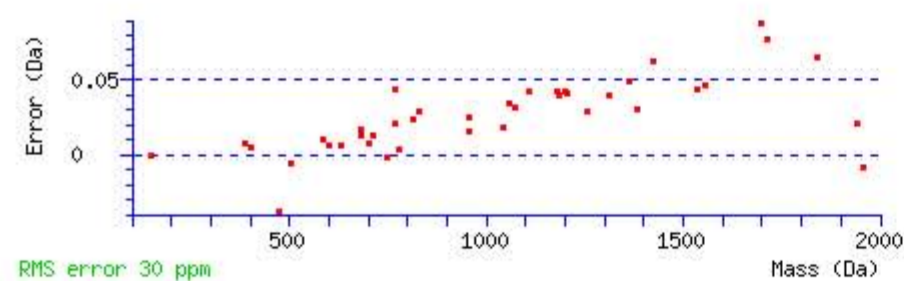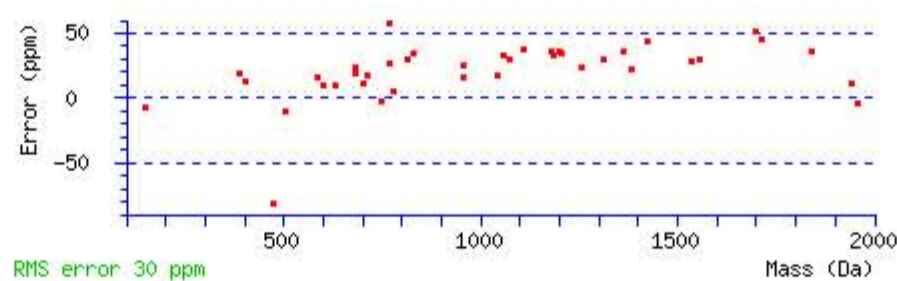

NCBI BLAST search of **DTWVEHWPEEDECQDEENQK**

(Parameters: blastp, nr protein database, expect=20000, no filter, PAM30)

Other BLAST [web gateways](#)

All matches to this query

| Score | $M_r(\text{calc})$ : | Delta    | Sequence                             |
|-------|----------------------|----------|--------------------------------------|
| 66.4  | 2913.185776          | 0.010376 | <a href="#">DTWVEHWPEEDECQDEENQK</a> |
| 30.0  | 2913.185776          | 0.010376 | <a href="#">DTWVEHWPEEDECQDEENQK</a> |

Mascot: <http://www.matrixscience.com/>



# **MASCOT** Mascot Search Results

## Peptide View

MS/MS Fragmentation of **GQAGLQR**

Found in **CO4A\_HUMAN**, Complement C4-A OS=Homo sapiens GN=C4A PE=1 SV=2

Match to Query 16000: 1039.547608 from(520.781080,2+) rtinseconds(1452) index(47728)

Title: Locus:1.1.1.3149.7 File:"2013-07-02 CLN FXIII 30 min 3rd F 4.wiff"

Data file C:\Program Files (x86)\Matrix Science\Mascot Daemon\mgf\3 FXIII 30 min 3rd\mascot\_daemon\_merge.mgf

Click mouse within plot area to zoom in by factor of two about that point

Or, Plot from  to  Da

Label all possible matches  Label matches used for scoring

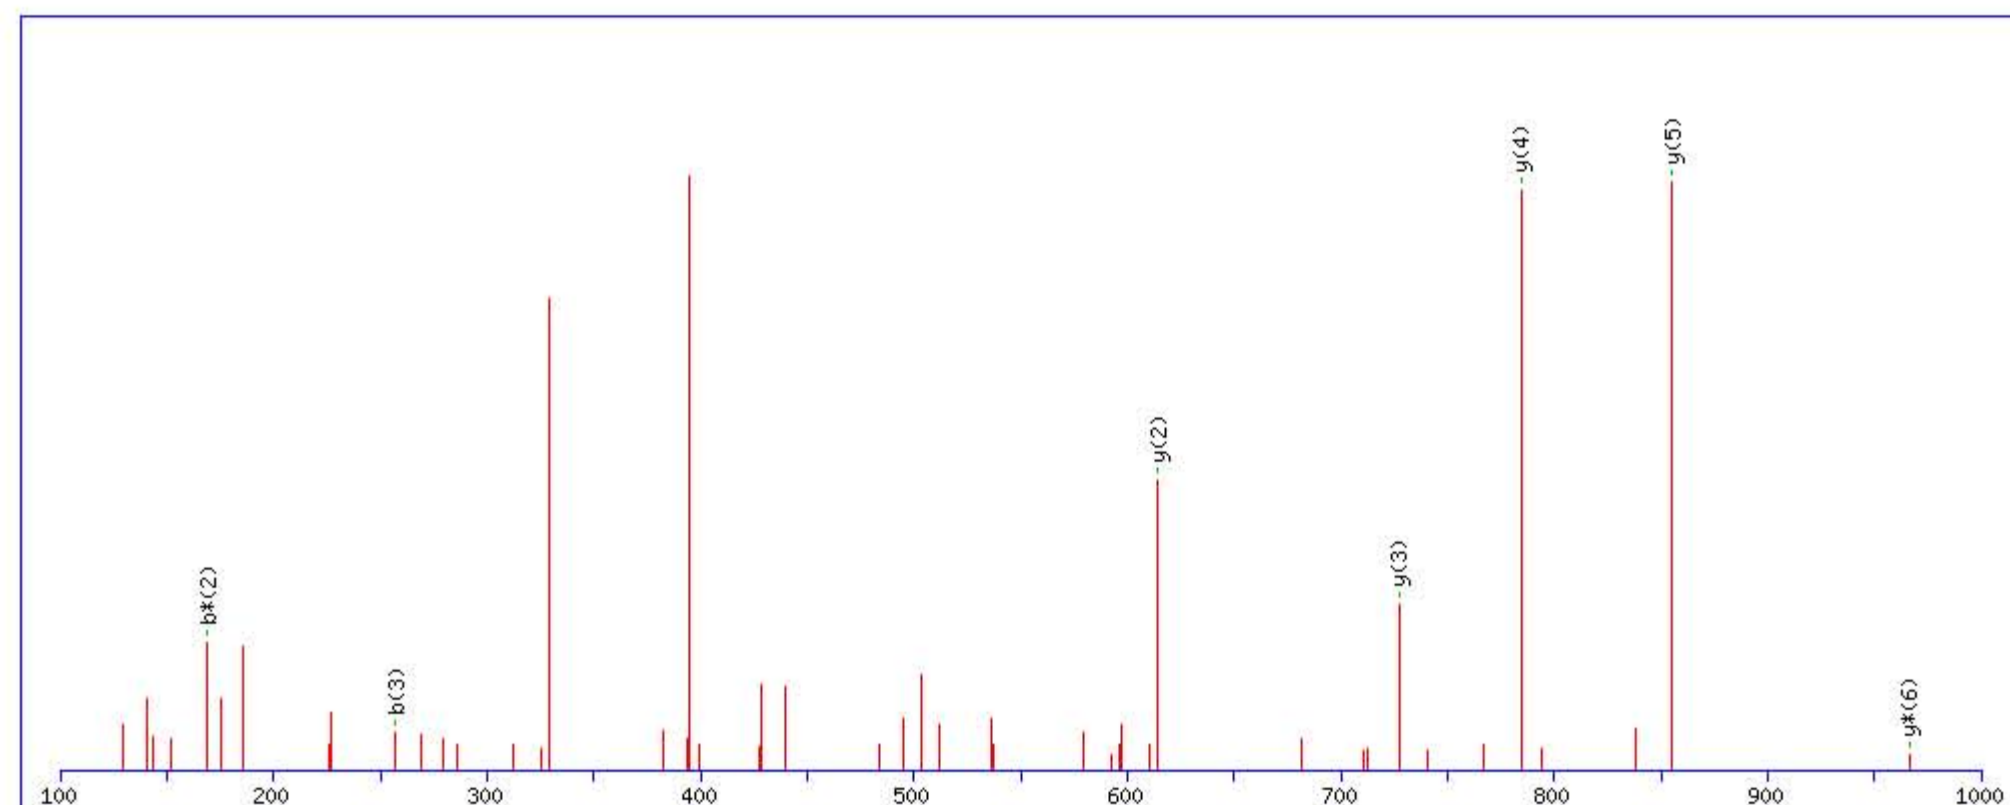

Monoisotopic mass of neutral peptide Mr(calc): 1039.559677

Fixed modifications: Carbamidomethyl (C) (apply to specified residues or termini only)

Variable modifications:

Q6 : Biotin:Thermo-21345 (Q)

Ions Score: 33 Expect: 0.0068

Matches : 7/46 fragment ions using 9 most intense peaks [\(help\)](#)

| # | b          | b <sup>++</sup> | b <sup>*</sup> | b <sup>*++</sup> | Seq.     | y          | y <sup>++</sup> | y <sup>*</sup> | y <sup>*++</sup> | # |
|---|------------|-----------------|----------------|------------------|----------|------------|-----------------|----------------|------------------|---|
| 1 | 58.028740  | 29.518008       |                |                  | <b>G</b> |            |                 |                |                  | 7 |
| 2 | 186.087318 | 93.547297       | 169.060769     | 85.034023        | <b>Q</b> | 983.545498 | 492.276387      | 966.518949     | 483.763113       | 6 |
| 3 | 257.124432 | 129.065854      | 240.097883     | 120.552580       | <b>A</b> | 855.486920 | 428.247098      | 838.460371     | 419.733824       | 5 |
| 4 | 314.145896 | 157.576586      | 297.119347     | 149.063312       | <b>G</b> | 784.449806 | 392.728541      | 767.423257     | 384.215267       | 4 |
| 5 | 427.229960 | 214.118618      | 410.203411     | 205.605344       | <b>L</b> | 727.428342 | 364.217809      | 710.401793     | 355.704535       | 3 |
| 6 | 866.455286 | 433.731281      | 849.428737     | 425.218007       | <b>Q</b> | 614.344278 | 307.675777      | 597.317729     | 299.162503       | 2 |
| 7 |            |                 |                |                  | <b>R</b> | 175.118952 | 88.063114       | 158.092403     | 79.549840        | 1 |

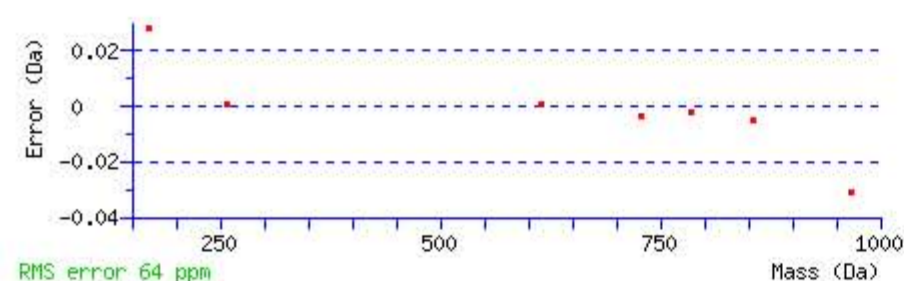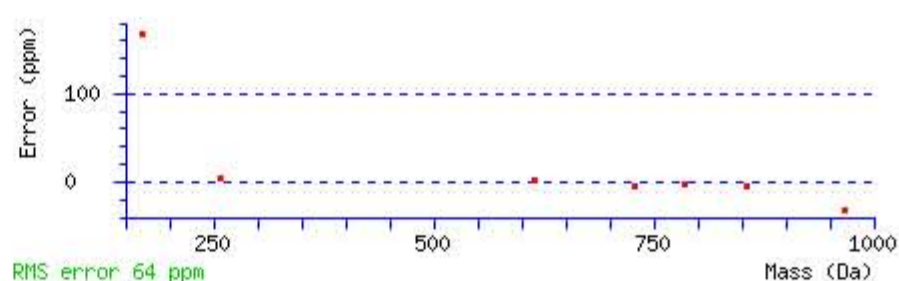

NCBI BLAST search of **GQAGLQR**

(Parameters: blastp, nr protein database, expect=20000, no filter, PAM30)

Other BLAST [web gateways](#)

## All matches to this query

| Score | Mr(calc):   | Delta     | Sequence                   |
|-------|-------------|-----------|----------------------------|
| 33.1  | 1039.559677 | -0.012069 | <a href="#">GQAGLQR</a>    |
| 11.6  | 1039.559677 | -0.012069 | <a href="#">GQQIQR</a>     |
| 8.2   | 1039.541061 | 0.006547  | <a href="#">GQGDLLQPGR</a> |
| 4.5   | 1039.559677 | -0.012069 | <a href="#">KGGPSQR</a>    |
| 3.6   | 1039.541046 | 0.006562  | <a href="#">NATTAPNPVR</a> |
| 3.3   | 1039.552277 | -0.004669 | <a href="#">QRAALDGGPR</a> |

Mascot: <http://www.matrixscience.com/>



# Mascot Search Results

## Peptide View

MS/MS Fragmentation of **VQQPDCR**

Found in **CO4A\_HUMAN**, Complement C4-A OS=Homo sapiens GN=C4A PE=1 SV=2

Match to Query 22007: 1212.573488 from(607.294020,2+) rtinseconds(1298) index(46941)

Title: Locus:1.1.1.3095.9 File:"2013-07-02 CLN FXIII 30 min 3rd F 4.wiff"

Data file C:\Program Files (x86)\Matrix Science\Mascot Daemon\mgf3 FXIII 30 min 3rd\mascot\_daemon\_merge.mgf

Click mouse within plot area to zoom in by factor of two about that point

Or, Plot from  to  Da

Label all possible matches  Label matches used for scoring

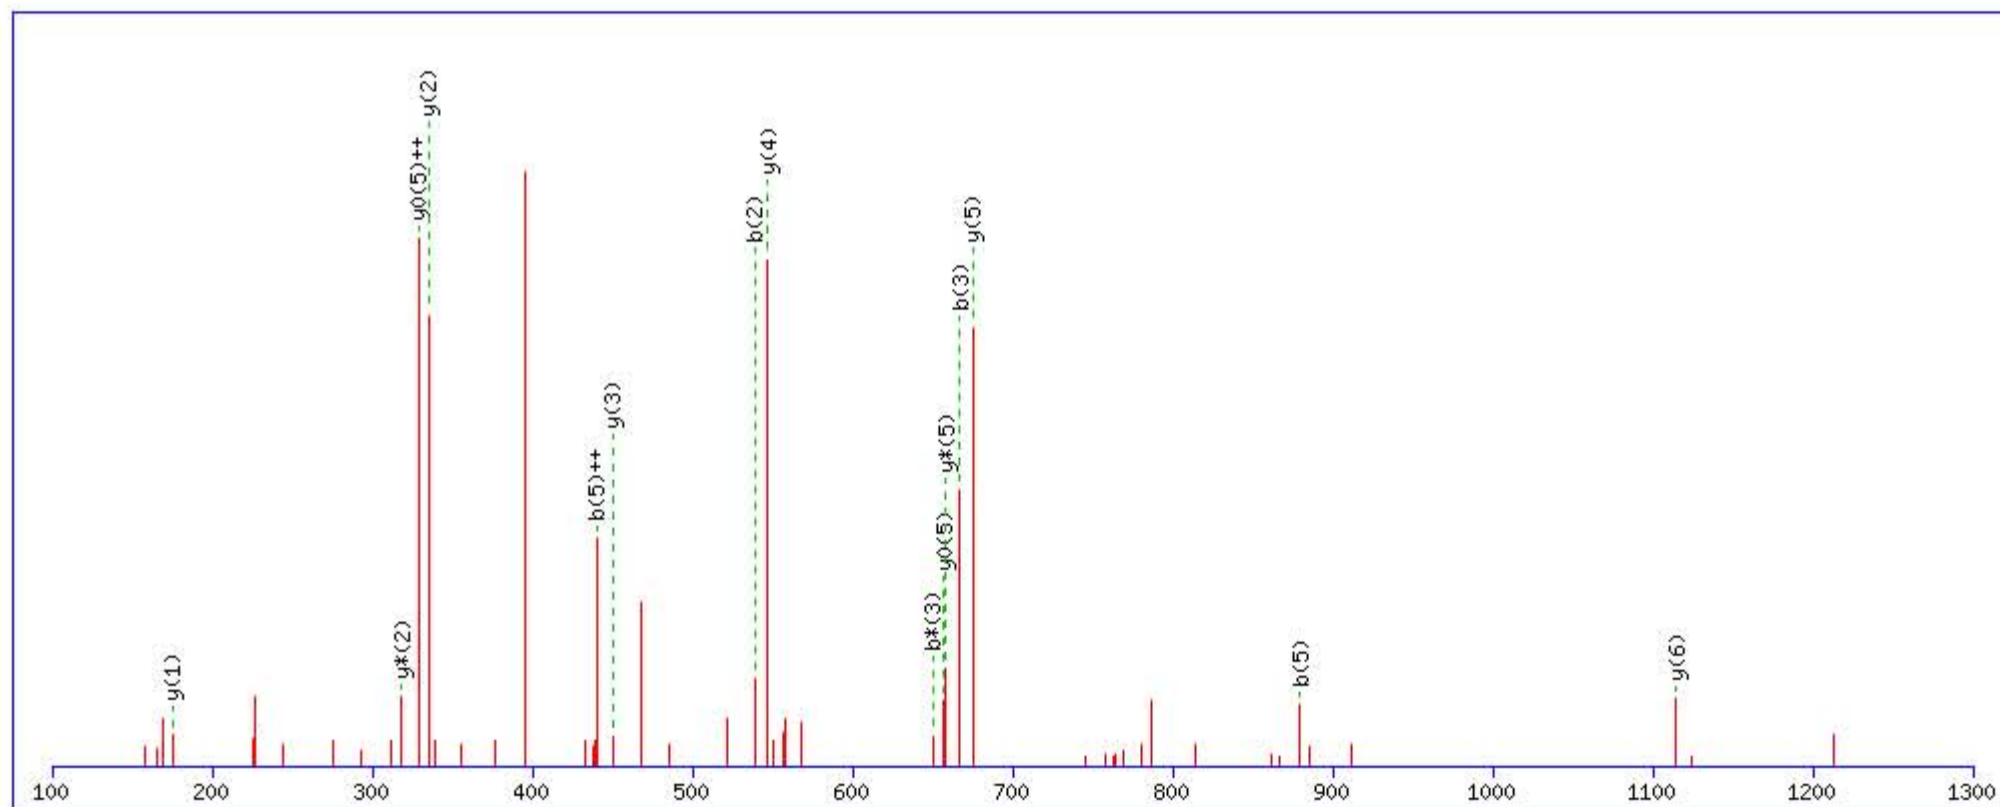

Monoisotopic mass of neutral peptide Mr(calc): 1212.574356

Fixed modifications: Carbamidomethyl (C) (apply to specified residues or termini only)

Variable modifications:

Q2 : Biotin:Thermo-21345 (Q)

Ions Score: 36 Expect: 0.0026

Matches : 15/58 fragment ions using 26 most intense peaks [\(help\)](#)

| # | b                 | b <sup>++</sup>   | b <sup>*</sup>    | b <sup>+++</sup> | b <sup>0</sup> | b <sup>0++</sup> | Seq. | y                  | y <sup>++</sup> | y <sup>*</sup>    | y <sup>+++</sup> | y <sup>0</sup>    | y <sup>0++</sup>  | # |
|---|-------------------|-------------------|-------------------|------------------|----------------|------------------|------|--------------------|-----------------|-------------------|------------------|-------------------|-------------------|---|
| 1 | 100.075690        | 50.541483         |                   |                  |                |                  | V    |                    |                 |                   |                  |                   |                   | 7 |
| 2 | <b>539.301016</b> | 270.154146        | 522.274467        | 261.640872       |                |                  | Q    | <b>1114.513212</b> | 557.760244      | 1097.486663       | 549.246970       | 1096.502647       | 548.754962        | 6 |
| 3 | <b>667.359594</b> | 334.183435        | <b>650.333045</b> | 325.670161       |                |                  | Q    | <b>675.287886</b>  | 338.147581      | <b>658.261337</b> | 329.634307       | <b>657.277321</b> | <b>329.142299</b> | 5 |
| 4 | 764.412358        | 382.709817        | 747.385809        | 374.196543       |                |                  | P    | <b>547.229308</b>  | 274.118292      | 530.202759        | 265.605018       | 529.218743        | 265.113010        | 4 |
| 5 | <b>879.439301</b> | <b>440.223289</b> | 862.412752        | 431.710014       | 861.428736     | 431.218006       | D    | <b>450.176544</b>  | 225.591910      | 433.149995        | 217.078635       | 432.165979        | 216.586627        | 3 |
| 6 | 1039.469950       | 520.238613        | 1022.443401       | 511.725339       | 1021.459385    | 511.233331       | C    | <b>335.149601</b>  | 168.078438      | <b>318.123052</b> | 159.565164       |                   |                   | 2 |
| 7 |                   |                   |                   |                  |                |                  | R    | <b>175.118952</b>  | 88.063114       | 158.092403        | 79.549839        |                   |                   | 1 |

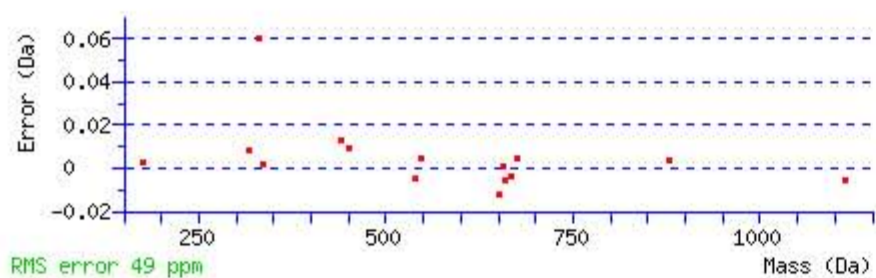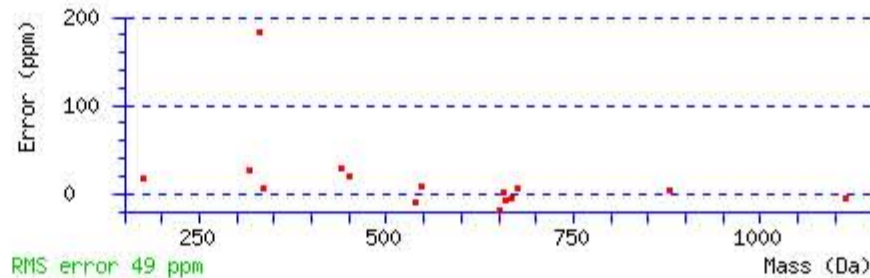

NCBI BLAST search of **VQQPDCR**

(Parameters: blastp, nr protein database, expect=20000, no filter, PAM30)

Other BLAST [web gateways](#)

All matches to this query

| Score | Mr(calc):   | Delta     | Sequence                |
|-------|-------------|-----------|-------------------------|
| 35.7  | 1212.574356 | -0.000868 | <a href="#">VQQPDCR</a> |
| 17.8  | 1212.574356 | -0.000868 | <a href="#">VQQPDCR</a> |



# MASCOT SCIENCE Mascot Search Results

## Peptide View

MS/MS Fragmentation of **VEYGFQVK**

Found in **CO4A\_HUMAN**, Complement C4-A OS=Homo sapiens GN=C4A PE=1 SV=2

Match to Query 23926: 1279.659428 from(640.836990,2+) rtinseconds(2011) index(51285)

Title: Locus:1.1.1.3343.11 File:"2013-07-02 CLN FXIII 30 min 3rd F 4.wiff"

Data file C:\Program Files (x86)\Matrix Science\Mascot Daemon\mgf\3 FXIII 30 min 3rd\mascot\_daemon\_merge.mgf

Click mouse within plot area to zoom in by factor of two about that point

Or, Plot from  to  Da

Label all possible matches  Label matches used for scoring

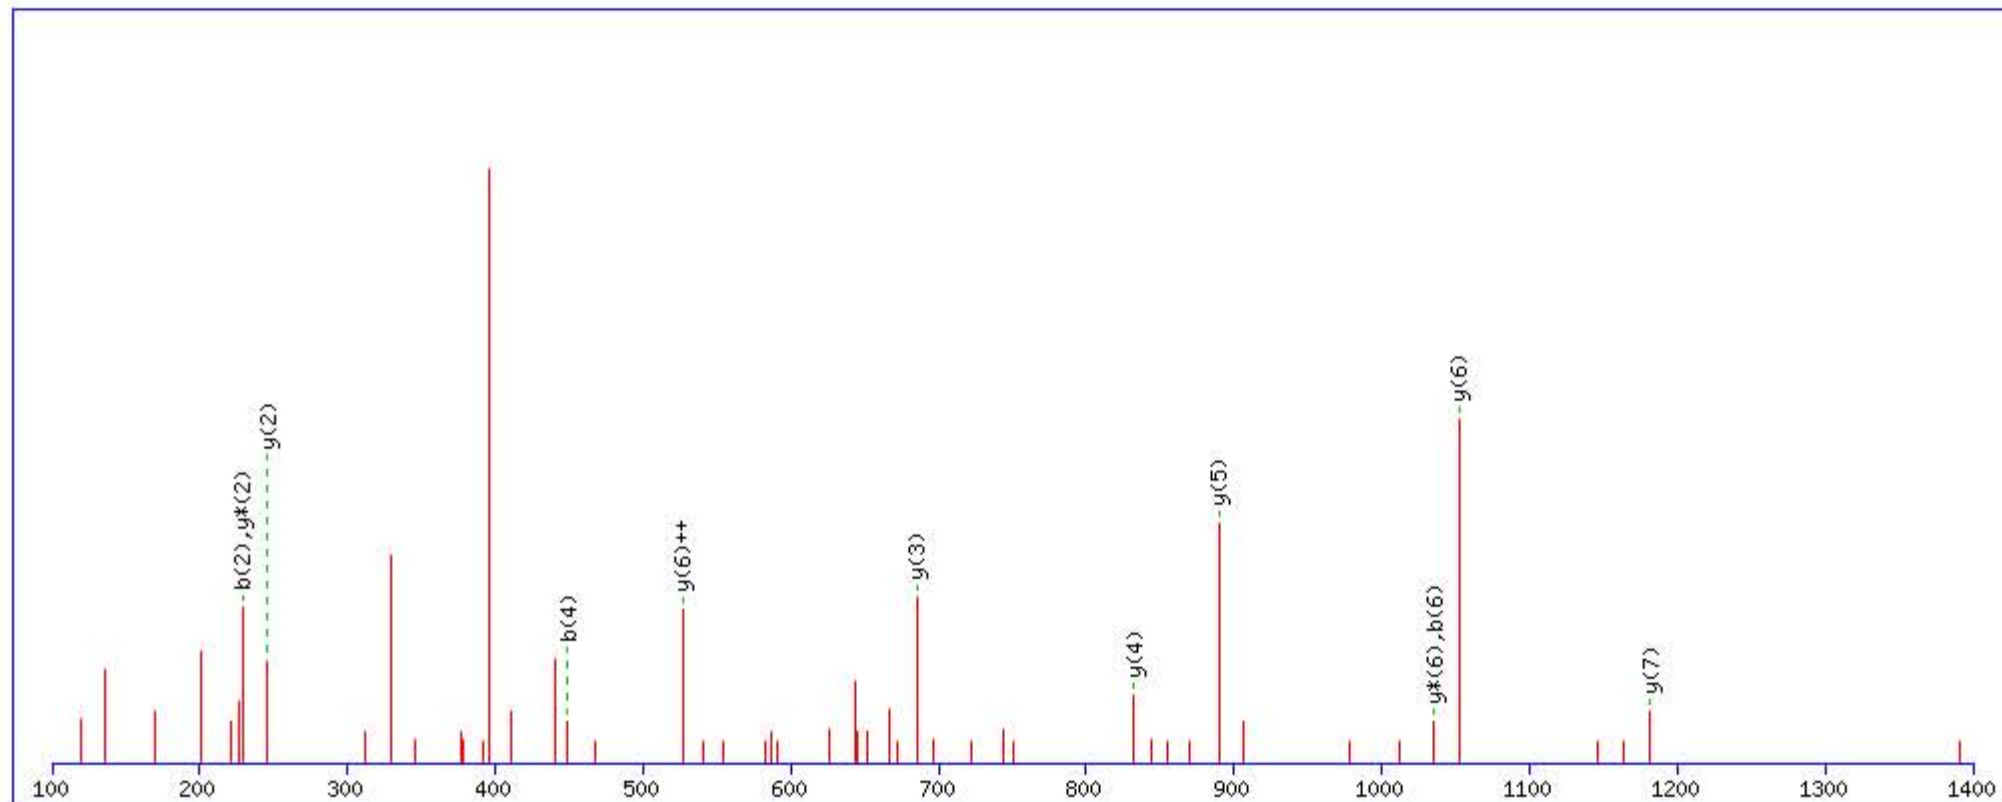

Monoisotopic mass of neutral peptide Mr(calc): 1279.663483

Fixed modifications: Carbamidomethyl (C) (apply to specified residues or termini only)

Variable modifications:

Q6 : Biotin:Thermo-21345 (Q)

Ions Score: 28 Expect: 0.0068

Matches : 12/60 fragment ions using 22 most intense peaks ([help](#))

| # | b                  | b <sup>++</sup> | b <sup>*</sup> | b <sup>+++</sup> | b <sup>0</sup> | b <sup>0++</sup> | Seq. | y                  | y <sup>++</sup>   | y <sup>*</sup>     | y <sup>+++</sup> | y <sup>0</sup> | y <sup>0++</sup> | # |
|---|--------------------|-----------------|----------------|------------------|----------------|------------------|------|--------------------|-------------------|--------------------|------------------|----------------|------------------|---|
| 1 | 100.075690         | 50.541483       |                |                  |                |                  | V    |                    |                   |                    |                  |                |                  | 8 |
| 2 | <b>229.118283</b>  | 115.062780      |                |                  | 211.107718     | 106.057497       | E    | <b>1181.602344</b> | 591.304810        | 1164.575795        | 582.791536       | 1163.591779    | 582.299528       | 7 |
| 3 | 392.181612         | 196.594444      |                |                  | 374.171047     | 187.589162       | Y    | <b>1052.559751</b> | <b>526.783514</b> | <b>1035.533202</b> | 518.270239       |                |                  | 6 |
| 4 | <b>449.203076</b>  | 225.105176      |                |                  | 431.192511     | 216.099894       | G    | <b>889.496422</b>  | 445.251849        | 872.469873         | 436.738575       |                |                  | 5 |
| 5 | 596.271490         | 298.639383      |                |                  | 578.260925     | 289.634101       | F    | <b>832.474958</b>  | 416.741117        | 815.448409         | 408.227843       |                |                  | 4 |
| 6 | <b>1035.496816</b> | 518.252046      | 1018.470267    | 509.738772       | 1017.486251    | 509.246764       | Q    | <b>685.406544</b>  | 343.206910        | 668.379995         | 334.693636       |                |                  | 3 |
| 7 | 1134.565230        | 567.786253      | 1117.538681    | 559.272979       | 1116.554665    | 558.780971       | V    | <b>246.181218</b>  | 123.594247        | <b>229.154669</b>  | 115.080973       |                |                  | 2 |
| 8 |                    |                 |                |                  |                |                  | K    | 147.112804         | 74.060040         | 130.086255         | 65.546765        |                |                  | 1 |

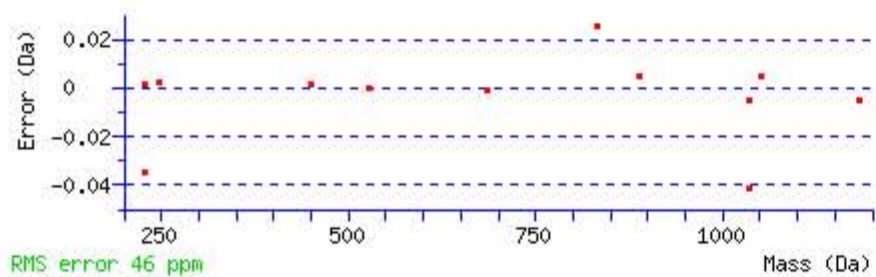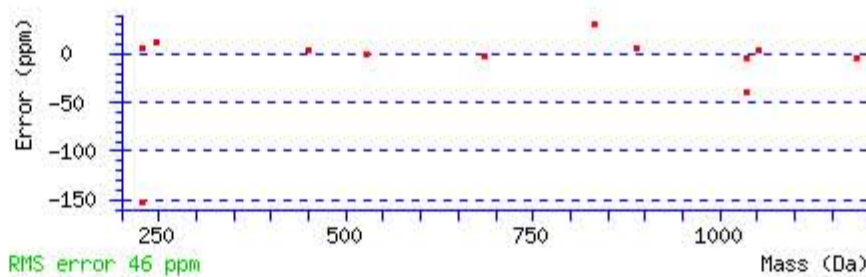

NCBI BLAST search of **VEYGFQVK**

(Parameters: blastp, nr protein database, expect=20000, no filter, PAM30)

Other BLAST [web gateways](#)

### All matches to this query

| Score | Mr(calc):   | Delta     | Sequence                     |
|-------|-------------|-----------|------------------------------|
| 28.3  | 1279.663483 | -0.004055 | <a href="#">VEYGFQVK</a>     |
| 4.9   | 1279.659424 | 0.000004  | <a href="#">VECLYEALKR</a>   |
| 0.8   | 1279.652039 | 0.007389  | <a href="#">VERAITEASPAH</a> |



**Peptide View**

MS/MS Fragmentation of **LGQYASPTAK**

Found in **CO4A\_HUMAN**, Complement C4-A OS=Homo sapiens GN=C4A PE=1 SV=2

Match to Query 25390: 1345.703568 from(673.859060,2+) rtinseconds(1636) index(48921)

Title: Locus:1.1.1.3213.10 File:"2013-07-02 CLN FXIII 30 min 3rd F 4.wiff"

Data file C:\Program Files (x86)\Matrix Science\Mascot Daemon\mgf\3 FXIII 30 min 3rd\mascot\_daemon\_merge.mgf

Click mouse within plot area to zoom in by factor of two about that point

Or, Plot from 100 to 1600 Da Full range

Label all possible matches  Label matches used for scoring

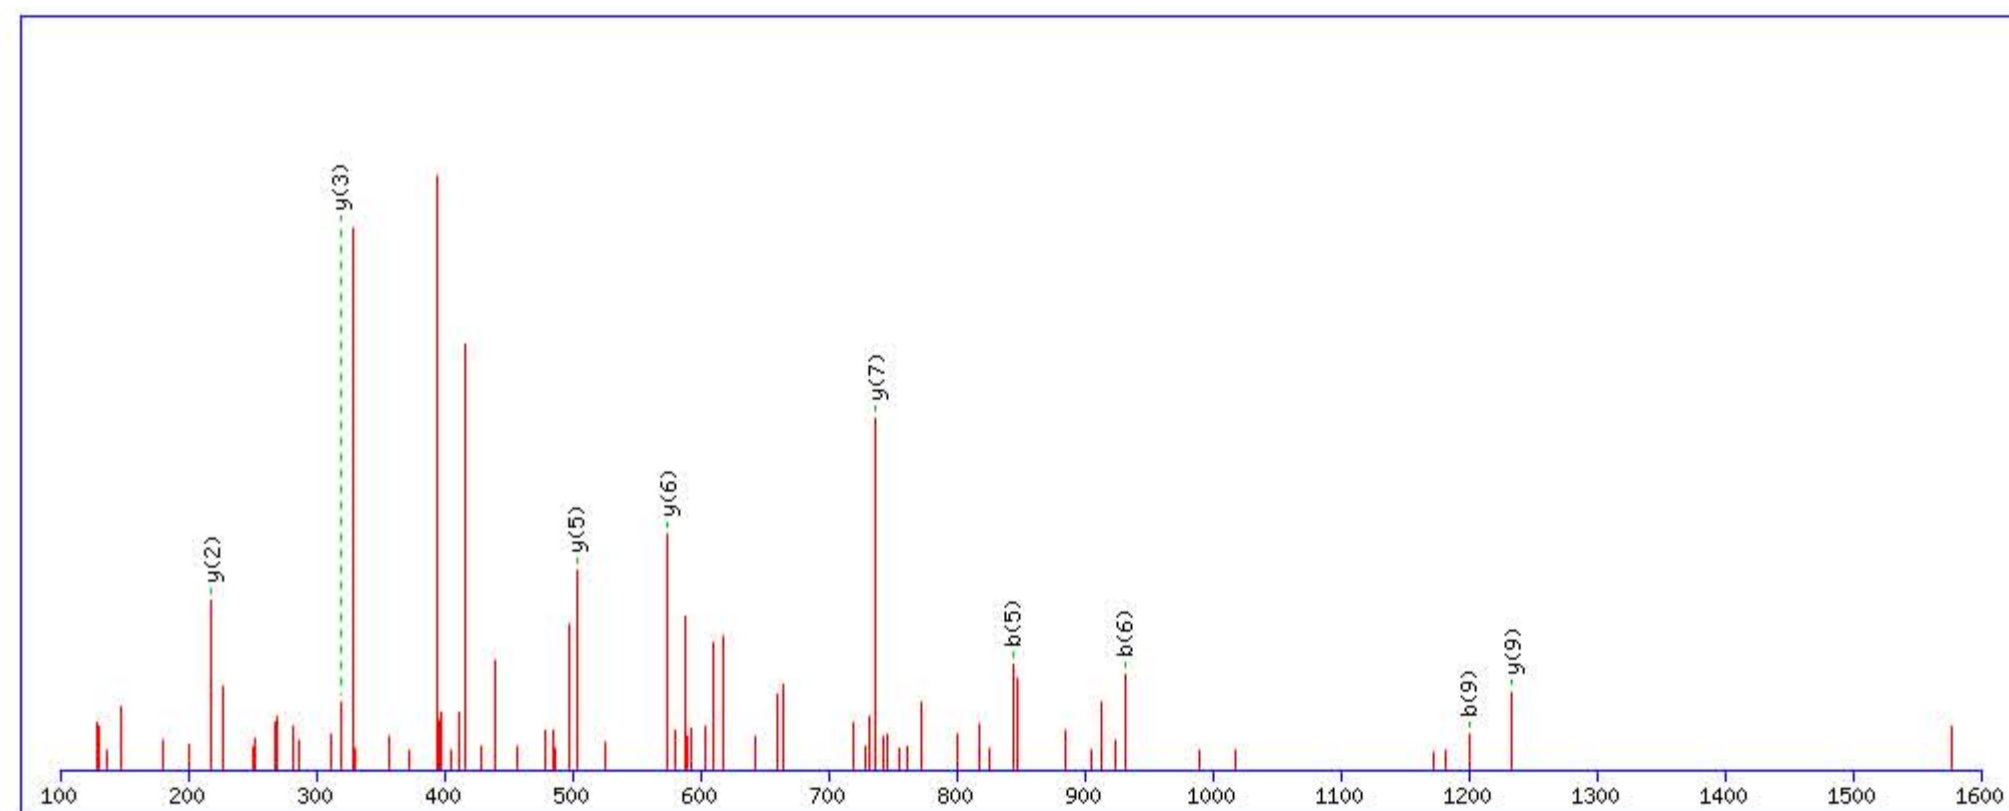

Monoisotopic mass of neutral peptide Mr(calc): 1345.706390

Fixed modifications: Carbamidomethyl (C) (apply to specified residues or termini only)

Variable modifications:

Q3 : Biotin:Thermo-21345 (Q)

Ions Score: 52 Expect: 0.0001

Matches : 9/90 fragment ions using 11 most intense peaks [\(help\)](#)

| #  | b           | b <sup>++</sup> | b <sup>*</sup> | b <sup>*++</sup> | b <sup>0</sup> | b <sup>0++</sup> | Seq. | y           | y <sup>++</sup> | y <sup>*</sup> | y <sup>*++</sup> | y <sup>0</sup> | y <sup>0++</sup> | #  |
|----|-------------|-----------------|----------------|------------------|----------------|------------------|------|-------------|-----------------|----------------|------------------|----------------|------------------|----|
| 1  | 114.091340  | 57.549308       |                |                  |                |                  | L    |             |                 |                |                  |                |                  | 10 |
| 2  | 171.112804  | 86.060040       |                |                  |                |                  | G    | 1233.629622 | 617.318449      | 1216.603073    | 608.805175       | 1215.619057    | 608.313167       | 9  |
| 3  | 610.338130  | 305.672703      | 593.311581     | 297.159429       |                |                  | Q    | 1176.608158 | 588.807717      | 1159.581609    | 580.294443       | 1158.597593    | 579.802435       | 8  |
| 4  | 773.401459  | 387.204368      | 756.374910     | 378.691093       |                |                  | Y    | 737.382832  | 369.195054      | 720.356283     | 360.681780       | 719.372267     | 360.189772       | 7  |
| 5  | 844.438573  | 422.722925      | 827.412024     | 414.209650       |                |                  | A    | 574.319503  | 287.663389      | 557.292954     | 279.150115       | 556.308938     | 278.658107       | 6  |
| 6  | 931.470601  | 466.238939      | 914.444052     | 457.725664       | 913.460036     | 457.233656       | S    | 503.282389  | 252.144832      | 486.255840     | 243.631558       | 485.271824     | 243.139550       | 5  |
| 7  | 1028.523365 | 514.765321      | 1011.496816    | 506.252046       | 1010.512800    | 505.760038       | P    | 416.250361  | 208.628818      | 399.223812     | 200.115544       | 398.239796     | 199.623536       | 4  |
| 8  | 1129.571044 | 565.289160      | 1112.544495    | 556.775886       | 1111.560479    | 556.283878       | T    | 319.197597  | 160.102436      | 302.171048     | 151.589162       | 301.187032     | 151.097154       | 3  |
| 9  | 1200.608158 | 600.807717      | 1183.581609    | 592.294443       | 1182.597593    | 591.802435       | A    | 218.149918  | 109.578597      | 201.123369     | 101.065322       |                |                  | 2  |
| 10 |             |                 |                |                  |                |                  | K    | 147.112804  | 74.060040       | 130.086255     | 65.546765        |                |                  | 1  |

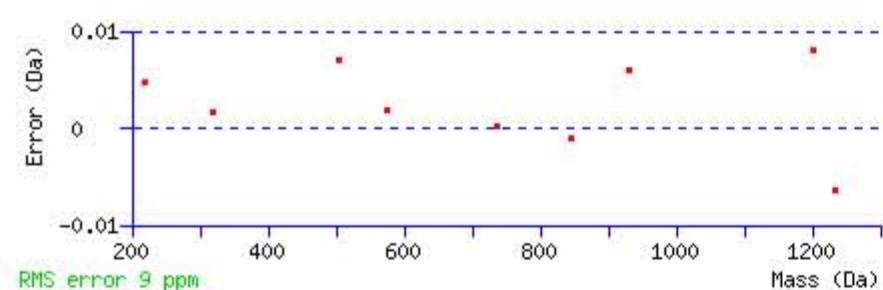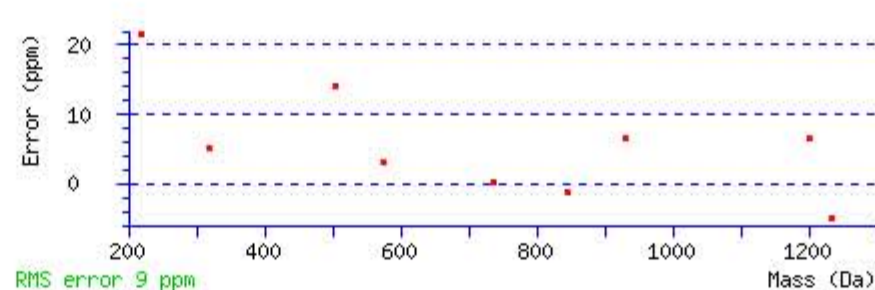

NCBI BLAST search of **LGQYASPTAK**

(Parameters: blastp, nr protein database, expect=20000, no filter, PAM30)

Other BLAST [web gateways](#)

**All matches to this query**

| Score | Mr(calc):   | Delta     | Sequence                      |
|-------|-------------|-----------|-------------------------------|
| 52.0  | 1345.706390 | -0.002822 | <a href="#">LGQYASPTAK</a>    |
| 8.9   | 1345.706406 | -0.002838 | <a href="#">QGLYTPQTK</a>     |
| 7.3   | 1345.706390 | -0.002822 | <a href="#">LGQYDQALK</a>     |
| 6.7   | 1345.713608 | -0.010040 | <a href="#">NGMLLTGGGKDRK</a> |
| 5.8   | 1345.692474 | 0.011094  | <a href="#">VASCRYPALGPR</a>  |
| 5.4   | 1345.717636 | -0.014068 | <a href="#">QMPQPTFTLRK</a>   |
| 4.9   | 1345.683746 | 0.019822  | <a href="#">QDASTLISDLQR</a>  |
| 4.1   | 1345.694977 | 0.008591  | <a href="#">TQKDTGVNEKAR</a>  |
| 3.3   | 1345.720993 | -0.017425 | <a href="#">QVGMICERLLK</a>   |
| 1.9   | 1345.720139 | -0.016571 | <a href="#">ASAVLSSVPTASR</a> |



# MASCOT Search Results

## Peptide View

MS/MS Fragmentation of **TEQWSTLPPETK**

Found in **CO4A\_HUMAN**, Complement C4-A OS=Homo sapiens GN=C4A PE=1 SV=2

Match to Query 37538: 1726.847728 from(864.431140,2+) rtinseconds(2017) index(51328)

Title: Locus:1.1.1.3345.15 File:"2013-07-02 CLN FXIII 30 min 3rd F 4.wiff"

Data file C:\Program Files (x86)\Matrix Science\Mascot Daemon\mgf\3 FXIII 30 min 3rd\mascot\_daemon\_merge.mgf

Click mouse within plot area to zoom in by factor of two about that point

Or, Plot from  to  Da

Label all possible matches  Label matches used for scoring

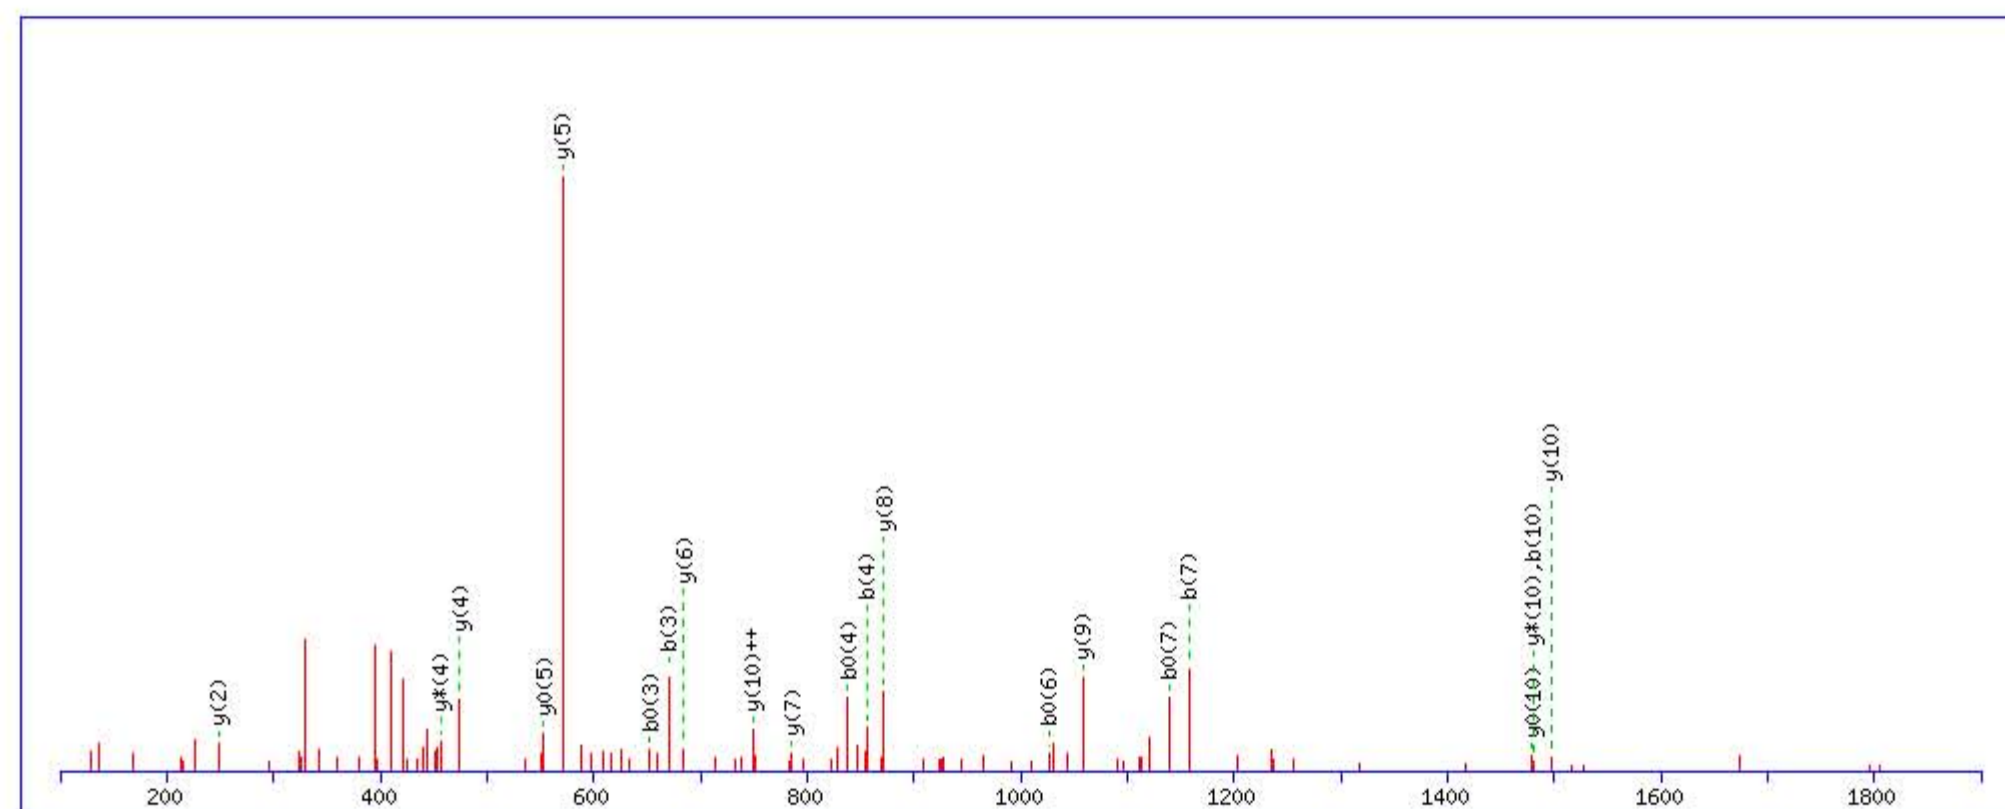

Monoisotopic mass of neutral peptide Mr(calc): 1726.860001

Fixed modifications: Carbamidomethyl (C) (apply to specified residues or termini only)

Variable modifications:

Q3 : Biotin:Thermo-21345 (Q)

Ions Score: 38 Expect: 0.0059

Matches : 21/126 fragment ions using 41 most intense peaks [\(help\)](#)

| #  | b                  | b <sup>++</sup> | b <sup>*</sup> | b <sup>*++</sup> | b <sup>0</sup>     | b <sup>0++</sup> | Seq. | y                  | y <sup>++</sup>   | y <sup>*</sup>     | y <sup>*++</sup> | y <sup>0</sup>     | y <sup>0++</sup> | #  |
|----|--------------------|-----------------|----------------|------------------|--------------------|------------------|------|--------------------|-------------------|--------------------|------------------|--------------------|------------------|----|
| 1  | 102.054955         | 51.531116       |                |                  | 84.044390          | 42.525833        | T    |                    |                   |                    |                  |                    |                  | 12 |
| 2  | 231.097548         | 116.052412      |                |                  | 213.086983         | 107.047130       | E    | 1626.819607        | 813.913442        | 1609.793058        | 805.400167       | 1608.809042        | 804.908159       | 11 |
| 3  | <b>670.322874</b>  | 335.665075      | 653.296325     | 327.151801       | <b>652.312309</b>  | 326.659793       | Q    | <b>1497.777014</b> | <b>749.392145</b> | <b>1480.750465</b> | 740.878871       | <b>1479.766449</b> | 740.386863       | 10 |
| 4  | <b>856.402187</b>  | 428.704732      | 839.375638     | 420.191457       | <b>838.391622</b>  | 419.699449       | W    | <b>1058.551688</b> | 529.779482        | 1041.525139        | 521.266208       | 1040.541123        | 520.774200       | 9  |
| 5  | 943.434215         | 472.220746      | 926.407666     | 463.707471       | 925.423650         | 463.215463       | S    | <b>872.472375</b>  | 436.739826        | 855.445826         | 428.226551       | 854.461810         | 427.734543       | 8  |
| 6  | 1044.481894        | 522.744585      | 1027.455345    | 514.231311       | <b>1026.471329</b> | 513.739303       | T    | <b>785.440347</b>  | 393.223812        | 768.413798         | 384.710537       | 767.429782         | 384.218529       | 7  |
| 7  | <b>1157.565958</b> | 579.286617      | 1140.539409    | 570.773343       | <b>1139.555393</b> | 570.281334       | L    | <b>684.392668</b>  | 342.699972        | 667.366119         | 334.186698       | 666.382103         | 333.694690       | 6  |
| 8  | 1254.618722        | 627.812999      | 1237.592173    | 619.299725       | 1236.608157        | 618.807716       | P    | <b>571.308604</b>  | 286.157940        | 554.282055         | 277.644666       | <b>553.298039</b>  | 277.152658       | 5  |
| 9  | 1351.671486        | 676.339381      | 1334.644937    | 667.826107       | 1333.660921        | 667.334098       | P    | <b>474.255840</b>  | 237.631558        | <b>457.229291</b>  | 229.118284       | 456.245275         | 228.626276       | 4  |
| 10 | <b>1480.714079</b> | 740.860678      | 1463.687530    | 732.347403       | 1462.703514        | 731.855395       | E    | 377.203076         | 189.105176        | 360.176527         | 180.591902       | 359.192511         | 180.099894       | 3  |
| 11 | 1581.761758        | 791.384517      | 1564.735209    | 782.871243       | 1563.751193        | 782.379235       | T    | <b>248.160483</b>  | 124.583879        | 231.133934         | 116.070605       | 230.149918         | 115.578597       | 2  |
| 12 |                    |                 |                |                  |                    |                  | K    | 147.112804         | 74.060040         | 130.086255         | 65.546765        |                    |                  | 1  |

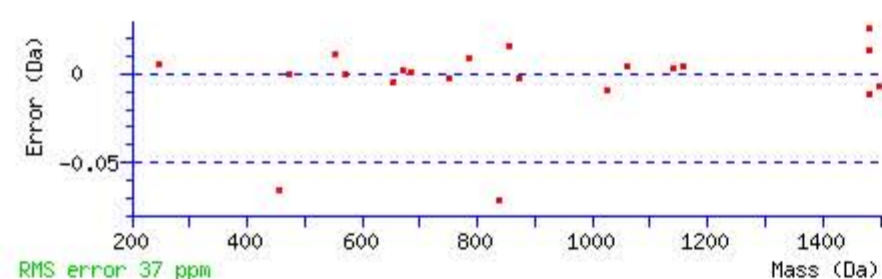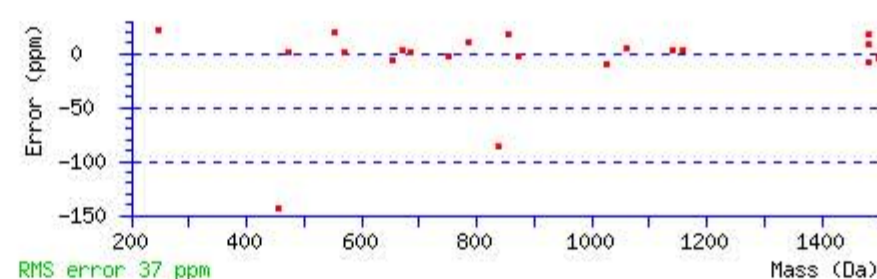

NCBI BLAST search of **TEQWSTLPPETK**

(Parameters: blastp, nr protein database, expect=20000, no filter, PAM30)

Other BLAST [web gateways](#)

## All matches to this query

| Score | Mr(calc):   | Delta     | Sequence                          |
|-------|-------------|-----------|-----------------------------------|
| 37.6  | 1726.860001 | -0.012273 | <a href="#">TEQWSTLPPETK</a>      |
| 12.9  | 1726.867188 | -0.019460 | <a href="#">KDHAEMQAVIDAKQK</a>   |
| 8.1   | 1726.849960 | -0.002232 | <a href="#">TERFGQGAGPVGGQGPR</a> |
| 2.1   | 1726.853485 | -0.005757 | <a href="#">MASGHAFQPDLVK</a>     |
| 1.0   | 1726.831009 | 0.016719  | <a href="#">MLPVDEFLPVMYNK</a>    |
| 0.1   | 1726.871216 | -0.023488 | <a href="#">NLNTKLQMYFQSPK</a>    |



# MASCOT SCIENCE Mascot Search Results

## Peptide View

MS/MS Fragmentation of **GLEEELQFSLGSK**

Found in **CO4A\_HUMAN**, Complement C4-A OS=Homo sapiens GN=C4A PE=1 SV=2

Match to Query 38088: 1746.884142 from(583.301990,3+) rtinseconds(2555) index(53815)

Title: Locus:1.1.1.3533.3 File:"2013-07-02 CLN FXIII 30 min 3rd F 4.wiff"

Data file C:\Program Files (x86)\Matrix Science\Mascot Daemon\mgf3 FXIII 30 min 3rd\mascot\_daemon\_merge.mgf

Click mouse within plot area to zoom in by factor of two about that point

Or, Plot from  to  Da

Label all possible matches  Label matches used for scoring

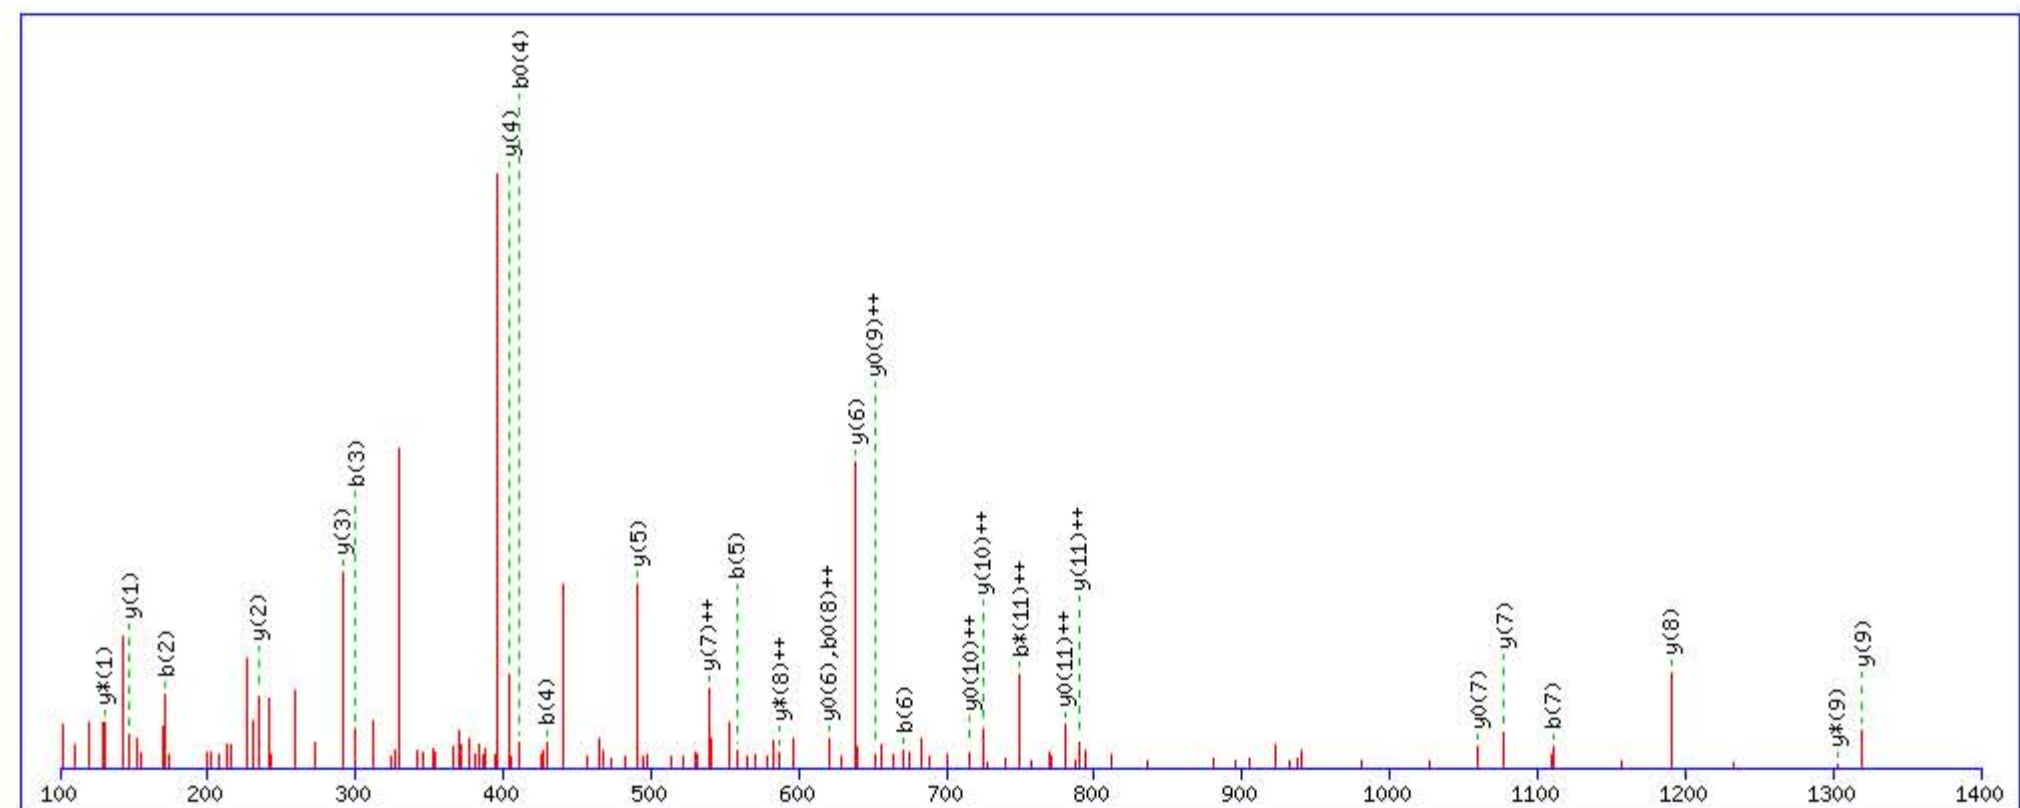

Monoisotopic mass of neutral peptide Mr(calc): 1746.886200

Fixed modifications: Carbamidomethyl (C) (apply to specified residues or termini only)

Variable modifications:

Q7 : Biotin:Thermo-21345 (Q)

Ions Score: 31 Expect: 0.022

Matches : 29/126 fragment ions using 76 most intense peaks [\(help\)](#)

| #  | b                  | b <sup>++</sup> | b <sup>*</sup> | b <sup>+++</sup>  | b <sup>0</sup>    | b <sup>0++</sup>  | Seq. | y                  | y <sup>++</sup>   | y <sup>*</sup>     | y <sup>+++</sup>  | y <sup>0</sup>     | y <sup>0++</sup>  | #  |
|----|--------------------|-----------------|----------------|-------------------|-------------------|-------------------|------|--------------------|-------------------|--------------------|-------------------|--------------------|-------------------|----|
| 1  | 58.028740          | 29.518008       |                |                   |                   |                   | G    |                    |                   |                    |                   |                    |                   | 13 |
| 2  | <b>171.112804</b>  | 86.060040       |                |                   |                   |                   | L    | 1690.872035        | 845.939656        | 1673.845486        | 837.426381        | 1672.861470        | 836.934373        | 12 |
| 3  | <b>300.155397</b>  | 150.581336      |                |                   | 282.144832        | 141.576054        | E    | 1577.787971        | <b>789.397624</b> | 1560.761422        | 780.884349        | 1559.777406        | <b>780.392341</b> | 11 |
| 4  | <b>429.197990</b>  | 215.102633      |                |                   | <b>411.187425</b> | 206.097351        | E    | 1448.745378        | <b>724.876327</b> | 1431.718829        | 716.363053        | 1430.734813        | <b>715.871045</b> | 10 |
| 5  | <b>558.240583</b>  | 279.623930      |                |                   | 540.230018        | 270.618647        | E    | <b>1319.702785</b> | 660.355031        | <b>1302.676236</b> | 651.841756        | 1301.692220        | <b>651.349748</b> | 9  |
| 6  | <b>671.324647</b>  | 336.165962      |                |                   | 653.314082        | 327.160679        | L    | <b>1190.660192</b> | 595.833734        | 1173.633643        | <b>587.320460</b> | 1172.649627        | 586.828452        | 8  |
| 7  | <b>1110.549973</b> | 555.778624      | 1093.523424    | 547.265350        | 1092.539408       | 546.773342        | Q    | <b>1077.576128</b> | <b>539.291702</b> | 1060.549579        | 530.778428        | <b>1059.565563</b> | 530.286419        | 7  |
| 8  | 1257.618387        | 629.312832      | 1240.591838    | 620.799557        | 1239.607822       | <b>620.307549</b> | F    | <b>638.350802</b>  | 319.679039        | 621.324253         | 311.165765        | <b>620.340237</b>  | 310.673757        | 6  |
| 9  | 1344.650415        | 672.828846      | 1327.623866    | 664.315571        | 1326.639850       | 663.823563        | S    | <b>491.282388</b>  | 246.144832        | 474.255839         | 237.631557        | 473.271823         | 237.139549        | 5  |
| 10 | 1457.734479        | 729.370878      | 1440.707930    | 720.857603        | 1439.723914       | 720.365595        | L    | <b>404.250360</b>  | 202.628818        | 387.223811         | 194.115543        | 386.239795         | 193.623535        | 4  |
| 11 | 1514.755943        | 757.881609      | 1497.729394    | <b>749.368335</b> | 1496.745378       | 748.876327        | G    | <b>291.166296</b>  | 146.086786        | 274.139747         | 137.573512        | 273.155731         | 137.081504        | 3  |
| 12 | 1601.787971        | 801.397624      | 1584.761422    | 792.884349        | 1583.777406       | 792.392341        | S    | <b>234.144832</b>  | 117.576054        | 217.118283         | 109.062780        | 216.134267         | 108.570772        | 2  |
| 13 |                    |                 |                |                   |                   |                   | K    | <b>147.112804</b>  | 74.060040         | <b>130.086255</b>  | 65.546765         |                    |                   | 1  |

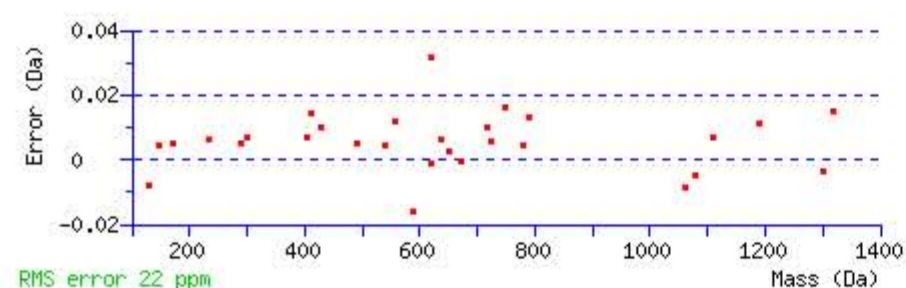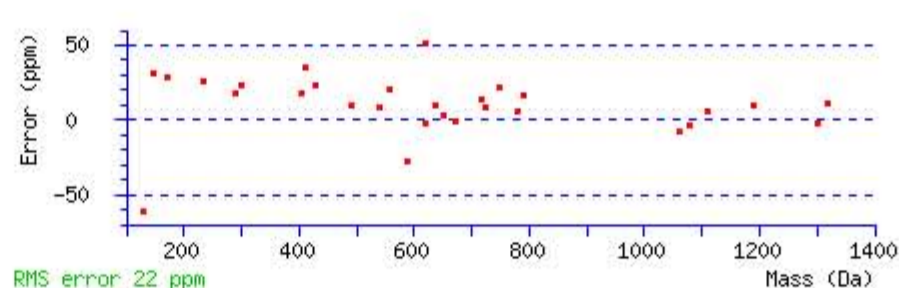

NCBI BLAST search of [GLEEELQFSLGSK](#)

(Parameters: blastp, nr protein database, expect=20000, no filter, PAM30)

Other BLAST [web gateways](#)

All matches to this query

| Score | Mr(calc):   | Delta     | Sequence                      |
|-------|-------------|-----------|-------------------------------|
| 30.8  | 1746.886200 | -0.002058 | <a href="#">GLEEELQFSLGSK</a> |

Mascot: <http://www.matrixscience.com/>



# MASCOT Search Results

## Peptide View

MS/MS Fragmentation of **EPFLSCCQFAESLR**

Found in **CO4A\_HUMAN**, Complement C4-A OS=Homo sapiens GN=C4A PE=1 SV=2

Match to Query 44806: 2053.939488 from(1027.977020,2+) rtinseconds(2502) index(53566)

Title: Locus:1.1.1.3514.16 File:"2013-07-02 CLN FXIII 30 min 3rd F 4.wiff"

Data file C:\Program Files (x86)\Matrix Science\Mascot Daemon\mgf3 FXIII 30 min 3rd\mascot\_daemon\_merge.mgf

Click mouse within plot area to zoom in by factor of two about that point

Or, Plot from  to  Da

Label all possible matches  Label matches used for scoring

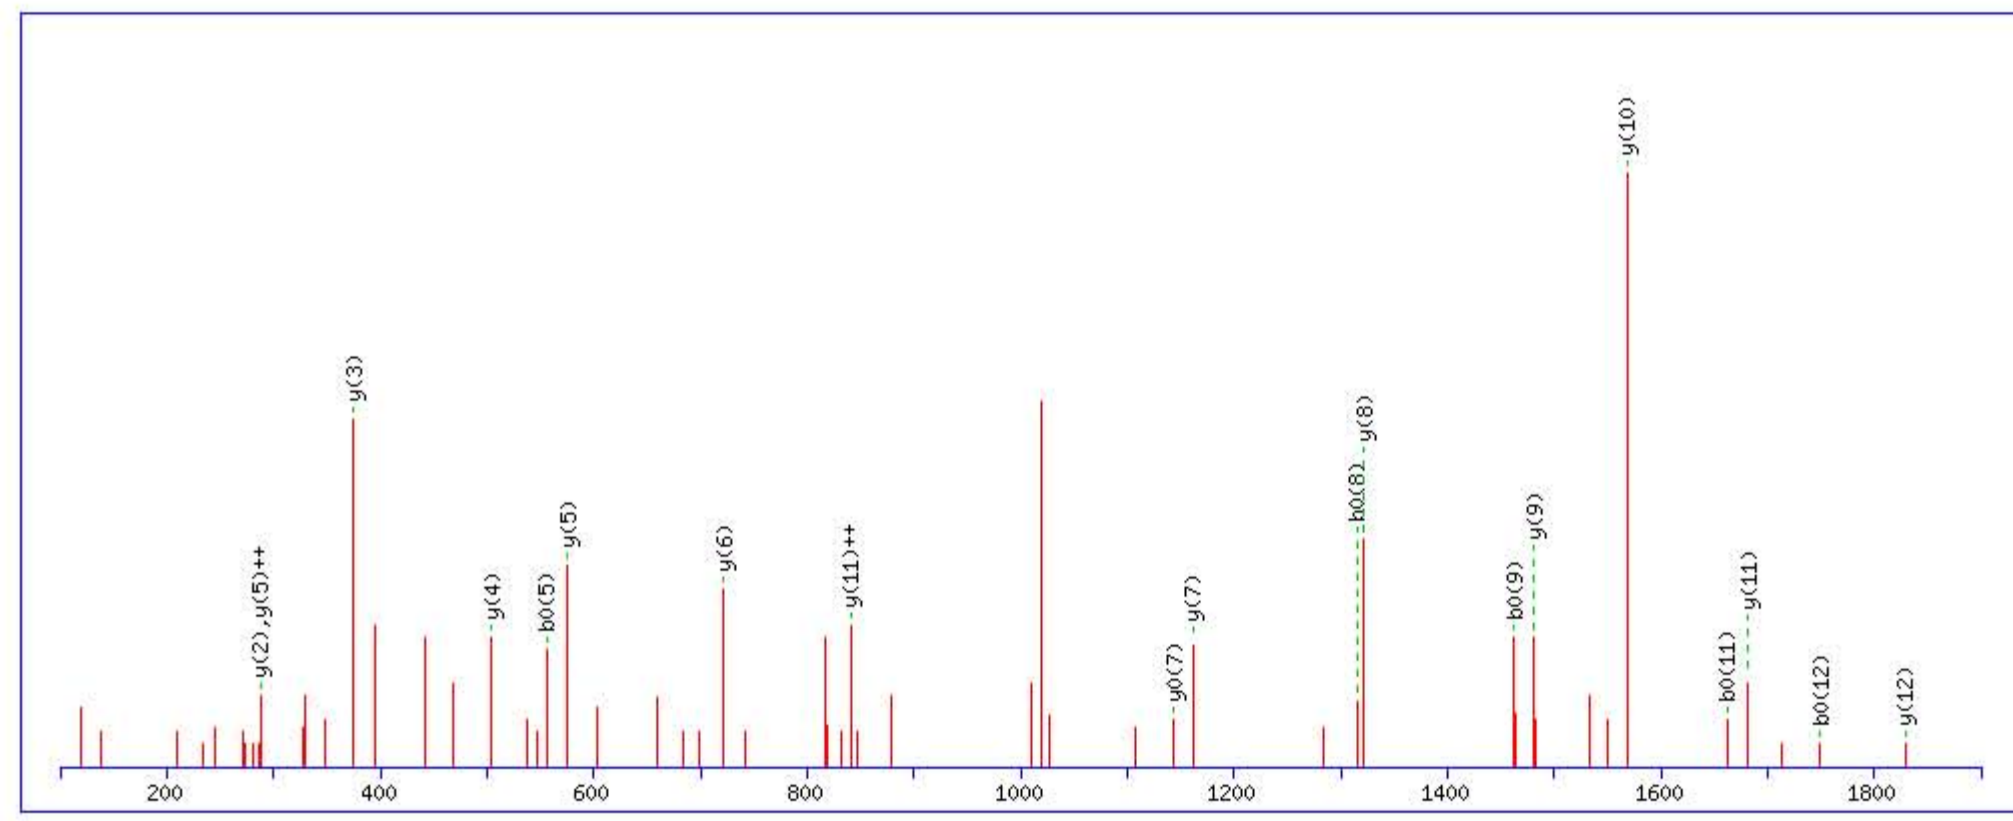

Monoisotopic mass of neutral peptide Mr(calc): 2053.942368

Fixed modifications: Carbamidomethyl (C) (apply to specified residues or termini only)

Variable modifications:

Q8 : Biotin:Thermo-21345 (Q)

Ions Score: 62 Expect: 1.3e-005

Matches : 19/138 fragment ions using 34 most intense peaks [\(help\)](#)

| #  | b           | b <sup>++</sup> | b <sup>*</sup> | b <sup>*++</sup> | b <sup>0</sup>     | b <sup>0++</sup> | Seq. | y                  | y <sup>++</sup>   | y <sup>*</sup> | y <sup>*++</sup> | y <sup>0</sup>     | y <sup>0++</sup> | #  |
|----|-------------|-----------------|----------------|------------------|--------------------|------------------|------|--------------------|-------------------|----------------|------------------|--------------------|------------------|----|
| 1  | 130.049869  | 65.528572       |                |                  | 112.039304         | 56.523290        | E    |                    |                   |                |                  |                    |                  | 14 |
| 2  | 227.102633  | 114.054954      |                |                  | 209.092068         | 105.049672       | P    | 1925.907059        | 963.457168        | 1908.880510    | 954.943893       | 1907.896494        | 954.451885       | 13 |
| 3  | 374.171047  | 187.589161      |                |                  | 356.160482         | 178.583879       | F    | <b>1828.854295</b> | 914.930786        | 1811.827746    | 906.417511       | 1810.843730        | 905.925503       | 12 |
| 4  | 487.255111  | 244.131193      |                |                  | 469.244546         | 235.125911       | L    | <b>1681.785881</b> | <b>841.396579</b> | 1664.759332    | 832.883304       | 1663.775316        | 832.391296       | 11 |
| 5  | 574.287139  | 287.647208      |                |                  | <b>556.276574</b>  | 278.641925       | S    | <b>1568.701817</b> | 784.854547        | 1551.675268    | 776.341272       | 1550.691252        | 775.849264       | 10 |
| 6  | 734.317788  | 367.662532      |                |                  | 716.307223         | 358.657250       | C    | <b>1481.669789</b> | 741.338533        | 1464.643240    | 732.825258       | 1463.659224        | 732.333250       | 9  |
| 7  | 894.348437  | 447.677857      |                |                  | 876.337872         | 438.672574       | C    | <b>1321.639140</b> | 661.323208        | 1304.612591    | 652.809934       | 1303.628575        | 652.317926       | 8  |
| 8  | 1333.573763 | 667.290520      | 1316.547214    | 658.777245       | <b>1315.563198</b> | 658.285237       | Q    | <b>1161.608491</b> | 581.307884        | 1144.581942    | 572.794609       | <b>1143.597926</b> | 572.302601       | 7  |
| 9  | 1480.642177 | 740.824727      | 1463.615628    | 732.311452       | <b>1462.631612</b> | 731.819444       | F    | <b>722.383165</b>  | 361.695221        | 705.356616     | 353.181946       | 704.372600         | 352.689938       | 6  |
| 10 | 1551.679291 | 776.343284      | 1534.652742    | 767.830009       | 1533.668726        | 767.338001       | A    | <b>575.314751</b>  | <b>288.161014</b> | 558.288202     | 279.647739       | 557.304186         | 279.155731       | 5  |
| 11 | 1680.721884 | 840.864580      | 1663.695335    | 832.351306       | <b>1662.711319</b> | 831.859298       | E    | <b>504.277637</b>  | 252.642457        | 487.251088     | 244.129182       | 486.267072         | 243.637174       | 4  |
| 12 | 1767.753912 | 884.380594      | 1750.727363    | 875.867320       | <b>1749.743347</b> | 875.375312       | S    | <b>375.235044</b>  | 188.121160        | 358.208495     | 179.607885       | 357.224479         | 179.115877       | 3  |
| 13 | 1880.837976 | 940.922626      | 1863.811427    | 932.409352       | 1862.827411        | 931.917344       | L    | <b>288.203016</b>  | 144.605146        | 271.176467     | 136.091871       |                    |                  | 2  |
| 14 |             |                 |                |                  |                    |                  | R    | 175.118952         | 88.063114         | 158.092403     | 79.549839        |                    |                  | 1  |

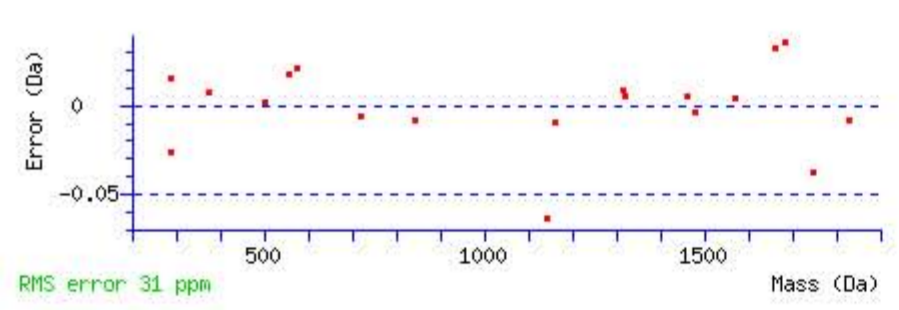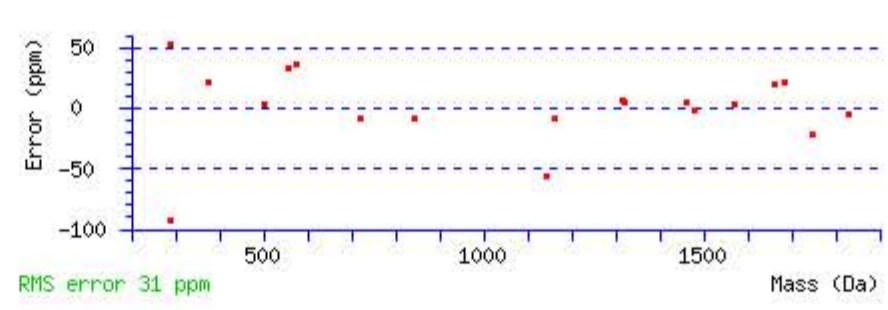

NCBI BLAST search of [EPFLSCCQFAESLR](#)

(Parameters: blastp, nr protein database, expect=20000, no filter, PAM30)

Other BLAST [web gateways](#)

### All matches to this query

| Score | Mr(calc):   | Delta     | Sequence                       |
|-------|-------------|-----------|--------------------------------|
| 61.9  | 2053.942368 | -0.002880 | <a href="#">EPFLSCCQFAESLR</a> |



# MASCOT Search Results

## Peptide View

MS/MS Fragmentation of **LLATLCSAEVCQCAEGK**

Found in **CO4A\_HUMAN**, Complement C4-A OS=Homo sapiens GN=C4A PE=1 SV=2

Match to Query 47566: 2220.032952 from(741.018260,3+) rtinseconds(2131) index(64602)

Title: Locus:1.1.1.3221.14 File:"2013-07-02 CLN FXIII 30 min 3rd FT.wiff"

Data file C:\Program Files (x86)\Matrix Science\Mascot Daemon\mgf\3 FXIII 30 min 3rd\mascot\_daemon\_merge.mgf

Click mouse within plot area to zoom in by factor of two about that point

Or, Plot from  to  Da

Label all possible matches  Label matches used for scoring

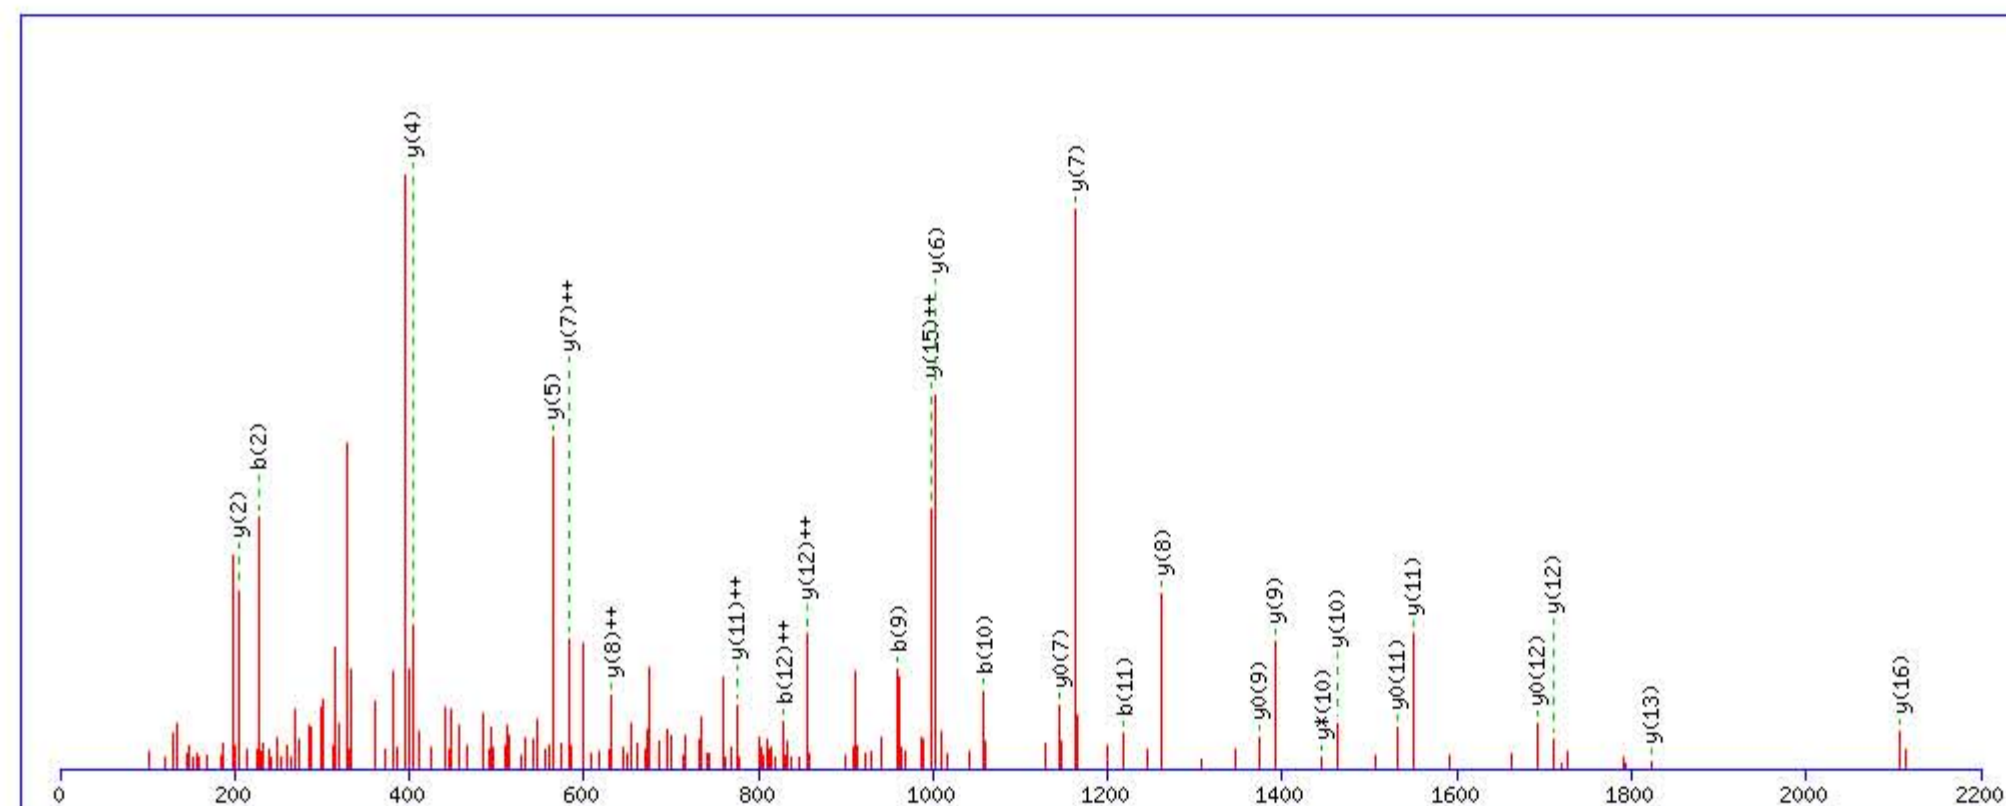

Monoisotopic mass of neutral peptide Mr(calc): 2220.041092

Fixed modifications: Carbamidomethyl (C) (apply to specified residues or termini only)

Variable modifications:

Q12 : Biotin:Thermo-21345 (Q)

Ions Score: 88 Expect: 1.5e-008

Matches : 27/160 fragment ions using 37 most intense peaks [\(help\)](#)

| #  | b                  | b <sup>++</sup>   | b <sup>+</sup> | b <sup>+++</sup> | b <sup>0</sup> | b <sup>0++</sup> | Seq. | y                  | y <sup>++</sup>   | y <sup>+</sup>     | y <sup>+++</sup> | y <sup>0</sup>     | y <sup>0++</sup> | #  |
|----|--------------------|-------------------|----------------|------------------|----------------|------------------|------|--------------------|-------------------|--------------------|------------------|--------------------|------------------|----|
| 1  | 114.091340         | 57.549308         |                |                  |                |                  | L    |                    |                   |                    |                  |                    |                  | 17 |
| 2  | <b>227.175404</b>  | 114.091340        |                |                  |                |                  | L    | <b>2107.964318</b> | 1054.485797       | 2090.937769        | 1045.972522      | 2089.953753        | 1045.480514      | 16 |
| 3  | 298.212518         | 149.609897        |                |                  |                |                  | A    | 1994.880254        | <b>997.943765</b> | 1977.853705        | 989.430491       | 1976.869689        | 988.938483       | 15 |
| 4  | 399.260197         | 200.133737        |                |                  | 381.249632     | 191.128454       | T    | 1923.843140        | 962.425208        | 1906.816591        | 953.911934       | 1905.832575        | 953.419926       | 14 |
| 5  | 512.344261         | 256.675769        |                |                  | 494.333696     | 247.670486       | L    | <b>1822.795461</b> | 911.901369        | 1805.768912        | 903.388094       | 1804.784896        | 902.896086       | 13 |
| 6  | 672.374910         | 336.691093        |                |                  | 654.364345     | 327.685811       | C    | <b>1709.711397</b> | <b>855.359337</b> | 1692.684848        | 846.846062       | <b>1691.700832</b> | 846.354054       | 12 |
| 7  | 759.406938         | 380.207107        |                |                  | 741.396373     | 371.201825       | S    | <b>1549.680748</b> | <b>775.344012</b> | 1532.654199        | 766.830738       | <b>1531.670183</b> | 766.338730       | 11 |
| 8  | 830.444052         | 415.725664        |                |                  | 812.433487     | 406.720382       | A    | <b>1462.648720</b> | 731.827998        | <b>1445.622171</b> | 723.314724       | 1444.638155        | 722.822716       | 10 |
| 9  | <b>959.486645</b>  | 480.246961        |                |                  | 941.476080     | 471.241678       | E    | <b>1391.611606</b> | 696.309441        | 1374.585057        | 687.796167       | <b>1373.601041</b> | 687.304159       | 9  |
| 10 | <b>1058.555059</b> | 529.781168        |                |                  | 1040.544494    | 520.775885       | V    | <b>1262.569013</b> | <b>631.788145</b> | 1245.542464        | 623.274870       | 1244.558448        | 622.782862       | 8  |
| 11 | <b>1218.585708</b> | 609.796492        |                |                  | 1200.575143    | 600.791210       | C    | <b>1163.500599</b> | <b>582.253938</b> | 1146.474050        | 573.740663       | <b>1145.490034</b> | 573.248655       | 7  |
| 12 | 1657.811034        | <b>829.409155</b> | 1640.784485    | 820.895881       | 1639.800469    | 820.403873       | Q    | <b>1003.469950</b> | 502.238613        | 986.443401         | 493.725339       | 985.459385         | 493.233331       | 6  |
| 13 | 1817.841683        | 909.424480        | 1800.815134    | 900.911205       | 1799.831118    | 900.419197       | C    | <b>564.244624</b>  | 282.625950        | 547.218075         | 274.112676       | 546.234059         | 273.620668       | 5  |
| 14 | 1888.878797        | 944.943037        | 1871.852248    | 936.429762       | 1870.868232    | 935.937754       | A    | <b>404.213975</b>  | 202.610626        | 387.187426         | 194.097351       | 386.203410         | 193.605343       | 4  |
| 15 | 2017.921390        | 1009.464333       | 2000.894841    | 1000.951059      | 1999.910825    | 1000.459051      | E    | 333.176861         | 167.092069        | 316.150312         | 158.578794       | 315.166296         | 158.086786       | 3  |
| 16 | 2074.942854        | 1037.975065       | 2057.916305    | 1029.461790      | 2056.932289    | 1028.969782      | G    | <b>204.134268</b>  | 102.570772        | 187.107719         | 94.057497        |                    |                  | 2  |
| 17 |                    |                   |                |                  |                |                  | K    | 147.112804         | 74.060040         | 130.086255         | 65.546765        |                    |                  | 1  |

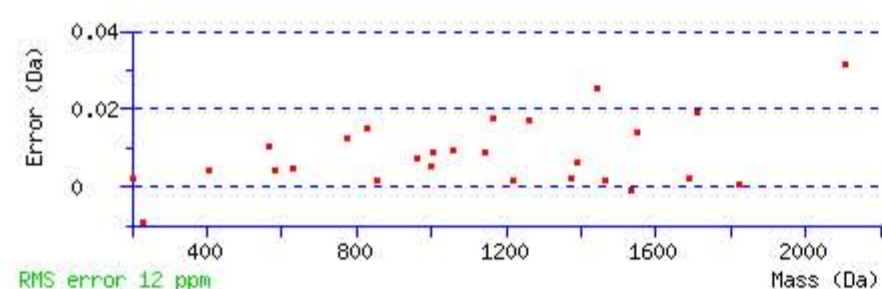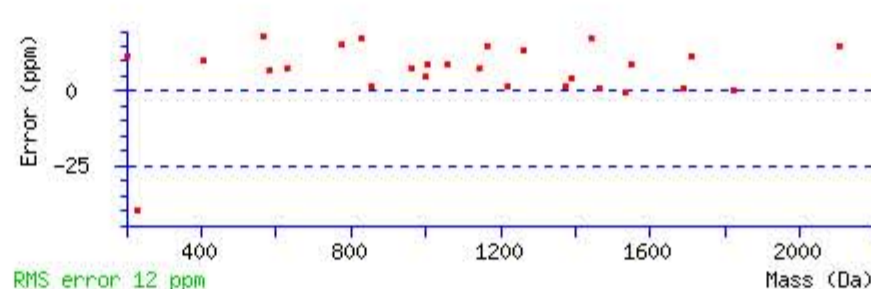

NCBI BLAST search of **LLATLCSAEVCQCAEGK**

(Parameters: blastp, nr protein database, expect=20000, no filter, PAM30)

Other BLAST [web gateways](#)

## All matches to this query

| Score | Mr(calc):   | Delta     | Sequence                            |
|-------|-------------|-----------|-------------------------------------|
| 87.8  | 2220.041092 | -0.008140 | <a href="#">LLATLCSAEVCQCAEGK</a>   |
| 3.9   | 2220.048080 | -0.015128 | <a href="#">EPQEGAELPEATGTTSHR</a>  |
| 0.4   | 2220.048752 | -0.015800 | <a href="#">AQDDAFWLQSLITDAFHDK</a> |

Mascot: <http://www.matrixscience.com/>



# MASCOT Search Results

## Peptide View

MS/MS Fragmentation of **AACAQLNDFLQEYGTQGCQV**

Found in **CO4A\_HUMAN**, Complement C4-A OS=Homo sapiens GN=C4A PE=1 SV=2

Match to Query 53263: 2583.155502 from(862.059110,3+) rtinseconds(2740) index(54999)

Title: Locus:1.1.1.3596.12 File:"2013-07-02 CLN FXIII 30 min 3rd F 4.wiff"

Data file C:\Program Files (x86)\Matrix Science\Mascot Daemon\mgf3 FXIII 30 min 3rd\mascot\_daemon\_merge.mgf

Click mouse within plot area to zoom in by factor of two about that point

Or, Plot from  to  Da

Label all possible matches  Label matches used for scoring

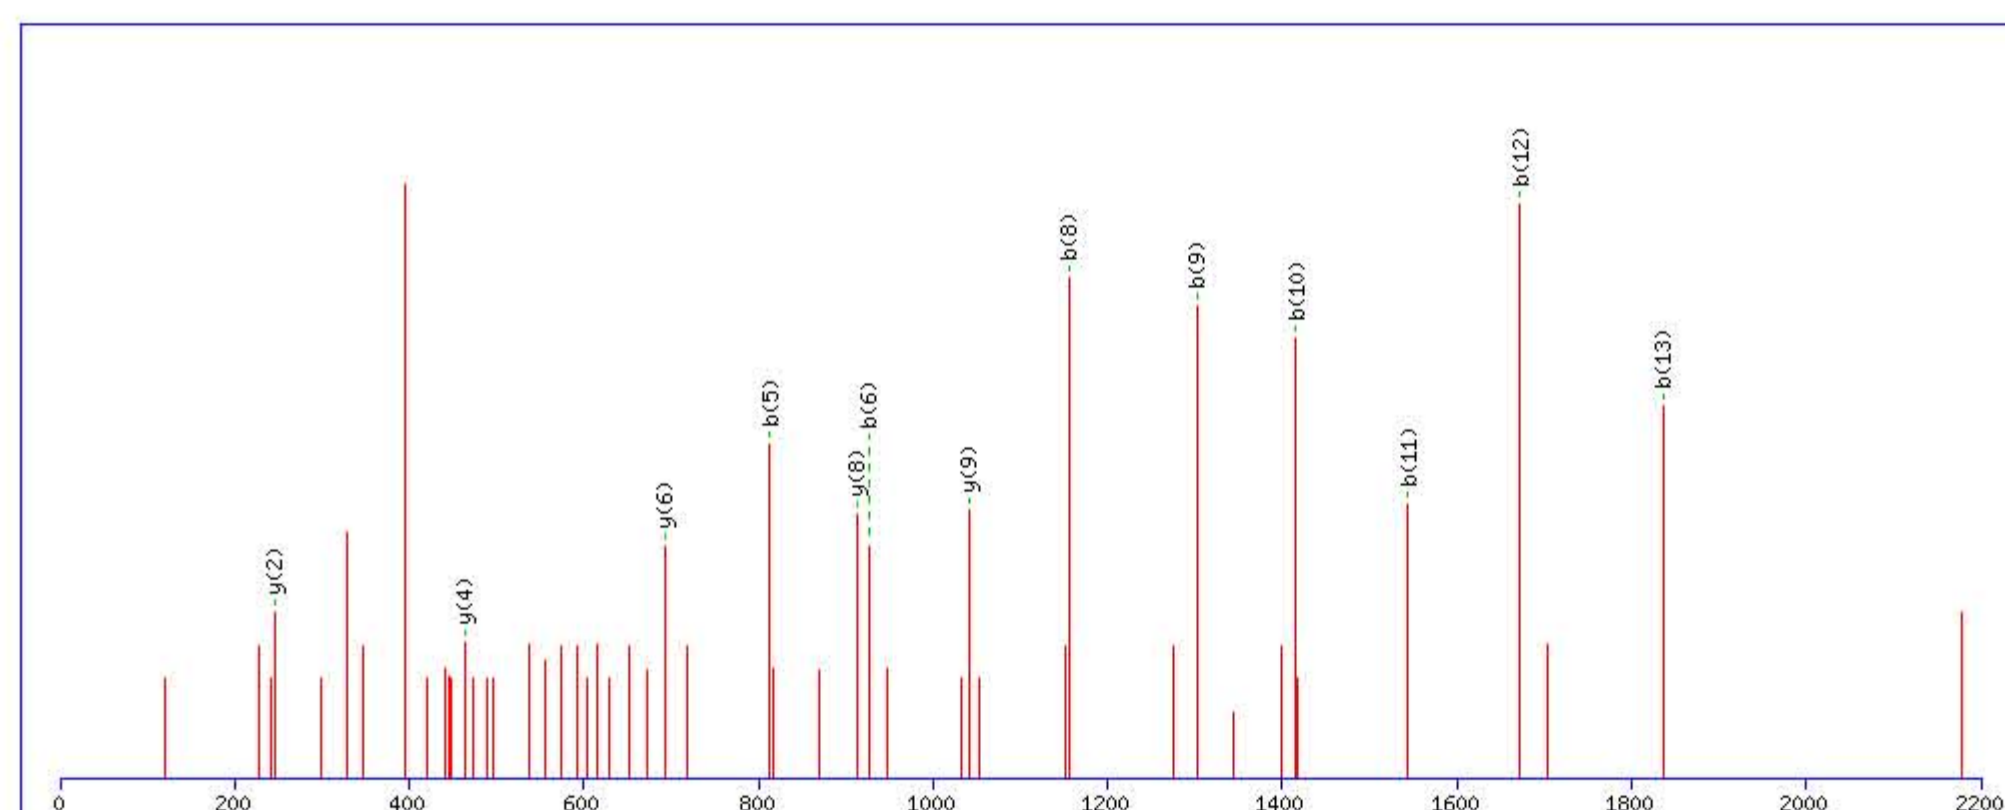

Monoisotopic mass of neutral peptide Mr(calc): 2583.155624

Fixed modifications: Carbamidomethyl (C) (apply to specified residues or termini only)

Variable modifications:

Q5 : Biotin:Thermo-21345 (Q)

Ions Score: 61 Expect: 2.2e-006

Matches : 13/194 fragment ions using 17 most intense peaks [\(help\)](#)

| #  | b                  | b <sup>++</sup> | b <sup>*</sup> | b <sup>*++</sup> | b <sup>0</sup> | b <sup>0++</sup> | Seq. | y                  | y <sup>++</sup> | y <sup>*</sup> | y <sup>*++</sup> | y <sup>0</sup> | y <sup>0++</sup> | #  |
|----|--------------------|-----------------|----------------|------------------|----------------|------------------|------|--------------------|-----------------|----------------|------------------|----------------|------------------|----|
| 1  | 72.044390          | 36.525833       |                |                  |                |                  | A    |                    |                 |                |                  |                |                  | 20 |
| 2  | 143.081504         | 72.044390       |                |                  |                |                  | A    | 2513.125782        | 1257.066529     | 2496.099233    | 1248.553254      | 2495.115217    | 1248.061246      | 19 |
| 3  | 303.112153         | 152.059714      |                |                  |                |                  | C    | 2442.088668        | 1221.547972     | 2425.062119    | 1213.034697      | 2424.078103    | 1212.542689      | 18 |
| 4  | 374.149267         | 187.578271      |                |                  |                |                  | A    | 2282.058019        | 1141.532647     | 2265.031470    | 1133.019373      | 2264.047454    | 1132.527365      | 17 |
| 5  | <b>813.374593</b>  | 407.190935      | 796.348044     | 398.677660       |                |                  | Q    | 2211.020905        | 1106.014090     | 2193.994356    | 1097.500816      | 2193.010340    | 1097.008808      | 16 |
| 6  | <b>926.458657</b>  | 463.732967      | 909.432108     | 455.219692       |                |                  | L    | 1771.795579        | 886.401428      | 1754.769030    | 877.888153       | 1753.785014    | 877.396145       | 15 |
| 7  | 1040.501584        | 520.754430      | 1023.475035    | 512.241155       |                |                  | N    | 1658.711515        | 829.859396      | 1641.684966    | 821.346121       | 1640.700950    | 820.854113       | 14 |
| 8  | <b>1155.528527</b> | 578.267902      | 1138.501978    | 569.754627       | 1137.517962    | 569.262619       | D    | 1544.668588        | 772.837932      | 1527.642039    | 764.324658       | 1526.658023    | 763.832650       | 13 |
| 9  | <b>1302.596941</b> | 651.802109      | 1285.570392    | 643.288834       | 1284.586376    | 642.796826       | F    | 1429.641645        | 715.324460      | 1412.615096    | 706.811186       | 1411.631080    | 706.319178       | 12 |
| 10 | <b>1415.681005</b> | 708.344141      | 1398.654456    | 699.830866       | 1397.670440    | 699.338858       | L    | 1282.573231        | 641.790253      | 1265.546682    | 633.276979       | 1264.562666    | 632.784971       | 11 |
| 11 | <b>1543.739583</b> | 772.373430      | 1526.713034    | 763.860155       | 1525.729018    | 763.368147       | Q    | 1169.489167        | 585.248222      | 1152.462618    | 576.734947       | 1151.478602    | 576.242939       | 10 |
| 12 | <b>1672.782176</b> | 836.894726      | 1655.755627    | 828.381452       | 1654.771611    | 827.889444       | E    | <b>1041.430589</b> | 521.218932      | 1024.404040    | 512.705658       | 1023.420024    | 512.213650       | 9  |
| 13 | <b>1835.845505</b> | 918.426391      | 1818.818956    | 909.913116       | 1817.834940    | 909.421108       | Y    | <b>912.387996</b>  | 456.697636      | 895.361447     | 448.184361       | 894.377431     | 447.692353       | 8  |
| 14 | 1892.866969        | 946.937123      | 1875.840420    | 938.423848       | 1874.856404    | 937.931840       | G    | 749.324667         | 375.165971      | 732.298118     | 366.652697       | 731.314102     | 366.160689       | 7  |
| 15 | 1993.914648        | 997.460962      | 1976.888099    | 988.947688       | 1975.904083    | 988.455680       | T    | <b>692.303203</b>  | 346.655239      | 675.276654     | 338.141965       | 674.292638     | 337.649957       | 6  |
| 16 | 2121.973226        | 1061.490251     | 2104.946677    | 1052.976976      | 2103.962661    | 1052.484968      | Q    | 591.255524         | 296.131400      | 574.228975     | 287.618125       |                |                  | 5  |
| 17 | 2178.994690        | 1090.000983     | 2161.968141    | 1081.487708      | 2160.984125    | 1080.995700      | G    | <b>463.196946</b>  | 232.102111      | 446.170397     | 223.588836       |                |                  | 4  |
| 18 | 2339.025339        | 1170.016307     | 2321.998790    | 1161.503033      | 2321.014774    | 1161.011025      | C    | 406.175482         | 203.591379      | 389.148933     | 195.078104       |                |                  | 3  |
| 19 | 2467.083917        | 1234.045596     | 2450.057368    | 1225.532322      | 2449.073352    | 1225.040314      | Q    | <b>246.144833</b>  | 123.576054      | 229.118284     | 115.062780       |                |                  | 2  |
| 20 |                    |                 |                |                  |                |                  | V    | 118.086255         | 59.546765       |                |                  |                |                  | 1  |

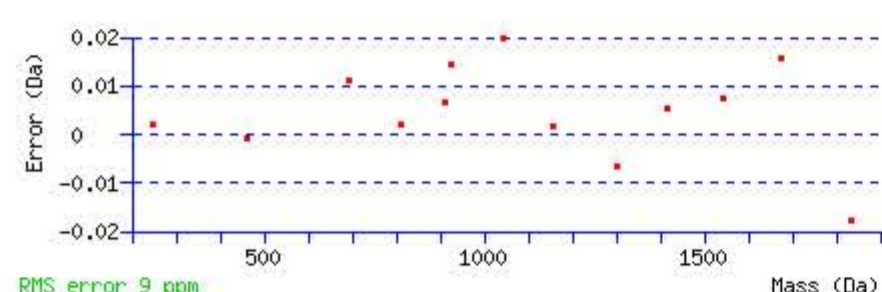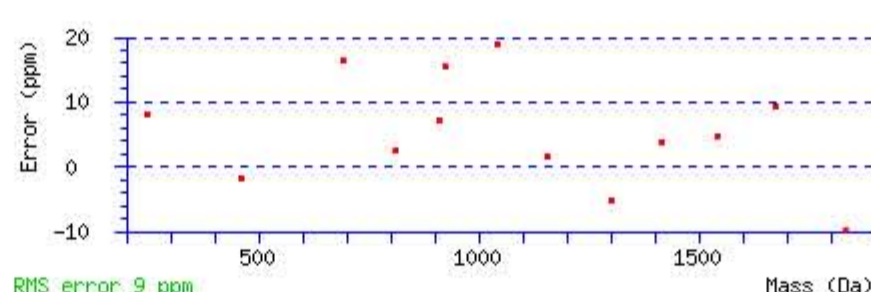

NCBI BLAST search of [AACAQLNDFLQEYGTQGCQV](#)

(Parameters: blastp, nr protein database, expect=20000, no filter, PAM30)

Other BLAST [web gateways](#)

All matches to this query

| Score | Mr(calc):   | Delta     | Sequence                              |
|-------|-------------|-----------|---------------------------------------|
| 60.9  | 2583.155624 | -0.000122 | <a href="#">AACAQLNDFLQEYGTQGCQV</a>  |
| 16.7  | 2583.155624 | -0.000122 | <a href="#">AACAQLNDFLQEYGTQGCQV</a>  |
| 0.5   | 2583.147705 | 0.007797  | <a href="#">MYAMKSSLEDMDALELDFRMR</a> |



# MASCOT SCIENCE Mascot Search Results

## Peptide View

MS/MS Fragmentation of **AASGTQNNVLR**

Found in **CO7\_HUMAN**, Complement component C7 OS=Homo sapiens GN=C7 PE=1 SV=2

Match to Query 29445: 1440.766932 from(481.262920,3+) rtinseconds(1580) index(2835)

Title: Locus:1.1.1.3120.9 File:"2013-07-02 CLN FXIII 30 min 3rd F 1.wiff"

Data file C:\Program Files (x86)\Matrix Science\Mascot Daemon\mgf3 FXIII 30 min 3rd\mascot\_daemon\_merge.mgf

Click mouse within plot area to zoom in by factor of two about that point

Or, Plot from  to  Da

Label all possible matches  Label matches used for scoring

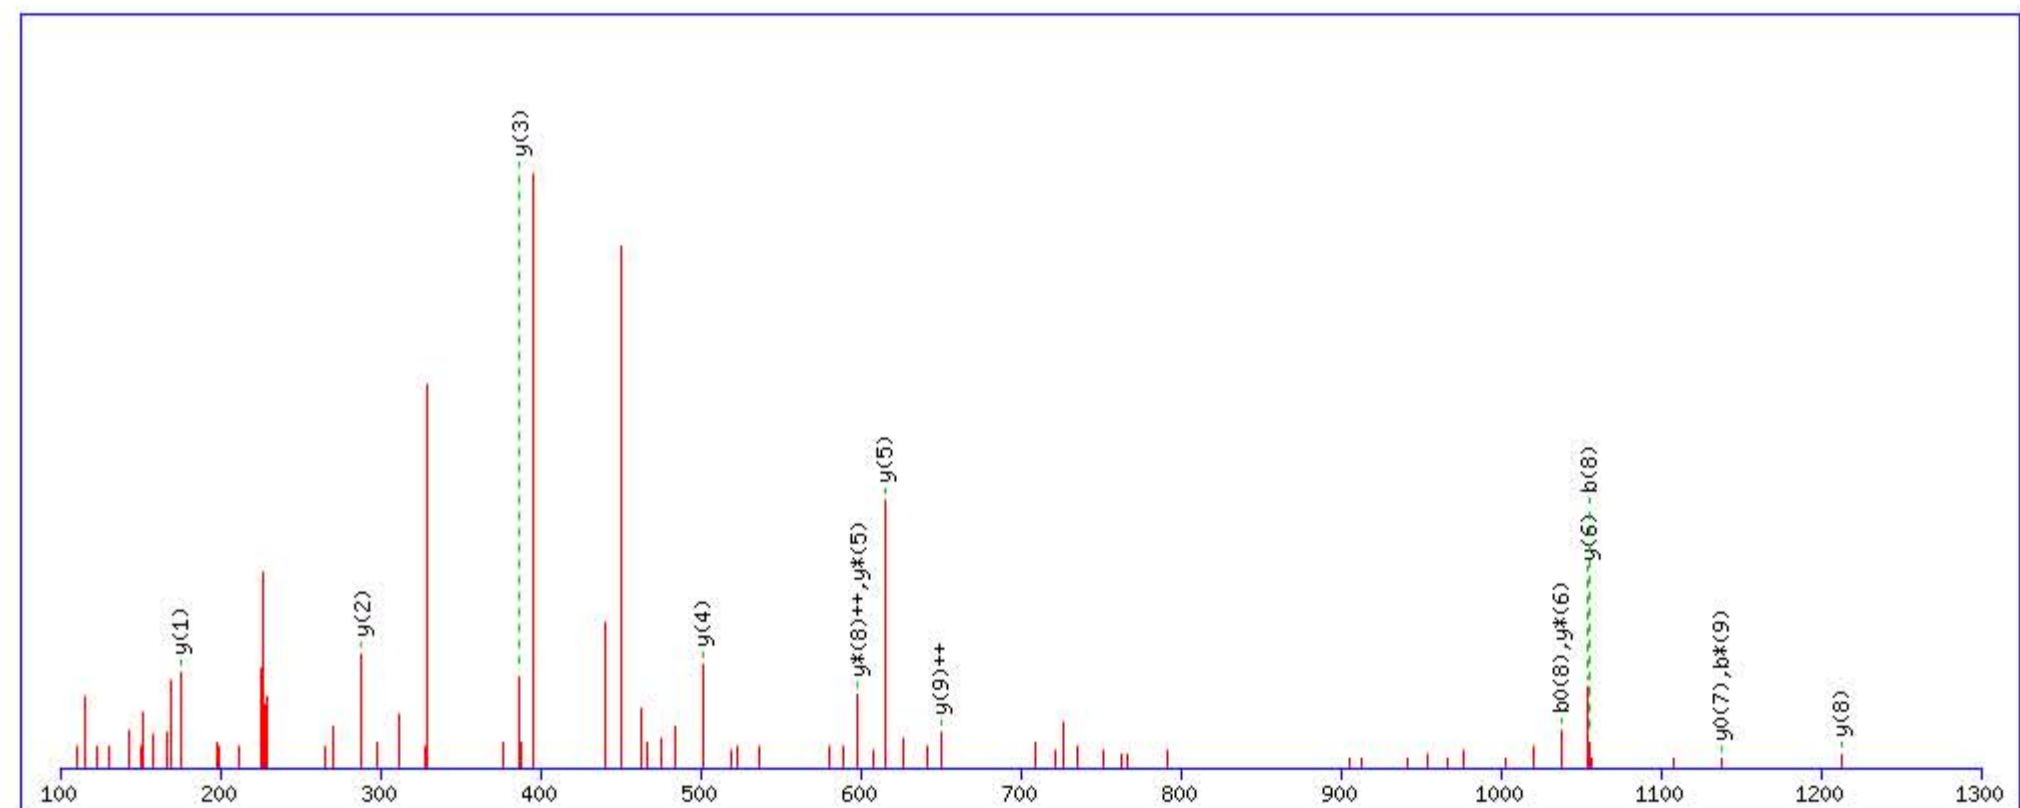

Monoisotopic mass of neutral peptide Mr(calc): 1440.750717

Fixed modifications: Carbamidomethyl (C) (apply to specified residues or termini only)

Variable modifications:

Q6 : Biotin:Thermo-21345 (Q)

Ions Score: 26 Expect: 0.016

Matches : 15/94 fragment ions using 30 most intense peaks [\(help\)](#)

| #  | b           | b <sup>++</sup> | b <sup>*</sup> | b <sup>*++</sup> | b <sup>0</sup> | b <sup>0++</sup> | Seq. | y           | y <sup>++</sup> | y <sup>*</sup> | y <sup>*++</sup> | y <sup>0</sup> | y <sup>0++</sup> | #  |
|----|-------------|-----------------|----------------|------------------|----------------|------------------|------|-------------|-----------------|----------------|------------------|----------------|------------------|----|
| 1  | 72.044390   | 36.525833       |                |                  |                |                  | A    |             |                 |                |                  |                |                  | 11 |
| 2  | 143.081504  | 72.044390       |                |                  |                |                  | A    | 1370.720895 | 685.864086      | 1353.694346    | 677.350811       | 1352.710330    | 676.858803       | 10 |
| 3  | 230.113532  | 115.560404      |                |                  | 212.102967     | 106.555121       | S    | 1299.683781 | 650.345529      | 1282.657232    | 641.832254       | 1281.673216    | 641.340246       | 9  |
| 4  | 287.134996  | 144.071136      |                |                  | 269.124431     | 135.065854       | G    | 1212.651753 | 606.829515      | 1195.625204    | 598.316240       | 1194.641188    | 597.824232       | 8  |
| 5  | 388.182675  | 194.594976      |                |                  | 370.172110     | 185.589693       | T    | 1155.630289 | 578.318783      | 1138.603740    | 569.805508       | 1137.619724    | 569.313500       | 7  |
| 6  | 827.408001  | 414.207639      | 810.381452     | 405.694364       | 809.397436     | 405.202356       | Q    | 1054.582610 | 527.794943      | 1037.556061    | 519.281669       |                |                  | 6  |
| 7  | 941.450928  | 471.229102      | 924.424379     | 462.715828       | 923.440363     | 462.223820       | N    | 615.357284  | 308.182280      | 598.330735     | 299.669006       |                |                  | 5  |
| 8  | 1055.493855 | 528.250566      | 1038.467306    | 519.737291       | 1037.483290    | 519.245283       | N    | 501.314357  | 251.160816      | 484.287808     | 242.647542       |                |                  | 4  |
| 9  | 1154.562269 | 577.784773      | 1137.535720    | 569.271498       | 1136.551704    | 568.779490       | V    | 387.271430  | 194.139353      | 370.244881     | 185.626078       |                |                  | 3  |
| 10 | 1267.646333 | 634.326805      | 1250.619784    | 625.813530       | 1249.635768    | 625.321522       | L    | 288.203016  | 144.605146      | 271.176467     | 136.091871       |                |                  | 2  |
| 11 |             |                 |                |                  |                |                  | R    | 175.118952  | 88.063114       | 158.092403     | 79.549839        |                |                  | 1  |

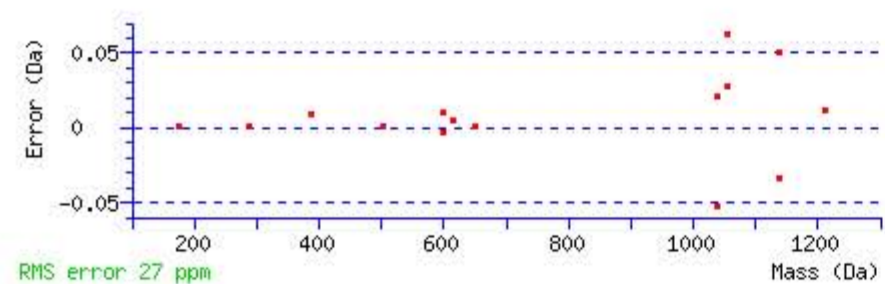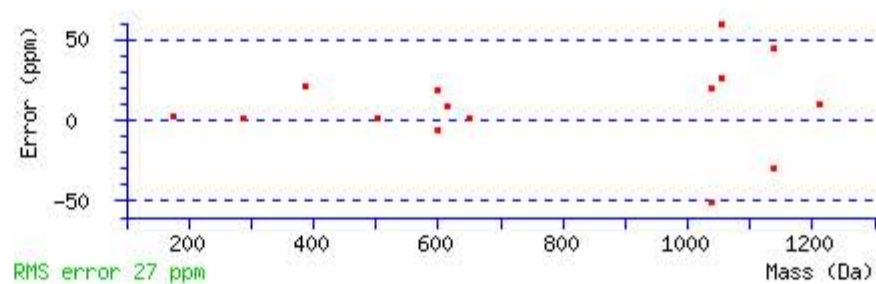

NCBI BLAST search of **AASGTQNNVLR**

(Parameters: blastp, nr protein database, expect=20000, no filter, PAM30)

Other BLAST [web gateways](#)

All matches to this query

| Score | Mr(calc):   | Delta    | Sequence                    |
|-------|-------------|----------|-----------------------------|
| 26.1  | 1440.750717 | 0.016215 | <a href="#">AASGTQNNVLR</a> |
| 6.9   | 1440.754745 | 0.012187 | <a href="#">WEATQQVLR</a>   |
| 5.0   | 1440.754745 | 0.012187 | <a href="#">WEATQQVLR</a>   |

Mascot: <http://www.matrixscience.com/>



# MASCOT Search Results

## Peptide View

MS/MS Fragmentation of **WLVGEMHCQK**

Found in **CO7\_HUMAN**, Complement component C7 OS=Homo sapiens GN=C7 PE=1 SV=2

Match to Query 34025: 1597.772472 from(533.598100,3+) rtinseconds(1890) index(4501)

Title: Locus:1.1.1.3228.14 File:"2013-07-02 CLN FXIII 30 min 3rd F 1.wiff"

Data file C:\Program Files (x86)\Matrix Science\Mascot Daemon\mgf3 FXIII 30 min 3rd\mascot\_daemon\_merge.mgf

Click mouse within plot area to zoom in by factor of two about that point

Or, Plot from  to  Da

Label all possible matches  Label matches used for scoring

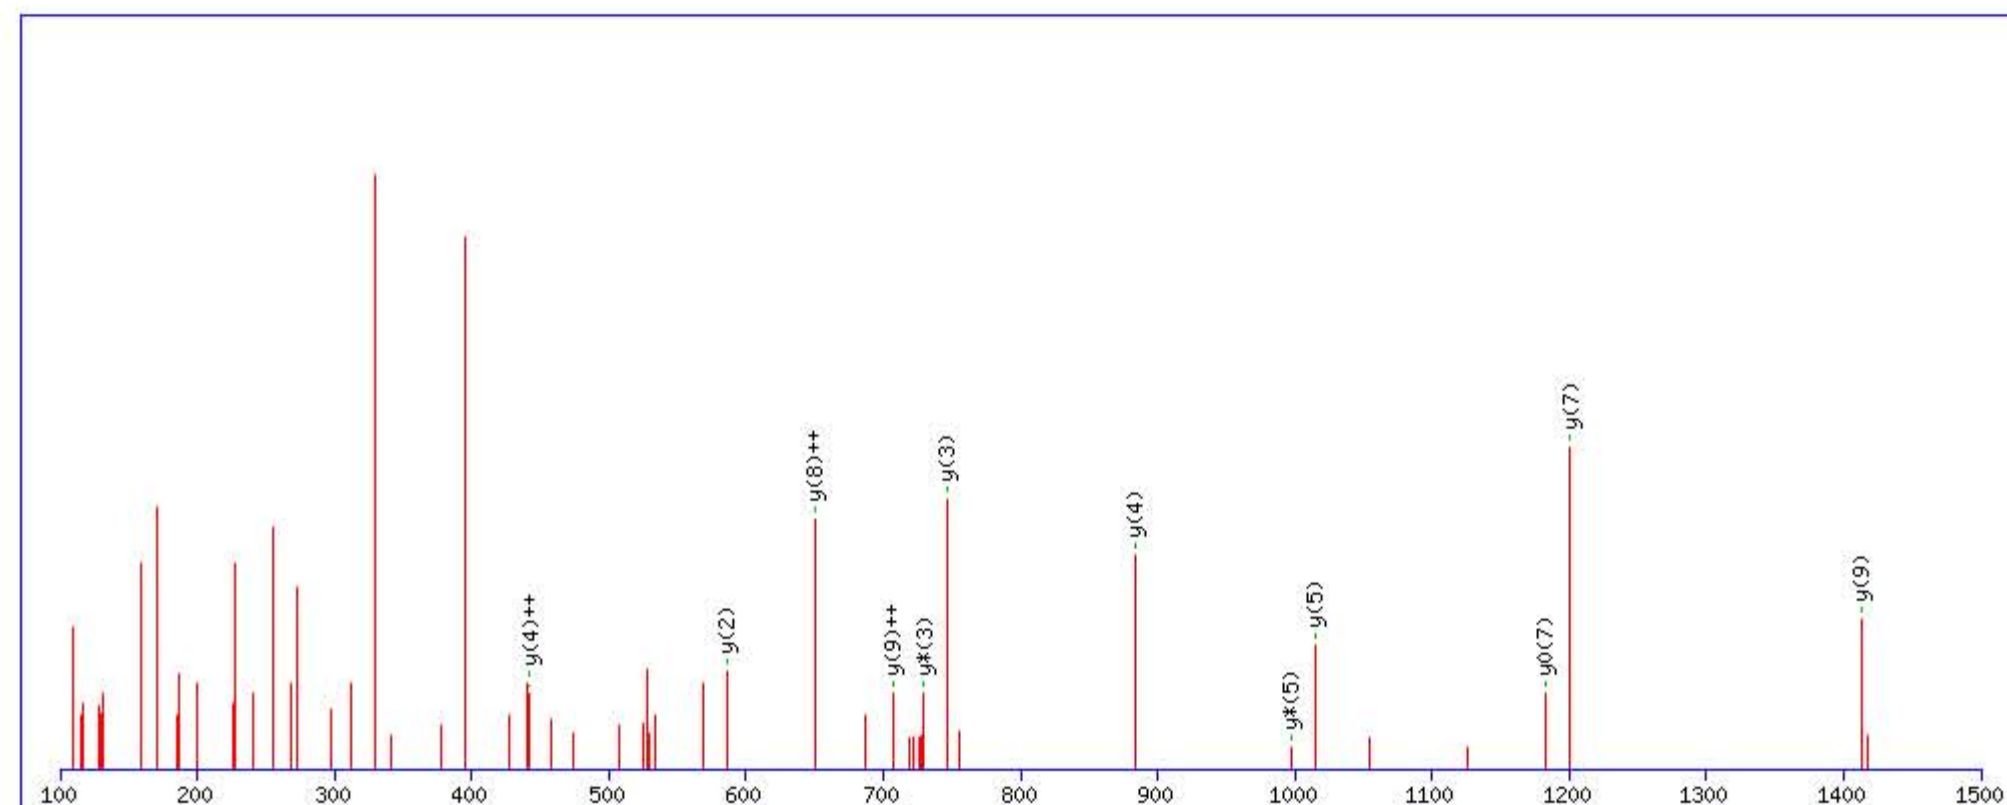

Monoisotopic mass of neutral peptide Mr(calc): 1597.756744

Fixed modifications: Carbamidomethyl (C) (apply to specified residues or termini only)

Variable modifications:

Q9 : Biotin:Thermo-21345 (Q)

Ions Score: 30 Expect: 0.0017

Matches : 12/74 fragment ions using 22 most intense peaks [\(help\)](#)

| #  | b           | b <sup>++</sup> | b <sup>*</sup> | b <sup>*++</sup> | b <sup>0</sup> | b <sup>0++</sup> | Seq. | y           | y <sup>++</sup> | y <sup>*</sup> | y <sup>*++</sup> | y <sup>0</sup> | y <sup>0++</sup> | #  |
|----|-------------|-----------------|----------------|------------------|----------------|------------------|------|-------------|-----------------|----------------|------------------|----------------|------------------|----|
| 1  | 187.086589  | 94.046932       |                |                  |                |                  | W    |             |                 |                |                  |                |                  | 10 |
| 2  | 300.170653  | 150.588965      |                |                  |                |                  | L    | 1412.684711 | 706.845994      | 1395.658162    | 698.332719       | 1394.674146    | 697.840711       | 9  |
| 3  | 399.239067  | 200.123172      |                |                  |                |                  | V    | 1299.600647 | 650.303962      | 1282.574098    | 641.790687       | 1281.590082    | 641.298679       | 8  |
| 4  | 456.260531  | 228.633904      |                |                  |                |                  | G    | 1200.532233 | 600.769755      | 1183.505684    | 592.256480       | 1182.521668    | 591.764472       | 7  |
| 5  | 585.303124  | 293.155200      |                |                  | 567.292559     | 284.149918       | E    | 1143.510769 | 572.259023      | 1126.484220    | 563.745748       | 1125.500204    | 563.253740       | 6  |
| 6  | 716.343609  | 358.675443      |                |                  | 698.333044     | 349.670160       | M    | 1014.468176 | 507.737726      | 997.441627     | 499.224452       |                |                  | 5  |
| 7  | 853.402521  | 427.204899      |                |                  | 835.391956     | 418.199616       | H    | 883.427691  | 442.217484      | 866.401142     | 433.704209       |                |                  | 4  |
| 8  | 1013.433170 | 507.220223      |                |                  | 995.422605     | 498.214941       | C    | 746.368779  | 373.688028      | 729.342230     | 365.174753       |                |                  | 3  |
| 9  | 1452.658496 | 726.832886      | 1435.631947    | 718.319612       | 1434.647931    | 717.827604       | Q    | 586.338130  | 293.672703      | 569.311581     | 285.159429       |                |                  | 2  |
| 10 |             |                 |                |                  |                |                  | K    | 147.112804  | 74.060040       | 130.086255     | 65.546765        |                |                  | 1  |

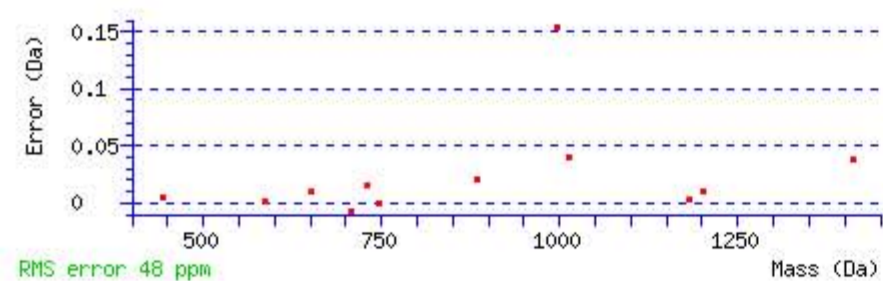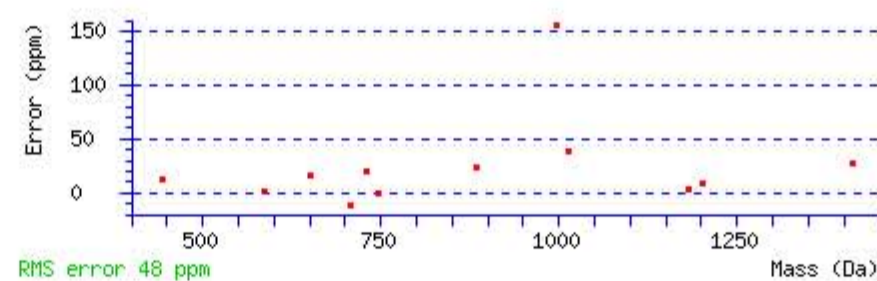

NCBI BLAST search of **WLVGEMHCQK**

(Parameters: blastp, nr protein database, expect=20000, no filter, PAM30)

Other BLAST [web gateways](#)

## All matches to this query

| Score | Mr(calc):   | Delta    | Sequence                     |
|-------|-------------|----------|------------------------------|
| 29.7  | 1597.756744 | 0.015728 | <a href="#">WLVGEMHCQK</a>   |
| 0.3   | 1597.763718 | 0.008754 | <a href="#">LWKDEGRWEHDK</a> |



# MASCOT Search Results

## Peptide View

MS/MS Fragmentation of **LSGNVLSYTFQVK**

Found in **CO7\_HUMAN**, Complement component C7 OS=Homo sapiens GN=C7 PE=1 SV=2

Match to Query 38468: 1765.945788 from(883.980170,2+) rtinseconds(2479) index(7849)

Title: Locus:1.1.1.3433.17 File:"2013-07-02 CLN FXIII 30 min 3rd F 1.wiff"

Data file C:\Program Files (x86)\Matrix Science\Mascot Daemon\mgf\3 FXIII 30 min 3rd\mascot\_daemon\_merge.mgf

Click mouse within plot area to zoom in by factor of two about that point

Or, Plot from  to  Da

Label all possible matches  Label matches used for scoring

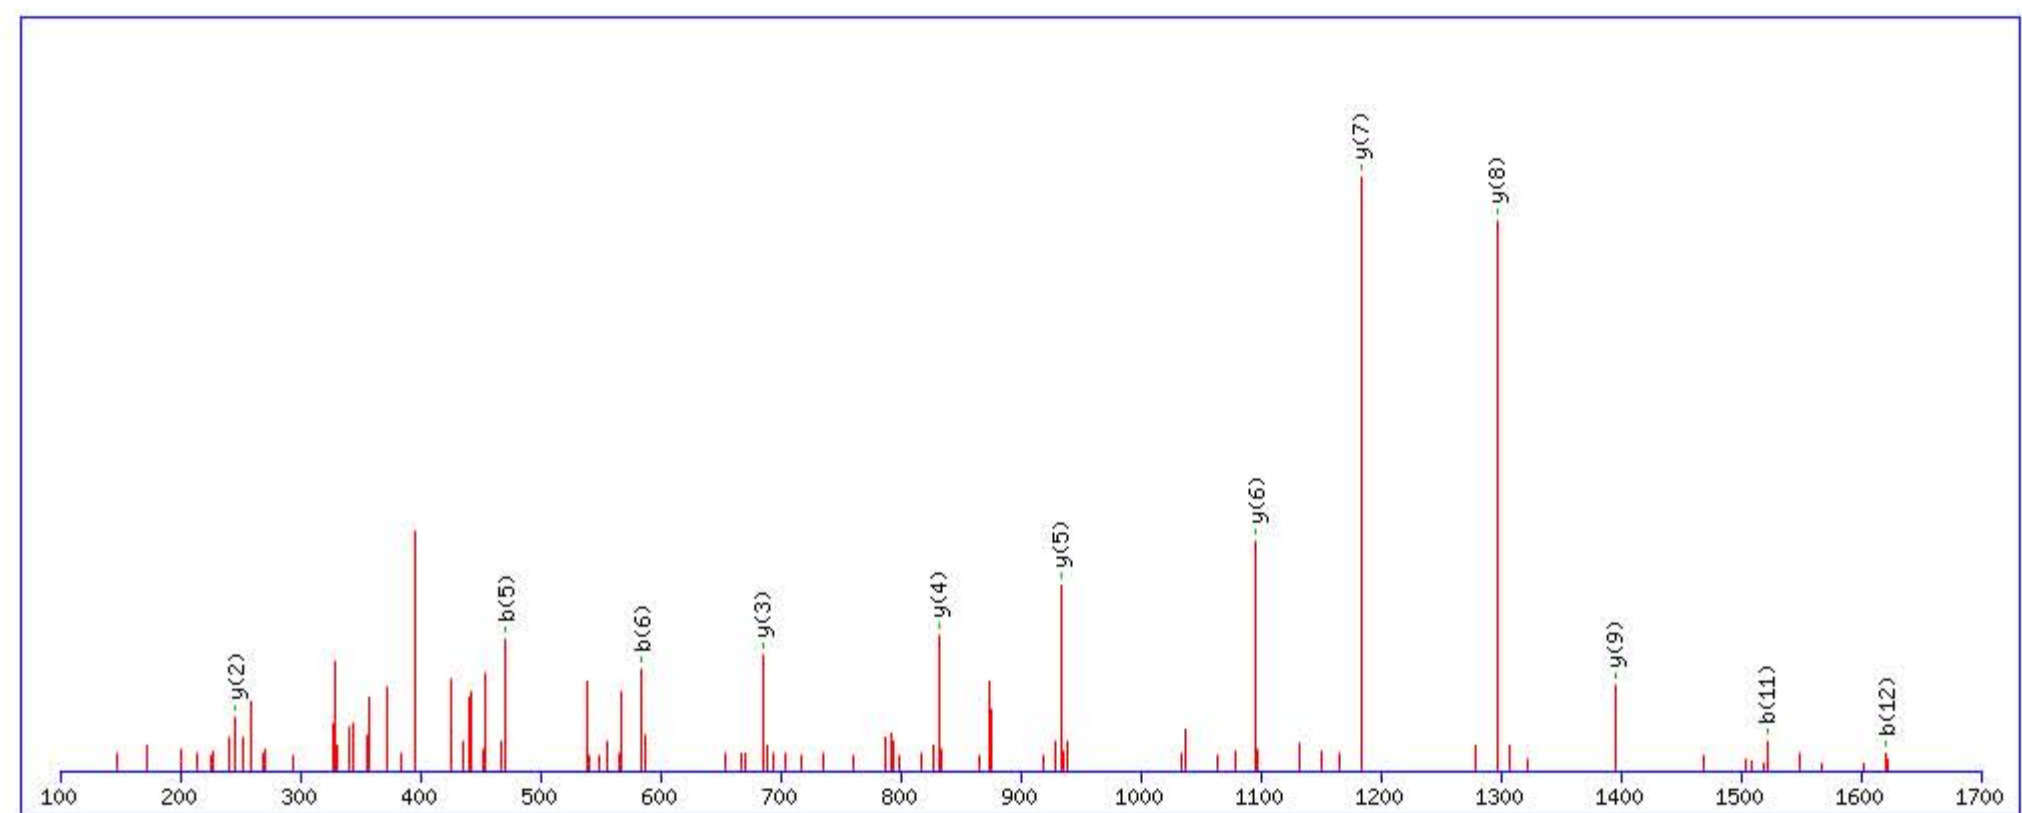

Monoisotopic mass of neutral peptide Mr(calc): 1765.943680

Fixed modifications: Carbamidomethyl (C) (apply to specified residues or termini only)

Variable modifications:

Q11 : Biotin:Thermo-21345 (Q)

Ions Score: 66 Expect: 5.3e-006

Matches : 12/128 fragment ions using 15 most intense peaks [\(help\)](#)

| #  | b                  | b <sup>++</sup> | b <sup>*</sup> | b <sup>*++</sup> | b <sup>0</sup> | b <sup>0++</sup> | Seq. | y                  | y <sup>++</sup> | y <sup>*</sup> | y <sup>*++</sup> | y <sup>0</sup> | y <sup>0++</sup> | #  |
|----|--------------------|-----------------|----------------|------------------|----------------|------------------|------|--------------------|-----------------|----------------|------------------|----------------|------------------|----|
| 1  | 114.091340         | 57.549308       |                |                  |                |                  | L    |                    |                 |                |                  |                |                  | 13 |
| 2  | 201.123368         | 101.065322      |                |                  | 183.112803     | 92.060039        | S    | 1653.866891        | 827.437084      | 1636.840342    | 818.923809       | 1635.856326    | 818.431801       | 12 |
| 3  | 258.144832         | 129.576054      |                |                  | 240.134267     | 120.570771       | G    | 1566.834863        | 783.921070      | 1549.808314    | 775.407795       | 1548.824298    | 774.915787       | 11 |
| 4  | 372.187759         | 186.597517      | 355.161210     | 178.084243       | 354.177194     | 177.592235       | N    | 1509.813399        | 755.410338      | 1492.786850    | 746.897063       | 1491.802834    | 746.405055       | 10 |
| 5  | <b>471.256173</b>  | 236.131724      | 454.229624     | 227.618450       | 453.245608     | 227.126442       | V    | <b>1395.770472</b> | 698.388874      | 1378.743923    | 689.875600       | 1377.759907    | 689.383592       | 9  |
| 6  | <b>584.340237</b>  | 292.673757      | 567.313688     | 284.160482       | 566.329672     | 283.668474       | L    | <b>1296.702058</b> | 648.854667      | 1279.675509    | 640.341393       | 1278.691493    | 639.849385       | 8  |
| 7  | 671.372265         | 336.189771      | 654.345716     | 327.676496       | 653.361700     | 327.184488       | S    | <b>1183.617994</b> | 592.312635      | 1166.591445    | 583.799361       | 1165.607429    | 583.307353       | 7  |
| 8  | 834.435594         | 417.721435      | 817.409045     | 409.208161       | 816.425029     | 408.716153       | Y    | <b>1096.585966</b> | 548.796621      | 1079.559417    | 540.283347       | 1078.575401    | 539.791339       | 6  |
| 9  | 935.483273         | 468.245275      | 918.456724     | 459.732000       | 917.472708     | 459.239992       | T    | <b>933.522637</b>  | 467.264957      | 916.496088     | 458.751682       | 915.512072     | 458.259674       | 5  |
| 10 | 1082.551687        | 541.779482      | 1065.525138    | 533.266207       | 1064.541122    | 532.774199       | F    | <b>832.474958</b>  | 416.741117      | 815.448409     | 408.227843       |                |                  | 4  |
| 11 | <b>1521.777013</b> | 761.392145      | 1504.750464    | 752.878870       | 1503.766448    | 752.386862       | Q    | <b>685.406544</b>  | 343.206910      | 668.379995     | 334.693636       |                |                  | 3  |
| 12 | <b>1620.845427</b> | 810.926352      | 1603.818878    | 802.413077       | 1602.834862    | 801.921069       | V    | <b>246.181218</b>  | 123.594247      | 229.154669     | 115.080973       |                |                  | 2  |
| 13 |                    |                 |                |                  |                |                  | K    | 147.112804         | 74.060040       | 130.086255     | 65.546765        |                |                  | 1  |

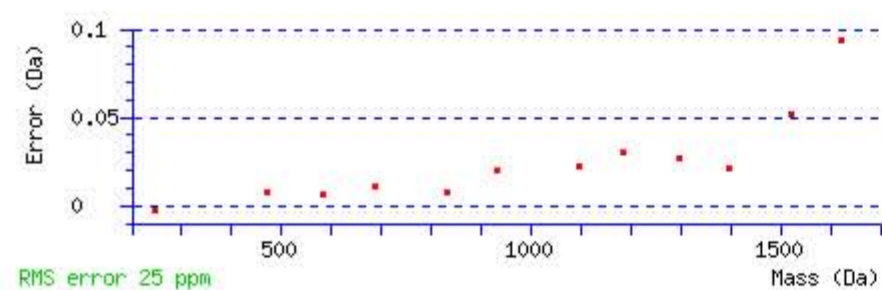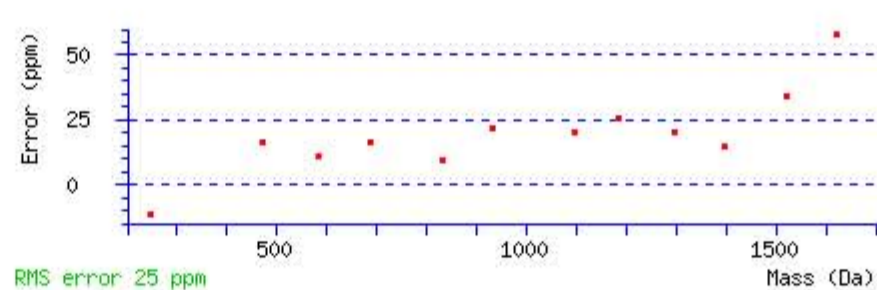

NCBI BLAST search of **LSGNVLSYTFQVK**

(Parameters: blastp, nr protein database, expect=20000, no filter, PAM30)

Other BLAST [web gateways](#)

## All matches to this query

| Score | Mr(calc):   | Delta     | Sequence                         |
|-------|-------------|-----------|----------------------------------|
| 66.2  | 1765.943680 | 0.002108  | <a href="#">LSGNVLSYTFQVK</a>    |
| 12.0  | 1765.931763 | 0.014025  | <a href="#">NMIEVVTSEMKTLLK</a>  |
| 7.0   | 1765.921005 | 0.024783  | <a href="#">VENTLNIHEDLDKVK</a>  |
| 3.2   | 1765.950882 | -0.005094 | <a href="#">VTGNVSKKTNYLVMGR</a> |
| 0.1   | 1765.940262 | 0.005526  | <a href="#">EAKLYLFOAQEWLK</a>   |



# MASCOT Search Results

## Peptide View

MS/MS Fragmentation of **IACVLPVLM DGIQSH P QKPFYTVGEK**

Found in **CO7\_HUMAN**, Complement component C7 OS=Homo sapiens GN=C7 PE=1 SV=2

Match to Query 59974: 3237.682216 from(810.427830,4+) rtinseconds(2583) index(8288)

Title: Locus:1.1.1.3469.9 File:"2013-07-02 CLN FXIII 30 min 3rd F 1.wiff"

Data file C:\Program Files (x86)\Matrix Science\Mascot Daemon\mgf3 FXIII 30 min 3rd\mascot\_daemon\_merge.mgf

Click mouse within plot area to zoom in by factor of two about that point

Or, Plot from  to  Da

Label all possible matches  Label matches used for scoring

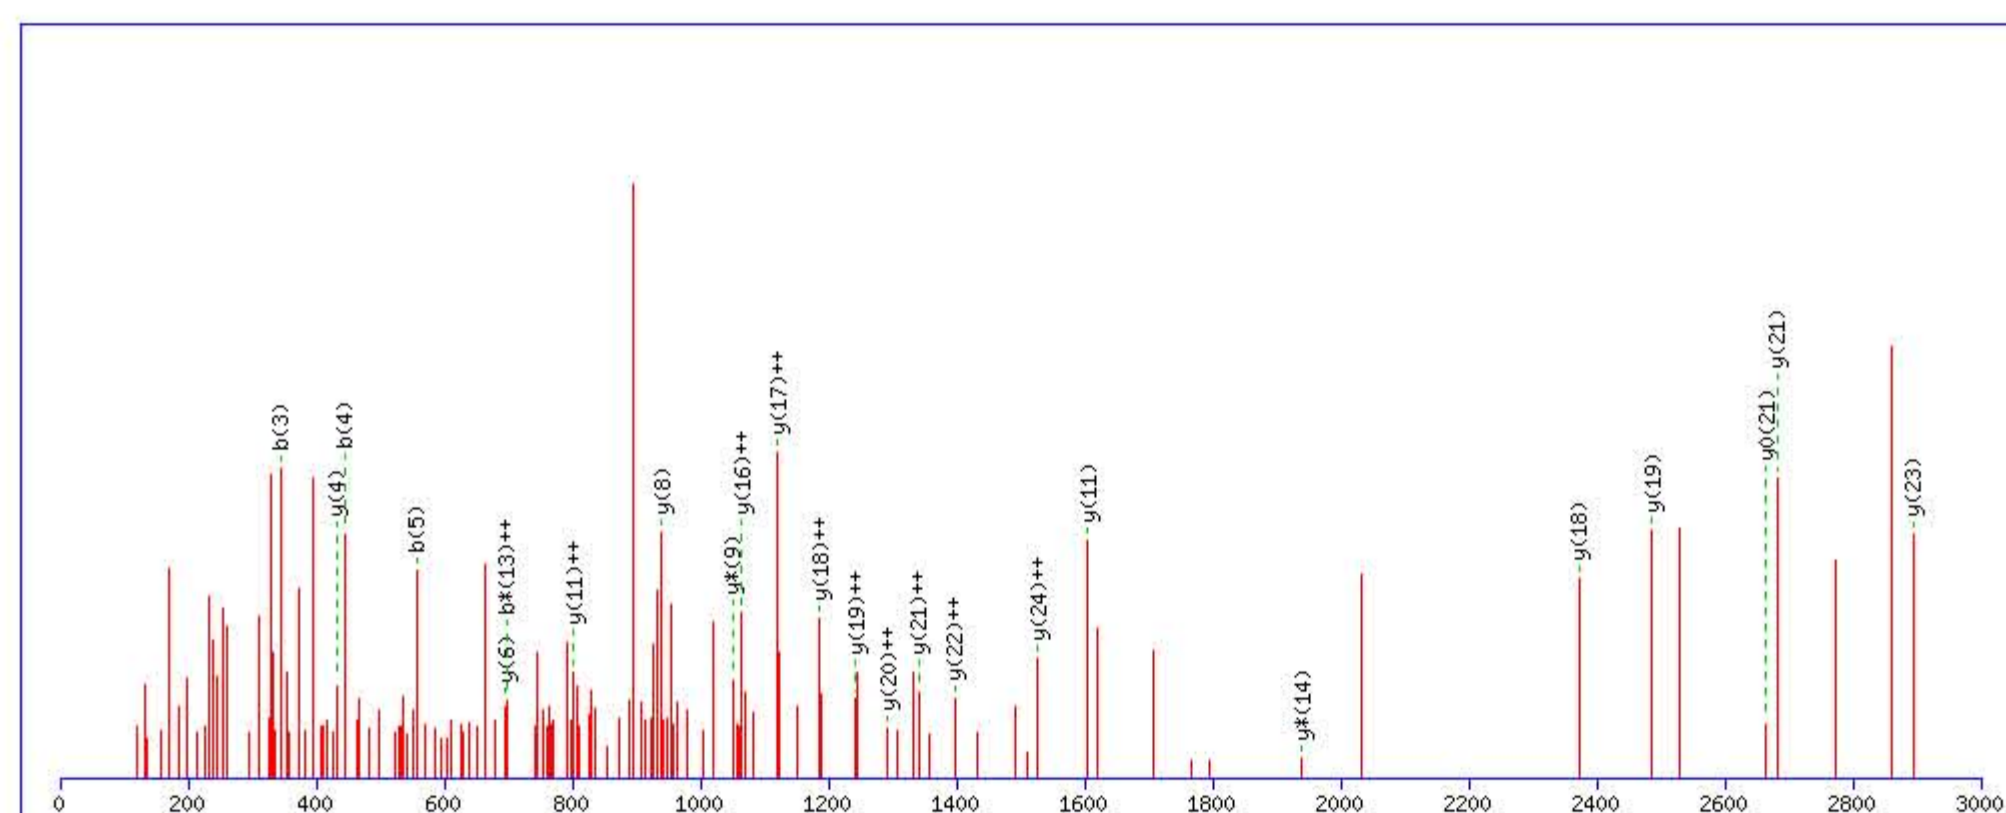

Monoisotopic mass of neutral peptide Mr(calc): 3237.675262

Fixed modifications: Carbamidomethyl (C) (apply to specified residues or termini only)

Variable modifications:

Q17 : Biotin:Thermo-21345 (Q)

Ions Score: 33 Expect: 0.012

Matches : 24/256 fragment ions using 59 most intense peaks [\(help\)](#)

| #  | b                 | b <sup>++</sup> | b <sup>*</sup> | b <sup>*++</sup>  | b <sup>0</sup> | b <sup>0++</sup> | Seq. | y                  | y <sup>++</sup>    | y <sup>*</sup>     | y <sup>*++</sup> | y <sup>0</sup>     | y <sup>0++</sup> | #  |
|----|-------------------|-----------------|----------------|-------------------|----------------|------------------|------|--------------------|--------------------|--------------------|------------------|--------------------|------------------|----|
| 1  | 114.091340        | 57.549308       |                |                   |                |                  | I    |                    |                    |                    |                  |                    |                  | 26 |
| 2  | 185.128454        | 93.067865       |                |                   |                |                  | A    | 3125.598471        | 1563.302873        | 3108.571922        | 1554.789599      | 3107.587906        | 1554.297591      | 25 |
| 3  | <b>345.159103</b> | 173.083190      |                |                   |                |                  | C    | 3054.561357        | <b>1527.784316</b> | 3037.534808        | 1519.271042      | 3036.550792        | 1518.779034      | 24 |
| 4  | <b>444.227517</b> | 222.617397      |                |                   |                |                  | V    | <b>2894.530708</b> | 1447.768992        | 2877.504159        | 1439.255717      | 2876.520143        | 1438.763709      | 23 |
| 5  | <b>557.311581</b> | 279.159429      |                |                   |                |                  | L    | 2795.462294        | <b>1398.234785</b> | 2778.435745        | 1389.721510      | 2777.451729        | 1389.229502      | 22 |
| 6  | 654.364345        | 327.685811      |                |                   |                |                  | P    | <b>2682.378230</b> | <b>1341.692753</b> | 2665.351681        | 1333.179478      | <b>2664.367665</b> | 1332.687470      | 21 |
| 7  | 753.432759        | 377.220018      |                |                   |                |                  | V    | 2585.325466        | <b>1293.166371</b> | 2568.298917        | 1284.653096      | 2567.314901        | 1284.161088      | 20 |
| 8  | 866.516823        | 433.762050      |                |                   |                |                  | L    | <b>2486.257052</b> | <b>1243.632164</b> | 2469.230503        | 1235.118889      | 2468.246487        | 1234.626881      | 19 |
| 9  | 997.557308        | 499.282292      |                |                   |                |                  | M    | <b>2373.172988</b> | <b>1187.090132</b> | 2356.146439        | 1178.576857      | 2355.162423        | 1178.084849      | 18 |
| 10 | 1112.584251       | 556.795764      |                |                   | 1094.573686    | 547.790481       | D    | 2242.132503        | <b>1121.569889</b> | 2225.105954        | 1113.056615      | 2224.121938        | 1112.564607      | 17 |
| 11 | 1169.605715       | 585.306495      |                |                   | 1151.595150    | 576.301213       | G    | 2127.105560        | <b>1064.056418</b> | 2110.079011        | 1055.543143      | 2109.094995        | 1055.051135      | 16 |
| 12 | 1282.689779       | 641.848527      |                |                   | 1264.679214    | 632.843245       | I    | 2070.084096        | 1035.545686        | 2053.057547        | 1027.032411      | 2052.073531        | 1026.540403      | 15 |
| 13 | 1410.748357       | 705.877816      | 1393.721808    | <b>697.364542</b> | 1392.737792    | 696.872534       | Q    | 1957.000032        | 979.003654         | <b>1939.973483</b> | 970.490380       | 1938.989467        | 969.998371       | 14 |
| 14 | 1497.780385       | 749.393830      | 1480.753836    | 740.880556        | 1479.769820    | 740.388548       | S    | 1828.941454        | 914.974365         | 1811.914905        | 906.461091       | 1810.930889        | 905.969083       | 13 |
| 15 | 1634.839297       | 817.923286      | 1617.812748    | 809.410012        | 1616.828732    | 808.918004       | H    | 1741.909426        | 871.458351         | 1724.882877        | 862.945077       | 1723.898861        | 862.453068       | 12 |
| 16 | 1731.892061       | 866.449668      | 1714.865512    | 857.936394        | 1713.881496    | 857.444386       | P    | <b>1604.850514</b> | <b>802.928895</b>  | 1587.823965        | 794.415621       | 1586.839949        | 793.923612       | 11 |
| 17 | 2171.117387       | 1086.062331     | 2154.090838    | 1077.549057       | 2153.106822    | 1077.057049      | Q    | 1507.797750        | 754.402513         | 1490.771201        | 745.889239       | 1489.787185        | 745.397230       | 10 |
| 18 | 2299.212350       | 1150.109813     | 2282.185801    | 1141.596538       | 2281.201785    | 1141.104530      | K    | 1068.572424        | 534.789850         | <b>1051.545875</b> | 526.276575       | 1050.561859        | 525.784567       | 9  |
| 19 | 2396.265114       | 1198.636195     | 2379.238565    | 1190.122920       | 2378.254549    | 1189.630912      | P    | <b>940.477461</b>  | 470.742368         | 923.450912         | 462.229094       | 922.466896         | 461.737086       | 8  |
| 20 | 2543.333528       | 1272.170402     | 2526.306979    | 1263.657127       | 2525.322963    | 1263.165119      | F    | 843.424697         | 422.215986         | 826.398148         | 413.702712       | 825.414132         | 413.210704       | 7  |
| 21 | 2706.396857       | 1353.702066     | 2689.370308    | 1345.188792       | 2688.386292    | 1344.696784      | Y    | <b>696.356283</b>  | 348.681779         | 679.329734         | 340.168505       | 678.345718         | 339.676497       | 6  |
| 22 | 2807.444536       | 1404.225906     | 2790.417987    | 1395.712631       | 2789.433971    | 1395.220623      | T    | 533.292954         | 267.150115         | 516.266405         | 258.636840       | 515.282389         | 258.144832       | 5  |
| 23 | 2906.512950       | 1453.760113     | 2889.486401    | 1445.246838       | 2888.502385    | 1444.754830      | V    | <b>432.245275</b>  | 216.626275         | 415.218726         | 208.113001       | 414.234710         | 207.620993       | 4  |
| 24 | 2963.534414       | 1482.270845     | 2946.507865    | 1473.757570       | 2945.523849    | 1473.265562      | G    | 333.176861         | 167.092069         | 316.150312         | 158.578794       | 315.166296         | 158.086786       | 3  |
| 25 | 3092.577007       | 1546.792141     | 3075.550458    | 1538.278867       | 3074.566442    | 1537.786859      | E    | 276.155397         | 138.581337         | 259.128848         | 130.068062       | 258.144832         | 129.576054       | 2  |
| 26 |                   |                 |                |                   |                |                  | K    | 147.112804         | 74.060040          | 130.086255         | 65.546765        |                    |                  | 1  |

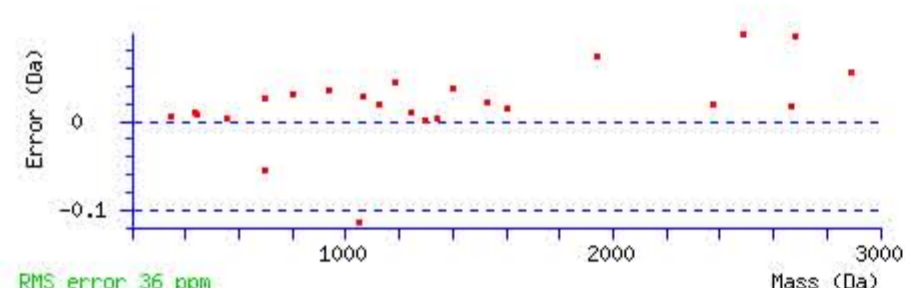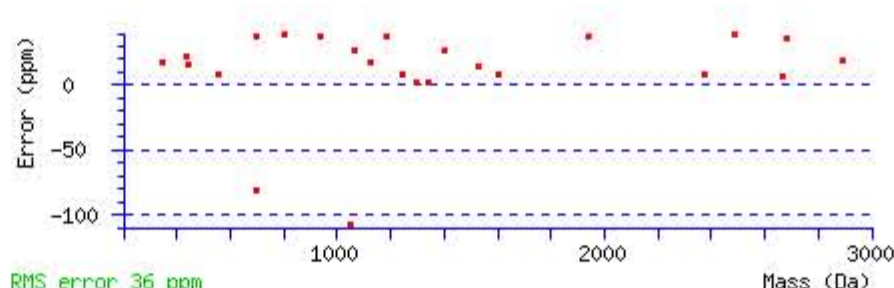

NCBI BLAST search of **IACVLPVLM DGIQSH P QKPFYTVGEK**

(Parameters: blastp, nr protein database, expect=20000, no filter, PAM30)

Other BLAST [web gateways](#)

All matches to this query

| Score | Mr(calc):   | Delta    | Sequence                                      |
|-------|-------------|----------|-----------------------------------------------|
| 33.3  | 3237.675262 | 0.006954 | <a href="#">IACVLPVLM DGIQSH P QKPFYTVGEK</a> |
| 23.4  | 3237.675262 | 0.006954 | <a href="#">IACVLPVLM DGIQSH P QKPFYTVGEK</a> |



# MASCOT Search Results

## Peptide View

MS/MS Fragmentation of **AGIQER**

Found in **CO8A\_HUMAN**, Complement component C8 alpha chain OS=Homo sapiens GN=C8A PE=1 SV=2

Match to Query 14214: 983.535228 from(492.774890,2+) rtinseconds(1412) index(16301)

Title: Locus:1.1.1.3054.14 File:"2013-07-02 CLN FXIII 30 min 3rd F 2.wiff"

Data file C:\Program Files (x86)\Matrix Science\Mascot Daemon\mgf3 FXIII 30 min 3rd\mascot\_daemon\_merge.mgf

Click mouse within plot area to zoom in by factor of two about that point

Or, Plot from  to  Da

Label all possible matches  Label matches used for scoring

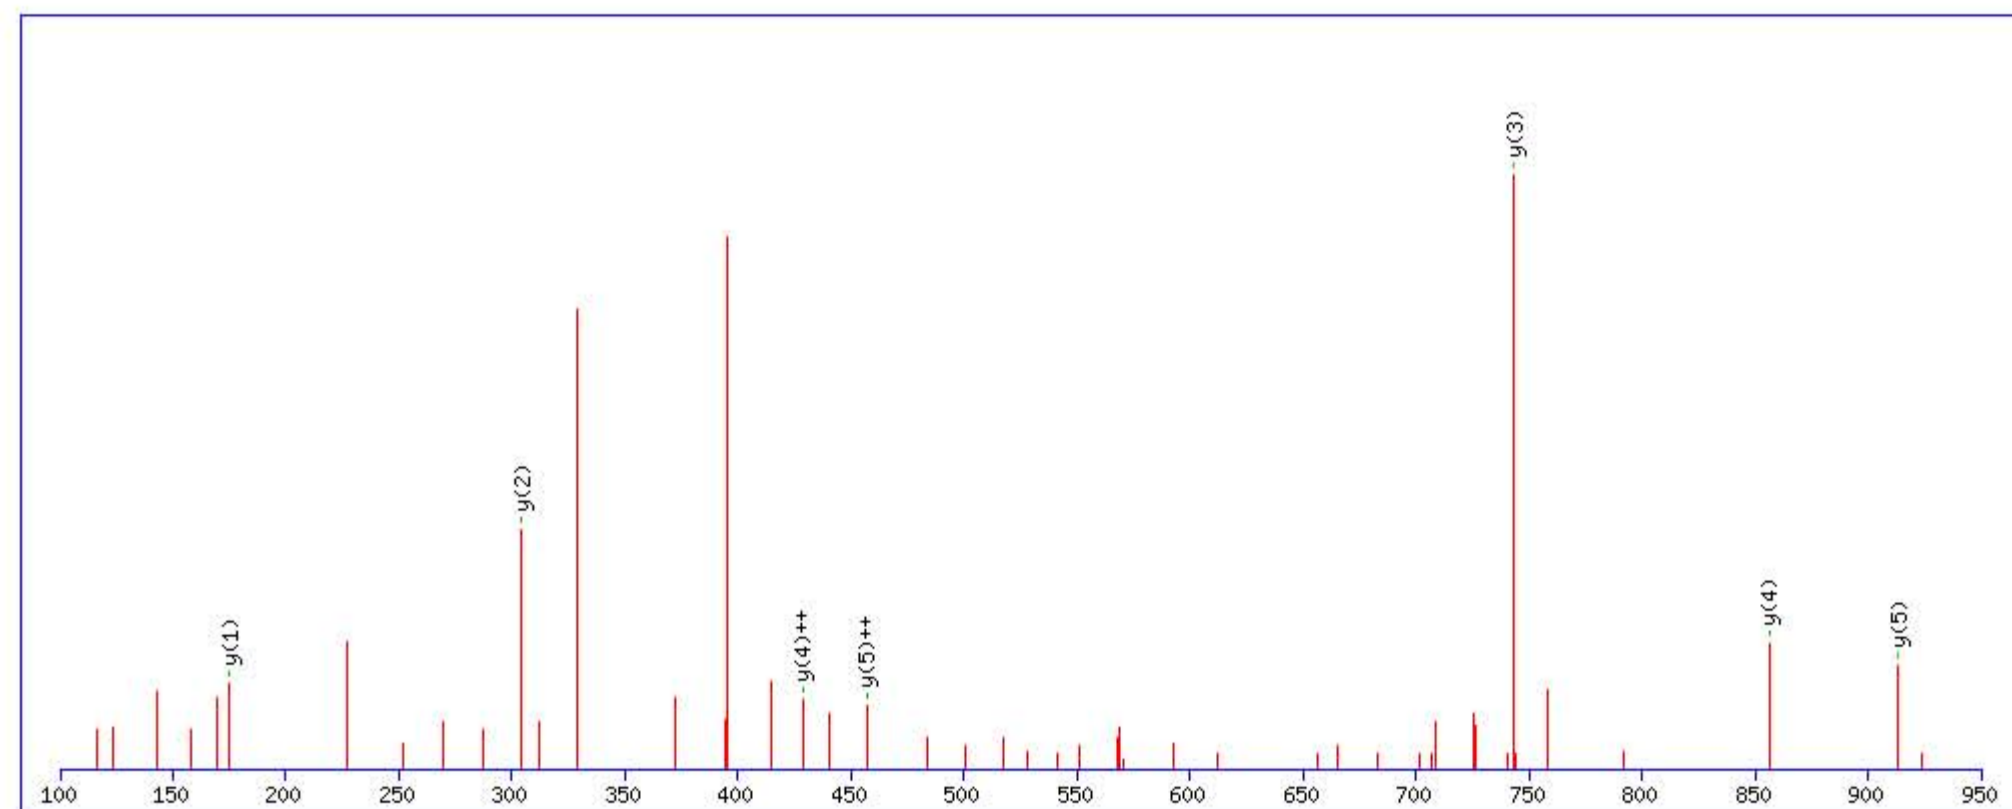

Monoisotopic mass of neutral peptide Mr(calc): 983.522217

Fixed modifications: Carbamidomethyl (C) (apply to specified residues or termini only)

Variable modifications:

Q4 : Biotin:Thermo-21345 (Q)

Ions Score: 25 Expect: 0.066

Matches : 7/44 fragment ions using 17 most intense peaks [\(help\)](#)

| # | b          | b <sup>++</sup> | b <sup>*</sup> | b <sup>+++</sup> | b <sup>0</sup> | b <sup>0++</sup> | Seq. | y          | y <sup>++</sup> | y <sup>*</sup> | y <sup>+++</sup> | y <sup>0</sup> | y <sup>0++</sup> | # |
|---|------------|-----------------|----------------|------------------|----------------|------------------|------|------------|-----------------|----------------|------------------|----------------|------------------|---|
| 1 | 72.044390  | 36.525833       |                |                  |                |                  | A    |            |                 |                |                  |                |                  | 6 |
| 2 | 129.065854 | 65.036565       |                |                  |                |                  | G    | 913.492399 | 457.249838      | 896.465850     | 448.736563       | 895.481834     | 448.244555       | 5 |
| 3 | 242.149918 | 121.578597      |                |                  |                |                  | I    | 856.470935 | 428.739106      | 839.444386     | 420.225831       | 838.460370     | 419.733823       | 4 |
| 4 | 681.375244 | 341.191260      | 664.348695     | 332.677986       |                |                  | Q    | 743.386871 | 372.197074      | 726.360322     | 363.683799       | 725.376306     | 363.191791       | 3 |
| 5 | 810.417837 | 405.712557      | 793.391288     | 397.199282       | 792.407272     | 396.707274       | E    | 304.161545 | 152.584411      | 287.134996     | 144.071136       | 286.150980     | 143.579128       | 2 |
| 6 |            |                 |                |                  |                |                  | R    | 175.118952 | 88.063114       | 158.092403     | 79.549840        |                |                  | 1 |

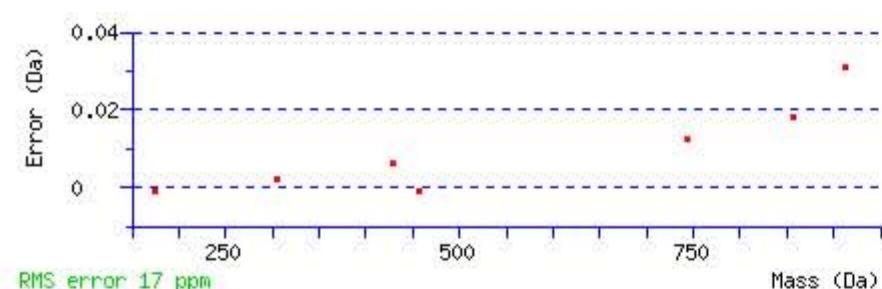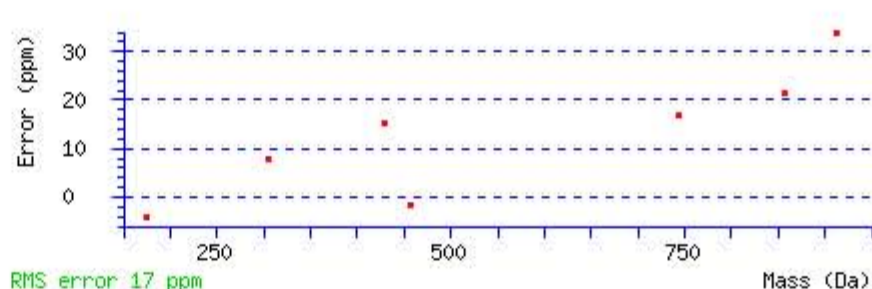

NCBI BLAST search of **AGIQER**

(Parameters: blastp, nr protein database, expect=20000, no filter, PAM30)

Other BLAST [web gateways](#)

## All matches to this query

| Score | Mr(calc):  | Delta    | Sequence                 |
|-------|------------|----------|--------------------------|
| 25.1  | 983.522217 | 0.013011 | <a href="#">AGIQER</a>   |
| 23.4  | 983.522217 | 0.013011 | <a href="#">QIQER</a>    |
| 23.4  | 983.522217 | 0.013011 | <a href="#">QLQER</a>    |
| 14.1  | 983.522217 | 0.013011 | <a href="#">AGLEQR</a>   |
| 11.2  | 983.522202 | 0.013026 | <a href="#">KLMENPPR</a> |
| 11.2  | 983.522217 | 0.013011 | <a href="#">QLEQR</a>    |
| 11.2  | 983.530090 | 0.005138 | <a href="#">QLLNHFGR</a> |
| 9.3   | 983.522217 | 0.013011 | <a href="#">IQQER</a>    |
| 9.3   | 983.522217 | 0.013011 | <a href="#">LQQER</a>    |
| 8.9   | 983.522217 | 0.013011 | <a href="#">QQLER</a>    |

Mascot: <http://www.matrixscience.com/>



# MASCOT SEARCH RESULTS

## Peptide View

MS/MS Fragmentation of **LGSLGAACEQTQTEGAK**

Found in **CO8A\_HUMAN**, Complement component C8 alpha chain OS=Homo sapiens GN=C8A PE=1 SV=2

Match to Query 44293: 2030.978548 from(1016.496550,2+) rtinseconds(1708) index(18087)

Title: Locus:1.1.1.3157.12 File:"2013-07-02 CLN FXIII 30 min 3rd F 2.wiff"

Data file C:\Program Files (x86)\Matrix Science\Mascot Daemon\mgf\3 FXIII 30 min 3rd\mascot\_daemon\_merge.mgf

Click mouse within plot area to zoom in by factor of two about that point

Or, Plot from  to  Da

Label all possible matches  Label matches used for scoring

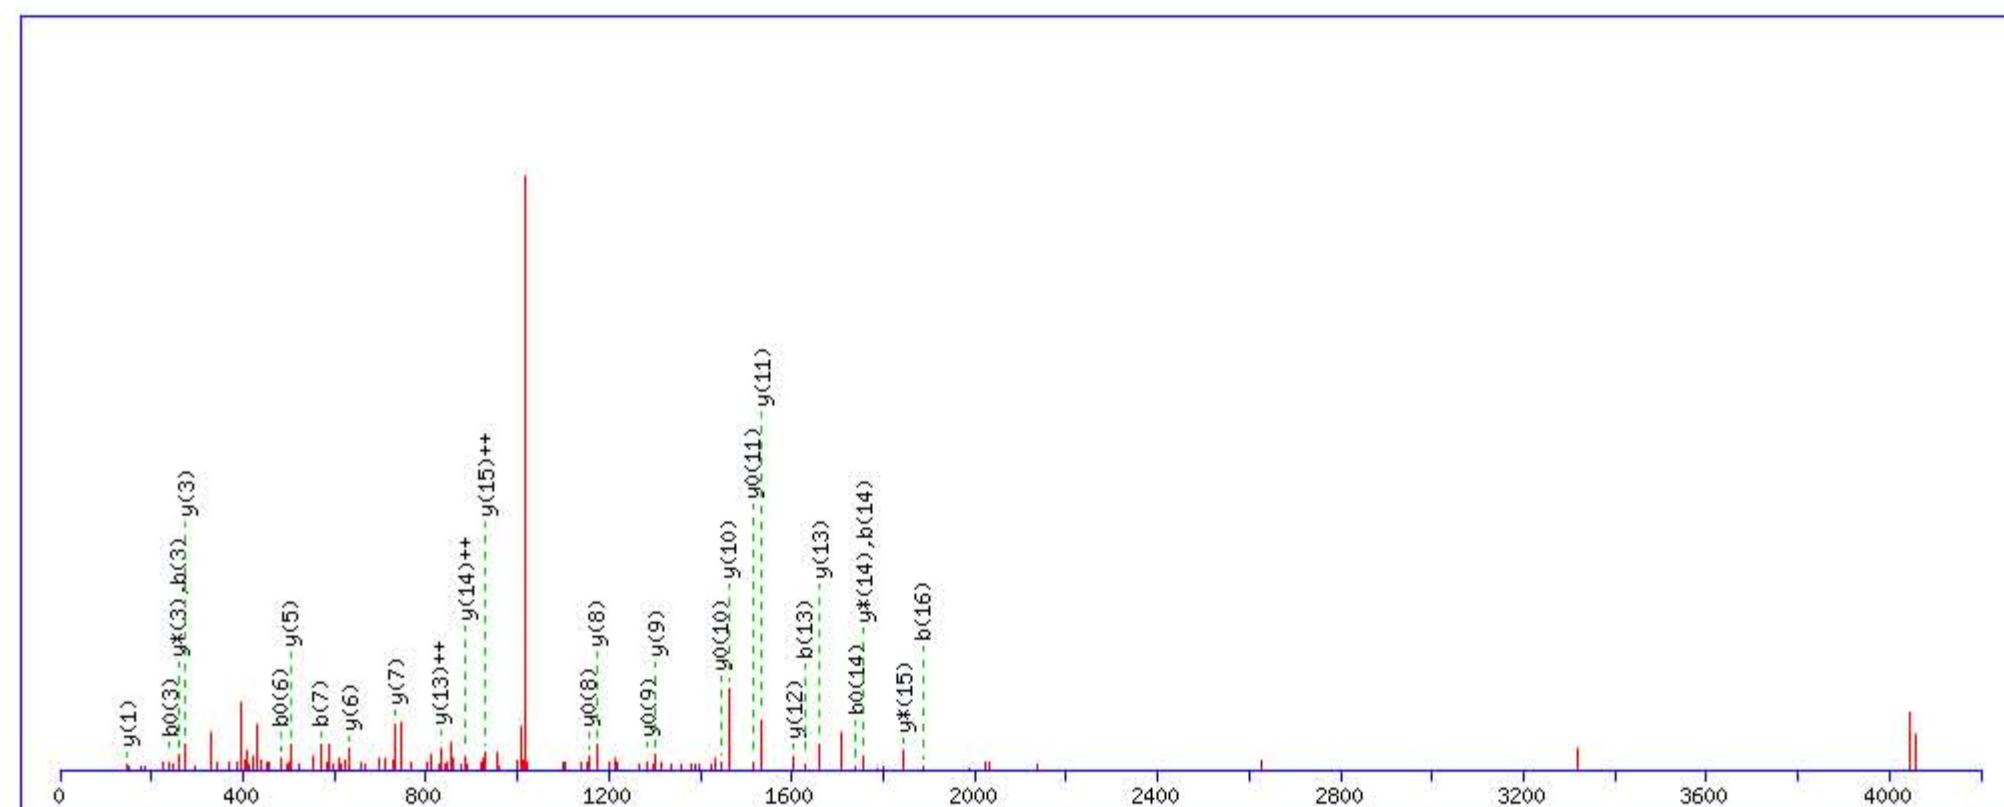

Monoisotopic mass of neutral peptide Mr(calc): 2030.976501

Fixed modifications: Carbamidomethyl (C) (apply to specified residues or termini only)

Variable modifications:

Q10 : Biotin:Thermo-21345 (Q)

Ions Score: 56 Expect: 7.3e-006

Matches : 29/164 fragment ions using 55 most intense peaks [\(help\)](#)

| #  | b                  | b <sup>++</sup> | b <sup>+</sup> | b <sup>+++</sup> | b <sup>0</sup>     | b <sup>0++</sup> | Seq. | y                  | y <sup>++</sup>   | y <sup>+</sup>     | y <sup>+++</sup> | y <sup>0</sup>     | y <sup>0++</sup> | #  |
|----|--------------------|-----------------|----------------|------------------|--------------------|------------------|------|--------------------|-------------------|--------------------|------------------|--------------------|------------------|----|
| 1  | 114.091340         | 57.549308       |                |                  |                    |                  | L    |                    |                   |                    |                  |                    |                  | 17 |
| 2  | 171.112804         | 86.060040       |                |                  |                    |                  | G    | 1918.899727        | 959.953502        | 1901.873178        | 951.440227       | 1900.889162        | 950.948219       | 16 |
| 3  | <b>258.144832</b>  | 129.576054      |                |                  | 240.134267         | 120.570772       | S    | 1861.878263        | <b>931.442770</b> | <b>1844.851714</b> | 922.929495       | 1843.867698        | 922.437487       | 15 |
| 4  | 371.228896         | 186.118086      |                |                  | 353.218331         | 177.112804       | L    | 1774.846235        | <b>887.926756</b> | <b>1757.819686</b> | 879.413481       | 1756.835670        | 878.921473       | 14 |
| 5  | 428.250360         | 214.628818      |                |                  | 410.239795         | 205.623536       | G    | <b>1661.762171</b> | <b>831.384724</b> | 1644.735622        | 822.871449       | 1643.751606        | 822.379441       | 13 |
| 6  | 499.287474         | 250.147375      |                |                  | <b>481.276909</b>  | 241.142093       | A    | <b>1604.740707</b> | 802.873992        | 1587.714158        | 794.360717       | 1586.730142        | 793.868709       | 12 |
| 7  | <b>570.324588</b>  | 285.665932      |                |                  | 552.314023         | 276.660650       | A    | <b>1533.703593</b> | 767.355435        | 1516.677044        | 758.842160       | <b>1515.693028</b> | 758.350152       | 11 |
| 8  | 730.355237         | 365.681257      |                |                  | 712.344672         | 356.675974       | C    | <b>1462.666479</b> | 731.836878        | 1445.639930        | 723.323603       | <b>1444.655914</b> | 722.831595       | 10 |
| 9  | 859.397830         | 430.202553      |                |                  | 841.387265         | 421.197271       | E    | <b>1302.635830</b> | 651.821553        | 1285.609281        | 643.308279       | <b>1284.625265</b> | 642.816270       | 9  |
| 10 | 1298.623156        | 649.815216      | 1281.596607    | 641.301942       | 1280.612591        | 640.809934       | Q    | <b>1173.593237</b> | 587.300257        | 1156.566688        | 578.786982       | <b>1155.582672</b> | 578.294974       | 8  |
| 11 | 1399.670835        | 700.339056      | 1382.644286    | 691.825781       | 1381.660270        | 691.333773       | T    | <b>734.367911</b>  | 367.687594        | 717.341362         | 359.174319       | 716.357346         | 358.682311       | 7  |
| 12 | 1527.729413        | 764.368345      | 1510.702864    | 755.855070       | 1509.718848        | 755.363062       | Q    | <b>633.320232</b>  | 317.163754        | 616.293683         | 308.650480       | 615.309667         | 308.158472       | 6  |
| 13 | <b>1628.777092</b> | 814.892184      | 1611.750543    | 806.378910       | 1610.766527        | 805.886902       | T    | <b>505.261654</b>  | 253.134465        | 488.235105         | 244.621190       | 487.251089         | 244.129182       | 5  |
| 14 | <b>1757.819685</b> | 879.413481      | 1740.793136    | 870.900206       | <b>1739.809120</b> | 870.408198       | E    | 404.213975         | 202.610625        | 387.187426         | 194.097351       | 386.203410         | 193.605343       | 4  |
| 15 | 1814.841149        | 907.924213      | 1797.814600    | 899.410938       | 1796.830584        | 898.918930       | G    | <b>275.171382</b>  | 138.089329        | <b>258.144833</b>  | 129.576054       |                    |                  | 3  |
| 16 | <b>1885.878263</b> | 943.442770      | 1868.851714    | 934.929495       | 1867.867698        | 934.437487       | A    | 218.149918         | 109.578597        | 201.123369         | 101.065322       |                    |                  | 2  |
| 17 |                    |                 |                |                  |                    |                  | K    | <b>147.112804</b>  | 74.060040         | 130.086255         | 65.546765        |                    |                  | 1  |

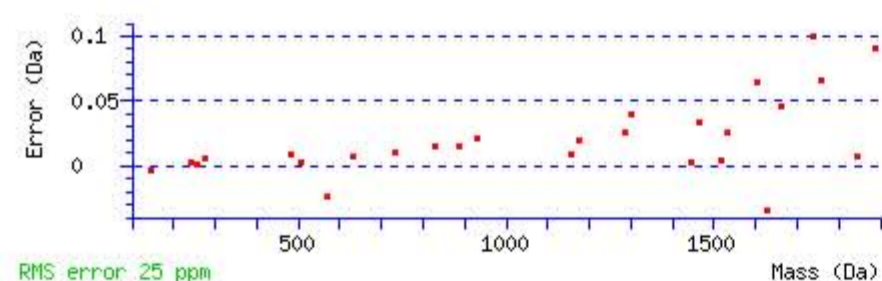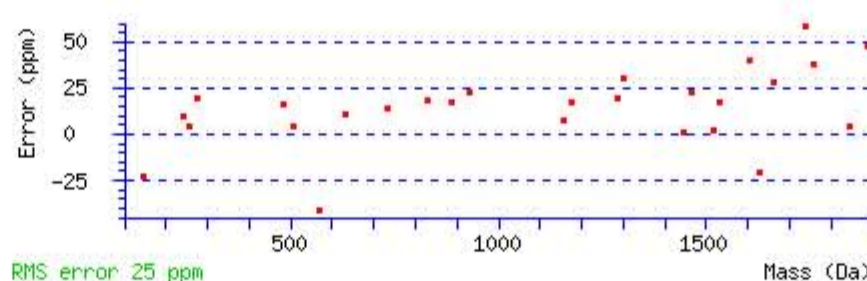

NCBI BLAST search of **LGSLGAACEQTQTEGAK**

(Parameters: blastp, nr protein database, expect=20000, no filter, PAM30)

Other BLAST [web gateways](#)

### All matches to this query

| Score | Mr(calc):   | Delta    | Sequence                            |
|-------|-------------|----------|-------------------------------------|
| 55.6  | 2030.976501 | 0.002047 | <a href="#">LGSLGAACEQTQTEGAK</a>   |
| 35.3  | 2030.976501 | 0.002047 | <a href="#">LGSLGAACEQTQTEGAK</a>   |
| 0.8   | 2030.958710 | 0.019838 | <a href="#">QPMNAASGAAMSLAGA EK</a> |



# MASCOT Search Results

## Peptide View

MS/MS Fragmentation of **AIDEDCSQYEPIPGSQK**

Found in **CO8A\_HUMAN**, Complement component C8 alpha chain OS=Homo sapiens GN=C8A PE=1 SV=2

Match to Query 48073: 2247.026232 from(750.016020,3+) rtinseconds(1893) index(19151)

Title: Locus:1.1.1.3222.10 File:"2013-07-02 CLN FXIII 30 min 3rd F 2.wiff"

Data file C:\Program Files (x86)\Matrix Science\Mascot Daemon\mgf3 FXIII 30 min 3rd\mascot\_daemon\_merge.mgf

Click mouse within plot area to zoom in by factor of two about that point

Or, Plot from  to  Da

Label all possible matches  Label matches used for scoring

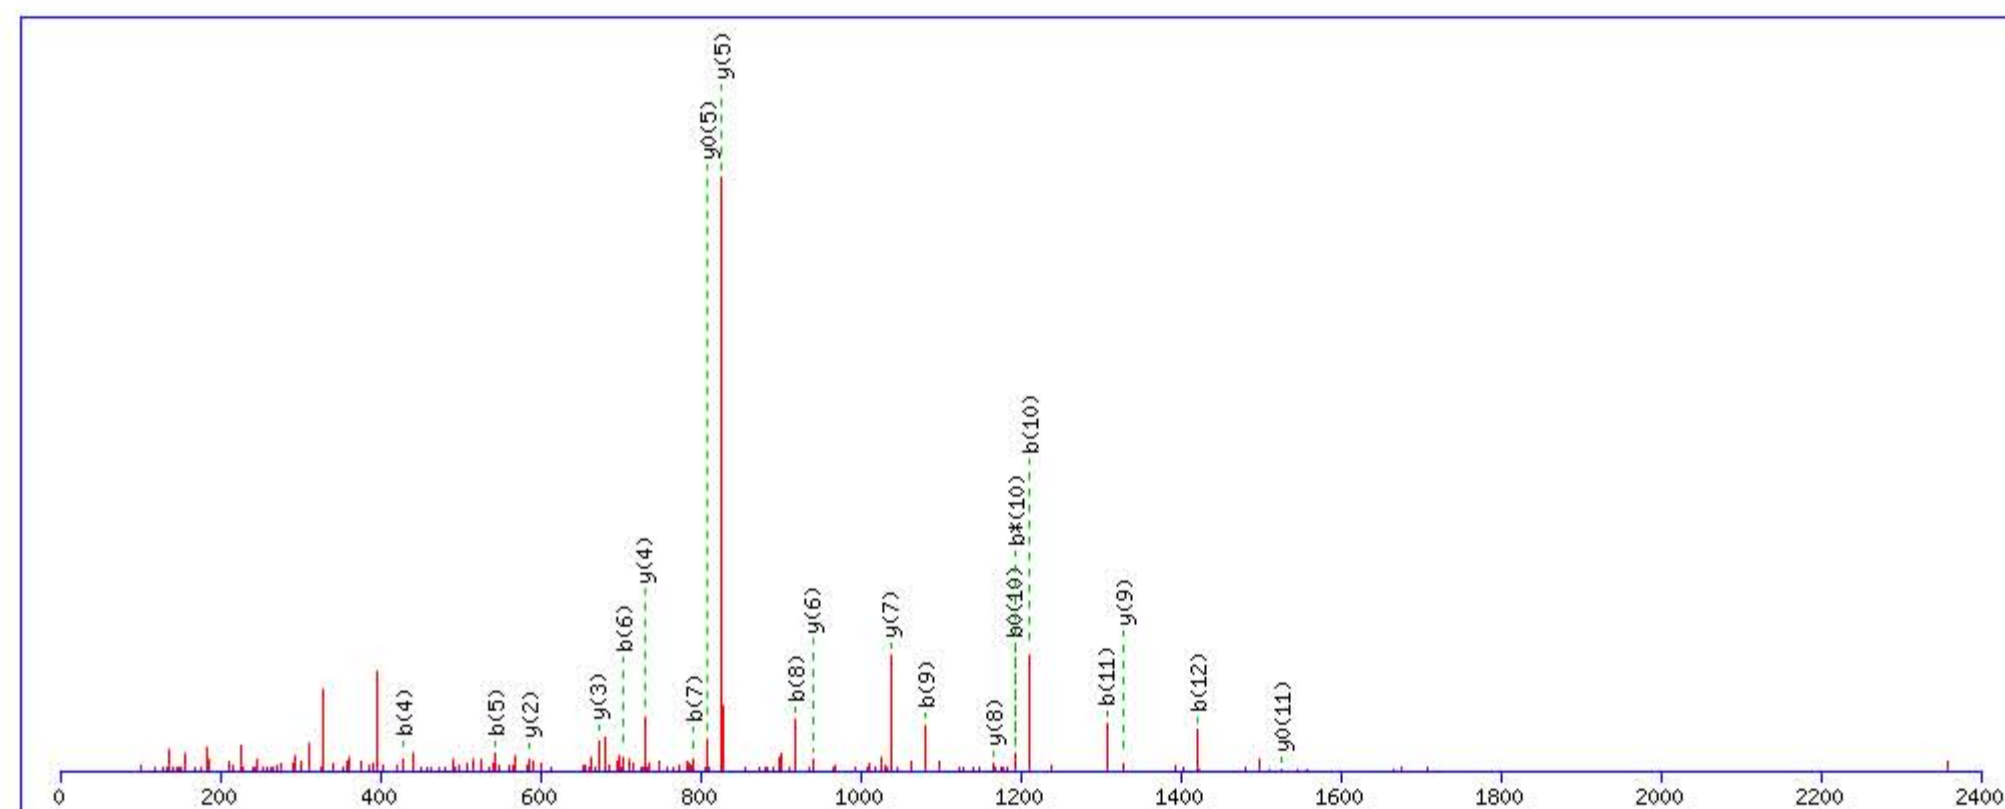

Monoisotopic mass of neutral peptide Mr(calc): 2247.018753

Fixed modifications: Carbamidomethyl (C) (apply to specified residues or termini only)

Variable modifications:

Q16 : Biotin:Thermo-21345 (Q)

Ions Score: 45 Expect: 0.00038

Matches : 21/170 fragment ions using 48 most intense peaks [\(help\)](#)

| #  | b                  | b <sup>++</sup> | b <sup>*</sup>     | b <sup>*++</sup> | b <sup>0</sup>     | b <sup>0++</sup> | Seq. | y                  | y <sup>++</sup> | y <sup>*</sup> | y <sup>*++</sup> | y <sup>0</sup>     | y <sup>0++</sup> | #  |
|----|--------------------|-----------------|--------------------|------------------|--------------------|------------------|------|--------------------|-----------------|----------------|------------------|--------------------|------------------|----|
| 1  | 72.044390          | 36.525833       |                    |                  |                    |                  | A    |                    |                 |                |                  |                    |                  | 17 |
| 2  | 185.128454         | 93.067865       |                    |                  |                    |                  | I    | 2176.988934        | 1088.998105     | 2159.962385    | 1080.484830      | 2158.978369        | 1079.992822      | 16 |
| 3  | 300.155397         | 150.581336      |                    |                  | 282.144832         | 141.576054       | D    | 2063.904870        | 1032.456073     | 2046.878321    | 1023.942798      | 2045.894305        | 1023.450790      | 15 |
| 4  | <b>429.197990</b>  | 215.102633      |                    |                  | 411.187425         | 206.097351       | E    | 1948.877927        | 974.942602      | 1931.851378    | 966.429327       | 1930.867362        | 965.937319       | 14 |
| 5  | <b>544.224933</b>  | 272.616105      |                    |                  | 526.214368         | 263.610822       | D    | 1819.835334        | 910.421305      | 1802.808785    | 901.908031       | 1801.824769        | 901.416022       | 13 |
| 6  | <b>704.255582</b>  | 352.631429      |                    |                  | 686.245017         | 343.626147       | C    | 1704.808391        | 852.907833      | 1687.781842    | 844.394559       | 1686.797826        | 843.902551       | 12 |
| 7  | <b>791.287610</b>  | 396.147443      |                    |                  | 773.277045         | 387.142161       | S    | 1544.777742        | 772.892509      | 1527.751193    | 764.379235       | <b>1526.767177</b> | 763.887227       | 11 |
| 8  | <b>919.346188</b>  | 460.176732      | 902.319639         | 451.663458       | 901.335623         | 451.171450       | Q    | 1457.745714        | 729.376495      | 1440.719165    | 720.863221       | 1439.735149        | 720.371212       | 10 |
| 9  | <b>1082.409517</b> | 541.708397      | 1065.382968        | 533.195122       | 1064.398952        | 532.703114       | Y    | <b>1329.687136</b> | 665.347206      | 1312.660587    | 656.833931       | 1311.676571        | 656.341923       | 9  |
| 10 | <b>1211.452110</b> | 606.229693      | <b>1194.425561</b> | 597.716419       | <b>1193.441545</b> | 597.224410       | E    | <b>1166.623807</b> | 583.815541      | 1149.597258    | 575.302267       | 1148.613242        | 574.810259       | 8  |
| 11 | <b>1308.504874</b> | 654.756075      | 1291.478325        | 646.242801       | 1290.494309        | 645.750792       | P    | <b>1037.581214</b> | 519.294245      | 1020.554665    | 510.780971       | 1019.570649        | 510.288963       | 7  |
| 12 | <b>1421.588938</b> | 711.298107      | 1404.562389        | 702.784832       | 1403.578373        | 702.292824       | I    | <b>940.528450</b>  | 470.767863      | 923.501901     | 462.254589       | 922.517885         | 461.762581       | 6  |
| 13 | 1518.641702        | 759.824489      | 1501.615153        | 751.311215       | 1500.631137        | 750.819206       | P    | <b>827.444386</b>  | 414.225831      | 810.417837     | 405.712557       | <b>809.433821</b>  | 405.220549       | 5  |
| 14 | 1575.663166        | 788.335221      | 1558.636617        | 779.821946       | 1557.652601        | 779.329938       | G    | <b>730.391622</b>  | 365.699449      | 713.365073     | 357.186175       | 712.381057         | 356.694167       | 4  |
| 15 | 1662.695194        | 831.851235      | 1645.668645        | 823.337961       | 1644.684629        | 822.845952       | S    | <b>673.370158</b>  | 337.188717      | 656.343609     | 328.675443       | 655.359593         | 328.183435       | 3  |
| 16 | 2101.920520        | 1051.463898     | 2084.893971        | 1042.950623      | 2083.909955        | 1042.458615      | Q    | <b>586.338130</b>  | 293.672703      | 569.311581     | 285.159429       |                    |                  | 2  |
| 17 |                    |                 |                    |                  |                    |                  | K    | 147.112804         | 74.060040       | 130.086255     | 65.546765        |                    |                  | 1  |

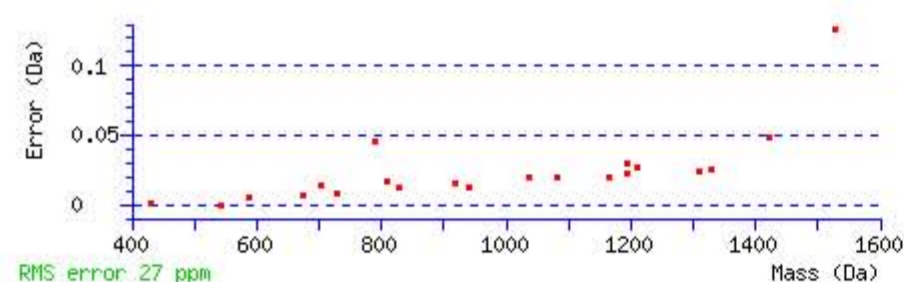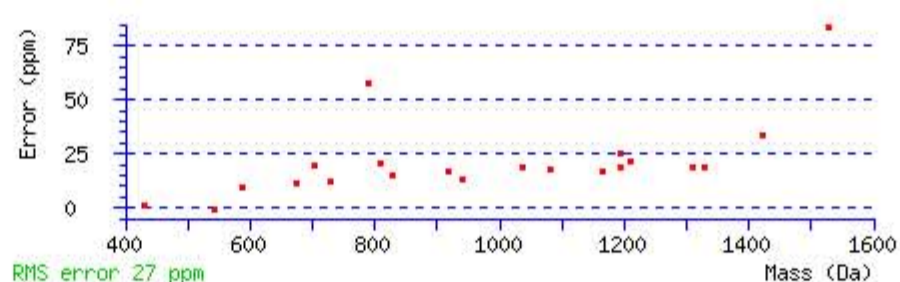

NCBI BLAST search of **AIDEDCSQYEPIPGSQK**

(Parameters: blastp, nr protein database, expect=20000, no filter, PAM30)

Other BLAST [web gateways](#)

All matches to this query

| Score | Mr(calc):   | Delta    | Sequence                          |
|-------|-------------|----------|-----------------------------------|
| 44.9  | 2247.018753 | 0.007479 | <a href="#">AIDEDCSQYEPIPGSQK</a> |

Mascot: <http://www.matrixscience.com/>



# MASCOT Search Results

## Peptide View

MS/MS Fragmentation of **AIDEDCSQYEPIPGSQK**  
 Found in **CO8A\_HUMAN**, Complement component C8 alpha chain OS=Homo sapiens GN=C8A PE=1 SV=2

Match to Query 53096: 2558.213922 from(853.745250,3+) rtinseconds(2168) index(36211)  
 Title: Locus:1.1.1.3388.24 File:"2013-07-02 CLN FXIII 30 min 3rd F 3.wiff"  
 Data file C:\Program Files (x86)\Matrix Science\Mascot Daemon\mgf3 FXIII 30 min 3rd\mascot\_daemon\_merge.mgf

Click mouse within plot area to zoom in by factor of two about that point  
 Or, Plot from  to  Da   
 Label all possible matches  Label matches used for scoring

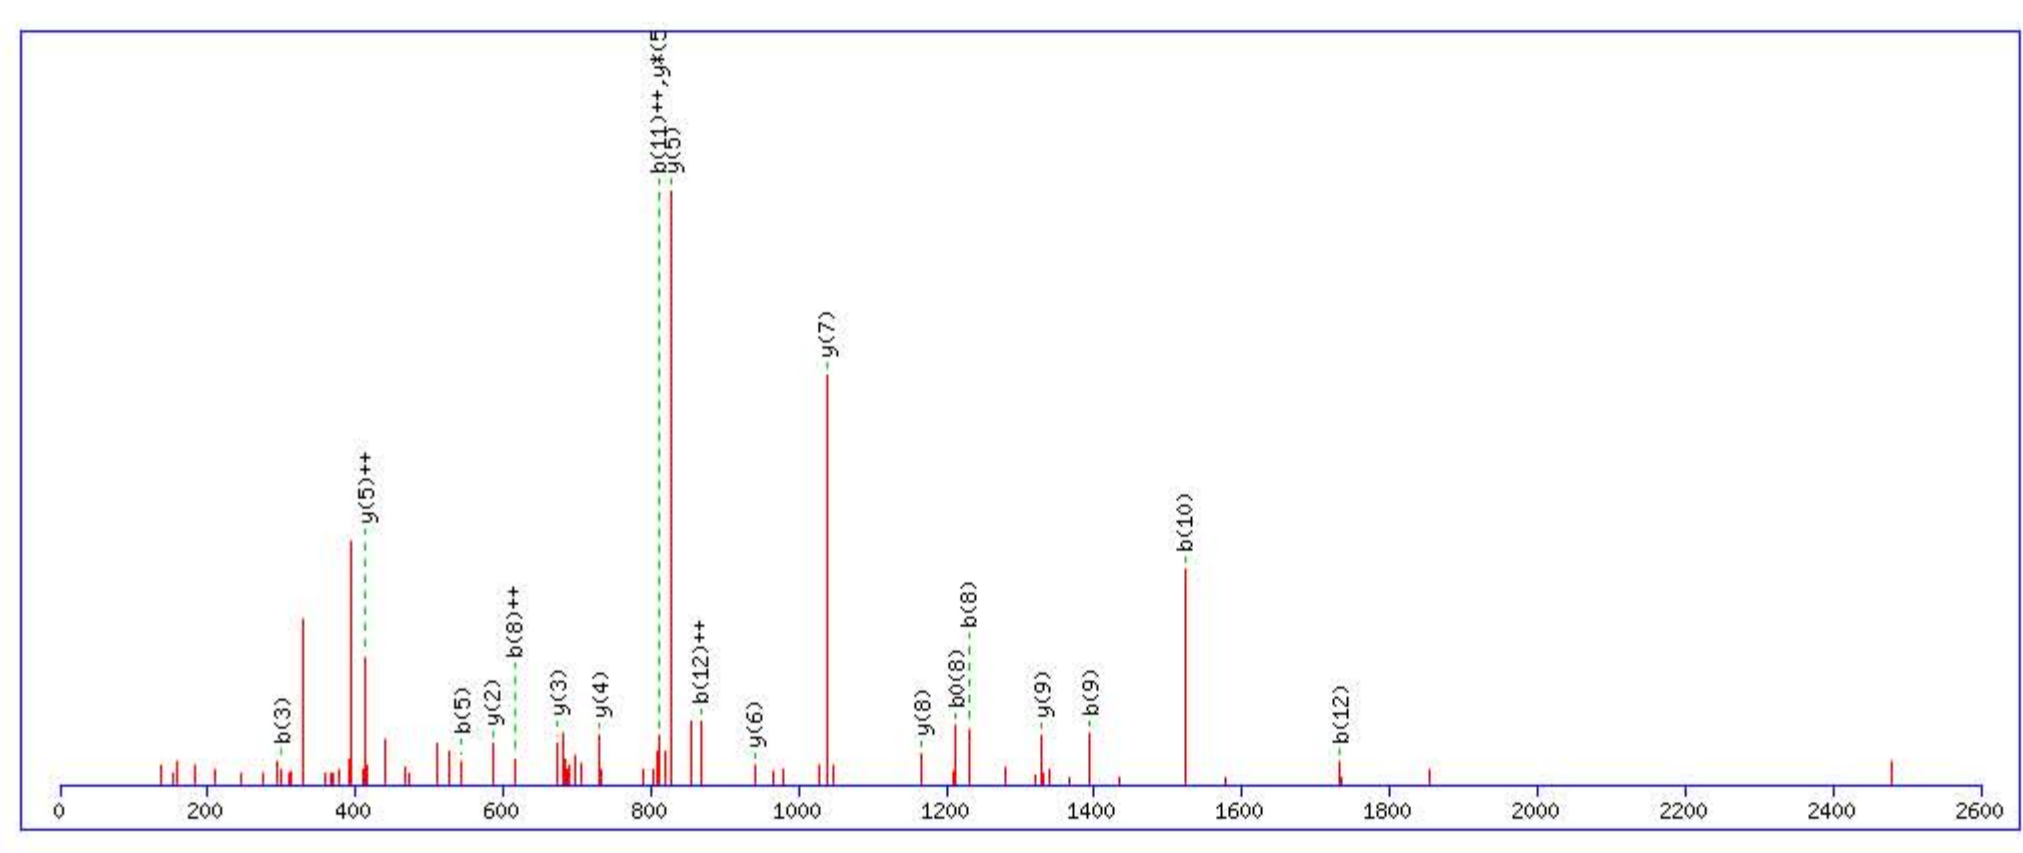

Monoisotopic mass of neutral peptide Mr(calc): 2558.185501  
 Fixed modifications: Carbamidomethyl (C) (apply to specified residues or termini only)  
 Variable modifications:  
 Q8 : Biotin:Thermo-21345 (Q)  
 Q16 : Biotin:Thermo-21345 (Q)  
 Ions Score: 28 Expect: 0.0044  
 Matches : 20/170 fragment ions using 46 most intense peaks [\(help\)](#)

| #  | b                  | b <sup>++</sup>   | b <sup>*</sup> | b <sup>*++</sup> | b <sup>0</sup>     | b <sup>0++</sup> | Seq. | y                  | y <sup>++</sup>   | y <sup>*</sup>    | y <sup>*++</sup> | y <sup>0</sup> | y <sup>0++</sup> | #  |
|----|--------------------|-------------------|----------------|------------------|--------------------|------------------|------|--------------------|-------------------|-------------------|------------------|----------------|------------------|----|
| 1  | 72.044390          | 36.525833         |                |                  |                    |                  | A    |                    |                   |                   |                  |                |                  | 17 |
| 2  | 185.128454         | 93.067865         |                |                  |                    |                  | I    | 2488.155682        | 1244.581479       | 2471.129133       | 1236.068204      | 2470.145117    | 1235.576196      | 16 |
| 3  | <b>300.155397</b>  | 150.581336        |                |                  | 282.144832         | 141.576054       | D    | 2375.071618        | 1188.039447       | 2358.045069       | 1179.526172      | 2357.061053    | 1179.034164      | 15 |
| 4  | 429.197990         | 215.102633        |                |                  | 411.187425         | 206.097351       | E    | 2260.044675        | 1130.525975       | 2243.018126       | 1122.012701      | 2242.034110    | 1121.520693      | 14 |
| 5  | <b>544.224933</b>  | 272.616105        |                |                  | 526.214368         | 263.610822       | D    | 2131.002082        | 1066.004679       | 2113.975533       | 1057.491404      | 2112.991517    | 1056.999396      | 13 |
| 6  | 704.255582         | 352.631429        |                |                  | 686.245017         | 343.626147       | C    | 2015.975139        | 1008.491208       | 1998.948590       | 999.977933       | 1997.964574    | 999.485925       | 12 |
| 7  | 791.287610         | 396.147443        |                |                  | 773.277045         | 387.142161       | S    | 1855.944490        | 928.475883        | 1838.917941       | 919.962609       | 1837.933925    | 919.470601       | 11 |
| 8  | <b>1230.512936</b> | <b>615.760106</b> | 1213.486387    | 607.246832       | <b>1212.502371</b> | 606.754824       | Q    | 1768.912462        | 884.959869        | 1751.885913       | 876.446595       | 1750.901897    | 875.954587       | 10 |
| 9  | <b>1393.576265</b> | 697.291771        | 1376.549716    | 688.778496       | 1375.565700        | 688.286488       | Y    | <b>1329.687136</b> | 665.347206        | 1312.660587       | 656.833932       | 1311.676571    | 656.341924       | 9  |
| 10 | <b>1522.618858</b> | 761.813067        | 1505.592309    | 753.299793       | 1504.608293        | 752.807785       | E    | <b>1166.623807</b> | 583.815541        | 1149.597258       | 575.302267       | 1148.613242    | 574.810259       | 8  |
| 11 | 1619.671622        | <b>810.339449</b> | 1602.645073    | 801.826175       | 1601.661057        | 801.334167       | P    | <b>1037.581214</b> | 519.294245        | 1020.554665       | 510.780971       | 1019.570649    | 510.288963       | 7  |
| 12 | <b>1732.755686</b> | <b>866.881481</b> | 1715.729137    | 858.368207       | 1714.745121        | 857.876198       | I    | <b>940.528450</b>  | 470.767863        | 923.501901        | 462.254589       | 922.517885     | 461.762581       | 6  |
| 13 | 1829.808450        | 915.407863        | 1812.781901    | 906.894589       | 1811.797885        | 906.402581       | P    | <b>827.444386</b>  | <b>414.225831</b> | <b>810.417837</b> | 405.712557       | 809.433821     | 405.220549       | 5  |
| 14 | 1886.829914        | 943.918595        | 1869.803365    | 935.405321       | 1868.819349        | 934.913312       | G    | <b>730.391622</b>  | 365.699449        | 713.365073        | 357.186175       | 712.381057     | 356.694167       | 4  |
| 15 | 1973.861942        | 987.434609        | 1956.835393    | 978.921335       | 1955.851377        | 978.429327       | S    | <b>673.370158</b>  | 337.188717        | 656.343609        | 328.675443       | 655.359593     | 328.183435       | 3  |
| 16 | 2413.087268        | 1207.047272       | 2396.060719    | 1198.533997      | 2395.076703        | 1198.041989      | Q    | <b>586.338130</b>  | 293.672703        | 569.311581        | 285.159429       |                |                  | 2  |
| 17 |                    |                   |                |                  |                    |                  | K    | 147.112804         | 74.060040         | 130.086255        | 65.546765        |                |                  | 1  |

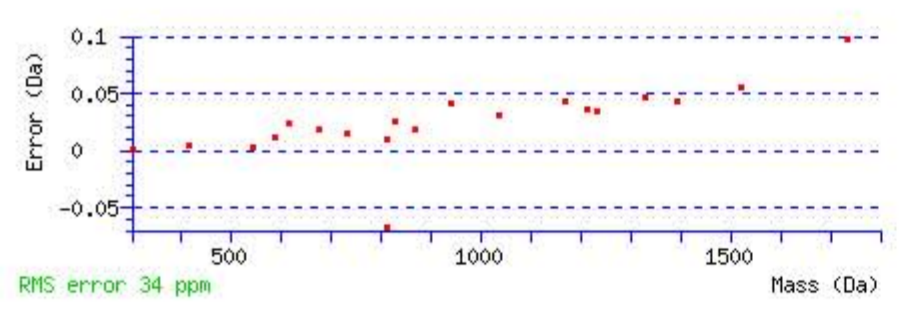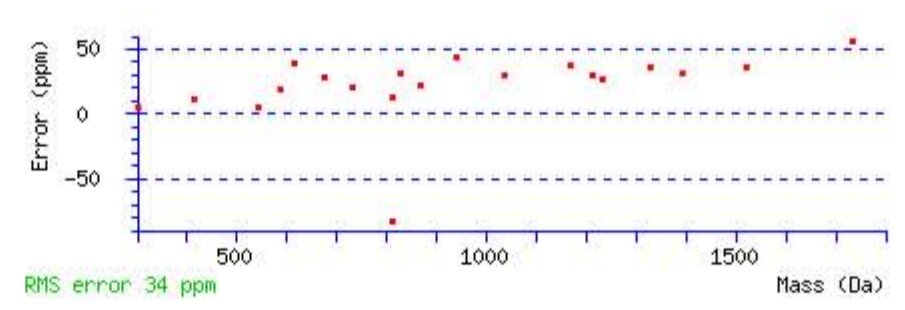

NCBI BLAST search of [AIDEDCSQYEPIPGSQK](#)  
 (Parameters: blastp, nr protein database, expect=20000, no filter, PAM30)  
 Other BLAST [web gateways](#)

### All matches to this query

| Score | Mr(calc):   | Delta     | Sequence                                 |
|-------|-------------|-----------|------------------------------------------|
| 28.5  | 2558.185501 | 0.028421  | <a href="#">AIDEDCSQYEPIPGSQK</a>        |
| 3.3   | 2558.214981 | -0.001059 | <a href="#">TSPQSAPPSSPLSPNWVSPSDHQR</a> |



# MASCOT Search Results

## Peptide View

MS/MS Fragmentation of **FGGTICSGDIWDQASCSSTTCVR**

Found in **CO8A\_HUMAN**, Complement component C8 alpha chain OS=Homo sapiens GN=C8A PE=1 SV=2

Match to Query 57023: 2962.279722 from(988.433850,3+) rtinseconds(2368) index(21827)

Title: Locus:1.1.1.3387.19 File:"2013-07-02 CLN FXIII 30 min 3rd F 2.wiff"

Data file C:\Program Files (x86)\Matrix Science\Mascot Daemon\mgf3 FXIII 30 min 3rd\mascot\_daemon\_merge.mgf

Click mouse within plot area to zoom in by factor of two about that point

Or, Plot from  to  Da

Label all possible matches  Label matches used for scoring

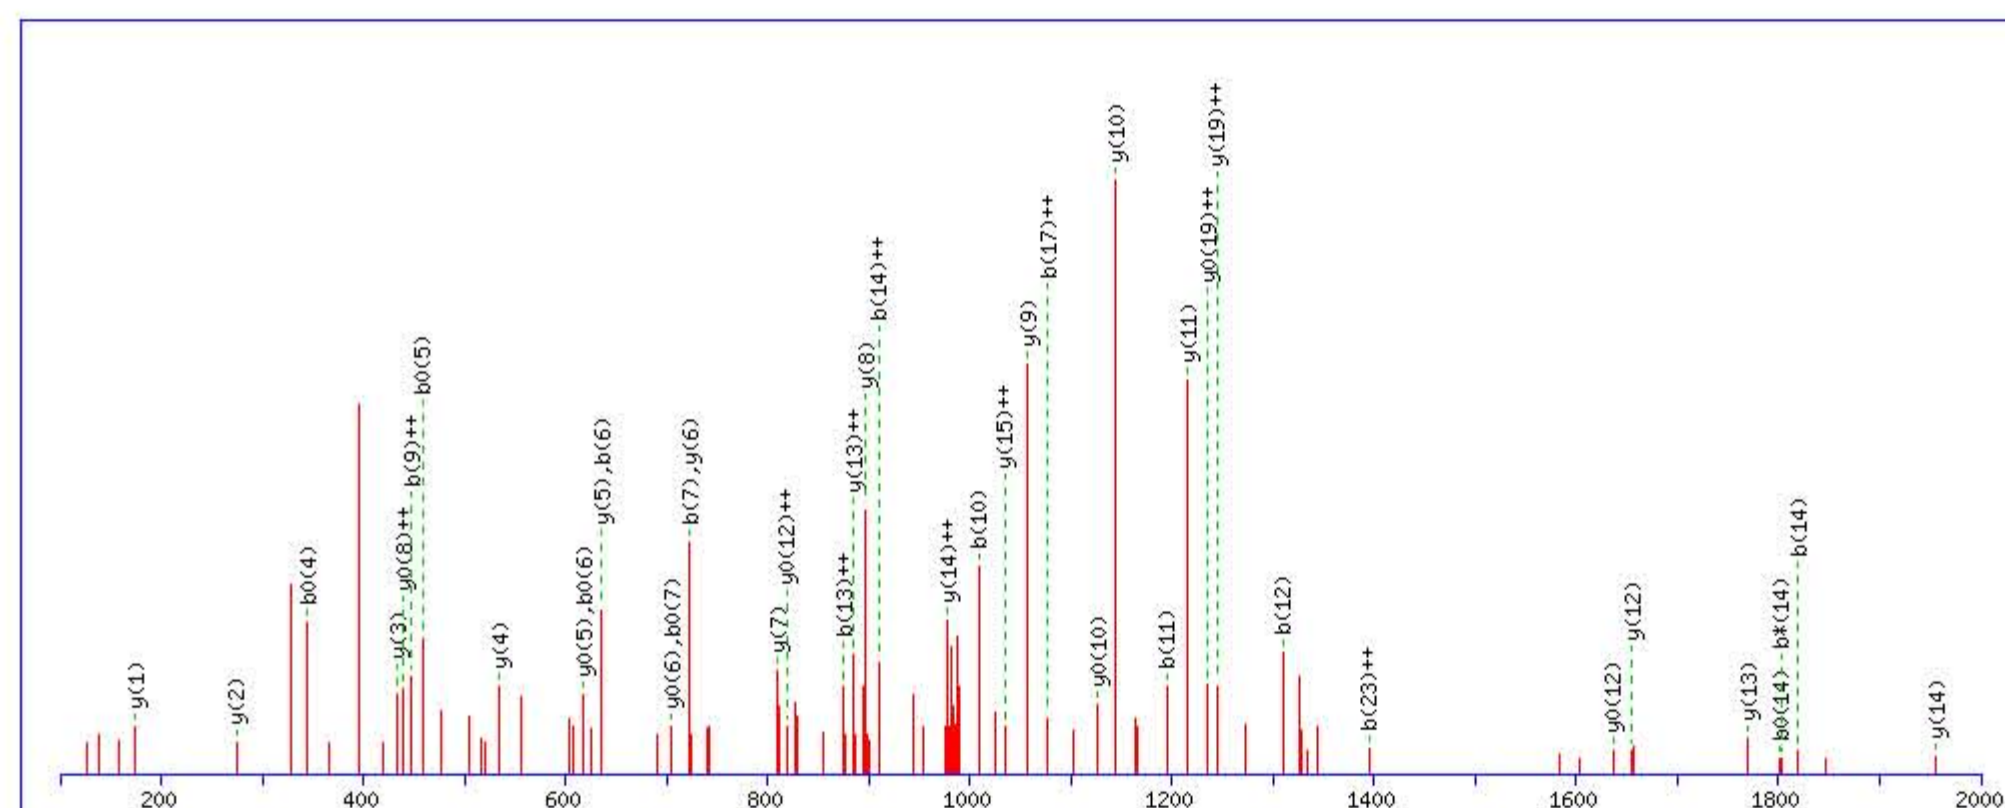

Monoisotopic mass of neutral peptide Mr(calc): 2962.271835

Fixed modifications: Carbamidomethyl (C) (apply to specified residues or termini only)

Variable modifications:

Q13 : Biotin:Thermo-21345 (Q)

Ions Score: 86 Expect: 9.8e-009

Matches : 42/240 fragment ions using 60 most intense peaks [\(help\)](#)

| #  | b                  | b <sup>++</sup>    | b <sup>*</sup>     | b <sup>*++</sup> | b <sup>0</sup>     | b <sup>0++</sup> | Seq. | y                  | y <sup>++</sup>    | y <sup>*</sup> | y <sup>*++</sup> | y <sup>0</sup>     | y <sup>0++</sup>   | #  |
|----|--------------------|--------------------|--------------------|------------------|--------------------|------------------|------|--------------------|--------------------|----------------|------------------|--------------------|--------------------|----|
| 1  | 148.075690         | 74.541483          |                    |                  |                    |                  | F    |                    |                    |                |                  |                    |                    | 24 |
| 2  | 205.097154         | 103.052215         |                    |                  |                    |                  | G    | 2816.210649        | 1408.608962        | 2799.184100    | 1400.095688      | 2798.200084        | 1399.603680        | 23 |
| 3  | 262.118618         | 131.562947         |                    |                  |                    |                  | G    | 2759.189185        | 1380.098230        | 2742.162636    | 1371.584956      | 2741.178620        | 1371.092948        | 22 |
| 4  | 363.166297         | 182.086786         |                    |                  | 345.155732         | 173.081504       | T    | 2702.167721        | 1351.587498        | 2685.141172    | 1343.074224      | 2684.157156        | 1342.582216        | 21 |
| 5  | 476.250361         | 238.628818         |                    |                  | 458.239796         | 229.623536       | I    | 2601.120042        | 1301.063659        | 2584.093493    | 1292.550384      | 2583.109477        | 1292.058376        | 20 |
| 6  | <b>636.281010</b>  | 318.644143         |                    |                  | <b>618.270445</b>  | 309.638861       | C    | 2488.035978        | <b>1244.521627</b> | 2471.009429    | 1236.008352      | 2470.025413        | <b>1235.516344</b> | 19 |
| 7  | <b>723.313038</b>  | 362.160157         |                    |                  | <b>705.302473</b>  | 353.154875       | S    | 2328.005329        | 1164.506302        | 2310.978780    | 1155.993028      | 2309.994764        | 1155.501020        | 18 |
| 8  | 780.334502         | 390.670889         |                    |                  | 762.323937         | 381.665607       | G    | 2240.973301        | 1120.990288        | 2223.946752    | 1112.477014      | 2222.962736        | 1111.985006        | 17 |
| 9  | 895.361445         | <b>448.184361</b>  |                    |                  | 877.350880         | 439.179078       | D    | 2183.951837        | 1092.479556        | 2166.925288    | 1083.966282      | 2165.941272        | 1083.474274        | 16 |
| 10 | <b>1008.445509</b> | 504.726393         |                    |                  | 990.434944         | 495.721110       | I    | 2068.924894        | <b>1034.966085</b> | 2051.898345    | 1026.452810      | 2050.914329        | 1025.968082        | 15 |
| 11 | <b>1194.524822</b> | 597.766049         |                    |                  | 1176.514257        | 588.760767       | W    | <b>1955.840830</b> | <b>978.424053</b>  | 1938.814281    | 969.910778       | 1937.830265        | 969.418770         | 14 |
| 12 | <b>1309.551765</b> | 655.279521         |                    |                  | 1291.541200        | 646.274238       | D    | <b>1769.761517</b> | <b>885.384396</b>  | 1752.734968    | 876.871122       | 1751.750952        | 876.379114         | 13 |
| 13 | 1748.777091        | <b>874.892184</b>  | 1731.750542        | 866.378909       | 1730.766526        | 865.886901       | Q    | <b>1654.734574</b> | 827.870925         | 1637.708025    | 819.357650       | <b>1636.724009</b> | <b>818.865642</b>  | 12 |
| 14 | <b>1819.814205</b> | <b>910.410741</b>  | <b>1802.787656</b> | 901.897466       | <b>1801.803640</b> | 901.405458       | A    | <b>1215.509248</b> | 608.258262         | 1198.482699    | 599.744987       | 1197.498683        | 599.252979         | 11 |
| 15 | 1906.846233        | 953.926755         | 1889.819684        | 945.413480       | 1888.835668        | 944.921472       | S    | <b>1144.472134</b> | 572.739705         | 1127.445585    | 564.226430       | <b>1126.461569</b> | 563.734422         | 10 |
| 16 | 2066.876882        | 1033.942079        | 2049.850333        | 1025.428804      | 2048.866317        | 1024.936796      | C    | <b>1057.440106</b> | 529.223691         | 1040.413557    | 520.710416       | 1039.429541        | 520.218408         | 9  |
| 17 | 2153.908910        | <b>1077.458093</b> | 2136.882361        | 1068.944818      | 2135.898345        | 1068.452810      | S    | <b>897.409457</b>  | 449.208366         | 880.382908     | 440.695092       | 879.398892         | <b>440.203084</b>  | 8  |
| 18 | 2240.940938        | 1120.974107        | 2223.914389        | 1112.460832      | 2222.930373        | 1111.968825      | S    | <b>810.377429</b>  | 405.692352         | 793.350880     | 397.179078       | 792.366864         | 396.687070         | 7  |
| 19 | 2327.972966        | 1164.490121        | 2310.946417        | 1155.976847      | 2309.962401        | 1155.484839      | S    | <b>723.345401</b>  | 362.176338         | 706.318852     | 353.663064       | <b>705.334836</b>  | 353.171056         | 6  |
| 20 | 2429.020645        | 1215.013960        | 2411.994096        | 1206.500686      | 2411.010080        | 1206.008678      | T    | <b>636.313373</b>  | 318.660324         | 619.286824     | 310.147050       | <b>618.302808</b>  | 309.655042         | 5  |
| 21 | 2530.068324        | 1265.537800        | 2513.041775        | 1257.024525      | 2512.057759        | 1256.532517      | T    | <b>535.265694</b>  | 268.136485         | 518.239145     | 259.623210       | 517.255129         | 259.131202         | 4  |
| 22 | 2690.098973        | 1345.553124        | 2673.072424        | 1337.039850      | 2672.088408        | 1336.547842      | C    | <b>434.218015</b>  | 217.612645         | 417.191466     | 209.099371       |                    |                    | 3  |
| 23 | 2789.167387        | <b>1395.087331</b> | 2772.140838        | 1386.574057      | 2771.156822        | 1386.082049      | V    | <b>274.187366</b>  | 137.597321         | 257.160817     | 129.084046       |                    |                    | 2  |
| 24 |                    |                    |                    |                  |                    |                  | R    | <b>175.118952</b>  | 88.063114          | 158.092403     | 79.549839        |                    |                    | 1  |

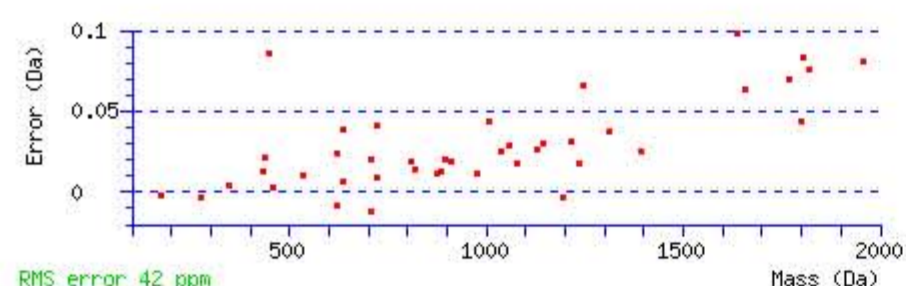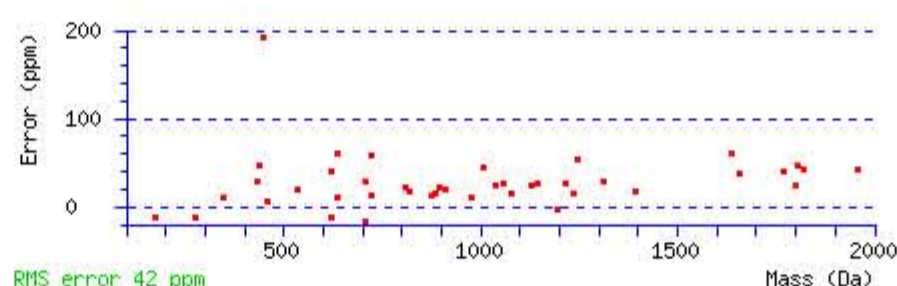

NCBI BLAST search of [FGGTICSGDIWDQASCSSTTCVR](#)

(Parameters: blastp, nr protein database, expect=20000, no filter, PAM30)

Other BLAST [web gateways](#)

All matches to this query

| Score | Mr(calc):   | Delta    | Sequence                                |
|-------|-------------|----------|-----------------------------------------|
| 86.2  | 2962.271835 | 0.007887 | <a href="#">FGGTICSGDIWDQASCSSTTCVR</a> |

Mascot: <http://www.matrixscience.com/>



# MASCOT SEARCH RESULTS

## Peptide View

MS/MS Fragmentation of **SLPVSDSVLSGFQR**

Found in **CO8G\_HUMAN**, Complement component C8 gamma chain OS=Homo sapiens GN=C8G PE=1 SV=3

Match to Query 41586: 1930.998868 from(966.506710,2+) rtinseconds(2523) index(38066)

Title: Locus:1.1.1.3512.24 File:"2013-07-02 CLN FXIII 30 min 3rd F 3.wiff"

Data file C:\Program Files (x86)\Matrix Science\Mascot Daemon\mgf\3 FXIII 30 min 3rd\mascot\_daemon\_merge.mgf

Click mouse within plot area to zoom in by factor of two about that point

Or, Plot from 100 to 1800 Da Full range

Label all possible matches  Label matches used for scoring

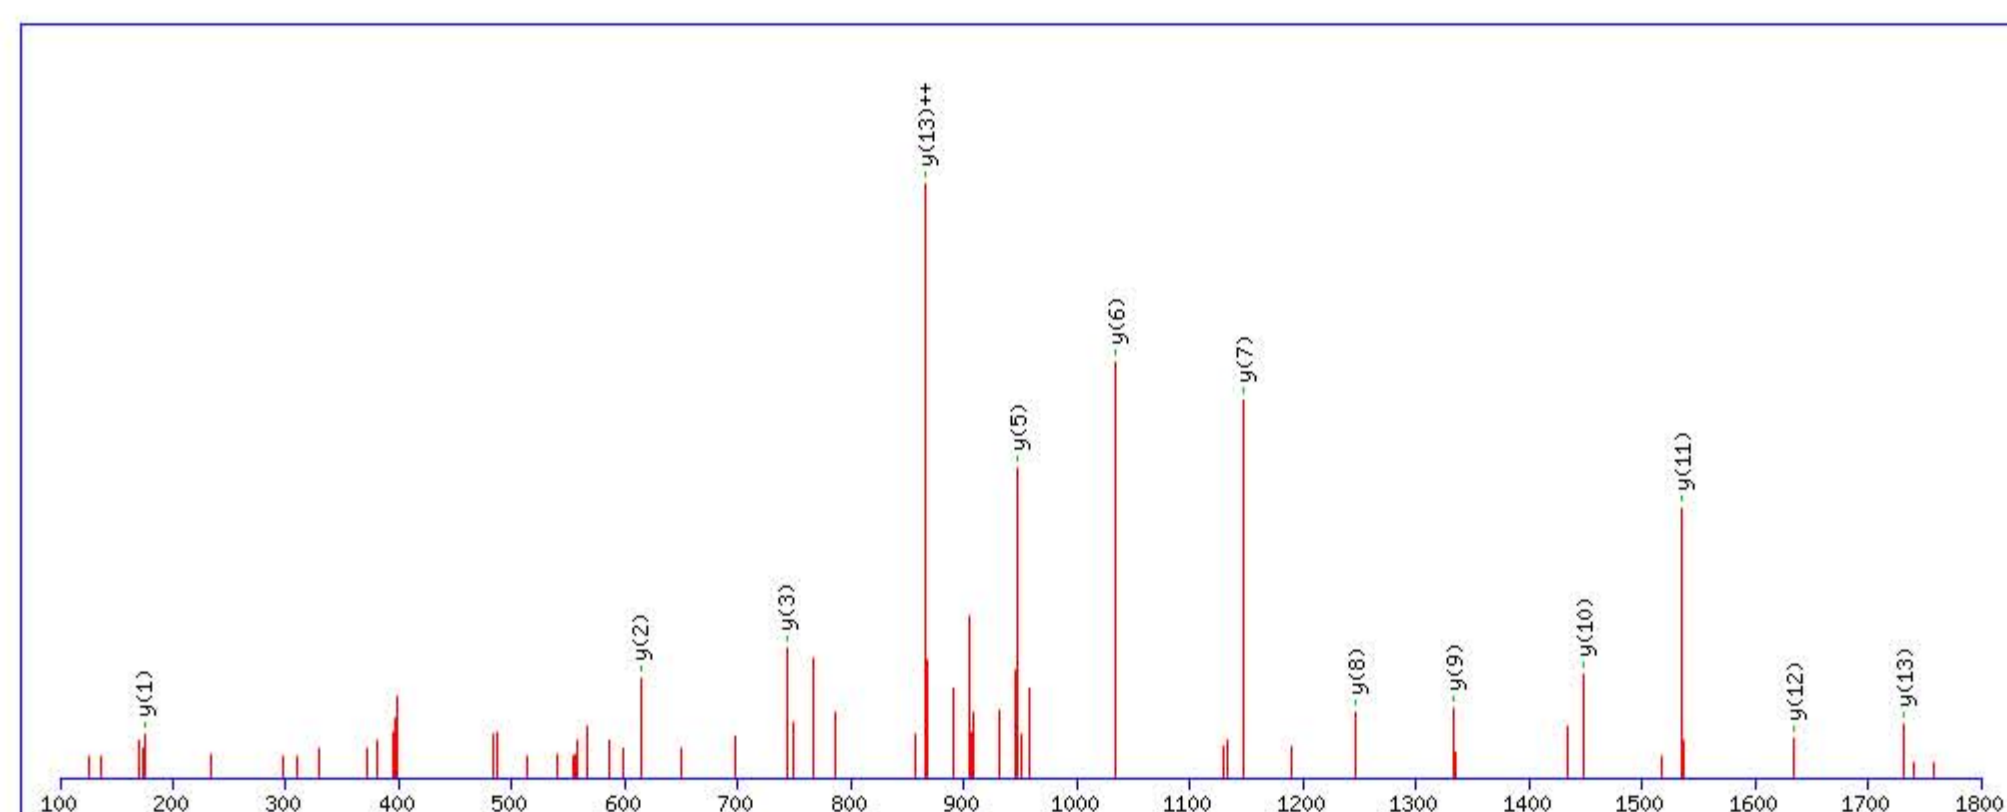

Monoisotopic mass of neutral peptide Mr(calc): 1930.982254

Fixed modifications: Carbamidomethyl (C) (apply to specified residues or termini only)

Variable modifications:

Q14 : Biotin:Thermo-21345 (Q)

Ions Score: 105 Expect: 8.4e-010

Matches : 13/138 fragment ions using 17 most intense peaks [\(help\)](#)

| #  | b           | b <sup>++</sup> | b <sup>*</sup> | b <sup>+++</sup> | b <sup>0</sup> | b <sup>0++</sup> | Seq. | y                  | y <sup>++</sup>   | y <sup>*</sup> | y <sup>+++</sup> | y <sup>0</sup> | y <sup>0++</sup> | #  |
|----|-------------|-----------------|----------------|------------------|----------------|------------------|------|--------------------|-------------------|----------------|------------------|----------------|------------------|----|
| 1  | 88.039304   | 44.523290       |                |                  | 70.028739      | 35.518008        | S    |                    |                   |                |                  |                |                  | 15 |
| 2  | 201.123368  | 101.065322      |                |                  | 183.112803     | 92.060039        | L    | 1844.957496        | 922.982386        | 1827.930947    | 914.469112       | 1826.946931    | 913.977104       | 14 |
| 3  | 298.176132  | 149.591704      |                |                  | 280.165567     | 140.586422       | P    | <b>1731.873432</b> | <b>866.440354</b> | 1714.846883    | 857.927080       | 1713.862867    | 857.435072       | 13 |
| 4  | 397.244546  | 199.125911      |                |                  | 379.233981     | 190.120629       | V    | <b>1634.820668</b> | 817.913972        | 1617.794119    | 809.400698       | 1616.810103    | 808.908690       | 12 |
| 5  | 484.276574  | 242.641925      |                |                  | 466.266009     | 233.636643       | S    | <b>1535.752254</b> | 768.379765        | 1518.725705    | 759.866491       | 1517.741689    | 759.374483       | 11 |
| 6  | 599.303517  | 300.155397      |                |                  | 581.292952     | 291.150114       | D    | <b>1448.720226</b> | 724.863751        | 1431.693677    | 716.350477       | 1430.709661    | 715.858469       | 10 |
| 7  | 686.335545  | 343.671411      |                |                  | 668.324980     | 334.666128       | S    | <b>1333.693283</b> | 667.350280        | 1316.666734    | 658.837005       | 1315.682718    | 658.344997       | 9  |
| 8  | 785.403959  | 393.205618      |                |                  | 767.393394     | 384.200335       | V    | <b>1246.661255</b> | 623.834266        | 1229.634706    | 615.320991       | 1228.650690    | 614.828983       | 8  |
| 9  | 898.488023  | 449.747650      |                |                  | 880.477458     | 440.742367       | L    | <b>1147.592841</b> | 574.300059        | 1130.566292    | 565.786784       | 1129.582276    | 565.294776       | 7  |
| 10 | 985.520051  | 493.263664      |                |                  | 967.509486     | 484.258381       | S    | <b>1034.508777</b> | 517.758027        | 1017.482228    | 509.244752       | 1016.498212    | 508.752744       | 6  |
| 11 | 1042.541515 | 521.774395      |                |                  | 1024.530950    | 512.769113       | G    | <b>947.476749</b>  | 474.242013        | 930.450200     | 465.728738       | 929.466184     | 465.236730       | 5  |
| 12 | 1189.609929 | 595.308603      |                |                  | 1171.599364    | 586.303320       | F    | 890.455285         | 445.731281        | 873.428736     | 437.218006       | 872.444720     | 436.725998       | 4  |
| 13 | 1318.652522 | 659.829899      |                |                  | 1300.641957    | 650.824617       | E    | <b>743.386871</b>  | 372.197074        | 726.360322     | 363.683799       | 725.376306     | 363.191791       | 3  |
| 14 | 1757.877848 | 879.442562      | 1740.851299    | 870.929288       | 1739.867283    | 870.437280       | Q    | <b>614.344278</b>  | 307.675777        | 597.317729     | 299.162503       |                |                  | 2  |
| 15 |             |                 |                |                  |                |                  | R    | <b>175.118952</b>  | 88.063114         | 158.092403     | 79.549839        |                |                  | 1  |

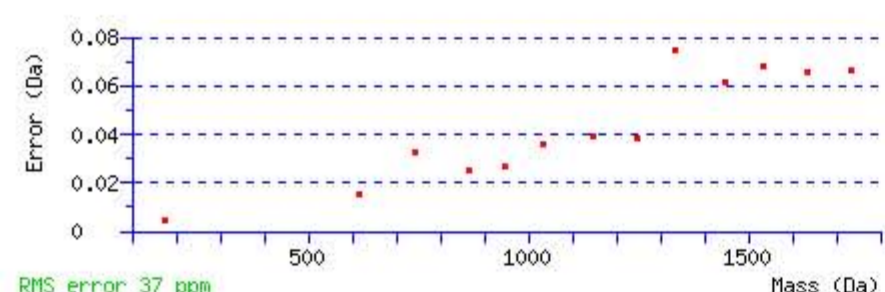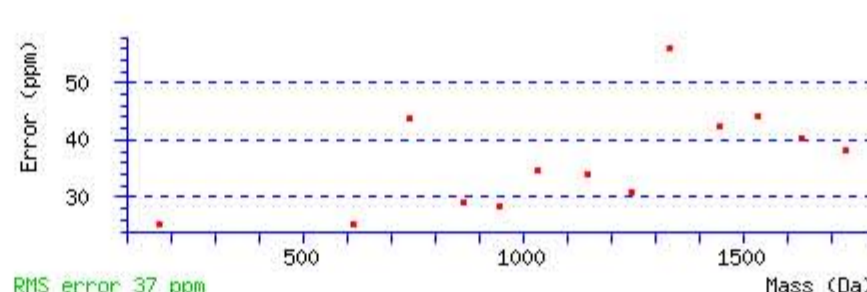

NCBI BLAST search of **SLPVSDSVLSGFQR**

(Parameters: blastp, nr protein database, expect=20000, no filter, PAM30)

Other BLAST [web gateways](#)

## All matches to this query

| Score | Mr(calc):   | Delta     | Sequence                           |
|-------|-------------|-----------|------------------------------------|
| 105.4 | 1930.982254 | 0.016614  | <a href="#">SLPVSDSVLSGFQR</a>     |
| 9.1   | 1931.000885 | -0.002017 | <a href="#">LSPVTACAGQTLQFK</a>    |
| 5.3   | 1930.989410 | 0.009458  | <a href="#">EAQSQLIKSDEMQRRLR</a>  |
| 1.3   | 1930.978210 | 0.020658  | <a href="#">VTDLVNQQQTLEEKMR</a>   |
| 0.8   | 1930.997513 | 0.001355  | <a href="#">SLPPVPPMGLPPPQEFGR</a> |
| 0.5   | 1931.000885 | -0.002017 | <a href="#">LSPVTACAGQTLQFK</a>    |
| 0.1   | 1930.985580 | 0.013288  | <a href="#">LSPLQKLSSMDPAMLER</a>  |



# MASCOT Search Results

## Peptide View

MS/MS Fragmentation of **VQEAHLTEDQIFYFPK**  
 Found in **CO8G\_HUMAN**, Complement component C8 gamma chain OS=Homo sapiens GN=C8G PE=1 SV=3

Match to Query 48632: 2275.148052 from(759.389960,3+) rtinseconds(2371) index(21848)  
 Title: Locus:1.1.1.3388.22 File:"2013-07-02 CLN FXIII 30 min 3rd F 2.wiff"  
 Data file C:\Program Files (x86)\Matrix Science\Mascot Daemon\mgf3 FXIII 30 min 3rd\mascot\_daemon\_merge.mgf

Click mouse within plot area to zoom in by factor of two about that point  
 Or, Plot from  to  Da   
 Label all possible matches  Label matches used for scoring

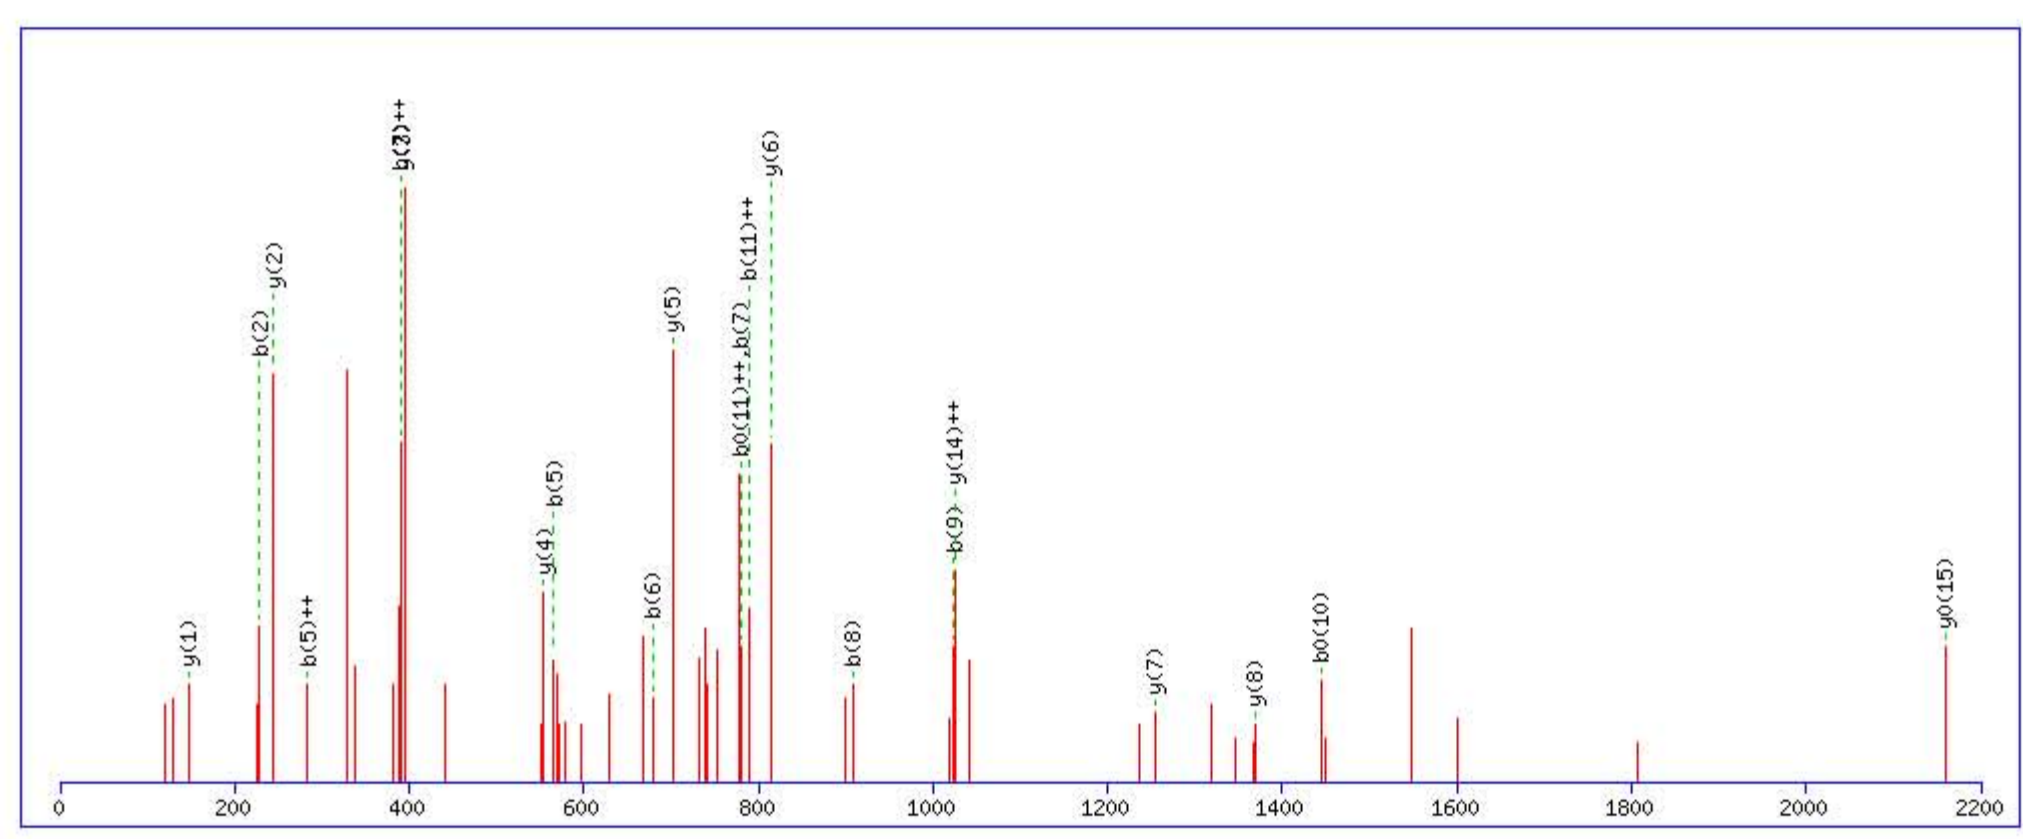

Monoisotopic mass of neutral peptide Mr(calc): 2275.134720  
 Fixed modifications: Carbamidomethyl (C) (apply to specified residues or termini only)  
 Variable modifications:  
 Q10 : Biotin:Thermo-21345 (Q)  
 Ions Score: 36 Expect: 0.00066  
 Matches : 21/160 fragment ions using 47 most intense peaks [\(help\)](#)

| #  | b                  | b <sup>++</sup>   | b <sup>*</sup> | b <sup>*++</sup> | b <sup>0</sup>     | b <sup>0++</sup>  | Seq. | y                  | y <sup>++</sup>    | y <sup>*</sup> | y <sup>*++</sup> | y <sup>0</sup>     | y <sup>0++</sup> | #  |
|----|--------------------|-------------------|----------------|------------------|--------------------|-------------------|------|--------------------|--------------------|----------------|------------------|--------------------|------------------|----|
| 1  | 100.075690         | 50.541483         |                |                  |                    |                   | V    |                    |                    |                |                  |                    |                  | 16 |
| 2  | <b>228.134268</b>  | 114.570772        | 211.107719     | 106.057498       |                    |                   | Q    | 2177.073591        | 1089.040433        | 2160.047042    | 1080.527159      | <b>2159.063026</b> | 1080.035151      | 15 |
| 3  | 357.176861         | 179.092069        | 340.150312     | 170.578794       | 339.166296         | 170.086786        | E    | 2049.015013        | <b>1025.011144</b> | 2031.988464    | 1016.497870      | 2031.004448        | 1016.005862      | 14 |
| 4  | 428.213975         | 214.610626        | 411.187426     | 206.097351       | 410.203410         | 205.605343        | A    | 1919.972420        | 960.489848         | 1902.945871    | 951.976573       | 1901.961855        | 951.484565       | 13 |
| 5  | <b>565.272887</b>  | <b>283.140082</b> | 548.246338     | 274.626807       | 547.262322         | 274.134799        | H    | 1848.935306        | 924.971291         | 1831.908757    | 916.458016       | 1830.924741        | 915.966008       | 12 |
| 6  | <b>678.356951</b>  | 339.682114        | 661.330402     | 331.168839       | 660.346386         | 330.676831        | L    | 1711.876394        | 856.441835         | 1694.849845    | 847.928561       | 1693.865829        | 847.436552       | 11 |
| 7  | <b>779.404630</b>  | <b>390.205953</b> | 762.378081     | 381.692679       | 761.394065         | 381.200671        | T    | 1598.792330        | 799.899803         | 1581.765781    | 791.386529       | 1580.781765        | 790.894521       | 10 |
| 8  | <b>908.447223</b>  | 454.727250        | 891.420674     | 446.213975       | 890.436658         | 445.721967        | E    | 1497.744651        | 749.375963         | 1480.718102    | 740.862689       | 1479.734086        | 740.370681       | 9  |
| 9  | <b>1023.474166</b> | 512.240721        | 1006.447617    | 503.727447       | 1005.463601        | 503.235439        | D    | <b>1368.702058</b> | 684.854667         | 1351.675509    | 676.341392       | 1350.691493        | 675.849384       | 8  |
| 10 | 1462.699492        | 731.853384        | 1445.672943    | 723.340110       | <b>1444.688927</b> | 722.848101        | Q    | <b>1253.675115</b> | 627.341195         | 1236.648566    | 618.827921       |                    |                  | 7  |
| 11 | 1575.783556        | <b>788.395416</b> | 1558.757007    | 779.882141       | 1557.772991        | <b>779.390133</b> | I    | <b>814.449789</b>  | 407.728533         | 797.423240     | 399.215258       |                    |                  | 6  |
| 12 | 1722.851970        | 861.929623        | 1705.825421    | 853.416349       | 1704.841405        | 852.924340        | F    | <b>701.365725</b>  | 351.186501         | 684.339176     | 342.673226       |                    |                  | 5  |
| 13 | 1885.915299        | 943.461288        | 1868.888750    | 934.948013       | 1867.904734        | 934.456005        | Y    | <b>554.297311</b>  | 277.652294         | 537.270762     | 269.139019       |                    |                  | 4  |
| 14 | 2032.983713        | 1016.995495       | 2015.957164    | 1008.482220      | 2014.973148        | 1007.990212       | F    | <b>391.233982</b>  | 196.120629         | 374.207433     | 187.607354       |                    |                  | 3  |
| 15 | 2130.036477        | 1065.521876       | 2113.009928    | 1057.008602      | 2112.025912        | 1056.516594       | P    | <b>244.165568</b>  | 122.586422         | 227.139019     | 114.073147       |                    |                  | 2  |
| 16 |                    |                   |                |                  |                    |                   | K    | <b>147.112804</b>  | 74.060040          | 130.086255     | 65.546765        |                    |                  | 1  |

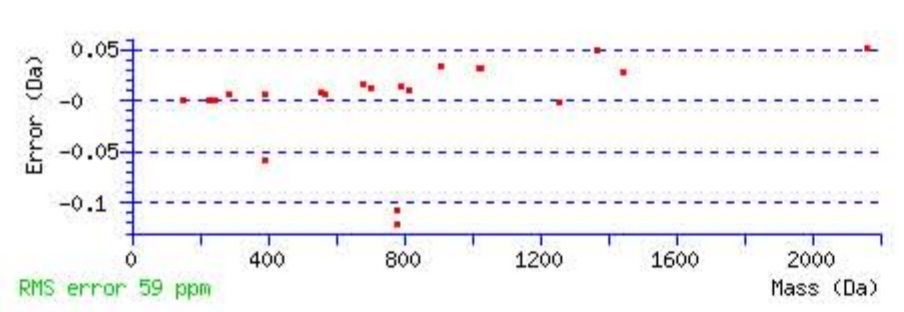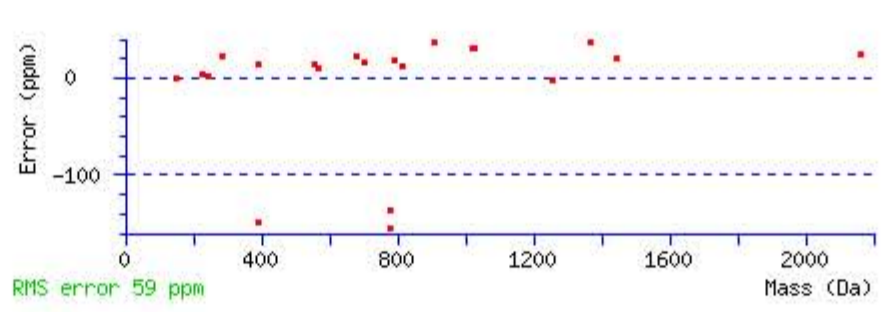

NCBI BLAST search of **VQEAHLTEDQIFYFPK**  
 (Parameters: blastp, nr protein database, expect=20000, no filter, PAM30)  
 Other BLAST [web gateways](#)

### All matches to this query

| Score | Mr(calc):   | Delta     | Sequence                              |
|-------|-------------|-----------|---------------------------------------|
| 35.8  | 2275.134720 | 0.013332  | <a href="#">VQEAHLTEDQIFYFPK</a>      |
| 14.6  | 2275.134720 | 0.013332  | <a href="#">VQEAHLTEDQIFYFPK</a>      |
| 1.8   | 2275.166412 | -0.018360 | <a href="#">AMEKLV RVIDQEMQAIGGQK</a> |
| 1.0   | 2275.163040 | -0.014988 | <a href="#">QIQTPPDAGKLNSENQPK</a>    |



# MASCOT Search Results

## Peptide View

MS/MS Fragmentation of **YGFCEAADQFHVLDEVR**

Found in **CO8G\_HUMAN**, Complement component C8 gamma chain OS=Homo sapiens GN=C8G PE=1 SV=3

Match to Query 49852: 2366.084862 from(789.702230,3+) rtinseconds(2570) index(53870)

Title: Locus:1.1.1.3538.15 File:"2013-07-02 CLN FXIII 30 min 3rd F 4.wiff"

Data file C:\Program Files (x86)\Matrix Science\Mascot Daemon\mgf3 FXIII 30 min 3rd\mascot\_daemon\_merge.mgf

Click mouse within plot area to zoom in by factor of two about that point

Or, Plot from  to  Da

Label all possible matches  Label matches used for scoring

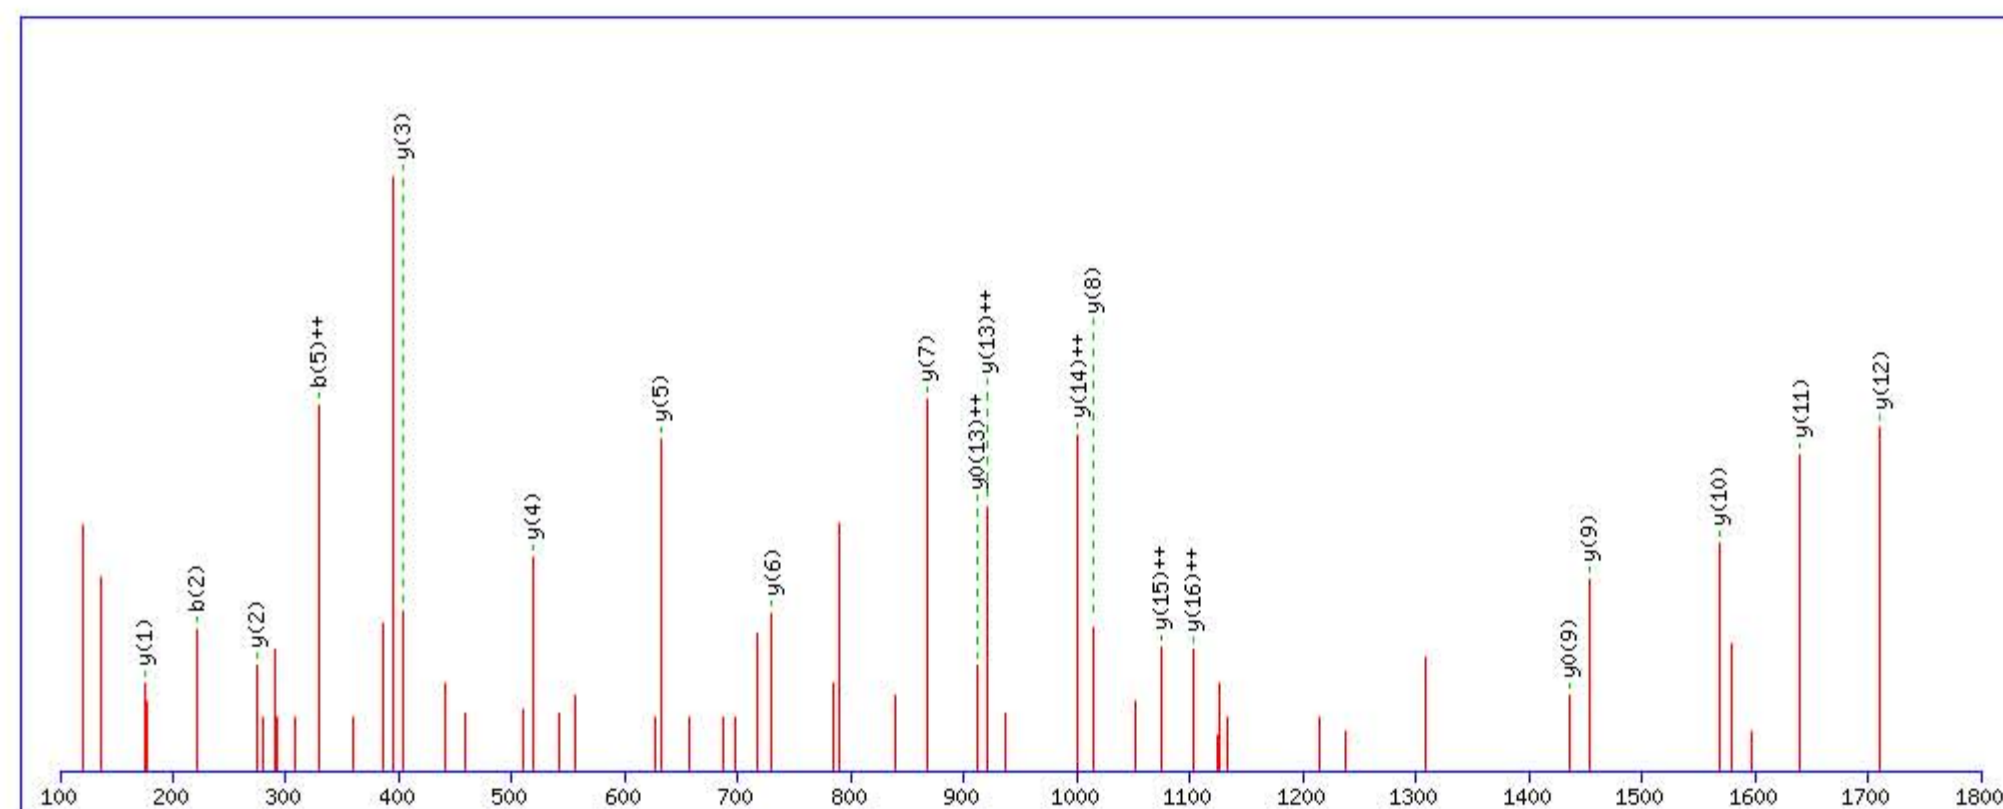

Monoisotopic mass of neutral peptide  $M_r(\text{calc})$ : 2366.082382

Fixed modifications: Carbamidomethyl (C) (apply to specified residues or termini only)

Variable modifications:

Q9 : Biotin:Thermo-21345 (Q)

Ions Score: 63 Expect: 6e-006

Matches : 20/164 fragment ions using 41 most intense peaks ([help](#))

| #  | b           | b <sup>++</sup> | b <sup>*</sup> | b <sup>*++</sup> | b <sup>0</sup> | b <sup>0++</sup> | Seq. | y           | y <sup>++</sup> | y <sup>*</sup> | y <sup>*++</sup> | y <sup>0</sup> | y <sup>0++</sup> | #  |
|----|-------------|-----------------|----------------|------------------|----------------|------------------|------|-------------|-----------------|----------------|------------------|----------------|------------------|----|
| 1  | 164.070605  | 82.538940       |                |                  |                |                  | Y    |             |                 |                |                  |                |                  | 17 |
| 2  | 221.092069  | 111.049673      |                |                  |                |                  | G    | 2204.026323 | 1102.516799     | 2186.999774    | 1094.003525      | 2186.015758    | 1093.511517      | 16 |
| 3  | 368.160483  | 184.583879      |                |                  |                |                  | F    | 2147.004859 | 1074.006067     | 2129.978310    | 1065.492793      | 2128.994294    | 1065.000785      | 15 |
| 4  | 528.191132  | 264.599204      |                |                  |                |                  | C    | 1999.936445 | 1000.471860     | 1982.909896    | 991.958586       | 1981.925880    | 991.466578       | 14 |
| 5  | 657.233725  | 329.120501      |                |                  | 639.223160     | 320.115218       | E    | 1839.905796 | 920.456536      | 1822.879247    | 911.943261       | 1821.895231    | 911.451253       | 13 |
| 6  | 728.270839  | 364.639058      |                |                  | 710.260274     | 355.633775       | A    | 1710.863203 | 855.935239      | 1693.836654    | 847.421965       | 1692.852638    | 846.929957       | 12 |
| 7  | 799.307953  | 400.157615      |                |                  | 781.297388     | 391.152332       | A    | 1639.826089 | 820.416682      | 1622.799540    | 811.903408       | 1621.815524    | 811.411400       | 11 |
| 8  | 914.334896  | 457.671086      |                |                  | 896.324331     | 448.665803       | D    | 1568.788975 | 784.898125      | 1551.762426    | 776.384851       | 1550.778410    | 775.892843       | 10 |
| 9  | 1353.560222 | 677.283749      | 1336.533673    | 668.770474       | 1335.549657    | 668.278466       | Q    | 1453.762032 | 727.384654      | 1436.735483    | 718.871379       | 1435.751467    | 718.379371       | 9  |
| 10 | 1500.628636 | 750.817956      | 1483.602087    | 742.304682       | 1482.618071    | 741.812673       | F    | 1014.536706 | 507.771991      | 997.510157     | 499.258717       | 996.526141     | 498.766709       | 8  |
| 11 | 1637.687548 | 819.347412      | 1620.660999    | 810.834138       | 1619.676983    | 810.342129       | H    | 867.468292  | 434.237784      | 850.441743     | 425.724510       | 849.457727     | 425.232502       | 7  |
| 12 | 1736.755962 | 868.881619      | 1719.729413    | 860.368345       | 1718.745397    | 859.876336       | V    | 730.409380  | 365.708328      | 713.382831     | 357.195054       | 712.398815     | 356.703046       | 6  |
| 13 | 1849.840026 | 925.423651      | 1832.813477    | 916.910376       | 1831.829461    | 916.418368       | L    | 631.340966  | 316.174121      | 614.314417     | 307.660846       | 613.330401     | 307.168838       | 5  |
| 14 | 1964.866969 | 982.937122      | 1947.840420    | 974.423848       | 1946.856404    | 973.931840       | D    | 518.256902  | 259.632089      | 501.230353     | 251.118815       | 500.246337     | 250.626807       | 4  |
| 15 | 2093.909562 | 1047.458419     | 2076.883013    | 1038.945144      | 2075.898997    | 1038.453136      | E    | 403.229959  | 202.118617      | 386.203410     | 193.605343       | 385.219394     | 193.113335       | 3  |
| 16 | 2192.977976 | 1096.992626     | 2175.951427    | 1088.479351      | 2174.967411    | 1087.987343      | V    | 274.187366  | 137.597321      | 257.160817     | 129.084046       |                |                  | 2  |
| 17 |             |                 |                |                  |                |                  | R    | 175.118952  | 88.063114       | 158.092403     | 79.549839        |                |                  | 1  |

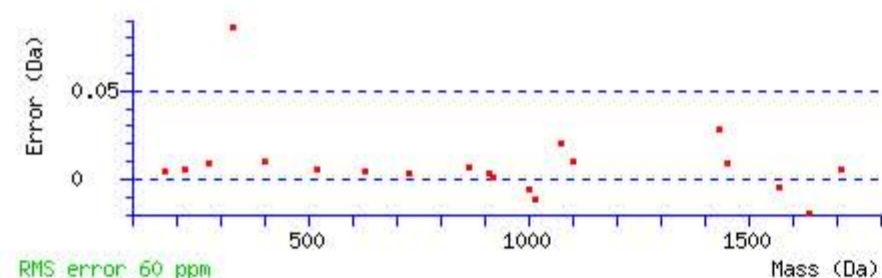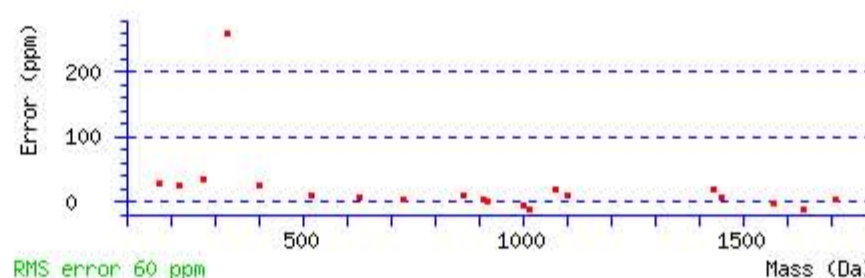

NCBI BLAST search of [YGFCEAADQFHVLDEVR](#)

(Parameters: blastp, nr protein database, expect=20000, no filter, PAM30)

Other BLAST [web gateways](#)

All matches to this query

| Score | $M_r(\text{calc})$ : | Delta    | Sequence                          |
|-------|----------------------|----------|-----------------------------------|
| 63.3  | 2366.082382          | 0.002480 | <a href="#">YGFCEAADQFHVLDEVR</a> |

Mascot: <http://www.matrixscience.com/>



# MASCOT Search Results

## Peptide View

MS/MS Fragmentation of **AEQCCEETASSISLHGK**  
 Found in **CO9\_HUMAN**, Complement component C9 OS=Homo sapiens GN=C9 PE=1 SV=2

Match to Query 47493: 2216.977722 from(739.999850,3+) rtinseconds(1613) index(48753)  
 Title: Locus:1.1.1.3205.17 File:"2013-07-02 CLN FXIII 30 min 3rd F 4.wiff"  
 Data file C:\Program Files (x86)\Matrix Science\Mascot Daemon\mgf3 FXIII 30 min 3rd\mascot\_daemon\_merge.mgf

Click mouse within plot area to zoom in by factor of two about that point  
 Or, Plot from  to  Da   
 Label all possible matches  Label matches used for scoring

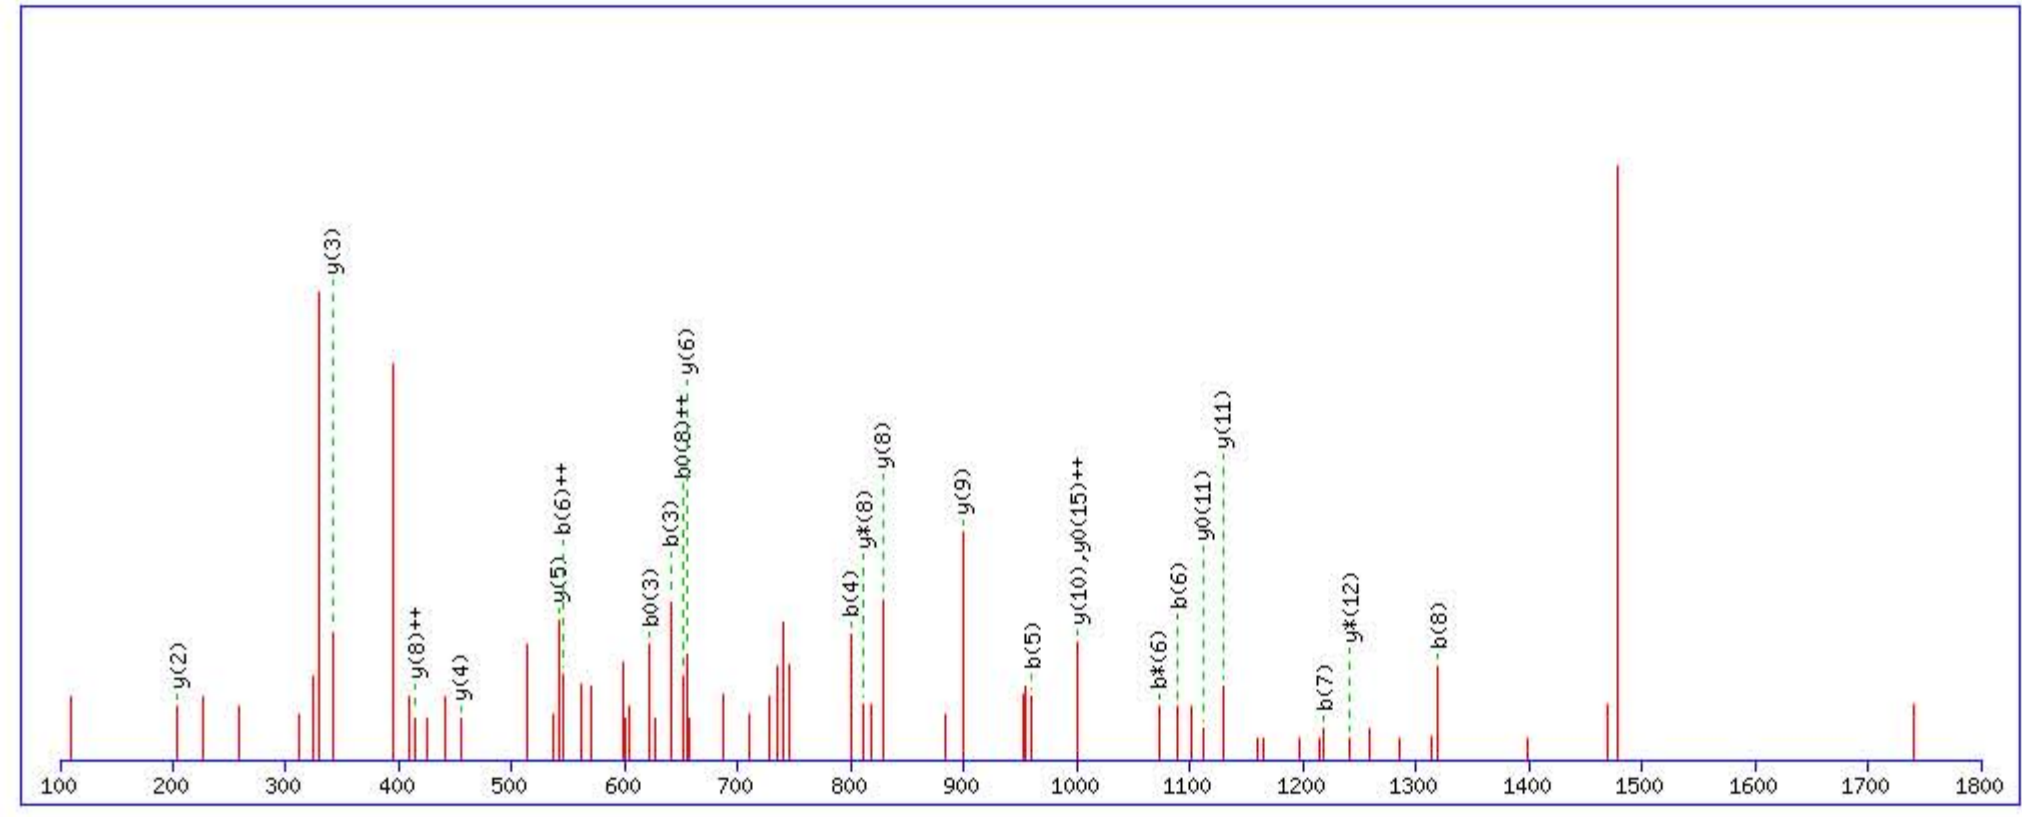

Monoisotopic mass of neutral peptide Mr(calc): 2216.986404  
 Fixed modifications: Carbamidomethyl (C) (apply to specified residues or termini only)  
 Variable modifications:  
 Q3 : Biotin:Thermo-21345 (Q)  
 Ions Score: 39 Expect: 0.00092  
 Matches : 24/178 fragment ions using 49 most intense peaks [\(help\)](#)

| #  | b                  | b <sup>++</sup>   | b <sup>*</sup>     | b <sup>*++</sup> | b <sup>0</sup>    | b <sup>0++</sup>  | Seq. | y                  | y <sup>++</sup>   | y <sup>*</sup>     | y <sup>*++</sup> | y <sup>0</sup>     | y <sup>0++</sup>   | #  |
|----|--------------------|-------------------|--------------------|------------------|-------------------|-------------------|------|--------------------|-------------------|--------------------|------------------|--------------------|--------------------|----|
| 1  | 72.044390          | 36.525833         |                    |                  |                   |                   | A    |                    |                   |                    |                  |                    |                    | 17 |
| 2  | 201.086983         | 101.047130        |                    |                  | 183.076418        | 92.041847         | E    | 2146.956588        | 1073.981932       | 2129.930039        | 1065.468657      | 2128.946023        | 1064.976649        | 16 |
| 3  | <b>640.312309</b>  | 320.659793        | 623.285760         | 312.146518       | <b>622.301744</b> | 311.654510        | Q    | 2017.913995        | 1009.460636       | 2000.887446        | 1000.947361      | 1999.903430        | <b>1000.455353</b> | 15 |
| 4  | <b>800.342958</b>  | 400.675117        | 783.316409         | 392.161843       | 782.332393        | 391.669835        | C    | 1578.688669        | 789.847972        | 1561.662120        | 781.334698       | 1560.678104        | 780.842690         | 14 |
| 5  | <b>960.373607</b>  | 480.690442        | 943.347058         | 472.177167       | 942.363042        | 471.685159        | C    | 1418.658020        | 709.832648        | 1401.631471        | 701.319374       | 1400.647455        | 700.827366         | 13 |
| 6  | <b>1089.416200</b> | <b>545.211738</b> | <b>1072.389651</b> | 536.698464       | 1071.405635       | 536.206456        | E    | 1258.627371        | 629.817323        | <b>1241.600822</b> | 621.304049       | 1240.616806        | 620.812041         | 12 |
| 7  | <b>1218.458793</b> | 609.733035        | 1201.432244        | 601.219760       | 1200.448228       | 600.727752        | E    | <b>1129.584778</b> | 565.296027        | 1112.558229        | 556.782753       | <b>1111.574213</b> | 556.290744         | 11 |
| 8  | <b>1319.506472</b> | 660.256874        | 1302.479923        | 651.743600       | 1301.495907       | <b>651.251592</b> | T    | <b>1000.542185</b> | 500.774731        | 983.515636         | 492.261456       | 982.531620         | 491.769448         | 10 |
| 9  | 1390.543586        | 695.775431        | 1373.517037        | 687.262157       | 1372.533021       | 686.770149        | A    | <b>899.494506</b>  | 450.250891        | 882.467957         | 441.737617       | 881.483941         | 441.245609         | 9  |
| 10 | 1477.575614        | 739.291445        | 1460.549065        | 730.778171       | 1459.565049       | 730.286163        | S    | <b>828.457392</b>  | <b>414.732334</b> | <b>811.430843</b>  | 406.219060       | 810.446827         | 405.727052         | 8  |
| 11 | 1564.607642        | 782.807459        | 1547.581093        | 774.294185       | 1546.597077       | 773.802177        | S    | 741.425364         | 371.216320        | 724.398815         | 362.703045       | 723.414799         | 362.211037         | 7  |
| 12 | 1677.691706        | 839.349491        | 1660.665157        | 830.836217       | 1659.681141       | 830.344209        | I    | <b>654.393336</b>  | 327.700306        | 637.366787         | 319.187031       | 636.382771         | 318.695023         | 6  |
| 13 | 1764.723734        | 882.865505        | 1747.697185        | 874.352231       | 1746.713169       | 873.860223        | S    | <b>541.309272</b>  | 271.158274        | 524.282723         | 262.644999       | 523.298707         | 262.152991         | 5  |
| 14 | 1877.807798        | 939.407537        | 1860.781249        | 930.894263       | 1859.797233       | 930.402255        | L    | <b>454.277244</b>  | 227.642260        | 437.250695         | 219.128985       |                    |                    | 4  |
| 15 | 2014.866710        | 1007.936993       | 1997.840161        | 999.423719       | 1996.856145       | 998.931711        | H    | <b>341.193180</b>  | 171.100228        | 324.166631         | 162.586953       |                    |                    | 3  |
| 16 | 2071.888174        | 1036.447725       | 2054.861625        | 1027.934450      | 2053.877609       | 1027.442442       | G    | <b>204.134268</b>  | 102.570772        | 187.107719         | 94.057497        |                    |                    | 2  |
| 17 |                    |                   |                    |                  |                   |                   | K    | 147.112804         | 74.060040         | 130.086255         | 65.546765        |                    |                    | 1  |

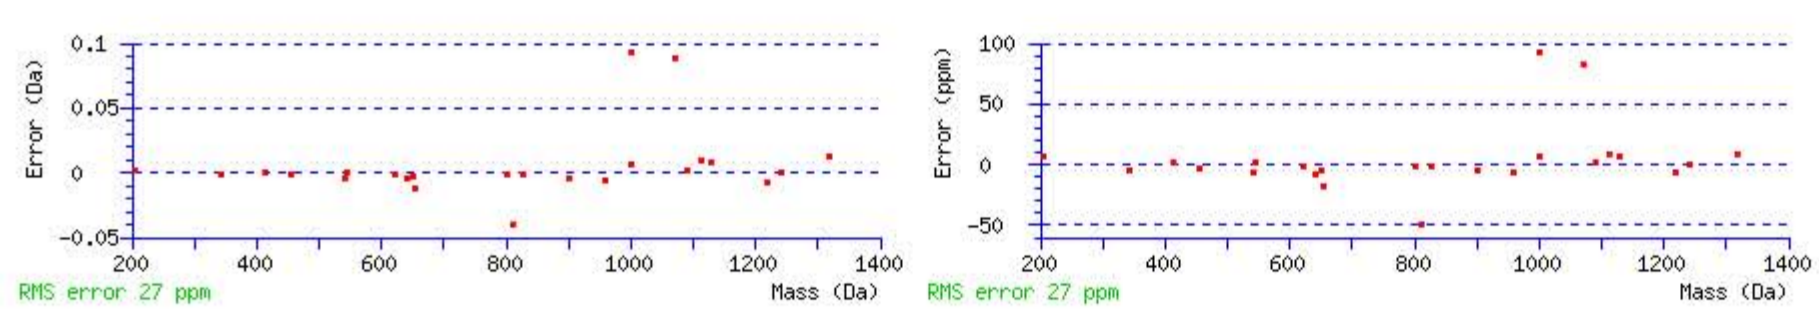

NCBI BLAST search of **AEQCCEETASSISLHGK**  
 (Parameters: blastp, nr protein database, expect=20000, no filter, PAM30)  
 Other BLAST [web gateways](#)

### All matches to this query

| Score | Mr(calc):   | Delta     | Sequence                          |
|-------|-------------|-----------|-----------------------------------|
| 39.0  | 2216.986404 | -0.008682 | <a href="#">AEQCCEETASSISLHGK</a> |



# MASCOT Search Results

## Peptide View

MS/MS Fragmentation of **YGQTIKPIKLPCTEGTTR**

Found in **CFAB\_HUMAN**, Complement factor B OS=Homo sapiens GN=CFB PE=1 SV=2

Match to Query 50773: 2433.178302 from(812.066710,3+) rtinseconds(2088) index(64356)

Title: Locus:1.1.1.3206.15 File:"2013-07-02 CLN FXIII 30 min 3rd FT.wiff"

Data file C:\Program Files (x86)\Matrix Science\Mascot Daemon\mgf3 FXIII 30 min 3rd\mascot\_daemon\_merge.mgf

Click mouse within plot area to zoom in by factor of two about that point

Or, Plot from  to  Da

Label all possible matches  Label matches used for scoring

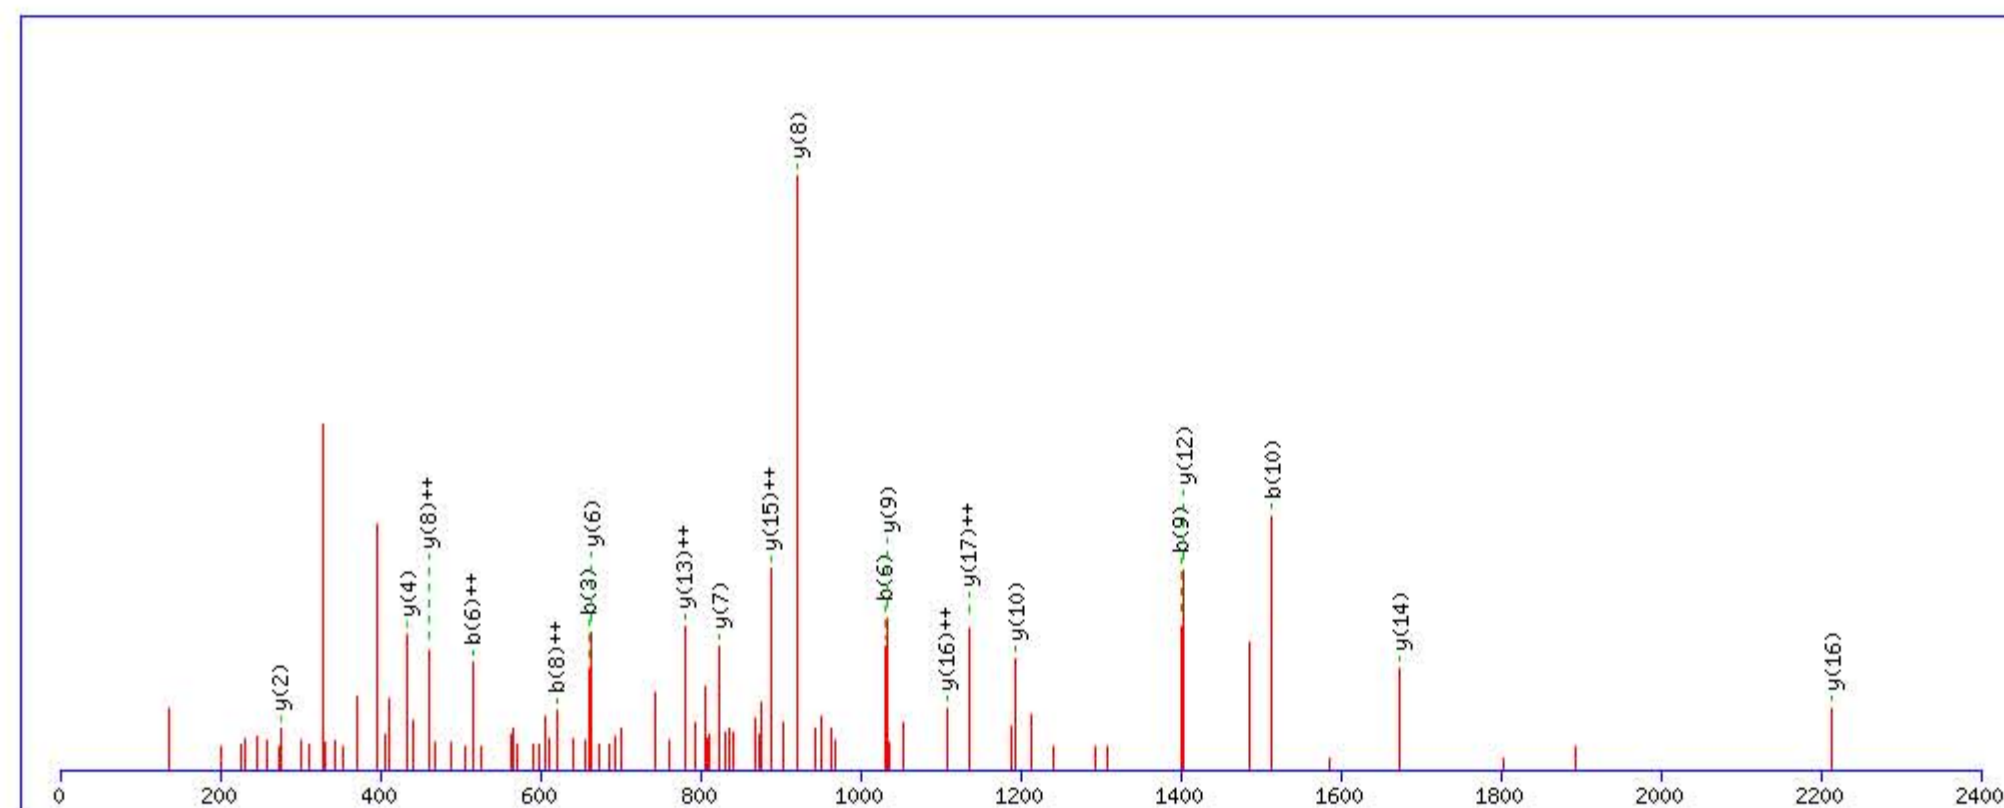

Monoisotopic mass of neutral peptide Mr(calc): 2433.196701

Fixed modifications: Carbamidomethyl (C) (apply to specified residues or termini only)

Variable modifications:

Q3 : Biotin:Thermo-21345 (Q)

Ions Score: 62 Expect: 1.3e-005

Matches : 21/192 fragment ions using 33 most intense peaks [\(help\)](#)

| #  | b                  | b <sup>++</sup>   | b <sup>*</sup> | b <sup>***</sup> | b <sup>0</sup> | b <sup>0++</sup> | Seq. | y                  | y <sup>++</sup>    | y <sup>*</sup> | y <sup>***</sup> | y <sup>0</sup> | y <sup>0++</sup> | #  |
|----|--------------------|-------------------|----------------|------------------|----------------|------------------|------|--------------------|--------------------|----------------|------------------|----------------|------------------|----|
| 1  | 164.070605         | 82.538940         |                |                  |                |                  | Y    |                    |                    |                |                  |                |                  | 18 |
| 2  | 221.092069         | 111.049673        |                |                  |                |                  | G    | 2271.140644        | 1136.073960        | 2254.114095    | 1127.560685      | 2253.130079    | 1127.068677      | 17 |
| 3  | <b>660.317395</b>  | 330.662336        | 643.290846     | 322.149061       |                |                  | Q    | <b>2214.119180</b> | <b>1107.563228</b> | 2197.092631    | 1099.049953      | 2196.108615    | 1098.557945      | 16 |
| 4  | 761.365074         | 381.186175        | 744.338525     | 372.672901       | 743.354509     | 372.180893       | T    | 1774.893854        | 887.950565         | 1757.867305    | 879.437290       | 1756.883289    | 878.945282       | 15 |
| 5  | 874.449138         | 437.728207        | 857.422589     | 429.214933       | 856.438573     | 428.722925       | I    | <b>1673.846175</b> | 837.426725         | 1656.819626    | 828.913451       | 1655.835610    | 828.421443       | 14 |
| 6  | <b>1030.550249</b> | <b>515.778763</b> | 1013.523700    | 507.265488       | 1012.539684    | 506.773480       | R    | 1560.762111        | <b>780.884693</b>  | 1543.735562    | 772.371419       | 1542.751546    | 771.879411       | 13 |
| 7  | 1127.603013        | 564.305145        | 1110.576464    | 555.791870       | 1109.592448    | 555.299862       | P    | <b>1404.661000</b> | 702.834138         | 1387.634451    | 694.320863       | 1386.650435    | 693.828855       | 12 |
| 8  | 1240.687077        | <b>620.847177</b> | 1223.660528    | 612.333902       | 1222.676512    | 611.841894       | I    | 1307.608236        | 654.307756         | 1290.581687    | 645.794481       | 1289.597671    | 645.302473       | 11 |
| 9  | <b>1400.717726</b> | 700.862501        | 1383.691177    | 692.349227       | 1382.707161    | 691.857219       | C    | <b>1194.524172</b> | 597.765724         | 1177.497623    | 589.252449       | 1176.513607    | 588.760441       | 10 |
| 10 | <b>1513.801790</b> | 757.404533        | 1496.775241    | 748.891259       | 1495.791225    | 748.399250       | L    | <b>1034.493523</b> | 517.750399         | 1017.466974    | 509.237125       | 1016.482958    | 508.745117       | 9  |
| 11 | 1610.854554        | 805.930915        | 1593.828005    | 797.417641       | 1592.843989    | 796.925633       | P    | <b>921.409459</b>  | <b>461.208367</b>  | 904.382910     | 452.695093       | 903.398894     | 452.203085       | 8  |
| 12 | 1770.885203        | 885.946240        | 1753.858654    | 877.432965       | 1752.874638    | 876.940957       | C    | <b>824.356695</b>  | 412.681985         | 807.330146     | 404.168711       | 806.346130     | 403.676703       | 7  |
| 13 | 1871.932882        | 936.470079        | 1854.906333    | 927.956805       | 1853.922317    | 927.464797       | T    | <b>664.326046</b>  | 332.666661         | 647.299497     | 324.153386       | 646.315481     | 323.661378       | 6  |
| 14 | 2000.975475        | 1000.991376       | 1983.948926    | 992.478101       | 1982.964910    | 991.986093       | E    | 563.278367         | 282.142821         | 546.251818     | 273.629547       | 545.267802     | 273.137539       | 5  |
| 15 | 2057.996939        | 1029.502107       | 2040.970390    | 1020.988833      | 2039.986374    | 1020.496825      | G    | <b>434.235774</b>  | 217.621525         | 417.209225     | 209.108250       | 416.225209     | 208.616242       | 4  |
| 16 | 2159.044618        | 1080.025947       | 2142.018069    | 1071.512672      | 2141.034053    | 1071.020664      | T    | 377.214310         | 189.110793         | 360.187761     | 180.597518       | 359.203745     | 180.105510       | 3  |
| 17 | 2260.092297        | 1130.549786       | 2243.065748    | 1122.036512      | 2242.081732    | 1121.544504      | T    | <b>276.166631</b>  | 138.586953         | 259.140082     | 130.073679       | 258.156066     | 129.581671       | 2  |
| 18 |                    |                   |                |                  |                |                  | R    | 175.118952         | 88.063114          | 158.092403     | 79.549839        |                |                  | 1  |

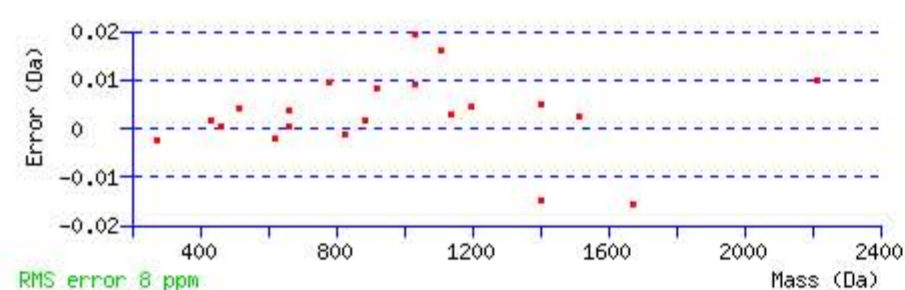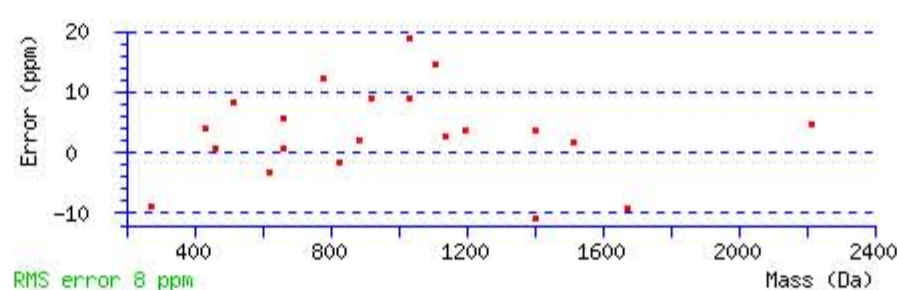

NCBI BLAST search of **YGQTIKPIKLPCTEGTTR**

(Parameters: blastp, nr protein database, expect=20000, no filter, PAM30)

Other BLAST [web gateways](#)

All matches to this query

| Score | Mr(calc):   | Delta     | Sequence                           |
|-------|-------------|-----------|------------------------------------|
| 62.3  | 2433.196701 | -0.018399 | <a href="#">YGQTIKPIKLPCTEGTTR</a> |



# MASCOT SEARCH RESULTS

## Peptide View

MS/MS Fragmentation of **AGEQVITYTCATYYK**

Found in **CFAH\_HUMAN**, Complement factor H OS=Homo sapiens GN=CFH PE=1 SV=4

Match to Query 42283: 1964.911902 from(655.977910,3+) rtinseconds(1875) index(19047)

Title: Locus:1.1.1.3216.3 File:"2013-07-02 CLN FXIII 30 min 3rd F 2.wiff"

Data file C:\Program Files (x86)\Matrix Science\Mascot Daemon\mgf3 FXIII 30 min 3rd\mascot\_daemon\_merge.mgf

Click mouse within plot area to zoom in by factor of two about that point

Or, Plot from  to  Da

Label all possible matches  Label matches used for scoring

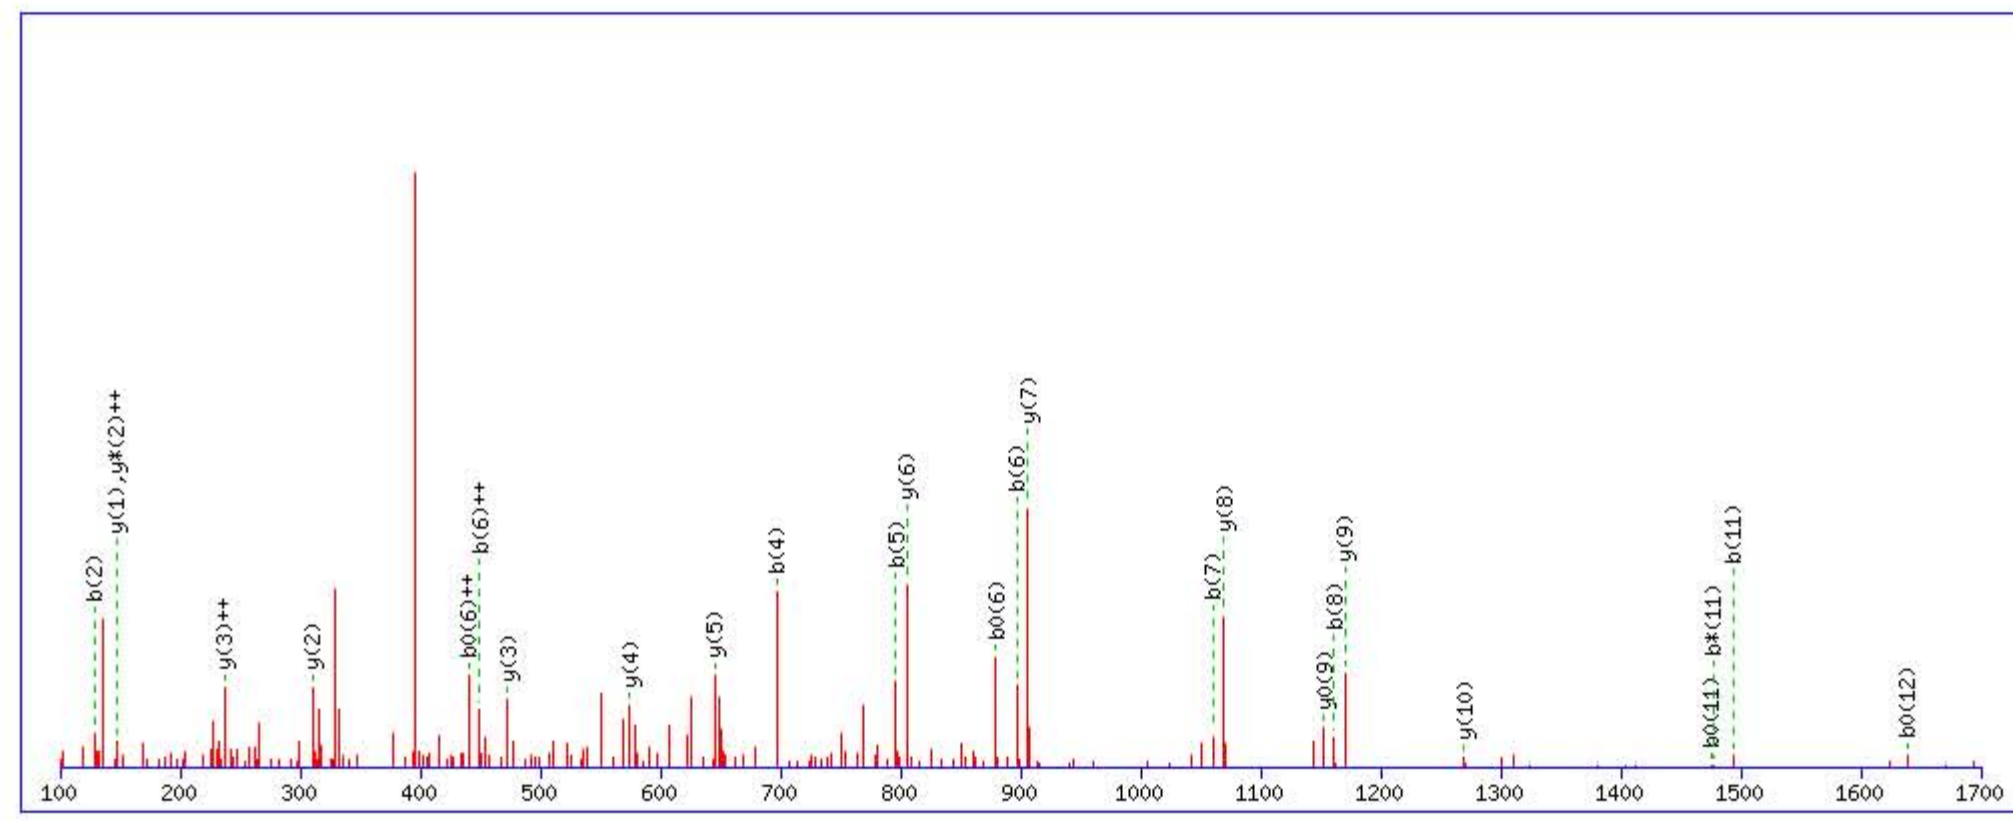

Monoisotopic mass of neutral peptide Mr(calc): 1964.901215

Fixed modifications: Carbamidomethyl (C) (apply to specified residues or termini only)

Variable modifications:

Q4 : Biotin:Thermo-21345 (Q)

Ions Score: 55 Expect: 4.7e-005

Matches : 26/140 fragment ions using 44 most intense peaks [\(help\)](#)

| #  | b                  | b <sup>++</sup>   | b <sup>*</sup>     | b <sup>*++</sup> | b <sup>0</sup>     | b <sup>0++</sup>  | Seq. | y                  | y <sup>++</sup>   | y <sup>*</sup> | y <sup>*++</sup>  | y <sup>0</sup>     | y <sup>0++</sup> | #  |
|----|--------------------|-------------------|--------------------|------------------|--------------------|-------------------|------|--------------------|-------------------|----------------|-------------------|--------------------|------------------|----|
| 1  | 72.044390          | 36.525833         |                    |                  |                    |                   | A    |                    |                   |                |                   |                    |                  | 14 |
| 2  | <b>129.065854</b>  | 65.036565         |                    |                  |                    |                   | G    | 1894.871388        | 947.939332        | 1877.844839    | 939.426058        | 1876.860823        | 938.934050       | 13 |
| 3  | 258.108447         | 129.557862        |                    |                  | 240.097882         | 120.552579        | E    | 1837.849924        | 919.428600        | 1820.823375    | 910.915326        | 1819.839359        | 910.423318       | 12 |
| 4  | <b>697.333773</b>  | 349.170525        | 680.307224         | 340.657250       | 679.323208         | 340.165242        | Q    | 1708.807331        | 854.907304        | 1691.780782    | 846.394029        | 1690.796766        | 845.902021       | 11 |
| 5  | <b>796.402187</b>  | 398.704732        | 779.375638         | 390.191457       | 778.391622         | 389.699449        | V    | <b>1269.582005</b> | 635.294641        | 1252.555456    | 626.781366        | 1251.571440        | 626.289358       | 10 |
| 6  | <b>897.449866</b>  | <b>449.228571</b> | 880.423317         | 440.715297       | <b>879.439301</b>  | <b>440.223289</b> | T    | <b>1170.513591</b> | 585.760434        | 1153.487042    | 577.247159        | <b>1152.503026</b> | 576.755151       | 9  |
| 7  | <b>1060.513195</b> | 530.760236        | 1043.486646        | 522.246961       | 1042.502630        | 521.754953        | Y    | <b>1069.465912</b> | 535.236594        | 1052.439363    | 526.723320        | 1051.455347        | 526.231312       | 8  |
| 8  | <b>1161.560874</b> | 581.284075        | 1144.534325        | 572.770801       | 1143.550309        | 572.278793        | T    | <b>906.402583</b>  | 453.704930        | 889.376034     | 445.191655        | 888.392018         | 444.699647       | 7  |
| 9  | 1321.591523        | 661.299400        | 1304.564974        | 652.786125       | 1303.580958        | 652.294117        | C    | <b>805.354904</b>  | 403.181090        | 788.328355     | 394.667816        | 787.344339         | 394.175808       | 6  |
| 10 | 1392.628637        | 696.817957        | 1375.602088        | 688.304682       | 1374.618072        | 687.812674        | A    | <b>645.324255</b>  | 323.165766        | 628.297706     | 314.652491        | 627.313690         | 314.160483       | 5  |
| 11 | <b>1493.676316</b> | 747.341796        | <b>1476.649767</b> | 738.828522       | <b>1475.665751</b> | 738.336514        | T    | <b>574.287141</b>  | 287.647209        | 557.260592     | 279.133934        | 556.276576         | 278.641926       | 4  |
| 12 | 1656.739645        | 828.873461        | 1639.713096        | 820.360186       | <b>1638.729080</b> | 819.868178        | Y    | <b>473.239462</b>  | <b>237.123369</b> | 456.212913     | 228.610095        |                    |                  | 3  |
| 13 | 1819.802974        | 910.405125        | 1802.776425        | 901.891851       | 1801.792409        | 901.399843        | Y    | <b>310.176133</b>  | 155.591705        | 293.149584     | <b>147.078430</b> |                    |                  | 2  |
| 14 |                    |                   |                    |                  |                    |                   | K    | <b>147.112804</b>  | 74.060040         | 130.086255     | 65.546765         |                    |                  | 1  |

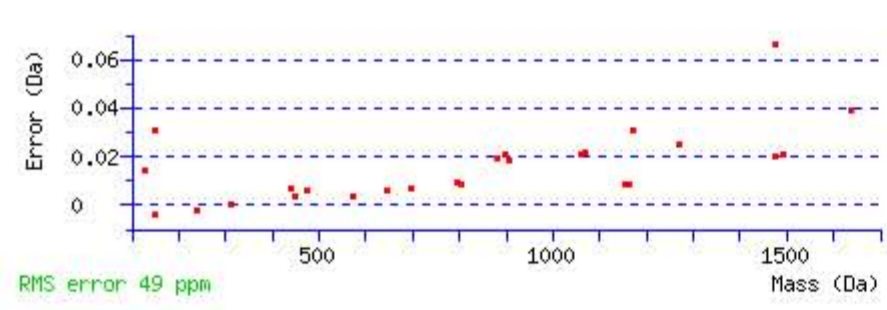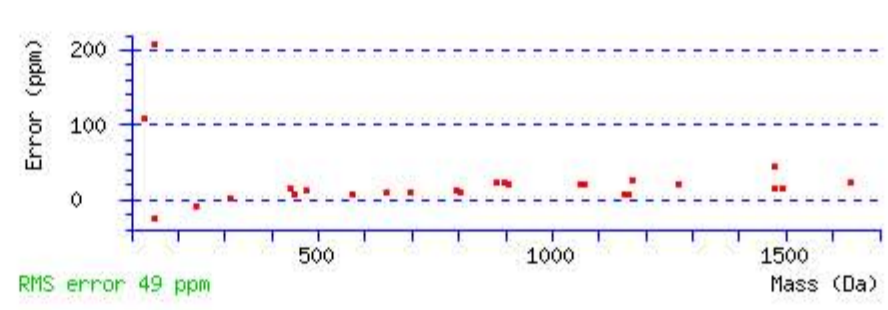

NCBI BLAST search of [AGEQVITYTCATYYK](#)

(Parameters: blastp, nr protein database, expect=20000, no filter, PAM30)

Other BLAST [web gateways](#)

### All matches to this query

| Score | Mr(calc):   | Delta    | Sequence                        |
|-------|-------------|----------|---------------------------------|
| 54.6  | 1964.901215 | 0.010687 | <a href="#">AGEQVITYTCATYYK</a> |



# MASCOT Search Results

## Peptide View

MS/MS Fragmentation of **SFPTYCQQK**

Found in **CFAI\_HUMAN**, Complement factor I OS=Homo sapiens GN=CFI PE=1 SV=2

Match to Query 30119: 1468.665788 from(735.340170,2+) rtinseconds(1773) index(62563)

Title: Locus:1.1.1.3096.23 File:"2013-07-02 CLN FXIII 30 min 3rd FT.wiff"

Data file C:\Program Files (x86)\Matrix Science\Mascot Daemon\mgf\3 FXIII 30 min 3rd\mascot\_daemon\_merge.mgf

Click mouse within plot area to zoom in by factor of two about that point

Or, Plot from  to  Da

Label all possible matches  Label matches used for scoring

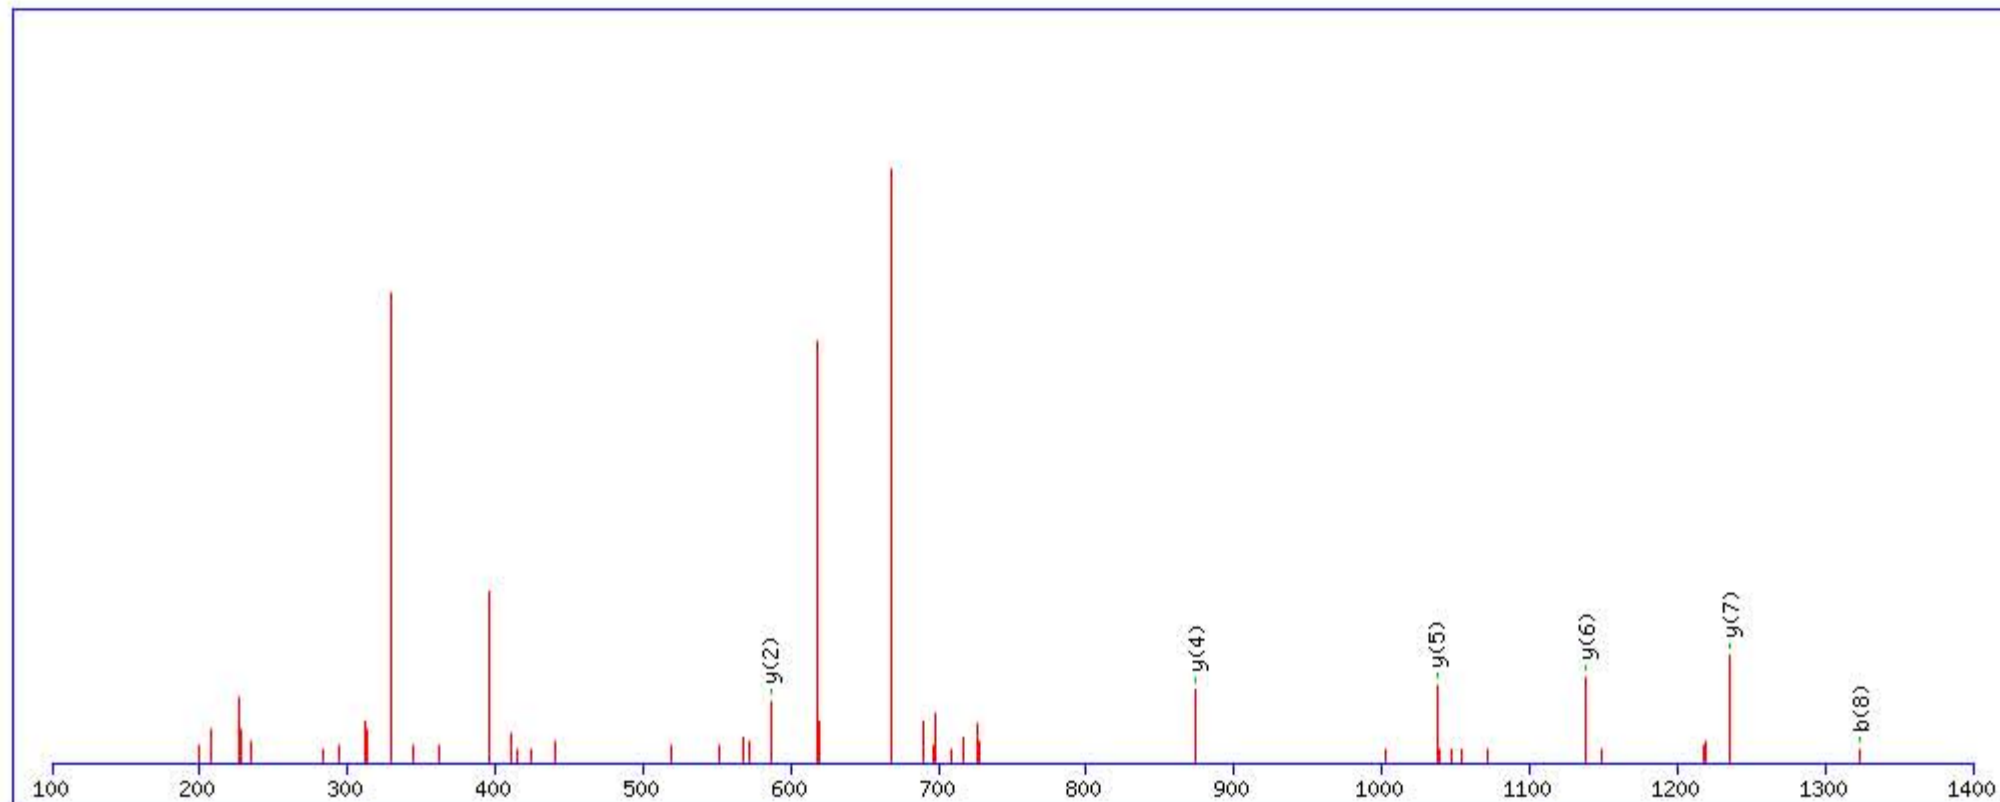

Monoisotopic mass of neutral peptide Mr(calc): 1468.684296

Fixed modifications: Carbamidomethyl (C) (apply to specified residues or termini only)

Variable modifications:

Q8 : Biotin:Thermo-21345 (Q)

Ions Score: 27 Expect: 0.063

Matches : 6/74 fragment ions using 11 most intense peaks ([help](#))

| # | b                  | b <sup>++</sup> | b <sup>*</sup> | b <sup>***</sup> | b <sup>0</sup> | b <sup>0++</sup> | Seq. | y                  | y <sup>++</sup> | y <sup>*</sup> | y <sup>***</sup> | y <sup>0</sup> | y <sup>0++</sup> | # |
|---|--------------------|-----------------|----------------|------------------|----------------|------------------|------|--------------------|-----------------|----------------|------------------|----------------|------------------|---|
| 1 | 88.039304          | 44.523290       |                |                  | 70.028739      | 35.518008        | S    |                    |                 |                |                  |                |                  | 9 |
| 2 | 235.107718         | 118.057497      |                |                  | 217.097153     | 109.052214       | F    | 1382.659543        | 691.833410      | 1365.632994    | 683.320135       | 1364.648978    | 682.828127       | 8 |
| 3 | 332.160482         | 166.583879      |                |                  | 314.149917     | 157.578596       | P    | <b>1235.591129</b> | 618.299203      | 1218.564580    | 609.785928       | 1217.580564    | 609.293920       | 7 |
| 4 | 433.208161         | 217.107718      |                |                  | 415.197596     | 208.102436       | T    | <b>1138.538365</b> | 569.772821      | 1121.511816    | 561.259546       | 1120.527800    | 560.767538       | 6 |
| 5 | 596.271490         | 298.639383      |                |                  | 578.260925     | 289.634101       | Y    | <b>1037.490686</b> | 519.248981      | 1020.464137    | 510.735707       |                |                  | 5 |
| 6 | 756.302139         | 378.654708      |                |                  | 738.291574     | 369.649425       | C    | <b>874.427357</b>  | 437.717317      | 857.400808     | 429.204042       |                |                  | 4 |
| 7 | 884.360717         | 442.683997      | 867.334168     | 434.170722       | 866.350152     | 433.678714       | Q    | 714.396708         | 357.701992      | 697.370159     | 349.188718       |                |                  | 3 |
| 8 | <b>1323.586043</b> | 662.296660      | 1306.559494    | 653.783385       | 1305.575478    | 653.291377       | Q    | <b>586.338130</b>  | 293.672703      | 569.311581     | 285.159428       |                |                  | 2 |
| 9 |                    |                 |                |                  |                |                  | K    | 147.112804         | 74.060040       | 130.086255     | 65.546765        |                |                  | 1 |

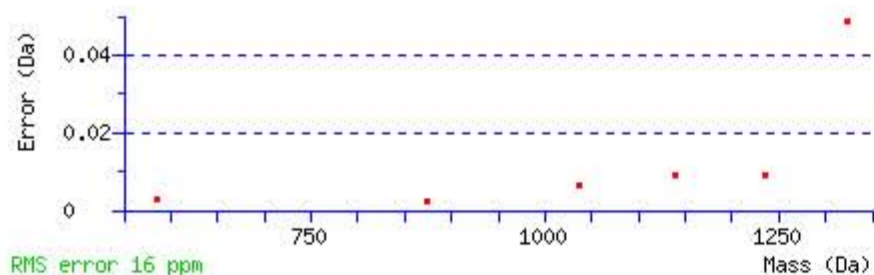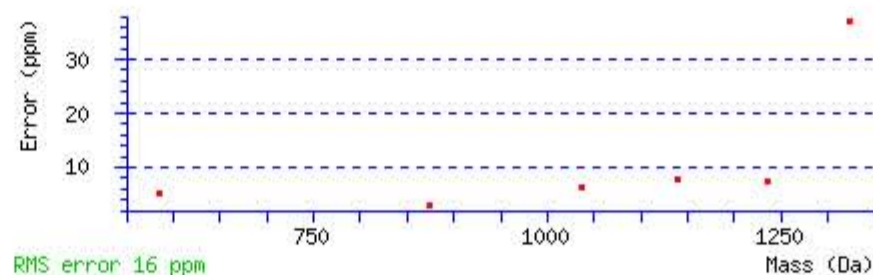

NCBI BLAST search of [SFPTYCQQK](#)

(Parameters: blastp, nr protein database, expect=20000, no filter, PAM30)

Other BLAST [web gateways](#)

All matches to this query

| Score | Mr(calc):   | Delta     | Sequence                  |
|-------|-------------|-----------|---------------------------|
| 26.8  | 1468.684296 | -0.018508 | <a href="#">SFPTYCQQK</a> |
| 14.9  | 1468.684296 | -0.018508 | <a href="#">SFPTYCQQK</a> |

Mascot: <http://www.matrixscience.com/>



# MASCOT Search Results

## Peptide View

MS/MS Fragmentation of **LLPAQLPAEK**

Found in **ECM1\_HUMAN**, Extracellular matrix protein 1 OS=Homo sapiens GN=ECM1 PE=1 SV=2

Match to Query 27289: 1389.814648 from(695.914600,2+) rtinseconds(2026) index(5381)

Title: Locus:1.1.1.3275.16 File:"2013-07-02 CLN FXIII 30 min 3rd F 1.wiff"

Data file C:\Program Files (x86)\Matrix Science\Mascot Daemon\mgf3 FXIII 30 min 3rd\mascot\_daemon\_merge.mgf

Click mouse within plot area to zoom in by factor of two about that point

Or, Plot from  to  Da

Label all possible matches  Label matches used for scoring

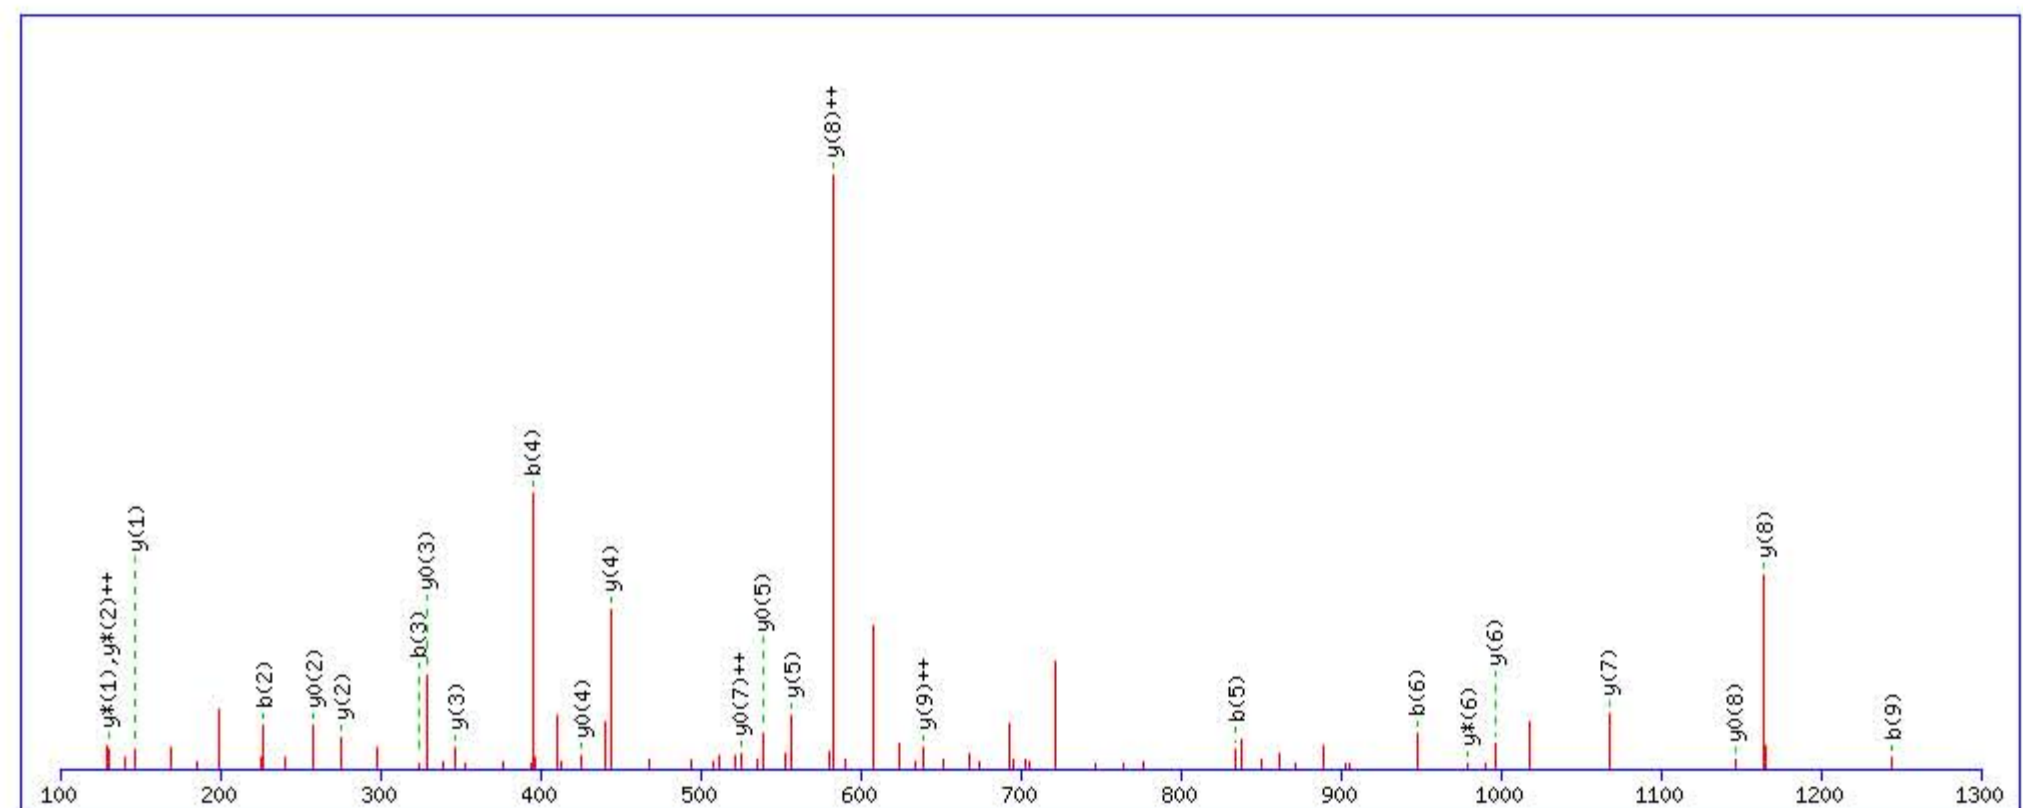

Monoisotopic mass of neutral peptide  $M_r(\text{calc})$ : 1389.805359

Fixed modifications: Carbamidomethyl (C) (apply to specified residues or termini only)

Variable modifications:

Q5 : Biotin:Thermo-21345 (Q)

Ions Score: 38 Expect: 0.00042

Matches : 25/82 fragment ions using 55 most intense peaks [\(help\)](#)

| #  | b                  | b <sup>++</sup> | b <sup>*</sup> | b <sup>*++</sup> | b <sup>0</sup> | b <sup>0++</sup> | Seq. | y                  | y <sup>++</sup>   | y <sup>*</sup>    | y <sup>*++</sup>  | y <sup>0</sup>     | y <sup>0++</sup>  | #  |
|----|--------------------|-----------------|----------------|------------------|----------------|------------------|------|--------------------|-------------------|-------------------|-------------------|--------------------|-------------------|----|
| 1  | 114.091340         | 57.549308       |                |                  |                |                  | L    |                    |                   |                   |                   |                    |                   | 10 |
| 2  | <b>227.175404</b>  | 114.091340      |                |                  |                |                  | L    | 1277.728607        | <b>639.367942</b> | 1260.702058       | 630.854667        | 1259.718042        | 630.362659        | 9  |
| 3  | <b>324.228168</b>  | 162.617722      |                |                  |                |                  | P    | <b>1164.644543</b> | <b>582.825909</b> | 1147.617994       | 574.312635        | <b>1146.633978</b> | 573.820627        | 8  |
| 4  | <b>395.265282</b>  | 198.136279      |                |                  |                |                  | A    | <b>1067.591779</b> | 534.299527        | 1050.565230       | 525.786253        | 1049.581214        | <b>525.294245</b> | 7  |
| 5  | <b>834.490608</b>  | 417.748942      | 817.464059     | 409.235668       |                |                  | Q    | <b>996.554665</b>  | 498.780970        | <b>979.528116</b> | 490.267696        | 978.544100         | 489.775688        | 6  |
| 6  | <b>947.574672</b>  | 474.290974      | 930.548123     | 465.777700       |                |                  | L    | <b>557.329339</b>  | 279.168307        | 540.302790        | 270.655033        | <b>539.318774</b>  | 270.163025        | 5  |
| 7  | 1044.627436        | 522.817356      | 1027.600887    | 514.304082       |                |                  | P    | <b>444.245275</b>  | 222.626275        | 427.218726        | 214.113001        | <b>426.234710</b>  | 213.620993        | 4  |
| 8  | 1115.664550        | 558.335913      | 1098.638001    | 549.822639       |                |                  | A    | <b>347.192511</b>  | 174.099893        | 330.165962        | 165.586619        | <b>329.181946</b>  | 165.094611        | 3  |
| 9  | <b>1244.707143</b> | 622.857209      | 1227.680594    | 614.343935       | 1226.696578    | 613.851927       | E    | <b>276.155397</b>  | 138.581336        | 259.128848        | <b>130.068062</b> | <b>258.144832</b>  | 129.576054        | 2  |
| 10 |                    |                 |                |                  |                |                  | K    | <b>147.112804</b>  | 74.060040         | <b>130.086255</b> | 65.546765         |                    |                   | 1  |

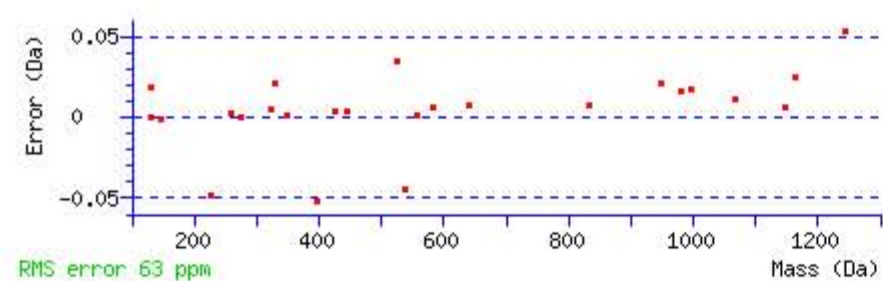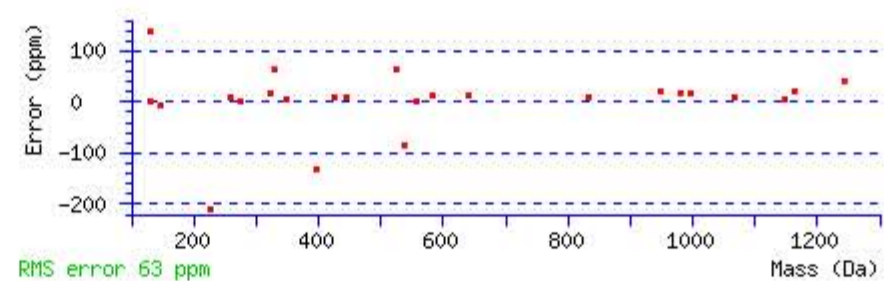

NCBI BLAST search of **LLPAQLPAEK**

(Parameters: blastp, nr protein database, expect=20000, no filter, PAM30)

Other BLAST [web gateways](#)

All matches to this query

| Score | $M_r(\text{calc})$ : | Delta    | Sequence                    |
|-------|----------------------|----------|-----------------------------|
| 37.8  | 1389.805359          | 0.009289 | <a href="#">LLPAQLPAEK</a>  |
| 1.8   | 1389.797958          | 0.016690 | <a href="#">QAYISRGELLK</a> |



# MASCOT SCIENCE Mascot Search Results

## Peptide View

MS/MS Fragmentation of **VTPNLMGHLCGNQR**

Found in **ECM1\_HUMAN**, Extracellular matrix protein 1 OS=Homo sapiens GN=ECM1 PE=1 SV=2

Match to Query 41136: 1906.939782 from(636.653870,3+) rtinseconds(1899) index(4583)

Title: Locus:1.1.1.3231.21 File:"2013-07-02 CLN FXIII 30 min 3rd F 1.wiff"

Data file C:\Program Files (x86)\Matrix Science\Mascot Daemon\mgf3 FXIII 30 min 3rd\mascot\_daemon\_merge.mgf

Click mouse within plot area to zoom in by factor of two about that point

Or, Plot from  to  Da

Label all possible matches  Label matches used for scoring

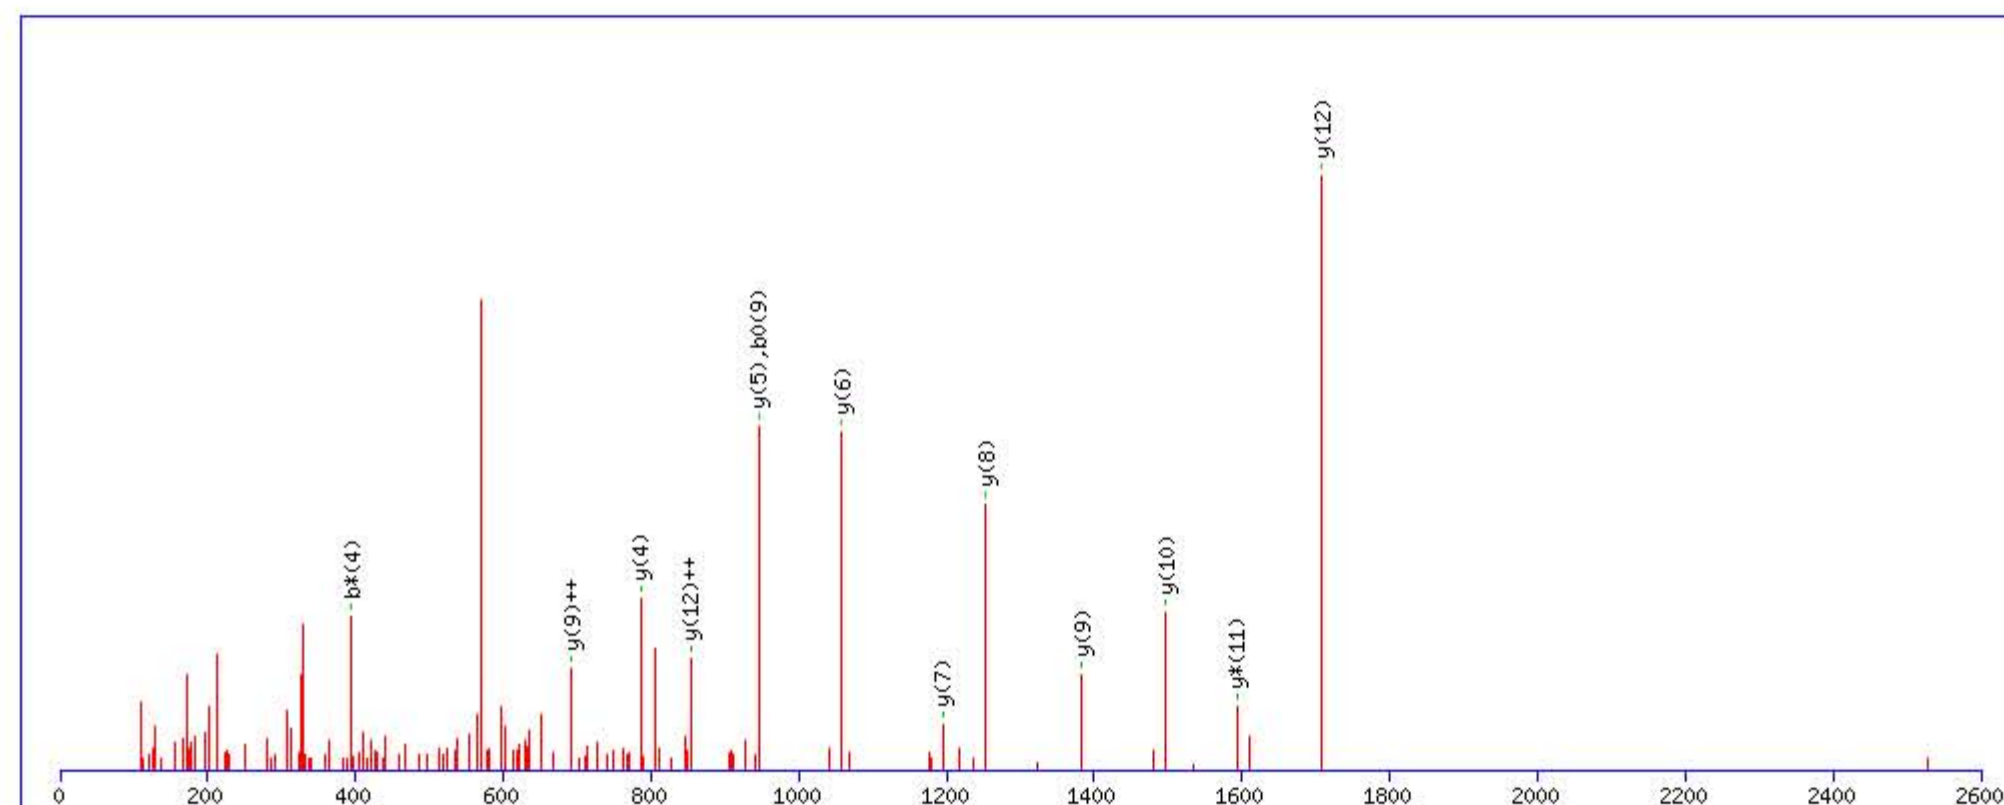

Monoisotopic mass of neutral peptide Mr(calc): 1906.932816

Fixed modifications: Carbamidomethyl (C) (apply to specified residues or termini only)

Variable modifications:

Q13 : Biotin:Thermo-21345 (Q)

Ions Score: 57 Expect: 4.9e-005

Matches : 13/124 fragment ions using 16 most intense peaks [\(help\)](#)

| #  | b           | b <sup>++</sup> | b <sup>*</sup> | b <sup>*++</sup> | b <sup>0</sup> | b <sup>0++</sup> | Seq. | y           | y <sup>++</sup> | y <sup>*</sup> | y <sup>*++</sup> | y <sup>0</sup> | y <sup>0++</sup> | #  |
|----|-------------|-----------------|----------------|------------------|----------------|------------------|------|-------------|-----------------|----------------|------------------|----------------|------------------|----|
| 1  | 100.075690  | 50.541483       |                |                  |                |                  | V    |             |                 |                |                  |                |                  | 14 |
| 2  | 201.123369  | 101.065322      |                |                  | 183.112804     | 92.060040        | T    | 1808.871677 | 904.939477      | 1791.845128    | 896.426202       | 1790.861112    | 895.934194       | 13 |
| 3  | 298.176133  | 149.591704      |                |                  | 280.165568     | 140.586422       | P    | 1707.823998 | 854.415637      | 1690.797449    | 845.902363       |                |                  | 12 |
| 4  | 412.219060  | 206.613168      | 395.192511     | 198.099894       | 394.208495     | 197.607886       | N    | 1610.771234 | 805.889255      | 1593.744685    | 797.375981       |                |                  | 11 |
| 5  | 525.303124  | 263.155200      | 508.276575     | 254.641926       | 507.292559     | 254.149918       | L    | 1496.728307 | 748.867792      | 1479.701758    | 740.354517       |                |                  | 10 |
| 6  | 656.343609  | 328.675443      | 639.317060     | 320.162168       | 638.333044     | 319.670160       | M    | 1383.644243 | 692.325760      | 1366.617694    | 683.812485       |                |                  | 9  |
| 7  | 713.365073  | 357.186175      | 696.338524     | 348.672900       | 695.354508     | 348.180892       | G    | 1252.603758 | 626.805517      | 1235.577209    | 618.292243       |                |                  | 8  |
| 8  | 850.423985  | 425.715631      | 833.397436     | 417.202356       | 832.413420     | 416.710348       | H    | 1195.582294 | 598.294785      | 1178.555745    | 589.781511       |                |                  | 7  |
| 9  | 963.508049  | 482.257663      | 946.481500     | 473.744388       | 945.497484     | 473.252380       | L    | 1058.523382 | 529.765329      | 1041.496833    | 521.252055       |                |                  | 6  |
| 10 | 1123.538698 | 562.272987      | 1106.512149    | 553.759713       | 1105.528133    | 553.267705       | C    | 945.439318  | 473.223297      | 928.412769     | 464.710023       |                |                  | 5  |
| 11 | 1180.560162 | 590.783719      | 1163.533613    | 582.270445       | 1162.549597    | 581.778437       | G    | 785.408669  | 393.207973      | 768.382120     | 384.694698       |                |                  | 4  |
| 12 | 1294.603089 | 647.805183      | 1277.576540    | 639.291908       | 1276.592524    | 638.799900       | N    | 728.387205  | 364.697241      | 711.360656     | 356.183966       |                |                  | 3  |
| 13 | 1733.828415 | 867.417846      | 1716.801866    | 858.904571       | 1715.817850    | 858.412563       | Q    | 614.344278  | 307.675777      | 597.317729     | 299.162503       |                |                  | 2  |
| 14 |             |                 |                |                  |                |                  | R    | 175.118952  | 88.063114       | 158.092403     | 79.549839        |                |                  | 1  |

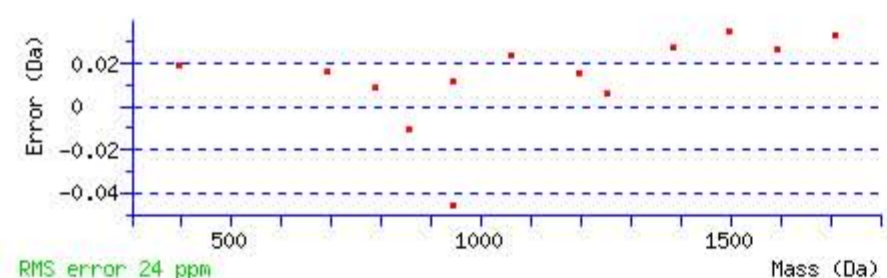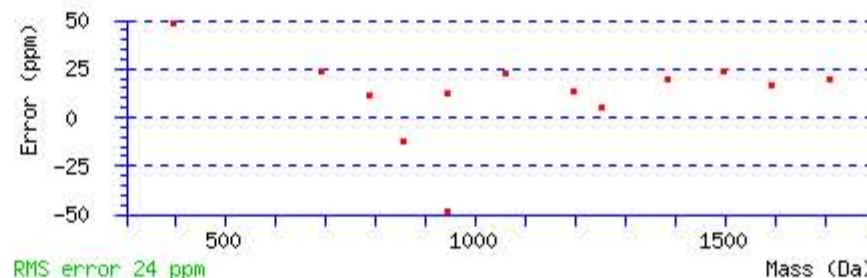

NCBI BLAST search of **VTPNLMGHLCGNQR**

(Parameters: blastp, nr protein database, expect=20000, no filter, PAM30)

Other BLAST [web gateways](#)

All matches to this query

| Score | Mr(calc):   | Delta    | Sequence                       |
|-------|-------------|----------|--------------------------------|
| 56.9  | 1906.932816 | 0.006966 | <a href="#">VTPNLMGHLCGNQR</a> |

Mascot: <http://www.matrixscience.com/>



# MASCOT Search Results

## Peptide View

MS/MS Fragmentation of **FSCFQEEAPQPHYQLR**

Found in **ECM1\_HUMAN**, Extracellular matrix protein 1 OS=Homo sapiens GN=ECM1 PE=1 SV=2

Match to Query 49693: 2347.081362 from(783.367730,3+) rtinseconds(1938) index(4912)

Title: Locus:1.1.1.3244.25 File:"2013-07-02 CLN FXIII 30 min 3rd F 1.wiff"

Data file C:\Program Files (x86)\Matrix Science\Mascot Daemon\mgf3 FXIII 30 min 3rd\mascot\_daemon\_merge.mgf

Click mouse within plot area to zoom in by factor of two about that point

Or, Plot from  to  Da

Label all possible matches  Label matches used for scoring

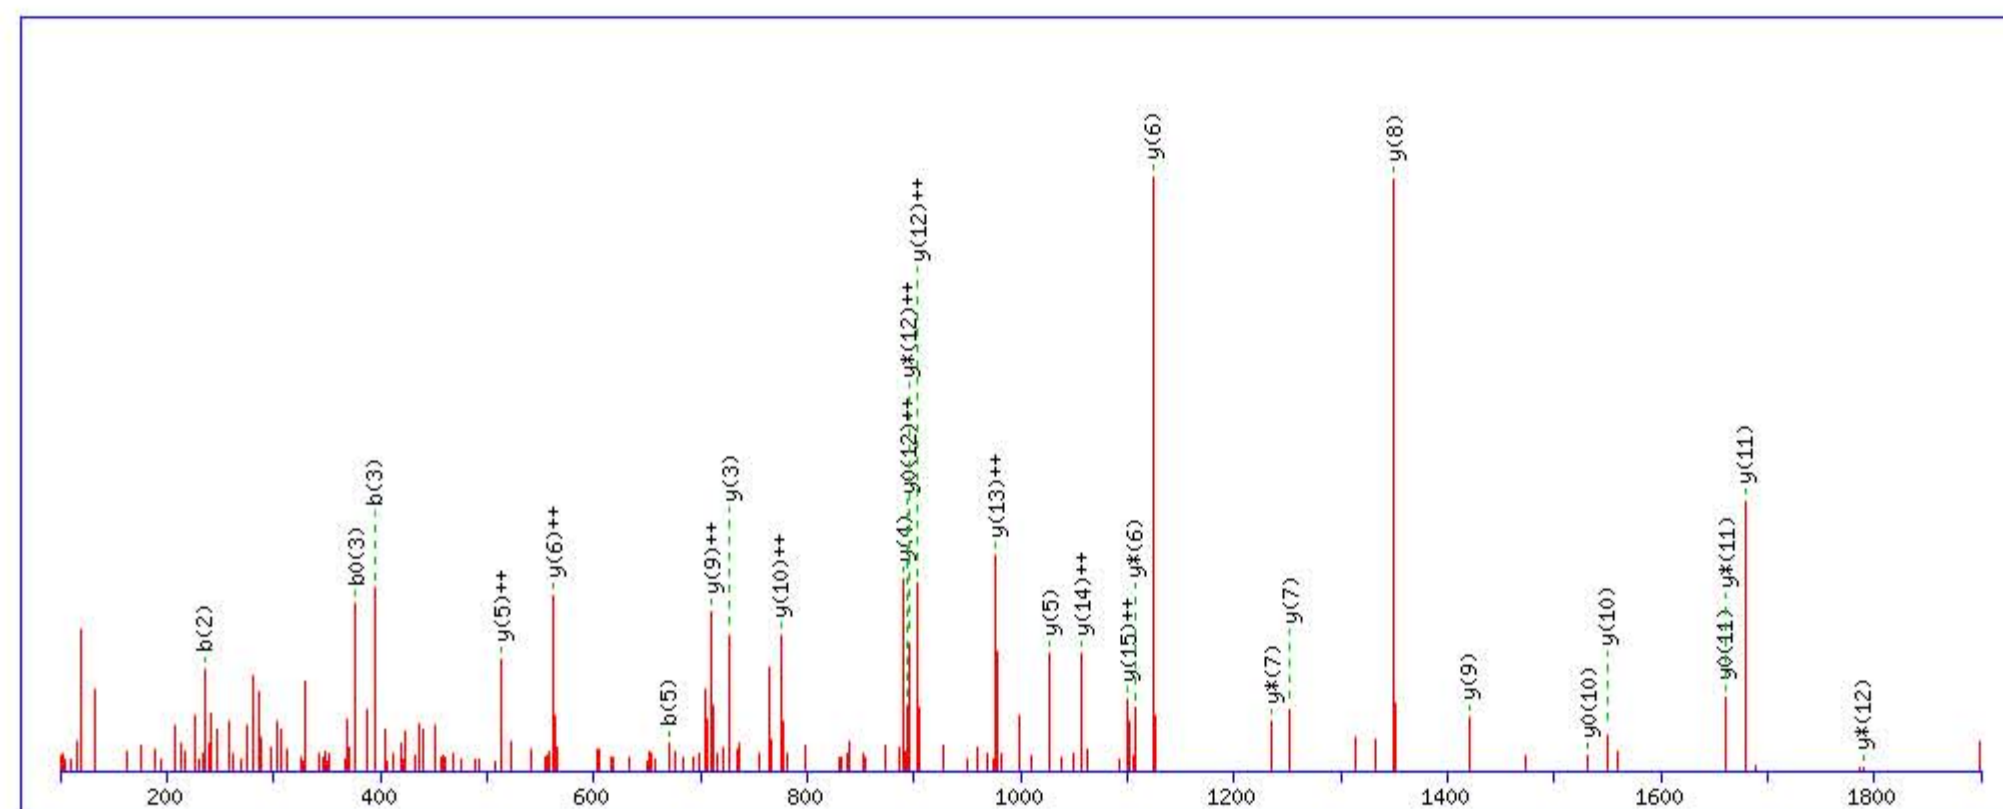

Monoisotopic mass of neutral peptide Mr(calc): 2347.087784

Fixed modifications: Carbamidomethyl (C) (apply to specified residues or termini only)

Variable modifications:

Q14 : Biotin:Thermo-21345 (Q)

Ions Score: 57 Expect: 3.1e-005

Matches : 29/152 fragment ions using 50 most intense peaks [\(help\)](#)

| #  | b                 | b <sup>++</sup> | b <sup>*</sup> | b <sup>+++</sup> | b <sup>0</sup>    | b <sup>0++</sup> | Seq. | y                  | y <sup>++</sup>    | y <sup>*</sup>     | y <sup>+++</sup>  | y <sup>0</sup>     | y <sup>0++</sup>  | #  |
|----|-------------------|-----------------|----------------|------------------|-------------------|------------------|------|--------------------|--------------------|--------------------|-------------------|--------------------|-------------------|----|
| 1  | 148.075690        | 74.541483       |                |                  |                   |                  | F    |                    |                    |                    |                   |                    |                   | 16 |
| 2  | <b>235.107718</b> | 118.057497      |                |                  | 217.097153        | 109.052214       | S    | 2201.026658        | <b>1101.016967</b> | 2184.000109        | 1092.503692       | 2183.016093        | 1092.011684       | 15 |
| 3  | <b>395.138367</b> | 198.072821      |                |                  | <b>377.127802</b> | 189.067539       | C    | 2113.994630        | <b>1057.500953</b> | 2096.968081        | 1048.987678       | 2095.984065        | 1048.495670       | 14 |
| 4  | 542.206781        | 271.607029      |                |                  | 524.196216        | 262.601746       | F    | 1953.963981        | <b>977.485629</b>  | 1936.937432        | 968.972354        | 1935.953416        | 968.480346        | 13 |
| 5  | <b>670.265359</b> | 335.636318      | 653.238810     | 327.123043       | 652.254794        | 326.631035       | Q    | 1806.895567        | <b>903.951422</b>  | <b>1789.869018</b> | <b>895.438147</b> | 1788.885002        | <b>894.946139</b> | 12 |
| 6  | 799.307952        | 400.157614      | 782.281403     | 391.644340       | 781.297387        | 391.152332       | E    | <b>1678.836989</b> | 839.922133         | <b>1661.810440</b> | 831.408858        | <b>1660.826424</b> | 830.916850        | 11 |
| 7  | 928.350545        | 464.678911      | 911.323996     | 456.165636       | 910.339980        | 455.673628       | E    | <b>1549.794396</b> | <b>775.400836</b>  | 1532.767847        | 766.887562        | <b>1531.783831</b> | 766.395554        | 10 |
| 8  | 999.387659        | 500.197468      | 982.361110     | 491.684193       | 981.377094        | 491.192185       | A    | <b>1420.751803</b> | <b>710.879540</b>  | 1403.725254        | 702.366265        |                    |                   | 9  |
| 9  | 1096.440423       | 548.723850      | 1079.413874    | 540.210575       | 1078.429858       | 539.718567       | P    | <b>1349.714689</b> | 675.360983         | 1332.688140        | 666.847708        |                    |                   | 8  |
| 10 | 1224.499001       | 612.753138      | 1207.472452    | 604.239864       | 1206.488436       | 603.747856       | Q    | <b>1252.661925</b> | 626.834601         | <b>1235.635376</b> | 618.321326        |                    |                   | 7  |
| 11 | 1321.551765       | 661.279520      | 1304.525216    | 652.766246       | 1303.541200       | 652.274238       | P    | <b>1124.603347</b> | <b>562.805312</b>  | <b>1107.576798</b> | 554.292037        |                    |                   | 6  |
| 12 | 1458.610677       | 729.808976      | 1441.584128    | 721.295702       | 1440.600112       | 720.803694       | H    | <b>1027.550583</b> | <b>514.278930</b>  | 1010.524034        | 505.765655        |                    |                   | 5  |
| 13 | 1621.674006       | 811.340641      | 1604.647457    | 802.827367       | 1603.663441       | 802.335358       | Y    | <b>890.491671</b>  | 445.749474         | 873.465122         | 437.236199        |                    |                   | 4  |
| 14 | 2060.899332       | 1030.953304     | 2043.872783    | 1022.440030      | 2042.888767       | 1021.948022      | Q    | <b>727.428342</b>  | 364.217809         | 710.401793         | 355.704535        |                    |                   | 3  |
| 15 | 2173.983396       | 1087.495336     | 2156.956847    | 1078.982061      | 2155.972831       | 1078.490053      | L    | 288.203016         | 144.605146         | 271.176467         | 136.091872        |                    |                   | 2  |
| 16 |                   |                 |                |                  |                   |                  | R    | 175.118952         | 88.063114          | 158.092403         | 79.549839         |                    |                   | 1  |

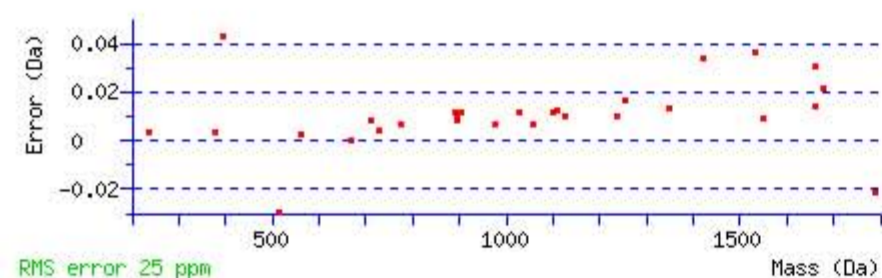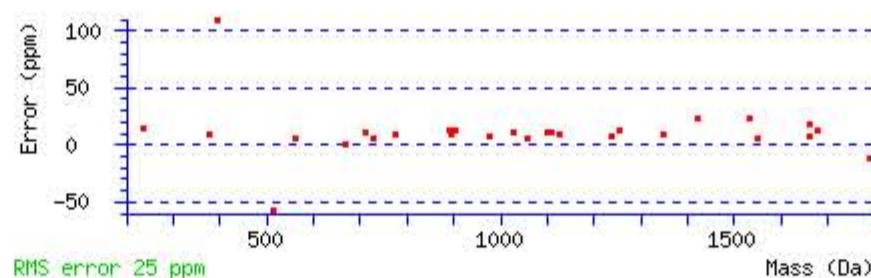

NCBI BLAST search of **FSCFQEEAPQPHYQLR**

(Parameters: blastp, nr protein database, expect=20000, no filter, PAM30)

Other BLAST [web gateways](#)

## All matches to this query

| Score | Mr(calc):   | Delta     | Sequence                         |
|-------|-------------|-----------|----------------------------------|
| 56.5  | 2347.087784 | -0.006422 | <a href="#">FSCFQEEAPQPHYQLR</a> |
| 22.8  | 2347.087784 | -0.006422 | <a href="#">FSCFQEEAPQPHYQLR</a> |



# MASCOT Search Results

## Peptide View

MS/MS Fragmentation of **QLEQVIAK**

Found in **FIBA\_HUMAN**, Fibrinogen alpha chain OS=Homo sapiens GN=FGA PE=1 SV=2

Match to Query 22699: 1238.693888 from(620.354220,2+) rtinseconds(1811) index(49949)

Title: Locus:1.1.1.3274.9 File:"2013-07-02 CLN FXIII 30 min 3rd F 4.wiff"

Data file C:\Program Files (x86)\Matrix Science\Mascot Daemon\mgf3 FXIII 30 min 3rd\mascot\_daemon\_merge.mgf

Click mouse within plot area to zoom in by factor of two about that point

Or, Plot from  to  Da

Label all possible matches  Label matches used for scoring

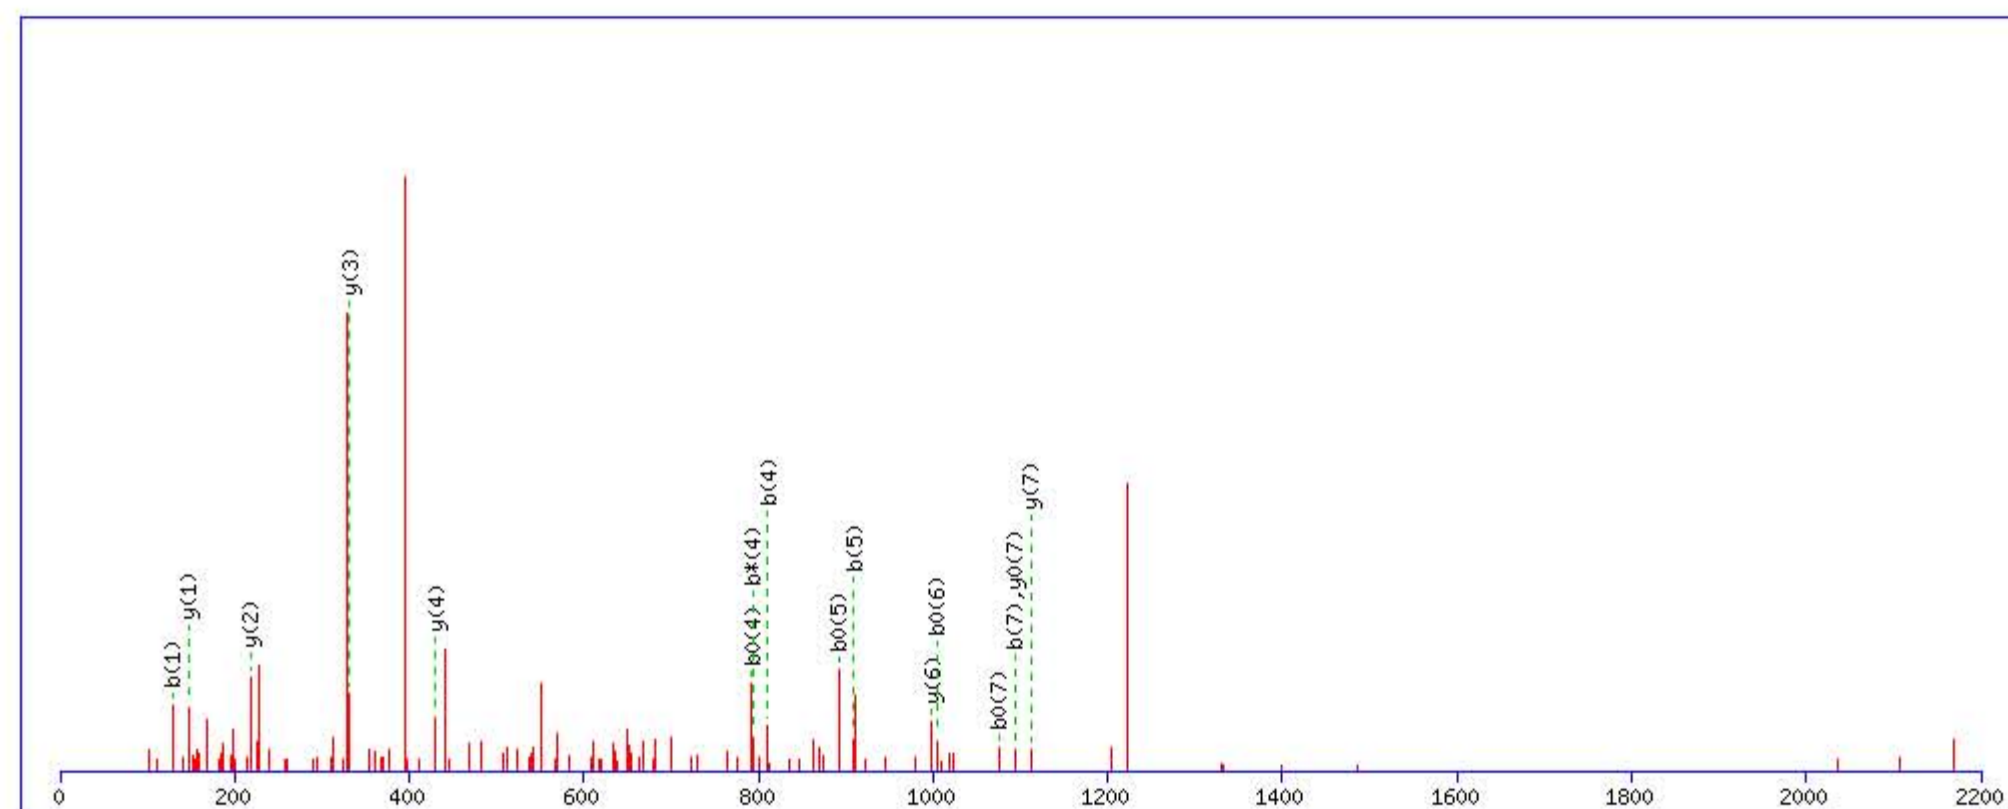

Monoisotopic mass of neutral peptide Mr(calc): 1238.705658

Fixed modifications: Carbamidomethyl (C) (apply to specified residues or termini only)

Variable modifications:

Q4 : Biotin:Thermo-21345 (Q)

Ions Score: 28 Expect: 0.062

Matches : 16/70 fragment ions using 33 most intense peaks [\(help\)](#)

| # | b           | b <sup>++</sup> | b <sup>*</sup> | b <sup>*++</sup> | b <sup>0</sup> | b <sup>0++</sup> | Seq. | y           | y <sup>++</sup> | y <sup>*</sup> | y <sup>*++</sup> | y <sup>0</sup> | y <sup>0++</sup> | # |
|---|-------------|-----------------|----------------|------------------|----------------|------------------|------|-------------|-----------------|----------------|------------------|----------------|------------------|---|
| 1 | 129.065854  | 65.036565       | 112.039305     | 56.523291        |                |                  | Q    |             |                 |                |                  |                |                  | 8 |
| 2 | 242.149918  | 121.578597      | 225.123369     | 113.065323       |                |                  | L    | 1111.654379 | 556.330828      | 1094.627830    | 547.817553       | 1093.643814    | 547.325545       | 7 |
| 3 | 371.192511  | 186.099894      | 354.165962     | 177.586619       | 353.181946     | 177.094611       | E    | 998.570315  | 499.788796      | 981.543766     | 491.275521       | 980.559750     | 490.783513       | 6 |
| 4 | 810.417837  | 405.712557      | 793.391288     | 397.199282       | 792.407272     | 396.707274       | Q    | 869.527722  | 435.267499      | 852.501173     | 426.754225       |                |                  | 5 |
| 5 | 909.486251  | 455.246764      | 892.459702     | 446.733489       | 891.475686     | 446.241481       | V    | 430.302396  | 215.654836      | 413.275847     | 207.141562       |                |                  | 4 |
| 6 | 1022.570315 | 511.788796      | 1005.543766    | 503.275521       | 1004.559750    | 502.783513       | I    | 331.233982  | 166.120629      | 314.207433     | 157.607355       |                |                  | 3 |
| 7 | 1093.607429 | 547.307353      | 1076.580880    | 538.794078       | 1075.596864    | 538.302070       | A    | 218.149918  | 109.578597      | 201.123369     | 101.065323       |                |                  | 2 |
| 8 |             |                 |                |                  |                |                  | K    | 147.112804  | 74.060040       | 130.086255     | 65.546765        |                |                  | 1 |

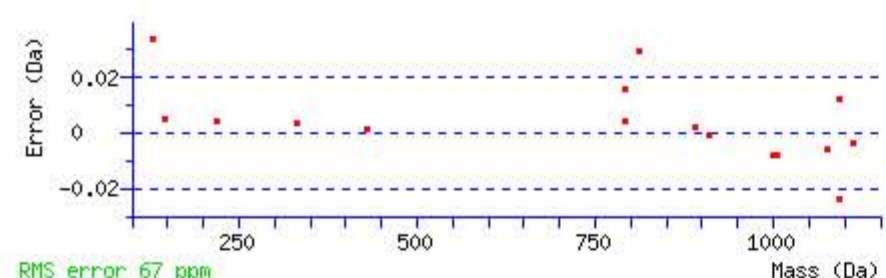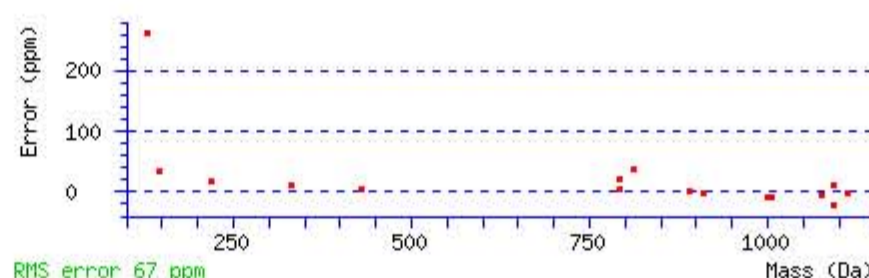

NCBI BLAST search of **QLEQVIAK**

(Parameters: blastp, nr protein database, expect=20000, no filter, PAM30)

Other BLAST [web gateways](#)

All matches to this query

| Score | Mr(calc):   | Delta     | Sequence                     |
|-------|-------------|-----------|------------------------------|
| 27.8  | 1238.705658 | -0.011770 | <a href="#">QLEQVIAK</a>     |
| 20.6  | 1238.705658 | -0.011770 | <a href="#">QLEQVIAK</a>     |
| 14.2  | 1238.687027 | 0.006861  | <a href="#">KEETQPPVALK</a>  |
| 14.0  | 1238.698257 | -0.004369 | <a href="#">IHADASSKVLAK</a> |
| 10.0  | 1238.680511 | 0.013377  | <a href="#">EPGRTQIK</a>     |
| 7.8   | 1238.698273 | -0.004385 | <a href="#">GHVTQLKESLK</a>  |
| 7.7   | 1238.698227 | -0.004339 | <a href="#">KPENKPAEAKK</a>  |
| 4.4   | 1238.680496 | 0.013392  | <a href="#">QEVAAAALR</a>    |
| 4.4   | 1238.684341 | 0.009547  | <a href="#">QGELPREVRR</a>   |
| 4.4   | 1238.702301 | -0.008413 | <a href="#">DVFKKGFSLAK</a>  |



# MASCOT Search Results

## Peptide View

MS/MS Fragmentation of **ALTDMPQMR**

Found in **FIBA\_HUMAN**, Fibrinogen alpha chain OS=Homo sapiens GN=FGA PE=1 SV=2

Match to Query 27144: 1388.653528 from(695.334040,2+) rtinseconds(1679) index(49194)

Title: Locus:1.1.1.3228.12 File:"2013-07-02 CLN FXIII 30 min 3rd F 4.wiff"

Data file C:\Program Files (x86)\Matrix Science\Mascot Daemon\mgf3 FXIII 30 min 3rd\mascot\_daemon\_merge.mgf

Click mouse within plot area to zoom in by factor of two about that point

Or, Plot from  to  Da

Label all possible matches  Label matches used for scoring

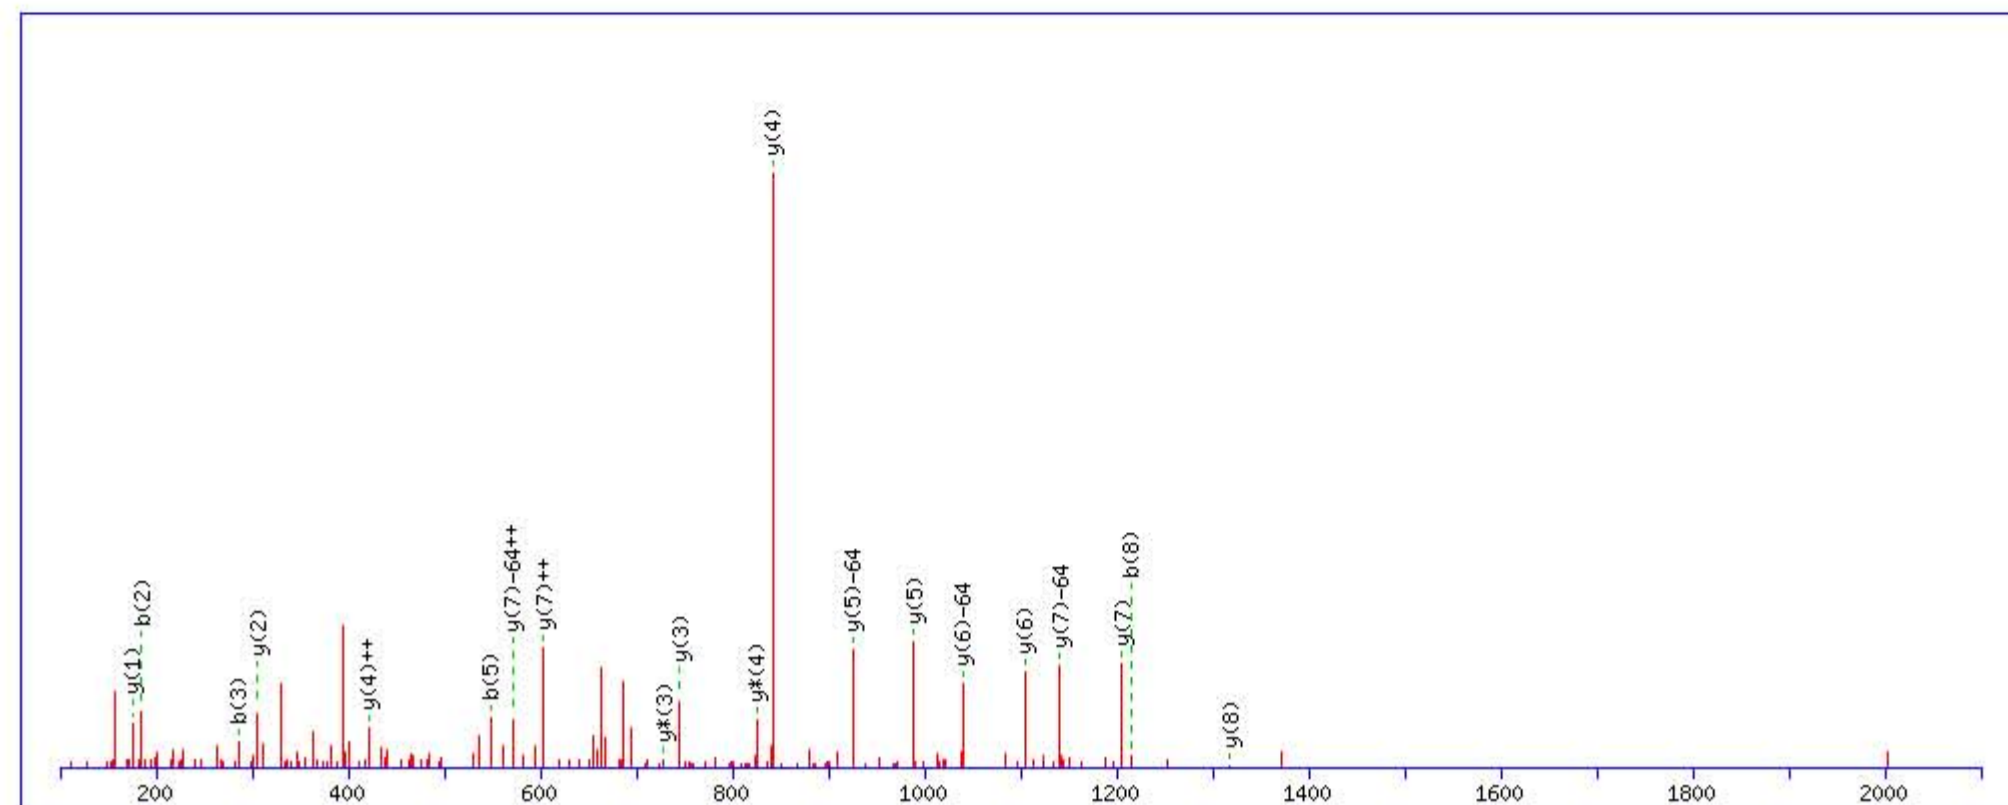

Monoisotopic mass of neutral peptide Mr(calc): 1388.661438

Fixed modifications: Carbamidomethyl (C) (apply to specified residues or termini only)

Variable modifications:

M5 : Oxidation (M), with neutral losses 0.000000 (shown in table), 63.998285

Q7 : Biotin:Thermo-21345 (Q)

Ions Score: 53 Expect: 1.9e-005

Matches : 20/112 fragment ions using 37 most intense peaks [\(help\)](#)

| # | b                  | b <sup>++</sup> | b <sup>*</sup> | b <sup>*++</sup> | b <sup>0</sup> | b <sup>0++</sup> | Seq. | y                  | y <sup>++</sup>   | y <sup>*</sup>    | y <sup>*++</sup> | y <sup>0</sup> | y <sup>0++</sup> | # |
|---|--------------------|-----------------|----------------|------------------|----------------|------------------|------|--------------------|-------------------|-------------------|------------------|----------------|------------------|---|
| 1 | 72.044390          | 36.525833       |                |                  |                |                  | A    |                    |                   |                   |                  |                |                  | 9 |
| 2 | <b>185.128454</b>  | 93.067865       |                |                  |                |                  | L    | <b>1318.631613</b> | 659.819445        | 1301.605064       | 651.306170       | 1300.621048    | 650.814162       | 8 |
| 3 | <b>286.176133</b>  | 143.591704      |                |                  | 268.165568     | 134.586422       | T    | <b>1205.547549</b> | <b>603.277413</b> | 1188.521000       | 594.764138       | 1187.536984    | 594.272130       | 7 |
| 4 | 401.203076         | 201.105176      |                |                  | 383.192511     | 192.099894       | D    | <b>1104.499870</b> | 552.753573        | 1087.473321       | 544.240298       | 1086.489305    | 543.748290       | 6 |
| 5 | <b>548.238476</b>  | 274.622876      |                |                  | 530.227911     | 265.617594       | M    | <b>989.472927</b>  | 495.240102        | 972.446378        | 486.726827       |                |                  | 5 |
| 6 | 645.291240         | 323.149258      |                |                  | 627.280675     | 314.143976       | P    | <b>842.437527</b>  | <b>421.722402</b> | <b>825.410978</b> | 413.209127       |                |                  | 4 |
| 7 | 1084.516566        | 542.761921      | 1067.490017    | 534.248647       | 1066.506001    | 533.756639       | Q    | <b>745.384763</b>  | 373.196020        | <b>728.358214</b> | 364.682745       |                |                  | 3 |
| 8 | <b>1215.557051</b> | 608.282164      | 1198.530502    | 599.768889       | 1197.546486    | 599.276881       | M    | <b>306.159437</b>  | 153.583356        | 289.132888        | 145.070082       |                |                  | 2 |
| 9 |                    |                 |                |                  |                |                  | R    | <b>175.118952</b>  | 88.063114         | 158.092403        | 79.549839        |                |                  | 1 |

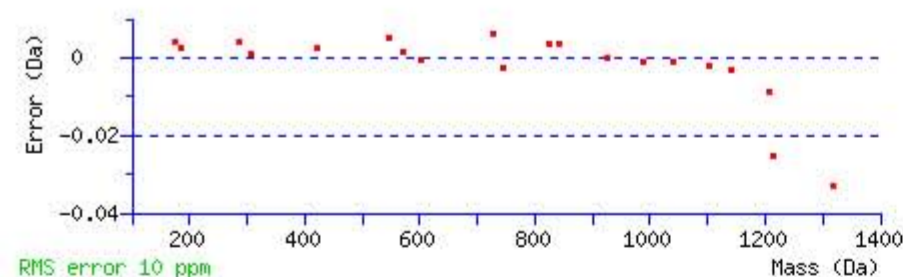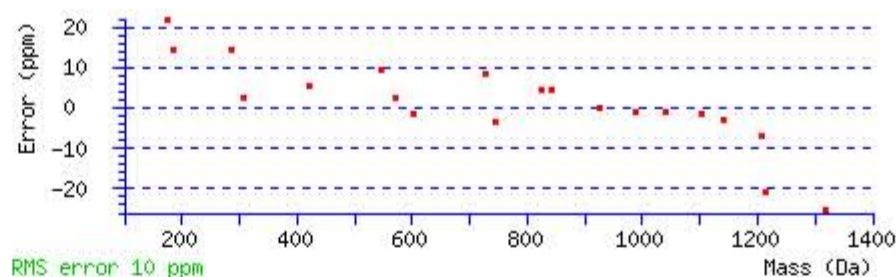

NCBI BLAST search of [ALTDMPQMR](#)

(Parameters: blastp, nr protein database, expect=20000, no filter, PAM30)

Other BLAST [web gateways](#)

All matches to this query

| Score | Mr(calc):   | Delta     | Sequence                     |
|-------|-------------|-----------|------------------------------|
| 52.9  | 1388.661438 | -0.007910 | <a href="#">ALTDMPQMR</a>    |
| 16.2  | 1388.661438 | -0.007910 | <a href="#">ALTDMPQMR</a>    |
| 2.4   | 1388.669296 | -0.015768 | <a href="#">DREPFQMR</a>     |
| 2.1   | 1388.660568 | -0.007040 | <a href="#">SEMTASPLVGP</a>  |
| 1.0   | 1388.647293 | 0.006235  | <a href="#">SPSPYYSRGGYR</a> |
| 0.8   | 1388.654053 | -0.000525 | <a href="#">SMDTIVGMLHNR</a> |

Mascot: <http://www.matrixscience.com/>



# MASCOT Search Results

## Peptide View

MS/MS Fragmentation of **QFTSSTSYNR**

Found in **FIBA\_HUMAN**, Fibrinogen alpha chain OS=Homo sapiens GN=FGA PE=1 SV=2

Match to Query 30922: 1500.684608 from(751.349580,2+) rtinseconds(1604) index(61658)

Title: Locus:1.1.1.3037.20 File:"2013-07-02 CLN FXIII 30 min 3rd FT.wiff"

Data file C:\Program Files (x86)\Matrix Science\Mascot Daemon\mgf3 FXIII 30 min 3rd\mascot\_daemon\_merge.mgf

Click mouse within plot area to zoom in by factor of two about that point

Or, Plot from  to  Da

Label all possible matches  Label matches used for scoring

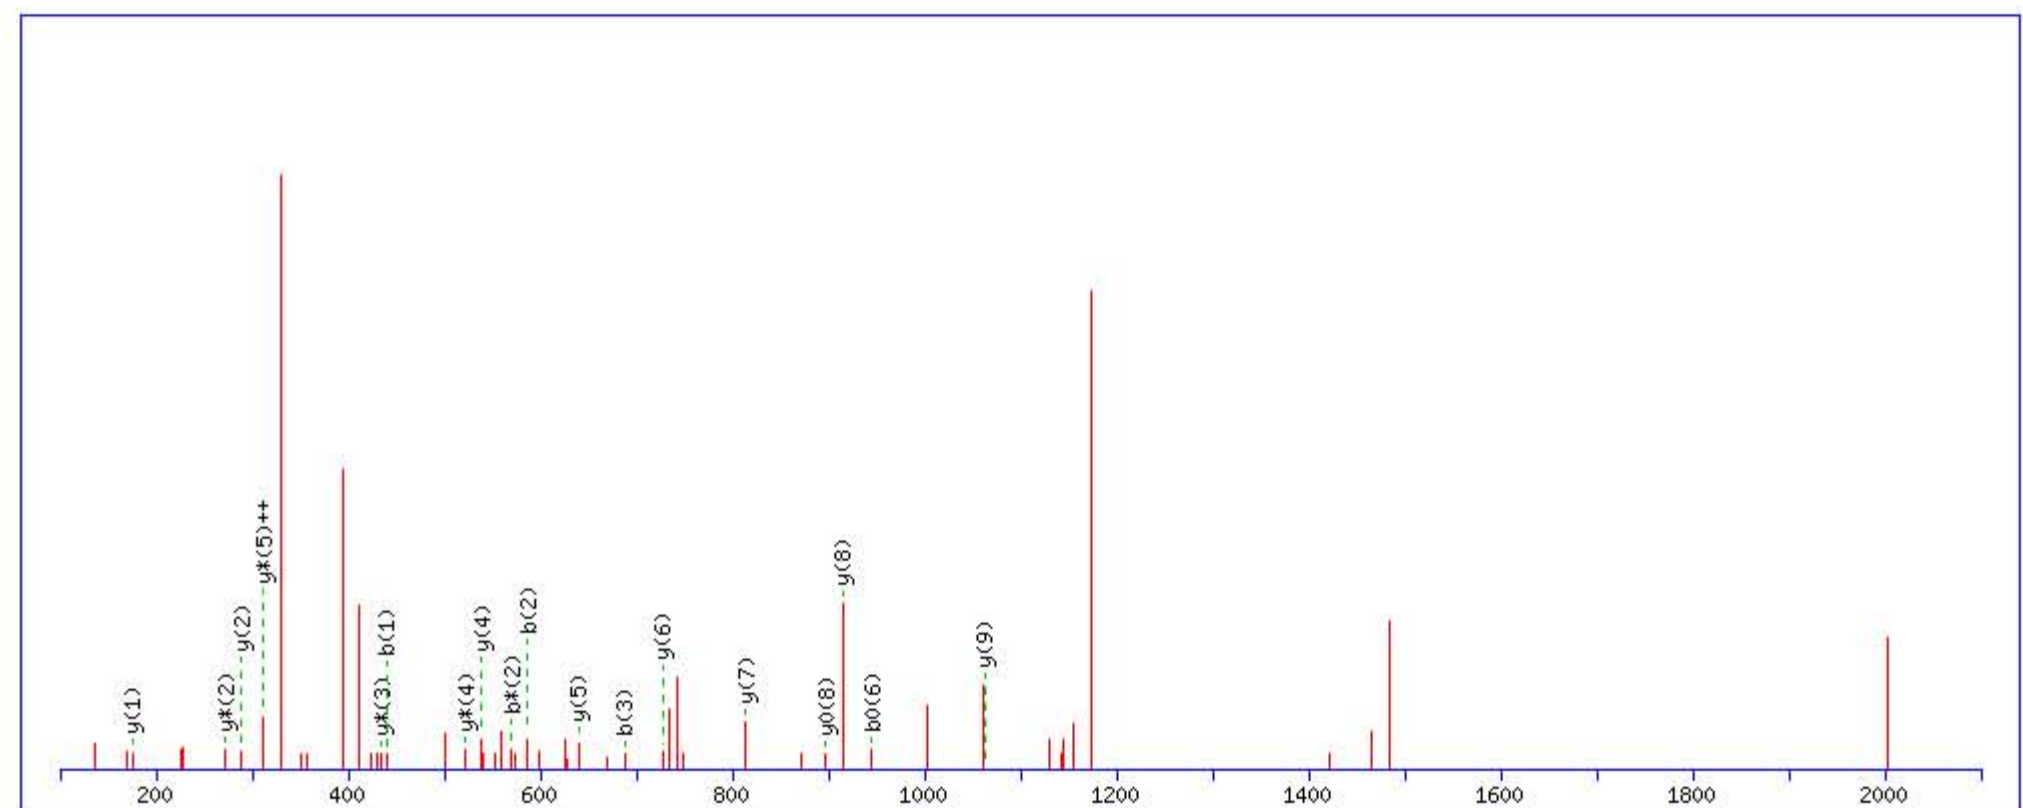

Monoisotopic mass of neutral peptide Mr(calc): 1500.703110

Fixed modifications: Carbamidomethyl (C) (apply to specified residues or termini only)

Variable modifications:

Q1 : Biotin:Thermo-21345 (Q)

Ions Score: 37 Expect: 0.0011

Matches : 18/98 fragment ions using 48 most intense peaks [\(help\)](#)

| #  | b                 | b <sup>++</sup> | b <sup>*</sup>    | b <sup>*++</sup> | b <sup>0</sup>    | b <sup>0++</sup> | Seq. | y                  | y <sup>++</sup> | y <sup>*</sup>    | y <sup>*++</sup>  | y <sup>0</sup>    | y <sup>0++</sup> | #  |
|----|-------------------|-----------------|-------------------|------------------|-------------------|------------------|------|--------------------|-----------------|-------------------|-------------------|-------------------|------------------|----|
| 1  | <b>440.232602</b> | 220.619939      | 423.206053        | 212.106664       |                   |                  | Q    |                    |                 |                   |                   |                   |                  | 10 |
| 2  | <b>587.301016</b> | 294.154146      | <b>570.274467</b> | 285.640872       |                   |                  | F    | <b>1062.485064</b> | 531.746170      | 1045.458515       | 523.232896        | 1044.474499       | 522.740887       | 9  |
| 3  | <b>688.348695</b> | 344.677986      | 671.322146        | 336.164711       | 670.338130        | 335.672703       | T    | <b>915.416650</b>  | 458.211963      | 898.390101        | 449.698689        | <b>897.406085</b> | 449.206681       | 8  |
| 4  | 775.380723        | 388.194000      | 758.354174        | 379.680725       | 757.370158        | 379.188717       | S    | <b>814.368971</b>  | 407.688124      | 797.342422        | 399.174849        | 796.358406        | 398.682841       | 7  |
| 5  | 862.412751        | 431.710014      | 845.386202        | 423.196739       | 844.402186        | 422.704731       | S    | <b>727.336943</b>  | 364.172110      | 710.310394        | 355.658835        | 709.326378        | 355.166827       | 6  |
| 6  | 963.460430        | 482.233853      | 946.433881        | 473.720578       | <b>945.449865</b> | 473.228570       | T    | <b>640.304915</b>  | 320.656096      | 623.278366        | <b>312.142821</b> | 622.294350        | 311.650813       | 5  |
| 7  | 1050.492458       | 525.749867      | 1033.465909       | 517.236593       | 1032.481893       | 516.744584       | S    | <b>539.257236</b>  | 270.132256      | <b>522.230687</b> | 261.618982        | 521.246671        | 261.126974       | 4  |
| 8  | 1213.555787       | 607.281532      | 1196.529238       | 598.768257       | 1195.545222       | 598.276249       | Y    | 452.225208         | 226.616242      | <b>435.198659</b> | 218.102967        |                   |                  | 3  |
| 9  | 1327.598714       | 664.302995      | 1310.572165       | 655.789721       | 1309.588149       | 655.297712       | N    | <b>289.161879</b>  | 145.084577      | <b>272.135330</b> | 136.571303        |                   |                  | 2  |
| 10 |                   |                 |                   |                  |                   |                  | R    | <b>175.118952</b>  | 88.063114       | 158.092403        | 79.549839         |                   |                  | 1  |

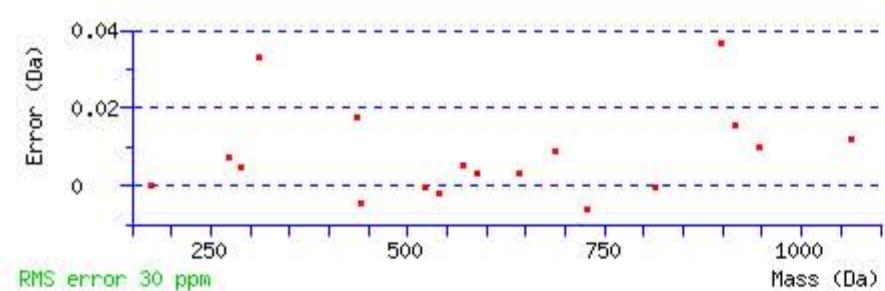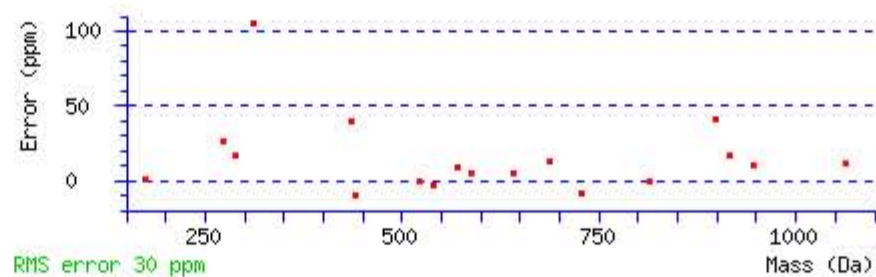

NCBI BLAST search of **QFTSSTSYNR**

(Parameters: blastp, nr protein database, expect=20000, no filter, PAM30)

Other BLAST [web gateways](#)

All matches to this query

| Score | Mr(calc):   | Delta     | Sequence                       |
|-------|-------------|-----------|--------------------------------|
| 37.3  | 1500.703110 | -0.018502 | <a href="#">QFTSSTSYNR</a>     |
| 5.8   | 1500.699768 | -0.015160 | <a href="#">AEAGSGGPGFTTFR</a> |

Mascot: <http://www.matrixscience.com/>



# MASCOT Search Results

## Peptide View

MS/MS Fragmentation of **NPGSSGTGGTATWKPGSSGPGSTGSWNSGSSGTGSTGNQNPGSPRPGSTGTWNPSSER**  
 Found in **FIBA\_HUMAN**, Fibrinogen alpha chain OS=Homo sapiens GN=FGA PE=1 SV=2

Match to Query 71229: 5844.562520 from(1169.919780,5+) rtinseconds(1765) index(3890)  
 Title: Locus:1.1.1.3184.16 File:"2013-07-02 CLN FXIII 30 min 3rd F 1.wiff"  
 Data file C:\Program Files (x86)\Matrix Science\Mascot Daemon\mgf\3 FXIII 30 min 3rd\mascot\_daemon\_merge.mgf

Click mouse within plot area to zoom in by factor of two about that point  
 Or, Plot from  to  Da  Full range

Label all possible matches  Label matches used for scoring

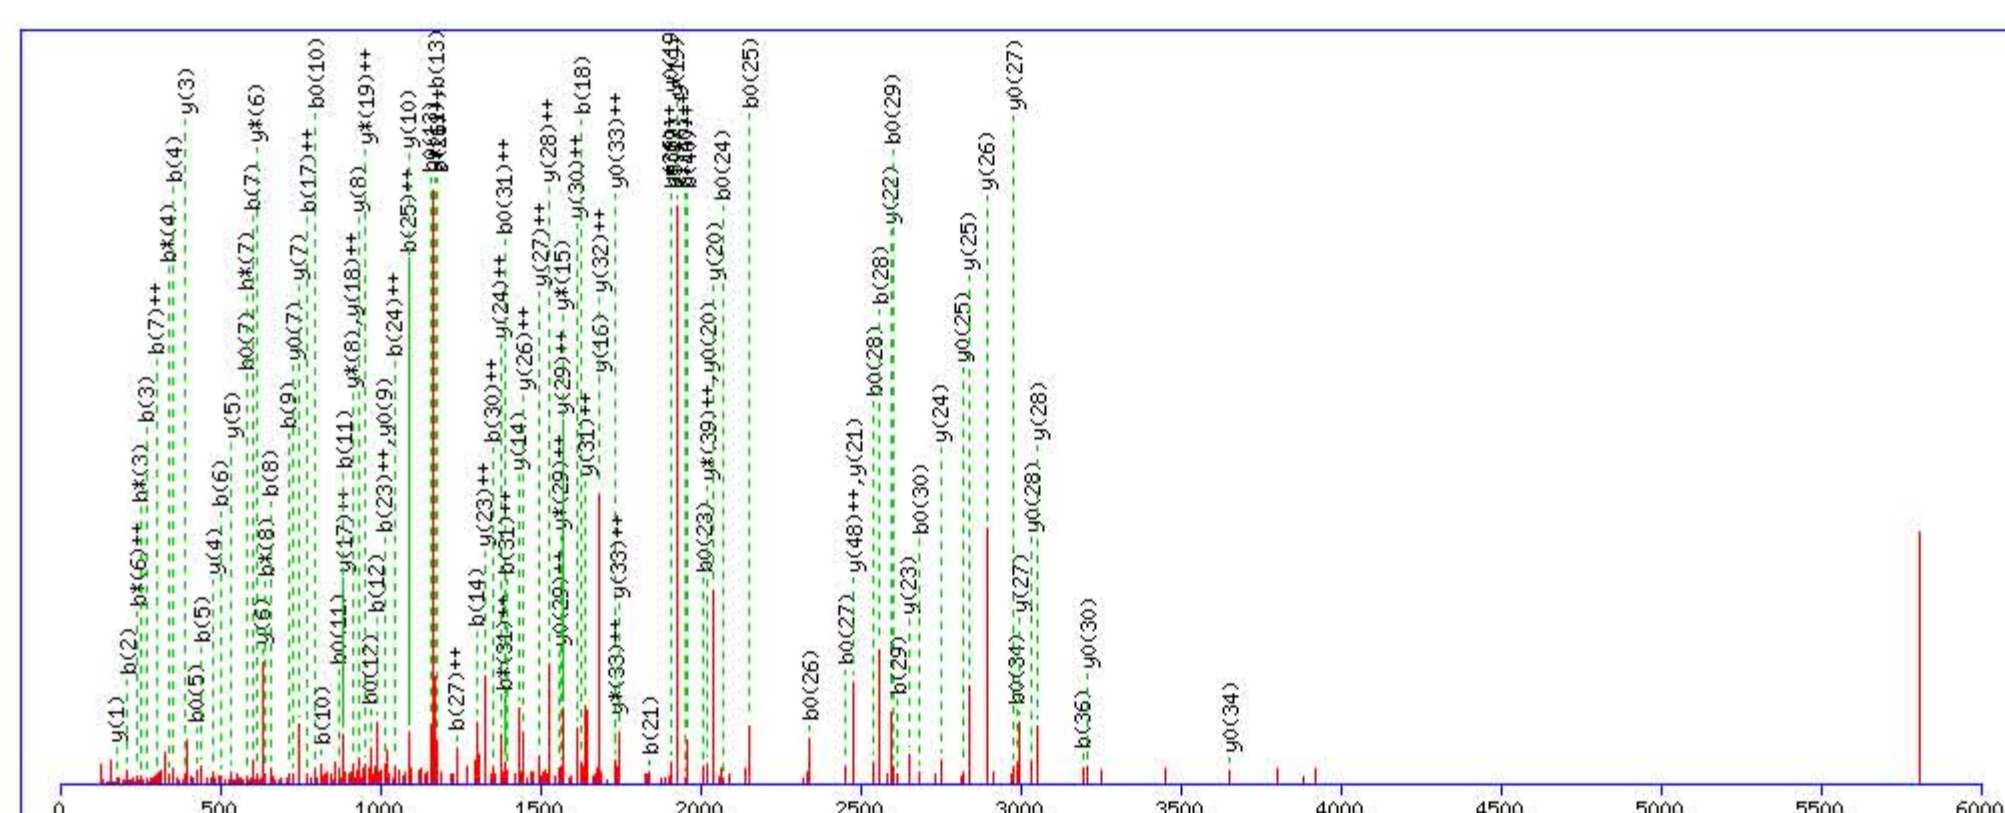

Monoisotopic mass of neutral peptide Mr(calc): 5844.608032  
 Fixed modifications: Carbamidomethyl (C) (apply to specified residues or termini only)  
 Variable modifications:  
 Q39 : Biotin:Thermo-21345 (Q)  
 Ions Score: 119 Expect: 3.6e-012  
 Matches : 106/688 fragment ions using 177 most intense peaks [\(help\)](#)

| #  | b                  | b <sup>++</sup>    | b <sup>+</sup>    | b <sup>+++</sup>   | b <sup>0</sup>     | b <sup>0++</sup>   | Seq. | y                  | y <sup>++</sup>    | y <sup>+</sup>     | y <sup>+++</sup>   | y <sup>0</sup>     | y <sup>0++</sup>   | #  |
|----|--------------------|--------------------|-------------------|--------------------|--------------------|--------------------|------|--------------------|--------------------|--------------------|--------------------|--------------------|--------------------|----|
| 1  | 115.050203         | 58.028740          | 98.023654         | 49.515465          |                    |                    | N    |                    |                    |                    |                    |                    |                    | 59 |
| 2  | <b>212.102967</b>  | 106.555121         | 195.076418        | 98.041847          |                    |                    | P    | 5731.572302        | 2866.289789        | 5714.545753        | 2857.776515        | 5713.561737        | 2857.284507        | 58 |
| 3  | <b>269.124431</b>  | 135.065853         | <b>252.097882</b> | 126.552579         |                    |                    | G    | 5634.519538        | 2817.763407        | 5617.492989        | 2809.250133        | 5616.508973        | 2808.758125        | 57 |
| 4  | <b>356.156459</b>  | 178.581867         | <b>339.129910</b> | 170.068593         | 338.145894         | 169.576585         | S    | 5577.498074        | 2789.252675        | 5560.471525        | 2780.739401        | 5559.487509        | 2780.247393        | 56 |
| 5  | <b>443.188487</b>  | 222.097881         | 426.161938        | 213.584607         | <b>425.177922</b>  | 213.092599         | S    | 5490.466046        | 2745.736661        | 5473.439497        | 2737.223387        | 5472.455481        | 2736.731379        | 55 |
| 6  | <b>500.209951</b>  | 250.608613         | 483.183402        | <b>242.095339</b>  | 482.199386         | 241.603331         | G    | 5403.434018        | 2702.220647        | 5386.407469        | 2693.707373        | 5385.423453        | 2693.215365        | 54 |
| 7  | <b>601.257630</b>  | <b>301.132453</b>  | <b>584.231081</b> | 292.619178         | <b>583.247065</b>  | 292.127170         | T    | 5346.412554        | 2673.709915        | 5329.386005        | 2665.196641        | 5328.401989        | 2664.704633        | 53 |
| 8  | <b>658.279094</b>  | 329.643185         | <b>641.252545</b> | 321.129910         | 640.268529         | 320.637903         | G    | 5245.364875        | 2623.186076        | 5228.338326        | 2614.672801        | 5227.354310        | 2614.180793        | 52 |
| 9  | <b>715.300558</b>  | 358.153917         | 698.274009        | 349.640643         | 697.289993         | 349.148635         | G    | 5188.343411        | 2594.675344        | 5171.316862        | 2586.162069        | 5170.332846        | 2585.670061        | 51 |
| 10 | <b>816.348237</b>  | 408.677757         | 799.321688        | 400.164482         | <b>798.337672</b>  | 399.672474         | T    | 5131.321947        | 2566.164612        | 5114.295398        | 2557.651337        | 5113.311382        | 2557.159329        | 50 |
| 11 | <b>887.385351</b>  | 444.196314         | 870.358802        | 435.683039         | <b>869.374786</b>  | 435.191031         | A    | 5030.274268        | 2515.640772        | 5013.247719        | 2507.127498        | 5012.263703        | 2506.635490        | 49 |
| 12 | <b>988.433030</b>  | 494.720153         | 971.406481        | 486.206879         | <b>970.422465</b>  | 485.714871         | T    | 4959.237154        | <b>2480.122215</b> | 4942.210605        | 2471.608941        | 4941.226589        | 2471.116933        | 48 |
| 13 | <b>1174.512343</b> | 587.759810         | 1157.485794       | 579.246535         | <b>1156.501778</b> | 578.754527         | W    | 4858.189475        | 2429.598376        | 4841.162926        | 2421.085101        | 4840.178910        | 2420.593093        | 47 |
| 14 | <b>1302.607306</b> | 651.807291         | 1285.580757       | 643.294017         | 1284.596741        | 642.802009         | K    | 4672.110162        | 2336.558719        | 4655.083613        | 2328.045445        | 4654.099597        | 2327.553437        | 46 |
| 15 | 1399.660070        | 700.333673         | 1382.633521       | 691.820399         | 1381.649505        | 691.328391         | P    | 4544.015199        | 2272.511238        | 4526.988650        | 2263.997963        | 4526.004634        | 2263.505955        | 45 |
| 16 | 1456.681534        | 728.844405         | 1439.654985       | 720.331131         | 1438.670969        | 719.839123         | G    | 4446.962435        | 2223.984856        | 4429.935886        | 2215.471581        | 4428.951870        | 2214.979573        | 44 |
| 17 | 1543.713562        | <b>772.360419</b>  | 1526.687013       | 763.847145         | 1525.702997        | 763.355137         | S    | 4389.940971        | 2195.474124        | 4372.914422        | 2186.960849        | 4371.930406        | 2186.468841        | 43 |
| 18 | <b>1630.745590</b> | 815.876433         | 1613.719041       | 807.363159         | 1612.735025        | 806.871151         | S    | 4302.908943        | 2151.958110        | 4285.882394        | 2143.444835        | 4284.898378        | 2142.952827        | 42 |
| 19 | 1687.767054        | 844.387165         | 1670.740505       | 835.873891         | 1669.756489        | 835.381883         | G    | 4215.876915        | 2108.442096        | 4198.850366        | 2099.928821        | 4197.866350        | 2099.436813        | 41 |
| 20 | 1784.819818        | 892.913547         | 1767.793269       | 884.400273         | 1766.809253        | 883.908265         | P    | 4158.855451        | 2079.931364        | 4141.828902        | 2071.418089        | 4140.844886        | 2070.926081        | 40 |
| 21 | <b>1841.841282</b> | 921.424279         | 1824.814733       | 912.911005         | 1823.830717        | 912.418997         | G    | 4061.802687        | 2031.404982        | 4044.776138        | <b>2022.891707</b> | 4043.792122        | 2022.399699        | 39 |
| 22 | 1928.873310        | 964.940293         | 1911.846761       | 956.427019         | <b>1910.862745</b> | 955.935011         | S    | 4004.781223        | 2002.894250        | 3987.754674        | 1994.380975        | 3986.770658        | 1993.888967        | 38 |
| 23 | 2029.920989        | <b>1015.464133</b> | 2012.894440       | 1006.950858        | <b>2011.910424</b> | 1006.458850        | T    | 3917.749195        | 1959.378236        | 3900.722646        | 1950.864961        | 3899.738630        | 1950.372953        | 37 |
| 24 | 2086.942453        | <b>1043.974865</b> | 2069.915904       | 1035.461590        | <b>2068.931888</b> | 1034.969582        | G    | 3816.701516        | <b>1908.854396</b> | 3799.674967        | 1900.341122        | 3798.690951        | 1899.849114        | 36 |
| 25 | 2173.974481        | <b>1087.490879</b> | 2156.947932       | 1078.977604        | <b>2155.963916</b> | 1078.485596        | S    | 3759.680052        | 1880.343664        | 3742.653503        | 1871.830389        | 3741.669487        | 1871.338382        | 35 |
| 26 | 2360.053794        | <b>1180.530535</b> | 2343.027245       | 1172.017261        | <b>2342.043229</b> | 1171.525253        | W    | 3672.648024        | 1836.827650        | 3655.621475        | 1828.314375        | <b>3654.637459</b> | 1827.822367        | 34 |
| 27 | 2474.096721        | <b>1237.551999</b> | 2457.070172       | 1229.038724        | <b>2456.086156</b> | 1228.546716        | N    | 3486.568711        | <b>1743.787993</b> | 3469.542162        | <b>1735.274719</b> | 3468.558146        | <b>1734.782711</b> | 33 |
| 28 | <b>2561.128749</b> | 1281.068013        | 2544.102200       | 1272.554738        | <b>2543.118184</b> | 1272.062730        | S    | 3372.525784        | <b>1686.766530</b> | 3355.499235        | 1678.253255        | 3354.515219        | 1677.761247        | 32 |
| 29 | <b>2618.150213</b> | 1309.578745        | 2601.123664       | 1301.065470        | <b>2600.139648</b> | 1300.573462        | G    | 3285.493756        | <b>1643.250516</b> | 3268.467207        | 1634.737241        | 3267.483191        | 1634.245233        | 31 |
| 30 | 2705.182241        | <b>1353.094759</b> | 2688.155692       | 1344.581484        | <b>2687.171676</b> | 1344.089476        | S    | 3228.472292        | <b>1614.739784</b> | 3211.445743        | 1606.226509        | <b>3210.461727</b> | 1605.734501        | 30 |
| 31 | 2792.214269        | <b>1396.610773</b> | 2775.187720       | <b>1388.097498</b> | 2774.203704        | <b>1387.605490</b> | S    | 3141.440264        | <b>1571.223770</b> | 3124.413715        | <b>1562.710495</b> | 3123.429699        | <b>1562.218487</b> | 29 |
| 32 | 2849.235733        | 1425.121505        | 2832.209184       | 1416.608230        | 2831.225168        | 1416.116222        | G    | <b>3054.408236</b> | <b>1527.707756</b> | 3037.381687        | 1519.194481        | <b>3036.397671</b> | 1518.702473        | 28 |
| 33 | 2950.283412        | 1475.645344        | 2933.256863       | 1467.132069        | 2932.272847        | 1466.640062        | T    | <b>2997.386772</b> | <b>1499.197024</b> | 2980.360223        | 1490.683749        | <b>2979.376207</b> | 1490.191741        | 27 |
| 34 | 3007.304876        | 1504.156076        | 2990.278327       | 1495.642801        | <b>2989.294311</b> | 1495.150794        | G    | <b>2896.339093</b> | <b>1448.673184</b> | 2879.312544        | 1440.159910        | 2878.328528        | 1439.667902        | 26 |
| 35 | 3094.336904        | 1547.672090        | 3077.310355       | 1539.158815        | 3076.326339        | 1538.666808        | S    | <b>2839.317629</b> | 1420.162453        | 2822.291080        | 1411.649178        | <b>2821.307064</b> | 1411.157170        | 25 |
| 36 | <b>3195.384583</b> | 1598.195929        | 3178.358034       | 1589.682655        | 3177.374018        | 1589.190647        | T    | <b>2752.285601</b> | <b>1376.646438</b> | 2735.259052        | 1368.133164        | 2734.275036        | 1367.641156        | 24 |
| 37 | 3252.406047        | 1626.706661        | 3235.379498       | 1618.193387        | 3234.395482        | 1617.701379        | G    | <b>2651.237922</b> | <b>1326.122599</b> | 2634.211373        | 1317.609325        | 2633.227357        | 1317.117317        | 23 |
| 38 | 3366.448974        | 1683.728125        | 3349.422425       | 1675.214850        | 3348.438409        | 1674.722842        | N    | <b>2594.216458</b> | 1297.611867        | 2577.189909        | 1289.098593        | 2576.205893        | 1288.606585        | 22 |
| 39 | 3805.674300        | 1903.340788        | 3788.647751       | 1894.827513        | 3787.663735        | 1894.335506        | Q    | <b>2480.173531</b> | 1240.590404        | 2463.146982        | 1232.077129        | 2462.162966        | 1231.585121        | 21 |
| 40 | 3919.717227        | <b>1960.362252</b> | 3902.690678       | <b>1951.848977</b> | 3901.706662        | 1951.356969        | N    | <b>2040.948205</b> | 1020.977741        | 2023.921656        | 1012.464466        | <b>2022.937640</b> | 1011.972458        | 20 |
| 41 | 4016.769991        | 2008.888634        | 3999.743442       | 2000.375359        | 3998.759426        | 1999.883351        | P    | <b>1926.905278</b> | 963.956277         | <b>1909.878729</b> | <b>955.443003</b>  | <b>1908.894713</b> | 954.950995         | 19 |
| 42 | 4073.791455        | 2037.399365        | 4056.764906       | 2028.886091        | 4055.780890        | 2028.394083        | G    | 1829.852514        | <b>915.429895</b>  | 1812.825965        | 906.916621         | 1811.841949        | 906.424613         | 18 |
| 43 | 4160.823483        | 2080.915380        | 4143.796934       | 2072.402105        | 4142.812918        | 2071.910097        | S    | 1772.831050        | <b>886.919163</b>  | 1755.804501        | 878.405889         | 1754.820485        | 877.913881         | 17 |
| 44 | 4257.876247        | 2129.441762        | 4240.849698       | 2120.928487        | 4239.865682        | 2120.436479        | P    | <b>1685.799022</b> | 843.403149         | 1668.772473        | 834.889875         | 1667.788457        | 834.397867         | 16 |
| 45 | 4413.977358        | 2207.492317        | 4396.950809       | 2198.979043        | 4395.966793        | 2198.487035        | R    | 1588.746258        | 794.876767         | <b>1571.719709</b> | 786.363493         | 1570.735693        | 785.871485         | 15 |
| 46 | 4511.030122        | 2256.018699        | 4494.003573       | 2247.505425        | 4493.019557        | 2247.013417        | P    | <b>1432.645147</b> | 716.826212         | 1415.618598        | 708.312937         | 1414.634582        | 707.820929         | 14 |
| 47 | 4568.051586        | 2284.529431        | 4551.025037       | 2276.016157        | 4550.041021        | 2275.524149        | G    | 1335.592383        | 668.299830         | 1318.565834        | 659.786555         | 1317.581818        | 659.294547         | 13 |
| 48 | 4655.083614        | 2328.045445        | 4638.057065       | 2319.532171        | 4637.073049        | 2319.040163        | S    | 1278.570919        | 639.789098         | 1261.544370        | 631.275823         | 1260.560354        | 630.783815         | 12 |
| 49 | 4756.131293        | 2378.569285        | 4739.104744       | 2370.056010        | 4738.120728        | 2369.564002        | T    | 1191.538891        | 596.273084         | <b>1174.512342</b> | 587.759809         | 1173.528326        | 587.267801         | 11 |
| 50 | 4813.152757        | 2407.080017        | 4796.126208       | 2398.566742        | 4795.142192        | 2398.074734        | G    | <b>1090.491212</b> | 545.749244         | 1073.464663        | 537.235970         | 1072.480647        | 536.743962         | 10 |
| 51 | 4914.200436        | 2457.603856        | 4897.173887       | 2449.090582        | 4896.189871        | 2448.598574        | T    | 1033.469748        | 517.238512         | 1016.443199        | 508.725238         | <b>1015.459183</b> | 508.233230         | 9  |
| 52 | 5100.279749        | 2550.643513        | 5083.253200       | 2542.130238        | 5082.269184        | 2541.638230        | W    | <b>932.422069</b>  | 466.714673         | <b>915.395520</b>  | 458.201398         | 914.411504         | 457.709390         | 8  |
| 53 | 5214.322676        |                    |                   |                    |                    |                    |      |                    |                    |                    |                    |                    |                    |    |



**Peptide View**

MS/MS Fragmentation of **GSAGHWTSESSVSGSTGQWHSESGSFRPDSPGSGNARPNPDWGTFFEEVSGNVSPGTR**  
 Found in **FIBA\_HUMAN**, Fibrinogen alpha chain OS=Homo sapiens GN=FGA PE=1 SV=2

Match to Query 71573: 6284.734164 from(1048.462970,6+) rtinseconds(2066) index(5622)  
 Title: Locus:1.1.1.3289.21 File:"2013-07-02 CLN FXIII 30 min 3rd F 1.wiff"  
 Data file C:\Program Files (x86)\Matrix Science\Mascot Daemon\mgf3 FXIII 30 min 3rd\mascot\_daemon\_merge.mgf

Click mouse within plot area to zoom in by factor of two about that point  
 Or, Plot from 0 to 5500 Da Full range  
 Label all possible matches  Label matches used for scoring

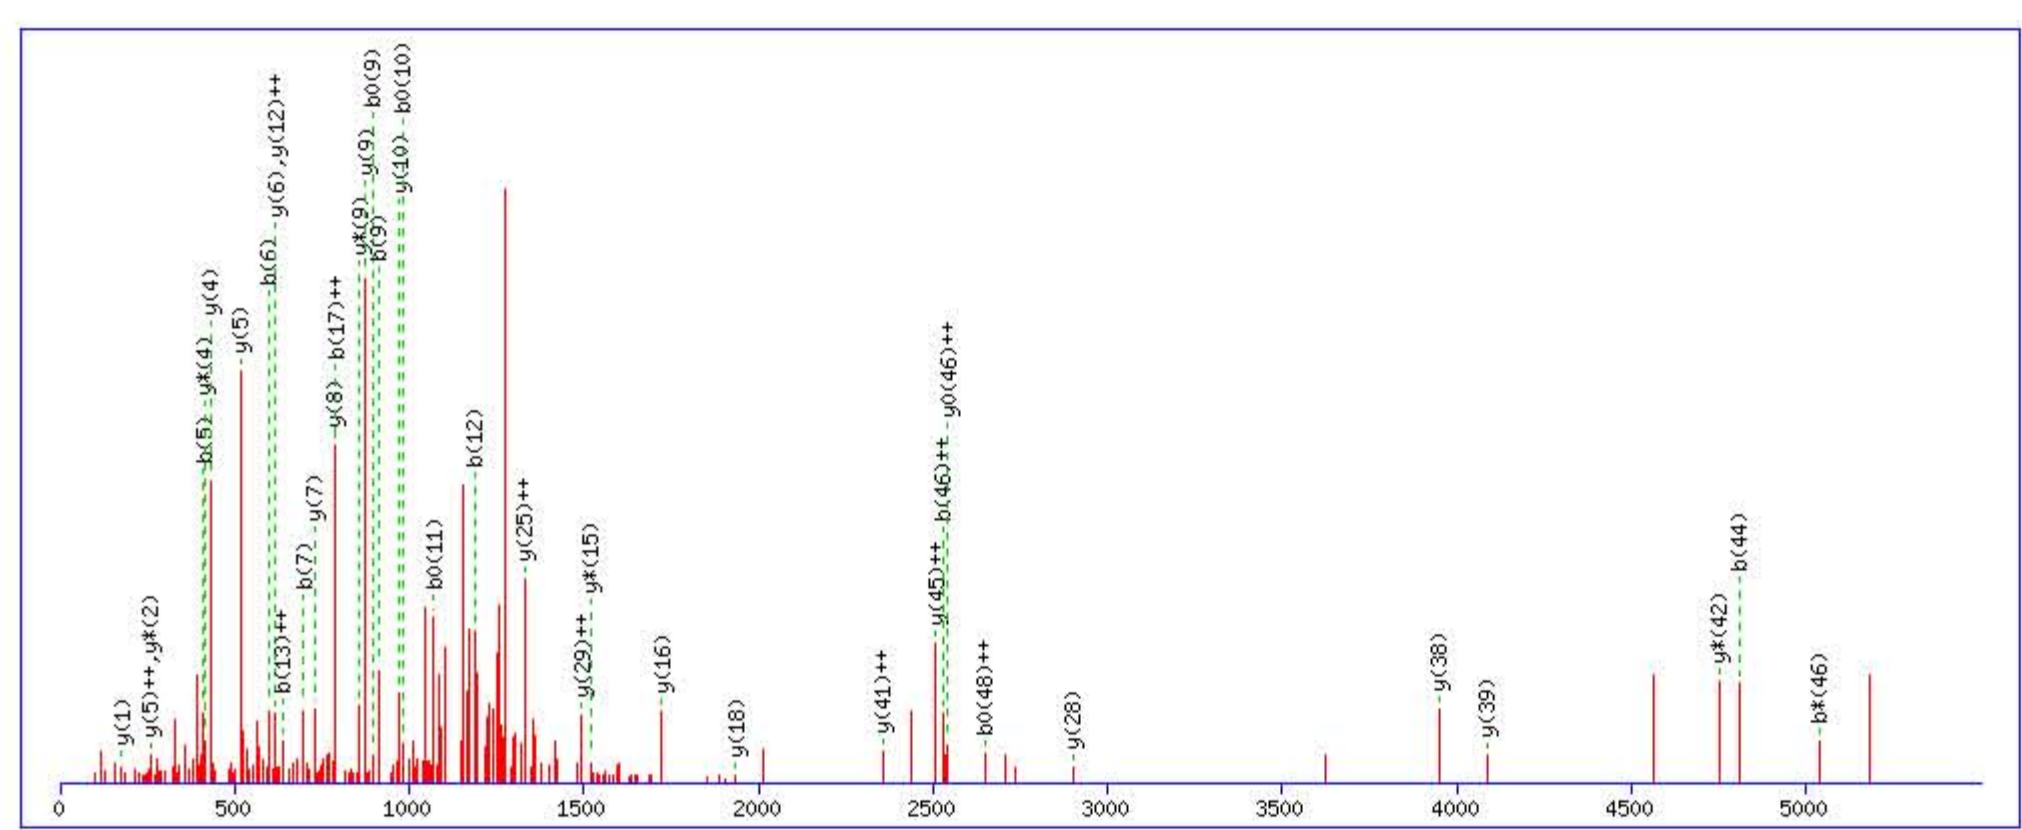

Monoisotopic mass of neutral peptide Mr(calc): 6284.792847  
 Fixed modifications: Carbamidomethyl (C) (apply to specified residues or termini only)  
 Variable modifications:  
 Q18 : Biotin:Thermo-21345 (Q)  
 Ions Score: 44 Expect: 0.0001  
 Matches : 39/646 fragment ions using 72 most intense peaks [\(help\)](#)

| #  | b                  | b <sup>++</sup>    | b*                 | b <sup>+++</sup> | b <sup>0</sup>     | b <sup>0++</sup>   | Seq. | y                  | y <sup>++</sup>    | y*                 | y <sup>+++</sup> | y <sup>0</sup> | y <sup>0++</sup>   | #  |
|----|--------------------|--------------------|--------------------|------------------|--------------------|--------------------|------|--------------------|--------------------|--------------------|------------------|----------------|--------------------|----|
| 1  | 58.028740          | 29.518008          |                    |                  |                    |                    | G    |                    |                    |                    |                  |                |                    | 58 |
| 2  | 145.060768         | 73.034022          |                    |                  | 127.050203         | 64.028740          | S    | 6228.778603        | 3114.892940        | 6211.752054        | 3106.379665      | 6210.768038    | 3105.887657        | 57 |
| 3  | 216.097882         | 108.552579         |                    |                  | 198.087317         | 99.547296          | A    | 6141.746575        | 3071.376926        | 6124.720026        | 3062.863651      | 6123.736010    | 3062.371643        | 56 |
| 4  | 273.119346         | 137.063311         |                    |                  | 255.108781         | 128.058029         | G    | 6070.709461        | 3035.858369        | 6053.682912        | 3027.345094      | 6052.698896    | 3026.853086        | 55 |
| 5  | <b>410.178258</b>  | 205.592767         |                    |                  | 392.167693         | 196.587484         | H    | 6013.687997        | 3007.347637        | 5996.661448        | 2998.834362      | 5995.677432    | 2998.342354        | 54 |
| 6  | <b>596.257571</b>  | 298.632424         |                    |                  | 578.247006         | 289.627141         | W    | 5876.629085        | 2938.818181        | 5859.602536        | 2930.304906      | 5858.618520    | 2929.812898        | 53 |
| 7  | <b>697.305250</b>  | 349.156263         |                    |                  | 679.294685         | 340.150981         | T    | 5690.549772        | 2845.778524        | 5673.523223        | 2837.265250      | 5672.539207    | 2836.773242        | 52 |
| 8  | 784.337278         | 392.672277         |                    |                  | 766.326713         | 383.666995         | S    | 5589.502093        | 2795.254685        | 5572.475544        | 2786.741410      | 5571.491528    | 2786.249402        | 51 |
| 9  | <b>913.379871</b>  | 457.193574         |                    |                  | <b>895.369306</b>  | 448.188291         | E    | 5502.470065        | 2751.738671        | 5485.443516        | 2743.225396      | 5484.459500    | 2742.733388        | 50 |
| 10 | 1000.411899        | 500.709588         |                    |                  | <b>982.401334</b>  | 491.704305         | S    | 5373.427472        | 2687.217374        | 5356.400923        | 2678.704100      | 5355.416907    | 2678.212092        | 49 |
| 11 | 1087.443927        | 544.225602         |                    |                  | <b>1069.433362</b> | 535.220319         | S    | 5286.395444        | 2643.701360        | 5269.368895        | 2635.188086      | 5268.384879    | 2634.696078        | 48 |
| 12 | <b>1186.512341</b> | 593.759809         |                    |                  | 1168.501776        | 584.754526         | V    | 5199.363416        | 2600.185346        | 5182.336867        | 2591.672072      | 5181.352851    | 2591.180064        | 47 |
| 13 | 1273.544369        | <b>637.275823</b>  |                    |                  | 1255.533804        | 628.270540         | S    | 5100.295002        | 2550.651139        | 5083.268453        | 2542.137865      | 5082.284437    | <b>2541.645857</b> | 46 |
| 14 | 1330.565833        | 665.786555         |                    |                  | 1312.555268        | 656.781272         | G    | 5013.262974        | <b>2507.135125</b> | 4996.236425        | 2498.621851      | 4995.252409    | 2498.129843        | 45 |
| 15 | 1417.597861        | 709.302569         |                    |                  | 1399.587296        | 700.297286         | S    | 4956.241510        | 2478.624393        | 4939.214961        | 2470.111119      | 4938.230945    | 2469.619111        | 44 |
| 16 | 1518.645540        | 759.826408         |                    |                  | 1500.634975        | 750.821126         | T    | 4869.209482        | 2435.108379        | 4852.182933        | 2426.595105      | 4851.198917    | 2426.103097        | 43 |
| 17 | 1575.667004        | <b>788.337140</b>  |                    |                  | 1557.656439        | 779.331858         | G    | 4768.161803        | 2384.584540        | <b>4751.135254</b> | 2376.071265      | 4750.151238    | 2375.579257        | 42 |
| 18 | 2014.892330        | 1007.949803        | 1997.865781        | 999.436529       | 1996.881765        | 998.944521         | Q    | 4711.140339        | <b>2356.073808</b> | 4694.113790        | 2347.560533      | 4693.129774    | 2347.068525        | 41 |
| 19 | 2200.971643        | 1100.989460        | 2183.945094        | 1092.476185      | 2182.961078        | 1091.984177        | W    | 4271.915013        | 2136.461145        | 4254.888464        | 2127.947870      | 4253.904448    | 2127.455862        | 40 |
| 20 | 2338.030555        | 1169.518916        | 2321.004006        | 1161.005641      | 2320.019990        | 1160.513633        | H    | <b>4085.835700</b> | 2043.421488        | 4068.809151        | 2034.908214      | 4067.825135    | 2034.416206        | 39 |
| 21 | 2425.062583        | 1213.034930        | 2408.036034        | 1204.521655      | 2407.052018        | 1204.029647        | S    | <b>3948.776788</b> | 1974.892032        | 3931.750239        | 1966.378758      | 3930.766223    | 1965.886750        | 38 |
| 22 | 2554.105176        | 1277.556226        | 2537.078627        | 1269.042952      | 2536.094611        | 1268.550944        | E    | 3861.744760        | 1931.376018        | 3844.718211        | 1922.862744      | 3843.734195    | 1922.370736        | 37 |
| 23 | 2641.137204        | 1321.072240        | 2624.110655        | 1312.558966      | 2623.126639        | 1312.066958        | S    | 3732.702167        | 1866.854722        | 3715.675618        | 1858.341447      | 3714.691602    | 1857.849439        | 36 |
| 24 | 2698.158668        | 1349.582972        | 2681.132119        | 1341.069698      | 2680.148103        | 1340.577690        | G    | 3645.670139        | 1823.338708        | 3628.643590        | 1814.825433      | 3627.659574    | 1814.333425        | 35 |
| 25 | 2785.190696        | 1393.098986        | 2768.164147        | 1384.585712      | 2767.180131        | 1384.093704        | S    | 3588.648675        | 1794.827976        | 3571.622126        | 1786.314701      | 3570.638110    | 1785.822693        | 34 |
| 26 | 2932.259110        | 1466.633193        | 2915.232561        | 1458.119919      | 2914.248545        | 1457.627911        | F    | 3501.616647        | 1751.311962        | 3484.590098        | 1742.798687      | 3483.606082    | 1742.306679        | 33 |
| 27 | 3088.360221        | 1544.683749        | 3071.333672        | 1536.170474      | 3070.349656        | 1535.678466        | R    | 3354.548233        | 1677.777755        | 3337.521684        | 1669.264480      | 3336.537668    | 1668.772472        | 32 |
| 28 | 3185.412985        | 1593.210131        | 3168.386436        | 1584.696856      | 3167.402420        | 1584.204848        | P    | 3198.447122        | 1599.727199        | 3181.420573        | 1591.213925      | 3180.436557    | 1590.721917        | 31 |
| 29 | 3300.439928        | 1650.723602        | 3283.413379        | 1642.210327      | 3282.429363        | 1641.718320        | D    | 3101.394358        | 1551.200817        | 3084.367809        | 1542.687543      | 3083.383793    | 1542.195535        | 30 |
| 30 | 3387.471956        | 1694.239616        | 3370.445407        | 1685.726342      | 3369.461391        | 1685.234334        | S    | 2986.367415        | <b>1493.687346</b> | 2969.340866        | 1485.174071      | 2968.356850    | 1484.682063        | 29 |
| 31 | 3484.524720        | 1742.765998        | 3467.498171        | 1734.252724      | 3466.514155        | 1733.760716        | P    | <b>2899.335387</b> | 1450.171332        | 2882.308838        | 1441.658057      | 2881.324822    | 1441.166049        | 28 |
| 32 | 3541.546184        | 1771.276730        | 3524.519635        | 1762.763456      | 3523.535619        | 1762.271448        | G    | 2802.282623        | 1401.644950        | 2785.256074        | 1393.131675      | 2784.272058    | 1392.639667        | 27 |
| 33 | 3628.578212        | 1814.792744        | 3611.551663        | 1806.279470      | 3610.567647        | 1805.787462        | S    | 2745.261159        | 1373.134218        | 2728.234610        | 1364.620943      | 2727.250594    | 1364.128935        | 26 |
| 34 | 3685.599676        | 1843.303476        | 3668.573127        | 1834.790202      | 3667.589111        | 1834.298194        | G    | 2658.229131        | <b>1329.618204</b> | 2641.202582        | 1321.104929      | 2640.218566    | 1320.612921        | 25 |
| 35 | 3799.642603        | 1900.324940        | 3782.616054        | 1891.811665      | 3781.632038        | 1891.319657        | N    | 2601.207667        | 1301.107472        | 2584.181118        | 1292.594197      | 2583.197102    | 1292.102189        | 24 |
| 36 | 3870.679717        | 1935.843497        | 3853.653168        | 1927.330222      | 3852.669152        | 1926.838214        | A    | 2487.164740        | 1244.086008        | 2470.138191        | 1235.572734      | 2469.154175    | 1235.080726        | 23 |
| 37 | 4026.780828        | 2013.894052        | 4009.754279        | 2005.380778      | 4008.770263        | 2004.888770        | R    | 2416.127626        | 1208.567451        | 2399.101077        | 1200.054177      | 2398.117061    | 1199.562169        | 22 |
| 38 | 4123.833592        | 2062.420434        | 4106.807043        | 2053.907160      | 4105.823027        | 2053.415152        | P    | 2260.026515        | 1130.516896        | 2242.999966        | 1122.003621      | 2242.015950    | 1121.511613        | 21 |
| 39 | 4237.876519        | 2119.441898        | 4220.849970        | 2110.928623      | 4219.865954        | 2110.436615        | N    | 2162.973751        | 1081.990514        | 2145.947202        | 1073.477239      | 2144.963186    | 1072.985231        | 20 |
| 40 | 4351.919446        | 2176.463361        | 4334.892897        | 2167.950087      | 4333.908881        | 2167.458079        | N    | 2048.930824        | 1024.969050        | 2031.904275        | 1016.455776      | 2030.920259    | 1015.963768        | 19 |
| 41 | 4448.972210        | 2224.989743        | 4431.945661        | 2216.476469      | 4430.961645        | 2215.984461        | P    | <b>1934.887897</b> | 967.947587         | 1917.861348        | 959.434312       | 1916.877332    | 958.942304         | 18 |
| 42 | 4563.999153        | 2282.503215        | 4546.972604        | 2273.989940      | 4545.988588        | 2273.497932        | D    | 1837.835133        | 919.421205         | 1820.808584        | 910.907930       | 1819.824568    | 910.415922         | 17 |
| 43 | 4750.078466        | 2375.542871        | 4733.051917        | 2367.029597      | 4732.067901        | 2366.537589        | W    | <b>1722.808190</b> | 861.907733         | 1705.781641        | 853.394459       | 1704.797625    | 852.902451         | 16 |
| 44 | <b>4807.099930</b> | 2404.053603        | 4790.073381        | 2395.540329      | 4789.089365        | 2395.048321        | G    | 1536.728877        | 768.868077         | <b>1519.702328</b> | 760.354802       | 1518.718312    | 759.862794         | 15 |
| 45 | 4908.147609        | 2454.577443        | 4891.121060        | 2446.064168      | 4890.137044        | 2445.572160        | T    | 1479.707413        | 740.357345         | 1462.680864        | 731.844070       | 1461.696848    | 731.352062         | 14 |
| 46 | 5055.216023        | <b>2528.111650</b> | <b>5038.189474</b> | 2519.598375      | 5037.205458        | 2519.106367        | F    | 1378.659734        | 689.833505         | 1361.633185        | 681.320231       | 1360.649169    | 680.828223         | 13 |
| 47 | 5184.258616        | 2592.632946        | 5167.232067        | 2584.119672      | 5166.248051        | 2583.627664        | E    | 1231.591320        | <b>616.299298</b>  | 1214.564771        | 607.786024       | 1213.580755    | 607.294016         | 12 |
| 48 | 5313.301209        | 2657.154243        | 5296.274660        | 2648.640968      | 5295.290644        | <b>2648.148960</b> | E    | 1102.548727        | 551.778002         | 1085.522178        | 543.264727       | 1084.538162    | 542.772719         | 11 |
| 49 | 5412.369623        | 2706.688450        | 5395.343074        | 2698.175175      | 5394.359058        | 2697.683167        | V    | <b>973.506134</b>  | 487.256705         | 956.479585         | 478.743431       | 955.495569     | 478.251423         | 10 |
| 50 | 5499.401651        | 2750.204464        | 5482.375102        | 2741.691189      | 5481.391086        | 2741.199181        | S    | <b>874.437720</b>  | 437.722498         | <b>857.411171</b>  | 429.209224       | 856.427155     | 428.717216         | 9  |
| 51 | 5556.423115        | 2778.715196        | 5539.396566        | 2770.201921      | 5538.412550        | 2769.709913        | G    | <b>787.405692</b>  | 394.206484         | 770.379143         | 385.693210       | 769.395127     | 385.201202         | 8  |
| 52 | 5670.466042        | 2835.736659        | 5653.439493        | 2827.223385      | 5652.455477        | 2826.731377        | N    | <b>730.384228</b>  | 365.695752         | 713.357679         | 357.182478       | 712.373663     | 356.690470         | 7  |
| 53 | 5769.534456        | 2885.270866        | 5752.507907        | 2876.757592      | 5751.523891        | 2876.265584        | V    | <b>616.341301</b>  | 308.674289         | 599.314752         | 300.161014       | 598.330736     | 299.669006         | 6  |
| 54 | 5856.566484        | 2928.786880        | 5839.539935        | 2920.273606      | 5838.555919        | 2919.781598        | S    | <b>517.272887</b>  | <b>259.140082</b>  | 500.246338         | 250.626807       | 499.262322     | 250.134799         | 5  |
| 55 | 5953.619248        | 2977.313262        | 5936.592699        | 2968.799988      | 5935.608683        | 2968.307980        | P    | <b>430.240859</b>  | 215.624068         | <b>413.214310</b>  | 207.11           |                |                    |    |



# MASCOT Search Results

## Peptide View

MS/MS Fragmentation of **HQLYIDETVNSNIPTNLR**

Found in **FIBB\_HUMAN**, Fibrinogen beta chain OS=Homo sapiens GN=FGB PE=1 SV=2

Match to Query 50807: 2437.248042 from(813.423290,3+) rtinseconds(2178) index(52151)

Title: Locus:1.1.1.3401.21 File:"2013-07-02 CLN FXIII 30 min 3rd F 4.wiff"

Data file C:\Program Files (x86)\Matrix Science\Mascot Daemon\mgf\3 FXIII 30 min 3rd\mascot\_daemon\_merge.mgf

Click mouse within plot area to zoom in by factor of two about that point

Or, Plot from 100 to 1600 Da Full range

Label all possible matches  Label matches used for scoring

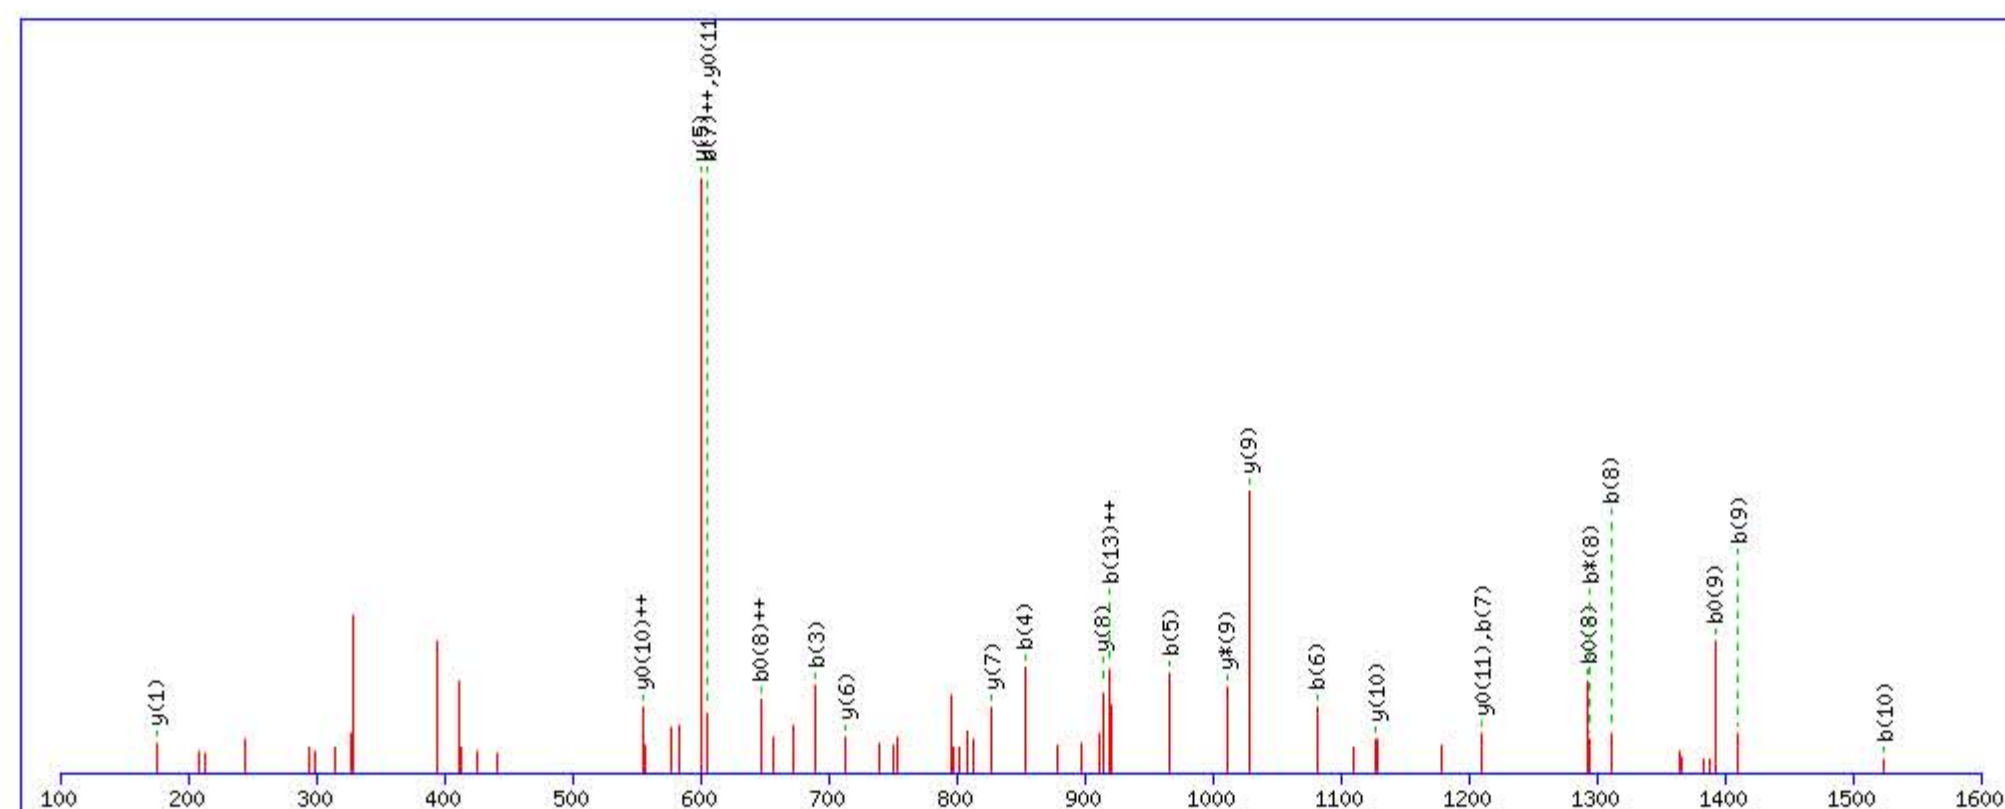

Monoisotopic mass of neutral peptide Mr(calc): 2437.242355

Fixed modifications: Carbamidomethyl (C) (apply to specified residues or termini only)

Variable modifications:

Q2 : Biotin:Thermo-21345 (Q)

Ions Score: 52 Expect: 1.9e-005

Matches : 25/186 fragment ions using 39 most intense peaks [\(help\)](#)

| #  | b                  | b <sup>++</sup>   | b <sup>*</sup>     | b <sup>+++</sup> | b <sup>0</sup>     | b <sup>0++</sup>  | Seq. | y                  | y <sup>++</sup> | y <sup>*</sup>     | y <sup>+++</sup> | y <sup>0</sup>     | y <sup>0++</sup>  | #  |
|----|--------------------|-------------------|--------------------|------------------|--------------------|-------------------|------|--------------------|-----------------|--------------------|------------------|--------------------|-------------------|----|
| 1  | 138.066188         | 69.536732         |                    |                  |                    |                   | H    |                    |                 |                    |                  |                    |                   | 18 |
| 2  | 577.291514         | 289.149395        | 560.264965         | 280.636121       |                    |                   | Q    | 2301.190744        | 1151.099010     | 2284.164195        | 1142.585735      | 2283.180179        | 1142.093727       | 17 |
| 3  | <b>690.375578</b>  | 345.691427        | 673.349029         | 337.178153       |                    |                   | L    | 1861.965418        | 931.486347      | 1844.938869        | 922.973073       | 1843.954853        | 922.481065        | 16 |
| 4  | <b>853.438907</b>  | 427.223092        | 836.412358         | 418.709817       |                    |                   | Y    | 1748.881354        | 874.944315      | 1731.854805        | 866.431041       | 1730.870789        | 865.939033        | 15 |
| 5  | <b>966.522971</b>  | 483.765124        | 949.496422         | 475.251849       |                    |                   | I    | 1585.818025        | 793.412651      | 1568.791476        | 784.899376       | 1567.807460        | 784.407368        | 14 |
| 6  | <b>1081.549914</b> | 541.278595        | 1064.523365        | 532.765321       | 1063.539349        | 532.273312        | D    | 1472.733961        | 736.870619      | 1455.707412        | 728.357344       | 1454.723396        | 727.865336        | 13 |
| 7  | <b>1210.592507</b> | <b>605.799892</b> | 1193.565958        | 597.286617       | 1192.581942        | 596.794609        | E    | 1357.707018        | 679.357147      | 1340.680469        | 670.843873       | 1339.696453        | 670.351865        | 12 |
| 8  | <b>1311.640186</b> | 656.323731        | <b>1294.613637</b> | 647.810457       | <b>1293.629621</b> | <b>647.318449</b> | T    | 1228.664425        | 614.835851      | 1211.637876        | 606.322576       | <b>1210.653860</b> | <b>605.830568</b> | 11 |
| 9  | <b>1410.708600</b> | 705.857938        | 1393.682051        | 697.344664       | <b>1392.698035</b> | 696.852656        | V    | <b>1127.616746</b> | 564.312011      | 1110.590197        | 555.798737       | 1109.606181        | <b>555.306729</b> | 10 |
| 10 | <b>1524.751527</b> | 762.879402        | 1507.724978        | 754.366127       | 1506.740962        | 753.874119        | N    | <b>1028.548332</b> | 514.777804      | <b>1011.521783</b> | 506.264530       | 1010.537767        | 505.772522        | 9  |
| 11 | 1611.783555        | 806.395416        | 1594.757006        | 797.882141       | 1593.772990        | 797.390133        | S    | <b>914.505405</b>  | 457.756341      | 897.478856         | 449.243066       | 896.494840         | 448.751058        | 8  |
| 12 | 1725.826482        | 863.416879        | 1708.799933        | 854.903605       | 1707.815917        | 854.411597        | N    | <b>827.473377</b>  | 414.240327      | 810.446828         | 405.727052       | 809.462812         | 405.235044        | 7  |
| 13 | 1838.910546        | <b>919.958911</b> | 1821.883997        | 911.445637       | 1820.899981        | 910.953629        | I    | <b>713.430450</b>  | 357.218863      | 696.403901         | 348.705589       | 695.419885         | 348.213581        | 6  |
| 14 | 1935.963310        | 968.485293        | 1918.936761        | 959.972019       | 1917.952745        | 959.480011        | P    | <b>600.346386</b>  | 300.676831      | 583.319837         | 292.163557       | 582.335821         | 291.671549        | 5  |
| 15 | 2037.010989        | 1019.009133       | 2019.984440        | 1010.495858      | 2019.000424        | 1010.003850       | T    | 503.293622         | 252.150449      | 486.267073         | 243.637175       | 485.283057         | 243.145167        | 4  |
| 16 | 2151.053916        | 1076.030596       | 2134.027367        | 1067.517321      | 2133.043351        | 1067.025313       | N    | 402.245943         | 201.626610      | 385.219394         | 193.113335       |                    |                   | 3  |
| 17 | 2264.137980        | 1132.572628       | 2247.111431        | 1124.059353      | 2246.127415        | 1123.567345       | L    | 288.203016         | 144.605146      | 271.176467         | 136.091872       |                    |                   | 2  |
| 18 |                    |                   |                    |                  |                    |                   | R    | <b>175.118952</b>  | 88.063114       | 158.092403         | 79.549839        |                    |                   | 1  |

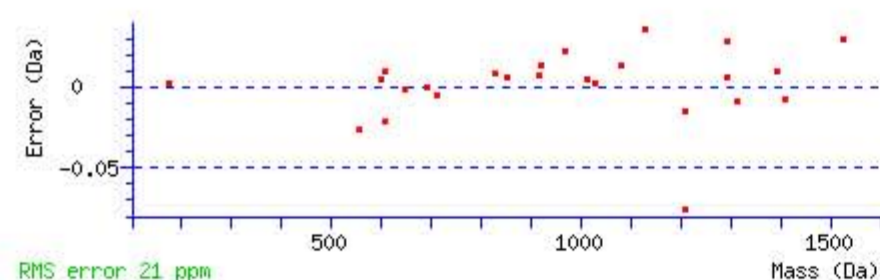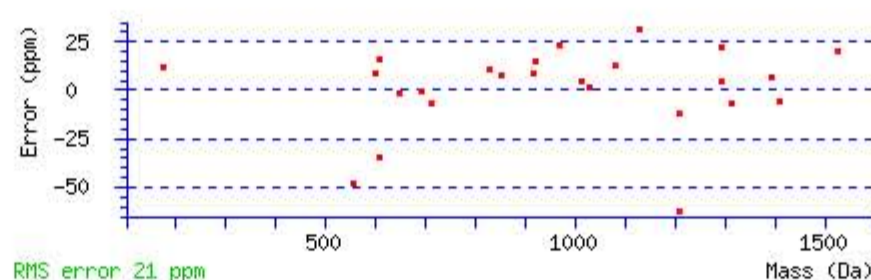

NCBI BLAST search of **HQLYIDETVNSNIPTNLR**

(Parameters: blastp, nr protein database, expect=20000, no filter, PAM30)

Other BLAST [web gateways](#)

All matches to this query

| Score | Mr(calc):   | Delta    | Sequence                               |
|-------|-------------|----------|----------------------------------------|
| 52.3  | 2437.242355 | 0.005687 | <a href="#">HQLYIDETVNSNIPTNLR</a>     |
| 1.8   | 2437.246399 | 0.001643 | <a href="#">LSKLASNGTPMGTFAPLWEVFR</a> |
| 0.5   | 2437.216736 | 0.031306 | <a href="#">MIEPESVGDLLRQQAQ</a>       |



# MASCOT Search Results

## Peptide View

MS/MS Fragmentation of **LTIGEGQQHHLGGAK**

Found in **FIBG\_HUMAN**, Fibrinogen gamma chain OS=Homo sapiens GN=FGG PE=1 SV=3

Match to Query 40388: 1855.962372 from(619.661400,3+) rtinseconds(1556) index(48369)

Title: Locus:1.1.1.3185.8 File:"2013-07-02 CLN FXIII 30 min 3rd F 4.wiff"

Data file C:\Program Files (x86)\Matrix Science\Mascot Daemon\mgf\3 FXIII 30 min 3rd\mascot\_daemon\_merge.mgf

Click mouse within plot area to zoom in by factor of two about that point

Or, Plot from  to  Da

Label all possible matches  Label matches used for scoring

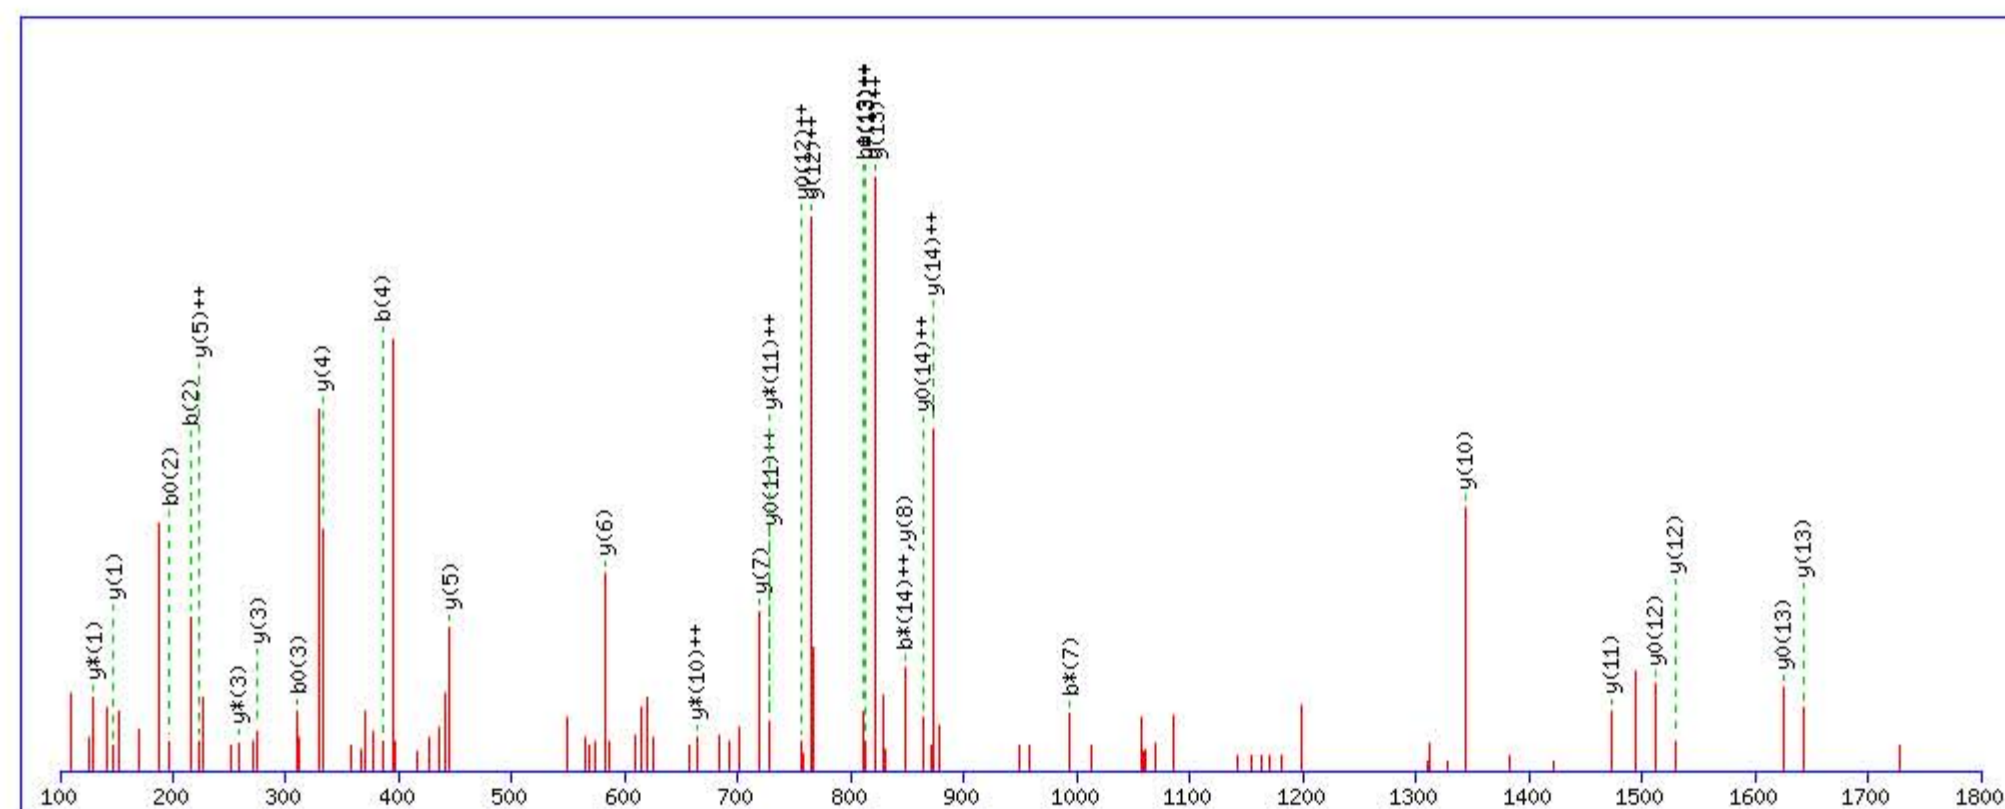

Monoisotopic mass of neutral peptide Mr(calc): 1855.972687

Fixed modifications: Carbamidomethyl (C) (apply to specified residues or termini only)

Variable modifications:

Q7 : Biotin:Thermo-21345 (Q)

Ions Score: 38 Expect: 0.0011

Matches : 32/134 fragment ions using 96 most intense peaks [\(help\)](#)

| #  | b                 | b <sup>++</sup> | b <sup>*</sup>    | b <sup>*++</sup>  | b <sup>0</sup>    | b <sup>0++</sup>  | Seq. | y                  | y <sup>++</sup>   | y <sup>*</sup>    | y <sup>*++</sup>  | y <sup>0</sup>     | y <sup>0++</sup>  | #  |
|----|-------------------|-----------------|-------------------|-------------------|-------------------|-------------------|------|--------------------|-------------------|-------------------|-------------------|--------------------|-------------------|----|
| 1  | 114.091340        | 57.549308       |                   |                   |                   |                   | L    |                    |                   |                   |                   |                    |                   | 15 |
| 2  | <b>215.139019</b> | 108.073147      |                   |                   | 197.128454        | 99.067865         | T    | 1743.895902        | <b>872.451589</b> | 1726.869353       | 863.938314        | 1725.885337        | <b>863.446306</b> | 14 |
| 3  | 328.223083        | 164.615179      |                   |                   | <b>310.212518</b> | 155.609897        | I    | <b>1642.848223</b> | <b>821.927749</b> | 1625.821674       | <b>813.414475</b> | <b>1624.837658</b> | 812.922467        | 13 |
| 4  | <b>385.244547</b> | 193.125911      |                   |                   | 367.233982        | 184.120629        | G    | <b>1529.764159</b> | <b>765.385717</b> | 1512.737610       | 756.872443        | <b>1511.753594</b> | <b>756.380435</b> | 12 |
| 5  | 514.287140        | 257.647208      |                   |                   | 496.276575        | 248.641926        | E    | <b>1472.742695</b> | 736.874985        | 1455.716146       | <b>728.361711</b> | 1454.732130        | <b>727.869703</b> | 11 |
| 6  | 571.308604        | 286.157940      |                   |                   | 553.298039        | 277.152658        | G    | <b>1343.700102</b> | 672.353689        | 1326.673553       | <b>663.840414</b> |                    |                   | 10 |
| 7  | 1010.533930       | 505.770603      | <b>993.507381</b> | 497.257329        | 992.523365        | 496.765321        | Q    | 1286.678638        | 643.842957        | 1269.652089       | 635.329682        |                    |                   | 9  |
| 8  | 1138.592508       | 569.799892      | 1121.565959       | 561.286618        | 1120.581943       | 560.794609        | Q    | <b>847.453312</b>  | 424.230294        | 830.426763        | 415.717019        |                    |                   | 8  |
| 9  | 1275.651420       | 638.329348      | 1258.624871       | 629.816074        | 1257.640855       | 629.324065        | H    | <b>719.394734</b>  | 360.201005        | 702.368185        | 351.687730        |                    |                   | 7  |
| 10 | 1412.710332       | 706.858804      | 1395.683783       | 698.345530        | 1394.699767       | 697.853521        | H    | <b>582.335822</b>  | 291.671549        | 565.309273        | 283.158274        |                    |                   | 6  |
| 11 | 1525.794396       | 763.400836      | 1508.767847       | 754.887561        | 1507.783831       | 754.395553        | L    | <b>445.276910</b>  | <b>223.142093</b> | 428.250361        | 214.628818        |                    |                   | 5  |
| 12 | 1582.815860       | 791.911568      | 1565.789311       | 783.398293        | 1564.805295       | 782.906285        | G    | <b>332.192846</b>  | 166.600061        | 315.166297        | 158.086786        |                    |                   | 4  |
| 13 | 1639.837324       | 820.422300      | 1622.810775       | 811.909025        | 1621.826759       | <b>811.417017</b> | G    | <b>275.171382</b>  | 138.089329        | <b>258.144833</b> | 129.576054        |                    |                   | 3  |
| 14 | 1710.874438       | 855.940857      | 1693.847889       | <b>847.427582</b> | 1692.863873       | 846.935574        | A    | 218.149918         | 109.578597        | 201.123369        | 101.065322        |                    |                   | 2  |
| 15 |                   |                 |                   |                   |                   |                   | K    | <b>147.112804</b>  | 74.060040         | <b>130.086255</b> | 65.546765         |                    |                   | 1  |

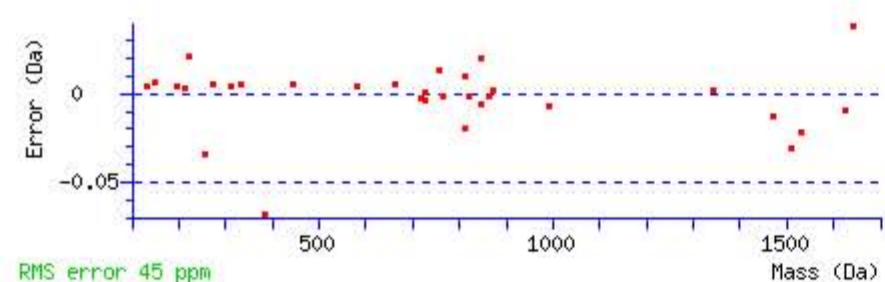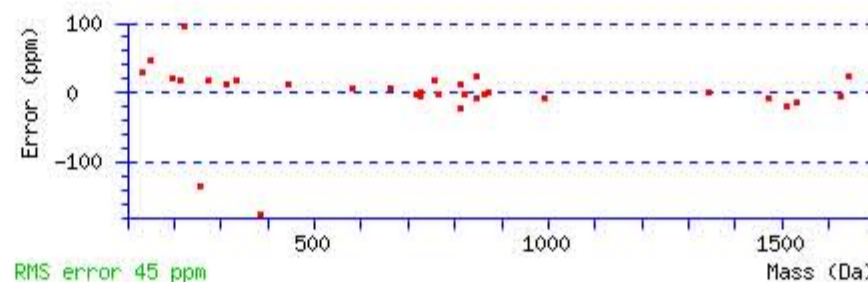

NCBI BLAST search of **LTIGEGQQHHLGGAK**

(Parameters: blastp, nr protein database, expect=20000, no filter, PAM30)

Other BLAST [web gateways](#)

All matches to this query

| Score | Mr(calc):   | Delta     | Sequence                          |
|-------|-------------|-----------|-----------------------------------|
| 38.3  | 1855.972687 | -0.010315 | <a href="#">LTIGEGQQHHLGGAK</a>   |
| 32.8  | 1855.972687 | -0.010315 | <a href="#">LTIGEGQQHHLGGAK</a>   |
| 6.6   | 1855.979202 | -0.016830 | <a href="#">ITIVENVGSVEGLAYHR</a> |



# Mascot Search Results

## Peptide View

MS/MS Fragmentation of **LTIGEGQQHHLGGAK**

Found in **FIBG\_HUMAN**, Fibrinogen gamma chain OS=Homo sapiens GN=FGG PE=1 SV=3

Match to Query 40393: 1855.964168 from(928.989360,2+) rtinseconds(1502) index(16912)

Title: Locus:1.1.1.3085.14 File:"2013-07-02 CLN FXIII 30 min 3rd F 2.wiff"

Data file C:\Program Files (x86)\Matrix Science\Mascot Daemon\mgf3 FXIII 30 min 3rd\mascot\_daemon\_merge.mgf

Click mouse within plot area to zoom in by factor of two about that point

Or, Plot from  to  Da

Label all possible matches  Label matches used for scoring

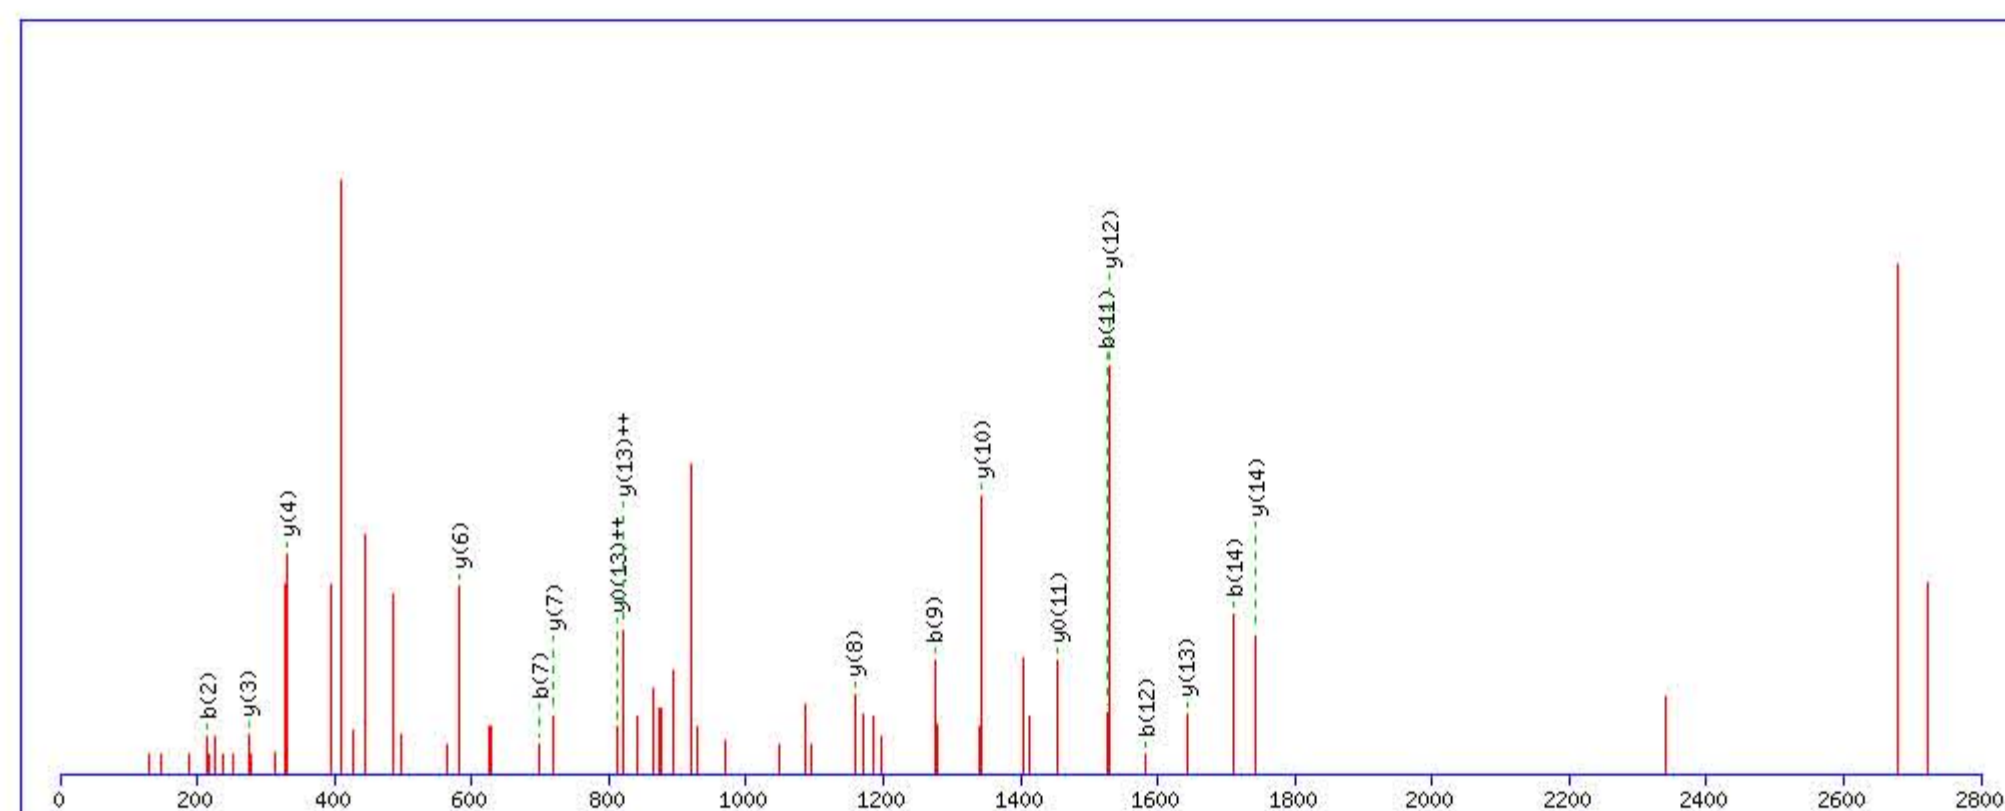

Monoisotopic mass of neutral peptide Mr(calc): 1855.972687

Fixed modifications: Carbamidomethyl (C) (apply to specified residues or termini only)

Variable modifications:

Q8 : Biotin:Thermo-21345 (Q)

Ions Score: 56 Expect: 6.3e-005

Matches : 18/134 fragment ions using 32 most intense peaks [\(help\)](#)

| #  | b                  | b <sup>++</sup> | b <sup>+</sup> | b <sup>+++</sup> | b <sup>0</sup> | b <sup>0++</sup> | Seq. | y                  | y <sup>++</sup>   | y <sup>+</sup> | y <sup>+++</sup> | y <sup>0</sup>     | y <sup>0++</sup>  | #  |
|----|--------------------|-----------------|----------------|------------------|----------------|------------------|------|--------------------|-------------------|----------------|------------------|--------------------|-------------------|----|
| 1  | 114.091340         | 57.549308       |                |                  |                |                  | L    |                    |                   |                |                  |                    |                   | 15 |
| 2  | <b>215.139019</b>  | 108.073147      |                |                  | 197.128454     | 99.067865        | T    | <b>1743.895902</b> | 872.451589        | 1726.869353    | 863.938314       | 1725.885337        | 863.446306        | 14 |
| 3  | 328.223083         | 164.615179      |                |                  | 310.212518     | 155.609897       | I    | <b>1642.848223</b> | <b>821.927749</b> | 1625.821674    | 813.414475       | 1624.837658        | <b>812.922467</b> | 13 |
| 4  | 385.244547         | 193.125911      |                |                  | 367.233982     | 184.120629       | G    | <b>1529.764159</b> | 765.385717        | 1512.737610    | 756.872443       | 1511.753594        | 756.380435        | 12 |
| 5  | 514.287140         | 257.647208      |                |                  | 496.276575     | 248.641926       | E    | 1472.742695        | 736.874985        | 1455.716146    | 728.361711       | <b>1454.732130</b> | 727.869703        | 11 |
| 6  | 571.308604         | 286.157940      |                |                  | 553.298039     | 277.152658       | G    | <b>1343.700102</b> | 672.353689        | 1326.673553    | 663.840414       |                    |                   | 10 |
| 7  | <b>699.367182</b>  | 350.187229      | 682.340633     | 341.673955       | 681.356617     | 341.181947       | Q    | 1286.678638        | 643.842957        | 1269.652089    | 635.329682       |                    |                   | 9  |
| 8  | 1138.592508        | 569.799892      | 1121.565959    | 561.286618       | 1120.581943    | 560.794609       | Q    | <b>1158.620060</b> | 579.813668        | 1141.593511    | 571.300393       |                    |                   | 8  |
| 9  | <b>1275.651420</b> | 638.329348      | 1258.624871    | 629.816074       | 1257.640855    | 629.324065       | H    | <b>719.394734</b>  | 360.201005        | 702.368185     | 351.687730       |                    |                   | 7  |
| 10 | 1412.710332        | 706.858804      | 1395.683783    | 698.345530       | 1394.699767    | 697.853521       | H    | <b>582.335822</b>  | 291.671549        | 565.309273     | 283.158274       |                    |                   | 6  |
| 11 | <b>1525.794396</b> | 763.400836      | 1508.767847    | 754.887561       | 1507.783831    | 754.395553       | L    | 445.276910         | 223.142093        | 428.250361     | 214.628818       |                    |                   | 5  |
| 12 | <b>1582.815860</b> | 791.911568      | 1565.789311    | 783.398293       | 1564.805295    | 782.906285       | G    | <b>332.192846</b>  | 166.600061        | 315.166297     | 158.086786       |                    |                   | 4  |
| 13 | 1639.837324        | 820.422300      | 1622.810775    | 811.909025       | 1621.826759    | 811.417017       | G    | <b>275.171382</b>  | 138.089329        | 258.144833     | 129.576054       |                    |                   | 3  |
| 14 | <b>1710.874438</b> | 855.940857      | 1693.847889    | 847.427582       | 1692.863873    | 846.935574       | A    | 218.149918         | 109.578597        | 201.123369     | 101.065322       |                    |                   | 2  |
| 15 |                    |                 |                |                  |                |                  | K    | 147.112804         | 74.060040         | 130.086255     | 65.546765        |                    |                   | 1  |

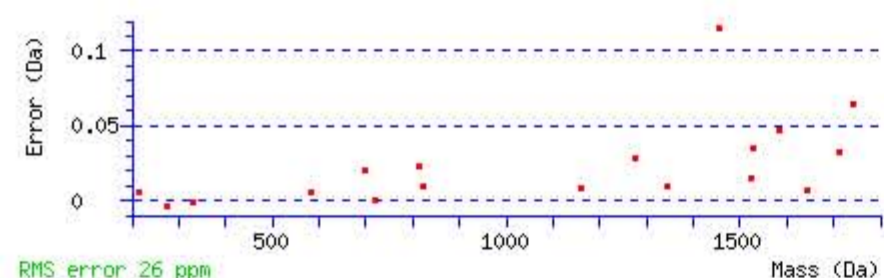

RMS error 26 ppm

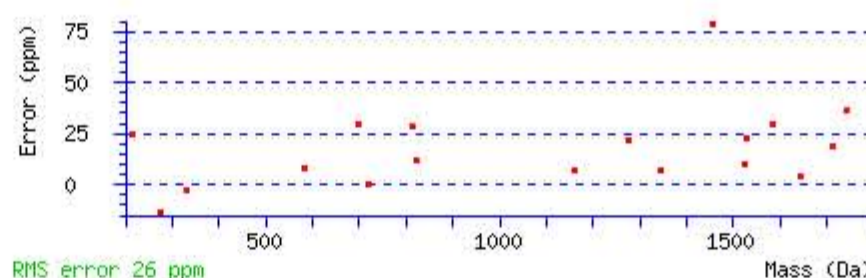

RMS error 26 ppm

NCBI BLAST search of **LTIGEGQQHHLGGAK**

(Parameters: blastp, nr protein database, expect=20000, no filter, PAM30)

Other BLAST [web gateways](#)

All matches to this query

| Score | Mr(calc):   | Delta     | Sequence                           |
|-------|-------------|-----------|------------------------------------|
| 56.0  | 1855.972687 | -0.008519 | <a href="#">LTIGEGQQHHLGGAK</a>    |
| 42.7  | 1855.972687 | -0.008519 | <a href="#">LTIGEGQQHHLGGAK</a>    |
| 10.6  | 1855.989944 | -0.025776 | <a href="#">MLSITPSQLENGKK</a>     |
| 6.2   | 1855.963928 | 0.000240  | <a href="#">SLEDLKATLNSGPGAQQK</a> |
| 3.0   | 1855.950195 | 0.013973  | <a href="#">LLSSLDIDHNQYK</a>      |
| 1.3   | 1855.978714 | -0.014546 | <a href="#">LTMPTDEEKQK</a>        |
| 1.2   | 1855.979202 | -0.015034 | <a href="#">ITIVENVGSVEGLAYHR</a>  |
| 0.9   | 1855.946182 | 0.017986  | <a href="#">LADSDQASKVQQQK</a>     |
| 0.9   | 1855.946182 | 0.017986  | <a href="#">LADSDQASKVQQQK</a>     |



# MASCOT Search Results

## Peptide View

MS/MS Fragmentation of **LTIGEGQQHHLGGAK**

Found in **FIBG\_HUMAN**, Fibrinogen gamma chain OS=Homo sapiens GN=FGG PE=1 SV=3

Match to Query 46593: 2167.156992 from(723.392940,3+) rtinseconds(1811) index(34031)

Title: Locus:1.1.1.3264.14 File:"2013-07-02 CLN FXIII 30 min 3rd F 3.wiff"

Data file C:\Program Files (x86)\Matrix Science\Mascot Daemon\mgf3 FXIII 30 min 3rd\mascot\_daemon\_merge.mgf

Click mouse within plot area to zoom in by factor of two about that point

Or, Plot from  to  Da

Label all possible matches  Label matches used for scoring

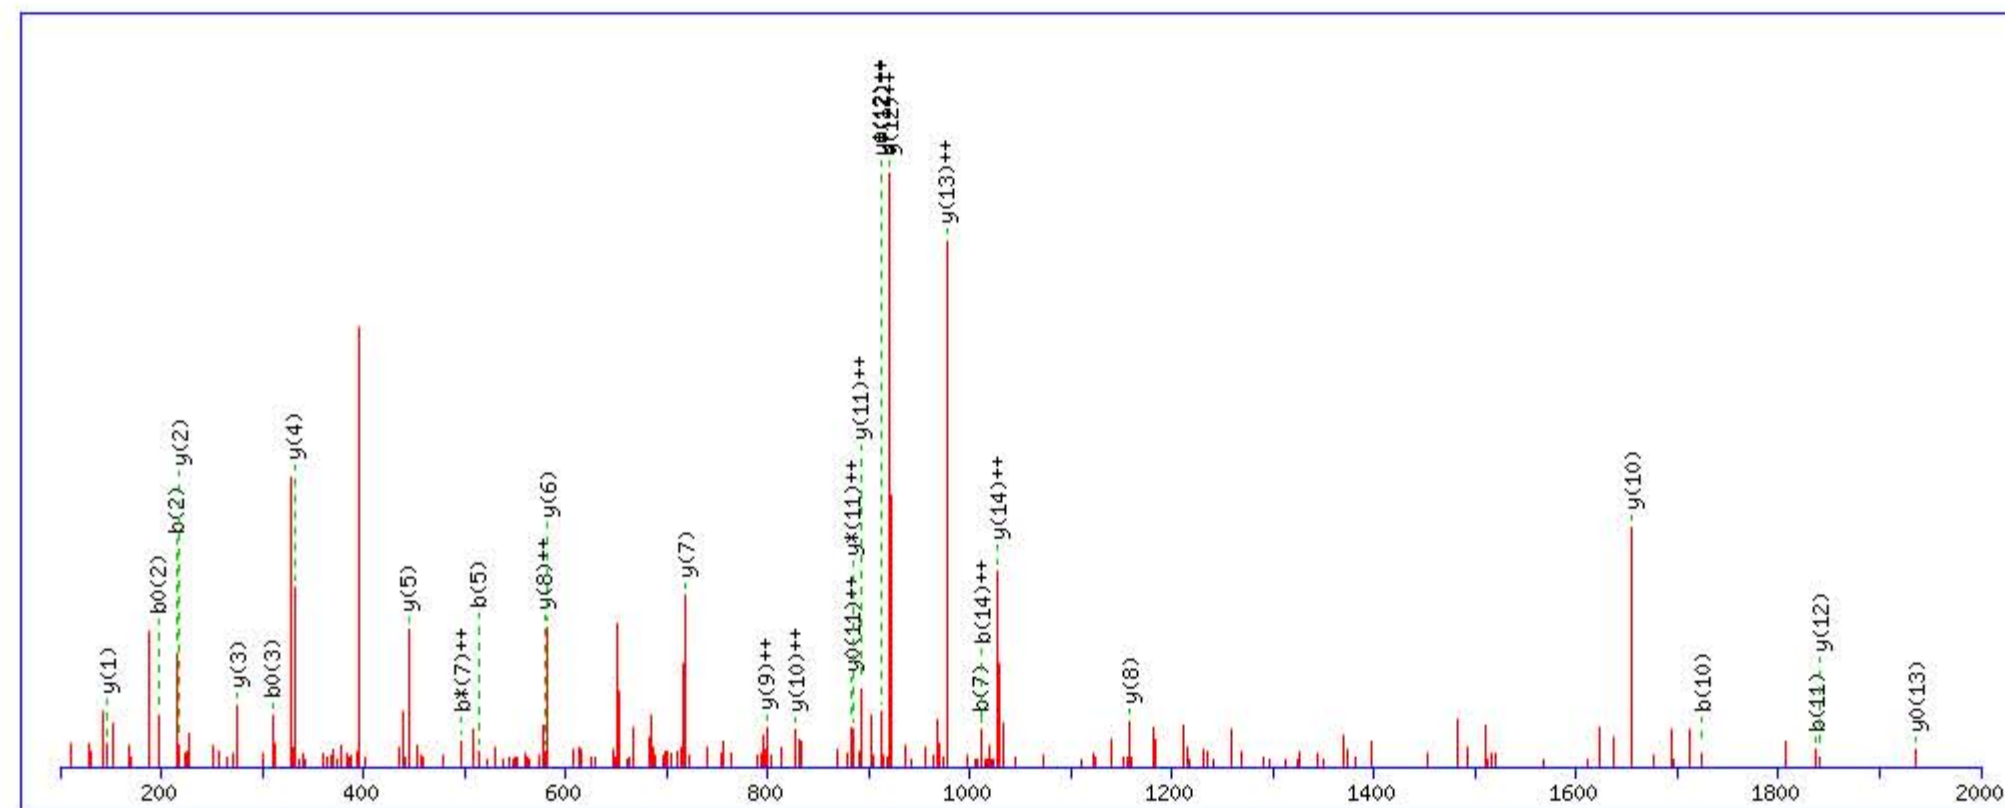

Monoisotopic mass of neutral peptide Mr(calc): 2167.139435

Fixed modifications: Carbamidomethyl (C) (apply to specified residues or termini only)

Variable modifications:

Q7 : Biotin:Thermo-21345 (Q)

Q8 : Biotin:Thermo-21345 (Q)

Ions Score: 31 Expect: 0.017

Matches : 31/134 fragment ions using 99 most intense peaks [\(help\)](#)

| #  | b                  | b <sup>++</sup>    | b <sup>+</sup> | b <sup>*++</sup>  | b <sup>0</sup>    | b <sup>0++</sup> | Seq. | y                  | y <sup>++</sup>    | y <sup>+</sup> | y <sup>*++</sup>  | y <sup>0</sup>     | y <sup>0++</sup>  | #  |
|----|--------------------|--------------------|----------------|-------------------|-------------------|------------------|------|--------------------|--------------------|----------------|-------------------|--------------------|-------------------|----|
| 1  | 114.091340         | 57.549308          |                |                   |                   |                  | L    |                    |                    |                |                   |                    |                   | 15 |
| 2  | <b>215.139019</b>  | 108.073147         |                |                   | <b>197.128454</b> | 99.067865        | T    | 2055.062650        | <b>1028.034963</b> | 2038.036101    | 1019.521688       | 2037.052085        | 1019.029680       | 14 |
| 3  | 328.223083         | 164.615179         |                |                   | <b>310.212518</b> | 155.609897       | I    | 1954.014971        | <b>977.511123</b>  | 1936.988422    | 968.997849        | <b>1936.004406</b> | 968.505841        | 13 |
| 4  | 385.244547         | 193.125911         |                |                   | 367.233982        | 184.120629       | G    | <b>1840.930907</b> | <b>920.969091</b>  | 1823.904358    | <b>912.455817</b> | 1822.920342        | <b>911.963809</b> | 12 |
| 5  | <b>514.287140</b>  | 257.647208         |                |                   | 496.276575        | 248.641926       | E    | 1783.909443        | <b>892.458359</b>  | 1766.882894    | <b>883.945085</b> | 1765.898878        | <b>883.453077</b> | 11 |
| 6  | 571.308604         | 286.157940         |                |                   | 553.298039        | 277.152658       | G    | <b>1654.866850</b> | <b>827.937063</b>  | 1637.840301    | 819.423788        |                    |                   | 10 |
| 7  | <b>1010.533930</b> | 505.770603         | 993.507381     | <b>497.257329</b> | 992.523365        | 496.765321       | Q    | 1597.845386        | <b>799.426331</b>  | 1580.818837    | 790.913056        |                    |                   | 9  |
| 8  | 1449.759256        | 725.383266         | 1432.732707    | 716.869992        | 1431.748691       | 716.377984       | Q    | <b>1158.620060</b> | <b>579.813668</b>  | 1141.593511    | 571.300393        |                    |                   | 8  |
| 9  | 1586.818168        | 793.912722         | 1569.791619    | 785.399448        | 1568.807603       | 784.907440       | H    | <b>719.394734</b>  | 360.201005         | 702.368185     | 351.687730        |                    |                   | 7  |
| 10 | <b>1723.877080</b> | 862.442178         | 1706.850531    | 853.928904        | 1705.866515       | 853.436895       | H    | <b>582.335822</b>  | 291.671549         | 565.309273     | 283.158274        |                    |                   | 6  |
| 11 | <b>1836.961144</b> | 918.984210         | 1819.934595    | 910.470936        | 1818.950579       | 909.978927       | L    | <b>445.276910</b>  | 223.142093         | 428.250361     | 214.628818        |                    |                   | 5  |
| 12 | 1893.982608        | 947.494942         | 1876.956059    | 938.981667        | 1875.972043       | 938.489659       | G    | <b>332.192846</b>  | 166.600061         | 315.166297     | 158.086786        |                    |                   | 4  |
| 13 | 1951.004072        | 976.005674         | 1933.977523    | 967.492399        | 1932.993507       | 967.000391       | G    | <b>275.171382</b>  | 138.089329         | 258.144833     | 129.576054        |                    |                   | 3  |
| 14 | 2022.041186        | <b>1011.524231</b> | 2005.014637    | 1003.010956       | 2004.030621       | 1002.518948      | A    | <b>218.149918</b>  | 109.578597         | 201.123369     | 101.065322        |                    |                   | 2  |
| 15 |                    |                    |                |                   |                   |                  | K    | <b>147.112804</b>  | 74.060040          | 130.086255     | 65.546765         |                    |                   | 1  |

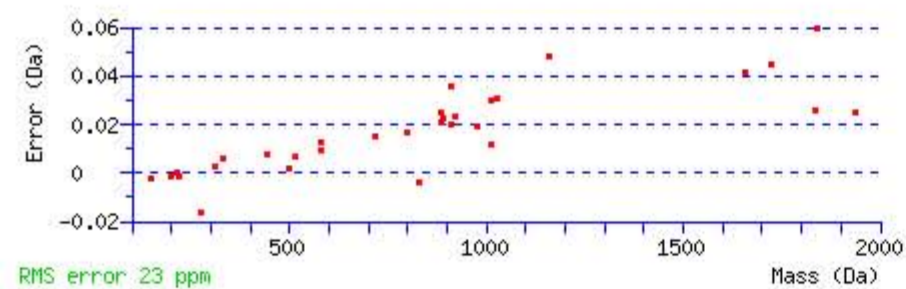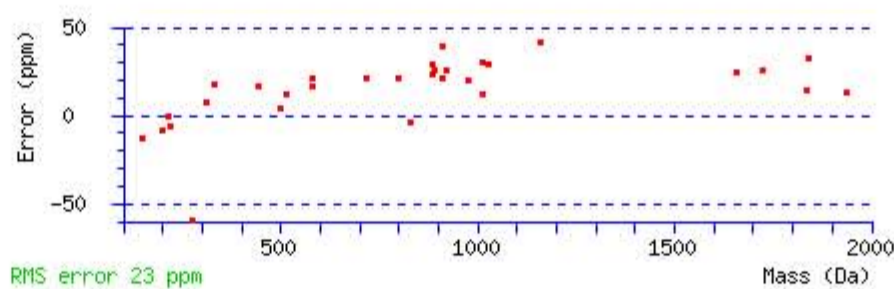

NCBI BLAST search of **LTIGEGQQHHLGGAK**

(Parameters: blastp, nr protein database, expect=20000, no filter, PAM30)

Other BLAST [web gateways](#)

All matches to this query

| Score | Mr(calc):   | Delta    | Sequence               |
|-------|-------------|----------|------------------------|
| 31.3  | 2167.139435 | 0.017557 | <b>LTIGEGQQHHLGGAK</b> |

Mascot: <http://www.matrixscience.com/>



# MASCOT Search Results

## Peptide View

MS/MS Fragmentation of **RPGGEPSPGTTGQSYNQYSQR**

Found in **FINC\_HUMAN**, Fibronectin OS=Homo sapiens GN=FN1 PE=1 SV=4

Match to Query 43997: 3017.411562 from(1006.811130,3+) rtinseconds(1826) index(34105)

Title: Locus:1.1.1.3269.8 File:"2013-07-02 CLN FXIII 30 min 3rd F 3.wiff"

Data file C:\Program Files (x86)\Matrix Science\Mascot Daemon\mgf\3 FXIII 30 min 3rd\mascot\_daemon\_merge.mgf

Click mouse within plot area to zoom in by factor of two about that point

Or, Plot from  to  Da

Label all possible matches  Label matches used for scoring

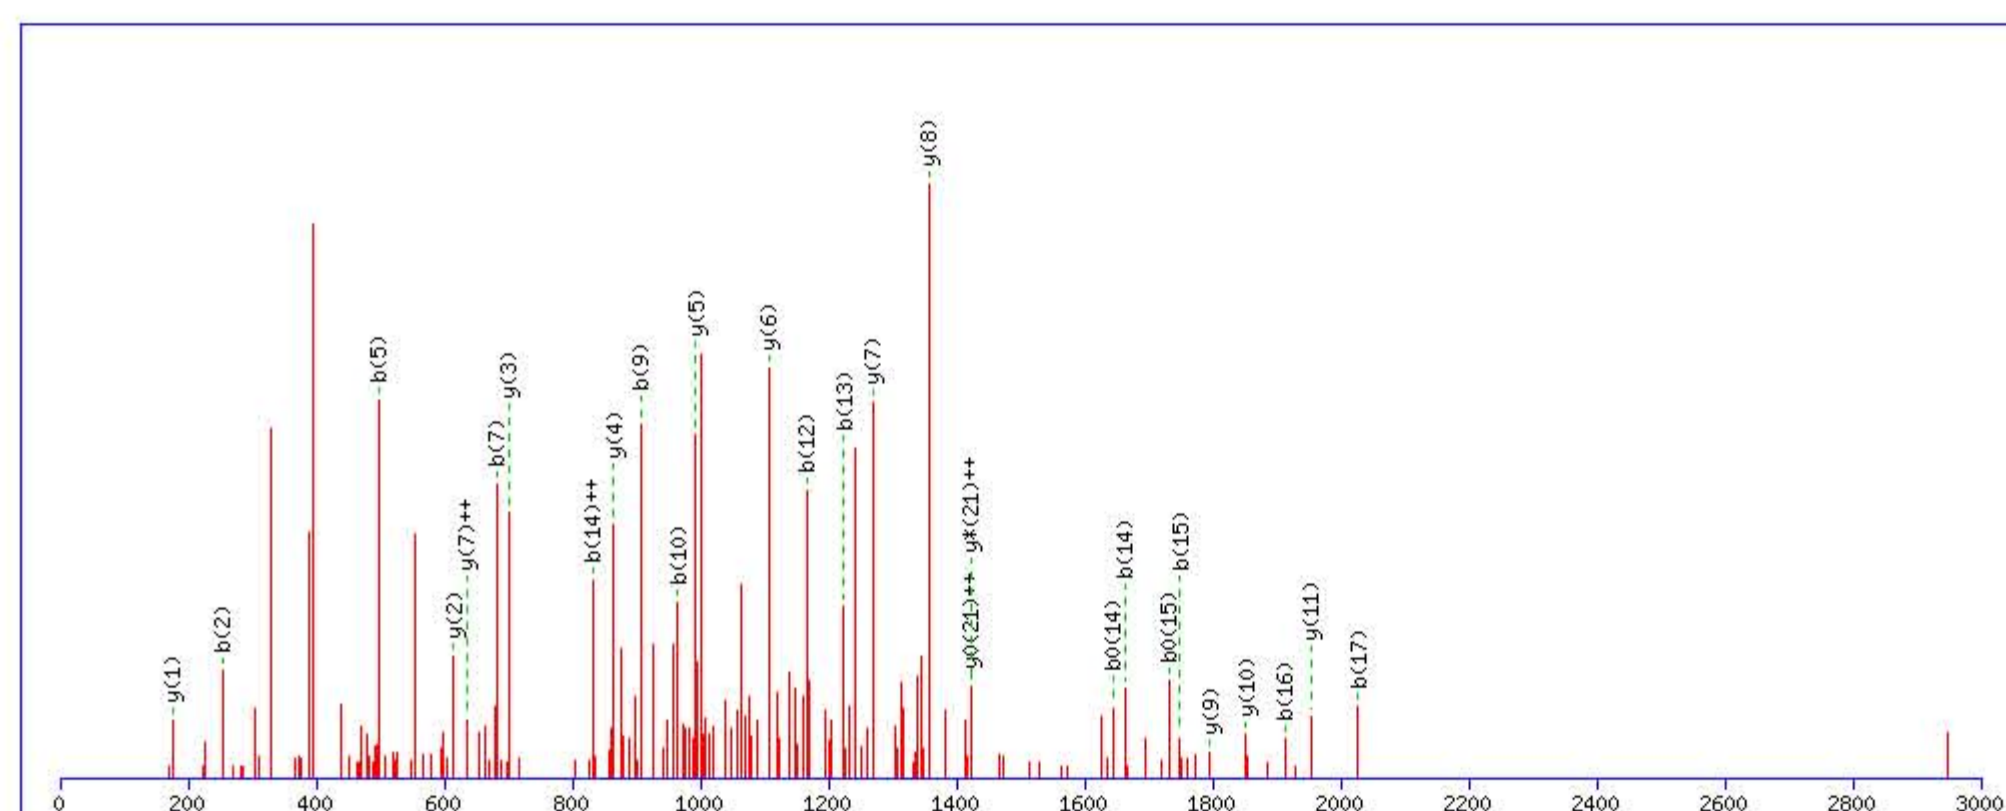

Monoisotopic mass of neutral peptide Mr(calc): 3017.412369

Fixed modifications: Carbamidomethyl (C) (apply to specified residues or termini only)

Variable modifications:

Q14 : Biotin:Thermo-21345 (Q)

Q21 : Biotin:Thermo-21345 (Q)

Ions Score: 92 Expect: 1.5e-008

Matches : 29/240 fragment ions using 38 most intense peaks [\(help\)](#)

| #  | b                  | b <sup>++</sup>    | b <sup>+</sup> | b <sup>+++</sup> | b <sup>0</sup>     | b <sup>0++</sup> | Seq. | y                  | y <sup>++</sup>   | y <sup>+</sup> | y <sup>+++</sup>   | y <sup>0</sup> | y <sup>0++</sup>   | #  |
|----|--------------------|--------------------|----------------|------------------|--------------------|------------------|------|--------------------|-------------------|----------------|--------------------|----------------|--------------------|----|
| 1  | 157.108387         | 79.057831          | 140.081838     | 70.544557        |                    |                  | R    |                    |                   |                |                    |                |                    | 22 |
| 2  | <b>254.161151</b>  | 127.584213         | 237.134602     | 119.070939       |                    |                  | P    | 2862.318543        | 1431.662909       | 2845.291994    | <b>1423.149635</b> | 2844.307978    | <b>1422.657627</b> | 21 |
| 3  | 311.182615         | 156.094945         | 294.156066     | 147.581671       |                    |                  | G    | 2765.265779        | 1383.136527       | 2748.239230    | 1374.623253        | 2747.255214    | 1374.131245        | 20 |
| 4  | 368.204079         | 184.605677         | 351.177530     | 176.092403       |                    |                  | G    | 2708.244315        | 1354.625795       | 2691.217766    | 1346.112521        | 2690.233750    | 1345.620513        | 19 |
| 5  | <b>497.246672</b>  | 249.126974         | 480.220123     | 240.613700       | 479.236107         | 240.121692       | E    | 2651.222851        | 1326.115063       | 2634.196302    | 1317.601789        | 2633.212286    | 1317.109781        | 18 |
| 6  | 594.299436         | 297.653356         | 577.272887     | 289.140082       | 576.288871         | 288.648074       | P    | 2522.180258        | 1261.593767       | 2505.153709    | 1253.080492        | 2504.169693    | 1252.588484        | 17 |
| 7  | <b>681.331464</b>  | 341.169370         | 664.304915     | 332.656095       | 663.320899         | 332.164087       | S    | 2425.127494        | 1213.067385       | 2408.100945    | 1204.554110        | 2407.116929    | 1204.062102        | 16 |
| 8  | 778.384228         | 389.695752         | 761.357679     | 381.182478       | 760.373663         | 380.690470       | P    | 2338.095466        | 1169.551371       | 2321.068917    | 1161.038096        | 2320.084901    | 1160.546088        | 15 |
| 9  | <b>907.426821</b>  | 454.217049         | 890.400272     | 445.703774       | 889.416256         | 445.211766       | E    | 2241.042702        | 1121.024989       | 2224.016153    | 1112.511714        | 2223.032137    | 1112.019706        | 14 |
| 10 | <b>964.448285</b>  | 482.727781         | 947.421736     | 474.214506       | 946.437720         | 473.722498       | G    | 2112.000109        | 1056.503692       | 2094.973560    | 1047.990418        | 2093.989544    | 1047.498410        | 13 |
| 11 | 1065.495964        | 533.251620         | 1048.469415    | 524.738346       | 1047.485399        | 524.246337       | T    | 2054.978645        | 1027.992960       | 2037.952096    | 1019.479686        | 2036.968080    | 1018.987678        | 12 |
| 12 | <b>1166.543643</b> | 583.775460         | 1149.517094    | 575.262185       | 1148.533078        | 574.770177       | T    | <b>1953.930966</b> | 977.469121        | 1936.904417    | 968.955847         | 1935.920401    | 968.463839         | 11 |
| 13 | <b>1223.565107</b> | 612.286191         | 1206.538558    | 603.772917       | 1205.554542        | 603.280909       | G    | <b>1852.883287</b> | 926.945282        | 1835.856738    | 918.432007         | 1834.872722    | 917.939999         | 10 |
| 14 | <b>1662.790433</b> | <b>831.898854</b>  | 1645.763884    | 823.385580       | <b>1644.779868</b> | 822.893572       | Q    | <b>1795.861823</b> | 898.434550        | 1778.835274    | 889.921275         | 1777.851258    | 889.429267         | 9  |
| 15 | <b>1749.822461</b> | 875.414869         | 1732.795912    | 866.901594       | <b>1731.811896</b> | 866.409586       | S    | <b>1356.636497</b> | 678.821887        | 1339.609948    | 670.308612         | 1338.625932    | 669.816604         | 8  |
| 16 | <b>1912.885790</b> | 956.946533         | 1895.859241    | 948.433259       | 1894.875225        | 947.941251       | Y    | <b>1269.604469</b> | <b>635.305873</b> | 1252.577920    | 626.792598         | 1251.593904    | 626.300590         | 7  |
| 17 | <b>2026.928717</b> | 1013.967997        | 2009.902168    | 1005.454722      | 2008.918152        | 1004.962714      | N    | <b>1106.541140</b> | 553.774208        | 1089.514591    | 545.260934         | 1088.530575    | 544.768926         | 6  |
| 18 | 2154.987295        | 1077.997285        | 2137.960746    | 1069.484011      | 2136.976730        | 1068.992003      | Q    | <b>992.498213</b>  | 496.752745        | 975.471664     | 488.239470         | 974.487648     | 487.747462         | 5  |
| 19 | 2318.050624        | 1159.528950        | 2301.024075    | 1151.015675      | 2300.040059        | 1150.523667      | Y    | <b>864.439635</b>  | 432.723456        | 847.413086     | 424.210181         | 846.429070     | 423.718173         | 4  |
| 20 | 2405.082652        | 1203.044964        | 2388.056103    | 1194.531689      | 2387.072087        | 1194.039681      | S    | <b>701.376306</b>  | 351.191791        | 684.349757     | 342.678517         | 683.365741     | 342.186509         | 3  |
| 21 | 2844.307978        | <b>1422.657627</b> | 2827.281429    | 1414.144353      | 2826.297413        | 1413.652345      | Q    | <b>614.344278</b>  | 307.675777        | 597.317729     | 299.162503         |                |                    | 2  |
| 22 |                    |                    |                |                  |                    |                  | R    | <b>175.118952</b>  | 88.063114         | 158.092403     | 79.549839          |                |                    | 1  |

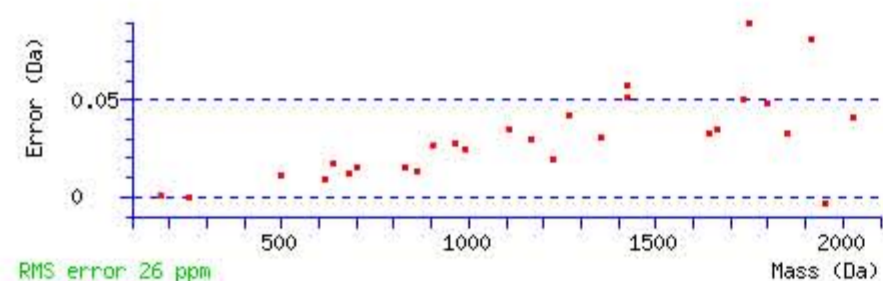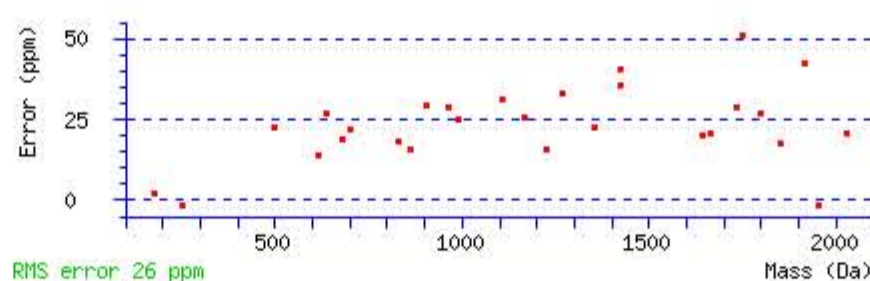

NCBI BLAST search of **RPGGEPSPGTTGQSYNQYSQR**

(Parameters: blastp, nr protein database, expect=20000, no filter, PAM30)

Other BLAST [web gateways](#)

All matches to this query

| Score | Mr(calc):   | Delta     | Sequence                              |
|-------|-------------|-----------|---------------------------------------|
| 91.7  | 3017.412369 | -0.000807 | <a href="#">RPGGEPSPGTTGQSYNQYSQR</a> |
| 91.6  | 3017.412369 | -0.000807 | <a href="#">RPGGEPSPGTTGQSYNQYSQR</a> |
| 30.9  | 3017.412369 | -0.000807 | <a href="#">RPGGEPSPGTTGQSYNQYSQR</a> |



# MASCOT Search Results

## Peptide View

MS/MS Fragmentation of **HTSVQTTSSGSGPFTDVR**

Found in **FINC\_HUMAN**, Fibronectin OS=Homo sapiens GN=FN1 PE=1 SV=4

Match to Query 46720: 2174.058552 from(725.693460,3+) rtinseconds(1717) index(33470)

Title: Locus:1.1.1.3231.10 File:"2013-07-02 CLN FXIII 30 min 3rd F 3.wiff"

Data file C:\Program Files (x86)\Matrix Science\Mascot Daemon\mgf3 FXIII 30 min 3rd\mascot\_daemon\_merge.mgf

Click mouse within plot area to zoom in by factor of two about that point

Or, Plot from  to  Da

Label all possible matches  Label matches used for scoring

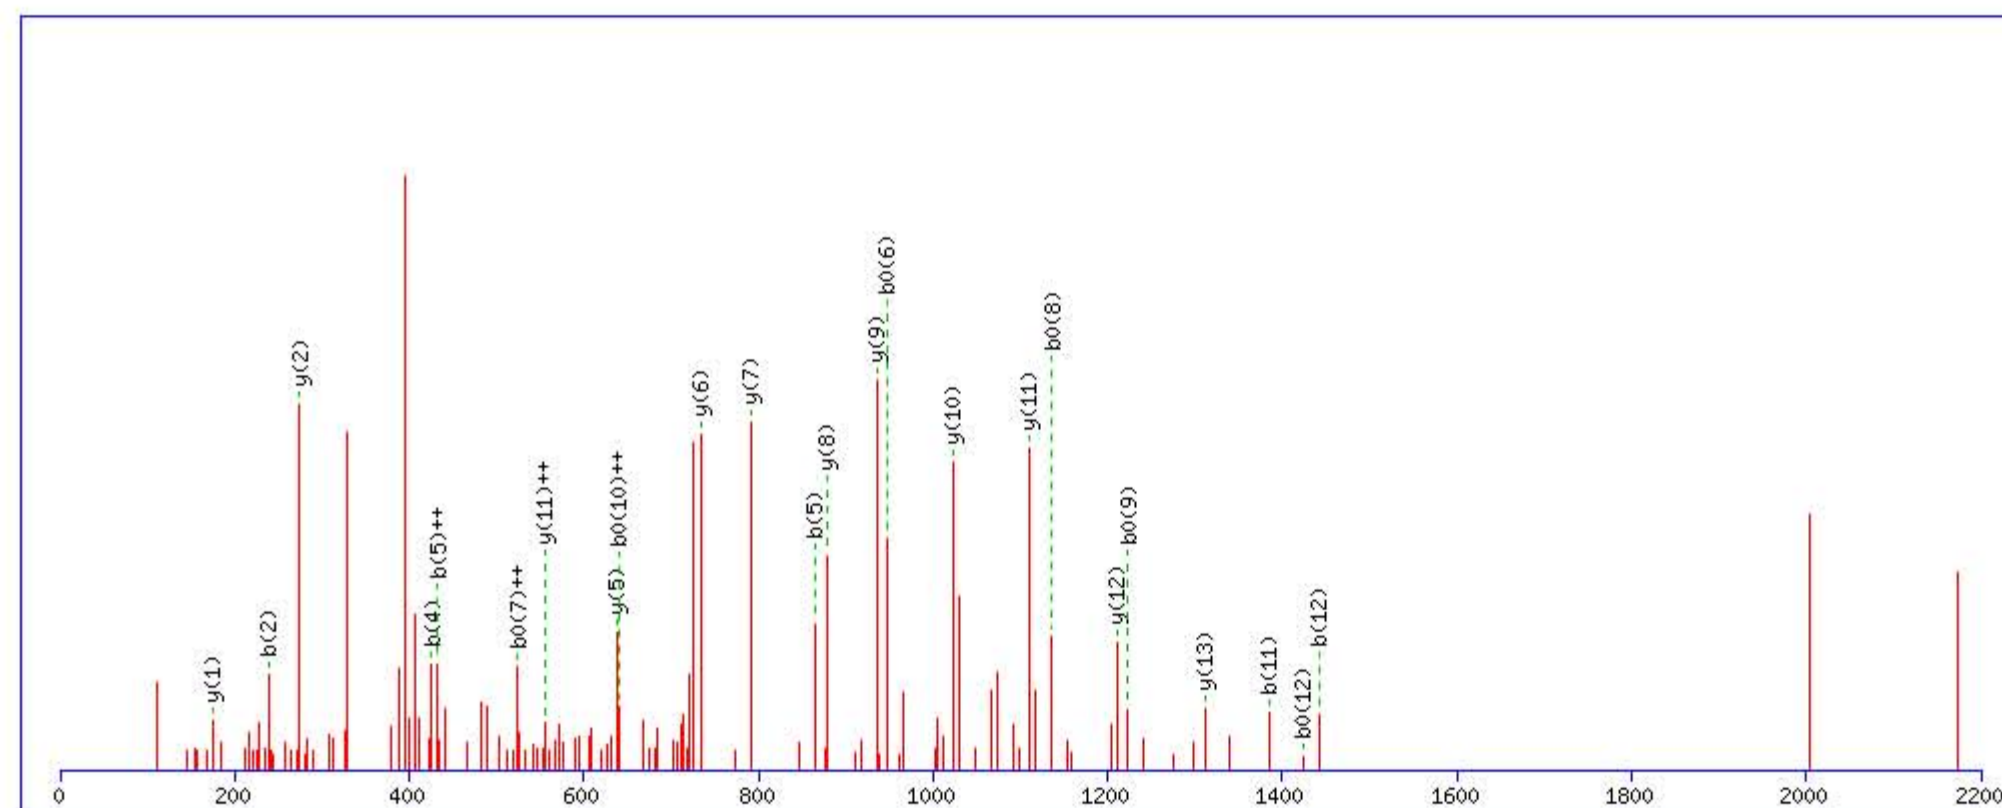

Monoisotopic mass of neutral peptide Mr(calc): 2174.042664

Fixed modifications: Carbamidomethyl (C) (apply to specified residues or termini only)

Variable modifications:

Q5 : Biotin:Thermo-21345 (Q)

Ions Score: 86 Expect: 5.6e-008

Matches : 24/190 fragment ions using 29 most intense peaks [\(help\)](#)

| #  | b                  | b <sup>++</sup>   | b <sup>*</sup> | b <sup>*++</sup> | b <sup>0</sup>     | b <sup>0++</sup>  | Seq. | y                  | y <sup>++</sup>   | y <sup>*</sup> | y <sup>*++</sup> | y <sup>0</sup> | y <sup>0++</sup> | #  |
|----|--------------------|-------------------|----------------|------------------|--------------------|-------------------|------|--------------------|-------------------|----------------|------------------|----------------|------------------|----|
| 1  | 138.066188         | 69.536732         |                |                  |                    |                   | H    |                    |                   |                |                  |                |                  | 18 |
| 2  | <b>239.113867</b>  | 120.060571        |                |                  | 221.103302         | 111.055289        | T    | 2037.990983        | 1019.499130       | 2020.964434    | 1010.985855      | 2019.980418    | 1010.493847      | 17 |
| 3  | 326.145895         | 163.576585        |                |                  | 308.135330         | 154.571303        | S    | 1936.943304        | 968.975290        | 1919.916755    | 960.462016       | 1918.932739    | 959.970008       | 16 |
| 4  | <b>425.214309</b>  | 213.110792        |                |                  | 407.203744         | 204.105510        | V    | 1849.911276        | 925.459276        | 1832.884727    | 916.946002       | 1831.900711    | 916.453994       | 15 |
| 5  | <b>864.439635</b>  | <b>432.723456</b> | 847.413086     | 424.210181       | 846.429070         | 423.718173        | Q    | 1750.842862        | 875.925069        | 1733.816313    | 867.411795       | 1732.832297    | 866.919787       | 14 |
| 6  | 965.487314         | 483.247295        | 948.460765     | 474.734021       | <b>947.476749</b>  | 474.242013        | T    | <b>1311.617536</b> | 656.312406        | 1294.590987    | 647.799132       | 1293.606971    | 647.307124       | 13 |
| 7  | 1066.534993        | 533.771135        | 1049.508444    | 525.257860       | 1048.524428        | <b>524.765852</b> | T    | <b>1210.569857</b> | 605.788567        | 1193.543308    | 597.275292       | 1192.559292    | 596.783284       | 12 |
| 8  | 1153.567021        | 577.287149        | 1136.540472    | 568.773874       | <b>1135.556456</b> | 568.281866        | S    | <b>1109.522178</b> | <b>555.264727</b> | 1092.495629    | 546.751453       | 1091.511613    | 546.259445       | 11 |
| 9  | 1240.599049        | 620.803163        | 1223.572500    | 612.289888       | <b>1222.588484</b> | 611.797880        | S    | <b>1022.490150</b> | 511.748713        | 1005.463601    | 503.235439       | 1004.479585    | 502.743431       | 10 |
| 10 | 1297.620513        | 649.313895        | 1280.593964    | 640.800620       | 1279.609948        | <b>640.308612</b> | G    | <b>935.458122</b>  | 468.232699        | 918.431573     | 459.719425       | 917.447557     | 459.227417       | 9  |
| 11 | <b>1384.652541</b> | 692.829909        | 1367.625992    | 684.316634       | 1366.641976        | 683.824626        | S    | <b>878.436658</b>  | 439.721967        | 861.410109     | 431.208693       | 860.426093     | 430.716685       | 8  |
| 12 | <b>1441.674005</b> | 721.340641        | 1424.647456    | 712.827366       | <b>1423.663440</b> | 712.335358        | G    | <b>791.404630</b>  | 396.205953        | 774.378081     | 387.692679       | 773.394065     | 387.200671       | 7  |
| 13 | 1538.726769        | 769.867023        | 1521.700220    | 761.353748       | 1520.716204        | 760.861740        | P    | <b>734.383166</b>  | 367.695221        | 717.356617     | 359.181947       | 716.372601     | 358.689939       | 6  |
| 14 | 1685.795183        | 843.401230        | 1668.768634    | 834.887955       | 1667.784618        | 834.395947        | F    | <b>637.330402</b>  | 319.168839        | 620.303853     | 310.655565       | 619.319837     | 310.163557       | 5  |
| 15 | 1786.842862        | 893.925069        | 1769.816313    | 885.411795       | 1768.832297        | 884.919787        | T    | 490.261988         | 245.634632        | 473.235439     | 237.121358       | 472.251423     | 236.629350       | 4  |
| 16 | 1901.869805        | 951.438541        | 1884.843256    | 942.925266       | 1883.859240        | 942.433258        | D    | 389.214309         | 195.110793        | 372.187760     | 186.597518       | 371.203744     | 186.105510       | 3  |
| 17 | 2000.938219        | 1000.972748       | 1983.911670    | 992.459473       | 1982.927654        | 991.967465        | V    | <b>274.187366</b>  | 137.597321        | 257.160817     | 129.084047       |                |                  | 2  |
| 18 |                    |                   |                |                  |                    |                   | R    | <b>175.118952</b>  | 88.063114         | 158.092403     | 79.549839        |                |                  | 1  |

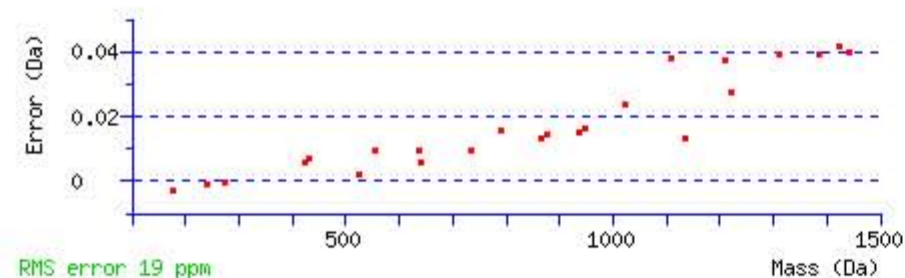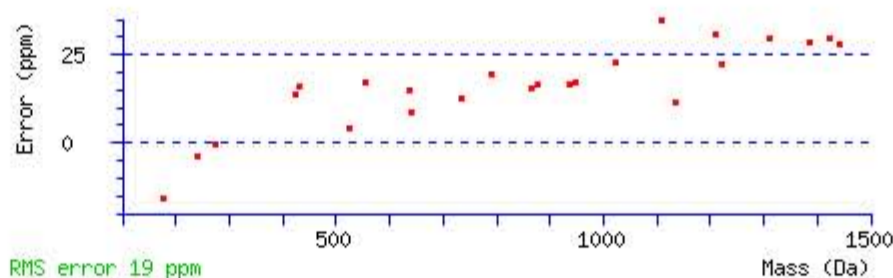

NCBI BLAST search of [HTSVQTTSSGSGPFTDVR](#)

(Parameters: blastp, nr protein database, expect=20000, no filter, PAM30)

Other BLAST [web gateways](#)

All matches to this query

| Score | Mr(calc):   | Delta    | Sequence                           |
|-------|-------------|----------|------------------------------------|
| 86.4  | 2174.042664 | 0.015888 | <a href="#">HTSVQTTSSGSGPFTDVR</a> |

Mascot: <http://www.matrixscience.com/>



**Mascot Search Results**

**Peptide View**

MS/MS Fragmentation of **RPGGEPSPGTTGQSYNQYSQR**  
 Found in **FINC\_HUMAN**, Fibronectin OS=Homo sapiens GN=FN1 PE=1 SV=4

Match to Query 54187: 2706.258042 from(903.093290,3+) rtinseconds(1541) index(32465)  
 Title: Locus:1.1.1.3170.13 File:"2013-07-02 CLN FXIII 30 min 3rd F 3.wiff"  
 Data file C:\Program Files (x86)\Matrix Science\Mascot Daemon\mgf\3 FXIII 30 min 3rd\mascot\_daemon\_merge.mgf

Click mouse within plot area to zoom in by factor of two about that point  
 Or, Plot from  to  Da   
 Label all possible matches  Label matches used for scoring

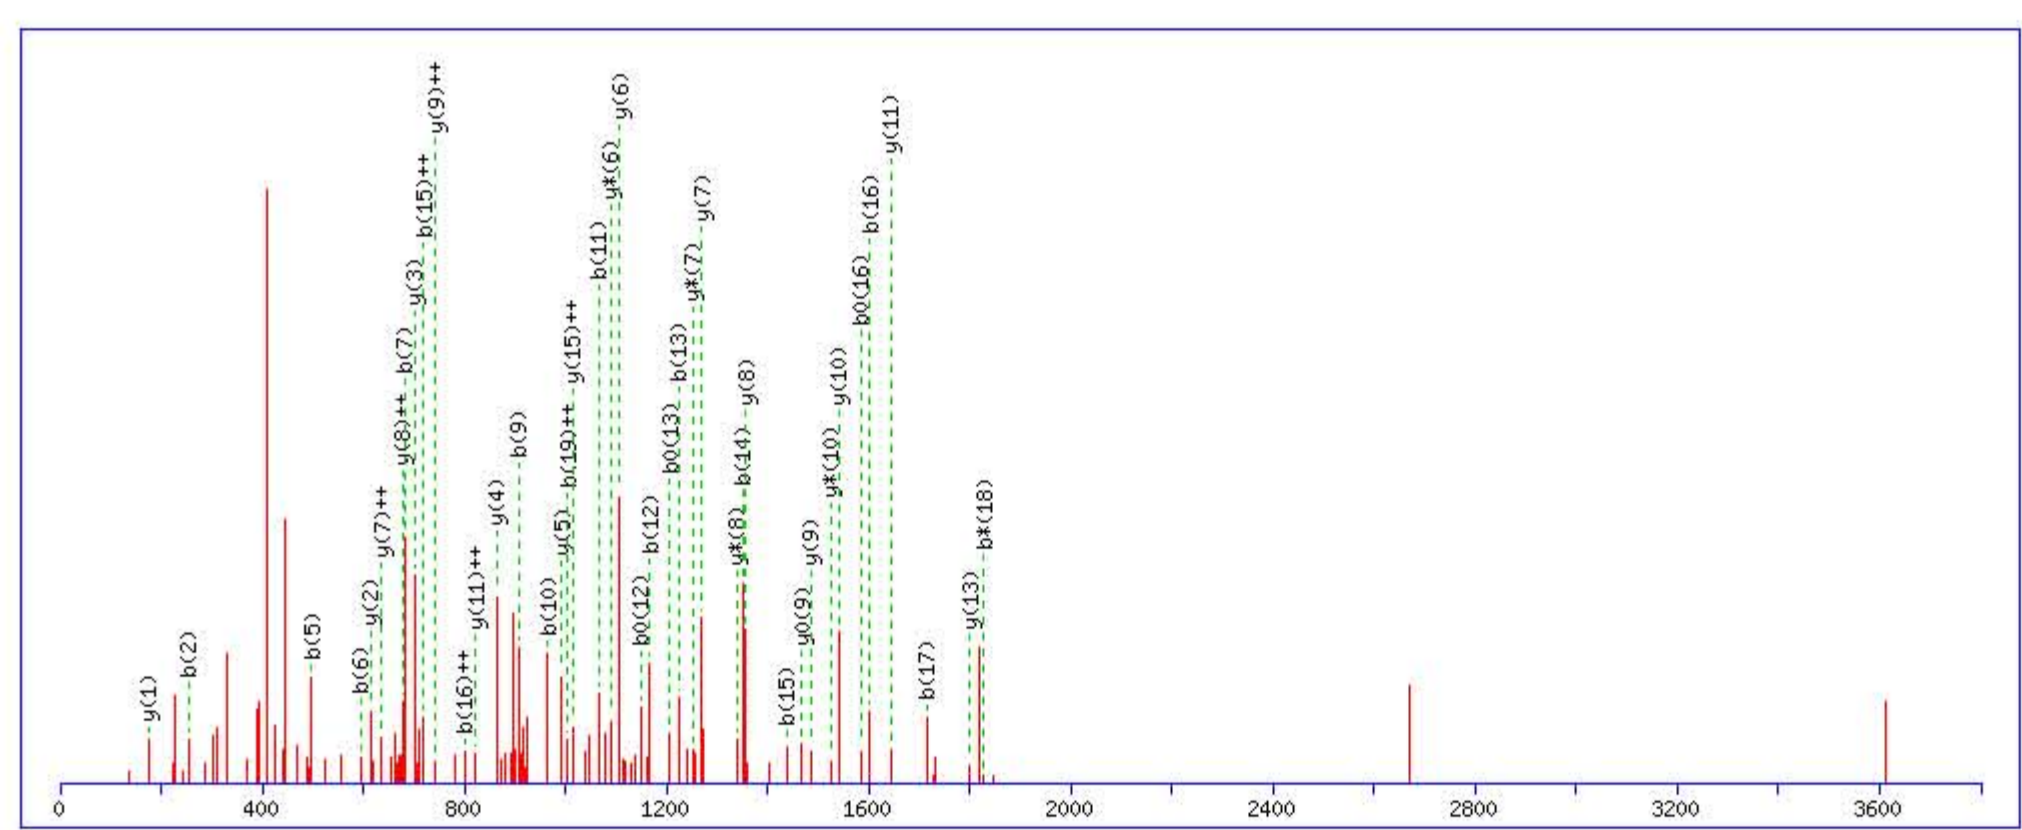

Monoisotopic mass of neutral peptide Mr(calc): 2706.245621  
 Fixed modifications: Carbamidomethyl (C) (apply to specified residues or termini only)  
 Variable modifications:  
 Q21 : Biotin:Thermo-21345 (Q)  
 Ions Score: 89 Expect: 1.9e-008  
 Matches : 42/240 fragment ions using 68 most intense peaks [\(help\)](#)

| #  | b                  | b <sup>++</sup>    | b <sup>*</sup>     | b <sup>*++</sup> | b <sup>0</sup>     | b <sup>0++</sup> | Seq. | y                  | y <sup>++</sup>    | y <sup>*</sup>     | y <sup>*++</sup> | y <sup>0</sup>     | y <sup>0++</sup> | #  |
|----|--------------------|--------------------|--------------------|------------------|--------------------|------------------|------|--------------------|--------------------|--------------------|------------------|--------------------|------------------|----|
| 1  | 157.108387         | 79.057831          | 140.081838         | 70.544557        |                    |                  | R    |                    |                    |                    |                  |                    |                  | 22 |
| 2  | <b>254.161151</b>  | 127.584213         | 237.134602         | 119.070939       |                    |                  | P    | 2551.151795        | 1276.079535        | 2534.125246        | 1267.566261      | 2533.141230        | 1267.074253      | 21 |
| 3  | 311.182615         | 156.094945         | 294.156066         | 147.581671       |                    |                  | G    | 2454.099031        | 1227.553153        | 2437.072482        | 1219.039879      | 2436.088466        | 1218.547871      | 20 |
| 4  | 368.204079         | 184.605677         | 351.177530         | 176.092403       |                    |                  | G    | 2397.077567        | 1199.042421        | 2380.051018        | 1190.529147      | 2379.067002        | 1190.037139      | 19 |
| 5  | <b>497.246672</b>  | 249.126974         | 480.220123         | 240.613700       | 479.236107         | 240.121692       | E    | 2340.056103        | 1170.531689        | 2323.029554        | 1162.018415      | 2322.045538        | 1161.526407      | 18 |
| 6  | <b>594.299436</b>  | 297.653356         | 577.272887         | 289.140082       | 576.288871         | 288.648074       | P    | 2211.013510        | 1106.010393        | 2193.986961        | 1097.497118      | 2193.002945        | 1097.005110      | 17 |
| 7  | <b>681.331464</b>  | 341.169370         | 664.304915         | 332.656095       | 663.320899         | 332.164087       | S    | 2113.960746        | 1057.484011        | 2096.934197        | 1048.970736      | 2095.950181        | 1048.478728      | 16 |
| 8  | 778.384228         | 389.695752         | 761.357679         | 381.182478       | 760.373663         | 380.690470       | P    | 2026.928718        | <b>1013.967997</b> | 2009.902169        | 1005.454723      | 2008.918153        | 1004.962715      | 15 |
| 9  | <b>907.426821</b>  | 454.217049         | 890.400272         | 445.703774       | 889.416256         | 445.211766       | E    | 1929.875954        | 965.441615         | 1912.849405        | 956.928341       | 1911.865389        | 956.436333       | 14 |
| 10 | <b>964.448285</b>  | 482.727781         | 947.421736         | 474.214506       | 946.437720         | 473.722498       | G    | <b>1800.833361</b> | 900.920319         | 1783.806812        | 892.407044       | 1782.822796        | 891.915036       | 13 |
| 11 | <b>1065.495964</b> | 533.251620         | 1048.469415        | 524.738346       | 1047.485399        | 524.246337       | T    | 1743.811897        | 872.409587         | 1726.785348        | 863.896312       | 1725.801332        | 863.404304       | 12 |
| 12 | <b>1166.543643</b> | 583.775460         | 1149.517094        | 575.262185       | <b>1148.533078</b> | 574.770177       | T    | <b>1642.764218</b> | <b>821.885747</b>  | 1625.737669        | 813.372473       | 1624.753653        | 812.880465       | 11 |
| 13 | <b>1223.565107</b> | 612.286191         | 1206.538558        | 603.772917       | <b>1205.554542</b> | 603.280909       | G    | <b>1541.716539</b> | 771.361908         | <b>1524.689990</b> | 762.848633       | 1523.705974        | 762.356625       | 10 |
| 14 | <b>1351.623685</b> | 676.315480         | 1334.597136        | 667.802206       | 1333.613120        | 667.310198       | Q    | <b>1484.695075</b> | <b>742.851176</b>  | 1467.668526        | 734.337901       | <b>1466.684510</b> | 733.845893       | 9  |
| 15 | <b>1438.655713</b> | <b>719.831494</b>  | 1421.629164        | 711.318220       | 1420.645148        | 710.826212       | S    | <b>1356.636497</b> | <b>678.821887</b>  | <b>1339.609948</b> | 670.308612       | 1338.625932        | 669.816604       | 8  |
| 16 | <b>1601.719042</b> | <b>801.363159</b>  | 1584.692493        | 792.849885       | <b>1583.708477</b> | 792.357876       | Y    | <b>1269.604469</b> | <b>635.305873</b>  | <b>1252.577920</b> | 626.792598       | 1251.593904        | 626.300590       | 7  |
| 17 | <b>1715.761969</b> | 858.384622         | 1698.735420        | 849.871348       | 1697.751404        | 849.379340       | N    | <b>1106.541140</b> | 553.774208         | <b>1089.514591</b> | 545.260934       | 1088.530575        | 544.768926       | 6  |
| 18 | 1843.820547        | 922.413912         | <b>1826.793998</b> | 913.900637       | 1825.809982        | 913.408629       | Q    | <b>992.498213</b>  | 496.752745         | 975.471664         | 488.239470       | 974.487648         | 487.747462       | 5  |
| 19 | 2006.883876        | <b>1003.945576</b> | 1989.857327        | 995.432302       | 1988.873311        | 994.940294       | Y    | <b>864.439635</b>  | 432.723456         | 847.413086         | 424.210181       | 846.429070         | 423.718173       | 4  |
| 20 | 2093.915904        | 1047.461590        | 2076.889355        | 1038.948315      | 2075.905339        | 1038.456307      | S    | <b>701.376306</b>  | 351.191791         | 684.349757         | 342.678517       | 683.365741         | 342.186509       | 3  |
| 21 | 2533.141230        | 1267.074253        | 2516.114681        | 1258.560978      | 2515.130665        | 1258.068971      | Q    | <b>614.344278</b>  | 307.675777         | 597.317729         | 299.162503       |                    |                  | 2  |
| 22 |                    |                    |                    |                  |                    |                  | R    | <b>175.118952</b>  | 88.063114          | 158.092403         | 79.549839        |                    |                  | 1  |

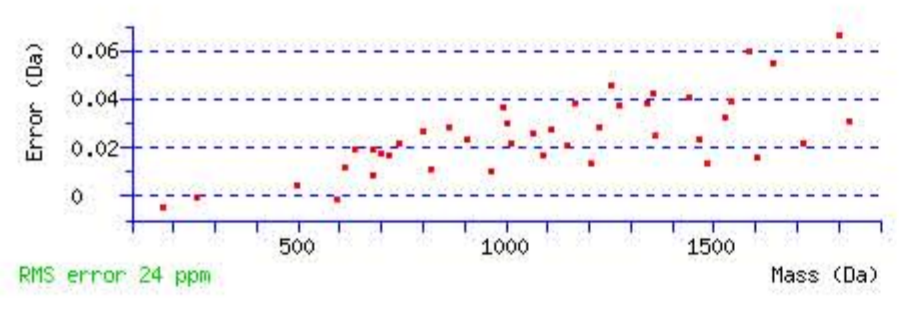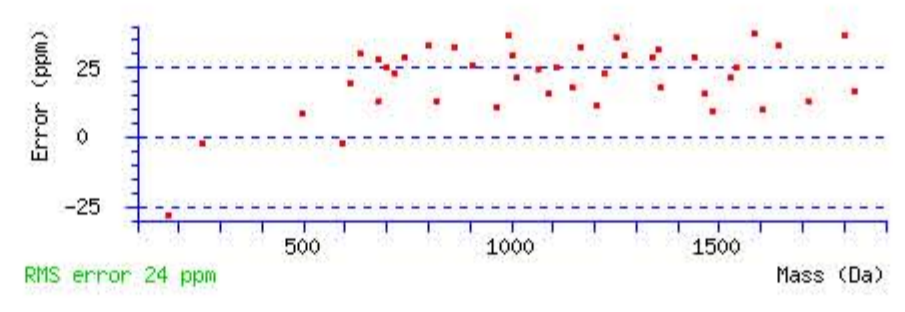

NCBI BLAST search of [RPGGEPSPGTTGQSYNQYSQR](#)  
 (Parameters: blastp, nr protein database, expect=20000, no filter, PAM30)  
 Other BLAST [web gateways](#)

**All matches to this query**

| Score | Mr(calc):   | Delta    | Sequence                              |
|-------|-------------|----------|---------------------------------------|
| 89.0  | 2706.245621 | 0.012421 | <a href="#">RPGGEPSPGTTGQSYNQYSQR</a> |
| 77.0  | 2706.245621 | 0.012421 | <a href="#">RPGGEPSPGTTGQSYNQYSQR</a> |
| 31.2  | 2706.245621 | 0.012421 | <a href="#">RPGGEPSPGTTGQSYNQYSQR</a> |



**MASCOT** Mascot Search Results

**Peptide View**

MS/MS Fragmentation of **RPGGEPSPGTTGQSYNQYSQR**  
 Found in **FINC\_HUMAN**, Fibronectin OS=Homo sapiens GN=FN1 PE=1 SV=4

Match to Query 54188: 2706.269136 from(677.574560,4+) rtinseconds(1549) index(32519)  
 Title: Locus:1.1.1.3173.12 File:"2013-07-02 CLN FXIII 30 min 3rd F 3.wiff"  
 Data file C:\Program Files (x86)\Matrix Science\Mascot Daemon\mgf\3 FXIII 30 min 3rd\mascot\_daemon\_merge.mgf

Click mouse within plot area to zoom in by factor of two about that point  
 Or, Plot from  to  Da   
 Label all possible matches  Label matches used for scoring

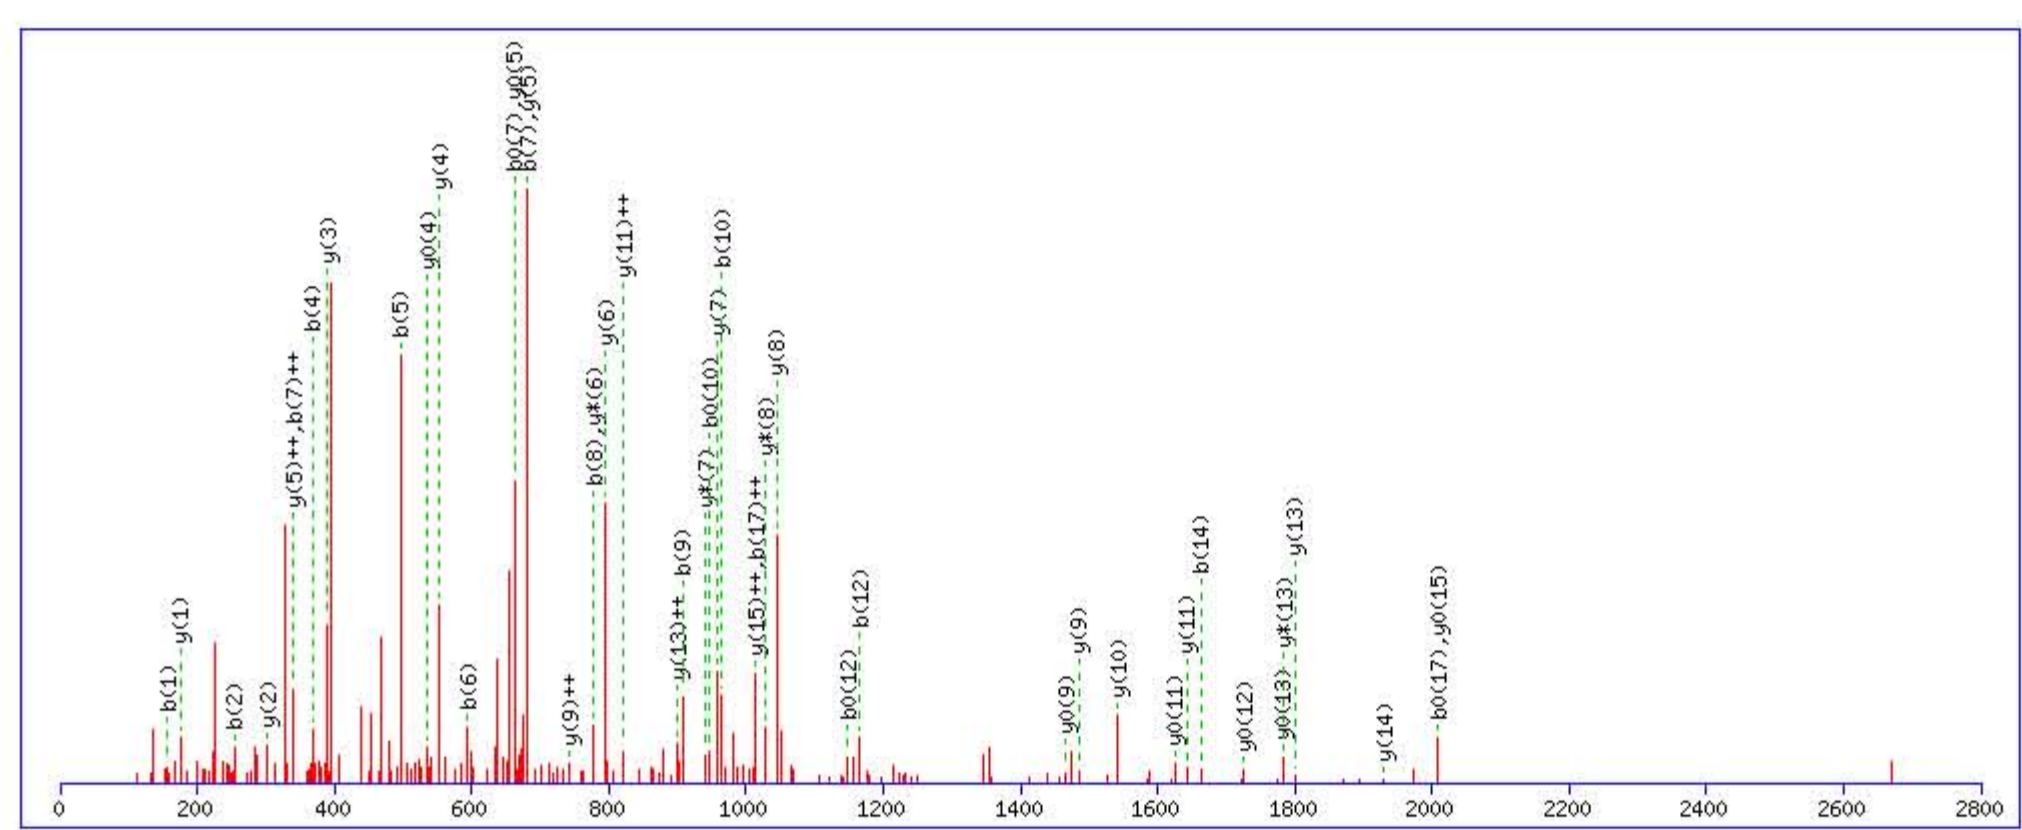

Monoisotopic mass of neutral peptide Mr(calc): 2706.245621  
 Fixed modifications: Carbamidomethyl (C) (apply to specified residues or termini only)  
 Variable modifications:  
 Q14 : Biotin:Thermo-21345 (Q)  
 Ions Score: 73 Expect: 9e-007  
 Matches : 46/240 fragment ions using 91 most intense peaks [\(help\)](#)

| #  | b           | b <sup>++</sup> | b <sup>*</sup> | b <sup>*++</sup> | b <sup>0</sup> | b <sup>0++</sup> | Seq. | y           | y <sup>++</sup> | y <sup>*</sup> | y <sup>*++</sup> | y <sup>0</sup> | y <sup>0++</sup> | #  |
|----|-------------|-----------------|----------------|------------------|----------------|------------------|------|-------------|-----------------|----------------|------------------|----------------|------------------|----|
| 1  | 157.108387  | 79.057831       | 140.081838     | 70.544557        |                |                  | R    |             |                 |                |                  |                |                  | 22 |
| 2  | 254.161151  | 127.584213      | 237.134602     | 119.070939       |                |                  | P    | 2551.151795 | 1276.079535     | 2534.125246    | 1267.566261      | 2533.141230    | 1267.074253      | 21 |
| 3  | 311.182615  | 156.094945      | 294.156066     | 147.581671       |                |                  | G    | 2454.099031 | 1227.553153     | 2437.072482    | 1219.039879      | 2436.088466    | 1218.547871      | 20 |
| 4  | 368.204079  | 184.605677      | 351.177530     | 176.092403       |                |                  | G    | 2397.077567 | 1199.042421     | 2380.051018    | 1190.529147      | 2379.067002    | 1190.037139      | 19 |
| 5  | 497.246672  | 249.126974      | 480.220123     | 240.613700       | 479.236107     | 240.121692       | E    | 2340.056103 | 1170.531689     | 2323.029554    | 1162.018415      | 2322.045538    | 1161.526407      | 18 |
| 6  | 594.299436  | 297.653356      | 577.272887     | 289.140082       | 576.288871     | 288.648074       | P    | 2211.013510 | 1106.010393     | 2193.986961    | 1097.497118      | 2193.002945    | 1097.005110      | 17 |
| 7  | 681.331464  | 341.169370      | 664.304915     | 332.656095       | 663.320899     | 332.164087       | S    | 2113.960746 | 1057.484011     | 2096.934197    | 1048.970736      | 2095.950181    | 1048.478728      | 16 |
| 8  | 778.384228  | 389.695752      | 761.357679     | 381.182478       | 760.373663     | 380.690470       | P    | 2026.928718 | 1013.967997     | 2009.902169    | 1005.454723      | 2008.918153    | 1004.962715      | 15 |
| 9  | 907.426821  | 454.217049      | 890.400272     | 445.703774       | 889.416256     | 445.211766       | E    | 1929.875954 | 965.441615      | 1912.849405    | 956.928341       | 1911.865389    | 956.436333       | 14 |
| 10 | 964.448285  | 482.727781      | 947.421736     | 474.214506       | 946.437720     | 473.722498       | G    | 1800.833361 | 900.920319      | 1783.806812    | 892.407044       | 1782.822796    | 891.915036       | 13 |
| 11 | 1065.495964 | 533.251620      | 1048.469415    | 524.738346       | 1047.485399    | 524.246337       | T    | 1743.811897 | 872.409587      | 1726.785348    | 863.896312       | 1725.801332    | 863.404304       | 12 |
| 12 | 1166.543643 | 583.775460      | 1149.517094    | 575.262185       | 1148.533078    | 574.770177       | T    | 1642.764218 | 821.885747      | 1625.737669    | 813.372473       | 1624.753653    | 812.880465       | 11 |
| 13 | 1223.565107 | 612.286191      | 1206.538558    | 603.772917       | 1205.554542    | 603.280909       | G    | 1541.716539 | 771.361908      | 1524.689990    | 762.848633       | 1523.705974    | 762.356625       | 10 |
| 14 | 1662.790433 | 831.898854      | 1645.763884    | 823.385580       | 1644.779868    | 822.893572       | Q    | 1484.695075 | 742.851176      | 1467.668526    | 734.337901       | 1466.684510    | 733.845893       | 9  |
| 15 | 1749.822461 | 875.414869      | 1732.795912    | 866.901594       | 1731.811896    | 866.409586       | S    | 1045.469749 | 523.238513      | 1028.443200    | 514.725238       | 1027.459184    | 514.233230       | 8  |
| 16 | 1912.885790 | 956.946533      | 1895.859241    | 948.433259       | 1894.875225    | 947.941251       | Y    | 958.437721  | 479.722499      | 941.411172     | 471.209224       | 940.427156     | 470.717216       | 7  |
| 17 | 2026.928717 | 1013.967997     | 2009.902168    | 1005.454722      | 2008.918152    | 1004.962714      | N    | 795.374392  | 398.190834      | 778.347843     | 389.677560       | 777.363827     | 389.185552       | 6  |
| 18 | 2154.987295 | 1077.997285     | 2137.960746    | 1069.484011      | 2136.976730    | 1068.992003      | Q    | 681.331465  | 341.169371      | 664.304916     | 332.656096       | 663.320900     | 332.164088       | 5  |
| 19 | 2318.050624 | 1159.528950     | 2301.024075    | 1151.015675      | 2300.040059    | 1150.523667      | Y    | 553.272887  | 277.140082      | 536.246338     | 268.626807       | 535.262322     | 268.134799       | 4  |
| 20 | 2405.082652 | 1203.044964     | 2388.056103    | 1194.531689      | 2387.072087    | 1194.039681      | S    | 390.209558  | 195.608417      | 373.183009     | 187.095143       | 372.198993     | 186.603135       | 3  |
| 21 | 2533.141230 | 1267.074253     | 2516.114681    | 1258.560978      | 2515.130665    | 1258.068971      | Q    | 303.177530  | 152.092403      | 286.150981     | 143.579129       |                |                  | 2  |
| 22 |             |                 |                |                  |                |                  | R    | 175.118952  | 88.063114       | 158.092403     | 79.549839        |                |                  | 1  |

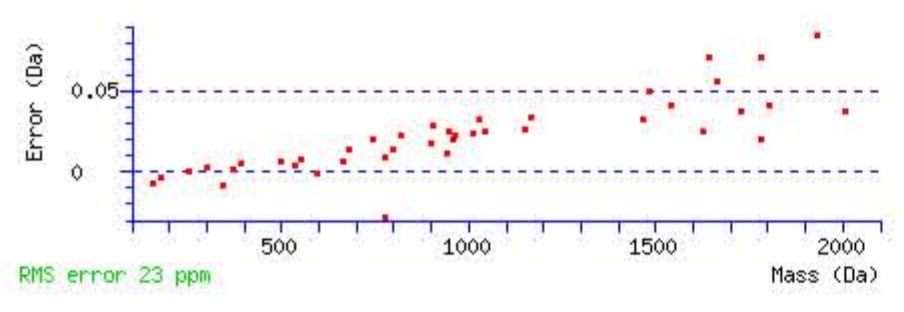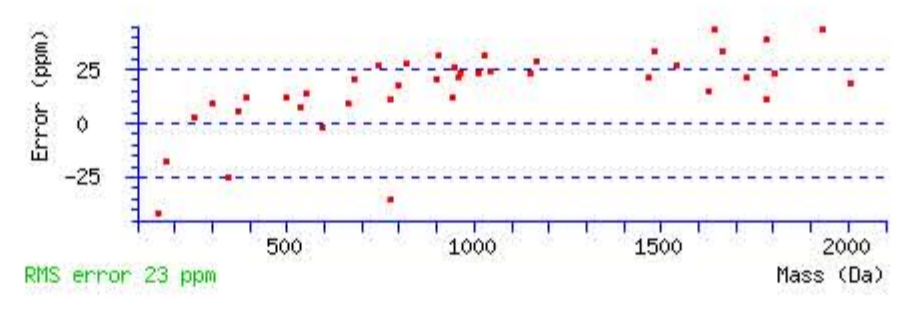

NCBI BLAST search of **RPGGEPSPGTTGQSYNQYSQR**  
 (Parameters: blastp, nr protein database, expect=20000, no filter, PAM30)  
 Other BLAST [web gateways](#)

**All matches to this query**

| Score | Mr(calc):   | Delta    | Sequence                              |
|-------|-------------|----------|---------------------------------------|
| 72.6  | 2706.245621 | 0.023515 | <a href="#">RPGGEPSPGTTGQSYNQYSQR</a> |
| 59.2  | 2706.245621 | 0.023515 | <a href="#">RPGGEPSPGTTGQSYNQYSQR</a> |
| 38.7  | 2706.245621 | 0.023515 | <a href="#">RPGGEPSPGTTGQSYNQYSQR</a> |



# Mascot Search Results

## Peptide View

MS/MS Fragmentation of **RPGGEPSPGTTGQSYNQYSQR**  
 Found in **FINC\_HUMAN**, Fibronectin OS=Homo sapiens GN=FN1 PE=1 SV=4

Match to Query 57454: 3017.435416 from(755.366130,4+) rtinseconds(1834) index(34132)  
 Title: Locus:1.1.1.3272.8 File:"2013-07-02 CLN FXIII 30 min 3rd F 3.wiff"  
 Data file C:\Program Files (x86)\Matrix Science\Mascot Daemon\mgf3 FXIII 30 min 3rd\mascot\_daemon\_merge.mgf

Click mouse within plot area to zoom in by factor of two about that point  
 Or, Plot from  to  Da   
 Label all possible matches  Label matches used for scoring

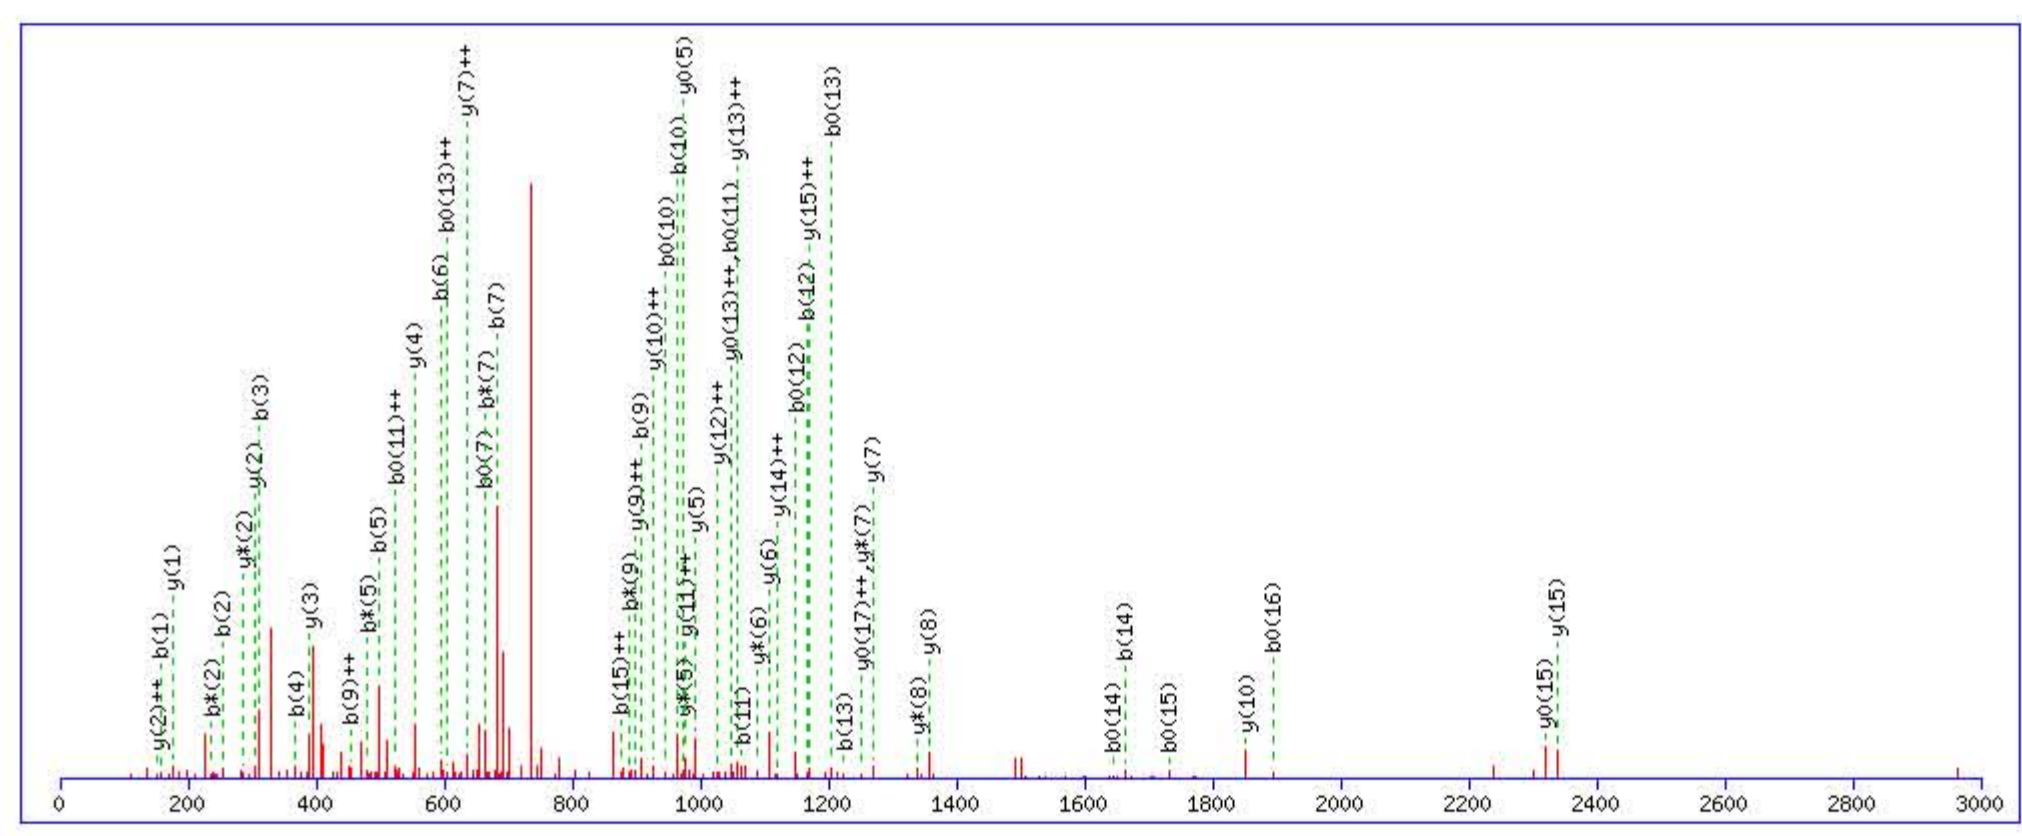

Monoisotopic mass of neutral peptide Mr(calc): 3017.412369  
 Fixed modifications: Carbamidomethyl (C) (apply to specified residues or termini only)  
 Variable modifications:  
 Q14 : Biotin:Thermo-21345 (Q)  
 Q18 : Biotin:Thermo-21345 (Q)  
 Ions Score: 54 Expect: 9.2e-005  
 Matches : 57/240 fragment ions using 136 most intense peaks [\(help\)](#)

| #  | b                  | b <sup>++</sup>   | b <sup>+</sup>    | b <sup>*++</sup> | b <sup>0</sup>     | b <sup>0++</sup>  | Seq. | y                  | y <sup>++</sup>    | y <sup>+</sup>     | y <sup>*++</sup> | y <sup>0</sup>     | y <sup>0++</sup>   | #  |
|----|--------------------|-------------------|-------------------|------------------|--------------------|-------------------|------|--------------------|--------------------|--------------------|------------------|--------------------|--------------------|----|
| 1  | <b>157.108387</b>  | 79.057831         | 140.081838        | 70.544557        |                    |                   | R    |                    |                    |                    |                  |                    |                    | 22 |
| 2  | <b>254.161151</b>  | 127.584213        | <b>237.134602</b> | 119.070939       |                    |                   | P    | 2862.318543        | 1431.662909        | 2845.291994        | 1423.149635      | 2844.307978        | 1422.657627        | 21 |
| 3  | <b>311.182615</b>  | 156.094945        | 294.156066        | 147.581671       |                    |                   | G    | 2765.265779        | 1383.136527        | 2748.239230        | 1374.623253      | 2747.255214        | 1374.131245        | 20 |
| 4  | <b>368.204079</b>  | 184.605677        | 351.177530        | 176.092403       |                    |                   | G    | 2708.244315        | 1354.625795        | 2691.217766        | 1346.112521      | 2690.233750        | 1345.620513        | 19 |
| 5  | <b>497.246672</b>  | 249.126974        | <b>480.220123</b> | 240.613700       | 479.236107         | 240.121692        | E    | 2651.222851        | 1326.115063        | 2634.196302        | 1317.601789      | 2633.212286        | 1317.109781        | 18 |
| 6  | <b>594.299436</b>  | 297.653356        | 577.272887        | 289.140082       | 576.288871         | 288.648074        | P    | 2522.180258        | 1261.593767        | 2505.153709        | 1253.080492      | 2504.169693        | <b>1252.588484</b> | 17 |
| 7  | <b>681.331464</b>  | 341.169370        | <b>664.304915</b> | 332.656095       | <b>663.320899</b>  | 332.164087        | S    | 2425.127494        | 1213.067385        | 2408.100945        | 1204.554110      | 2407.116929        | 1204.062102        | 16 |
| 8  | 778.384228         | 389.695752        | 761.357679        | 381.182478       | 760.373663         | 380.690470        | P    | <b>2338.095466</b> | <b>1169.551371</b> | 2321.068917        | 1161.038096      | <b>2320.084901</b> | 1160.546088        | 15 |
| 9  | <b>907.426821</b>  | <b>454.217049</b> | <b>890.400272</b> | 445.703774       | 889.416256         | 445.211766        | E    | 2241.042702        | <b>1121.024989</b> | 2224.016153        | 1112.511714      | 2223.032137        | 1112.019706        | 14 |
| 10 | <b>964.448285</b>  | 482.727781        | 947.421736        | 474.214506       | <b>946.437720</b>  | 473.722498        | G    | 2112.000109        | <b>1056.503692</b> | 2094.973560        | 1047.990418      | 2093.989544        | <b>1047.498410</b> | 13 |
| 11 | <b>1065.495964</b> | 533.251620        | 1048.469415       | 524.738346       | <b>1047.485399</b> | <b>524.246337</b> | T    | 2054.978645        | <b>1027.992960</b> | 2037.952096        | 1019.479686      | 2036.968080        | 1018.987678        | 12 |
| 12 | <b>1166.543643</b> | 583.775460        | 1149.517094       | 575.262185       | <b>1148.533078</b> | 574.770177        | T    | 1953.930966        | <b>977.469121</b>  | 1936.904417        | 968.955847       | 1935.920401        | 968.463839         | 11 |
| 13 | <b>1223.565107</b> | 612.286191        | 1206.538558       | 603.772917       | <b>1205.554542</b> | <b>603.280909</b> | G    | <b>1852.883287</b> | <b>926.945282</b>  | 1835.856738        | 918.432007       | 1834.872722        | 917.939999         | 10 |
| 14 | <b>1662.790433</b> | 831.898854        | 1645.763884       | 823.385580       | <b>1644.779868</b> | 822.893572        | Q    | 1795.861823        | <b>898.434550</b>  | 1778.835274        | 889.921275       | 1777.851258        | 889.429267         | 9  |
| 15 | 1749.822461        | <b>875.414869</b> | 1732.795912       | 866.901594       | <b>1731.811896</b> | 866.409586        | S    | <b>1356.636497</b> | 678.821887         | <b>1339.609948</b> | 670.308612       | 1338.625932        | 669.816604         | 8  |
| 16 | 1912.885790        | 956.946533        | 1895.859241       | 948.433259       | <b>1894.875225</b> | 947.941251        | Y    | <b>1269.604469</b> | <b>635.305873</b>  | <b>1252.577920</b> | 626.792598       | 1251.593904        | 626.300590         | 7  |
| 17 | 2026.928717        | 1013.967997       | 2009.902168       | 1005.454722      | 2008.918152        | 1004.962714       | N    | <b>1106.541140</b> | 553.774208         | <b>1089.514591</b> | 545.260934       | 1088.530575        | 544.768926         | 6  |
| 18 | 2466.154043        | 1233.580659       | 2449.127494       | 1225.067385      | 2448.143478        | 1224.575377       | Q    | <b>992.498213</b>  | 496.752745         | <b>975.471664</b>  | 488.239470       | <b>974.487648</b>  | 487.747462         | 5  |
| 19 | 2629.217372        | 1315.112324       | 2612.190823       | 1306.599049      | 2611.206807        | 1306.107041       | Y    | <b>553.272887</b>  | 277.140082         | 536.246338         | 268.626807       | 535.262322         | 268.134799         | 4  |
| 20 | 2716.249400        | 1358.628338       | 2699.222851       | 1350.115063      | 2698.238835        | 1349.623056       | S    | <b>390.209558</b>  | 195.608417         | 373.183009         | 187.095143       | 372.198993         | 186.603135         | 3  |
| 21 | 2844.307978        | 1422.657627       | 2827.281429       | 1414.144353      | 2826.297413        | 1413.652345       | Q    | <b>303.177530</b>  | <b>152.092403</b>  | <b>286.150981</b>  | 143.579129       |                    |                    | 2  |
| 22 |                    |                   |                   |                  |                    |                   | R    | <b>175.118952</b>  | 88.063114          | 158.092403         | 79.549839        |                    |                    | 1  |

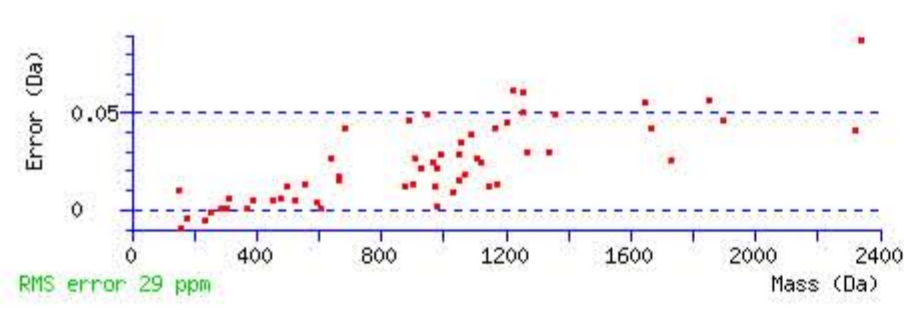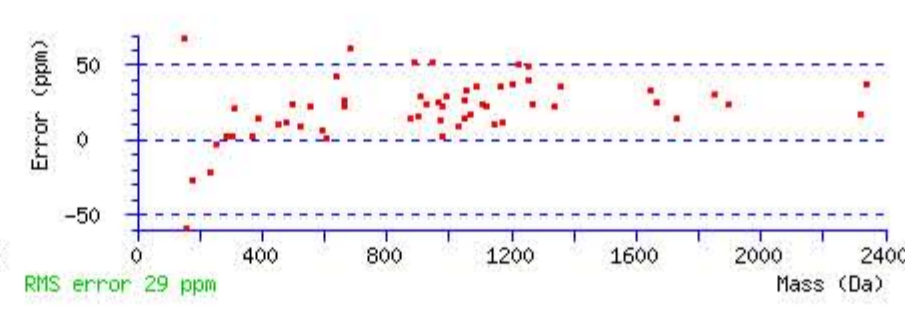

NCBI BLAST search of **RPGGEPSPGTTGQSYNQYSQR**  
 (Parameters: blastp, nr protein database, expect=20000, no filter, PAM30)  
 Other BLAST [web gateways](#)

### All matches to this query

| Score | Mr(calc):   | Delta    | Sequence                              |
|-------|-------------|----------|---------------------------------------|
| 53.5  | 3017.412369 | 0.023047 | <a href="#">RPGGEPSPGTTGQSYNQYSQR</a> |
| 52.8  | 3017.412369 | 0.023047 | <a href="#">RPGGEPSPGTTGQSYNQYSQR</a> |
| 30.6  | 3017.412369 | 0.023047 | <a href="#">RPGGEPSPGTTGQSYNQYSQR</a> |



# MASCOT Search Results

## Peptide View

MS/MS Fragmentation of **TDELPQLVTLPHPNLHGPEILDVPSTVQK**  
 Found in **FINC\_HUMAN**, Fibronectin OS=Homo sapiens GN=FN1 PE=1 SV=4

Match to Query 62279: 3497.858736 from(875.471960,4+) rtinseconds(2603) index(54130)  
 Title: Locus:1.1.1.3549.15 File:"2013-07-02 CLN FXIII 30 min 3rd F 4.wiff"  
 Data file C:\Program Files (x86)\Matrix Science\Mascot Daemon\mgf3 FXIII 30 min 3rd\mascot\_daemon\_merge.mgf

Click mouse within plot area to zoom in by factor of two about that point

Or, Plot from  to  Da

Label all possible matches  Label matches used for scoring

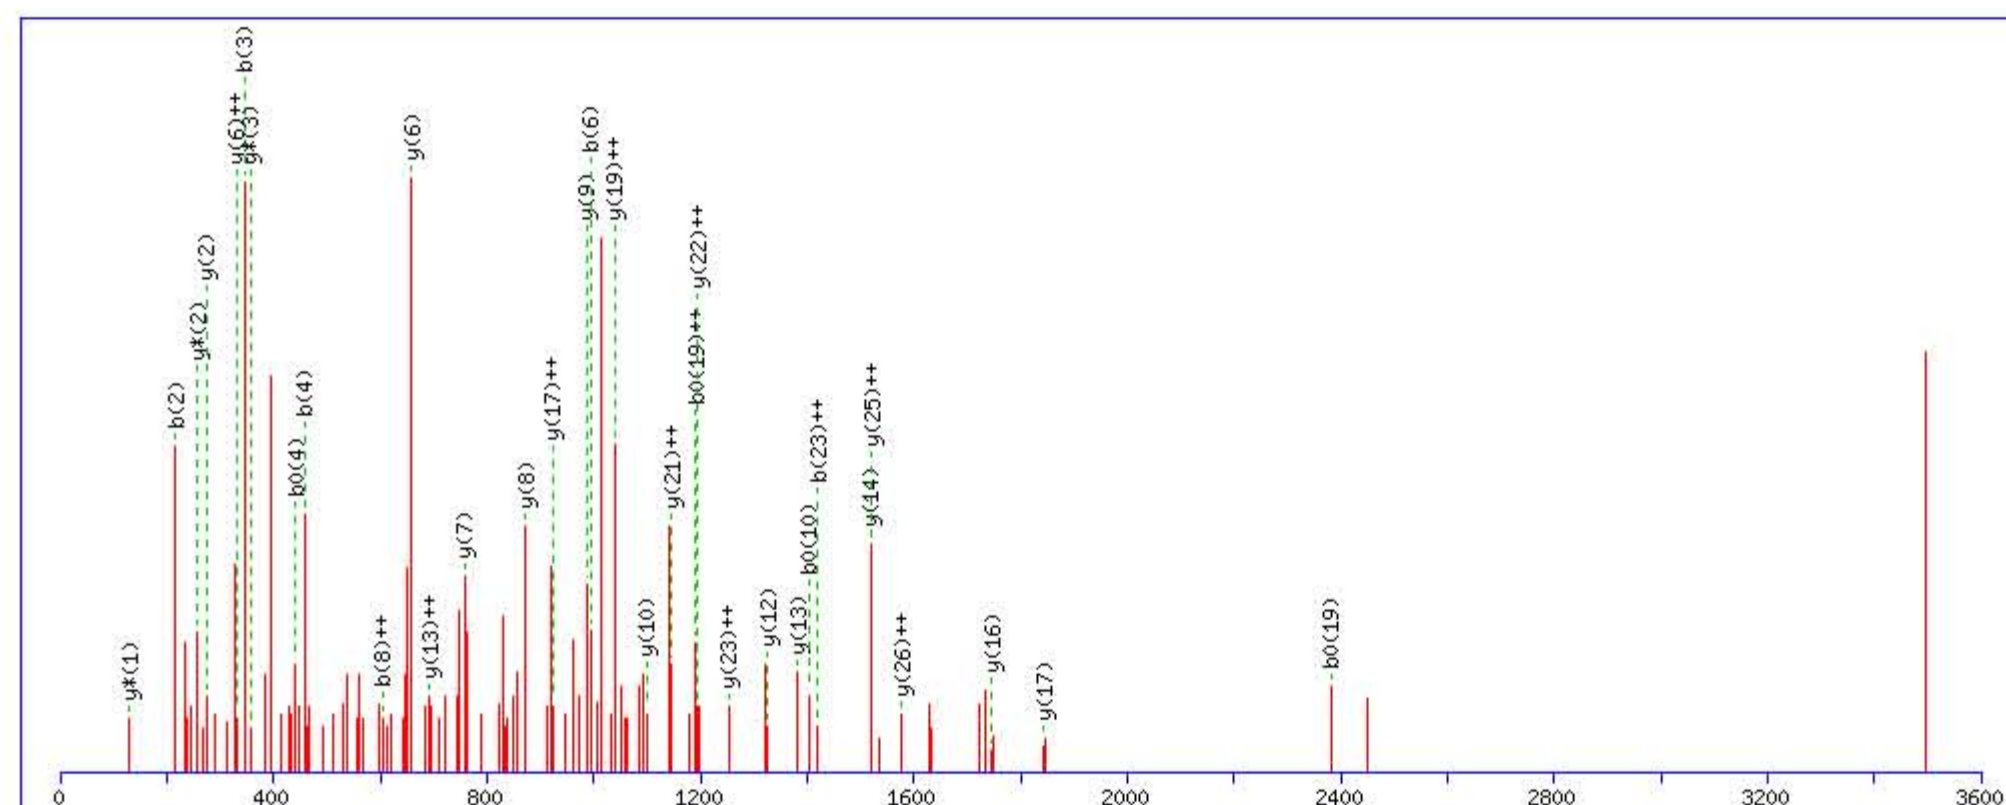

Monoisotopic mass of neutral peptide Mr(calc): 3497.859238  
 Fixed modifications: Carbamidomethyl (C) (apply to specified residues or termini only)  
 Variable modifications:  
 Q6 : Biotin:Thermo-21345 (Q)  
 Ions Score: 33 Expect: 0.0098  
 Matches : 33/320 fragment ions using 101 most intense peaks ([help](#))

| #  | b                 | b <sup>++</sup>    | b <sup>*</sup> | b <sup>+++</sup> | b <sup>0</sup>     | b <sup>0++</sup>   | Seq. | y                  | y <sup>++</sup>    | y <sup>*</sup>    | y <sup>+++</sup> | y <sup>0</sup> | y <sup>0++</sup> | #  |
|----|-------------------|--------------------|----------------|------------------|--------------------|--------------------|------|--------------------|--------------------|-------------------|------------------|----------------|------------------|----|
| 1  | 102.054955        | 51.531116          |                |                  | 84.044390          | 42.525833          | T    |                    |                    |                   |                  |                |                  | 29 |
| 2  | <b>217.081898</b> | 109.044587         |                |                  | 199.071333         | 100.039304         | D    | 3397.818827        | 1699.413051        | 3380.792278       | 1690.899777      | 3379.808262    | 1690.407769      | 28 |
| 3  | <b>346.124491</b> | 173.565883         |                |                  | 328.113926         | 164.560601         | E    | 3282.791884        | 1641.899580        | 3265.765335       | 1633.386305      | 3264.781319    | 1632.894297      | 27 |
| 4  | <b>459.208555</b> | 230.107915         |                |                  | <b>441.197990</b>  | 221.102633         | L    | 3153.749291        | <b>1577.378283</b> | 3136.722742       | 1568.865009      | 3135.738726    | 1568.373001      | 26 |
| 5  | 556.261319        | 278.634298         |                |                  | 538.250754         | 269.629015         | P    | 3040.665227        | <b>1520.836251</b> | 3023.638678       | 1512.322977      | 3022.654662    | 1511.830969      | 25 |
| 6  | <b>995.486645</b> | 498.246961         | 978.460096     | 489.733686       | 977.476080         | 489.241678         | Q    | 2943.612463        | 1472.309869        | 2926.585914       | 1463.796595      | 2925.601898    | 1463.304587      | 24 |
| 7  | 1108.570709       | 554.788993         | 1091.544160    | 546.275718       | 1090.560144        | 545.783710         | L    | 2504.387137        | <b>1252.697206</b> | 2487.360588       | 1244.183932      | 2486.376572    | 1243.691924      | 23 |
| 8  | 1207.639123       | <b>604.323200</b>  | 1190.612574    | 595.809925       | 1189.628558        | 595.317917         | V    | 2391.303073        | <b>1196.155174</b> | 2374.276524       | 1187.641900      | 2373.292508    | 1187.149892      | 22 |
| 9  | 1308.686802       | 654.847039         | 1291.660253    | 646.333765       | 1290.676237        | 645.841757         | T    | 2292.234659        | <b>1146.620967</b> | 2275.208110       | 1138.107693      | 2274.224094    | 1137.615685      | 21 |
| 10 | 1421.770866       | 711.389071         | 1404.744317    | 702.875797       | <b>1403.760301</b> | 702.383789         | L    | 2191.186980        | 1096.097128        | 2174.160431       | 1087.583853      | 2173.176415    | 1087.091845      | 20 |
| 11 | 1518.823630       | 759.915453         | 1501.797081    | 751.402179       | 1500.813065        | 750.910171         | P    | 2078.102916        | <b>1039.555096</b> | 2061.076367       | 1031.041821      | 2060.092351    | 1030.549813      | 19 |
| 12 | 1655.882542       | 828.444909         | 1638.855993    | 819.931635       | 1637.871977        | 819.439627         | H    | 1981.050152        | 991.028714         | 1964.023603       | 982.515440       | 1963.039587    | 982.023432       | 18 |
| 13 | 1752.935306       | 876.971291         | 1735.908757    | 868.458017       | 1734.924741        | 867.966009         | P    | <b>1843.991240</b> | <b>922.499258</b>  | 1826.964691       | 913.985984       | 1825.980675    | 913.493976       | 17 |
| 14 | 1866.978233       | 933.992755         | 1849.951684    | 925.479480       | 1848.967668        | 924.987472         | N    | <b>1746.938476</b> | 873.972876         | 1729.911927       | 865.459602       | 1728.927911    | 864.967594       | 16 |
| 15 | 1980.062297       | 990.534787         | 1963.035748    | 982.021512       | 1962.051732        | 981.529504         | L    | 1632.895549        | 816.951413         | 1615.869000       | 808.438138       | 1614.884984    | 807.946130       | 15 |
| 16 | 2117.121209       | 1059.064242        | 2100.094660    | 1050.550968      | 2099.110644        | 1050.058960        | H    | <b>1519.811485</b> | 760.409381         | 1502.784936       | 751.896106       | 1501.800920    | 751.404098       | 14 |
| 17 | 2174.142673       | 1087.574974        | 2157.116124    | 1079.061700      | 2156.132108        | 1078.569692        | G    | <b>1382.752573</b> | <b>691.879925</b>  | 1365.726024       | 683.366650       | 1364.742008    | 682.874642       | 13 |
| 18 | 2271.195437       | 1136.101356        | 2254.168888    | 1127.588082      | 2253.184872        | 1127.096074        | P    | <b>1325.731109</b> | 663.369193         | 1308.704560       | 654.855918       | 1307.720544    | 654.363910       | 12 |
| 19 | 2400.238030       | 1200.622653        | 2383.211481    | 1192.109378      | <b>2382.227465</b> | <b>1191.617370</b> | E    | 1228.678345        | 614.842811         | 1211.651796       | 606.329536       | 1210.667780    | 605.837528       | 11 |
| 20 | 2513.322094       | 1257.164685        | 2496.295545    | 1248.651410      | 2495.311529        | 1248.159402        | I    | <b>1099.635752</b> | 550.321514         | 1082.609203       | 541.808240       | 1081.625187    | 541.316231       | 10 |
| 21 | 2626.406158       | 1313.706717        | 2609.379609    | 1305.193442      | 2608.395593        | 1304.701435        | L    | <b>986.551688</b>  | 493.779482         | 969.525139        | 485.266207       | 968.541123     | 484.774199       | 9  |
| 22 | 2741.433101       | 1371.220188        | 2724.406552    | 1362.706914      | 2723.422536        | 1362.214906        | D    | <b>873.467624</b>  | 437.237450         | 856.441075        | 428.724175       | 855.457059     | 428.232167       | 8  |
| 23 | 2840.501515       | <b>1420.754395</b> | 2823.474966    | 1412.241121      | 2822.490950        | 1411.749113        | V    | <b>758.440681</b>  | 379.723978         | 741.414132        | 371.210704       | 740.430116     | 370.718696       | 7  |
| 24 | 2937.554279       | 1469.280777        | 2920.527730    | 1460.767503      | 2919.543714        | 1460.275495        | P    | <b>659.372267</b>  | <b>330.189772</b>  | 642.345718        | 321.676497       | 641.361702     | 321.184489       | 6  |
| 25 | 3024.586307       | 1512.796791        | 3007.559758    | 1504.283517      | 3006.575742        | 1503.791509        | S    | 562.319503         | 281.663389         | 545.292954        | 273.150115       | 544.308938     | 272.658107       | 5  |
| 26 | 3125.633986       | 1563.320631        | 3108.607437    | 1554.807356      | 3107.623421        | 1554.315348        | T    | 475.287475         | 238.147375         | 458.260926        | 229.634101       | 457.276910     | 229.142093       | 4  |
| 27 | 3224.702400       | 1612.854838        | 3207.675851    | 1604.341563      | 3206.691835        | 1603.849555        | V    | 374.239796         | 187.623536         | <b>357.213247</b> | 179.110261       |                |                  | 3  |
| 28 | 3352.760978       | 1676.884127        | 3335.734429    | 1668.370852      | 3334.750413        | 1667.878844        | Q    | <b>275.171382</b>  | 138.089329         | <b>258.144833</b> | 129.576055       |                |                  | 2  |
| 29 |                   |                    |                |                  |                    |                    | K    | 147.112804         | 74.060040          | <b>130.086255</b> | 65.546765        |                |                  | 1  |

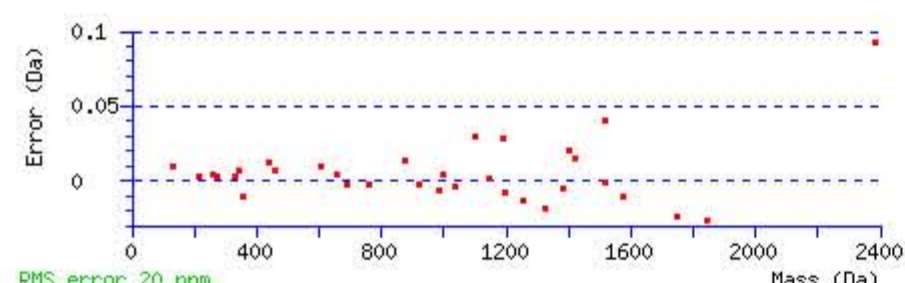

NCBI BLAST search of **TDELPQLVTLPHPNLHGPEILDVPSTVQK**  
 (Parameters: blastp, nr protein database, expect=20000, no filter, PAM30)  
 Other BLAST [web gateways](#)

## All matches to this query

| Score | Mr(calc):   | Delta     | Sequence                             |
|-------|-------------|-----------|--------------------------------------|
| 32.6  | 3497.859238 | -0.000502 | <b>TDELPQLVTLPHPNLHGPEILDVPSTVQK</b> |

Mascot: <http://www.matrixscience.com/>



# MASCOT Search Results

## Peptide View

MS/MS Fragmentation of **SAATLQQEK**

Found in **FBLN1\_HUMAN**, Fibulin-1 OS=Homo sapiens GN=FBLN1 PE=1 SV=4

Match to Query 24215: 1285.682648 from(643.848600,2+) rtinseconds(1510) index(32295)

Title: Locus:1.1.1.3159.20 File:"2013-07-02 CLN FXIII 30 min 3rd F 3.wiff"

Data file C:\Program Files (x86)\Matrix Science\Mascot Daemon\mgf3 FXIII 30 min 3rd\mascot\_daemon\_merge.mgf

Click mouse within plot area to zoom in by factor of two about that point

Or, Plot from  to  Da

Label all possible matches  Label matches used for scoring

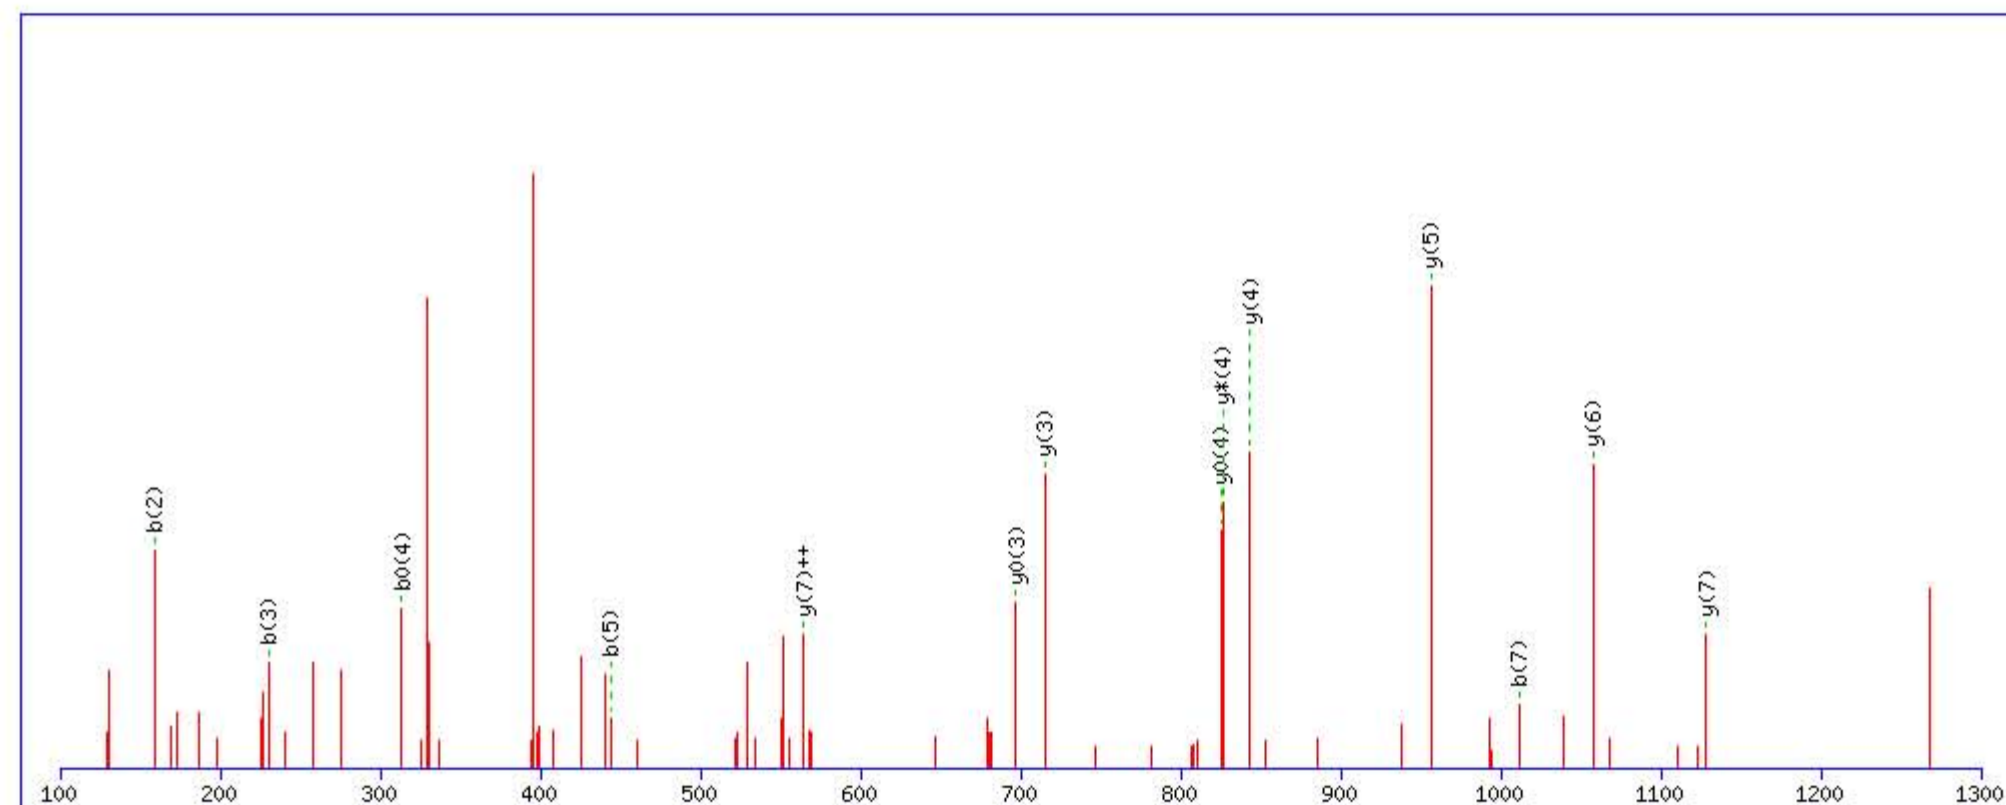

Monoisotopic mass of neutral peptide Mr(calc): 1285.669998

Fixed modifications: Carbamidomethyl (C) (apply to specified residues or termini only)

Variable modifications:

Q7 : Biotin:Thermo-21345 (Q)

Ions Score: 32 Expect: 0.0026

Matches : 14/84 fragment ions using 21 most intense peaks ([help](#))

| # | b                  | b <sup>++</sup> | b <sup>*</sup> | b <sup>*++</sup> | b <sup>0</sup>    | b <sup>0++</sup> | Seq. | y                  | y <sup>++</sup>   | y <sup>*</sup>    | y <sup>*++</sup> | y <sup>0</sup>    | y <sup>0++</sup> | # |
|---|--------------------|-----------------|----------------|------------------|-------------------|------------------|------|--------------------|-------------------|-------------------|------------------|-------------------|------------------|---|
| 1 | 88.039304          | 44.523290       |                |                  | 70.028739         | 35.518008        | S    |                    |                   |                   |                  |                   |                  | 9 |
| 2 | <b>159.076418</b>  | 80.041847       |                |                  | 141.065853        | 71.036564        | A    | 1199.645272        | 600.326274        | 1182.618723       | 591.813000       | 1181.634707       | 591.320991       | 8 |
| 3 | <b>230.113532</b>  | 115.560404      |                |                  | 212.102967        | 106.555121       | A    | <b>1128.608158</b> | <b>564.807717</b> | 1111.581609       | 556.294443       | 1110.597593       | 555.802435       | 7 |
| 4 | 331.161211         | 166.084243      |                |                  | <b>313.150646</b> | 157.078961       | T    | <b>1057.571044</b> | 529.289160        | 1040.544495       | 520.775886       | 1039.560479       | 520.283878       | 6 |
| 5 | <b>444.245275</b>  | 222.626275      |                |                  | 426.234710        | 213.620993       | L    | <b>956.523365</b>  | 478.765321        | 939.496816        | 470.252046       | 938.512800        | 469.760038       | 5 |
| 6 | 572.303853         | 286.655565      | 555.277304     | 278.142290       | 554.293288        | 277.650282       | Q    | <b>843.439301</b>  | 422.223289        | <b>826.412752</b> | 413.710014       | <b>825.428736</b> | 413.218006       | 4 |
| 7 | <b>1011.529179</b> | 506.268228      | 994.502630     | 497.754953       | 993.518614        | 497.262945       | Q    | <b>715.380723</b>  | 358.194000        | 698.354174        | 349.680725       | <b>697.370158</b> | 349.188717       | 3 |
| 8 | 1140.571772        | 570.789524      | 1123.545223    | 562.276250       | 1122.561207       | 561.784242       | E    | 276.155397         | 138.581336        | 259.128848        | 130.068062       | 258.144832        | 129.576054       | 2 |
| 9 |                    |                 |                |                  |                   |                  | K    | 147.112804         | 74.060040         | 130.086255        | 65.546765        |                   |                  | 1 |

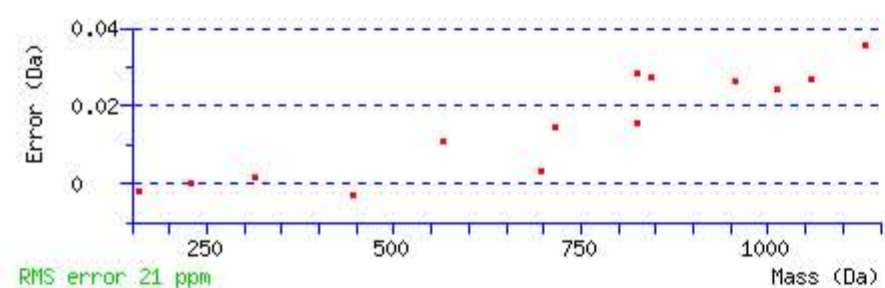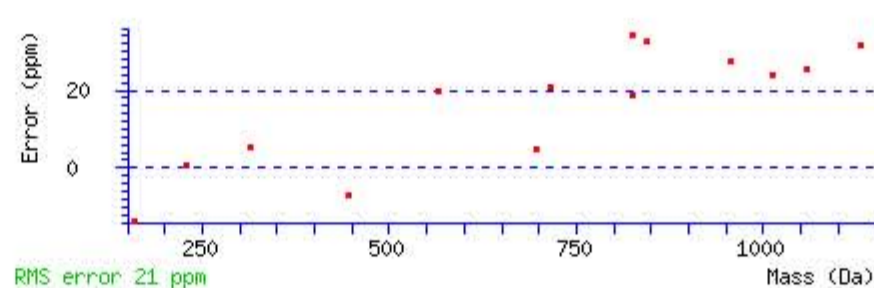

NCBI BLAST search of **SAATLQQEK**

(Parameters: blastp, nr protein database, expect=20000, no filter, PAM30)

Other BLAST [web gateways](#)

## All matches to this query

| Score | Mr(calc):   | Delta     | Sequence                     |
|-------|-------------|-----------|------------------------------|
| 32.0  | 1285.669998 | 0.012650  | <a href="#">SAATLQQEK</a>    |
| 24.5  | 1285.669998 | 0.012650  | <a href="#">SAATLQQEK</a>    |
| 3.8   | 1285.688614 | -0.005966 | <a href="#">QKEIQAMK</a>     |
| 1.1   | 1285.685074 | -0.002426 | <a href="#">RGVSETAPASRR</a> |
| 1.0   | 1285.692474 | -0.009826 | <a href="#">RTQRTGEK</a>     |



# MASCOT Search Results

## Peptide View

MS/MS Fragmentation of **MVQEQCCHSQQLEELHLCATGISLANEQDR**  
 Found in **FBLN1\_HUMAN**, Fibulin-1 OS=Homo sapiens GN=FBLN1 PE=1 SV=4

Match to Query 63128: 3653.611056 from(914.410040,4+) rtinseconds(2006) index(51249)  
 Title: Locus:1.1.1.3341.25 File:"2013-07-02 CLN FXIII 30 min 3rd F 4.wiff"  
 Data file C:\Program Files (x86)\Matrix Science\Mascot Daemon\mgf\3 FXIII 30 min 3rd\mascot\_daemon\_merge.mgf

Click mouse within plot area to zoom in by factor of two about that point

Or, Plot from  to  Da

Label all possible matches  Label matches used for scoring

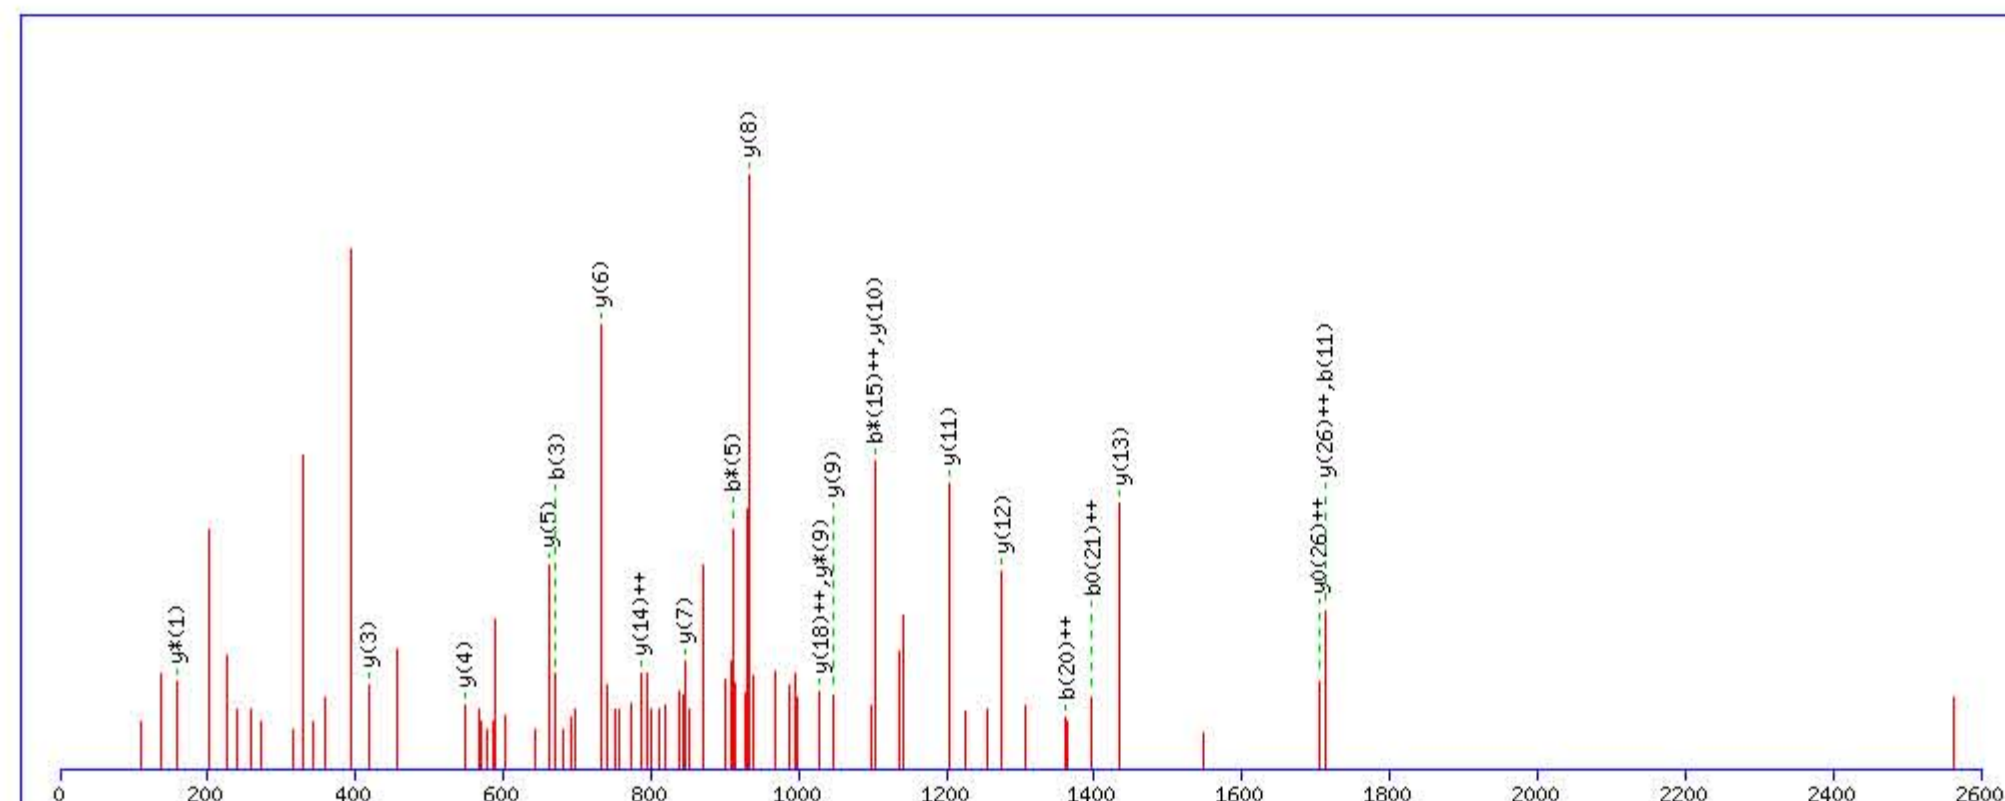

Monoisotopic mass of neutral peptide Mr(calc): 3653.615311  
 Fixed modifications: Carbamidomethyl (C) (apply to specified residues or termini only)  
 Variable modifications:  
 Q3 : Biotin:Thermo-21345 (Q)  
 Ions Score: 43 Expect: 0.00029  
 Matches : 23/312 fragment ions using 43 most intense peaks [\(help\)](#)

| #  | b                  | b <sup>++</sup>    | b <sup>*</sup>    | b <sup>*++</sup>   | b <sup>0</sup> | b <sup>0++</sup>   | Seq. | y                  | y <sup>++</sup>    | y <sup>*</sup>     | y <sup>*++</sup> | y <sup>0</sup> | y <sup>0++</sup>   | #  |
|----|--------------------|--------------------|-------------------|--------------------|----------------|--------------------|------|--------------------|--------------------|--------------------|------------------|----------------|--------------------|----|
| 1  | 132.047761         | 66.527518          |                   |                    |                |                    | M    |                    |                    |                    |                  |                |                    | 28 |
| 2  | 231.116175         | 116.061725         |                   |                    |                |                    | V    | 3523.582122        | 1762.294699        | 3506.555573        | 1753.781424      | 3505.571557    | 1753.289416        | 27 |
| 3  | <b>670.341501</b>  | 335.674389         | 653.314952        | 327.161114         |                |                    | Q    | 3424.513708        | <b>1712.760492</b> | 3407.487159        | 1704.247217      | 3406.503143    | <b>1703.755209</b> | 26 |
| 4  | 799.384094         | 400.195685         | 782.357545        | 391.682411         | 781.373529     | 391.190403         | E    | 2985.288382        | 1493.147829        | 2968.261833        | 1484.634554      | 2967.277817    | 1484.142546        | 25 |
| 5  | 927.442672         | 464.224974         | <b>910.416123</b> | 455.711700         | 909.432107     | 455.219692         | Q    | 2856.245789        | 1428.626532        | 2839.219240        | 1420.113258      | 2838.235224    | 1419.621250        | 24 |
| 6  | 1087.473321        | 544.240299         | 1070.446772       | 535.727024         | 1069.462756    | 535.235016         | C    | 2728.187211        | 1364.597243        | 2711.160662        | 1356.083969      | 2710.176646    | 1355.591961        | 23 |
| 7  | 1247.503970        | 624.255623         | 1230.477421       | 615.742349         | 1229.493405    | 615.250341         | C    | 2568.156562        | 1284.581919        | 2551.130013        | 1276.068644      | 2550.145997    | 1275.576636        | 22 |
| 8  | 1384.562882        | 692.785079         | 1367.536333       | 684.271805         | 1366.552317    | 683.779797         | H    | 2408.125913        | 1204.566594        | 2391.099364        | 1196.053320      | 2390.115348    | 1195.561312        | 21 |
| 9  | 1471.594910        | 736.301093         | 1454.568361       | 727.787819         | 1453.584345    | 727.295811         | S    | 2271.067001        | 1136.037138        | 2254.040452        | 1127.523864      | 2253.056436    | 1127.031856        | 20 |
| 10 | 1599.653488        | 800.330382         | 1582.626939       | 791.817108         | 1581.642923    | 791.325100         | Q    | 2184.034973        | 1092.521124        | 2167.008424        | 1084.007850      | 2166.024408    | 1083.515842        | 19 |
| 11 | <b>1712.737552</b> | 856.872414         | 1695.711003       | 848.359140         | 1694.726987    | 847.867132         | L    | 2055.976395        | <b>1028.491835</b> | 2038.949846        | 1019.978561      | 2037.965830    | 1019.486553        | 18 |
| 12 | 1841.780145        | 921.393711         | 1824.753596       | 912.880436         | 1823.769580    | 912.388428         | E    | 1942.892331        | 971.949804         | 1925.865782        | 963.436529       | 1924.881766    | 962.944521         | 17 |
| 13 | 1970.822738        | 985.915007         | 1953.796189       | 977.401733         | 1952.812173    | 976.909725         | E    | 1813.849738        | 907.428507         | 1796.823189        | 898.915233       | 1795.839173    | 898.423225         | 16 |
| 14 | 2083.906802        | 1042.457039        | 2066.880253       | 1033.943764        | 2065.896237    | 1033.451756        | L    | 1684.807145        | 842.907211         | 1667.780596        | 834.393936       | 1666.796580    | 833.901928         | 15 |
| 15 | 2220.965714        | 1110.986495        | 2203.939165       | <b>1102.473220</b> | 2202.955149    | 1101.981212        | H    | 1571.723081        | <b>786.365179</b>  | 1554.696532        | 777.851904       | 1553.712516    | 777.359896         | 14 |
| 16 | 2380.996363        | 1191.001819        | 2363.969814       | 1182.488545        | 2362.985798    | 1181.996537        | C    | <b>1434.664169</b> | 717.835723         | 1417.637620        | 709.322448       | 1416.653604    | 708.830440         | 13 |
| 17 | 2452.033477        | 1226.520376        | 2435.006928       | 1218.007102        | 2434.022912    | 1217.515094        | A    | <b>1274.633520</b> | 637.820398         | 1257.606971        | 629.307124       | 1256.622955    | 628.815116         | 12 |
| 18 | 2553.081156        | 1277.044216        | 2536.054607       | 1268.530941        | 2535.070591    | 1268.038933        | T    | <b>1203.596406</b> | 602.301841         | 1186.569857        | 593.788567       | 1185.585841    | 593.296559         | 11 |
| 19 | 2610.102620        | 1305.554948        | 2593.076071       | 1297.041673        | 2592.092055    | 1296.549665        | G    | <b>1102.548727</b> | 551.778002         | 1085.522178        | 543.264727       | 1084.538162    | 542.772719         | 10 |
| 20 | 2723.186684        | <b>1362.096980</b> | 2706.160135       | 1353.583705        | 2705.176119    | 1353.091697        | I    | <b>1045.527263</b> | 523.267270         | <b>1028.500714</b> | 514.753995       | 1027.516698    | 514.261987         | 9  |
| 21 | 2810.218712        | 1405.612994        | 2793.192163       | 1397.099719        | 2792.208147    | <b>1396.607711</b> | S    | <b>932.443199</b>  | 466.725238         | 915.416650         | 458.211963       | 914.432634     | 457.719955         | 8  |
| 22 | 2923.302776        | 1462.155026        | 2906.276227       | 1453.641751        | 2905.292211    | 1453.149743        | L    | <b>845.411171</b>  | 423.209224         | 828.384622         | 414.695949       | 827.400606     | 414.203941         | 7  |
| 23 | 2994.339890        | 1497.673583        | 2977.313341       | 1489.160308        | 2976.329325    | 1488.668301        | A    | <b>732.327107</b>  | 366.667192         | 715.300558         | 358.153917       | 714.316542     | 357.661909         | 6  |
| 24 | 3108.382817        | 1554.695047        | 3091.356268       | 1546.181772        | 3090.372252    | 1545.689764        | N    | <b>661.289993</b>  | 331.148635         | 644.263444         | 322.635360       | 643.279428     | 322.143352         | 5  |
| 25 | 3237.425410        | 1619.216343        | 3220.398861       | 1610.703069        | 3219.414845    | 1610.211061        | E    | <b>547.247066</b>  | 274.127171         | 530.220517         | 265.613897       | 529.236501     | 265.121889         | 4  |
| 26 | 3365.483988        | 1683.245632        | 3348.457439       | 1674.732358        | 3347.473423    | 1674.240350        | Q    | <b>418.204473</b>  | 209.605874         | 401.177924         | 201.092600       | 400.193908     | 200.600592         | 3  |
| 27 | 3480.510931        | 1740.759104        | 3463.484382       | 1732.245829        | 3462.500366    | 1731.753821        | D    | 290.145895         | 145.576585         | 273.119346         | 137.063311       | 272.135330     | 136.571303         | 2  |
| 28 |                    |                    |                   |                    |                |                    | R    | 175.118952         | 88.063114          | <b>158.092403</b>  | 79.549839        |                |                    | 1  |

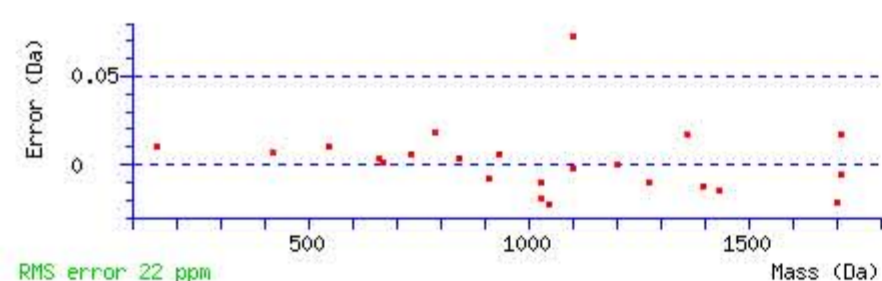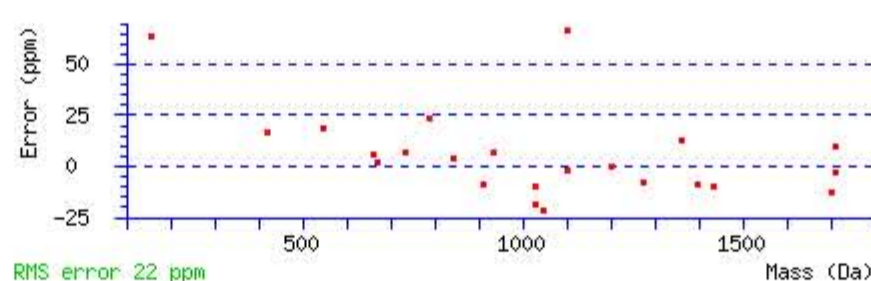

NCBI BLAST search of **MVQEQCCHSQQLEELHLCATGISLANEQDR**  
 (Parameters: blastp, nr protein database, expect=20000, no filter, PAM30)  
 Other BLAST [web gateways](#)

## All matches to this query

| Score | Mr(calc):   | Delta     | Sequence                                       |
|-------|-------------|-----------|------------------------------------------------|
| 43.4  | 3653.615311 | -0.004255 | <a href="#">MVQEQCCHSQQLEELHLCATGISLANEQDR</a> |
| 43.3  | 3653.615311 | -0.004255 | <a href="#">MVQEQCCHSQQLEELHLCATGISLANEQDR</a> |
| 43.2  | 3653.615311 | -0.004255 | <a href="#">MVQEQCCHSQQLEELHLCATGISLANEQDR</a> |



# MASCOT Search Results

## Peptide View

MS/MS Fragmentation of **MVQEQCCHSQLEELHCATGISLANEQDR**  
 Found in **FBLN1\_HUMAN**, Fibulin-1 OS=Homo sapiens GN=FBLN1 PE=1 SV=4

Match to Query 64421: 3964.803416 from(992.208130,4+) rtinseconds(2156) index(36124)  
 Title: Locus:1.1.1.3384.21 File:"2013-07-02 CLN FXIII 30 min 3rd F 3.wiff"  
 Data file C:\Program Files (x86)\Matrix Science\Mascot Daemon\mgf\3 FXIII 30 min 3rd\mascot\_daemon\_merge.mgf

Click mouse within plot area to zoom in by factor of two about that point

Or, Plot from  to  Da

Label all possible matches  Label matches used for scoring

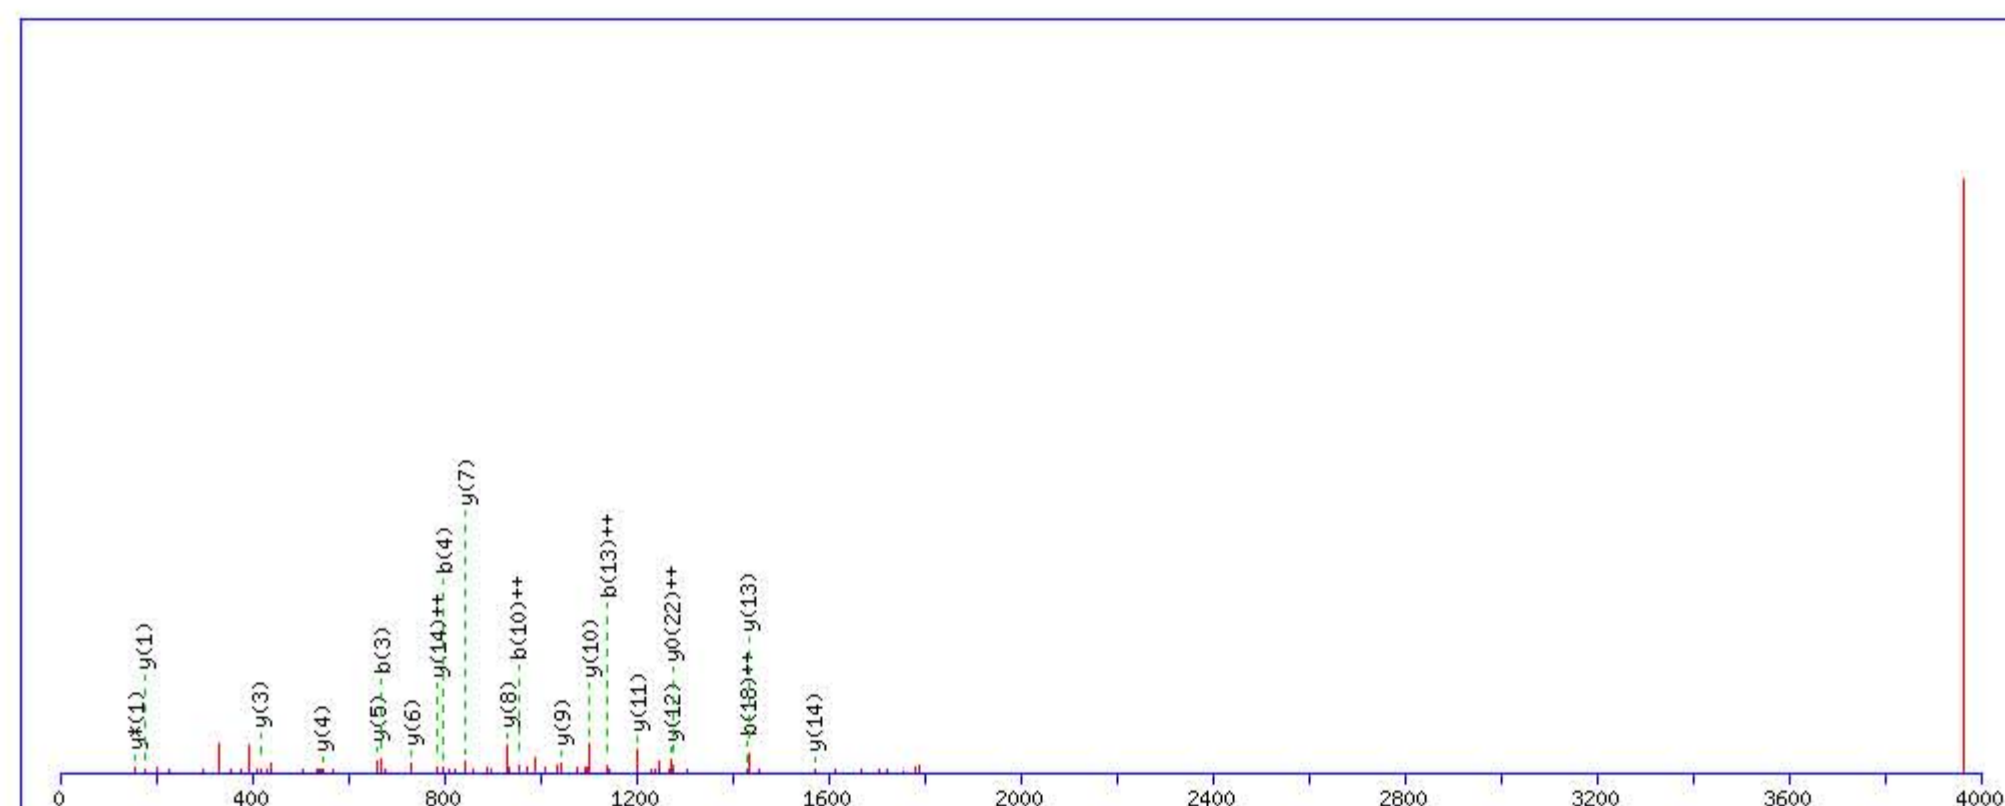

Monoisotopic mass of neutral peptide Mr(calc): 3964.782059  
 Fixed modifications: Carbamidomethyl (C) (apply to specified residues or termini only)  
 Variable modifications:  
 Q3 : Biotin:Thermo-21345 (Q)  
 Q5 : Biotin:Thermo-21345 (Q)  
 Ions Score: 43 Expect: 0.00054  
 Matches : 21/312 fragment ions using 57 most intense peaks [\(help\)](#)

| #  | b                 | b <sup>++</sup>    | b <sup>*</sup> | b <sup>*++</sup> | b <sup>0</sup> | b <sup>0++</sup> | Seq. | y                  | y <sup>++</sup>   | y <sup>*</sup>    | y <sup>*++</sup> | y <sup>0</sup> | y <sup>0++</sup>   | #  |
|----|-------------------|--------------------|----------------|------------------|----------------|------------------|------|--------------------|-------------------|-------------------|------------------|----------------|--------------------|----|
| 1  | 132.047761        | 66.527518          |                |                  |                |                  | M    |                    |                   |                   |                  |                |                    | 28 |
| 2  | 231.116175        | 116.061725         |                |                  |                |                  | V    | 3834.748870        | 1917.878073       | 3817.722321       | 1909.364798      | 3816.738305    | 1908.872790        | 27 |
| 3  | <b>670.341501</b> | 335.674389         | 653.314952     | 327.161114       |                |                  | Q    | 3735.680456        | 1868.343866       | 3718.653907       | 1859.830591      | 3717.669891    | 1859.338583        | 26 |
| 4  | <b>799.384094</b> | 400.195685         | 782.357545     | 391.682411       | 781.373529     | 391.190403       | E    | 3296.455130        | 1648.731203       | 3279.428581       | 1640.217928      | 3278.444565    | 1639.725920        | 25 |
| 5  | 1238.609420       | 619.808348         | 1221.582871    | 611.295074       | 1220.598855    | 610.803066       | Q    | 3167.412537        | 1584.209906       | 3150.385988       | 1575.696632      | 3149.401972    | 1575.204624        | 24 |
| 6  | 1398.640069       | 699.823673         | 1381.613520    | 691.310398       | 1380.629504    | 690.818390       | C    | 2728.187211        | 1364.597243       | 2711.160662       | 1356.083969      | 2710.176646    | 1355.591961        | 23 |
| 7  | 1558.670718       | 779.838997         | 1541.644169    | 771.325723       | 1540.660153    | 770.833715       | C    | 2568.156562        | 1284.581919       | 2551.130013       | 1276.068644      | 2550.145997    | <b>1275.576636</b> | 22 |
| 8  | 1695.729630       | 848.368453         | 1678.703081    | 839.855179       | 1677.719065    | 839.363171       | H    | 2408.125913        | 1204.566594       | 2391.099364       | 1196.053320      | 2390.115348    | 1195.561312        | 21 |
| 9  | 1782.761658       | 891.884467         | 1765.735109    | 883.371193       | 1764.751093    | 882.879185       | S    | 2271.067001        | 1136.037138       | 2254.040452       | 1127.523864      | 2253.056436    | 1127.031856        | 20 |
| 10 | 1910.820236       | <b>955.913756</b>  | 1893.793687    | 947.400482       | 1892.809671    | 946.908474       | Q    | 2184.034973        | 1092.521124       | 2167.008424       | 1084.007850      | 2166.024408    | 1083.515842        | 19 |
| 11 | 2023.904300       | 1012.455788        | 2006.877751    | 1003.942514      | 2005.893735    | 1003.450506      | L    | 2055.976395        | 1028.491835       | 2038.949846       | 1019.978561      | 2037.965830    | 1019.486553        | 18 |
| 12 | 2152.946893       | 1076.977084        | 2135.920344    | 1068.463810      | 2134.936328    | 1067.971802      | E    | 1942.892331        | 971.949804        | 1925.865782       | 963.436529       | 1924.881766    | 962.944521         | 17 |
| 13 | 2281.989486       | <b>1141.498381</b> | 2264.962937    | 1132.985106      | 2263.978921    | 1132.493098      | E    | 1813.849738        | 907.428507        | 1796.823189       | 898.915233       | 1795.839173    | 898.423225         | 16 |
| 14 | 2395.073550       | 1198.040413        | 2378.047001    | 1189.527138      | 2377.062985    | 1189.035130      | L    | 1684.807145        | 842.907211        | 1667.780596       | 834.393936       | 1666.796580    | 833.901928         | 15 |
| 15 | 2532.132462       | 1266.569869        | 2515.105913    | 1258.056594      | 2514.121897    | 1257.564586      | H    | <b>1571.723081</b> | <b>786.365179</b> | 1554.696532       | 777.851904       | 1553.712516    | 777.359896         | 14 |
| 16 | 2692.163111       | 1346.585193        | 2675.136562    | 1338.071919      | 2674.152546    | 1337.579911      | C    | <b>1434.664169</b> | 717.835723        | 1417.637620       | 709.322448       | 1416.653604    | 708.830440         | 13 |
| 17 | 2763.200225       | 1382.103750        | 2746.173676    | 1373.590476      | 2745.189660    | 1373.098468      | A    | <b>1274.633520</b> | 637.820398        | 1257.606971       | 629.307124       | 1256.622955    | 628.815116         | 12 |
| 18 | 2864.247904       | <b>1432.627590</b> | 2847.221355    | 1424.114315      | 2846.237339    | 1423.622307      | T    | <b>1203.596406</b> | 602.301841        | 1186.569857       | 593.788567       | 1185.585841    | 593.296559         | 11 |
| 19 | 2921.269368       | 1461.138322        | 2904.242819    | 1452.625047      | 2903.258803    | 1452.133039      | G    | <b>1102.548727</b> | 551.778002        | 1085.522178       | 543.264727       | 1084.538162    | 542.772719         | 10 |
| 20 | 3034.353432       | 1517.680354        | 3017.326883    | 1509.167079      | 3016.342867    | 1508.675071      | I    | <b>1045.527263</b> | 523.267270        | 1028.500714       | 514.753995       | 1027.516698    | 514.261987         | 9  |
| 21 | 3121.385460       | 1561.196368        | 3104.358911    | 1552.683093      | 3103.374895    | 1552.191085      | S    | <b>932.443199</b>  | 466.725238        | 915.416650        | 458.211963       | 914.432634     | 457.719955         | 8  |
| 22 | 3234.469524       | 1617.738400        | 3217.442975    | 1609.225125      | 3216.458959    | 1608.733117      | L    | <b>845.411171</b>  | 423.209224        | 828.384622        | 414.695949       | 827.400606     | 414.203941         | 7  |
| 23 | 3305.506638       | 1653.256957        | 3288.480089    | 1644.743683      | 3287.496073    | 1644.251675      | A    | <b>732.327107</b>  | 366.667192        | 715.300558        | 358.153917       | 714.316542     | 357.661909         | 6  |
| 24 | 3419.549565       | 1710.278421        | 3402.523016    | 1701.765146      | 3401.539000    | 1701.273138      | N    | <b>661.289993</b>  | 331.148635        | 644.263444        | 322.635360       | 643.279428     | 322.143352         | 5  |
| 25 | 3548.592158       | 1774.799717        | 3531.565609    | 1766.286443      | 3530.581593    | 1765.794435      | E    | <b>547.247066</b>  | 274.127171        | 530.220517        | 265.613897       | 529.236501     | 265.121889         | 4  |
| 26 | 3676.650736       | 1838.829006        | 3659.624187    | 1830.315732      | 3658.640171    | 1829.823724      | Q    | <b>418.204473</b>  | 209.605874        | 401.177924        | 201.092600       | 400.193908     | 200.600592         | 3  |
| 27 | 3791.677679       | 1896.342478        | 3774.651130    | 1887.829203      | 3773.667114    | 1887.337195      | D    | 290.145895         | 145.576585        | 273.119346        | 137.063311       | 272.135330     | 136.571303         | 2  |
| 28 |                   |                    |                |                  |                |                  | R    | <b>175.118952</b>  | 88.063114         | <b>158.092403</b> | 79.549839        |                |                    | 1  |

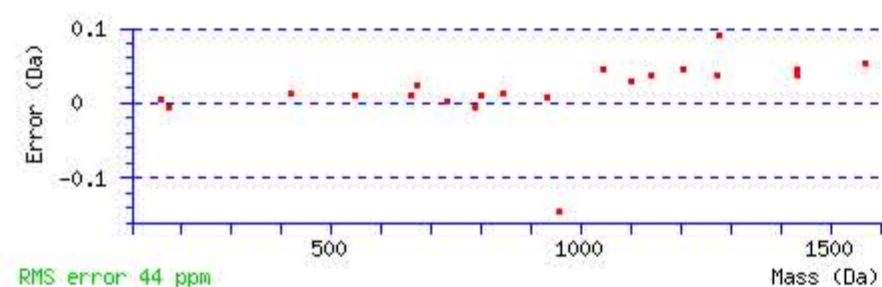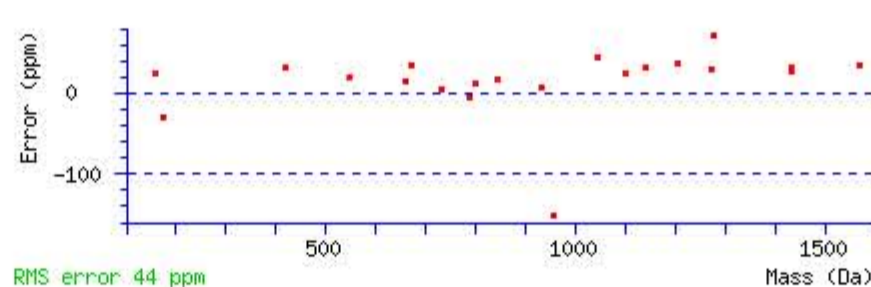

NCBI BLAST search of **MVQEQCCHSQLEELHCATGISLANEQDR**  
 (Parameters: blastp, nr protein database, expect=20000, no filter, PAM30)  
 Other BLAST [web gateways](#)

### All matches to this query

| Score | Mr(calc):   | Delta    | Sequence                                     |
|-------|-------------|----------|----------------------------------------------|
| 43.0  | 3964.782059 | 0.021357 | <a href="#">MVQEQCCHSQLEELHCATGISLANEQDR</a> |
| 41.3  | 3964.782059 | 0.021357 | <a href="#">MVQEQCCHSQLEELHCATGISLANEQDR</a> |
| 37.8  | 3964.782059 | 0.021357 | <a href="#">MVQEQCCHSQLEELHCATGISLANEQDR</a> |



# MASCOT Search Results

## Peptide View

MS/MS Fragmentation of **SQLVYQSR**

Found in **LG3BP\_HUMAN**, Galectin-3-binding protein OS=Homo sapiens GN=LGALS3BP PE=1 SV=1

Match to Query 24353: 1290.666968 from(646.340760,2+) rtinseconds(1713) index(49371)

Title: Locus:1.1.1.3240.7 File:"2013-07-02 CLN FXIII 30 min 3rd F 4.wiff"

Data file C:\Program Files (x86)\Matrix Science\Mascot Daemon\mgf\3 FXIII 30 min 3rd\mascot\_daemon\_merge.mgf

Click mouse within plot area to zoom in by factor of two about that point

Or, Plot from  to  Da

Label all possible matches  Label matches used for scoring

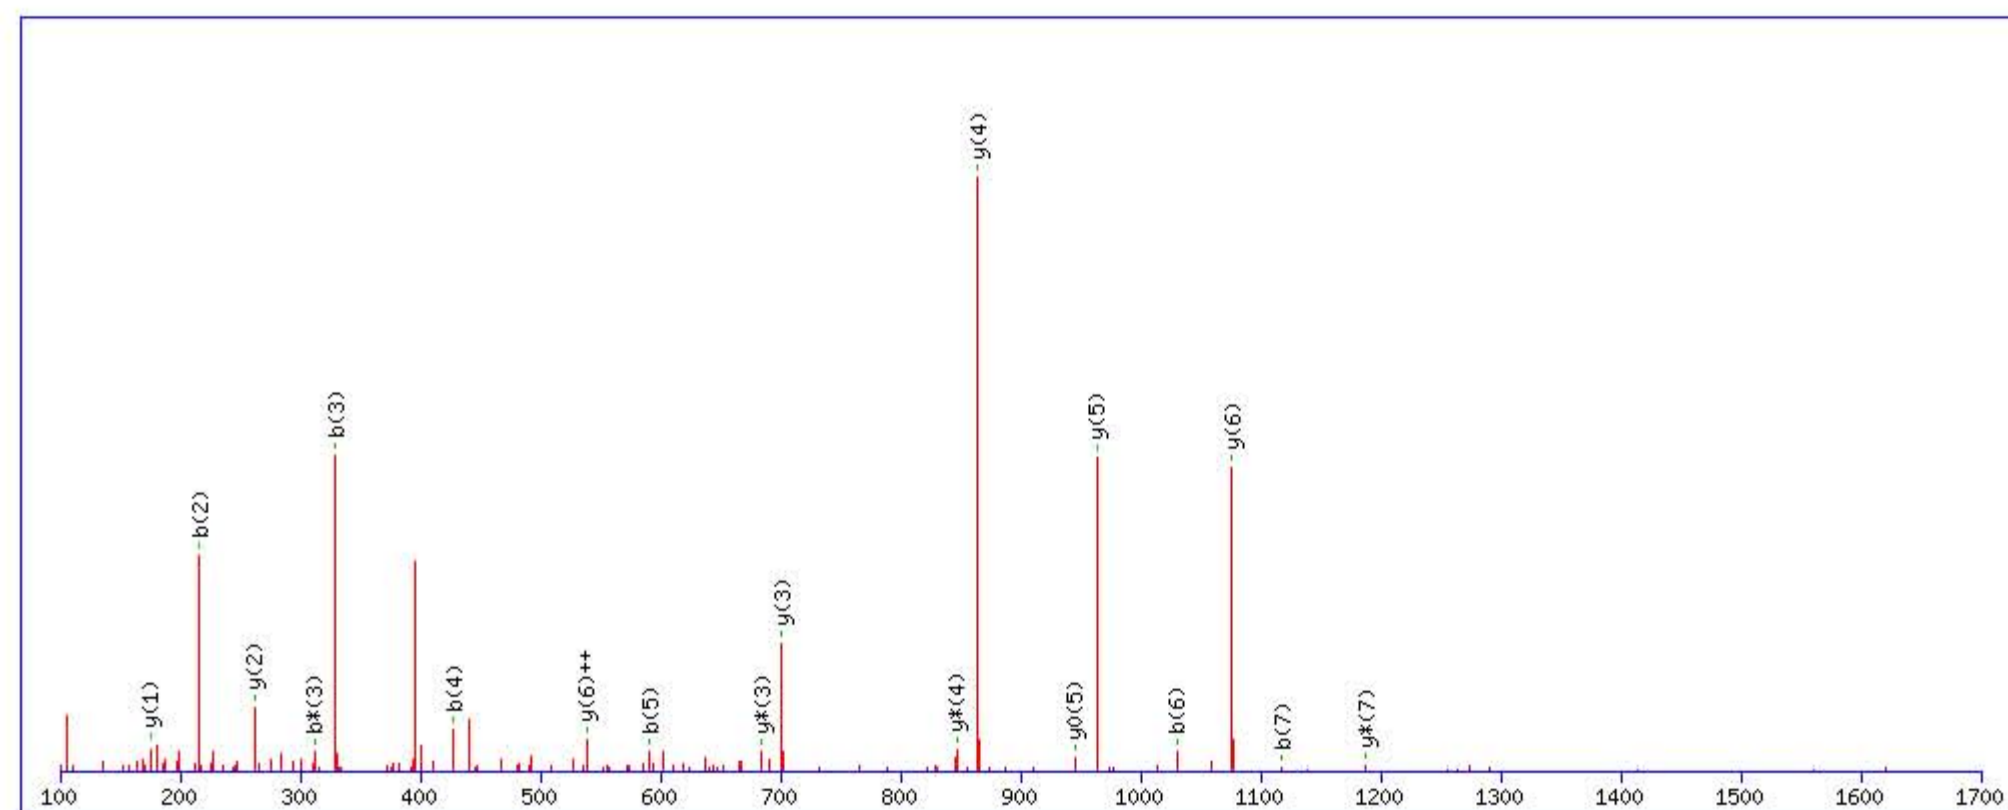

Monoisotopic mass of neutral peptide Mr(calc): 1290.675430

Fixed modifications: Carbamidomethyl (C) (apply to specified residues or termini only)

Variable modifications:

Q6 : Biotin:Thermo-21345 (Q)

Ions Score: 33 Expect: 0.0027

Matches : 18/80 fragment ions using 36 most intense peaks ([help](#))

| # | b                  | b <sup>++</sup> | b <sup>*</sup>    | b <sup>*++</sup> | b <sup>0</sup> | b <sup>0++</sup> | Seq. | y                  | y <sup>++</sup>   | y <sup>*</sup>     | y <sup>*++</sup> | y <sup>0</sup>    | y <sup>0++</sup> | # |
|---|--------------------|-----------------|-------------------|------------------|----------------|------------------|------|--------------------|-------------------|--------------------|------------------|-------------------|------------------|---|
| 1 | 88.039304          | 44.523290       |                   |                  | 70.028739      | 35.518008        | S    |                    |                   |                    |                  |                   |                  | 8 |
| 2 | <b>216.097882</b>  | 108.552579      | 199.071333        | 100.039305       | 198.087317     | 99.547296        | Q    | 1204.650691        | 602.828984        | <b>1187.624142</b> | 594.315709       | 1186.640126       | 593.823701       | 7 |
| 3 | <b>329.181946</b>  | 165.094611      | <b>312.155397</b> | 156.581336       | 311.171381     | 156.089328       | L    | <b>1076.592113</b> | <b>538.799695</b> | 1059.565564        | 530.286420       | 1058.581548       | 529.794412       | 6 |
| 4 | <b>428.250360</b>  | 214.628818      | 411.223811        | 206.115544       | 410.239795     | 205.623536       | V    | <b>963.508049</b>  | 482.257663        | 946.481500         | 473.744388       | <b>945.497484</b> | 473.252380       | 5 |
| 5 | <b>591.313689</b>  | 296.160483      | 574.287140        | 287.647208       | 573.303124     | 287.155200       | Y    | <b>864.439635</b>  | 432.723456        | <b>847.413086</b>  | 424.210181       | 846.429070        | 423.718173       | 4 |
| 6 | <b>1030.539015</b> | 515.773146      | 1013.512466       | 507.259871       | 1012.528450    | 506.767863       | Q    | <b>701.376306</b>  | 351.191791        | <b>684.349757</b>  | 342.678517       | 683.365741        | 342.186509       | 3 |
| 7 | <b>1117.571043</b> | 559.289160      | 1100.544494       | 550.775885       | 1099.560478    | 550.283877       | S    | <b>262.150980</b>  | 131.579128        | 245.124431         | 123.065854       | 244.140415        | 122.573846       | 2 |
| 8 |                    |                 |                   |                  |                |                  | R    | <b>175.118952</b>  | 88.063114         | 158.092403         | 79.549839        |                   |                  | 1 |

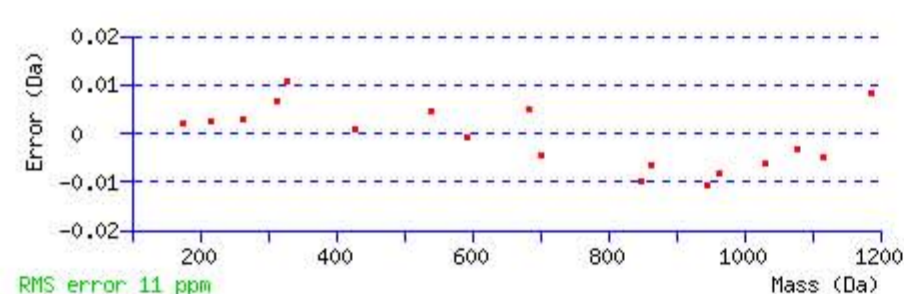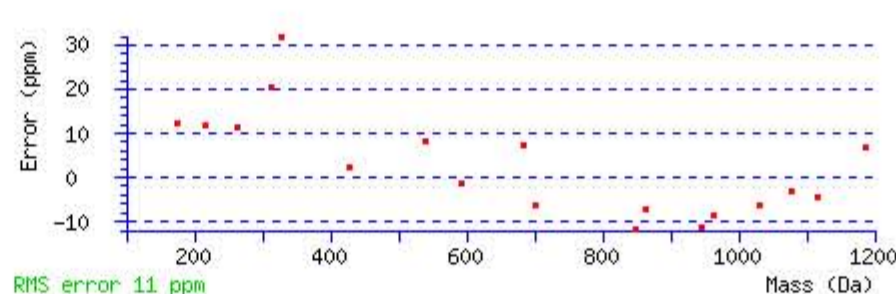

NCBI BLAST search of [SQLVYQSR](#)

(Parameters: blastp, nr protein database, expect=20000, no filter, PAM30)

Other BLAST [web gateways](#)

All matches to this query

| Score | Mr(calc):   | Delta     | Sequence                     |
|-------|-------------|-----------|------------------------------|
| 32.6  | 1290.675430 | -0.008462 | <a href="#">SQLVYQSR</a>     |
| 5.0   | 1290.685303 | -0.018335 | <a href="#">SQISELNLLMK</a>  |
| 3.3   | 1290.677933 | -0.010965 | <a href="#">TIVSTAQISESR</a> |

Mascot: <http://www.matrixscience.com/>



# MASCOT Search Results

## Peptide View

MS/MS Fragmentation of **SQLVYQSR**

Found in **LG3BP\_HUMAN**, Galectin-3-binding protein OS=Homo sapiens GN=LGALS3BP PE=1 SV=1

Match to Query 34122: 1601.837988 from(801.926270,2+) rtinseconds(2087) index(35677)

Title: Locus:1.1.1.3360.13 File:"2013-07-02 CLN FXIII 30 min 3rd F 3.wiff"

Data file C:\Program Files (x86)\Matrix Science\Mascot Daemon\mgf\3 FXIII 30 min 3rd\mascot\_daemon\_merge.mgf

Click mouse within plot area to zoom in by factor of two about that point

Or, Plot from  to  Da

Label all possible matches  Label matches used for scoring

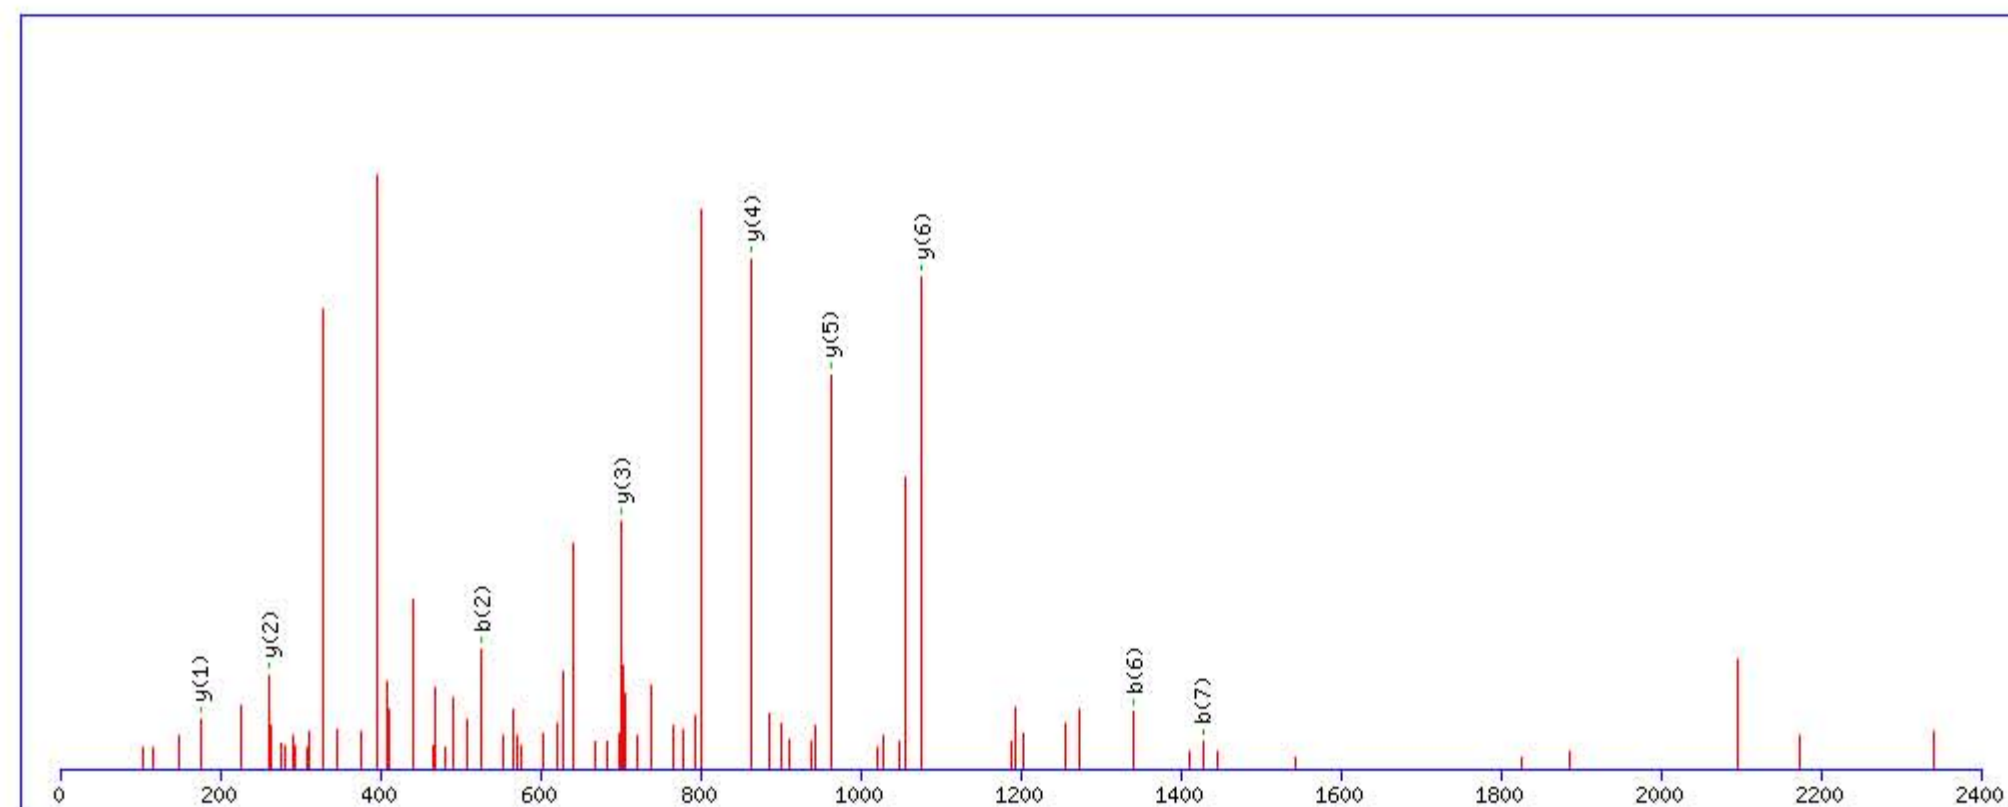

Monoisotopic mass of neutral peptide Mr(calc): 1601.842178

Fixed modifications: Carbamidomethyl (C) (apply to specified residues or termini only)

Variable modifications:

Q2 : Biotin:Thermo-21345 (Q)

Q6 : Biotin:Thermo-21345 (Q)

Ions Score: 35 Expect: 0.0033

Matches : 9/80 fragment ions using 15 most intense peaks [\(help\)](#)

| # | b                  | b <sup>++</sup> | b <sup>*</sup> | b <sup>*++</sup> | b <sup>0</sup> | b <sup>0++</sup> | Seq. | y                  | y <sup>++</sup> | y <sup>*</sup> | y <sup>*++</sup> | y <sup>0</sup> | y <sup>0++</sup> | # |
|---|--------------------|-----------------|----------------|------------------|----------------|------------------|------|--------------------|-----------------|----------------|------------------|----------------|------------------|---|
| 1 | 88.039304          | 44.523290       |                |                  | 70.028739      | 35.518008        | S    |                    |                 |                |                  |                |                  | 8 |
| 2 | <b>527.264630</b>  | 264.135953      | 510.238081     | 255.622679       | 509.254065     | 255.130671       | Q    | 1515.817439        | 758.412358      | 1498.790890    | 749.899083       | 1497.806874    | 749.407075       | 7 |
| 3 | 640.348694         | 320.677985      | 623.322145     | 312.164711       | 622.338129     | 311.672703       | L    | <b>1076.592113</b> | 538.799695      | 1059.565564    | 530.286420       | 1058.581548    | 529.794412       | 6 |
| 4 | 739.417108         | 370.212192      | 722.390559     | 361.698917       | 721.406543     | 361.206909       | V    | <b>963.508049</b>  | 482.257663      | 946.481500     | 473.744388       | 945.497484     | 473.252380       | 5 |
| 5 | 902.480437         | 451.743856      | 885.453888     | 443.230582       | 884.469872     | 442.738574       | Y    | <b>864.439635</b>  | 432.723456      | 847.413086     | 424.210181       | 846.429070     | 423.718173       | 4 |
| 6 | <b>1341.705763</b> | 671.356520      | 1324.679214    | 662.843245       | 1323.695198    | 662.351237       | Q    | <b>701.376306</b>  | 351.191791      | 684.349757     | 342.678517       | 683.365741     | 342.186509       | 3 |
| 7 | <b>1428.737791</b> | 714.872534      | 1411.711242    | 706.359259       | 1410.727226    | 705.867251       | S    | <b>262.150980</b>  | 131.579128      | 245.124431     | 123.065854       | 244.140415     | 122.573846       | 2 |
| 8 |                    |                 |                |                  |                |                  | R    | <b>175.118952</b>  | 88.063114       | 158.092403     | 79.549839        |                |                  | 1 |

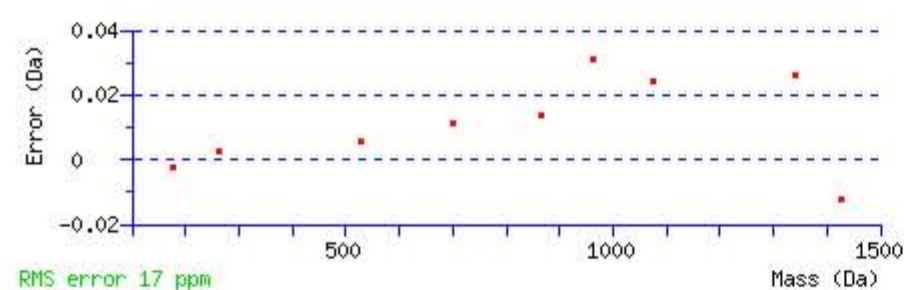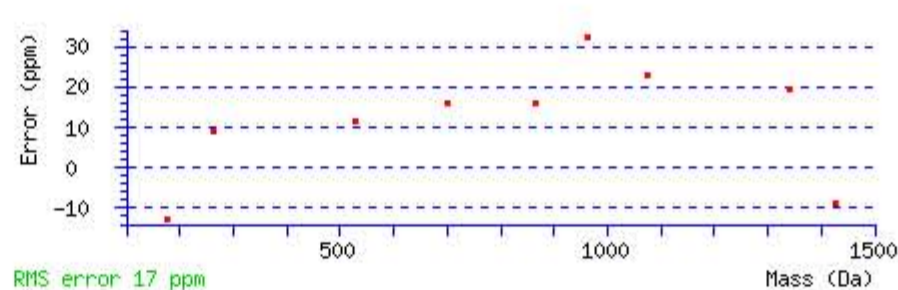

NCBI BLAST search of [SQLVYQSR](#)

(Parameters: blastp, nr protein database, expect=20000, no filter, PAM30)

Other BLAST [web gateways](#)

## All matches to this query

| Score | Mr(calc):   | Delta     | Sequence                      |
|-------|-------------|-----------|-------------------------------|
| 34.8  | 1601.842178 | -0.004190 | <a href="#">SQLVYQSR</a>      |
| 7.8   | 1601.846024 | -0.008036 | <a href="#">RFVLSCSLLSHQR</a> |
| 0.6   | 1601.834763 | 0.003225  | <a href="#">QMLEALNFLHSKR</a> |

Mascot: <http://www.matrixscience.com/>



# MASCOT SEARCH RESULTS

## Peptide View

MS/MS Fragmentation of **YSSDYFQAPSDYR**

Found in **LG3BP\_HUMAN**, Galectin-3-binding protein OS=Homo sapiens GN=LGALS3BP PE=1 SV=1

Match to Query 41173: 1908.844008 from(955.429280,2+) rtinseconds(2110) index(35844)

Title: Locus:1.1.1.3368.25 File:"2013-07-02 CLN FXIII 30 min 3rd F 3.wiff"

Data file C:\Program Files (x86)\Matrix Science\Mascot Daemon\mgf3 FXIII 30 min 3rd\mascot\_daemon\_merge.mgf

Click mouse within plot area to zoom in by factor of two about that point

Or, Plot from  to  Da

Label all possible matches  Label matches used for scoring

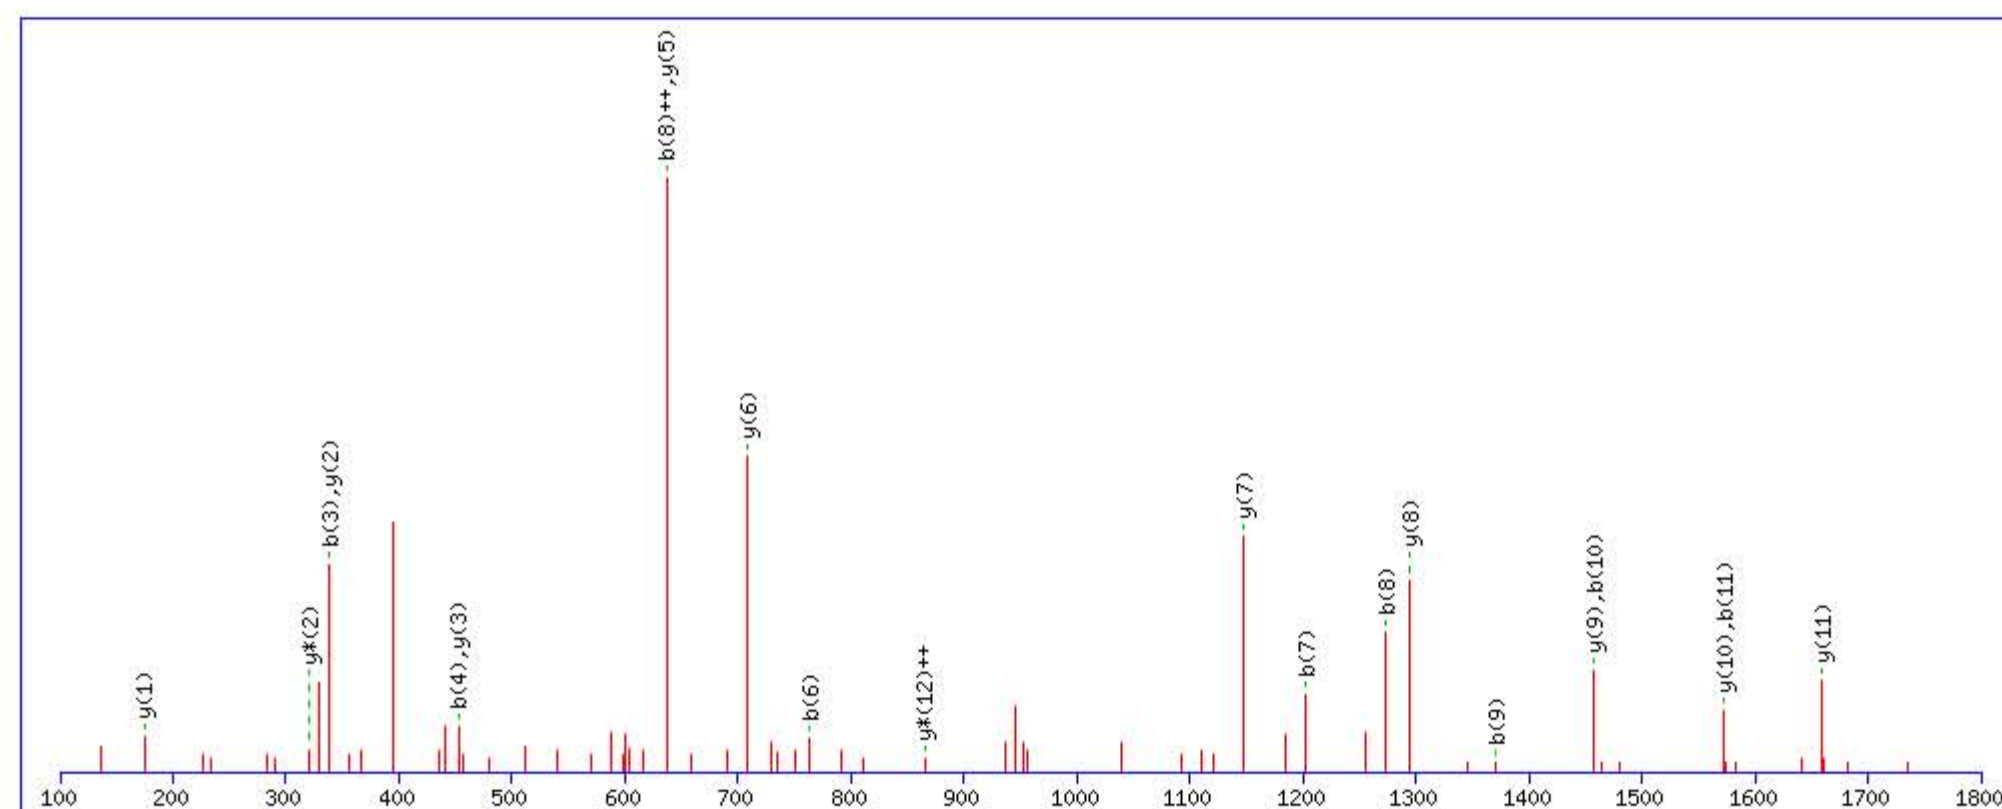

Monoisotopic mass of neutral peptide Mr(calc): 1908.835236

Fixed modifications: Carbamidomethyl (C) (apply to specified residues or termini only)

Variable modifications:

Q7 : Biotin:Thermo-21345 (Q)

Ions Score: 64 Expect: 7.9e-006

Matches : 21/126 fragment ions using 31 most intense peaks [\(help\)](#)

| #  | b           | b <sup>++</sup> | b <sup>*</sup> | b <sup>*++</sup> | b <sup>0</sup> | b <sup>0++</sup> | Seq. | y           | y <sup>++</sup> | y <sup>*</sup> | y <sup>*++</sup> | y <sup>0</sup> | y <sup>0++</sup> | #  |
|----|-------------|-----------------|----------------|------------------|----------------|------------------|------|-------------|-----------------|----------------|------------------|----------------|------------------|----|
| 1  | 164.070605  | 82.538940       |                |                  |                |                  | Y    |             |                 |                |                  |                |                  | 13 |
| 2  | 251.102633  | 126.054954      |                |                  | 233.092068     | 117.049672       | S    | 1746.779198 | 873.893237      | 1729.752649    | 865.379963       | 1728.768633    | 864.887955       | 12 |
| 3  | 338.134661  | 169.570968      |                |                  | 320.124096     | 160.565686       | S    | 1659.747170 | 830.377223      | 1642.720621    | 821.863949       | 1641.736605    | 821.371941       | 11 |
| 4  | 453.161604  | 227.084440      |                |                  | 435.151039     | 218.079158       | D    | 1572.715142 | 786.861209      | 1555.688593    | 778.347935       | 1554.704577    | 777.855927       | 10 |
| 5  | 616.224933  | 308.616105      |                |                  | 598.214368     | 299.610822       | Y    | 1457.688199 | 729.347738      | 1440.661650    | 720.834463       | 1439.677634    | 720.342455       | 9  |
| 6  | 763.293347  | 382.150312      |                |                  | 745.282782     | 373.145029       | F    | 1294.624870 | 647.816073      | 1277.598321    | 639.302799       | 1276.614305    | 638.810791       | 8  |
| 7  | 1202.518673 | 601.762975      | 1185.492124    | 593.249700       | 1184.508108    | 592.757692       | Q    | 1147.556456 | 574.281866      | 1130.529907    | 565.768592       | 1129.545891    | 565.276584       | 7  |
| 8  | 1273.555787 | 637.281532      | 1256.529238    | 628.768257       | 1255.545222    | 628.276249       | A    | 708.331130  | 354.669203      | 691.304581     | 346.155929       | 690.320565     | 345.663921       | 6  |
| 9  | 1370.608551 | 685.807914      | 1353.582002    | 677.294639       | 1352.597986    | 676.802631       | P    | 637.294016  | 319.150646      | 620.267467     | 310.637372       | 619.283451     | 310.145364       | 5  |
| 10 | 1457.640579 | 729.323928      | 1440.614030    | 720.810653       | 1439.630014    | 720.318645       | S    | 540.241252  | 270.624264      | 523.214703     | 262.110990       | 522.230687     | 261.618982       | 4  |
| 11 | 1572.667522 | 786.837399      | 1555.640973    | 778.324125       | 1554.656957    | 777.832117       | D    | 453.209224  | 227.108250      | 436.182675     | 218.594976       | 435.198659     | 218.102968       | 3  |
| 12 | 1735.730851 | 868.369064      | 1718.704302    | 859.855789       | 1717.720286    | 859.363781       | Y    | 338.182281  | 169.594778      | 321.155732     | 161.081504       |                |                  | 2  |
| 13 |             |                 |                |                  |                |                  | R    | 175.118952  | 88.063114       | 158.092403     | 79.549839        |                |                  | 1  |

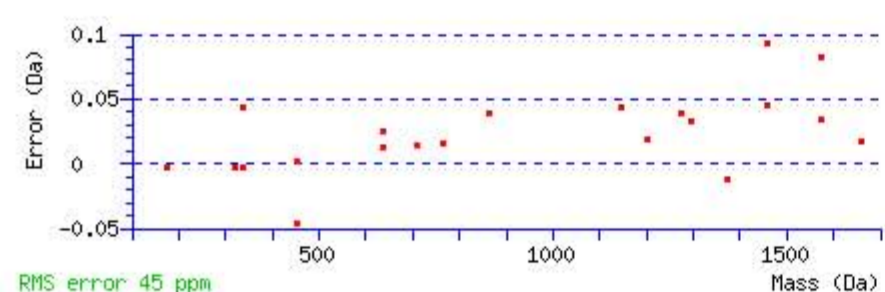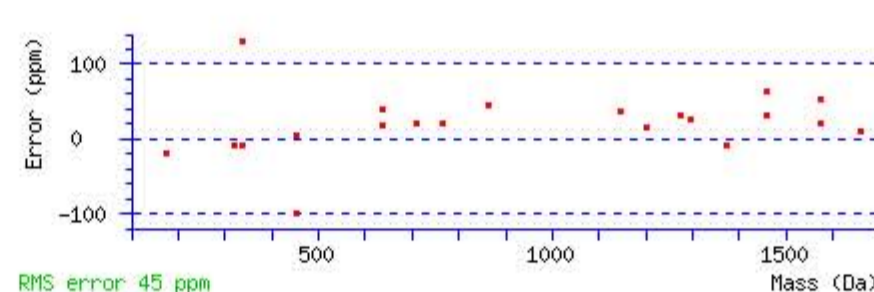

NCBI BLAST search of **YSSDYFQAPSDYR**

(Parameters: blastp, nr protein database, expect=20000, no filter, PAM30)

Other BLAST [web gateways](#)

All matches to this query

| Score | Mr(calc):   | Delta    | Sequence                      |
|-------|-------------|----------|-------------------------------|
| 63.5  | 1908.835236 | 0.008772 | <a href="#">YSSDYFQAPSDYR</a> |

Mascot: <http://www.matrixscience.com/>



# MASCOT Search Results

## Peptide View

MS/MS Fragmentation of **QTQVSVLPEGGETPLFK**

Found in **GELS\_HUMAN**, Gelsolin OS=Homo sapiens GN=GSN PE=1 SV=1

Match to Query 51026: 2451.292782 from(818.104870,3+) rtinseconds(2612) index(54199)

Title: Locus:1.1.1.3552.17 File:"2013-07-02 CLN FXIII 30 min 3rd F 4.wiff"

Data file C:\Program Files (x86)\Matrix Science\Mascot Daemon\mgf3 FXIII 30 min 3rd\mascot\_daemon\_merge.mgf

Click mouse within plot area to zoom in by factor of two about that point

Or, Plot from  to  Da

Label all possible matches  Label matches used for scoring

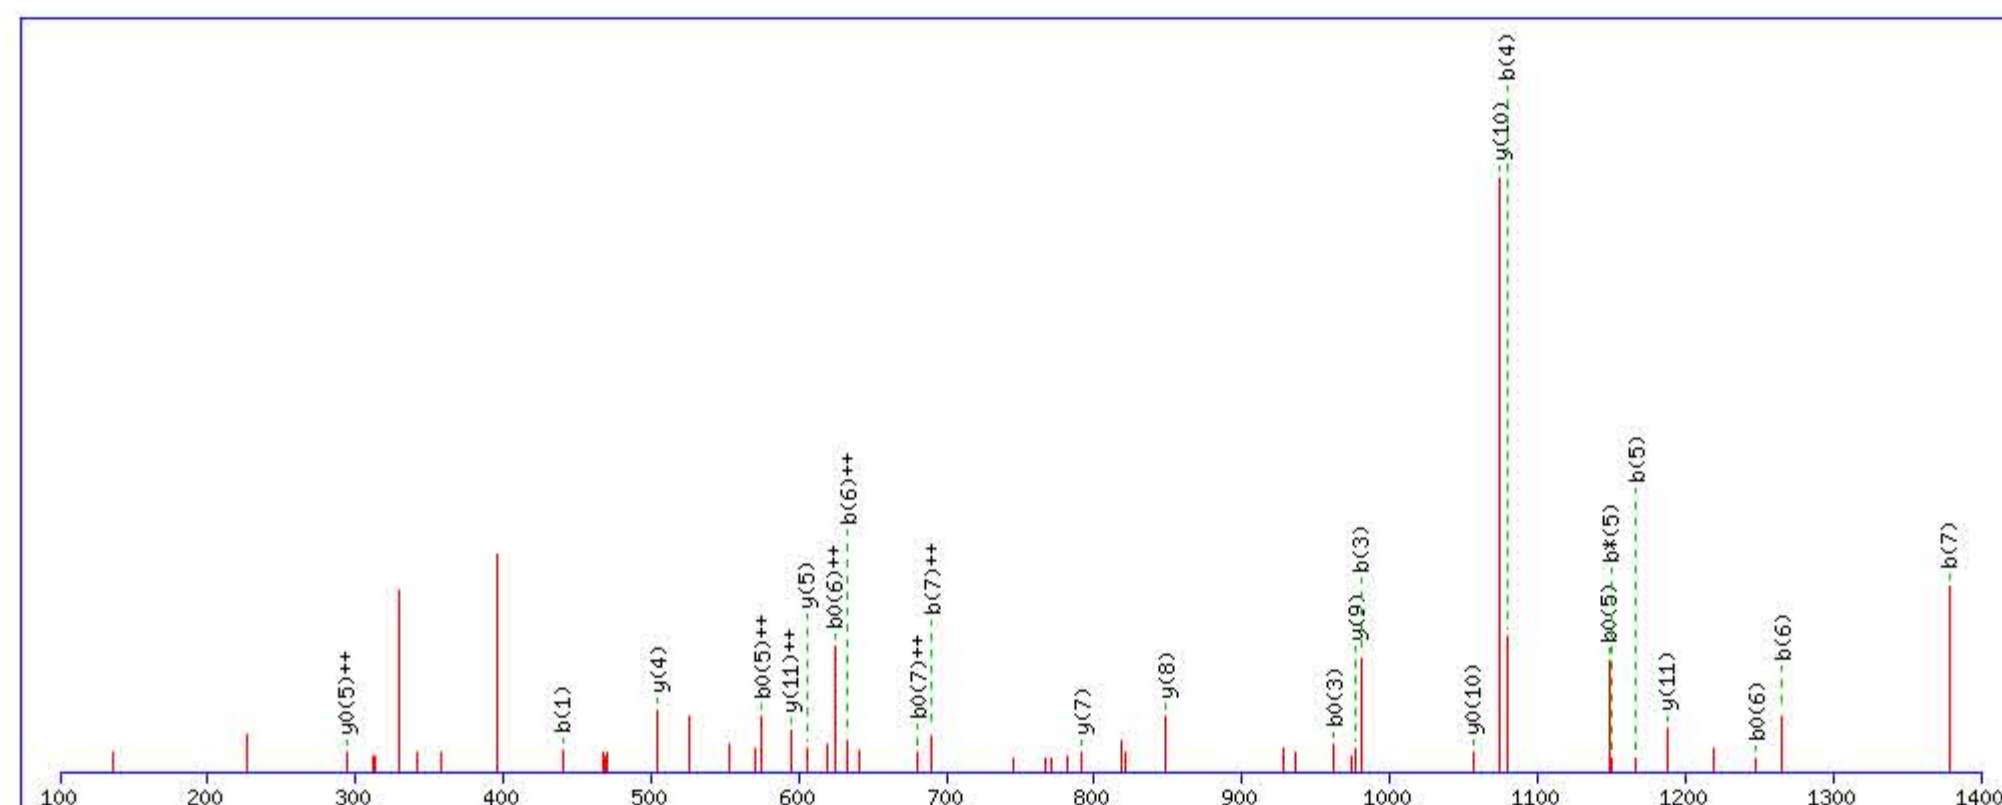

Monoisotopic mass of neutral peptide Mr(calc): 2451.290588

Fixed modifications: Carbamidomethyl (C) (apply to specified residues or termini only)

Variable modifications:

Q1 : Biotin:Thermo-21345 (Q)

Q3 : Biotin:Thermo-21345 (Q)

Ions Score: 39 Expect: 0.00049

Matches : 26/182 fragment ions using 50 most intense peaks [\(help\)](#)

| #  | b                  | b <sup>++</sup>   | b <sup>*</sup>     | b <sup>*++</sup> | b <sup>0</sup>     | b <sup>0++</sup>  | Seq. | y                  | y <sup>++</sup>   | y <sup>*</sup> | y <sup>*++</sup> | y <sup>0</sup>     | y <sup>0++</sup>  | #  |
|----|--------------------|-------------------|--------------------|------------------|--------------------|-------------------|------|--------------------|-------------------|----------------|------------------|--------------------|-------------------|----|
| 1  | <b>440.232602</b>  | 220.619939        | 423.206053         | 212.106664       |                    |                   | Q    |                    |                   |                |                  |                    |                   | 17 |
| 2  | 541.280281         | 271.143779        | 524.253732         | 262.630504       | 523.269716         | 262.138496        | T    | 2013.072528        | 1007.039902       | 1996.045979    | 998.526628       | 1995.061963        | 998.034620        | 16 |
| 3  | <b>980.505607</b>  | 490.756442        | 963.479058         | 482.243167       | <b>962.495042</b>  | 481.751159        | Q    | 1912.024849        | 956.516063        | 1894.998300    | 948.002788       | 1894.014284        | 947.510780        | 15 |
| 4  | <b>1079.574021</b> | 540.290649        | 1062.547472        | 531.777374       | 1061.563456        | 531.285366        | V    | 1472.799523        | 736.903400        | 1455.772974    | 728.390125       | 1454.788958        | 727.898117        | 14 |
| 5  | <b>1166.606049</b> | 583.806663        | <b>1149.579500</b> | 575.293388       | <b>1148.595484</b> | <b>574.801380</b> | S    | 1373.731109        | 687.369193        | 1356.704560    | 678.855918       | 1355.720544        | 678.363910        | 13 |
| 6  | <b>1265.674463</b> | <b>633.340870</b> | 1248.647914        | 624.827595       | <b>1247.663898</b> | <b>624.335587</b> | V    | 1286.699081        | 643.853179        | 1269.672532    | 635.339904       | 1268.688516        | 634.847896        | 12 |
| 7  | <b>1378.758527</b> | <b>689.882902</b> | 1361.731978        | 681.369627       | 1360.747962        | <b>680.877619</b> | L    | <b>1187.630667</b> | <b>594.318971</b> | 1170.604118    | 585.805697       | 1169.620102        | 585.313689        | 11 |
| 8  | 1475.811291        | 738.409284        | 1458.784742        | 729.896009       | 1457.800726        | 729.404001        | P    | <b>1074.546603</b> | 537.776940        | 1057.520054    | 529.263665       | <b>1056.536038</b> | 528.771657        | 10 |
| 9  | 1604.853884        | 802.930580        | 1587.827335        | 794.417306       | 1586.843319        | 793.925298        | E    | <b>977.493839</b>  | 489.250558        | 960.467290     | 480.737283       | 959.483274         | 480.245275        | 9  |
| 10 | 1661.875348        | 831.441312        | 1644.848799        | 822.928038       | 1643.864783        | 822.436030        | G    | <b>848.451246</b>  | 424.729261        | 831.424697     | 416.215986       | 830.440681         | 415.723978        | 8  |
| 11 | 1718.896812        | 859.952044        | 1701.870263        | 851.438770       | 1700.886247        | 850.946762        | G    | <b>791.429782</b>  | 396.218529        | 774.403233     | 387.705254       | 773.419217         | 387.213246        | 7  |
| 12 | 1847.939405        | 924.473341        | 1830.912856        | 915.960066       | 1829.928840        | 915.468058        | E    | 734.408318         | 367.707797        | 717.381769     | 359.194523       | 716.397753         | 358.702515        | 6  |
| 13 | 1948.987084        | 974.997180        | 1931.960535        | 966.483906       | 1930.976519        | 965.991898        | T    | <b>605.365725</b>  | 303.186500        | 588.339176     | 294.673226       | 587.355160         | <b>294.181218</b> | 5  |
| 14 | 2046.039848        | 1023.523562       | 2029.013299        | 1015.010288      | 2028.029283        | 1014.518280       | P    | <b>504.318046</b>  | 252.662661        | 487.291497     | 244.149386       |                    |                   | 4  |
| 15 | 2159.123912        | 1080.065594       | 2142.097363        | 1071.552319      | 2141.113347        | 1071.060311       | L    | 407.265282         | 204.136279        | 390.238733     | 195.623004       |                    |                   | 3  |
| 16 | 2306.192326        | 1153.599801       | 2289.165777        | 1145.086526      | 2288.181761        | 1144.594518       | F    | <b>294.181218</b>  | 147.594247        | 277.154669     | 139.080972       |                    |                   | 2  |
| 17 |                    |                   |                    |                  |                    |                   | K    | 147.112804         | 74.060040         | 130.086255     | 65.546765        |                    |                   | 1  |

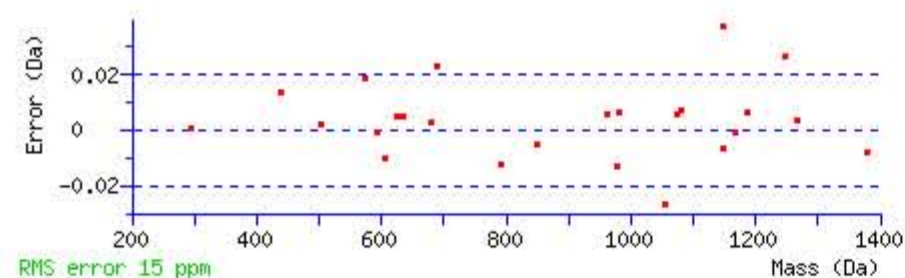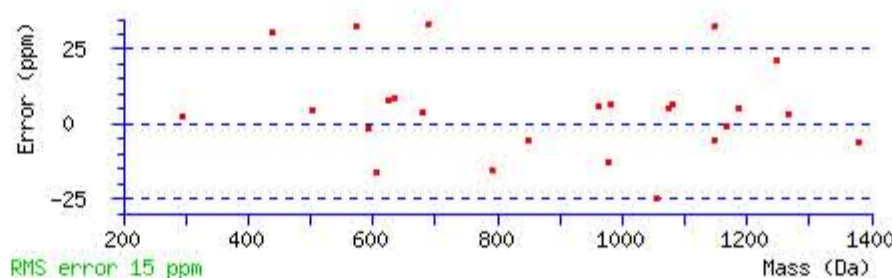

NCBI BLAST search of **QTQVSVLPEGGETPLFK**

(Parameters: blastp, nr protein database, expect=20000, no filter, PAM30)

Other BLAST [web gateways](#)

## All matches to this query

| Score | Mr(calc):   | Delta     | Sequence                               |
|-------|-------------|-----------|----------------------------------------|
| 39.3  | 2451.290588 | 0.002194  | <a href="#">QTQVSVLPEGGETPLFK</a>      |
| 3.8   | 2451.277130 | 0.015652  | <a href="#">GFPSDTQLLDLRRNHFPSVPR</a>  |
| 3.3   | 2451.301590 | -0.008808 | <a href="#">ATKRISHMPSRPELSAVATDLR</a> |
| 0.3   | 2451.313705 | -0.020923 | <a href="#">ITKLGWFEVQKDQFVFR</a>      |
| 0.2   | 2451.264496 | 0.028286  | <a href="#">GLAHSIRLLLEYTDSSYEEKK</a>  |



# MASCOT Search Results

## Peptide View

MS/MS Fragmentation of **DPDQTDGLGLSYLSSHIANVER**  
 Found in **GELS\_HUMAN**, Gelsolin OS=Homo sapiens GN=GSN PE=1 SV=1

Match to Query 54142: 2697.307962 from(900.109930,3+) rtinseconds(2571) index(8252)  
 Title: Locus:1.1.1.3465.4 File:"2013-07-02 CLN FXIII 30 min 3rd F 1.wiff"  
 Data file C:\Program Files (x86)\Matrix Science\Mascot Daemon\mgf3 FXIII 30 min 3rd\mascot\_daemon\_merge.mgf

Click mouse within plot area to zoom in by factor of two about that point

Or, Plot from  to  Da

Label all possible matches  Label matches used for scoring

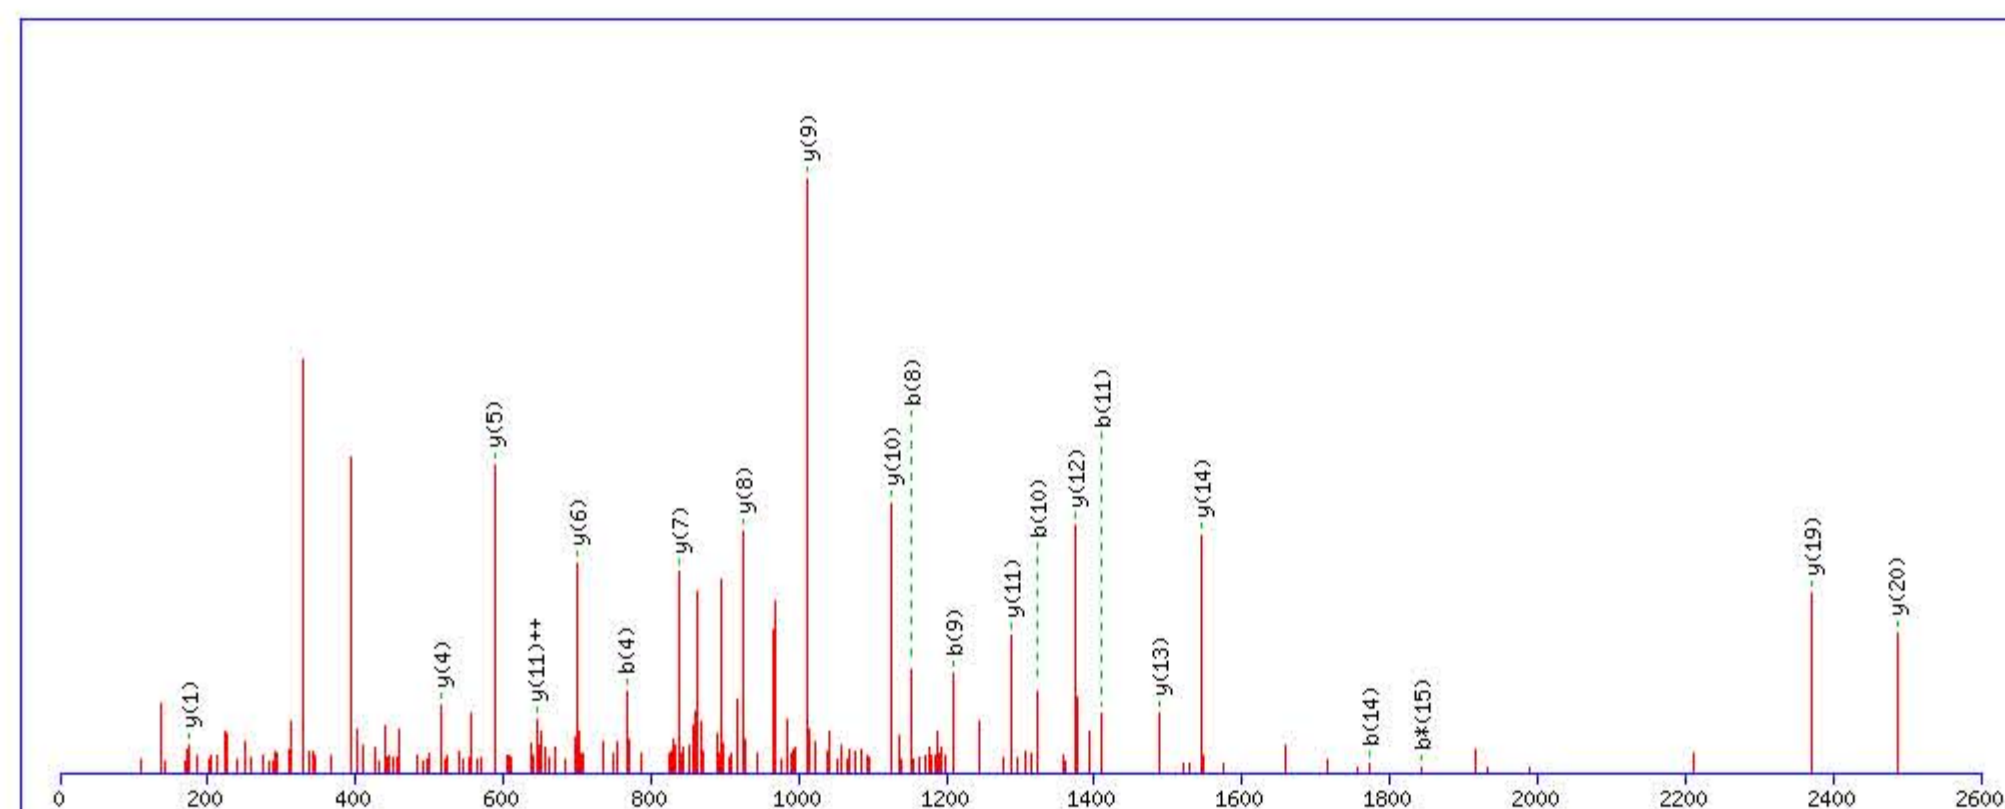

Monoisotopic mass of neutral peptide Mr(calc): 2697.306824  
 Fixed modifications: Carbamidomethyl (C) (apply to specified residues or termini only)  
 Variable modifications:  
 Q4 : Biotin:Thermo-21345 (Q)  
 Ions Score: 87 Expect: 4.9e-008  
 Matches : 22/244 fragment ions using 39 most intense peaks [\(help\)](#)

| #  | b                  | b <sup>++</sup> | b <sup>*</sup>     | b <sup>*++</sup> | b <sup>0</sup> | b <sup>0++</sup> | Seq. | y                  | y <sup>++</sup>   | y <sup>*</sup> | y <sup>*++</sup> | y <sup>0</sup> | y <sup>0++</sup> | #  |
|----|--------------------|-----------------|--------------------|------------------|----------------|------------------|------|--------------------|-------------------|----------------|------------------|----------------|------------------|----|
| 1  | 116.034219         | 58.520748       |                    |                  | 98.023654      | 49.515465        | D    |                    |                   |                |                  |                |                  | 22 |
| 2  | 213.086983         | 107.047129      |                    |                  | 195.076418     | 98.041847        | P    | 2583.287164        | 1292.147220       | 2566.260615    | 1283.633945      | 2565.276599    | 1283.141937      | 21 |
| 3  | 328.113926         | 164.560601      |                    |                  | 310.103361     | 155.555319       | D    | <b>2486.234400</b> | 1243.620838       | 2469.207851    | 1235.107563      | 2468.223835    | 1234.615555      | 20 |
| 4  | <b>767.339252</b>  | 384.173264      | 750.312703         | 375.659989       | 749.328687     | 375.167982       | Q    | <b>2371.207457</b> | 1186.107366       | 2354.180908    | 1177.594092      | 2353.196892    | 1177.102084      | 19 |
| 5  | 868.386931         | 434.697104      | 851.360382         | 426.183829       | 850.376366     | 425.691821       | T    | 1931.982131        | 966.494704        | 1914.955582    | 957.981429       | 1913.971566    | 957.489421       | 18 |
| 6  | 983.413874         | 492.210575      | 966.387325         | 483.697300       | 965.403309     | 483.205292       | D    | 1830.934452        | 915.970864        | 1813.907903    | 907.457590       | 1812.923887    | 906.965581       | 17 |
| 7  | 1040.435338        | 520.721307      | 1023.408789        | 512.208032       | 1022.424773    | 511.716025       | G    | 1715.907509        | 858.457392        | 1698.880960    | 849.944118       | 1697.896944    | 849.452110       | 16 |
| 8  | <b>1153.519402</b> | 577.263339      | 1136.492853        | 568.750065       | 1135.508837    | 568.258056       | L    | 1658.886045        | 829.946661        | 1641.859496    | 821.433386       | 1640.875480    | 820.941378       | 15 |
| 9  | <b>1210.540866</b> | 605.774071      | 1193.514317        | 597.260796       | 1192.530301    | 596.768788       | G    | <b>1545.801981</b> | 773.404629        | 1528.775432    | 764.891354       | 1527.791416    | 764.399346       | 14 |
| 10 | <b>1323.624930</b> | 662.316103      | 1306.598381        | 653.802828       | 1305.614365    | 653.310820       | L    | <b>1488.780517</b> | 744.893897        | 1471.753968    | 736.380622       | 1470.769952    | 735.888614       | 13 |
| 11 | <b>1410.656958</b> | 705.832117      | 1393.630409        | 697.318842       | 1392.646393    | 696.826834       | S    | <b>1375.696453</b> | 688.351865        | 1358.669904    | 679.838590       | 1357.685888    | 679.346582       | 12 |
| 12 | 1573.720287        | 787.363781      | 1556.693738        | 778.850507       | 1555.709722    | 778.358499       | Y    | <b>1288.664425</b> | <b>644.835851</b> | 1271.637876    | 636.322576       | 1270.653860    | 635.830568       | 11 |
| 13 | 1686.804351        | 843.905813      | 1669.777802        | 835.392539       | 1668.793786    | 834.900531       | L    | <b>1125.601096</b> | 563.304186        | 1108.574547    | 554.790912       | 1107.590531    | 554.298904       | 10 |
| 14 | <b>1773.836379</b> | 887.421827      | 1756.809830        | 878.908553       | 1755.825814    | 878.416545       | S    | <b>1012.517032</b> | 506.762154        | 995.490483     | 498.248880       | 994.506467     | 497.756872       | 9  |
| 15 | 1860.868407        | 930.937841      | <b>1843.841858</b> | 922.424567       | 1842.857842    | 921.932559       | S    | <b>925.485004</b>  | 463.246140        | 908.458455     | 454.732866       | 907.474439     | 454.240858       | 8  |
| 16 | 1997.927319        | 999.467297      | 1980.900770        | 990.954023       | 1979.916754    | 990.462015       | H    | <b>838.452976</b>  | 419.730126        | 821.426427     | 411.216852       | 820.442411     | 410.724844       | 7  |
| 17 | 2111.011383        | 1056.009329     | 2093.984834        | 1047.496055      | 2093.000818    | 1047.004047      | I    | <b>701.394064</b>  | 351.200670        | 684.367515     | 342.687396       | 683.383499     | 342.195388       | 6  |
| 18 | 2182.048497        | 1091.527886     | 2165.021948        | 1083.014612      | 2164.037932    | 1082.522604      | A    | <b>588.310000</b>  | 294.658638        | 571.283451     | 286.145364       | 570.299435     | 285.653356       | 5  |
| 19 | 2296.091424        | 1148.549350     | 2279.064875        | 1140.036075      | 2278.080859    | 1139.544067      | N    | <b>517.272886</b>  | 259.140081        | 500.246337     | 250.626806       | 499.262321     | 250.134798       | 4  |
| 20 | 2395.159838        | 1198.083557     | 2378.133289        | 1189.570282      | 2377.149273    | 1189.078274      | V    | 403.229959         | 202.118617        | 386.203410     | 193.605343       | 385.219394     | 193.113335       | 3  |
| 21 | 2524.202431        | 1262.604853     | 2507.175882        | 1254.091579      | 2506.191866    | 1253.599571      | E    | 304.161545         | 152.584411        | 287.134996     | 144.071136       | 286.150980     | 143.579128       | 2  |
| 22 |                    |                 |                    |                  |                |                  | R    | <b>175.118952</b>  | 88.063114         | 158.092403     | 79.549839        |                |                  | 1  |

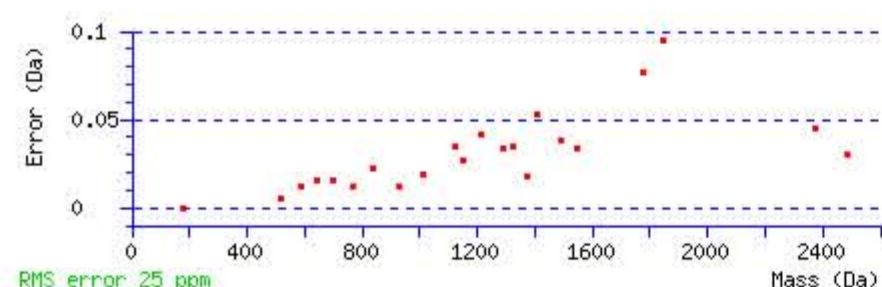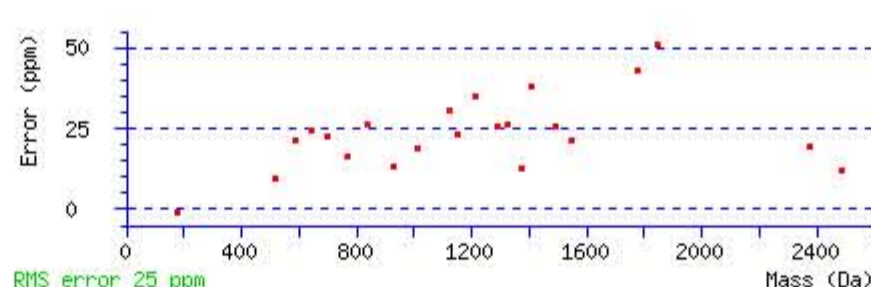

NCBI BLAST search of **DPDQTDGLGLSYLSSHIANVER**  
 (Parameters: blastp, nr protein database, expect=20000, no filter, PAM30)  
 Other BLAST [web gateways](#)

### All matches to this query

| Score | Mr(calc):   | Delta    | Sequence                               |
|-------|-------------|----------|----------------------------------------|
| 87.2  | 2697.306824 | 0.001138 | <a href="#">DPDQTDGLGLSYLSSHIANVER</a> |



# MASCOT Search Results

## Peptide View

MS/MS Fragmentation of **TYFPHFDSLHGSAQVK**

Found in **HBA\_HUMAN**, Hemoglobin subunit alpha OS=Homo sapiens GN=HBA1 PE=1 SV=2

Match to Query 46171: 2144.072656 from(537.025440,4+) rtinseconds(2085) index(5721)

Title: Locus:1.1.1.3296.6 File:"2013-07-02 CLN FXIII 30 min 3rd F 1.wiff"

Data file C:\Program Files (x86)\Matrix Science\Mascot Daemon\mgf\3 FXIII 30 min 3rd\mascot\_daemon\_merge.mgf

Click mouse within plot area to zoom in by factor of two about that point

Or, Plot from  to  Da

Label all possible matches  Label matches used for scoring

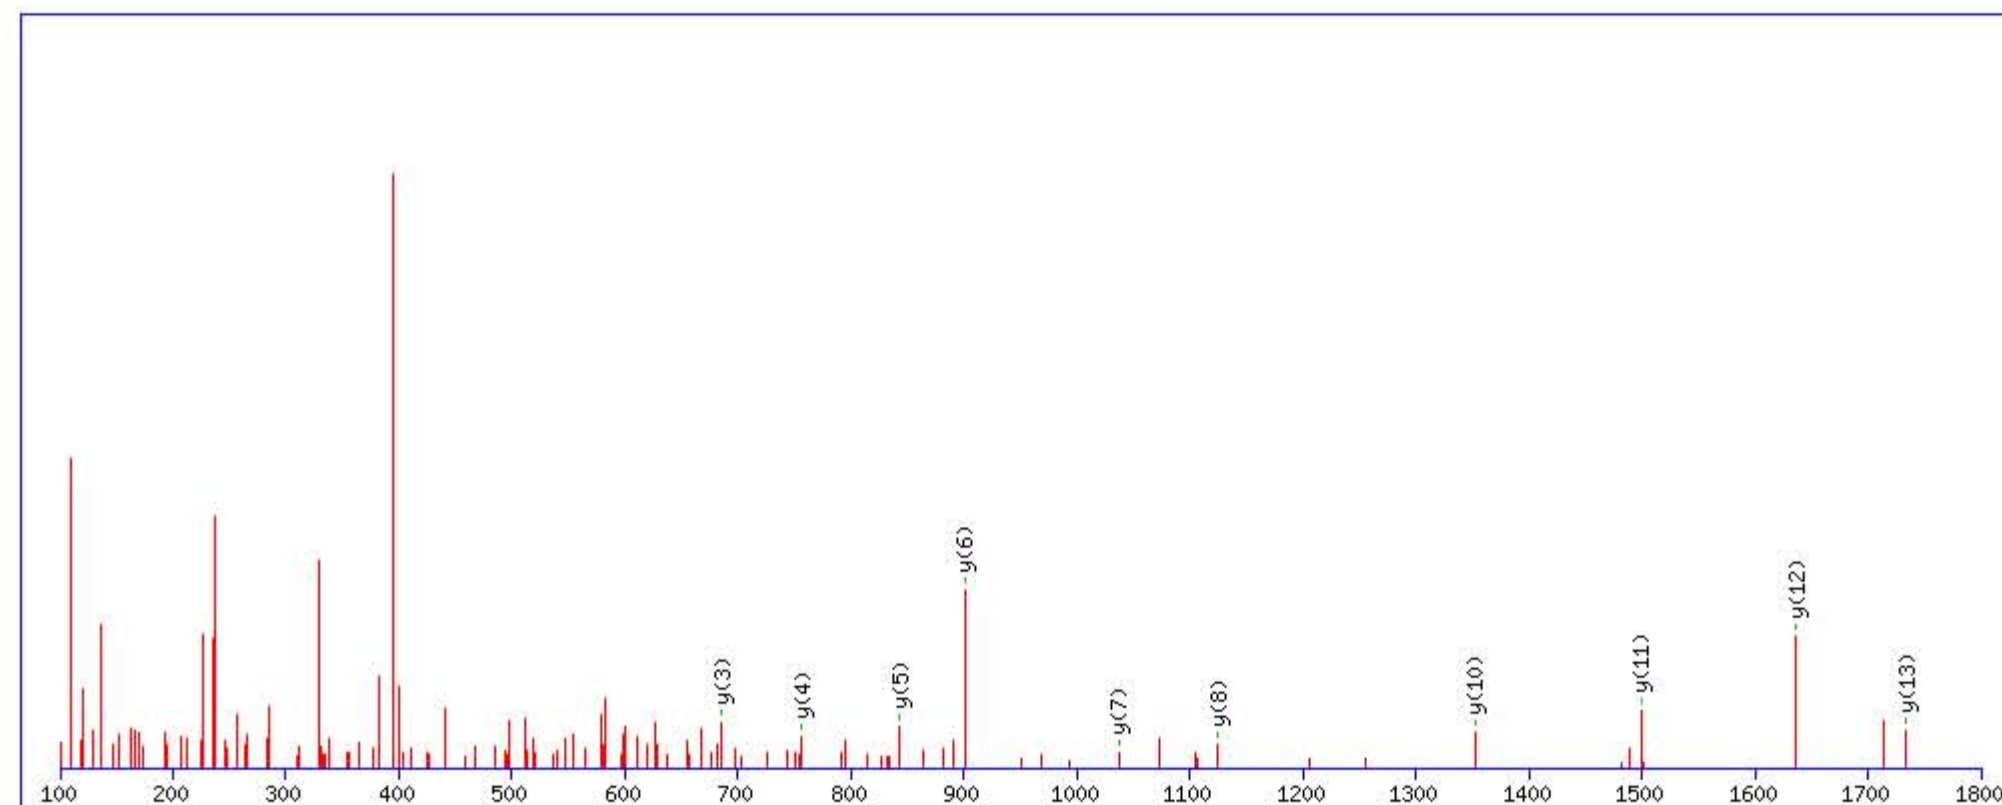

Monoisotopic mass of neutral peptide Mr(calc): 2144.051346

Fixed modifications: Carbamidomethyl (C) (apply to specified residues or termini only)

Variable modifications:

Q14 : Biotin:Thermo-21345 (Q)

Ions Score: 38 Expect: 0.0045

Matches : 10/146 fragment ions using 31 most intense peaks [\(help\)](#)

| #  | b           | b <sup>++</sup> | b <sup>*</sup> | b <sup>*++</sup> | b <sup>0</sup> | b <sup>0++</sup> | Seq. | y                  | y <sup>++</sup> | y <sup>*</sup> | y <sup>*++</sup> | y <sup>0</sup> | y <sup>0++</sup> | #  |
|----|-------------|-----------------|----------------|------------------|----------------|------------------|------|--------------------|-----------------|----------------|------------------|----------------|------------------|----|
| 1  | 102.054955  | 51.531116       |                |                  | 84.044390      | 42.525833        | T    |                    |                 |                |                  |                |                  | 16 |
| 2  | 265.118284  | 133.062780      |                |                  | 247.107719     | 124.057498       | Y    | 2044.010930        | 1022.509103     | 2026.984381    | 1013.995829      | 2026.000365    | 1013.503821      | 15 |
| 3  | 412.186698  | 206.596987      |                |                  | 394.176133     | 197.591705       | F    | 1880.947601        | 940.977438      | 1863.921052    | 932.464164       | 1862.937036    | 931.972156       | 14 |
| 4  | 509.239462  | 255.123369      |                |                  | 491.228897     | 246.118087       | P    | <b>1733.879187</b> | 867.443231      | 1716.852638    | 858.929957       | 1715.868622    | 858.437949       | 13 |
| 5  | 646.298374  | 323.652825      |                |                  | 628.287809     | 314.647543       | H    | <b>1636.826423</b> | 818.916849      | 1619.799874    | 810.403575       | 1618.815858    | 809.911567       | 12 |
| 6  | 793.366788  | 397.187032      |                |                  | 775.356223     | 388.181750       | F    | <b>1499.767511</b> | 750.387393      | 1482.740962    | 741.874119       | 1481.756946    | 741.382111       | 11 |
| 7  | 908.393731  | 454.700504      |                |                  | 890.383166     | 445.695221       | D    | <b>1352.699097</b> | 676.853186      | 1335.672548    | 668.339912       | 1334.688532    | 667.847904       | 10 |
| 8  | 1021.477795 | 511.242536      |                |                  | 1003.467230    | 502.237253       | L    | 1237.672154        | 619.339715      | 1220.645605    | 610.826441       | 1219.661589    | 610.334433       | 9  |
| 9  | 1108.509823 | 554.758550      |                |                  | 1090.499258    | 545.753267       | S    | <b>1124.588090</b> | 562.797683      | 1107.561541    | 554.284409       | 1106.577525    | 553.792400       | 8  |
| 10 | 1245.568735 | 623.288006      |                |                  | 1227.558170    | 614.282723       | H    | <b>1037.556062</b> | 519.281669      | 1020.529513    | 510.768394       | 1019.545497    | 510.276386       | 7  |
| 11 | 1302.590199 | 651.798738      |                |                  | 1284.579634    | 642.793455       | G    | <b>900.497150</b>  | 450.752213      | 883.470601     | 442.238938       | 882.486585     | 441.746930       | 6  |
| 12 | 1389.622227 | 695.314752      |                |                  | 1371.611662    | 686.309469       | S    | <b>843.475686</b>  | 422.241481      | 826.449137     | 413.728207       | 825.465121     | 413.236199       | 5  |
| 13 | 1460.659341 | 730.833309      |                |                  | 1442.648776    | 721.828026       | A    | <b>756.443658</b>  | 378.725467      | 739.417109     | 370.212192       |                |                  | 4  |
| 14 | 1899.884667 | 950.445972      | 1882.858118    | 941.932697       | 1881.874102    | 941.440689       | Q    | <b>685.406544</b>  | 343.206910      | 668.379995     | 334.693635       |                |                  | 3  |
| 15 | 1998.953081 | 999.980179      | 1981.926532    | 991.466904       | 1980.942516    | 990.974896       | V    | 246.181218         | 123.594247      | 229.154669     | 115.080972       |                |                  | 2  |
| 16 |             |                 |                |                  |                |                  | K    | 147.112804         | 74.060040       | 130.086255     | 65.546765        |                |                  | 1  |

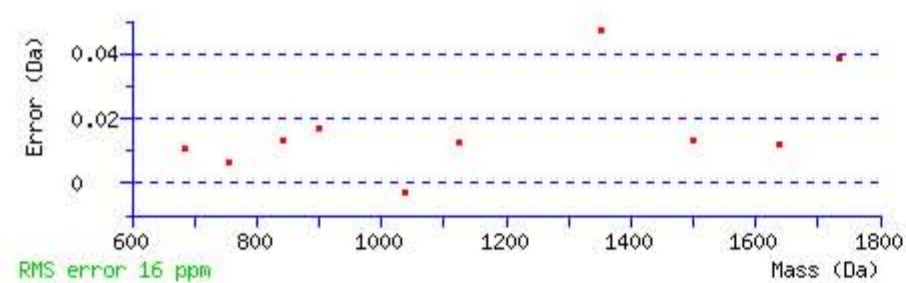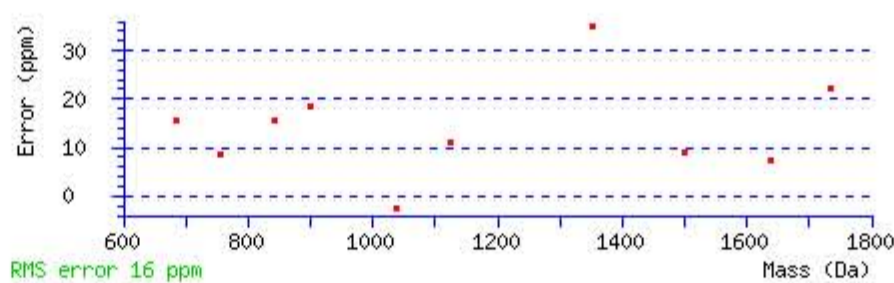

NCBI BLAST search of [TYFPHFDSLHGSAQVK](#)

(Parameters: blastp, nr protein database, expect=20000, no filter, PAM30)

Other BLAST [web gateways](#)

All matches to this query

| Score | Mr(calc):   | Delta    | Sequence                         |
|-------|-------------|----------|----------------------------------|
| 38.0  | 2144.051346 | 0.021310 | <a href="#">TYFPHFDSLHGSAQVK</a> |

Mascot: <http://www.matrixscience.com/>



# MASCOT Search Results

## Peptide View

MS/MS Fragmentation of **LLQDEFPGIPSPLDAAVECHR**

Found in **HEMO\_HUMAN**, Hemopexin OS=Homo sapiens GN=HPX PE=1 SV=2

Match to Query 53934: 2674.300932 from(892.440920,3+) rtinseconds(2672) index(67503)

Title: Locus:1.1.1.3409.17 File:"2013-07-02 CLN FXIII 30 min 3rd FT.wiff"

Data file C:\Program Files (x86)\Matrix Science\Mascot Daemon\mgf3 FXIII 30 min 3rd\mascot\_daemon\_merge.mgf

Click mouse within plot area to zoom in by factor of two about that point

Or, Plot from  to  Da

Label all possible matches  Label matches used for scoring

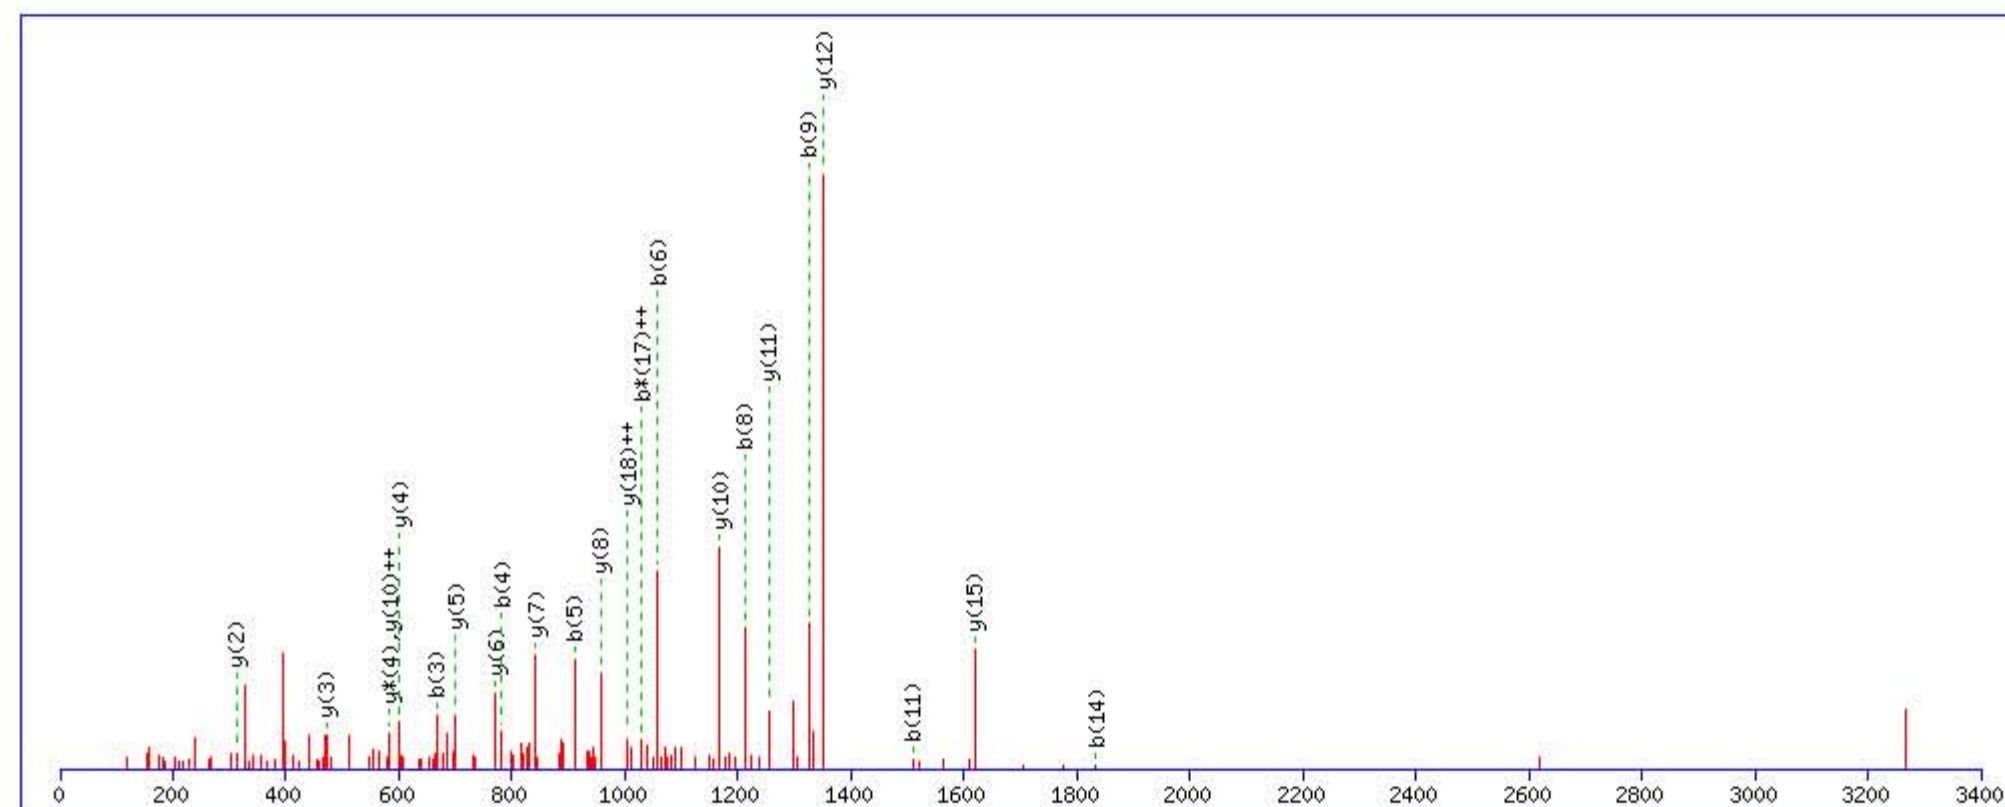

Monoisotopic mass of neutral peptide Mr(calc): 2674.324722

Fixed modifications: Carbamidomethyl (C) (apply to specified residues or termini only)

Variable modifications:

Q3 : Biotin:Thermo-21345 (Q)

Ions Score: 81 Expect: 1.8e-007

Matches : 23/224 fragment ions using 33 most intense peaks [\(help\)](#)

| #  | b                  | b <sup>++</sup> | b <sup>*</sup> | b <sup>*++</sup>   | b <sup>0</sup> | b <sup>0++</sup> | Seq. | y                  | y <sup>++</sup>    | y <sup>*</sup>    | y <sup>*++</sup> | y <sup>0</sup> | y <sup>0++</sup> | #  |
|----|--------------------|-----------------|----------------|--------------------|----------------|------------------|------|--------------------|--------------------|-------------------|------------------|----------------|------------------|----|
| 1  | 114.091340         | 57.549308       |                |                    |                |                  | L    |                    |                    |                   |                  |                |                  | 21 |
| 2  | 227.175404         | 114.091340      |                |                    |                |                  | L    | 2562.247943        | 1281.627609        | 2545.221394       | 1273.114335      | 2544.237378    | 1272.622327      | 20 |
| 3  | <b>666.400730</b>  | 333.704003      | 649.374181     | 325.190729         |                |                  | Q    | 2449.163879        | 1225.085577        | 2432.137330       | 1216.572303      | 2431.153314    | 1216.080295      | 19 |
| 4  | <b>781.427673</b>  | 391.217475      | 764.401124     | 382.704200         | 763.417108     | 382.212192       | D    | 2009.938553        | <b>1005.472914</b> | 1992.912004       | 996.959640       | 1991.927988    | 996.467632       | 18 |
| 5  | <b>910.470266</b>  | 455.738771      | 893.443717     | 447.225497         | 892.459701     | 446.733489       | E    | 1894.911610        | 947.959443         | 1877.885061       | 939.446169       | 1876.901045    | 938.954160       | 17 |
| 6  | <b>1057.538680</b> | 529.272978      | 1040.512131    | 520.759704         | 1039.528115    | 520.267696       | F    | 1765.869017        | 883.438146         | 1748.842468       | 874.924872       | 1747.858452    | 874.432864       | 16 |
| 7  | 1154.591444        | 577.799360      | 1137.564895    | 569.286086         | 1136.580879    | 568.794078       | P    | <b>1618.800603</b> | 809.903939         | 1601.774054       | 801.390665       | 1600.790038    | 800.898657       | 15 |
| 8  | <b>1211.612908</b> | 606.310092      | 1194.586359    | 597.796818         | 1193.602343    | 597.304810       | G    | 1521.747839        | 761.377557         | 1504.721290       | 752.864283       | 1503.737274    | 752.372275       | 14 |
| 9  | <b>1324.696972</b> | 662.852124      | 1307.670423    | 654.338850         | 1306.686407    | 653.846841       | I    | 1464.726375        | 732.866825         | 1447.699826       | 724.353551       | 1446.715810    | 723.861543       | 13 |
| 10 | 1421.749736        | 711.378506      | 1404.723187    | 702.865232         | 1403.739171    | 702.373223       | P    | <b>1351.642311</b> | 676.324793         | 1334.615762       | 667.811519       | 1333.631746    | 667.319511       | 12 |
| 11 | <b>1508.781764</b> | 754.894520      | 1491.755215    | 746.381246         | 1490.771199    | 745.889238       | S    | <b>1254.589547</b> | 627.798411         | 1237.562998       | 619.285137       | 1236.578982    | 618.793129       | 11 |
| 12 | 1605.834528        | 803.420902      | 1588.807979    | 794.907628         | 1587.823963    | 794.415620       | P    | <b>1167.557519</b> | <b>584.282397</b>  | 1150.530970       | 575.769123       | 1149.546954    | 575.277115       | 10 |
| 13 | 1718.918592        | 859.962934      | 1701.892043    | 851.449660         | 1700.908027    | 850.957652       | L    | 1070.504755        | 535.756015         | 1053.478206       | 527.242741       | 1052.494190    | 526.750733       | 9  |
| 14 | <b>1833.945535</b> | 917.476406      | 1816.918986    | 908.963131         | 1815.934970    | 908.471123       | D    | <b>957.420691</b>  | 479.213983         | 940.394142        | 470.700709       | 939.410126     | 470.208701       | 8  |
| 15 | 1904.982649        | 952.994963      | 1887.956100    | 944.481688         | 1886.972084    | 943.989680       | A    | <b>842.393748</b>  | 421.700512         | 825.367199        | 413.187237       | 824.383183     | 412.695229       | 7  |
| 16 | 1976.019763        | 988.513520      | 1958.993214    | 980.000245         | 1958.009198    | 979.508237       | A    | <b>771.356634</b>  | 386.181955         | 754.330085        | 377.668680       | 753.346069     | 377.176672       | 6  |
| 17 | 2075.088177        | 1038.047726     | 2058.061628    | <b>1029.534452</b> | 2057.077612    | 1029.042444      | V    | <b>700.319520</b>  | 350.663398         | 683.292971        | 342.150123       | 682.308955     | 341.658115       | 5  |
| 18 | 2204.130770        | 1102.569023     | 2187.104221    | 1094.055748        | 2186.120205    | 1093.563740      | E    | <b>601.251106</b>  | 301.129191         | <b>584.224557</b> | 292.615916       | 583.240541     | 292.123908       | 4  |
| 19 | 2364.161419        | 1182.584347     | 2347.134870    | 1174.071073        | 2346.150854    | 1173.579065      | C    | <b>472.208513</b>  | 236.607894         | 455.181964        | 228.094620       |                |                  | 3  |
| 20 | 2501.220331        | 1251.113803     | 2484.193782    | 1242.600529        | 2483.209766    | 1242.108521      | H    | <b>312.177864</b>  | 156.592570         | 295.151315        | 148.079295       |                |                  | 2  |
| 21 |                    |                 |                |                    |                |                  | R    | 175.118952         | 88.063114          | 158.092403        | 79.549839        |                |                  | 1  |

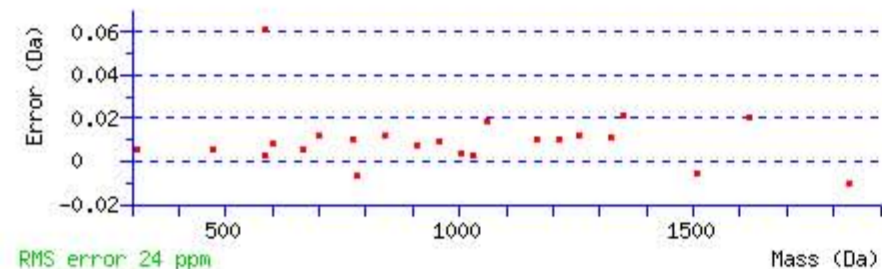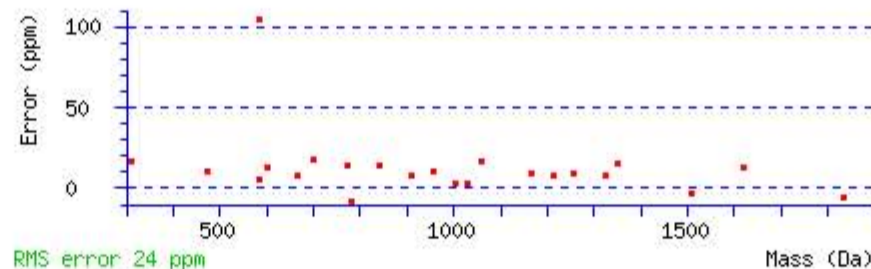

NCBI BLAST search of [LLQDEFPGIPSPLDAAVECHR](#)

(Parameters: blastp, nr protein database, expect=20000, no filter, PAM30)

Other BLAST [web gateways](#)

## All matches to this query

| Score | Mr(calc):   | Delta     | Sequence                              |
|-------|-------------|-----------|---------------------------------------|
| 81.3  | 2674.324722 | -0.023790 | <a href="#">LLQDEFPGIPSPLDAAVECHR</a> |



**Peptide View**

MS/MS Fragmentation of **GGETAQSADPQWEQLNKK**

Found in **HEP2\_HUMAN**, Heparin cofactor 2 OS=Homo sapiens GN=SERPIND1 PE=1 SV=3

Match to Query 48759: 2283.073902 from(762.031910,3+) rtinseconds(1954) index(34826)

Title: Locus:1.1.1.3314.24 File:"2013-07-02 CLN FXIII 30 min 3rd F 3.wiff"

Data file C:\Program Files (x86)\Matrix Science\Mascot Daemon\mgf3 FXIII 30 min 3rd\mascot\_daemon\_merge.mgf

Click mouse within plot area to zoom in by factor of two about that point

Or, Plot from 100 to 1800 Da Full range

Label all possible matches  Label matches used for scoring

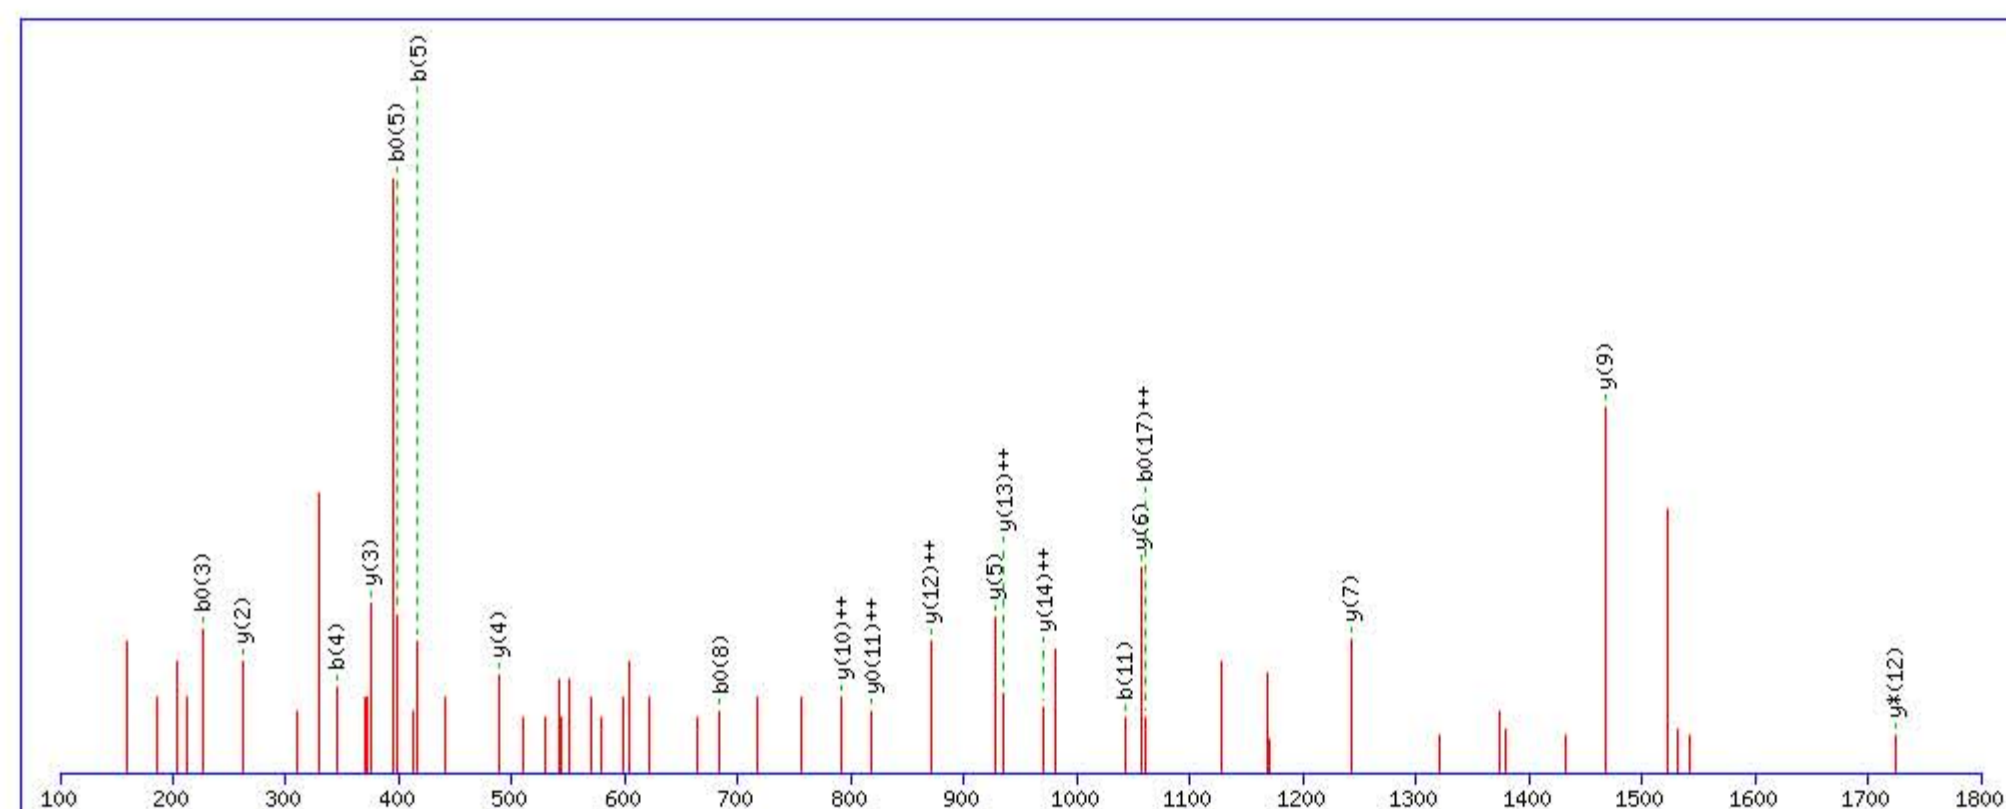

Monoisotopic mass of neutral peptide Mr(calc): 2283.058975  
 Fixed modifications: Carbamidomethyl (C) (apply to specified residues or termini only)  
 Variable modifications:  
 Q14 : Biotin:Thermo-21345 (Q)  
 Ions Score: 27 Expect: 0.033  
 Matches : 20/180 fragment ions using 48 most intense peaks (help)

| #  | b                  | b <sup>++</sup> | b <sup>*</sup> | b <sup>*++</sup> | b <sup>0</sup> | b <sup>0++</sup> | Seq.     | y                  | y <sup>++</sup>   | y <sup>*</sup>     | y <sup>*++</sup> | y <sup>0</sup> | y <sup>0++</sup> | #  |
|----|--------------------|-----------------|----------------|------------------|----------------|------------------|----------|--------------------|-------------------|--------------------|------------------|----------------|------------------|----|
| 1  | 58.028740          | 29.518008       |                |                  |                |                  | <b>G</b> |                    |                   |                    |                  |                |                  | 18 |
| 2  | 115.050204         | 58.028740       |                |                  |                |                  | <b>G</b> | 2227.044809        | 1114.026042       | 2210.018260        | 1105.512768      | 2209.034244    | 1105.020760      | 17 |
| 3  | 244.092797         | 122.550037      |                |                  | 226.082232     | 113.544754       | <b>E</b> | 2170.023345        | 1085.515310       | 2152.996796        | 1077.002036      | 2152.012780    | 1076.510028      | 16 |
| 4  | <b>345.140476</b>  | 173.073876      |                |                  | 327.129911     | 164.068594       | <b>T</b> | 2040.980752        | 1020.994014       | 2023.954203        | 1012.480740      | 2022.970187    | 1011.988732      | 15 |
| 5  | <b>416.177590</b>  | 208.592433      |                |                  | 398.167025     | 199.587151       | <b>A</b> | 1939.933073        | <b>970.470175</b> | 1922.906524        | 961.956900       | 1921.922508    | 961.464892       | 14 |
| 6  | 544.236168         | 272.621722      | 527.209619     | 264.108448       | 526.225603     | 263.616440       | <b>Q</b> | 1868.895959        | <b>934.951618</b> | 1851.869410        | 926.438343       | 1850.885394    | 925.946335       | 13 |
| 7  | 631.268196         | 316.137736      | 614.241647     | 307.624462       | 613.257631     | 307.132454       | <b>S</b> | 1740.837381        | <b>870.922329</b> | <b>1723.810832</b> | 862.409054       | 1722.826816    | 861.917046       | 12 |
| 8  | 702.305310         | 351.656293      | 685.278761     | 343.143019       | 684.294745     | 342.651011       | <b>A</b> | 1653.805353        | 827.406315        | 1636.778804        | 818.893040       | 1635.794788    | 818.401032       | 11 |
| 9  | 817.332253         | 409.169765      | 800.305704     | 400.656490       | 799.321688     | 400.164482       | <b>D</b> | 1582.768239        | <b>791.887758</b> | 1565.741690        | 783.374483       | 1564.757674    | 782.882475       | 10 |
| 10 | 914.385017         | 457.696147      | 897.358468     | 449.182872       | 896.374452     | 448.690864       | <b>P</b> | <b>1467.741296</b> | 734.374286        | 1450.714747        | 725.861012       | 1449.730731    | 725.369004       | 9  |
| 11 | <b>1042.443595</b> | 521.725436      | 1025.417046    | 513.212161       | 1024.433030    | 512.720153       | <b>Q</b> | 1370.688532        | 685.847904        | 1353.661983        | 677.334630       | 1352.677967    | 676.842622       | 8  |
| 12 | 1228.522908        | 614.765092      | 1211.496359    | 606.251818       | 1210.512343    | 605.759809       | <b>W</b> | <b>1242.629954</b> | 621.818615        | 1225.603405        | 613.305341       | 1224.619389    | 612.813333       | 7  |
| 13 | 1357.565501        | 679.286388      | 1340.538952    | 670.773114       | 1339.554936    | 670.281106       | <b>E</b> | <b>1056.550641</b> | 528.778959        | 1039.524092        | 520.265684       | 1038.540076    | 519.773676       | 6  |
| 14 | 1796.790827        | 898.899052      | 1779.764278    | 890.385777       | 1778.780262    | 889.893769       | <b>Q</b> | <b>927.508048</b>  | 464.257662        | 910.481499         | 455.744388       |                |                  | 5  |
| 15 | 1909.874891        | 955.441083      | 1892.848342    | 946.927809       | 1891.864326    | 946.435801       | <b>L</b> | <b>488.282722</b>  | 244.644999        | 471.256173         | 236.131725       |                |                  | 4  |
| 16 | 2023.917818        | 1012.462547     | 2006.891269    | 1003.949273      | 2005.907253    | 1003.457265      | <b>N</b> | <b>375.198658</b>  | 188.102967        | 358.172109         | 179.589693       |                |                  | 3  |
| 17 | 2137.960745        | 1069.484010     | 2120.934196    | 1060.970736      | 2119.950180    | 1060.478728      | <b>N</b> | <b>261.155731</b>  | 131.081504        | 244.129182         | 122.568229       |                |                  | 2  |
| 18 |                    |                 |                |                  |                |                  | <b>K</b> | 147.112804         | 74.060040         | 130.086255         | 65.546765        |                |                  | 1  |

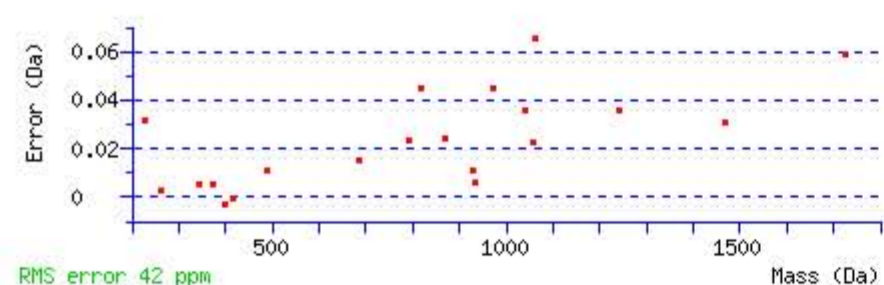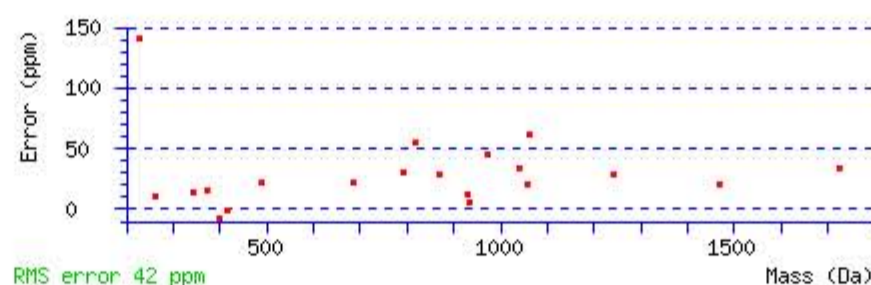

NCBI BLAST search of **GGETAQSADPQWEQLNKK**  
 (Parameters: blastp, nr protein database, expect=20000, no filter, PAM30)  
 Other BLAST [web gateways](#)

**All matches to this query**

| Score | Mr(calc):   | Delta    | Sequence                           |
|-------|-------------|----------|------------------------------------|
| 26.9  | 2283.058975 | 0.014927 | <a href="#">GGETAQSADPQWEQLNKK</a> |
| 10.6  | 2283.058975 | 0.014927 | <a href="#">GGETAQSADPQWEQLNKK</a> |
| 1.8   | 2283.058975 | 0.014927 | <a href="#">GGETAQSADPQWEQLNKK</a> |



# MASCOT Search Results

## Peptide View

MS/MS Fragmentation of **GGETAQSADPQWEQLNKK**  
 Found in **HEP2\_HUMAN**, Heparin cofactor 2 OS=Homo sapiens GN=SERPIND1 PE=1 SV=3

Match to Query 48762: 2283.080862 from(762.034230,3+) rtinseconds(1928) index(34612)  
 Title: Locus:1.1.1.3305.20 File:"2013-07-02 CLN FXIII 30 min 3rd F 3.wiff"  
 Data file C:\Program Files (x86)\Matrix Science\Mascot Daemon\mgf3 FXIII 30 min 3rd\mascot\_daemon\_merge.mgf

Click mouse within plot area to zoom in by factor of two about that point  
 Or, Plot from  to  Da   
 Label all possible matches  Label matches used for scoring

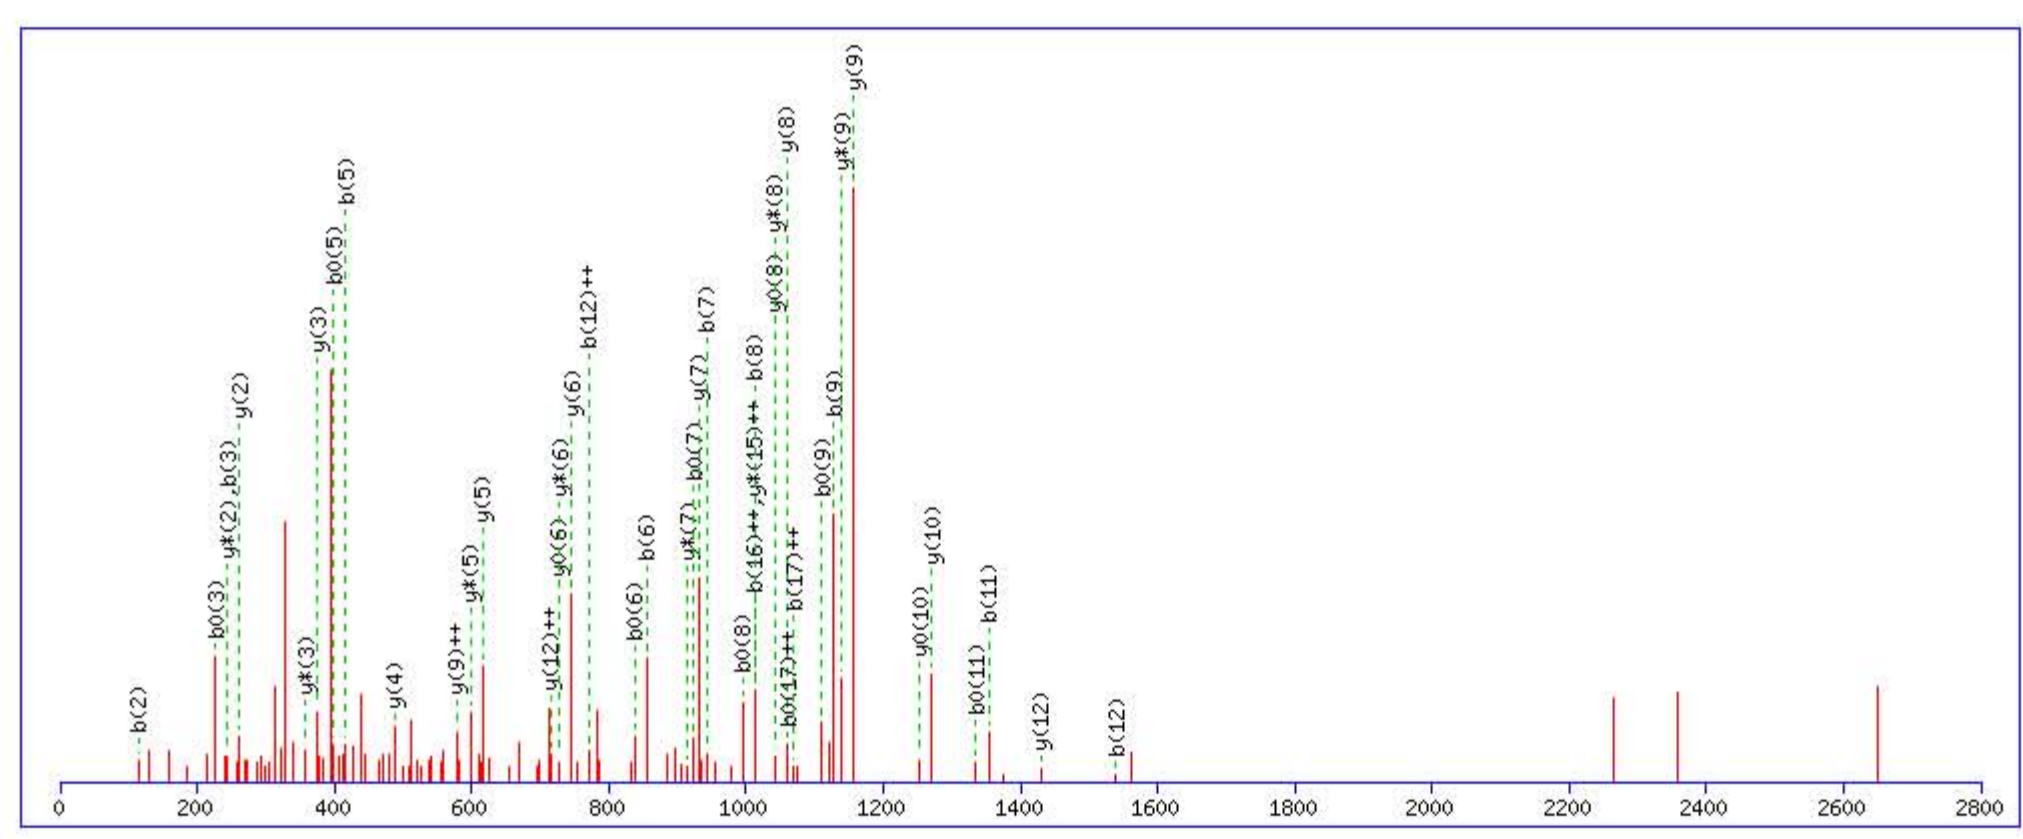

Monoisotopic mass of neutral peptide Mr(calc): 2283.058975  
 Fixed modifications: Carbamidomethyl (C) (apply to specified residues or termini only)  
 Variable modifications:  
 Q6 : Biotin:Thermo-21345 (Q)  
 Ions Score: 53 Expect: 9.6e-005  
 Matches : 43/180 fragment ions using 82 most intense peaks [\(help\)](#)

| #  | b                  | b <sup>++</sup>    | b <sup>*</sup> | b <sup>*++</sup> | b <sup>0</sup>     | b <sup>0++</sup>   | Seq. | y                  | y <sup>++</sup>   | y <sup>*</sup>     | y <sup>*++</sup>   | y <sup>0</sup>     | y <sup>0++</sup> | #  |
|----|--------------------|--------------------|----------------|------------------|--------------------|--------------------|------|--------------------|-------------------|--------------------|--------------------|--------------------|------------------|----|
| 1  | 58.028740          | 29.518008          |                |                  |                    |                    | G    |                    |                   |                    |                    |                    |                  | 18 |
| 2  | <b>115.050204</b>  | 58.028740          |                |                  |                    |                    | G    | 2227.044809        | 1114.026042       | 2210.018260        | 1105.512768        | 2209.034244        | 1105.020760      | 17 |
| 3  | <b>244.092797</b>  | 122.550037         |                |                  | <b>226.082232</b>  | 113.544754         | E    | 2170.023345        | 1085.515310       | 2152.996796        | 1077.002036        | 2152.012780        | 1076.510028      | 16 |
| 4  | 345.140476         | 173.073876         |                |                  | 327.129911         | 164.068594         | T    | 2040.980752        | 1020.994014       | 2023.954203        | <b>1012.480740</b> | 2022.970187        | 1011.988732      | 15 |
| 5  | <b>416.177590</b>  | 208.592433         |                |                  | <b>398.167025</b>  | 199.587151         | A    | 1939.933073        | 970.470175        | 1922.906524        | 961.956900         | 1921.922508        | 961.464892       | 14 |
| 6  | <b>855.402916</b>  | 428.205096         | 838.376367     | 419.691822       | <b>837.392351</b>  | 419.199814         | Q    | 1868.895959        | 934.951618        | 1851.869410        | 926.438343         | 1850.885394        | 925.946335       | 13 |
| 7  | <b>942.434944</b>  | 471.721110         | 925.408395     | 463.207836       | <b>924.424379</b>  | 462.715828         | S    | <b>1429.670633</b> | <b>715.338955</b> | 1412.644084        | 706.825680         | 1411.660068        | 706.333672       | 12 |
| 8  | <b>1013.472058</b> | 507.239667         | 996.445509     | 498.726393       | <b>995.461493</b>  | 498.234385         | A    | 1342.638605        | 671.822941        | 1325.612056        | 663.309666         | 1324.628040        | 662.817658       | 11 |
| 9  | <b>1128.499001</b> | 564.753139         | 1111.472452    | 556.239864       | <b>1110.488436</b> | 555.747856         | D    | <b>1271.601491</b> | 636.304384        | 1254.574942        | 627.791109         | <b>1253.590926</b> | 627.299101       | 10 |
| 10 | 1225.551765        | 613.279521         | 1208.525216    | 604.766246       | 1207.541200        | 604.274238         | P    | <b>1156.574548</b> | <b>578.790912</b> | <b>1139.547999</b> | 570.277638         | 1138.563983        | 569.785630       | 9  |
| 11 | <b>1353.610343</b> | 677.308810         | 1336.583794    | 668.795535       | <b>1335.599778</b> | 668.303527         | Q    | <b>1059.521784</b> | 530.264530        | <b>1042.495235</b> | 521.751256         | <b>1041.511219</b> | 521.259248       | 8  |
| 12 | <b>1539.689656</b> | <b>770.348466</b>  | 1522.663107    | 761.835192       | 1521.679091        | 761.343184         | W    | <b>931.463206</b>  | 466.235241        | <b>914.436657</b>  | 457.721967         | 913.452641         | 457.229959       | 7  |
| 13 | 1668.732249        | 834.869762         | 1651.705700    | 826.356488       | 1650.721684        | 825.864480         | E    | <b>745.383893</b>  | 373.195585        | <b>728.357344</b>  | 364.682310         | <b>727.373328</b>  | 364.190302       | 6  |
| 14 | 1796.790827        | 898.899052         | 1779.764278    | 890.385777       | 1778.780262        | 889.893769         | Q    | <b>616.341300</b>  | 308.674288        | <b>599.314751</b>  | 300.161014         |                    |                  | 5  |
| 15 | 1909.874891        | 955.441083         | 1892.848342    | 946.927809       | 1891.864326        | 946.435801         | L    | <b>488.282722</b>  | 244.644999        | 471.256173         | 236.131725         |                    |                  | 4  |
| 16 | 2023.917818        | <b>1012.462547</b> | 2006.891269    | 1003.949273      | 2005.907253        | 1003.457265        | N    | <b>375.198658</b>  | 188.102967        | <b>358.172109</b>  | 179.589693         |                    |                  | 3  |
| 17 | 2137.960745        | <b>1069.484010</b> | 2120.934196    | 1060.970736      | 2119.950180        | <b>1060.478728</b> | N    | <b>261.155731</b>  | 131.081504        | <b>244.129182</b>  | 122.568229         |                    |                  | 2  |
| 18 |                    |                    |                |                  |                    |                    | K    | 147.112804         | 74.060040         | 130.086255         | 65.546765          |                    |                  | 1  |

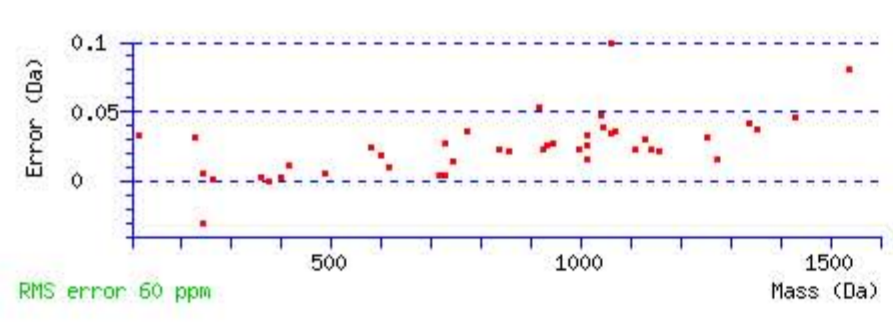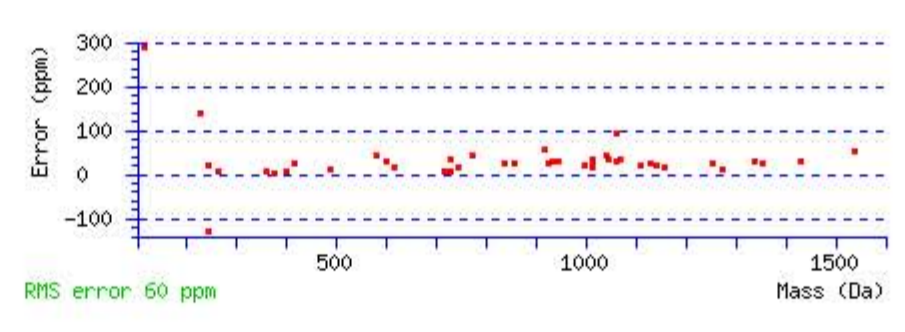

NCBI BLAST search of **GGETAQSADPQWEQLNKK**  
 (Parameters: blastp, nr protein database, expect=20000, no filter, PAM30)  
 Other BLAST [web gateways](#)

### All matches to this query

| Score | Mr(calc):   | Delta    | Sequence                           |
|-------|-------------|----------|------------------------------------|
| 52.6  | 2283.058975 | 0.021887 | <a href="#">GGETAQSADPQWEQLNKK</a> |
| 12.7  | 2283.058975 | 0.021887 | <a href="#">GGETAQSADPQWEQLNKK</a> |



# MASCOT SEARCH RESULTS

## Peptide View

MS/MS Fragmentation of **QEATTVSCFR**

Found in **HGFL\_HUMAN**, Hepatocyte growth factor-like protein OS=Homo sapiens GN=MST1 PE=1 SV=2

Match to Query 31192: 1508.724042 from(503.915290,3+) rtinseconds(1760) index(62472)

Title: Locus:1.1.1.3092.15 File:"2013-07-02 CLN FXIII 30 min 3rd FT.wiff"

Data file C:\Program Files (x86)\Matrix Science\Mascot Daemon\mgf3 FXIII 30 min 3rd\mascot\_daemon\_merge.mgf

Click mouse within plot area to zoom in by factor of two about that point

Or, Plot from  to  Da

Label all possible matches  Label matches used for scoring

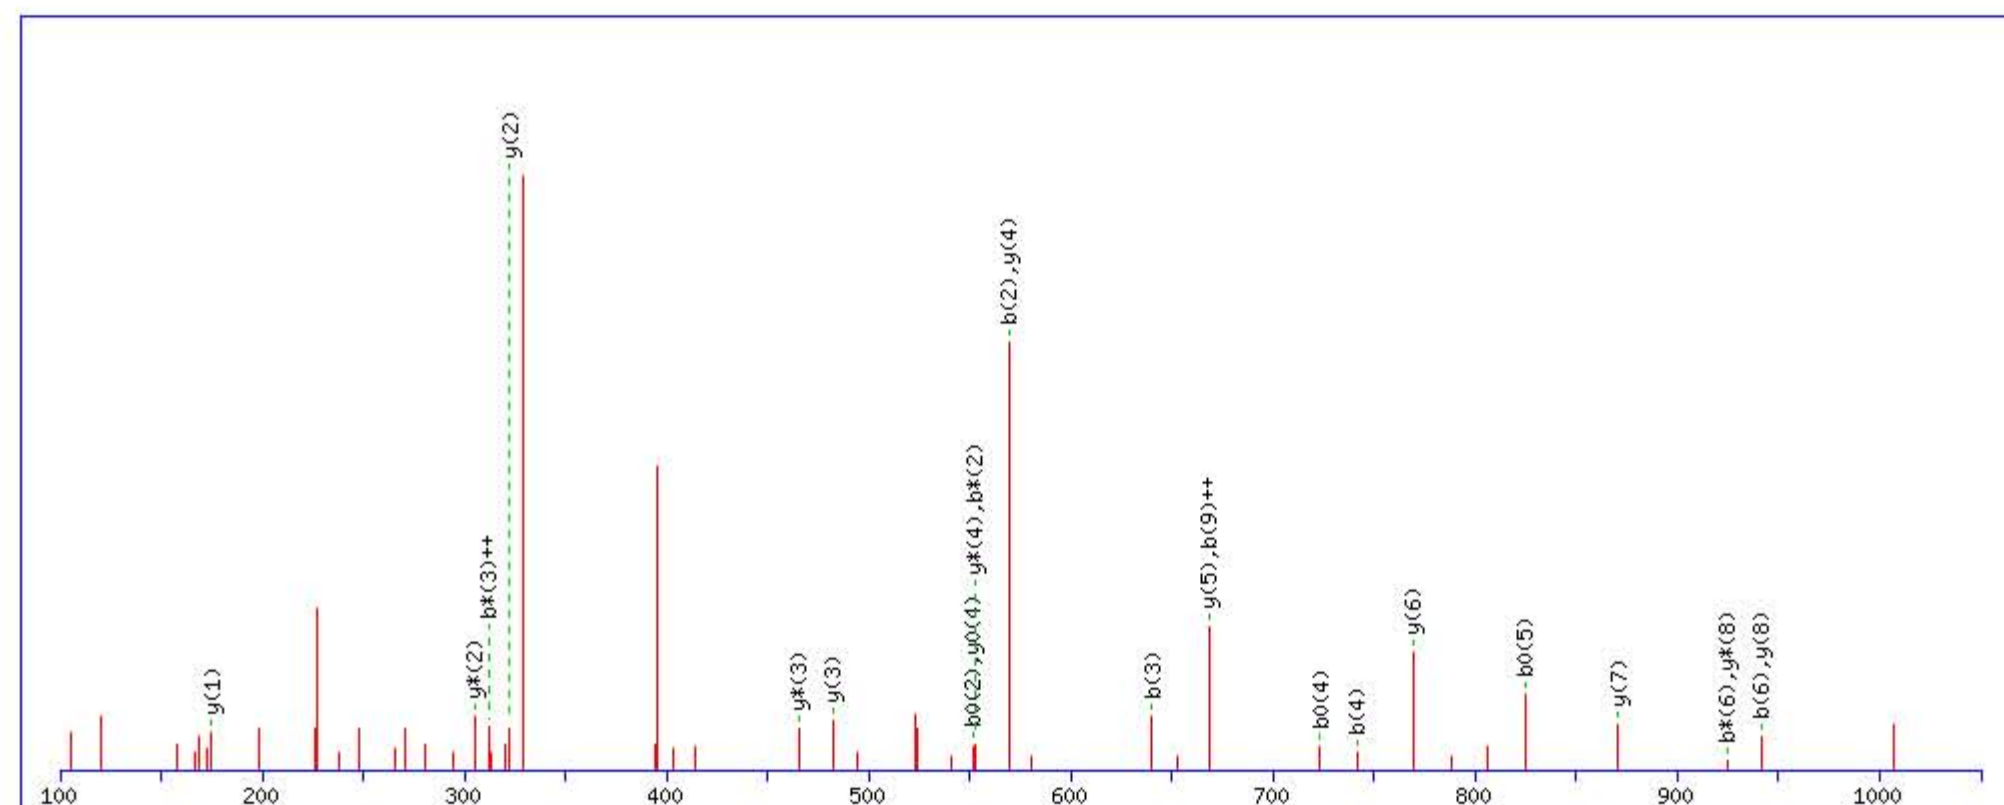

Monoisotopic mass of neutral peptide Mr(calc): 1508.711578

Fixed modifications: Carbamidomethyl (C) (apply to specified residues or termini only)

Variable modifications:

Q1 : Biotin:Thermo-21345 (Q)

Ions Score: 42 Expect: 0.00015

Matches : 24/100 fragment ions using 37 most intense peaks [\(help\)](#)

| #  | b                 | b <sup>++</sup>   | b <sup>+</sup>    | b <sup>+++</sup>  | b <sup>0</sup>    | b <sup>0++</sup> | Seq. | y                 | y <sup>++</sup> | y <sup>+</sup>    | y <sup>+++</sup> | y <sup>0</sup>    | y <sup>0++</sup> | #  |
|----|-------------------|-------------------|-------------------|-------------------|-------------------|------------------|------|-------------------|-----------------|-------------------|------------------|-------------------|------------------|----|
| 1  | 440.232602        | 220.619939        | 423.206053        | 212.106664        |                   |                  | Q    |                   |                 |                   |                  |                   |                  | 10 |
| 2  | <b>569.275195</b> | 285.141236        | <b>552.248646</b> | 276.627961        | <b>551.264630</b> | 276.135953       | E    | 1070.493522       | 535.750399      | 1053.466973       | 527.237125       | 1052.482957       | 526.745117       | 9  |
| 3  | <b>640.312309</b> | 320.659793        | 623.285760        | <b>312.146518</b> | 622.301744        | 311.654510       | A    | <b>941.450929</b> | 471.229103      | <b>924.424380</b> | 462.715828       | 923.440364        | 462.223820       | 8  |
| 4  | <b>741.359988</b> | 371.183632        | 724.333439        | 362.670358        | <b>723.349423</b> | 362.178350       | T    | <b>870.413815</b> | 435.710546      | 853.387266        | 427.197271       | 852.403250        | 426.705263       | 7  |
| 5  | 842.407667        | 421.707472        | 825.381118        | 413.194197        | <b>824.397102</b> | 412.702189       | T    | <b>769.366136</b> | 385.186706      | 752.339587        | 376.673432       | 751.355571        | 376.181424       | 6  |
| 6  | <b>941.476081</b> | 471.241679        | <b>924.449532</b> | 462.728404        | 923.465516        | 462.236396       | V    | <b>668.318457</b> | 334.662867      | 651.291908        | 326.149592       | 650.307892        | 325.657584       | 5  |
| 7  | 1028.508109       | 514.757693        | 1011.481560       | 506.244418        | 1010.497544       | 505.752410       | S    | <b>569.250043</b> | 285.128660      | <b>552.223494</b> | 276.615385       | <b>551.239478</b> | 276.123377       | 4  |
| 8  | 1188.538758       | 594.773017        | 1171.512209       | 586.259743        | 1170.528193       | 585.767735       | C    | <b>482.218015</b> | 241.612646      | <b>465.191466</b> | 233.099371       |                   |                  | 3  |
| 9  | 1335.607172       | <b>668.307224</b> | 1318.580623       | 659.793950        | 1317.596607       | 659.301942       | F    | <b>322.187366</b> | 161.597321      | <b>305.160817</b> | 153.084047       |                   |                  | 2  |
| 10 |                   |                   |                   |                   |                   |                  | R    | <b>175.118952</b> | 88.063114       | 158.092403        | 79.549839        |                   |                  | 1  |

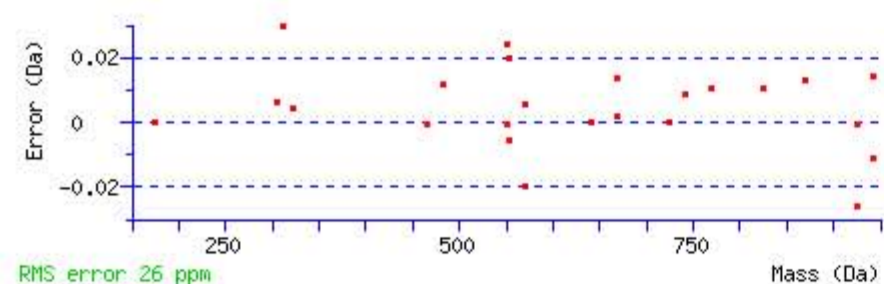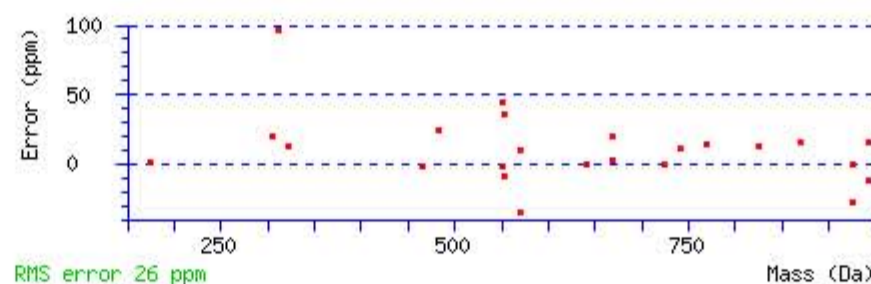

NCBI BLAST search of **QEATTVSCFR**

(Parameters: blastp, nr protein database, expect=20000, no filter, PAM30)

Other BLAST [web gateways](#)

All matches to this query

| Score | Mr(calc):   | Delta     | Sequence                       |
|-------|-------------|-----------|--------------------------------|
| 42.0  | 1508.711578 | 0.012464  | <a href="#">QEATTVSCFR</a>     |
| 1.1   | 1508.711380 | 0.012662  | <a href="#">RTASGGRTQGMRSR</a> |
| 0.1   | 1508.736710 | -0.012668 | <a href="#">LKSSQMEQFT</a>     |

Mascot: <http://www.matrixscience.com/>



# MASCOT Search Results

## Peptide View

MS/MS Fragmentation of **WSAETPHKPQFTTSEPHAQLEENFCR**

Found in **HGFL\_HUMAN**, Hepatocyte growth factor-like protein OS=Homo sapiens GN=MST1 PE=1 SV=2

Match to Query 62911: 3584.643170 from(717.935910,5+) rtinseconds(2044) index(64132)

Title: Locus:1.1.1.3191.8 File:"2013-07-02 CLN FXIII 30 min 3rd FT.wiff"

Data file C:\Program Files (x86)\Matrix Science\Mascot Daemon\mgf3 FXIII 30 min 3rd\mascot\_daemon\_merge.mgf

Click mouse within plot area to zoom in by factor of two about that point

Or, Plot from  to  Da

Label all possible matches  Label matches used for scoring

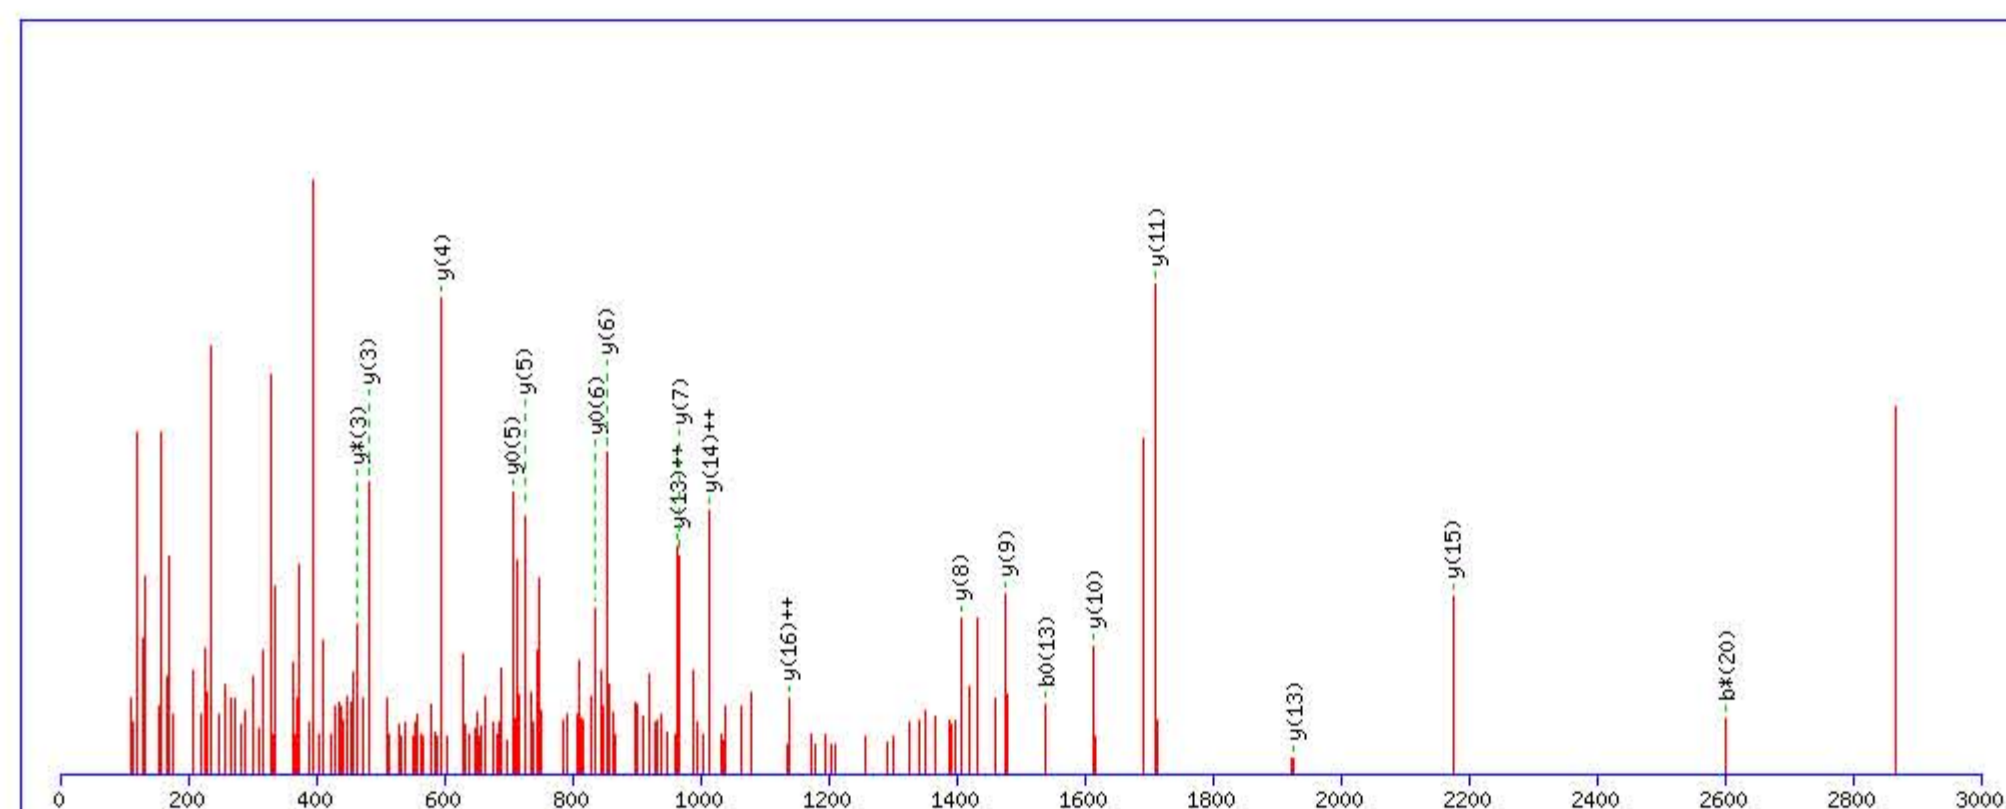

Monoisotopic mass of neutral peptide Mr(calc): 3584.660538

Fixed modifications: Carbamidomethyl (C) (apply to specified residues or termini only)

Variable modifications:

Q20 : Biotin:Thermo-21345 (Q)

Ions Score: 43 Expect: 0.00072

Matches : 19/288 fragment ions using 39 most intense peaks [\(help\)](#)

| #  | b           | b <sup>++</sup> | b <sup>*</sup> | b <sup>*++</sup> | b <sup>0</sup> | b <sup>0++</sup> | Seq. | y           | y <sup>++</sup> | y <sup>*</sup> | y <sup>*++</sup> | y <sup>0</sup> | y <sup>0++</sup> | #  |
|----|-------------|-----------------|----------------|------------------|----------------|------------------|------|-------------|-----------------|----------------|------------------|----------------|------------------|----|
| 1  | 187.086589  | 94.046932       |                |                  |                |                  | W    |             |                 |                |                  |                |                  | 27 |
| 2  | 274.118617  | 137.562947      |                |                  | 256.108052     | 128.557664       | S    | 3399.588510 | 1700.297893     | 3382.561961    | 1691.784618      | 3381.577945    | 1691.292610      | 26 |
| 3  | 345.155731  | 173.081504      |                |                  | 327.145166     | 164.076221       | A    | 3312.556482 | 1656.781879     | 3295.529933    | 1648.268605      | 3294.545917    | 1647.776597      | 25 |
| 4  | 474.198324  | 237.602800      |                |                  | 456.187759     | 228.597518       | E    | 3241.519368 | 1621.263322     | 3224.492819    | 1612.750047      | 3223.508803    | 1612.258040      | 24 |
| 5  | 575.246003  | 288.126640      |                |                  | 557.235438     | 279.121357       | T    | 3112.476775 | 1556.742026     | 3095.450226    | 1548.228751      | 3094.466210    | 1547.736743      | 23 |
| 6  | 672.298767  | 336.653022      |                |                  | 654.288202     | 327.647739       | P    | 3011.429096 | 1506.218186     | 2994.402547    | 1497.704912      | 2993.418531    | 1497.212904      | 22 |
| 7  | 809.357679  | 405.182478      |                |                  | 791.347114     | 396.177195       | H    | 2914.376332 | 1457.691804     | 2897.349783    | 1449.178530      | 2896.365767    | 1448.686522      | 21 |
| 8  | 937.452642  | 469.229959      | 920.426093     | 460.716685       | 919.442077     | 460.224677       | K    | 2777.317420 | 1389.162348     | 2760.290871    | 1380.649074      | 2759.306855    | 1380.157066      | 20 |
| 9  | 1034.505406 | 517.756341      | 1017.478857    | 509.243067       | 1016.494841    | 508.751059       | P    | 2649.222457 | 1325.114867     | 2632.195908    | 1316.601592      | 2631.211892    | 1316.109584      | 19 |
| 10 | 1162.563984 | 581.785630      | 1145.537435    | 573.272356       | 1144.553419    | 572.780348       | Q    | 2552.169693 | 1276.588485     | 2535.143144    | 1268.075210      | 2534.159128    | 1267.583202      | 18 |
| 11 | 1309.632398 | 655.319837      | 1292.605849    | 646.806563       | 1291.621833    | 646.314555       | F    | 2424.111115 | 1212.559196     | 2407.084566    | 1204.045921      | 2406.100550    | 1203.553913      | 17 |
| 12 | 1410.680077 | 705.843677      | 1393.653528    | 697.330402       | 1392.669512    | 696.838394       | T    | 2277.042701 | 1139.024988     | 2260.016152    | 1130.511714      | 2259.032136    | 1130.019706      | 16 |
| 13 | 1557.748491 | 779.377884      | 1540.721942    | 770.864609       | 1539.737926    | 770.372601       | F    | 2175.995022 | 1088.501149     | 2158.968473    | 1079.987874      | 2157.984457    | 1079.495866      | 15 |
| 14 | 1658.796170 | 829.901723      | 1641.769621    | 821.388449       | 1640.785605    | 820.896441       | T    | 2028.926608 | 1014.966942     | 2011.900059    | 1006.453668      | 2010.916043    | 1005.961660      | 14 |
| 15 | 1745.828198 | 873.417737      | 1728.801649    | 864.904463       | 1727.817633    | 864.412455       | S    | 1927.878929 | 964.443103      | 1910.852380    | 955.929828       | 1909.868364    | 955.437820       | 13 |
| 16 | 1874.870791 | 937.939034      | 1857.844242    | 929.425759       | 1856.860226    | 928.933751       | E    | 1840.846901 | 920.927089      | 1823.820352    | 912.413814       | 1822.836336    | 911.921806       | 12 |
| 17 | 1971.923555 | 986.465416      | 1954.897006    | 977.952141       | 1953.912990    | 977.460133       | P    | 1711.804308 | 856.405792      | 1694.777759    | 847.892518       | 1693.793743    | 847.400510       | 11 |
| 18 | 2108.982467 | 1054.994872     | 2091.955918    | 1046.481597      | 2090.971902    | 1045.989589      | H    | 1614.751544 | 807.879410      | 1597.724995    | 799.366136       | 1596.740979    | 798.874128       | 10 |
| 19 | 2180.019581 | 1090.513429     | 2162.993032    | 1082.000154      | 2162.009016    | 1081.508146      | A    | 1477.692632 | 739.349954      | 1460.666083    | 730.836680       | 1459.682067    | 730.344672       | 9  |
| 20 | 2619.244907 | 1310.126092     | 2602.218358    | 1301.612817      | 2601.234342    | 1301.120809      | Q    | 1406.655518 | 703.831397      | 1389.628969    | 695.318123       | 1388.644953    | 694.826115       | 8  |
| 21 | 2732.328971 | 1366.668124     | 2715.302422    | 1358.154849      | 2714.318406    | 1357.662841      | L    | 967.430192  | 484.218734      | 950.403643     | 475.705460       | 949.419627     | 475.213452       | 7  |
| 22 | 2861.371564 | 1431.189420     | 2844.345015    | 1422.676146      | 2843.360999    | 1422.184138      | E    | 854.346128  | 427.676702      | 837.319579     | 419.163427       | 836.335563     | 418.671419       | 6  |
| 23 | 2990.414157 | 1495.710717     | 2973.387608    | 1487.197442      | 2972.403592    | 1486.705434      | E    | 725.303535  | 363.155405      | 708.276986     | 354.642131       | 707.292970     | 354.150123       | 5  |
| 24 | 3104.457084 | 1552.732180     | 3087.430535    | 1544.218906      | 3086.446519    | 1543.726898      | N    | 596.260942  | 298.634109      | 579.234393     | 290.120834       |                |                  | 4  |
| 25 | 3251.525498 | 1626.266387     | 3234.498949    | 1617.753113      | 3233.514933    | 1617.261105      | F    | 482.218015  | 241.612645      | 465.191466     | 233.099371       |                |                  | 3  |
| 26 | 3411.556147 | 1706.281712     | 3394.529598    | 1697.768437      | 3393.545582    | 1697.276429      | C    | 335.149601  | 168.078438      | 318.123052     | 159.565164       |                |                  | 2  |
| 27 |             |                 |                |                  |                |                  | R    | 175.118952  | 88.063114       | 158.092403     | 79.549839        |                |                  | 1  |

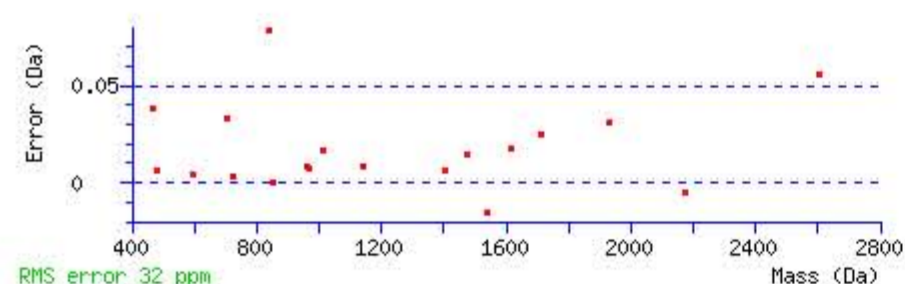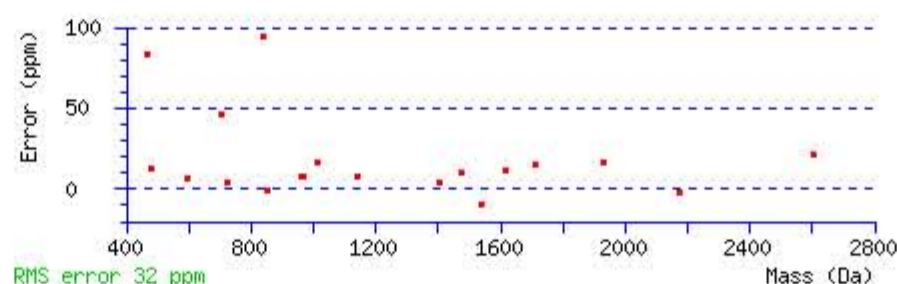

NCBI BLAST search of [WSAETPHKPQFTTSEPHAQLEENFCR](#)  
(Parameters: blastp, nr protein database, expect=20000, no filter, PAM30)

Other BLAST [web gateways](#)

All matches to this query

| Score | Mr(calc):   | Delta     | Sequence                                   |
|-------|-------------|-----------|--------------------------------------------|
| 42.7  | 3584.660538 | -0.017368 | <a href="#">WSAETPHKPQFTTSEPHAQLEENFCR</a> |

Mascot: <http://www.matrixscience.com/>



# MASCOT Search Results

## Peptide View

MS/MS Fragmentation of **FTCACPDQFK**

Found in **HABP2\_HUMAN**, Hyaluronan-binding protein 2 OS=Homo sapiens GN=HABP2 PE=1 SV=1

Match to Query 33379: 1583.688432 from(528.903420,3+) rtinseconds(1882) index(50288)

Title: Locus:1.1.1.3299.8 File:"2013-07-02 CLN FXIII 30 min 3rd F 4.wiff"

Data file C:\Program Files (x86)\Matrix Science\Mascot Daemon\mgf3 FXIII 30 min 3rd\mascot\_daemon\_merge.mgf

Click mouse within plot area to zoom in by factor of two about that point

Or, Plot from  to  Da

Label all possible matches  Label matches used for scoring

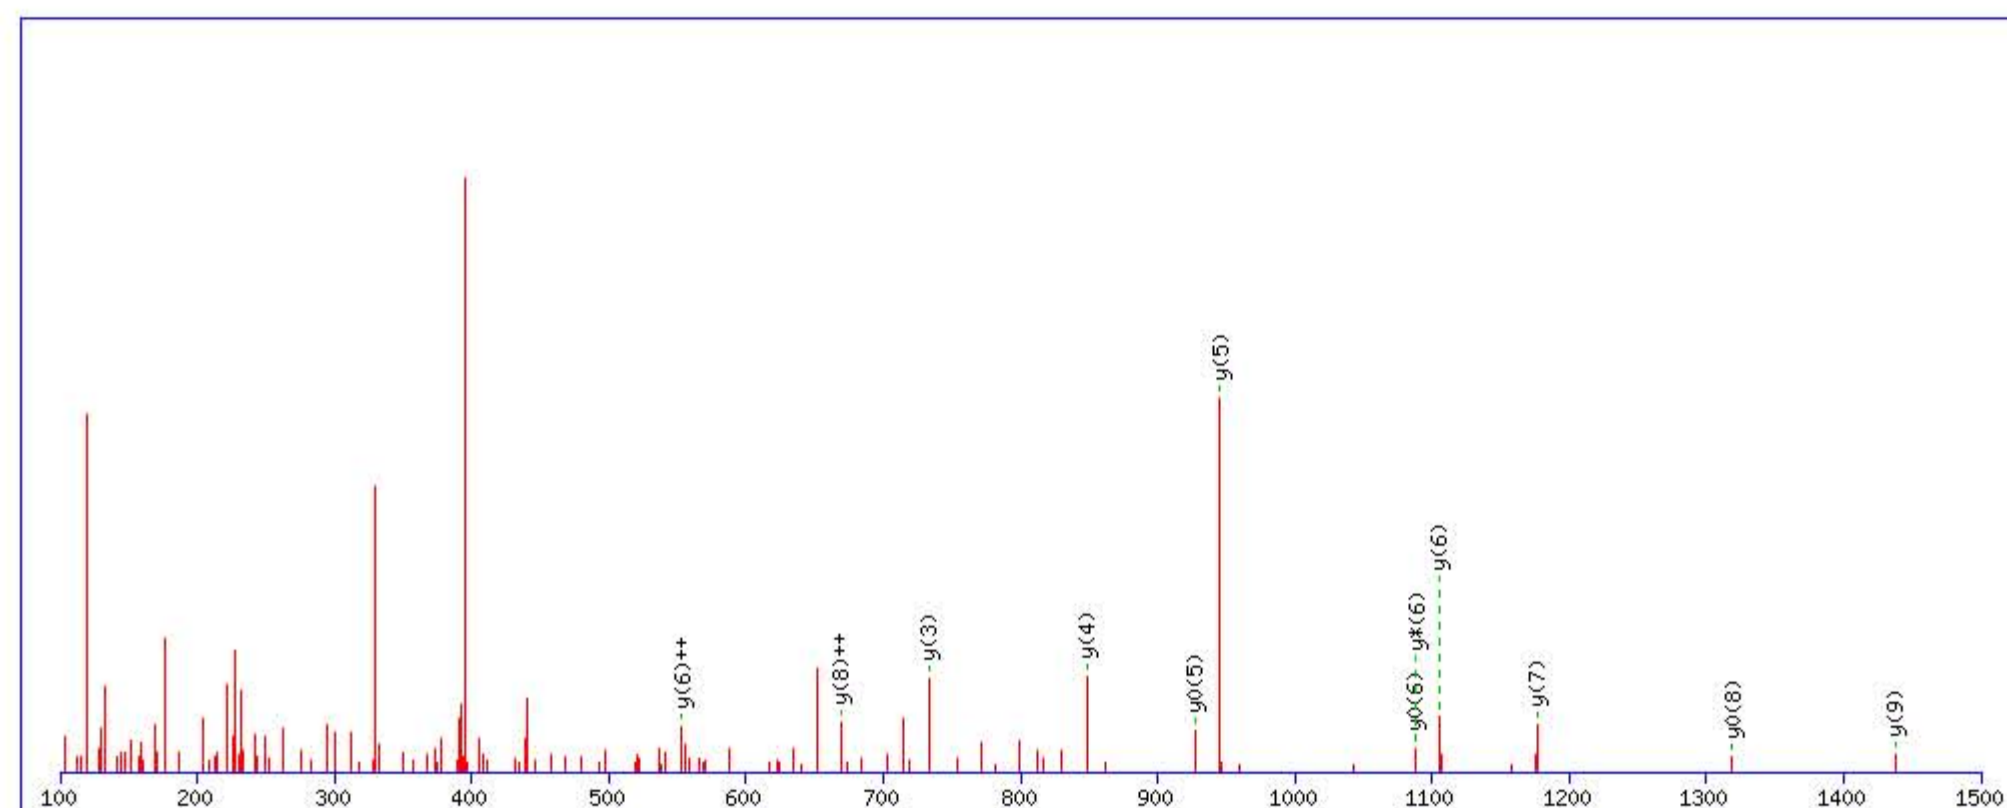

Monoisotopic mass of neutral peptide  $M_r(\text{calc})$ : 1583.693497

Fixed modifications: Carbamidomethyl (C) (apply to specified residues or termini only)

Variable modifications:

Q8 : Biotin:Thermo-21345 (Q)

Ions Score: 26 Expect: 0.015

Matches : 12/86 fragment ions using 24 most intense peaks [\(help\)](#)

| #  | b           | b <sup>++</sup> | b <sup>*</sup> | b <sup>*++</sup> | b <sup>0</sup> | b <sup>0++</sup> | Seq. | y           | y <sup>++</sup> | y <sup>*</sup> | y <sup>*++</sup> | y <sup>0</sup> | y <sup>0++</sup> | #  |
|----|-------------|-----------------|----------------|------------------|----------------|------------------|------|-------------|-----------------|----------------|------------------|----------------|------------------|----|
| 1  | 148.075690  | 74.541483       |                |                  |                |                  | F    |             |                 |                |                  |                |                  | 10 |
| 2  | 249.123369  | 125.065322      |                |                  | 231.112804     | 116.060040       | T    | 1437.632342 | 719.319809      | 1420.605793    | 710.806535       | 1419.621777    | 710.314527       | 9  |
| 3  | 409.154018  | 205.080647      |                |                  | 391.143453     | 196.075365       | C    | 1336.584663 | 668.795970      | 1319.558114    | 660.282695       | 1318.574098    | 659.790687       | 8  |
| 4  | 480.191132  | 240.599204      |                |                  | 462.180567     | 231.593921       | A    | 1176.554014 | 588.780645      | 1159.527465    | 580.267371       | 1158.543449    | 579.775363       | 7  |
| 5  | 640.221781  | 320.614529      |                |                  | 622.211216     | 311.609246       | C    | 1105.516900 | 553.262088      | 1088.490351    | 544.748814       | 1087.506335    | 544.256806       | 6  |
| 6  | 737.274545  | 369.140911      |                |                  | 719.263980     | 360.135628       | P    | 945.486251  | 473.246764      | 928.459702     | 464.733489       | 927.475686     | 464.241481       | 5  |
| 7  | 852.301488  | 426.654382      |                |                  | 834.290923     | 417.649100       | D    | 848.433487  | 424.720382      | 831.406938     | 416.207107       | 830.422922     | 415.715099       | 4  |
| 8  | 1291.526814 | 646.267045      | 1274.500265    | 637.753771       | 1273.516249    | 637.261763       | Q    | 733.406544  | 367.206910      | 716.379995     | 358.693636       |                |                  | 3  |
| 9  | 1438.595228 | 719.801252      | 1421.568679    | 711.287978       | 1420.584663    | 710.795970       | F    | 294.181218  | 147.594247      | 277.154669     | 139.080973       |                |                  | 2  |
| 10 |             |                 |                |                  |                |                  | K    | 147.112804  | 74.060040       | 130.086255     | 65.546765        |                |                  | 1  |

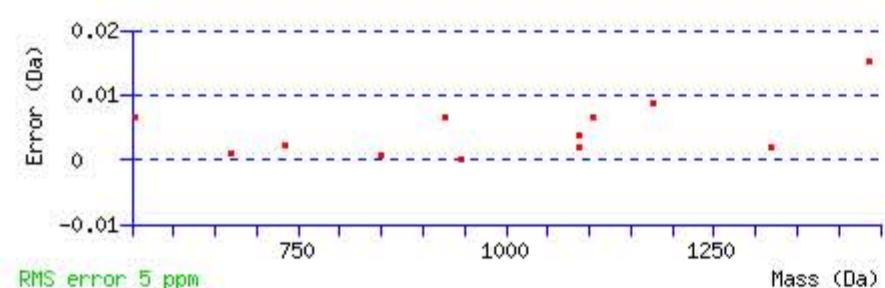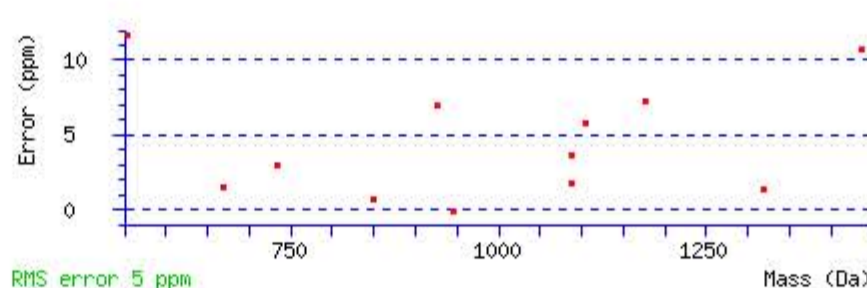

NCBI BLAST search of **FTCACPDQFK**

(Parameters: blastp, nr protein database, expect=20000, no filter, PAM30)

Other BLAST [web gateways](#)

All matches to this query

| Score | $M_r(\text{calc})$ : | Delta     | Sequence                      |
|-------|----------------------|-----------|-------------------------------|
| 25.6  | 1583.693497          | -0.005065 | <a href="#">FTCACPDQFK</a>    |
| 7.2   | 1583.699341          | -0.010909 | <a href="#">PTQLEMAMDTMIR</a> |

Mascot: <http://www.matrixscience.com/>



# MASCOT SEARCH RESULTS

## Peptide View

MS/MS Fragmentation of **GQCLITQSPYYR**

Found in **HABP2\_HUMAN**, Hyaluronan-binding protein 2 OS=Homo sapiens GN=HABP2 PE=1 SV=1

Match to Query 40862: 1892.926542 from(631.982790,3+) rtinseconds(2139) index(51895)

Title: Locus:1.1.1.3388.7 File:"2013-07-02 CLN FXIII 30 min 3rd F 4.wiff"

Data file C:\Program Files (x86)\Matrix Science\Mascot Daemon\mgf3 FXIII 30 min 3rd\mascot\_daemon\_merge.mgf

Click mouse within plot area to zoom in by factor of two about that point

Or, Plot from  to  Da

Label all possible matches  Label matches used for scoring

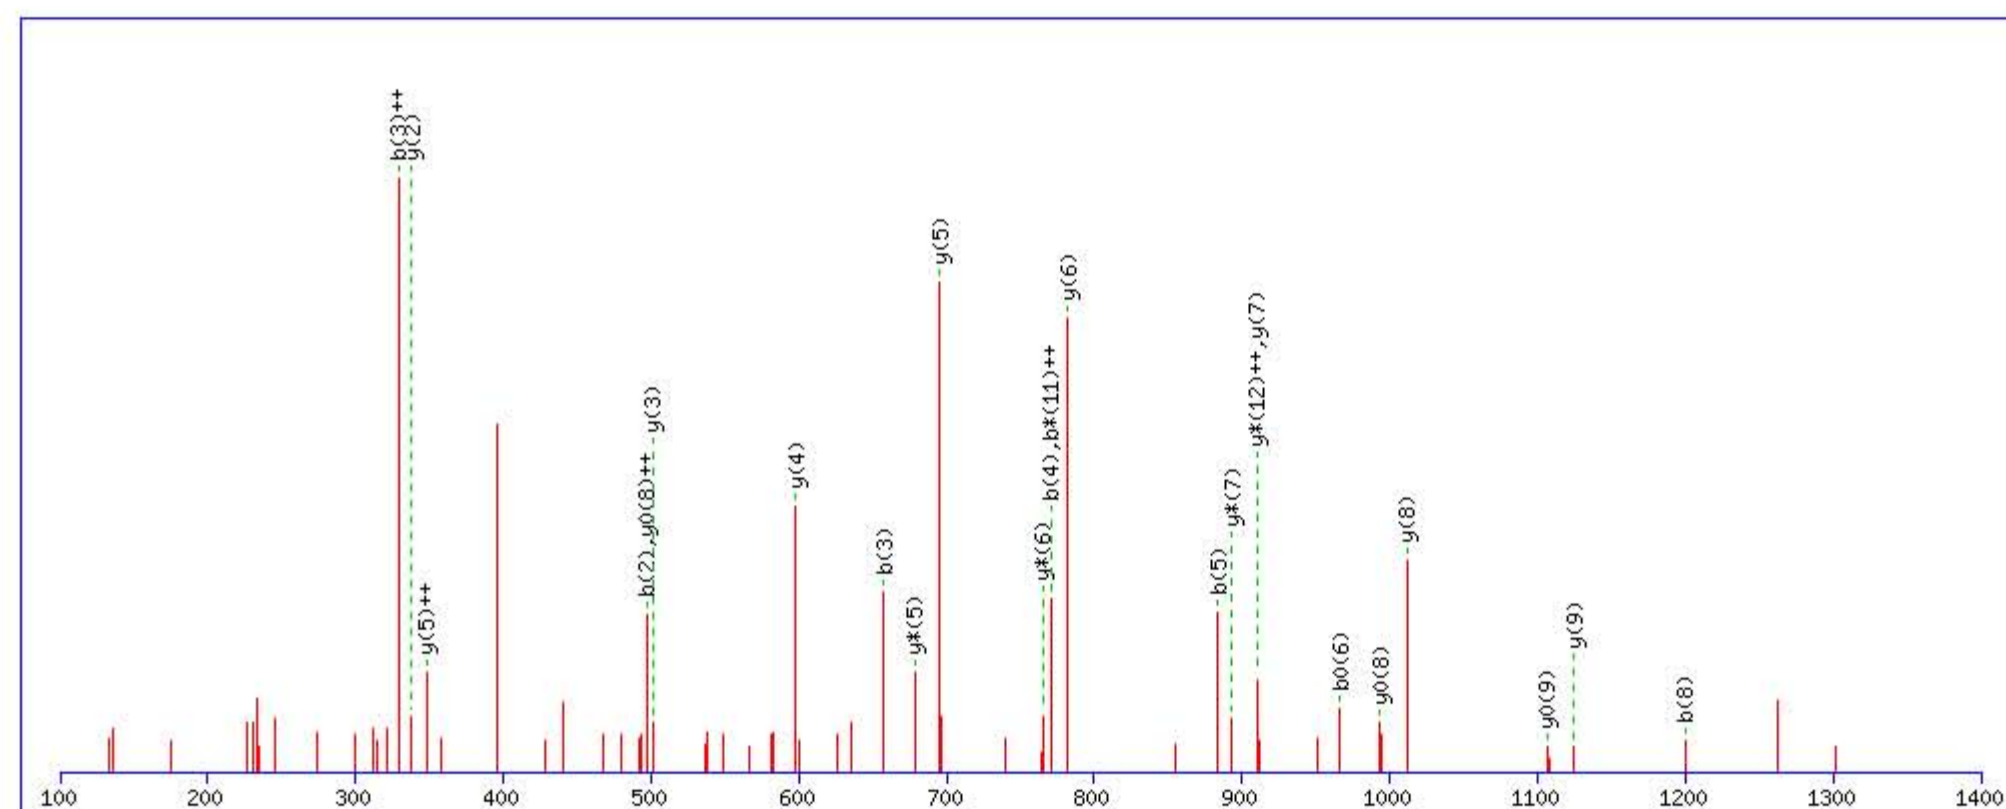

Monoisotopic mass of neutral peptide  $M_r(\text{calc})$ : 1892.927704

Fixed modifications: Carbamidomethyl (C) (apply to specified residues or termini only)

Variable modifications:

Q2 : Biotin:Thermo-21345 (Q)

Ions Score: 45 Expect: 0.00029

Matches : 24/122 fragment ions using 33 most intense peaks [\(help\)](#)

| #  | b                  | b <sup>++</sup>   | b <sup>*</sup> | b <sup>*++</sup>  | b <sup>0</sup>    | b <sup>0++</sup> | Seq. | y                  | y <sup>++</sup>   | y <sup>*</sup>    | y <sup>*++</sup>  | y <sup>0</sup>     | y <sup>0++</sup>  | #  |
|----|--------------------|-------------------|----------------|-------------------|-------------------|------------------|------|--------------------|-------------------|-------------------|-------------------|--------------------|-------------------|----|
| 1  | 58.028740          | 29.518008         |                |                   |                   |                  | G    |                    |                   |                   |                   |                    |                   | 13 |
| 2  | <b>497.254066</b>  | 249.130671        | 480.227517     | 240.617397        |                   |                  | Q    | 1836.913526        | 918.960401        | 1819.886977       | <b>910.447127</b> | 1818.902961        | 909.955119        | 12 |
| 3  | <b>657.284715</b>  | <b>329.145996</b> | 640.258166     | 320.632721        |                   |                  | C    | 1397.688200        | 699.347738        | 1380.661651       | 690.834464        | 1379.677635        | 690.342456        | 11 |
| 4  | <b>770.368779</b>  | 385.688028        | 753.342230     | 377.174753        |                   |                  | L    | 1237.657551        | 619.332414        | 1220.631002       | 610.819139        | 1219.646986        | 610.327131        | 10 |
| 5  | <b>883.452843</b>  | 442.230060        | 866.426294     | 433.716785        |                   |                  | I    | <b>1124.573487</b> | 562.790382        | 1107.546938       | 554.277107        | <b>1106.562922</b> | 553.785099        | 9  |
| 6  | 984.500522         | 492.753899        | 967.473973     | 484.240625        | <b>966.489957</b> | 483.748617       | T    | <b>1011.489423</b> | 506.248350        | 994.462874        | 497.735075        | <b>993.478858</b>  | <b>497.243067</b> | 8  |
| 7  | 1112.559100        | 556.783188        | 1095.532551    | 548.269914        | 1094.548535       | 547.777906       | Q    | <b>910.441744</b>  | 455.724510        | <b>893.415195</b> | 447.211236        | 892.431179         | 446.719228        | 7  |
| 8  | <b>1199.591128</b> | 600.299202        | 1182.564579    | 591.785928        | 1181.580563       | 591.293920       | S    | <b>782.383166</b>  | 391.695221        | <b>765.356617</b> | 383.181947        | 764.372601         | 382.689939        | 6  |
| 9  | 1296.643892        | 648.825584        | 1279.617343    | 640.312310        | 1278.633327       | 639.820302       | P    | <b>695.351138</b>  | <b>348.179207</b> | <b>678.324589</b> | 339.665933        |                    |                   | 5  |
| 10 | 1393.696656        | 697.351966        | 1376.670107    | 688.838692        | 1375.686091       | 688.346684       | P    | <b>598.298374</b>  | 299.652825        | 581.271825        | 291.139551        |                    |                   | 4  |
| 11 | 1556.759985        | 778.883631        | 1539.733436    | <b>770.370356</b> | 1538.749420       | 769.878348       | Y    | <b>501.245610</b>  | 251.126443        | 484.219061        | 242.613169        |                    |                   | 3  |
| 12 | 1719.823314        | 860.415295        | 1702.796765    | 851.902021        | 1701.812749       | 851.410013       | Y    | <b>338.182281</b>  | 169.594778        | 321.155732        | 161.081504        |                    |                   | 2  |
| 13 |                    |                   |                |                   |                   |                  | R    | 175.118952         | 88.063114         | 158.092403        | 79.549839         |                    |                   | 1  |

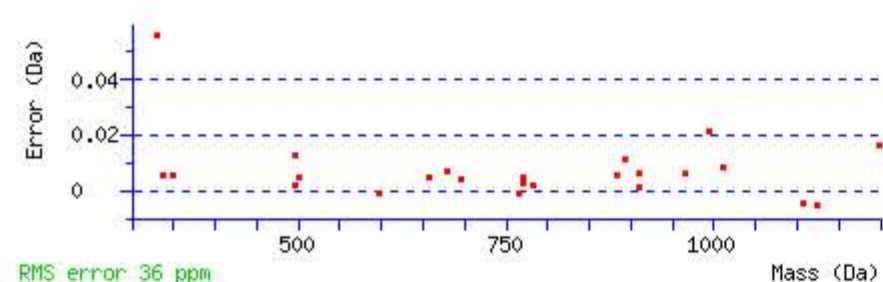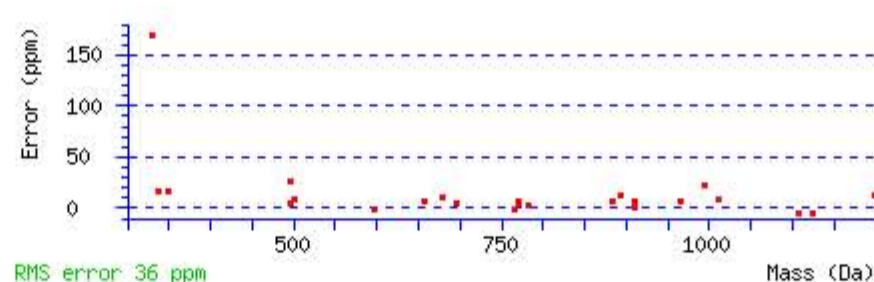

NCBI BLAST search of **GQCLITQSPYYR**

(Parameters: blastp, nr protein database, expect=20000, no filter, PAM30)

Other BLAST [web gateways](#)

All matches to this query

| Score | $M_r(\text{calc})$ : | Delta     | Sequence                         |
|-------|----------------------|-----------|----------------------------------|
| 45.4  | 1892.927704          | -0.001162 | <a href="#">GQCLITQSPYYR</a>     |
| 10.2  | 1892.927704          | -0.001162 | <a href="#">GQCLITQSPYYR</a>     |
| 7.3   | 1892.910431          | 0.016111  | <a href="#">FSFDTFSHHRACLR</a>   |
| 1.2   | 1892.934921          | -0.008379 | <a href="#">QGSQAGPGPQLAQGMR</a> |

Mascot: <http://www.matrixscience.com/>



# MASCOT Search Results

## Peptide View

MS/MS Fragmentation of **KGDTFSCMVGHEALPLAFTQK**

Found in **IGHA1\_HUMAN**, Ig alpha-1 chain C region OS=Homo sapiens GN=IGHA1 PE=1 SV=2

Match to Query 53754: 2647.316616 from(662.836430,4+) rtinseconds(2358) index(7235)

Title: Locus:1.1.1.3391.18 File:"2013-07-02 CLN FXIII 30 min 3rd F 1.wiff"

Data file C:\Program Files (x86)\Matrix Science\Mascot Daemon\mgf3 FXIII 30 min 3rd\mascot\_daemon\_merge.mgf

Click mouse within plot area to zoom in by factor of two about that point

Or, Plot from  to  Da

Label all possible matches  Label matches used for scoring

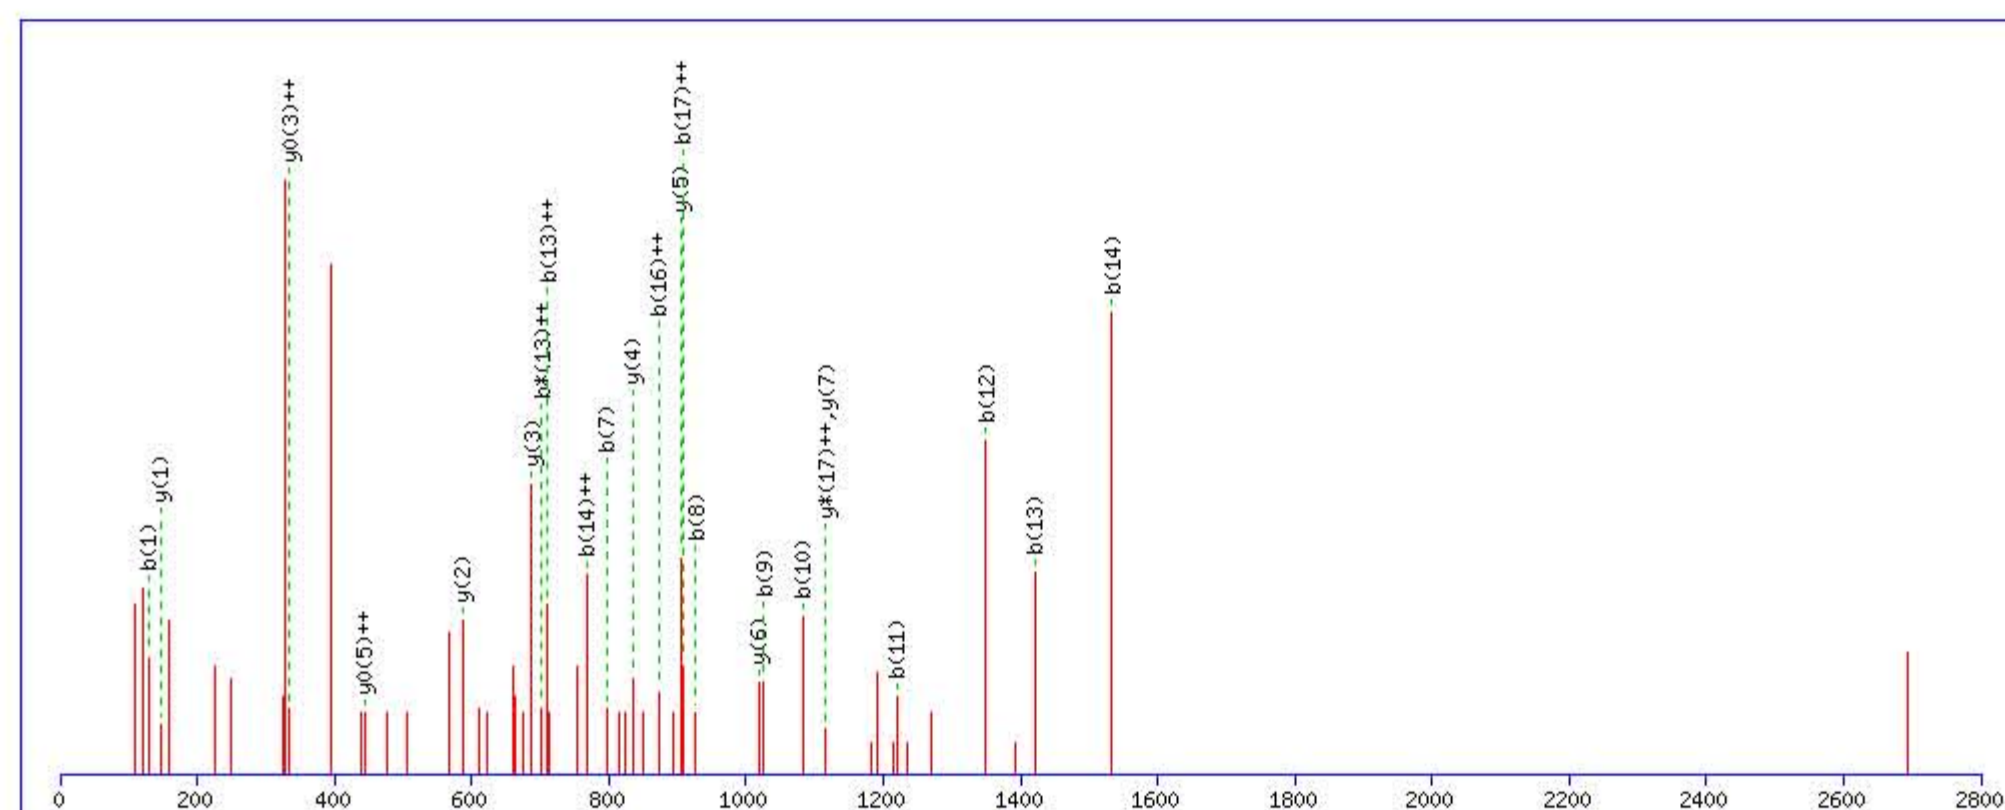

Monoisotopic mass of neutral peptide Mr(calc): 2647.296082

Fixed modifications: Carbamidomethyl (C) (apply to specified residues or termini only)

Variable modifications:

Q20 : Biotin:Thermo-21345 (Q)

Ions Score: 53 Expect: 3.2e-005

Matches : 24/232 fragment ions using 48 most intense peaks [\(help\)](#)

| #  | b                  | b <sup>++</sup>   | b <sup>*</sup> | b <sup>*++</sup>  | b <sup>0</sup> | b <sup>0++</sup> | Seq.     | y                  | y <sup>++</sup> | y <sup>*</sup> | y <sup>*++</sup>   | y <sup>0</sup> | y <sup>0++</sup>  | #         |
|----|--------------------|-------------------|----------------|-------------------|----------------|------------------|----------|--------------------|-----------------|----------------|--------------------|----------------|-------------------|-----------|
| 1  | <b>129.102239</b>  | 65.054757         | 112.075690     | 56.541483         |                |                  | <b>K</b> |                    |                 |                |                    |                |                   | <b>21</b> |
| 2  | 186.123703         | 93.565489         | 169.097154     | 85.052215         |                |                  | <b>G</b> | 2520.208388        | 1260.607832     | 2503.181839    | 1252.094557        | 2502.197823    | 1251.602549       | <b>20</b> |
| 3  | 301.150646         | 151.078961        | 284.124097     | 142.565687        | 283.140081     | 142.073679       | <b>D</b> | 2463.186924        | 1232.097100     | 2446.160375    | 1223.583825        | 2445.176359    | 1223.091817       | <b>19</b> |
| 4  | 402.198325         | 201.602801        | 385.171776     | 193.089526        | 384.187760     | 192.597518       | <b>T</b> | 2348.159981        | 1174.583628     | 2331.133432    | 1166.070354        | 2330.149416    | 1165.578346       | <b>18</b> |
| 5  | 549.266739         | 275.137008        | 532.240190     | 266.623733        | 531.256174     | 266.131725       | <b>F</b> | 2247.112302        | 1124.059789     | 2230.085753    | <b>1115.546514</b> | 2229.101737    | 1115.054506       | <b>17</b> |
| 6  | 636.298767         | 318.653022        | 619.272218     | 310.139747        | 618.288202     | 309.647739       | <b>S</b> | 2100.043888        | 1050.525582     | 2083.017339    | 1042.012307        | 2082.033323    | 1041.520299       | <b>16</b> |
| 7  | <b>796.329416</b>  | 398.668346        | 779.302867     | 390.155072        | 778.318851     | 389.663064       | <b>C</b> | 2013.011860        | 1007.009568     | 1995.985311    | 998.496294         | 1995.001295    | 998.004286        | <b>15</b> |
| 8  | <b>927.369901</b>  | 464.188589        | 910.343352     | 455.675314        | 909.359336     | 455.183306       | <b>M</b> | 1852.981211        | 926.994244      | 1835.954662    | 918.480969         | 1834.970646    | 917.988961        | <b>14</b> |
| 9  | <b>1026.438315</b> | 513.722796        | 1009.411766    | 505.209521        | 1008.427750    | 504.717513       | <b>V</b> | 1721.940726        | 861.474001      | 1704.914177    | 852.960727         | 1703.930161    | 852.468719        | <b>13</b> |
| 10 | <b>1083.459779</b> | 542.233528        | 1066.433230    | 533.720253        | 1065.449214    | 533.228245       | <b>G</b> | 1622.872312        | 811.939794      | 1605.845763    | 803.426520         | 1604.861747    | 802.934512        | <b>12</b> |
| 11 | <b>1220.518691</b> | 610.762984        | 1203.492142    | 602.249709        | 1202.508126    | 601.757701       | <b>H</b> | 1565.850848        | 783.429062      | 1548.824299    | 774.915788         | 1547.840283    | 774.423780        | <b>11</b> |
| 12 | <b>1349.561284</b> | 675.284280        | 1332.534735    | 666.771006        | 1331.550719    | 666.278998       | <b>E</b> | 1428.791936        | 714.899606      | 1411.765387    | 706.386332         | 1410.781371    | 705.894324        | <b>10</b> |
| 13 | <b>1420.598398</b> | <b>710.802837</b> | 1403.571849    | <b>702.289563</b> | 1402.587833    | 701.797555       | <b>A</b> | 1299.749343        | 650.378310      | 1282.722794    | 641.865035         | 1281.738778    | 641.373027        | <b>9</b>  |
| 14 | <b>1533.682462</b> | <b>767.344869</b> | 1516.655913    | 758.831595        | 1515.671897    | 758.339587       | <b>L</b> | 1228.712229        | 614.859753      | 1211.685680    | 606.346478         | 1210.701664    | 605.854470        | <b>8</b>  |
| 15 | 1630.735226        | 815.871251        | 1613.708677    | 807.357977        | 1612.724661    | 806.865969       | <b>P</b> | <b>1115.628165</b> | 558.317721      | 1098.601616    | 549.804446         | 1097.617600    | 549.312438        | <b>7</b>  |
| 16 | 1743.819290        | <b>872.413283</b> | 1726.792741    | 863.900009        | 1725.808725    | 863.408000       | <b>L</b> | <b>1018.575401</b> | 509.791339      | 1001.548852    | 501.278064         | 1000.564836    | 500.786056        | <b>6</b>  |
| 17 | 1814.856404        | <b>907.931840</b> | 1797.829855    | 899.418566        | 1796.845839    | 898.926557       | <b>A</b> | <b>905.491337</b>  | 453.249307      | 888.464788     | 444.736032         | 887.480772     | <b>444.244024</b> | <b>5</b>  |
| 18 | 1961.924818        | 981.466047        | 1944.898269    | 972.952773        | 1943.914253    | 972.460764       | <b>F</b> | <b>834.454223</b>  | 417.730750      | 817.427674     | 409.217475         | 816.443658     | 408.725467        | <b>4</b>  |
| 19 | 2062.972497        | 1031.989886       | 2045.945948    | 1023.476612       | 2044.961932    | 1022.984604      | <b>T</b> | <b>687.385809</b>  | 344.196543      | 670.359260     | 335.683268         | 669.375244     | <b>335.191260</b> | <b>3</b>  |
| 20 | 2502.197823        | 1251.602549       | 2485.171274    | 1243.089275       | 2484.187258    | 1242.597267      | <b>Q</b> | <b>586.338130</b>  | 293.672703      | 569.311581     | 285.159429         |                |                   | <b>2</b>  |
| 21 |                    |                   |                |                   |                |                  | <b>K</b> | <b>147.112804</b>  | 74.060040       | 130.086255     | 65.546765          |                |                   | <b>1</b>  |

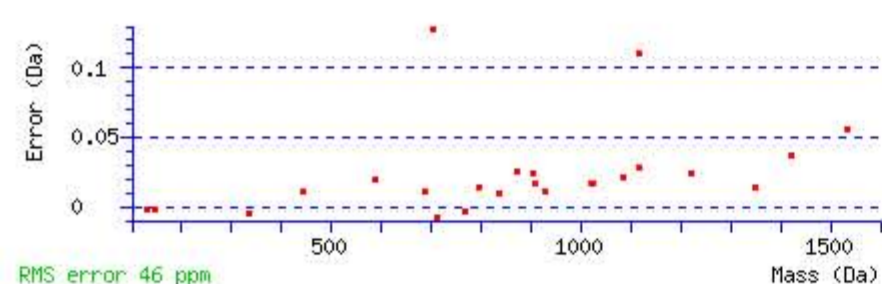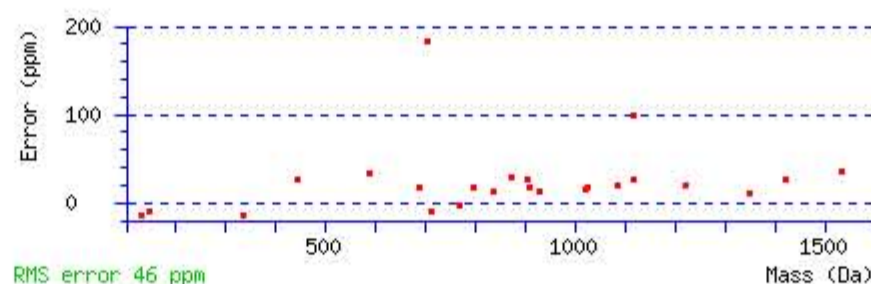

NCBI BLAST search of **KGDTFSCMVGHEALPLAFTQK**

(Parameters: blastp, nr protein database, expect=20000, no filter, PAM30)

Other BLAST [web gateways](#)

All matches to this query

| Score | Mr(calc):   | Delta    | Sequence                                |
|-------|-------------|----------|-----------------------------------------|
| 52.5  | 2647.296082 | 0.020534 | <a href="#">KGDTFSCMVGHEALPLAFTQK</a>   |
| 4.6   | 2647.281662 | 0.034954 | <a href="#">AAVLACQACCMLAIFLSMLVSYR</a> |



# **MASCOT** Mascot Search Results

## Peptide View

MS/MS Fragmentation of **EPAAQAPVK**

Found in **IGHD\_HUMAN**, Ig delta chain C region OS=Homo sapiens GN=IGHD PE=1 SV=2

Match to Query 22188: 1220.657228 from(611.335890,2+) rtinseconds(1458) index(60707)

Title: Locus:1.1.1.2986.13 File:"2013-07-02 CLN FXIII 30 min 3rd FT.wiff"

Data file C:\Program Files (x86)\Matrix Science\Mascot Daemon\mgf3 FXIII 30 min 3rd\mascot\_daemon\_merge.mgf

Click mouse within plot area to zoom in by factor of two about that point

Or, Plot from  to  Da

Label all possible matches  Label matches used for scoring

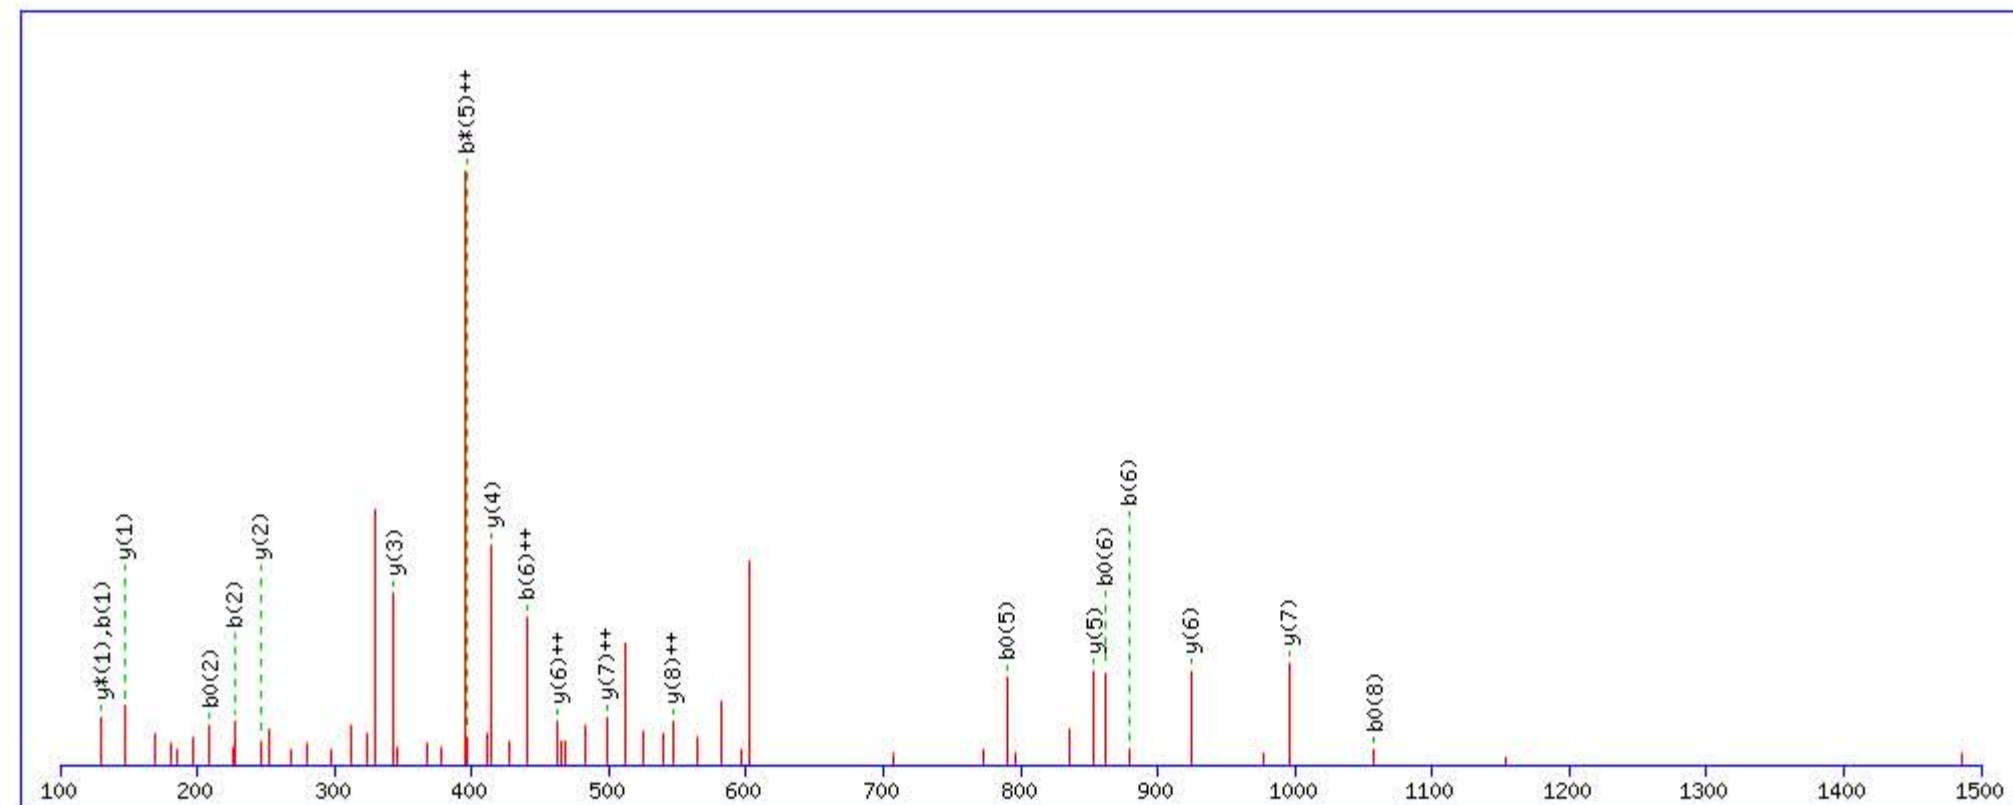

Monoisotopic mass of neutral peptide Mr(calc): 1220.658707

Fixed modifications: Carbamidomethyl (C) (apply to specified residues or termini only)

Variable modifications:

Q5 : Biotin:Thermo-21345 (Q)

Ions Score: 39 Expect: 0.0011

Matches : 20/72 fragment ions using 38 most intense peaks [\(help\)](#)

| # | b           | b <sup>++</sup> | b <sup>*</sup> | b <sup>*++</sup> | b <sup>0</sup> | b <sup>0++</sup> | Seq. | y           | y <sup>++</sup> | y <sup>*</sup> | y <sup>*++</sup> | # |
|---|-------------|-----------------|----------------|------------------|----------------|------------------|------|-------------|-----------------|----------------|------------------|---|
| 1 | 130.049869  | 65.528572       |                |                  | 112.039304     | 56.523290        | E    |             |                 |                |                  | 9 |
| 2 | 227.102633  | 114.054954      |                |                  | 209.092068     | 105.049672       | P    | 1092.623414 | 546.815345      | 1075.596865    | 538.302071       | 8 |
| 3 | 298.139747  | 149.573512      |                |                  | 280.129182     | 140.568229       | A    | 995.570650  | 498.288963      | 978.544101     | 489.775689       | 7 |
| 4 | 369.176861  | 185.092068      |                |                  | 351.166296     | 176.086786       | A    | 924.533536  | 462.770406      | 907.506987     | 454.257132       | 6 |
| 5 | 808.402187  | 404.704732      | 791.375638     | 396.191457       | 790.391622     | 395.699449       | Q    | 853.496422  | 427.251849      | 836.469873     | 418.738575       | 5 |
| 6 | 879.439301  | 440.223289      | 862.412752     | 431.710014       | 861.428736     | 431.218006       | A    | 414.271096  | 207.639186      | 397.244547     | 199.125911       | 4 |
| 7 | 976.492065  | 488.749671      | 959.465516     | 480.236396       | 958.481500     | 479.744388       | P    | 343.233982  | 172.120629      | 326.207433     | 163.607354       | 3 |
| 8 | 1075.560479 | 538.283878      | 1058.533930    | 529.770603       | 1057.549914    | 529.278595       | V    | 246.181218  | 123.594247      | 229.154669     | 115.080972       | 2 |
| 9 |             |                 |                |                  |                |                  | K    | 147.112804  | 74.060040       | 130.086255     | 65.546765        | 1 |

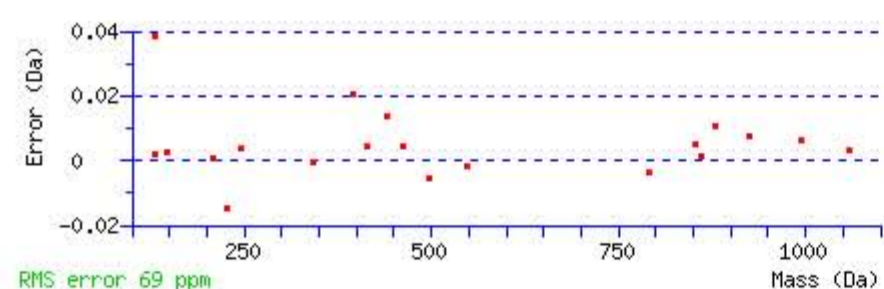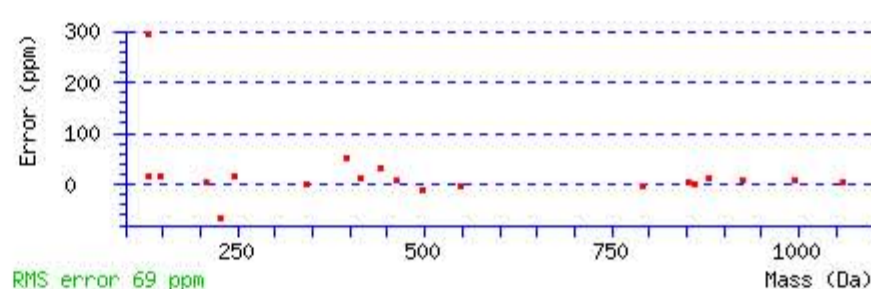

NCBI BLAST search of [EPAAQAPVK](#)

(Parameters: blastp, nr protein database, expect=20000, no filter, PAM30)

Other BLAST [web gateways](#)

All matches to this query

| Score | Mr(calc):   | Delta     | Sequence                     |
|-------|-------------|-----------|------------------------------|
| 38.6  | 1220.658707 | -0.001479 | <a href="#">EPAAQAPVK</a>    |
| 6.5   | 1220.666580 | -0.009352 | <a href="#">EPAIVRFFSR</a>   |
| 5.8   | 1220.669937 | -0.012709 | <a href="#">IIAHSNQK</a>     |
| 5.8   | 1220.640076 | 0.017152  | <a href="#">LLAEYTGAAQK</a>  |
| 5.5   | 1220.658722 | -0.001494 | <a href="#">EQNVPVPK</a>     |
| 1.7   | 1220.658691 | -0.001463 | <a href="#">AACLVAAAYALK</a> |
| 0.6   | 1220.651306 | 0.005922  | <a href="#">ILSHTEEHKK</a>   |



# MASCOT SCIENCE Mascot Search Results

## Peptide View

MS/MS Fragmentation of **NQVSLTCLVK**

Found in **IGHG1\_HUMAN**, Ig gamma-1 chain C region OS=Homo sapiens GN=IGHG1 PE=1 SV=1

Match to Query 30214: 1471.784288 from(736.899420,2+) rtinseconds(2251) index(65260)

Title: Locus:1.1.1.3263.18 File:"2013-07-02 CLN FXIII 30 min 3rd FT.wiff"

Data file C:\Program Files (x86)\Matrix Science\Mascot Daemon\mgf3 FXIII 30 min 3rd\mascot\_daemon\_merge.mgf

Click mouse within plot area to zoom in by factor of two about that point

Or, Plot from  to  Da

Label all possible matches  Label matches used for scoring

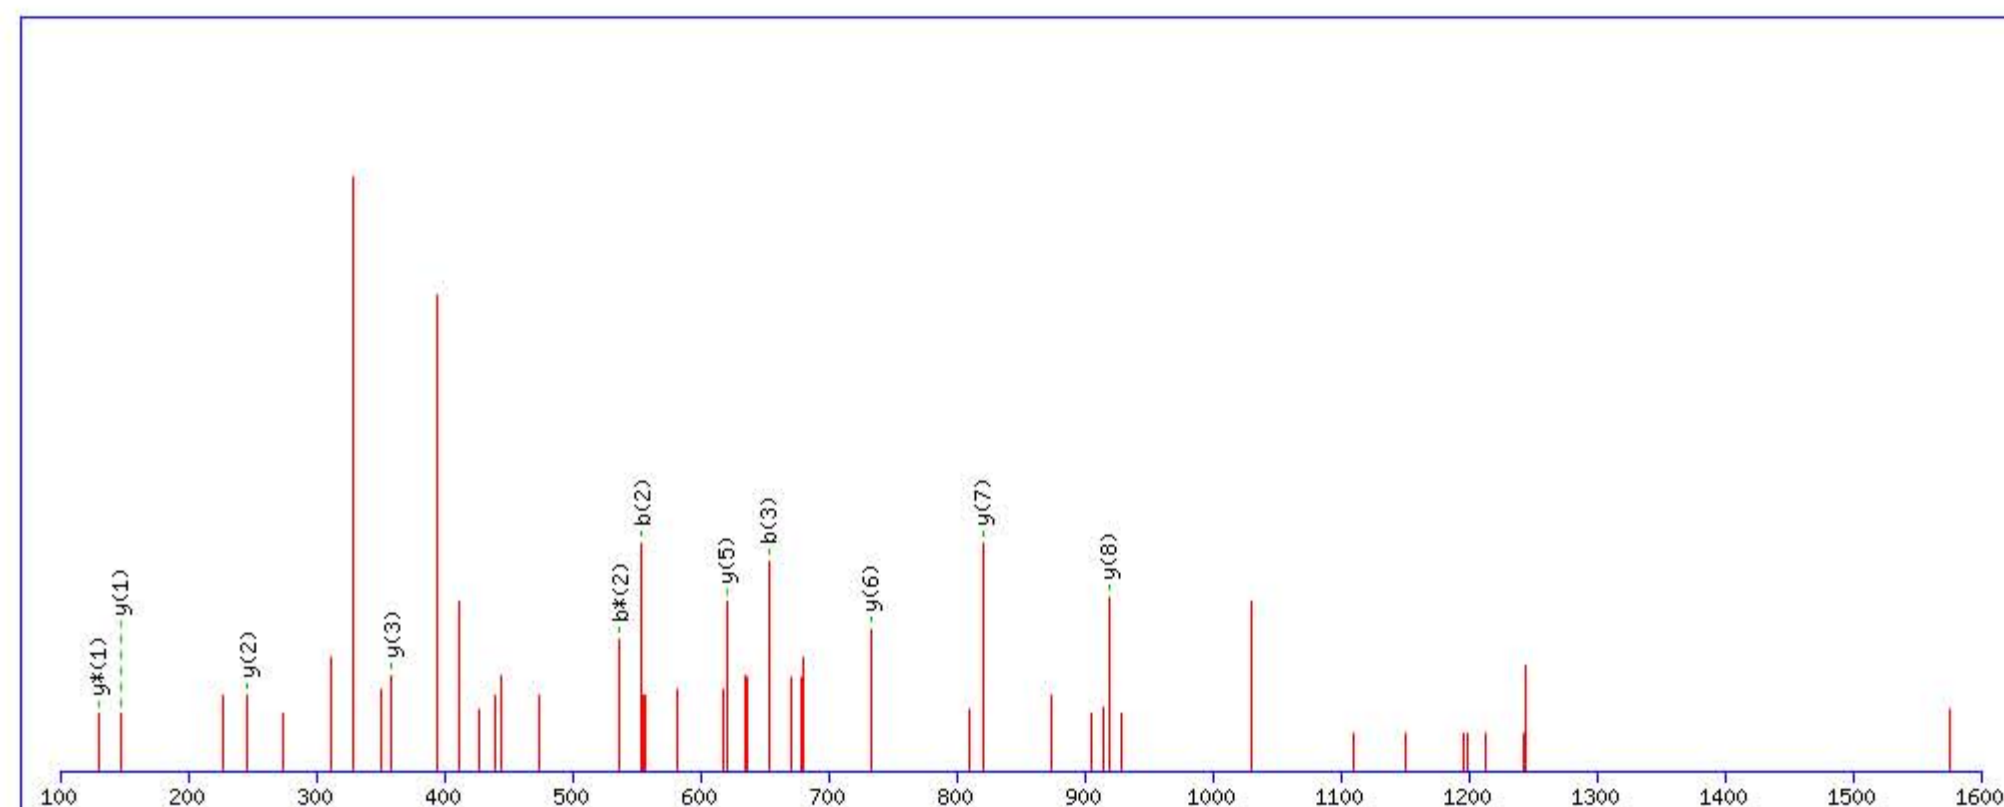

Monoisotopic mass of neutral peptide Mr(calc): 1471.789093

Fixed modifications: Carbamidomethyl (C) (apply to specified residues or termini only)

Variable modifications:

Q2 : Biotin:Thermo-21345 (Q)

Ions Score: 27 Expect: 0.05

Matches : 11/94 fragment ions using 31 most intense peaks [\(help\)](#)

| #  | b                 | b <sup>++</sup> | b <sup>*</sup>    | b <sup>*++</sup> | b <sup>0</sup> | b <sup>0++</sup> | Seq. | y                 | y <sup>++</sup> | y <sup>*</sup>    | y <sup>*++</sup> | y <sup>0</sup> | y <sup>0++</sup> | #  |
|----|-------------------|-----------------|-------------------|------------------|----------------|------------------|------|-------------------|-----------------|-------------------|------------------|----------------|------------------|----|
| 1  | 115.050203        | 58.028740       | 98.023654         | 49.515465        |                |                  | N    |                   |                 |                   |                  |                |                  | 10 |
| 2  | <b>554.275529</b> | 277.641403      | <b>537.248980</b> | 269.128128       |                |                  | Q    | 1358.753442       | 679.880359      | 1341.726893       | 671.367085       | 1340.742877    | 670.875076       | 9  |
| 3  | <b>653.343943</b> | 327.175610      | 636.317394        | 318.662335       |                |                  | V    | <b>919.528116</b> | 460.267696      | 902.501567        | 451.754421       | 901.517551     | 451.262413       | 8  |
| 4  | 740.375971        | 370.691623      | 723.349422        | 362.178349       | 722.365406     | 361.686341       | S    | <b>820.459702</b> | 410.733489      | 803.433153        | 402.220215       | 802.449137     | 401.728207       | 7  |
| 5  | 853.460035        | 427.233656      | 836.433486        | 418.720381       | 835.449470     | 418.228373       | L    | <b>733.427674</b> | 367.217475      | 716.401125        | 358.704201       | 715.417109     | 358.212193       | 6  |
| 6  | 954.507714        | 477.757495      | 937.481165        | 469.244220       | 936.497149     | 468.752212       | T    | <b>620.343610</b> | 310.675443      | 603.317061        | 302.162169       | 602.333045     | 301.670161       | 5  |
| 7  | 1114.538363       | 557.772819      | 1097.511814       | 549.259545       | 1096.527798    | 548.767537       | C    | 519.295931        | 260.151604      | 502.269382        | 251.638329       |                |                  | 4  |
| 8  | 1227.622427       | 614.314851      | 1210.595878       | 605.801577       | 1209.611862    | 605.309569       | L    | <b>359.265282</b> | 180.136279      | 342.238733        | 171.623004       |                |                  | 3  |
| 9  | 1326.690841       | 663.849058      | 1309.664292       | 655.335784       | 1308.680276    | 654.843776       | V    | <b>246.181218</b> | 123.594247      | 229.154669        | 115.080973       |                |                  | 2  |
| 10 |                   |                 |                   |                  |                |                  | K    | <b>147.112804</b> | 74.060040       | <b>130.086255</b> | 65.546765        |                |                  | 1  |

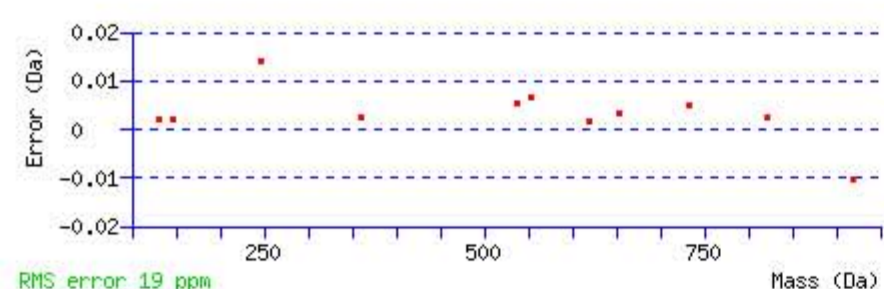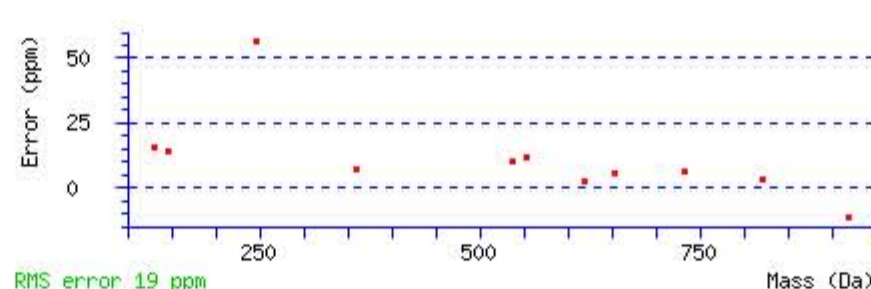

NCBI BLAST search of **NQVSLTCLVK**

(Parameters: blastp, nr protein database, expect=20000, no filter, PAM30)

Other BLAST [web gateways](#)

All matches to this query

| Score | Mr(calc):   | Delta     | Sequence                   |
|-------|-------------|-----------|----------------------------|
| 27.3  | 1471.789093 | -0.004805 | <a href="#">NQVSLTCLVK</a> |

Mascot: <http://www.matrixscience.com/>



**Peptide View**

MS/MS Fragmentation of **EPQVYTLPPSR**

Found in **IGHG1\_HUMAN**, Ig gamma-1 chain C region OS=Homo sapiens GN=IGHG1 PE=1 SV=1

Match to Query 33998: 1596.814828 from(799.414690,2+) rtinseconds(1962) index(63681)

Title: Locus:1.1.1.3162.26 File:"2013-07-02 CLN FXIII 30 min 3rd FT.wiff"

Data file C:\Program Files (x86)\Matrix Science\Mascot Daemon\mgf3 FXIII 30 min 3rd\mascot\_daemon\_merge.mgf

Click mouse within plot area to zoom in by factor of two about that point

Or, Plot from  to  Da

Label all possible matches  Label matches used for scoring

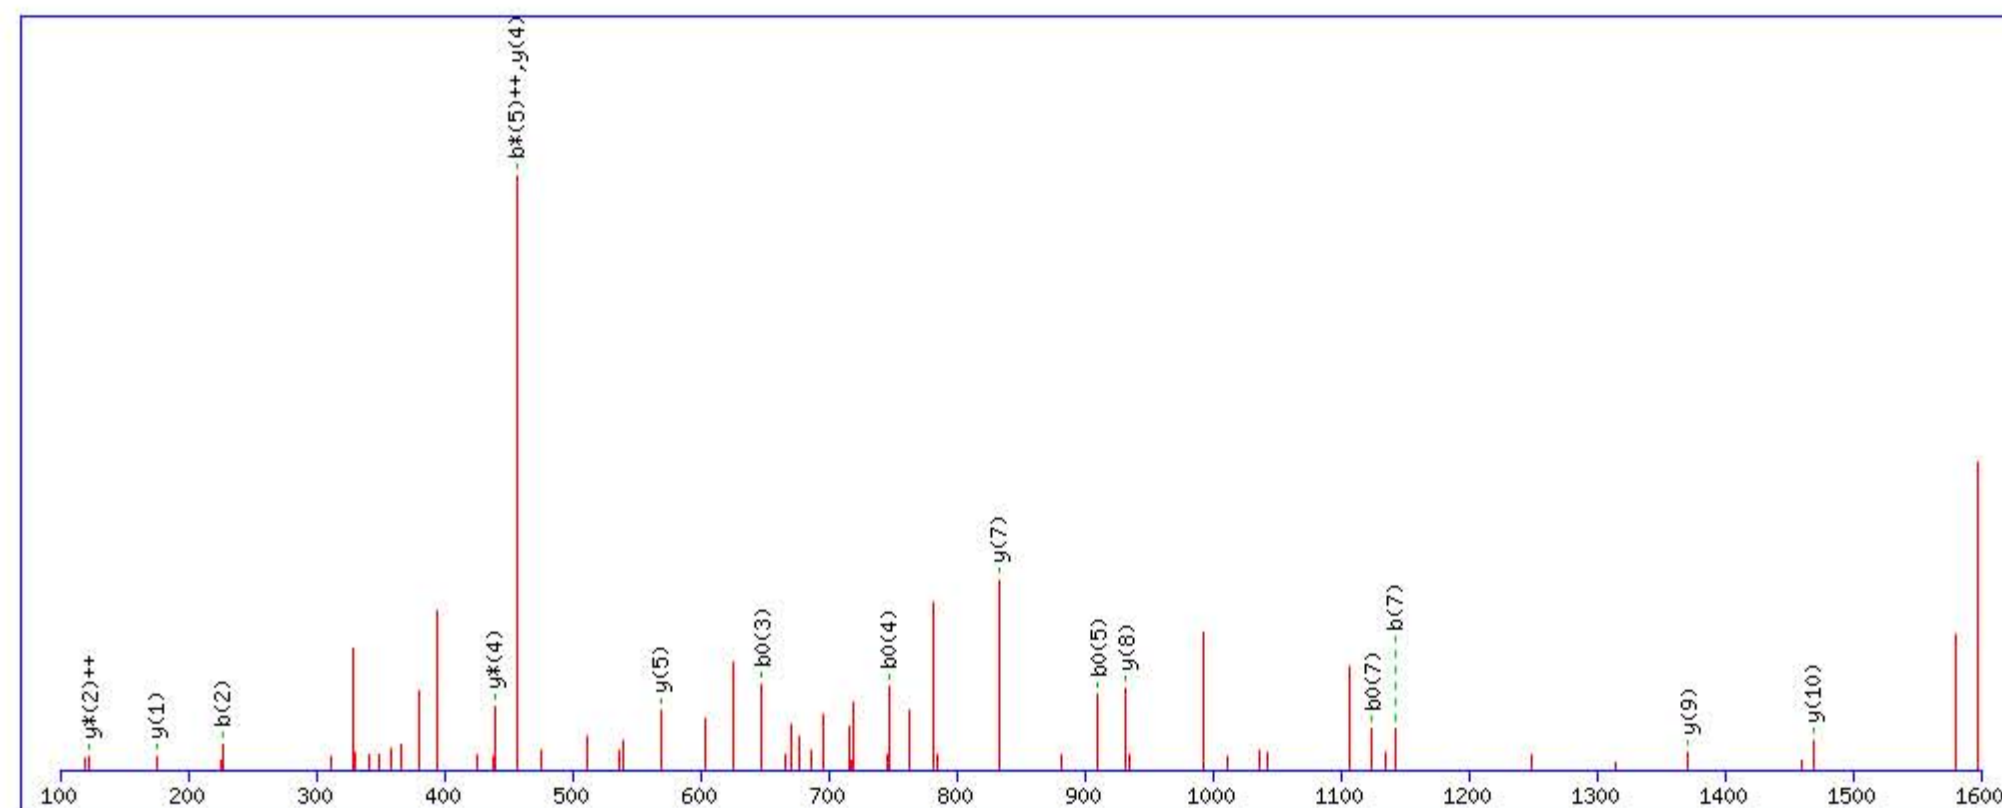

Monoisotopic mass of neutral peptide Mr(calc): 1596.833389

Fixed modifications: Carbamidomethyl (C) (apply to specified residues or termini only)

Variable modifications:

Q3 : Biotin:Thermo-21345 (Q)

Ions Score: 42 Expect: 0.00012

Matches : 16/114 fragment ions using 28 most intense peaks [\(help\)](#)

| #  | b                  | b <sup>++</sup> | b <sup>+</sup> | b <sup>*++</sup>  | b <sup>0</sup>     | b <sup>0++</sup> | Seq. | y                  | y <sup>++</sup> | y <sup>+</sup>    | y <sup>*++</sup>  | y <sup>0</sup> | y <sup>0++</sup> | #  |
|----|--------------------|-----------------|----------------|-------------------|--------------------|------------------|------|--------------------|-----------------|-------------------|-------------------|----------------|------------------|----|
| 1  | 130.049869         | 65.528572       |                |                   | 112.039304         | 56.523290        | E    |                    |                 |                   |                   |                |                  | 11 |
| 2  | <b>227.102633</b>  | 114.054954      |                |                   | 209.092068         | 105.049672       | P    | <b>1468.798084</b> | 734.902680      | 1451.771535       | 726.389406        | 1450.787519    | 725.897398       | 10 |
| 3  | 666.327959         | 333.667618      | 649.301410     | 325.154343        | <b>648.317394</b>  | 324.662335       | Q    | <b>1371.745320</b> | 686.376298      | 1354.718771       | 677.863024        | 1353.734755    | 677.371016       | 9  |
| 4  | 765.396373         | 383.201825      | 748.369824     | 374.688550        | <b>747.385808</b>  | 374.196542       | V    | <b>932.519994</b>  | 466.763635      | 915.493445        | 458.250361        | 914.509429     | 457.758353       | 8  |
| 5  | 928.459702         | 464.733489      | 911.433153     | <b>456.220215</b> | <b>910.449137</b>  | 455.728207       | Y    | <b>833.451580</b>  | 417.229428      | 816.425031        | 408.716154        | 815.441015     | 408.224146       | 7  |
| 6  | 1029.507381        | 515.257329      | 1012.480832    | 506.744054        | 1011.496816        | 506.252046       | T    | 670.388251         | 335.697764      | 653.361702        | 327.184489        | 652.377686     | 326.692481       | 6  |
| 7  | <b>1142.591445</b> | 571.799361      | 1125.564896    | 563.286086        | <b>1124.580880</b> | 562.794078       | L    | <b>569.340572</b>  | 285.173924      | 552.314023        | 276.660650        | 551.330007     | 276.168642       | 5  |
| 8  | 1239.644209        | 620.325743      | 1222.617660    | 611.812468        | 1221.633644        | 611.320460       | P    | <b>456.256508</b>  | 228.631892      | <b>439.229959</b> | 220.118618        | 438.245943     | 219.626610       | 4  |
| 9  | 1336.696973        | 668.852125      | 1319.670424    | 660.338850        | 1318.686408        | 659.846842       | P    | 359.203744         | 180.105510      | 342.177195        | 171.592236        | 341.193179     | 171.100228       | 3  |
| 10 | 1423.729001        | 712.368139      | 1406.702452    | 703.854864        | 1405.718436        | 703.362856       | S    | 262.150980         | 131.579128      | 245.124431        | <b>123.065854</b> | 244.140415     | 122.573846       | 2  |
| 11 |                    |                 |                |                   |                    |                  | R    | <b>175.118952</b>  | 88.063114       | 158.092403        | 79.549839         |                |                  | 1  |

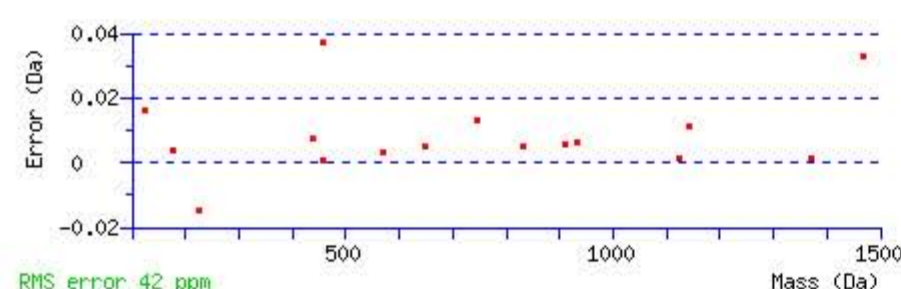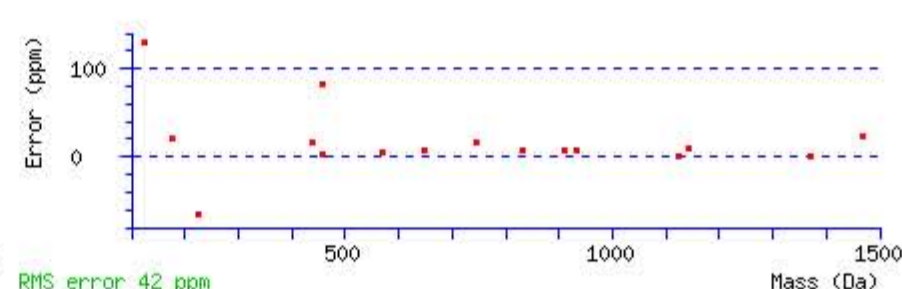

NCBI BLAST search of **EPQVYTLPPSR**

(Parameters: blastp, nr protein database, expect=20000, no filter, PAM30)

Other BLAST [web gateways](#)

All matches to this query

| Score | Mr(calc):   | Delta     | Sequence                        |
|-------|-------------|-----------|---------------------------------|
| 41.8  | 1596.833389 | -0.018561 | <a href="#">EPQVYTLPPSR</a>     |
| 0.0   | 1596.825974 | -0.011146 | <a href="#">KLSLDLEAQWAPSPR</a> |



# Mascot Search Results

## Peptide View

MS/MS Fragmentation of **WQQGNVFSCSVMEALHNHYTQK**

Found in **IGHG1\_HUMAN**, Ig gamma-1 chain C region OS=Homo sapiens GN=IGHG1 PE=1 SV=1

Match to Query 58037: 3111.422570 from(623.291790,5+) rtinseconds(2073) index(64285)

Title: Locus:1.1.1.3201.9 File:"2013-07-02 CLN FXIII 30 min 3rd FT.wiff"

Data file C:\Program Files (x86)\Matrix Science\Mascot Daemon\mgf3 FXIII 30 min 3rd\mascot\_daemon\_merge.mgf

Click mouse within plot area to zoom in by factor of two about that point

Or, Plot from  to  Da

Label all possible matches  Label matches used for scoring

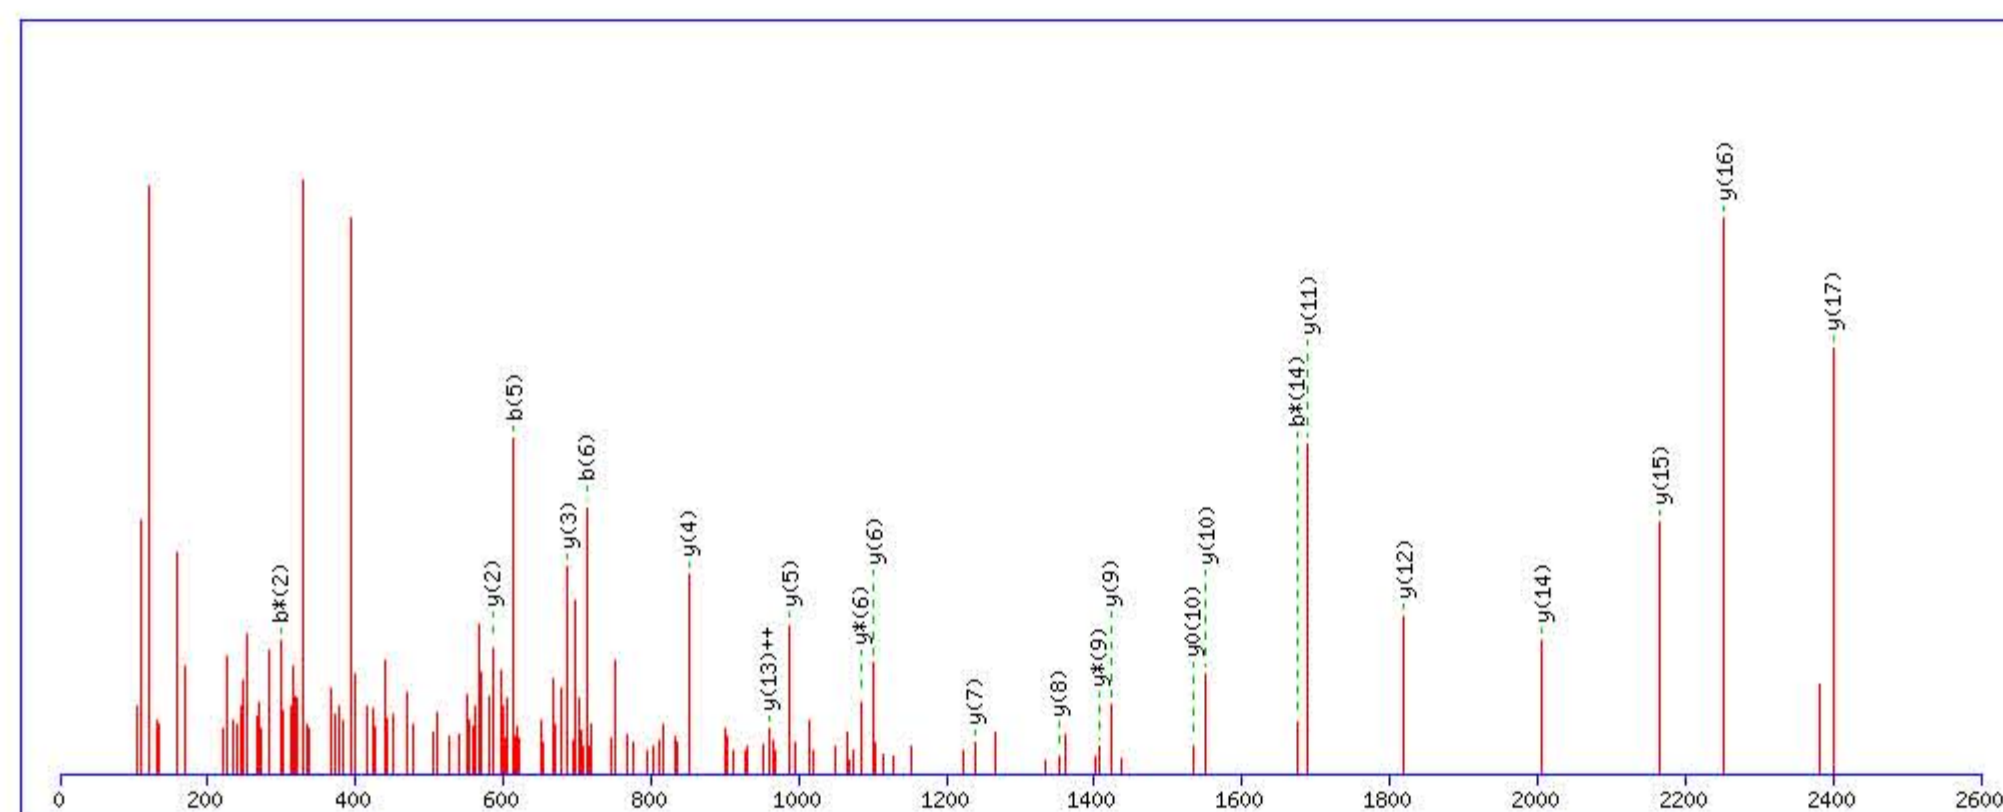

Monoisotopic mass of neutral peptide Mr(calc): 3111.426590

Fixed modifications: Carbamidomethyl (C) (apply to specified residues or termini only)

Variable modifications:

Q22 : Biotin:Thermo-21345 (Q)

Ions Score: 95 Expect: 3.9e-009

Matches : 23/244 fragment ions using 38 most intense peaks [\(help\)](#)

| #  | b           | b <sup>++</sup> | b <sup>*</sup> | b <sup>*++</sup> | b <sup>0</sup> | b <sup>0++</sup> | Seq. | y           | y <sup>++</sup> | y <sup>*</sup> | y <sup>*++</sup> | y <sup>0</sup> | y <sup>0++</sup> | #  |
|----|-------------|-----------------|----------------|------------------|----------------|------------------|------|-------------|-----------------|----------------|------------------|----------------|------------------|----|
| 1  | 187.086589  | 94.046932       |                |                  |                |                  | W    |             |                 |                |                  |                |                  | 23 |
| 2  | 315.145167  | 158.076222      | 298.118618     | 149.562947       |                |                  | Q    | 2926.354551 | 1463.680913     | 2909.328002    | 1455.167639      | 2908.343986    | 1454.675631      | 22 |
| 3  | 443.203745  | 222.105511      | 426.177196     | 213.592236       |                |                  | Q    | 2798.295973 | 1399.651624     | 2781.269424    | 1391.138350      | 2780.285408    | 1390.646342      | 21 |
| 4  | 500.225209  | 250.616243      | 483.198660     | 242.102968       |                |                  | G    | 2670.237395 | 1335.622335     | 2653.210846    | 1327.109061      | 2652.226830    | 1326.617053      | 20 |
| 5  | 614.268136  | 307.637706      | 597.241587     | 299.124432       |                |                  | N    | 2613.215931 | 1307.111603     | 2596.189382    | 1298.598329      | 2595.205366    | 1298.106321      | 19 |
| 6  | 713.336550  | 357.171913      | 696.310001     | 348.658639       |                |                  | V    | 2499.173004 | 1250.090140     | 2482.146455    | 1241.576865      | 2481.162439    | 1241.084857      | 18 |
| 7  | 860.404964  | 430.706120      | 843.378415     | 422.192845       |                |                  | F    | 2400.104590 | 1200.555933     | 2383.078041    | 1192.042658      | 2382.094025    | 1191.550650      | 17 |
| 8  | 947.436992  | 474.222134      | 930.410443     | 465.708859       | 929.426427     | 465.216851       | S    | 2253.036176 | 1127.021726     | 2236.009627    | 1118.508451      | 2235.025611    | 1118.016443      | 16 |
| 9  | 1107.467641 | 554.237459      | 1090.441092    | 545.724184       | 1089.457076    | 545.232176       | C    | 2166.004148 | 1083.505712     | 2148.977599    | 1074.992437      | 2147.993583    | 1074.500429      | 15 |
| 10 | 1194.499669 | 597.753473      | 1177.473120    | 589.240198       | 1176.489104    | 588.748190       | S    | 2005.973499 | 1003.490388     | 1988.946950    | 994.977113       | 1987.962934    | 994.485105       | 14 |
| 11 | 1293.568083 | 647.287680      | 1276.541534    | 638.774405       | 1275.557518    | 638.282397       | V    | 1918.941471 | 959.974373      | 1901.914922    | 951.461099       | 1900.930906    | 950.969091       | 13 |
| 12 | 1424.608568 | 712.807922      | 1407.582019    | 704.294648       | 1406.598003    | 703.802640       | M    | 1819.873057 | 910.440166      | 1802.846508    | 901.926892       | 1801.862492    | 901.434884       | 12 |
| 13 | 1561.667480 | 781.337378      | 1544.640931    | 772.824104       | 1543.656915    | 772.332096       | H    | 1688.832572 | 844.919924      | 1671.806023    | 836.406649       | 1670.822007    | 835.914641       | 11 |
| 14 | 1690.710073 | 845.858675      | 1673.683524    | 837.345400       | 1672.699508    | 836.853392       | E    | 1551.773660 | 776.390468      | 1534.747111    | 767.877193       | 1533.763095    | 767.385185       | 10 |
| 15 | 1761.747187 | 881.377231      | 1744.720638    | 872.863957       | 1743.736622    | 872.371949       | A    | 1422.731067 | 711.869171      | 1405.704518    | 703.355897       | 1404.720502    | 702.863889       | 9  |
| 16 | 1874.831251 | 937.919263      | 1857.804702    | 929.405989       | 1856.820686    | 928.913981       | L    | 1351.693953 | 676.350615      | 1334.667404    | 667.837340       | 1333.683388    | 667.345332       | 8  |
| 17 | 2011.890163 | 1006.448719     | 1994.863614    | 997.935445       | 1993.879598    | 997.443437       | H    | 1238.609889 | 619.808583      | 1221.583340    | 611.295308       | 1220.599324    | 610.803300       | 7  |
| 18 | 2125.933090 | 1063.470183     | 2108.906541    | 1054.956908      | 2107.922525    | 1054.464900      | N    | 1101.550977 | 551.279127      | 1084.524428    | 542.765852       | 1083.540412    | 542.273844       | 6  |
| 19 | 2262.992002 | 1131.999639     | 2245.965453    | 1123.486364      | 2244.981437    | 1122.994356      | H    | 987.508050  | 494.257663      | 970.481501     | 485.744389       | 969.497485     | 485.252381       | 5  |
| 20 | 2426.055331 | 1213.531303     | 2409.028782    | 1205.018029      | 2408.044766    | 1204.526021      | Y    | 850.449138  | 425.728207      | 833.422589     | 417.214933       | 832.438573     | 416.722925       | 4  |
| 21 | 2527.103010 | 1264.055143     | 2510.076461    | 1255.541868      | 2509.092445    | 1255.049860      | T    | 687.385809  | 344.196543      | 670.359260     | 335.683268       | 669.375244     | 335.191260       | 3  |
| 22 | 2966.328336 | 1483.667806     | 2949.301787    | 1475.154531      | 2948.317771    | 1474.662523      | Q    | 586.338130  | 293.672703      | 569.311581     | 285.159429       |                |                  | 2  |
| 23 |             |                 |                |                  |                |                  | K    | 147.112804  | 74.060040       | 130.086255     | 65.546765        |                |                  | 1  |

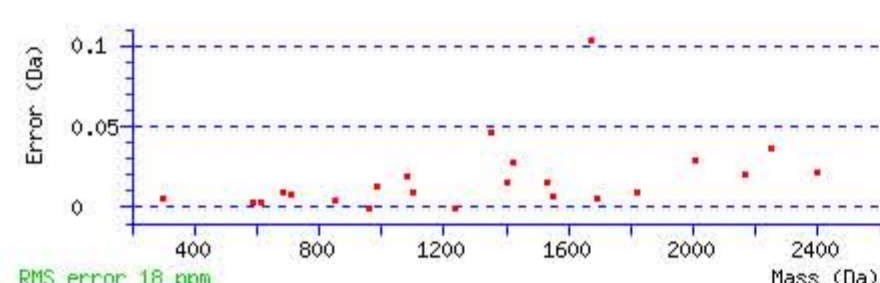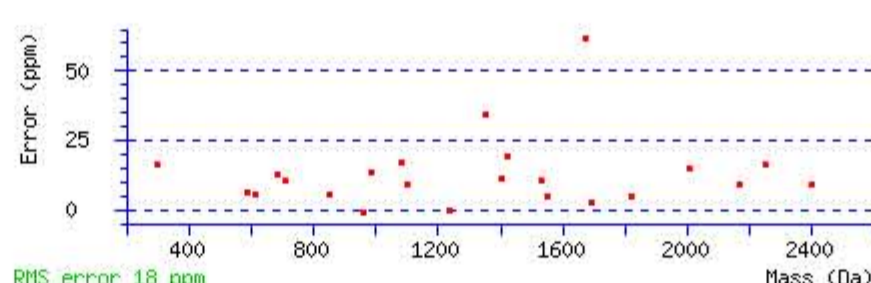

NCBI BLAST search of **WQQGNVFSCSVMEALHNHYTQK**

(Parameters: blastp, nr protein database, expect=20000, no filter, PAM30)

Other BLAST [web gateways](#)

All matches to this query

| Score | Mr(calc):   | Delta     | Sequence                      |
|-------|-------------|-----------|-------------------------------|
| 95.2  | 3111.426590 | -0.004020 | <b>WQQGNVFSCSVMEALHNHYTQK</b> |



# MASCOT SCIENCE Mascot Search Results

## Peptide View

MS/MS Fragmentation of **NQVSLTCLVK**

Found in **IGHG1\_HUMAN**, Ig gamma-1 chain C region OS=Homo sapiens GN=IGHG1 PE=1 SV=1

Match to Query 30214: 1471.784288 from(736.899420,2+) rtinseconds(2251) index(65260)

Title: Locus:1.1.1.3263.18 File:"2013-07-02 CLN FXIII 30 min 3rd FT.wiff"

Data file C:\Program Files (x86)\Matrix Science\Mascot Daemon\mgf3 FXIII 30 min 3rd\mascot\_daemon\_merge.mgf

Click mouse within plot area to zoom in by factor of two about that point

Or, Plot from  to  Da

Label all possible matches  Label matches used for scoring



Monoisotopic mass of neutral peptide Mr(calc): 1471.789093

Fixed modifications: Carbamidomethyl (C) (apply to specified residues or termini only)

Variable modifications:

Q2 : Biotin:Thermo-21345 (Q)

Ions Score: 27 Expect: 0.05

Matches : 11/94 fragment ions using 31 most intense peaks [\(help\)](#)

| #  | b                 | b <sup>++</sup> | b <sup>*</sup>    | b <sup>*++</sup> | b <sup>0</sup> | b <sup>0++</sup> | Seq. | y                 | y <sup>++</sup> | y <sup>*</sup>    | y <sup>*++</sup> | y <sup>0</sup> | y <sup>0++</sup> | #  |
|----|-------------------|-----------------|-------------------|------------------|----------------|------------------|------|-------------------|-----------------|-------------------|------------------|----------------|------------------|----|
| 1  | 115.050203        | 58.028740       | 98.023654         | 49.515465        |                |                  | N    |                   |                 |                   |                  |                |                  | 10 |
| 2  | <b>554.275529</b> | 277.641403      | <b>537.248980</b> | 269.128128       |                |                  | Q    | 1358.753442       | 679.880359      | 1341.726893       | 671.367085       | 1340.742877    | 670.875076       | 9  |
| 3  | <b>653.343943</b> | 327.175610      | 636.317394        | 318.662335       |                |                  | V    | <b>919.528116</b> | 460.267696      | 902.501567        | 451.754421       | 901.517551     | 451.262413       | 8  |
| 4  | 740.375971        | 370.691623      | 723.349422        | 362.178349       | 722.365406     | 361.686341       | S    | <b>820.459702</b> | 410.733489      | 803.433153        | 402.220215       | 802.449137     | 401.728207       | 7  |
| 5  | 853.460035        | 427.233656      | 836.433486        | 418.720381       | 835.449470     | 418.228373       | L    | <b>733.427674</b> | 367.217475      | 716.401125        | 358.704201       | 715.417109     | 358.212193       | 6  |
| 6  | 954.507714        | 477.757495      | 937.481165        | 469.244220       | 936.497149     | 468.752212       | T    | <b>620.343610</b> | 310.675443      | 603.317061        | 302.162169       | 602.333045     | 301.670161       | 5  |
| 7  | 1114.538363       | 557.772819      | 1097.511814       | 549.259545       | 1096.527798    | 548.767537       | C    | 519.295931        | 260.151604      | 502.269382        | 251.638329       |                |                  | 4  |
| 8  | 1227.622427       | 614.314851      | 1210.595878       | 605.801577       | 1209.611862    | 605.309569       | L    | <b>359.265282</b> | 180.136279      | 342.238733        | 171.623004       |                |                  | 3  |
| 9  | 1326.690841       | 663.849058      | 1309.664292       | 655.335784       | 1308.680276    | 654.843776       | V    | <b>246.181218</b> | 123.594247      | 229.154669        | 115.080973       |                |                  | 2  |
| 10 |                   |                 |                   |                  |                |                  | K    | <b>147.112804</b> | 74.060040       | <b>130.086255</b> | 65.546765        |                |                  | 1  |

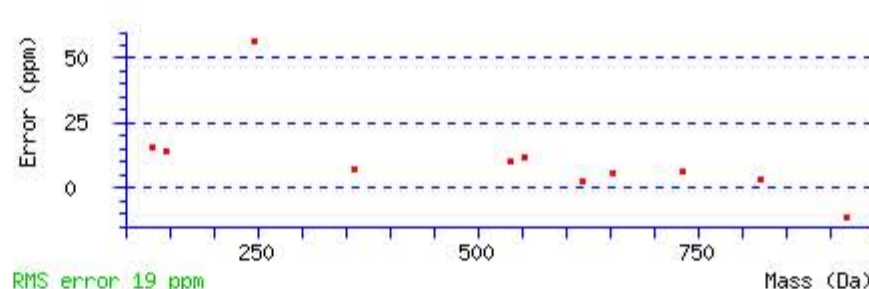

NCBI BLAST search of **NQVSLTCLVK**

(Parameters: blastp, nr protein database, expect=20000, no filter, PAM30)

Other BLAST [web gateways](#)

All matches to this query

| Score | Mr(calc):   | Delta     | Sequence                   |
|-------|-------------|-----------|----------------------------|
| 27.3  | 1471.789093 | -0.004805 | <a href="#">NQVSLTCLVK</a> |

Mascot: <http://www.matrixscience.com/>



**Peptide View**

MS/MS Fragmentation of **EPQVYTLPPSR**

Found in **IGHG1\_HUMAN**, Ig gamma-1 chain C region OS=Homo sapiens GN=IGHG1 PE=1 SV=1

Match to Query 33998: 1596.814828 from(799.414690,2+) rtinseconds(1962) index(63681)

Title: Locus:1.1.1.3162.26 File:"2013-07-02 CLN FXIII 30 min 3rd FT.wiff"

Data file C:\Program Files (x86)\Matrix Science\Mascot Daemon\mgf\3 FXIII 30 min 3rd\mascot\_daemon\_merge.mgf

Click mouse within plot area to zoom in by factor of two about that point

Or, Plot from  to  Da

Label all possible matches  Label matches used for scoring



Monoisotopic mass of neutral peptide Mr(calc): 1596.833389

Fixed modifications: Carbamidomethyl (C) (apply to specified residues or termini only)

Variable modifications:

Q3 : Biotin:Thermo-21345 (Q)

Ions Score: 42 Expect: 0.00012

Matches : 16/114 fragment ions using 28 most intense peaks [\(help\)](#)

| #  | b                  | b <sup>++</sup> | b <sup>+</sup> | b <sup>*++</sup>  | b <sup>0</sup>     | b <sup>0++</sup> | Seq. | y                  | y <sup>++</sup> | y <sup>+</sup>    | y <sup>*++</sup>  | y <sup>0</sup> | y <sup>0++</sup> | #  |
|----|--------------------|-----------------|----------------|-------------------|--------------------|------------------|------|--------------------|-----------------|-------------------|-------------------|----------------|------------------|----|
| 1  | 130.049869         | 65.528572       |                |                   | 112.039304         | 56.523290        | E    |                    |                 |                   |                   |                |                  | 11 |
| 2  | <b>227.102633</b>  | 114.054954      |                |                   | 209.092068         | 105.049672       | P    | <b>1468.798084</b> | 734.902680      | 1451.771535       | 726.389406        | 1450.787519    | 725.897398       | 10 |
| 3  | 666.327959         | 333.667618      | 649.301410     | 325.154343        | <b>648.317394</b>  | 324.662335       | Q    | <b>1371.745320</b> | 686.376298      | 1354.718771       | 677.863024        | 1353.734755    | 677.371016       | 9  |
| 4  | 765.396373         | 383.201825      | 748.369824     | 374.688550        | <b>747.385808</b>  | 374.196542       | V    | <b>932.519994</b>  | 466.763635      | 915.493445        | 458.250361        | 914.509429     | 457.758353       | 8  |
| 5  | 928.459702         | 464.733489      | 911.433153     | <b>456.220215</b> | <b>910.449137</b>  | 455.728207       | Y    | <b>833.451580</b>  | 417.229428      | 816.425031        | 408.716154        | 815.441015     | 408.224146       | 7  |
| 6  | 1029.507381        | 515.257329      | 1012.480832    | 506.744054        | 1011.496816        | 506.252046       | T    | 670.388251         | 335.697764      | 653.361702        | 327.184489        | 652.377686     | 326.692481       | 6  |
| 7  | <b>1142.591445</b> | 571.799361      | 1125.564896    | 563.286086        | <b>1124.580880</b> | 562.794078       | L    | <b>569.340572</b>  | 285.173924      | 552.314023        | 276.660650        | 551.330007     | 276.168642       | 5  |
| 8  | 1239.644209        | 620.325743      | 1222.617660    | 611.812468        | 1221.633644        | 611.320460       | P    | <b>456.256508</b>  | 228.631892      | <b>439.229959</b> | 220.118618        | 438.245943     | 219.626610       | 4  |
| 9  | 1336.696973        | 668.852125      | 1319.670424    | 660.338850        | 1318.686408        | 659.846842       | P    | 359.203744         | 180.105510      | 342.177195        | 171.592236        | 341.193179     | 171.100228       | 3  |
| 10 | 1423.729001        | 712.368139      | 1406.702452    | 703.854864        | 1405.718436        | 703.362856       | S    | 262.150980         | 131.579128      | 245.124431        | <b>123.065854</b> | 244.140415     | 122.573846       | 2  |
| 11 |                    |                 |                |                   |                    |                  | R    | <b>175.118952</b>  | 88.063114       | 158.092403        | 79.549839         |                |                  | 1  |



NCBI BLAST search of **EPQVYTLPPSR**

(Parameters: blastp, nr protein database, expect=20000, no filter, PAM30)

Other BLAST [web gateways](#)

All matches to this query

| Score | Mr(calc):   | Delta     | Sequence                        |
|-------|-------------|-----------|---------------------------------|
| 41.8  | 1596.833389 | -0.018561 | <a href="#">EPQVYTLPPSR</a>     |
| 0.0   | 1596.825974 | -0.011146 | <a href="#">KLSLDLEAQWAPSPR</a> |



# Mascot Search Results

## Peptide View

MS/MS Fragmentation of **WQQGNVFSCSVMEALHNHYTQK**

Found in **IGHG1\_HUMAN**, Ig gamma-1 chain C region OS=Homo sapiens GN=IGHG1 PE=1 SV=1

Match to Query 58037: 3111.422570 from(623.291790,5+) rtinseconds(2073) index(64285)

Title: Locus:1.1.1.3201.9 File:"2013-07-02 CLN FXIII 30 min 3rd FT.wiff"

Data file C:\Program Files (x86)\Matrix Science\Mascot Daemon\mgf3 FXIII 30 min 3rd\mascot\_daemon\_merge.mgf

Click mouse within plot area to zoom in by factor of two about that point

Or, Plot from  to  Da

Label all possible matches  Label matches used for scoring



Monoisotopic mass of neutral peptide Mr(calc): 3111.426590

Fixed modifications: Carbamidomethyl (C) (apply to specified residues or termini only)

Variable modifications:

Q22 : Biotin:Thermo-21345 (Q)

Ions Score: 95 Expect: 3.9e-009

Matches : 23/244 fragment ions using 38 most intense peaks [\(help\)](#)

| #  | b           | b <sup>++</sup> | b <sup>*</sup> | b <sup>*++</sup> | b <sup>0</sup> | b <sup>0++</sup> | Seq. | y           | y <sup>++</sup> | y <sup>*</sup> | y <sup>*++</sup> | y <sup>0</sup> | y <sup>0++</sup> | #  |
|----|-------------|-----------------|----------------|------------------|----------------|------------------|------|-------------|-----------------|----------------|------------------|----------------|------------------|----|
| 1  | 187.086589  | 94.046932       |                |                  |                |                  | W    |             |                 |                |                  |                |                  | 23 |
| 2  | 315.145167  | 158.076222      | 298.118618     | 149.562947       |                |                  | Q    | 2926.354551 | 1463.680913     | 2909.328002    | 1455.167639      | 2908.343986    | 1454.675631      | 22 |
| 3  | 443.203745  | 222.105511      | 426.177196     | 213.592236       |                |                  | Q    | 2798.295973 | 1399.651624     | 2781.269424    | 1391.138350      | 2780.285408    | 1390.646342      | 21 |
| 4  | 500.225209  | 250.616243      | 483.198660     | 242.102968       |                |                  | G    | 2670.237395 | 1335.622335     | 2653.210846    | 1327.109061      | 2652.226830    | 1326.617053      | 20 |
| 5  | 614.268136  | 307.637706      | 597.241587     | 299.124432       |                |                  | N    | 2613.215931 | 1307.111603     | 2596.189382    | 1298.598329      | 2595.205366    | 1298.106321      | 19 |
| 6  | 713.336550  | 357.171913      | 696.310001     | 348.658639       |                |                  | V    | 2499.173004 | 1250.090140     | 2482.146455    | 1241.576865      | 2481.162439    | 1241.084857      | 18 |
| 7  | 860.404964  | 430.706120      | 843.378415     | 422.192845       |                |                  | F    | 2400.104590 | 1200.555933     | 2383.078041    | 1192.042658      | 2382.094025    | 1191.550650      | 17 |
| 8  | 947.436992  | 474.222134      | 930.410443     | 465.708859       | 929.426427     | 465.216851       | S    | 2253.036176 | 1127.021726     | 2236.009627    | 1118.508451      | 2235.025611    | 1118.016443      | 16 |
| 9  | 1107.467641 | 554.237459      | 1090.441092    | 545.724184       | 1089.457076    | 545.232176       | C    | 2166.004148 | 1083.505712     | 2148.977599    | 1074.992437      | 2147.993583    | 1074.500429      | 15 |
| 10 | 1194.499669 | 597.753473      | 1177.473120    | 589.240198       | 1176.489104    | 588.748190       | S    | 2005.973499 | 1003.490388     | 1988.946950    | 994.977113       | 1987.962934    | 994.485105       | 14 |
| 11 | 1293.568083 | 647.287680      | 1276.541534    | 638.774405       | 1275.557518    | 638.282397       | V    | 1918.941471 | 959.974373      | 1901.914922    | 951.461099       | 1900.930906    | 950.969091       | 13 |
| 12 | 1424.608568 | 712.807922      | 1407.582019    | 704.294648       | 1406.598003    | 703.802640       | M    | 1819.873057 | 910.440166      | 1802.846508    | 901.926892       | 1801.862492    | 901.434884       | 12 |
| 13 | 1561.667480 | 781.337378      | 1544.640931    | 772.824104       | 1543.656915    | 772.332096       | H    | 1688.832572 | 844.919924      | 1671.806023    | 836.406649       | 1670.822007    | 835.914641       | 11 |
| 14 | 1690.710073 | 845.858675      | 1673.683524    | 837.345400       | 1672.699508    | 836.853392       | E    | 1551.773660 | 776.390468      | 1534.747111    | 767.877193       | 1533.763095    | 767.385185       | 10 |
| 15 | 1761.747187 | 881.377231      | 1744.720638    | 872.863957       | 1743.736622    | 872.371949       | A    | 1422.731067 | 711.869171      | 1405.704518    | 703.355897       | 1404.720502    | 702.863889       | 9  |
| 16 | 1874.831251 | 937.919263      | 1857.804702    | 929.405989       | 1856.820686    | 928.913981       | L    | 1351.693953 | 676.350615      | 1334.667404    | 667.837340       | 1333.683388    | 667.345332       | 8  |
| 17 | 2011.890163 | 1006.448719     | 1994.863614    | 997.935445       | 1993.879598    | 997.443437       | H    | 1238.609889 | 619.808583      | 1221.583340    | 611.295308       | 1220.599324    | 610.803300       | 7  |
| 18 | 2125.933090 | 1063.470183     | 2108.906541    | 1054.956908      | 2107.922525    | 1054.464900      | N    | 1101.550977 | 551.279127      | 1084.524428    | 542.765852       | 1083.540412    | 542.273844       | 6  |
| 19 | 2262.992002 | 1131.999639     | 2245.965453    | 1123.486364      | 2244.981437    | 1122.994356      | H    | 987.508050  | 494.257663      | 970.481501     | 485.744389       | 969.497485     | 485.252381       | 5  |
| 20 | 2426.055331 | 1213.531303     | 2409.028782    | 1205.018029      | 2408.044766    | 1204.526021      | Y    | 850.449138  | 425.728207      | 833.422589     | 417.214933       | 832.438573     | 416.722925       | 4  |
| 21 | 2527.103010 | 1264.055143     | 2510.076461    | 1255.541868      | 2509.092445    | 1255.049860      | T    | 687.385809  | 344.196543      | 670.359260     | 335.683268       | 669.375244     | 335.191260       | 3  |
| 22 | 2966.328336 | 1483.667806     | 2949.301787    | 1475.154531      | 2948.317771    | 1474.662523      | Q    | 586.338130  | 293.672703      | 569.311581     | 285.159429       |                |                  | 2  |
| 23 |             |                 |                |                  |                |                  | K    | 147.112804  | 74.060040       | 130.086255     | 65.546765        |                |                  | 1  |



NCBI BLAST search of **WQQGNVFSCSVMEALHNHYTQK**

(Parameters: blastp, nr protein database, expect=20000, no filter, PAM30)

Other BLAST [web gateways](#)

All matches to this query

| Score | Mr(calc):   | Delta     | Sequence                      |
|-------|-------------|-----------|-------------------------------|
| 95.2  | 3111.426590 | -0.004020 | <b>WQQGNVFSCSVMEALHNHYTQK</b> |



# MASCOT SCIENCE Mascot Search Results

## Peptide View

MS/MS Fragmentation of **NQVSLTCLVK**

Found in **IGHG1\_HUMAN**, Ig gamma-1 chain C region OS=Homo sapiens GN=IGHG1 PE=1 SV=1

Match to Query 30214: 1471.784288 from(736.899420,2+) rtinseconds(2251) index(65260)

Title: Locus:1.1.1.3263.18 File:"2013-07-02 CLN FXIII 30 min 3rd FT.wiff"

Data file C:\Program Files (x86)\Matrix Science\Mascot Daemon\mgf3 FXIII 30 min 3rd\mascot\_daemon\_merge.mgf

Click mouse within plot area to zoom in by factor of two about that point

Or, Plot from  to  Da

Label all possible matches  Label matches used for scoring



Monoisotopic mass of neutral peptide Mr(calc): 1471.789093

Fixed modifications: Carbamidomethyl (C) (apply to specified residues or termini only)

Variable modifications:

Q2 : Biotin:Thermo-21345 (Q)

Ions Score: 27 Expect: 0.05

Matches : 11/94 fragment ions using 31 most intense peaks [\(help\)](#)

| #  | b                 | b <sup>++</sup> | b <sup>*</sup>    | b <sup>*++</sup> | b <sup>0</sup> | b <sup>0++</sup> | Seq. | y                 | y <sup>++</sup> | y <sup>*</sup>    | y <sup>*++</sup> | y <sup>0</sup> | y <sup>0++</sup> | #  |
|----|-------------------|-----------------|-------------------|------------------|----------------|------------------|------|-------------------|-----------------|-------------------|------------------|----------------|------------------|----|
| 1  | 115.050203        | 58.028740       | 98.023654         | 49.515465        |                |                  | N    |                   |                 |                   |                  |                |                  | 10 |
| 2  | <b>554.275529</b> | 277.641403      | <b>537.248980</b> | 269.128128       |                |                  | Q    | 1358.753442       | 679.880359      | 1341.726893       | 671.367085       | 1340.742877    | 670.875076       | 9  |
| 3  | <b>653.343943</b> | 327.175610      | 636.317394        | 318.662335       |                |                  | V    | <b>919.528116</b> | 460.267696      | 902.501567        | 451.754421       | 901.517551     | 451.262413       | 8  |
| 4  | 740.375971        | 370.691623      | 723.349422        | 362.178349       | 722.365406     | 361.686341       | S    | <b>820.459702</b> | 410.733489      | 803.433153        | 402.220215       | 802.449137     | 401.728207       | 7  |
| 5  | 853.460035        | 427.233656      | 836.433486        | 418.720381       | 835.449470     | 418.228373       | L    | <b>733.427674</b> | 367.217475      | 716.401125        | 358.704201       | 715.417109     | 358.212193       | 6  |
| 6  | 954.507714        | 477.757495      | 937.481165        | 469.244220       | 936.497149     | 468.752212       | T    | <b>620.343610</b> | 310.675443      | 603.317061        | 302.162169       | 602.333045     | 301.670161       | 5  |
| 7  | 1114.538363       | 557.772819      | 1097.511814       | 549.259545       | 1096.527798    | 548.767537       | C    | 519.295931        | 260.151604      | 502.269382        | 251.638329       |                |                  | 4  |
| 8  | 1227.622427       | 614.314851      | 1210.595878       | 605.801577       | 1209.611862    | 605.309569       | L    | <b>359.265282</b> | 180.136279      | 342.238733        | 171.623004       |                |                  | 3  |
| 9  | 1326.690841       | 663.849058      | 1309.664292       | 655.335784       | 1308.680276    | 654.843776       | V    | <b>246.181218</b> | 123.594247      | 229.154669        | 115.080973       |                |                  | 2  |
| 10 |                   |                 |                   |                  |                |                  | K    | <b>147.112804</b> | 74.060040       | <b>130.086255</b> | 65.546765        |                |                  | 1  |

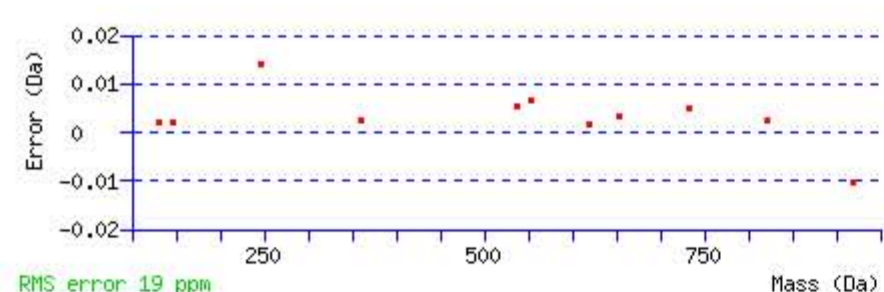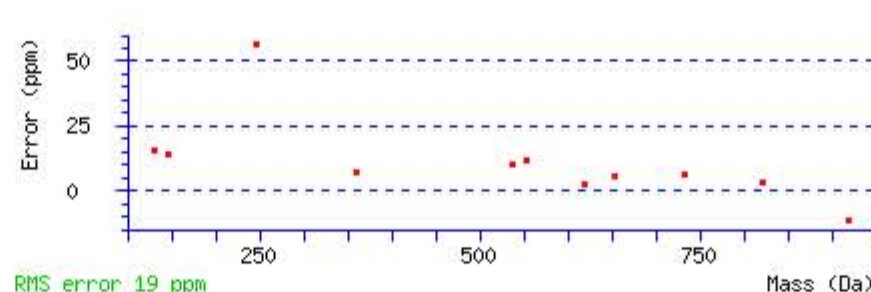

NCBI BLAST search of **NQVSLTCLVK**

(Parameters: blastp, nr protein database, expect=20000, no filter, PAM30)

Other BLAST [web gateways](#)

All matches to this query

| Score | Mr(calc):   | Delta     | Sequence                   |
|-------|-------------|-----------|----------------------------|
| 27.3  | 1471.789093 | -0.004805 | <a href="#">NQVSLTCLVK</a> |

Mascot: <http://www.matrixscience.com/>



**Peptide View**

MS/MS Fragmentation of **EPQVYTLPPSR**

Found in **IGHG1\_HUMAN**, Ig gamma-1 chain C region OS=Homo sapiens GN=IGHG1 PE=1 SV=1

Match to Query 33998: 1596.814828 from(799.414690,2+) rtinseconds(1962) index(63681)

Title: Locus:1.1.1.3162.26 File:"2013-07-02 CLN FXIII 30 min 3rd FT.wiff"

Data file C:\Program Files (x86)\Matrix Science\Mascot Daemon\mgf3 FXIII 30 min 3rd\mascot\_daemon\_merge.mgf

Click mouse within plot area to zoom in by factor of two about that point

Or, Plot from  to  Da

Label all possible matches  Label matches used for scoring

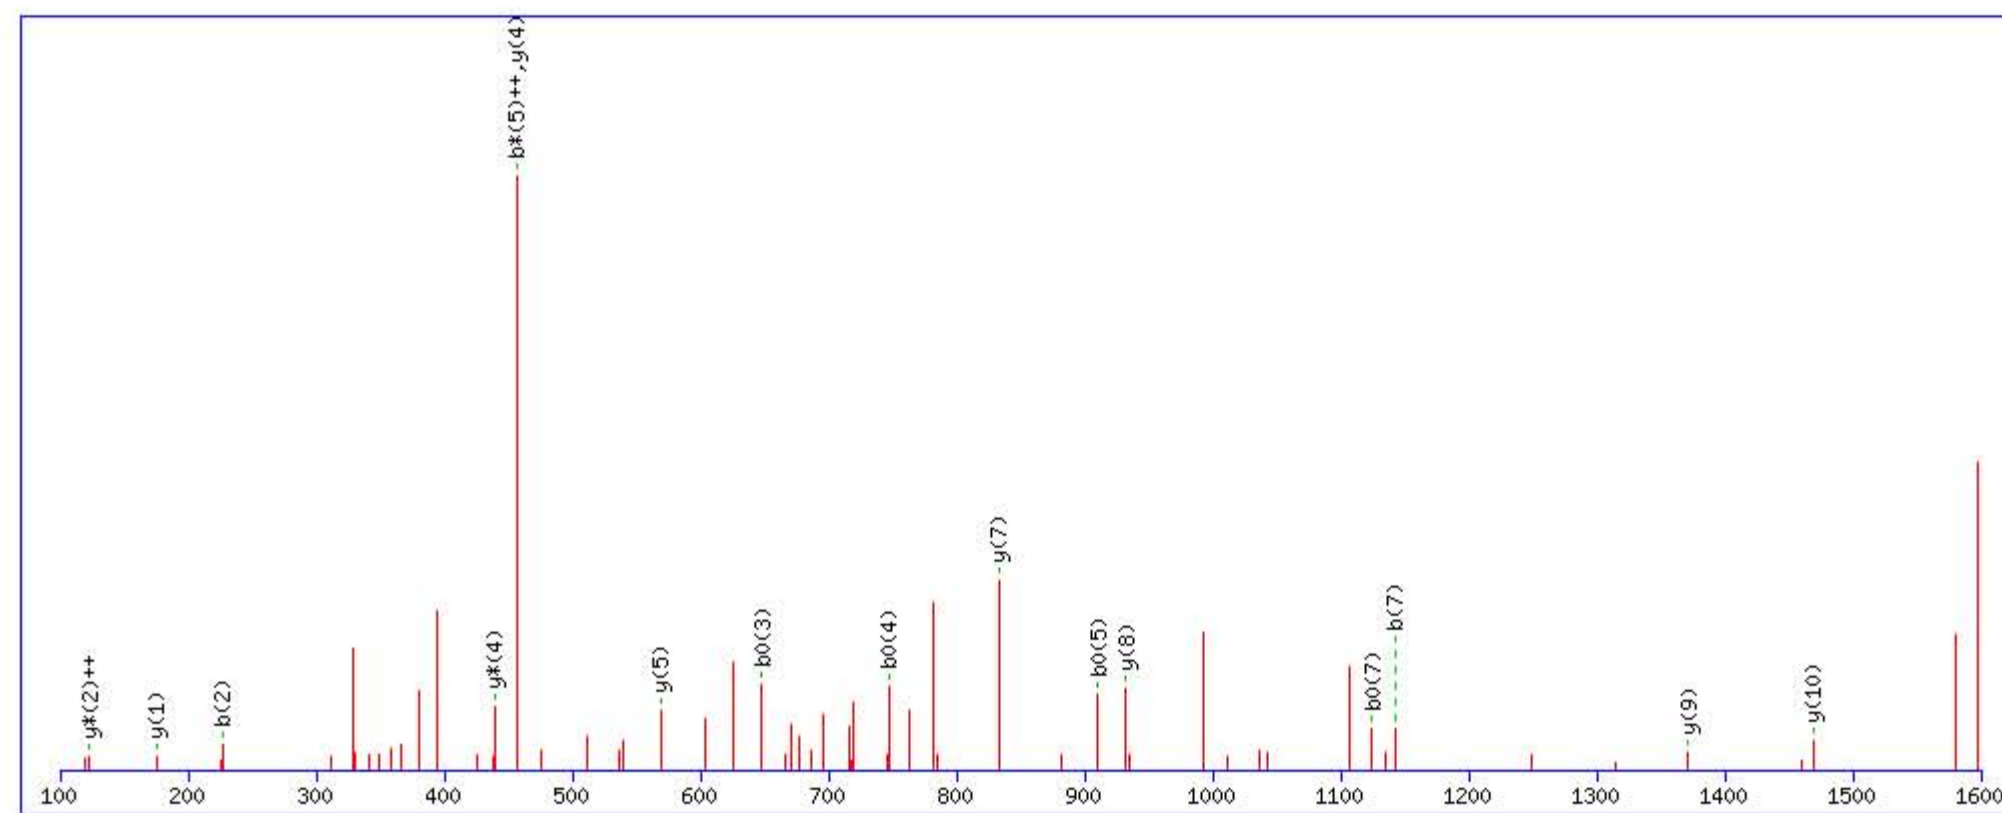

Monoisotopic mass of neutral peptide Mr(calc): 1596.833389

Fixed modifications: Carbamidomethyl (C) (apply to specified residues or termini only)

Variable modifications:

Q3 : Biotin:Thermo-21345 (Q)

Ions Score: 42 Expect: 0.00012

Matches : 16/114 fragment ions using 28 most intense peaks [\(help\)](#)

| #  | b                  | b <sup>++</sup> | b <sup>+</sup> | b <sup>*++</sup>  | b <sup>0</sup>     | b <sup>0++</sup> | Seq. | y                  | y <sup>++</sup> | y <sup>+</sup>    | y <sup>*++</sup>  | y <sup>0</sup> | y <sup>0++</sup> | #  |
|----|--------------------|-----------------|----------------|-------------------|--------------------|------------------|------|--------------------|-----------------|-------------------|-------------------|----------------|------------------|----|
| 1  | 130.049869         | 65.528572       |                |                   | 112.039304         | 56.523290        | E    |                    |                 |                   |                   |                |                  | 11 |
| 2  | <b>227.102633</b>  | 114.054954      |                |                   | 209.092068         | 105.049672       | P    | <b>1468.798084</b> | 734.902680      | 1451.771535       | 726.389406        | 1450.787519    | 725.897398       | 10 |
| 3  | 666.327959         | 333.667618      | 649.301410     | 325.154343        | <b>648.317394</b>  | 324.662335       | Q    | <b>1371.745320</b> | 686.376298      | 1354.718771       | 677.863024        | 1353.734755    | 677.371016       | 9  |
| 4  | 765.396373         | 383.201825      | 748.369824     | 374.688550        | <b>747.385808</b>  | 374.196542       | V    | <b>932.519994</b>  | 466.763635      | 915.493445        | 458.250361        | 914.509429     | 457.758353       | 8  |
| 5  | 928.459702         | 464.733489      | 911.433153     | <b>456.220215</b> | <b>910.449137</b>  | 455.728207       | Y    | <b>833.451580</b>  | 417.229428      | 816.425031        | 408.716154        | 815.441015     | 408.224146       | 7  |
| 6  | 1029.507381        | 515.257329      | 1012.480832    | 506.744054        | 1011.496816        | 506.252046       | T    | 670.388251         | 335.697764      | 653.361702        | 327.184489        | 652.377686     | 326.692481       | 6  |
| 7  | <b>1142.591445</b> | 571.799361      | 1125.564896    | 563.286086        | <b>1124.580880</b> | 562.794078       | L    | <b>569.340572</b>  | 285.173924      | 552.314023        | 276.660650        | 551.330007     | 276.168642       | 5  |
| 8  | 1239.644209        | 620.325743      | 1222.617660    | 611.812468        | 1221.633644        | 611.320460       | P    | <b>456.256508</b>  | 228.631892      | <b>439.229959</b> | 220.118618        | 438.245943     | 219.626610       | 4  |
| 9  | 1336.696973        | 668.852125      | 1319.670424    | 660.338850        | 1318.686408        | 659.846842       | P    | 359.203744         | 180.105510      | 342.177195        | 171.592236        | 341.193179     | 171.100228       | 3  |
| 10 | 1423.729001        | 712.368139      | 1406.702452    | 703.854864        | 1405.718436        | 703.362856       | S    | 262.150980         | 131.579128      | 245.124431        | <b>123.065854</b> | 244.140415     | 122.573846       | 2  |
| 11 |                    |                 |                |                   |                    |                  | R    | <b>175.118952</b>  | 88.063114       | 158.092403        | 79.549839         |                |                  | 1  |



NCBI BLAST search of **EPQVYTLPPSR**

(Parameters: blastp, nr protein database, expect=20000, no filter, PAM30)

Other BLAST [web gateways](#)

All matches to this query

| Score | Mr(calc):   | Delta     | Sequence                        |
|-------|-------------|-----------|---------------------------------|
| 41.8  | 1596.833389 | -0.018561 | <a href="#">EPQVYTLPPSR</a>     |
| 0.0   | 1596.825974 | -0.011146 | <a href="#">KLSLDLEAQWAPSPR</a> |



# MASCOT SCIENCE Mascot Search Results

## Peptide View

MS/MS Fragmentation of **NQVSLTCLVK**

Found in **IGHG1\_HUMAN**, Ig gamma-1 chain C region OS=Homo sapiens GN=IGHG1 PE=1 SV=1

Match to Query 30214: 1471.784288 from(736.899420,2+) rtinseconds(2251) index(65260)

Title: Locus:1.1.1.3263.18 File:"2013-07-02 CLN FXIII 30 min 3rd FT.wiff"

Data file C:\Program Files (x86)\Matrix Science\Mascot Daemon\mgf3 FXIII 30 min 3rd\mascot\_daemon\_merge.mgf

Click mouse within plot area to zoom in by factor of two about that point

Or, Plot from  to  Da

Label all possible matches  Label matches used for scoring



Monoisotopic mass of neutral peptide Mr(calc): 1471.789093

Fixed modifications: Carbamidomethyl (C) (apply to specified residues or termini only)

Variable modifications:

Q2 : Biotin:Thermo-21345 (Q)

Ions Score: 27 Expect: 0.05

Matches : 11/94 fragment ions using 31 most intense peaks [\(help\)](#)

| #  | b                 | b <sup>++</sup> | b <sup>*</sup>    | b <sup>*++</sup> | b <sup>0</sup> | b <sup>0++</sup> | Seq. | y                 | y <sup>++</sup> | y <sup>*</sup>    | y <sup>*++</sup> | y <sup>0</sup> | y <sup>0++</sup> | #  |
|----|-------------------|-----------------|-------------------|------------------|----------------|------------------|------|-------------------|-----------------|-------------------|------------------|----------------|------------------|----|
| 1  | 115.050203        | 58.028740       | 98.023654         | 49.515465        |                |                  | N    |                   |                 |                   |                  |                |                  | 10 |
| 2  | <b>554.275529</b> | 277.641403      | <b>537.248980</b> | 269.128128       |                |                  | Q    | 1358.753442       | 679.880359      | 1341.726893       | 671.367085       | 1340.742877    | 670.875076       | 9  |
| 3  | <b>653.343943</b> | 327.175610      | 636.317394        | 318.662335       |                |                  | V    | <b>919.528116</b> | 460.267696      | 902.501567        | 451.754421       | 901.517551     | 451.262413       | 8  |
| 4  | 740.375971        | 370.691623      | 723.349422        | 362.178349       | 722.365406     | 361.686341       | S    | <b>820.459702</b> | 410.733489      | 803.433153        | 402.220215       | 802.449137     | 401.728207       | 7  |
| 5  | 853.460035        | 427.233656      | 836.433486        | 418.720381       | 835.449470     | 418.228373       | L    | <b>733.427674</b> | 367.217475      | 716.401125        | 358.704201       | 715.417109     | 358.212193       | 6  |
| 6  | 954.507714        | 477.757495      | 937.481165        | 469.244220       | 936.497149     | 468.752212       | T    | <b>620.343610</b> | 310.675443      | 603.317061        | 302.162169       | 602.333045     | 301.670161       | 5  |
| 7  | 1114.538363       | 557.772819      | 1097.511814       | 549.259545       | 1096.527798    | 548.767537       | C    | 519.295931        | 260.151604      | 502.269382        | 251.638329       |                |                  | 4  |
| 8  | 1227.622427       | 614.314851      | 1210.595878       | 605.801577       | 1209.611862    | 605.309569       | L    | <b>359.265282</b> | 180.136279      | 342.238733        | 171.623004       |                |                  | 3  |
| 9  | 1326.690841       | 663.849058      | 1309.664292       | 655.335784       | 1308.680276    | 654.843776       | V    | <b>246.181218</b> | 123.594247      | 229.154669        | 115.080973       |                |                  | 2  |
| 10 |                   |                 |                   |                  |                |                  | K    | <b>147.112804</b> | 74.060040       | <b>130.086255</b> | 65.546765        |                |                  | 1  |



NCBI BLAST search of **NQVSLTCLVK**

(Parameters: blastp, nr protein database, expect=20000, no filter, PAM30)

Other BLAST [web gateways](#)

All matches to this query

| Score | Mr(calc):   | Delta     | Sequence                   |
|-------|-------------|-----------|----------------------------|
| 27.3  | 1471.789093 | -0.004805 | <a href="#">NQVSLTCLVK</a> |

Mascot: <http://www.matrixscience.com/>



# MASCOT Search Results

## Peptide View

MS/MS Fragmentation of **LICQATGFSPR**

Found in **IGHM\_HUMAN**, Ig mu chain C region OS=Homo sapiens GN=IGHM PE=1 SV=3

Match to Query 32284: 1559.808428 from(780.911490,2+) rtinseconds(2009) index(35287)

Title: Locus:1.1.1.3333.15 File:"2013-07-02 CLN FXIII 30 min 3rd F 3.wiff"

Data file C:\Program Files (x86)\Matrix Science\Mascot Daemon\mgf3 FXIII 30 min 3rd\mascot\_daemon\_merge.mgf

Click mouse within plot area to zoom in by factor of two about that point

Or, Plot from  to  Da

Label all possible matches  Label matches used for scoring

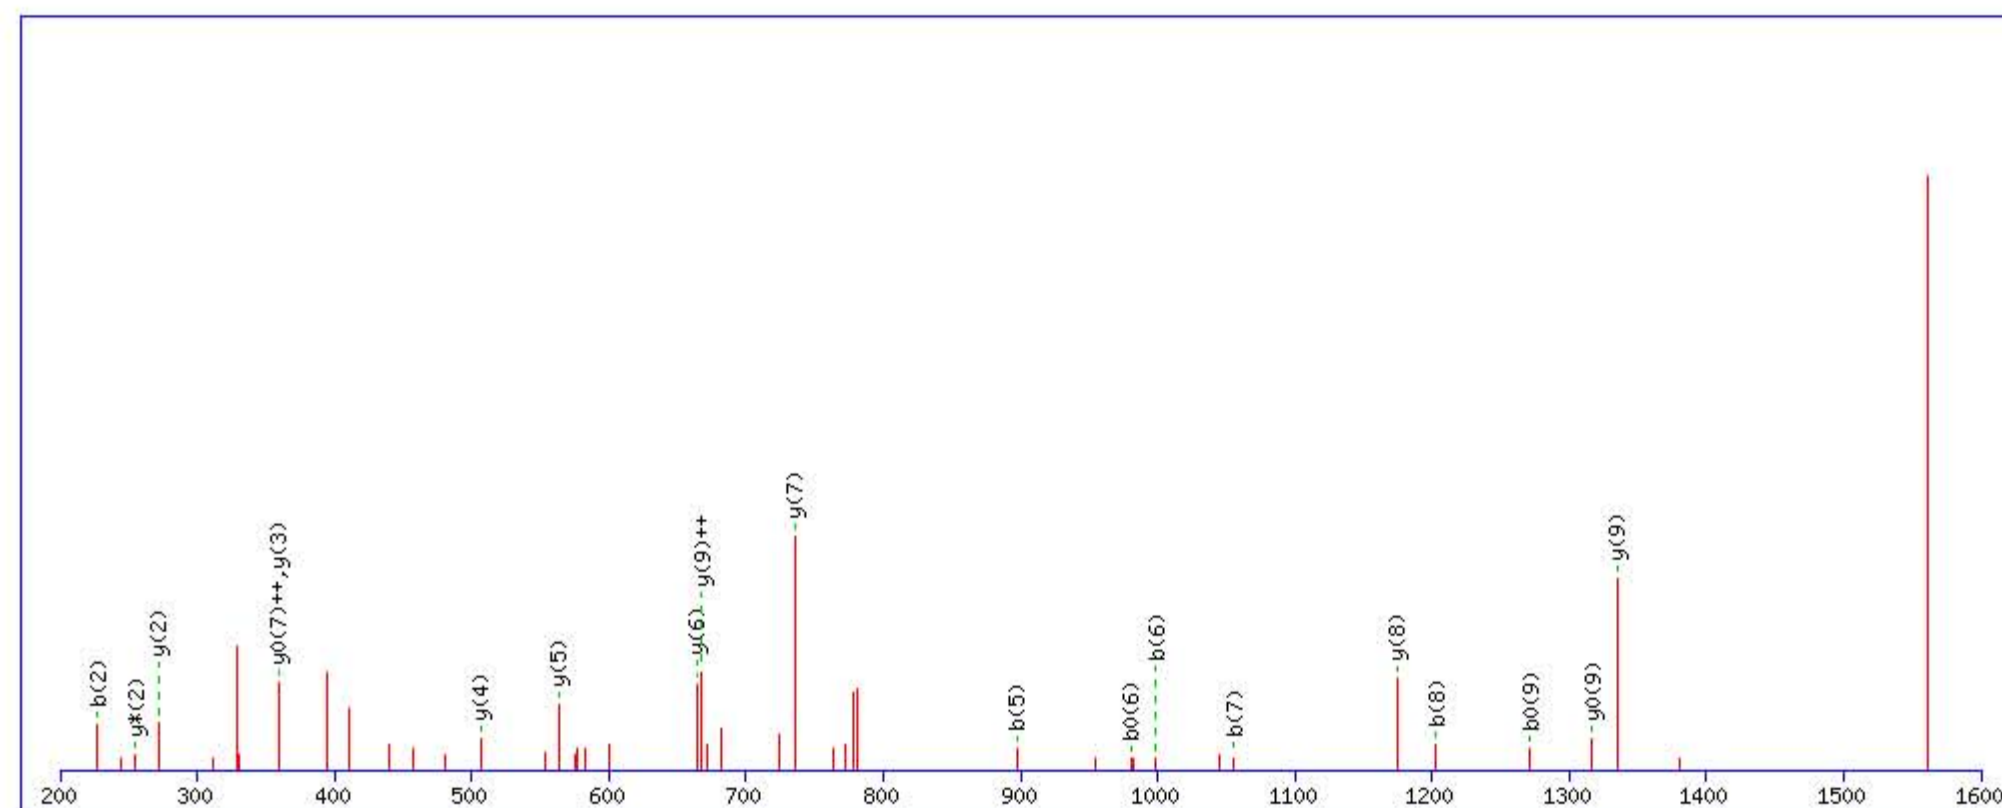

Monoisotopic mass of neutral peptide Mr(calc): 1559.795242

Fixed modifications: Carbamidomethyl (C) (apply to specified residues or termini only)

Variable modifications:

Q4 : Biotin:Thermo-21345 (Q)

Ions Score: 49 Expect: 4.4e-005

Matches : 19/100 fragment ions using 30 most intense peaks [\(help\)](#)

| #  | b                  | b <sup>++</sup> | b <sup>+</sup> | b <sup>*++</sup> | b <sup>0</sup>     | b <sup>0++</sup> | Seq. | y                  | y <sup>++</sup>   | y <sup>+</sup>    | y <sup>*++</sup> | y <sup>0</sup>     | y <sup>0++</sup>  | #  |
|----|--------------------|-----------------|----------------|------------------|--------------------|------------------|------|--------------------|-------------------|-------------------|------------------|--------------------|-------------------|----|
| 1  | 114.091340         | 57.549308       |                |                  |                    |                  | L    |                    |                   |                   |                  |                    |                   | 11 |
| 2  | <b>227.175404</b>  | 114.091340      |                |                  |                    |                  | I    | 1447.718454        | 724.362865        | 1430.691905       | 715.849591       | 1429.707889        | 715.357583        | 10 |
| 3  | 387.206053         | 194.106664      |                |                  |                    |                  | C    | <b>1334.634390</b> | <b>667.820833</b> | 1317.607841       | 659.307559       | <b>1316.623825</b> | 658.815551        | 9  |
| 4  | 826.431379         | 413.719328      | 809.404830     | 405.206053       |                    |                  | Q    | <b>1174.603741</b> | 587.805509        | 1157.577192       | 579.292234       | 1156.593176        | 578.800226        | 8  |
| 5  | <b>897.468493</b>  | 449.237885      | 880.441944     | 440.724610       |                    |                  | A    | <b>735.378415</b>  | 368.192846        | 718.351866        | 359.679571       | 717.367850         | <b>359.187563</b> | 7  |
| 6  | <b>998.516172</b>  | 499.761724      | 981.489623     | 491.248449       | <b>980.505607</b>  | 490.756441       | T    | <b>664.341301</b>  | 332.674289        | 647.314752        | 324.161014       | 646.330736         | 323.669006        | 6  |
| 7  | <b>1055.537636</b> | 528.272456      | 1038.511087    | 519.759182       | 1037.527071        | 519.267174       | G    | <b>563.293622</b>  | 282.150449        | 546.267073        | 273.637175       | 545.283057         | 273.145167        | 5  |
| 8  | <b>1202.606050</b> | 601.806663      | 1185.579501    | 593.293389       | 1184.595485        | 592.801381       | F    | <b>506.272158</b>  | 253.639717        | 489.245609        | 245.126443       | 488.261593         | 244.634435        | 4  |
| 9  | 1289.638078        | 645.322677      | 1272.611529    | 636.809403       | <b>1271.627513</b> | 636.317395       | S    | <b>359.203744</b>  | 180.105510        | 342.177195        | 171.592236       | 341.193179         | 171.100228        | 3  |
| 10 | 1386.690842        | 693.849059      | 1369.664293    | 685.335785       | 1368.680277        | 684.843777       | P    | <b>272.171716</b>  | 136.589496        | <b>255.145167</b> | 128.076221       |                    |                   | 2  |
| 11 |                    |                 |                |                  |                    |                  | R    | 175.118952         | 88.063114         | 158.092403        | 79.549839        |                    |                   | 1  |

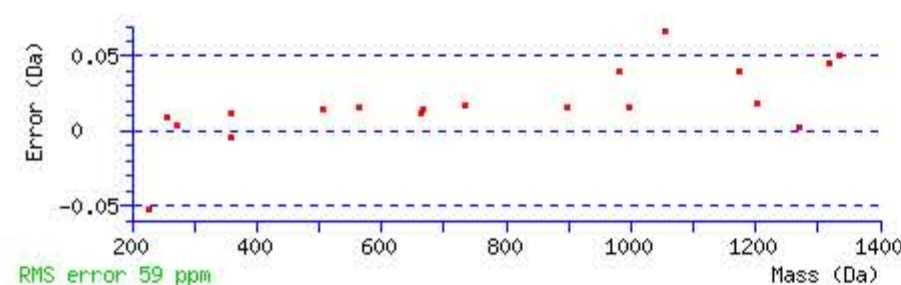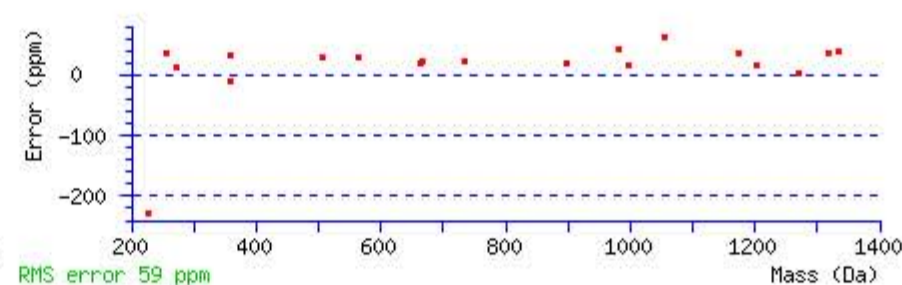

NCBI BLAST search of **LICQATGFSPR**

(Parameters: blastp, nr protein database, expect=20000, no filter, PAM30)

Other BLAST [web gateways](#)

All matches to this query

| Score | Mr(calc):   | Delta     | Sequence                       |
|-------|-------------|-----------|--------------------------------|
| 49.0  | 1559.795242 | 0.013186  | <a href="#">LICQATGFSPR</a>    |
| 2.5   | 1559.820190 | -0.011762 | <a href="#">MTRSATQAQKQVPR</a> |

Mascot: <http://www.matrixscience.com/>



# MASCOT Search Results

## Peptide View

MS/MS Fragmentation of **LICQATGFSPR**

Found in **IGHM\_HUMAN**, Ig mu chain C region OS=Homo sapiens GN=IGHM PE=1 SV=3

Match to Query 32284: 1559.808428 from(780.911490,2+) rtinseconds(2009) index(35287)

Title: Locus:1.1.1.3333.15 File:"2013-07-02 CLN FXIII 30 min 3rd F 3.wiff"

Data file C:\Program Files (x86)\Matrix Science\Mascot Daemon\mgf3 FXIII 30 min 3rd\mascot\_daemon\_merge.mgf

Click mouse within plot area to zoom in by factor of two about that point

Or, Plot from  to  Da

Label all possible matches  Label matches used for scoring



Monoisotopic mass of neutral peptide Mr(calc): 1559.795242

Fixed modifications: Carbamidomethyl (C) (apply to specified residues or termini only)

Variable modifications:

Q4 : Biotin:Thermo-21345 (Q)

Ions Score: 49 Expect: 4.4e-005

Matches : 19/100 fragment ions using 30 most intense peaks [\(help\)](#)

| #  | b                  | b <sup>++</sup> | b <sup>+</sup> | b <sup>*++</sup> | b <sup>0</sup>     | b <sup>0++</sup> | Seq. | y                  | y <sup>++</sup>   | y <sup>+</sup>    | y <sup>*++</sup> | y <sup>0</sup>     | y <sup>0++</sup>  | #  |
|----|--------------------|-----------------|----------------|------------------|--------------------|------------------|------|--------------------|-------------------|-------------------|------------------|--------------------|-------------------|----|
| 1  | 114.091340         | 57.549308       |                |                  |                    |                  | L    |                    |                   |                   |                  |                    |                   | 11 |
| 2  | <b>227.175404</b>  | 114.091340      |                |                  |                    |                  | I    | 1447.718454        | 724.362865        | 1430.691905       | 715.849591       | 1429.707889        | 715.357583        | 10 |
| 3  | 387.206053         | 194.106664      |                |                  |                    |                  | C    | <b>1334.634390</b> | <b>667.820833</b> | 1317.607841       | 659.307559       | <b>1316.623825</b> | 658.815551        | 9  |
| 4  | 826.431379         | 413.719328      | 809.404830     | 405.206053       |                    |                  | Q    | <b>1174.603741</b> | 587.805509        | 1157.577192       | 579.292234       | 1156.593176        | 578.800226        | 8  |
| 5  | <b>897.468493</b>  | 449.237885      | 880.441944     | 440.724610       |                    |                  | A    | <b>735.378415</b>  | 368.192846        | 718.351866        | 359.679571       | 717.367850         | <b>359.187563</b> | 7  |
| 6  | <b>998.516172</b>  | 499.761724      | 981.489623     | 491.248449       | <b>980.505607</b>  | 490.756441       | T    | <b>664.341301</b>  | 332.674289        | 647.314752        | 324.161014       | 646.330736         | 323.669006        | 6  |
| 7  | <b>1055.537636</b> | 528.272456      | 1038.511087    | 519.759182       | 1037.527071        | 519.267174       | G    | <b>563.293622</b>  | 282.150449        | 546.267073        | 273.637175       | 545.283057         | 273.145167        | 5  |
| 8  | <b>1202.606050</b> | 601.806663      | 1185.579501    | 593.293389       | 1184.595485        | 592.801381       | F    | <b>506.272158</b>  | 253.639717        | 489.245609        | 245.126443       | 488.261593         | 244.634435        | 4  |
| 9  | 1289.638078        | 645.322677      | 1272.611529    | 636.809403       | <b>1271.627513</b> | 636.317395       | S    | <b>359.203744</b>  | 180.105510        | 342.177195        | 171.592236       | 341.193179         | 171.100228        | 3  |
| 10 | 1386.690842        | 693.849059      | 1369.664293    | 685.335785       | 1368.680277        | 684.843777       | P    | <b>272.171716</b>  | 136.589496        | <b>255.145167</b> | 128.076221       |                    |                   | 2  |
| 11 |                    |                 |                |                  |                    |                  | R    | 175.118952         | 88.063114         | 158.092403        | 79.549839        |                    |                   | 1  |

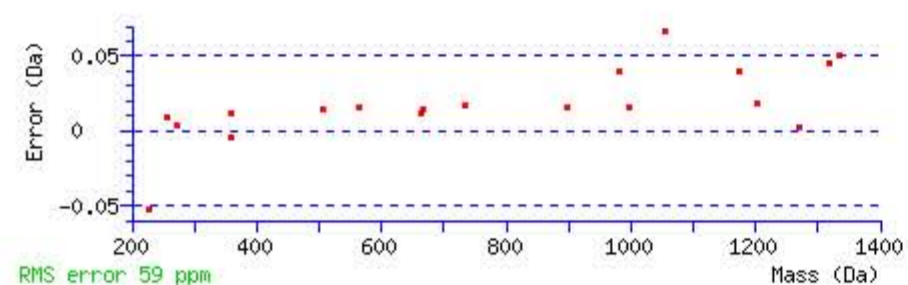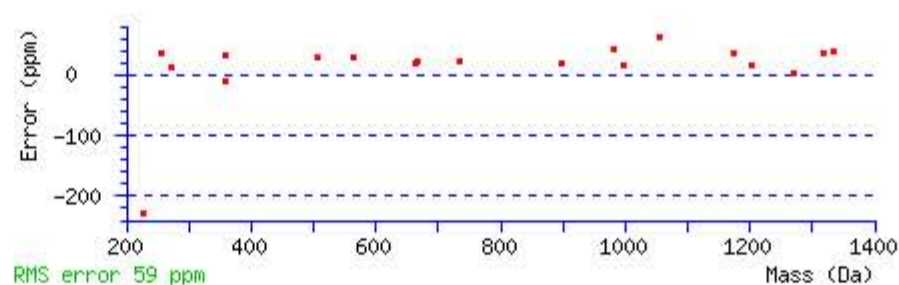

NCBI BLAST search of **LICQATGFSPR**

(Parameters: blastp, nr protein database, expect=20000, no filter, PAM30)

Other BLAST [web gateways](#)

All matches to this query

| Score | Mr(calc):   | Delta     | Sequence                       |
|-------|-------------|-----------|--------------------------------|
| 49.0  | 1559.795242 | 0.013186  | <a href="#">LICQATGFSPR</a>    |
| 2.5   | 1559.820190 | -0.011762 | <a href="#">MTRSATQAQKQVPR</a> |

Mascot: <http://www.matrixscience.com/>



# MASCOT Search Results

## Peptide View

MS/MS Fragmentation of **SFEGLGQLEVLTLTDHNLQLEVK**

Found in **ALS\_HUMAN**, Insulin-like growth factor-binding protein complex acid labile subunit OS=Homo sapiens GN=IGFALS PE=1 SV=1

Match to Query 55227: 2807.476692 from(936.832840,3+) rtinseconds(2721) index(39325)  
 Title: Locus:1.1.1.3580.24 File:"2013-07-02 CLN FXIII 30 min 3rd F 3.wiff"  
 Data file C:\Program Files (x86)\Matrix Science\Mascot Daemon\mgf\3 FXIII 30 min 3rd\mascot\_daemon\_merge.mgf

Click mouse within plot area to zoom in by factor of two about that point

Or, Plot from  to  Da   
 Label all possible matches  Label matches used for scoring

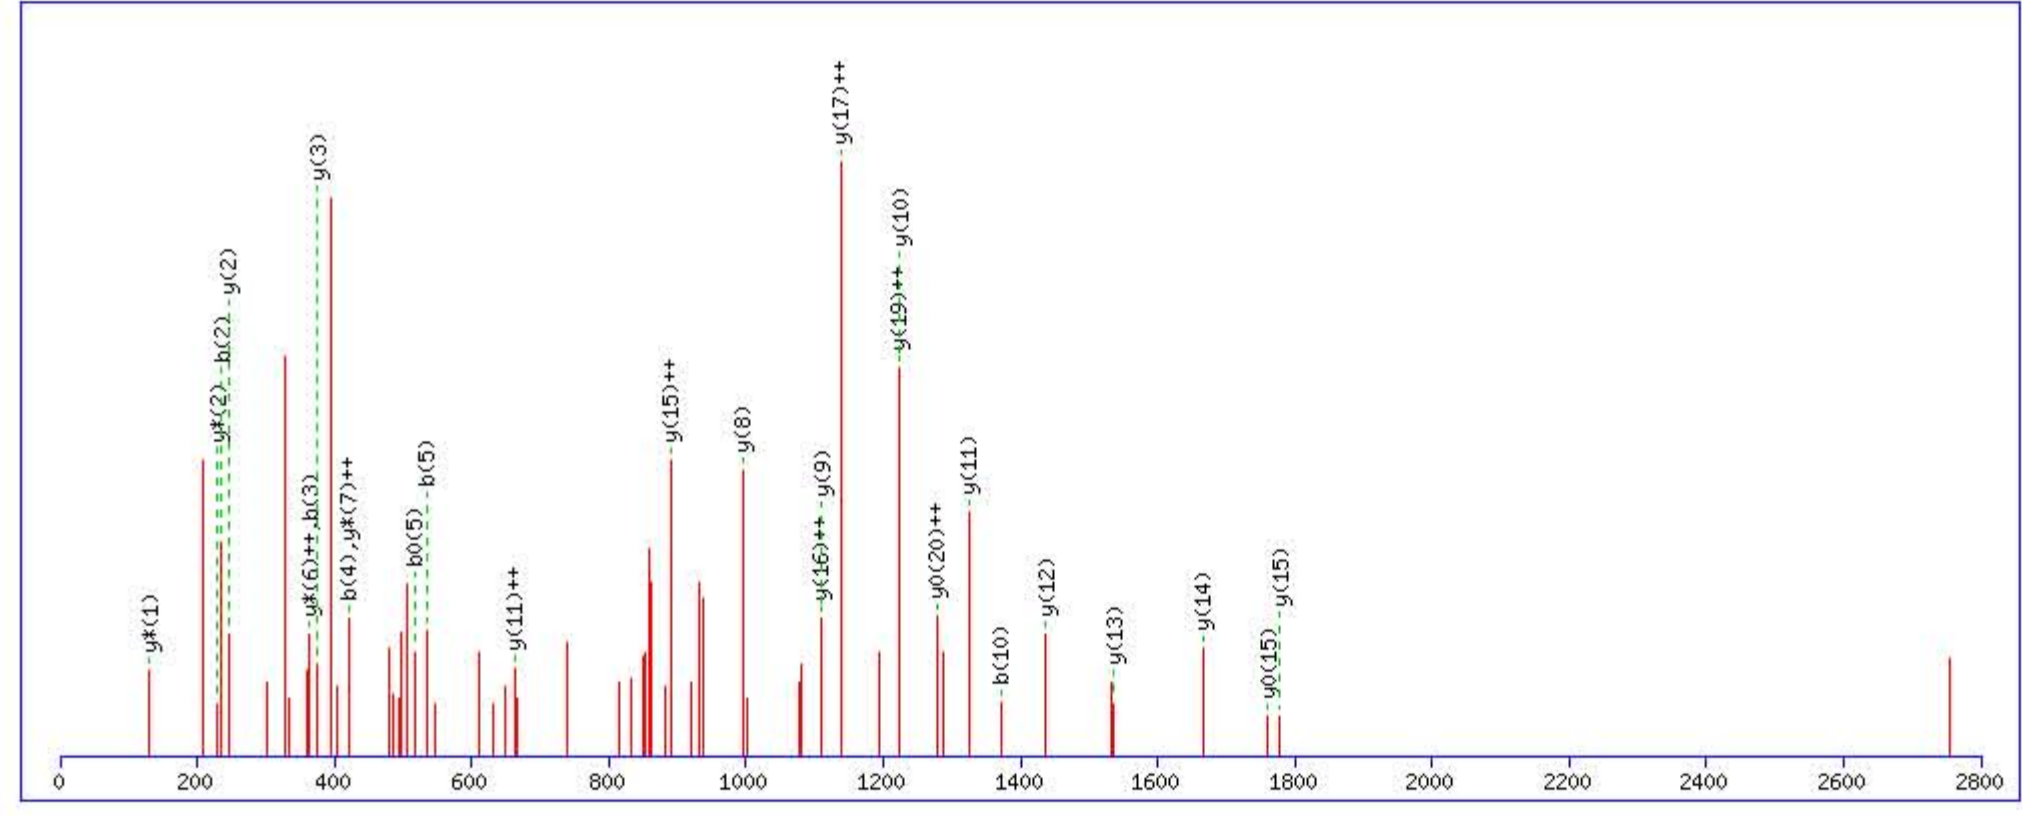

Monoisotopic mass of neutral peptide Mr(calc): 2807.452759  
 Fixed modifications: Carbamidomethyl (C) (apply to specified residues or termini only)  
 Variable modifications:  
 Q7 : Biotin:Thermo-21345 (Q)  
 Ions Score: 45 Expect: 0.00076  
 Matches : 27/236 fragment ions using 51 most intense peaks [\(help\)](#)

| #  | b                  | b <sup>++</sup> | b <sup>*</sup> | b <sup>+++</sup> | b <sup>0</sup>    | b <sup>0++</sup> | Seq. | y                  | y <sup>++</sup>    | y <sup>*</sup>    | y <sup>+++</sup>  | y <sup>0</sup>     | y <sup>0++</sup>   | #  |
|----|--------------------|-----------------|----------------|------------------|-------------------|------------------|------|--------------------|--------------------|-------------------|-------------------|--------------------|--------------------|----|
| 1  | 88.039304          | 44.523290       |                |                  | 70.028739         | 35.518008        | S    |                    |                    |                   |                   |                    |                    | 22 |
| 2  | <b>235.107718</b>  | 118.057497      |                |                  | 217.097153        | 109.052214       | F    | 2721.428016        | 1361.217646        | 2704.401467       | 1352.704371       | 2703.417451        | 1352.212363        | 21 |
| 3  | <b>364.150311</b>  | 182.578793      |                |                  | 346.139746        | 173.573511       | E    | 2574.359602        | 1287.683439        | 2557.333053       | 1279.170164       | 2556.349037        | <b>1278.678156</b> | 20 |
| 4  | <b>421.171775</b>  | 211.089525      |                |                  | 403.161210        | 202.084243       | G    | 2445.317009        | <b>1223.162142</b> | 2428.290460       | 1214.648868       | 2427.306444        | 1214.156860        | 19 |
| 5  | <b>534.255839</b>  | 267.631558      |                |                  | <b>516.245274</b> | 258.626275       | L    | 2388.295545        | 1194.651410        | 2371.268996       | 1186.138136       | 2370.284980        | 1185.646128        | 18 |
| 6  | 591.277303         | 296.142290      |                |                  | 573.266738        | 287.137007       | G    | 2275.211481        | <b>1138.109378</b> | 2258.184932       | 1129.596104       | 2257.200916        | 1129.104096        | 17 |
| 7  | 1030.502629        | 515.754953      | 1013.476080    | 507.241678       | 1012.492064       | 506.749670       | Q    | 2218.190017        | <b>1109.598646</b> | 2201.163468       | 1101.085372       | 2200.179452        | 1100.593364        | 16 |
| 8  | 1143.586693        | 572.296985      | 1126.560144    | 563.783710       | 1125.576128       | 563.291702       | L    | <b>1778.964691</b> | <b>889.985984</b>  | 1761.938142       | 881.472709        | <b>1760.954126</b> | 880.980701         | 15 |
| 9  | 1272.629286        | 636.818281      | 1255.602737    | 628.305007       | 1254.618721       | 627.812999       | E    | <b>1665.880627</b> | 833.443952         | 1648.854078       | 824.930677        | 1647.870062        | 824.438669         | 14 |
| 10 | <b>1371.697700</b> | 686.352488      | 1354.671151    | 677.839214       | 1353.687135       | 677.347206       | V    | <b>1536.838034</b> | 768.922655         | 1519.811485       | 760.409381        | 1518.827469        | 759.917373         | 13 |
| 11 | 1484.781764        | 742.894520      | 1467.755215    | 734.381246       | 1466.771199       | 733.889238       | L    | <b>1437.769620</b> | 719.388448         | 1420.743071       | 710.875174        | 1419.759055        | 710.383166         | 12 |
| 12 | 1585.829443        | 793.418360      | 1568.802894    | 784.905085       | 1567.818878       | 784.413077       | T    | <b>1324.685556</b> | <b>662.846416</b>  | 1307.659007       | 654.333142        | 1306.674991        | 653.841134         | 11 |
| 13 | 1698.913507        | 849.960392      | 1681.886958    | 841.447117       | 1680.902942       | 840.955109       | L    | <b>1223.637877</b> | 612.322577         | 1206.611328       | 603.809302        | 1205.627312        | 603.317294         | 10 |
| 14 | 1813.940450        | 907.473863      | 1796.913901    | 898.960589       | 1795.929885       | 898.468581       | D    | <b>1110.553813</b> | 555.780545         | 1093.527264       | 547.267270        | 1092.543248        | 546.775262         | 9  |
| 15 | 1950.999362        | 976.003319      | 1933.972813    | 967.490045       | 1932.988797       | 966.998037       | H    | <b>995.526870</b>  | 498.267073         | 978.500321        | 489.753799        | 977.516305         | 489.261791         | 8  |
| 16 | 2065.042289        | 1033.024782     | 2048.015740    | 1024.511508      | 2047.031724       | 1024.019500      | N    | 858.467958         | 429.737617         | 841.441409        | <b>421.224343</b> | 840.457393         | 420.732335         | 7  |
| 17 | 2193.100867        | 1097.054072     | 2176.074318    | 1088.540797      | 2175.090302       | 1088.048789      | Q    | 744.425031         | 372.716154         | 727.398482        | <b>364.202879</b> | 726.414466         | 363.710871         | 6  |
| 18 | 2306.184931        | 1153.596104     | 2289.158382    | 1145.082829      | 2288.174366       | 1144.590821      | L    | 616.366453         | 308.686865         | 599.339904        | 300.173590        | 598.355888         | 299.681582         | 5  |
| 19 | 2434.243509        | 1217.625393     | 2417.216960    | 1209.112118      | 2416.232944       | 1208.620110      | Q    | 503.282389         | 252.144833         | 486.255840        | 243.631558        | 485.271824         | 243.139550         | 4  |
| 20 | 2563.286102        | 1282.146689     | 2546.259553    | 1273.633415      | 2545.275537       | 1273.141407      | E    | <b>375.223811</b>  | 188.115543         | 358.197262        | 179.602269        | 357.213246         | 179.110261         | 3  |
| 21 | 2662.354516        | 1331.680896     | 2645.327967    | 1323.167622      | 2644.343951       | 1322.675614      | V    | <b>246.181218</b>  | 123.594247         | <b>229.154669</b> | 115.080972        |                    |                    | 2  |
| 22 |                    |                 |                |                  |                   |                  | K    | 147.112804         | 74.060040          | <b>130.086255</b> | 65.546765         |                    |                    | 1  |

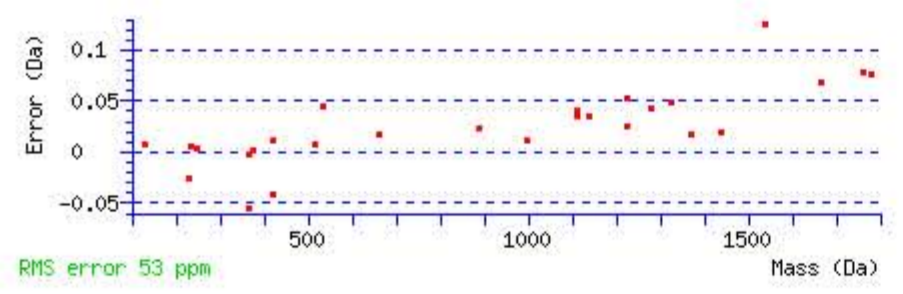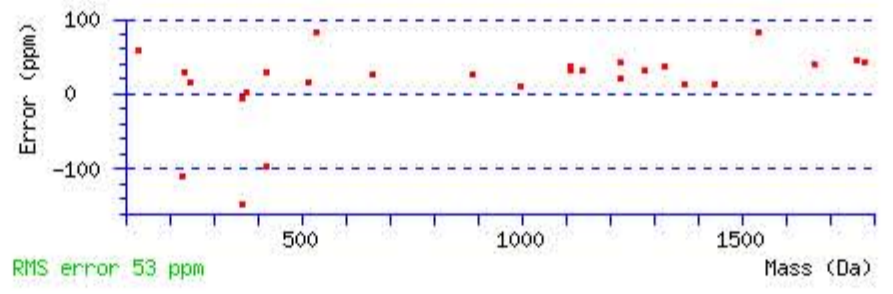

NCBI BLAST search of **SFEGLGQLEVLTLTDHNLQLEVK**  
 (Parameters: blastp, nr protein database, expect=20000, no filter, PAM30)  
 Other BLAST [web gateways](#)

### All matches to this query

| Score | Mr(calc):   | Delta    | Sequence                                |
|-------|-------------|----------|-----------------------------------------|
| 44.7  | 2807.452759 | 0.023933 | <a href="#">SFEGLGQLEVLTLTDHNLQLEVK</a> |
| 0.7   | 2807.452759 | 0.023933 | <a href="#">SFEGLGQLEVLTLTDHNLQLEVK</a> |
| 0.6   | 2807.452759 | 0.023933 | <a href="#">SFEGLGQLEVLTLTDHNLQLEVK</a> |



# MASCOT SEARCH RESULTS

## Peptide View

MS/MS Fragmentation of **ELAAQTIK**

Found in **ITIH1\_HUMAN**, Inter-alpha-trypsin inhibitor heavy chain H1 OS=Homo sapiens GN=ITIH1 PE=1 SV=3

Match to Query 21359: 1183.660488 from(592.837520,2+) rtinseconds(1741) index(49537)

Title: Locus:1.1.1.3250.3 File:"2013-07-02 CLN FXIII 30 min 3rd F 4.wiff"

Data file C:\Program Files (x86)\Matrix Science\Mascot Daemon\mgf3 FXIII 30 min 3rd\mascot\_daemon\_merge.mgf

Click mouse within plot area to zoom in by factor of two about that point

Or, Plot from  to  Da

Label all possible matches  Label matches used for scoring

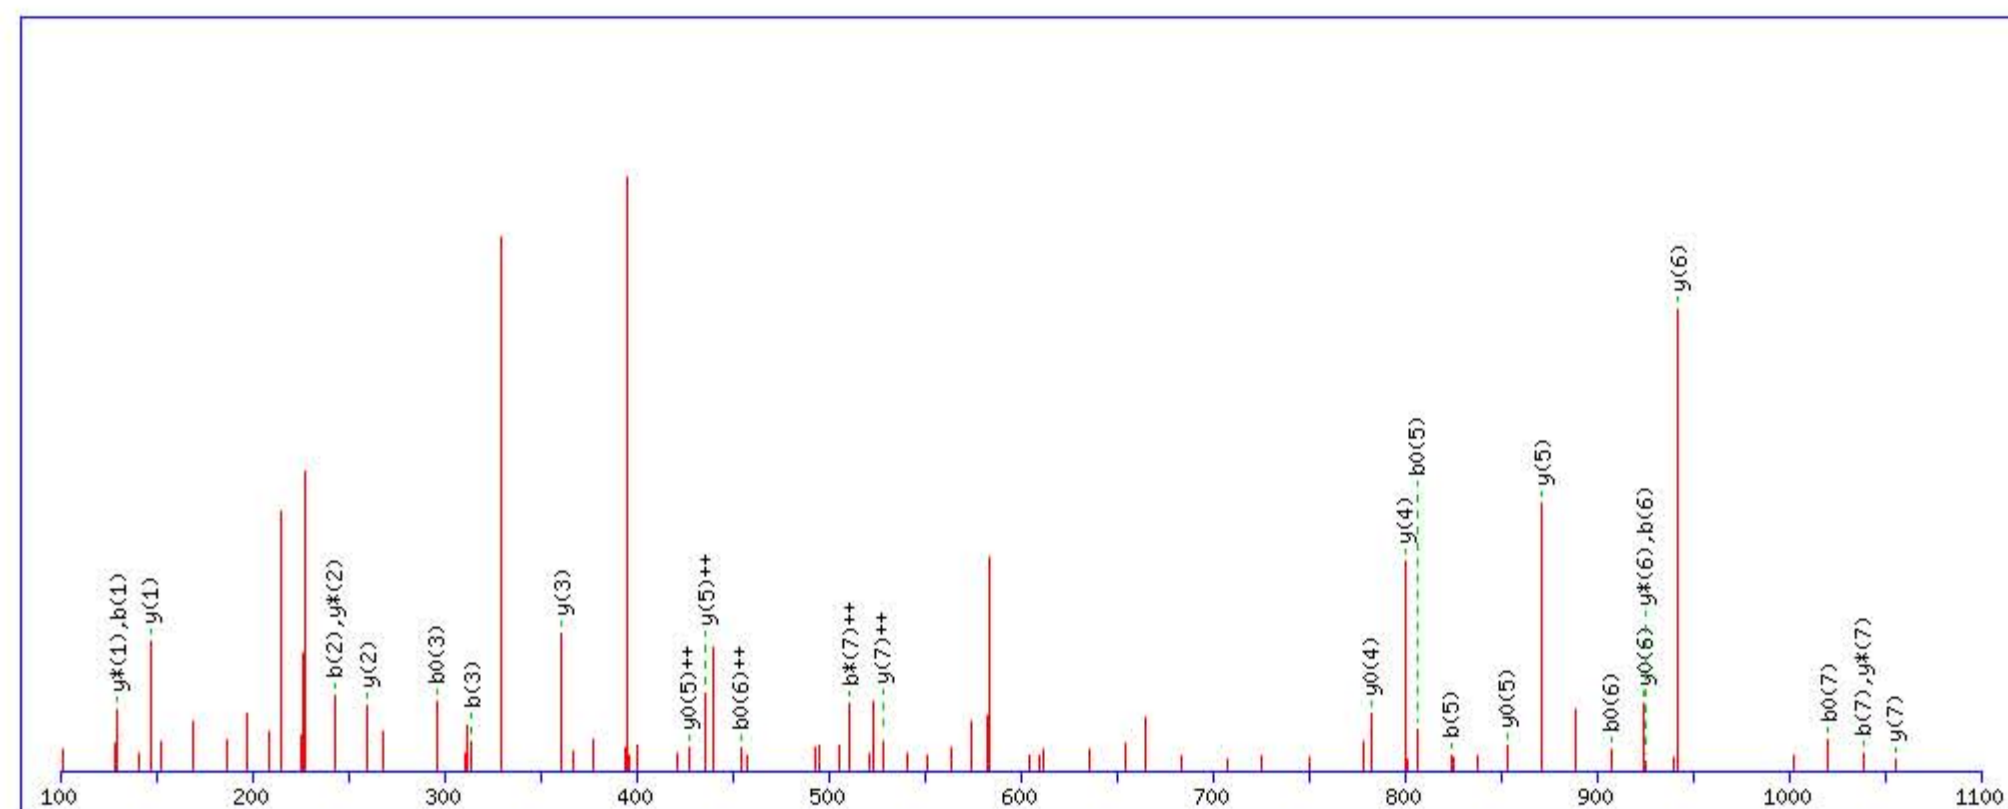

Monoisotopic mass of neutral peptide Mr(calc): 1183.663452

Fixed modifications: Carbamidomethyl (C) (apply to specified residues or termini only)

Variable modifications:

Q5 : Biotin:Thermo-21345 (Q)

Ions Score: 33 Expect: 0.011

Matches : 29/72 fragment ions using 57 most intense peaks [\(help\)](#)

| # | b           | b <sup>++</sup> | b <sup>*</sup> | b <sup>+++</sup> | b <sup>0</sup> | b <sup>0++</sup> | Seq. | y           | y <sup>++</sup> | y <sup>*</sup> | y <sup>+++</sup> | y <sup>0</sup> | y <sup>0++</sup> | # |
|---|-------------|-----------------|----------------|------------------|----------------|------------------|------|-------------|-----------------|----------------|------------------|----------------|------------------|---|
| 1 | 130.049869  | 65.528572       |                |                  | 112.039304     | 56.523290        | E    |             |                 |                |                  |                |                  | 8 |
| 2 | 243.133933  | 122.070605      |                |                  | 225.123368     | 113.065322       | L    | 1055.628165 | 528.317720      | 1038.601616    | 519.804446       | 1037.617600    | 519.312438       | 7 |
| 3 | 314.171047  | 157.589161      |                |                  | 296.160482     | 148.583879       | A    | 942.544101  | 471.775689      | 925.517552     | 463.262414       | 924.533536     | 462.770406       | 6 |
| 4 | 385.208161  | 193.107718      |                |                  | 367.197596     | 184.102436       | A    | 871.506987  | 436.257132      | 854.480438     | 427.743857       | 853.496422     | 427.251849       | 5 |
| 5 | 824.433487  | 412.720382      | 807.406938     | 404.207107       | 806.422922     | 403.715099       | Q    | 800.469873  | 400.738575      | 783.443324     | 392.225300       | 782.459308     | 391.733292       | 4 |
| 6 | 925.481166  | 463.244221      | 908.454617     | 454.730947       | 907.470601     | 454.238939       | T    | 361.244547  | 181.125911      | 344.217998     | 172.612637       | 343.233982     | 172.120629       | 3 |
| 7 | 1038.565230 | 519.786253      | 1021.538681    | 511.272978       | 1020.554665    | 510.780970       | I    | 260.196868  | 130.602072      | 243.170319     | 122.088797       |                |                  | 2 |
| 8 |             |                 |                |                  |                |                  | K    | 147.112804  | 74.060040       | 130.086255     | 65.546765        |                |                  | 1 |

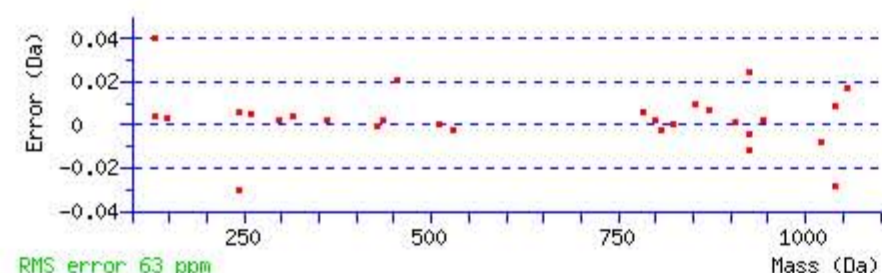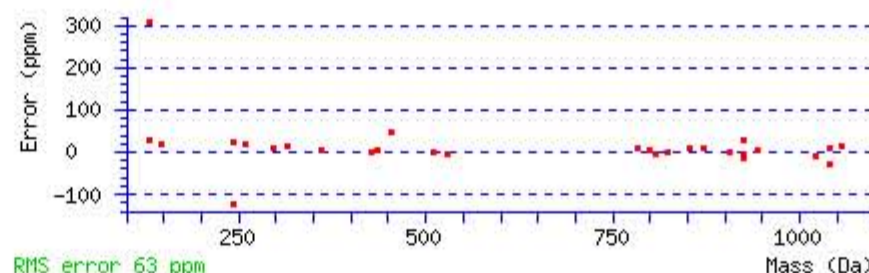

NCBI BLAST search of **ELAAQTIK**

(Parameters: blastp, nr protein database, expect=20000, no filter, PAM30)

Other BLAST [web gateways](#)

All matches to this query

| Score | Mr(calc):   | Delta     | Sequence                    |
|-------|-------------|-----------|-----------------------------|
| 32.6  | 1183.663452 | -0.002964 | <a href="#">ELAAQTIK</a>    |
| 23.6  | 1183.663452 | -0.002964 | <a href="#">ELAAQTIK</a>    |
| 12.0  | 1183.663467 | -0.002979 | <a href="#">TQLSPSIK</a>    |
| 7.3   | 1183.660080 | 0.000408  | <a href="#">AIEVAISPWK</a>  |
| 7.3   | 1183.667282 | -0.006794 | <a href="#">GKQASEPALRK</a> |
| 7.1   | 1183.649551 | 0.010937  | <a href="#">KVCGHKQSLK</a>  |
| 7.0   | 1183.667297 | -0.006809 | <a href="#">EPTGRVEIRK</a>  |
| 5.9   | 1183.674683 | -0.014195 | <a href="#">ELRQLSK</a>     |
| 5.6   | 1183.663452 | -0.002964 | <a href="#">LEQAATLK</a>    |
| 5.4   | 1183.674698 | -0.014210 | <a href="#">QLTKQOK</a>     |



# MASCOT SEARCH RESULTS

## Peptide View

MS/MS Fragmentation of **LDAQASFLPK**

Found in **ITIH1\_HUMAN**, Inter-alpha-trypsin inhibitor heavy chain H1 OS=Homo sapiens GN=ITIH1 PE=1 SV=3

Match to Query 27641: 1399.752608 from(700.883580,2+) rtinseconds(2215) index(52294)

Title: Locus:1.1.1.3414.7 File:"2013-07-02 CLN FXIII 30 min 3rd F 4.wiff"

Data file C:\Program Files (x86)\Matrix Science\Mascot Daemon\mgf3 FXIII 30 min 3rd\mascot\_daemon\_merge.mgf

Click mouse within plot area to zoom in by factor of two about that point

Or, Plot from  to  Da

Label all possible matches  Label matches used for scoring

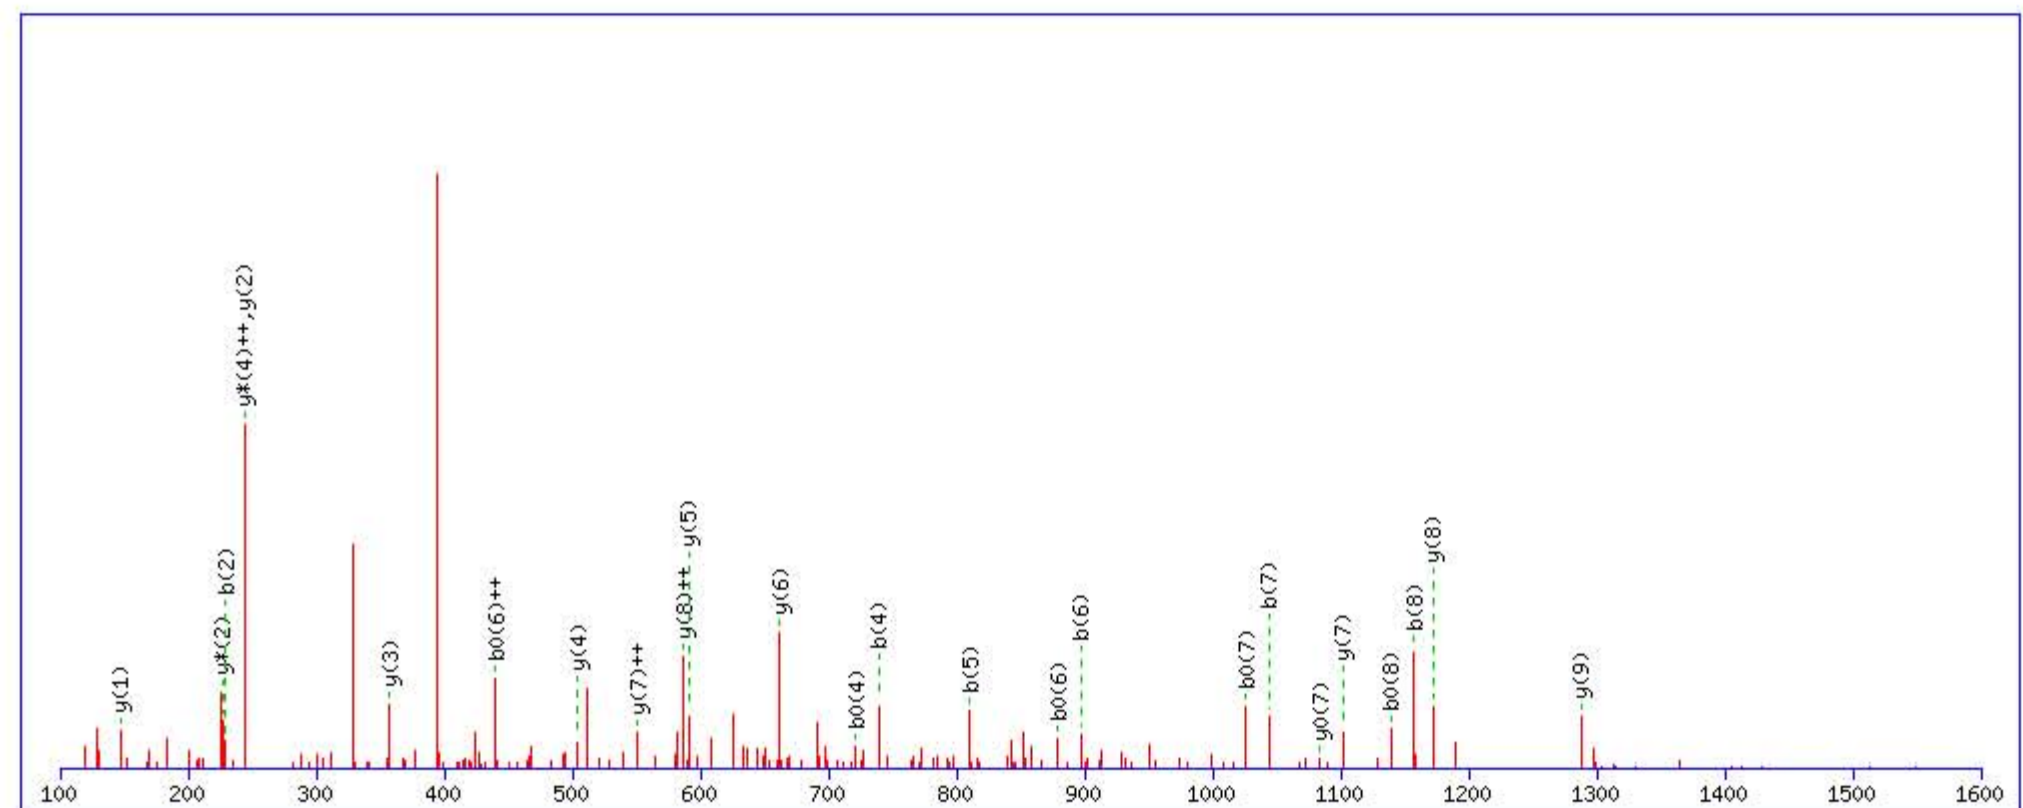

Monoisotopic mass of neutral peptide Mr(calc): 1399.753342

Fixed modifications: Carbamidomethyl (C) (apply to specified residues or termini only)

Variable modifications:

Q4 : Biotin:Thermo-21345 (Q)

Ions Score: 52 Expect: 5.7e-005

Matches : 25/92 fragment ions using 50 most intense peaks [\(help\)](#)

| #  | b                  | b <sup>++</sup> | b <sup>*</sup> | b <sup>*++</sup> | b <sup>0</sup>     | b <sup>0++</sup>  | Seq. | y                  | y <sup>++</sup>   | y <sup>*</sup>    | y <sup>*++</sup>  | y <sup>0</sup>     | y <sup>0++</sup> | #  |
|----|--------------------|-----------------|----------------|------------------|--------------------|-------------------|------|--------------------|-------------------|-------------------|-------------------|--------------------|------------------|----|
| 1  | 114.091340         | 57.549308       |                |                  |                    |                   | L    |                    |                   |                   |                   |                    |                  | 10 |
| 2  | <b>229.118283</b>  | 115.062779      |                |                  | 211.107718         | 106.057497        | D    | <b>1287.676571</b> | 644.341924        | 1270.650022       | 635.828649        | 1269.666006        | 635.336641       | 9  |
| 3  | 300.155397         | 150.581336      |                |                  | 282.144832         | 141.576054        | A    | <b>1172.649628</b> | <b>586.828452</b> | 1155.623079       | 578.315178        | 1154.639063        | 577.823169       | 8  |
| 4  | <b>739.380723</b>  | 370.194000      | 722.354174     | 361.680725       | <b>721.370158</b>  | 361.188717        | Q    | <b>1101.612514</b> | <b>551.309895</b> | 1084.585965       | 542.796621        | <b>1083.601949</b> | 542.304612       | 7  |
| 5  | <b>810.417837</b>  | 405.712557      | 793.391288     | 397.199282       | 792.407272         | 396.707274        | A    | <b>662.387188</b>  | 331.697232        | 645.360639        | 323.183957        | 644.376623         | 322.691949       | 6  |
| 6  | <b>897.449865</b>  | 449.228570      | 880.423316     | 440.715296       | <b>879.439300</b>  | <b>440.223288</b> | S    | <b>591.350074</b>  | 296.178675        | 574.323525        | 287.665400        | 573.339509         | 287.173392       | 5  |
| 7  | <b>1044.518279</b> | 522.762777      | 1027.491730    | 514.249503       | <b>1026.507714</b> | 513.757495        | F    | <b>504.318046</b>  | 252.662661        | 487.291497        | <b>244.149386</b> |                    |                  | 4  |
| 8  | <b>1157.602343</b> | 579.304809      | 1140.575794    | 570.791535       | <b>1139.591778</b> | 570.299527        | L    | <b>357.249632</b>  | 179.128454        | 340.223083        | 170.615179        |                    |                  | 3  |
| 9  | 1254.655107        | 627.831191      | 1237.628558    | 619.317917       | 1236.644542        | 618.825909        | P    | <b>244.165568</b>  | 122.586422        | <b>227.139019</b> | 114.073148        |                    |                  | 2  |
| 10 |                    |                 |                |                  |                    |                   | K    | <b>147.112804</b>  | 74.060040         | 130.086255        | 65.546765         |                    |                  | 1  |

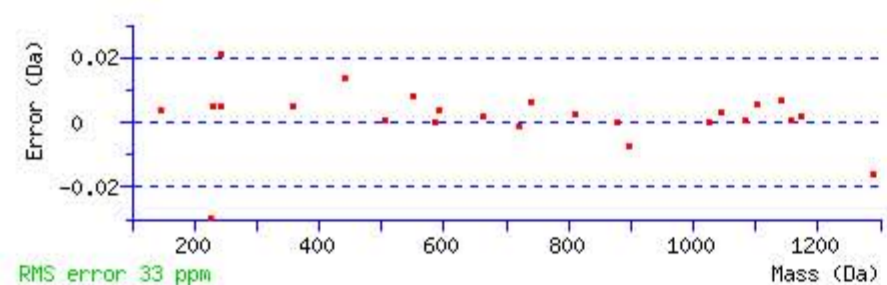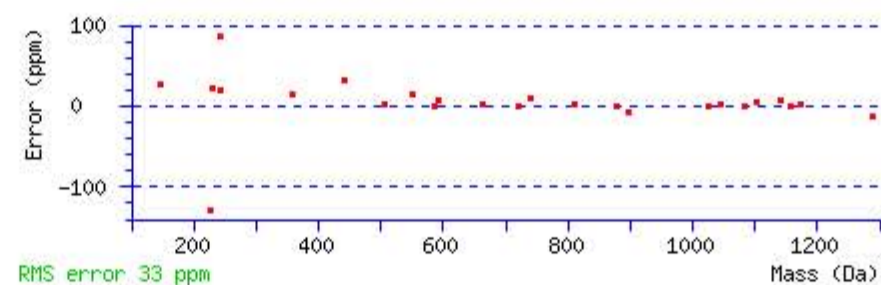

NCBI BLAST search of **LDAQASFLPK**

(Parameters: blastp, nr protein database, expect=20000, no filter, PAM30)

Other BLAST [web gateways](#)

All matches to this query

| Score | Mr(calc):   | Delta     | Sequence                      |
|-------|-------------|-----------|-------------------------------|
| 52.0  | 1399.753342 | -0.000734 | <a href="#">LDAQASFLPK</a>    |
| 6.4   | 1399.745972 | 0.006636  | <a href="#">IDAATGIPVTTWR</a> |
| 3.2   | 1399.755814 | -0.003206 | <a href="#">KTELGPLKEEEK</a>  |
| 0.9   | 1399.767059 | -0.014451 | <a href="#">EKAVTDEKPKQK</a>  |

Mascot: <http://www.matrixscience.com/>



# MASCOT Search Results

## Peptide View

MS/MS Fragmentation of **GSLVQASEANLQAAQDFVR**

Found in **ITIH1\_HUMAN**, Inter-alpha-trypsin inhibitor heavy chain H1 OS=Homo sapiens GN=ITIH1 PE=1 SV=3

Match to Query 49242: 2314.169442 from(772.397090,3+) rtinseconds(2516) index(53670)

Title: Locus:1.1.1.3519.17 File:"2013-07-02 CLN FXIII 30 min 3rd F 4.wiff"

Data file C:\Program Files (x86)\Matrix Science\Mascot Daemon\mgf3 FXIII 30 min 3rd\mascot\_daemon\_merge.mgf

Click mouse within plot area to zoom in by factor of two about that point

Or, Plot from  to  Da

Label all possible matches  Label matches used for scoring

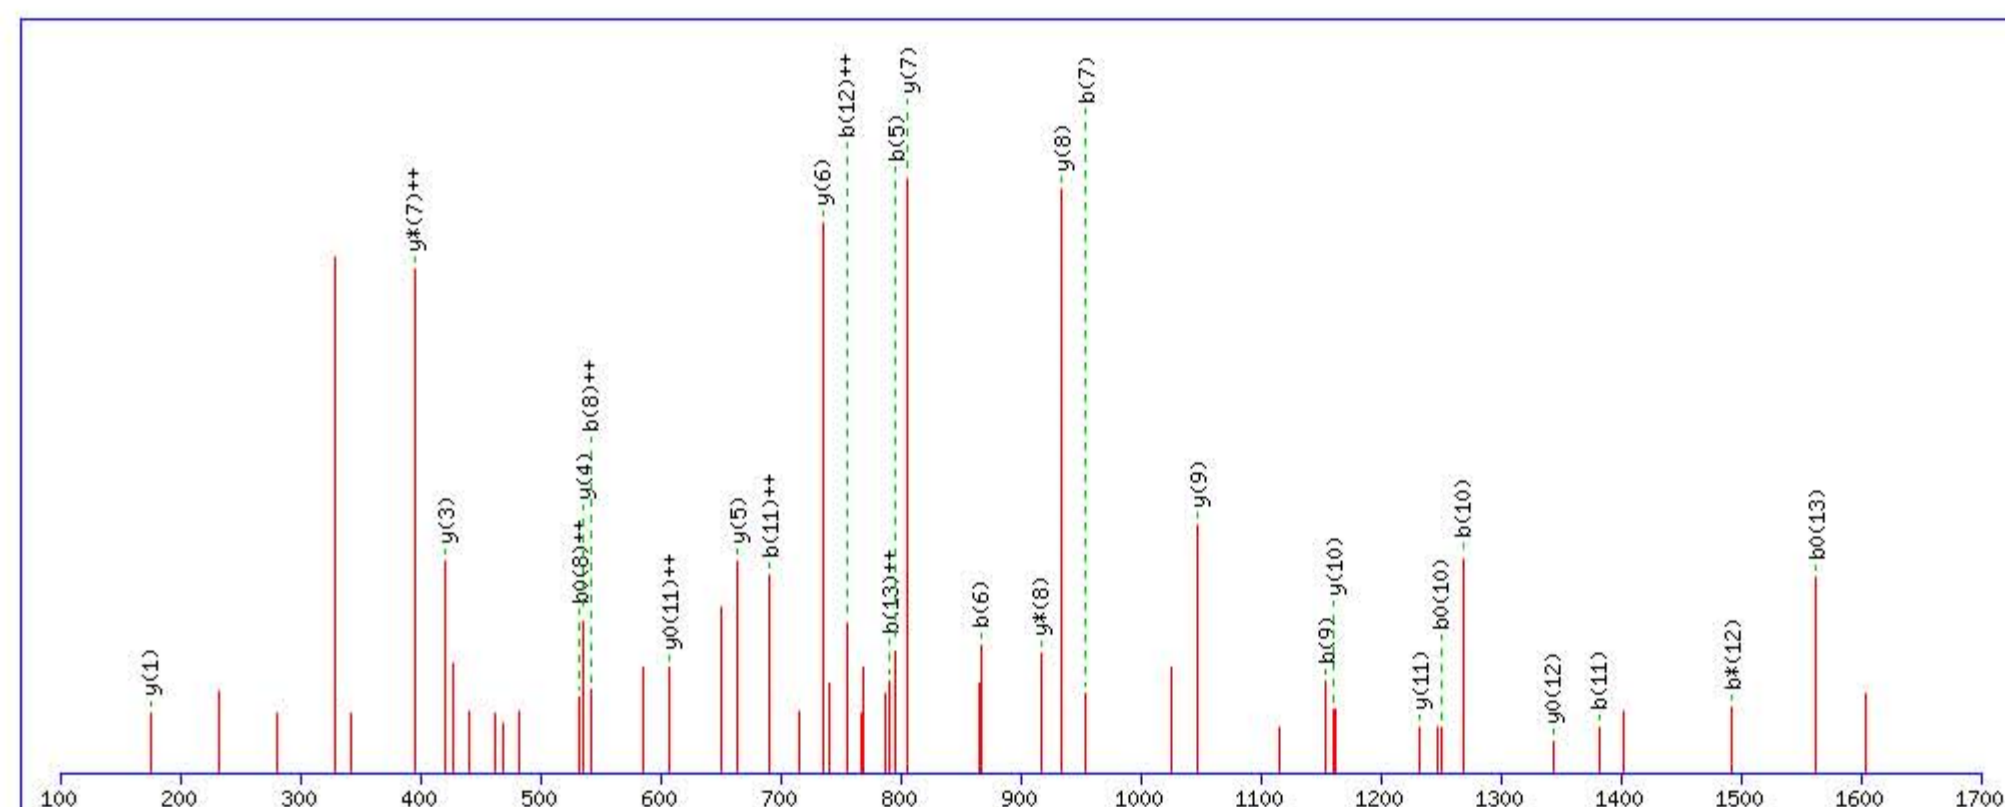

Monoisotopic mass of neutral peptide Mr(calc): 2314.173950

Fixed modifications: Carbamidomethyl (C) (apply to specified residues or termini only)

Variable modifications:

Q5 : Biotin:Thermo-21345 (Q)

Ions Score: 63 Expect: 1.5e-006

Matches : 28/200 fragment ions using 44 most intense peaks [\(help\)](#)

| #  | b                  | b <sup>++</sup>   | b <sup>*</sup>     | b <sup>*++</sup> | b <sup>0</sup>     | b <sup>0++</sup>  | Seq. | y                  | y <sup>++</sup> | y <sup>*</sup>    | y <sup>*++</sup>  | y <sup>0</sup>     | y <sup>0++</sup>  | #  |
|----|--------------------|-------------------|--------------------|------------------|--------------------|-------------------|------|--------------------|-----------------|-------------------|-------------------|--------------------|-------------------|----|
| 1  | 58.028740          | 29.518008         |                    |                  |                    |                   | G    |                    |                 |                   |                   |                    |                   | 19 |
| 2  | 145.060768         | 73.034022         |                    |                  | 127.050203         | 64.028740         | S    | 2258.159779        | 1129.583527     | 2241.133230       | 1121.070253       | 2240.149214        | 1120.578245       | 18 |
| 3  | 258.144832         | 129.576054        |                    |                  | 240.134267         | 120.570772        | L    | 2171.127751        | 1086.067513     | 2154.101202       | 1077.554239       | 2153.117186        | 1077.062231       | 17 |
| 4  | 357.213246         | 179.110261        |                    |                  | 339.202681         | 170.104979        | V    | 2058.043687        | 1029.525481     | 2041.017138       | 1021.012207       | 2040.033122        | 1020.520199       | 16 |
| 5  | <b>796.438572</b>  | 398.722924        | 779.412023         | 390.209650       | 778.428007         | 389.717642        | Q    | 1958.975273        | 979.991274      | 1941.948724       | 971.478000        | 1940.964708        | 970.985992        | 15 |
| 6  | <b>867.475686</b>  | 434.241481        | 850.449137         | 425.728207       | 849.465121         | 425.236199        | A    | 1519.749947        | 760.378611      | 1502.723398       | 751.865337        | 1501.739382        | 751.373329        | 14 |
| 7  | <b>954.507714</b>  | 477.757495        | 937.481165         | 469.244220       | 936.497149         | 468.752212        | S    | 1448.712833        | 724.860054      | 1431.686284       | 716.346780        | 1430.702268        | 715.854772        | 13 |
| 8  | 1083.550307        | <b>542.278792</b> | 1066.523758        | 533.765517       | 1065.539742        | <b>533.273509</b> | E    | 1361.680805        | 681.344040      | 1344.654256       | 672.830766        | <b>1343.670240</b> | 672.338758        | 12 |
| 9  | <b>1154.587421</b> | 577.797349        | 1137.560872        | 569.284074       | 1136.576856        | 568.792066        | A    | <b>1232.638212</b> | 616.822744      | 1215.611663       | 608.309469        | 1214.627647        | <b>607.817461</b> | 11 |
| 10 | <b>1268.630348</b> | 634.818812        | 1251.603799        | 626.305538       | <b>1250.619783</b> | 625.813529        | N    | <b>1161.601098</b> | 581.304187      | 1144.574549       | 572.790912        | 1143.590533        | 572.298904        | 10 |
| 11 | <b>1381.714412</b> | <b>691.360844</b> | 1364.687863        | 682.847569       | 1363.703847        | 682.355561        | L    | <b>1047.558171</b> | 524.282723      | 1030.531622       | 515.769449        | 1029.547606        | 515.277441        | 9  |
| 12 | 1509.772990        | <b>755.390133</b> | <b>1492.746441</b> | 746.876858       | 1491.762425        | 746.384850        | Q    | <b>934.474107</b>  | 467.740692      | <b>917.447558</b> | 459.227417        | 916.463542         | 458.735409        | 8  |
| 13 | 1580.810104        | <b>790.908690</b> | 1563.783555        | 782.395415       | <b>1562.799539</b> | 781.903407        | A    | <b>806.415529</b>  | 403.711403      | 789.388980        | <b>395.198128</b> | 788.404964         | 394.706120        | 7  |
| 14 | 1651.847218        | 826.427247        | 1634.820669        | 817.913972       | 1633.836653        | 817.421964        | A    | <b>735.378415</b>  | 368.192846      | 718.351866        | 359.679571        | 717.367850         | 359.187563        | 6  |
| 15 | 1779.905796        | 890.456536        | 1762.879247        | 881.943261       | 1761.895231        | 881.451253        | Q    | <b>664.341301</b>  | 332.674289      | 647.314752        | 324.161014        | 646.330736         | 323.669006        | 5  |
| 16 | 1894.932739        | 947.970007        | 1877.906190        | 939.456733       | 1876.922174        | 938.964725        | D    | <b>536.282723</b>  | 268.645000      | 519.256174        | 260.131725        | 518.272158         | 259.639717        | 4  |
| 17 | 2042.001153        | 1021.504215       | 2024.974604        | 1012.990940      | 2023.990588        | 1012.498932       | F    | <b>421.255780</b>  | 211.131528      | 404.229231        | 202.618253        |                    |                   | 3  |
| 18 | 2141.069567        | 1071.038421       | 2124.043018        | 1062.525147      | 2123.059002        | 1062.033139       | V    | 274.187366         | 137.597321      | 257.160817        | 129.084046        |                    |                   | 2  |
| 19 |                    |                   |                    |                  |                    |                   | R    | <b>175.118952</b>  | 88.063114       | 158.092403        | 79.549839         |                    |                   | 1  |

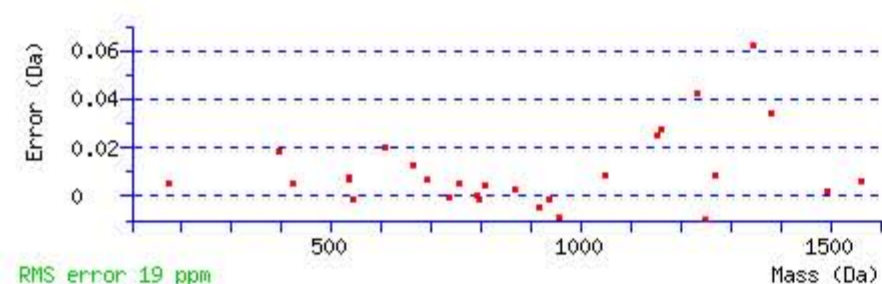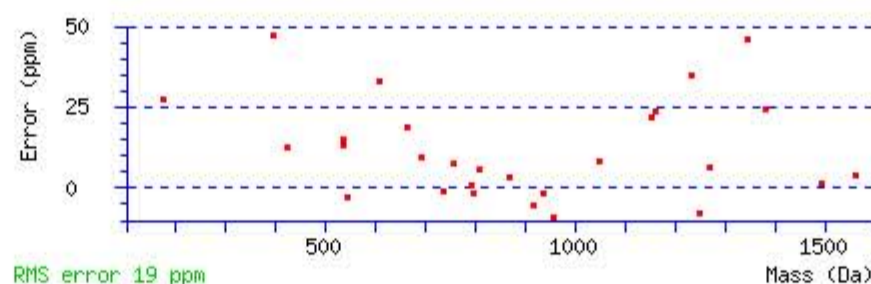

NCBI BLAST search of [GSLVQASEANLQAAQDFVR](#)

(Parameters: blastp, nr protein database, expect=20000, no filter, PAM30)

Other BLAST [web gateways](#)

All matches to this query

| Score | Mr(calc):   | Delta     | Sequence                            |
|-------|-------------|-----------|-------------------------------------|
| 62.6  | 2314.173950 | -0.004508 | <a href="#">GSLVQASEANLQAAQDFVR</a> |
| 13.5  | 2314.173950 | -0.004508 | <a href="#">GSLVQASEANLQAAQDFVR</a> |
| 0.4   | 2314.178635 | -0.009193 | <a href="#">NKDRPAMQLYQPGARSR</a>   |



# MASCOT Search Results

## Peptide View

MS/MS Fragmentation of **GSLVQASEANLQAAQDFVR**

Found in **ITIH1\_HUMAN**, Inter-alpha-trypsin inhibitor heavy chain H1 OS=Homo sapiens GN=ITIH1 PE=1 SV=3

Match to Query 49243: 2314.171572 from(772.397800,3+) rtinseconds(2556) index(53818)

Title: Locus:1.1.1.3533.6 File:"2013-07-02 CLN FXIII 30 min 3rd F 4.wiff"

Data file C:\Program Files (x86)\Matrix Science\Mascot Daemon\mgf3 FXIII 30 min 3rd\mascot\_daemon\_merge.mgf

Click mouse within plot area to zoom in by factor of two about that point

Or, Plot from  to  Da

Label all possible matches  Label matches used for scoring

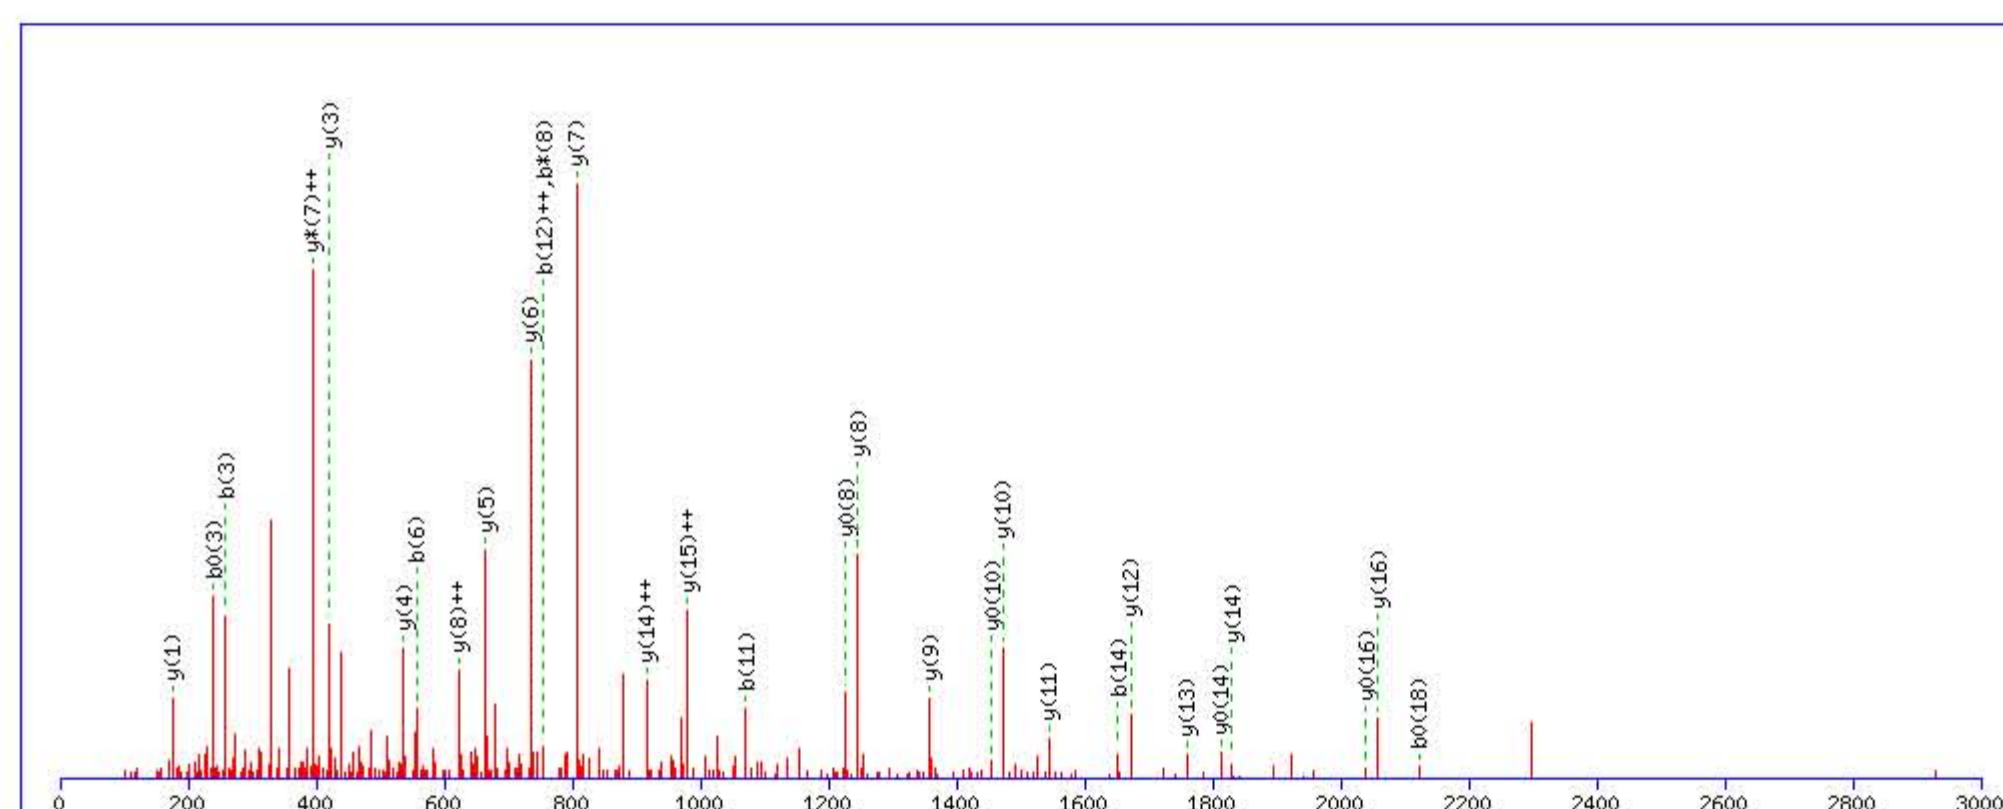

Monoisotopic mass of neutral peptide Mr(calc): 2314.173950

Fixed modifications: Carbamidomethyl (C) (apply to specified residues or termini only)

Variable modifications:

Q12 : Biotin:Thermo-21345 (Q)

Ions Score: 111 Expect: 6.8e-011

Matches : 30/200 fragment ions using 42 most intense peaks [\(help\)](#)

| #  | b                  | b <sup>++</sup>   | b <sup>*</sup>    | b <sup>*++</sup> | b <sup>0</sup>     | b <sup>0++</sup> | Seq. | y                  | y <sup>++</sup>   | y <sup>*</sup> | y <sup>*++</sup>  | y <sup>0</sup>     | y <sup>0++</sup> | #  |
|----|--------------------|-------------------|-------------------|------------------|--------------------|------------------|------|--------------------|-------------------|----------------|-------------------|--------------------|------------------|----|
| 1  | 58.028740          | 29.518008         |                   |                  |                    |                  | G    |                    |                   |                |                   |                    |                  | 19 |
| 2  | 145.060768         | 73.034022         |                   |                  | 127.050203         | 64.028740        | S    | 2258.159779        | 1129.583527       | 2241.133230    | 1121.070253       | 2240.149214        | 1120.578245      | 18 |
| 3  | <b>258.144832</b>  | 129.576054        |                   |                  | <b>240.134267</b>  | 120.570772       | L    | 2171.127751        | 1086.067513       | 2154.101202    | 1077.554239       | 2153.117186        | 1077.062231      | 17 |
| 4  | 357.213246         | 179.110261        |                   |                  | 339.202681         | 170.104979       | V    | <b>2058.043687</b> | 1029.525481       | 2041.017138    | 1021.012207       | <b>2040.033122</b> | 1020.520199      | 16 |
| 5  | 485.271824         | 243.139550        | 468.245275        | 234.626276       | 467.261259         | 234.134268       | Q    | 1958.975273        | <b>979.991275</b> | 1941.948724    | 971.478000        | 1940.964708        | 970.985992       | 15 |
| 6  | <b>556.308938</b>  | 278.658107        | 539.282389        | 270.144833       | 538.298373         | 269.652825       | A    | <b>1830.916695</b> | <b>915.961986</b> | 1813.890146    | 907.448711        | <b>1812.906130</b> | 906.956703       | 14 |
| 7  | 643.340966         | 322.174121        | 626.314417        | 313.660847       | 625.330401         | 313.168839       | S    | <b>1759.879581</b> | 880.443429        | 1742.853032    | 871.930154        | 1741.869016        | 871.438146       | 13 |
| 8  | 772.383559         | 386.695418        | <b>755.357010</b> | 378.182143       | 754.372994         | 377.690135       | E    | <b>1672.847553</b> | 836.927415        | 1655.821004    | 828.414140        | 1654.836988        | 827.922132       | 12 |
| 9  | 843.420673         | 422.213975        | 826.394124        | 413.700700       | 825.410108         | 413.208692       | A    | <b>1543.804960</b> | 772.406118        | 1526.778411    | 763.892844        | 1525.794395        | 763.400836       | 11 |
| 10 | 957.463600         | 479.235438        | 940.437051        | 470.722164       | 939.453035         | 470.230156       | N    | <b>1472.767846</b> | 736.887561        | 1455.741297    | 728.374287        | <b>1454.757281</b> | 727.882279       | 10 |
| 11 | <b>1070.547664</b> | 535.777470        | 1053.521115       | 527.264196       | 1052.537099        | 526.772187       | L    | <b>1358.724919</b> | 679.866098        | 1341.698370    | 671.352823        | 1340.714354        | 670.860815       | 9  |
| 12 | 1509.772990        | <b>755.390133</b> | 1492.746441       | 746.876859       | 1491.762425        | 746.384851       | Q    | <b>1245.640855</b> | <b>623.324066</b> | 1228.614306    | 614.810791        | <b>1227.630290</b> | 614.318783       | 8  |
| 13 | 1580.810104        | 790.908690        | 1563.783555       | 782.395416       | 1562.799539        | 781.903408       | A    | <b>806.415529</b>  | 403.711403        | 789.388980     | <b>395.198128</b> | 788.404964         | 394.706120       | 7  |
| 14 | <b>1651.847218</b> | 826.427247        | 1634.820669       | 817.913973       | 1633.836653        | 817.421965       | A    | <b>735.378415</b>  | 368.192846        | 718.351866     | 359.679571        | 717.367850         | 359.187563       | 6  |
| 15 | 1779.905796        | 890.456536        | 1762.879247       | 881.943262       | 1761.895231        | 881.451254       | Q    | <b>664.341301</b>  | 332.674289        | 647.314752     | 324.161014        | 646.330736         | 323.669006       | 5  |
| 16 | 1894.932739        | 947.970008        | 1877.906190       | 939.456733       | 1876.922174        | 938.964725       | D    | <b>536.282723</b>  | 268.645000        | 519.256174     | 260.131725        | 518.272158         | 259.639717       | 4  |
| 17 | 2042.001153        | 1021.504215       | 2024.974604       | 1012.990940      | 2023.990588        | 1012.498932      | F    | <b>421.255780</b>  | 211.131528        | 404.229231     | 202.618253        |                    |                  | 3  |
| 18 | 2141.069567        | 1071.038421       | 2124.043018       | 1062.525147      | <b>2123.059002</b> | 1062.033139      | V    | 274.187366         | 137.597321        | 257.160817     | 129.084046        |                    |                  | 2  |
| 19 |                    |                   |                   |                  |                    |                  | R    | <b>175.118952</b>  | 88.063114         | 158.092403     | 79.549839         |                    |                  | 1  |

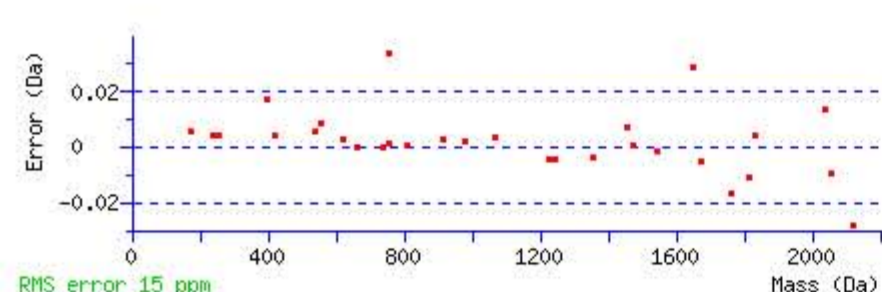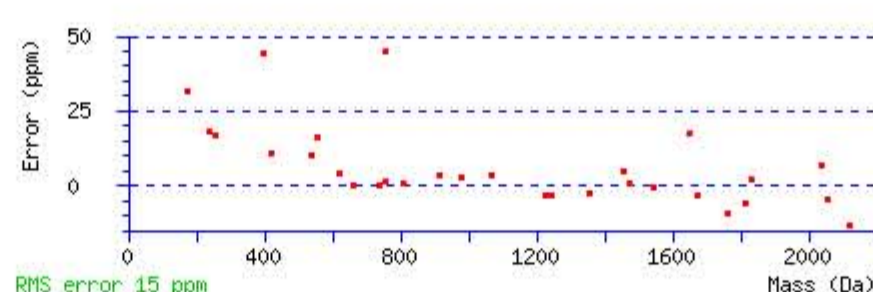

NCBI BLAST search of [GSLVQASEANLQAAQDFVR](#)

(Parameters: blastp, nr protein database, expect=20000, no filter, PAM30)

Other BLAST [web gateways](#)

### All matches to this query

| Score | Mr(calc):   | Delta     | Sequence                            |
|-------|-------------|-----------|-------------------------------------|
| 111.3 | 2314.173950 | -0.002378 | <a href="#">GSLVQASEANLQAAQDFVR</a> |
| 65.8  | 2314.173950 | -0.002378 | <a href="#">GSLVQASEANLQAAQDFVR</a> |
| 28.7  | 2314.173950 | -0.002378 | <a href="#">GSLVQASEANLQAAQDFVR</a> |
| 2.9   | 2314.178635 | -0.007063 | <a href="#">NKDRPAMQLYQPGARSR</a>   |



# MASCOT Search Results

## Peptide View

MS/MS Fragmentation of **GSLVQASEANLQAAQDFVR**

Found in **ITIH1\_HUMAN**, Inter-alpha-trypsin inhibitor heavy chain H1 OS=Homo sapiens GN=ITIH1 PE=1 SV=3

Match to Query 49244: 2314.173402 from(772.398410,3+) rtinseconds(2652) index(54322)

Title: Locus:1.1.1.3566.9 File:"2013-07-02 CLN FXIII 30 min 3rd F 4.wiff"

Data file C:\Program Files (x86)\Matrix Science\Mascot Daemon\mgf3 FXIII 30 min 3rd\mascot\_daemon\_merge.mgf

Click mouse within plot area to zoom in by factor of two about that point

Or, Plot from  to  Da

Label all possible matches  Label matches used for scoring

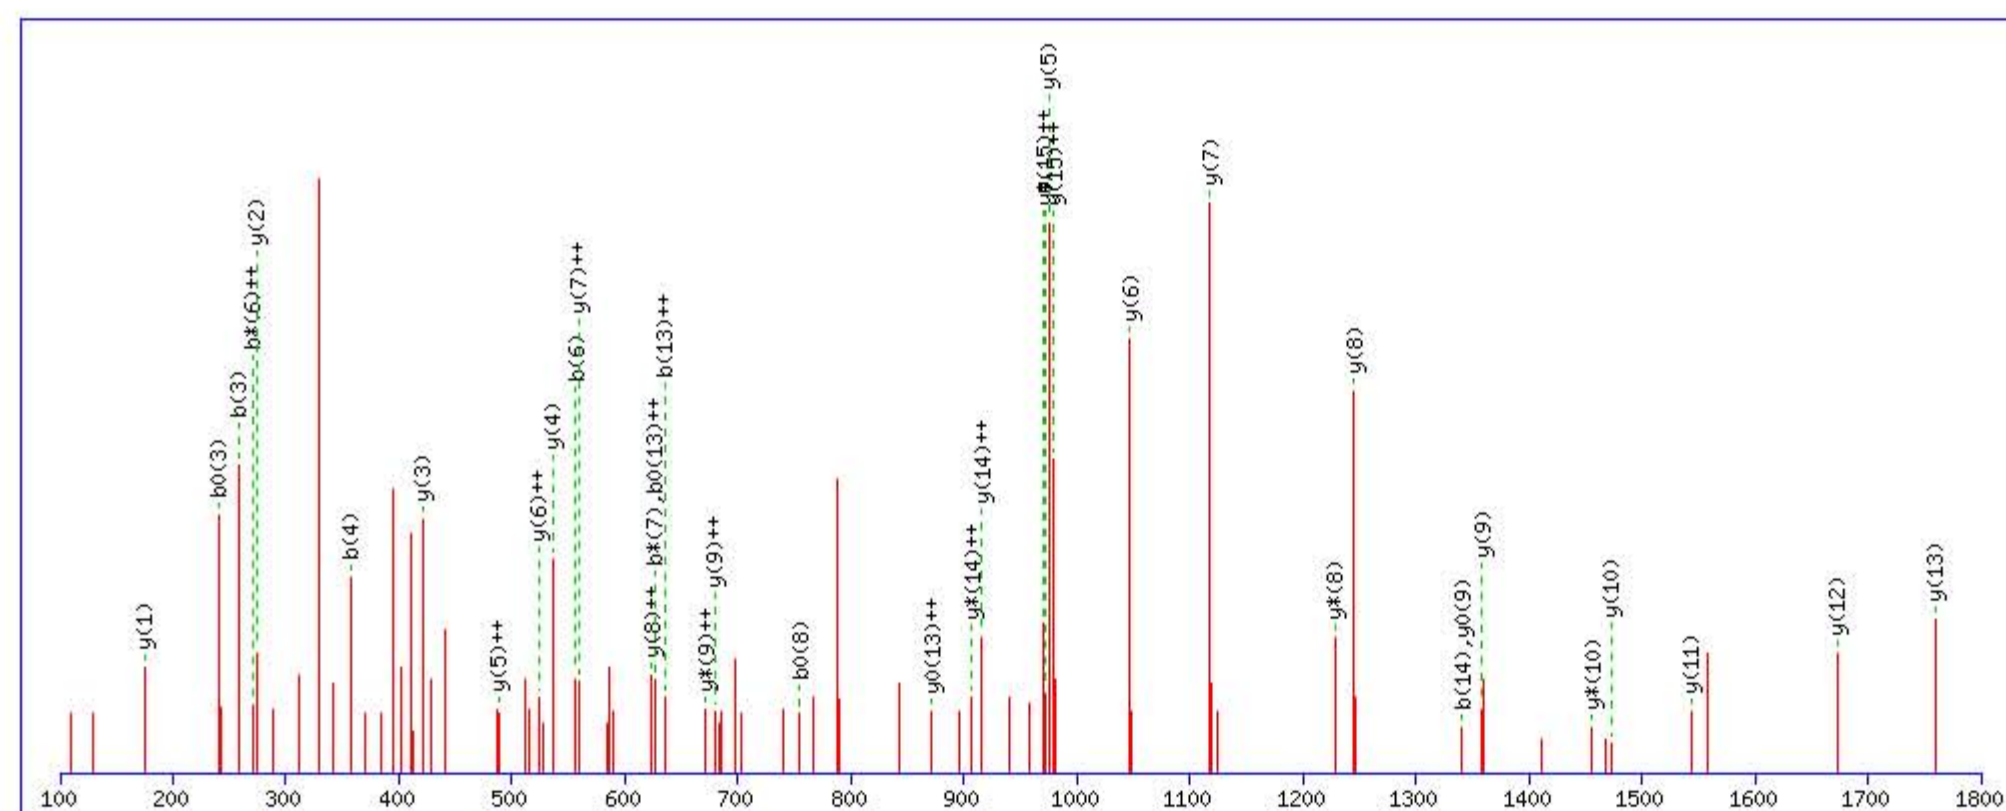

Monoisotopic mass of neutral peptide Mr(calc): 2314.173950

Fixed modifications: Carbamidomethyl (C) (apply to specified residues or termini only)

Variable modifications:

Q15 : Biotin:Thermo-21345 (Q)

Ions Score: 71 Expect: 2.5e-006

Matches : 38/200 fragment ions using 69 most intense peaks ([help](#))

| #  | b                  | b <sup>++</sup>   | b <sup>*</sup>    | b <sup>*++</sup>  | b <sup>0</sup>    | b <sup>0++</sup>  | Seq. | y                  | y <sup>++</sup>   | y <sup>*</sup>     | y <sup>*++</sup>  | y <sup>0</sup>     | y <sup>0++</sup>  | #  |
|----|--------------------|-------------------|-------------------|-------------------|-------------------|-------------------|------|--------------------|-------------------|--------------------|-------------------|--------------------|-------------------|----|
| 1  | 58.028740          | 29.518008         |                   |                   |                   |                   | G    |                    |                   |                    |                   |                    |                   | 19 |
| 2  | 145.060768         | 73.034022         |                   |                   | 127.050203        | 64.028740         | S    | 2258.159779        | 1129.583527       | 2241.133230        | 1121.070253       | 2240.149214        | 1120.578245       | 18 |
| 3  | <b>258.144832</b>  | 129.576054        |                   |                   | <b>240.134267</b> | 120.570772        | L    | 2171.127751        | 1086.067513       | 2154.101202        | 1077.554239       | 2153.117186        | 1077.062231       | 17 |
| 4  | <b>357.213246</b>  | 179.110261        |                   |                   | 339.202681        | 170.104979        | V    | 2058.043687        | 1029.525481       | 2041.017138        | 1021.012207       | 2040.033122        | 1020.520199       | 16 |
| 5  | 485.271824         | 243.139550        | 468.245275        | 234.626276        | 467.261259        | 234.134268        | Q    | 1958.975273        | <b>979.991275</b> | 1941.948724        | <b>971.478000</b> | 1940.964708        | <b>970.985992</b> | 15 |
| 6  | <b>556.308938</b>  | 278.658107        | 539.282389        | <b>270.144833</b> | 538.298373        | 269.652825        | A    | 1830.916695        | <b>915.961986</b> | 1813.890146        | <b>907.448711</b> | 1812.906130        | 906.956703        | 14 |
| 7  | 643.340966         | 322.174121        | <b>626.314417</b> | 313.660847        | 625.330401        | 313.168839        | S    | <b>1759.879581</b> | 880.443429        | 1742.853032        | 871.930154        | 1741.869016        | <b>871.438146</b> | 13 |
| 8  | 772.383559         | 386.695418        | 755.357010        | 378.182143        | <b>754.372994</b> | 377.690135        | E    | <b>1672.847553</b> | 836.927415        | 1655.821004        | 828.414140        | 1654.836988        | 827.922132        | 12 |
| 9  | 843.420673         | 422.213975        | 826.394124        | 413.700700        | 825.410108        | 413.208692        | A    | <b>1543.804960</b> | 772.406118        | 1526.778411        | 763.892844        | 1525.794395        | 763.400836        | 11 |
| 10 | 957.463600         | 479.235438        | 940.437051        | 470.722164        | 939.453035        | 470.230156        | N    | <b>1472.767846</b> | 736.887561        | <b>1455.741297</b> | 728.374287        | 1454.757281        | 727.882279        | 10 |
| 11 | 1070.547664        | 535.777470        | 1053.521115       | 527.264196        | 1052.537099       | 526.772187        | L    | <b>1358.724919</b> | <b>679.866098</b> | 1341.698370        | <b>671.352823</b> | <b>1340.714354</b> | 670.860815        | 9  |
| 12 | 1198.606242        | 599.806759        | 1181.579693       | 591.293485        | 1180.595677       | 590.801477        | Q    | <b>1245.640855</b> | <b>623.324066</b> | <b>1228.614306</b> | 614.810791        | 1227.630290        | 614.318783        | 8  |
| 13 | 1269.643356        | <b>635.325316</b> | 1252.616807       | 626.812042        | 1251.632791       | <b>626.320034</b> | A    | <b>1117.582277</b> | <b>559.294777</b> | 1100.555728        | 550.781502        | 1099.571712        | 550.289494        | 7  |
| 14 | <b>1340.680470</b> | 670.843873        | 1323.653921       | 662.330599        | 1322.669905       | 661.838591        | A    | <b>1046.545163</b> | <b>523.776220</b> | 1029.518614        | 515.262945        | 1028.534598        | 514.770937        | 6  |
| 15 | 1779.905796        | 890.456536        | 1762.879247       | 881.943262        | 1761.895231       | 881.451254        | Q    | <b>975.508049</b>  | <b>488.257663</b> | 958.481500         | 479.744388        | 957.497484         | 479.252380        | 5  |
| 16 | 1894.932739        | 947.970008        | 1877.906190       | 939.456733        | 1876.922174       | 938.964725        | D    | <b>536.282723</b>  | 268.645000        | 519.256174         | 260.131725        | 518.272158         | 259.639717        | 4  |
| 17 | 2042.001153        | 1021.504215       | 2024.974604       | 1012.990940       | 2023.990588       | 1012.498932       | F    | <b>421.255780</b>  | 211.131528        | 404.229231         | 202.618253        |                    |                   | 3  |
| 18 | 2141.069567        | 1071.038421       | 2124.043018       | 1062.525147       | 2123.059002       | 1062.033139       | V    | <b>274.187366</b>  | 137.597321        | 257.160817         | 129.084046        |                    |                   | 2  |
| 19 |                    |                   |                   |                   |                   |                   | R    | <b>175.118952</b>  | 88.063114         | 158.092403         | 79.549839         |                    |                   | 1  |

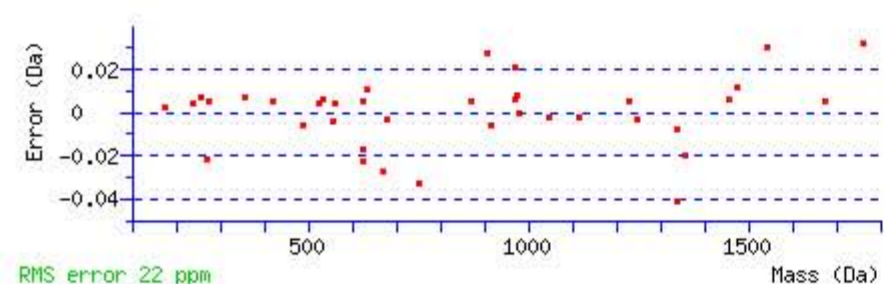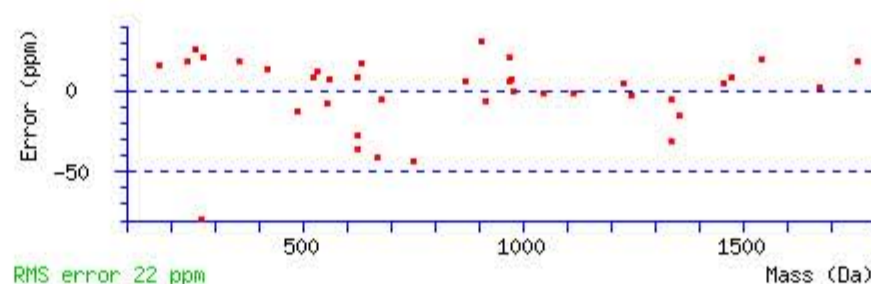

NCBI BLAST search of [GSLVQASEANLQAAQDFVR](#)

(Parameters: blastp, nr protein database, expect=20000, no filter, PAM30)

Other BLAST [web gateways](#)

All matches to this query

| Score | Mr(calc):   | Delta     | Sequence                            |
|-------|-------------|-----------|-------------------------------------|
| 70.6  | 2314.173950 | -0.000548 | <a href="#">GSLVQASEANLQAAQDFVR</a> |
| 40.8  | 2314.173950 | -0.000548 | <a href="#">GSLVQASEANLQAAQDFVR</a> |
| 5.5   | 2314.173950 | -0.000548 | <a href="#">GSLVQASEANLQAAQDFVR</a> |



# MASCOT Search Results

## Peptide View

MS/MS Fragmentation of **FAHYVVTSQVVNTANEAR**

Found in **ITIH1\_HUMAN**, Inter-alpha-trypsin inhibitor heavy chain H1 OS=Homo sapiens GN=ITIH1 PE=1 SV=3

Match to Query 49267: 2316.159852 from(773.060560,3+) rtinseconds(1973) index(50966)

Title: Locus:1.1.1.3330.17 File:"2013-07-02 CLN FXIII 30 min 3rd F 4.wiff"

Data file C:\Program Files (x86)\Matrix Science\Mascot Daemon\mgf3 FXIII 30 min 3rd\mascot\_daemon\_merge.mgf

Click mouse within plot area to zoom in by factor of two about that point

Or, Plot from  to  Da

Label all possible matches  Label matches used for scoring

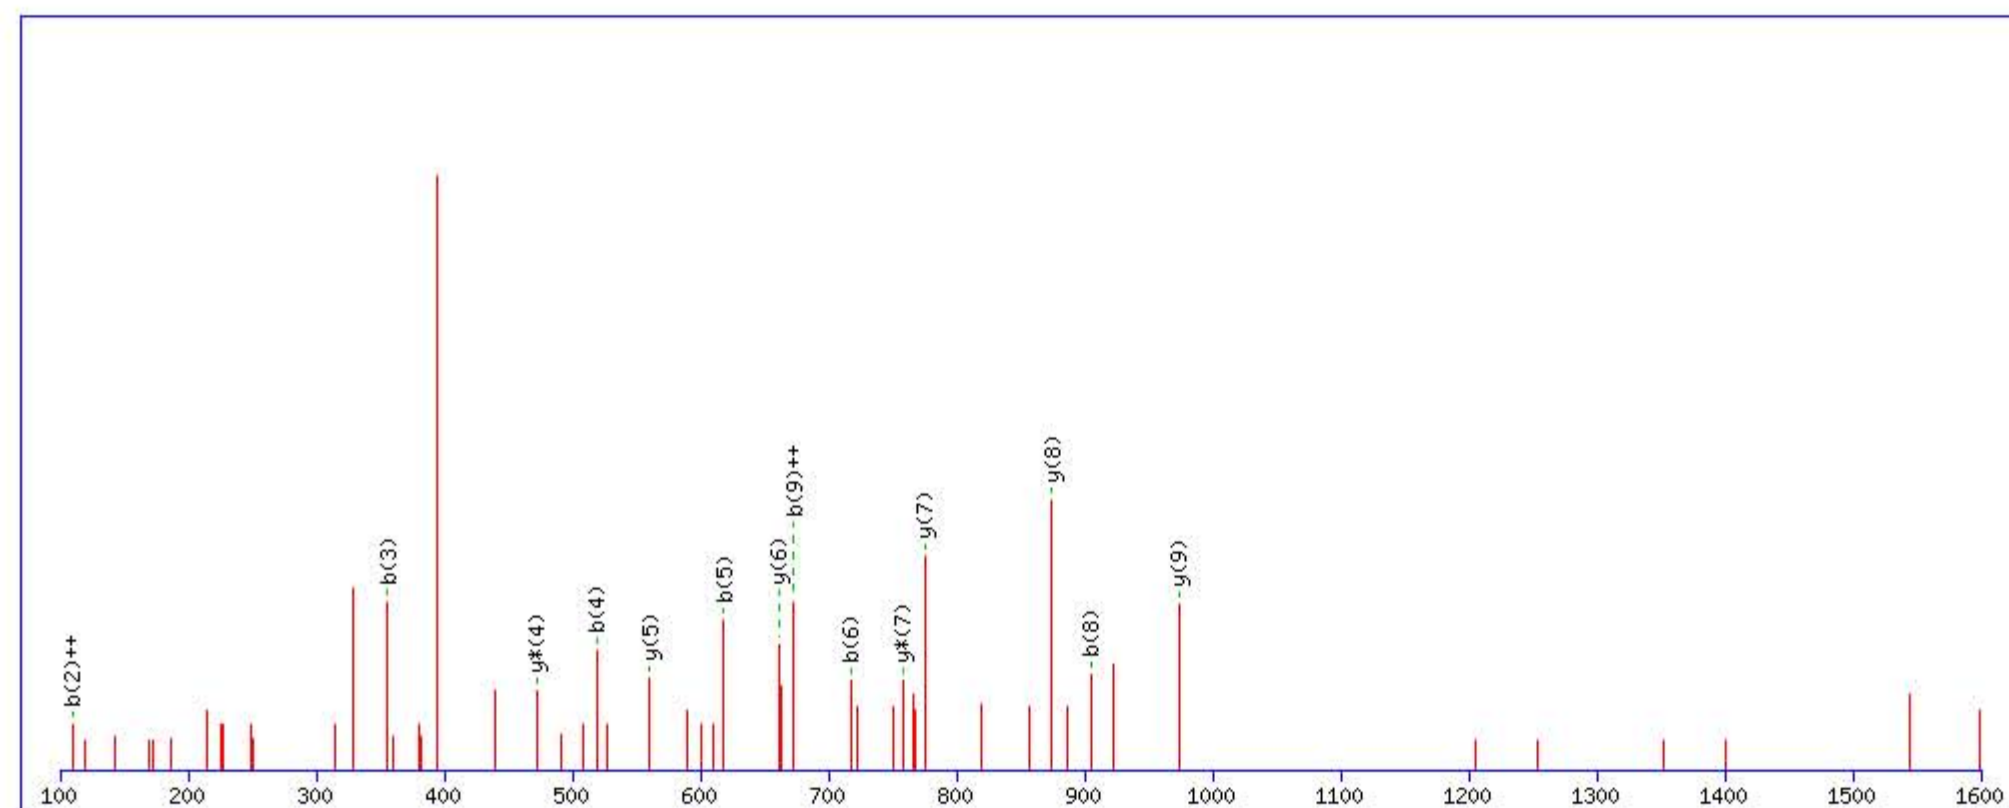

Monoisotopic mass of neutral peptide Mr(calc): 2316.168488

Fixed modifications: Carbamidomethyl (C) (apply to specified residues or termini only)

Variable modifications:

Q9 : Biotin:Thermo-21345 (Q)

Ions Score: 27 Expect: 0.053

Matches : 14/172 fragment ions using 32 most intense peaks [\(help\)](#)

| #  | b                 | b <sup>++</sup>   | b <sup>*</sup> | b <sup>+++</sup> | b <sup>0</sup> | b <sup>0++</sup> | Seq. | y                 | y <sup>++</sup> | y <sup>*</sup>    | y <sup>+++</sup> | y <sup>0</sup> | y <sup>0++</sup> | #  |
|----|-------------------|-------------------|----------------|------------------|----------------|------------------|------|-------------------|-----------------|-------------------|------------------|----------------|------------------|----|
| 1  | 148.075690        | 74.541483         |                |                  |                |                  | F    |                   |                 |                   |                  |                |                  | 18 |
| 2  | 219.112804        | <b>110.060040</b> |                |                  |                |                  | A    | 2170.107350       | 1085.557313     | 2153.080801       | 1077.044038      | 2152.096785    | 1076.552030      | 17 |
| 3  | <b>356.171716</b> | 178.589496        |                |                  |                |                  | H    | 2099.070236       | 1050.038756     | 2082.043687       | 1041.525481      | 2081.059671    | 1041.033473      | 16 |
| 4  | <b>519.235045</b> | 260.121161        |                |                  |                |                  | Y    | 1962.011324       | 981.509300      | 1944.984775       | 972.996026       | 1944.000759    | 972.504018       | 15 |
| 5  | <b>618.303459</b> | 309.655368        |                |                  |                |                  | V    | 1798.947995       | 899.977636      | 1781.921446       | 891.464361       | 1780.937430    | 890.972353       | 14 |
| 6  | <b>717.371873</b> | 359.189575        |                |                  |                |                  | V    | 1699.879581       | 850.443429      | 1682.853032       | 841.930154       | 1681.869016    | 841.438146       | 13 |
| 7  | 818.419552        | 409.713414        |                |                  | 800.408987     | 400.708132       | T    | 1600.811167       | 800.909222      | 1583.784618       | 792.395947       | 1582.800602    | 791.903939       | 12 |
| 8  | <b>905.451580</b> | 453.229428        |                |                  | 887.441015     | 444.224146       | S    | 1499.763488       | 750.385382      | 1482.736939       | 741.872108       | 1481.752923    | 741.380100       | 11 |
| 9  | 1344.676906       | <b>672.842091</b> | 1327.650357    | 664.328817       | 1326.666341    | 663.836808       | Q    | 1412.731460       | 706.869368      | 1395.704911       | 698.356094       | 1394.720895    | 697.864086       | 10 |
| 10 | 1443.745320       | 722.376298        | 1426.718771    | 713.863024       | 1425.734755    | 713.371016       | V    | <b>973.506134</b> | 487.256705      | 956.479585        | 478.743431       | 955.495569     | 478.251423       | 9  |
| 11 | 1542.813734       | 771.910505        | 1525.787185    | 763.397231       | 1524.803169    | 762.905223       | V    | <b>874.437720</b> | 437.722498      | 857.411171        | 429.209224       | 856.427155     | 428.717216       | 8  |
| 12 | 1656.856661       | 828.931969        | 1639.830112    | 820.418694       | 1638.846096    | 819.926686       | N    | <b>775.369306</b> | 388.188291      | <b>758.342757</b> | 379.675017       | 757.358741     | 379.183009       | 7  |
| 13 | 1757.904340       | 879.455808        | 1740.877791    | 870.942534       | 1739.893775    | 870.450526       | T    | <b>661.326379</b> | 331.166828      | 644.299830        | 322.653553       | 643.315814     | 322.161545       | 6  |
| 14 | 1828.941454       | 914.974365        | 1811.914905    | 906.461091       | 1810.930889    | 905.969083       | A    | <b>560.278700</b> | 280.642988      | 543.252151        | 272.129714       | 542.268135     | 271.637706       | 5  |
| 15 | 1942.984381       | 971.995829        | 1925.957832    | 963.482554       | 1924.973816    | 962.990546       | N    | 489.241586        | 245.124431      | <b>472.215037</b> | 236.611157       | 471.231021     | 236.119149       | 4  |
| 16 | 2072.026974       | 1036.517125       | 2055.000425    | 1028.003850      | 2054.016409    | 1027.511842      | E    | 375.198659        | 188.102968      | 358.172110        | 179.589693       | 357.188094     | 179.097685       | 3  |
| 17 | 2143.064088       | 1072.035682       | 2126.037539    | 1063.522407      | 2125.053523    | 1063.030399      | A    | 246.156066        | 123.581671      | 229.129517        | 115.068397       |                |                  | 2  |
| 18 |                   |                   |                |                  |                |                  | R    | 175.118952        | 88.063114       | 158.092403        | 79.549839        |                |                  | 1  |

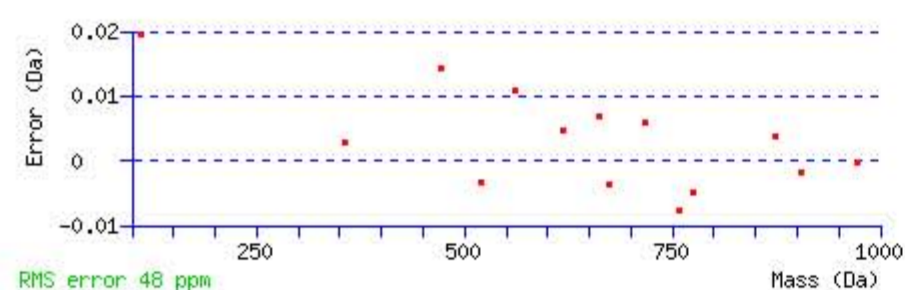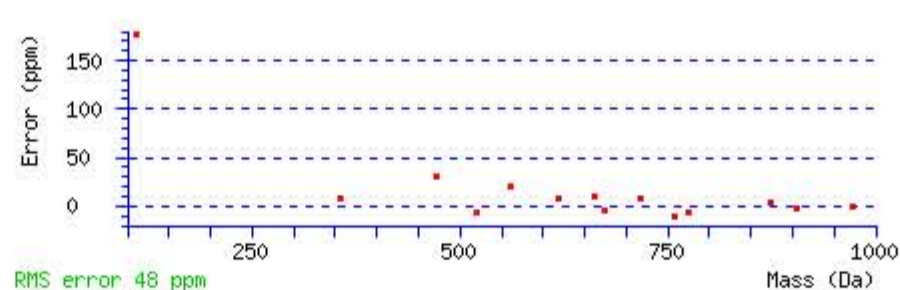

NCBI BLAST search of [FAHYVVTSQVVNTANEAR](#)

(Parameters: blastp, nr protein database, expect=20000, no filter, PAM30)

Other BLAST [web gateways](#)

All matches to this query

| Score | Mr(calc):   | Delta     | Sequence                           |
|-------|-------------|-----------|------------------------------------|
| 26.9  | 2316.168488 | -0.008636 | <a href="#">FAHYVVTSQVVNTANEAR</a> |

Mascot: <http://www.matrixscience.com/>



# MASCOT Search Results

## Peptide View

MS/MS Fragmentation of **GMADQDGLKPTIDKPSDSPLEMLGPR**  
 Found in **ITIH1\_HUMAN**, Inter-alpha-trypsin inhibitor heavy chain H1 OS=Homo sapiens GN=ITIH1 PE=1 SV=3

Match to Query 61050: 3304.615336 from(827.161110,4+) rtinseconds(2247) index(52520)  
 Title: Locus:1.1.1.3425.16 File:"2013-07-02 CLN FXIII 30 min 3rd F 4.wiff"  
 Data file C:\Program Files (x86)\Matrix Science\Mascot Daemon\mgf3 FXIII 30 min 3rd\mascot\_daemon\_merge.mgf

Click mouse within plot area to zoom in by factor of two about that point  
 Or, Plot from  to  Da   
 Label all possible matches  Label matches used for scoring

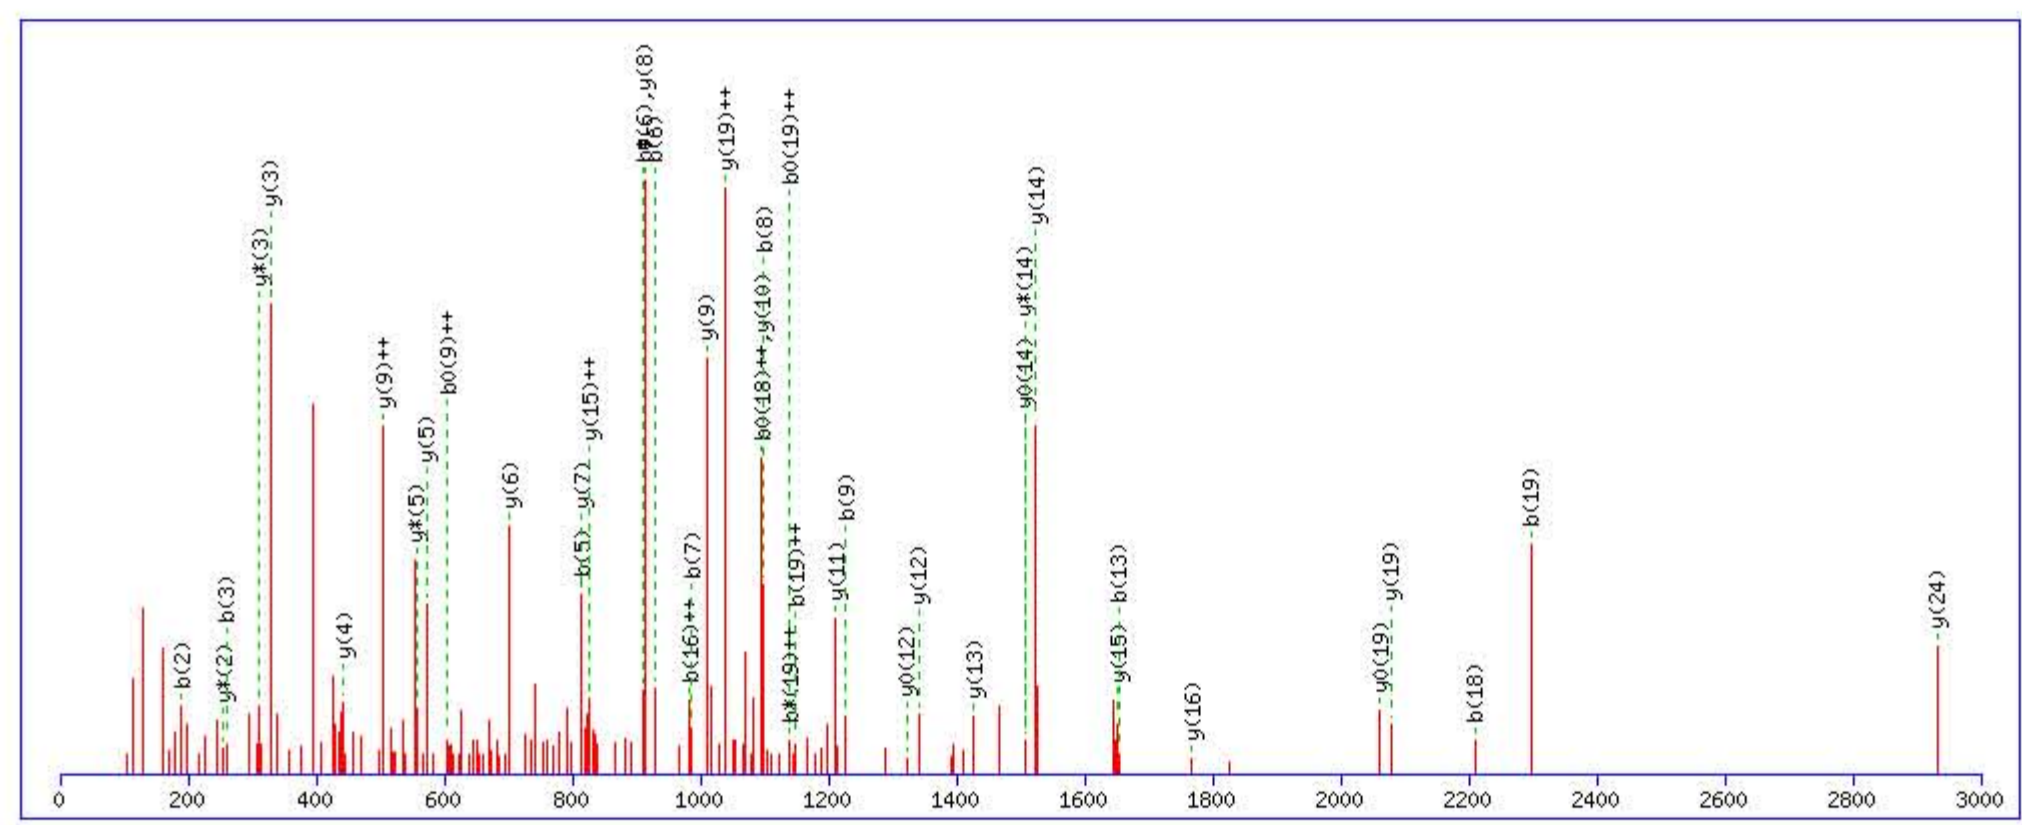

Monoisotopic mass of neutral peptide Mr(calc): 3304.614151  
 Fixed modifications: Carbamidomethyl (C) (apply to specified residues or termini only)  
 Variable modifications:  
 Q5 : Biotin:Thermo-21345 (Q)  
 Ions Score: 91 Expect: 1.8e-008  
 Matches : 44/300 fragment ions using 82 most intense peaks [\(help\)](#)

| #  | b                  | b <sup>++</sup>    | b <sup>+</sup>    | b <sup>+++</sup>   | b <sup>0</sup>    | b <sup>0++</sup>   | Seq. | y                  | y <sup>++</sup>    | y <sup>+</sup>     | y <sup>+++</sup> | y <sup>0</sup>     | y <sup>0++</sup> | #  |
|----|--------------------|--------------------|-------------------|--------------------|-------------------|--------------------|------|--------------------|--------------------|--------------------|------------------|--------------------|------------------|----|
| 1  | 58.028740          | 29.518008          |                   |                    |                   |                    | G    |                    |                    |                    |                  |                    |                  | 28 |
| 2  | <b>189.069225</b>  | 95.038250          |                   |                    |                   |                    | M    | 3248.599985        | 1624.803630        | 3231.573436        | 1616.290356      | 3230.589420        | 1615.798348      | 27 |
| 3  | <b>260.106339</b>  | 130.556807         |                   |                    |                   |                    | A    | 3117.559500        | 1559.283388        | 3100.532951        | 1550.770113      | 3099.548935        | 1550.278105      | 26 |
| 4  | 375.133282         | 188.070279         |                   |                    | 357.122717        | 179.064997         | D    | 3046.522386        | 1523.764831        | 3029.495837        | 1515.251556      | 3028.511821        | 1514.759548      | 25 |
| 5  | <b>814.358608</b>  | 407.682942         | 797.332059        | 399.169668         | 796.348043        | 398.677660         | Q    | <b>2931.495443</b> | 1466.251359        | 2914.468894        | 1457.738085      | 2913.484878        | 1457.246077      | 24 |
| 6  | <b>929.385551</b>  | 465.196414         | <b>912.359002</b> | 456.683139         | <b>911.374986</b> | 456.191131         | D    | 2492.270117        | 1246.638696        | 2475.243568        | 1238.125422      | 2474.259552        | 1237.633414      | 23 |
| 7  | <b>986.407015</b>  | 493.707146         | 969.380466        | 485.193871         | 968.396450        | 484.701863         | G    | 2377.243174        | 1189.125225        | 2360.216625        | 1180.611950      | 2359.232609        | 1180.119942      | 22 |
| 8  | <b>1099.491079</b> | 550.249177         | 1082.464530       | 541.735903         | 1081.480514       | 541.243895         | L    | 2320.221710        | 1160.614493        | 2303.195161        | 1152.101218      | 2302.211145        | 1151.609210      | 21 |
| 9  | <b>1227.586042</b> | 614.296659         | 1210.559493       | 605.783385         | 1209.575477       | <b>605.291376</b>  | K    | 2207.137646        | 1104.072461        | 2190.111097        | 1095.559186      | 2189.127081        | 1095.067178      | 20 |
| 10 | 1324.638806        | 662.823041         | 1307.612257       | 654.309767         | 1306.628241       | 653.817758         | P    | <b>2079.042683</b> | <b>1040.024980</b> | 2062.016134        | 1031.511705      | <b>2061.032118</b> | 1031.019697      | 19 |
| 11 | 1425.686485        | 713.346881         | 1408.659936       | 704.833606         | 1407.675920       | 704.341598         | T    | 1981.989919        | 991.498598         | 1964.963370        | 982.985323       | 1963.979354        | 982.493315       | 18 |
| 12 | 1538.770549        | 769.888912         | 1521.744000       | 761.375638         | 1520.759984       | 760.883630         | I    | 1880.942240        | 940.974758         | 1863.915691        | 932.461484       | 1862.931675        | 931.969476       | 17 |
| 13 | <b>1653.797492</b> | 827.402384         | 1636.770943       | 818.889110         | 1635.786927       | 818.397101         | D    | <b>1767.858176</b> | 884.432726         | 1750.831627        | 875.919452       | 1749.847611        | 875.427444       | 16 |
| 14 | 1781.892455        | 891.449865         | 1764.865906       | 882.936591         | 1763.881890       | 882.444583         | K    | <b>1652.831233</b> | <b>826.919255</b>  | 1635.804684        | 818.405980       | 1634.820668        | 817.913972       | 15 |
| 15 | 1878.945219        | 939.976248         | 1861.918670       | 931.462973         | 1860.934654       | 930.970965         | P    | <b>1524.736270</b> | 762.871773         | <b>1507.709721</b> | 754.358499       | <b>1506.725705</b> | 753.866491       | 14 |
| 16 | 1965.977247        | <b>983.492262</b>  | 1948.950698       | 974.978987         | 1947.966682       | 974.486979         | S    | <b>1427.683506</b> | 714.345391         | 1410.656957        | 705.832117       | 1409.672941        | 705.340109       | 13 |
| 17 | 2095.019840        | 1048.013558        | 2077.993291       | 1039.500283        | 2077.009275       | 1039.008275        | E    | <b>1340.651478</b> | 670.829377         | 1323.624929        | 662.316103       | <b>1322.640913</b> | 661.824095       | 12 |
| 18 | <b>2210.046783</b> | 1105.527029        | 2193.020234       | 1097.013755        | 2192.036218       | <b>1096.521747</b> | D    | <b>1211.608885</b> | 606.308081         | 1194.582336        | 597.794806       | 1193.598320        | 597.302798       | 11 |
| 19 | <b>2297.078811</b> | <b>1149.043043</b> | 2280.052262       | <b>1140.529769</b> | 2279.068246       | <b>1140.037761</b> | S    | <b>1096.581942</b> | 548.794609         | 1079.555393        | 540.281335       | 1078.571377        | 539.789327       | 10 |
| 20 | 2394.131575        | 1197.569425        | 2377.105026       | 1189.056151        | 2376.121010       | 1188.564143        | P    | <b>1009.549914</b> | <b>505.278595</b>  | 992.523365         | 496.765321       | 991.539349         | 496.273313       | 9  |
| 21 | 2491.184339        | 1246.095807        | 2474.157790       | 1237.582533        | 2473.173774       | 1237.090525        | P    | <b>912.497150</b>  | 456.752213         | 895.470601         | 448.238939       | 894.486585         | 447.746931       | 8  |
| 22 | 2604.268403        | 1302.637839        | 2587.241854       | 1294.124565        | 2586.257838       | 1293.632557        | L    | <b>815.444386</b>  | 408.225831         | 798.417837         | 399.712557       | 797.433821         | 399.220549       | 7  |
| 23 | 2733.310996        | 1367.159136        | 2716.284447       | 1358.645861        | 2715.300431       | 1358.153854        | E    | <b>702.360322</b>  | 351.683799         | 685.333773         | 343.170525       | 684.349757         | 342.678517       | 6  |
| 24 | 2864.351481        | 1432.679379        | 2847.324932       | 1424.166104        | 2846.340916       | 1423.674096        | M    | <b>573.317729</b>  | 287.162503         | <b>556.291180</b>  | 278.649228       |                    |                  | 5  |
| 25 | 2977.435545        | 1489.221411        | 2960.408996       | 1480.708136        | 2959.424980       | 1480.216128        | L    | <b>442.277244</b>  | 221.642260         | 425.250695         | 213.128986       |                    |                  | 4  |
| 26 | 3034.457009        | 1517.732143        | 3017.430460       | 1509.218868        | 3016.446444       | 1508.726860        | G    | <b>329.193180</b>  | 165.100228         | <b>312.166631</b>  | 156.586953       |                    |                  | 3  |
| 27 | 3131.509773        | 1566.258525        | 3114.483224       | 1557.745250        | 3113.499208       | 1557.253242        | P    | 272.171716         | 136.589496         | <b>255.145167</b>  | 128.076221       |                    |                  | 2  |
| 28 |                    |                    |                   |                    |                   |                    | R    | 175.118952         | 88.063114          | 158.092403         | 79.549839        |                    |                  | 1  |

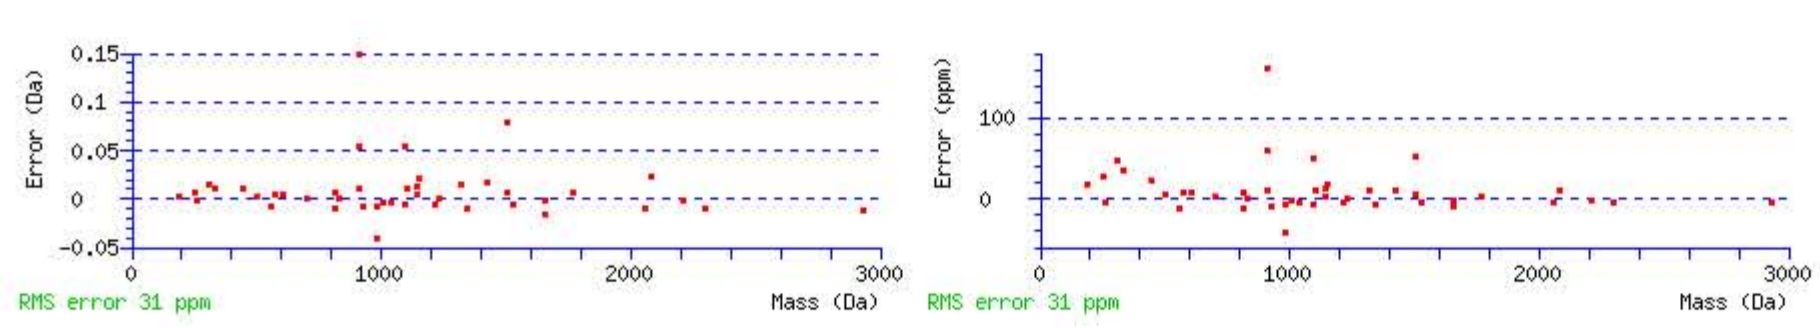

NCBI BLAST search of **GMADQDGLKPTIDKPSDSPLEMLGPR**  
 (Parameters: blastp, nr protein database, expect=20000, no filter, PAM30)  
 Other BLAST [web gateways](#)

### All matches to this query

| Score | Mr(calc):   | Delta    | Sequence                                   |
|-------|-------------|----------|--------------------------------------------|
| 91.4  | 3304.614151 | 0.001185 | <a href="#">GMADQDGLKPTIDKPSDSPLEMLGPR</a> |



# MASCOT Search Results

## Peptide View

### MS/MS Fragmentation of TQVADAK

Found in **ITIH2\_HUMAN**, Inter-alpha-trypsin inhibitor heavy chain H2 OS=Homo sapiens GN=ITIH2 PE=1 SV=2

Match to Query 16066: 1042.543608 from(522.279080,2+) rtinseconds(1306) index(46971)

Title: Locus:1.1.1.3098.9 File:"2013-07-02 CLN FXIII 30 min 3rd F 4.wiff"

Data file C:\Program Files (x86)\Matrix Science\Mascot Daemon\mgf3 FXIII 30 min 3rd\mascot\_daemon\_merge.mgf

Click mouse within plot area to zoom in by factor of two about that point

Or, Plot from  to  Da

Label all possible matches  Label matches used for scoring

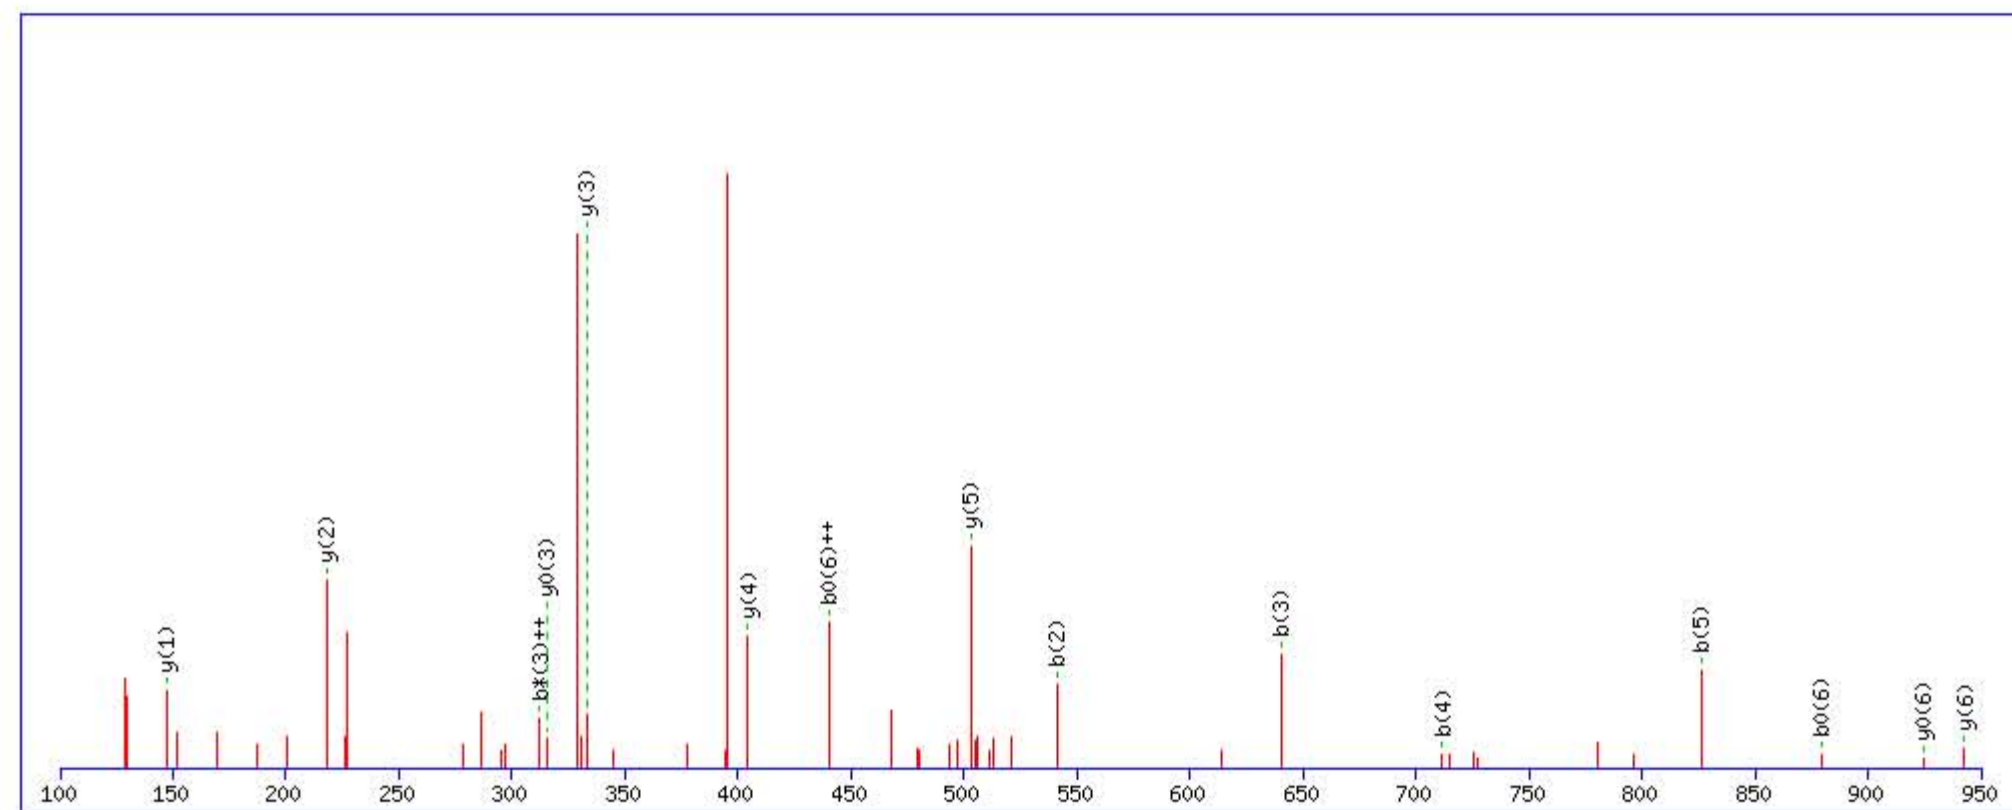

Monoisotopic mass of neutral peptide Mr(calc): 1042.548111

Fixed modifications: Carbamidomethyl (C) (apply to specified residues or termini only)

Variable modifications:

Q2 : Biotin:Thermo-21345 (Q)

Ions Score: 34 Expect: 0.0085

Matches : 15/66 fragment ions using 28 most intense peaks [\(help\)](#)

| # | b                 | b <sup>++</sup> | b <sup>*</sup> | b <sup>+++</sup>  | b <sup>0</sup>    | b <sup>0++</sup>  | Seq. | y                 | y <sup>++</sup> | y <sup>*</sup> | y <sup>+++</sup> | y <sup>0</sup>    | y <sup>0++</sup> | # |
|---|-------------------|-----------------|----------------|-------------------|-------------------|-------------------|------|-------------------|-----------------|----------------|------------------|-------------------|------------------|---|
| 1 | 102.054955        | 51.531116       |                |                   | 84.044390         | 42.525833         | T    |                   |                 |                |                  |                   |                  | 7 |
| 2 | <b>541.280281</b> | 271.143779      | 524.253732     | 262.630504        | 523.269716        | 262.138496        | Q    | <b>942.507715</b> | 471.757496      | 925.481166     | 463.244221       | <b>924.497150</b> | 462.752213       | 6 |
| 3 | <b>640.348695</b> | 320.677986      | 623.322146     | <b>312.164711</b> | 622.338130        | 311.672703        | V    | <b>503.282389</b> | 252.144832      | 486.255840     | 243.631558       | 485.271824        | 243.139550       | 5 |
| 4 | <b>711.385809</b> | 356.196543      | 694.359260     | 347.683268        | 693.375244        | 347.191260        | A    | <b>404.213975</b> | 202.610625      | 387.187426     | 194.097351       | 386.203410        | 193.605343       | 4 |
| 5 | <b>826.412752</b> | 413.710014      | 809.386203     | 405.196739        | 808.402187        | 404.704731        | D    | <b>333.176861</b> | 167.092068      | 316.150312     | 158.578794       | <b>315.166296</b> | 158.086786       | 3 |
| 6 | 897.449866        | 449.228571      | 880.423317     | 440.715296        | <b>879.439301</b> | <b>440.223288</b> | A    | <b>218.149918</b> | 109.578597      | 201.123369     | 101.065322       |                   |                  | 2 |
| 7 |                   |                 |                |                   |                   |                   | K    | <b>147.112804</b> | 74.060040       | 130.086255     | 65.546765        |                   |                  | 1 |

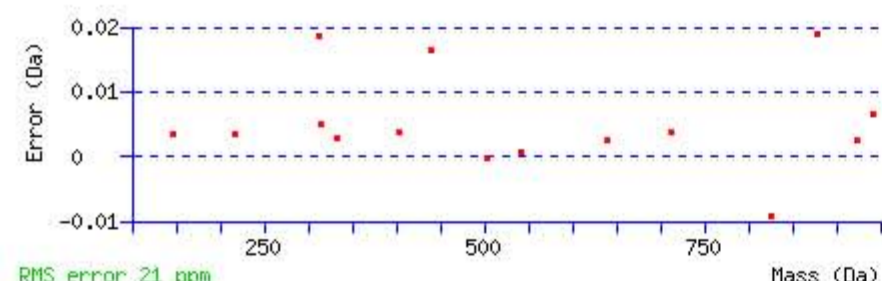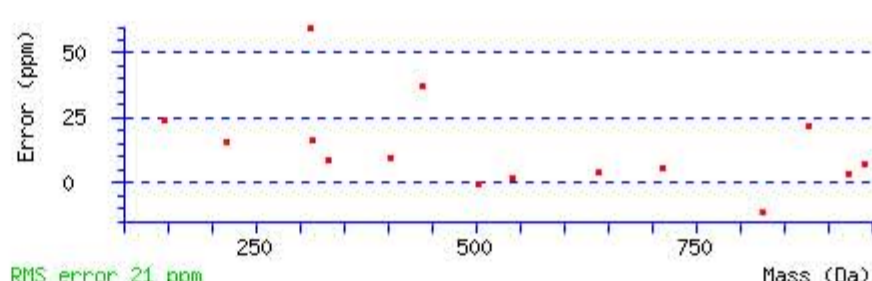

### NCBI BLAST search of TQVADAK

(Parameters: blastp, nr protein database, expect=20000, no filter, PAM30)

Other BLAST [web gateways](#)

### All matches to this query

| Score | Mr(calc):   | Delta     | Sequence                    |
|-------|-------------|-----------|-----------------------------|
| 34.0  | 1042.548111 | -0.004503 | <a href="#">TQVADAK</a>     |
| 11.4  | 1042.548096 | -0.004488 | <a href="#">SLQADAK</a>     |
| 9.4   | 1042.540726 | 0.002882  | <a href="#">KPVSEVGDGR</a>  |
| 7.2   | 1042.529465 | 0.014143  | <a href="#">TEAGAALPEGK</a> |
| 7.0   | 1042.540680 | 0.002928  | <a href="#">EAEKRPADK</a>   |
| 6.9   | 1042.529480 | 0.014128  | <a href="#">TSPQPESGIK</a>  |
| 3.3   | 1042.544724 | -0.001116 | <a href="#">WKGIEPGEK</a>   |
| 3.2   | 1042.538208 | 0.005400  | <a href="#">TACKHLWK</a>    |
| 2.9   | 1042.548080 | -0.004472 | <a href="#">KAEEQK</a>      |
| 2.0   | 1042.548096 | -0.004488 | <a href="#">ISAQDAK</a>     |



# **MASCOT** Mascot Search Results

## Peptide View

MS/MS Fragmentation of **ALYAQAR**

Found in **ITIH2\_HUMAN**, Inter-alpha-trypsin inhibitor heavy chain H2 OS=Homo sapiens GN=ITIH2 PE=1 SV=2

Match to Query 17544: 1102.589948 from(552.302250,2+) rtinseconds(1679) index(49191)

Title: Locus:1.1.1.3228.9 File:"2013-07-02 CLN FXIII 30 min 3rd F 4.wiff"

Data file C:\Program Files (x86)\Matrix Science\Mascot Daemon\mgf3 FXIII 30 min 3rd\mascot\_daemon\_merge.mgf

Click mouse within plot area to zoom in by factor of two about that point

Or, Plot from  to  Da

Label all possible matches  Label matches used for scoring

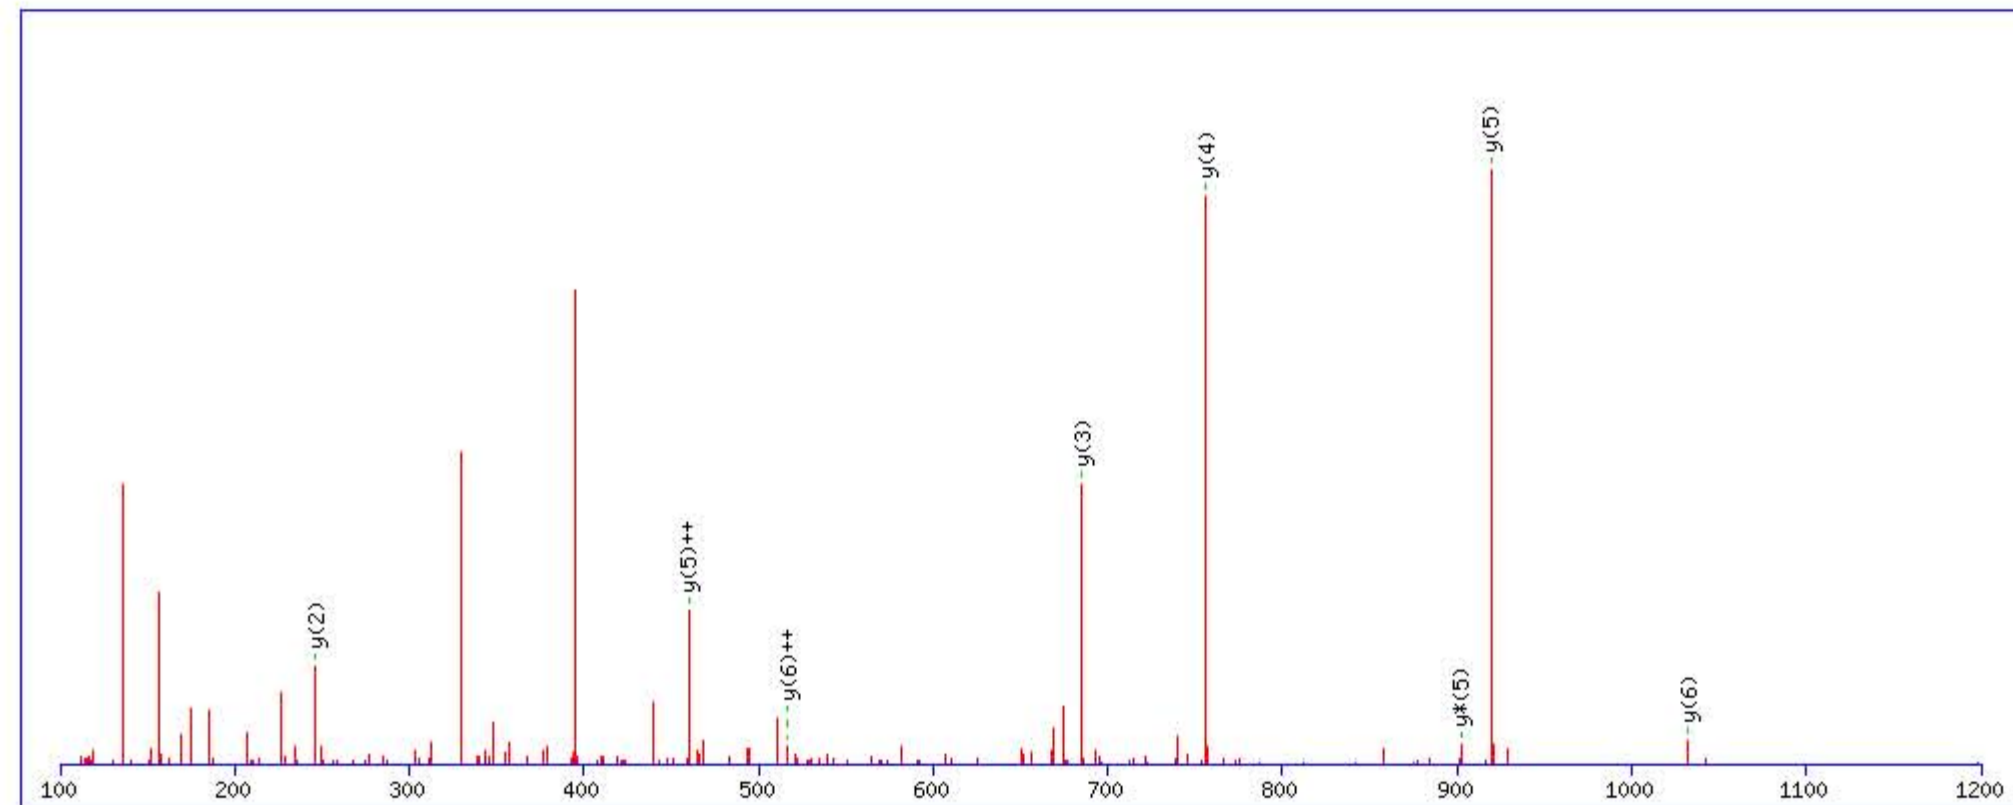

Monoisotopic mass of neutral peptide Mr(calc): 1102.595703

Fixed modifications: Carbamidomethyl (C) (apply to specified residues or termini only)

Variable modifications:

Q5 : Biotin:Thermo-21345 (Q)

Ions Score: 41 Expect: 0.0018

Matches : 8/40 fragment ions using 10 most intense peaks [\(help\)](#)

| # | b          | b <sup>++</sup> | b <sup>*</sup> | b <sup>*++</sup> | Seq. | y           | y <sup>++</sup> | y <sup>*</sup> | y <sup>*++</sup> | # |
|---|------------|-----------------|----------------|------------------|------|-------------|-----------------|----------------|------------------|---|
| 1 | 72.044390  | 36.525833       |                |                  | A    |             |                 |                |                  | 7 |
| 2 | 185.128454 | 93.067865       |                |                  | L    | 1032.565899 | 516.786588      | 1015.539350    | 508.273313       | 6 |
| 3 | 348.191783 | 174.599529      |                |                  | Y    | 919.481835  | 460.244556      | 902.455286     | 451.731281       | 5 |
| 4 | 419.228897 | 210.118087      |                |                  | A    | 756.418506  | 378.712891      | 739.391957     | 370.199617       | 4 |
| 5 | 858.454223 | 429.730750      | 841.427674     | 421.217475       | Q    | 685.381392  | 343.194334      | 668.354843     | 334.681060       | 3 |
| 6 | 929.491337 | 465.249307      | 912.464788     | 456.736032       | A    | 246.156066  | 123.581671      | 229.129517     | 115.068397       | 2 |
| 7 |            |                 |                |                  | R    | 175.118952  | 88.063114       | 158.092403     | 79.549840        | 1 |

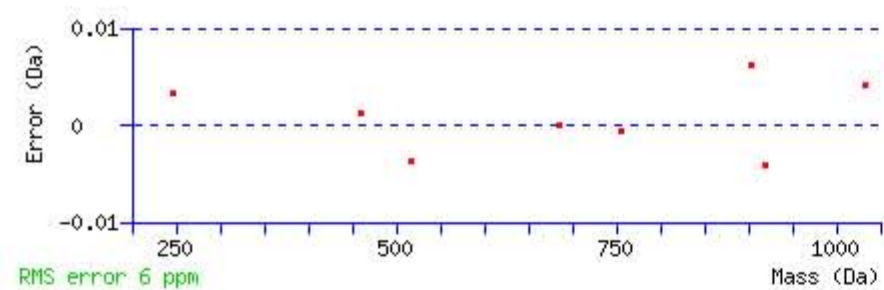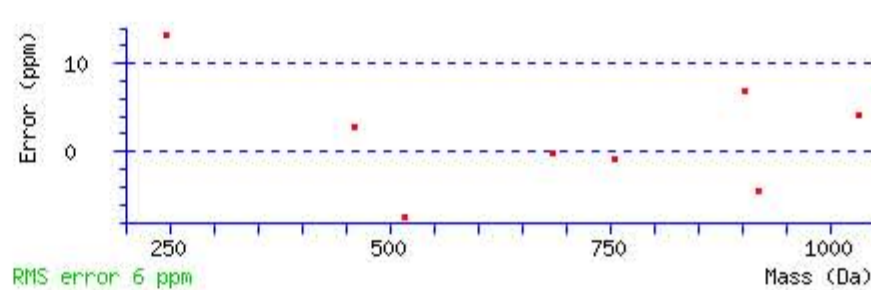

NCBI BLAST search of **ALYAQAR**

(Parameters: blastp, nr protein database, expect=20000, no filter, PAM30)

Other BLAST [web gateways](#)

## All matches to this query

| Score | Mr(calc):   | Delta     | Sequence                     |
|-------|-------------|-----------|------------------------------|
| 41.2  | 1102.595703 | -0.005755 | <a href="#">ALYAQAR</a>      |
| 12.8  | 1102.602234 | -0.012286 | <a href="#">AIELGYNPVK</a>   |
| 5.8   | 1102.580460 | 0.009488  | <a href="#">AMVENVTLAR</a>   |
| 4.2   | 1102.591660 | -0.001712 | <a href="#">AMKRLEEAR</a>    |
| 4.0   | 1102.588333 | 0.001615  | <a href="#">SPYGLTPRGR</a>   |
| 3.2   | 1102.598221 | -0.008273 | <a href="#">DDLKATLTAR</a>   |
| 3.2   | 1102.584305 | 0.005643  | <a href="#">QSSQRGLTAR</a>   |
| 2.2   | 1102.580460 | 0.009488  | <a href="#">AIKCIEGGQK</a>   |
| 2.2   | 1102.602249 | -0.012301 | <a href="#">AIVLFNPDSK</a>   |
| 2.2   | 1102.598236 | -0.008288 | <a href="#">ALSAGNGVTKVS</a> |



# MASCOT Search Results

## Peptide View

MS/MS Fragmentation of **VQSTITSR**

Found in **ITIH2\_HUMAN**, Inter-alpha-trypsin inhibitor heavy chain H2 OS=Homo sapiens GN=ITIH2 PE=1 SV=2

Match to Query 21779: 1201.642148 from(601.828350,2+) rtinseconds(1512) index(48142)

Title: Locus:1.1.1.3170.8 File:"2013-07-02 CLN FXIII 30 min 3rd F 4.wiff"

Data file C:\Program Files (x86)\Matrix Science\Mascot Daemon\mgf3 FXIII 30 min 3rd\mascot\_daemon\_merge.mgf

Click mouse within plot area to zoom in by factor of two about that point

Or, Plot from  to  Da

Label all possible matches  Label matches used for scoring

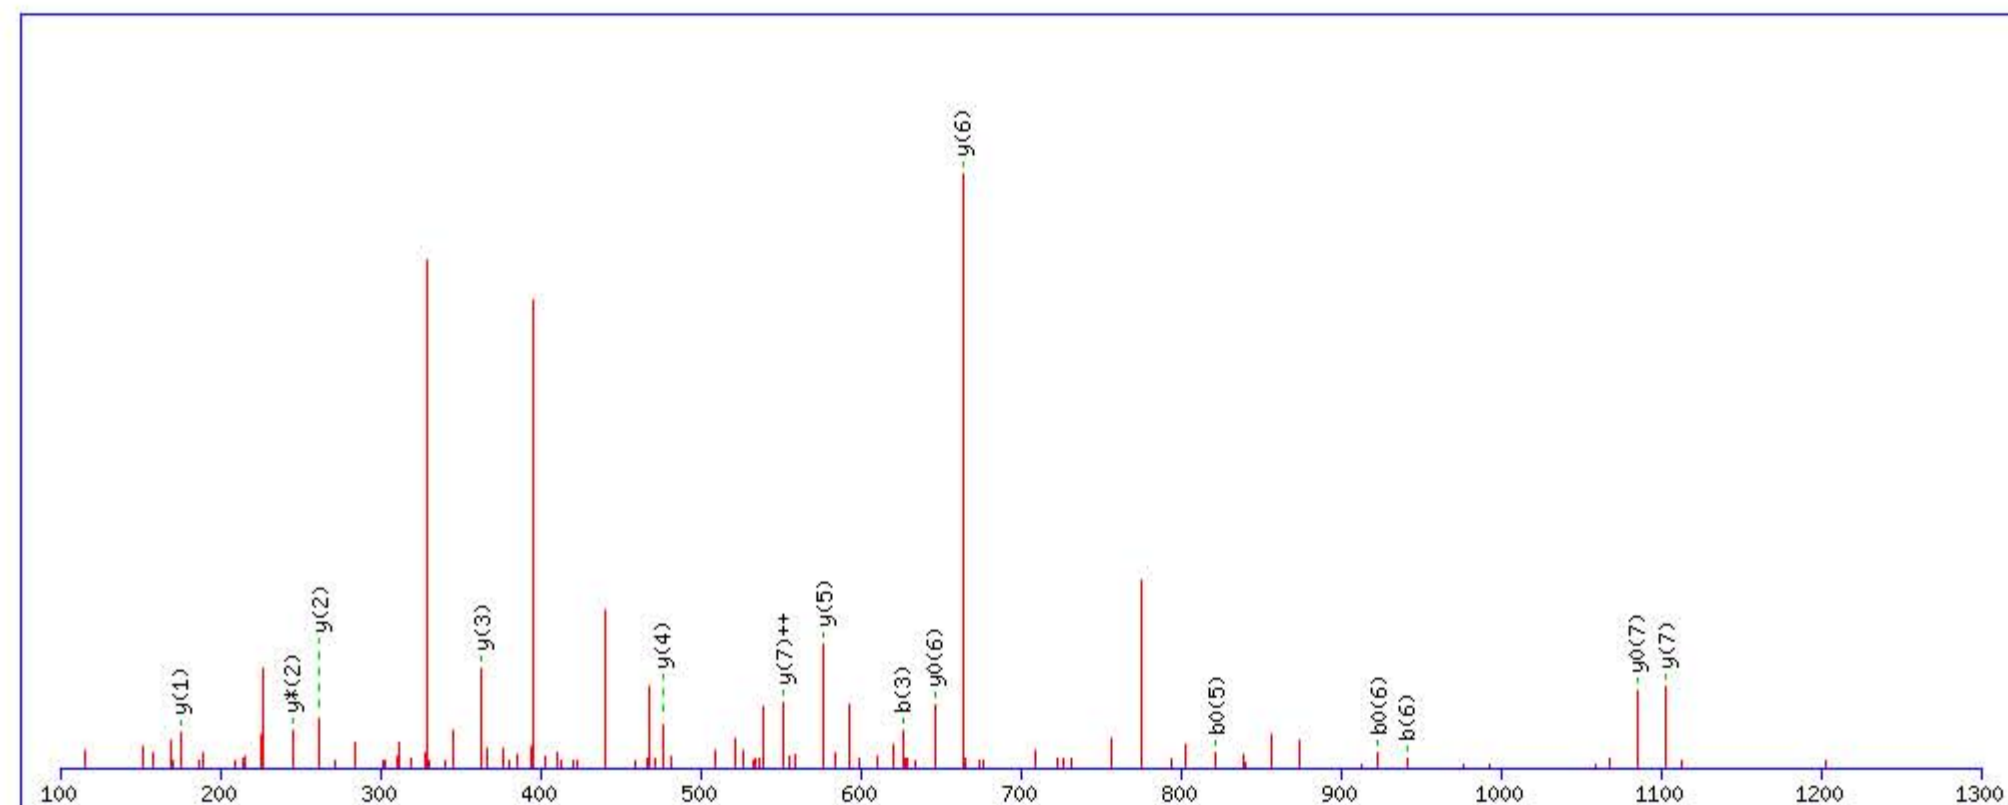

Monoisotopic mass of neutral peptide Mr(calc): 1201.648895

Fixed modifications: Carbamidomethyl (C) (apply to specified residues or termini only)

Variable modifications:

Q2 : Biotin:Thermo-21345 (Q)

Ions Score: 40 Expect: 0.0012

Matches : 15/76 fragment ions using 30 most intense peaks [\(help\)](#)

| # | b           | b <sup>++</sup> | b <sup>*</sup> | b <sup>*++</sup> | b <sup>0</sup> | b <sup>0++</sup> | Seq. | y           | y <sup>++</sup> | y <sup>*</sup> | y <sup>*++</sup> | y <sup>0</sup> | y <sup>0++</sup> | # |
|---|-------------|-----------------|----------------|------------------|----------------|------------------|------|-------------|-----------------|----------------|------------------|----------------|------------------|---|
| 1 | 100.075690  | 50.541483       |                |                  |                |                  | V    |             |                 |                |                  |                |                  | 8 |
| 2 | 539.301016  | 270.154146      | 522.274467     | 261.640872       |                |                  | Q    | 1103.587756 | 552.297516      | 1086.561207    | 543.784242       | 1085.577191    | 543.292234       | 7 |
| 3 | 626.333044  | 313.670160      | 609.306495     | 305.156886       | 608.322479     | 304.664878       | S    | 664.362430  | 332.684853      | 647.335881     | 324.171579       | 646.351865     | 323.679571       | 6 |
| 4 | 727.380723  | 364.194000      | 710.354174     | 355.680725       | 709.370158     | 355.188717       | T    | 577.330402  | 289.168839      | 560.303853     | 280.655565       | 559.319837     | 280.163557       | 5 |
| 5 | 840.464787  | 420.736032      | 823.438238     | 412.222757       | 822.454222     | 411.730749       | I    | 476.282723  | 238.645000      | 459.256174     | 230.131725       | 458.272158     | 229.639717       | 4 |
| 6 | 941.512466  | 471.259871      | 924.485917     | 462.746597       | 923.501901     | 462.254589       | T    | 363.198659  | 182.102968      | 346.172110     | 173.589693       | 345.188094     | 173.097685       | 3 |
| 7 | 1028.544494 | 514.775885      | 1011.517945    | 506.262611       | 1010.533929    | 505.770603       | S    | 262.150980  | 131.579128      | 245.124431     | 123.065854       | 244.140415     | 122.573846       | 2 |
| 8 |             |                 |                |                  |                |                  | R    | 175.118952  | 88.063114       | 158.092403     | 79.549839        |                |                  | 1 |

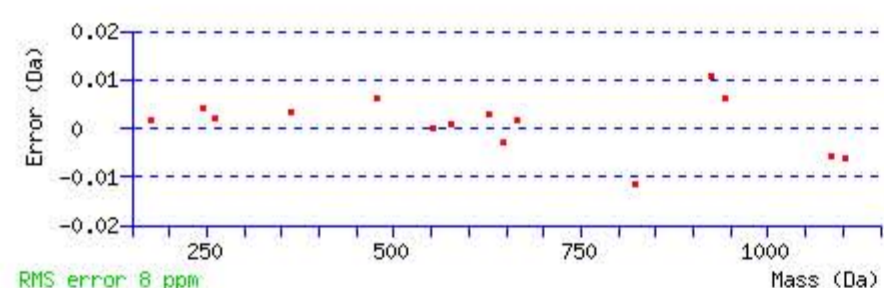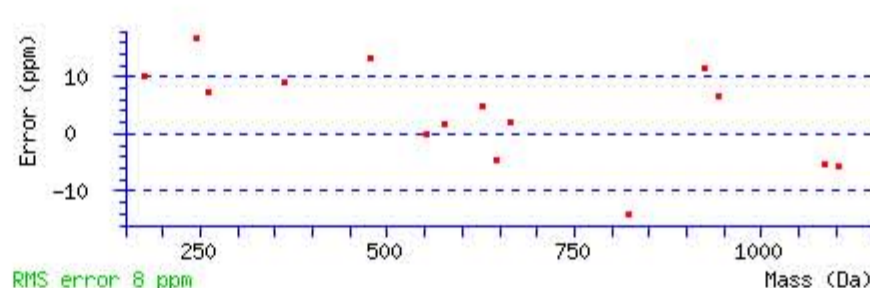

NCBI BLAST search of **VQSTITSR**

(Parameters: blastp, nr protein database, expect=20000, no filter, PAM30)

Other BLAST [web gateways](#)

All matches to this query

| Score | Mr(calc):   | Delta     | Sequence                     |
|-------|-------------|-----------|------------------------------|
| 40.0  | 1201.648895 | -0.006747 | <a href="#">VQSTITSR</a>     |
| 8.6   | 1201.641479 | 0.000669  | <a href="#">VSIKDNQKDR</a>   |
| 8.6   | 1201.638992 | 0.003156  | <a href="#">VQPPSHAR</a>     |
| 6.3   | 1201.638992 | 0.003156  | <a href="#">VQGREFR</a>      |
| 4.4   | 1201.630249 | 0.011899  | <a href="#">KLD AEDVIGSR</a> |
| 3.9   | 1201.641495 | 0.000653  | <a href="#">NL TNVLGTQSR</a> |

Mascot: <http://www.matrixscience.com/>



# MASCOT Search Results

## Peptide View

MS/MS Fragmentation of **MATTMIQSK**

Found in **ITIH2\_HUMAN**, Inter-alpha-trypsin inhibitor heavy chain H2 OS=Homo sapiens GN=ITIH2 PE=1 SV=2

Match to Query 24828: 1320.656128 from(661.335340,2+) rtinseconds(1756) index(49640)

Title: Locus:1.1.1.3255.7 File:"2013-07-02 CLN FXIII 30 min 3rd F 4.wiff"

Data file C:\Program Files (x86)\Matrix Science\Mascot Daemon\mgf3 FXIII 30 min 3rd\mascot\_daemon\_merge.mgf

Click mouse within plot area to zoom in by factor of two about that point

Or, Plot from  to  Da

Label all possible matches  Label matches used for scoring

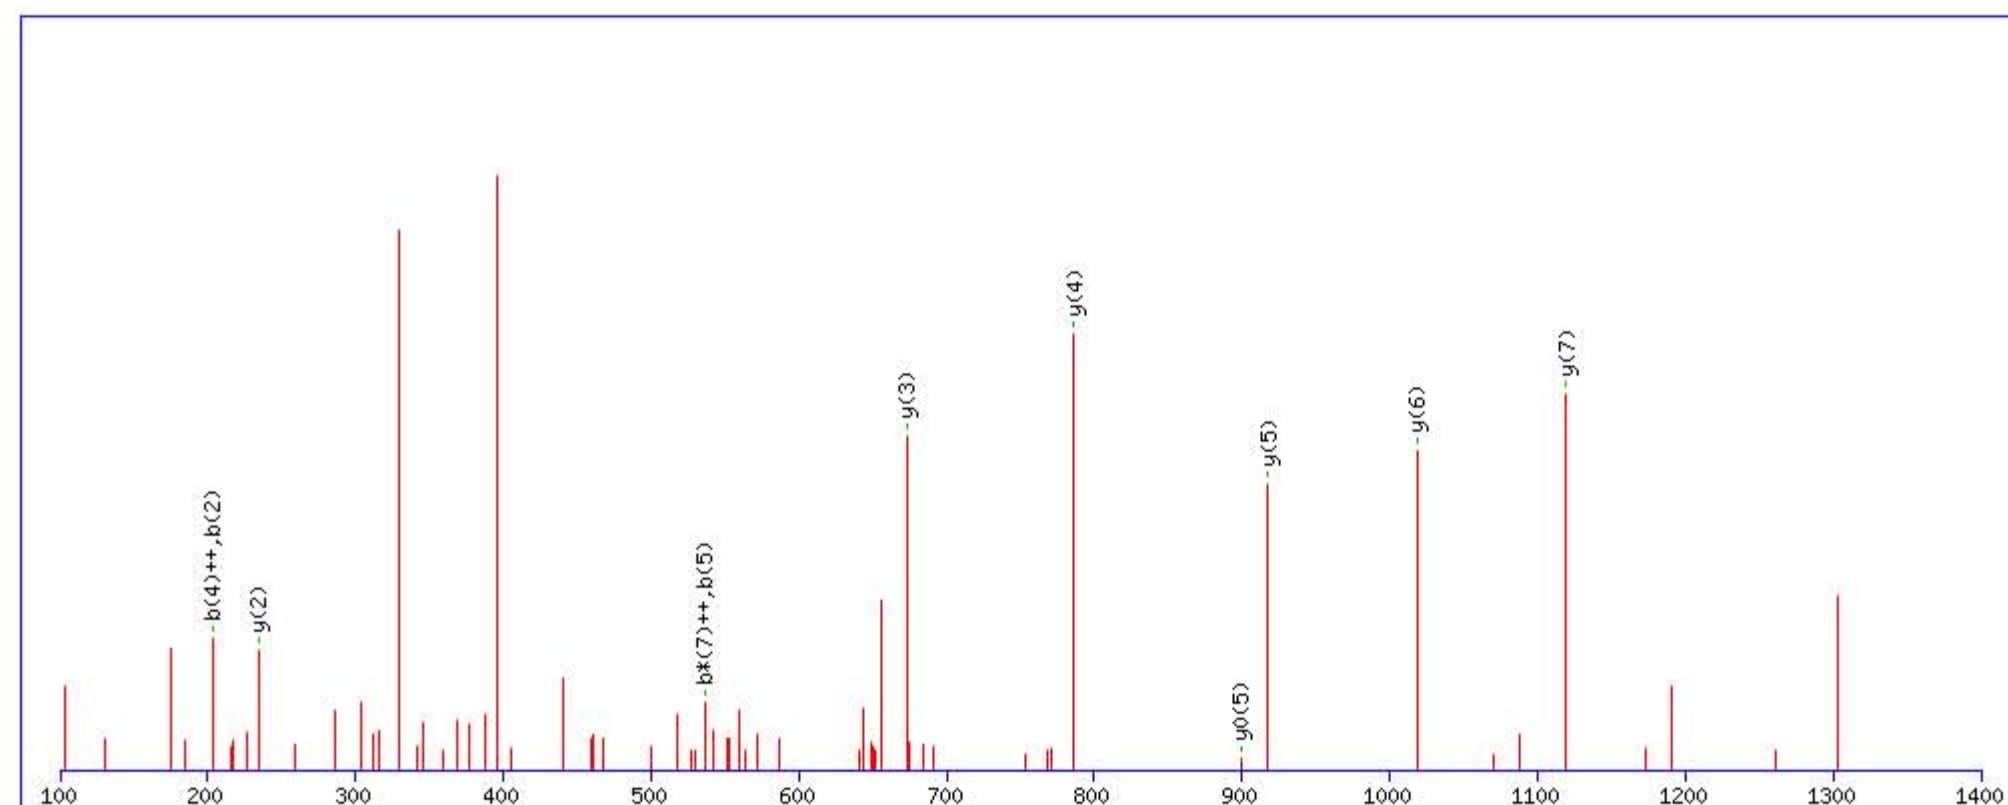

Monoisotopic mass of neutral peptide Mr(calc): 1320.660370

Fixed modifications: Carbamidomethyl (C) (apply to specified residues or termini only)

Variable modifications:

Q7 : Biotin:Thermo-21345 (Q)

Ions Score: 51 Expect: 7.8e-005

Matches : 11/78 fragment ions using 12 most intense peaks [\(help\)](#)

| # | b                 | b <sup>++</sup>   | b <sup>*</sup> | b <sup>*++</sup>  | b <sup>0</sup> | b <sup>0++</sup> | Seq. | y                  | y <sup>++</sup> | y <sup>*</sup> | y <sup>*++</sup> | y <sup>0</sup>    | y <sup>0++</sup> | # |
|---|-------------------|-------------------|----------------|-------------------|----------------|------------------|------|--------------------|-----------------|----------------|------------------|-------------------|------------------|---|
| 1 | 132.047761        | 66.527518         |                |                   |                |                  | M    |                    |                 |                |                  |                   |                  | 9 |
| 2 | <b>203.084875</b> | 102.046075        |                |                   |                |                  | A    | 1190.627179        | 595.817228      | 1173.600630    | 587.303953       | 1172.616614       | 586.811945       | 8 |
| 3 | 304.132554        | 152.569915        |                |                   | 286.121989     | 143.564632       | T    | <b>1119.590065</b> | 560.298671      | 1102.563516    | 551.785396       | 1101.579500       | 551.293388       | 7 |
| 4 | 405.180233        | <b>203.093754</b> |                |                   | 387.169668     | 194.088472       | T    | <b>1018.542386</b> | 509.774831      | 1001.515837    | 501.261557       | 1000.531821       | 500.769549       | 6 |
| 5 | <b>536.220718</b> | 268.613997        |                |                   | 518.210153     | 259.608715       | M    | <b>917.494707</b>  | 459.250992      | 900.468158     | 450.737717       | <b>899.484142</b> | 450.245709       | 5 |
| 6 | 649.304782        | 325.156029        |                |                   | 631.294217     | 316.150747       | I    | <b>786.454222</b>  | 393.730749      | 769.427673     | 385.217475       | 768.443657        | 384.725467       | 4 |
| 7 | 1088.530108       | 544.768692        | 1071.503559    | <b>536.255418</b> | 1070.519543    | 535.763410       | Q    | <b>673.370158</b>  | 337.188717      | 656.343609     | 328.675443       | 655.359593        | 328.183435       | 3 |
| 8 | 1175.562136       | 588.284706        | 1158.535587    | 579.771432        | 1157.551571    | 579.279424       | S    | <b>234.144832</b>  | 117.576054      | 217.118283     | 109.062780       | 216.134267        | 108.570772       | 2 |
| 9 |                   |                   |                |                   |                |                  | K    | 147.112804         | 74.060040       | 130.086255     | 65.546765        |                   |                  | 1 |

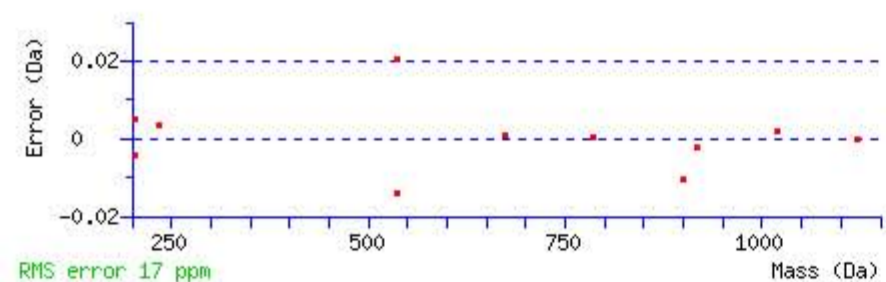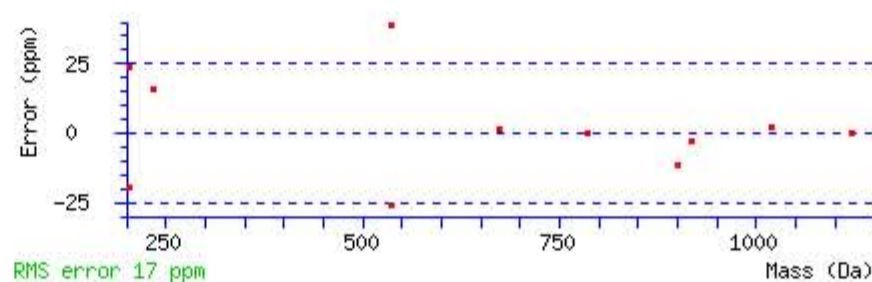

NCBI BLAST search of **MATTMIQSK**

(Parameters: blastp, nr protein database, expect=20000, no filter, PAM30)

Other BLAST [web gateways](#)

## All matches to this query

| Score | Mr(calc):   | Delta     | Sequence                       |
|-------|-------------|-----------|--------------------------------|
| 50.8  | 1320.660370 | -0.004242 | <a href="#">MATTMIQSK</a>      |
| 6.6   | 1320.643082 | 0.013046  | <a href="#">MADSQRFR</a>       |
| 3.1   | 1320.670715 | -0.014587 | <a href="#">IAPKASMAGASSSK</a> |
| 2.3   | 1320.674728 | -0.018600 | <a href="#">IAMAPLLEYER</a>    |
| 1.4   | 1320.675461 | -0.019333 | <a href="#">RMRLVVDGMGR</a>    |
| 0.3   | 1320.670715 | -0.014587 | <a href="#">SPELMKSKER</a>     |



# MASCOT SEARCH RESULTS

## Peptide View

MS/MS Fragmentation of **LSNENHGIAQR**

Found in **ITIH2\_HUMAN**, Inter-alpha-trypsin inhibitor heavy chain H2 OS=Homo sapiens GN=ITIH2 PE=1 SV=2

Match to Query 32065: 1548.778332 from(517.266720,3+) rtinseconds(1418) index(47486)

Title: Locus:1.1.1.3137.13 File:"2013-07-02 CLN FXIII 30 min 3rd F 4.wiff"

Data file C:\Program Files (x86)\Matrix Science\Mascot Daemon\mgf3 FXIII 30 min 3rd\mascot\_daemon\_merge.mgf

Click mouse within plot area to zoom in by factor of two about that point

Or, Plot from  to  Da

Label all possible matches  Label matches used for scoring

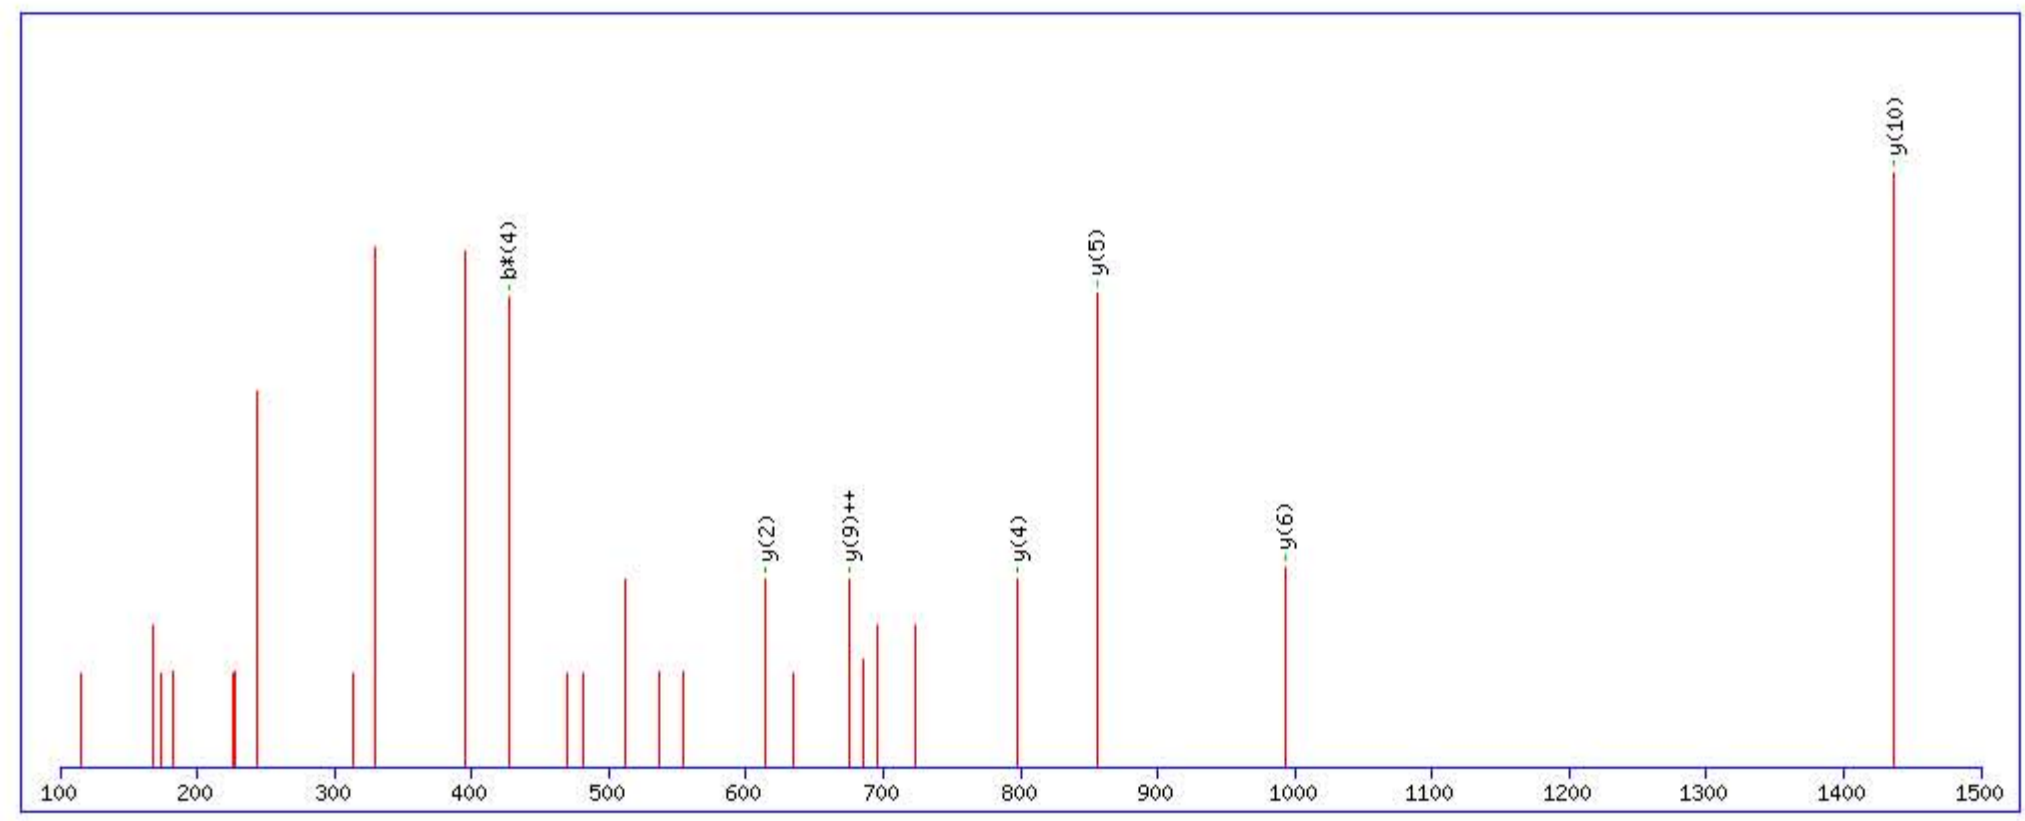

Monoisotopic mass of neutral peptide Mr(calc): 1548.783066

Fixed modifications: Carbamidomethyl (C) (apply to specified residues or termini only)

Variable modifications:

Q10 : Biotin:Thermo-21345 (Q)

Ions Score: 30 Expect: 0.0027

Matches : 7/100 fragment ions using 10 most intense peaks [\(help\)](#)

| #  | b           | b <sup>++</sup> | b <sup>*</sup> | b <sup>*++</sup> | b <sup>0</sup> | b <sup>0++</sup> | Seq. | y           | y <sup>++</sup> | y <sup>*</sup> | y <sup>*++</sup> | y <sup>0</sup> | y <sup>0++</sup> | #  |
|----|-------------|-----------------|----------------|------------------|----------------|------------------|------|-------------|-----------------|----------------|------------------|----------------|------------------|----|
| 1  | 114.091340  | 57.549308       |                |                  |                |                  | L    |             |                 |                |                  |                |                  | 11 |
| 2  | 201.123368  | 101.065322      |                |                  | 183.112803     | 92.060039        | S    | 1436.706307 | 718.856792      | 1419.679758    | 710.343517       | 1418.695742    | 709.851509       | 10 |
| 3  | 315.166295  | 158.086785      | 298.139746     | 149.573511       | 297.155730     | 149.081503       | N    | 1349.674279 | 675.340778      | 1332.647730    | 666.827503       | 1331.663714    | 666.335495       | 9  |
| 4  | 444.208888  | 222.608082      | 427.182339     | 214.094808       | 426.198323     | 213.602800       | E    | 1235.631352 | 618.319314      | 1218.604803    | 609.806040       | 1217.620787    | 609.314032       | 8  |
| 5  | 558.251815  | 279.629546      | 541.225266     | 271.116271       | 540.241250     | 270.624263       | N    | 1106.588759 | 553.798018      | 1089.562210    | 545.284743       |                |                  | 7  |
| 6  | 695.310727  | 348.159002      | 678.284178     | 339.645727       | 677.300162     | 339.153719       | H    | 992.545832  | 496.776554      | 975.519283     | 488.263280       |                |                  | 6  |
| 7  | 752.332191  | 376.669734      | 735.305642     | 368.156459       | 734.321626     | 367.664451       | G    | 855.486920  | 428.247098      | 838.460371     | 419.733824       |                |                  | 5  |
| 8  | 865.416255  | 433.211766      | 848.389706     | 424.698491       | 847.405690     | 424.206483       | I    | 798.465456  | 399.736366      | 781.438907     | 391.223092       |                |                  | 4  |
| 9  | 936.453369  | 468.730323      | 919.426820     | 460.217048       | 918.442804     | 459.725040       | A    | 685.381392  | 343.194334      | 668.354843     | 334.681060       |                |                  | 3  |
| 10 | 1375.678695 | 688.342986      | 1358.652146    | 679.829711       | 1357.668130    | 679.337703       | Q    | 614.344278  | 307.675777      | 597.317729     | 299.162503       |                |                  | 2  |
| 11 |             |                 |                |                  |                |                  | R    | 175.118952  | 88.063114       | 158.092403     | 79.549839        |                |                  | 1  |

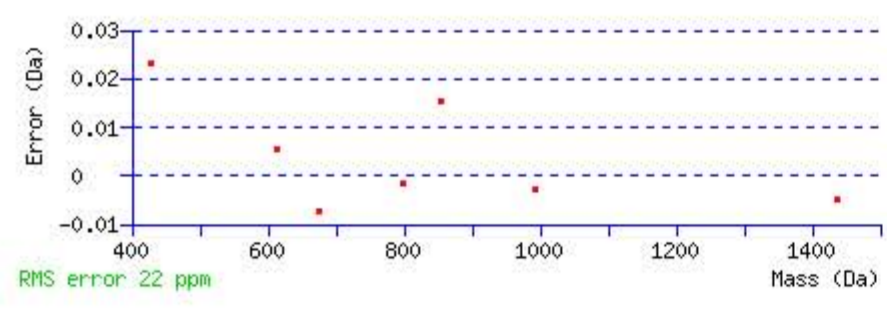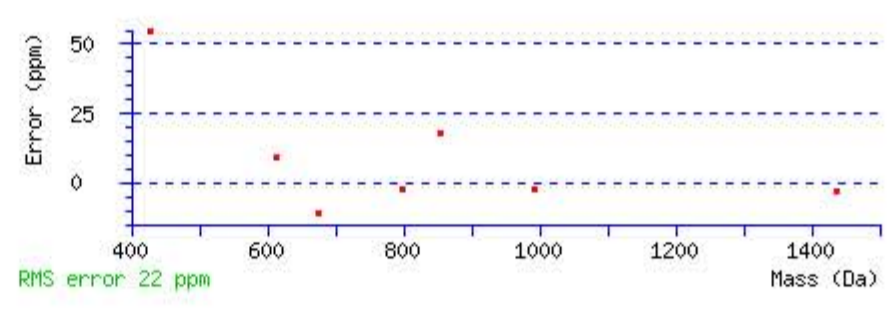

NCBI BLAST search of **LSNENHGIAQR**

(Parameters: blastp, nr protein database, expect=20000, no filter, PAM30)

Other BLAST [web gateways](#)

### All matches to this query

| Score | Mr(calc):   | Delta     | Sequence                       |
|-------|-------------|-----------|--------------------------------|
| 29.8  | 1548.783066 | -0.004734 | <a href="#">LSNENHGIAQR</a>    |
| 2.2   | 1548.767990 | 0.010342  | <a href="#">LWEMDNMLIQIK</a>   |
| 1.5   | 1548.800827 | -0.022495 | <a href="#">LPKNPQNATGAPGR</a> |
| 0.1   | 1548.772034 | 0.006298  | <a href="#">LIFSFSSEVMFAMK</a> |



# MASCOT SCIENCE Mascot Search Results

## Peptide View

MS/MS Fragmentation of **IYGNQDTSSQLK**

Found in **ITIH2\_HUMAN**, Inter-alpha-trypsin inhibitor heavy chain H2 OS=Homo sapiens GN=ITIH2 PE=1 SV=2

Match to Query 36312: 1663.816302 from(555.612710,3+) rtinseconds(1673) index(49160)

Title: Locus:1.1.1.3226.7 File:"2013-07-02 CLN FXIII 30 min 3rd F 4.wiff"

Data file C:\Program Files (x86)\Matrix Science\Mascot Daemon\mgf3 FXIII 30 min 3rd\mascot\_daemon\_merge.mgf

Click mouse within plot area to zoom in by factor of two about that point

Or, Plot from  to  Da

Label all possible matches  Label matches used for scoring

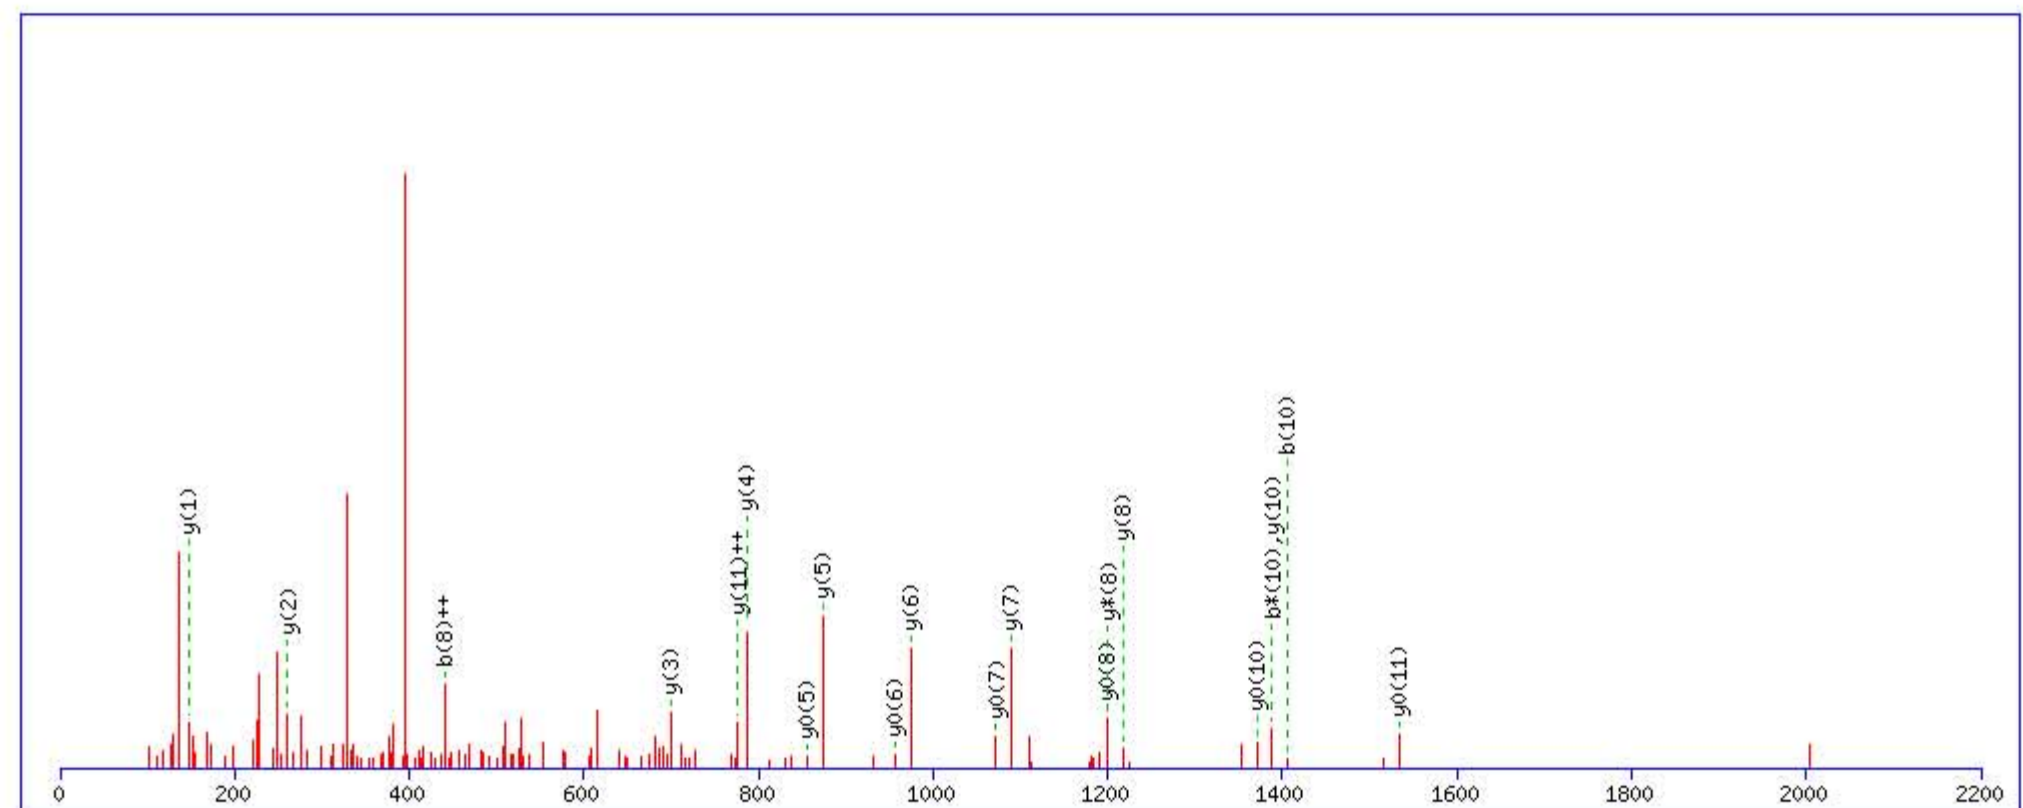

Monoisotopic mass of neutral peptide Mr(calc): 1663.823944

Fixed modifications: Carbamidomethyl (C) (apply to specified residues or termini only)

Variable modifications:

Q10 : Biotin:Thermo-21345 (Q)

Ions Score: 42 Expect: 0.0015

Matches : 20/110 fragment ions using 40 most intense peaks [\(help\)](#)

| #  | b           | b <sup>++</sup> | b <sup>*</sup> | b <sup>*++</sup> | b <sup>0</sup> | b <sup>0++</sup> | Seq. | y           | y <sup>++</sup> | y <sup>*</sup> | y <sup>*++</sup> | y <sup>0</sup> | y <sup>0++</sup> | #  |
|----|-------------|-----------------|----------------|------------------|----------------|------------------|------|-------------|-----------------|----------------|------------------|----------------|------------------|----|
| 1  | 114.091340  | 57.549308       |                |                  |                |                  | I    |             |                 |                |                  |                |                  | 12 |
| 2  | 277.154669  | 139.080973      |                |                  |                |                  | Y    | 1551.747170 | 776.377223      | 1534.720621    | 767.863948       | 1533.736605    | 767.371940       | 11 |
| 3  | 334.176133  | 167.591704      |                |                  |                |                  | G    | 1388.683841 | 694.845558      | 1371.657292    | 686.332284       | 1370.673276    | 685.840276       | 10 |
| 4  | 448.219060  | 224.613168      | 431.192511     | 216.099894       |                |                  | N    | 1331.662377 | 666.334826      | 1314.635828    | 657.821552       | 1313.651812    | 657.329544       | 9  |
| 5  | 576.277638  | 288.642457      | 559.251089     | 280.129183       |                |                  | Q    | 1217.619450 | 609.313363      | 1200.592901    | 600.800088       | 1199.608885    | 600.308080       | 8  |
| 6  | 691.304581  | 346.155929      | 674.278032     | 337.642654       | 673.294016     | 337.150646       | D    | 1089.560872 | 545.284074      | 1072.534323    | 536.770799       | 1071.550307    | 536.278791       | 7  |
| 7  | 792.352260  | 396.679768      | 775.325711     | 388.166494       | 774.341695     | 387.674486       | T    | 974.533929  | 487.770602      | 957.507380     | 479.257328       | 956.523364     | 478.765320       | 6  |
| 8  | 879.384288  | 440.195782      | 862.357739     | 431.682507       | 861.373723     | 431.190499       | S    | 873.486250  | 437.246763      | 856.459701     | 428.733488       | 855.475685     | 428.241480       | 5  |
| 9  | 966.416316  | 483.711796      | 949.389767     | 475.198521       | 948.405751     | 474.706513       | S    | 786.454222  | 393.730749      | 769.427673     | 385.217474       | 768.443657     | 384.725466       | 4  |
| 10 | 1405.641642 | 703.324459      | 1388.615093    | 694.811184       | 1387.631077    | 694.319176       | Q    | 699.422194  | 350.214735      | 682.395645     | 341.701460       |                |                  | 3  |
| 11 | 1518.725706 | 759.866491      | 1501.699157    | 751.353216       | 1500.715141    | 750.861208       | L    | 260.196868  | 130.602072      | 243.170319     | 122.088797       |                |                  | 2  |
| 12 |             |                 |                |                  |                |                  | K    | 147.112804  | 74.060040       | 130.086255     | 65.546765        |                |                  | 1  |

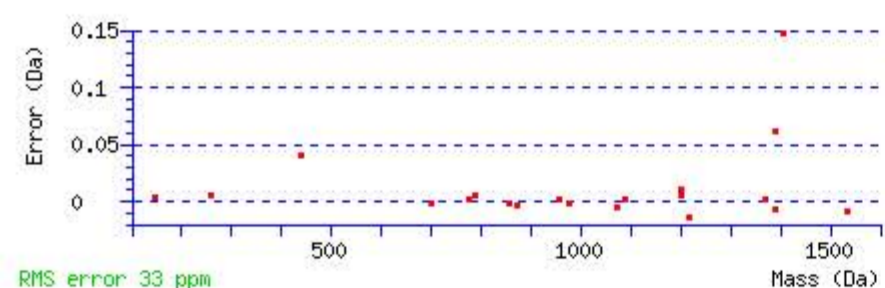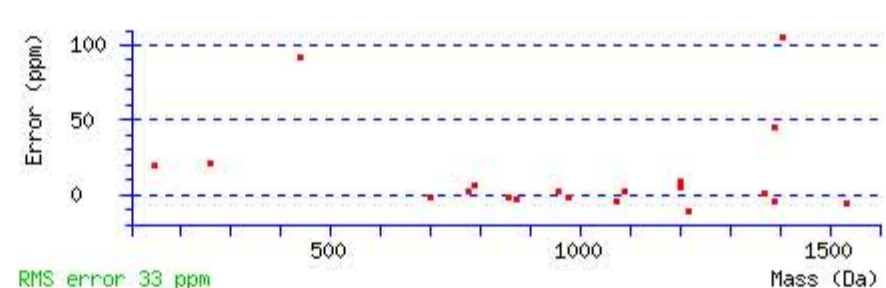

NCBI BLAST search of **IYGNQDTSSQLK**

(Parameters: blastp, nr protein database, expect=20000, no filter, PAM30)

Other BLAST [web gateways](#)

All matches to this query

| Score | Mr(calc):   | Delta     | Sequence                     |
|-------|-------------|-----------|------------------------------|
| 41.5  | 1663.823944 | -0.007642 | <a href="#">IYGNQDTSSQLK</a> |
| 0.0   | 1663.823944 | -0.007642 | <a href="#">IYGNQDTSSQLK</a> |

Mascot: <http://www.matrixscience.com/>



# MASCOT Search Results

## Peptide View

MS/MS Fragmentation of **KFYNQVSTPLLR**

Found in **ITIH2\_HUMAN**, Inter-alpha-trypsin inhibitor heavy chain H2 OS=Homo sapiens GN=ITIH2 PE=1 SV=2

Match to Query 38745: 1775.973822 from(592.998550,3+) rtinseconds(2116) index(51788)

Title: Locus:1.1.1.3380.4 File:"2013-07-02 CLN FXIII 30 min 3rd F 4.wiff"

Data file C:\Program Files (x86)\Matrix Science\Mascot Daemon\mgf3 FXIII 30 min 3rd\mascot\_daemon\_merge.mgf

Click mouse within plot area to zoom in by factor of two about that point

Or, Plot from  to  Da

Label all possible matches  Label matches used for scoring

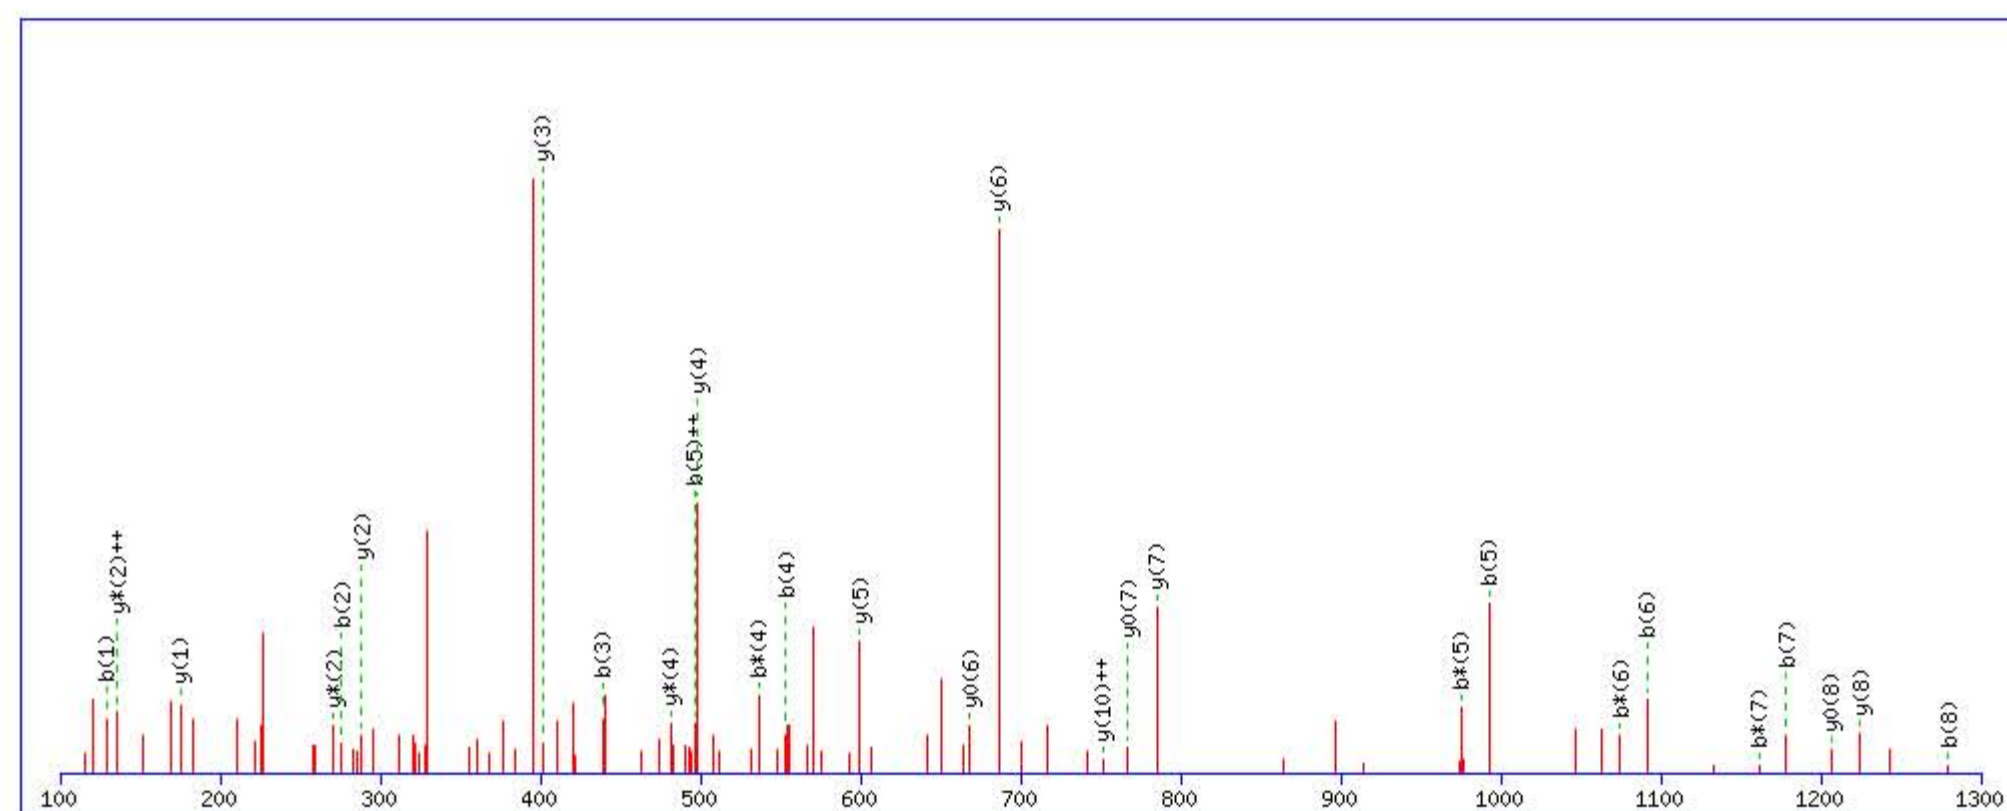

Monoisotopic mass of neutral peptide Mr(calc): 1775.975632

Fixed modifications: Carbamidomethyl (C) (apply to specified residues or termini only)

Variable modifications:

Q5 : Biotin:Thermo-21345 (Q)

Ions Score: 32 Expect: 0.01

Matches : 28/112 fragment ions using 74 most intense peaks [\(help\)](#)

| #  | b                  | b <sup>++</sup> | b <sup>+</sup>     | b <sup>*++</sup> | b <sup>0</sup> | b <sup>0++</sup> | Seq.     | y                  | y <sup>++</sup>   | y <sup>+</sup>    | y <sup>*++</sup>  | y <sup>0</sup>     | y <sup>0++</sup> | #         |
|----|--------------------|-----------------|--------------------|------------------|----------------|------------------|----------|--------------------|-------------------|-------------------|-------------------|--------------------|------------------|-----------|
| 1  | <b>129.102239</b>  | 65.054757       | 112.075690         | 56.541483        |                |                  | <b>K</b> |                    |                   |                   |                   |                    |                  | <b>12</b> |
| 2  | <b>276.170653</b>  | 138.588964      | 259.144104         | 130.075690       |                |                  | <b>F</b> | 1648.887961        | 824.947618        | 1631.861412       | 816.434344        | 1630.877396        | 815.942336       | <b>11</b> |
| 3  | <b>439.233982</b>  | 220.120629      | 422.207433         | 211.607354       |                |                  | <b>Y</b> | 1501.819547        | <b>751.413411</b> | 1484.792998       | 742.900137        | 1483.808982        | 742.408129       | <b>10</b> |
| 4  | <b>553.276909</b>  | 277.142093      | <b>536.250360</b>  | 268.628818       |                |                  | <b>N</b> | 1338.756218        | 669.881747        | 1321.729669       | 661.368473        | 1320.745653        | 660.876465       | <b>9</b>  |
| 5  | <b>992.502235</b>  | 496.754756      | <b>975.475686</b>  | 488.241481       |                |                  | <b>Q</b> | <b>1224.713291</b> | 612.860283        | 1207.686742       | 604.347009        | <b>1206.702726</b> | 603.855001       | <b>8</b>  |
| 6  | <b>1091.570649</b> | 546.288963      | <b>1074.544100</b> | 537.775688       |                |                  | <b>V</b> | <b>785.487965</b>  | 393.247620        | 768.461416        | 384.734346        | <b>767.477400</b>  | 384.242338       | <b>7</b>  |
| 7  | <b>1178.602677</b> | 589.804977      | <b>1161.576128</b> | 581.291702       | 1160.592112    | 580.799694       | <b>S</b> | <b>686.419551</b>  | 343.713414        | 669.393002        | 335.200139        | <b>668.408986</b>  | 334.708131       | <b>6</b>  |
| 8  | <b>1279.650356</b> | 640.328816      | 1262.623807        | 631.815542       | 1261.639791    | 631.323534       | <b>T</b> | <b>599.387523</b>  | 300.197399        | 582.360974        | 291.684125        | 581.376958         | 291.192117       | <b>5</b>  |
| 9  | 1376.703120        | 688.855198      | 1359.676571        | 680.341924       | 1358.692555    | 679.849916       | <b>P</b> | <b>498.339844</b>  | 249.673560        | <b>481.313295</b> | 241.160285        |                    |                  | <b>4</b>  |
| 10 | 1489.787184        | 745.397230      | 1472.760635        | 736.883956       | 1471.776619    | 736.391948       | <b>L</b> | <b>401.287080</b>  | 201.147178        | 384.260531        | 192.633903        |                    |                  | <b>3</b>  |
| 11 | 1602.871248        | 801.939262      | 1585.844699        | 793.425988       | 1584.860683    | 792.933979       | <b>L</b> | <b>288.203016</b>  | 144.605146        | <b>271.176467</b> | <b>136.091871</b> |                    |                  | <b>2</b>  |
| 12 |                    |                 |                    |                  |                |                  | <b>R</b> | <b>175.118952</b>  | 88.063114         | 158.092403        | 79.549839         |                    |                  | <b>1</b>  |

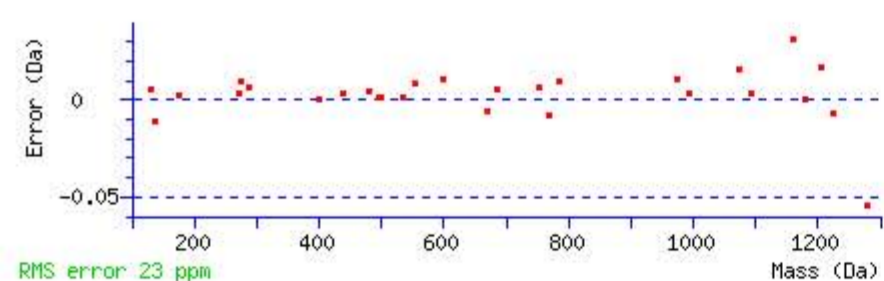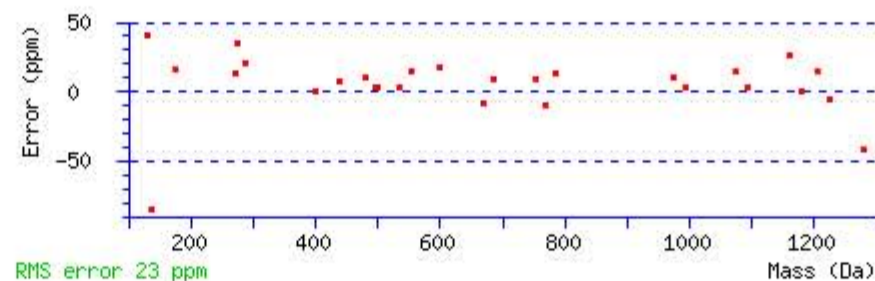

NCBI BLAST search of **KFYNQVSTPLLR**

(Parameters: blastp, nr protein database, expect=20000, no filter, PAM30)

Other BLAST [web gateways](#)

All matches to this query

| Score | Mr(calc):   | Delta     | Sequence                     |
|-------|-------------|-----------|------------------------------|
| 31.9  | 1775.975632 | -0.001810 | <a href="#">KFYNQVSTPLLR</a> |

Mascot: <http://www.matrixscience.com/>



# MASCOT Search Results

## Peptide View

MS/MS Fragmentation of **AHVSFKPTVAQQR**

Found in **ITIH2\_HUMAN**, Inter-alpha-trypsin inhibitor heavy chain H2 OS=Homo sapiens GN=ITIH2 PE=1 SV=2

Match to Query 38789: 1778.951802 from(593.991210,3+) rtinseconds(1550) index(48340)

Title: Locus:1.1.1.3183.10 File:"2013-07-02 CLN FXIII 30 min 3rd F 4.wiff"

Data file C:\Program Files (x86)\Matrix Science\Mascot Daemon\mgf3 FXIII 30 min 3rd\mascot\_daemon\_merge.mgf

Click mouse within plot area to zoom in by factor of two about that point

Or, Plot from  to  Da

Label all possible matches  Label matches used for scoring

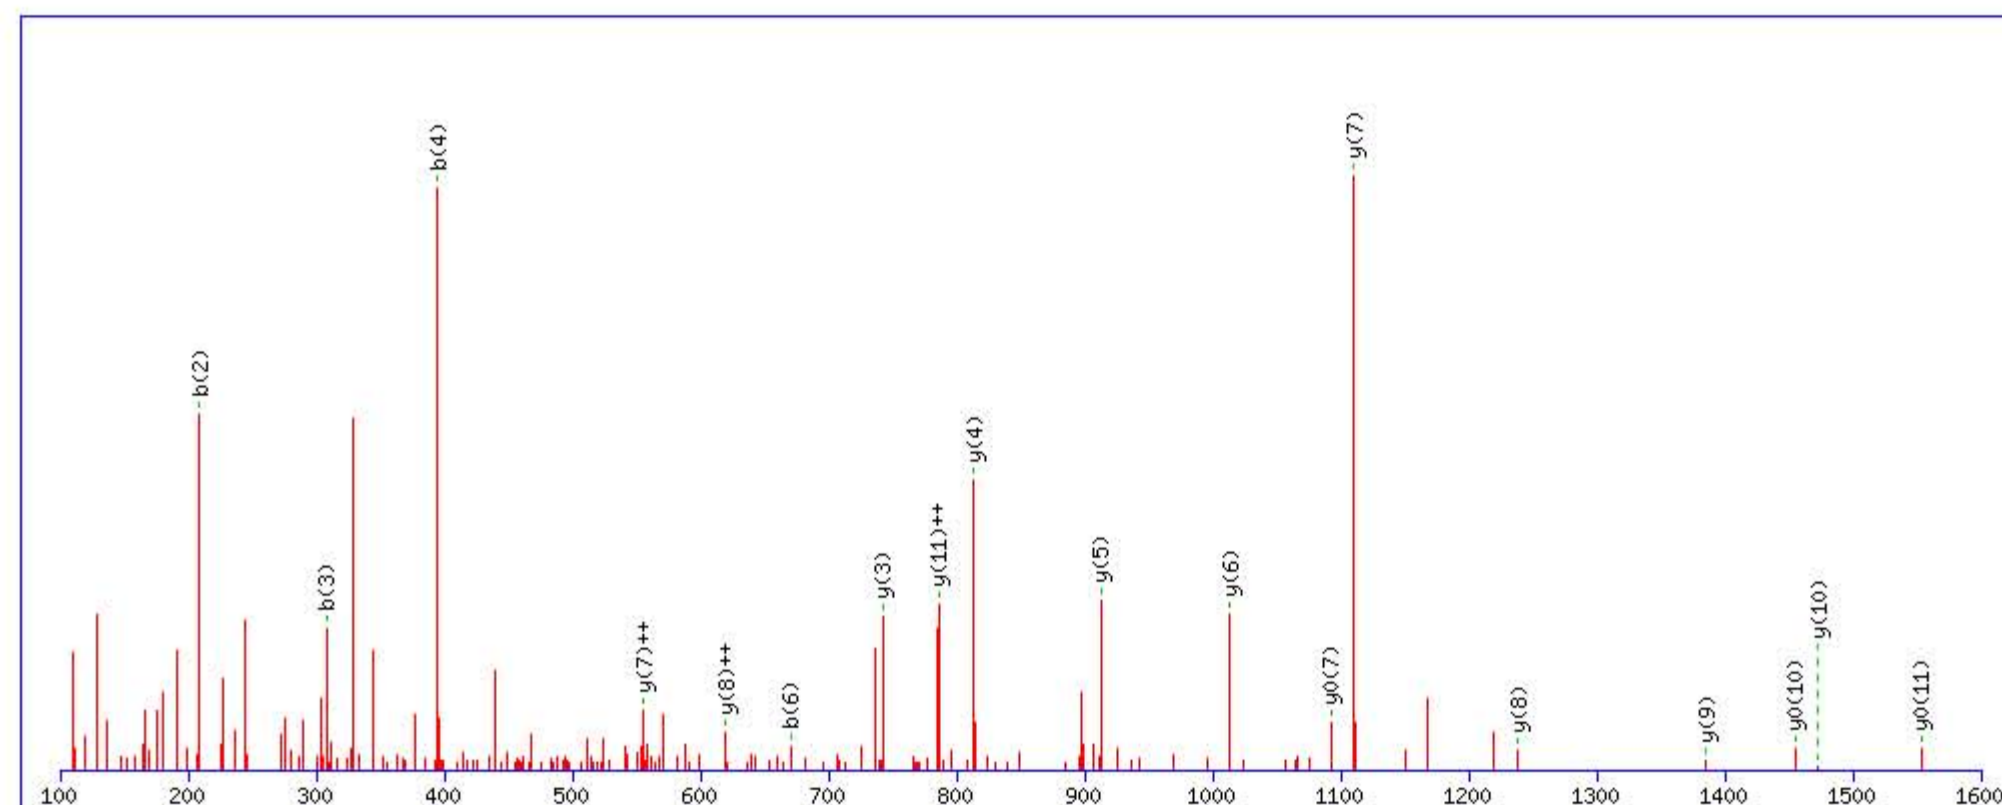

Monoisotopic mass of neutral peptide Mr(calc): 1778.961395

Fixed modifications: Carbamidomethyl (C) (apply to specified residues or termini only)

Variable modifications:

Q12 : Biotin:Thermo-21345 (Q)

Ions Score: 50 Expect: 0.00019

Matches : 18/118 fragment ions using 28 most intense peaks [\(help\)](#)

| #  | b                 | b <sup>++</sup> | b <sup>*</sup> | b <sup>*++</sup> | b <sup>0</sup> | b <sup>0++</sup> | Seq. | y                  | y <sup>++</sup>   | y <sup>*</sup> | y <sup>*++</sup> | y <sup>0</sup>     | y <sup>0++</sup> | #  |
|----|-------------------|-----------------|----------------|------------------|----------------|------------------|------|--------------------|-------------------|----------------|------------------|--------------------|------------------|----|
| 1  | 72.044390         | 36.525833       |                |                  |                |                  | A    |                    |                   |                |                  |                    |                  | 13 |
| 2  | <b>209.103302</b> | 105.055289      |                |                  |                |                  | H    | 1708.931558        | 854.969417        | 1691.905009    | 846.456143       | 1690.920993        | 845.964135       | 12 |
| 3  | <b>308.171716</b> | 154.589496      |                |                  |                |                  | V    | 1571.872646        | <b>786.439961</b> | 1554.846097    | 777.926687       | <b>1553.862081</b> | 777.434679       | 11 |
| 4  | <b>395.203744</b> | 198.105510      |                |                  | 377.193179     | 189.100227       | S    | <b>1472.804232</b> | 736.905754        | 1455.777683    | 728.392480       | <b>1454.793667</b> | 727.900472       | 10 |
| 5  | 542.272158        | 271.639717      |                |                  | 524.261593     | 262.634435       | F    | <b>1385.772204</b> | 693.389740        | 1368.745655    | 684.876466       | 1367.761639        | 684.384458       | 9  |
| 6  | <b>670.367121</b> | 335.687199      | 653.340572     | 327.173924       | 652.356556     | 326.681916       | K    | <b>1238.703790</b> | <b>619.855533</b> | 1221.677241    | 611.342259       | 1220.693225        | 610.850251       | 8  |
| 7  | 767.419885        | 384.213581      | 750.393336     | 375.700306       | 749.409320     | 375.208298       | P    | <b>1110.608827</b> | <b>555.808052</b> | 1093.582278    | 547.294777       | <b>1092.598262</b> | 546.802769       | 7  |
| 8  | 868.467564        | 434.737420      | 851.441015     | 426.224146       | 850.456999     | 425.732138       | T    | <b>1013.556063</b> | 507.281670        | 996.529514     | 498.768395       | 995.545498         | 498.276387       | 6  |
| 9  | 967.535978        | 484.271627      | 950.509429     | 475.758353       | 949.525413     | 475.266345       | V    | <b>912.508384</b>  | 456.757830        | 895.481835     | 448.244556       |                    |                  | 5  |
| 10 | 1038.573092       | 519.790184      | 1021.546543    | 511.276910       | 1020.562527    | 510.784902       | A    | <b>813.439970</b>  | 407.223623        | 796.413421     | 398.710349       |                    |                  | 4  |
| 11 | 1166.631670       | 583.819473      | 1149.605121    | 575.306199       | 1148.621105    | 574.814191       | Q    | <b>742.402856</b>  | 371.705066        | 725.376307     | 363.191792       |                    |                  | 3  |
| 12 | 1605.856996       | 803.432136      | 1588.830447    | 794.918862       | 1587.846431    | 794.426854       | Q    | 614.344278         | 307.675777        | 597.317729     | 299.162503       |                    |                  | 2  |
| 13 |                   |                 |                |                  |                |                  | R    | 175.118952         | 88.063114         | 158.092403     | 79.549839        |                    |                  | 1  |

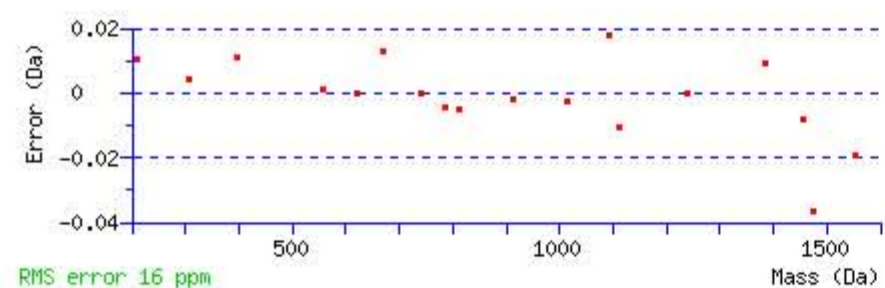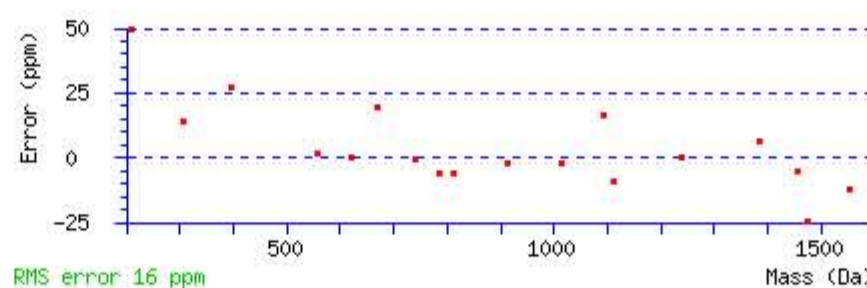

NCBI BLAST search of **AHVSFKPTVAQQR**

(Parameters: blastp, nr protein database, expect=20000, no filter, PAM30)

Other BLAST [web gateways](#)

All matches to this query

| Score | Mr(calc):   | Delta     | Sequence                      |
|-------|-------------|-----------|-------------------------------|
| 50.4  | 1778.961395 | -0.009593 | <a href="#">AHVSFKPTVAQQR</a> |
| 50.4  | 1778.961395 | -0.009593 | <a href="#">AHVSFKPTVAQQR</a> |



# MASCOT SEARCH RESULTS

## Peptide View

MS/MS Fragmentation of **AHVSFKPTVAQQR**

Found in **ITIH2\_HUMAN**, Inter-alpha-trypsin inhibitor heavy chain H2 OS=Homo sapiens GN=ITIH2 PE=1 SV=2

Match to Query 45409: 2090.124056 from(523.538290,4+) rtinseconds(1796) index(49876)

Title: Locus:1.1.1.3269.10 File:"2013-07-02 CLN FXIII 30 min 3rd F 4.wiff"

Data file C:\Program Files (x86)\Matrix Science\Mascot Daemon\mgf3 FXIII 30 min 3rd\mascot\_daemon\_merge.mgf

Click mouse within plot area to zoom in by factor of two about that point

Or, Plot from  to  Da

Label all possible matches  Label matches used for scoring

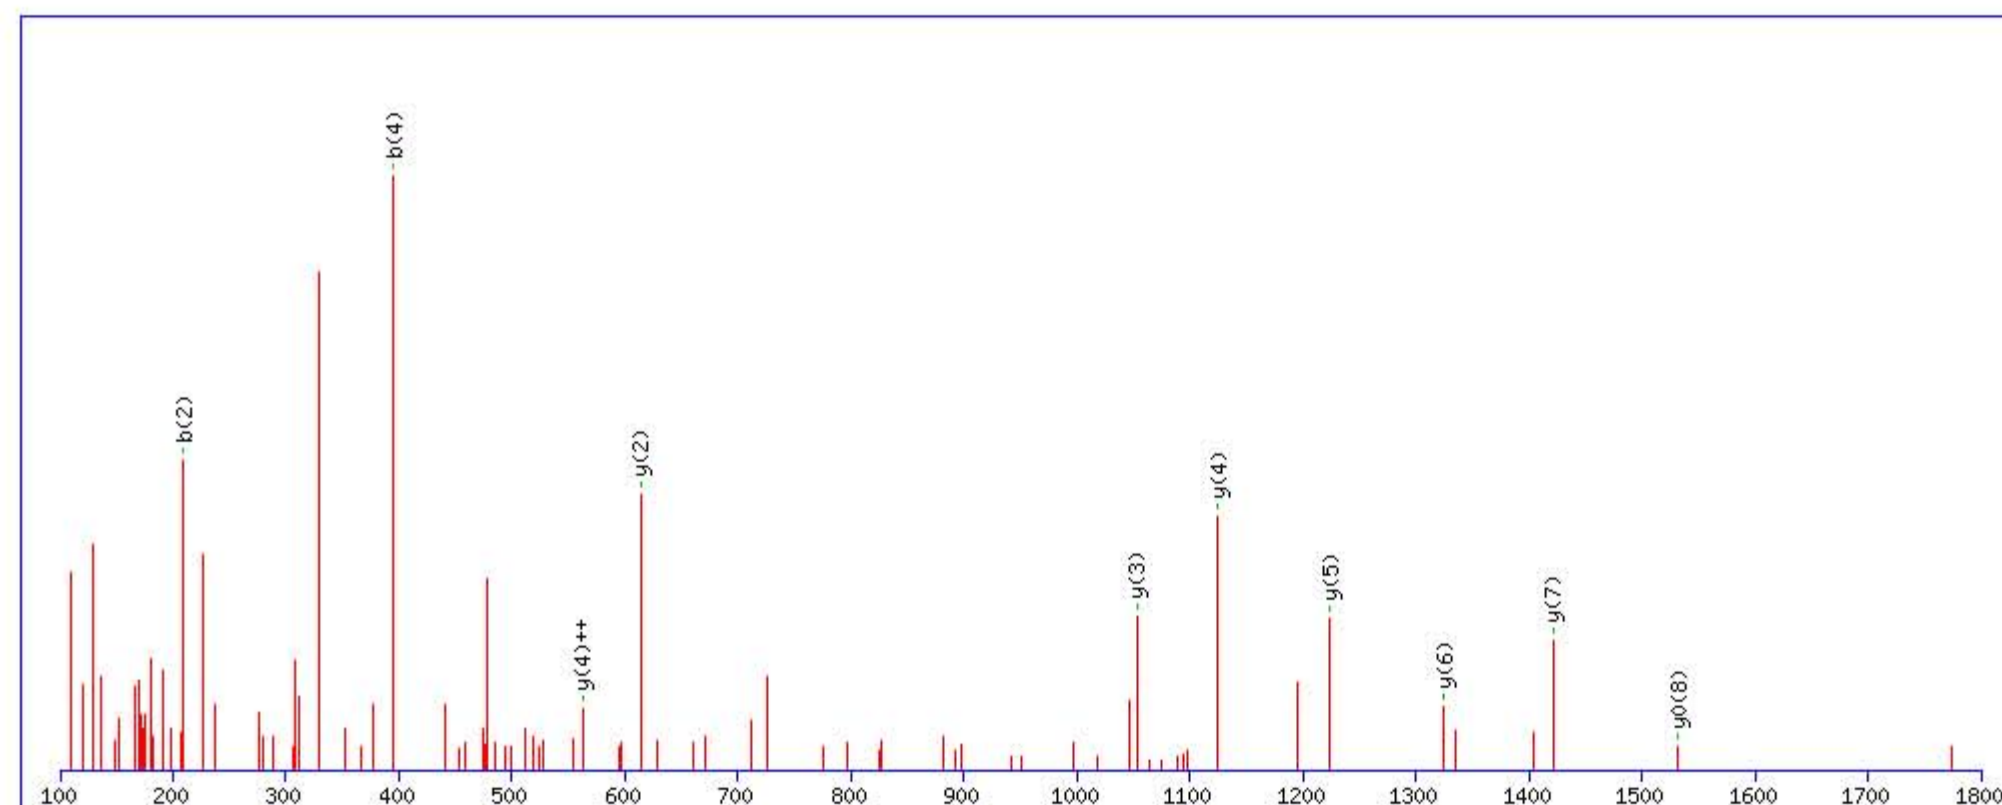

Monoisotopic mass of neutral peptide Mr(calc): 2090.128143

Fixed modifications: Carbamidomethyl (C) (apply to specified residues or termini only)

Variable modifications:

Q11 : Biotin:Thermo-21345 (Q)

Q12 : Biotin:Thermo-21345 (Q)

Ions Score: 31 Expect: 0.018

Matches : 10/118 fragment ions using 16 most intense peaks [\(help\)](#)

| #  | b                 | b <sup>++</sup> | b <sup>*</sup> | b <sup>+++</sup> | b <sup>0</sup> | b <sup>0++</sup> | Seq. | y                  | y <sup>++</sup>   | y <sup>*</sup> | y <sup>+++</sup> | y <sup>0</sup>     | y <sup>0++</sup> | #  |
|----|-------------------|-----------------|----------------|------------------|----------------|------------------|------|--------------------|-------------------|----------------|------------------|--------------------|------------------|----|
| 1  | 72.044390         | 36.525833       |                |                  |                |                  | A    |                    |                   |                |                  |                    |                  | 13 |
| 2  | <b>209.103302</b> | 105.055289      |                |                  |                |                  | H    | 2020.098306        | 1010.552791       | 2003.071757    | 1002.039517      | 2002.087741        | 1001.547509      | 12 |
| 3  | 308.171716        | 154.589496      |                |                  |                |                  | V    | 1883.039394        | 942.023335        | 1866.012845    | 933.510061       | 1865.028829        | 933.018053       | 11 |
| 4  | <b>395.203744</b> | 198.105510      |                |                  | 377.193179     | 189.100227       | S    | 1783.970980        | 892.489128        | 1766.944431    | 883.975854       | 1765.960415        | 883.483846       | 10 |
| 5  | 542.272158        | 271.639717      |                |                  | 524.261593     | 262.634435       | F    | 1696.938952        | 848.973114        | 1679.912403    | 840.459840       | 1678.928387        | 839.967832       | 9  |
| 6  | 670.367121        | 335.687199      | 653.340572     | 327.173924       | 652.356556     | 326.681916       | K    | 1549.870538        | 775.438907        | 1532.843989    | 766.925633       | <b>1531.859973</b> | 766.433625       | 8  |
| 7  | 767.419885        | 384.213581      | 750.393336     | 375.700306       | 749.409320     | 375.208298       | P    | <b>1421.775575</b> | 711.391426        | 1404.749026    | 702.878151       | 1403.765010        | 702.386143       | 7  |
| 8  | 868.467564        | 434.737420      | 851.441015     | 426.224146       | 850.456999     | 425.732138       | T    | <b>1324.722811</b> | 662.865044        | 1307.696262    | 654.351769       | 1306.712246        | 653.859761       | 6  |
| 9  | 967.535978        | 484.271627      | 950.509429     | 475.758353       | 949.525413     | 475.266345       | V    | <b>1223.675132</b> | 612.341204        | 1206.648583    | 603.827930       |                    |                  | 5  |
| 10 | 1038.573092       | 519.790184      | 1021.546543    | 511.276910       | 1020.562527    | 510.784902       | A    | <b>1124.606718</b> | <b>562.806997</b> | 1107.580169    | 554.293723       |                    |                  | 4  |
| 11 | 1477.798418       | 739.402847      | 1460.771869    | 730.889573       | 1459.787853    | 730.397565       | Q    | <b>1053.569604</b> | 527.288440        | 1036.543055    | 518.775166       |                    |                  | 3  |
| 12 | 1917.023744       | 959.015510      | 1899.997195    | 950.502236       | 1899.013179    | 950.010228       | Q    | <b>614.344278</b>  | 307.675777        | 597.317729     | 299.162503       |                    |                  | 2  |
| 13 |                   |                 |                |                  |                |                  | R    | 175.118952         | 88.063114         | 158.092403     | 79.549839        |                    |                  | 1  |

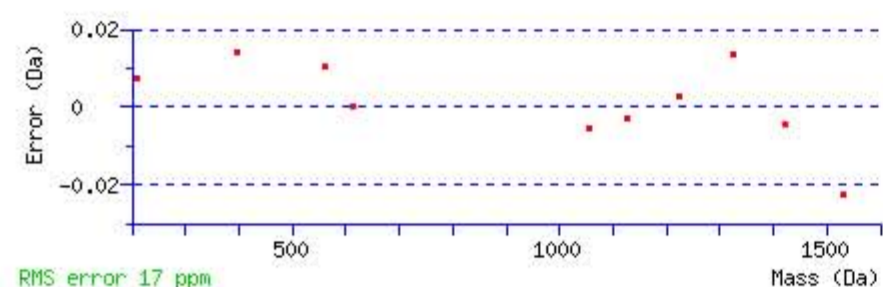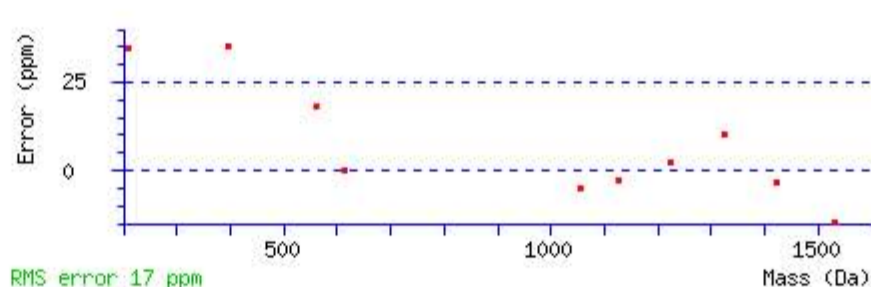

NCBI BLAST search of [AHVSFKPTVAQQR](#)

(Parameters: blastp, nr protein database, expect=20000, no filter, PAM30)

Other BLAST [web gateways](#)

All matches to this query

| Score | Mr(calc):   | Delta     | Sequence                      |
|-------|-------------|-----------|-------------------------------|
| 30.9  | 2090.128143 | -0.004087 | <a href="#">AHVSFKPTVAQQR</a> |

Mascot: <http://www.matrixscience.com/>



# MASCOT Search Results

## Peptide View

MS/MS Fragmentation of **AEDHFSVIDFNQIR**

Found in **ITIH2\_HUMAN**, Inter-alpha-trypsin inhibitor heavy chain H2 OS=Homo sapiens GN=ITIH2 PE=1 SV=2

Match to Query 45741: 2115.018282 from(706.013370,3+) rtinseconds(2325) index(52837)

Title: Locus:1.1.1.3452.8 File:"2013-07-02 CLN FXIII 30 min 3rd F 4.wiff"

Data file C:\Program Files (x86)\Matrix Science\Mascot Daemon\mgf\3 FXIII 30 min 3rd\mascot\_daemon\_merge.mgf

Click mouse within plot area to zoom in by factor of two about that point

Or, Plot from  to  Da

Label all possible matches  Label matches used for scoring

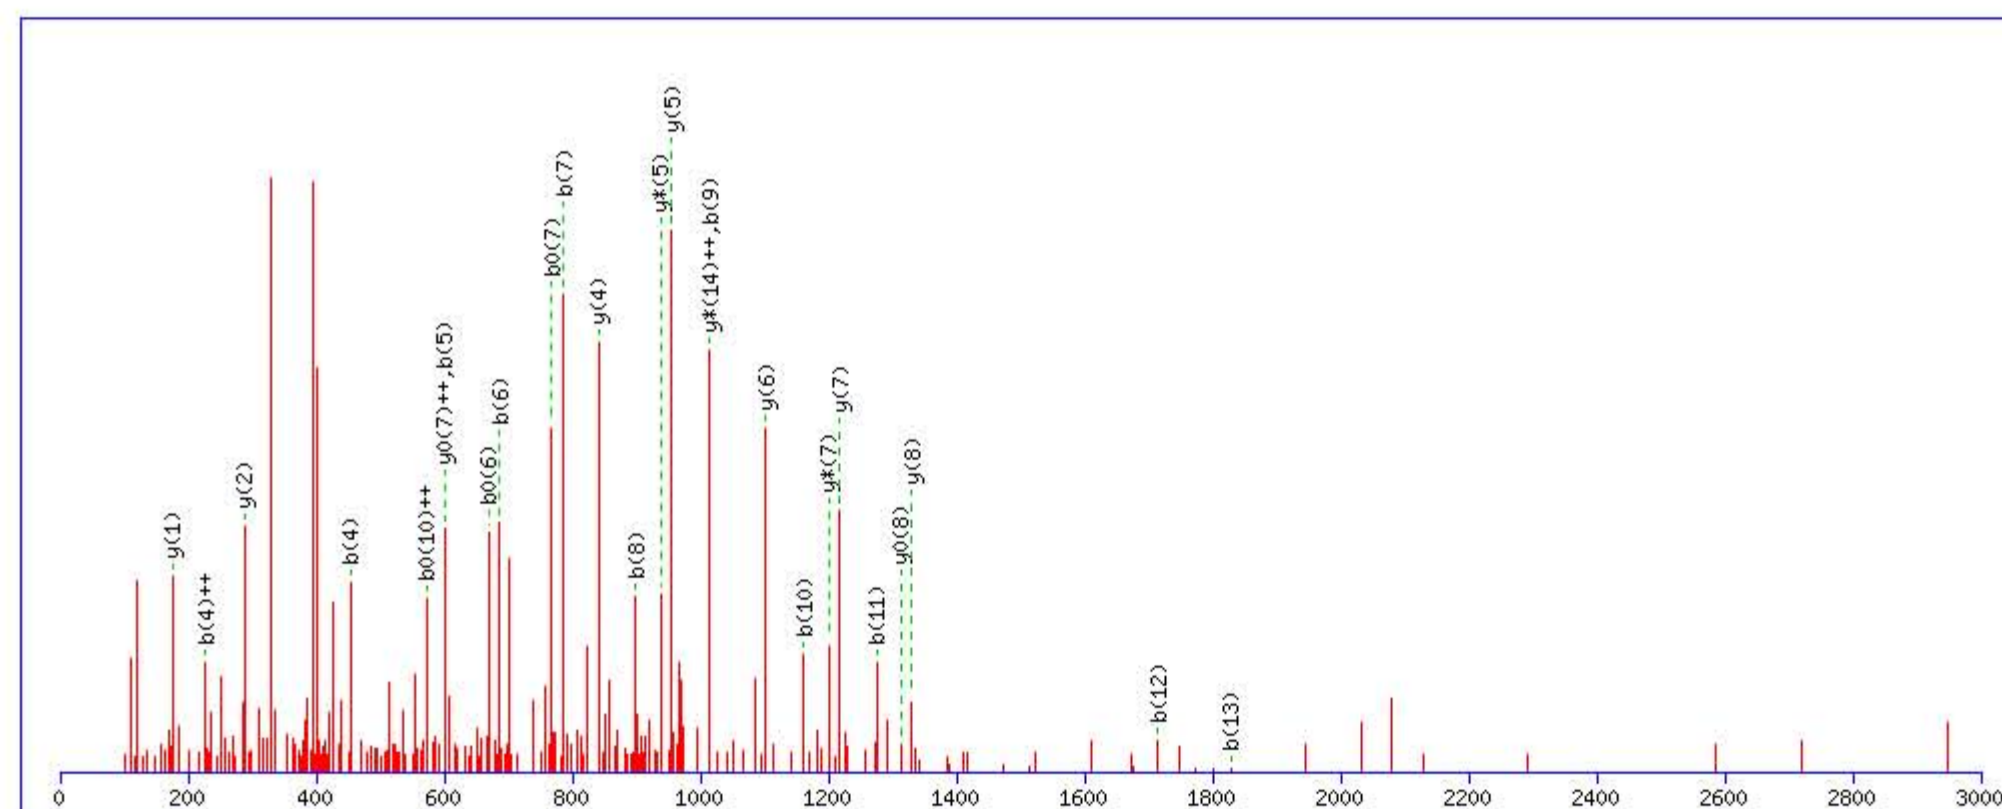

Monoisotopic mass of neutral peptide  $M_r(\text{calc})$ : 2115.020752

Fixed modifications: Carbamidomethyl (C) (apply to specified residues or termini only)

Variable modifications:

Q12 : Biotin:Thermo-21345 (Q)

Ions Score: 62 Expect: 4.8e-006

Matches : 26/134 fragment ions using 38 most intense peaks [\(help\)](#)

| #  | b           | b <sup>++</sup> | b <sup>+</sup> | b <sup>+++</sup> | b <sup>0</sup> | b <sup>0++</sup> | Seq. | y           | y <sup>++</sup> | y <sup>+</sup> | y <sup>+++</sup> | y <sup>0</sup> | y <sup>0++</sup> | #  |
|----|-------------|-----------------|----------------|------------------|----------------|------------------|------|-------------|-----------------|----------------|------------------|----------------|------------------|----|
| 1  | 72.044390   | 36.525833       |                |                  |                |                  | A    |             |                 |                |                  |                |                  | 15 |
| 2  | 201.086983  | 101.047130      |                |                  | 183.076418     | 92.041847        | E    | 2044.990921 | 1022.999099     | 2027.964372    | 1014.485824      | 2026.980356    | 1013.993816      | 14 |
| 3  | 316.113926  | 158.560601      |                |                  | 298.103361     | 149.555319       | D    | 1915.948328 | 958.477802      | 1898.921779    | 949.964528       | 1897.937763    | 949.472519       | 13 |
| 4  | 453.172838  | 227.090057      |                |                  | 435.162273     | 218.084775       | H    | 1800.921385 | 900.964331      | 1783.894836    | 892.451056       | 1782.910820    | 891.959048       | 12 |
| 5  | 600.241252  | 300.624264      |                |                  | 582.230687     | 291.618982       | F    | 1663.862473 | 832.434874      | 1646.835924    | 823.921600       | 1645.851908    | 823.429592       | 11 |
| 6  | 687.273280  | 344.140278      |                |                  | 669.262715     | 335.134996       | S    | 1516.794059 | 758.900668      | 1499.767510    | 750.387393       | 1498.783494    | 749.895385       | 10 |
| 7  | 786.341694  | 393.674485      |                |                  | 768.331129     | 384.669202       | V    | 1429.762031 | 715.384654      | 1412.735482    | 706.871379       | 1411.751466    | 706.379371       | 9  |
| 8  | 899.425758  | 450.216517      |                |                  | 881.415193     | 441.211234       | I    | 1330.693617 | 665.850447      | 1313.667068    | 657.337172       | 1312.683052    | 656.845164       | 8  |
| 9  | 1014.452701 | 507.729988      |                |                  | 996.442136     | 498.724706       | D    | 1217.609553 | 609.308415      | 1200.583004    | 600.795140       | 1199.598988    | 600.303132       | 7  |
| 10 | 1161.521115 | 581.264196      |                |                  | 1143.510550    | 572.258913       | F    | 1102.582610 | 551.794943      | 1085.556061    | 543.281669       |                |                  | 6  |
| 11 | 1275.564042 | 638.285659      | 1258.537493    | 629.772385       | 1257.553477    | 629.280376       | N    | 955.514196  | 478.260736      | 938.487647     | 469.747462       |                |                  | 5  |
| 12 | 1714.789368 | 857.898322      | 1697.762819    | 849.385048       | 1696.778803    | 848.893039       | Q    | 841.471269  | 421.239273      | 824.444720     | 412.725998       |                |                  | 4  |
| 13 | 1828.832295 | 914.919785      | 1811.805746    | 906.406511       | 1810.821730    | 905.914503       | N    | 402.245943  | 201.626610      | 385.219394     | 193.113335       |                |                  | 3  |
| 14 | 1941.916359 | 971.461817      | 1924.889810    | 962.948543       | 1923.905794    | 962.456535       | I    | 288.203016  | 144.605146      | 271.176467     | 136.091872       |                |                  | 2  |
| 15 |             |                 |                |                  |                |                  | R    | 175.118952  | 88.063114       | 158.092403     | 79.549840        |                |                  | 1  |

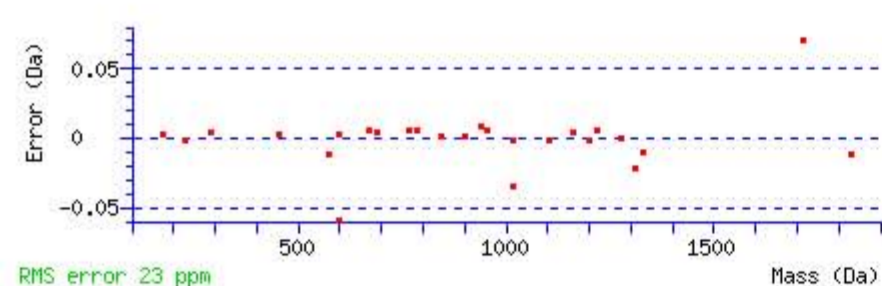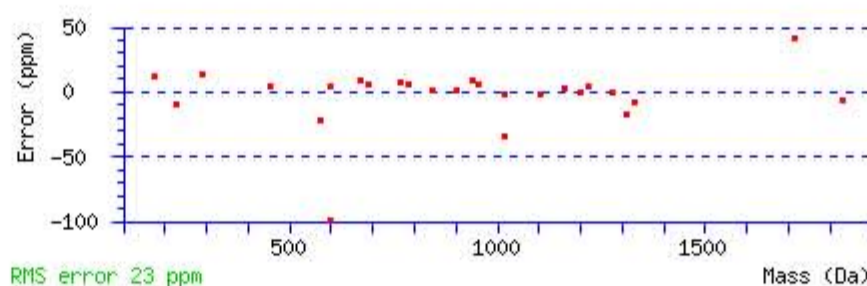

NCBI BLAST search of **AEDHFSVIDFNQIR**

(Parameters: blastp, nr protein database, expect=20000, no filter, PAM30)

Other BLAST [web gateways](#)

All matches to this query

| Score | $M_r(\text{calc})$ | Delta     | Sequence                        |
|-------|--------------------|-----------|---------------------------------|
| 62.0  | 2115.020752        | -0.002470 | <a href="#">AEDHFSVIDFNQIR</a>  |
| 5.3   | 2115.033981        | -0.015699 | <a href="#">ESADRQVLMQEEIHK</a> |

Mascot: <http://www.matrixscience.com/>



# MASCOT Search Results

## Peptide View

MS/MS Fragmentation of **MLADAPPQDPSCCSGALYYGSK**

Found in **ITIH2\_HUMAN**, Inter-alpha-trypsin inhibitor heavy chain H2 OS=Homo sapiens GN=ITIH2 PE=1 SV=2

Match to Query 54152: 2698.187472 from(900.403100,3+) rtinseconds(2106) index(51709)

Title: Locus:1.1.1.3376.18 File:"2013-07-02 CLN FXIII 30 min 3rd F 4.wiff"

Data file C:\Program Files (x86)\Matrix Science\Mascot Daemon\mgf3 FXIII 30 min 3rd\mascot\_daemon\_merge.mgf

Click mouse within plot area to zoom in by factor of two about that point

Or, Plot from  to  Da

Label all possible matches  Label matches used for scoring

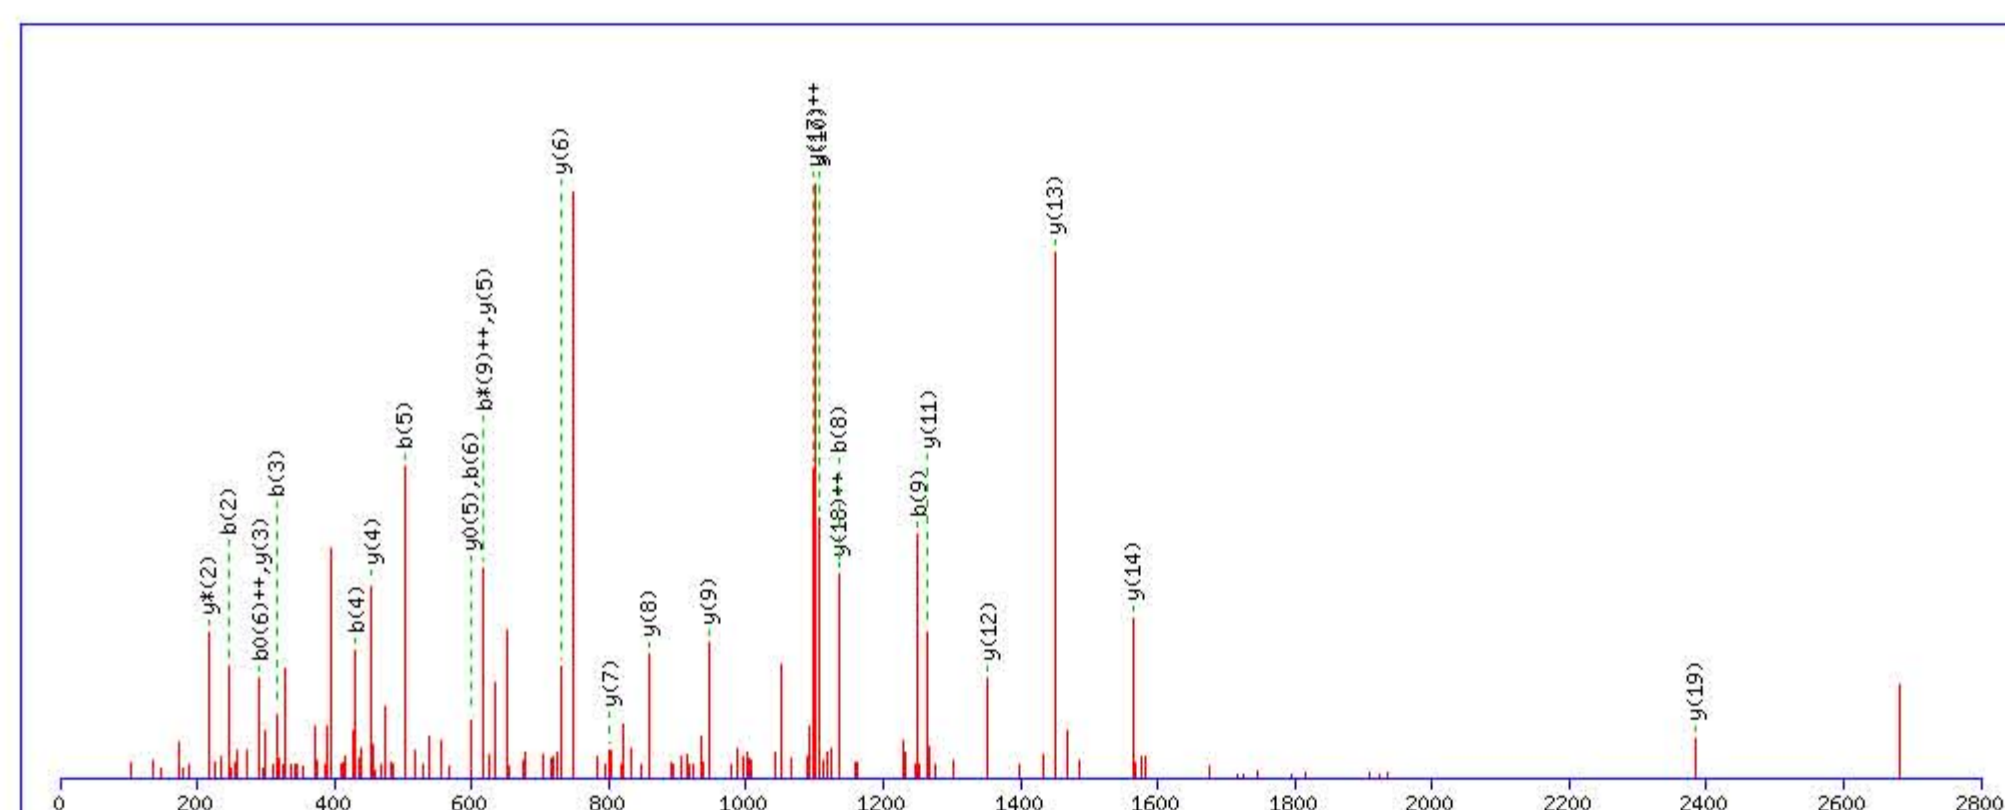

Monoisotopic mass of neutral peptide Mr(calc): 2698.189941

Fixed modifications: Carbamidomethyl (C) (apply to specified residues or termini only)

Variable modifications:

Q8 : Biotin:Thermo-21345 (Q)

Ions Score: 64 Expect: 2.3e-006

Matches : 26/230 fragment ions using 54 most intense peaks [\(help\)](#)

| #  | b                  | b <sup>++</sup> | b <sup>*</sup> | b <sup>*++</sup>  | b <sup>0</sup> | b <sup>0++</sup>  | Seq. | y                  | y <sup>++</sup>    | y <sup>*</sup>    | y <sup>*++</sup> | y <sup>0</sup>    | y <sup>0++</sup> | #  |
|----|--------------------|-----------------|----------------|-------------------|----------------|-------------------|------|--------------------|--------------------|-------------------|------------------|-------------------|------------------|----|
| 1  | 132.047761         | 66.527518       |                |                   |                |                   | M    |                    |                    |                   |                  |                   |                  | 22 |
| 2  | <b>245.131825</b>  | 123.069550      |                |                   |                |                   | L    | 2568.156746        | 1284.582011        | 2551.130197       | 1276.068736      | 2550.146181       | 1275.576728      | 21 |
| 3  | <b>316.168939</b>  | 158.588107      |                |                   |                |                   | A    | 2455.072682        | 1228.039979        | 2438.046133       | 1219.526704      | 2437.062117       | 1219.034696      | 20 |
| 4  | <b>431.195882</b>  | 216.101579      |                |                   | 413.185317     | 207.096296        | D    | <b>2384.035568</b> | 1192.521422        | 2367.009019       | 1184.008148      | 2366.025003       | 1183.516140      | 19 |
| 5  | <b>502.232996</b>  | 251.620136      |                |                   | 484.222431     | 242.614854        | A    | 2269.008625        | <b>1135.007950</b> | 2251.982076       | 1126.494676      | 2250.998060       | 1126.002668      | 18 |
| 6  | <b>599.285760</b>  | 300.146518      |                |                   | 581.275195     | <b>291.141236</b> | P    | 2197.971511        | <b>1099.489394</b> | 2180.944962       | 1090.976119      | 2179.960946       | 1090.484111      | 17 |
| 7  | 696.338524         | 348.672900      |                |                   | 678.327959     | 339.667618        | P    | 2100.918747        | 1050.963012        | 2083.892198       | 1042.449737      | 2082.908182       | 1041.957729      | 16 |
| 8  | <b>1135.563850</b> | 568.285563      | 1118.537301    | 559.772289        | 1117.553285    | 559.280281        | Q    | 2003.865983        | 1002.436630        | 1986.839434       | 993.923355       | 1985.855418       | 993.431347       | 15 |
| 9  | <b>1250.590793</b> | 625.799035      | 1233.564244    | <b>617.285760</b> | 1232.580228    | 616.793752        | D    | <b>1564.640657</b> | 782.823967         | 1547.614108       | 774.310692       | 1546.630092       | 773.818684       | 14 |
| 10 | 1347.643557        | 674.325417      | 1330.617008    | 665.812142        | 1329.632992    | 665.320134        | P    | <b>1449.613714</b> | 725.310495         | 1432.587165       | 716.797221       | 1431.603149       | 716.305213       | 13 |
| 11 | 1434.675585        | 717.841431      | 1417.649036    | 709.328156        | 1416.665020    | 708.836148        | S    | <b>1352.560950</b> | 676.784113         | 1335.534401       | 668.270839       | 1334.550385       | 667.778831       | 12 |
| 12 | 1594.706234        | 797.856755      | 1577.679685    | 789.343481        | 1576.695669    | 788.851473        | C    | <b>1265.528922</b> | 633.268099         | 1248.502373       | 624.754825       | 1247.518357       | 624.262817       | 11 |
| 13 | 1754.736883        | 877.872080      | 1737.710334    | 869.358805        | 1736.726318    | 868.866797        | C    | <b>1105.498273</b> | 553.252775         | 1088.471724       | 544.739500       | 1087.487708       | 544.247492       | 10 |
| 14 | 1841.768911        | 921.388094      | 1824.742362    | 912.874819        | 1823.758346    | 912.382811        | S    | <b>945.467624</b>  | 473.237450         | 928.441075        | 464.724176       | 927.457059        | 464.232168       | 9  |
| 15 | 1898.790375        | 949.898826      | 1881.763826    | 941.385551        | 1880.779810    | 940.893543        | G    | <b>858.435596</b>  | 429.721436         | 841.409047        | 421.208162       | 840.425031        | 420.716154       | 8  |
| 16 | 1969.827489        | 985.417383      | 1952.800940    | 976.904108        | 1951.816924    | 976.412100        | A    | <b>801.414132</b>  | 401.210704         | 784.387583        | 392.697430       | 783.403567        | 392.205422       | 7  |
| 17 | 2082.911553        | 1041.959415     | 2065.885004    | 1033.446140       | 2064.900988    | 1032.954132       | L    | <b>730.377018</b>  | 365.692147         | 713.350469        | 357.178873       | 712.366453        | 356.686865       | 6  |
| 18 | 2245.974882        | 1123.491079     | 2228.948333    | 1114.977805       | 2227.964317    | 1114.485797       | Y    | <b>617.292954</b>  | 309.150115         | 600.266405        | 300.636841       | <b>599.282389</b> | 300.144833       | 5  |
| 19 | 2409.038211        | 1205.022744     | 2392.011662    | 1196.509469       | 2391.027646    | 1196.017461       | Y    | <b>454.229625</b>  | 227.618451         | 437.203076        | 219.105176       | 436.219060        | 218.613168       | 4  |
| 20 | 2466.059675        | 1233.533476     | 2449.033126    | 1225.020201       | 2448.049110    | 1224.528193       | G    | <b>291.166296</b>  | 146.086786         | 274.139747        | 137.573512       | 273.155731        | 137.081504       | 3  |
| 21 | 2553.091703        | 1277.049490     | 2536.065154    | 1268.536215       | 2535.081138    | 1268.044207       | S    | 234.144832         | 117.576054         | <b>217.118283</b> | 109.062780       | 216.134267        | 108.570772       | 2  |
| 22 |                    |                 |                |                   |                |                   | K    | 147.112804         | 74.060040          | 130.086255        | 65.546765        |                   |                  | 1  |

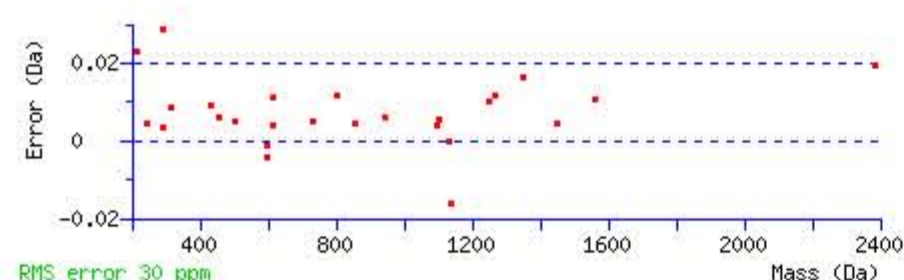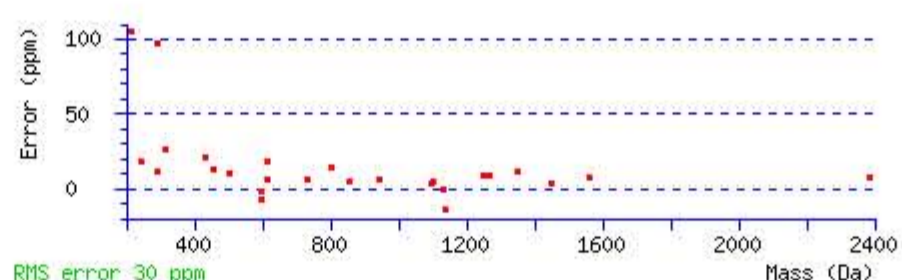

NCBI BLAST search of [MLADAPPQDPSCCSGALYYGSK](#)

(Parameters: blastp, nr protein database, expect=20000, no filter, PAM30)

Other BLAST [web gateways](#)

## All matches to this query

| Score | Mr(calc):   | Delta     | Sequence                               |
|-------|-------------|-----------|----------------------------------------|
| 64.2  | 2698.189941 | -0.002469 | <a href="#">MLADAPPQDPSCCSGALYYGSK</a> |



# MASCOT Search Results

## Peptide View

MS/MS Fragmentation of **SILQMSLDHHIVTPLTSLVIENEAGDER**

Found in **ITIH2\_HUMAN**, Inter-alpha-trypsin inhibitor heavy chain H2 OS=Homo sapiens GN=ITIH2 PE=1 SV=2

Match to Query 61898: 3443.741936 from(861.942760,4+) rtinseconds(2667) index(54443)

Title: Locus:1.1.1.3571.18 File:"2013-07-02 CLN FXIII 30 min 3rd F 4.wiff"

Data file C:\Program Files (x86)\Matrix Science\Mascot Daemon\mgf\3 FXIII 30 min 3rd\mascot\_daemon\_merge.mgf

Click mouse within plot area to zoom in by factor of two about that point

Or, Plot from  to  Da

Label all possible matches  Label matches used for scoring

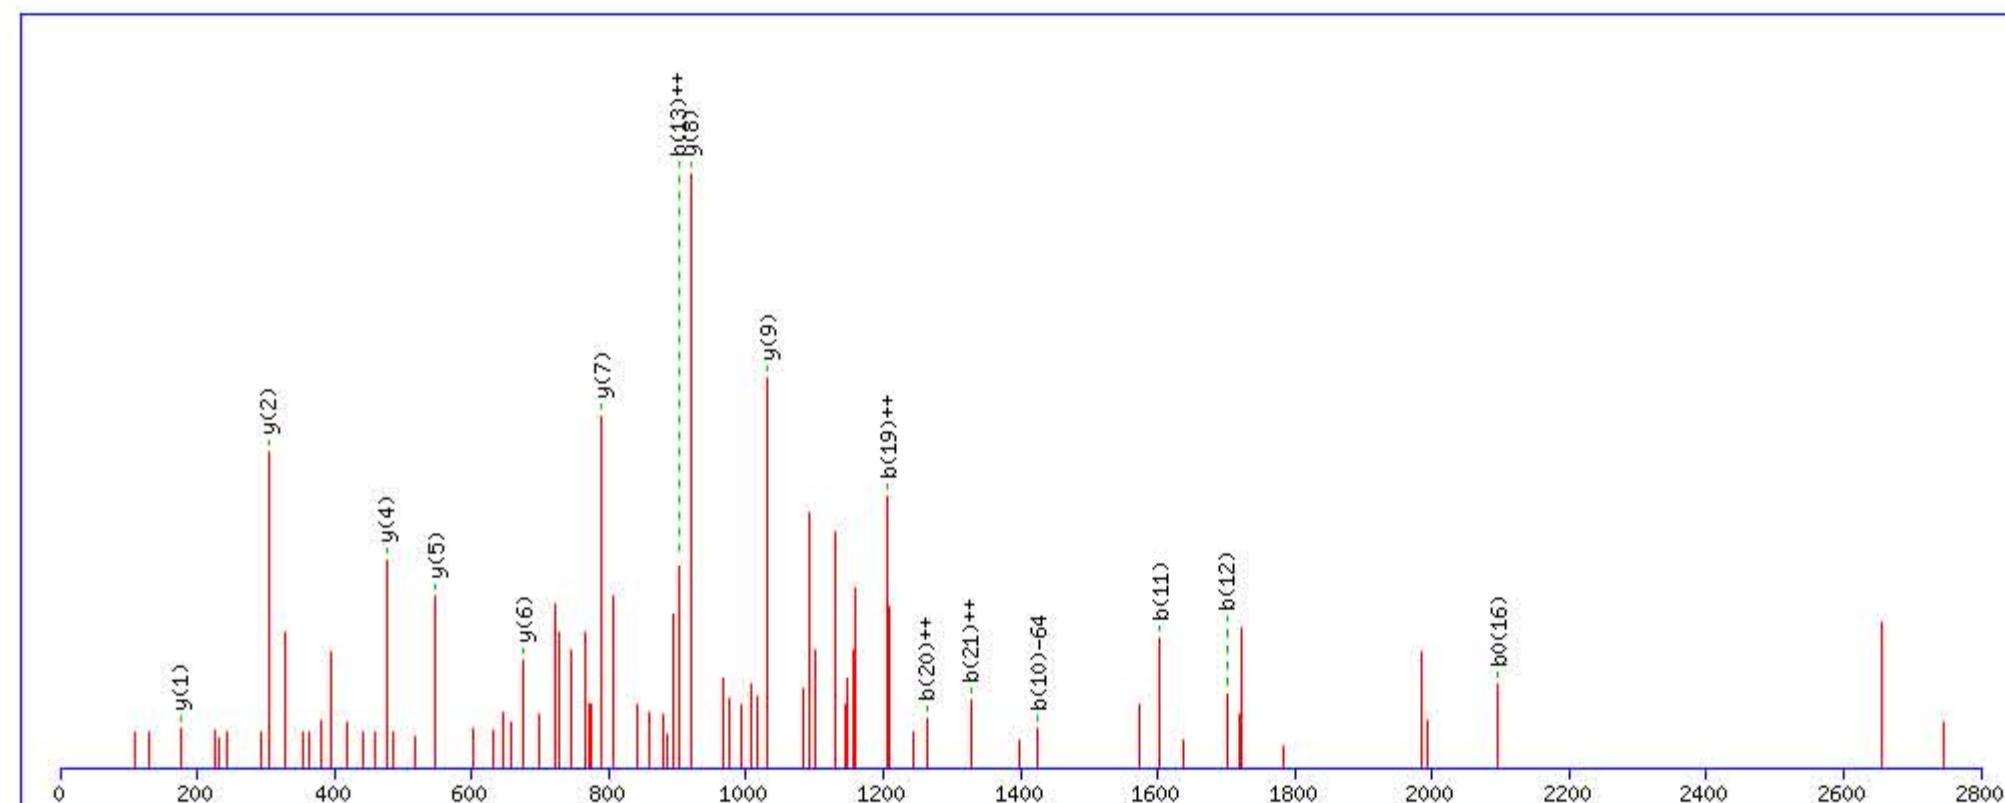

Monoisotopic mass of neutral peptide Mr(calc): 3443.742859

Fixed modifications: Carbamidomethyl (C) (apply to specified residues or termini only)

Variable modifications:

Q4 : Biotin:Thermo-21345 (Q)

M5 : Oxidation (M), with neutral losses 0.000000 (shown in table), 63.998285

Ions Score: 48 Expect: 3e-005

Matches : 16/478 fragment ions using 21 most intense peaks [\(help\)](#)

| #  | b                  | b <sup>++</sup>    | b <sup>*</sup> | b <sup>*++</sup> | b <sup>0</sup>     | b <sup>0++</sup> | Seq. | y                  | y <sup>++</sup> | y <sup>*</sup> | y <sup>*++</sup> | y <sup>0</sup> | y <sup>0++</sup> | #  |
|----|--------------------|--------------------|----------------|------------------|--------------------|------------------|------|--------------------|-----------------|----------------|------------------|----------------|------------------|----|
| 1  | 88.039304          | 44.523290          |                |                  | 70.028739          | 35.518008        | S    |                    |                 |                |                  |                |                  | 28 |
| 2  | 201.123368         | 101.065322         |                |                  | 183.112803         | 92.060039        | I    | 3357.718126        | 1679.362701     | 3340.691577    | 1670.849426      | 3339.707561    | 1670.357418      | 27 |
| 3  | 314.207432         | 157.607354         |                |                  | 296.196867         | 148.602071       | L    | 3244.634062        | 1622.820669     | 3227.607513    | 1614.307394      | 3226.623497    | 1613.815386      | 26 |
| 4  | 753.432758         | 377.220017         | 736.406209     | 368.706743       | 735.422193         | 368.214735       | Q    | 3131.549998        | 1566.278637     | 3114.523449    | 1557.765362      | 3113.539433    | 1557.273354      | 25 |
| 5  | 900.468158         | 450.737717         | 883.441609     | 442.224443       | 882.457593         | 441.732435       | M    | 2692.324672        | 1346.665974     | 2675.298123    | 1338.152699      | 2674.314107    | 1337.660691      | 24 |
| 6  | 987.500186         | 494.253731         | 970.473637     | 485.740456       | 969.489621         | 485.248448       | S    | 2545.289272        | 1273.148274     | 2528.262723    | 1264.634999      | 2527.278707    | 1264.142991      | 23 |
| 7  | 1100.584250        | 550.795763         | 1083.557701    | 542.282489       | 1082.573685        | 541.790480       | L    | 2458.257244        | 1229.632260     | 2441.230695    | 1221.118985      | 2440.246679    | 1220.626977      | 22 |
| 8  | 1215.611193        | 608.309235         | 1198.584644    | 599.795960       | 1197.600628        | 599.303952       | D    | 2345.173180        | 1173.090228     | 2328.146631    | 1164.576953      | 2327.162615    | 1164.084945      | 21 |
| 9  | 1352.670105        | 676.838690         | 1335.643556    | 668.325416       | 1334.659540        | 667.833408       | H    | 2230.146237        | 1115.576756     | 2213.119688    | 1107.063482      | 2212.135672    | 1106.571474      | 20 |
| 10 | 1489.729017        | 745.368146         | 1472.702468    | 736.854872       | 1471.718452        | 736.362864       | H    | 2093.087325        | 1047.047300     | 2076.060776    | 1038.534026      | 2075.076760    | 1038.042018      | 19 |
| 11 | <b>1602.813081</b> | 801.910178         | 1585.786532    | 793.396904       | 1584.802516        | 792.904896       | I    | 1956.028413        | 978.517845      | 1939.001864    | 970.004570       | 1938.017848    | 969.512562       | 18 |
| 12 | <b>1701.881495</b> | 851.444385         | 1684.854946    | 842.931111       | 1683.870930        | 842.439103       | V    | 1842.944349        | 921.975813      | 1825.917800    | 913.462538       | 1824.933784    | 912.970530       | 17 |
| 13 | 1802.929174        | <b>901.968225</b>  | 1785.902625    | 893.454951       | 1784.918609        | 892.962942       | T    | 1743.875935        | 872.441606      | 1726.849386    | 863.928331       | 1725.865370    | 863.436323       | 16 |
| 14 | 1899.981938        | 950.494607         | 1882.955389    | 941.981333       | 1881.971373        | 941.489324       | P    | 1642.828256        | 821.917766      | 1625.801707    | 813.404492       | 1624.817691    | 812.912484       | 15 |
| 15 | 2013.066002        | 1007.036639        | 1996.039453    | 998.523364       | 1995.055437        | 998.031356       | L    | 1545.775492        | 773.391384      | 1528.748943    | 764.878110       | 1527.764927    | 764.386102       | 14 |
| 16 | 2114.113681        | 1057.560478        | 2097.087132    | 1049.047204      | <b>2096.103116</b> | 1048.555196      | T    | 1432.691428        | 716.849352      | 1415.664879    | 708.336078       | 1414.680863    | 707.844070       | 13 |
| 17 | 2201.145709        | 1101.076492        | 2184.119160    | 1092.563218      | 2183.135144        | 1092.071210      | S    | 1331.643749        | 666.325513      | 1314.617200    | 657.812238       | 1313.633184    | 657.320230       | 12 |
| 18 | 2314.229773        | 1157.618524        | 2297.203224    | 1149.105250      | 2296.219208        | 1148.613242      | L    | 1244.611721        | 622.809499      | 1227.585172    | 614.296224       | 1226.601156    | 613.804216       | 11 |
| 19 | 2413.298187        | <b>1207.152731</b> | 2396.271638    | 1198.639457      | 2395.287622        | 1198.147449      | V    | 1131.527657        | 566.267467      | 1114.501108    | 557.754192       | 1113.517092    | 557.262184       | 10 |
| 20 | 2526.382251        | <b>1263.694763</b> | 2509.355702    | 1255.181489      | 2508.371686        | 1254.689481      | I    | <b>1032.459243</b> | 516.733260      | 1015.432694    | 508.219985       | 1014.448678    | 507.727977       | 9  |
| 21 | 2655.424844        | <b>1328.216060</b> | 2638.398295    | 1319.702785      | 2637.414279        | 1319.210777      | E    | <b>919.375179</b>  | 460.191228      | 902.348630     | 451.677953       | 901.364614     | 451.185945       | 8  |
| 22 | 2769.467771        | 1385.237523        | 2752.441222    | 1376.724249      | 2751.457206        | 1376.232241      | N    | <b>790.332586</b>  | 395.669931      | 773.306037     | 387.156657       | 772.322021     | 386.664649       | 7  |
| 23 | 2898.510364        | 1449.758820        | 2881.483815    | 1441.245545      | 2880.499799        | 1440.753537      | E    | <b>676.289659</b>  | 338.648468      | 659.263110     | 330.135193       | 658.279094     | 329.643185       | 6  |
| 24 | 2969.547478        | 1485.277377        | 2952.520929    | 1476.764102      | 2951.536913        | 1476.272094      | A    | <b>547.247066</b>  | 274.127171      | 530.220517     | 265.613897       | 529.236501     | 265.121889       | 5  |
| 25 | 3026.568942        | 1513.788109        | 3009.542393    | 1505.274834      | 3008.558377        | 1504.782826      | G    | <b>476.209952</b>  | 238.608614      | 459.183403     | 230.095339       | 458.199387     | 229.603331       | 4  |
| 26 | 3141.595885        | 1571.301580        | 3124.569336    | 1562.788306      | 3123.585320        | 1562.296298      | D    | 419.188488         | 210.097882      | 402.161939     | 201.584607       | 401.177923     | 201.092599       | 3  |
| 27 | 3270.638478        | 1635.822877        | 3253.611929    | 1627.309602      | 3252.627913        | 1626.817594      | E    | <b>304.161545</b>  | 152.584411      | 287.134996     | 144.071136       | 286.150980     | 143.579128       | 2  |
| 28 |                    |                    |                |                  |                    |                  | R    | <b>175.118952</b>  | 88.063114       | 158.092403     | 79.549839        |                |                  | 1  |

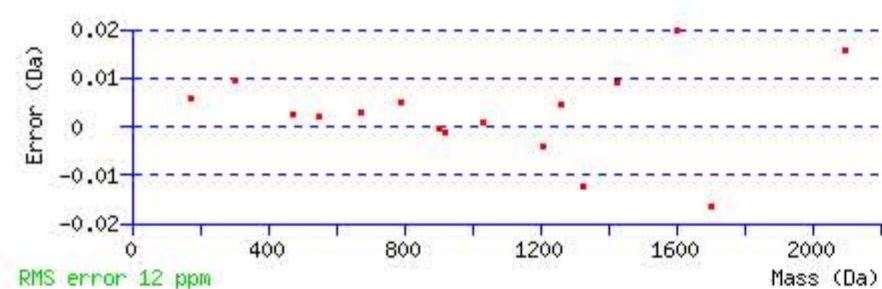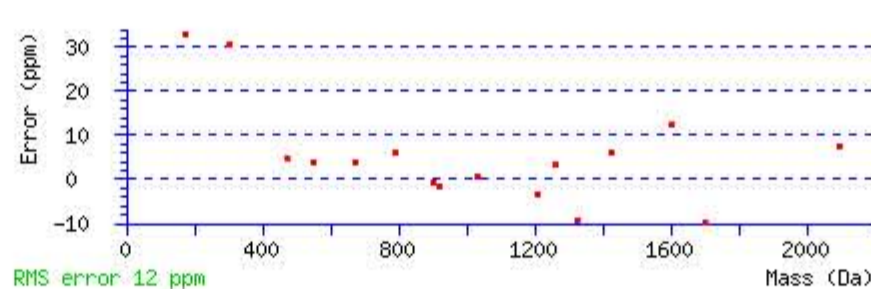

NCBI BLAST search of **SILQMSLDHHIVTPLTSLVIENEAGDER**

(Parameters: blastp, nr protein database, expect=20000, no filter, PAM30)

Other BLAST [web gateways](#)

All matches to this query

| Score | Mr(calc):   | Delta     | Sequence                                     |
|-------|-------------|-----------|----------------------------------------------|
| 48.4  | 3443.742859 | -0.000923 | <a href="#">SILQMSLDHHIVTPLTSLVIENEAGDER</a> |
| 0.2   | 3443.717194 | 0.024742  | <a href="#">ASVAAMEAKEQLSAQELMESGLQIQK</a>   |



# MASCOT Search Results

## Peptide View

MS/MS Fragmentation of **NVQFNYPHTSVTDVTDVQNNFHNYFGGSEIVVAGK**

Found in **ITIH2\_HUMAN**, Inter-alpha-trypsin inhibitor heavy chain H2 OS=Homo sapiens GN=ITIH2 PE=1 SV=2

Match to Query 64557: 3993.902016 from(999.482780,4+) rtinseconds(2396) index(53144)

Title: Locus:1.1.1.3477.14 File:"2013-07-02 CLN FXIII 30 min 3rd F 4.wiff"

Data file C:\Program Files (x86)\Matrix Science\Mascot Daemon\mgf3 FXIII 30 min 3rd\mascot\_daemon\_merge.mgf

Click mouse within plot area to zoom in by factor of two about that point

Or, Plot from  to  Da

Label all possible matches  Label matches used for scoring

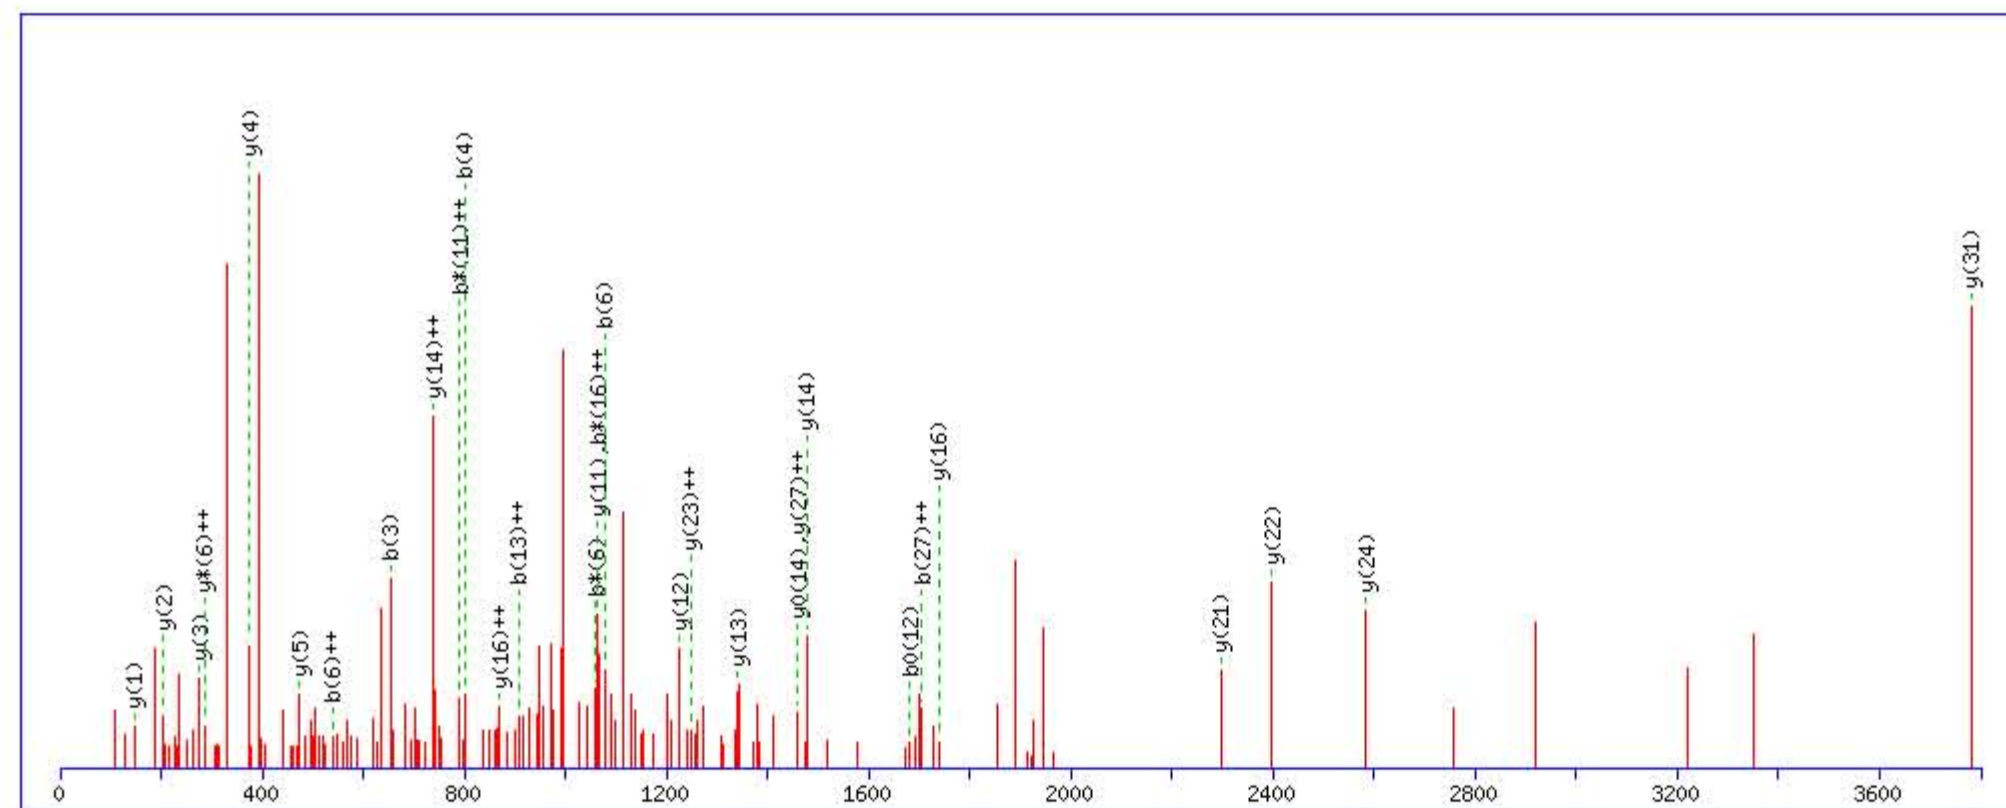

Monoisotopic mass of neutral peptide Mr(calc): 3993.910858

Fixed modifications: Carbamidomethyl (C) (apply to specified residues or termini only)

Variable modifications:

Q3 : Biotin:Thermo-21345 (Q)

Ions Score: 40 Expect: 0.0018

Matches : 30/356 fragment ions using 80 most intense peaks [\(help\)](#)

| #  | b                  | b <sup>++</sup>    | b <sup>*</sup>     | b <sup>***</sup>   | b <sup>0</sup>     | b <sup>0++</sup> | Seq. | y                  | y <sup>++</sup>    | y <sup>*</sup> | y <sup>***</sup>  | y <sup>0</sup>     | y <sup>0++</sup> | #  |
|----|--------------------|--------------------|--------------------|--------------------|--------------------|------------------|------|--------------------|--------------------|----------------|-------------------|--------------------|------------------|----|
| 1  | 115.050203         | 58.028740          | 98.023654          | 49.515465          |                    |                  | N    |                    |                    |                |                   |                    |                  | 33 |
| 2  | 214.118617         | 107.562947         | 197.092068         | 99.049672          |                    |                  | V    | 3880.875173        | 1940.941224        | 3863.848624    | 1932.427950       | 3862.864608        | 1931.935942      | 32 |
| 3  | <b>653.343943</b>  | 327.175610         | 636.317394         | 318.662335         |                    |                  | Q    | <b>3781.806759</b> | 1891.407017        | 3764.780210    | 1882.893743       | 3763.796194        | 1882.401735      | 31 |
| 4  | <b>800.412357</b>  | 400.709817         | 783.385808         | 392.196542         |                    |                  | F    | 3342.581433        | 1671.794354        | 3325.554884    | 1663.281080       | 3324.570868        | 1662.789072      | 30 |
| 5  | 914.455284         | 457.731280         | 897.428735         | 449.218006         |                    |                  | N    | 3195.513019        | 1598.260147        | 3178.486470    | 1589.746873       | 3177.502454        | 1589.254865      | 29 |
| 6  | <b>1077.518613</b> | <b>539.262945</b>  | <b>1060.492064</b> | 530.749670         |                    |                  | Y    | 3081.470092        | 1541.238684        | 3064.443543    | 1532.725409       | 3063.459527        | 1532.233401      | 28 |
| 7  | 1174.571377        | 587.789327         | 1157.544828        | 579.276052         |                    |                  | P    | 2918.406763        | <b>1459.707019</b> | 2901.380214    | 1451.193745       | 2900.396198        | 1450.701737      | 27 |
| 8  | 1311.630289        | 656.318783         | 1294.603740        | 647.805508         |                    |                  | H    | 2821.353999        | 1411.180637        | 2804.327450    | 1402.667363       | 2803.343434        | 1402.175355      | 26 |
| 9  | 1412.677968        | 706.842622         | 1395.651419        | 698.329348         | 1394.667403        | 697.837339       | T    | 2684.295087        | 1342.651181        | 2667.268538    | 1334.137907       | 2666.284522        | 1333.645899      | 25 |
| 10 | 1499.709996        | 750.358636         | 1482.683447        | 741.845362         | 1481.699431        | 741.353354       | S    | <b>2583.247408</b> | 1292.127342        | 2566.220859    | 1283.614067       | 2565.236843        | 1283.122059      | 24 |
| 11 | 1598.778410        | 799.892843         | 1581.751861        | <b>791.379569</b>  | 1580.767845        | 790.887561       | V    | 2496.215380        | <b>1248.611328</b> | 2479.188831    | 1240.098053       | 2478.204815        | 1239.606045      | 23 |
| 12 | 1699.826089        | 850.416683         | 1682.799540        | 841.903408         | <b>1681.815524</b> | 841.411400       | T    | <b>2397.146966</b> | 1199.077121        | 2380.120417    | 1190.563846       | 2379.136401        | 1190.071838      | 22 |
| 13 | 1814.853032        | <b>907.930154</b>  | 1797.826483        | 899.416880         | 1796.842467        | 898.924872       | D    | <b>2296.099287</b> | 1148.553281        | 2279.072738    | 1140.040007       | 2278.088722        | 1139.547999      | 21 |
| 14 | 1913.921446        | 957.464361         | 1896.894897        | 948.951087         | 1895.910881        | 948.459079       | V    | 2181.072344        | 1091.039810        | 2164.045795    | 1082.526535       | 2163.061779        | 1082.034527      | 20 |
| 15 | 2014.969125        | 1007.988201        | 1997.942576        | 999.474926         | 1996.958560        | 998.982918       | T    | 2082.003930        | 1041.505603        | 2064.977381    | 1032.992328       | 2063.993365        | 1032.500320      | 19 |
| 16 | 2143.027703        | 1072.017490        | 2126.001154        | <b>1063.504215</b> | 2125.017138        | 1063.012207      | Q    | 1980.956251        | 990.981763         | 1963.929702    | 982.468489        | 1962.945686        | 981.976481       | 18 |
| 17 | 2257.070630        | 1129.038953        | 2240.044081        | 1120.525678        | 2239.060065        | 1120.033671      | N    | 1852.897673        | 926.952474         | 1835.871124    | 918.439200        | 1834.887108        | 917.947192       | 17 |
| 18 | 2371.113557        | 1186.060417        | 2354.087008        | 1177.547142        | 2353.102992        | 1177.055134      | N    | <b>1738.854746</b> | <b>869.931011</b>  | 1721.828197    | 861.417736        | 1720.844181        | 860.925728       | 16 |
| 19 | 2518.181971        | 1259.594623        | 2501.155422        | 1251.081349        | 2500.171406        | 1250.589341      | F    | 1624.811819        | 812.909547         | 1607.785270    | 804.396273        | 1606.801254        | 803.904265       | 15 |
| 20 | 2655.240883        | 1328.124079        | 2638.214334        | 1319.610805        | 2637.230318        | 1319.118797      | H    | <b>1477.743405</b> | <b>739.375340</b>  | 1460.716856    | 730.862066        | <b>1459.732840</b> | 730.370058       | 14 |
| 21 | 2769.283810        | 1385.145543        | 2752.257261        | 1376.632268        | 2751.273245        | 1376.140260      | N    | <b>1340.684493</b> | 670.845885         | 1323.657944    | 662.332610        | 1322.673928        | 661.840602       | 13 |
| 22 | 2932.347139        | 1466.677207        | 2915.320590        | 1458.163933        | 2914.336574        | 1457.671925      | Y    | <b>1226.641566</b> | 613.824421         | 1209.615017    | 605.311147        | 1208.631001        | 604.819139       | 12 |
| 23 | 3079.415553        | 1540.211414        | 3062.389004        | 1531.698140        | 3061.404988        | 1531.206132      | F    | <b>1063.578237</b> | 532.292757         | 1046.551688    | 523.779482        | 1045.567672        | 523.287474       | 11 |
| 24 | 3136.437017        | 1568.722146        | 3119.410468        | 1560.208872        | 3118.426452        | 1559.716864      | G    | 916.509823         | 458.758550         | 899.483274     | 450.245275        | 898.499258         | 449.753267       | 10 |
| 25 | 3193.458481        | 1597.232878        | 3176.431932        | 1588.719604        | 3175.447916        | 1588.227596      | G    | 859.488359         | 430.247818         | 842.461810     | 421.734543        | 841.477794         | 421.242535       | 9  |
| 26 | 3280.490509        | 1640.748892        | 3263.463960        | 1632.235618        | 3262.479944        | 1631.743610      | S    | 802.466895         | 401.737086         | 785.440346     | 393.223811        | 784.456330         | 392.731803       | 8  |
| 27 | 3409.533102        | <b>1705.270189</b> | 3392.506553        | 1696.756914        | 3391.522537        | 1696.264906      | E    | 715.434867         | 358.221072         | 698.408318     | 349.707797        | 697.424302         | 349.215789       | 7  |
| 28 | 3522.617166        | 1761.812221        | 3505.590617        | 1753.298946        | 3504.606601        | 1752.806938      | I    | 586.392274         | 293.699775         | 569.365725     | <b>285.186501</b> |                    |                  | 6  |
| 29 | 3621.685580        | 1811.346428        | 3604.659031        | 1802.833153        | 3603.675015        | 1802.341145      | V    | <b>473.308210</b>  | 237.157743         | 456.281661     | 228.644468        |                    |                  | 5  |
| 30 | 3720.753994        | 1860.880635        | 3703.727445        | 1852.367360        | 3702.743429        | 1851.875352      | V    | <b>374.239796</b>  | 187.623536         | 357.213247     | 179.110261        |                    |                  | 4  |
| 31 | 3791.791108        | 1896.399192        | 3774.764559        | 1887.885917        | 3773.780543        | 1887.393909      | A    | <b>275.171382</b>  | 138.089329         | 258.144833     | 129.576055        |                    |                  | 3  |
| 32 | 3848.812572        | 1924.909924        | 3831.786023        | 1916.396649        | 3830.802007        | 1915.904641      | G    | <b>204.134268</b>  | 102.570772         | 187.107719     | 94.057497         |                    |                  | 2  |
| 33 |                    |                    |                    |                    |                    |                  | K    | <b>147.112804</b>  | 74.060040          | 130.086255     | 65.546765         |                    |                  | 1  |

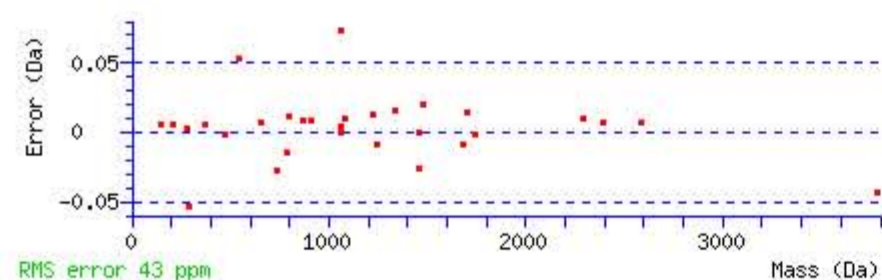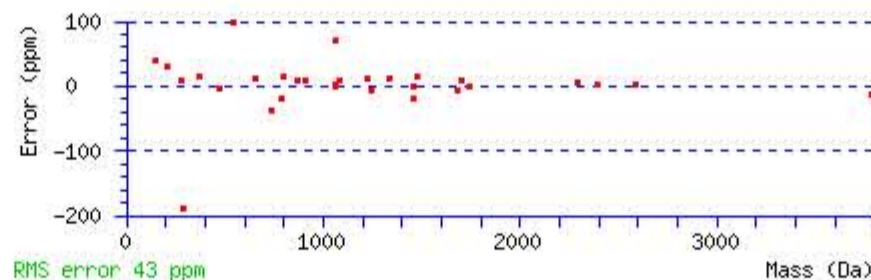

NCBI BLAST search of [NVQFNYPHTSVTDVTDVQNNFHNYFGGSEIVVAGK](#)

(Parameters: blastp, nr protein database, expect=20000, no filter, PAM30)

Other BLAST [web gateways](#)

All matches to this query

| Score | Mr(calc):   | Delta     | Sequence                                            |
|-------|-------------|-----------|-----------------------------------------------------|
| 40.3  | 3993.910858 | -0.008842 | <a href="#">NVQFNYPHTSVTDVTDVQNNFHNYFGGSEIVVAGK</a> |
| 11.9  | 3993.910858 | -0.008842 | <a href="#">NVQFNYPHTSVTDVTDVQNNFHNYFGGSEIVVAGK</a> |



# MASCOT SCIENCE Mascot Search Results

## Peptide View

MS/MS Fragmentation of **GHVSFKPSLDQQR**

Found in **ITIH3\_HUMAN**, Inter-alpha-trypsin inhibitor heavy chain H3 OS=Homo sapiens GN=ITIH3 PE=1 SV=2

Match to Query 39357: 1808.929936 from(453.239760,4+) rtinseconds(1655) index(49032)

Title: Locus:1.1.1.3220.6 File:"2013-07-02 CLN FXIII 30 min 3rd F 4.wiff"

Data file C:\Program Files (x86)\Matrix Science\Mascot Daemon\mgf3 FXIII 30 min 3rd\mascot\_daemon\_merge.mgf

Click mouse within plot area to zoom in by factor of two about that point

Or, Plot from  to  Da

Label all possible matches  Label matches used for scoring

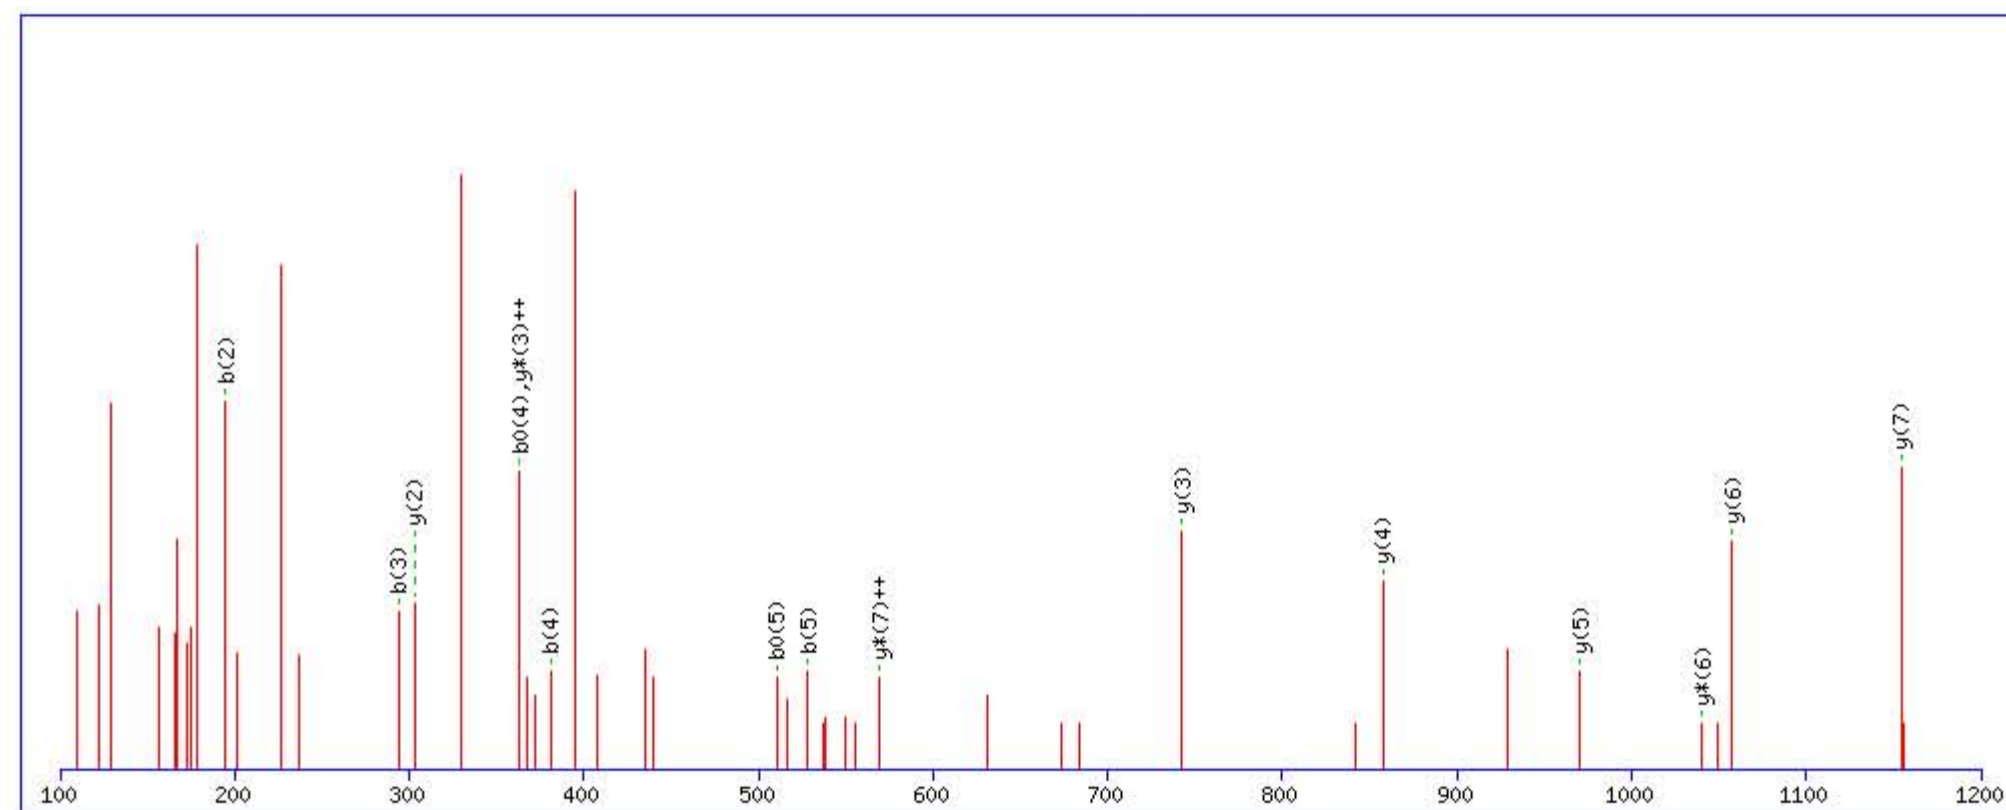

Monoisotopic mass of neutral peptide Mr(calc): 1808.935577

Fixed modifications: Carbamidomethyl (C) (apply to specified residues or termini only)

Variable modifications:

Q11 : Biotin:Thermo-21345 (Q)

Ions Score: 30 Expect: 0.0018

Matches : 15/122 fragment ions using 31 most intense peaks [\(help\)](#)

| #  | b                 | b <sup>++</sup> | b <sup>+</sup> | b <sup>+++</sup> | b <sup>0</sup>    | b <sup>0++</sup> | Seq.     | y                  | y <sup>++</sup> | y <sup>+</sup>     | y <sup>+++</sup>  | y <sup>0</sup> | y <sup>0++</sup> | #  |
|----|-------------------|-----------------|----------------|------------------|-------------------|------------------|----------|--------------------|-----------------|--------------------|-------------------|----------------|------------------|----|
| 1  | 58.028740         | 29.518008       |                |                  |                   |                  | <b>G</b> |                    |                 |                    |                   |                |                  | 13 |
| 2  | <b>195.087652</b> | 98.047464       |                |                  |                   |                  | <b>H</b> | 1752.921386        | 876.964331      | 1735.894837        | 868.451057        | 1734.910821    | 867.959049       | 12 |
| 3  | <b>294.156066</b> | 147.581671      |                |                  |                   |                  | <b>V</b> | 1615.862474        | 808.434875      | 1598.835925        | 799.921601        | 1597.851909    | 799.429593       | 11 |
| 4  | <b>381.188094</b> | 191.097685      |                |                  | <b>363.177529</b> | 182.092403       | <b>S</b> | 1516.794060        | 758.900668      | 1499.767511        | 750.387394        | 1498.783495    | 749.895386       | 10 |
| 5  | <b>528.256508</b> | 264.631892      |                |                  | <b>510.245943</b> | 255.626610       | <b>F</b> | 1429.762032        | 715.384654      | 1412.735483        | 706.871380        | 1411.751467    | 706.379372       | 9  |
| 6  | 656.351471        | 328.679374      | 639.324922     | 320.166099       | 638.340906        | 319.674091       | <b>K</b> | 1282.693618        | 641.850447      | 1265.667069        | 633.337173        | 1264.683053    | 632.845165       | 8  |
| 7  | 753.404235        | 377.205756      | 736.377686     | 368.692481       | 735.393670        | 368.200473       | <b>P</b> | <b>1154.598655</b> | 577.802966      | 1137.572106        | <b>569.289691</b> | 1136.588090    | 568.797683       | 7  |
| 8  | 840.436263        | 420.721770      | 823.409714     | 412.208495       | 822.425698        | 411.716487       | <b>S</b> | <b>1057.545891</b> | 529.276584      | <b>1040.519342</b> | 520.763309        | 1039.535326    | 520.271301       | 6  |
| 9  | 953.520327        | 477.263802      | 936.493778     | 468.750527       | 935.509762        | 468.258519       | <b>L</b> | <b>970.513863</b>  | 485.760570      | 953.487314         | 477.247295        | 952.503298     | 476.755287       | 5  |
| 10 | 1068.547270       | 534.777273      | 1051.520721    | 526.263999       | 1050.536705       | 525.771991       | <b>D</b> | <b>857.429799</b>  | 429.218538      | 840.403250         | 420.705263        | 839.419234     | 420.213255       | 4  |
| 11 | 1507.772596       | 754.389936      | 1490.746047    | 745.876662       | 1489.762031       | 745.384654       | <b>Q</b> | <b>742.402856</b>  | 371.705066      | 725.376307         | <b>363.191792</b> |                |                  | 3  |
| 12 | 1635.831174       | 818.419225      | 1618.804625    | 809.905951       | 1617.820609       | 809.413943       | <b>Q</b> | <b>303.177530</b>  | 152.092403      | 286.150981         | 143.579129        |                |                  | 2  |
| 13 |                   |                 |                |                  |                   |                  | <b>R</b> | 175.118952         | 88.063114       | 158.092403         | 79.549839         |                |                  | 1  |

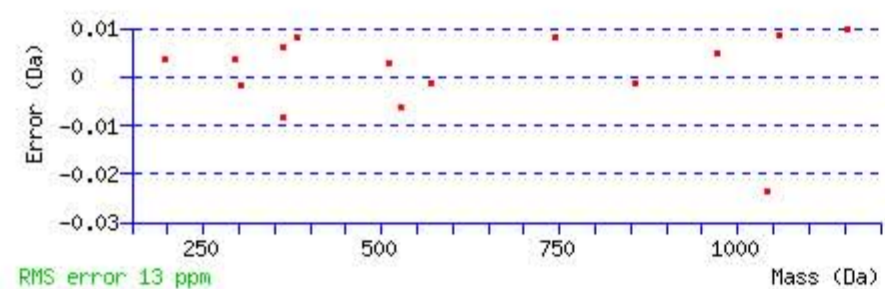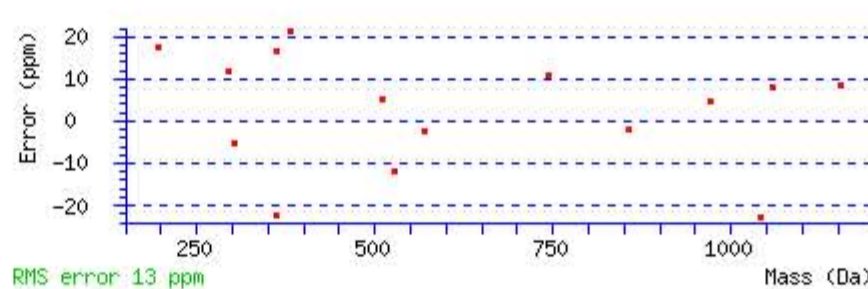

NCBI BLAST search of **GHVSFKPSLDQQR**

(Parameters: blastp, nr protein database, expect=20000, no filter, PAM30)

Other BLAST [web gateways](#)

All matches to this query

| Score | Mr(calc):   | Delta     | Sequence                      |
|-------|-------------|-----------|-------------------------------|
| 30.5  | 1808.935577 | -0.005641 | <a href="#">GHVSFKPSLDQQR</a> |
| 23.1  | 1808.935577 | -0.005641 | <a href="#">GHVSFKPSLDQQR</a> |
| 1.3   | 1808.956650 | -0.026714 | <a href="#">LLRELQEAQNER</a>  |

Mascot: <http://www.matrixscience.com/>



# MASCOT Search Results

## Peptide View

MS/MS Fragmentation of **KGHVSFKPSLDQQR**

Found in **ITIH3\_HUMAN**, Inter-alpha-trypsin inhibitor heavy chain H3 OS=Homo sapiens GN=ITIH3 PE=1 SV=2

Match to Query 41740: 1937.019856 from(485.262240,4+) rtinseconds(1512) index(48138)

Title: Locus:1.1.1.3170.4 File:"2013-07-02 CLN FXIII 30 min 3rd F 4.wiff"

Data file C:\Program Files (x86)\Matrix Science\Mascot Daemon\mgf3 FXIII 30 min 3rd\mascot\_daemon\_merge.mgf

Click mouse within plot area to zoom in by factor of two about that point

Or, Plot from  to  Da

Label all possible matches  Label matches used for scoring

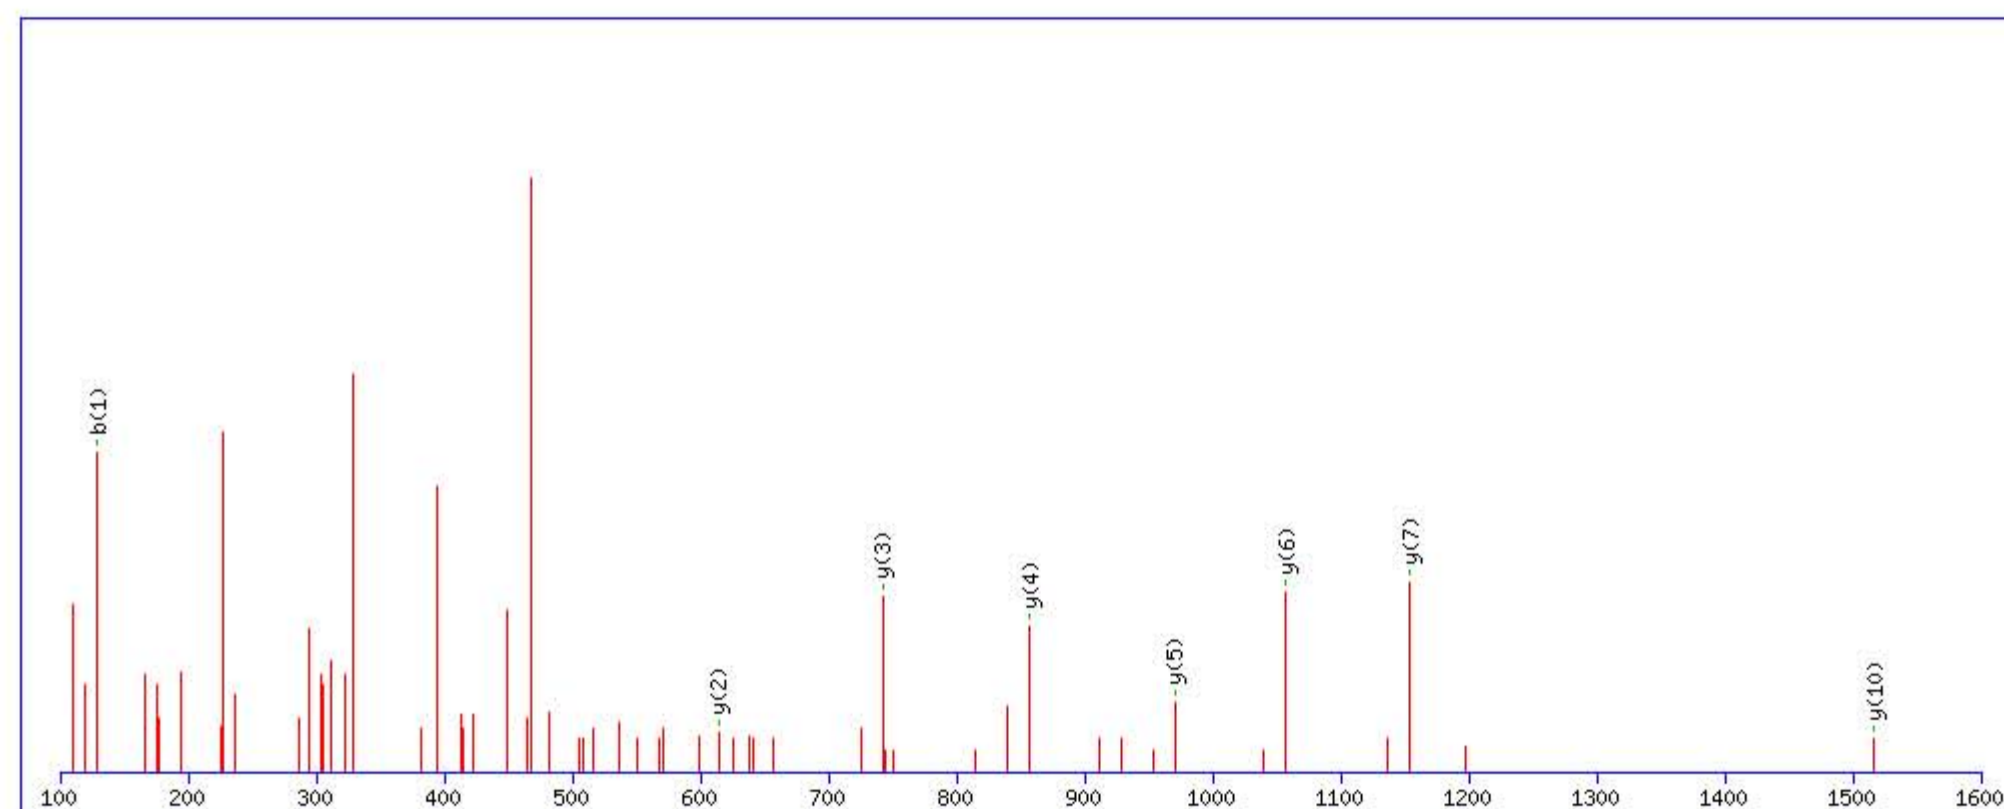

Monoisotopic mass of neutral peptide Mr(calc): 1937.030533

Fixed modifications: Carbamidomethyl (C) (apply to specified residues or termini only)

Variable modifications:

Q13 : Biotin:Thermo-21345 (Q)

Ions Score: 45 Expect: 6.3e-005

Matches : 8/142 fragment ions using 12 most intense peaks [\(help\)](#)

| #  | b                 | b <sup>++</sup> | b <sup>*</sup> | b <sup>*++</sup> | b <sup>0</sup> | b <sup>0++</sup> | Seq.     | y                  | y <sup>++</sup> | y <sup>*</sup> | y <sup>*++</sup> | y <sup>0</sup> | y <sup>0++</sup> | #         |
|----|-------------------|-----------------|----------------|------------------|----------------|------------------|----------|--------------------|-----------------|----------------|------------------|----------------|------------------|-----------|
| 1  | <b>129.102239</b> | 65.054757       | 112.075690     | 56.541483        |                |                  | <b>K</b> |                    |                 |                |                  |                |                  | <b>14</b> |
| 2  | 186.123703        | 93.565489       | 169.097154     | 85.052215        |                |                  | <b>G</b> | 1809.942850        | 905.475063      | 1792.916301    | 896.961789       | 1791.932285    | 896.469781       | <b>13</b> |
| 3  | 323.182615        | 162.094945      | 306.156066     | 153.581671       |                |                  | <b>H</b> | 1752.921386        | 876.964331      | 1735.894837    | 868.451057       | 1734.910821    | 867.959049       | <b>12</b> |
| 4  | 422.251029        | 211.629153      | 405.224480     | 203.115878       |                |                  | <b>V</b> | 1615.862474        | 808.434875      | 1598.835925    | 799.921601       | 1597.851909    | 799.429593       | <b>11</b> |
| 5  | 509.283057        | 255.145167      | 492.256508     | 246.631892       | 491.272492     | 246.139884       | <b>S</b> | <b>1516.794060</b> | 758.900668      | 1499.767511    | 750.387394       | 1498.783495    | 749.895386       | <b>10</b> |
| 6  | 656.351471        | 328.679374      | 639.324922     | 320.166099       | 638.340906     | 319.674091       | <b>F</b> | 1429.762032        | 715.384654      | 1412.735483    | 706.871380       | 1411.751467    | 706.379372       | <b>9</b>  |
| 7  | 784.446434        | 392.726855      | 767.419885     | 384.213581       | 766.435869     | 383.721573       | <b>K</b> | 1282.693618        | 641.850447      | 1265.667069    | 633.337173       | 1264.683053    | 632.845165       | <b>8</b>  |
| 8  | 881.499198        | 441.253237      | 864.472649     | 432.739963       | 863.488633     | 432.247955       | <b>P</b> | <b>1154.598655</b> | 577.802966      | 1137.572106    | 569.289691       | 1136.588090    | 568.797683       | <b>7</b>  |
| 9  | 968.531226        | 484.769251      | 951.504677     | 476.255977       | 950.520661     | 475.763969       | <b>S</b> | <b>1057.545891</b> | 529.276584      | 1040.519342    | 520.763309       | 1039.535326    | 520.271301       | <b>6</b>  |
| 10 | 1081.615290       | 541.311283      | 1064.588741    | 532.798009       | 1063.604725    | 532.306000       | <b>L</b> | <b>970.513863</b>  | 485.760570      | 953.487314     | 477.247295       | 952.503298     | 476.755287       | <b>5</b>  |
| 11 | 1196.642233       | 598.824755      | 1179.615684    | 590.311480       | 1178.631668    | 589.819472       | <b>D</b> | <b>857.429799</b>  | 429.218538      | 840.403250     | 420.705263       | 839.419234     | 420.213255       | <b>4</b>  |
| 12 | 1324.700811       | 662.854043      | 1307.674262    | 654.340769       | 1306.690246    | 653.848761       | <b>Q</b> | <b>742.402856</b>  | 371.705066      | 725.376307     | 363.191792       |                |                  | <b>3</b>  |
| 13 | 1763.926137       | 882.466707      | 1746.899588    | 873.953432       | 1745.915572    | 873.461424       | <b>Q</b> | <b>614.344278</b>  | 307.675777      | 597.317729     | 299.162503       |                |                  | <b>2</b>  |
| 14 |                   |                 |                |                  |                |                  | <b>R</b> | 175.118952         | 88.063114       | 158.092403     | 79.549839        |                |                  | <b>1</b>  |

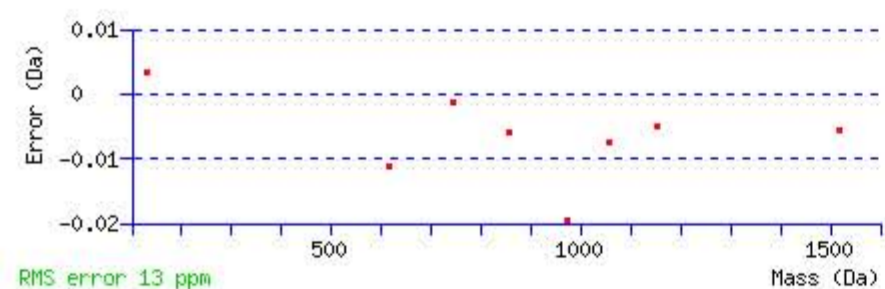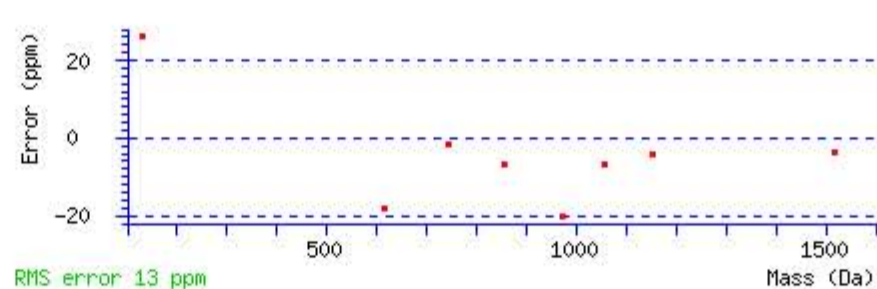

NCBI BLAST search of **KGHVSFKPSLDQQR**

(Parameters: blastp, nr protein database, expect=20000, no filter, PAM30)

Other BLAST [web gateways](#)

All matches to this query

| Score | Mr(calc):   | Delta     | Sequence                       |
|-------|-------------|-----------|--------------------------------|
| 45.4  | 1937.030533 | -0.010677 | <a href="#">KGHVSFKPSLDQQR</a> |
| 34.7  | 1937.030533 | -0.010677 | <a href="#">KGHVSFKPSLDQQR</a> |
| 0.6   | 1937.008057 | 0.011799  | <a href="#">QSKETPVGWQELPK</a> |

Mascot: <http://www.matrixscience.com/>



# MASCOT SCIENCE Mascot Search Results

## Peptide View

MS/MS Fragmentation of **EHLVQATPENLQEAR**

Found in **ITIH3\_HUMAN**, Inter-alpha-trypsin inhibitor heavy chain H3 OS=Homo sapiens GN=ITIH3 PE=1 SV=2

Match to Query 44597: 2045.038692 from(682.686840,3+) rtinseconds(1773) index(49743)

Title: Locus:1.1.1.3261.8 File:"2013-07-02 CLN FXIII 30 min 3rd F 4.wiff"

Data file C:\Program Files (x86)\Matrix Science\Mascot Daemon\mgf3 FXIII 30 min 3rd\mascot\_daemon\_merge.mgf

Click mouse within plot area to zoom in by factor of two about that point

Or, Plot from  to  Da

Label all possible matches  Label matches used for scoring

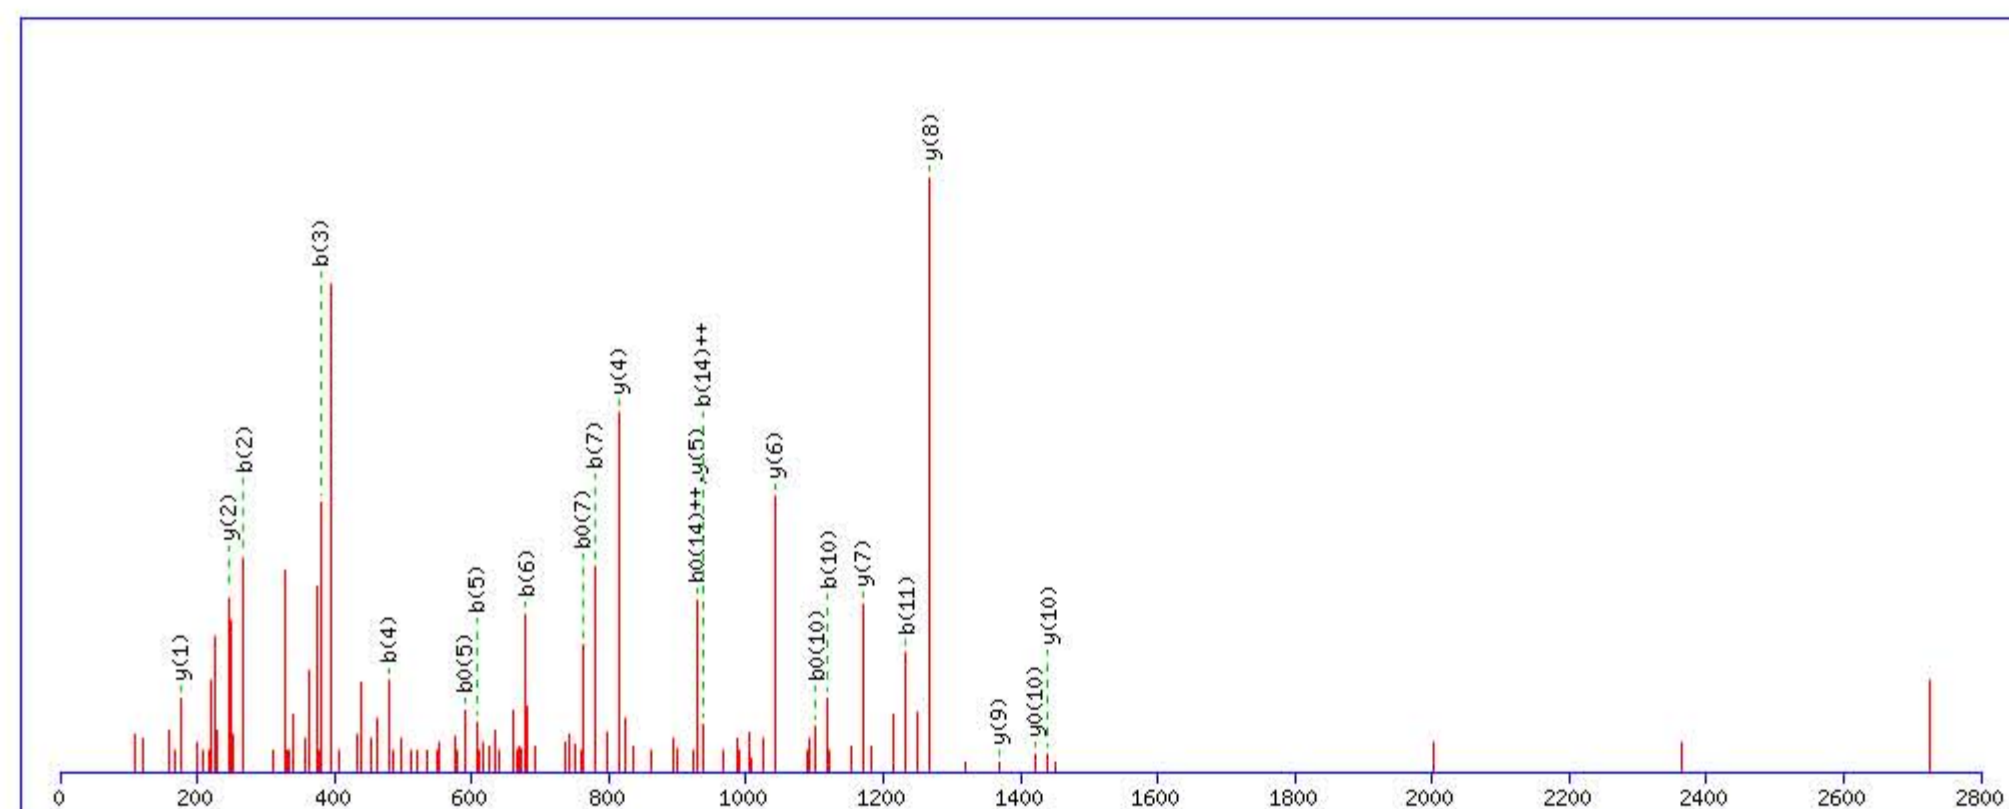

Monoisotopic mass of neutral peptide Mr(calc): 2045.036377

Fixed modifications: Carbamidomethyl (C) (apply to specified residues or termini only)

Variable modifications:

Q12 : Biotin:Thermo-21345 (Q)

Ions Score: 75 Expect: 1.1e-007

Matches : 23/156 fragment ions using 29 most intense peaks [\(help\)](#)

| #  | b                  | b <sup>++</sup>   | b <sup>*</sup> | b <sup>*++</sup> | b <sup>0</sup>     | b <sup>0++</sup>  | Seq. | y                  | y <sup>++</sup> | y <sup>*</sup> | y <sup>*++</sup> | y <sup>0</sup>     | y <sup>0++</sup> | #  |
|----|--------------------|-------------------|----------------|------------------|--------------------|-------------------|------|--------------------|-----------------|----------------|------------------|--------------------|------------------|----|
| 1  | 130.049869         | 65.528572         |                |                  | 112.039304         | 56.523290         | E    |                    |                 |                |                  |                    |                  | 15 |
| 2  | <b>267.108781</b>  | 134.058028        |                |                  | 249.098216         | 125.052746        | H    | 1917.001094        | 959.004185      | 1899.974545    | 950.490911       | 1898.990529        | 949.998903       | 14 |
| 3  | <b>380.192845</b>  | 190.600060        |                |                  | 362.182280         | 181.594778        | L    | 1779.942182        | 890.474729      | 1762.915633    | 881.961455       | 1761.931617        | 881.469447       | 13 |
| 4  | <b>479.261259</b>  | 240.134267        |                |                  | 461.250694         | 231.128985        | V    | 1666.858118        | 833.932697      | 1649.831569    | 825.419423       | 1648.847553        | 824.927415       | 12 |
| 5  | <b>607.319837</b>  | 304.163557        | 590.293288     | 295.650282       | <b>589.309272</b>  | 295.158274        | Q    | 1567.789704        | 784.398490      | 1550.763155    | 775.885216       | 1549.779139        | 775.393208       | 11 |
| 6  | <b>678.356951</b>  | 339.682114        | 661.330402     | 331.168839       | 660.346386         | 330.676831        | A    | <b>1439.731126</b> | 720.369201      | 1422.704577    | 711.855927       | <b>1421.720561</b> | 711.363919       | 10 |
| 7  | <b>779.404630</b>  | 390.205953        | 762.378081     | 381.692679       | <b>761.394065</b>  | 381.200671        | T    | <b>1368.694012</b> | 684.850644      | 1351.667463    | 676.337370       | 1350.683447        | 675.845362       | 9  |
| 8  | 876.457394         | 438.732335        | 859.430845     | 430.219061       | 858.446829         | 429.727053        | P    | <b>1267.646333</b> | 634.326805      | 1250.619784    | 625.813530       | 1249.635768        | 625.321522       | 8  |
| 9  | 1005.499987        | 503.253632        | 988.473438     | 494.740357       | 987.489422         | 494.248349        | E    | <b>1170.593569</b> | 585.800423      | 1153.567020    | 577.287148       | 1152.583004        | 576.795140       | 7  |
| 10 | <b>1119.542914</b> | 560.275095        | 1102.516365    | 551.761821       | <b>1101.532349</b> | 551.269813        | N    | <b>1041.550976</b> | 521.279126      | 1024.524427    | 512.765852       | 1023.540411        | 512.273844       | 6  |
| 11 | <b>1232.626978</b> | 616.817127        | 1215.600429    | 608.303853       | 1214.616413        | 607.811845        | L    | <b>927.508049</b>  | 464.257663      | 910.481500     | 455.744388       | 909.497484         | 455.252380       | 5  |
| 12 | 1671.852304        | 836.429790        | 1654.825755    | 827.916516       | 1653.841739        | 827.424508        | Q    | <b>814.423985</b>  | 407.715631      | 797.397436     | 399.202356       | 796.413420         | 398.710348       | 4  |
| 13 | 1800.894897        | 900.951087        | 1783.868348    | 892.437812       | 1782.884332        | 891.945804        | E    | 375.198659         | 188.102968      | 358.172110     | 179.589693       | 357.188094         | 179.097685       | 3  |
| 14 | 1871.932011        | <b>936.469644</b> | 1854.905462    | 927.956369       | 1853.921446        | <b>927.464361</b> | A    | <b>246.156066</b>  | 123.581671      | 229.129517     | 115.068396       |                    |                  | 2  |
| 15 |                    |                   |                |                  |                    |                   | R    | <b>175.118952</b>  | 88.063114       | 158.092403     | 79.549839        |                    |                  | 1  |

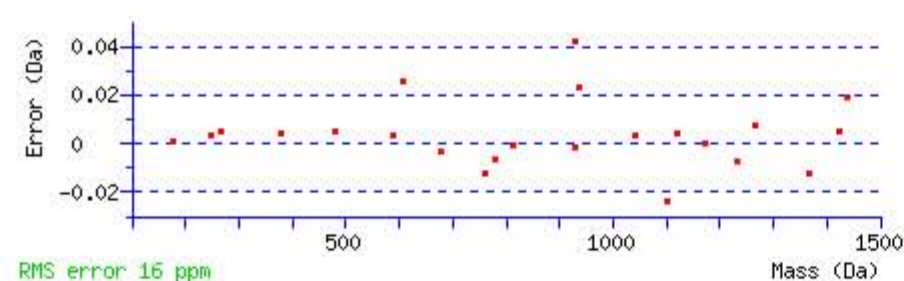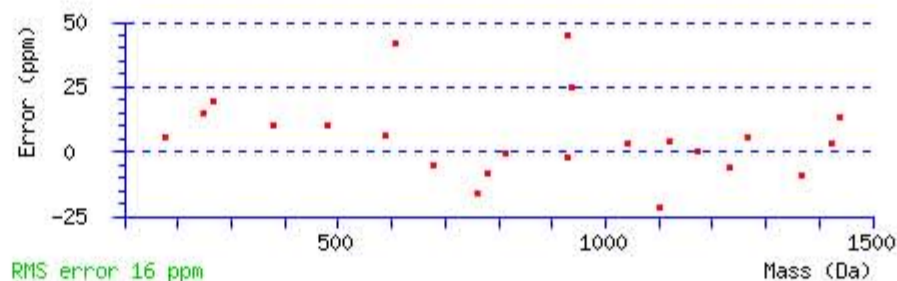

NCBI BLAST search of [EHLVQATPENLQEAR](#)

(Parameters: blastp, nr protein database, expect=20000, no filter, PAM30)

Other BLAST [web gateways](#)

All matches to this query

| Score | Mr(calc):   | Delta     | Sequence                           |
|-------|-------------|-----------|------------------------------------|
| 74.8  | 2045.036377 | 0.002315  | <a href="#">EHLVQATPENLQEAR</a>    |
| 0.4   | 2045.051193 | -0.012501 | <a href="#">VVGGYLLMLAYACVTMLR</a> |

Mascot: <http://www.matrixscience.com/>



**Peptide View**

MS/MS Fragmentation of **QLGLPGPPDVPDHAAYHPFR**

Found in **ITIH4\_HUMAN**, Inter-alpha-trypsin inhibitor heavy chain H4 OS=Homo sapiens GN=ITIH4 PE=1 SV=4

Match to Query 52304: 2494.259736 from(624.572210,4+) rtinseconds(2163) index(6170)

Title: Locus:1.1.1.3323.9 File:"2013-07-02 CLN FXIII 30 min 3rd F 1.wiff"

Data file C:\Program Files (x86)\Matrix Science\Mascot Daemon\mgf3 FXIII 30 min 3rd\mascot\_daemon\_merge.mgf

Click mouse within plot area to zoom in by factor of two about that point

Or, Plot from  to  Da

Label all possible matches  Label matches used for scoring

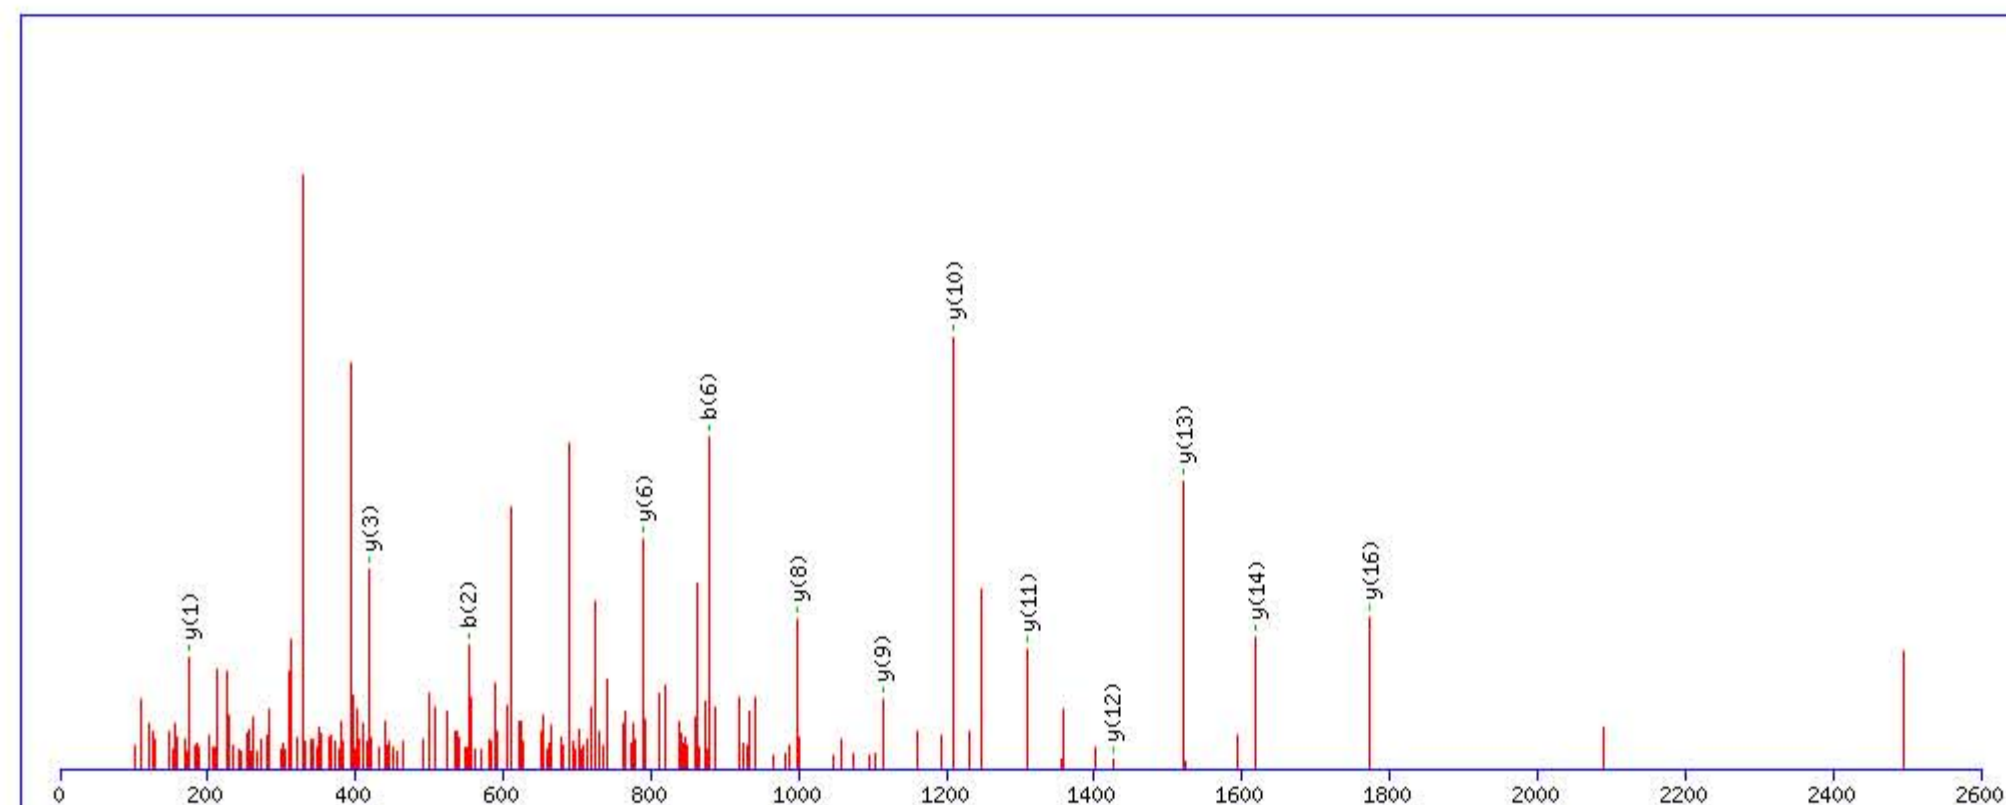

Monoisotopic mass of neutral peptide Mr(calc): 2494.257980

Fixed modifications: Carbamidomethyl (C) (apply to specified residues or termini only)

Variable modifications:

Q1 : Biotin:Thermo-21345 (Q)

Ions Score: 83 Expect: 1.4e-007

Matches : 13/196 fragment ions using 18 most intense peaks [\(help\)](#)

| #  | b                 | b <sup>++</sup> | b <sup>*</sup> | b <sup>+++</sup> | b <sup>0</sup> | b <sup>0++</sup> | Seq. | y                  | y <sup>++</sup> | y <sup>*</sup> | y <sup>+++</sup> | y <sup>0</sup> | y <sup>0++</sup> | #  |
|----|-------------------|-----------------|----------------|------------------|----------------|------------------|------|--------------------|-----------------|----------------|------------------|----------------|------------------|----|
| 1  | 440.232602        | 220.619939      | 423.206053     | 212.106664       |                |                  | Q    |                    |                 |                |                  |                |                  | 20 |
| 2  | <b>553.316666</b> | 277.161971      | 536.290117     | 268.648697       |                |                  | L    | 2056.039923        | 1028.523599     | 2039.013374    | 1020.010325      | 2038.029358    | 1019.518317      | 19 |
| 3  | 610.338130        | 305.672703      | 593.311581     | 297.159429       |                |                  | G    | 1942.955859        | 971.981568      | 1925.929310    | 963.468293       | 1924.945294    | 962.976285       | 18 |
| 4  | 723.422194        | 362.214735      | 706.395645     | 353.701461       |                |                  | L    | 1885.934395        | 943.470836      | 1868.907846    | 934.957561       | 1867.923830    | 934.465553       | 17 |
| 5  | 820.474958        | 410.741117      | 803.448409     | 402.227843       |                |                  | P    | <b>1772.850331</b> | 886.928804      | 1755.823782    | 878.415529       | 1754.839766    | 877.923521       | 16 |
| 6  | <b>877.496422</b> | 439.251849      | 860.469873     | 430.738575       |                |                  | G    | 1675.797567        | 838.402422      | 1658.771018    | 829.889147       | 1657.787002    | 829.397139       | 15 |
| 7  | 974.549186        | 487.778231      | 957.522637     | 479.264957       |                |                  | P    | <b>1618.776103</b> | 809.891690      | 1601.749554    | 801.378415       | 1600.765538    | 800.886407       | 14 |
| 8  | 1071.601950       | 536.304613      | 1054.575401    | 527.791339       |                |                  | P    | <b>1521.723339</b> | 761.365308      | 1504.696790    | 752.852033       | 1503.712774    | 752.360025       | 13 |
| 9  | 1186.628893       | 593.818085      | 1169.602344    | 585.304810       | 1168.618328    | 584.812802       | D    | <b>1424.670575</b> | 712.838926      | 1407.644026    | 704.325651       | 1406.660010    | 703.833643       | 12 |
| 10 | 1285.697307       | 643.352292      | 1268.670758    | 634.839017       | 1267.686742    | 634.347009       | V    | <b>1309.643632</b> | 655.325454      | 1292.617083    | 646.812180       | 1291.633067    | 646.320172       | 11 |
| 11 | 1382.750071       | 691.878674      | 1365.723522    | 683.365399       | 1364.739506    | 682.873391       | P    | <b>1210.575218</b> | 605.791247      | 1193.548669    | 597.277973       | 1192.564653    | 596.785964       | 10 |
| 12 | 1497.777014       | 749.392145      | 1480.750465    | 740.878871       | 1479.766449    | 740.386863       | D    | <b>1113.522454</b> | 557.264865      | 1096.495905    | 548.751591       | 1095.511889    | 548.259582       | 9  |
| 13 | 1634.835926       | 817.921601      | 1617.809377    | 809.408327       | 1616.825361    | 808.916319       | H    | <b>998.495511</b>  | 499.751393      | 981.468962     | 491.238119       |                |                  | 8  |
| 14 | 1705.873040       | 853.440158      | 1688.846491    | 844.926884       | 1687.862475    | 844.434876       | A    | 861.436599         | 431.221937      | 844.410050     | 422.708663       |                |                  | 7  |
| 15 | 1776.910154       | 888.958715      | 1759.883605    | 880.445441       | 1758.899589    | 879.953433       | A    | <b>790.399485</b>  | 395.703380      | 773.372936     | 387.190106       |                |                  | 6  |
| 16 | 1939.973483       | 970.490380      | 1922.946934    | 961.977105       | 1921.962918    | 961.485097       | Y    | 719.362371         | 360.184823      | 702.335822     | 351.671549       |                |                  | 5  |
| 17 | 2077.032395       | 1039.019836     | 2060.005846    | 1030.506561      | 2059.021830    | 1030.014553      | H    | 556.299042         | 278.653159      | 539.272493     | 270.139884       |                |                  | 4  |
| 18 | 2174.085159       | 1087.546218     | 2157.058610    | 1079.032943      | 2156.074594    | 1078.540935      | P    | <b>419.240130</b>  | 210.123703      | 402.213581     | 201.610428       |                |                  | 3  |
| 19 | 2321.153573       | 1161.080424     | 2304.127024    | 1152.567150      | 2303.143008    | 1152.075142      | F    | 322.187366         | 161.597321      | 305.160817     | 153.084046       |                |                  | 2  |
| 20 |                   |                 |                |                  |                |                  | R    | <b>175.118952</b>  | 88.063114       | 158.092403     | 79.549839        |                |                  | 1  |

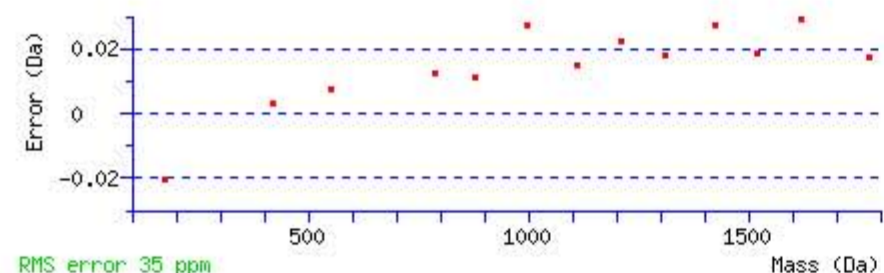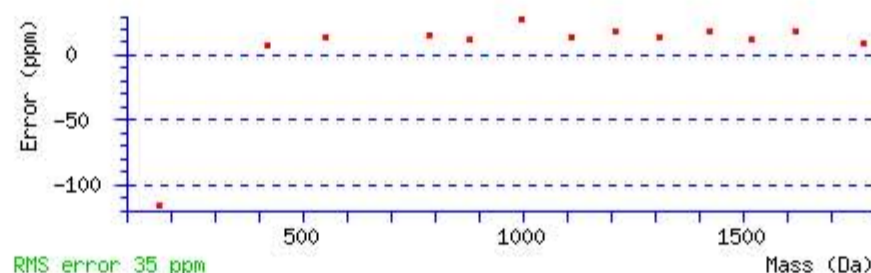

NCBI BLAST search of **QLGLPGPPDVPDHAAYHPFR**

(Parameters: blastp, nr protein database, expect=20000, no filter, PAM30)

Other BLAST [web gateways](#)

All matches to this query

| Score | Mr(calc):   | Delta    | Sequence                             |
|-------|-------------|----------|--------------------------------------|
| 83.1  | 2494.257980 | 0.001756 | <a href="#">QLGLPGPPDVPDHAAYHPFR</a> |



# MASCOT Search Results

## Peptide View

MS/MS Fragmentation of **YNSQNSNNQFVLYR**

Found in **KNG1\_HUMAN**, Kininogen-1 OS=Homo sapiens GN=KNG1 PE=1 SV=2

Match to Query 46934: 2185.030288 from(1093.522420,2+) rtinseconds(2133) index(20612)

Title: Locus:1.1.1.3305.13 File:"2013-07-02 CLN FXIII 30 min 3rd F 2.wiff"

Data file C:\Program Files (x86)\Matrix Science\Mascot Daemon\mgf3 FXIII 30 min 3rd\mascot\_daemon\_merge.mgf

Click mouse within plot area to zoom in by factor of two about that point

Or, Plot from  to  Da

Label all possible matches  Label matches used for scoring

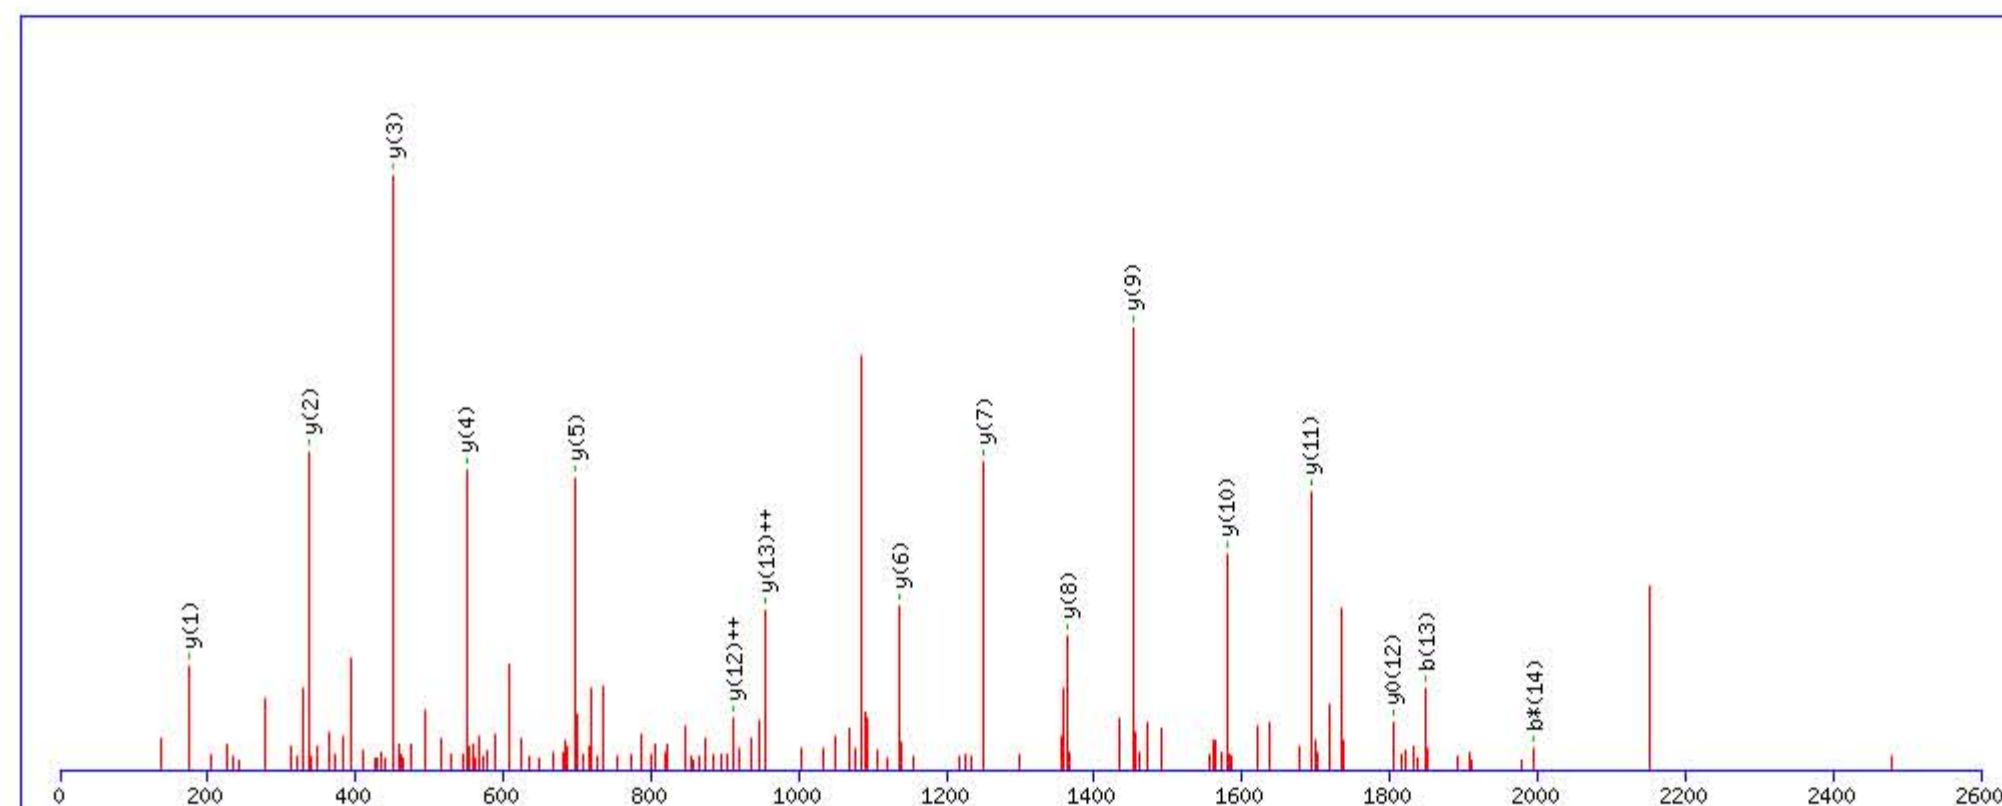

Monoisotopic mass of neutral peptide Mr(calc): 2185.037445

Fixed modifications: Carbamidomethyl (C) (apply to specified residues or termini only)

Variable modifications:

Q10 : Biotin:Thermo-21345 (Q)

Ions Score: 91 Expect: 4.9e-009

Matches : 16/146 fragment ions using 20 most intense peaks [\(help\)](#)

| #  | b           | b <sup>++</sup> | b <sup>+</sup> | b <sup>+++</sup> | b <sup>0</sup> | b <sup>0++</sup> | Seq. | y           | y <sup>++</sup> | y <sup>+</sup> | y <sup>+++</sup> | y <sup>0</sup> | y <sup>0++</sup> | #  |
|----|-------------|-----------------|----------------|------------------|----------------|------------------|------|-------------|-----------------|----------------|------------------|----------------|------------------|----|
| 1  | 164.070605  | 82.538940       |                |                  |                |                  | Y    |             |                 |                |                  |                |                  | 15 |
| 2  | 278.113532  | 139.560404      | 261.086983     | 131.047130       |                |                  | N    | 2022.981419 | 1011.994348     | 2005.954870    | 1003.481073      | 2004.970854    | 1002.989065      | 14 |
| 3  | 365.145560  | 183.076418      | 348.119011     | 174.563144       | 347.134995     | 174.071136       | S    | 1908.938492 | 954.972884      | 1891.911943    | 946.459610       | 1890.927927    | 945.967602       | 13 |
| 4  | 493.204138  | 247.105707      | 476.177589     | 238.592433       | 475.193573     | 238.100425       | Q    | 1821.906464 | 911.456870      | 1804.879915    | 902.943596       | 1803.895899    | 902.451588       | 12 |
| 5  | 607.247065  | 304.127171      | 590.220516     | 295.613896       | 589.236500     | 295.121888       | N    | 1693.847886 | 847.427581      | 1676.821337    | 838.914307       | 1675.837321    | 838.422299       | 11 |
| 6  | 735.305643  | 368.156460      | 718.279094     | 359.643185       | 717.295078     | 359.151177       | Q    | 1579.804959 | 790.406118      | 1562.778410    | 781.892843       | 1561.794394    | 781.400835       | 10 |
| 7  | 822.337671  | 411.672474      | 805.311122     | 403.159199       | 804.327106     | 402.667191       | S    | 1451.746381 | 726.376829      | 1434.719832    | 717.863554       | 1433.735816    | 717.371546       | 9  |
| 8  | 936.380598  | 468.693937      | 919.354049     | 460.180662       | 918.370033     | 459.688654       | N    | 1364.714353 | 682.860815      | 1347.687804    | 674.347540       |                |                  | 8  |
| 9  | 1050.423525 | 525.715400      | 1033.396976    | 517.202126       | 1032.412960    | 516.710118       | N    | 1250.671426 | 625.839351      | 1233.644877    | 617.326077       |                |                  | 7  |
| 10 | 1489.648851 | 745.328064      | 1472.622302    | 736.814789       | 1471.638286    | 736.322781       | Q    | 1136.628499 | 568.817888      | 1119.601950    | 560.304613       |                |                  | 6  |
| 11 | 1636.717265 | 818.862271      | 1619.690716    | 810.348996       | 1618.706700    | 809.856988       | F    | 697.403173  | 349.205225      | 680.376624     | 340.691950       |                |                  | 5  |
| 12 | 1735.785679 | 868.396478      | 1718.759130    | 859.883203       | 1717.775114    | 859.391195       | V    | 550.334759  | 275.671018      | 533.308210     | 267.157743       |                |                  | 4  |
| 13 | 1848.869743 | 924.938510      | 1831.843194    | 916.425235       | 1830.859178    | 915.933227       | L    | 451.266345  | 226.136811      | 434.239796     | 217.623536       |                |                  | 3  |
| 14 | 2011.933072 | 1006.470174     | 1994.906523    | 997.956900       | 1993.922507    | 997.464892       | Y    | 338.182281  | 169.594779      | 321.155732     | 161.081504       |                |                  | 2  |
| 15 |             |                 |                |                  |                |                  | R    | 175.118952  | 88.063114       | 158.092403     | 79.549840        |                |                  | 1  |

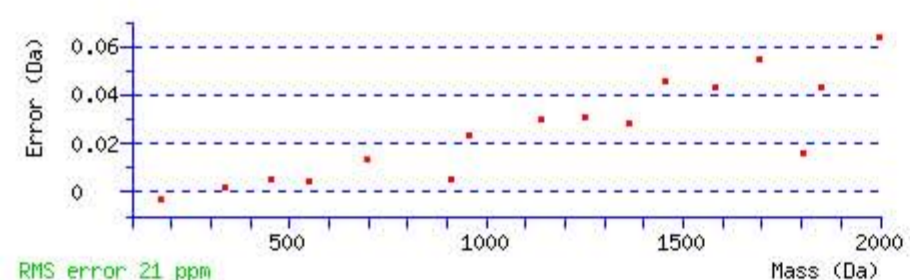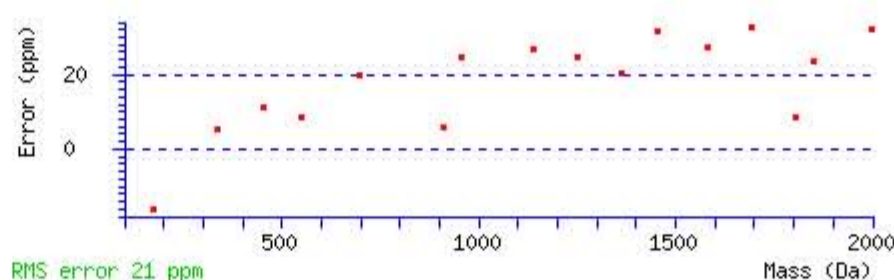

NCBI BLAST search of **YNSQNSNNQFVLYR**

(Parameters: blastp, nr protein database, expect=20000, no filter, PAM30)

Other BLAST [web gateways](#)

All matches to this query

| Score | Mr(calc):   | Delta     | Sequence                                |
|-------|-------------|-----------|-----------------------------------------|
| 90.8  | 2185.037445 | -0.007157 | <a href="#">YNSQNSNNQFVLYR</a>          |
| 36.7  | 2185.037445 | -0.007157 | <a href="#">YNSQNSNNQFVLYR</a>          |
| 21.0  | 2185.037445 | -0.007157 | <a href="#">YNSQNSNNQFVLYR</a>          |
| 2.1   | 2185.011810 | 0.018478  | <a href="#">SLQMCKWAMNISEANQFK</a>      |
| 1.0   | 2185.004013 | 0.026275  | <a href="#">CVLSCPSMDLVTCLLDFR</a>      |
| 0.1   | 2185.040604 | -0.010316 | <a href="#">ERAAAAAAAAQMHAKNNGGSSSR</a> |

Mascot: <http://www.matrixscience.com/>



**MASCOT** SCIENCE Mascot Search Results

Peptide View

MS/MS Fragmentation of **FSVATQTCQITPAEGPVVTAQYDCLGCVHPISTQSPDLEPILR**  
 Found in **KNG1\_HUMAN**, Kininogen-1 OS=Homo sapiens GN=KNG1 PE=1 SV=2

Match to Query 70176: 5066.460320 from(1014.299340,5+) rtinseconds(2666) index(8748)  
 Title: Locus:1.1.1.3498.11 File:"2013-07-02 CLN FXIII 30 min 3rd F 1.wiff"  
 Data file C:\Program Files (x86)\Matrix Science\Mascot Daemon\mgf\3 FXIII 30 min 3rd\mascot\_daemon\_merge.mgf

Click mouse within plot area to zoom in by factor of two about that point  
 Or, Plot from  to  Da   
 Label all possible matches  Label matches used for scoring

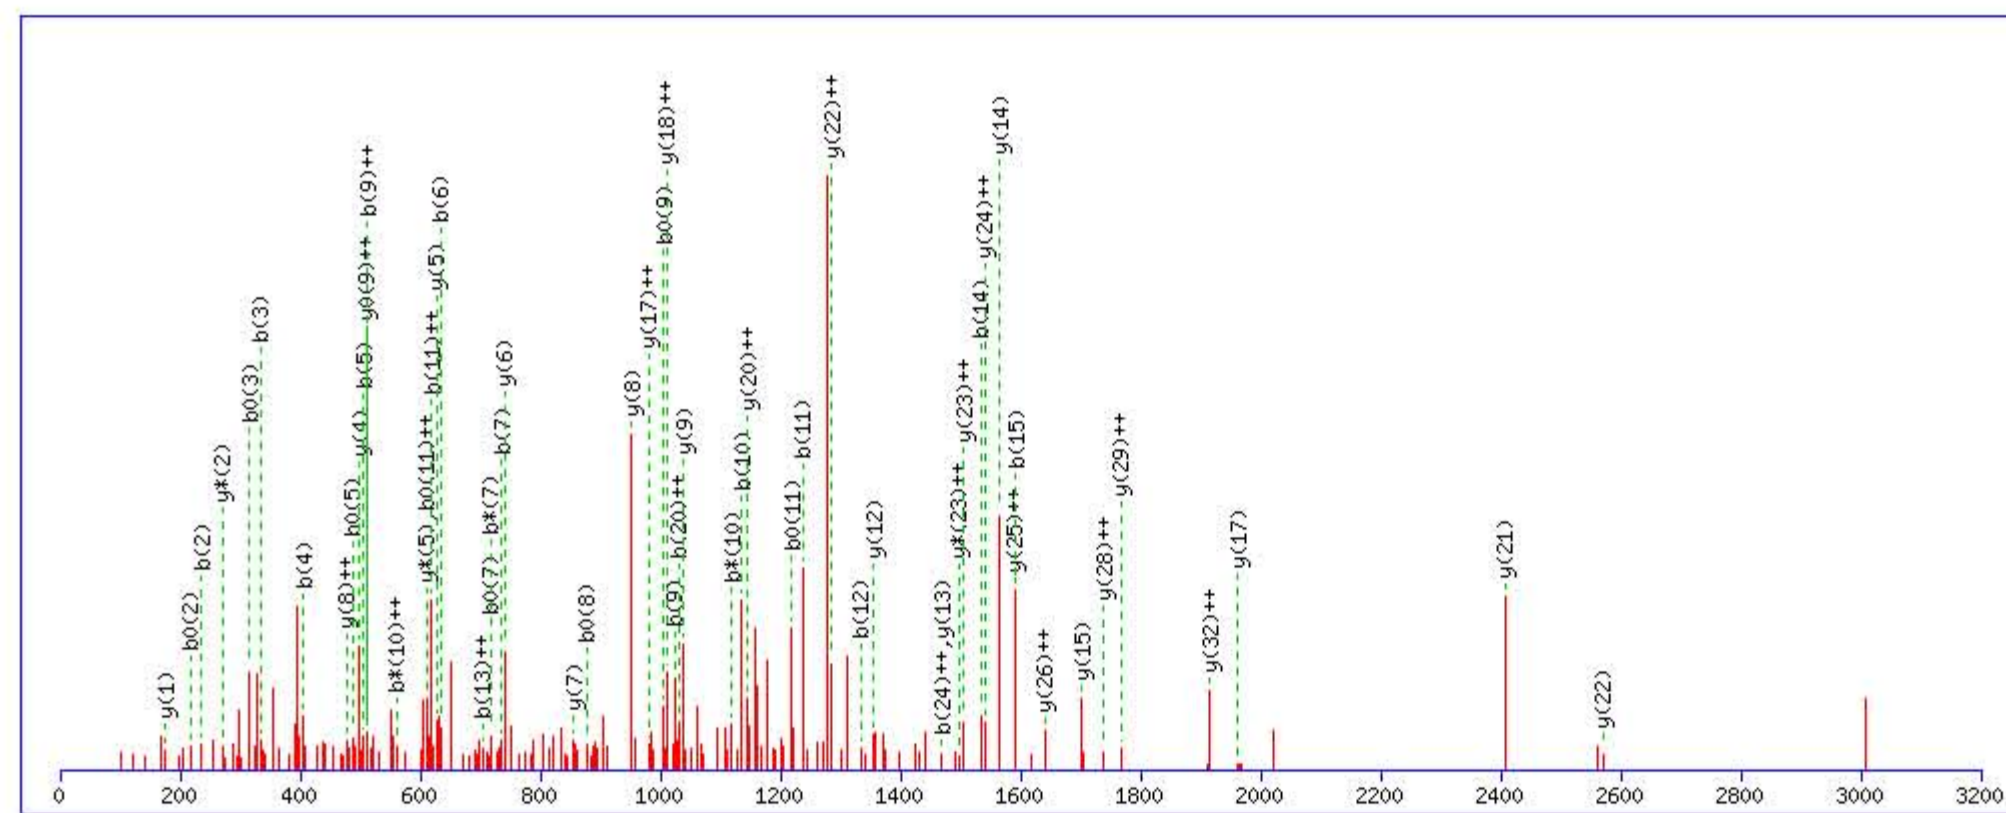

Monoisotopic mass of neutral peptide Mr(calc): 5066.465057  
 Fixed modifications: Carbamidomethyl (C) (apply to specified residues or termini only)  
 Variable modifications:  
 Q21 : Biotin:Thermo-21345 (Q)  
 Ions Score: 55 Expect: 5.4e-005  
 Matches : 58/484 fragment ions using 153 most intense peaks [\(help\)](#)

| #  | b                  | b <sup>++</sup>    | b <sup>*</sup>     | b <sup>*++</sup>  | b <sup>0</sup>     | b <sup>0++</sup>  | Seq. | y                  | y <sup>++</sup>    | y <sup>*</sup>    | y <sup>*++</sup>   | y <sup>0</sup> | y <sup>0++</sup>  | #  |
|----|--------------------|--------------------|--------------------|-------------------|--------------------|-------------------|------|--------------------|--------------------|-------------------|--------------------|----------------|-------------------|----|
| 1  | 148.075690         | 74.541483          |                    |                   |                    |                   | F    |                    |                    |                   |                    |                |                   | 43 |
| 2  | <b>235.107718</b>  | 118.057497         |                    |                   | 217.097153         | 109.052214        | S    | 4920.403881        | 2460.705578        | 4903.377332       | 2452.192304        | 4902.393316    | 2451.700296       | 42 |
| 3  | <b>334.176132</b>  | 167.591704         |                    |                   | 316.165567         | 158.586422        | V    | 4833.371853        | 2417.189565        | 4816.345304       | 2408.676290        | 4815.361288    | 2408.184282       | 41 |
| 4  | <b>405.213246</b>  | 203.110261         |                    |                   | 387.202681         | 194.104978        | A    | 4734.303439        | 2367.655357        | 4717.276890       | 2359.142083        | 4716.292874    | 2358.650075       | 40 |
| 5  | <b>506.260925</b>  | 253.634100         |                    |                   | 488.250360         | 244.628818        | T    | 4663.266325        | 2332.136800        | 4646.239776       | 2323.623526        | 4645.255760    | 2323.131518       | 39 |
| 6  | <b>634.319503</b>  | 317.663390         | 617.292954         | 309.150115        | 616.308938         | 308.658107        | Q    | 4562.218646        | 2281.612961        | 4545.192097       | 2273.099686        | 4544.208081    | 2272.607679       | 38 |
| 7  | <b>735.367182</b>  | 368.187229         | <b>718.340633</b>  | 359.673955        | <b>717.356617</b>  | 359.181947        | T    | 4434.160068        | 2217.583672        | 4417.133519       | 2209.070397        | 4416.149503    | 2208.578390       | 37 |
| 8  | 895.397831         | 448.202554         | 878.371282         | 439.689279        | <b>877.387266</b>  | 439.197271        | C    | 4333.112389        | 2167.059833        | 4316.085840       | 2158.546558        | 4315.101824    | 2158.054550       | 36 |
| 9  | <b>1023.456409</b> | <b>512.231843</b>  | 1006.429860        | 503.718568        | <b>1005.445844</b> | 503.226560        | Q    | 4173.081740        | 2087.044508        | 4156.055191       | 2078.531233        | 4155.071175    | 2078.039226       | 35 |
| 10 | <b>1136.540473</b> | 568.773875         | <b>1119.513924</b> | <b>560.260600</b> | 1118.529908        | 559.768592        | I    | 4045.023162        | 2023.015219        | 4027.996613       | 2014.501944        | 4027.012597    | 2014.009936       | 34 |
| 11 | <b>1237.588152</b> | <b>619.297714</b>  | 1220.561603        | 610.784440        | <b>1219.577587</b> | <b>610.292432</b> | T    | 3931.939098        | 1966.473187        | 3914.912549       | 1957.959912        | 3913.928533    | 1957.467904       | 33 |
| 12 | <b>1334.640916</b> | 667.824096         | 1317.614367        | 659.310822        | 1316.630351        | 658.818814        | P    | 3830.891419        | <b>1915.949347</b> | 3813.864870       | 1907.436073        | 3812.880854    | 1906.944065       | 32 |
| 13 | 1405.678030        | <b>703.342653</b>  | 1388.651481        | 694.829379        | 1387.667465        | 694.337371        | A    | 3733.838655        | 1867.422965        | 3716.812106       | 1858.909691        | 3715.828090    | 1858.417683       | 31 |
| 14 | <b>1534.720623</b> | 767.863949         | 1517.694074        | 759.350675        | 1516.710058        | 758.858667        | E    | 3662.801541        | 1831.904408        | 3645.774992       | 1823.391134        | 3644.790976    | 1822.899126       | 30 |
| 15 | <b>1591.742087</b> | 796.374681         | 1574.715538        | 787.861407        | 1573.731522        | 787.369399        | G    | 3533.758948        | <b>1767.383112</b> | 3516.732399       | 1758.869837        | 3515.748383    | 1758.377829       | 29 |
| 16 | 1688.794851        | 844.901063         | 1671.768302        | 836.387789        | 1670.784286        | 835.895781        | P    | 3476.737484        | <b>1738.872380</b> | 3459.710935       | 1730.359105        | 3458.726919    | 1729.867097       | 28 |
| 17 | 1787.863265        | 894.435271         | 1770.836716        | 885.921996        | 1769.852700        | 885.429988        | V    | 3379.684720        | 1690.345998        | 3362.658171       | 1681.832723        | 3361.674155    | 1681.340715       | 27 |
| 18 | 1886.931679        | 943.969478         | 1869.905130        | 935.456203        | 1868.921114        | 934.964195        | V    | 3280.616306        | <b>1640.811791</b> | 3263.589757       | 1632.298516        | 3262.605741    | 1631.806508       | 26 |
| 19 | 1987.979358        | 994.493317         | 1970.952809        | 985.980043        | 1969.968793        | 985.488035        | T    | 3181.547892        | <b>1591.277584</b> | 3164.521343       | 1582.764309        | 3163.537327    | 1582.272301       | 25 |
| 20 | 2059.016472        | <b>1030.011874</b> | 2041.989923        | 1021.498600       | 2041.005907        | 1021.006591       | A    | 3080.500213        | <b>1540.753744</b> | 3063.473664       | 1532.240470        | 3062.489648    | 1531.748462       | 24 |
| 21 | 2498.241798        | 1249.624537        | 2481.215249        | 1241.111262       | 2480.231233        | 1240.619254       | Q    | 3009.463099        | <b>1505.235187</b> | 2992.436550       | <b>1496.721913</b> | 2991.452534    | 1496.229905       | 23 |
| 22 | 2661.305127        | 1331.156202        | 2644.278578        | 1322.642927       | 2643.294562        | 1322.150919       | Y    | <b>2570.237773</b> | <b>1285.622524</b> | 2553.211224       | 1277.109250        | 2552.227208    | 1276.617242       | 22 |
| 23 | 2776.332070        | 1388.669673        | 2759.305521        | 1380.156398       | 2758.321505        | 1379.664390       | D    | <b>2407.174444</b> | 1204.090860        | 2390.147895       | 1195.577585        | 2389.163879    | 1195.085577       | 21 |
| 24 | 2936.362719        | <b>1468.684997</b> | 2919.336170        | 1460.171723       | 2918.352154        | 1459.679715       | C    | 2292.147501        | <b>1146.577388</b> | 2275.120952       | 1138.064114        | 2274.136936    | 1137.572106       | 20 |
| 25 | 3049.446783        | 1525.227029        | 3032.420234        | 1516.713755       | 3031.436218        | 1516.221747       | L    | 2132.116852        | 1066.562064        | 2115.090303       | 1058.048789        | 2114.106287    | 1057.556781       | 19 |
| 26 | 3106.468247        | 1553.737761        | 3089.441698        | 1545.224487       | 3088.457682        | 1544.732479       | G    | 2019.032788        | <b>1010.020032</b> | 2002.006239       | 1001.506757        | 2001.022223    | 1001.014749       | 18 |
| 27 | 3266.498896        | 1633.753086        | 3249.472347        | 1625.239811       | 3248.488331        | 1624.747803       | C    | <b>1962.011324</b> | <b>981.509300</b>  | 1944.984775       | 972.996025         | 1944.000759    | 972.504017        | 17 |
| 28 | 3365.567310        | 1683.287293        | 3348.540761        | 1674.774018       | 3347.556745        | 1674.282010       | V    | 1801.980675        | 901.493975         | 1784.954126       | 892.980701         | 1783.970110    | 892.488693        | 16 |
| 29 | 3502.626222        | 1751.816749        | 3485.599673        | 1743.303474       | 3484.615657        | 1742.811466       | H    | <b>1702.912261</b> | 851.959768         | 1685.885712       | 843.446494         | 1684.901696    | 842.954486        | 15 |
| 30 | 3599.678986        | 1800.343131        | 3582.652437        | 1791.829856       | 3581.668421        | 1791.337848       | P    | <b>1565.853349</b> | 783.430312         | 1548.826800       | 774.917038         | 1547.842784    | 774.425030        | 14 |
| 31 | 3712.763050        | 1856.885163        | 3695.736501        | 1848.371888       | 3694.752485        | 1847.879880       | I    | <b>1468.800585</b> | 734.903930         | 1451.774036       | 726.390656         | 1450.790020    | 725.898648        | 13 |
| 32 | 3799.795078        | 1900.401177        | 3782.768529        | 1891.887902       | 3781.784513        | 1891.395894       | S    | <b>1355.716521</b> | 678.361898         | 1338.689972       | 669.848624         | 1337.705956    | 669.356616        | 12 |
| 33 | 3900.842757        | 1950.925016        | 3883.816208        | 1942.411742       | 3882.832192        | 1941.919734       | T    | 1268.684493        | 634.845884         | 1251.657944       | 626.332610         | 1250.673928    | 625.840602        | 11 |
| 34 | 4028.901335        | 2014.954305        | 4011.874786        | 2006.441031       | 4010.890770        | 2005.949023       | Q    | 1167.636814        | 584.322045         | 1150.610265       | 575.808770         | 1149.626249    | 575.316762        | 10 |
| 35 | 4115.933363        | 2058.470320        | 4098.906814        | 2049.957045       | 4097.922798        | 2049.465037       | S    | <b>1039.578236</b> | 520.292756         | 1022.551687       | 511.779481         | 1021.567671    | <b>511.287473</b> | 9  |
| 36 | 4212.986127        | 2106.996702        | 4195.959578        | 2098.483427       | 4194.975562        | 2097.991419       | P    | <b>952.546208</b>  | <b>476.776742</b>  | 935.519659        | 468.263467         | 934.535643     | 467.771459        | 8  |
| 37 | 4328.013070        | 2164.510173        | 4310.986521        | 2155.996899       | 4310.002505        | 2155.504891       | D    | <b>855.493444</b>  | 428.250360         | 838.466895        | 419.737085         | 837.482879     | 419.245077        | 7  |
| 38 | 4441.097134        | 2221.052205        | 4424.070585        | 2212.538930       | 4423.086569        | 2212.046923       | L    | <b>740.466501</b>  | 370.736888         | 723.439952        | 362.223614         | 722.455936     | 361.731606        | 6  |
| 39 | 4570.139727        | 2285.573502        | 4553.113178        | 2277.060227       | 4552.129162        | 2276.568219       | E    | <b>627.382437</b>  | 314.194856         | <b>610.355888</b> | 305.681582         | 609.371872     | 305.189574        | 5  |
| 40 | 4667.192491        | 2334.099884        | 4650.165942        | 2325.586609       | 4649.181926        | 2325.094601       | P    | <b>498.339844</b>  | 249.673560         | 481.313295        | 241.160285         |                |                   | 4  |
| 41 | 4780.276555        | 2390.641915        | 4763.250006        | 2382.128641       | 4762.265990        | 2381.636633       | I    | 401.287080         | 201.147178         | 384.260531        | 192.633903         |                |                   | 3  |
| 42 | 4893.360619        | 2447.183947        | 4876.334070        | 2438.670673       | 4875.350054        | 2438.178665       | L    | 288.203016         | 144.605146         | <b>271.176467</b> | 136.091871         |                |                   | 2  |
| 43 |                    |                    |                    |                   |                    |                   | R    | <b>175.118952</b>  | 88.063114          | 158.092403        | 79.549839          |                |                   | 1  |

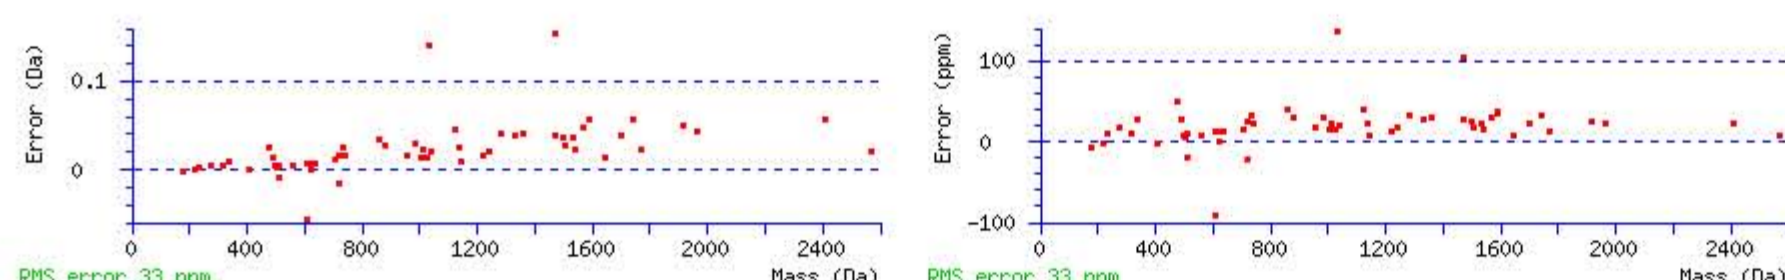

NCBI BLAST search of **FSVATQTCQITPAEGPVVTAQYDCLGCVHPISTQSPDLEPILR**  
 (Parameters: blastp, nr protein database, expect=20000, no filter, PAM30)  
 Other BLAST [web gateways](#)

All matches to this query

| Score | Mr(calc):   | Delta     | Sequence                                                    |
|-------|-------------|-----------|-------------------------------------------------------------|
| 55.1  | 5066.465057 | -0.004737 | <a href="#">FSVATQTCQITPAEGPVVTAQYDCLGCVHPISTQSPDLEPILR</a> |
| 27.2  | 5066.465057 | -0.004737 | <a href="#">FSVATQTCQITPAEGPVVTAQYDCLGCVHPISTQSPDLEPILR</a> |
| 16.5  | 5066.465057 | -0.004737 | <a href="#">FSVATQTCQITPAEGPVVTAQYDCLGCVHPISTQSPDLEPILR</a> |
| 14.5  | 5066.465057 | -0.004737 | <a href="#">FSVATQTCQITPAEGPVVTAQYDCLGCVHPISTQSPDLEPILR</a> |



# Mascot Search Results

## Peptide View

MS/MS Fragmentation of **FPETLMEIEIPIVDHSTCQK**

Found in **MASPI\_HUMAN**, Mannan-binding lectin serine protease 1 OS=Homo sapiens GN=MASPI PE=1 SV=3

Match to Query 54144: 2697.319182 from(900.113670,3+) rtinseconds(2771) index(55171)

Title: Locus:1.1.1.3606.23 File:"2013-07-02 CLN FXIII 30 min 3rd F 4.wiff"

Data file C:\Program Files (x86)\Matrix Science\Mascot Daemon\mgf3 FXIII 30 min 3rd\mascot\_daemon\_merge.mgf

Click mouse within plot area to zoom in by factor of two about that point

Or, Plot from  to  Da

Label all possible matches  Label matches used for scoring

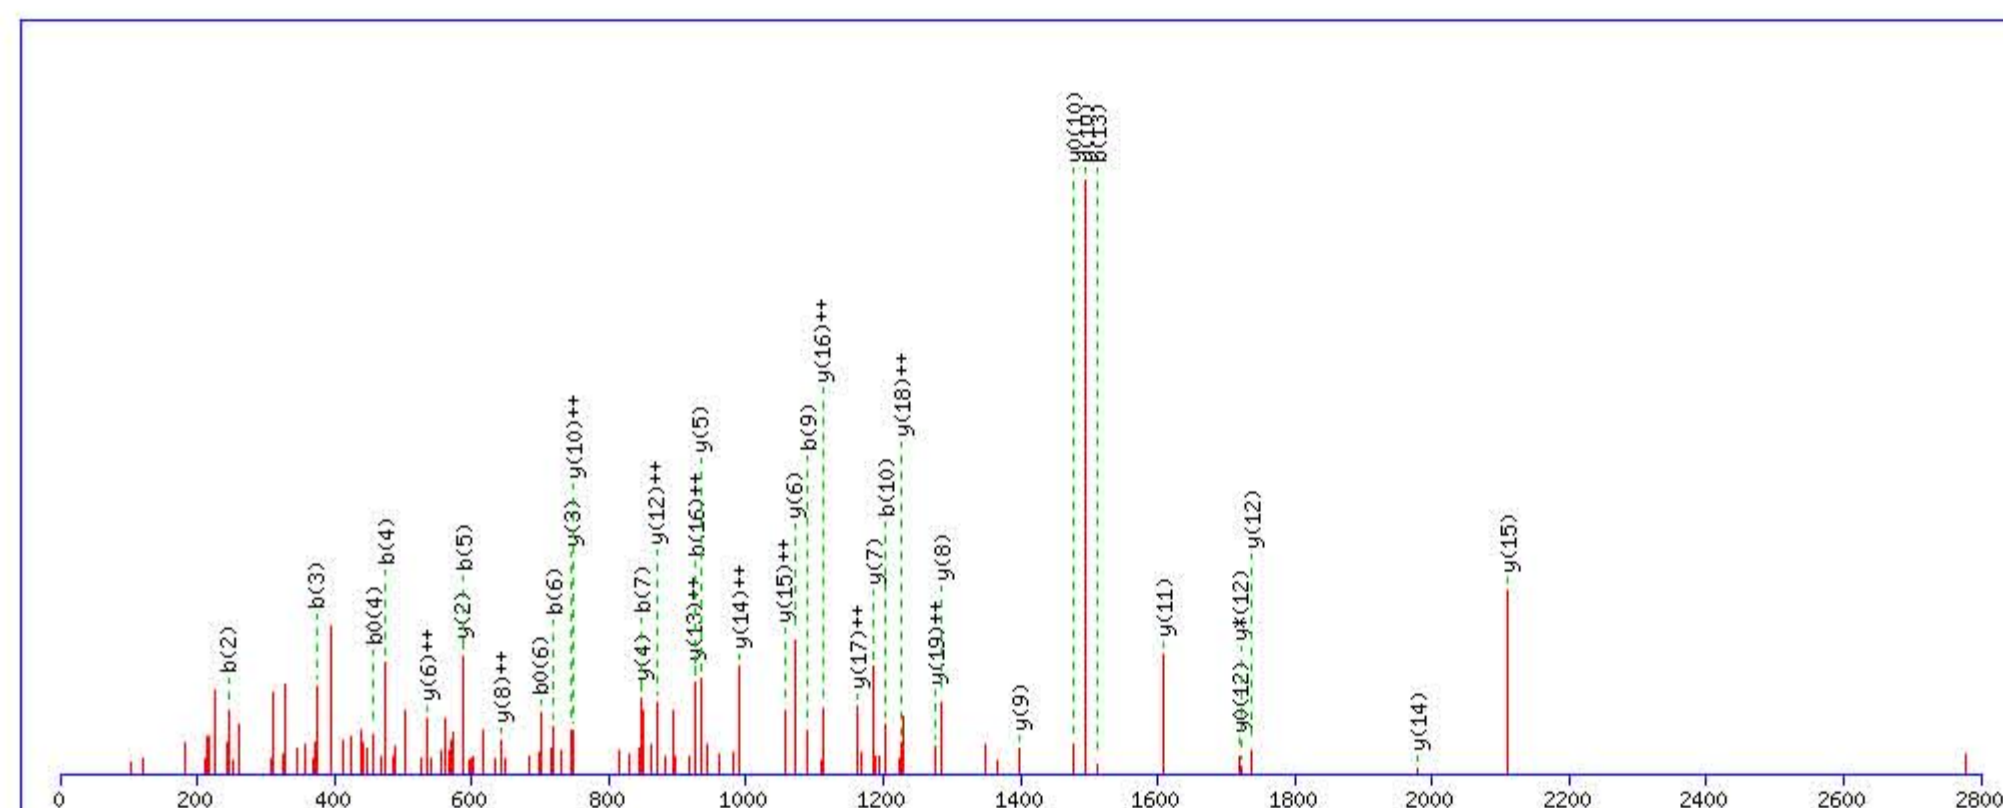

Monoisotopic mass of neutral peptide Mr(calc): 2697.321609

Fixed modifications: Carbamidomethyl (C) (apply to specified residues or termini only)

Variable modifications:

Q19 : Biotin:Thermo-21345 (Q)

Ions Score: 98 Expect: 1.2e-009

Matches : 39/182 fragment ions using 59 most intense peaks [\(help\)](#)

| #  | b                  | b <sup>++</sup>   | b <sup>*</sup> | b <sup>*++</sup> | b <sup>0</sup>    | b <sup>0++</sup> | Seq. | y                  | y <sup>++</sup>    | y <sup>*</sup>     | y <sup>*++</sup> | y <sup>0</sup>     | y <sup>0++</sup> | #  |
|----|--------------------|-------------------|----------------|------------------|-------------------|------------------|------|--------------------|--------------------|--------------------|------------------|--------------------|------------------|----|
| 1  | 148.075690         | 74.541483         |                |                  |                   |                  | F    |                    |                    |                    |                  |                    |                  | 20 |
| 2  | <b>245.128454</b>  | 123.067865        |                |                  |                   |                  | P    | 2551.260482        | <b>1276.133879</b> | 2534.233933        | 1267.620604      | 2533.249917        | 1267.128596      | 19 |
| 3  | <b>374.171047</b>  | 187.589161        |                |                  | 356.160482        | 178.583879       | E    | 2454.207718        | <b>1227.607497</b> | 2437.181169        | 1219.094222      | 2436.197153        | 1218.602214      | 18 |
| 4  | <b>475.218726</b>  | 238.113001        |                |                  | <b>457.208161</b> | 229.107719       | T    | 2325.165125        | <b>1163.086200</b> | 2308.138576        | 1154.572926      | 2307.154560        | 1154.080918      | 17 |
| 5  | <b>588.302790</b>  | 294.655033        |                |                  | 570.292225        | 285.649751       | L    | 2224.117446        | <b>1112.562361</b> | 2207.090897        | 1104.049086      | 2206.106881        | 1103.557078      | 16 |
| 6  | <b>719.343275</b>  | 360.175276        |                |                  | <b>701.332710</b> | 351.169993       | M    | <b>2111.033382</b> | <b>1056.020329</b> | 2094.006833        | 1047.507054      | 2093.022817        | 1047.015046      | 15 |
| 7  | <b>848.385868</b>  | 424.696572        |                |                  | 830.375303        | 415.691290       | E    | <b>1979.992897</b> | <b>990.500087</b>  | 1962.966348        | 981.986812       | 1961.982332        | 981.494804       | 14 |
| 8  | 961.469932         | 481.238604        |                |                  | 943.459367        | 472.233322       | I    | 1850.950304        | <b>925.978790</b>  | 1833.923755        | 917.465516       | 1832.939739        | 916.973508       | 13 |
| 9  | <b>1090.512525</b> | 545.759901        |                |                  | 1072.501960       | 536.754618       | E    | <b>1737.866240</b> | <b>869.436758</b>  | <b>1720.839691</b> | 860.923484       | <b>1719.855675</b> | 860.431476       | 12 |
| 10 | <b>1203.596589</b> | 602.301933        |                |                  | 1185.586024       | 593.296650       | I    | <b>1608.823647</b> | 804.915462         | 1591.797098        | 796.402187       | 1590.813082        | 795.910179       | 11 |
| 11 | 1300.649353        | 650.828315        |                |                  | 1282.638788       | 641.823032       | P    | <b>1495.739583</b> | <b>748.373430</b>  | 1478.713034        | 739.860155       | <b>1477.729018</b> | 739.368147       | 10 |
| 12 | 1413.733417        | 707.370346        |                |                  | 1395.722852       | 698.365064       | I    | <b>1398.686819</b> | 699.847048         | 1381.660270        | 691.333773       | 1380.676254        | 690.841765       | 9  |
| 13 | <b>1512.801831</b> | 756.904554        |                |                  | 1494.791266       | 747.899271       | V    | <b>1285.602755</b> | <b>643.305016</b>  | 1268.576206        | 634.791741       | 1267.592190        | 634.299733       | 8  |
| 14 | 1627.828774        | 814.418025        |                |                  | 1609.818209       | 805.412743       | D    | <b>1186.534341</b> | 593.770809         | 1169.507792        | 585.257534       | 1168.523776        | 584.765526       | 7  |
| 15 | 1764.887686        | 882.947481        |                |                  | 1746.877121       | 873.942199       | H    | <b>1071.507398</b> | <b>536.257337</b>  | 1054.480849        | 527.744063       | 1053.496833        | 527.252055       | 6  |
| 16 | 1851.919714        | <b>926.463495</b> |                |                  | 1833.909149       | 917.458213       | S    | <b>934.448486</b>  | 467.727881         | 917.421937         | 459.214607       | 916.437921         | 458.722599       | 5  |
| 17 | 1952.967393        | 976.987335        |                |                  | 1934.956828       | 967.982052       | T    | <b>847.416458</b>  | 424.211867         | 830.389909         | 415.698593       | 829.405893         | 415.206585       | 4  |
| 18 | 2112.998042        | 1057.002659       |                |                  | 2094.987477       | 1047.997376      | C    | <b>746.368779</b>  | 373.688028         | 729.342230         | 365.174753       |                    |                  | 3  |
| 19 | 2552.223368        | 1276.615322       | 2535.196819    | 1268.102047      | 2534.212803       | 1267.610039      | Q    | <b>586.338130</b>  | 293.672703         | 569.311581         | 285.159429       |                    |                  | 2  |
| 20 |                    |                   |                |                  |                   |                  | K    | 147.112804         | 74.060040          | 130.086255         | 65.546765        |                    |                  | 1  |

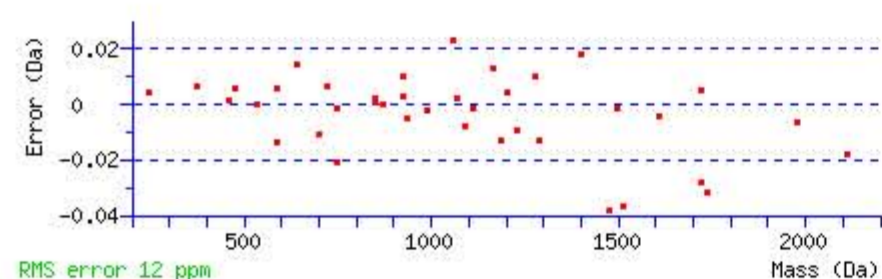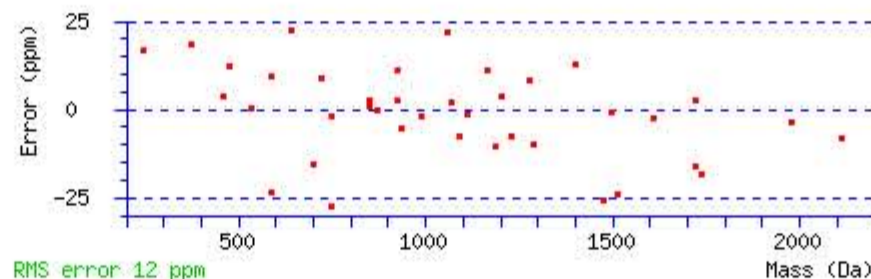

NCBI BLAST search of [FPETLMEIEIPIVDHSTCQK](#)

(Parameters: blastp, nr protein database, expect=20000, no filter, PAM30)

Other BLAST [web gateways](#)

All matches to this query

| Score | Mr(calc):   | Delta     | Sequence                                |
|-------|-------------|-----------|-----------------------------------------|
| 98.0  | 2697.321609 | -0.002427 | <a href="#">FPETLMEIEIPIVDHSTCQK</a>    |
| 3.0   | 2697.325470 | -0.006288 | <a href="#">KDAATTVCSEKFNDFDQQTLLQK</a> |
| 3.0   | 2697.325470 | -0.006288 | <a href="#">KDAATTVCSEKFNDFDQQTLLQK</a> |
| 2.6   | 2697.307693 | 0.011489  | <a href="#">QFNLLGNSVPTATQTLMTMYR</a>   |
| 2.1   | 2697.325470 | -0.006288 | <a href="#">KDAATTVCSEKFNDFDQQTLLQK</a> |



# MASCOT Search Results

## Peptide View

MS/MS Fragmentation of **APEPISTQSHSVLILFHSDNSGENR**

Found in **MASPI\_HUMAN**, Mannan-binding lectin serine protease 1 OS=Homo sapiens GN=MASPI PE=1 SV=3

Match to Query 57665: 3045.497496 from(762.381650,4+) rtinseconds(2293) index(52717)

Title: Locus:1.1.1.3441.16 File:"2013-07-02 CLN FXIII 30 min 3rd F 4.wiff"

Data file C:\Program Files (x86)\Matrix Science\Mascot Daemon\mgf3 FXIII 30 min 3rd\mascot\_daemon\_merge.mgf

Click mouse within plot area to zoom in by factor of two about that point

Or, Plot from  to  Da

Label all possible matches  Label matches used for scoring

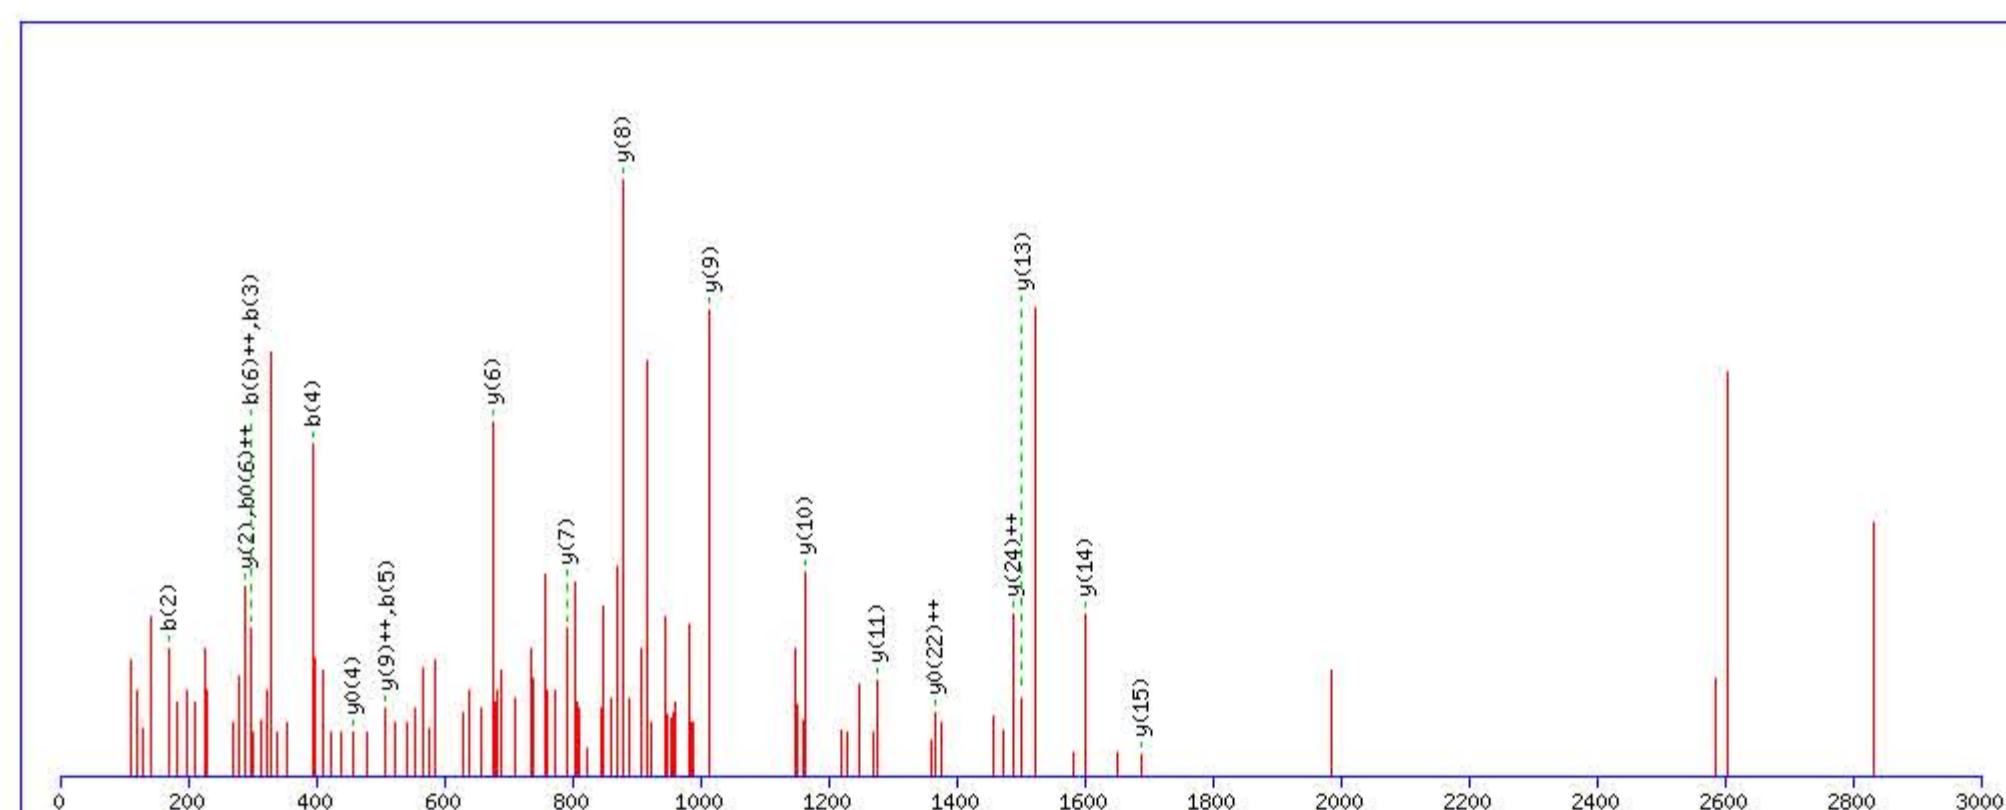

Monoisotopic mass of neutral peptide Mr(calc): 3045.497803

Fixed modifications: Carbamidomethyl (C) (apply to specified residues or termini only)

Variable modifications:

Q8 : Biotin:Thermo-21345 (Q)

Ions Score: 29 Expect: 0.032

Matches : 20/266 fragment ions using 49 most intense peaks [\(help\)](#)

| #  | b                 | b <sup>++</sup>   | b <sup>+</sup> | b <sup>+++</sup> | b <sup>0</sup> | b <sup>0++</sup>  | Seq. | y                  | y <sup>++</sup>    | y <sup>+</sup> | y <sup>+++</sup> | y <sup>0</sup>    | y <sup>0++</sup>   | #  |
|----|-------------------|-------------------|----------------|------------------|----------------|-------------------|------|--------------------|--------------------|----------------|------------------|-------------------|--------------------|----|
| 1  | 72.044390         | 36.525833         |                |                  |                |                   | A    |                    |                    |                |                  |                   |                    | 25 |
| 2  | <b>169.097154</b> | 85.052215         |                |                  |                |                   | P    | 2975.467980        | <b>1488.237628</b> | 2958.441431    | 1479.724353      | 2957.457415       | 1479.232345        | 24 |
| 3  | <b>298.139747</b> | 149.573512        |                |                  | 280.129182     | 140.568229        | E    | 2878.415216        | 1439.711246        | 2861.388667    | 1431.197971      | 2860.404651       | 1430.705963        | 23 |
| 4  | <b>395.192511</b> | 198.099894        |                |                  | 377.181946     | 189.094611        | P    | 2749.372623        | 1375.189949        | 2732.346074    | 1366.676675      | 2731.362058       | <b>1366.184667</b> | 22 |
| 5  | <b>508.276575</b> | 254.641926        |                |                  | 490.266010     | 245.636643        | I    | 2652.319859        | 1326.663567        | 2635.293310    | 1318.150293      | 2634.309294       | 1317.658285        | 21 |
| 6  | 595.308603        | <b>298.157940</b> |                |                  | 577.298038     | <b>289.152657</b> | S    | 2539.235795        | 1270.121535        | 2522.209246    | 1261.608261      | 2521.225230       | 1261.116253        | 20 |
| 7  | 696.356282        | 348.681779        |                |                  | 678.345717     | 339.676497        | T    | 2452.203767        | 1226.605521        | 2435.177218    | 1218.092247      | 2434.193202       | 1217.600239        | 19 |
| 8  | 1135.581608       | 568.294442        | 1118.555059    | 559.781168       | 1117.571043    | 559.289160        | Q    | 2351.156088        | 1176.081682        | 2334.129539    | 1167.568407      | 2333.145523       | 1167.076399        | 18 |
| 9  | 1222.613636       | 611.810456        | 1205.587087    | 603.297182       | 1204.603071    | 602.805174        | S    | 1911.930762        | 956.469019         | 1894.904213    | 947.955745       | 1893.920197       | 947.463737         | 17 |
| 10 | 1359.672548       | 680.339912        | 1342.645999    | 671.826638       | 1341.661983    | 671.334630        | H    | 1824.898734        | 912.953005         | 1807.872185    | 904.439731       | 1806.888169       | 903.947723         | 16 |
| 11 | 1446.704576       | 723.855926        | 1429.678027    | 715.342652       | 1428.694011    | 714.850644        | S    | <b>1687.839822</b> | 844.423549         | 1670.813273    | 835.910275       | 1669.829257       | 835.418267         | 15 |
| 12 | 1545.772990       | 773.390133        | 1528.746441    | 764.876859       | 1527.762425    | 764.384851        | V    | <b>1600.807794</b> | 800.907535         | 1583.781245    | 792.394261       | 1582.797229       | 791.902253         | 14 |
| 13 | 1658.857054       | 829.932165        | 1641.830505    | 821.418891       | 1640.846489    | 820.926883        | L    | <b>1501.739380</b> | 751.373328         | 1484.712831    | 742.860054       | 1483.728815       | 742.368045         | 13 |
| 14 | 1771.941118       | 886.474197        | 1754.914569    | 877.960923       | 1753.930553    | 877.468915        | I    | 1388.655316        | 694.831296         | 1371.628767    | 686.318022       | 1370.644751       | 685.826014         | 12 |
| 15 | 1885.025182       | 943.016229        | 1867.998633    | 934.502955       | 1867.014617    | 934.010947        | L    | <b>1275.571252</b> | 638.289264         | 1258.544703    | 629.775990       | 1257.560687       | 629.283982         | 11 |
| 16 | 2032.093596       | 1016.550436       | 2015.067047    | 1008.037162      | 2014.083031    | 1007.545154       | F    | <b>1162.487188</b> | 581.747232         | 1145.460639    | 573.233958       | 1144.476623       | 572.741950         | 10 |
| 17 | 2169.152508       | 1085.079892       | 2152.125959    | 1076.566617      | 2151.141943    | 1076.074610       | H    | <b>1015.418774</b> | <b>508.213025</b>  | 998.392225     | 499.699751       | 997.408209        | 499.207743         | 9  |
| 18 | 2256.184536       | 1128.595906       | 2239.157987    | 1120.082631      | 2238.173971    | 1119.590624       | S    | <b>878.359862</b>  | 439.683569         | 861.333313     | 431.170295       | 860.349297        | 430.678287         | 8  |
| 19 | 2371.211479       | 1186.109377       | 2354.184930    | 1177.596103      | 2353.200914    | 1177.104095       | D    | <b>791.327834</b>  | 396.167555         | 774.301285     | 387.654280       | 773.317269        | 387.162272         | 7  |
| 20 | 2485.254406       | 1243.130841       | 2468.227857    | 1234.617566      | 2467.243841    | 1234.125558       | N    | <b>676.300891</b>  | 338.654084         | 659.274342     | 330.140809       | 658.290326        | 329.648801         | 6  |
| 21 | 2572.286434       | 1286.646855       | 2555.259885    | 1278.133580      | 2554.275869    | 1277.641572       | S    | 562.257964         | 281.632620         | 545.231415     | 273.119346       | 544.247399        | 272.627338         | 5  |
| 22 | 2629.307898       | 1315.157587       | 2612.281349    | 1306.644312      | 2611.297333    | 1306.152304       | G    | 475.225936         | 238.116606         | 458.199387     | 229.603331       | <b>457.215371</b> | 229.111323         | 4  |
| 23 | 2758.350491       | 1379.678884       | 2741.323942    | 1371.165609      | 2740.339926    | 1370.673601       | E    | 418.204472         | 209.605874         | 401.177923     | 201.092600       | 400.193907        | 200.600592         | 3  |
| 24 | 2872.393418       | 1436.700347       | 2855.366869    | 1428.187072      | 2854.382853    | 1427.695064       | N    | <b>289.161879</b>  | 145.084577         | 272.135330     | 136.571303       |                   |                    | 2  |
| 25 |                   |                   |                |                  |                |                   | R    | 175.118952         | 88.063114          | 158.092403     | 79.549839        |                   |                    | 1  |

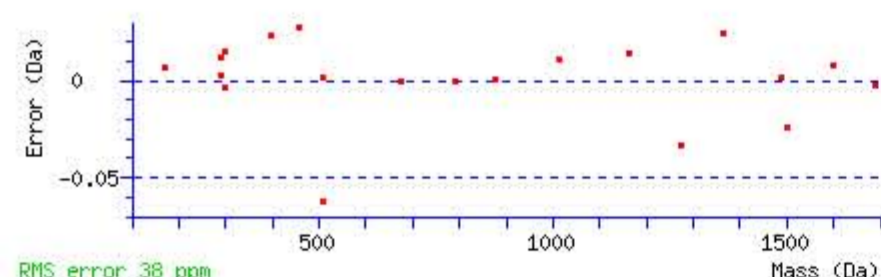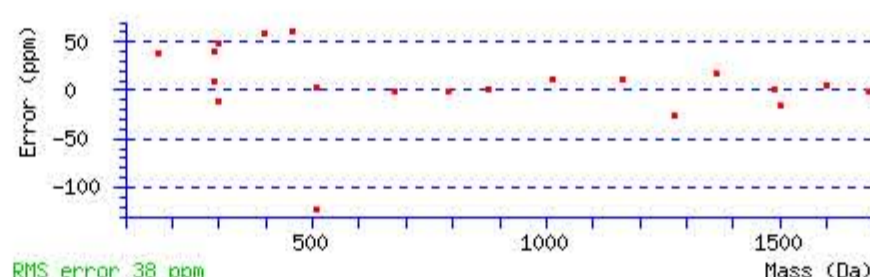

NCBI BLAST search of [APEPISTQSHSVLILFHSDNSGENR](#)  
 (Parameters: blastp, nr protein database, expect=20000, no filter, PAM30)  
 Other BLAST [web gateways](#)

All matches to this query

| Score | Mr(calc):   | Delta     | Sequence                                  |
|-------|-------------|-----------|-------------------------------------------|
| 29.3  | 3045.497803 | -0.000307 | <a href="#">APEPISTQSHSVLILFHSDNSGENR</a> |

Mascot: <http://www.matrixscience.com/>



**Peptide View**

MS/MS Fragmentation of **LCQPVLSPACQLVLHQILK**  
 Found in **PMEL\_HUMAN**, Melanocyte protein PMEL OS=Homo sapiens GN=PMEL PE=1 SV=2

Match to Query 53627: 2624.434512 from(875.818780,3+) rtinseconds(2679) index(54541)  
 Title: Locus:1.1.1.3575.17 File:"2013-07-02 CLN FXIII 30 min 3rd F 4.wiff"  
 Data file C:\Program Files (x86)\Matrix Science\Mascot Daemon\mgf3 FXIII 30 min 3rd\mascot\_daemon\_merge.mgf

Click mouse within plot area to zoom in by factor of two about that point  
 Or, Plot from  to  Da   
 Label all possible matches  Label matches used for scoring

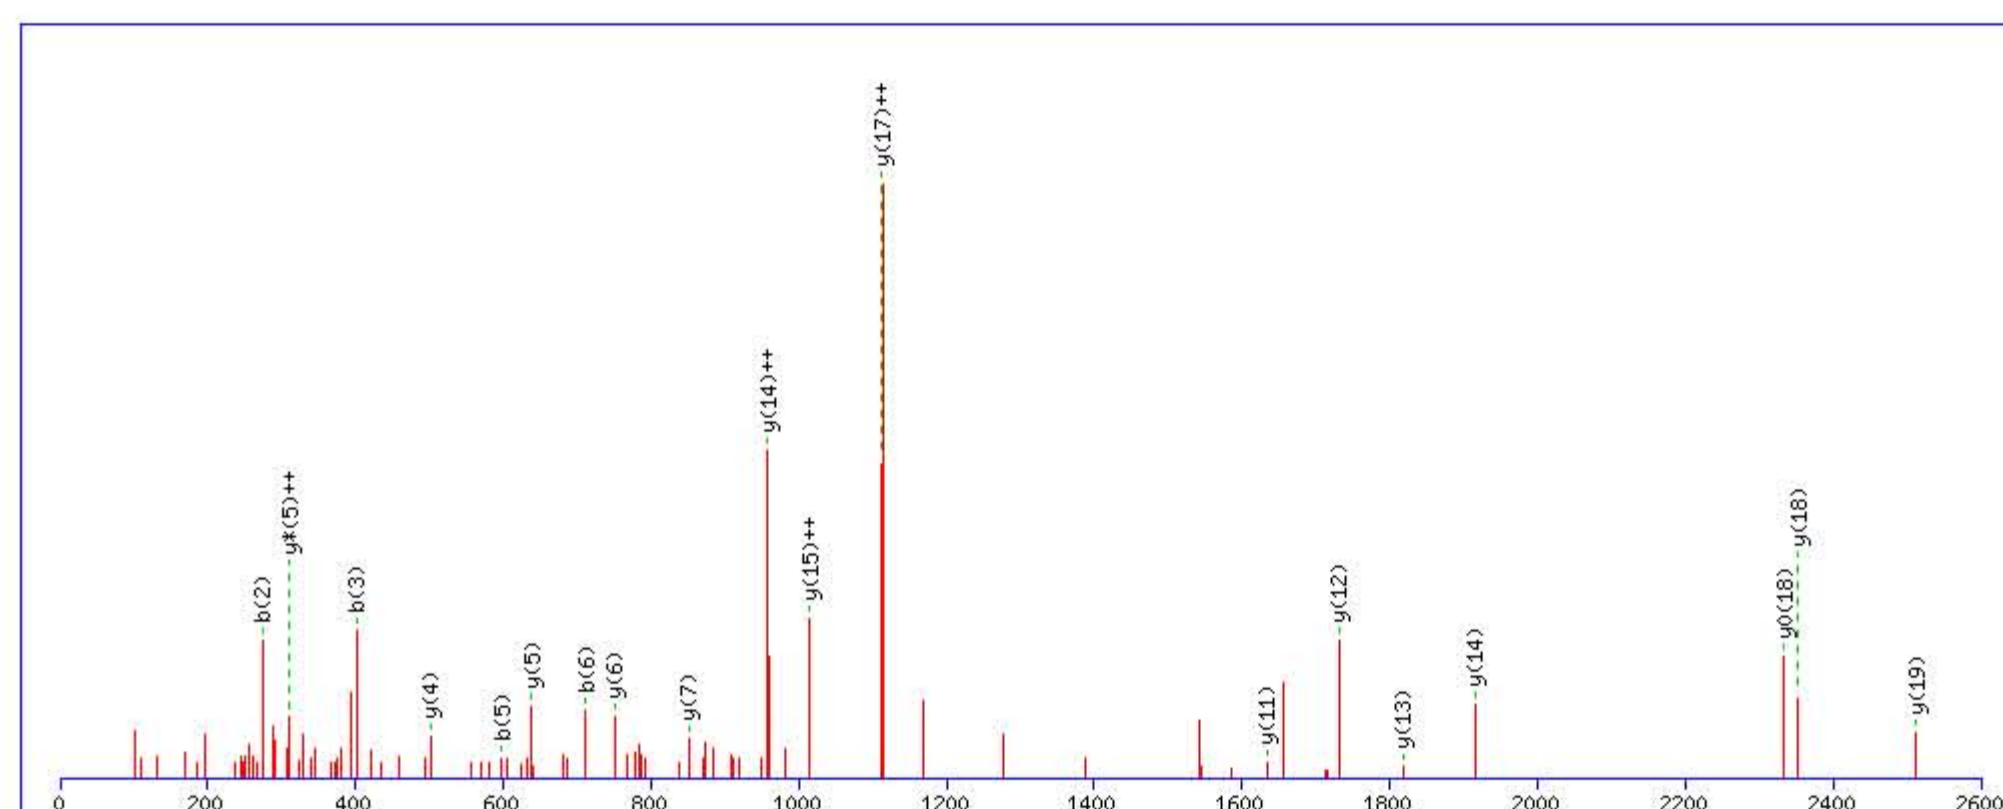

Monoisotopic mass of neutral peptide Mr(calc): 2624.436859  
 Fixed modifications: Carbamidomethyl (C) (apply to specified residues or termini only)  
 Variable modifications:  
 Q12 : Biotin:Thermo-21345 (Q)  
 Ions Score: 49 Expect: 0.00016  
 Matches : 19/186 fragment ions using 37 most intense peaks [\(help\)](#)

| #  | b                 | b <sup>++</sup> | b <sup>*</sup> | b <sup>*++</sup> | b <sup>0</sup> | b <sup>0++</sup> | Seq. | y                  | y <sup>++</sup>    | y <sup>*</sup> | y <sup>*++</sup>  | y <sup>0</sup>     | y <sup>0++</sup> | #  |
|----|-------------------|-----------------|----------------|------------------|----------------|------------------|------|--------------------|--------------------|----------------|-------------------|--------------------|------------------|----|
| 1  | 114.091340        | 57.549308       |                |                  |                |                  | L    |                    |                    |                |                   |                    |                  | 20 |
| 2  | <b>274.121989</b> | 137.564632      |                |                  |                |                  | C    | <b>2512.360078</b> | 1256.683677        | 2495.333529    | 1248.170402       | 2494.349513        | 1247.678394      | 19 |
| 3  | <b>402.180567</b> | 201.593921      | 385.154018     | 193.080647       |                |                  | Q    | <b>2352.329429</b> | 1176.668352        | 2335.302880    | 1168.155078       | <b>2334.318864</b> | 1167.663070      | 18 |
| 4  | 499.233331        | 250.120303      | 482.206782     | 241.607029       |                |                  | P    | 2224.270851        | <b>1112.639063</b> | 2207.244302    | 1104.125789       | 2206.260286        | 1103.633781      | 17 |
| 5  | <b>598.301745</b> | 299.654511      | 581.275196     | 291.141236       |                |                  | V    | 2127.218087        | 1064.112681        | 2110.191538    | 1055.599407       | 2109.207522        | 1055.107399      | 16 |
| 6  | <b>711.385809</b> | 356.196543      | 694.359260     | 347.683268       |                |                  | L    | 2028.149673        | <b>1014.578475</b> | 2011.123124    | 1006.065200       | 2010.139108        | 1005.573192      | 15 |
| 7  | 808.438573        | 404.722925      | 791.412024     | 396.209650       |                |                  | P    | <b>1915.065609</b> | <b>958.036443</b>  | 1898.039060    | 949.523168        | 1897.055044        | 949.031160       | 14 |
| 8  | 895.470601        | 448.238939      | 878.444052     | 439.725664       | 877.460036     | 439.233656       | S    | <b>1818.012845</b> | 909.510061         | 1800.986296    | 900.996786        | 1800.002280        | 900.504778       | 13 |
| 9  | 992.523365        | 496.765321      | 975.496816     | 488.252046       | 974.512800     | 487.760038       | P    | <b>1730.980817</b> | 865.994047         | 1713.954268    | 857.480772        |                    |                  | 12 |
| 10 | 1063.560479       | 532.283878      | 1046.533930    | 523.770603       | 1045.549914    | 523.278595       | A    | <b>1633.928053</b> | 817.467665         | 1616.901504    | 808.954390        |                    |                  | 11 |
| 11 | 1223.591128       | 612.299202      | 1206.564579    | 603.785928       | 1205.580563    | 603.293920       | C    | 1562.890939        | 781.949108         | 1545.864390    | 773.435833        |                    |                  | 10 |
| 12 | 1662.816454       | 831.911865      | 1645.789905    | 823.398591       | 1644.805889    | 822.906583       | Q    | 1402.860290        | 701.933783         | 1385.833741    | 693.420509        |                    |                  | 9  |
| 13 | 1775.900518       | 888.453897      | 1758.873969    | 879.940623       | 1757.889953    | 879.448614       | L    | 963.634964         | 482.321120         | 946.608415     | 473.807846        |                    |                  | 8  |
| 14 | 1874.968932       | 937.988104      | 1857.942383    | 929.474830       | 1856.958367    | 928.982822       | V    | <b>850.550900</b>  | 425.779088         | 833.524351     | 417.265814        |                    |                  | 7  |
| 15 | 1988.052996       | 994.530136      | 1971.026447    | 986.016862       | 1970.042431    | 985.524853       | L    | <b>751.482486</b>  | 376.244881         | 734.455937     | 367.731607        |                    |                  | 6  |
| 16 | 2125.111908       | 1063.059592     | 2108.085359    | 1054.546317      | 2107.101343    | 1054.054309      | H    | <b>638.398422</b>  | 319.702849         | 621.371873     | <b>311.189575</b> |                    |                  | 5  |
| 17 | 2253.170486       | 1127.088881     | 2236.143937    | 1118.575606      | 2235.159921    | 1118.083598      | Q    | <b>501.339510</b>  | 251.173393         | 484.312961     | 242.660119        |                    |                  | 4  |
| 18 | 2366.254550       | 1183.630913     | 2349.228001    | 1175.117638      | 2348.243985    | 1174.625630      | I    | 373.280932         | 187.144104         | 356.254383     | 178.630830        |                    |                  | 3  |
| 19 | 2479.338614       | 1240.172945     | 2462.312065    | 1231.659670      | 2461.328049    | 1231.167663      | L    | 260.196868         | 130.602072         | 243.170319     | 122.088798        |                    |                  | 2  |
| 20 |                   |                 |                |                  |                |                  | K    | 147.112804         | 74.060040          | 130.086255     | 65.546765         |                    |                  | 1  |

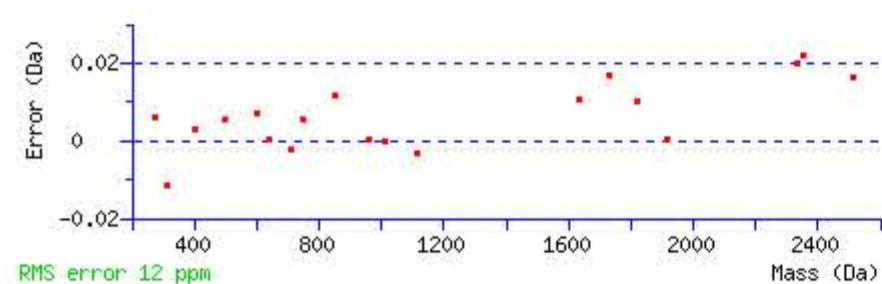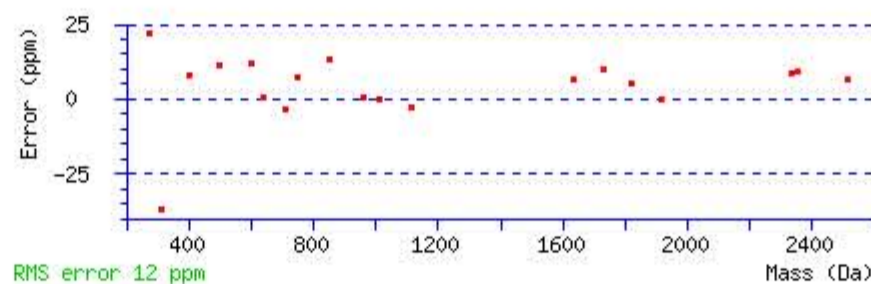

NCBI BLAST search of **LCQPVLSPACQLVLHQILK**  
 (Parameters: blastp, nr protein database, expect=20000, no filter, PAM30)  
 Other BLAST [web gateways](#)

**All matches to this query**

| Score | Mr(calc):   | Delta     | Sequence                            |
|-------|-------------|-----------|-------------------------------------|
| 49.2  | 2624.436859 | -0.002347 | <a href="#">LCQPVLSPACQLVLHQILK</a> |
| 15.7  | 2624.436859 | -0.002347 | <a href="#">LCQPVLSPACQLVLHQILK</a> |
| 2.4   | 2624.436859 | -0.002347 | <a href="#">LCQPVLSPACQLVLHQILK</a> |



# MASCOT Search Results

## Peptide View

MS/MS Fragmentation of **QVLLVGAPTYDDVSK**

Found in **PHLD\_HUMAN**, Phosphatidylinositol-glycan-specific phospholipase D OS=Homo sapiens GN=GPLD1 PE=1 SV=3

Match to Query 41310: 1915.012122 from(639.344650,3+) rtinseconds(2338) index(52881)

Title: Locus:1.1.1.3457.7 File:"2013-07-02 CLN FXIII 30 min 3rd F 4.wiff"

Data file C:\Program Files (x86)\Matrix Science\Mascot Daemon\mgf\3 FXIII 30 min 3rd\mascot\_daemon\_merge.mgf

Click mouse within plot area to zoom in by factor of two about that point

Or, Plot from  to  Da

Label all possible matches  Label matches used for scoring

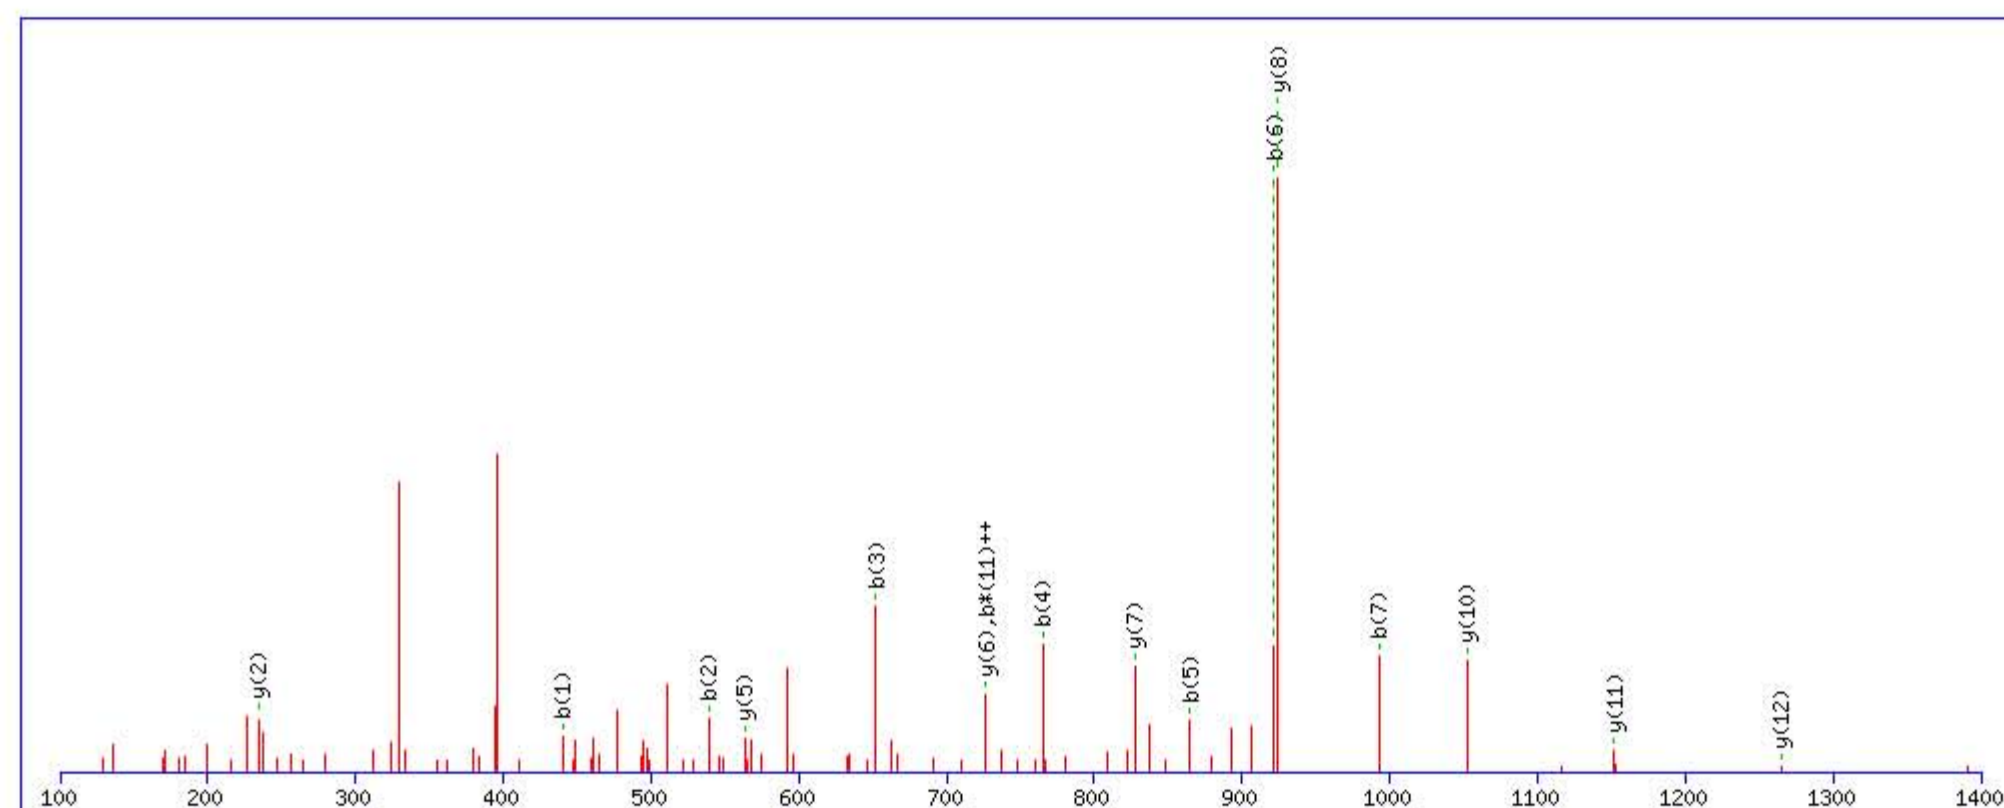

Monoisotopic mass of neutral peptide Mr(calc): 1915.012497

Fixed modifications: Carbamidomethyl (C) (apply to specified residues or termini only)

Variable modifications:

Q1 : Biotin:Thermo-21345 (Q)

Ions Score: 49 Expect: 7.7e-005

Matches : 16/150 fragment ions using 31 most intense peaks [\(help\)](#)

| #  | b           | b <sup>++</sup> | b <sup>+</sup> | b <sup>+++</sup> | b <sup>0</sup> | b <sup>0++</sup> | Seq. | y           | y <sup>++</sup> | y <sup>+</sup> | y <sup>+++</sup> | y <sup>0</sup> | y <sup>0++</sup> | #  |
|----|-------------|-----------------|----------------|------------------|----------------|------------------|------|-------------|-----------------|----------------|------------------|----------------|------------------|----|
| 1  | 440.232602  | 220.619939      | 423.206053     | 212.106664       |                |                  | Q    |             |                 |                |                  |                |                  | 15 |
| 2  | 539.301016  | 270.154146      | 522.274467     | 261.640872       |                |                  | V    | 1476.794438 | 738.900857      | 1459.767889    | 730.387583       | 1458.783873    | 729.895575       | 14 |
| 3  | 652.385080  | 326.696178      | 635.358531     | 318.182904       |                |                  | L    | 1377.726024 | 689.366650      | 1360.699475    | 680.853376       | 1359.715459    | 680.361368       | 13 |
| 4  | 765.469144  | 383.238210      | 748.442595     | 374.724936       |                |                  | L    | 1264.641960 | 632.824618      | 1247.615411    | 624.311344       | 1246.631395    | 623.819336       | 12 |
| 5  | 864.537558  | 432.772417      | 847.511009     | 424.259143       |                |                  | V    | 1151.557896 | 576.282586      | 1134.531347    | 567.769312       | 1133.547331    | 567.277304       | 11 |
| 6  | 921.559022  | 461.283149      | 904.532473     | 452.769875       |                |                  | G    | 1052.489482 | 526.748379      | 1035.462933    | 518.235105       | 1034.478917    | 517.743097       | 10 |
| 7  | 992.596136  | 496.801706      | 975.569587     | 488.288432       |                |                  | A    | 995.468018  | 498.237647      | 978.441469     | 489.724373       | 977.457453     | 489.232365       | 9  |
| 8  | 1089.648900 | 545.328088      | 1072.622351    | 536.814814       |                |                  | P    | 924.430904  | 462.719090      | 907.404355     | 454.205816       | 906.420339     | 453.713808       | 8  |
| 9  | 1190.696579 | 595.851927      | 1173.670030    | 587.338653       | 1172.686014    | 586.846645       | T    | 827.378140  | 414.192708      | 810.351591     | 405.679434       | 809.367575     | 405.187426       | 7  |
| 10 | 1353.759908 | 677.383592      | 1336.733359    | 668.870318       | 1335.749343    | 668.378310       | Y    | 726.330461  | 363.668869      | 709.303912     | 355.155594       | 708.319896     | 354.663586       | 6  |
| 11 | 1468.786851 | 734.897064      | 1451.760302    | 726.383789       | 1450.776286    | 725.891781       | D    | 563.267132  | 282.137204      | 546.240583     | 273.623930       | 545.256567     | 273.131922       | 5  |
| 12 | 1583.813794 | 792.410535      | 1566.787245    | 783.897261       | 1565.803229    | 783.405253       | D    | 448.240189  | 224.623733      | 431.213640     | 216.110458       | 430.229624     | 215.618450       | 4  |
| 13 | 1682.882208 | 841.944742      | 1665.855659    | 833.431468       | 1664.871643    | 832.939460       | V    | 333.213246  | 167.110261      | 316.186697     | 158.596987       | 315.202681     | 158.104979       | 3  |
| 14 | 1769.914236 | 885.460756      | 1752.887687    | 876.947482       | 1751.903671    | 876.455474       | S    | 234.144832  | 117.576054      | 217.118283     | 109.062780       | 216.134267     | 108.570772       | 2  |
| 15 |             |                 |                |                  |                |                  | K    | 147.112804  | 74.060040       | 130.086255     | 65.546765        |                |                  | 1  |

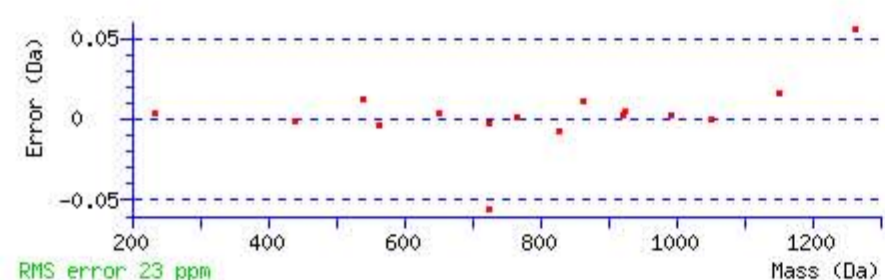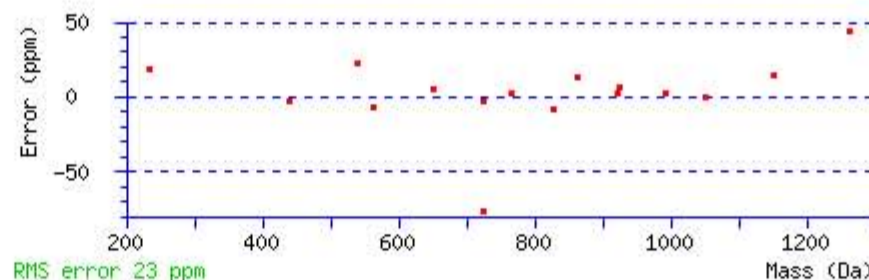

NCBI BLAST search of **QVLLVGAPTYDDVSK**

(Parameters: blastp, nr protein database, expect=20000, no filter, PAM30)

Other BLAST [web gateways](#)

All matches to this query

| Score | Mr(calc):   | Delta     | Sequence                        |
|-------|-------------|-----------|---------------------------------|
| 48.5  | 1915.012497 | -0.000375 | <a href="#">QVLLVGAPTYDDVSK</a> |
| 4.4   | 1915.027710 | -0.015588 | <a href="#">DYPIYLLKFKQCLSK</a> |
| 0.4   | 1914.998550 | 0.013572  | <a href="#">LLAPEAGSHPQQTQK</a> |
| 0.4   | 1914.998550 | 0.013572  | <a href="#">LLAPEAGSHPQQTQK</a> |
| 0.4   | 1914.998550 | 0.013572  | <a href="#">LLAPEAGSHPQQTQK</a> |

Mascot: <http://www.matrixscience.com/>



# MASCOT SCIENCE Mascot Search Results

## Peptide View

MS/MS Fragmentation of **VSSVEECQK**

Found in **KLKB1\_HUMAN**, Plasma kallikrein OS=Homo sapiens GN=KLKB1 PE=1 SV=1

Match to Query 26918: 1375.658648 from(688.836600,2+) rtinseconds(1408) index(31617)

Title: Locus:1.1.1.3123.19 File:"2013-07-02 CLN FXIII 30 min 3rd F 3.wiff"

Data file C:\Program Files (x86)\Matrix Science\Mascot Daemon\mgf\3 FXIII 30 min 3rd\mascot\_daemon\_merge.mgf

Click mouse within plot area to zoom in by factor of two about that point

Or, Plot from  to  Da

Label all possible matches  Label matches used for scoring

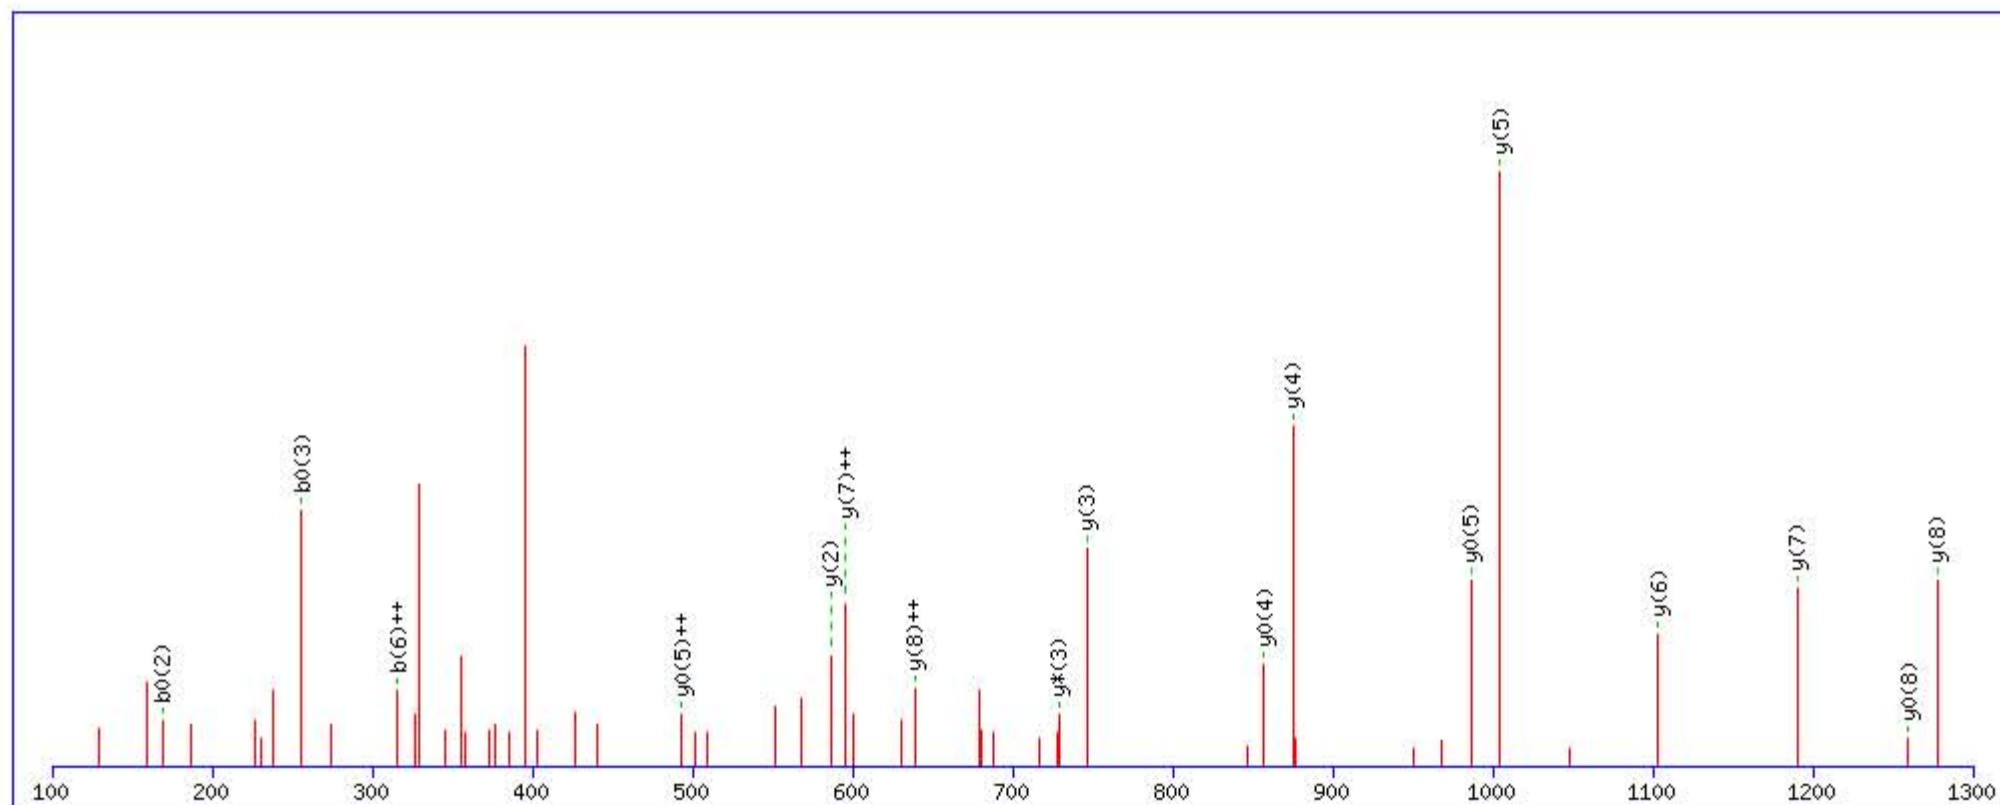

Monoisotopic mass of neutral peptide Mr(calc): 1375.647568

Fixed modifications: Carbamidomethyl (C) (apply to specified residues or termini only)

Variable modifications:

Q8 : Biotin:Thermo-21345 (Q)

Ions Score: 49 Expect: 0.00021

Matches : 17/74 fragment ions using 23 most intense peaks [\(help\)](#)

| # | b           | b <sup>++</sup> | b <sup>*</sup> | b <sup>*++</sup> | b <sup>0</sup> | b <sup>0++</sup> | Seq. | y           | y <sup>++</sup> | y <sup>*</sup> | y <sup>*++</sup> | y <sup>0</sup> | y <sup>0++</sup> | # |
|---|-------------|-----------------|----------------|------------------|----------------|------------------|------|-------------|-----------------|----------------|------------------|----------------|------------------|---|
| 1 | 100.075690  | 50.541483       |                |                  |                |                  | V    |             |                 |                |                  |                |                  | 9 |
| 2 | 187.107718  | 94.057497       |                |                  | 169.097153     | 85.052214        | S    | 1277.586435 | 639.296856      | 1260.559886    | 630.783581       | 1259.575870    | 630.291573       | 8 |
| 3 | 274.139746  | 137.573511      |                |                  | 256.129181     | 128.568229       | S    | 1190.554407 | 595.780842      | 1173.527858    | 587.267567       | 1172.543842    | 586.775559       | 7 |
| 4 | 373.208160  | 187.107718      |                |                  | 355.197595     | 178.102436       | V    | 1103.522379 | 552.264828      | 1086.495830    | 543.751553       | 1085.511814    | 543.259545       | 6 |
| 5 | 502.250753  | 251.629015      |                |                  | 484.240188     | 242.623732       | E    | 1004.453965 | 502.730621      | 987.427416     | 494.217346       | 986.443400     | 493.725338       | 5 |
| 6 | 631.293346  | 316.150311      |                |                  | 613.282781     | 307.145029       | E    | 875.411372  | 438.209324      | 858.384823     | 429.696050       | 857.400807     | 429.204042       | 4 |
| 7 | 791.323995  | 396.165636      |                |                  | 773.313430     | 387.160353       | C    | 746.368779  | 373.688028      | 729.342230     | 365.174753       |                |                  | 3 |
| 8 | 1230.549321 | 615.778299      | 1213.522772    | 607.265024       | 1212.538756    | 606.773016       | Q    | 586.338130  | 293.672703      | 569.311581     | 285.159429       |                |                  | 2 |
| 9 |             |                 |                |                  |                |                  | K    | 147.112804  | 74.060040       | 130.086255     | 65.546765        |                |                  | 1 |

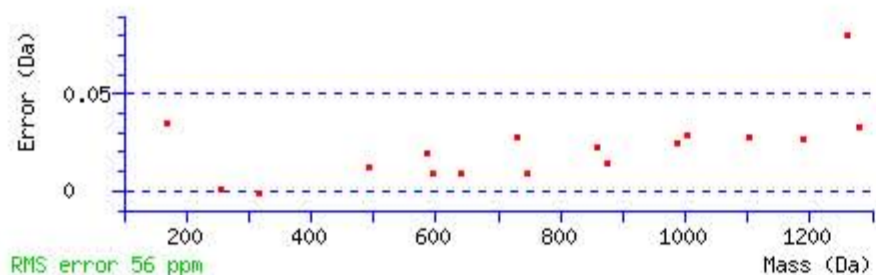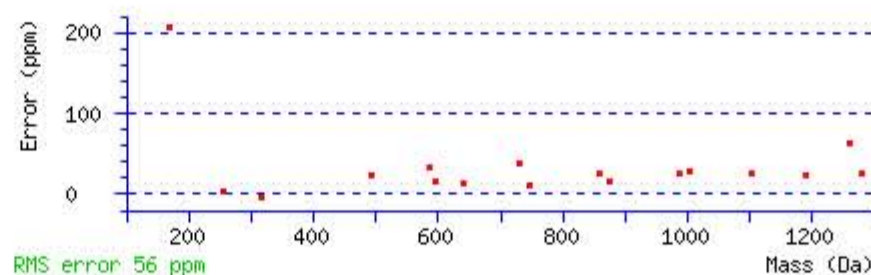

NCBI BLAST search of [VSSVEECQK](#)

(Parameters: blastp, nr protein database, expect=20000, no filter, PAM30)

Other BLAST [web gateways](#)

All matches to this query

| Score | Mr(calc):   | Delta    | Sequence                  |
|-------|-------------|----------|---------------------------|
| 48.8  | 1375.647568 | 0.011080 | <a href="#">VSSVEECQK</a> |

Mascot: <http://www.matrixscience.com/>



# MASCOT SEARCH RESULTS

## Peptide View

MS/MS Fragmentation of **VNIPLVTNEECQK**

Found in **KLKB1\_HUMAN**, Plasma kallikrein OS=Homo sapiens GN=KLKB1 PE=1 SV=1

Match to Query 40309: 1853.944092 from(618.988640,3+) rtinseconds(2155) index(64733)

Title: Locus:1.1.1.3230.9 File:"2013-07-02 CLN FXIII 30 min 3rd FT.wiff"

Data file C:\Program Files (x86)\Matrix Science\Mascot Daemon\mgf3 FXIII 30 min 3rd\mascot\_daemon\_merge.mgf

Click mouse within plot area to zoom in by factor of two about that point

Or, Plot from  to  Da

Label all possible matches  Label matches used for scoring

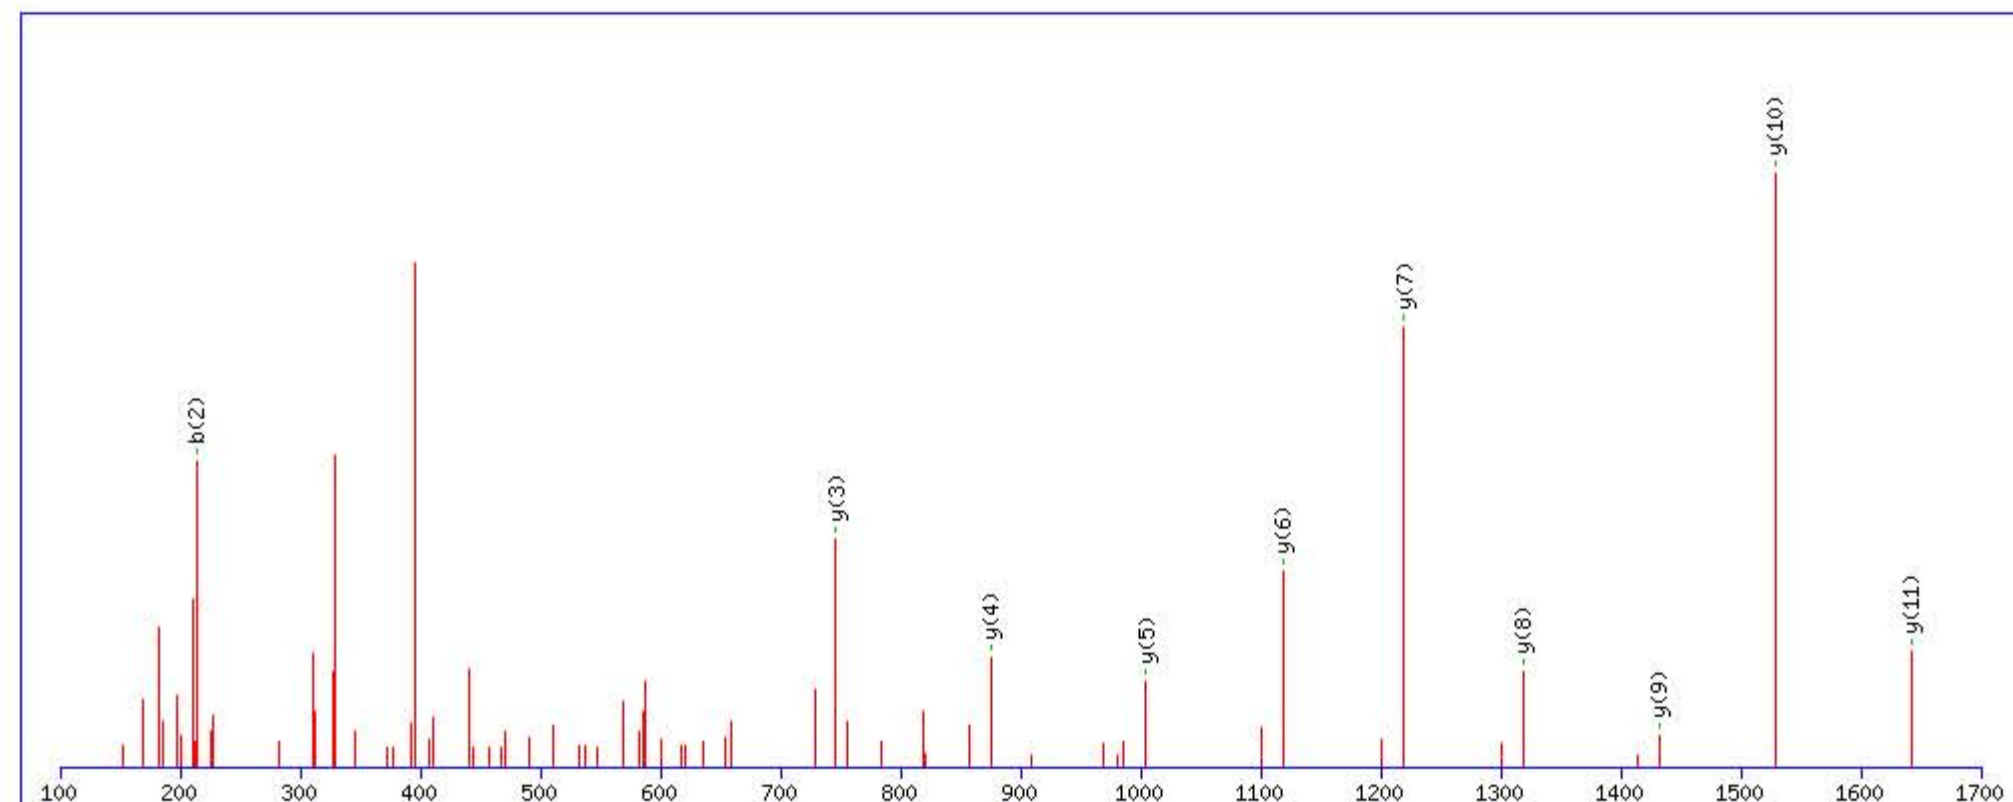

Monoisotopic mass of neutral peptide Mr(calc): 1853.937927

Fixed modifications: Carbamidomethyl (C) (apply to specified residues or termini only)

Variable modifications:

Q12 : Biotin:Thermo-21345 (Q)

Ions Score: 65 Expect: 1.7e-006

Matches : 10/124 fragment ions using 15 most intense peaks [\(help\)](#)

| #  | b                 | b <sup>++</sup> | b <sup>*</sup> | b <sup>*++</sup> | b <sup>0</sup> | b <sup>0++</sup> | Seq. | y                  | y <sup>++</sup> | y <sup>*</sup> | y <sup>*++</sup> | y <sup>0</sup> | y <sup>0++</sup> | #  |
|----|-------------------|-----------------|----------------|------------------|----------------|------------------|------|--------------------|-----------------|----------------|------------------|----------------|------------------|----|
| 1  | 100.075690        | 50.541483       |                |                  |                |                  | V    |                    |                 |                |                  |                |                  | 13 |
| 2  | <b>214.118617</b> | 107.562947      | 197.092068     | 99.049672        |                |                  | N    | 1755.876804        | 878.442040      | 1738.850255    | 869.928766       | 1737.866239    | 869.436758       | 12 |
| 3  | 327.202681        | 164.104978      | 310.176132     | 155.591704       |                |                  | I    | <b>1641.833877</b> | 821.420577      | 1624.807328    | 812.907302       | 1623.823312    | 812.415294       | 11 |
| 4  | 424.255445        | 212.631360      | 407.228896     | 204.118086       |                |                  | P    | <b>1528.749813</b> | 764.878545      | 1511.723264    | 756.365270       | 1510.739248    | 755.873262       | 10 |
| 5  | 537.339509        | 269.173393      | 520.312960     | 260.660118       |                |                  | L    | <b>1431.697049</b> | 716.352163      | 1414.670500    | 707.838888       | 1413.686484    | 707.346880       | 9  |
| 6  | 636.407923        | 318.707600      | 619.381374     | 310.194325       |                |                  | V    | <b>1318.612985</b> | 659.810131      | 1301.586436    | 651.296856       | 1300.602420    | 650.804848       | 8  |
| 7  | 737.455602        | 369.231439      | 720.429053     | 360.718165       | 719.445037     | 360.226157       | T    | <b>1219.544571</b> | 610.275924      | 1202.518022    | 601.762649       | 1201.534006    | 601.270641       | 7  |
| 8  | 851.498529        | 426.252903      | 834.471980     | 417.739628       | 833.487964     | 417.247620       | N    | <b>1118.496892</b> | 559.752084      | 1101.470343    | 551.238810       | 1100.486327    | 550.746802       | 6  |
| 9  | 980.541122        | 490.774199      | 963.514573     | 482.260924       | 962.530557     | 481.768916       | E    | <b>1004.453965</b> | 502.730621      | 987.427416     | 494.217346       | 986.443400     | 493.725338       | 5  |
| 10 | 1109.583715       | 555.295496      | 1092.557166    | 546.782221       | 1091.573150    | 546.290213       | E    | <b>875.411372</b>  | 438.209324      | 858.384823     | 429.696050       | 857.400807     | 429.204042       | 4  |
| 11 | 1269.614364       | 635.310820      | 1252.587815    | 626.797546       | 1251.603799    | 626.305538       | C    | <b>746.368779</b>  | 373.688028      | 729.342230     | 365.174753       |                |                  | 3  |
| 12 | 1708.839690       | 854.923483      | 1691.813141    | 846.410209       | 1690.829125    | 845.918201       | Q    | 586.338130         | 293.672703      | 569.311581     | 285.159429       |                |                  | 2  |
| 13 |                   |                 |                |                  |                |                  | K    | 147.112804         | 74.060040       | 130.086255     | 65.546765        |                |                  | 1  |

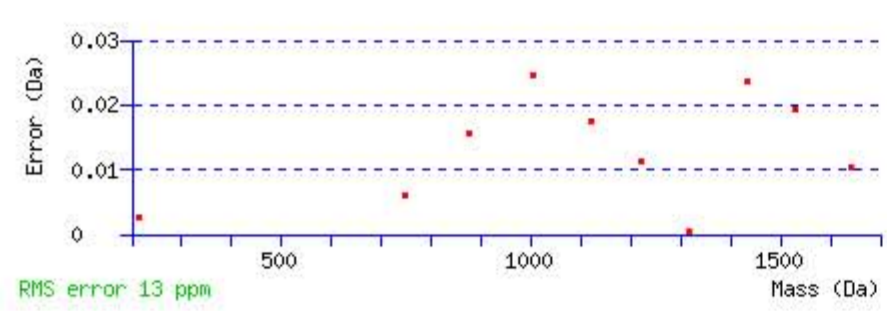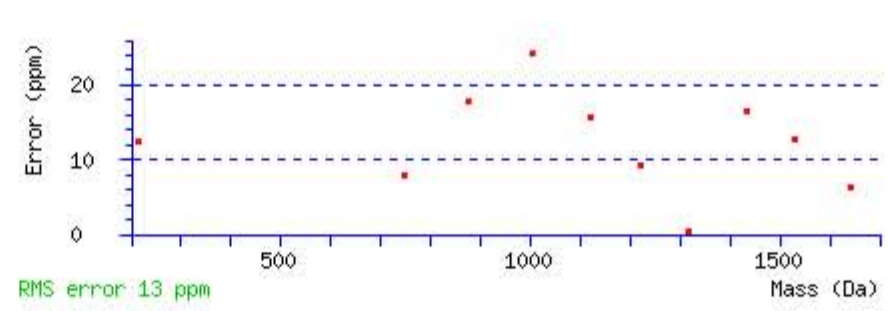

NCBI BLAST search of **VNIPLVTNEECQK**

(Parameters: blastp, nr protein database, expect=20000, no filter, PAM30)

Other BLAST [web gateways](#)

All matches to this query

| Score | Mr(calc):   | Delta    | Sequence                         |
|-------|-------------|----------|----------------------------------|
| 64.9  | 1853.937927 | 0.006165 | <a href="#">VNIPLVTNEECQK</a>    |
| 3.3   | 1853.934341 | 0.009751 | <a href="#">RGLSNPNELQAIDSNR</a> |

Mascot: <http://www.matrixscience.com/>



# MASCOT Search Results

## Peptide View

MS/MS Fragmentation of **QCGHQISACHR**

Found in **KLKB1\_HUMAN**, Plasma kallikrein OS=Homo sapiens GN=KLKB1 PE=1 SV=1

Match to Query 42478: 1974.936496 from(494.741400,4+) rtinseconds(1466) index(16702)

Title: Locus:1.1.1.3073.9 File:"2013-07-02 CLN FXIII 30 min 3rd F 2.wiff"

Data file C:\Program Files (x86)\Matrix Science\Mascot Daemon\mgf3 FXIII 30 min 3rd\mascot\_daemon\_merge.mgf

Click mouse within plot area to zoom in by factor of two about that point

Or, Plot from  to  Da

Label all possible matches  Label matches used for scoring

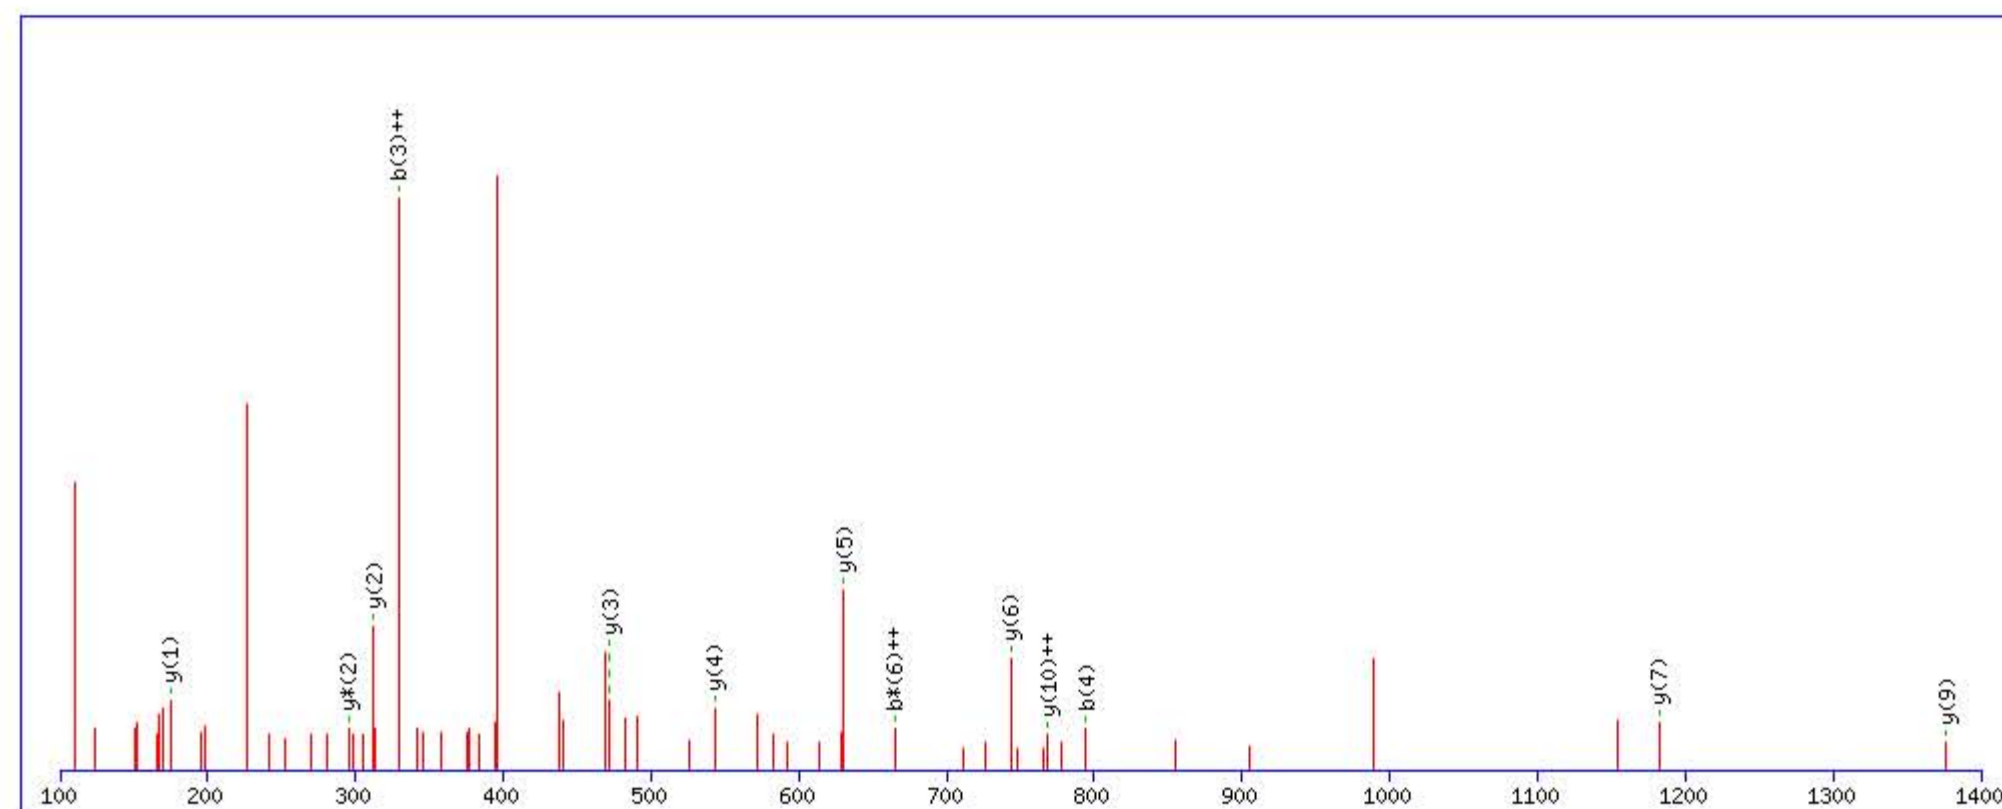

Monoisotopic mass of neutral peptide  $M_r(\text{calc})$ : 1974.916122

Fixed modifications: Carbamidomethyl (C) (apply to specified residues or termini only)

Variable modifications:

Q1 : Biotin:Thermo-21345 (Q)

Q5 : Biotin:Thermo-21345 (Q)

Ions Score: 32 Expect: 0.012

Matches : 13/100 fragment ions using 27 most intense peaks ([help](#))

| #  | b           | b <sup>++</sup> | b <sup>*</sup> | b <sup>*++</sup> | b <sup>0</sup> | b <sup>0++</sup> | Seq. | y           | y <sup>++</sup> | y <sup>*</sup> | y <sup>*++</sup> | y <sup>0</sup> | y <sup>0++</sup> | #  |
|----|-------------|-----------------|----------------|------------------|----------------|------------------|------|-------------|-----------------|----------------|------------------|----------------|------------------|----|
| 1  | 440.232602  | 220.619939      | 423.206053     | 212.106664       |                |                  | Q    |             |                 |                |                  |                |                  | 11 |
| 2  | 600.263251  | 300.635264      | 583.236702     | 292.121989       |                |                  | C    | 1536.698070 | 768.852673      | 1519.671521    | 760.339399       | 1518.687505    | 759.847391       | 10 |
| 3  | 657.284715  | 329.145996      | 640.258166     | 320.632721       |                |                  | G    | 1376.667421 | 688.837349      | 1359.640872    | 680.324074       | 1358.656856    | 679.832066       | 9  |
| 4  | 794.343627  | 397.675452      | 777.317078     | 389.162177       |                |                  | H    | 1319.645957 | 660.326617      | 1302.619408    | 651.813342       | 1301.635392    | 651.321334       | 8  |
| 5  | 1233.568953 | 617.288115      | 1216.542404    | 608.774840       |                |                  | Q    | 1182.587045 | 591.797161      | 1165.560496    | 583.283886       | 1164.576480    | 582.791878       | 7  |
| 6  | 1346.653017 | 673.830147      | 1329.626468    | 665.316872       |                |                  | I    | 743.361719  | 372.184498      | 726.335170     | 363.671223       | 725.351154     | 363.179215       | 6  |
| 7  | 1433.685045 | 717.346161      | 1416.658496    | 708.832886       | 1415.674480    | 708.340878       | S    | 630.277655  | 315.642466      | 613.251106     | 307.129191       | 612.267090     | 306.637183       | 5  |
| 8  | 1504.722159 | 752.864718      | 1487.695610    | 744.351443       | 1486.711594    | 743.859435       | A    | 543.245627  | 272.126452      | 526.219078     | 263.613177       |                |                  | 4  |
| 9  | 1664.752808 | 832.880042      | 1647.726259    | 824.366768       | 1646.742243    | 823.874760       | C    | 472.208513  | 236.607894      | 455.181964     | 228.094620       |                |                  | 3  |
| 10 | 1801.811720 | 901.409498      | 1784.785171    | 892.896224       | 1783.801155    | 892.404216       | H    | 312.177864  | 156.592570      | 295.151315     | 148.079295       |                |                  | 2  |
| 11 |             |                 |                |                  |                |                  | R    | 175.118952  | 88.063114       | 158.092403     | 79.549839        |                |                  | 1  |

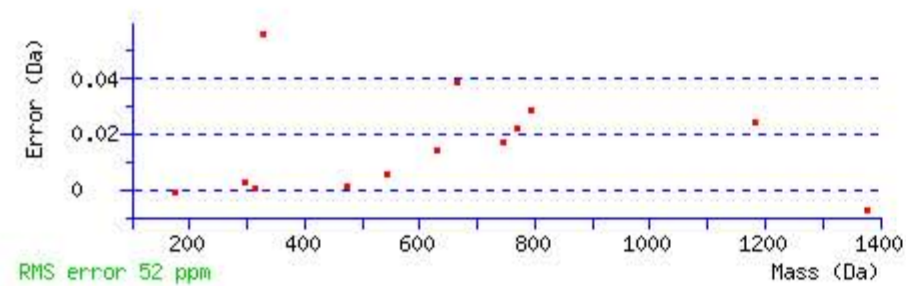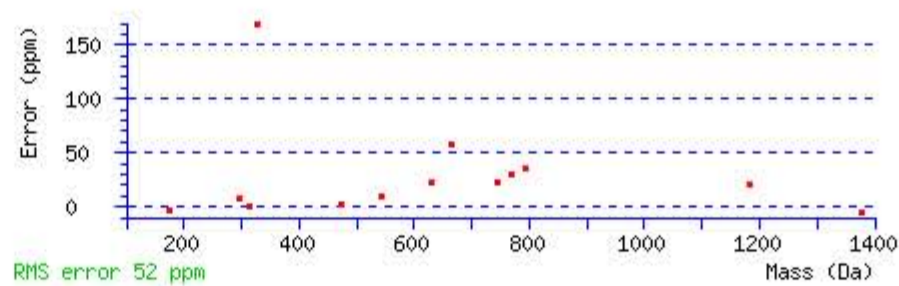

NCBI BLAST search of **QCGHQISACHR**

(Parameters: blastp, nr protein database, expect=20000, no filter, PAM30)

Other BLAST [web gateways](#)

All matches to this query

| Score | $M_r(\text{calc})$ : | Delta    | Sequence           |
|-------|----------------------|----------|--------------------|
| 31.7  | 1974.916122          | 0.020374 | <b>QCGHQISACHR</b> |

Mascot: <http://www.matrixscience.com/>



# MASCOT Search Results

## Peptide View

MS/MS Fragmentation of **EAQLPVIENK**

Found in **PLMN\_HUMAN**, Plasminogen OS=Homo sapiens GN=PLG PE=1 SV=2

Match to Query 29705: 1450.776448 from(726.395500,2+) rtinseconds(1997) index(63910)

Title: Locus:1.1.1.3174.9 File:"2013-07-02 CLN FXIII 30 min 3rd FT.wiff"

Data file C:\Program Files (x86)\Matrix Science\Mascot Daemon\mgf3 FXIII 30 min 3rd\mascot\_daemon\_merge.mgf

Click mouse within plot area to zoom in by factor of two about that point

Or, Plot from  to  Da

Label all possible matches  Label matches used for scoring

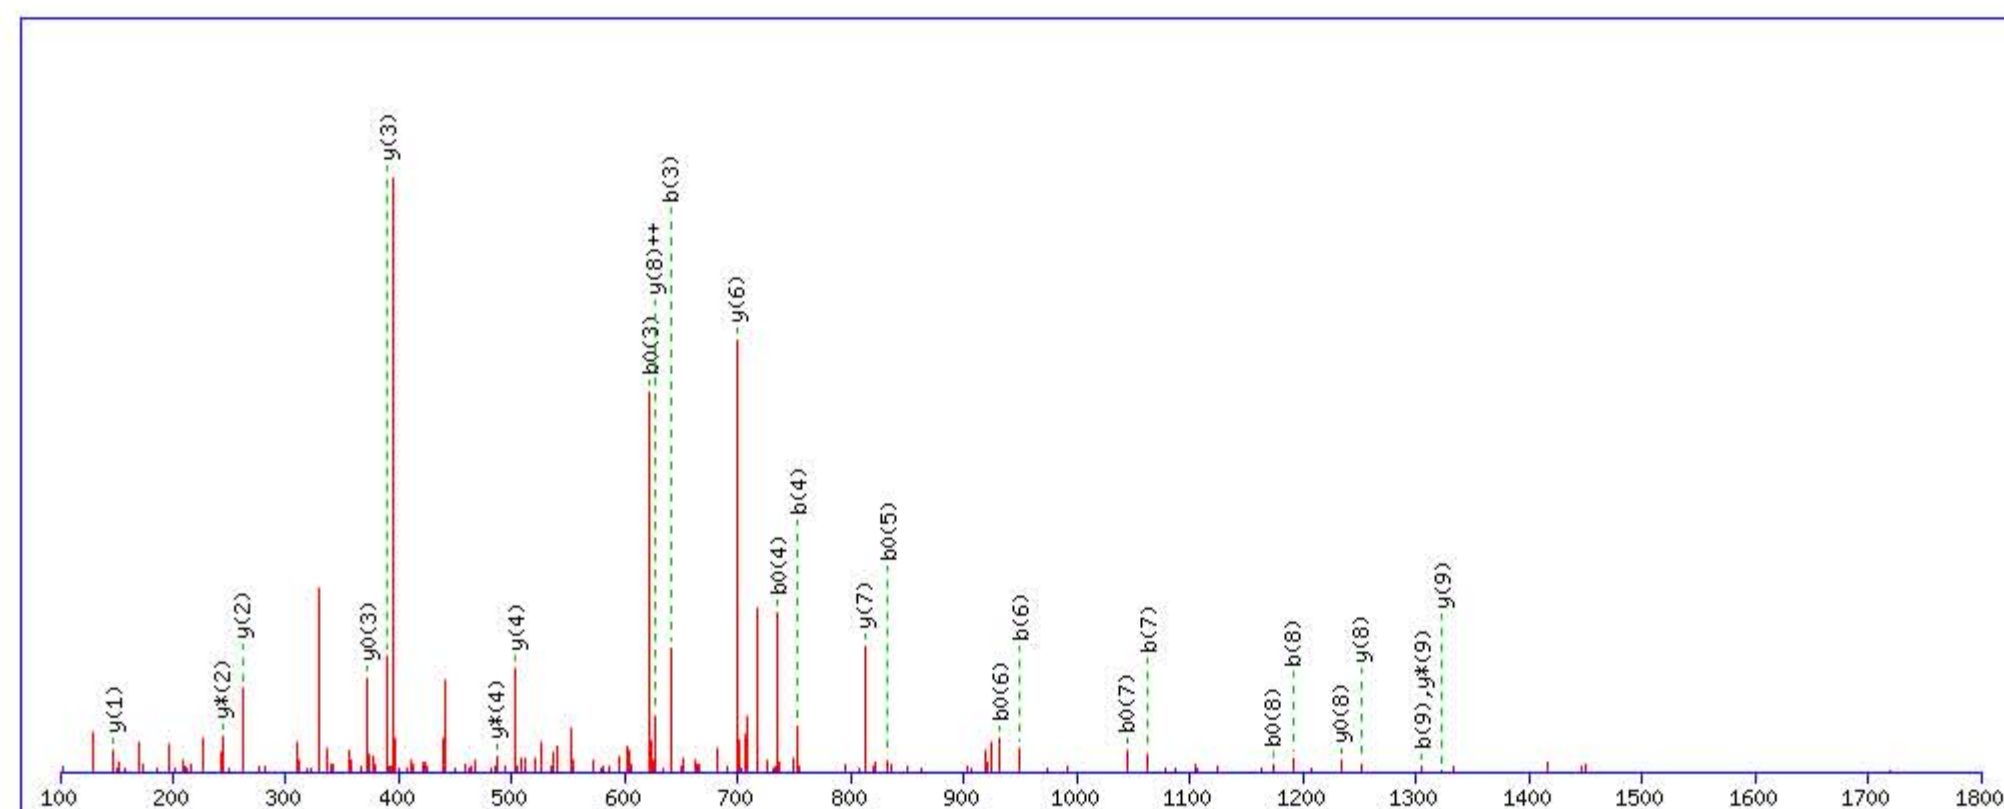

Monoisotopic mass of neutral peptide Mr(calc): 1450.785355

Fixed modifications: Carbamidomethyl (C) (apply to specified residues or termini only)

Variable modifications:

Q3 : Biotin:Thermo-21345 (Q)

Ions Score: 39 Expect: 0.00068

Matches : 26/100 fragment ions using 54 most intense peaks [\(help\)](#)

| #  | b           | b <sup>++</sup> | b <sup>*</sup> | b <sup>*++</sup> | b <sup>0</sup> | b <sup>0++</sup> | Seq. | y           | y <sup>++</sup> | y <sup>*</sup> | y <sup>*++</sup> | y <sup>0</sup> | y <sup>0++</sup> | #  |
|----|-------------|-----------------|----------------|------------------|----------------|------------------|------|-------------|-----------------|----------------|------------------|----------------|------------------|----|
| 1  | 130.049869  | 65.528572       |                |                  | 112.039304     | 56.523290        | E    |             |                 |                |                  |                |                  | 10 |
| 2  | 201.086983  | 101.047130      |                |                  | 183.076418     | 92.041847        | A    | 1322.750070 | 661.878673      | 1305.723521    | 653.365398       | 1304.739505    | 652.873390       | 9  |
| 3  | 640.312309  | 320.659793      | 623.285760     | 312.146518       | 622.301744     | 311.654510       | Q    | 1251.712956 | 626.360116      | 1234.686407    | 617.846841       | 1233.702391    | 617.354833       | 8  |
| 4  | 753.396373  | 377.201825      | 736.369824     | 368.688550       | 735.385808     | 368.196542       | L    | 812.487630  | 406.747453      | 795.461081     | 398.234178       | 794.477065     | 397.742170       | 7  |
| 5  | 850.449137  | 425.728207      | 833.422588     | 417.214932       | 832.438572     | 416.722924       | P    | 699.403566  | 350.205421      | 682.377017     | 341.692146       | 681.393001     | 341.200138       | 6  |
| 6  | 949.517551  | 475.262414      | 932.491002     | 466.749139       | 931.506986     | 466.257131       | V    | 602.350802  | 301.679039      | 585.324253     | 293.165764       | 584.340237     | 292.673756       | 5  |
| 7  | 1062.601615 | 531.804446      | 1045.575066    | 523.291171       | 1044.591050    | 522.799163       | I    | 503.282388  | 252.144832      | 486.255839     | 243.631557       | 485.271823     | 243.139549       | 4  |
| 8  | 1191.644208 | 596.325742      | 1174.617659    | 587.812468       | 1173.633643    | 587.320459       | E    | 390.198324  | 195.602800      | 373.171775     | 187.089525       | 372.187759     | 186.597517       | 3  |
| 9  | 1305.687135 | 653.347205      | 1288.660586    | 644.833931       | 1287.676570    | 644.341923       | N    | 261.155731  | 131.081503      | 244.129182     | 122.568229       |                |                  | 2  |
| 10 |             |                 |                |                  |                |                  | K    | 147.112804  | 74.060040       | 130.086255     | 65.546765        |                |                  | 1  |

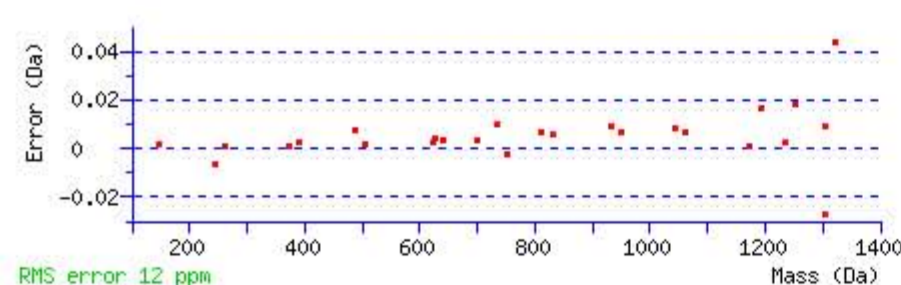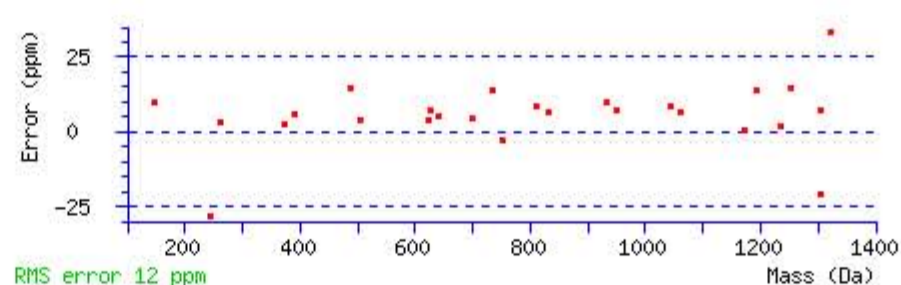

NCBI BLAST search of **EAQLPVIENK**

(Parameters: blastp, nr protein database, expect=20000, no filter, PAM30)

Other BLAST [web gateways](#)

## All matches to this query

| Score | Mr(calc):   | Delta     | Sequence                      |
|-------|-------------|-----------|-------------------------------|
| 39.3  | 1450.785355 | -0.008907 | <a href="#">EAQLPVIENK</a>    |
| 5.2   | 1450.775467 | 0.000981  | <a href="#">QAPAPTKWNK</a>    |
| 4.3   | 1450.764236 | 0.012212  | <a href="#">EIFHPEIQK</a>     |
| 3.6   | 1450.790527 | -0.014079 | <a href="#">QNIWRHNRLSK</a>   |
| 2.1   | 1450.764252 | 0.012196  | <a href="#">QKFSEQVFK</a>     |
| 0.4   | 1450.764236 | 0.012212  | <a href="#">AEPPTWAQLK</a>    |
| 0.1   | 1450.777969 | -0.001521 | <a href="#">EPSDKPQKAVQPK</a> |

Mascot: <http://www.matrixscience.com/>



# MASCOT Search Results

## Peptide View

MS/MS Fragmentation of **EQQCIVMAENR**

Found in **PLGB\_HUMAN**, Plasminogen-like protein B OS=Homo sapiens GN=PLGLB1 PE=1 SV=1

Match to Query 36810: 1687.765508 from(844.890030,2+) rtinseconds(1813) index(62777)

Title: Locus:1.1.1.3110.11 File:"2013-07-02 CLN FXIII 30 min 3rd FT.wiff"

Data file C:\Program Files (x86)\Matrix Science\Mascot Daemon\mgf3 FXIII 30 min 3rd\mascot\_daemon\_merge.mgf

Click mouse within plot area to zoom in by factor of two about that point

Or, Plot from  to  Da

Label all possible matches  Label matches used for scoring

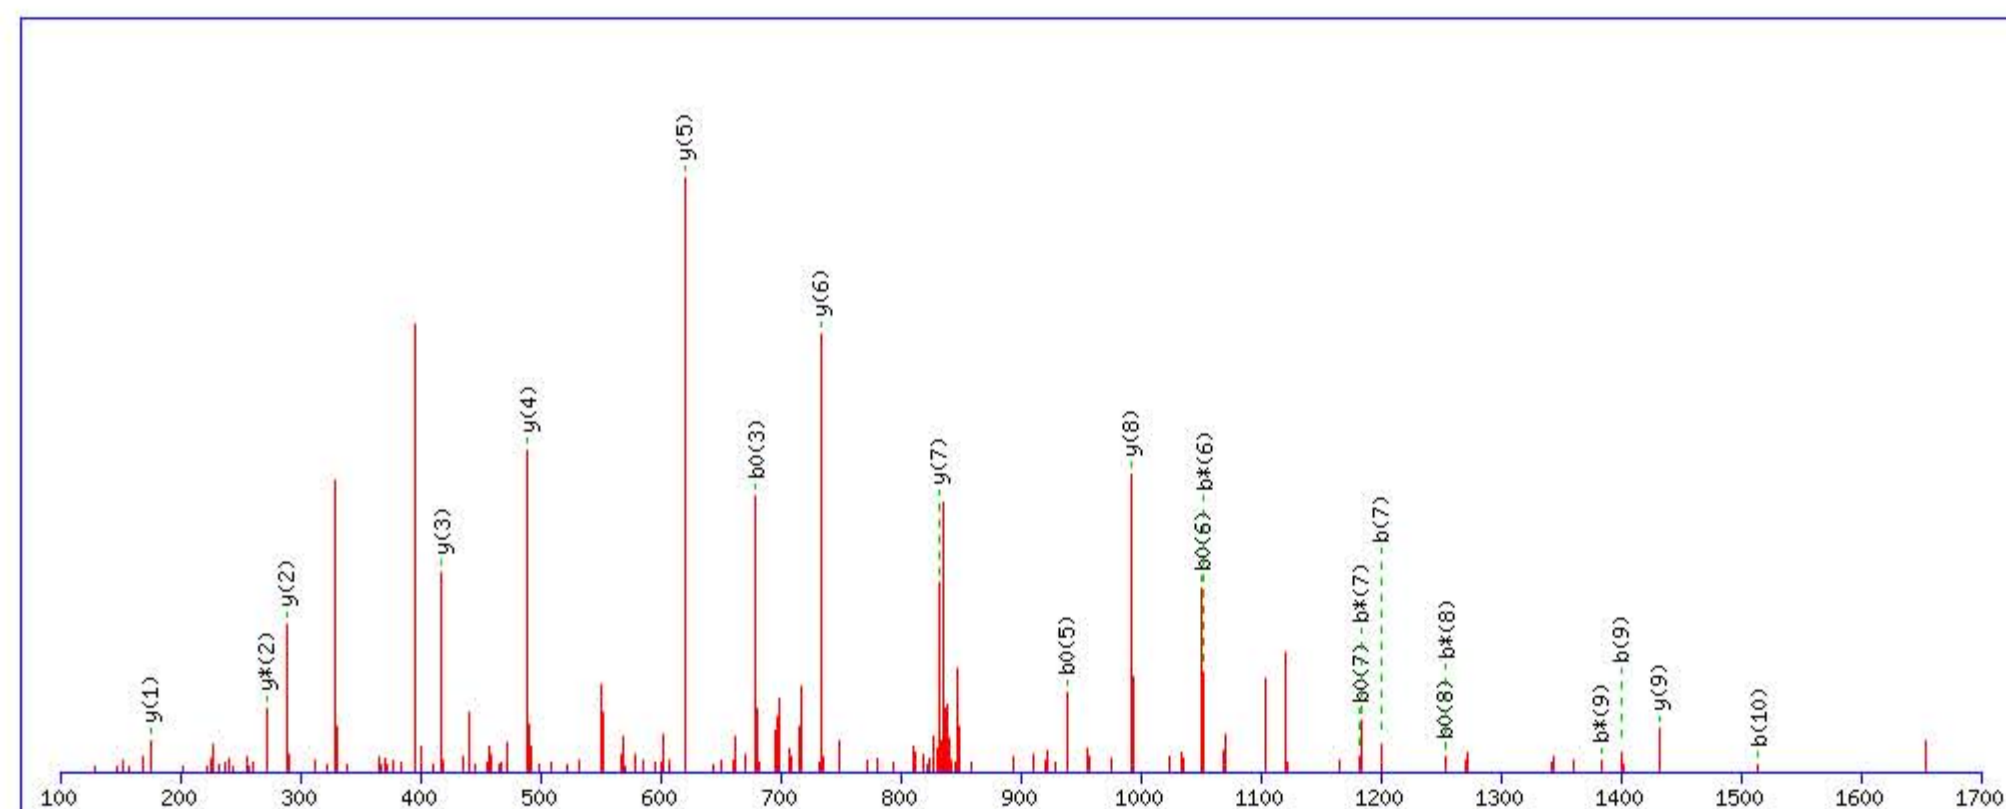

Monoisotopic mass of neutral peptide Mr(calc): 1687.784393

Fixed modifications: Carbamidomethyl (C) (apply to specified residues or termini only)

Variable modifications:

Q3 : Biotin:Thermo-21345 (Q)

Ions Score: 50 Expect: 4.4e-005

Matches : 22/114 fragment ions using 43 most intense peaks [\(help\)](#)

| #  | b           | b <sup>++</sup> | b <sup>*</sup> | b <sup>*++</sup> | b <sup>0</sup> | b <sup>0++</sup> | Seq. | y           | y <sup>++</sup> | y <sup>*</sup> | y <sup>*++</sup> | y <sup>0</sup> | y <sup>0++</sup> | #  |
|----|-------------|-----------------|----------------|------------------|----------------|------------------|------|-------------|-----------------|----------------|------------------|----------------|------------------|----|
| 1  | 130.049869  | 65.528572       |                |                  | 112.039304     | 56.523290        | E    |             |                 |                |                  |                |                  | 11 |
| 2  | 258.108447  | 129.557862      | 241.081898     | 121.044587       | 240.097882     | 120.552579       | Q    | 1559.749102 | 780.378189      | 1542.722553    | 771.864915       | 1541.738537    | 771.372907       | 10 |
| 3  | 697.333773  | 349.170525      | 680.307224     | 340.657250       | 679.323208     | 340.165242       | Q    | 1431.690524 | 716.348900      | 1414.663975    | 707.835626       | 1413.679959    | 707.343618       | 9  |
| 4  | 857.364422  | 429.185849      | 840.337873     | 420.672575       | 839.353857     | 420.180567       | C    | 992.465198  | 496.736237      | 975.438649     | 488.222963       | 974.454633     | 487.730955       | 8  |
| 5  | 956.432836  | 478.720056      | 939.406287     | 470.206782       | 938.422271     | 469.714774       | V    | 832.434549  | 416.720913      | 815.408000     | 408.207638       | 814.423984     | 407.715630       | 7  |
| 6  | 1069.516900 | 535.262088      | 1052.490351    | 526.748814       | 1051.506335    | 526.256806       | I    | 733.366135  | 367.186706      | 716.339586     | 358.673431       | 715.355570     | 358.181423       | 6  |
| 7  | 1200.557385 | 600.782331      | 1183.530836    | 592.269056       | 1182.546820    | 591.777048       | M    | 620.282071  | 310.644674      | 603.255522     | 302.131399       | 602.271506     | 301.639391       | 5  |
| 8  | 1271.594499 | 636.300888      | 1254.567950    | 627.787613       | 1253.583934    | 627.295605       | A    | 489.241586  | 245.124431      | 472.215037     | 236.611156       | 471.231021     | 236.119148       | 4  |
| 9  | 1400.637092 | 700.822184      | 1383.610543    | 692.308910       | 1382.626527    | 691.816902       | E    | 418.204472  | 209.605874      | 401.177923     | 201.092600       | 400.193907     | 200.600592       | 3  |
| 10 | 1514.680019 | 757.843648      | 1497.653470    | 749.330373       | 1496.669454    | 748.838365       | N    | 289.161879  | 145.084577      | 272.135330     | 136.571303       |                |                  | 2  |
| 11 |             |                 |                |                  |                |                  | R    | 175.118952  | 88.063114       | 158.092403     | 79.549839        |                |                  | 1  |

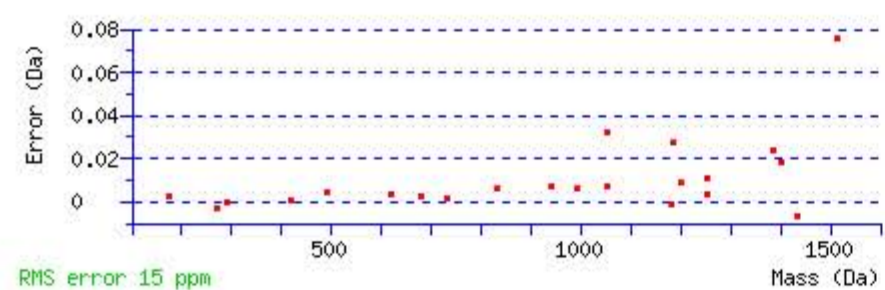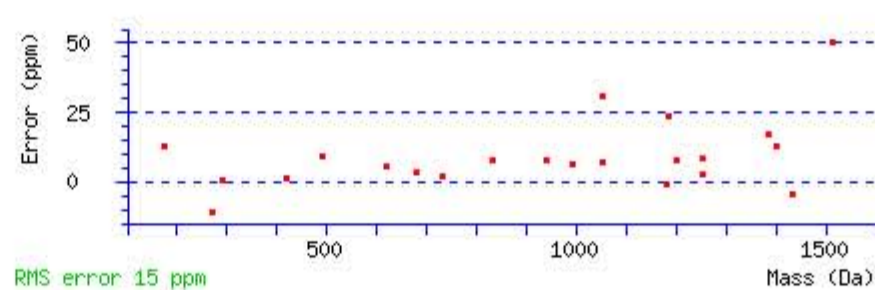

NCBI BLAST search of **EQQCIVMAENR**

(Parameters: blastp, nr protein database, expect=20000, no filter, PAM30)

Other BLAST [web gateways](#)

## All matches to this query

| Score | Mr(calc):   | Delta     | Sequence                          |
|-------|-------------|-----------|-----------------------------------|
| 50.0  | 1687.784393 | -0.018885 | <a href="#">EQQCIVMAENR</a>       |
| 45.2  | 1687.784393 | -0.018885 | <a href="#">EQQCIVMAENR</a>       |
| 3.5   | 1687.776093 | -0.010585 | <a href="#">QEEEAQAAAAAASAESR</a> |
| 3.0   | 1687.744675 | 0.020833  | <a href="#">QPFTVNSMSGFGMNR</a>   |
| 2.8   | 1687.781006 | -0.015498 | <a href="#">ELMAWNQAENR</a>       |
| 2.0   | 1687.754562 | 0.010946  | <a href="#">VDDAMLMFDKTTNR</a>    |



# MASCOT SEARCH RESULTS

## Peptide View

MS/MS Fragmentation of **EQQCHEMAENR**

Found in **PLGB\_HUMAN**, Plasminogen-like protein B OS=Homo sapiens GN=PLGLB1 PE=1 SV=1

Match to Query 36812: 1687.788912 from(563.603580,3+) rtinseconds(1812) index(62772)

Title: Locus:1.1.1.3110.6 File:"2013-07-02 CLN FXIII 30 min 3rd FT.wiff"

Data file C:\Program Files (x86)\Matrix Science\Mascot Daemon\mgf\3 FXIII 30 min 3rd\mascot\_daemon\_merge.mgf

Click mouse within plot area to zoom in by factor of two about that point

Or, Plot from  to  Da

Label all possible matches  Label matches used for scoring

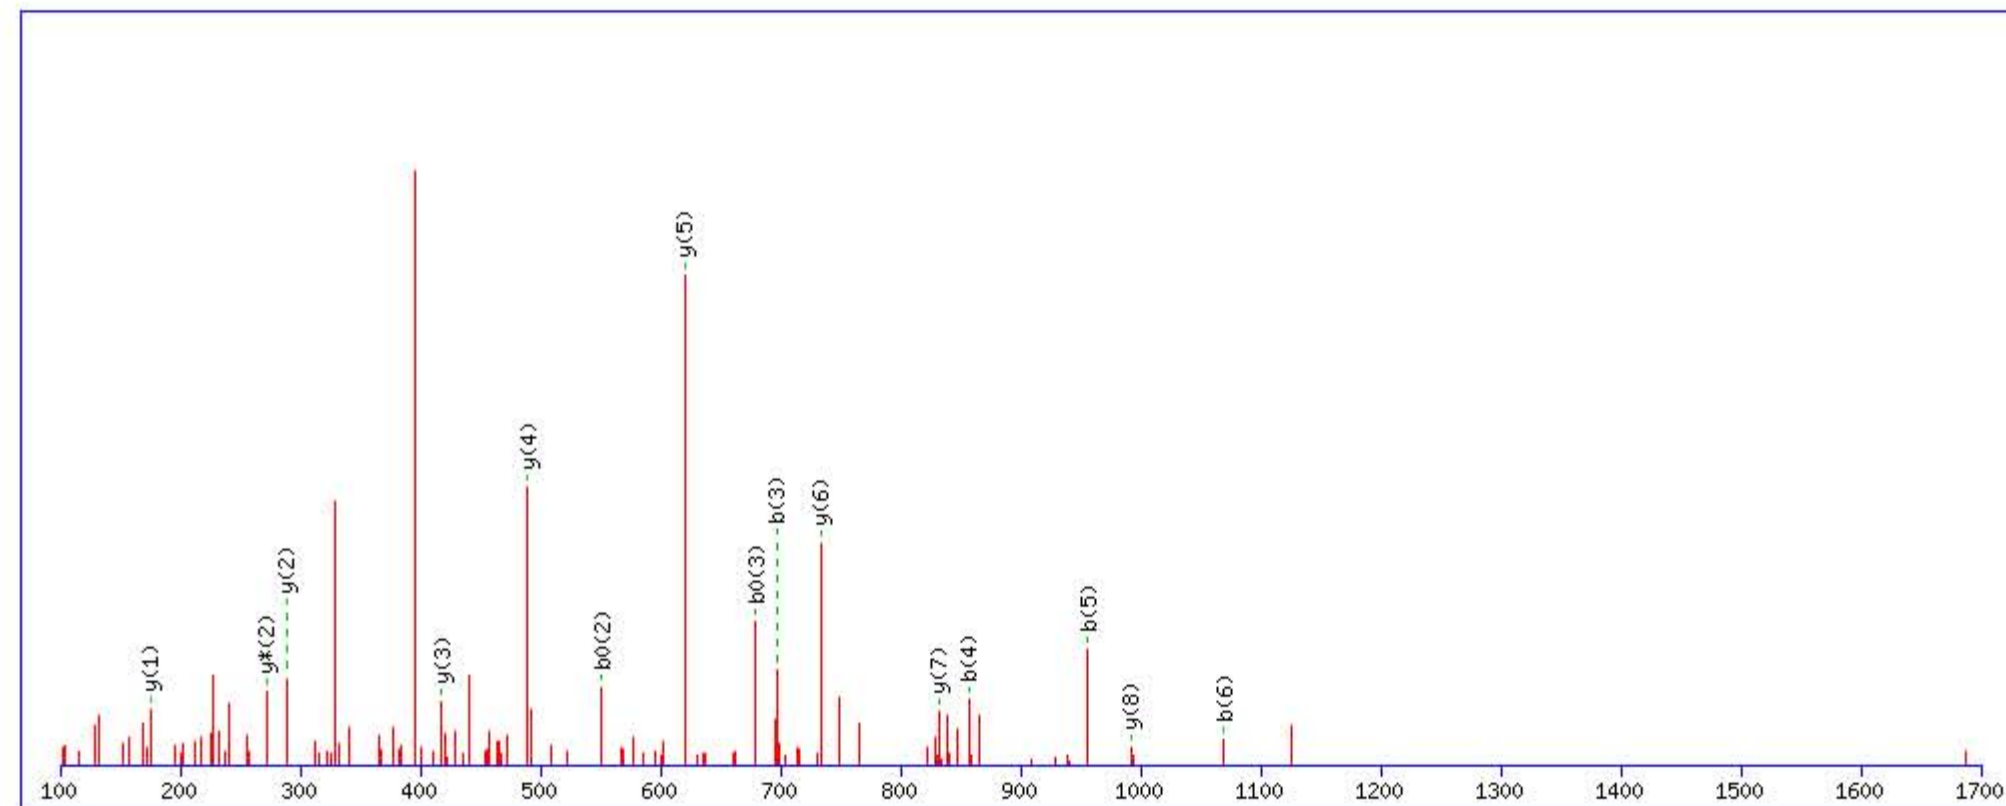

Monoisotopic mass of neutral peptide Mr(calc): 1687.784393

Fixed modifications: Carbamidomethyl (C) (apply to specified residues or termini only)

Variable modifications:

Q2 : Biotin:Thermo-21345 (Q)

Ions Score: 44 Expect: 0.0002

Matches : 15/114 fragment ions using 29 most intense peaks [\(help\)](#)

| #  | b           | b <sup>++</sup> | b <sup>+</sup> | b <sup>+++</sup> | b <sup>0</sup> | b <sup>0++</sup> | Seq. | y           | y <sup>++</sup> | y <sup>+</sup> | y <sup>+++</sup> | y <sup>0</sup> | y <sup>0++</sup> | #  |
|----|-------------|-----------------|----------------|------------------|----------------|------------------|------|-------------|-----------------|----------------|------------------|----------------|------------------|----|
| 1  | 130.049869  | 65.528572       |                |                  | 112.039304     | 56.523290        | E    |             |                 |                |                  |                |                  | 11 |
| 2  | 569.275195  | 285.141236      | 552.248646     | 276.627961       | 551.264630     | 276.135953       | Q    | 1559.749102 | 780.378189      | 1542.722553    | 771.864915       | 1541.738537    | 771.372907       | 10 |
| 3  | 697.333773  | 349.170525      | 680.307224     | 340.657250       | 679.323208     | 340.165242       | Q    | 1120.523776 | 560.765526      | 1103.497227    | 552.252252       | 1102.513211    | 551.760244       | 9  |
| 4  | 857.364422  | 429.185849      | 840.337873     | 420.672575       | 839.353857     | 420.180567       | C    | 992.465198  | 496.736237      | 975.438649     | 488.222963       | 974.454633     | 487.730955       | 8  |
| 5  | 956.432836  | 478.720056      | 939.406287     | 470.206782       | 938.422271     | 469.714774       | V    | 832.434549  | 416.720913      | 815.408000     | 408.207638       | 814.423984     | 407.715630       | 7  |
| 6  | 1069.516900 | 535.262088      | 1052.490351    | 526.748814       | 1051.506335    | 526.256806       | I    | 733.366135  | 367.186706      | 716.339586     | 358.673431       | 715.355570     | 358.181423       | 6  |
| 7  | 1200.557385 | 600.782331      | 1183.530836    | 592.269056       | 1182.546820    | 591.777048       | M    | 620.282071  | 310.644674      | 603.255522     | 302.131399       | 602.271506     | 301.639391       | 5  |
| 8  | 1271.594499 | 636.300888      | 1254.567950    | 627.787613       | 1253.583934    | 627.295605       | A    | 489.241586  | 245.124431      | 472.215037     | 236.611156       | 471.231021     | 236.119148       | 4  |
| 9  | 1400.637092 | 700.822184      | 1383.610543    | 692.308910       | 1382.626527    | 691.816902       | E    | 418.204472  | 209.605874      | 401.177923     | 201.092600       | 400.193907     | 200.600592       | 3  |
| 10 | 1514.680019 | 757.843648      | 1497.653470    | 749.330373       | 1496.669454    | 748.838365       | N    | 289.161879  | 145.084577      | 272.135330     | 136.571303       |                |                  | 2  |
| 11 |             |                 |                |                  |                |                  | R    | 175.118952  | 88.063114       | 158.092403     | 79.549839        |                |                  | 1  |

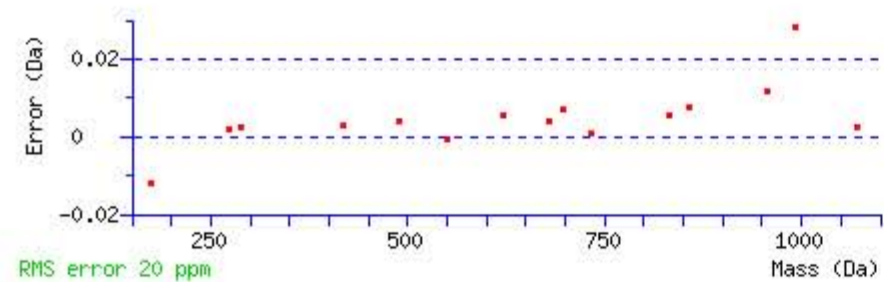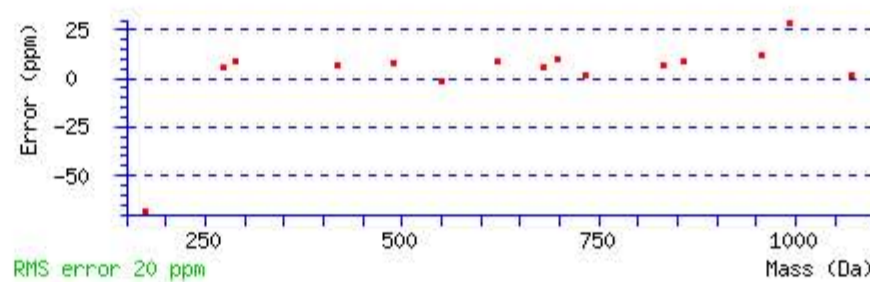

NCBI BLAST search of [EQQCHEMAENR](#)

(Parameters: blastp, nr protein database, expect=20000, no filter, PAM30)

Other BLAST [web gateways](#)

All matches to this query

| Score | Mr(calc):   | Delta    | Sequence                         |
|-------|-------------|----------|----------------------------------|
| 43.9  | 1687.784393 | 0.004519 | <a href="#">EQQCHEMAENR</a>      |
| 41.8  | 1687.784393 | 0.004519 | <a href="#">EQQCHEMAENR</a>      |
| 4.2   | 1687.773666 | 0.015246 | <a href="#">TTGPPSGQMPDNPPHR</a> |
| 0.7   | 1687.787552 | 0.001360 | <a href="#">GASEDGEYFLMIRGK</a>  |
| 0.0   | 1687.765778 | 0.023134 | <a href="#">NVMNKVSEMSSFQR</a>   |

Mascot: <http://www.matrixscience.com/>



# MASCOT Search Results

## Peptide View

MS/MS Fragmentation of **APWCHTTNSQVR**

Found in **PLMN\_HUMAN**, Plasminogen OS=Homo sapiens GN=PLG PE=1 SV=2

Match to Query 38507: 1766.830482 from(589.950770,3+) rtinseconds(1546) index(61292)

Title: Locus:1.1.1.3017.10 File:"2013-07-02 CLN FXIII 30 min 3rd FT.wiff"

Data file C:\Program Files (x86)\Matrix Science\Mascot Daemon\mgf3 FXIII 30 min 3rd\mascot\_daemon\_merge.mgf

Click mouse within plot area to zoom in by factor of two about that point

Or, Plot from  to  Da

Label all possible matches  Label matches used for scoring

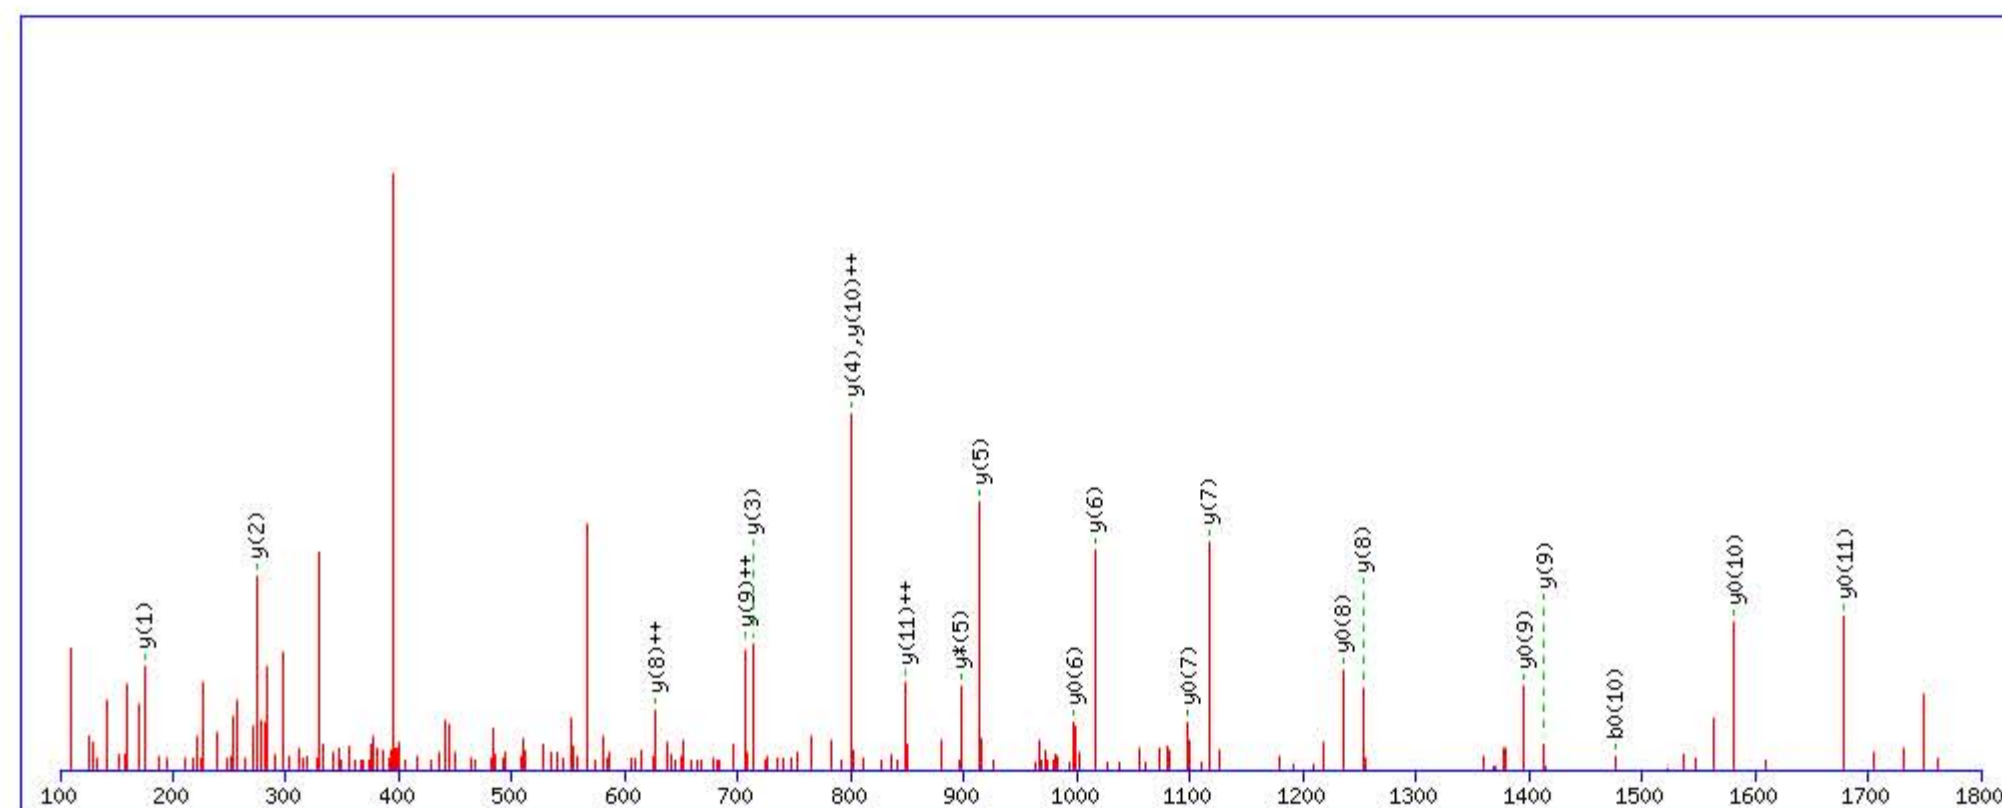

Monoisotopic mass of neutral peptide Mr(calc): 1766.834488

Fixed modifications: Carbamidomethyl (C) (apply to specified residues or termini only)

Variable modifications:

Q10 : Biotin:Thermo-21345 (Q)

Ions Score: 56 Expect: 4.4e-005

Matches : 21/102 fragment ions using 34 most intense peaks [\(help\)](#)

| #  | b           | b <sup>++</sup> | b <sup>+</sup> | b <sup>*++</sup> | b <sup>0</sup> | b <sup>0++</sup> | Seq. | y           | y <sup>++</sup> | y <sup>+</sup> | y <sup>*++</sup> | y <sup>0</sup> | y <sup>0++</sup> | #  |
|----|-------------|-----------------|----------------|------------------|----------------|------------------|------|-------------|-----------------|----------------|------------------|----------------|------------------|----|
| 1  | 72.044390   | 36.525833       |                |                  |                |                  | A    |             |                 |                |                  |                |                  | 12 |
| 2  | 169.097154  | 85.052215       |                |                  |                |                  | P    | 1696.804643 | 848.905960      | 1679.778094    | 840.392685       | 1678.794078    | 839.900677       | 11 |
| 3  | 355.176467  | 178.091872      |                |                  |                |                  | W    | 1599.751879 | 800.379578      | 1582.725330    | 791.866303       | 1581.741314    | 791.374295       | 10 |
| 4  | 515.207116  | 258.107196      |                |                  |                |                  | C    | 1413.672566 | 707.339921      | 1396.646017    | 698.826647       | 1395.662001    | 698.334639       | 9  |
| 5  | 652.266028  | 326.636652      |                |                  |                |                  | H    | 1253.641917 | 627.324597      | 1236.615368    | 618.811322       | 1235.631352    | 618.319314       | 8  |
| 6  | 753.313707  | 377.160492      |                |                  | 735.303142     | 368.155209       | T    | 1116.583005 | 558.795141      | 1099.556456    | 550.281866       | 1098.572440    | 549.789858       | 7  |
| 7  | 854.361386  | 427.684331      |                |                  | 836.350821     | 418.679049       | T    | 1015.535326 | 508.271301      | 998.508777     | 499.758027       | 997.524761     | 499.266019       | 6  |
| 8  | 968.404313  | 484.705795      | 951.377764     | 476.192520       | 950.393748     | 475.700512       | N    | 914.487647  | 457.747462      | 897.461098     | 449.234187       | 896.477082     | 448.742179       | 5  |
| 9  | 1055.436341 | 528.221809      | 1038.409792    | 519.708534       | 1037.425776    | 519.216526       | S    | 800.444720  | 400.725998      | 783.418171     | 392.212724       | 782.434155     | 391.720716       | 4  |
| 10 | 1494.661667 | 747.834472      | 1477.635118    | 739.321197       | 1476.651102    | 738.829189       | Q    | 713.412692  | 357.209984      | 696.386143     | 348.696710       |                |                  | 3  |
| 11 | 1593.730081 | 797.368679      | 1576.703532    | 788.855404       | 1575.719516    | 788.363396       | V    | 274.187366  | 137.597321      | 257.160817     | 129.084047       |                |                  | 2  |
| 12 |             |                 |                |                  |                |                  | R    | 175.118952  | 88.063114       | 158.092403     | 79.549839        |                |                  | 1  |

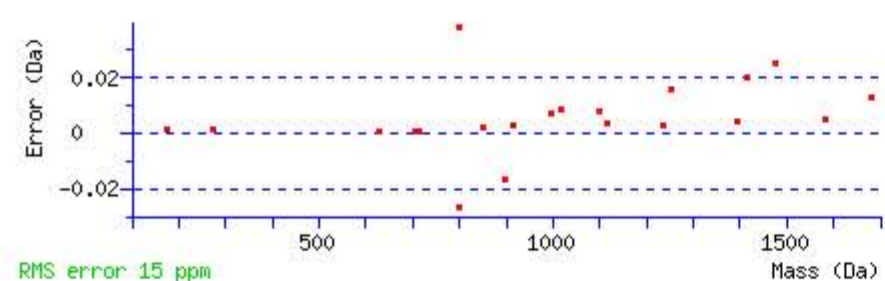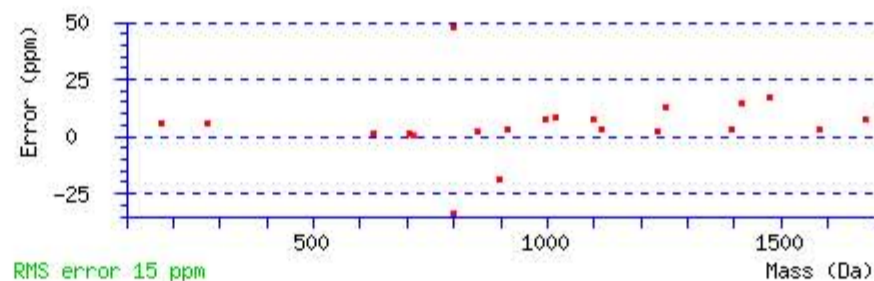

NCBI BLAST search of **APWCHTTNSQVR**

(Parameters: blastp, nr protein database, expect=20000, no filter, PAM30)

Other BLAST [web gateways](#)

All matches to this query

| Score | Mr(calc):   | Delta     | Sequence                     |
|-------|-------------|-----------|------------------------------|
| 55.7  | 1766.834488 | -0.004006 | <a href="#">APWCHTTNSQVR</a> |

Mascot: <http://www.matrixscience.com/>



# MASCOT SEARCH RESULTS

## Peptide View

MS/MS Fragmentation of **EQQCHEMAENR**

Found in **PLGB\_HUMAN**, Plasminogen-like protein B OS=Homo sapiens GN=PLGLB1 PE=1 SV=1

Match to Query 42914: 1998.929848 from(1000.472200,2+) rtinseconds(2136) index(64633)  
 Title: Locus:1.1.1.3223.13 File:"2013-07-02 CLN FXIII 30 min 3rd FT.wiff"

Data file C:\Program Files (x86)\Matrix Science\Mascot Daemon\mgf3 FXIII 30 min 3rd\mascot\_daemon\_merge.mgf

Click mouse within plot area to zoom in by factor of two about that point

Or, Plot from  to  Da

Label all possible matches  Label matches used for scoring

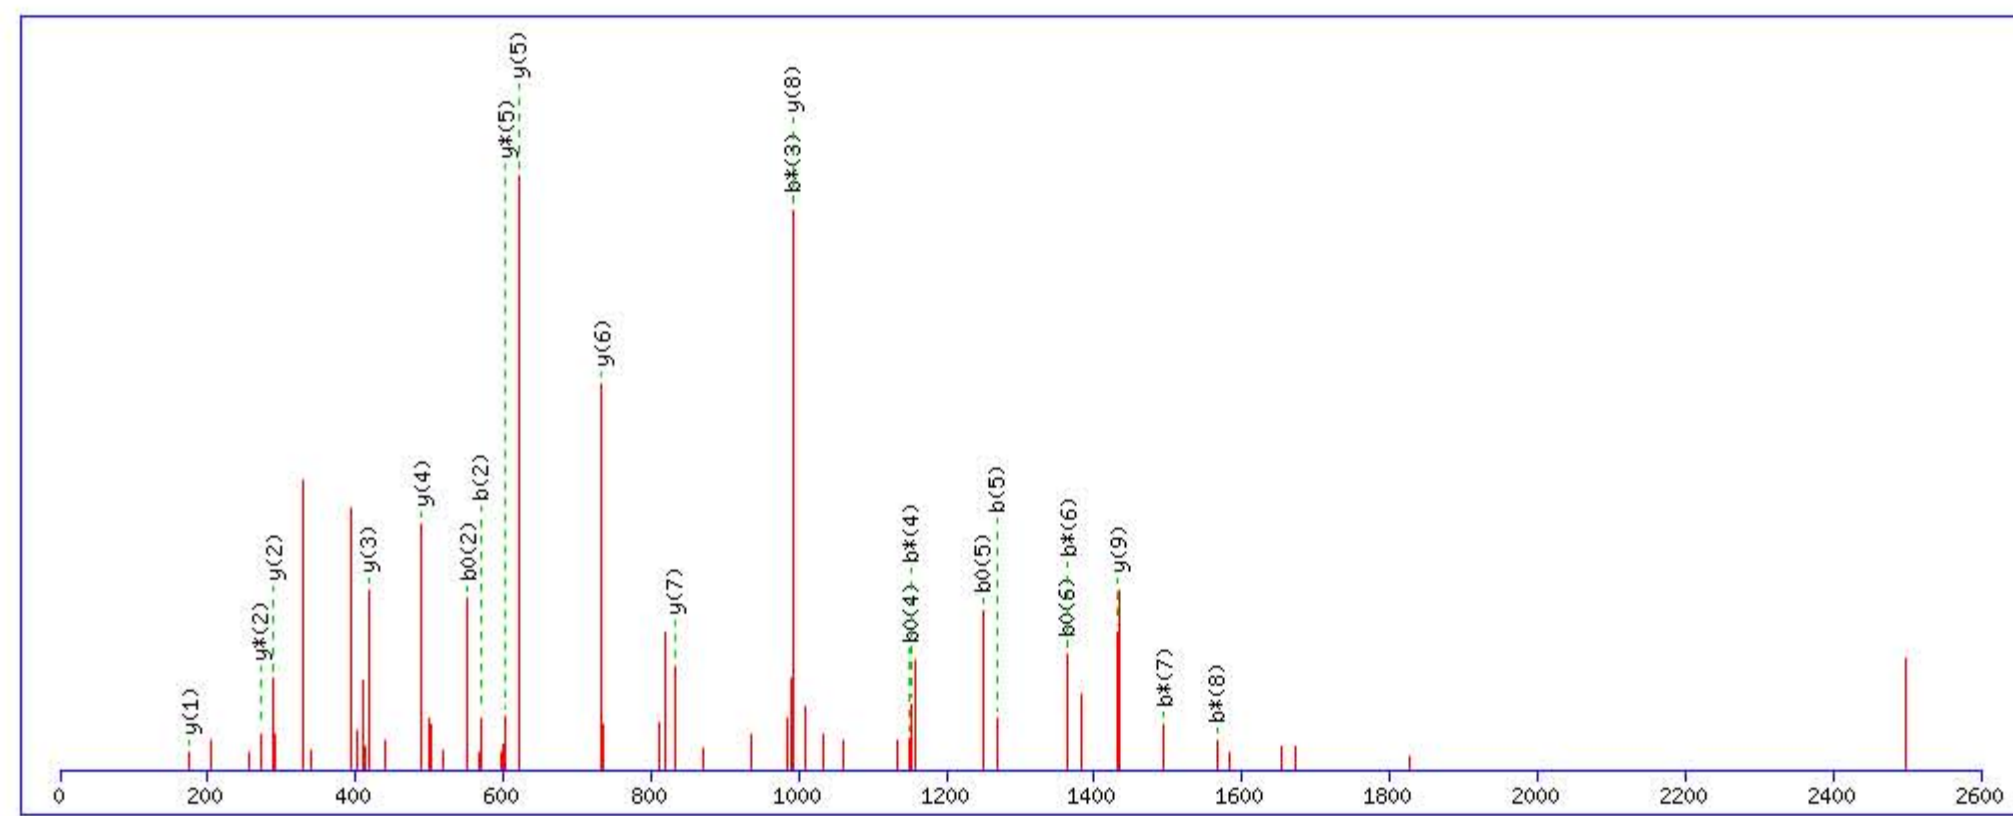

Monoisotopic mass of neutral peptide Mr(calc): 1998.951141

Fixed modifications: Carbamidomethyl (C) (apply to specified residues or termini only)

Variable modifications:

Q2 : Biotin:Thermo-21345 (Q)

Q3 : Biotin:Thermo-21345 (Q)

Ions Score: 51 Expect: 2.8e-005

Matches : 22/114 fragment ions using 40 most intense peaks [\(help\)](#)

| #  | b                  | b <sup>++</sup> | b <sup>*</sup>     | b <sup>*++</sup> | b <sup>0</sup>     | b <sup>0++</sup> | Seq. | y                  | y <sup>++</sup> | y <sup>*</sup>    | y <sup>*++</sup> | y <sup>0</sup> | y <sup>0++</sup> | #  |
|----|--------------------|-----------------|--------------------|------------------|--------------------|------------------|------|--------------------|-----------------|-------------------|------------------|----------------|------------------|----|
| 1  | 130.049869         | 65.528572       |                    |                  | 112.039304         | 56.523290        | E    |                    |                 |                   |                  |                |                  | 11 |
| 2  | <b>569.275195</b>  | 285.141236      | 552.248646         | 276.627961       | <b>551.264630</b>  | 276.135953       | Q    | 1870.915850        | 935.961563      | 1853.889301       | 927.448288       | 1852.905285    | 926.956280       | 10 |
| 3  | 1008.500521        | 504.753899      | <b>991.473972</b>  | 496.240624       | 990.489956         | 495.748616       | Q    | <b>1431.690524</b> | 716.348900      | 1414.663975       | 707.835625       | 1413.679959    | 707.343617       | 9  |
| 4  | 1168.531170        | 584.769223      | <b>1151.504621</b> | 576.255949       | <b>1150.520605</b> | 575.763940       | C    | <b>992.465198</b>  | 496.736237      | 975.438649        | 488.222962       | 974.454633     | 487.730954       | 8  |
| 5  | <b>1267.599584</b> | 634.303430      | 1250.573035        | 625.790156       | <b>1249.589019</b> | 625.298148       | V    | <b>832.434549</b>  | 416.720912      | 815.408000        | 408.207638       | 814.423984     | 407.715630       | 7  |
| 6  | 1380.683648        | 690.845462      | <b>1363.657099</b> | 682.332188       | <b>1362.673083</b> | 681.840179       | I    | <b>733.366135</b>  | 367.186705      | 716.339586        | 358.673431       | 715.355570     | 358.181423       | 6  |
| 7  | 1511.724133        | 756.365704      | <b>1494.697584</b> | 747.852430       | 1493.713568        | 747.360422       | M    | <b>620.282071</b>  | 310.644673      | <b>603.255522</b> | 302.131399       | 602.271506     | 301.639391       | 5  |
| 8  | 1582.761247        | 791.884261      | <b>1565.734698</b> | 783.370987       | 1564.750682        | 782.878979       | A    | <b>489.241586</b>  | 245.124431      | 472.215037        | 236.611156       | 471.231021     | 236.119148       | 4  |
| 9  | 1711.803840        | 856.405558      | 1694.777291        | 847.892283       | 1693.793275        | 847.400275       | E    | <b>418.204472</b>  | 209.605874      | 401.177923        | 201.092599       | 400.193907     | 200.600591       | 3  |
| 10 | 1825.846767        | 913.427021      | 1808.820218        | 904.913747       | 1807.836202        | 904.421739       | N    | <b>289.161879</b>  | 145.084577      | <b>272.135330</b> | 136.571303       |                |                  | 2  |
| 11 |                    |                 |                    |                  |                    |                  | R    | <b>175.118952</b>  | 88.063114       | 158.092403        | 79.549839        |                |                  | 1  |

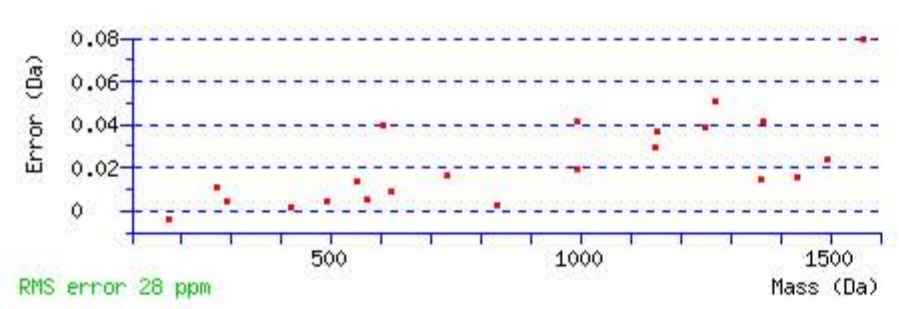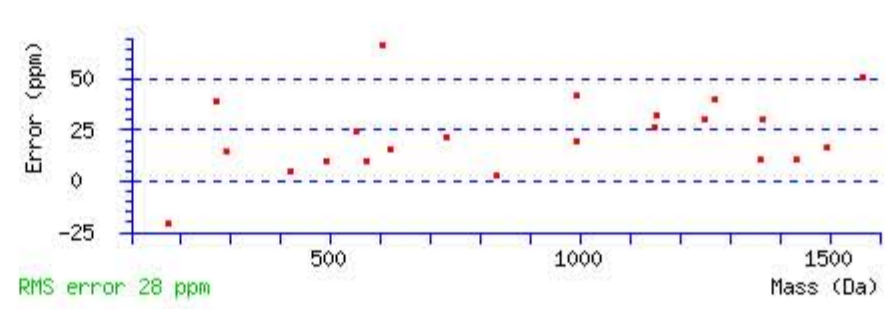

NCBI BLAST search of **EQQCHEMAENR**

(Parameters: blastp, nr protein database, expect=20000, no filter, PAM30)

Other BLAST [web gateways](#)

All matches to this query

| Score | Mr(calc):   | Delta     | Sequence                         |
|-------|-------------|-----------|----------------------------------|
| 50.7  | 1998.951141 | -0.021293 | <a href="#">EQQCHEMAENR</a>      |
| 2.1   | 1998.946899 | -0.017051 | <a href="#">FSSMAPDLRLNELGYR</a> |
| 0.8   | 1998.921280 | 0.008568  | <a href="#">LSQMCLNTEWVEMKSK</a> |



# MASCOT SCIENCE Mascot Search Results

## Peptide View

MS/MS Fragmentation of **CTTPPPSSGPTYQLK**

Found in **PLMN\_HUMAN**, Plasminogen OS=Homo sapiens GN=PLG PE=1 SV=2

Match to Query 45618: 2103.964002 from(702.328610,3+) rtinseconds(1769) index(62537)

Title: Locus:1.1.1.3095.18 File:"2013-07-02 CLN FXIII 30 min 3rd FT.wiff"

Data file C:\Program Files (x86)\Matrix Science\Mascot Daemon\mgf3 FXIII 30 min 3rd\mascot\_daemon\_merge.mgf

Click mouse within plot area to zoom in by factor of two about that point

Or, Plot from  to  Da

Label all possible matches  Label matches used for scoring

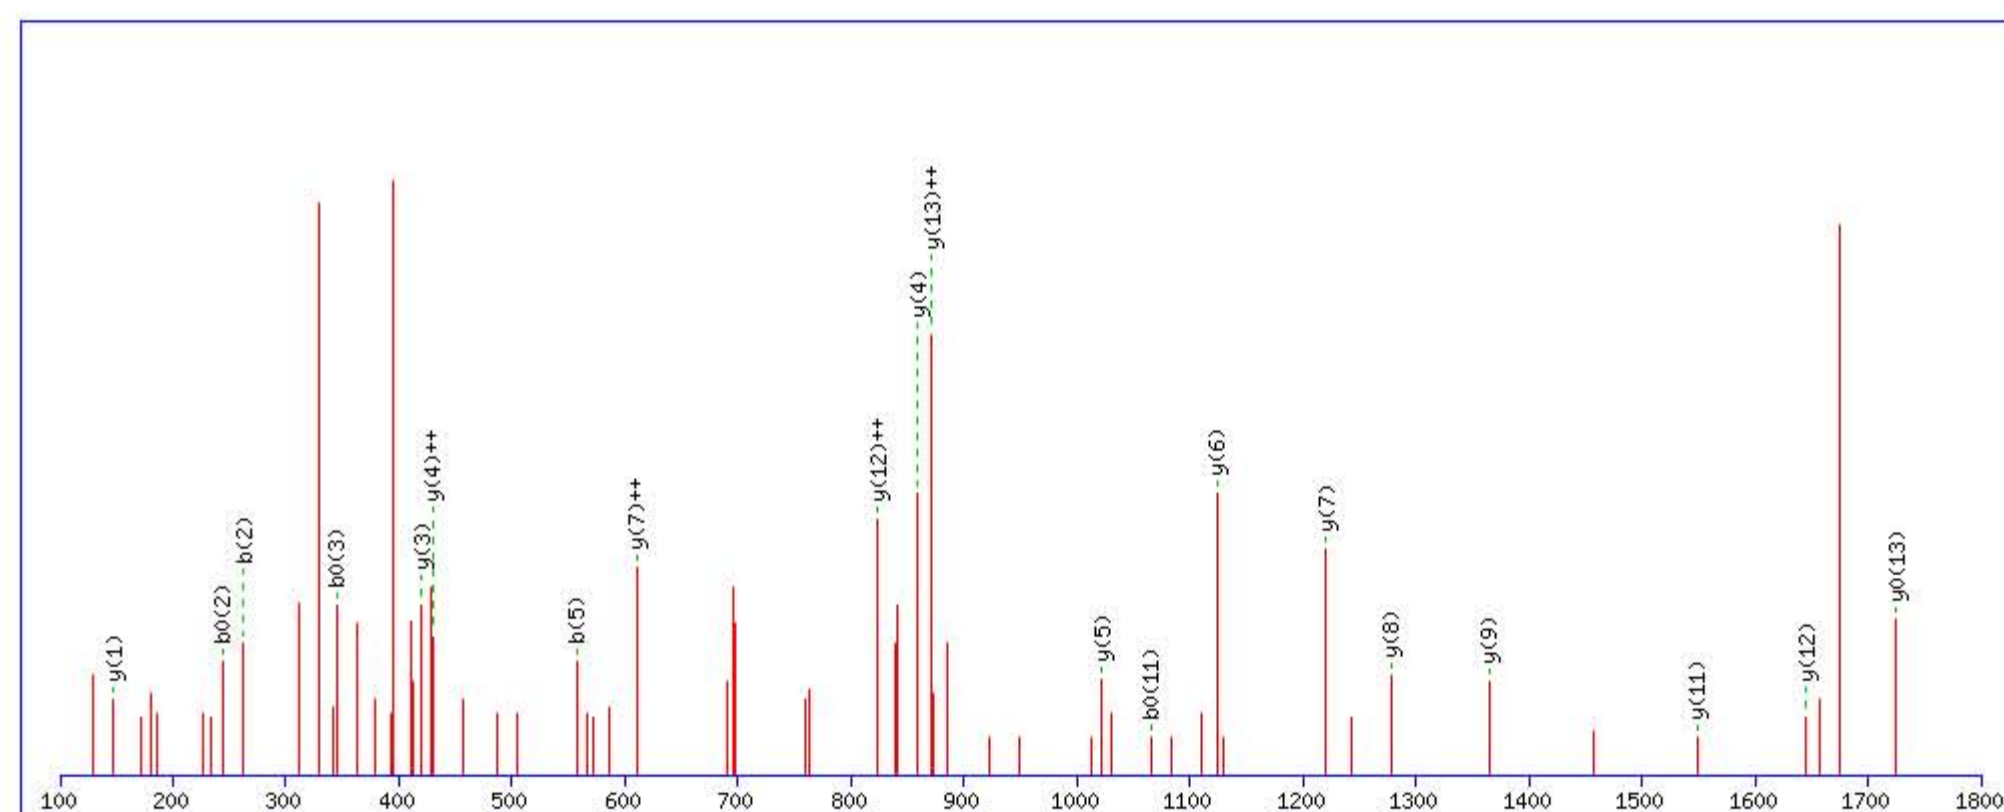

Monoisotopic mass of neutral peptide Mr(calc): 2103.979172

Fixed modifications: Carbamidomethyl (C) (apply to specified residues or termini only)

Variable modifications:

Q13 : Biotin:Thermo-21345 (Q)

Ions Score: 44 Expect: 0.00048

Matches : 20/144 fragment ions using 48 most intense peaks [\(help\)](#)

| #  | b                 | b <sup>++</sup> | b <sup>*</sup> | b <sup>++</sup> | b <sup>0</sup>     | b <sup>0++</sup> | Seq. | y                  | y <sup>++</sup>   | y <sup>*</sup> | y <sup>++</sup> | y <sup>0</sup>     | y <sup>0++</sup> | #  |
|----|-------------------|-----------------|----------------|-----------------|--------------------|------------------|------|--------------------|-------------------|----------------|-----------------|--------------------|------------------|----|
| 1  | 161.037925        | 81.022600       |                |                 |                    |                  | C    |                    |                   |                |                 |                    |                  | 16 |
| 2  | <b>262.085604</b> | 131.546440      |                |                 | <b>244.075039</b>  | 122.541158       | T    | 1944.955785        | 972.981531        | 1927.929236    | 964.468256      | 1926.945220        | 963.976248       | 15 |
| 3  | 363.133283        | 182.070280      |                |                 | <b>345.122718</b>  | 173.064997       | T    | 1843.908106        | 922.457691        | 1826.881557    | 913.944417      | 1825.897541        | 913.452409       | 14 |
| 4  | 460.186047        | 230.596661      |                |                 | 442.175482         | 221.591379       | P    | 1742.860427        | <b>871.933852</b> | 1725.833878    | 863.420577      | <b>1724.849862</b> | 862.928569       | 13 |
| 5  | <b>557.238811</b> | 279.123044      |                |                 | 539.228246         | 270.117761       | P    | <b>1645.807663</b> | <b>823.407470</b> | 1628.781114    | 814.894195      | 1627.797098        | 814.402187       | 12 |
| 6  | 654.291575        | 327.649426      |                |                 | 636.281010         | 318.644143       | P    | <b>1548.754899</b> | 774.881088        | 1531.728350    | 766.367813      | 1530.744334        | 765.875805       | 11 |
| 7  | 741.323603        | 371.165440      |                |                 | 723.313038         | 362.160157       | S    | 1451.702135        | 726.354706        | 1434.675586    | 717.841431      | 1433.691570        | 717.349423       | 10 |
| 8  | 828.355631        | 414.681454      |                |                 | 810.345066         | 405.676171       | S    | <b>1364.670107</b> | 682.838692        | 1347.643558    | 674.325417      | 1346.659542        | 673.833409       | 9  |
| 9  | 885.377095        | 443.192186      |                |                 | 867.366530         | 434.186903       | G    | <b>1277.638079</b> | 639.322678        | 1260.611530    | 630.809403      | 1259.627514        | 630.317395       | 8  |
| 10 | 982.429859        | 491.718568      |                |                 | 964.419294         | 482.713285       | P    | <b>1220.616615</b> | <b>610.811946</b> | 1203.590066    | 602.298671      | 1202.606050        | 601.806663       | 7  |
| 11 | 1083.477538       | 542.242407      |                |                 | <b>1065.466973</b> | 533.237125       | T    | <b>1123.563851</b> | 562.285564        | 1106.537302    | 553.772289      | 1105.553286        | 553.280281       | 6  |
| 12 | 1246.540867       | 623.774072      |                |                 | 1228.530302        | 614.768789       | Y    | <b>1022.516172</b> | 511.761724        | 1005.489623    | 503.248450      |                    |                  | 5  |
| 13 | 1685.766193       | 843.386735      | 1668.739644    | 834.873460      | 1667.755628        | 834.381452       | Q    | <b>859.452843</b>  | <b>430.230060</b> | 842.426294     | 421.716785      |                    |                  | 4  |
| 14 | 1845.796842       | 923.402059      | 1828.770293    | 914.888785      | 1827.786277        | 914.396777       | C    | <b>420.227517</b>  | 210.617396        | 403.200968     | 202.104122      |                    |                  | 3  |
| 15 | 1958.880906       | 979.944091      | 1941.854357    | 971.430817      | 1940.870341        | 970.938809       | L    | 260.196868         | 130.602072        | 243.170319     | 122.088797      |                    |                  | 2  |
| 16 |                   |                 |                |                 |                    |                  | K    | <b>147.112804</b>  | 74.060040         | 130.086255     | 65.546765       |                    |                  | 1  |

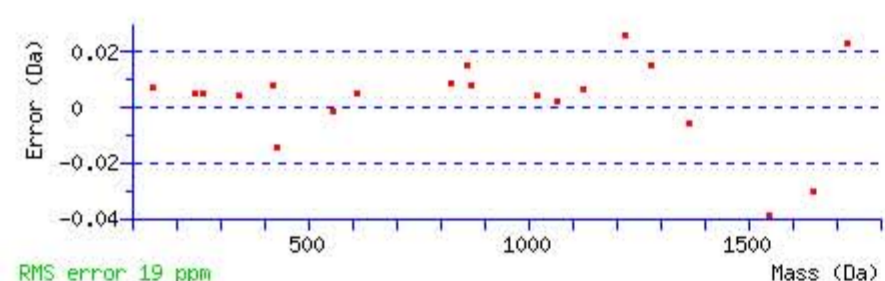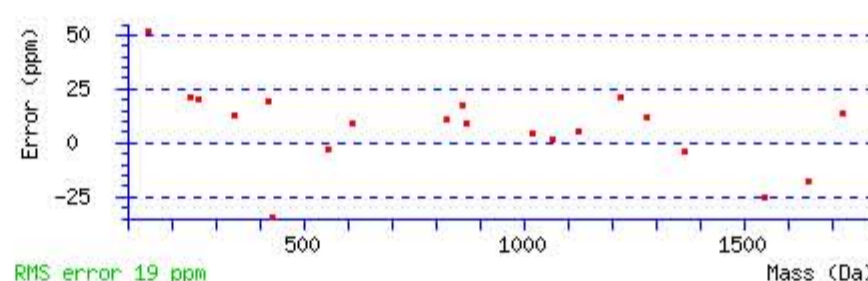

NCBI BLAST search of **CTTPPPSSGPTYQLK**

(Parameters: blastp, nr protein database, expect=20000, no filter, PAM30)

Other BLAST [web gateways](#)

All matches to this query

| Score | Mr(calc):   | Delta     | Sequence                        |
|-------|-------------|-----------|---------------------------------|
| 44.3  | 2103.979172 | -0.015170 | <a href="#">CTTPPPSSGPTYQLK</a> |

Mascot: <http://www.matrixscience.com/>



# MASCOT Search Results

## Peptide View

MS/MS Fragmentation of **ATTVTGTPCQDWAAQEPHR**

Found in **PLMN\_HUMAN**, Plasminogen OS=Homo sapiens GN=PLG PE=1 SV=2

Match to Query 50794: 2436.108852 from(813.043560,3+) rtinseconds(1867) index(63017)

Title: Locus:1.1.1.3129.21 File:"2013-07-02 CLN FXIII 30 min 3rd FT.wiff"

Data file C:\Program Files (x86)\Matrix Science\Mascot Daemon\mgf3 FXIII 30 min 3rd\mascot\_daemon\_merge.mgf

Click mouse within plot area to zoom in by factor of two about that point

Or, Plot from  to  Da

Label all possible matches  Label matches used for scoring

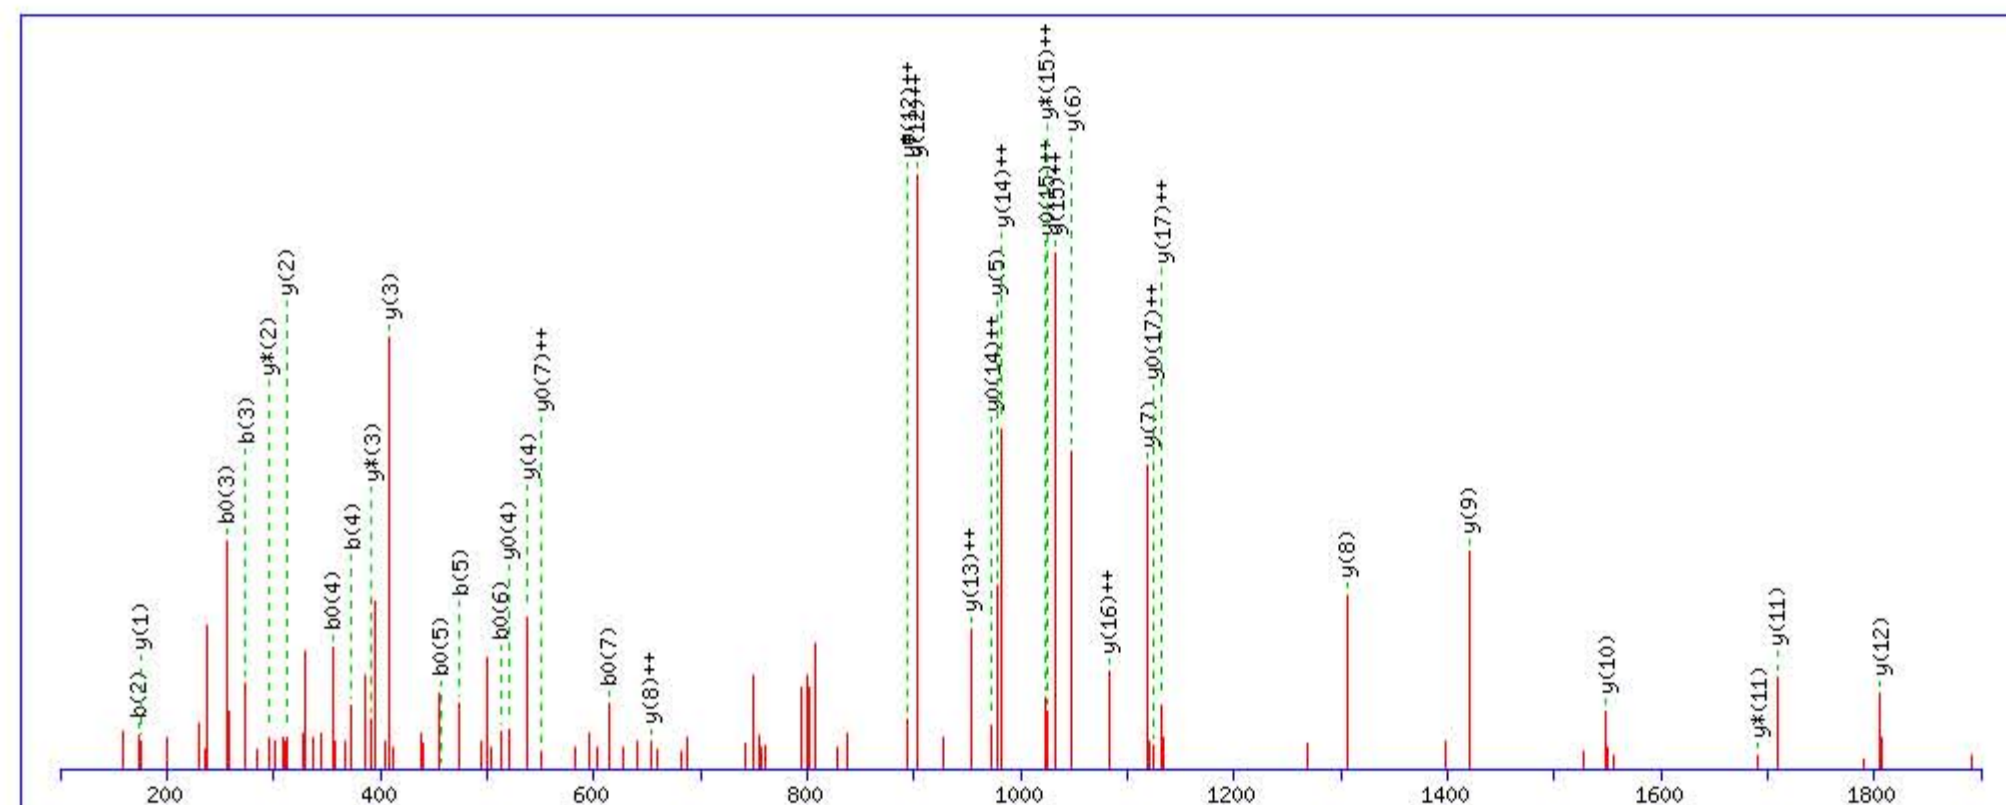

Monoisotopic mass of neutral peptide Mr(calc): 2436.131470

Fixed modifications: Carbamidomethyl (C) (apply to specified residues or termini only)

Variable modifications:

Q15 : Biotin:Thermo-21345 (Q)

Ions Score: 54 Expect: 4.6e-005

Matches : 39/190 fragment ions using 96 most intense peaks [\(help\)](#)

| #  | b                 | b <sup>++</sup> | b <sup>*</sup> | b <sup>*++</sup> | b <sup>0</sup>    | b <sup>0++</sup> | Seq. | y                  | y <sup>++</sup>    | y <sup>*</sup>     | y <sup>*++</sup>   | y <sup>0</sup>    | y <sup>0++</sup>   | #  |
|----|-------------------|-----------------|----------------|------------------|-------------------|------------------|------|--------------------|--------------------|--------------------|--------------------|-------------------|--------------------|----|
| 1  | 72.044390         | 36.525833       |                |                  |                   |                  | A    |                    |                    |                    |                    |                   |                    | 19 |
| 2  | <b>173.092069</b> | 87.049672       |                |                  | 155.081504        | 78.044390        | T    | 2366.101616        | 1183.554446        | 2349.075067        | 1175.041171        | 2348.091051       | 1174.549163        | 18 |
| 3  | <b>274.139748</b> | 137.573512      |                |                  | <b>256.129183</b> | 128.568230       | T    | 2265.053937        | <b>1133.030606</b> | 2248.027388        | 1124.517332        | 2247.043372       | <b>1124.025324</b> | 17 |
| 4  | <b>373.208162</b> | 187.107719      |                |                  | <b>355.197597</b> | 178.102437       | V    | 2164.006258        | <b>1082.506767</b> | 2146.979709        | 1073.993492        | 2145.995693       | 1073.501484        | 16 |
| 5  | <b>474.255841</b> | 237.631559      |                |                  | <b>456.245276</b> | 228.626276       | T    | 2064.937844        | <b>1032.972560</b> | 2047.911295        | <b>1024.459285</b> | 2046.927279       | <b>1023.967277</b> | 15 |
| 6  | 531.277305        | 266.142291      |                |                  | <b>513.266740</b> | 257.137008       | G    | 1963.890165        | <b>982.448721</b>  | 1946.863616        | 973.935446         | 1945.879600       | <b>973.443438</b>  | 14 |
| 7  | 632.324984        | 316.666130      |                |                  | <b>614.314419</b> | 307.660848       | T    | 1906.868701        | <b>953.937989</b>  | 1889.842152        | 945.424714         | 1888.858136       | 944.932706         | 13 |
| 8  | 729.377748        | 365.192512      |                |                  | 711.367183        | 356.187230       | P    | <b>1805.821022</b> | <b>903.414149</b>  | 1788.794473        | <b>894.900875</b>  | 1787.810457       | <b>894.408867</b>  | 12 |
| 9  | 889.408397        | 445.207837      |                |                  | 871.397832        | 436.202554       | C    | <b>1708.768258</b> | 854.887767         | <b>1691.741709</b> | 846.374493         | 1690.757693       | 845.882485         | 11 |
| 10 | 1017.466975       | 509.237126      | 1000.440426    | 500.723851       | 999.456410        | 500.231843       | Q    | <b>1548.737609</b> | 774.872443         | 1531.711060        | 766.359168         | 1530.727044       | 765.867160         | 10 |
| 11 | 1132.493918       | 566.750597      | 1115.467369    | 558.237323       | 1114.483353       | 557.745315       | D    | <b>1420.679031</b> | 710.843154         | 1403.652482        | 702.329879         | 1402.668466       | 701.837871         | 9  |
| 12 | 1318.573231       | 659.790254      | 1301.546682    | 651.276979       | 1300.562666       | 650.784971       | W    | <b>1305.652088</b> | <b>653.329682</b>  | 1288.625539        | 644.816408         | 1287.641523       | 644.324400         | 8  |
| 13 | 1389.610345       | 695.308811      | 1372.583796    | 686.795536       | 1371.599780       | 686.303528       | A    | <b>1119.572775</b> | 560.290026         | 1102.546226        | 551.776751         | 1101.562210       | <b>551.284743</b>  | 7  |
| 14 | 1460.647459       | 730.827368      | 1443.620910    | 722.314093       | 1442.636894       | 721.822085       | A    | <b>1048.535661</b> | 524.771469         | 1031.509112        | 516.258194         | 1030.525096       | 515.766186         | 6  |
| 15 | 1899.872785       | 950.440031      | 1882.846236    | 941.926756       | 1881.862220       | 941.434748       | Q    | <b>977.498547</b>  | 489.252912         | 960.471998         | 480.739637         | 959.487982        | 480.247629         | 5  |
| 16 | 2028.915378       | 1014.961327     | 2011.888829    | 1006.448053      | 2010.904813       | 1005.956045      | E    | <b>538.273221</b>  | 269.640249         | 521.246672         | 261.126974         | <b>520.262656</b> | 260.634966         | 4  |
| 17 | 2125.968142       | 1063.487709     | 2108.941593    | 1054.974434      | 2107.957577       | 1054.482427      | P    | <b>409.230628</b>  | 205.118952         | <b>392.204079</b>  | 196.605677         |                   |                    | 3  |
| 18 | 2263.027054       | 1132.017165     | 2246.000505    | 1123.503890      | 2245.016489       | 1123.011883      | H    | <b>312.177864</b>  | 156.592570         | <b>295.151315</b>  | 148.079295         |                   |                    | 2  |
| 19 |                   |                 |                |                  |                   |                  | R    | <b>175.118952</b>  | 88.063114          | 158.092403         | 79.549839          |                   |                    | 1  |

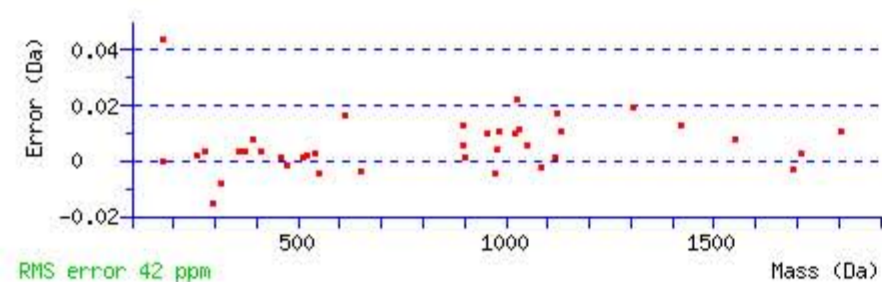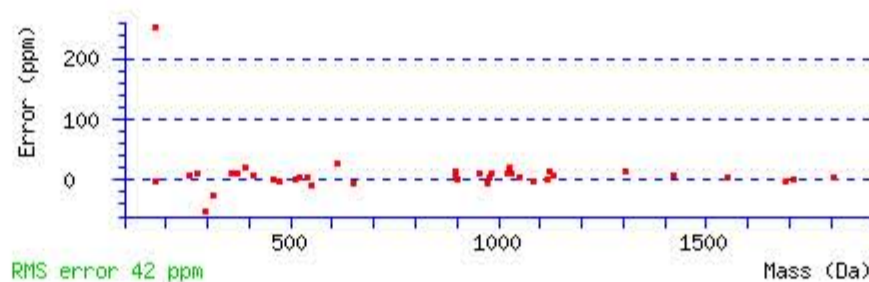

NCBI BLAST search of [ATTVTGTPCQDWAAQEPHR](#)

(Parameters: blastp, nr protein database, expect=20000, no filter, PAM30)

Other BLAST [web gateways](#)

All matches to this query

| Score | Mr(calc):   | Delta     | Sequence                            |
|-------|-------------|-----------|-------------------------------------|
| 54.0  | 2436.131470 | -0.022618 | <a href="#">ATTVTGTPCQDWAAQEPHR</a> |
| 23.5  | 2436.131470 | -0.022618 | <a href="#">ATTVTGTPCQDWAAQEPHR</a> |



# MASCOT Search Results

## Peptide View

MS/MS Fragmentation of **VVGGCVAHPHSWPWQVSLR**

Found in **PLMN\_HUMAN**, Plasminogen OS=Homo sapiens GN=PLG PE=1 SV=2

Match to Query 51825: 2482.254336 from(621.570860,4+) rtinseconds(2221) index(65075)

Title: Locus:1.1.1.3253.12 File:"2013-07-02 CLN FXIII 30 min 3rd FT.wiff"

Data file C:\Program Files (x86)\Matrix Science\Mascot Daemon\mgf\3 FXIII 30 min 3rd\mascot\_daemon\_merge.mgf

Click mouse within plot area to zoom in by factor of two about that point

Or, Plot from  to  Da

Label all possible matches  Label matches used for scoring

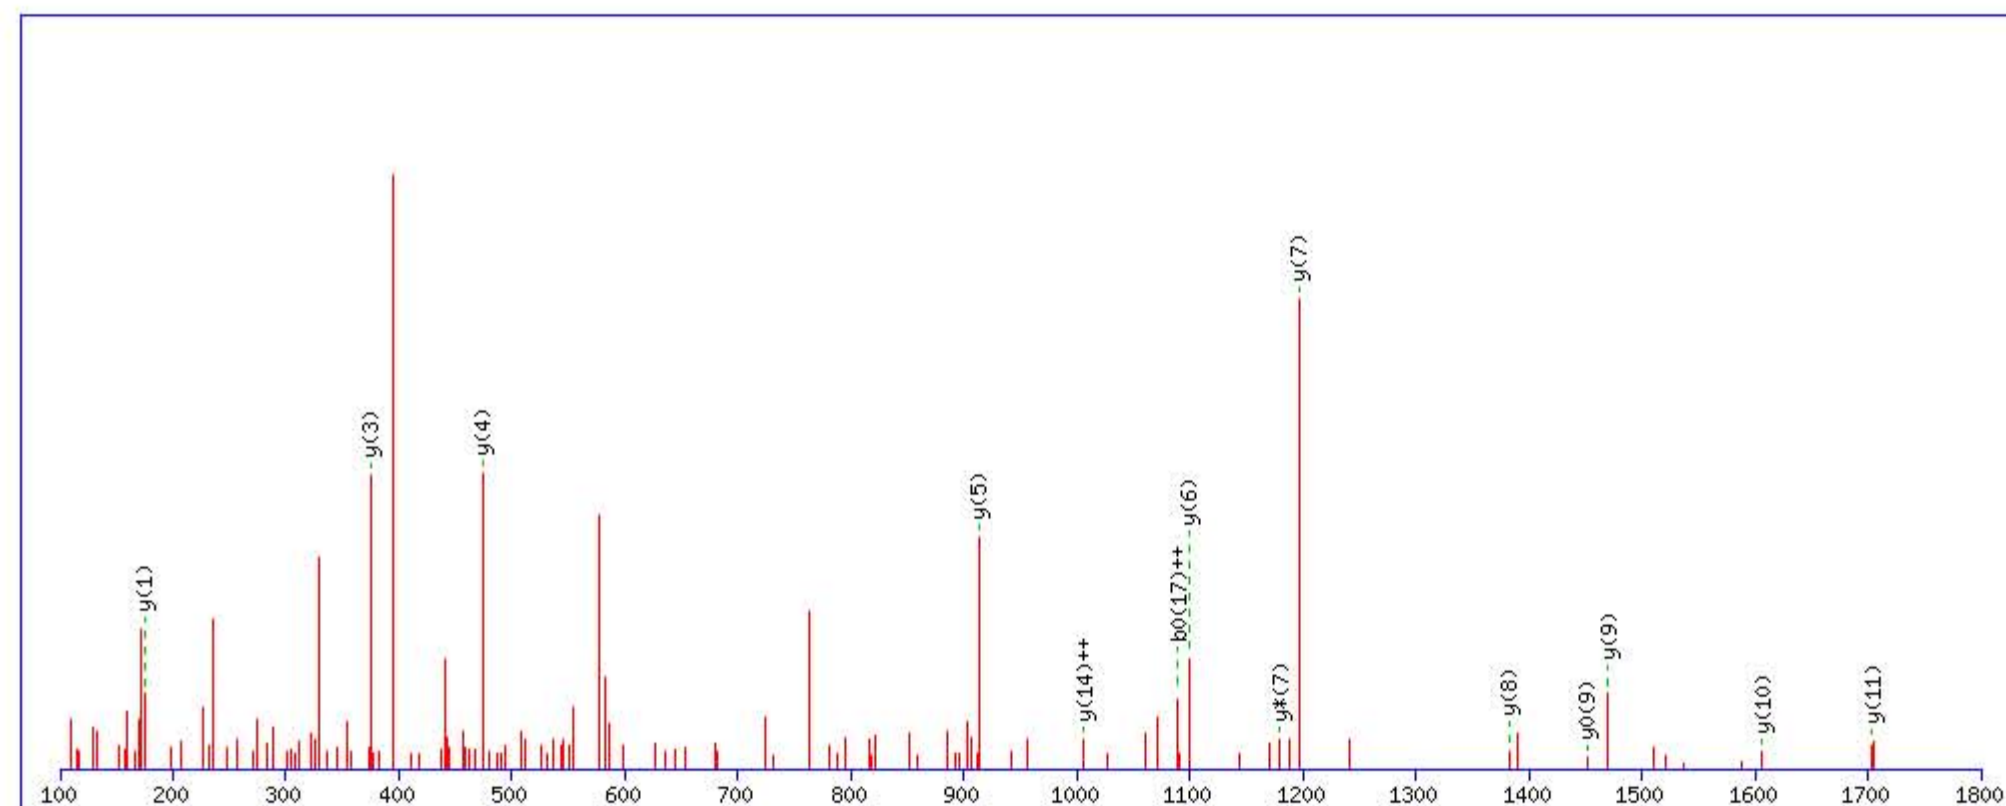

Monoisotopic mass of neutral peptide Mr(calc): 2482.251480

Fixed modifications: Carbamidomethyl (C) (apply to specified residues or termini only)

Variable modifications:

Q15 : Biotin:Thermo-21345 (Q)

Ions Score: 43 Expect: 0.0015

Matches : 14/164 fragment ions using 31 most intense peaks [\(help\)](#)

| #  | b           | b <sup>++</sup> | b <sup>+</sup> | b <sup>+++</sup> | b <sup>0</sup> | b <sup>0++</sup> | Seq. | y           | y <sup>++</sup> | y <sup>+</sup> | y <sup>+++</sup> | y <sup>0</sup> | y <sup>0++</sup> | #  |
|----|-------------|-----------------|----------------|------------------|----------------|------------------|------|-------------|-----------------|----------------|------------------|----------------|------------------|----|
| 1  | 100.075690  | 50.541483       |                |                  |                |                  | V    |             |                 |                |                  |                |                  | 19 |
| 2  | 199.144104  | 100.075690      |                |                  |                |                  | V    | 2384.190309 | 1192.598792     | 2367.163760    | 1184.085518      | 2366.179744    | 1183.593510      | 18 |
| 3  | 256.165568  | 128.586422      |                |                  |                |                  | G    | 2285.121895 | 1143.064585     | 2268.095346    | 1134.551311      | 2267.111330    | 1134.059303      | 17 |
| 4  | 313.187032  | 157.097154      |                |                  |                |                  | G    | 2228.100431 | 1114.553853     | 2211.073882    | 1106.040579      | 2210.089866    | 1105.548571      | 16 |
| 5  | 473.217681  | 237.112479      |                |                  |                |                  | C    | 2171.078967 | 1086.043121     | 2154.052418    | 1077.529847      | 2153.068402    | 1077.037839      | 15 |
| 6  | 572.286095  | 286.646686      |                |                  |                |                  | V    | 2011.048318 | 1006.027797     | 1994.021769    | 997.514523       | 1993.037753    | 997.022515       | 14 |
| 7  | 643.323209  | 322.165243      |                |                  |                |                  | A    | 1911.979904 | 956.493590      | 1894.953355    | 947.980316       | 1893.969339    | 947.488308       | 13 |
| 8  | 780.382121  | 390.694699      |                |                  |                |                  | H    | 1840.942790 | 920.975033      | 1823.916241    | 912.461759       | 1822.932225    | 911.969751       | 12 |
| 9  | 877.434885  | 439.221081      |                |                  |                |                  | P    | 1703.883878 | 852.445577      | 1686.857329    | 843.932303       | 1685.873313    | 843.440295       | 11 |
| 10 | 1014.493797 | 507.750537      |                |                  |                |                  | H    | 1606.831114 | 803.919195      | 1589.804565    | 795.405921       | 1588.820549    | 794.913913       | 10 |
| 11 | 1101.525825 | 551.266550      |                |                  | 1083.515260    | 542.261268       | S    | 1469.772202 | 735.389739      | 1452.745653    | 726.876465       | 1451.761637    | 726.384457       | 9  |
| 12 | 1287.605138 | 644.306207      |                |                  | 1269.594573    | 635.300924       | W    | 1382.740174 | 691.873725      | 1365.713625    | 683.360451       | 1364.729609    | 682.868443       | 8  |
| 13 | 1384.657902 | 692.832589      |                |                  | 1366.647337    | 683.827306       | P    | 1196.660861 | 598.834069      | 1179.634312    | 590.320794       | 1178.650296    | 589.828786       | 7  |
| 14 | 1570.737215 | 785.872245      |                |                  | 1552.726650    | 776.866963       | W    | 1099.608097 | 550.307687      | 1082.581548    | 541.794412       | 1081.597532    | 541.302404       | 6  |
| 15 | 2009.962541 | 1005.484909     | 1992.935992    | 996.971634       | 1991.951976    | 996.479626       | Q    | 913.528784  | 457.268030      | 896.502235     | 448.754756       | 895.518219     | 448.262748       | 5  |
| 16 | 2109.030955 | 1055.019115     | 2092.004406    | 1046.505841      | 2091.020390    | 1046.013833      | V    | 474.303458  | 237.655367      | 457.276909     | 229.142092       | 456.292893     | 228.650084       | 4  |
| 17 | 2196.062983 | 1098.535129     | 2179.036434    | 1090.021855      | 2178.052418    | 1089.529847      | S    | 375.235044  | 188.121160      | 358.208495     | 179.607886       | 357.224479     | 179.115878       | 3  |
| 18 | 2309.147047 | 1155.077161     | 2292.120498    | 1146.563887      | 2291.136482    | 1146.071879      | L    | 288.203016  | 144.605146      | 271.176467     | 136.091872       |                |                  | 2  |
| 19 |             |                 |                |                  |                |                  | R    | 175.118952  | 88.063114       | 158.092403     | 79.549839        |                |                  | 1  |

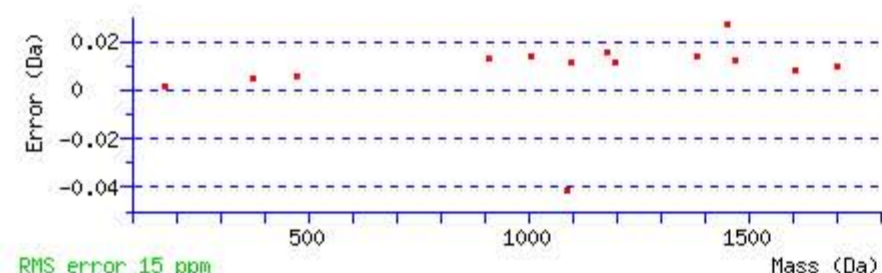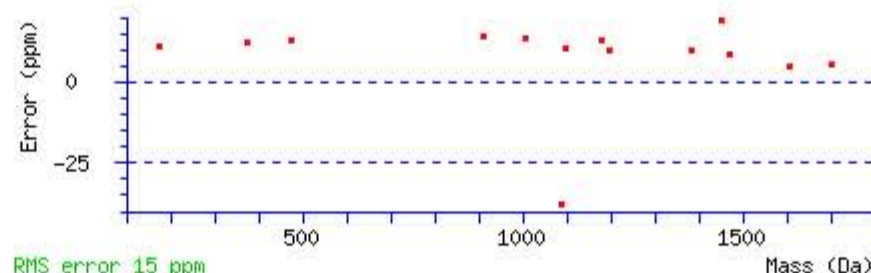

NCBI BLAST search of [VVGGCVAHPHSWPWQVSLR](#)

(Parameters: blastp, nr protein database, expect=20000, no filter, PAM30)

Other BLAST [web gateways](#)

All matches to this query

| Score | Mr(calc):   | Delta    | Sequence                            |
|-------|-------------|----------|-------------------------------------|
| 43.4  | 2482.251480 | 0.002856 | <a href="#">VVGGCVAHPHSWPWQVSLR</a> |

Mascot: <http://www.matrixscience.com/>



# MASCOT Search Results

## Peptide View

MS/MS Fragmentation of **NPDNDPQGPWCYTTDPEKR**  
 Found in **PLMN\_HUMAN**, Plasminogen OS=Homo sapiens GN=PLG PE=1 SV=2

Match to Query 53452: 2600.116512 from(867.712780,3+) rtinseconds(1965) index(63706)  
 Title: Locus:1.1.1.3163.26 File:"2013-07-02 CLN FXIII 30 min 3rd FT.wiff"  
 Data file C:\Program Files (x86)\Matrix Science\Mascot Daemon\mgf3 FXIII 30 min 3rd\mascot\_daemon\_merge.mgf

Click mouse within plot area to zoom in by factor of two about that point

Or, Plot from  to  Da

Label all possible matches  Label matches used for scoring

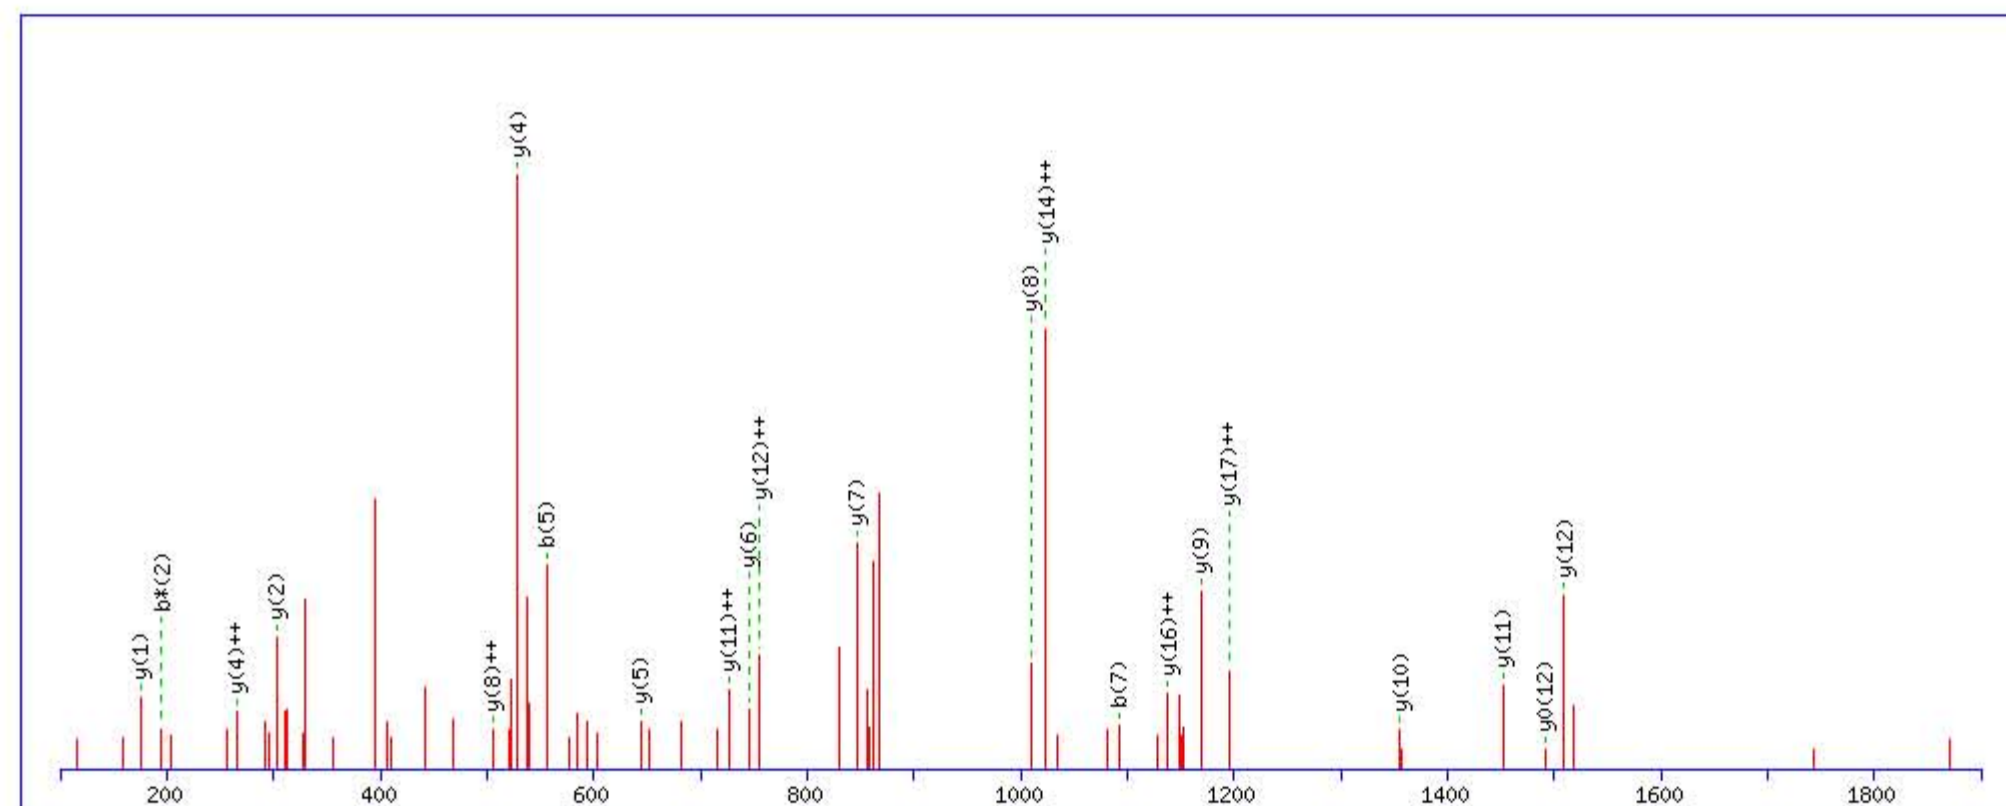

Monoisotopic mass of neutral peptide Mr(calc): 2600.142410  
 Fixed modifications: Carbamidomethyl (C) (apply to specified residues or termini only)  
 Variable modifications:  
 Q7 : Biotin:Thermo-21345 (Q)  
 Ions Score: 64 Expect: 1.6e-006  
 Matches : 22/208 fragment ions using 39 most intense peaks [\(help\)](#)

| #  | b           | b <sup>++</sup> | b <sup>+</sup> | b <sup>+++</sup> | b <sup>0</sup> | b <sup>0++</sup> | Seq. | y           | y <sup>++</sup> | y <sup>+</sup> | y <sup>+++</sup> | y <sup>0</sup> | y <sup>0++</sup> | #  |
|----|-------------|-----------------|----------------|------------------|----------------|------------------|------|-------------|-----------------|----------------|------------------|----------------|------------------|----|
| 1  | 115.050203  | 58.028740       | 98.023654      | 49.515465        |                |                  | N    |             |                 |                |                  |                |                  | 19 |
| 2  | 212.102967  | 106.555121      | 195.076418     | 98.041847        |                |                  | P    | 2487.106759 | 1244.057017     | 2470.080210    | 1235.543743      | 2469.096194    | 1235.051735      | 18 |
| 3  | 327.129910  | 164.068593      | 310.103361     | 155.555319       | 309.119345     | 155.063311       | D    | 2390.053995 | 1195.530635     | 2373.027446    | 1187.017361      | 2372.043430    | 1186.525353      | 17 |
| 4  | 441.172837  | 221.090057      | 424.146288     | 212.576782       | 423.162272     | 212.084774       | N    | 2275.027052 | 1138.017164     | 2258.000503    | 1129.503889      | 2257.016487    | 1129.011881      | 16 |
| 5  | 556.199780  | 278.603528      | 539.173231     | 270.090254       | 538.189215     | 269.598246       | D    | 2160.984125 | 1080.995700     | 2143.957576    | 1072.482426      | 2142.973560    | 1071.990418      | 15 |
| 6  | 653.252544  | 327.129910      | 636.225995     | 318.616636       | 635.241979     | 318.124628       | P    | 2045.957182 | 1023.482229     | 2028.930633    | 1014.968955      | 2027.946617    | 1014.476946      | 14 |
| 7  | 1092.477870 | 546.742573      | 1075.451321    | 538.229299       | 1074.467305    | 537.737290       | Q    | 1948.904418 | 974.955847      | 1931.877869    | 966.442572       | 1930.893853    | 965.950564       | 13 |
| 8  | 1149.499334 | 575.253305      | 1132.472785    | 566.740030       | 1131.488769    | 566.248022       | G    | 1509.679092 | 755.343184      | 1492.652543    | 746.829910       | 1491.668527    | 746.337902       | 12 |
| 9  | 1246.552098 | 623.779687      | 1229.525549    | 615.266413       | 1228.541533    | 614.774404       | P    | 1452.657628 | 726.832452      | 1435.631079    | 718.319178       | 1434.647063    | 717.827170       | 11 |
| 10 | 1432.631411 | 716.819343      | 1415.604862    | 708.306069       | 1414.620846    | 707.814061       | W    | 1355.604864 | 678.306070      | 1338.578315    | 669.792796       | 1337.594299    | 669.300788       | 10 |
| 11 | 1592.662060 | 796.834668      | 1575.635511    | 788.321394       | 1574.651495    | 787.829385       | C    | 1169.525551 | 585.266414      | 1152.499002    | 576.753139       | 1151.514986    | 576.261131       | 9  |
| 12 | 1755.725389 | 878.366333      | 1738.698840    | 869.853058       | 1737.714824    | 869.361050       | Y    | 1009.494902 | 505.251089      | 992.468353     | 496.737815       | 991.484337     | 496.245807       | 8  |
| 13 | 1856.773068 | 928.890172      | 1839.746519    | 920.376898       | 1838.762503    | 919.884889       | T    | 846.431573  | 423.719425      | 829.405024     | 415.206150       | 828.421008     | 414.714142       | 7  |
| 14 | 1957.820747 | 979.414012      | 1940.794198    | 970.900737       | 1939.810182    | 970.408729       | T    | 745.383894  | 373.195585      | 728.357345     | 364.682311       | 727.373329     | 364.190303       | 6  |
| 15 | 2072.847690 | 1036.927483     | 2055.821141    | 1028.414208      | 2054.837125    | 1027.922200      | D    | 644.336215  | 322.671746      | 627.309666     | 314.158471       | 626.325650     | 313.666463       | 5  |
| 16 | 2169.900454 | 1085.453865     | 2152.873905    | 1076.940590      | 2151.889889    | 1076.448582      | P    | 529.309272  | 265.158274      | 512.282723     | 256.645000       | 511.298707     | 256.152992       | 4  |
| 17 | 2298.943047 | 1149.975161     | 2281.916498    | 1141.461887      | 2280.932482    | 1140.969879      | E    | 432.256508  | 216.631892      | 415.229959     | 208.118618       | 414.245943     | 207.626610       | 3  |
| 18 | 2427.038010 | 1214.022643     | 2410.011461    | 1205.509368      | 2409.027445    | 1205.017360      | K    | 303.213915  | 152.110595      | 286.187366     | 143.597321       |                |                  | 2  |
| 19 |             |                 |                |                  |                |                  | R    | 175.118952  | 88.063114       | 158.092403     | 79.549839        |                |                  | 1  |

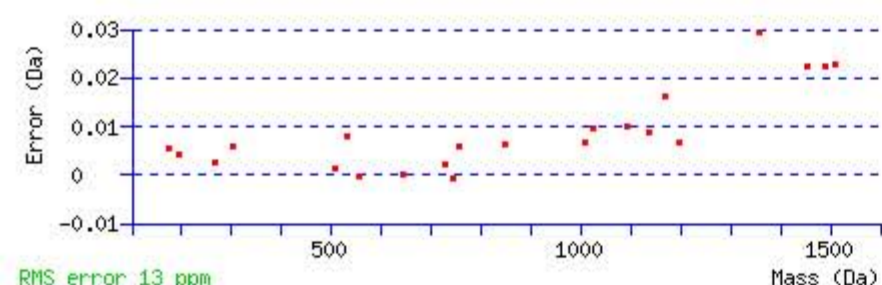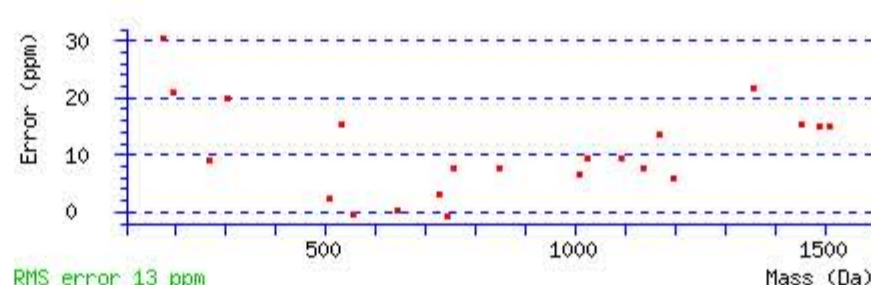

NCBI BLAST search of [NPDNDPQGPWCYTTDPEKR](#)  
 (Parameters: blastp, nr protein database, expect=20000, no filter, PAM30)  
 Other BLAST [web gateways](#)

## All matches to this query

| Score | Mr(calc):   | Delta     | Sequence                            |
|-------|-------------|-----------|-------------------------------------|
| 63.5  | 2600.142410 | -0.025898 | <a href="#">NPDNDPQGPWCYTTDPEKR</a> |



# Mascot Search Results

## Peptide View

MS/MS Fragmentation of **VILGAHQEVNLEPHVQEIIVSR**

Found in **PLMN\_HUMAN**, Plasminogen OS=Homo sapiens GN=PLG PE=1 SV=2

Match to Query 55224: 2806.462976 from(702.623020,4+) rtinseconds(2073) index(64287)

Title: Locus:1.1.1.3201.11 File:"2013-07-02 CLN FXIII 30 min 3rd FT.wiff"

Data file C:\Program Files (x86)\Matrix Science\Mascot Daemon\mgf3 FXIII 30 min 3rd\mascot\_daemon\_merge.mgf

Click mouse within plot area to zoom in by factor of two about that point

Or, Plot from  to  Da

Label all possible matches  Label matches used for scoring

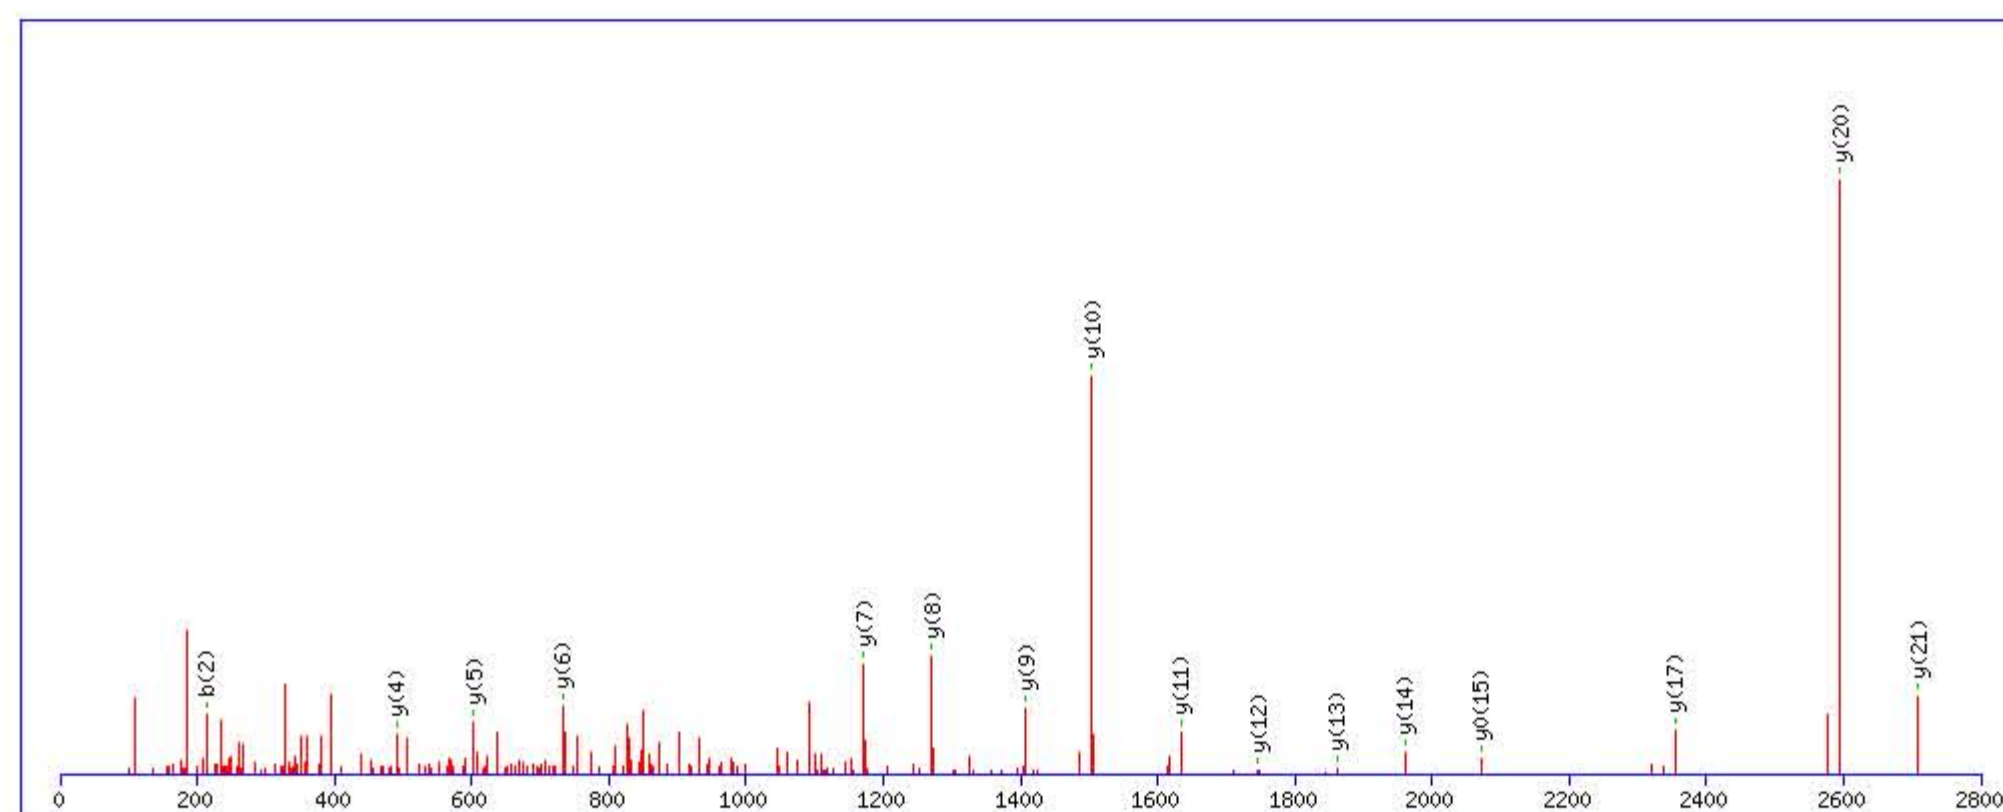

Monoisotopic mass of neutral peptide Mr(calc): 2806.479965

Fixed modifications: Carbamidomethyl (C) (apply to specified residues or termini only)

Variable modifications:

Q16 : Biotin:Thermo-21345 (Q)

Ions Score: 106 Expect: 6.7e-010

Matches : 16/224 fragment ions using 23 most intense peaks [\(help\)](#)

| #  | b           | b <sup>++</sup> | b <sup>*</sup> | b <sup>*++</sup> | b <sup>0</sup> | b <sup>0++</sup> | Seq. | y           | y <sup>++</sup> | y <sup>*</sup> | y <sup>*++</sup> | y <sup>0</sup> | y <sup>0++</sup> | #  |
|----|-------------|-----------------|----------------|------------------|----------------|------------------|------|-------------|-----------------|----------------|------------------|----------------|------------------|----|
| 1  | 100.075690  | 50.541483       |                |                  |                |                  | V    |             |                 |                |                  |                |                  | 22 |
| 2  | 213.159754  | 107.083515      |                |                  |                |                  | I    | 2708.418847 | 1354.713061     | 2691.392298    | 1346.199787      | 2690.408282    | 1345.707779      | 21 |
| 3  | 326.243818  | 163.625547      |                |                  |                |                  | L    | 2595.334783 | 1298.171029     | 2578.308234    | 1289.657755      | 2577.324218    | 1289.165747      | 20 |
| 4  | 383.265282  | 192.136279      |                |                  |                |                  | G    | 2482.250719 | 1241.628997     | 2465.224170    | 1233.115723      | 2464.240154    | 1232.623715      | 19 |
| 5  | 454.302396  | 227.654836      |                |                  |                |                  | A    | 2425.229255 | 1213.118265     | 2408.202706    | 1204.604991      | 2407.218690    | 1204.112983      | 18 |
| 6  | 591.361308  | 296.184292      |                |                  |                |                  | H    | 2354.192141 | 1177.599708     | 2337.165592    | 1169.086434      | 2336.181576    | 1168.594426      | 17 |
| 7  | 719.419886  | 360.213581      | 702.393337     | 351.700307       |                |                  | Q    | 2217.133229 | 1109.070252     | 2200.106680    | 1100.556978      | 2199.122664    | 1100.064970      | 16 |
| 8  | 848.462479  | 424.734878      | 831.435930     | 416.221603       | 830.451914     | 415.729595       | E    | 2089.074651 | 1045.040963     | 2072.048102    | 1036.527689      | 2071.064086    | 1036.035681      | 15 |
| 9  | 947.530893  | 474.269085      | 930.504344     | 465.755810       | 929.520328     | 465.263802       | V    | 1960.032058 | 980.519667      | 1943.005509    | 972.006393       | 1942.021493    | 971.514385       | 14 |
| 10 | 1061.573820 | 531.290548      | 1044.547271    | 522.777274       | 1043.563255    | 522.285266       | N    | 1860.963644 | 930.985460      | 1843.937095    | 922.472186       | 1842.953079    | 921.980178       | 13 |
| 11 | 1174.657884 | 587.832580      | 1157.631335    | 579.319306       | 1156.647319    | 578.827297       | L    | 1746.920717 | 873.963997      | 1729.894168    | 865.450722       | 1728.910152    | 864.958714       | 12 |
| 12 | 1303.700477 | 652.353877      | 1286.673928    | 643.840602       | 1285.689912    | 643.348594       | E    | 1633.836653 | 817.421965      | 1616.810104    | 808.908690       | 1615.826088    | 808.416682       | 11 |
| 13 | 1400.753241 | 700.880259      | 1383.726692    | 692.366984       | 1382.742676    | 691.874976       | P    | 1504.794060 | 752.900668      | 1487.767511    | 744.387394       | 1486.783495    | 743.895386       | 10 |
| 14 | 1537.812153 | 769.409715      | 1520.785604    | 760.896440       | 1519.801588    | 760.404432       | H    | 1407.741296 | 704.374286      | 1390.714747    | 695.861012       | 1389.730731    | 695.369004       | 9  |
| 15 | 1636.880567 | 818.943922      | 1619.854018    | 810.430647       | 1618.870002    | 809.938639       | V    | 1270.682384 | 635.844830      | 1253.655835    | 627.331556       | 1252.671819    | 626.839548       | 8  |
| 16 | 2076.105893 | 1038.556584     | 2059.079344    | 1030.043310      | 2058.095328    | 1029.551302      | Q    | 1171.613970 | 586.310623      | 1154.587421    | 577.797349       | 1153.603405    | 577.305341       | 7  |
| 17 | 2205.148486 | 1103.077881     | 2188.121937    | 1094.564606      | 2187.137921    | 1094.072598      | E    | 732.388644  | 366.697960      | 715.362095     | 358.184686       | 714.378079     | 357.692678       | 6  |
| 18 | 2318.232550 | 1159.619913     | 2301.206001    | 1151.106638      | 2300.221985    | 1150.614631      | I    | 603.346051  | 302.176664      | 586.319502     | 293.663389       | 585.335486     | 293.171381       | 5  |
| 19 | 2447.275143 | 1224.141210     | 2430.248594    | 1215.627935      | 2429.264578    | 1215.135927      | E    | 490.261987  | 245.634631      | 473.235438     | 237.121357       | 472.251422     | 236.629349       | 4  |
| 20 | 2546.343557 | 1273.675417     | 2529.317008    | 1265.162142      | 2528.332992    | 1264.670134      | V    | 361.219394  | 181.113335      | 344.192845     | 172.600060       | 343.208829     | 172.108052       | 3  |
| 21 | 2633.375585 | 1317.191431     | 2616.349036    | 1308.678156      | 2615.365020    | 1308.186148      | S    | 262.150980  | 131.579128      | 245.124431     | 123.065854       | 244.140415     | 122.573846       | 2  |
| 22 |             |                 |                |                  |                |                  | R    | 175.118952  | 88.063114       | 158.092403     | 79.549839        |                |                  | 1  |

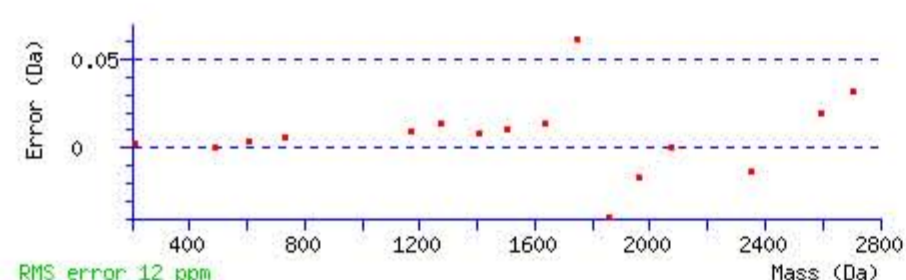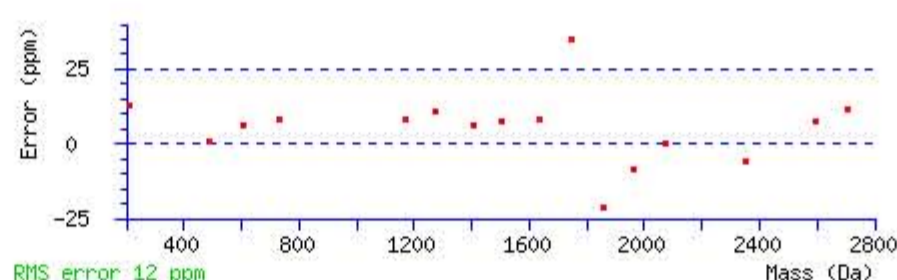

NCBI BLAST search of [VILGAHQEVNLEPHVQEIIVSR](#)

(Parameters: blastp, nr protein database, expect=20000, no filter, PAM30)

Other BLAST [web gateways](#)

All matches to this query

| Score | Mr(calc):   | Delta     | Sequence                               |
|-------|-------------|-----------|----------------------------------------|
| 105.7 | 2806.479965 | -0.016989 | <a href="#">VILGAHQEVNLEPHVQEIIVSR</a> |
| 15.3  | 2806.479965 | -0.016989 | <a href="#">VILGAHQEVNLEPHVQEIIVSR</a> |



# Mascot Search Results

## Peptide View

MS/MS Fragmentation of **VILGAHQEVNLEPHVQEIIVSR**

Found in **PLMN\_HUMAN**, Plasminogen OS=Homo sapiens GN=PLG PE=1 SV=2

Match to Query 55226: 2806.467096 from(702.624050,4+) rtinseconds(2105) index(64459)

Title: Locus:1.1.1.3212.14 File:"2013-07-02 CLN FXIII 30 min 3rd FT.wiff"

Data file C:\Program Files (x86)\Matrix Science\Mascot Daemon\mgf3 FXIII 30 min 3rd\mascot\_daemon\_merge.mgf

Click mouse within plot area to zoom in by factor of two about that point

Or, Plot from  to  Da

Label all possible matches  Label matches used for scoring

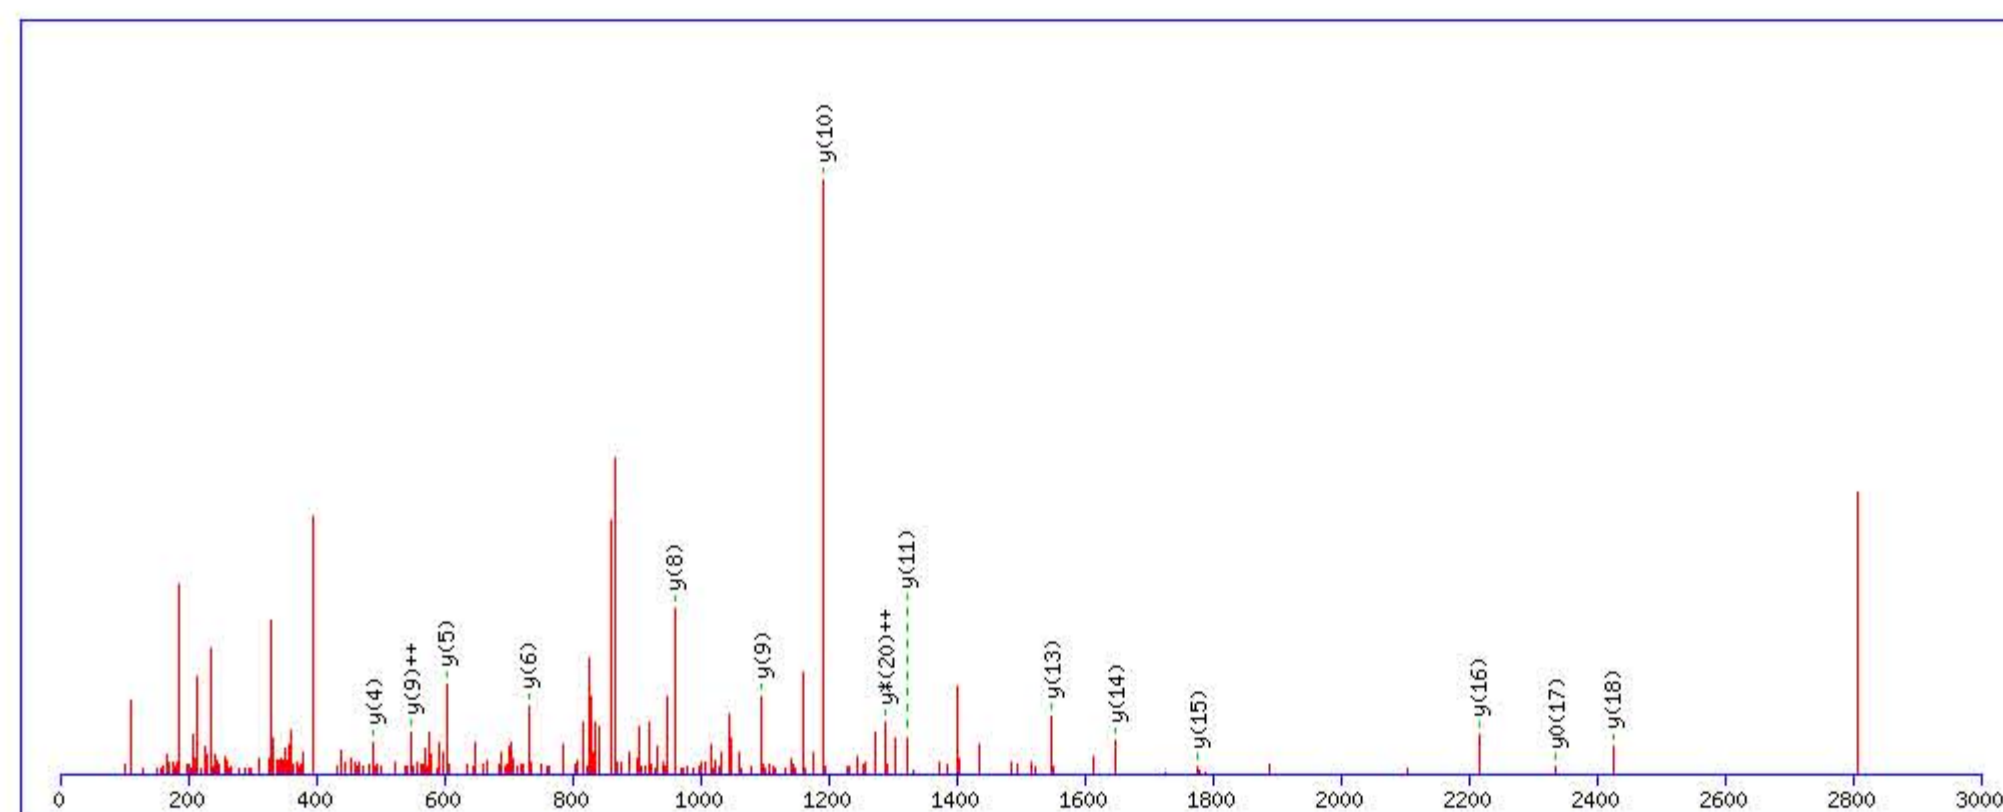

Monoisotopic mass of neutral peptide Mr(calc): 2806.479965

Fixed modifications: Carbamidomethyl (C) (apply to specified residues or termini only)

Variable modifications:

Q7 : Biotin:Thermo-21345 (Q)

Ions Score: 81 Expect: 2.1e-007

Matches : 15/224 fragment ions using 22 most intense peaks [\(help\)](#)

| #  | b           | b <sup>++</sup> | b <sup>*</sup> | b <sup>*++</sup> | b <sup>0</sup> | b <sup>0++</sup> | Seq. | y           | y <sup>++</sup> | y <sup>*</sup> | y <sup>*++</sup> | y <sup>0</sup> | y <sup>0++</sup> | #  |
|----|-------------|-----------------|----------------|------------------|----------------|------------------|------|-------------|-----------------|----------------|------------------|----------------|------------------|----|
| 1  | 100.075690  | 50.541483       |                |                  |                |                  | V    |             |                 |                |                  |                |                  | 22 |
| 2  | 213.159754  | 107.083515      |                |                  |                |                  | I    | 2708.418847 | 1354.713061     | 2691.392298    | 1346.199787      | 2690.408282    | 1345.707779      | 21 |
| 3  | 326.243818  | 163.625547      |                |                  |                |                  | L    | 2595.334783 | 1298.171029     | 2578.308234    | 1289.657755      | 2577.324218    | 1289.165747      | 20 |
| 4  | 383.265282  | 192.136279      |                |                  |                |                  | G    | 2482.250719 | 1241.628997     | 2465.224170    | 1233.115723      | 2464.240154    | 1232.623715      | 19 |
| 5  | 454.302396  | 227.654836      |                |                  |                |                  | A    | 2425.229255 | 1213.118265     | 2408.202706    | 1204.604991      | 2407.218690    | 1204.112983      | 18 |
| 6  | 591.361308  | 296.184292      |                |                  |                |                  | H    | 2354.192141 | 1177.599708     | 2337.165592    | 1169.086434      | 2336.181576    | 1168.594426      | 17 |
| 7  | 1030.586634 | 515.796955      | 1013.560085    | 507.283681       |                |                  | Q    | 2217.133229 | 1109.070252     | 2200.106680    | 1100.556978      | 2199.122664    | 1100.064970      | 16 |
| 8  | 1159.629227 | 580.318252      | 1142.602678    | 571.804977       | 1141.618662    | 571.312969       | E    | 1777.907903 | 889.457590      | 1760.881354    | 880.944315       | 1759.897338    | 880.452307       | 15 |
| 9  | 1258.697641 | 629.852459      | 1241.671092    | 621.339184       | 1240.687076    | 620.847176       | V    | 1648.865310 | 824.936293      | 1631.838761    | 816.423019       | 1630.854745    | 815.931011       | 14 |
| 10 | 1372.740568 | 686.873922      | 1355.714019    | 678.360648       | 1354.730003    | 677.868640       | N    | 1549.796896 | 775.402086      | 1532.770347    | 766.888812       | 1531.786331    | 766.396804       | 13 |
| 11 | 1485.824632 | 743.415954      | 1468.798083    | 734.902680       | 1467.814067    | 734.410672       | L    | 1435.753969 | 718.380623      | 1418.727420    | 709.867348       | 1417.743404    | 709.375340       | 12 |
| 12 | 1614.867225 | 807.937251      | 1597.840676    | 799.423976       | 1596.856660    | 798.931968       | E    | 1322.669905 | 661.838591      | 1305.643356    | 653.325316       | 1304.659340    | 652.833308       | 11 |
| 13 | 1711.919989 | 856.463633      | 1694.893440    | 847.950358       | 1693.909424    | 847.458350       | P    | 1193.627312 | 597.317294      | 1176.600763    | 588.804020       | 1175.616747    | 588.312012       | 10 |
| 14 | 1848.978901 | 924.993089      | 1831.952352    | 916.479814       | 1830.968336    | 915.987806       | H    | 1096.574548 | 548.790912      | 1079.547999    | 540.277638       | 1078.563983    | 539.785630       | 9  |
| 15 | 1948.047315 | 974.527296      | 1931.020766    | 966.014021       | 1930.036750    | 965.522013       | V    | 959.515636  | 480.261456      | 942.489087     | 471.748182       | 941.505071     | 471.256174       | 8  |
| 16 | 2076.105893 | 1038.556584     | 2059.079344    | 1030.043310      | 2058.095328    | 1029.551302      | Q    | 860.447222  | 430.727249      | 843.420673     | 422.213975       | 842.436657     | 421.721967       | 7  |
| 17 | 2205.148486 | 1103.077881     | 2188.121937    | 1094.564606      | 2187.137921    | 1094.072598      | E    | 732.388644  | 366.697960      | 715.362095     | 358.184686       | 714.378079     | 357.692678       | 6  |
| 18 | 2318.232550 | 1159.619913     | 2301.206001    | 1151.106638      | 2300.221985    | 1150.614631      | I    | 603.346051  | 302.176664      | 586.319502     | 293.663389       | 585.335486     | 293.171381       | 5  |
| 19 | 2447.275143 | 1224.141210     | 2430.248594    | 1215.627935      | 2429.264578    | 1215.135927      | E    | 490.261987  | 245.634631      | 473.235438     | 237.121357       | 472.251422     | 236.629349       | 4  |
| 20 | 2546.343557 | 1273.675417     | 2529.317008    | 1265.162142      | 2528.332992    | 1264.670134      | V    | 361.219394  | 181.113335      | 344.192845     | 172.600060       | 343.208829     | 172.108052       | 3  |
| 21 | 2633.375585 | 1317.191431     | 2616.349036    | 1308.678156      | 2615.365020    | 1308.186148      | S    | 262.150980  | 131.579128      | 245.124431     | 123.065854       | 244.140415     | 122.573846       | 2  |
| 22 |             |                 |                |                  |                |                  | R    | 175.118952  | 88.063114       | 158.092403     | 79.549839        |                |                  | 1  |

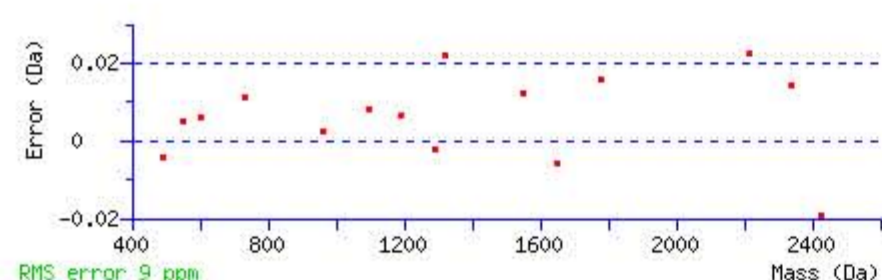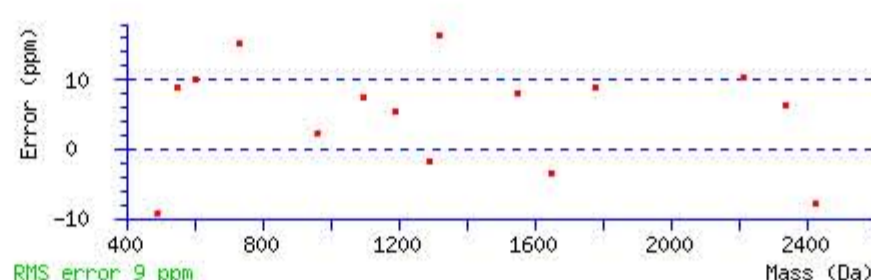

NCBI BLAST search of [VILGAHQEVNLEPHVQEIIVSR](#)

(Parameters: blastp, nr protein database, expect=20000, no filter, PAM30)

Other BLAST [web gateways](#)

All matches to this query

| Score | Mr(calc):   | Delta     | Sequence                               |
|-------|-------------|-----------|----------------------------------------|
| 80.8  | 2806.479965 | -0.012869 | <a href="#">VILGAHQEVNLEPHVQEIIVSR</a> |
| 4.9   | 2806.479965 | -0.012869 | <a href="#">VILGAHQEVNLEPHVQEIIVSR</a> |



# Mascot Search Results

## Peptide View

MS/MS Fragmentation of **TMSGLECAWDSQSPHAHGYPISK**

Found in **PLMN\_HUMAN**, Plasminogen OS=Homo sapiens GN=PLG PE=1 SV=2

Match to Query 57305: 2997.338456 from(750.341890,4+) rtinseconds(1976) index(63794)

Title: Locus:1.1.1.3167.21 File:"2013-07-02 CLN FXIII 30 min 3rd FT.wiff"

Data file C:\Program Files (x86)\Matrix Science\Mascot Daemon\mgf3 FXIII 30 min 3rd\mascot\_daemon\_merge.mgf

Click mouse within plot area to zoom in by factor of two about that point

Or, Plot from  to  Da

Label all possible matches  Label matches used for scoring

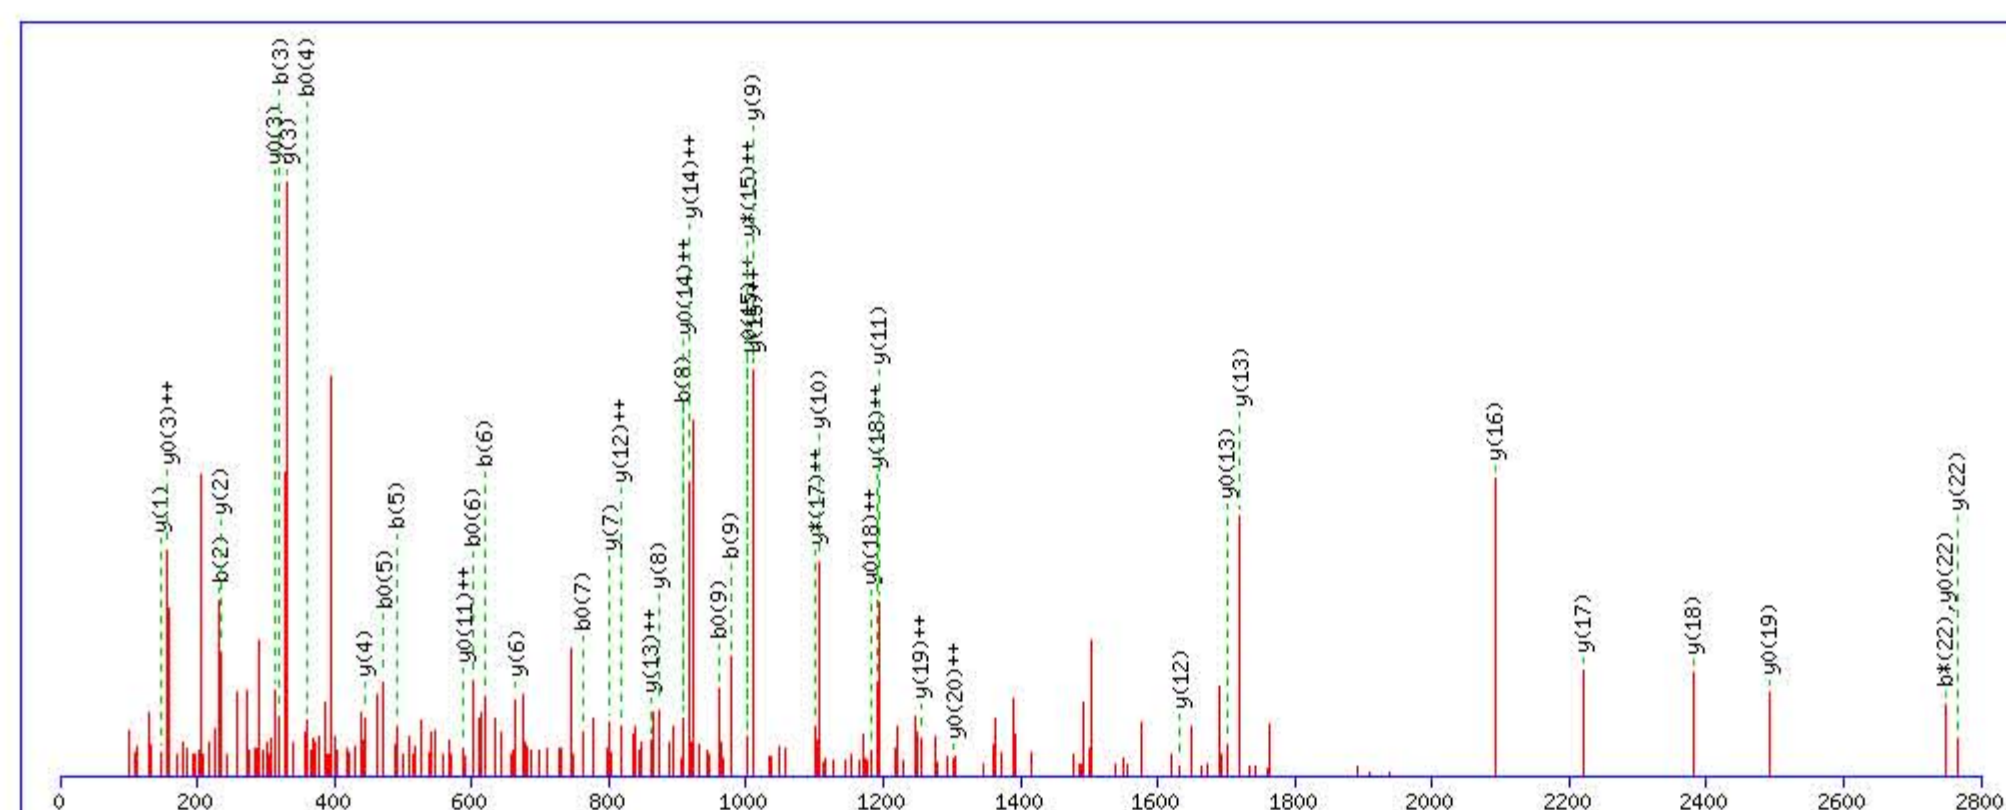

Monoisotopic mass of neutral peptide Mr(calc): 2997.357162

Fixed modifications: Carbamidomethyl (C) (apply to specified residues or termini only)

Variable modifications:

Q13 : Biotin:Thermo-21345 (Q)

Ions Score: 43 Expect: 0.00035

Matches : 46/260 fragment ions using 153 most intense peaks [\(help\)](#)

| #  | b                 | b <sup>++</sup> | b <sup>+</sup>     | b <sup>+++</sup> | b <sup>0</sup>    | b <sup>0++</sup> | Seq. | y                  | y <sup>++</sup>    | y <sup>+</sup> | y <sup>+++</sup>   | y <sup>0</sup>     | y <sup>0++</sup>   | #  |
|----|-------------------|-----------------|--------------------|------------------|-------------------|------------------|------|--------------------|--------------------|----------------|--------------------|--------------------|--------------------|----|
| 1  | 102.054955        | 51.531116       |                    |                  | 84.044390         | 42.525833        | T    |                    |                    |                |                    |                    |                    | 24 |
| 2  | <b>233.095440</b> | 117.051358      |                    |                  | 215.084875        | 108.046076       | M    | 2897.316768        | 1449.162022        | 2880.290219    | 1440.648748        | 2879.306203        | 1440.156740        | 23 |
| 3  | <b>320.127468</b> | 160.567372      |                    |                  | 302.116903        | 151.562089       | S    | <b>2766.276283</b> | 1383.641780        | 2749.249734    | 1375.128505        | <b>2748.265718</b> | 1374.636497        | 22 |
| 4  | 377.148932        | 189.078104      |                    |                  | <b>359.138367</b> | 180.072821       | G    | 2679.244255        | 1340.125766        | 2662.217706    | 1331.612491        | 2661.233690        | 1331.120483        | 21 |
| 5  | <b>490.232996</b> | 245.620136      |                    |                  | <b>472.222431</b> | 236.614853       | L    | 2622.222791        | 1311.615034        | 2605.196242    | 1303.101759        | 2604.212226        | <b>1302.609751</b> | 20 |
| 6  | <b>619.275589</b> | 310.141433      |                    |                  | <b>601.265024</b> | 301.136150       | E    | 2509.138727        | <b>1255.073002</b> | 2492.112178    | 1246.559727        | <b>2491.128162</b> | 1246.067719        | 19 |
| 7  | 779.306238        | 390.156757      |                    |                  | <b>761.295673</b> | 381.151475       | C    | <b>2380.096134</b> | <b>1190.551705</b> | 2363.069585    | 1182.038431        | 2362.085569        | <b>1181.546423</b> | 18 |
| 8  | <b>907.364816</b> | 454.186046      | 890.338267         | 445.672772       | 889.354251        | 445.180764       | Q    | <b>2220.065485</b> | 1110.536381        | 2203.038936    | <b>1102.023106</b> | 2202.054920        | 1101.531098        | 17 |
| 9  | <b>978.401930</b> | 489.704603      | 961.375381         | 481.191329       | <b>960.391365</b> | 480.699321       | A    | <b>2092.006907</b> | 1046.507092        | 2074.980358    | 1037.993817        | 2073.996342        | 1037.501809        | 16 |
| 10 | 1164.481243       | 582.744260      | 1147.454694        | 574.230985       | 1146.470678       | 573.738977       | W    | 2020.969793        | <b>1010.988535</b> | 2003.943244    | <b>1002.475260</b> | 2002.959228        | <b>1001.983252</b> | 15 |
| 11 | 1279.508186       | 640.257731      | 1262.481637        | 631.744457       | 1261.497621       | 631.252449       | D    | 1834.890480        | <b>917.948878</b>  | 1817.863931    | 909.435604         | 1816.879915        | <b>908.943596</b>  | 14 |
| 12 | 1366.540214       | 683.773745      | 1349.513665        | 675.260471       | 1348.529649       | 674.768463       | S    | <b>1719.863537</b> | <b>860.435407</b>  | 1702.836988    | 851.922132         | <b>1701.852972</b> | 851.430124         | 13 |
| 13 | 1805.765540       | 903.386408      | 1788.738991        | 894.873134       | 1787.754975       | 894.381126       | Q    | <b>1632.831509</b> | <b>816.919393</b>  | 1615.804960    | 808.406118         | 1614.820944        | 807.914110         | 12 |
| 14 | 1892.797568       | 946.902422      | 1875.771019        | 938.389148       | 1874.787003       | 937.897140       | S    | <b>1193.606183</b> | 597.306730         | 1176.579634    | 588.793455         | 1175.595618        | <b>588.301447</b>  | 11 |
| 15 | 1989.850332       | 995.428804      | 1972.823783        | 986.915530       | 1971.839767       | 986.423522       | P    | <b>1106.574155</b> | 553.790716         | 1089.547606    | 545.277441         | 1088.563590        | 544.785433         | 10 |
| 16 | 2126.909244       | 1063.958260     | 2109.882695        | 1055.444986      | 2108.898679       | 1054.952978      | H    | <b>1009.521391</b> | 505.264334         | 992.494842     | 496.751059         | 991.510826         | 496.259051         | 9  |
| 17 | 2197.946358       | 1099.476817     | 2180.919809        | 1090.963543      | 2179.935793       | 1090.471535      | A    | <b>872.462479</b>  | 436.734878         | 855.435930     | 428.221603         | 854.451914         | 427.729595         | 8  |
| 18 | 2335.005270       | 1168.006273     | 2317.978721        | 1159.492999      | 2316.994705       | 1159.000991      | H    | <b>801.425365</b>  | 401.216321         | 784.398816     | 392.703046         | 783.414800         | 392.211038         | 7  |
| 19 | 2392.026734       | 1196.517005     | 2375.000185        | 1188.003731      | 2374.016169       | 1187.511723      | G    | <b>664.366453</b>  | 332.686865         | 647.339904     | 324.173590         | 646.355888         | 323.681582         | 6  |
| 20 | 2555.090063       | 1278.048670     | 2538.063514        | 1269.535395      | 2537.079498       | 1269.043387      | Y    | 607.344989         | 304.176133         | 590.318440     | 295.662858         | 589.334424         | 295.170850         | 5  |
| 21 | 2668.174127       | 1334.590702     | 2651.147578        | 1326.077427      | 2650.163562       | 1325.585419      | I    | <b>444.281660</b>  | 222.644468         | 427.255111     | 214.131194         | 426.271095         | 213.639186         | 4  |
| 22 | 2765.226891       | 1383.117084     | <b>2748.200342</b> | 1374.603809      | 2747.216326       | 1374.111801      | P    | <b>331.197596</b>  | 166.102436         | 314.171047     | 157.589162         | <b>313.187031</b>  | <b>157.097154</b>  | 3  |
| 23 | 2852.258919       | 1426.633098     | 2835.232370        | 1418.119823      | 2834.248354       | 1417.627815      | S    | <b>234.144832</b>  | 117.576054         | 217.118283     | 109.062780         | 216.134267         | 108.570772         | 2  |
| 24 |                   |                 |                    |                  |                   |                  | K    | <b>147.112804</b>  | 74.060040          | 130.086255     | 65.546765          |                    |                    | 1  |

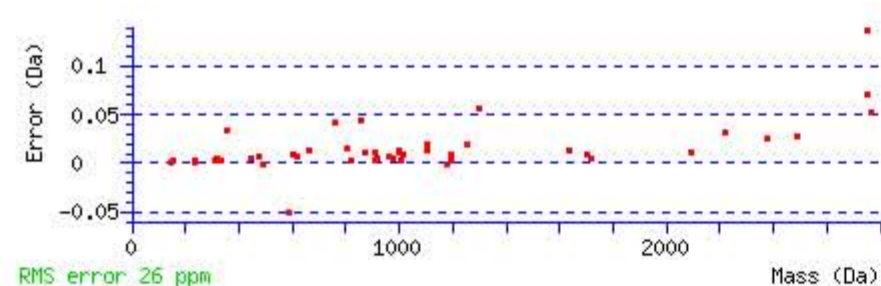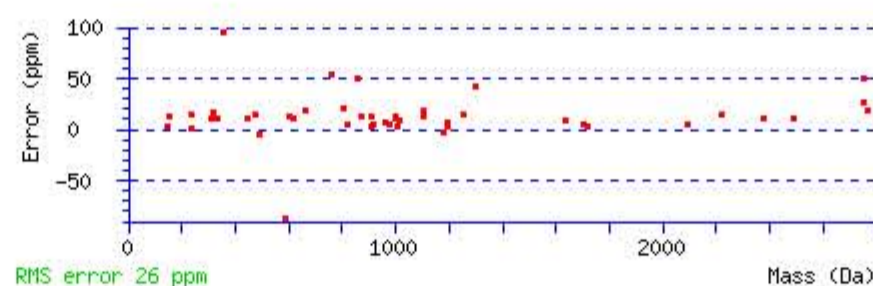

NCBI BLAST search of **TMSGLECAWDSQSPHAHGYPISK**

(Parameters: blastp, nr protein database, expect=20000, no filter, PAM30)

Other BLAST [web gateways](#)

All matches to this query

| Score | Mr(calc):   | Delta     | Sequence                                |
|-------|-------------|-----------|-----------------------------------------|
| 43.4  | 2997.357162 | -0.018706 | <a href="#">TMSGLECAWDSQSPHAHGYPISK</a> |
| 22.4  | 2997.357162 | -0.018706 | <a href="#">TMSGLECAWDSQSPHAHGYPISK</a> |



# Mascot Search Results

## Peptide View

MS/MS Fragmentation of **GNVAVTVSGHTCQHWSAQTPHTHNR**

Found in **PLMN\_HUMAN**, Plasminogen OS=Homo sapiens GN=PLG PE=1 SV=2

Match to Query 57919: 3092.444620 from(619.496200,5+) rtinseconds(1437) index(60564)

Title: Locus:1.1.1.2979.14 File:"2013-07-02 CLN FXIII 30 min 3rd FT.wiff"

Data file C:\Program Files (x86)\Matrix Science\Mascot Daemon\mgf3 FXIII 30 min 3rd\mascot\_daemon\_merge.mgf

Click mouse within plot area to zoom in by factor of two about that point

Or, Plot from  to  Da

Label all possible matches  Label matches used for scoring

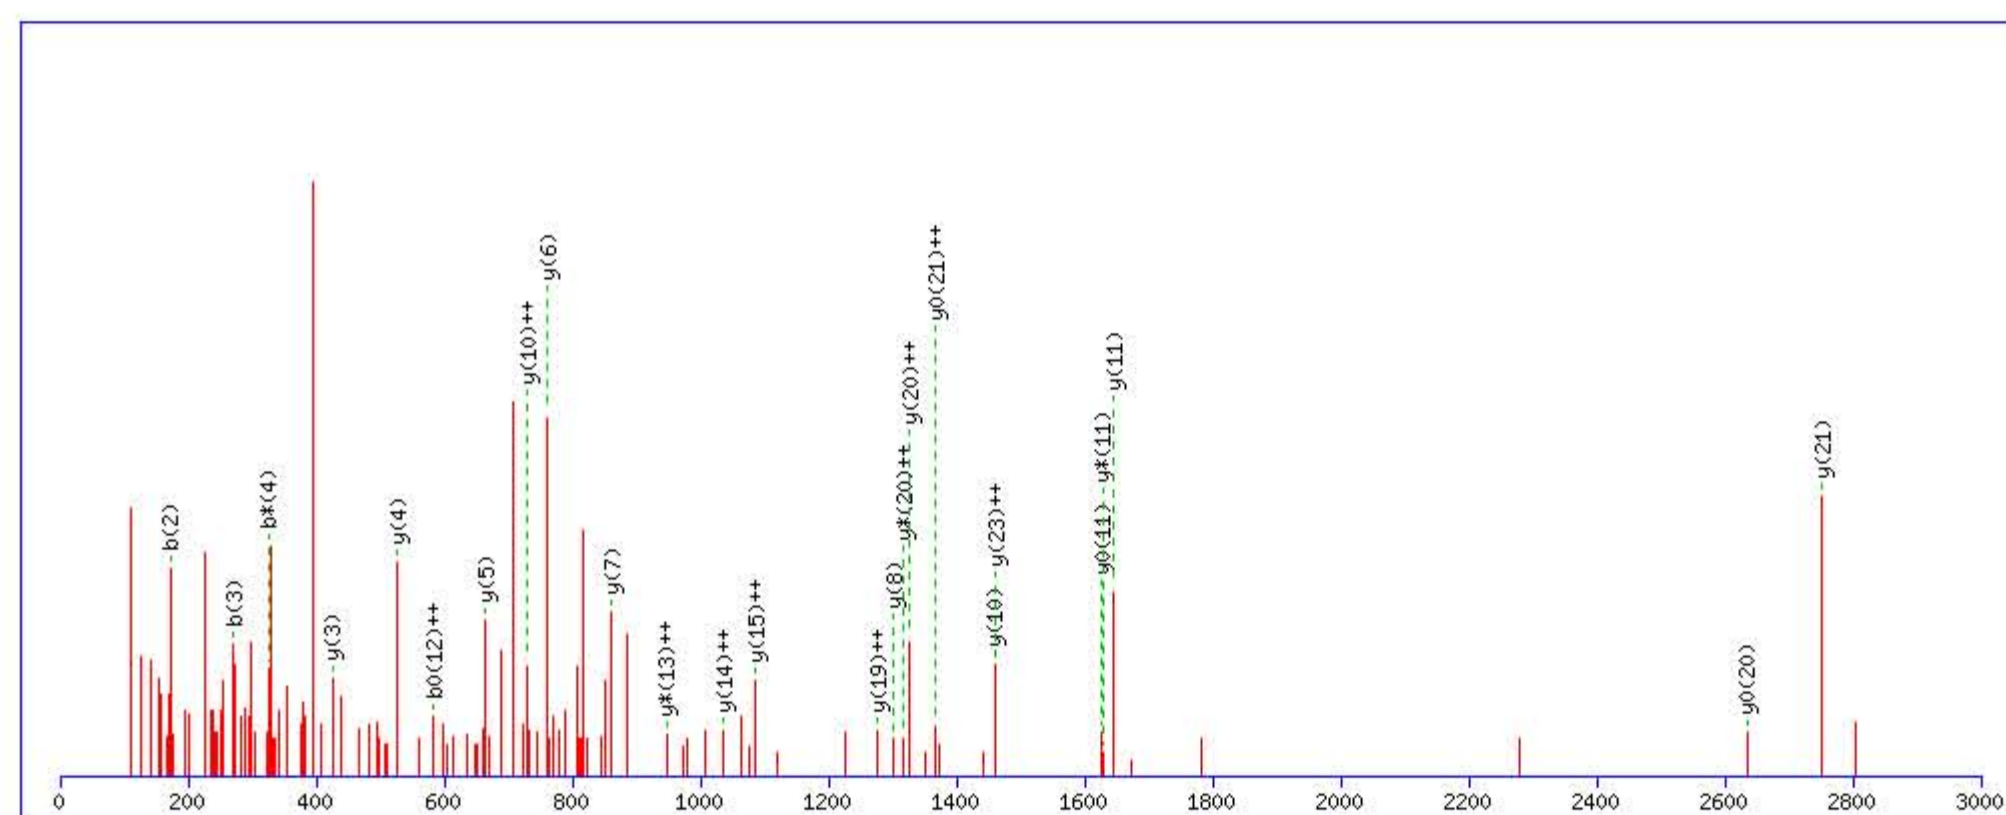

Monoisotopic mass of neutral peptide Mr(calc): 3092.457016

Fixed modifications: Carbamidomethyl (C) (apply to specified residues or termini only)

Variable modifications:

Q18 : Biotin:Thermo-21345 (Q)

Ions Score: 44 Expect: 0.00073

Matches : 25/270 fragment ions using 48 most intense peaks [\(help\)](#)

| #  | b                 | b <sup>++</sup> | b <sup>+</sup>    | b <sup>+++</sup> | b <sup>0</sup> | b <sup>0++</sup>  | Seq. | y                  | y <sup>++</sup>    | y <sup>+</sup>     | y <sup>+++</sup>   | y <sup>0</sup>     | y <sup>0++</sup>   | #  |
|----|-------------------|-----------------|-------------------|------------------|----------------|-------------------|------|--------------------|--------------------|--------------------|--------------------|--------------------|--------------------|----|
| 1  | 58.028740         | 29.518008       |                   |                  |                |                   | G    |                    |                    |                    |                    |                    |                    | 25 |
| 2  | <b>172.071667</b> | 86.539471       | 155.045118        | 78.026197        |                |                   | N    | 3036.442790        | 1518.725033        | 3019.416241        | 1510.211758        | 3018.432225        | 1509.719750        | 24 |
| 3  | <b>271.140081</b> | 136.073679      | 254.113532        | 127.560404       |                |                   | V    | 2922.399863        | <b>1461.703569</b> | 2905.373314        | 1453.190295        | 2904.389298        | 1452.698287        | 23 |
| 4  | 342.177195        | 171.592236      | <b>325.150646</b> | 163.078961       |                |                   | A    | 2823.331449        | 1412.169362        | 2806.304900        | 1403.656088        | 2805.320884        | 1403.164080        | 22 |
| 5  | 441.245609        | 221.126443      | 424.219060        | 212.613168       |                |                   | V    | <b>2752.294335</b> | 1376.650805        | 2735.267786        | 1368.137531        | 2734.283770        | <b>1367.645523</b> | 21 |
| 6  | 542.293288        | 271.650282      | 525.266739        | 263.137008       | 524.282723     | 262.645000        | T    | 2653.225921        | <b>1327.116598</b> | 2636.199372        | <b>1318.603324</b> | <b>2635.215356</b> | 1318.111316        | 20 |
| 7  | 641.361702        | 321.184489      | 624.335153        | 312.671215       | 623.351137     | 312.179207        | V    | 2552.178242        | <b>1276.592759</b> | 2535.151693        | 1268.079484        | 2534.167677        | 1267.587476        | 19 |
| 8  | 728.393730        | 364.700503      | 711.367181        | 356.187229       | 710.383165     | 355.695221        | S    | 2453.109828        | 1227.058552        | 2436.083279        | 1218.545277        | 2435.099263        | 1218.053269        | 18 |
| 9  | 785.415194        | 393.211235      | 768.388645        | 384.697961       | 767.404629     | 384.205953        | G    | 2366.077800        | 1183.542538        | 2349.051251        | 1175.029263        | 2348.067235        | 1174.537255        | 17 |
| 10 | 922.474106        | 461.740691      | 905.447557        | 453.227417       | 904.463541     | 452.735409        | H    | 2309.056336        | 1155.031806        | 2292.029787        | 1146.518531        | 2291.045771        | 1146.026523        | 16 |
| 11 | 1023.521785       | 512.264530      | 1006.495236       | 503.751256       | 1005.511220    | 503.259248        | T    | 2171.997424        | <b>1086.502350</b> | 2154.970875        | 1077.989075        | 2153.986859        | 1077.497067        | 15 |
| 12 | 1183.552434       | 592.279855      | 1166.525885       | 583.766581       | 1165.541869    | <b>583.274572</b> | C    | 2070.949745        | <b>1035.978510</b> | 2053.923196        | 1027.465236        | 2052.939180        | 1026.973228        | 14 |
| 13 | 1311.611012       | 656.309144      | 1294.584463       | 647.795870       | 1293.600447    | 647.303862        | Q    | 1910.919096        | 955.963186         | 1893.892547        | <b>947.449911</b>  | 1892.908531        | 946.957903         | 13 |
| 14 | 1448.669924       | 724.838600      | 1431.643375       | 716.325326       | 1430.659359    | 715.833318        | H    | 1782.860518        | 891.933897         | 1765.833969        | 883.420622         | 1764.849953        | 882.928614         | 12 |
| 15 | 1634.749237       | 817.878257      | 1617.722688       | 809.364982       | 1616.738672    | 808.872974        | W    | <b>1645.801606</b> | 823.404441         | <b>1628.775057</b> | 814.891166         | <b>1627.791041</b> | 814.399158         | 11 |
| 16 | 1721.781265       | 861.394271      | 1704.754716       | 852.880996       | 1703.770700    | 852.388988        | S    | <b>1459.722293</b> | <b>730.364784</b>  | 1442.695744        | 721.851510         | 1441.711728        | 721.359502         | 10 |
| 17 | 1792.818379       | 896.912828      | 1775.791830       | 888.399553       | 1774.807814    | 887.907545        | A    | 1372.690265        | 686.848770         | 1355.663716        | 678.335496         | 1354.679700        | 677.843488         | 9  |
| 18 | 2232.043705       | 1116.525490     | 2215.017156       | 1108.012216      | 2214.033140    | 1107.520208       | Q    | <b>1301.653151</b> | 651.330213         | 1284.626602        | 642.816939         | 1283.642586        | 642.324931         | 8  |
| 19 | 2333.091384       | 1167.049330     | 2316.064835       | 1158.536055      | 2315.080819    | 1158.044047       | T    | <b>862.427825</b>  | 431.717550         | 845.401276         | 423.204276         | 844.417260         | 422.712268         | 7  |
| 20 | 2430.144148       | 1215.575712     | 2413.117599       | 1207.062437      | 2412.133583    | 1206.570429       | P    | <b>761.380146</b>  | 381.193711         | 744.353597         | 372.680436         | 743.369581         | 372.188428         | 6  |
| 21 | 2567.203060       | 1284.105168     | 2550.176511       | 1275.591893      | 2549.192495    | 1275.099885       | H    | <b>664.327382</b>  | 332.667329         | 647.300833         | 324.154054         | 646.316817         | 323.662046         | 5  |
| 22 | 2668.250739       | 1334.629007     | 2651.224190       | 1326.115733      | 2650.240174    | 1325.623725       | T    | <b>527.268470</b>  | 264.137873         | 510.241921         | 255.624598         | 509.257905         | 255.132590         | 4  |
| 23 | 2805.309651       | 1403.158463     | 2788.283102       | 1394.645189      | 2787.299086    | 1394.153181       | H    | <b>426.220791</b>  | 213.614033         | 409.194242         | 205.100759         |                    |                    | 3  |
| 24 | 2919.352578       | 1460.179927     | 2902.326029       | 1451.666652      | 2901.342013    | 1451.174644       | N    | 289.161879         | 145.084577         | 272.135330         | 136.571303         |                    |                    | 2  |
| 25 |                   |                 |                   |                  |                |                   | R    | 175.118952         | 88.063114          | 158.092403         | 79.549839          |                    |                    | 1  |

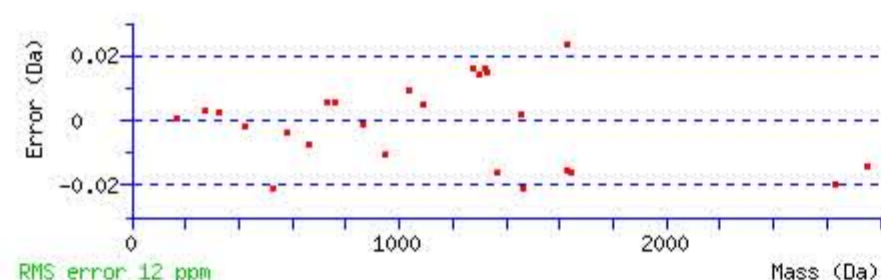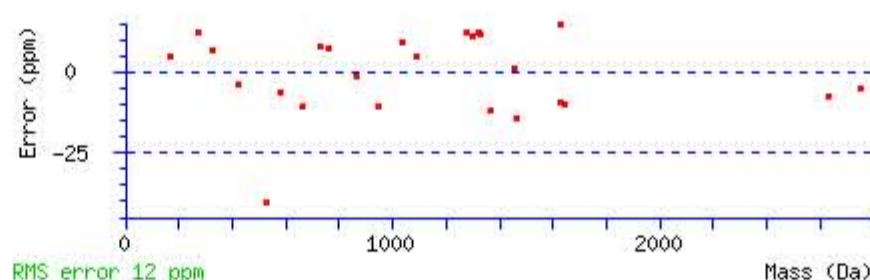

NCBI BLAST search of **GNVAVTVSGHTCQHWSAQTPHTHNR**

(Parameters: blastp, nr protein database, expect=20000, no filter, PAM30)

Other BLAST [web gateways](#)

All matches to this query

| Score | Mr(calc):   | Delta     | Sequence                                  |
|-------|-------------|-----------|-------------------------------------------|
| 43.6  | 3092.457016 | -0.012396 | <a href="#">GNVAVTVSGHTCQHWSAQTPHTHNR</a> |
| 19.9  | 3092.457016 | -0.012396 | <a href="#">GNVAVTVSGHTCQHWSAQTPHTHNR</a> |



# MASCOT Search Results

## Peptide View

MS/MS Fragmentation of **KLYDYCDVPQCAAPSFDCGKQVEPK**  
 Found in **PLMN\_HUMAN**, Plasminogen OS=Homo sapiens GN=PLG PE=1 SV=2

Match to Query 61396: 3382.513696 from(846.635700,4+) rtinseconds(1980) index(63824)  
 Title: Locus:1.1.1.3168.26 File:"2013-07-02 CLN FXIII 30 min 3rd FT.wiff"  
 Data file C:\Program Files (x86)\Matrix Science\Mascot Daemon\mgf3 FXIII 30 min 3rd\mascot\_daemon\_merge.mgf

Click mouse within plot area to zoom in by factor of two about that point  
 Or, Plot from  to  Da   
 Label all possible matches  Label matches used for scoring

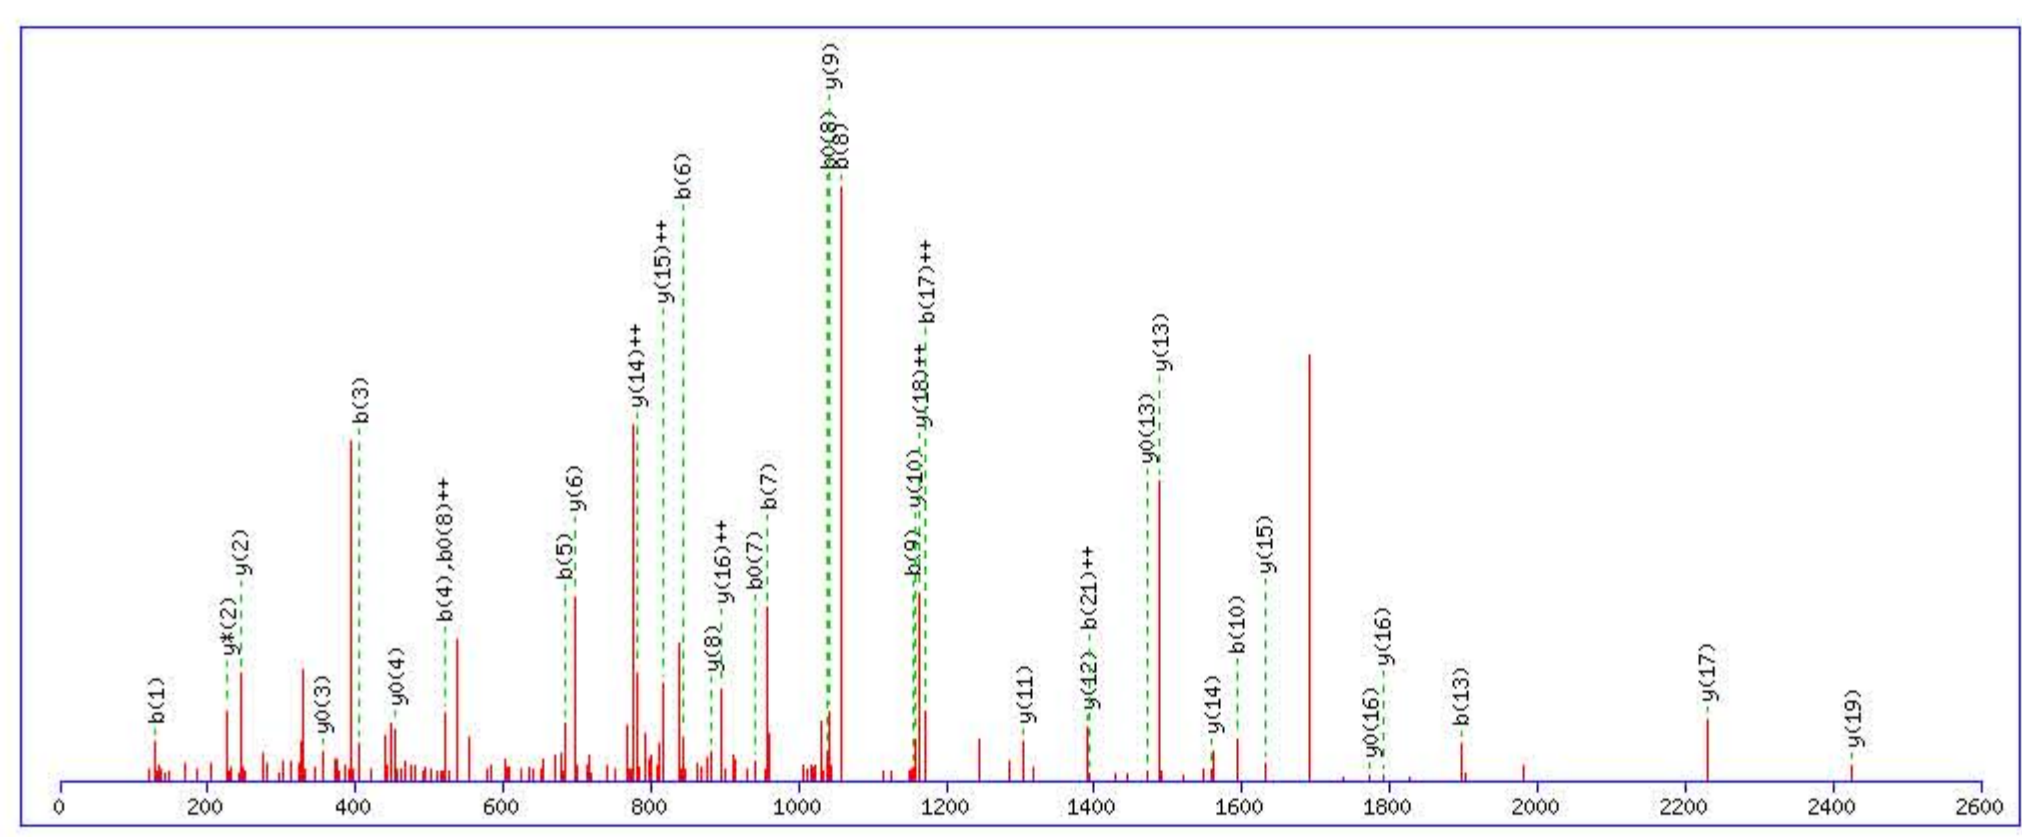

Monoisotopic mass of neutral peptide Mr(calc): 3382.549469  
 Fixed modifications: Carbamidomethyl (C) (apply to specified residues or termini only)  
 Variable modifications:  
 Q10 : Biotin:Thermo-21345 (Q)  
 Ions Score: 60 Expect: 7e-006  
 Matches : 37/290 fragment ions using 84 most intense peaks [\(help\)](#)

| #  | b                  | b <sup>++</sup>    | b <sup>*</sup> | b <sup>+++</sup> | b <sup>0</sup>     | b <sup>0++</sup>  | Seq.     | y                  | y <sup>++</sup>    | y <sup>*</sup>    | y <sup>+++</sup> | y <sup>0</sup>     | y <sup>0++</sup> | #         |
|----|--------------------|--------------------|----------------|------------------|--------------------|-------------------|----------|--------------------|--------------------|-------------------|------------------|--------------------|------------------|-----------|
| 1  | <b>129.102239</b>  | 65.054757          | 112.075690     | 56.541483        |                    |                   | <b>K</b> |                    |                    |                   |                  |                    |                  | <b>26</b> |
| 2  | 242.186303         | 121.596790         | 225.159754     | 113.083515       |                    |                   | <b>L</b> | 3255.461780        | 1628.234528        | 3238.435231       | 1619.721253      | 3237.451215        | 1619.229245      | <b>25</b> |
| 3  | <b>405.249632</b>  | 203.128454         | 388.223083     | 194.615180       |                    |                   | <b>Y</b> | 3142.377716        | 1571.692496        | 3125.351167       | 1563.179221      | 3124.367151        | 1562.687213      | <b>24</b> |
| 4  | <b>520.276575</b>  | 260.641926         | 503.250026     | 252.128651       | 502.266010         | 251.636643        | <b>D</b> | 2979.314387        | 1490.160831        | 2962.287838       | 1481.647557      | 2961.303822        | 1481.155549      | <b>23</b> |
| 5  | <b>683.339904</b>  | 342.173590         | 666.313355     | 333.660316       | 665.329339         | 333.168308        | <b>Y</b> | 2864.287444        | 1432.647360        | 2847.260895       | 1424.134085      | 2846.276879        | 1423.642077      | <b>22</b> |
| 6  | <b>843.370553</b>  | 422.188915         | 826.344004     | 413.675640       | 825.359988         | 413.183632        | <b>C</b> | 2701.224115        | 1351.115695        | 2684.197566       | 1342.602421      | 2683.213550        | 1342.110413      | <b>21</b> |
| 7  | <b>958.397496</b>  | 479.702386         | 941.370947     | 471.189112       | <b>940.386931</b>  | 470.697104        | <b>D</b> | 2541.193466        | 1271.100371        | 2524.166917       | 1262.587096      | 2523.182901        | 1262.095088      | <b>20</b> |
| 8  | <b>1057.465910</b> | 529.236593         | 1040.439361    | 520.723319       | <b>1039.455345</b> | <b>520.231311</b> | <b>V</b> | <b>2426.166523</b> | 1213.586899        | 2409.139974       | 1205.073625      | 2408.155958        | 1204.581617      | <b>19</b> |
| 9  | <b>1154.518674</b> | 577.762975         | 1137.492125    | 569.249701       | 1136.508109        | 568.757693        | <b>P</b> | 2327.098109        | <b>1164.052692</b> | 2310.071560       | 1155.539418      | 2309.087544        | 1155.047410      | <b>18</b> |
| 10 | <b>1593.744000</b> | 797.375638         | 1576.717451    | 788.862364       | 1575.733435        | 788.370356        | <b>Q</b> | <b>2230.045345</b> | 1115.526310        | 2213.018796       | 1107.013036      | 2212.034780        | 1106.521028      | <b>17</b> |
| 11 | 1753.774649        | 877.390963         | 1736.748100    | 868.877688       | 1735.764084        | 868.385680        | <b>C</b> | <b>1790.820019</b> | <b>895.913647</b>  | 1773.793470       | 887.400373       | <b>1772.809454</b> | 886.908365       | <b>16</b> |
| 12 | 1824.811763        | 912.909520         | 1807.785214    | 904.396245       | 1806.801198        | 903.904237        | <b>A</b> | <b>1630.789370</b> | <b>815.898323</b>  | 1613.762821       | 807.385048       | 1612.778805        | 806.893040       | <b>15</b> |
| 13 | <b>1895.848877</b> | 948.428077         | 1878.822328    | 939.914802       | 1877.838312        | 939.422794        | <b>A</b> | <b>1559.752256</b> | <b>780.379766</b>  | 1542.725707       | 771.866491       | 1541.741691        | 771.374483       | <b>14</b> |
| 14 | 1992.901641        | 996.954459         | 1975.875092    | 988.441184       | 1974.891076        | 987.949176        | <b>P</b> | <b>1488.715142</b> | 744.861209         | 1471.688593       | 736.347934       | <b>1470.704577</b> | 735.855926       | <b>13</b> |
| 15 | 2079.933669        | 1040.470472        | 2062.907120    | 1031.957198      | 2061.923104        | 1031.465190       | <b>S</b> | <b>1391.662378</b> | 696.334827         | 1374.635829       | 687.821552       | 1373.651813        | 687.329544       | <b>12</b> |
| 16 | 2227.002083        | 1114.004679        | 2209.975534    | 1105.491405      | 2208.991518        | 1104.999397       | <b>F</b> | <b>1304.630350</b> | 652.818813         | 1287.603801       | 644.305538       | 1286.619785        | 643.813530       | <b>11</b> |
| 17 | 2342.029026        | <b>1171.518151</b> | 2325.002477    | 1163.004876      | 2324.018461        | 1162.512868       | <b>D</b> | <b>1157.561936</b> | 579.284606         | 1140.535387       | 570.771331       | 1139.551371        | 570.279323       | <b>10</b> |
| 18 | 2502.059675        | 1251.533475        | 2485.033126    | 1243.020201      | 2484.049110        | 1242.528193       | <b>C</b> | <b>1042.534993</b> | 521.771135         | 1025.508444       | 513.257860       | 1024.524428        | 512.765852       | <b>9</b>  |
| 19 | 2559.081139        | 1280.044207        | 2542.054590    | 1271.530933      | 2541.070574        | 1271.038925       | <b>G</b> | <b>882.504344</b>  | 441.755810         | 865.477795        | 433.242536       | 864.493779         | 432.750528       | <b>8</b>  |
| 20 | 2687.176102        | 1344.091689        | 2670.149553    | 1335.578414      | 2669.165537        | 1335.086406       | <b>K</b> | 825.482880         | 413.245078         | 808.456331        | 404.731804       | 807.472315         | 404.239796       | <b>7</b>  |
| 21 | 2784.228866        | <b>1392.618071</b> | 2767.202317    | 1384.104796      | 2766.218301        | 1383.612788       | <b>P</b> | <b>697.387917</b>  | 349.197597         | 680.361368        | 340.684322       | 679.377352         | 340.192314       | <b>6</b>  |
| 22 | 2912.287444        | 1456.647360        | 2895.260895    | 1448.134085      | 2894.276879        | 1447.642077       | <b>Q</b> | 600.335153         | 300.671215         | 583.308604        | 292.157940       | 582.324588         | 291.665932       | <b>5</b>  |
| 23 | 3011.355858        | 1506.181567        | 2994.329309    | 1497.668292      | 2993.345293        | 1497.176284       | <b>V</b> | 472.276575         | 236.641925         | 455.250026        | 228.128651       | <b>454.266010</b>  | 227.636643       | <b>4</b>  |
| 24 | 3140.398451        | 1570.702863        | 3123.371902    | 1562.189589      | 3122.387886        | 1561.697581       | <b>E</b> | 373.208161         | 187.107719         | 356.181612        | 178.594444       | <b>355.197596</b>  | 178.102436       | <b>3</b>  |
| 25 | 3237.451215        | 1619.229245        | 3220.424666    | 1610.715971      | 3219.440650        | 1610.223963       | <b>P</b> | <b>244.165568</b>  | 122.586422         | <b>227.139019</b> | 114.073148       |                    |                  | <b>2</b>  |
| 26 |                    |                    |                |                  |                    |                   | <b>K</b> | 147.112804         | 74.060040          | 130.086255        | 65.546765        |                    |                  | <b>1</b>  |

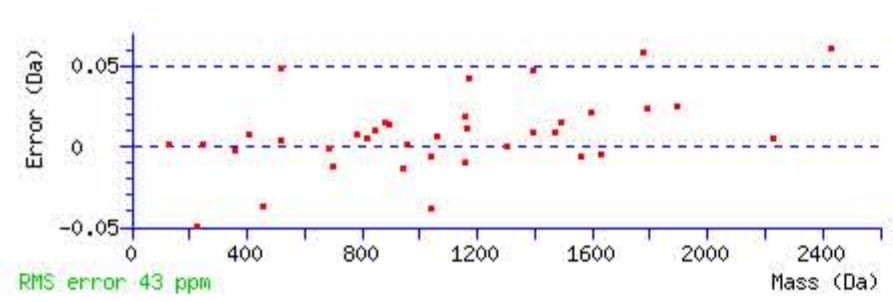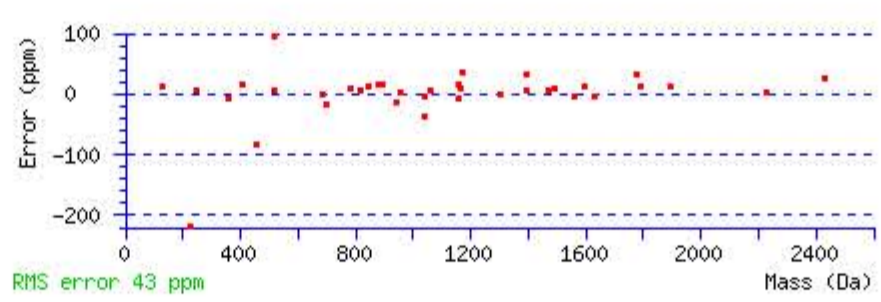

NCBI BLAST search of **KLYDYCDVPQCAAPSFDCGKQVEPK**  
 (Parameters: blastp, nr protein database, expect=20000, no filter, PAM30)  
 Other BLAST [web gateways](#)

### All matches to this query

| Score | Mr(calc):   | Delta     | Sequence                                  |
|-------|-------------|-----------|-------------------------------------------|
| 60.4  | 3382.549469 | -0.035773 | <a href="#">KLYDYCDVPQCAAPSFDCGKQVEPK</a> |
| 8.6   | 3382.549469 | -0.035773 | <a href="#">KLYDYCDVPQCAAPSFDCGKQVEPK</a> |



# MASCOT Search Results

## Peptide View

MS/MS Fragmentation of **VQSTELCAGHLAGGTDSCQGDSGGPLVCFEK**  
 Found in **PLMN\_HUMAN**, Plasminogen OS=Homo sapiens GN=PLG PE=1 SV=2

Match to Query 62539: 3547.552776 from(887.895470,4+) rtinseconds(2176) index(64848)  
 Title: Locus:1.1.1.3237.15 File:"2013-07-02 CLN FXIII 30 min 3rd FT.wiff"  
 Data file C:\Program Files (x86)\Matrix Science\Mascot Daemon\mgf3 FXIII 30 min 3rd\mascot\_daemon\_merge.mgf

Click mouse within plot area to zoom in by factor of two about that point  
 Or, Plot from  to  Da   
 Label all possible matches  Label matches used for scoring

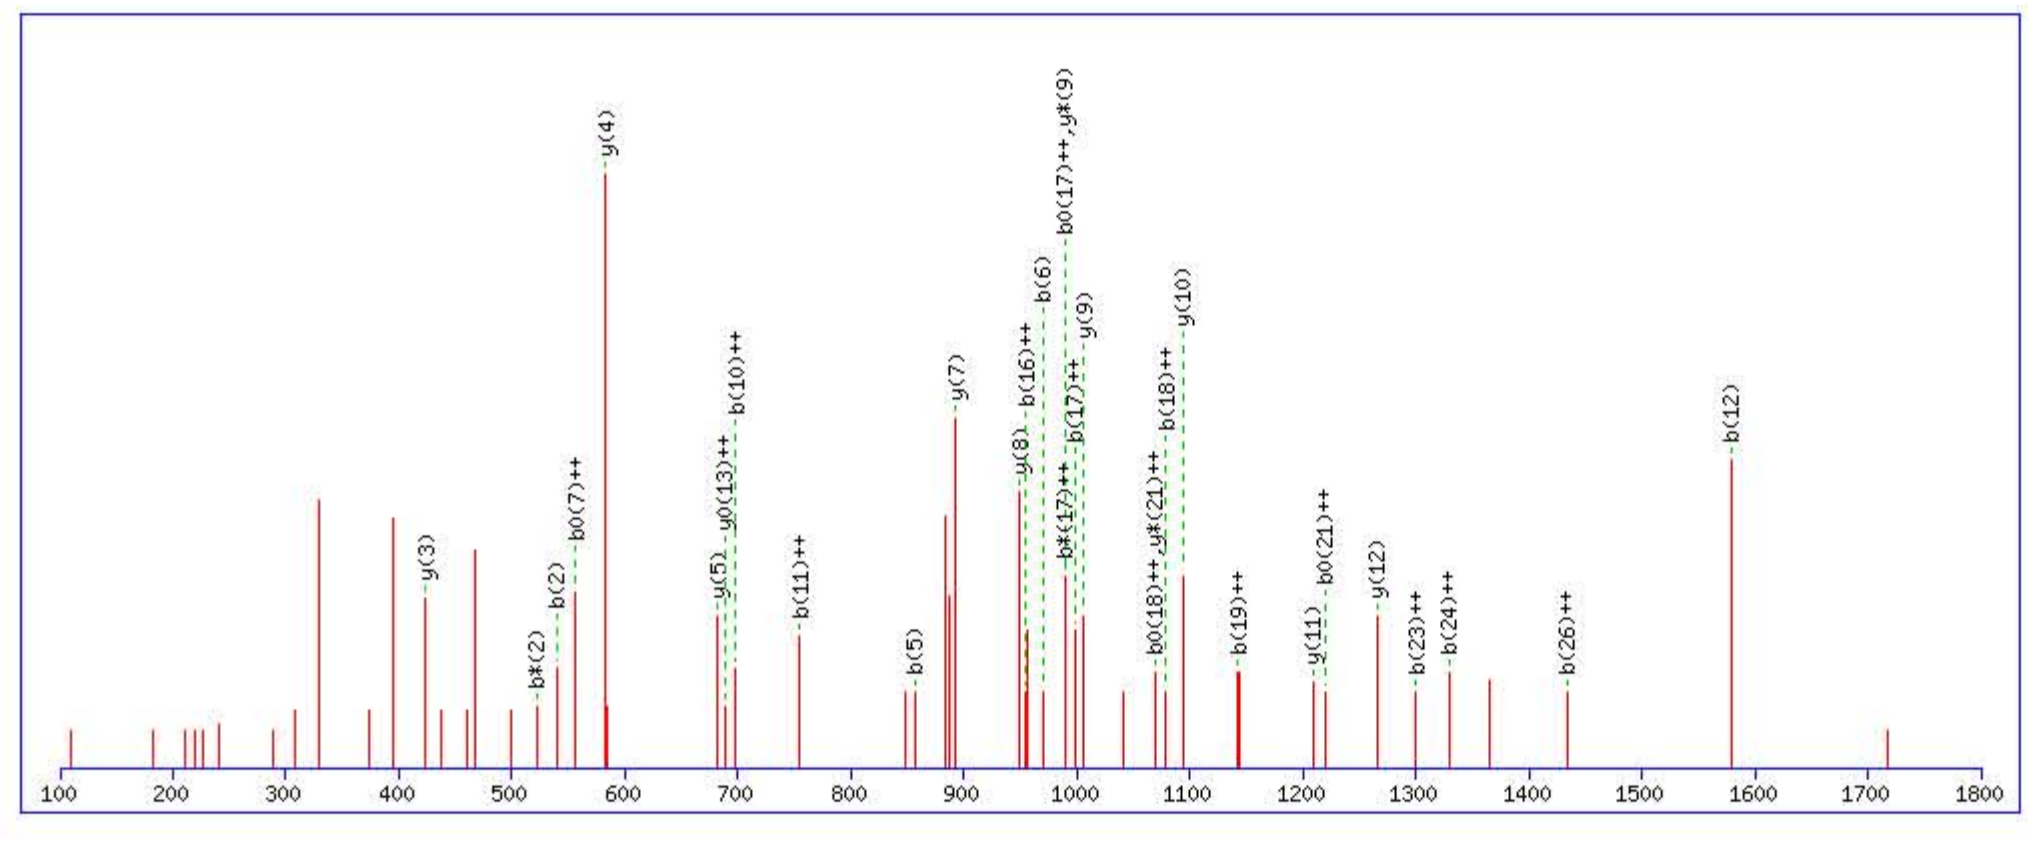

Monoisotopic mass of neutral peptide Mr(calc): 3547.584061  
 Fixed modifications: Carbamidomethyl (C) (apply to specified residues or termini only)  
 Variable modifications:  
 Q2 : Biotin:Thermo-21345 (Q)  
 Ions Score: 47 Expect: 6.8e-005  
 Matches : 31/352 fragment ions using 57 most intense peaks ([help](#))

| #  | b                  | b <sup>++</sup>    | b <sup>*</sup>    | b <sup>*+*</sup>  | b <sup>0</sup> | b <sup>0++</sup>   | Seq. | y                  | y <sup>++</sup> | y <sup>*</sup>    | y <sup>*+*</sup>   | y <sup>0</sup> | y <sup>0++</sup>  | #  |
|----|--------------------|--------------------|-------------------|-------------------|----------------|--------------------|------|--------------------|-----------------|-------------------|--------------------|----------------|-------------------|----|
| 1  | 100.075690         | 50.541483          |                   |                   |                |                    | V    |                    |                 |                   |                    |                |                   | 31 |
| 2  | <b>539.301016</b>  | 270.154146         | <b>522.274467</b> | 261.640872        |                |                    | Q    | 3449.522877        | 1725.265076     | 3432.496328       | 1716.751802        | 3431.512312    | 1716.259794       | 30 |
| 3  | 626.333044         | 313.670160         | 609.306495        | 305.156886        | 608.322479     | 304.664878         | S    | 3010.297551        | 1505.652413     | 2993.271002       | 1497.139139        | 2992.286986    | 1496.647131       | 29 |
| 4  | 727.380723         | 364.194000         | 710.354174        | 355.680725        | 709.370158     | 355.188717         | T    | 2923.265523        | 1462.136399     | 2906.238974       | 1453.623125        | 2905.254958    | 1453.131117       | 28 |
| 5  | <b>856.423316</b>  | 428.715296         | 839.396767        | 420.202022        | 838.412751     | 419.710014         | E    | 2822.217844        | 1411.612560     | 2805.191295       | 1403.099285        | 2804.207279    | 1402.607277       | 27 |
| 6  | <b>969.507380</b>  | 485.257328         | 952.480831        | 476.744054        | 951.496815     | 476.252046         | L    | 2693.175251        | 1347.091263     | 2676.148702       | 1338.577989        | 2675.164686    | 1338.085981       | 26 |
| 7  | 1129.538029        | 565.272653         | 1112.511480       | 556.759378        | 1111.527464    | <b>556.267370</b>  | C    | 2580.091187        | 1290.549231     | 2563.064638       | 1282.035957        | 2562.080622    | 1281.543949       | 25 |
| 8  | 1200.575143        | 600.791210         | 1183.548594       | 592.277935        | 1182.564578    | 591.785927         | A    | 2420.060538        | 1210.533907     | 2403.033989       | 1202.020632        | 2402.049973    | 1201.528624       | 24 |
| 9  | 1257.596607        | 629.301942         | 1240.570058       | 620.788667        | 1239.586042    | 620.296659         | G    | 2349.023424        | 1175.015350     | 2331.996875       | 1166.502075        | 2331.012859    | 1166.010067       | 23 |
| 10 | 1394.655519        | <b>697.831397</b>  | 1377.628970       | 689.318123        | 1376.644954    | 688.826115         | H    | 2292.001960        | 1146.504618     | 2274.975411       | 1137.991343        | 2273.991395    | 1137.499335       | 22 |
| 11 | 1507.739583        | <b>754.373429</b>  | 1490.713034       | 745.860155        | 1489.729018    | 745.368147         | L    | 2154.943048        | 1077.975162     | 2137.916499       | <b>1069.461887</b> | 2136.932483    | 1068.969879       | 21 |
| 12 | <b>1578.776697</b> | 789.891986         | 1561.750148       | 781.378712        | 1560.766132    | 780.886704         | A    | 2041.858984        | 1021.433130     | 2024.832435       | 1012.919855        | 2023.848419    | 1012.427847       | 20 |
| 13 | 1635.798161        | 818.402718         | 1618.771612       | 809.889444        | 1617.787596    | 809.397436         | G    | 1970.821870        | 985.914573      | 1953.795321       | 977.401298         | 1952.811305    | 976.909290        | 19 |
| 14 | 1692.819625        | 846.913450         | 1675.793076       | 838.400176        | 1674.809060    | 837.908168         | G    | 1913.800406        | 957.403841      | 1896.773857       | 948.890566         | 1895.789841    | 948.398558        | 18 |
| 15 | 1793.867304        | 897.437290         | 1776.840755       | 888.924015        | 1775.856739    | 888.432007         | T    | 1856.778942        | 928.893109      | 1839.752393       | 920.379835         | 1838.768377    | 919.887826        | 17 |
| 16 | 1908.894247        | <b>954.950761</b>  | 1891.867698       | 946.437487        | 1890.883682    | 945.945479         | D    | 1755.731263        | 878.369269      | 1738.704714       | 869.855995         | 1737.720698    | 869.363987        | 16 |
| 17 | 1995.926275        | <b>998.466775</b>  | 1978.899726       | <b>989.953501</b> | 1977.915710    | <b>989.461493</b>  | S    | 1640.704320        | 820.855798      | 1623.677771       | 812.342523         | 1622.693755    | 811.850515        | 15 |
| 18 | 2155.956924        | <b>1078.482100</b> | 2138.930375       | 1069.968825       | 2137.946359    | <b>1069.476817</b> | C    | 1553.672292        | 777.339784      | 1536.645743       | 768.826509         | 1535.661727    | 768.334501        | 14 |
| 19 | 2284.015502        | <b>1142.511389</b> | 2266.988953       | 1133.998114       | 2266.004937    | 1133.506106        | Q    | 1393.641643        | 697.324459      | 1376.615094       | 688.811185         | 1375.631078    | <b>688.319177</b> | 13 |
| 20 | 2341.036966        | 1171.022121        | 2324.010417       | 1162.508846       | 2323.026401    | 1162.016838        | G    | <b>1265.583065</b> | 633.295170      | 1248.556516       | 624.781896         | 1247.572500    | 624.289888        | 12 |
| 21 | 2456.063909        | 1228.535592        | 2439.037360       | 1220.022318       | 2438.053344    | <b>1219.530310</b> | D    | <b>1208.561601</b> | 604.784438      | 1191.535052       | 596.271164         | 1190.551036    | 595.779156        | 11 |
| 22 | 2543.095937        | 1272.051606        | 2526.069388       | 1263.538332       | 2525.085372    | 1263.046324        | S    | <b>1093.534658</b> | 547.270967      | 1076.508109       | 538.757692         | 1075.524093    | 538.265684        | 10 |
| 23 | 2600.117401        | <b>1300.562338</b> | 2583.090852       | 1292.049064       | 2582.106836    | 1291.557056        | G    | <b>1006.502630</b> | 503.754953      | <b>989.476081</b> | 495.241678         | 988.492065     | 494.749670        | 9  |
| 24 | 2657.138865        | <b>1329.073070</b> | 2640.112316       | 1320.559796       | 2639.128300    | 1320.067788        | G    | <b>949.481166</b>  | 475.244221      | 932.454617        | 466.730946         | 931.470601     | 466.238938        | 8  |
| 25 | 2754.191629        | 1377.599452        | 2737.165080       | 1369.086178       | 2736.181064    | 1368.594170        | P    | <b>892.459702</b>  | 446.733489      | 875.433153        | 438.220214         | 874.449137     | 437.728206        | 7  |
| 26 | 2867.275693        | <b>1434.141484</b> | 2850.249144       | 1425.628210       | 2849.265128    | 1425.136202        | L    | 795.406938         | 398.207107      | 778.380389        | 389.693832         | 777.396373     | 389.201824        | 6  |
| 27 | 2966.344107        | 1483.675691        | 2949.317558       | 1475.162417       | 2948.333542    | 1474.670409        | V    | <b>682.322874</b>  | 341.665075      | 665.296325        | 333.151800         | 664.312309     | 332.659792        | 5  |
| 28 | 3126.374756        | 1563.691016        | 3109.348207       | 1555.177741       | 3108.364191    | 1554.685733        | C    | <b>583.254460</b>  | 292.130868      | 566.227911        | 283.617593         | 565.243895     | 283.125585        | 4  |
| 29 | 3273.443170        | 1637.225223        | 3256.416621       | 1628.711948       | 3255.432605    | 1628.219940        | F    | <b>423.223811</b>  | 212.115543      | 406.197262        | 203.602269         | 405.213246     | 203.110261        | 3  |
| 30 | 3402.485763        | 1701.746519        | 3385.459214       | 1693.233245       | 3384.475198    | 1692.741237        | E    | 276.155397         | 138.581337      | 259.128848        | 130.068062         | 258.144832     | 129.576054        | 2  |
| 31 |                    |                    |                   |                   |                |                    | K    | 147.112804         | 74.060040       | 130.086255        | 65.546765          |                |                   | 1  |

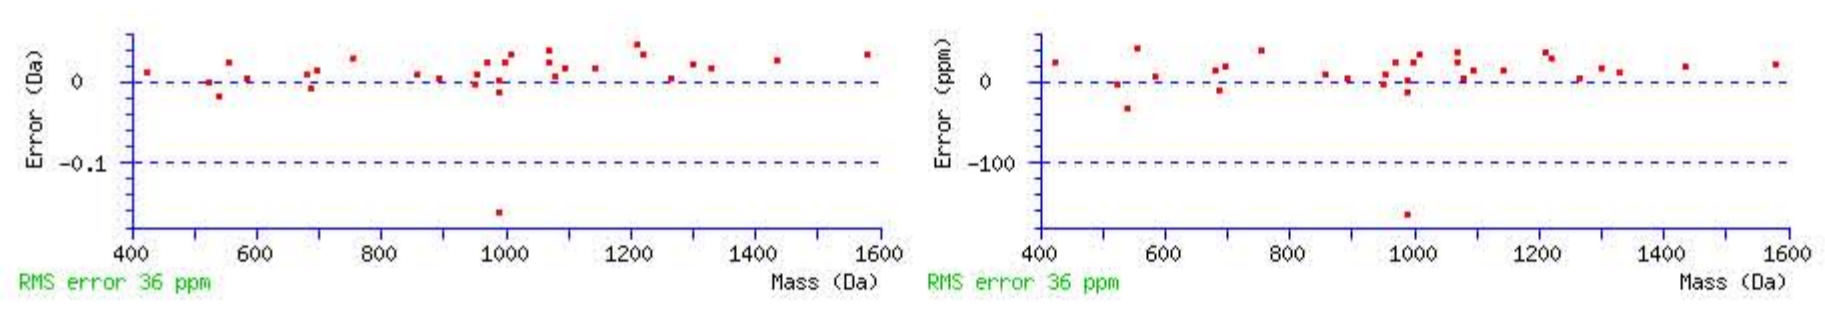

NCBI BLAST search of **VQSTELCAGHLAGGTDSCQGDSGGPLVCFEK**  
 (Parameters: blastp, nr protein database, expect=20000, no filter, PAM30)  
 Other BLAST [web gateways](#)

### All matches to this query

| Score | Mr(calc):   | Delta     | Sequence                                        |
|-------|-------------|-----------|-------------------------------------------------|
| 47.4  | 3547.584061 | -0.031285 | <a href="#">VQSTELCAGHLAGGTDSCQGDSGGPLVCFEK</a> |
| 25.1  | 3547.584061 | -0.031285 | <a href="#">VQSTELCAGHLAGGTDSCQGDSGGPLVCFEK</a> |



# MASCOT SEARCH RESULTS

## Peptide View

MS/MS Fragmentation of **TNTQPFDLQVYHPSR**

Found in **LRP1\_HUMAN**, Prolow-density lipoprotein receptor-related protein 1 OS=Homo sapiens GN=LRP1 PE=1 SV=2

Match to Query 45712: 2113.039302 from(705.353710,3+) rtinseconds(2119) index(51799)

Title: Locus:1.1.1.3381.4 File:"2013-07-02 CLN FXIII 30 min 3rd F 4.wiff"

Data file C:\Program Files (x86)\Matrix Science\Mascot Daemon\mgf3 FXIII 30 min 3rd\mascot\_daemon\_merge.mgf

Click mouse within plot area to zoom in by factor of two about that point

Or, Plot from  to  Da

Label all possible matches  Label matches used for scoring

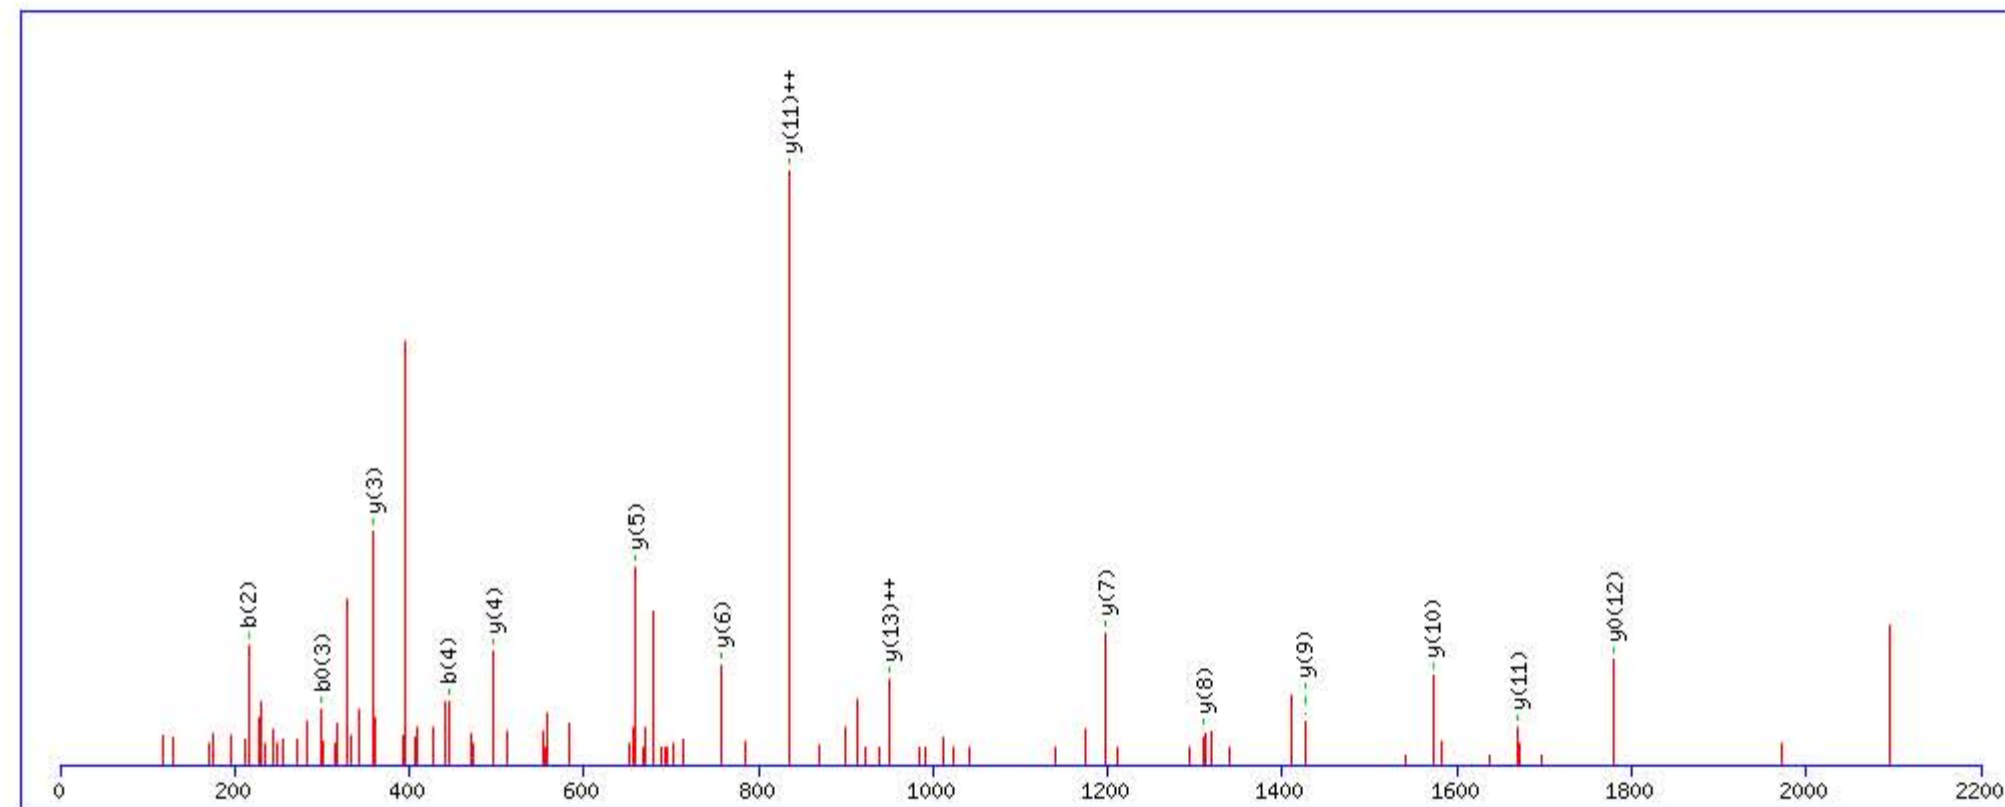

Monoisotopic mass of neutral peptide Mr(calc): 2113.041504

Fixed modifications: Carbamidomethyl (C) (apply to specified residues or termini only)

Variable modifications:

Q9 : Biotin:Thermo-21345 (Q)

Ions Score: 43 Expect: 0.0014

Matches : 15/164 fragment ions using 35 most intense peaks ([help](#))

| #  | b                 | b <sup>++</sup> | b <sup>+</sup> | b <sup>+++</sup> | b <sup>0</sup>    | b <sup>0++</sup> | Seq. | y                  | y <sup>++</sup>   | y <sup>+</sup> | y <sup>+++</sup> | y <sup>0</sup>     | y <sup>0++</sup> | #  |
|----|-------------------|-----------------|----------------|------------------|-------------------|------------------|------|--------------------|-------------------|----------------|------------------|--------------------|------------------|----|
| 1  | 102.054955        | 51.531116       |                |                  | 84.044390         | 42.525833        | T    |                    |                   |                |                  |                    |                  | 15 |
| 2  | <b>216.097882</b> | 108.552579      | 199.071333     | 100.039305       | 198.087317        | 99.547296        | N    | 2013.001094        | 1007.004185       | 1995.974545    | 998.490911       | 1994.990529        | 997.998903       | 14 |
| 3  | 317.145561        | 159.076418      | 300.119012     | 150.563144       | <b>299.134996</b> | 150.071136       | T    | 1898.958167        | <b>949.982722</b> | 1881.931618    | 941.469447       | 1880.947602        | 940.977439       | 13 |
| 4  | <b>445.204139</b> | 223.105707      | 428.177590     | 214.592433       | 427.193574        | 214.100425       | Q    | 1797.910488        | 899.458882        | 1780.883939    | 890.945608       | <b>1779.899923</b> | 890.453600       | 12 |
| 5  | 542.256903        | 271.632090      | 525.230354     | 263.118815       | 524.246338        | 262.626807       | P    | <b>1669.851910</b> | <b>835.429593</b> | 1652.825361    | 826.916319       | 1651.841345        | 826.424311       | 11 |
| 6  | 689.325317        | 345.166297      | 672.298768     | 336.653022       | 671.314752        | 336.161014       | F    | <b>1572.799146</b> | 786.903211        | 1555.772597    | 778.389937       | 1554.788581        | 777.897929       | 10 |
| 7  | 804.352260        | 402.679768      | 787.325711     | 394.166494       | 786.341695        | 393.674486       | D    | <b>1425.730732</b> | 713.369004        | 1408.704183    | 704.855730       | 1407.720167        | 704.363722       | 9  |
| 8  | 917.436324        | 459.221800      | 900.409775     | 450.708526       | 899.425759        | 450.216518       | L    | <b>1310.703789</b> | 655.855533        | 1293.677240    | 647.342258       | 1292.693224        | 646.850250       | 8  |
| 9  | 1356.661650       | 678.834463      | 1339.635101    | 670.321189       | 1338.651085       | 669.829181       | Q    | <b>1197.619725</b> | 599.313501        | 1180.593176    | 590.800226       | 1179.609160        | 590.308218       | 7  |
| 10 | 1455.730064       | 728.368670      | 1438.703515    | 719.855396       | 1437.719499       | 719.363388       | V    | <b>758.394399</b>  | 379.700838        | 741.367850     | 371.187563       | 740.383834         | 370.695555       | 6  |
| 11 | 1618.793393       | 809.900335      | 1601.766844    | 801.387060       | 1600.782828       | 800.895052       | Y    | <b>659.325985</b>  | 330.166631        | 642.299436     | 321.653356       | 641.315420         | 321.161348       | 5  |
| 12 | 1755.852305       | 878.429791      | 1738.825756    | 869.916516       | 1737.841740       | 869.424508       | H    | <b>496.262656</b>  | 248.634966        | 479.236107     | 240.121692       | 478.252091         | 239.629684       | 4  |
| 13 | 1852.905069       | 926.956173      | 1835.878520    | 918.442898       | 1834.894504       | 917.950890       | P    | <b>359.203744</b>  | 180.105510        | 342.177195     | 171.592236       | 341.193179         | 171.100228       | 3  |
| 14 | 1939.937097       | 970.472187      | 1922.910548    | 961.958912       | 1921.926532       | 961.466904       | S    | 262.150980         | 131.579128        | 245.124431     | 123.065854       | 244.140415         | 122.573846       | 2  |
| 15 |                   |                 |                |                  |                   |                  | R    | 175.118952         | 88.063114         | 158.092403     | 79.549840        |                    |                  | 1  |

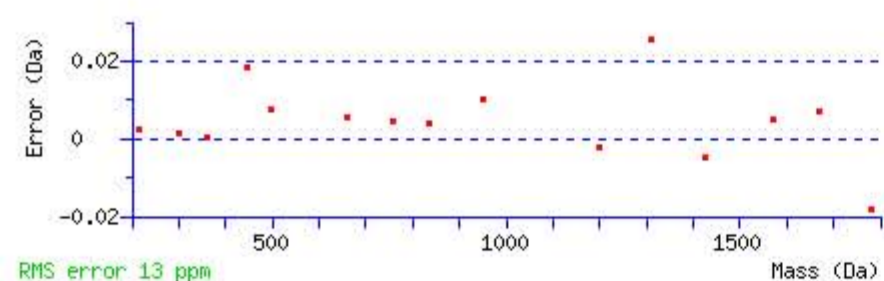

RMS error 13 ppm

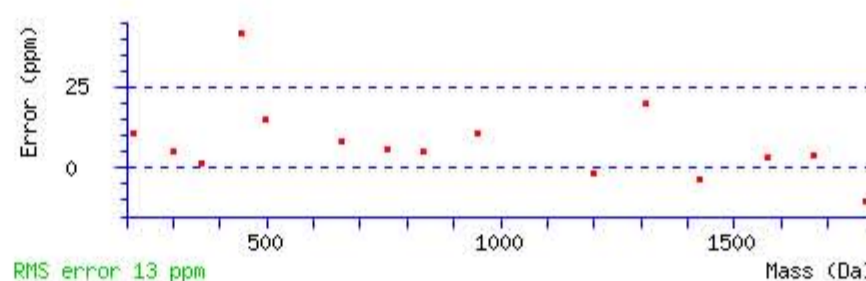

RMS error 13 ppm

NCBI BLAST search of [TNTQPFDLQVYHPSR](#)

(Parameters: blastp, nr protein database, expect=20000, no filter, PAM30)

Other BLAST [web gateways](#)

All matches to this query

| Score | Mr(calc):   | Delta     | Sequence                        |
|-------|-------------|-----------|---------------------------------|
| 42.5  | 2113.041504 | -0.002202 | <a href="#">TNTQPFDLQVYHPSR</a> |
| 5.2   | 2113.041504 | -0.002202 | <a href="#">TNTQPFDLQVYHPSR</a> |

Mascot: <http://www.matrixscience.com/>



# MASCOT SEARCH RESULTS

## Peptide View

### MS/MS Fragmentation of ECLQTCR

Found in **AMBP\_HUMAN**, Protein AMBP OS=Homo sapiens GN=AMBP PE=1 SV=1

Match to Query 23825: 1276.567148 from(639.290850,2+) rtinseconds(1502) index(48082)

Title: Locus:1.1.1.3166.9 File:"2013-07-02 CLN FXIII 30 min 3rd F 4.wiff"

Data file C:\Program Files (x86)\Matrix Science\Mascot Daemon\mgf3 FXIII 30 min 3rd\mascot\_daemon\_merge.mgf

Click mouse within plot area to zoom in by factor of two about that point

Or, Plot from 0 to 2600 Da Full range

Label all possible matches  Label matches used for scoring

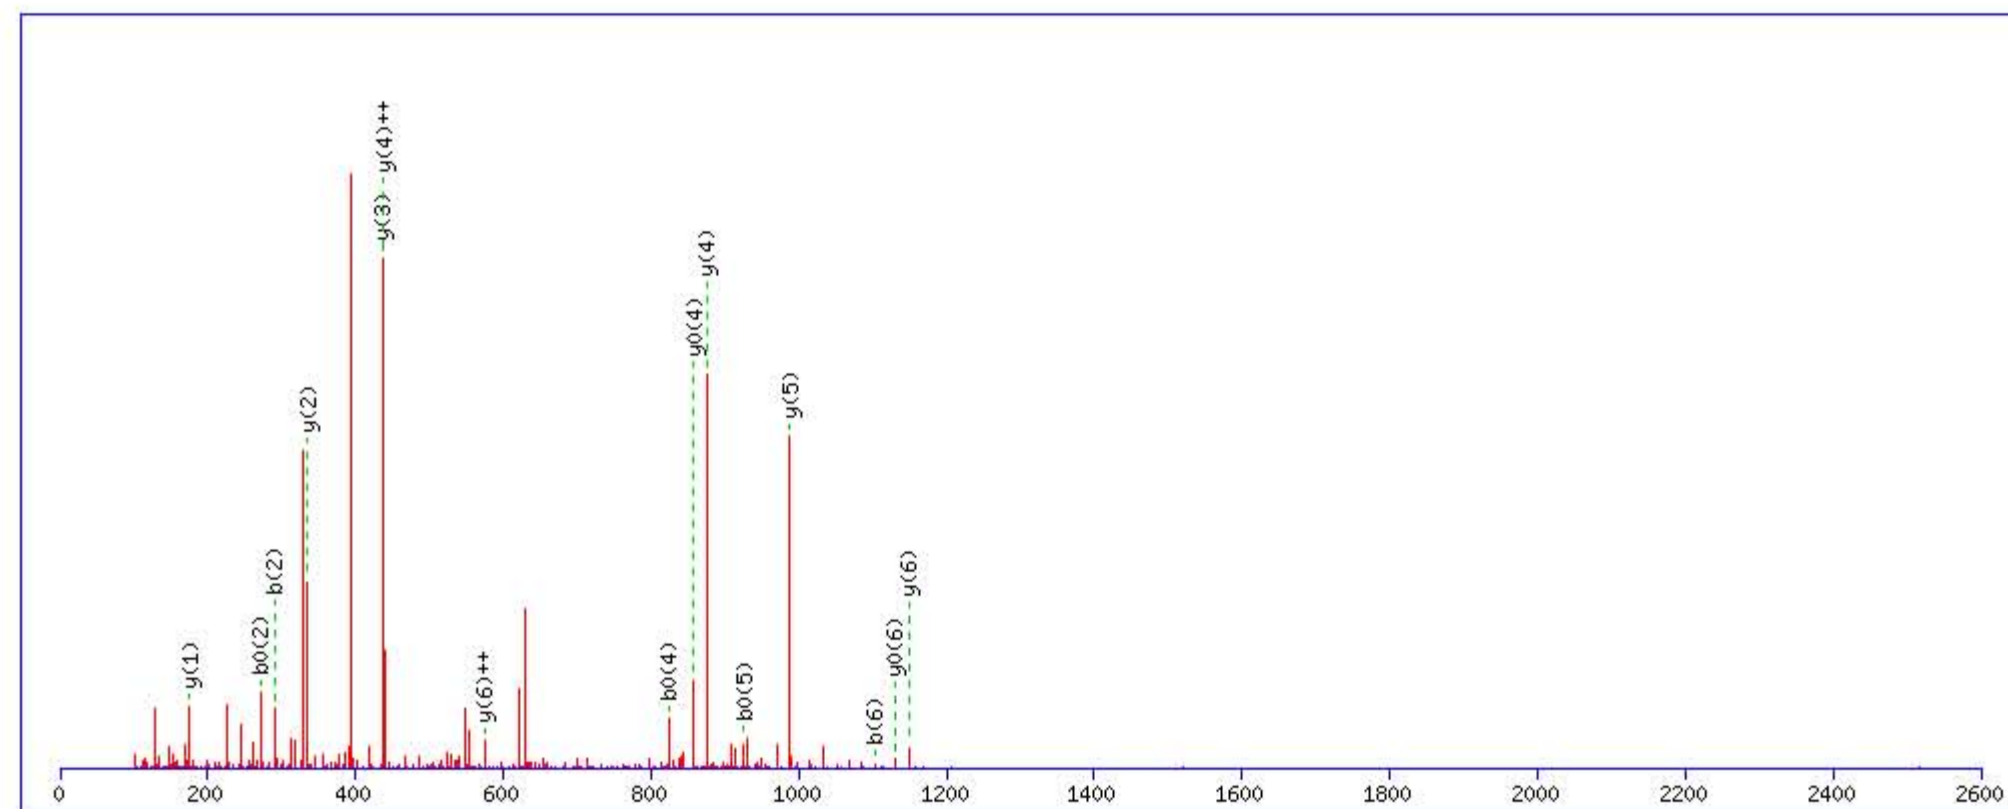

Monoisotopic mass of neutral peptide Mr(calc): 1276.572632

Fixed modifications: Carbamidomethyl (C) (apply to specified residues or termini only)

Variable modifications:

Q4 : Biotin:Thermo-21345 (Q)

Ions Score: 31 Expect: 0.0044

Matches : 15/62 fragment ions using 34 most intense peaks [\(help\)](#)

| # | b                  | b <sup>++</sup> | b <sup>*</sup> | b <sup>+++</sup> | b <sup>0</sup>    | b <sup>0++</sup> | Seq. | y                  | y <sup>++</sup>   | y <sup>*</sup> | y <sup>+++</sup> | y <sup>0</sup>     | y <sup>0++</sup> | # |
|---|--------------------|-----------------|----------------|------------------|-------------------|------------------|------|--------------------|-------------------|----------------|------------------|--------------------|------------------|---|
| 1 | 130.049869         | 65.528572       |                |                  | 112.039304        | 56.523290        | E    |                    |                   |                |                  |                    |                  | 7 |
| 2 | <b>290.080518</b>  | 145.543897      |                |                  | <b>272.069953</b> | 136.538615       | C    | <b>1148.537319</b> | <b>574.772298</b> | 1131.510770    | 566.259023       | <b>1130.526754</b> | 565.767015       | 6 |
| 3 | 403.164582         | 202.085929      |                |                  | 385.154017        | 193.080647       | L    | <b>988.506670</b>  | 494.756973        | 971.480121     | 486.243699       | 970.496105         | 485.751691       | 5 |
| 4 | 842.389908         | 421.698592      | 825.363359     | 413.185318       | <b>824.379343</b> | 412.693310       | Q    | <b>875.422606</b>  | <b>438.214941</b> | 858.396057     | 429.701667       | <b>857.412041</b>  | 429.209659       | 4 |
| 5 | 943.437587         | 472.222432      | 926.411038     | 463.709157       | <b>925.427022</b> | 463.217149       | T    | <b>436.197280</b>  | 218.602278        | 419.170731     | 210.089003       | 418.186715         | 209.596995       | 3 |
| 6 | <b>1103.468236</b> | 552.237756      | 1086.441687    | 543.724482       | 1085.457671       | 543.232474       | C    | <b>335.149601</b>  | 168.078438        | 318.123052     | 159.565164       |                    |                  | 2 |
| 7 |                    |                 |                |                  |                   |                  | R    | <b>175.118952</b>  | 88.063114         | 158.092403     | 79.549839        |                    |                  | 1 |

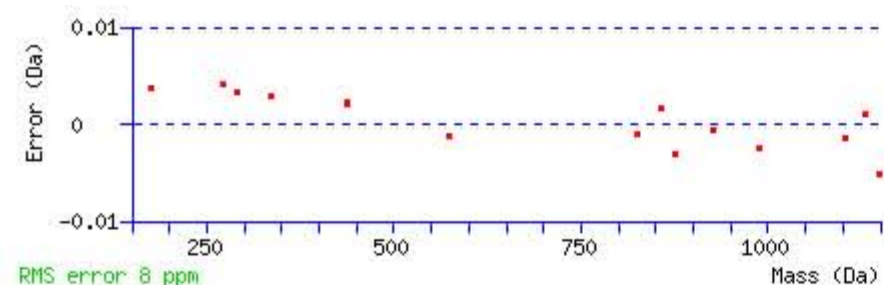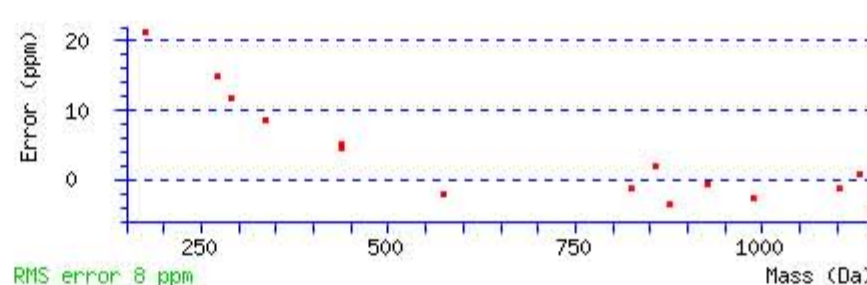

### NCBI BLAST search of ECLQTCR

(Parameters: blastp, nr protein database, expect=20000, no filter, PAM30)

Other BLAST [web gateways](#)

### All matches to this query

| Score | Mr(calc):   | Delta     | Sequence                      |
|-------|-------------|-----------|-------------------------------|
| 30.6  | 1276.572632 | -0.005484 | <a href="#">ECLQTCR</a>       |
| 7.9   | 1276.553116 | 0.014032  | <a href="#">EDLDNASKDDR</a>   |
| 6.0   | 1276.569275 | -0.002127 | <a href="#">MPMWAGGVGSPR</a>  |
| 5.9   | 1276.583862 | -0.016714 | <a href="#">KMSLSCHVCR</a>    |
| 4.8   | 1276.572617 | -0.005469 | <a href="#">AMAAMDGQR</a>     |
| 4.6   | 1276.579605 | -0.012457 | <a href="#">EEQRSPFNDR</a>    |
| 3.8   | 1276.571762 | -0.004614 | <a href="#">AGAESPTMSVDGR</a> |
| 1.6   | 1276.582977 | -0.015829 | <a href="#">EMQLGREDQR</a>    |
| 1.0   | 1276.572388 | -0.005240 | <a href="#">EDSYANYFIR</a>    |
| 1.0   | 1276.579132 | -0.011984 | <a href="#">MPMNAALGEPK</a>   |



# MASCOT Search Results

## Peptide View

MS/MS Fragmentation of **VGALSQLR**

Found in **MENT\_HUMAN**, Protein MENT OS=Homo sapiens GN=MENT PE=2 SV=1

Match to Query 20319: 1153.661188 from(577.837870,2+) rtinseconds(1952) index(50786)

Title: Locus:1.1.1.3323.12 File:"2013-07-02 CLN FXIII 30 min 3rd F 4.wiff"

Data file C:\Program Files (x86)\Matrix Science\Mascot Daemon\mgf3 FXIII 30 min 3rd\mascot\_daemon\_merge.mgf

Click mouse within plot area to zoom in by factor of two about that point

Or, Plot from  to  Da

Label all possible matches  Label matches used for scoring

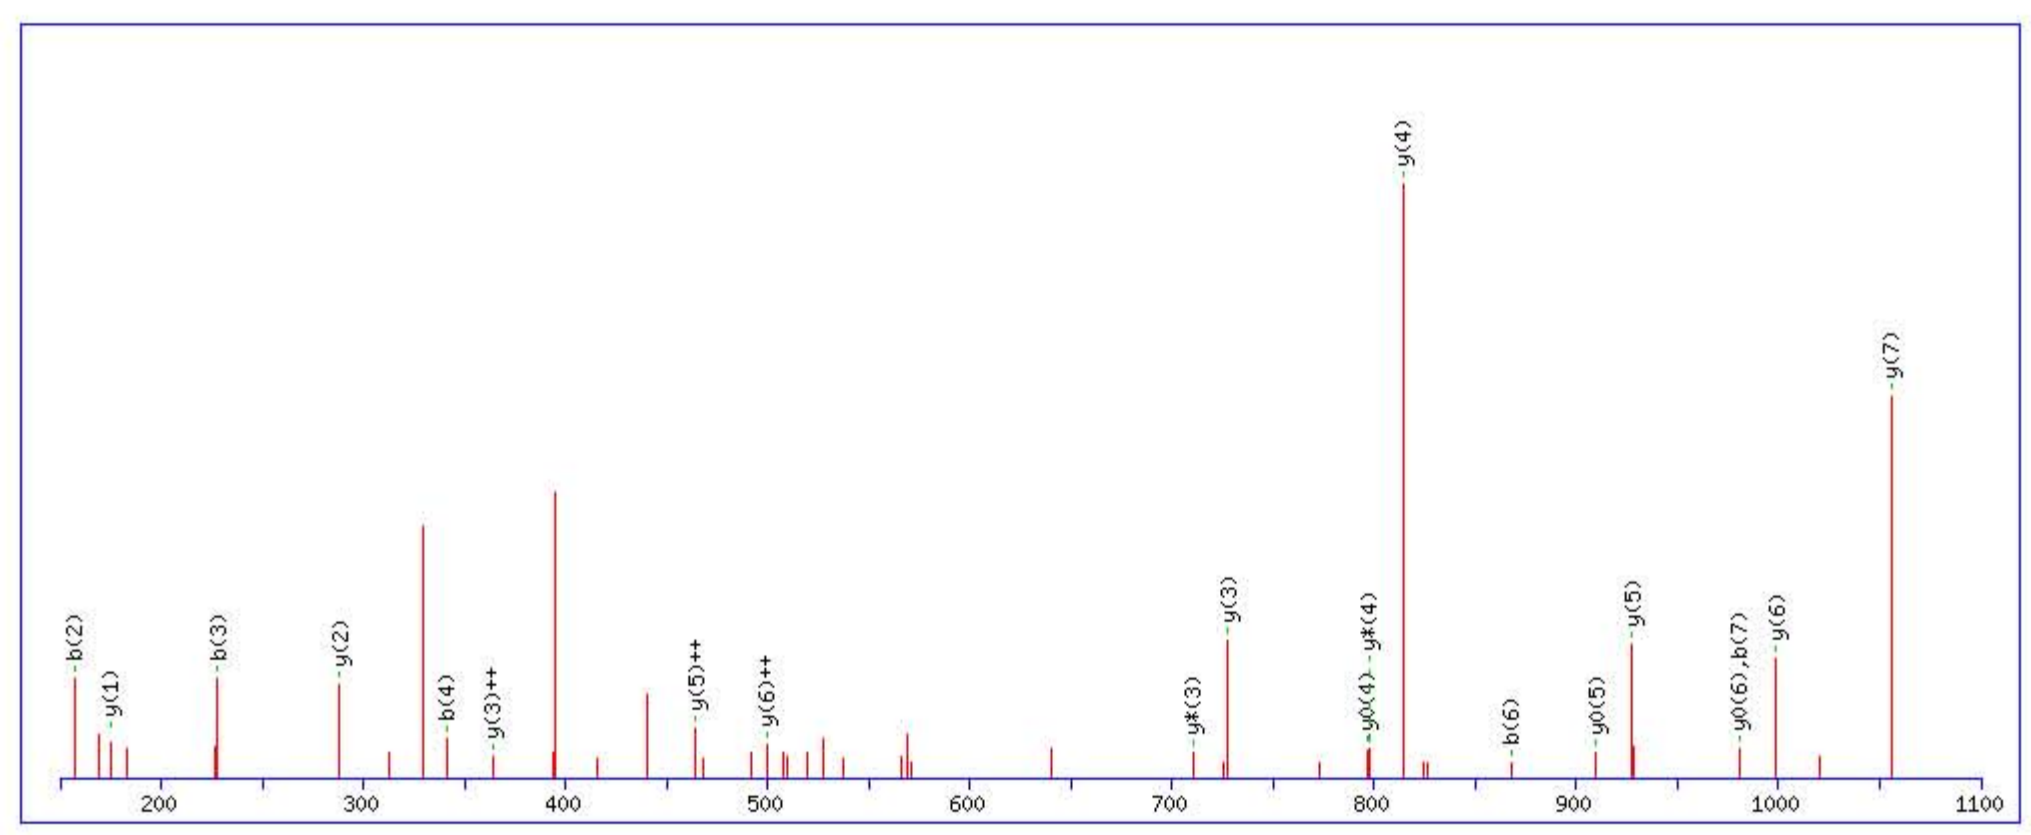

Monoisotopic mass of neutral peptide Mr(calc): 1153.664139

Fixed modifications: Carbamidomethyl (C) (apply to specified residues or termini only)

Variable modifications:

Q6 : Biotin:Thermo-21345 (Q)

Ions Score: 44 Expect: 0.00059

Matches : 20/60 fragment ions using 35 most intense peaks [\(help\)](#)

| # | b          | b <sup>++</sup> | b <sup>*</sup> | b <sup>*++</sup> | b <sup>0</sup> | b <sup>0++</sup> | Seq. | y           | y <sup>++</sup> | y <sup>*</sup> | y <sup>*++</sup> | y <sup>0</sup> | y <sup>0++</sup> | # |
|---|------------|-----------------|----------------|------------------|----------------|------------------|------|-------------|-----------------|----------------|------------------|----------------|------------------|---|
| 1 | 100.075690 | 50.541483       |                |                  |                |                  | V    |             |                 |                |                  |                |                  | 8 |
| 2 | 157.097154 | 79.052215       |                |                  |                |                  | G    | 1055.603012 | 528.305144      | 1038.576463    | 519.791870       | 1037.592447    | 519.299862       | 7 |
| 3 | 228.134268 | 114.570772      |                |                  |                |                  | A    | 998.581548  | 499.794412      | 981.554999     | 491.281138       | 980.570983     | 490.789130       | 6 |
| 4 | 341.218332 | 171.112804      |                |                  |                |                  | L    | 927.544434  | 464.275855      | 910.517885     | 455.762581       | 909.533869     | 455.270573       | 5 |
| 5 | 428.250360 | 214.628818      |                |                  | 410.239795     | 205.623535       | S    | 814.460370  | 407.733823      | 797.433821     | 399.220549       | 796.449805     | 398.728541       | 4 |
| 6 | 867.475686 | 434.241481      | 850.449137     | 425.728207       | 849.465121     | 425.236199       | Q    | 727.428342  | 364.217809      | 710.401793     | 355.704535       |                |                  | 3 |
| 7 | 980.559750 | 490.783513      | 963.533201     | 482.270239       | 962.549185     | 481.778231       | L    | 288.203016  | 144.605146      | 271.176467     | 136.091872       |                |                  | 2 |
| 8 |            |                 |                |                  |                |                  | R    | 175.118952  | 88.063114       | 158.092403     | 79.549840        |                |                  | 1 |

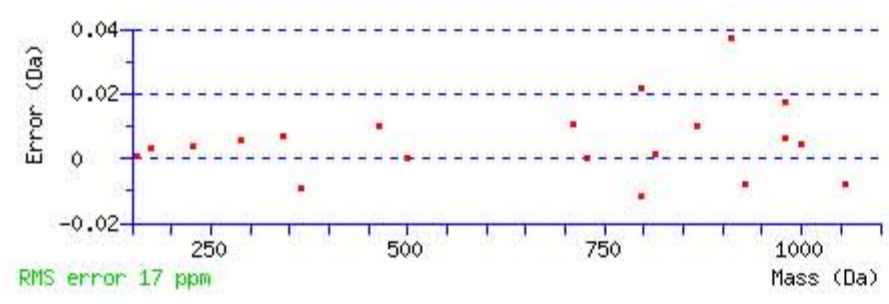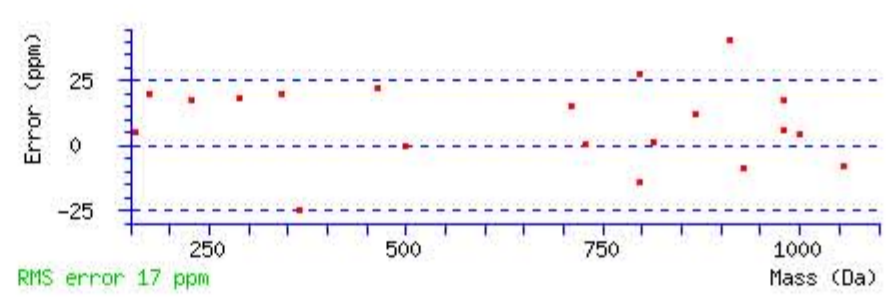

NCBI BLAST search of **VGALSQLR**

(Parameters: blastp, nr protein database, expect=20000, no filter, PAM30)

Other BLAST [web gateways](#)

### All matches to this query

| Score | Mr(calc):   | Delta     | Sequence                     |
|-------|-------------|-----------|------------------------------|
| 44.3  | 1153.664139 | -0.002951 | <a href="#">VGALSQLR</a>     |
| 15.1  | 1153.675354 | -0.014166 | <a href="#">RALLSQR</a>      |
| 15.1  | 1153.675369 | -0.014181 | <a href="#">RALTVQR</a>      |
| 14.9  | 1153.645477 | 0.015711  | <a href="#">RALAAPVAEEK</a>  |
| 10.3  | 1153.667953 | -0.006765 | <a href="#">RANPNSIRVK</a>   |
| 9.6   | 1153.656723 | 0.004465  | <a href="#">RPSADPGKKAK</a>  |
| 9.3   | 1153.664124 | -0.002936 | <a href="#">VKQEALR</a>      |
| 6.2   | 1153.645493 | 0.015695  | <a href="#">NLLKLDPADR</a>   |
| 5.9   | 1153.675369 | -0.014181 | <a href="#">QTVRALR</a>      |
| 4.6   | 1153.645523 | 0.015665  | <a href="#">GGLSVAVPGEIR</a> |



# MASCOT Search Results

## Peptide View

MS/MS Fragmentation of **ETAASLLQAGYK**

Found in **THRB\_HUMAN**, Prothrombin OS=Homo sapiens GN=F2 PE=1 SV=2

Match to Query 32338: 1561.801128 from(781.907840,2+) rtinseconds(2152) index(51967)

Title: Locus:1.1.1.3392.12 File:"2013-07-02 CLN FXIII 30 min 3rd F 4.wiff"

Data file C:\Program Files (x86)\Matrix Science\Mascot Daemon\mgf3 FXIII 30 min 3rd\mascot\_daemon\_merge.mgf

Click mouse within plot area to zoom in by factor of two about that point

Or, Plot from  to  Da

Label all possible matches  Label matches used for scoring

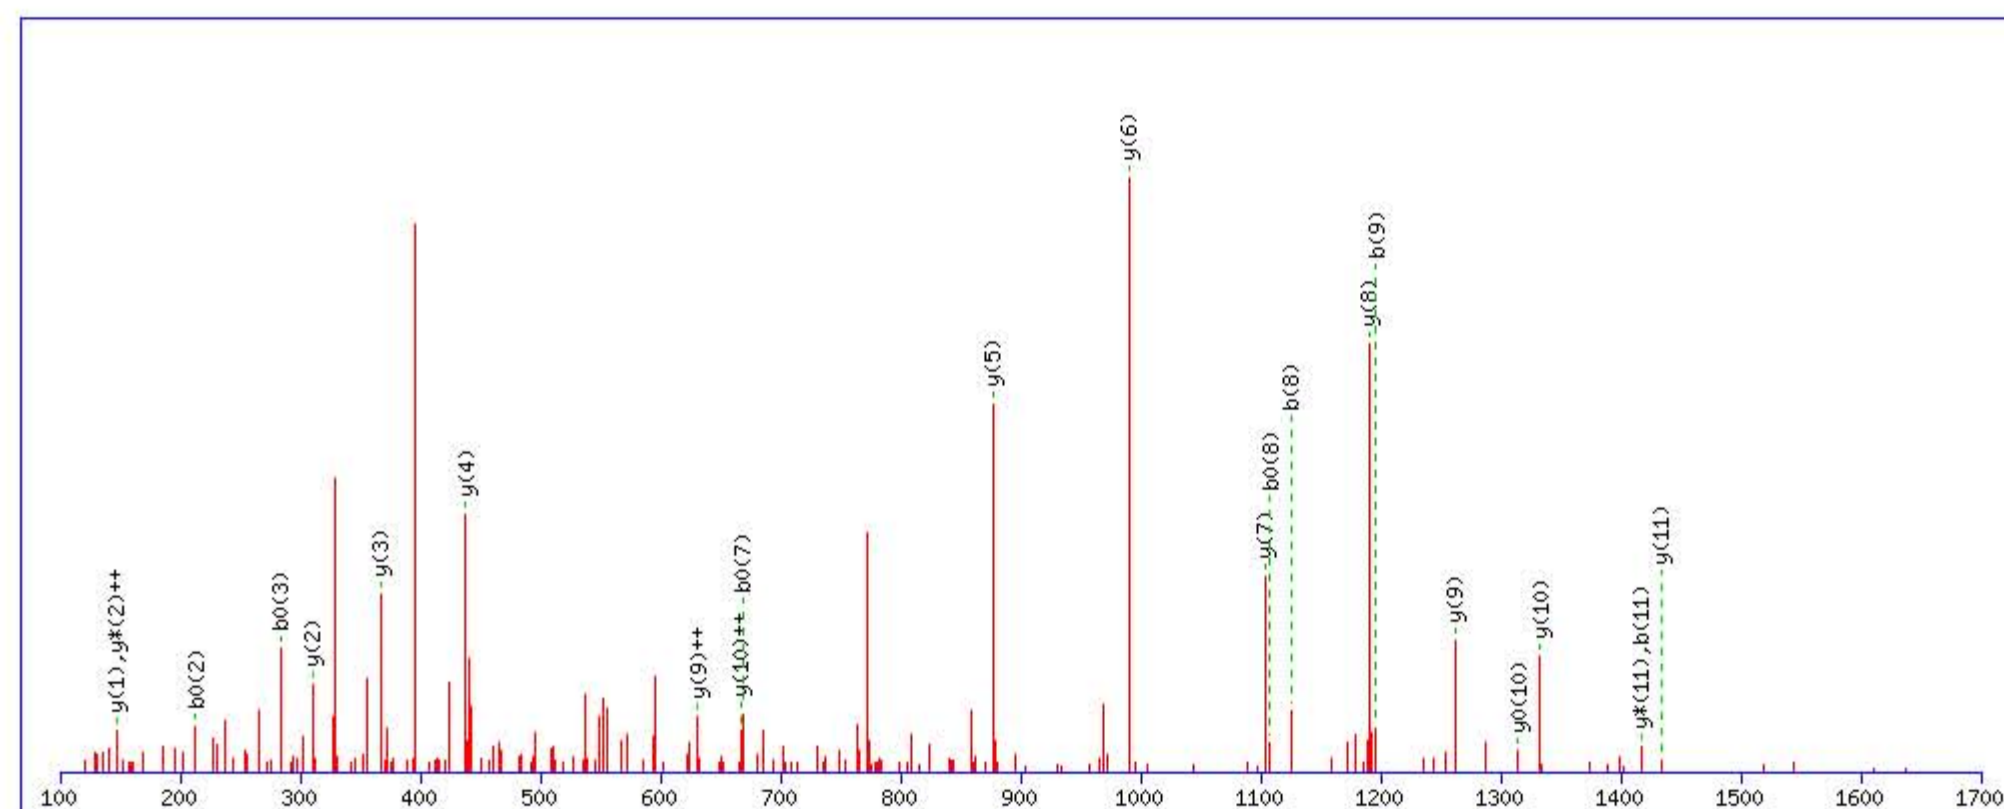

Monoisotopic mass of neutral peptide Mr(calc): 1561.817383

Fixed modifications: Carbamidomethyl (C) (apply to specified residues or termini only)

Variable modifications:

Q8 : Biotin:Thermo-21345 (Q)

Ions Score: 76 Expect: 1.9e-007

Matches : 23/104 fragment ions using 42 most intense peaks [\(help\)](#)

| #  | b           | b <sup>++</sup> | b <sup>*</sup> | b <sup>*++</sup> | b <sup>0</sup> | b <sup>0++</sup> | Seq. | y           | y <sup>++</sup> | y <sup>*</sup> | y <sup>*++</sup> | y <sup>0</sup> | y <sup>0++</sup> | #  |
|----|-------------|-----------------|----------------|------------------|----------------|------------------|------|-------------|-----------------|----------------|------------------|----------------|------------------|----|
| 1  | 130.049869  | 65.528572       |                |                  | 112.039304     | 56.523290        | E    |             |                 |                |                  |                |                  | 12 |
| 2  | 231.097548  | 116.052412      |                |                  | 213.086983     | 107.047130       | T    | 1433.782100 | 717.394688      | 1416.755551    | 708.881414       | 1415.771535    | 708.389406       | 11 |
| 3  | 302.134662  | 151.570969      |                |                  | 284.124097     | 142.565687       | A    | 1332.734421 | 666.870848      | 1315.707872    | 658.357574       | 1314.723856    | 657.865566       | 10 |
| 4  | 373.171776  | 187.089526      |                |                  | 355.161211     | 178.084243       | A    | 1261.697307 | 631.352292      | 1244.670758    | 622.839017       | 1243.686742    | 622.347009       | 9  |
| 5  | 460.203804  | 230.605540      |                |                  | 442.193239     | 221.600257       | S    | 1190.660193 | 595.833734      | 1173.633644    | 587.320460       | 1172.649628    | 586.828452       | 8  |
| 6  | 573.287868  | 287.147572      |                |                  | 555.277303     | 278.142290       | L    | 1103.628165 | 552.317721      | 1086.601616    | 543.804446       |                |                  | 7  |
| 7  | 686.371932  | 343.689604      |                |                  | 668.361367     | 334.684322       | L    | 990.544101  | 495.775689      | 973.517552     | 487.262414       |                |                  | 6  |
| 8  | 1125.597258 | 563.302267      | 1108.570709    | 554.788993       | 1107.586693    | 554.296985       | Q    | 877.460037  | 439.233657      | 860.433488     | 430.720382       |                |                  | 5  |
| 9  | 1196.634372 | 598.820824      | 1179.607823    | 590.307550       | 1178.623807    | 589.815541       | A    | 438.234711  | 219.620993      | 421.208162     | 211.107719       |                |                  | 4  |
| 10 | 1253.655836 | 627.331556      | 1236.629287    | 618.818282       | 1235.645271    | 618.326273       | G    | 367.197597  | 184.102436      | 350.171048     | 175.589162       |                |                  | 3  |
| 11 | 1416.719165 | 708.863221      | 1399.692616    | 700.349946       | 1398.708600    | 699.857938       | Y    | 310.176133  | 155.591705      | 293.149584     | 147.078430       |                |                  | 2  |
| 12 |             |                 |                |                  |                |                  | K    | 147.112804  | 74.060040       | 130.086255     | 65.546765        |                |                  | 1  |

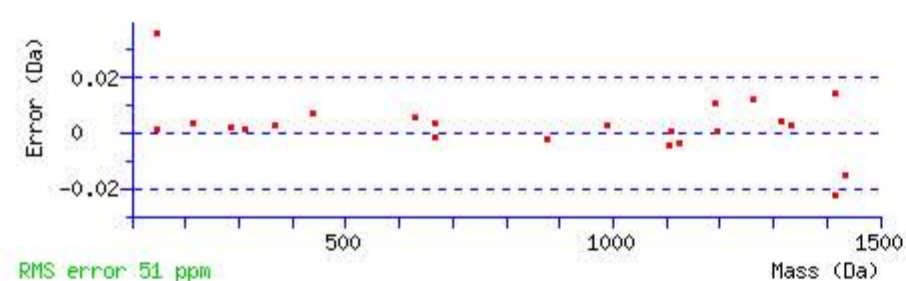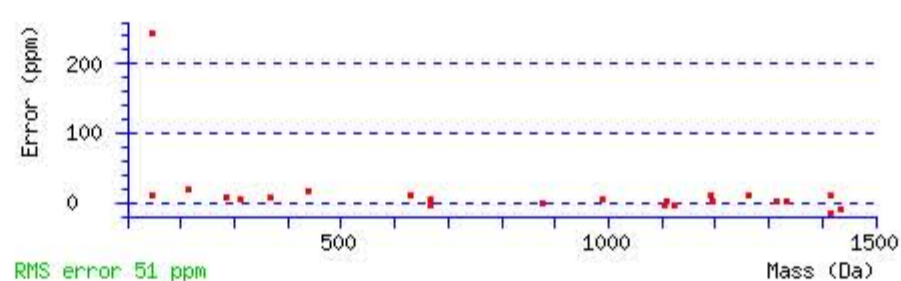

NCBI BLAST search of **ETAASLLQAGYK**

(Parameters: blastp, nr protein database, expect=20000, no filter, PAM30)

Other BLAST [web gateways](#)

All matches to this query

| Score | Mr(calc):   | Delta     | Sequence                        |
|-------|-------------|-----------|---------------------------------|
| 75.8  | 1561.817383 | -0.016255 | <a href="#">ETAASLLQAGYK</a>    |
| 4.0   | 1561.817398 | -0.016270 | <a href="#">VLPEVLEKQCGYK</a>   |
| 3.6   | 1561.788208 | 0.012920  | <a href="#">EGASRAQTMGNSLLK</a> |
| 2.5   | 1561.810883 | -0.009755 | <a href="#">RLGLDWCLITMGK</a>   |
| 1.9   | 1561.782364 | 0.018764  | <a href="#">FHIPLNGCGTRYK</a>   |

Mascot: <http://www.matrixscience.com/>



# MATRIX SCIENCE Mascot Search Results

## Peptide View

MS/MS Fragmentation of **TATSEYQIFFNPR**

Found in **THRB\_HUMAN**, Prothrombin OS=Homo sapiens GN=F2 PE=1 SV=2

Match to Query 40628: 1871.887602 from(624.969810,3+) rtinseconds(2307) index(52783)

Title: Locus:1.1.1.3446.6 File:"2013-07-02 CLN FXIII 30 min 3rd F 4.wiff"

Data file C:\Program Files (x86)\Matrix Science\Mascot Daemon\mgf3 FXIII 30 min 3rd\mascot\_daemon\_merge.mgf

Click mouse within plot area to zoom in by factor of two about that point

Or, Plot from  to  Da

Label all possible matches  Label matches used for scoring

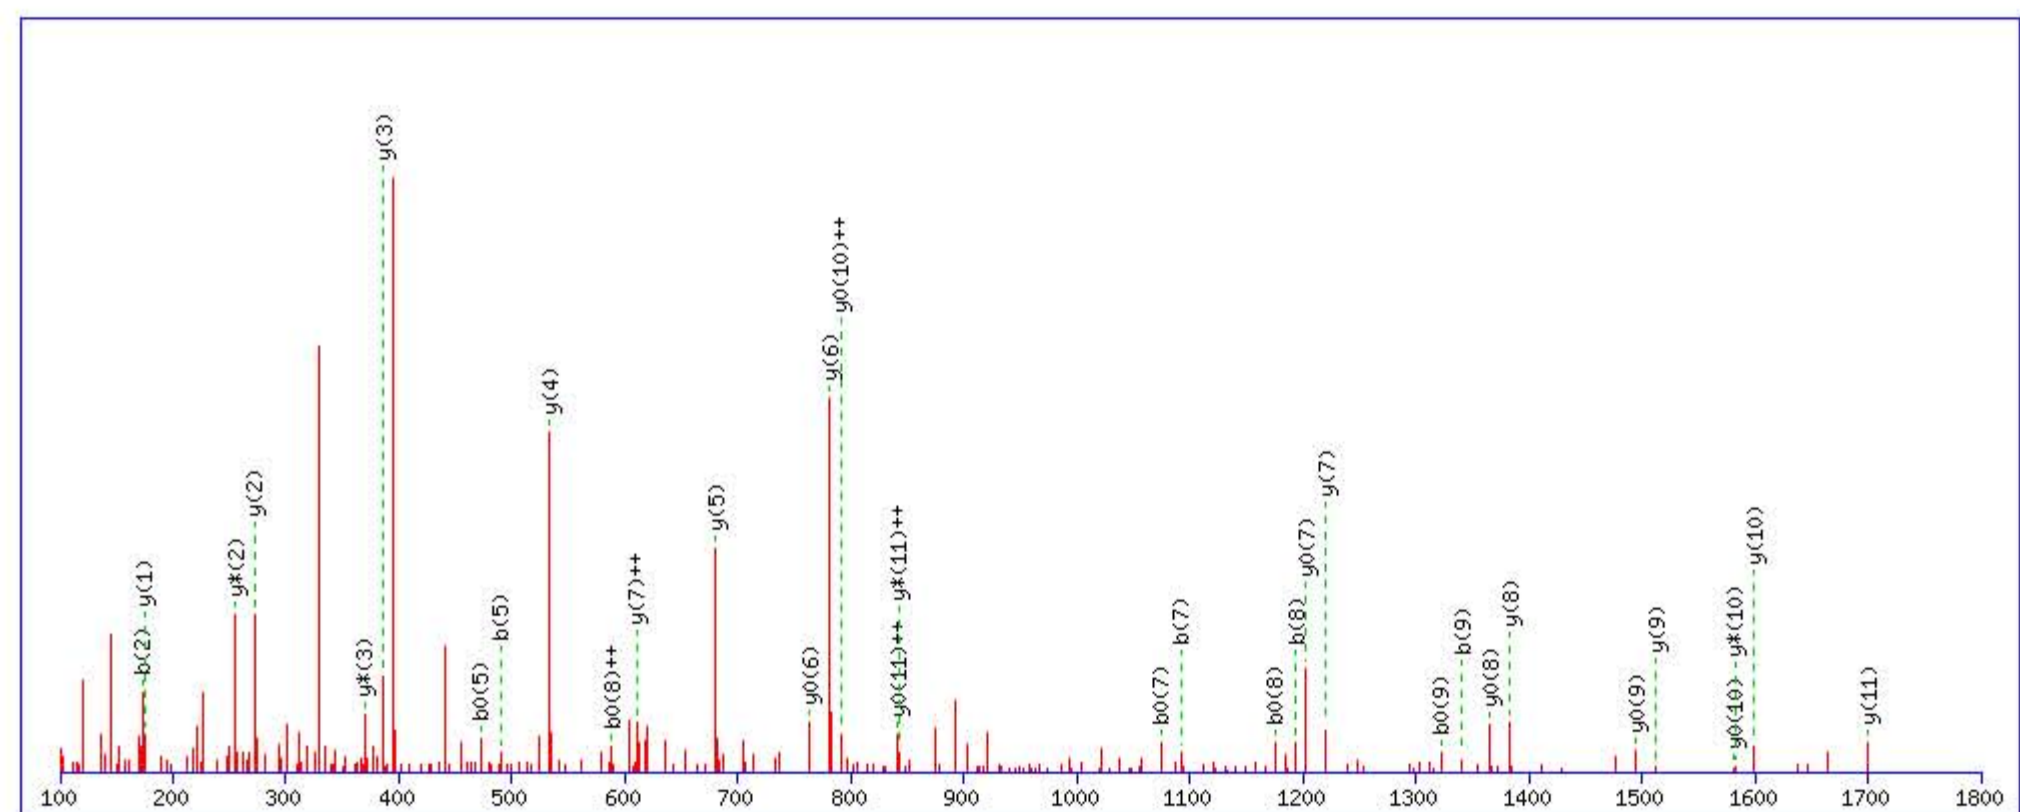

Monoisotopic mass of neutral peptide Mr(calc): 1871.887619

Fixed modifications: Carbamidomethyl (C) (apply to specified residues or termini only)

Variable modifications:

Q7 : Biotin:Thermo-21345 (Q)

Ions Score: 57 Expect: 3.1e-005

Matches : 33/122 fragment ions using 65 most intense peaks [\(help\)](#)

| #  | b                  | b <sup>++</sup> | b <sup>*</sup> | b <sup>*++</sup> | b <sup>0</sup>     | b <sup>0++</sup>  | Seq. | y                  | y <sup>++</sup>   | y <sup>*</sup>     | y <sup>*++</sup>  | y <sup>0</sup>     | y <sup>0++</sup>  | #  |
|----|--------------------|-----------------|----------------|------------------|--------------------|-------------------|------|--------------------|-------------------|--------------------|-------------------|--------------------|-------------------|----|
| 1  | 102.054955         | 51.531116       |                |                  | 84.044390          | 42.525833         | T    |                    |                   |                    |                   |                    |                   | 13 |
| 2  | <b>173.092069</b>  | 87.049672       |                |                  | 155.081504         | 78.044390         | A    | 1771.847219        | 886.427248        | 1754.820670        | 877.913973        | 1753.836654        | 877.421965        | 12 |
| 3  | 274.139748         | 137.573512      |                |                  | 256.129183         | 128.568230        | T    | <b>1700.810105</b> | 850.908691        | 1683.783556        | <b>842.395416</b> | 1682.799540        | <b>841.903408</b> | 11 |
| 4  | 361.171776         | 181.089526      |                |                  | 343.161211         | 172.084243        | S    | <b>1599.762426</b> | 800.384851        | <b>1582.735877</b> | 791.871577        | <b>1581.751861</b> | <b>791.379569</b> | 10 |
| 5  | <b>490.214369</b>  | 245.610822      |                |                  | <b>472.203804</b>  | 236.605540        | E    | <b>1512.730398</b> | 756.868837        | 1495.703849        | 748.355563        | <b>1494.719833</b> | 747.863555        | 9  |
| 6  | 653.277698         | 327.142487      |                |                  | 635.267133         | 318.137205        | Y    | <b>1383.687805</b> | 692.347541        | 1366.661256        | 683.834266        | <b>1365.677240</b> | 683.342258        | 8  |
| 7  | <b>1092.503024</b> | 546.755150      | 1075.476475    | 538.241876       | <b>1074.492459</b> | 537.749868        | Q    | <b>1220.624476</b> | <b>610.815876</b> | 1203.597927        | 602.302602        | <b>1202.613911</b> | 601.810594        | 7  |
| 8  | <b>1193.550703</b> | 597.278990      | 1176.524154    | 588.765715       | <b>1175.540138</b> | <b>588.273707</b> | T    | <b>781.399150</b>  | 391.203213        | 764.372601         | 382.689939        | <b>763.388585</b>  | 382.197931        | 6  |
| 9  | <b>1340.619117</b> | 670.813197      | 1323.592568    | 662.299922       | <b>1322.608552</b> | 661.807914        | F    | <b>680.351471</b>  | 340.679374        | 663.324922         | 332.166099        |                    |                   | 5  |
| 10 | 1487.687531        | 744.347404      | 1470.660982    | 735.834129       | 1469.676966        | 735.342121        | F    | <b>533.283057</b>  | 267.145167        | 516.256508         | 258.631892        |                    |                   | 4  |
| 11 | 1601.730458        | 801.368867      | 1584.703909    | 792.855593       | 1583.719893        | 792.363585        | N    | <b>386.214643</b>  | 193.610959        | <b>369.188094</b>  | 185.097685        |                    |                   | 3  |
| 12 | 1698.783222        | 849.895249      | 1681.756673    | 841.381975       | 1680.772657        | 840.889967        | P    | <b>272.171716</b>  | 136.589496        | <b>255.145167</b>  | 128.076221        |                    |                   | 2  |
| 13 |                    |                 |                |                  |                    |                   | R    | <b>175.118952</b>  | 88.063114         | 158.092403         | 79.549839         |                    |                   | 1  |

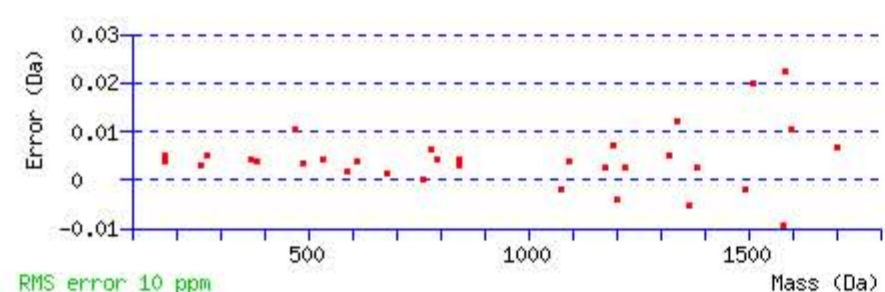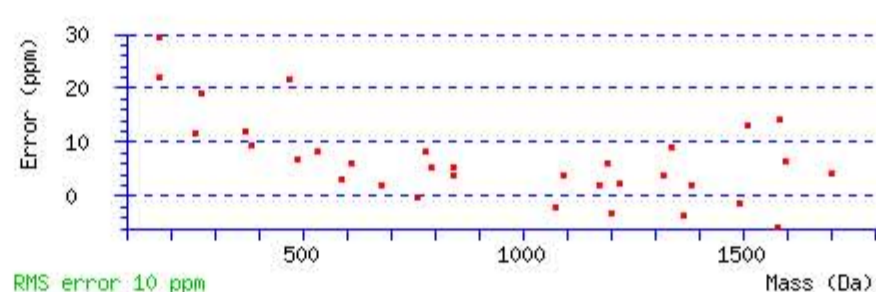

NCBI BLAST search of [TATSEYQIFFNPR](#)

(Parameters: blastp, nr protein database, expect=20000, no filter, PAM30)

Other BLAST [web gateways](#)

All matches to this query

| Score | Mr(calc):   | Delta     | Sequence                      |
|-------|-------------|-----------|-------------------------------|
| 57.4  | 1871.887619 | -0.000017 | <a href="#">TATSEYQIFFNPR</a> |

Mascot: <http://www.matrixscience.com/>



# MASCOT Search Results

## Peptide View

MS/MS Fragmentation of **SPQELLCGASLISDR**

Found in **THRB\_HUMAN**, Prothrombin OS=Homo sapiens GN=F2 PE=1 SV=2

Match to Query 42085: 1955.984952 from(653.002260,3+) rtinseconds(2501) index(53557)

Title: Locus:1.1.1.3514.7 File:"2013-07-02 CLN FXIII 30 min 3rd F 4.wiff"

Data file C:\Program Files (x86)\Matrix Science\Mascot Daemon\mgf\3 FXIII 30 min 3rd\mascot\_daemon\_merge.mgf

Click mouse within plot area to zoom in by factor of two about that point

Or, Plot from  to  Da

Label all possible matches  Label matches used for scoring

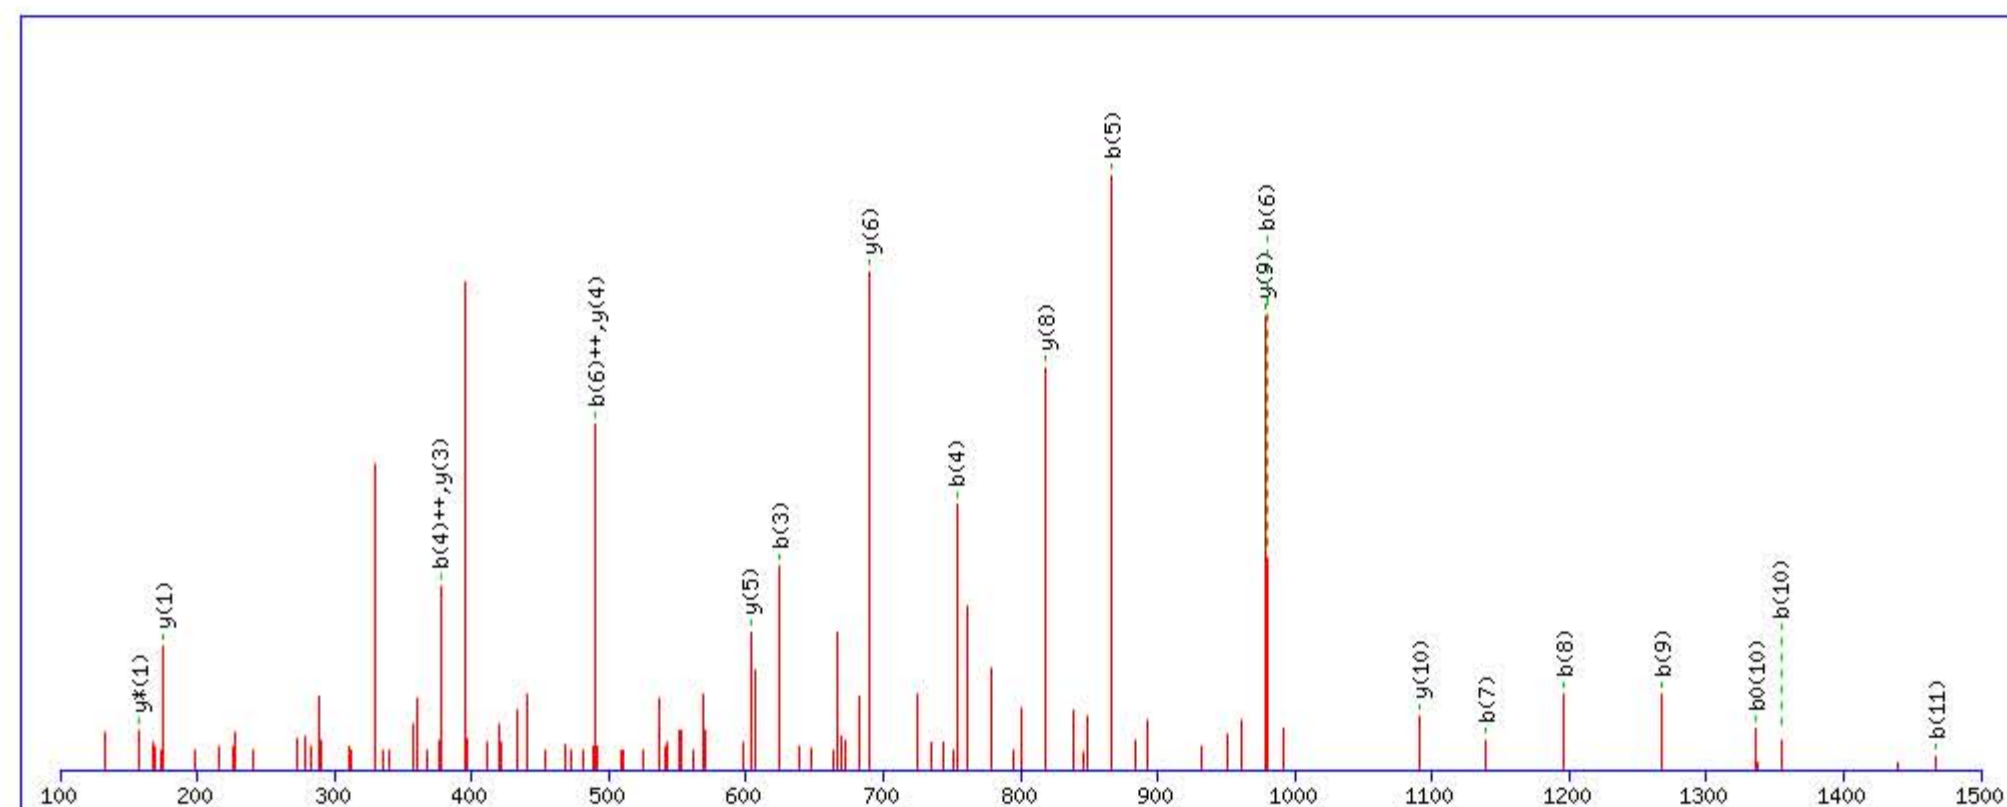

Monoisotopic mass of neutral peptide Mr(calc): 1955.980850

Fixed modifications: Carbamidomethyl (C) (apply to specified residues or termini only)

Variable modifications:

Q3 : Biotin:Thermo-21345 (Q)

Ions Score: 74 Expect: 2.8e-007

Matches : 21/162 fragment ions using 26 most intense peaks [\(help\)](#)

| #  | b                  | b <sup>++</sup>   | b <sup>+</sup> | b <sup>+++</sup> | b <sup>0</sup>     | b <sup>0++</sup> | Seq. | y                  | y <sup>++</sup> | y <sup>+</sup>    | y <sup>+++</sup> | y <sup>0</sup> | y <sup>0++</sup> | #  |
|----|--------------------|-------------------|----------------|------------------|--------------------|------------------|------|--------------------|-----------------|-------------------|------------------|----------------|------------------|----|
| 1  | 88.039304          | 44.523290         |                |                  | 70.028739          | 35.518008        | S    |                    |                 |                   |                  |                |                  | 15 |
| 2  | 185.092068         | 93.049672         |                |                  | 167.081503         | 84.044389        | P    | 1869.956117        | 935.481697      | 1852.929568       | 926.968422       | 1851.945552    | 926.476414       | 14 |
| 3  | <b>624.317394</b>  | 312.662335        | 607.290845     | 304.149061       | 606.306829         | 303.657053       | Q    | 1772.903353        | 886.955314      | 1755.876804       | 878.442040       | 1754.892788    | 877.950032       | 13 |
| 4  | <b>753.359987</b>  | <b>377.183632</b> | 736.333438     | 368.670357       | 735.349422         | 368.178349       | E    | 1333.678027        | 667.342652      | 1316.651478       | 658.829377       | 1315.667462    | 658.337369       | 12 |
| 5  | <b>866.444051</b>  | 433.725664        | 849.417502     | 425.212389       | 848.433486         | 424.720381       | L    | 1204.635434        | 602.821355      | 1187.608885       | 594.308081       | 1186.624869    | 593.816073       | 11 |
| 6  | <b>979.528115</b>  | <b>490.267696</b> | 962.501566     | 481.754421       | 961.517550         | 481.262413       | L    | <b>1091.551370</b> | 546.279323      | 1074.524821       | 537.766049       | 1073.540805    | 537.274040       | 10 |
| 7  | <b>1139.558764</b> | 570.283020        | 1122.532215    | 561.769746       | 1121.548199        | 561.277738       | C    | <b>978.467306</b>  | 489.737291      | 961.440757        | 481.224017       | 960.456741     | 480.732009       | 9  |
| 8  | <b>1196.580228</b> | 598.793752        | 1179.553679    | 590.280478       | 1178.569663        | 589.788470       | G    | <b>818.436657</b>  | 409.721967      | 801.410108        | 401.208692       | 800.426092     | 400.716684       | 8  |
| 9  | <b>1267.617342</b> | 634.312309        | 1250.590793    | 625.799035       | 1249.606777        | 625.307027       | A    | 761.415193         | 381.211235      | 744.388644        | 372.697960       | 743.404628     | 372.205952       | 7  |
| 10 | <b>1354.649370</b> | 677.828323        | 1337.622821    | 669.315049       | <b>1336.638805</b> | 668.823041       | S    | <b>690.378079</b>  | 345.692678      | 673.351530        | 337.179403       | 672.367514     | 336.687395       | 6  |
| 11 | <b>1467.733434</b> | 734.370355        | 1450.706885    | 725.857081       | 1449.722869        | 725.365073       | L    | <b>603.346051</b>  | 302.176664      | 586.319502        | 293.663389       | 585.335486     | 293.171381       | 5  |
| 12 | 1580.817498        | 790.912387        | 1563.790949    | 782.399113       | 1562.806933        | 781.907104       | I    | <b>490.261987</b>  | 245.634631      | 473.235438        | 237.121357       | 472.251422     | 236.629349       | 4  |
| 13 | 1667.849526        | 834.428401        | 1650.822977    | 825.915127       | 1649.838961        | 825.423118       | S    | <b>377.177923</b>  | 189.092600      | 360.151374        | 180.579325       | 359.167358     | 180.087317       | 3  |
| 14 | 1782.876469        | 891.941873        | 1765.849920    | 883.428598       | 1764.865904        | 882.936590       | D    | 290.145895         | 145.576585      | 273.119346        | 137.063311       | 272.135330     | 136.571303       | 2  |
| 15 |                    |                   |                |                  |                    |                  | R    | <b>175.118952</b>  | 88.063114       | <b>158.092403</b> | 79.549839        |                |                  | 1  |

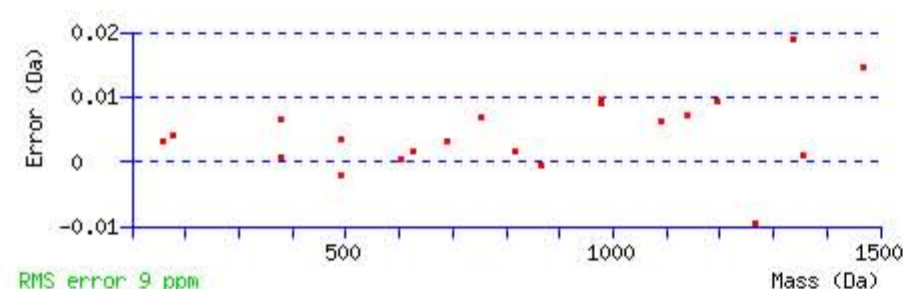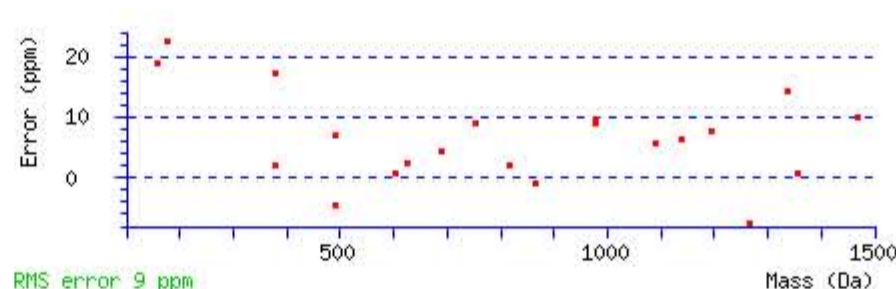

NCBI BLAST search of **SPQELLCGASLISDR**

(Parameters: blastp, nr protein database, expect=20000, no filter, PAM30)

Other BLAST [web gateways](#)

## All matches to this query

| Score | Mr(calc):   | Delta    | Sequence                          |
|-------|-------------|----------|-----------------------------------|
| 74.0  | 1955.980850 | 0.004102 | <a href="#">SPQELLCGASLISDR</a>   |
| 3.8   | 1955.975464 | 0.009488 | <a href="#">QHSLHSAQWFAGAFILR</a> |
| 0.9   | 1955.966949 | 0.018003 | <a href="#">EQQPGKCEGTRTVR</a>    |
| 0.9   | 1955.966949 | 0.018003 | <a href="#">EQQPGKCEGTRTVR</a>    |
| 0.2   | 1955.957047 | 0.027905 | <a href="#">RHLDQCEHQIGPR</a>     |



# MASCOT Search Results

## Peptide View

MS/MS Fragmentation of **KSPQELLCGASLISDR**  
 Found in **THRB\_HUMAN**, Prothrombin OS=Homo sapiens GN=F2 PE=1 SV=2

Match to Query 45288: 2084.074302 from(695.698710,3+) rtinseconds(2302) index(52761)  
 Title: Locus:1.1.1.3444.13 File:"2013-07-02 CLN FXIII 30 min 3rd F 4.wiff"  
 Data file C:\Program Files (x86)\Matrix Science\Mascot Daemon\mgf3 FXIII 30 min 3rd\mascot\_daemon\_merge.mgf

Click mouse within plot area to zoom in by factor of two about that point  
 Or, Plot from  to  Da   
 Label all possible matches  Label matches used for scoring

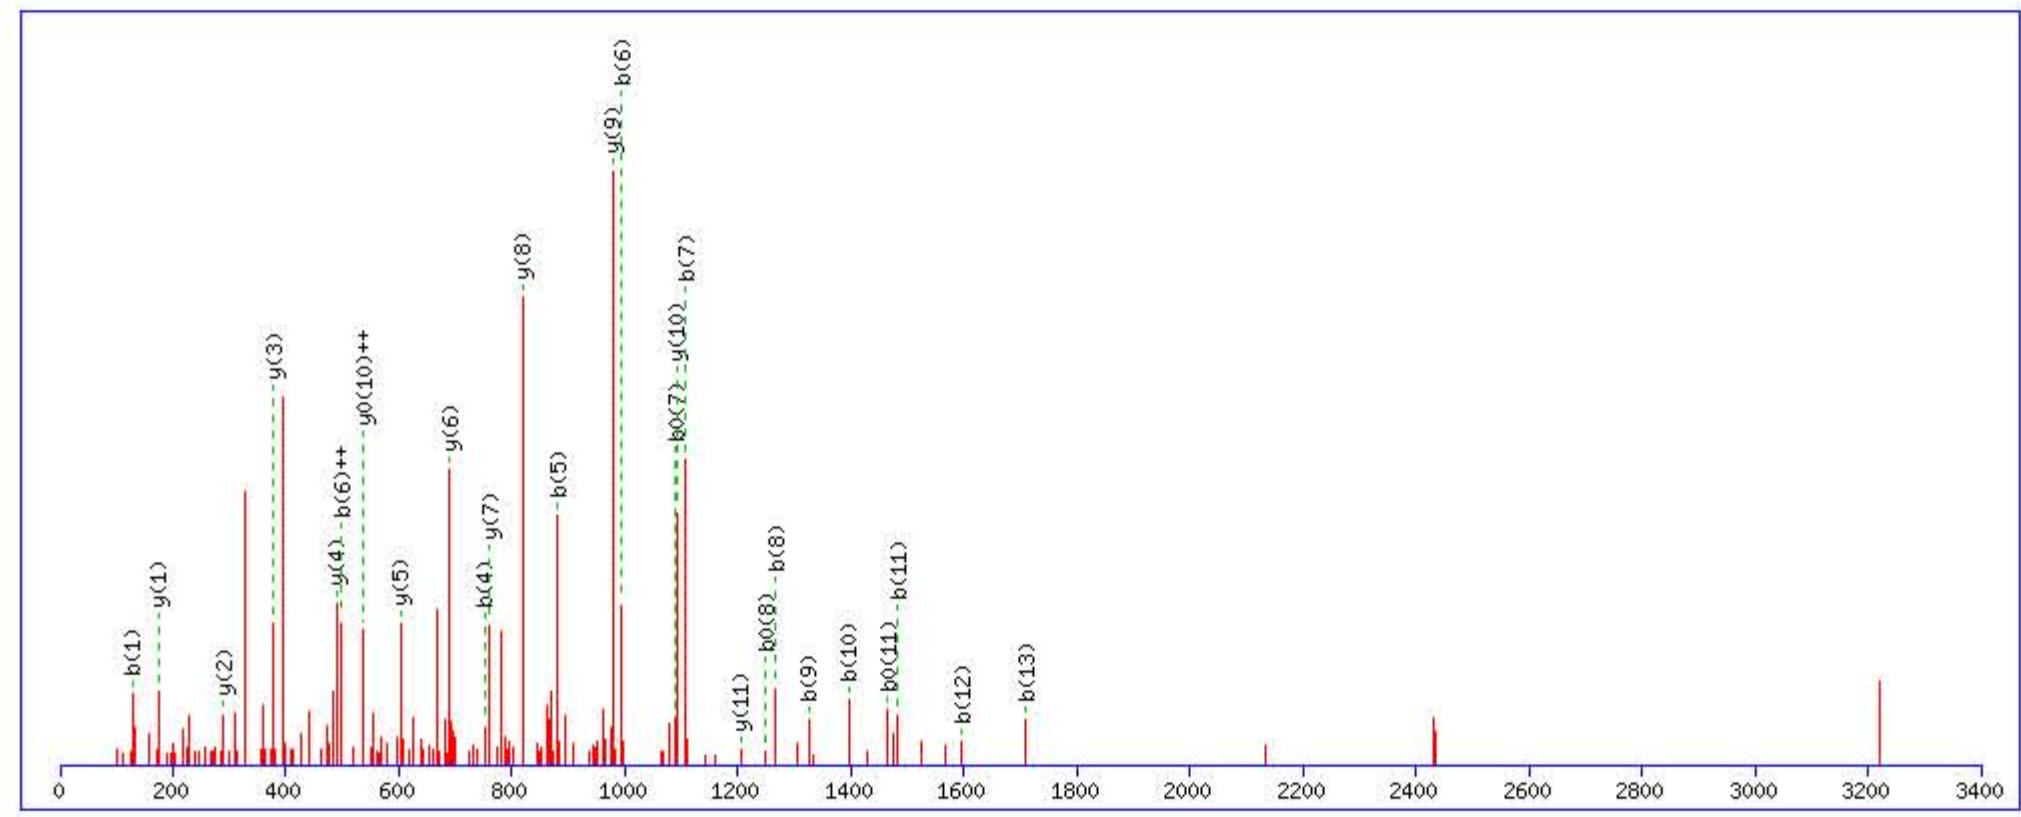

Monoisotopic mass of neutral peptide Mr(calc): 2084.075806  
 Fixed modifications: Carbamidomethyl (C) (apply to specified residues or termini only)  
 Variable modifications:  
 Q4 : Biotin:Thermo-21345 (Q)  
 Ions Score: 74 Expect: 2.3e-007  
 Matches : 27/176 fragment ions using 46 most intense peaks [\(help\)](#)

| #  | b                  | b <sup>++</sup>   | b <sup>*</sup> | b <sup>*++</sup> | b <sup>0</sup>     | b <sup>0++</sup> | Seq.     | y                  | y <sup>++</sup> | y <sup>*</sup> | y <sup>*++</sup> | y <sup>0</sup> | y <sup>0++</sup>  | #         |
|----|--------------------|-------------------|----------------|------------------|--------------------|------------------|----------|--------------------|-----------------|----------------|------------------|----------------|-------------------|-----------|
| 1  | <b>129.102239</b>  | 65.054757         | 112.075690     | 56.541483        |                    |                  | <b>K</b> |                    |                 |                |                  |                |                   | <b>16</b> |
| 2  | 216.134267         | 108.570771        | 199.107718     | 100.057497       | 198.123702         | 99.565489        | <b>S</b> | 1956.988145        | 978.997711      | 1939.961596    | 970.484436       | 1938.977580    | 969.992428        | <b>15</b> |
| 3  | 313.187031         | 157.097153        | 296.160482     | 148.583879       | 295.176466         | 148.091871       | <b>P</b> | 1869.956117        | 935.481697      | 1852.929568    | 926.968422       | 1851.945552    | 926.476414        | <b>14</b> |
| 4  | <b>752.412357</b>  | 376.709817        | 735.385808     | 368.196542       | 734.401792         | 367.704534       | <b>Q</b> | 1772.903353        | 886.955314      | 1755.876804    | 878.442040       | 1754.892788    | 877.950032        | <b>13</b> |
| 5  | <b>881.454950</b>  | 441.231113        | 864.428401     | 432.717839       | 863.444385         | 432.225831       | <b>E</b> | 1333.678027        | 667.342652      | 1316.651478    | 658.829377       | 1315.667462    | 658.337369        | <b>12</b> |
| 6  | <b>994.539014</b>  | <b>497.773145</b> | 977.512465     | 489.259871       | 976.528449         | 488.767863       | <b>L</b> | <b>1204.635434</b> | 602.821355      | 1187.608885    | 594.308081       | 1186.624869    | 593.816073        | <b>11</b> |
| 7  | <b>1107.623078</b> | 554.315177        | 1090.596529    | 545.801903       | <b>1089.612513</b> | 545.309895       | <b>L</b> | <b>1091.551370</b> | 546.279323      | 1074.524821    | 537.766049       | 1073.540805    | <b>537.274040</b> | <b>10</b> |
| 8  | <b>1267.653727</b> | 634.330502        | 1250.627178    | 625.817227       | <b>1249.643162</b> | 625.325219       | <b>C</b> | <b>978.467306</b>  | 489.737291      | 961.440757     | 481.224017       | 960.456741     | 480.732009        | <b>9</b>  |
| 9  | <b>1324.675191</b> | 662.841234        | 1307.648642    | 654.327959       | 1306.664626        | 653.835951       | <b>G</b> | <b>818.436657</b>  | 409.721967      | 801.410108     | 401.208692       | 800.426092     | 400.716684        | <b>8</b>  |
| 10 | <b>1395.712305</b> | 698.359791        | 1378.685756    | 689.846516       | 1377.701740        | 689.354508       | <b>A</b> | <b>761.415193</b>  | 381.211235      | 744.388644     | 372.697960       | 743.404628     | 372.205952        | <b>7</b>  |
| 11 | <b>1482.744333</b> | 741.875805        | 1465.717784    | 733.362530       | <b>1464.733768</b> | 732.870522       | <b>S</b> | <b>690.378079</b>  | 345.692678      | 673.351530     | 337.179403       | 672.367514     | 336.687395        | <b>6</b>  |
| 12 | <b>1595.828397</b> | 798.417837        | 1578.801848    | 789.904562       | 1577.817832        | 789.412554       | <b>L</b> | <b>603.346051</b>  | 302.176664      | 586.319502     | 293.663389       | 585.335486     | 293.171381        | <b>5</b>  |
| 13 | <b>1708.912461</b> | 854.959868        | 1691.885912    | 846.446594       | 1690.901896        | 845.954586       | <b>I</b> | <b>490.261987</b>  | 245.634631      | 473.235438     | 237.121357       | 472.251422     | 236.629349        | <b>4</b>  |
| 14 | 1795.944489        | 898.475883        | 1778.917940    | 889.962608       | 1777.933924        | 889.470600       | <b>S</b> | <b>377.177923</b>  | 189.092600      | 360.151374     | 180.579325       | 359.167358     | 180.087317        | <b>3</b>  |
| 15 | 1910.971432        | 955.989354        | 1893.944883    | 947.476080       | 1892.960867        | 946.984072       | <b>D</b> | <b>290.145895</b>  | 145.576585      | 273.119346     | 137.063311       | 272.135330     | 136.571303        | <b>2</b>  |
| 16 |                    |                   |                |                  |                    |                  | <b>R</b> | <b>175.118952</b>  | 88.063114       | 158.092403     | 79.549839        |                |                   | <b>1</b>  |

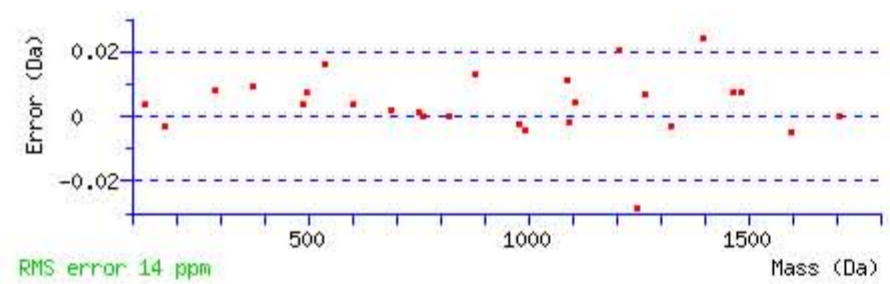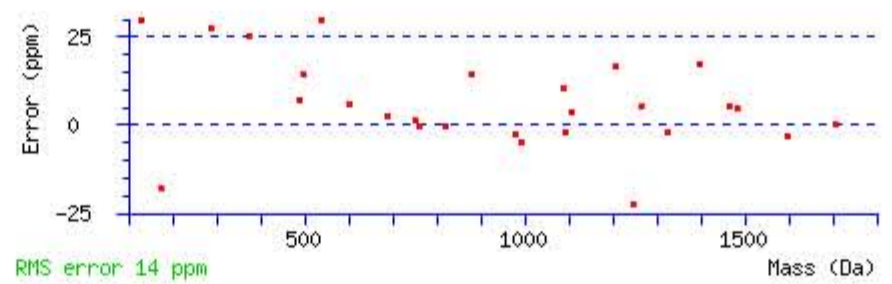

NCBI BLAST search of **KSPQELLCGASLISDR**  
 (Parameters: blastp, nr protein database, expect=20000, no filter, PAM30)  
 Other BLAST [web gateways](#)

### All matches to this query

| Score | Mr(calc):   | Delta     | Sequence                            |
|-------|-------------|-----------|-------------------------------------|
| 74.3  | 2084.075806 | -0.001504 | <a href="#">KSPQELLCGASLISDR</a>    |
| 3.3   | 2084.097565 | -0.023263 | <a href="#">KEFIMAELIQTEKAYVR</a>   |
| 3.3   | 2084.097565 | -0.023263 | <a href="#">KEFIMAELLQTEKAYVR</a>   |
| 2.2   | 2084.083679 | -0.009377 | <a href="#">EDLISFLCGKVPVPPRNSR</a> |
| 1.5   | 2084.104782 | -0.030480 | <a href="#">VLEGRAQPQLSERMLETK</a>  |
| 0.4   | 2084.090225 | -0.015923 | <a href="#">SKYDVPGPPLNVITIDVNR</a> |
| 0.1   | 2084.050659 | 0.023643  | <a href="#">EGSSEISQRVQSR</a>       |



# MASCOT Search Results

## Peptide View

MS/MS Fragmentation of **HQDFNSAVQLVENFCR**  
 Found in **THRB\_HUMAN**, Prothrombin OS=Homo sapiens GN=F2 PE=1 SV=2

Match to Query 48587: 2274.058572 from(759.026800,3+) rtinseconds(2471) index(66305)  
 Title: Locus:1.1.1.3340.7 File:"2013-07-02 CLN FXIII 30 min 3rd FT.wiff"  
 Data file C:\Program Files (x86)\Matrix Science\Mascot Daemon\mgf3 FXIII 30 min 3rd\mascot\_daemon\_merge.mgf

Click mouse within plot area to zoom in by factor of two about that point  
 Or, Plot from  to  Da   
 Label all possible matches  Label matches used for scoring

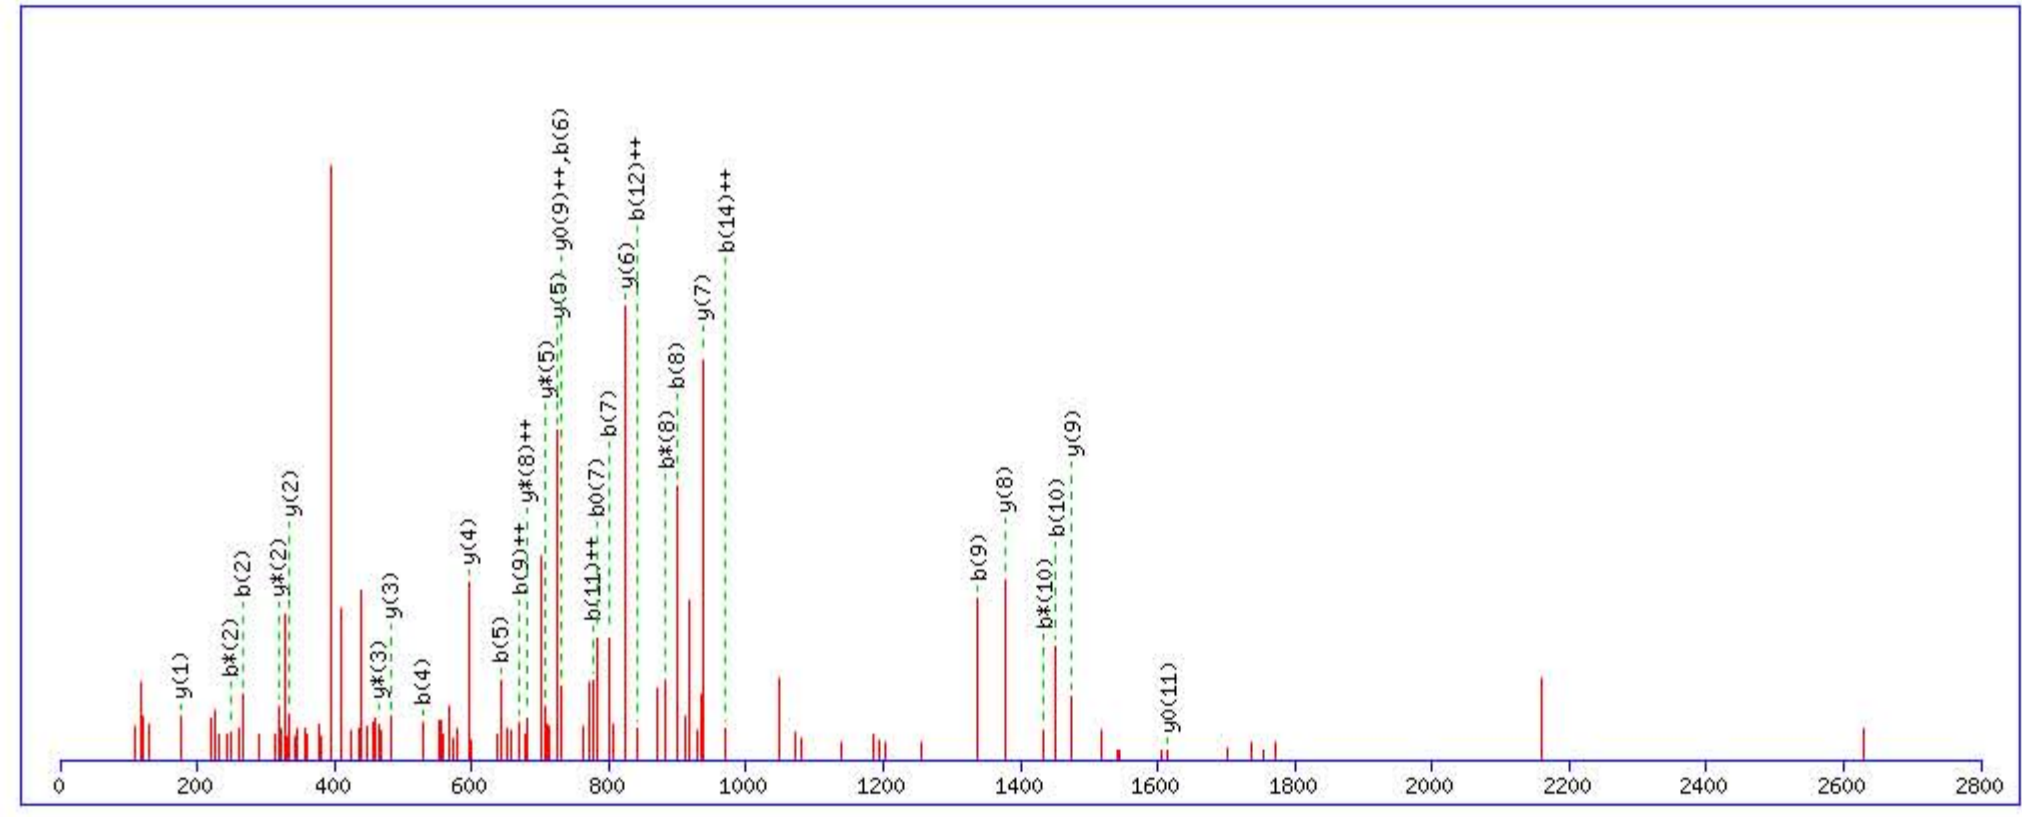

Monoisotopic mass of neutral peptide Mr(calc): 2274.067398  
 Fixed modifications: Carbamidomethyl (C) (apply to specified residues or termini only)  
 Variable modifications:  
 Q9 : Biotin:Thermo-21345 (Q)  
 Ions Score: 36 Expect: 0.0041  
 Matches : 31/166 fragment ions using 78 most intense peaks [\(help\)](#)

| #  | b                  | b <sup>++</sup>   | b <sup>*</sup>     | b <sup>*++</sup> | b <sup>0</sup>    | b <sup>0++</sup> | Seq. | y                  | y <sup>++</sup> | y <sup>*</sup>    | y <sup>*++</sup>  | y <sup>0</sup>     | y <sup>0++</sup>  | #  |
|----|--------------------|-------------------|--------------------|------------------|-------------------|------------------|------|--------------------|-----------------|-------------------|-------------------|--------------------|-------------------|----|
| 1  | 138.066188         | 69.536732         |                    |                  |                   |                  | H    |                    |                 |                   |                   |                    |                   | 16 |
| 2  | <b>266.124766</b>  | 133.566021        | <b>249.098217</b>  | 125.052746       |                   |                  | Q    | 2138.015757        | 1069.511516     | 2120.989208       | 1060.998242       | 2120.005192        | 1060.506234       | 15 |
| 3  | 381.151709         | 191.079492        | 364.125160         | 182.566218       | 363.141144        | 182.074210       | D    | 2009.957179        | 1005.482228     | 1992.930630       | 996.968953        | 1991.946614        | 996.476945        | 14 |
| 4  | <b>528.220123</b>  | 264.613700        | 511.193574         | 256.100425       | 510.209558        | 255.608417       | F    | 1894.930236        | 947.968756      | 1877.903687       | 939.455482        | 1876.919671        | 938.963474        | 13 |
| 5  | <b>642.263050</b>  | 321.635163        | 625.236501         | 313.121889       | 624.252485        | 312.629881       | N    | 1747.861822        | 874.434549      | 1730.835273       | 865.921275        | 1729.851257        | 865.429267        | 12 |
| 6  | <b>729.295078</b>  | 365.151177        | 712.268529         | 356.637903       | 711.284513        | 356.145895       | S    | 1633.818895        | 817.413086      | 1616.792346       | 808.899811        | <b>1615.808330</b> | 808.407803        | 11 |
| 7  | <b>800.332192</b>  | 400.669734        | 783.305643         | 392.156459       | <b>782.321627</b> | 391.664451       | A    | 1546.786867        | 773.897072      | 1529.760318       | 765.383797        | 1528.776302        | 764.891789        | 10 |
| 8  | <b>899.400606</b>  | 450.203941        | <b>882.374057</b>  | 441.690666       | 881.390041        | 441.198658       | V    | <b>1475.749753</b> | 738.378515      | 1458.723204       | 729.865240        | 1457.739188        | <b>729.373232</b> | 9  |
| 9  | <b>1338.625932</b> | <b>669.816604</b> | 1321.599383        | 661.303330       | 1320.615367       | 660.811322       | Q    | <b>1376.681339</b> | 688.844308      | 1359.654790       | <b>680.331033</b> | 1358.670774        | 679.839025        | 8  |
| 10 | <b>1451.709996</b> | 726.358636        | <b>1434.683447</b> | 717.845362       | 1433.699431       | 717.353354       | L    | <b>937.456013</b>  | 469.231645      | 920.429464        | 460.718370        | 919.445448         | 460.226362        | 7  |
| 11 | 1550.778410        | <b>775.892843</b> | 1533.751861        | 767.379569       | 1532.767845       | 766.887561       | V    | <b>824.371949</b>  | 412.689613      | 807.345400        | 404.176338        | 806.361384         | 403.684330        | 6  |
| 12 | 1679.821003        | <b>840.414140</b> | 1662.794454        | 831.900865       | 1661.810438       | 831.408857       | E    | <b>725.303535</b>  | 363.155406      | <b>708.276986</b> | 354.642131        | 707.292970         | 354.150123        | 5  |
| 13 | 1793.863930        | 897.435603        | 1776.837381        | 888.922329       | 1775.853365       | 888.430321       | N    | <b>596.260942</b>  | 298.634109      | 579.234393        | 290.120835        |                    |                   | 4  |
| 14 | 1940.932344        | <b>970.969810</b> | 1923.905795        | 962.456536       | 1922.921779       | 961.964528       | F    | <b>482.218015</b>  | 241.612646      | <b>465.191466</b> | 233.099371        |                    |                   | 3  |
| 15 | 2100.962993        | 1050.985135       | 2083.936444        | 1042.471860      | 2082.952428       | 1041.979852      | C    | <b>335.149601</b>  | 168.078438      | <b>318.123052</b> | 159.565164        |                    |                   | 2  |
| 16 |                    |                   |                    |                  |                   |                  | R    | <b>175.118952</b>  | 88.063114       | 158.092403        | 79.549839         |                    |                   | 1  |

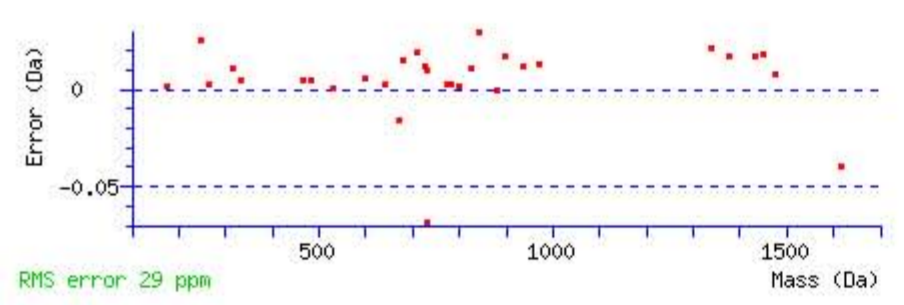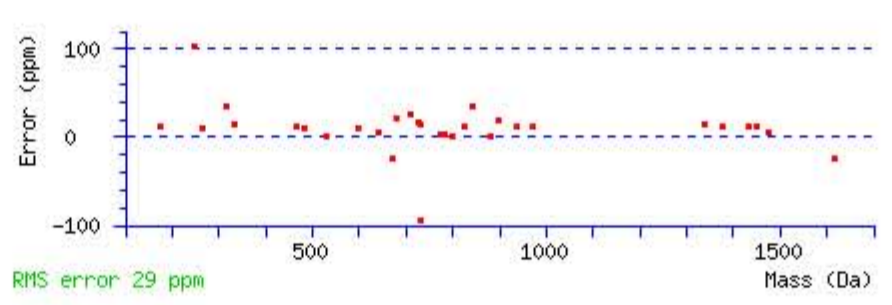

NCBI BLAST search of **HQDFNSAVQLVENFCR**  
 (Parameters: blastp, nr protein database, expect=20000, no filter, PAM30)  
 Other BLAST [web gateways](#)

### All matches to this query

| Score | Mr(calc):   | Delta     | Sequence                         |
|-------|-------------|-----------|----------------------------------|
| 36.2  | 2274.067398 | -0.008826 | <a href="#">HQDFNSAVQLVENFCR</a> |
| 11.0  | 2274.067398 | -0.008826 | <a href="#">HQDFNSAVQLVENFCR</a> |



# MASCOT Search Results

## Peptide View

MS/MS Fragmentation of **LAVTTHGLPCLAWASAQAK**  
 Found in **THRB\_HUMAN**, Prothrombin OS=Homo sapiens GN=F2 PE=1 SV=2

Match to Query 49121: 2305.212402 from(769.411410,3+) rtinseconds(2365) index(52996)  
 Title: Locus:1.1.1.3466.14 File:"2013-07-02 CLN FXIII 30 min 3rd F 4.wiff"  
 Data file C:\Program Files (x86)\Matrix Science\Mascot Daemon\mgf3 FXIII 30 min 3rd\mascot\_daemon\_merge.mgf

Click mouse within plot area to zoom in by factor of two about that point  
 Or, Plot from  to  Da   
 Label all possible matches  Label matches used for scoring

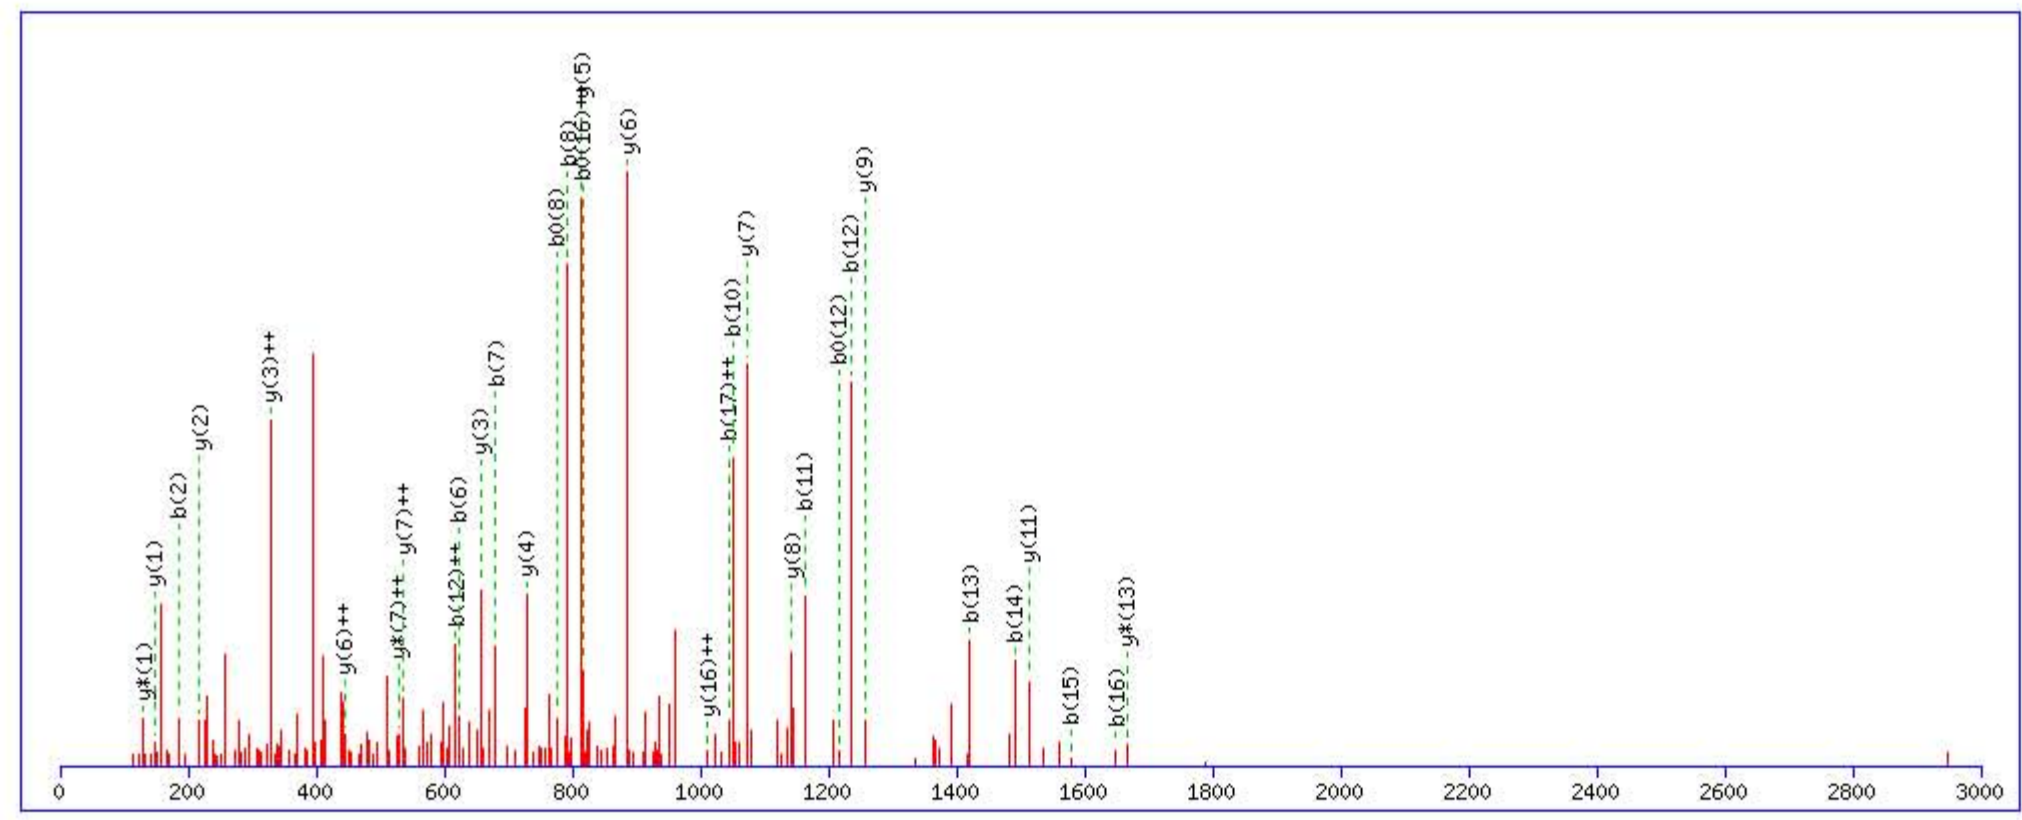

Monoisotopic mass of neutral peptide Mr(calc): 2305.207504  
 Fixed modifications: Carbamidomethyl (C) (apply to specified residues or termini only)  
 Variable modifications:  
 Q17 : Biotin:Thermo-21345 (Q)  
 Ions Score: 49 Expect: 4.9e-005  
 Matches : 33/170 fragment ions using 77 most intense peaks [\(help\)](#)

| #  | b                  | b <sup>++</sup>    | b <sup>*</sup> | b <sup>*++</sup> | b <sup>0</sup>     | b <sup>0++</sup>  | Seq. | y                  | y <sup>++</sup>    | y <sup>*</sup>     | y <sup>*++</sup>  | y <sup>0</sup> | y <sup>0++</sup> | #  |
|----|--------------------|--------------------|----------------|------------------|--------------------|-------------------|------|--------------------|--------------------|--------------------|-------------------|----------------|------------------|----|
| 1  | 114.091340         | 57.549308          |                |                  |                    |                   | L    |                    |                    |                    |                   |                |                  | 19 |
| 2  | <b>185.128454</b>  | 93.067865          |                |                  |                    |                   | A    | 2193.130730        | 1097.069003        | 2176.104181        | 1088.555728       | 2175.120165    | 1088.063720      | 18 |
| 3  | 284.196868         | 142.602072         |                |                  |                    |                   | V    | 2122.093616        | 1061.550446        | 2105.067067        | 1053.037171       | 2104.083051    | 1052.545163      | 17 |
| 4  | 385.244547         | 193.125912         |                |                  | 367.233982         | 184.120629        | T    | 2023.025202        | <b>1012.016239</b> | 2005.998653        | 1003.502965       | 2005.014637    | 1003.010957      | 16 |
| 5  | 486.292226         | 243.649751         |                |                  | 468.281661         | 234.644469        | T    | 1921.977523        | 961.492400         | 1904.950974        | 952.979125        | 1903.966958    | 952.487117       | 15 |
| 6  | <b>623.351138</b>  | 312.179207         |                |                  | 605.340573         | 303.173925        | H    | 1820.929844        | 910.968560         | 1803.903295        | 902.455286        | 1802.919279    | 901.963278       | 14 |
| 7  | <b>680.372602</b>  | 340.689939         |                |                  | 662.362037         | 331.684657        | G    | 1683.870932        | 842.439104         | <b>1666.844383</b> | 833.925830        | 1665.860367    | 833.433822       | 13 |
| 8  | <b>793.456666</b>  | 397.231971         |                |                  | <b>775.446101</b>  | 388.226689        | L    | 1626.849468        | 813.928372         | 1609.822919        | 805.415098        | 1608.838903    | 804.923090       | 12 |
| 9  | 890.509430         | 445.758353         |                |                  | 872.498865         | 436.753071        | P    | <b>1513.765404</b> | 757.386340         | 1496.738855        | 748.873066        | 1495.754839    | 748.381058       | 11 |
| 10 | <b>1050.540079</b> | 525.773678         |                |                  | 1032.529514        | 516.768395        | C    | 1416.712640        | 708.859958         | 1399.686091        | 700.346684        | 1398.702075    | 699.854675       | 10 |
| 11 | <b>1163.624143</b> | 582.315710         |                |                  | 1145.613578        | 573.310427        | L    | <b>1256.681991</b> | 628.844634         | 1239.655442        | 620.331359        | 1238.671426    | 619.839351       | 9  |
| 12 | <b>1234.661257</b> | <b>617.834267</b>  |                |                  | <b>1216.650692</b> | 608.828984        | A    | <b>1143.597927</b> | 572.302602         | 1126.571378        | 563.789327        | 1125.587362    | 563.297319       | 8  |
| 13 | <b>1420.740570</b> | 710.873923         |                |                  | 1402.730005        | 701.868640        | W    | <b>1072.560813</b> | <b>536.784045</b>  | 1055.534264        | <b>528.270770</b> | 1054.550248    | 527.778762       | 7  |
| 14 | <b>1491.777684</b> | 746.392480         |                |                  | 1473.767119        | 737.387197        | A    | <b>886.481500</b>  | <b>443.744388</b>  | 869.454951         | 435.231114        | 868.470935     | 434.739106       | 6  |
| 15 | <b>1578.809712</b> | 789.908494         |                |                  | 1560.799147        | 780.903212        | S    | <b>815.444386</b>  | 408.225831         | 798.417837         | 399.712557        | 797.433821     | 399.220549       | 5  |
| 16 | <b>1649.846826</b> | 825.427051         |                |                  | 1631.836261        | <b>816.421768</b> | A    | <b>728.412358</b>  | 364.709817         | 711.385809         | 356.196543        |                |                  | 4  |
| 17 | 2089.072152        | <b>1045.039714</b> | 2072.045603    | 1036.526439      | 2071.061587        | 1036.034431       | Q    | <b>657.375244</b>  | <b>329.191260</b>  | 640.348695         | 320.677986        |                |                  | 3  |
| 18 | 2160.109266        | 1080.558271        | 2143.082717    | 1072.044996      | 2142.098701        | 1071.552988       | A    | <b>218.149918</b>  | 109.578597         | 201.123369         | 101.065323        |                |                  | 2  |
| 19 |                    |                    |                |                  |                    |                   | K    | <b>147.112804</b>  | 74.060040          | <b>130.086255</b>  | 65.546765         |                |                  | 1  |

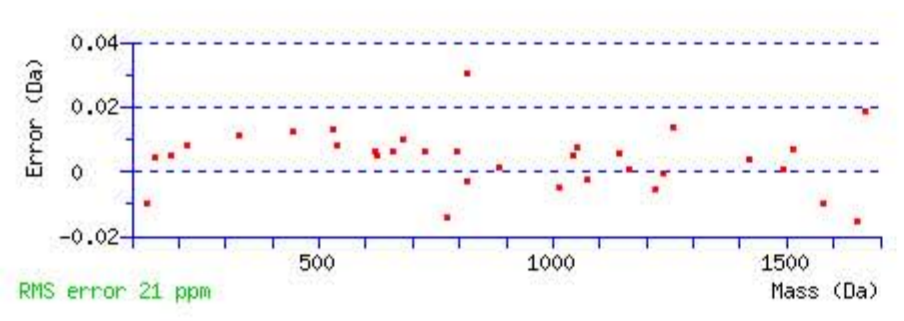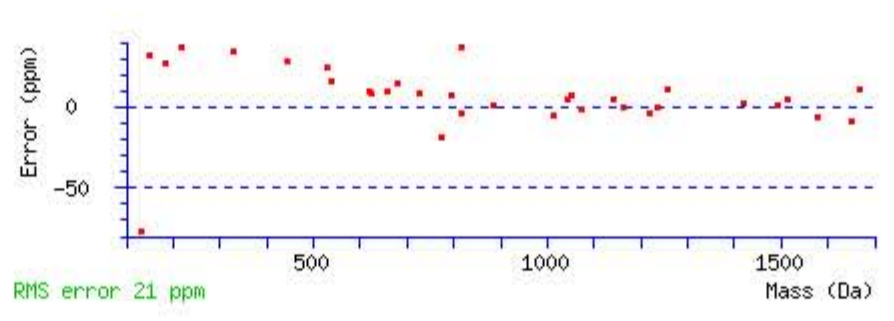

NCBI BLAST search of **LAVTTHGLPCLAWASAQAK**  
 (Parameters: blastp, nr protein database, expect=20000, no filter, PAM30)  
 Other BLAST [web gateways](#)

### All matches to this query

| Score | Mr(calc):   | Delta     | Sequence                            |
|-------|-------------|-----------|-------------------------------------|
| 48.6  | 2305.207504 | 0.004898  | <a href="#">LAVTTHGLPCLAWASAQAK</a> |
| 2.5   | 2305.189545 | 0.022857  | <a href="#">RSKSIRPPQSPQNC SR</a>   |
| 0.5   | 2305.236481 | -0.024079 | <a href="#">STLSQHLRIHTGKPYK</a>    |



# Mascot Search Results

## Peptide View

MS/MS Fragmentation of **SEGSSVNLSPPLEQCVDR**

Found in **THRB\_HUMAN**, Prothrombin OS=Homo sapiens GN=F2 PE=1 SV=2

Match to Query 49977: 2381.138052 from(794.719960,3+) rtinseconds(2178) index(52150)

Title: Locus:1.1.1.3401.20 File:"2013-07-02 CLN FXIII 30 min 3rd F 4.wiff"

Data file C:\Program Files (x86)\Matrix Science\Mascot Daemon\mgf3 FXIII 30 min 3rd\mascot\_daemon\_merge.mgf

Click mouse within plot area to zoom in by factor of two about that point

Or, Plot from 100 to 1700 Da Full range

Label all possible matches  Label matches used for scoring

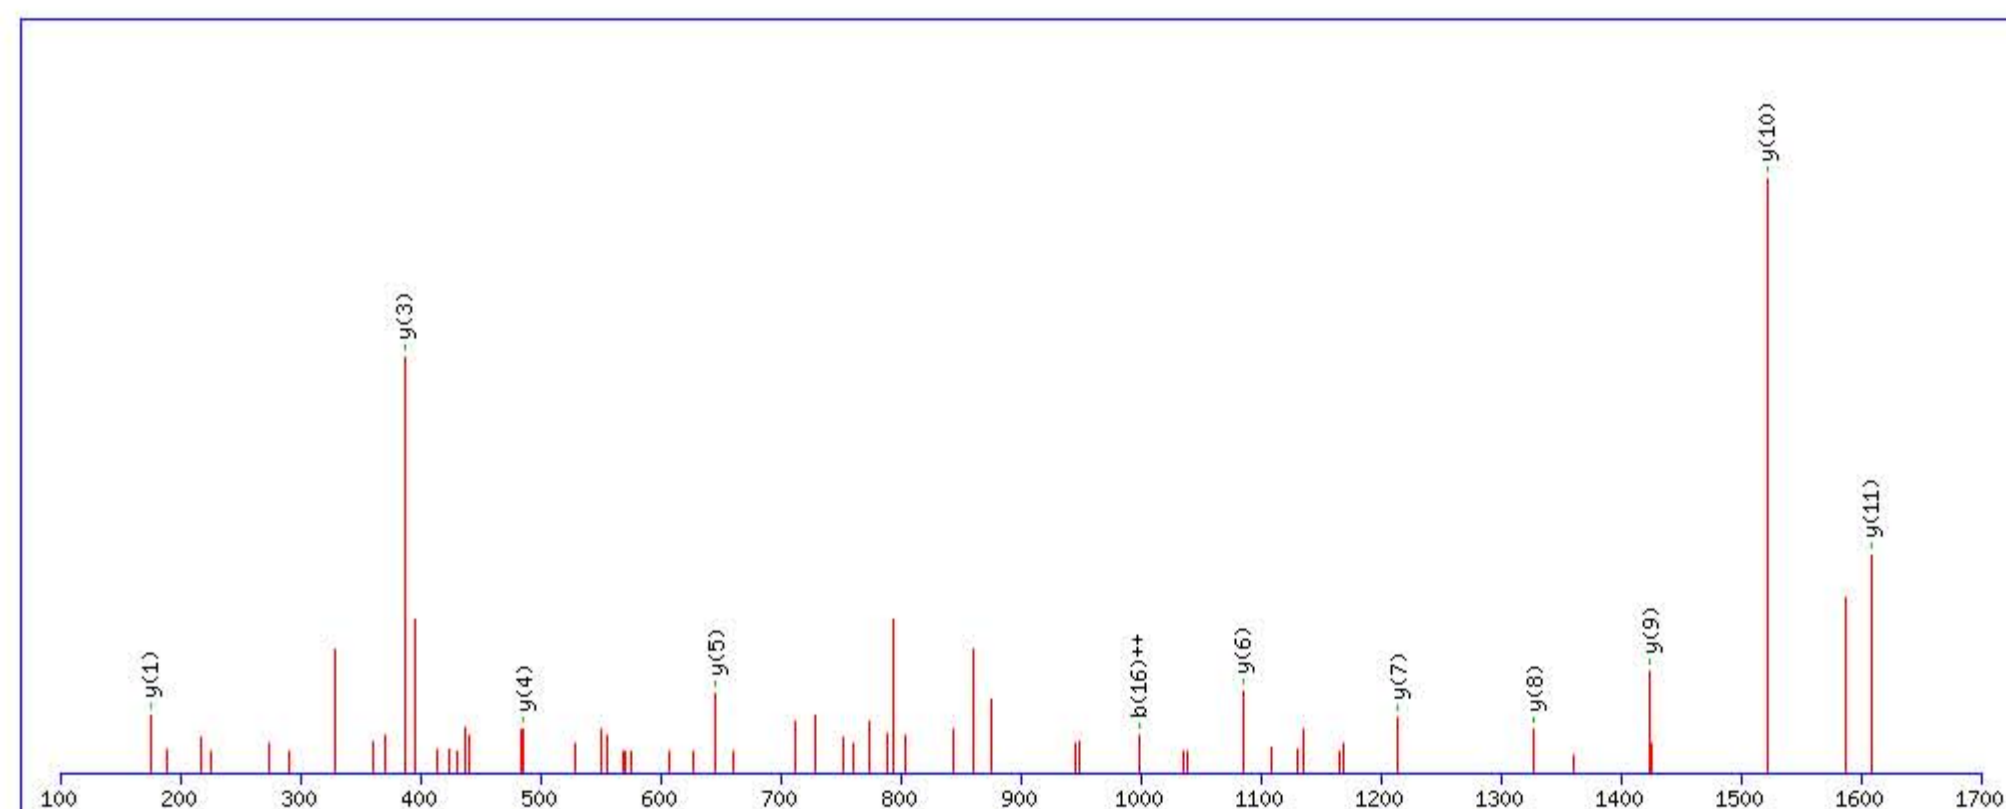

Monoisotopic mass of neutral peptide Mr(calc): 2381.135529

Fixed modifications: Carbamidomethyl (C) (apply to specified residues or termini only)

Variable modifications:

Q14 : Biotin:Thermo-21345 (Q)

Ions Score: 74 Expect: 1.5e-007

Matches : 11/202 fragment ions using 15 most intense peaks [\(help\)](#)

| #  | b           | b <sup>++</sup>   | b <sup>*</sup> | b <sup>*++</sup> | b <sup>0</sup> | b <sup>0++</sup> | Seq. | y                  | y <sup>++</sup> | y <sup>*</sup> | y <sup>*++</sup> | y <sup>0</sup> | y <sup>0++</sup> | #  |
|----|-------------|-------------------|----------------|------------------|----------------|------------------|------|--------------------|-----------------|----------------|------------------|----------------|------------------|----|
| 1  | 88.039304   | 44.523290         |                |                  | 70.028739      | 35.518008        | S    |                    |                 |                |                  |                |                  | 19 |
| 2  | 217.081897  | 109.044586        |                |                  | 199.071332     | 100.039304       | E    | 2295.110779        | 1148.059027     | 2278.084230    | 1139.545753      | 2277.100214    | 1139.053745      | 18 |
| 3  | 274.103361  | 137.555319        |                |                  | 256.092796     | 128.550036       | G    | 2166.068186        | 1083.537731     | 2149.041637    | 1075.024456      | 2148.057621    | 1074.532448      | 17 |
| 4  | 361.135389  | 181.071332        |                |                  | 343.124824     | 172.066050       | S    | 2109.046722        | 1055.026999     | 2092.020173    | 1046.513724      | 2091.036157    | 1046.021716      | 16 |
| 5  | 448.167417  | 224.587346        |                |                  | 430.156852     | 215.582064       | S    | 2022.014694        | 1011.510985     | 2004.988145    | 1002.997711      | 2004.004129    | 1002.505703      | 15 |
| 6  | 547.235831  | 274.121554        |                |                  | 529.225266     | 265.116271       | V    | 1934.982666        | 967.994971      | 1917.956117    | 959.481697       | 1916.972101    | 958.989689       | 14 |
| 7  | 661.278758  | 331.143017        | 644.252209     | 322.629742       | 643.268193     | 322.137734       | N    | 1835.914252        | 918.460764      | 1818.887703    | 909.947490       | 1817.903687    | 909.455482       | 13 |
| 8  | 774.362822  | 387.685049        | 757.336273     | 379.171774       | 756.352257     | 378.679766       | L    | 1721.871325        | 861.439301      | 1704.844776    | 852.926026       | 1703.860760    | 852.434018       | 12 |
| 9  | 861.394850  | 431.201063        | 844.368301     | 422.687788       | 843.384285     | 422.195780       | S    | <b>1608.787261</b> | 804.897269      | 1591.760712    | 796.383994       | 1590.776696    | 795.891986       | 11 |
| 10 | 958.447614  | 479.727445        | 941.421065     | 471.214170       | 940.437049     | 470.722162       | P    | <b>1521.755233</b> | 761.381255      | 1504.728684    | 752.867980       | 1503.744668    | 752.375972       | 10 |
| 11 | 1055.500378 | 528.253827        | 1038.473829    | 519.740553       | 1037.489813    | 519.248544       | P    | <b>1424.702469</b> | 712.854873      | 1407.675920    | 704.341598       | 1406.691904    | 703.849590       | 9  |
| 12 | 1168.584442 | 584.795859        | 1151.557893    | 576.282584       | 1150.573877    | 575.790576       | L    | <b>1327.649705</b> | 664.328491      | 1310.623156    | 655.815216       | 1309.639140    | 655.323208       | 8  |
| 13 | 1297.627035 | 649.317155        | 1280.600486    | 640.803881       | 1279.616470    | 640.311873       | E    | <b>1214.565641</b> | 607.786459      | 1197.539092    | 599.273184       | 1196.555076    | 598.781176       | 7  |
| 14 | 1736.852361 | 868.929819        | 1719.825812    | 860.416544       | 1718.841796    | 859.924536       | Q    | <b>1085.523048</b> | 543.265162      | 1068.496499    | 534.751888       | 1067.512483    | 534.259880       | 6  |
| 15 | 1896.883010 | 948.945143        | 1879.856461    | 940.431869       | 1878.872445    | 939.939861       | C    | <b>646.297722</b>  | 323.652499      | 629.271173     | 315.139225       | 628.287157     | 314.647217       | 5  |
| 16 | 1995.951424 | <b>998.479350</b> | 1978.924875    | 989.966076       | 1977.940859    | 989.474068       | V    | <b>486.267073</b>  | 243.637174      | 469.240524     | 235.123900       | 468.256508     | 234.631892       | 4  |
| 17 | 2093.004188 | 1047.005732       | 2075.977639    | 1038.492457      | 2074.993623    | 1038.000449      | P    | <b>387.198659</b>  | 194.102967      | 370.172110     | 185.589693       | 369.188094     | 185.097685       | 3  |
| 18 | 2208.031131 | 1104.519203       | 2191.004582    | 1096.005929      | 2190.020566    | 1095.513921      | D    | 290.145895         | 145.576585      | 273.119346     | 137.063311       | 272.135330     | 136.571303       | 2  |
| 19 |             |                   |                |                  |                |                  | R    | <b>175.118952</b>  | 88.063114       | 158.092403     | 79.549839        |                |                  | 1  |

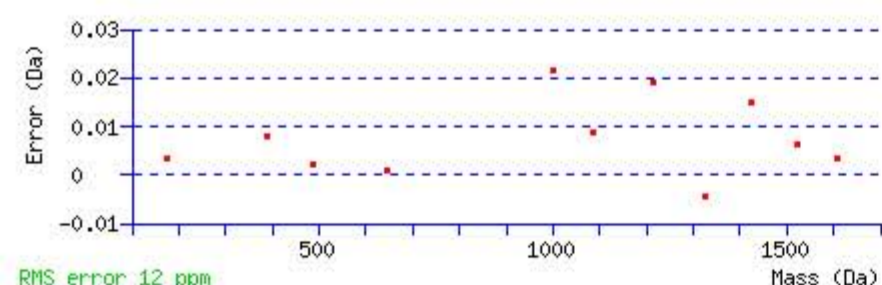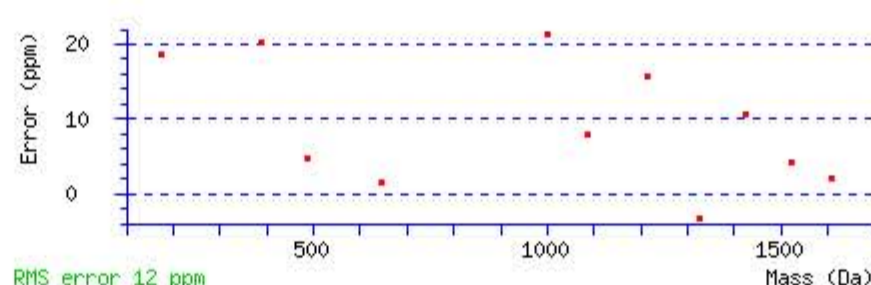

NCBI BLAST search of [SEGSSVNLSPPLEQCVDR](#)

(Parameters: blastp, nr protein database, expect=20000, no filter, PAM30)

Other BLAST [web gateways](#)

All matches to this query

| Score | Mr(calc):   | Delta     | Sequence                              |
|-------|-------------|-----------|---------------------------------------|
| 73.9  | 2381.135529 | 0.002523  | <a href="#">SEGSSVNLSPPLEQCVDR</a>    |
| 0.9   | 2381.160675 | -0.022623 | <a href="#">IPSTVEFCSTPAEKMAETVLR</a> |



# MASCOT Search Results

## Peptide View

MS/MS Fragmentation of **GQPSVLQVVNLPIVERPVCK**

Found in **THRB\_HUMAN**, Prothrombin OS=Homo sapiens GN=F2 PE=1 SV=2

Match to Query 53001: 2542.412052 from(848.477960,3+) rtinseconds(2549) index(53801)

Title: Locus:1.1.1.3530.6 File:"2013-07-02 CLN FXIII 30 min 3rd F 4.wiff"

Data file C:\Program Files (x86)\Matrix Science\Mascot Daemon\mgf3 FXIII 30 min 3rd\mascot\_daemon\_merge.mgf

Click mouse within plot area to zoom in by factor of two about that point

Or, Plot from  to  Da

Label all possible matches  Label matches used for scoring

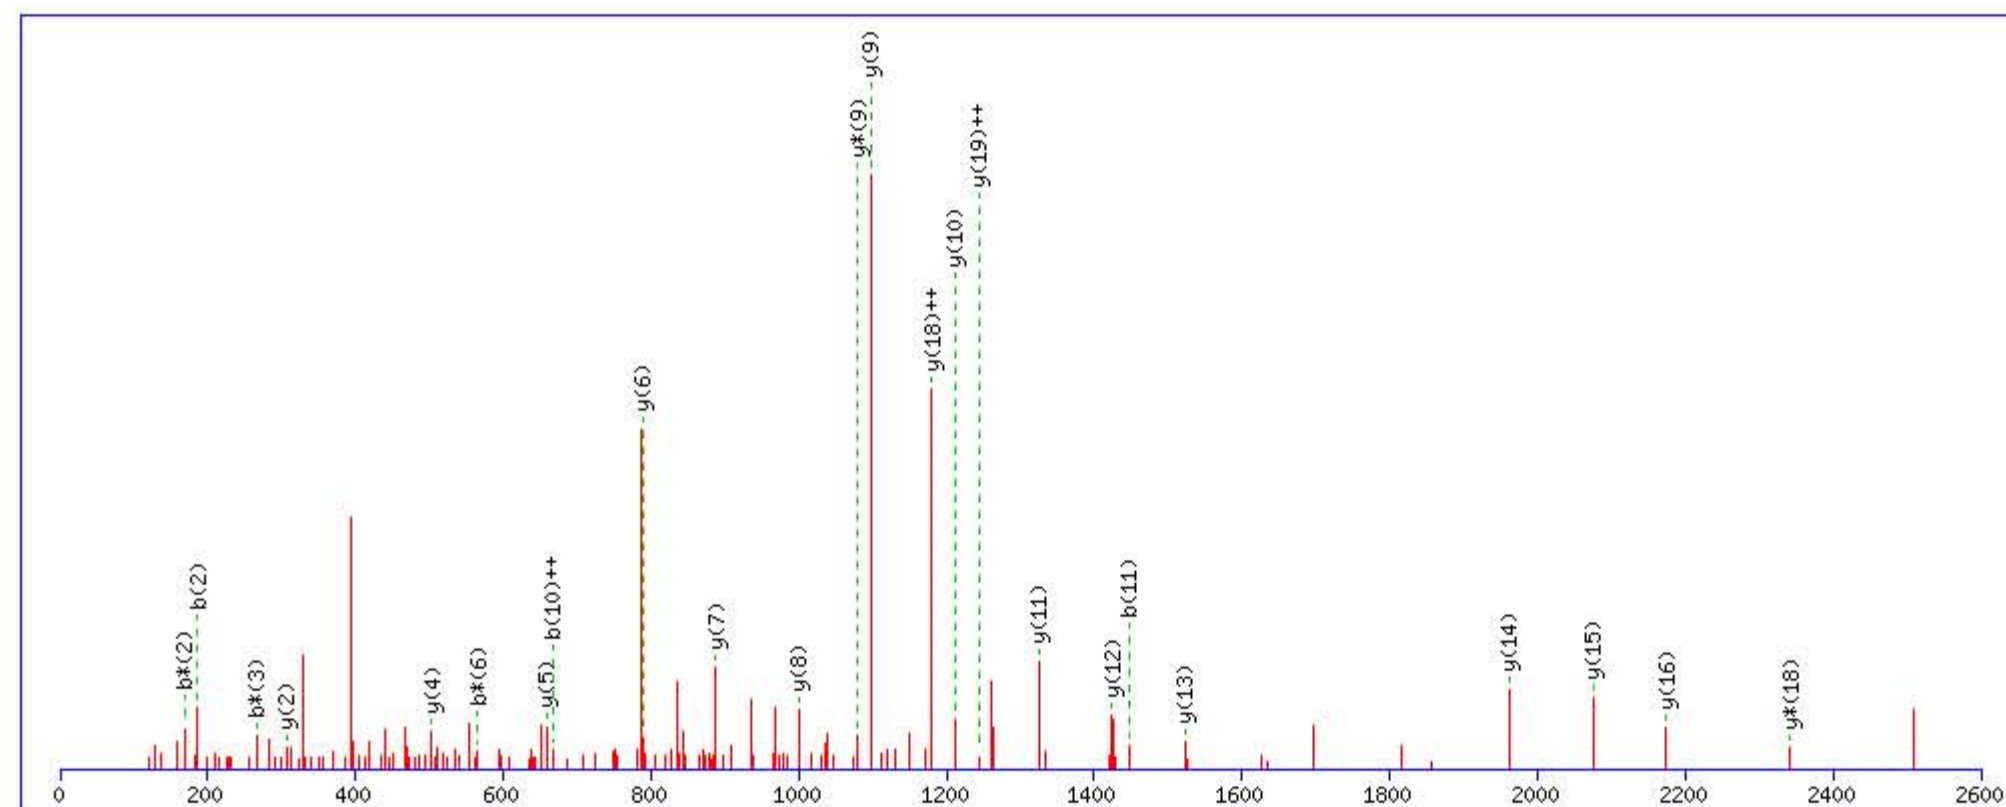

Monoisotopic mass of neutral peptide Mr(calc): 2542.412766

Fixed modifications: Carbamidomethyl (C) (apply to specified residues or termini only)

Variable modifications:

Q7 : Biotin:Thermo-21345 (Q)

Ions Score: 58 Expect: 1.6e-005

Matches : 24/210 fragment ions using 69 most intense peaks [\(help\)](#)

| #  | b                  | b <sup>++</sup>   | b <sup>*</sup>    | b <sup>*++</sup> | b <sup>0</sup> | b <sup>0++</sup> | Seq. | y                  | y <sup>++</sup>    | y <sup>*</sup>     | y <sup>*++</sup> | y <sup>0</sup> | y <sup>0++</sup> | #  |
|----|--------------------|-------------------|-------------------|------------------|----------------|------------------|------|--------------------|--------------------|--------------------|------------------|----------------|------------------|----|
| 1  | 58.028740          | 29.518008         |                   |                  |                |                  | G    |                    |                    |                    |                  |                |                  | 20 |
| 2  | <b>186.087318</b>  | 93.547297         | <b>169.060769</b> | 85.034023        |                |                  | Q    | 2486.398570        | <b>1243.702923</b> | 2469.372021        | 1235.189648      | 2468.388005    | 1234.697640      | 19 |
| 3  | 283.140082         | 142.073679        | <b>266.113533</b> | 133.560405       |                |                  | P    | 2358.339992        | <b>1179.673634</b> | <b>2341.313443</b> | 1171.160359      | 2340.329427    | 1170.668351      | 18 |
| 4  | 370.172110         | 185.589693        | 353.145561        | 177.076419       | 352.161545     | 176.584411       | S    | 2261.287228        | 1131.147252        | 2244.260679        | 1122.633977      | 2243.276663    | 1122.141969      | 17 |
| 5  | 469.240524         | 235.123900        | 452.213975        | 226.610626       | 451.229959     | 226.118618       | V    | <b>2174.255200</b> | 1087.631238        | 2157.228651        | 1079.117963      | 2156.244635    | 1078.625955      | 16 |
| 6  | 582.324588         | 291.665932        | <b>565.298039</b> | 283.152658       | 564.314023     | 282.660650       | L    | <b>2075.186786</b> | 1038.097031        | 2058.160237        | 1029.583756      | 2057.176221    | 1029.091748      | 15 |
| 7  | 1021.549914        | 511.278595        | 1004.523365       | 502.765321       | 1003.539349    | 502.273313       | Q    | <b>1962.102722</b> | 981.554999         | 1945.076173        | 973.041724       | 1944.092157    | 972.549716       | 14 |
| 8  | 1120.618328        | 560.812802        | 1103.591779       | 552.299528       | 1102.607763    | 551.807520       | V    | <b>1522.877396</b> | 761.942336         | 1505.850847        | 753.429061       | 1504.866831    | 752.937053       | 13 |
| 9  | 1219.686742        | 610.347009        | 1202.660193       | 601.833735       | 1201.676177    | 601.341727       | V    | <b>1423.808982</b> | 712.408129         | 1406.782433        | 703.894854       | 1405.798417    | 703.402846       | 12 |
| 10 | 1333.729669        | <b>667.368473</b> | 1316.703120       | 658.855198       | 1315.719104    | 658.363190       | N    | <b>1324.740568</b> | 662.873922         | 1307.714019        | 654.360647       | 1306.730003    | 653.868639       | 11 |
| 11 | <b>1446.813733</b> | 723.910505        | 1429.787184       | 715.397230       | 1428.803168    | 714.905222       | L    | <b>1210.697641</b> | 605.852458         | 1193.671092        | 597.339184       | 1192.687076    | 596.847176       | 10 |
| 12 | 1543.866497        | 772.436887        | 1526.839948       | 763.923612       | 1525.855932    | 763.431604       | P    | <b>1097.613577</b> | 549.310426         | <b>1080.587028</b> | 540.797152       | 1079.603012    | 540.305144       | 9  |
| 13 | 1656.950561        | 828.978918        | 1639.924012       | 820.465644       | 1638.939996    | 819.973636       | I    | <b>1000.560813</b> | 500.784044         | 983.534264         | 492.270770       | 982.550248     | 491.778762       | 8  |
| 14 | 1756.018975        | 878.513126        | 1738.992426       | 869.999851       | 1738.008410    | 869.507843       | V    | <b>887.476749</b>  | 444.242012         | 870.450200         | 435.728738       | 869.466184     | 435.236730       | 7  |
| 15 | 1885.061568        | 943.034422        | 1868.035019       | 934.521147       | 1867.051003    | 934.029139       | E    | <b>788.408335</b>  | 394.707805         | 771.381786         | 386.194531       | 770.397770     | 385.702523       | 6  |
| 16 | 2041.162679        | 1021.084977       | 2024.136130       | 1012.571703      | 2023.152114    | 1012.079695      | R    | <b>659.365742</b>  | 330.186509         | 642.339193         | 321.673234       |                |                  | 5  |
| 17 | 2138.215443        | 1069.611359       | 2121.188894       | 1061.098085      | 2120.204878    | 1060.606077      | P    | <b>503.264631</b>  | 252.135953         | 486.238082         | 243.622679       |                |                  | 4  |
| 18 | 2237.283857        | 1119.145566       | 2220.257308       | 1110.632292      | 2219.273292    | 1110.140284      | V    | 406.211867         | 203.609571         | 389.185318         | 195.096297       |                |                  | 3  |
| 19 | 2397.314506        | 1199.160891       | 2380.287957       | 1190.647616      | 2379.303941    | 1190.155608      | C    | <b>307.143453</b>  | 154.075364         | 290.116904         | 145.562090       |                |                  | 2  |
| 20 |                    |                   |                   |                  |                |                  | K    | 147.112804         | 74.060040          | 130.086255         | 65.546765        |                |                  | 1  |

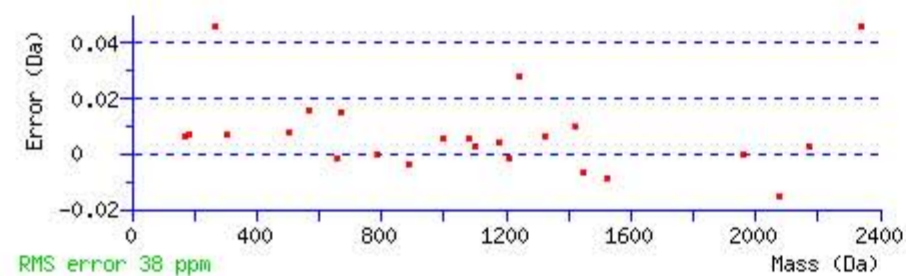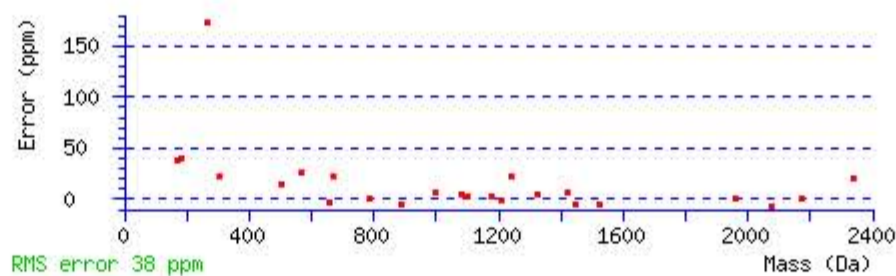

NCBI BLAST search of **GQPSVLQVVNLPIVERPVCK**

(Parameters: blastp, nr protein database, expect=20000, no filter, PAM30)

Other BLAST [web gateways](#)

All matches to this query

| Score | Mr(calc):   | Delta     | Sequence                             |
|-------|-------------|-----------|--------------------------------------|
| 57.9  | 2542.412766 | -0.000714 | <a href="#">GQPSVLQVVNLPIVERPVCK</a> |
| 19.8  | 2542.412766 | -0.000714 | <a href="#">GQPSVLQVVNLPIVERPVCK</a> |

Mascot: <http://www.matrixscience.com/>



**Mascot Search Results**

**Peptide View**

MS/MS Fragmentation of **RQECSIPVCGQDQVTAMTPR**  
 Found in **THRB\_HUMAN**, Prothrombin OS=Homo sapiens GN=F2 PE=1 SV=2

Match to Query 54575: 2742.295722 from(915.105850,3+) rtinseconds(1994) index(51148)  
 Title: Locus:1.1.1.3337.24 File:"2013-07-02 CLN FXIII 30 min 3rd F 4.wiff"  
 Data file C:\Program Files (x86)\Matrix Science\Mascot Daemon\mgf\3 FXIII 30 min 3rd\mascot\_daemon\_merge.mgf

Click mouse within plot area to zoom in by factor of two about that point  
 Or, Plot from  to  Da   
 Label all possible matches  Label matches used for scoring

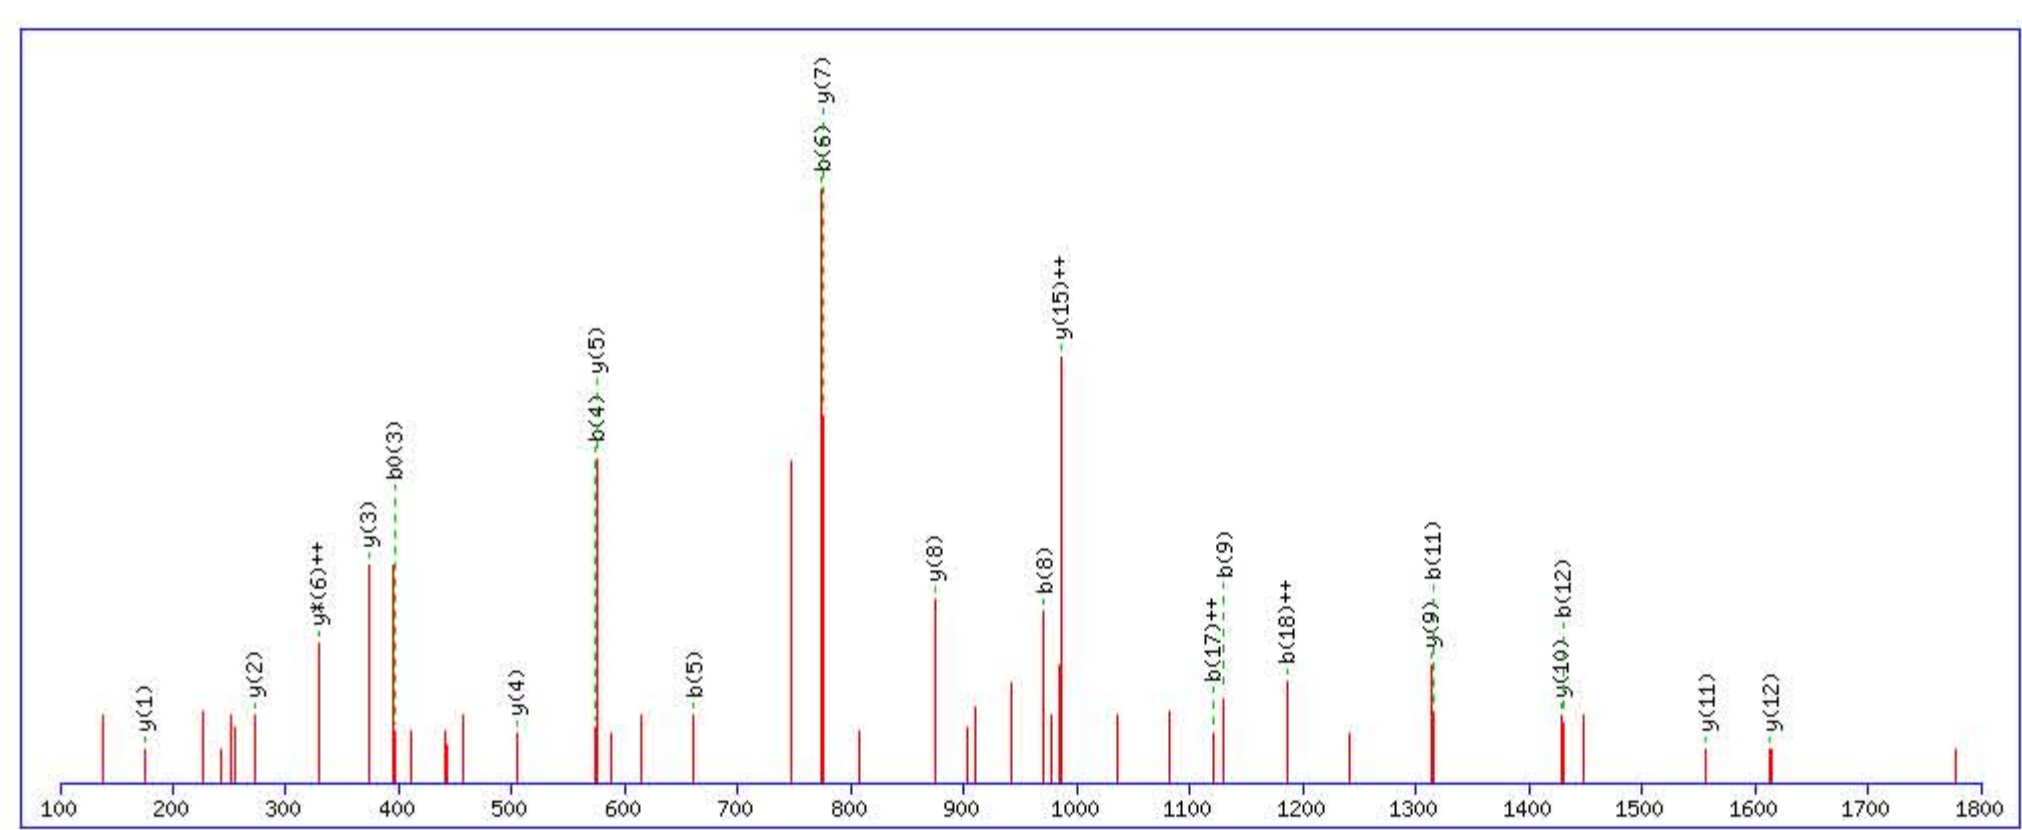

Monoisotopic mass of neutral peptide Mr(calc): 2742.307404  
 Fixed modifications: Carbamidomethyl (C) (apply to specified residues or termini only)  
 Variable modifications:  
 Q13 : Biotin:Thermo-21345 (Q)  
 Ions Score: 66 Expect: 9e-007  
 Matches : 23/232 fragment ions using 40 most intense peaks [\(help\)](#)

| #  | b           | b <sup>++</sup> | b <sup>*</sup> | b <sup>*++</sup> | b <sup>0</sup> | b <sup>0++</sup> | Seq. | y           | y <sup>++</sup> | y <sup>*</sup> | y <sup>*++</sup> | y <sup>0</sup> | y <sup>0++</sup> | #  |
|----|-------------|-----------------|----------------|------------------|----------------|------------------|------|-------------|-----------------|----------------|------------------|----------------|------------------|----|
| 1  | 157.108387  | 79.057831       | 140.081838     | 70.544557        |                |                  | R    |             |                 |                |                  |                |                  | 21 |
| 2  | 285.166965  | 143.087121      | 268.140416     | 134.573846       |                |                  | Q    | 2587.213551 | 1294.110413     | 2570.187002    | 1285.597139      | 2569.202986    | 1285.105131      | 20 |
| 3  | 414.209558  | 207.608417      | 397.183009     | 199.095143       | 396.198993     | 198.603135       | E    | 2459.154973 | 1230.081124     | 2442.128424    | 1221.567850      | 2441.144408    | 1221.075842      | 19 |
| 4  | 574.240207  | 287.623742      | 557.213658     | 279.110467       | 556.229642     | 278.618459       | C    | 2330.112380 | 1165.559828     | 2313.085831    | 1157.046553      | 2312.101815    | 1156.554545      | 18 |
| 5  | 661.272235  | 331.139756      | 644.245686     | 322.626481       | 643.261670     | 322.134473       | S    | 2170.081731 | 1085.544503     | 2153.055182    | 1077.031229      | 2152.071166    | 1076.539221      | 17 |
| 6  | 774.356299  | 387.681788      | 757.329750     | 379.168513       | 756.345734     | 378.676505       | I    | 2083.049703 | 1042.028489     | 2066.023154    | 1033.515215      | 2065.039138    | 1033.023207      | 16 |
| 7  | 871.409063  | 436.208170      | 854.382514     | 427.694895       | 853.398498     | 427.202887       | P    | 1969.965639 | 985.486458      | 1952.939090    | 976.973183       | 1951.955074    | 976.481175       | 15 |
| 8  | 970.477477  | 485.742377      | 953.450928     | 477.229102       | 952.466912     | 476.737094       | V    | 1872.912875 | 936.960076      | 1855.886326    | 928.446801       | 1854.902310    | 927.954793       | 14 |
| 9  | 1130.508126 | 565.757701      | 1113.481577    | 557.244427       | 1112.497561    | 556.752418       | C    | 1773.844461 | 887.425868      | 1756.817912    | 878.912594       | 1755.833896    | 878.420586       | 13 |
| 10 | 1187.529590 | 594.268433      | 1170.503041    | 585.755158       | 1169.519025    | 585.263150       | G    | 1613.813812 | 807.410544      | 1596.787263    | 798.897270       | 1595.803247    | 798.405262       | 12 |
| 11 | 1315.588168 | 658.297722      | 1298.561619    | 649.784448       | 1297.577603    | 649.292440       | Q    | 1556.792348 | 778.899812      | 1539.765799    | 770.386538       | 1538.781783    | 769.894530       | 11 |
| 12 | 1430.615111 | 715.811194      | 1413.588562    | 707.297919       | 1412.604546    | 706.805911       | D    | 1428.733770 | 714.870523      | 1411.707221    | 706.357249       | 1410.723205    | 705.865241       | 10 |
| 13 | 1869.840437 | 935.423857      | 1852.813888    | 926.910582       | 1851.829872    | 926.418574       | Q    | 1313.706827 | 657.357052      | 1296.680278    | 648.843777       | 1295.696262    | 648.351769       | 9  |
| 14 | 1968.908851 | 984.958064      | 1951.882302    | 976.444789       | 1950.898286    | 975.952781       | V    | 874.481501  | 437.744389      | 857.454952     | 429.231114       | 856.470936     | 428.739106       | 8  |
| 15 | 2069.956530 | 1035.481903     | 2052.929981    | 1026.968628      | 2051.945965    | 1026.476620      | T    | 775.413087  | 388.210181      | 758.386538     | 379.696907       | 757.402522     | 379.204899       | 7  |
| 16 | 2169.024944 | 1085.016110     | 2151.998395    | 1076.502835      | 2151.014379    | 1076.010827      | V    | 674.365408  | 337.686342      | 657.338859     | 329.173067       | 656.354843     | 328.681059       | 6  |
| 17 | 2240.062058 | 1120.534667     | 2223.035509    | 1112.021392      | 2222.051493    | 1111.529384      | A    | 575.296994  | 288.152135      | 558.270445     | 279.638861       | 557.286429     | 279.146853       | 5  |
| 18 | 2371.102543 | 1186.054909     | 2354.075994    | 1177.541635      | 2353.091978    | 1177.049627      | M    | 504.259880  | 252.633578      | 487.233331     | 244.120303       | 486.249315     | 243.628295       | 4  |
| 19 | 2472.150222 | 1236.578749     | 2455.123673    | 1228.065474      | 2454.139657    | 1227.573466      | T    | 373.219395  | 187.113335      | 356.192846     | 178.600061       | 355.208830     | 178.108053       | 3  |
| 20 | 2569.202986 | 1285.105131     | 2552.176437    | 1276.591856      | 2551.192421    | 1276.099848      | P    | 272.171716  | 136.589496      | 255.145167     | 128.076221       |                |                  | 2  |
| 21 |             |                 |                |                  |                |                  | R    | 175.118952  | 88.063114       | 158.092403     | 79.549839        |                |                  | 1  |

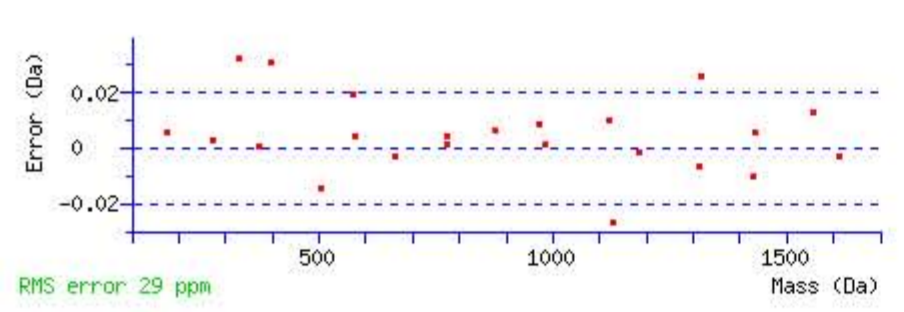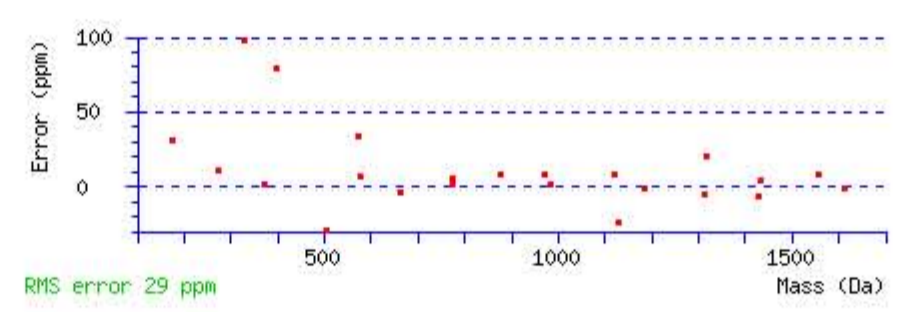

NCBI BLAST search of **RQECSIPVCGQDQVTAMTPR**  
 (Parameters: blastp, nr protein database, expect=20000, no filter, PAM30)  
 Other BLAST [web gateways](#)

**All matches to this query**

| Score | Mr(calc):   | Delta     | Sequence                                 |
|-------|-------------|-----------|------------------------------------------|
| 66.0  | 2742.307404 | -0.011682 | <a href="#">RQECSIPVCGQDQVTAMTPR</a>     |
| 43.0  | 2742.307404 | -0.011682 | <a href="#">RQECSIPVCGQDQVTAMTPR</a>     |
| 15.0  | 2742.307404 | -0.011682 | <a href="#">RQECSIPVCGQDQVTAMTPR</a>     |
| 1.5   | 2742.317032 | -0.021310 | <a href="#">TAEDDETPVDLNKHL YQIEKPKK</a> |



# MASCOT SCIENCE Mascot Search Results

## Peptide View

MS/MS Fragmentation of **HQTVPQNTGGK**

Found in **TRFE\_HUMAN**, Serotransferrin OS=Homo sapiens GN=TF PE=1 SV=3

Match to Query 30361: 1476.735148 from(739.374850,2+) rtinseconds(1196) index(59528)  
 Title: Locus:1.1.1.2895.13 File:"2013-07-02 CLN FXIII 30 min 3rd FT.wiff"

Data file C:\Program Files (x86)\Matrix Science\Mascot Daemon\mgf3 FXIII 30 min 3rd\mascot\_daemon\_merge.mgf

Click mouse within plot area to zoom in by factor of two about that point

Or, Plot from  to  Da

Label all possible matches  Label matches used for scoring

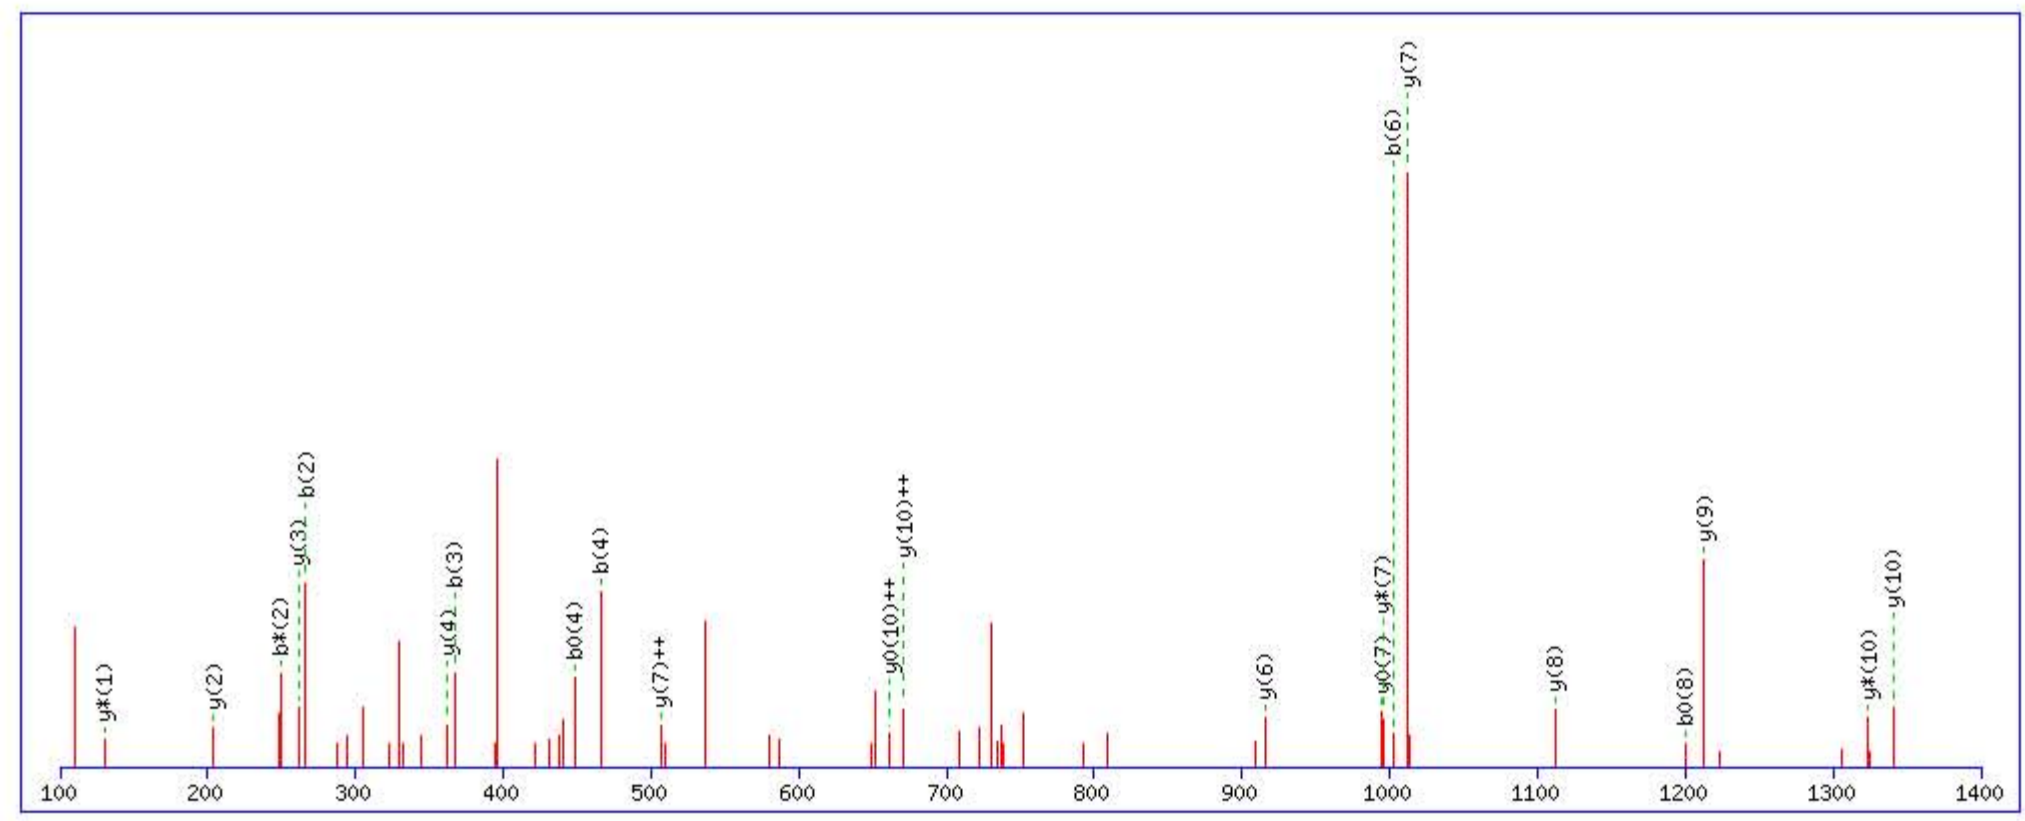

Monoisotopic mass of neutral peptide Mr(calc): 1476.750748

Fixed modifications: Carbamidomethyl (C) (apply to specified residues or termini only)

Variable modifications:

Q6 : Biotin:Thermo-21345 (Q)

Ions Score: 48 Expect: 0.00039

Matches : 22/108 fragment ions using 41 most intense peaks [\(help\)](#)

| #  | b                  | b <sup>++</sup> | b <sup>*</sup>    | b <sup>*++</sup> | b <sup>0</sup>     | b <sup>0++</sup> | Seq. | y                  | y <sup>++</sup>   | y <sup>*</sup>     | y <sup>*++</sup> | y <sup>0</sup>    | y <sup>0++</sup>  | #  |
|----|--------------------|-----------------|-------------------|------------------|--------------------|------------------|------|--------------------|-------------------|--------------------|------------------|-------------------|-------------------|----|
| 1  | 138.066188         | 69.536732       |                   |                  |                    |                  | H    |                    |                   |                    |                  |                   |                   | 11 |
| 2  | <b>266.124766</b>  | 133.566021      | <b>249.098217</b> | 125.052746       |                    |                  | Q    | <b>1340.699099</b> | <b>670.853187</b> | <b>1323.672550</b> | 662.339913       | 1322.688534       | <b>661.847905</b> | 10 |
| 3  | <b>367.172445</b>  | 184.089860      | 350.145896        | 175.576586       | 349.161880         | 175.084578       | T    | <b>1212.640521</b> | 606.823899        | 1195.613972        | 598.310624       | 1194.629956       | 597.818616        | 9  |
| 4  | <b>466.240859</b>  | 233.624068      | 449.214310        | 225.110793       | <b>448.230294</b>  | 224.618785       | V    | <b>1111.592842</b> | 556.300059        | 1094.566293        | 547.786784       | 1093.582277       | 547.294776        | 8  |
| 5  | 563.293623         | 282.150450      | 546.267074        | 273.637175       | 545.283058         | 273.145167       | P    | <b>1012.524428</b> | <b>506.765852</b> | <b>995.497879</b>  | 498.252577       | <b>994.513863</b> | 497.760569        | 7  |
| 6  | <b>1002.518949</b> | 501.763113      | 985.492400        | 493.249838       | 984.508384         | 492.757830       | Q    | <b>915.471664</b>  | 458.239470        | 898.445115         | 449.726195       | 897.461099        | 449.234187        | 6  |
| 7  | 1116.561876        | 558.784576      | 1099.535327       | 550.271302       | 1098.551311        | 549.779293       | N    | 476.246338         | 238.626807        | 459.219789         | 230.113532       | 458.235773        | 229.621524        | 5  |
| 8  | 1217.609555        | 609.308416      | 1200.583006       | 600.795141       | <b>1199.598990</b> | 600.303133       | T    | <b>362.203411</b>  | 181.605343        | 345.176862         | 173.092069       | 344.192846        | 172.600061        | 4  |
| 9  | 1274.631019        | 637.819147      | 1257.604470       | 629.305873       | 1256.620454        | 628.813865       | G    | <b>261.155732</b>  | 131.081504        | 244.129183         | 122.568229       |                   |                   | 3  |
| 10 | 1331.652483        | 666.329879      | 1314.625934       | 657.816605       | 1313.641918        | 657.324597       | G    | <b>204.134268</b>  | 102.570772        | 187.107719         | 94.057497        |                   |                   | 2  |
| 11 |                    |                 |                   |                  |                    |                  | K    | 147.112804         | 74.060040         | <b>130.086255</b>  | 65.546765        |                   |                   | 1  |

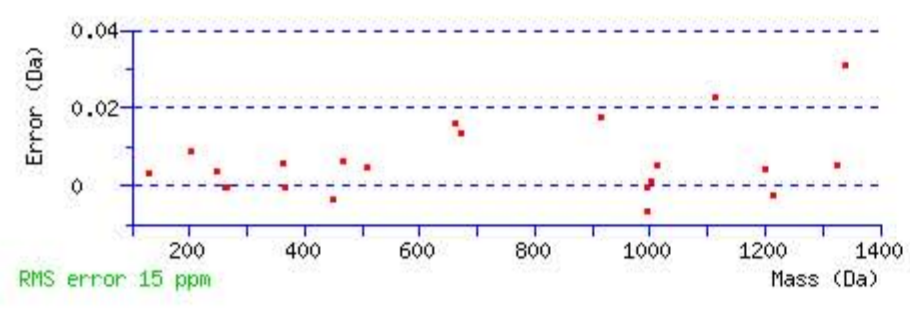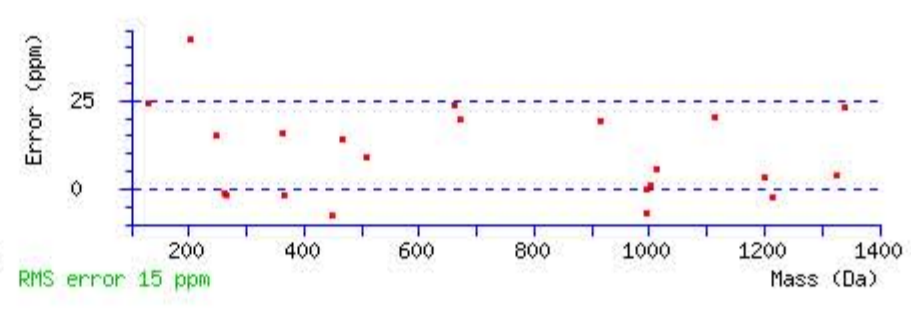

NCBI BLAST search of **HQTVPQNTGGK**

(Parameters: blastp, nr protein database, expect=20000, no filter, PAM30)

Other BLAST [web gateways](#)

### All matches to this query

| Score | Mr(calc):   | Delta     | Sequence                      |
|-------|-------------|-----------|-------------------------------|
| 47.8  | 1476.750748 | -0.015600 | <a href="#">HQTVPQNTGGK</a>   |
| 25.1  | 1476.736115 | -0.000967 | <a href="#">HQEALIGQSFYGK</a> |
| 6.9   | 1476.739487 | -0.004339 | <a href="#">GPEVMAFIEQGKR</a> |
| 1.5   | 1476.750748 | -0.015600 | <a href="#">HQTVPQNTGGK</a>   |



# MASCOT Search Results

## Peptide View

MS/MS Fragmentation of **DSGFQMNQLR**

Found in **TRFE\_HUMAN**, Serotransferrin OS=Homo sapiens GN=TF PE=1 SV=3

Match to Query 31077: 1505.699328 from(753.856940,2+) rtinseconds(2074) index(64289)

Title: Locus:1.1.1.3201.13 File:"2013-07-02 CLN FXIII 30 min 3rd FT.wiff"

Data file C:\Program Files (x86)\Matrix Science\Mascot Daemon\mgf\3 FXIII 30 min 3rd\mascot\_daemon\_merge.mgf

Click mouse within plot area to zoom in by factor of two about that point

Or, Plot from  to  Da

Label all possible matches  Label matches used for scoring

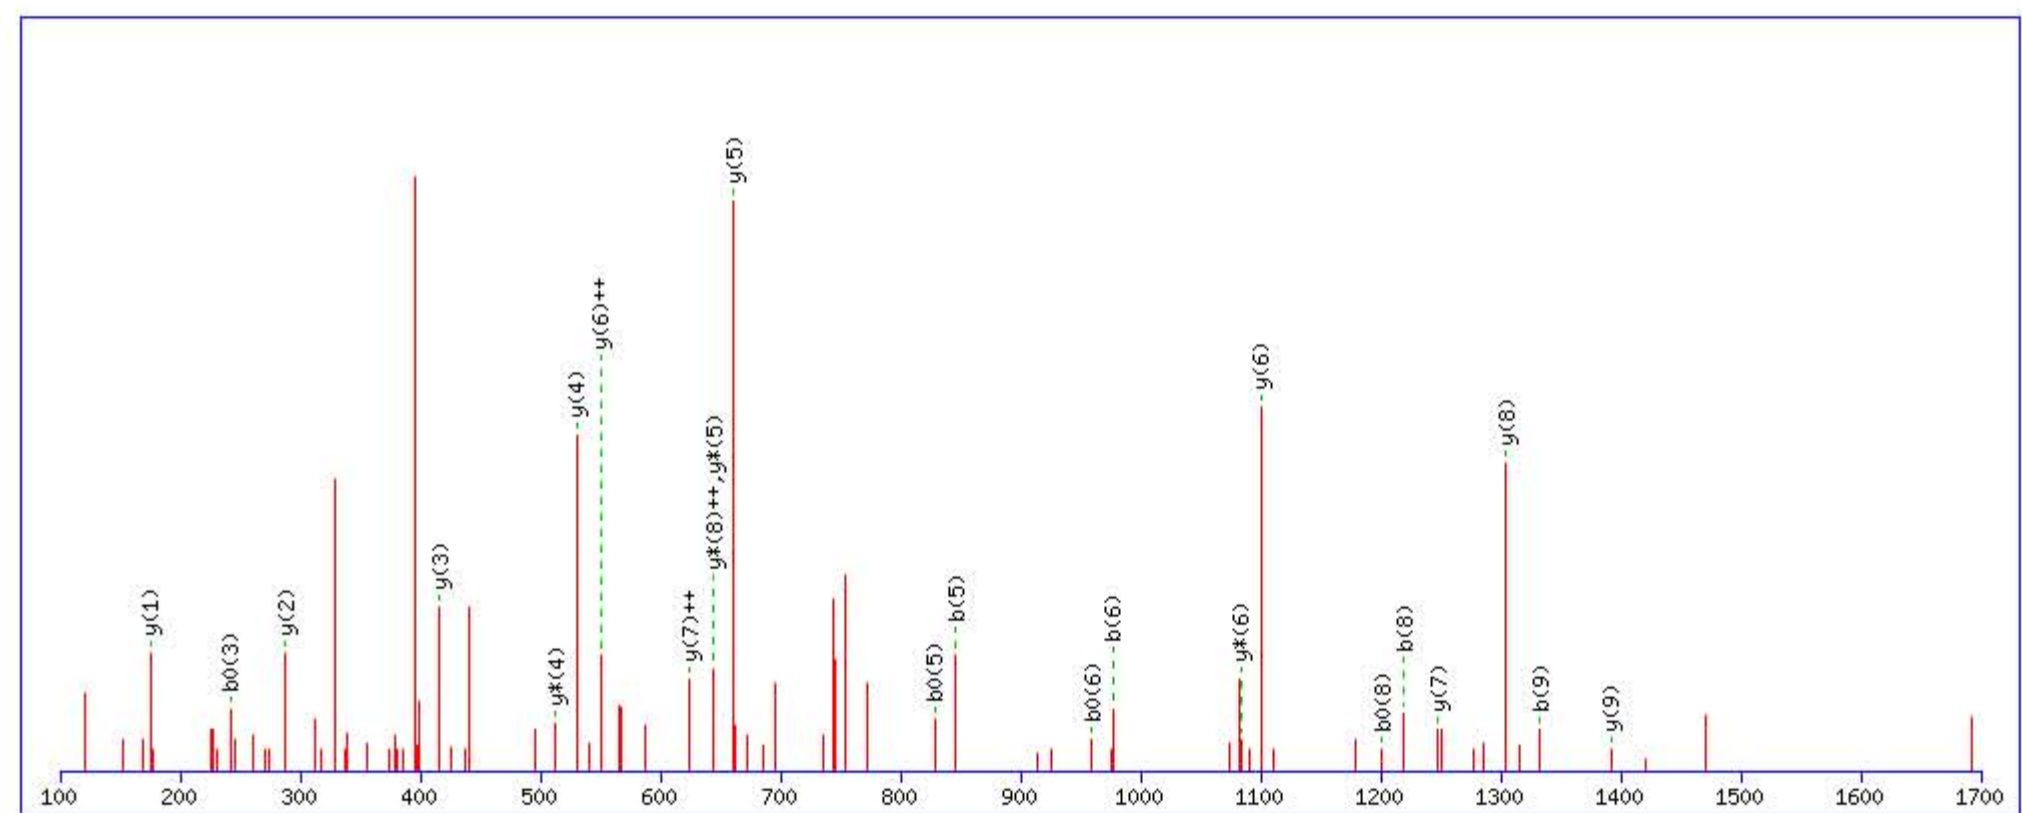

Monoisotopic mass of neutral peptide Mr(calc): 1505.711899

Fixed modifications: Carbamidomethyl (C) (apply to specified residues or termini only)

Variable modifications:

Q5 : Biotin:Thermo-21345 (Q)

Ions Score: 60 Expect: 1.2e-005

Matches : 23/84 fragment ions using 40 most intense peaks [\(help\)](#)

| #  | b                  | b <sup>++</sup> | b <sup>*</sup> | b <sup>*++</sup> | b <sup>0</sup>     | b <sup>0++</sup> | Seq. | y                  | y <sup>++</sup>   | y <sup>*</sup>     | y <sup>*++</sup>  | y <sup>0</sup> | y <sup>0++</sup> | #  |
|----|--------------------|-----------------|----------------|------------------|--------------------|------------------|------|--------------------|-------------------|--------------------|-------------------|----------------|------------------|----|
| 1  | 116.034219         | 58.520748       |                |                  | 98.023654          | 49.515465        | D    |                    |                   |                    |                   |                |                  | 10 |
| 2  | 203.066247         | 102.036761      |                |                  | 185.055682         | 93.031479        | S    | <b>1391.692238</b> | 696.349757        | 1374.665689        | 687.836482        | 1373.681673    | 687.344474       | 9  |
| 3  | 260.087711         | 130.547493      |                |                  | <b>242.077146</b>  | 121.542211       | G    | <b>1304.660210</b> | 652.833743        | 1287.633661        | <b>644.320469</b> |                |                  | 8  |
| 4  | 407.156125         | 204.081700      |                |                  | 389.145560         | 195.076418       | F    | <b>1247.638746</b> | <b>624.323011</b> | 1230.612197        | 615.809736        |                |                  | 7  |
| 5  | <b>846.381451</b>  | 423.694364      | 829.354902     | 415.181089       | <b>828.370886</b>  | 414.689081       | Q    | <b>1100.570332</b> | <b>550.788804</b> | <b>1083.543783</b> | 542.275530        |                |                  | 6  |
| 6  | <b>977.421936</b>  | 489.214606      | 960.395387     | 480.701331       | <b>959.411371</b>  | 480.209323       | M    | <b>661.345006</b>  | 331.176141        | <b>644.318457</b>  | 322.662867        |                |                  | 5  |
| 7  | 1091.464863        | 546.236069      | 1074.438314    | 537.722795       | 1073.454298        | 537.230787       | N    | <b>530.304521</b>  | 265.655899        | <b>513.277972</b>  | 257.142624        |                |                  | 4  |
| 8  | <b>1219.523441</b> | 610.265359      | 1202.496892    | 601.752084       | <b>1201.512876</b> | 601.260076       | Q    | <b>416.261594</b>  | 208.634435        | 399.235045         | 200.121160        |                |                  | 3  |
| 9  | <b>1332.607505</b> | 666.807391      | 1315.580956    | 658.294116       | 1314.596940        | 657.802108       | L    | <b>288.203016</b>  | 144.605146        | 271.176467         | 136.091871        |                |                  | 2  |
| 10 |                    |                 |                |                  |                    |                  | R    | <b>175.118952</b>  | 88.063114         | 158.092403         | 79.549839         |                |                  | 1  |

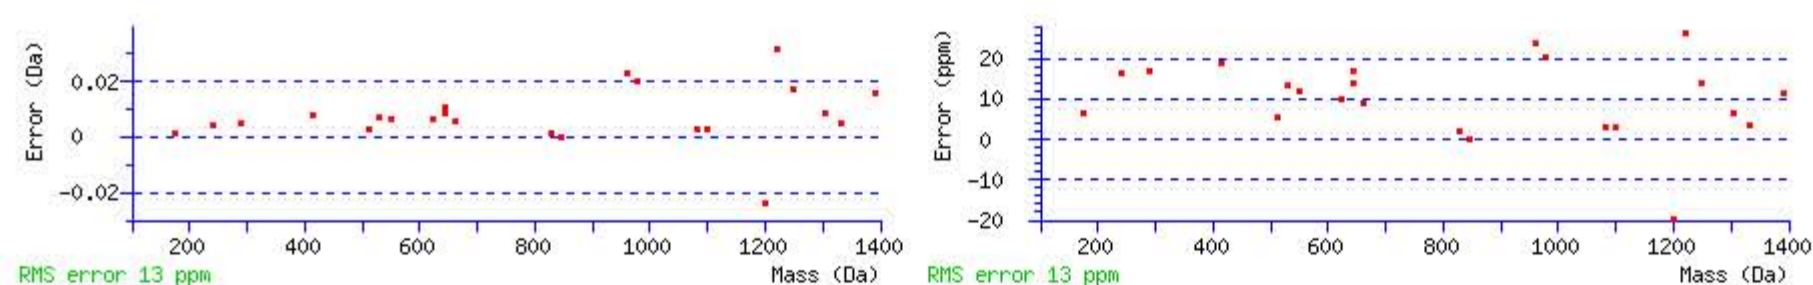

NCBI BLAST search of **DSGFQMNQLR**

(Parameters: blastp, nr protein database, expect=20000, no filter, PAM30)

Other BLAST [web gateways](#)

All matches to this query

| Score | Mr(calc):   | Delta     | Sequence                     |
|-------|-------------|-----------|------------------------------|
| 60.4  | 1505.711899 | -0.012571 | <a href="#">DSGFQMNQLR</a>   |
| 23.2  | 1505.711899 | -0.012571 | <a href="#">DSGFQMNQLR</a>   |
| 12.2  | 1505.703140 | -0.003812 | <a href="#">DETMEEQDIKLR</a> |
| 8.7   | 1505.691910 | 0.007418  | <a href="#">MEDLLDLDEELR</a> |
| 8.1   | 1505.704025 | -0.004697 | <a href="#">MQMEIDQLR</a>    |
| 3.8   | 1505.686249 | 0.013079  | <a href="#">EMQQEMMLR</a>    |
| 2.1   | 1505.718384 | -0.019056 | <a href="#">AESEQEAYLR</a>   |
| 2.0   | 1505.686249 | 0.013079  | <a href="#">EMQQEMMLR</a>    |



# MASCOT SEARCH RESULTS

## Peptide View

MS/MS Fragmentation of **DSGFQMNQLR**

Found in **TRFE\_HUMAN**, Serotransferrin OS=Homo sapiens GN=TF PE=1 SV=3

Match to Query 31080: 1505.704228 from(753.859390,2+) rtinseconds(2131) index(64603)

Title: Locus:1.1.1.3221.15 File:"2013-07-02 CLN FXIII 30 min 3rd FT.wiff"

Data file C:\Program Files (x86)\Matrix Science\Mascot Daemon\mgf3 FXIII 30 min 3rd\mascot\_daemon\_merge.mgf

Click mouse within plot area to zoom in by factor of two about that point

Or, Plot from  to  Da

Label all possible matches  Label matches used for scoring

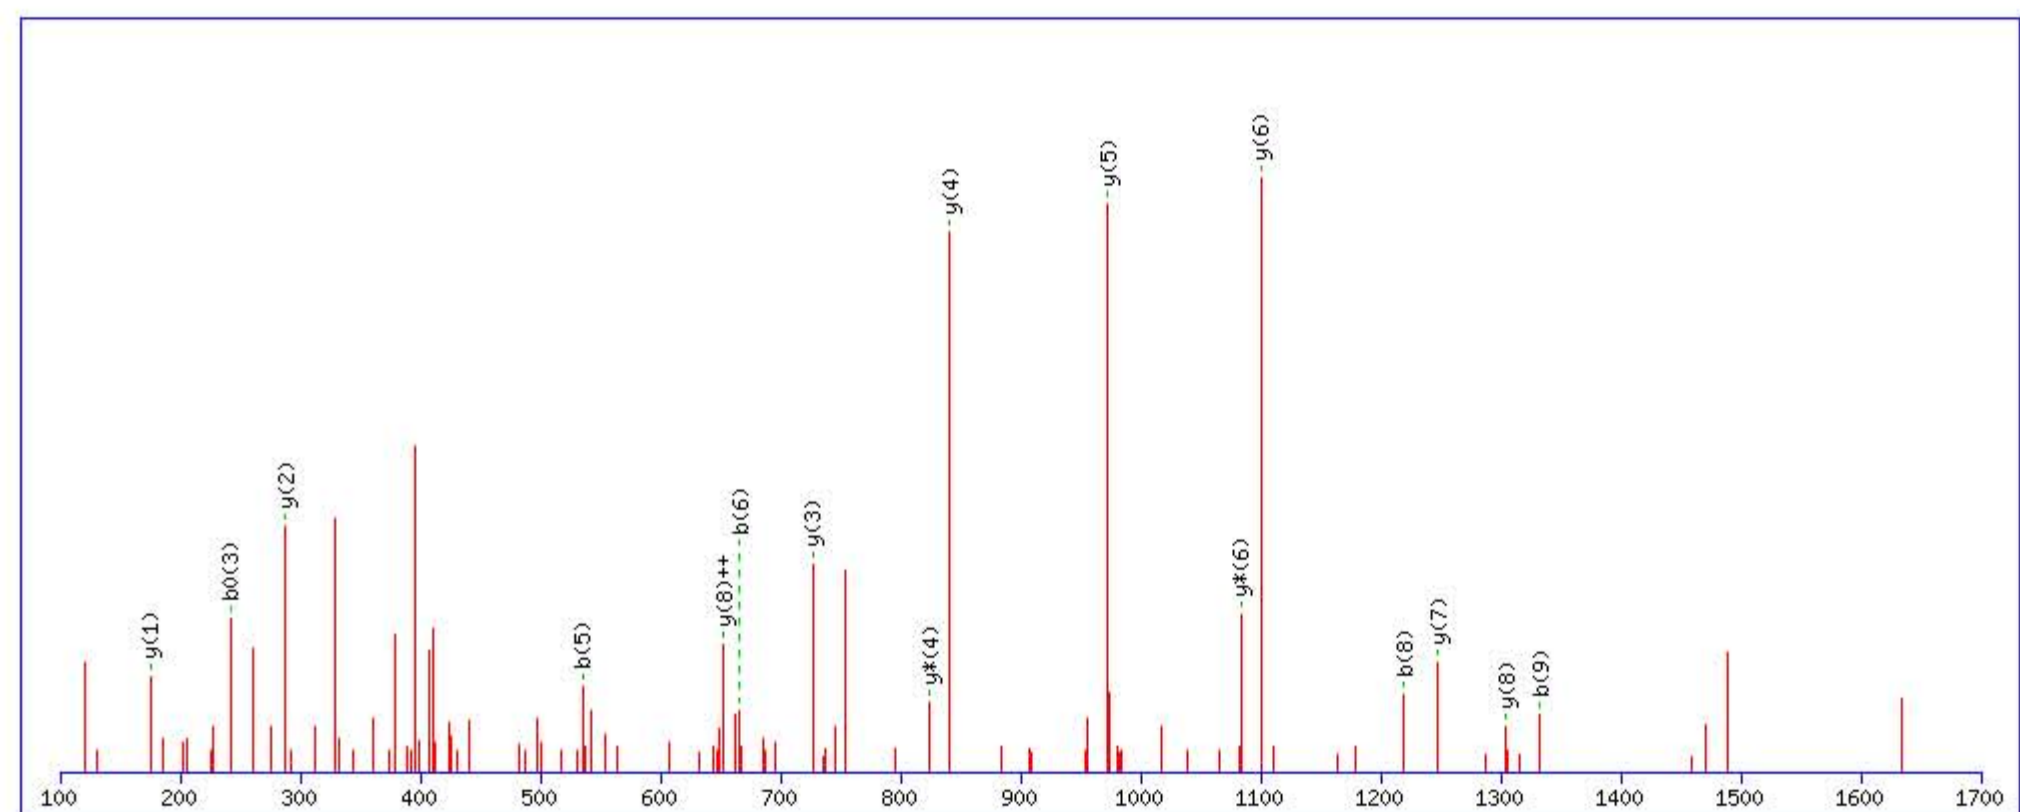

Monoisotopic mass of neutral peptide Mr(calc): 1505.711899

Fixed modifications: Carbamidomethyl (C) (apply to specified residues or termini only)

Variable modifications:

Q8 : Biotin:Thermo-21345 (Q)

Ions Score: 54 Expect: 1.8e-005

Matches : 16/84 fragment ions using 27 most intense peaks [\(help\)](#)

| #  | b           | b <sup>++</sup> | b <sup>*</sup> | b <sup>*++</sup> | b <sup>0</sup> | b <sup>0++</sup> | Seq. | y           | y <sup>++</sup> | y <sup>*</sup> | y <sup>*++</sup> | y <sup>0</sup> | y <sup>0++</sup> | #  |
|----|-------------|-----------------|----------------|------------------|----------------|------------------|------|-------------|-----------------|----------------|------------------|----------------|------------------|----|
| 1  | 116.034219  | 58.520748       |                |                  | 98.023654      | 49.515465        | D    |             |                 |                |                  |                |                  | 10 |
| 2  | 203.066247  | 102.036761      |                |                  | 185.055682     | 93.031479        | S    | 1391.692238 | 696.349757      | 1374.665689    | 687.836482       | 1373.681673    | 687.344474       | 9  |
| 3  | 260.087711  | 130.547493      |                |                  | 242.077146     | 121.542211       | G    | 1304.660210 | 652.833743      | 1287.633661    | 644.320469       |                |                  | 8  |
| 4  | 407.156125  | 204.081700      |                |                  | 389.145560     | 195.076418       | F    | 1247.638746 | 624.323011      | 1230.612197    | 615.809736       |                |                  | 7  |
| 5  | 535.214703  | 268.110990      | 518.188154     | 259.597715       | 517.204138     | 259.105707       | Q    | 1100.570332 | 550.788804      | 1083.543783    | 542.275530       |                |                  | 6  |
| 6  | 666.255188  | 333.631232      | 649.228639     | 325.117957       | 648.244623     | 324.625949       | M    | 972.511754  | 486.759515      | 955.485205     | 478.246241       |                |                  | 5  |
| 7  | 780.298115  | 390.652695      | 763.271566     | 382.139421       | 762.287550     | 381.647413       | N    | 841.471269  | 421.239273      | 824.444720     | 412.725998       |                |                  | 4  |
| 8  | 1219.523441 | 610.265359      | 1202.496892    | 601.752084       | 1201.512876    | 601.260076       | Q    | 727.428342  | 364.217809      | 710.401793     | 355.704535       |                |                  | 3  |
| 9  | 1332.607505 | 666.807391      | 1315.580956    | 658.294116       | 1314.596940    | 657.802108       | L    | 288.203016  | 144.605146      | 271.176467     | 136.091871       |                |                  | 2  |
| 10 |             |                 |                |                  |                |                  | R    | 175.118952  | 88.063114       | 158.092403     | 79.549839        |                |                  | 1  |

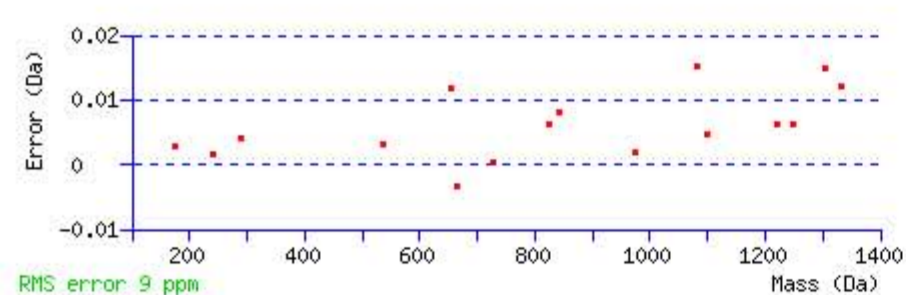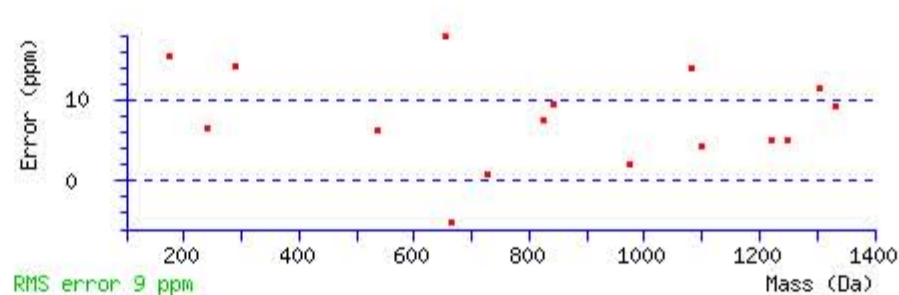

NCBI BLAST search of [DSGFQMNQLR](#)

(Parameters: blastp, nr protein database, expect=20000, no filter, PAM30)

Other BLAST [web gateways](#)

All matches to this query

| Score | Mr(calc):   | Delta     | Sequence                       |
|-------|-------------|-----------|--------------------------------|
| 54.5  | 1505.711899 | -0.007671 | <a href="#">DSGFQMNQLR</a>     |
| 15.8  | 1505.711899 | -0.007671 | <a href="#">DSGFQMNQLR</a>     |
| 3.8   | 1505.704025 | 0.000203  | <a href="#">MQMEIDQLR</a>      |
| 3.7   | 1505.721802 | -0.017574 | <a href="#">GMQVSM DIPDILR</a> |

Mascot: <http://www.matrixscience.com/>



# MASCOT SEARCH RESULTS

## Peptide View

MS/MS Fragmentation of **EFQLFSSPHGK**

Found in **TRFE\_HUMAN**, Serotransferrin OS=Homo sapiens GN=TF PE=1 SV=3

Match to Query 33480: 1586.801232 from(529.941020,3+) rtinseconds(2107) index(64471)

Title: Locus:1.1.1.3213.10 File:"2013-07-02 CLN FXIII 30 min 3rd FT.wiff"

Data file C:\Program Files (x86)\Matrix Science\Mascot Daemon\mgf3 FXIII 30 min 3rd\mascot\_daemon\_merge.mgf

Click mouse within plot area to zoom in by factor of two about that point

Or, Plot from  to  Da

Label all possible matches  Label matches used for scoring

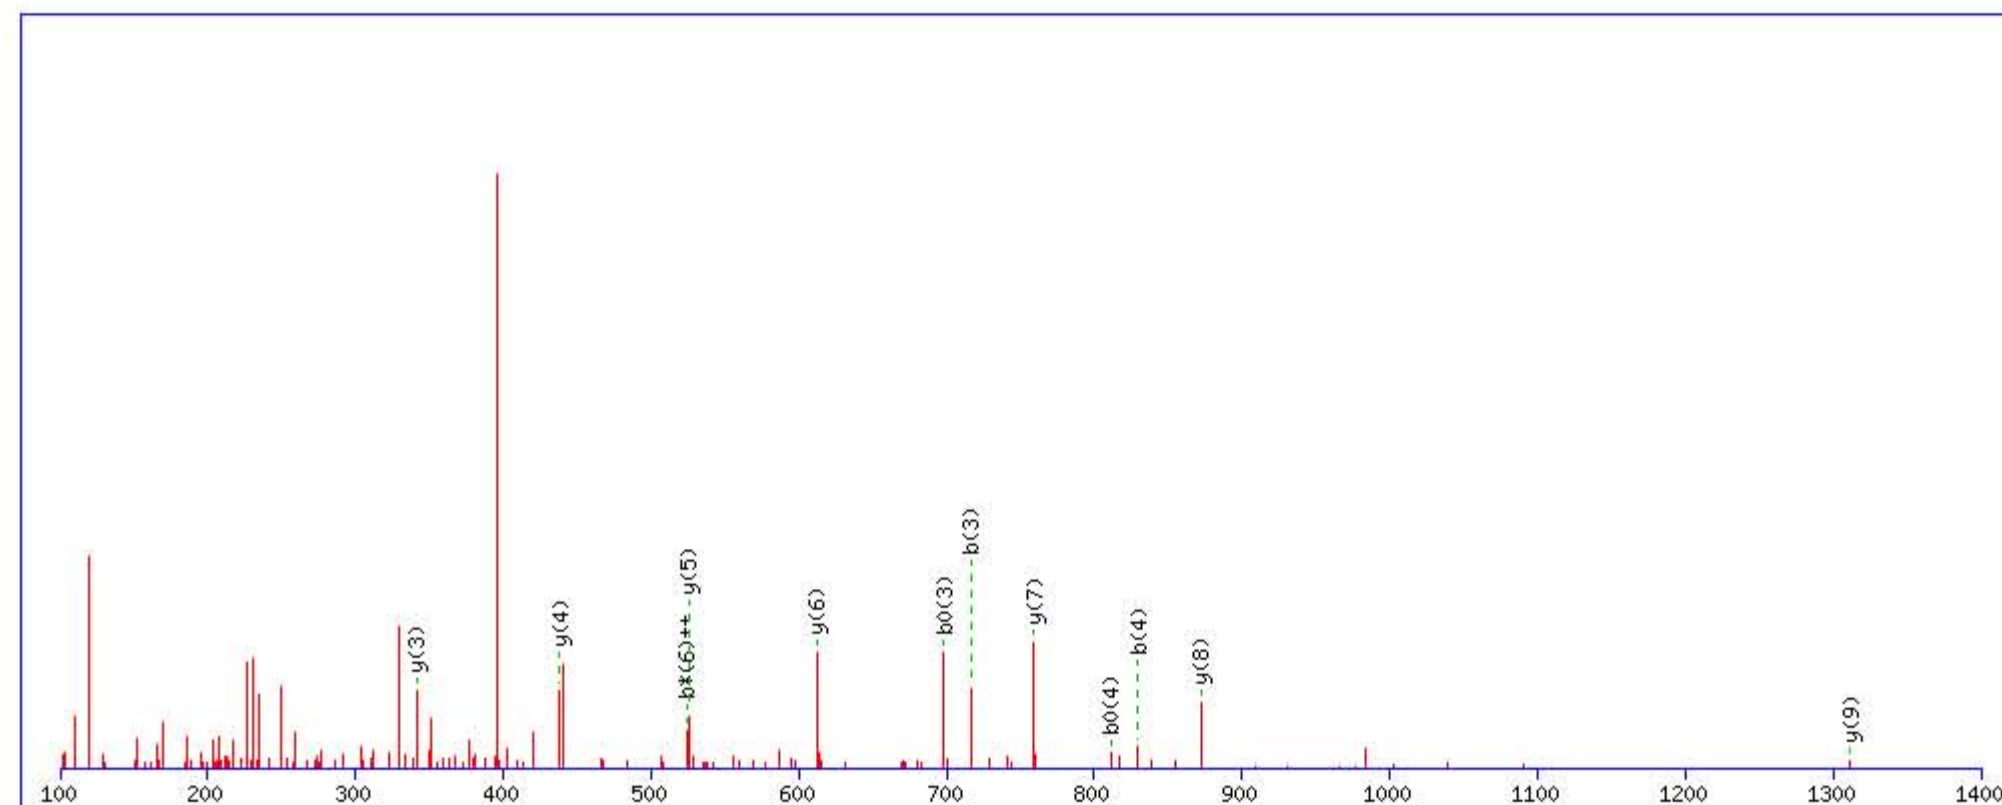

Monoisotopic mass of neutral peptide Mr(calc): 1586.791534

Fixed modifications: Carbamidomethyl (C) (apply to specified residues or termini only)

Variable modifications:

Q3 : Biotin:Thermo-21345 (Q)

Ions Score: 27 Expect: 0.0055

Matches : 12/108 fragment ions using 31 most intense peaks [\(help\)](#)

| #  | b                 | b <sup>++</sup> | b <sup>*</sup> | b <sup>*++</sup>  | b <sup>0</sup>    | b <sup>0++</sup> | Seq. | y                  | y <sup>++</sup> | y <sup>*</sup> | y <sup>*++</sup> | y <sup>0</sup> | y <sup>0++</sup> | #  |
|----|-------------------|-----------------|----------------|-------------------|-------------------|------------------|------|--------------------|-----------------|----------------|------------------|----------------|------------------|----|
| 1  | 130.049869        | 65.528572       |                |                   | 112.039304        | 56.523290        | E    |                    |                 |                |                  |                |                  | 11 |
| 2  | 277.118283        | 139.062779      |                |                   | 259.107718        | 130.057497       | F    | 1458.756218        | 729.881747      | 1441.729669    | 721.368473       | 1440.745653    | 720.876465       | 10 |
| 3  | <b>716.343609</b> | 358.675443      | 699.317060     | 350.162168        | <b>698.333044</b> | 349.670160       | Q    | <b>1311.687804</b> | 656.347540      | 1294.661255    | 647.834266       | 1293.677239    | 647.342258       | 9  |
| 4  | <b>829.427673</b> | 415.217475      | 812.401124     | 406.704200        | <b>811.417108</b> | 406.212192       | L    | <b>872.462478</b>  | 436.734877      | 855.435929     | 428.221603       | 854.451913     | 427.729595       | 8  |
| 5  | 976.496087        | 488.751682      | 959.469538     | 480.238407        | 958.485522        | 479.746399       | F    | <b>759.378414</b>  | 380.192845      | 742.351865     | 371.679571       | 741.367849     | 371.187563       | 7  |
| 6  | 1063.528115       | 532.267696      | 1046.501566    | <b>523.754421</b> | 1045.517550       | 523.262413       | S    | <b>612.310000</b>  | 306.658638      | 595.283451     | 298.145364       | 594.299435     | 297.653356       | 6  |
| 7  | 1150.560143       | 575.783710      | 1133.533594    | 567.270435        | 1132.549578       | 566.778427       | S    | <b>525.277972</b>  | 263.142624      | 508.251423     | 254.629350       | 507.267407     | 254.137342       | 5  |
| 8  | 1247.612907       | 624.310092      | 1230.586358    | 615.796817        | 1229.602342       | 615.304809       | P    | <b>438.245944</b>  | 219.626610      | 421.219395     | 211.113335       |                |                  | 4  |
| 9  | 1384.671819       | 692.839548      | 1367.645270    | 684.326273        | 1366.661254       | 683.834265       | H    | <b>341.193180</b>  | 171.100228      | 324.166631     | 162.586953       |                |                  | 3  |
| 10 | 1441.693283       | 721.350280      | 1424.666734    | 712.837005        | 1423.682718       | 712.344997       | G    | 204.134268         | 102.570772      | 187.107719     | 94.057497        |                |                  | 2  |
| 11 |                   |                 |                |                   |                   |                  | K    | 147.112804         | 74.060040       | 130.086255     | 65.546765        |                |                  | 1  |

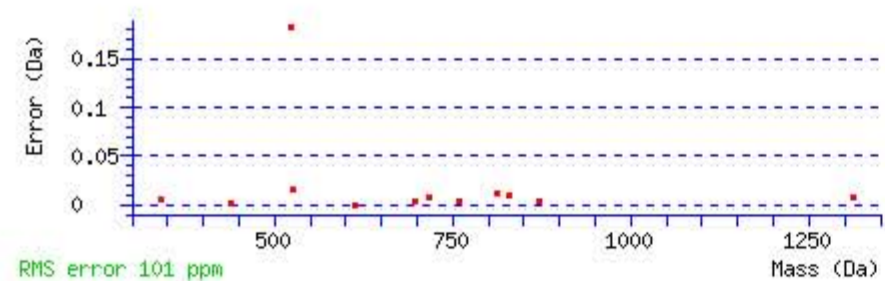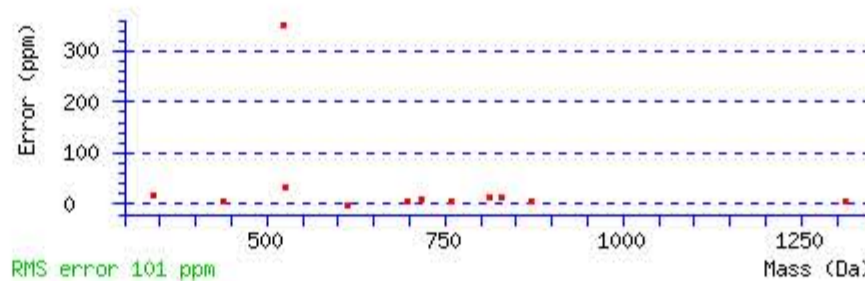

NCBI BLAST search of **EFQLFSSPHGK**

(Parameters: blastp, nr protein database, expect=20000, no filter, PAM30)

Other BLAST [web gateways](#)

## All matches to this query

| Score | Mr(calc):   | Delta     | Sequence                     |
|-------|-------------|-----------|------------------------------|
| 26.9  | 1586.791534 | 0.009698  | <a href="#">EFQLFSSPHGK</a>  |
| 2.8   | 1586.779633 | 0.021599  | <a href="#">MEQTALSPEVR</a>  |
| 2.6   | 1586.813980 | -0.012748 | <a href="#">FTQNHMLIYHKR</a> |

Mascot: <http://www.matrixscience.com/>



# MASCOT Search Results

## Peptide View

MS/MS Fragmentation of **KDSGFQMNQLR**

Found in **TRFE\_HUMAN**, Serotransferrin OS=Homo sapiens GN=TF PE=1 SV=3

Match to Query 35724: 1633.785528 from(817.900040,2+) rtinseconds(1758) index(62453)

Title: Locus:1.1.1.3091.13 File:"2013-07-02 CLN FXIII 30 min 3rd FT.wiff"

Data file C:\Program Files (x86)\Matrix Science\Mascot Daemon\mgf\3 FXIII 30 min 3rd\mascot\_daemon\_merge.mgf

Click mouse within plot area to zoom in by factor of two about that point

Or, Plot from 100 to 1700 Da Full range

Label all possible matches  Label matches used for scoring

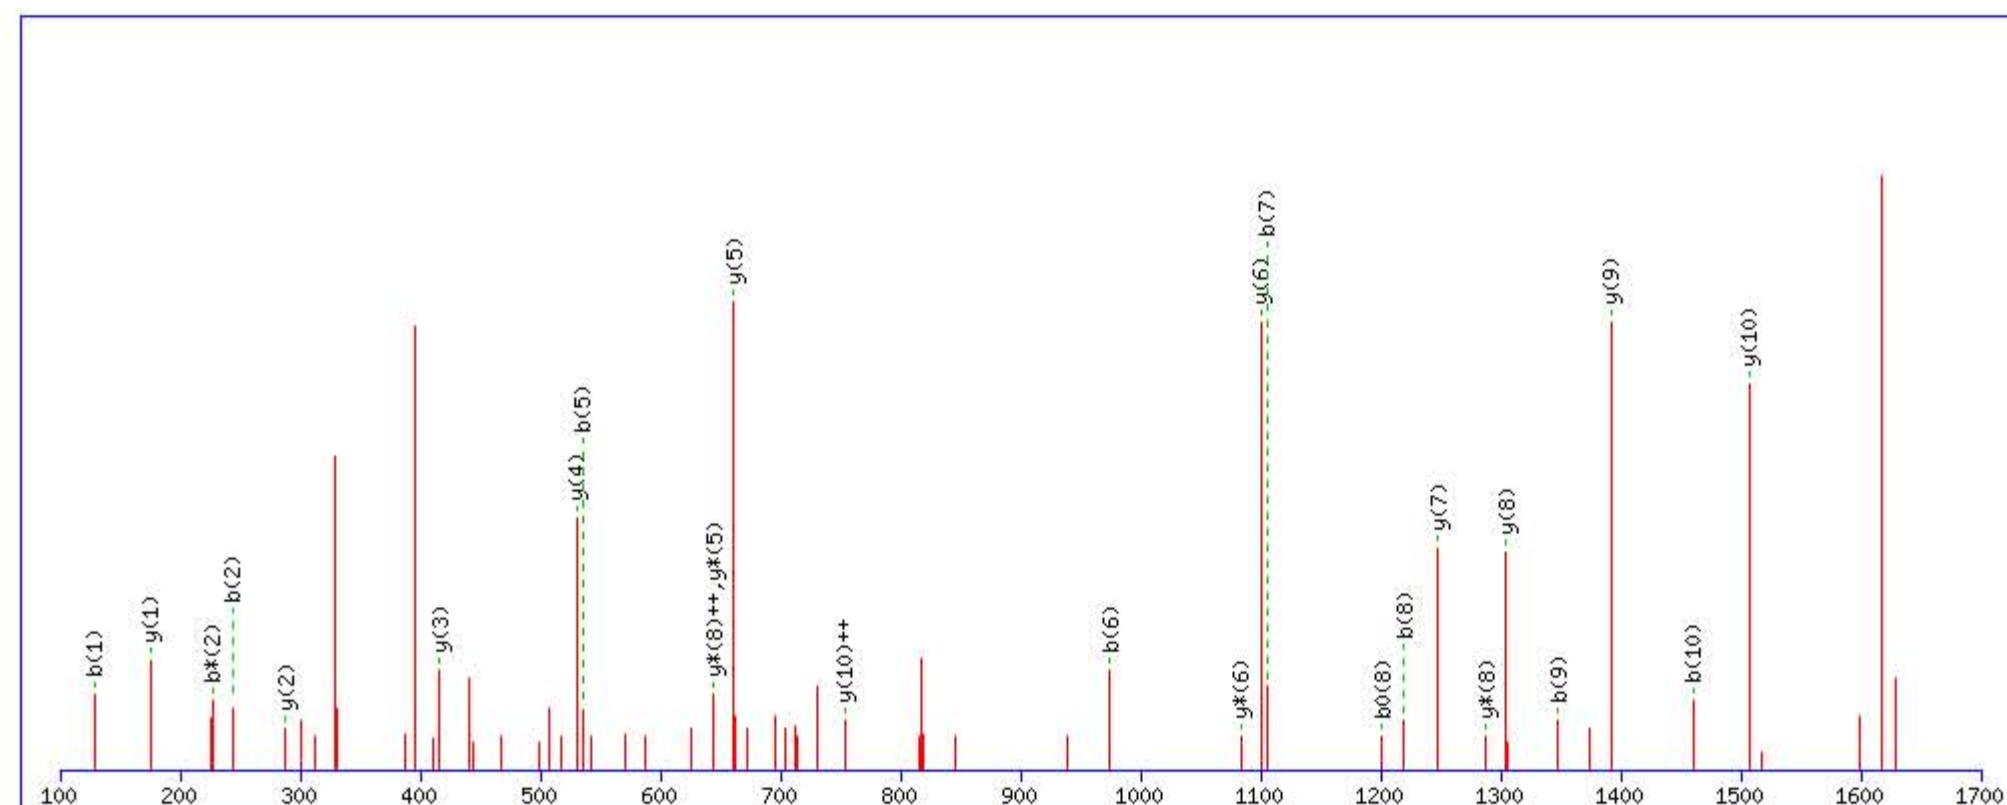

Monoisotopic mass of neutral peptide Mr(calc): 1633.806854

Fixed modifications: Carbamidomethyl (C) (apply to specified residues or termini only)

Variable modifications:

Q6 : Biotin:Thermo-21345 (Q)

Ions Score: 68 Expect: 3.2e-006

Matches : 25/102 fragment ions using 42 most intense peaks [\(help\)](#)

| #  | b                  | b <sup>++</sup> | b <sup>*</sup>    | b <sup>+++</sup> | b <sup>0</sup>     | b <sup>0++</sup> | Seq.     | y                  | y <sup>++</sup>   | y <sup>*</sup>     | y <sup>+++</sup>  | y <sup>0</sup> | y <sup>0++</sup> | #         |
|----|--------------------|-----------------|-------------------|------------------|--------------------|------------------|----------|--------------------|-------------------|--------------------|-------------------|----------------|------------------|-----------|
| 1  | <b>129.102239</b>  | 65.054757       | 112.075690        | 56.541483        |                    |                  | <b>K</b> |                    |                   |                    |                   |                |                  | <b>11</b> |
| 2  | <b>244.129182</b>  | 122.568229      | <b>227.102633</b> | 114.054955       | 226.118617         | 113.562947       | <b>D</b> | <b>1506.719181</b> | <b>753.863228</b> | 1489.692632        | 745.349954        | 1488.708616    | 744.857946       | <b>10</b> |
| 3  | 331.161210         | 166.084243      | 314.134661        | 157.570969       | 313.150645         | 157.078961       | <b>S</b> | <b>1391.692238</b> | 696.349757        | 1374.665689        | 687.836482        | 1373.681673    | 687.344474       | <b>9</b>  |
| 4  | 388.182674         | 194.594975      | 371.156125        | 186.081701       | 370.172109         | 185.589693       | <b>G</b> | <b>1304.660210</b> | 652.833743        | <b>1287.633661</b> | <b>644.320468</b> |                |                  | <b>8</b>  |
| 5  | <b>535.251088</b>  | 268.129182      | 518.224539        | 259.615908       | 517.240523         | 259.123900       | <b>F</b> | <b>1247.638746</b> | 624.323011        | 1230.612197        | 615.809736        |                |                  | <b>7</b>  |
| 6  | <b>974.476414</b>  | 487.741845      | 957.449865        | 479.228571       | 956.465849         | 478.736563       | <b>Q</b> | <b>1100.570332</b> | 550.788804        | <b>1083.543783</b> | 542.275530        |                |                  | <b>6</b>  |
| 7  | <b>1105.516899</b> | 553.262088      | 1088.490350       | 544.748813       | 1087.506334        | 544.256805       | <b>M</b> | <b>661.345006</b>  | 331.176141        | <b>644.318457</b>  | 322.662866        |                |                  | <b>5</b>  |
| 8  | <b>1219.559826</b> | 610.283551      | 1202.533277       | 601.770277       | <b>1201.549261</b> | 601.278268       | <b>N</b> | <b>530.304521</b>  | 265.655899        | 513.277972         | 257.142624        |                |                  | <b>4</b>  |
| 9  | <b>1347.618404</b> | 674.312840      | 1330.591855       | 665.799566       | 1329.607839        | 665.307558       | <b>Q</b> | <b>416.261594</b>  | 208.634435        | 399.235045         | 200.121160        |                |                  | <b>3</b>  |
| 10 | <b>1460.702468</b> | 730.854872      | 1443.675919       | 722.341598       | 1442.691903        | 721.849589       | <b>L</b> | <b>288.203016</b>  | 144.605146        | 271.176467         | 136.091871        |                |                  | <b>2</b>  |
| 11 |                    |                 |                   |                  |                    |                  | <b>R</b> | <b>175.118952</b>  | 88.063114         | 158.092403         | 79.549839         |                |                  | <b>1</b>  |

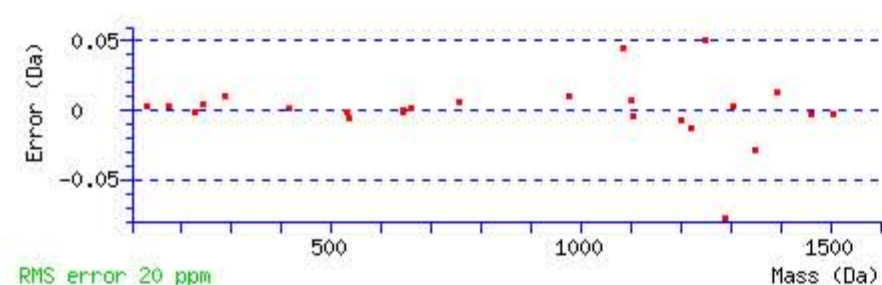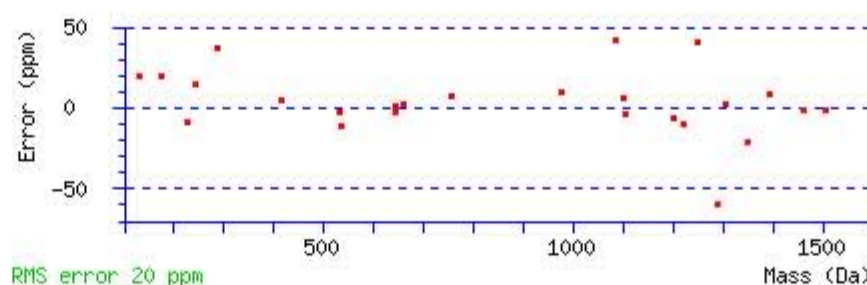

NCBI BLAST search of **KDSGFQMNQLR**

(Parameters: blastp, nr protein database, expect=20000, no filter, PAM30)

Other BLAST [web gateways](#)

## All matches to this query

| Score | Mr(calc):   | Delta     | Sequence                        |
|-------|-------------|-----------|---------------------------------|
| 67.7  | 1633.806854 | -0.021326 | <a href="#">KDSGFQMNQLR</a>     |
| 29.2  | 1633.806854 | -0.021326 | <a href="#">KDSGFQMNQLR</a>     |
| 12.0  | 1633.769608 | 0.015920  | <a href="#">AGDGSSVKEVETYHR</a> |
| 6.4   | 1633.805954 | -0.020426 | <a href="#">LFREENDINESIR</a>   |
| 5.1   | 1633.795609 | -0.010081 | <a href="#">KFMEDEQQLR</a>      |
| 4.5   | 1633.798096 | -0.012568 | <a href="#">QDQEKDNMIEKLEK</a>  |
| 4.0   | 1633.780319 | 0.005209  | <a href="#">EELMRMLAEDEL</a>    |
| 3.1   | 1633.799454 | -0.013926 | <a href="#">DANSFKSRDQR</a>     |
| 3.1   | 1633.802826 | -0.017298 | <a href="#">DANKLLCEVCTRR</a>   |
| 2.6   | 1633.785080 | 0.000448  | <a href="#">VCSLSNQRMGR</a>     |



# MASCOT Search Results

## Peptide View

MS/MS Fragmentation of **DCHLAQVPSHTVVAR**

Found in **TRFE\_HUMAN**, Serotransferrin OS=Homo sapiens GN=TF PE=1 SV=3

Match to Query 42934: 1999.994952 from(667.672260,3+) rtinseconds(1598) index(61620)

Title: Locus:1.1.1.3035.20 File:"2013-07-02 CLN FXIII 30 min 3rd FT.wiff"

Data file C:\Program Files (x86)\Matrix Science\Mascot Daemon\mgf3 FXIII 30 min 3rd\mascot\_daemon\_merge.mgf

Click mouse within plot area to zoom in by factor of two about that point

Or, Plot from  to  Da

Label all possible matches  Label matches used for scoring

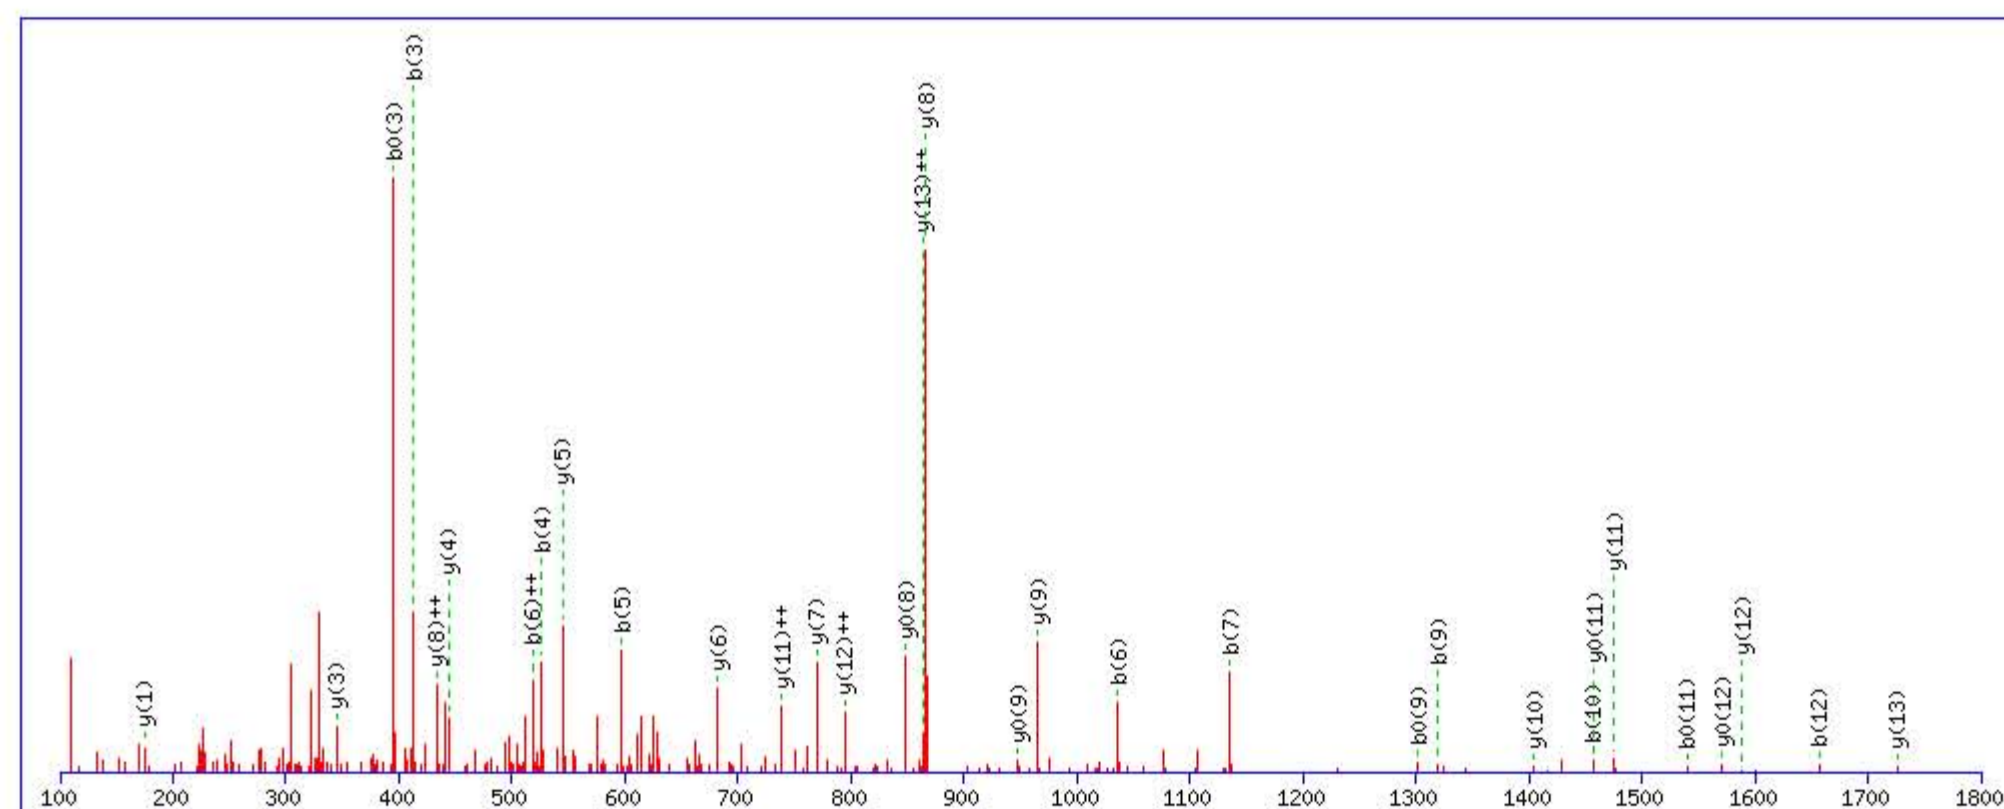

Monoisotopic mass of neutral peptide Mr(calc): 2000.008438

Fixed modifications: Carbamidomethyl (C) (apply to specified residues or termini only)

Variable modifications:

Q6 : Biotin:Thermo-21345 (Q)

Ions Score: 68 Expect: 5.7e-007

Matches : 32/150 fragment ions using 60 most intense peaks [\(help\)](#)

| #  | b                  | b <sup>++</sup>   | b <sup>+</sup> | b <sup>+++</sup> | b <sup>0</sup>     | b <sup>0++</sup> | Seq. | y                  | y <sup>++</sup>   | y <sup>+</sup> | y <sup>+++</sup> | y <sup>0</sup>     | y <sup>0++</sup> | #  |
|----|--------------------|-------------------|----------------|------------------|--------------------|------------------|------|--------------------|-------------------|----------------|------------------|--------------------|------------------|----|
| 1  | 116.034219         | 58.520748         |                |                  | 98.023654          | 49.515465        | D    |                    |                   |                |                  |                    |                  | 15 |
| 2  | 276.064868         | 138.536072        |                |                  | 258.054303         | 129.530790       | C    | 1885.988756        | 943.498016        | 1868.962207    | 934.984742       | 1867.978191        | 934.492734       | 14 |
| 3  | <b>413.123780</b>  | 207.065528        |                |                  | <b>395.113215</b>  | 198.060245       | H    | <b>1725.958107</b> | <b>863.482692</b> | 1708.931558    | 854.969417       | 1707.947542        | 854.477409       | 13 |
| 4  | <b>526.207844</b>  | 263.607560        |                |                  | 508.197279         | 254.602278       | L    | <b>1588.899195</b> | <b>794.953236</b> | 1571.872646    | 786.439961       | <b>1570.888630</b> | 785.947953       | 12 |
| 5  | <b>597.244958</b>  | 299.126117        |                |                  | 579.234393         | 290.120835       | A    | <b>1475.815131</b> | <b>738.411204</b> | 1458.788582    | 729.897929       | <b>1457.804566</b> | 729.405921       | 11 |
| 6  | <b>1036.470284</b> | <b>518.738780</b> | 1019.443735    | 510.225506       | 1018.459719        | 509.733498       | Q    | <b>1404.778017</b> | 702.892647        | 1387.751468    | 694.379372       | 1386.767452        | 693.887364       | 10 |
| 7  | <b>1135.538698</b> | 568.272987        | 1118.512149    | 559.759713       | 1117.528133        | 559.267705       | V    | <b>965.552691</b>  | 483.279984        | 948.526142     | 474.766709       | <b>947.542126</b>  | 474.274701       | 9  |
| 8  | 1232.591462        | 616.799369        | 1215.564913    | 608.286095       | 1214.580897        | 607.794087       | P    | <b>866.484277</b>  | <b>433.745777</b> | 849.457728     | 425.232502       | <b>848.473712</b>  | 424.740494       | 8  |
| 9  | <b>1319.623490</b> | 660.315383        | 1302.596941    | 651.802109       | <b>1301.612925</b> | 651.310101       | S    | <b>769.431513</b>  | 385.219395        | 752.404964     | 376.706120       | 751.420948         | 376.214112       | 7  |
| 10 | <b>1456.682402</b> | 728.844839        | 1439.655853    | 720.331565       | 1438.671837        | 719.839557       | H    | <b>682.399485</b>  | 341.703381        | 665.372936     | 333.190106       | 664.388920         | 332.698098       | 6  |
| 11 | 1557.730081        | 779.368679        | 1540.703532    | 770.855404       | <b>1539.719516</b> | 770.363396       | T    | <b>545.340573</b>  | 273.173925        | 528.314024     | 264.660650       | 527.330008         | 264.168642       | 5  |
| 12 | <b>1656.798495</b> | 828.902886        | 1639.771946    | 820.389611       | 1638.787930        | 819.897603       | V    | <b>444.292894</b>  | 222.650085        | 427.266345     | 214.136811       |                    |                  | 4  |
| 13 | 1755.866909        | 878.437093        | 1738.840360    | 869.923818       | 1737.856344        | 869.431810       | V    | <b>345.224480</b>  | 173.115878        | 328.197931     | 164.602603       |                    |                  | 3  |
| 14 | 1826.904023        | 913.955650        | 1809.877474    | 905.442375       | 1808.893458        | 904.950367       | A    | 246.156066         | 123.581671        | 229.129517     | 115.068396       |                    |                  | 2  |
| 15 |                    |                   |                |                  |                    |                  | R    | <b>175.118952</b>  | 88.063114         | 158.092403     | 79.549839        |                    |                  | 1  |

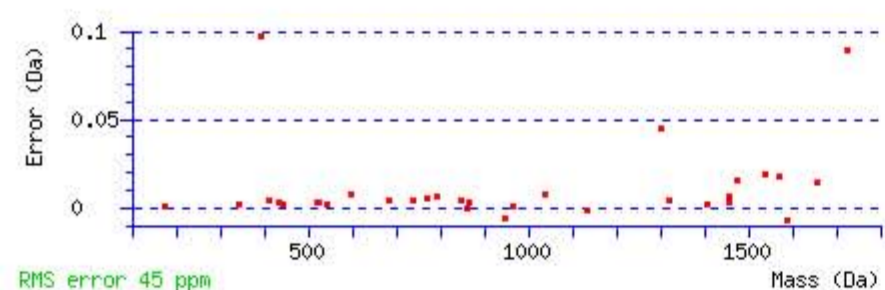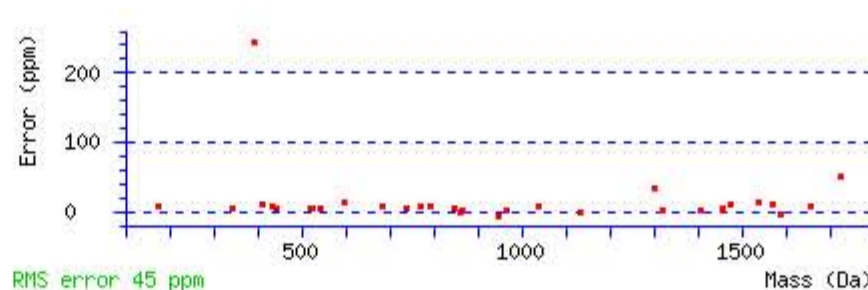

NCBI BLAST search of **DCHLAQVPSHTVVAR**

(Parameters: blastp, nr protein database, expect=20000, no filter, PAM30)

Other BLAST [web gateways](#)

All matches to this query

| Score | Mr(calc):   | Delta     | Sequence                          |
|-------|-------------|-----------|-----------------------------------|
| 68.2  | 2000.008438 | -0.013486 | <a href="#">DCHLAQVPSHTVVAR</a>   |
| 1.6   | 1999.997162 | -0.002210 | <a href="#">ECGKAFAHMSVLIKHEK</a> |

Mascot: <http://www.matrixscience.com/>



# MASCOT SEARCH RESULTS

## Peptide View

MS/MS Fragmentation of **ADRDQYELLCLDNTR**

Found in **TRFE\_HUMAN**, Serotransferrin OS=Homo sapiens GN=TF PE=1 SV=3

Match to Query 47055: 2192.033682 from(731.685170,3+) rtinseconds(2207) index(65002)

Title: Locus:1.1.1.3248.6 File:"2013-07-02 CLN FXIII 30 min 3rd FT.wiff"

Data file C:\Program Files (x86)\Matrix Science\Mascot Daemon\mgf3 FXIII 30 min 3rd\mascot\_daemon\_merge.mgf

Click mouse within plot area to zoom in by factor of two about that point

Or, Plot from  to  Da

Label all possible matches  Label matches used for scoring

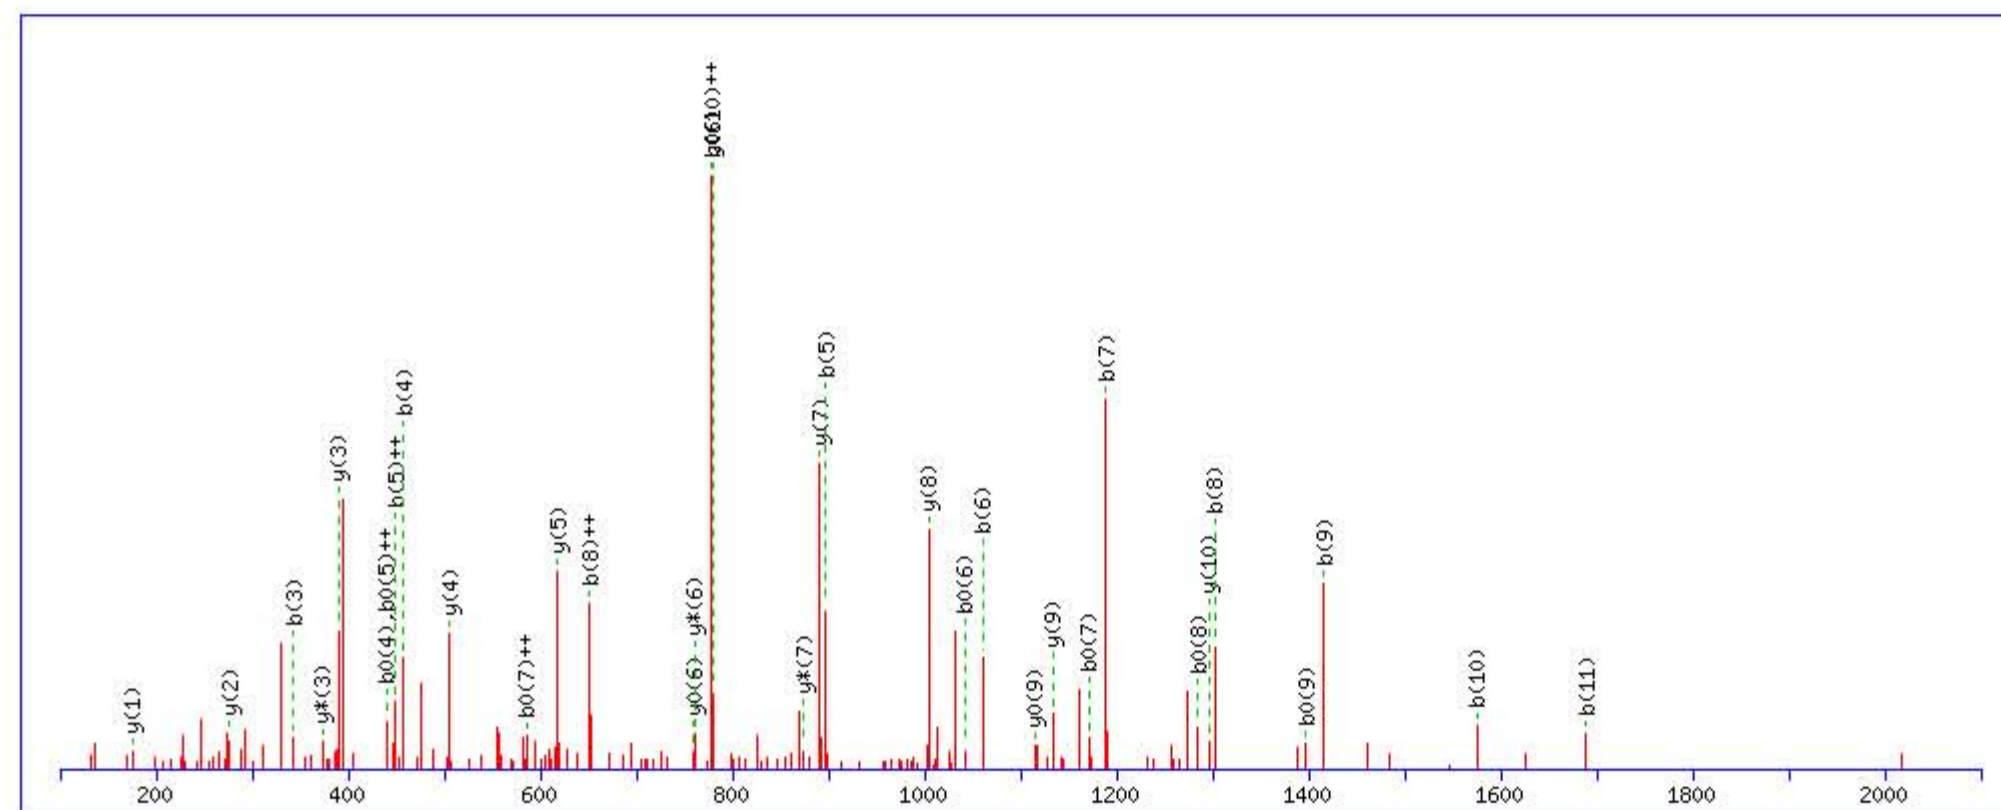

Monoisotopic mass of neutral peptide Mr(calc): 2192.035400

Fixed modifications: Carbamidomethyl (C) (apply to specified residues or termini only)

Variable modifications:

Q5 : Biotin:Thermo-21345 (Q)

Ions Score: 46 Expect: 0.00041

Matches : 34/160 fragment ions using 70 most intense peaks [\(help\)](#)

| #  | b                  | b <sup>++</sup>   | b <sup>+</sup> | b <sup>+++</sup> | b <sup>0</sup>     | b <sup>0++</sup>  | Seq. | y                  | y <sup>++</sup> | y <sup>+</sup>    | y <sup>+++</sup> | y <sup>0</sup>     | y <sup>0++</sup> | #  |
|----|--------------------|-------------------|----------------|------------------|--------------------|-------------------|------|--------------------|-----------------|-------------------|------------------|--------------------|------------------|----|
| 1  | 72.044390          | 36.525833         |                |                  |                    |                   | A    |                    |                 |                   |                  |                    |                  | 15 |
| 2  | 187.071333         | 94.039304         |                |                  | 169.060768         | 85.034022         | D    | 2122.005587        | 1061.506431     | 2104.979038       | 1052.993157      | 2103.995022        | 1052.501149      | 14 |
| 3  | <b>343.172444</b>  | 172.089860        | 326.145895     | 163.576585       | 325.161879         | 163.084577        | R    | 2006.978644        | 1003.992960     | 1989.952095       | 995.479685       | 1988.968079        | 994.987677       | 13 |
| 4  | <b>458.199387</b>  | 229.603332        | 441.172838     | 221.090057       | <b>440.188822</b>  | 220.598049        | D    | 1850.877533        | 925.942404      | 1833.850984       | 917.429130       | 1832.866968        | 916.937122       | 12 |
| 5  | <b>897.424713</b>  | <b>449.215995</b> | 880.398164     | 440.702720       | 879.414148         | <b>440.210712</b> | Q    | 1735.850590        | 868.428933      | 1718.824041       | 859.915658       | 1717.840025        | 859.423650       | 11 |
| 6  | <b>1060.488042</b> | 530.747659        | 1043.461493    | 522.234385       | <b>1042.477477</b> | 521.742376        | Y    | <b>1296.625264</b> | 648.816270      | 1279.598715       | 640.302995       | 1278.614699        | 639.810987       | 10 |
| 7  | <b>1189.530635</b> | 595.268955        | 1172.504086    | 586.755681       | <b>1171.520070</b> | <b>586.263673</b> | E    | <b>1133.561935</b> | 567.284605      | 1116.535386       | 558.771331       | <b>1115.551370</b> | 558.279323       | 9  |
| 8  | <b>1302.614699</b> | <b>651.810987</b> | 1285.588150    | 643.297713       | <b>1284.604134</b> | 642.805705        | L    | <b>1004.519342</b> | 502.763309      | 987.492793        | 494.250034       | 986.508777         | 493.758026       | 8  |
| 9  | <b>1415.698763</b> | 708.353019        | 1398.672214    | 699.839745       | <b>1397.688198</b> | 699.347737        | L    | <b>891.435278</b>  | 446.221277      | <b>874.408729</b> | 437.708002       | 873.424713         | 437.215994       | 7  |
| 10 | <b>1575.729412</b> | 788.368344        | 1558.702863    | 779.855069       | 1557.718847        | <b>779.363061</b> | C    | <b>778.351214</b>  | 389.679245      | <b>761.324665</b> | 381.165971       | <b>760.340649</b>  | 380.673963       | 6  |
| 11 | <b>1688.813476</b> | 844.910376        | 1671.786927    | 836.397101       | 1670.802911        | 835.905093        | L    | <b>618.320565</b>  | 309.663921      | 601.294016        | 301.150646       | 600.310000         | 300.658638       | 5  |
| 12 | 1803.840419        | 902.423847        | 1786.813870    | 893.910573       | 1785.829854        | 893.418565        | D    | <b>505.236501</b>  | 253.121888      | 488.209952        | 244.608614       | 487.225936         | 244.116606       | 4  |
| 13 | 1917.883346        | 959.445311        | 1900.856797    | 950.932036       | 1899.872781        | 950.440028        | N    | <b>390.209558</b>  | 195.608417      | <b>373.183009</b> | 187.095142       | 372.198993         | 186.603134       | 3  |
| 14 | 2018.931025        | 1009.969150       | 2001.904476    | 1001.455876      | 2000.920460        | 1000.963868       | T    | <b>276.166631</b>  | 138.586953      | 259.140082        | 130.073679       | 258.156066         | 129.581671       | 2  |
| 15 |                    |                   |                |                  |                    |                   | R    | <b>175.118952</b>  | 88.063114       | 158.092403        | 79.549839        |                    |                  | 1  |

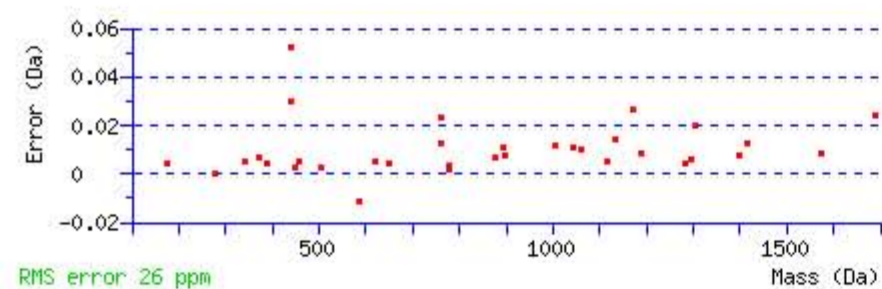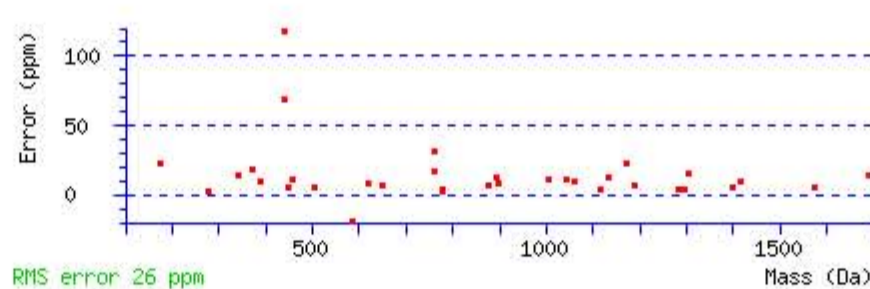

NCBI BLAST search of [ADRDQYELLCLDNTR](#)

(Parameters: blastp, nr protein database, expect=20000, no filter, PAM30)

Other BLAST [web gateways](#)

All matches to this query

| Score | Mr(calc):   | Delta     | Sequence                        |
|-------|-------------|-----------|---------------------------------|
| 46.3  | 2192.035400 | -0.001718 | <a href="#">ADRDQYELLCLDNTR</a> |

Mascot: <http://www.matrixscience.com/>



# MASCOT Search Results

## Peptide View

MS/MS Fragmentation of **EDLIWELLNQAQEHFGK**  
 Found in **TRFE\_HUMAN**, Serotransferrin OS=Homo sapiens GN=TF PE=1 SV=3

Match to Query 49968: 2380.178502 from(794.400110,3+) rtinseconds(3246) index(70954)  
 Title: Locus:1.1.1.3604.6 File:"2013-07-02 CLN FXIII 30 min 3rd FT.wiff"  
 Data file C:\Program Files (x86)\Matrix Science\Mascot Daemon\mgf3 FXIII 30 min 3rd\mascot\_daemon\_merge.mgf

Click mouse within plot area to zoom in by factor of two about that point  
 Or, Plot from  to  Da   
 Label all possible matches  Label matches used for scoring

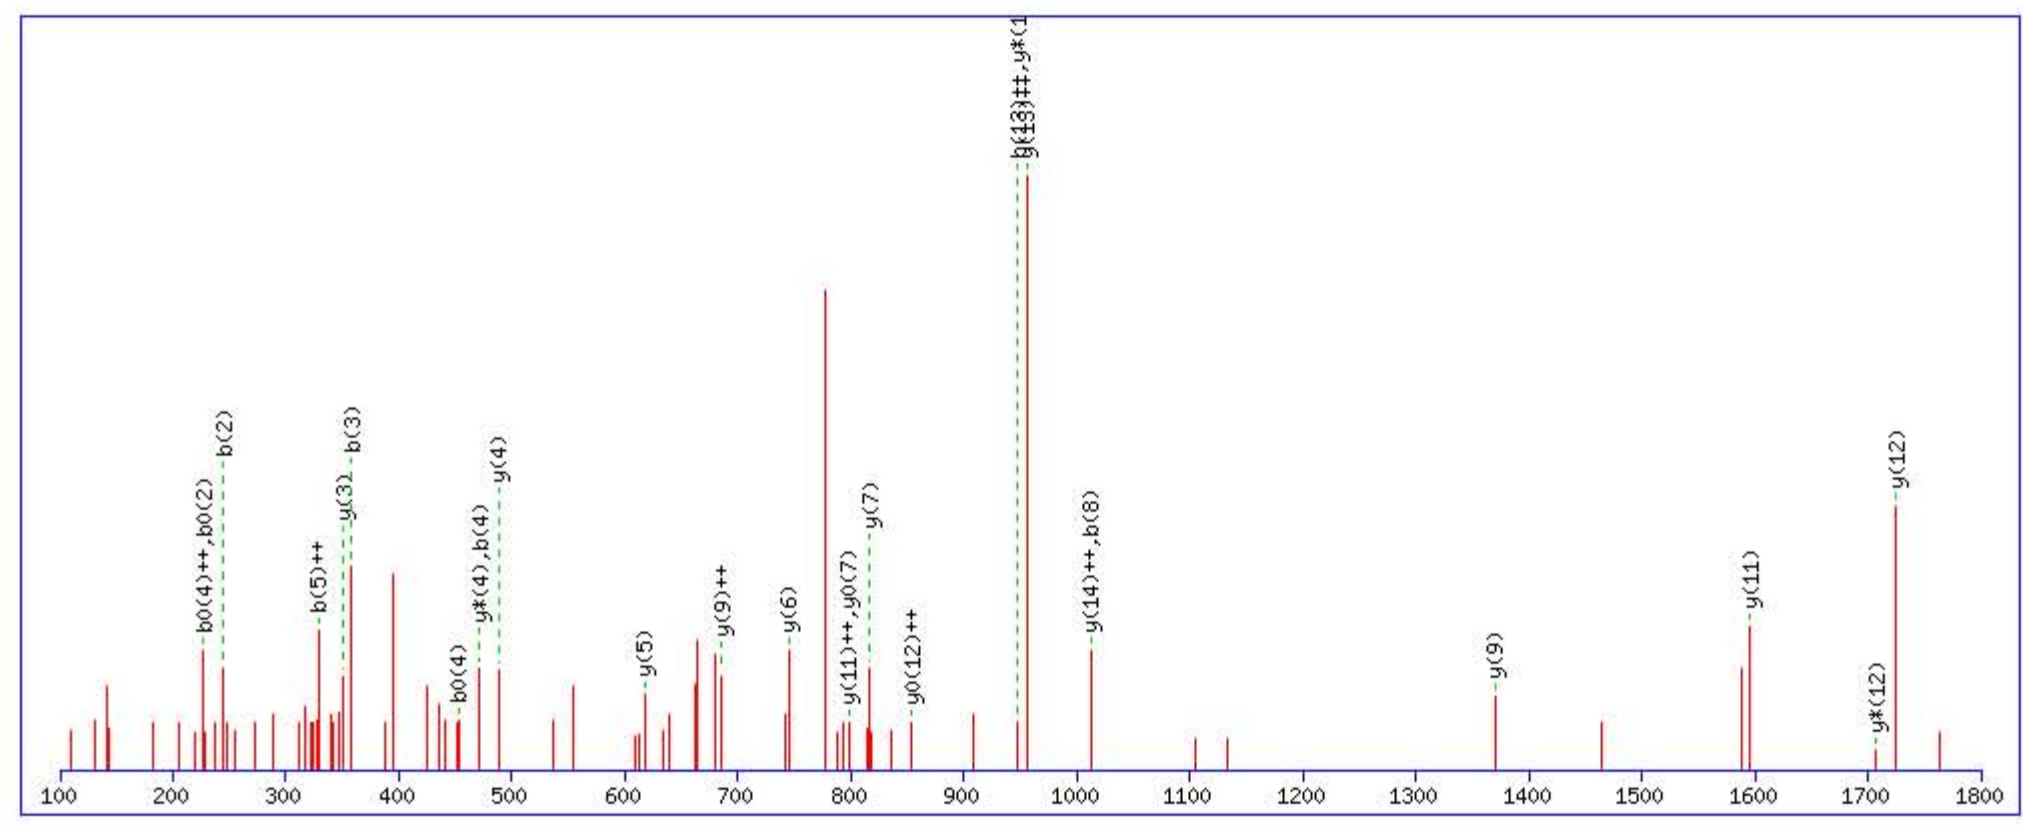

Monoisotopic mass of neutral peptide Mr(calc): 2380.188522  
 Fixed modifications: Carbamidomethyl (C) (apply to specified residues or termini only)  
 Variable modifications:  
 Q10 : Biotin:Thermo-21345 (Q)  
 Ions Score: 27 Expect: 0.053  
 Matches : 26/168 fragment ions using 52 most intense peaks [\(help\)](#)

| #  | b                  | b <sup>++</sup>   | b <sup>*</sup> | b <sup>+++</sup> | b <sup>0</sup>    | b <sup>0++</sup>  | Seq. | y                  | y <sup>++</sup>    | y <sup>*</sup>     | y <sup>+++</sup>  | y <sup>0</sup>    | y <sup>0++</sup>  | #  |
|----|--------------------|-------------------|----------------|------------------|-------------------|-------------------|------|--------------------|--------------------|--------------------|-------------------|-------------------|-------------------|----|
| 1  | 130.049869         | 65.528572         |                |                  | 112.039304        | 56.523290         | E    |                    |                    |                    |                   |                   |                   | 17 |
| 2  | <b>245.076812</b>  | 123.042044        |                |                  | <b>227.066247</b> | 114.036762        | D    | 2252.153237        | 1126.580256        | 2235.126688        | 1118.066982       | 2234.142672       | 1117.574974       | 16 |
| 3  | <b>358.160876</b>  | 179.584076        |                |                  | 340.150311        | 170.578794        | L    | 2137.126294        | 1069.066785        | 2120.099745        | 1060.553510       | 2119.115729       | 1060.061502       | 15 |
| 4  | <b>471.244940</b>  | 236.126108        |                |                  | <b>453.234375</b> | <b>227.120826</b> | I    | 2024.042230        | <b>1012.524753</b> | 2007.015681        | 1004.011479       | 2006.031665       | 1003.519470       | 14 |
| 5  | 657.324253         | <b>329.165765</b> |                |                  | 639.313688        | 320.160482        | W    | 1910.958166        | <b>955.982721</b>  | 1893.931617        | <b>947.469447</b> | 1892.947601       | 946.977438        | 13 |
| 6  | 786.366846         | 393.687061        |                |                  | 768.356281        | 384.681779        | E    | <b>1724.878853</b> | 862.943064         | <b>1707.852304</b> | 854.429790        | 1706.868288       | <b>853.937782</b> | 12 |
| 7  | 899.450910         | 450.229093        |                |                  | 881.440345        | 441.223811        | L    | <b>1595.836260</b> | <b>798.421768</b>  | 1578.809711        | 789.908493        | 1577.825695       | 789.416485        | 11 |
| 8  | <b>1012.534974</b> | 506.771125        |                |                  | 994.524409        | 497.765843        | L    | 1482.752196        | 741.879736         | 1465.725647        | 733.366461        | 1464.741631       | 732.874453        | 10 |
| 9  | 1126.577901        | 563.792589        | 1109.551352    | 555.279314       | 1108.567336       | 554.787306        | N    | <b>1369.668132</b> | <b>685.337704</b>  | 1352.641583        | 676.824429        | 1351.657567       | 676.332421        | 9  |
| 10 | 1565.803227        | 783.405252        | 1548.776678    | 774.891977       | 1547.792662       | 774.399969        | Q    | 1255.625205        | 628.316240         | 1238.598656        | 619.802966        | 1237.614640       | 619.310958        | 8  |
| 11 | 1636.840341        | 818.923809        | 1619.813792    | 810.410534       | 1618.829776       | 809.918526        | A    | <b>816.399879</b>  | 408.703577         | 799.373330         | 400.190303        | <b>798.389314</b> | 399.698295        | 7  |
| 12 | 1764.898919        | 882.953098        | 1747.872370    | 874.439823       | 1746.888354       | 873.947815        | Q    | <b>745.362765</b>  | 373.185020         | 728.336216         | 364.671746        | 727.352200        | 364.179738        | 6  |
| 13 | 1893.941512        | <b>947.474394</b> | 1876.914963    | 938.961120       | 1875.930947       | 938.469112        | E    | <b>617.304187</b>  | 309.155732         | 600.277638         | 300.642457        | 599.293622        | 300.150449        | 5  |
| 14 | 2031.000424        | 1016.003850       | 2013.973875    | 1007.490576      | 2012.989859       | 1006.998568       | H    | <b>488.261594</b>  | 244.634435         | <b>471.235045</b>  | 236.121160        |                   |                   | 4  |
| 15 | 2178.068838        | 1089.538057       | 2161.042289    | 1081.024782      | 2160.058273       | 1080.532774       | F    | <b>351.202682</b>  | 176.104979         | 334.176133         | 167.591704        |                   |                   | 3  |
| 16 | 2235.090302        | 1118.048789       | 2218.063753    | 1109.535514      | 2217.079737       | 1109.043506       | G    | 204.134268         | 102.570772         | 187.107719         | 94.057497         |                   |                   | 2  |
| 17 |                    |                   |                |                  |                   |                   | K    | 147.112804         | 74.060040          | 130.086255         | 65.546765         |                   |                   | 1  |

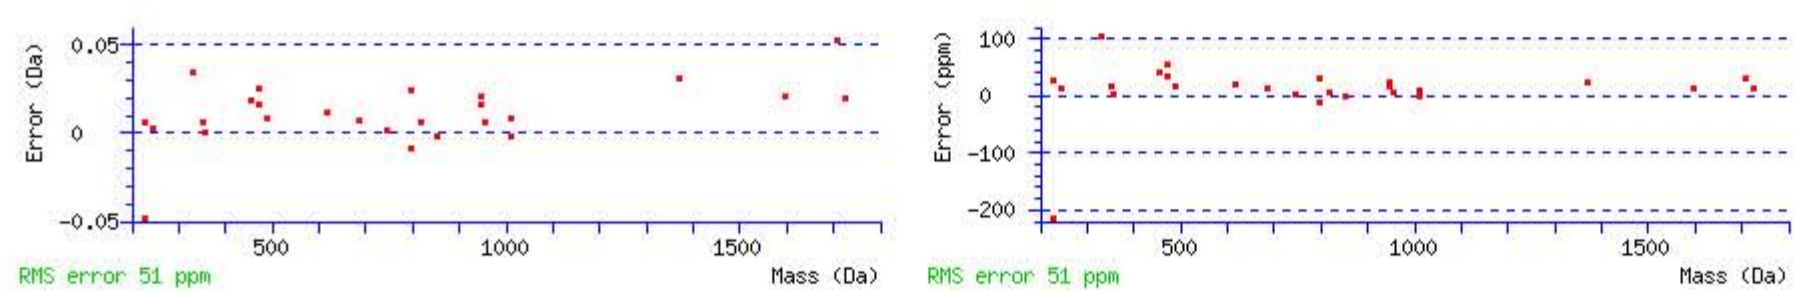

NCBI BLAST search of **EDLIWELLNQAQEHFGK**  
 (Parameters: blastp, nr protein database, expect=20000, no filter, PAM30)  
 Other BLAST [web gateways](#)

### All matches to this query

| Score | Mr(calc):   | Delta     | Sequence                          |
|-------|-------------|-----------|-----------------------------------|
| 27.2  | 2380.188522 | -0.010020 | <a href="#">EDLIWELLNQAQEHFGK</a> |
| 17.2  | 2380.188522 | -0.010020 | <a href="#">EDLIWELLNQAQEHFGK</a> |



# MASCOT Search Results

## Peptide View

MS/MS Fragmentation of **AKLIALLTLLGMGLALFRNHQSSYQTR**

Found in **PON1\_HUMAN**, Serum paraoxonase/arylesterase 1 OS=Homo sapiens GN=PON1 PE=1 SV=3

Match to Query 58907: 3212.765970 from(643.560470,5+) rtinseconds(3229) index(57332)

Title: Locus:1.1.1.3762.2 File:"2013-07-02 CLN FXIII 30 min 3rd F 4.wiff"

Data file C:\Program Files (x86)\Matrix Science\Mascot Daemon\mgf3 FXIII 30 min 3rd\mascot\_daemon\_merge.mgf

Click mouse within plot area to zoom in by factor of two about that point

Or, Plot from  to  Da

Label all possible matches  Label matches used for scoring

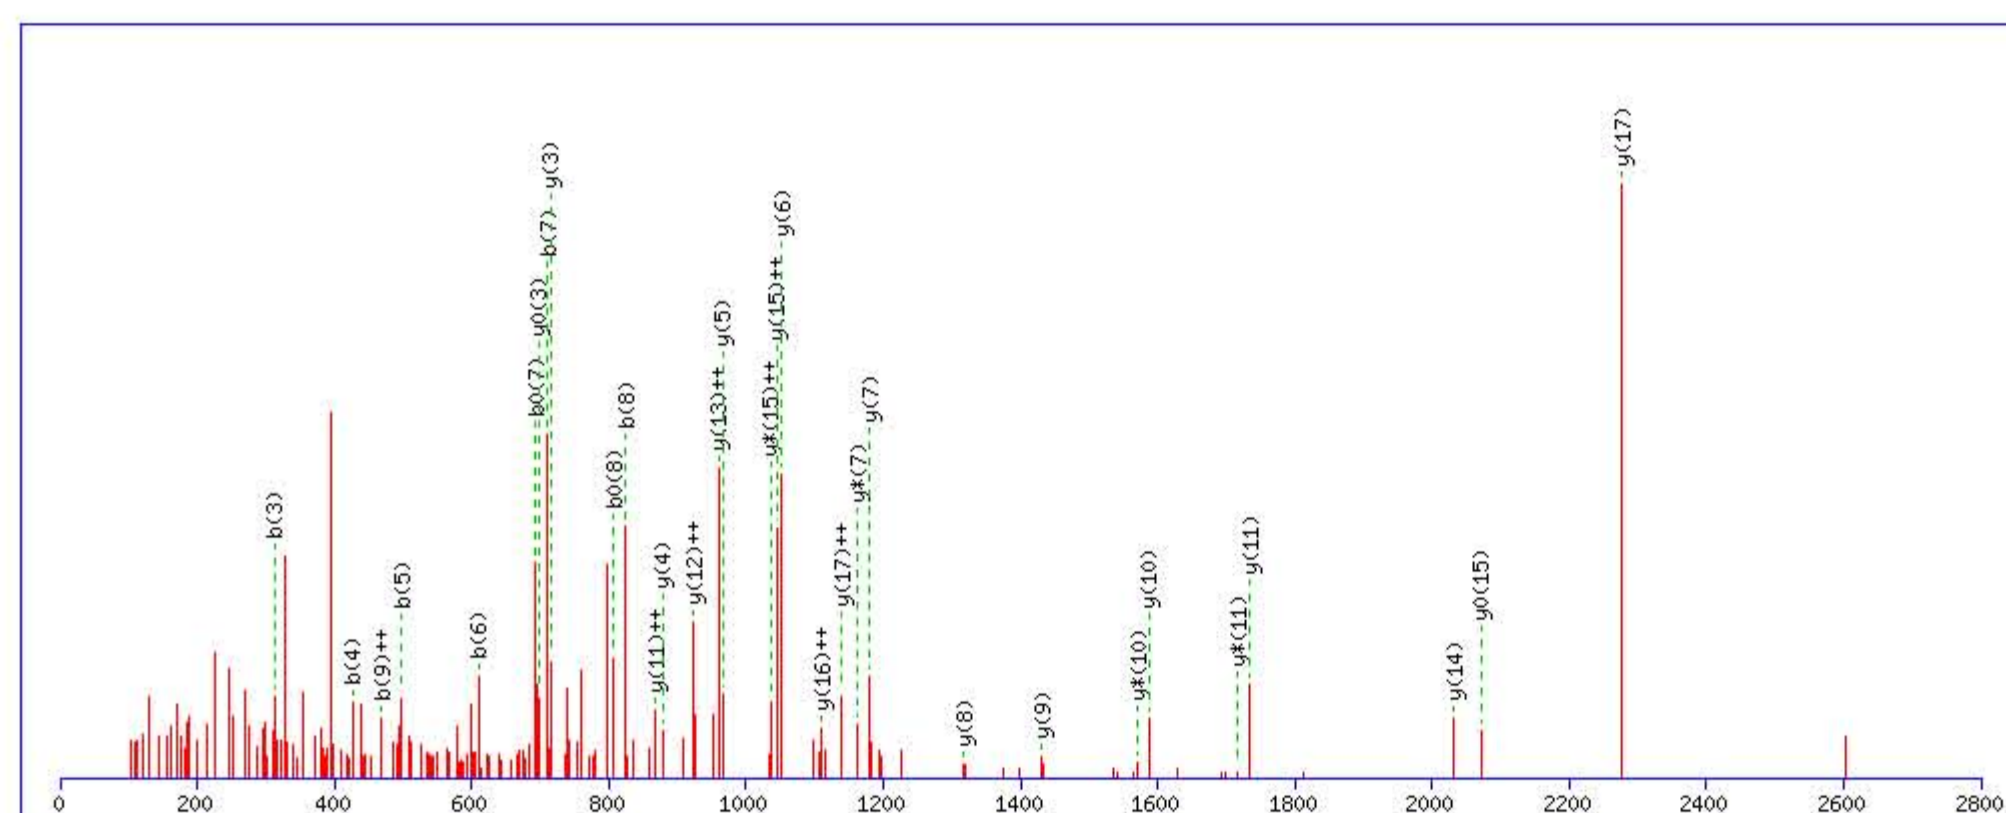

Monoisotopic mass of neutral peptide Mr(calc): 3212.767807

Fixed modifications: Carbamidomethyl (C) (apply to specified residues or termini only)

Variable modifications:

Q24 : Biotin:Thermo-21345 (Q)

Ions Score: 54 Expect: 3.4e-005

Matches : 32/284 fragment ions using 66 most intense peaks [\(help\)](#)

| #  | b                 | b <sup>++</sup>   | b <sup>*</sup> | b <sup>++</sup> | b <sup>0</sup>    | b <sup>0++</sup> | Seq. | y                  | y <sup>++</sup>    | y <sup>*</sup>     | y <sup>++</sup>    | y <sup>0</sup>     | y <sup>0++</sup> | #  |
|----|-------------------|-------------------|----------------|-----------------|-------------------|------------------|------|--------------------|--------------------|--------------------|--------------------|--------------------|------------------|----|
| 1  | 72.044390         | 36.525833         |                |                 |                   |                  | A    |                    |                    |                    |                    |                    |                  | 26 |
| 2  | 200.139353        | 100.573315        | 183.112804     | 92.060040       |                   |                  | K    | 3142.738015        | 1571.872645        | 3125.711466        | 1563.359371        | 3124.727450        | 1562.867363      | 25 |
| 3  | <b>313.223417</b> | 157.115346        | 296.196868     | 148.602072      |                   |                  | L    | 3014.643052        | 1507.825164        | 2997.616503        | 1499.311889        | 2996.632487        | 1498.819881      | 24 |
| 4  | <b>426.307481</b> | 213.657378        | 409.280932     | 205.144104      |                   |                  | I    | 2901.558988        | 1451.283132        | 2884.532439        | 1442.769857        | 2883.548423        | 1442.277849      | 23 |
| 5  | <b>497.344595</b> | 249.175935        | 480.318046     | 240.662661      |                   |                  | A    | 2788.474924        | 1394.741100        | 2771.448375        | 1386.227825        | 2770.464359        | 1385.735817      | 22 |
| 6  | <b>610.428659</b> | 305.717968        | 593.402110     | 297.204693      |                   |                  | L    | 2717.437810        | 1359.222543        | 2700.411261        | 1350.709268        | 2699.427245        | 1350.217260      | 21 |
| 7  | <b>711.476338</b> | 356.241807        | 694.449789     | 347.728533      | <b>693.465773</b> | 347.236525       | T    | 2604.353746        | 1302.680511        | 2587.327197        | 1294.167236        | 2586.343181        | 1293.675228      | 20 |
| 8  | <b>824.560402</b> | 412.783839        | 807.533853     | 404.270565      | <b>806.549837</b> | 403.778557       | L    | 2503.306067        | 1252.156671        | 2486.279518        | 1243.643397        | 2485.295502        | 1243.151389      | 19 |
| 9  | 937.644466        | <b>469.325871</b> | 920.617917     | 460.812597      | 919.633901        | 460.320589       | L    | 2390.222003        | 1195.614639        | 2373.195454        | 1187.101365        | 2372.211438        | 1186.609357      | 18 |
| 10 | 994.665930        | 497.836603        | 977.639381     | 489.323329      | 976.655365        | 488.831321       | G    | <b>2277.137939</b> | <b>1139.072607</b> | 2260.111390        | 1130.559333        | 2259.127374        | 1130.067325      | 17 |
| 11 | 1125.706415       | 563.356846        | 1108.679866    | 554.843571      | 1107.695850       | 554.351563       | M    | 2220.116475        | <b>1110.561875</b> | 2203.089926        | 1102.048601        | 2202.105910        | 1101.556593      | 16 |
| 12 | 1182.727879       | 591.867578        | 1165.701330    | 583.354303      | 1164.717314       | 582.862295       | G    | 2089.075990        | <b>1045.041633</b> | 2072.049441        | <b>1036.528358</b> | <b>2071.065425</b> | 1036.036350      | 15 |
| 13 | 1295.811943       | 648.409609        | 1278.785394    | 639.896335      | 1277.801378       | 639.404327       | L    | <b>2032.054526</b> | 1016.530901        | 2015.027977        | 1008.017627        | 2014.043961        | 1007.525619      | 14 |
| 14 | 1366.849057       | 683.928166        | 1349.822508    | 675.414892      | 1348.838492       | 674.922884       | A    | 1918.970462        | <b>959.988869</b>  | 1901.943913        | 951.475595         | 1900.959897        | 950.983587       | 13 |
| 15 | 1479.933121       | 740.470198        | 1462.906572    | 731.956924      | 1461.922556       | 731.464916       | L    | 1847.933348        | <b>924.470312</b>  | 1830.906799        | 915.957038         | 1829.922783        | 915.465030       | 12 |
| 16 | 1627.001535       | 814.004405        | 1609.974986    | 805.491131      | 1608.990970       | 804.999123       | F    | <b>1734.849284</b> | <b>867.928280</b>  | <b>1717.822735</b> | 859.415006         | 1716.838719        | 858.922998       | 11 |
| 17 | 1783.102646       | 892.054961        | 1766.076097    | 883.541686      | 1765.092081       | 883.049678       | R    | <b>1587.780870</b> | 794.394073         | <b>1570.754321</b> | 785.880799         | 1569.770305        | 785.388791       | 10 |
| 18 | 1897.145573       | 949.076424        | 1880.119024    | 940.563150      | 1879.135008       | 940.071142       | N    | <b>1431.679759</b> | 716.343518         | 1414.653210        | 707.830243         | 1413.669194        | 707.338235       | 9  |
| 19 | 2034.204485       | 1017.605880       | 2017.177936    | 1009.092606     | 2016.193920       | 1008.600598      | H    | <b>1317.636832</b> | 659.322054         | 1300.610283        | 650.808780         | 1299.626267        | 650.316772       | 8  |
| 20 | 2162.263063       | 1081.635169       | 2145.236514    | 1073.121895     | 2144.252498       | 1072.629887      | Q    | <b>1180.577920</b> | 590.792598         | <b>1163.551371</b> | 582.279324         | 1162.567355        | 581.787316       | 7  |
| 21 | 2249.295091       | 1125.151183       | 2232.268542    | 1116.637909     | 2231.284526       | 1116.145901      | S    | <b>1052.519342</b> | 526.763309         | 1035.492793        | 518.250035         | 1034.508777        | 517.758027       | 6  |
| 22 | 2336.327119       | 1168.667197       | 2319.300570    | 1160.153923     | 2318.316554       | 1159.661915      | S    | <b>965.487314</b>  | 483.247295         | 948.460765         | 474.734021         | 947.476749         | 474.242013       | 5  |
| 23 | 2499.390448       | 1250.198862       | 2482.363899    | 1241.685587     | 2481.379883       | 1241.193579      | Y    | <b>878.455286</b>  | 439.731281         | 861.428737         | 431.218007         | 860.444721         | 430.725999       | 4  |
| 24 | 2938.615774       | 1469.811525       | 2921.589225    | 1461.298250     | 2920.605209       | 1460.806242      | Q    | <b>715.391957</b>  | 358.199617         | 698.365408         | 349.686342         | <b>697.381392</b>  | 349.194334       | 3  |
| 25 | 3039.663453       | 1520.335364       | 3022.636904    | 1511.822090     | 3021.652888       | 1511.330082      | T    | 276.166631         | 138.586953         | 259.140082         | 130.073679         | 258.156066         | 129.581671       | 2  |
| 26 |                   |                   |                |                 |                   |                  | R    | 175.118952         | 88.063114          | 158.092403         | 79.549839          |                    |                  | 1  |

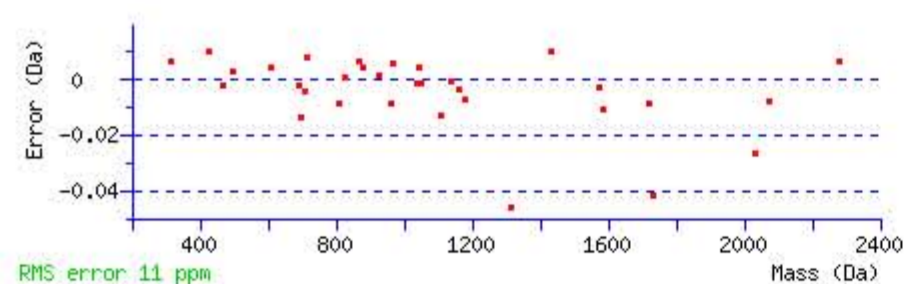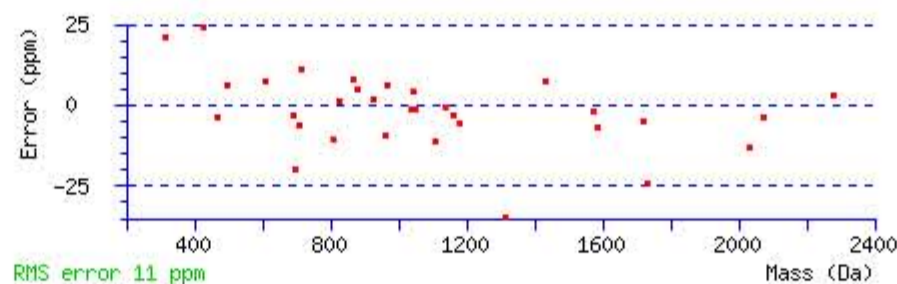

NCBI BLAST search of **AKLIALLTLLGMGLALFRNHQSSYQTR**

(Parameters: blastp, nr protein database, expect=20000, no filter, PAM30)

Other BLAST [web gateways](#)

All matches to this query

| Score | Mr(calc):   | Delta     | Sequence                                    |
|-------|-------------|-----------|---------------------------------------------|
| 54.0  | 3212.767807 | -0.001837 | <a href="#">AKLIALLTLLGMGLALFRNHQSSYQTR</a> |
| 35.2  | 3212.767807 | -0.001837 | <a href="#">AKLIALLTLLGMGLALFRNHQSSYQTR</a> |



# MASCOT SEARCH RESULTS

## Peptide View

MS/MS Fragmentation of **GHQLQLDYFGACK**

Found in **SPRL1\_HUMAN**, SPARC-like protein 1 OS=Homo sapiens GN=SPARCL1 PE=1 SV=2

Match to Query 40117: 1846.883652 from(616.635160,3+) rtinseconds(2157) index(52004)

Title: Locus:1.1.1.3394.8 File:"2013-07-02 CLN FXIII 30 min 3rd F 4.wiff"

Data file C:\Program Files (x86)\Matrix Science\Mascot Daemon\mgf3 FXIII 30 min 3rd\mascot\_daemon\_merge.mgf

Click mouse within plot area to zoom in by factor of two about that point

Or, Plot from  to  Da

Label all possible matches  Label matches used for scoring

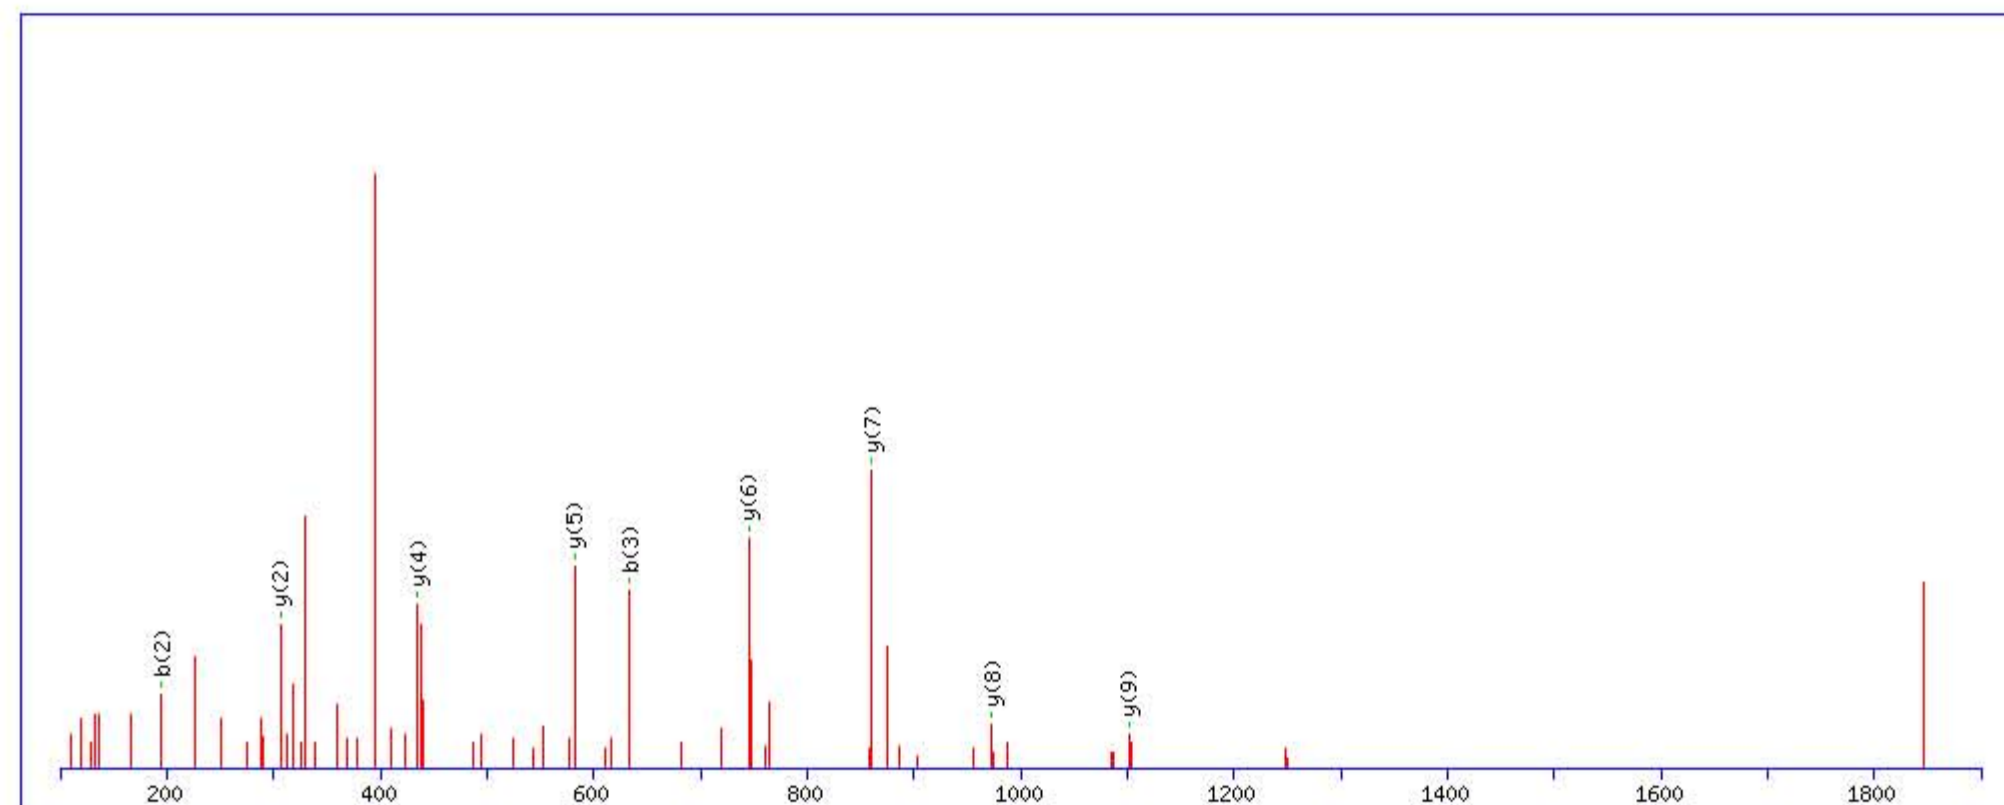

Monoisotopic mass of neutral peptide Mr(calc): 1846.885849

Fixed modifications: Carbamidomethyl (C) (apply to specified residues or termini only)

Variable modifications:

Q3 : Biotin:Thermo-21345 (Q)

Ions Score: 55 Expect: 1.1e-005

Matches : 9/116 fragment ions using 11 most intense peaks [\(help\)](#)

| #  | b                 | b <sup>++</sup> | b <sup>*</sup> | b <sup>*++</sup> | b <sup>0</sup> | b <sup>0++</sup> | Seq. | y                  | y <sup>++</sup> | y <sup>*</sup> | y <sup>*++</sup> | y <sup>0</sup> | y <sup>0++</sup> | #  |
|----|-------------------|-----------------|----------------|------------------|----------------|------------------|------|--------------------|-----------------|----------------|------------------|----------------|------------------|----|
| 1  | 58.028740         | 29.518008       |                |                  |                |                  | G    |                    |                 |                |                  |                |                  | 13 |
| 2  | <b>195.087652</b> | 98.047464       |                |                  |                |                  | H    | 1790.871661        | 895.939469      | 1773.845112    | 887.426194       | 1772.861096    | 886.934186       | 12 |
| 3  | <b>634.312978</b> | 317.660127      | 617.286429     | 309.146853       |                |                  | Q    | 1653.812749        | 827.410013      | 1636.786200    | 818.896738       | 1635.802184    | 818.404730       | 11 |
| 4  | 747.397042        | 374.202159      | 730.370493     | 365.688885       |                |                  | L    | 1214.587423        | 607.797350      | 1197.560874    | 599.284075       | 1196.576858    | 598.792067       | 10 |
| 5  | 875.455620        | 438.231448      | 858.429071     | 429.718174       |                |                  | Q    | <b>1101.503359</b> | 551.255318      | 1084.476810    | 542.742043       | 1083.492794    | 542.250035       | 9  |
| 6  | 988.539684        | 494.773480      | 971.513135     | 486.260206       |                |                  | L    | <b>973.444781</b>  | 487.226029      | 956.418232     | 478.712754       | 955.434216     | 478.220746       | 8  |
| 7  | 1103.566627       | 552.286952      | 1086.540078    | 543.773677       | 1085.556062    | 543.281669       | D    | <b>860.360717</b>  | 430.683997      | 843.334168     | 422.170722       | 842.350152     | 421.678714       | 7  |
| 8  | 1266.629956       | 633.818616      | 1249.603407    | 625.305342       | 1248.619391    | 624.813334       | Y    | <b>745.333774</b>  | 373.170525      | 728.307225     | 364.657251       |                |                  | 6  |
| 9  | 1413.698370       | 707.352823      | 1396.671821    | 698.839549       | 1395.687805    | 698.347541       | F    | <b>582.270445</b>  | 291.638861      | 565.243896     | 283.125586       |                |                  | 5  |
| 10 | 1470.719834       | 735.863555      | 1453.693285    | 727.350281       | 1452.709269    | 726.858273       | G    | <b>435.202031</b>  | 218.104653      | 418.175482     | 209.591379       |                |                  | 4  |
| 11 | 1541.756948       | 771.382112      | 1524.730399    | 762.868838       | 1523.746383    | 762.376830       | A    | 378.180567         | 189.593921      | 361.154018     | 181.080647       |                |                  | 3  |
| 12 | 1701.787597       | 851.397437      | 1684.761048    | 842.884162       | 1683.777032    | 842.392154       | C    | <b>307.143453</b>  | 154.075365      | 290.116904     | 145.562090       |                |                  | 2  |
| 13 |                   |                 |                |                  |                |                  | K    | 147.112804         | 74.060040       | 130.086255     | 65.546765        |                |                  | 1  |

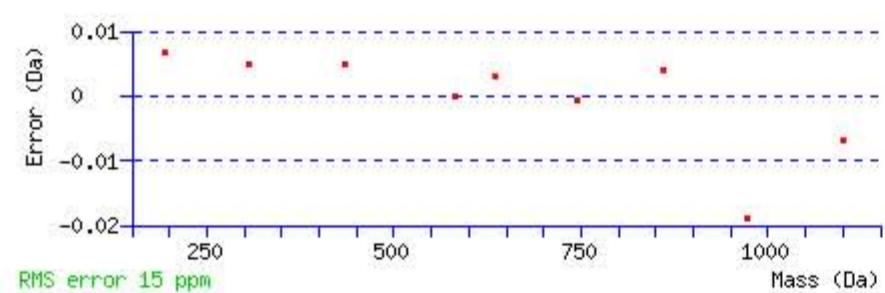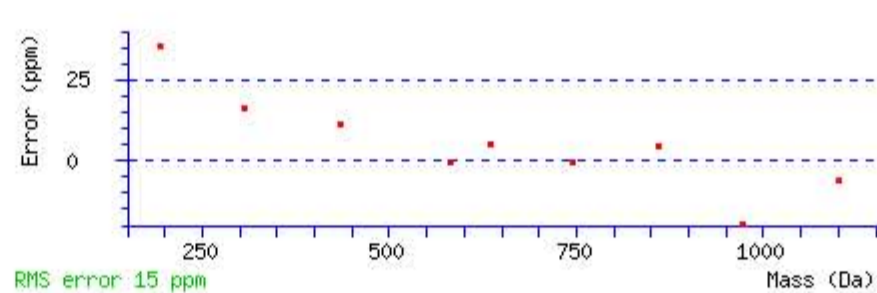

NCBI BLAST search of **GHQLQLDYFGACK**

(Parameters: blastp, nr protein database, expect=20000, no filter, PAM30)

Other BLAST [web gateways](#)

All matches to this query

| Score | Mr(calc):   | Delta     | Sequence                          |
|-------|-------------|-----------|-----------------------------------|
| 55.4  | 1846.885849 | -0.002197 | <a href="#">GHQLQLDYFGACK</a>     |
| 36.8  | 1846.885849 | -0.002197 | <a href="#">GHQLQLDYFGACK</a>     |
| 2.5   | 1846.910110 | -0.026458 | <a href="#">FYNDYGDIKETLIR</a>    |
| 0.5   | 1846.873062 | 0.010590  | <a href="#">AGINQNMDAVTEELQAK</a> |

Mascot: <http://www.matrixscience.com/>



# MASCOT Search Results

## Peptide View

MS/MS Fragmentation of **AAAFEEQENETVVVK**

Found in **TLN1\_HUMAN**, Talin-1 OS=Homo sapiens GN=TLN1 PE=1 SV=3

Match to Query 24776: 1973.978502 from(659.000110,3+) rtinseconds(1997) index(51167)

Title: Locus:1.1.1.3338.18 File:"2013-07-02 CLN FXIII 30 min 3rd F 4.wiff"

Data file C:\Program Files (x86)\Matrix Science\Mascot Daemon\mgf3 FXIII 30 min 3rd\mascot\_daemon\_merge.mgf

Click mouse within plot area to zoom in by factor of two about that point

Or, Plot from  to  Da

Label all possible matches  Label matches used for scoring

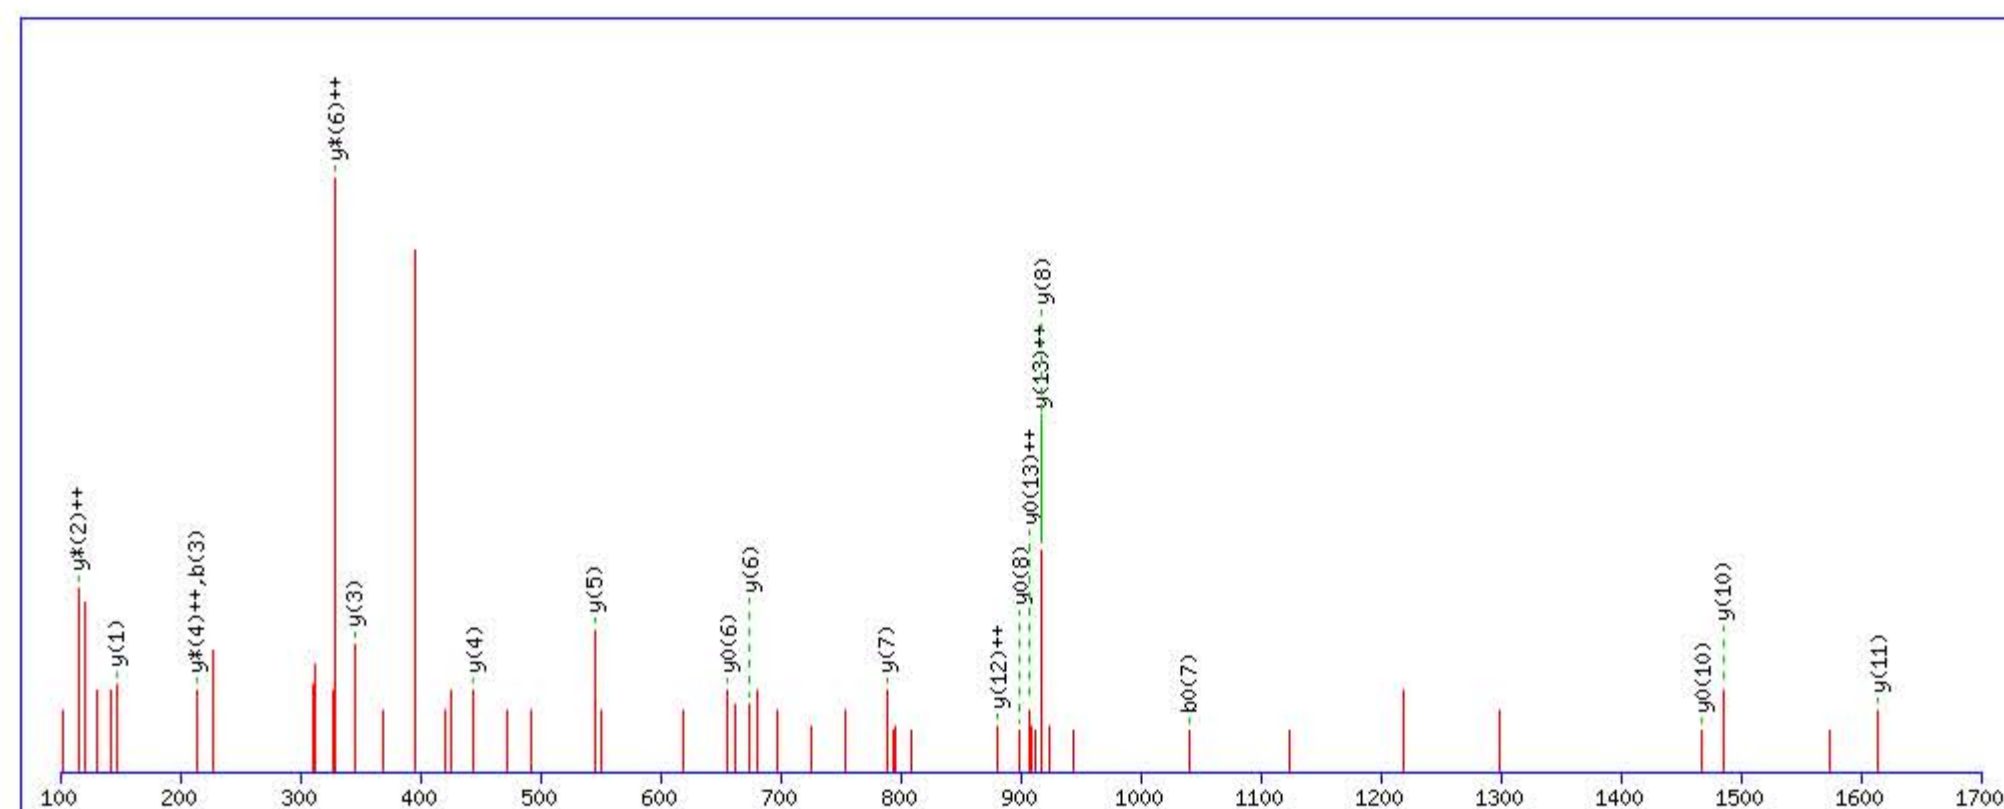

Monoisotopic mass of neutral peptide Mr(calc): 1973.976807

Fixed modifications: Carbamidomethyl (C) (apply to specified residues or termini only)

Variable modifications:

Q7 : Biotin:Thermo-21345 (Q)

Ions Score: 51 Expect: 4.5e-005

Matches : 20/140 fragment ions using 33 most intense peaks [\(help\)](#)

| #  | b                 | b <sup>++</sup> | b <sup>*</sup> | b <sup>*++</sup> | b <sup>0</sup>     | b <sup>0++</sup> | Seq. | y                  | y <sup>++</sup>   | y <sup>*</sup> | y <sup>*++</sup>  | y <sup>0</sup>     | y <sup>0++</sup>  | #  |
|----|-------------------|-----------------|----------------|------------------|--------------------|------------------|------|--------------------|-------------------|----------------|-------------------|--------------------|-------------------|----|
| 1  | 72.044390         | 36.525833       |                |                  |                    |                  | A    |                    |                   |                |                   |                    |                   | 15 |
| 2  | 143.081504        | 72.044390       |                |                  |                    |                  | A    | 1903.946992        | 952.477134        | 1886.920443    | 943.963860        | 1885.936427        | 943.471852        | 14 |
| 3  | <b>214.118618</b> | 107.562947      |                |                  |                    |                  | A    | 1832.909878        | <b>916.958577</b> | 1815.883329    | 908.445303        | 1814.899313        | <b>907.953295</b> | 13 |
| 4  | 361.187032        | 181.097154      |                |                  |                    |                  | F    | 1761.872764        | <b>881.440020</b> | 1744.846215    | 872.926746        | 1743.862199        | 872.434738        | 12 |
| 5  | 490.229625        | 245.618450      |                |                  | 472.219060         | 236.613168       | E    | <b>1614.804350</b> | 807.905813        | 1597.777801    | 799.392539        | 1596.793785        | 798.900531        | 11 |
| 6  | 619.272218        | 310.139747      |                |                  | 601.261653         | 301.134465       | E    | <b>1485.761757</b> | 743.384517        | 1468.735208    | 734.871242        | <b>1467.751192</b> | 734.379234        | 10 |
| 7  | 1058.497544       | 529.752410      | 1041.470995    | 521.239136       | <b>1040.486979</b> | 520.747128       | Q    | 1356.719164        | 678.863220        | 1339.692615    | 670.349946        | 1338.708599        | 669.857938        | 9  |
| 8  | 1187.540137       | 594.273707      | 1170.513588    | 585.760432       | 1169.529572        | 585.268424       | E    | <b>917.493838</b>  | 459.250557        | 900.467289     | 450.737283        | <b>899.483273</b>  | 450.245275        | 8  |
| 9  | 1301.583064       | 651.295170      | 1284.556515    | 642.781896       | 1283.572499        | 642.289888       | N    | <b>788.451245</b>  | 394.729261        | 771.424696     | 386.215986        | 770.440680         | 385.723978        | 7  |
| 10 | 1430.625657       | 715.816467      | 1413.599108    | 707.303192       | 1412.615092        | 706.811184       | E    | <b>674.408318</b>  | 337.707797        | 657.381769     | <b>329.194523</b> | <b>656.397753</b>  | 328.702515        | 6  |
| 11 | 1531.673336       | 766.340306      | 1514.646787    | 757.827032       | 1513.662771        | 757.335024       | T    | <b>545.365725</b>  | 273.186501        | 528.339176     | 264.673226        | 527.355160         | 264.181218        | 5  |
| 12 | 1630.741750       | 815.874513      | 1613.715201    | 807.361239       | 1612.731185        | 806.869231       | V    | <b>444.318046</b>  | 222.662661        | 427.291497     | <b>214.149387</b> |                    |                   | 4  |
| 13 | 1729.810164       | 865.408720      | 1712.783615    | 856.895446       | 1711.799599        | 856.403438       | V    | <b>345.249632</b>  | 173.128454        | 328.223083     | 164.615180        |                    |                   | 3  |
| 14 | 1828.878578       | 914.942927      | 1811.852029    | 906.429653       | 1810.868013        | 905.937645       | V    | 246.181218         | 123.594247        | 229.154669     | <b>115.080973</b> |                    |                   | 2  |
| 15 |                   |                 |                |                  |                    |                  | K    | <b>147.112804</b>  | 74.060040         | 130.086255     | 65.546765         |                    |                   | 1  |

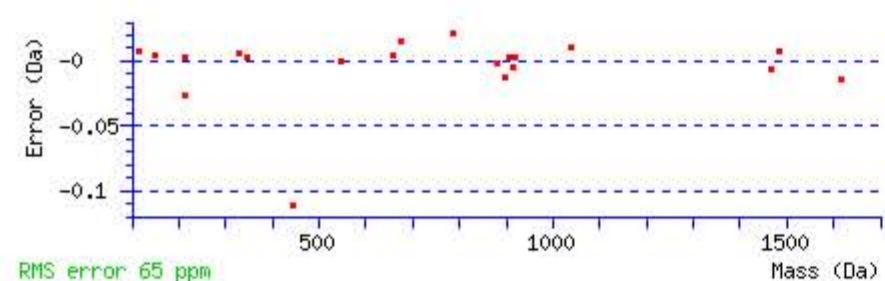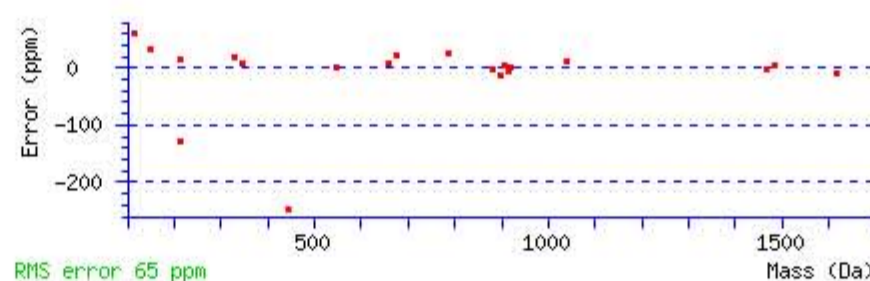

NCBI BLAST search of **AAAFEEQENETVVVK**

(Parameters: blastp, nr protein database, expect=20000, no filter, PAM30)

Other BLAST [web gateways](#)

All matches to this query

| Score | Mr(calc):   | Delta     | Sequence                           |
|-------|-------------|-----------|------------------------------------|
| 51.3  | 1973.976807 | 0.001695  | <a href="#">AAAFEEQENETVVVK</a>    |
| 5.0   | 1973.990555 | -0.012053 | <a href="#">ESQVVSENGQEKVVDLSK</a> |

Mascot: <http://www.matrixscience.com/>



# MASCOT Search Results

## Peptide View

MS/MS Fragmentation of **SPYQLVLQHSR**

Found in **BGH3\_HUMAN**, Transforming growth factor-beta-induced protein ig-h3 OS=Homo sapiens GN=TGFBI PE=1 SV=1

Match to Query 35830: 1637.886342 from(546.969390,3+) rtinseconds(1905) index(4627)

Title: Locus:1.1.1.3233.15 File:"2013-07-02 CLN FXIII 30 min 3rd F 1.wiff"

Data file C:\Program Files (x86)\Matrix Science\Mascot Daemon\mgf3 FXIII 30 min 3rd\mascot\_daemon\_merge.mgf

Click mouse within plot area to zoom in by factor of two about that point

Or, Plot from  to  Da

Label all possible matches  Label matches used for scoring

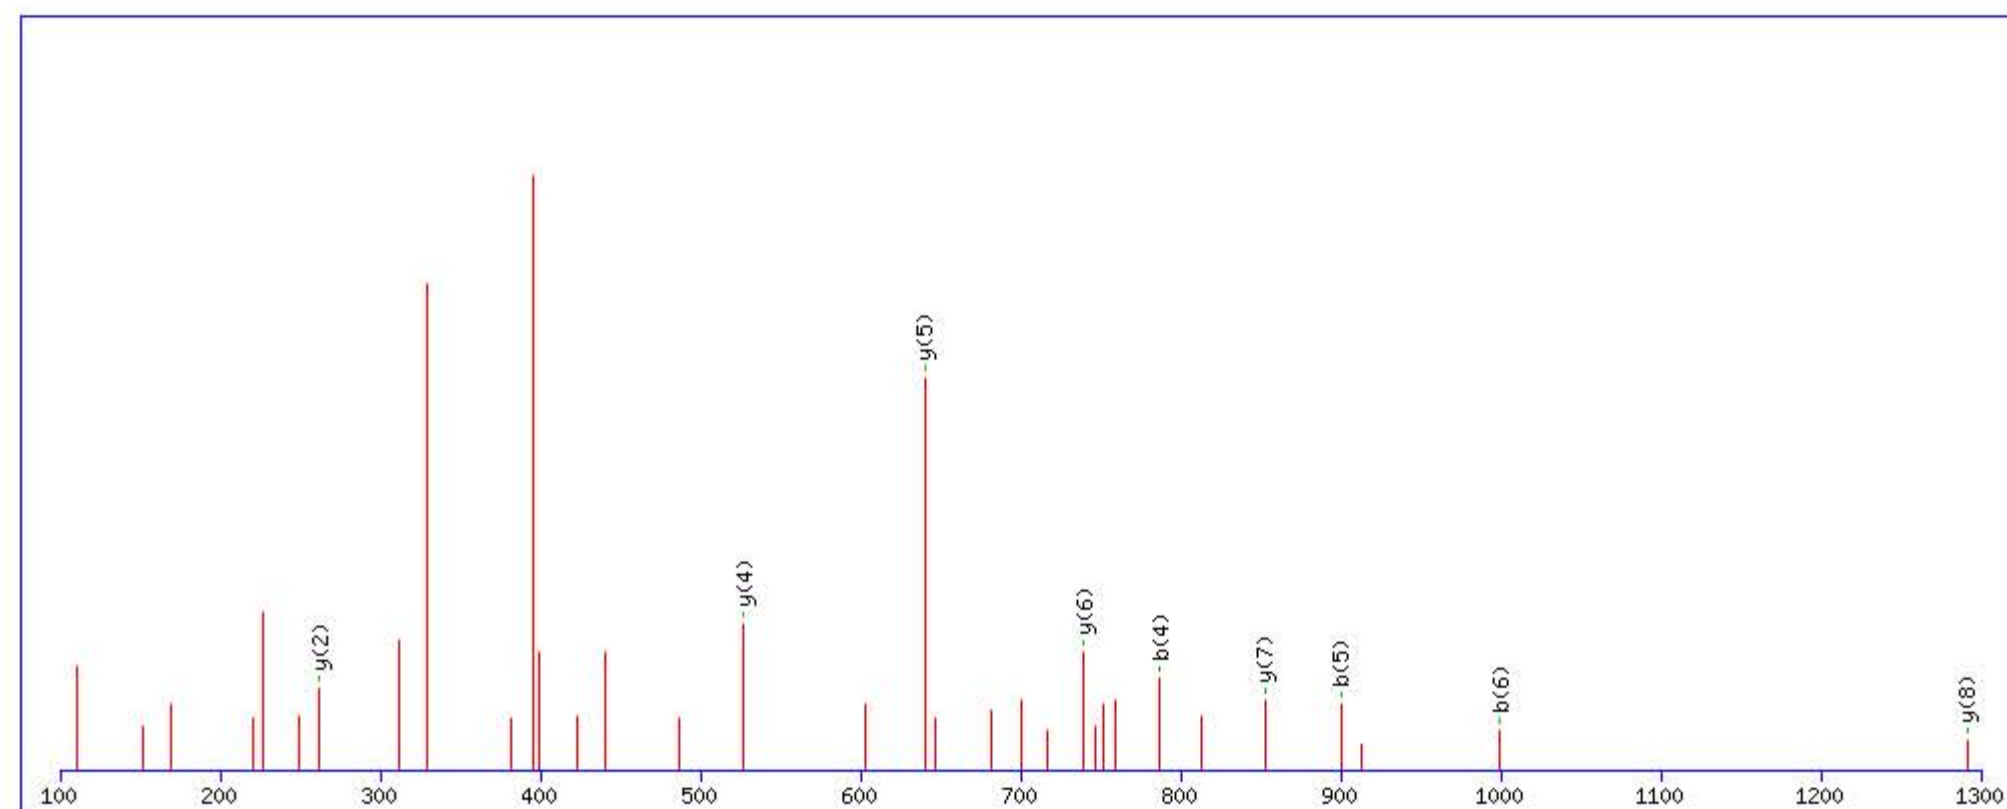

Monoisotopic mass of neutral peptide Mr(calc): 1637.871170

Fixed modifications: Carbamidomethyl (C) (apply to specified residues or termini only)

Variable modifications:

Q4 : Biotin:Thermo-21345 (Q)

Ions Score: 28 Expect: 0.0048

Matches : 9/112 fragment ions using 19 most intense peaks [\(help\)](#)

| #  | b                 | b <sup>++</sup> | b <sup>+</sup> | b <sup>+++</sup> | b <sup>0</sup> | b <sup>0++</sup> | Seq. | y                  | y <sup>++</sup> | y <sup>+</sup> | y <sup>+++</sup> | y <sup>0</sup> | y <sup>0++</sup> | #  |
|----|-------------------|-----------------|----------------|------------------|----------------|------------------|------|--------------------|-----------------|----------------|------------------|----------------|------------------|----|
| 1  | 88.039304         | 44.523290       |                |                  | 70.028739      | 35.518008        | S    |                    |                 |                |                  |                |                  | 11 |
| 2  | 185.092068        | 93.049672       |                |                  | 167.081503     | 84.044389        | P    | 1551.846431        | 776.426853      | 1534.819882    | 767.913579       | 1533.835866    | 767.421571       | 10 |
| 3  | 348.155397        | 174.581336      |                |                  | 330.144832     | 165.576054       | Y    | 1454.793667        | 727.900471      | 1437.767118    | 719.387197       | 1436.783102    | 718.895189       | 9  |
| 4  | <b>787.380723</b> | 394.194000      | 770.354174     | 385.680725       | 769.370158     | 385.188717       | Q    | <b>1291.730338</b> | 646.368807      | 1274.703789    | 637.855532       | 1273.719773    | 637.363524       | 8  |
| 5  | <b>900.464787</b> | 450.736032      | 883.438238     | 442.222757       | 882.454222     | 441.730749       | L    | <b>852.505012</b>  | 426.756144      | 835.478463     | 418.242869       | 834.494447     | 417.750861       | 7  |
| 6  | <b>999.533201</b> | 500.270239      | 982.506652     | 491.756964       | 981.522636     | 491.264956       | V    | <b>739.420948</b>  | 370.214112      | 722.394399     | 361.700837       | 721.410383     | 361.208829       | 6  |
| 7  | 1112.617265       | 556.812270      | 1095.590716    | 548.298996       | 1094.606700    | 547.806988       | L    | <b>640.352534</b>  | 320.679905      | 623.325985     | 312.166630       | 622.341969     | 311.674622       | 5  |
| 8  | 1240.675843       | 620.841559      | 1223.649294    | 612.328285       | 1222.665278    | 611.836277       | Q    | <b>527.268470</b>  | 264.137873      | 510.241921     | 255.624598       | 509.257905     | 255.132590       | 4  |
| 9  | 1377.734755       | 689.371015      | 1360.708206    | 680.857741       | 1359.724190    | 680.365733       | H    | 399.209892         | 200.108584      | 382.183343     | 191.595309       | 381.199327     | 191.103301       | 3  |
| 10 | 1464.766783       | 732.887029      | 1447.740234    | 724.373755       | 1446.756218    | 723.881747       | S    | <b>262.150980</b>  | 131.579128      | 245.124431     | 123.065854       | 244.140415     | 122.573846       | 2  |
| 11 |                   |                 |                |                  |                |                  | R    | 175.118952         | 88.063114       | 158.092403     | 79.549839        |                |                  | 1  |

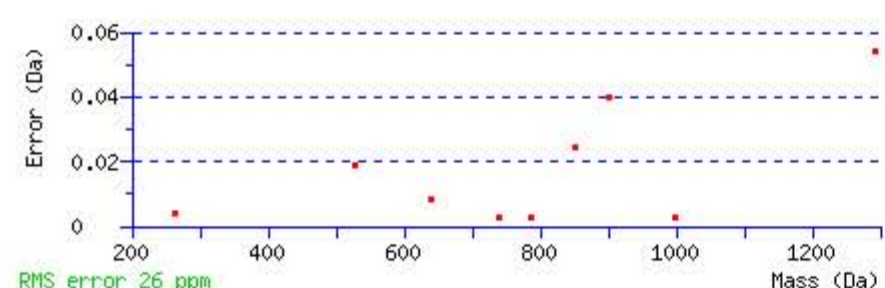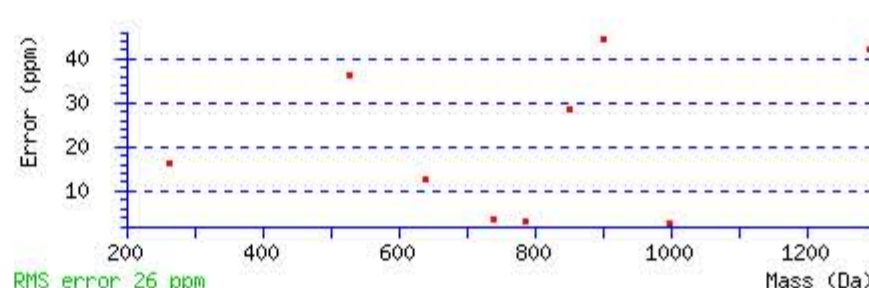

NCBI BLAST search of **SPYQLVLQHSR**

(Parameters: blastp, nr protein database, expect=20000, no filter, PAM30)

Other BLAST [web gateways](#)

All matches to this query

| Score | Mr(calc):   | Delta     | Sequence                          |
|-------|-------------|-----------|-----------------------------------|
| 28.0  | 1637.871170 | 0.015172  | <a href="#">SPYQLVLQHSR</a>       |
| 3.2   | 1637.888916 | -0.002574 | <a href="#">APAPPPAGALLPEPGQR</a> |

Mascot: <http://www.matrixscience.com/>



# MASCOT SEARCH RESULTS

## Peptide View

MS/MS Fragmentation of **LGDDLLQCHPAVK**

Found in **PROC\_HUMAN**, Vitamin K-dependent protein C OS=Homo sapiens GN=PROC PE=1 SV=1

Match to Query 38743: 1775.899662 from(592.973830,3+) rtinseconds(1981) index(51032)

Title: Locus:1.1.1.3333.8 File:"2013-07-02 CLN FXIII 30 min 3rd F 4.wiff"

Data file C:\Program Files (x86)\Matrix Science\Mascot Daemon\mgf3 FXIII 30 min 3rd\mascot\_daemon\_merge.mgf

Click mouse within plot area to zoom in by factor of two about that point

Or, Plot from  to  Da

Label all possible matches  Label matches used for scoring

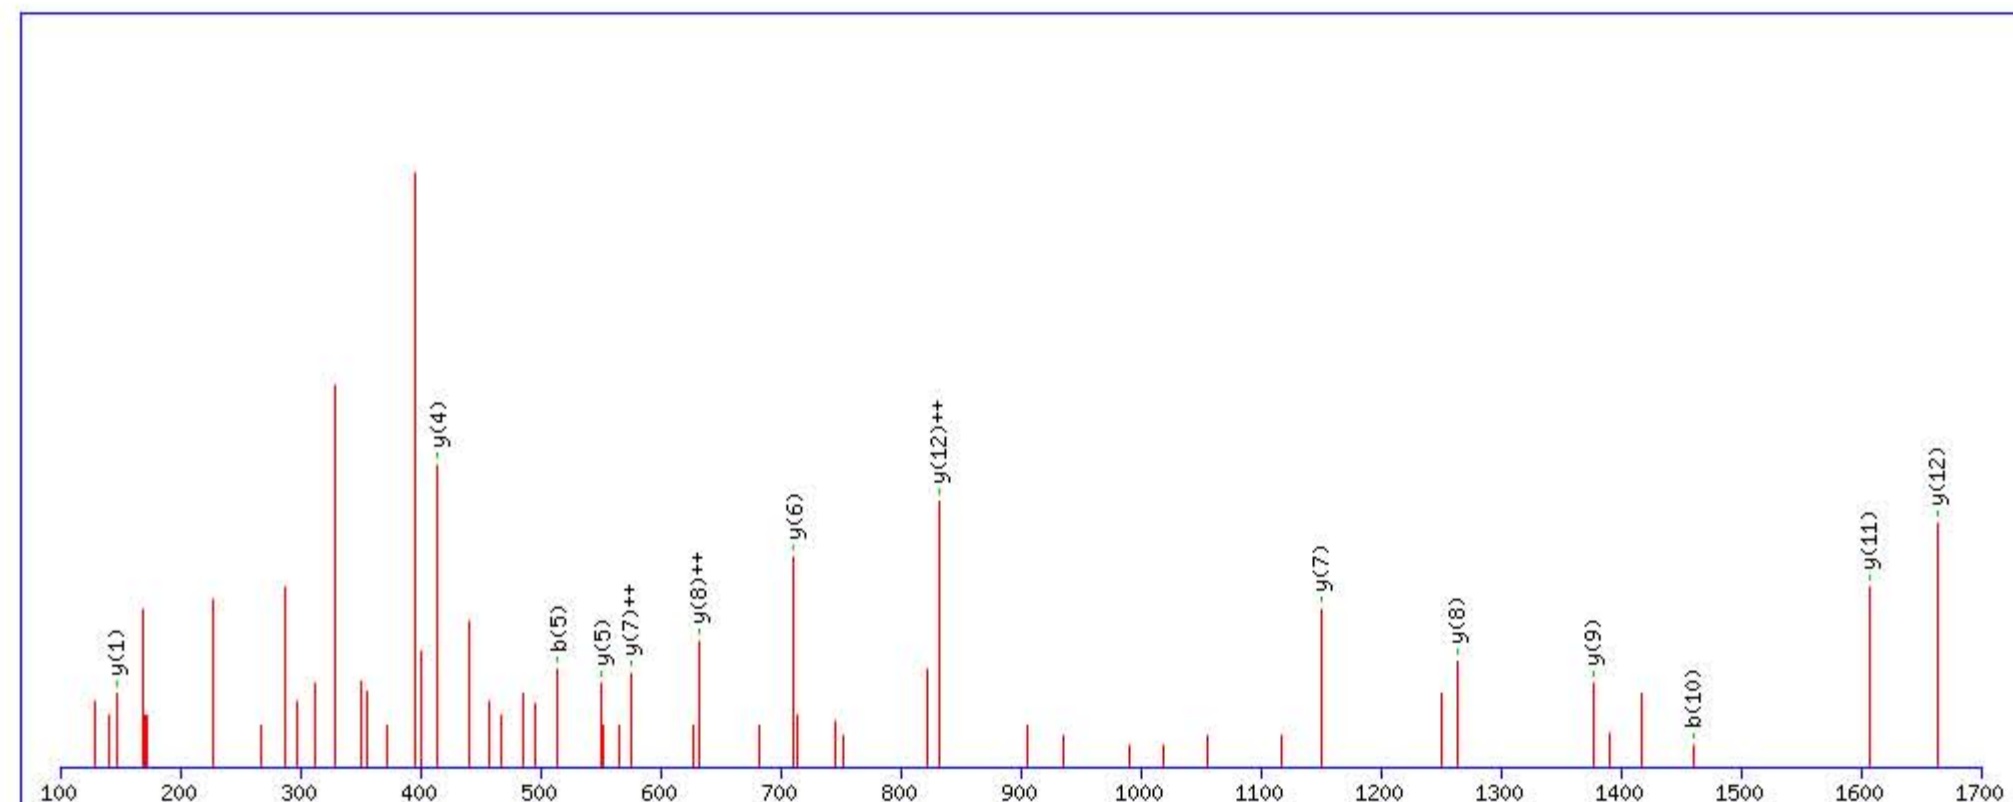

Monoisotopic mass of neutral peptide Mr(calc): 1775.906250

Fixed modifications: Carbamidomethyl (C) (apply to specified residues or termini only)

Variable modifications:

Q7 : Biotin:Thermo-21345 (Q)

Ions Score: 41 Expect: 0.0002

Matches : 14/110 fragment ions using 37 most intense peaks [\(help\)](#)

| #  | b           | b <sup>++</sup> | b <sup>*</sup> | b <sup>*++</sup> | b <sup>0</sup> | b <sup>0++</sup> | Seq. | y           | y <sup>++</sup> | y <sup>*</sup> | y <sup>*++</sup> | y <sup>0</sup> | y <sup>0++</sup> | #  |
|----|-------------|-----------------|----------------|------------------|----------------|------------------|------|-------------|-----------------|----------------|------------------|----------------|------------------|----|
| 1  | 114.091340  | 57.549308       |                |                  |                |                  | L    |             |                 |                |                  |                |                  | 13 |
| 2  | 171.112804  | 86.060040       |                |                  |                |                  | G    | 1663.829461 | 832.418369      | 1646.802912    | 823.905094       | 1645.818896    | 823.413086       | 12 |
| 3  | 286.139747  | 143.573512      |                |                  | 268.129182     | 134.568229       | D    | 1606.807997 | 803.907637      | 1589.781448    | 795.394362       | 1588.797432    | 794.902354       | 11 |
| 4  | 401.166690  | 201.086983      |                |                  | 383.156125     | 192.081701       | D    | 1491.781054 | 746.394165      | 1474.754505    | 737.880891       | 1473.770489    | 737.388883       | 10 |
| 5  | 514.250754  | 257.629015      |                |                  | 496.240189     | 248.623733       | L    | 1376.754111 | 688.880694      | 1359.727562    | 680.367419       |                |                  | 9  |
| 6  | 627.334818  | 314.171047      |                |                  | 609.324253     | 305.165765       | L    | 1263.670047 | 632.338662      | 1246.643498    | 623.825387       |                |                  | 8  |
| 7  | 1066.560144 | 533.783710      | 1049.533595    | 525.270436       | 1048.549579    | 524.778428       | Q    | 1150.585983 | 575.796630      | 1133.559434    | 567.283355       |                |                  | 7  |
| 8  | 1226.590793 | 613.799035      | 1209.564244    | 605.285760       | 1208.580228    | 604.793752       | C    | 711.360657  | 356.183967      | 694.334108     | 347.670692       |                |                  | 6  |
| 9  | 1363.649705 | 682.328491      | 1346.623156    | 673.815216       | 1345.639140    | 673.323208       | H    | 551.330008  | 276.168642      | 534.303459     | 267.655368       |                |                  | 5  |
| 10 | 1460.702469 | 730.854873      | 1443.675920    | 722.341598       | 1442.691904    | 721.849590       | P    | 414.271096  | 207.639186      | 397.244547     | 199.125912       |                |                  | 4  |
| 11 | 1531.739583 | 766.373430      | 1514.713034    | 757.860155       | 1513.729018    | 757.368147       | A    | 317.218332  | 159.112804      | 300.191783     | 150.599530       |                |                  | 3  |
| 12 | 1630.807997 | 815.907637      | 1613.781448    | 807.394362       | 1612.797432    | 806.902354       | V    | 246.181218  | 123.594247      | 229.154669     | 115.080973       |                |                  | 2  |
| 13 |             |                 |                |                  |                |                  | K    | 147.112804  | 74.060040       | 130.086255     | 65.546765        |                |                  | 1  |

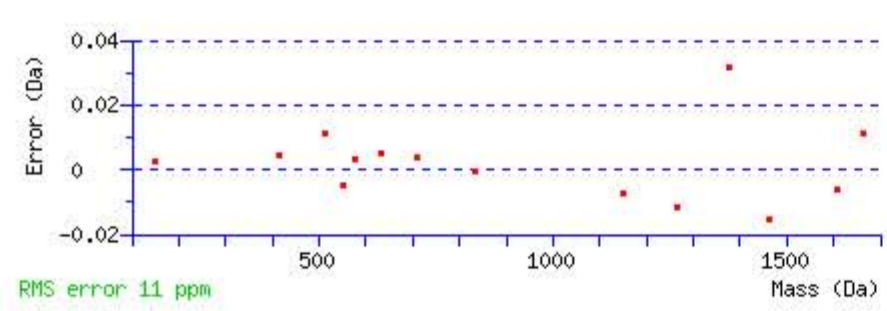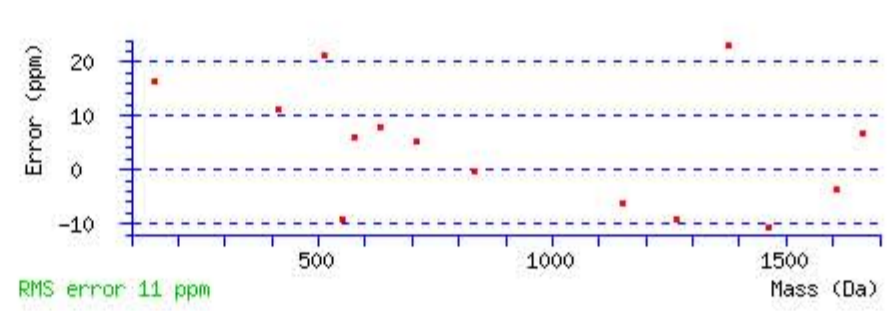

NCBI BLAST search of **LGDDLLQCHPAVK**

(Parameters: blastp, nr protein database, expect=20000, no filter, PAM30)

Other BLAST [web gateways](#)

All matches to this query

| Score | Mr(calc):   | Delta     | Sequence                       |
|-------|-------------|-----------|--------------------------------|
| 40.9  | 1775.906250 | -0.006588 | <a href="#">LGDDLLQCHPAVK</a>  |
| 1.4   | 1775.891418 | 0.008244  | <a href="#">IENQNSRQYLDQIR</a> |

Mascot: <http://www.matrixscience.com/>



# MASCOT Search Results

## Peptide View

MS/MS Fragmentation of **QLAVLDK**

Found in **PROS\_HUMAN**, Vitamin K-dependent protein S OS=Homo sapiens GN=PROS1 PE=1 SV=1

Match to Query 17470: 1096.627308 from(549.320930,2+) rtinseconds(1981) index(51029)

Title: Locus:1.1.1.3333.5 File:"2013-07-02 CLN FXIII 30 min 3rd F 4.wiff"

Data file C:\Program Files (x86)\Matrix Science\Mascot Daemon\mgf3 FXIII 30 min 3rd\mascot\_daemon\_merge.mgf

Click mouse within plot area to zoom in by factor of two about that point

Or, Plot from  to  Da

Label all possible matches  Label matches used for scoring

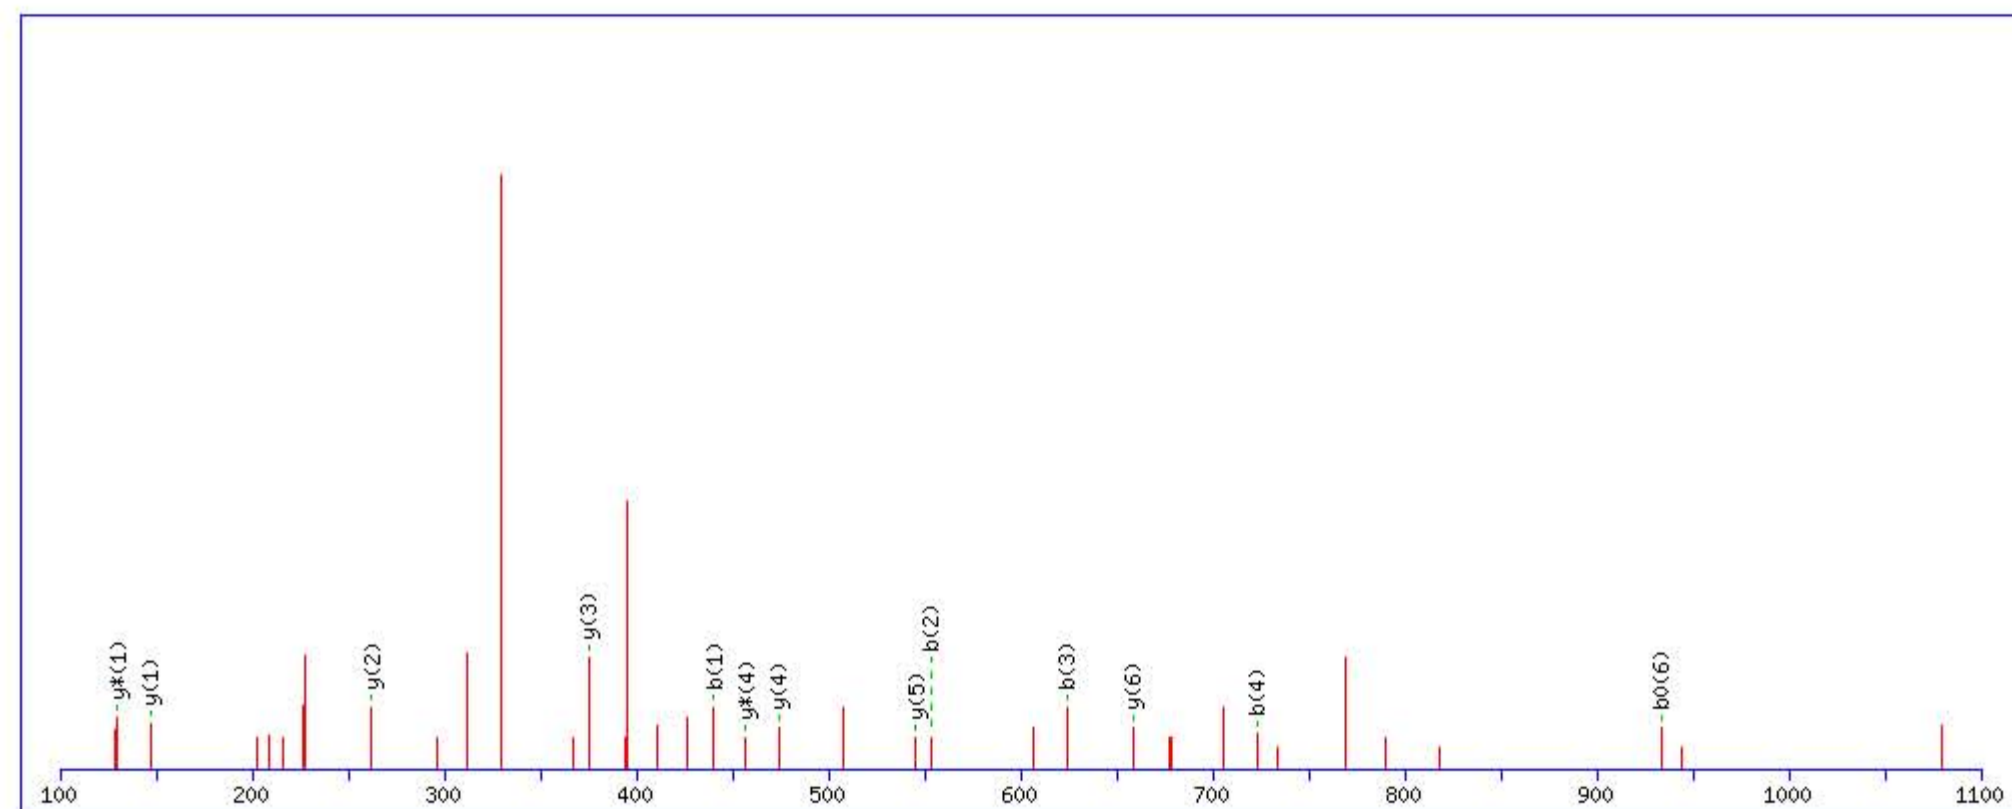

Monoisotopic mass of neutral peptide Mr(calc): 1096.631439

Fixed modifications: Carbamidomethyl (C) (apply to specified residues or termini only)

Variable modifications:

Q1 : Biotin:Thermo-21345 (Q)

Ions Score: 29 Expect: 0.013

Matches : 13/60 fragment ions using 30 most intense peaks [\(help\)](#)

| # | b                 | b <sup>++</sup> | b <sup>*</sup> | b <sup>+++</sup> | b <sup>0</sup>    | b <sup>0++</sup> | Seq. | y                 | y <sup>++</sup> | y <sup>*</sup>    | y <sup>+++</sup> | y <sup>0</sup> | y <sup>0++</sup> | # |
|---|-------------------|-----------------|----------------|------------------|-------------------|------------------|------|-------------------|-----------------|-------------------|------------------|----------------|------------------|---|
| 1 | <b>440.232602</b> | 220.619939      | 423.206053     | 212.106664       |                   |                  | Q    |                   |                 |                   |                  |                |                  | 7 |
| 2 | <b>553.316666</b> | 277.161971      | 536.290117     | 268.648697       |                   |                  | L    | <b>658.413403</b> | 329.710340      | 641.386854        | 321.197065       | 640.402838     | 320.705057       | 6 |
| 3 | <b>624.353780</b> | 312.680528      | 607.327231     | 304.167254       |                   |                  | A    | <b>545.329339</b> | 273.168308      | 528.302790        | 264.655033       | 527.318774     | 264.163025       | 5 |
| 4 | <b>723.422194</b> | 362.214735      | 706.395645     | 353.701461       |                   |                  | V    | <b>474.292225</b> | 237.649750      | <b>457.265676</b> | 229.136476       | 456.281660     | 228.644468       | 4 |
| 5 | 836.506258        | 418.756767      | 819.479709     | 410.243493       |                   |                  | L    | <b>375.223811</b> | 188.115543      | 358.197262        | 179.602269       | 357.213246     | 179.110261       | 3 |
| 6 | 951.533201        | 476.270239      | 934.506652     | 467.756964       | <b>933.522636</b> | 467.264956       | D    | <b>262.139747</b> | 131.573511      | 245.113198        | 123.060237       | 244.129182     | 122.568229       | 2 |
| 7 |                   |                 |                |                  |                   |                  | K    | <b>147.112804</b> | 74.060040       | <b>130.086255</b> | 65.546765        |                |                  | 1 |

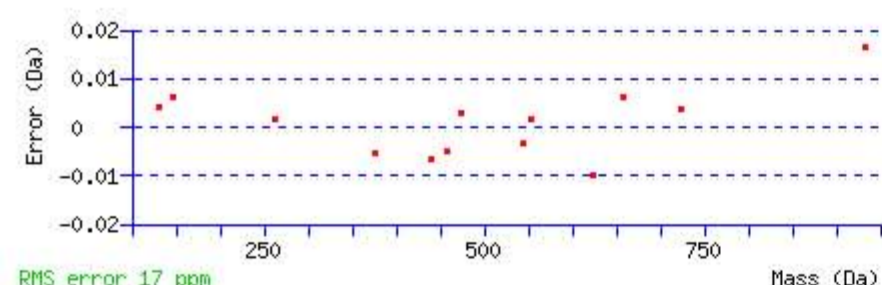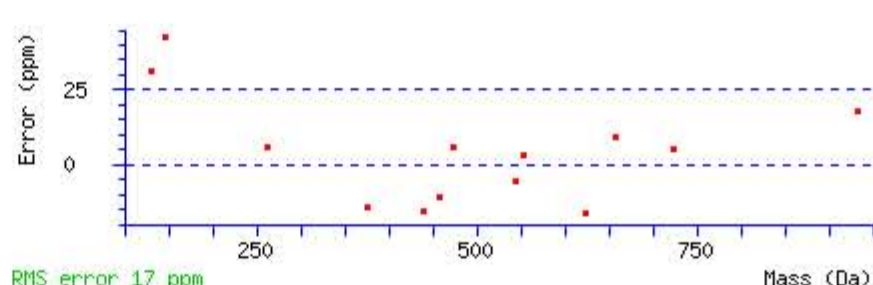

NCBI BLAST search of [QLAVLDK](#)

(Parameters: blastp, nr protein database, expect=20000, no filter, PAM30)

Other BLAST [web gateways](#)

### All matches to this query

| Score | Mr(calc):   | Delta     | Sequence                   |
|-------|-------------|-----------|----------------------------|
| 29.0  | 1096.631439 | -0.004131 | <a href="#">QLAVLDK</a>    |
| 8.5   | 1096.624054 | 0.003254  | <a href="#">KPVDSVPLSR</a> |
| 6.9   | 1096.614166 | 0.013142  | <a href="#">TVKVVWATHR</a> |
| 5.5   | 1096.639297 | -0.011989 | <a href="#">AHVSPLFKAK</a> |
| 1.8   | 1096.631439 | -0.004131 | <a href="#">QIDVAIK</a>    |
| 0.8   | 1096.624023 | 0.003285  | <a href="#">IPRENLLDK</a>  |
| 0.2   | 1096.635269 | -0.007961 | <a href="#">SKLKTVER</a>   |
| 0.0   | 1096.642654 | -0.015346 | <a href="#">QIRELK</a>     |
| 0.0   | 1096.631439 | -0.004131 | <a href="#">QLDAVIK</a>    |



# MASCOT Search Results

## Peptide View

MS/MS Fragmentation of **QSTNAYPDLR**

Found in **PROS\_HUMAN**, Vitamin K-dependent protein S OS=Homo sapiens GN=PROS1 PE=1 SV=1

Match to Query 30275: 1474.720728 from(738.367640,2+) rtinseconds(1788) index(49830)

Title: Locus:1.1.1.3266.12 File:"2013-07-02 CLN FXIII 30 min 3rd F 4.wiff"

Data file C:\Program Files (x86)\Matrix Science\Mascot Daemon\mgf3 FXIII 30 min 3rd\mascot\_daemon\_merge.mgf

Click mouse within plot area to zoom in by factor of two about that point

Or, Plot from  to  Da

Label all possible matches  Label matches used for scoring

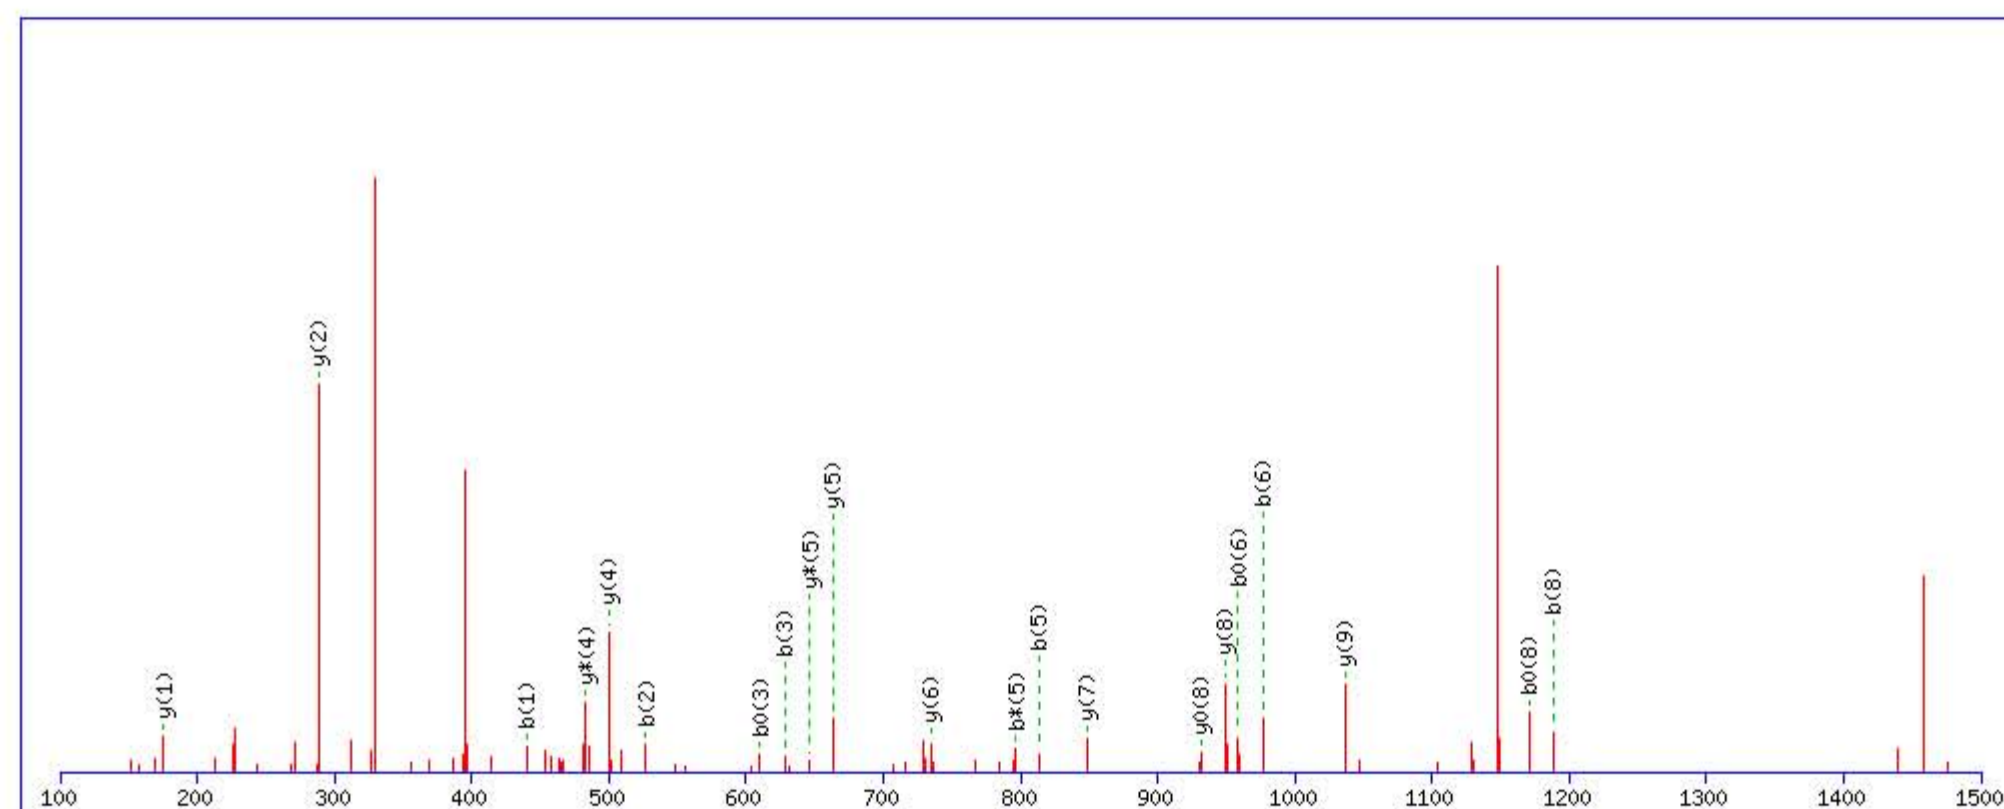

Monoisotopic mass of neutral peptide Mr(calc): 1474.723831

Fixed modifications: Carbamidomethyl (C) (apply to specified residues or termini only)

Variable modifications:

Q1 : Biotin:Thermo-21345 (Q)

Ions Score: 56 Expect: 5.6e-005

Matches : 21/102 fragment ions using 34 most intense peaks [\(help\)](#)

| #  | b                  | b <sup>++</sup> | b <sup>*</sup>    | b <sup>*++</sup> | b <sup>0</sup>     | b <sup>0++</sup> | Seq.     | y                  | y <sup>++</sup> | y <sup>*</sup>    | y <sup>*++</sup> | y <sup>0</sup>    | y <sup>0++</sup> | #         |
|----|--------------------|-----------------|-------------------|------------------|--------------------|------------------|----------|--------------------|-----------------|-------------------|------------------|-------------------|------------------|-----------|
| 1  | <b>440.232602</b>  | 220.619939      | 423.206053        | 212.106664       |                    |                  | <b>Q</b> |                    |                 |                   |                  |                   |                  | <b>10</b> |
| 2  | <b>527.264630</b>  | 264.135953      | 510.238081        | 255.622679       | 509.254065         | 255.130671       | <b>S</b> | <b>1036.505800</b> | 518.756538      | 1019.479251       | 510.243263       | 1018.495235       | 509.751255       | <b>9</b>  |
| 3  | <b>628.312309</b>  | 314.659793      | 611.285760        | 306.146518       | <b>610.301744</b>  | 305.654510       | <b>T</b> | <b>949.473772</b>  | 475.240524      | 932.447223        | 466.727249       | <b>931.463207</b> | 466.235241       | <b>8</b>  |
| 4  | 742.355236         | 371.681256      | 725.328687        | 363.167982       | 724.344671         | 362.675974       | <b>N</b> | <b>848.426093</b>  | 424.716684      | 831.399544        | 416.203410       | 830.415528        | 415.711402       | <b>7</b>  |
| 5  | <b>813.392350</b>  | 407.199813      | <b>796.365801</b> | 398.686538       | 795.381785         | 398.194530       | <b>A</b> | <b>734.383166</b>  | 367.695221      | 717.356617        | 359.181946       | 716.372601        | 358.689938       | <b>6</b>  |
| 6  | <b>976.455679</b>  | 488.731477      | 959.429130        | 480.218203       | <b>958.445114</b>  | 479.726195       | <b>Y</b> | <b>663.346052</b>  | 332.176664      | <b>646.319503</b> | 323.663389       | 645.335487        | 323.171382       | <b>5</b>  |
| 7  | 1073.508443        | 537.257860      | 1056.481894       | 528.744585       | 1055.497878        | 528.252577       | <b>P</b> | <b>500.282723</b>  | 250.644999      | <b>483.256174</b> | 242.131725       | 482.272158        | 241.639717       | <b>4</b>  |
| 8  | <b>1188.535386</b> | 594.771331      | 1171.508837       | 586.258057       | <b>1170.524821</b> | 585.766049       | <b>D</b> | 403.229959         | 202.118617      | 386.203410        | 193.605343       | 385.219394        | 193.113335       | <b>3</b>  |
| 9  | 1301.619450        | 651.313363      | 1284.592901       | 642.800089       | 1283.608885        | 642.308080       | <b>L</b> | <b>288.203016</b>  | 144.605146      | 271.176467        | 136.091871       |                   |                  | <b>2</b>  |
| 10 |                    |                 |                   |                  |                    |                  | <b>R</b> | <b>175.118952</b>  | 88.063114       | 158.092403        | 79.549839        |                   |                  | <b>1</b>  |

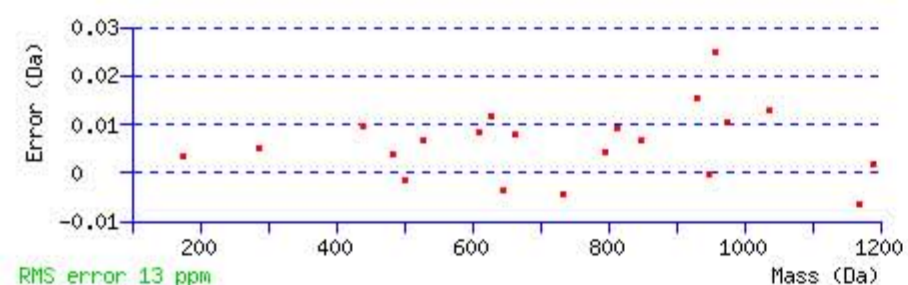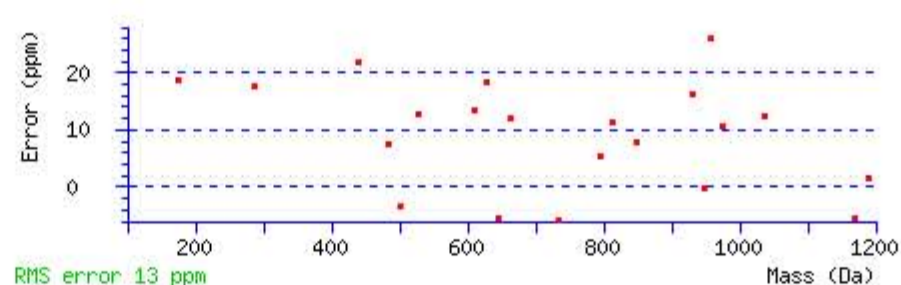

NCBI BLAST search of **QSTNAYPDLR**

(Parameters: blastp, nr protein database, expect=20000, no filter, PAM30)

Other BLAST [web gateways](#)

## All matches to this query

| Score | Mr(calc):   | Delta     | Sequence                      |
|-------|-------------|-----------|-------------------------------|
| 55.6  | 1474.723831 | -0.003103 | <a href="#">QSTNAYPDLR</a>    |
| 14.9  | 1474.721161 | -0.000433 | <a href="#">QSTHGERGHR</a>    |
| 9.0   | 1474.741592 | -0.020864 | <a href="#">SSLEHGSDVYLLR</a> |
| 6.6   | 1474.727188 | -0.006460 | <a href="#">IMTLEKEMTSHR</a>  |
| 4.5   | 1474.719788 | 0.000940  | <a href="#">QQEELEQMRLR</a>   |
| 0.5   | 1474.735092 | -0.014364 | <a href="#">SFCVLSQLTQHR</a>  |
| 0.3   | 1474.741592 | -0.020864 | <a href="#">QAELVPATVNDYR</a> |

Mascot: <http://www.matrixscience.com/>



# MASCOT SEARCH RESULTS

## Peptide View

MS/MS Fragmentation of **SFQTGLFTAAR**

Found in **PROS\_HUMAN**, Vitamin K-dependent protein S OS=Homo sapiens GN=PROS1 PE=1 SV=1

Match to Query 31212: 1508.778088 from(755.396320,2+) rtinseconds(2347) index(52928)

Title: Locus:1.1.1.3460.13 File:"2013-07-02 CLN FXIII 30 min 3rd F 4.wiff"

Data file C:\Program Files (x86)\Matrix Science\Mascot Daemon\mgf3 FXIII 30 min 3rd\mascot\_daemon\_merge.mgf

Click mouse within plot area to zoom in by factor of two about that point

Or, Plot from  to  Da

Label all possible matches  Label matches used for scoring

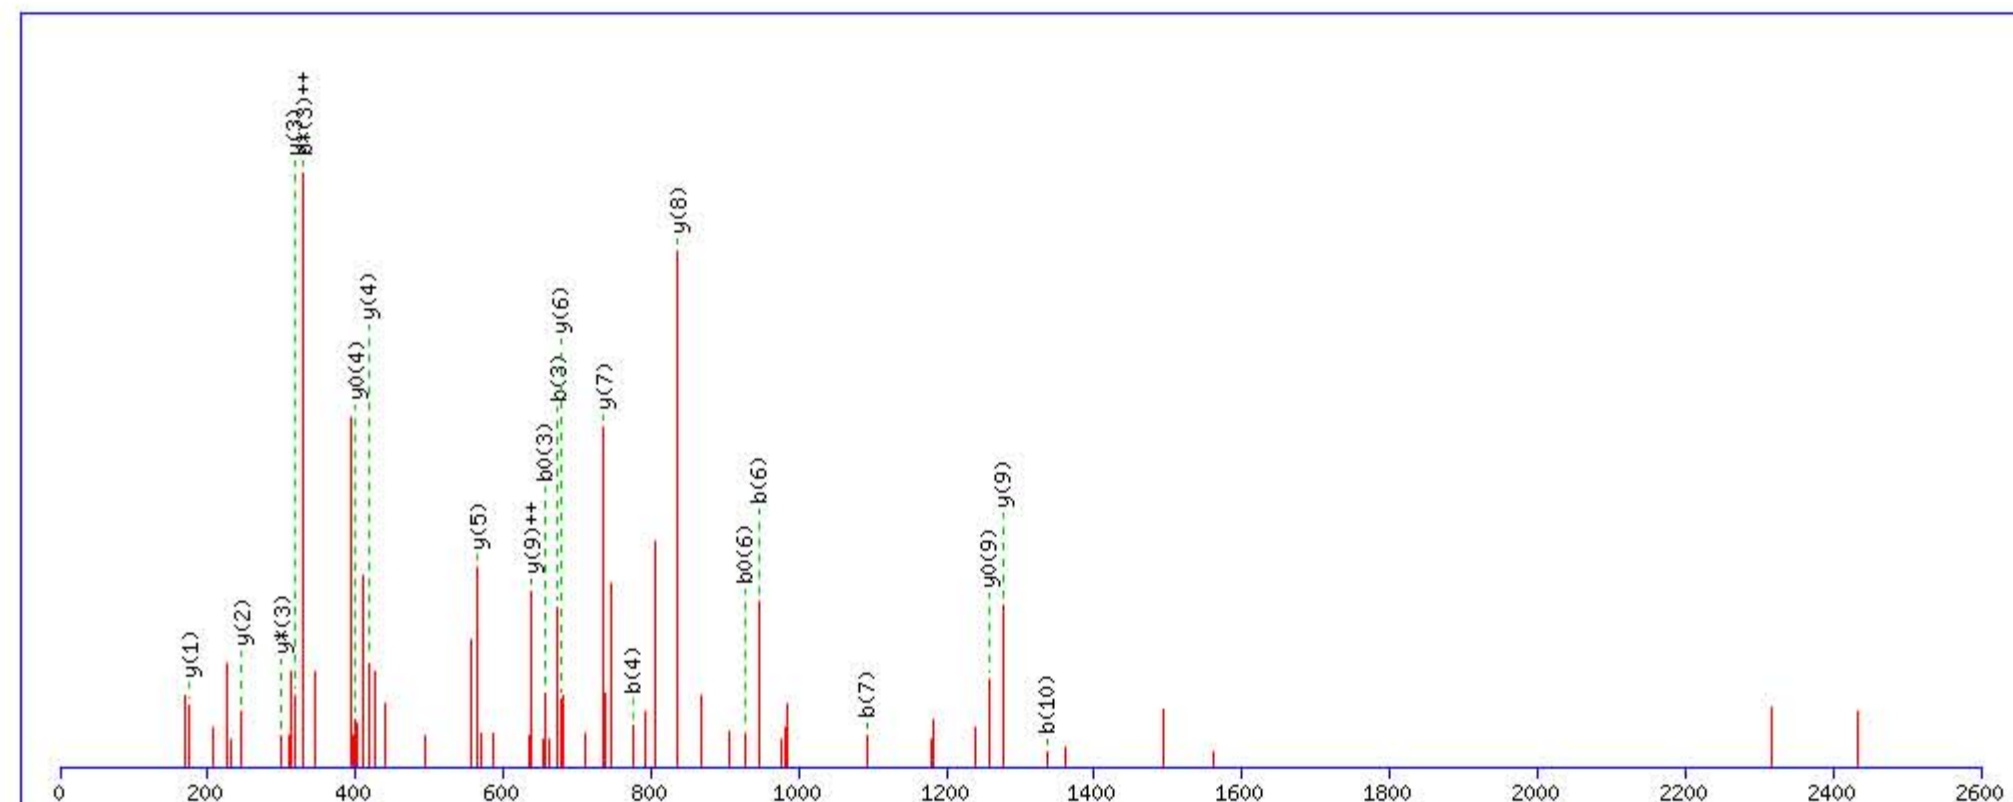

Monoisotopic mass of neutral peptide Mr(calc): 1508.780975

Fixed modifications: Carbamidomethyl (C) (apply to specified residues or termini only)

Variable modifications:

Q3 : Biotin:Thermo-21345 (Q)

Ions Score: 42 Expect: 0.00057

Matches : 21/110 fragment ions using 56 most intense peaks [\(help\)](#)

| #  | b                  | b <sup>++</sup> | b <sup>*</sup> | b <sup>*++</sup>  | b <sup>0</sup>    | b <sup>0++</sup> | Seq. | y                  | y <sup>++</sup>   | y <sup>*</sup>    | y <sup>*++</sup> | y <sup>0</sup>     | y <sup>0++</sup> | #  |
|----|--------------------|-----------------|----------------|-------------------|-------------------|------------------|------|--------------------|-------------------|-------------------|------------------|--------------------|------------------|----|
| 1  | 88.039304          | 44.523290       |                |                   | 70.028739         | 35.518008        | S    |                    |                   |                   |                  |                    |                  | 11 |
| 2  | 235.107718         | 118.057497      |                |                   | 217.097153        | 109.052214       | F    | 1422.756220        | 711.881748        | 1405.729671       | 703.368474       | 1404.745655        | 702.876465       | 10 |
| 3  | <b>674.333044</b>  | 337.670160      | 657.306495     | <b>329.156885</b> | <b>656.322479</b> | 328.664877       | Q    | <b>1275.687806</b> | <b>638.347541</b> | 1258.661257       | 629.834267       | <b>1257.677241</b> | 629.342259       | 9  |
| 4  | <b>775.380723</b>  | 388.194000      | 758.354174     | 379.680725        | 757.370158        | 379.188717       | T    | <b>836.462480</b>  | 418.734878        | 819.435931        | 410.221604       | 818.451915         | 409.729596       | 8  |
| 5  | 832.402187         | 416.704732      | 815.375638     | 408.191457        | 814.391622        | 407.699449       | G    | <b>735.414801</b>  | 368.211039        | 718.388252        | 359.697764       | 717.404236         | 359.205756       | 7  |
| 6  | <b>945.486251</b>  | 473.246764      | 928.459702     | 464.733489        | <b>927.475686</b> | 464.241481       | L    | <b>678.393337</b>  | 339.700307        | 661.366788        | 331.187032       | 660.382772         | 330.695024       | 6  |
| 7  | <b>1092.554665</b> | 546.780971      | 1075.528116    | 538.267696        | 1074.544100       | 537.775688       | F    | <b>565.309273</b>  | 283.158275        | 548.282724        | 274.645000       | 547.298708         | 274.152992       | 5  |
| 8  | 1193.602344        | 597.304810      | 1176.575795    | 588.791536        | 1175.591779       | 588.299528       | T    | <b>418.240859</b>  | 209.624067        | 401.214310        | 201.110793       | <b>400.230294</b>  | 200.618785       | 4  |
| 9  | 1264.639458        | 632.823367      | 1247.612909    | 624.310093        | 1246.628893       | 623.818085       | A    | <b>317.193180</b>  | 159.100228        | <b>300.166631</b> | 150.586953       |                    |                  | 3  |
| 10 | <b>1335.676572</b> | 668.341924      | 1318.650023    | 659.828650        | 1317.666007       | 659.336642       | A    | <b>246.156066</b>  | 123.581671        | 229.129517        | 115.068396       |                    |                  | 2  |
| 11 |                    |                 |                |                   |                   |                  | R    | <b>175.118952</b>  | 88.063114         | 158.092403        | 79.549839        |                    |                  | 1  |

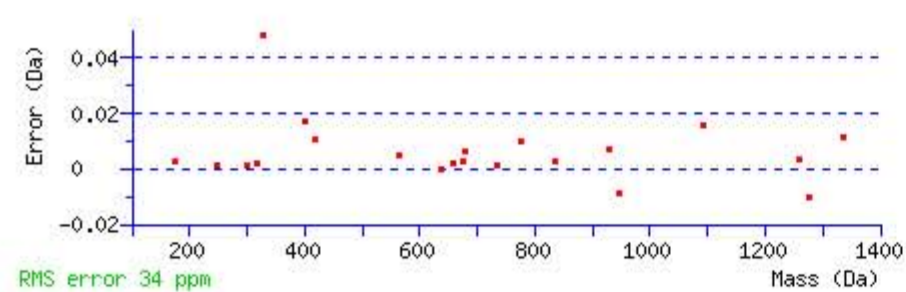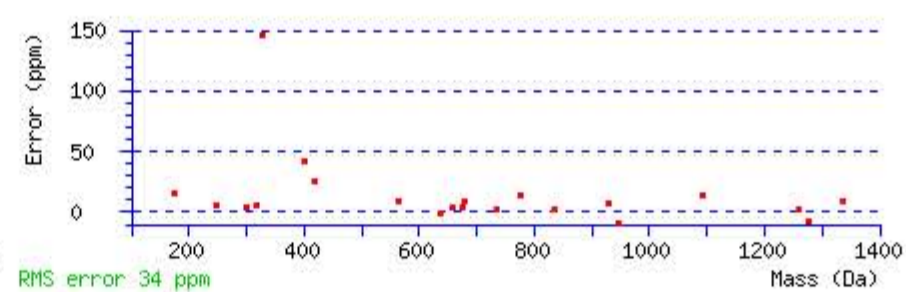

NCBI BLAST search of **SFQTGLFTAAR**

(Parameters: blastp, nr protein database, expect=20000, no filter, PAM30)

Other BLAST [web gateways](#)

All matches to this query

| Score | Mr(calc):   | Delta     | Sequence                      |
|-------|-------------|-----------|-------------------------------|
| 42.4  | 1508.780975 | -0.002887 | <a href="#">SFQTGLFTAAR</a>   |
| 7.3   | 1508.776932 | 0.001156  | <a href="#">LMGADSLQLFRSR</a> |
| 1.3   | 1508.762314 | 0.015774  | <a href="#">EPAETLKPPEGWR</a> |
| 0.2   | 1508.762344 | 0.015744  | <a href="#">EDFVPFTGEKKGR</a> |

Mascot: <http://www.matrixscience.com/>



# MATRIX SCIENCE Mascot Search Results

## Peptide View

MS/MS Fragmentation of **IETISHEDLQR**

Found in **PROS\_HUMAN**, Vitamin K-dependent protein S OS=Homo sapiens GN=PROS1 PE=1 SV=1

Match to Query 36098: 1650.832092 from(551.284640,3+) rtinseconds(1659) index(49060)

Title: Locus:1.1.1.3221.15 File:"2013-07-02 CLN FXIII 30 min 3rd F 4.wiff"

Data file C:\Program Files (x86)\Matrix Science\Mascot Daemon\mgf3 FXIII 30 min 3rd\mascot\_daemon\_merge.mgf

Click mouse within plot area to zoom in by factor of two about that point

Or, Plot from  to  Da

Label all possible matches  Label matches used for scoring

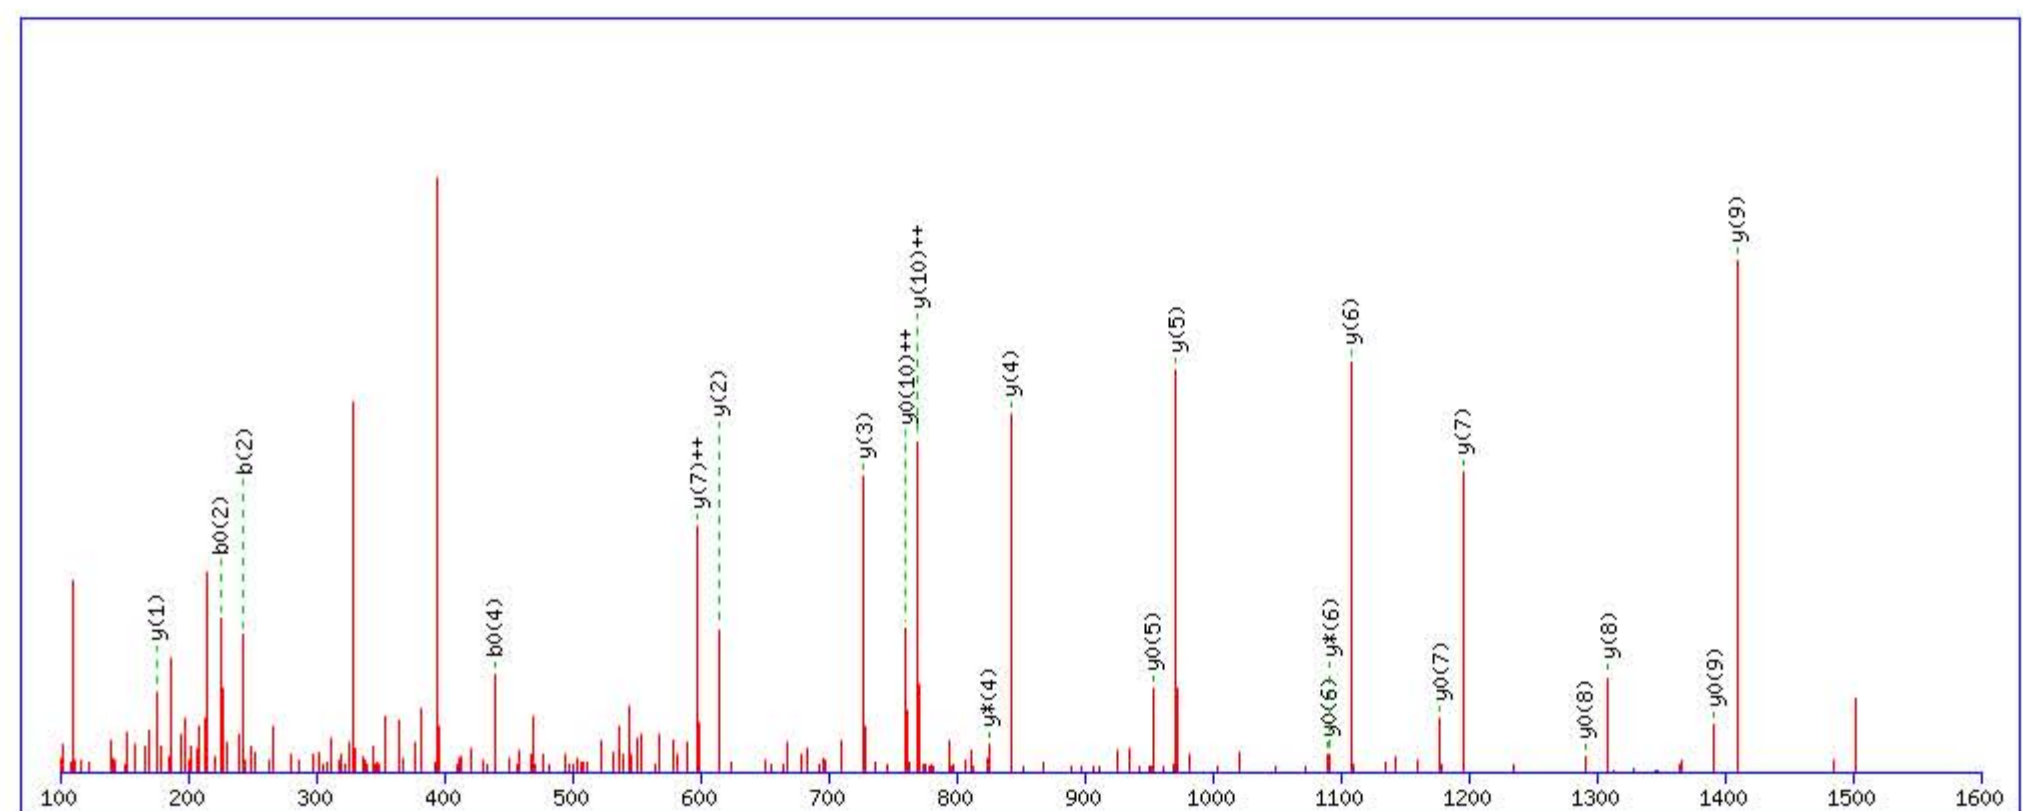

Monoisotopic mass of neutral peptide Mr(calc): 1650.839920

Fixed modifications: Carbamidomethyl (C) (apply to specified residues or termini only)

Variable modifications:

Q10 : Biotin:Thermo-21345 (Q)

Ions Score: 48 Expect: 0.00037

Matches : 22/94 fragment ions using 41 most intense peaks [\(help\)](#)

| #  | b           | b <sup>++</sup> | b <sup>*</sup> | b <sup>*++</sup> | b <sup>0</sup> | b <sup>0++</sup> | Seq. | y           | y <sup>++</sup> | y <sup>*</sup> | y <sup>*++</sup> | y <sup>0</sup> | y <sup>0++</sup> | #  |
|----|-------------|-----------------|----------------|------------------|----------------|------------------|------|-------------|-----------------|----------------|------------------|----------------|------------------|----|
| 1  | 114.091340  | 57.549308       |                |                  |                |                  | I    |             |                 |                |                  |                |                  | 11 |
| 2  | 243.133933  | 122.070605      |                |                  | 225.123368     | 113.065322       | E    | 1538.763154 | 769.885215      | 1521.736605    | 761.371941       | 1520.752589    | 760.879933       | 10 |
| 3  | 344.181612  | 172.594444      |                |                  | 326.171047     | 163.589162       | T    | 1409.720561 | 705.363919      | 1392.694012    | 696.850644       | 1391.709996    | 696.358636       | 9  |
| 4  | 457.265676  | 229.136476      |                |                  | 439.255111     | 220.131194       | I    | 1308.672882 | 654.840079      | 1291.646333    | 646.326805       | 1290.662317    | 645.834797       | 8  |
| 5  | 544.297704  | 272.652490      |                |                  | 526.287139     | 263.647208       | S    | 1195.588818 | 598.298047      | 1178.562269    | 589.784773       | 1177.578253    | 589.292764       | 7  |
| 6  | 681.356616  | 341.181946      |                |                  | 663.346051     | 332.176664       | H    | 1108.556790 | 554.782033      | 1091.530241    | 546.268759       | 1090.546225    | 545.776751       | 6  |
| 7  | 810.399209  | 405.703243      |                |                  | 792.388644     | 396.697960       | E    | 971.497878  | 486.252577      | 954.471329     | 477.739303       | 953.487313     | 477.247295       | 5  |
| 8  | 925.426152  | 463.216714      |                |                  | 907.415587     | 454.211432       | D    | 842.455285  | 421.731281      | 825.428736     | 413.218006       | 824.444720     | 412.725998       | 4  |
| 9  | 1038.510216 | 519.758746      |                |                  | 1020.499651    | 510.753463       | L    | 727.428342  | 364.217809      | 710.401793     | 355.704535       |                |                  | 3  |
| 10 | 1477.735542 | 739.371409      | 1460.708993    | 730.858135       | 1459.724977    | 730.366127       | Q    | 614.344278  | 307.675777      | 597.317729     | 299.162503       |                |                  | 2  |
| 11 |             |                 |                |                  |                |                  | R    | 175.118952  | 88.063114       | 158.092403     | 79.549839        |                |                  | 1  |

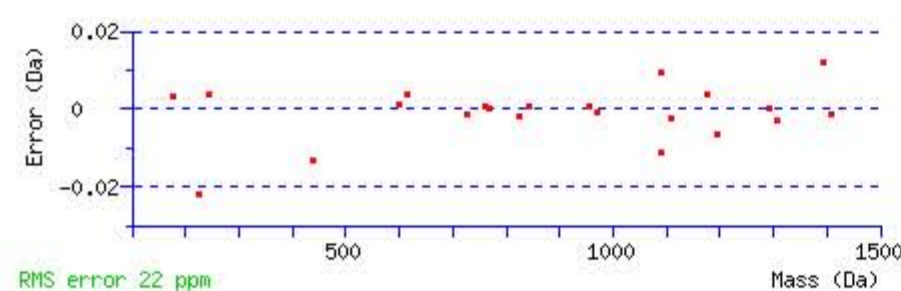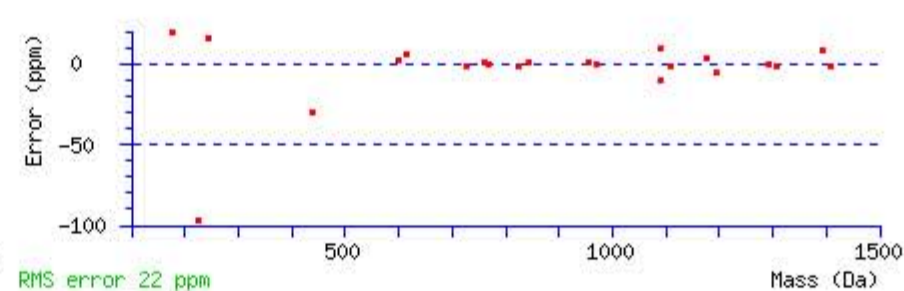

NCBI BLAST search of [IETISHEDLQR](#)

(Parameters: blastp, nr protein database, expect=20000, no filter, PAM30)

Other BLAST [web gateways](#)

All matches to this query

| Score | Mr(calc):   | Delta     | Sequence                    |
|-------|-------------|-----------|-----------------------------|
| 47.9  | 1650.839920 | -0.007828 | <a href="#">IETISHEDLQR</a> |

Mascot: <http://www.matrixscience.com/>



# MASCOT Search Results

## Peptide View

MS/MS Fragmentation of **IQALSLCSDQQSHLEFR**

Found in **PROS\_HUMAN**, Vitamin K-dependent protein S OS=Homo sapiens GN=PROS1 PE=1 SV=1

Match to Query 49624: 2342.147022 from(781.722950,3+) rtinseconds(2196) index(64943)

Title: Locus:1.1.1.3244.11 File:"2013-07-02 CLN FXIII 30 min 3rd FT.wiff"

Data file C:\Program Files (x86)\Matrix Science\Mascot Daemon\mgf\3 FXIII 30 min 3rd\mascot\_daemon\_merge.mgf

Click mouse within plot area to zoom in by factor of two about that point

Or, Plot from  to  Da

Label all possible matches  Label matches used for scoring

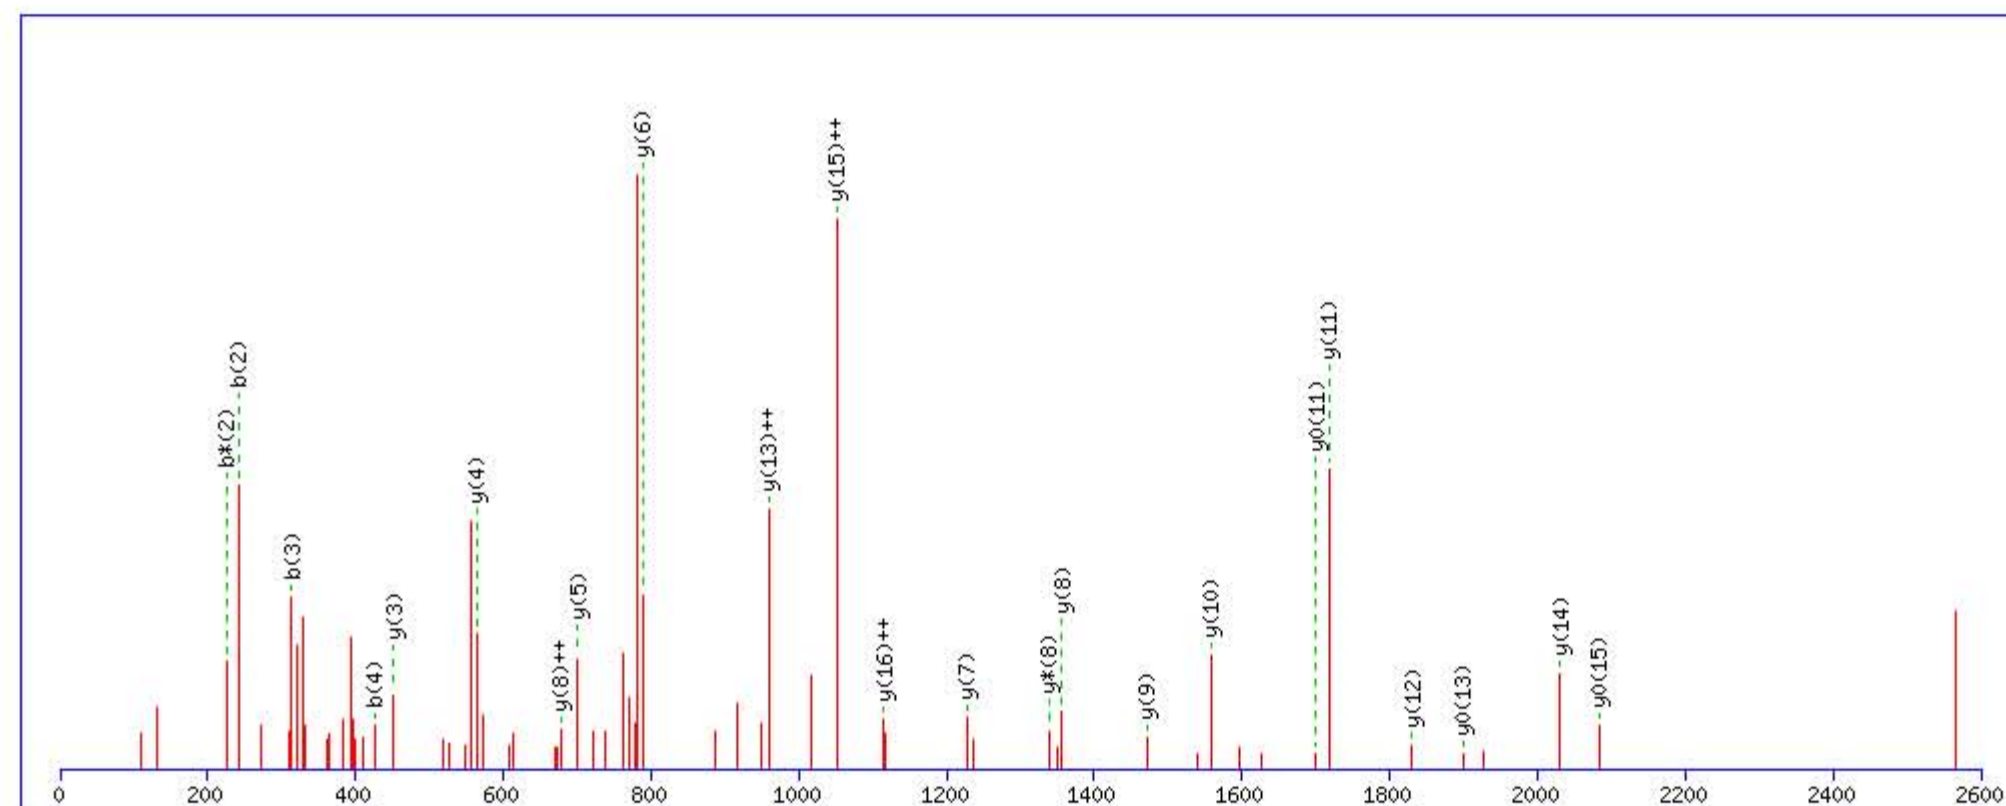

Monoisotopic mass of neutral peptide Mr(calc): 2342.151108

Fixed modifications: Carbamidomethyl (C) (apply to specified residues or termini only)

Variable modifications:

Q11 : Biotin:Thermo-21345 (Q)

Ions Score: 71 Expect: 2.5e-007

Matches : 23/178 fragment ions using 36 most intense peaks [\(help\)](#)

| #  | b                 | b <sup>++</sup> | b <sup>+</sup>    | b <sup>+++</sup> | b <sup>0</sup> | b <sup>0++</sup> | Seq. | y                  | y <sup>++</sup>    | y <sup>+</sup>     | y <sup>+++</sup> | y <sup>0</sup>     | y <sup>0++</sup> | #  |
|----|-------------------|-----------------|-------------------|------------------|----------------|------------------|------|--------------------|--------------------|--------------------|------------------|--------------------|------------------|----|
| 1  | 114.091340        | 57.549308       |                   |                  |                |                  | I    |                    |                    |                    |                  |                    |                  | 17 |
| 2  | <b>242.149918</b> | 121.578597      | <b>225.123369</b> | 113.065323       |                |                  | Q    | 2230.074335        | <b>1115.540805</b> | 2213.047786        | 1107.027531      | 2212.063770        | 1106.535523      | 16 |
| 3  | <b>313.187032</b> | 157.097154      | 296.160483        | 148.583879       |                |                  | A    | 2102.015757        | <b>1051.511516</b> | 2084.989208        | 1042.998242      | <b>2084.005192</b> | 1042.506234      | 15 |
| 4  | <b>426.271096</b> | 213.639186      | 409.244547        | 205.125912       |                |                  | L    | <b>2030.978643</b> | 1015.992959        | 2013.952094        | 1007.479685      | 2012.968078        | 1006.987677      | 14 |
| 5  | 513.303124        | 257.155200      | 496.276575        | 248.641926       | 495.292559     | 248.149918       | S    | 1917.894579        | <b>959.450927</b>  | 1900.868030        | 950.937653       | <b>1899.884014</b> | 950.445645       | 13 |
| 6  | 626.387188        | 313.697232      | 609.360639        | 305.183958       | 608.376623     | 304.691950       | L    | <b>1830.862551</b> | 915.934913         | 1813.836002        | 907.421639       | 1812.851986        | 906.929631       | 12 |
| 7  | 786.417837        | 393.712557      | 769.391288        | 385.199282       | 768.407272     | 384.707274       | C    | <b>1717.778487</b> | 859.392881         | 1700.751938        | 850.879607       | <b>1699.767922</b> | 850.387599       | 11 |
| 8  | 873.449865        | 437.228571      | 856.423316        | 428.715296       | 855.439300     | 428.223288       | S    | <b>1557.747838</b> | 779.377557         | 1540.721289        | 770.864282       | 1539.737273        | 770.372274       | 10 |
| 9  | 988.476808        | 494.742042      | 971.450259        | 486.228768       | 970.466243     | 485.736760       | D    | <b>1470.715810</b> | 735.861543         | 1453.689261        | 727.348268       | 1452.705245        | 726.856260       | 9  |
| 10 | 1116.535386       | 558.771331      | 1099.508837       | 550.258057       | 1098.524821    | 549.766049       | Q    | <b>1355.688867</b> | <b>678.348071</b>  | <b>1338.662318</b> | 669.834797       | 1337.678302        | 669.342789       | 8  |
| 11 | 1555.760712       | 778.383994      | 1538.734163       | 769.870720       | 1537.750147    | 769.378712       | Q    | <b>1227.630289</b> | 614.318782         | 1210.603740        | 605.805508       | 1209.619724        | 605.313500       | 7  |
| 12 | 1642.792740       | 821.900008      | 1625.766191       | 813.386734       | 1624.782175    | 812.894726       | S    | <b>788.404963</b>  | 394.706119         | 771.378414         | 386.192845       | 770.394398         | 385.700837       | 6  |
| 13 | 1779.851652       | 890.429464      | 1762.825103       | 881.916190       | 1761.841087    | 881.424182       | H    | <b>701.372935</b>  | 351.190105         | 684.346386         | 342.676831       | 683.362370         | 342.184823       | 5  |
| 14 | 1892.935716       | 946.971496      | 1875.909167       | 938.458222       | 1874.925151    | 937.966213       | L    | <b>564.314023</b>  | 282.660649         | 547.287474         | 274.147375       | 546.303458         | 273.655367       | 4  |
| 15 | 2021.978309       | 1011.492793     | 2004.951760       | 1002.979518      | 2003.967744    | 1002.487510      | E    | <b>451.229959</b>  | 226.118617         | 434.203410         | 217.605343       | 433.219394         | 217.113335       | 3  |
| 16 | 2169.046723       | 1085.026999     | 2152.020174       | 1076.513725      | 2151.036158    | 1076.021717      | F    | 322.187366         | 161.597321         | 305.160817         | 153.084046       |                    |                  | 2  |
| 17 |                   |                 |                   |                  |                |                  | R    | 175.118952         | 88.063114          | 158.092403         | 79.549839        |                    |                  | 1  |

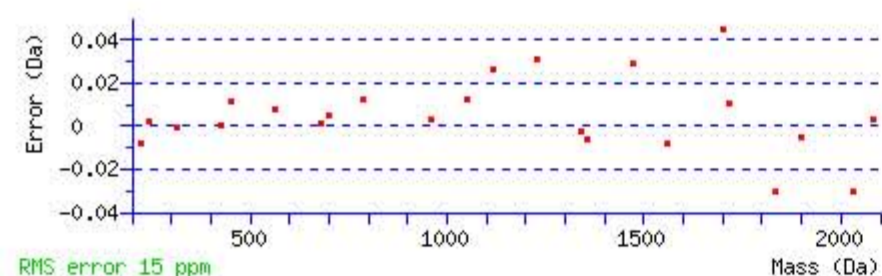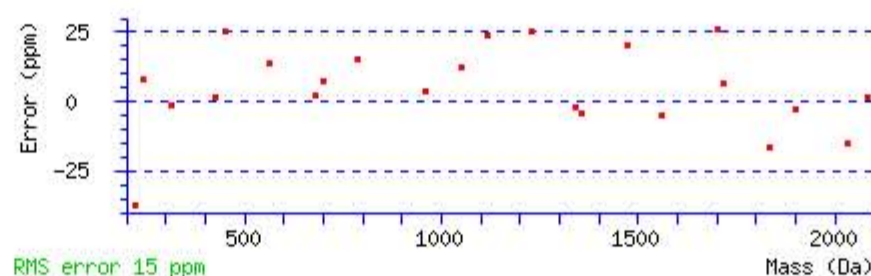

NCBI BLAST search of **IQALSLCSDQQSHLEFR**

(Parameters: blastp, nr protein database, expect=20000, no filter, PAM30)

Other BLAST [web gateways](#)

## All matches to this query

| Score | Mr(calc):   | Delta     | Sequence                              |
|-------|-------------|-----------|---------------------------------------|
| 71.1  | 2342.151108 | -0.004086 | <a href="#">IQALSLCSDQQSHLEFR</a>     |
| 65.1  | 2342.151108 | -0.004086 | <a href="#">IQALSLCSDQQSHLEFR</a>     |
| 0.7   | 2342.117249 | 0.029773  | <a href="#">LQASTSTEVSHQCSVPGLGEK</a> |



# MASCOT Search Results

## Peptide View

MS/MS Fragmentation of **GQYCYELDEK**

Found in **VTNC\_HUMAN**, Vitronectin OS=Homo sapiens GN=VTN PE=1 SV=1

Match to Query 34598: 1614.702928 from(808.358740,2+) rtinseconds(1883) index(50293)

Title: Locus:1.1.1.3299.13 File:"2013-07-02 CLN FXIII 30 min 3rd F 4.wiff"

Data file C:\Program Files (x86)\Matrix Science\Mascot Daemon\mgf3 FXIII 30 min 3rd\mascot\_daemon\_merge.mgf

Click mouse within plot area to zoom in by factor of two about that point

Or, Plot from  to  Da

Label all possible matches  Label matches used for scoring

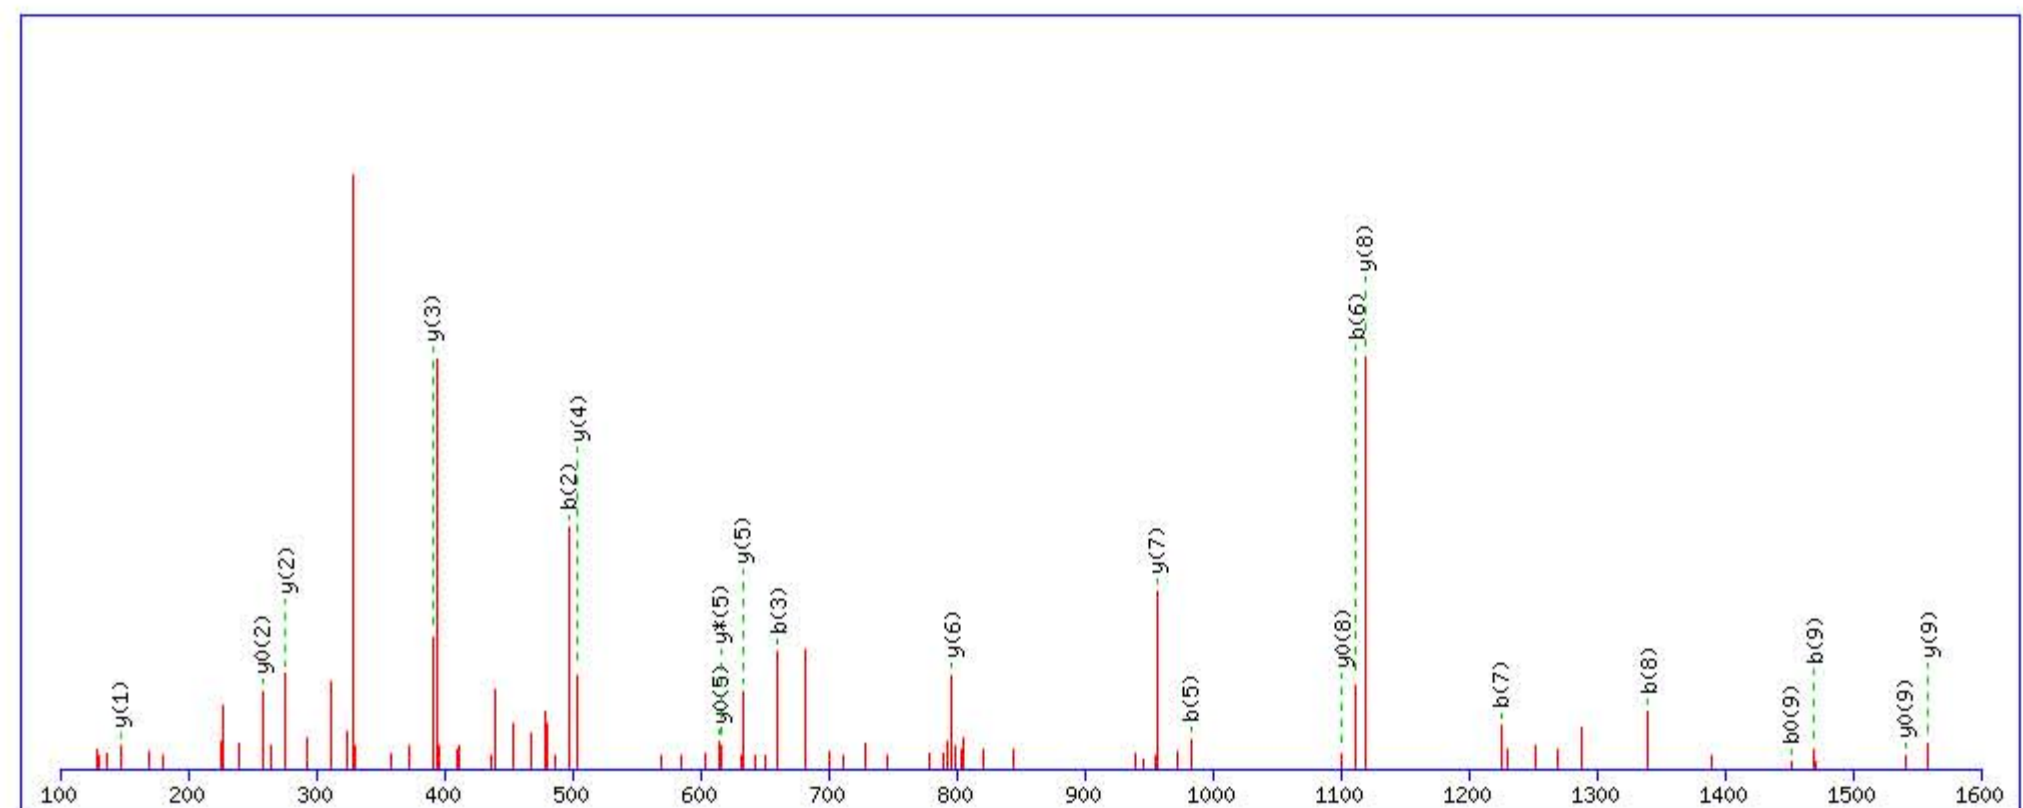

Monoisotopic mass of neutral peptide  $M_r(\text{calc})$ : 1614.705795

Fixed modifications: Carbamidomethyl (C) (apply to specified residues or termini only)

Variable modifications:

Q2 : Biotin:Thermo-21345 (Q)

Ions Score: 54 Expect: 4.8e-005

Matches : 22/94 fragment ions using 39 most intense peaks [\(help\)](#)

| #  | b                  | b <sup>++</sup> | b <sup>*</sup> | b <sup>*++</sup> | b <sup>0</sup>     | b <sup>0++</sup> | Seq. | y                  | y <sup>++</sup> | y <sup>*</sup>    | y <sup>*++</sup> | y <sup>0</sup>     | y <sup>0++</sup> | #  |
|----|--------------------|-----------------|----------------|------------------|--------------------|------------------|------|--------------------|-----------------|-------------------|------------------|--------------------|------------------|----|
| 1  | 58.028740          | 29.518008       |                |                  |                    |                  | G    |                    |                 |                   |                  |                    |                  | 10 |
| 2  | <b>497.254066</b>  | 249.130671      | 480.227517     | 240.617397       |                    |                  | Q    | <b>1558.691630</b> | 779.849453      | 1541.665081       | 771.336179       | <b>1540.681065</b> | 770.844171       | 9  |
| 3  | <b>660.317395</b>  | 330.662336      | 643.290846     | 322.149061       |                    |                  | Y    | <b>1119.466304</b> | 560.236790      | 1102.439755       | 551.723516       | <b>1101.455739</b> | 551.231508       | 8  |
| 4  | 820.348044         | 410.677660      | 803.321495     | 402.164386       |                    |                  | C    | <b>956.402975</b>  | 478.705126      | 939.376426        | 470.191851       | 938.392410         | 469.699843       | 7  |
| 5  | <b>983.411373</b>  | 492.209325      | 966.384824     | 483.696050       |                    |                  | Y    | <b>796.372326</b>  | 398.689801      | 779.345777        | 390.176527       | 778.361761         | 389.684519       | 6  |
| 6  | <b>1112.453966</b> | 556.730621      | 1095.427417    | 548.217347       | 1094.443401        | 547.725339       | E    | <b>633.308997</b>  | 317.158137      | <b>616.282448</b> | 308.644862       | <b>615.298432</b>  | 308.152854       | 5  |
| 7  | <b>1225.538030</b> | 613.272653      | 1208.511481    | 604.759379       | 1207.527465        | 604.267371       | L    | <b>504.266404</b>  | 252.636840      | 487.239855        | 244.123566       | 486.255839         | 243.631558       | 4  |
| 8  | <b>1340.564973</b> | 670.786125      | 1323.538424    | 662.272850       | 1322.554408        | 661.780842       | D    | <b>391.182340</b>  | 196.094808      | 374.155791        | 187.581534       | 373.171775         | 187.089526       | 3  |
| 9  | <b>1469.607566</b> | 735.307421      | 1452.581017    | 726.794147       | <b>1451.597001</b> | 726.302139       | E    | <b>276.155397</b>  | 138.581337      | 259.128848        | 130.068062       | <b>258.144832</b>  | 129.576054       | 2  |
| 10 |                    |                 |                |                  |                    |                  | K    | <b>147.112804</b>  | 74.060040       | 130.086255        | 65.546765        |                    |                  | 1  |

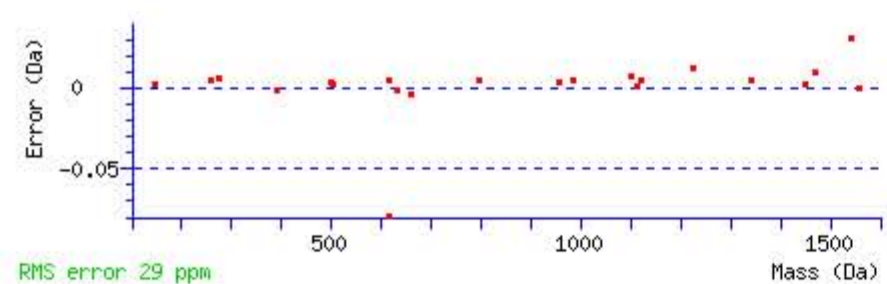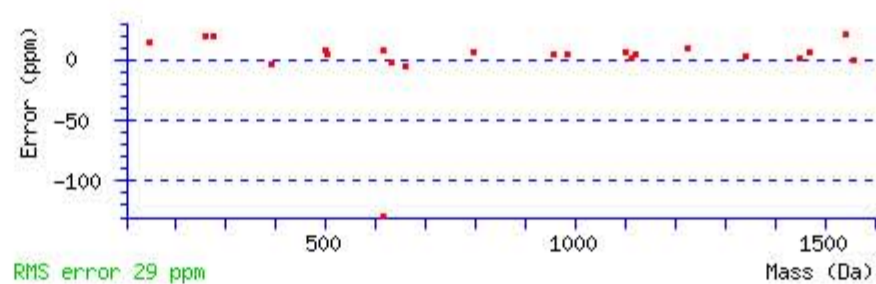

NCBI BLAST search of **GQYCYELDEK**

(Parameters: blastp, nr protein database, expect=20000, no filter, PAM30)

Other BLAST [web gateways](#)

All matches to this query

| Score | $M_r(\text{calc})$ : | Delta     | Sequence                     |
|-------|----------------------|-----------|------------------------------|
| 54.3  | 1614.705795          | -0.002867 | <a href="#">GQYCYELDEK</a>   |
| 6.2   | 1614.717010          | -0.014082 | <a href="#">EYFRMELMHAEK</a> |



# MASCOT Search Results

## Peptide View

MS/MS Fragmentation of **DWHGVPGQVDAAMAGR**

Found in **VTNC\_HUMAN**, Vitronectin OS=Homo sapiens GN=VTN PE=1 SV=1

Match to Query 42727: 1992.925452 from(665.315760,3+) rtinseconds(1958) index(50835)

Title: Locus:1.1.1.3325.11 File:"2013-07-02 CLN FXIII 30 min 3rd F 4.wiff"

Data file C:\Program Files (x86)\Matrix Science\Mascot Daemon\mgf\3 FXIII 30 min 3rd\mascot\_daemon\_merge.mgf

Click mouse within plot area to zoom in by factor of two about that point

Or, Plot from  to  Da

Label all possible matches  Label matches used for scoring

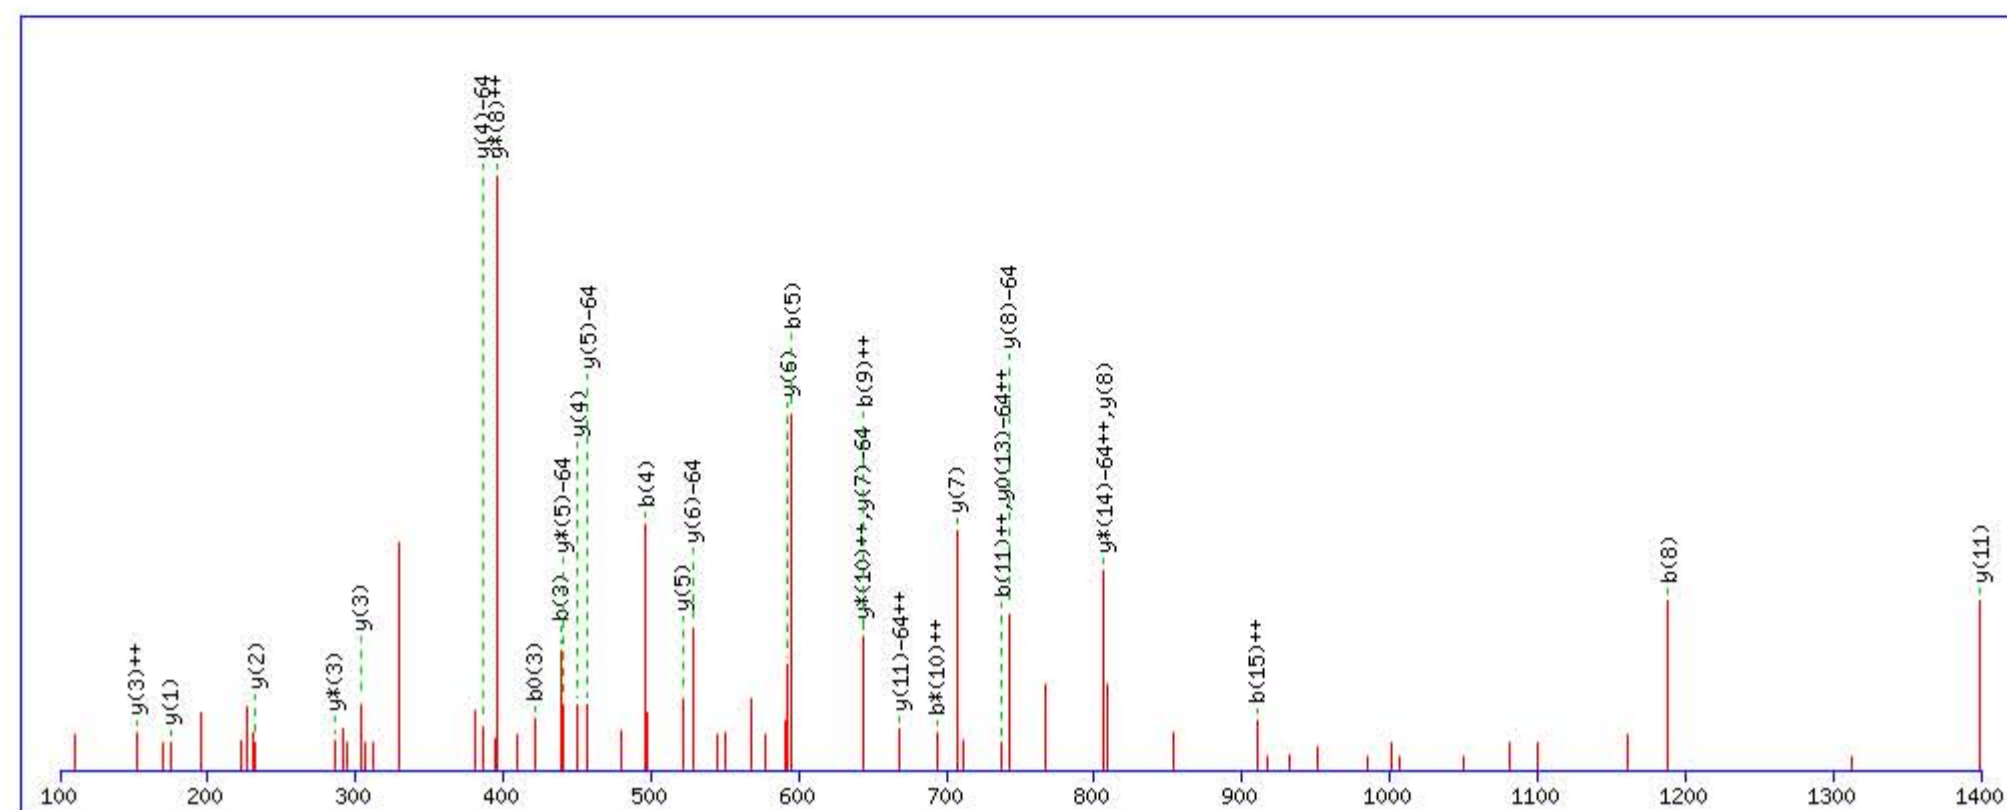

Monoisotopic mass of neutral peptide Mr(calc): 1992.929855

Fixed modifications: Carbamidomethyl (C) (apply to specified residues or termini only)

Variable modifications:

Q8 : Biotin:Thermo-21345 (Q)

M13 : Oxidation (M), with neutral losses 0.000000 (shown in table), 63.998285

Ions Score: 36 Expect: 0.0037

Matches : 31/238 fragment ions using 63 most intense peaks [\(help\)](#)

| #  | b                  | b <sup>++</sup>   | b <sup>*</sup> | b <sup>+++</sup>  | b <sup>0</sup>    | b <sup>0++</sup> | Seq. | y                  | y <sup>++</sup>   | y <sup>*</sup>    | y <sup>+++</sup>  | y <sup>0</sup> | y <sup>0++</sup> | #  |
|----|--------------------|-------------------|----------------|-------------------|-------------------|------------------|------|--------------------|-------------------|-------------------|-------------------|----------------|------------------|----|
| 1  | 116.034219         | 58.520748         |                |                   | 98.023654         | 49.515465        | D    |                    |                   |                   |                   |                |                  | 16 |
| 2  | 302.113532         | 151.560404        |                |                   | 284.102967        | 142.555122       | W    | 1878.910172        | 939.958724        | 1861.883623       | 931.445450        | 1860.899607    | 930.953441       | 15 |
| 3  | <b>439.172444</b>  | 220.089860        |                |                   | <b>421.161879</b> | 211.084577       | H    | 1692.830859        | 846.919067        | 1675.804310       | 838.405793        | 1674.820294    | 837.913785       | 14 |
| 4  | <b>496.193908</b>  | 248.600592        |                |                   | 478.183343        | 239.595309       | G    | 1555.771947        | 778.389612        | 1538.745398       | 769.876337        | 1537.761382    | 769.384329       | 13 |
| 5  | <b>595.262322</b>  | 298.134799        |                |                   | 577.251757        | 289.129517       | V    | 1498.750483        | 749.878880        | 1481.723934       | 741.365605        | 1480.739918    | 740.873597       | 12 |
| 6  | 692.315086         | 346.661181        |                |                   | 674.304521        | 337.655899       | P    | <b>1399.682069</b> | 700.344673        | 1382.655520       | 691.831398        | 1381.671504    | 691.339390       | 11 |
| 7  | 749.336550         | 375.171913        |                |                   | 731.325985        | 366.166631       | G    | 1302.629305        | 651.818290        | 1285.602756       | <b>643.305016</b> | 1284.618740    | 642.813008       | 10 |
| 8  | <b>1188.561876</b> | 594.784576        | 1171.535327    | 586.271302        | 1170.551311       | 585.779293       | Q    | 1245.607841        | 623.307558        | 1228.581292       | 614.794284        | 1227.597276    | 614.302276       | 9  |
| 9  | 1287.630290        | <b>644.318783</b> | 1270.603741    | 635.805509        | 1269.619725       | 635.313501       | V    | <b>806.382515</b>  | 403.694896        | 789.355966        | <b>395.181621</b> | 788.371950     | 394.689613       | 8  |
| 10 | 1402.657233        | 701.832255        | 1385.630684    | <b>693.318980</b> | 1384.646668       | 692.826972       | D    | <b>707.314101</b>  | 354.160688        | 690.287552        | 345.647414        | 689.303536     | 345.155406       | 7  |
| 11 | 1473.694347        | <b>737.350812</b> | 1456.667798    | 728.837537        | 1455.683782       | 728.345529       | A    | <b>592.287158</b>  | 296.647217        | 575.260609        | 288.133942        |                |                  | 6  |
| 12 | 1544.731461        | 772.869369        | 1527.704912    | 764.356094        | 1526.720896       | 763.864086       | A    | <b>521.250044</b>  | 261.128660        | 504.223495        | 252.615385        |                |                  | 5  |
| 13 | 1691.766861        | 846.387069        | 1674.740312    | 837.873794        | 1673.756296       | 837.381786       | M    | <b>450.212930</b>  | 225.610103        | 433.186381        | 217.096828        |                |                  | 4  |
| 14 | 1762.803975        | 881.905626        | 1745.777426    | 873.392351        | 1744.793410       | 872.900343       | A    | <b>303.177530</b>  | <b>152.092403</b> | <b>286.150981</b> | 143.579128        |                |                  | 3  |
| 15 | 1819.825439        | <b>910.416358</b> | 1802.798890    | 901.903083        | 1801.814874       | 901.411075       | G    | <b>232.140416</b>  | 116.573846        | 215.113867        | 108.060571        |                |                  | 2  |
| 16 |                    |                   |                |                   |                   |                  | R    | <b>175.118952</b>  | 88.063114         | 158.092403        | 79.549839         |                |                  | 1  |

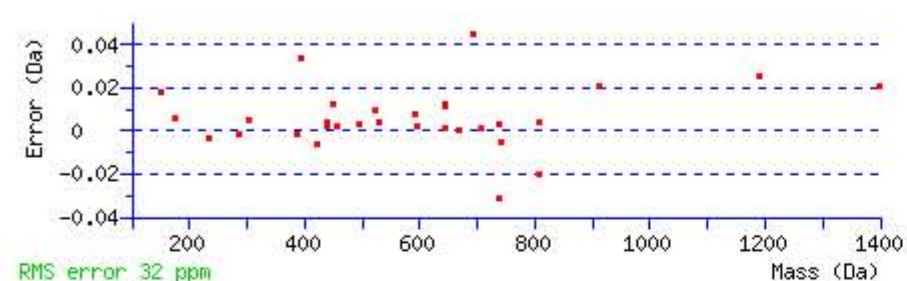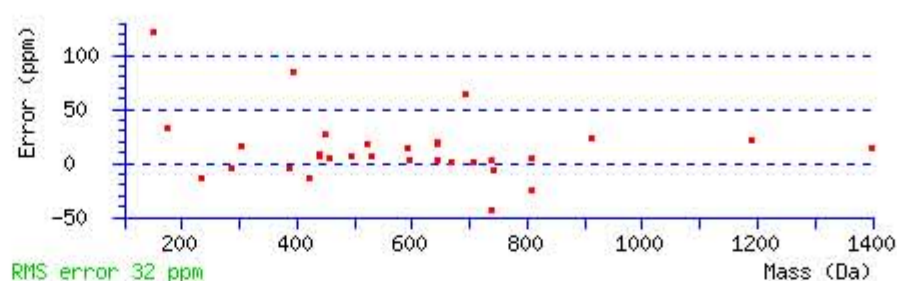

NCBI BLAST search of **DWHGVPGQVDAAMAGR**

(Parameters: blastp, nr protein database, expect=20000, no filter, PAM30)

Other BLAST [web gateways](#)

All matches to this query

| Score | Mr(calc):   | Delta     | Sequence                         |
|-------|-------------|-----------|----------------------------------|
| 35.7  | 1992.929855 | -0.004403 | <a href="#">DWHGVPGQVDAAMAGR</a> |

Mascot: <http://www.matrixscience.com/>



# Mascot Search Results

## Peptide View

MS/MS Fragmentation of **GNPEQTPVLKPEEEAPAPEV GASKPEGIDSRPETLHPGRPQPPAEELCSGKPFDAFTDLK**  
 Found in **VTNC\_HUMAN**, Vitronectin OS=Homo sapiens GN=VTN PE=1 SV=1

Match to Query 72084: 6883.378698 from(984.347090,7+) rtinseconds(2115) index(51782)  
 Title: Locus:1.1.1.3379.16 File:"2013-07-02 CLN FXIII 30 min 3rd F 4.wiff"  
 Data file C:\Program Files (x86)\Matrix Science\Mascot Daemon\mgf3 FXIII 30 min 3rd\mascot\_daemon\_merge.mgf

Click mouse within plot area to zoom in by factor of two about that point

Or, Plot from 0 to 6500 Da Full range

Label all possible matches  Label matches used for scoring

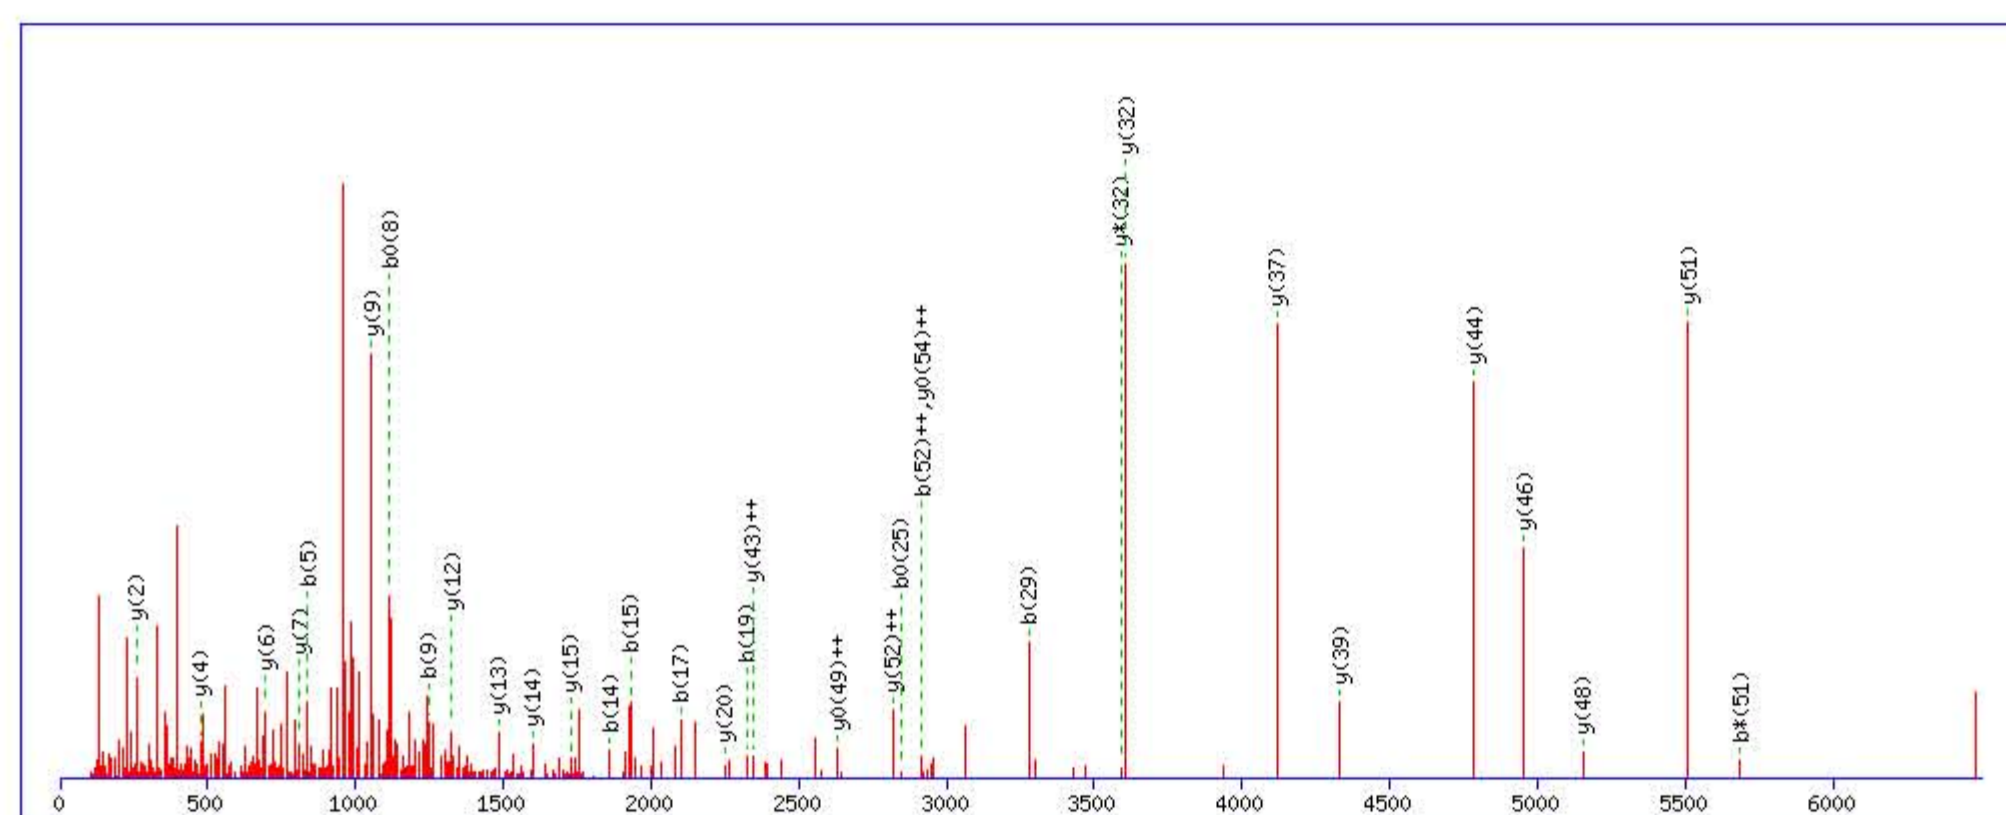

Monoisotopic mass of neutral peptide Mr(calc): 6883.374893  
 Fixed modifications: Carbamidomethyl (C) (apply to specified residues or termini only)  
 Variable modifications:  
 Q5 : Biotin:Thermo-21345 (Q)  
 Ions Score: 58 Expect: 1.7e-005  
 Matches : 33/708 fragment ions using 71 most intense peaks [\(help\)](#)

| #  | b                  | b <sup>++</sup>    | b <sup>+</sup>     | b <sup>+++</sup> | b <sup>0</sup>     | b <sup>0++</sup> | Seq. | y                  | y <sup>++</sup>    | y <sup>+</sup>     | y <sup>+++</sup> | y <sup>0</sup> | y <sup>0++</sup>   | #  |
|----|--------------------|--------------------|--------------------|------------------|--------------------|------------------|------|--------------------|--------------------|--------------------|------------------|----------------|--------------------|----|
| 1  | 58.028740          | 29.518008          |                    |                  |                    |                  | G    |                    |                    |                    |                  |                |                    | 61 |
| 2  | 172.071667         | 86.539471          | 155.045118         | 78.026197        |                    |                  | N    | 6827.360757        | 3414.184017        | 6810.334208        | 3405.670742      | 6809.350192    | 3405.178734        | 60 |
| 3  | 269.124431         | 135.065854         | 252.097882         | 126.552579       |                    |                  | P    | 6713.317830        | 3357.162553        | 6696.291281        | 3348.649279      | 6695.307265    | 3348.157271        | 59 |
| 4  | 398.167024         | 199.587150         | 381.140475         | 191.073876       | 380.156459         | 190.581868       | E    | 6616.265066        | 3308.636171        | 6599.238517        | 3300.122897      | 6598.254501    | 3299.630889        | 58 |
| 5  | <b>837.392350</b>  | 419.199813         | 820.365801         | 410.686539       | 819.381785         | 410.194531       | Q    | 6487.222473        | 3244.114875        | 6470.195924        | 3235.601600      | 6469.211908    | 3235.109592        | 57 |
| 6  | 938.440029         | 469.723653         | 921.413480         | 461.210378       | 920.429464         | 460.718370       | T    | 6047.997147        | 3024.502212        | 6030.970598        | 3015.988937      | 6029.986582    | 3015.496929        | 56 |
| 7  | 1035.492793        | 518.250035         | 1018.466244        | 509.736760       | 1017.482228        | 509.244752       | P    | 5946.949468        | 2973.978372        | 5929.922919        | 2965.465098      | 5928.938903    | 2964.973090        | 55 |
| 8  | 1134.561207        | 567.784242         | 1117.534658        | 559.270967       | <b>1116.550642</b> | 558.778959       | V    | 5849.896704        | 2925.451990        | 5832.870155        | 2916.938716      | 5831.886139    | <b>2916.446708</b> | 54 |
| 9  | <b>1247.645271</b> | 624.326274         | 1230.618722        | 615.812999       | 1229.634706        | 615.320991       | L    | 5750.828290        | 2875.917783        | 5733.801741        | 2867.404509      | 5732.817725    | 2866.912501        | 53 |
| 10 | 1375.740234        | 688.373755         | 1358.713685        | 679.860481       | 1357.729669        | 679.368473       | K    | 5637.744226        | <b>2819.375751</b> | 5620.717677        | 2810.862477      | 5619.733661    | 2810.370469        | 52 |
| 11 | 1472.792998        | 736.900137         | 1455.766449        | 728.386863       | 1454.782433        | 727.894855       | P    | <b>5509.649263</b> | 2755.328270        | 5492.622714        | 2746.814995      | 5491.638698    | 2746.322987        | 51 |
| 12 | 1601.835591        | 801.421434         | 1584.809042        | 792.908159       | 1583.825026        | 792.416151       | E    | 5412.596499        | 2706.801888        | 5395.569950        | 2698.288613      | 5394.585934    | 2697.796605        | 50 |
| 13 | 1730.878184        | 865.942730         | 1713.851635        | 857.429456       | 1712.867619        | 856.937448       | E    | 5283.553906        | 2642.280591        | 5266.527357        | 2633.767317      | 5265.543341    | <b>2633.275309</b> | 49 |
| 14 | <b>1859.920777</b> | 930.464027         | 1842.894228        | 921.950752       | 1841.910212        | 921.458744       | E    | <b>5154.511313</b> | 2577.759295        | 5137.484764        | 2569.246020      | 5136.500748    | 2568.754012        | 48 |
| 15 | <b>1930.957891</b> | 965.982584         | 1913.931342        | 957.469309       | 1912.947326        | 956.977301       | A    | 5025.468720        | 2513.237998        | 5008.442171        | 2504.724724      | 5007.458155    | 2504.232716        | 47 |
| 16 | 2028.010655        | 1014.508966        | 2010.984106        | 1005.995691      | 2010.000090        | 1005.503683      | P    | <b>4954.431606</b> | 2477.719441        | 4937.405057        | 2469.206167      | 4936.421041    | 2468.714159        | 46 |
| 17 | <b>2099.047769</b> | 1050.027523        | 2082.021220        | 1041.514248      | 2081.037204        | 1041.022240      | A    | 4857.378842        | 2429.193059        | 4840.352293        | 2420.679785      | 4839.368277    | 2420.187777        | 45 |
| 18 | 2196.100533        | 1098.553905        | 2179.073984        | 1090.040630      | 2178.089968        | 1089.548622      | P    | <b>4786.341728</b> | 2393.674502        | 4769.315179        | 2385.161228      | 4768.331163    | 2384.669220        | 44 |
| 19 | <b>2325.143126</b> | 1163.075201        | 2308.116577        | 1154.561927      | 2307.132561        | 1154.069919      | E    | 4689.288964        | <b>2345.148120</b> | 4672.262415        | 2336.634846      | 4671.278399    | 2336.142838        | 43 |
| 20 | 2424.211540        | 1212.609408        | 2407.184991        | 1204.096134      | 2406.200975        | 1203.604126      | V    | 4560.246371        | 2280.626824        | 4543.219822        | 2272.113549      | 4542.235806    | 2271.621541        | 42 |
| 21 | 2481.233004        | 1241.120140        | 2464.206455        | 1232.606865      | 2463.222439        | 1232.114858      | G    | 4461.177957        | 2231.092617        | 4444.151408        | 2222.579342      | 4443.167392    | 2222.087334        | 41 |
| 22 | 2552.270118        | 1276.638697        | 2535.243569        | 1268.125423      | 2534.259553        | 1267.633415      | A    | 4404.156493        | 2202.581885        | 4387.129944        | 2194.068610      | 4386.145928    | 2193.576602        | 40 |
| 23 | 2639.302146        | 1320.154711        | 2622.275597        | 1311.641437      | 2621.291581        | 1311.149429      | S    | <b>4333.119379</b> | 2167.063328        | 4316.092830        | 2158.550053      | 4315.108814    | 2158.058045        | 39 |
| 24 | 2767.397109        | 1384.202193        | 2750.370560        | 1375.688918      | 2749.386544        | 1375.196910      | K    | 4246.087351        | 2123.547314        | 4229.060802        | 2115.034039      | 4228.076786    | 2114.542031        | 38 |
| 25 | 2864.449873        | 1432.728575        | 2847.423324        | 1424.215300      | <b>2846.439308</b> | 1423.723292      | P    | <b>4117.992388</b> | 2059.499832        | 4100.965839        | 2050.986558      | 4099.981823    | 2050.494550        | 37 |
| 26 | 2993.492466        | 1497.249871        | 2976.465917        | 1488.736597      | 2975.481901        | 1488.244589      | E    | 4020.939624        | 2010.973450        | 4003.913075        | 2002.460176      | 4002.929059    | 2001.968168        | 36 |
| 27 | 3050.513930        | 1525.760603        | 3033.487381        | 1517.247329      | 3032.503365        | 1516.755321      | G    | 3891.897031        | 1946.452154        | 3874.870482        | 1937.938879      | 3873.886466    | 1937.446871        | 35 |
| 28 | 3163.597994        | 1582.302635        | 3146.571445        | 1573.789361      | 3145.587429        | 1573.297353      | I    | 3834.875567        | 1917.941422        | 3817.849018        | 1909.428147      | 3816.865002    | 1908.936139        | 34 |
| 29 | <b>3278.624937</b> | 1639.816107        | 3261.598388        | 1631.302832      | 3260.614372        | 1630.810824      | D    | 3721.791503        | 1861.399390        | 3704.764954        | 1852.886115      | 3703.780938    | 1852.394107        | 33 |
| 30 | 3365.656965        | 1683.332121        | 3348.630416        | 1674.818846      | 3347.646400        | 1674.326838      | S    | <b>3606.764560</b> | 1803.885918        | <b>3589.738011</b> | 1795.372644      | 3588.753995    | 1794.880636        | 32 |
| 31 | 3521.758076        | 1761.382676        | 3504.731527        | 1752.869402      | 3503.747511        | 1752.377394      | R    | 3519.732532        | 1760.369904        | 3502.705983        | 1751.856630      | 3501.721967    | 1751.364622        | 31 |
| 32 | 3618.810840        | 1809.909058        | 3601.784291        | 1801.395784      | 3600.800275        | 1800.903776      | P    | 3363.631421        | 1682.319349        | 3346.604872        | 1673.806074      | 3345.620856    | 1673.314066        | 30 |
| 33 | 3747.853433        | 1874.430355        | 3730.826884        | 1865.917080      | 3729.842868        | 1865.425072      | E    | 3266.578657        | 1633.792967        | 3249.552108        | 1625.279692      | 3248.568092    | 1624.787684        | 29 |
| 34 | 3848.901112        | 1924.954194        | 3831.874563        | 1916.440920      | 3830.890547        | 1915.948912      | T    | 3137.536064        | 1569.271670        | 3120.509515        | 1560.758396      | 3119.525499    | 1560.266388        | 28 |
| 35 | 3961.985176        | 1981.496226        | 3944.958627        | 1972.982952      | 3943.974611        | 1972.490944      | L    | 3036.488385        | 1518.747831        | 3019.461836        | 1510.234556      | 3018.477820    | 1509.742548        | 27 |
| 36 | 4099.044088        | 2050.025682        | 4082.017539        | 2041.512408      | 4081.033523        | 2041.020400      | H    | 2923.404321        | 1462.205799        | 2906.377772        | 1453.692524      | 2905.393756    | 1453.200516        | 26 |
| 37 | 4196.096852        | 2098.552064        | 4179.070303        | 2090.038790      | 4178.086287        | 2089.546782      | P    | 2786.345409        | 1393.676343        | 2769.318860        | 1385.163068      | 2768.334844    | 1384.671060        | 25 |
| 38 | 4253.118316        | 2127.062796        | 4236.091767        | 2118.549522      | 4235.107751        | 2118.057514      | G    | 2689.292645        | 1345.149961        | 2672.266096        | 1336.636686      | 2671.282080    | 1336.144678        | 24 |
| 39 | 4409.219427        | 2205.113352        | 4392.192878        | 2196.600077      | 4391.208862        | 2196.108069      | R    | 2632.271181        | 1316.639229        | 2615.244632        | 1308.125954      | 2614.260616    | 1307.633946        | 23 |
| 40 | 4506.272191        | 2253.639734        | 4489.245642        | 2245.126459      | 4488.261626        | 2244.634451      | P    | 2476.170070        | 1238.588673        | 2459.143521        | 1230.075399      | 2458.159505    | 1229.583391        | 22 |
| 41 | 4634.330769        | 2317.669023        | 4617.304220        | 2309.155748      | 4616.320204        | 2308.663740      | Q    | 2379.117306        | 1190.062291        | 2362.090757        | 1181.549017      | 2361.106741    | 1181.057009        | 21 |
| 42 | 4731.383533        | 2366.195405        | 4714.356984        | 2357.682130      | 4713.372968        | 2357.190122      | P    | <b>2251.058728</b> | 1126.033002        | 2234.032179        | 1117.519728      | 2233.048163    | 1117.027720        | 20 |
| 43 | 4828.436297        | 2414.721787        | 4811.409748        | 2406.208512      | 4810.425732        | 2405.716504      | P    | 2154.005964        | 1077.506620        | 2136.979415        | 1068.993346      | 2135.995399    | 1068.501338        | 19 |
| 44 | 4899.473411        | 2450.240344        | 4882.446862        | 2441.727069      | 4881.462846        | 2441.235061      | A    | 2056.953200        | 1028.980238        | 2039.926651        | 1020.466964      | 2038.942635    | 1019.974956        | 18 |
| 45 | 5028.516004        | 2514.761640        | 5011.489455        | 2506.248366      | 5010.505439        | 2505.756358      | E    | 1985.916086        | 993.461681         | 1968.889537        | 984.948407       | 1967.905521    | 984.456399         | 17 |
| 46 | 5157.558597        | 2579.282937        | 5140.532048        | 2570.769662      | 5139.548032        | 2570.277654      | E    | 1856.873493        | 928.940385         | 1839.846944        | 920.427110       | 1838.862928    | 919.935102         | 16 |
| 47 | 5286.601190        | 2643.804233        | 5269.574641        | 2635.290959      | 5268.590625        | 2634.798951      | E    | <b>1727.830900</b> | 864.419088         | 1710.804351        | 855.905814       | 1709.820335    | 855.413806         | 15 |
| 48 | 5399.685254        | 2700.346265        | 5382.658705        | 2691.832991      | 5381.674689        | 2691.340983      | L    | <b>1598.788307</b> | 799.897792         | 1581.761758        | 791.384517       | 1580.777742    | 790.892509         | 14 |
| 49 | 5559.715903        | 2780.361590        | 5542.689354        | 2771.848315      | 5541.705338        | 2771.356307      | C    | <b>1485.704243</b> | 743.355760         | 1468.677694        | 734.842485       | 1467.693678    | 734.350477         | 13 |
| 50 | 5646.747931        | 2823.877604        | 5629.721382        | 2815.364329      | 5628.737366        | 2814.872321      | S    | <b>1325.673594</b> | 663.340435         | 1308.647045        | 654.827161       | 1307.663029    | 654.335153         | 12 |
| 51 | 5703.769395        | 2852.388336        | <b>5686.742846</b> | 2843.875061      | 5685.758830        | 2843.383053      | G    | 1238.641566        | 619.824421         | 1221.615017        | 611.311147       | 1220.631001    | 610.819139         | 11 |
| 52 | 5831.864358        | <b>2916.435817</b> | 5814.837809        | 2907.922543      | 5813.853793        | 2907.430535      | K    | 1181.620102        | 591.313689         | 1164.593553        | 582.800415       | 1163.609537    | 582.308407         | 10 |
| 53 | 5928.917122        | 2964.962199        | 5911.890573        | 2956.448925      | 5910.906557        | 2955.956917      | P    | <b>1053.525139</b> | 527.266208         | 1036.498590        | 518.752933       | 1035.514574    | 518.2              |    |



# MASCOT Search Results

## Peptide View

MS/MS Fragmentation of **GGQIMTLK**

Found in **VWF\_HUMAN**, von Willebrand factor OS=Homo sapiens GN=VWF PE=1 SV=4

Match to Query 20391: 1157.645928 from(579.830240,2+) rtinseconds(1939) index(34693)

Title: Locus:1.1.1.3309.16 File:"2013-07-02 CLN FXIII 30 min 3rd F 3.wiff"

Data file C:\Program Files (x86)\Matrix Science\Mascot Daemon\mgf3 FXIII 30 min 3rd\mascot\_daemon\_merge.mgf

Click mouse within plot area to zoom in by factor of two about that point

Or, Plot from  to  Da

Label all possible matches  Label matches used for scoring

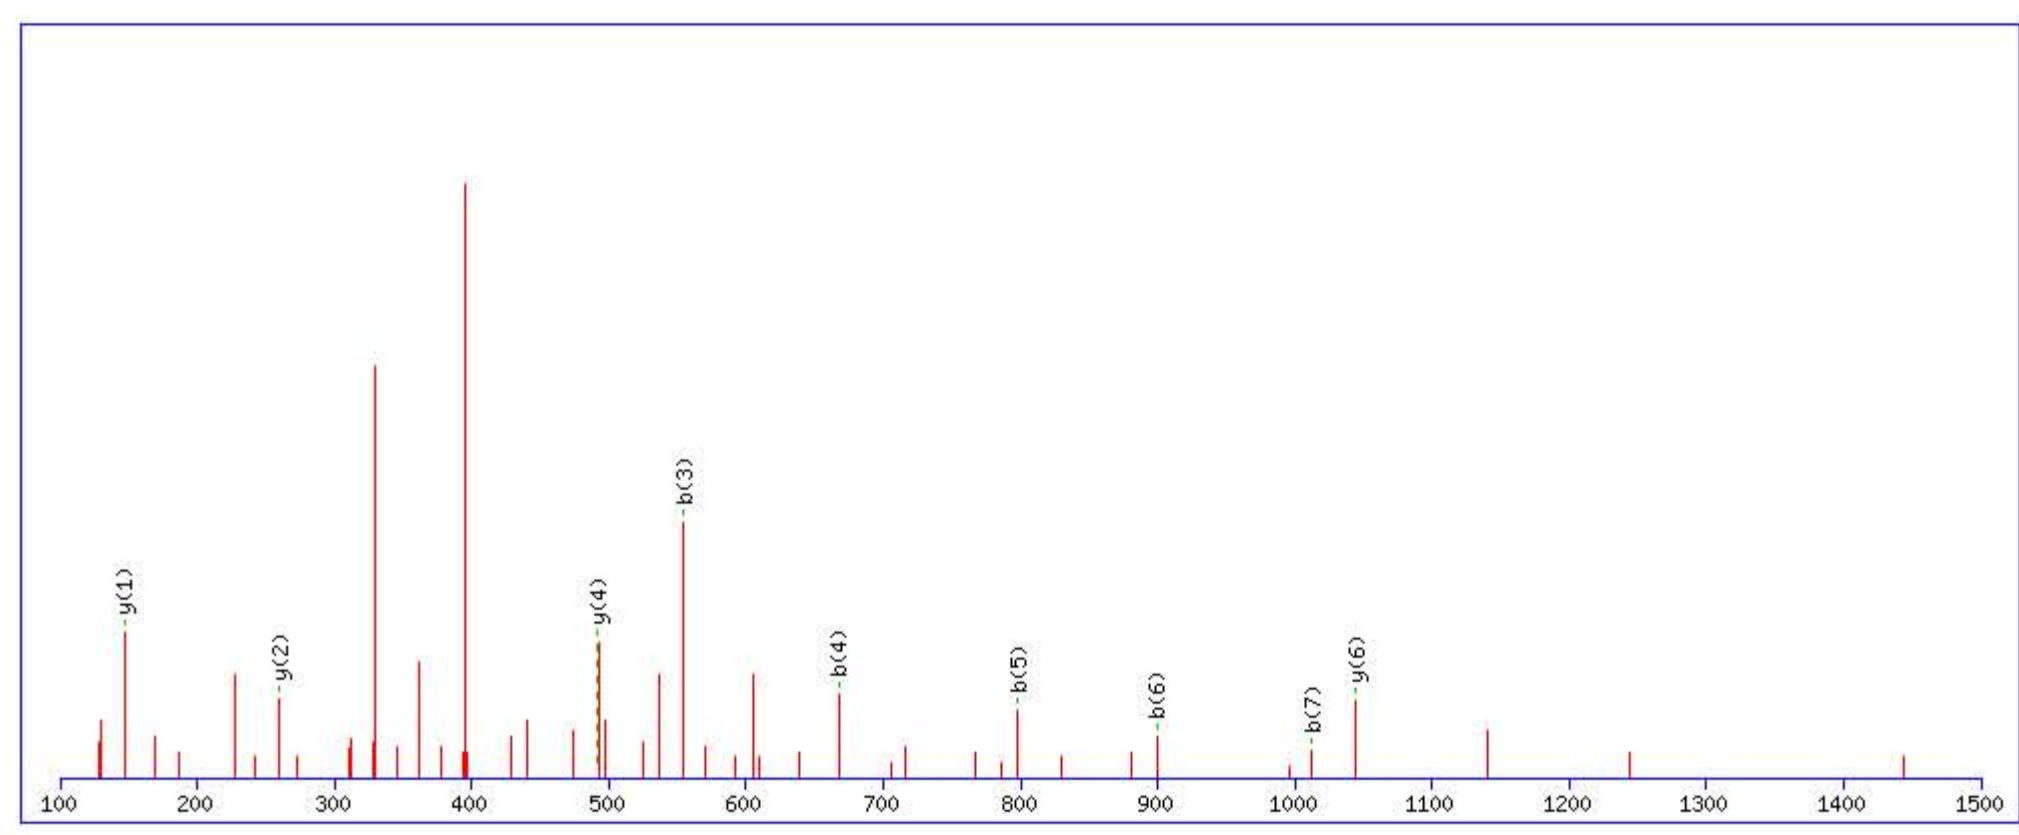

Monoisotopic mass of neutral peptide Mr(calc): 1157.630066

Fixed modifications: Carbamidomethyl (C) (apply to specified residues or termini only)

Variable modifications:

Q3 : Biotin:Thermo-21345 (Q)

Ions Score: 46 Expect: 0.00067

Matches : 9/66 fragment ions using 11 most intense peaks [\(help\)](#)

| # | b                  | b <sup>++</sup> | b <sup>*</sup> | b <sup>*++</sup> | b <sup>0</sup> | b <sup>0++</sup> | Seq. | y                  | y <sup>++</sup> | y <sup>*</sup> | y <sup>*++</sup> | y <sup>0</sup> | y <sup>0++</sup> | # |
|---|--------------------|-----------------|----------------|------------------|----------------|------------------|------|--------------------|-----------------|----------------|------------------|----------------|------------------|---|
| 1 | 58.028740          | 29.518008       |                |                  |                |                  | G    |                    |                 |                |                  |                |                  | 8 |
| 2 | 115.050204         | 58.028740       |                |                  |                |                  | G    | 1101.615886        | 551.311581      | 1084.589337    | 542.798307       | 1083.605321    | 542.306299       | 7 |
| 3 | <b>554.275530</b>  | 277.641403      | 537.248981     | 269.128129       |                |                  | Q    | <b>1044.594422</b> | 522.800849      | 1027.567873    | 514.287575       | 1026.583857    | 513.795567       | 6 |
| 4 | <b>667.359594</b>  | 334.183435      | 650.333045     | 325.670161       |                |                  | I    | 605.369096         | 303.188186      | 588.342547     | 294.674912       | 587.358531     | 294.182904       | 5 |
| 5 | <b>798.400079</b>  | 399.703678      | 781.373530     | 391.190403       |                |                  | M    | <b>492.285032</b>  | 246.646154      | 475.258483     | 238.132880       | 474.274467     | 237.640872       | 4 |
| 6 | <b>899.447758</b>  | 450.227517      | 882.421209     | 441.714243       | 881.437193     | 441.222235       | T    | 361.244547         | 181.125912      | 344.217998     | 172.612637       | 343.233982     | 172.120629       | 3 |
| 7 | <b>1012.531822</b> | 506.769549      | 995.505273     | 498.256275       | 994.521257     | 497.764267       | L    | <b>260.196868</b>  | 130.602072      | 243.170319     | 122.088798       |                |                  | 2 |
| 8 |                    |                 |                |                  |                |                  | K    | <b>147.112804</b>  | 74.060040       | 130.086255     | 65.546765        |                |                  | 1 |

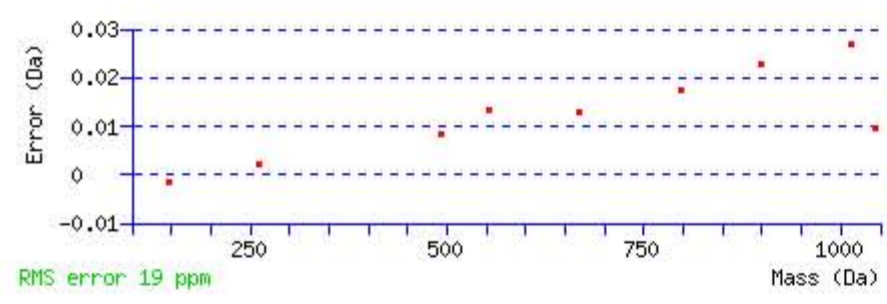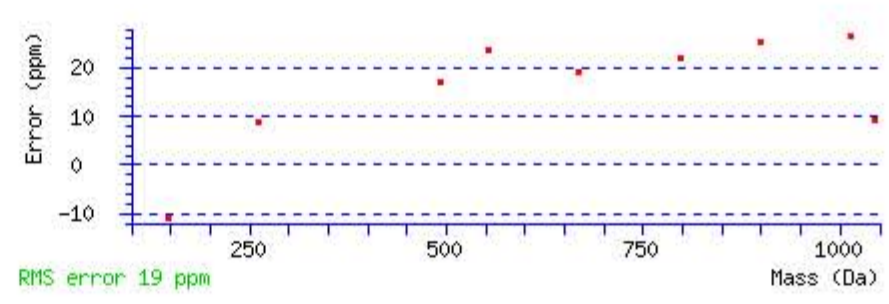

NCBI BLAST search of [GGQIMTLK](#)

(Parameters: blastp, nr protein database, expect=20000, no filter, PAM30)

Other BLAST [web gateways](#)

### All matches to this query

| Score | Mr(calc):   | Delta     | Sequence                     |
|-------|-------------|-----------|------------------------------|
| 45.5  | 1157.630066 | 0.015862  | <a href="#">GGQIMTLK</a>     |
| 22.3  | 1157.647827 | -0.001899 | <a href="#">ALVGGTAPMTIK</a> |
| 16.3  | 1157.630051 | 0.015877  | <a href="#">QLSQMLK</a>      |
| 16.0  | 1157.640411 | 0.005517  | <a href="#">AQQLSSGNLK</a>   |
| 15.2  | 1157.630051 | 0.015877  | <a href="#">QAGAMLLK</a>     |
| 12.2  | 1157.659042 | -0.013114 | <a href="#">NLMLVRDGK</a>    |
| 10.7  | 1157.640411 | 0.005517  | <a href="#">SPGKNSSIQLK</a>  |
| 8.3   | 1157.630081 | 0.015847  | <a href="#">CVTLVQK</a>      |
| 8.3   | 1157.659698 | -0.013770 | <a href="#">IFRYFATLK</a>    |
| 8.3   | 1157.629196 | 0.016732  | <a href="#">VTGKPDATLK</a>   |



# MASCOT SCIENCE Mascot Search Results

## Peptide View

MS/MS Fragmentation of **VKEEVFIQQR**

Found in **VWF\_HUMAN**, von Willebrand factor OS=Homo sapiens GN=VWF PE=1 SV=4

Match to Query 33463: 1585.862832 from(529.628220,3+) rtinseconds(1807) index(49934)

Title: Locus:1.1.1.3273.4 File:"2013-07-02 CLN FXIII 30 min 3rd F 4.wiff"

Data file C:\Program Files (x86)\Matrix Science\Mascot Daemon\mgf3 FXIII 30 min 3rd\mascot\_daemon\_merge.mgf

Click mouse within plot area to zoom in by factor of two about that point

Or, Plot from  to  Da

Label all possible matches  Label matches used for scoring

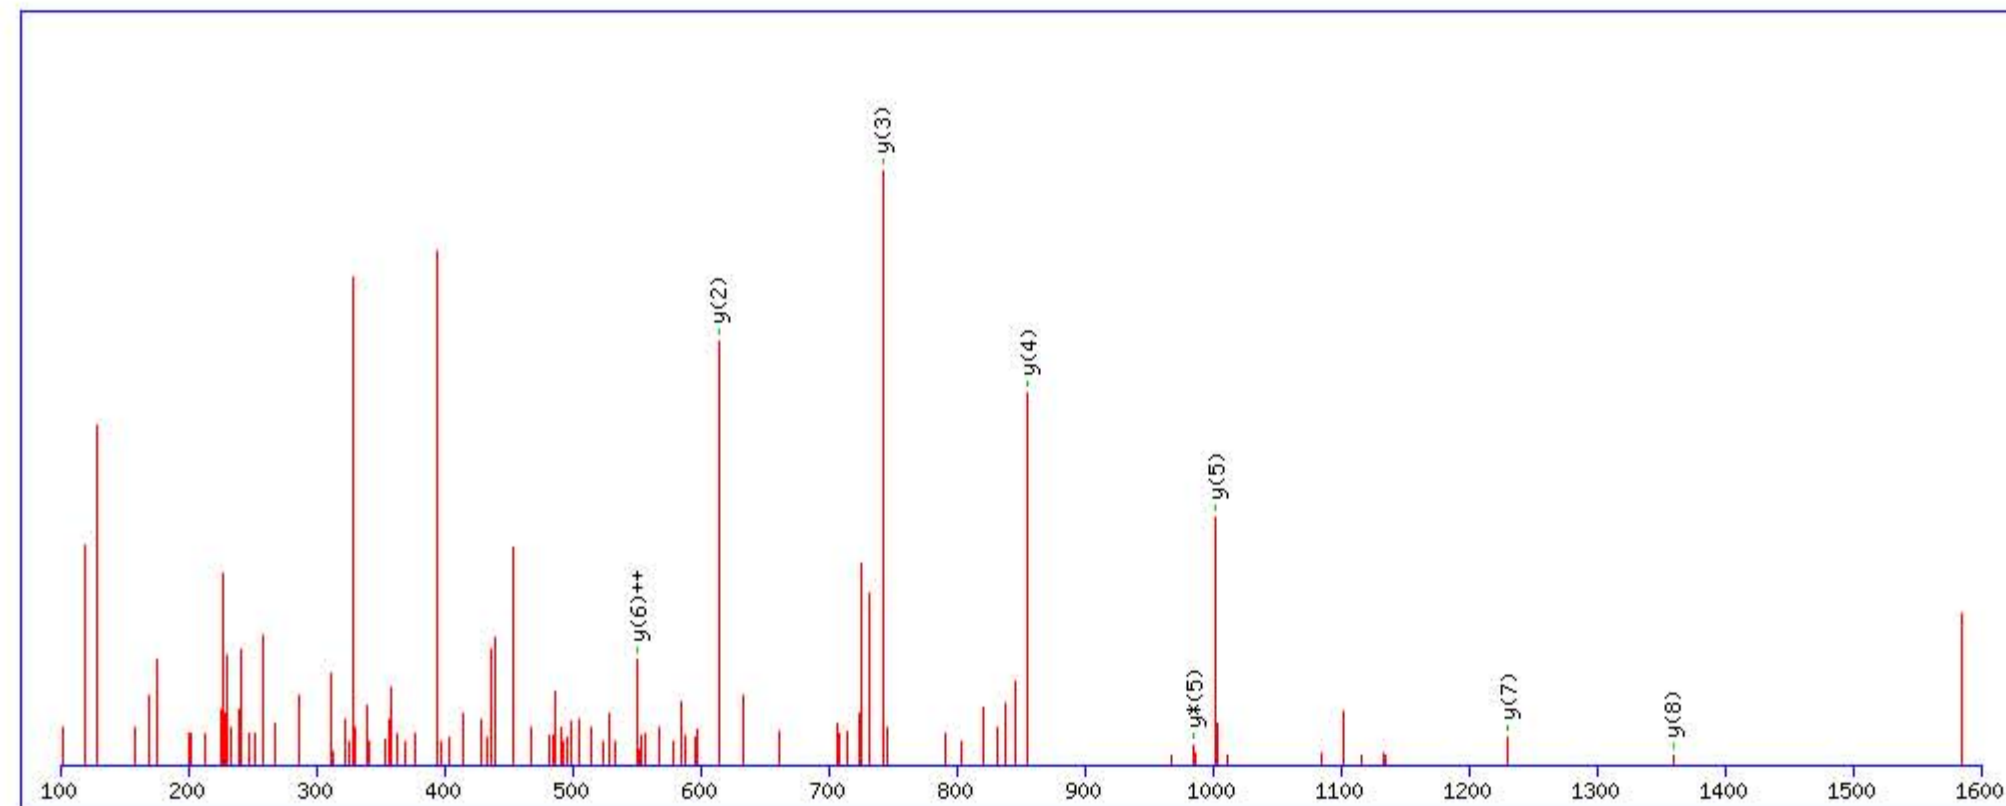

Monoisotopic mass of neutral peptide Mr(calc): 1585.865021

Fixed modifications: Carbamidomethyl (C) (apply to specified residues or termini only)

Variable modifications:

Q9 : Biotin:Thermo-21345 (Q)

Ions Score: 36 Expect: 0.0013

Matches : 8/90 fragment ions using 13 most intense peaks [\(help\)](#)

| #  | b           | b <sup>++</sup> | b <sup>+</sup> | b <sup>0++</sup> | b <sup>0</sup> | b <sup>0++</sup> | Seq. | y                  | y <sup>++</sup>   | y <sup>+</sup>    | y <sup>0++</sup> | y <sup>0</sup> | y <sup>0++</sup> | #  |
|----|-------------|-----------------|----------------|------------------|----------------|------------------|------|--------------------|-------------------|-------------------|------------------|----------------|------------------|----|
| 1  | 100.075690  | 50.541483       |                |                  |                |                  | V    |                    |                   |                   |                  |                |                  | 10 |
| 2  | 228.170653  | 114.588965      | 211.144104     | 106.075690       |                |                  | K    | 1487.803897        | 744.405587        | 1470.777348       | 735.892312       | 1469.793332    | 735.400304       | 9  |
| 3  | 357.213246  | 179.110261      | 340.186697     | 170.596987       | 339.202681     | 170.104979       | E    | <b>1359.708934</b> | 680.358105        | 1342.682385       | 671.844831       | 1341.698369    | 671.352823       | 8  |
| 4  | 486.255839  | 243.631558      | 469.229290     | 235.118283       | 468.245274     | 234.626275       | E    | <b>1230.666341</b> | 615.836809        | 1213.639792       | 607.323534       | 1212.655776    | 606.831526       | 7  |
| 5  | 585.324253  | 293.165765      | 568.297704     | 284.652490       | 567.313688     | 284.160482       | V    | 1101.623748        | <b>551.315512</b> | 1084.597199       | 542.802238       |                |                  | 6  |
| 6  | 732.392667  | 366.699972      | 715.366118     | 358.186697       | 714.382102     | 357.694689       | F    | <b>1002.555334</b> | 501.781305        | <b>985.528785</b> | 493.268031       |                |                  | 5  |
| 7  | 845.476731  | 423.242004      | 828.450182     | 414.728729       | 827.466166     | 414.236721       | I    | <b>855.486920</b>  | 428.247098        | 838.460371        | 419.733824       |                |                  | 4  |
| 8  | 973.535309  | 487.271293      | 956.508760     | 478.758018       | 955.524744     | 478.266010       | Q    | <b>742.402856</b>  | 371.705066        | 725.376307        | 363.191792       |                |                  | 3  |
| 9  | 1412.760635 | 706.883956      | 1395.734086    | 698.370681       | 1394.750070    | 697.878673       | Q    | <b>614.344278</b>  | 307.675777        | 597.317729        | 299.162503       |                |                  | 2  |
| 10 |             |                 |                |                  |                |                  | R    | 175.118952         | 88.063114         | 158.092403        | 79.549839        |                |                  | 1  |

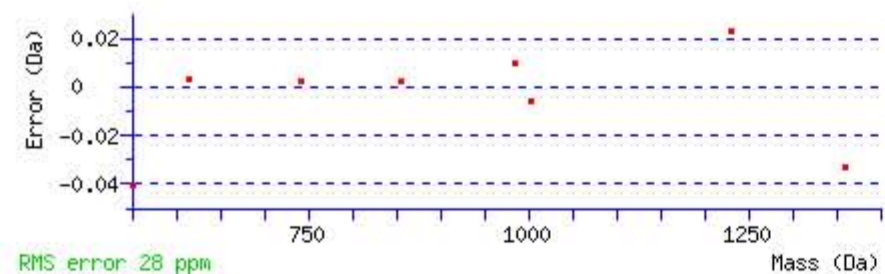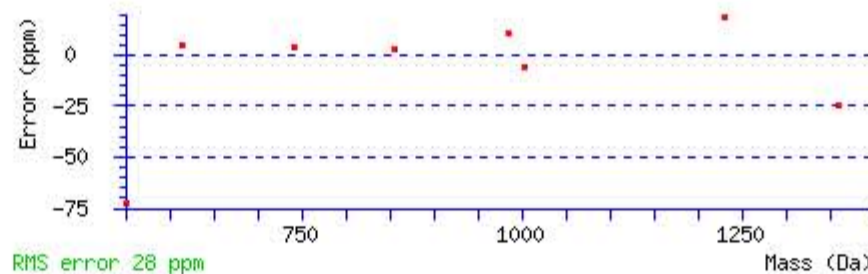

NCBI BLAST search of **VKEEVFIQQR**

(Parameters: blastp, nr protein database, expect=20000, no filter, PAM30)

Other BLAST [web gateways](#)

## All matches to this query

| Score | Mr(calc):   | Delta     | Sequence                        |
|-------|-------------|-----------|---------------------------------|
| 36.0  | 1585.865021 | -0.002189 | <a href="#">VKEEVFIQQR</a>      |
| 25.6  | 1585.865021 | -0.002189 | <a href="#">VKEEVFIQQR</a>      |
| 5.1   | 1585.842392 | 0.020440  | <a href="#">EIQTITGNQQVLVR</a>  |
| 4.8   | 1585.842407 | 0.020425  | <a href="#">QLQTGGIIDTVTGQR</a> |
| 2.4   | 1585.857605 | 0.005227  | <a href="#">QEEVAGIRAKFPNK</a>  |
| 2.2   | 1585.857620 | 0.005212  | <a href="#">GSRLHPEELGGPPLK</a> |

Mascot: <http://www.matrixscience.com/>



# MASCOT SEARCH RESULTS

## Peptide View

MS/MS Fragmentation of **TCQSLHINEMCQER**

Found in **VWF\_HUMAN**, von Willebrand factor OS=Homo sapiens GN=VWF PE=1 SV=4

Match to Query 45751: 2115.952602 from(706.324810,3+) rtinseconds(1753) index(33706)

Title: Locus:1.1.1.3244.17 File:"2013-07-02 CLN FXIII 30 min 3rd F 3.wiff"

Data file C:\Program Files (x86)\Matrix Science\Mascot Daemon\mgf3 FXIII 30 min 3rd\mascot\_daemon\_merge.mgf

Click mouse within plot area to zoom in by factor of two about that point

Or, Plot from  to  Da

Label all possible matches  Label matches used for scoring

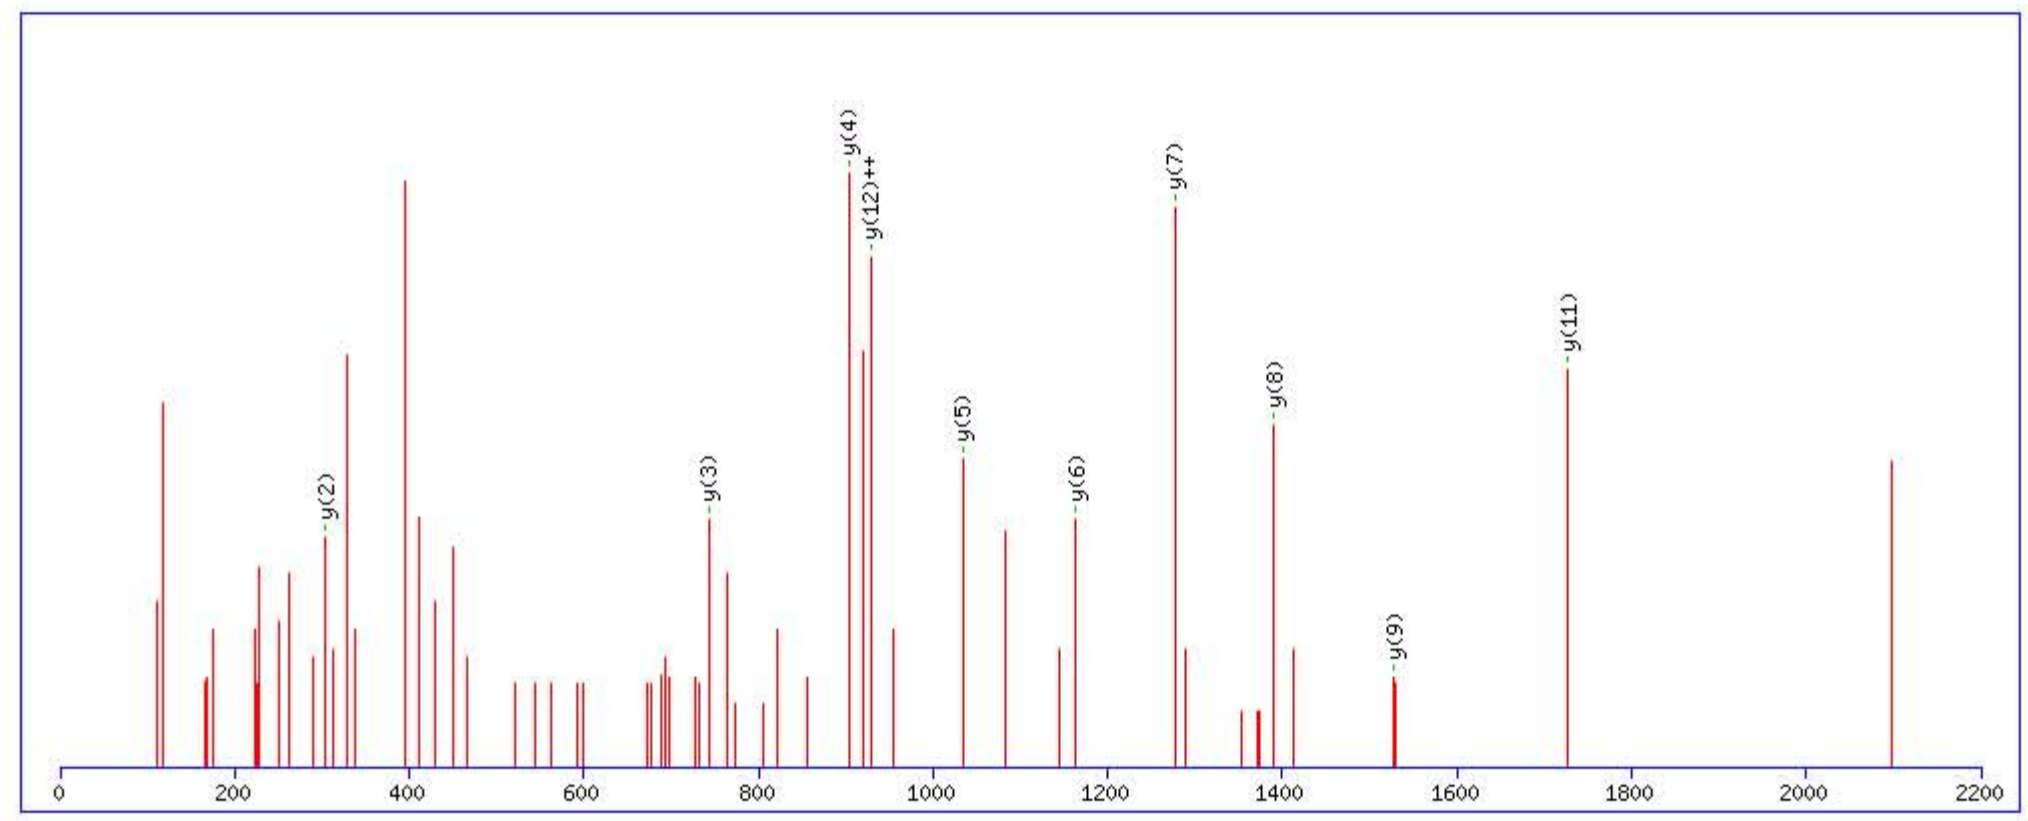

Monoisotopic mass of neutral peptide Mr(calc): 2115.932205

Fixed modifications: Carbamidomethyl (C) (apply to specified residues or termini only)

Variable modifications:

Q12 : Biotin:Thermo-21345 (Q)

Ions Score: 59 Expect: 1.3e-005

Matches : 10/150 fragment ions using 17 most intense peaks [\(help\)](#)

| #  | b           | b <sup>++</sup> | b <sup>*</sup> | b <sup>+++</sup> | b <sup>0</sup> | b <sup>0++</sup> | Seq. | y           | y <sup>++</sup> | y <sup>*</sup> | y <sup>+++</sup> | y <sup>0</sup> | y <sup>0++</sup> | #  |
|----|-------------|-----------------|----------------|------------------|----------------|------------------|------|-------------|-----------------|----------------|------------------|----------------|------------------|----|
| 1  | 102.054955  | 51.531116       |                |                  | 84.044390      | 42.525833        | T    |             |                 |                |                  |                |                  | 14 |
| 2  | 262.085604  | 131.546440      |                |                  | 244.075039     | 122.541158       | C    | 2015.891820 | 1008.449548     | 1998.865271    | 999.936274       | 1997.881255    | 999.444266       | 13 |
| 3  | 390.144182  | 195.575729      | 373.117633     | 187.062455       | 372.133617     | 186.570447       | Q    | 1855.861171 | 928.434224      | 1838.834622    | 919.920949       | 1837.850606    | 919.428941       | 12 |
| 4  | 477.176210  | 239.091743      | 460.149661     | 230.578469       | 459.165645     | 230.086461       | S    | 1727.802593 | 864.404935      | 1710.776044    | 855.891660       | 1709.792028    | 855.399652       | 11 |
| 5  | 590.260274  | 295.633775      | 573.233725     | 287.120501       | 572.249709     | 286.628493       | L    | 1640.770565 | 820.888921      | 1623.744016    | 812.375646       | 1622.760000    | 811.883638       | 10 |
| 6  | 727.319186  | 364.163231      | 710.292637     | 355.649957       | 709.308621     | 355.157949       | H    | 1527.686501 | 764.346889      | 1510.659952    | 755.833614       | 1509.675936    | 755.341606       | 9  |
| 7  | 840.403250  | 420.705263      | 823.376701     | 412.191989       | 822.392685     | 411.699981       | I    | 1390.627589 | 695.817433      | 1373.601040    | 687.304158       | 1372.617024    | 686.812150       | 8  |
| 8  | 954.446177  | 477.726727      | 937.419628     | 469.213452       | 936.435612     | 468.721444       | N    | 1277.543525 | 639.275401      | 1260.516976    | 630.762126       | 1259.532960    | 630.270118       | 7  |
| 9  | 1083.488770 | 542.248023      | 1066.462221    | 533.734749       | 1065.478205    | 533.242741       | E    | 1163.500598 | 582.253937      | 1146.474049    | 573.740663       | 1145.490033    | 573.248655       | 6  |
| 10 | 1214.529255 | 607.768266      | 1197.502706    | 599.254991       | 1196.518690    | 598.762983       | M    | 1034.458005 | 517.732641      | 1017.431456    | 509.219366       | 1016.447440    | 508.727358       | 5  |
| 11 | 1374.559904 | 687.783590      | 1357.533355    | 679.270316       | 1356.549339    | 678.778308       | C    | 903.417520  | 452.212398      | 886.390971     | 443.699124       | 885.406955     | 443.207116       | 4  |
| 12 | 1813.785230 | 907.396253      | 1796.758681    | 898.882979       | 1795.774665    | 898.390971       | Q    | 743.386871  | 372.197074      | 726.360322     | 363.683799       | 725.376306     | 363.191791       | 3  |
| 13 | 1942.827823 | 971.917550      | 1925.801274    | 963.404275       | 1924.817258    | 962.912267       | E    | 304.161545  | 152.584411      | 287.134996     | 144.071136       | 286.150980     | 143.579128       | 2  |
| 14 |             |                 |                |                  |                |                  | R    | 175.118952  | 88.063114       | 158.092403     | 79.549839        |                |                  | 1  |

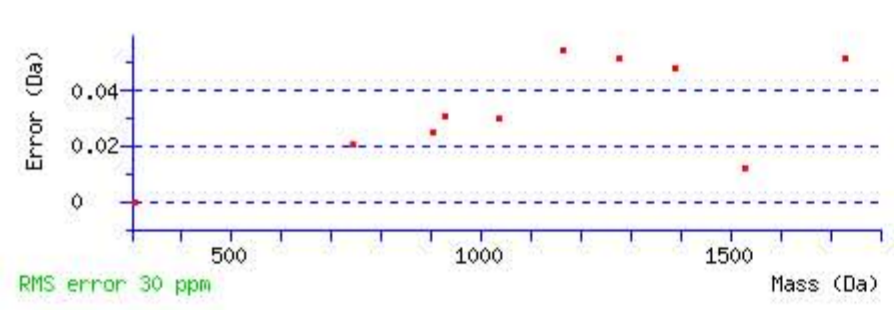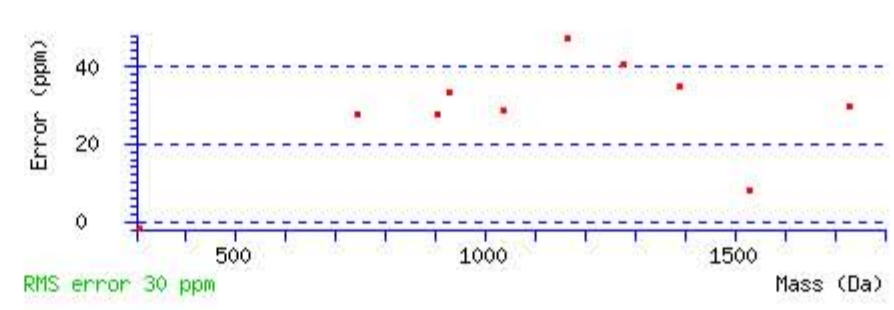

NCBI BLAST search of **TCQSLHINEMCQER**

(Parameters: blastp, nr protein database, expect=20000, no filter, PAM30)

Other BLAST [web gateways](#)

### All matches to this query

| Score | Mr(calc):   | Delta    | Sequence                       |
|-------|-------------|----------|--------------------------------|
| 58.5  | 2115.932205 | 0.020397 | <a href="#">TCQSLHINEMCQER</a> |



**MASCOT SEARCH RESULTS**

**Peptide View**

MS/MS Fragmentation of **RPGDVWTLPDQCHTVTCQPDGQTLK**  
 Found in **VWF\_HUMAN**, von Willebrand factor OS=Homo sapiens GN=VWF PE=1 SV=4

Match to Query 61156: 3332.603976 from(834.158270,4+) rtinseconds(2216) index(52296)  
 Title: Locus:1.1.1.3414.9 File:"2013-07-02 CLN FXIII 30 min 3rd F 4.wiff"  
 Data file C:\Program Files (x86)\Matrix Science\Mascot Daemon\mgf3 FXIII 30 min 3rd\mascot\_daemon\_merge.mgf

Click mouse within plot area to zoom in by factor of two about that point  
 Or, Plot from  to  Da   
 Label all possible matches  Label matches used for scoring

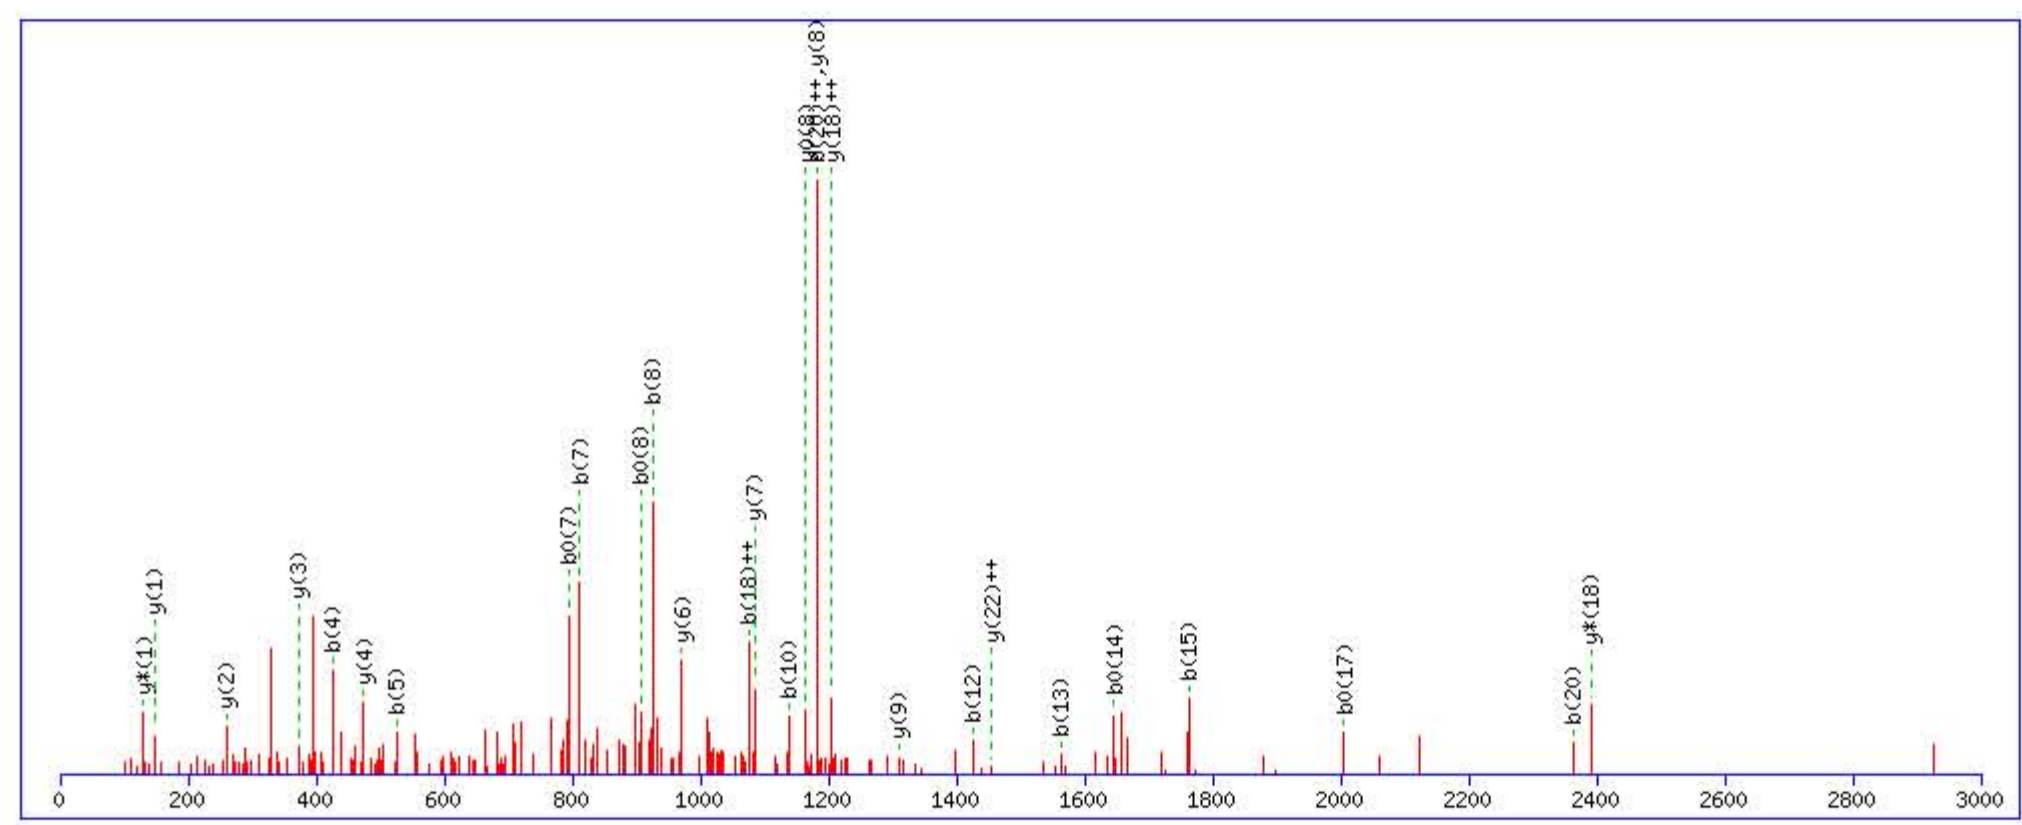

Monoisotopic mass of neutral peptide Mr(calc): 3332.610474  
 Fixed modifications: Carbamidomethyl (C) (apply to specified residues or termini only)  
 Variable modifications:  
 Q22 : Biotin:Thermo-21345 (Q)  
 Ions Score: 45 Expect: 0.0007  
 Matches : 28/288 fragment ions using 59 most intense peaks [\(help\)](#)

| #  | b                  | b <sup>++</sup>    | b <sup>*</sup> | b <sup>+++</sup> | b <sup>0</sup>     | b <sup>0++</sup> | Seq. | y                  | y <sup>++</sup>    | y <sup>*</sup>     | y <sup>+++</sup> | y <sup>0</sup>     | y <sup>0++</sup> | #  |
|----|--------------------|--------------------|----------------|------------------|--------------------|------------------|------|--------------------|--------------------|--------------------|------------------|--------------------|------------------|----|
| 1  | 157.108387         | 79.057831          | 140.081838     | 70.544557        |                    |                  | R    |                    |                    |                    |                  |                    |                  | 26 |
| 2  | 254.161151         | 127.584213         | 237.134602     | 119.070939       |                    |                  | P    | 3177.516594        | 1589.261935        | 3160.490045        | 1580.748660      | 3159.506029        | 1580.256652      | 25 |
| 3  | 311.182615         | 156.094945         | 294.156066     | 147.581671       |                    |                  | G    | 3080.463830        | 1540.735553        | 3063.437281        | 1532.222278      | 3062.453265        | 1531.730270      | 24 |
| 4  | <b>426.209558</b>  | 213.608417         | 409.183009     | 205.095143       | 408.198993         | 204.603135       | D    | 3023.442366        | 1512.224821        | 3006.415817        | 1503.711546      | 3005.431801        | 1503.219538      | 23 |
| 5  | <b>525.277972</b>  | 263.142624         | 508.251423     | 254.629350       | 507.267407         | 254.137342       | V    | 2908.415423        | <b>1454.711349</b> | 2891.388874        | 1446.198075      | 2890.404858        | 1445.706067      | 22 |
| 6  | 711.357285         | 356.182281         | 694.330736     | 347.669006       | 693.346720         | 347.176998       | W    | 2809.347009        | 1405.177142        | 2792.320460        | 1396.663868      | 2791.336444        | 1396.171860      | 21 |
| 7  | <b>812.404964</b>  | 406.706120         | 795.378415     | 398.192846       | <b>794.394399</b>  | 397.700838       | T    | 2623.267696        | 1312.137486        | 2606.241147        | 1303.624211      | 2605.257131        | 1303.132203      | 20 |
| 8  | <b>925.489028</b>  | 463.248152         | 908.462479     | 454.734878       | <b>907.478463</b>  | 454.242870       | L    | 2522.220017        | 1261.613646        | 2505.193468        | 1253.100372      | 2504.209452        | 1252.608364      | 19 |
| 9  | 1022.541792        | 511.774534         | 1005.515243    | 503.261260       | 1004.531227        | 502.769252       | P    | 2409.135953        | <b>1205.071614</b> | <b>2392.109404</b> | 1196.558340      | 2391.125388        | 1196.066332      | 18 |
| 10 | <b>1137.568735</b> | 569.288006         | 1120.542186    | 560.774731       | 1119.558170        | 560.282723       | D    | 2312.083189        | 1156.545232        | 2295.056640        | 1148.031958      | 2294.072624        | 1147.539950      | 17 |
| 11 | 1265.627313        | 633.317295         | 1248.600764    | 624.804020       | 1247.616748        | 624.312012       | Q    | 2197.056246        | 1099.031761        | 2180.029697        | 1090.518486      | 2179.045681        | 1090.026478      | 16 |
| 12 | <b>1425.657962</b> | 713.332619         | 1408.631413    | 704.819345       | 1407.647397        | 704.327337       | C    | 2068.997668        | 1035.002472        | 2051.971119        | 1026.489197      | 2050.987103        | 1025.997189      | 15 |
| 13 | <b>1562.716874</b> | 781.862075         | 1545.690325    | 773.348801       | 1544.706309        | 772.856793       | H    | 1908.967019        | 954.987148         | 1891.940470        | 946.473873       | 1890.956454        | 945.981865       | 14 |
| 14 | 1663.764553        | 832.385915         | 1646.738004    | 823.872640       | <b>1645.753988</b> | 823.380632       | T    | 1771.908107        | 886.457692         | 1754.881558        | 877.944417       | 1753.897542        | 877.452409       | 13 |
| 15 | <b>1762.832967</b> | 881.920122         | 1745.806418    | 873.406847       | 1744.822402        | 872.914839       | V    | 1670.860428        | 835.933852         | 1653.833879        | 827.420578       | 1652.849863        | 826.928570       | 12 |
| 16 | 1863.880646        | 932.443961         | 1846.854097    | 923.930687       | 1845.870081        | 923.438679       | T    | 1571.792014        | 786.399645         | 1554.765465        | 777.886371       | 1553.781449        | 777.394363       | 11 |
| 17 | 2023.911295        | 1012.459286        | 2006.884746    | 1003.946011      | <b>2005.900730</b> | 1003.454003      | C    | 1470.744335        | 735.875806         | 1453.717786        | 727.362531       | 1452.733770        | 726.870523       | 10 |
| 18 | 2151.969873        | <b>1076.488574</b> | 2134.943324    | 1067.975300      | 2133.959308        | 1067.483292      | Q    | <b>1310.713686</b> | 655.860481         | 1293.687137        | 647.347207       | 1292.703121        | 646.855199       | 9  |
| 19 | 2249.022637        | 1125.014956        | 2231.996088    | 1116.501682      | 2231.012072        | 1116.009674      | P    | <b>1182.655108</b> | 591.831192         | 1165.628559        | 583.317918       | <b>1164.644543</b> | 582.825910       | 8  |
| 20 | <b>2364.049580</b> | <b>1182.528428</b> | 2347.023031    | 1174.015153      | 2346.039015        | 1173.523145      | D    | <b>1085.602344</b> | 543.304810         | 1068.575795        | 534.791536       | 1067.591779        | 534.299528       | 7  |
| 21 | 2421.071044        | 1211.039160        | 2404.044495    | 1202.525885      | 2403.060479        | 1202.033877      | G    | <b>970.575401</b>  | 485.791339         | 953.548852         | 477.278064       | 952.564836         | 476.786056       | 6  |
| 22 | 2860.296370        | 1430.651823        | 2843.269821    | 1422.138548      | 2842.285805        | 1421.646540      | Q    | 913.553937         | 457.280607         | 896.527388         | 448.767332       | 895.543372         | 448.275324       | 5  |
| 23 | 2961.344049        | 1481.175662        | 2944.317500    | 1472.662388      | 2943.333484        | 1472.170380      | T    | <b>474.328611</b>  | 237.667944         | 457.302062         | 229.154669       | 456.318046         | 228.662661       | 4  |
| 24 | 3074.428113        | 1537.717694        | 3057.401564    | 1529.204420      | 3056.417548        | 1528.712412      | L    | <b>373.280932</b>  | 187.144104         | 356.254383         | 178.630830       |                    |                  | 3  |
| 25 | 3187.512177        | 1594.259726        | 3170.485628    | 1585.746452      | 3169.501612        | 1585.254444      | L    | <b>260.196868</b>  | 130.602072         | 243.170319         | 122.088798       |                    |                  | 2  |
| 26 |                    |                    |                |                  |                    |                  | K    | <b>147.112804</b>  | 74.060040          | <b>130.086255</b>  | 65.546765        |                    |                  | 1  |

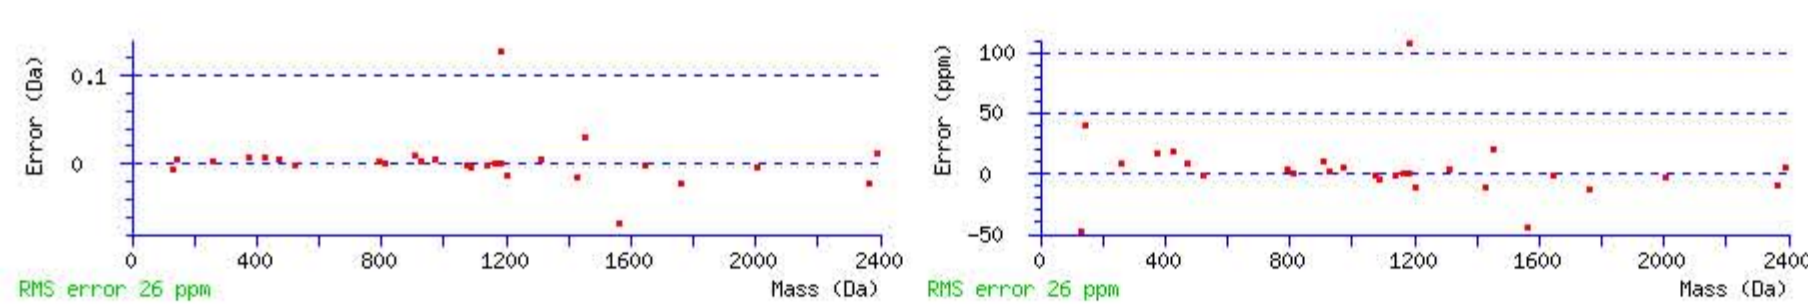

NCBI BLAST search of **RPGDVWTLPDQCHTVTCQPDGQTLK**  
 (Parameters: blastp, nr protein database, expect=20000, no filter, PAM30)  
 Other BLAST [web gateways](#)

**All matches to this query**

| Score | Mr(calc):   | Delta     | Sequence                                  |
|-------|-------------|-----------|-------------------------------------------|
| 45.1  | 3332.610474 | -0.006498 | <a href="#">RPGDVWTLPDQCHTVTCQPDGQTLK</a> |
| 23.6  | 3332.610474 | -0.006498 | <a href="#">RPGDVWTLPDQCHTVTCQPDGQTLK</a> |
| 6.2   | 3332.610474 | -0.006498 | <a href="#">RPGDVWTLPDQCHTVTCQPDGQTLK</a> |
