# Supplementary material
Source: PubMed Central journal article supplement (PMC3945317)
Supplement: supp_M113.517904_jbc.M113.517904-7.pdf [file supp_M113.517904_jbc.M113.517904-7.pdf]

# MASCOT Search Results

## Peptide View

MS/MS Fragmentation of **AEAESLYQSK**

Found in **K2C1\_HUMAN**, Keratin, type II cytoskeletal 1 OS=Homo sapiens GN=KRT1 PE=1 SV=6

Match to Query 36581: 1435.717728 from(718.866140,2+) rtinseconds(1653) index(22238)

Title: Locus:1.1.1.2530.11 File:"2013-07-02 CLN FXIII 60 min 1st F 2.wiff"

Data file C:\Program Files (x86)\Matrix Science\Mascot Daemon\mgf4 FXIII 60 min 1st\mascot\_daemon\_merge.mgf

Click mouse within plot area to zoom in by factor of two about that point

Or, Plot from  to  Da

Label all possible matches  Label matches used for scoring

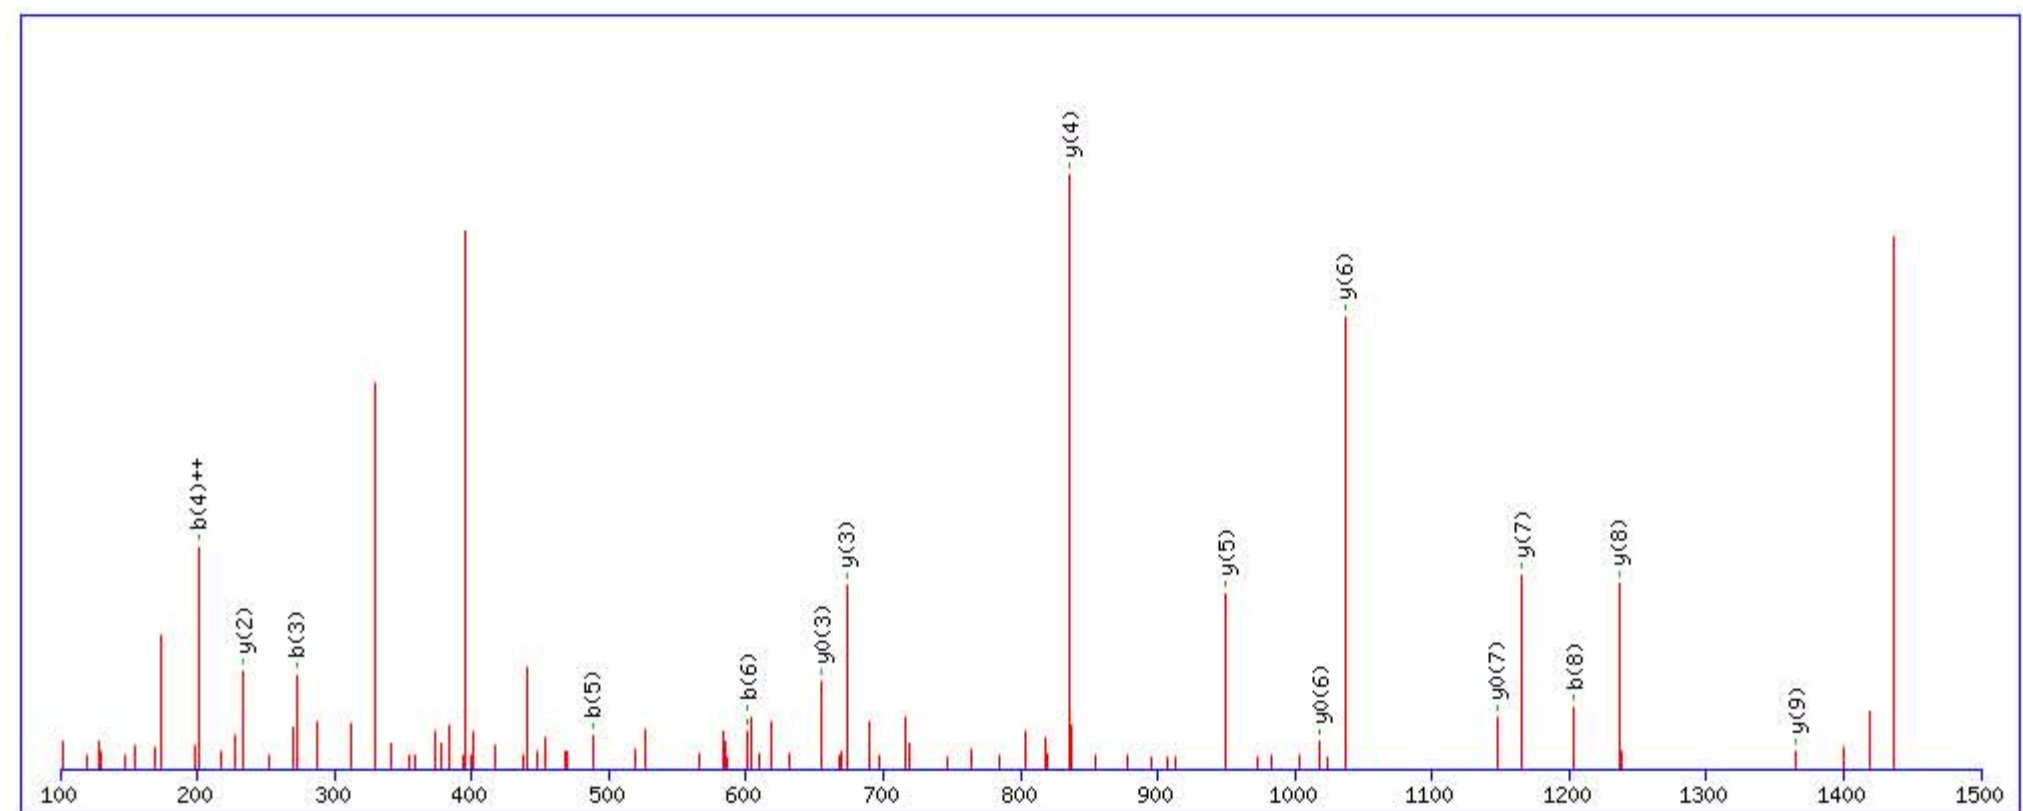

Monoisotopic mass of neutral peptide Mr(calc): 1435.701675

Fixed modifications: Carbamidomethyl (C) (apply to specified residues or termini only)

Variable modifications:

Q8 : Biotin:Thermo-21345 (Q)

Ions Score: 58 Expect: 4.8e-006

Matches : 17/90 fragment ions using 27 most intense peaks [\(help\)](#)

| #  | b                  | b <sup>++</sup>   | b <sup>*</sup> | b <sup>*++</sup> | b <sup>0</sup> | b <sup>0++</sup> | Seq. | y                  | y <sup>++</sup> | y <sup>*</sup> | y <sup>*++</sup> | y <sup>0</sup>     | y <sup>0++</sup> | #  |
|----|--------------------|-------------------|----------------|------------------|----------------|------------------|------|--------------------|-----------------|----------------|------------------|--------------------|------------------|----|
| 1  | 72.044390          | 36.525833         |                |                  |                |                  | A    |                    |                 |                |                  |                    |                  | 10 |
| 2  | <b>201.086983</b>  | 101.047130        |                |                  | 183.076418     | 92.041847        | E    | <b>1365.671879</b> | 683.339578      | 1348.645330    | 674.826303       | 1347.661314        | 674.334295       | 9  |
| 3  | <b>272.124097</b>  | 136.565687        |                |                  | 254.113532     | 127.560404       | A    | <b>1236.629286</b> | 618.818281      | 1219.602737    | 610.305007       | 1218.618721        | 609.812999       | 8  |
| 4  | 401.166690         | <b>201.086983</b> |                |                  | 383.156125     | 192.081701       | E    | <b>1165.592172</b> | 583.299724      | 1148.565623    | 574.786450       | <b>1147.581607</b> | 574.294442       | 7  |
| 5  | <b>488.198718</b>  | 244.602997        |                |                  | 470.188153     | 235.597715       | S    | <b>1036.549579</b> | 518.778428      | 1019.523030    | 510.265153       | <b>1018.539014</b> | 509.773145       | 6  |
| 6  | <b>601.282782</b>  | 301.145029        |                |                  | 583.272217     | 292.139747       | L    | <b>949.517551</b>  | 475.262414      | 932.491002     | 466.749139       | 931.506986         | 466.257131       | 5  |
| 7  | 764.346111         | 382.676694        |                |                  | 746.335546     | 373.671411       | Y    | <b>836.433487</b>  | 418.720382      | 819.406938     | 410.207107       | 818.422922         | 409.715099       | 4  |
| 8  | <b>1203.571437</b> | 602.289357        | 1186.544888    | 593.776082       | 1185.560872    | 593.284074       | Q    | <b>673.370158</b>  | 337.188717      | 656.343609     | 328.675443       | <b>655.359593</b>  | 328.183435       | 3  |
| 9  | 1290.603465        | 645.805371        | 1273.576916    | 637.292096       | 1272.592900    | 636.800088       | S    | <b>234.144832</b>  | 117.576054      | 217.118283     | 109.062780       | 216.134267         | 108.570772       | 2  |
| 10 |                    |                   |                |                  |                |                  | K    | 147.112804         | 74.060040       | 130.086255     | 65.546765        |                    |                  | 1  |

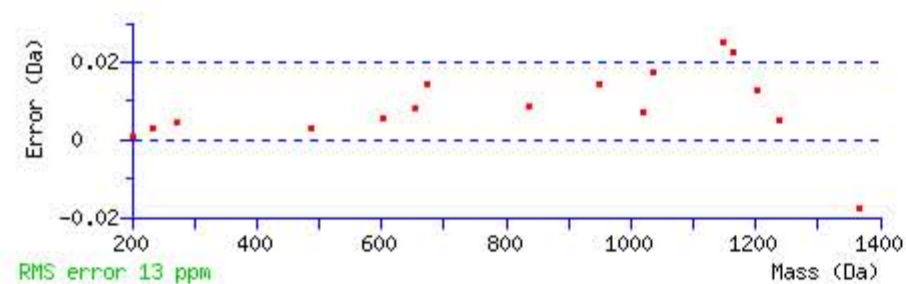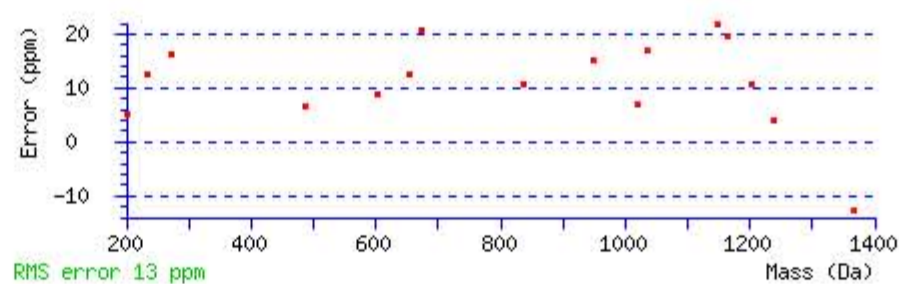

NCBI BLAST search of [AEAESLYQSK](#)

(Parameters: blastp, nr protein database, expect=20000, no filter, PAM30)

Other BLAST [web gateways](#)

All matches to this query

| Score | Mr(calc):   | Delta     | Sequence                   |
|-------|-------------|-----------|----------------------------|
| 58.3  | 1435.701675 | 0.016053  | <a href="#">AEAESLYQSK</a> |
| 1.6   | 1435.735397 | -0.017669 | <a href="#">LSARDGHNQK</a> |



# MASCOT Search Results

## Peptide View

MS/MS Fragmentation of **HQGV MVGMGQK**

Found in **ACTA\_HUMAN**, Actin, aortic smooth muscle OS=Homo sapiens GN=ACTA2 PE=1 SV=1

Match to Query 38144: 1481.728392 from(494.916740,3+) rtinseconds(1526) index(39057)

Title: Locus:1.1.1.2815.12 File:"2013-07-02 CLN FXIII 60 min 1st F 3.wiff"

Data file C:\Program Files (x86)\Matrix Science\Mascot Daemon\mgf4 FXIII 60 min 1st\mascot\_daemon\_merge.mgf

Click mouse within plot area to zoom in by factor of two about that point

Or, Plot from  to  Da

Label all possible matches  Label matches used for scoring

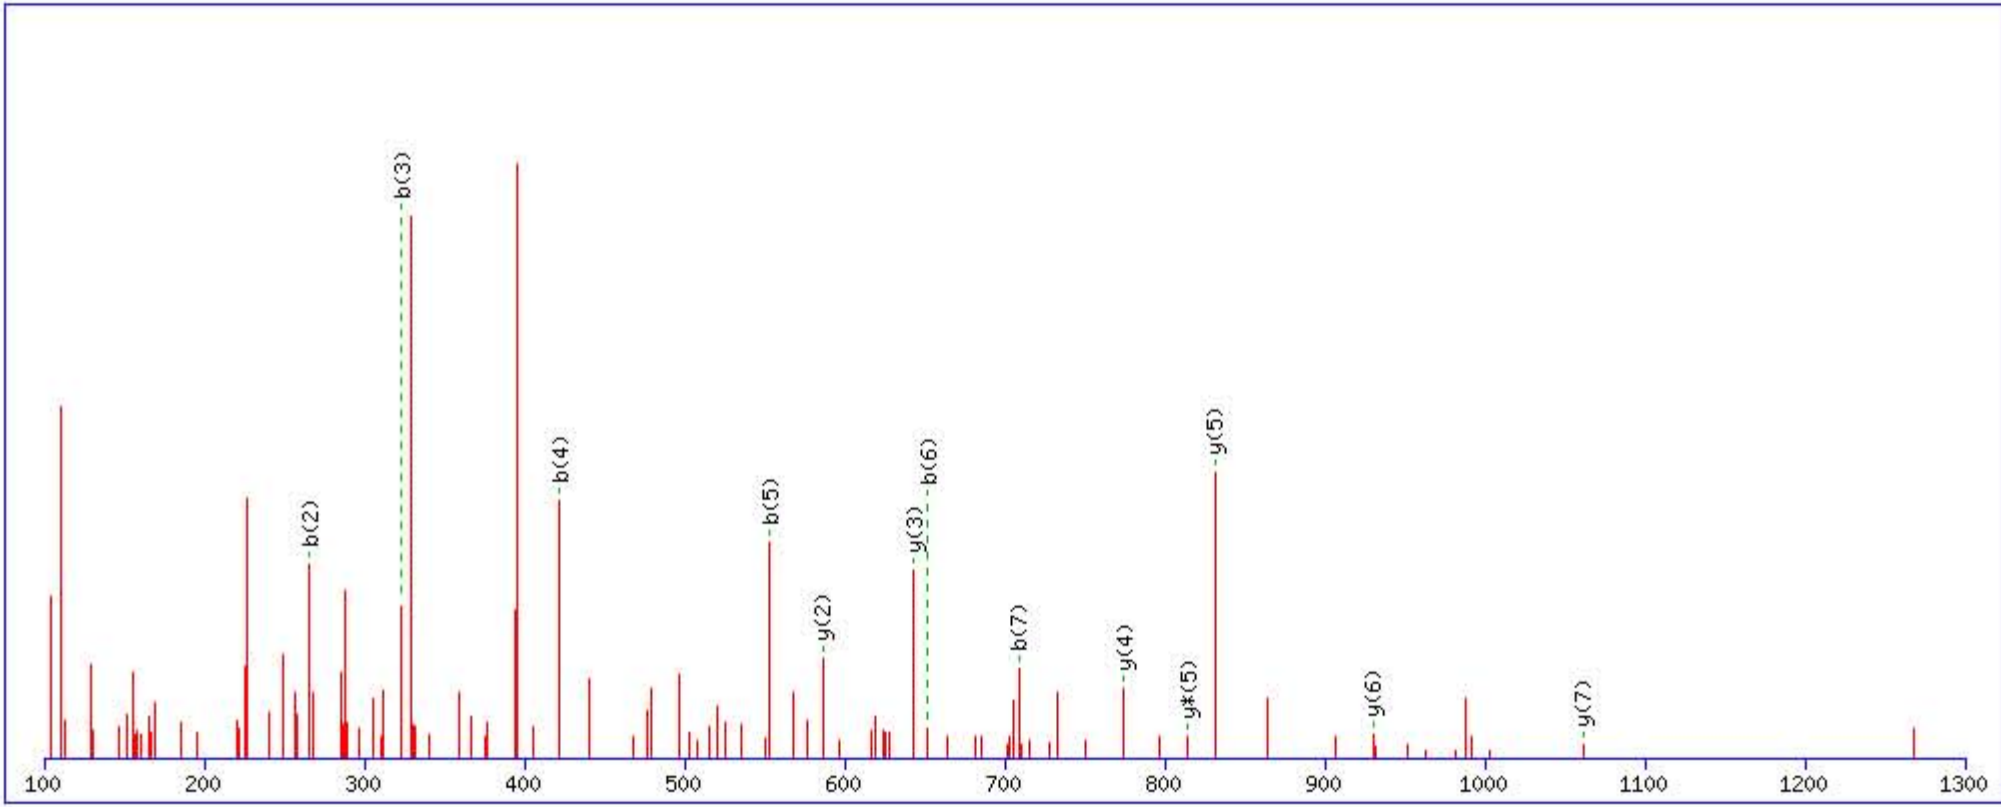

Monoisotopic mass of neutral peptide Mr(calc): 1481.730545

Fixed modifications: Carbamidomethyl (C) (apply to specified residues or termini only)

Variable modifications:

Q10 : Biotin:Thermo-21345 (Q)

Ions Score: 33 Expect: 0.0098

Matches : 13/78 fragment ions using 29 most intense peaks [\(help\)](#)

| #  | b                 | b <sup>++</sup> | b <sup>*</sup> | b <sup>*++</sup> | Seq. | y                  | y <sup>++</sup> | y <sup>*</sup>    | y <sup>*++</sup> | #  |
|----|-------------------|-----------------|----------------|------------------|------|--------------------|-----------------|-------------------|------------------|----|
| 1  | 138.066188        | 69.536732       |                |                  | H    |                    |                 |                   |                  | 11 |
| 2  | <b>266.124766</b> | 133.566021      | 249.098217     | 125.052746       | Q    | 1345.678898        | 673.343087      | 1328.652349       | 664.829813       | 10 |
| 3  | <b>323.146230</b> | 162.076753      | 306.119681     | 153.563478       | G    | 1217.620320        | 609.313798      | 1200.593771       | 600.800524       | 9  |
| 4  | <b>422.214644</b> | 211.610960      | 405.188095     | 203.097685       | V    | 1160.598856        | 580.803066      | 1143.572307       | 572.289792       | 8  |
| 5  | <b>553.255129</b> | 277.131203      | 536.228580     | 268.617928       | M    | <b>1061.530442</b> | 531.268859      | 1044.503893       | 522.755585       | 7  |
| 6  | <b>652.323543</b> | 326.665410      | 635.296994     | 318.152135       | V    | <b>930.489957</b>  | 465.748617      | 913.463408        | 457.235342       | 6  |
| 7  | <b>709.345007</b> | 355.176142      | 692.318458     | 346.662867       | G    | <b>831.421543</b>  | 416.214410      | <b>814.394994</b> | 407.701135       | 5  |
| 8  | 840.385492        | 420.696384      | 823.358943     | 412.183110       | M    | <b>774.400079</b>  | 387.703678      | 757.373530        | 379.190403       | 4  |
| 9  | 897.406956        | 449.207116      | 880.380407     | 440.693842       | G    | <b>643.359594</b>  | 322.183435      | 626.333045        | 313.670161       | 3  |
| 10 | 1336.632282       | 668.819779      | 1319.605733    | 660.306505       | Q    | <b>586.338130</b>  | 293.672703      | 569.311581        | 285.159429       | 2  |
| 11 |                   |                 |                |                  | K    | 147.112804         | 74.060040       | 130.086255        | 65.546765        | 1  |

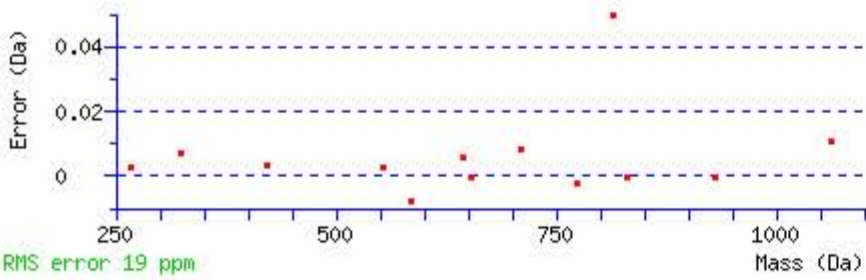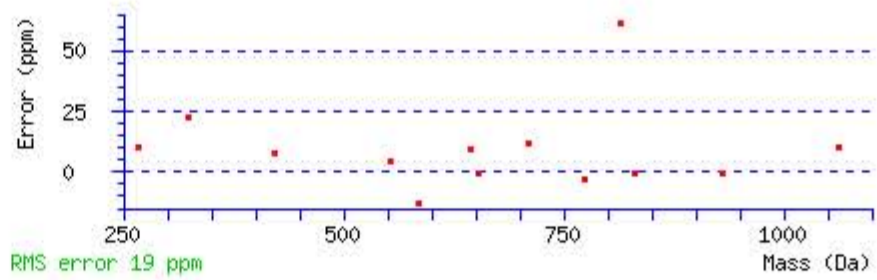

NCBI BLAST search of [HQGV MVGMGQK](#)

(Parameters: blastp, nr protein database, expect=20000, no filter, PAM30)

Other BLAST [web gateways](#)

### All matches to this query

| Score | Mr(calc):   | Delta     | Sequence                     |
|-------|-------------|-----------|------------------------------|
| 32.5  | 1481.730545 | -0.002153 | <a href="#">HQGV MVGMGQK</a> |

Mascot: <http://www.matrixscience.com/>



# MASCOT Search Results

## Peptide View

MS/MS Fragmentation of **SYELPDGQVITIGNER**

Found in **ACTA\_HUMAN**, Actin, aortic smooth muscle OS=Homo sapiens GN=ACTA2 PE=1 SV=1

Match to Query 56086: 2101.073172 from(701.365000,3+) rtinseconds(2604) index(64643)

Title: Locus:1.1.1.3211.10 File:"2013-07-02 CLN FXIII 60 min 1st F 4.wiff"

Data file C:\Program Files (x86)\Matrix Science\Mascot Daemon\mgf4 FXIII 60 min 1st\mascot\_daemon\_merge.mgf

Click mouse within plot area to zoom in by factor of two about that point

Or, Plot from  to  Da

Label all possible matches  Label matches used for scoring

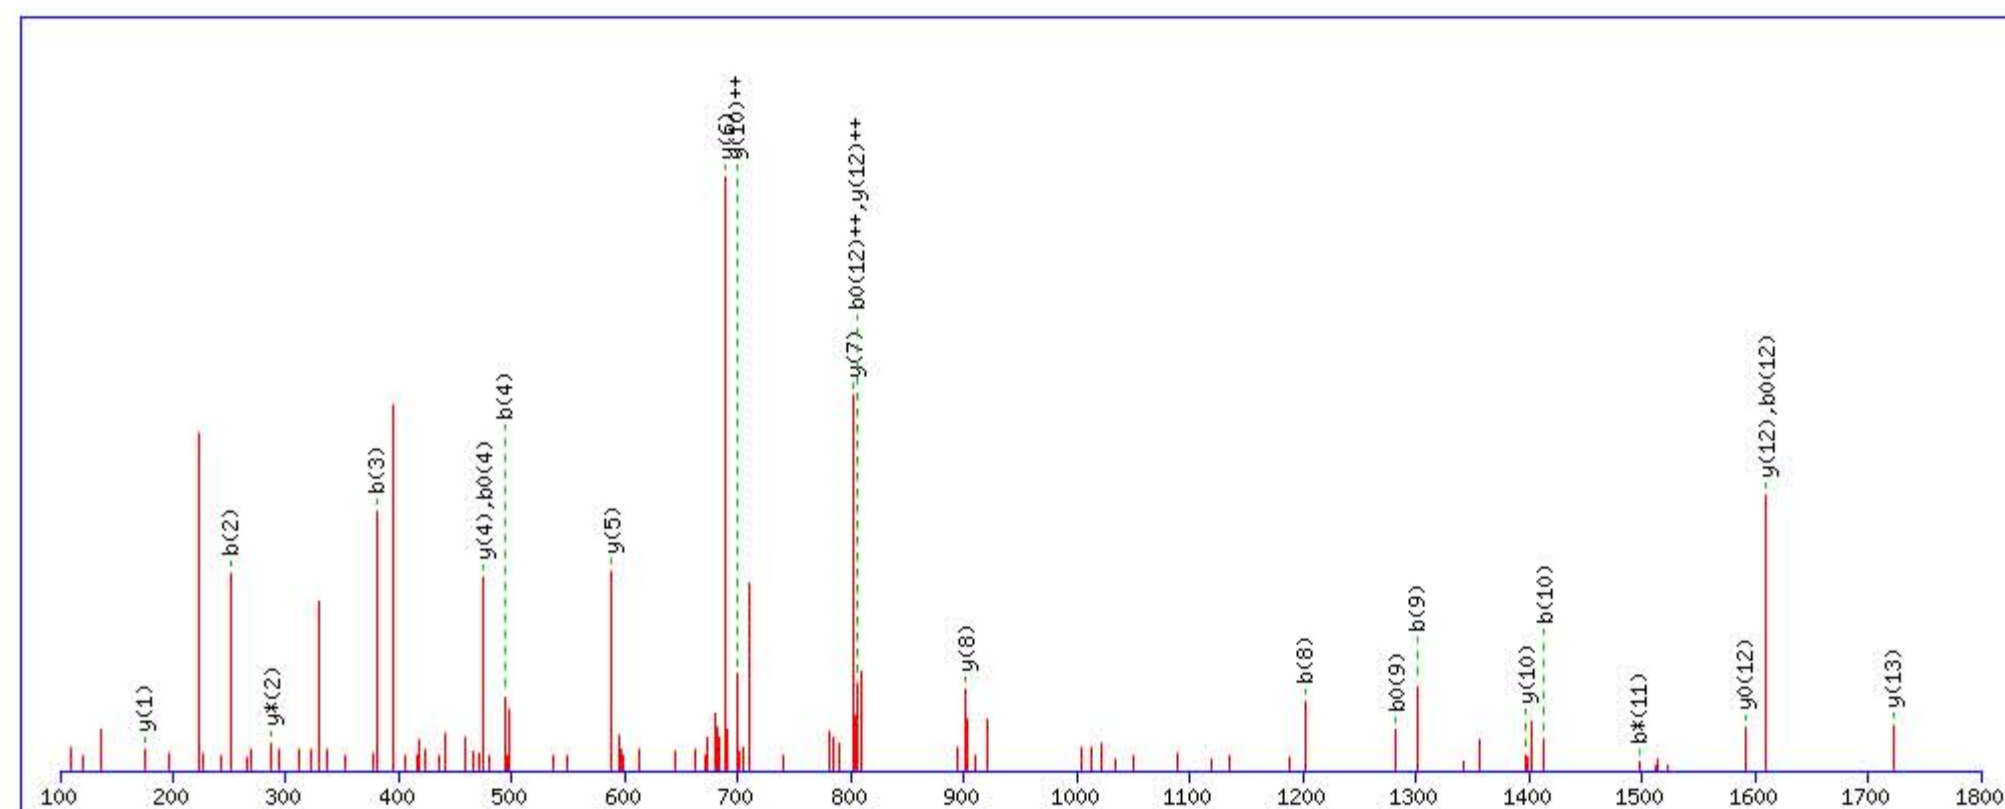

Monoisotopic mass of neutral peptide Mr(calc): 2101.051376

Fixed modifications: Carbamidomethyl (C) (apply to specified residues or termini only)

Variable modifications:

Q8 : Biotin:Thermo-21345 (Q)

Ions Score: 43 Expect: 0.00023

Matches : 24/164 fragment ions using 44 most intense peaks [\(help\)](#)

| #  | b                  | b <sup>++</sup> | b <sup>*</sup>     | b <sup>*++</sup> | b <sup>0</sup>     | b <sup>0++</sup>  | Seq. | y                  | y <sup>++</sup>   | y <sup>*</sup>    | y <sup>*++</sup> | y <sup>0</sup>     | y <sup>0++</sup> | #  |
|----|--------------------|-----------------|--------------------|------------------|--------------------|-------------------|------|--------------------|-------------------|-------------------|------------------|--------------------|------------------|----|
| 1  | 88.039304          | 44.523290       |                    |                  | 70.028739          | 35.518008         | S    |                    |                   |                   |                  |                    |                  | 16 |
| 2  | <b>251.102633</b>  | 126.054954      |                    |                  | 233.092068         | 117.049672        | Y    | 2015.026640        | 1008.016958       | 1998.000091       | 999.503683       | 1997.016075        | 999.011675       | 15 |
| 3  | <b>380.145226</b>  | 190.576251      |                    |                  | 362.134661         | 181.570969        | E    | 1851.963311        | 926.485294        | 1834.936762       | 917.972019       | 1833.952746        | 917.480011       | 14 |
| 4  | <b>493.229290</b>  | 247.118283      |                    |                  | <b>475.218725</b>  | 238.113001        | L    | <b>1722.920718</b> | 861.963997        | 1705.894169       | 853.450722       | 1704.910153        | 852.958714       | 13 |
| 5  | 590.282054         | 295.644665      |                    |                  | 572.271489         | 286.639383        | P    | <b>1609.836654</b> | <b>805.421965</b> | 1592.810105       | 796.908691       | <b>1591.826089</b> | 796.416682       | 12 |
| 6  | 705.308997         | 353.158137      |                    |                  | 687.298432         | 344.152854        | D    | 1512.783890        | 756.895583        | 1495.757341       | 748.382309       | 1494.773325        | 747.890300       | 11 |
| 7  | 762.330461         | 381.668869      |                    |                  | 744.319896         | 372.663586        | G    | <b>1397.756947</b> | <b>699.382111</b> | 1380.730398       | 690.868837       | 1379.746382        | 690.376829       | 10 |
| 8  | <b>1201.555787</b> | 601.281532      | 1184.529238        | 592.768257       | 1183.545222        | 592.276249        | Q    | 1340.735483        | 670.871379        | 1323.708934       | 662.358105       | 1322.724918        | 661.866097       | 9  |
| 9  | <b>1300.624201</b> | 650.815739      | 1283.597652        | 642.302464       | <b>1282.613636</b> | 641.810456        | V    | <b>901.510157</b>  | 451.258716        | 884.483608        | 442.745442       | 883.499592         | 442.253434       | 8  |
| 10 | <b>1413.708265</b> | 707.357771      | 1396.681716        | 698.844496       | 1395.697700        | 698.352488        | I    | <b>802.441743</b>  | 401.724509        | 785.415194        | 393.211235       | 784.431178         | 392.719227       | 7  |
| 11 | 1514.755944        | 757.881610      | <b>1497.729395</b> | 749.368336       | 1496.745379        | 748.876328        | T    | <b>689.357679</b>  | 345.182478        | 672.331130        | 336.669203       | 671.347114         | 336.177195       | 6  |
| 12 | 1627.840008        | 814.423642      | 1610.813459        | 805.910368       | <b>1609.829443</b> | <b>805.418359</b> | I    | <b>588.310000</b>  | 294.658638        | 571.283451        | 286.145363       | 570.299435         | 285.653355       | 5  |
| 13 | 1684.861472        | 842.934374      | 1667.834923        | 834.421099       | 1666.850907        | 833.929091        | G    | <b>475.225936</b>  | 238.116606        | 458.199387        | 229.603331       | 457.215371         | 229.111323       | 4  |
| 14 | 1798.904399        | 899.955837      | 1781.877850        | 891.442563       | 1780.893834        | 890.950555        | N    | 418.204472         | 209.605874        | 401.177923        | 201.092600       | 400.193907         | 200.600592       | 3  |
| 15 | 1927.946992        | 964.477134      | 1910.920443        | 955.963860       | 1909.936427        | 955.471851        | E    | 304.161545         | 152.584411        | <b>287.134996</b> | 144.071136       | 286.150980         | 143.579128       | 2  |
| 16 |                    |                 |                    |                  |                    |                   | R    | <b>175.118952</b>  | 88.063114         | 158.092403        | 79.549839        |                    |                  | 1  |

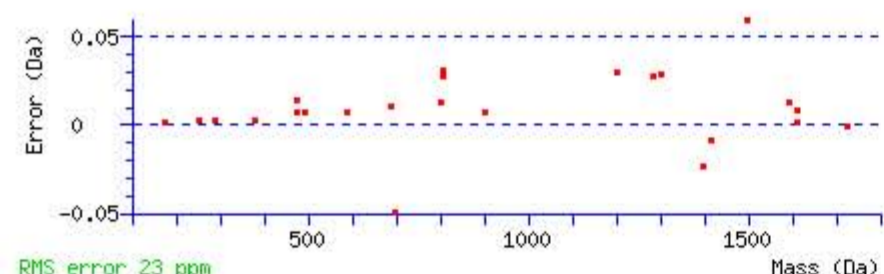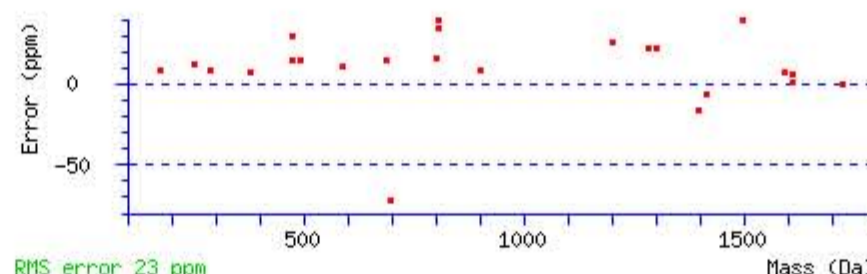

NCBI BLAST search of [SYELPDGQVITIGNER](#)

(Parameters: blastp, nr protein database, expect=20000, no filter, PAM30)

Other BLAST [web gateways](#)

## All matches to this query

| Score | Mr(calc):   | Delta    | Sequence                              |
|-------|-------------|----------|---------------------------------------|
| 42.5  | 2101.051376 | 0.021796 | <a href="#">SYELPDGQVITIGNER</a>      |
| 3.7   | 2101.047363 | 0.025809 | <a href="#">IMGGNSILHSAADSVTSAVQK</a> |

Mascot: <http://www.matrixscience.com/>



# MASCOT Search Results

## Peptide View

MS/MS Fragmentation of **VNCLQTR**

Found in **AFAM\_HUMAN**, Afamin OS=Homo sapiens GN=AFM PE=1 SV=1

Match to Query 27699: 1200.619288 from(601.316920,2+) rtinseconds(1469) index(3534)

Title: Locus:1.1.1.2643.20 File:"2013-07-02 CLN FXIII 60 min 1st F 1.wiff"

Data file C:\Program Files (x86)\Matrix Science\Mascot Daemon\mgf\4 FXIII 60 min 1st\mascot\_daemon\_merge.mgf

Click mouse within plot area to zoom in by factor of two about that point

Or, Plot from  to  Da

Label all possible matches  Label matches used for scoring

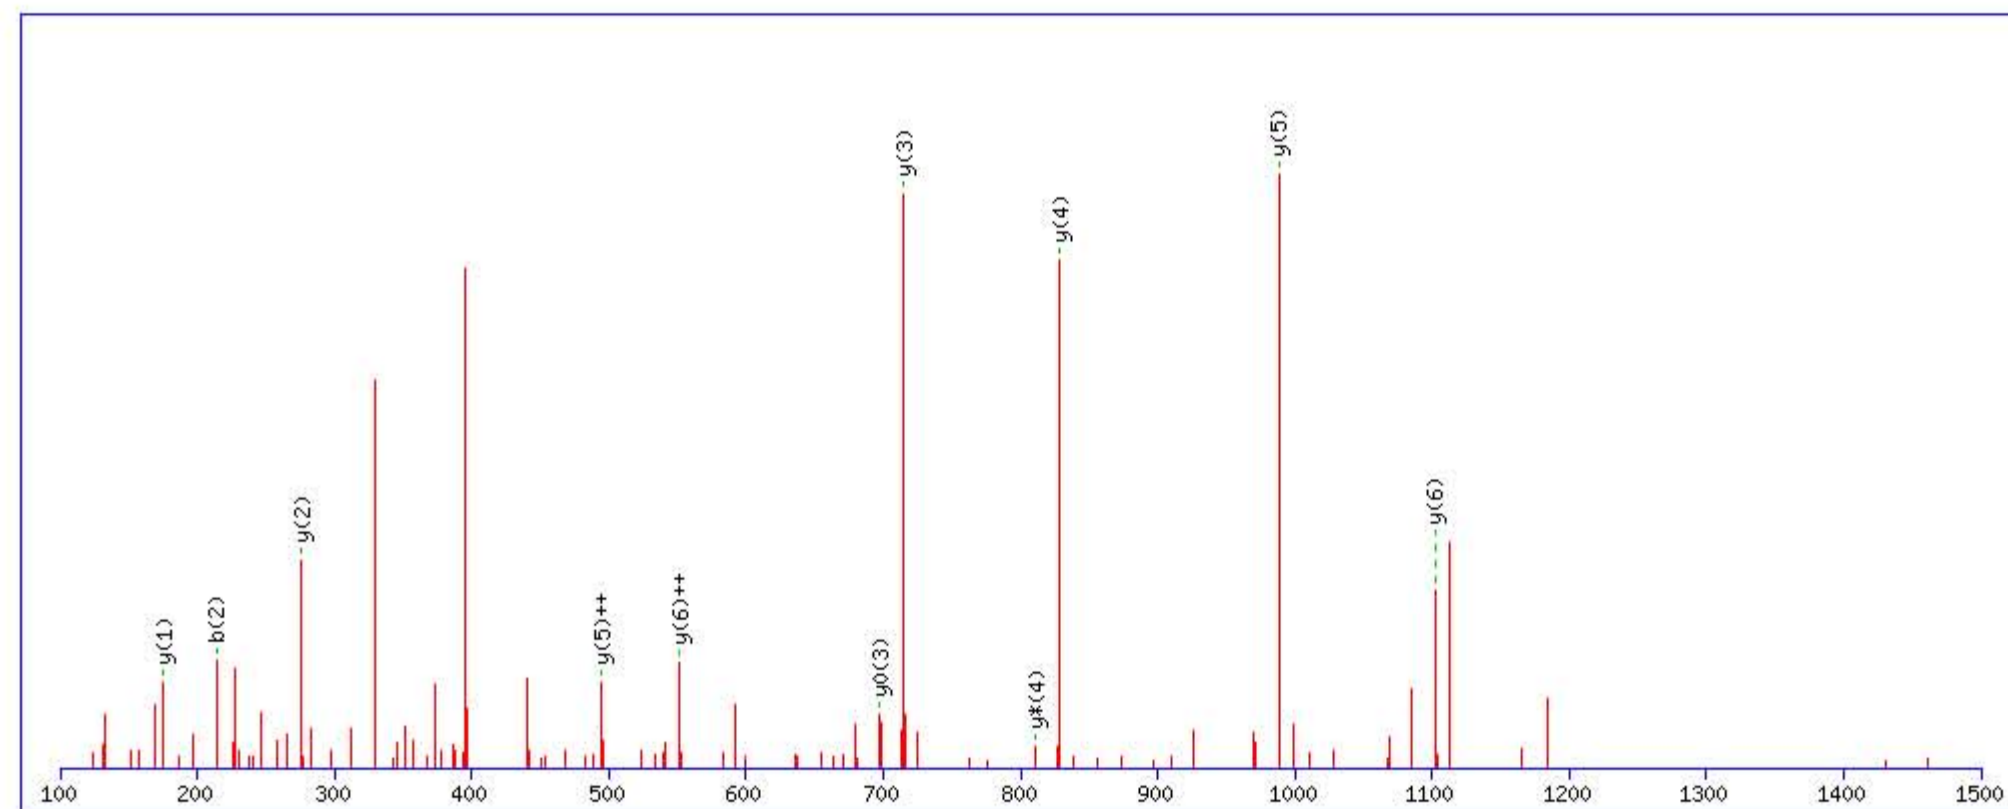

Monoisotopic mass of neutral peptide Mr(calc): 1200.610733

Fixed modifications: Carbamidomethyl (C) (apply to specified residues or termini only)

Variable modifications:

Q5 : Biotin:Thermo-21345 (Q)

Ions Score: 36 Expect: 0.0013

Matches : 11/58 fragment ions using 22 most intense peaks [\(help\)](#)

| # | b                 | b <sup>++</sup> | b <sup>*</sup> | b <sup>+++</sup> | b <sup>0</sup> | b <sup>0++</sup> | Seq. | y                  | y <sup>++</sup>   | y <sup>*</sup>    | y <sup>+++</sup> | y <sup>0</sup>    | y <sup>0++</sup> | # |
|---|-------------------|-----------------|----------------|------------------|----------------|------------------|------|--------------------|-------------------|-------------------|------------------|-------------------|------------------|---|
| 1 | 100.075690        | 50.541483       |                |                  |                |                  | V    |                    |                   |                   |                  |                   |                  | 7 |
| 2 | <b>214.118617</b> | 107.562947      | 197.092068     | 99.049672        |                |                  | N    | <b>1102.549597</b> | <b>551.778437</b> | 1085.523048       | 543.265162       | 1084.539032       | 542.773154       | 6 |
| 3 | 374.149266        | 187.578271      | 357.122717     | 179.064997       |                |                  | C    | <b>988.506670</b>  | <b>494.756973</b> | 971.480121        | 486.243698       | 970.496105        | 485.751691       | 5 |
| 4 | 487.233330        | 244.120303      | 470.206781     | 235.607029       |                |                  | L    | <b>828.476021</b>  | 414.741649        | <b>811.449472</b> | 406.228374       | 810.465456        | 405.736366       | 4 |
| 5 | 926.458656        | 463.732966      | 909.432107     | 455.219692       |                |                  | Q    | <b>715.391957</b>  | 358.199617        | 698.365408        | 349.686342       | <b>697.381392</b> | 349.194334       | 3 |
| 6 | 1027.506335       | 514.256806      | 1010.479786    | 505.743531       | 1009.495770    | 505.251523       | T    | <b>276.166631</b>  | 138.586953        | 259.140082        | 130.073679       | 258.156066        | 129.581671       | 2 |
| 7 |                   |                 |                |                  |                |                  | R    | <b>175.118952</b>  | 88.063114         | 158.092403        | 79.549839        |                   |                  | 1 |

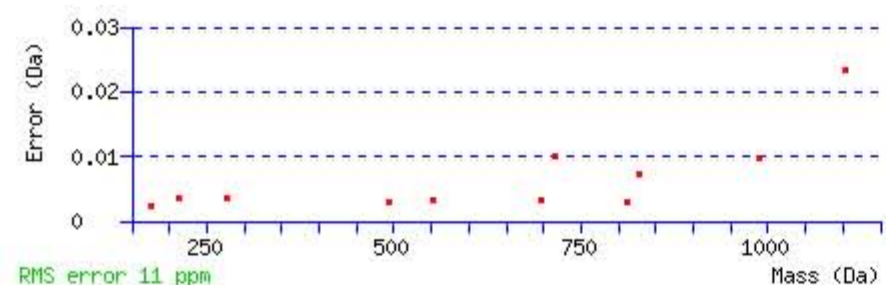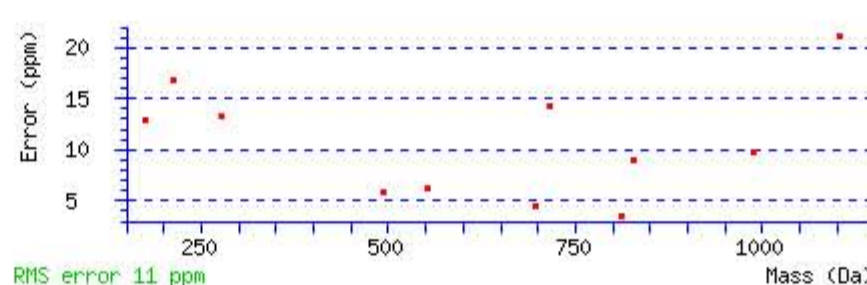

NCBI BLAST search of **VNCLQTR**

(Parameters: blastp, nr protein database, expect=20000, no filter, PAM30)

Other BLAST [web gateways](#)

All matches to this query

| Score | Mr(calc):   | Delta     | Sequence                      |
|-------|-------------|-----------|-------------------------------|
| 36.1  | 1200.610733 | 0.008555  | <a href="#">VNCLQTR</a>       |
| 5.1   | 1200.628479 | -0.009191 | <a href="#">MVAALLGGGGEAR</a> |
| 3.7   | 1200.635010 | -0.015722 | <a href="#">ELDLQVLDTR</a>    |
| 3.5   | 1200.628464 | -0.009176 | <a href="#">LLQLQEMGNR</a>    |
| 3.5   | 1200.611191 | 0.008097  | <a href="#">HDSHLAKHTR</a>    |
| 3.5   | 1200.603333 | 0.015955  | <a href="#">GRIAEPSVCGR</a>   |
| 2.4   | 1200.632462 | -0.013174 | <a href="#">YKMYLEKAR</a>     |
| 1.0   | 1200.609848 | 0.009440  | <a href="#">ERAPVSGTQEK</a>   |
| 0.6   | 1200.634964 | -0.015676 | <a href="#">NVA AEIEAKEK</a>  |
| 0.3   | 1200.621948 | -0.002660 | <a href="#">VNMLKHCKR</a>     |

Mascot: <http://www.matrixscience.com/>



# MASCOT Search Results

## Peptide View

MS/MS Fragmentation of **LPNNVLQEK**

Found in **AFAM\_HUMAN**, Afamin OS=Homo sapiens GN=AFM PE=1 SV=1

Match to Query 33380: 1364.756832 from(455.926220,3+) rtinseconds(1828) index(5818)

Title: Locus:1.1.1.2769.5 File:"2013-07-02 CLN FXIII 60 min 1st F 1.wiff"

Data file C:\Program Files (x86)\Matrix Science\Mascot Daemon\mgf\4 FXIII 60 min 1st\mascot\_daemon\_merge.mgf

Click mouse within plot area to zoom in by factor of two about that point

Or, Plot from  to  Da

Label all possible matches  Label matches used for scoring

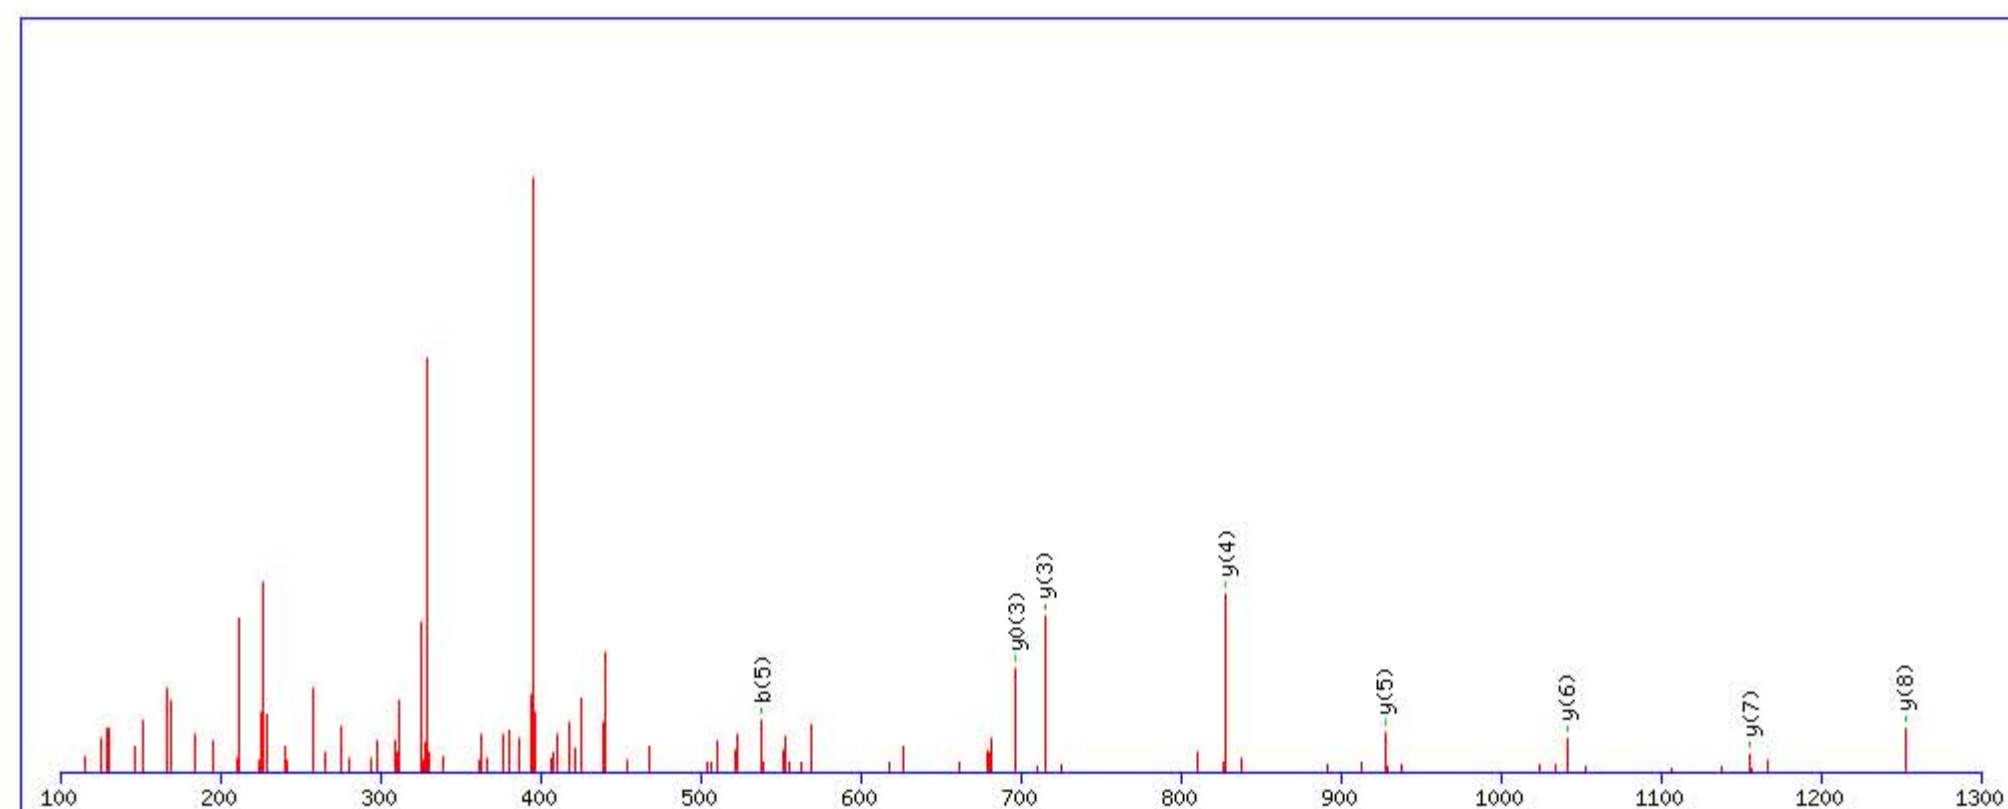

Monoisotopic mass of neutral peptide Mr(calc): 1364.748581

Fixed modifications: Carbamidomethyl (C) (apply to specified residues or termini only)

Variable modifications:

Q7 : Biotin:Thermo-21345 (Q)

Ions Score: 38 Expect: 0.0017

Matches : 8/76 fragment ions using 12 most intense peaks ([help](#))

| # | b                 | b <sup>++</sup> | b <sup>*</sup> | b <sup>*++</sup> | b <sup>0</sup> | b <sup>0++</sup> | Seq. | y                  | y <sup>++</sup> | y <sup>*</sup> | y <sup>*++</sup> | y <sup>0</sup>    | y <sup>0++</sup> | # |
|---|-------------------|-----------------|----------------|------------------|----------------|------------------|------|--------------------|-----------------|----------------|------------------|-------------------|------------------|---|
| 1 | 114.091340        | 57.549308       |                |                  |                |                  | L    |                    |                 |                |                  |                   |                  | 9 |
| 2 | 211.144104        | 106.075690      |                |                  |                |                  | P    | <b>1252.671819</b> | 626.839548      | 1235.645270    | 618.326273       | 1234.661254       | 617.834265       | 8 |
| 3 | 325.187031        | 163.097153      | 308.160482     | 154.583879       |                |                  | N    | <b>1155.619055</b> | 578.313166      | 1138.592506    | 569.799891       | 1137.608490       | 569.307883       | 7 |
| 4 | 439.229958        | 220.118617      | 422.203409     | 211.605343       |                |                  | N    | <b>1041.576128</b> | 521.291702      | 1024.549579    | 512.778428       | 1023.565563       | 512.286420       | 6 |
| 5 | <b>538.298372</b> | 269.652824      | 521.271823     | 261.139550       |                |                  | V    | <b>927.533201</b>  | 464.270239      | 910.506652     | 455.756964       | 909.522636        | 455.264956       | 5 |
| 6 | 651.382436        | 326.194856      | 634.355887     | 317.681582       |                |                  | L    | <b>828.464787</b>  | 414.736032      | 811.438238     | 406.222757       | 810.454222        | 405.730749       | 4 |
| 7 | 1090.607762       | 545.807519      | 1073.581213    | 537.294245       |                |                  | Q    | <b>715.380723</b>  | 358.194000      | 698.354174     | 349.680725       | <b>697.370158</b> | 349.188717       | 3 |
| 8 | 1219.650355       | 610.328816      | 1202.623806    | 601.815541       | 1201.639790    | 601.323533       | E    | 276.155397         | 138.581336      | 259.128848     | 130.068062       | 258.144832        | 129.576054       | 2 |
| 9 |                   |                 |                |                  |                |                  | K    | 147.112804         | 74.060040       | 130.086255     | 65.546765        |                   |                  | 1 |

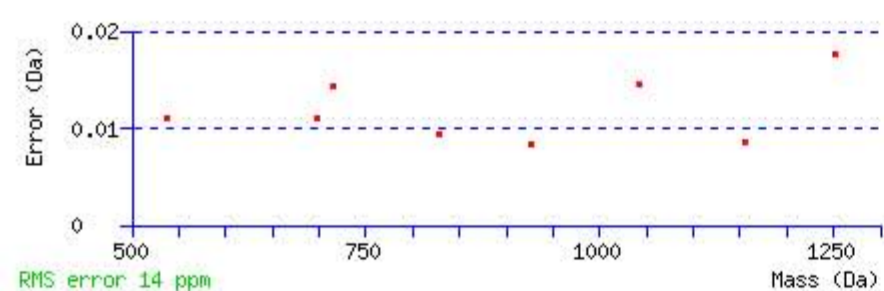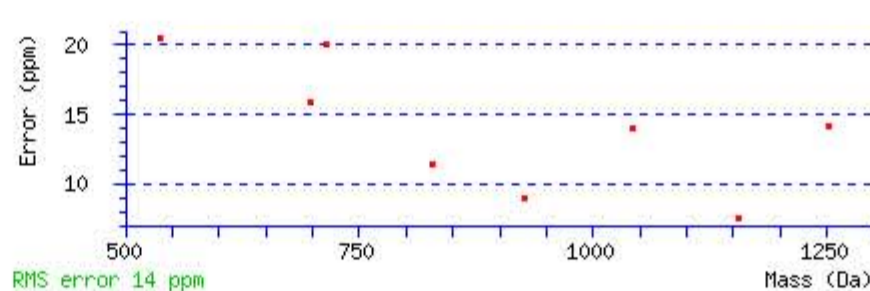

NCBI BLAST search of **LPNNVLQEK**

(Parameters: blastp, nr protein database, expect=20000, no filter, PAM30)

Other BLAST [web gateways](#)

## All matches to this query

| Score | Mr(calc):   | Delta     | Sequence                    |
|-------|-------------|-----------|-----------------------------|
| 38.3  | 1364.748581 | 0.008251  | <a href="#">LPNNVLQEK</a>   |
| 8.2   | 1364.759827 | -0.002995 | <a href="#">QTSSLIHR</a>    |
| 1.7   | 1364.766342 | -0.009510 | <a href="#">QPVEPKKPESK</a> |
| 0.9   | 1364.745239 | 0.011593  | <a href="#">KVVSVIDVYTR</a> |
| 0.4   | 1364.752609 | 0.004223  | <a href="#">ILPIMFPSLYR</a> |



# MASCOT SEARCH RESULTS

## Peptide View

MS/MS Fragmentation of **FTDSENVQER**

Found in **AFAM\_HUMAN**, Afamin OS=Homo sapiens GN=AFM PE=1 SV=1

Match to Query 45648: 1694.745132 from(565.922320,3+) rtinseconds(1529) index(3942)

Title: Locus:1.1.1.2664.21 File:"2013-07-02 CLN FXIII 60 min 1st F 1.wiff"

Data file C:\Program Files (x86)\Matrix Science\Mascot Daemon\mgf4 FXIII 60 min 1st\mascot\_daemon\_merge.mgf

Click mouse within plot area to zoom in by factor of two about that point

Or, Plot from  to  Da

Label all possible matches  Label matches used for scoring

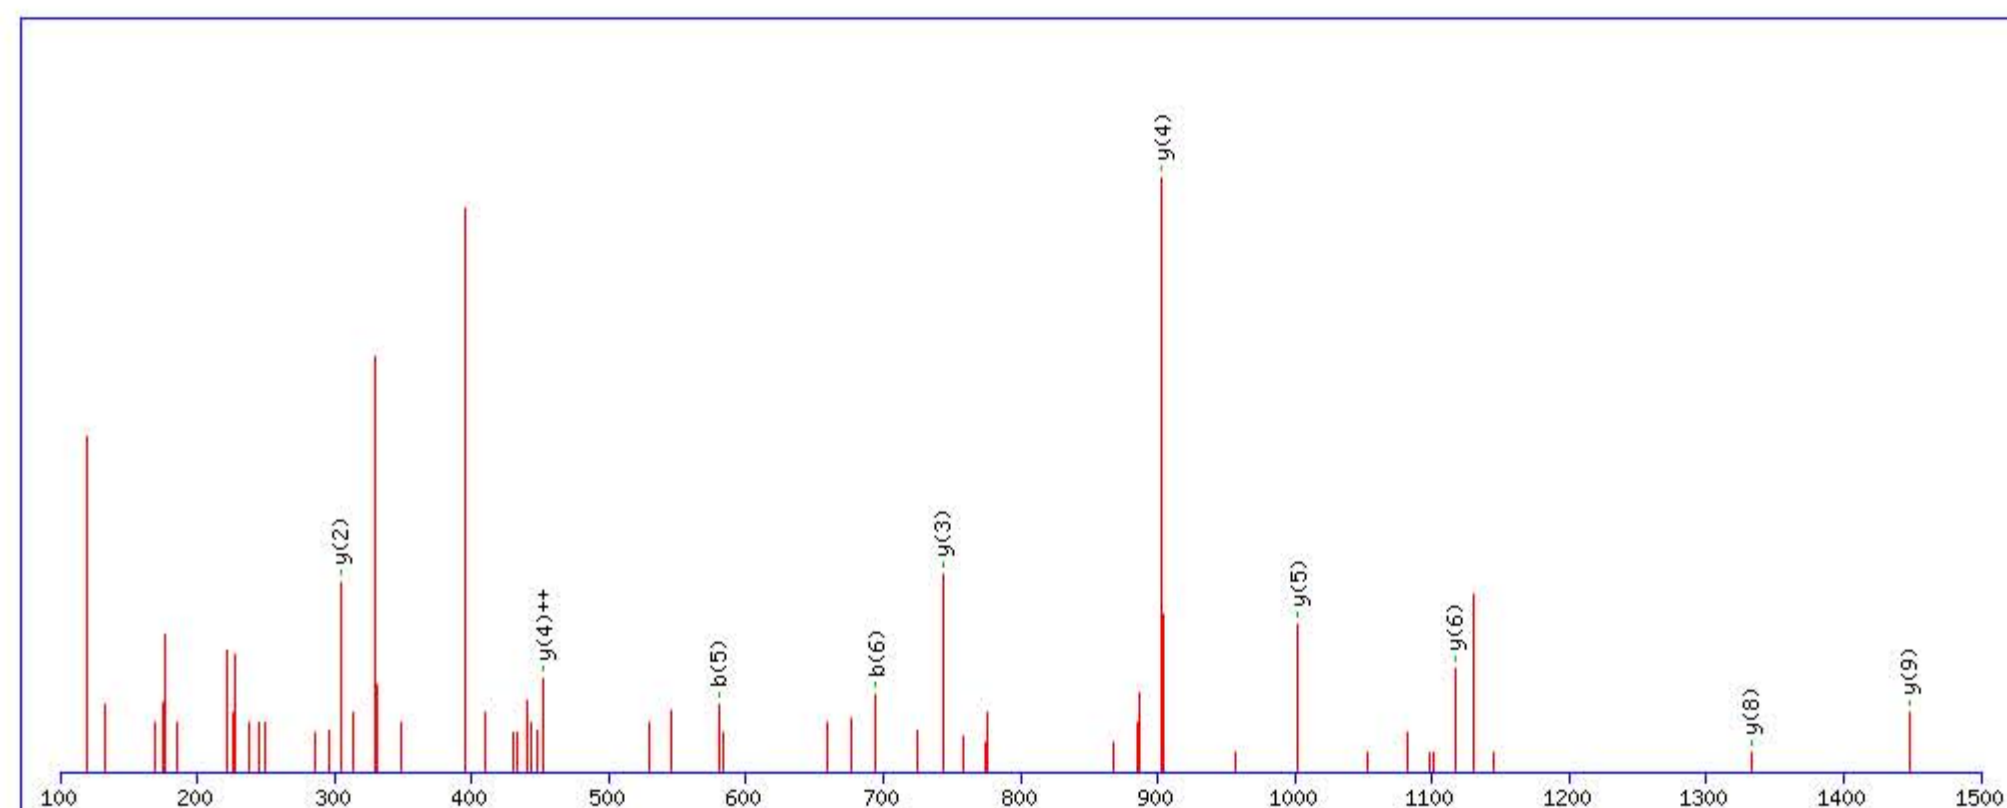

Monoisotopic mass of neutral peptide Mr(calc): 1694.739243

Fixed modifications: Carbamidomethyl (C) (apply to specified residues or termini only)

Variable modifications:

Q9 : Biotin:Thermo-21345 (Q)

Ions Score: 53 Expect: 3e-005

Matches : 10/106 fragment ions using 13 most intense peaks [\(help\)](#)

| #  | b                 | b <sup>++</sup> | b <sup>*</sup> | b <sup>*++</sup> | b <sup>0</sup> | b <sup>0++</sup> | Seq. | y                  | y <sup>++</sup>   | y <sup>*</sup> | y <sup>*++</sup> | y <sup>0</sup> | y <sup>0++</sup> | #  |
|----|-------------------|-----------------|----------------|------------------|----------------|------------------|------|--------------------|-------------------|----------------|------------------|----------------|------------------|----|
| 1  | 148.075690        | 74.541483       |                |                  |                |                  | F    |                    |                   |                |                  |                |                  | 11 |
| 2  | 249.123369        | 125.065322      |                |                  | 231.112804     | 116.060040       | T    | 1548.678104        | 774.842690        | 1531.651555    | 766.329416       | 1530.667539    | 765.837408       | 10 |
| 3  | 364.150312        | 182.578794      |                |                  | 346.139747     | 173.573512       | D    | <b>1447.630425</b> | 724.318851        | 1430.603876    | 715.805576       | 1429.619860    | 715.313568       | 9  |
| 4  | 451.182340        | 226.094808      |                |                  | 433.171775     | 217.089526       | S    | <b>1332.603482</b> | 666.805379        | 1315.576933    | 658.292105       | 1314.592917    | 657.800097       | 8  |
| 5  | <b>580.224933</b> | 290.616105      |                |                  | 562.214368     | 281.610822       | E    | 1245.571454        | 623.289365        | 1228.544905    | 614.776091       | 1227.560889    | 614.284083       | 7  |
| 6  | <b>694.267860</b> | 347.637568      | 677.241311     | 339.124294       | 676.257295     | 338.632286       | N    | <b>1116.528861</b> | 558.768069        | 1099.502312    | 550.254794       | 1098.518296    | 549.762786       | 6  |
| 7  | 793.336274        | 397.171775      | 776.309725     | 388.658501       | 775.325709     | 388.166493       | V    | <b>1002.485934</b> | 501.746605        | 985.459385     | 493.233331       | 984.475369     | 492.741323       | 5  |
| 8  | 953.366923        | 477.187100      | 936.340374     | 468.673825       | 935.356358     | 468.181817       | C    | <b>903.417520</b>  | <b>452.212398</b> | 886.390971     | 443.699124       | 885.406955     | 443.207116       | 4  |
| 9  | 1392.592249       | 696.799763      | 1375.565700    | 688.286488       | 1374.581684    | 687.794480       | Q    | <b>743.386871</b>  | 372.197074        | 726.360322     | 363.683799       | 725.376306     | 363.191791       | 3  |
| 10 | 1521.634842       | 761.321059      | 1504.608293    | 752.807785       | 1503.624277    | 752.315777       | E    | <b>304.161545</b>  | 152.584411        | 287.134996     | 144.071136       | 286.150980     | 143.579128       | 2  |
| 11 |                   |                 |                |                  |                |                  | R    | 175.118952         | 88.063114         | 158.092403     | 79.549839        |                |                  | 1  |

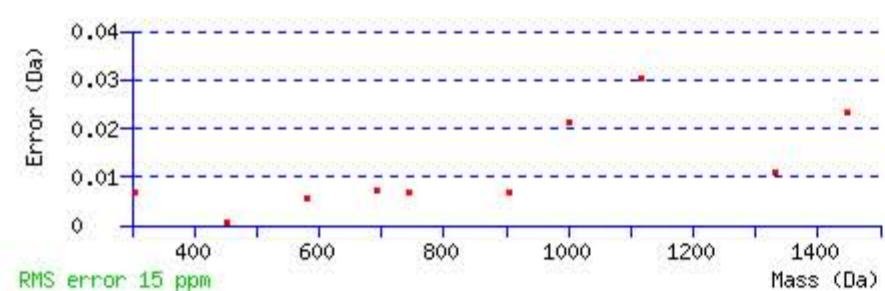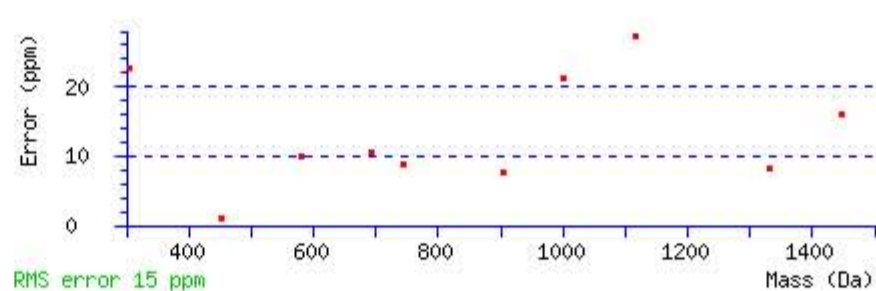

NCBI BLAST search of [FTDSENVQER](#)

(Parameters: blastp, nr protein database, expect=20000, no filter, PAM30)

Other BLAST [web gateways](#)

All matches to this query

| Score | Mr(calc):   | Delta    | Sequence                   |
|-------|-------------|----------|----------------------------|
| 52.6  | 1694.739243 | 0.005889 | <a href="#">FTDSENVQER</a> |

Mascot: <http://www.matrixscience.com/>



# MASCOT Search Results

## Peptide View

MS/MS Fragmentation of **GQCIINSNKDDRPK**

Found in **AFAM\_HUMAN**, Afamin OS=Homo sapiens GN=AFM PE=1 SV=1

Match to Query 51831: 1954.982816 from(489.752980,4+) rtinseconds(1318) index(2428)

Title: Locus:1.1.1.2591.4 File:"2013-07-02 CLN FXIII 60 min 1st F 1.wiff"

Data file C:\Program Files (x86)\Matrix Science\Mascot Daemon\mgf4 FXIII 60 min 1st\mascot\_daemon\_merge.mgf

Click mouse within plot area to zoom in by factor of two about that point

Or, Plot from  to  Da

Label all possible matches  Label matches used for scoring

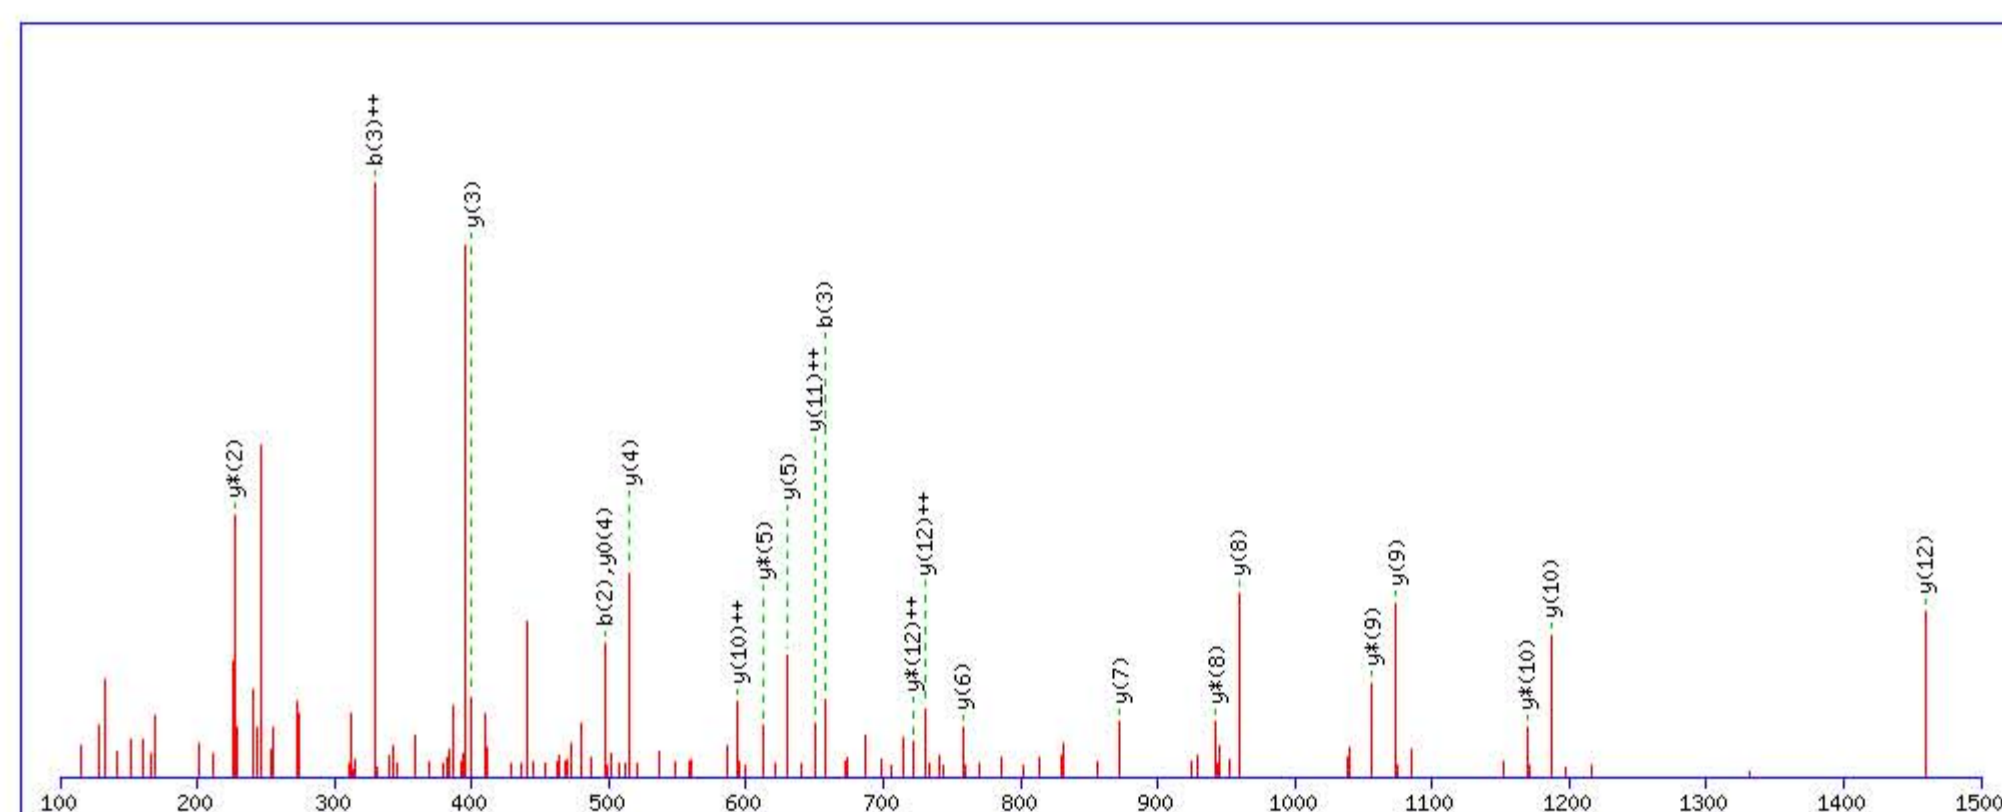

Monoisotopic mass of neutral peptide Mr(calc): 1954.971680

Fixed modifications: Carbamidomethyl (C) (apply to specified residues or termini only)

Variable modifications:

Q2 : Biotin:Thermo-21345 (Q)

Ions Score: 51 Expect: 0.00023

Matches : 22/136 fragment ions using 36 most intense peaks [\(help\)](#)

| #  | b                 | b <sup>++</sup>   | b <sup>*</sup> | b <sup>*++</sup> | b <sup>0</sup> | b <sup>0++</sup> | Seq. | y                  | y <sup>++</sup>   | y <sup>*</sup>     | y <sup>*++</sup>  | y <sup>0</sup>    | y <sup>0++</sup> | #  |
|----|-------------------|-------------------|----------------|------------------|----------------|------------------|------|--------------------|-------------------|--------------------|-------------------|-------------------|------------------|----|
| 1  | 58.028740         | 29.518008         |                |                  |                |                  | G    |                    |                   |                    |                   |                   |                  | 14 |
| 2  | <b>497.254066</b> | 249.130671        | 480.227517     | 240.617397       |                |                  | Q    | 1898.957513        | 949.982395        | 1881.930964        | 941.469120        | 1880.946948       | 940.977112       | 13 |
| 3  | <b>657.284715</b> | <b>329.145996</b> | 640.258166     | 320.632721       |                |                  | C    | <b>1459.732187</b> | <b>730.369732</b> | 1442.705638        | <b>721.856457</b> | 1441.721622       | 721.364449       | 12 |
| 4  | 770.368779        | 385.688028        | 753.342230     | 377.174753       |                |                  | I    | 1299.701538        | <b>650.354407</b> | 1282.674989        | 641.841133        | 1281.690973       | 641.349125       | 11 |
| 5  | 883.452843        | 442.230060        | 866.426294     | 433.716785       |                |                  | I    | <b>1186.617474</b> | <b>593.812375</b> | <b>1169.590925</b> | 585.299101        | 1168.606909       | 584.807093       | 10 |
| 6  | 997.495770        | 499.251523        | 980.469221     | 490.738249       |                |                  | N    | <b>1073.533410</b> | 537.270343        | <b>1056.506861</b> | 528.757069        | 1055.522845       | 528.265061       | 9  |
| 7  | 1084.527798       | 542.767537        | 1067.501249    | 534.254263       | 1066.517233    | 533.762255       | S    | <b>959.490483</b>  | 480.248880        | <b>942.463934</b>  | 471.735605        | 941.479918        | 471.243597       | 8  |
| 8  | 1198.570725       | 599.789001        | 1181.544176    | 591.275726       | 1180.560160    | 590.783718       | N    | <b>872.458455</b>  | 436.732866        | 855.431906         | 428.219591        | 854.447890        | 427.727583       | 7  |
| 9  | 1326.665688       | 663.836482        | 1309.639139    | 655.323208       | 1308.655123    | 654.831200       | K    | <b>758.415528</b>  | 379.711402        | 741.388979         | 371.198128        | 740.404963        | 370.706120       | 6  |
| 10 | 1441.692631       | 721.349954        | 1424.666082    | 712.836679       | 1423.682066    | 712.344671       | D    | <b>630.320565</b>  | 315.663921        | <b>613.294016</b>  | 307.150646        | 612.310000        | 306.658638       | 5  |
| 11 | 1556.719574       | 778.863425        | 1539.693025    | 770.350151       | 1538.709009    | 769.858143       | D    | <b>515.293622</b>  | 258.150449        | 498.267073         | 249.637175        | <b>497.283057</b> | 249.145167       | 4  |
| 12 | 1712.820685       | 856.913981        | 1695.794136    | 848.400706       | 1694.810120    | 847.908698       | R    | <b>400.266679</b>  | 200.636977        | 383.240130         | 192.123703        |                   |                  | 3  |
| 13 | 1809.873449       | 905.440363        | 1792.846900    | 896.927088       | 1791.862884    | 896.435080       | P    | 244.165568         | 122.586422        | <b>227.139019</b>  | 114.073148        |                   |                  | 2  |
| 14 |                   |                   |                |                  |                |                  | K    | 147.112804         | 74.060040         | 130.086255         | 65.546765         |                   |                  | 1  |

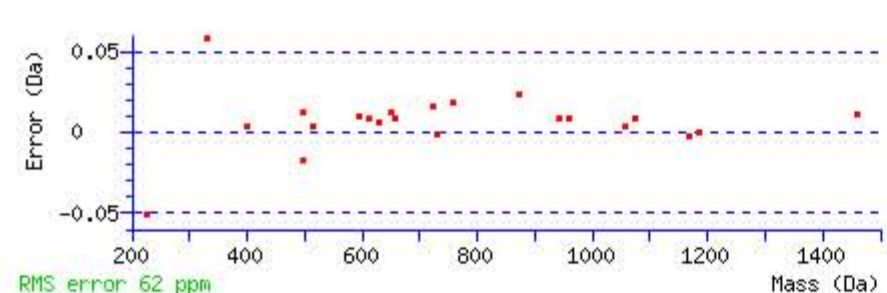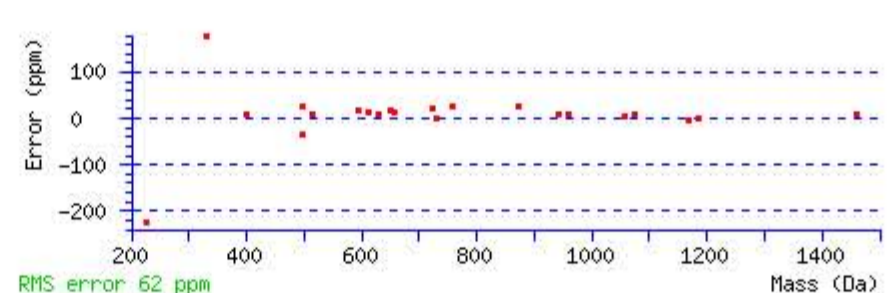

NCBI BLAST search of **GQCIINSNKDDRPK**

(Parameters: blastp, nr protein database, expect=20000, no filter, PAM30)

Other BLAST [web gateways](#)

### All matches to this query

| Score | Mr(calc):   | Delta    | Sequence                       |
|-------|-------------|----------|--------------------------------|
| 50.8  | 1954.971680 | 0.011136 | <a href="#">GQCIINSNKDDRPK</a> |

Mascot: <http://www.matrixscience.com/>



# MASCOT Search Results

## Peptide View

MS/MS Fragmentation of **SCCEEQNKNCLQTR**

Found in **AFAM\_HUMAN**, Afamin OS=Homo sapiens GN=AFM PE=1 SV=1

Match to Query 59039: 2235.994932 from(746.338920,3+) rtinseconds(1403) index(3005)

Title: Locus:1.1.1.2620.23 File:"2013-07-02 CLN FXIII 60 min 1st F 1.wiff"

Data file C:\Program Files (x86)\Matrix Science\Mascot Daemon\mgf4 FXIII 60 min 1st\mascot\_daemon\_merge.mgf

Click mouse within plot area to zoom in by factor of two about that point

Or, Plot from  to  Da

Label all possible matches  Label matches used for scoring

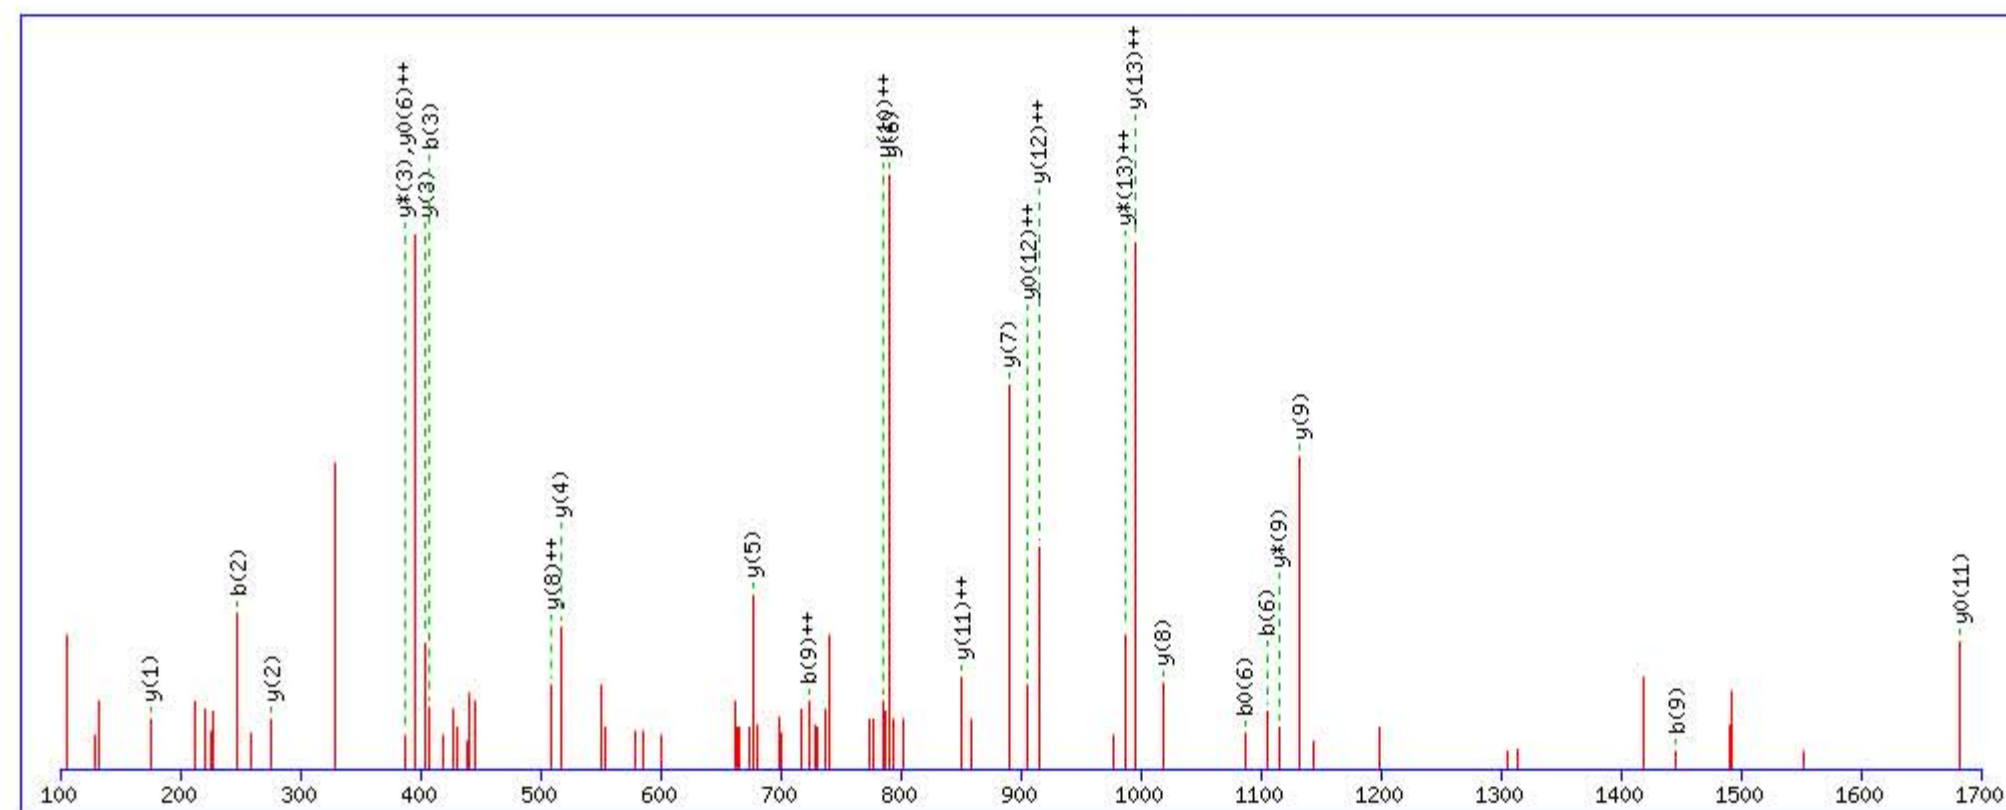

Monoisotopic mass of neutral peptide Mr(calc): 2235.985703

Fixed modifications: Carbamidomethyl (C) (apply to specified residues or termini only)

Variable modifications:

Q6 : Biotin:Thermo-21345 (Q)

Ions Score: 38 Expect: 0.0012

Matches : 26/156 fragment ions using 58 most intense peaks [\(help\)](#)

| #  | b                  | b <sup>++</sup>   | b <sup>+</sup> | b <sup>+++</sup> | b <sup>0</sup>     | b <sup>0++</sup> | Seq. | y                  | y <sup>++</sup>   | y <sup>+</sup>     | y <sup>+++</sup>  | y <sup>0</sup>     | y <sup>0++</sup>  | #  |
|----|--------------------|-------------------|----------------|------------------|--------------------|------------------|------|--------------------|-------------------|--------------------|-------------------|--------------------|-------------------|----|
| 1  | 88.039304          | 44.523290         |                |                  | 70.028739          | 35.518008        | S    |                    |                   |                    |                   |                    |                   | 15 |
| 2  | <b>248.069953</b>  | 124.538614        |                |                  | 230.059388         | 115.533332       | C    | 2149.960963        | 1075.484119       | 2132.934414        | 1066.970845       | 2131.950398        | 1066.478837       | 14 |
| 3  | <b>408.100602</b>  | 204.553939        |                |                  | 390.090037         | 195.548657       | C    | 1989.930314        | <b>995.468795</b> | 1972.903765        | <b>986.955521</b> | 1971.919749        | 986.463512        | 13 |
| 4  | 537.143195         | 269.075236        |                |                  | 519.132630         | 260.069953       | E    | 1829.899665        | <b>915.453470</b> | 1812.873116        | 906.940196        | 1811.889100        | <b>906.448188</b> | 12 |
| 5  | 666.185788         | 333.596532        |                |                  | 648.175223         | 324.591250       | E    | 1700.857072        | <b>850.932174</b> | 1683.830523        | 842.418899        | <b>1682.846507</b> | 841.926891        | 11 |
| 6  | <b>1105.411114</b> | 553.209195        | 1088.384565    | 544.695921       | <b>1087.400549</b> | 544.203913       | Q    | 1571.814479        | <b>786.410877</b> | 1554.787930        | 777.897603        | 1553.803914        | 777.405595        | 10 |
| 7  | 1219.454041        | 610.230659        | 1202.427492    | 601.717384       | 1201.443476        | 601.225376       | N    | <b>1132.589153</b> | 566.798214        | <b>1115.562604</b> | 558.284940        | 1114.578588        | 557.792932        | 9  |
| 8  | 1347.549004        | 674.278140        | 1330.522455    | 665.764866       | 1329.538439        | 665.272858       | K    | <b>1018.546226</b> | <b>509.776751</b> | 1001.519677        | 501.263476        | 1000.535661        | 500.771468        | 8  |
| 9  | <b>1446.617418</b> | <b>723.812347</b> | 1429.590869    | 715.299073       | 1428.606853        | 714.807065       | V    | <b>890.451263</b>  | 445.729269        | 873.424714         | 437.215995        | 872.440698         | 436.723987        | 7  |
| 10 | 1560.660345        | 780.833811        | 1543.633796    | 772.320536       | 1542.649780        | 771.828528       | N    | <b>791.382849</b>  | 396.195062        | 774.356300         | 387.681788        | 773.372284         | <b>387.189780</b> | 6  |
| 11 | 1720.690994        | 860.849135        | 1703.664445    | 852.335861       | 1702.680429        | 851.843853       | C    | <b>677.339922</b>  | 339.173599        | 660.313373         | 330.660324        | 659.329357         | 330.168316        | 5  |
| 12 | 1833.775058        | 917.391167        | 1816.748509    | 908.877893       | 1815.764493        | 908.385885       | L    | <b>517.309273</b>  | 259.158274        | 500.282724         | 250.645000        | 499.298708         | 250.152992        | 4  |
| 13 | 1961.833636        | 981.420456        | 1944.807087    | 972.907182       | 1943.823071        | 972.415174       | Q    | <b>404.225209</b>  | 202.616242        | <b>387.198660</b>  | 194.102968        | 386.214644         | 193.610960        | 3  |
| 14 | 2062.881315        | 1031.944295       | 2045.854766    | 1023.431021      | 2044.870750        | 1022.939013      | T    | <b>276.166631</b>  | 138.586953        | 259.140082         | 130.073679        | 258.156066         | 129.581671        | 2  |
| 15 |                    |                   |                |                  |                    |                  | R    | <b>175.118952</b>  | 88.063114         | 158.092403         | 79.549839         |                    |                   | 1  |

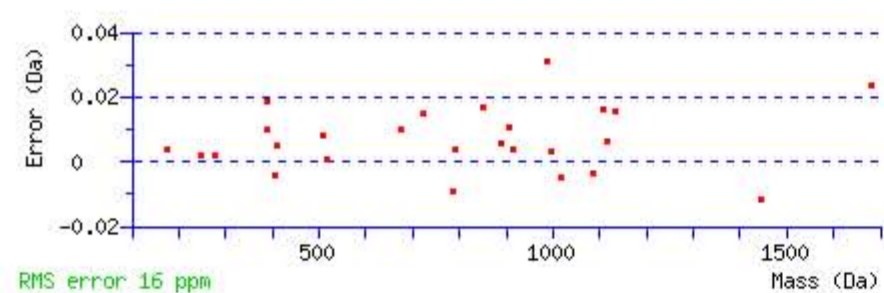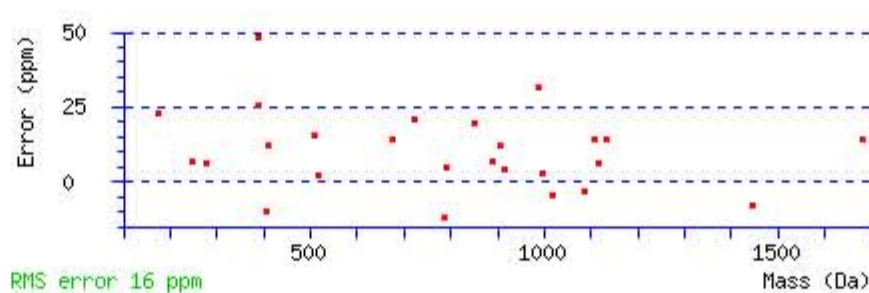

NCBI BLAST search of **SCCEEQNKNCLQTR**

(Parameters: blastp, nr protein database, expect=20000, no filter, PAM30)

Other BLAST [web gateways](#)

All matches to this query

| Score | Mr(calc):   | Delta    | Sequence                       |
|-------|-------------|----------|--------------------------------|
| 37.9  | 2235.985703 | 0.009229 | <a href="#">SCCEEQNKNCLQTR</a> |

Mascot: <http://www.matrixscience.com/>



# MASCOT Search Results

## Peptide View

MS/MS Fragmentation of **EQQDSPGNK**

Found in **A2AP\_HUMAN**, Alpha-2-antiplasmin OS=Homo sapiens GN=SERPINF2 PE=1 SV=3

Match to Query 31196: 1312.619308 from(657.316930,2+) rtinseconds(1119) index(1102)

Title: Locus:1.1.1.2521.9 File:"2013-07-02 CLN FXIII 60 min 1st F 1.wiff"

Data file C:\Program Files (x86)\Matrix Science\Mascot Daemon\mgf4 FXIII 60 min 1st\mascot\_daemon\_merge.mgf

Click mouse within plot area to zoom in by factor of two about that point

Or, Plot from  to  Da

Label all possible matches  Label matches used for scoring

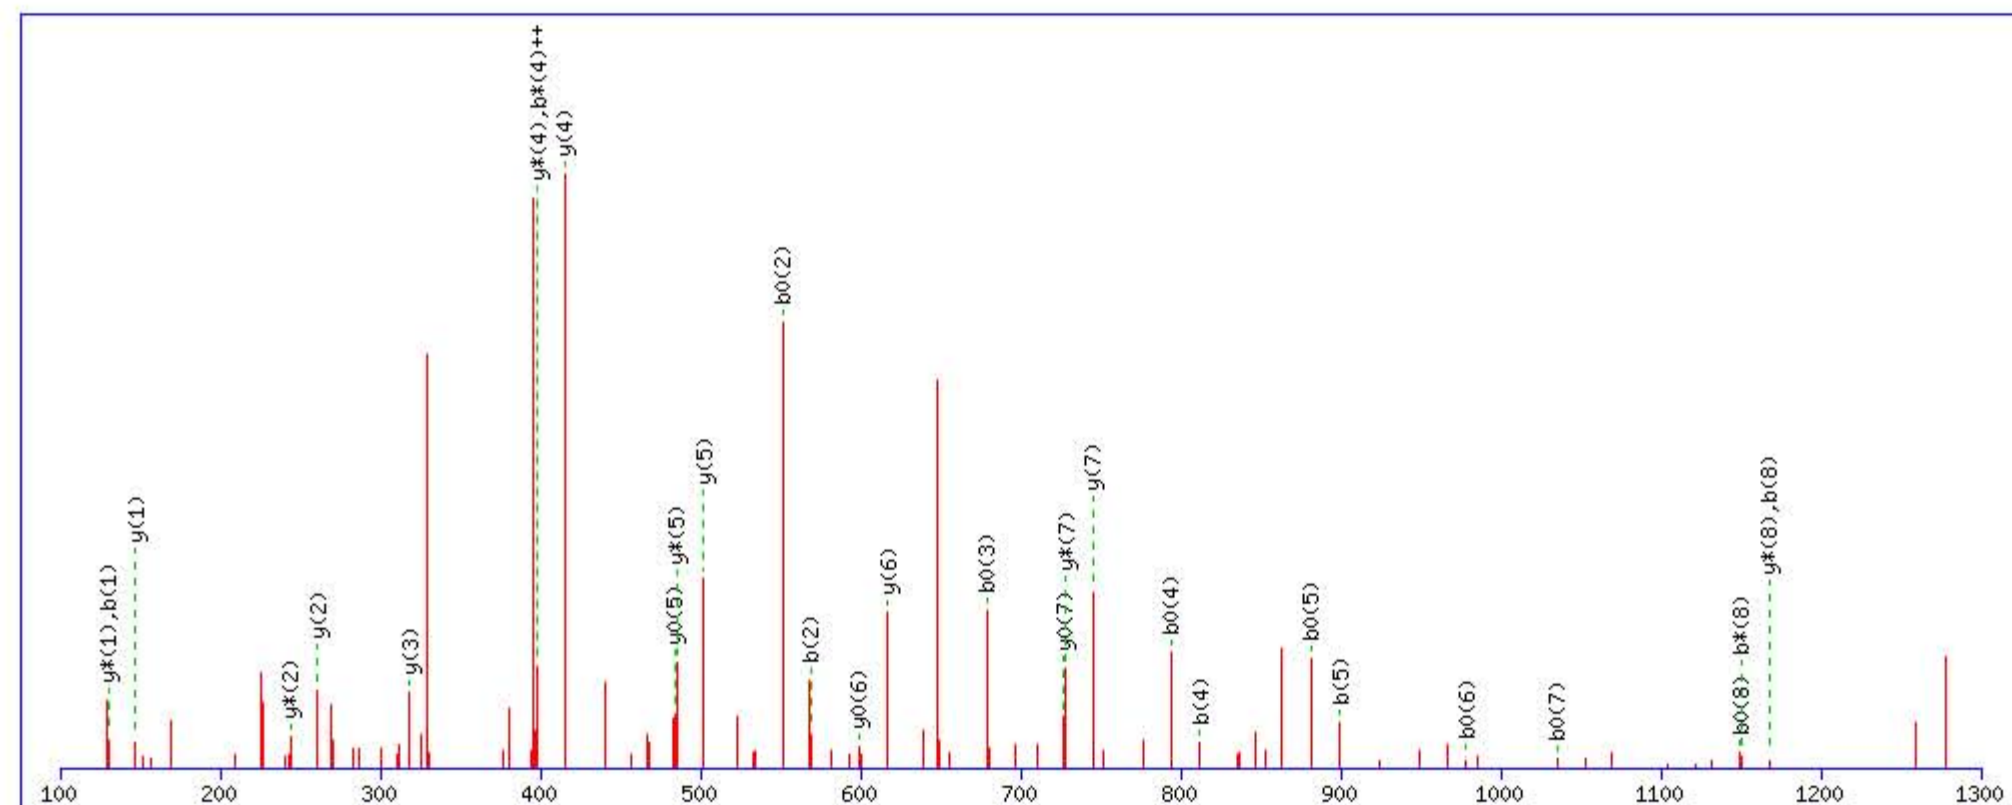

Monoisotopic mass of neutral peptide Mr(calc): 1312.608139

Fixed modifications: Carbamidomethyl (C) (apply to specified residues or termini only)

Variable modifications:

Q2 : Biotin:Thermo-21345 (Q)

Ions Score: 32 Expect: 0.0028

Matches : 30/86 fragment ions using 63 most intense peaks [\(help\)](#)

| # | b           | b <sup>++</sup> | b <sup>*</sup> | b <sup>*++</sup> | b <sup>0</sup> | b <sup>0++</sup> | Seq. | y           | y <sup>++</sup> | y <sup>*</sup> | y <sup>*++</sup> | y <sup>0</sup> | y <sup>0++</sup> | # |
|---|-------------|-----------------|----------------|------------------|----------------|------------------|------|-------------|-----------------|----------------|------------------|----------------|------------------|---|
| 1 | 130.049869  | 65.528572       |                |                  | 112.039304     | 56.523290        | E    |             |                 |                |                  |                |                  | 9 |
| 2 | 569.275195  | 285.141236      | 552.248646     | 276.627961       | 551.264630     | 276.135953       | Q    | 1184.572834 | 592.790055      | 1167.546285    | 584.276780       | 1166.562269    | 583.784772       | 8 |
| 3 | 697.333773  | 349.170525      | 680.307224     | 340.657250       | 679.323208     | 340.165242       | Q    | 745.347508  | 373.177392      | 728.320959     | 364.664117       | 727.336943     | 364.172109       | 7 |
| 4 | 812.360716  | 406.683996      | 795.334167     | 398.170722       | 794.350151     | 397.678714       | D    | 617.288930  | 309.148103      | 600.262381     | 300.634828       | 599.278365     | 300.142820       | 6 |
| 5 | 899.392744  | 450.200010      | 882.366195     | 441.686736       | 881.382179     | 441.194728       | S    | 502.261987  | 251.634631      | 485.235438     | 243.121357       | 484.251422     | 242.629349       | 5 |
| 6 | 996.445508  | 498.726392      | 979.418959     | 490.213118       | 978.434943     | 489.721110       | P    | 415.229959  | 208.118617      | 398.203410     | 199.605343       |                |                  | 4 |
| 7 | 1053.466972 | 527.237124      | 1036.440423    | 518.723850       | 1035.456407    | 518.231841       | G    | 318.177195  | 159.592235      | 301.150646     | 151.078961       |                |                  | 3 |
| 8 | 1167.509899 | 584.258587      | 1150.483350    | 575.745313       | 1149.499334    | 575.253305       | N    | 261.155731  | 131.081503      | 244.129182     | 122.568229       |                |                  | 2 |
| 9 |             |                 |                |                  |                |                  | K    | 147.112804  | 74.060040       | 130.086255     | 65.546765        |                |                  | 1 |

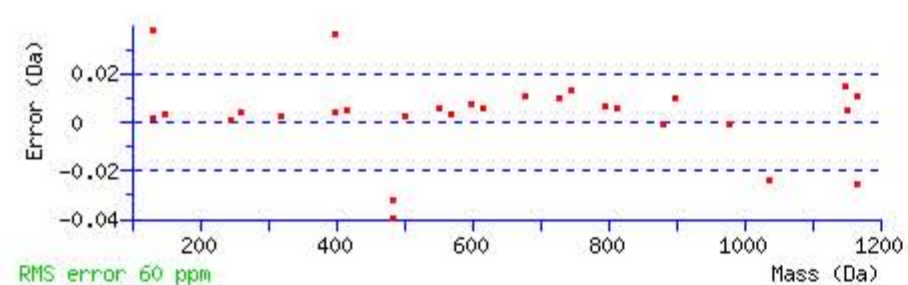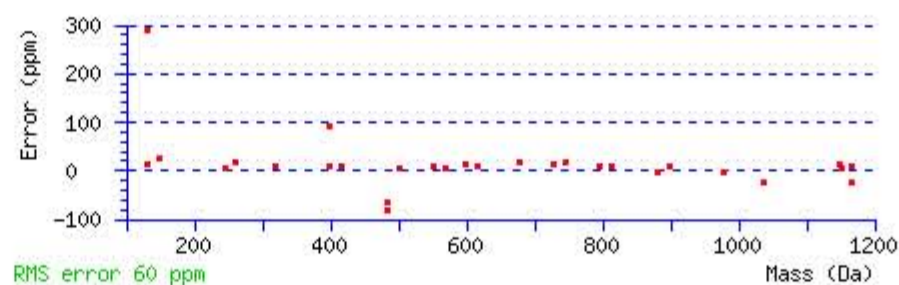

NCBI BLAST search of **EQQDSPGNK**

(Parameters: blastp, nr protein database, expect=20000, no filter, PAM30)

Other BLAST [web gateways](#)

All matches to this query

| Score | Mr(calc):   | Delta     | Sequence                     |
|-------|-------------|-----------|------------------------------|
| 32.0  | 1312.608139 | 0.011169  | <a href="#">EQQDSPGNK</a>    |
| 19.8  | 1312.608139 | 0.011169  | <a href="#">EQQDSPGNK</a>    |
| 4.8   | 1312.637115 | -0.017807 | <a href="#">KTNHSSPEAQSK</a> |
| 4.1   | 1312.626770 | -0.007462 | <a href="#">QQASPSCPQK</a>   |
| 4.0   | 1312.626770 | -0.007462 | <a href="#">QQASPSCPQK</a>   |

Mascot: <http://www.matrixscience.com/>



# MASCOT SCIENCE Mascot Search Results

## Peptide View

MS/MS Fragmentation of **LGNQEPGGQTALK**

Found in **A2AP\_HUMAN**, Alpha-2-antiplasmin OS=Homo sapiens GN=SERPINF2 PE=1 SV=3

Match to Query 43219: 1622.853582 from(541.958470,3+) rtinseconds(1589) index(4342)

Title: Locus:1.1.1.2685.14 File:"2013-07-02 CLN FXIII 60 min 1st F 1.wiff"

Data file C:\Program Files (x86)\Matrix Science\Mascot Daemon\mgf\4 FXIII 60 min 1st\mascot\_daemon\_merge.mgf

Click mouse within plot area to zoom in by factor of two about that point

Or, Plot from  to  Da

Label all possible matches  Label matches used for scoring

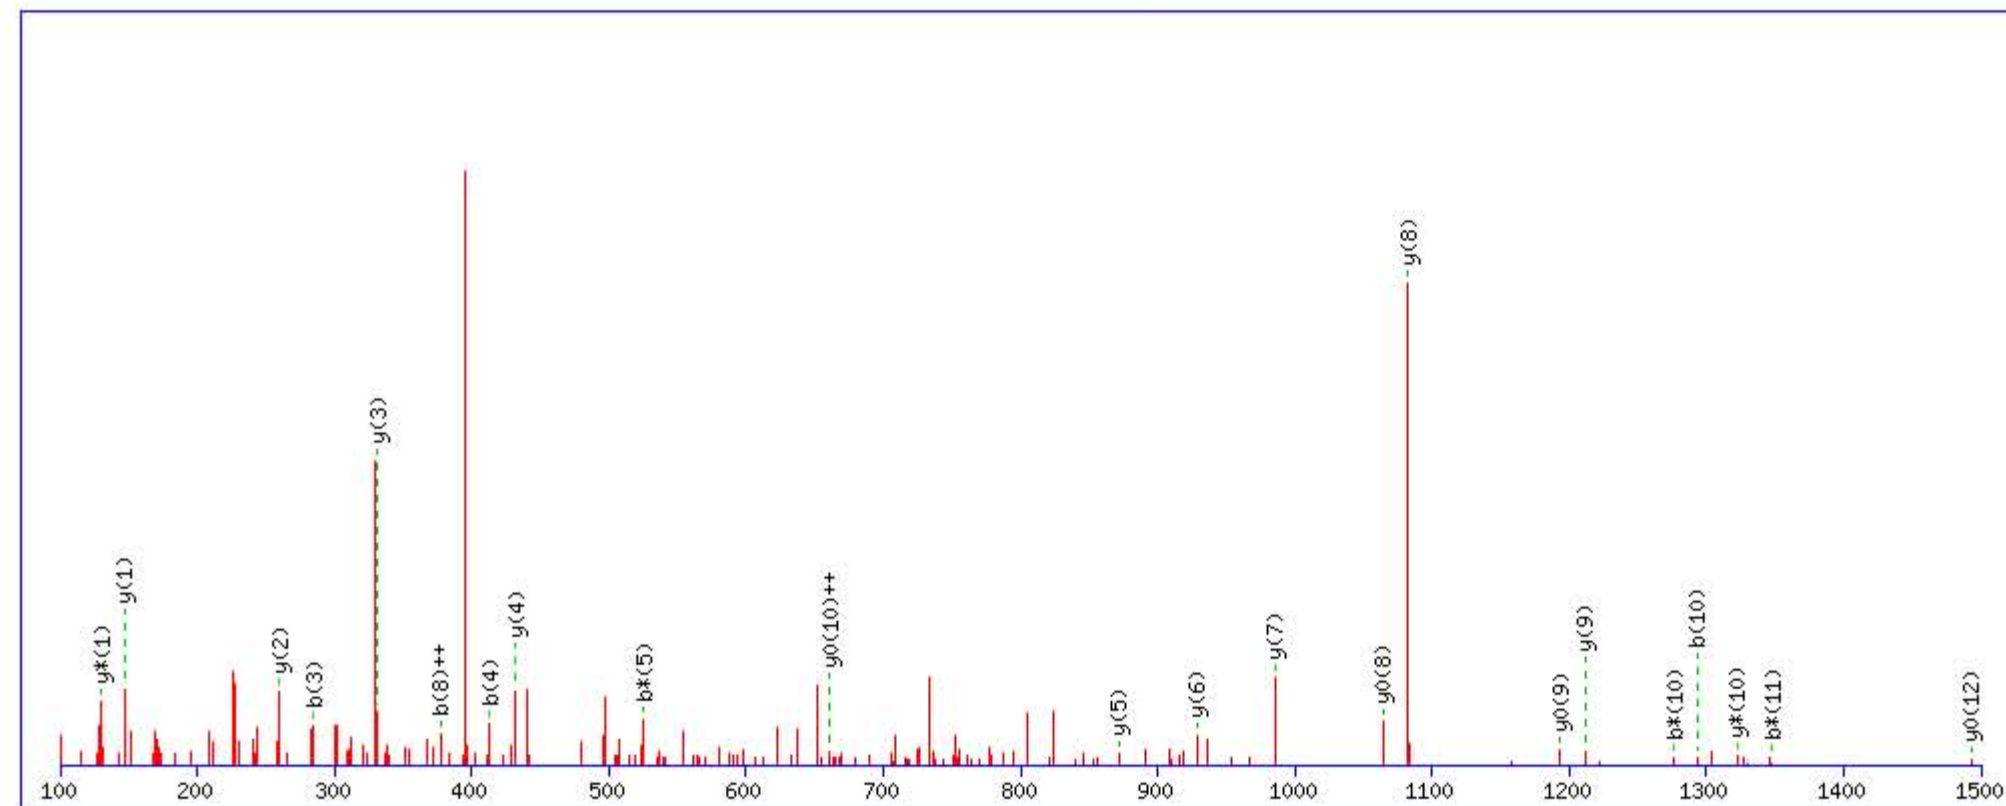

Monoisotopic mass of neutral peptide Mr(calc): 1622.845016

Fixed modifications: Carbamidomethyl (C) (apply to specified residues or termini only)

Variable modifications:

Q9 : Biotin:Thermo-21345 (Q)

Ions Score: 33 Expect: 0.0019

Matches : 22/126 fragment ions using 60 most intense peaks [\(help\)](#)

| #  | b                  | b <sup>++</sup>   | b <sup>+</sup>     | b <sup>+++</sup> | b <sup>0</sup> | b <sup>0++</sup> | Seq. | y                  | y <sup>++</sup> | y <sup>+</sup>     | y <sup>+++</sup> | y <sup>0</sup>     | y <sup>0++</sup>  | #  |
|----|--------------------|-------------------|--------------------|------------------|----------------|------------------|------|--------------------|-----------------|--------------------|------------------|--------------------|-------------------|----|
| 1  | 114.091340         | 57.549308         |                    |                  |                |                  | L    |                    |                 |                    |                  |                    |                   | 13 |
| 2  | 171.112804         | 86.060040         |                    |                  |                |                  | G    | 1510.768241        | 755.887759      | 1493.741692        | 747.374484       | 1492.757676        | 746.882476        | 12 |
| 3  | <b>285.155731</b>  | 143.081504        | 268.129182         | 134.568229       |                |                  | N    | 1453.746777        | 727.377027      | 1436.720228        | 718.863752       | 1435.736212        | 718.371744        | 11 |
| 4  | <b>413.214309</b>  | 207.110793        | 396.187760         | 198.597518       |                |                  | Q    | 1339.703850        | 670.355563      | <b>1322.677301</b> | 661.842289       | 1321.693285        | <b>661.350281</b> | 10 |
| 5  | 542.256902         | 271.632089        | <b>525.230353</b>  | 263.118815       | 524.246337     | 262.626807       | E    | <b>1211.645272</b> | 606.326274      | 1194.618723        | 597.813000       | <b>1193.634707</b> | 597.320991        | 9  |
| 6  | 639.309666         | 320.158471        | 622.283117         | 311.645197       | 621.299101     | 311.153189       | P    | <b>1082.602679</b> | 541.804978      | 1065.576130        | 533.291703       | <b>1064.592114</b> | 532.799695        | 8  |
| 7  | 696.331130         | 348.669203        | 679.304581         | 340.155929       | 678.320565     | 339.663921       | G    | <b>985.549915</b>  | 493.278596      | 968.523366         | 484.765321       | 967.539350         | 484.273313        | 7  |
| 8  | 753.352594         | <b>377.179935</b> | 736.326045         | 368.666661       | 735.342029     | 368.174653       | G    | <b>928.528451</b>  | 464.767864      | 911.501902         | 456.254589       | 910.517886         | 455.762581        | 6  |
| 9  | 1192.577920        | 596.792598        | 1175.551371        | 588.279324       | 1174.567355    | 587.787316       | Q    | <b>871.506987</b>  | 436.257132      | 854.480438         | 427.743857       | 853.496422         | 427.251849        | 5  |
| 10 | <b>1293.625599</b> | 647.316438        | <b>1276.599050</b> | 638.803163       | 1275.615034    | 638.311155       | T    | <b>432.281661</b>  | 216.644468      | 415.255112         | 208.131194       | 414.271096         | 207.639186        | 4  |
| 11 | 1364.662713        | 682.834995        | <b>1347.636164</b> | 674.321720       | 1346.652148    | 673.829712       | A    | <b>331.233982</b>  | 166.120629      | 314.207433         | 157.607354       |                    |                   | 3  |
| 12 | 1477.746777        | 739.377027        | 1460.720228        | 730.863752       | 1459.736212    | 730.371744       | L    | <b>260.196868</b>  | 130.602072      | 243.170319         | 122.088797       |                    |                   | 2  |
| 13 |                    |                   |                    |                  |                |                  | K    | <b>147.112804</b>  | 74.060040       | <b>130.086255</b>  | 65.546765        |                    |                   | 1  |

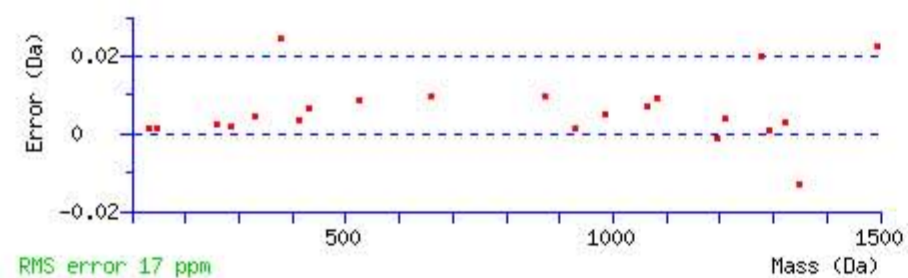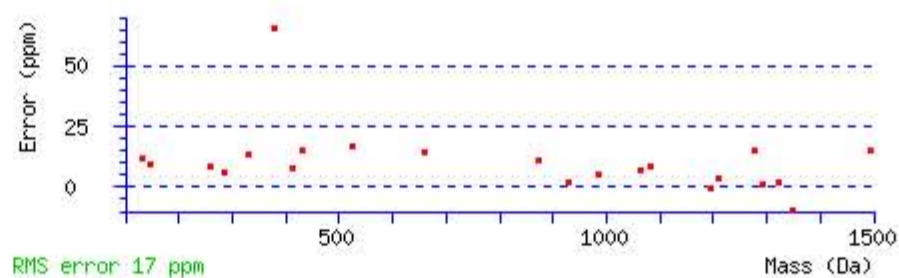

NCBI BLAST search of **LGNQEPGGQTALK**

(Parameters: blastp, nr protein database, expect=20000, no filter, PAM30)

Other BLAST [web gateways](#)

All matches to this query

| Score | Mr(calc):   | Delta     | Sequence                       |
|-------|-------------|-----------|--------------------------------|
| 33.1  | 1622.845016 | 0.008566  | <a href="#">LGNQEPGGQTALK</a>  |
| 5.8   | 1622.845016 | 0.008566  | <a href="#">LGNQEPGGQTALK</a>  |
| 4.0   | 1622.858917 | -0.005335 | <a href="#">SVLLMELEVNYGLK</a> |

Mascot: <http://www.matrixscience.com/>



# MASCOT Search Results

## Peptide View

MS/MS Fragmentation of **LGNQEPGGQTALK**

Found in **A2AP\_HUMAN**, Alpha-2-antiplasmin OS=Homo sapiens GN=SERPINF2 PE=1 SV=3

Match to Query 43222: 1622.856528 from(812.435540,2+) rtinseconds(1581) index(4300)

Title: Locus:1.1.1.2682.16 File:"2013-07-02 CLN FXIII 60 min 1st F 1.wiff"

Data file C:\Program Files (x86)\Matrix Science\Mascot Daemon\mgf\4 FXIII 60 min 1st\mascot\_daemon\_merge.mgf

Click mouse within plot area to zoom in by factor of two about that point

Or, Plot from  to  Da

Label all possible matches  Label matches used for scoring

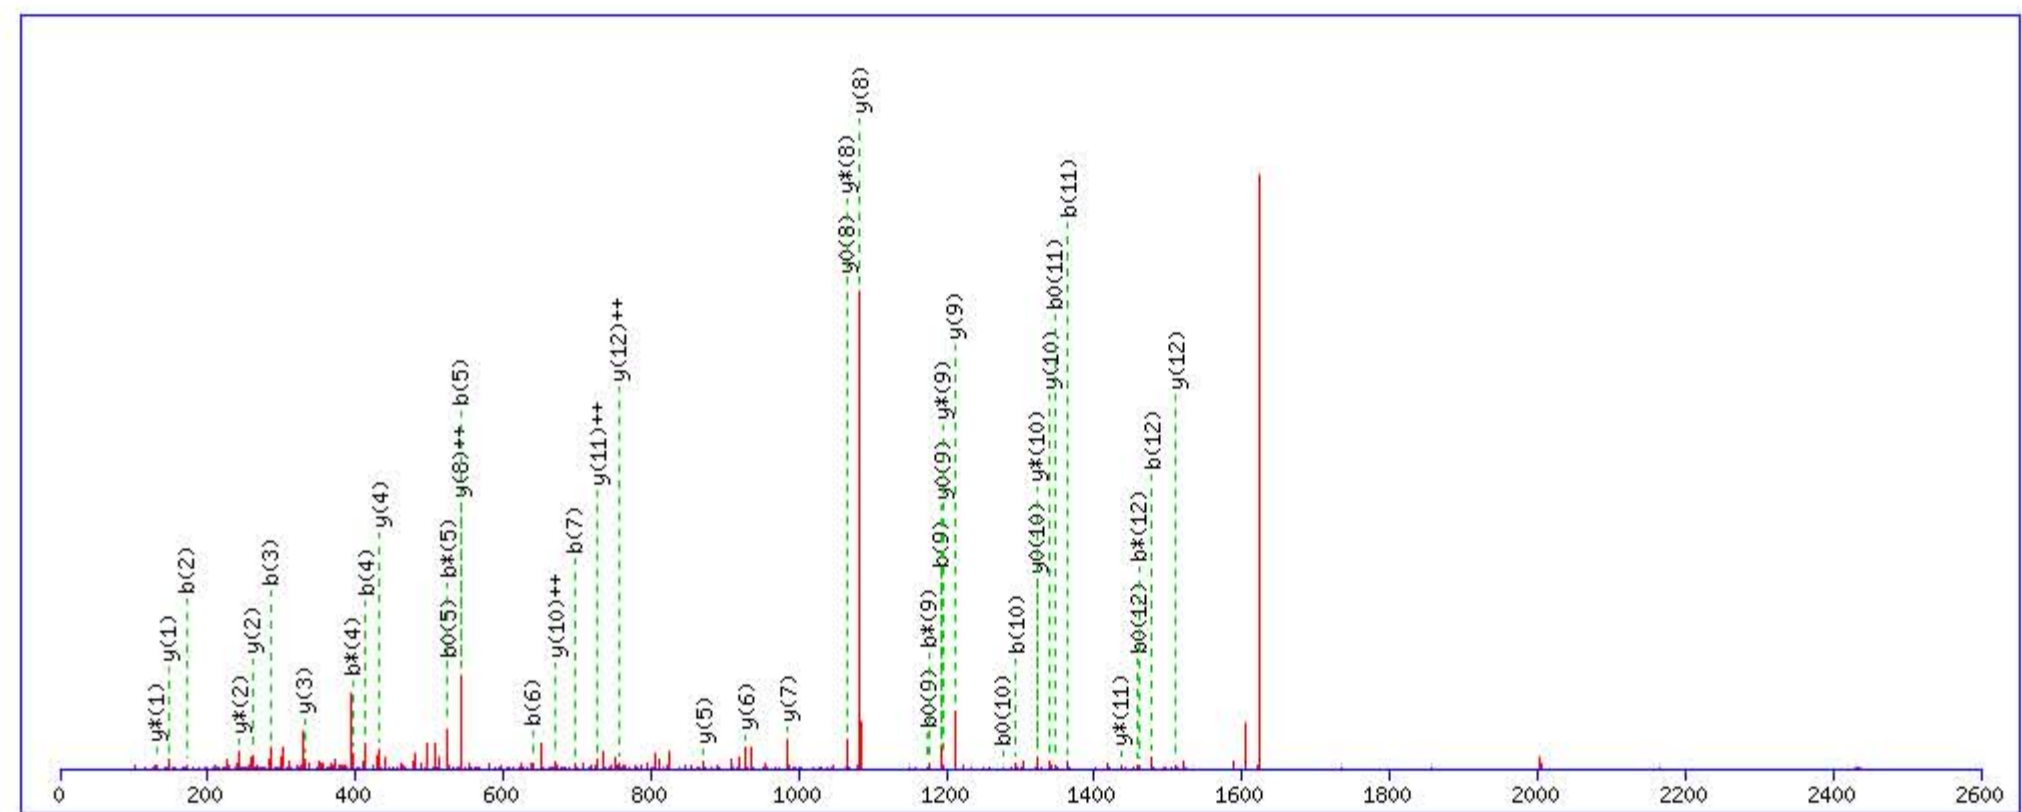

Monoisotopic mass of neutral peptide Mr(calc): 1622.845016

Fixed modifications: Carbamidomethyl (C) (apply to specified residues or termini only)

Variable modifications:

Q9 : Biotin:Thermo-21345 (Q)

Ions Score: 57 Expect: 2.4e-005

Matches : 43/126 fragment ions using 93 most intense peaks [\(help\)](#)

| #  | b                  | b <sup>++</sup> | b <sup>*</sup>     | b <sup>+++</sup> | b <sup>0</sup>     | b <sup>0++</sup> | Seq. | y                  | y <sup>++</sup>   | y <sup>*</sup>     | y <sup>+++</sup> | y <sup>0</sup>     | y <sup>0++</sup> | #  |
|----|--------------------|-----------------|--------------------|------------------|--------------------|------------------|------|--------------------|-------------------|--------------------|------------------|--------------------|------------------|----|
| 1  | 114.091340         | 57.549308       |                    |                  |                    |                  | L    |                    |                   |                    |                  |                    |                  | 13 |
| 2  | <b>171.112804</b>  | 86.060040       |                    |                  |                    |                  | G    | <b>1510.768241</b> | <b>755.887759</b> | 1493.741692        | 747.374484       | 1492.757676        | 746.882476       | 12 |
| 3  | <b>285.155731</b>  | 143.081504      | 268.129182         | 134.568229       |                    |                  | N    | 1453.746777        | <b>727.377027</b> | <b>1436.720228</b> | 718.863752       | 1435.736212        | 718.371744       | 11 |
| 4  | <b>413.214309</b>  | 207.110793      | <b>396.187760</b>  | 198.597518       |                    |                  | Q    | <b>1339.703850</b> | <b>670.355563</b> | <b>1322.677301</b> | 661.842289       | <b>1321.693285</b> | 661.350281       | 10 |
| 5  | <b>542.256902</b>  | 271.632089      | <b>525.230353</b>  | 263.118815       | <b>524.246337</b>  | 262.626807       | E    | <b>1211.645272</b> | 606.326274        | <b>1194.618723</b> | 597.813000       | <b>1193.634707</b> | 597.320991       | 9  |
| 6  | <b>639.309666</b>  | 320.158471      | 622.283117         | 311.645197       | 621.299101         | 311.153189       | P    | <b>1082.602679</b> | <b>541.804978</b> | <b>1065.576130</b> | 533.291703       | <b>1064.592114</b> | 532.799695       | 8  |
| 7  | <b>696.331130</b>  | 348.669203      | 679.304581         | 340.155929       | 678.320565         | 339.663921       | G    | <b>985.549915</b>  | 493.278596        | 968.523366         | 484.765321       | 967.539350         | 484.273313       | 7  |
| 8  | 753.352594         | 377.179935      | 736.326045         | 368.666661       | 735.342029         | 368.174653       | G    | <b>928.528451</b>  | 464.767864        | 911.501902         | 456.254589       | 910.517886         | 455.762581       | 6  |
| 9  | <b>1192.577920</b> | 596.792598      | <b>1175.551371</b> | 588.279324       | <b>1174.567355</b> | 587.787316       | Q    | <b>871.506987</b>  | 436.257132        | 854.480438         | 427.743857       | 853.496422         | 427.251849       | 5  |
| 10 | <b>1293.625599</b> | 647.316438      | 1276.599050        | 638.803163       | <b>1275.615034</b> | 638.311155       | T    | <b>432.281661</b>  | 216.644468        | 415.255112         | 208.131194       | 414.271096         | 207.639186       | 4  |
| 11 | <b>1364.662713</b> | 682.834995      | 1347.636164        | 674.321720       | <b>1346.652148</b> | 673.829712       | A    | <b>331.233982</b>  | 166.120629        | 314.207433         | 157.607354       |                    |                  | 3  |
| 12 | <b>1477.746777</b> | 739.377027      | <b>1460.720228</b> | 730.863752       | <b>1459.736212</b> | 730.371744       | L    | <b>260.196868</b>  | 130.602072        | <b>243.170319</b>  | 122.088797       |                    |                  | 2  |
| 13 |                    |                 |                    |                  |                    |                  | K    | <b>147.112804</b>  | 74.060040         | <b>130.086255</b>  | 65.546765        |                    |                  | 1  |

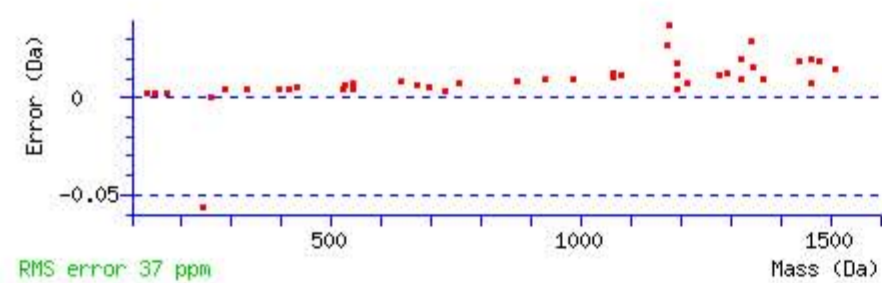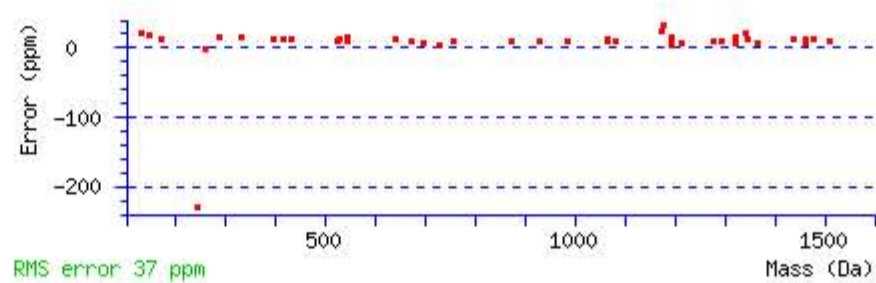

NCBI BLAST search of **LGNQEPGGQTALK**

(Parameters: blastp, nr protein database, expect=20000, no filter, PAM30)

Other BLAST [web gateways](#)

All matches to this query

| Score | Mr(calc):   | Delta     | Sequence                       |
|-------|-------------|-----------|--------------------------------|
| 56.9  | 1622.845016 | 0.011512  | <a href="#">LGNQEPGGQTALK</a>  |
| 25.5  | 1622.845016 | 0.011512  | <a href="#">LGNQEPGGQTALK</a>  |
| 7.2   | 1622.858917 | -0.002389 | <a href="#">SVLLMELEVNYGLK</a> |
| 5.8   | 1622.837601 | 0.018927  | <a href="#">SQSEKQTYLEVRR</a>  |
| 1.9   | 1622.878021 | -0.021493 | <a href="#">RLQPPDFIDPLANK</a> |
| 1.8   | 1622.860260 | -0.003732 | <a href="#">EHSAFQAPAVKK</a>   |
| 1.8   | 1622.864288 | -0.007760 | <a href="#">FPLPSMYRALVWK</a>  |
| 1.8   | 1622.849045 | 0.007483  | <a href="#">IPMPDFDLHLKGP</a>  |
| 0.2   | 1622.870132 | -0.013604 | <a href="#">QAKPAEELLEGK</a>   |



# MASCOT SCIENCE Mascot Search Results

## Peptide View

MS/MS Fragmentation of **LGNQEPGGQTALK**

Found in **A2AP\_HUMAN**, Alpha-2-antiplasmin OS=Homo sapiens GN=SERPINF2 PE=1 SV=3

Match to Query 51388: 1934.028342 from(645.683390,3+) rtinseconds(1942) index(6683)

Title: Locus:1.1.1.2808.10 File:"2013-07-02 CLN FXIII 60 min 1st F 1.wiff"

Data file C:\Program Files (x86)\Matrix Science\Mascot Daemon\mgf4 FXIII 60 min 1st\mascot\_daemon\_merge.mgf

Click mouse within plot area to zoom in by factor of two about that point

Or, Plot from  to  Da

Label all possible matches  Label matches used for scoring

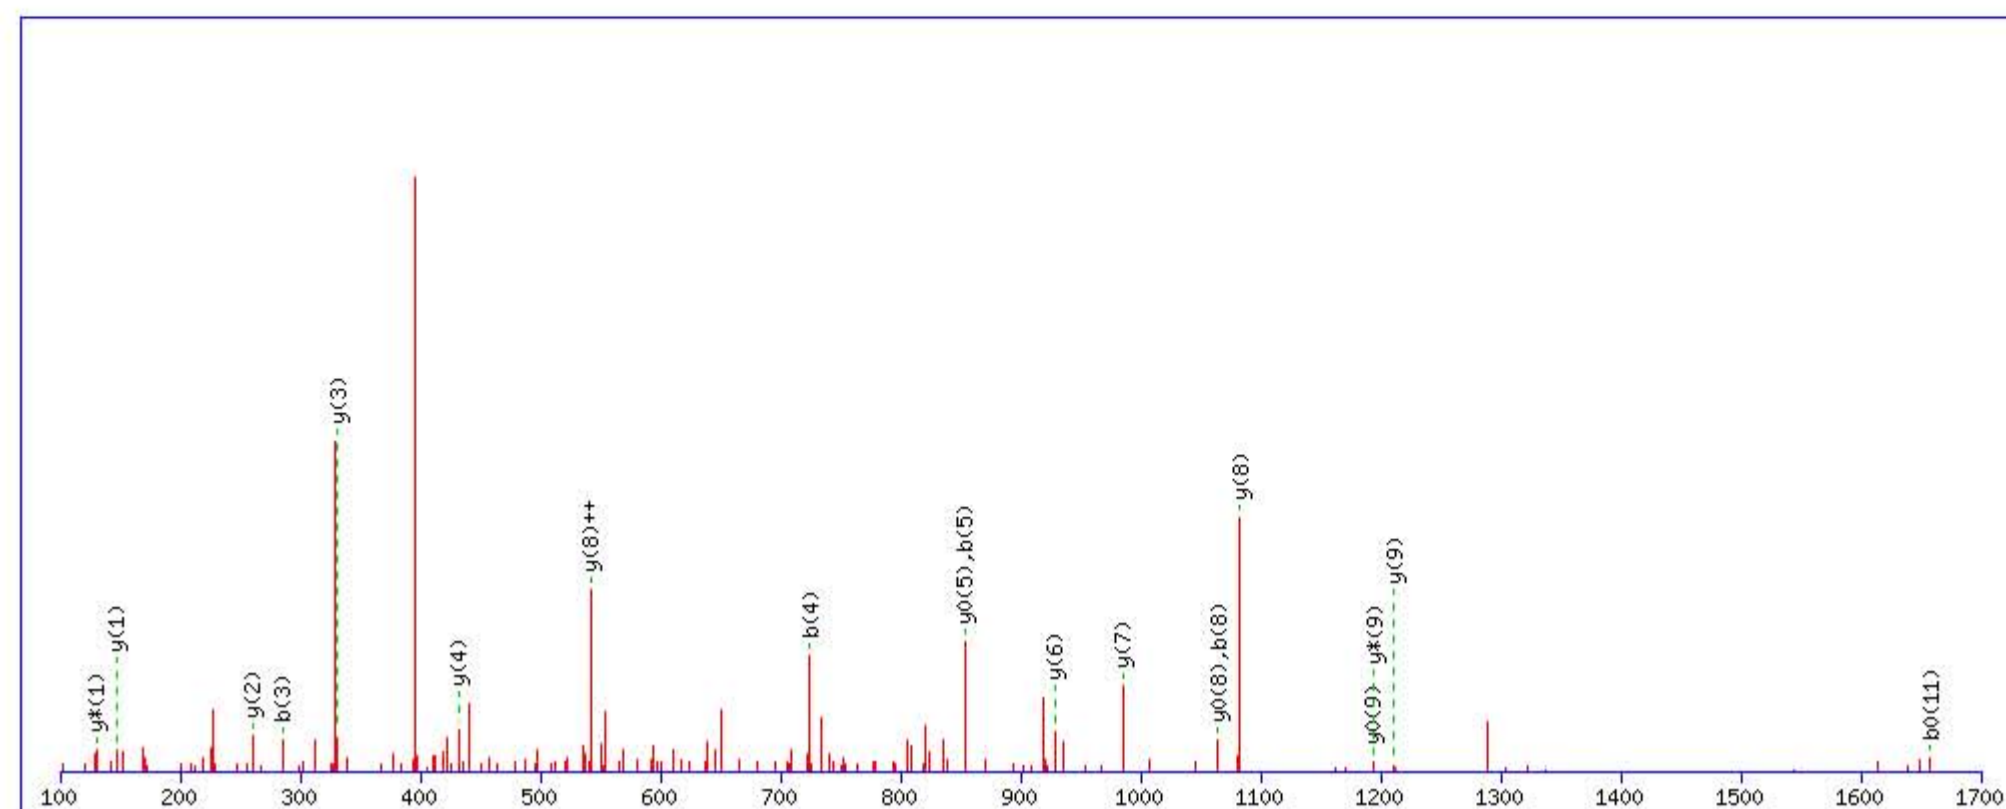

Monoisotopic mass of neutral peptide Mr(calc): 1934.011765

Fixed modifications: Carbamidomethyl (C) (apply to specified residues or termini only)

Variable modifications:

Q4 : Biotin:Thermo-21345 (Q)

Q9 : Biotin:Thermo-21345 (Q)

Ions Score: 28 Expect: 0.018

Matches : 19/126 fragment ions using 43 most intense peaks [\(help\)](#)

| #  | b                  | b <sup>++</sup> | b <sup>*</sup> | b <sup>+++</sup> | b <sup>0</sup>     | b <sup>0++</sup> | Seq. | y                  | y <sup>++</sup>   | y <sup>*</sup>     | y <sup>+++</sup> | y <sup>0</sup>     | y <sup>0++</sup> | #  |
|----|--------------------|-----------------|----------------|------------------|--------------------|------------------|------|--------------------|-------------------|--------------------|------------------|--------------------|------------------|----|
| 1  | 114.091340         | 57.549308       |                |                  |                    |                  | L    |                    |                   |                    |                  |                    |                  | 13 |
| 2  | 171.112804         | 86.060040       |                |                  |                    |                  | G    | 1821.934989        | 911.471133        | 1804.908440        | 902.957858       | 1803.924424        | 902.465850       | 12 |
| 3  | <b>285.155731</b>  | 143.081504      | 268.129182     | 134.568229       |                    |                  | N    | 1764.913525        | 882.960400        | 1747.886976        | 874.447126       | 1746.902960        | 873.955118       | 11 |
| 4  | <b>724.381057</b>  | 362.694167      | 707.354508     | 354.180892       |                    |                  | Q    | 1650.870598        | 825.938937        | 1633.844049        | 817.425663       | 1632.860033        | 816.933654       | 10 |
| 5  | <b>853.423650</b>  | 427.215463      | 836.397101     | 418.702189       | 835.413085         | 418.210181       | E    | <b>1211.645272</b> | 606.326274        | <b>1194.618723</b> | 597.813000       | <b>1193.634707</b> | 597.320991       | 9  |
| 6  | 950.476414         | 475.741845      | 933.449865     | 467.228571       | 932.465849         | 466.736563       | P    | <b>1082.602679</b> | <b>541.804977</b> | 1065.576130        | 533.291703       | <b>1064.592114</b> | 532.799695       | 8  |
| 7  | 1007.497878        | 504.252577      | 990.471329     | 495.739303       | 989.487313         | 495.247295       | G    | <b>985.549915</b>  | 493.278595        | 968.523366         | 484.765321       | 967.539350         | 484.273313       | 7  |
| 8  | <b>1064.519342</b> | 532.763309      | 1047.492793    | 524.250035       | 1046.508777        | 523.758027       | G    | <b>928.528451</b>  | 464.767863        | 911.501902         | 456.254589       | 910.517886         | 455.762581       | 6  |
| 9  | 1503.744668        | 752.375972      | 1486.718119    | 743.862698       | 1485.734103        | 743.370690       | Q    | 871.506987         | 436.257132        | 854.480438         | 427.743857       | <b>853.496422</b>  | 427.251849       | 5  |
| 10 | 1604.792347        | 802.899812      | 1587.765798    | 794.386537       | 1586.781782        | 793.894529       | T    | <b>432.281661</b>  | 216.644468        | 415.255112         | 208.131194       | 414.271096         | 207.639186       | 4  |
| 11 | 1675.829461        | 838.418369      | 1658.802912    | 829.905094       | <b>1657.818896</b> | 829.413086       | A    | <b>331.233982</b>  | 166.120629        | 314.207433         | 157.607354       |                    |                  | 3  |
| 12 | 1788.913525        | 894.960400      | 1771.886976    | 886.447126       | 1770.902960        | 885.955118       | L    | <b>260.196868</b>  | 130.602072        | 243.170319         | 122.088797       |                    |                  | 2  |
| 13 |                    |                 |                |                  |                    |                  | K    | <b>147.112804</b>  | 74.060040         | <b>130.086255</b>  | 65.546765        |                    |                  | 1  |

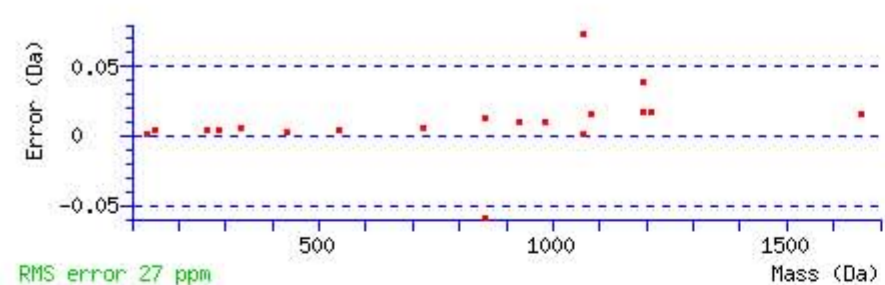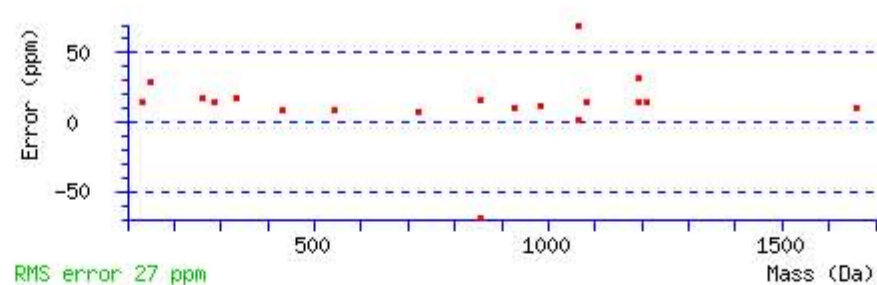

NCBI BLAST search of **LGNQEPGGQTALK**

(Parameters: blastp, nr protein database, expect=20000, no filter, PAM30)

Other BLAST [web gateways](#)

All matches to this query

| Score | Mr(calc):   | Delta     | Sequence                          |
|-------|-------------|-----------|-----------------------------------|
| 27.5  | 1934.011765 | 0.016577  | <a href="#">LGNQEPGGQTALK</a>     |
| 9.0   | 1934.032867 | -0.004525 | <a href="#">KSRPLTGLMDLAKEMTK</a> |

Mascot: <http://www.matrixscience.com/>



# MASCOT Search Results

## Peptide View

MS/MS Fragmentation of **QLTSGPNQEQVSPLTLK**

Found in **A2AP\_HUMAN**, Alpha-2-antiplasmin OS=Homo sapiens GN=SERPINF2 PE=1 SV=3

Match to Query 59736: 2263.251942 from(755.424590,3+) rtinseconds(2502) index(10243)

Title: Locus:1.1.1.3003.22 File:"2013-07-02 CLN FXIII 60 min 1st F 1.wiff"

Data file C:\Program Files (x86)\Matrix Science\Mascot Daemon\mgf4 FXIII 60 min 1st\mascot\_daemon\_merge.mgf

Click mouse within plot area to zoom in by factor of two about that point

Or, Plot from  to  Da

Label all possible matches  Label matches used for scoring

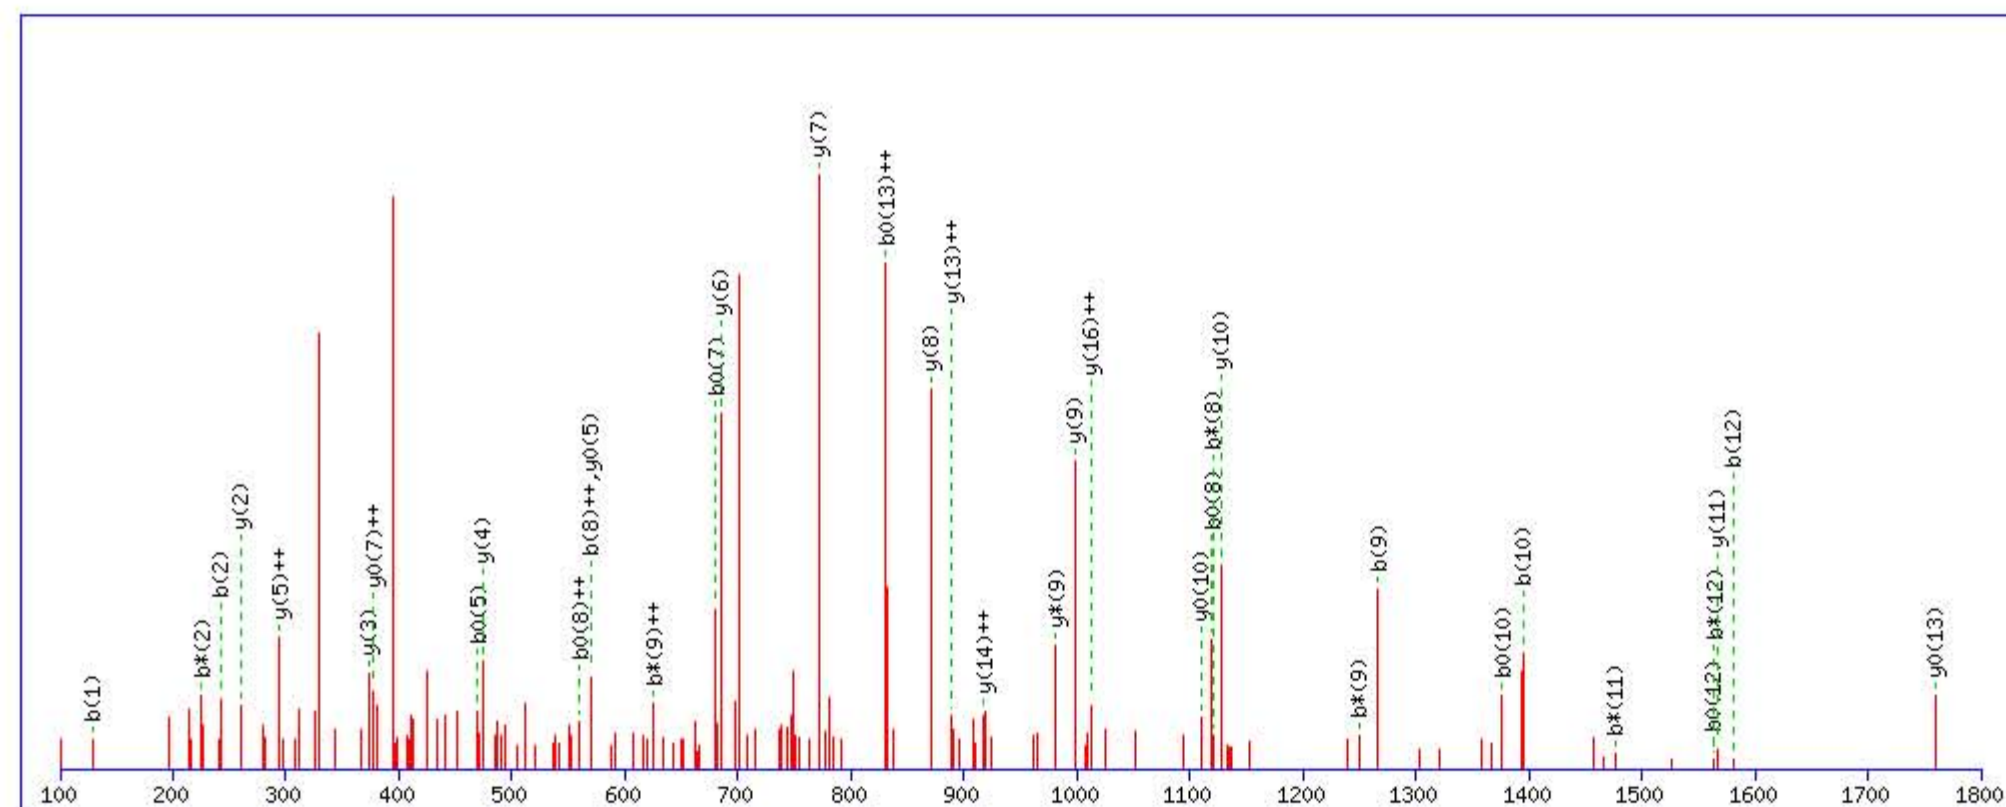

Monoisotopic mass of neutral peptide Mr(calc): 2263.224594

Fixed modifications: Carbamidomethyl (C) (apply to specified residues or termini only)

Variable modifications:

Q8 : Biotin:Thermo-21345 (Q)

Ions Score: 48 Expect: 8.2e-005

Matches : 37/194 fragment ions using 59 most intense peaks [\(help\)](#)

| #  | b           | b <sup>++</sup> | b <sup>*</sup> | b <sup>*++</sup> | b <sup>0</sup> | b <sup>0++</sup> | Seq. | y           | y <sup>++</sup> | y <sup>*</sup> | y <sup>*++</sup> | y <sup>0</sup> | y <sup>0++</sup> | #  |
|----|-------------|-----------------|----------------|------------------|----------------|------------------|------|-------------|-----------------|----------------|------------------|----------------|------------------|----|
| 1  | 129.065854  | 65.036565       | 112.039305     | 56.523291        |                |                  | Q    |             |                 |                |                  |                |                  | 18 |
| 2  | 242.149918  | 121.578597      | 225.123369     | 113.065323       |                |                  | L    | 2136.173304 | 1068.590290     | 2119.146755    | 1060.077015      | 2118.162739    | 1059.585007      | 17 |
| 3  | 343.197597  | 172.102437      | 326.171048     | 163.589162       | 325.187032     | 163.097154       | T    | 2023.089240 | 1012.048258     | 2006.062691    | 1003.534984      | 2005.078675    | 1003.042976      | 16 |
| 4  | 430.229625  | 215.618450      | 413.203076     | 207.105176       | 412.219060     | 206.613168       | S    | 1922.041561 | 961.524419      | 1905.015012    | 953.011144       | 1904.030996    | 952.519136       | 15 |
| 5  | 487.251089  | 244.129182      | 470.224540     | 235.615908       | 469.240524     | 235.123900       | G    | 1835.009533 | 918.008405      | 1817.982984    | 909.495130       | 1816.998968    | 909.003122       | 14 |
| 6  | 584.303853  | 292.655565      | 567.277304     | 284.142290       | 566.293288     | 283.650282       | P    | 1777.988069 | 889.497673      | 1760.961520    | 880.984398       | 1759.977504    | 880.492390       | 13 |
| 7  | 698.346780  | 349.677028      | 681.320231     | 341.163753       | 680.336215     | 340.671745       | N    | 1680.935305 | 840.971291      | 1663.908756    | 832.458016       | 1662.924740    | 831.966008       | 12 |
| 8  | 1137.572106 | 569.289691      | 1120.545557    | 560.776416       | 1119.561541    | 560.284408       | Q    | 1566.892378 | 783.949827      | 1549.865829    | 775.436553       | 1548.881813    | 774.944545       | 11 |
| 9  | 1266.614699 | 633.810988      | 1249.588150    | 625.297713       | 1248.604134    | 624.805705       | E    | 1127.667052 | 564.337164      | 1110.640503    | 555.823890       | 1109.656487    | 555.331882       | 10 |
| 10 | 1394.673277 | 697.840277      | 1377.646728    | 689.327002       | 1376.662712    | 688.834994       | Q    | 998.624459  | 499.815868      | 981.597910     | 491.302593       | 980.613894     | 490.810585       | 9  |
| 11 | 1493.741691 | 747.374484      | 1476.715142    | 738.861209       | 1475.731126    | 738.369201       | V    | 870.565881  | 435.786579      | 853.539332     | 427.273304       | 852.555316     | 426.781296       | 8  |
| 12 | 1580.773719 | 790.890498      | 1563.747170    | 782.377223       | 1562.763154    | 781.885215       | S    | 771.497467  | 386.252372      | 754.470918     | 377.739097       | 753.486902     | 377.247089       | 7  |
| 13 | 1677.826483 | 839.416880      | 1660.799934    | 830.903605       | 1659.815918    | 830.411597       | P    | 684.465439  | 342.736358      | 667.438890     | 334.223083       | 666.454874     | 333.731075       | 6  |
| 14 | 1790.910547 | 895.958912      | 1773.883998    | 887.445637       | 1772.899982    | 886.953629       | L    | 587.412675  | 294.209976      | 570.386126     | 285.696701       | 569.402110     | 285.204693       | 5  |
| 15 | 1891.958226 | 946.482751      | 1874.931677    | 937.969477       | 1873.947661    | 937.477469       | T    | 474.328611  | 237.667944      | 457.302062     | 229.154669       | 456.318046     | 228.662661       | 4  |
| 16 | 2005.042290 | 1003.024783     | 1988.015741    | 994.511509       | 1987.031725    | 994.019501       | L    | 373.280932  | 187.144104      | 356.254383     | 178.630830       |                |                  | 3  |
| 17 | 2118.126354 | 1059.566815     | 2101.099805    | 1051.053540      | 2100.115789    | 1050.561532      | L    | 260.196868  | 130.602072      | 243.170319     | 122.088798       |                |                  | 2  |
| 18 |             |                 |                |                  |                |                  | K    | 147.112804  | 74.060040       | 130.086255     | 65.546765        |                |                  | 1  |

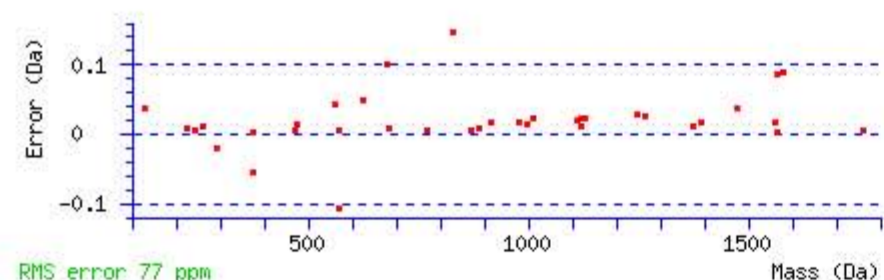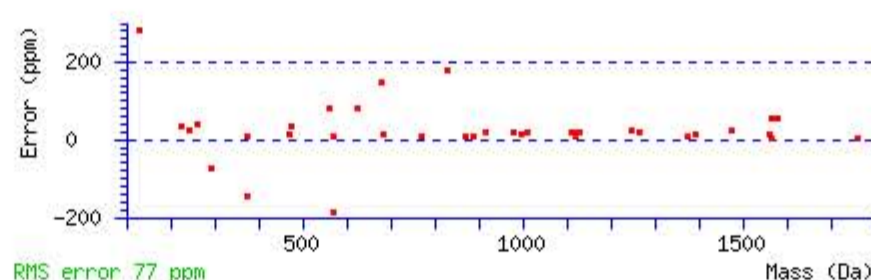

NCBI BLAST search of **QLTSGPNQEQVSPLTLK**

(Parameters: blastp, nr protein database, expect=20000, no filter, PAM30)

Other BLAST [web gateways](#)

All matches to this query

| Score | Mr(calc):   | Delta    | Sequence                            |
|-------|-------------|----------|-------------------------------------|
| 47.9  | 2263.224594 | 0.027348 | <a href="#">QLTSGPNQEQVSPLTLK</a>   |
| 35.5  | 2263.224594 | 0.027348 | <a href="#">QLTSGPNQEQVSPLTLK</a>   |
| 25.6  | 2263.224594 | 0.027348 | <a href="#">QLTSGPNQEQVSPLTLK</a>   |
| 4.3   | 2263.224594 | 0.027348 | <a href="#">GLALSSNKVKSVMVFDNEK</a> |



# Mascot Search Results

## Peptide View

MS/MS Fragmentation of **ELKEQQDSPGNKDFLQSLK**

Found in **A2AP\_HUMAN**, Alpha-2-antiplasmin OS=Homo sapiens GN=SERPINF2 PE=1 SV=3

Match to Query 65702: 2514.300896 from(629.582500,4+) rtinseconds(1882) index(6243)

Title: Locus:1.1.1.2787.19 File:"2013-07-02 CLN FXIII 60 min 1st F 1.wiff"

Data file C:\Program Files (x86)\Matrix Science\Mascot Daemon\mgf4 FXIII 60 min 1st\mascot\_daemon\_merge.mgf

Click mouse within plot area to zoom in by factor of two about that point

Or, Plot from  to  Da

Label all possible matches  Label matches used for scoring

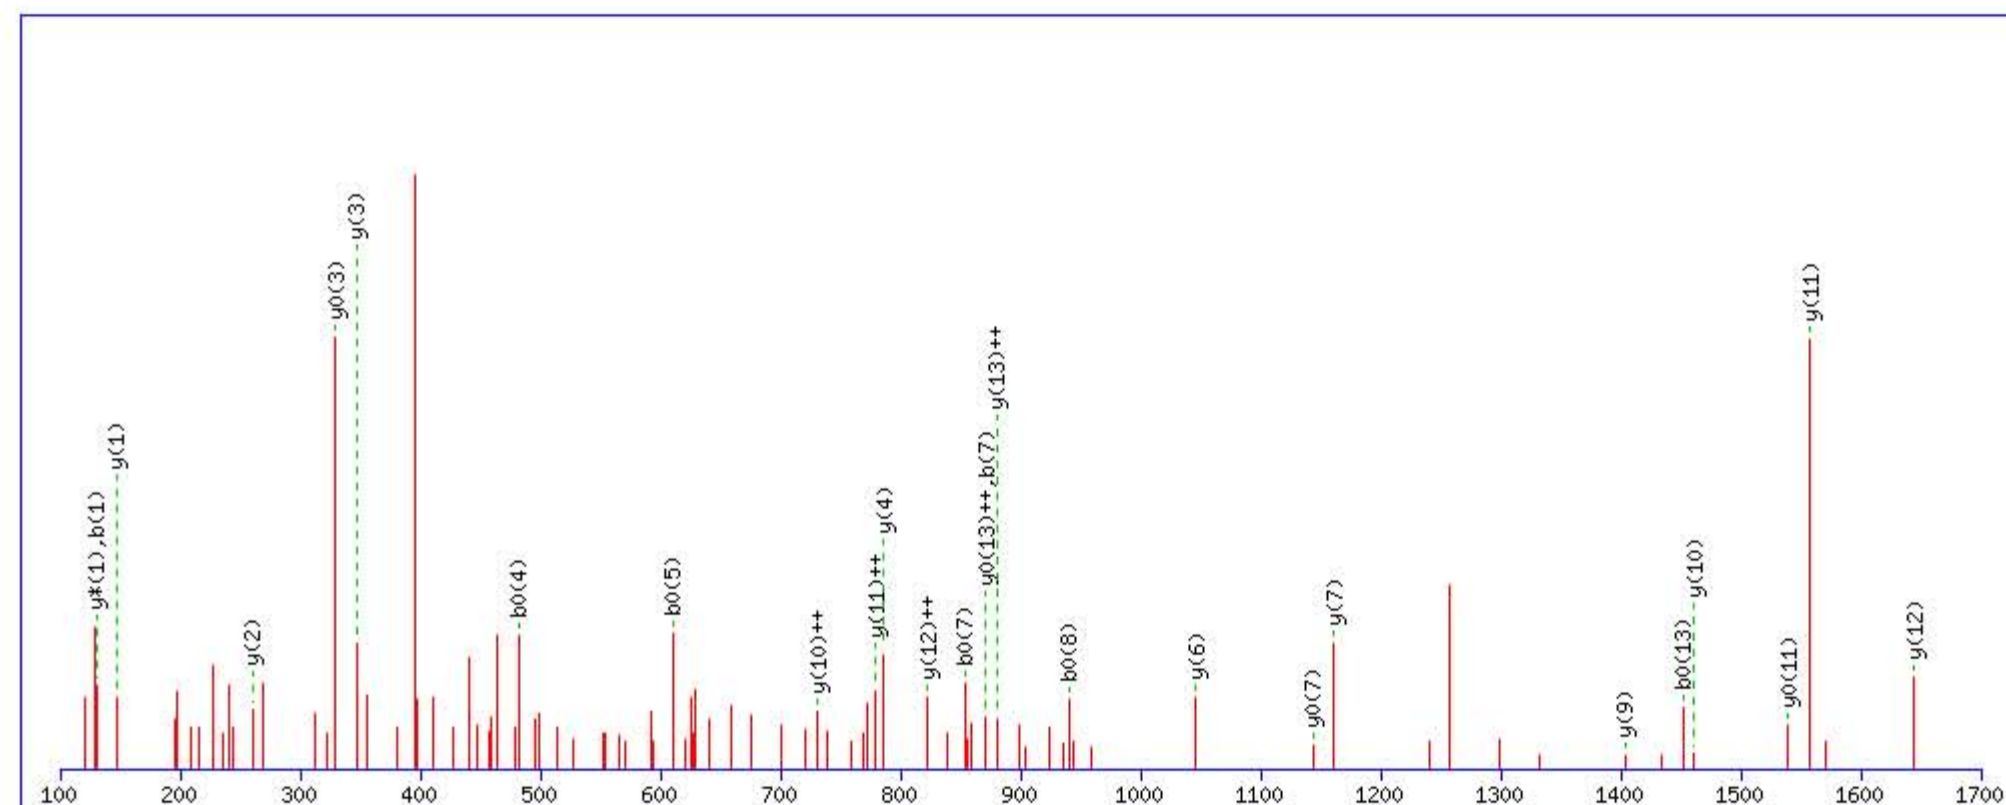

Monoisotopic mass of neutral peptide Mr(calc): 2514.278793

Fixed modifications: Carbamidomethyl (C) (apply to specified residues or termini only)

Variable modifications:

Q16 : Biotin:Thermo-21345 (Q)

Ions Score: 45 Expect: 0.00014

Matches : 26/208 fragment ions using 52 most intense peaks [\(help\)](#)

| #  | b                 | b <sup>++</sup> | b <sup>*</sup> | b <sup>*++</sup> | b <sup>0</sup>     | b <sup>0++</sup> | Seq.     | y                  | y <sup>++</sup>   | y <sup>*</sup>    | y <sup>*++</sup> | y <sup>0</sup>     | y <sup>0++</sup>  | #  |
|----|-------------------|-----------------|----------------|------------------|--------------------|------------------|----------|--------------------|-------------------|-------------------|------------------|--------------------|-------------------|----|
| 1  | <b>130.049869</b> | 65.528572       |                |                  | 112.039304         | 56.523290        | <b>E</b> |                    |                   |                   |                  |                    |                   | 19 |
| 2  | 243.133933        | 122.070605      |                |                  | 225.123368         | 113.065322       | <b>L</b> | 2386.243508        | 1193.625392       | 2369.216959       | 1185.112117      | 2368.232943        | 1184.620109       | 18 |
| 3  | 371.228896        | 186.118086      | 354.202347     | 177.604812       | 353.218331         | 177.112804       | <b>K</b> | 2273.159444        | 1137.083360       | 2256.132895       | 1128.570085      | 2255.148879        | 1128.078077       | 17 |
| 4  | 500.271489        | 250.639383      | 483.244940     | 242.126108       | <b>482.260924</b>  | 241.634100       | <b>E</b> | 2145.064481        | 1073.035878       | 2128.037932       | 1064.522604      | 2127.053916        | 1064.030596       | 16 |
| 5  | 628.330067        | 314.668672      | 611.303518     | 306.155397       | <b>610.319502</b>  | 305.663389       | <b>Q</b> | 2016.021888        | 1008.514582       | 1998.995339       | 1000.001308      | 1998.011323        | 999.509300        | 15 |
| 6  | 756.388645        | 378.697961      | 739.362096     | 370.184686       | 738.378080         | 369.692678       | <b>Q</b> | 1887.963310        | 944.485293        | 1870.936761       | 935.972019       | 1869.952745        | 935.480011        | 14 |
| 7  | <b>871.415588</b> | 436.211432      | 854.389039     | 427.698158       | <b>853.405023</b>  | 427.206150       | <b>D</b> | 1759.904732        | <b>880.456004</b> | 1742.878183       | 871.942730       | 1741.894167        | <b>871.450722</b> | 13 |
| 8  | 958.447616        | 479.727446      | 941.421067     | 471.214172       | <b>940.437051</b>  | 470.722164       | <b>S</b> | <b>1644.877789</b> | <b>822.942533</b> | 1627.851240       | 814.429258       | 1626.867224        | 813.937250        | 12 |
| 9  | 1055.500380       | 528.253828      | 1038.473831    | 519.740554       | 1037.489815        | 519.248545       | <b>P</b> | <b>1557.845761</b> | <b>779.426519</b> | 1540.819212       | 770.913244       | <b>1539.835196</b> | 770.421236        | 11 |
| 10 | 1112.521844       | 556.764560      | 1095.495295    | 548.251285       | 1094.511279        | 547.759277       | <b>G</b> | <b>1460.792997</b> | <b>730.900137</b> | 1443.766448       | 722.386862       | 1442.782432        | 721.894854        | 10 |
| 11 | 1226.564771       | 613.786023      | 1209.538222    | 605.272749       | 1208.554206        | 604.780741       | <b>N</b> | <b>1403.771533</b> | 702.389405        | 1386.744984       | 693.876130       | 1385.760968        | 693.384122        | 9  |
| 12 | 1354.659734       | 677.833505      | 1337.633185    | 669.320230       | 1336.649169        | 668.828222       | <b>K</b> | 1289.728606        | 645.367941        | 1272.702057       | 636.854667       | 1271.718041        | 636.362659        | 8  |
| 13 | 1469.686677       | 735.346976      | 1452.660128    | 726.833702       | <b>1451.676112</b> | 726.341694       | <b>D</b> | <b>1161.633643</b> | 581.320460        | 1144.607094       | 572.807185       | <b>1143.623078</b> | 572.315177        | 7  |
| 14 | 1616.755091       | 808.881184      | 1599.728542    | 800.367909       | 1598.744526        | 799.875901       | <b>F</b> | <b>1046.606700</b> | 523.806988        | 1029.580151       | 515.293714       | 1028.596135        | 514.801706        | 6  |
| 15 | 1729.839155       | 865.423215      | 1712.812606    | 856.909941       | 1711.828590        | 856.417933       | <b>L</b> | 899.538286         | 450.272781        | 882.511737        | 441.759507       | 881.527721         | 441.267499        | 5  |
| 16 | 2169.064481       | 1085.035878     | 2152.037932    | 1076.522604      | 2151.053916        | 1076.030596      | <b>Q</b> | <b>786.454222</b>  | 393.730749        | 769.427673        | 385.217475       | 768.443657         | 384.725467        | 4  |
| 17 | 2256.096509       | 1128.551892     | 2239.069960    | 1120.038618      | 2238.085944        | 1119.546610      | <b>S</b> | <b>347.228896</b>  | 174.118086        | 330.202347        | 165.604812       | <b>329.218331</b>  | 165.112804        | 3  |
| 18 | 2369.180573       | 1185.093925     | 2352.154024    | 1176.580650      | 2351.170008        | 1176.088642      | <b>L</b> | <b>260.196868</b>  | 130.602072        | 243.170319        | 122.088798       |                    |                   | 2  |
| 19 |                   |                 |                |                  |                    |                  | <b>K</b> | <b>147.112804</b>  | 74.060040         | <b>130.086255</b> | 65.546765        |                    |                   | 1  |

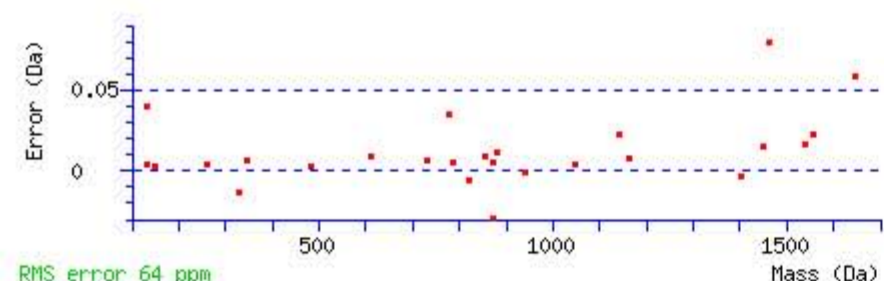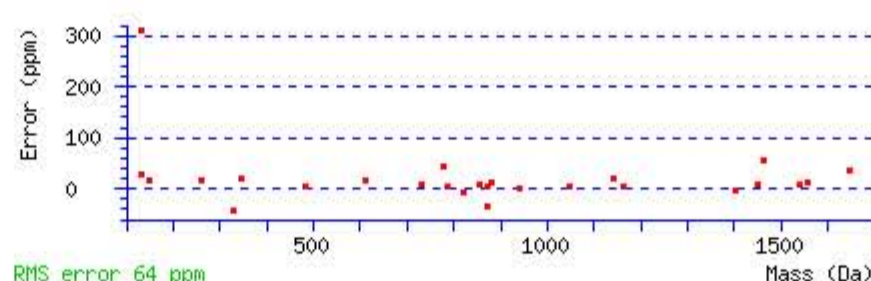

NCBI BLAST search of [ELKEQQDSPGNKDFLQSLK](#)

(Parameters: blastp, nr protein database, expect=20000, no filter, PAM30)

Other BLAST [web gateways](#)

All matches to this query

| Score | Mr(calc):   | Delta    | Sequence                                |
|-------|-------------|----------|-----------------------------------------|
| 44.5  | 2514.278793 | 0.022103 | <a href="#">ELKEQQDSPGNKDFLQSLK</a>     |
| 3.4   | 2514.268951 | 0.031945 | <a href="#">GNSGPPGIVGQKGDPGYGPAGPK</a> |



# Mascot Search Results

## Peptide View

MS/MS Fragmentation of **QLTSGPNQEQVSPLTLK**

Found in **A2AP\_HUMAN**, Alpha-2-antiplasmin OS=Homo sapiens GN=SERPINF2 PE=1 SV=3

Match to Query 66306: 2574.423582 from(859.148470,3+) rtinseconds(2681) index(11246)

Title: Locus:1.1.1.3065.14 File:"2013-07-02 CLN FXIII 60 min 1st F 1.wiff"

Data file C:\Program Files (x86)\Matrix Science\Mascot Daemon\mgf4 FXIII 60 min 1st\mascot\_daemon\_merge.mgf

Click mouse within plot area to zoom in by factor of two about that point

Or, Plot from  to  Da

Label all possible matches  Label matches used for scoring

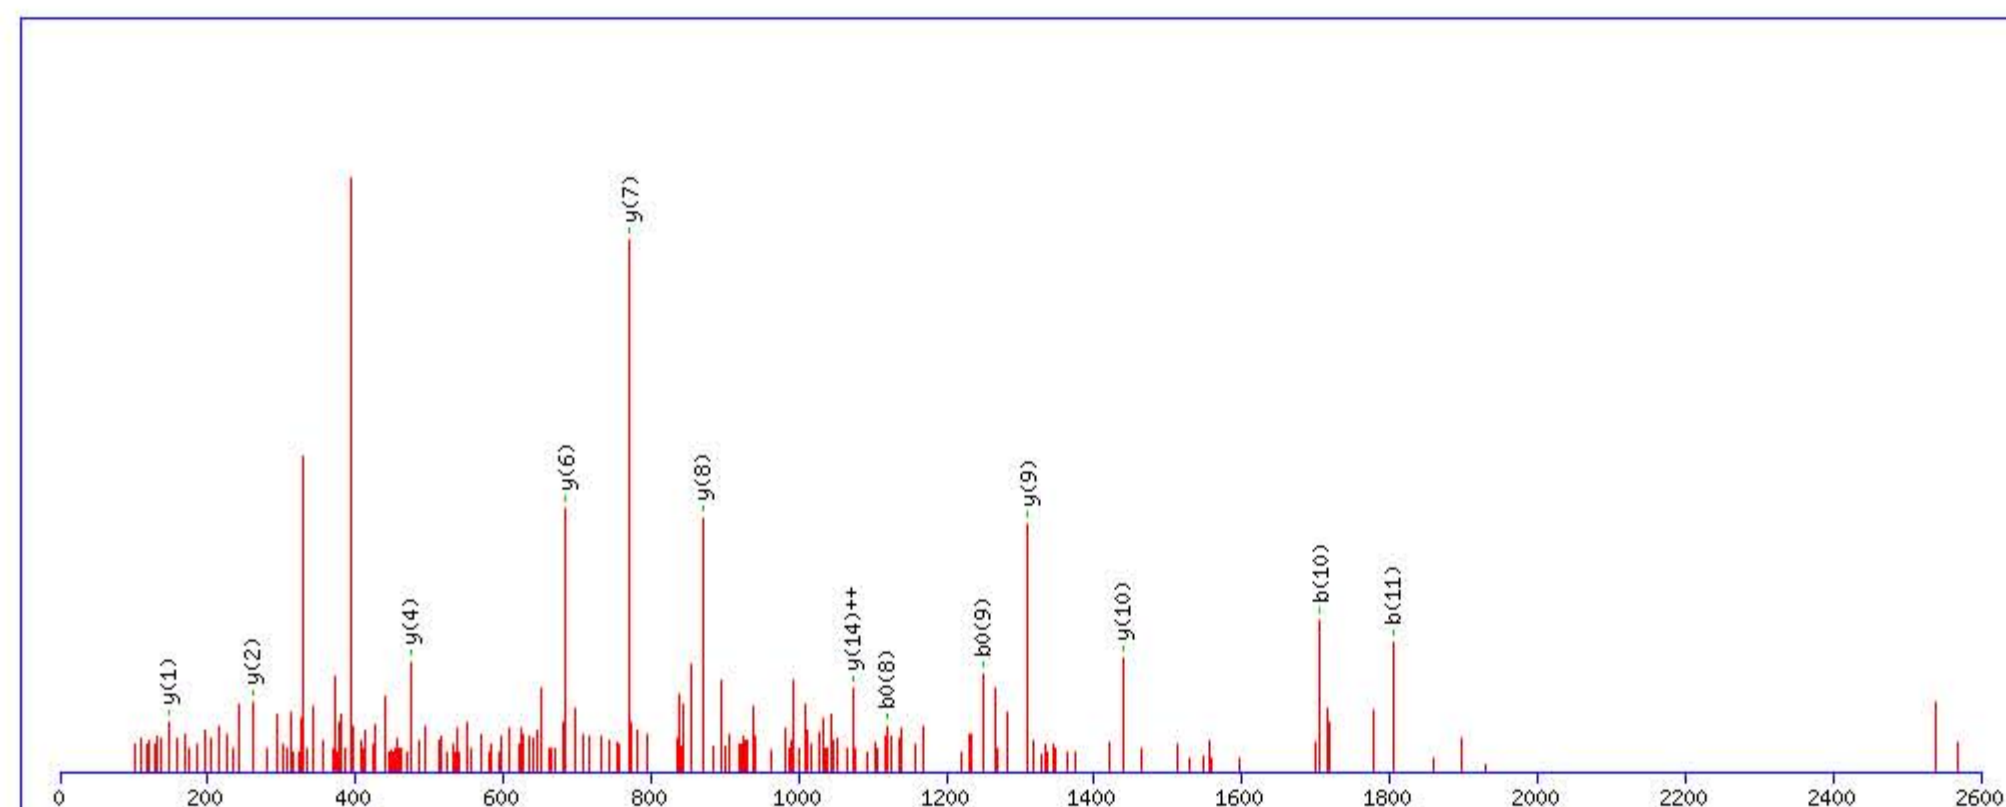

Monoisotopic mass of neutral peptide Mr(calc): 2574.391342

Fixed modifications: Carbamidomethyl (C) (apply to specified residues or termini only)

Variable modifications:

Q8 : Biotin:Thermo-21345 (Q)

Q10 : Biotin:Thermo-21345 (Q)

Ions Score: 46 Expect: 0.00028

Matches : 13/194 fragment ions using 20 most intense peaks [\(help\)](#)

| #  | b           | b <sup>++</sup> | b <sup>*</sup> | b <sup>*++</sup> | b <sup>0</sup> | b <sup>0++</sup> | Seq. | y           | y <sup>++</sup> | y <sup>*</sup> | y <sup>*++</sup> | y <sup>0</sup> | y <sup>0++</sup> | #  |
|----|-------------|-----------------|----------------|------------------|----------------|------------------|------|-------------|-----------------|----------------|------------------|----------------|------------------|----|
| 1  | 129.065854  | 65.036565       | 112.039305     | 56.523291        |                |                  | Q    |             |                 |                |                  |                |                  | 18 |
| 2  | 242.149918  | 121.578597      | 225.123369     | 113.065323       |                |                  | L    | 2447.340052 | 1224.173664     | 2430.313503    | 1215.660389      | 2429.329487    | 1215.168381      | 17 |
| 3  | 343.197597  | 172.102437      | 326.171048     | 163.589162       | 325.187032     | 163.097154       | T    | 2334.255988 | 1167.631632     | 2317.229439    | 1159.118357      | 2316.245423    | 1158.626349      | 16 |
| 4  | 430.229625  | 215.618450      | 413.203076     | 207.105176       | 412.219060     | 206.613168       | S    | 2233.208309 | 1117.107792     | 2216.181760    | 1108.594518      | 2215.197744    | 1108.102510      | 15 |
| 5  | 487.251089  | 244.129182      | 470.224540     | 235.615908       | 469.240524     | 235.123900       | G    | 2146.176281 | 1073.591778     | 2129.149732    | 1065.078504      | 2128.165716    | 1064.586496      | 14 |
| 6  | 584.303853  | 292.655565      | 567.277304     | 284.142290       | 566.293288     | 283.650282       | P    | 2089.154817 | 1045.081046     | 2072.128268    | 1036.567772      | 2071.144252    | 1036.075764      | 13 |
| 7  | 698.346780  | 349.677028      | 681.320231     | 341.163753       | 680.336215     | 340.671745       | N    | 1992.102053 | 996.554665      | 1975.075504    | 988.041390       | 1974.091488    | 987.549382       | 12 |
| 8  | 1137.572106 | 569.289691      | 1120.545557    | 560.776416       | 1119.561541    | 560.284408       | Q    | 1878.059126 | 939.533201      | 1861.032577    | 931.019927       | 1860.048561    | 930.527919       | 11 |
| 9  | 1266.614699 | 633.810988      | 1249.588150    | 625.297713       | 1248.604134    | 624.805705       | E    | 1438.833800 | 719.920538      | 1421.807251    | 711.407264       | 1420.823235    | 710.915256       | 10 |
| 10 | 1705.840025 | 853.423651      | 1688.813476    | 844.910376       | 1687.829460    | 844.418368       | Q    | 1309.791207 | 655.399242      | 1292.764658    | 646.885967       | 1291.780642    | 646.393959       | 9  |
| 11 | 1804.908439 | 902.957858      | 1787.881890    | 894.444583       | 1786.897874    | 893.952575       | V    | 870.565881  | 435.786579      | 853.539332     | 427.273304       | 852.555316     | 426.781296       | 8  |
| 12 | 1891.940467 | 946.473872      | 1874.913918    | 937.960597       | 1873.929902    | 937.468589       | S    | 771.497467  | 386.252372      | 754.470918     | 377.739097       | 753.486902     | 377.247089       | 7  |
| 13 | 1988.993231 | 995.000254      | 1971.966682    | 986.486979       | 1970.982666    | 985.994971       | P    | 684.465439  | 342.736358      | 667.438890     | 334.223083       | 666.454874     | 333.731075       | 6  |
| 14 | 2102.077295 | 1051.542285     | 2085.050746    | 1043.029011      | 2084.066730    | 1042.537003      | L    | 587.412675  | 294.209976      | 570.386126     | 285.696701       | 569.402110     | 285.204693       | 5  |
| 15 | 2203.124974 | 1102.066125     | 2186.098425    | 1093.552850      | 2185.114409    | 1093.060842      | T    | 474.328611  | 237.667944      | 457.302062     | 229.154669       | 456.318046     | 228.662661       | 4  |
| 16 | 2316.209038 | 1158.608157     | 2299.182489    | 1150.094882      | 2298.198473    | 1149.602874      | L    | 373.280932  | 187.144104      | 356.254383     | 178.630830       |                |                  | 3  |
| 17 | 2429.293102 | 1215.150189     | 2412.266553    | 1206.636914      | 2411.282537    | 1206.144906      | L    | 260.196868  | 130.602072      | 243.170319     | 122.088798       |                |                  | 2  |
| 18 |             |                 |                |                  |                |                  | K    | 147.112804  | 74.060040       | 130.086255     | 65.546765        |                |                  | 1  |

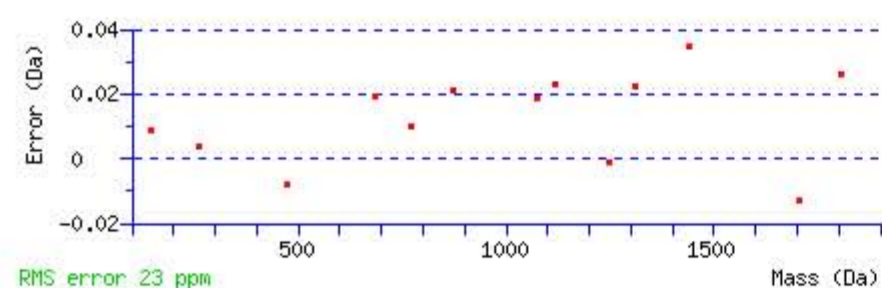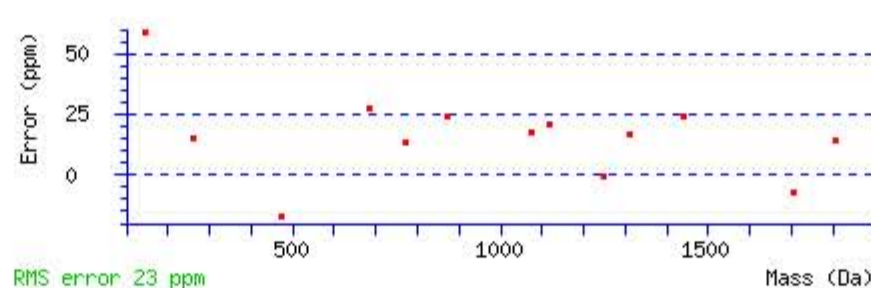

NCBI BLAST search of **QLTSGPNQEQVSPLTLK**

(Parameters: blastp, nr protein database, expect=20000, no filter, PAM30)

Other BLAST [web gateways](#)

All matches to this query

| Score | Mr(calc):   | Delta    | Sequence                          |
|-------|-------------|----------|-----------------------------------|
| 45.9  | 2574.391342 | 0.032240 | <a href="#">QLTSGPNQEQVSPLTLK</a> |
| 45.8  | 2574.391342 | 0.032240 | <a href="#">QLTSGPNQEQVSPLTLK</a> |
| 20.2  | 2574.391342 | 0.032240 | <a href="#">QLTSGPNQEQVSPLTLK</a> |

Mascot: <http://www.matrixscience.com/>



# MASCOT Search Results

## Peptide View

MS/MS Fragmentation of **GFPIKEDFLEQSEQLFGAKPVSLTGK**

Found in **A2AP\_HUMAN**, Alpha-2-antiplasmin OS=Homo sapiens GN=SERPINF2 PE=1 SV=3

Match to Query 73208: 3175.697296 from(794.931600,4+) rtinseconds(2712) index(11496)

Title: Locus:1.1.1.3076.16 File:"2013-07-02 CLN FXIII 60 min 1st F 1.wiff"

Data file C:\Program Files (x86)\Matrix Science\Mascot Daemon\mgf4 FXIII 60 min 1st\mascot\_daemon\_merge.mgf

Click mouse within plot area to zoom in by factor of two about that point

Or, Plot from  to  Da

Label all possible matches  Label matches used for scoring

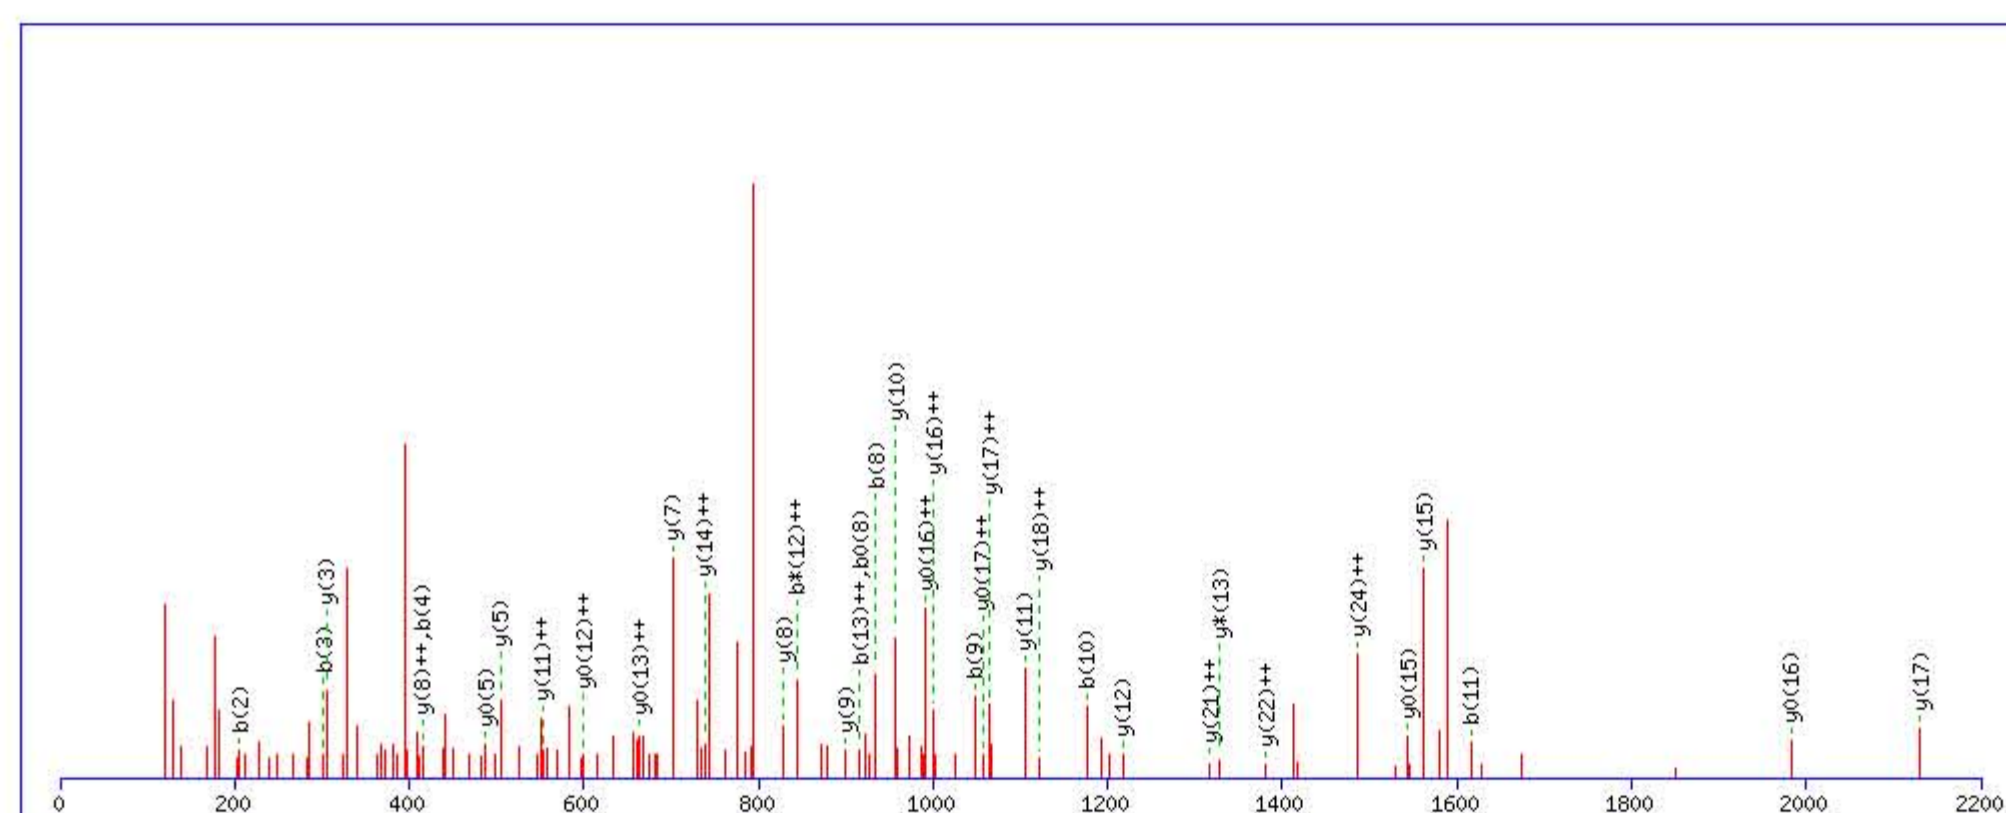

Monoisotopic mass of neutral peptide Mr(calc): 3175.662750

Fixed modifications: Carbamidomethyl (C) (apply to specified residues or termini only)

Variable modifications:

Q11 : Biotin:Thermo-21345 (Q)

Ions Score: 39 Expect: 0.0022

Matches : 37/278 fragment ions using 93 most intense peaks [\(help\)](#)

| #  | b                  | b <sup>++</sup>   | b <sup>*</sup> | b <sup>+++</sup>  | b <sup>0</sup>    | b <sup>0++</sup> | Seq. | y                  | y <sup>++</sup>    | y <sup>*</sup>     | y <sup>+++</sup> | y <sup>0</sup>     | y <sup>0++</sup>   | #  |
|----|--------------------|-------------------|----------------|-------------------|-------------------|------------------|------|--------------------|--------------------|--------------------|------------------|--------------------|--------------------|----|
| 1  | 58.028740          | 29.518008         |                |                   |                   |                  | G    |                    |                    |                    |                  |                    |                    | 26 |
| 2  | <b>205.097154</b>  | 103.052215        |                |                   |                   |                  | F    | 3119.648573        | 1560.327924        | 3102.622024        | 1551.814650      | 3101.638008        | 1551.322642        | 25 |
| 3  | <b>302.149918</b>  | 151.578597        |                |                   |                   |                  | P    | 2972.580159        | <b>1486.793717</b> | 2955.553610        | 1478.280443      | 2954.569594        | 1477.788435        | 24 |
| 4  | <b>415.233982</b>  | 208.120629        |                |                   |                   |                  | I    | 2875.527395        | 1438.267335        | 2858.500846        | 1429.754061      | 2857.516830        | 1429.262053        | 23 |
| 5  | 543.328945         | 272.168111        | 526.302396     | 263.654836        |                   |                  | K    | 2762.443331        | <b>1381.725303</b> | 2745.416782        | 1373.212029      | 2744.432766        | 1372.720021        | 22 |
| 6  | 672.371538         | 336.689407        | 655.344989     | 328.176133        | 654.360973        | 327.684125       | E    | 2634.348368        | <b>1317.677822</b> | 2617.321819        | 1309.164547      | 2616.337803        | 1308.672539        | 21 |
| 7  | 787.398481         | 394.202879        | 770.371932     | 385.689604        | 769.387916        | 385.197596       | D    | 2505.305775        | 1253.156525        | 2488.279226        | 1244.643251      | 2487.295210        | 1244.151243        | 20 |
| 8  | <b>934.466895</b>  | 467.737086        | 917.440346     | 459.223811        | <b>916.456330</b> | 458.731803       | F    | 2390.278832        | 1195.643054        | 2373.252283        | 1187.129779      | 2372.268267        | 1186.637771        | 19 |
| 9  | <b>1047.550959</b> | 524.279117        | 1030.524410    | 515.765843        | 1029.540394       | 515.273835       | L    | 2243.210418        | <b>1122.108847</b> | 2226.183869        | 1113.595572      | 2225.199853        | 1113.103564        | 18 |
| 10 | <b>1176.593552</b> | 588.800414        | 1159.567003    | 580.287140        | 1158.582987       | 579.795132       | E    | <b>2130.126354</b> | <b>1065.566815</b> | 2113.099805        | 1057.053540      | 2112.115789        | <b>1056.561532</b> | 17 |
| 11 | <b>1615.818878</b> | 808.413077        | 1598.792329    | 799.899803        | 1597.808313       | 799.407795       | Q    | 2001.083761        | <b>1001.045519</b> | 1984.057212        | 992.532244       | <b>1983.073196</b> | <b>992.040236</b>  | 16 |
| 12 | 1702.850906        | 851.929091        | 1685.824357    | <b>843.415817</b> | 1684.840341       | 842.923809       | S    | <b>1561.858435</b> | 781.432856         | 1544.831886        | 772.919581       | <b>1543.847870</b> | 772.427573         | 15 |
| 13 | 1831.893499        | <b>916.450388</b> | 1814.866950    | 907.937113        | 1813.882934       | 907.445105       | E    | 1474.826407        | <b>737.916842</b>  | 1457.799858        | 729.403567       | 1456.815842        | 728.911559         | 14 |
| 14 | 1959.952077        | 980.479677        | 1942.925528    | 971.966402        | 1941.941512       | 971.474394       | Q    | 1345.783814        | 673.395545         | <b>1328.757265</b> | 664.882271       | 1327.773249        | <b>664.390263</b>  | 13 |
| 15 | 2073.036141        | 1037.021709       | 2056.009592    | 1028.508434       | 2055.025576       | 1028.016426      | L    | <b>1217.725236</b> | 609.366256         | 1200.698687        | 600.852982       | 1199.714671        | <b>600.360974</b>  | 12 |
| 16 | 2220.104555        | 1110.555916       | 2203.078006    | 1102.042641       | 2202.093990       | 1101.550633      | F    | <b>1104.641172</b> | <b>552.824224</b>  | 1087.614623        | 544.310949       | 1086.630607        | 543.818941         | 11 |
| 17 | 2277.126019        | 1139.066648       | 2260.099470    | 1130.553373       | 2259.115454       | 1130.061365      | G    | <b>957.572758</b>  | 479.290017         | 940.546209         | 470.776743       | 939.562193         | 470.284735         | 10 |
| 18 | 2348.163133        | 1174.585205       | 2331.136584    | 1166.071930       | 2330.152568       | 1165.579922      | A    | <b>900.551294</b>  | 450.779285         | 883.524745         | 442.266011       | 882.540729         | 441.774003         | 9  |
| 19 | 2476.258096        | 1238.632686       | 2459.231547    | 1230.119412       | 2458.247531       | 1229.627404      | K    | <b>829.514180</b>  | <b>415.260728</b>  | 812.487631         | 406.747453       | 811.503615         | 406.255445         | 8  |
| 20 | 2573.310860        | 1287.159068       | 2556.284311    | 1278.645794       | 2555.300295       | 1278.153786      | P    | <b>701.419217</b>  | 351.213246         | 684.392668         | 342.699972       | 683.408652         | 342.207964         | 7  |
| 21 | 2672.379274        | 1336.693275       | 2655.352725    | 1328.180001       | 2654.368709       | 1327.687993      | V    | 604.366453         | 302.686864         | 587.339904         | 294.173590       | 586.355888         | 293.681582         | 6  |
| 22 | 2759.411302        | 1380.209289       | 2742.384753    | 1371.696015       | 2741.400737       | 1371.204007      | S    | <b>505.298039</b>  | 253.152657         | 488.271490         | 244.639383       | <b>487.287474</b>  | 244.147375         | 5  |
| 23 | 2872.495366        | 1436.751321       | 2855.468817    | 1428.238047       | 2854.484801       | 1427.746039      | L    | 418.266011         | 209.636643         | 401.239462         | 201.123369       | 400.255446         | 200.631361         | 4  |
| 24 | 2973.543045        | 1487.275161       | 2956.516496    | 1478.761886       | 2955.532480       | 1478.269878      | T    | <b>305.181947</b>  | 153.094611         | 288.155398         | 144.581337       | 287.171382         | 144.089329         | 3  |
| 25 | 3030.564509        | 1515.785893       | 3013.537960    | 1507.272618       | 3012.553944       | 1506.780610      | G    | 204.134268         | 102.570772         | 187.107719         | 94.057497        |                    |                    | 2  |
| 26 |                    |                   |                |                   |                   |                  | K    | 147.112804         | 74.060040          | 130.086255         | 65.546765        |                    |                    | 1  |

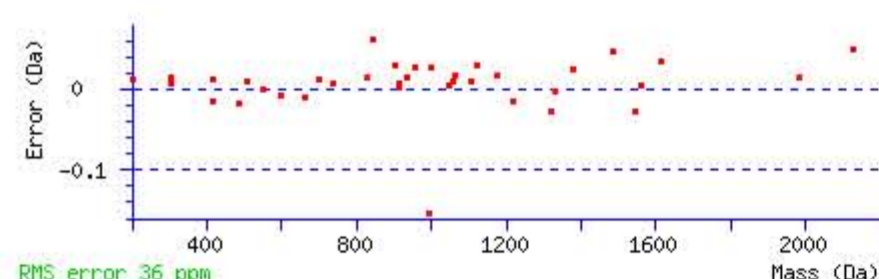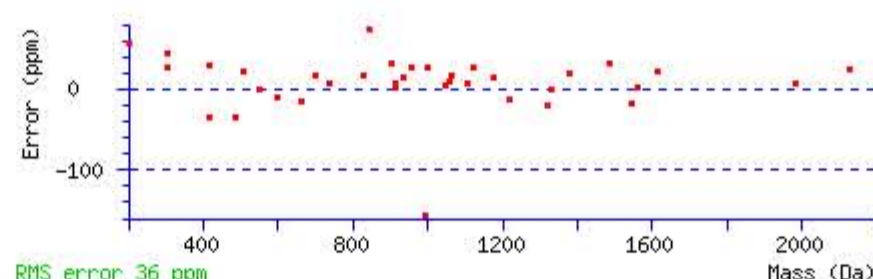

NCBI BLAST search of **GFPIKEDFLEQSEQLFGAKPVSLTGK**

(Parameters: blastp, nr protein database, expect=20000, no filter, PAM30)

Other BLAST [web gateways](#)

All matches to this query

| Score | Mr(calc):   | Delta    | Sequence                                   |
|-------|-------------|----------|--------------------------------------------|
| 39.0  | 3175.662750 | 0.034546 | <a href="#">GFPIKEDFLEQSEQLFGAKPVSLTGK</a> |
| 24.4  | 3175.662750 | 0.034546 | <a href="#">GFPIKEDFLEQSEQLFGAKPVSLTGK</a> |

Mascot: <http://www.matrixscience.com/>



# MASCOT Search Results

## Peptide View

MS/MS Fragmentation of **EHAVEGDCDFQLLK**

Found in **FETUA\_HUMAN**, Alpha-2-HS-glycoprotein OS=Homo sapiens GN=AHSG PE=1 SV=1

Match to Query 52300: 1970.939382 from(657.987070,3+) rtinseconds(2055) index(42474)

Title: Locus:1.1.1.2999.12 File:"2013-07-02 CLN FXIII 60 min 1st F 3.wiff"

Data file C:\Program Files (x86)\Matrix Science\Mascot Daemon\mgf4 FXIII 60 min 1st\mascot\_daemon\_merge.mgf

Click mouse within plot area to zoom in by factor of two about that point

Or, Plot from  to  Da

Label all possible matches  Label matches used for scoring

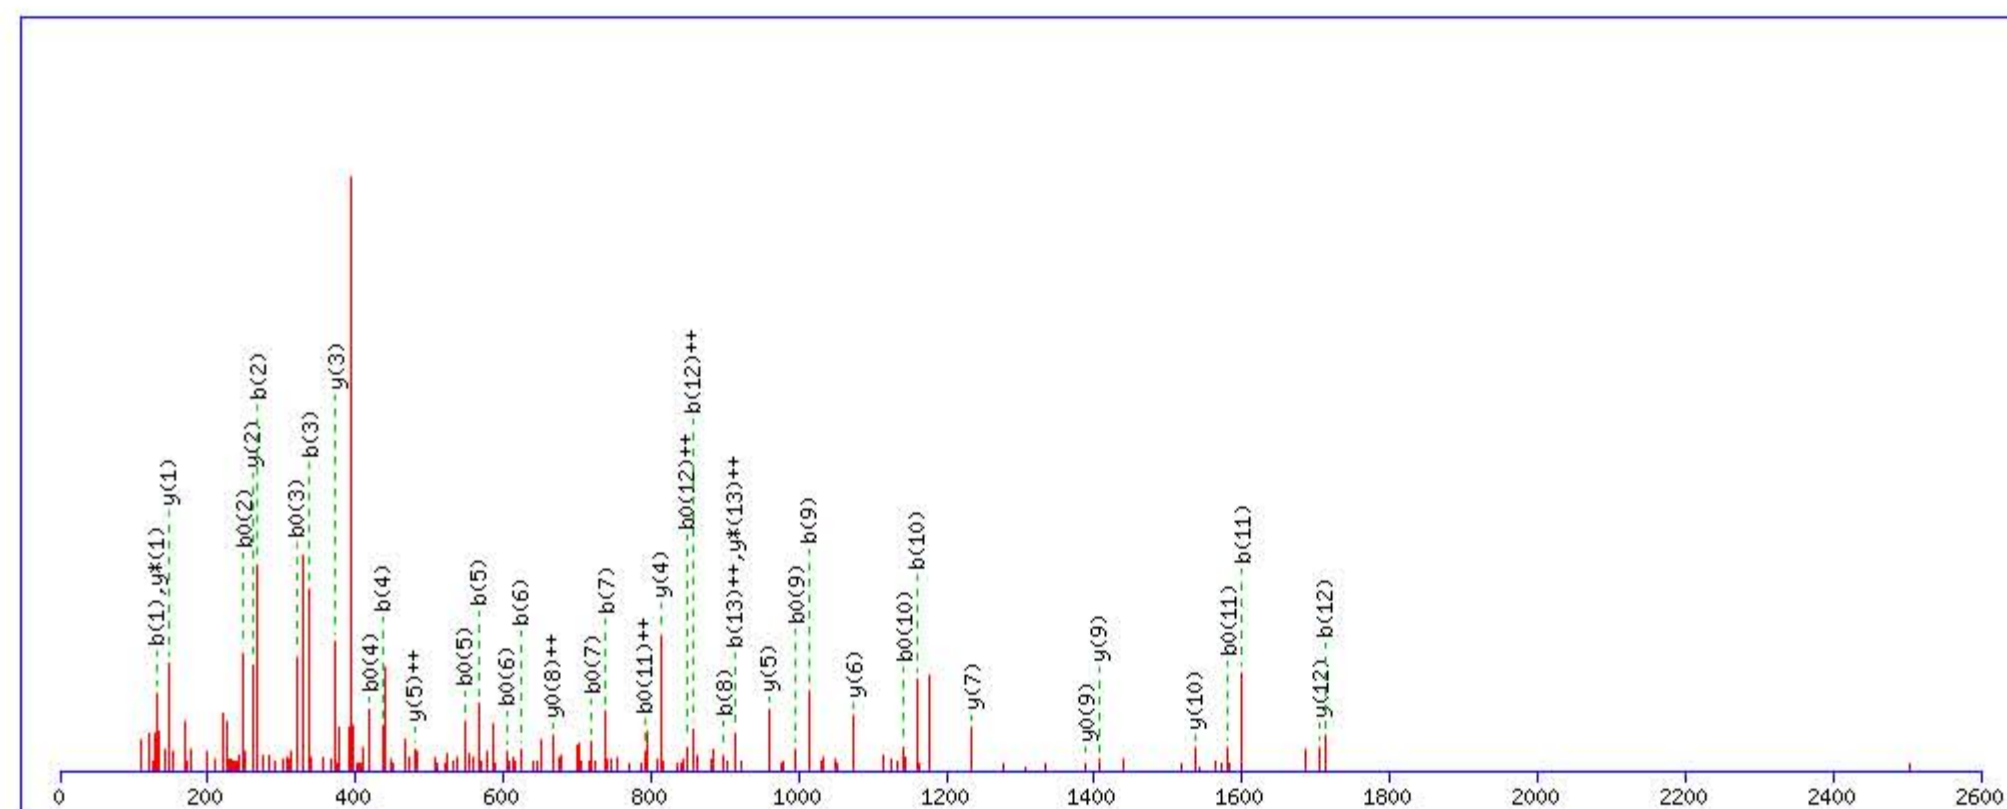

Monoisotopic mass of neutral peptide Mr(calc): 1970.923019

Fixed modifications: Carbamidomethyl (C) (apply to specified residues or termini only)

Variable modifications:

Q11 : Biotin:Thermo-21345 (Q)

Ions Score: 67 Expect: 1.8e-006

Matches : 40/126 fragment ions using 71 most intense peaks [\(help\)](#)

| #  | b           | b <sup>++</sup> | b <sup>*</sup> | b <sup>+++</sup> | b <sup>0</sup> | b <sup>0++</sup> | Seq. | y           | y <sup>++</sup> | y <sup>*</sup> | y <sup>+++</sup> | y <sup>0</sup> | y <sup>0++</sup> | #  |
|----|-------------|-----------------|----------------|------------------|----------------|------------------|------|-------------|-----------------|----------------|------------------|----------------|------------------|----|
| 1  | 130.049869  | 65.528572       |                |                  | 112.039304     | 56.523290        | E    |             |                 |                |                  |                |                  | 14 |
| 2  | 267.108781  | 134.058028      |                |                  | 249.098216     | 125.052746       | H    | 1842.887704 | 921.947490      | 1825.861155    | 913.434216       | 1824.877139    | 912.942207       | 13 |
| 3  | 338.145895  | 169.576585      |                |                  | 320.135330     | 160.571303       | A    | 1705.828792 | 853.418034      | 1688.802243    | 844.904760       | 1687.818227    | 844.412752       | 12 |
| 4  | 437.214309  | 219.110792      |                |                  | 419.203744     | 210.105510       | V    | 1634.791678 | 817.899477      | 1617.765129    | 809.386203       | 1616.781113    | 808.894195       | 11 |
| 5  | 566.256902  | 283.632089      |                |                  | 548.246337     | 274.626807       | E    | 1535.723264 | 768.365270      | 1518.696715    | 759.851996       | 1517.712699    | 759.359988       | 10 |
| 6  | 623.278366  | 312.142821      |                |                  | 605.267801     | 303.137539       | G    | 1406.680671 | 703.843974      | 1389.654122    | 695.330699       | 1388.670106    | 694.838691       | 9  |
| 7  | 738.305309  | 369.656293      |                |                  | 720.294744     | 360.651010       | D    | 1349.659207 | 675.333241      | 1332.632658    | 666.819967       | 1331.648642    | 666.327959       | 8  |
| 8  | 898.335958  | 449.671617      |                |                  | 880.325393     | 440.666335       | C    | 1234.632264 | 617.819770      | 1217.605715    | 609.306496       | 1216.621699    | 608.814488       | 7  |
| 9  | 1013.362901 | 507.185089      |                |                  | 995.352336     | 498.179806       | D    | 1074.601615 | 537.804446      | 1057.575066    | 529.291171       | 1056.591050    | 528.799163       | 6  |
| 10 | 1160.431315 | 580.719296      |                |                  | 1142.420750    | 571.714013       | F    | 959.574672  | 480.290974      | 942.548123     | 471.777700       |                |                  | 5  |
| 11 | 1599.656641 | 800.331959      | 1582.630092    | 791.818684       | 1581.646076    | 791.326676       | Q    | 812.506258  | 406.756767      | 795.479709     | 398.243493       |                |                  | 4  |
| 12 | 1712.740705 | 856.873991      | 1695.714156    | 848.360716       | 1694.730140    | 847.868708       | L    | 373.280932  | 187.144104      | 356.254383     | 178.630829       |                |                  | 3  |
| 13 | 1825.824769 | 913.416023      | 1808.798220    | 904.902748       | 1807.814204    | 904.410740       | L    | 260.196868  | 130.602072      | 243.170319     | 122.088797       |                |                  | 2  |
| 14 |             |                 |                |                  |                |                  | K    | 147.112804  | 74.060040       | 130.086255     | 65.546765        |                |                  | 1  |

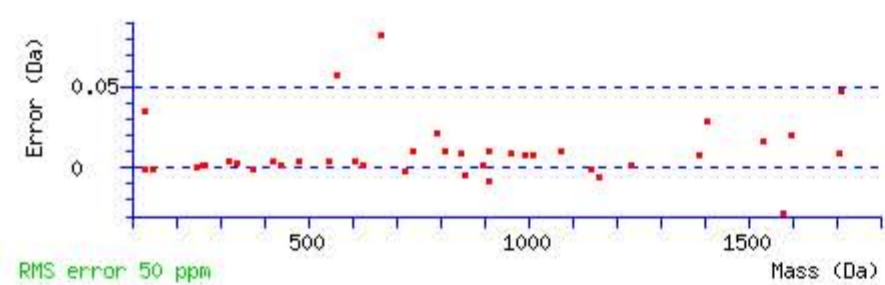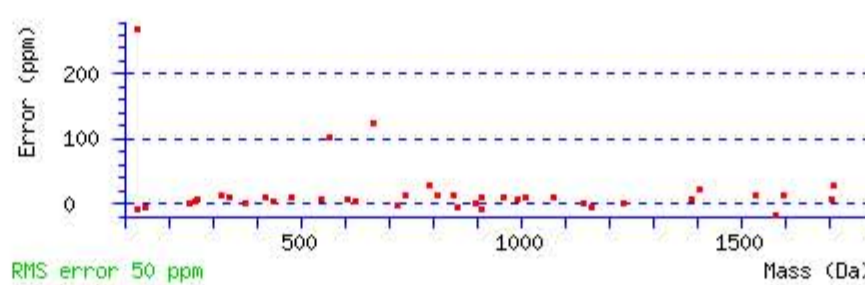

NCBI BLAST search of [EHAVEGDCDFQLLK](#)

(Parameters: blastp, nr protein database, expect=20000, no filter, PAM30)

Other BLAST [web gateways](#)

All matches to this query

| Score | Mr(calc):   | Delta     | Sequence                           |
|-------|-------------|-----------|------------------------------------|
| 66.5  | 1970.923019 | 0.016363  | <a href="#">EHAVEGDCDFQLLK</a>     |
| 5.0   | 1970.965729 | -0.026347 | <a href="#">EAINGQREDTGDQQGLLK</a> |
| 3.3   | 1970.959381 | -0.019999 | <a href="#">NEEKPVQMMFKQSTFK</a>   |
| 2.7   | 1970.959396 | -0.020014 | <a href="#">DVQSAMDRYTAFLK</a>     |
| 1.3   | 1970.963882 | -0.024500 | <a href="#">EHWLYPQQITTNQWK</a>    |



# MASCOT Search Results

## Peptide View

MS/MS Fragmentation of **VTAAPQSVCALR**

Found in **A2MG\_HUMAN**, Alpha-2-macroglobulin OS=Homo sapiens GN=A2M PE=1 SV=3

Match to Query 41197: 1582.841188 from(792.427870,2+) rtinseconds(1814) index(40818)

Title: Locus:1.1.1.2915.14 File:"2013-07-02 CLN FXIII 60 min 1st F 3.wiff"

Data file C:\Program Files (x86)\Matrix Science\Mascot Daemon\mgf\4 FXIII 60 min 1st\mascot\_daemon\_merge.mgf

Click mouse within plot area to zoom in by factor of two about that point

Or, Plot from  to  Da

Label all possible matches  Label matches used for scoring

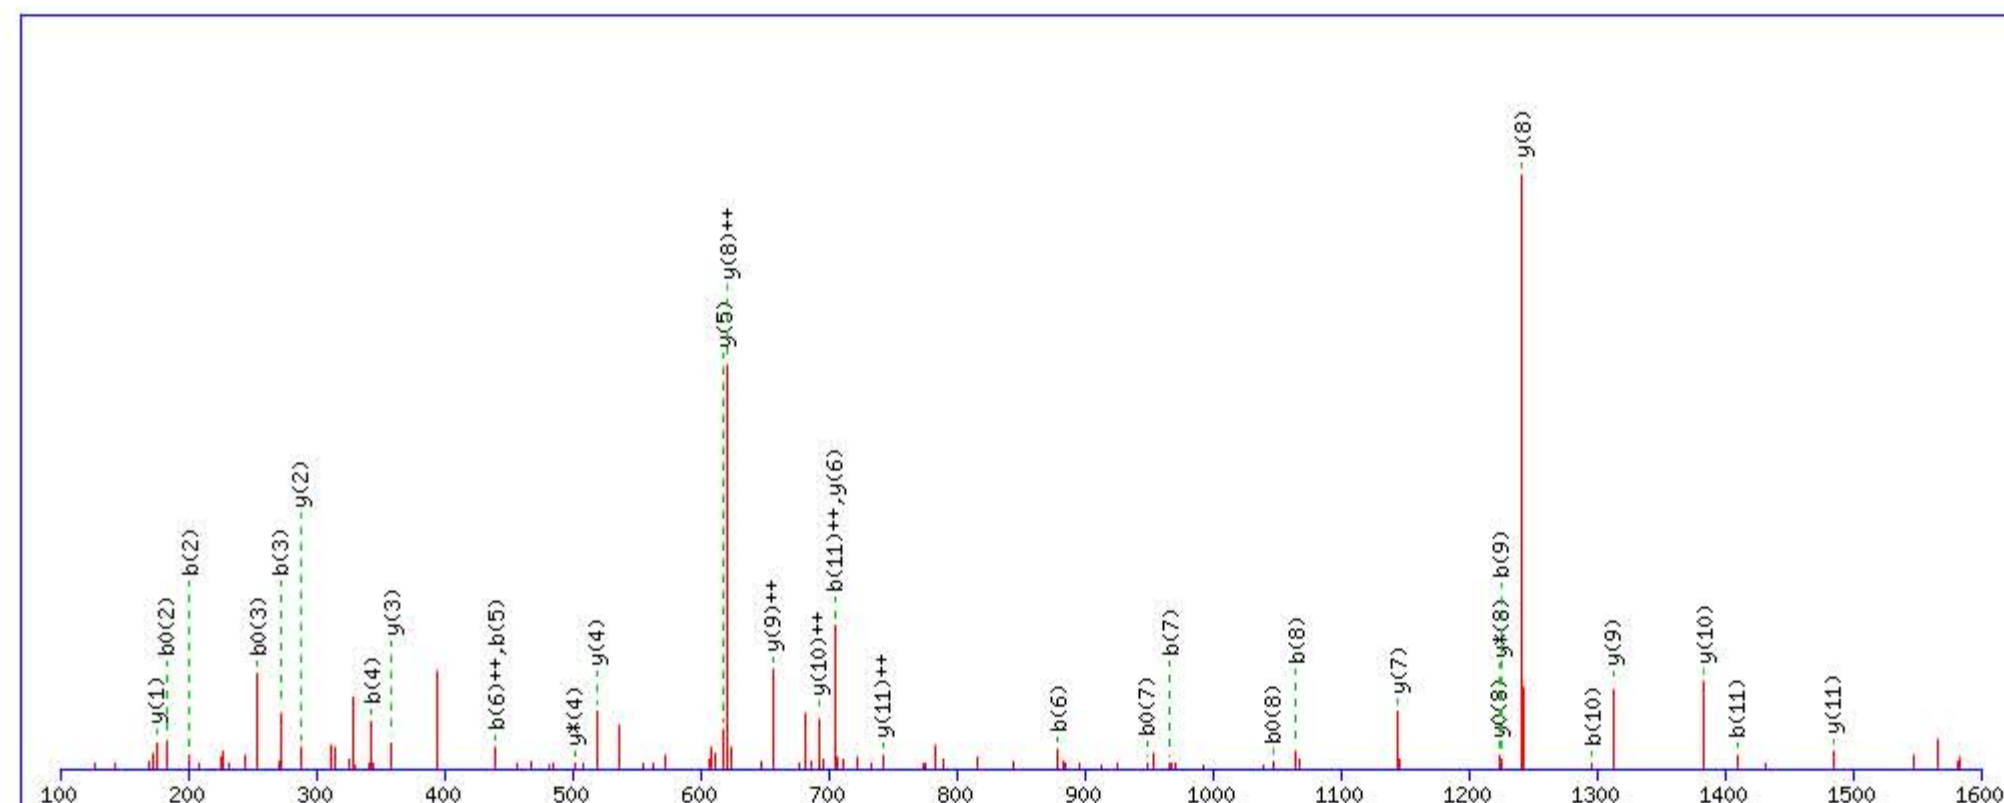

Monoisotopic mass of neutral peptide  $M_r(\text{calc})$ : 1582.832352

Fixed modifications: Carbamidomethyl (C) (apply to specified residues or termini only)

Variable modifications:

Q6 : Biotin:Thermo-21345 (Q)

Ions Score: 68 Expect: 2.7e-006

Matches : 34/110 fragment ions using 66 most intense peaks [\(help\)](#)

| #  | b           | b <sup>++</sup> | b <sup>*</sup> | b <sup>+++</sup> | b <sup>0</sup> | b <sup>0++</sup> | Seq. | y           | y <sup>++</sup> | y <sup>*</sup> | y <sup>+++</sup> | y <sup>0</sup> | y <sup>0++</sup> | #  |
|----|-------------|-----------------|----------------|------------------|----------------|------------------|------|-------------|-----------------|----------------|------------------|----------------|------------------|----|
| 1  | 100.075690  | 50.541483       |                |                  |                |                  | V    |             |                 |                |                  |                |                  | 12 |
| 2  | 201.123369  | 101.065322      |                |                  | 183.112804     | 92.060040        | T    | 1484.771218 | 742.889247      | 1467.744669    | 734.375972       | 1466.760653    | 733.883964       | 11 |
| 3  | 272.160483  | 136.583879      |                |                  | 254.149918     | 127.578597       | A    | 1383.723539 | 692.365407      | 1366.696990    | 683.852133       | 1365.712974    | 683.360125       | 10 |
| 4  | 343.197597  | 172.102437      |                |                  | 325.187032     | 163.097154       | A    | 1312.686425 | 656.846850      | 1295.659876    | 648.333576       | 1294.675860    | 647.841568       | 9  |
| 5  | 440.250361  | 220.628819      |                |                  | 422.239796     | 211.623536       | P    | 1241.649311 | 621.328293      | 1224.622762    | 612.815019       | 1223.638746    | 612.323011       | 8  |
| 6  | 879.475687  | 440.241482      | 862.449138     | 431.728207       | 861.465122     | 431.236199       | Q    | 1144.596547 | 572.801911      | 1127.569998    | 564.288637       | 1126.585982    | 563.796629       | 7  |
| 7  | 966.507715  | 483.757496      | 949.481166     | 475.244221       | 948.497150     | 474.752213       | S    | 705.371221  | 353.189248      | 688.344672     | 344.675974       | 687.360656     | 344.183966       | 6  |
| 8  | 1065.576129 | 533.291703      | 1048.549580    | 524.778428       | 1047.565564    | 524.286420       | V    | 618.339193  | 309.673234      | 601.312644     | 301.159960       |                |                  | 5  |
| 9  | 1225.606778 | 613.307027      | 1208.580229    | 604.793753       | 1207.596213    | 604.301745       | C    | 519.270779  | 260.139028      | 502.244230     | 251.625753       |                |                  | 4  |
| 10 | 1296.643892 | 648.825584      | 1279.617343    | 640.312310       | 1278.633327    | 639.820302       | A    | 359.240130  | 180.123703      | 342.213581     | 171.610428       |                |                  | 3  |
| 11 | 1409.727956 | 705.367616      | 1392.701407    | 696.854342       | 1391.717391    | 696.362333       | L    | 288.203016  | 144.605146      | 271.176467     | 136.091871       |                |                  | 2  |
| 12 |             |                 |                |                  |                |                  | R    | 175.118952  | 88.063114       | 158.092403     | 79.549839        |                |                  | 1  |

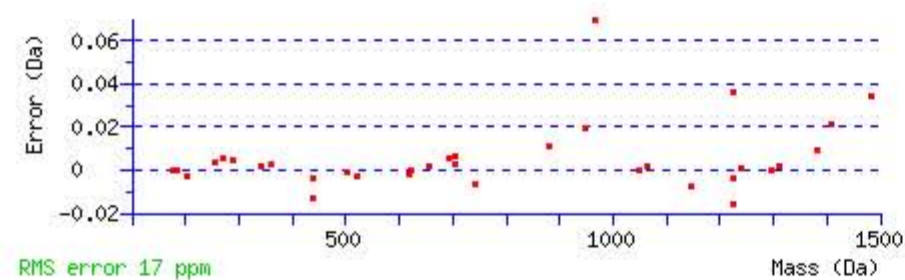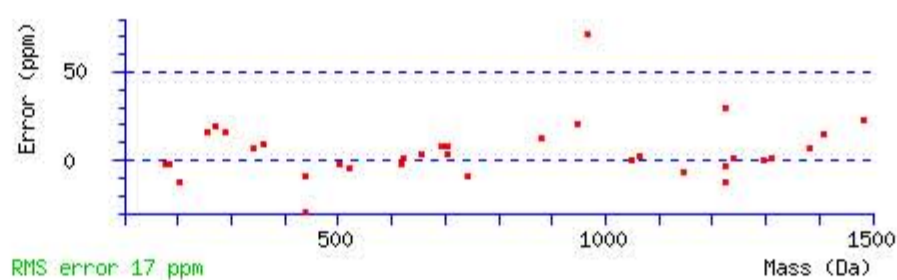

NCBI BLAST search of **VTAAPQSVCALR**

(Parameters: blastp, nr protein database, expect=20000, no filter, PAM30)

Other BLAST [web gateways](#)

All matches to this query

| Score | $M_r(\text{calc})$ : | Delta     | Sequence                         |
|-------|----------------------|-----------|----------------------------------|
| 68.0  | 1582.832352          | 0.008836  | <a href="#">VTAAPQSVCALR</a>     |
| 8.1   | 1582.844040          | -0.002852 | <a href="#">APRHGPARDPGLPSR</a>  |
| 3.3   | 1582.821564          | 0.019624  | <a href="#">LSKAVATWHANTER</a>   |
| 2.9   | 1582.836868          | 0.004320  | <a href="#">LHTVDGHWWAPVPR</a>   |
| 2.3   | 1582.846756          | -0.005568 | <a href="#">VTEVWTL PQVAGQR</a>  |
| 1.9   | 1582.850067          | -0.008879 | <a href="#">AEQEASLQKLR</a>      |
| 1.2   | 1582.853912          | -0.012724 | <a href="#">RPRDDAQISEKLR</a>    |
| 1.1   | 1582.817535          | 0.023653  | <a href="#">KTLSEETRQHQAR</a>    |
| 1.0   | 1582.853912          | -0.012724 | <a href="#">RKPASGGLAASSAPAR</a> |
| 0.7   | 1582.831451          | 0.009737  | <a href="#">SAKELVEQDIQPAR</a>   |



# MASCOT Search Results

## Peptide View

MS/MS Fragmentation of **FSGQLNSHGCFYQQVK**

Found in **A2MG\_HUMAN**, Alpha-2-macroglobulin OS=Homo sapiens GN=A2M PE=1 SV=3

Match to Query 58315: 2210.056422 from(737.692750,3+) rtinseconds(1845) index(40970)

Title: Locus:1.1.1.2926.18 File:"2013-07-02 CLN FXIII 60 min 1st F 3.wiff"

Data file C:\Program Files (x86)\Matrix Science\Mascot Daemon\mgf4 FXIII 60 min 1st\mascot\_daemon\_merge.mgf

Click mouse within plot area to zoom in by factor of two about that point

Or, Plot from  to  Da

Label all possible matches  Label matches used for scoring

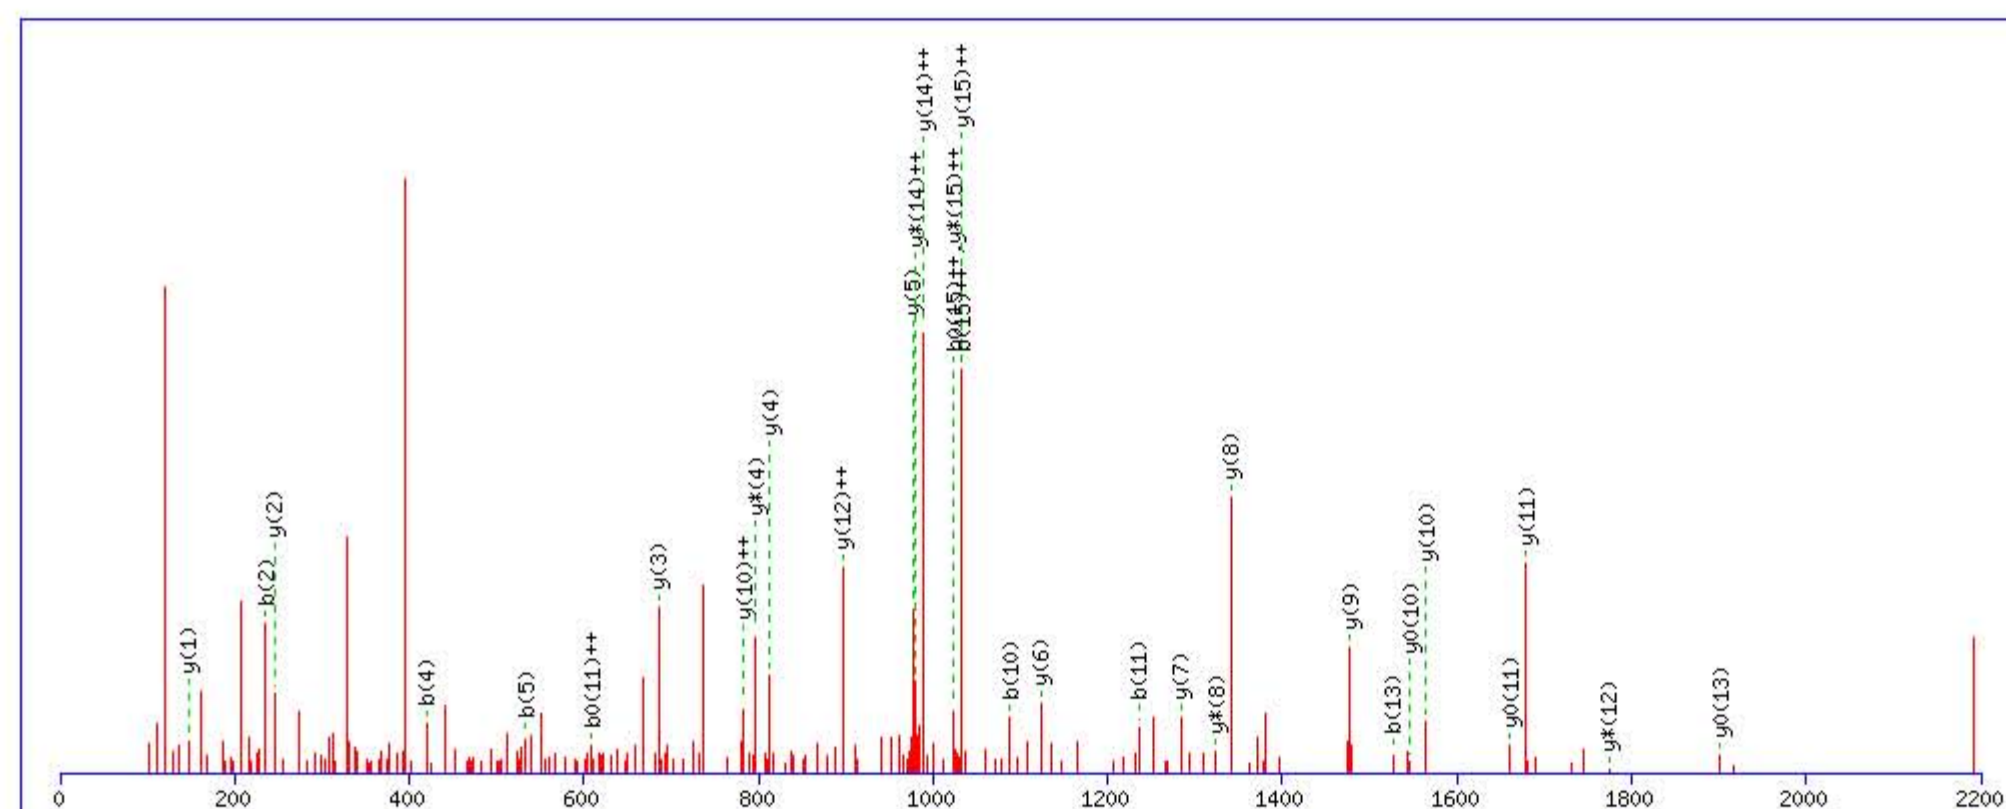

Monoisotopic mass of neutral peptide Mr(calc): 2210.040131

Fixed modifications: Carbamidomethyl (C) (apply to specified residues or termini only)

Variable modifications:

Q14 : Biotin:Thermo-21345 (Q)

Ions Score: 46 Expect: 0.00015

Matches : 32/154 fragment ions using 70 most intense peaks [\(help\)](#)

| #  | b                  | b <sup>++</sup>    | b <sup>*</sup> | b <sup>*++</sup> | b <sup>0</sup> | b <sup>0++</sup>   | Seq. | y                  | y <sup>++</sup>    | y <sup>*</sup>     | y <sup>*++</sup>   | y <sup>0</sup>     | y <sup>0++</sup> | #  |
|----|--------------------|--------------------|----------------|------------------|----------------|--------------------|------|--------------------|--------------------|--------------------|--------------------|--------------------|------------------|----|
| 1  | 148.075690         | 74.541483          |                |                  |                |                    | F    |                    |                    |                    |                    |                    |                  | 16 |
| 2  | <b>235.107718</b>  | 118.057497         |                |                  | 217.097153     | 109.052214         | S    | 2063.978979        | <b>1032.493127</b> | 2046.952430        | <b>1023.979853</b> | 2045.968414        | 1023.487845      | 15 |
| 3  | 292.129182         | 146.568229         |                |                  | 274.118617     | 137.562946         | G    | 1976.946951        | <b>988.977114</b>  | 1959.920402        | <b>980.463839</b>  | 1958.936386        | 979.971831       | 14 |
| 4  | <b>420.187760</b>  | 210.597518         | 403.161211     | 202.084243       | 402.177195     | 201.592235         | Q    | 1919.925487        | 960.466382         | 1902.898938        | 951.953107         | <b>1901.914922</b> | 951.461099       | 13 |
| 5  | <b>533.271824</b>  | 267.139550         | 516.245275     | 258.626276       | 515.261259     | 258.134268         | L    | 1791.866909        | <b>896.437093</b>  | <b>1774.840360</b> | 887.923818         | 1773.856344        | 887.431810       | 12 |
| 6  | 647.314751         | 324.161014         | 630.288202     | 315.647739       | 629.304186     | 315.155731         | N    | <b>1678.782845</b> | 839.895061         | 1661.756296        | 831.381786         | <b>1660.772280</b> | 830.889778       | 11 |
| 7  | 734.346779         | 367.677028         | 717.320230     | 359.163753       | 716.336214     | 358.671745         | S    | <b>1564.739918</b> | <b>782.873597</b>  | 1547.713369        | 774.360323         | <b>1546.729353</b> | 773.868315       | 10 |
| 8  | 871.405691         | 436.206483         | 854.379142     | 427.693209       | 853.395126     | 427.201201         | H    | <b>1477.707890</b> | 739.357583         | 1460.681341        | 730.844309         |                    |                  | 9  |
| 9  | 928.427155         | 464.717216         | 911.400606     | 456.203941       | 910.416590     | 455.711933         | G    | <b>1340.648978</b> | 670.828127         | <b>1323.622429</b> | 662.314853         |                    |                  | 8  |
| 10 | <b>1088.457804</b> | 544.732540         | 1071.431255    | 536.219266       | 1070.447239    | 535.727257         | C    | <b>1283.627514</b> | 642.317395         | 1266.600965        | 633.804121         |                    |                  | 7  |
| 11 | <b>1235.526218</b> | 618.266747         | 1218.499669    | 609.753473       | 1217.515653    | 609.261464         | F    | <b>1123.596865</b> | 562.302071         | 1106.570316        | 553.788796         |                    |                  | 6  |
| 12 | 1398.589547        | 699.798412         | 1381.562998    | 691.285137       | 1380.578982    | 690.793129         | Y    | <b>976.528451</b>  | 488.767864         | 959.501902         | 480.254589         |                    |                  | 5  |
| 13 | <b>1526.648125</b> | 763.827700         | 1509.621576    | 755.314426       | 1508.637560    | 754.822418         | Q    | <b>813.465122</b>  | 407.236199         | <b>796.438573</b>  | 398.722925         |                    |                  | 4  |
| 14 | 1965.873451        | 983.440364         | 1948.846902    | 974.927089       | 1947.862886    | 974.435081         | Q    | <b>685.406544</b>  | 343.206910         | 668.379995         | 334.693636         |                    |                  | 3  |
| 15 | 2064.941865        | <b>1032.974570</b> | 2047.915316    | 1024.461296      | 2046.931300    | <b>1023.969288</b> | V    | <b>246.181218</b>  | 123.594247         | 229.154669         | 115.080972         |                    |                  | 2  |
| 16 |                    |                    |                |                  |                |                    | K    | <b>147.112804</b>  | 74.060040          | 130.086255         | 65.546765          |                    |                  | 1  |

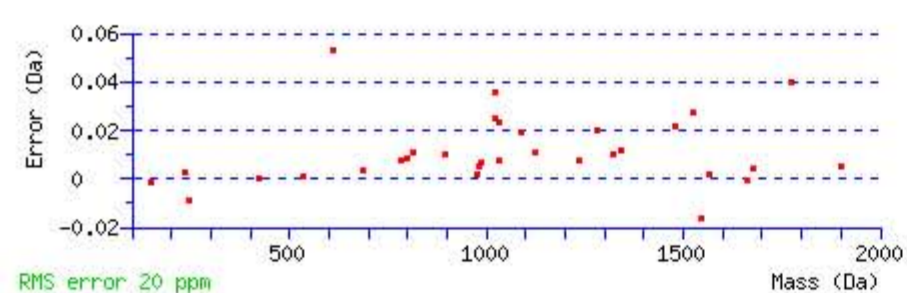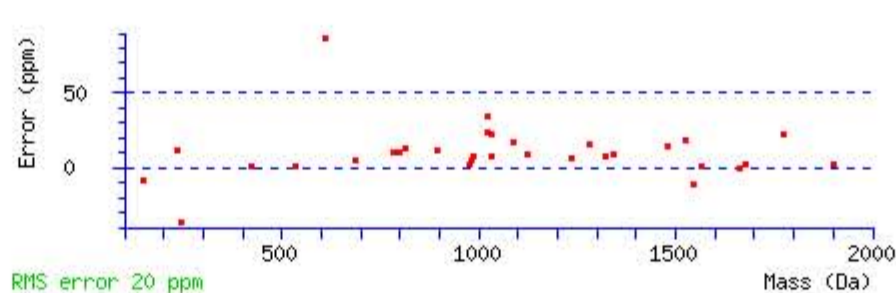

NCBI BLAST search of **FSGQLNSHGCFYQQVK**

(Parameters: blastp, nr protein database, expect=20000, no filter, PAM30)

Other BLAST [web gateways](#)

All matches to this query

| Score | Mr(calc):   | Delta     | Sequence                         |
|-------|-------------|-----------|----------------------------------|
| 46.2  | 2210.040131 | 0.016291  | <a href="#">FSGQLNSHGCFYQQVK</a> |
| 36.2  | 2210.040131 | 0.016291  | <a href="#">FSGQLNSHGCFYQQVK</a> |
| 5.3   | 2210.058075 | -0.001653 | <a href="#">FSHLSRNMTMQRTMK</a>  |
| 3.0   | 2210.058075 | -0.001653 | <a href="#">FSHLSRNMTMQRTMK</a>  |
| 1.9   | 2210.045486 | 0.010936  | <a href="#">MSMKEVDEQMLAIQSK</a> |



# MASCOT Search Results

## Peptide View

MS/MS Fragmentation of **LLLQQVSLPELPGEYSMK**

Found in **A2MG\_HUMAN**, Alpha-2-macroglobulin OS=Homo sapiens GN=A2M PE=1 SV=3

Match to Query 61731: 2355.283872 from(786.101900,3+) rtinseconds(2826) index(47538)

Title: Locus:1.1.1.3266.13 File:"2013-07-02 CLN FXIII 60 min 1st F 3.wiff"

Data file C:\Program Files (x86)\Matrix Science\Mascot Daemon\mgf\4 FXIII 60 min 1st\mascot\_daemon\_merge.mgf

Click mouse within plot area to zoom in by factor of two about that point

Or, Plot from  to  Da

Label all possible matches  Label matches used for scoring

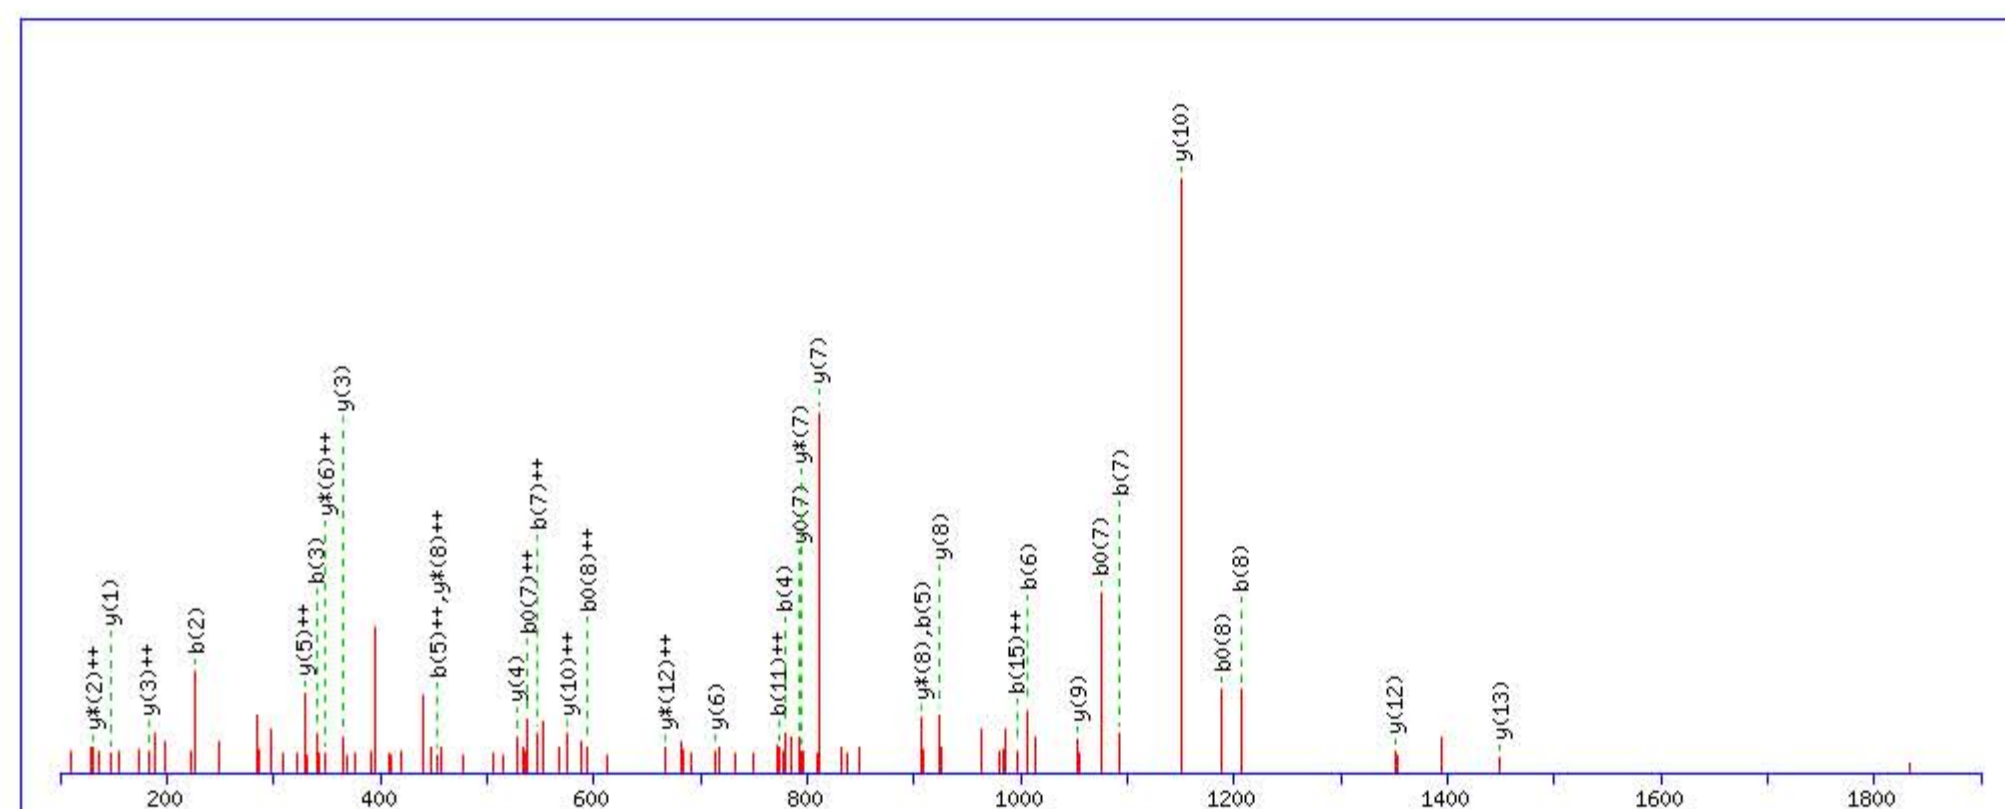

Monoisotopic mass of neutral peptide Mr(calc): 2355.258179

Fixed modifications: Carbamidomethyl (C) (apply to specified residues or termini only)

Variable modifications:

Q4 : Biotin:Thermo-21345 (Q)

Ions Score: 34 Expect: 0.00064

Matches : 35/182 fragment ions using 94 most intense peaks [\(help\)](#)

| #  | b                  | b <sup>++</sup>   | b <sup>+</sup> | b <sup>+++</sup> | b <sup>0</sup>     | b <sup>0++</sup>  | Seq. | y                  | y <sup>++</sup>   | y <sup>+</sup>    | y <sup>+++</sup>  | y <sup>0</sup>    | y <sup>0++</sup> | #  |
|----|--------------------|-------------------|----------------|------------------|--------------------|-------------------|------|--------------------|-------------------|-------------------|-------------------|-------------------|------------------|----|
| 1  | 114.091340         | 57.549308         |                |                  |                    |                   | L    |                    |                   |                   |                   |                   |                  | 18 |
| 2  | <b>227.175404</b>  | 114.091340        |                |                  |                    |                   | L    | 2243.181426        | 1122.094351       | 2226.154877       | 1113.581076       | 2225.170861       | 1113.089068      | 17 |
| 3  | <b>340.259468</b>  | 170.633372        |                |                  |                    |                   | L    | 2130.097362        | 1065.552319       | 2113.070813       | 1057.039044       | 2112.086797       | 1056.547036      | 16 |
| 4  | <b>779.484794</b>  | 390.246035        | 762.458245     | 381.732760       |                    |                   | Q    | 2017.013298        | 1009.010287       | 1999.986749       | 1000.497013       | 1999.002733       | 1000.005005      | 15 |
| 5  | <b>907.543372</b>  | <b>454.275324</b> | 890.516823     | 445.762049       |                    |                   | Q    | 1577.787972        | 789.397624        | 1560.761423       | 780.884350        | 1559.777407       | 780.392342       | 14 |
| 6  | <b>1006.611786</b> | 503.809531        | 989.585237     | 495.296256       |                    |                   | V    | <b>1449.729394</b> | 725.368335        | 1432.702845       | 716.855061        | 1431.718829       | 716.363053       | 13 |
| 7  | <b>1093.643814</b> | <b>547.325545</b> | 1076.617265    | 538.812271       | <b>1075.633249</b> | <b>538.320263</b> | S    | <b>1350.660980</b> | 675.834128        | 1333.634431       | <b>667.320854</b> | 1332.650415       | 666.828846       | 12 |
| 8  | <b>1206.727878</b> | 603.867577        | 1189.701329    | 595.354303       | <b>1188.717313</b> | <b>594.862294</b> | L    | 1263.628952        | 632.318114        | 1246.602403       | 623.804840        | 1245.618387       | 623.312832       | 11 |
| 9  | 1303.780642        | 652.393959        | 1286.754093    | 643.880685       | 1285.770077        | 643.388676        | P    | <b>1150.544888</b> | <b>575.776082</b> | 1133.518339       | 567.262808        | 1132.534323       | 566.770800       | 10 |
| 10 | 1432.823235        | 716.915256        | 1415.796686    | 708.401981       | 1414.812670        | 707.909973        | E    | <b>1053.492124</b> | 527.249700        | 1036.465575       | 518.736426        | 1035.481559       | 518.244418       | 9  |
| 11 | 1545.907299        | <b>773.457288</b> | 1528.880750    | 764.944013       | 1527.896734        | 764.452005        | L    | <b>924.449531</b>  | 462.728404        | <b>907.422982</b> | <b>454.215129</b> | 906.438966        | 453.723121       | 8  |
| 12 | 1642.960063        | 821.983670        | 1625.933514    | 813.470395       | 1624.949498        | 812.978387        | P    | <b>811.365467</b>  | 406.186372        | <b>794.338918</b> | 397.673097        | <b>793.354902</b> | 397.181089       | 7  |
| 13 | 1699.981527        | 850.494401        | 1682.954978    | 841.981127       | 1681.970962        | 841.489119        | G    | <b>714.312703</b>  | 357.659990        | 697.286154        | <b>349.146715</b> | 696.302138        | 348.654707       | 6  |
| 14 | 1829.024120        | 915.015698        | 1811.997571    | 906.502423       | 1811.013555        | 906.010415        | E    | 657.291239         | <b>329.149258</b> | 640.264690        | 320.635983        | 639.280674        | 320.143975       | 5  |
| 15 | 1992.087449        | <b>996.547362</b> | 1975.060900    | 988.034088       | 1974.076884        | 987.542080        | Y    | <b>528.248646</b>  | 264.627961        | 511.222097        | 256.114687        | 510.238081        | 255.622679       | 4  |
| 16 | 2079.119477        | 1040.063376       | 2062.092928    | 1031.550102      | 2061.108912        | 1031.058094       | S    | <b>365.185317</b>  | <b>183.096297</b> | 348.158768        | 174.583022        | 347.174752        | 174.091014       | 3  |
| 17 | 2210.159962        | 1105.583619       | 2193.133413    | 1097.070344      | 2192.149397        | 1096.578336       | M    | 278.153289         | 139.580282        | 261.126740        | <b>131.067008</b> |                   |                  | 2  |
| 18 |                    |                   |                |                  |                    |                   | K    | <b>147.112804</b>  | 74.060040         | 130.086255        | 65.546765         |                   |                  | 1  |

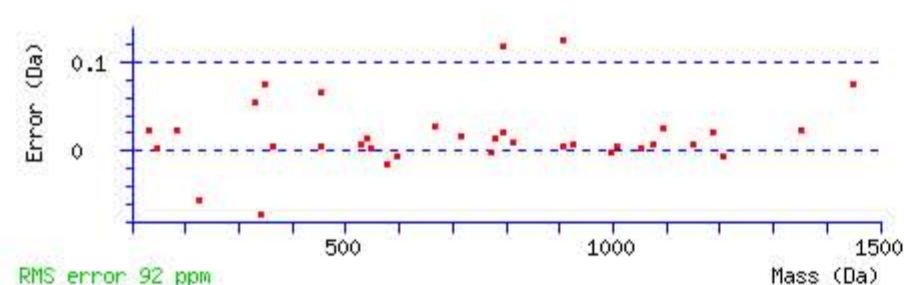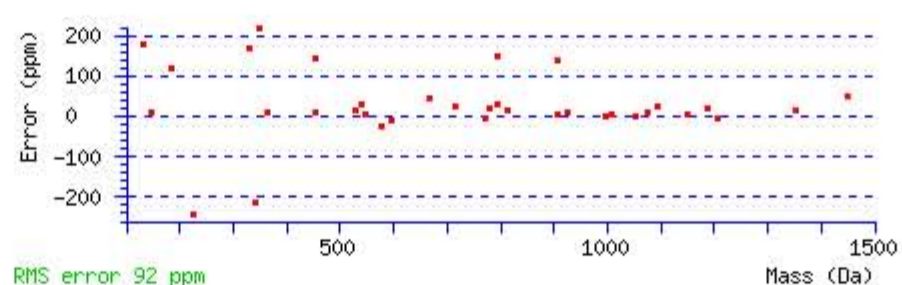

NCBI BLAST search of [LLLQQVSLPELPGEYSMK](#)

(Parameters: blastp, nr protein database, expect=20000, no filter, PAM30)

Other BLAST [web gateways](#)

## All matches to this query

| Score | Mr(calc):   | Delta    | Sequence                             |
|-------|-------------|----------|--------------------------------------|
| 34.4  | 2355.258179 | 0.025693 | <a href="#">LLLQQVSLPELPGEYSMK</a>   |
| 29.3  | 2355.258179 | 0.025693 | <a href="#">LLLQQVSLPELPGEYSMK</a>   |
| 0.3   | 2355.273926 | 0.009946 | <a href="#">LGLYTFVNLANFVKSWTNLR</a> |

Mascot: <http://www.matrixscience.com/>



**Peptide View**

MS/MS Fragmentation of **MCPQLQQYEMHGPEGLR**  
 Found in **A2MG\_HUMAN**, Alpha-2-macroglobulin OS=Homo sapiens GN=A2M PE=1 SV=3

Match to Query 62368: 2400.087792 from(801.036540,3+) rtinseconds(1923) index(41606)  
 Title: Locus:1.1.1.2953.23 File:"2013-07-02 CLN FXIII 60 min 1st F 3.wiff"  
 Data file C:\Program Files (x86)\Matrix Science\Mascot Daemon\mgf4 FXIII 60 min 1st\mascot\_daemon\_merge.mgf

Click mouse within plot area to zoom in by factor of two about that point  
 Or, Plot from  to  Da   
 Label all possible matches  Label matches used for scoring

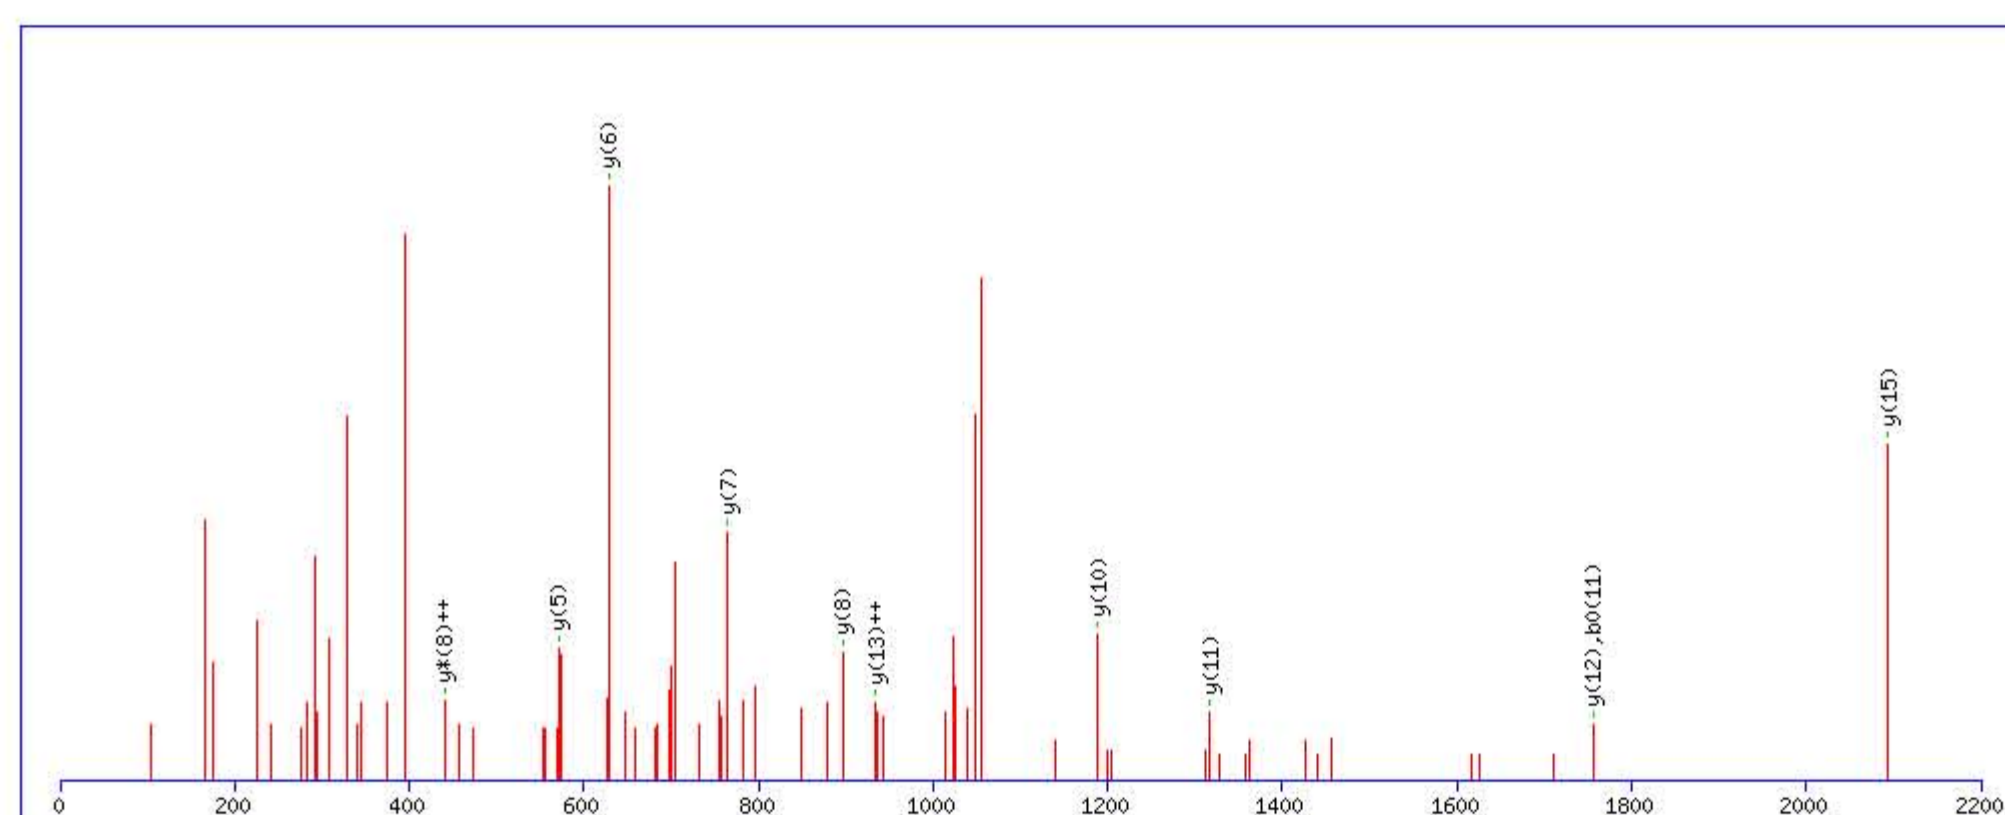

Monoisotopic mass of neutral peptide Mr(calc): 2400.084686  
 Fixed modifications: Carbamidomethyl (C) (apply to specified residues or termini only)  
 Variable modifications:  
 M1 : Oxidation (M), with neutral losses 0.000000 (shown in table), 63.998285  
 Q6 : Biotin:Thermo-21345 (Q)  
 Ions Score: 44 Expect: 0.00036  
 Matches : 11/238 fragment ions using 16 most intense peaks [\(help\)](#)

| #  | b           | b <sup>++</sup> | b <sup>*</sup> | b <sup>*++</sup> | b <sup>0</sup>     | b <sup>0++</sup> | Seq. | y                  | y <sup>++</sup>   | y <sup>*</sup> | y <sup>*++</sup>  | y <sup>0</sup> | y <sup>0++</sup> | #  |
|----|-------------|-----------------|----------------|------------------|--------------------|------------------|------|--------------------|-------------------|----------------|-------------------|----------------|------------------|----|
| 1  | 148.042676  | 74.524976       |                |                  |                    |                  | M    |                    |                   |                |                   |                |                  | 17 |
| 2  | 308.073325  | 154.540301      |                |                  |                    |                  | C    | 2254.056579        | 1127.531927       | 2237.030030    | 1119.018653       | 2236.046014    | 1118.526645      | 16 |
| 3  | 405.126089  | 203.066683      |                |                  |                    |                  | P    | <b>2094.025930</b> | 1047.516603       | 2076.999381    | 1039.003328       | 2076.015365    | 1038.511320      | 15 |
| 4  | 533.184667  | 267.095972      | 516.158118     | 258.582697       |                    |                  | Q    | 1996.973166        | 998.990221        | 1979.946617    | 990.476947        | 1978.962601    | 989.984939       | 14 |
| 5  | 646.268731  | 323.638004      | 629.242182     | 315.124729       |                    |                  | L    | 1868.914588        | <b>934.960932</b> | 1851.888039    | 926.447658        | 1850.904023    | 925.955650       | 13 |
| 6  | 1085.494057 | 543.250667      | 1068.467508    | 534.737392       |                    |                  | Q    | <b>1755.830524</b> | 878.418900        | 1738.803975    | 869.905626        | 1737.819959    | 869.413618       | 12 |
| 7  | 1213.552635 | 607.279956      | 1196.526086    | 598.766681       |                    |                  | Q    | <b>1316.605198</b> | 658.806237        | 1299.578649    | 650.292963        | 1298.594633    | 649.800955       | 11 |
| 8  | 1376.615964 | 688.811620      | 1359.589415    | 680.298346       |                    |                  | Y    | <b>1188.546620</b> | 594.776948        | 1171.520071    | 586.263674        | 1170.536055    | 585.771666       | 10 |
| 9  | 1505.658557 | 753.332917      | 1488.632008    | 744.819642       | 1487.647992        | 744.327634       | E    | 1025.483291        | 513.245284        | 1008.456742    | 504.732009        | 1007.472726    | 504.240001       | 9  |
| 10 | 1636.699042 | 818.853159      | 1619.672493    | 810.339885       | 1618.688477        | 809.847877       | M    | <b>896.440698</b>  | 448.723987        | 879.414149     | <b>440.210713</b> | 878.430133     | 439.718705       | 8  |
| 11 | 1773.757954 | 887.382615      | 1756.731405    | 878.869341       | <b>1755.747389</b> | 878.377333       | H    | <b>765.400213</b>  | 383.203745        | 748.373664     | 374.690470        | 747.389648     | 374.198462       | 7  |
| 12 | 1830.779418 | 915.893347      | 1813.752869    | 907.380073       | 1812.768853        | 906.888065       | G    | <b>628.341301</b>  | 314.674289        | 611.314752     | 306.161014        | 610.330736     | 305.669006       | 6  |
| 13 | 1927.832182 | 964.419729      | 1910.805633    | 955.906455       | 1909.821617        | 955.414447       | P    | <b>571.319837</b>  | 286.163557        | 554.293288     | 277.650282        | 553.309272     | 277.158274       | 5  |
| 14 | 2056.874775 | 1028.941026     | 2039.848226    | 1020.427751      | 2038.864210        | 1019.935743      | E    | 474.267073         | 237.637175        | 457.240524     | 229.123900        | 456.256508     | 228.631892       | 4  |
| 15 | 2113.896239 | 1057.451758     | 2096.869690    | 1048.938483      | 2095.885674        | 1048.446475      | G    | 345.224480         | 173.115878        | 328.197931     | 164.602603        |                |                  | 3  |
| 16 | 2226.980303 | 1113.993790     | 2209.953754    | 1105.480515      | 2208.969738        | 1104.988507      | L    | 288.203016         | 144.605146        | 271.176467     | 136.091872        |                |                  | 2  |
| 17 |             |                 |                |                  |                    |                  | R    | 175.118952         | 88.063114         | 158.092403     | 79.549839         |                |                  | 1  |

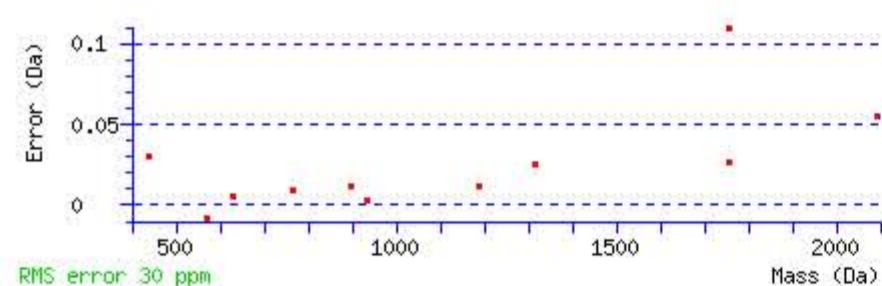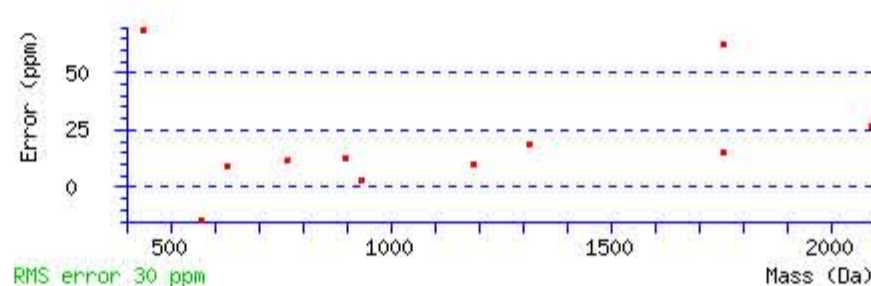

NCBI BLAST search of **MCPQLQQYEMHGPEGLR**  
 (Parameters: blastp, nr protein database, expect=20000, no filter, PAM30)  
 Other BLAST [web gateways](#)

**All matches to this query**

| Score | Mr(calc):   | Delta    | Sequence                          |
|-------|-------------|----------|-----------------------------------|
| 44.5  | 2400.084686 | 0.003106 | <a href="#">MCPQLQQYEMHGPEGLR</a> |
| 32.9  | 2400.084686 | 0.003106 | <a href="#">MCPQLQQYEMHGPEGLR</a> |
| 32.7  | 2400.084686 | 0.003106 | <a href="#">MCPQLQQYEMHGPEGLR</a> |
| 13.5  | 2400.084686 | 0.003106 | <a href="#">MCPQLQQYEMHGPEGLR</a> |
| 10.4  | 2400.084686 | 0.003106 | <a href="#">MCPQLQQYEMHGPEGLR</a> |
| 10.4  | 2400.084686 | 0.003106 | <a href="#">MCPQLQQYEMHGPEGLR</a> |



# MASCOT Search Results

## Peptide View

MS/MS Fragmentation of **MCPQLQQYEMHGPEGLR**

Found in **A2MG\_HUMAN**, Alpha-2-macroglobulin OS=Homo sapiens GN=A2M PE=1 SV=3

Match to Query 62372: 2400.095022 from(801.038950,3+) rtinseconds(1967) index(41940)

Title: Locus:1.1.1.2968.20 File:"2013-07-02 CLN FXIII 60 min 1st F 3.wiff"

Data file C:\Program Files (x86)\Matrix Science\Mascot Daemon\mgf4 FXIII 60 min 1st\mascot\_daemon\_merge.mgf

Click mouse within plot area to zoom in by factor of two about that point

Or, Plot from  to  Da

Label all possible matches  Label matches used for scoring

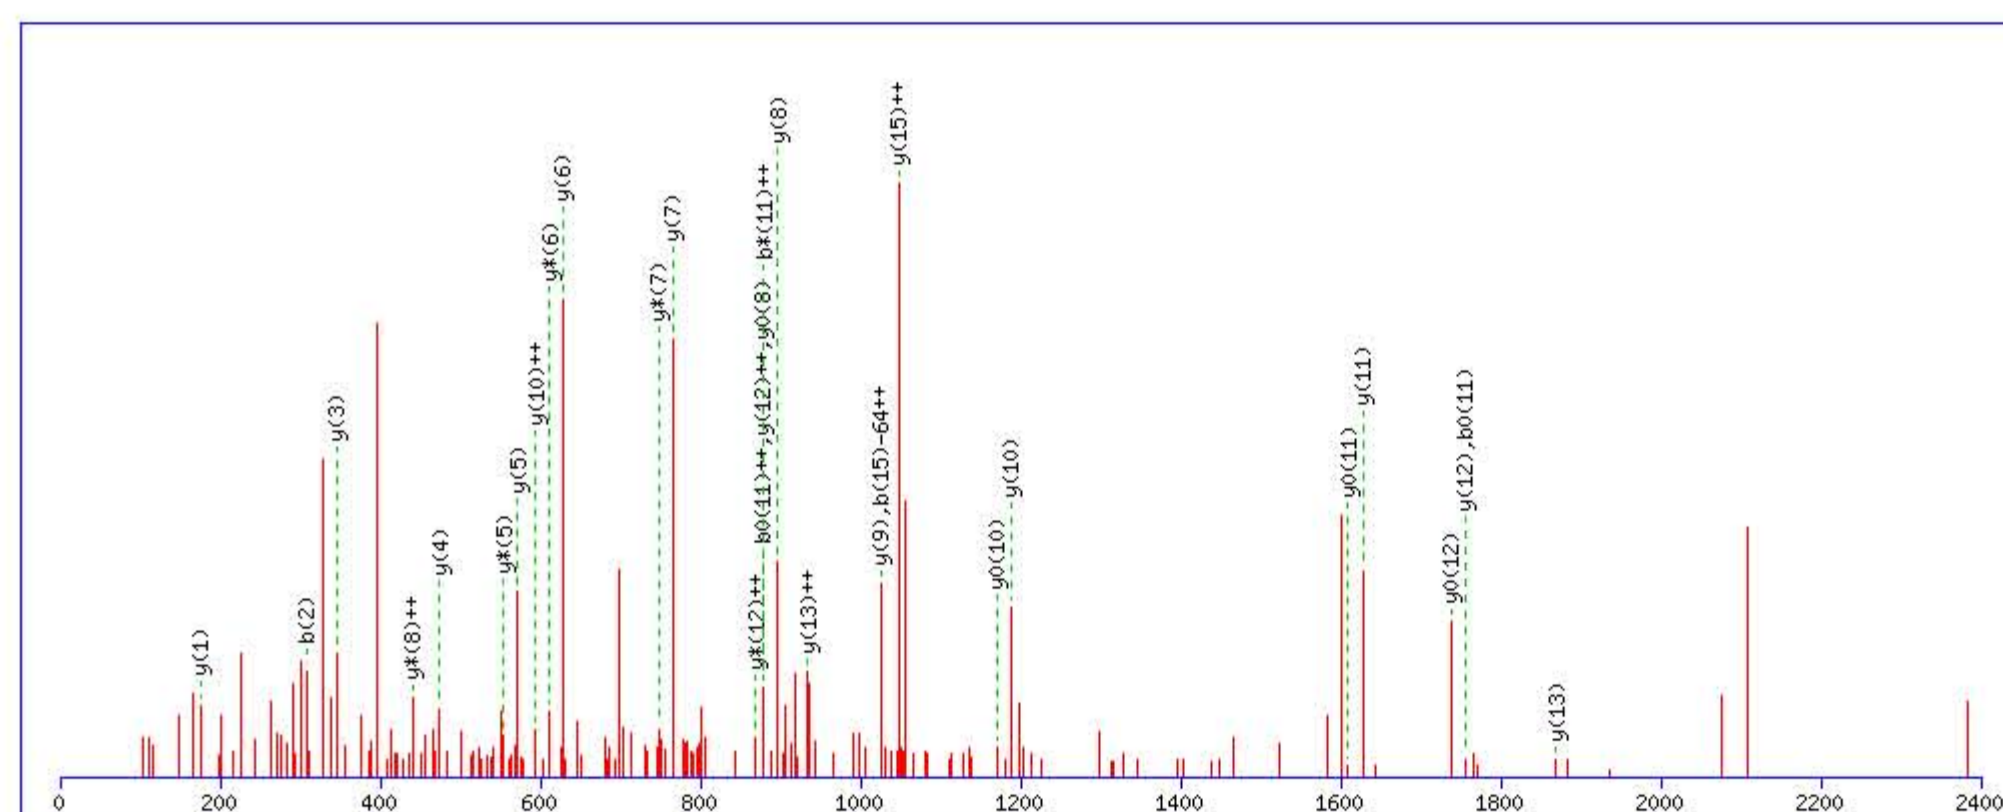

Monoisotopic mass of neutral peptide Mr(calc): 2400.084686

Fixed modifications: Carbamidomethyl (C) (apply to specified residues or termini only)

Variable modifications:

M1 : Oxidation (M), with neutral losses 0.000000 (shown in table), 63.998285

Q7 : Biotin:Thermo-21345 (Q)

Ions Score: 41 Expect: 0.00093

Matches : 30/238 fragment ions using 75 most intense peaks [\(help\)](#)

| #  | b                 | b <sup>++</sup> | b <sup>*</sup> | b <sup>*++</sup>  | b <sup>0</sup>     | b <sup>0++</sup>  | Seq. | y                  | y <sup>++</sup>    | y <sup>*</sup>    | y <sup>*++</sup>  | y <sup>0</sup>     | y <sup>0++</sup> | #  |
|----|-------------------|-----------------|----------------|-------------------|--------------------|-------------------|------|--------------------|--------------------|-------------------|-------------------|--------------------|------------------|----|
| 1  | 148.042676        | 74.524976       |                |                   |                    |                   | M    |                    |                    |                   |                   |                    |                  | 17 |
| 2  | <b>308.073325</b> | 154.540301      |                |                   |                    |                   | C    | 2254.056579        | 1127.531927        | 2237.030030       | 1119.018653       | 2236.046014        | 1118.526645      | 16 |
| 3  | 405.126089        | 203.066683      |                |                   |                    |                   | P    | 2094.025930        | <b>1047.516603</b> | 2076.999381       | 1039.003328       | 2076.015365        | 1038.511320      | 15 |
| 4  | 533.184667        | 267.095972      | 516.158118     | 258.582697        |                    |                   | Q    | 1996.973166        | 998.990221         | 1979.946617       | 990.476947        | 1978.962601        | 989.984939       | 14 |
| 5  | 646.268731        | 323.638004      | 629.242182     | 315.124729        |                    |                   | L    | <b>1868.914588</b> | <b>934.960932</b>  | 1851.888039       | 926.447658        | 1850.904023        | 925.955650       | 13 |
| 6  | 774.327309        | 387.667293      | 757.300760     | 379.154018        |                    |                   | Q    | <b>1755.830524</b> | <b>878.418900</b>  | 1738.803975       | <b>869.905626</b> | <b>1737.819959</b> | 869.413618       | 12 |
| 7  | 1213.552635       | 607.279956      | 1196.526086    | 598.766681        |                    |                   | Q    | <b>1627.771946</b> | 814.389611         | 1610.745397       | 805.876337        | <b>1609.761381</b> | 805.384329       | 11 |
| 8  | 1376.615964       | 688.811620      | 1359.589415    | 680.298346        |                    |                   | Y    | <b>1188.546620</b> | <b>594.776948</b>  | 1171.520071       | 586.263674        | <b>1170.536055</b> | 585.771666       | 10 |
| 9  | 1505.658557       | 753.332917      | 1488.632008    | 744.819642        | 1487.647992        | 744.327634        | E    | <b>1025.483291</b> | 513.245284         | 1008.456742       | 504.732009        | 1007.472726        | 504.240001       | 9  |
| 10 | 1636.699042       | 818.853159      | 1619.672493    | 810.339885        | 1618.688477        | 809.847877        | M    | <b>896.440698</b>  | 448.723987         | 879.414149        | <b>440.210713</b> | <b>878.430133</b>  | 439.718705       | 8  |
| 11 | 1773.757954       | 887.382615      | 1756.731405    | <b>878.869341</b> | <b>1755.747389</b> | <b>878.377333</b> | H    | <b>765.400213</b>  | 383.203745         | <b>748.373664</b> | 374.690470        | 747.389648         | 374.198462       | 7  |
| 12 | 1830.779418       | 915.893347      | 1813.752869    | 907.380073        | 1812.768853        | 906.888065        | G    | <b>628.341301</b>  | 314.674289         | <b>611.314752</b> | 306.161014        | 610.330736         | 305.669006       | 6  |
| 13 | 1927.832182       | 964.419729      | 1910.805633    | 955.906455        | 1909.821617        | 955.414447        | P    | <b>571.319837</b>  | 286.163557         | <b>554.293288</b> | 277.650282        | 553.309272         | 277.158274       | 5  |
| 14 | 2056.874775       | 1028.941026     | 2039.848226    | 1020.427751       | 2038.864210        | 1019.935743       | E    | <b>474.267073</b>  | 237.637175         | 457.240524        | 229.123900        | 456.256508         | 228.631892       | 4  |
| 15 | 2113.896239       | 1057.451758     | 2096.869690    | 1048.938483       | 2095.885674        | 1048.446475       | G    | <b>345.224480</b>  | 173.115878         | 328.197931        | 164.602603        |                    |                  | 3  |
| 16 | 2226.980303       | 1113.993790     | 2209.953754    | 1105.480515       | 2208.969738        | 1104.988507       | L    | 288.203016         | 144.605146         | 271.176467        | 136.091872        |                    |                  | 2  |
| 17 |                   |                 |                |                   |                    |                   | R    | <b>175.118952</b>  | 88.063114          | 158.092403        | 79.549839         |                    |                  | 1  |

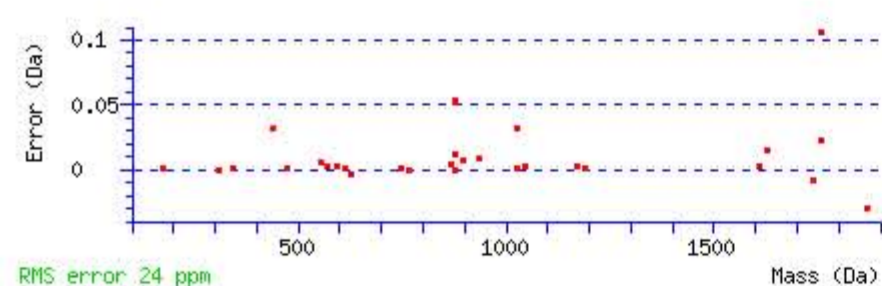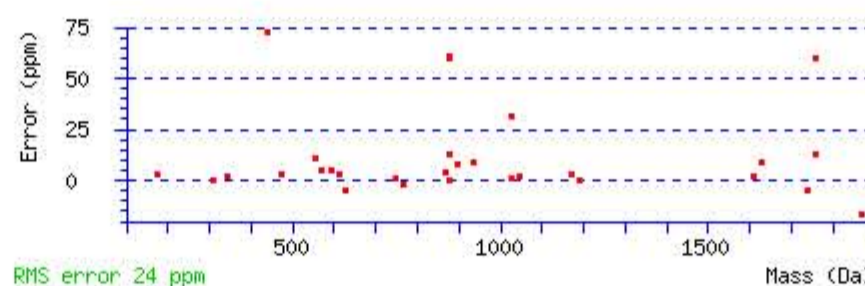

NCBI BLAST search of **MCPQLQQYEMHGPEGLR**

(Parameters: blastp, nr protein database, expect=20000, no filter, PAM30)

Other BLAST [web gateways](#)

## All matches to this query

| Score | Mr(calc):   | Delta    | Sequence                          |
|-------|-------------|----------|-----------------------------------|
| 40.9  | 2400.084686 | 0.010336 | <a href="#">MCPQLQQYEMHGPEGLR</a> |
| 36.6  | 2400.084686 | 0.010336 | <a href="#">MCPQLQQYEMHGPEGLR</a> |
| 17.7  | 2400.084686 | 0.010336 | <a href="#">MCPQLQQYEMHGPEGLR</a> |
| 12.6  | 2400.084686 | 0.010336 | <a href="#">MCPQLQQYEMHGPEGLR</a> |
| 11.7  | 2400.084686 | 0.010336 | <a href="#">MCPQLQQYEMHGPEGLR</a> |
| 7.2   | 2400.084686 | 0.010336 | <a href="#">MCPQLQQYEMHGPEGLR</a> |



# MASCOT Search Results

## Peptide View

MS/MS Fragmentation of **KYSDASDCHGEDSQAFCEK**  
 Found in **A2MG\_HUMAN**, Alpha-2-macroglobulin OS=Homo sapiens GN=A2M PE=1 SV=3

Match to Query 66032: 2544.041456 from(637.017640,4+) rtinseconds(1410) index(38175)  
 Title: Locus:1.1.1.2774.25 File:"2013-07-02 CLN FXIII 60 min 1st F 3.wiff"  
 Data file C:\Program Files (x86)\Matrix Science\Mascot Daemon\mgf4 FXIII 60 min 1st\mascot\_daemon\_merge.mgf

Click mouse within plot area to zoom in by factor of two about that point  
 Or, Plot from  to  Da   
 Label all possible matches  Label matches used for scoring

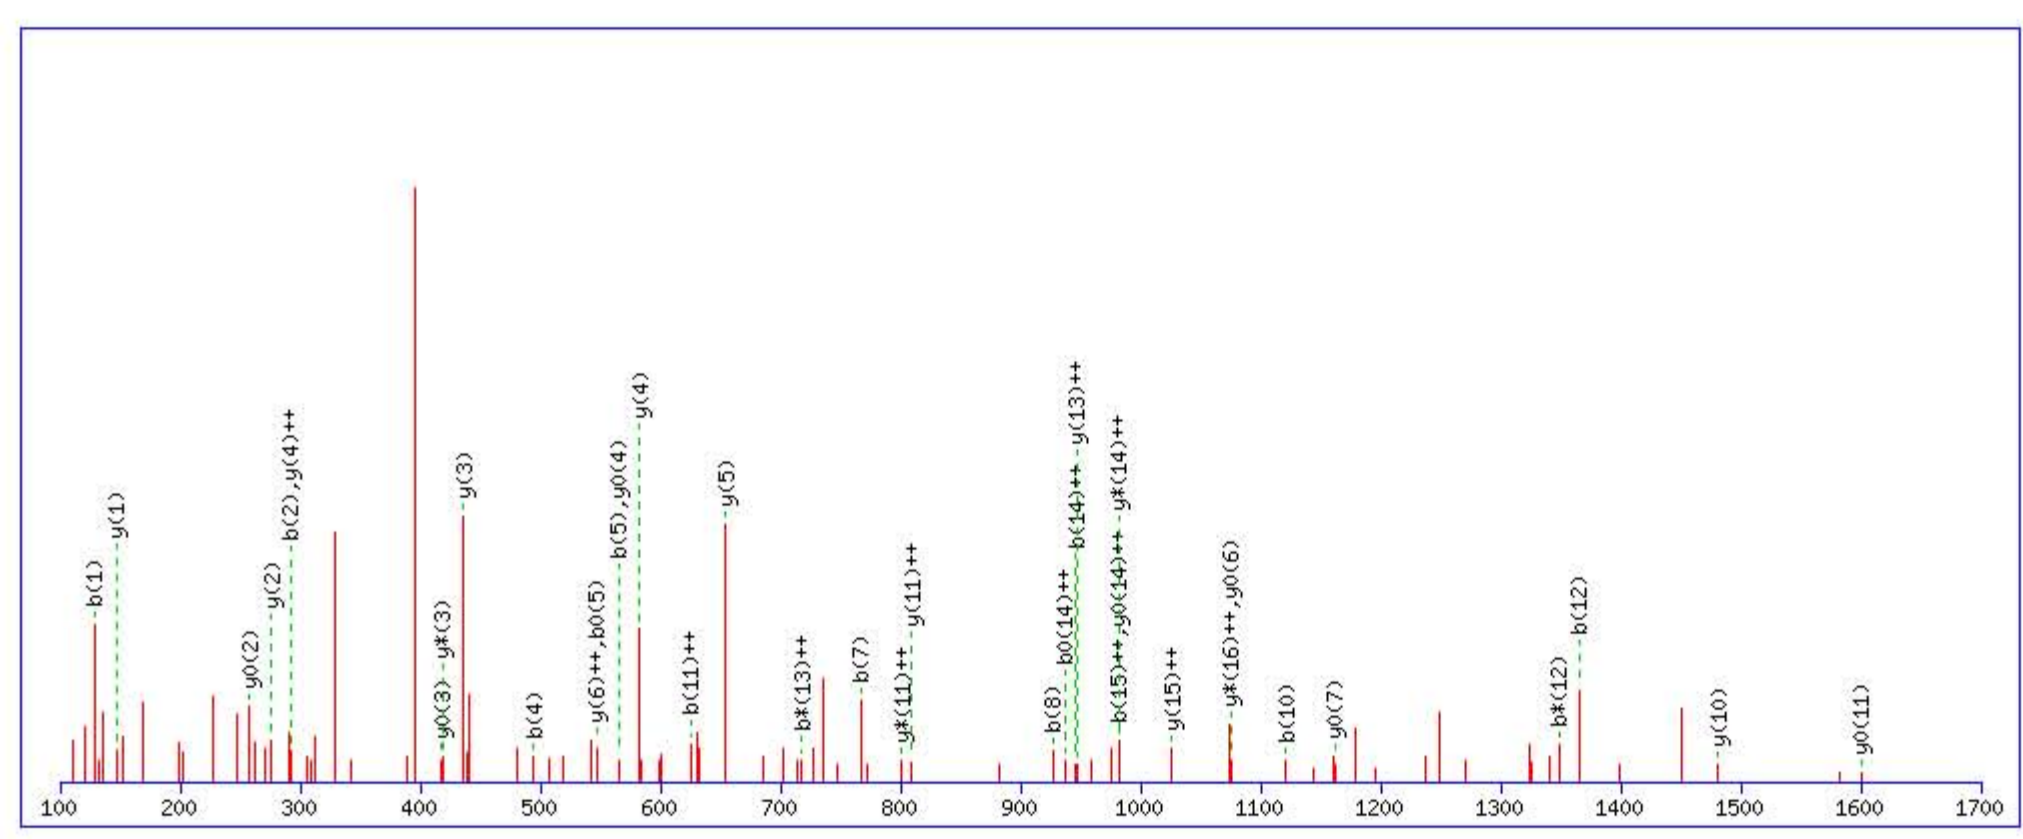

Monoisotopic mass of neutral peptide Mr(calc): 2544.035553  
 Fixed modifications: Carbamidomethyl (C) (apply to specified residues or termini only)  
 Variable modifications:  
 Q14 : Biotin:Thermo-21345 (Q)  
 Ions Score: 27 Expect: 0.0035  
 Matches : 37/210 fragment ions using 85 most intense peaks [\(help\)](#)

| #  | b                  | b <sup>++</sup>   | b <sup>*</sup>     | b <sup>*++</sup>  | b <sup>0</sup>    | b <sup>0++</sup>  | Seq.     | y                  | y <sup>++</sup>    | y <sup>*</sup>    | y <sup>*++</sup>   | y <sup>0</sup>     | y <sup>0++</sup>  | #  |
|----|--------------------|-------------------|--------------------|-------------------|-------------------|-------------------|----------|--------------------|--------------------|-------------------|--------------------|--------------------|-------------------|----|
| 1  | <b>129.102239</b>  | 65.054757         | 112.075690         | 56.541483         |                   |                   | <b>K</b> |                    |                    |                   |                    |                    |                   | 19 |
| 2  | <b>292.165568</b>  | 146.586422        | 275.139019         | 138.073148        |                   |                   | <b>Y</b> | 2416.947874        | 1208.977575        | 2399.921325       | 1200.464300        | 2398.937309        | 1199.972292       | 18 |
| 3  | 379.197596         | 190.102436        | 362.171047         | 181.589162        | 361.187031        | 181.097154        | <b>S</b> | 2253.884545        | 1127.445910        | 2236.857996       | 1118.932636        | 2235.873980        | 1118.440628       | 17 |
| 4  | <b>494.224539</b>  | 247.615908        | 477.197990         | 239.102633        | 476.213974        | 238.610625        | <b>D</b> | 2166.852517        | 1083.929896        | 2149.825968       | <b>1075.416622</b> | 2148.841952        | 1074.924614       | 16 |
| 5  | <b>565.261653</b>  | 283.134465        | 548.235104         | 274.621190        | <b>547.251088</b> | 274.129182        | <b>A</b> | 2051.825574        | <b>1026.416425</b> | 2034.799025       | 1017.903150        | 2033.815009        | 1017.411142       | 15 |
| 6  | 652.293681         | 326.650479        | 635.267132         | 318.137204        | 634.283116        | 317.645196        | <b>S</b> | 1980.788460        | 990.897868         | 1963.761911       | <b>982.384594</b>  | 1962.777895        | <b>981.892586</b> | 14 |
| 7  | <b>767.320624</b>  | 384.163950        | 750.294075         | 375.650676        | 749.310059        | 375.158668        | <b>D</b> | 1893.756432        | <b>947.381854</b>  | 1876.729883       | 938.868580         | 1875.745867        | 938.376572        | 13 |
| 8  | <b>927.351273</b>  | 464.179275        | 910.324724         | 455.666000        | 909.340708        | 455.173992        | <b>C</b> | 1778.729489        | 889.868383         | 1761.702940       | 881.355108         | 1760.718924        | 880.863100        | 12 |
| 9  | 1064.410185        | 532.708731        | 1047.383636        | 524.195456        | 1046.399620       | 523.703448        | <b>H</b> | 1618.698840        | <b>809.853058</b>  | 1601.672291       | <b>801.339784</b>  | <b>1600.688275</b> | 800.847776        | 11 |
| 10 | <b>1121.431649</b> | 561.219463        | 1104.405100        | 552.706188        | 1103.421084       | 552.214180        | <b>G</b> | <b>1481.639928</b> | 741.323602         | 1464.613379       | 732.810328         | 1463.629363        | 732.318320        | 10 |
| 11 | 1250.474242        | <b>625.740759</b> | 1233.447693        | 617.227485        | 1232.463677       | 616.735477        | <b>E</b> | 1424.618464        | 712.812870         | 1407.591915       | 704.299596         | 1406.607899        | 703.807588        | 9  |
| 12 | <b>1365.501185</b> | 683.254231        | <b>1348.474636</b> | 674.740956        | 1347.490620       | 674.248948        | <b>D</b> | 1295.575871        | 648.291574         | 1278.549322       | 639.778299         | 1277.565306        | 639.286291        | 8  |
| 13 | 1452.533213        | 726.770245        | 1435.506664        | <b>718.256970</b> | 1434.522648       | 717.764962        | <b>S</b> | 1180.548928        | 590.778102         | 1163.522379       | 582.264828         | <b>1162.538363</b> | 581.772820        | 7  |
| 14 | 1891.758539        | <b>946.382908</b> | 1874.731990        | 937.869633        | 1873.747974       | <b>937.377625</b> | <b>Q</b> | 1093.516900        | <b>547.262088</b>  | 1076.490351       | 538.748814         | <b>1075.506335</b> | 538.256806        | 6  |
| 15 | 1962.795653        | <b>981.901465</b> | 1945.769104        | 973.388190        | 1944.785088       | 972.896182        | <b>A</b> | <b>654.291574</b>  | 327.649425         | 637.265025        | 319.136151         | 636.281009         | 318.644143        | 5  |
| 16 | 2109.864067        | 1055.435671       | 2092.837518        | 1046.922397       | 2091.853502       | 1046.430389       | <b>F</b> | <b>583.254460</b>  | <b>292.130868</b>  | 566.227911        | 283.617594         | <b>565.243895</b>  | 283.125586        | 4  |
| 17 | 2269.894716        | 1135.450996       | 2252.868167        | 1126.937721       | 2251.884151       | 1126.445713       | <b>C</b> | <b>436.186046</b>  | 218.596661         | <b>419.159497</b> | 210.083386         | <b>418.175481</b>  | 209.591378        | 3  |
| 18 | 2398.937309        | 1199.972292       | 2381.910760        | 1191.459018       | 2380.926744       | 1190.967010       | <b>E</b> | <b>276.155397</b>  | 138.581337         | 259.128848        | 130.068062         | <b>258.144832</b>  | 129.576054        | 2  |
| 19 |                    |                   |                    |                   |                   |                   | <b>K</b> | <b>147.112804</b>  | 74.060040          | 130.086255        | 65.546765          |                    |                   | 1  |

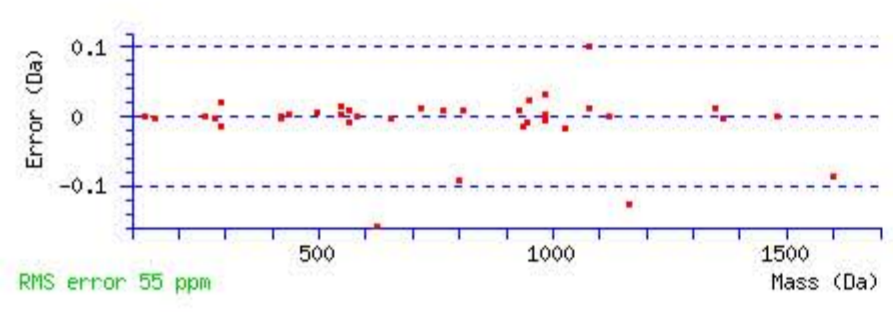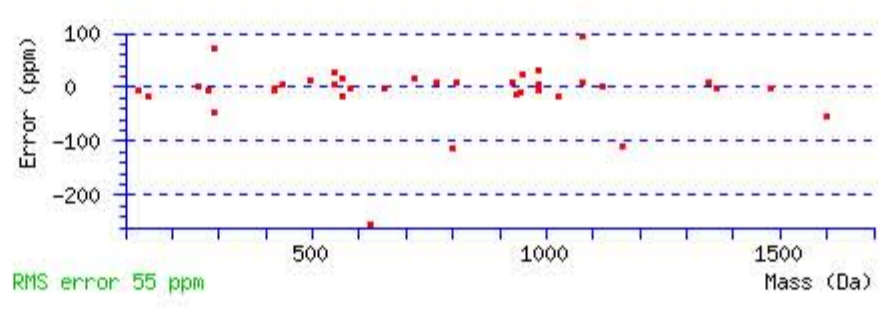

NCBI BLAST search of **KYSDASDCHGEDSQAFCEK**  
 (Parameters: blastp, nr protein database, expect=20000, no filter, PAM30)  
 Other BLAST [web gateways](#)

### All matches to this query

| Score | Mr(calc):   | Delta    | Sequence                            |
|-------|-------------|----------|-------------------------------------|
| 27.0  | 2544.035553 | 0.005903 | <a href="#">KYSDASDCHGEDSQAFCEK</a> |



# MASCOT Search Results

## Peptide View

MS/MS Fragmentation of **MCPQLQQYEMHGPEGLR**

Found in **A2MG\_HUMAN**, Alpha-2-macroglobulin OS=Homo sapiens GN=A2M PE=1 SV=3

Match to Query 67443: 2695.282392 from(899.434740,3+) rtinseconds(2202) index(43445)

Title: Locus:1.1.1.3050.15 File:"2013-07-02 CLN FXIII 60 min 1st F 3.wiff"

Data file C:\Program Files (x86)\Matrix Science\Mascot Daemon\mgf4 FXIII 60 min 1st\mascot\_daemon\_merge.mgf

Click mouse within plot area to zoom in by factor of two about that point

Or, Plot from  to  Da

Label all possible matches  Label matches used for scoring

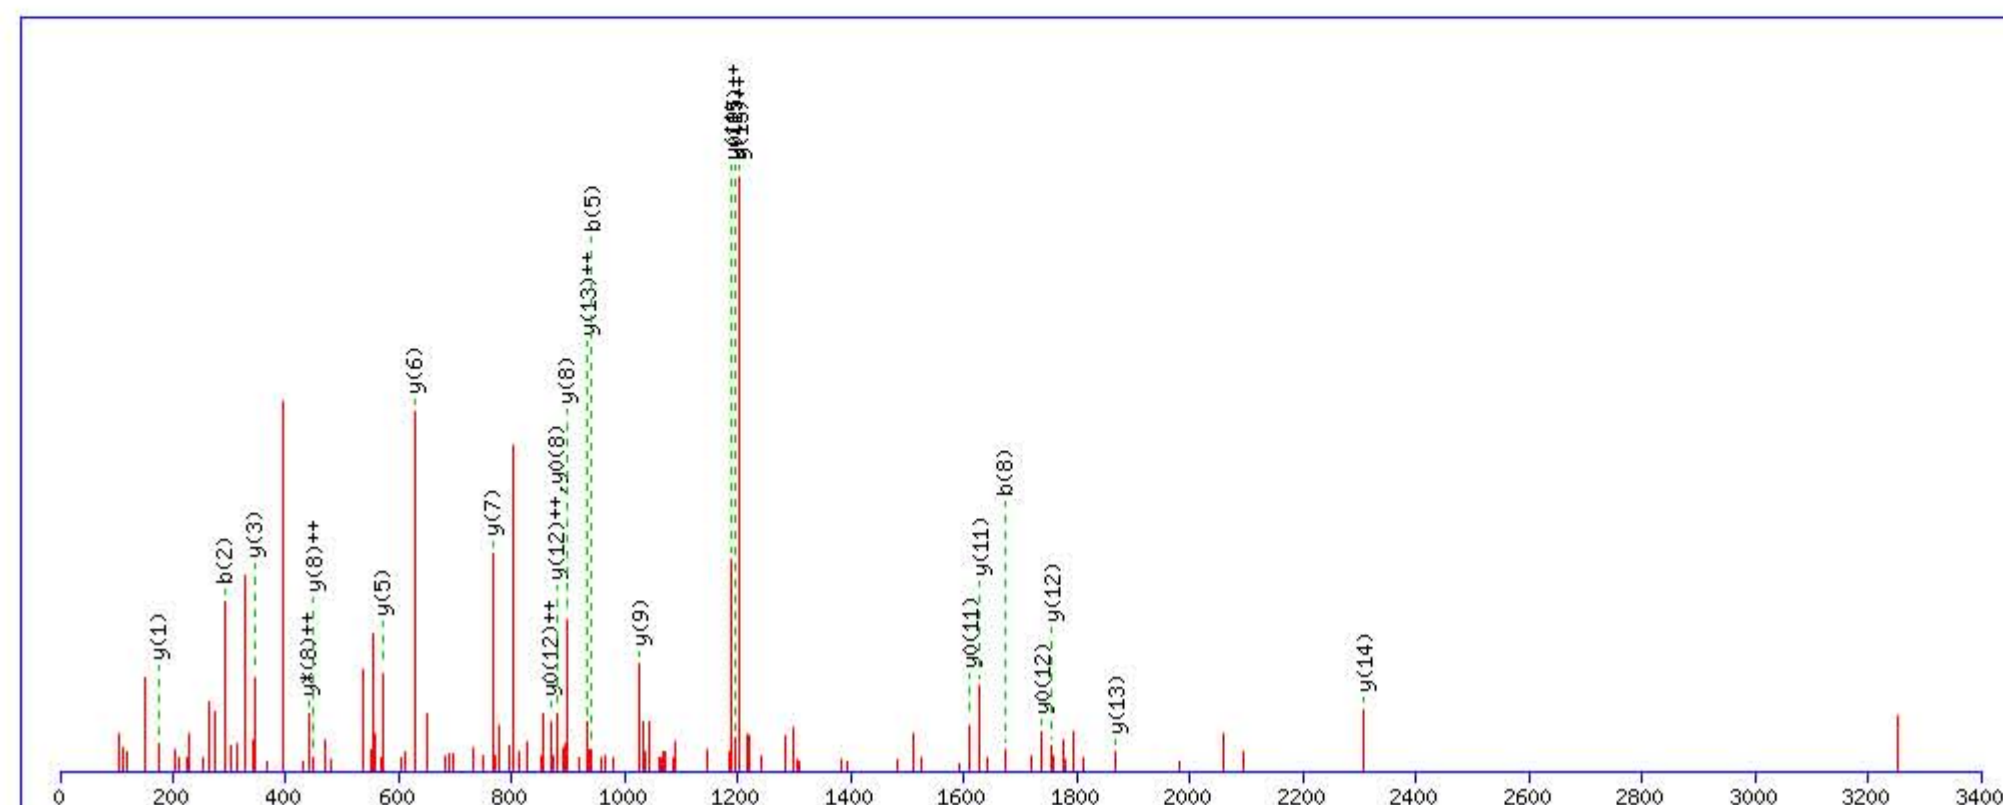

Monoisotopic mass of neutral peptide Mr(calc): 2695.256516

Fixed modifications: Carbamidomethyl (C) (apply to specified residues or termini only)

Variable modifications:

Q4 : Biotin:Thermo-21345 (Q)

Q7 : Biotin:Thermo-21345 (Q)

Ions Score: 39 Expect: 0.0027

Matches : 25/164 fragment ions using 72 most intense peaks [\(help\)](#)

| #  | b                  | b <sup>++</sup> | b <sup>+</sup> | b <sup>+++</sup> | b <sup>0</sup> | b <sup>0++</sup> | Seq. | y                  | y <sup>++</sup>    | y <sup>+</sup> | y <sup>+++</sup>  | y <sup>0</sup>     | y <sup>0++</sup>   | #  |
|----|--------------------|-----------------|----------------|------------------|----------------|------------------|------|--------------------|--------------------|----------------|-------------------|--------------------|--------------------|----|
| 1  | 132.047761         | 66.527518       |                |                  |                |                  | M    |                    |                    |                |                   |                    |                    | 17 |
| 2  | <b>292.078410</b>  | 146.542843      |                |                  |                |                  | C    | 2565.223327        | 1283.115301        | 2548.196778    | 1274.602027       | 2547.212762        | 1274.110019        | 16 |
| 3  | 389.131174         | 195.069225      |                |                  |                |                  | P    | 2405.192678        | <b>1203.099977</b> | 2388.166129    | 1194.586702       | 2387.182113        | <b>1194.094694</b> | 15 |
| 4  | 828.356500         | 414.681888      | 811.329951     | 406.168614       |                |                  | Q    | <b>2308.139914</b> | 1154.573595        | 2291.113365    | 1146.060320       | 2290.129349        | 1145.568312        | 14 |
| 5  | <b>941.440564</b>  | 471.223920      | 924.414015     | 462.710646       |                |                  | L    | <b>1868.914588</b> | <b>934.960932</b>  | 1851.888039    | 926.447658        | 1850.904023        | 925.955650         | 13 |
| 6  | 1069.499142        | 535.253209      | 1052.472593    | 526.739935       |                |                  | Q    | <b>1755.830524</b> | <b>878.418900</b>  | 1738.803975    | 869.905626        | <b>1737.819959</b> | <b>869.413618</b>  | 12 |
| 7  | 1508.724468        | 754.865872      | 1491.697919    | 746.352598       |                |                  | Q    | <b>1627.771946</b> | 814.389611         | 1610.745397    | 805.876337        | <b>1609.761381</b> | 805.384329         | 11 |
| 8  | <b>1671.787797</b> | 836.397537      | 1654.761248    | 827.884262       |                |                  | Y    | <b>1188.546620</b> | 594.776948         | 1171.520071    | 586.263674        | 1170.536055        | 585.771666         | 10 |
| 9  | 1800.830390        | 900.918833      | 1783.803841    | 892.405559       | 1782.819825    | 891.913551       | E    | <b>1025.483291</b> | 513.245284         | 1008.456742    | 504.732009        | 1007.472726        | 504.240001         | 9  |
| 10 | 1931.870875        | 966.439076      | 1914.844326    | 957.925801       | 1913.860310    | 957.433793       | M    | <b>896.440698</b>  | <b>448.723987</b>  | 879.414149     | <b>440.210713</b> | <b>878.430133</b>  | 439.718705         | 8  |
| 11 | 2068.929787        | 1034.968531     | 2051.903238    | 1026.455257      | 2050.919222    | 1025.963249      | H    | <b>765.400213</b>  | 383.203745         | 748.373664     | 374.690470        | 747.389648         | 374.198462         | 7  |
| 12 | 2125.951251        | 1063.479263     | 2108.924702    | 1054.965989      | 2107.940686    | 1054.473981      | G    | <b>628.341301</b>  | 314.674289         | 611.314752     | 306.161014        | 610.330736         | 305.669006         | 6  |
| 13 | 2223.004015        | 1112.005645     | 2205.977466    | 1103.492371      | 2204.993450    | 1103.000363      | P    | <b>571.319837</b>  | 286.163557         | 554.293288     | 277.650282        | 553.309272         | 277.158274         | 5  |
| 14 | 2352.046608        | 1176.526942     | 2335.020059    | 1168.013667      | 2334.036043    | 1167.521659      | E    | 474.267073         | 237.637175         | 457.240524     | 229.123900        | 456.256508         | 228.631892         | 4  |
| 15 | 2409.068072        | 1205.037674     | 2392.041523    | 1196.524399      | 2391.057507    | 1196.032391      | G    | <b>345.224480</b>  | 173.115878         | 328.197931     | 164.602603        |                    |                    | 3  |
| 16 | 2522.152136        | 1261.579706     | 2505.125587    | 1253.066431      | 2504.141571    | 1252.574424      | L    | 288.203016         | 144.605146         | 271.176467     | 136.091872        |                    |                    | 2  |
| 17 |                    |                 |                |                  |                |                  | R    | <b>175.118952</b>  | 88.063114          | 158.092403     | 79.549839         |                    |                    | 1  |

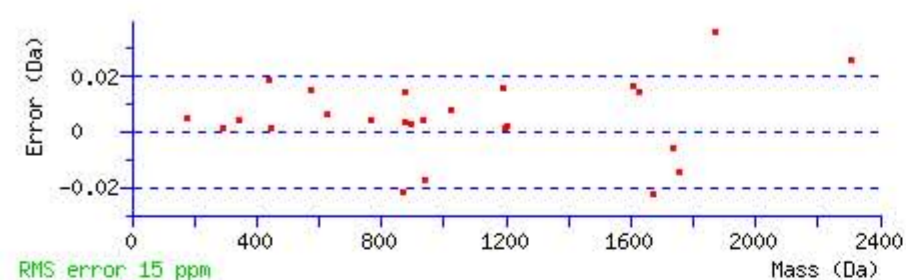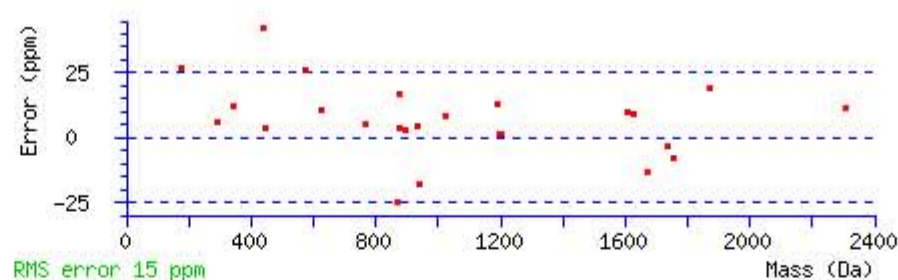

NCBI BLAST search of [MCPQLQQYEMHGPEGLR](#)

(Parameters: blastp, nr protein database, expect=20000, no filter, PAM30)

Other BLAST [web gateways](#)

## All matches to this query

| Score | Mr(calc):   | Delta    | Sequence                          |
|-------|-------------|----------|-----------------------------------|
| 38.7  | 2695.256516 | 0.025876 | <a href="#">MCPQLQQYEMHGPEGLR</a> |
| 32.2  | 2695.256516 | 0.025876 | <a href="#">MCPQLQQYEMHGPEGLR</a> |
| 28.2  | 2695.256516 | 0.025876 | <a href="#">MCPQLQQYEMHGPEGLR</a> |



# Mascot Search Results

## Peptide View

MS/MS Fragmentation of **MCPQLQQYEMHGPEGLR**

Found in **A2MG\_HUMAN**, Alpha-2-macroglobulin OS=Homo sapiens GN=A2M PE=1 SV=3

Match to Query 67445: 2695.282722 from(899.434850,3+) rtinseconds(2175) index(43266)

Title: Locus:1.1.1.3041.14 File:"2013-07-02 CLN FXIII 60 min 1st F 3.wiff"

Data file C:\Program Files (x86)\Matrix Science\Mascot Daemon\mgf4 FXIII 60 min 1st\mascot\_daemon\_merge.mgf

Click mouse within plot area to zoom in by factor of two about that point

Or, Plot from  to  Da

Label all possible matches  Label matches used for scoring

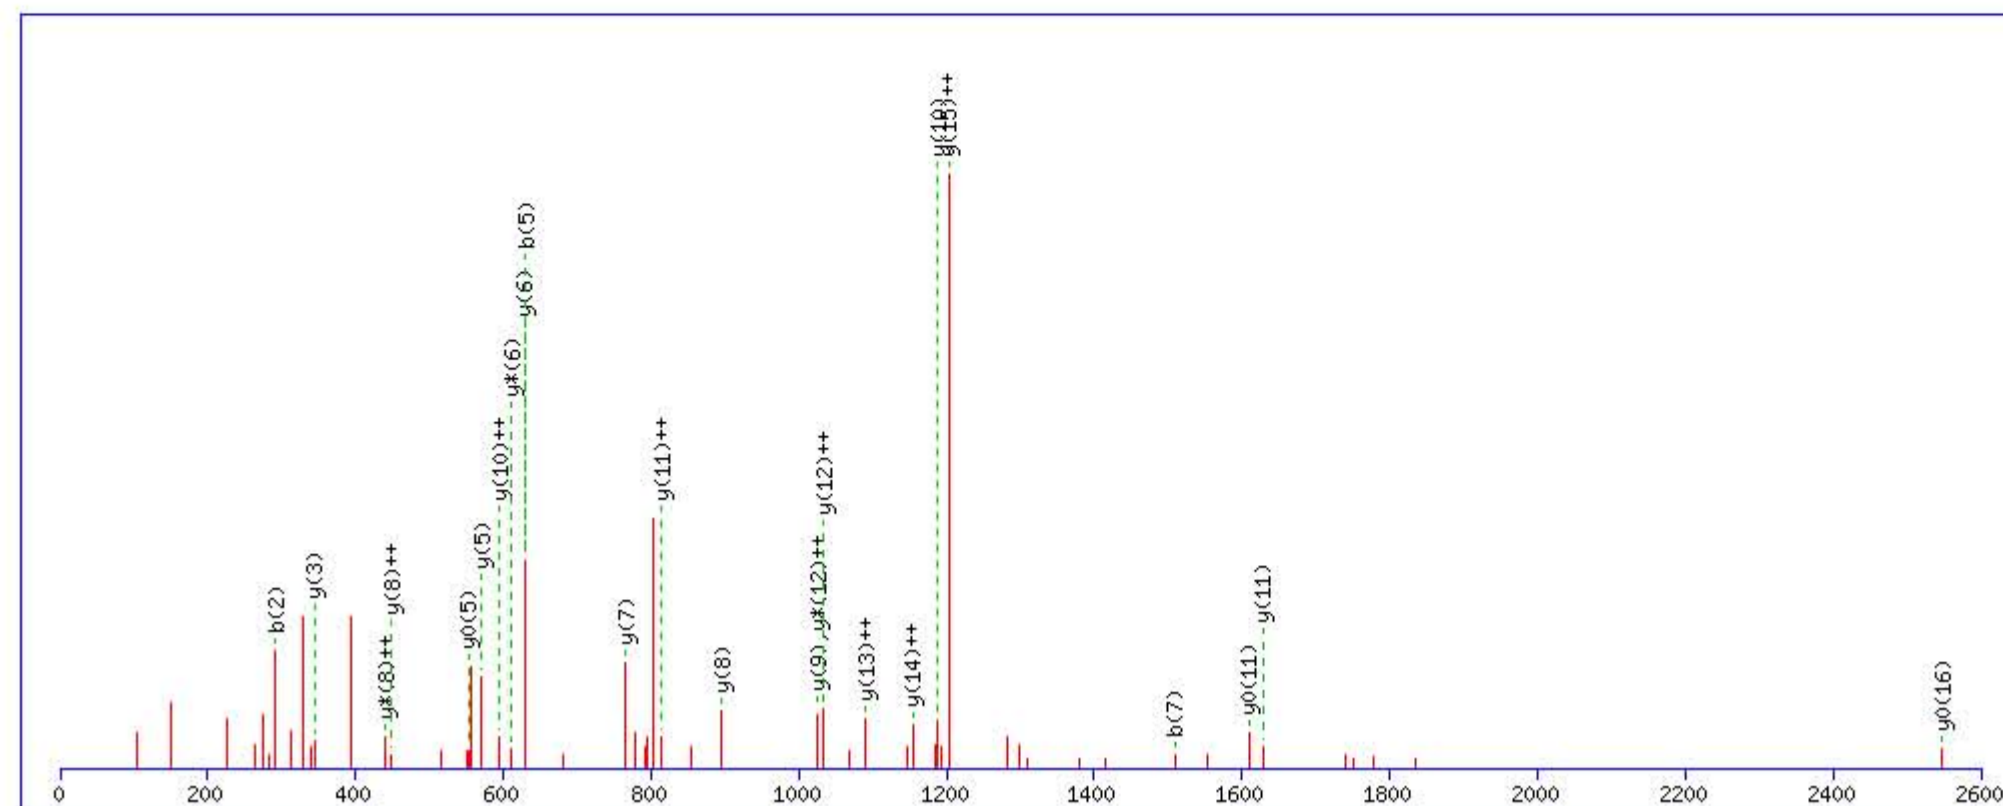

Monoisotopic mass of neutral peptide Mr(calc): 2695.256516

Fixed modifications: Carbamidomethyl (C) (apply to specified residues or termini only)

Variable modifications:

Q6 : Biotin:Thermo-21345 (Q)

Q7 : Biotin:Thermo-21345 (Q)

Ions Score: 35 Expect: 0.0059

Matches : 24/164 fragment ions using 52 most intense peaks [\(help\)](#)

| #  | b                  | b <sup>++</sup> | b <sup>+</sup> | b <sup>+++</sup> | b <sup>0</sup> | b <sup>0++</sup> | Seq. | y                  | y <sup>++</sup>    | y <sup>+</sup>    | y <sup>+++</sup>   | y <sup>0</sup>     | y <sup>0++</sup> | #  |
|----|--------------------|-----------------|----------------|------------------|----------------|------------------|------|--------------------|--------------------|-------------------|--------------------|--------------------|------------------|----|
| 1  | 132.047761         | 66.527518       |                |                  |                |                  | M    |                    |                    |                   |                    |                    |                  | 17 |
| 2  | <b>292.078410</b>  | 146.542843      |                |                  |                |                  | C    | 2565.223327        | 1283.115301        | 2548.196778       | 1274.602027        | <b>2547.212762</b> | 1274.110019      | 16 |
| 3  | 389.131174         | 195.069225      |                |                  |                |                  | P    | 2405.192678        | <b>1203.099977</b> | 2388.166129       | 1194.586702        | 2387.182113        | 1194.094694      | 15 |
| 4  | 517.189752         | 259.098514      | 500.163203     | 250.585240       |                |                  | Q    | 2308.139914        | <b>1154.573595</b> | 2291.113365       | 1146.060320        | 2290.129349        | 1145.568312      | 14 |
| 5  | <b>630.273816</b>  | 315.640546      | 613.247267     | 307.127272       |                |                  | L    | 2180.081336        | <b>1090.544306</b> | 2163.054787       | 1082.031031        | 2162.070771        | 1081.539023      | 13 |
| 6  | 1069.499142        | 535.253209      | 1052.472593    | 526.739935       |                |                  | Q    | 2066.997272        | <b>1034.002274</b> | 2049.970723       | <b>1025.488999</b> | 2048.986707        | 1024.996991      | 12 |
| 7  | <b>1508.724468</b> | 754.865872      | 1491.697919    | 746.352598       |                |                  | Q    | <b>1627.771946</b> | <b>814.389611</b>  | 1610.745397       | 805.876337         | <b>1609.761381</b> | 805.384329       | 11 |
| 8  | 1671.787797        | 836.397537      | 1654.761248    | 827.884262       |                |                  | Y    | <b>1188.546620</b> | <b>594.776948</b>  | 1171.520071       | 586.263674         | 1170.536055        | 585.771666       | 10 |
| 9  | 1800.830390        | 900.918833      | 1783.803841    | 892.405559       | 1782.819825    | 891.913551       | E    | <b>1025.483291</b> | 513.245284         | 1008.456742       | 504.732009         | 1007.472726        | 504.240001       | 9  |
| 10 | 1931.870875        | 966.439076      | 1914.844326    | 957.925801       | 1913.860310    | 957.433793       | M    | <b>896.440698</b>  | <b>448.723987</b>  | 879.414149        | <b>440.210713</b>  | 878.430133         | 439.718705       | 8  |
| 11 | 2068.929787        | 1034.968531     | 2051.903238    | 1026.455257      | 2050.919222    | 1025.963249      | H    | <b>765.400213</b>  | 383.203745         | 748.373664        | 374.690470         | 747.389648         | 374.198462       | 7  |
| 12 | 2125.951251        | 1063.479263     | 2108.924702    | 1054.965989      | 2107.940686    | 1054.473981      | G    | <b>628.341301</b>  | 314.674289         | <b>611.314752</b> | 306.161014         | 610.330736         | 305.669006       | 6  |
| 13 | 2223.004015        | 1112.005645     | 2205.977466    | 1103.492371      | 2204.993450    | 1103.000363      | P    | <b>571.319837</b>  | 286.163557         | 554.293288        | 277.650282         | <b>553.309272</b>  | 277.158274       | 5  |
| 14 | 2352.046608        | 1176.526942     | 2335.020059    | 1168.013667      | 2334.036043    | 1167.521659      | E    | 474.267073         | 237.637175         | 457.240524        | 229.123900         | 456.256508         | 228.631892       | 4  |
| 15 | 2409.068072        | 1205.037674     | 2392.041523    | 1196.524399      | 2391.057507    | 1196.032391      | G    | <b>345.224480</b>  | 173.115878         | 328.197931        | 164.602603         |                    |                  | 3  |
| 16 | 2522.152136        | 1261.579706     | 2505.125587    | 1253.066431      | 2504.141571    | 1252.574424      | L    | 288.203016         | 144.605146         | 271.176467        | 136.091872         |                    |                  | 2  |
| 17 |                    |                 |                |                  |                |                  | R    | 175.118952         | 88.063114          | 158.092403        | 79.549839          |                    |                  | 1  |

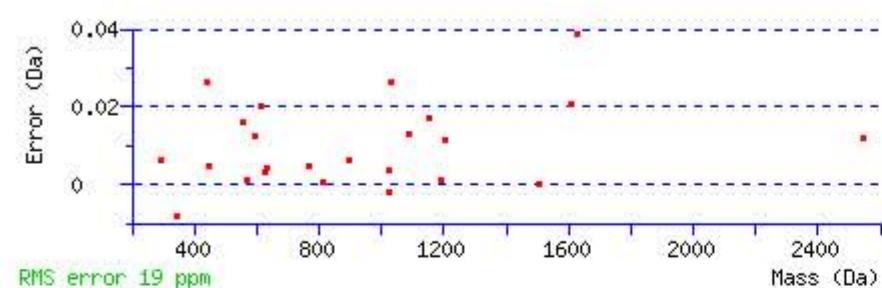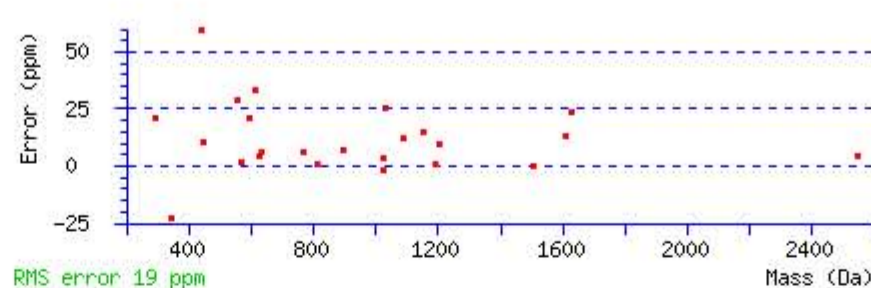

NCBI BLAST search of [MCPQLQQYEMHGPEGLR](#)

(Parameters: blastp, nr protein database, expect=20000, no filter, PAM30)

Other BLAST [web gateways](#)

All matches to this query

| Score | Mr(calc):   | Delta    | Sequence                          |
|-------|-------------|----------|-----------------------------------|
| 35.3  | 2695.256516 | 0.026206 | <a href="#">MCPQLQQYEMHGPEGLR</a> |
| 24.1  | 2695.256516 | 0.026206 | <a href="#">MCPQLQQYEMHGPEGLR</a> |
| 18.3  | 2695.256516 | 0.026206 | <a href="#">MCPQLQQYEMHGPEGLR</a> |



# MASCOT Search Results

## Peptide View

MS/MS Fragmentation of **MCPQLQQYEMHGPEGLR**

Found in **A2MG\_HUMAN**, Alpha-2-macroglobulin OS=Homo sapiens GN=A2M PE=1 SV=3

Match to Query 67628: 2711.267176 from(678.824070,4+) rtinseconds(2026) index(42295)

Title: Locus:1.1.1.2989.14 File:"2013-07-02 CLN FXIII 60 min 1st F 3.wiff"

Data file C:\Program Files (x86)\Matrix Science\Mascot Daemon\mgf4 FXIII 60 min 1st\mascot\_daemon\_merge.mgf

Click mouse within plot area to zoom in by factor of two about that point

Or, Plot from  to  Da

Label all possible matches  Label matches used for scoring

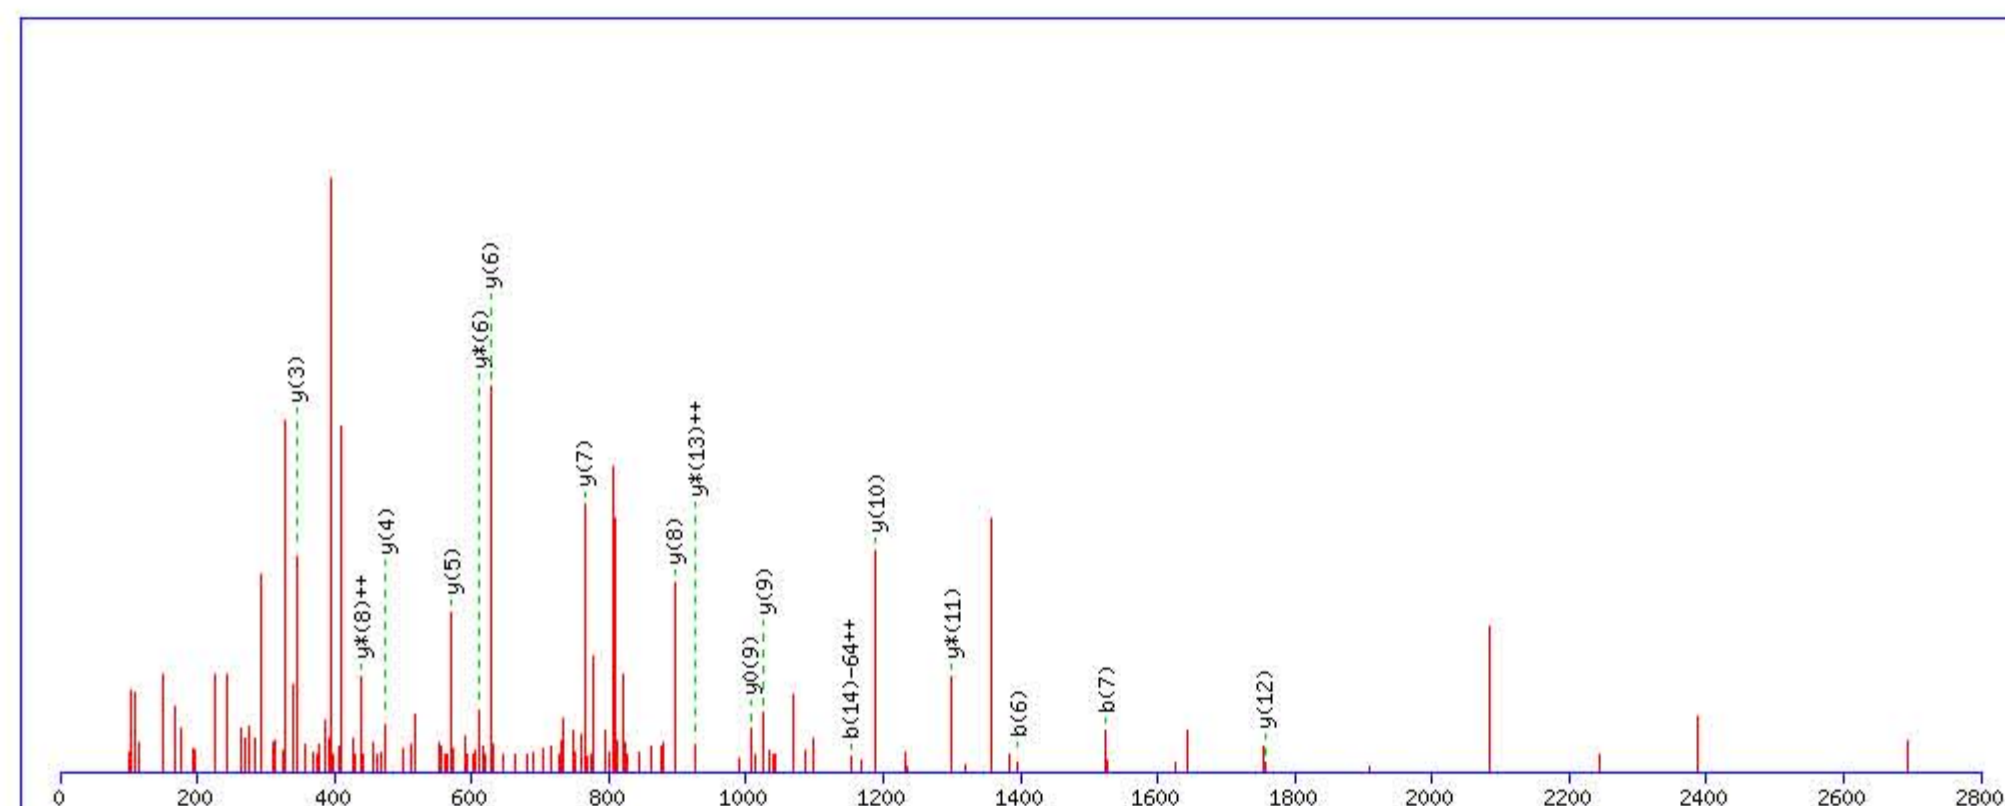

Monoisotopic mass of neutral peptide Mr(calc): 2711.251434  
 Fixed modifications: Carbamidomethyl (C) (apply to specified residues or termini only)  
 Variable modifications:  
 M1 : Oxidation (M), with neutral losses 0.000000 (shown in table), 63.998285  
 Q4 : Biotin:Thermo-21345 (Q)  
 Q6 : Biotin:Thermo-21345 (Q)  
 Ions Score: 27 Expect: 0.033  
 Matches : 17/238 fragment ions using 49 most intense peaks ([help](#))

| #  | b                  | b <sup>++</sup> | b <sup>+</sup> | b <sup>*++</sup> | b <sup>0</sup> | b <sup>0++</sup> | Seq. | y                  | y <sup>++</sup> | y <sup>+</sup>     | y <sup>*++</sup>  | y <sup>0</sup>     | y <sup>0++</sup> | #  |
|----|--------------------|-----------------|----------------|------------------|----------------|------------------|------|--------------------|-----------------|--------------------|-------------------|--------------------|------------------|----|
| 1  | 148.042676         | 74.524976       |                |                  |                |                  | M    |                    |                 |                    |                   |                    |                  | 17 |
| 2  | 308.073325         | 154.540301      |                |                  |                |                  | C    | 2565.223327        | 1283.115302     | 2548.196778        | 1274.602027       | 2547.212762        | 1274.110019      | 16 |
| 3  | 405.126089         | 203.066683      |                |                  |                |                  | P    | 2405.192678        | 1203.099977     | 2388.166129        | 1194.586702       | 2387.182113        | 1194.094694      | 15 |
| 4  | 844.351415         | 422.679346      | 827.324866     | 414.166071       |                |                  | Q    | 2308.139914        | 1154.573595     | 2291.113365        | 1146.060320       | 2290.129349        | 1145.568312      | 14 |
| 5  | 957.435479         | 479.221378      | 940.408930     | 470.708103       |                |                  | L    | 1868.914588        | 934.960932      | 1851.888039        | 926.447658        | 1850.904023        | 925.955650       | 13 |
| 6  | <b>1396.660805</b> | 698.834041      | 1379.634256    | 690.320766       |                |                  | Q    | <b>1755.830524</b> | 878.418900      | 1738.803975        | 869.905626        | 1737.819959        | 869.413618       | 12 |
| 7  | <b>1524.719383</b> | 762.863330      | 1507.692834    | 754.350055       |                |                  | Q    | 1316.605198        | 658.806237      | <b>1299.578649</b> | 650.292963        | 1298.594633        | 649.800955       | 11 |
| 8  | 1687.782712        | 844.394994      | 1670.756163    | 835.881720       |                |                  | Y    | <b>1188.546620</b> | 594.776948      | 1171.520071        | 586.263674        | 1170.536055        | 585.771666       | 10 |
| 9  | 1816.825305        | 908.916291      | 1799.798756    | 900.403016       | 1798.814740    | 899.911008       | E    | <b>1025.483291</b> | 513.245284      | 1008.456742        | 504.732009        | <b>1007.472726</b> | 504.240001       | 9  |
| 10 | 1947.865790        | 974.436533      | 1930.839241    | 965.923259       | 1929.855225    | 965.431251       | M    | <b>896.440698</b>  | 448.723987      | 879.414149         | <b>440.210713</b> | 878.430133         | 439.718705       | 8  |
| 11 | 2084.924702        | 1042.965989     | 2067.898153    | 1034.452715      | 2066.914137    | 1033.960707      | H    | <b>765.400213</b>  | 383.203745      | 748.373664         | 374.690470        | 747.389648         | 374.198462       | 7  |
| 12 | 2141.946166        | 1071.476721     | 2124.919617    | 1062.963446      | 2123.935601    | 1062.471439      | G    | <b>628.341301</b>  | 314.674289      | <b>611.314752</b>  | 306.161014        | 610.330736         | 305.669006       | 6  |
| 13 | 2238.998930        | 1120.003103     | 2221.972381    | 1111.489828      | 2220.988365    | 1110.997821      | P    | <b>571.319837</b>  | 286.163557      | 554.293288         | 277.650282        | 553.309272         | 277.158274       | 5  |
| 14 | 2368.041523        | 1184.524400     | 2351.014974    | 1176.011125      | 2350.030958    | 1175.519117      | E    | <b>474.267073</b>  | 237.637175      | 457.240524         | 229.123900        | 456.256508         | 228.631892       | 4  |
| 15 | 2425.062987        | 1213.035132     | 2408.036438    | 1204.521857      | 2407.052422    | 1204.029849      | G    | <b>345.224480</b>  | 173.115878      | 328.197931         | 164.602603        |                    |                  | 3  |
| 16 | 2538.147051        | 1269.577164     | 2521.120502    | 1261.063889      | 2520.136486    | 1260.571881      | L    | 288.203016         | 144.605146      | 271.176467         | 136.091872        |                    |                  | 2  |
| 17 |                    |                 |                |                  |                |                  | R    | 175.118952         | 88.063114       | 158.092403         | 79.549839         |                    |                  | 1  |

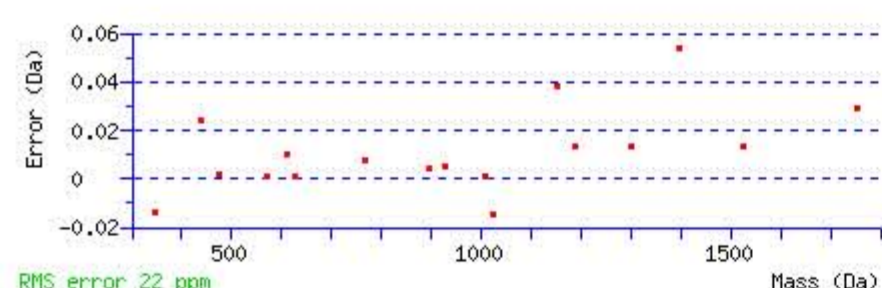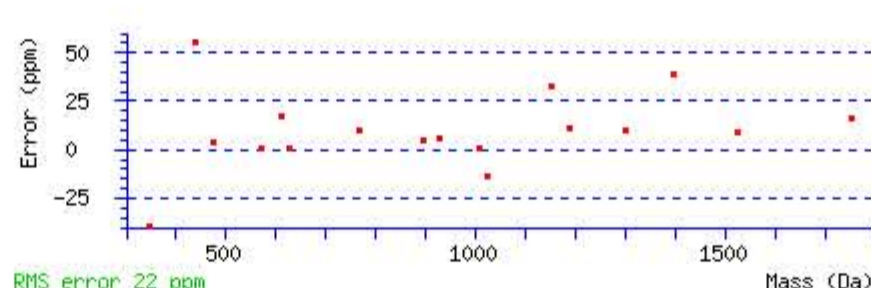

NCBI BLAST search of **MCPQLQQYEMHGPEGLR**  
 (Parameters: blastp, nr protein database, expect=20000, no filter, PAM30)  
 Other BLAST [web gateways](#)

## All matches to this query

| Score | Mr(calc):   | Delta    | Sequence                          |
|-------|-------------|----------|-----------------------------------|
| 27.0  | 2711.251434 | 0.015742 | <a href="#">MCPQLQQYEMHGPEGLR</a> |
| 21.9  | 2711.251434 | 0.015742 | <a href="#">MCPQLQQYEMHGPEGLR</a> |
| 15.3  | 2711.251434 | 0.015742 | <a href="#">MCPQLQQYEMHGPEGLR</a> |
| 14.8  | 2711.251434 | 0.015742 | <a href="#">MCPQLQQYEMHGPEGLR</a> |
| 8.0   | 2711.251434 | 0.015742 | <a href="#">MCPQLQQYEMHGPEGLR</a> |
| 0.1   | 2711.251434 | 0.015742 | <a href="#">MCPQLQQYEMHGPEGLR</a> |



# MASCOT Search Results

## Peptide View

MS/MS Fragmentation of **MCPQLQQYEMHGPEGLR**

Found in **A2MG\_HUMAN**, Alpha-2-macroglobulin OS=Homo sapiens GN=A2M PE=1 SV=3

Match to Query 71708: 3006.457936 from(752.621760,4+) rtinseconds(2325) index(44198)

Title: Locus:1.1.1.3093.17 File:"2013-07-02 CLN FXIII 60 min 1st F 3.wiff"

Data file C:\Program Files (x86)\Matrix Science\Mascot Daemon\mgf4 FXIII 60 min 1st\mascot\_daemon\_merge.mgf

Click mouse within plot area to zoom in by factor of two about that point

Or, Plot from  to  Da

Label all possible matches  Label matches used for scoring

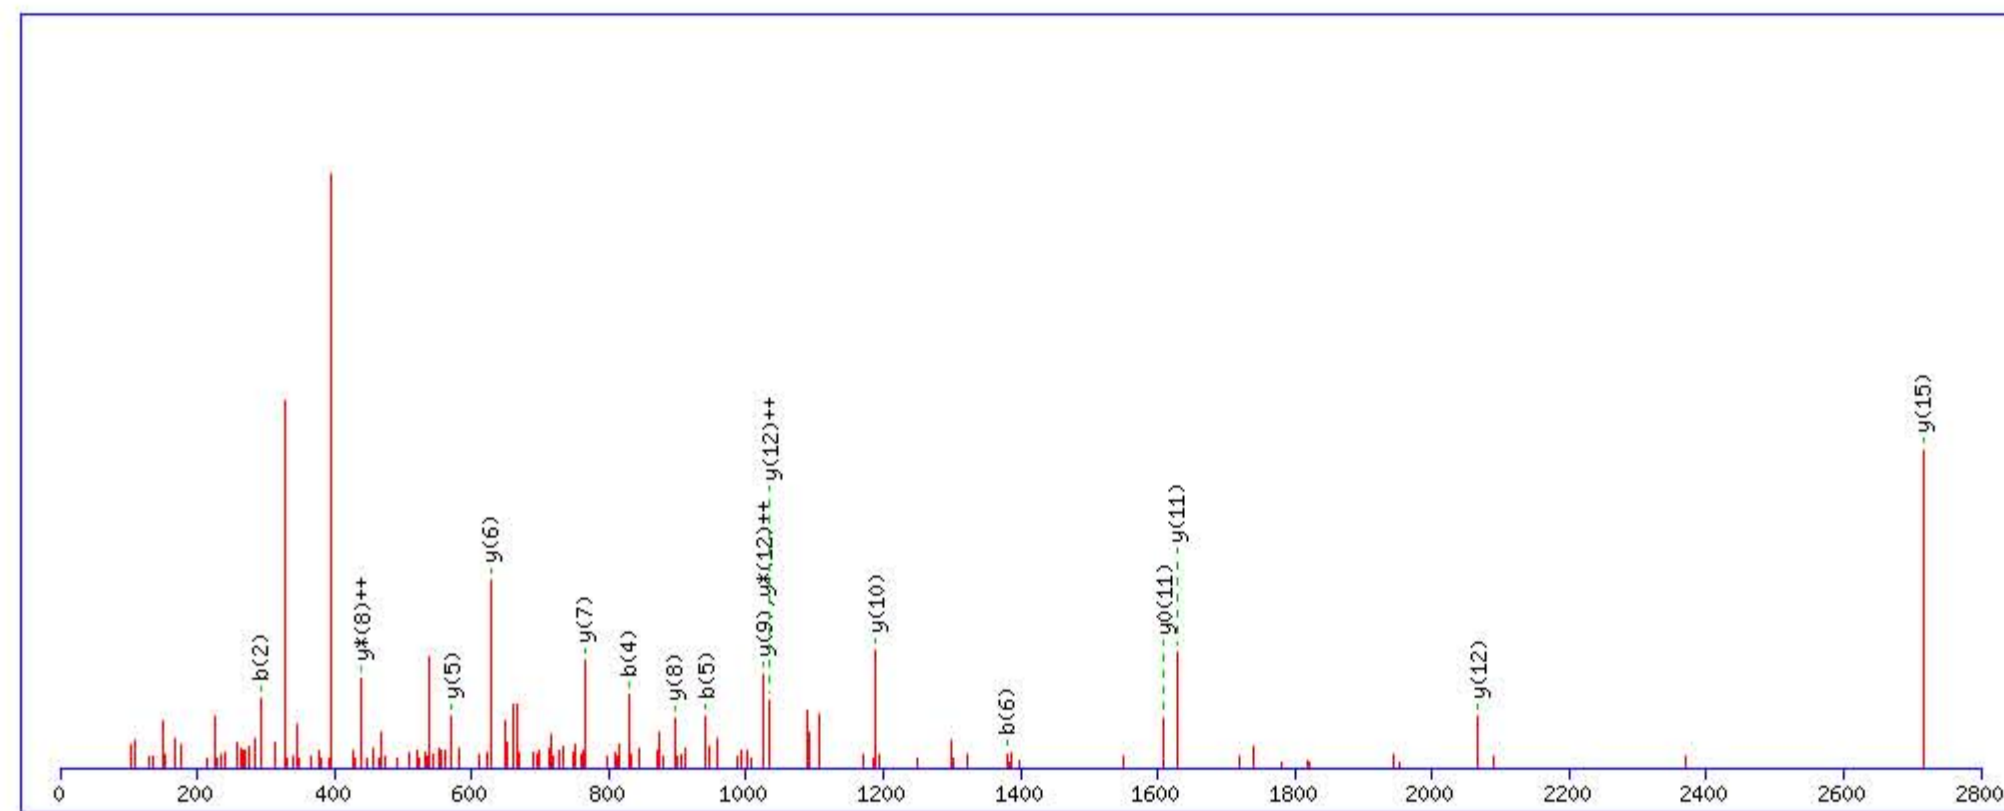

Monoisotopic mass of neutral peptide Mr(calc): 3006.423264

Fixed modifications: Carbamidomethyl (C) (apply to specified residues or termini only)

Variable modifications:

Q4 : Biotin:Thermo-21345 (Q)

Q6 : Biotin:Thermo-21345 (Q)

Q7 : Biotin:Thermo-21345 (Q)

Ions Score: 30 Expect: 0.03

Matches : 17/164 fragment ions using 39 most intense peaks [\(help\)](#)

| #  | b                  | b <sup>++</sup> | b <sup>*</sup> | b <sup>+++</sup> | b <sup>0</sup> | b <sup>0++</sup> | Seq. | y                  | y <sup>++</sup>    | y <sup>*</sup> | y <sup>+++</sup>   | y <sup>0</sup>     | y <sup>0++</sup> | #  |
|----|--------------------|-----------------|----------------|------------------|----------------|------------------|------|--------------------|--------------------|----------------|--------------------|--------------------|------------------|----|
| 1  | 132.047761         | 66.527518       |                |                  |                |                  | M    |                    |                    |                |                    |                    |                  | 17 |
| 2  | <b>292.078410</b>  | 146.542843      |                |                  |                |                  | C    | 2876.390075        | 1438.698675        | 2859.363526    | 1430.185401        | 2858.379510        | 1429.693393      | 16 |
| 3  | 389.131174         | 195.069225      |                |                  |                |                  | P    | <b>2716.359426</b> | 1358.683351        | 2699.332877    | 1350.170076        | 2698.348861        | 1349.678068      | 15 |
| 4  | <b>828.356500</b>  | 414.681888      | 811.329951     | 406.168614       |                |                  | Q    | 2619.306662        | 1310.156969        | 2602.280113    | 1301.643694        | 2601.296097        | 1301.151686      | 14 |
| 5  | <b>941.440564</b>  | 471.223920      | 924.414015     | 462.710646       |                |                  | L    | 2180.081336        | 1090.544306        | 2163.054787    | 1082.031031        | 2162.070771        | 1081.539023      | 13 |
| 6  | <b>1380.665890</b> | 690.836583      | 1363.639341    | 682.323309       |                |                  | Q    | <b>2066.997272</b> | <b>1034.002274</b> | 2049.970723    | <b>1025.488999</b> | 2048.986707        | 1024.996991      | 12 |
| 7  | 1819.891216        | 910.449246      | 1802.864667    | 901.935972       |                |                  | Q    | <b>1627.771946</b> | 814.389611         | 1610.745397    | 805.876337         | <b>1609.761381</b> | 805.384329       | 11 |
| 8  | 1982.954545        | 991.980911      | 1965.927996    | 983.467636       |                |                  | Y    | <b>1188.546620</b> | 594.776948         | 1171.520071    | 586.263674         | 1170.536055        | 585.771666       | 10 |
| 9  | 2111.997138        | 1056.502207     | 2094.970589    | 1047.988932      | 2093.986573    | 1047.496925      | E    | <b>1025.483291</b> | 513.245284         | 1008.456742    | 504.732009         | 1007.472726        | 504.240001       | 9  |
| 10 | 2243.037623        | 1122.022450     | 2226.011074    | 1113.509175      | 2225.027058    | 1113.017167      | M    | <b>896.440698</b>  | 448.723987         | 879.414149     | <b>440.210713</b>  | 878.430133         | 439.718705       | 8  |
| 11 | 2380.096535        | 1190.551906     | 2363.069986    | 1182.038631      | 2362.085970    | 1181.546623      | H    | <b>765.400213</b>  | 383.203745         | 748.373664     | 374.690470         | 747.389648         | 374.198462       | 7  |
| 12 | 2437.117999        | 1219.062637     | 2420.091450    | 1210.549363      | 2419.107434    | 1210.057355      | G    | <b>628.341301</b>  | 314.674289         | 611.314752     | 306.161014         | 610.330736         | 305.669006       | 6  |
| 13 | 2534.170763        | 1267.589019     | 2517.144214    | 1259.075745      | 2516.160198    | 1258.583737      | P    | <b>571.319837</b>  | 286.163557         | 554.293288     | 277.650282         | 553.309272         | 277.158274       | 5  |
| 14 | 2663.213356        | 1332.110316     | 2646.186807    | 1323.597041      | 2645.202791    | 1323.105034      | E    | 474.267073         | 237.637175         | 457.240524     | 229.123900         | 456.256508         | 228.631892       | 4  |
| 15 | 2720.234820        | 1360.621048     | 2703.208271    | 1352.107773      | 2702.224255    | 1351.615766      | G    | 345.224480         | 173.115878         | 328.197931     | 164.602603         |                    |                  | 3  |
| 16 | 2833.318884        | 1417.163080     | 2816.292335    | 1408.649806      | 2815.308319    | 1408.157798      | L    | 288.203016         | 144.605146         | 271.176467     | 136.091872         |                    |                  | 2  |
| 17 |                    |                 |                |                  |                |                  | R    | 175.118952         | 88.063114          | 158.092403     | 79.549839          |                    |                  | 1  |

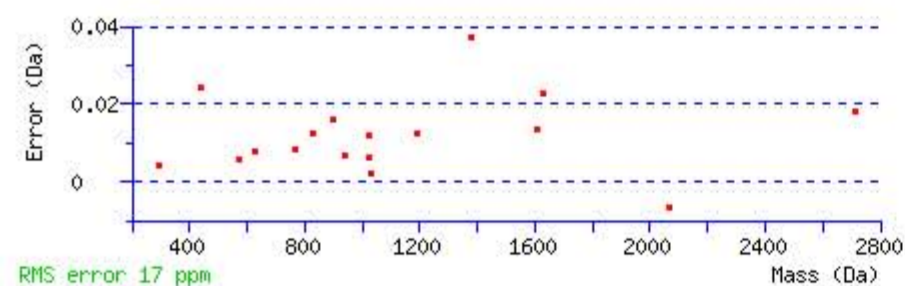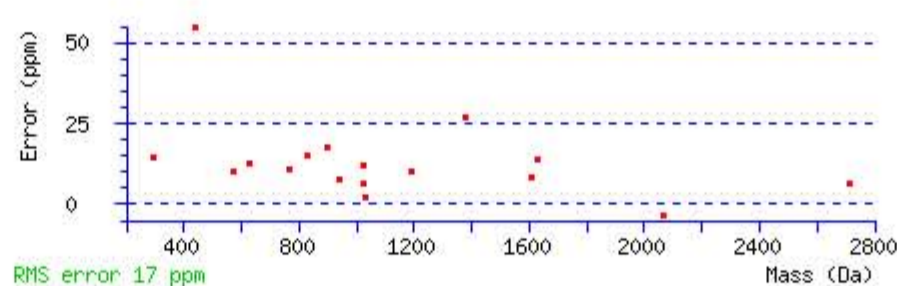

NCBI BLAST search of [MCPQLQQYEMHGPEGLR](#)

(Parameters: blastp, nr protein database, expect=20000, no filter, PAM30)

Other BLAST [web gateways](#)

## All matches to this query

| Score | Mr(calc):   | Delta    | Sequence                          |
|-------|-------------|----------|-----------------------------------|
| 29.7  | 3006.423264 | 0.034672 | <a href="#">MCPQLQQYEMHGPEGLR</a> |



# MASCOT Search Results

## Peptide View

MS/MS Fragmentation of **AVDQSVLLMKPDAELSASSVYNLLPEK**  
 Found in **A2MG\_HUMAN**, Alpha-2-macroglobulin OS=Homo sapiens GN=A2M PE=1 SV=3

Match to Query 74341: 3227.724822 from(1076.915550,3+) rtinseconds(2742) index(46923)  
 Title: Locus:1.1.1.3237.25 File:"2013-07-02 CLN FXIII 60 min 1st F 3.wiff"  
 Data file C:\Program Files (x86)\Matrix Science\Mascot Daemon\mgf4 FXIII 60 min 1st\mascot\_daemon\_merge.mgf

Click mouse within plot area to zoom in by factor of two about that point  
 Or, Plot from  to  Da   
 Label all possible matches  Label matches used for scoring

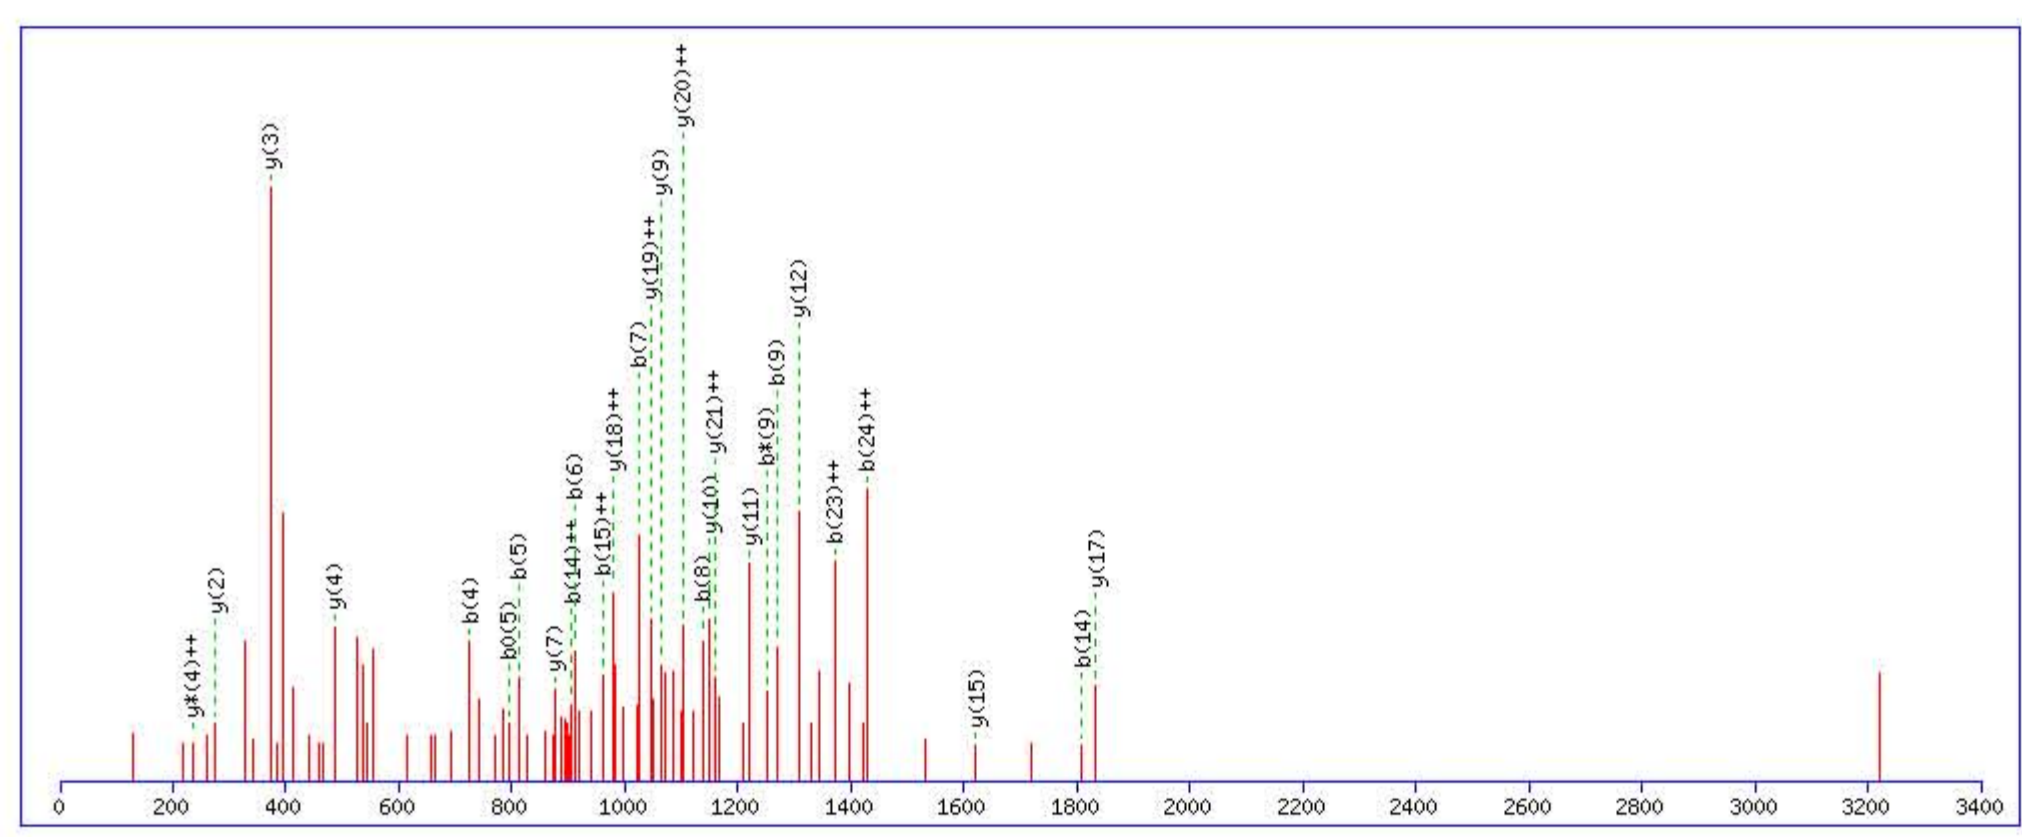

Monoisotopic mass of neutral peptide Mr(calc): 3227.682129  
 Fixed modifications: Carbamidomethyl (C) (apply to specified residues or termini only)  
 Variable modifications:  
 Q4 : Biotin:Thermo-21345 (Q)  
 Ions Score: 53 Expect: 7.3e-005  
 Matches : 28/300 fragment ions using 57 most intense peaks [\(help\)](#)

| #  | b                  | b <sup>++</sup>    | b <sup>*</sup>     | b <sup>+++</sup> | b <sup>0</sup>    | b <sup>0++</sup> | Seq. | y                  | y <sup>++</sup>    | y <sup>*</sup> | y <sup>+++</sup>  | y <sup>0</sup> | y <sup>0++</sup> | #  |
|----|--------------------|--------------------|--------------------|------------------|-------------------|------------------|------|--------------------|--------------------|----------------|-------------------|----------------|------------------|----|
| 1  | 72.044390          | 36.525833          |                    |                  |                   |                  | A    |                    |                    |                |                   |                |                  | 27 |
| 2  | 171.112804         | 86.060040          |                    |                  |                   |                  | V    | 3157.652336        | 1579.329806        | 3140.625787    | 1570.816531       | 3139.641771    | 1570.324523      | 26 |
| 3  | 286.139747         | 143.573512         |                    |                  | 268.129182        | 134.568229       | D    | 3058.583922        | 1529.795599        | 3041.557373    | 1521.282324       | 3040.573357    | 1520.790316      | 25 |
| 4  | <b>725.365073</b>  | 363.186175         | 708.338524         | 354.672900       | 707.354508        | 354.180892       | Q    | 2943.556979        | 1472.282127        | 2926.530430    | 1463.768853       | 2925.546414    | 1463.276845      | 24 |
| 5  | <b>812.397101</b>  | 406.702189         | 795.370552         | 398.188914       | <b>794.386536</b> | 397.696906       | S    | 2504.331653        | 1252.669464        | 2487.305104    | 1244.156190       | 2486.321088    | 1243.664182      | 23 |
| 6  | <b>911.465515</b>  | 456.236396         | 894.438966         | 447.723121       | 893.454950        | 447.231113       | V    | 2417.299625        | 1209.153451        | 2400.273076    | 1200.640176       | 2399.289060    | 1200.148168      | 22 |
| 7  | <b>1024.549579</b> | 512.778427         | 1007.523030        | 504.265153       | 1006.539014       | 503.773145       | L    | 2318.231211        | <b>1159.619243</b> | 2301.204662    | 1151.105969       | 2300.220646    | 1150.613961      | 21 |
| 8  | <b>1137.633643</b> | 569.320459         | 1120.607094        | 560.807185       | 1119.623078       | 560.315177       | L    | 2205.147147        | <b>1103.077212</b> | 2188.120598    | 1094.563937       | 2187.136582    | 1094.071929      | 20 |
| 9  | <b>1268.674128</b> | 634.840702         | <b>1251.647579</b> | 626.327428       | 1250.663563       | 625.835419       | M    | 2092.063083        | <b>1046.535179</b> | 2075.036534    | 1038.021905       | 2074.052518    | 1037.529897      | 19 |
| 10 | 1396.769091        | 698.888183         | 1379.742542        | 690.374909       | 1378.758526       | 689.882901       | K    | 1961.022598        | <b>981.014937</b>  | 1943.996049    | 972.501663        | 1943.012033    | 972.009655       | 18 |
| 11 | 1493.821855        | 747.414565         | 1476.795306        | 738.901291       | 1475.811290       | 738.409283       | P    | <b>1832.927635</b> | 916.967456         | 1815.901086    | 908.454181        | 1814.917070    | 907.962173       | 17 |
| 12 | 1608.848798        | 804.928037         | 1591.822249        | 796.414763       | 1590.838233       | 795.922755       | D    | 1735.874871        | 868.441074         | 1718.848322    | 859.927799        | 1717.864306    | 859.435791       | 16 |
| 13 | 1679.885912        | 840.446594         | 1662.859363        | 831.933320       | 1661.875347       | 831.441311       | A    | <b>1620.847928</b> | 810.927602         | 1603.821379    | 802.414328        | 1602.837363    | 801.922320       | 15 |
| 14 | <b>1808.928505</b> | <b>904.967891</b>  | 1791.901956        | 896.454616       | 1790.917940       | 895.962608       | E    | 1549.810814        | 775.409045         | 1532.784265    | 766.895771        | 1531.800249    | 766.403763       | 14 |
| 15 | 1922.012569        | <b>961.509923</b>  | 1904.986020        | 952.996648       | 1904.002004       | 952.504640       | L    | 1420.768221        | 710.887749         | 1403.741672    | 702.374474        | 1402.757656    | 701.882466       | 13 |
| 16 | 2009.044597        | 1005.025937        | 1992.018048        | 996.512662       | 1991.034032       | 996.020654       | S    | <b>1307.684157</b> | 654.345717         | 1290.657608    | 645.832442        | 1289.673592    | 645.340434       | 12 |
| 17 | 2080.081711        | 1040.544493        | 2063.055162        | 1032.031219      | 2062.071146       | 1031.539211      | A    | <b>1220.652129</b> | 610.829703         | 1203.625580    | 602.316428        | 1202.641564    | 601.824420       | 11 |
| 18 | 2167.113739        | 1084.060507        | 2150.087190        | 1075.547233      | 2149.103174       | 1075.055225      | S    | <b>1149.615015</b> | 575.311146         | 1132.588466    | 566.797871        | 1131.604450    | 566.305863       | 10 |
| 19 | 2254.145767        | 1127.576521        | 2237.119218        | 1119.063247      | 2236.135202       | 1118.571239      | S    | <b>1062.582987</b> | 531.795132         | 1045.556438    | 523.281857        | 1044.572422    | 522.789849       | 9  |
| 20 | 2353.214181        | 1177.110728        | 2336.187632        | 1168.597454      | 2335.203616       | 1168.105446      | V    | 975.550959         | 488.279118         | 958.524410     | 479.765843        | 957.540394     | 479.273835       | 8  |
| 21 | 2516.277510        | 1258.642393        | 2499.250961        | 1250.129118      | 2498.266945       | 1249.637110      | Y    | <b>876.482545</b>  | 438.744911         | 859.455996     | 430.231636        | 858.471980     | 429.739628       | 7  |
| 22 | 2630.320437        | 1315.663856        | 2613.293888        | 1307.150582      | 2612.309872       | 1306.658574      | N    | 713.419216         | 357.213246         | 696.392667     | 348.699972        | 695.408651     | 348.207964       | 6  |
| 23 | 2743.404501        | <b>1372.205888</b> | 2726.377952        | 1363.692614      | 2725.393936       | 1363.200606      | L    | 599.376289         | 300.191783         | 582.349740     | 291.678508        | 581.365724     | 291.186500       | 5  |
| 24 | 2856.488565        | <b>1428.747921</b> | 2839.462016        | 1420.234646      | 2838.478000       | 1419.742638      | L    | <b>486.292225</b>  | 243.649751         | 469.265676     | <b>235.136476</b> | 468.281660     | 234.644468       | 4  |
| 25 | 2953.541329        | 1477.274303        | 2936.514780        | 1468.761028      | 2935.530764       | 1468.269020      | P    | <b>373.208161</b>  | 187.107719         | 356.181612     | 178.594444        | 355.197596     | 178.102436       | 3  |
| 26 | 3082.583922        | 1541.795599        | 3065.557373        | 1533.282325      | 3064.573357       | 1532.790317      | E    | <b>276.155397</b>  | 138.581337         | 259.128848     | 130.068062        | 258.144832     | 129.576054       | 2  |
| 27 |                    |                    |                    |                  |                   |                  | K    | 147.112804         | 74.060040          | 130.086255     | 65.546765         |                |                  | 1  |

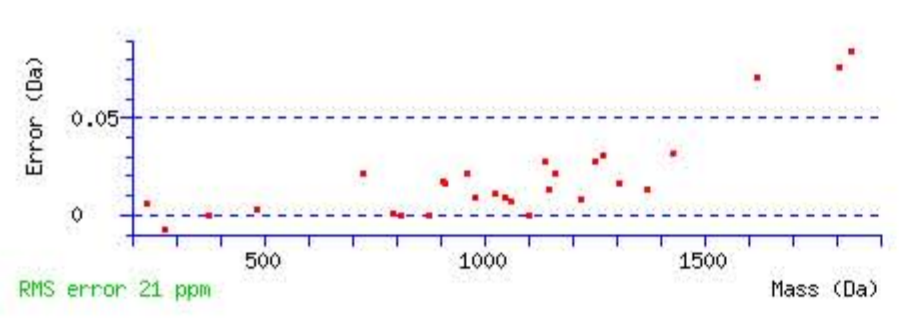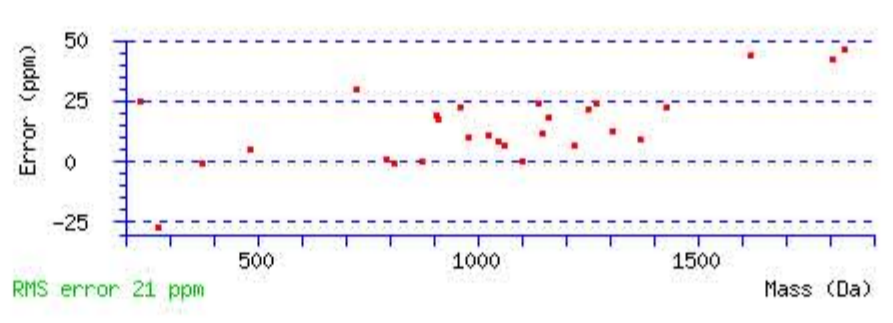

NCBI BLAST search of **AVDQSVLLMKPDAELSASSVYNLLPEK**  
 (Parameters: blastp, nr protein database, expect=20000, no filter, PAM30)  
 Other BLAST [web gateways](#)

### All matches to this query

| Score | Mr(calc):   | Delta    | Sequence                                    |
|-------|-------------|----------|---------------------------------------------|
| 53.4  | 3227.682129 | 0.042693 | <a href="#">AVDQSVLLMKPDAELSASSVYNLLPEK</a> |



# MASCOT Search Results

## Peptide View

MS/MS Fragmentation of **ENAEQSR**

Found in **ANT3\_HUMAN**, Antithrombin-III OS=Homo sapiens GN=SERPINC1 PE=1 SV=1

Match to Query 25467: 1143.535948 from(572.775250,2+) rtinseconds(1117) index(36288)

Title: Locus:1.1.1.2672.16 File:"2013-07-02 CLN FXIII 60 min 1st F 3.wiff"

Data file C:\Program Files (x86)\Matrix Science\Mascot Daemon\mgf4 FXIII 60 min 1st\mascot\_daemon\_merge.mgf

Click mouse within plot area to zoom in by factor of two about that point

Or, Plot from  to  Da

Label all possible matches  Label matches used for scoring

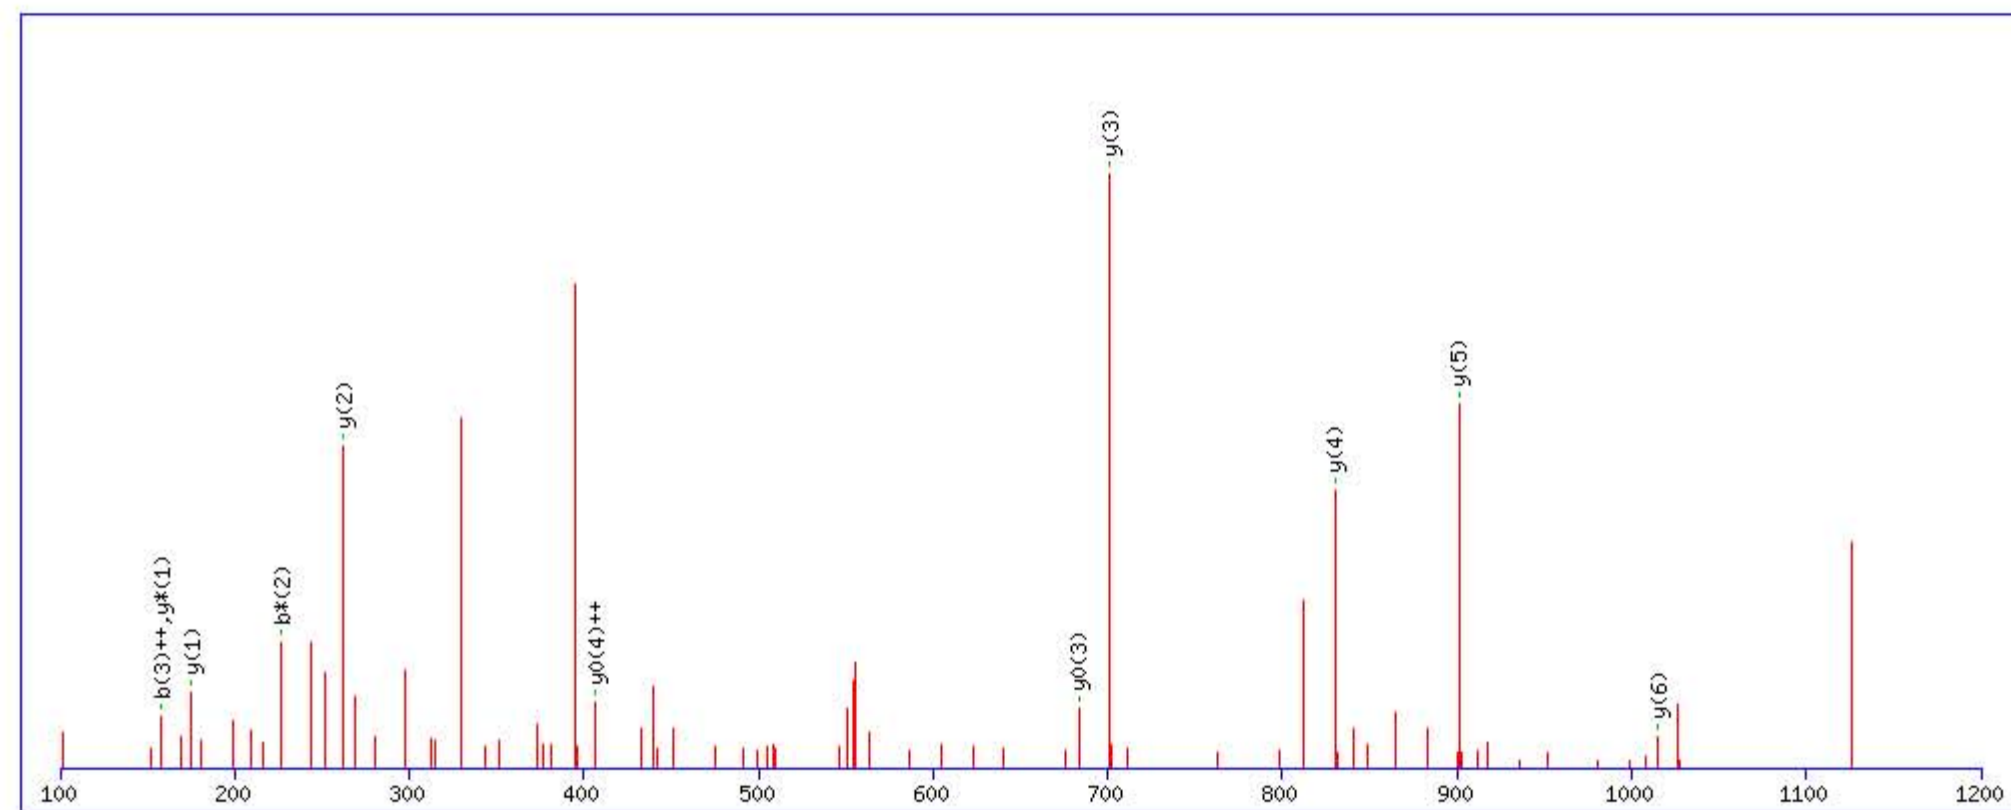

Monoisotopic mass of neutral peptide Mr(calc): 1143.534225

Fixed modifications: Carbamidomethyl (C) (apply to specified residues or termini only)

Variable modifications:

Q5 : Biotin:Thermo-21345 (Q)

Ions Score: 33 Expect: 0.0054

Matches : 11/68 fragment ions using 21 most intense peaks [\(help\)](#)

| # | b          | b <sup>++</sup> | b <sup>*</sup> | b <sup>*++</sup> | b <sup>0</sup> | b <sup>0++</sup> | Seq. | y           | y <sup>++</sup> | y <sup>*</sup> | y <sup>*++</sup> | y <sup>0</sup> | y <sup>0++</sup> | # |
|---|------------|-----------------|----------------|------------------|----------------|------------------|------|-------------|-----------------|----------------|------------------|----------------|------------------|---|
| 1 | 130.049869 | 65.528572       |                |                  | 112.039304     | 56.523290        | E    |             |                 |                |                  |                |                  | 7 |
| 2 | 244.092796 | 122.550036      | 227.066247     | 114.036762       | 226.082231     | 113.544754       | N    | 1015.498940 | 508.253108      | 998.472391     | 499.739834       | 997.488375     | 499.247826       | 6 |
| 3 | 315.129910 | 158.068593      | 298.103361     | 149.555319       | 297.119345     | 149.063311       | A    | 901.456013  | 451.231645      | 884.429464     | 442.718370       | 883.445448     | 442.226362       | 5 |
| 4 | 444.172503 | 222.589890      | 427.145954     | 214.076615       | 426.161938     | 213.584607       | E    | 830.418899  | 415.713088      | 813.392350     | 407.199813       | 812.408334     | 406.707805       | 4 |
| 5 | 883.397829 | 442.202553      | 866.371280     | 433.689278       | 865.387264     | 433.197270       | Q    | 701.376306  | 351.191791      | 684.349757     | 342.678517       | 683.365741     | 342.186509       | 3 |
| 6 | 970.429857 | 485.718567      | 953.403308     | 477.205292       | 952.419292     | 476.713284       | S    | 262.150980  | 131.579128      | 245.124431     | 123.065853       | 244.140415     | 122.573845       | 2 |
| 7 |            |                 |                |                  |                |                  | R    | 175.118952  | 88.063114       | 158.092403     | 79.549839        |                |                  | 1 |

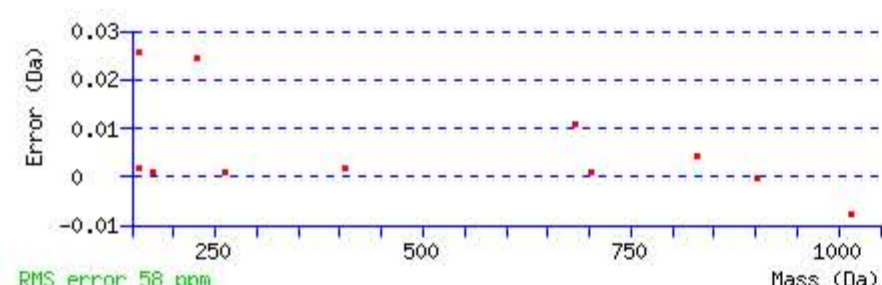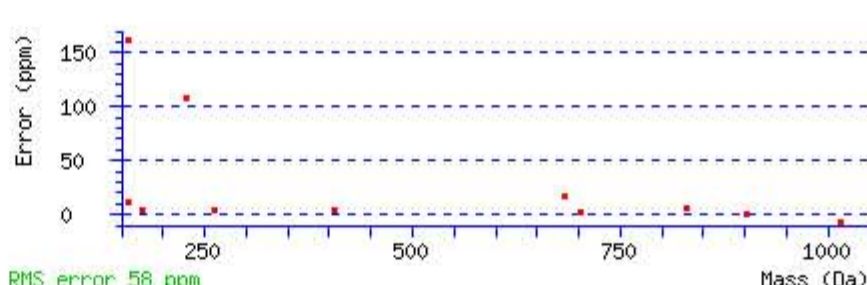

NCBI BLAST search of **ENAEQSR**

(Parameters: blastp, nr protein database, expect=20000, no filter, PAM30)

Other BLAST [web gateways](#)

### All matches to this query

| Score | Mr(calc):   | Delta     | Sequence                     |
|-------|-------------|-----------|------------------------------|
| 33.5  | 1143.534225 | 0.001723  | <a href="#">ENAEQSR</a>      |
| 13.2  | 1143.549500 | -0.013552 | <a href="#">WQEQSR</a>       |
| 11.2  | 1143.552017 | -0.016069 | <a href="#">VDDGTGREAPK</a>  |
| 6.3   | 1143.552002 | -0.016054 | <a href="#">SSSALDSPAGPR</a> |
| 4.6   | 1143.551987 | -0.016039 | <a href="#">ELNGSEAATPR</a>  |
| 4.4   | 1143.549316 | -0.013368 | <a href="#">SRSRSHSGDR</a>   |
| 4.1   | 1143.526840 | 0.009108  | <a href="#">EGEGASAPRDR</a>  |
| 3.1   | 1143.549500 | -0.013552 | <a href="#">EQWSQR</a>       |
| 2.5   | 1143.530899 | 0.005049  | <a href="#">TPFPDSSTHR</a>   |
| 1.6   | 1143.551987 | -0.016039 | <a href="#">EQGNIEEAVR</a>   |



# MASCOT SCIENCE Mascot Search Results

## Peptide View

MS/MS Fragmentation of **ATEDEGSEQK**

Found in **ANT3\_HUMAN**, Antithrombin-III OS=Homo sapiens GN=SERPINC1 PE=1 SV=1

Match to Query 35315: 1403.644348 from(702.829450,2+) rtinseconds(1183) index(19051)

Title: Locus:1.1.1.2366.19 File:"2013-07-02 CLN FXIII 60 min 1st F 2.wiff"

Data file C:\Program Files (x86)\Matrix Science\Mascot Daemon\mgf4 FXIII 60 min 1st\mascot\_daemon\_merge.mgf

Click mouse within plot area to zoom in by factor of two about that point

Or, Plot from  to  Da

Label all possible matches  Label matches used for scoring

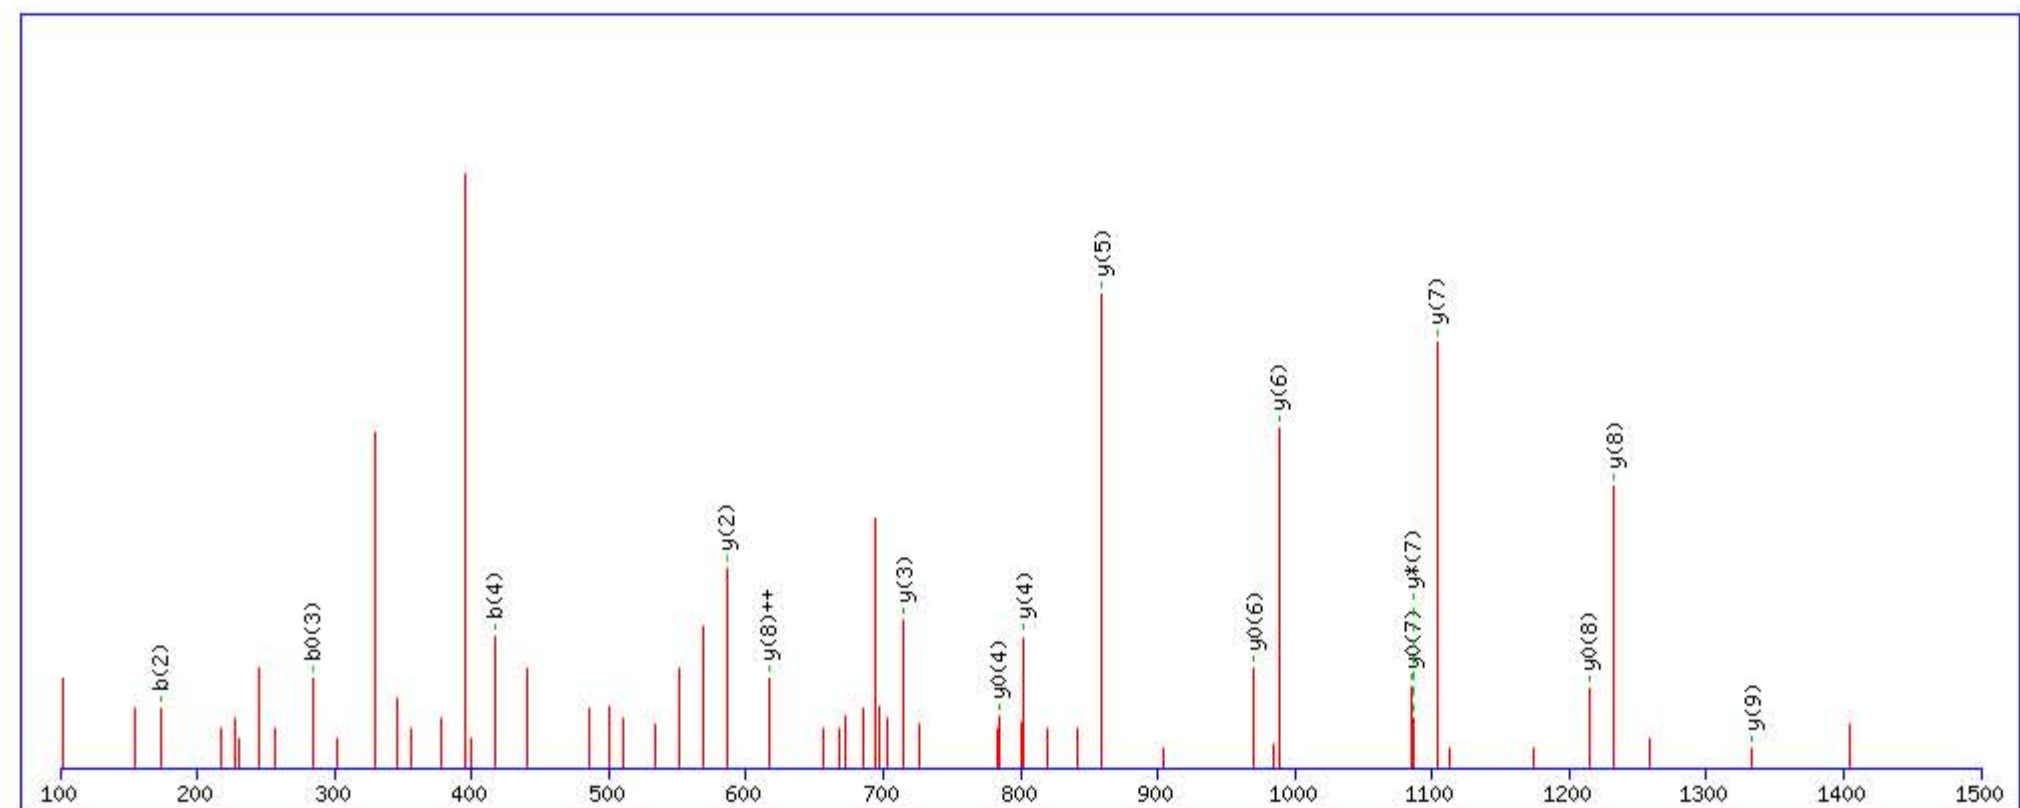

Monoisotopic mass of neutral peptide Mr(calc): 1403.623840

Fixed modifications: Carbamidomethyl (C) (apply to specified residues or termini only)

Variable modifications:

Q9 : Biotin:Thermo-21345 (Q)

Ions Score: 60 Expect: 9.8e-006

Matches : 17/86 fragment ions using 25 most intense peaks [\(help\)](#)

| #  | b                 | b <sup>++</sup> | b <sup>*</sup> | b <sup>***</sup> | b <sup>0</sup>    | b <sup>0++</sup> | Seq. | y                  | y <sup>++</sup>   | y <sup>*</sup>     | y <sup>***</sup> | y <sup>0</sup>     | y <sup>0++</sup> | #  |
|----|-------------------|-----------------|----------------|------------------|-------------------|------------------|------|--------------------|-------------------|--------------------|------------------|--------------------|------------------|----|
| 1  | 72.044390         | 36.525833       |                |                  |                   |                  | A    |                    |                   |                    |                  |                    |                  | 10 |
| 2  | <b>173.092069</b> | 87.049672       |                |                  | 155.081504        | 78.044390        | T    | <b>1333.594023</b> | 667.300650        | 1316.567474        | 658.787375       | 1315.583458        | 658.295367       | 9  |
| 3  | 302.134662        | 151.570969      |                |                  | <b>284.124097</b> | 142.565687       | E    | <b>1232.546344</b> | <b>616.776810</b> | 1215.519795        | 608.263536       | <b>1214.535779</b> | 607.771528       | 8  |
| 4  | <b>417.161605</b> | 209.084441      |                |                  | 399.151040        | 200.079158       | D    | <b>1103.503751</b> | 552.255514        | <b>1086.477202</b> | 543.742239       | <b>1085.493186</b> | 543.250231       | 7  |
| 5  | 546.204198        | 273.605737      |                |                  | 528.193633        | 264.600455       | E    | <b>988.476808</b>  | 494.742042        | 971.450259         | 486.228768       | <b>970.466243</b>  | 485.736760       | 6  |
| 6  | 603.225662        | 302.116469      |                |                  | 585.215097        | 293.111187       | G    | <b>859.434215</b>  | 430.220746        | 842.407666         | 421.707471       | 841.423650         | 421.215463       | 5  |
| 7  | 690.257690        | 345.632483      |                |                  | 672.247125        | 336.627201       | S    | <b>802.412751</b>  | 401.710014        | 785.386202         | 393.196739       | <b>784.402186</b>  | 392.704731       | 4  |
| 8  | 819.300283        | 410.153780      |                |                  | 801.289718        | 401.148497       | E    | <b>715.380723</b>  | 358.194000        | 698.354174         | 349.680725       | 697.370158         | 349.188717       | 3  |
| 9  | 1258.525609       | 629.766443      | 1241.499060    | 621.253168       | 1240.515044       | 620.761160       | Q    | <b>586.338130</b>  | 293.672703        | 569.311581         | 285.159428       |                    |                  | 2  |
| 10 |                   |                 |                |                  |                   |                  | K    | 147.112804         | 74.060040         | 130.086255         | 65.546765        |                    |                  | 1  |

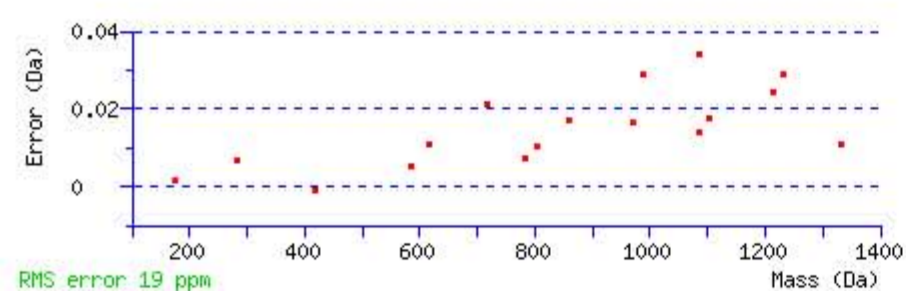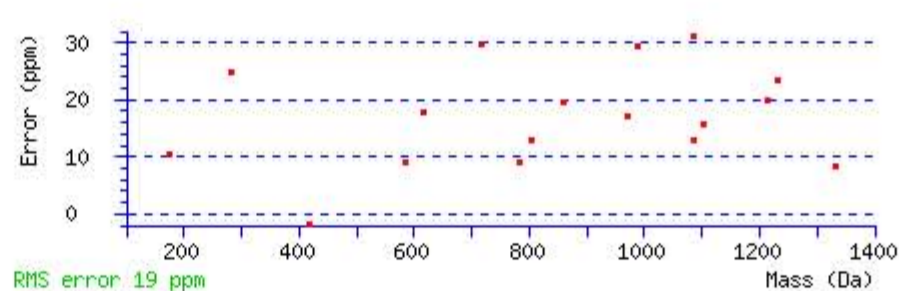

NCBI BLAST search of [ATEDEGSEQK](#)

(Parameters: blastp, nr protein database, expect=20000, no filter, PAM30)

Other BLAST [web gateways](#)

All matches to this query

| Score | Mr(calc):   | Delta     | Sequence                      |
|-------|-------------|-----------|-------------------------------|
| 60.0  | 1403.623840 | 0.020508  | <a href="#">ATEDEGSEQK</a>    |
| 9.2   | 1403.652832 | -0.008484 | <a href="#">LTSDEEGEPSGKR</a> |
| 7.4   | 1403.642929 | 0.001419  | <a href="#">EAESWSQIGNQR</a>  |
| 0.8   | 1403.650345 | -0.005997 | <a href="#">ATLKDSGSYFCR</a>  |

Mascot: <http://www.matrixscience.com/>



# MASCOT Search Results

## Peptide View

MS/MS Fragmentation of **AELQEGAR**

Found in **APOA1\_HUMAN**, Apolipoprotein A-I OS=Homo sapiens GN=APOA1 PE=1 SV=1

Match to Query 27181: 1183.606088 from(592.810320,2+) rtinseconds(1441) index(38444)

Title: Locus:1.1.1.2785.21 File:"2013-07-02 CLN FXIII 60 min 1st F 3.wiff"

Data file C:\Program Files (x86)\Matrix Science\Mascot Daemon\mgf4 FXIII 60 min 1st\mascot\_daemon\_merge.mgf

Click mouse within plot area to zoom in by factor of two about that point

Or, Plot from  to  Da

Label all possible matches  Label matches used for scoring

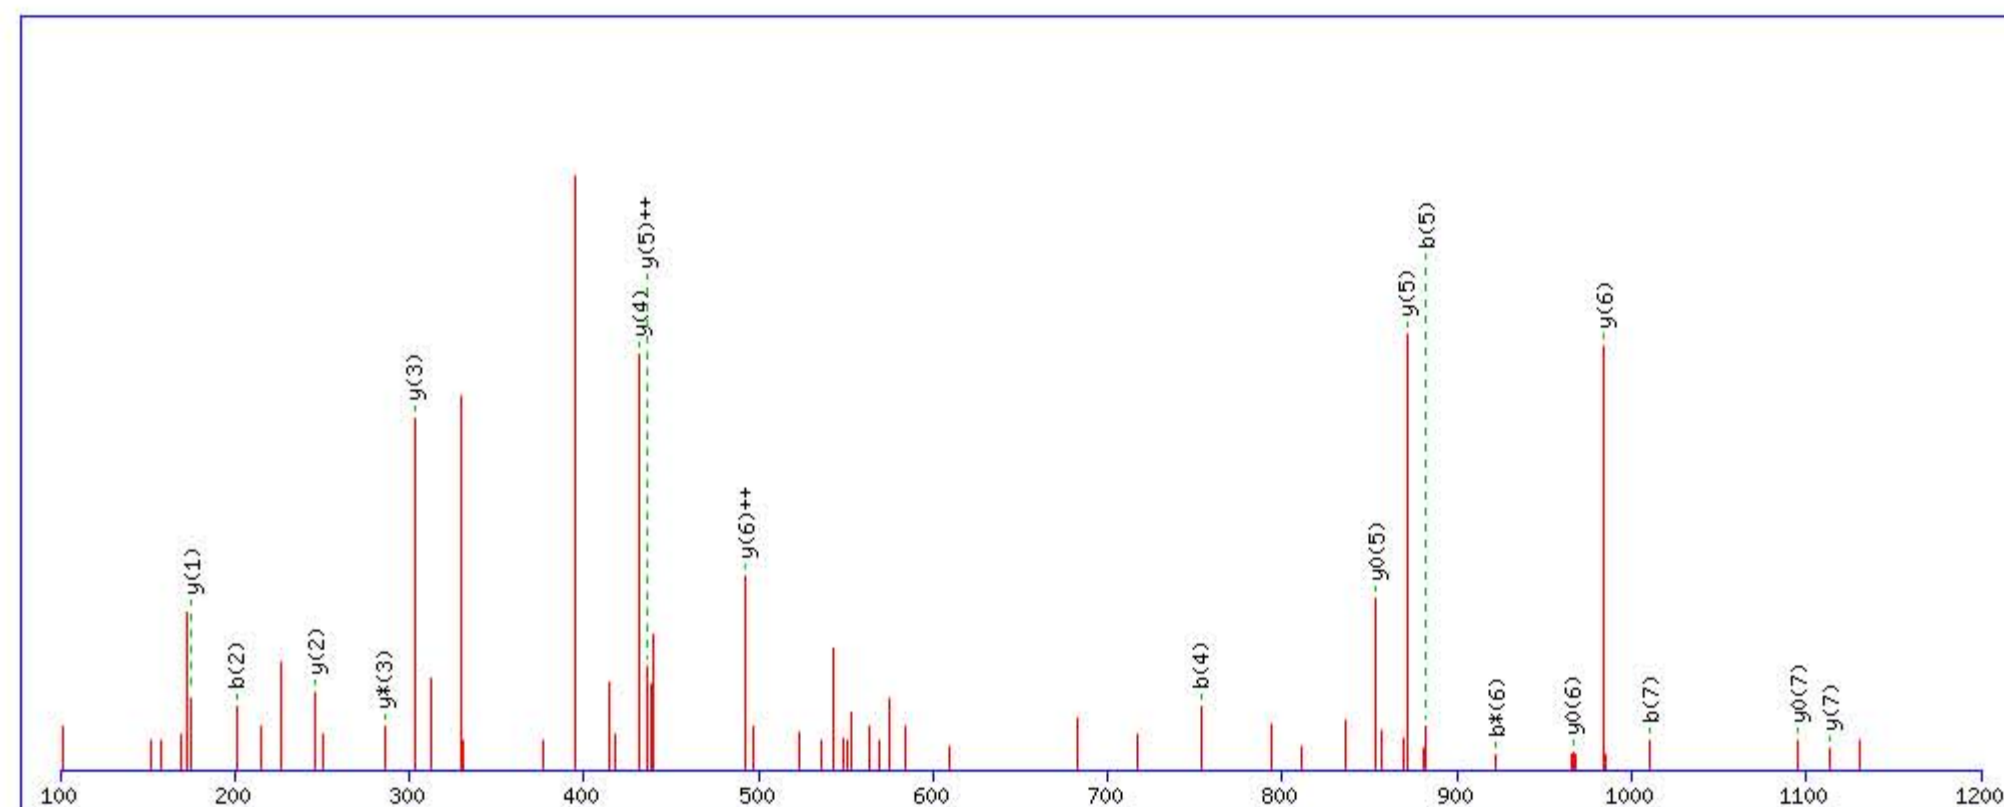

Monoisotopic mass of neutral peptide Mr(calc): 1183.601913

Fixed modifications: Carbamidomethyl (C) (apply to specified residues or termini only)

Variable modifications:

Q4 : Biotin:Thermo-21345 (Q)

Ions Score: 41 Expect: 0.0014

Matches : 18/70 fragment ions using 37 most intense peaks [\(help\)](#)

| # | b                  | b <sup>++</sup> | b <sup>*</sup>    | b <sup>*++</sup> | b <sup>0</sup> | b <sup>0++</sup> | Seq. | y                  | y <sup>++</sup>   | y <sup>*</sup>    | y <sup>*++</sup> | y <sup>0</sup>     | y <sup>0++</sup> | # |
|---|--------------------|-----------------|-------------------|------------------|----------------|------------------|------|--------------------|-------------------|-------------------|------------------|--------------------|------------------|---|
| 1 | 72.044390          | 36.525833       |                   |                  |                |                  | A    |                    |                   |                   |                  |                    |                  | 8 |
| 2 | <b>201.086983</b>  | 101.047130      |                   |                  | 183.076418     | 92.041847        | E    | <b>1113.572106</b> | 557.289691        | 1096.545557       | 548.776417       | <b>1095.561541</b> | 548.284409       | 7 |
| 3 | 314.171047         | 157.589161      |                   |                  | 296.160482     | 148.583879       | L    | <b>984.529513</b>  | <b>492.768395</b> | 967.502964        | 484.255120       | <b>966.518948</b>  | 483.763112       | 6 |
| 4 | <b>753.396373</b>  | 377.201825      | 736.369824        | 368.688550       | 735.385808     | 368.196542       | Q    | <b>871.445449</b>  | <b>436.226363</b> | 854.418900        | 427.713088       | <b>853.434884</b>  | 427.221080       | 5 |
| 5 | <b>882.438966</b>  | 441.723121      | 865.412417        | 433.209847       | 864.428401     | 432.717839       | E    | <b>432.220123</b>  | 216.613699        | 415.193574        | 208.100425       | 414.209558         | 207.608417       | 4 |
| 6 | 939.460430         | 470.233853      | <b>922.433881</b> | 461.720579       | 921.449865     | 461.228571       | G    | <b>303.177530</b>  | 152.092403        | <b>286.150981</b> | 143.579128       |                    |                  | 3 |
| 7 | <b>1010.497544</b> | 505.752410      | 993.470995        | 497.239136       | 992.486979     | 496.747128       | A    | <b>246.156066</b>  | 123.581671        | 229.129517        | 115.068396       |                    |                  | 2 |
| 8 |                    |                 |                   |                  |                |                  | R    | <b>175.118952</b>  | 88.063114         | 158.092403        | 79.549839        |                    |                  | 1 |

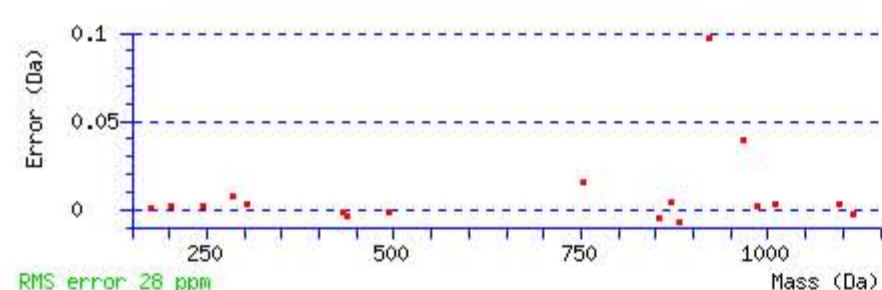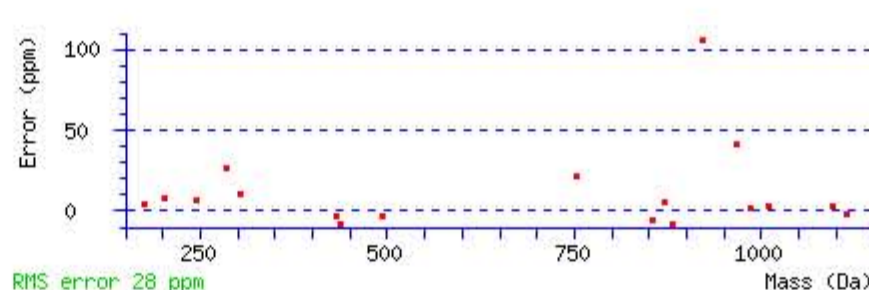

NCBI BLAST search of [AELQEGAR](#)

(Parameters: blastp, nr protein database, expect=20000, no filter, PAM30)

Other BLAST [web gateways](#)

All matches to this query

| Score | Mr(calc):   | Delta     | Sequence                     |
|-------|-------------|-----------|------------------------------|
| 41.0  | 1183.601913 | 0.004175  | <a href="#">AELQEGAR</a>     |
| 12.1  | 1183.613815 | -0.007727 | <a href="#">FHFEALPPAR</a>   |
| 10.2  | 1183.601913 | 0.004175  | <a href="#">EALQQR</a>       |
| 6.9   | 1183.601913 | 0.004175  | <a href="#">QLAEQER</a>      |
| 5.9   | 1183.601913 | 0.004175  | <a href="#">ELQAEAGR</a>     |
| 5.5   | 1183.601913 | 0.004175  | <a href="#">LQEAQER</a>      |
| 5.5   | 1183.617172 | -0.011084 | <a href="#">AQLEAWR</a>      |
| 5.1   | 1183.619690 | -0.013602 | <a href="#">TDPRPDAATIK</a>  |
| 3.7   | 1183.601913 | 0.004175  | <a href="#">EALQQR</a>       |
| 3.3   | 1183.609802 | -0.003714 | <a href="#">ATPHFSGLAAGR</a> |



# MASCOT Search Results

## Peptide View

MS/MS Fragmentation of **QGLLPVLESFK**

Found in **APOA1\_HUMAN**, Apolipoprotein A-I OS=Homo sapiens GN=APOA1 PE=1 SV=1

Match to Query 39736: 1540.882908 from(771.448730,2+) rtinseconds(2782) index(11927)

Title: Locus:1.1.1.3100.10 File:"2013-07-02 CLN FXIII 60 min 1st F 1.wiff"

Data file C:\Program Files (x86)\Matrix Science\Mascot Daemon\mgf4 FXIII 60 min 1st\mascot\_daemon\_merge.mgf

Click mouse within plot area to zoom in by factor of two about that point

Or, Plot from  to  Da

Label all possible matches  Label matches used for scoring

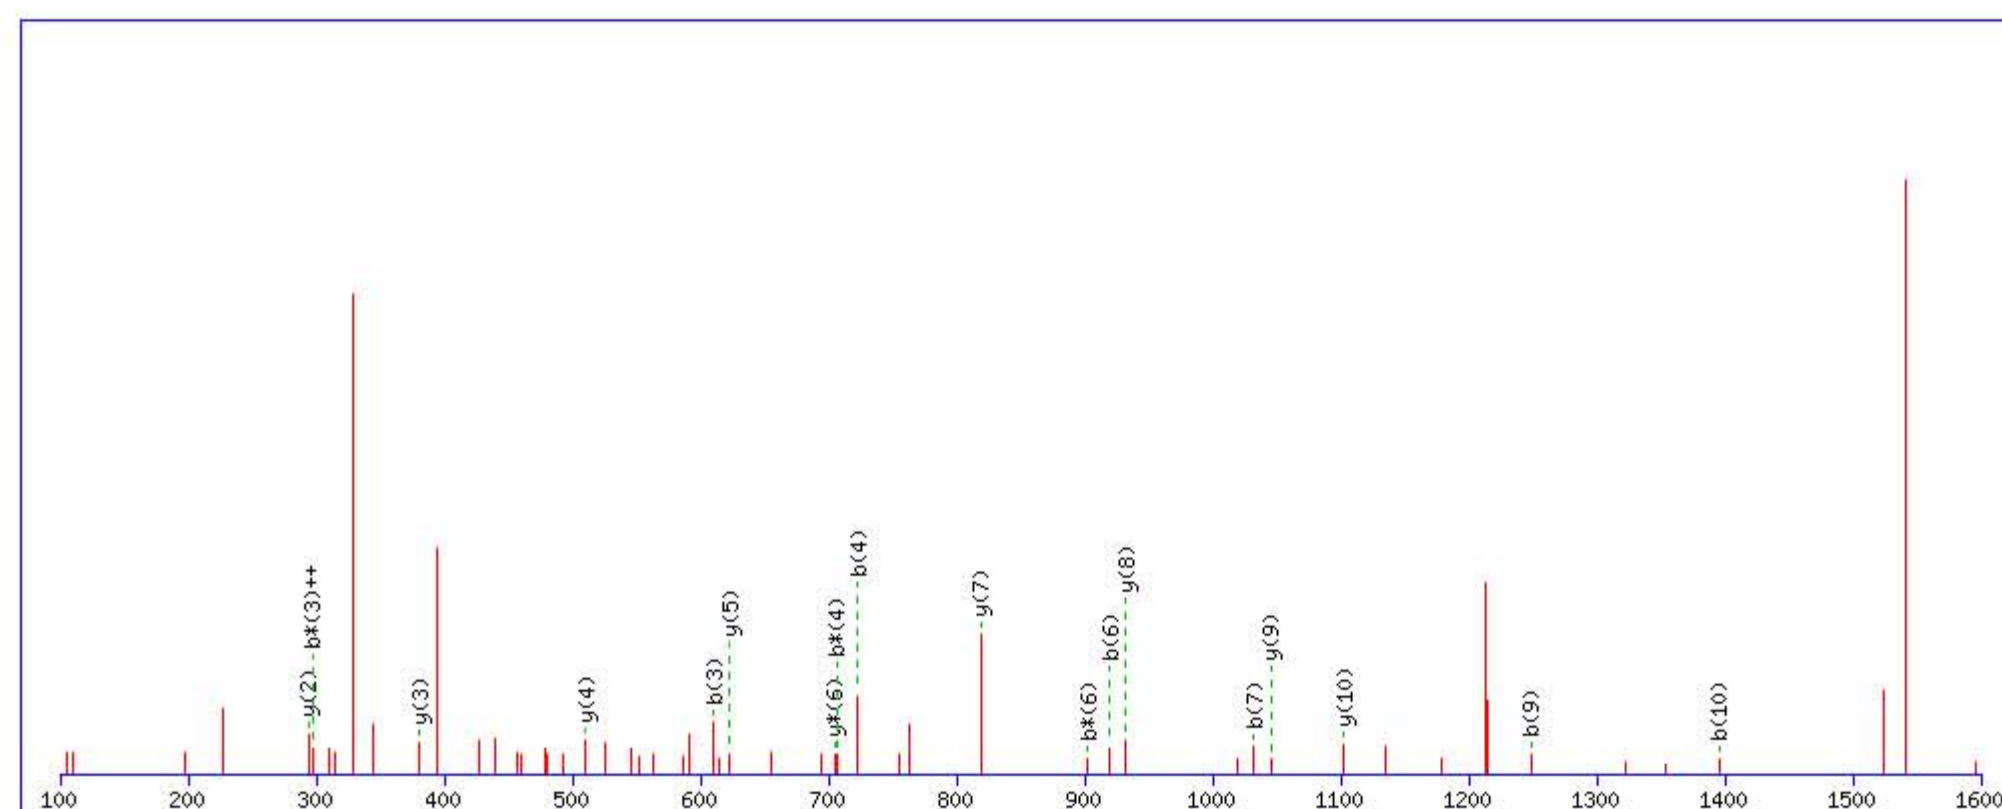

Monoisotopic mass of neutral peptide Mr(calc): 1540.868713

Fixed modifications: Carbamidomethyl (C) (apply to specified residues or termini only)

Variable modifications:

Q1 : Biotin:Thermo-21345 (Q)

Ions Score: 38 Expect: 0.0018

Matches : 18/102 fragment ions using 43 most intense peaks [\(help\)](#)

| #  | b           | b <sup>++</sup> | b <sup>*</sup> | b <sup>*++</sup> | b <sup>0</sup> | b <sup>0++</sup> | Seq. | y           | y <sup>++</sup> | y <sup>*</sup> | y <sup>*++</sup> | y <sup>0</sup> | y <sup>0++</sup> | #  |
|----|-------------|-----------------|----------------|------------------|----------------|------------------|------|-------------|-----------------|----------------|------------------|----------------|------------------|----|
| 1  | 440.232602  | 220.619939      | 423.206053     | 212.106664       |                |                  | Q    |             |                 |                |                  |                |                  | 11 |
| 2  | 497.254066  | 249.130671      | 480.227517     | 240.617396       |                |                  | G    | 1102.650673 | 551.828975      | 1085.624124    | 543.315700       | 1084.640108    | 542.823692       | 10 |
| 3  | 610.338130  | 305.672703      | 593.311581     | 297.159428       |                |                  | L    | 1045.629209 | 523.318243      | 1028.602660    | 514.804968       | 1027.618644    | 514.312960       | 9  |
| 4  | 723.422194  | 362.214735      | 706.395645     | 353.701461       |                |                  | L    | 932.545145  | 466.776211      | 915.518596     | 458.262936       | 914.534580     | 457.770928       | 8  |
| 5  | 820.474958  | 410.741117      | 803.448409     | 402.227843       |                |                  | P    | 819.461081  | 410.234179      | 802.434532     | 401.720904       | 801.450516     | 401.228896       | 7  |
| 6  | 919.543372  | 460.275324      | 902.516823     | 451.762049       |                |                  | V    | 722.408317  | 361.707797      | 705.381768     | 353.194522       | 704.397752     | 352.702514       | 6  |
| 7  | 1032.627436 | 516.817356      | 1015.600887    | 508.304082       |                |                  | L    | 623.339903  | 312.173590      | 606.313354     | 303.660315       | 605.329338     | 303.168307       | 5  |
| 8  | 1161.670029 | 581.338653      | 1144.643480    | 572.825378       | 1143.659464    | 572.333370       | E    | 510.255839  | 255.631558      | 493.229290     | 247.118283       | 492.245274     | 246.626275       | 4  |
| 9  | 1248.702057 | 624.854667      | 1231.675508    | 616.341392       | 1230.691492    | 615.849384       | S    | 381.213246  | 191.110261      | 364.186697     | 182.596987       | 363.202681     | 182.104979       | 3  |
| 10 | 1395.770471 | 698.388874      | 1378.743922    | 689.875599       | 1377.759906    | 689.383591       | F    | 294.181218  | 147.594247      | 277.154669     | 139.080973       |                |                  | 2  |
| 11 |             |                 |                |                  |                |                  | K    | 147.112804  | 74.060040       | 130.086255     | 65.546765        |                |                  | 1  |

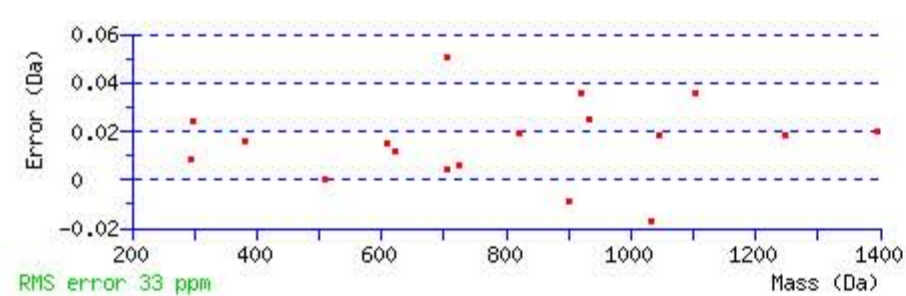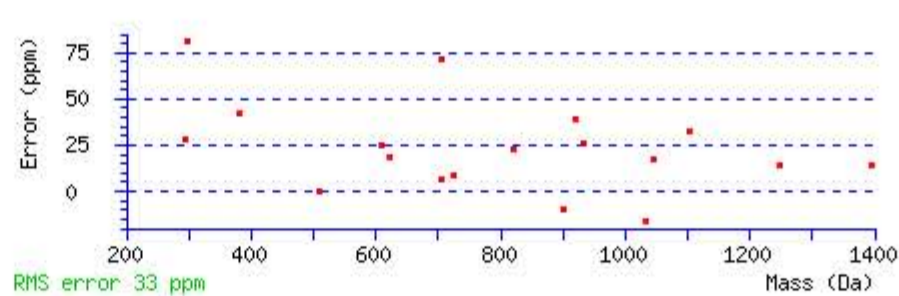

NCBI BLAST search of **QGLLPVLESFK**

(Parameters: blastp, nr protein database, expect=20000, no filter, PAM30)

Other BLAST [web gateways](#)

All matches to this query

| Score | Mr(calc):   | Delta     | Sequence                      |
|-------|-------------|-----------|-------------------------------|
| 37.8  | 1540.868713 | 0.014195  | <a href="#">QGLLPVLESFK</a>   |
| 15.2  | 1540.894531 | -0.011623 | <a href="#">QAVLSMVRKAK</a>   |
| 0.0   | 1540.864700 | 0.018208  | <a href="#">KVTVGKDDIQK</a>   |
| 0.0   | 1540.893677 | -0.010769 | <a href="#">LKSVDVGLQLREK</a> |

Mascot: <http://www.matrixscience.com/>



# MASCOT Search Results

## Peptide View

MS/MS Fragmentation of **VQPYLDDFQK**

Found in **APOA1\_HUMAN**, Apolipoprotein A-I OS=Homo sapiens GN=APOA1 PE=1 SV=1

Match to Query 40356: 1562.787252 from(521.936360,3+) rtinseconds(2160) index(43157)

Title: Locus:1.1.1.3036.7 File:"2013-07-02 CLN FXIII 60 min 1st F 3.wiff"

Data file C:\Program Files (x86)\Matrix Science\Mascot Daemon\mgf4 FXIII 60 min 1st\mascot\_daemon\_merge.mgf

Click mouse within plot area to zoom in by factor of two about that point

Or, Plot from  to  Da

Label all possible matches  Label matches used for scoring

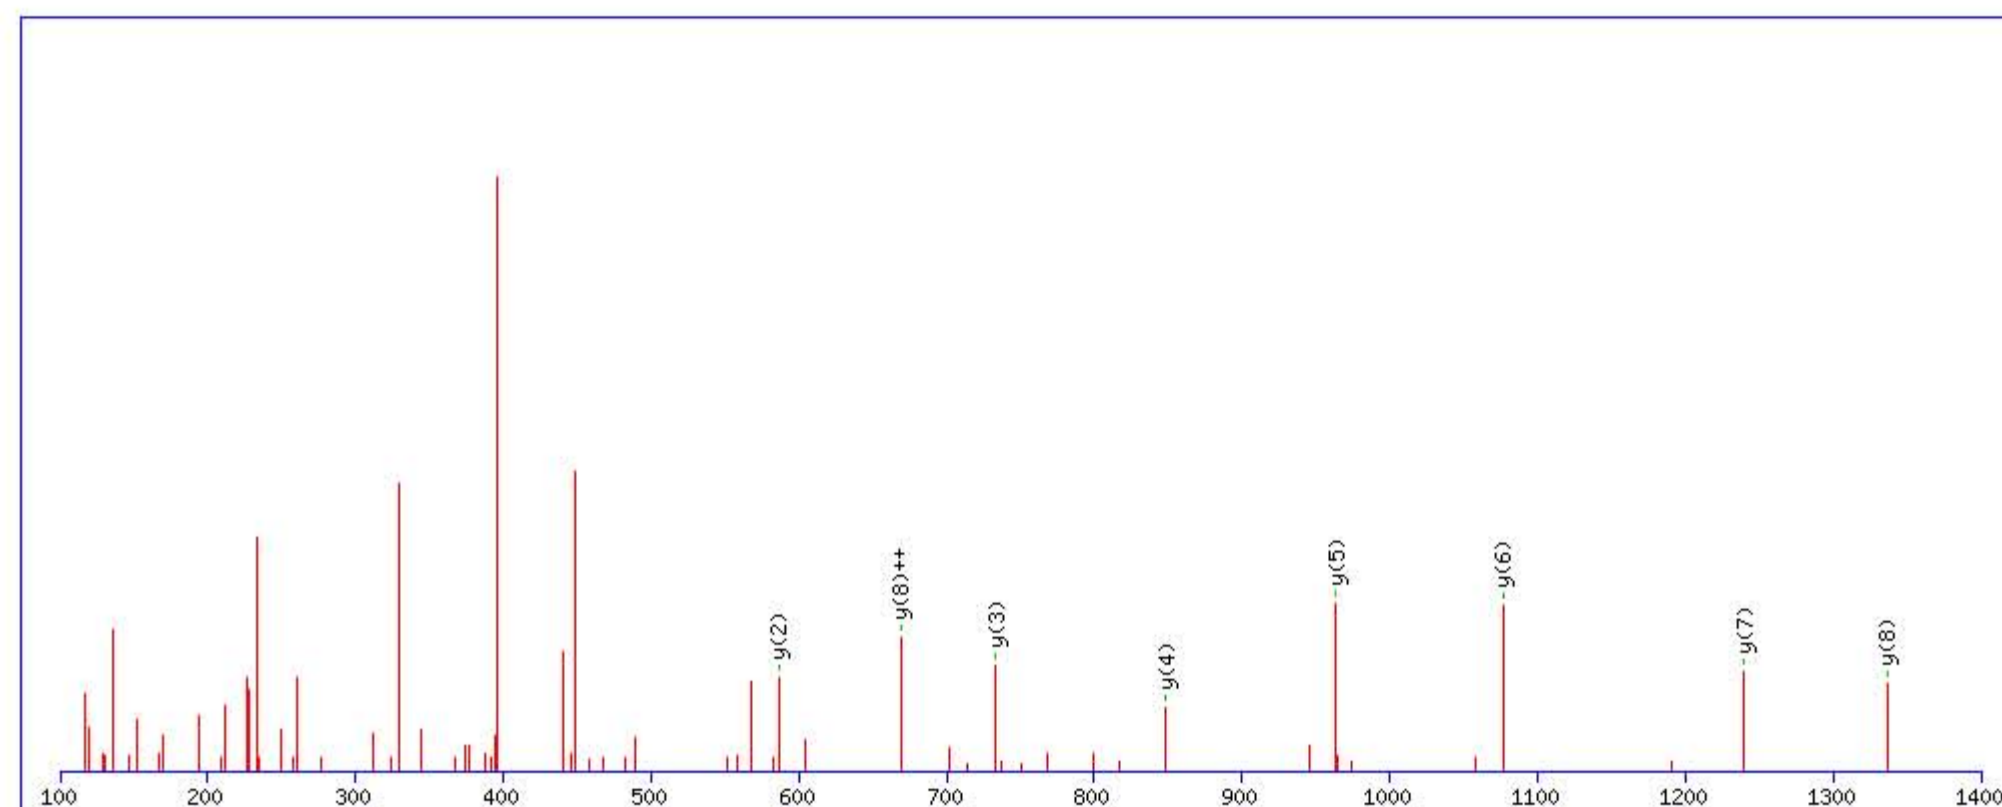

Monoisotopic mass of neutral peptide Mr(calc): 1562.780304

Fixed modifications: Carbamidomethyl (C) (apply to specified residues or termini only)

Variable modifications:

Q9 : Biotin:Thermo-21345 (Q)

Ions Score: 46 Expect: 0.00069

Matches : 8/90 fragment ions using 13 most intense peaks [\(help\)](#)

| #  | b           | b <sup>++</sup> | b <sup>*</sup> | b <sup>*++</sup> | b <sup>0</sup> | b <sup>0++</sup> | Seq. | y                  | y <sup>++</sup>   | y <sup>*</sup> | y <sup>*++</sup> | y <sup>0</sup> | y <sup>0++</sup> | #  |
|----|-------------|-----------------|----------------|------------------|----------------|------------------|------|--------------------|-------------------|----------------|------------------|----------------|------------------|----|
| 1  | 100.075690  | 50.541483       |                |                  |                |                  | V    |                    |                   |                |                  |                |                  | 10 |
| 2  | 228.134268  | 114.570772      | 211.107719     | 106.057498       |                |                  | Q    | 1464.719165        | 732.863221        | 1447.692616    | 724.349946       | 1446.708600    | 723.857938       | 9  |
| 3  | 325.187032  | 163.097154      | 308.160483     | 154.583879       |                |                  | P    | <b>1336.660587</b> | <b>668.833932</b> | 1319.634038    | 660.320657       | 1318.650022    | 659.828649       | 8  |
| 4  | 488.250361  | 244.628818      | 471.223812     | 236.115544       |                |                  | Y    | <b>1239.607823</b> | 620.307550        | 1222.581274    | 611.794275       | 1221.597258    | 611.302267       | 7  |
| 5  | 601.334425  | 301.170851      | 584.307876     | 292.657576       |                |                  | L    | <b>1076.544494</b> | 538.775885        | 1059.517945    | 530.262611       | 1058.533929    | 529.770603       | 6  |
| 6  | 716.361368  | 358.684322      | 699.334819     | 350.171047       | 698.350803     | 349.679039       | D    | <b>963.460430</b>  | 482.233853        | 946.433881     | 473.720579       | 945.449865     | 473.228571       | 5  |
| 7  | 831.388311  | 416.197793      | 814.361762     | 407.684519       | 813.377746     | 407.192511       | D    | <b>848.433487</b>  | 424.720382        | 831.406938     | 416.207107       | 830.422922     | 415.715099       | 4  |
| 8  | 978.456725  | 489.732000      | 961.430176     | 481.218726       | 960.446160     | 480.726718       | F    | <b>733.406544</b>  | 367.206910        | 716.379995     | 358.693636       |                |                  | 3  |
| 9  | 1417.682051 | 709.344664      | 1400.655502    | 700.831389       | 1399.671486    | 700.339381       | Q    | <b>586.338130</b>  | 293.672703        | 569.311581     | 285.159429       |                |                  | 2  |
| 10 |             |                 |                |                  |                |                  | K    | 147.112804         | 74.060040         | 130.086255     | 65.546765        |                |                  | 1  |

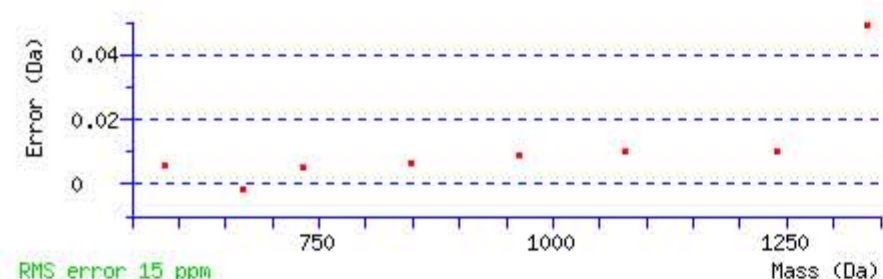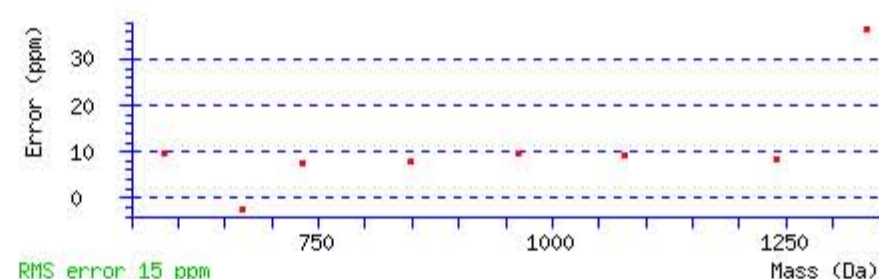

NCBI BLAST search of **VQPYLDDFQK**

(Parameters: blastp, nr protein database, expect=20000, no filter, PAM30)

Other BLAST [web gateways](#)

All matches to this query

| Score | Mr(calc):   | Delta    | Sequence          |
|-------|-------------|----------|-------------------|
| 45.6  | 1562.780304 | 0.006948 | <b>VQPYLDDFQK</b> |

Mascot: <http://www.matrixscience.com/>



# MASCOT SEARCH RESULTS

## Peptide View

MS/MS Fragmentation of **DYVSQFEGSALGK**

Found in **APOA1\_HUMAN**, Apolipoprotein A-I OS=Homo sapiens GN=APOA1 PE=1 SV=1

Match to Query 46079: 1710.841768 from(856.428160,2+) rtinseconds(2372) index(44553)

Title: Locus:1.1.1.3109.15 File:"2013-07-02 CLN FXIII 60 min 1st F 3.wiff"

Data file C:\Program Files (x86)\Matrix Science\Mascot Daemon\mgf4 FXIII 60 min 1st\mascot\_daemon\_merge.mgf

Click mouse within plot area to zoom in by factor of two about that point

Or, Plot from  to  Da

Label all possible matches  Label matches used for scoring

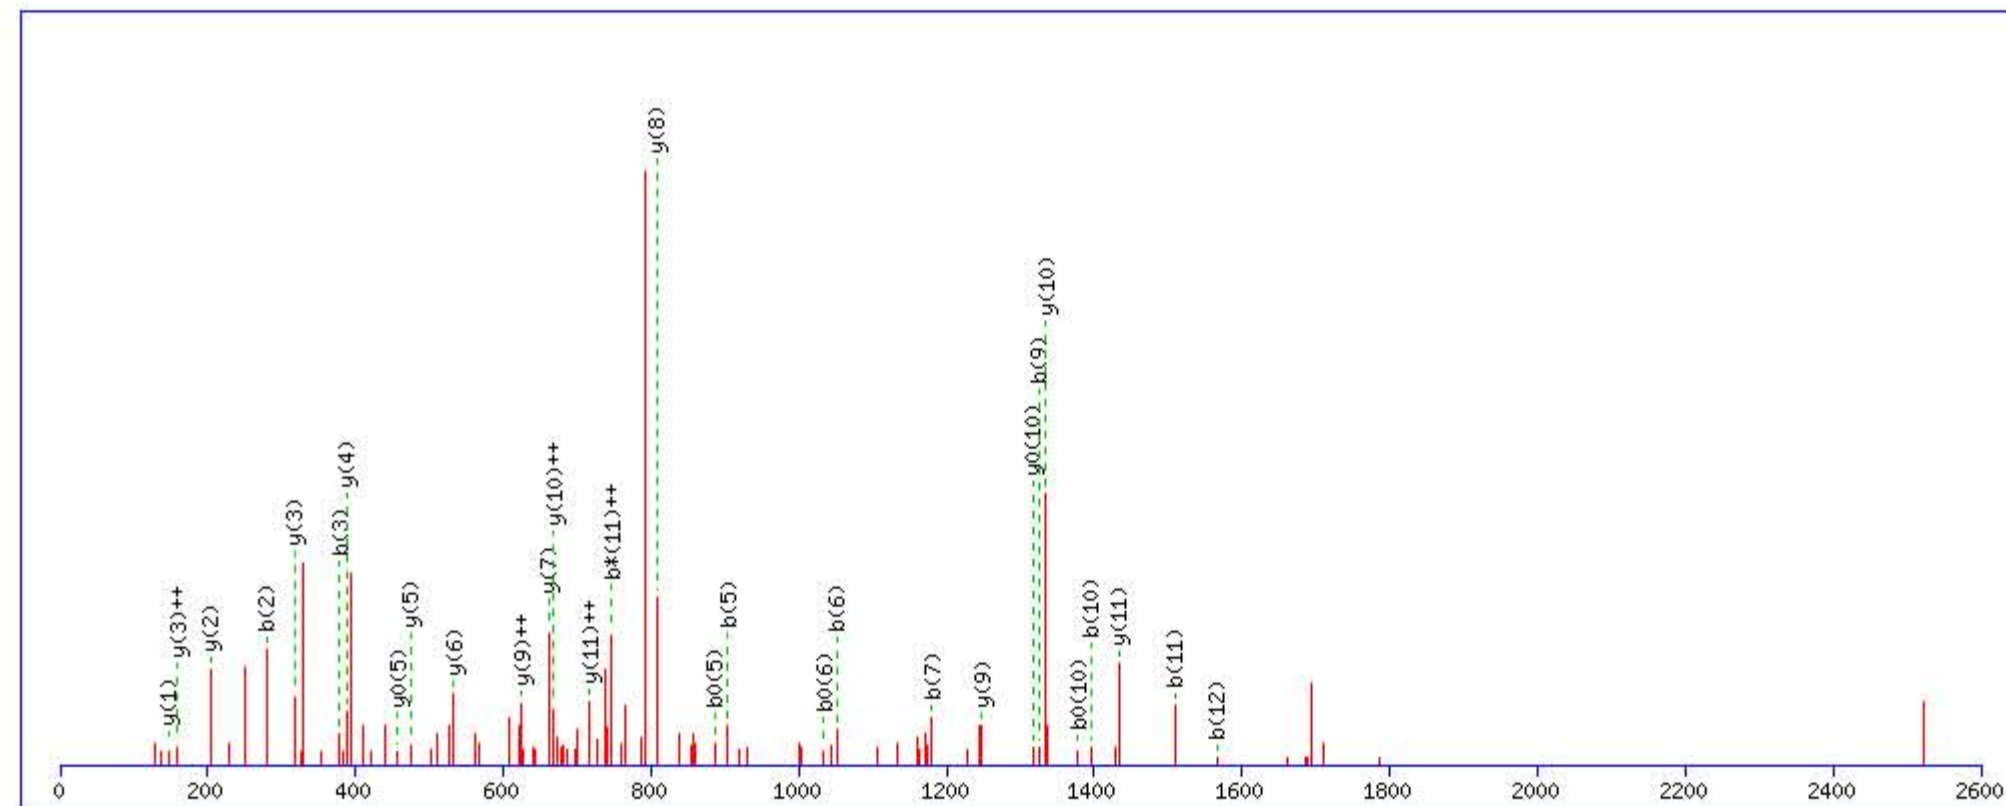

Monoisotopic mass of neutral peptide Mr(calc): 1710.828705

Fixed modifications: Carbamidomethyl (C) (apply to specified residues or termini only)

Variable modifications:

Q5 : Biotin:Thermo-21345 (Q)

Ions Score: 49 Expect: 5e-005

Matches : 30/128 fragment ions using 79 most intense peaks [\(help\)](#)

| #  | b                  | b <sup>++</sup> | b <sup>+</sup> | b <sup>+++</sup>  | b <sup>0</sup>     | b <sup>0++</sup> | Seq. | y                  | y <sup>++</sup>   | y <sup>+</sup> | y <sup>+++</sup> | y <sup>0</sup>     | y <sup>0++</sup> | #  |
|----|--------------------|-----------------|----------------|-------------------|--------------------|------------------|------|--------------------|-------------------|----------------|------------------|--------------------|------------------|----|
| 1  | 116.034219         | 58.520748       |                |                   | 98.023654          | 49.515465        | D    |                    |                   |                |                  |                    |                  | 13 |
| 2  | <b>279.097548</b>  | 140.052412      |                |                   | 261.086983         | 131.047130       | Y    | 1596.809042        | 798.908159        | 1579.782493    | 790.394884       | 1578.798477        | 789.902876       | 12 |
| 3  | <b>378.165962</b>  | 189.586619      |                |                   | 360.155397         | 180.581337       | V    | <b>1433.745713</b> | <b>717.376495</b> | 1416.719164    | 708.863220       | 1415.735148        | 708.371212       | 11 |
| 4  | 465.197990         | 233.102633      |                |                   | 447.187425         | 224.097351       | S    | <b>1334.677299</b> | <b>667.842288</b> | 1317.650750    | 659.329013       | <b>1316.666734</b> | 658.837005       | 10 |
| 5  | <b>904.423316</b>  | 452.715296      | 887.396767     | 444.202022        | <b>886.412751</b>  | 443.710014       | Q    | <b>1247.645271</b> | <b>624.326273</b> | 1230.618722    | 615.812999       | 1229.634706        | 615.320991       | 9  |
| 6  | <b>1051.491730</b> | 526.249503      | 1034.465181    | 517.736229        | <b>1033.481165</b> | 517.244221       | F    | <b>808.419945</b>  | 404.713610        | 791.393396     | 396.200336       | 790.409380         | 395.708328       | 8  |
| 7  | <b>1180.534323</b> | 590.770800      | 1163.507774    | 582.257525        | 1162.523758        | 581.765517       | E    | <b>661.351531</b>  | 331.179403        | 644.324982     | 322.666129       | 643.340966         | 322.174121       | 7  |
| 8  | 1237.555787        | 619.281532      | 1220.529238    | 610.768257        | 1219.545222        | 610.276249       | G    | <b>532.308938</b>  | 266.658107        | 515.282389     | 258.144832       | 514.298373         | 257.652824       | 6  |
| 9  | <b>1324.587815</b> | 662.797546      | 1307.561266    | 654.284271        | 1306.577250        | 653.792263       | S    | <b>475.287474</b>  | 238.147375        | 458.260925     | 229.634100       | <b>457.276909</b>  | 229.142092       | 5  |
| 10 | <b>1395.624929</b> | 698.316103      | 1378.598380    | 689.802828        | <b>1377.614364</b> | 689.310820       | A    | <b>388.255446</b>  | 194.631361        | 371.228897     | 186.118086       |                    |                  | 4  |
| 11 | <b>1508.708993</b> | 754.858135      | 1491.682444    | <b>746.344860</b> | 1490.698428        | 745.852852       | L    | <b>317.218332</b>  | <b>159.112804</b> | 300.191783     | 150.599529       |                    |                  | 3  |
| 12 | <b>1565.730457</b> | 783.368866      | 1548.703908    | 774.855592        | 1547.719892        | 774.363584       | G    | <b>204.134268</b>  | 102.570772        | 187.107719     | 94.057497        |                    |                  | 2  |
| 13 |                    |                 |                |                   |                    |                  | K    | <b>147.112804</b>  | 74.060040         | 130.086255     | 65.546765        |                    |                  | 1  |

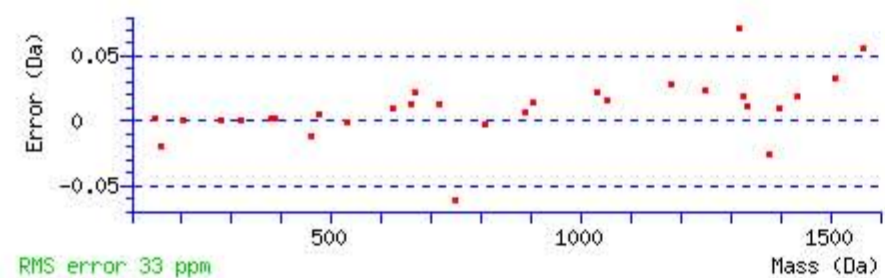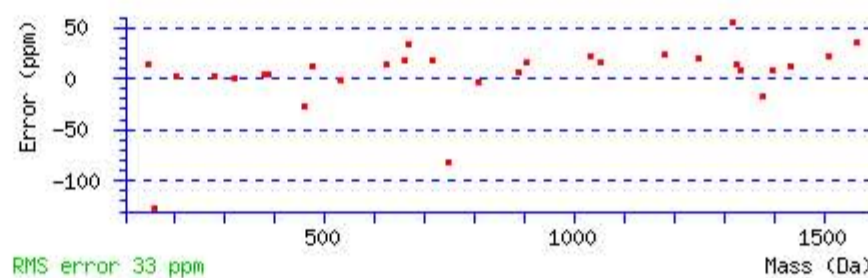

NCBI BLAST search of **DYVSQFEGSALGK**

(Parameters: blastp, nr protein database, expect=20000, no filter, PAM30)

Other BLAST [web gateways](#)

All matches to this query

| Score | Mr(calc):   | Delta    | Sequence                         |
|-------|-------------|----------|----------------------------------|
| 49.5  | 1710.828705 | 0.013063 | <a href="#">DYVSQFEGSALGK</a>    |
| 3.5   | 1710.835907 | 0.005861 | <a href="#">ASRKGSFGEMGEQTVK</a> |
| 2.7   | 1710.833420 | 0.008348 | <a href="#">YDPVWMTVTRKCR</a>    |

Mascot: <http://www.matrixscience.com/>



# MASCOT Search Results

## Peptide View

MS/MS Fragmentation of **VKSPQLQAEAK**

Found in **APOA2\_HUMAN**, Apolipoprotein A-II OS=Homo sapiens GN=APOA2 PE=1 SV=1

Match to Query 38997: 1509.820992 from(504.280940,3+) rtinseconds(1429) index(38339)

Title: Locus:1.1.1.2781.14 File:"2013-07-02 CLN FXIII 60 min 1st F 3.wiff"

Data file C:\Program Files (x86)\Matrix Science\Mascot Daemon\mgf\4 FXIII 60 min 1st\mascot\_daemon\_merge.mgf

Click mouse within plot area to zoom in by factor of two about that point

Or, Plot from  to  Da

Label all possible matches  Label matches used for scoring

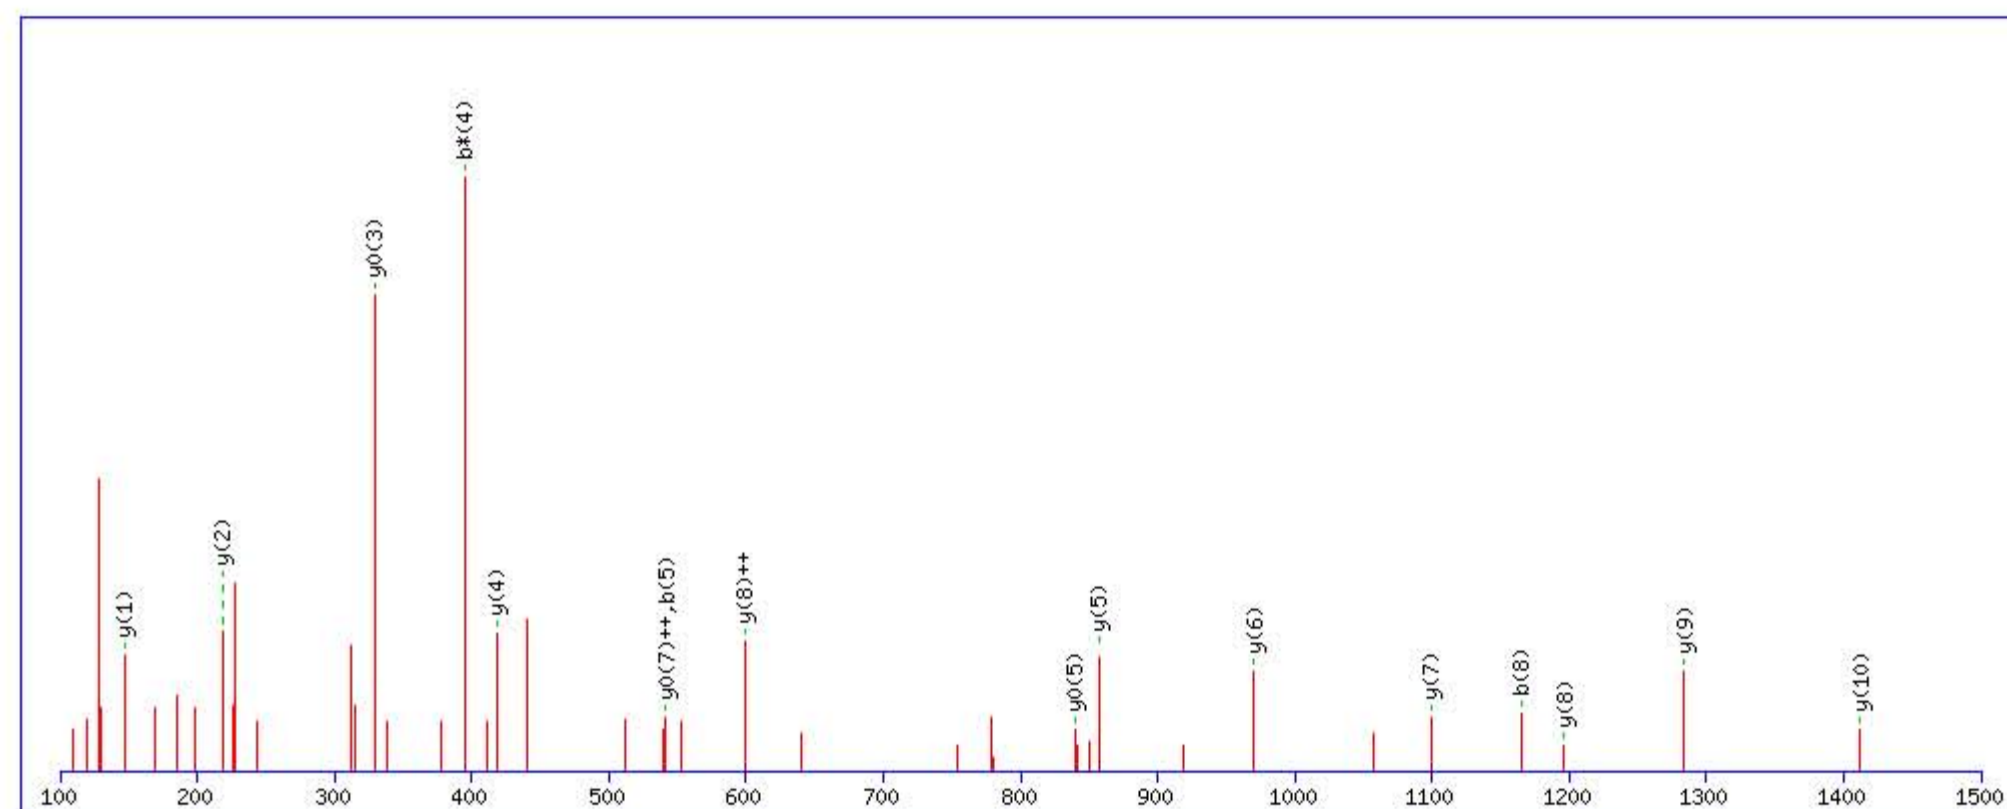

Monoisotopic mass of neutral peptide Mr(calc): 1509.822464

Fixed modifications: Carbamidomethyl (C) (apply to specified residues or termini only)

Variable modifications:

Q7 : Biotin:Thermo-21345 (Q)

Ions Score: 67 Expect: 4.1e-006

Matches : 16/110 fragment ions using 23 most intense peaks [\(help\)](#)

| #  | b           | b <sup>++</sup> | b <sup>*</sup> | b <sup>*++</sup> | b <sup>0</sup> | b <sup>0++</sup> | Seq. | y           | y <sup>++</sup> | y <sup>*</sup> | y <sup>*++</sup> | y <sup>0</sup> | y <sup>0++</sup> | #  |
|----|-------------|-----------------|----------------|------------------|----------------|------------------|------|-------------|-----------------|----------------|------------------|----------------|------------------|----|
| 1  | 100.075690  | 50.541483       |                |                  |                |                  | V    |             |                 |                |                  |                |                  | 11 |
| 2  | 228.170653  | 114.588965      | 211.144104     | 106.075690       |                |                  | K    | 1411.761363 | 706.384319      | 1394.734814    | 697.871045       | 1393.750798    | 697.379037       | 10 |
| 3  | 315.202681  | 158.104979      | 298.176132     | 149.591704       | 297.192116     | 149.099696       | S    | 1283.666400 | 642.336838      | 1266.639851    | 633.823563       | 1265.655835    | 633.331555       | 9  |
| 4  | 412.255445  | 206.631361      | 395.228896     | 198.118086       | 394.244880     | 197.626078       | P    | 1196.634372 | 598.820824      | 1179.607823    | 590.307549       | 1178.623807    | 589.815541       | 8  |
| 5  | 541.298038  | 271.152657      | 524.271489     | 262.639383       | 523.287473     | 262.147375       | E    | 1099.581608 | 550.294442      | 1082.555059    | 541.781167       | 1081.571043    | 541.289159       | 7  |
| 6  | 654.382102  | 327.694689      | 637.355553     | 319.181415       | 636.371537     | 318.689407       | L    | 970.539015  | 485.773145      | 953.512466     | 477.259871       | 952.528450     | 476.767863       | 6  |
| 7  | 1093.607428 | 547.307352      | 1076.580879    | 538.794078       | 1075.596863    | 538.302070       | Q    | 857.454951  | 429.231113      | 840.428402     | 420.717839       | 839.444386     | 420.225831       | 5  |
| 8  | 1164.644542 | 582.825909      | 1147.617993    | 574.312635       | 1146.633977    | 573.820627       | A    | 418.229625  | 209.618450      | 401.203076     | 201.105176       | 400.219060     | 200.613168       | 4  |
| 9  | 1293.687135 | 647.347205      | 1276.660586    | 638.833931       | 1275.676570    | 638.341923       | E    | 347.192511  | 174.099893      | 330.165962     | 165.586619       | 329.181946     | 165.094611       | 3  |
| 10 | 1364.724249 | 682.865762      | 1347.697700    | 674.352488       | 1346.713684    | 673.860480       | A    | 218.149918  | 109.578597      | 201.123369     | 101.065322       |                |                  | 2  |
| 11 |             |                 |                |                  |                |                  | K    | 147.112804  | 74.060040       | 130.086255     | 65.546765        |                |                  | 1  |

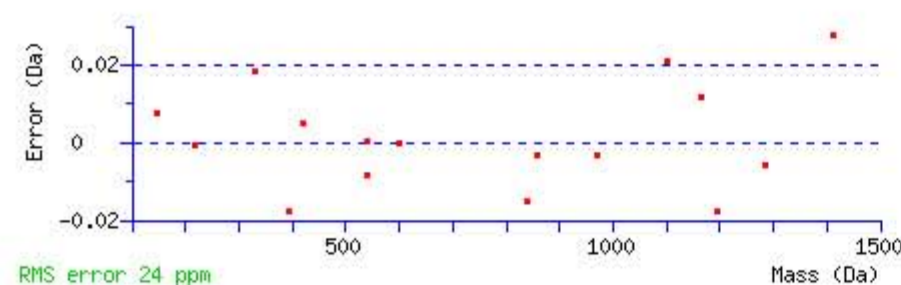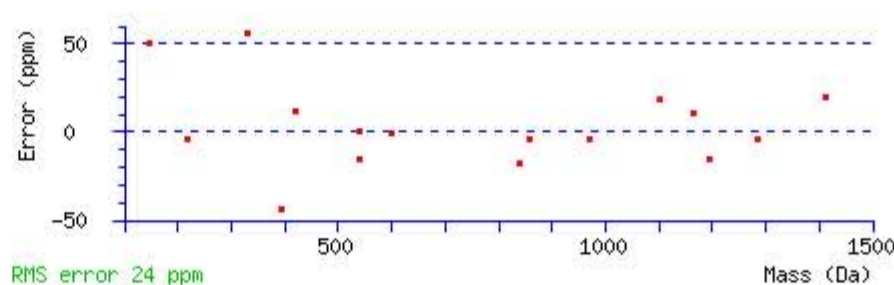

NCBI BLAST search of **VKSPQLQAEAK**

(Parameters: blastp, nr protein database, expect=20000, no filter, PAM30)

Other BLAST [web gateways](#)

All matches to this query

| Score | Mr(calc):   | Delta     | Sequence                        |
|-------|-------------|-----------|---------------------------------|
| 66.5  | 1509.822464 | -0.001472 | <a href="#">VKSPQLQAEAK</a>     |
| 8.5   | 1509.822479 | -0.001487 | <a href="#">AQELTLQTPAK</a>     |
| 5.2   | 1509.803848 | 0.017144  | <a href="#">KGEVLPPEQGPSIK</a>  |
| 4.5   | 1509.822464 | -0.001472 | <a href="#">QVLLAQAEAEK</a>     |
| 4.3   | 1509.803879 | 0.017113  | <a href="#">TGGLDLPSPTGASLK</a> |
| 3.9   | 1509.833679 | -0.012687 | <a href="#">QAELEAARLAK</a>     |
| 3.5   | 1509.830338 | -0.009346 | <a href="#">DQAFKAIRSFLSK</a>   |
| 0.7   | 1509.822479 | -0.001487 | <a href="#">QTLEVPQKEK</a>      |



# MASCOT Search Results

## Peptide View

MS/MS Fragmentation of **EPCVESLVSQYFQTVTDYGK**

Found in **APOA2\_HUMAN**, Apolipoprotein A-II OS=Homo sapiens GN=APOA2 PE=1 SV=1

Match to Query 67131: 2660.280972 from(887.767600,3+) rtinseconds(3124) index(49837)

Title: Locus:1.1.1.3367.19 File:"2013-07-02 CLN FXIII 60 min 1st F 3.wiff"

Data file C:\Program Files (x86)\Matrix Science\Mascot Daemon\mgf4 FXIII 60 min 1st\mascot\_daemon\_merge.mgf

Click mouse within plot area to zoom in by factor of two about that point

Or, Plot from  to  Da

Label all possible matches  Label matches used for scoring

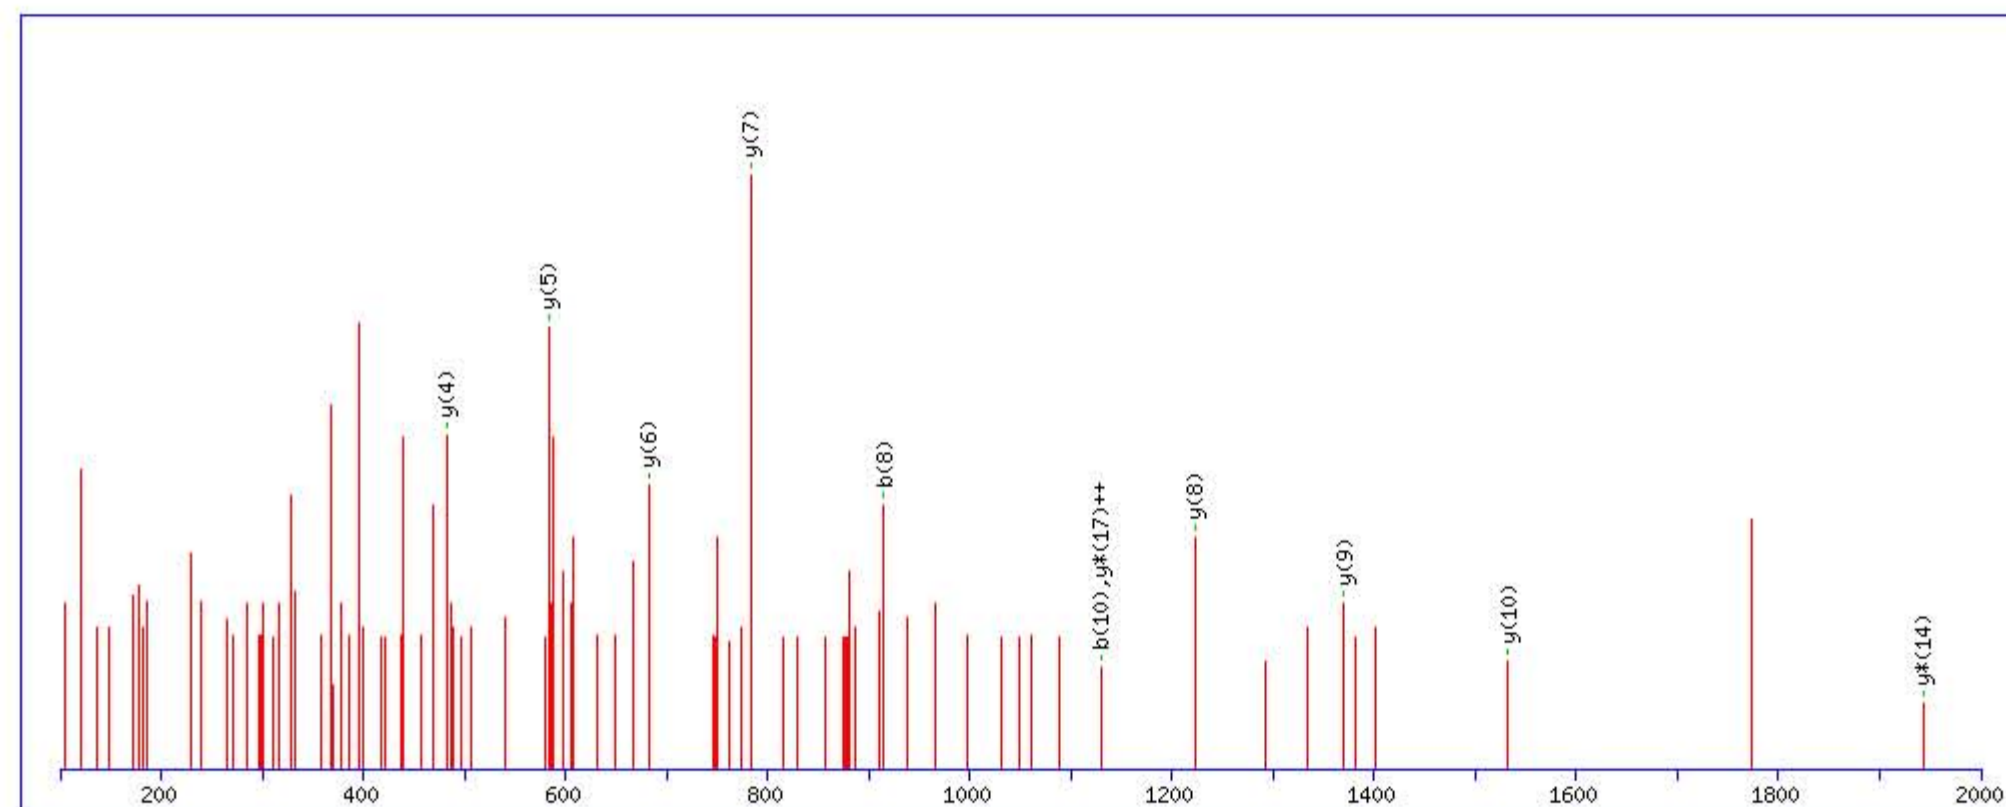

Monoisotopic mass of neutral peptide Mr(calc): 2660.250244

Fixed modifications: Carbamidomethyl (C) (apply to specified residues or termini only)

Variable modifications:

Q13 : Biotin:Thermo-21345 (Q)

Ions Score: 36 Expect: 0.006

Matches : 11/204 fragment ions using 16 most intense peaks [\(help\)](#)

| #  | b                  | b <sup>++</sup> | b <sup>*</sup> | b <sup>*++</sup> | b <sup>0</sup> | b <sup>0++</sup> | Seq. | y                  | y <sup>++</sup> | y <sup>*</sup> | y <sup>*++</sup> | y <sup>0</sup> | y <sup>0++</sup> | #  |
|----|--------------------|-----------------|----------------|------------------|----------------|------------------|------|--------------------|-----------------|----------------|------------------|----------------|------------------|----|
| 1  | 130.049869         | 65.528572       |                |                  | 112.039304     | 56.523290        | E    |                    |                 |                |                  |                |                  | 20 |
| 2  | 227.102633         | 114.054954      |                |                  | 209.092068     | 105.049672       | P    | 2532.214913        | 1266.611094     | 2515.188364    | 1258.097820      | 2514.204348    | 1257.605812      | 19 |
| 3  | 387.133282         | 194.070279      |                |                  | 369.122717     | 185.064997       | C    | 2435.162149        | 1218.084712     | 2418.135600    | 1209.571438      | 2417.151584    | 1209.079430      | 18 |
| 4  | 486.201696         | 243.604486      |                |                  | 468.191131     | 234.599204       | V    | 2275.131500        | 1138.069388     | 2258.104951    | 1129.556113      | 2257.120935    | 1129.064105      | 17 |
| 5  | 615.244289         | 308.125783      |                |                  | 597.233724     | 299.120500       | E    | 2176.063086        | 1088.535181     | 2159.036537    | 1080.021906      | 2158.052521    | 1079.529898      | 16 |
| 6  | 702.276317         | 351.641797      |                |                  | 684.265752     | 342.636514       | S    | 2047.020493        | 1024.013885     | 2029.993944    | 1015.500610      | 2029.009928    | 1015.008602      | 15 |
| 7  | 815.360381         | 408.183829      |                |                  | 797.349816     | 399.178546       | L    | 1959.988465        | 980.497871      | 1942.961916    | 971.984596       | 1941.977900    | 971.492588       | 14 |
| 8  | <b>914.428795</b>  | 457.718036      |                |                  | 896.418230     | 448.712753       | V    | 1846.904401        | 923.955839      | 1829.877852    | 915.442564       | 1828.893836    | 914.950556       | 13 |
| 9  | 1001.460823        | 501.234050      |                |                  | 983.450258     | 492.228767       | S    | 1747.835987        | 874.421632      | 1730.809438    | 865.908357       | 1729.825422    | 865.416349       | 12 |
| 10 | <b>1129.519401</b> | 565.263339      | 1112.492852    | 556.750064       | 1111.508836    | 556.258056       | Q    | 1660.803959        | 830.905618      | 1643.777410    | 822.392343       | 1642.793394    | 821.900335       | 11 |
| 11 | 1292.582730        | 646.795003      | 1275.556181    | 638.281729       | 1274.572165    | 637.789721       | Y    | <b>1532.745381</b> | 766.876329      | 1515.718832    | 758.363054       | 1514.734816    | 757.871046       | 10 |
| 12 | 1439.651144        | 720.329210      | 1422.624595    | 711.815936       | 1421.640579    | 711.323928       | F    | <b>1369.682052</b> | 685.344664      | 1352.655503    | 676.831390       | 1351.671487    | 676.339382       | 9  |
| 13 | 1878.876470        | 939.941873      | 1861.849921    | 931.428599       | 1860.865905    | 930.936591       | Q    | <b>1222.613638</b> | 611.810457      | 1205.587089    | 603.297183       | 1204.603073    | 602.805175       | 8  |
| 14 | 1979.924149        | 990.465713      | 1962.897600    | 981.952438       | 1961.913584    | 981.460430       | T    | <b>783.388312</b>  | 392.197794      | 766.361763     | 383.684519       | 765.377747     | 383.192511       | 7  |
| 15 | 2078.992563        | 1039.999920     | 2061.966014    | 1031.486645      | 2060.981998    | 1030.994637      | V    | <b>682.340633</b>  | 341.673954      | 665.314084     | 333.160680       | 664.330068     | 332.668672       | 6  |
| 16 | 2180.040242        | 1090.523759     | 2163.013693    | 1082.010484      | 2162.029677    | 1081.518476      | T    | <b>583.272219</b>  | 292.139747      | 566.245670     | 283.626473       | 565.261654     | 283.134465       | 5  |
| 17 | 2295.067185        | 1148.037230     | 2278.040636    | 1139.523956      | 2277.056620    | 1139.031948      | D    | <b>482.224540</b>  | 241.615908      | 465.197991     | 233.102633       | 464.213975     | 232.610625       | 4  |
| 18 | 2458.130514        | 1229.568895     | 2441.103965    | 1221.055620      | 2440.119949    | 1220.563612      | Y    | 367.197597         | 184.102436      | 350.171048     | 175.589162       |                |                  | 3  |
| 19 | 2515.151978        | 1258.079627     | 2498.125429    | 1249.566352      | 2497.141413    | 1249.074344      | G    | 204.134268         | 102.570772      | 187.107719     | 94.057497        |                |                  | 2  |
| 20 |                    |                 |                |                  |                |                  | K    | 147.112804         | 74.060040       | 130.086255     | 65.546765        |                |                  | 1  |

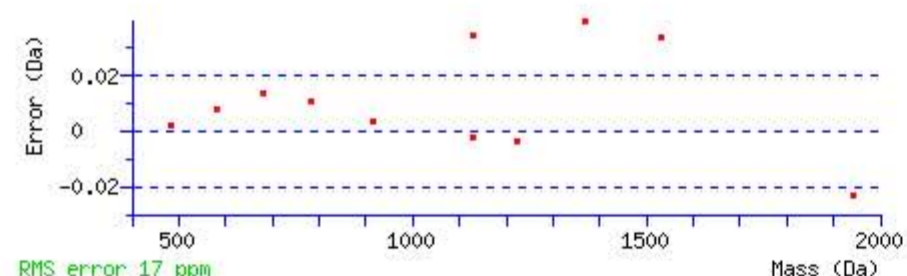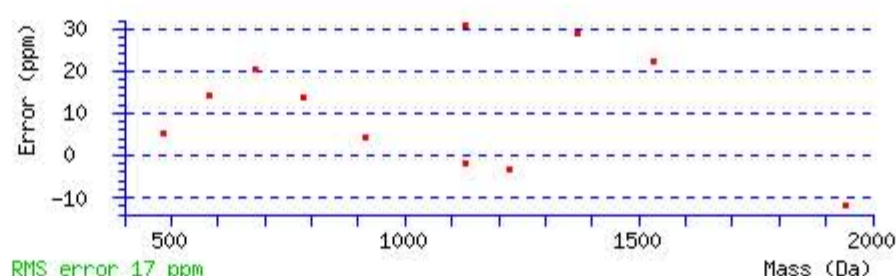

NCBI BLAST search of **EPCVESLVSQYFQTVTDYGK**

(Parameters: blastp, nr protein database, expect=20000, no filter, PAM30)

Other BLAST [web gateways](#)

All matches to this query

| Score | Mr(calc):   | Delta    | Sequence                             |
|-------|-------------|----------|--------------------------------------|
| 36.1  | 2660.250244 | 0.030728 | <a href="#">EPCVESLVSQYFQTVTDYGK</a> |
| 3.6   | 2660.250244 | 0.030728 | <a href="#">EPCVESLVSQYFQTVTDYGK</a> |



# MASCOT Search Results

## Peptide View

MS/MS Fragmentation of **EPCVESLVSQYFQTVTDYGK**

Found in **APOA2\_HUMAN**, Apolipoprotein A-II OS=Homo sapiens GN=APOA2 PE=1 SV=1

Match to Query 67135: 2660.283612 from(887.768480,3+) rtinseconds(3144) index(50011)

Title: Locus:1.1.1.3374.18 File:"2013-07-02 CLN FXIII 60 min 1st F 3.wiff"

Data file C:\Program Files (x86)\Matrix Science\Mascot Daemon\mgf4 FXIII 60 min 1st\mascot\_daemon\_merge.mgf

Click mouse within plot area to zoom in by factor of two about that point

Or, Plot from  to  Da

Label all possible matches  Label matches used for scoring

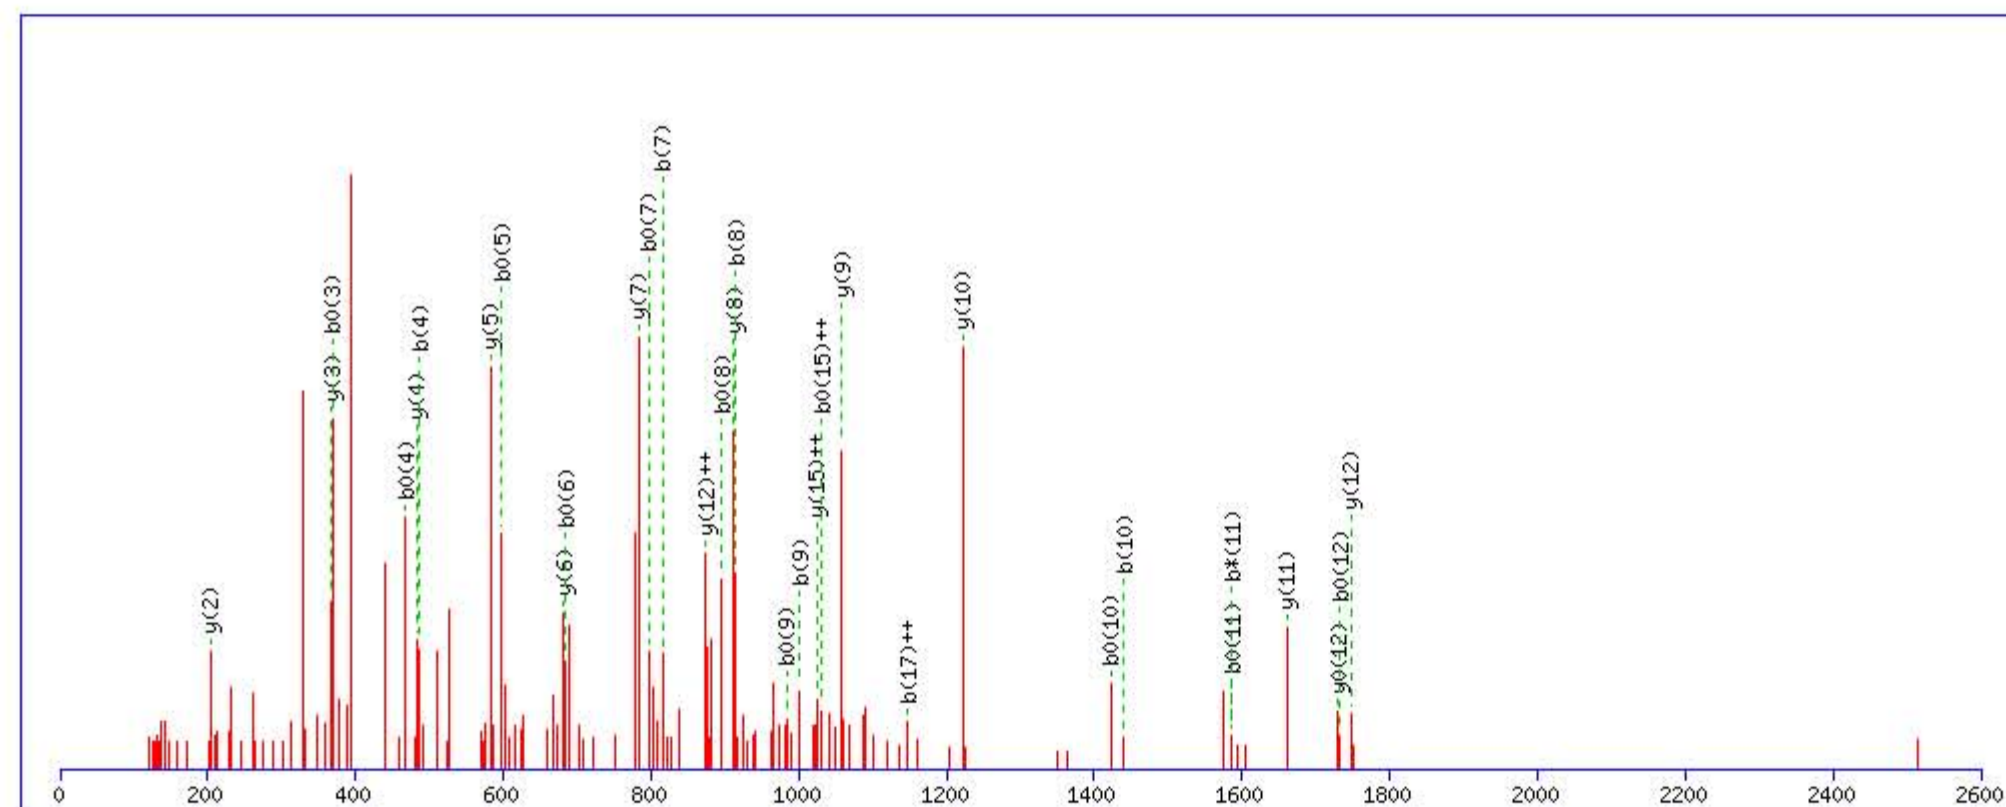

Monoisotopic mass of neutral peptide Mr(calc): 2660.250244

Fixed modifications: Carbamidomethyl (C) (apply to specified residues or termini only)

Variable modifications:

Q10 : Biotin:Thermo-21345 (Q)

Ions Score: 51 Expect: 0.00017

Matches : 32/204 fragment ions using 60 most intense peaks [\(help\)](#)

| #  | b           | b <sup>++</sup> | b <sup>*</sup> | b <sup>*++</sup> | b <sup>0</sup> | b <sup>0++</sup> | Seq. | y           | y <sup>++</sup> | y <sup>*</sup> | y <sup>*++</sup> | y <sup>0</sup> | y <sup>0++</sup> | #  |
|----|-------------|-----------------|----------------|------------------|----------------|------------------|------|-------------|-----------------|----------------|------------------|----------------|------------------|----|
| 1  | 130.049869  | 65.528572       |                |                  | 112.039304     | 56.523290        | E    |             |                 |                |                  |                |                  | 20 |
| 2  | 227.102633  | 114.054954      |                |                  | 209.092068     | 105.049672       | P    | 2532.214913 | 1266.611094     | 2515.188364    | 1258.097820      | 2514.204348    | 1257.605812      | 19 |
| 3  | 387.133282  | 194.070279      |                |                  | 369.122717     | 185.064997       | C    | 2435.162149 | 1218.084712     | 2418.135600    | 1209.571438      | 2417.151584    | 1209.079430      | 18 |
| 4  | 486.201696  | 243.604486      |                |                  | 468.191131     | 234.599204       | V    | 2275.131500 | 1138.069388     | 2258.104951    | 1129.556113      | 2257.120935    | 1129.064105      | 17 |
| 5  | 615.244289  | 308.125783      |                |                  | 597.233724     | 299.120500       | E    | 2176.063086 | 1088.535181     | 2159.036537    | 1080.021906      | 2158.052521    | 1079.529898      | 16 |
| 6  | 702.276317  | 351.641797      |                |                  | 684.265752     | 342.636514       | S    | 2047.020493 | 1024.013884     | 2029.993944    | 1015.500610      | 2029.009928    | 1015.008602      | 15 |
| 7  | 815.360381  | 408.183829      |                |                  | 797.349816     | 399.178546       | L    | 1959.988465 | 980.497870      | 1942.961916    | 971.984596       | 1941.977900    | 971.492588       | 14 |
| 8  | 914.428795  | 457.718036      |                |                  | 896.418230     | 448.712753       | V    | 1846.904401 | 923.955838      | 1829.877852    | 915.442564       | 1828.893836    | 914.950556       | 13 |
| 9  | 1001.460823 | 501.234050      |                |                  | 983.450258     | 492.228767       | S    | 1747.835987 | 874.421631      | 1730.809438    | 865.908357       | 1729.825422    | 865.416349       | 12 |
| 10 | 1440.686149 | 720.846712      | 1423.659600    | 712.333438       | 1422.675584    | 711.841430       | Q    | 1660.803959 | 830.905617      | 1643.777410    | 822.392343       | 1642.793394    | 821.900335       | 11 |
| 11 | 1603.749478 | 802.378377      | 1586.722929    | 793.865103       | 1585.738913    | 793.373094       | Y    | 1221.578633 | 611.292954      | 1204.552084    | 602.779680       | 1203.568068    | 602.287672       | 10 |
| 12 | 1750.817892 | 875.912584      | 1733.791343    | 867.399310       | 1732.807327    | 866.907302       | F    | 1058.515304 | 529.761290      | 1041.488755    | 521.248015       | 1040.504739    | 520.756007       | 9  |
| 13 | 1878.876470 | 939.941873      | 1861.849921    | 931.428599       | 1860.865905    | 930.936590       | Q    | 911.446890  | 456.227083      | 894.420341     | 447.713808       | 893.436325     | 447.221800       | 8  |
| 14 | 1979.924149 | 990.465713      | 1962.897600    | 981.952438       | 1961.913584    | 981.460430       | T    | 783.388312  | 392.197794      | 766.361763     | 383.684519       | 765.377747     | 383.192511       | 7  |
| 15 | 2078.992563 | 1039.999919     | 2061.966014    | 1031.486645      | 2060.981998    | 1030.994637      | V    | 682.340633  | 341.673954      | 665.314084     | 333.160680       | 664.330068     | 332.668672       | 6  |
| 16 | 2180.040242 | 1090.523759     | 2163.013693    | 1082.010484      | 2162.029677    | 1081.518476      | T    | 583.272219  | 292.139747      | 566.245670     | 283.626473       | 565.261654     | 283.134465       | 5  |
| 17 | 2295.067185 | 1148.037230     | 2278.040636    | 1139.523956      | 2277.056620    | 1139.031948      | D    | 482.224540  | 241.615908      | 465.197991     | 233.102633       | 464.213975     | 232.610625       | 4  |
| 18 | 2458.130514 | 1229.568895     | 2441.103965    | 1221.055620      | 2440.119949    | 1220.563612      | Y    | 367.197597  | 184.102436      | 350.171048     | 175.589162       |                |                  | 3  |
| 19 | 2515.151978 | 1258.079627     | 2498.125429    | 1249.566352      | 2497.141413    | 1249.074344      | G    | 204.134268  | 102.570772      | 187.107719     | 94.057497        |                |                  | 2  |
| 20 |             |                 |                |                  |                |                  | K    | 147.112804  | 74.060040       | 130.086255     | 65.546765        |                |                  | 1  |

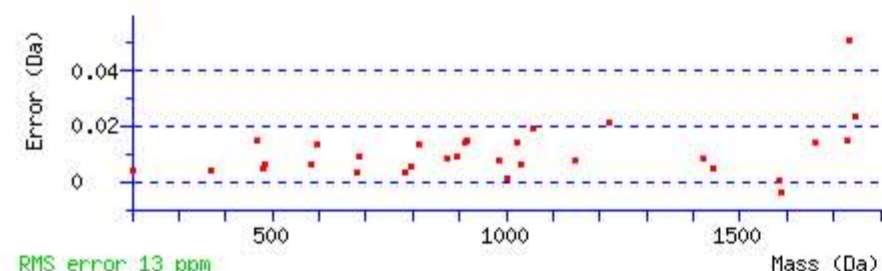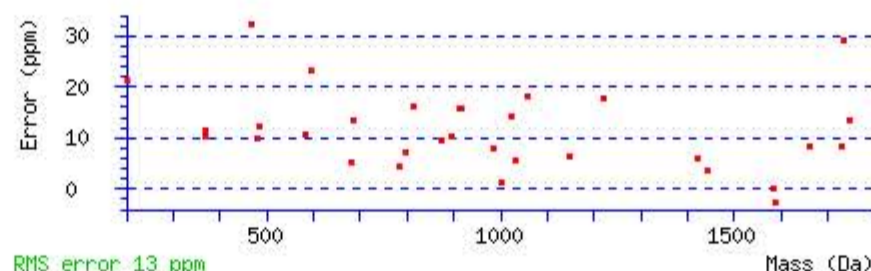

NCBI BLAST search of **EPCVESLVSQYFQTVTDYGK**

(Parameters: blastp, nr protein database, expect=20000, no filter, PAM30)

Other BLAST [web gateways](#)

All matches to this query

| Score | Mr(calc):   | Delta    | Sequence                             |
|-------|-------------|----------|--------------------------------------|
| 51.4  | 2660.250244 | 0.033368 | <a href="#">EPCVESLVSQYFQTVTDYGK</a> |
| 23.3  | 2660.250244 | 0.033368 | <a href="#">EPCVESLVSQYFQTVTDYGK</a> |



# **MASCOT** Mascot Search Results

## Peptide View

MS/MS Fragmentation of **GNTEGLQK**

Found in **APOA4\_HUMAN**, Apolipoprotein A-IV OS=Homo sapiens GN=APOA4 PE=1 SV=3

Match to Query 25937: 1156.592108 from(579.303330,2+) rtinseconds(1386) index(37996)

Title: Locus:1.1.1.2766.23 File:"2013-07-02 CLN FXIII 60 min 1st F 3.wiff"

Data file C:\Program Files (x86)\Matrix Science\Mascot Daemon\mgf\4 FXIII 60 min 1st\mascot\_daemon\_merge.mgf

Click mouse within plot area to zoom in by factor of two about that point

Or, Plot from  to  Da

Label all possible matches  Label matches used for scoring

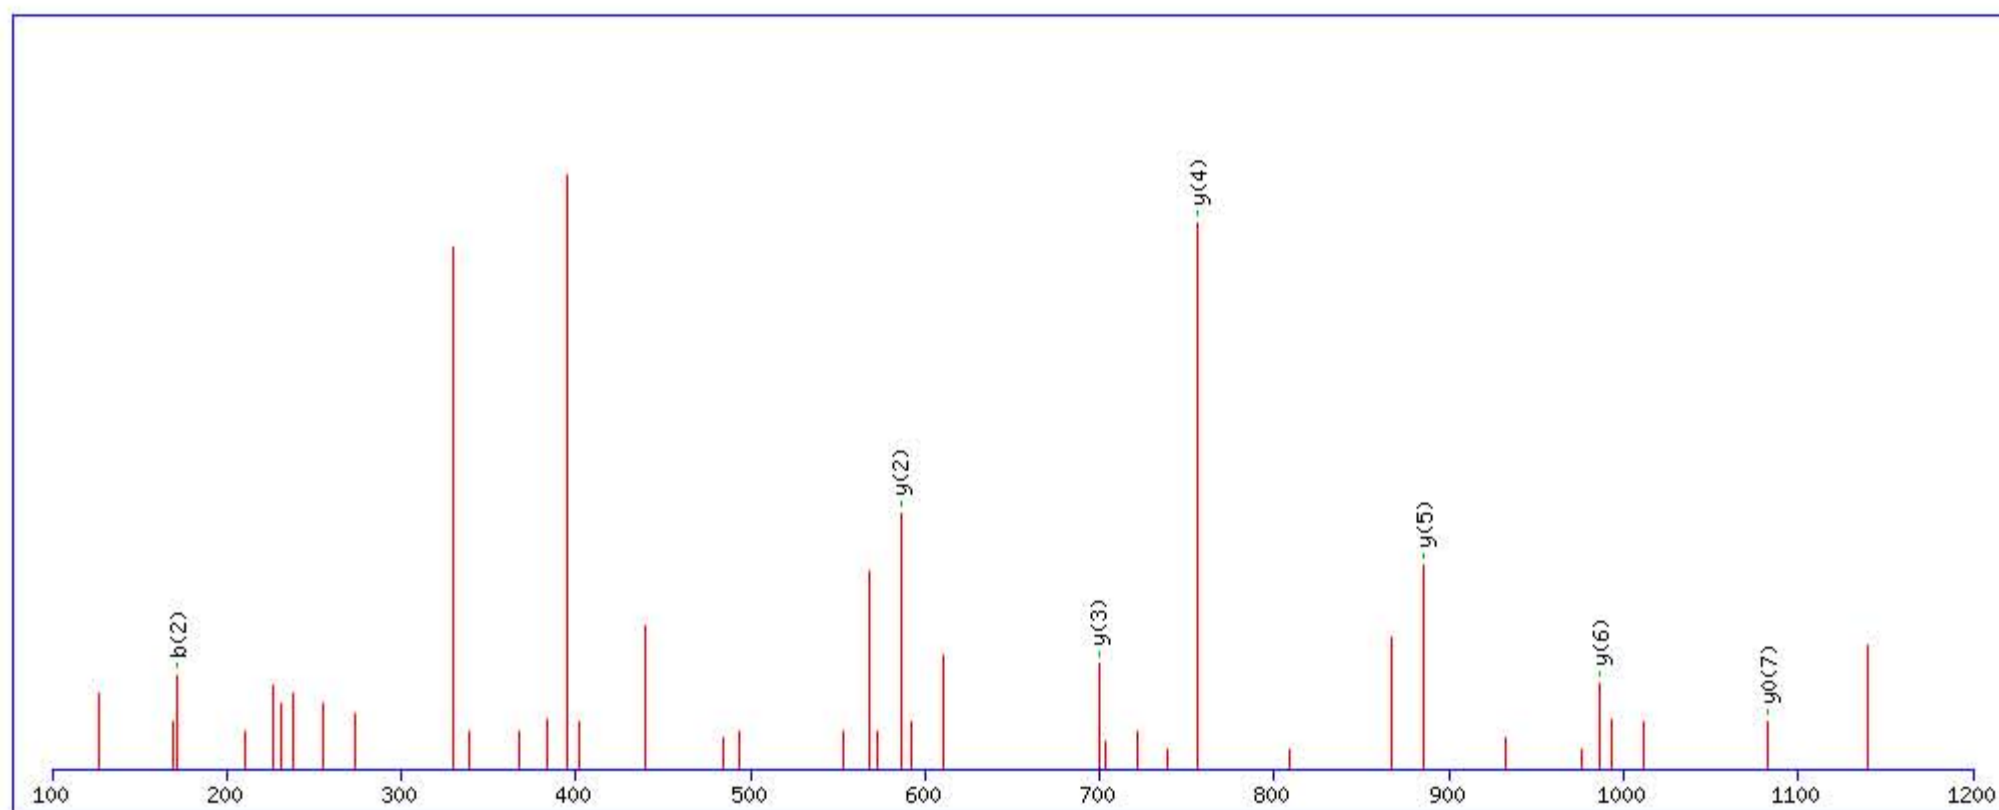

Monoisotopic mass of neutral peptide Mr(calc): 1156.591034

Fixed modifications: Carbamidomethyl (C) (apply to specified residues or termini only)

Variable modifications:

Q7 : Biotin:Thermo-21345 (Q)

Ions Score: 36 Expect: 0.0048

Matches : 7/70 fragment ions using 11 most intense peaks [\(help\)](#)

| # | b                 | b <sup>++</sup> | b <sup>*</sup> | b <sup>+++</sup> | b <sup>0</sup> | b <sup>0++</sup> | Seq.     | y                 | y <sup>++</sup> | y <sup>*</sup> | y <sup>+++</sup> | y <sup>0</sup>     | y <sup>0++</sup> | #        |
|---|-------------------|-----------------|----------------|------------------|----------------|------------------|----------|-------------------|-----------------|----------------|------------------|--------------------|------------------|----------|
| 1 | 58.028740         | 29.518008       |                |                  |                |                  | <b>G</b> |                   |                 |                |                  |                    |                  | <b>8</b> |
| 2 | <b>172.071667</b> | 86.539471       | 155.045118     | 78.026197        |                |                  | <b>N</b> | 1100.576857       | 550.792067      | 1083.550308    | 542.278792       | <b>1082.566292</b> | 541.786784       | <b>7</b> |
| 3 | 273.119346        | 137.063311      | 256.092797     | 128.550037       | 255.108781     | 128.058029       | <b>T</b> | <b>986.533930</b> | 493.770603      | 969.507381     | 485.257329       | 968.523365         | 484.765321       | <b>6</b> |
| 4 | 402.161939        | 201.584608      | 385.135390     | 193.071333       | 384.151374     | 192.579325       | <b>E</b> | <b>885.486251</b> | 443.246764      | 868.459702     | 434.733489       | 867.475686         | 434.241481       | <b>5</b> |
| 5 | 459.183403        | 230.095339      | 442.156854     | 221.582065       | 441.172838     | 221.090057       | <b>G</b> | <b>756.443658</b> | 378.725467      | 739.417109     | 370.212193       |                    |                  | <b>4</b> |
| 6 | 572.267467        | 286.637372      | 555.240918     | 278.124097       | 554.256902     | 277.632089       | <b>L</b> | <b>699.422194</b> | 350.214735      | 682.395645     | 341.701461       |                    |                  | <b>3</b> |
| 7 | 1011.492793       | 506.250035      | 994.466244     | 497.736760       | 993.482228     | 497.244752       | <b>Q</b> | <b>586.338130</b> | 293.672703      | 569.311581     | 285.159429       |                    |                  | <b>2</b> |
| 8 |                   |                 |                |                  |                |                  | <b>K</b> | 147.112804        | 74.060040       | 130.086255     | 65.546766        |                    |                  | <b>1</b> |

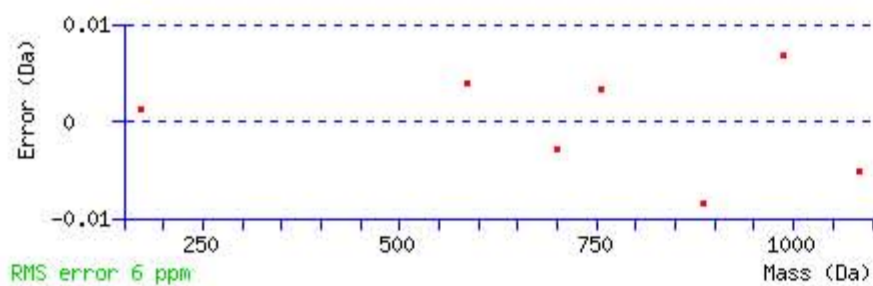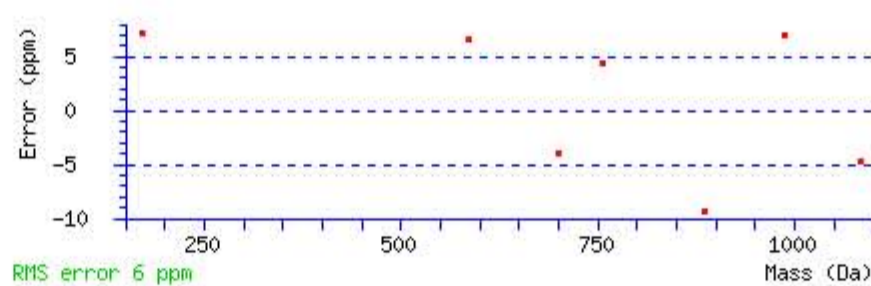

NCBI BLAST search of **GNTEGLQK**

(Parameters: blastp, nr protein database, expect=20000, no filter, PAM30)

Other BLAST [web gateways](#)

All matches to this query

| Score | Mr(calc):   | Delta    | Sequence                 |
|-------|-------------|----------|--------------------------|
| 36.1  | 1156.591034 | 0.001074 | <a href="#">GNTEGLQK</a> |

Mascot: <http://www.matrixscience.com/>



# MASCOT Search Results

## Peptide View

MS/MS Fragmentation of **IDQNVEELK**

Found in **APOA4\_HUMAN**, Apolipoprotein A-IV OS=Homo sapiens GN=APOA4 PE=1 SV=3

Match to Query 34520: 1397.732288 from(699.873420,2+) rtinseconds(1832) index(77278)

Title: Locus:1.1.1.2852.15 File:"2013-07-02 CLN FXIII 60 min 1st FT.wiff"

Data file C:\Program Files (x86)\Matrix Science\Mascot Daemon\mgf4 FXIII 60 min 1st\mascot\_daemon\_merge.mgf

Click mouse within plot area to zoom in by factor of two about that point

Or, Plot from  to  Da

Label all possible matches  Label matches used for scoring

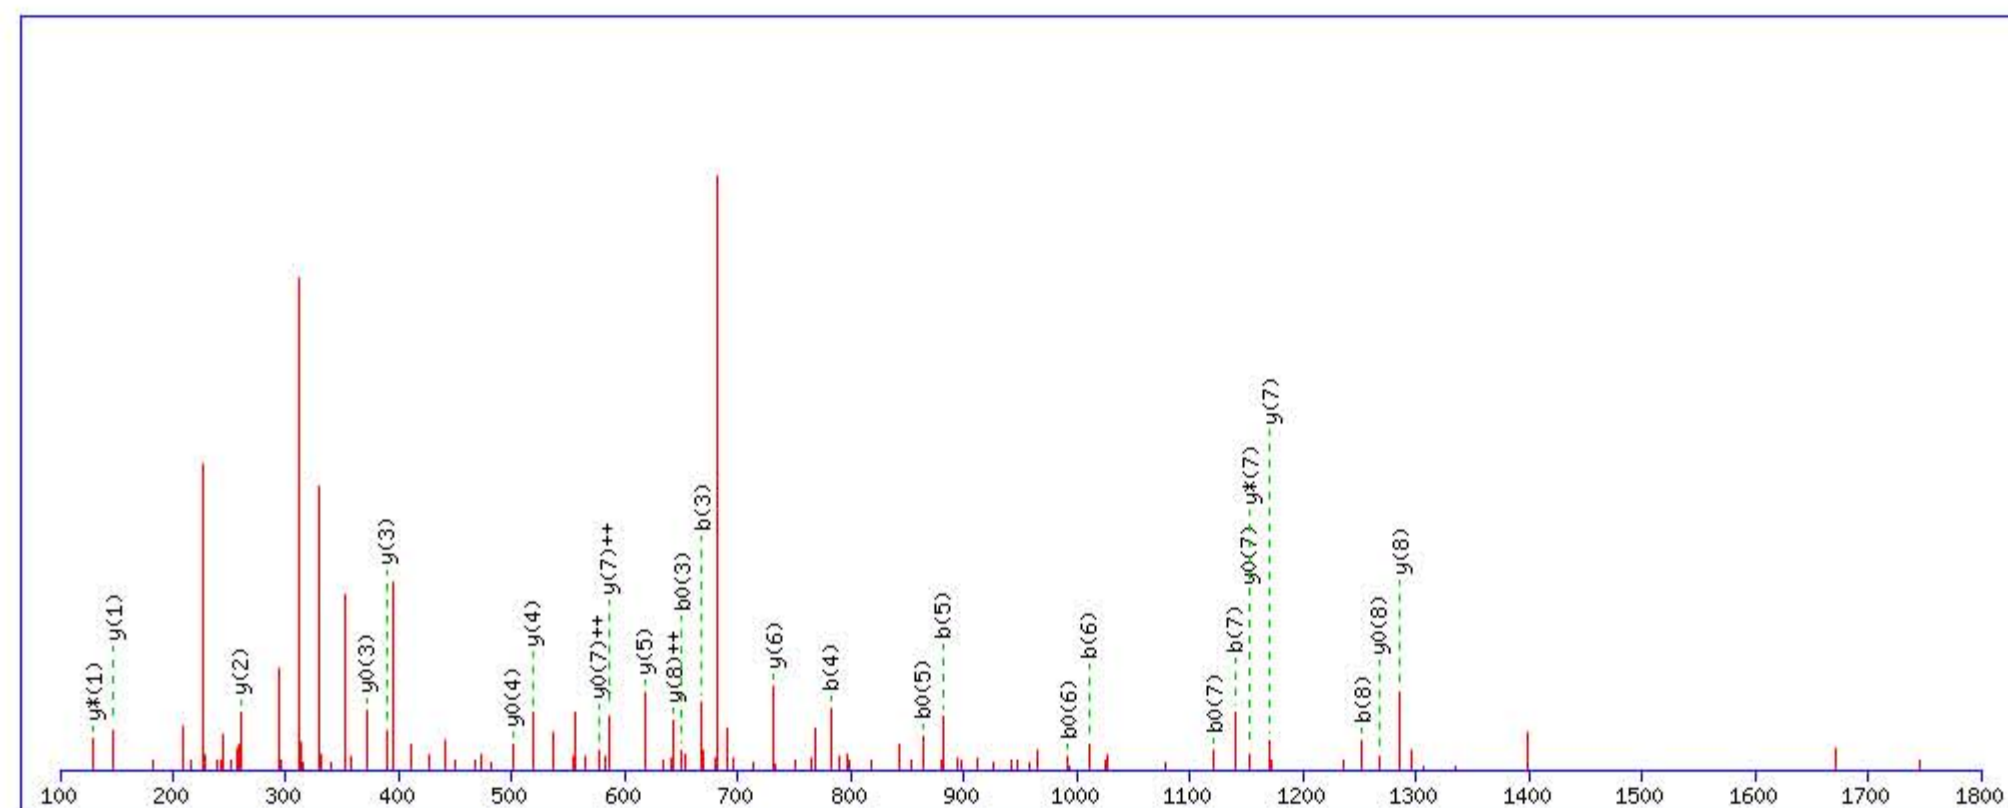

Monoisotopic mass of neutral peptide Mr(calc): 1397.722427

Fixed modifications: Carbamidomethyl (C) (apply to specified residues or termini only)

Variable modifications:

Q3 : Biotin:Thermo-21345 (Q)

Ions Score: 36 Expect: 0.0069

Matches : 27/86 fragment ions using 58 most intense peaks [\(help\)](#)

| # | b           | b <sup>++</sup> | b <sup>*</sup> | b <sup>*++</sup> | b <sup>0</sup> | b <sup>0++</sup> | Seq. | y           | y <sup>++</sup> | y <sup>*</sup> | y <sup>*++</sup> | y <sup>0</sup> | y <sup>0++</sup> | # |
|---|-------------|-----------------|----------------|------------------|----------------|------------------|------|-------------|-----------------|----------------|------------------|----------------|------------------|---|
| 1 | 114.091340  | 57.549308       |                |                  |                |                  | I    |             |                 |                |                  |                |                  | 9 |
| 2 | 229.118283  | 115.062779      |                |                  | 211.107718     | 106.057497       | D    | 1285.645664 | 643.326470      | 1268.619115    | 634.813196       | 1267.635099    | 634.321187       | 8 |
| 3 | 668.343609  | 334.675443      | 651.317060     | 326.162168       | 650.333044     | 325.670160       | Q    | 1170.618721 | 585.812998      | 1153.592172    | 577.299724       | 1152.608156    | 576.807716       | 7 |
| 4 | 782.386536  | 391.696906      | 765.359987     | 383.183631       | 764.375971     | 382.691623       | N    | 731.393395  | 366.200335      | 714.366846     | 357.687061       | 713.382830     | 357.195053       | 6 |
| 5 | 881.454950  | 441.231113      | 864.428401     | 432.717838       | 863.444385     | 432.225830       | V    | 617.350468  | 309.178872      | 600.323919     | 300.665597       | 599.339903     | 300.173589       | 5 |
| 6 | 1010.497543 | 505.752410      | 993.470994     | 497.239135       | 992.486978     | 496.747127       | E    | 518.282054  | 259.644665      | 501.255505     | 251.131390       | 500.271489     | 250.639382       | 4 |
| 7 | 1139.540136 | 570.273706      | 1122.513587    | 561.760431       | 1121.529571    | 561.268423       | E    | 389.239461  | 195.123368      | 372.212912     | 186.610094       | 371.228896     | 186.118086       | 3 |
| 8 | 1252.624200 | 626.815738      | 1235.597651    | 618.302463       | 1234.613635    | 617.810455       | L    | 260.196868  | 130.602072      | 243.170319     | 122.088797       |                |                  | 2 |
| 9 |             |                 |                |                  |                |                  | K    | 147.112804  | 74.060040       | 130.086255     | 65.546765        |                |                  | 1 |

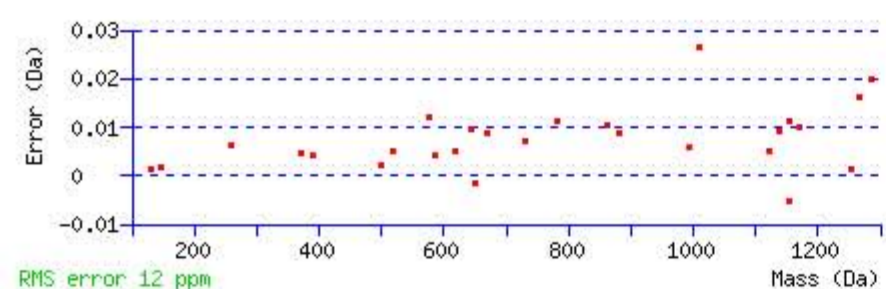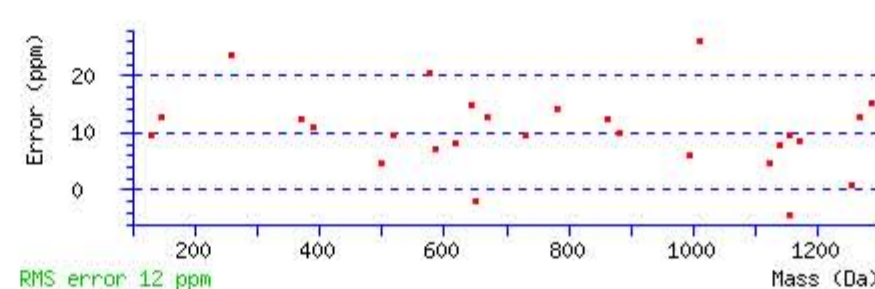

NCBI BLAST search of **IDQNVEELK**

(Parameters: blastp, nr protein database, expect=20000, no filter, PAM30)

Other BLAST [web gateways](#)

All matches to this query

| Score | Mr(calc):   | Delta     | Sequence                      |
|-------|-------------|-----------|-------------------------------|
| 36.0  | 1397.722427 | 0.009861  | <a href="#">IDQNVEELK</a>     |
| 15.4  | 1397.751404 | -0.019116 | <a href="#">QAPELDLRSIK</a>   |
| 9.7   | 1397.723785 | 0.008503  | <a href="#">LFVSHMIDKHR</a>   |
| 8.8   | 1397.744873 | -0.012585 | <a href="#">MLEKARHQELK</a>   |
| 6.7   | 1397.744873 | -0.012585 | <a href="#">QRREEELK</a>      |
| 4.6   | 1397.744873 | -0.012585 | <a href="#">QEERRELK</a>      |
| 3.4   | 1397.747589 | -0.015301 | <a href="#">LEPMIVPDLDLK</a>  |
| 3.2   | 1397.740204 | -0.007916 | <a href="#">VEGDLKGPEVDIK</a> |
| 3.2   | 1397.740204 | -0.007916 | <a href="#">VEGDLKGPEVDLK</a> |
| 2.9   | 1397.733658 | -0.001370 | <a href="#">QNITNQLEK</a>     |



# MASCOT Search Results

## Peptide View

MS/MS Fragmentation of **IDQTVEELR**

Found in **APOA4\_HUMAN**, Apolipoprotein A-IV OS=Homo sapiens GN=APOA4 PE=1 SV=3

Match to Query 35557: 1412.741588 from(707.378070,2+) rtinseconds(1877) index(41215)

Title: Locus:1.1.1.2937.24 File:"2013-07-02 CLN FXIII 60 min 1st F 3.wiff"

Data file C:\Program Files (x86)\Matrix Science\Mascot Daemon\mgf4 FXIII 60 min 1st\mascot\_daemon\_merge.mgf

Click mouse within plot area to zoom in by factor of two about that point

Or, Plot from  to  Da

Label all possible matches  Label matches used for scoring

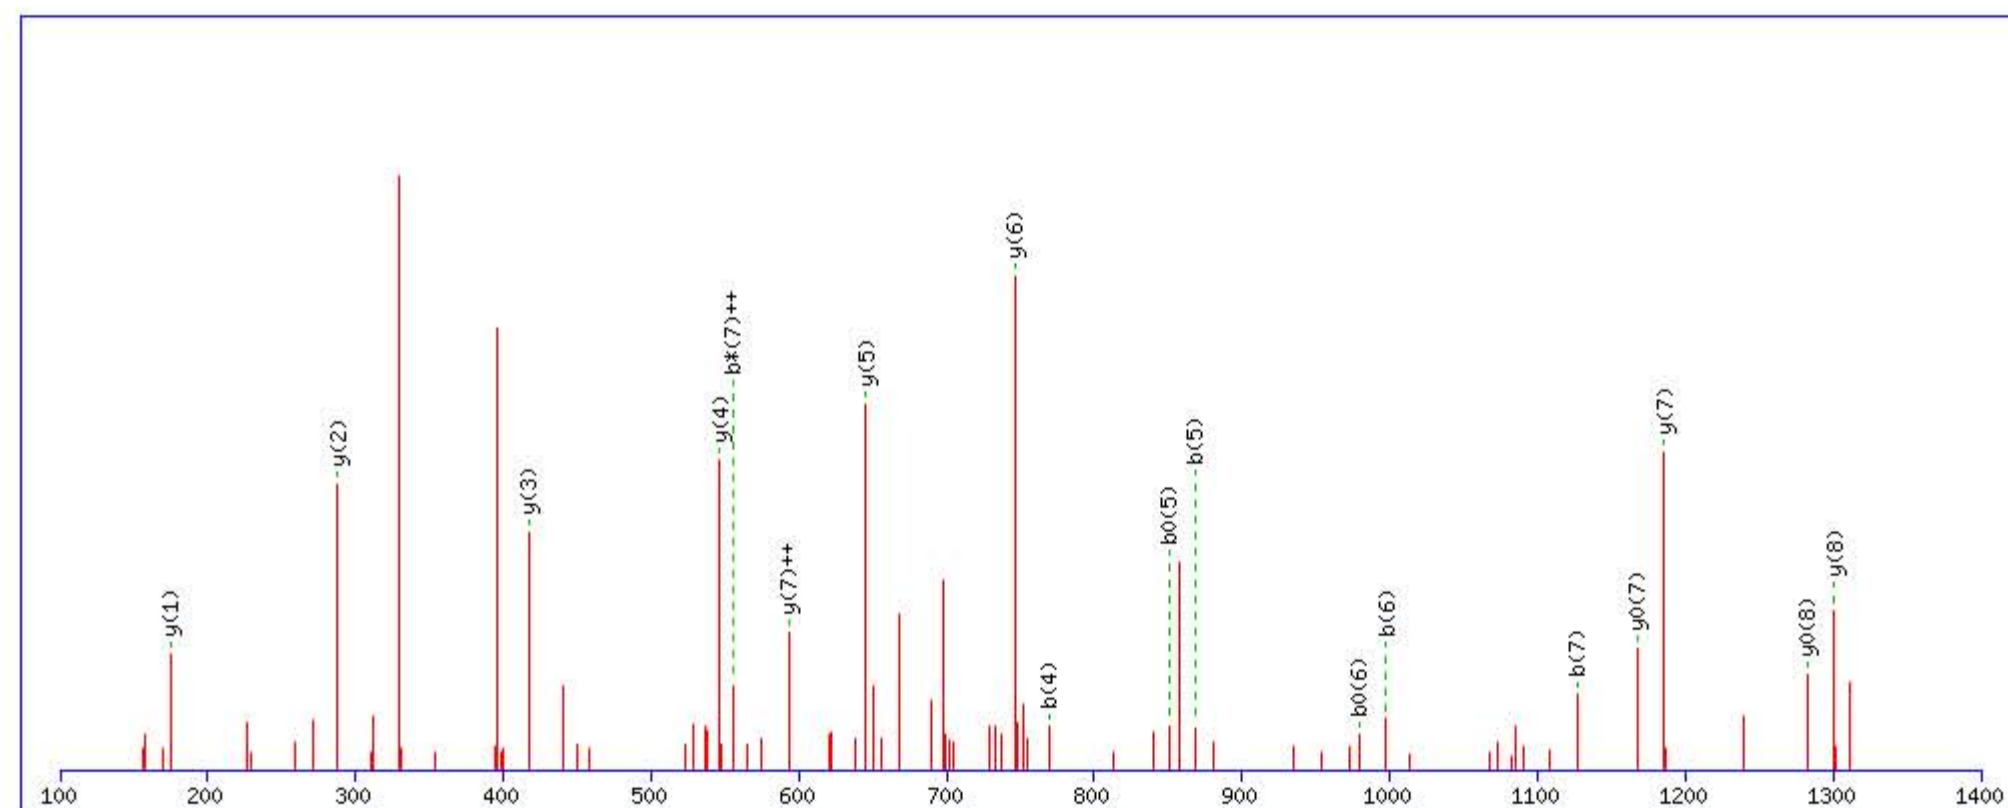

Monoisotopic mass of neutral peptide Mr(calc): 1412.733337

Fixed modifications: Carbamidomethyl (C) (apply to specified residues or termini only)

Variable modifications:

Q3 : Biotin:Thermo-21345 (Q)

Ions Score: 64 Expect: 9.1e-006

Matches : 18/86 fragment ions using 24 most intense peaks [\(help\)](#)

| # | b           | b <sup>++</sup> | b <sup>*</sup> | b <sup>*++</sup> | b <sup>0</sup> | b <sup>0++</sup> | Seq. | y           | y <sup>++</sup> | y <sup>*</sup> | y <sup>*++</sup> | y <sup>0</sup> | y <sup>0++</sup> | # |
|---|-------------|-----------------|----------------|------------------|----------------|------------------|------|-------------|-----------------|----------------|------------------|----------------|------------------|---|
| 1 | 114.091340  | 57.549308       |                |                  |                |                  | I    |             |                 |                |                  |                |                  | 9 |
| 2 | 229.118283  | 115.062779      |                |                  | 211.107718     | 106.057497       | D    | 1300.656564 | 650.831920      | 1283.630015    | 642.318646       | 1282.645999    | 641.826638       | 8 |
| 3 | 668.343609  | 334.675443      | 651.317060     | 326.162168       | 650.333044     | 325.670160       | Q    | 1185.629621 | 593.318449      | 1168.603072    | 584.805174       | 1167.619056    | 584.313166       | 7 |
| 4 | 769.391288  | 385.199282      | 752.364739     | 376.686008       | 751.380723     | 376.194000       | T    | 746.404295  | 373.705786      | 729.377746     | 365.192511       | 728.393730     | 364.700503       | 6 |
| 5 | 868.459702  | 434.733489      | 851.433153     | 426.220215       | 850.449137     | 425.728207       | V    | 645.356616  | 323.181946      | 628.330067     | 314.668672       | 627.346051     | 314.176664       | 5 |
| 6 | 997.502295  | 499.254786      | 980.475746     | 490.741511       | 979.491730     | 490.249503       | E    | 546.288202  | 273.647739      | 529.261653     | 265.134465       | 528.277637     | 264.642457       | 4 |
| 7 | 1126.544888 | 563.776082      | 1109.518339    | 555.262808       | 1108.534323    | 554.770800       | E    | 417.245609  | 209.126442      | 400.219060     | 200.613168       | 399.235044     | 200.121160       | 3 |
| 8 | 1239.628952 | 620.318114      | 1222.602403    | 611.804840       | 1221.618387    | 611.312832       | L    | 288.203016  | 144.605146      | 271.176467     | 136.091871       |                |                  | 2 |
| 9 |             |                 |                |                  |                |                  | R    | 175.118952  | 88.063114       | 158.092403     | 79.549839        |                |                  | 1 |

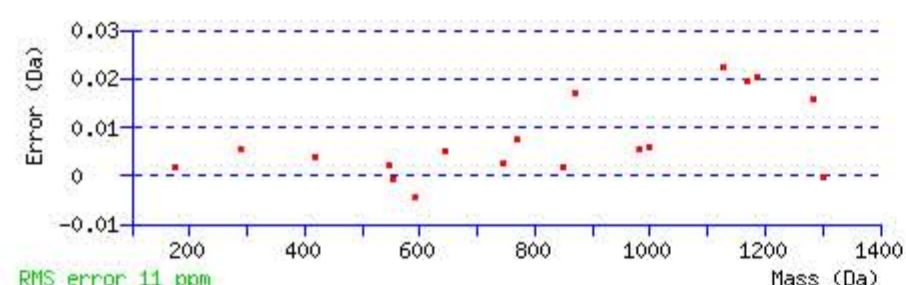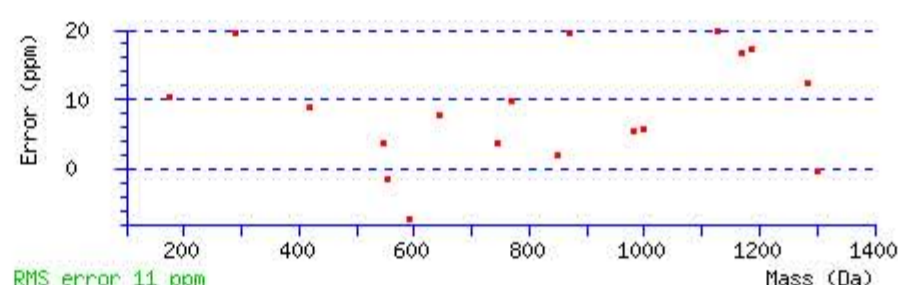

NCBI BLAST search of **IDQTVEELR**

(Parameters: blastp, nr protein database, expect=20000, no filter, PAM30)

Other BLAST [web gateways](#)

## All matches to this query

| Score | Mr(calc):   | Delta     | Sequence                       |
|-------|-------------|-----------|--------------------------------|
| 64.4  | 1412.733337 | 0.008251  | <a href="#">IDQTVEELR</a>      |
| 13.1  | 1412.744537 | -0.002949 | <a href="#">IPPEKMRELER</a>    |
| 10.4  | 1412.741211 | 0.000377  | <a href="#">KVTIYSFTGNQR</a>   |
| 9.7   | 1412.734665 | 0.006923  | <a href="#">MPADWRQQLR</a>     |
| 5.0   | 1412.741196 | 0.000392  | <a href="#">SSLHYKPTPLR</a>    |
| 4.0   | 1412.737167 | 0.004421  | <a href="#">ARPEDVISEGRGK</a>  |
| 3.9   | 1412.759857 | -0.018269 | <a href="#">LIPFPGGAVGCGIR</a> |
| 3.6   | 1412.756470 | -0.014882 | <a href="#">DLRSVFFNFIR</a>    |
| 3.6   | 1412.748398 | -0.006810 | <a href="#">LVDNIQRNTNAR</a>   |
| 3.3   | 1412.748596 | -0.007008 | <a href="#">SQLLMFLDKFR</a>    |



# MASCOT Search Results

## Peptide View

MS/MS Fragmentation of **LEPYADQLR**

Found in **APOA4\_HUMAN**, Apolipoprotein A-IV OS=Homo sapiens GN=APOA4 PE=1 SV=3

Match to Query 35599: 1414.735168 from(708.374860,2+) rtinseconds(1955) index(41855)

Title: Locus:1.1.1.2964.21 File:"2013-07-02 CLN FXIII 60 min 1st F 3.wiff"

Data file C:\Program Files (x86)\Matrix Science\Mascot Daemon\mgf4 FXIII 60 min 1st\mascot\_daemon\_merge.mgf

Click mouse within plot area to zoom in by factor of two about that point

Or, Plot from  to  Da

Label all possible matches  Label matches used for scoring

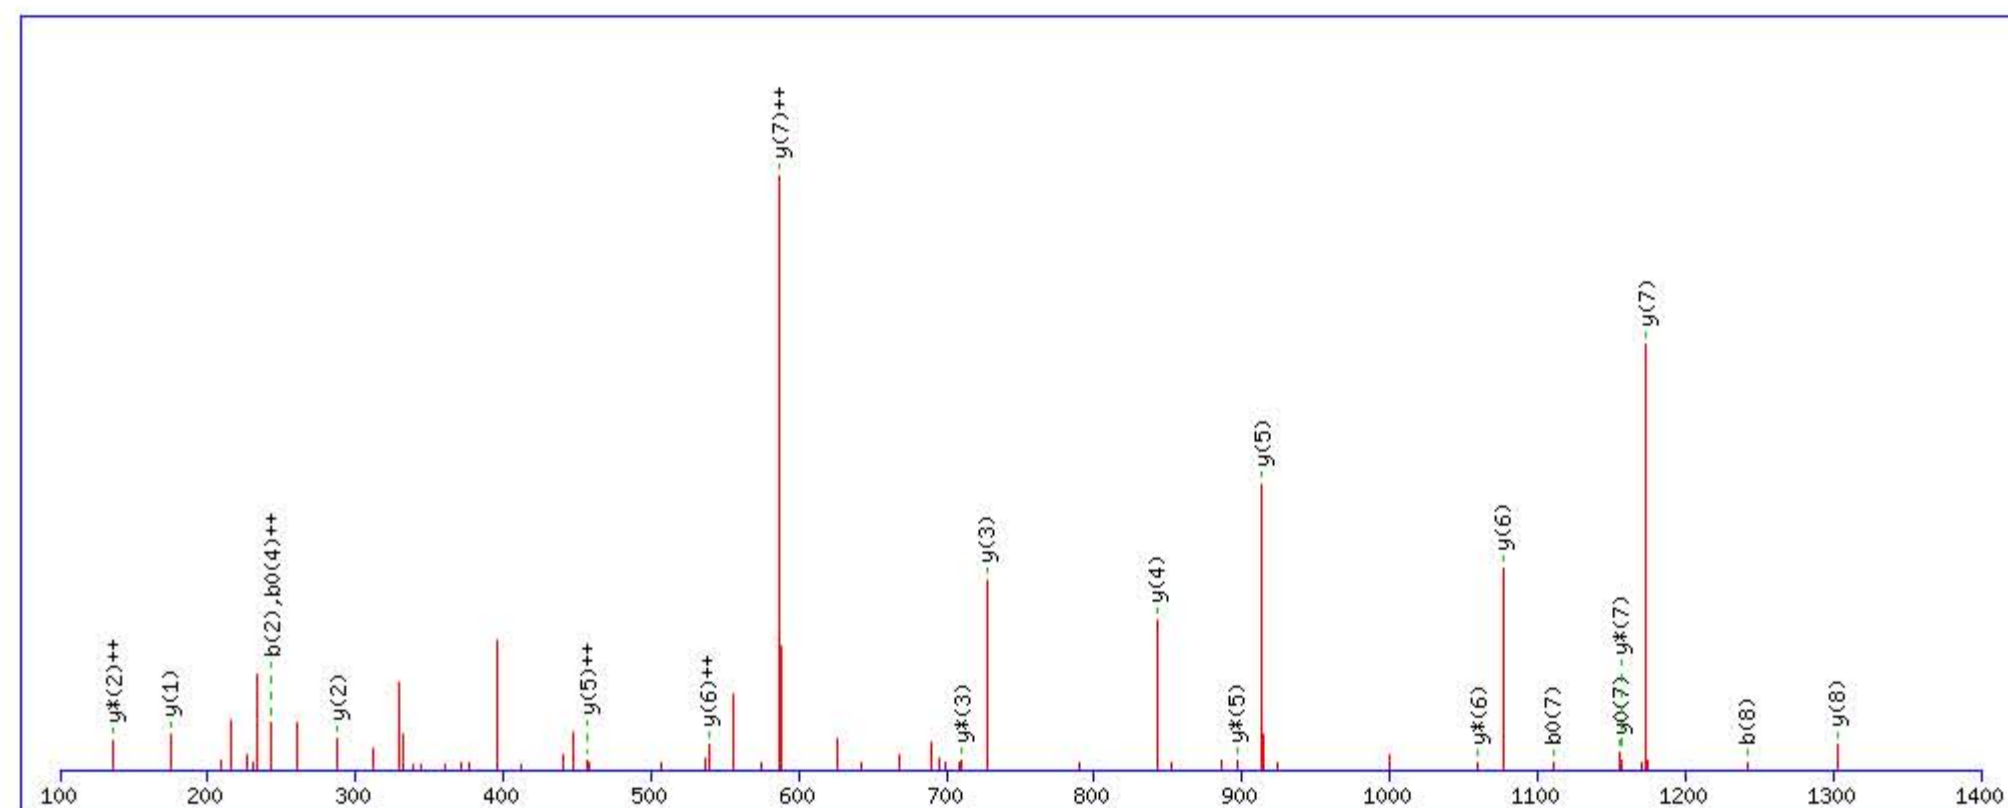

Monoisotopic mass of neutral peptide Mr(calc): 1414.727844

Fixed modifications: Carbamidomethyl (C) (apply to specified residues or termini only)

Variable modifications:

Q7 : Biotin:Thermo-21345 (Q)

Ions Score: 41 Expect: 0.00065

Matches : 21/76 fragment ions using 47 most intense peaks [\(help\)](#)

| # | b                  | b <sup>++</sup> | b <sup>*</sup> | b <sup>*++</sup> | b <sup>0</sup>     | b <sup>0++</sup>  | Seq. | y                  | y <sup>++</sup>   | y <sup>*</sup>     | y <sup>*++</sup>  | y <sup>0</sup>     | y <sup>0++</sup> | # |
|---|--------------------|-----------------|----------------|------------------|--------------------|-------------------|------|--------------------|-------------------|--------------------|-------------------|--------------------|------------------|---|
| 1 | 114.091340         | 57.549308       |                |                  |                    |                   | L    |                    |                   |                    |                   |                    |                  | 9 |
| 2 | <b>243.133933</b>  | 122.070605      |                |                  | 225.123368         | 113.065322        | E    | <b>1302.651085</b> | 651.829181        | 1285.624536        | 643.315906        | 1284.640520        | 642.823898       | 8 |
| 3 | 340.186697         | 170.596987      |                |                  | 322.176132         | 161.591704        | P    | <b>1173.608492</b> | <b>587.307884</b> | <b>1156.581943</b> | 578.794610        | <b>1155.597927</b> | 578.302602       | 7 |
| 4 | 503.250026         | 252.128651      |                |                  | 485.239461         | <b>243.123369</b> | Y    | <b>1076.555728</b> | <b>538.781502</b> | <b>1059.529179</b> | 530.268228        | 1058.545163        | 529.776220       | 6 |
| 5 | 574.287140         | 287.647208      |                |                  | 556.276575         | 278.641926        | A    | <b>913.492399</b>  | <b>457.249838</b> | <b>896.465850</b>  | 448.736563        | 895.481834         | 448.244555       | 5 |
| 6 | 689.314083         | 345.160680      |                |                  | 671.303518         | 336.155397        | D    | <b>842.455285</b>  | 421.731281        | 825.428736         | 413.218006        | 824.444720         | 412.725998       | 4 |
| 7 | 1128.539409        | 564.773343      | 1111.512860    | 556.260068       | <b>1110.528844</b> | 555.768060        | Q    | <b>727.428342</b>  | 364.217809        | <b>710.401793</b>  | 355.704535        |                    |                  | 3 |
| 8 | <b>1241.623473</b> | 621.315375      | 1224.596924    | 612.802100       | 1223.612908        | 612.310092        | L    | <b>288.203016</b>  | 144.605146        | 271.176467         | <b>136.091871</b> |                    |                  | 2 |
| 9 |                    |                 |                |                  |                    |                   | R    | <b>175.118952</b>  | 88.063114         | 158.092403         | 79.549839         |                    |                  | 1 |

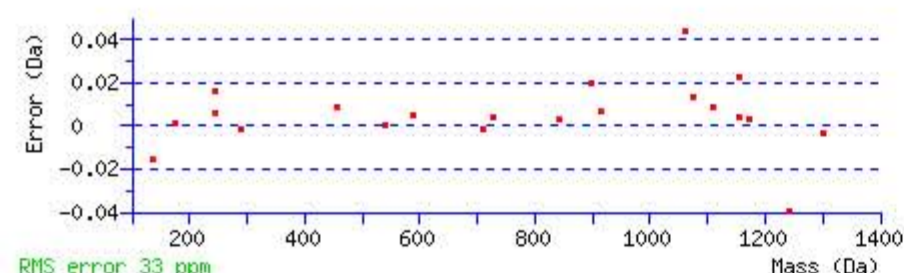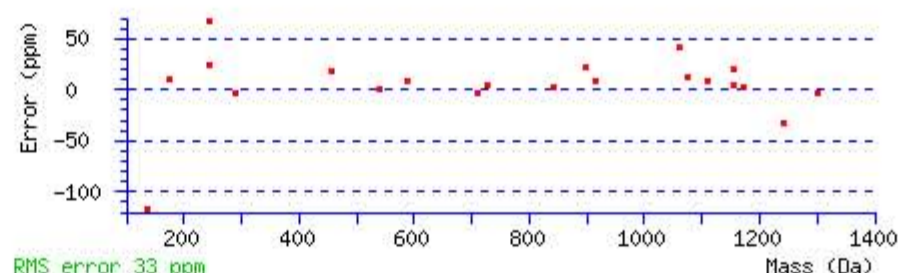

NCBI BLAST search of [LEPYADQLR](#)

(Parameters: blastp, nr protein database, expect=20000, no filter, PAM30)

Other BLAST [web gateways](#)

## All matches to this query

| Score | Mr(calc):   | Delta     | Sequence                      |
|-------|-------------|-----------|-------------------------------|
| 40.7  | 1414.727844 | 0.007324  | <a href="#">LEPYADQLR</a>     |
| 6.2   | 1414.752777 | -0.017609 | <a href="#">KNIESARAELEER</a> |
| 6.2   | 1414.735931 | -0.000763 | <a href="#">LMRGLLHCMIR</a>   |
| 5.2   | 1414.716400 | 0.018768  | <a href="#">LEEDARLEERR</a>   |
| 5.1   | 1414.731216 | 0.003952  | <a href="#">LMELQEAVR</a>     |
| 1.6   | 1414.741547 | -0.006379 | <a href="#">LEKENLEERQK</a>   |
| 1.3   | 1414.735062 | 0.000106  | <a href="#">IQLMQEVDQR</a>    |
| 1.3   | 1414.731689 | 0.003479  | <a href="#">NKAEFHQSVISR</a>  |
| 0.5   | 1414.741577 | -0.006409 | <a href="#">ELDVEVSRLEAR</a>  |
| 0.5   | 1414.741577 | -0.006409 | <a href="#">LETVQADNIREK</a>  |



# MASCOT Search Results

## Peptide View

MS/MS Fragmentation of **ALVQQMEQLR**

Found in **APOA4\_HUMAN**, Apolipoprotein A-IV OS=Homo sapiens GN=APOA4 PE=1 SV=3

Match to Query 39386: 1525.825968 from(763.920260,2+) rtinseconds(2103) index(79211)

Title: Locus:1.1.1.2946.25 File:"2013-07-02 CLN FXIII 60 min 1st FT.wiff"

Data file C:\Program Files (x86)\Matrix Science\Mascot Daemon\mgf\4 FXIII 60 min 1st\mascot\_daemon\_merge.mgf

Click mouse within plot area to zoom in by factor of two about that point

Or, Plot from  to  Da

Label all possible matches  Label matches used for scoring

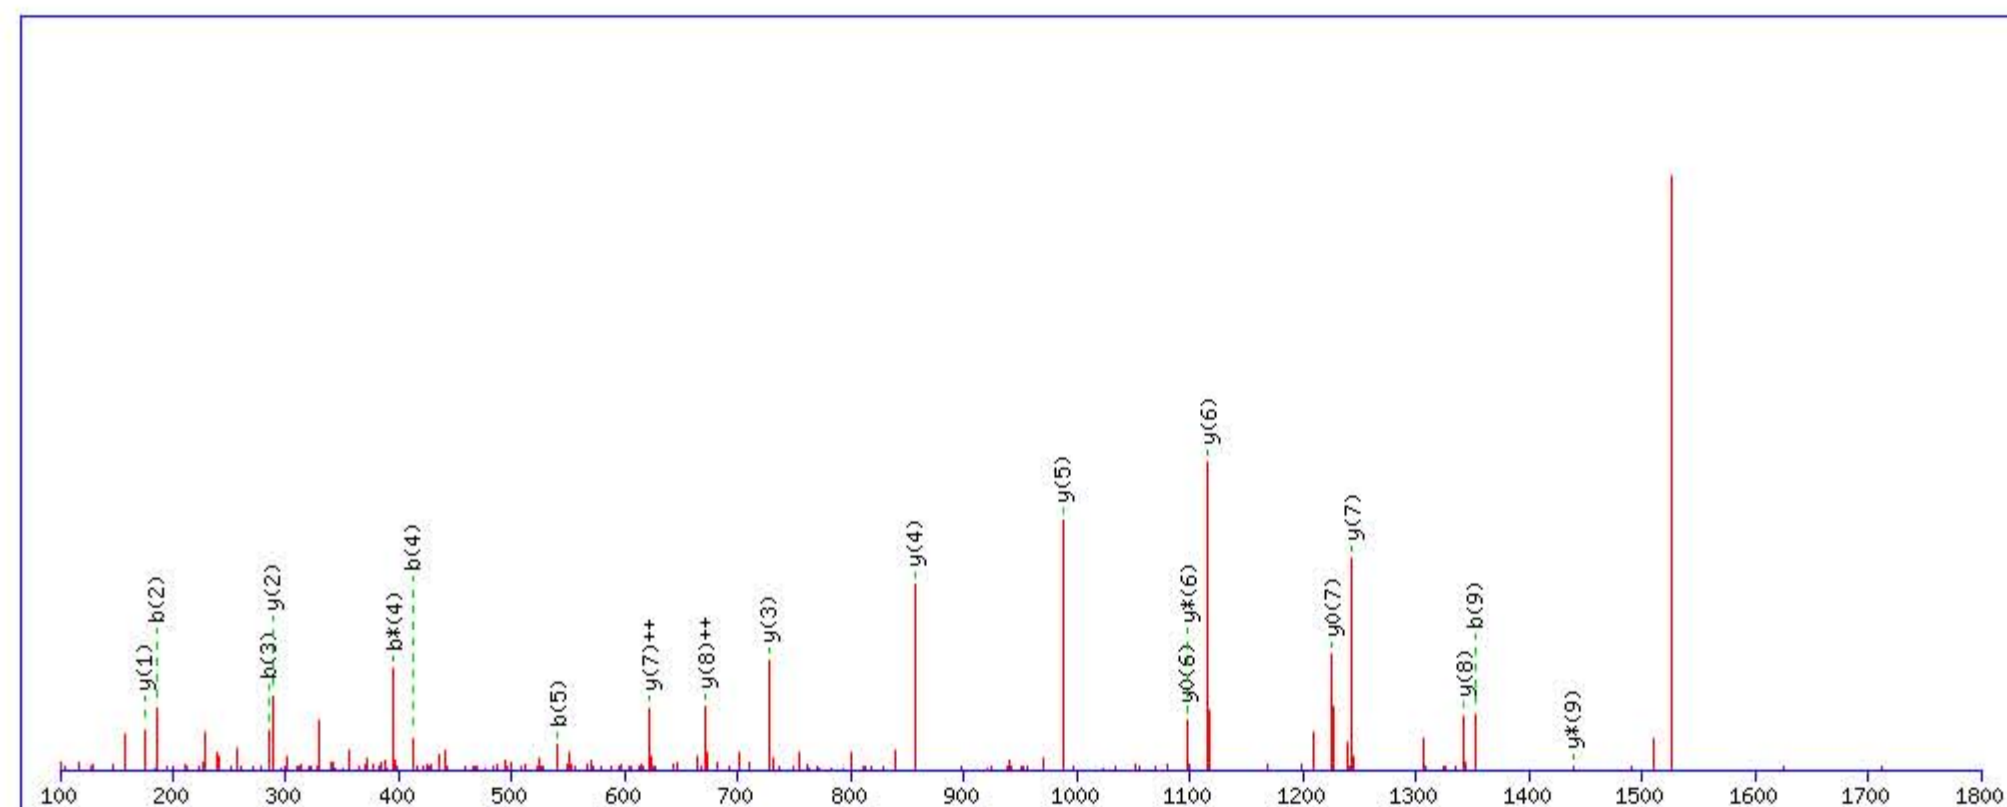

Monoisotopic mass of neutral peptide Mr(calc): 1525.810867

Fixed modifications: Carbamidomethyl (C) (apply to specified residues or termini only)

Variable modifications:

Q8 : Biotin:Thermo-21345 (Q)

Ions Score: 65 Expect: 8.9e-006

Matches : 20/84 fragment ions using 29 most intense peaks [\(help\)](#)

| #  | b           | b <sup>++</sup> | b <sup>+</sup> | b <sup>+++</sup> | b <sup>0</sup> | b <sup>0++</sup> | Seq. | y           | y <sup>++</sup> | y <sup>+</sup> | y <sup>+++</sup> | y <sup>0</sup> | y <sup>0++</sup> | #  |
|----|-------------|-----------------|----------------|------------------|----------------|------------------|------|-------------|-----------------|----------------|------------------|----------------|------------------|----|
| 1  | 72.044390   | 36.525833       |                |                  |                |                  | A    |             |                 |                |                  |                |                  | 10 |
| 2  | 185.128454  | 93.067865       |                |                  |                |                  | L    | 1455.781054 | 728.394165      | 1438.754505    | 719.880890       | 1437.770489    | 719.388882       | 9  |
| 3  | 284.196868  | 142.602072      |                |                  |                |                  | V    | 1342.696990 | 671.852133      | 1325.670441    | 663.338858       | 1324.686425    | 662.846850       | 8  |
| 4  | 412.255446  | 206.631361      | 395.228897     | 198.118087       |                |                  | Q    | 1243.628576 | 622.317926      | 1226.602027    | 613.804651       | 1225.618011    | 613.312643       | 7  |
| 5  | 540.314024  | 270.660650      | 523.287475     | 262.147376       |                |                  | Q    | 1115.569998 | 558.288637      | 1098.543449    | 549.775362       | 1097.559433    | 549.283354       | 6  |
| 6  | 671.354509  | 336.180893      | 654.327960     | 327.667618       |                |                  | M    | 987.511420  | 494.259348      | 970.484871     | 485.746073       | 969.500855     | 485.254065       | 5  |
| 7  | 800.397102  | 400.702189      | 783.370553     | 392.188915       | 782.386537     | 391.696907       | E    | 856.470935  | 428.739105      | 839.444386     | 420.225831       | 838.460370     | 419.733823       | 4  |
| 8  | 1239.622428 | 620.314852      | 1222.595879    | 611.801578       | 1221.611863    | 611.309569       | Q    | 727.428342  | 364.217809      | 710.401793     | 355.704534       |                |                  | 3  |
| 9  | 1352.706492 | 676.856884      | 1335.679943    | 668.343609       | 1334.695927    | 667.851601       | L    | 288.203016  | 144.605146      | 271.176467     | 136.091871       |                |                  | 2  |
| 10 |             |                 |                |                  |                |                  | R    | 175.118952  | 88.063114       | 158.092403     | 79.549839        |                |                  | 1  |

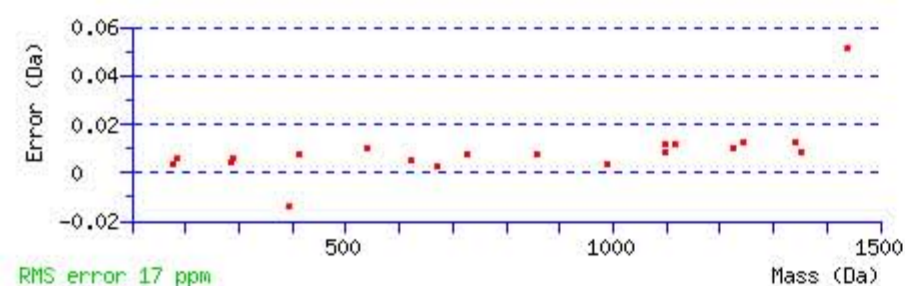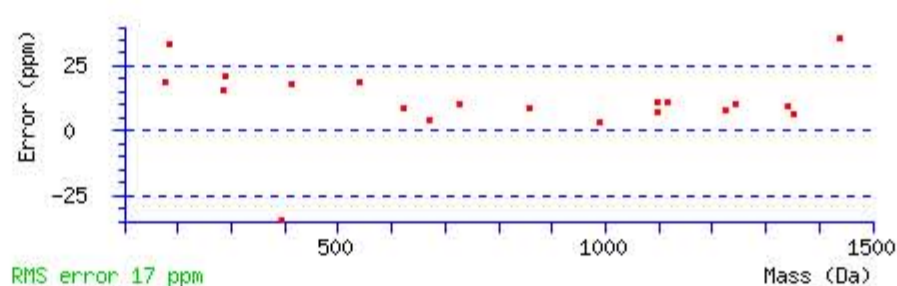

NCBI BLAST search of **ALVQQMEQLR**

(Parameters: blastp, nr protein database, expect=20000, no filter, PAM30)

Other BLAST [web gateways](#)

## All matches to this query

| Score | Mr(calc):   | Delta     | Sequence                        |
|-------|-------------|-----------|---------------------------------|
| 64.8  | 1525.810867 | 0.015101  | <a href="#">ALVQQMEQLR</a>      |
| 25.8  | 1525.810867 | 0.015101  | <a href="#">ALVQQMEQLR</a>      |
| 11.2  | 1525.810867 | 0.015101  | <a href="#">ALVQQMEQLR</a>      |
| 10.6  | 1525.803482 | 0.022486  | <a href="#">VNTPAGSSQKAR</a>    |
| 5.7   | 1525.803467 | 0.022501  | <a href="#">SPPSPRSSMAAVALR</a> |
| 5.5   | 1525.807495 | 0.018473  | <a href="#">WPPQQLMLSAALR</a>   |
| 5.5   | 1525.814682 | 0.011286  | <a href="#">LARASEQERR</a>      |
| 5.1   | 1525.843887 | -0.017919 | <a href="#">QFSLLSQHKK</a>      |
| 4.7   | 1525.846390 | -0.020422 | <a href="#">SLKGEAITDGPGLR</a>  |
| 2.6   | 1525.814697 | 0.011271  | <a href="#">ERQRTEQLR</a>       |



# MASCOT Search Results

## Peptide View

MS/MS Fragmentation of **LLPHANEVSQK**

Found in **APOA4\_HUMAN**, Apolipoprotein A-IV OS=Homo sapiens GN=APOA4 PE=1 SV=3

Match to Query 39849: 1545.835768 from(773.925160,2+) rtinseconds(1517) index(75365)

Title: Locus:1.1.1.2742.11 File:"2013-07-02 CLN FXIII 60 min 1st FT.wiff"

Data file C:\Program Files (x86)\Matrix Science\Mascot Daemon\mgf4 FXIII 60 min 1st\mascot\_daemon\_merge.mgf

Click mouse within plot area to zoom in by factor of two about that point

Or, Plot from  to  Da

Label all possible matches  Label matches used for scoring

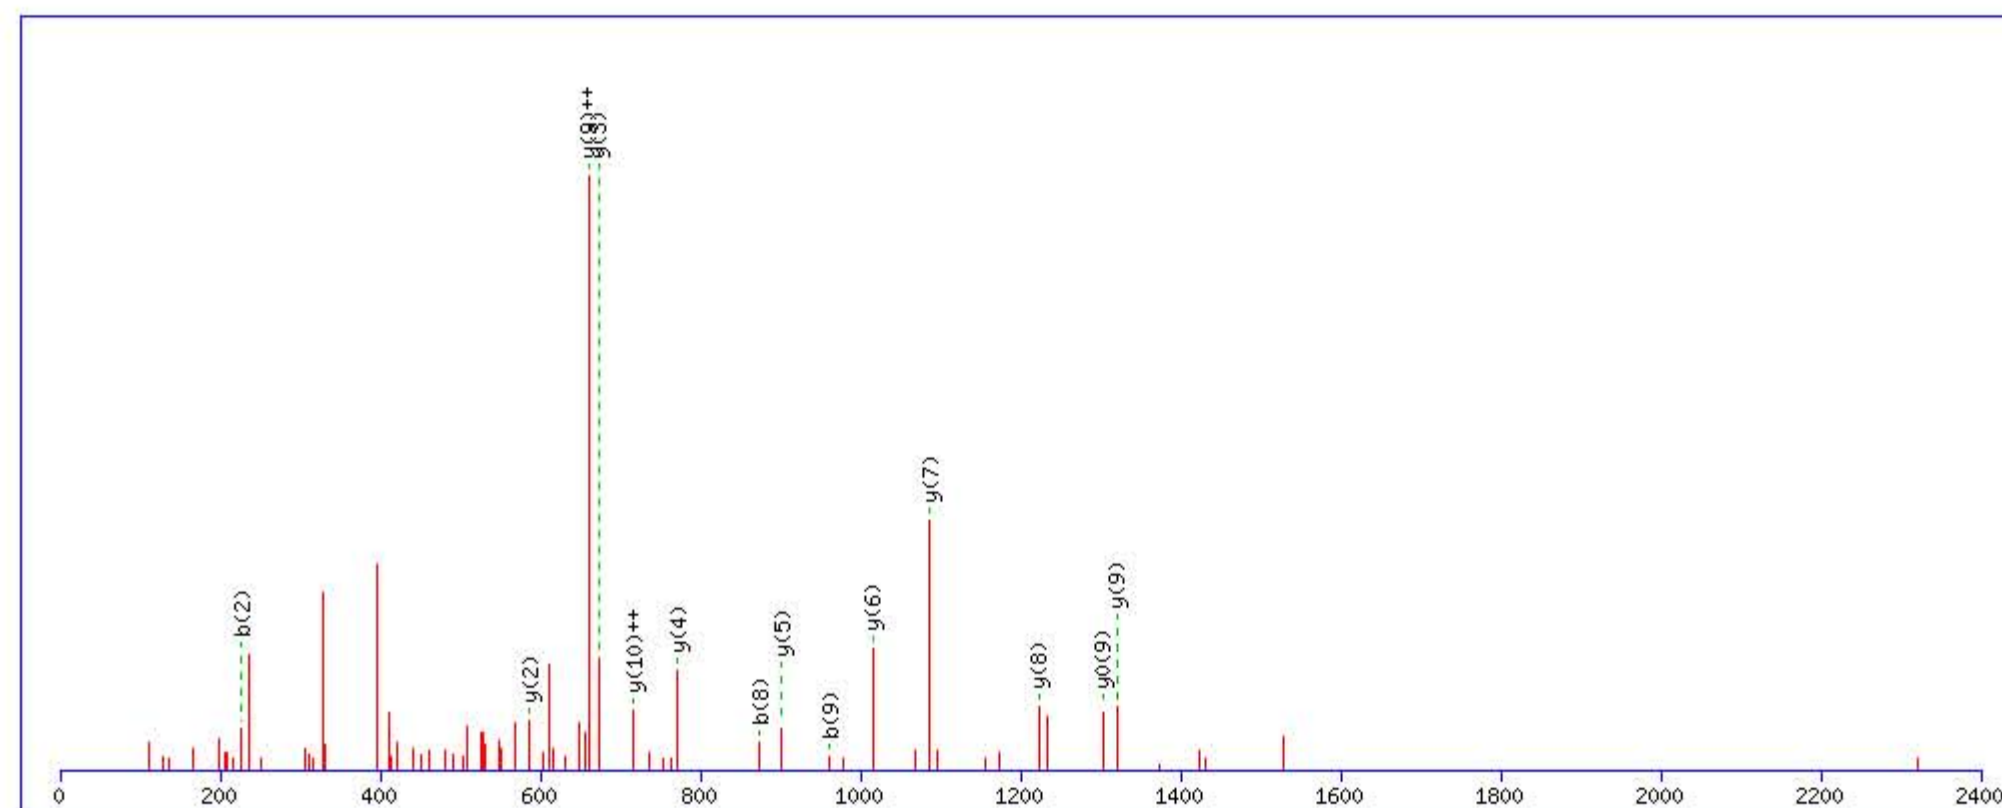

Monoisotopic mass of neutral peptide  $M_r(\text{calc})$ : 1545.833710

Fixed modifications: Carbamidomethyl (C) (apply to specified residues or termini only)

Variable modifications:

Q10 : Biotin:Thermo-21345 (Q)

Ions Score: 47 Expect: 3.9e-005

Matches : 14/94 fragment ions using 29 most intense peaks [\(help\)](#)

| #  | b                 | b <sup>++</sup> | b <sup>+</sup> | b <sup>*++</sup> | b <sup>0</sup> | b <sup>0++</sup> | Seq. | y                  | y <sup>++</sup>   | y <sup>+</sup> | y <sup>*++</sup> | y <sup>0</sup>     | y <sup>0++</sup> | #  |
|----|-------------------|-----------------|----------------|------------------|----------------|------------------|------|--------------------|-------------------|----------------|------------------|--------------------|------------------|----|
| 1  | 114.091340        | 57.549308       |                |                  |                |                  | L    |                    |                   |                |                  |                    |                  | 11 |
| 2  | <b>227.175404</b> | 114.091340      |                |                  |                |                  | L    | 1433.756946        | <b>717.382111</b> | 1416.730397    | 708.868837       | 1415.746381        | 708.376828       | 10 |
| 3  | 324.228168        | 162.617722      |                |                  |                |                  | P    | <b>1320.672882</b> | <b>660.840079</b> | 1303.646333    | 652.326804       | <b>1302.662317</b> | 651.834796       | 9  |
| 4  | 461.287080        | 231.147178      |                |                  |                |                  | H    | <b>1223.620118</b> | 612.313697        | 1206.593569    | 603.800422       | 1205.609553        | 603.308414       | 8  |
| 5  | 532.324194        | 266.665735      |                |                  |                |                  | A    | <b>1086.561206</b> | 543.784241        | 1069.534657    | 535.270966       | 1068.550641        | 534.778958       | 7  |
| 6  | 646.367121        | 323.687199      | 629.340572     | 315.173924       |                |                  | N    | <b>1015.524092</b> | 508.265684        | 998.497543     | 499.752409       | 997.513527         | 499.260401       | 6  |
| 7  | 775.409714        | 388.208495      | 758.383165     | 379.695221       | 757.399149     | 379.203213       | E    | <b>901.481165</b>  | 451.244220        | 884.454616     | 442.730946       | 883.470600         | 442.238938       | 5  |
| 8  | <b>874.478128</b> | 437.742702      | 857.451579     | 429.229427       | 856.467563     | 428.737419       | V    | <b>772.438572</b>  | 386.722924        | 755.412023     | 378.209649       | 754.428007         | 377.717641       | 4  |
| 9  | <b>961.510156</b> | 481.258716      | 944.483607     | 472.745441       | 943.499591     | 472.253433       | S    | <b>673.370158</b>  | 337.188717        | 656.343609     | 328.675442       | 655.359593         | 328.183434       | 3  |
| 10 | 1400.735482       | 700.871379      | 1383.708933    | 692.358104       | 1382.724917    | 691.866096       | Q    | <b>586.338130</b>  | 293.672703        | 569.311581     | 285.159428       |                    |                  | 2  |
| 11 |                   |                 |                |                  |                |                  | K    | 147.112804         | 74.060040         | 130.086255     | 65.546765        |                    |                  | 1  |

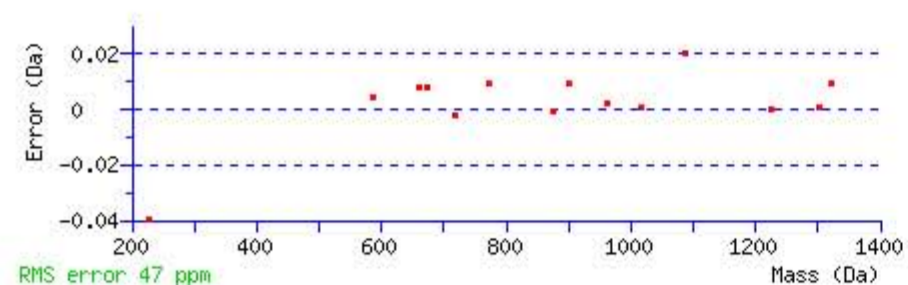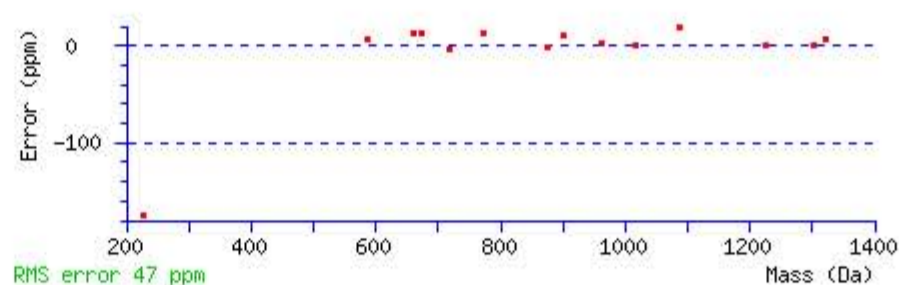

NCBI BLAST search of **LLPHANEVSQK**

(Parameters: blastp, nr protein database, expect=20000, no filter, PAM30)

Other BLAST [web gateways](#)

All matches to this query

| Score | $M_r(\text{calc})$ : | Delta    | Sequence                      |
|-------|----------------------|----------|-------------------------------|
| 47.4  | 1545.833710          | 0.002058 | <a href="#">LLPHANEVSQK</a>   |
| 0.3   | 1545.832352          | 0.003416 | <a href="#">LLSEVMEELEKVK</a> |

Mascot: <http://www.matrixscience.com/>



# MASCOT SCIENCE Mascot Search Results

## Peptide View

MS/MS Fragmentation of **SLAPYAQDTQEK**

Found in **APOA4\_HUMAN**, Apolipoprotein A-IV OS=Homo sapiens GN=APOA4 PE=1 SV=3

Match to Query 44862: 1660.815732 from(554.612520,3+) rtinseconds(1710) index(40151)

Title: Locus:1.1.1.2879.13 File:"2013-07-02 CLN FXIII 60 min 1st F 3.wiff"

Data file C:\Program Files (x86)\Matrix Science\Mascot Daemon\mgf4 FXIII 60 min 1st\mascot\_daemon\_merge.mgf

Click mouse within plot area to zoom in by factor of two about that point

Or, Plot from  to  Da

Label all possible matches  Label matches used for scoring

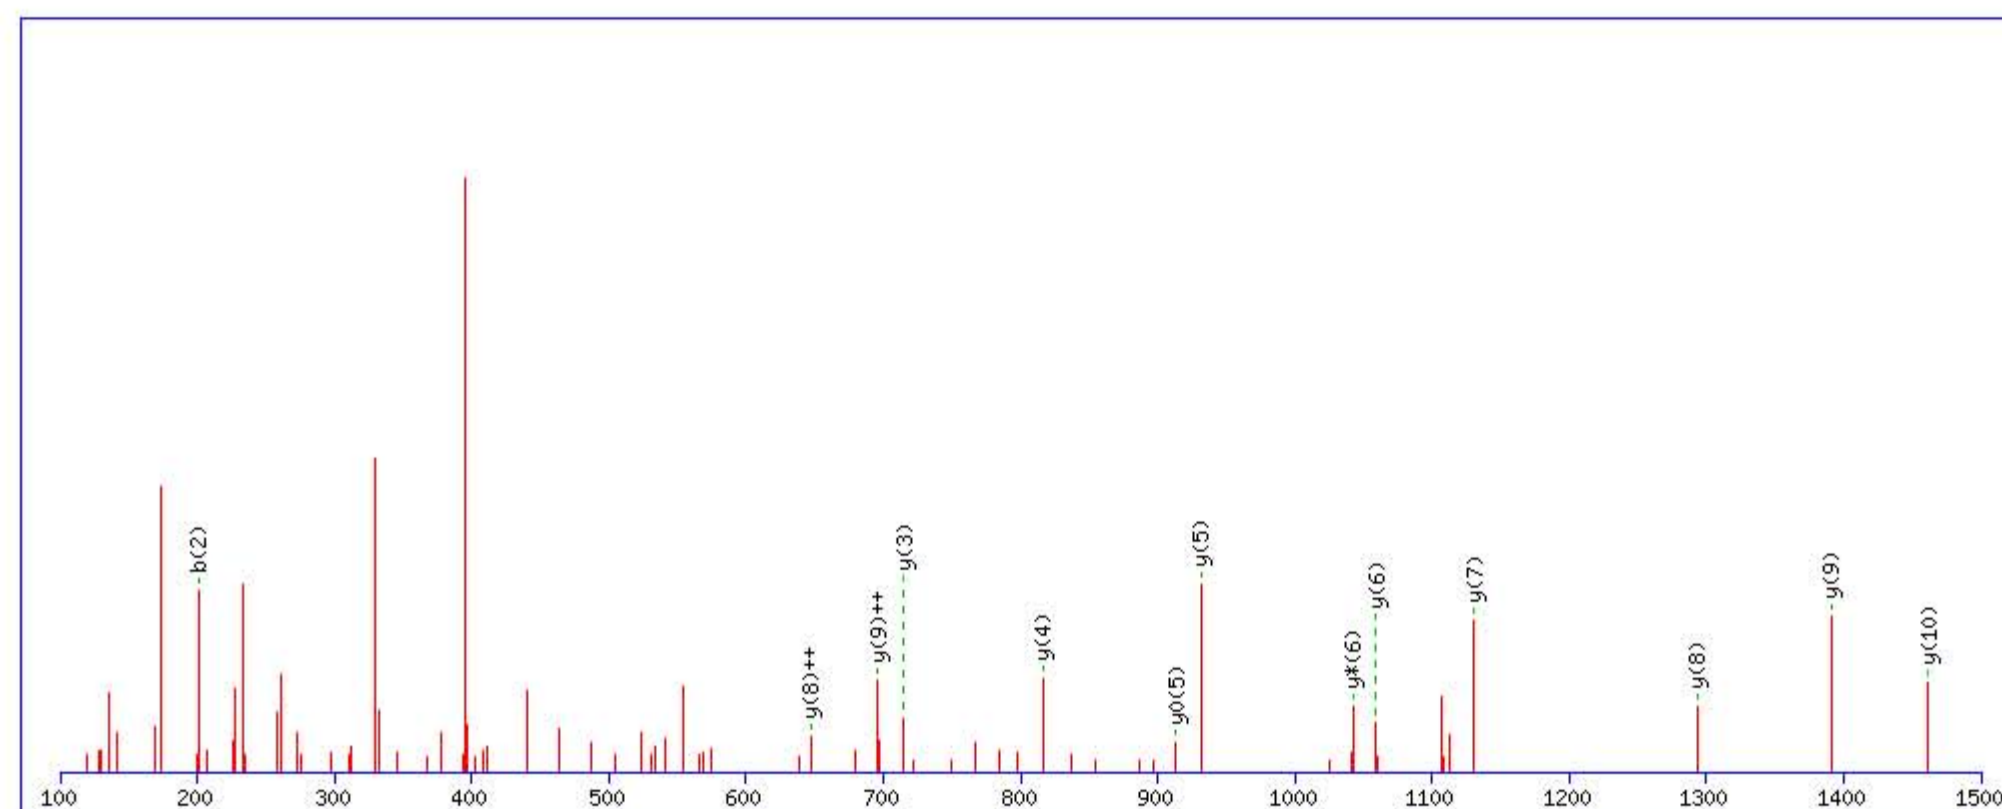

Monoisotopic mass of neutral peptide Mr(calc): 1660.813034

Fixed modifications: Carbamidomethyl (C) (apply to specified residues or termini only)

Variable modifications:

Q10 : Biotin:Thermo-21345 (Q)

Ions Score: 34 Expect: 0.0082

Matches : 13/118 fragment ions using 32 most intense peaks [\(help\)](#)

| #  | b                 | b <sup>++</sup> | b <sup>*</sup> | b <sup>*++</sup> | b <sup>0</sup> | b <sup>0++</sup> | Seq. | y                  | y <sup>++</sup>   | y <sup>*</sup>     | y <sup>*++</sup> | y <sup>0</sup>    | y <sup>0++</sup> | #  |
|----|-------------------|-----------------|----------------|------------------|----------------|------------------|------|--------------------|-------------------|--------------------|------------------|-------------------|------------------|----|
| 1  | 88.039304         | 44.523290       |                |                  | 70.028739      | 35.518008        | S    |                    |                   |                    |                  |                   |                  | 12 |
| 2  | <b>201.123368</b> | 101.065322      |                |                  | 183.112803     | 92.060039        | L    | 1574.788308        | 787.897792        | 1557.761759        | 779.384518       | 1556.777743       | 778.892510       | 11 |
| 3  | 272.160482        | 136.583879      |                |                  | 254.149917     | 127.578596       | A    | <b>1461.704244</b> | 731.355760        | 1444.677695        | 722.842486       | 1443.693679       | 722.350478       | 10 |
| 4  | 369.213246        | 185.110261      |                |                  | 351.202681     | 176.104978       | P    | <b>1390.667130</b> | <b>695.837203</b> | 1373.640581        | 687.323929       | 1372.656565       | 686.831921       | 9  |
| 5  | 532.276575        | 266.641926      |                |                  | 514.266010     | 257.636643       | Y    | <b>1293.614366</b> | <b>647.310821</b> | 1276.587817        | 638.797547       | 1275.603801       | 638.305539       | 8  |
| 6  | 603.313689        | 302.160483      |                |                  | 585.303124     | 293.155200       | A    | <b>1130.551037</b> | 565.779157        | 1113.524488        | 557.265882       | 1112.540472       | 556.773874       | 7  |
| 7  | 731.372267        | 366.189772      | 714.345718     | 357.676497       | 713.361702     | 357.184489       | Q    | <b>1059.513923</b> | 530.260600        | <b>1042.487374</b> | 521.747325       | 1041.503358       | 521.255317       | 6  |
| 8  | 846.399210        | 423.703243      | 829.372661     | 415.189969       | 828.388645     | 414.697961       | D    | <b>931.455345</b>  | 466.231311        | 914.428796         | 457.718036       | <b>913.444780</b> | 457.226028       | 5  |
| 9  | 947.446889        | 474.227083      | 930.420340     | 465.713808       | 929.436324     | 465.221800       | T    | <b>816.428402</b>  | 408.717839        | 799.401853         | 400.204565       | 798.417837        | 399.712557       | 4  |
| 10 | 1386.672215       | 693.839746      | 1369.645666    | 685.326471       | 1368.661650    | 684.834463       | Q    | <b>715.380723</b>  | 358.194000        | 698.354174         | 349.680725       | 697.370158        | 349.188717       | 3  |
| 11 | 1515.714808       | 758.361042      | 1498.688259    | 749.847768       | 1497.704243    | 749.355760       | E    | 276.155397         | 138.581337        | 259.128848         | 130.068062       | 258.144832        | 129.576054       | 2  |
| 12 |                   |                 |                |                  |                |                  | K    | 147.112804         | 74.060040         | 130.086255         | 65.546765        |                   |                  | 1  |

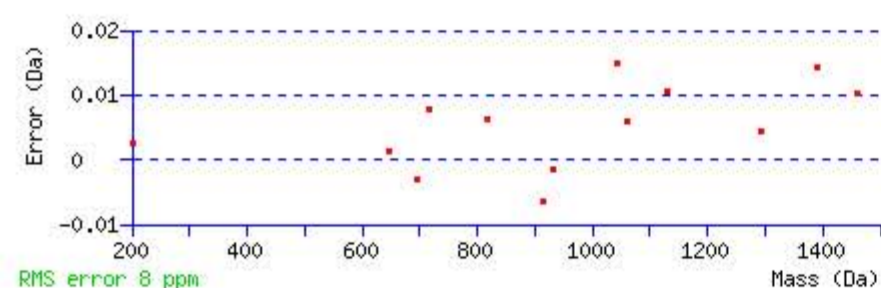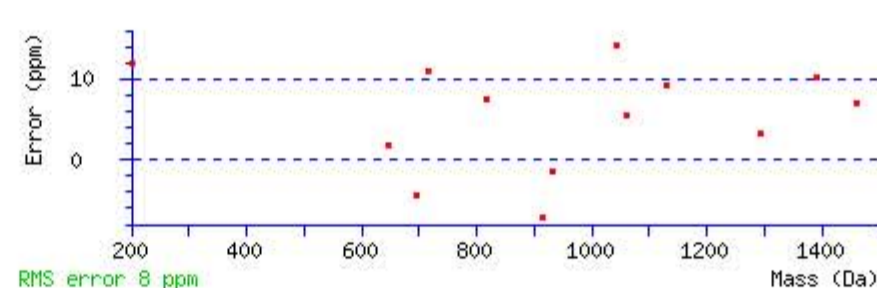

NCBI BLAST search of [SLAPYAQDTQEK](#)

(Parameters: blastp, nr protein database, expect=20000, no filter, PAM30)

Other BLAST [web gateways](#)

All matches to this query

| Score | Mr(calc):   | Delta    | Sequence                     |
|-------|-------------|----------|------------------------------|
| 34.4  | 1660.813034 | 0.002698 | <a href="#">SLAPYAQDTQEK</a> |
| 14.9  | 1660.813034 | 0.002698 | <a href="#">SLAPYAQDTQEK</a> |

Mascot: <http://www.matrixscience.com/>



# MASCOT SCIENCE Mascot Search Results

## Peptide View

MS/MS Fragmentation of **LGEVNTYAGDLQK**

Found in **APOA4\_HUMAN**, Apolipoprotein A-IV OS=Homo sapiens GN=APOA4 PE=1 SV=3

Match to Query 46261: 1717.877892 from(573.633240,3+) rtinseconds(1971) index(41954)

Title: Locus:1.1.1.2970.2 File:"2013-07-02 CLN FXIII 60 min 1st F 3.wiff"

Data file C:\Program Files (x86)\Matrix Science\Mascot Daemon\mgf4 FXIII 60 min 1st\mascot\_daemon\_merge.mgf

Click mouse within plot area to zoom in by factor of two about that point

Or, Plot from  to  Da

Label all possible matches  Label matches used for scoring

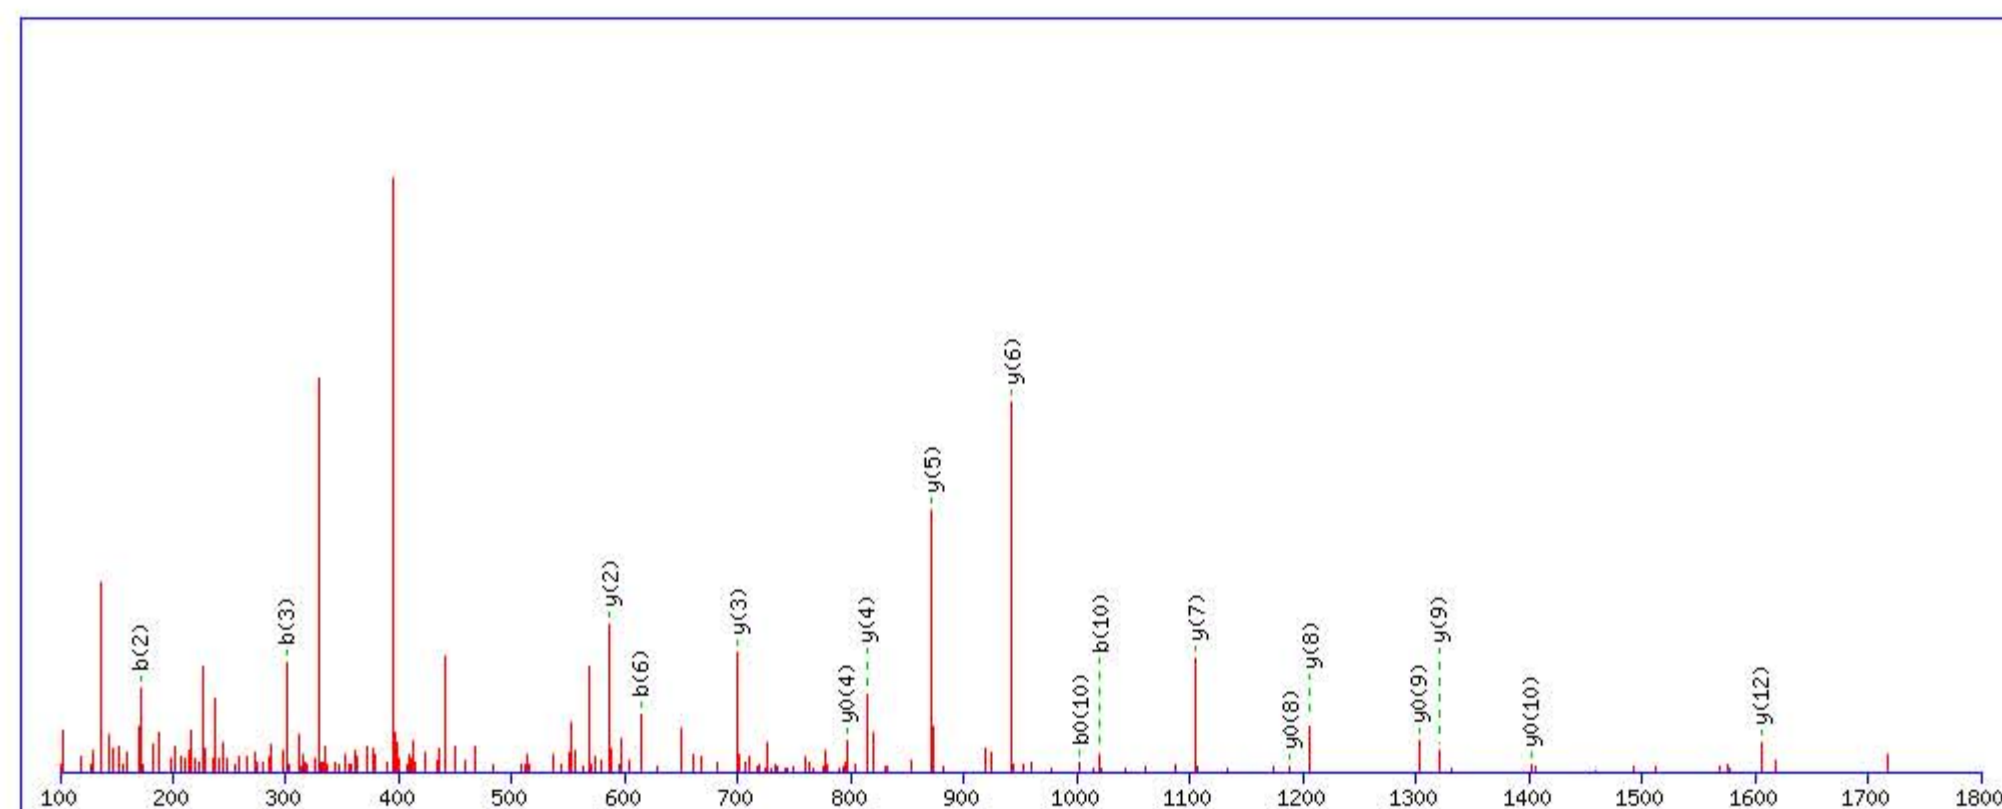

Monoisotopic mass of neutral peptide Mr(calc): 1717.870895

Fixed modifications: Carbamidomethyl (C) (apply to specified residues or termini only)

Variable modifications:

Q12 : Biotin:Thermo-21345 (Q)

Ions Score: 54 Expect: 0.00011

Matches : 18/126 fragment ions using 32 most intense peaks [\(help\)](#)

| #  | b                  | b <sup>++</sup> | b <sup>*</sup> | b <sup>+++</sup> | b <sup>0</sup>     | b <sup>0++</sup> | Seq. | y                  | y <sup>++</sup> | y <sup>*</sup> | y <sup>+++</sup> | y <sup>0</sup>     | y <sup>0++</sup> | #  |
|----|--------------------|-----------------|----------------|------------------|--------------------|------------------|------|--------------------|-----------------|----------------|------------------|--------------------|------------------|----|
| 1  | 114.091340         | 57.549308       |                |                  |                    |                  | L    |                    |                 |                |                  |                    |                  | 13 |
| 2  | <b>171.112804</b>  | 86.060040       |                |                  |                    |                  | G    | <b>1605.794121</b> | 803.400699      | 1588.767572    | 794.887424       | 1587.783556        | 794.395416       | 12 |
| 3  | <b>300.155397</b>  | 150.581336      |                |                  | 282.144832         | 141.576054       | E    | 1548.772657        | 774.889967      | 1531.746108    | 766.376692       | 1530.762092        | 765.884684       | 11 |
| 4  | 399.223811         | 200.115544      |                |                  | 381.213246         | 191.110261       | V    | 1419.730064        | 710.368670      | 1402.703515    | 701.855396       | <b>1401.719499</b> | 701.363388       | 10 |
| 5  | 513.266738         | 257.137007      | 496.240189     | 248.623733       | 495.256173         | 248.131725       | N    | <b>1320.661650</b> | 660.834463      | 1303.635101    | 652.321189       | <b>1302.651085</b> | 651.829181       | 9  |
| 6  | <b>614.314417</b>  | 307.660847      | 597.287868     | 299.147572       | 596.303852         | 298.655564       | T    | <b>1206.618723</b> | 603.813000      | 1189.592174    | 595.299725       | <b>1188.608158</b> | 594.807717       | 8  |
| 7  | 777.377746         | 389.192511      | 760.351197     | 380.679237       | 759.367181         | 380.187229       | Y    | <b>1105.571044</b> | 553.289160      | 1088.544495    | 544.775886       | 1087.560479        | 544.283878       | 7  |
| 8  | 848.414860         | 424.711068      | 831.388311     | 416.197794       | 830.404295         | 415.705786       | A    | <b>942.507715</b>  | 471.757496      | 925.481166     | 463.244221       | 924.497150         | 462.752213       | 6  |
| 9  | 905.436324         | 453.221800      | 888.409775     | 444.708526       | 887.425759         | 444.216518       | G    | <b>871.470601</b>  | 436.238939      | 854.444052     | 427.725664       | 853.460036         | 427.233656       | 5  |
| 10 | <b>1020.463267</b> | 510.735272      | 1003.436718    | 502.221997       | <b>1002.452702</b> | 501.729989       | D    | <b>814.449137</b>  | 407.728207      | 797.422588     | 399.214932       | <b>796.438572</b>  | 398.722924       | 4  |
| 11 | 1133.547331        | 567.277304      | 1116.520782    | 558.764029       | 1115.536766        | 558.272021       | L    | <b>699.422194</b>  | 350.214735      | 682.395645     | 341.701461       |                    |                  | 3  |
| 12 | 1572.772657        | 786.889967      | 1555.746108    | 778.376692       | 1554.762092        | 777.884684       | Q    | <b>586.338130</b>  | 293.672703      | 569.311581     | 285.159429       |                    |                  | 2  |
| 13 |                    |                 |                |                  |                    |                  | K    | 147.112804         | 74.060040       | 130.086255     | 65.546765        |                    |                  | 1  |

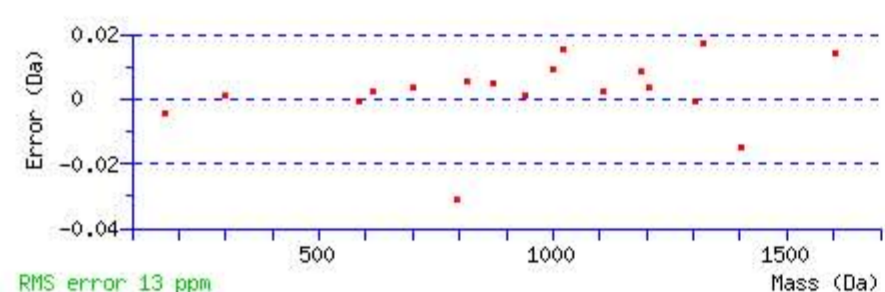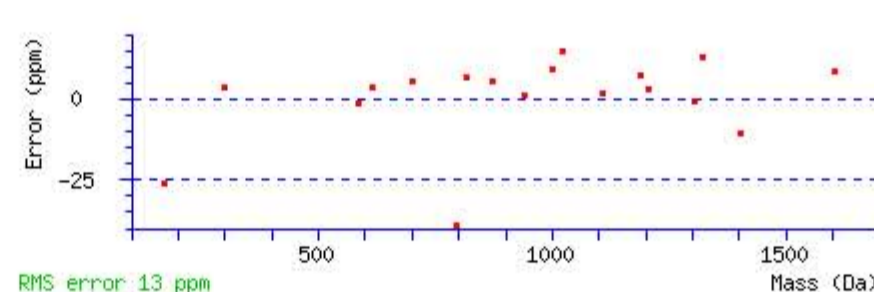

NCBI BLAST search of **LGEVNTYAGDLQK**

(Parameters: blastp, nr protein database, expect=20000, no filter, PAM30)

Other BLAST [web gateways](#)

All matches to this query

| Score | Mr(calc):   | Delta    | Sequence             |
|-------|-------------|----------|----------------------|
| 54.0  | 1717.870895 | 0.006997 | <b>LGEVNTYAGDLQK</b> |

Mascot: <http://www.matrixscience.com/>



# MASCOT SEARCH RESULTS

## Peptide View

MS/MS Fragmentation of **LNHQLEGLTFQMK**  
 Found in **APOA4\_HUMAN**, Apolipoprotein A-IV OS=Homo sapiens GN=APOA4 PE=1 SV=3

Match to Query 50044: 1868.977632 from(623.999820,3+) rtinseconds(2129) index(42909)  
 Title: Locus:1.1.1.3025.10 File:"2013-07-02 CLN FXIII 60 min 1st F 3.wiff"  
 Data file C:\Program Files (x86)\Matrix Science\Mascot Daemon\mgf4 FXIII 60 min 1st\mascot\_daemon\_merge.mgf

Click mouse within plot area to zoom in by factor of two about that point  
 Or, Plot from  to  Da   
 Label all possible matches  Label matches used for scoring

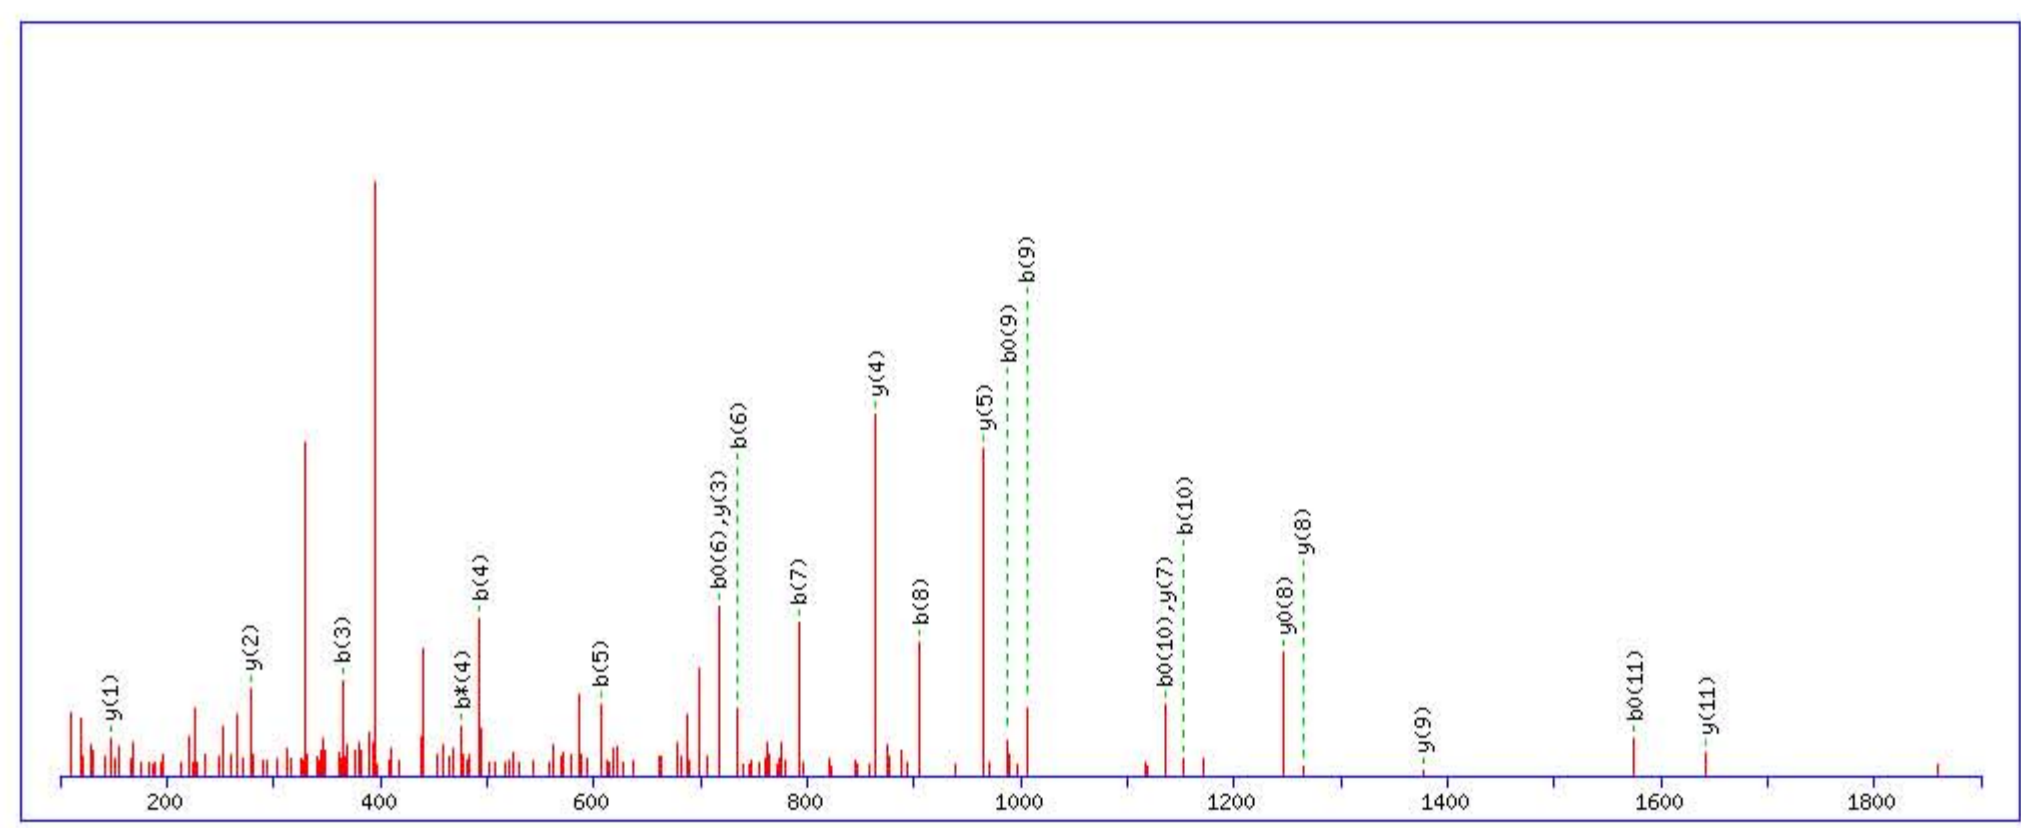

Monoisotopic mass of neutral peptide Mr(calc): 1868.964081  
 Fixed modifications: Carbamidomethyl (C) (apply to specified residues or termini only)  
 Variable modifications:  
 Q11 : Biotin:Thermo-21345 (Q)  
 Ions Score: 59 Expect: 3.7e-005  
 Matches : 23/124 fragment ions using 36 most intense peaks [\(help\)](#)

| #  | b                  | b <sup>++</sup> | b <sup>*</sup>    | b <sup>*++</sup> | b <sup>0</sup>     | b <sup>0++</sup> | Seq. | y                  | y <sup>++</sup> | y <sup>*</sup> | y <sup>*++</sup> | y <sup>0</sup>     | y <sup>0++</sup> | #  |
|----|--------------------|-----------------|-------------------|------------------|--------------------|------------------|------|--------------------|-----------------|----------------|------------------|--------------------|------------------|----|
| 1  | 114.091340         | 57.549308       |                   |                  |                    |                  | L    |                    |                 |                |                  |                    |                  | 13 |
| 2  | 228.134267         | 114.570771      | 211.107718        | 106.057497       |                    |                  | N    | 1756.887310        | 878.947293      | 1739.860761    | 870.434019       | 1738.876745        | 869.942011       | 12 |
| 3  | <b>365.193179</b>  | 183.100227      | 348.166630        | 174.586953       |                    |                  | H    | <b>1642.844383</b> | 821.925830      | 1625.817834    | 813.412555       | 1624.833818        | 812.920547       | 11 |
| 4  | <b>493.251757</b>  | 247.129516      | <b>476.225208</b> | 238.616242       |                    |                  | Q    | 1505.785471        | 753.396374      | 1488.758922    | 744.883099       | 1487.774906        | 744.391091       | 10 |
| 5  | <b>606.335821</b>  | 303.671549      | 589.309272        | 295.158274       |                    |                  | L    | <b>1377.726893</b> | 689.367085      | 1360.700344    | 680.853810       | 1359.716328        | 680.361802       | 9  |
| 6  | <b>735.378414</b>  | 368.192845      | 718.351865        | 359.679571       | <b>717.367849</b>  | 359.187563       | E    | <b>1264.642829</b> | 632.825053      | 1247.616280    | 624.311778       | <b>1246.632264</b> | 623.819770       | 8  |
| 7  | <b>792.399878</b>  | 396.703577      | 775.373329        | 388.190303       | 774.389313         | 387.698295       | G    | <b>1135.600236</b> | 568.303756      | 1118.573687    | 559.790482       | 1117.589671        | 559.298474       | 7  |
| 8  | <b>905.483942</b>  | 453.245609      | 888.457393        | 444.732335       | 887.473377         | 444.240327       | L    | 1078.578772        | 539.793024      | 1061.552223    | 531.279750       | 1060.568207        | 530.787742       | 6  |
| 9  | <b>1006.531621</b> | 503.769449      | 989.505072        | 495.256174       | <b>988.521056</b>  | 494.764166       | T    | <b>965.494708</b>  | 483.250992      | 948.468159     | 474.737718       | 947.484143         | 474.245710       | 5  |
| 10 | <b>1153.600035</b> | 577.303656      | 1136.573486       | 568.790381       | <b>1135.589470</b> | 568.298373       | F    | <b>864.447029</b>  | 432.727153      | 847.420480     | 424.213878       |                    |                  | 4  |
| 11 | 1592.825361        | 796.916319      | 1575.798812       | 788.403044       | <b>1574.814796</b> | 787.911036       | Q    | <b>717.378615</b>  | 359.192946      | 700.352066     | 350.679671       |                    |                  | 3  |
| 12 | 1723.865846        | 862.436561      | 1706.839297       | 853.923287       | 1705.855281        | 853.431279       | M    | <b>278.153289</b>  | 139.580282      | 261.126740     | 131.067008       |                    |                  | 2  |
| 13 |                    |                 |                   |                  |                    |                  | K    | <b>147.112804</b>  | 74.060040       | 130.086255     | 65.546765        |                    |                  | 1  |

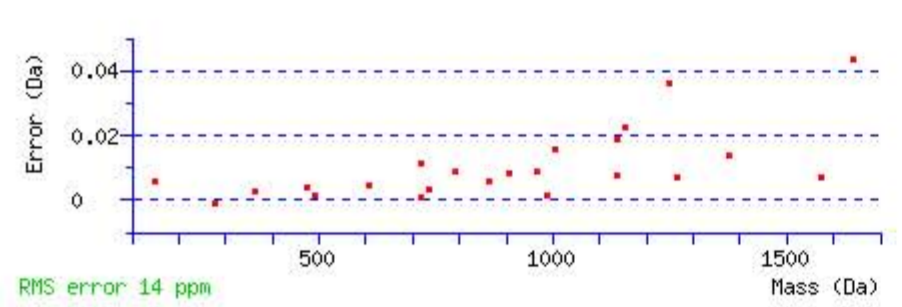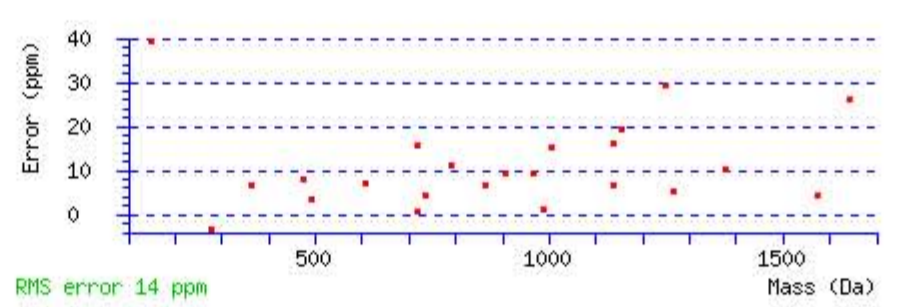

NCBI BLAST search of **LNHQLEGLTFQMK**  
 (Parameters: blastp, nr protein database, expect=20000, no filter, PAM30)  
 Other BLAST [web gateways](#)

### All matches to this query

| Score | Mr(calc):   | Delta    | Sequence                      |
|-------|-------------|----------|-------------------------------|
| 58.8  | 1868.964081 | 0.013551 | <a href="#">LNHQLEGLTFQMK</a> |



# MASCOT Search Results

## Peptide View

MS/MS Fragmentation of **TQVNTQAEQLR**

Found in **APOA4\_HUMAN**, Apolipoprotein A-IV OS=Homo sapiens GN=APOA4 PE=1 SV=3

Match to Query 50799: 1909.001502 from(637.341110,3+) rtinseconds(1918) index(77847)

Title: Locus:1.1.1.2882.18 File:"2013-07-02 CLN FXIII 60 min 1st FT.wiff"

Data file C:\Program Files (x86)\Matrix Science\Mascot Daemon\mgf4 FXIII 60 min 1st\mascot\_daemon\_merge.mgf

Click mouse within plot area to zoom in by factor of two about that point

Or, Plot from  to  Da

Label all possible matches  Label matches used for scoring

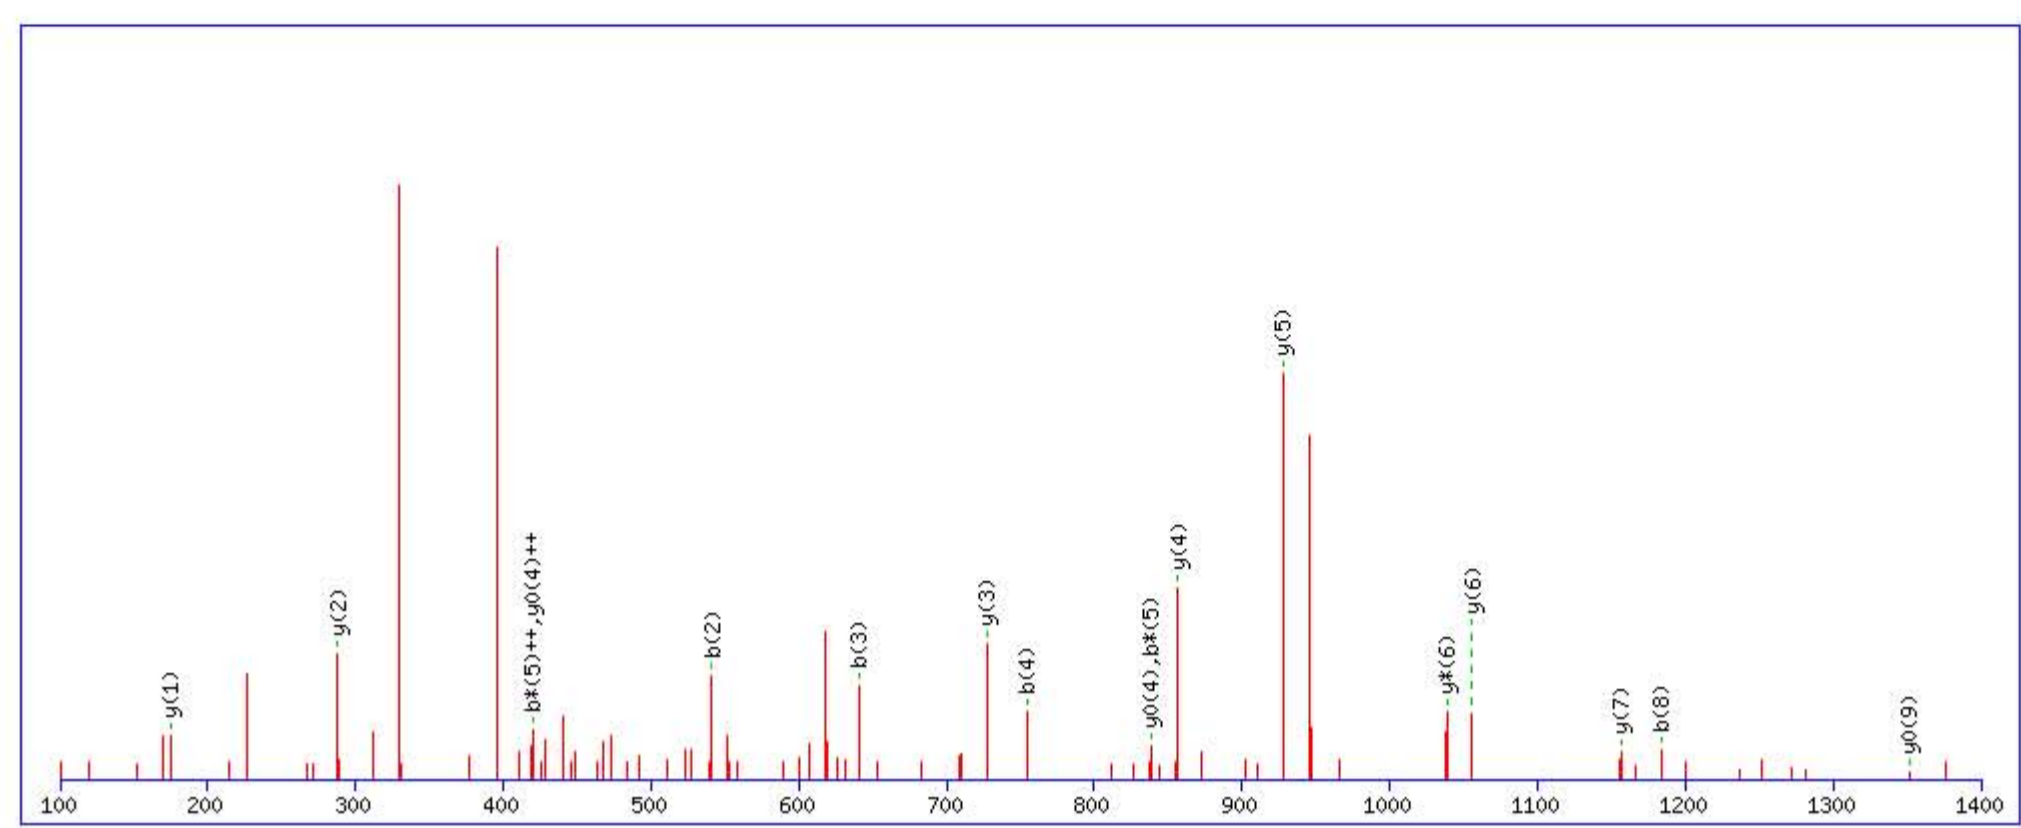

Monoisotopic mass of neutral peptide Mr(calc): 1908.991364

Fixed modifications: Carbamidomethyl (C) (apply to specified residues or termini only)

Variable modifications:

Q2 : Biotin:Thermo-21345 (Q)

Q9 : Biotin:Thermo-21345 (Q)

Ions Score: 36 Expect: 0.00052

Matches : 17/112 fragment ions using 26 most intense peaks [\(help\)](#)

| #  | b                  | b <sup>++</sup> | b <sup>*</sup>    | b <sup>*++</sup>  | b <sup>0</sup> | b <sup>0++</sup> | Seq. | y                  | y <sup>++</sup> | y <sup>*</sup>     | y <sup>*++</sup> | y <sup>0</sup>     | y <sup>0++</sup>  | #  |
|----|--------------------|-----------------|-------------------|-------------------|----------------|------------------|------|--------------------|-----------------|--------------------|------------------|--------------------|-------------------|----|
| 1  | 102.054955         | 51.531116       |                   |                   | 84.044390      | 42.525833        | T    |                    |                 |                    |                  |                    |                   | 11 |
| 2  | <b>541.280281</b>  | 271.143779      | 524.253732        | 262.630504        | 523.269716     | 262.138496       | Q    | 1808.950973        | 904.979125      | 1791.924424        | 896.465850       | 1790.940408        | 895.973842        | 10 |
| 3  | <b>640.348695</b>  | 320.677986      | 623.322146        | 312.164711        | 622.338130     | 311.672703       | V    | 1369.725647        | 685.366462      | 1352.699098        | 676.853187       | <b>1351.715082</b> | 676.361179        | 9  |
| 4  | <b>754.391622</b>  | 377.699449      | 737.365073        | 369.186174        | 736.381057     | 368.694166       | N    | 1270.657233        | 635.832255      | 1253.630684        | 627.318980       | 1252.646668        | 626.826972        | 8  |
| 5  | 855.439301         | 428.223289      | <b>838.412752</b> | <b>419.710014</b> | 837.428736     | 419.218006       | T    | <b>1156.614306</b> | 578.810791      | 1139.587757        | 570.297517       | 1138.603741        | 569.805509        | 7  |
| 6  | 983.497879         | 492.252578      | 966.471330        | 483.739303        | 965.487314     | 483.247295       | Q    | <b>1055.566627</b> | 528.286952      | <b>1038.540078</b> | 519.773677       | 1037.556062        | 519.281669        | 6  |
| 7  | 1054.534993        | 527.771135      | 1037.508444       | 519.257860        | 1036.524428    | 518.765852       | A    | <b>927.508049</b>  | 464.257663      | 910.481500         | 455.744388       | 909.497484         | 455.252380        | 5  |
| 8  | <b>1183.577586</b> | 592.292431      | 1166.551037       | 583.779157        | 1165.567021    | 583.287149       | E    | <b>856.470935</b>  | 428.739106      | 839.444386         | 420.225831       | <b>838.460370</b>  | <b>419.733823</b> | 4  |
| 9  | 1622.802912        | 811.905094      | 1605.776363       | 803.391820        | 1604.792347    | 802.899812       | Q    | <b>727.428342</b>  | 364.217809      | 710.401793         | 355.704535       |                    |                   | 3  |
| 10 | 1735.886976        | 868.447126      | 1718.860427       | 859.933852        | 1717.876411    | 859.441844       | L    | <b>288.203016</b>  | 144.605146      | 271.176467         | 136.091871       |                    |                   | 2  |
| 11 |                    |                 |                   |                   |                |                  | R    | <b>175.118952</b>  | 88.063114       | 158.092403         | 79.549839        |                    |                   | 1  |

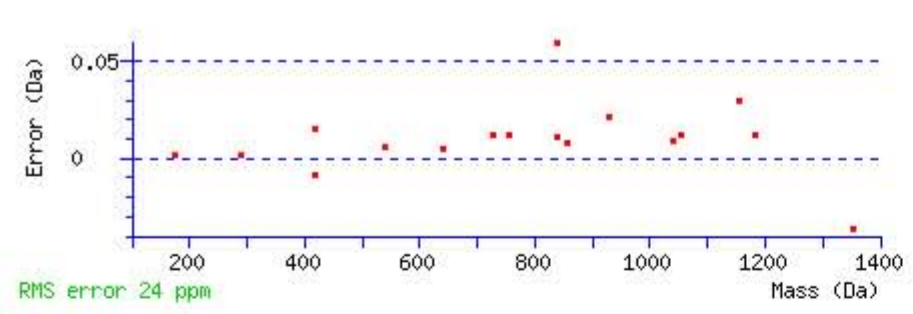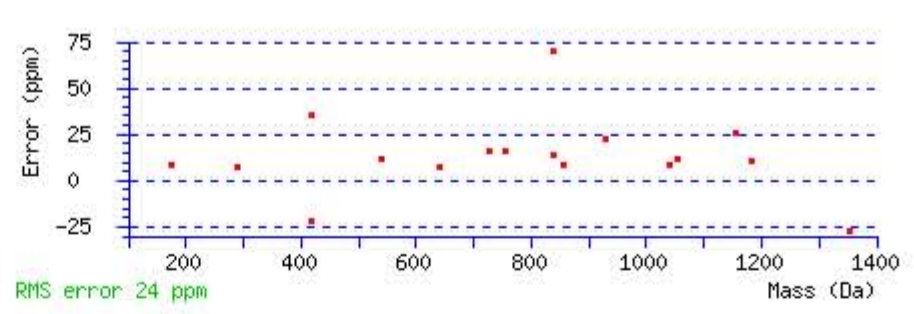

NCBI BLAST search of **TQVNTQAEQLR**

(Parameters: blastp, nr protein database, expect=20000, no filter, PAM30)

Other BLAST [web gateways](#)

### All matches to this query

| Score | Mr(calc):   | Delta     | Sequence                            |
|-------|-------------|-----------|-------------------------------------|
| 36.2  | 1908.991364 | 0.010138  | <a href="#">TQVNTQAEQLR</a>         |
| 14.6  | 1908.991364 | 0.010138  | <a href="#">TQVNTQAEQLR</a>         |
| 9.1   | 1908.991364 | 0.010138  | <a href="#">TQVNTQAEQLR</a>         |
| 1.2   | 1909.015610 | -0.014108 | <a href="#">SSIALTAPDAAADPKEKPK</a> |



# MASCOT Search Results

## Peptide View

MS/MS Fragmentation of **SLAELGGHLDQQVEEFR**  
 Found in **APOA4\_HUMAN**, Apolipoprotein A-IV OS=Homo sapiens GN=APOA4 PE=1 SV=3

Match to Query 59082: 2238.125382 from(747.049070,3+) rtinseconds(2222) index(43573)  
 Title: Locus:1.1.1.3057.18 File:"2013-07-02 CLN FXIII 60 min 1st F 3.wiff"  
 Data file C:\Program Files (x86)\Matrix Science\Mascot Daemon\mgf4 FXIII 60 min 1st\mascot\_daemon\_merge.mgf

Click mouse within plot area to zoom in by factor of two about that point

Or, Plot from  to  Da

Label all possible matches  Label matches used for scoring

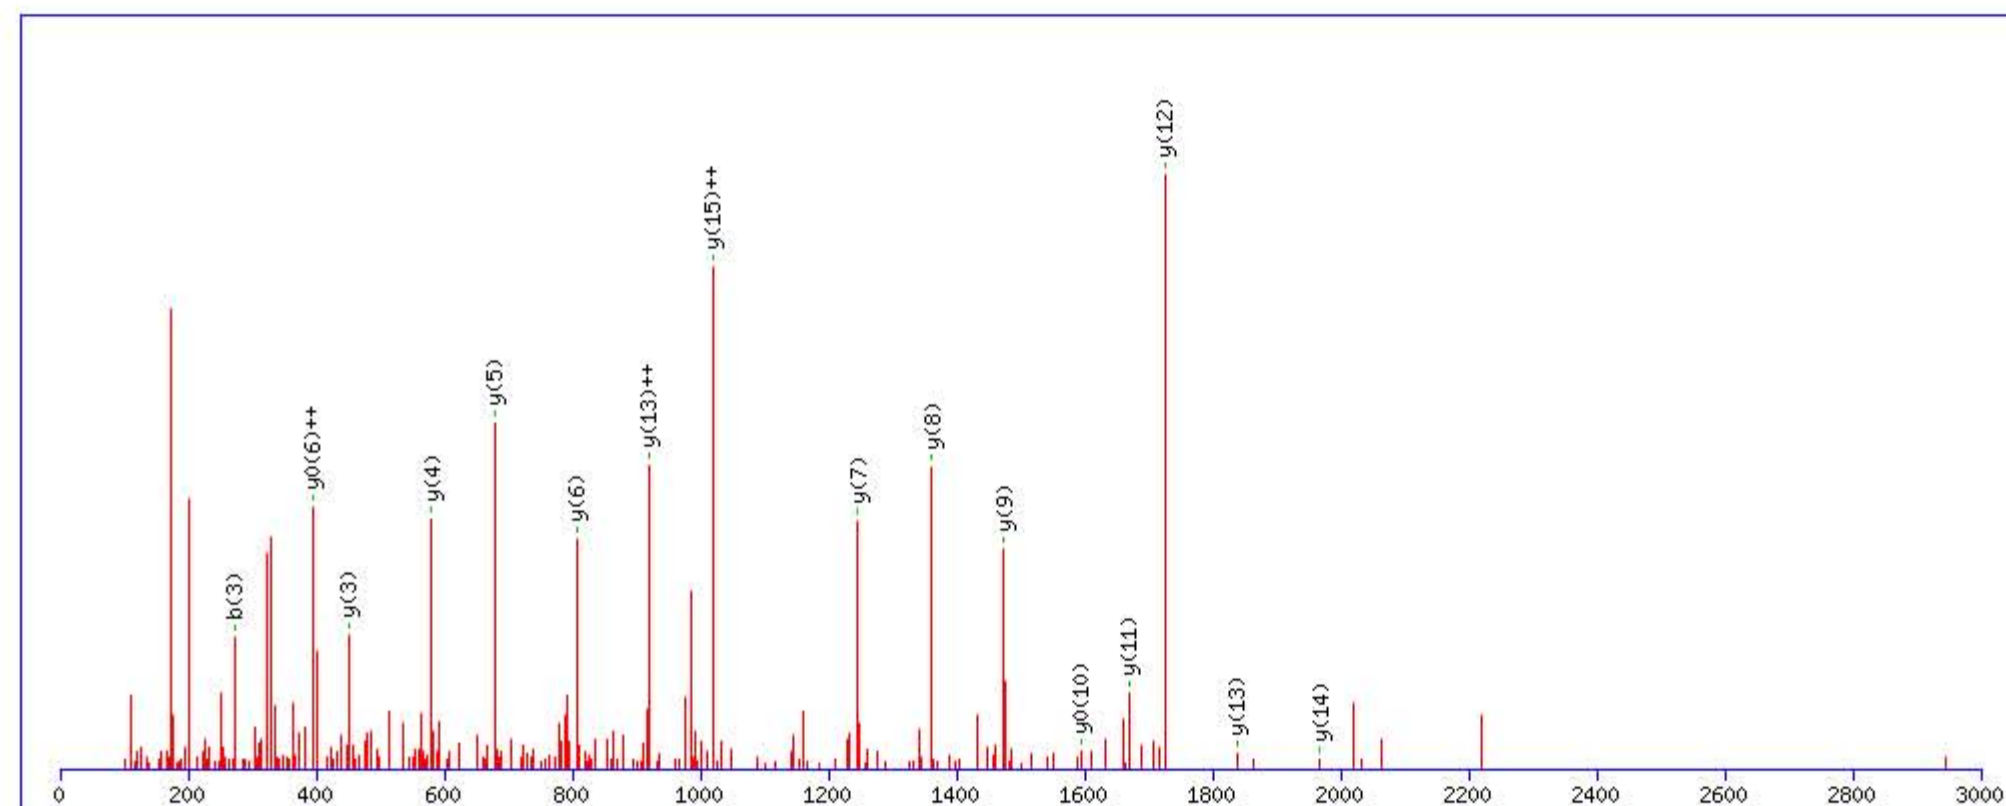

Monoisotopic mass of neutral peptide Mr(calc): 2238.110291  
 Fixed modifications: Carbamidomethyl (C) (apply to specified residues or termini only)  
 Variable modifications:  
 Q11 : Biotin:Thermo-21345 (Q)  
 Ions Score: 88 Expect: 8.9e-009  
 Matches : 16/168 fragment ions using 21 most intense peaks [\(help\)](#)

| #  | b                 | b <sup>++</sup> | b <sup>+</sup> | b <sup>+++</sup> | b <sup>0</sup> | b <sup>0++</sup> | Seq. | y                  | y <sup>++</sup>    | y <sup>+</sup> | y <sup>+++</sup> | y <sup>0</sup>     | y <sup>0++</sup>  | #  |
|----|-------------------|-----------------|----------------|------------------|----------------|------------------|------|--------------------|--------------------|----------------|------------------|--------------------|-------------------|----|
| 1  | 88.039304         | 44.523290       |                |                  | 70.028739      | 35.518008        | S    |                    |                    |                |                  |                    |                   | 17 |
| 2  | 201.123368        | 101.065322      |                |                  | 183.112803     | 92.060039        | L    | 2152.085552        | 1076.546414        | 2135.059003    | 1068.033139      | 2134.074987        | 1067.541131       | 16 |
| 3  | <b>272.160482</b> | 136.583879      |                |                  | 254.149917     | 127.578596       | A    | 2039.001488        | <b>1020.004382</b> | 2021.974939    | 1011.491108      | 2020.990923        | 1010.999100       | 15 |
| 4  | 401.203075        | 201.105175      |                |                  | 383.192510     | 192.099893       | E    | <b>1967.964374</b> | 984.485825         | 1950.937825    | 975.972551       | 1949.953809        | 975.480543        | 14 |
| 5  | 514.287139        | 257.647208      |                |                  | 496.276574     | 248.641925       | L    | <b>1838.921781</b> | <b>919.964529</b>  | 1821.895232    | 911.451254       | 1820.911216        | 910.959246        | 13 |
| 6  | 571.308603        | 286.157940      |                |                  | 553.298038     | 277.152657       | G    | <b>1725.837717</b> | 863.422497         | 1708.811168    | 854.909222       | 1707.827152        | 854.417214        | 12 |
| 7  | 628.330067        | 314.668672      |                |                  | 610.319502     | 305.663389       | G    | <b>1668.816253</b> | 834.911765         | 1651.789704    | 826.398490       | 1650.805688        | 825.906482        | 11 |
| 8  | 765.388979        | 383.198128      |                |                  | 747.378414     | 374.192845       | H    | 1611.794789        | 806.401033         | 1594.768240    | 797.887758       | <b>1593.784224</b> | 797.395750        | 10 |
| 9  | 878.473043        | 439.740160      |                |                  | 860.462478     | 430.734877       | L    | <b>1474.735877</b> | 737.871577         | 1457.709328    | 729.358302       | 1456.725312        | 728.866294        | 9  |
| 10 | 993.499986        | 497.253631      |                |                  | 975.489421     | 488.248349       | D    | <b>1361.651813</b> | 681.329545         | 1344.625264    | 672.816270       | 1343.641248        | 672.324262        | 8  |
| 11 | 1432.725312       | 716.866294      | 1415.698763    | 708.353020       | 1414.714747    | 707.861012       | Q    | <b>1246.624870</b> | 623.816073         | 1229.598321    | 615.302799       | 1228.614305        | 614.810791        | 7  |
| 12 | 1560.783890       | 780.895583      | 1543.757341    | 772.382309       | 1542.773325    | 771.890301       | Q    | <b>807.399544</b>  | 404.203410         | 790.372995     | 395.690136       | 789.388979         | <b>395.198128</b> | 6  |
| 13 | 1659.852304       | 830.429790      | 1642.825755    | 821.916516       | 1641.841739    | 821.424508       | V    | <b>679.340966</b>  | 340.174121         | 662.314417     | 331.660846       | 661.330401         | 331.168838        | 5  |
| 14 | 1788.894897       | 894.951087      | 1771.868348    | 886.437812       | 1770.884332    | 885.945804       | E    | <b>580.272552</b>  | 290.639914         | 563.246003     | 282.126639       | 562.261987         | 281.634631        | 4  |
| 15 | 1917.937490       | 959.472383      | 1900.910941    | 950.959109       | 1899.926925    | 950.467101       | E    | <b>451.229959</b>  | 226.118617         | 434.203410     | 217.605343       | 433.219394         | 217.113335        | 3  |
| 16 | 2065.005904       | 1033.006590     | 2047.979355    | 1024.493316      | 2046.995339    | 1024.001307      | F    | 322.187366         | 161.597321         | 305.160817     | 153.084046       |                    |                   | 2  |
| 17 |                   |                 |                |                  |                |                  | R    | 175.118952         | 88.063114          | 158.092403     | 79.549839        |                    |                   | 1  |

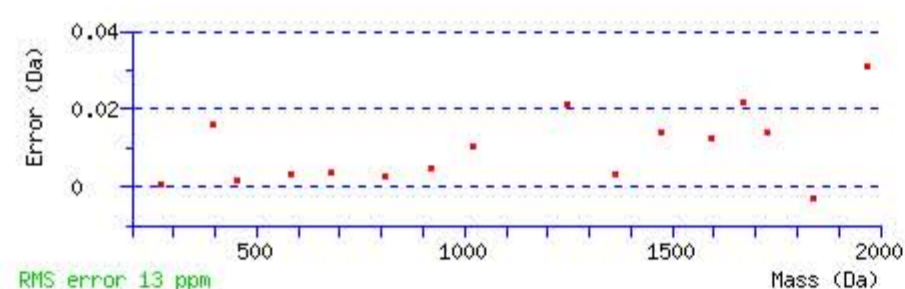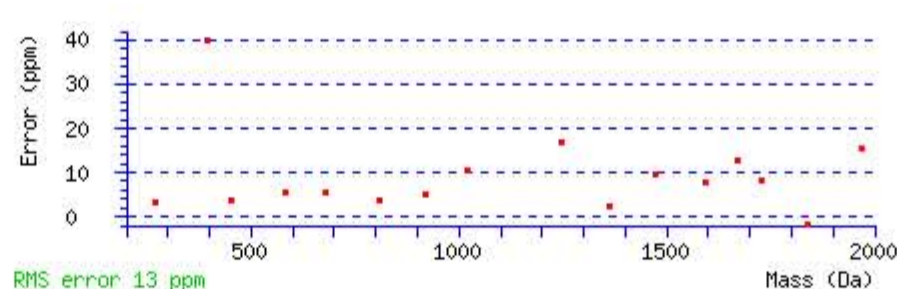

NCBI BLAST search of **SLAELGGHLDQQVEEFR**  
 (Parameters: blastp, nr protein database, expect=20000, no filter, PAM30)  
 Other BLAST [web gateways](#)

## All matches to this query

| Score | Mr(calc):   | Delta     | Sequence                            |
|-------|-------------|-----------|-------------------------------------|
| 88.4  | 2238.110291 | 0.015091  | <a href="#">SLAELGGHLDQQVEEFR</a>   |
| 69.8  | 2238.110291 | 0.015091  | <a href="#">SLAELGGHLDQQVEEFR</a>   |
| 2.5   | 2238.146637 | -0.021255 | <a href="#">AYGCGRTELAIKLLEYEPR</a> |



# MASCOT Search Results

## Peptide View

MS/MS Fragmentation of **ENADSLQASLRPHADELK**

Found in **APOA4\_HUMAN**, Apolipoprotein A-IV OS=Homo sapiens GN=APOA4 PE=1 SV=3

Match to Query 60761: 2304.182082 from(769.067970,3+) rtinseconds(1884) index(77566)

Title: Locus:1.1.1.2870.23 File:"2013-07-02 CLN FXIII 60 min 1st FT.wiff"

Data file C:\Program Files (x86)\Matrix Science\Mascot Daemon\mgf4 FXIII 60 min 1st\mascot\_daemon\_merge.mgf

Click mouse within plot area to zoom in by factor of two about that point

Or, Plot from  to  Da

Label all possible matches  Label matches used for scoring

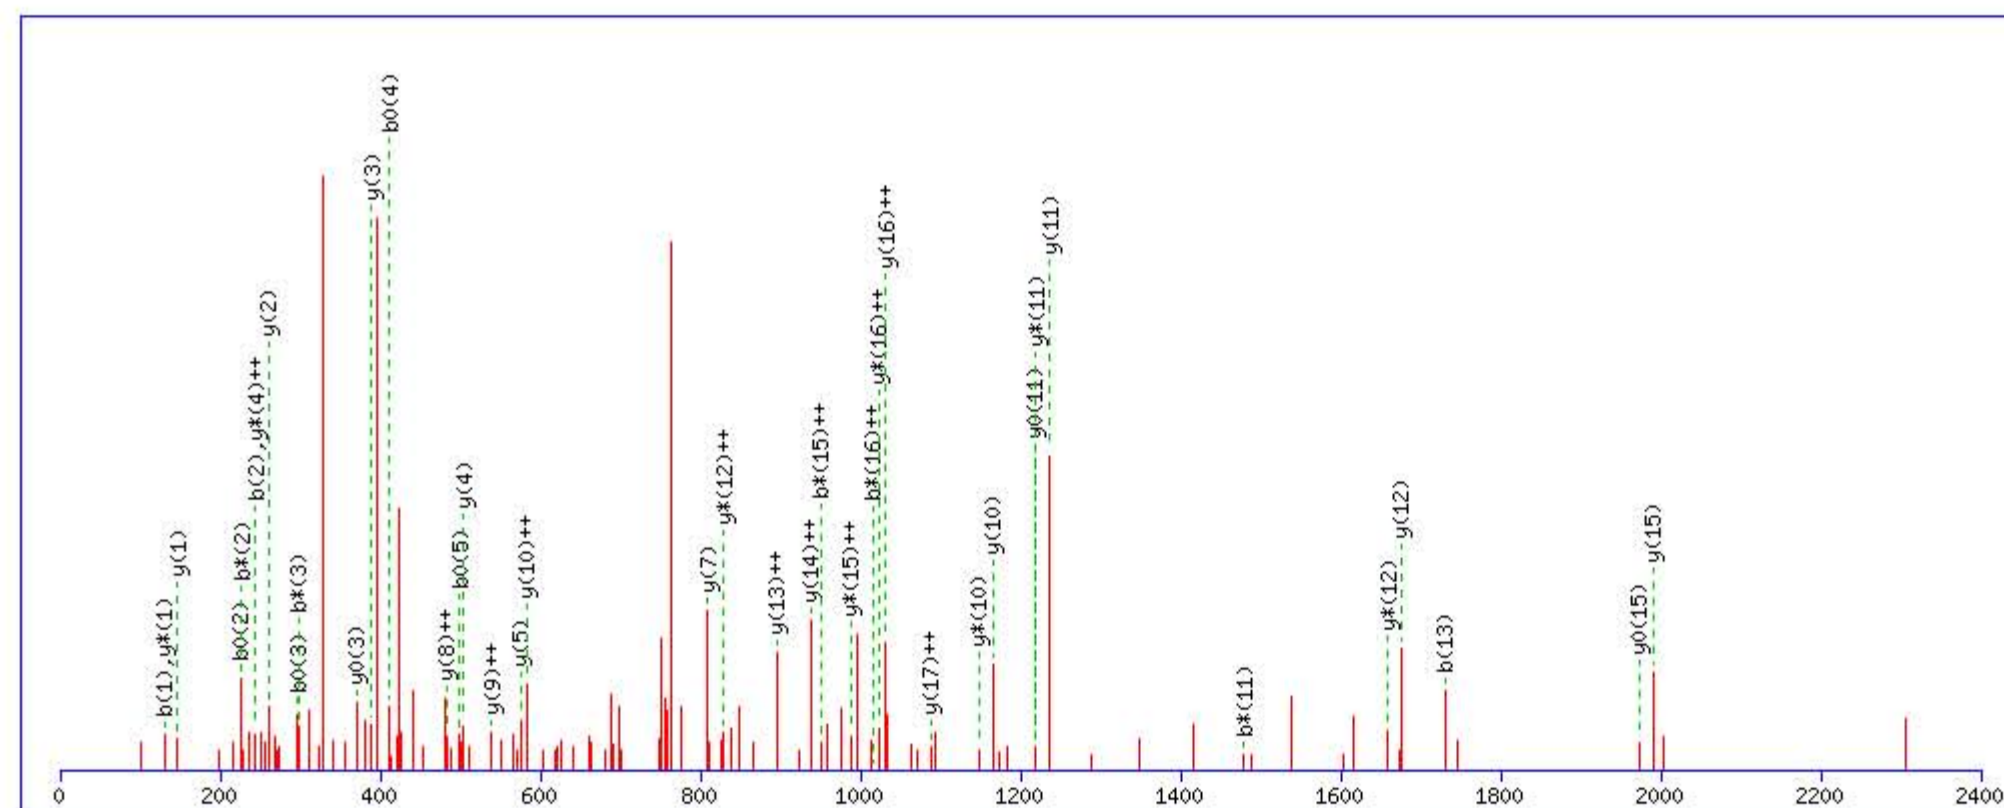

Monoisotopic mass of neutral peptide Mr(calc): 2304.153183

Fixed modifications: Carbamidomethyl (C) (apply to specified residues or termini only)

Variable modifications:

Q7 : Biotin:Thermo-21345 (Q)

Ions Score: 37 Expect: 0.0052

Matches : 40/198 fragment ions using 112 most intense peaks [\(help\)](#)

| #  | b           | b <sup>++</sup> | b <sup>*</sup> | b <sup>*++</sup> | b <sup>0</sup> | b <sup>0++</sup> | Seq. | y           | y <sup>++</sup> | y <sup>*</sup> | y <sup>*++</sup> | y <sup>0</sup> | y <sup>0++</sup> | #  |
|----|-------------|-----------------|----------------|------------------|----------------|------------------|------|-------------|-----------------|----------------|------------------|----------------|------------------|----|
| 1  | 130.049869  | 65.528572       |                |                  | 112.039304     | 56.523290        | E    |             |                 |                |                  |                |                  | 18 |
| 2  | 244.092796  | 122.550036      | 227.066247     | 114.036762       | 226.082231     | 113.544754       | N    | 2176.117913 | 1088.562594     | 2159.091364    | 1080.049320      | 2158.107348    | 1079.557312      | 17 |
| 3  | 315.129910  | 158.068593      | 298.103361     | 149.555319       | 297.119345     | 149.063311       | A    | 2062.074986 | 1031.541131     | 2045.048437    | 1023.027856      | 2044.064421    | 1022.535848      | 16 |
| 4  | 430.156853  | 215.582065      | 413.130304     | 207.068790       | 412.146288     | 206.576782       | D    | 1991.037872 | 996.022574      | 1974.011323    | 987.509300       | 1973.027307    | 987.017292       | 15 |
| 5  | 517.188881  | 259.098079      | 500.162332     | 250.584804       | 499.178316     | 250.092796       | S    | 1876.010929 | 938.509103      | 1858.984380    | 929.995828       | 1858.000364    | 929.503820       | 14 |
| 6  | 630.272945  | 315.640111      | 613.246396     | 307.126836       | 612.262380     | 306.634828       | L    | 1788.978901 | 894.993089      | 1771.952352    | 886.479814       | 1770.968336    | 885.987806       | 13 |
| 7  | 1069.498271 | 535.252774      | 1052.471722    | 526.739499       | 1051.487706    | 526.247491       | Q    | 1675.894837 | 838.451057      | 1658.868288    | 829.937782       | 1657.884272    | 829.445774       | 12 |
| 8  | 1140.535385 | 570.771331      | 1123.508836    | 562.258056       | 1122.524820    | 561.766048       | A    | 1236.669511 | 618.838394      | 1219.642962    | 610.325119       | 1218.658946    | 609.833111       | 11 |
| 9  | 1227.567413 | 614.287345      | 1210.540864    | 605.774070       | 1209.556848    | 605.282062       | S    | 1165.632397 | 583.319837      | 1148.605848    | 574.806562       | 1147.621832    | 574.314554       | 10 |
| 10 | 1340.651477 | 670.829377      | 1323.624928    | 662.316102       | 1322.640912    | 661.824094       | L    | 1078.600369 | 539.803823      | 1061.573820    | 531.290548       | 1060.589804    | 530.798540       | 9  |
| 11 | 1496.752588 | 748.879932      | 1479.726039    | 740.366658       | 1478.742023    | 739.874650       | R    | 965.516305  | 483.261791      | 948.489756     | 474.748516       | 947.505740     | 474.256508       | 8  |
| 12 | 1593.805352 | 797.406314      | 1576.778803    | 788.893040       | 1575.794787    | 788.401032       | P    | 809.415194  | 405.211235      | 792.388645     | 396.697961       | 791.404629     | 396.205953       | 7  |
| 13 | 1730.864264 | 865.935770      | 1713.837715    | 857.422496       | 1712.853699    | 856.930488       | H    | 712.362430  | 356.684853      | 695.335881     | 348.171579       | 694.351865     | 347.679571       | 6  |
| 14 | 1801.901378 | 901.454327      | 1784.874829    | 892.941053       | 1783.890813    | 892.449045       | A    | 575.303518  | 288.155397      | 558.276969     | 279.642123       | 557.292953     | 279.150115       | 5  |
| 15 | 1916.928321 | 958.967799      | 1899.901772    | 950.454524       | 1898.917756    | 949.962516       | D    | 504.266404  | 252.636840      | 487.239855     | 244.123566       | 486.255839     | 243.631558       | 4  |
| 16 | 2045.970914 | 1023.489095     | 2028.944365    | 1014.975821      | 2027.960349    | 1014.483813      | E    | 389.239461  | 195.123369      | 372.212912     | 186.610094       | 371.228896     | 186.118086       | 3  |
| 17 | 2159.054978 | 1080.031127     | 2142.028429    | 1071.517852      | 2141.044413    | 1071.025844      | L    | 260.196868  | 130.602072      | 243.170319     | 122.088798       |                |                  | 2  |
| 18 |             |                 |                |                  |                |                  | K    | 147.112804  | 74.060040       | 130.086255     | 65.546765        |                |                  | 1  |

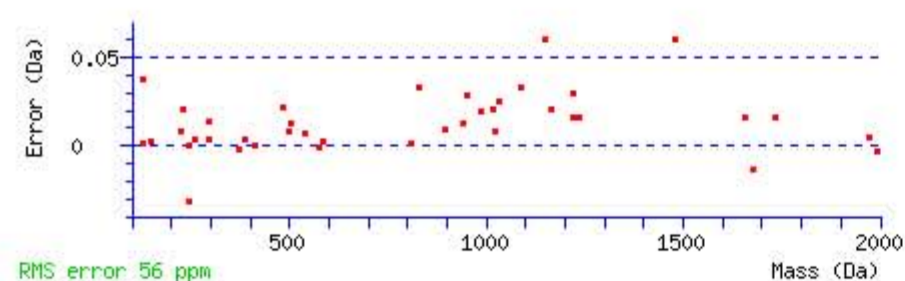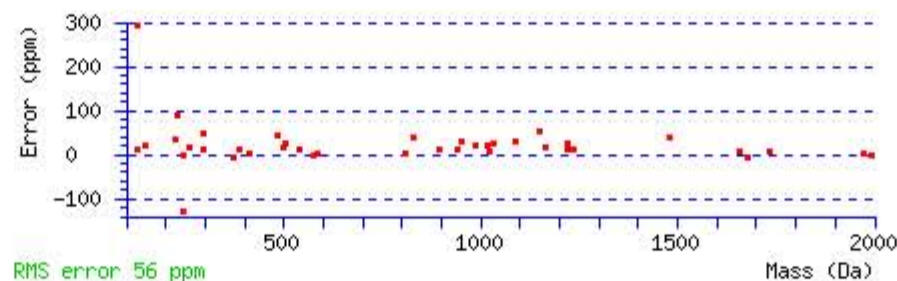

NCBI BLAST search of [ENADSLQASLRPHADELK](#)

(Parameters: blastp, nr protein database, expect=20000, no filter, PAM30)

Other BLAST [web gateways](#)

All matches to this query

| Score | Mr(calc):   | Delta    | Sequence                           |
|-------|-------------|----------|------------------------------------|
| 37.1  | 2304.153183 | 0.028899 | <a href="#">ENADSLQASLRPHADELK</a> |

Mascot: <http://www.matrixscience.com/>



**Peptide View**

MS/MS Fragmentation of **STAAMSTYTGIFTDQVLSVLK**

Found in **APOC2\_HUMAN**, Apolipoprotein C-II OS=Homo sapiens GN=APOC2 PE=1 SV=1

Match to Query 66023: 2543.333772 from(848.785200,3+) rtinseconds(3201) index(50486)

Title: Locus:1.1.1.3393.18 File:"2013-07-02 CLN FXIII 60 min 1st F 3.wiff"

Data file C:\Program Files (x86)\Matrix Science\Mascot Daemon\mgf4 FXIII 60 min 1st\mascot\_daemon\_merge.mgf

Click mouse within plot area to zoom in by factor of two about that point

Or, Plot from  to  Da

Label all possible matches  Label matches used for scoring

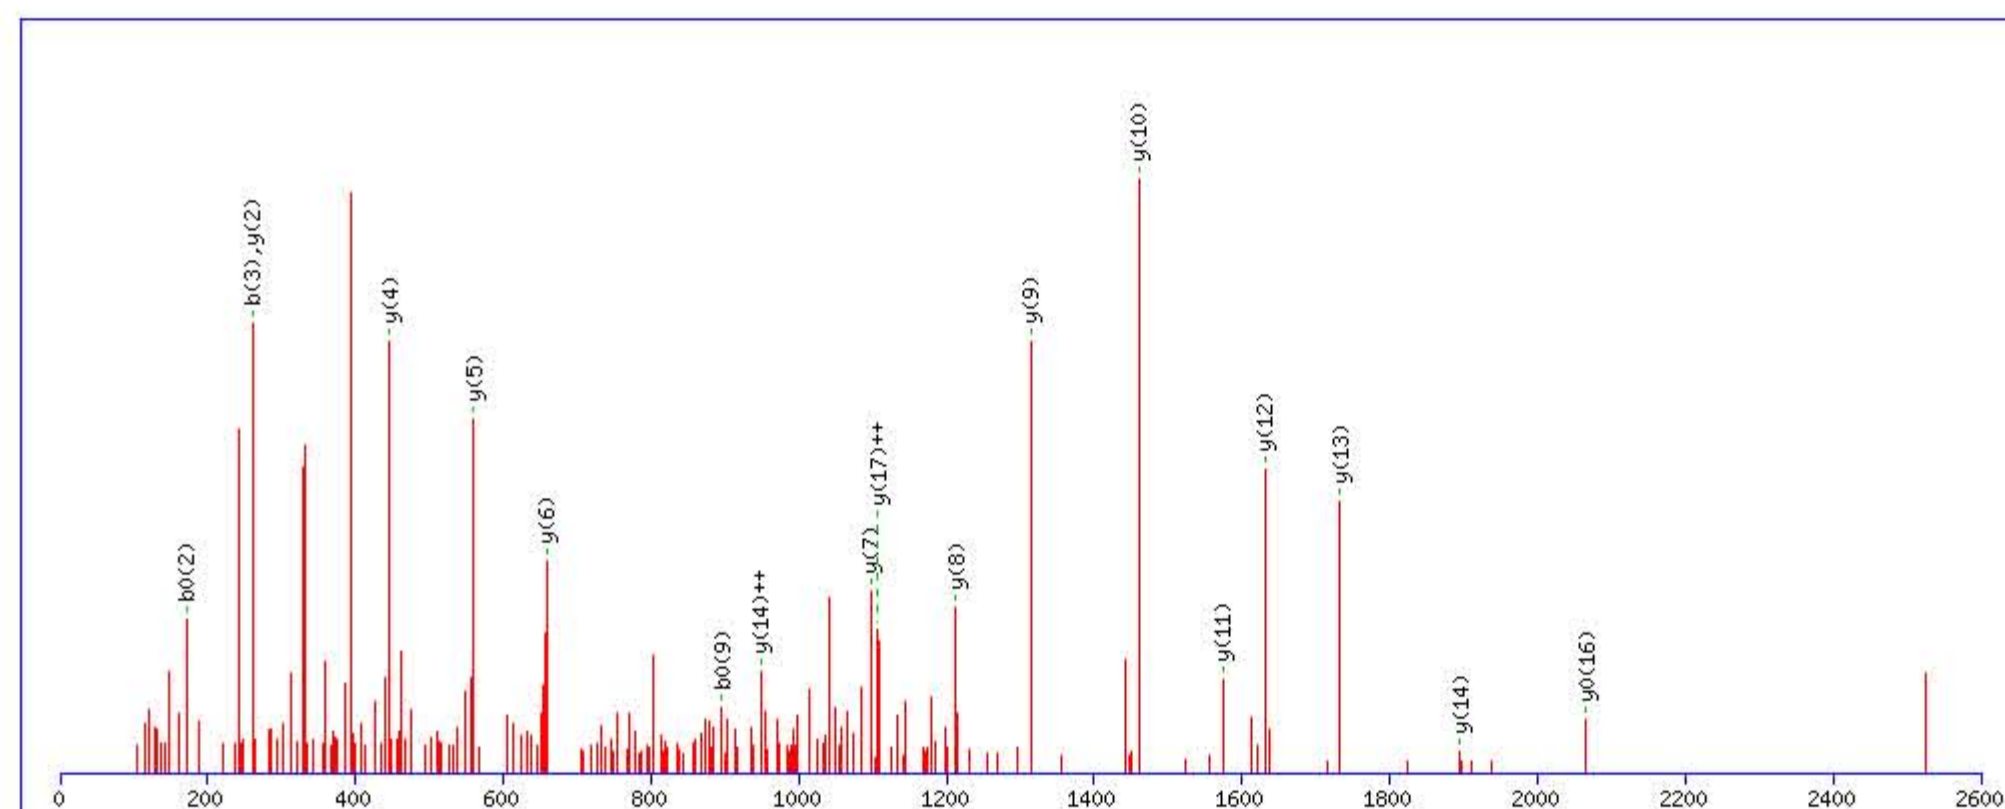

Monoisotopic mass of neutral peptide Mr(calc): 2543.301544

Fixed modifications: Carbamidomethyl (C) (apply to specified residues or termini only)

Variable modifications:

Q15 : Biotin:Thermo-21345 (Q)

Ions Score: 97 Expect: 1.9e-009

Matches : 18/206 fragment ions using 21 most intense peaks [\(help\)](#)

| #  | b           | b <sup>++</sup> | b <sup>*</sup> | b <sup>*++</sup> | b <sup>0</sup> | b <sup>0++</sup> | Seq. | y           | y <sup>++</sup> | y <sup>*</sup> | y <sup>*++</sup> | y <sup>0</sup> | y <sup>0++</sup> | #  |
|----|-------------|-----------------|----------------|------------------|----------------|------------------|------|-------------|-----------------|----------------|------------------|----------------|------------------|----|
| 1  | 88.039304   | 44.523290       |                |                  | 70.028739      | 35.518008        | S    |             |                 |                |                  |                |                  | 21 |
| 2  | 189.086983  | 95.047129       |                |                  | 171.076418     | 86.041847        | T    | 2457.276785 | 1229.142030     | 2440.250236    | 1220.628756      | 2439.266220    | 1220.136748      | 20 |
| 3  | 260.124097  | 130.565686      |                |                  | 242.113532     | 121.560404       | A    | 2356.229106 | 1178.618191     | 2339.202557    | 1170.104916      | 2338.218541    | 1169.612908      | 19 |
| 4  | 331.161211  | 166.084243      |                |                  | 313.150646     | 157.078961       | A    | 2285.191992 | 1143.099634     | 2268.165443    | 1134.586359      | 2267.181427    | 1134.094351      | 18 |
| 5  | 462.201696  | 231.604486      |                |                  | 444.191131     | 222.599203       | M    | 2214.154878 | 1107.581077     | 2197.128329    | 1099.067802      | 2196.144313    | 1098.575794      | 17 |
| 6  | 549.233724  | 275.120500      |                |                  | 531.223159     | 266.115217       | S    | 2083.114393 | 1042.060834     | 2066.087844    | 1033.547560      | 2065.103828    | 1033.055552      | 16 |
| 7  | 650.281403  | 325.644340      |                |                  | 632.270838     | 316.639057       | T    | 1996.082365 | 998.544821      | 1979.055816    | 990.031546       | 1978.071800    | 989.539538       | 15 |
| 8  | 813.344732  | 407.176004      |                |                  | 795.334167     | 398.170722       | Y    | 1895.034686 | 948.020981      | 1878.008137    | 939.507707       | 1877.024121    | 939.015699       | 14 |
| 9  | 914.392411  | 457.699844      |                |                  | 896.381846     | 448.694561       | T    | 1731.971357 | 866.489317      | 1714.944808    | 857.976042       | 1713.960792    | 857.484034       | 13 |
| 10 | 971.413875  | 486.210576      |                |                  | 953.403310     | 477.205293       | G    | 1630.923678 | 815.965477      | 1613.897129    | 807.452203       | 1612.913113    | 806.960195       | 12 |
| 11 | 1084.497939 | 542.752608      |                |                  | 1066.487374    | 533.747325       | I    | 1573.902214 | 787.454745      | 1556.875665    | 778.941471       | 1555.891649    | 778.449463       | 11 |
| 12 | 1231.566353 | 616.286815      |                |                  | 1213.555788    | 607.281532       | F    | 1460.818150 | 730.912713      | 1443.791601    | 722.399439       | 1442.807585    | 721.907431       | 10 |
| 13 | 1332.614032 | 666.810654      |                |                  | 1314.603467    | 657.805372       | T    | 1313.749736 | 657.378506      | 1296.723187    | 648.865232       | 1295.739171    | 648.373224       | 9  |
| 14 | 1447.640975 | 724.324126      |                |                  | 1429.630410    | 715.318843       | D    | 1212.702057 | 606.854667      | 1195.675508    | 598.341392       | 1194.691492    | 597.849384       | 8  |
| 15 | 1886.866301 | 943.936789      | 1869.839752    | 935.423514       | 1868.855736    | 934.931506       | Q    | 1097.675114 | 549.341195      | 1080.648565    | 540.827921       | 1079.664549    | 540.335913       | 7  |
| 16 | 1985.934715 | 993.470996      | 1968.908166    | 984.957721       | 1967.924150    | 984.465713       | V    | 658.449788  | 329.728532      | 641.423239     | 321.215258       | 640.439223     | 320.723250       | 6  |
| 17 | 2099.018779 | 1050.013027     | 2081.992230    | 1041.499753      | 2081.008214    | 1041.007745      | L    | 559.381374  | 280.194325      | 542.354825     | 271.681051       | 541.370809     | 271.189043       | 5  |
| 18 | 2186.050807 | 1093.529041     | 2169.024258    | 1085.015767      | 2168.040242    | 1084.523759      | S    | 446.297310  | 223.652293      | 429.270761     | 215.139019       | 428.286745     | 214.647011       | 4  |
| 19 | 2285.119221 | 1143.063248     | 2268.092672    | 1134.549974      | 2267.108656    | 1134.057966      | V    | 359.265282  | 180.136279      | 342.238733     | 171.623004       |                |                  | 3  |
| 20 | 2398.203285 | 1199.605280     | 2381.176736    | 1191.092006      | 2380.192720    | 1190.599998      | L    | 260.196868  | 130.602072      | 243.170319     | 122.088798       |                |                  | 2  |
| 21 |             |                 |                |                  |                |                  | K    | 147.112804  | 74.060040       | 130.086255     | 65.546765        |                |                  | 1  |

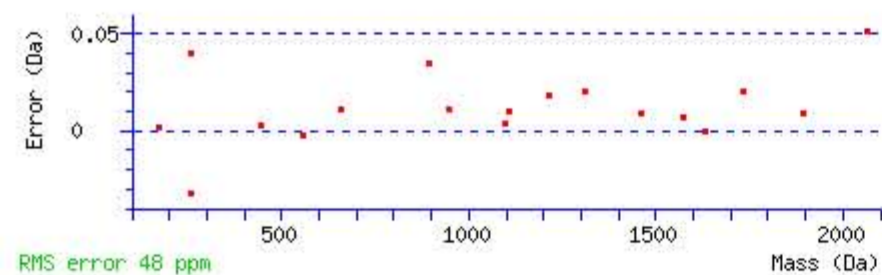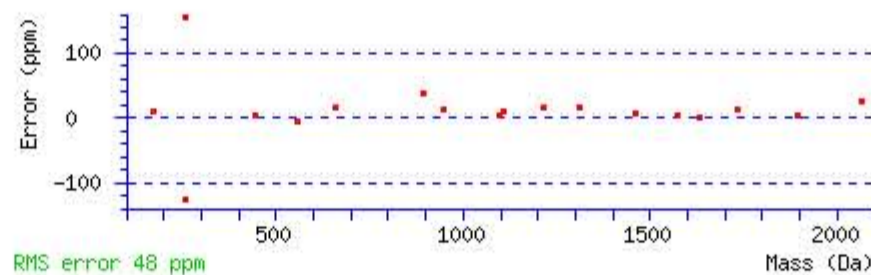

NCBI BLAST search of [STAAMSTYTGIFTDQVLSVLK](#)

(Parameters: blastp, nr protein database, expect=20000, no filter, PAM30)

Other BLAST [web gateways](#)

**All matches to this query**

| Score | Mr(calc):   | Delta     | Sequence                               |
|-------|-------------|-----------|----------------------------------------|
| 96.9  | 2543.301544 | 0.032228  | <a href="#">STAAMSTYTGIFTDQVLSVLK</a>  |
| 3.8   | 2543.370712 | -0.036940 | <a href="#">LELFNEIKTQVELATGQLGLRR</a> |



# MASCOT Search Results

## Peptide View

MS/MS Fragmentation of **DALSSVQESQVAQQAR**

Found in **APOC3\_HUMAN**, Apolipoprotein C-III OS=Homo sapiens GN=APOC3 PE=1 SV=1

Match to Query 54415: 2027.020122 from(676.680650,3+) rtinseconds(1943) index(41776)

Title: Locus:1.1.1.2960.18 File:"2013-07-02 CLN FXIII 60 min 1st F 3.wiff"

Data file C:\Program Files (x86)\Matrix Science\Mascot Daemon\mgf\4 FXIII 60 min 1st\mascot\_daemon\_merge.mgf

Click mouse within plot area to zoom in by factor of two about that point

Or, Plot from  to  Da

Label all possible matches  Label matches used for scoring

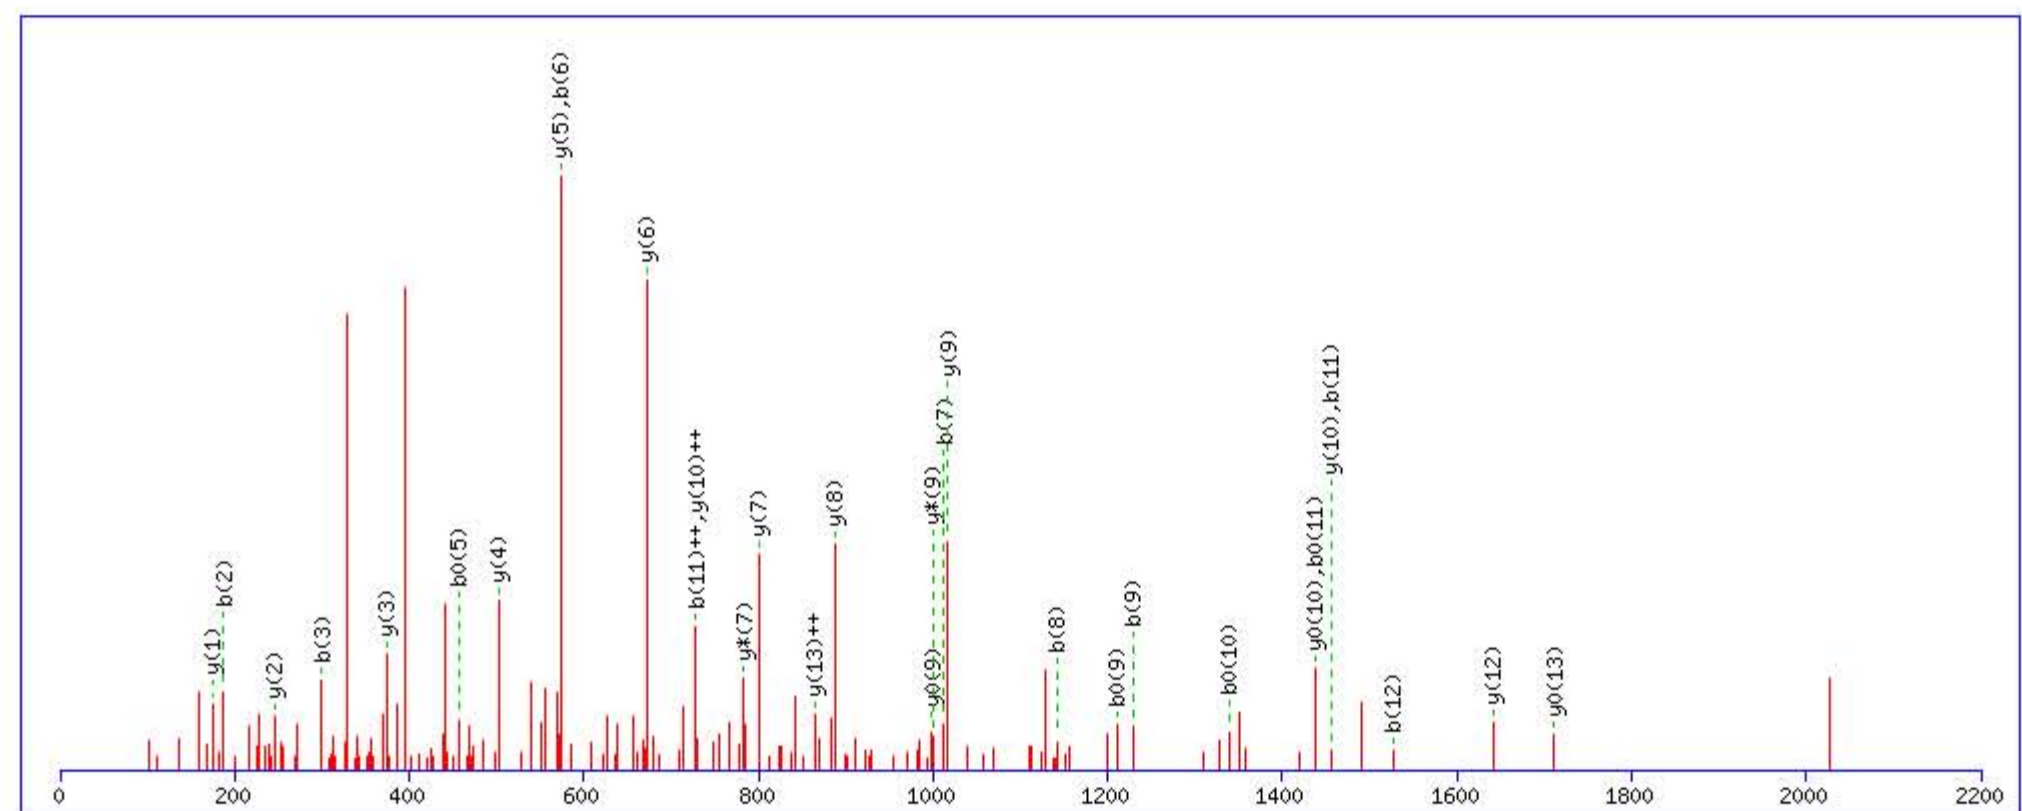

Monoisotopic mass of neutral peptide Mr(calc): 2027.010574

Fixed modifications: Carbamidomethyl (C) (apply to specified residues or termini only)

Variable modifications:

Q7 : Biotin:Thermo-21345 (Q)

Ions Score: 70 Expect: 2.5e-006

Matches : 31/154 fragment ions using 44 most intense peaks [\(help\)](#)

| #  | b                  | b <sup>++</sup>   | b <sup>+</sup> | b <sup>+++</sup> | b <sup>0</sup>     | b <sup>0++</sup> | Seq. | y                  | y <sup>++</sup>   | y <sup>+</sup>    | y <sup>+++</sup> | y <sup>0</sup>     | y <sup>0++</sup> | #  |
|----|--------------------|-------------------|----------------|------------------|--------------------|------------------|------|--------------------|-------------------|-------------------|------------------|--------------------|------------------|----|
| 1  | 116.034219         | 58.520748         |                |                  | 98.023654          | 49.515465        | D    |                    |                   |                   |                  |                    |                  | 16 |
| 2  | <b>187.071333</b>  | 94.039304         |                |                  | 169.060768         | 85.034022        | A    | 1912.990923        | 956.999100        | 1895.964374       | 948.485825       | 1894.980358        | 947.993817       | 15 |
| 3  | <b>300.155397</b>  | 150.581336        |                |                  | 282.144832         | 141.576054       | L    | 1841.953809        | 921.480543        | 1824.927260       | 912.967268       | 1823.943244        | 912.475260       | 14 |
| 4  | 387.187425         | 194.097351        |                |                  | 369.176860         | 185.092068       | S    | 1728.869745        | <b>864.938511</b> | 1711.843196       | 856.425236       | <b>1710.859180</b> | 855.933228       | 13 |
| 5  | 474.219453         | 237.613364        |                |                  | <b>456.208888</b>  | 228.608082       | S    | <b>1641.837717</b> | 821.422497        | 1624.811168       | 812.909222       | 1623.827152        | 812.417214       | 12 |
| 6  | <b>573.287867</b>  | 287.147572        |                |                  | 555.277302         | 278.142289       | V    | 1554.805689        | 777.906483        | 1537.779140       | 769.393208       | 1536.795124        | 768.901200       | 11 |
| 7  | <b>1012.513193</b> | 506.760235        | 995.486644     | 498.246960       | 994.502628         | 497.754952       | Q    | <b>1455.737275</b> | <b>728.372276</b> | 1438.710726       | 719.859001       | <b>1437.726710</b> | 719.366993       | 10 |
| 8  | <b>1141.555786</b> | 571.281531        | 1124.529237    | 562.768257       | 1123.545221        | 562.276249       | E    | <b>1016.511949</b> | 508.759613        | <b>999.485400</b> | 500.246338       | <b>998.501384</b>  | 499.754330       | 9  |
| 9  | <b>1228.587814</b> | 614.797545        | 1211.561265    | 606.284271       | <b>1210.577249</b> | 605.792263       | S    | <b>887.469356</b>  | 444.238316        | 870.442807        | 435.725042       | 869.458791         | 435.233034       | 8  |
| 10 | 1356.646392        | 678.826834        | 1339.619843    | 670.313560       | <b>1338.635827</b> | 669.821552       | Q    | <b>800.437328</b>  | 400.722302        | <b>783.410779</b> | 392.209028       |                    |                  | 7  |
| 11 | <b>1455.714806</b> | <b>728.361041</b> | 1438.688257    | 719.847767       | <b>1437.704241</b> | 719.355759       | V    | <b>672.378750</b>  | 336.693013        | 655.352201        | 328.179739       |                    |                  | 6  |
| 12 | <b>1526.751920</b> | 763.879598        | 1509.725371    | 755.366324       | 1508.741355        | 754.874316       | A    | <b>573.310336</b>  | 287.158806        | 556.283787        | 278.645532       |                    |                  | 5  |
| 13 | 1654.810498        | 827.908887        | 1637.783949    | 819.395613       | 1636.799933        | 818.903605       | Q    | <b>502.273222</b>  | 251.640249        | 485.246673        | 243.126975       |                    |                  | 4  |
| 14 | 1782.869076        | 891.938176        | 1765.842527    | 883.424902       | 1764.858511        | 882.932894       | Q    | <b>374.214644</b>  | 187.610960        | 357.188095        | 179.097686       |                    |                  | 3  |
| 15 | 1853.906190        | 927.456733        | 1836.879641    | 918.943459       | 1835.895625        | 918.451451       | A    | <b>246.156066</b>  | 123.581671        | 229.129517        | 115.068396       |                    |                  | 2  |
| 16 |                    |                   |                |                  |                    |                  | R    | <b>175.118952</b>  | 88.063114         | 158.092403        | 79.549839        |                    |                  | 1  |

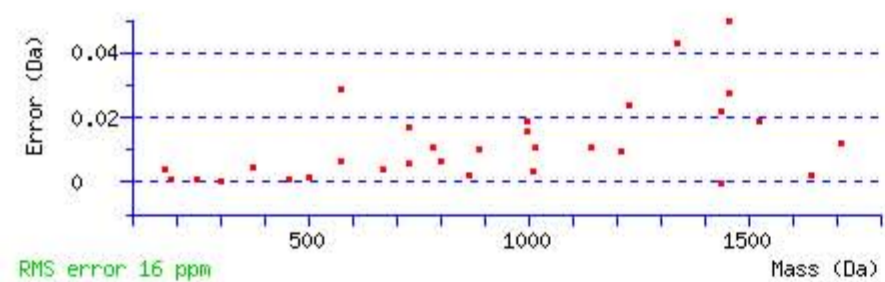

RMS error 16 ppm

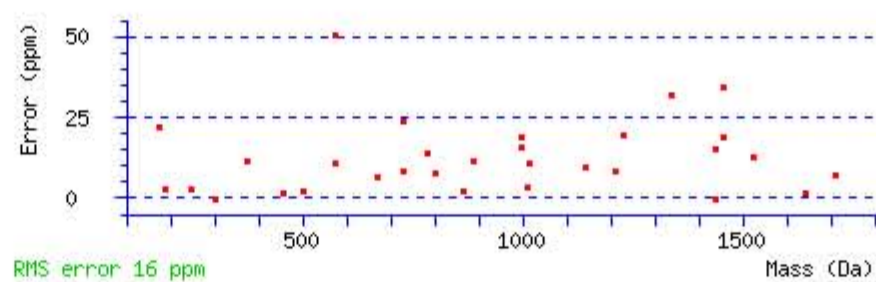

RMS error 16 ppm

NCBI BLAST search of **DALSSVQESQVAQQAR**

(Parameters: blastp, nr protein database, expect=20000, no filter, PAM30)

Other BLAST [web gateways](#)

All matches to this query

| Score | Mr(calc):   | Delta    | Sequence                         |
|-------|-------------|----------|----------------------------------|
| 70.0  | 2027.010574 | 0.009548 | <a href="#">DALSSVQESQVAQQAR</a> |
| 45.7  | 2027.010574 | 0.009548 | <a href="#">DALSSVQESQVAQQAR</a> |
| 31.7  | 2027.010574 | 0.009548 | <a href="#">DALSSVQESQVAQQAR</a> |
| 26.8  | 2027.010574 | 0.009548 | <a href="#">DALSSVQESQVAQQAR</a> |

Mascot: <http://www.matrixscience.com/>



# MASCOT Search Results

## Peptide View

MS/MS Fragmentation of **DALSSVQESQVAQQAR**

Found in **APOC3\_HUMAN**, Apolipoprotein C-III OS=Homo sapiens GN=APOC3 PE=1 SV=1

Match to Query 54416: 2027.021442 from(676.681090,3+) rtinseconds(1931) index(41676)

Title: Locus:1.1.1.2956.18 File:"2013-07-02 CLN FXIII 60 min 1st F 3.wiff"

Data file C:\Program Files (x86)\Matrix Science\Mascot Daemon\mgf\4 FXIII 60 min 1st\mascot\_daemon\_merge.mgf

Click mouse within plot area to zoom in by factor of two about that point

Or, Plot from  to  Da

Label all possible matches  Label matches used for scoring

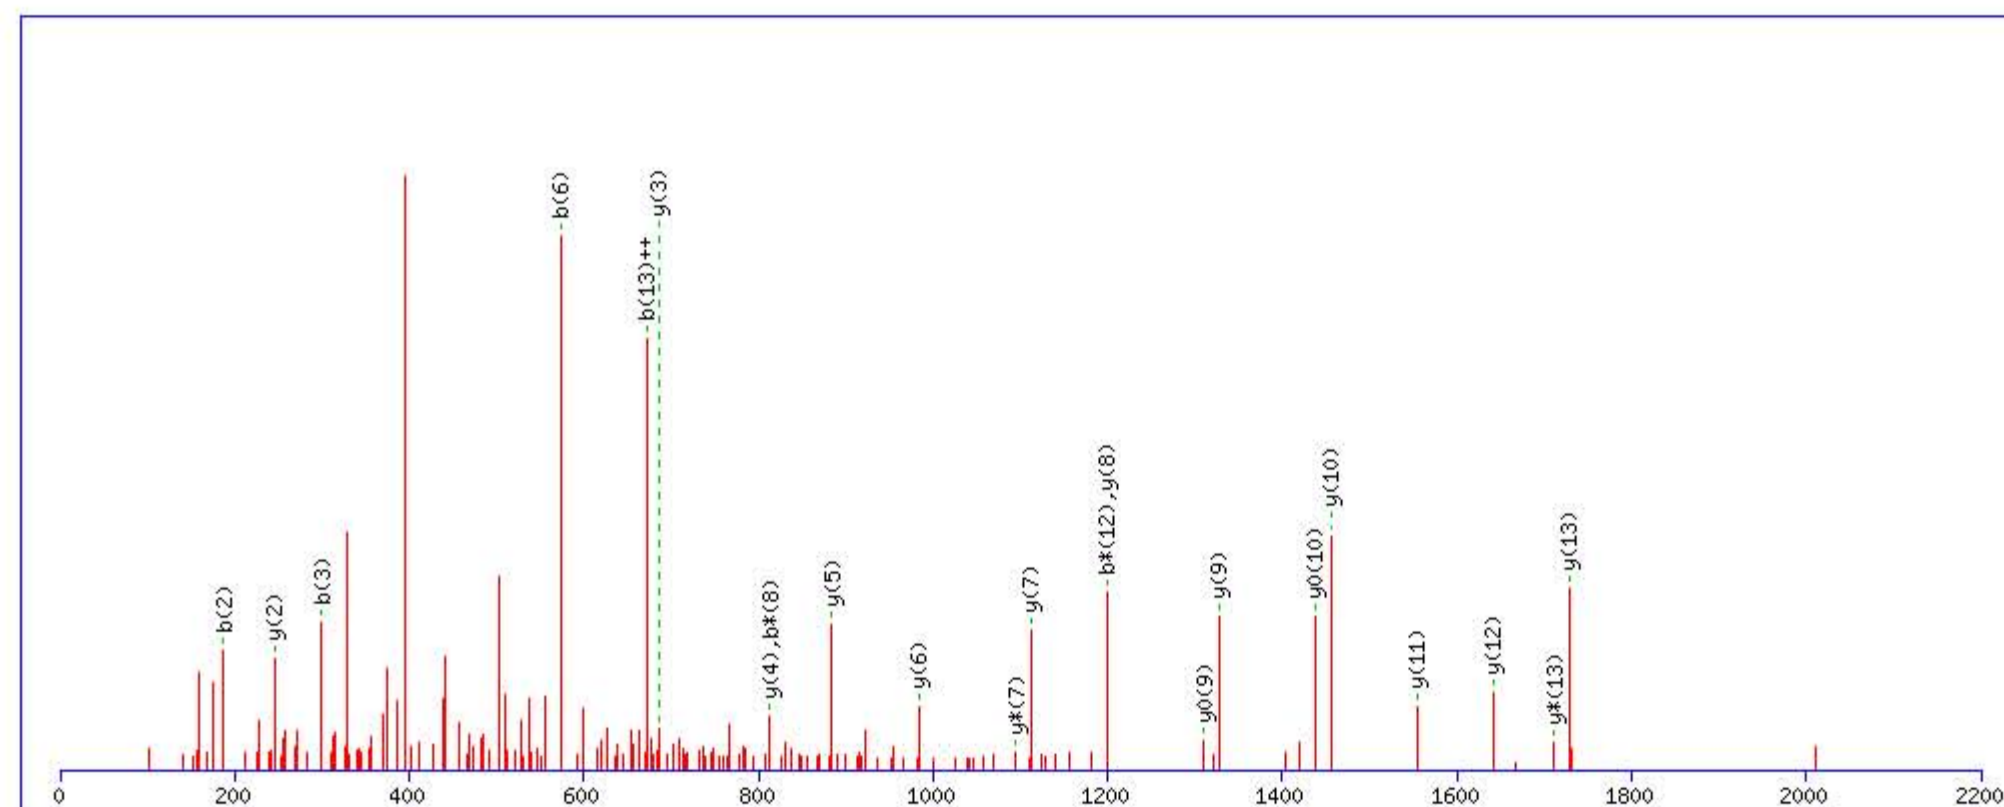

Monoisotopic mass of neutral peptide Mr(calc): 2027.010574

Fixed modifications: Carbamidomethyl (C) (apply to specified residues or termini only)

Variable modifications:

Q14 : Biotin:Thermo-21345 (Q)

Ions Score: 87 Expect: 5.3e-008

Matches : 22/154 fragment ions using 32 most intense peaks [\(help\)](#)

| #  | b                 | b <sup>++</sup>   | b <sup>+</sup>     | b <sup>+++</sup> | b <sup>0</sup> | b <sup>0++</sup> | Seq. | y                  | y <sup>++</sup> | y <sup>+</sup>     | y <sup>+++</sup> | y <sup>0</sup>     | y <sup>0++</sup> | #  |
|----|-------------------|-------------------|--------------------|------------------|----------------|------------------|------|--------------------|-----------------|--------------------|------------------|--------------------|------------------|----|
| 1  | 116.034219        | 58.520748         |                    |                  | 98.023654      | 49.515465        | D    |                    |                 |                    |                  |                    |                  | 16 |
| 2  | <b>187.071333</b> | 94.039304         |                    |                  | 169.060768     | 85.034022        | A    | 1912.990923        | 956.999100      | 1895.964374        | 948.485825       | 1894.980358        | 947.993817       | 15 |
| 3  | <b>300.155397</b> | 150.581336        |                    |                  | 282.144832     | 141.576054       | L    | 1841.953809        | 921.480543      | 1824.927260        | 912.967268       | 1823.943244        | 912.475260       | 14 |
| 4  | 387.187425        | 194.097351        |                    |                  | 369.176860     | 185.092068       | S    | <b>1728.869745</b> | 864.938511      | <b>1711.843196</b> | 856.425236       | 1710.859180        | 855.933228       | 13 |
| 5  | 474.219453        | 237.613364        |                    |                  | 456.208888     | 228.608082       | S    | <b>1641.837717</b> | 821.422497      | 1624.811168        | 812.909222       | 1623.827152        | 812.417214       | 12 |
| 6  | <b>573.287867</b> | 287.147572        |                    |                  | 555.277302     | 278.142289       | V    | <b>1554.805689</b> | 777.906483      | 1537.779140        | 769.393208       | 1536.795124        | 768.901200       | 11 |
| 7  | 701.346445        | 351.176861        | 684.319896         | 342.663586       | 683.335880     | 342.171578       | Q    | <b>1455.737275</b> | 728.372276      | 1438.710726        | 719.859001       | <b>1437.726710</b> | 719.366993       | 10 |
| 8  | 830.389038        | 415.698157        | <b>813.362489</b>  | 407.184883       | 812.378473     | 406.692875       | E    | <b>1327.678697</b> | 664.342987      | 1310.652148        | 655.829712       | <b>1309.668132</b> | 655.337704       | 9  |
| 9  | 917.421066        | 459.214171        | 900.394517         | 450.700897       | 899.410501     | 450.208889       | S    | <b>1198.636104</b> | 599.821690      | 1181.609555        | 591.308416       | 1180.625539        | 590.816408       | 8  |
| 10 | 1045.479644       | 523.243460        | 1028.453095        | 514.730186       | 1027.469079    | 514.238178       | Q    | <b>1111.604076</b> | 556.305676      | <b>1094.577527</b> | 547.792402       |                    |                  | 7  |
| 11 | 1144.548058       | 572.777667        | 1127.521509        | 564.264393       | 1126.537493    | 563.772385       | V    | <b>983.545498</b>  | 492.276387      | 966.518949         | 483.763113       |                    |                  | 6  |
| 12 | 1215.585172       | 608.296224        | <b>1198.558623</b> | 599.782950       | 1197.574607    | 599.290942       | A    | <b>884.477084</b>  | 442.742180      | 867.450535         | 434.228906       |                    |                  | 5  |
| 13 | 1343.643750       | <b>672.325513</b> | 1326.617201        | 663.812239       | 1325.633185    | 663.320230       | Q    | <b>813.439970</b>  | 407.223623      | 796.413421         | 398.710349       |                    |                  | 4  |
| 14 | 1782.869076       | 891.938176        | 1765.842527        | 883.424902       | 1764.858511    | 882.932894       | Q    | <b>685.381392</b>  | 343.194334      | 668.354843         | 334.681060       |                    |                  | 3  |
| 15 | 1853.906190       | 927.456733        | 1836.879641        | 918.943459       | 1835.895625    | 918.451451       | A    | <b>246.156066</b>  | 123.581671      | 229.129517         | 115.068396       |                    |                  | 2  |
| 16 |                   |                   |                    |                  |                |                  | R    | 175.118952         | 88.063114       | 158.092403         | 79.549839        |                    |                  | 1  |

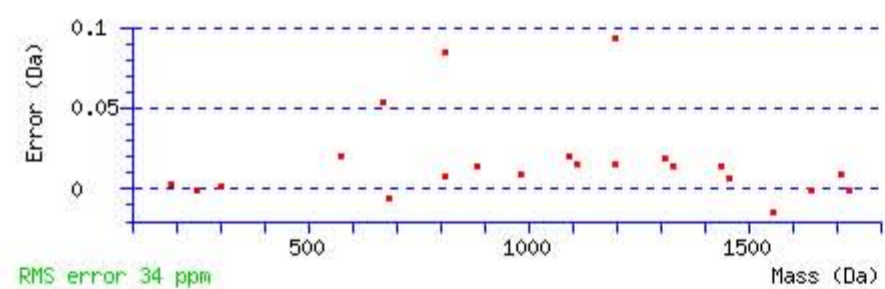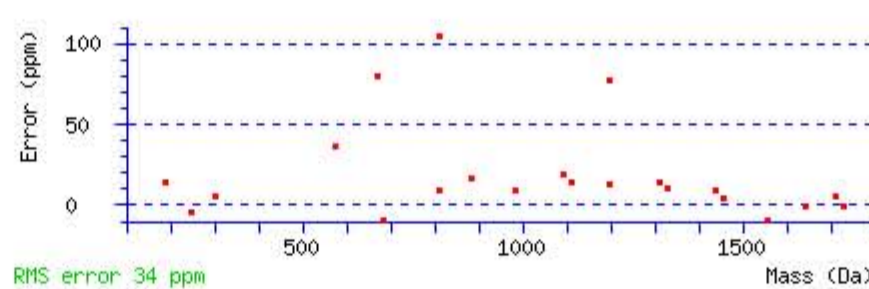

NCBI BLAST search of **DALSSVQESQVAQQAR**

(Parameters: blastp, nr protein database, expect=20000, no filter, PAM30)

Other BLAST [web gateways](#)

All matches to this query

| Score | Mr(calc):   | Delta    | Sequence                         |
|-------|-------------|----------|----------------------------------|
| 87.0  | 2027.010574 | 0.010868 | <a href="#">DALSSVQESQVAQQAR</a> |
| 83.0  | 2027.010574 | 0.010868 | <a href="#">DALSSVQESQVAQQAR</a> |
| 82.4  | 2027.010574 | 0.010868 | <a href="#">DALSSVQESQVAQQAR</a> |
| 43.0  | 2027.010574 | 0.010868 | <a href="#">DALSSVQESQVAQQAR</a> |



# MASCOT SEARCH RESULTS

## Peptide View

MS/MS Fragmentation of **DALSSVQESQVAQQAR**  
 Found in **APOC3\_HUMAN**, Apolipoprotein C-III OS=Homo sapiens GN=APOC3 PE=1 SV=1

Match to Query 54419: 2027.023482 from(676.681770,3+) rtinseconds(1871) index(41160)  
 Title: Locus:1.1.1.2935.19 File:"2013-07-02 CLN FXIII 60 min 1st F 3.wiff"  
 Data file C:\Program Files (x86)\Matrix Science\Mascot Daemon\mgf\4 FXIII 60 min 1st\mascot\_daemon\_merge.mgf

Click mouse within plot area to zoom in by factor of two about that point  
 Or, Plot from  to  Da   
 Label all possible matches  Label matches used for scoring

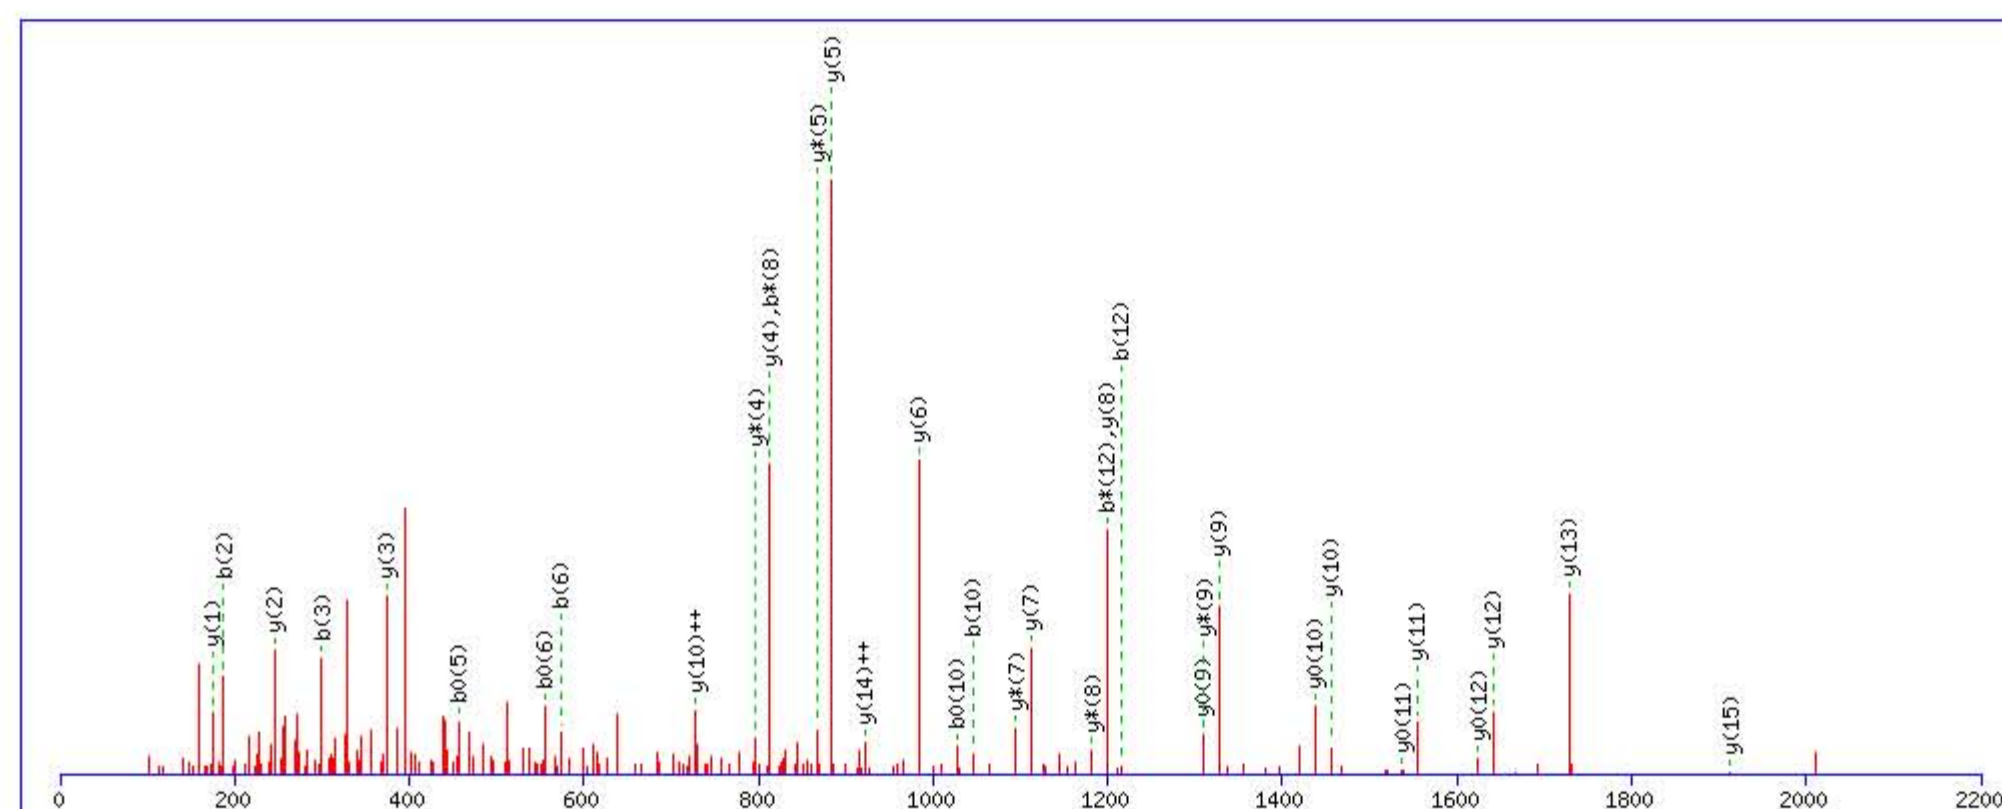

Monoisotopic mass of neutral peptide Mr(calc): 2027.010574  
 Fixed modifications: Carbamidomethyl (C) (apply to specified residues or termini only)  
 Variable modifications:  
 Q13 : Biotin:Thermo-21345 (Q)  
 Ions Score: 107 Expect: 9.4e-011  
 Matches : 35/154 fragment ions using 51 most intense peaks [\(help\)](#)

| #  | b                  | b <sup>++</sup> | b <sup>*</sup>     | b <sup>+++</sup> | b <sup>0</sup>     | b <sup>0++</sup> | Seq. | y                  | y <sup>++</sup>   | y <sup>*</sup>     | y <sup>+++</sup> | y <sup>0</sup>     | y <sup>0++</sup> | #  |
|----|--------------------|-----------------|--------------------|------------------|--------------------|------------------|------|--------------------|-------------------|--------------------|------------------|--------------------|------------------|----|
| 1  | 116.034219         | 58.520748       |                    |                  | 98.023654          | 49.515465        | D    |                    |                   |                    |                  |                    |                  | 16 |
| 2  | <b>187.071333</b>  | 94.039304       |                    |                  | 169.060768         | 85.034022        | A    | <b>1912.990923</b> | 956.999100        | 1895.964374        | 948.485825       | 1894.980358        | 947.993817       | 15 |
| 3  | <b>300.155397</b>  | 150.581336      |                    |                  | 282.144832         | 141.576054       | L    | 1841.953809        | <b>921.480543</b> | 1824.927260        | 912.967268       | 1823.943244        | 912.475260       | 14 |
| 4  | 387.187425         | 194.097351      |                    |                  | 369.176860         | 185.092068       | S    | <b>1728.869745</b> | 864.938511        | 1711.843196        | 856.425236       | 1710.859180        | 855.933228       | 13 |
| 5  | 474.219453         | 237.613364      |                    |                  | <b>456.208888</b>  | 228.608082       | S    | <b>1641.837717</b> | 821.422497        | 1624.811168        | 812.909222       | <b>1623.827152</b> | 812.417214       | 12 |
| 6  | <b>573.287867</b>  | 287.147572      |                    |                  | <b>555.277302</b>  | 278.142289       | V    | <b>1554.805689</b> | 777.906483        | 1537.779140        | 769.393208       | <b>1536.795124</b> | 768.901200       | 11 |
| 7  | 701.346445         | 351.176861      | 684.319896         | 342.663586       | 683.335880         | 342.171578       | Q    | <b>1455.737275</b> | <b>728.372276</b> | 1438.710726        | 719.859001       | <b>1437.726710</b> | 719.366993       | 10 |
| 8  | 830.389038         | 415.698157      | <b>813.362489</b>  | 407.184883       | 812.378473         | 406.692875       | E    | <b>1327.678697</b> | 664.342987        | <b>1310.652148</b> | 655.829712       | <b>1309.668132</b> | 655.337704       | 9  |
| 9  | 917.421066         | 459.214171      | 900.394517         | 450.700897       | 899.410501         | 450.208889       | S    | <b>1198.636104</b> | 599.821690        | <b>1181.609555</b> | 591.308416       | 1180.625539        | 590.816408       | 8  |
| 10 | <b>1045.479644</b> | 523.243460      | 1028.453095        | 514.730186       | <b>1027.469079</b> | 514.238178       | Q    | <b>1111.604076</b> | 556.305676        | <b>1094.577527</b> | 547.792402       |                    |                  | 7  |
| 11 | 1144.548058        | 572.777667      | 1127.521509        | 564.264393       | 1126.537493        | 563.772385       | V    | <b>983.545498</b>  | 492.276387        | 966.518949         | 483.763113       |                    |                  | 6  |
| 12 | <b>1215.585172</b> | 608.296224      | <b>1198.558623</b> | 599.782950       | 1197.574607        | 599.290942       | A    | <b>884.477084</b>  | 442.742180        | <b>867.450535</b>  | 434.228906       |                    |                  | 5  |
| 13 | 1654.810498        | 827.908887      | 1637.783949        | 819.395613       | 1636.799933        | 818.903605       | Q    | <b>813.439970</b>  | 407.223623        | <b>796.413421</b>  | 398.710349       |                    |                  | 4  |
| 14 | 1782.869076        | 891.938176      | 1765.842527        | 883.424902       | 1764.858511        | 882.932894       | Q    | <b>374.214644</b>  | 187.610960        | 357.188095         | 179.097686       |                    |                  | 3  |
| 15 | 1853.906190        | 927.456733      | 1836.879641        | 918.943459       | 1835.895625        | 918.451451       | A    | <b>246.156066</b>  | 123.581671        | 229.129517         | 115.068396       |                    |                  | 2  |
| 16 |                    |                 |                    |                  |                    |                  | R    | <b>175.118952</b>  | 88.063114         | 158.092403         | 79.549839        |                    |                  | 1  |

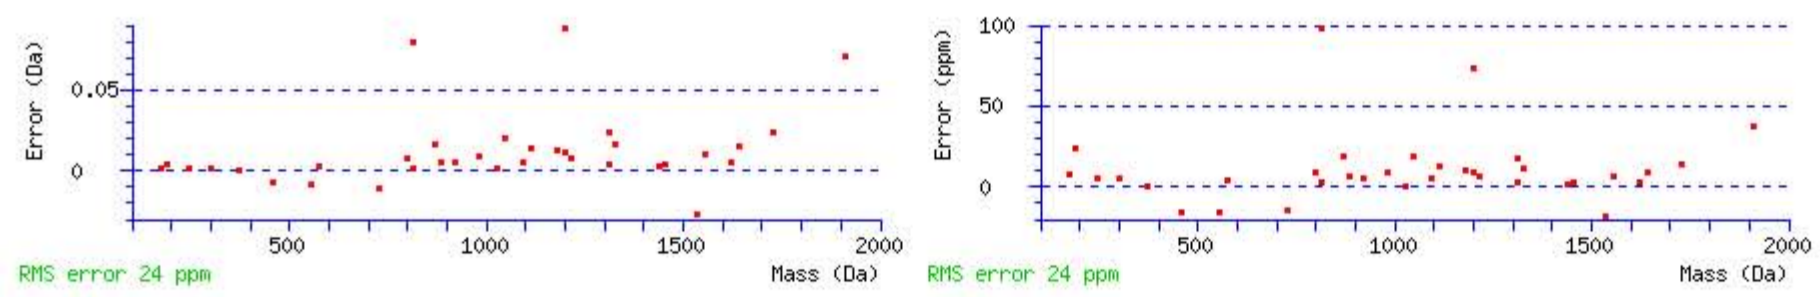

NCBI BLAST search of **DALSSVQESQVAQQAR**  
 (Parameters: blastp, nr protein database, expect=20000, no filter, PAM30)  
 Other BLAST [web gateways](#)

### All matches to this query

| Score | Mr(calc):   | Delta     | Sequence                         |
|-------|-------------|-----------|----------------------------------|
| 107.5 | 2027.010574 | 0.012908  | <a href="#">DALSSVQESQVAQQAR</a> |
| 93.3  | 2027.010574 | 0.012908  | <a href="#">DALSSVQESQVAQQAR</a> |
| 70.5  | 2027.010574 | 0.012908  | <a href="#">DALSSVQESQVAQQAR</a> |
| 32.8  | 2027.010574 | 0.012908  | <a href="#">DALSSVQESQVAQQAR</a> |
| 0.5   | 2027.029633 | -0.006151 | <a href="#">QEESHSKHLIELRR</a>   |



# MASCOT Search Results

## Peptide View

MS/MS Fragmentation of **DALSSVQESQVAQQAR**

Found in **APOC3\_HUMAN**, Apolipoprotein C-III OS=Homo sapiens GN=APOC3 PE=1 SV=1

Match to Query 54421: 2027.028188 from(1014.521370,2+) rtinseconds(1923) index(41609)

Title: Locus:1.1.1.2953.26 File:"2013-07-02 CLN FXIII 60 min 1st F 3.wiff"

Data file C:\Program Files (x86)\Matrix Science\Mascot Daemon\mgf4 FXIII 60 min 1st\mascot\_daemon\_merge.mgf

Click mouse within plot area to zoom in by factor of two about that point

Or, Plot from  to  Da

Label all possible matches  Label matches used for scoring

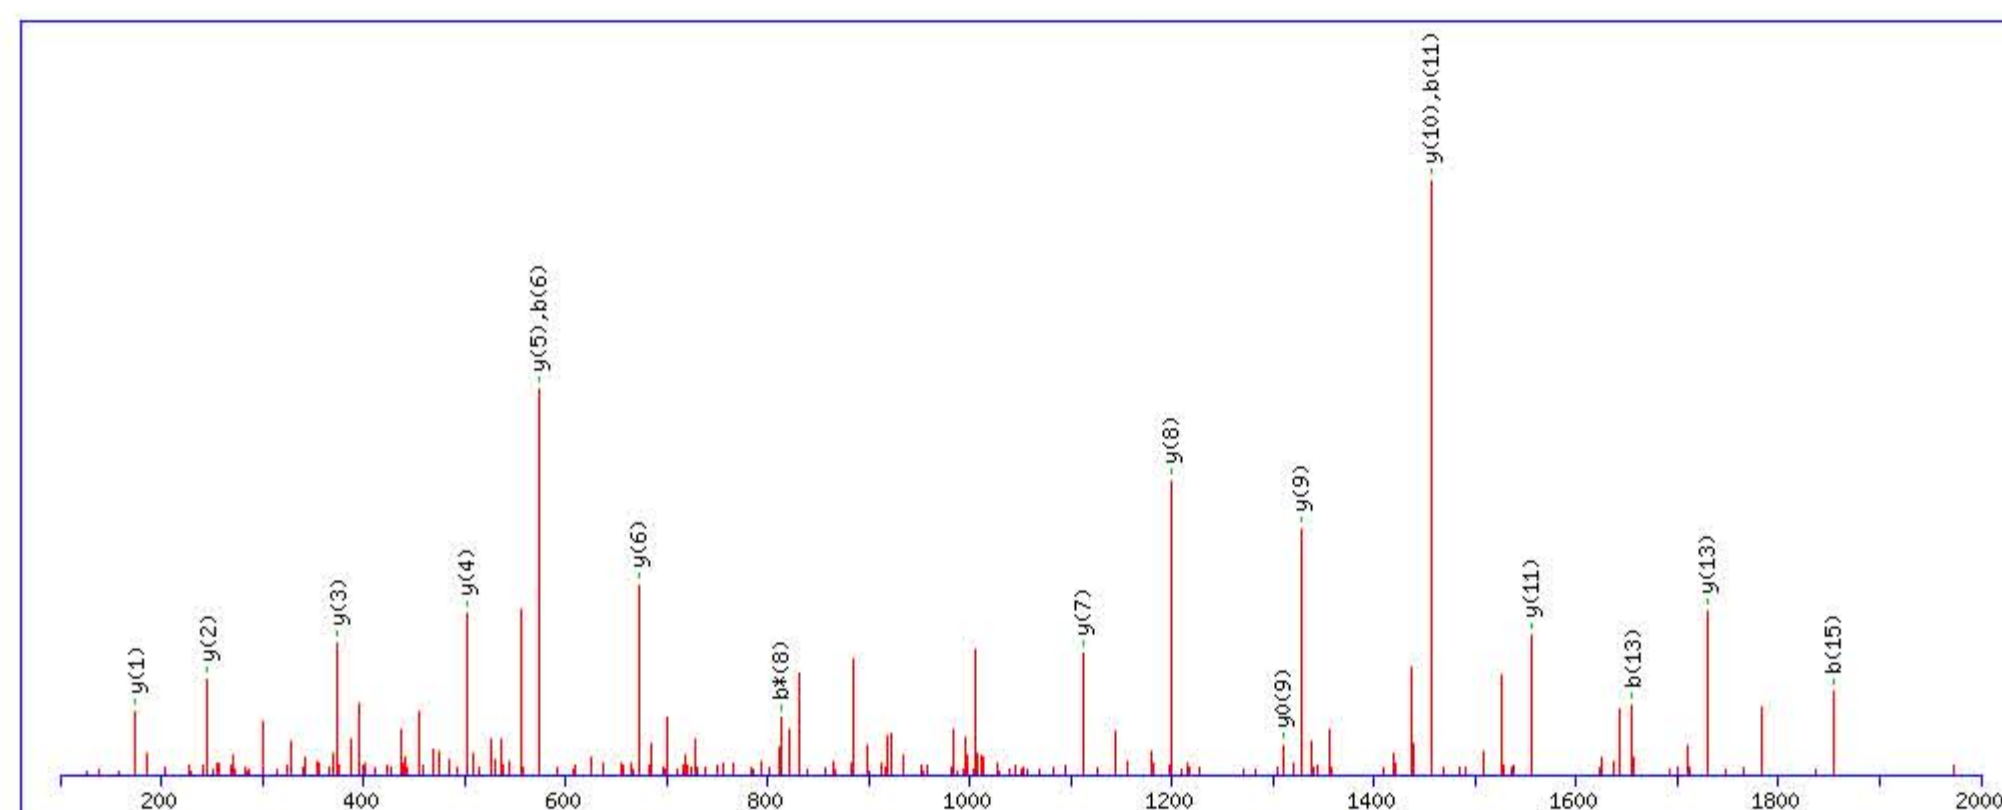

Monoisotopic mass of neutral peptide Mr(calc): 2027.010574

Fixed modifications: Carbamidomethyl (C) (apply to specified residues or termini only)

Variable modifications:

Q10 : Biotin:Thermo-21345 (Q)

Ions Score: 118 Expect: 4.7e-011

Matches : 18/154 fragment ions using 19 most intense peaks [\(help\)](#)

| #  | b                  | b <sup>++</sup> | b <sup>+</sup>    | b <sup>+++</sup> | b <sup>0</sup> | b <sup>0++</sup> | Seq. | y                  | y <sup>++</sup> | y <sup>*</sup> | y <sup>+++</sup> | y <sup>0</sup>     | y <sup>0++</sup> | #  |
|----|--------------------|-----------------|-------------------|------------------|----------------|------------------|------|--------------------|-----------------|----------------|------------------|--------------------|------------------|----|
| 1  | 116.034219         | 58.520748       |                   |                  | 98.023654      | 49.515465        | D    |                    |                 |                |                  |                    |                  | 16 |
| 2  | 187.071333         | 94.039304       |                   |                  | 169.060768     | 85.034022        | A    | 1912.990923        | 956.999100      | 1895.964374    | 948.485825       | 1894.980358        | 947.993817       | 15 |
| 3  | 300.155397         | 150.581336      |                   |                  | 282.144832     | 141.576054       | L    | 1841.953809        | 921.480543      | 1824.927260    | 912.967268       | 1823.943244        | 912.475260       | 14 |
| 4  | 387.187425         | 194.097351      |                   |                  | 369.176860     | 185.092068       | S    | <b>1728.869745</b> | 864.938511      | 1711.843196    | 856.425236       | 1710.859180        | 855.933228       | 13 |
| 5  | 474.219453         | 237.613364      |                   |                  | 456.208888     | 228.608082       | S    | 1641.837717        | 821.422497      | 1624.811168    | 812.909222       | 1623.827152        | 812.417214       | 12 |
| 6  | <b>573.287867</b>  | 287.147572      |                   |                  | 555.277302     | 278.142289       | V    | <b>1554.805689</b> | 777.906483      | 1537.779140    | 769.393208       | 1536.795124        | 768.901200       | 11 |
| 7  | 701.346445         | 351.176861      | 684.319896        | 342.663586       | 683.335880     | 342.171578       | Q    | <b>1455.737275</b> | 728.372276      | 1438.710726    | 719.859001       | 1437.726710        | 719.366993       | 10 |
| 8  | 830.389038         | 415.698157      | <b>813.362489</b> | 407.184883       | 812.378473     | 406.692875       | E    | <b>1327.678697</b> | 664.342987      | 1310.652148    | 655.829712       | <b>1309.668132</b> | 655.337704       | 9  |
| 9  | 917.421066         | 459.214171      | 900.394517        | 450.700897       | 899.410501     | 450.208889       | S    | <b>1198.636104</b> | 599.821690      | 1181.609555    | 591.308416       | 1180.625539        | 590.816408       | 8  |
| 10 | 1356.646392        | 678.826834      | 1339.619843       | 670.313560       | 1338.635827    | 669.821551       | Q    | <b>1111.604076</b> | 556.305676      | 1094.577527    | 547.792402       |                    |                  | 7  |
| 11 | <b>1455.714806</b> | 728.361041      | 1438.688257       | 719.847767       | 1437.704241    | 719.355758       | V    | <b>672.378750</b>  | 336.693013      | 655.352201     | 328.179739       |                    |                  | 6  |
| 12 | 1526.751920        | 763.879598      | 1509.725371       | 755.366324       | 1508.741355    | 754.874315       | A    | <b>573.310336</b>  | 287.158806      | 556.283787     | 278.645532       |                    |                  | 5  |
| 13 | <b>1654.810498</b> | 827.908887      | 1637.783949       | 819.395613       | 1636.799933    | 818.903605       | Q    | <b>502.273222</b>  | 251.640249      | 485.246673     | 243.126975       |                    |                  | 4  |
| 14 | 1782.869076        | 891.938176      | 1765.842527       | 883.424902       | 1764.858511    | 882.932894       | Q    | <b>374.214644</b>  | 187.610960      | 357.188095     | 179.097686       |                    |                  | 3  |
| 15 | <b>1853.906190</b> | 927.456733      | 1836.879641       | 918.943459       | 1835.895625    | 918.451451       | A    | <b>246.156066</b>  | 123.581671      | 229.129517     | 115.068396       |                    |                  | 2  |
| 16 |                    |                 |                   |                  |                |                  | R    | <b>175.118952</b>  | 88.063114       | 158.092403     | 79.549839        |                    |                  | 1  |

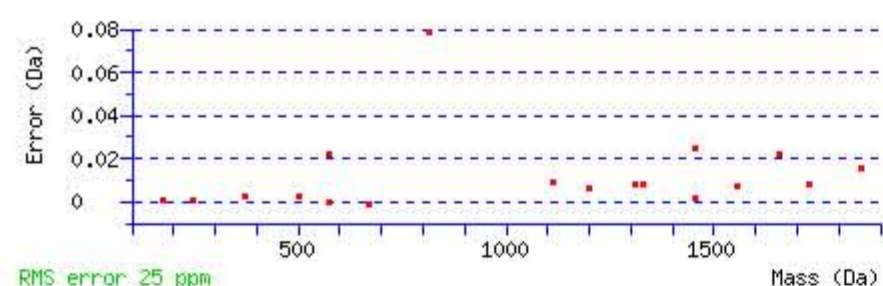

RMS error 25 ppm

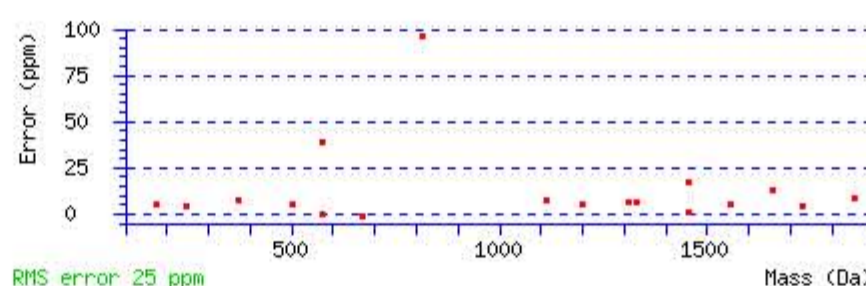

RMS error 25 ppm

NCBI BLAST search of **DALSSVQESQVAQQAR**

(Parameters: blastp, nr protein database, expect=20000, no filter, PAM30)

Other BLAST [web gateways](#)

## All matches to this query

| Score | Mr(calc):   | Delta     | Sequence                            |
|-------|-------------|-----------|-------------------------------------|
| 117.7 | 2027.010574 | 0.017614  | <a href="#">DALSSVQESQVAQQAR</a>    |
| 99.5  | 2027.010574 | 0.017614  | <a href="#">DALSSVQESQVAQQAR</a>    |
| 91.5  | 2027.010574 | 0.017614  | <a href="#">DALSSVQESQVAQQAR</a>    |
| 63.5  | 2027.010574 | 0.017614  | <a href="#">DALSSVQESQVAQQAR</a>    |
| 13.2  | 2027.021805 | 0.006383  | <a href="#">VASVESQGEISGNRR</a>     |
| 4.4   | 2027.017960 | 0.010228  | <a href="#">MFELTLRGMSEALVDKR</a>   |
| 3.7   | 2027.029633 | -0.001445 | <a href="#">QESEHSHKHLIELRR</a>     |
| 3.4   | 2027.041092 | -0.012904 | <a href="#">RTFVSKESPHWQSK</a>      |
| 3.0   | 2027.021805 | 0.006383  | <a href="#">VASVESQGEISGNRR</a>     |
| 2.6   | 2027.039520 | -0.011332 | <a href="#">GLERALEEAANSGLNLSAR</a> |



# MASCOT SCIENCE Mascot Search Results

## Peptide View

MS/MS Fragmentation of **ELQAAQAR**

Found in **APOE\_HUMAN**, Apolipoprotein E OS=Homo sapiens GN=APOE PE=1 SV=1

Match to Query 27618: 1196.632548 from(599.323550,2+) rtinseconds(1432) index(38370)

Title: Locus:1.1.1.2782.20 File:"2013-07-02 CLN FXIII 60 min 1st F 3.wiff"

Data file C:\Program Files (x86)\Matrix Science\Mascot Daemon\mgf4 FXIII 60 min 1st\mascot\_daemon\_merge.mgf

Click mouse within plot area to zoom in by factor of two about that point

Or, Plot from  to  Da

Label all possible matches  Label matches used for scoring

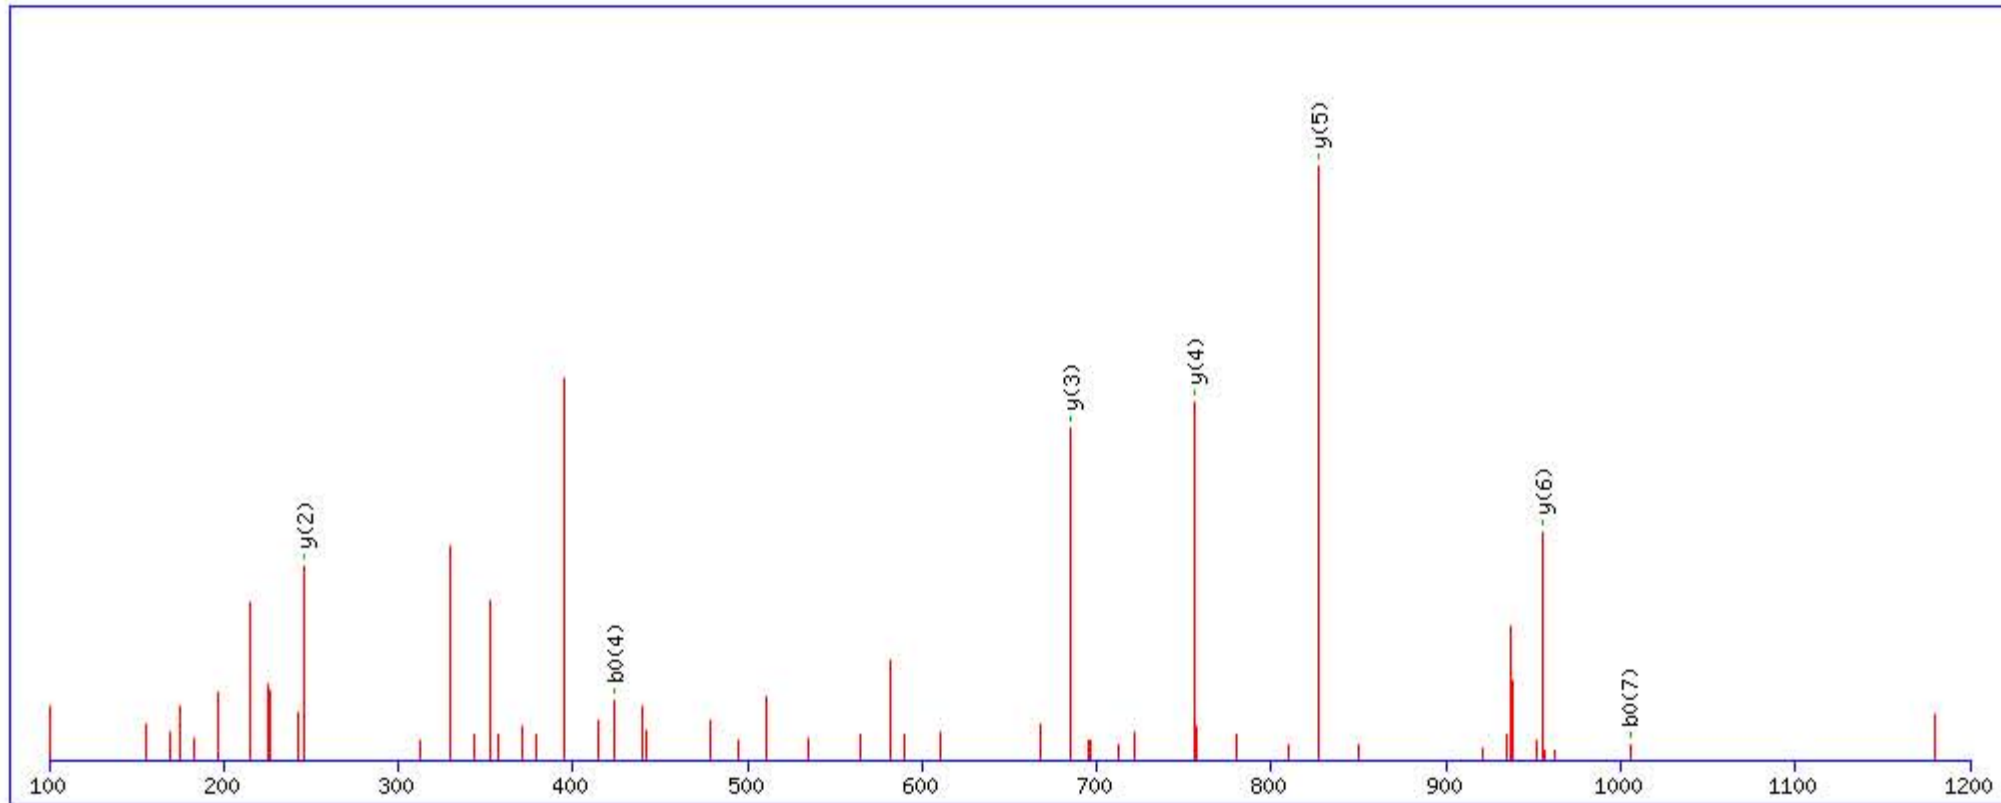

Monoisotopic mass of neutral peptide Mr(calc): 1196.633545

Fixed modifications: Carbamidomethyl (C) (apply to specified residues or termini only)

Variable modifications:

Q6 : Biotin:Thermo-21345 (Q)

Ions Score: 31 Expect: 0.004

Matches : 7/66 fragment ions using 11 most intense peaks [\(help\)](#)

| # | b           | b <sup>++</sup> | b <sup>*</sup> | b <sup>*++</sup> | b <sup>0</sup>     | b <sup>0++</sup> | Seq. | y                 | y <sup>++</sup> | y <sup>*</sup> | y <sup>*++</sup> | # |
|---|-------------|-----------------|----------------|------------------|--------------------|------------------|------|-------------------|-----------------|----------------|------------------|---|
| 1 | 130.049869  | 65.528572       |                |                  | 112.039304         | 56.523290        | E    |                   |                 |                |                  | 8 |
| 2 | 243.133933  | 122.070605      |                |                  | 225.123368         | 113.065322       | L    | 1068.598262       | 534.802769      | 1051.571713    | 526.289495       | 7 |
| 3 | 371.192511  | 186.099894      | 354.165962     | 177.586619       | 353.181946         | 177.094611       | Q    | <b>955.514198</b> | 478.260737      | 938.487649     | 469.747463       | 6 |
| 4 | 442.229625  | 221.618450      | 425.203076     | 213.105176       | <b>424.219060</b>  | 212.613168       | A    | <b>827.455620</b> | 414.231448      | 810.429071     | 405.718174       | 5 |
| 5 | 513.266739  | 257.137008      | 496.240190     | 248.623733       | 495.256174         | 248.131725       | A    | <b>756.418506</b> | 378.712891      | 739.391957     | 370.199617       | 4 |
| 6 | 952.492065  | 476.749671      | 935.465516     | 468.236396       | 934.481500         | 467.744388       | Q    | <b>685.381392</b> | 343.194334      | 668.354843     | 334.681060       | 3 |
| 7 | 1023.529179 | 512.268227      | 1006.502630    | 503.754953       | <b>1005.518614</b> | 503.262945       | A    | <b>246.156066</b> | 123.581671      | 229.129517     | 115.068397       | 2 |
| 8 |             |                 |                |                  |                    |                  | R    | 175.118952        | 88.063114       | 158.092403     | 79.549840        | 1 |

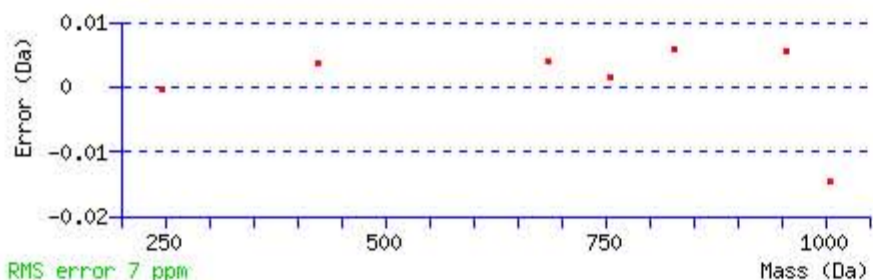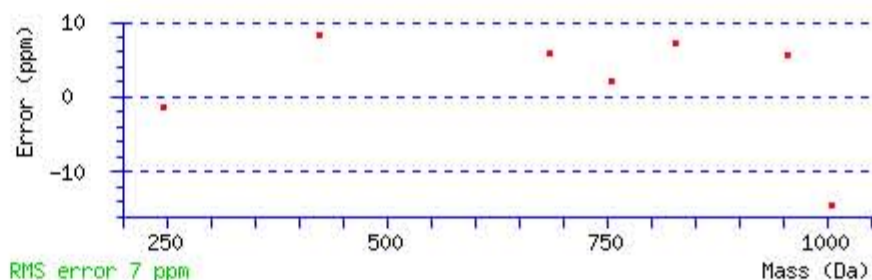

NCBI BLAST search of [ELQAAQAR](#)

(Parameters: blastp, nr protein database, expect=20000, no filter, PAM30)

Other BLAST [web gateways](#)

### All matches to this query

| Score | Mr(calc):   | Delta     | Sequence                   |
|-------|-------------|-----------|----------------------------|
| 31.3  | 1196.633545 | -0.000997 | <a href="#">ELQAAQAR</a>   |
| 5.7   | 1196.614914 | 0.017634  | <a href="#">ELQQAELPNR</a> |
| 3.6   | 1196.633575 | -0.001027 | <a href="#">QASTQVPR</a>   |

Mascot: <http://www.matrixscience.com/>



# MASCOT SCIENCE Mascot Search Results

## Peptide View

MS/MS Fragmentation of **LGPLVEQGR**

Found in **APOE\_HUMAN**, Apolipoprotein E OS=Homo sapiens GN=APOE PE=1 SV=1

Match to Query 30184: 1278.717328 from(640.365940,2+) rtinseconds(1935) index(41703)

Title: Locus:1.1.1.2957.20 File:"2013-07-02 CLN FXIII 60 min 1st F 3.wiff"

Data file C:\Program Files (x86)\Matrix Science\Mascot Daemon\mgf\4 FXIII 60 min 1st\mascot\_daemon\_merge.mgf

Click mouse within plot area to zoom in by factor of two about that point

Or, Plot from  to  Da

Label all possible matches  Label matches used for scoring

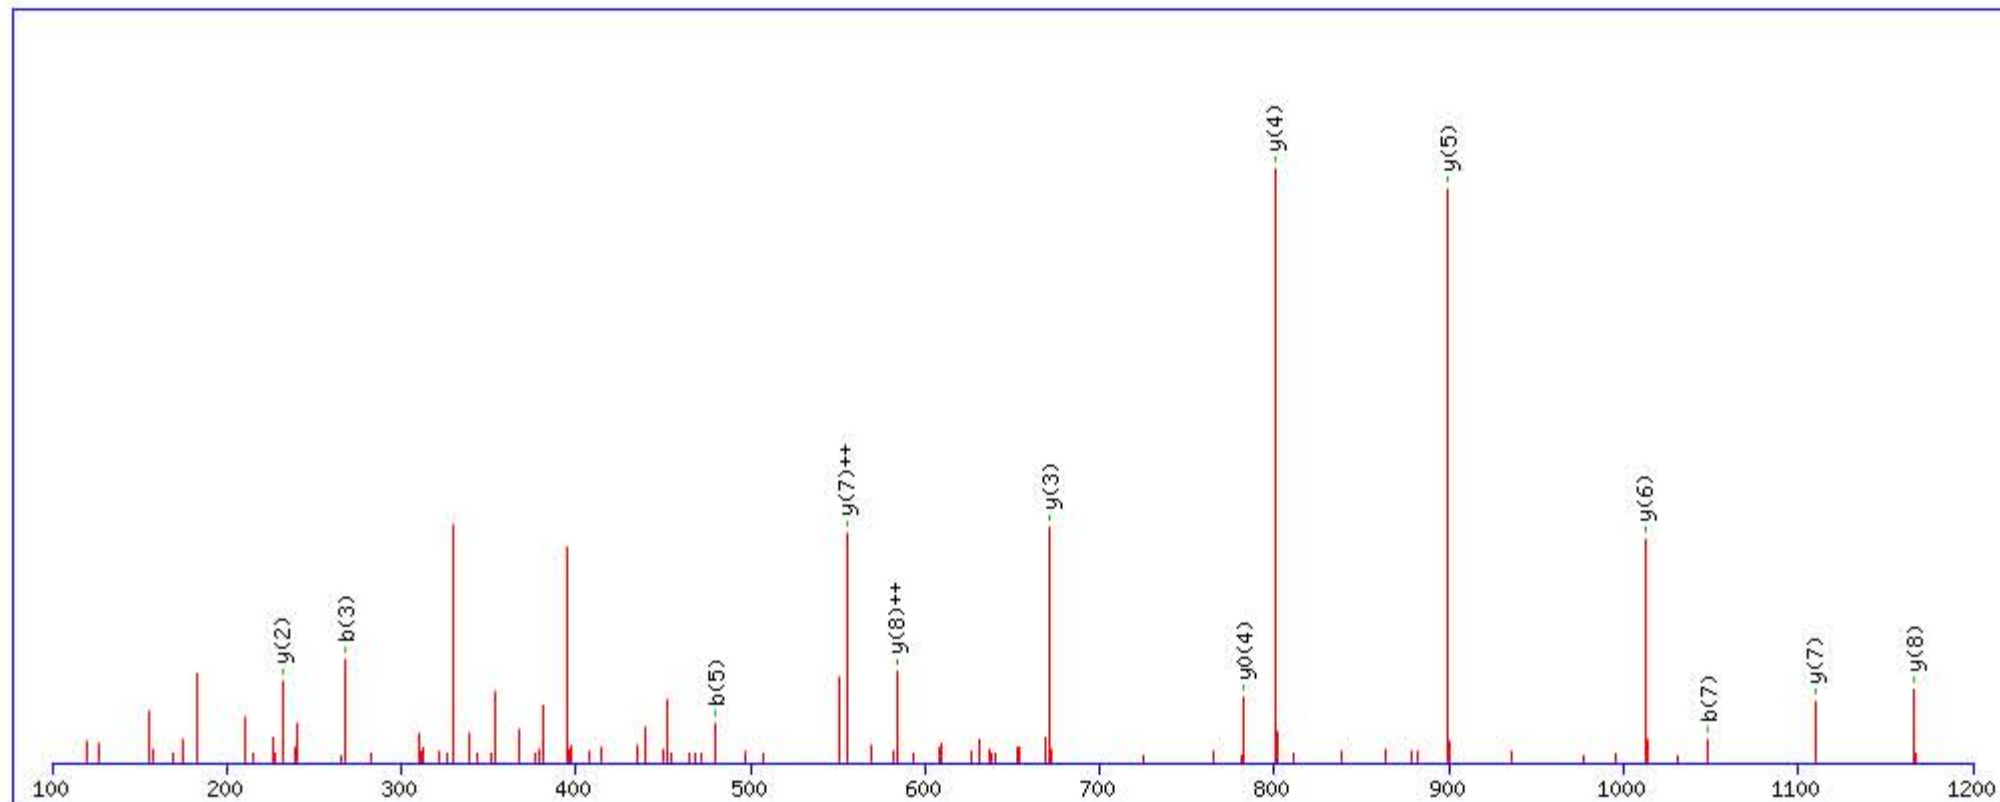

Monoisotopic mass of neutral peptide Mr(calc): 1278.711823

Fixed modifications: Carbamidomethyl (C) (apply to specified residues or termini only)

Variable modifications:

Q7 : Biotin:Thermo-21345 (Q)

Ions Score: 48 Expect: 5.5e-005

Matches : 13/68 fragment ions using 22 most intense peaks ([help](#))

| # | b           | b <sup>++</sup> | b <sup>*</sup> | b <sup>+++</sup> | b <sup>0</sup> | b <sup>0++</sup> | Seq. | y           | y <sup>++</sup> | y <sup>*</sup> | y <sup>+++</sup> | y <sup>0</sup> | y <sup>0++</sup> | # |
|---|-------------|-----------------|----------------|------------------|----------------|------------------|------|-------------|-----------------|----------------|------------------|----------------|------------------|---|
| 1 | 114.091340  | 57.549308       |                |                  |                |                  | L    |             |                 |                |                  |                |                  | 9 |
| 2 | 171.112804  | 86.060040       |                |                  |                |                  | G    | 1166.635041 | 583.821159      | 1149.608492    | 575.307884       | 1148.624476    | 574.815876       | 8 |
| 3 | 268.165568  | 134.586422      |                |                  |                |                  | P    | 1109.613577 | 555.310426      | 1092.587028    | 546.797152       | 1091.603012    | 546.305144       | 7 |
| 4 | 381.249632  | 191.128454      |                |                  |                |                  | L    | 1012.560813 | 506.784044      | 995.534264     | 498.270770       | 994.550248     | 497.778762       | 6 |
| 5 | 480.318046  | 240.662661      |                |                  |                |                  | V    | 899.476749  | 450.242012      | 882.450200     | 441.728738       | 881.466184     | 441.236730       | 5 |
| 6 | 609.360639  | 305.183958      |                |                  | 591.350074     | 296.178675       | E    | 800.408335  | 400.707805      | 783.381786     | 392.194531       | 782.397770     | 391.702523       | 4 |
| 7 | 1048.585965 | 524.796621      | 1031.559416    | 516.283346       | 1030.575400    | 515.791338       | Q    | 671.365742  | 336.186509      | 654.339193     | 327.673234       |                |                  | 3 |
| 8 | 1105.607429 | 553.307352      | 1088.580880    | 544.794078       | 1087.596864    | 544.302070       | G    | 232.140416  | 116.573846      | 215.113867     | 108.060571       |                |                  | 2 |
| 9 |             |                 |                |                  |                |                  | R    | 175.118952  | 88.063114       | 158.092403     | 79.549839        |                |                  | 1 |

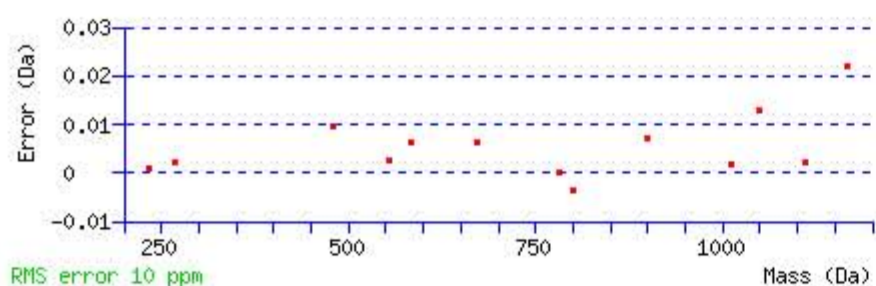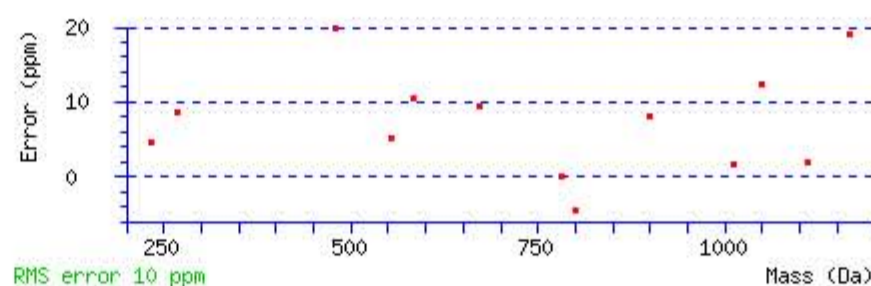

NCBI BLAST search of [LGPLVEQGR](#)

(Parameters: blastp, nr protein database, expect=20000, no filter, PAM30)

Other BLAST [web gateways](#)

All matches to this query

| Score | Mr(calc):   | Delta     | Sequence                     |
|-------|-------------|-----------|------------------------------|
| 47.7  | 1278.711823 | 0.005505  | <a href="#">LGPLVEQGR</a>    |
| 2.3   | 1278.729584 | -0.012256 | <a href="#">IVIVPSLNPDGR</a> |



# MASCOT Search Results

## Peptide View

MS/MS Fragmentation of **LEEQAQQIR**

Found in **APOE\_HUMAN**, Apolipoprotein E OS=Homo sapiens GN=APOE PE=1 SV=1

Match to Query 36155: 1424.747968 from(713.381260,2+) rtinseconds(1519) index(38994)

Title: Locus:1.1.1.2812.24 File:"2013-07-02 CLN FXIII 60 min 1st F 3.wiff"

Data file C:\Program Files (x86)\Matrix Science\Mascot Daemon\mgf4 FXIII 60 min 1st\mascot\_daemon\_merge.mgf

Click mouse within plot area to zoom in by factor of two about that point

Or, Plot from  to  Da

Label all possible matches  Label matches used for scoring

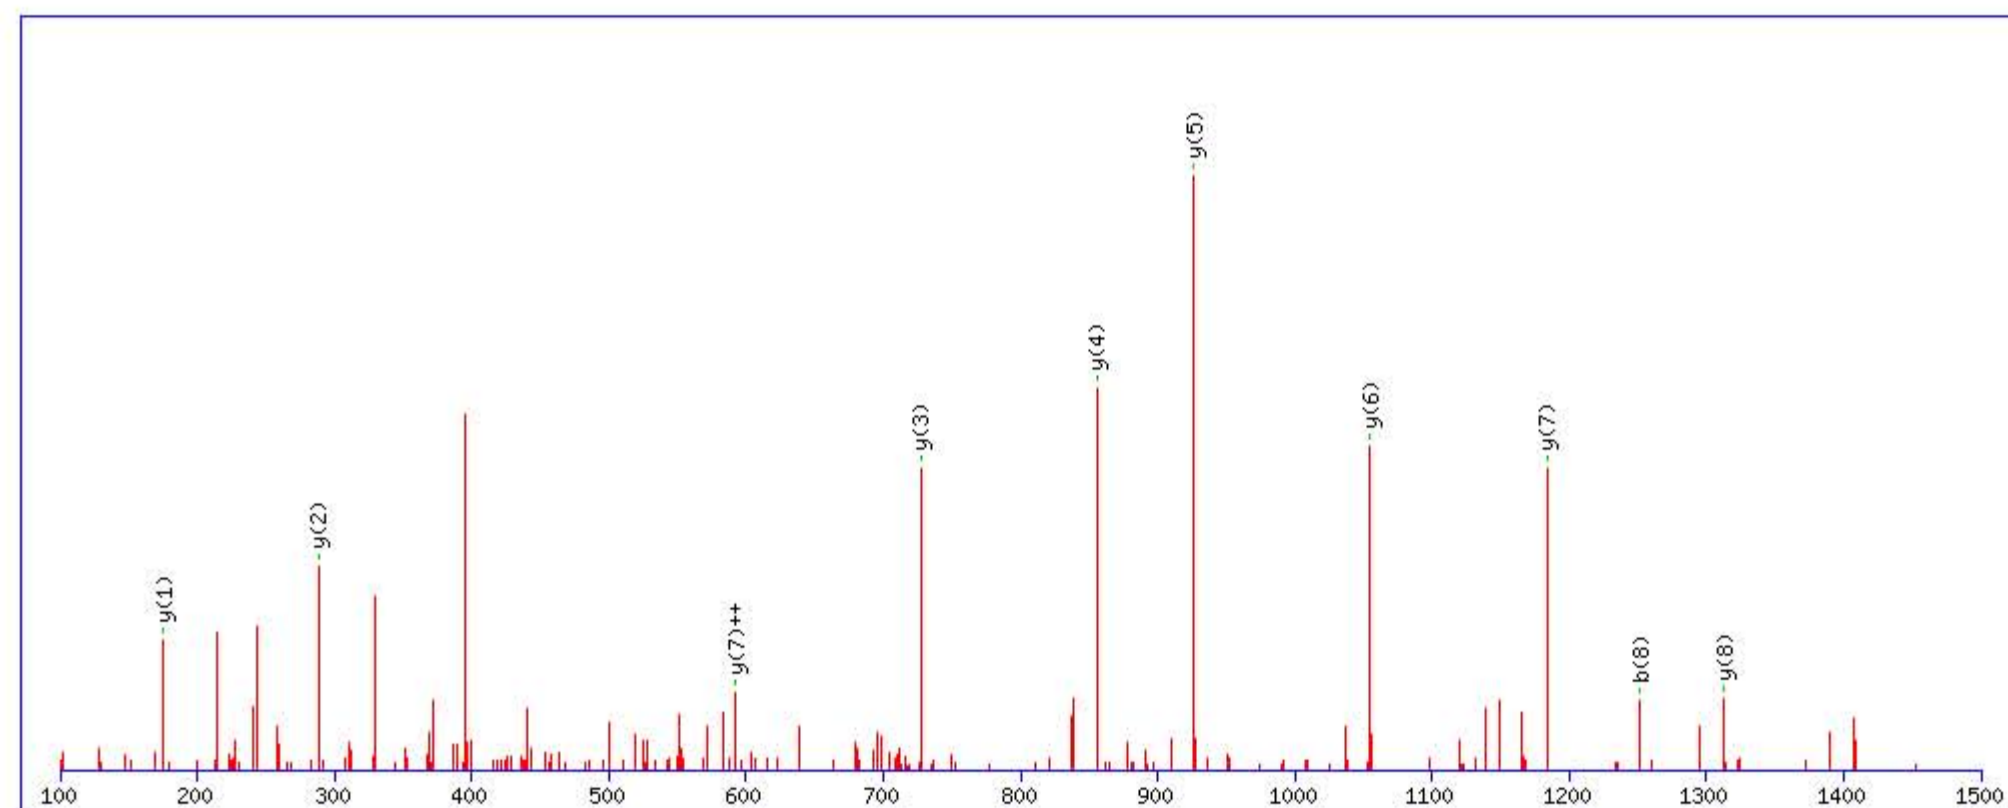

Monoisotopic mass of neutral peptide Mr(calc): 1424.744553

Fixed modifications: Carbamidomethyl (C) (apply to specified residues or termini only)

Variable modifications:

Q7 : Biotin:Thermo-21345 (Q)

Ions Score: 71 Expect: 2.1e-006

Matches : 10/76 fragment ions using 14 most intense peaks [\(help\)](#)

| # | b                  | b <sup>++</sup> | b <sup>*</sup> | b <sup>*++</sup> | b <sup>0</sup> | b <sup>0++</sup> | Seq. | y                  | y <sup>++</sup>   | y <sup>*</sup> | y <sup>*++</sup> | y <sup>0</sup> | y <sup>0++</sup> | # |
|---|--------------------|-----------------|----------------|------------------|----------------|------------------|------|--------------------|-------------------|----------------|------------------|----------------|------------------|---|
| 1 | 114.091340         | 57.549308       |                |                  |                |                  | L    |                    |                   |                |                  |                |                  | 9 |
| 2 | 243.133933         | 122.070605      |                |                  | 225.123368     | 113.065322       | E    | <b>1312.667798</b> | 656.837537        | 1295.641249    | 648.324263       | 1294.657233    | 647.832255       | 8 |
| 3 | 372.176526         | 186.591901      |                |                  | 354.165961     | 177.586619       | E    | <b>1183.625205</b> | <b>592.316241</b> | 1166.598656    | 583.802966       | 1165.614640    | 583.310958       | 7 |
| 4 | 500.235104         | 250.621190      | 483.208555     | 242.107916       | 482.224539     | 241.615908       | Q    | <b>1054.582612</b> | 527.794944        | 1037.556063    | 519.281670       |                |                  | 6 |
| 5 | 571.272218         | 286.139747      | 554.245669     | 277.626473       | 553.261653     | 277.134465       | A    | <b>926.524034</b>  | 463.765655        | 909.497485     | 455.252381       |                |                  | 5 |
| 6 | 699.330796         | 350.169036      | 682.304247     | 341.655762       | 681.320231     | 341.163754       | Q    | <b>855.486920</b>  | 428.247098        | 838.460371     | 419.733824       |                |                  | 4 |
| 7 | 1138.556122        | 569.781699      | 1121.529573    | 561.268425       | 1120.545557    | 560.776417       | Q    | <b>727.428342</b>  | 364.217809        | 710.401793     | 355.704535       |                |                  | 3 |
| 8 | <b>1251.640186</b> | 626.323731      | 1234.613637    | 617.810457       | 1233.629621    | 617.318449       | I    | <b>288.203016</b>  | 144.605146        | 271.176467     | 136.091871       |                |                  | 2 |
| 9 |                    |                 |                |                  |                |                  | R    | <b>175.118952</b>  | 88.063114         | 158.092403     | 79.549839        |                |                  | 1 |

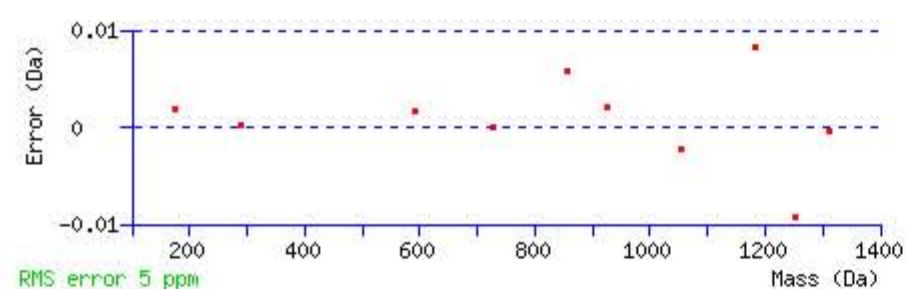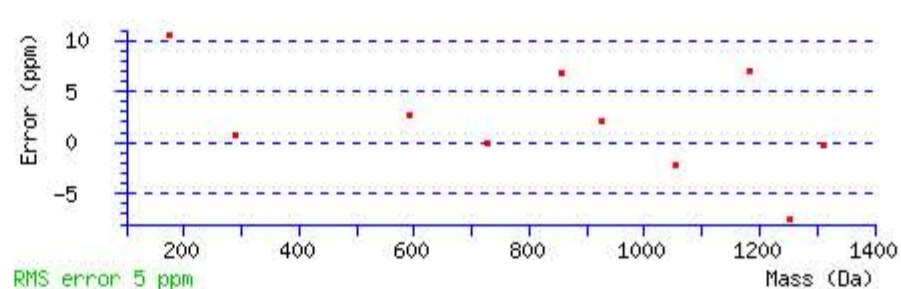

NCBI BLAST search of [LEEQAQQIR](#)

(Parameters: blastp, nr protein database, expect=20000, no filter, PAM30)

Other BLAST [web gateways](#)

## All matches to this query

| Score | Mr(calc):   | Delta     | Sequence                      |
|-------|-------------|-----------|-------------------------------|
| 70.6  | 1424.744553 | 0.003415  | <a href="#">LEEQAQQIR</a>     |
| 54.3  | 1424.744553 | 0.003415  | <a href="#">LEEQAQQIR</a>     |
| 25.6  | 1424.744553 | 0.003415  | <a href="#">LEEQAQQIR</a>     |
| 16.9  | 1424.733322 | 0.014646  | <a href="#">LEQETEPLR</a>     |
| 15.1  | 1424.745438 | 0.002530  | <a href="#">QMQQIR</a>        |
| 13.2  | 1424.767014 | -0.019046 | <a href="#">EERRQLR</a>       |
| 10.0  | 1424.730667 | 0.017301  | <a href="#">QPGCAVPQSGRLR</a> |
| 7.4   | 1424.744583 | 0.003385  | <a href="#">QLSGDQPTIR</a>    |
| 6.5   | 1424.726807 | 0.021161  | <a href="#">QMNLLQQQPK</a>    |
| 6.4   | 1424.745438 | 0.002530  | <a href="#">QMQQIR</a>        |



# MASCOT Search Results

## Peptide View

MS/MS Fragmentation of **QQTEWQSGQR**

Found in **APOE\_HUMAN**, Apolipoprotein E OS=Homo sapiens GN=APOE PE=1 SV=1

Match to Query 40109: 1557.748268 from(779.881410,2+) rtinseconds(1526) index(57129)

Title: Locus:1.1.1.2837.20 File:"2013-07-02 CLN FXIII 60 min 1st F 4.wiff"

Data file C:\Program Files (x86)\Matrix Science\Mascot Daemon\mgf\4 FXIII 60 min 1st\mascot\_daemon\_merge.mgf

Click mouse within plot area to zoom in by factor of two about that point

Or, Plot from  to  Da

Label all possible matches  Label matches used for scoring

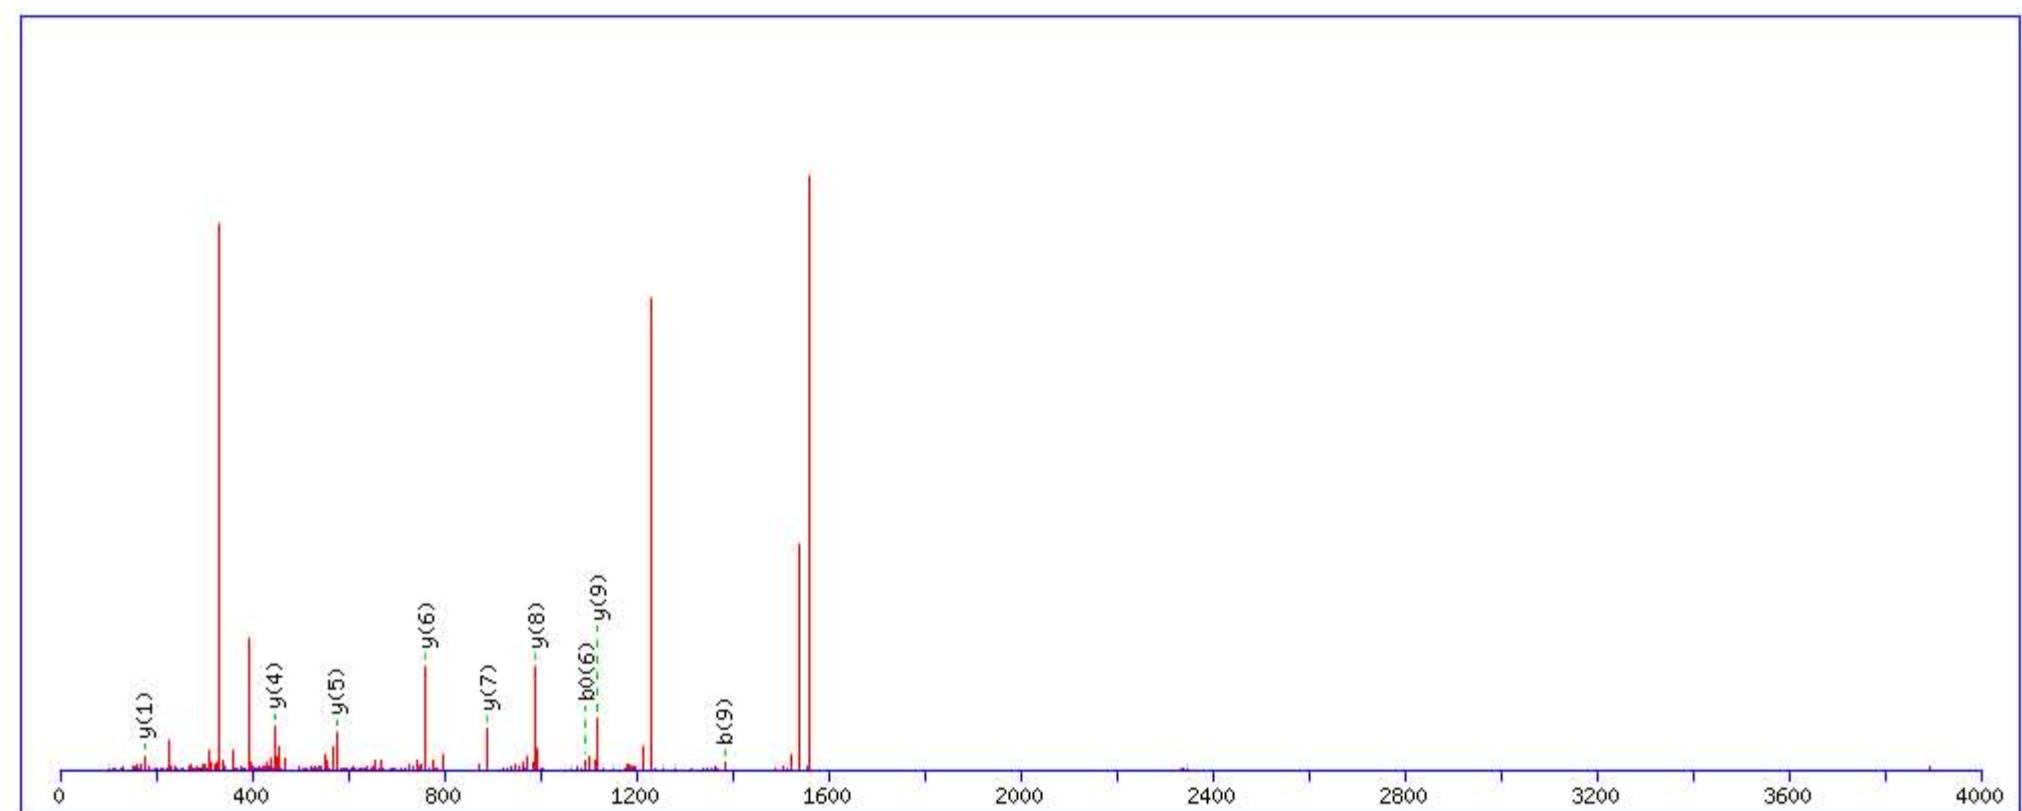

Monoisotopic mass of neutral peptide Mr(calc): 1557.735809

Fixed modifications: Carbamidomethyl (C) (apply to specified residues or termini only)

Variable modifications:

Q1 : Biotin:Thermo-21345 (Q)

Ions Score: 41 Expect: 0.0011

Matches : 9/98 fragment ions using 15 most intense peaks [\(help\)](#)

| #  | b           | b <sup>++</sup> | b <sup>+</sup> | b <sup>+++</sup> | b <sup>0</sup> | b <sup>0++</sup> | Seq. | y           | y <sup>++</sup> | y <sup>+</sup> | y <sup>+++</sup> | y <sup>0</sup> | y <sup>0++</sup> | #  |
|----|-------------|-----------------|----------------|------------------|----------------|------------------|------|-------------|-----------------|----------------|------------------|----------------|------------------|----|
| 1  | 440.232602  | 220.619939      | 423.206053     | 212.106664       |                |                  | Q    |             |                 |                |                  |                |                  | 10 |
| 2  | 568.291180  | 284.649228      | 551.264631     | 276.135954       |                |                  | Q    | 1119.517763 | 560.262520      | 1102.491214    | 551.749245       | 1101.507198    | 551.257237       | 9  |
| 3  | 669.338859  | 335.173068      | 652.312310     | 326.659793       | 651.328294     | 326.167785       | T    | 991.459185  | 496.233231      | 974.432636     | 487.719956       | 973.448620     | 487.227948       | 8  |
| 4  | 798.381452  | 399.694364      | 781.354903     | 391.181090       | 780.370887     | 390.689082       | E    | 890.411506  | 445.709391      | 873.384957     | 437.196117       | 872.400941     | 436.704109       | 7  |
| 5  | 984.460765  | 492.734021      | 967.434216     | 484.220746       | 966.450200     | 483.728738       | W    | 761.368913  | 381.188095      | 744.342364     | 372.674820       | 743.358348     | 372.182812       | 6  |
| 6  | 1112.519343 | 556.763310      | 1095.492794    | 548.250035       | 1094.508778    | 547.758027       | Q    | 575.289600  | 288.148438      | 558.263051     | 279.635164       | 557.279035     | 279.143156       | 5  |
| 7  | 1199.551371 | 600.279324      | 1182.524822    | 591.766049       | 1181.540806    | 591.274041       | S    | 447.231022  | 224.119149      | 430.204473     | 215.605875       | 429.220457     | 215.113867       | 4  |
| 8  | 1256.572835 | 628.790056      | 1239.546286    | 620.276781       | 1238.562270    | 619.784773       | G    | 360.198994  | 180.603135      | 343.172445     | 172.089860       |                |                  | 3  |
| 9  | 1384.631413 | 692.819345      | 1367.604864    | 684.306070       | 1366.620848    | 683.814062       | Q    | 303.177530  | 152.092403      | 286.150981     | 143.579129       |                |                  | 2  |
| 10 |             |                 |                |                  |                |                  | R    | 175.118952  | 88.063114       | 158.092403     | 79.549839        |                |                  | 1  |

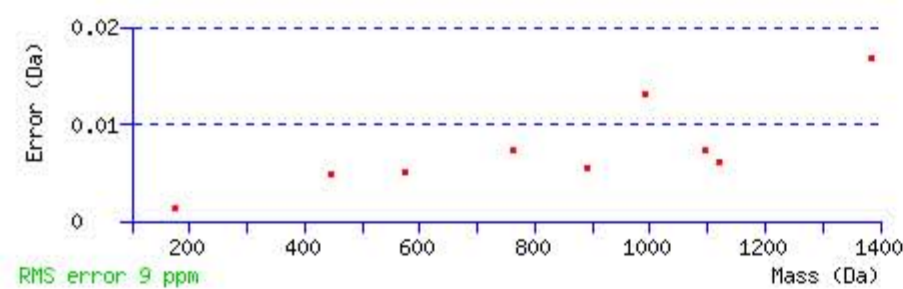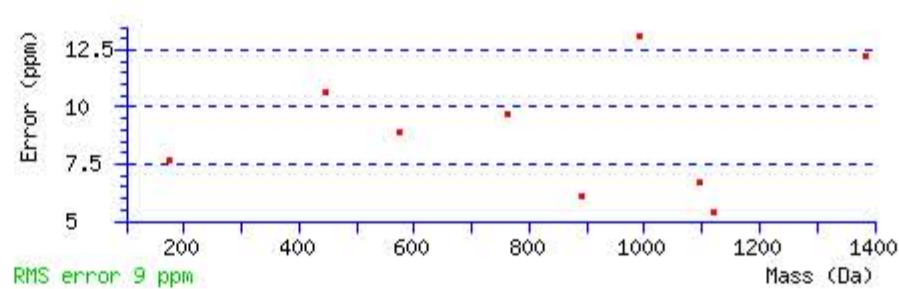

NCBI BLAST search of **QQTEWQSGQR**

(Parameters: blastp, nr protein database, expect=20000, no filter, PAM30)

Other BLAST [web gateways](#)

## All matches to this query

| Score | Mr(calc):   | Delta     | Sequence                         |
|-------|-------------|-----------|----------------------------------|
| 41.1  | 1557.735809 | 0.012459  | <a href="#">QQTEWQSGQR</a>       |
| 28.9  | 1557.735809 | 0.012459  | <a href="#">QQTEWQSGQR</a>       |
| 9.2   | 1557.747040 | 0.001228  | <a href="#">AFSHCSSLTKHQR</a>    |
| 6.0   | 1557.746567 | 0.001701  | <a href="#">QMSSPQSR</a>         |
| 5.2   | 1557.742340 | 0.005928  | <a href="#">TQSFEIPQPDSGPR</a>   |
| 3.6   | 1557.760925 | -0.012657 | <a href="#">AKEEAQWQTR</a>       |
| 3.6   | 1557.756897 | -0.008629 | <a href="#">MAASAAAELQASGGPR</a> |
| 3.6   | 1557.749496 | -0.001228 | <a href="#">QAEATRQAAAQEER</a>   |
| 2.9   | 1557.745697 | 0.002571  | <a href="#">GSSLFMDTEKSGKR</a>   |
| 1.7   | 1557.756912 | -0.008644 | <a href="#">SSDRLDEAAQR</a>      |



# MASCOT Search Results

## Peptide View

MS/MS Fragmentation of **AATVGS LAGQPLQER**

Found in **APOE\_HUMAN**, Apolipoprotein E OS=Homo sapiens GN=APOE PE=1 SV=1

Match to Query 48573: 1807.968792 from(603.663540,3+) rtinseconds(1943) index(41772)

Title: Locus:1.1.1.2960.14 File:"2013-07-02 CLN FXIII 60 min 1st F 3.wiff"

Data file C:\Program Files (x86)\Matrix Science\Mascot Daemon\mgf\4 FXIII 60 min 1st\mascot\_daemon\_merge.mgf

Click mouse within plot area to zoom in by factor of two about that point

Or, Plot from  to  Da

Label all possible matches  Label matches used for scoring

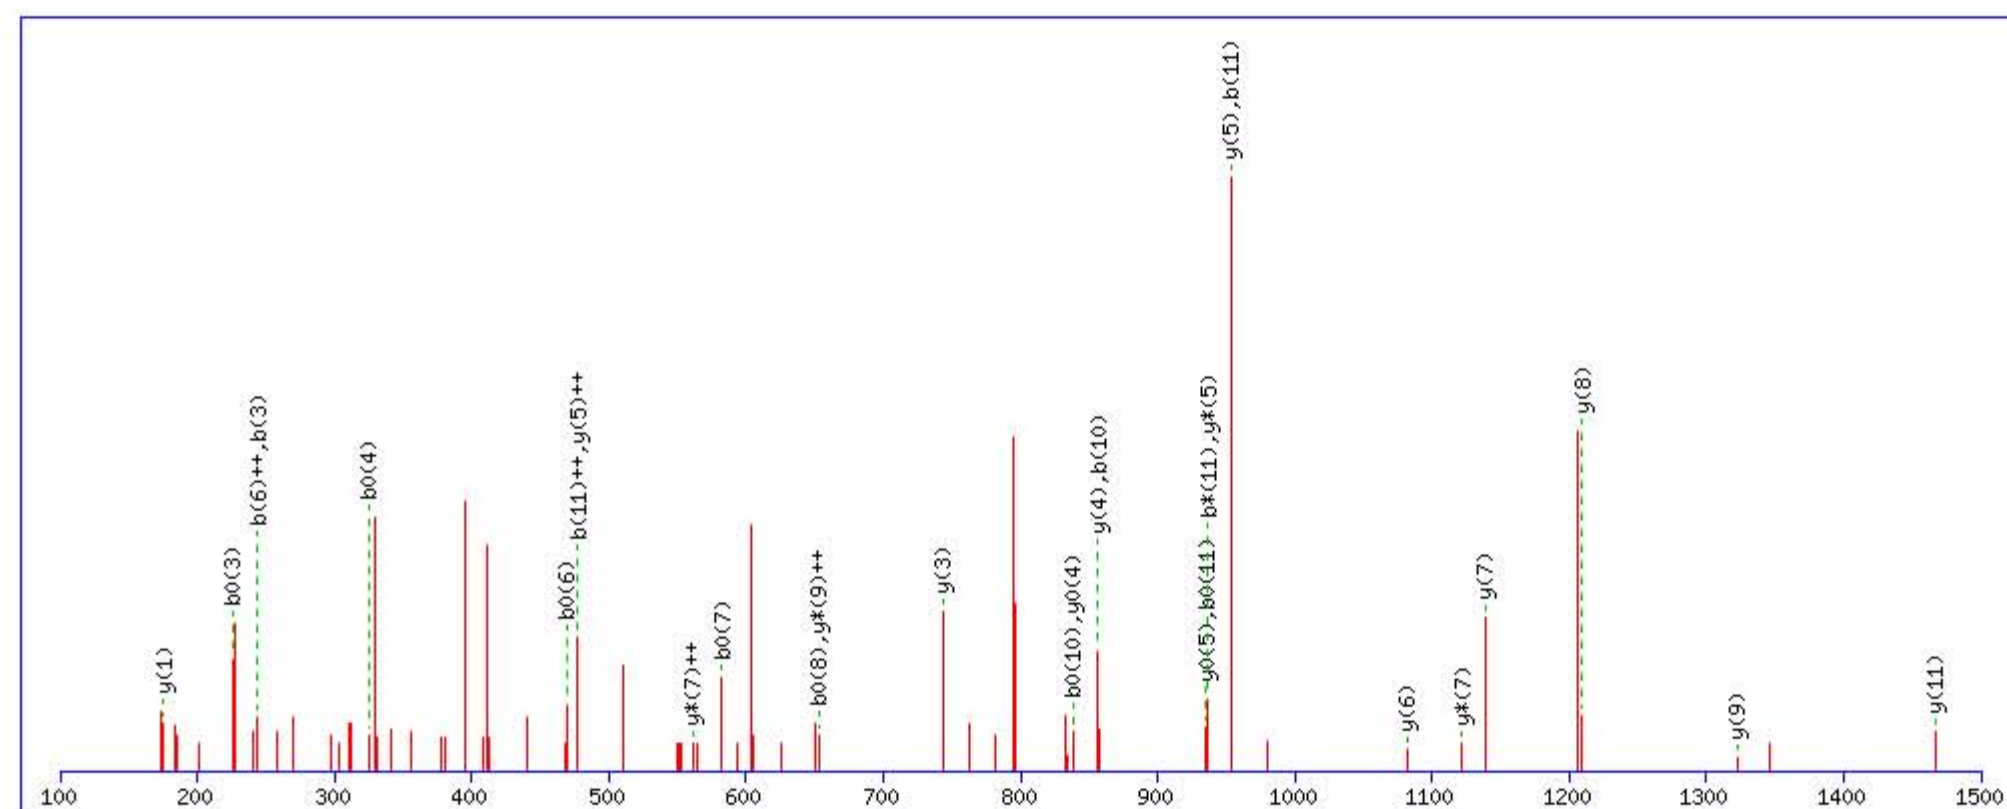

Monoisotopic mass of neutral peptide Mr(calc): 1807.961441

Fixed modifications: Carbamidomethyl (C) (apply to specified residues or termini only)

Variable modifications:

Q13 : Biotin:Thermo-21345 (Q)

Ions Score: 36 Expect: 0.0056

Matches : 29/144 fragment ions using 52 most intense peaks [\(help\)](#)

| #  | b                 | b <sup>++</sup>   | b <sup>*</sup>    | b <sup>*++</sup> | b <sup>0</sup>    | b <sup>0++</sup> | Seq. | y                  | y <sup>++</sup>   | y <sup>*</sup>     | y <sup>*++</sup>  | y <sup>0</sup>    | y <sup>0++</sup> | #  |
|----|-------------------|-------------------|-------------------|------------------|-------------------|------------------|------|--------------------|-------------------|--------------------|-------------------|-------------------|------------------|----|
| 1  | 72.044390         | 36.525833         |                   |                  |                   |                  | A    |                    |                   |                    |                   |                   |                  | 15 |
| 2  | 143.081504        | 72.044390         |                   |                  |                   |                  | A    | 1737.931618        | 869.469447        | 1720.905069        | 860.956173        | 1719.921053       | 860.464165       | 14 |
| 3  | <b>244.129183</b> | 122.568230        |                   |                  | <b>226.118618</b> | 113.562947       | T    | 1666.894504        | 833.950890        | 1649.867955        | 825.437616        | 1648.883939       | 824.945608       | 13 |
| 4  | 343.197597        | 172.102437        |                   |                  | <b>325.187032</b> | 163.097154       | V    | 1565.846825        | 783.427051        | 1548.820276        | 774.913776        | 1547.836260       | 774.421768       | 12 |
| 5  | 400.219061        | 200.613169        |                   |                  | 382.208496        | 191.607886       | G    | <b>1466.778411</b> | 733.892844        | 1449.751862        | 725.379569        | 1448.767846       | 724.887561       | 11 |
| 6  | 487.251089        | <b>244.129183</b> |                   |                  | <b>469.240524</b> | 235.123900       | S    | 1409.756947        | 705.382112        | 1392.730398        | 696.868837        | 1391.746382       | 696.376829       | 10 |
| 7  | 600.335153        | 300.671215        |                   |                  | <b>582.324588</b> | 291.665932       | L    | <b>1322.724919</b> | 661.866098        | 1305.698370        | <b>653.352823</b> | 1304.714354       | 652.860815       | 9  |
| 8  | 671.372267        | 336.189772        |                   |                  | <b>653.361702</b> | 327.184489       | A    | <b>1209.640855</b> | 605.324066        | 1192.614306        | 596.810791        | 1191.630290       | 596.318783       | 8  |
| 9  | 728.393731        | 364.700504        |                   |                  | 710.383166        | 355.695221       | G    | <b>1138.603741</b> | 569.805509        | <b>1121.577192</b> | <b>561.292234</b> | 1120.593176       | 560.800226       | 7  |
| 10 | <b>856.452309</b> | 428.729793        | 839.425760        | 420.216518       | <b>838.441744</b> | 419.724510       | Q    | <b>1081.582277</b> | 541.294777        | 1064.555728        | 532.781502        | 1063.571712       | 532.289494       | 6  |
| 11 | <b>953.505073</b> | <b>477.256175</b> | <b>936.478524</b> | 468.742900       | <b>935.494508</b> | 468.250892       | P    | <b>953.523699</b>  | <b>477.265488</b> | <b>936.497150</b>  | 468.752213        | <b>935.513134</b> | 468.260205       | 5  |
| 12 | 1066.589137       | 533.798207        | 1049.562588       | 525.284932       | 1048.578572       | 524.792924       | L    | <b>856.470935</b>  | 428.739106        | 839.444386         | 420.225831        | <b>838.460370</b> | 419.733823       | 4  |
| 13 | 1505.814463       | 753.410870        | 1488.787914       | 744.897595       | 1487.803898       | 744.405587       | Q    | <b>743.386871</b>  | 372.197074        | 726.360322         | 363.683799        | 725.376306        | 363.191791       | 3  |
| 14 | 1634.857056       | 817.932166        | 1617.830507       | 809.418892       | 1616.846491       | 808.926884       | E    | 304.161545         | 152.584411        | 287.134996         | 144.071136        | 286.150980        | 143.579128       | 2  |
| 15 |                   |                   |                   |                  |                   |                  | R    | <b>175.118952</b>  | 88.063114         | 158.092403         | 79.549839         |                   |                  | 1  |

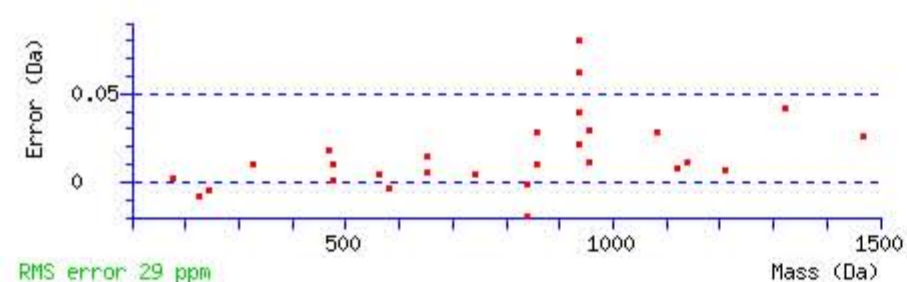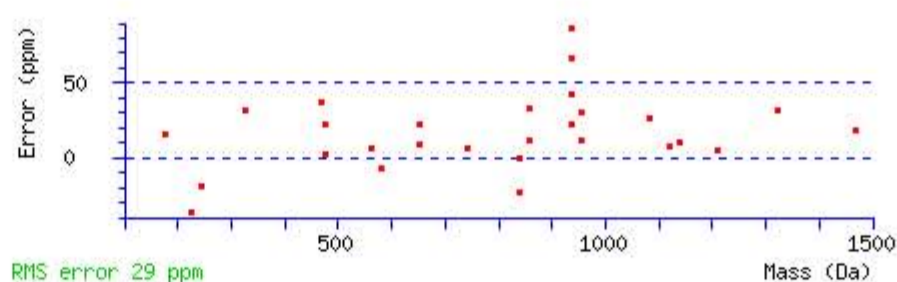

NCBI BLAST search of **AATVGS LAGQPLQER**

(Parameters: blastp, nr protein database, expect=20000, no filter, PAM30)

Other BLAST [web gateways](#)

All matches to this query

| Score | Mr(calc):   | Delta    | Sequence                          |
|-------|-------------|----------|-----------------------------------|
| 36.3  | 1807.961441 | 0.007351 | <a href="#">AATVGS LAGQPLQER</a>  |
| 11.7  | 1807.947510 | 0.021282 | <a href="#">VGLAQIAAMDISRGNHR</a> |
| 2.8   | 1807.942795 | 0.025997 | <a href="#">ENK DQLESVLEVLHR</a>  |
| 1.3   | 1807.961441 | 0.007351 | <a href="#">AATVGS LAGQPLQER</a>  |



**Peptide View**

MS/MS Fragmentation of **SWFEPLVEDMQR**

Found in **APOE\_HUMAN**, Apolipoprotein E OS=Homo sapiens GN=APOE PE=1 SV=1

Match to Query 49436: 1846.890372 from(616.637400,3+) rtinseconds(2799) index(47353)

Title: Locus:1.1.1.3257.2 File:"2013-07-02 CLN FXIII 60 min 1st F 3.wiff"

Data file C:\Program Files (x86)\Matrix Science\Mascot Daemon\mgf4 FXIII 60 min 1st\mascot\_daemon\_merge.mgf

Click mouse within plot area to zoom in by factor of two about that point

Or, Plot from  to  Da

Label all possible matches  Label matches used for scoring

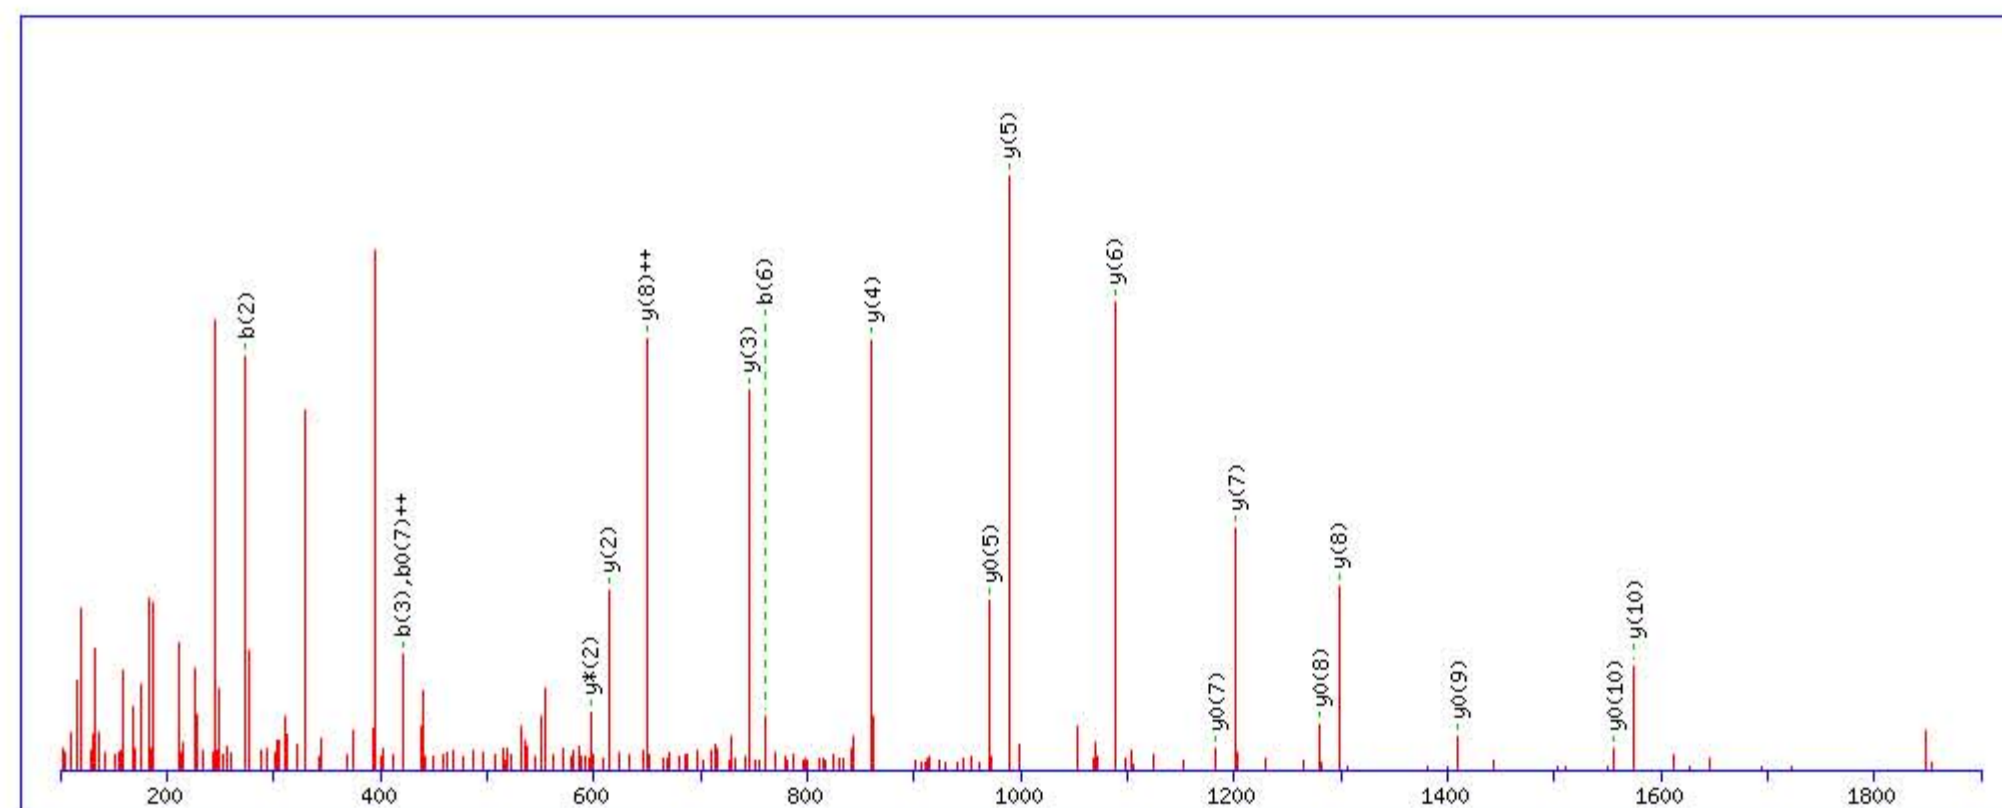

Monoisotopic mass of neutral peptide Mr(calc): 1846.874603

Fixed modifications: Carbamidomethyl (C) (apply to specified residues or termini only)

Variable modifications:

Q11 : Biotin:Thermo-21345 (Q)

Ions Score: 41 Expect: 0.0014

Matches : 19/106 fragment ions using 33 most intense peaks [\(help\)](#)

| #  | b                 | b <sup>++</sup> | b <sup>+</sup> | b <sup>*++</sup> | b <sup>0</sup> | b <sup>0++</sup>  | Seq. | y                  | y <sup>++</sup>   | y <sup>+</sup>    | y <sup>*++</sup> | y <sup>0</sup>     | y <sup>0++</sup> | #  |
|----|-------------------|-----------------|----------------|------------------|----------------|-------------------|------|--------------------|-------------------|-------------------|------------------|--------------------|------------------|----|
| 1  | 88.039304         | 44.523290       |                |                  | 70.028739      | 35.518008         | S    |                    |                   |                   |                  |                    |                  | 12 |
| 2  | <b>274.118617</b> | 137.562947      |                |                  | 256.108052     | 128.557664        | W    | 1760.849861        | 880.928568        | 1743.823312       | 872.415294       | 1742.839296        | 871.923286       | 11 |
| 3  | <b>421.187031</b> | 211.097153      |                |                  | 403.176466     | 202.091871        | F    | <b>1574.770548</b> | 787.888912        | 1557.743999       | 779.375638       | <b>1556.759983</b> | 778.883629       | 10 |
| 4  | 550.229624        | 275.618450      |                |                  | 532.219059     | 266.613168        | E    | 1427.702134        | 714.354705        | 1410.675585       | 705.841431       | <b>1409.691569</b> | 705.349422       | 9  |
| 5  | 647.282388        | 324.144832      |                |                  | 629.271823     | 315.139550        | P    | <b>1298.659541</b> | <b>649.833409</b> | 1281.632992       | 641.320134       | <b>1280.648976</b> | 640.828126       | 8  |
| 6  | <b>760.366452</b> | 380.686864      |                |                  | 742.355887     | 371.681582        | L    | <b>1201.606777</b> | 601.307027        | 1184.580228       | 592.793752       | <b>1183.596212</b> | 592.301744       | 7  |
| 7  | 859.434866        | 430.221071      |                |                  | 841.424301     | <b>421.215789</b> | V    | <b>1088.522713</b> | 544.764995        | 1071.496164       | 536.251720       | 1070.512148        | 535.759712       | 6  |
| 8  | 988.477459        | 494.742368      |                |                  | 970.466894     | 485.737085        | E    | <b>989.454299</b>  | 495.230788        | 972.427750        | 486.717513       | <b>971.443734</b>  | 486.225505       | 5  |
| 9  | 1103.504402       | 552.255839      |                |                  | 1085.493837    | 543.250557        | D    | <b>860.411706</b>  | 430.709491        | 843.385157        | 422.196216       | 842.401141         | 421.704208       | 4  |
| 10 | 1234.544887       | 617.776082      |                |                  | 1216.534322    | 608.770799        | M    | <b>745.384763</b>  | 373.196020        | 728.358214        | 364.682745       |                    |                  | 3  |
| 11 | 1673.770213       | 837.388745      | 1656.743664    | 828.875470       | 1655.759648    | 828.383462        | Q    | <b>614.344278</b>  | 307.675777        | <b>597.317729</b> | 299.162503       |                    |                  | 2  |
| 12 |                   |                 |                |                  |                |                   | R    | 175.118952         | 88.063114         | 158.092403        | 79.549839        |                    |                  | 1  |

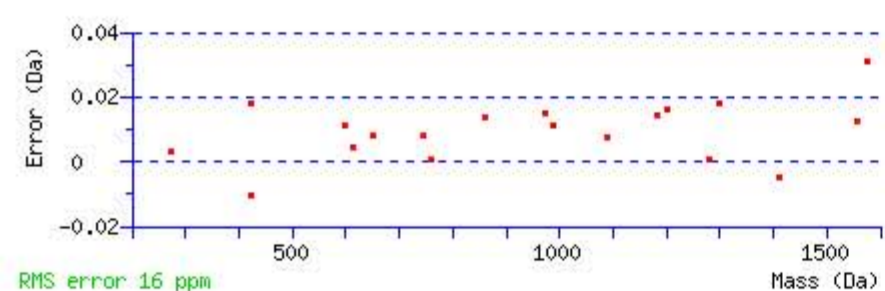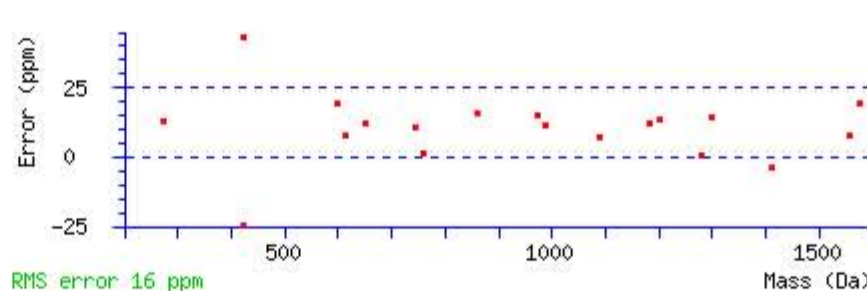

NCBI BLAST search of [SWFEPLVEDMQR](#)

(Parameters: blastp, nr protein database, expect=20000, no filter, PAM30)

Other BLAST [web gateways](#)

All matches to this query

| Score | Mr(calc):   | Delta    | Sequence                     |
|-------|-------------|----------|------------------------------|
| 41.4  | 1846.874603 | 0.015769 | <a href="#">SWFEPLVEDMQR</a> |



# MASCOT Search Results

## Peptide View

MS/MS Fragmentation of **GEVQAMLGQSTEELR**

Found in **APOE\_HUMAN**, Apolipoprotein E OS=Homo sapiens GN=APOE PE=1 SV=1

Match to Query 51923: 1957.972992 from(653.664940,3+) rtinseconds(2238) index(43690)

Title: Locus:1.1.1.3063.11 File:"2013-07-02 CLN FXIII 60 min 1st F 3.wiff"

Data file C:\Program Files (x86)\Matrix Science\Mascot Daemon\mgf4 FXIII 60 min 1st\mascot\_daemon\_merge.mgf

Click mouse within plot area to zoom in by factor of two about that point

Or, Plot from  to  Da

Label all possible matches  Label matches used for scoring

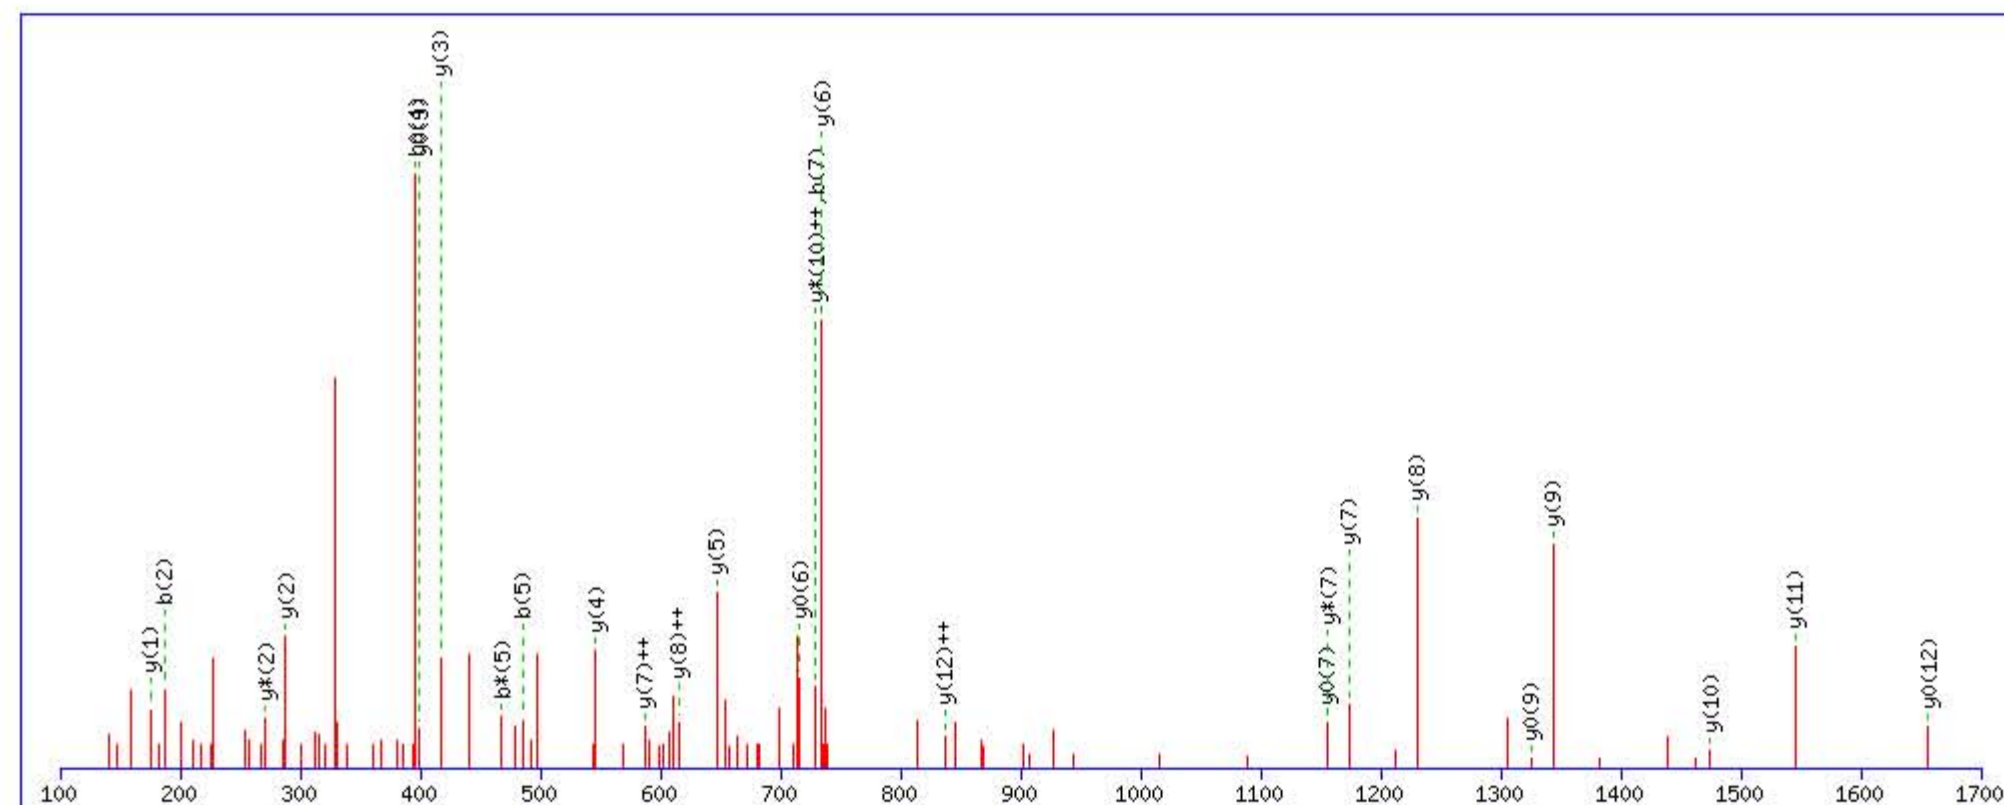

Monoisotopic mass of neutral peptide Mr(calc): 1957.960114

Fixed modifications: Carbamidomethyl (C) (apply to specified residues or termini only)

Variable modifications:

Q9 : Biotin:Thermo-21345 (Q)

Ions Score: 57 Expect: 5.5e-005

Matches : 27/156 fragment ions using 55 most intense peaks [\(help\)](#)

| #  | b                 | b <sup>++</sup> | b <sup>*</sup>    | b <sup>*++</sup> | b <sup>0</sup>    | b <sup>0++</sup> | Seq. | y                  | y <sup>++</sup>   | y <sup>*</sup>     | y <sup>*++</sup>  | y <sup>0</sup>     | y <sup>0++</sup> | #  |
|----|-------------------|-----------------|-------------------|------------------|-------------------|------------------|------|--------------------|-------------------|--------------------|-------------------|--------------------|------------------|----|
| 1  | 58.028740         | 29.518008       |                   |                  |                   |                  | G    |                    |                   |                    |                   |                    |                  | 15 |
| 2  | <b>187.071333</b> | 94.039305       |                   |                  | 169.060768        | 85.034022        | E    | 1901.945947        | 951.476612        | 1884.919398        | 942.963337        | 1883.935382        | 942.471329       | 14 |
| 3  | 286.139747        | 143.573512      |                   |                  | 268.129182        | 134.568229       | V    | 1772.903354        | 886.955315        | 1755.876805        | 878.442041        | 1754.892789        | 877.950033       | 13 |
| 4  | 414.198325        | 207.602801      | 397.171776        | 199.089526       | <b>396.187760</b> | 198.597518       | Q    | 1673.834940        | <b>837.421108</b> | 1656.808391        | 828.907834        | <b>1655.824375</b> | 828.415825       | 12 |
| 5  | <b>485.235439</b> | 243.121357      | <b>468.208890</b> | 234.608083       | 467.224874        | 234.116075       | A    | <b>1545.776362</b> | 773.391819        | 1528.749813        | 764.878545        | 1527.765797        | 764.386537       | 11 |
| 6  | 616.275924        | 308.641600      | 599.249375        | 300.128326       | 598.265359        | 299.636318       | M    | <b>1474.739248</b> | 737.873262        | 1457.712699        | <b>729.359988</b> | 1456.728683        | 728.867980       | 10 |
| 7  | <b>729.359988</b> | 365.183632      | 712.333439        | 356.670358       | 711.349423        | 356.178350       | L    | <b>1343.698763</b> | 672.353020        | 1326.672214        | 663.839745        | <b>1325.688198</b> | 663.347737       | 9  |
| 8  | 786.381452        | 393.694364      | 769.354903        | 385.181090       | 768.370887        | 384.689082       | G    | <b>1230.614699</b> | <b>615.810988</b> | 1213.588150        | 607.297713        | 1212.604134        | 606.805705       | 8  |
| 9  | 1225.606778       | 613.307027      | 1208.580229       | 604.793753       | 1207.596213       | 604.301745       | Q    | <b>1173.593235</b> | <b>587.300256</b> | <b>1156.566686</b> | 578.786981        | <b>1155.582670</b> | 578.294973       | 7  |
| 10 | 1312.638806       | 656.823041      | 1295.612257       | 648.309767       | 1294.628241       | 647.817759       | S    | <b>734.367909</b>  | 367.687593        | 717.341360         | 359.174318        | <b>716.357344</b>  | 358.682310       | 6  |
| 11 | 1413.686485       | 707.346881      | 1396.659936       | 698.833606       | 1395.675920       | 698.341598       | T    | <b>647.335881</b>  | 324.171579        | 630.309332         | 315.658304        | 629.325316         | 315.166296       | 5  |
| 12 | 1542.729078       | 771.868177      | 1525.702529       | 763.354903       | 1524.718513       | 762.862895       | E    | <b>546.288202</b>  | 273.647739        | 529.261653         | 265.134464        | 528.277637         | 264.642456       | 4  |
| 13 | 1671.771671       | 836.389474      | 1654.745122       | 827.876199       | 1653.761106       | 827.384191       | E    | <b>417.245609</b>  | 209.126442        | 400.219060         | 200.613168        | <b>399.235044</b>  | 200.121160       | 3  |
| 14 | 1784.855735       | 892.931506      | 1767.829186       | 884.418231       | 1766.845170       | 883.926223       | L    | <b>288.203016</b>  | 144.605146        | <b>271.176467</b>  | 136.091871        |                    |                  | 2  |
| 15 |                   |                 |                   |                  |                   |                  | R    | <b>175.118952</b>  | 88.063114         | 158.092403         | 79.549839         |                    |                  | 1  |

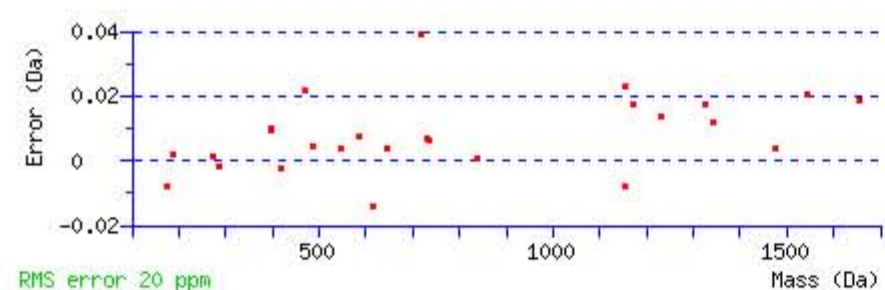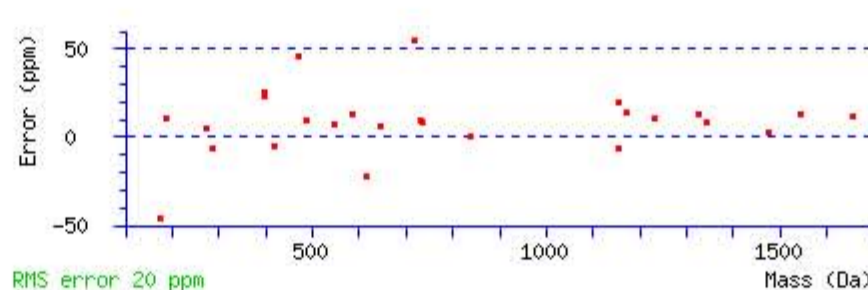

NCBI BLAST search of [GEVQAMLGQSTEELR](#)

(Parameters: blastp, nr protein database, expect=20000, no filter, PAM30)

Other BLAST [web gateways](#)

All matches to this query

| Score | Mr(calc):   | Delta    | Sequence                        |
|-------|-------------|----------|---------------------------------|
| 57.1  | 1957.960114 | 0.012878 | <a href="#">GEVQAMLGQSTEELR</a> |
| 8.9   | 1957.960114 | 0.012878 | <a href="#">GEVQAMLGQSTEELR</a> |

Mascot: <http://www.matrixscience.com/>



# Mascot Search Results

## Peptide View

MS/MS Fragmentation of **SGVQQLIQYYQDQK**

Found in **APOF\_HUMAN**, Apolipoprotein F OS=Homo sapiens GN=APOF PE=1 SV=2

Match to Query 54001: 2008.035448 from(1005.025000,2+) rtinseconds(2469) index(45067)

Title: Locus:1.1.1.3143.26 File:"2013-07-02 CLN FXIII 60 min 1st F 3.wiff"

Data file C:\Program Files (x86)\Matrix Science\Mascot Daemon\mgf4 FXIII 60 min 1st\mascot\_daemon\_merge.mgf

Click mouse within plot area to zoom in by factor of two about that point

Or, Plot from  to  Da

Label all possible matches  Label matches used for scoring

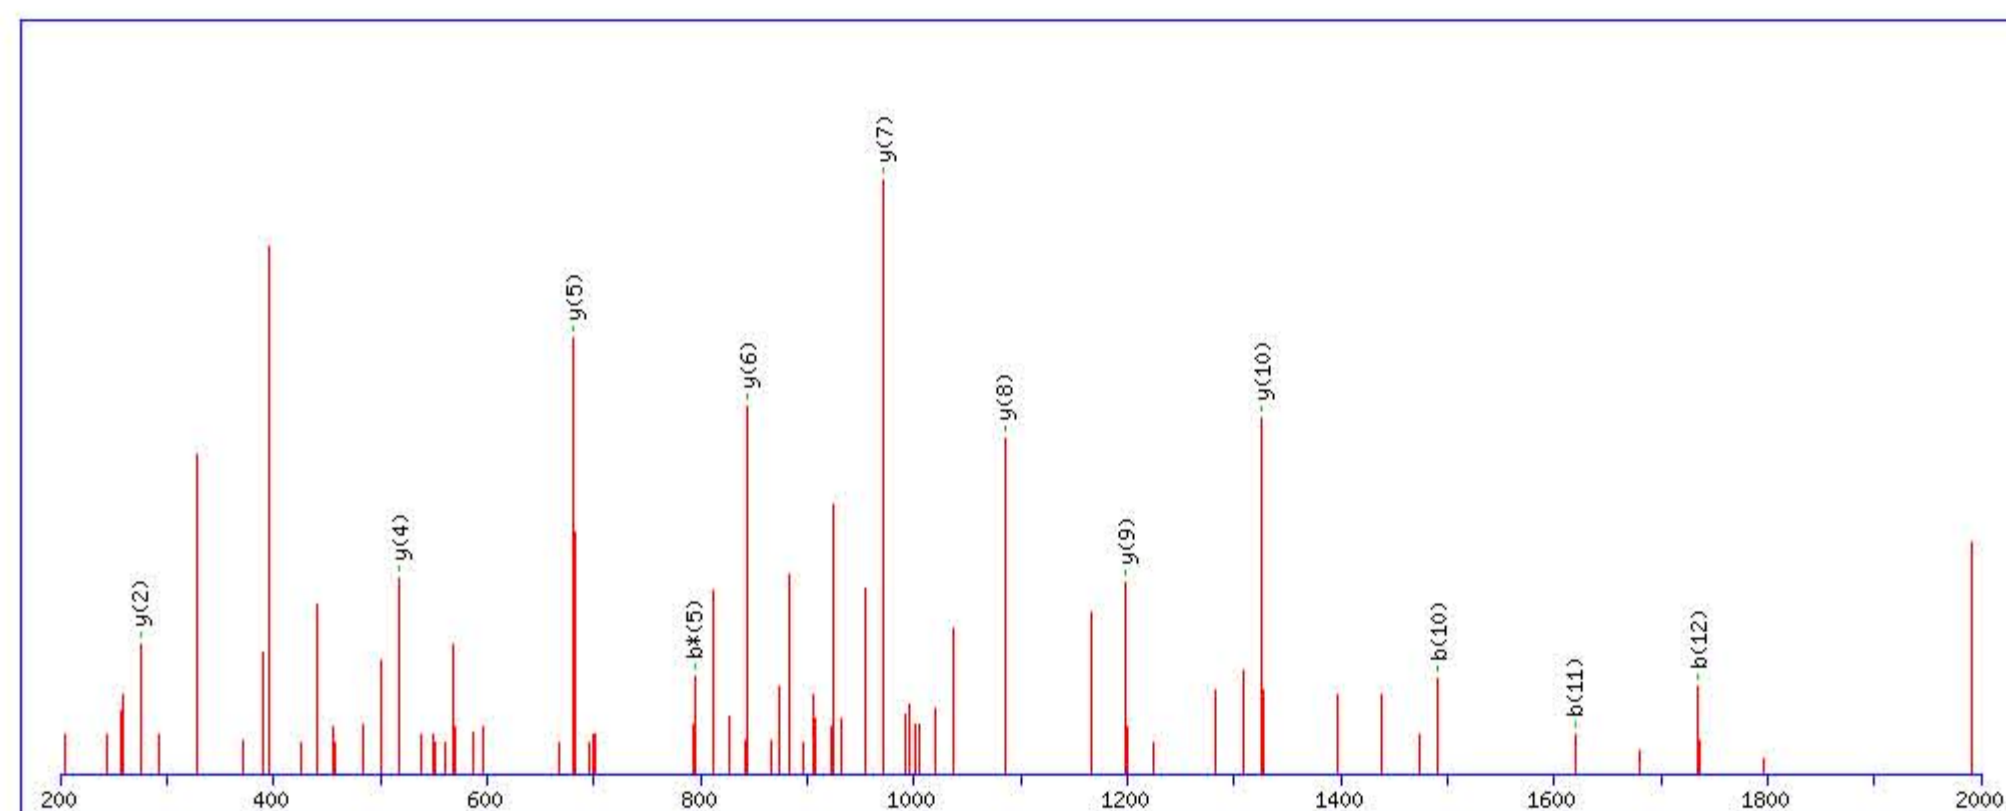

Monoisotopic mass of neutral peptide Mr(calc): 2008.008789

Fixed modifications: Carbamidomethyl (C) (apply to specified residues or termini only)

Variable modifications:

Q4 : Biotin:Thermo-21345 (Q)

Ions Score: 62 Expect: 4.7e-006

Matches : 12/146 fragment ions using 16 most intense peaks [\(help\)](#)

| #  | b                  | b <sup>++</sup> | b <sup>+</sup>    | b <sup>+++</sup> | b <sup>0</sup> | b <sup>0++</sup> | Seq. | y                  | y <sup>++</sup> | y <sup>+</sup> | y <sup>+++</sup> | y <sup>0</sup> | y <sup>0++</sup> | #  |
|----|--------------------|-----------------|-------------------|------------------|----------------|------------------|------|--------------------|-----------------|----------------|------------------|----------------|------------------|----|
| 1  | 88.039304          | 44.523290       |                   |                  | 70.028739      | 35.518008        | S    |                    |                 |                |                  |                |                  | 14 |
| 2  | 145.060768         | 73.034022       |                   |                  | 127.050203     | 64.028740        | G    | 1921.984049        | 961.495663      | 1904.957500    | 952.982388       | 1903.973484    | 952.490380       | 13 |
| 3  | 244.129182         | 122.568229      |                   |                  | 226.118617     | 113.562947       | V    | 1864.962585        | 932.984931      | 1847.936036    | 924.471656       | 1846.952020    | 923.979648       | 12 |
| 4  | 683.354508         | 342.180892      | 666.327959        | 333.667618       | 665.343943     | 333.175610       | Q    | 1765.894171        | 883.450724      | 1748.867622    | 874.937449       | 1747.883606    | 874.445441       | 11 |
| 5  | 811.413086         | 406.210181      | <b>794.386537</b> | 397.696907       | 793.402521     | 397.204899       | Q    | <b>1326.668845</b> | 663.838061      | 1309.642296    | 655.324786       | 1308.658280    | 654.832778       | 10 |
| 6  | 924.497150         | 462.752213      | 907.470601        | 454.238939       | 906.486585     | 453.746931       | L    | <b>1198.610267</b> | 599.808772      | 1181.583718    | 591.295497       | 1180.599702    | 590.803489       | 9  |
| 7  | 1037.581214        | 519.294245      | 1020.554665       | 510.780971       | 1019.570649    | 510.288963       | I    | <b>1085.526203</b> | 543.266740      | 1068.499654    | 534.753465       | 1067.515638    | 534.261457       | 8  |
| 8  | 1165.639792        | 583.323534      | 1148.613243       | 574.810260       | 1147.629227    | 574.318252       | Q    | <b>972.442139</b>  | 486.724708      | 955.415590     | 478.211433       | 954.431574     | 477.719425       | 7  |
| 9  | 1328.703121        | 664.855199      | 1311.676572       | 656.341924       | 1310.692556    | 655.849916       | Y    | <b>844.383561</b>  | 422.695419      | 827.357012     | 414.182144       | 826.372996     | 413.690136       | 6  |
| 10 | <b>1491.766450</b> | 746.386863      | 1474.739901       | 737.873589       | 1473.755885    | 737.381581       | Y    | <b>681.320232</b>  | 341.163754      | 664.293683     | 332.650480       | 663.309667     | 332.158472       | 5  |
| 11 | <b>1619.825028</b> | 810.416152      | 1602.798479       | 801.902878       | 1601.814463    | 801.410870       | Q    | <b>518.256903</b>  | 259.632090      | 501.230354     | 251.118815       | 500.246338     | 250.626807       | 4  |
| 12 | <b>1734.851971</b> | 867.929624      | 1717.825422       | 859.416349       | 1716.841406    | 858.924341       | D    | 390.198325         | 195.602800      | 373.171776     | 187.089526       | 372.187760     | 186.597518       | 3  |
| 13 | 1862.910549        | 931.958913      | 1845.884000       | 923.445638       | 1844.899984    | 922.953630       | Q    | <b>275.171382</b>  | 138.089329      | 258.144833     | 129.576054       |                |                  | 2  |
| 14 |                    |                 |                   |                  |                |                  | K    | 147.112804         | 74.060040       | 130.086255     | 65.546765        |                |                  | 1  |

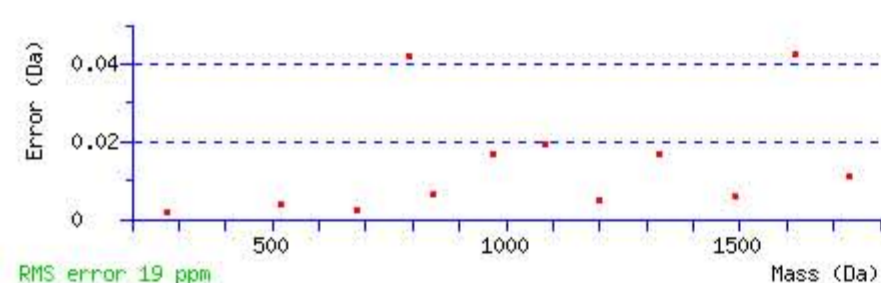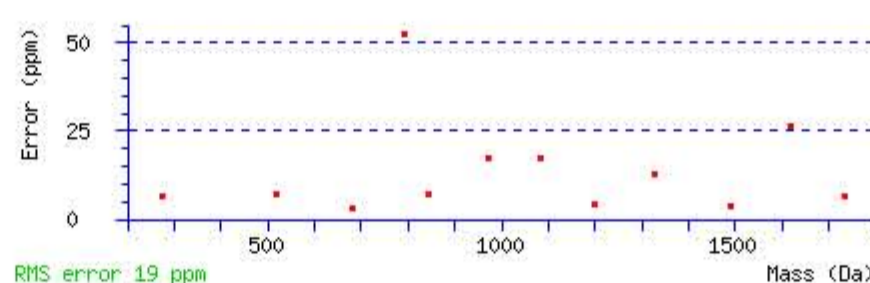

NCBI BLAST search of **SGVQQLIQYYQDQK**

(Parameters: blastp, nr protein database, expect=20000, no filter, PAM30)

Other BLAST [web gateways](#)

## All matches to this query

| Score | Mr(calc):   | Delta     | Sequence                            |
|-------|-------------|-----------|-------------------------------------|
| 62.5  | 2008.008789 | 0.026659  | <a href="#">SGVQQLIQYYQDQK</a>      |
| 52.5  | 2008.008789 | 0.026659  | <a href="#">SGVQQLIQYYQDQK</a>      |
| 31.6  | 2008.008789 | 0.026659  | <a href="#">SGVQQLIQYYQDQK</a>      |
| 8.3   | 2008.008789 | 0.026659  | <a href="#">SGVQQLIQYYQDQK</a>      |
| 5.3   | 2008.053009 | -0.017561 | <a href="#">WAEKPAFGTPLEEHLKR</a>   |
| 3.4   | 2008.008789 | 0.026659  | <a href="#">SGVQQLIQYYQDQK</a>      |
| 3.0   | 2008.005630 | 0.029818  | <a href="#">ITQRMVCAGYKEGGK</a>     |
| 2.1   | 2008.012146 | 0.023302  | <a href="#">LCEQDKVVHALEEK</a>      |
| 0.5   | 2008.030762 | 0.004686  | <a href="#">ASVMLFMKGKQAEAK</a>     |
| 0.2   | 2008.033752 | 0.001696  | <a href="#">SSSFRRSGPGSQLNTKLQK</a> |



# MASCOT SEARCH RESULTS

## Peptide View

MS/MS Fragmentation of **VTEPISAESGEQVER**

Found in **APOLI\_HUMAN**, Apolipoprotein L1 OS=Homo sapiens GN=APOL1 PE=1 SV=5

Match to Query 51534: 1940.958492 from(647.993440,3+) rtinseconds(1704) index(40107)

Title: Locus:1.1.1.2877.9 File:"2013-07-02 CLN FXIII 60 min 1st F 3.wiff"

Data file C:\Program Files (x86)\Matrix Science\Mascot Daemon\mgf\4 FXIII 60 min 1st\mascot\_daemon\_merge.mgf

Click mouse within plot area to zoom in by factor of two about that point

Or, Plot from  to  Da

Label all possible matches  Label matches used for scoring

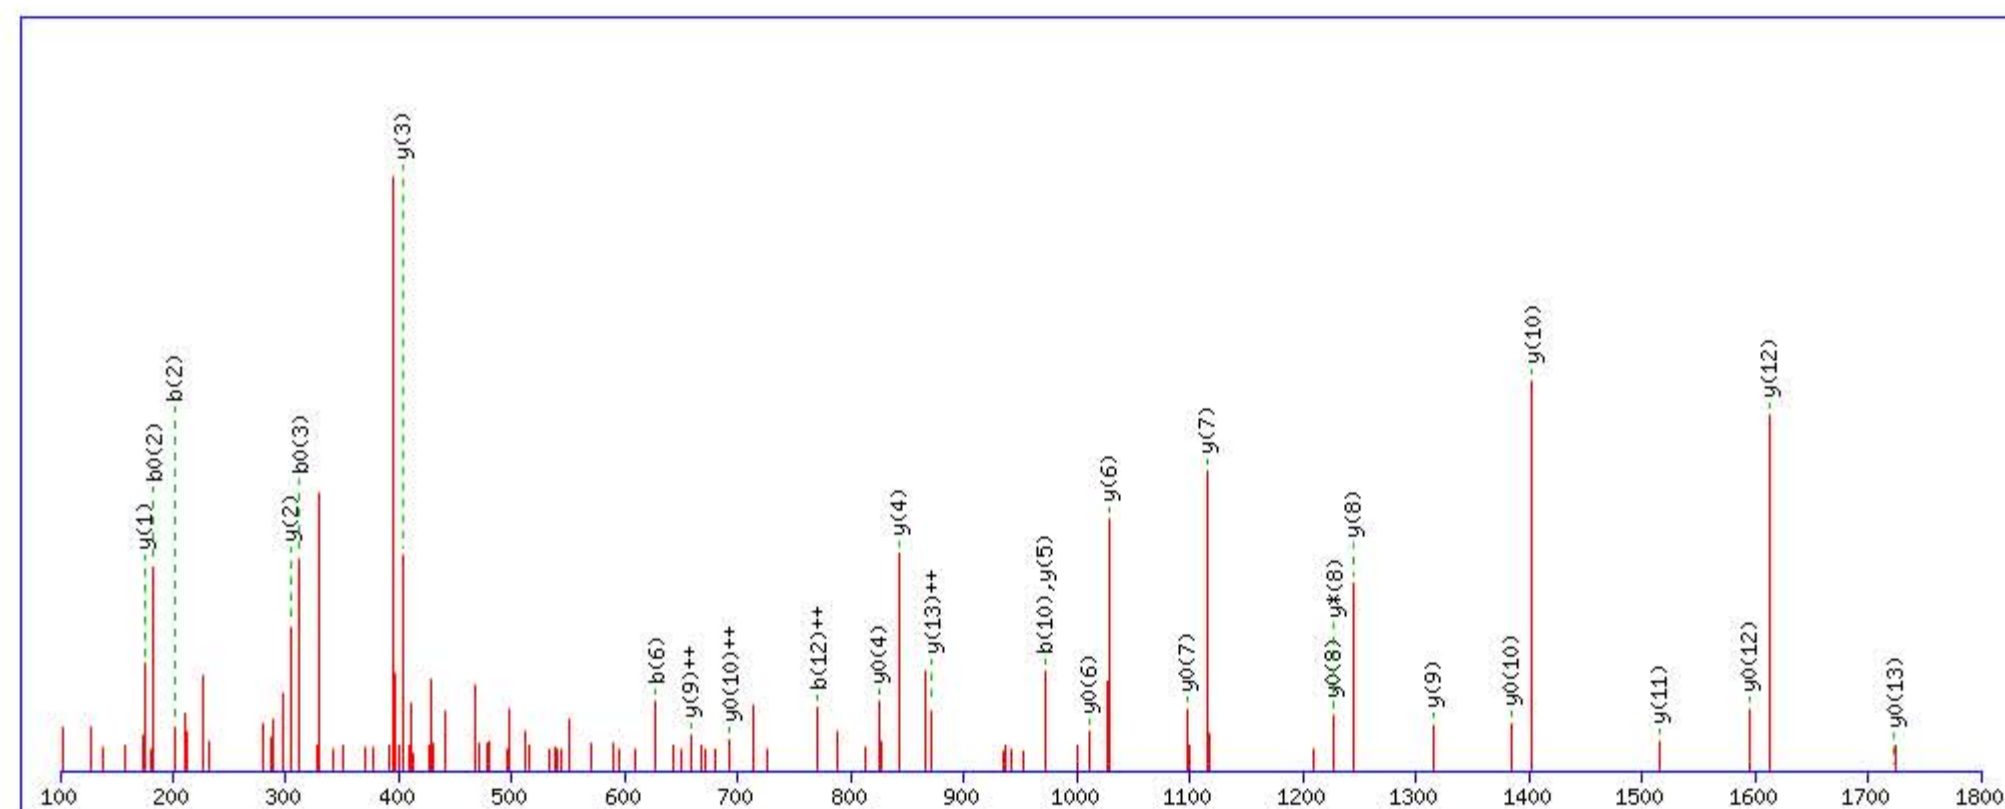

Monoisotopic mass of neutral peptide Mr(calc): 1940.951324

Fixed modifications: Carbamidomethyl (C) (apply to specified residues or termini only)

Variable modifications:

Q12 : Biotin:Thermo-21345 (Q)

Ions Score: 71 Expect: 1.9e-006

Matches : 29/142 fragment ions using 53 most intense peaks [\(help\)](#)

| #  | b                 | b <sup>++</sup>   | b <sup>*</sup> | b <sup>*++</sup> | b <sup>0</sup> | b <sup>0++</sup> | Seq. | y                  | y <sup>++</sup>   | y <sup>*</sup>     | y <sup>*++</sup> | y <sup>0</sup>     | y <sup>0++</sup>  | #  |
|----|-------------------|-------------------|----------------|------------------|----------------|------------------|------|--------------------|-------------------|--------------------|------------------|--------------------|-------------------|----|
| 1  | 100.075690        | 50.541483         |                |                  |                |                  | V    |                    |                   |                    |                  |                    |                   | 15 |
| 2  | <b>201.123369</b> | 101.065322        |                |                  | 183.112804     | 92.060040        | T    | 1842.890205        | 921.948741        | 1825.863656        | 913.435466       | 1824.879640        | 912.943458        | 14 |
| 3  | 330.165962        | 165.586619        |                |                  | 312.155397     | 156.581336       | E    | 1741.842526        | <b>871.424901</b> | 1724.815977        | 862.911627       | <b>1723.831961</b> | 862.419619        | 13 |
| 4  | 427.218726        | 214.113001        |                |                  | 409.208161     | 205.107719       | P    | <b>1612.799933</b> | 806.903605        | 1595.773384        | 798.390330       | <b>1594.789368</b> | 797.898322        | 12 |
| 5  | 540.302790        | 270.655033        |                |                  | 522.292225     | 261.649751       | I    | <b>1515.747169</b> | 758.377223        | 1498.720620        | 749.863948       | 1497.736604        | 749.371940        | 11 |
| 6  | <b>627.334818</b> | 314.171047        |                |                  | 609.324253     | 305.165765       | S    | <b>1402.663105</b> | 701.835191        | 1385.636556        | 693.321916       | <b>1384.652540</b> | <b>692.829908</b> | 10 |
| 7  | 698.371932        | 349.689604        |                |                  | 680.361367     | 340.684322       | A    | <b>1315.631077</b> | <b>658.319177</b> | 1298.604528        | 649.805902       | 1297.620512        | 649.313894        | 9  |
| 8  | 827.414525        | 414.210901        |                |                  | 809.403960     | 405.205618       | E    | <b>1244.593963</b> | 622.800620        | <b>1227.567414</b> | 614.287345       | <b>1226.583398</b> | 613.795337        | 8  |
| 9  | 914.446553        | 457.726915        |                |                  | 896.435988     | 448.721632       | S    | <b>1115.551370</b> | 558.279323        | 1098.524821        | 549.766049       | <b>1097.540805</b> | 549.274041        | 7  |
| 10 | <b>971.468017</b> | 486.237647        |                |                  | 953.457452     | 477.232364       | G    | <b>1028.519342</b> | 514.763309        | 1011.492793        | 506.250035       | <b>1010.508777</b> | 505.758027        | 6  |
| 11 | 1100.510610       | 550.758943        |                |                  | 1082.500045    | 541.753661       | E    | <b>971.497878</b>  | 486.252577        | 954.471329         | 477.739303       | 953.487313         | 477.247295        | 5  |
| 12 | 1539.735936       | <b>770.371606</b> | 1522.709387    | 761.858332       | 1521.725371    | 761.366324       | Q    | <b>842.455285</b>  | 421.731281        | 825.428736         | 413.218006       | <b>824.444720</b>  | 412.725998        | 4  |
| 13 | 1638.804350       | 819.905813        | 1621.777801    | 811.392539       | 1620.793785    | 810.900531       | V    | <b>403.229959</b>  | 202.118617        | 386.203410         | 193.605343       | 385.219394         | 193.113335        | 3  |
| 14 | 1767.846943       | 884.427110        | 1750.820394    | 875.913835       | 1749.836378    | 875.421827       | E    | <b>304.161545</b>  | 152.584410        | 287.134996         | 144.071136       | 286.150980         | 143.579128        | 2  |
| 15 |                   |                   |                |                  |                |                  | R    | <b>175.118952</b>  | 88.063114         | 158.092403         | 79.549839        |                    |                   | 1  |

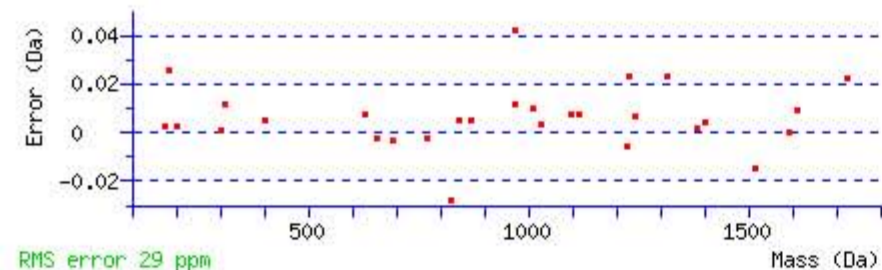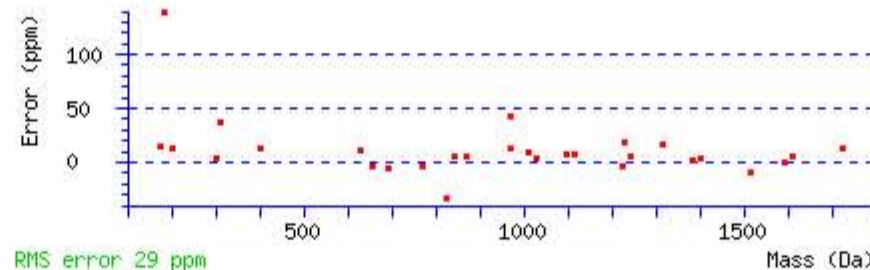

NCBI BLAST search of **VTEPISAESGEQVER**

(Parameters: blastp, nr protein database, expect=20000, no filter, PAM30)

Other BLAST [web gateways](#)

All matches to this query

| Score | Mr(calc):   | Delta     | Sequence                        |
|-------|-------------|-----------|---------------------------------|
| 71.2  | 1940.951324 | 0.007168  | <a href="#">VTEPISAESGEQVER</a> |
| 10.0  | 1940.962540 | -0.004048 | <a href="#">LLNDQEEEGTQRAK</a>  |
| 5.8   | 1940.937378 | 0.021114  | <a href="#">SNNLEREQEQLDR</a>   |



# MASCOT Search Results

## Peptide View

MS/MS Fragmentation of **NQEACELSNN**

Found in **APOM\_HUMAN**, Apolipoprotein M OS=Homo sapiens GN=APOM PE=1 SV=2

Match to Query 38261: 1488.638068 from(745.326310,2+) rtinseconds(1639) index(39711)

Title: Locus:1.1.1.2854.22 File:"2013-07-02 CLN FXIII 60 min 1st F 3.wiff"

Data file C:\Program Files (x86)\Matrix Science\Mascot Daemon\mgf4 FXIII 60 min 1st\mascot\_daemon\_merge.mgf

Click mouse within plot area to zoom in by factor of two about that point

Or, Plot from  to  Da

Label all possible matches  Label matches used for scoring

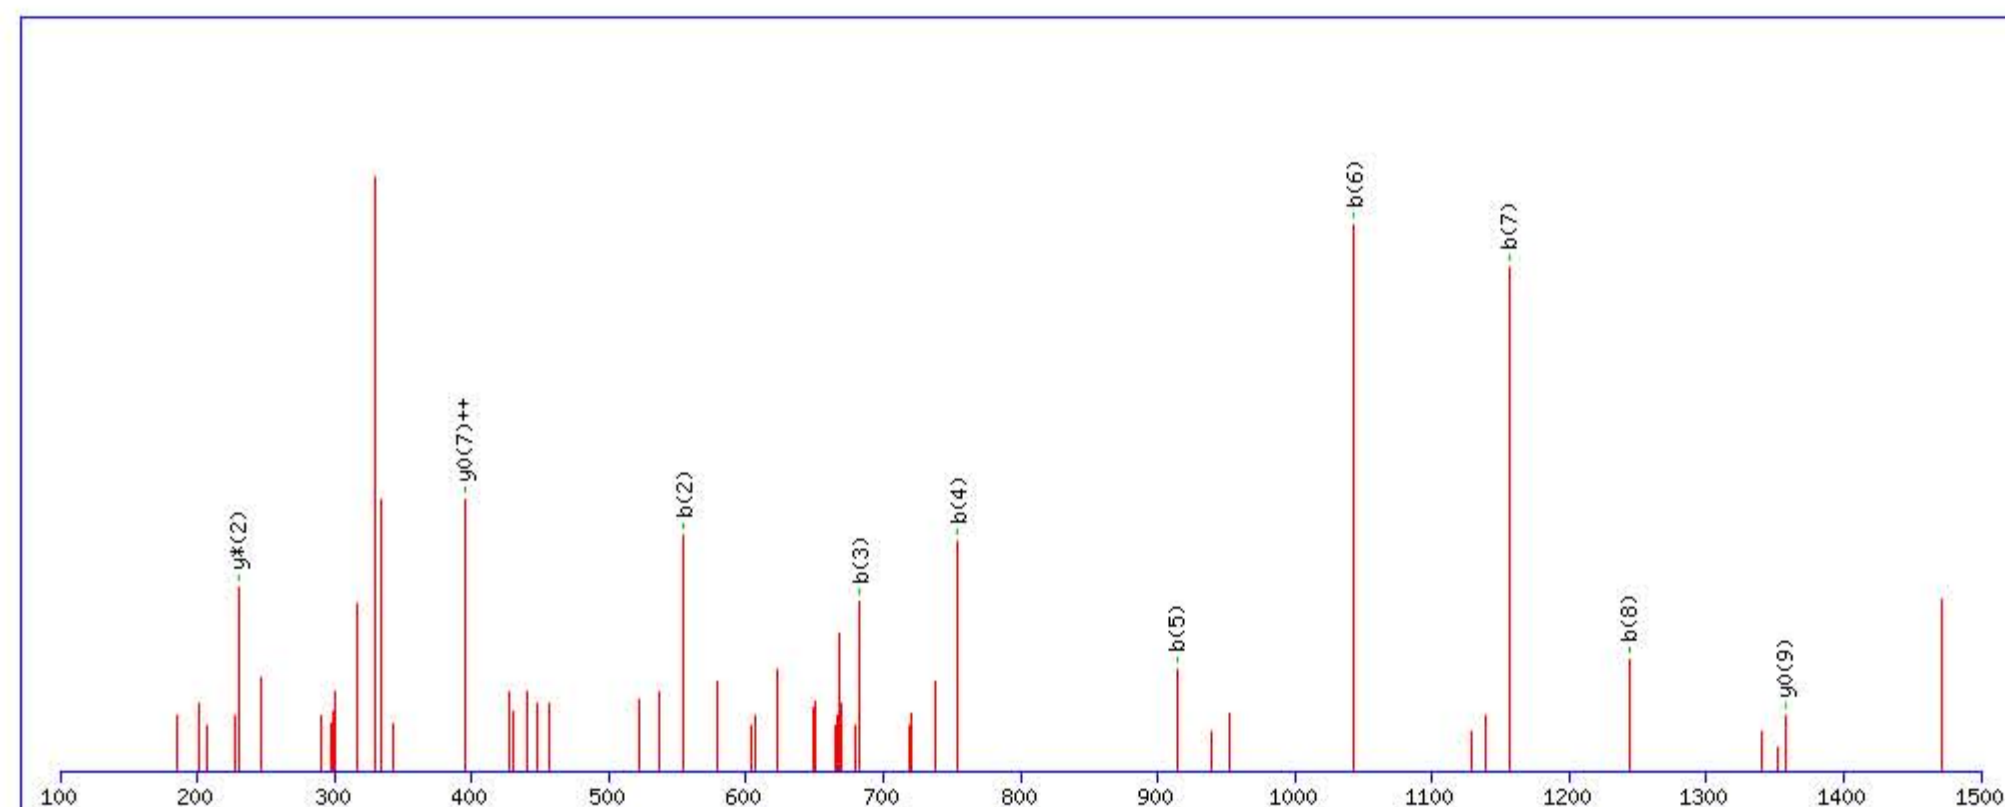

Monoisotopic mass of neutral peptide Mr(calc): 1488.633682

Fixed modifications: Carbamidomethyl (C) (apply to specified residues or termini only)

Variable modifications:

Q2 : Biotin:Thermo-21345 (Q)

Ions Score: 68 Expect: 6.8e-007

Matches : 11/100 fragment ions using 12 most intense peaks [\(help\)](#)

| #  | b                  | b <sup>++</sup> | b <sup>*</sup> | b <sup>+++</sup> | b <sup>0</sup> | b <sup>0++</sup> | Seq. | y           | y <sup>++</sup> | y <sup>*</sup>    | y <sup>+++</sup> | y <sup>0</sup>     | y <sup>0++</sup>  | #  |
|----|--------------------|-----------------|----------------|------------------|----------------|------------------|------|-------------|-----------------|-------------------|------------------|--------------------|-------------------|----|
| 1  | 115.050203         | 58.028740       | 98.023654      | 49.515465        |                |                  | N    |             |                 |                   |                  |                    |                   | 10 |
| 2  | <b>554.275529</b>  | 277.641403      | 537.248980     | 269.128128       |                |                  | Q    | 1375.598062 | 688.302669      | 1358.571513       | 679.789395       | <b>1357.587497</b> | 679.297387        | 9  |
| 3  | <b>683.318122</b>  | 342.162699      | 666.291573     | 333.649425       | 665.307557     | 333.157417       | E    | 936.372736  | 468.690006      | 919.346187        | 460.176732       | 918.362171         | 459.684724        | 8  |
| 4  | <b>754.355236</b>  | 377.681256      | 737.328687     | 369.167982       | 736.344671     | 368.675974       | A    | 807.330143  | 404.168710      | 790.303594        | 395.655435       | 789.319578         | <b>395.163427</b> | 7  |
| 5  | <b>914.385885</b>  | 457.696581      | 897.359336     | 449.183306       | 896.375320     | 448.691298       | C    | 736.293029  | 368.650153      | 719.266480        | 360.136878       | 718.282464         | 359.644870        | 6  |
| 6  | <b>1043.428478</b> | 522.217877      | 1026.401929    | 513.704603       | 1025.417913    | 513.212595       | E    | 576.262380  | 288.634828      | 559.235831        | 280.121554       | 558.251815         | 279.629546        | 5  |
| 7  | <b>1156.512542</b> | 578.759909      | 1139.485993    | 570.246635       | 1138.501977    | 569.754626       | L    | 447.219787  | 224.113531      | 430.193238        | 215.600257       | 429.209222         | 215.108249        | 4  |
| 8  | <b>1243.544570</b> | 622.275923      | 1226.518021    | 613.762649       | 1225.534005    | 613.270641       | S    | 334.135723  | 167.571499      | 317.109174        | 159.058225       | 316.125158         | 158.566217        | 3  |
| 9  | <b>1357.587497</b> | 679.297387      | 1340.560948    | 670.784112       | 1339.576932    | 670.292104       | N    | 247.103695  | 124.055485      | <b>230.077146</b> | 115.542211       |                    |                   | 2  |
| 10 |                    |                 |                |                  |                |                  | N    | 133.060768  | 67.034022       | 116.034219        | 58.520747        |                    |                   | 1  |

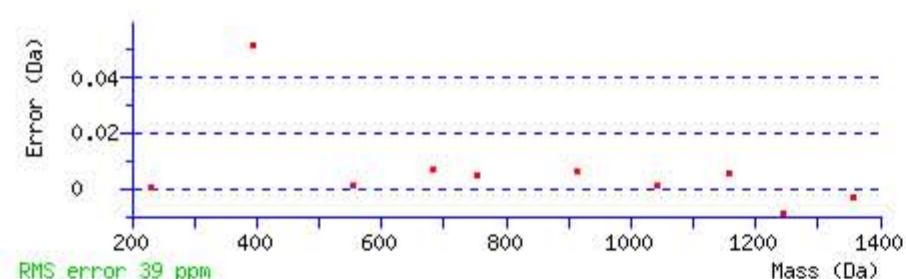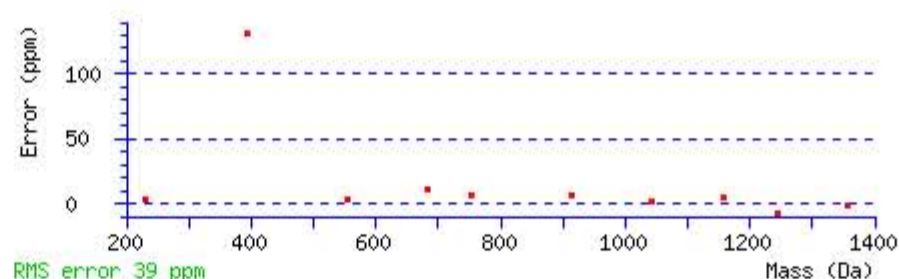

NCBI BLAST search of [NQEACELSNN](#)

(Parameters: blastp, nr protein database, expect=20000, no filter, PAM30)

Other BLAST [web gateways](#)

## All matches to this query

| Score | Mr(calc):   | Delta    | Sequence                   |
|-------|-------------|----------|----------------------------|
| 68.1  | 1488.633682 | 0.004386 | <a href="#">NQEACELSNN</a> |

Mascot: <http://www.matrixscience.com/>



# MATRIX SCIENCE Mascot Search Results

## Peptide View

MS/MS Fragmentation of **SCALDQNCQWEPR**

Found in **ATRN\_HUMAN**, Attractin OS=Homo sapiens GN=ATRN PE=1 SV=2

Match to Query 52342: 1973.871282 from(658.964370,3+) rtinseconds(1968) index(6828)

Title: Locus:1.1.1.2817.12 File:"2013-07-02 CLN FXIII 60 min 1st F 1.wiff"

Data file C:\Program Files (x86)\Matrix Science\Mascot Daemon\mgf4 FXIII 60 min 1st\mascot\_daemon\_merge.mgf

Click mouse within plot area to zoom in by factor of two about that point

Or, Plot from  to  Da

Label all possible matches  Label matches used for scoring

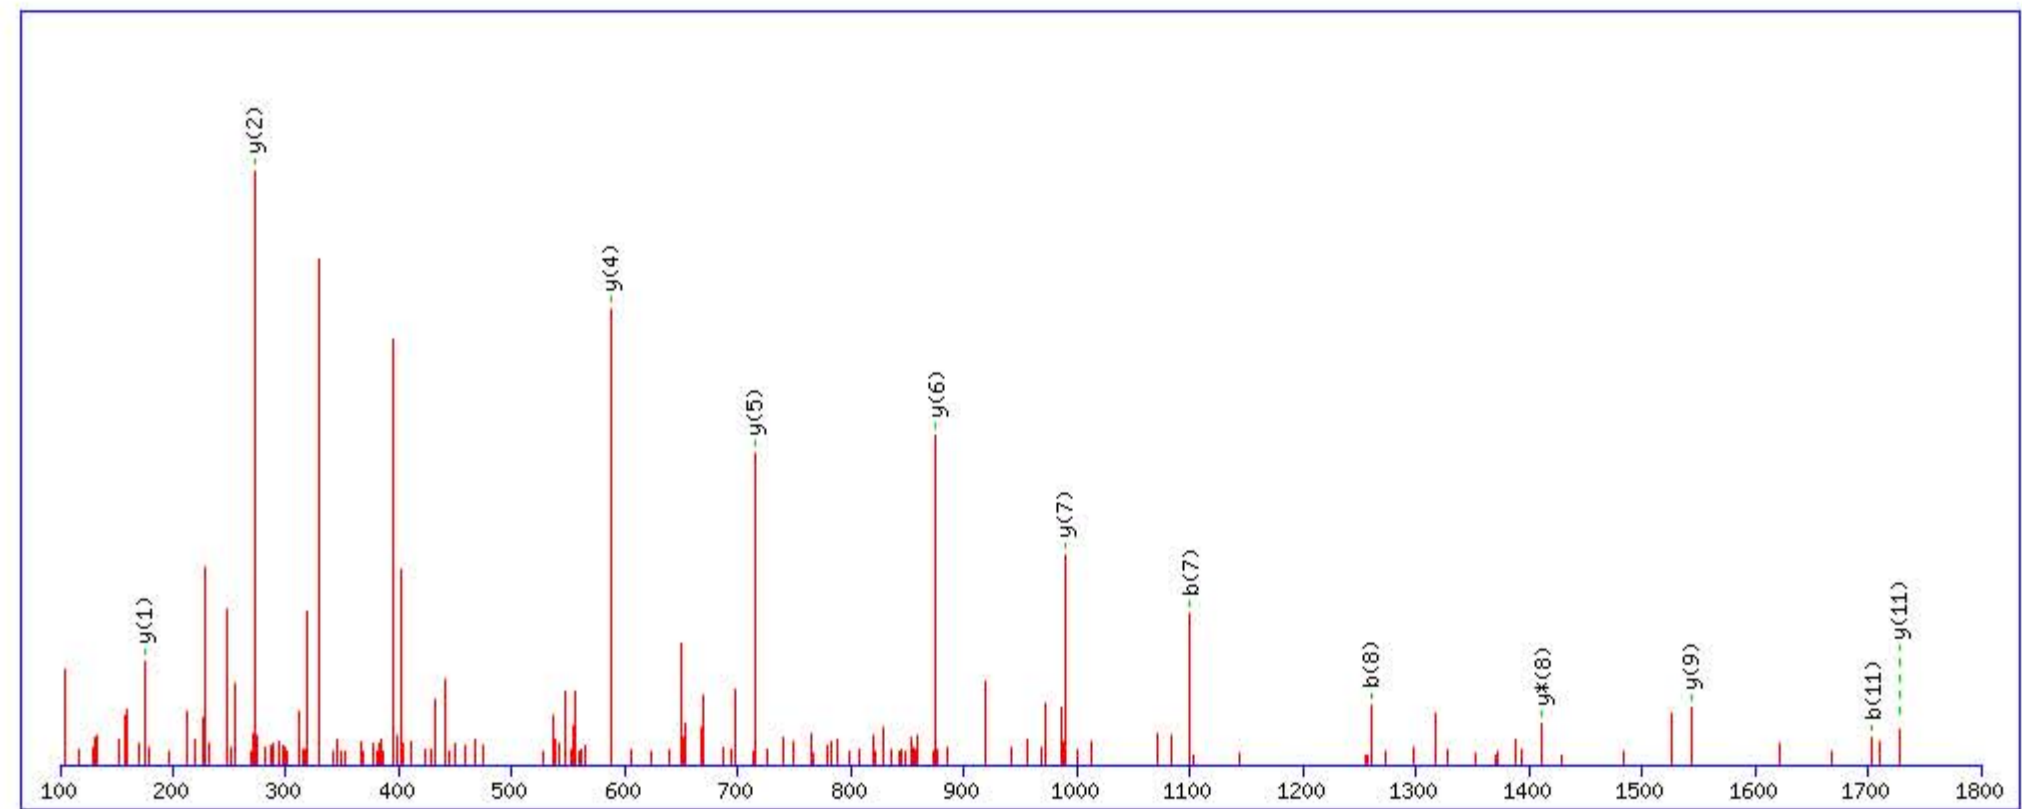

Monoisotopic mass of neutral peptide Mr(calc): 1973.854614

Fixed modifications: Carbamidomethyl (C) (apply to specified residues or termini only)

Variable modifications:

Q6 : Biotin:Thermo-21345 (Q)

Ions Score: 57 Expect: 1.3e-005

Matches : 12/130 fragment ions using 17 most intense peaks [\(help\)](#)

| #  | b                  | b <sup>++</sup> | b <sup>+</sup> | b <sup>+++</sup> | b <sup>0</sup> | b <sup>0++</sup> | Seq. | y                  | y <sup>++</sup> | y <sup>+</sup>     | y <sup>+++</sup> | y <sup>0</sup> | y <sup>0++</sup> | #  |
|----|--------------------|-----------------|----------------|------------------|----------------|------------------|------|--------------------|-----------------|--------------------|------------------|----------------|------------------|----|
| 1  | 88.039304          | 44.523290       |                |                  | 70.028739      | 35.518008        | S    |                    |                 |                    |                  |                |                  | 13 |
| 2  | 248.069953         | 124.538614      |                |                  | 230.059388     | 115.533332       | C    | 1887.829872        | 944.418574      | 1870.803323        | 935.905300       | 1869.819307    | 935.413292       | 12 |
| 3  | 319.107067         | 160.057171      |                |                  | 301.096502     | 151.051889       | A    | <b>1727.799223</b> | 864.403250      | 1710.772674        | 855.889975       | 1709.788658    | 855.397967       | 11 |
| 4  | 432.191131         | 216.599203      |                |                  | 414.180566     | 207.593921       | L    | 1656.762109        | 828.884693      | 1639.735560        | 820.371418       | 1638.751544    | 819.879410       | 10 |
| 5  | 547.218074         | 274.112675      |                |                  | 529.207509     | 265.107393       | D    | <b>1543.678045</b> | 772.342661      | 1526.651496        | 763.829386       | 1525.667480    | 763.337378       | 9  |
| 6  | 986.443400         | 493.725338      | 969.416851     | 485.212064       | 968.432835     | 484.720056       | Q    | 1428.651102        | 714.829189      | <b>1411.624553</b> | 706.315915       | 1410.640537    | 705.823907       | 8  |
| 7  | <b>1100.486327</b> | 550.746802      | 1083.459778    | 542.233527       | 1082.475762    | 541.741519       | N    | <b>989.425776</b>  | 495.216526      | 972.399227         | 486.703252       | 971.415211     | 486.211244       | 7  |
| 8  | <b>1260.516976</b> | 630.762126      | 1243.490427    | 622.248852       | 1242.506411    | 621.756844       | C    | <b>875.382849</b>  | 438.195063      | 858.356300         | 429.681788       | 857.372284     | 429.189780       | 6  |
| 9  | 1388.575554        | 694.791415      | 1371.549005    | 686.278141       | 1370.564989    | 685.786133       | Q    | <b>715.352200</b>  | 358.179738      | 698.325651         | 349.666464       | 697.341635     | 349.174456       | 5  |
| 10 | 1574.654867        | 787.831072      | 1557.628318    | 779.317797       | 1556.644302    | 778.825789       | W    | <b>587.293622</b>  | 294.150449      | 570.267073         | 285.637174       | 569.283057     | 285.145166       | 4  |
| 11 | <b>1703.697460</b> | 852.352368      | 1686.670911    | 843.839094       | 1685.686895    | 843.347086       | E    | 401.214309         | 201.110792      | 384.187760         | 192.597518       | 383.203744     | 192.105510       | 3  |
| 12 | 1800.750224        | 900.878750      | 1783.723675    | 892.365476       | 1782.739659    | 891.873468       | P    | <b>272.171716</b>  | 136.589496      | 255.145167         | 128.076221       |                |                  | 2  |
| 13 |                    |                 |                |                  |                |                  | R    | <b>175.118952</b>  | 88.063114       | 158.092403         | 79.549839        |                |                  | 1  |

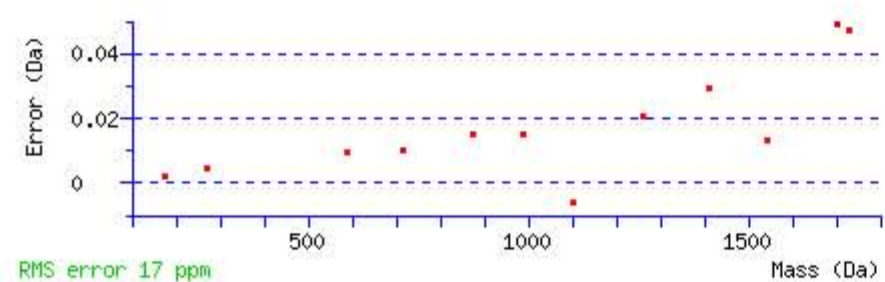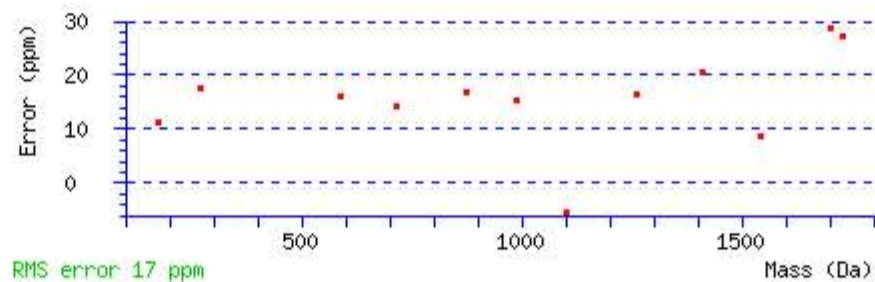

NCBI BLAST search of **SCALDQNCQWEPR**

(Parameters: blastp, nr protein database, expect=20000, no filter, PAM30)

Other BLAST [web gateways](#)

All matches to this query

| Score | Mr(calc):   | Delta    | Sequence                           |
|-------|-------------|----------|------------------------------------|
| 56.6  | 1973.854614 | 0.016668 | <a href="#">SCALDQNCQWEPR</a>      |
| 19.3  | 1973.854614 | 0.016668 | <a href="#">SCALDQNCQWEPR</a>      |
| 6.7   | 1973.853729 | 0.017553 | <a href="#">DSPETGEEMGRAEGAWPR</a> |

Mascot: <http://www.matrixscience.com/>



# MASCOT Search Results

## Peptide View

MS/MS Fragmentation of **KCSYTEDAQCIDGTIEVPK**  
 Found in **APOH\_HUMAN**, Beta-2-glycoprotein 1 OS=Homo sapiens GN=APOH PE=1 SV=3

Match to Query 65810: 2524.191162 from(842.404330,3+) rtinseconds(1980) index(78354)  
 Title: Locus:1.1.1.2903.23 File:"2013-07-02 CLN FXIII 60 min 1st FT.wiff"  
 Data file C:\Program Files (x86)\Matrix Science\Mascot Daemon\mgf4 FXIII 60 min 1st\mascot\_daemon\_merge.mgf

Click mouse within plot area to zoom in by factor of two about that point  
 Or, Plot from  to  Da   
 Label all possible matches  Label matches used for scoring

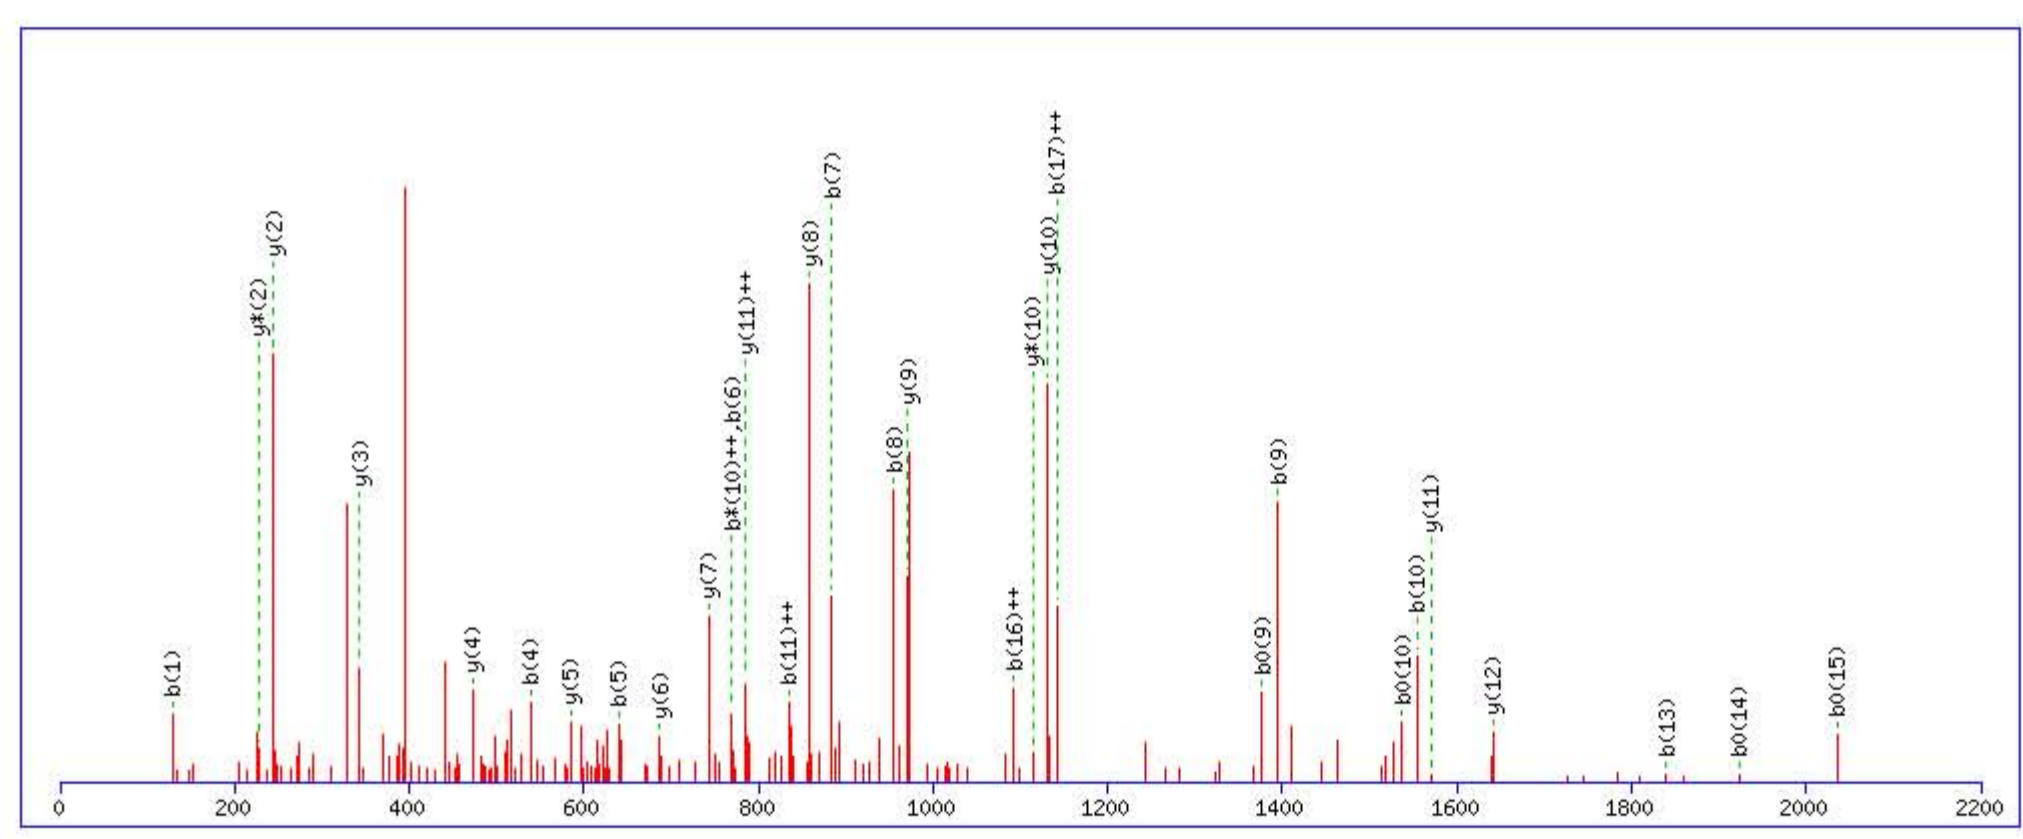

Monoisotopic mass of neutral peptide Mr(calc): 2524.164780  
 Fixed modifications: Carbamidomethyl (C) (apply to specified residues or termini only)  
 Variable modifications:  
 Q9 : Biotin:Thermo-21345 (Q)  
 Ions Score: 65 Expect: 5.7e-006  
 Matches : 31/206 fragment ions using 55 most intense peaks [\(help\)](#)

| #  | b                  | b <sup>++</sup>    | b <sup>*</sup> | b <sup>*++</sup>  | b <sup>0</sup>     | b <sup>0++</sup> | Seq.     | y                  | y <sup>++</sup>   | y <sup>*</sup>     | y <sup>*++</sup> | y <sup>0</sup> | y <sup>0++</sup> | #  |
|----|--------------------|--------------------|----------------|-------------------|--------------------|------------------|----------|--------------------|-------------------|--------------------|------------------|----------------|------------------|----|
| 1  | <b>129.102239</b>  | 65.054757          | 112.075690     | 56.541483         |                    |                  | <b>K</b> |                    |                   |                    |                  |                |                  | 19 |
| 2  | 289.132888         | 145.070082         | 272.106339     | 136.556808        |                    |                  | <b>C</b> | 2397.077099        | 1199.042187       | 2380.050550        | 1190.528913      | 2379.066534    | 1190.036905      | 18 |
| 3  | 376.164916         | 188.586096         | 359.138367     | 180.072822        | 358.154351         | 179.580814       | <b>S</b> | 2237.046450        | 1119.026863       | 2220.019901        | 1110.513588      | 2219.035885    | 1110.021580      | 17 |
| 4  | <b>539.228245</b>  | 270.117761         | 522.201696     | 261.604486        | 521.217680         | 261.112478       | <b>Y</b> | 2150.014422        | 1075.510849       | 2132.987873        | 1066.997574      | 2132.003857    | 1066.505566      | 16 |
| 5  | <b>640.275924</b>  | 320.641600         | 623.249375     | 312.128326        | 622.265359         | 311.636318       | <b>T</b> | 1986.951093        | 993.979185        | 1969.924544        | 985.465910       | 1968.940528    | 984.973902       | 15 |
| 6  | <b>769.318517</b>  | 385.162897         | 752.291968     | 376.649622        | 751.307952         | 376.157614       | <b>E</b> | 1885.903414        | 943.455345        | 1868.876865        | 934.942071       | 1867.892849    | 934.450063       | 14 |
| 7  | <b>884.345460</b>  | 442.676368         | 867.318911     | 434.163094        | 866.334895         | 433.671086       | <b>D</b> | 1756.860821        | 878.934049        | 1739.834272        | 870.420774       | 1738.850256    | 869.928766       | 13 |
| 8  | <b>955.382574</b>  | 478.194925         | 938.356025     | 469.681650        | 937.372009         | 469.189642       | <b>A</b> | <b>1641.833878</b> | 821.420577        | 1624.807329        | 812.907303       | 1623.823313    | 812.415295       | 12 |
| 9  | <b>1394.607900</b> | 697.807588         | 1377.581351    | 689.294314        | <b>1376.597335</b> | 688.802306       | <b>Q</b> | <b>1570.796764</b> | <b>785.902020</b> | 1553.770215        | 777.388746       | 1552.786199    | 776.896738       | 11 |
| 10 | <b>1554.638549</b> | 777.822913         | 1537.612000    | <b>769.309638</b> | <b>1536.627984</b> | 768.817630       | <b>C</b> | <b>1131.571438</b> | 566.289357        | <b>1114.544889</b> | 557.776083       | 1113.560873    | 557.284075       | 10 |
| 11 | 1667.722613        | <b>834.364945</b>  | 1650.696064    | 825.851670        | 1649.712048        | 825.359662       | <b>I</b> | <b>971.540789</b>  | 486.274033        | 954.514240         | 477.760758       | 953.530224     | 477.268750       | 9  |
| 12 | 1782.749556        | 891.878416         | 1765.723007    | 883.365142        | 1764.738991        | 882.873134       | <b>D</b> | <b>858.456725</b>  | 429.732001        | 841.430176         | 421.218726       | 840.446160     | 420.726718       | 8  |
| 13 | <b>1839.771020</b> | 920.389148         | 1822.744471    | 911.875874        | 1821.760455        | 911.383866       | <b>G</b> | <b>743.429782</b>  | 372.218529        | 726.403233         | 363.705255       | 725.419217     | 363.213247       | 7  |
| 14 | 1940.818699        | 970.912988         | 1923.792150    | 962.399713        | <b>1922.808134</b> | 961.907705       | <b>T</b> | <b>686.408318</b>  | 343.707797        | 669.381769         | 335.194523       | 668.397753     | 334.702515       | 6  |
| 15 | 2053.902763        | 1027.455019        | 2036.876214    | 1018.941745       | <b>2035.892198</b> | 1018.449737      | <b>I</b> | <b>585.360639</b>  | 293.183958        | 568.334090         | 284.670683       | 567.350074     | 284.178675       | 5  |
| 16 | 2182.945356        | <b>1091.976316</b> | 2165.918807    | 1083.463041       | 2164.934791        | 1082.971034      | <b>E</b> | <b>472.276575</b>  | 236.641925        | 455.250026         | 228.128651       | 454.266010     | 227.636643       | 4  |
| 17 | 2282.013770        | <b>1141.510523</b> | 2264.987221    | 1132.997248       | 2264.003205        | 1132.505240      | <b>V</b> | <b>343.233982</b>  | 172.120629        | 326.207433         | 163.607354       |                |                  | 3  |
| 18 | 2379.066534        | 1190.036905        | 2362.039985    | 1181.523630       | 2361.055969        | 1181.031622      | <b>P</b> | <b>244.165568</b>  | 122.586422        | <b>227.139019</b>  | 114.073148       |                |                  | 2  |
| 19 |                    |                    |                |                   |                    |                  | <b>K</b> | 147.112804         | 74.060040         | 130.086255         | 65.546765        |                |                  | 1  |

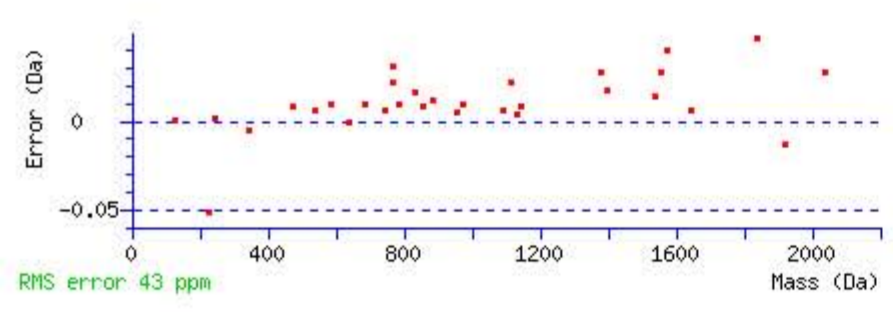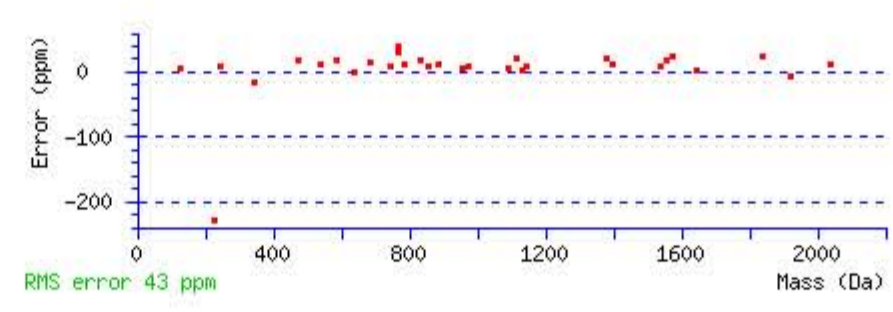

NCBI BLAST search of **KCSYTEDAQCIDGTIEVPK**  
 (Parameters: blastp, nr protein database, expect=20000, no filter, PAM30)  
 Other BLAST [web gateways](#)

### All matches to this query

| Score | Mr(calc):   | Delta    | Sequence                            |
|-------|-------------|----------|-------------------------------------|
| 64.9  | 2524.164780 | 0.026382 | <a href="#">KCSYTEDAQCIDGTIEVPK</a> |



# MASCOT Search Results

## Peptide View

MS/MS Fragmentation of **GYILVGQAK**

Found in **C4BPA\_HUMAN**, C4b-binding protein alpha chain OS=Homo sapiens GN=C4BPA PE=1 SV=2

Match to Query 29498: 1258.717068 from(630.365810,2+) rtinseconds(2035) index(42338)

Title: Locus:1.1.1.2992.11 File:"2013-07-02 CLN FXIII 60 min 1st F 3.wiff"

Data file C:\Program Files (x86)\Matrix Science\Mascot Daemon\mgf\4 FXIII 60 min 1st\mascot\_daemon\_merge.mgf

Click mouse within plot area to zoom in by factor of two about that point

Or, Plot from  to  Da

Label all possible matches  Label matches used for scoring

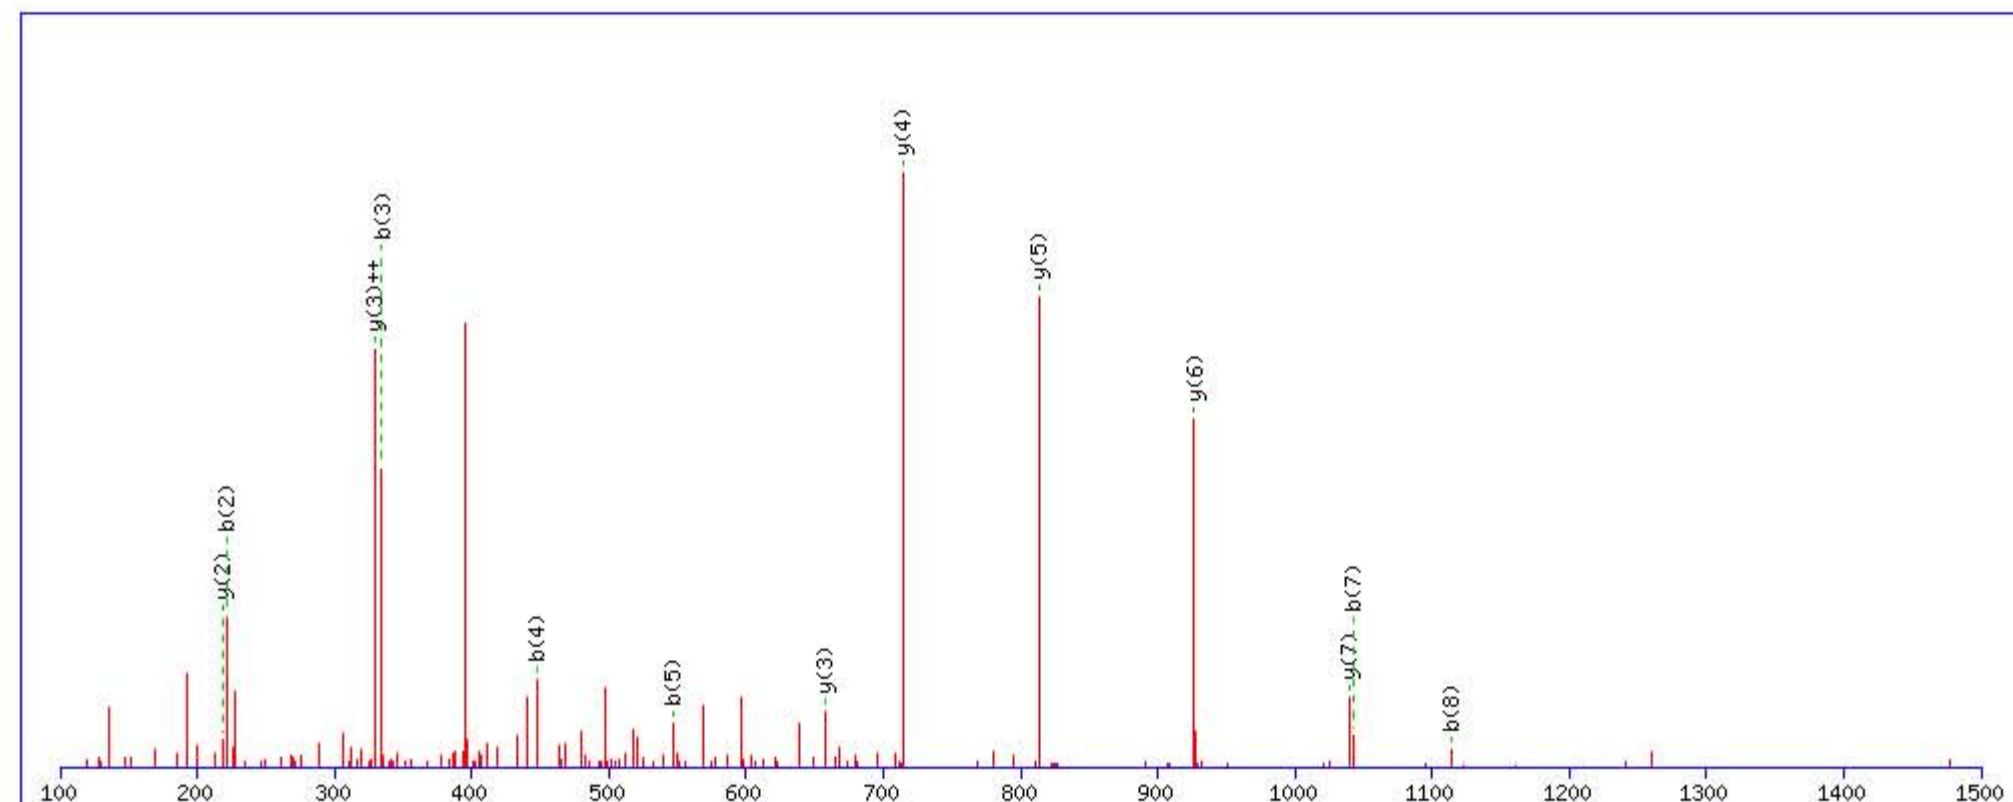

Monoisotopic mass of neutral peptide Mr(calc): 1258.710754

Fixed modifications: Carbamidomethyl (C) (apply to specified residues or termini only)

Variable modifications:

Q7 : Biotin:Thermo-21345 (Q)

Ions Score: 29 Expect: 0.018

Matches : 13/52 fragment ions using 33 most intense peaks [\(help\)](#)

| # | b                  | b <sup>++</sup> | b <sup>*</sup> | b <sup>*++</sup> | Seq.     | y                  | y <sup>++</sup>   | y <sup>*</sup> | y <sup>*++</sup> | #        |
|---|--------------------|-----------------|----------------|------------------|----------|--------------------|-------------------|----------------|------------------|----------|
| 1 | 58.028740          | 29.518008       |                |                  | <b>G</b> |                    |                   |                |                  | <b>9</b> |
| 2 | <b>221.092069</b>  | 111.049673      |                |                  | <b>Y</b> | 1202.696579        | 601.851928        | 1185.670030    | 593.338653       | <b>8</b> |
| 3 | <b>334.176133</b>  | 167.591704      |                |                  | <b>I</b> | <b>1039.633250</b> | 520.320263        | 1022.606701    | 511.806989       | <b>7</b> |
| 4 | <b>447.260197</b>  | 224.133737      |                |                  | <b>L</b> | <b>926.549186</b>  | 463.778231        | 909.522637     | 455.264957       | <b>6</b> |
| 5 | <b>546.328611</b>  | 273.667944      |                |                  | <b>V</b> | <b>813.465122</b>  | 407.236199        | 796.438573     | 398.722925       | <b>5</b> |
| 6 | 603.350075         | 302.178676      |                |                  | <b>G</b> | <b>714.396708</b>  | 357.701992        | 697.370159     | 349.188718       | <b>4</b> |
| 7 | <b>1042.575401</b> | 521.791339      | 1025.548852    | 513.278064       | <b>Q</b> | <b>657.375244</b>  | <b>329.191260</b> | 640.348695     | 320.677986       | <b>3</b> |
| 8 | <b>1113.612515</b> | 557.309896      | 1096.585966    | 548.796621       | <b>A</b> | <b>218.149918</b>  | 109.578597        | 201.123369     | 101.065322       | <b>2</b> |
| 9 |                    |                 |                |                  | <b>K</b> | 147.112804         | 74.060040         | 130.086255     | 65.546765        | <b>1</b> |

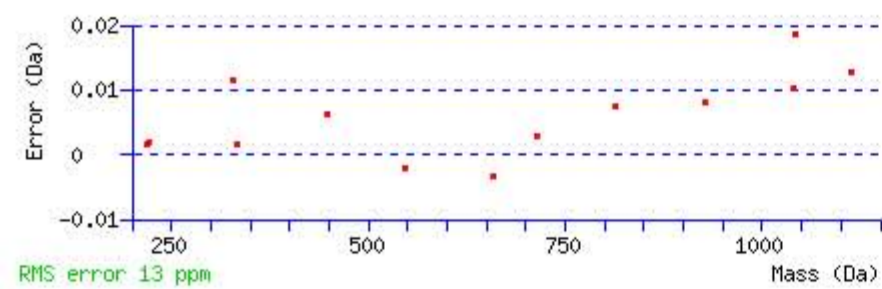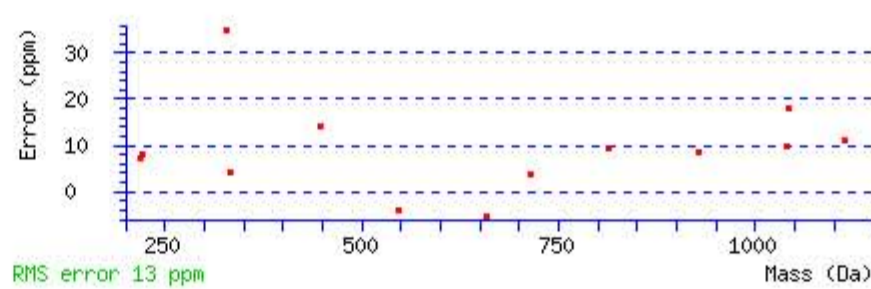

NCBI BLAST search of **GYILVGQAK**

(Parameters: blastp, nr protein database, expect=20000, no filter, PAM30)

Other BLAST [web gateways](#)

All matches to this query

| Score | Mr(calc):   | Delta     | Sequence                    |
|-------|-------------|-----------|-----------------------------|
| 29.1  | 1258.710754 | 0.006314  | <a href="#">GYILVGQAK</a>   |
| 9.8   | 1258.721970 | -0.004902 | <a href="#">GYILQAKR</a>    |
| 6.4   | 1258.717941 | -0.000873 | <a href="#">RILAKVQEMR</a>  |
| 0.6   | 1258.706726 | 0.010342  | <a href="#">QLAVKVEKCGK</a> |

Mascot: <http://www.matrixscience.com/>



# MASCOT SEARCH RESULTS

## Peptide View

MS/MS Fragmentation of **QSSSYSFFK**  
 Found in **C4BPA\_HUMAN**, C4b-binding protein alpha chain OS=Homo sapiens GN=C4BPA PE=1 SV=2  
 Match to Query 34176: 1390.673988 from(696.344270,2+) rtinseconds(2118) index(42848)  
 Title: Locus:1.1.1.3021.14 File:"2013-07-02 CLN FXIII 60 min 1st F 3.wiff"  
 Data file C:\Program Files (x86)\Matrix Science\Mascot Daemon\mgf4 FXIII 60 min 1st\mascot\_daemon\_merge.mgf

Click mouse within plot area to zoom in by factor of two about that point  
 Or, Plot from  to  Da   
 Label all possible matches  Label matches used for scoring

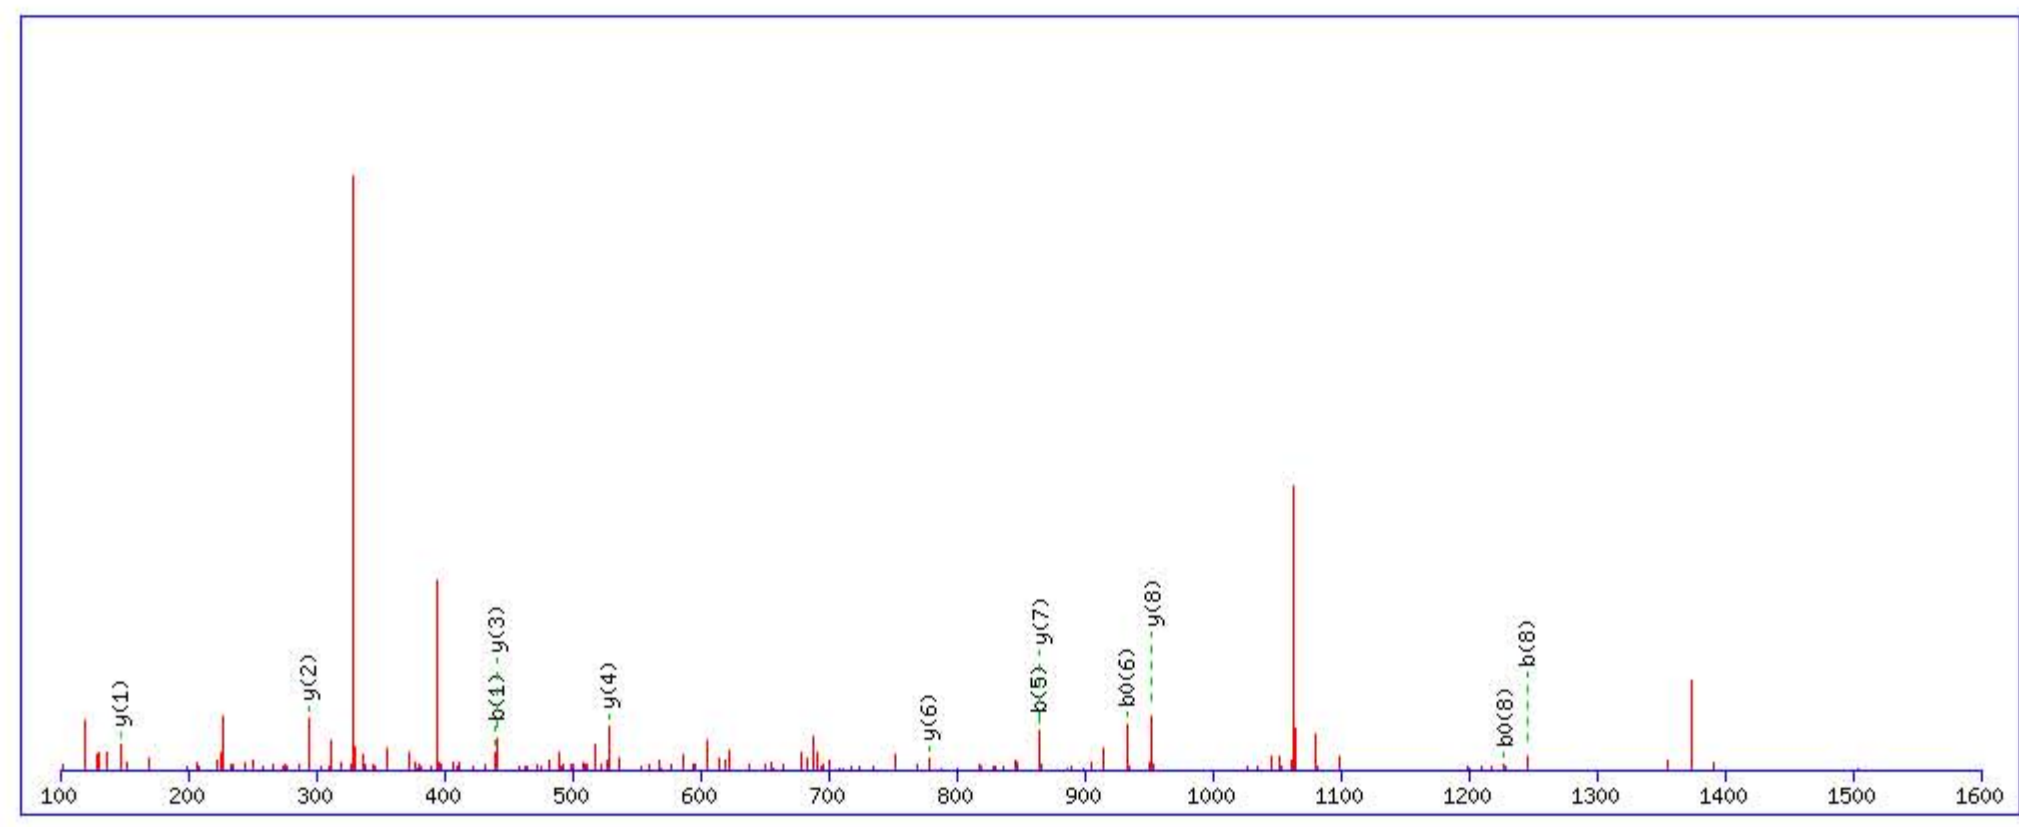

Monoisotopic mass of neutral peptide Mr(calc): 1390.659119  
 Fixed modifications: Carbamidomethyl (C) (apply to specified residues or termini only)  
 Variable modifications:  
 Q1 : Biotin:Thermo-21345 (Q)  
 Ions Score: 39 Expect: 0.0014  
 Matches : 12/88 fragment ions using 26 most intense peaks [\(help\)](#)

| # | b                  | b <sup>++</sup> | b <sup>+</sup> | b <sup>+++</sup> | b <sup>0</sup>     | b <sup>0++</sup> | Seq. | y                 | y <sup>++</sup> | y <sup>+</sup> | y <sup>+++</sup> | y <sup>0</sup> | y <sup>0++</sup> | # |
|---|--------------------|-----------------|----------------|------------------|--------------------|------------------|------|-------------------|-----------------|----------------|------------------|----------------|------------------|---|
| 1 | <b>440.232602</b>  | 220.619939      | 423.206053     | 212.106664       |                    |                  | Q    |                   |                 |                |                  |                |                  | 9 |
| 2 | 527.264630         | 264.135953      | 510.238081     | 255.622679       | 509.254065         | 255.130671       | S    | <b>952.441073</b> | 476.724175      | 935.414524     | 468.210900       | 934.430508     | 467.718892       | 8 |
| 3 | 614.296658         | 307.651967      | 597.270109     | 299.138692       | 596.286093         | 298.646684       | S    | <b>865.409045</b> | 433.208161      | 848.382496     | 424.694886       | 847.398480     | 424.202878       | 7 |
| 4 | 701.328686         | 351.167981      | 684.302137     | 342.654706       | 683.318121         | 342.162698       | S    | <b>778.377017</b> | 389.692147      | 761.350468     | 381.178872       | 760.366452     | 380.686864       | 6 |
| 5 | <b>864.392015</b>  | 432.699645      | 847.365466     | 424.186371       | 846.381450         | 423.694363       | Y    | 691.344989        | 346.176133      | 674.318440     | 337.662858       | 673.334424     | 337.170850       | 5 |
| 6 | 951.424043         | 476.215659      | 934.397494     | 467.702385       | <b>933.413478</b>  | 467.210377       | S    | <b>528.281660</b> | 264.644468      | 511.255111     | 256.131194       | 510.271095     | 255.639186       | 4 |
| 7 | 1098.492457        | 549.749866      | 1081.465908    | 541.236592       | 1080.481892        | 540.744584       | F    | <b>441.249632</b> | 221.128454      | 424.223083     | 212.615180       |                |                  | 3 |
| 8 | <b>1245.560871</b> | 623.284073      | 1228.534322    | 614.770799       | <b>1227.550306</b> | 614.278791       | F    | <b>294.181218</b> | 147.594247      | 277.154669     | 139.080973       |                |                  | 2 |
| 9 |                    |                 |                |                  |                    |                  | K    | <b>147.112804</b> | 74.060040       | 130.086255     | 65.546765        |                |                  | 1 |

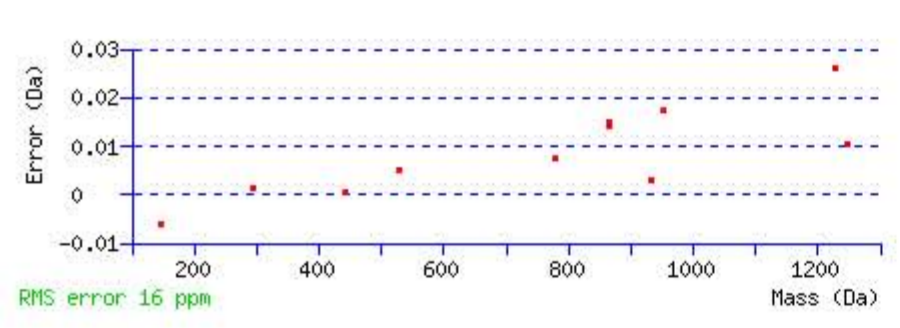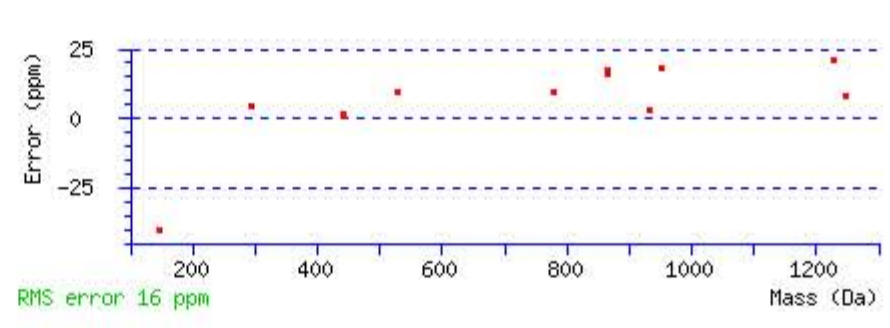

NCBI BLAST search of **QSSSYSFFK**  
 (Parameters: blastp, nr protein database, expect=20000, no filter, PAM30)  
 Other BLAST [web gateways](#)

### All matches to this query

| Score | Mr(calc):   | Delta     | Sequence                       |
|-------|-------------|-----------|--------------------------------|
| 39.2  | 1390.659119 | 0.014869  | <a href="#">QSSSYSFFK</a>      |
| 8.4   | 1390.691467 | -0.017479 | <a href="#">VTKEMNEFIHK</a>    |
| 5.9   | 1390.657547 | 0.016441  | <a href="#">EEGAASTAEEAAKK</a> |
| 4.0   | 1390.670135 | 0.003853  | <a href="#">YRNQESKSSHR</a>    |
| 3.8   | 1390.655075 | 0.018913  | <a href="#">IHEQDQLYSMK</a>    |
| 2.9   | 1390.659088 | 0.014900  | <a href="#">YFSKKEWEMK</a>     |
| 2.4   | 1390.669678 | 0.004310  | <a href="#">CAPASIRLMDNK</a>   |
| 2.0   | 1390.676208 | -0.002220 | <a href="#">AEKSSSTDQK</a>     |
| 1.8   | 1390.694839 | -0.020851 | <a href="#">SLKSDMMSHLVK</a>   |
| 1.8   | 1390.694839 | -0.020851 | <a href="#">SLKSDMMSHLVK</a>   |



# MASCOT Search Results

## Peptide View

MS/MS Fragmentation of **FSAICQGDGTWSPR**

Found in **C4BPA\_HUMAN**, C4b-binding protein alpha chain OS=Homo sapiens GN=C4BPA PE=1 SV=2

Match to Query 50437: 1891.887852 from(631.636560,3+) rtinseconds(2124) index(42876)

Title: Locus:1.1.1.3023.15 File:"2013-07-02 CLN FXIII 60 min 1st F 3.wiff"

Data file C:\Program Files (x86)\Matrix Science\Mascot Daemon\mgf4 FXIII 60 min 1st\mascot\_daemon\_merge.mgf

Click mouse within plot area to zoom in by factor of two about that point

Or, Plot from  to  Da

Label all possible matches  Label matches used for scoring

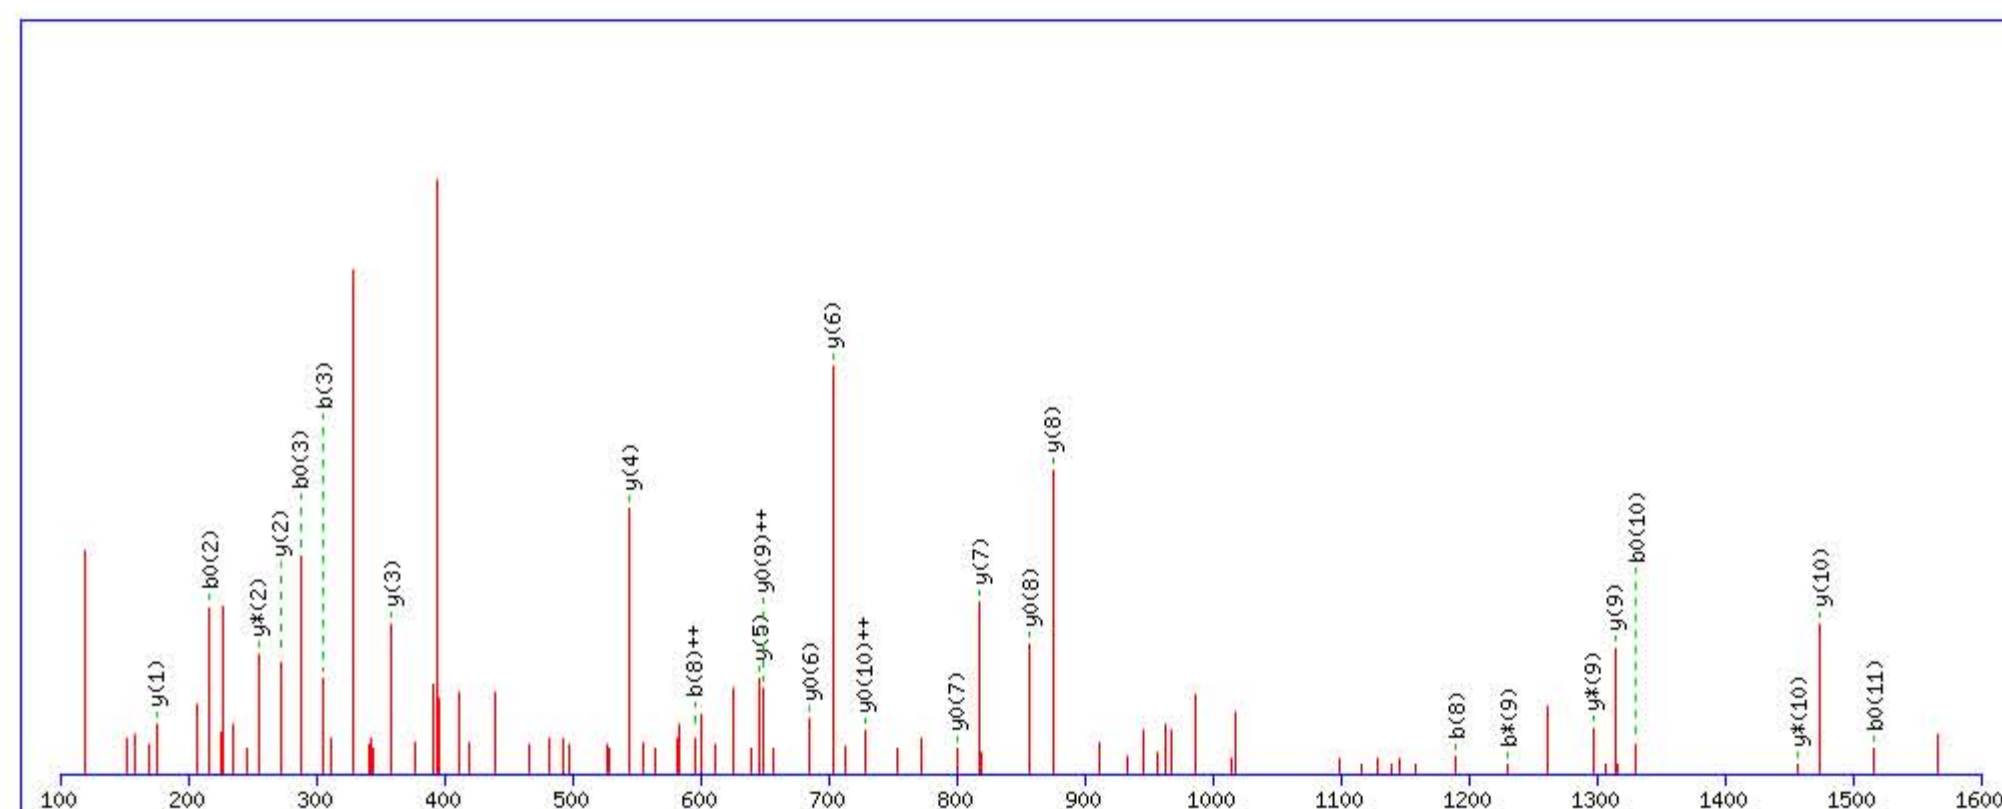

Monoisotopic mass of neutral peptide Mr(calc): 1891.870941

Fixed modifications: Carbamidomethyl (C) (apply to specified residues or termini only)

Variable modifications:

Q6 : Biotin:Thermo-21345 (Q)

Ions Score: 42 Expect: 0.00089

Matches : 26/140 fragment ions using 61 most intense peaks [\(help\)](#)

| #  | b                  | b <sup>++</sup>   | b <sup>*</sup>     | b <sup>*++</sup> | b <sup>0</sup>     | b <sup>0++</sup> | Seq. | y                  | y <sup>++</sup> | y <sup>*</sup>     | y <sup>*++</sup> | y <sup>0</sup>    | y <sup>0++</sup>  | #  |
|----|--------------------|-------------------|--------------------|------------------|--------------------|------------------|------|--------------------|-----------------|--------------------|------------------|-------------------|-------------------|----|
| 1  | 148.075690         | 74.541483         |                    |                  |                    |                  | F    |                    |                 |                    |                  |                   |                   | 14 |
| 2  | 235.107718         | 118.057497        |                    |                  | 217.097153         | 109.052214       | S    | 1745.809788        | 873.408532      | 1728.783239        | 864.895258       | 1727.799223       | 864.403250        | 13 |
| 3  | <b>306.144832</b>  | 153.576054        |                    |                  | <b>288.134267</b>  | 144.570772       | A    | 1658.777760        | 829.892518      | 1641.751211        | 821.379244       | 1640.767195       | 820.887236        | 12 |
| 4  | 419.228896         | 210.118086        |                    |                  | 401.218331         | 201.112804       | I    | 1587.740646        | 794.373961      | 1570.714097        | 785.860687       | 1569.730081       | 785.368678        | 11 |
| 5  | 579.259545         | 290.133411        |                    |                  | 561.248980         | 281.128128       | C    | <b>1474.656582</b> | 737.831929      | <b>1457.630033</b> | 729.318655       | 1456.646017       | <b>728.826647</b> | 10 |
| 6  | 1018.484871        | 509.746074        | 1001.458322        | 501.232799       | 1000.474306        | 500.740791       | Q    | <b>1314.625933</b> | 657.816605      | <b>1297.599384</b> | 649.303330       | 1296.615368       | <b>648.811322</b> | 9  |
| 7  | 1075.506335        | 538.256806        | 1058.479786        | 529.743531       | 1057.495770        | 529.251523       | G    | <b>875.400607</b>  | 438.203942      | 858.374058         | 429.690667       | <b>857.390042</b> | 429.198659        | 8  |
| 8  | <b>1190.533278</b> | <b>595.770277</b> | 1173.506729        | 587.257003       | 1172.522713        | 586.764995       | D    | <b>818.379143</b>  | 409.693210      | 801.352594         | 401.179935       | <b>800.368578</b> | 400.687927        | 7  |
| 9  | 1247.554742        | 624.281009        | <b>1230.528193</b> | 615.767735       | 1229.544177        | 615.275727       | G    | <b>703.352200</b>  | 352.179738      | 686.325651         | 343.666464       | <b>685.341635</b> | 343.174456        | 6  |
| 10 | 1348.602421        | 674.804849        | 1331.575872        | 666.291574       | <b>1330.591856</b> | 665.799566       | T    | <b>646.330736</b>  | 323.669006      | 629.304187         | 315.155732       | 628.320171        | 314.663724        | 5  |
| 11 | 1534.681734        | 767.844505        | 1517.655185        | 759.331231       | <b>1516.671169</b> | 758.839223       | W    | <b>545.283057</b>  | 273.145167      | 528.256508         | 264.631892       | 527.272492        | 264.139884        | 4  |
| 12 | 1621.713762        | 811.360519        | 1604.687213        | 802.847245       | 1603.703197        | 802.355237       | S    | <b>359.203744</b>  | 180.105510      | 342.177195         | 171.592236       | 341.193179        | 171.100228        | 3  |
| 13 | 1718.766526        | 859.886901        | 1701.739977        | 851.373627       | 1700.755961        | 850.881619       | P    | <b>272.171716</b>  | 136.589496      | <b>255.145167</b>  | 128.076221       |                   |                   | 2  |
| 14 |                    |                   |                    |                  |                    |                  | R    | <b>175.118952</b>  | 88.063114       | 158.092403         | 79.549839        |                   |                   | 1  |

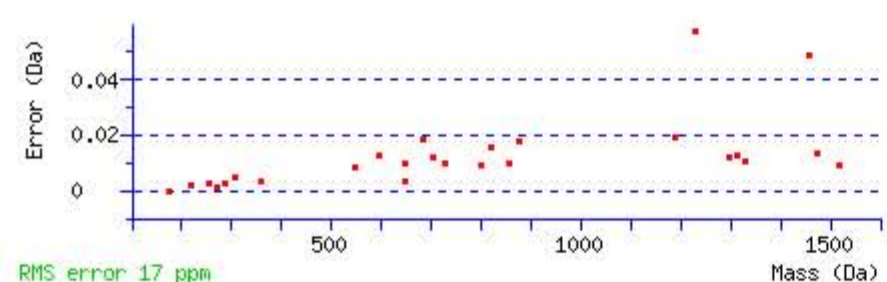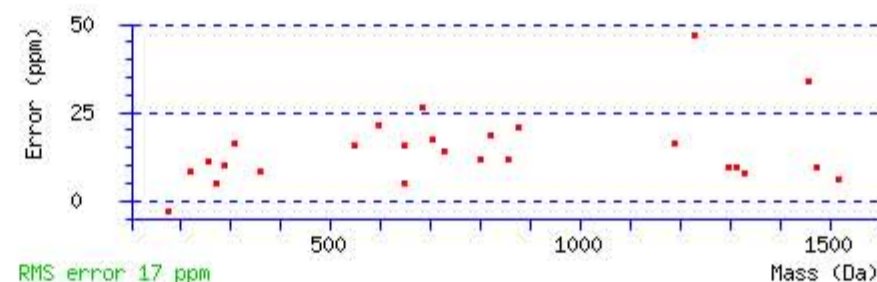

NCBI BLAST search of **FSAICQGDGTWSPR**

(Parameters: blastp, nr protein database, expect=20000, no filter, PAM30)

Other BLAST [web gateways](#)

### All matches to this query

| Score | Mr(calc):   | Delta    | Sequence                       |
|-------|-------------|----------|--------------------------------|
| 42.2  | 1891.870941 | 0.016911 | <a href="#">FSAICQGDGTWSPR</a> |

Mascot: <http://www.matrixscience.com/>



# MASCOT SEARCH RESULTS

## Peptide View

MS/MS Fragmentation of **GVGWSHPLPQCEIVK**

Found in **C4BPA\_HUMAN**, C4b-binding protein alpha chain OS=Homo sapiens GN=C4BPA PE=1 SV=2

Match to Query 54214: 2017.042332 from(673.354720,3+) rtinseconds(2046) index(42411)

Title: Locus:1.1.1.2996.14 File:"2013-07-02 CLN FXIII 60 min 1st F 3.wiff"

Data file C:\Program Files (x86)\Matrix Science\Mascot Daemon\mgf4 FXIII 60 min 1st\mascot\_daemon\_merge.mgf

Click mouse within plot area to zoom in by factor of two about that point

Or, Plot from  to  Da

Label all possible matches  Label matches used for scoring

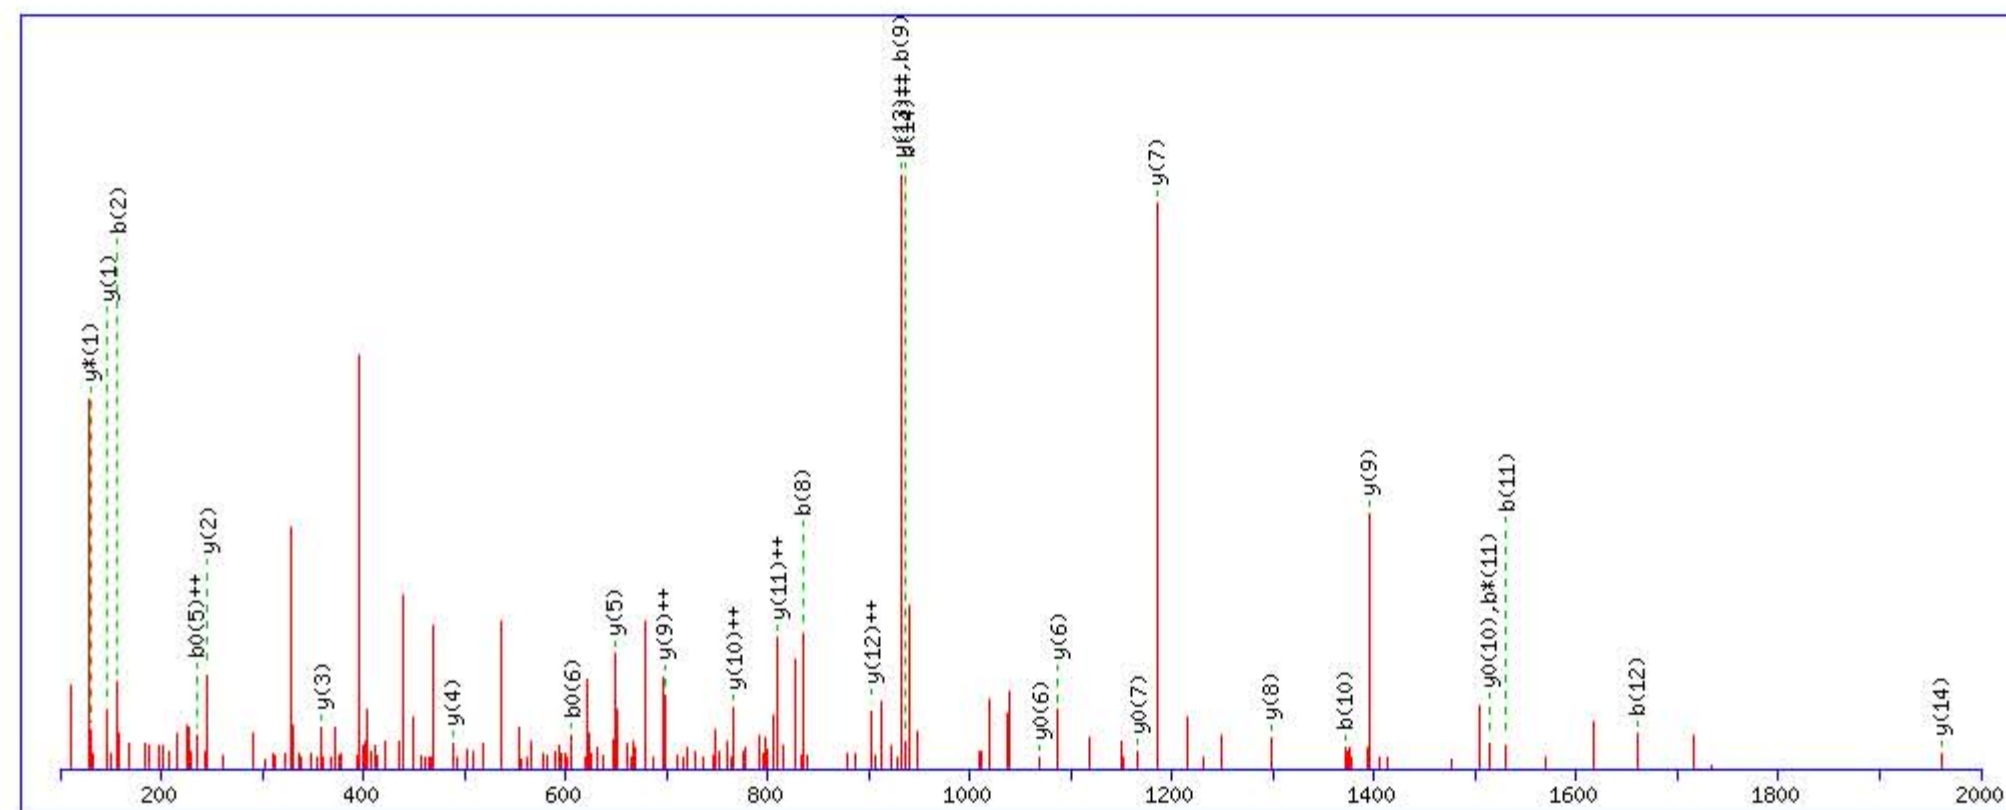

Monoisotopic mass of neutral peptide Mr(calc): 2017.027771

Fixed modifications: Carbamidomethyl (C) (apply to specified residues or termini only)

Variable modifications:

Q10 : Biotin:Thermo-21345 (Q)

Ions Score: 30 Expect: 0.032

Matches : 29/136 fragment ions using 91 most intense peaks [\(help\)](#)

| #  | b                  | b <sup>++</sup>   | b <sup>+</sup>     | b <sup>+++</sup> | b <sup>0</sup>    | b <sup>0++</sup>  | Seq. | y                  | y <sup>++</sup>   | y <sup>+</sup>    | y <sup>+++</sup> | y <sup>0</sup>     | y <sup>0++</sup> | #  |
|----|--------------------|-------------------|--------------------|------------------|-------------------|-------------------|------|--------------------|-------------------|-------------------|------------------|--------------------|------------------|----|
| 1  | 58.028740          | 29.518008         |                    |                  |                   |                   | G    |                    |                   |                   |                  |                    |                  | 15 |
| 2  | <b>157.097154</b>  | 79.052215         |                    |                  |                   |                   | V    | <b>1961.013573</b> | 981.010425        | 1943.987024       | 972.497150       | 1943.003008        | 972.005142       | 14 |
| 3  | 214.118618         | 107.562947        |                    |                  |                   |                   | G    | 1861.945159        | <b>931.476217</b> | 1844.918610       | 922.962943       | 1843.934594        | 922.470935       | 13 |
| 4  | 400.197931         | 200.602603        |                    |                  |                   |                   | W    | 1804.923695        | <b>902.965486</b> | 1787.897146       | 894.452211       | 1786.913130        | 893.960203       | 12 |
| 5  | 487.229959         | 244.118617        |                    |                  | 469.219394        | <b>235.113335</b> | S    | 1618.844382        | <b>809.925829</b> | 1601.817833       | 801.412555       | 1600.833817        | 800.920547       | 11 |
| 6  | 624.288871         | 312.648074        |                    |                  | <b>606.278306</b> | 303.642791        | H    | 1531.812354        | <b>766.409815</b> | 1514.785805       | 757.896541       | <b>1513.801789</b> | 757.404532       | 10 |
| 7  | 721.341635         | 361.174456        |                    |                  | 703.331070        | 352.169173        | P    | <b>1394.753442</b> | <b>697.880359</b> | 1377.726893       | 689.367085       | 1376.742877        | 688.875076       | 9  |
| 8  | <b>834.425699</b>  | 417.716488        |                    |                  | 816.415134        | 408.711205        | L    | <b>1297.700678</b> | 649.353977        | 1280.674129       | 640.840703       | 1279.690113        | 640.348694       | 8  |
| 9  | <b>931.478463</b>  | 466.242870        |                    |                  | 913.467898        | 457.237587        | P    | <b>1184.616614</b> | 592.811945        | 1167.590065       | 584.298670       | <b>1166.606049</b> | 583.806662       | 7  |
| 10 | <b>1370.703789</b> | 685.855532        | 1353.677240        | 677.342258       | 1352.693224       | 676.850250        | Q    | <b>1087.563850</b> | 544.285563        | 1070.537301       | 535.772288       | <b>1069.553285</b> | 535.280280       | 6  |
| 11 | <b>1530.734438</b> | 765.870857        | <b>1513.707889</b> | 757.357583       | 1512.723873       | 756.865574        | C    | <b>648.338524</b>  | 324.672900        | 631.311975        | 316.159626       | 630.327959         | 315.667618       | 5  |
| 12 | <b>1659.777031</b> | 830.392153        | 1642.750482        | 821.878879       | 1641.766466       | 821.386871        | E    | <b>488.307875</b>  | 244.657575        | 471.281326        | 236.144301       | 470.297310         | 235.652293       | 4  |
| 13 | 1772.861095        | 886.934185        | 1755.834546        | 878.420911       | 1754.850530       | 877.928903        | I    | <b>359.265282</b>  | 180.136279        | 342.238733        | 171.623004       |                    |                  | 3  |
| 14 | 1871.929509        | <b>936.468392</b> | 1854.902960        | 927.955118       | 1853.918944       | 927.463110        | V    | <b>246.181218</b>  | 123.594247        | 229.154669        | 115.080973       |                    |                  | 2  |
| 15 |                    |                   |                    |                  |                   |                   | K    | <b>147.112804</b>  | 74.060040         | <b>130.086255</b> | 65.546765        |                    |                  | 1  |

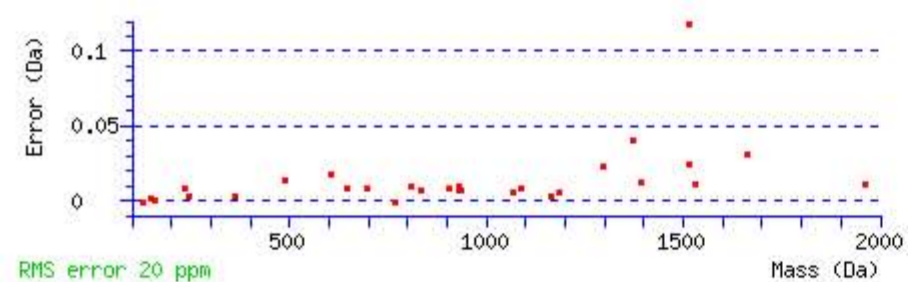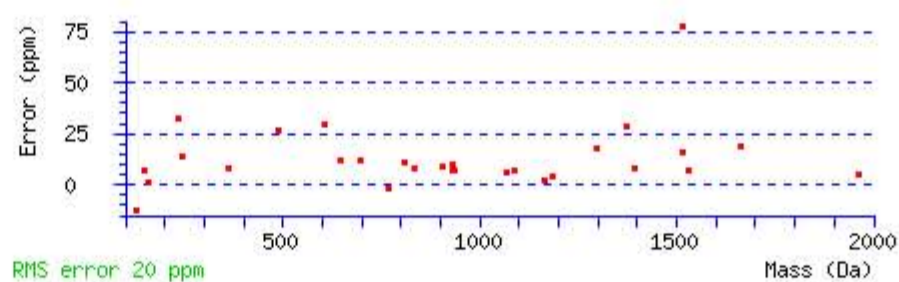

NCBI BLAST search of **GVGWSHPLPQCEIVK**

(Parameters: blastp, nr protein database, expect=20000, no filter, PAM30)

Other BLAST [web gateways](#)

All matches to this query

| Score | Mr(calc):   | Delta    | Sequence                        |
|-------|-------------|----------|---------------------------------|
| 29.8  | 2017.027771 | 0.014561 | <a href="#">GVGWSHPLPQCEIVK</a> |

Mascot: <http://www.matrixscience.com/>



# MASCOT Search Results

## Peptide View

MS/MS Fragmentation of **LSCSYSHWSAPAPQCK**

Found in **C4BPA\_HUMAN**, C4b-binding protein alpha chain OS=Homo sapiens GN=C4BPA PE=1 SV=2

Match to Query 57931: 2188.996542 from(730.672790,3+) rtinseconds(1750) index(40439)

Title: Locus:1.1.1.2893.14 File:"2013-07-02 CLN FXIII 60 min 1st F 3.wiff"

Data file C:\Program Files (x86)\Matrix Science\Mascot Daemon\mgf4 FXIII 60 min 1st\mascot\_daemon\_merge.mgf

Click mouse within plot area to zoom in by factor of two about that point

Or, Plot from  to  Da

Label all possible matches  Label matches used for scoring

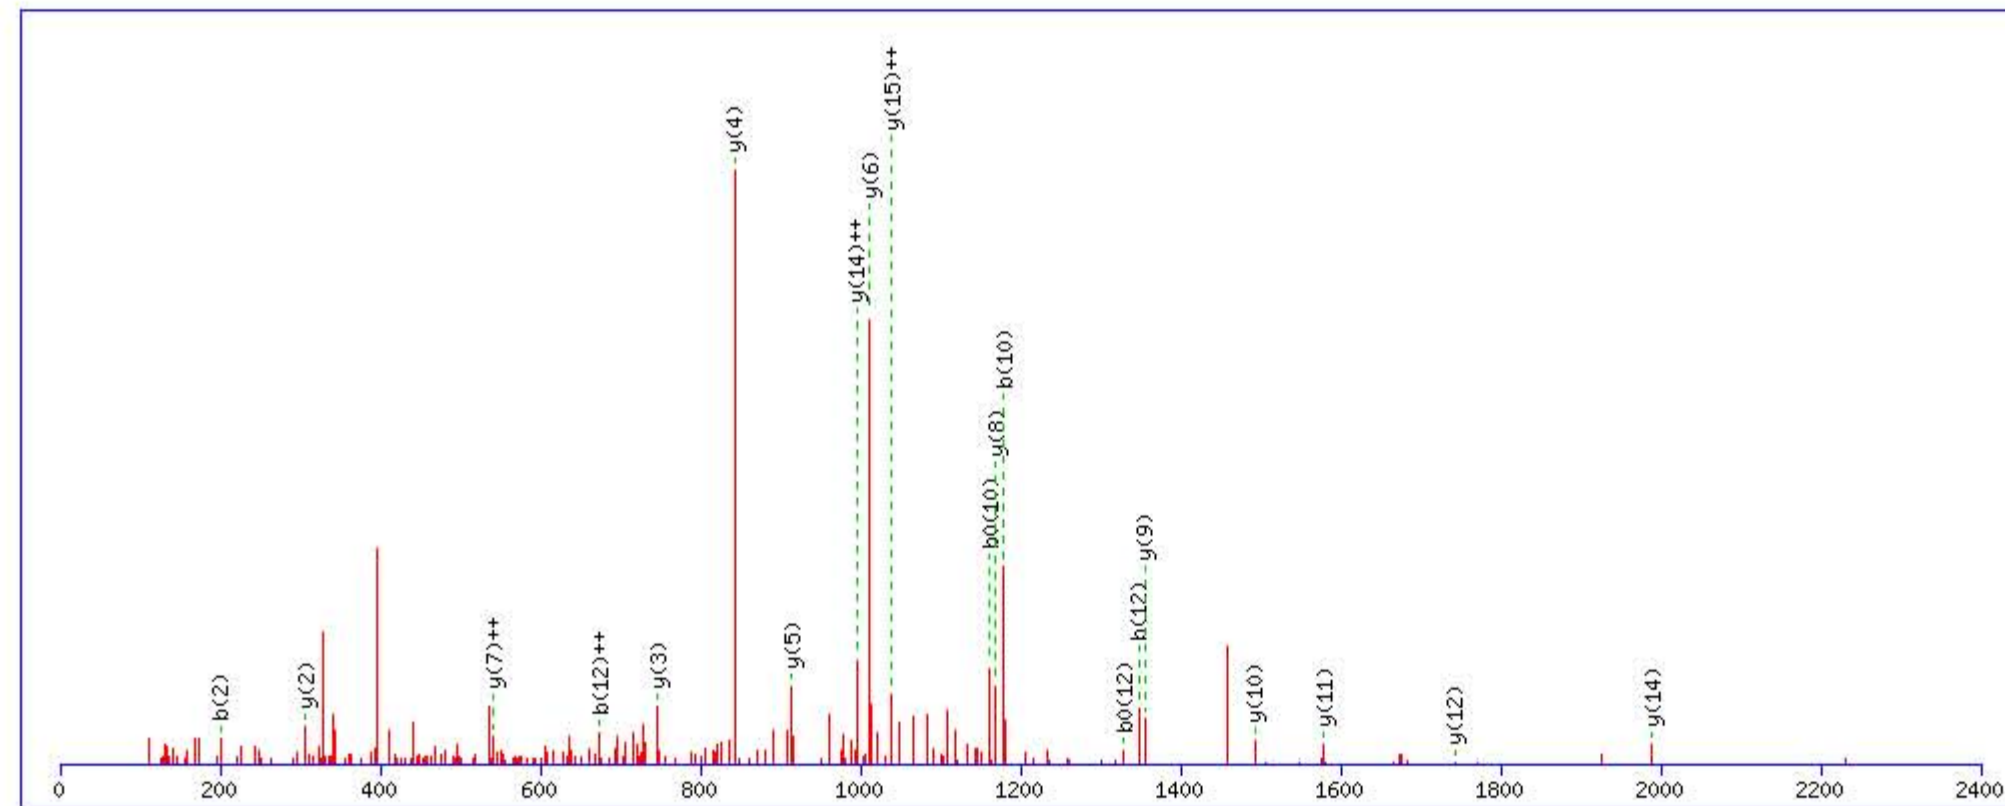

Monoisotopic mass of neutral peptide Mr(calc): 2188.985626

Fixed modifications: Carbamidomethyl (C) (apply to specified residues or termini only)

Variable modifications:

Q14 : Biotin:Thermo-21345 (Q)

Ions Score: 46 Expect: 0.00033

Matches : 20/138 fragment ions using 53 most intense peaks [\(help\)](#)

| #  | b                  | b <sup>++</sup>   | b <sup>*</sup> | b <sup>+++</sup> | b <sup>0</sup>     | b <sup>0++</sup> | Seq. | y                  | y <sup>++</sup>    | y <sup>*</sup> | y <sup>+++</sup> | y <sup>0</sup> | y <sup>0++</sup> | #  |
|----|--------------------|-------------------|----------------|------------------|--------------------|------------------|------|--------------------|--------------------|----------------|------------------|----------------|------------------|----|
| 1  | 114.091340         | 57.549308         |                |                  |                    |                  | L    |                    |                    |                |                  |                |                  | 16 |
| 2  | <b>201.123368</b>  | 101.065322        |                |                  | 183.112803         | 92.060039        | S    | 2076.908850        | <b>1038.958063</b> | 2059.882301    | 1030.444788      | 2058.898285    | 1029.952780      | 15 |
| 3  | 361.154017         | 181.080647        |                |                  | 343.143452         | 172.075364       | C    | <b>1989.876822</b> | <b>995.442049</b>  | 1972.850273    | 986.928775       | 1971.866257    | 986.436767       | 14 |
| 4  | 448.186045         | 224.596660        |                |                  | 430.175480         | 215.591378       | S    | 1829.846173        | 915.426725         | 1812.819624    | 906.913450       | 1811.835608    | 906.421442       | 13 |
| 5  | 611.249374         | 306.128325        |                |                  | 593.238809         | 297.123043       | Y    | <b>1742.814145</b> | 871.910711         | 1725.787596    | 863.397436       | 1724.803580    | 862.905428       | 12 |
| 6  | 698.281402         | 349.644339        |                |                  | 680.270837         | 340.639056       | S    | <b>1579.750816</b> | 790.379046         | 1562.724267    | 781.865772       | 1561.740251    | 781.373764       | 11 |
| 7  | 835.340314         | 418.173795        |                |                  | 817.329749         | 409.168512       | H    | <b>1492.718788</b> | 746.863032         | 1475.692239    | 738.349758       | 1474.708223    | 737.857750       | 10 |
| 8  | 1021.419627        | 511.213452        |                |                  | 1003.409062        | 502.208169       | W    | <b>1355.659876</b> | 678.333576         | 1338.633327    | 669.820302       | 1337.649311    | 669.328294       | 9  |
| 9  | 1108.451655        | 554.729466        |                |                  | 1090.441090        | 545.724183       | S    | <b>1169.580563</b> | 585.293920         | 1152.554014    | 576.780645       | 1151.569998    | 576.288637       | 8  |
| 10 | <b>1179.488769</b> | 590.248023        |                |                  | <b>1161.478204</b> | 581.242740       | A    | 1082.548535        | <b>541.777906</b>  | 1065.521986    | 533.264631       |                |                  | 7  |
| 11 | 1276.541533        | 638.774405        |                |                  | 1258.530968        | 629.769122       | P    | <b>1011.511421</b> | 506.259349         | 994.484872     | 497.746074       |                |                  | 6  |
| 12 | <b>1347.578647</b> | <b>674.292962</b> |                |                  | <b>1329.568082</b> | 665.287679       | A    | <b>914.458657</b>  | 457.732967         | 897.432108     | 449.219692       |                |                  | 5  |
| 13 | 1444.631411        | 722.819344        |                |                  | 1426.620846        | 713.814061       | P    | <b>843.421543</b>  | 422.214410         | 826.394994     | 413.701135       |                |                  | 4  |
| 14 | 1883.856737        | 942.432007        | 1866.830188    | 933.918732       | 1865.846172        | 933.426724       | Q    | <b>746.368779</b>  | 373.688028         | 729.342230     | 365.174753       |                |                  | 3  |
| 15 | 2043.887386        | 1022.447331       | 2026.860837    | 1013.934057      | 2025.876821        | 1013.442049      | C    | <b>307.143453</b>  | 154.075365         | 290.116904     | 145.562090       |                |                  | 2  |
| 16 |                    |                   |                |                  |                    |                  | K    | 147.112804         | 74.060040          | 130.086255     | 65.546766        |                |                  | 1  |

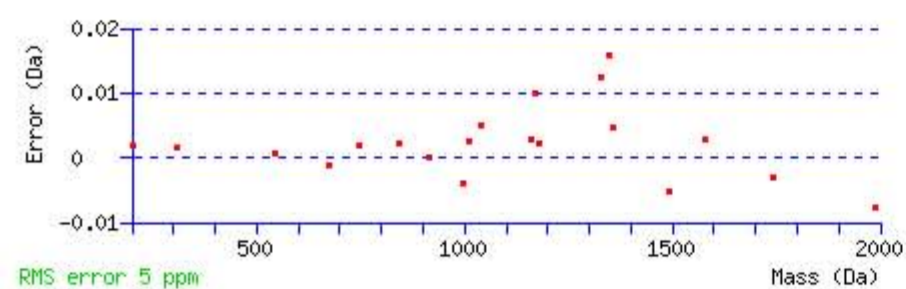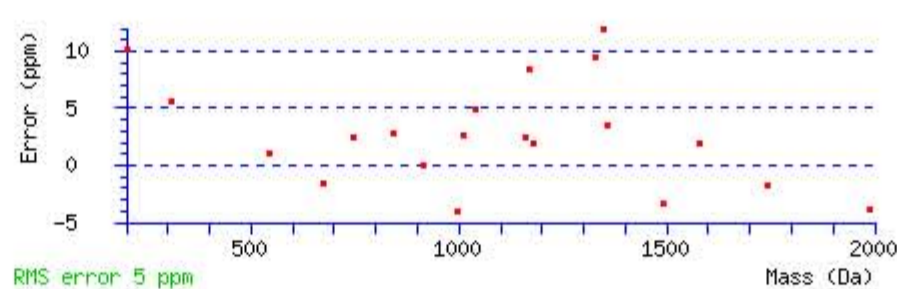

NCBI BLAST search of [LSCSYSHWSAPAPQCK](#)

(Parameters: blastp, nr protein database, expect=20000, no filter, PAM30)

Other BLAST [web gateways](#)

All matches to this query

| Score | Mr(calc):   | Delta    | Sequence                         |
|-------|-------------|----------|----------------------------------|
| 45.5  | 2188.985626 | 0.010916 | <a href="#">LSCSYSHWSAPAPQCK</a> |

Mascot: <http://www.matrixscience.com/>



# MASCOT Search Results

## Peptide View

MS/MS Fragmentation of **WTPYQGCEALCCPEPK**

Found in **C4BPA\_HUMAN**, C4b-binding protein alpha chain OS=Homo sapiens GN=C4BPA PE=1 SV=2

Match to Query 60818: 2306.025882 from(769.682570,3+) rtinseconds(2093) index(42701)

Title: Locus:1.1.1.3012.15 File:"2013-07-02 CLN FXIII 60 min 1st F 3.wiff"

Data file C:\Program Files (x86)\Matrix Science\Mascot Daemon\mgf\4 FXIII 60 min 1st\mascot\_daemon\_merge.mgf

Click mouse within plot area to zoom in by factor of two about that point

Or, Plot from  to  Da

Label all possible matches  Label matches used for scoring

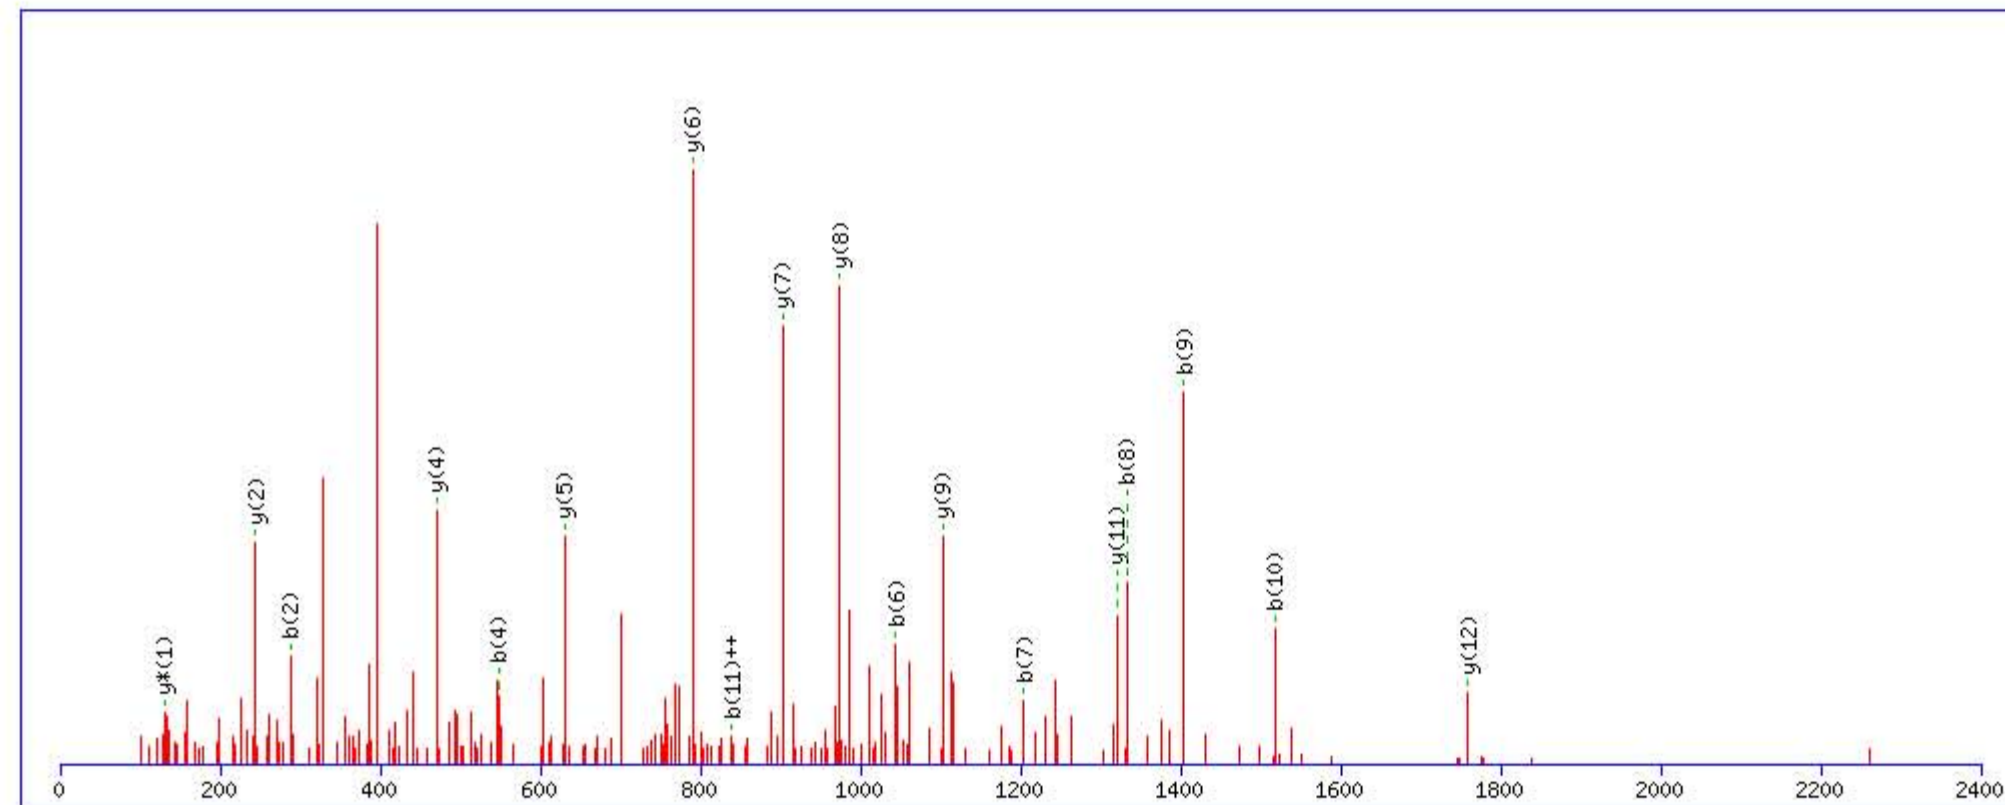

Monoisotopic mass of neutral peptide Mr(calc): 2305.999237

Fixed modifications: Carbamidomethyl (C) (apply to specified residues or termini only)

Variable modifications:

Q5 : Biotin:Thermo-21345 (Q)

Ions Score: 48 Expect: 0.00013

Matches : 18/166 fragment ions using 34 most intense peaks [\(help\)](#)

| #  | b                  | b <sup>++</sup>   | b <sup>*</sup> | b <sup>+++</sup> | b <sup>0</sup> | b <sup>0++</sup> | Seq. | y                  | y <sup>++</sup> | y <sup>*</sup>    | y <sup>+++</sup> | y <sup>0</sup> | y <sup>0++</sup> | #  |
|----|--------------------|-------------------|----------------|------------------|----------------|------------------|------|--------------------|-----------------|-------------------|------------------|----------------|------------------|----|
| 1  | 187.086589         | 94.046932         |                |                  |                |                  | W    |                    |                 |                   |                  |                |                  | 16 |
| 2  | <b>288.134268</b>  | 144.570772        |                |                  | 270.123703     | 135.565490       | T    | 2120.927205        | 1060.967240     | 2103.900656       | 1052.453966      | 2102.916640    | 1051.961958      | 15 |
| 3  | 385.187032         | 193.097154        |                |                  | 367.176467     | 184.091872       | P    | 2019.879526        | 1010.443401     | 2002.852977       | 1001.930127      | 2001.868961    | 1001.438119      | 14 |
| 4  | <b>548.250361</b>  | 274.628819        |                |                  | 530.239796     | 265.623536       | Y    | 1922.826762        | 961.917019      | 1905.800213       | 953.403745       | 1904.816197    | 952.911737       | 13 |
| 5  | 987.475687         | 494.241482        | 970.449138     | 485.728207       | 969.465122     | 485.236199       | Q    | <b>1759.763433</b> | 880.385355      | 1742.736884       | 871.872080       | 1741.752868    | 871.380072       | 12 |
| 6  | <b>1044.497151</b> | 522.752214        | 1027.470602    | 514.238939       | 1026.486586    | 513.746931       | G    | <b>1320.538107</b> | 660.772692      | 1303.511558       | 652.259417       | 1302.527542    | 651.767409       | 11 |
| 7  | <b>1204.527800</b> | 602.767538        | 1187.501251    | 594.254264       | 1186.517235    | 593.762256       | C    | 1263.516643        | 632.261960      | 1246.490094       | 623.748685       | 1245.506078    | 623.256677       | 10 |
| 8  | <b>1333.570393</b> | 667.288835        | 1316.543844    | 658.775560       | 1315.559828    | 658.283552       | E    | <b>1103.485994</b> | 552.246635      | 1086.459445       | 543.733361       | 1085.475429    | 543.241353       | 9  |
| 9  | <b>1404.607507</b> | 702.807392        | 1387.580958    | 694.294117       | 1386.596942    | 693.802109       | A    | <b>974.443401</b>  | 487.725339      | 957.416852        | 479.212064       | 956.432836     | 478.720056       | 8  |
| 10 | <b>1517.691571</b> | 759.349424        | 1500.665022    | 750.836149       | 1499.681006    | 750.344141       | L    | <b>903.406287</b>  | 452.206782      | 886.379738        | 443.693507       | 885.395722     | 443.201499       | 7  |
| 11 | 1677.722220        | <b>839.364748</b> | 1660.695671    | 830.851474       | 1659.711655    | 830.359466       | C    | <b>790.322223</b>  | 395.664750      | 773.295674        | 387.151475       | 772.311658     | 386.659467       | 6  |
| 12 | 1837.752869        | 919.380073        | 1820.726320    | 910.866798       | 1819.742304    | 910.374790       | C    | <b>630.291574</b>  | 315.649425      | 613.265025        | 307.136151       | 612.281009     | 306.644143       | 5  |
| 13 | 1934.805633        | 967.906455        | 1917.779084    | 959.393180       | 1916.795068    | 958.901172       | P    | <b>470.260925</b>  | 235.634101      | 453.234376        | 227.120826       | 452.250360     | 226.628818       | 4  |
| 14 | 2063.848226        | 1032.427751       | 2046.821677    | 1023.914477      | 2045.837661    | 1023.422469      | E    | 373.208161         | 187.107719      | 356.181612        | 178.594444       | 355.197596     | 178.102436       | 3  |
| 15 | 2160.900990        | 1080.954133       | 2143.874441    | 1072.440858      | 2142.890425    | 1071.948850      | P    | <b>244.165568</b>  | 122.586422      | 227.139019        | 114.073148       |                |                  | 2  |
| 16 |                    |                   |                |                  |                |                  | K    | 147.112804         | 74.060040       | <b>130.086255</b> | 65.546765        |                |                  | 1  |

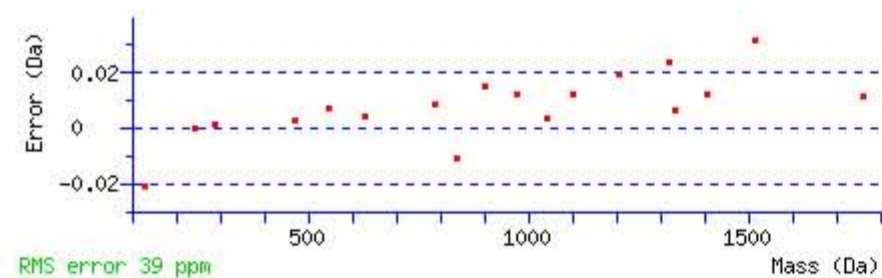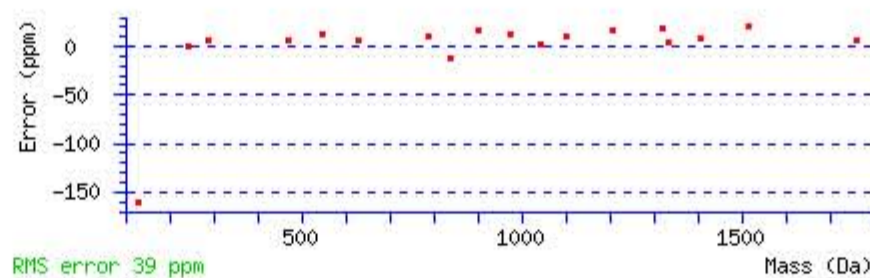

NCBI BLAST search of **WTPYQGCEALCCPEPK**

(Parameters: blastp, nr protein database, expect=20000, no filter, PAM30)

Other BLAST [web gateways](#)

All matches to this query

| Score | Mr(calc):   | Delta    | Sequence                         |
|-------|-------------|----------|----------------------------------|
| 47.5  | 2305.999237 | 0.026645 | <a href="#">WTPYQGCEALCCPEPK</a> |

Mascot: <http://www.matrixscience.com/>



# MASCOT Search Results

## Peptide View

MS/MS Fragmentation of **EVEGQILGTYVCIK**

Found in **C4BPB\_HUMAN**, C4b-binding protein beta chain OS=Homo sapiens GN=C4BPB PE=1 SV=1

Match to Query 51002: 1919.012082 from(640.677970,3+) rtinseconds(2459) index(44987)

Title: Locus:1.1.1.3140.6 File:"2013-07-02 CLN FXIII 60 min 1st F 3.wiff"

Data file C:\Program Files (x86)\Matrix Science\Mascot Daemon\mgf4 FXIII 60 min 1st\mascot\_daemon\_merge.mgf

Click mouse within plot area to zoom in by factor of two about that point

Or, Plot from  to  Da

Label all possible matches  Label matches used for scoring

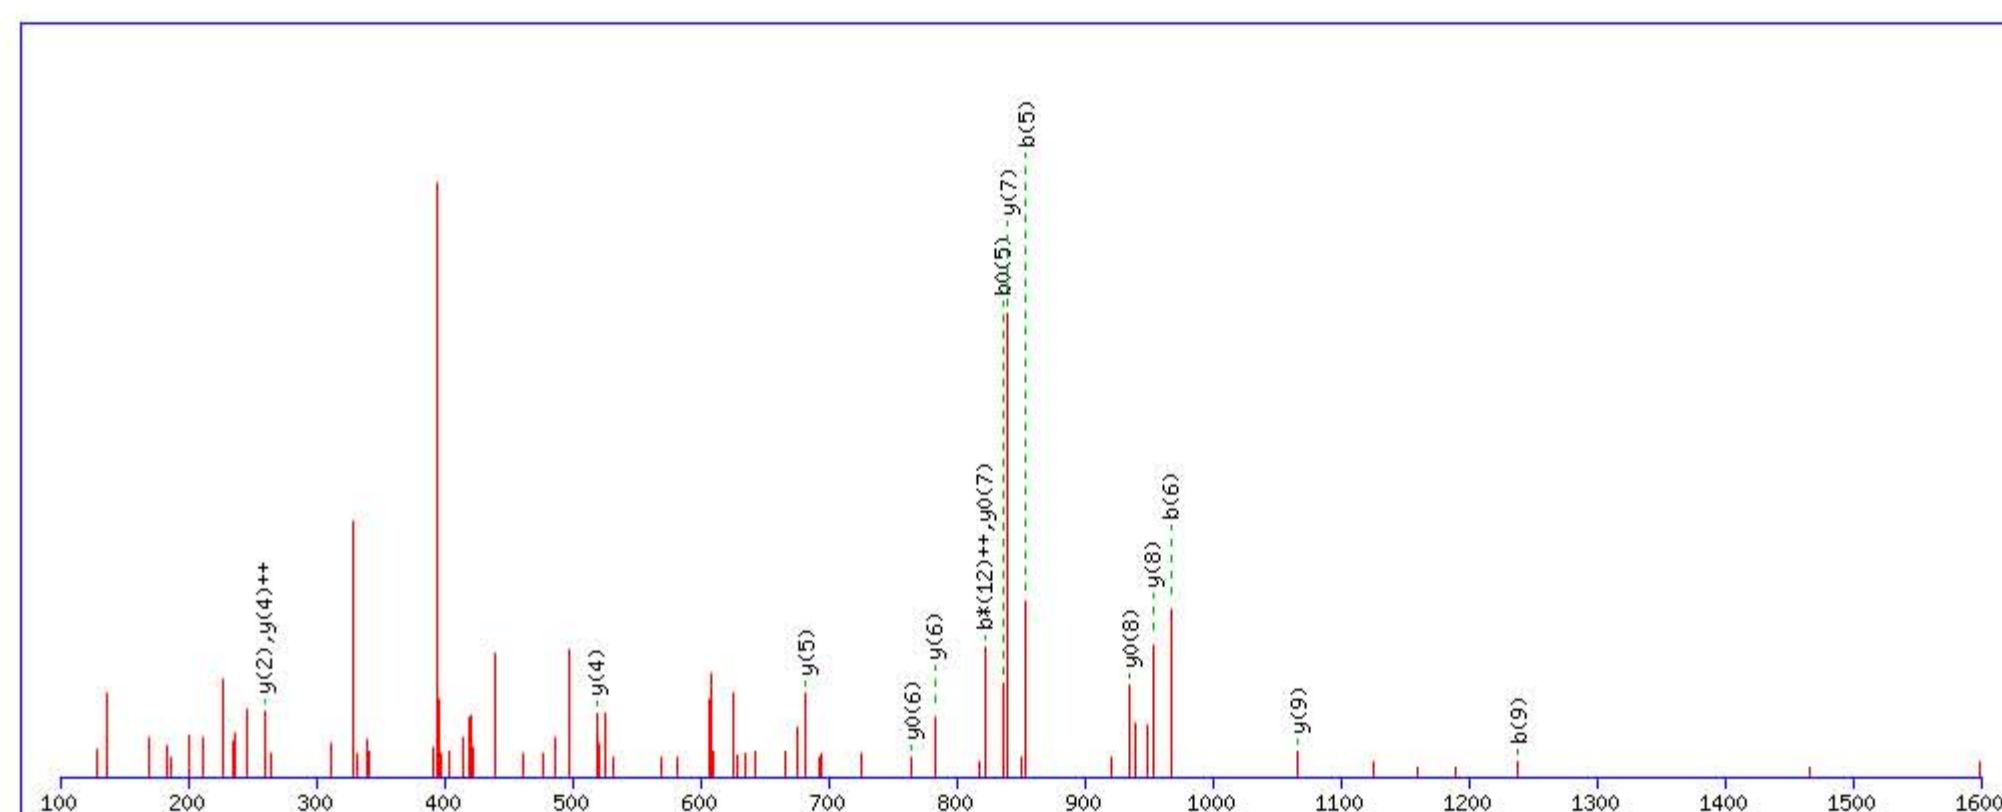

Monoisotopic mass of neutral peptide Mr(calc): 1918.989639

Fixed modifications: Carbamidomethyl (C) (apply to specified residues or termini only)

Variable modifications:

Q5 : Biotin:Thermo-21345 (Q)

Ions Score: 26 Expect: 0.06

Matches : 16/138 fragment ions using 34 most intense peaks [\(help\)](#)

| #  | b                  | b <sup>++</sup> | b <sup>*</sup> | b <sup>*++</sup>  | b <sup>0</sup>    | b <sup>0++</sup> | Seq. | y                  | y <sup>++</sup>   | y <sup>*</sup> | y <sup>*++</sup> | y <sup>0</sup>    | y <sup>0++</sup> | #  |
|----|--------------------|-----------------|----------------|-------------------|-------------------|------------------|------|--------------------|-------------------|----------------|------------------|-------------------|------------------|----|
| 1  | 130.049869         | 65.528572       |                |                   | 112.039304        | 56.523290        | E    |                    |                   |                |                  |                   |                  | 14 |
| 2  | 229.118283         | 115.062780      |                |                   | 211.107718        | 106.057497       | V    | 1790.954328        | 895.980802        | 1773.927779    | 887.467528       | 1772.943763       | 886.975520       | 13 |
| 3  | 358.160876         | 179.584076      |                |                   | 340.150311        | 170.578794       | E    | 1691.885914        | 846.446595        | 1674.859365    | 837.933321       | 1673.875349       | 837.441313       | 12 |
| 4  | 415.182340         | 208.094808      |                |                   | 397.171775        | 199.089526       | G    | 1562.843321        | 781.925299        | 1545.816772    | 773.412024       | 1544.832756       | 772.920016       | 11 |
| 5  | <b>854.407666</b>  | 427.707471      | 837.381117     | 419.194197        | <b>836.397101</b> | 418.702189       | Q    | 1505.821857        | 753.414567        | 1488.795308    | 744.901292       | 1487.811292       | 744.409284       | 10 |
| 6  | <b>967.491730</b>  | 484.249503      | 950.465181     | 475.736229        | 949.481165        | 475.244221       | I    | <b>1066.596531</b> | 533.801904        | 1049.569982    | 525.288629       | 1048.585966       | 524.796621       | 9  |
| 7  | 1080.575794        | 540.791535      | 1063.549245    | 532.278261        | 1062.565229       | 531.786253       | L    | <b>953.512467</b>  | 477.259872        | 936.485918     | 468.746597       | <b>935.501902</b> | 468.254589       | 8  |
| 8  | 1137.597258        | 569.302267      | 1120.570709    | 560.788993        | 1119.586693       | 560.296985       | G    | <b>840.428403</b>  | 420.717840        | 823.401854     | 412.204565       | <b>822.417838</b> | 411.712557       | 7  |
| 9  | <b>1238.644937</b> | 619.826107      | 1221.618388    | 611.312832        | 1220.634372       | 610.820824       | T    | <b>783.406939</b>  | 392.207108        | 766.380390     | 383.693833       | <b>765.396374</b> | 383.201825       | 6  |
| 10 | 1401.708266        | 701.357771      | 1384.681717    | 692.844497        | 1383.697701       | 692.352489       | Y    | <b>682.359260</b>  | 341.683268        | 665.332711     | 333.169994       |                   |                  | 5  |
| 11 | 1500.776680        | 750.891978      | 1483.750131    | 742.378704        | 1482.766115       | 741.886696       | V    | <b>519.295931</b>  | <b>260.151604</b> | 502.269382     | 251.638329       |                   |                  | 4  |
| 12 | 1660.807329        | 830.907303      | 1643.780780    | <b>822.394028</b> | 1642.796764       | 821.902020       | C    | 420.227517         | 210.617396        | 403.200968     | 202.104122       |                   |                  | 3  |
| 13 | 1773.891393        | 887.449335      | 1756.864844    | 878.936060        | 1755.880828       | 878.444052       | I    | <b>260.196868</b>  | 130.602072        | 243.170319     | 122.088797       |                   |                  | 2  |
| 14 |                    |                 |                |                   |                   |                  | K    | 147.112804         | 74.060040         | 130.086255     | 65.546765        |                   |                  | 1  |

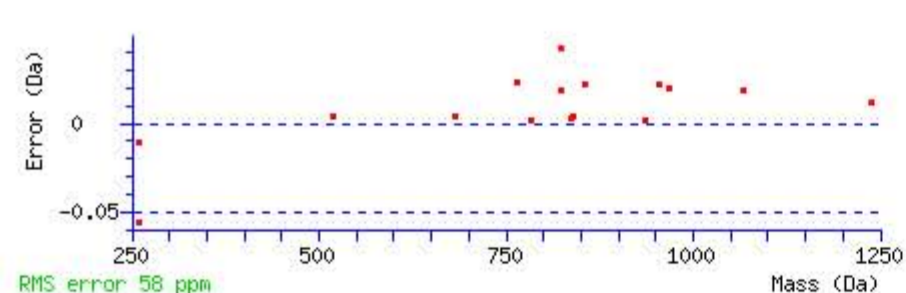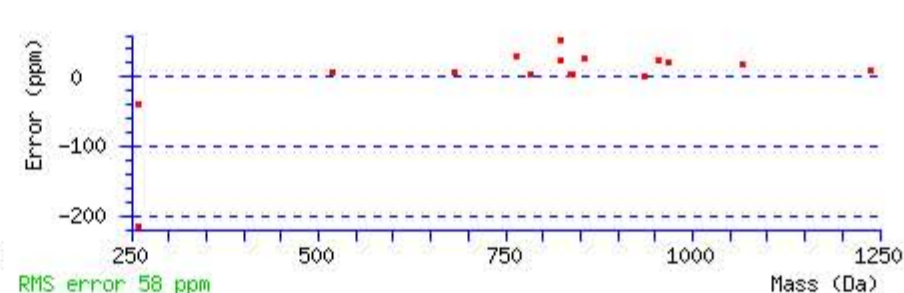

NCBI BLAST search of **EVEGQILGTYVCIK**

(Parameters: blastp, nr protein database, expect=20000, no filter, PAM30)

Other BLAST [web gateways](#)

All matches to this query

| Score | Mr(calc):   | Delta    | Sequence                       |
|-------|-------------|----------|--------------------------------|
| 26.0  | 1918.989639 | 0.022443 | <a href="#">EVEGQILGTYVCIK</a> |

Mascot: <http://www.matrixscience.com/>



# MASCOT SEARCH RESULTS

## Peptide View

MS/MS Fragmentation of **NLCEAMENFMQQLK**

Found in **C4BPB\_HUMAN**, C4b-binding protein beta chain OS=Homo sapiens GN=C4BPB PE=1 SV=1

Match to Query 55365: 2065.965972 from(689.662600,3+) rtinseconds(3066) index(49347)

Title: Locus:1.1.1.3348.4 File:"2013-07-02 CLN FXIII 60 min 1st F 3.wiff"

Data file C:\Program Files (x86)\Matrix Science\Mascot Daemon\mgf4 FXIII 60 min 1st\mascot\_daemon\_merge.mgf

Click mouse within plot area to zoom in by factor of two about that point

Or, Plot from  to  Da

Label all possible matches  Label matches used for scoring

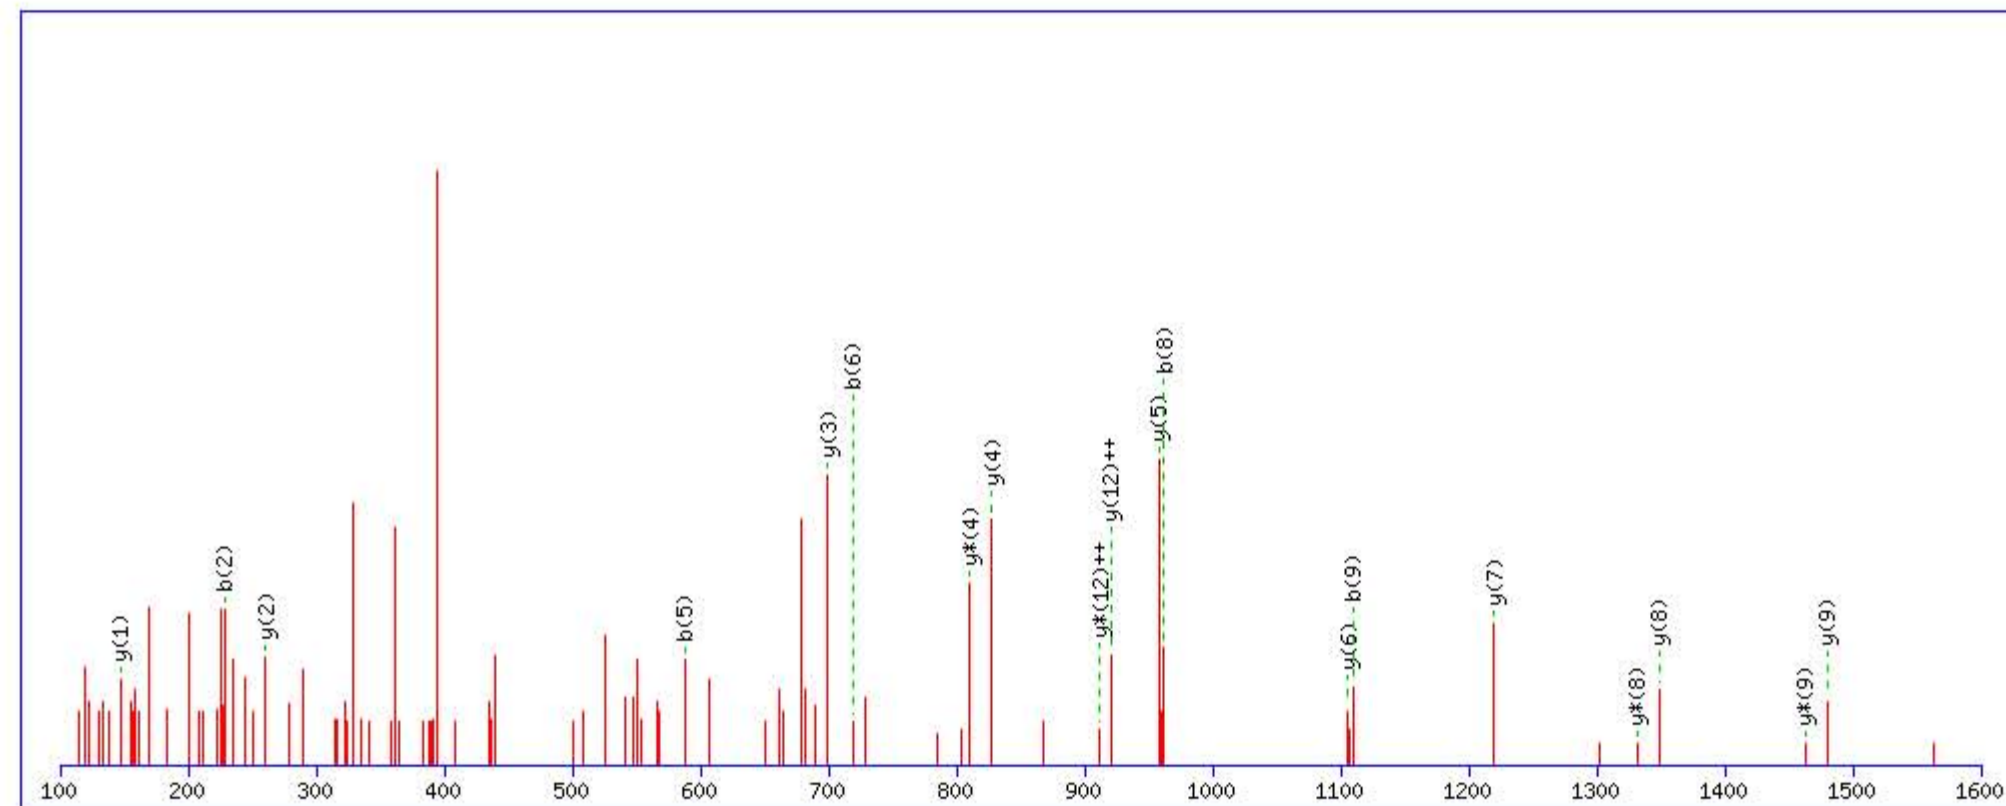

Monoisotopic mass of neutral peptide Mr(calc): 2065.945709

Fixed modifications: Carbamidomethyl (C) (apply to specified residues or termini only)

Variable modifications:

Q12 : Biotin:Thermo-21345 (Q)

Ions Score: 35 Expect: 0.0045

Matches : 19/136 fragment ions using 45 most intense peaks [\(help\)](#)

| #  | b                  | b <sup>++</sup> | b <sup>+</sup> | b <sup>+++</sup> | b <sup>0</sup> | b <sup>0++</sup> | Seq. | y                  | y <sup>++</sup>   | y <sup>+</sup>     | y <sup>+++</sup>  | y <sup>0</sup> | y <sup>0++</sup> | #  |
|----|--------------------|-----------------|----------------|------------------|----------------|------------------|------|--------------------|-------------------|--------------------|-------------------|----------------|------------------|----|
| 1  | 115.050203         | 58.028740       | 98.023654      | 49.515465        |                |                  | N    |                    |                   |                    |                   |                |                  | 14 |
| 2  | <b>228.134267</b>  | 114.570771      | 211.107718     | 106.057497       |                |                  | L    | 1952.910096        | 976.958686        | 1935.883547        | 968.445412        | 1934.899531    | 967.953404       | 13 |
| 3  | 388.164916         | 194.586096      | 371.138367     | 186.072822       |                |                  | C    | 1839.826032        | <b>920.416654</b> | 1822.799483        | <b>911.903380</b> | 1821.815467    | 911.411371       | 12 |
| 4  | 517.207509         | 259.107393      | 500.180960     | 250.594118       | 499.196944     | 250.102110       | E    | 1679.795383        | 840.401329        | 1662.768834        | 831.888055        | 1661.784818    | 831.396047       | 11 |
| 5  | <b>588.244623</b>  | 294.625950      | 571.218074     | 286.112675       | 570.234058     | 285.620667       | A    | 1550.752790        | 775.880033        | 1533.726241        | 767.366759        | 1532.742225    | 766.874751       | 10 |
| 6  | <b>719.285108</b>  | 360.146192      | 702.258559     | 351.632918       | 701.274543     | 351.140910       | M    | <b>1479.715676</b> | 740.361476        | <b>1462.689127</b> | 731.848202        | 1461.705111    | 731.356194       | 9  |
| 7  | 848.327701         | 424.667489      | 831.301152     | 416.154214       | 830.317136     | 415.662206       | E    | <b>1348.675191</b> | 674.841234        | <b>1331.648642</b> | 666.327959        | 1330.664626    | 665.835951       | 8  |
| 8  | <b>962.370628</b>  | 481.688952      | 945.344079     | 473.175678       | 944.360063     | 472.683670       | N    | <b>1219.632598</b> | 610.319937        | 1202.606049        | 601.806663        |                |                  | 7  |
| 9  | <b>1109.439042</b> | 555.223159      | 1092.412493    | 546.709885       | 1091.428477    | 546.217876       | F    | <b>1105.589671</b> | 553.298474        | 1088.563122        | 544.785199        |                |                  | 6  |
| 10 | 1240.479527        | 620.743402      | 1223.452978    | 612.230127       | 1222.468962    | 611.738119       | M    | <b>958.521257</b>  | 479.764267        | 941.494708         | 471.250992        |                |                  | 5  |
| 11 | 1368.538105        | 684.772690      | 1351.511556    | 676.259416       | 1350.527540    | 675.767408       | Q    | <b>827.480772</b>  | 414.244024        | <b>810.454223</b>  | 405.730750        |                |                  | 4  |
| 12 | 1807.763431        | 904.385354      | 1790.736882    | 895.872079       | 1789.752866    | 895.380071       | Q    | <b>699.422194</b>  | 350.214735        | 682.395645         | 341.701461        |                |                  | 3  |
| 13 | 1920.847495        | 960.927386      | 1903.820946    | 952.414111       | 1902.836930    | 951.922103       | L    | <b>260.196868</b>  | 130.602072        | 243.170319         | 122.088797        |                |                  | 2  |
| 14 |                    |                 |                |                  |                |                  | K    | <b>147.112804</b>  | 74.060040         | 130.086255         | 65.546765         |                |                  | 1  |

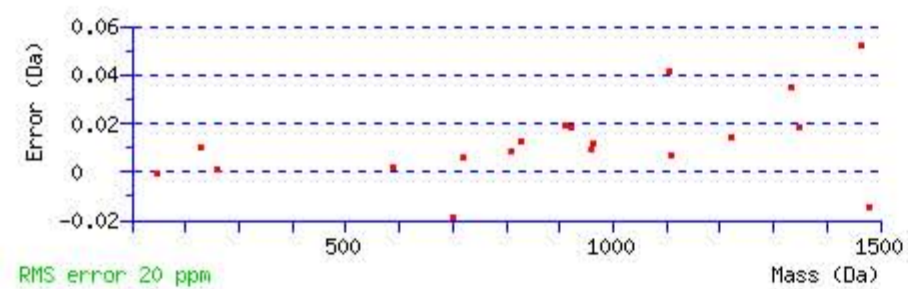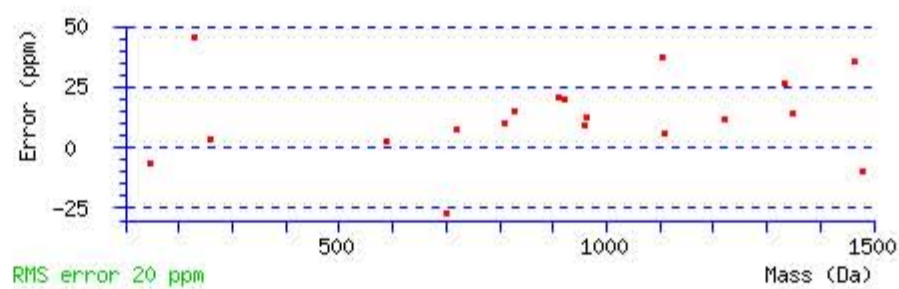

NCBI BLAST search of **NLCEAMENFMQQLK**

(Parameters: blastp, nr protein database, expect=20000, no filter, PAM30)

Other BLAST [web gateways](#)

All matches to this query

| Score | Mr(calc):   | Delta    | Sequence                       |
|-------|-------------|----------|--------------------------------|
| 35.3  | 2065.945709 | 0.020263 | <a href="#">NLCEAMENFMQQLK</a> |
| 26.2  | 2065.945709 | 0.020263 | <a href="#">NLCEAMENFMQQLK</a> |

Mascot: <http://www.matrixscience.com/>



# MASCOT Search Results

## Peptide View

MS/MS Fragmentation of **SQCLEDHTWAPFPICK**  
 Found in **C4BPB\_HUMAN**, C4b-binding protein beta chain OS=Homo sapiens GN=C4BPB PE=1 SV=1

Match to Query 62265: 2396.138742 from(799.720190,3+) rtinseconds(2319) index(44154)  
 Title: Locus:1.1.1.3091.17 File:"2013-07-02 CLN FXIII 60 min 1st F 3.wiff"  
 Data file C:\Program Files (x86)\Matrix Science\Mascot Daemon\mgf\4 FXIII 60 min 1st\mascot\_daemon\_merge.mgf

Click mouse within plot area to zoom in by factor of two about that point  
 Or, Plot from  to  Da   
 Label all possible matches  Label matches used for scoring

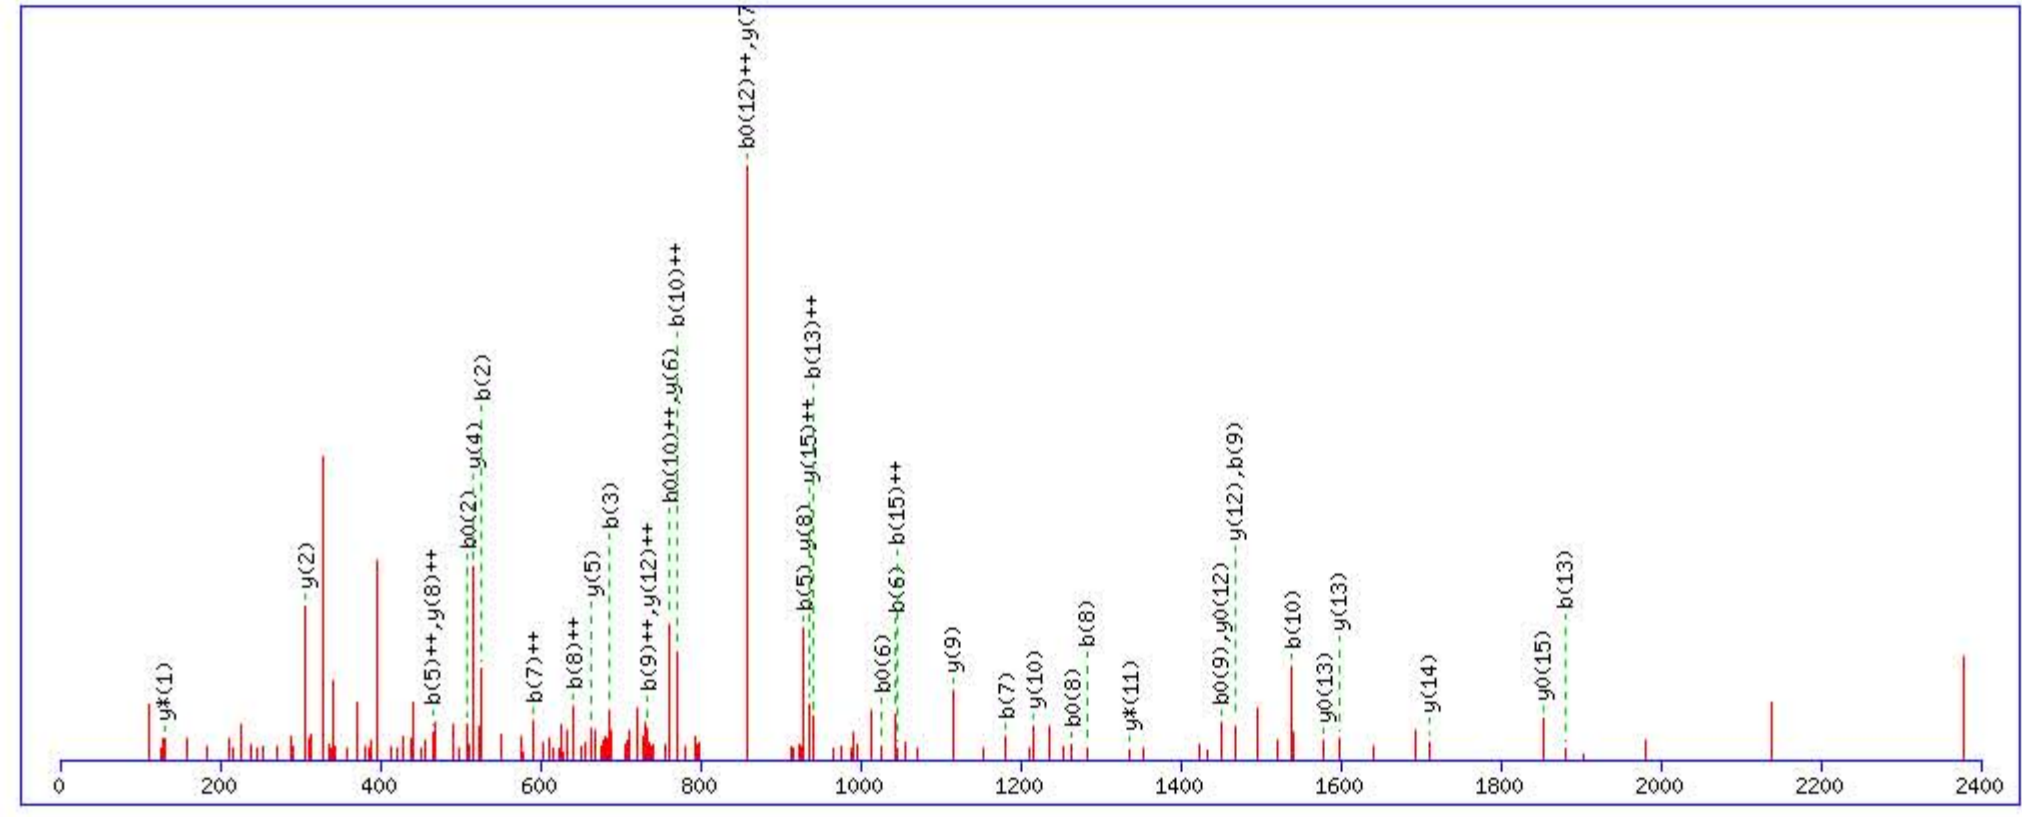

Monoisotopic mass of neutral peptide Mr(calc): 2396.111572  
 Fixed modifications: Carbamidomethyl (C) (apply to specified residues or termini only)  
 Variable modifications:  
 Q2 : Biotin:Thermo-21345 (Q)  
 Ions Score: 47 Expect: 0.00038  
 Matches : 41/172 fragment ions using 75 most intense peaks [\(help\)](#)

| #  | b                  | b <sup>++</sup>    | b <sup>*</sup> | b <sup>*++</sup> | b <sup>0</sup>     | b <sup>0++</sup>  | Seq. | y                  | y <sup>++</sup>   | y <sup>*</sup>     | y <sup>*++</sup> | y <sup>0</sup>     | y <sup>0++</sup> | #  |
|----|--------------------|--------------------|----------------|------------------|--------------------|-------------------|------|--------------------|-------------------|--------------------|------------------|--------------------|------------------|----|
| 1  | 88.039304          | 44.523290          |                |                  | 70.028739          | 35.518008         | S    |                    |                   |                    |                  |                    |                  | 17 |
| 2  | <b>527.264630</b>  | 264.135953         | 510.238081     | 255.622679       | <b>509.254065</b>  | 255.130671        | Q    | 2310.086816        | 1155.547046       | 2293.060267        | 1147.033771      | 2292.076251        | 1146.541763      | 16 |
| 3  | <b>687.295279</b>  | 344.151278         | 670.268730     | 335.638003       | 669.284714         | 335.145995        | C    | 1870.861490        | <b>935.934383</b> | 1853.834941        | 927.421109       | <b>1852.850925</b> | 926.929101       | 15 |
| 4  | 800.379343         | 400.693310         | 783.352794     | 392.180035       | 782.368778         | 391.688027        | L    | <b>1710.830841</b> | 855.919058        | 1693.804292        | 847.405784       | 1692.820276        | 846.913776       | 14 |
| 5  | <b>929.421936</b>  | <b>465.214606</b>  | 912.395387     | 456.701332       | 911.411371         | 456.209324        | E    | <b>1597.746777</b> | 799.377026        | 1580.720228        | 790.863752       | <b>1579.736212</b> | 790.371744       | 13 |
| 6  | <b>1044.448879</b> | 522.728078         | 1027.422330    | 514.214803       | <b>1026.438314</b> | 513.722795        | D    | <b>1468.704184</b> | <b>734.855730</b> | 1451.677635        | 726.342456       | <b>1450.693619</b> | 725.850447       | 12 |
| 7  | <b>1181.507791</b> | <b>591.257534</b>  | 1164.481242    | 582.744259       | 1163.497226        | 582.252251        | H    | 1353.677241        | 677.342258        | <b>1336.650692</b> | 668.828984       | 1335.666676        | 668.336976       | 11 |
| 8  | <b>1282.555470</b> | <b>641.781373</b>  | 1265.528921    | 633.268099       | <b>1264.544905</b> | 632.776091        | T    | <b>1216.618329</b> | 608.812802        | 1199.591780        | 600.299528       | 1198.607764        | 599.807520       | 10 |
| 9  | <b>1468.634783</b> | <b>734.821030</b>  | 1451.608234    | 726.307755       | <b>1450.624218</b> | 725.815747        | W    | <b>1115.570650</b> | 558.288963        | 1098.544101        | 549.775689       |                    |                  | 9  |
| 10 | <b>1539.671897</b> | <b>770.339587</b>  | 1522.645348    | 761.826312       | 1521.661332        | <b>761.334304</b> | A    | <b>929.491337</b>  | <b>465.249306</b> | 912.464788         | 456.736032       |                    |                  | 8  |
| 11 | 1636.724661        | 818.865969         | 1619.698112    | 810.352694       | 1618.714096        | 809.860686        | P    | <b>858.454223</b>  | 429.730750        | 841.427674         | 421.217475       |                    |                  | 7  |
| 12 | 1733.777425        | 867.392351         | 1716.750876    | 858.879076       | 1715.766860        | <b>858.387068</b> | P    | <b>761.401459</b>  | 381.204367        | 744.374910         | 372.691093       |                    |                  | 6  |
| 13 | <b>1880.845839</b> | <b>940.926558</b>  | 1863.819290    | 932.413283       | 1862.835274        | 931.921275        | F    | <b>664.348695</b>  | 332.677985        | 647.322146         | 324.164711       |                    |                  | 5  |
| 14 | 1977.898603        | 989.452940         | 1960.872054    | 980.939665       | 1959.888038        | 980.447657        | P    | <b>517.280281</b>  | 259.143778        | 500.253732         | 250.630504       |                    |                  | 4  |
| 15 | 2090.982667        | <b>1045.994971</b> | 2073.956118    | 1037.481697      | 2072.972102        | 1036.989689       | I    | 420.227517         | 210.617396        | 403.200968         | 202.104122       |                    |                  | 3  |
| 16 | 2251.013316        | 1126.010296        | 2233.986767    | 1117.497021      | 2233.002751        | 1117.005013       | C    | <b>307.143453</b>  | 154.075364        | 290.116904         | 145.562090       |                    |                  | 2  |
| 17 |                    |                    |                |                  |                    |                   | K    | 147.112804         | 74.060040         | <b>130.086255</b>  | 65.546765        |                    |                  | 1  |

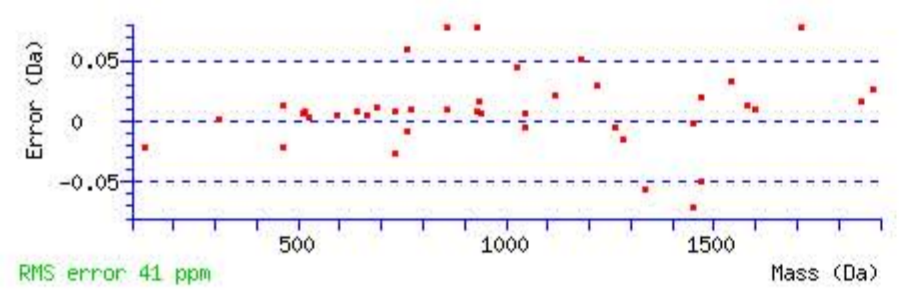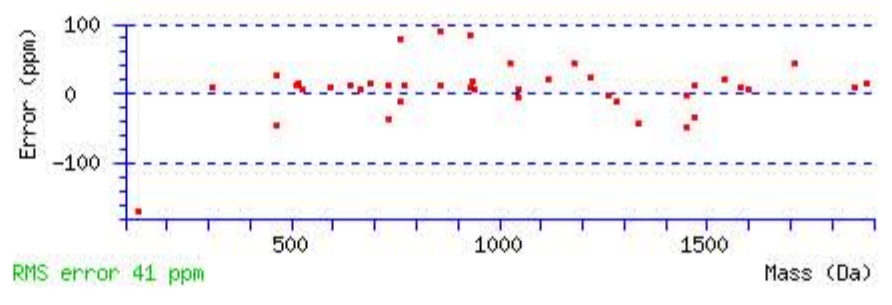

NCBI BLAST search of **SQCLEDHTWAPFPICK**  
 (Parameters: blastp, nr protein database, expect=20000, no filter, PAM30)  
 Other BLAST [web gateways](#)

### All matches to this query

| Score | Mr(calc):   | Delta    | Sequence                         |
|-------|-------------|----------|----------------------------------|
| 47.5  | 2396.111572 | 0.027170 | <a href="#">SQCLEDHTWAPFPICK</a> |



# MASCOT SCIENCE Mascot Search Results

## Peptide View

MS/MS Fragmentation of **DHLGFQVTPDESK**

Found in **CPN2\_HUMAN**, Carboxypeptidase N subunit 2 OS=Homo sapiens GN=CPN2 PE=1 SV=3

Match to Query 52253: 1968.955362 from(657.325730,3+) rtinseconds(2284) index(43962)

Title: Locus:1.1.1.3079.9 File:"2013-07-02 CLN FXIII 60 min 1st F 3.wiff"

Data file C:\Program Files (x86)\Matrix Science\Mascot Daemon\mgf4 FXIII 60 min 1st\mascot\_daemon\_merge.mgf

Click mouse within plot area to zoom in by factor of two about that point

Or, Plot from  to  Da

Label all possible matches  Label matches used for scoring

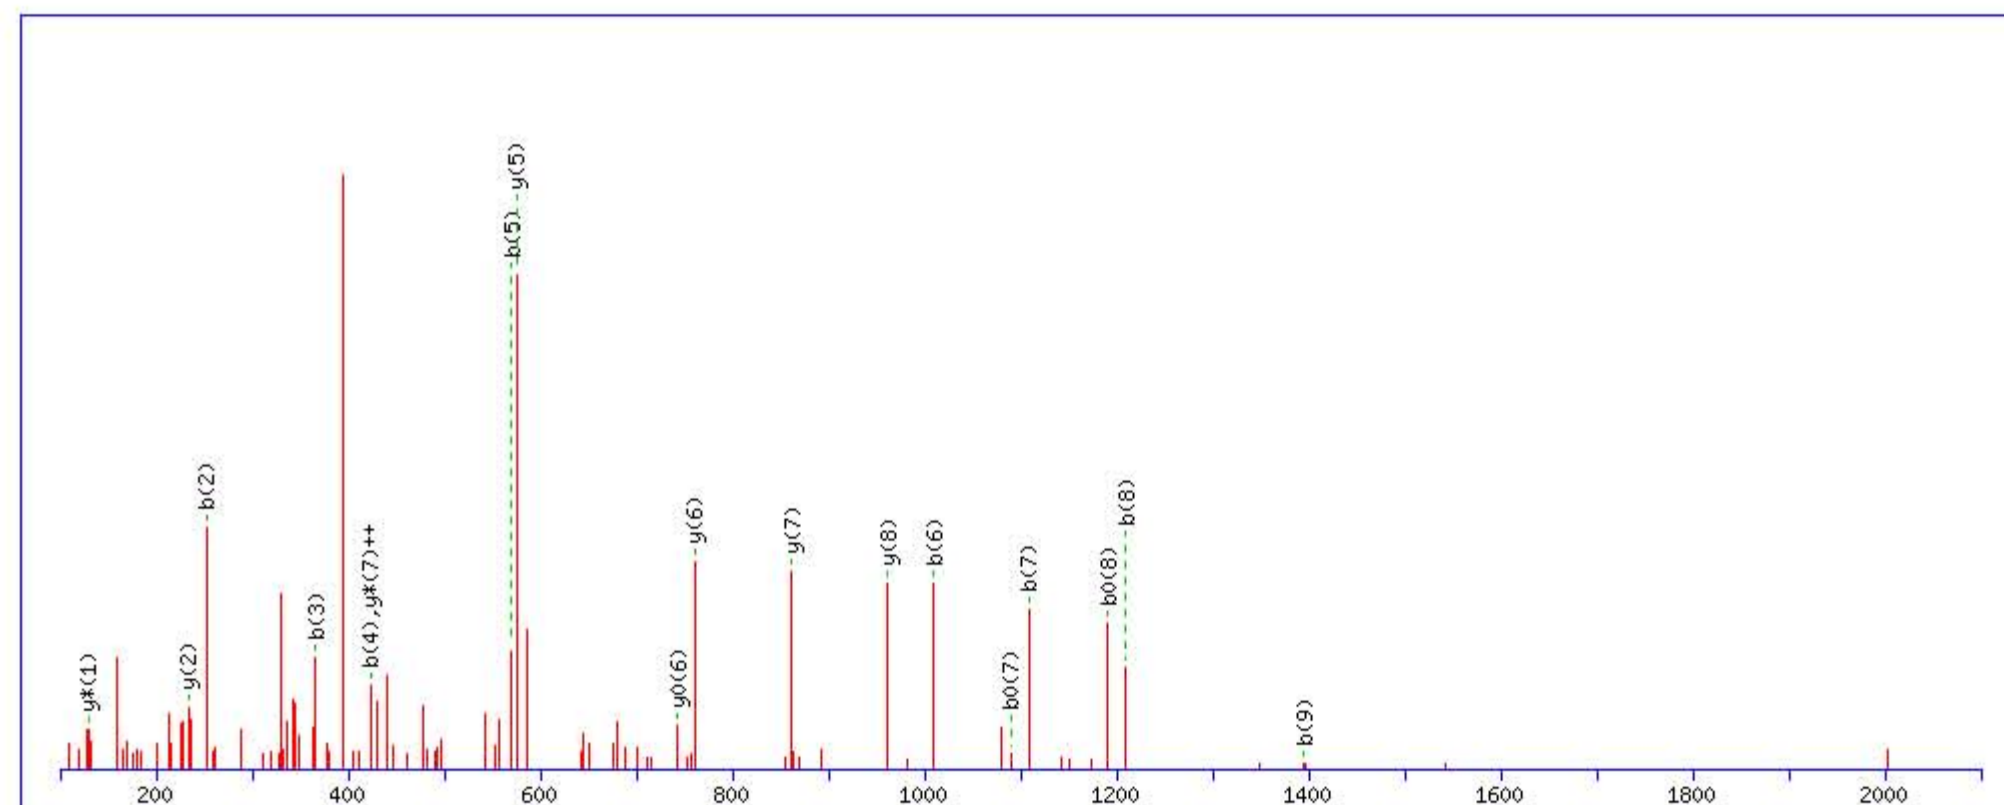

Monoisotopic mass of neutral peptide Mr(calc): 1968.940399

Fixed modifications: Carbamidomethyl (C) (apply to specified residues or termini only)

Variable modifications:

Q6 : Biotin:Thermo-21345 (Q)

Ions Score: 36 Expect: 0.0027

Matches : 18/144 fragment ions using 37 most intense peaks [\(help\)](#)

| #  | b                  | b <sup>++</sup> | b <sup>+</sup> | b <sup>+++</sup> | b <sup>0</sup>     | b <sup>0++</sup> | Seq. | y                 | y <sup>++</sup> | y <sup>+</sup>    | y <sup>+++</sup>  | y <sup>0</sup>    | y <sup>0++</sup> | #  |
|----|--------------------|-----------------|----------------|------------------|--------------------|------------------|------|-------------------|-----------------|-------------------|-------------------|-------------------|------------------|----|
| 1  | 116.034219         | 58.520748       |                |                  | 98.023654          | 49.515465        | D    |                   |                 |                   |                   |                   |                  | 14 |
| 2  | <b>253.093131</b>  | 127.050203      |                |                  | 235.082566         | 118.044921       | H    | 1854.920718       | 927.963997      | 1837.894169       | 919.450723        | 1836.910153       | 918.958715       | 13 |
| 3  | <b>366.177195</b>  | 183.592235      |                |                  | 348.166630         | 174.586953       | L    | 1717.861806       | 859.434541      | 1700.835257       | 850.921267        | 1699.851241       | 850.429259       | 12 |
| 4  | <b>423.198659</b>  | 212.102967      |                |                  | 405.188094         | 203.097685       | G    | 1604.777742       | 802.892509      | 1587.751193       | 794.379235        | 1586.767177       | 793.887227       | 11 |
| 5  | <b>570.267073</b>  | 285.637175      |                |                  | 552.256508         | 276.631892       | F    | 1547.756278       | 774.381777      | 1530.729729       | 765.868503        | 1529.745713       | 765.376495       | 10 |
| 6  | <b>1009.492399</b> | 505.249838      | 992.465850     | 496.736563       | 991.481834         | 496.244555       | Q    | 1400.687864       | 700.847570      | 1383.661315       | 692.334296        | 1382.677299       | 691.842288       | 9  |
| 7  | <b>1108.560813</b> | 554.784045      | 1091.534264    | 546.270770       | <b>1090.550248</b> | 545.778762       | V    | <b>961.462538</b> | 481.234907      | 944.435989        | 472.721633        | 943.451973        | 472.229625       | 8  |
| 8  | <b>1209.608492</b> | 605.307884      | 1192.581943    | 596.794610       | <b>1191.597927</b> | 596.302602       | T    | <b>862.394124</b> | 431.700700      | 845.367575        | <b>423.187426</b> | 844.383559        | 422.695418       | 7  |
| 9  | <b>1395.687805</b> | 698.347541      | 1378.661256    | 689.834266       | 1377.677240        | 689.342258       | W    | <b>761.346445</b> | 381.176861      | 744.319896        | 372.663586        | <b>743.335880</b> | 372.171578       | 6  |
| 10 | 1492.740569        | 746.873923      | 1475.714020    | 738.360648       | 1474.730004        | 737.868640       | P    | <b>575.267132</b> | 288.137204      | 558.240583        | 279.623930        | 557.256567        | 279.131922       | 5  |
| 11 | 1607.767512        | 804.387394      | 1590.740963    | 795.874120       | 1589.756947        | 795.382112       | D    | 478.214368        | 239.610822      | 461.187819        | 231.097548        | 460.203803        | 230.605540       | 4  |
| 12 | 1736.810105        | 868.908691      | 1719.783556    | 860.395416       | 1718.799540        | 859.903408       | E    | 363.187425        | 182.097351      | 346.160876        | 173.584076        | 345.176860        | 173.092068       | 3  |
| 13 | 1823.842133        | 912.424705      | 1806.815584    | 903.911430       | 1805.831568        | 903.419422       | S    | <b>234.144832</b> | 117.576054      | 217.118283        | 109.062780        | 216.134267        | 108.570772       | 2  |
| 14 |                    |                 |                |                  |                    |                  | K    | 147.112804        | 74.060040       | <b>130.086255</b> | 65.546765         |                   |                  | 1  |

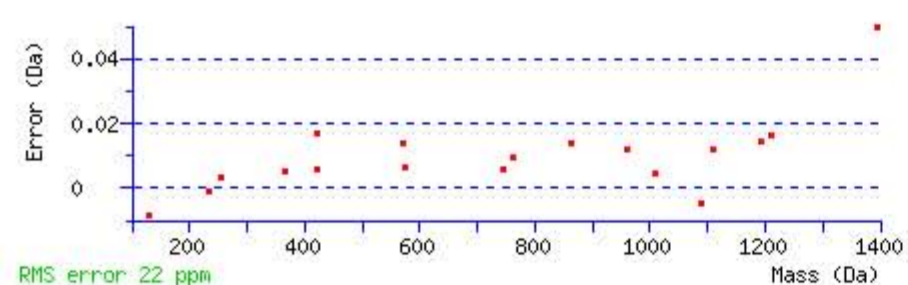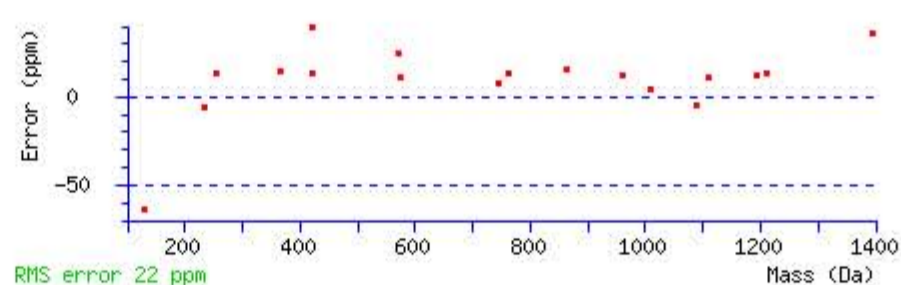

NCBI BLAST search of **DHLGFQVTPDESK**

(Parameters: blastp, nr protein database, expect=20000, no filter, PAM30)

Other BLAST [web gateways](#)

All matches to this query

| Score | Mr(calc):   | Delta    | Sequence                           |
|-------|-------------|----------|------------------------------------|
| 36.3  | 1968.940399 | 0.014963 | <a href="#">DHLGFQVTPDESK</a>      |
| 8.9   | 1968.949585 | 0.005777 | <a href="#">EGQMESVEAAMSSKTLKK</a> |

Mascot: <http://www.matrixscience.com/>



# MASCOT Search Results

## Peptide View

MS/MS Fragmentation of **SQCTYSNPEGTVVLACDQAQCR**

Found in **CPN2\_HUMAN**, Carboxypeptidase N subunit 2 OS=Homo sapiens GN=CPN2 PE=1 SV=3

Match to Query 69839: 2854.278822 from(952.433550,3+) rtinseconds(2038) index(42362)

Title: Locus:1.1.1.2993.19 File:"2013-07-02 CLN FXIII 60 min 1st F 3.wiff"

Data file C:\Program Files (x86)\Matrix Science\Mascot Daemon\mgf4 FXIII 60 min 1st\mascot\_daemon\_merge.mgf

Click mouse within plot area to zoom in by factor of two about that point

Or, Plot from  to  Da

Label all possible matches  Label matches used for scoring

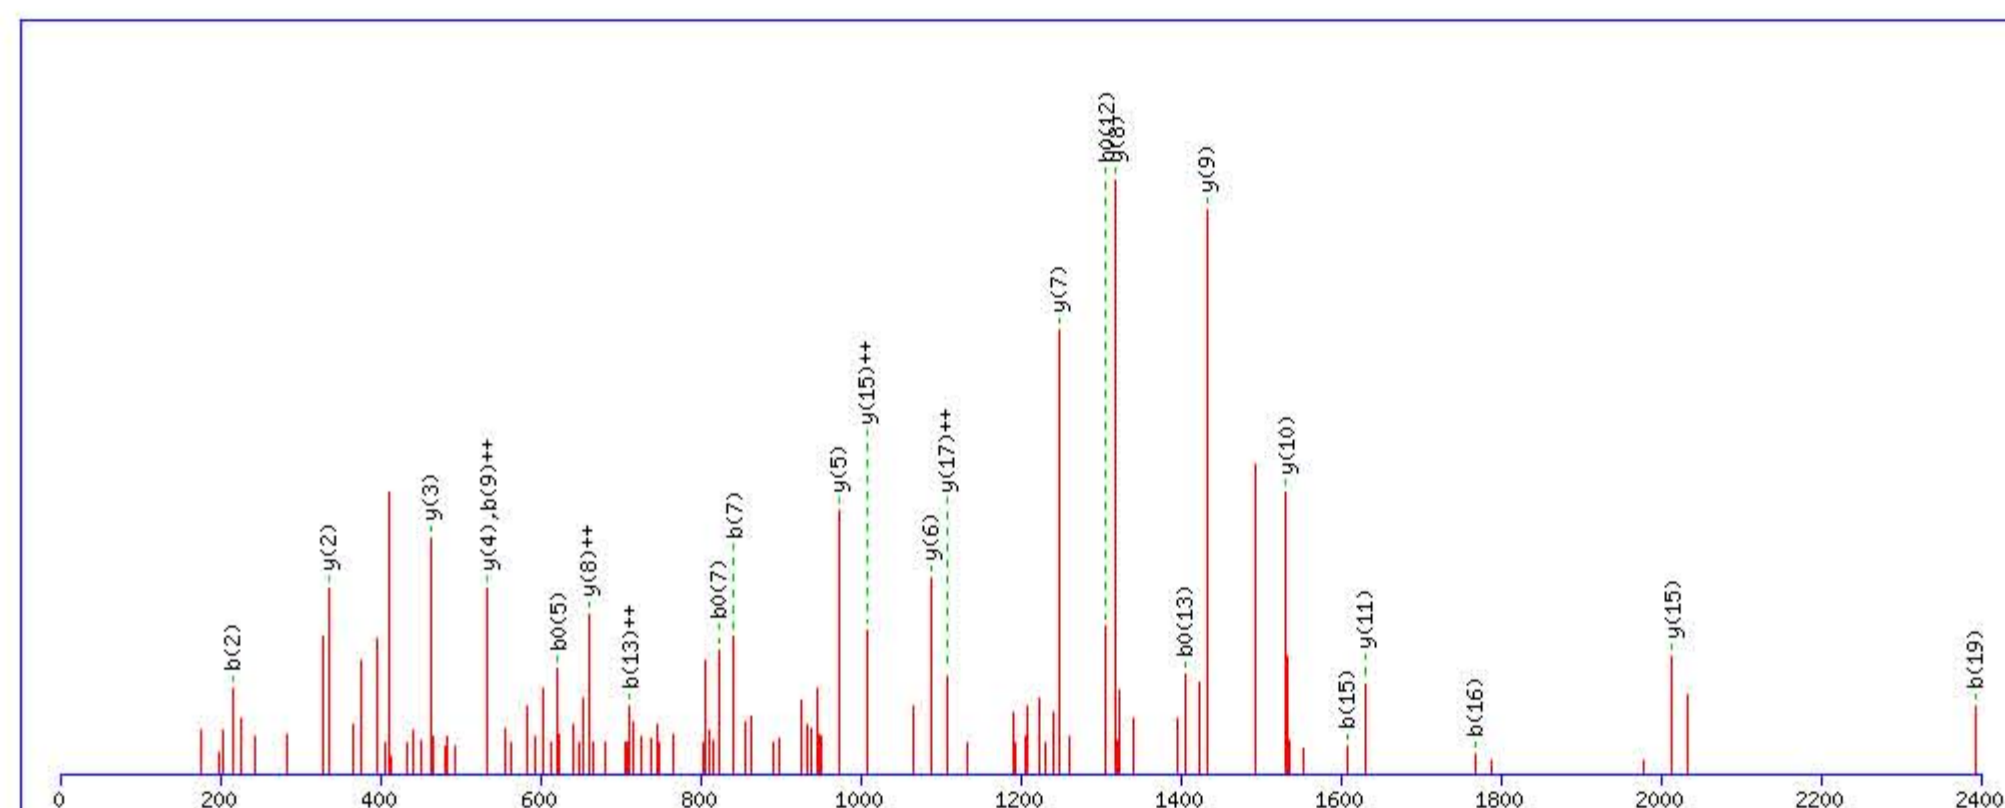

Monoisotopic mass of neutral peptide Mr(calc): 2854.250671

Fixed modifications: Carbamidomethyl (C) (apply to specified residues or termini only)

Variable modifications:

Q18 : Biotin:Thermo-21345 (Q)

Ions Score: 71 Expect: 6.6e-007

Matches : 25/240 fragment ions using 35 most intense peaks [\(help\)](#)

| #  | b                  | b <sup>++</sup>   | b <sup>*</sup> | b <sup>*++</sup> | b <sup>0</sup>     | b <sup>0++</sup> | Seq. | y                  | y <sup>++</sup>    | y <sup>*</sup> | y <sup>*++</sup> | y <sup>0</sup> | y <sup>0++</sup> | #  |
|----|--------------------|-------------------|----------------|------------------|--------------------|------------------|------|--------------------|--------------------|----------------|------------------|----------------|------------------|----|
| 1  | 88.039304          | 44.523290         |                |                  | 70.028739          | 35.518008        | S    |                    |                    |                |                  |                |                  | 22 |
| 2  | <b>216.097882</b>  | 108.552579        | 199.071333     | 100.039305       | 198.087317         | 99.547296        | Q    | 2768.225907        | 1384.616591        | 2751.199358    | 1376.103317      | 2750.215342    | 1375.611309      | 21 |
| 3  | 376.128531         | 188.567904        | 359.101982     | 180.054629       | 358.117966         | 179.562621       | C    | 2640.167329        | 1320.587302        | 2623.140780    | 1312.074028      | 2622.156764    | 1311.582020      | 20 |
| 4  | 477.176210         | 239.091743        | 460.149661     | 230.578469       | 459.165645         | 230.086461       | T    | 2480.136680        | 1240.571978        | 2463.110131    | 1232.058703      | 2462.126115    | 1231.566695      | 19 |
| 5  | 640.239539         | 320.623408        | 623.212990     | 312.110133       | <b>622.228974</b>  | 311.618125       | Y    | 2379.089001        | 1190.048138        | 2362.062452    | 1181.534864      | 2361.078436    | 1181.042856      | 18 |
| 6  | 727.271567         | 364.139422        | 710.245018     | 355.626147       | 709.261002         | 355.134139       | S    | 2216.025672        | <b>1108.516474</b> | 2198.999123    | 1100.003199      | 2198.015107    | 1099.511191      | 17 |
| 7  | <b>841.314494</b>  | 421.160885        | 824.287945     | 412.647611       | <b>823.303929</b>  | 412.155603       | N    | 2128.993644        | 1065.000460        | 2111.967095    | 1056.487185      | 2110.983079    | 1055.995177      | 16 |
| 8  | 938.367258         | 469.687267        | 921.340709     | 461.173993       | 920.356693         | 460.681985       | P    | <b>2014.950717</b> | <b>1007.978997</b> | 1997.924168    | 999.465722       | 1996.940152    | 998.973714       | 15 |
| 9  | 1067.409851        | <b>534.208564</b> | 1050.383302    | 525.695289       | 1049.399286        | 525.203281       | E    | 1917.897953        | 959.452615         | 1900.871404    | 950.939340       | 1899.887388    | 950.447332       | 14 |
| 10 | 1124.431315        | 562.719296        | 1107.404766    | 554.206021       | 1106.420750        | 553.714013       | G    | 1788.855360        | 894.931318         | 1771.828811    | 886.418044       | 1770.844795    | 885.926036       | 13 |
| 11 | 1225.478994        | 613.243135        | 1208.452445    | 604.729861       | 1207.468429        | 604.237853       | T    | 1731.833896        | 866.420586         | 1714.807347    | 857.907312       | 1713.823331    | 857.415304       | 12 |
| 12 | 1324.547408        | 662.777342        | 1307.520859    | 654.264068       | <b>1306.536843</b> | 653.772060       | V    | <b>1630.786217</b> | 815.896747         | 1613.759668    | 807.383472       | 1612.775652    | 806.891464       | 11 |
| 13 | 1423.615822        | <b>712.311549</b> | 1406.589273    | 703.798275       | <b>1405.605257</b> | 703.306267       | V    | <b>1531.717803</b> | 766.362540         | 1514.691254    | 757.849265       | 1513.707238    | 757.357257       | 10 |
| 14 | 1536.699886        | 768.853581        | 1519.673337    | 760.340307       | 1518.689321        | 759.848299       | L    | <b>1432.649389</b> | 716.828333         | 1415.622840    | 708.315058       | 1414.638824    | 707.823050       | 9  |
| 15 | <b>1607.737000</b> | 804.372138        | 1590.710451    | 795.858864       | 1589.726435        | 795.366856       | A    | <b>1319.565325</b> | <b>660.286301</b>  | 1302.538776    | 651.773026       | 1301.554760    | 651.281018       | 8  |
| 16 | <b>1767.767649</b> | 884.387463        | 1750.741100    | 875.874188       | 1749.757084        | 875.382180       | C    | <b>1248.528211</b> | 624.767744         | 1231.501662    | 616.254469       | 1230.517646    | 615.762461       | 7  |
| 17 | 1882.794592        | 941.900934        | 1865.768043    | 933.387660       | 1864.784027        | 932.895652       | D    | <b>1088.497562</b> | 544.752419         | 1071.471013    | 536.239145       | 1070.486997    | 535.747137       | 6  |
| 18 | 2322.019918        | 1161.513597       | 2304.993369    | 1153.000322      | 2304.009353        | 1152.508314      | Q    | <b>973.470619</b>  | 487.238948         | 956.444070     | 478.725673       |                |                  | 5  |
| 19 | <b>2393.057032</b> | 1197.032154       | 2376.030483    | 1188.518879      | 2375.046467        | 1188.026872      | A    | <b>534.245293</b>  | 267.626285         | 517.218744     | 259.113010       |                |                  | 4  |
| 20 | 2521.115610        | 1261.061443       | 2504.089061    | 1252.548169      | 2503.105045        | 1252.056161      | Q    | <b>463.208179</b>  | 232.107727         | 446.181630     | 223.594453       |                |                  | 3  |
| 21 | 2681.146259        | 1341.076768       | 2664.119710    | 1332.563493      | 2663.135694        | 1332.071485      | C    | <b>335.149601</b>  | 168.078438         | 318.123052     | 159.565164       |                |                  | 2  |
| 22 |                    |                   |                |                  |                    |                  | R    | 175.118952         | 88.063114          | 158.092403     | 79.549839        |                |                  | 1  |

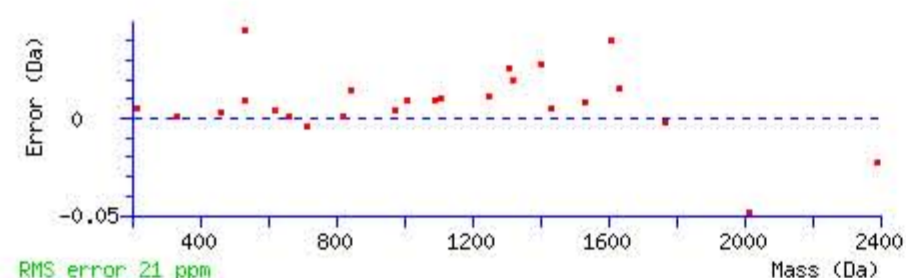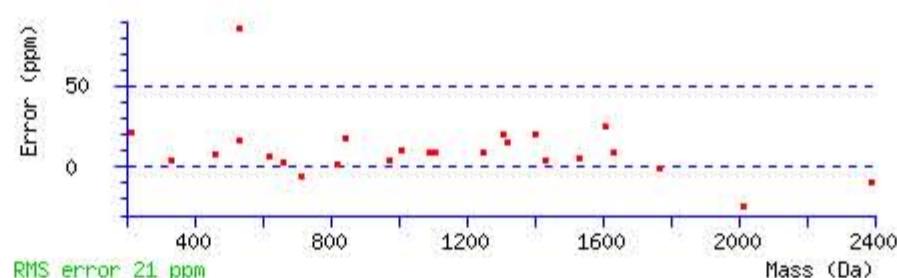

NCBI BLAST search of **SQCTYSNPEGTVVLACDQAQCR**

(Parameters: blastp, nr protein database, expect=20000, no filter, PAM30)

Other BLAST [web gateways](#)

All matches to this query

| Score | Mr(calc):   | Delta    | Sequence                               |
|-------|-------------|----------|----------------------------------------|
| 70.8  | 2854.250671 | 0.028151 | <a href="#">SQCTYSNPEGTVVLACDQAQCR</a> |
| 54.0  | 2854.250671 | 0.028151 | <a href="#">SQCTYSNPEGTVVLACDQAQCR</a> |
| 1.1   | 2854.250671 | 0.028151 | <a href="#">SQCTYSNPEGTVVLACDQAQCR</a> |

Mascot: <http://www.matrixscience.com/>



# MASCOT Search Results

## Peptide View

MS/MS Fragmentation of **SSTGPGEQLR**

Found in **COMP\_HUMAN**, Cartilage oligomeric matrix protein OS=Homo sapiens GN=COMP PE=1 SV=2

Match to Query 31826: 1341.675568 from(671.845060,2+) rtinseconds(1526) index(57126)

Title: Locus:1.1.1.2837.17 File:"2013-07-02 CLN FXIII 60 min 1st F 4.wiff"

Data file C:\Program Files (x86)\Matrix Science\Mascot Daemon\mgf\4 FXIII 60 min 1st\mascot\_daemon\_merge.mgf

Click mouse within plot area to zoom in by factor of two about that point

Or, Plot from  to  Da

Label all possible matches  Label matches used for scoring

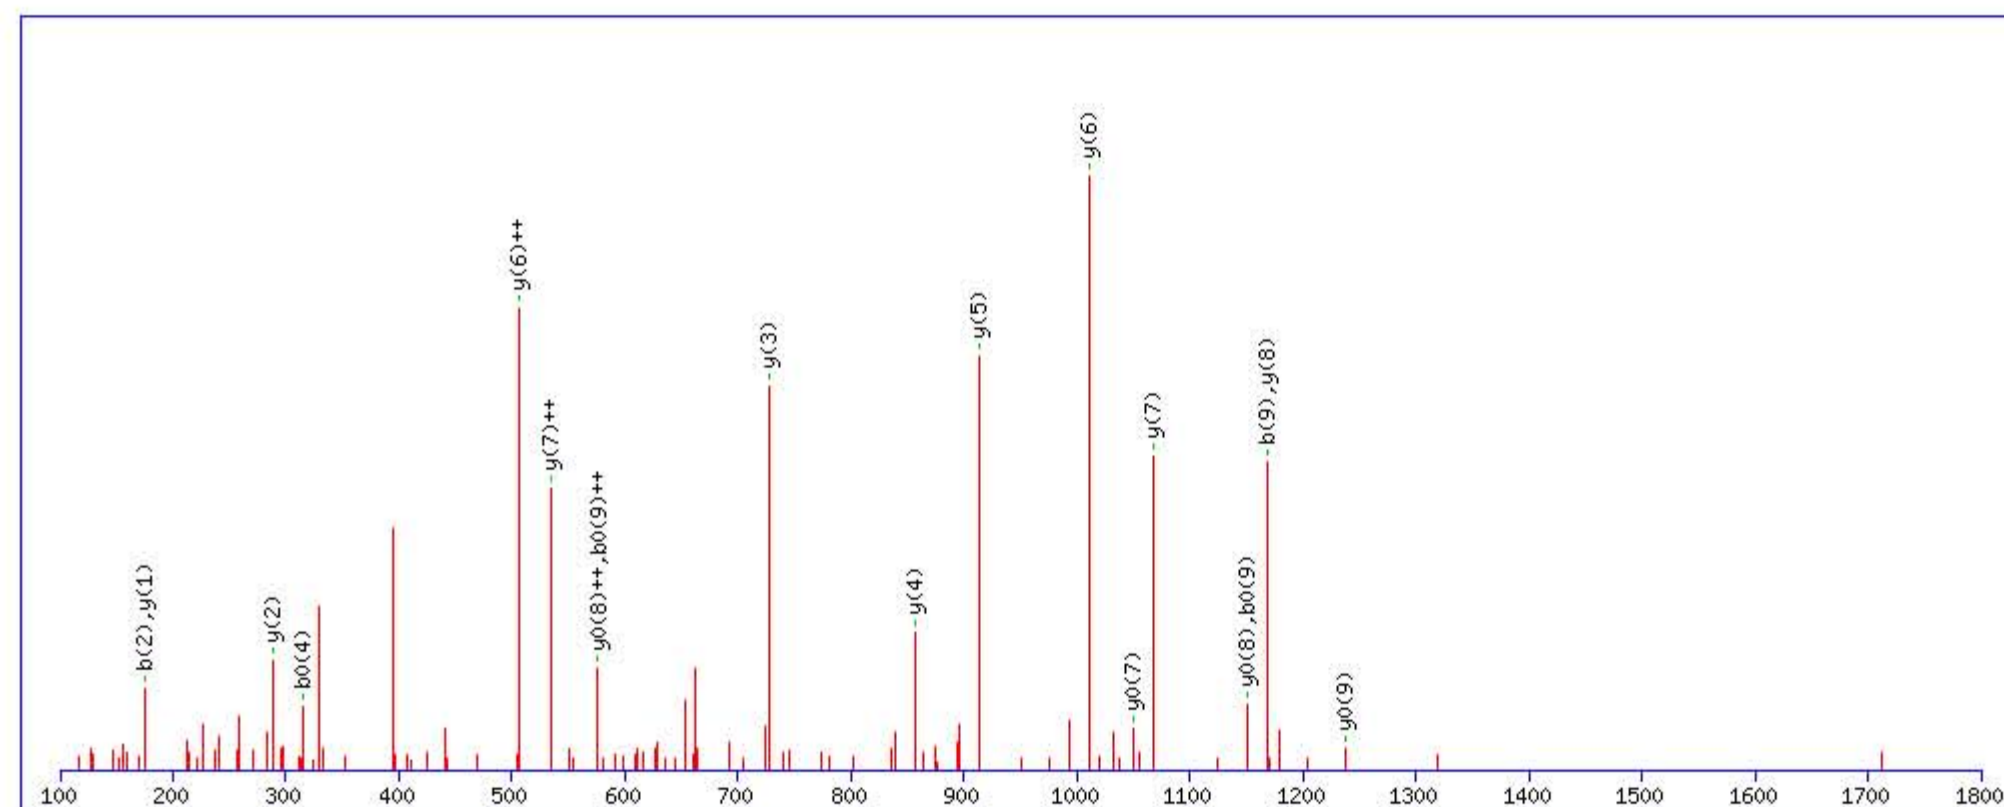

Monoisotopic mass of neutral peptide Mr(calc): 1341.671082

Fixed modifications: Carbamidomethyl (C) (apply to specified residues or termini only)

Variable modifications:

Q8 : Biotin:Thermo-21345 (Q)

Ions Score: 63 Expect: 9.7e-006

Matches : 19/88 fragment ions using 24 most intense peaks [\(help\)](#)

| #  | b                  | b <sup>++</sup> | b <sup>+</sup> | b <sup>+++</sup> | b <sup>0</sup>     | b <sup>0++</sup>  | Seq. | y                  | y <sup>++</sup>   | y <sup>+</sup> | y <sup>+++</sup> | y <sup>0</sup>     | y <sup>0++</sup>  | #  |
|----|--------------------|-----------------|----------------|------------------|--------------------|-------------------|------|--------------------|-------------------|----------------|------------------|--------------------|-------------------|----|
| 1  | 88.039304          | 44.523290       |                |                  | 70.028739          | 35.518008         | S    |                    |                   |                |                  |                    |                   | 10 |
| 2  | <b>175.071332</b>  | 88.039304       |                |                  | 157.060767         | 79.034021         | S    | 1255.646334        | 628.326805        | 1238.619785    | 619.813530       | <b>1237.635769</b> | 619.321522        | 9  |
| 3  | 276.119011         | 138.563144      |                |                  | 258.108446         | 129.557861        | T    | <b>1168.614306</b> | 584.810791        | 1151.587757    | 576.297517       | <b>1150.603741</b> | <b>575.805508</b> | 8  |
| 4  | 333.140475         | 167.073875      |                |                  | <b>315.129910</b>  | 158.068593        | G    | <b>1067.566627</b> | <b>534.286951</b> | 1050.540078    | 525.773677       | <b>1049.556062</b> | 525.281669        | 7  |
| 5  | 430.193239         | 215.600258      |                |                  | 412.182674         | 206.594975        | P    | <b>1010.545163</b> | <b>505.776219</b> | 993.518614     | 497.262945       | 992.534598         | 496.770937        | 6  |
| 6  | 487.214703         | 244.110989      |                |                  | 469.204138         | 235.105707        | G    | <b>913.492399</b>  | 457.249837        | 896.465850     | 448.736563       | 895.481834         | 448.244555        | 5  |
| 7  | 616.257296         | 308.632286      |                |                  | 598.246731         | 299.627004        | E    | <b>856.470935</b>  | 428.739105        | 839.444386     | 420.225831       | 838.460370         | 419.733823        | 4  |
| 8  | 1055.482622        | 528.244949      | 1038.456073    | 519.731675       | 1037.472057        | 519.239667        | Q    | <b>727.428342</b>  | 364.217809        | 710.401793     | 355.704534       |                    |                   | 3  |
| 9  | <b>1168.566686</b> | 584.786981      | 1151.540137    | 576.273707       | <b>1150.556121</b> | <b>575.781698</b> | L    | <b>288.203016</b>  | 144.605146        | 271.176467     | 136.091871       |                    |                   | 2  |
| 10 |                    |                 |                |                  |                    |                   | R    | <b>175.118952</b>  | 88.063114         | 158.092403     | 79.549839        |                    |                   | 1  |

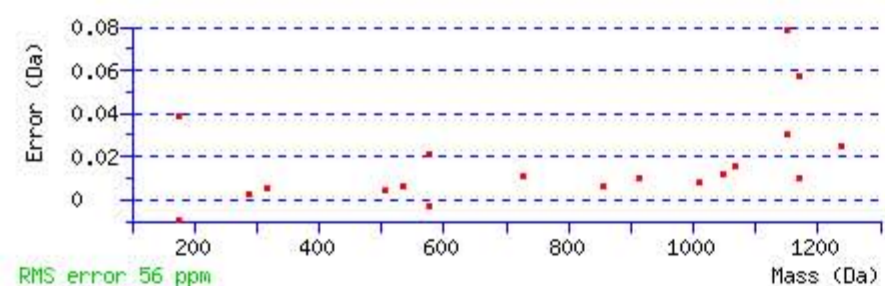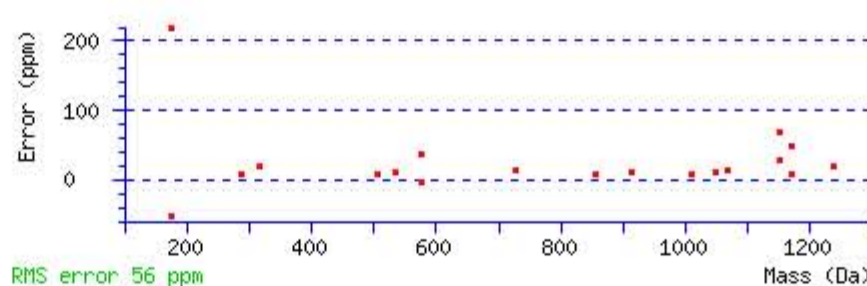

NCBI BLAST search of **SSTGPGEQLR**

(Parameters: blastp, nr protein database, expect=20000, no filter, PAM30)

Other BLAST [web gateways](#)

## All matches to this query

| Score | Mr(calc):   | Delta     | Sequence                      |
|-------|-------------|-----------|-------------------------------|
| 63.0  | 1341.671082 | 0.004486  | <a href="#">SSTGPGEQLR</a>    |
| 13.1  | 1341.663681 | 0.011887  | <a href="#">SSHKDSPRDVSK</a>  |
| 9.9   | 1341.674911 | 0.000657  | <a href="#">TSPERREPGTGR</a>  |
| 9.2   | 1341.663651 | 0.011917  | <a href="#">ESARDPKPEASR</a>  |
| 7.5   | 1341.693512 | -0.017944 | <a href="#">ASEQERRR</a>      |
| 5.9   | 1341.688828 | -0.013260 | <a href="#">DDAQLSGLPSALR</a> |
| 5.7   | 1341.682297 | -0.006729 | <a href="#">ASEQDVRAR</a>     |
| 5.7   | 1341.682297 | -0.006729 | <a href="#">LQEGRDASR</a>     |
| 5.0   | 1341.686340 | -0.010772 | <a href="#">GSGIQWDLR</a>     |
| 1.6   | 1341.671051 | 0.004517  | <a href="#">ASQEEQIAR</a>     |



# MASCOT SEARCH RESULTS

## Peptide View

MS/MS Fragmentation of **NALWHTGDTESQVR**

Found in **COMP\_HUMAN**, Cartilage oligomeric matrix protein OS=Homo sapiens GN=COMP PE=1 SV=2

Match to Query 51136: 1923.940872 from(642.320900,3+) rtinseconds(1732) index(58582)

Title: Locus:1.1.1.2909.9 File:"2013-07-02 CLN FXIII 60 min 1st F 4.wiff"

Data file C:\Program Files (x86)\Matrix Science\Mascot Daemon\mgf4 FXIII 60 min 1st\mascot\_daemon\_merge.mgf

Click mouse within plot area to zoom in by factor of two about that point

Or, Plot from  to  Da

Label all possible matches  Label matches used for scoring

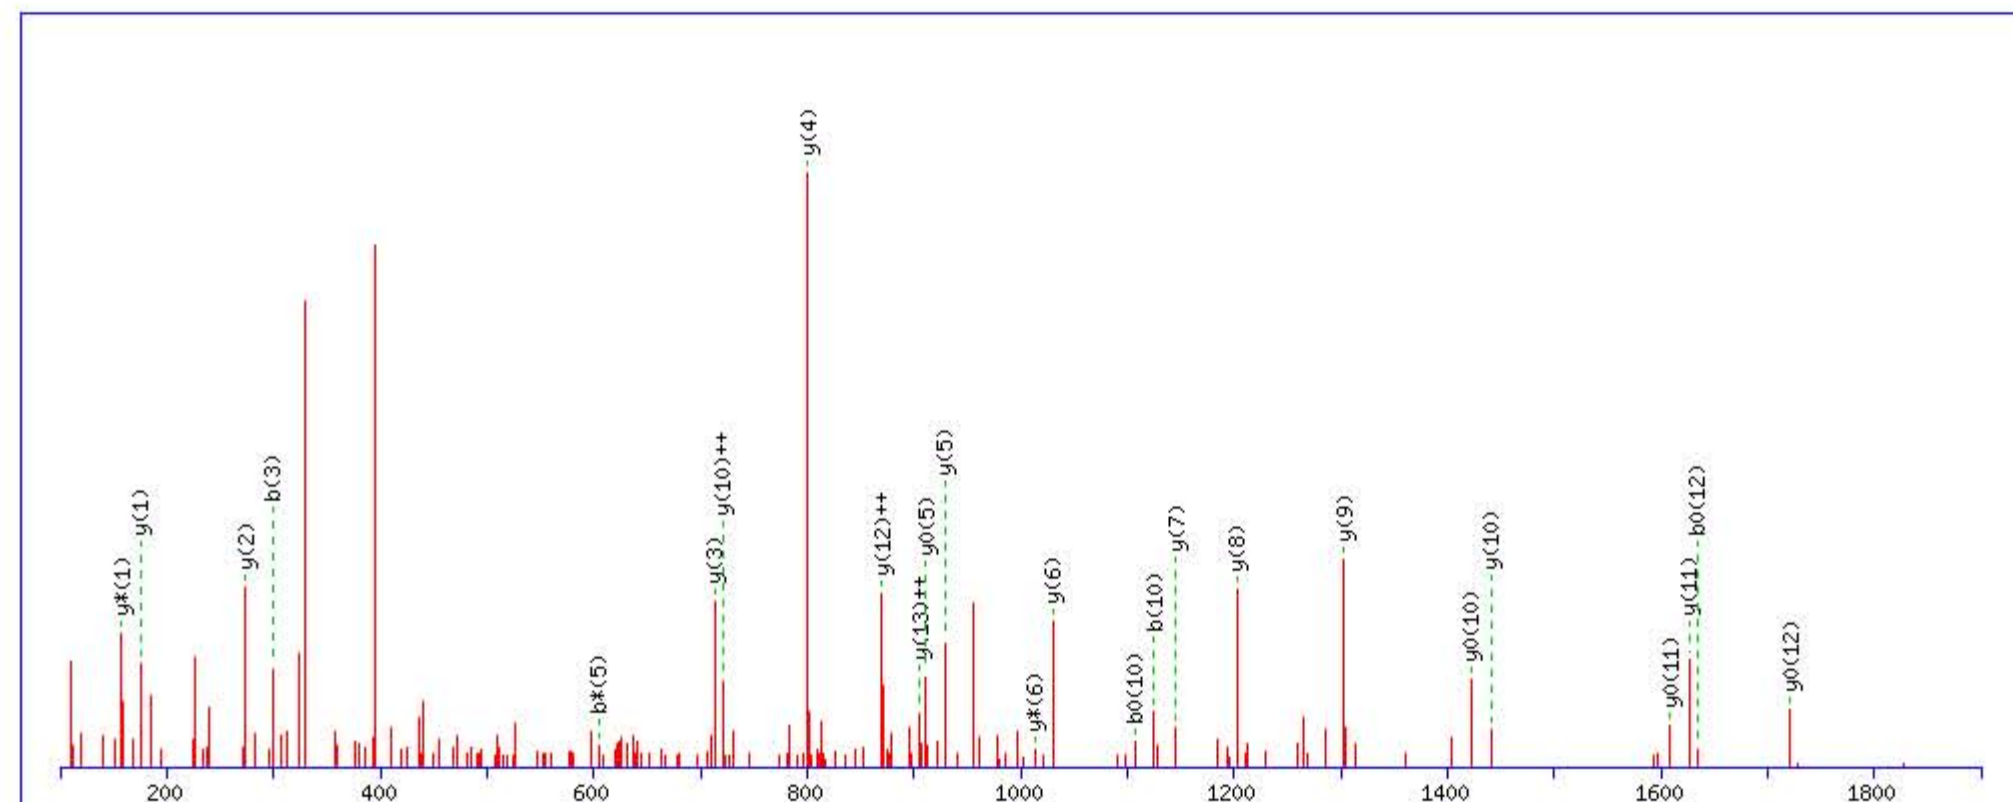

Monoisotopic mass of neutral peptide Mr(calc): 1923.926132

Fixed modifications: Carbamidomethyl (C) (apply to specified residues or termini only)

Variable modifications:

Q12 : Biotin:Thermo-21345 (Q)

Ions Score: 62 Expect: 1.4e-005

Matches : 25/140 fragment ions using 49 most intense peaks [\(help\)](#)

| #  | b                  | b <sup>++</sup> | b <sup>*</sup>    | b <sup>*++</sup> | b <sup>0</sup>     | b <sup>0++</sup> | Seq. | y                  | y <sup>++</sup>   | y <sup>*</sup>     | y <sup>*++</sup> | y <sup>0</sup>     | y <sup>0++</sup> | #  |
|----|--------------------|-----------------|-------------------|------------------|--------------------|------------------|------|--------------------|-------------------|--------------------|------------------|--------------------|------------------|----|
| 1  | 115.050203         | 58.028740       | 98.023654         | 49.515465        |                    |                  | N    |                    |                   |                    |                  |                    |                  | 14 |
| 2  | 186.087317         | 93.547296       | 169.060768        | 85.034022        |                    |                  | A    | 1810.890481        | 905.948879        | 1793.863932        | 897.435604       | 1792.879916        | 896.943596       | 13 |
| 3  | <b>299.171381</b>  | 150.089328      | 282.144832        | 141.576054       |                    |                  | L    | 1739.853367        | 870.430322        | 1722.826818        | 861.917047       | <b>1721.842802</b> | 861.425039       | 12 |
| 4  | 485.250694         | 243.128985      | 468.224145        | 234.615711       |                    |                  | W    | <b>1626.769303</b> | 813.888290        | 1609.742754        | 805.375015       | <b>1608.758738</b> | 804.883007       | 11 |
| 5  | 622.309606         | 311.658441      | <b>605.283057</b> | 303.145167       |                    |                  | H    | <b>1440.689990</b> | <b>720.848633</b> | 1423.663441        | 712.335359       | <b>1422.679425</b> | 711.843351       | 10 |
| 6  | 723.357285         | 362.182281      | 706.330736        | 353.669006       | 705.346720         | 353.176998       | T    | <b>1303.631078</b> | 652.319177        | 1286.604529        | 643.805903       | 1285.620513        | 643.313895       | 9  |
| 7  | 780.378749         | 390.693013      | 763.352200        | 382.179738       | 762.368184         | 381.687730       | G    | <b>1202.583399</b> | 601.795338        | 1185.556850        | 593.282063       | 1184.572834        | 592.790055       | 8  |
| 8  | 895.405692         | 448.206484      | 878.379143        | 439.693210       | 877.395127         | 439.201202       | D    | <b>1145.561935</b> | 573.284606        | 1128.535386        | 564.771331       | 1127.551370        | 564.279323       | 7  |
| 9  | 996.453371         | 498.730324      | 979.426822        | 490.217049       | 978.442806         | 489.725041       | T    | <b>1030.534992</b> | 515.771134        | <b>1013.508443</b> | 507.257860       | 1012.524427        | 506.765852       | 6  |
| 10 | <b>1125.495964</b> | 563.251620      | 1108.469415       | 554.738346       | <b>1107.485399</b> | 554.246337       | E    | <b>929.487313</b>  | 465.247295        | 912.460764         | 456.734020       | <b>911.476748</b>  | 456.242012       | 5  |
| 11 | 1212.527992        | 606.767634      | 1195.501443       | 598.254360       | 1194.517427        | 597.762352       | S    | <b>800.444720</b>  | 400.725998        | 783.418171         | 392.212724       | 782.434155         | 391.720716       | 4  |
| 12 | 1651.753318        | 826.380297      | 1634.726769       | 817.867023       | <b>1633.742753</b> | 817.375015       | Q    | <b>713.412692</b>  | 357.209984        | 696.386143         | 348.696710       |                    |                  | 3  |
| 13 | 1750.821732        | 875.914504      | 1733.795183       | 867.401230       | 1732.811167        | 866.909222       | V    | <b>274.187366</b>  | 137.597321        | 257.160817         | 129.084047       |                    |                  | 2  |
| 14 |                    |                 |                   |                  |                    |                  | R    | <b>175.118952</b>  | 88.063114         | <b>158.092403</b>  | 79.549839        |                    |                  | 1  |

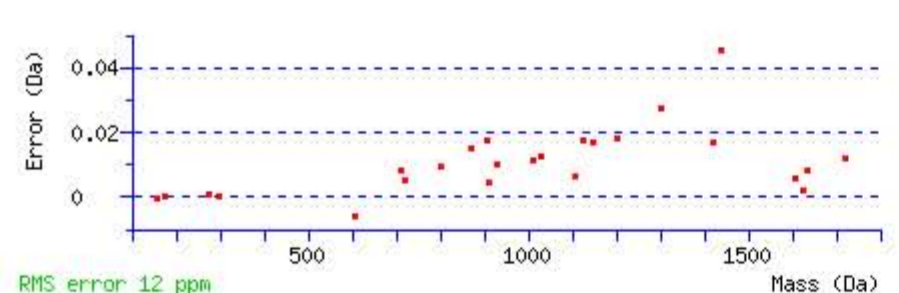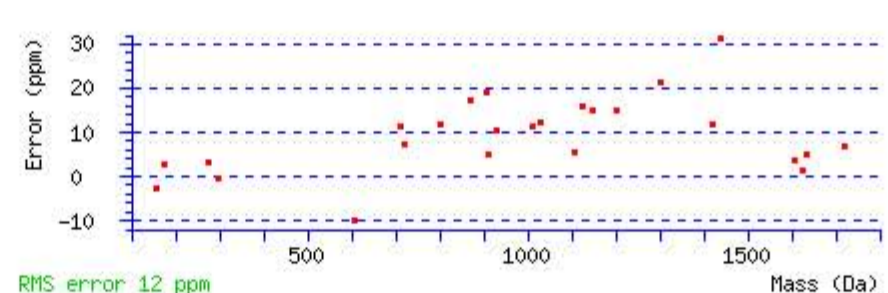

NCBI BLAST search of [NALWHTGDTESQVR](#)

(Parameters: blastp, nr protein database, expect=20000, no filter, PAM30)

Other BLAST [web gateways](#)

All matches to this query

| Score | Mr(calc):   | Delta    | Sequence                       |
|-------|-------------|----------|--------------------------------|
| 61.7  | 1923.926132 | 0.014740 | <a href="#">NALWHTGDTESQVR</a> |



# MASCOT Search Results

## Peptide View

MS/MS Fragmentation of **EDQVVCK**

Found in **CDSL\_HUMAN**, CD5 antigen-like OS=Homo sapiens GN=CD5L PE=1 SV=1

Match to Query 27309: 1187.566688 from(594.790620,2+) rtinseconds(1424) index(38297)

Title: Locus:1.1.1.2779.22 File:"2013-07-02 CLN FXIII 60 min 1st F 3.wiff"

Data file C:\Program Files (x86)\Matrix Science\Mascot Daemon\mgf4 FXIII 60 min 1st\mascot\_daemon\_merge.mgf

Click mouse within plot area to zoom in by factor of two about that point

Or, Plot from  to  Da

Label all possible matches  Label matches used for scoring

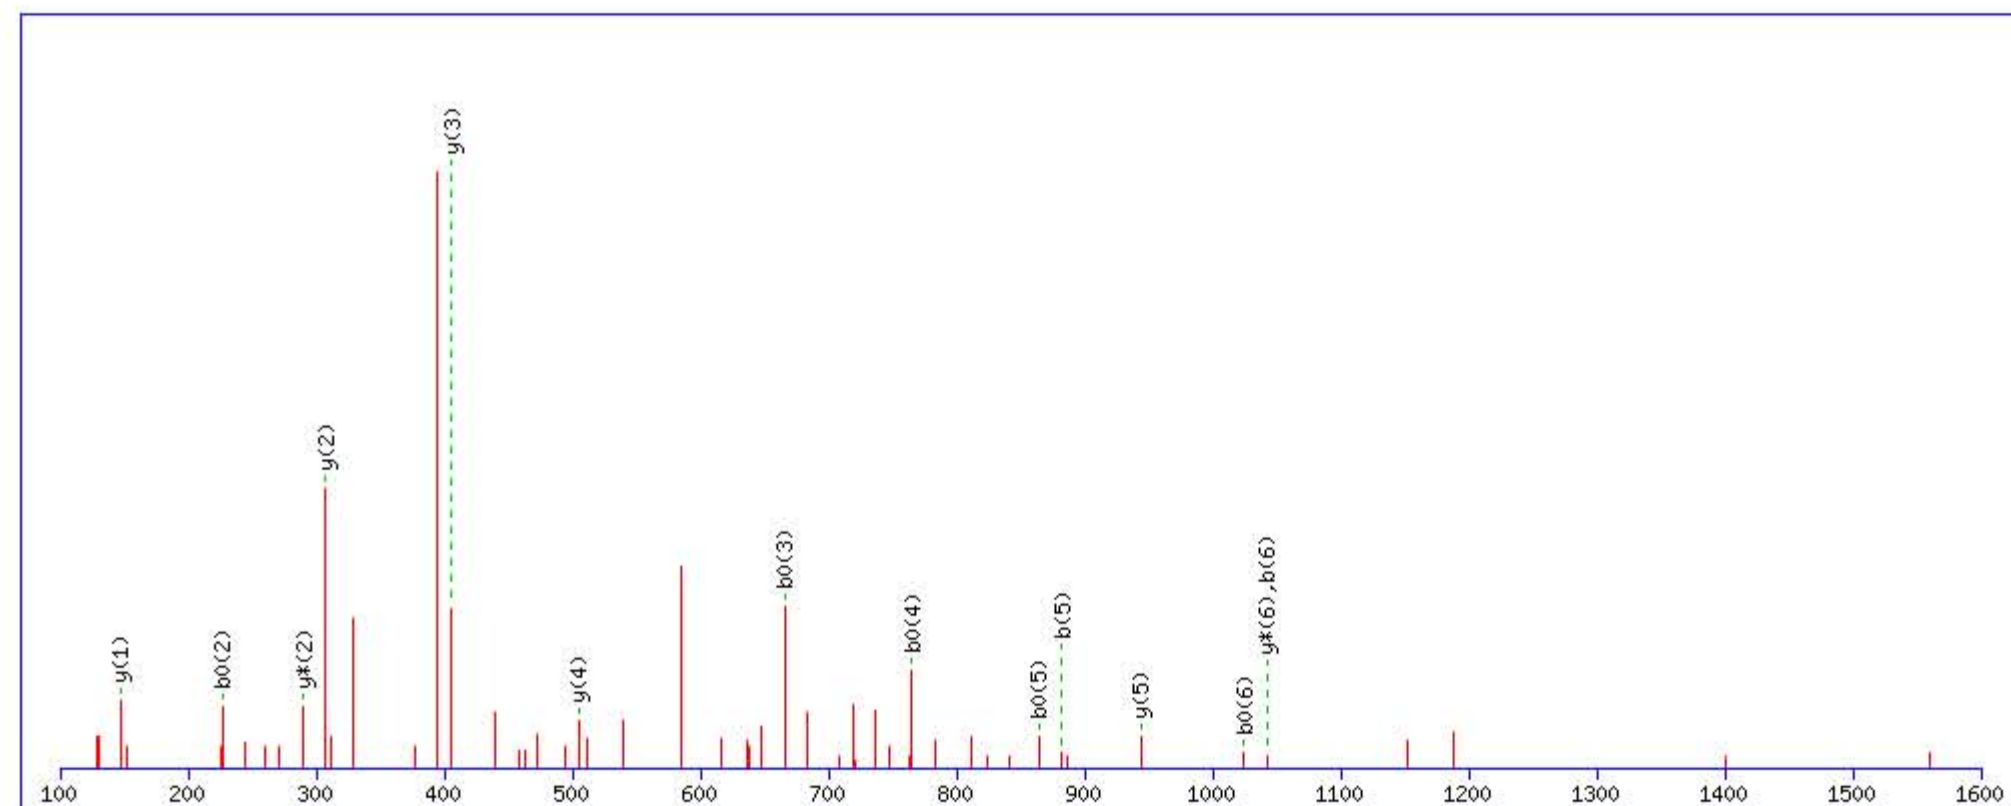

Monoisotopic mass of neutral peptide Mr(calc): 1187.567871

Fixed modifications: Carbamidomethyl (C) (apply to specified residues or termini only)

Variable modifications:

Q3 : Biotin:Thermo-21345 (Q)

Ions Score: 34 Expect: 0.0051

Matches : 14/58 fragment ions using 20 most intense peaks [\(help\)](#)

| # | b           | b <sup>++</sup> | b <sup>*</sup> | b <sup>*++</sup> | b <sup>0</sup> | b <sup>0++</sup> | Seq. | y           | y <sup>++</sup> | y <sup>*</sup> | y <sup>*++</sup> | y <sup>0</sup> | y <sup>0++</sup> | # |
|---|-------------|-----------------|----------------|------------------|----------------|------------------|------|-------------|-----------------|----------------|------------------|----------------|------------------|---|
| 1 | 130.049869  | 65.528572       |                |                  | 112.039304     | 56.523290        | E    |             |                 |                |                  |                |                  | 7 |
| 2 | 245.076812  | 123.042044      |                |                  | 227.066247     | 114.036762       | D    | 1059.532550 | 530.269913      | 1042.506001    | 521.756639       | 1041.521985    | 521.264631       | 6 |
| 3 | 684.302138  | 342.654707      | 667.275589     | 334.141433       | 666.291573     | 333.649425       | Q    | 944.505607  | 472.756442      | 927.479058     | 464.243167       |                |                  | 5 |
| 4 | 783.370552  | 392.188914      | 766.344003     | 383.675639       | 765.359987     | 383.183631       | V    | 505.280281  | 253.143778      | 488.253732     | 244.630504       |                |                  | 4 |
| 5 | 882.438966  | 441.723121      | 865.412417     | 433.209846       | 864.428401     | 432.717838       | V    | 406.211867  | 203.609571      | 389.185318     | 195.096297       |                |                  | 3 |
| 6 | 1042.469615 | 521.738446      | 1025.443066    | 513.225171       | 1024.459050    | 512.733163       | C    | 307.143453  | 154.075365      | 290.116904     | 145.562090       |                |                  | 2 |
| 7 |             |                 |                |                  |                |                  | K    | 147.112804  | 74.060040       | 130.086255     | 65.546765        |                |                  | 1 |

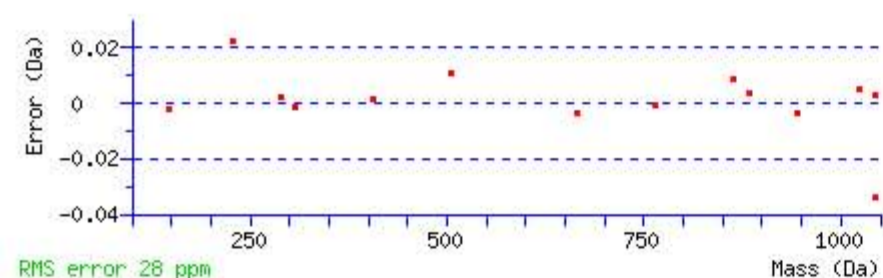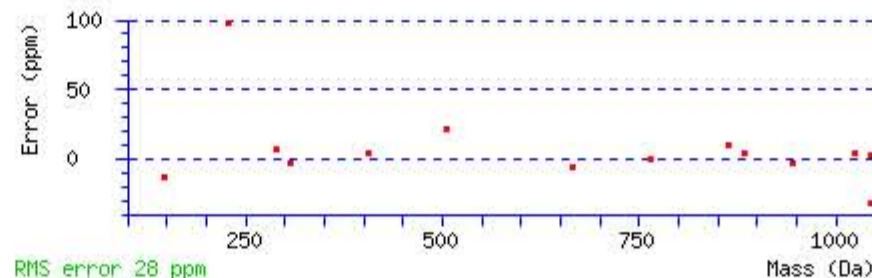

NCBI BLAST search of **EDQVVCK**

(Parameters: blastp, nr protein database, expect=20000, no filter, PAM30)

Other BLAST [web gateways](#)

## All matches to this query

| Score | Mr(calc):   | Delta     | Sequence                   |
|-------|-------------|-----------|----------------------------|
| 34.4  | 1187.567871 | -0.001183 | <a href="#">EDQVVCK</a>    |
| 9.4   | 1187.567841 | -0.001153 | <a href="#">QAEIECK</a>    |
| 8.5   | 1187.567841 | -0.001153 | <a href="#">QAEIECK</a>    |
| 8.4   | 1187.557968 | 0.008720  | <a href="#">QASFHCK</a>    |
| 7.8   | 1187.553955 | 0.012733  | <a href="#">VVHRQDMCK</a>  |
| 5.2   | 1187.553940 | 0.012748  | <a href="#">KSGPSCKHCK</a> |
| 3.9   | 1187.549225 | 0.017463  | <a href="#">QDEDKDK</a>    |
| 2.0   | 1187.564499 | 0.002189  | <a href="#">FCSLSFQATK</a> |
| 1.4   | 1187.564499 | 0.002189  | <a href="#">TEGKFCATFK</a> |
| 0.3   | 1187.579086 | -0.012398 | <a href="#">ANSIQGCK</a>   |



# MASCOT Search Results

## Peptide View

MS/MS Fragmentation of **KAEEEHLGILGPQLHADVGDK**

Found in **CERU\_HUMAN**, Ceruloplasmin OS=Homo sapiens GN=CP PE=1 SV=1

Match to Query 66214: 2566.341296 from(642.592600,4+) rtinseconds(1912) index(59868)

Title: Locus:1.1.1.2971.14 File:"2013-07-02 CLN FXIII 60 min 1st F 4.wiff"

Data file C:\Program Files (x86)\Matrix Science\Mascot Daemon\mgf\4 FXIII 60 min 1st\mascot\_daemon\_merge.mgf

Click mouse within plot area to zoom in by factor of two about that point

Or, Plot from  to  Da

Label all possible matches  Label matches used for scoring

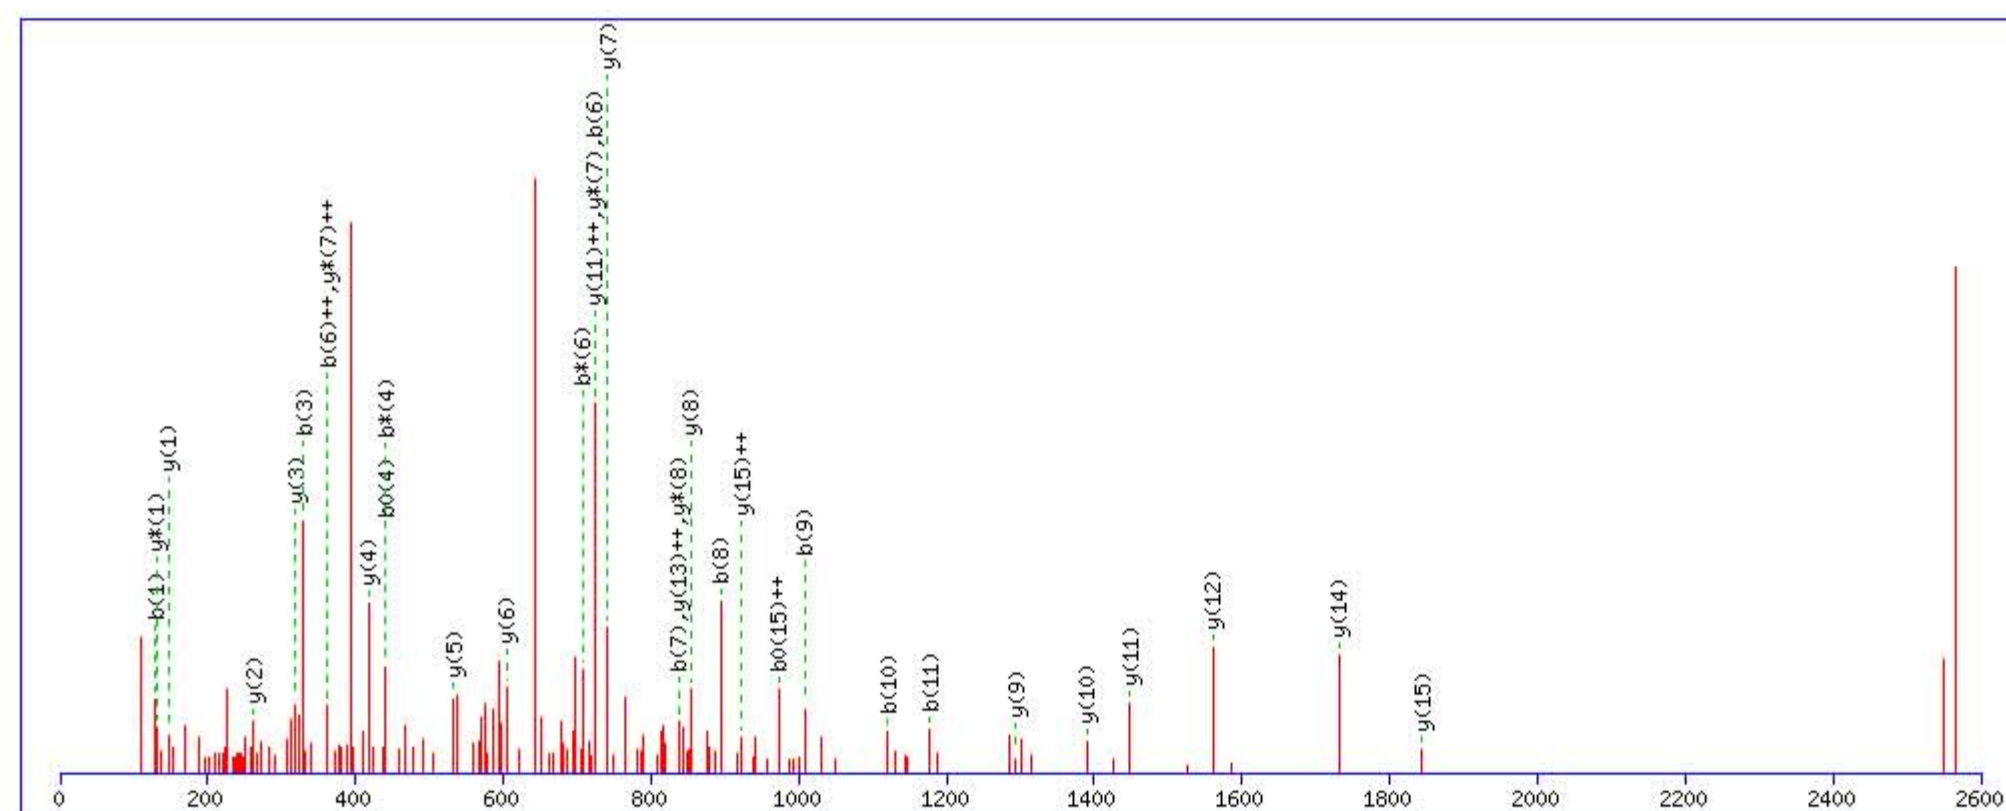

Monoisotopic mass of neutral peptide Mr(calc): 2566.321335

Fixed modifications: Carbamidomethyl (C) (apply to specified residues or termini only)

Variable modifications:

Q13 : Biotin:Thermo-21345 (Q)

Ions Score: 70 Expect: 2.7e-006

Matches : 34/234 fragment ions using 67 most intense peaks [\(help\)](#)

| #  | b           | b <sup>++</sup> | b <sup>*</sup> | b <sup>*++</sup> | b <sup>0</sup> | b <sup>0++</sup> | Seq. | y           | y <sup>++</sup> | y <sup>*</sup> | y <sup>*++</sup> | y <sup>0</sup> | y <sup>0++</sup> | #  |
|----|-------------|-----------------|----------------|------------------|----------------|------------------|------|-------------|-----------------|----------------|------------------|----------------|------------------|----|
| 1  | 129.102239  | 65.054757       | 112.075690     | 56.541483        |                |                  | K    |             |                 |                |                  |                |                  | 21 |
| 2  | 200.139353  | 100.573315      | 183.112804     | 92.060040        |                |                  | A    | 2439.233673 | 1220.120474     | 2422.207124    | 1211.607200      | 2421.223108    | 1211.115192      | 20 |
| 3  | 329.181946  | 165.094611      | 312.155397     | 156.581336       | 311.171381     | 156.089328       | E    | 2368.196559 | 1184.601917     | 2351.170010    | 1176.088643      | 2350.185994    | 1175.596635      | 19 |
| 4  | 458.224539  | 229.615907      | 441.197990     | 221.102633       | 440.213974     | 220.610625       | E    | 2239.153966 | 1120.080621     | 2222.127417    | 1111.567346      | 2221.143401    | 1111.075338      | 18 |
| 5  | 587.267132  | 294.137204      | 570.240583     | 285.623930       | 569.256567     | 285.131922       | E    | 2110.111373 | 1055.559324     | 2093.084824    | 1047.046050      | 2092.100808    | 1046.554042      | 17 |
| 6  | 724.326044  | 362.666660      | 707.299495     | 354.153386       | 706.315479     | 353.661378       | H    | 1981.068780 | 991.038028      | 1964.042231    | 982.524753       | 1963.058215    | 982.032745       | 16 |
| 7  | 837.410108  | 419.208692      | 820.383559     | 410.695418       | 819.399543     | 410.203410       | L    | 1844.009868 | 922.508572      | 1826.983319    | 913.995297       | 1825.999303    | 913.503289       | 15 |
| 8  | 894.431572  | 447.719424      | 877.405023     | 439.206150       | 876.421007     | 438.714142       | G    | 1730.925804 | 865.966540      | 1713.899255    | 857.453265       | 1712.915239    | 856.961257       | 14 |
| 9  | 1007.515636 | 504.261456      | 990.489087     | 495.748182       | 989.505071     | 495.256174       | I    | 1673.904340 | 837.455808      | 1656.877791    | 828.942533       | 1655.893775    | 828.450525       | 13 |
| 10 | 1120.599700 | 560.803488      | 1103.573151    | 552.290214       | 1102.589135    | 551.798205       | L    | 1560.820276 | 780.913776      | 1543.793727    | 772.400501       | 1542.809711    | 771.908493       | 12 |
| 11 | 1177.621164 | 589.314220      | 1160.594615    | 580.800946       | 1159.610599    | 580.308937       | G    | 1447.736212 | 724.371744      | 1430.709663    | 715.858469       | 1429.725647    | 715.366461       | 11 |
| 12 | 1274.673928 | 637.840602      | 1257.647379    | 629.327328       | 1256.663363    | 628.835319       | P    | 1390.714748 | 695.861012      | 1373.688199    | 687.347737       | 1372.704183    | 686.855729       | 10 |
| 13 | 1713.899254 | 857.453265      | 1696.872705    | 848.939991       | 1695.888689    | 848.447983       | Q    | 1293.661984 | 647.334630      | 1276.635435    | 638.821355       | 1275.651419    | 638.329347       | 9  |
| 14 | 1826.983318 | 913.995297      | 1809.956769    | 905.482023       | 1808.972753    | 904.990015       | L    | 854.436658  | 427.721967      | 837.410109     | 419.208692       | 836.426093     | 418.716684       | 8  |
| 15 | 1964.042230 | 982.524753      | 1947.015681    | 974.011479       | 1946.031665    | 973.519471       | H    | 741.352594  | 371.179935      | 724.326045     | 362.666660       | 723.342029     | 362.174652       | 7  |
| 16 | 2035.079344 | 1018.043310     | 2018.052795    | 1009.530036      | 2017.068779    | 1009.038028      | A    | 604.293682  | 302.650479      | 587.267133     | 294.137204       | 586.283117     | 293.645196       | 6  |
| 17 | 2150.106287 | 1075.556781     | 2133.079738    | 1067.043507      | 2132.095722    | 1066.551499      | D    | 533.256568  | 267.131922      | 516.230019     | 258.618647       | 515.246003     | 258.126639       | 5  |
| 18 | 2249.174701 | 1125.090988     | 2232.148152    | 1116.577714      | 2231.164136    | 1116.085706      | V    | 418.229625  | 209.618450      | 401.203076     | 201.105176       | 400.219060     | 200.613168       | 4  |
| 19 | 2306.196165 | 1153.601720     | 2289.169616    | 1145.088446      | 2288.185600    | 1144.596438      | G    | 319.161211  | 160.084243      | 302.134662     | 151.570969       | 301.150646     | 151.078961       | 3  |
| 20 | 2421.223108 | 1211.115192     | 2404.196559    | 1202.601917      | 2403.212543    | 1202.109909      | D    | 262.139747  | 131.573511      | 245.113198     | 123.060237       | 244.129182     | 122.568229       | 2  |
| 21 |             |                 |                |                  |                |                  | K    | 147.112804  | 74.060040       | 130.086255     | 65.546765        |                |                  | 1  |

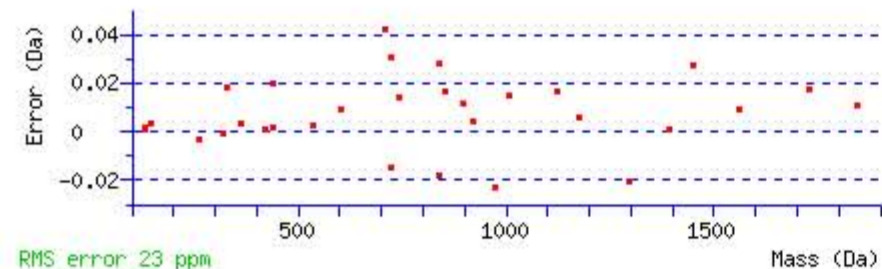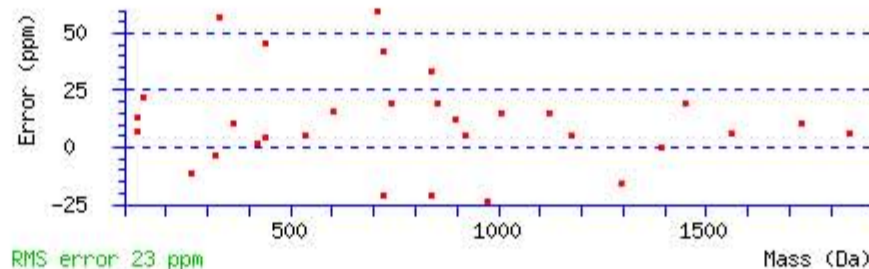

NCBI BLAST search of **KAEEEHLGILGPQLHADVGDK**

(Parameters: blastp, nr protein database, expect=20000, no filter, PAM30)

Other BLAST [web gateways](#)

All matches to this query

| Score | Mr(calc):   | Delta    | Sequence                              |
|-------|-------------|----------|---------------------------------------|
| 69.8  | 2566.321335 | 0.019961 | <a href="#">KAEEEHLGILGPQLHADVGDK</a> |

Mascot: <http://www.matrixscience.com/>



# MASCOT Search Results

## Peptide View

MS/MS Fragmentation of **ELDESLQVAER**

Found in **CLUS\_HUMAN**, Clusterin OS=Homo sapiens GN=CLU PE=1 SV=1

Match to Query 42154: 1598.802222 from(533.941350,3+) rtinseconds(1940) index(41744)

Title: Locus:1.1.1.2959.11 File:"2013-07-02 CLN FXIII 60 min 1st F 3.wiff"

Data file C:\Program Files (x86)\Matrix Science\Mascot Daemon\mgf4 FXIII 60 min 1st\mascot\_daemon\_merge.mgf

Click mouse within plot area to zoom in by factor of two about that point

Or, Plot from  to  Da

Label all possible matches  Label matches used for scoring

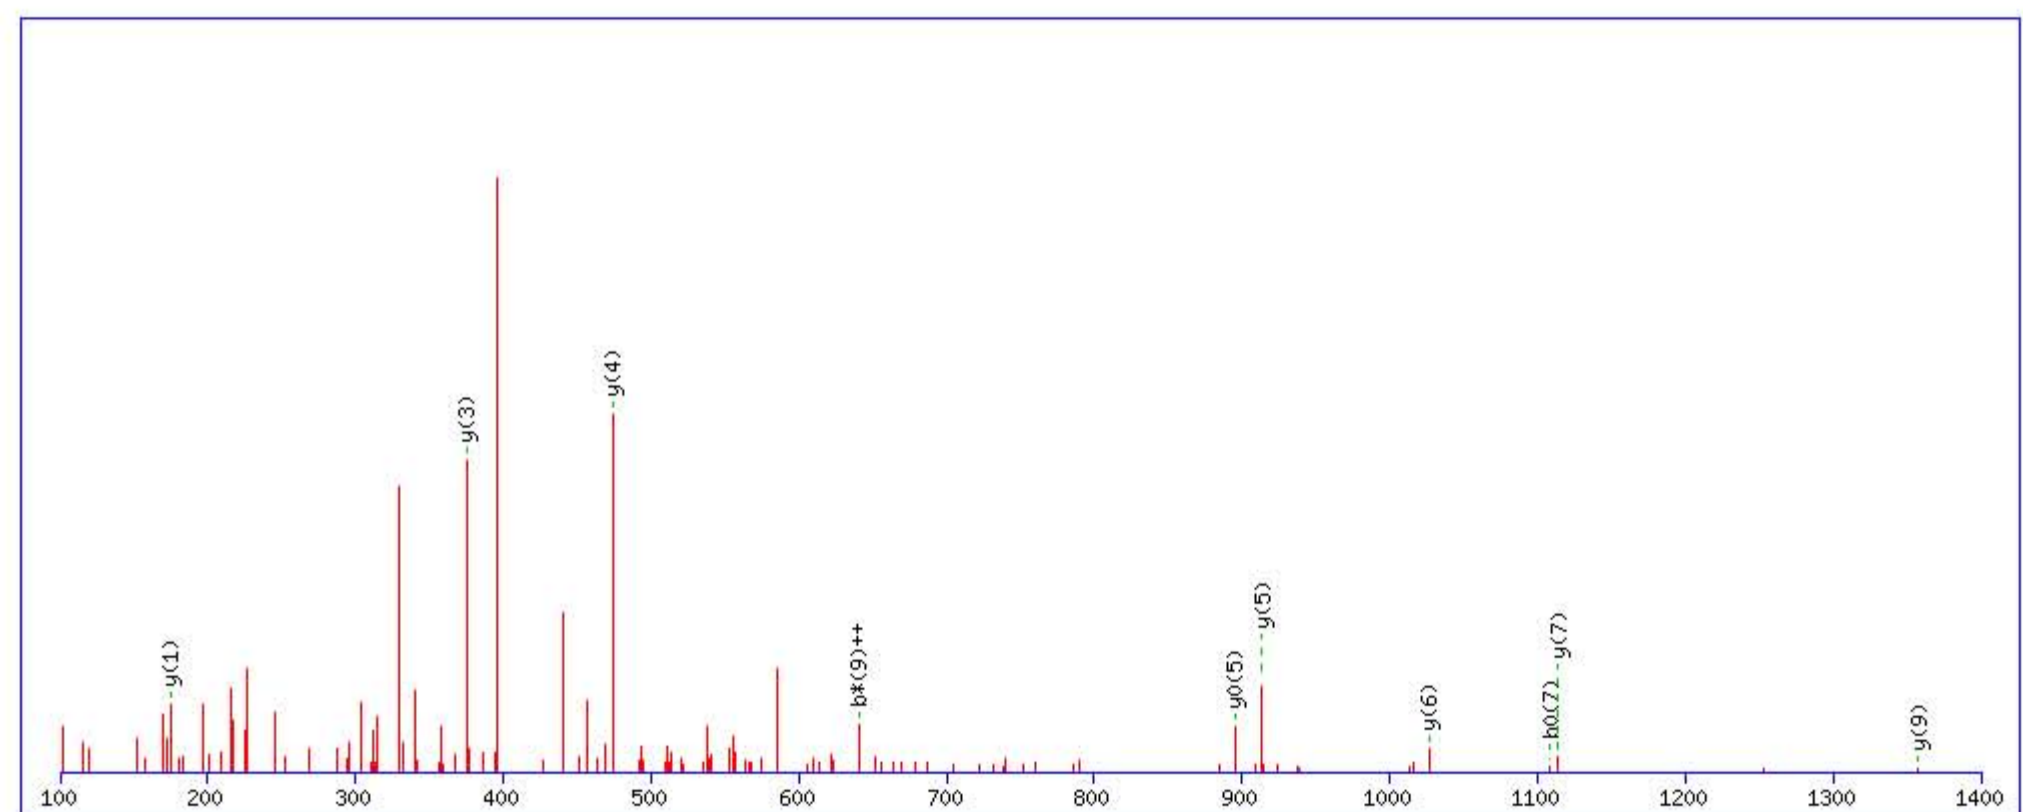

Monoisotopic mass of neutral peptide Mr(calc): 1598.797379

Fixed modifications: Carbamidomethyl (C) (apply to specified residues or termini only)

Variable modifications:

Q7 : Biotin:Thermo-21345 (Q)

Ions Score: 27 Expect: 0.0031

Matches : 10/106 fragment ions using 24 most intense peaks [\(help\)](#)

| #  | b           | b <sup>++</sup> | b <sup>*</sup> | b <sup>*++</sup>  | b <sup>0</sup>     | b <sup>0++</sup> | Seq. | y                  | y <sup>++</sup> | y <sup>*</sup> | y <sup>*++</sup> | y <sup>0</sup>    | y <sup>0++</sup> | #  |
|----|-------------|-----------------|----------------|-------------------|--------------------|------------------|------|--------------------|-----------------|----------------|------------------|-------------------|------------------|----|
| 1  | 130.049869  | 65.528572       |                |                   | 112.039304         | 56.523290        | E    |                    |                 |                |                  |                   |                  | 11 |
| 2  | 243.133933  | 122.070605      |                |                   | 225.123368         | 113.065322       | L    | 1470.762091        | 735.884684      | 1453.735542    | 727.371409       | 1452.751526       | 726.879401       | 10 |
| 3  | 358.160876  | 179.584076      |                |                   | 340.150311         | 170.578794       | D    | <b>1357.678027</b> | 679.342652      | 1340.651478    | 670.829377       | 1339.667462       | 670.337369       | 9  |
| 4  | 487.203469  | 244.105373      |                |                   | 469.192904         | 235.100090       | E    | 1242.651084        | 621.829180      | 1225.624535    | 613.315906       | 1224.640519       | 612.823898       | 8  |
| 5  | 574.235497  | 287.621387      |                |                   | 556.224932         | 278.616104       | S    | <b>1113.608491</b> | 557.307884      | 1096.581942    | 548.794609       | 1095.597926       | 548.302601       | 7  |
| 6  | 687.319561  | 344.163419      |                |                   | 669.308996         | 335.158136       | L    | <b>1026.576463</b> | 513.791870      | 1009.549914    | 505.278595       | 1008.565898       | 504.786587       | 6  |
| 7  | 1126.544887 | 563.776082      | 1109.518338    | 555.262807        | <b>1108.534322</b> | 554.770799       | Q    | <b>913.492399</b>  | 457.249838      | 896.465850     | 448.736563       | <b>895.481834</b> | 448.244555       | 5  |
| 8  | 1225.613301 | 613.310289      | 1208.586752    | 604.797014        | 1207.602736        | 604.305006       | V    | <b>474.267073</b>  | 237.637175      | 457.240524     | 229.123900       | 456.256508        | 228.631892       | 4  |
| 9  | 1296.650415 | 648.828846      | 1279.623866    | <b>640.315571</b> | 1278.639850        | 639.823563       | A    | <b>375.198659</b>  | 188.102968      | 358.172110     | 179.589693       | 357.188094        | 179.097685       | 3  |
| 10 | 1425.693008 | 713.350142      | 1408.666459    | 704.836868        | 1407.682443        | 704.344860       | E    | 304.161545         | 152.584411      | 287.134996     | 144.071136       | 286.150980        | 143.579128       | 2  |
| 11 |             |                 |                |                   |                    |                  | R    | <b>175.118952</b>  | 88.063114       | 158.092403     | 79.549839        |                   |                  | 1  |

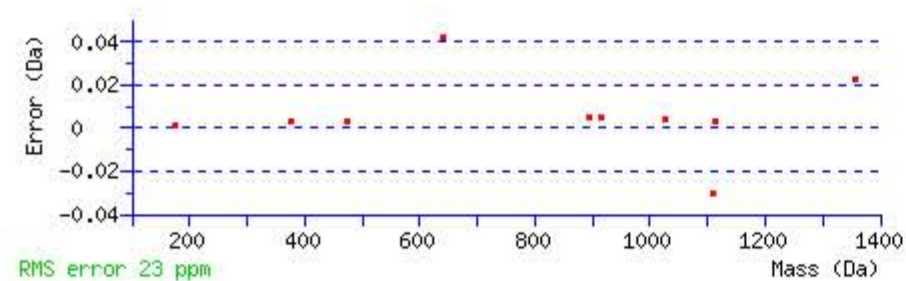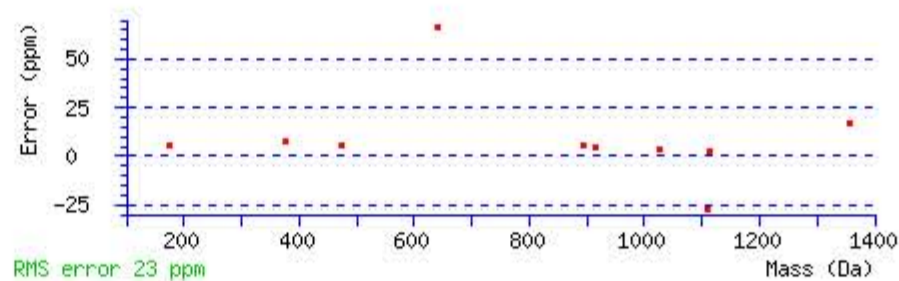

NCBI BLAST search of **ELDESLQVAER**

(Parameters: blastp, nr protein database, expect=20000, no filter, PAM30)

Other BLAST [web gateways](#)

All matches to this query

| Score | Mr(calc):   | Delta     | Sequence                      |
|-------|-------------|-----------|-------------------------------|
| 26.9  | 1598.797379 | 0.004843  | <a href="#">ELDESLQVAER</a>   |
| 0.2   | 1598.812439 | -0.010217 | <a href="#">EQQRLREGEEGLR</a> |
| 0.2   | 1598.812439 | -0.010217 | <a href="#">EQRRLQEGEEGIR</a> |

Mascot: <http://www.matrixscience.com/>



# MASCOT Search Results

## Peptide View

MS/MS Fragmentation of **ASSIIDELFQDR**

Found in **CLUS\_HUMAN**, Clusterin OS=Homo sapiens GN=CLU PE=1 SV=1

Match to Query 45941: 1703.862168 from(852.938360,2+) rtinseconds(2801) index(47357)

Title: Locus:1.1.1.3257.6 File:"2013-07-02 CLN FXIII 60 min 1st F 3.wiff"

Data file C:\Program Files (x86)\Matrix Science\Mascot Daemon\mgf4 FXIII 60 min 1st\mascot\_daemon\_merge.mgf

Click mouse within plot area to zoom in by factor of two about that point

Or, Plot from  to  Da

Label all possible matches  Label matches used for scoring

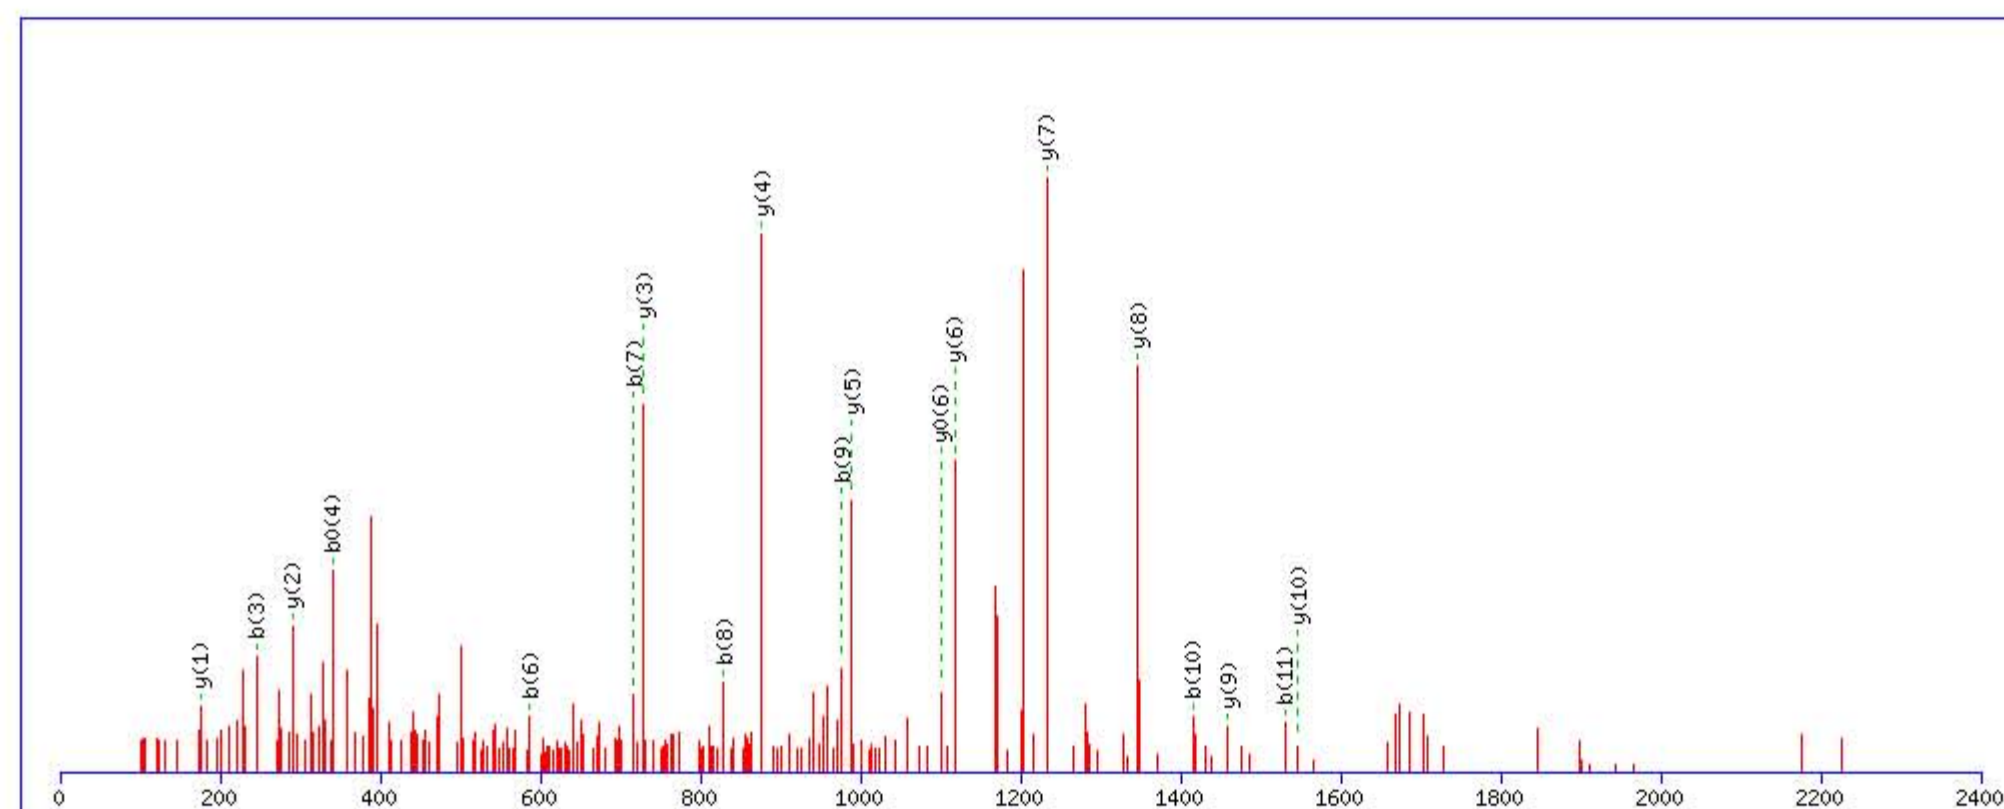

Monoisotopic mass of neutral peptide Mr(calc): 1703.855240

Fixed modifications: Carbamidomethyl (C) (apply to specified residues or termini only)

Variable modifications:

Q10 : Biotin:Thermo-21345 (Q)

Ions Score: 69 Expect: 1e-006

Matches : 19/110 fragment ions using 32 most intense peaks [\(help\)](#)

| #  | b                  | b <sup>++</sup> | b <sup>*</sup> | b <sup>*++</sup> | b <sup>0</sup>    | b <sup>0++</sup> | Seq. | y                  | y <sup>++</sup> | y <sup>*</sup> | y <sup>*++</sup> | y <sup>0</sup>     | y <sup>0++</sup> | #  |
|----|--------------------|-----------------|----------------|------------------|-------------------|------------------|------|--------------------|-----------------|----------------|------------------|--------------------|------------------|----|
| 1  | 72.044390          | 36.525833       |                |                  |                   |                  | A    |                    |                 |                |                  |                    |                  | 12 |
| 2  | 159.076418         | 80.041847       |                |                  | 141.065853        | 71.036564        | S    | 1633.825419        | 817.416348      | 1616.798870    | 808.903073       | 1615.814854        | 808.411065       | 11 |
| 3  | <b>246.108446</b>  | 123.557861      |                |                  | 228.097881        | 114.552578       | S    | <b>1546.793391</b> | 773.900333      | 1529.766842    | 765.387059       | 1528.782826        | 764.895051       | 10 |
| 4  | 359.192510         | 180.099893      |                |                  | <b>341.181945</b> | 171.094610       | I    | <b>1459.761363</b> | 730.384320      | 1442.734814    | 721.871045       | 1441.750798        | 721.379037       | 9  |
| 5  | 472.276574         | 236.641925      |                |                  | 454.266009        | 227.636642       | I    | <b>1346.677299</b> | 673.842288      | 1329.650750    | 665.329013       | 1328.666734        | 664.837005       | 8  |
| 6  | <b>587.303517</b>  | 294.155397      |                |                  | 569.292952        | 285.150114       | D    | <b>1233.593235</b> | 617.300256      | 1216.566686    | 608.786981       | 1215.582670        | 608.294973       | 7  |
| 7  | <b>716.346110</b>  | 358.676693      |                |                  | 698.335545        | 349.671411       | E    | <b>1118.566292</b> | 559.786784      | 1101.539743    | 551.273510       | <b>1100.555727</b> | 550.781501       | 6  |
| 8  | <b>829.430174</b>  | 415.218725      |                |                  | 811.419609        | 406.213443       | L    | <b>989.523699</b>  | 495.265488      | 972.497150     | 486.752213       | 971.513134         | 486.260205       | 5  |
| 9  | <b>976.498588</b>  | 488.752932      |                |                  | 958.488023        | 479.747650       | F    | <b>876.439635</b>  | 438.723456      | 859.413086     | 430.210181       | 858.429070         | 429.718173       | 4  |
| 10 | <b>1415.723914</b> | 708.365595      | 1398.697365    | 699.852321       | 1397.713349       | 699.360312       | Q    | <b>729.371221</b>  | 365.189249      | 712.344672     | 356.675974       | 711.360656         | 356.183966       | 3  |
| 11 | <b>1530.750857</b> | 765.879067      | 1513.724308    | 757.365792       | 1512.740292       | 756.873784       | D    | <b>290.145895</b>  | 145.576585      | 273.119346     | 137.063311       | 272.135330         | 136.571303       | 2  |
| 12 |                    |                 |                |                  |                   |                  | R    | <b>175.118952</b>  | 88.063114       | 158.092403     | 79.549839        |                    |                  | 1  |

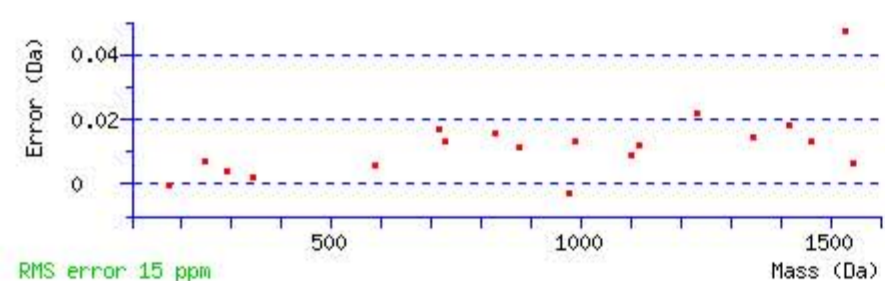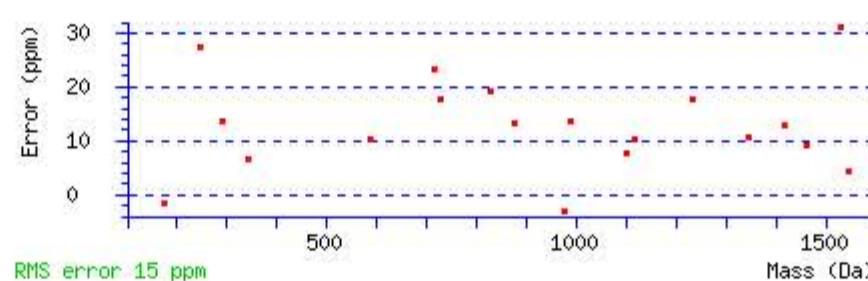

NCBI BLAST search of [ASSIIDELFQDR](#)

(Parameters: blastp, nr protein database, expect=20000, no filter, PAM30)

Other BLAST [web gateways](#)

## All matches to this query

| Score | Mr(calc):   | Delta     | Sequence                        |
|-------|-------------|-----------|---------------------------------|
| 69.3  | 1703.855240 | 0.006928  | <a href="#">ASSIIDELFQDR</a>    |
| 5.1   | 1703.859070 | 0.003098  | <a href="#">RWDELETTTQAKAR</a>  |
| 2.5   | 1703.866455 | -0.004287 | <a href="#">NNNLSKDHYMLIVK</a>  |
| 1.5   | 1703.881088 | -0.018920 | <a href="#">VQTSLAVCKLQACAR</a> |
| 1.4   | 1703.874313 | -0.012145 | <a href="#">NRGYLADPAKFPEAR</a> |

Mascot: <http://www.matrixscience.com/>



# MASCOT Search Results

## Peptide View

MS/MS Fragmentation of **EILSVDCSTNNPSQAK**

Found in **CLUS\_HUMAN**, Clusterin OS=Homo sapiens GN=CLU PE=1 SV=1

Match to Query 55460: 2072.998782 from(692.006870,3+) rtinseconds(1797) index(40728)

Title: Locus:1.1.1.2909.12 File:"2013-07-02 CLN FXIII 60 min 1st F 3.wiff"

Data file C:\Program Files (x86)\Matrix Science\Mascot Daemon\mgf4 FXIII 60 min 1st\mascot\_daemon\_merge.mgf

Click mouse within plot area to zoom in by factor of two about that point

Or, Plot from  to  Da

Label all possible matches  Label matches used for scoring

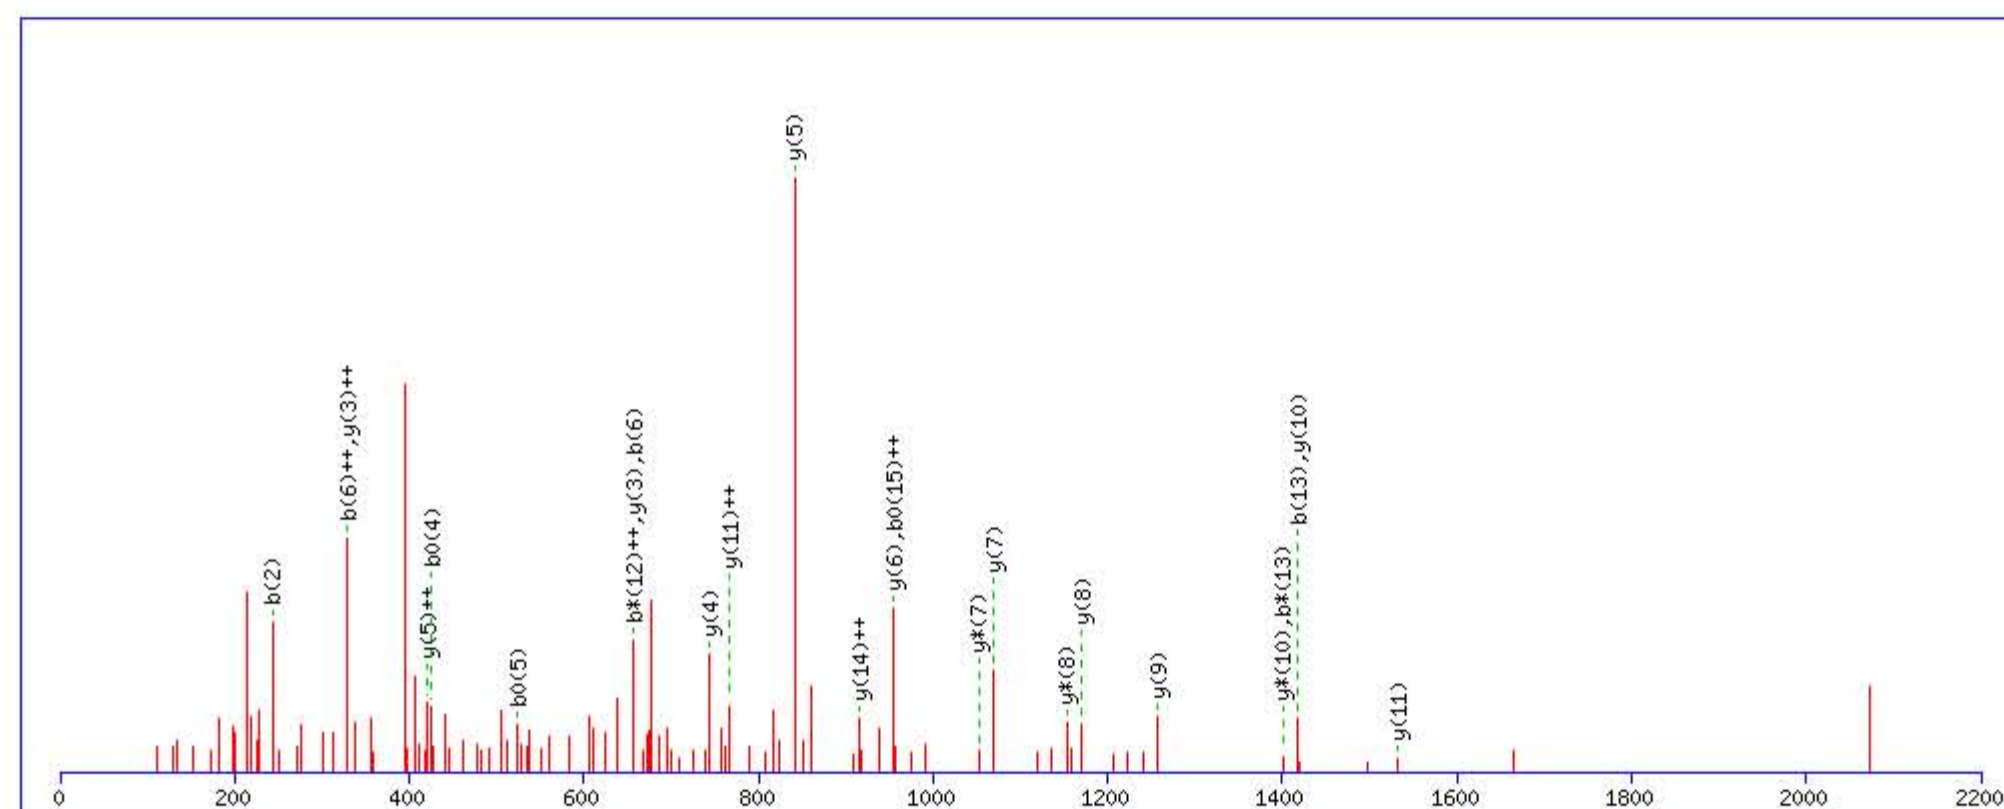

Monoisotopic mass of neutral peptide Mr(calc): 2072.987061

Fixed modifications: Carbamidomethyl (C) (apply to specified residues or termini only)

Variable modifications:

Q14 : Biotin:Thermo-21345 (Q)

Ions Score: 58 Expect: 3.5e-005

Matches : 25/156 fragment ions using 29 most intense peaks [\(help\)](#)

| #  | b                  | b <sup>++</sup>   | b <sup>*</sup>     | b <sup>*++</sup>  | b <sup>0</sup>    | b <sup>0++</sup>  | Seq. | y                  | y <sup>++</sup>   | y <sup>*</sup>     | y <sup>*++</sup> | y <sup>0</sup> | y <sup>0++</sup> | #  |
|----|--------------------|-------------------|--------------------|-------------------|-------------------|-------------------|------|--------------------|-------------------|--------------------|------------------|----------------|------------------|----|
| 1  | 130.049869         | 65.528572         |                    |                   | 112.039304        | 56.523290         | E    |                    |                   |                    |                  |                |                  | 16 |
| 2  | <b>243.133933</b>  | 122.070605        |                    |                   | 225.123368        | 113.065322        | I    | 1944.951759        | 972.979517        | 1927.925210        | 964.466243       | 1926.941194    | 963.974235       | 15 |
| 3  | 356.217997         | 178.612637        |                    |                   | 338.207432        | 169.607354        | L    | 1831.867695        | <b>916.437485</b> | 1814.841146        | 907.924211       | 1813.857130    | 907.432203       | 14 |
| 4  | 443.250025         | 222.128650        |                    |                   | <b>425.239460</b> | 213.123368        | S    | 1718.783631        | 859.895454        | 1701.757082        | 851.382179       | 1700.773066    | 850.890171       | 13 |
| 5  | 542.318439         | 271.662858        |                    |                   | <b>524.307874</b> | 262.657575        | V    | 1631.751603        | 816.379439        | 1614.725054        | 807.866165       | 1613.741038    | 807.374157       | 12 |
| 6  | <b>657.345382</b>  | <b>329.176329</b> |                    |                   | 639.334817        | 320.171046        | D    | <b>1532.683189</b> | <b>766.845233</b> | 1515.656640        | 758.331958       | 1514.672624    | 757.839950       | 11 |
| 7  | 817.376031         | 409.191654        |                    |                   | 799.365466        | 400.186371        | C    | <b>1417.656246</b> | 709.331761        | <b>1400.629697</b> | 700.818487       | 1399.645681    | 700.326479       | 10 |
| 8  | 904.408059         | 452.707668        |                    |                   | 886.397494        | 443.702385        | S    | <b>1257.625597</b> | 629.316437        | 1240.599048        | 620.803162       | 1239.615032    | 620.311154       | 9  |
| 9  | 1005.455738        | 503.231507        |                    |                   | 987.445173        | 494.226225        | T    | <b>1170.593569</b> | 585.800422        | <b>1153.567020</b> | 577.287148       | 1152.583004    | 576.795140       | 8  |
| 10 | 1119.498665        | 560.252971        | 1102.472116        | 551.739696        | 1101.488100       | 551.247688        | N    | <b>1069.545890</b> | 535.276583        | <b>1052.519341</b> | 526.763309       | 1051.535325    | 526.271301       | 7  |
| 11 | 1233.541592        | 617.274434        | 1216.515043        | 608.761160        | 1215.531027       | 608.269152        | N    | <b>955.502963</b>  | 478.255119        | 938.476414         | 469.741845       | 937.492398     | 469.249837       | 6  |
| 12 | 1330.594356        | 665.800816        | 1313.567807        | <b>657.287542</b> | 1312.583791       | 656.795534        | P    | <b>841.460036</b>  | <b>421.233656</b> | 824.433487         | 412.720381       | 823.449471     | 412.228373       | 5  |
| 13 | <b>1417.626384</b> | 709.316830        | <b>1400.599835</b> | 700.803556        | 1399.615819       | 700.311548        | S    | <b>744.407272</b>  | 372.707274        | 727.380723         | 364.193999       | 726.396707     | 363.701991       | 4  |
| 14 | 1856.851710        | 928.929493        | 1839.825161        | 920.416219        | 1838.841145       | 919.924211        | Q    | <b>657.375244</b>  | <b>329.191260</b> | 640.348695         | 320.677985       |                |                  | 3  |
| 15 | 1927.888824        | 964.448050        | 1910.862275        | 955.934776        | 1909.878259       | <b>955.442768</b> | A    | 218.149918         | 109.578597        | 201.123369         | 101.065322       |                |                  | 2  |
| 16 |                    |                   |                    |                   |                   |                   | K    | 147.112804         | 74.060040         | 130.086255         | 65.546765        |                |                  | 1  |

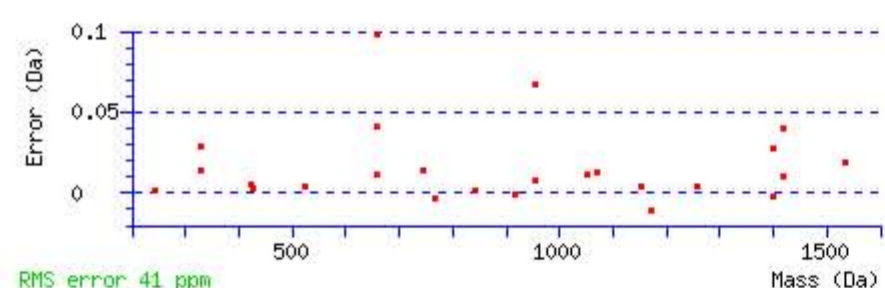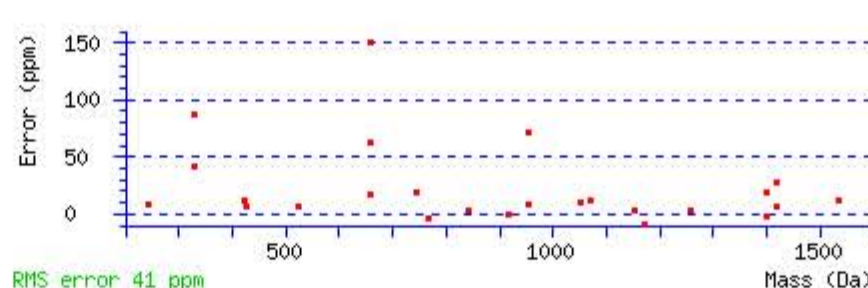

NCBI BLAST search of **EILSVDCSTNNPSQAK**

(Parameters: blastp, nr protein database, expect=20000, no filter, PAM30)

Other BLAST [web gateways](#)

All matches to this query

| Score | Mr(calc):   | Delta    | Sequence                         |
|-------|-------------|----------|----------------------------------|
| 57.7  | 2072.987061 | 0.011721 | <a href="#">EILSVDCSTNNPSQAK</a> |

Mascot: <http://www.matrixscience.com/>



# MASCOT Search Results

## Peptide View

MS/MS Fragmentation of **QQTHMLDVMQDHF**SR

Found in **CLUS\_HUMAN**, Clusterin OS=Homo sapiens GN=CLU PE=1 SV=1

Match to Query 57785: 2183.013736 from(546.760710,4+) rtinseconds(1986) index(42032)

Title: Locus:1.1.1.2975.12 File:"2013-07-02 CLN FXIII 60 min 1st F 3.wiff"

Data file C:\Program Files (x86)\Matrix Science\Mascot Daemon\mgf4 FXIII 60 min 1st\mascot\_daemon\_merge.mgf

Click mouse within plot area to zoom in by factor of two about that point

Or, Plot from  to  Da

Label all possible matches  Label matches used for scoring

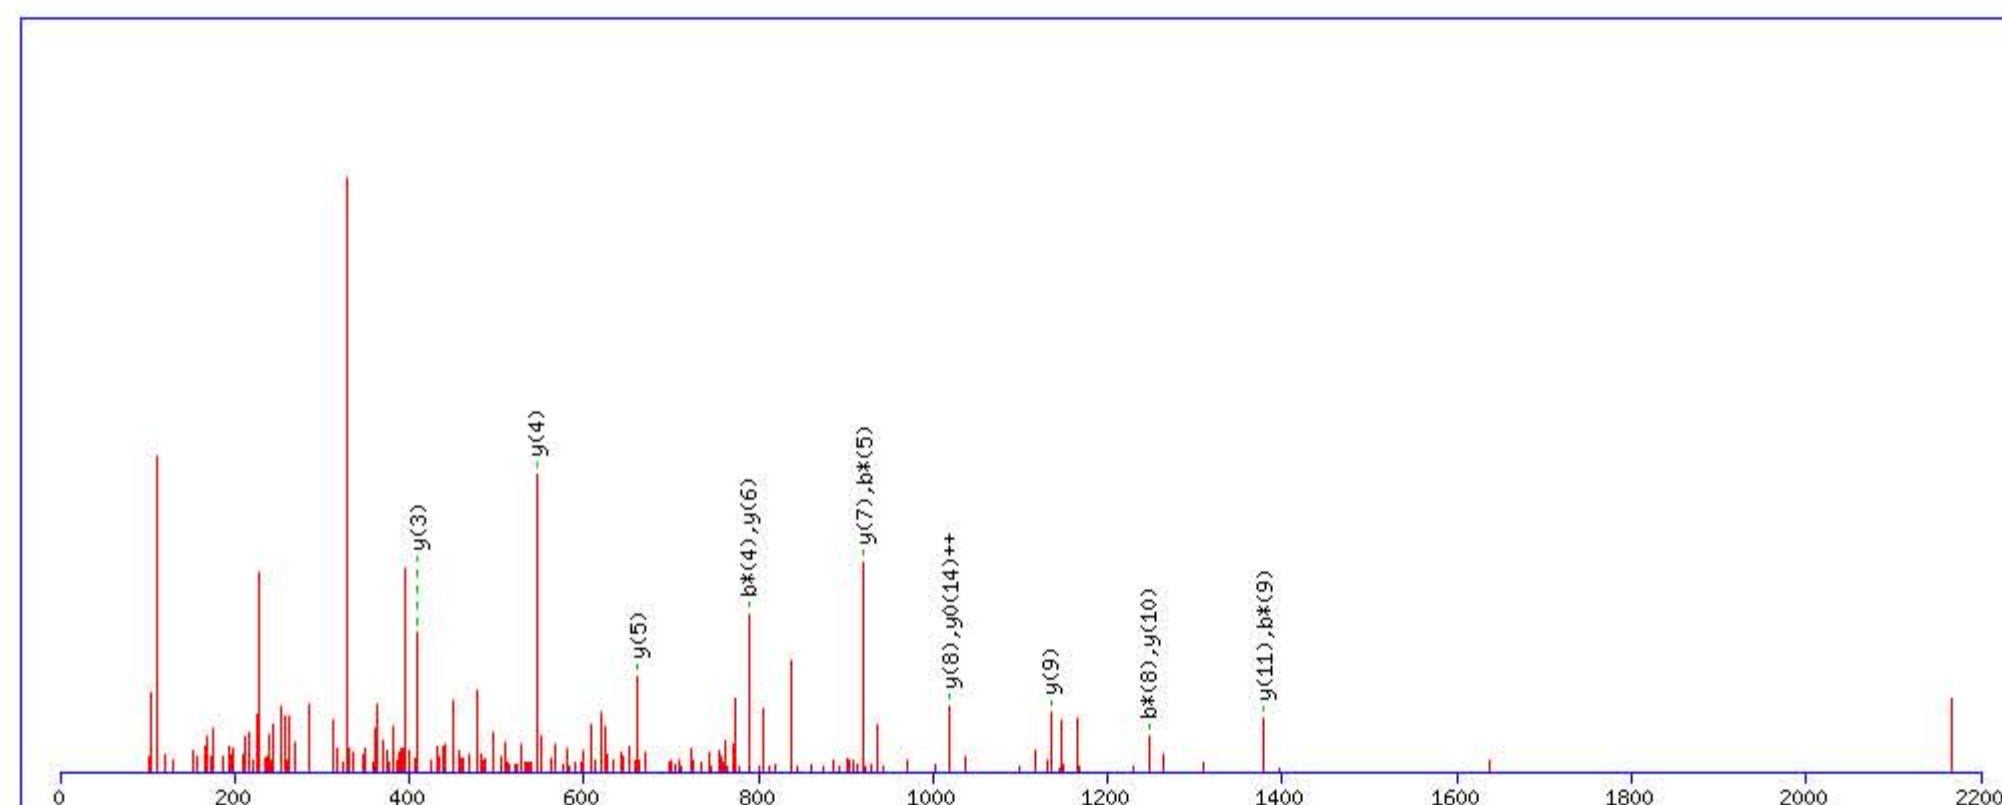

Monoisotopic mass of neutral peptide Mr(calc): 2183.007446

Fixed modifications: Carbamidomethyl (C) (apply to specified residues or termini only)

Variable modifications:

Q2 : Biotin:Thermo-21345 (Q)

Ions Score: 62 Expect: 8e-006

Matches : 14/162 fragment ions using 15 most intense peaks [\(help\)](#)

| #  | b           | b <sup>++</sup> | b <sup>*</sup> | b <sup>+++</sup> | b <sup>0</sup> | b <sup>0++</sup> | Seq. | y           | y <sup>++</sup> | y <sup>*</sup> | y <sup>+++</sup> | y <sup>0</sup> | y <sup>0++</sup> | #  |
|----|-------------|-----------------|----------------|------------------|----------------|------------------|------|-------------|-----------------|----------------|------------------|----------------|------------------|----|
| 1  | 129.065854  | 65.036565       | 112.039305     | 56.523291        |                |                  | Q    |             |                 |                |                  |                |                  | 15 |
| 2  | 568.291180  | 284.649228      | 551.264631     | 276.135954       |                |                  | Q    | 2055.956135 | 1028.481705     | 2038.929586    | 1019.968431      | 2037.945570    | 1019.476423      | 14 |
| 3  | 669.338859  | 335.173068      | 652.312310     | 326.659793       | 651.328294     | 326.167785       | T    | 1616.730809 | 808.869043      | 1599.704260    | 800.355768       | 1598.720244    | 799.863760       | 13 |
| 4  | 806.397771  | 403.702524      | 789.371222     | 395.189249       | 788.387206     | 394.697241       | H    | 1515.683130 | 758.345203      | 1498.656581    | 749.831929       | 1497.672565    | 749.339921       | 12 |
| 5  | 937.438256  | 469.222766      | 920.411707     | 460.709492       | 919.427691     | 460.217484       | M    | 1378.624218 | 689.815747      | 1361.597669    | 681.302473       | 1360.613653    | 680.810465       | 11 |
| 6  | 1050.522320 | 525.764798      | 1033.495771    | 517.251524       | 1032.511755    | 516.759516       | L    | 1247.583733 | 624.295505      | 1230.557184    | 615.782230       | 1229.573168    | 615.290222       | 10 |
| 7  | 1165.549263 | 583.278270      | 1148.522714    | 574.764995       | 1147.538698    | 574.272987       | D    | 1134.499669 | 567.753473      | 1117.473120    | 559.240198       | 1116.489104    | 558.748190       | 9  |
| 8  | 1264.617677 | 632.812477      | 1247.591128    | 624.299202       | 1246.607112    | 623.807194       | V    | 1019.472726 | 510.240001      | 1002.446177    | 501.726727       | 1001.462161    | 501.234719       | 8  |
| 9  | 1395.658162 | 698.332719      | 1378.631613    | 689.819445       | 1377.647597    | 689.327437       | M    | 920.404312  | 460.705794      | 903.377763     | 452.192520       | 902.393747     | 451.700512       | 7  |
| 10 | 1523.716740 | 762.362008      | 1506.690191    | 753.848734       | 1505.706175    | 753.356726       | Q    | 789.363827  | 395.185552      | 772.337278     | 386.672277       | 771.353262     | 386.180269       | 6  |
| 11 | 1638.743683 | 819.875480      | 1621.717134    | 811.362205       | 1620.733118    | 810.870197       | D    | 661.305249  | 331.156263      | 644.278700     | 322.642988       | 643.294684     | 322.150980       | 5  |
| 12 | 1775.802595 | 888.404936      | 1758.776046    | 879.891661       | 1757.792030    | 879.399653       | H    | 546.278306  | 273.642791      | 529.251757     | 265.129517       | 528.267741     | 264.637509       | 4  |
| 13 | 1922.871009 | 961.939143      | 1905.844460    | 953.425868       | 1904.860444    | 952.933860       | F    | 409.219394  | 205.113335      | 392.192845     | 196.600061       | 391.208829     | 196.108053       | 3  |
| 14 | 2009.903037 | 1005.455157     | 1992.876488    | 996.941882       | 1991.892472    | 996.449874       | S    | 262.150980  | 131.579128      | 245.124431     | 123.065854       | 244.140415     | 122.573846       | 2  |
| 15 |             |                 |                |                  |                |                  | R    | 175.118952  | 88.063114       | 158.092403     | 79.549839        |                |                  | 1  |

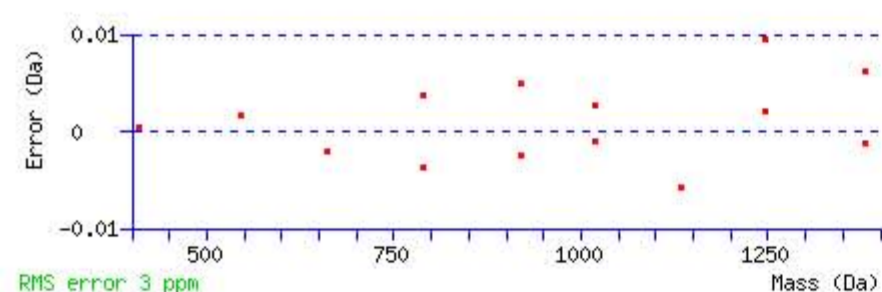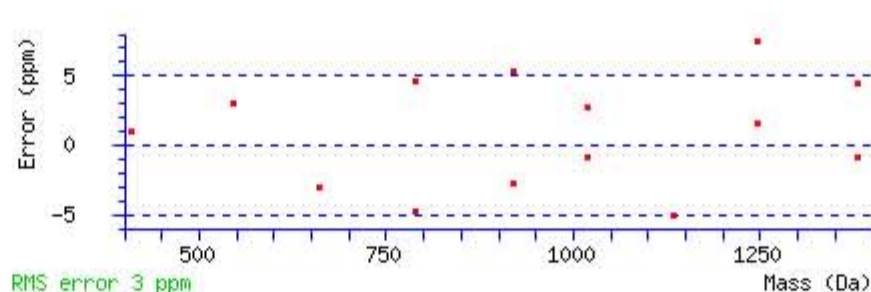

NCBI BLAST search of **QQTHMLDVMQDHF**SR

(Parameters: blastp, nr protein database, expect=20000, no filter, PAM30)

Other BLAST [web gateways](#)

All matches to this query

| Score | Mr(calc):   | Delta    | Sequence                         |
|-------|-------------|----------|----------------------------------|
| 62.4  | 2183.007446 | 0.006290 | <a href="#">QQTHMLDVMQDHF</a> SR |
| 62.4  | 2183.007446 | 0.006290 | <a href="#">QQTHMLDVMQDHF</a> SR |



# MASCOT SCIENCE Mascot Search Results

## Peptide View

MS/MS Fragmentation of **VSVSQTSK**

Found in **FA9\_HUMAN**, Coagulation factor IX OS=Homo sapiens GN=F9 PE=1 SV=2

Match to Query 25574: 1145.616688 from(573.815620,2+) rtinseconds(1380) index(56053)

Title: Locus:1.1.1.2786.20 File:"2013-07-02 CLN FXIII 60 min 1st F 4.wiff"

Data file C:\Program Files (x86)\Matrix Science\Mascot Daemon\mgf\4 FXIII 60 min 1st\mascot\_daemon\_merge.mgf

Click mouse within plot area to zoom in by factor of two about that point

Or, Plot from  to  Da

Label all possible matches  Label matches used for scoring

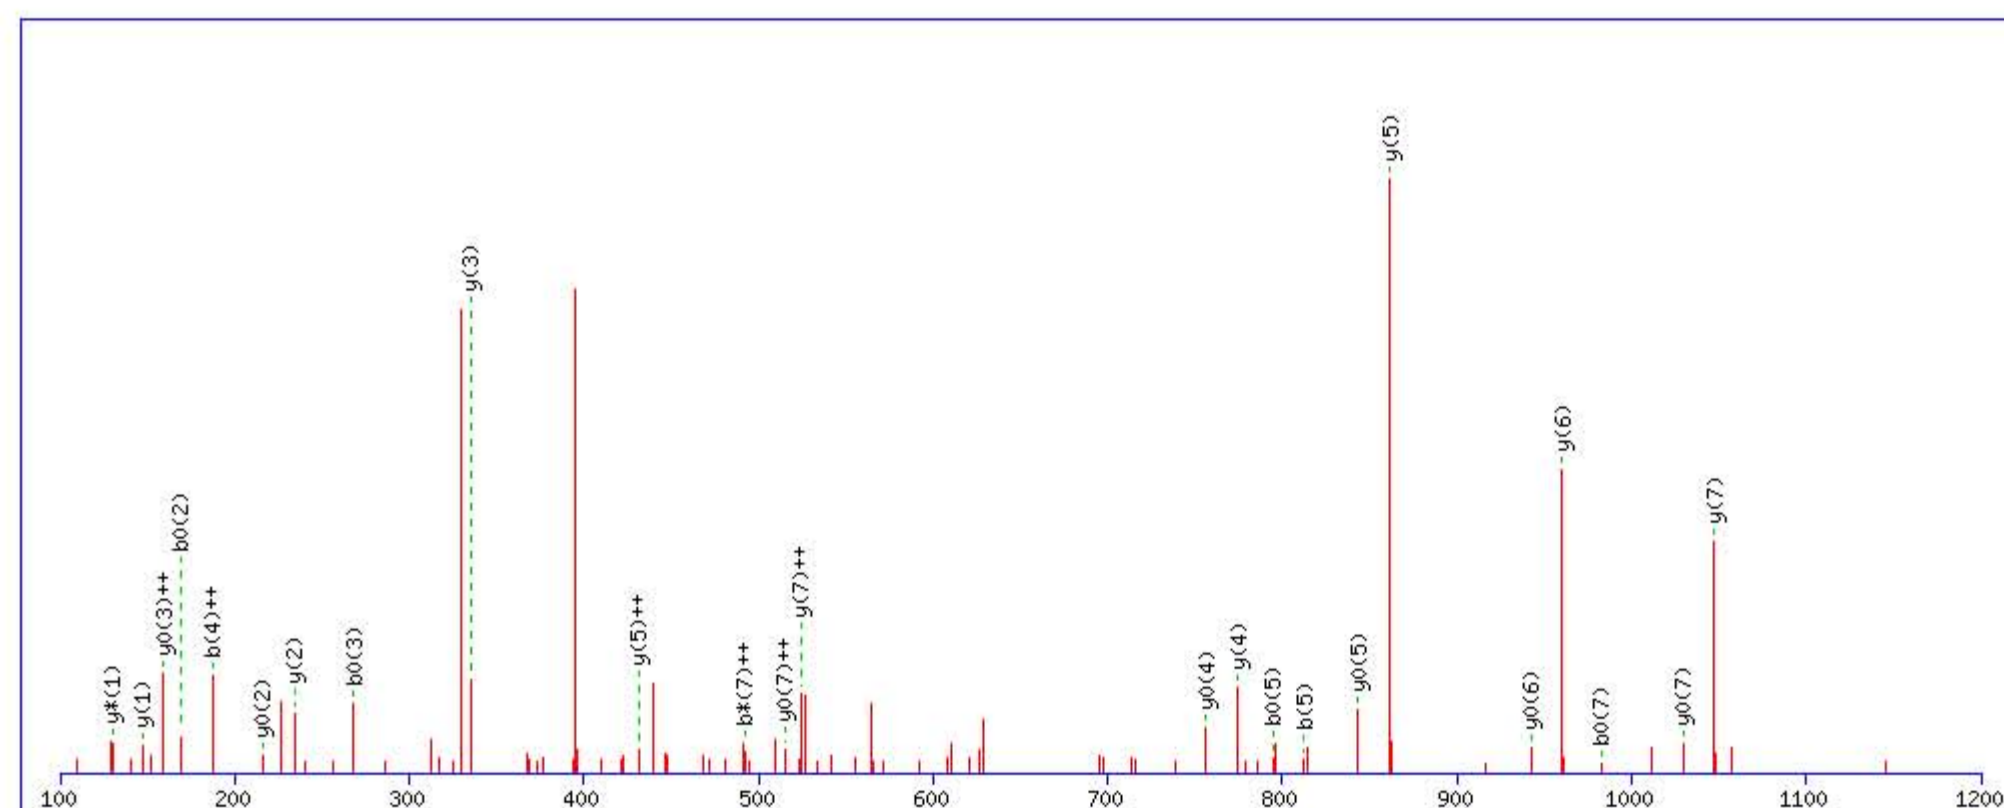

Monoisotopic mass of neutral peptide Mr(calc): 1145.611450

Fixed modifications: Carbamidomethyl (C) (apply to specified residues or termini only)

Variable modifications:

Q5 : Biotin:Thermo-21345 (Q)

Ions Score: 32 Expect: 0.0067

Matches : 25/72 fragment ions using 57 most intense peaks [\(help\)](#)

| # | b                 | b <sup>++</sup>   | b <sup>+</sup> | b <sup>*++</sup>  | b <sup>0</sup>    | b <sup>0++</sup> | Seq. | y                  | y <sup>++</sup>   | y <sup>+</sup>    | y <sup>*++</sup> | y <sup>0</sup>     | y <sup>0++</sup>  | # |
|---|-------------------|-------------------|----------------|-------------------|-------------------|------------------|------|--------------------|-------------------|-------------------|------------------|--------------------|-------------------|---|
| 1 | 100.075690        | 50.541483         |                |                   |                   |                  | V    |                    |                   |                   |                  |                    |                   | 8 |
| 2 | <b>187.107718</b> | 94.057497         |                |                   | 169.097153        | 85.052214        | S    | <b>1047.550307</b> | <b>524.278792</b> | 1030.523758       | 515.765517       | <b>1029.539742</b> | <b>515.273509</b> | 7 |
| 3 | 286.176132        | 143.591704        |                |                   | <b>268.165567</b> | 134.586422       | V    | <b>960.518279</b>  | 480.762778        | 943.491730        | 472.249503       | <b>942.507714</b>  | 471.757495        | 6 |
| 4 | 373.208160        | <b>187.107718</b> |                |                   | 355.197595        | 178.102435       | S    | <b>861.449865</b>  | <b>431.228571</b> | 844.423316        | 422.715296       | <b>843.439300</b>  | 422.223288        | 5 |
| 5 | <b>812.433486</b> | 406.720381        | 795.406937     | 398.207107        | <b>794.422921</b> | 397.715099       | Q    | <b>774.417837</b>  | 387.712557        | 757.391288        | 379.199282       | <b>756.407272</b>  | 378.707274        | 4 |
| 6 | 913.481165        | 457.244221        | 896.454616     | 448.730946        | 895.470600        | 448.238938       | T    | <b>335.192511</b>  | 168.099893        | 318.165962        | 159.586619       | 317.181946         | <b>159.094611</b> | 3 |
| 7 | 1000.513193       | 500.760235        | 983.486644     | <b>492.246960</b> | <b>982.502628</b> | 491.754952       | S    | <b>234.144832</b>  | 117.576054        | 217.118283        | 109.062779       | <b>216.134267</b>  | 108.570771        | 2 |
| 8 |                   |                   |                |                   |                   |                  | K    | <b>147.112804</b>  | 74.060040         | <b>130.086255</b> | 65.546765        |                    |                   | 1 |

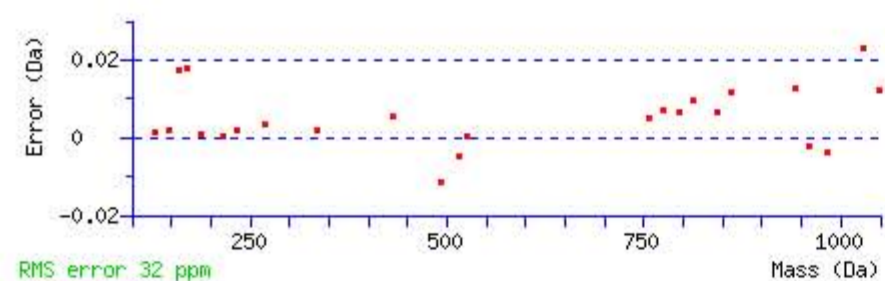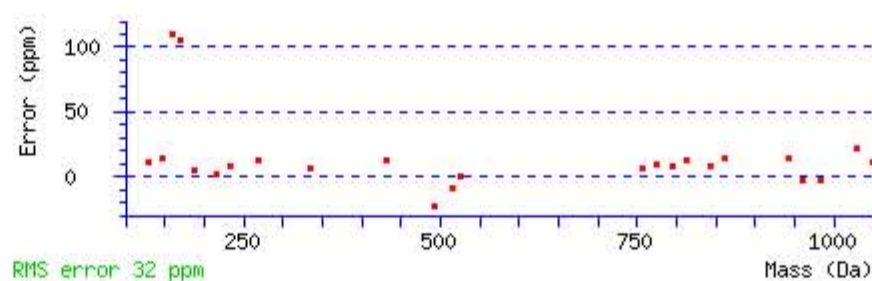

NCBI BLAST search of [VSVSQTSK](#)

(Parameters: blastp, nr protein database, expect=20000, no filter, PAM30)

Other BLAST [web gateways](#)

## All matches to this query

| Score | Mr(calc):   | Delta     | Sequence                     |
|-------|-------------|-----------|------------------------------|
| 31.6  | 1145.611450 | 0.005238  | <a href="#">VSVSQTSK</a>     |
| 8.0   | 1145.629196 | -0.012508 | <a href="#">GEVLGLSSSLGK</a> |
| 5.5   | 1145.604019 | 0.012669  | <a href="#">REQLSDASLK</a>   |
| 2.6   | 1145.629181 | -0.012493 | <a href="#">VAKEVVEASSK</a>  |
| 2.3   | 1145.611420 | 0.005268  | <a href="#">KSIMVQSPEK</a>   |

Mascot: <http://www.matrixscience.com/>



# Mascot Search Results

## Peptide View

MS/MS Fragmentation of **SALVLQYLR**

Found in **FA9\_HUMAN**, Coagulation factor IX OS=Homo sapiens GN=F9 PE=1 SV=2

Match to Query 33630: 1372.803748 from(687.409150,2+) rtinseconds(2382) index(63327)

Title: Locus:1.1.1.3134.9 File:"2013-07-02 CLN FXIII 60 min 1st F 4.wiff"

Data file C:\Program Files (x86)\Matrix Science\Mascot Daemon\mgf4 FXIII 60 min 1st\mascot\_daemon\_merge.mgf

Click mouse within plot area to zoom in by factor of two about that point

Or, Plot from  to  Da

Label all possible matches  Label matches used for scoring

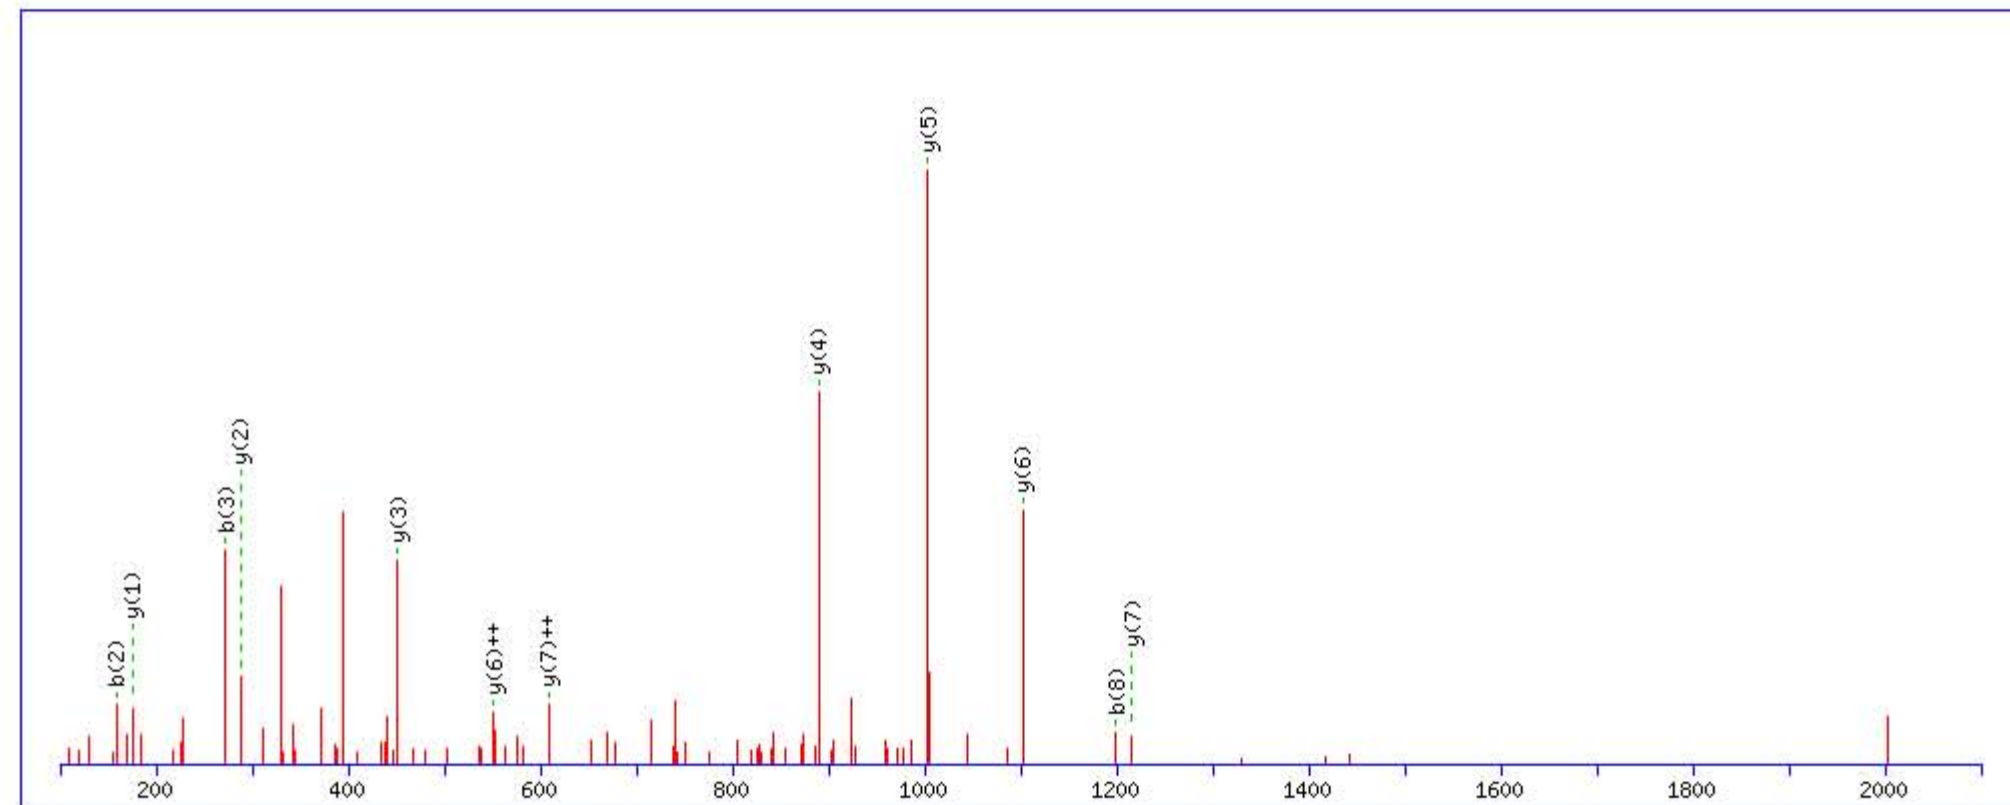

Monoisotopic mass of neutral peptide  $M_r(\text{calc})$ : 1372.790054

Fixed modifications: Carbamidomethyl (C) (apply to specified residues or termini only)

Variable modifications:

Q6 : Biotin:Thermo-21345 (Q)

Ions Score: 44 Expect: 0.00026

Matches : 12/70 fragment ions using 23 most intense peaks [\(help\)](#)

| # | b                  | b <sup>++</sup> | b <sup>*</sup> | b <sup>+++</sup> | b <sup>0</sup> | b <sup>0++</sup> | Seq. | y                  | y <sup>++</sup>   | y <sup>*</sup> | y <sup>+++</sup> | # |
|---|--------------------|-----------------|----------------|------------------|----------------|------------------|------|--------------------|-------------------|----------------|------------------|---|
| 1 | 88.039304          | 44.523290       |                |                  | 70.028739      | 35.518008        | S    |                    |                   |                |                  | 9 |
| 2 | <b>159.076418</b>  | 80.041847       |                |                  | 141.065853     | 71.036564        | A    | 1286.765327        | 643.886301        | 1269.738778    | 635.373027       | 8 |
| 3 | <b>272.160482</b>  | 136.583879      |                |                  | 254.149917     | 127.578597       | L    | <b>1215.728213</b> | <b>608.367744</b> | 1198.701664    | 599.854470       | 7 |
| 4 | 371.228896         | 186.118086      |                |                  | 353.218331     | 177.112804       | V    | <b>1102.644149</b> | <b>551.825713</b> | 1085.617600    | 543.312438       | 6 |
| 5 | 484.312960         | 242.660118      |                |                  | 466.302395     | 233.654836       | L    | <b>1003.575735</b> | 502.291505        | 986.549186     | 493.778231       | 5 |
| 6 | 923.538286         | 462.272781      | 906.511737     | 453.759507       | 905.527721     | 453.267499       | Q    | <b>890.491671</b>  | 445.749473        | 873.465122     | 437.236199       | 4 |
| 7 | 1086.601615        | 543.804446      | 1069.575066    | 535.291171       | 1068.591050    | 534.799163       | Y    | <b>451.266345</b>  | 226.136810        | 434.239796     | 217.623536       | 3 |
| 8 | <b>1199.685679</b> | 600.346477      | 1182.659130    | 591.833203       | 1181.675114    | 591.341195       | L    | <b>288.203016</b>  | 144.605146        | 271.176467     | 136.091871       | 2 |
| 9 |                    |                 |                |                  |                |                  | R    | <b>175.118952</b>  | 88.063114         | 158.092403     | 79.549839        | 1 |

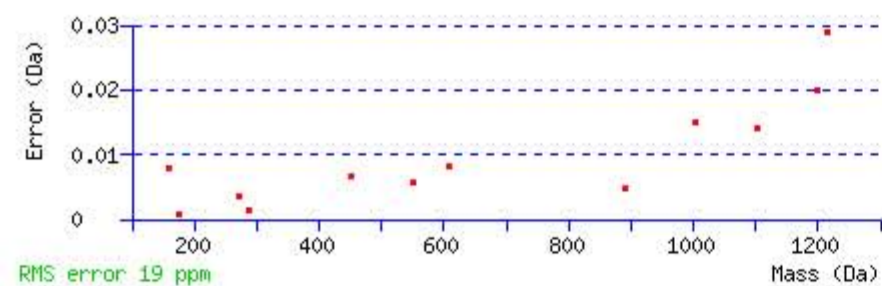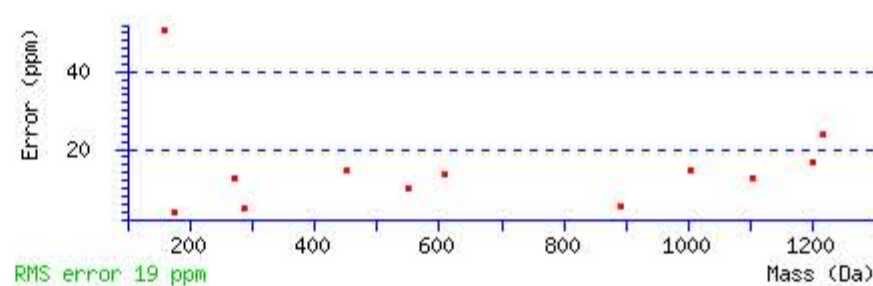

NCBI BLAST search of **SALVLQYLR**

(Parameters: blastp, nr protein database, expect=20000, no filter, PAM30)

Other BLAST [web gateways](#)

All matches to this query

| Score | $M_r(\text{calc})$ : | Delta     | Sequence                    |
|-------|----------------------|-----------|-----------------------------|
| 44.1  | 1372.790054          | 0.013694  | <a href="#">SALVLQYLR</a>   |
| 5.7   | 1372.819046          | -0.015298 | <a href="#">QNLVIKDKFIR</a> |
| 0.5   | 1372.790039          | 0.013709  | <a href="#">KELQILYR</a>    |
| 0.3   | 1372.793900          | 0.009848  | <a href="#">TERRVPFSLLR</a> |
| 0.2   | 1372.790039          | 0.013709  | <a href="#">IIEKYQLR</a>    |

Mascot: <http://www.matrixscience.com/>



# MASCOT Search Results

## Peptide View

MS/MS Fragmentation of **ITVVAGEHNIEETEHTEQK**

Found in **FA9\_HUMAN**, Coagulation factor IX OS=Homo sapiens GN=F9 PE=1 SV=2

Match to Query 64536: 2474.225496 from(619.563650,4+) rtinseconds(1580) index(57494)

Title: Locus:1.1.1.2856.9 File:"2013-07-02 CLN FXIII 60 min 1st F 4.wiff"

Data file C:\Program Files (x86)\Matrix Science\Mascot Daemon\mgf4 FXIII 60 min 1st\mascot\_daemon\_merge.mgf

Click mouse within plot area to zoom in by factor of two about that point

Or, Plot from  to  Da

Label all possible matches  Label matches used for scoring

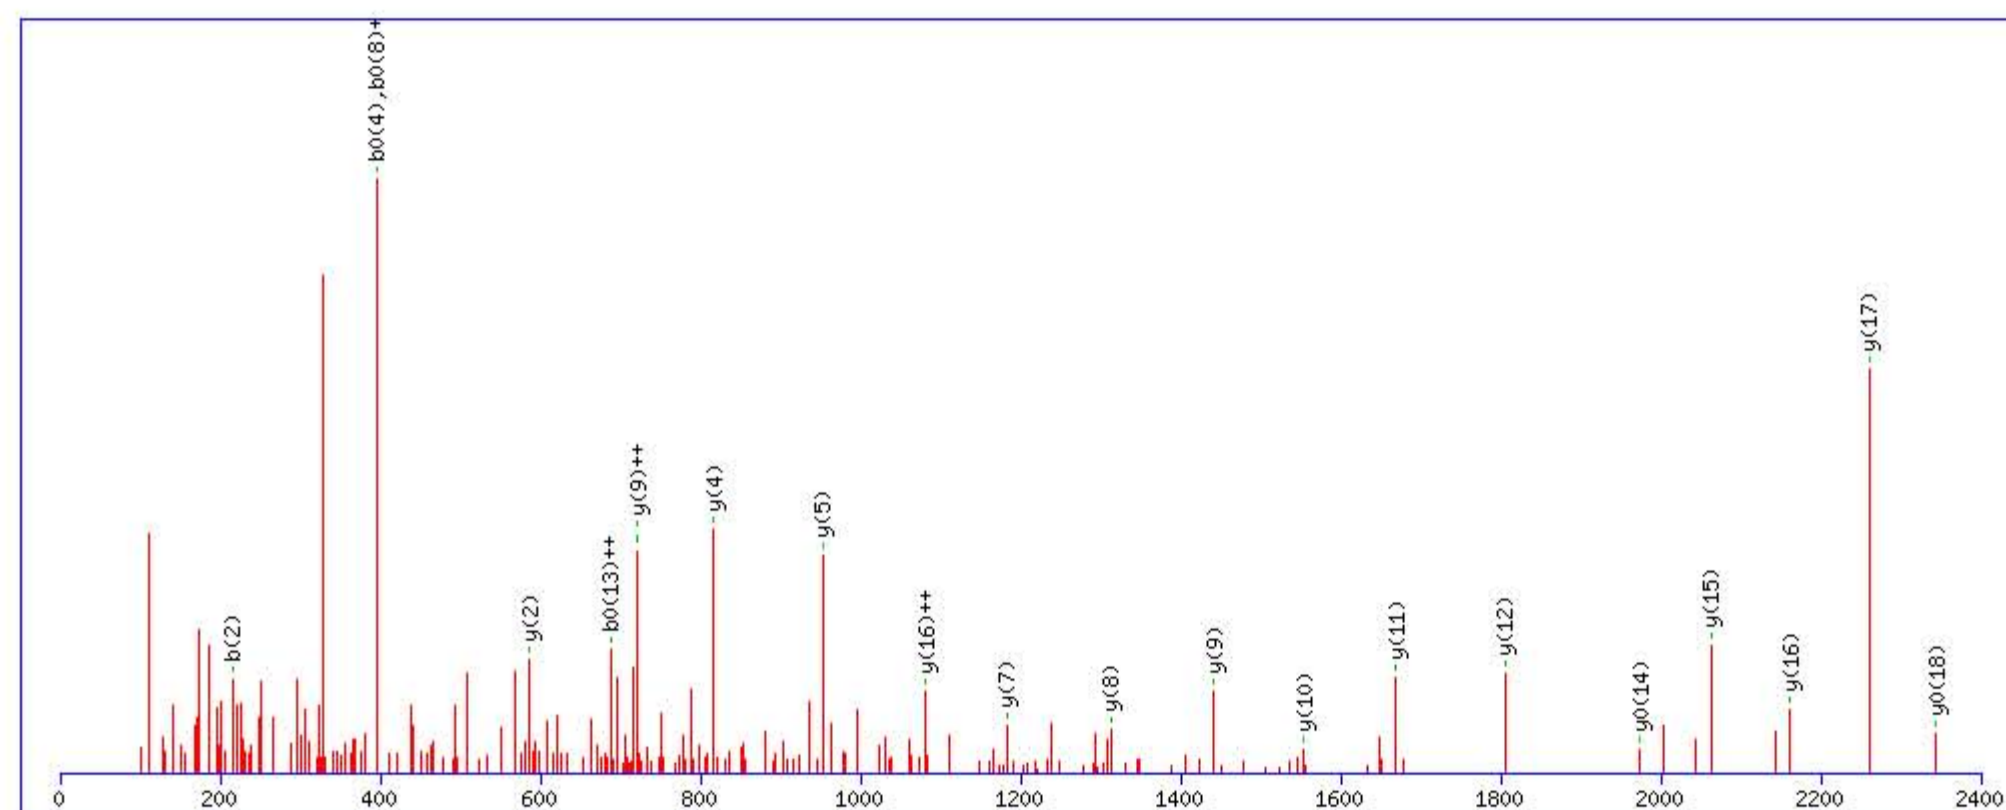

Monoisotopic mass of neutral peptide Mr(calc): 2474.211121

Fixed modifications: Carbamidomethyl (C) (apply to specified residues or termini only)

Variable modifications:

Q18 : Biotin:Thermo-21345 (Q)

Ions Score: 97 Expect: 5.1e-009

Matches : 20/194 fragment ions using 22 most intense peaks [\(help\)](#)

| #  | b                 | b <sup>++</sup> | b <sup>+</sup> | b <sup>+++</sup> | b <sup>0</sup>    | b <sup>0++</sup>  | Seq. | y                  | y <sup>++</sup>    | y <sup>+</sup> | y <sup>+++</sup> | y <sup>0</sup>     | y <sup>0++</sup> | #  |
|----|-------------------|-----------------|----------------|------------------|-------------------|-------------------|------|--------------------|--------------------|----------------|------------------|--------------------|------------------|----|
| 1  | 114.091340        | 57.549308       |                |                  |                   |                   | I    |                    |                    |                |                  |                    |                  | 19 |
| 2  | <b>215.139019</b> | 108.073147      |                |                  | 197.128454        | 99.067865         | T    | 2362.134353        | 1181.570814        | 2345.107804    | 1173.057540      | <b>2344.123788</b> | 1172.565532      | 18 |
| 3  | 314.207433        | 157.607354      |                |                  | 296.196868        | 148.602072        | V    | <b>2261.086674</b> | 1131.046975        | 2244.060125    | 1122.533700      | 2243.076109        | 1122.041692      | 17 |
| 4  | 413.275847        | 207.141561      |                |                  | <b>395.265282</b> | 198.136279        | V    | <b>2162.018260</b> | <b>1081.512768</b> | 2144.991711    | 1072.999493      | 2144.007695        | 1072.507485      | 16 |
| 5  | 484.312961        | 242.660119      |                |                  | 466.302396        | 233.654836        | A    | <b>2062.949846</b> | 1031.978561        | 2045.923297    | 1023.465286      | 2044.939281        | 1022.973278      | 15 |
| 6  | 541.334425        | 271.170851      |                |                  | 523.323860        | 262.165568        | G    | 1991.912732        | 996.460004         | 1974.886183    | 987.946730       | <b>1973.902167</b> | 987.454722       | 14 |
| 7  | 670.377018        | 335.692147      |                |                  | 652.366453        | 326.686865        | E    | 1934.891268        | 967.949272         | 1917.864719    | 959.435998       | 1916.880703        | 958.943990       | 13 |
| 8  | 807.435930        | 404.221603      |                |                  | 789.425365        | <b>395.216321</b> | H    | <b>1805.848675</b> | 903.427976         | 1788.822126    | 894.914701       | 1787.838110        | 894.422693       | 12 |
| 9  | 921.478857        | 461.243067      | 904.452308     | 452.729792       | 903.468292        | 452.237784        | N    | <b>1668.789763</b> | 834.898520         | 1651.763214    | 826.385245       | 1650.779198        | 825.893237       | 11 |
| 10 | 1034.562921       | 517.785099      | 1017.536372    | 509.271824       | 1016.552356       | 508.779816        | I    | <b>1554.746836</b> | 777.877056         | 1537.720287    | 769.363782       | 1536.736271        | 768.871774       | 10 |
| 11 | 1163.605514       | 582.306395      | 1146.578965    | 573.793121       | 1145.594949       | 573.301113        | E    | <b>1441.662772</b> | <b>721.335024</b>  | 1424.636223    | 712.821750       | 1423.652207        | 712.329742       | 9  |
| 12 | 1292.648107       | 646.827692      | 1275.621558    | 638.314417       | 1274.637542       | 637.822409        | E    | <b>1312.620179</b> | 656.813728         | 1295.593630    | 648.300453       | 1294.609614        | 647.808445       | 8  |
| 13 | 1393.695786       | 697.351531      | 1376.669237    | 688.838257       | 1375.685221       | <b>688.346249</b> | T    | <b>1183.577586</b> | 592.292431         | 1166.551037    | 583.779157       | 1165.567021        | 583.287149       | 7  |
| 14 | 1522.738379       | 761.872828      | 1505.711830    | 753.359553       | 1504.727814       | 752.867545        | E    | 1082.529907        | 541.768592         | 1065.503358    | 533.255317       | 1064.519342        | 532.763309       | 6  |
| 15 | 1659.797291       | 830.402284      | 1642.770742    | 821.889009       | 1641.786726       | 821.397001        | H    | <b>953.487314</b>  | 477.247295         | 936.460765     | 468.734021       | 935.476749         | 468.242013       | 5  |
| 16 | 1760.844970       | 880.926123      | 1743.818421    | 872.412849       | 1742.834405       | 871.920841        | T    | <b>816.428402</b>  | 408.717839         | 799.401853     | 400.204565       | 798.417837         | 399.712557       | 4  |
| 17 | 1889.887563       | 945.447420      | 1872.861014    | 936.934145       | 1871.876998       | 936.442137        | E    | 715.380723         | 358.194000         | 698.354174     | 349.680725       | 697.370158         | 349.188717       | 3  |
| 18 | 2329.112889       | 1165.060082     | 2312.086340    | 1156.546808      | 2311.102324       | 1156.054800       | Q    | <b>586.338130</b>  | 293.672703         | 569.311581     | 285.159429       |                    |                  | 2  |
| 19 |                   |                 |                |                  |                   |                   | K    | 147.112804         | 74.060040          | 130.086255     | 65.546765        |                    |                  | 1  |

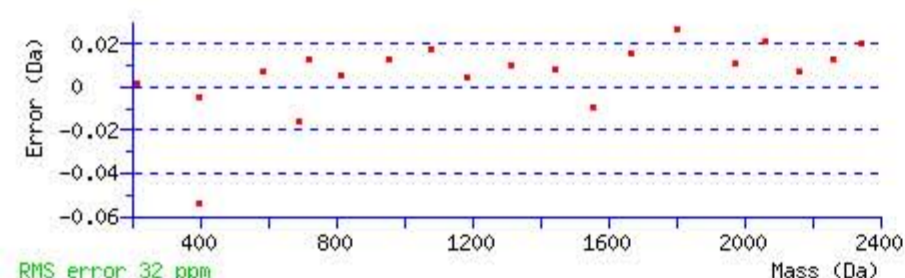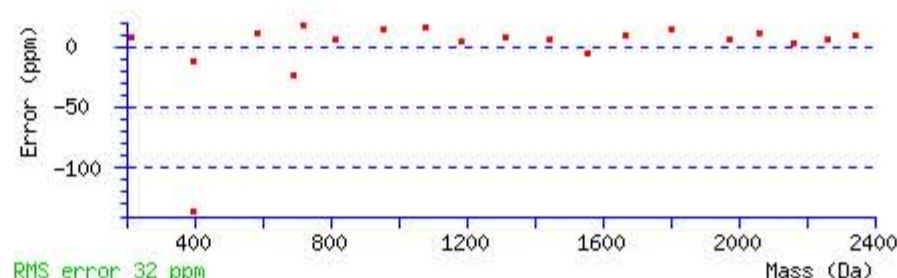

NCBI BLAST search of [ITVVAGEHNIEETEHTEQK](#)

(Parameters: blastp, nr protein database, expect=20000, no filter, PAM30)

Other BLAST [web gateways](#)

All matches to this query

| Score | Mr(calc):   | Delta    | Sequence                            |
|-------|-------------|----------|-------------------------------------|
| 97.2  | 2474.211121 | 0.014375 | <a href="#">ITVVAGEHNIEETEHTEQK</a> |

Mascot: <http://www.matrixscience.com/>



# MASCOT Search Results

## Peptide View

MS/MS Fragmentation of **SQHLDNFSNQIGK**

Found in **FA5\_HUMAN**, Coagulation factor V OS=Homo sapiens GN=F5 PE=1 SV=4

Match to Query 48359: 1797.896052 from(600.305960,3+) rtinseconds(1735) index(58608)

Title: Locus:1.1.1.2910.10 File:"2013-07-02 CLN FXIII 60 min 1st F 4.wiff"

Data file C:\Program Files (x86)\Matrix Science\Mascot Daemon\mgf4 FXIII 60 min 1st\mascot\_daemon\_merge.mgf

Click mouse within plot area to zoom in by factor of two about that point

Or, Plot from  to  Da

Label all possible matches  Label matches used for scoring

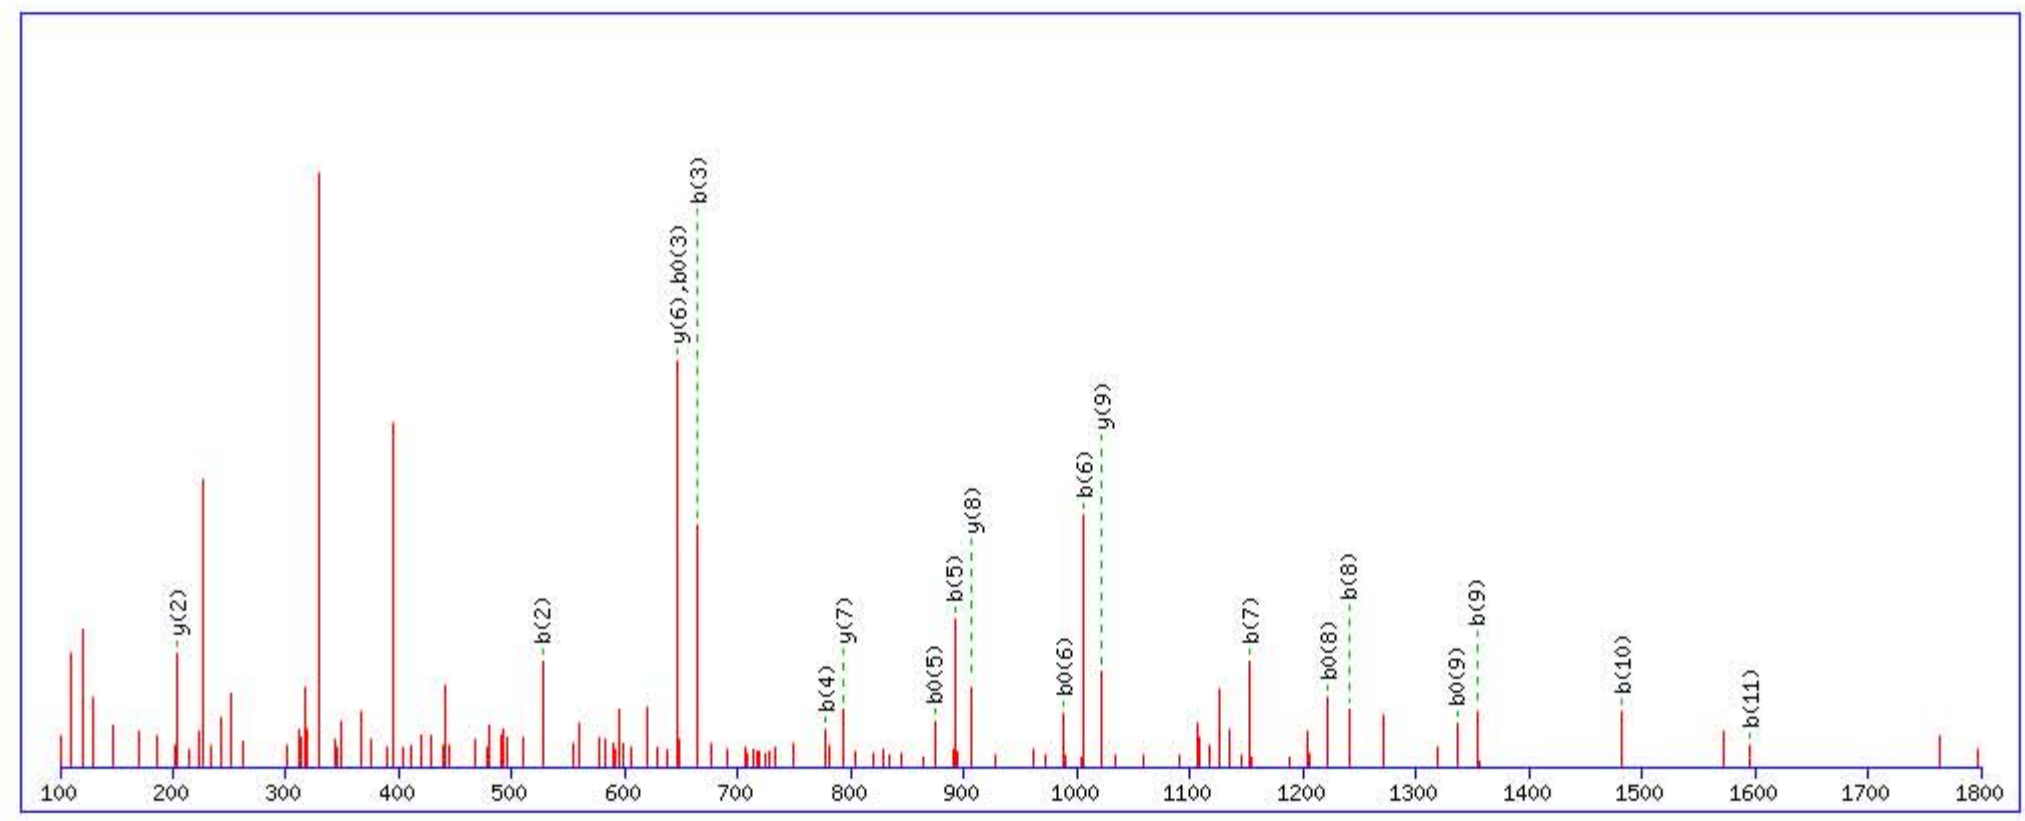

Monoisotopic mass of neutral peptide Mr(calc): 1797.883194

Fixed modifications: Carbamidomethyl (C) (apply to specified residues or termini only)

Variable modifications:

Q2 : Biotin:Thermo-21345 (Q)

Ions Score: 69 Expect: 5.2e-007

Matches : 20/132 fragment ions using 31 most intense peaks [\(help\)](#)

| #  | b                  | b <sup>++</sup> | b <sup>*</sup> | b <sup>***</sup> | b <sup>0</sup>     | b <sup>0++</sup> | Seq. | y                  | y <sup>++</sup> | y <sup>*</sup> | y <sup>***</sup> | y <sup>0</sup> | y <sup>0++</sup> | #  |
|----|--------------------|-----------------|----------------|------------------|--------------------|------------------|------|--------------------|-----------------|----------------|------------------|----------------|------------------|----|
| 1  | 88.039304          | 44.523290       |                |                  | 70.028739          | 35.518008        | S    |                    |                 |                |                  |                |                  | 13 |
| 2  | <b>527.264630</b>  | 264.135953      | 510.238081     | 255.622679       | 509.254065         | 255.130671       | Q    | 1711.858451        | 856.432863      | 1694.831902    | 847.919589       | 1693.847886    | 847.427581       | 12 |
| 3  | <b>664.323542</b>  | 332.665409      | 647.296993     | 324.152134       | <b>646.312977</b>  | 323.660126       | H    | 1272.633125        | 636.820200      | 1255.606576    | 628.306926       | 1254.622560    | 627.814918       | 11 |
| 4  | <b>777.407606</b>  | 389.207441      | 760.381057     | 380.694166       | 759.397041         | 380.202159       | L    | 1135.574213        | 568.290744      | 1118.547664    | 559.777470       | 1117.563648    | 559.285462       | 10 |
| 5  | <b>892.434549</b>  | 446.720913      | 875.408000     | 438.207638       | <b>874.423984</b>  | 437.715630       | D    | <b>1022.490149</b> | 511.748712      | 1005.463600    | 503.235438       | 1004.479584    | 502.743430       | 9  |
| 6  | <b>1006.477476</b> | 503.742376      | 989.450927     | 495.229101       | <b>988.466911</b>  | 494.737093       | N    | <b>907.463206</b>  | 454.235241      | 890.436657     | 445.721966       | 889.452641     | 445.229958       | 8  |
| 7  | <b>1153.545890</b> | 577.276583      | 1136.519341    | 568.763308       | 1135.535325        | 568.271300       | F    | <b>793.420279</b>  | 397.213777      | 776.393730     | 388.700503       | 775.409714     | 388.208495       | 7  |
| 8  | <b>1240.577918</b> | 620.792597      | 1223.551369    | 612.279323       | <b>1222.567353</b> | 611.787314       | S    | <b>646.351865</b>  | 323.679570      | 629.325316     | 315.166296       | 628.341300     | 314.674288       | 6  |
| 9  | <b>1354.620845</b> | 677.814060      | 1337.594296    | 669.300786       | <b>1336.610280</b> | 668.808778       | N    | 559.319837         | 280.163556      | 542.293288     | 271.650282       |                |                  | 5  |
| 10 | <b>1482.679423</b> | 741.843349      | 1465.652874    | 733.330075       | 1464.668858        | 732.838067       | Q    | 445.276910         | 223.142093      | 428.250361     | 214.628818       |                |                  | 4  |
| 11 | <b>1595.763487</b> | 798.385381      | 1578.736938    | 789.872107       | 1577.752922        | 789.380099       | I    | 317.218332         | 159.112804      | 300.191783     | 150.599529       |                |                  | 3  |
| 12 | 1652.784951        | 826.896113      | 1635.758402    | 818.382839       | 1634.774386        | 817.890831       | G    | <b>204.134268</b>  | 102.570772      | 187.107719     | 94.057497        |                |                  | 2  |
| 13 |                    |                 |                |                  |                    |                  | K    | 147.112804         | 74.060040       | 130.086255     | 65.546765        |                |                  | 1  |

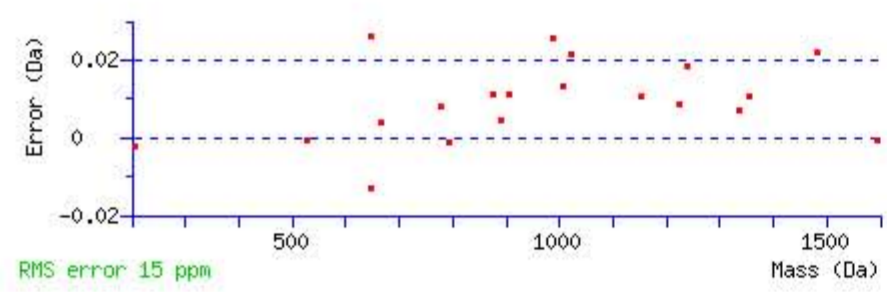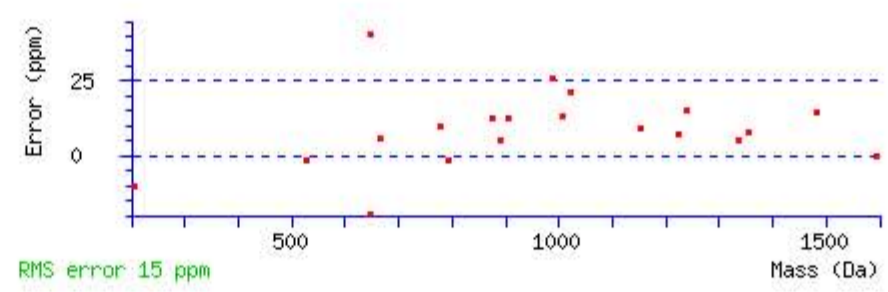

NCBI BLAST search of **SQHLDNFSNQIGK**

(Parameters: blastp, nr protein database, expect=20000, no filter, PAM30)

Other BLAST [web gateways](#)

All matches to this query

| Score | Mr(calc):   | Delta    | Sequence                       |
|-------|-------------|----------|--------------------------------|
| 69.0  | 1797.883194 | 0.012858 | <a href="#">SQHLDNFSNQIGK</a>  |
| 2.0   | 1797.872604 | 0.023448 | <a href="#">KWDFSKYYVSNFSK</a> |



# MASCOT Search Results

## Peptide View

MS/MS Fragmentation of **MPMGLSTGIISDSQIK**

Found in **FA5\_HUMAN**, Coagulation factor V OS=Homo sapiens GN=F5 PE=1 SV=4

Match to Query 52595: 1988.036712 from(663.686180,3+) rtinseconds(2440) index(63646)

Title: Locus:1.1.1.3154.7 File:"2013-07-02 CLN FXIII 60 min 1st F 4.wiff"

Data file C:\Program Files (x86)\Matrix Science\Mascot Daemon\mgf4 FXIII 60 min 1st\mascot\_daemon\_merge.mgf

Click mouse within plot area to zoom in by factor of two about that point

Or, Plot from  to  Da

Label all possible matches  Label matches used for scoring

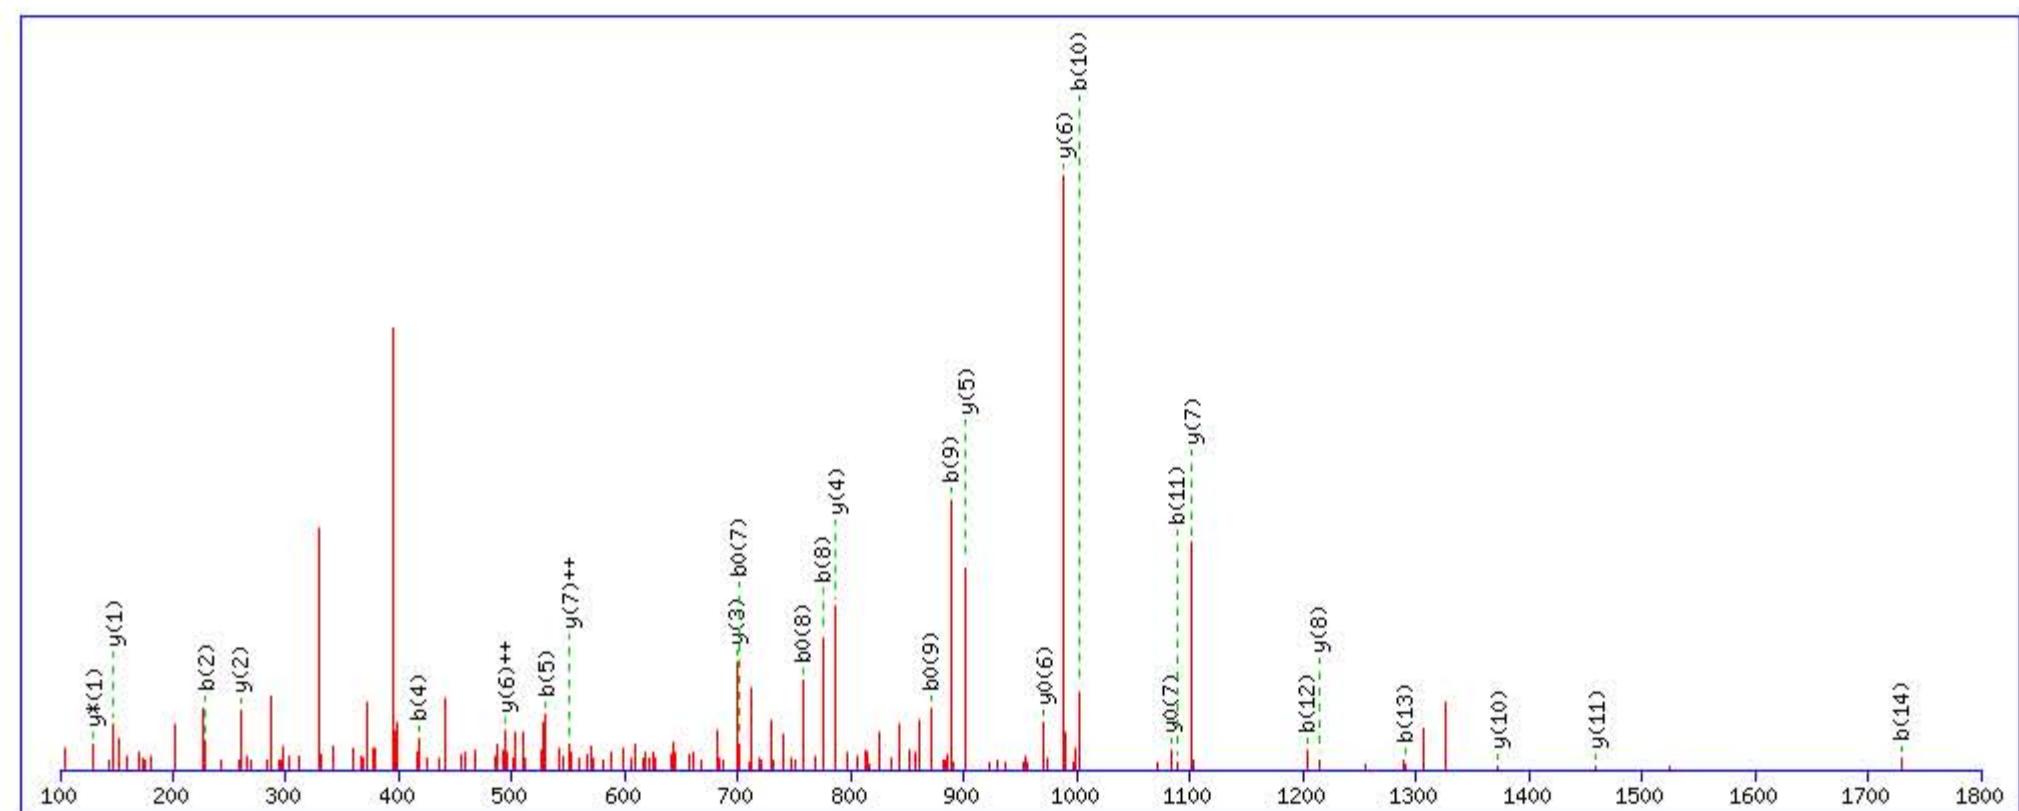

Monoisotopic mass of neutral peptide Mr(calc): 1988.014465

Fixed modifications: Carbamidomethyl (C) (apply to specified residues or termini only)

Variable modifications:

Q14 : Biotin:Thermo-21345 (Q)

Ions Score: 62 Expect: 4.8e-006

Matches : 28/138 fragment ions using 51 most intense peaks [\(help\)](#)

| #  | b                  | b <sup>++</sup> | b <sup>+</sup> | b <sup>+++</sup> | b <sup>0</sup>    | b <sup>0++</sup> | Seq. | y                  | y <sup>++</sup>   | y <sup>+</sup>    | y <sup>+++</sup> | y <sup>0</sup>     | y <sup>0++</sup> | #  |
|----|--------------------|-----------------|----------------|------------------|-------------------|------------------|------|--------------------|-------------------|-------------------|------------------|--------------------|------------------|----|
| 1  | 132.047761         | 66.527518       |                |                  |                   |                  | M    |                    |                   |                   |                  |                    |                  | 16 |
| 2  | <b>229.100525</b>  | 115.053900      |                |                  |                   |                  | P    | 1857.981269        | 929.494273        | 1840.954720       | 920.980998       | 1839.970704        | 920.488990       | 15 |
| 3  | 360.141010         | 180.574143      |                |                  |                   |                  | M    | 1760.928505        | 880.967891        | 1743.901956       | 872.454616       | 1742.917940        | 871.962608       | 14 |
| 4  | <b>417.162474</b>  | 209.084875      |                |                  |                   |                  | G    | 1629.888020        | 815.447648        | 1612.861471       | 806.934374       | 1611.877455        | 806.442366       | 13 |
| 5  | <b>530.246538</b>  | 265.626907      |                |                  |                   |                  | L    | 1572.866556        | 786.936916        | 1555.840007       | 778.423642       | 1554.855991        | 777.931634       | 12 |
| 6  | 617.278566         | 309.142921      |                |                  | 599.268001        | 300.137638       | S    | <b>1459.782492</b> | 730.394884        | 1442.755943       | 721.881610       | 1441.771927        | 721.389602       | 11 |
| 7  | 718.326245         | 359.666761      |                |                  | <b>700.315680</b> | 350.661478       | T    | <b>1372.750464</b> | 686.878870        | 1355.723915       | 678.365596       | 1354.739899        | 677.873588       | 10 |
| 8  | <b>775.347709</b>  | 388.177493      |                |                  | <b>757.337144</b> | 379.172210       | G    | 1271.702785        | 636.355031        | 1254.676236       | 627.841756       | 1253.692220        | 627.349748       | 9  |
| 9  | <b>888.431773</b>  | 444.719525      |                |                  | <b>870.421208</b> | 435.714242       | I    | <b>1214.681321</b> | 607.844299        | 1197.654772       | 599.331024       | 1196.670756        | 598.839016       | 8  |
| 10 | <b>1001.515837</b> | 501.261557      |                |                  | 983.505272        | 492.256274       | I    | <b>1101.597257</b> | <b>551.302267</b> | 1084.570708       | 542.788992       | <b>1083.586692</b> | 542.296984       | 7  |
| 11 | <b>1088.547865</b> | 544.777571      |                |                  | 1070.537300       | 535.772288       | S    | <b>988.513193</b>  | <b>494.760235</b> | 971.486644        | 486.246960       | <b>970.502628</b>  | 485.754952       | 6  |
| 12 | <b>1203.574808</b> | 602.291042      |                |                  | 1185.564243       | 593.285760       | D    | <b>901.481165</b>  | 451.244221        | 884.454616        | 442.730946       | 883.470600         | 442.238938       | 5  |
| 13 | <b>1290.606836</b> | 645.807056      |                |                  | 1272.596271       | 636.801774       | S    | <b>786.454222</b>  | 393.730749        | 769.427673        | 385.217475       | 768.443657         | 384.725467       | 4  |
| 14 | <b>1729.832162</b> | 865.419719      | 1712.805613    | 856.906445       | 1711.821597       | 856.414437       | Q    | <b>699.422194</b>  | 350.214735        | 682.395645        | 341.701461       |                    |                  | 3  |
| 15 | 1842.916226        | 921.961751      | 1825.889677    | 913.448477       | 1824.905661       | 912.956469       | I    | <b>260.196868</b>  | 130.602072        | 243.170319        | 122.088797       |                    |                  | 2  |
| 16 |                    |                 |                |                  |                   |                  | K    | <b>147.112804</b>  | 74.060040         | <b>130.086255</b> | 65.546765        |                    |                  | 1  |

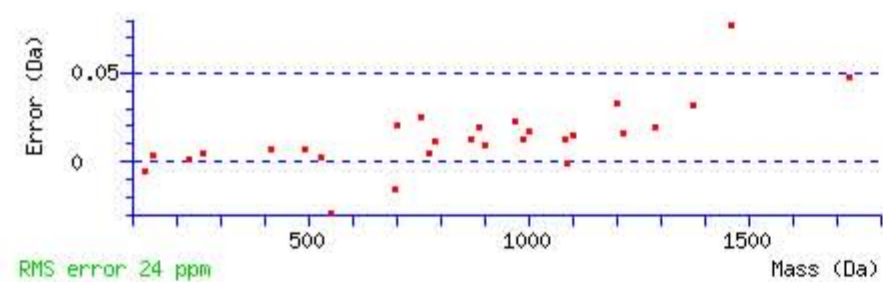

RMS error 24 ppm

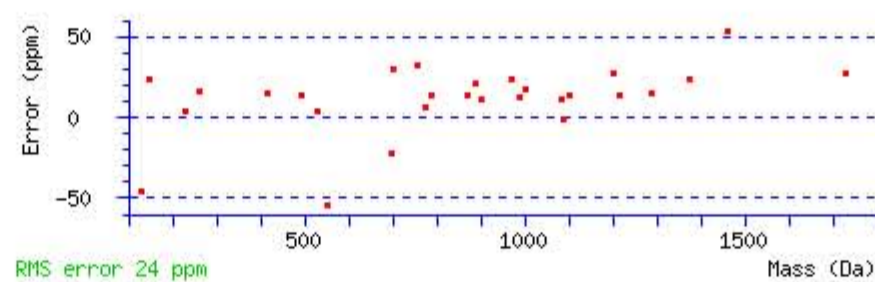

RMS error 24 ppm

NCBI BLAST search of **MPMGLSTGIISDSQIK**

(Parameters: blastp, nr protein database, expect=20000, no filter, PAM30)

Other BLAST [web gateways](#)

All matches to this query

| Score | Mr(calc):   | Delta     | Sequence                           |
|-------|-------------|-----------|------------------------------------|
| 61.9  | 1988.014465 | 0.022247  | <a href="#">MPMGLSTGIISDSQIK</a>   |
| 5.0   | 1988.047485 | -0.010773 | <a href="#">YDVSSQVISQLK</a>       |
| 4.0   | 1988.054688 | -0.017975 | <a href="#">EVGKILCTDCATRPKPKL</a> |
| 1.5   | 1988.051331 | -0.014619 | <a href="#">MTHKLVFLEDGTSQVRK</a>  |

Mascot: <http://www.matrixscience.com/>



# MASCOT Search Results

## Peptide View

MS/MS Fragmentation of **AADIEQQAVFAVFDENK**

Found in **FA5\_HUMAN**, Coagulation factor V OS=Homo sapiens GN=F5 PE=1 SV=4

Match to Query 58219: 2205.110232 from(736.044020,3+) rtinseconds(2735) index(65587)

Title: Locus:1.1.1.3256.11 File:"2013-07-02 CLN FXIII 60 min 1st F 4.wiff"

Data file C:\Program Files (x86)\Matrix Science\Mascot Daemon\mgf4 FXIII 60 min 1st\mascot\_daemon\_merge.mgf

Click mouse within plot area to zoom in by factor of two about that point

Or, Plot from  to  Da

Label all possible matches  Label matches used for scoring

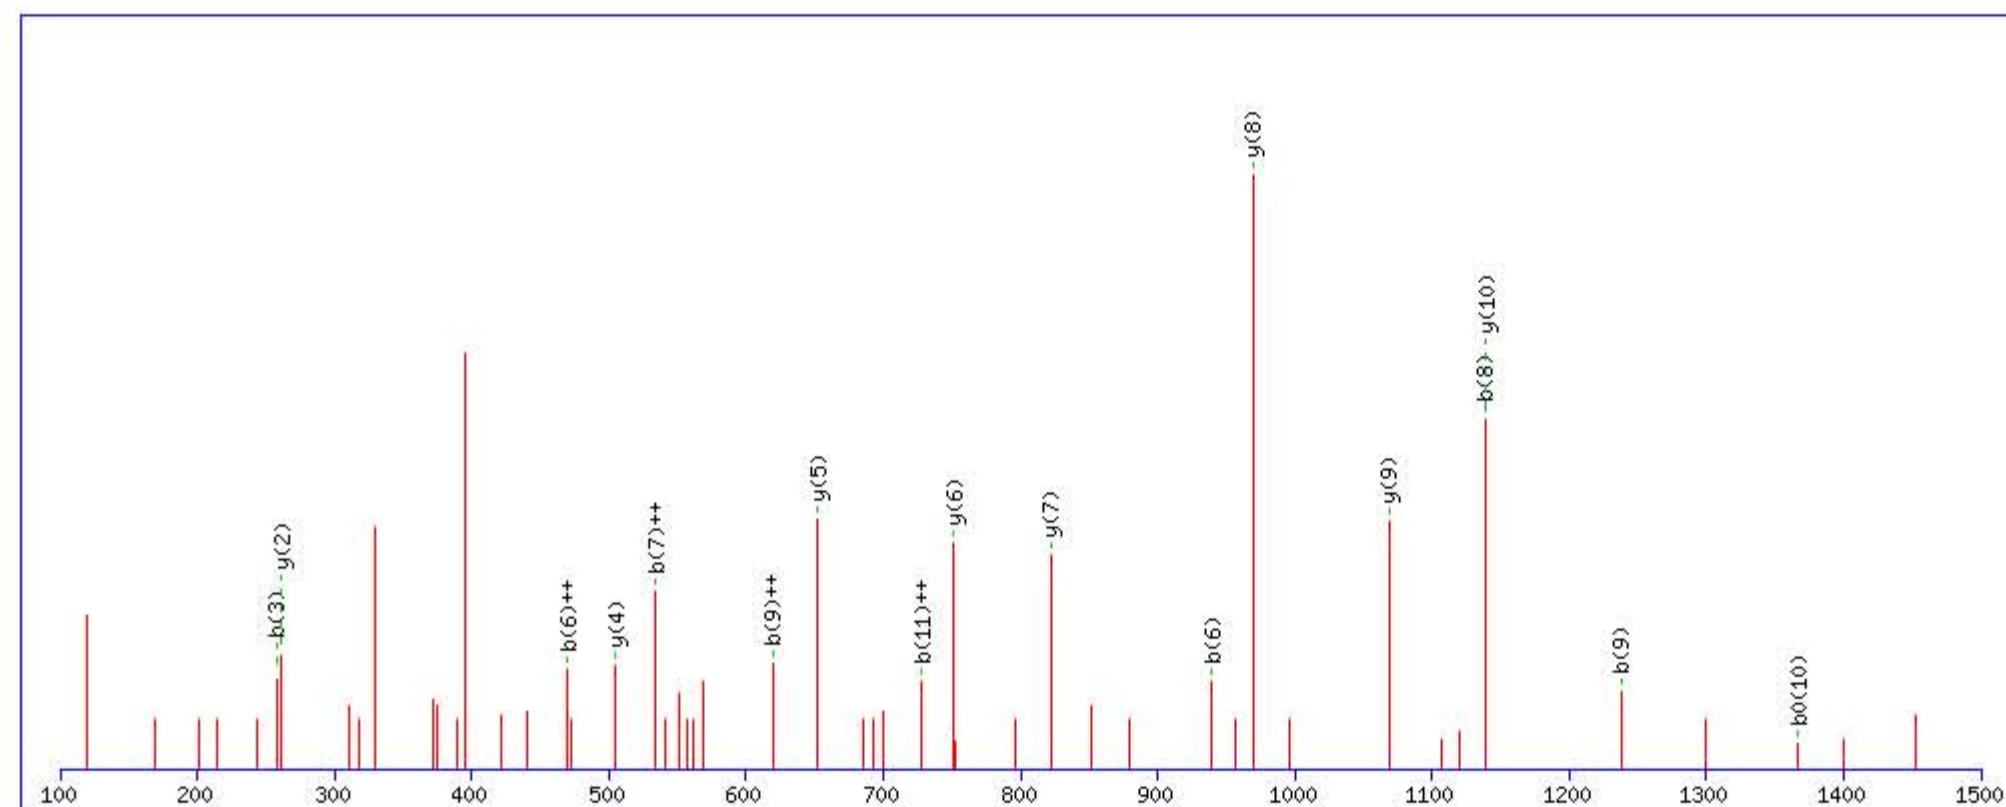

Monoisotopic mass of neutral peptide Mr(calc): 2205.077591

Fixed modifications: Carbamidomethyl (C) (apply to specified residues or termini only)

Variable modifications:

Q6 : Biotin:Thermo-21345 (Q)

Ions Score: 48 Expect: 0.00027

Matches : 17/174 fragment ions using 27 most intense peaks [\(help\)](#)

| #  | b                  | b <sup>++</sup>   | b <sup>*</sup> | b <sup>*++</sup> | b <sup>0</sup>     | b <sup>0++</sup> | Seq. | y                  | y <sup>++</sup> | y <sup>*</sup> | y <sup>*++</sup> | y <sup>0</sup> | y <sup>0++</sup> | #  |
|----|--------------------|-------------------|----------------|------------------|--------------------|------------------|------|--------------------|-----------------|----------------|------------------|----------------|------------------|----|
| 1  | 72.044390          | 36.525833         |                |                  |                    |                  | A    |                    |                 |                |                  |                |                  | 17 |
| 2  | 143.081504         | 72.044390         |                |                  |                    |                  | A    | 2135.047769        | 1068.027522     | 2118.021220    | 1059.514248      | 2117.037204    | 1059.022240      | 16 |
| 3  | <b>258.108447</b>  | 129.557862        |                |                  | 240.097882         | 120.552579       | D    | 2064.010655        | 1032.508965     | 2046.984106    | 1023.995691      | 2046.000090    | 1023.503683      | 15 |
| 4  | 371.192511         | 186.099894        |                |                  | 353.181946         | 177.094611       | I    | 1948.983712        | 974.995494      | 1931.957163    | 966.482220       | 1930.973147    | 965.990212       | 14 |
| 5  | 500.235104         | 250.621190        |                |                  | 482.224539         | 241.615908       | E    | 1835.899648        | 918.453462      | 1818.873099    | 909.940188       | 1817.889083    | 909.448180       | 13 |
| 6  | <b>939.460430</b>  | <b>470.233853</b> | 922.433881     | 461.720579       | 921.449865         | 461.228571       | Q    | 1706.857055        | 853.932166      | 1689.830506    | 845.418891       | 1688.846490    | 844.926883       | 12 |
| 7  | 1067.519008        | <b>534.263142</b> | 1050.492459    | 525.749868       | 1049.508443        | 525.257860       | Q    | 1267.631729        | 634.319503      | 1250.605180    | 625.806228       | 1249.621164    | 625.314220       | 11 |
| 8  | <b>1138.556122</b> | 569.781699        | 1121.529573    | 561.268425       | 1120.545557        | 560.776416       | A    | <b>1139.573151</b> | 570.290214      | 1122.546602    | 561.776939       | 1121.562586    | 561.284931       | 10 |
| 9  | <b>1237.624536</b> | <b>619.315906</b> | 1220.597987    | 610.802632       | 1219.613971        | 610.310624       | V    | <b>1068.536037</b> | 534.771657      | 1051.509488    | 526.258382       | 1050.525472    | 525.766374       | 9  |
| 10 | 1384.692950        | 692.850113        | 1367.666401    | 684.336839       | <b>1366.682385</b> | 683.844831       | F    | <b>969.467623</b>  | 485.237450      | 952.441074     | 476.724175       | 951.457058     | 476.232167       | 8  |
| 11 | 1455.730064        | <b>728.368670</b> | 1438.703515    | 719.855396       | 1437.719499        | 719.363388       | A    | <b>822.399209</b>  | 411.703243      | 805.372660     | 403.189968       | 804.388644     | 402.697960       | 7  |
| 12 | 1554.798478        | 777.902877        | 1537.771929    | 769.389603       | 1536.787913        | 768.897595       | V    | <b>751.362095</b>  | 376.184686      | 734.335546     | 367.671411       | 733.351530     | 367.179403       | 6  |
| 13 | 1701.866892        | 851.437084        | 1684.840343    | 842.923810       | 1683.856327        | 842.431802       | F    | <b>652.293681</b>  | 326.650479      | 635.267132     | 318.137204       | 634.283116     | 317.645196       | 5  |
| 14 | 1816.893835        | 908.950556        | 1799.867286    | 900.437281       | 1798.883270        | 899.945273       | D    | <b>505.225267</b>  | 253.116271      | 488.198718     | 244.602997       | 487.214702     | 244.110989       | 4  |
| 15 | 1945.936428        | 973.471852        | 1928.909879    | 964.958578       | 1927.925863        | 964.466570       | E    | 390.198324         | 195.602800      | 373.171775     | 187.089525       | 372.187759     | 186.597517       | 3  |
| 16 | 2059.979355        | 1030.493315       | 2042.952806    | 1021.980041      | 2041.968790        | 1021.488033      | N    | <b>261.155731</b>  | 131.081503      | 244.129182     | 122.568229       |                |                  | 2  |
| 17 |                    |                   |                |                  |                    |                  | K    | 147.112804         | 74.060040       | 130.086255     | 65.546765        |                |                  | 1  |

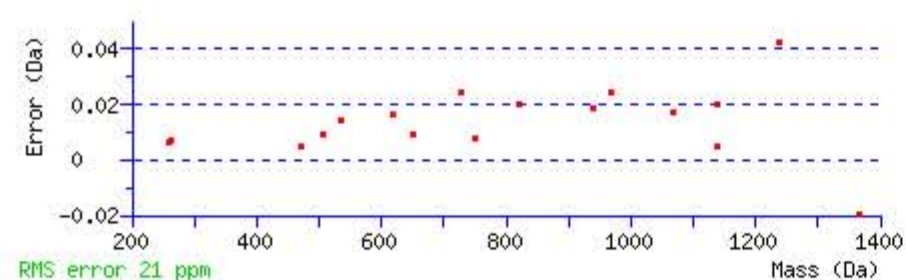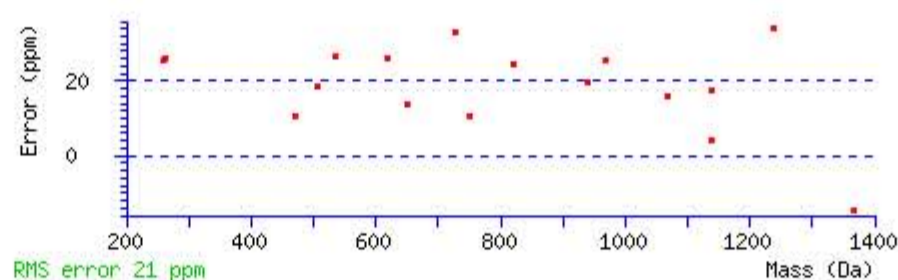

NCBI BLAST search of **AADIEQQAVFAVFDENK**

(Parameters: blastp, nr protein database, expect=20000, no filter, PAM30)

Other BLAST [web gateways](#)

All matches to this query

| Score | Mr(calc):   | Delta     | Sequence                            |
|-------|-------------|-----------|-------------------------------------|
| 47.8  | 2205.077591 | 0.032641  | <a href="#">AADIEQQAVFAVFDENK</a>   |
| 47.7  | 2205.077591 | 0.032641  | <a href="#">AADIEQQAVFAVFDENK</a>   |
| 9.2   | 2205.080063 | 0.030169  | <a href="#">EKENDELDIQLKVF DENK</a> |
| 3.4   | 2205.129929 | -0.019697 | <a href="#">YPRNGAQMMVHIVFKVAR</a>  |
| 0.4   | 2205.115311 | -0.005079 | <a href="#">FLPPPGYAPCHEAVLPRER</a> |



# MASCOT SCIENCE Mascot Search Results

## Peptide View

MS/MS Fragmentation of **IVGGQECK**

Found in **FA10\_HUMAN**, Coagulation factor X OS=Homo sapiens GN=F10 PE=1 SV=2

Match to Query 27696: 1200.606228 from(601.310390,2+) rtinseconds(1391) index(56148)

Title: Locus:1.1.1.2790.15 File:"2013-07-02 CLN FXIII 60 min 1st F 4.wiff"

Data file C:\Program Files (x86)\Matrix Science\Mascot Daemon\mgf4 FXIII 60 min 1st\mascot\_daemon\_merge.mgf

Click mouse within plot area to zoom in by factor of two about that point

Or, Plot from  to  Da

Label all possible matches  Label matches used for scoring

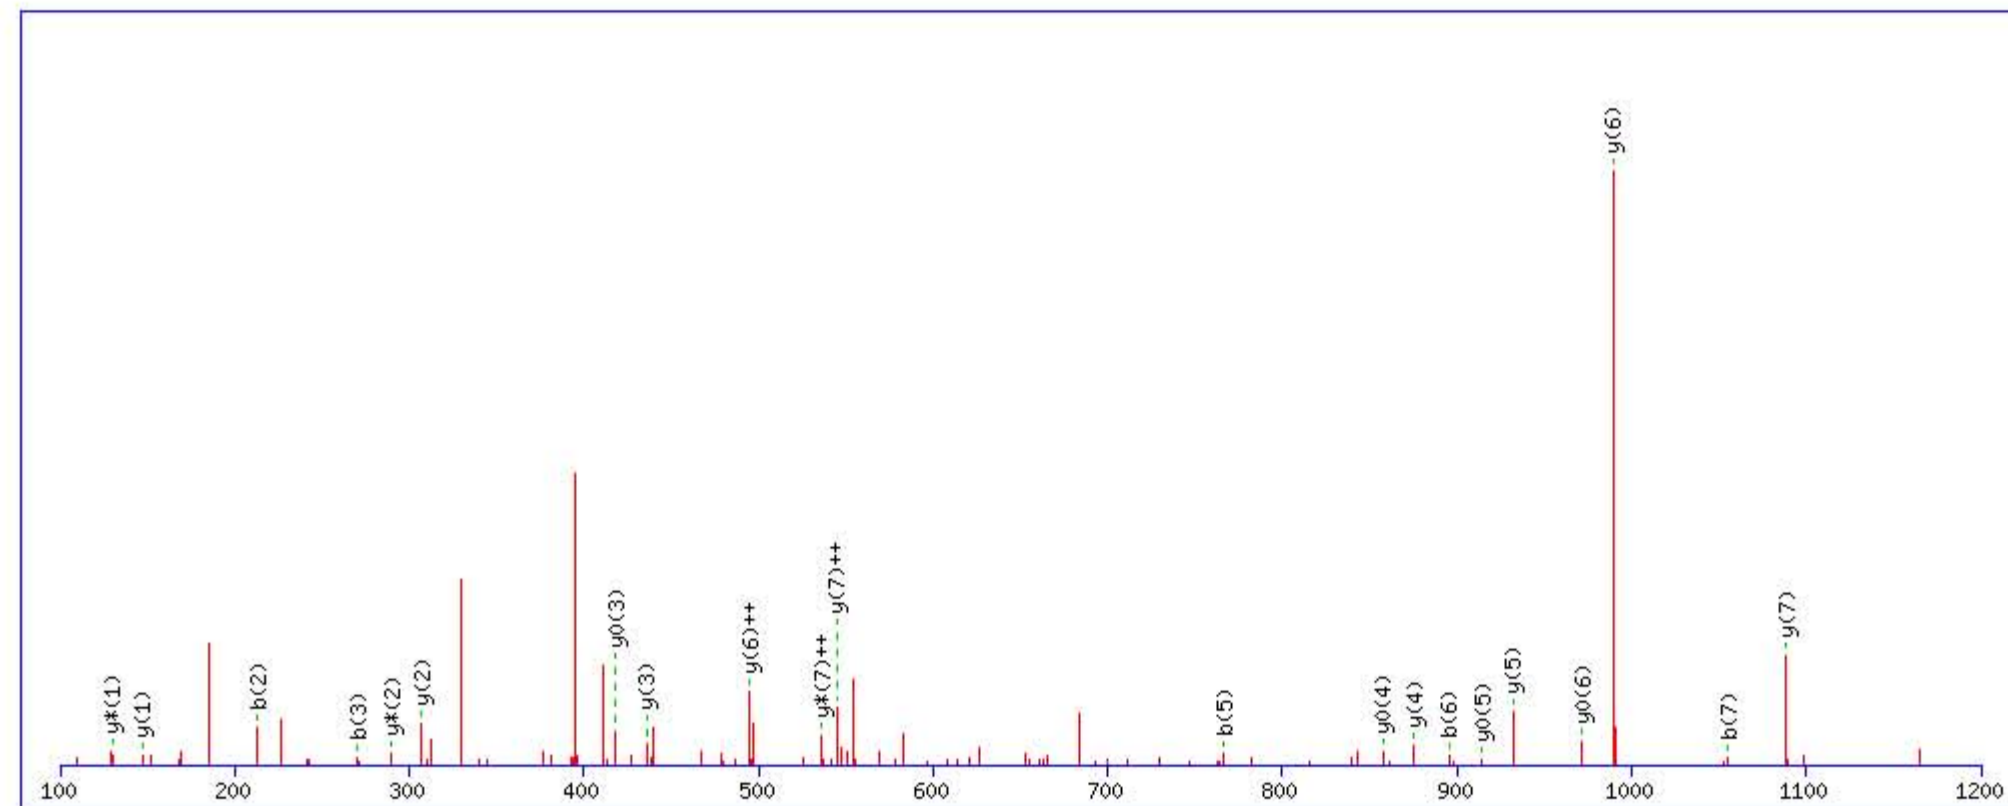

Monoisotopic mass of neutral peptide Mr(calc): 1200.599503

Fixed modifications: Carbamidomethyl (C) (apply to specified residues or termini only)

Variable modifications:

Q5 : Biotin:Thermo-21345 (Q)

Ions Score: 28 Expect: 0.0063

Matches : 21/62 fragment ions using 59 most intense peaks [\(help\)](#)

| # | b                  | b <sup>++</sup> | b <sup>+</sup> | b <sup>+++</sup> | b <sup>0</sup> | b <sup>0++</sup> | Seq. | y                  | y <sup>++</sup>   | y <sup>+</sup>    | y <sup>+++</sup>  | y <sup>0</sup>    | y <sup>0++</sup> | # |
|---|--------------------|-----------------|----------------|------------------|----------------|------------------|------|--------------------|-------------------|-------------------|-------------------|-------------------|------------------|---|
| 1 | 114.091340         | 57.549308       |                |                  |                |                  | I    |                    |                   |                   |                   |                   |                  | 8 |
| 2 | <b>213.159754</b>  | 107.083515      |                |                  |                |                  | V    | <b>1088.522714</b> | <b>544.764995</b> | 1071.496165       | <b>536.251721</b> | 1070.512149       | 535.759713       | 7 |
| 3 | <b>270.181218</b>  | 135.594247      |                |                  |                |                  | G    | <b>989.454300</b>  | <b>495.230788</b> | 972.427751        | 486.717514        | <b>971.443735</b> | 486.225506       | 6 |
| 4 | 327.202682         | 164.104979      |                |                  |                |                  | G    | <b>932.432836</b>  | 466.720056        | 915.406287        | 458.206782        | <b>914.422271</b> | 457.714774       | 5 |
| 5 | <b>766.428008</b>  | 383.717642      | 749.401459     | 375.204368       |                |                  | Q    | <b>875.411372</b>  | 438.209324        | 858.384823        | 429.696050        | <b>857.400807</b> | 429.204042       | 4 |
| 6 | <b>895.470601</b>  | 448.238939      | 878.444052     | 439.725664       | 877.460036     | 439.233656       | E    | <b>436.186046</b>  | 218.596661        | 419.159497        | 210.083386        | <b>418.175481</b> | 209.591378       | 3 |
| 7 | <b>1055.501250</b> | 528.254263      | 1038.474701    | 519.740989       | 1037.490685    | 519.248981       | C    | <b>307.143453</b>  | 154.075364        | <b>290.116904</b> | 145.562090        |                   |                  | 2 |
| 8 |                    |                 |                |                  |                |                  | K    | <b>147.112804</b>  | 74.060040         | <b>130.086255</b> | 65.546765         |                   |                  | 1 |

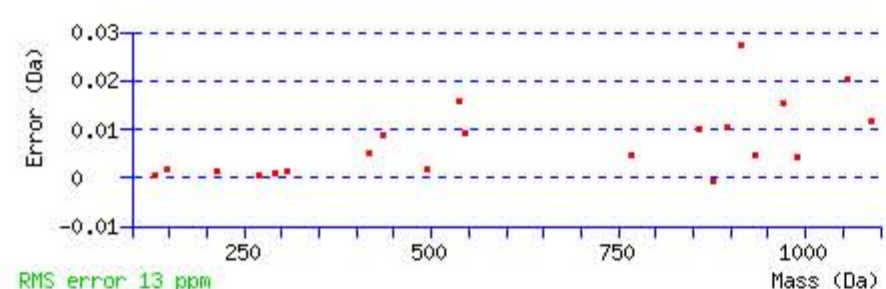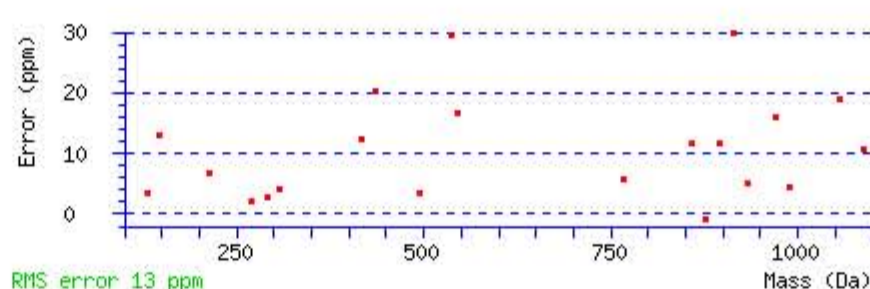

NCBI BLAST search of **IVGGQECK**

(Parameters: blastp, nr protein database, expect=20000, no filter, PAM30)

Other BLAST [web gateways](#)

All matches to this query

| Score | Mr(calc):   | Delta     | Sequence                    |
|-------|-------------|-----------|-----------------------------|
| 28.4  | 1200.599503 | 0.006725  | <a href="#">IVGGQECK</a>    |
| 4.6   | 1200.621048 | -0.014820 | <a href="#">IRQKEEENR</a>   |
| 3.5   | 1200.599503 | 0.006725  | <a href="#">LIQGDGCK</a>    |
| 2.0   | 1200.598587 | 0.007641  | <a href="#">ILADLEEENR</a>  |
| 1.9   | 1200.607376 | -0.001148 | <a href="#">HTGVKPFQCK</a>  |
| 0.6   | 1200.609863 | -0.003635 | <a href="#">QTVEADVNGLR</a> |
| 0.5   | 1200.599487 | 0.006741  | <a href="#">LLNDQCK</a>     |
| 0.2   | 1200.596100 | 0.010128  | <a href="#">LVKMYDNR</a>    |

Mascot: <http://www.matrixscience.com/>



# MASCOT Search Results

## Peptide View

MS/MS Fragmentation of **DWAESTLMTQK**

Found in **FA10\_HUMAN**, Coagulation factor X OS=Homo sapiens GN=F10 PE=1 SV=2

Match to Query 43013: 1619.787048 from(810.900800,2+) rtinseconds(2245) index(62332)

Title: Locus:1.1.1.3086.22 File:"2013-07-02 CLN FXIII 60 min 1st F 4.wiff"

Data file C:\Program Files (x86)\Matrix Science\Mascot Daemon\mgf4 FXIII 60 min 1st\mascot\_daemon\_merge.mgf

Click mouse within plot area to zoom in by factor of two about that point

Or, Plot from  to  Da

Label all possible matches  Label matches used for scoring

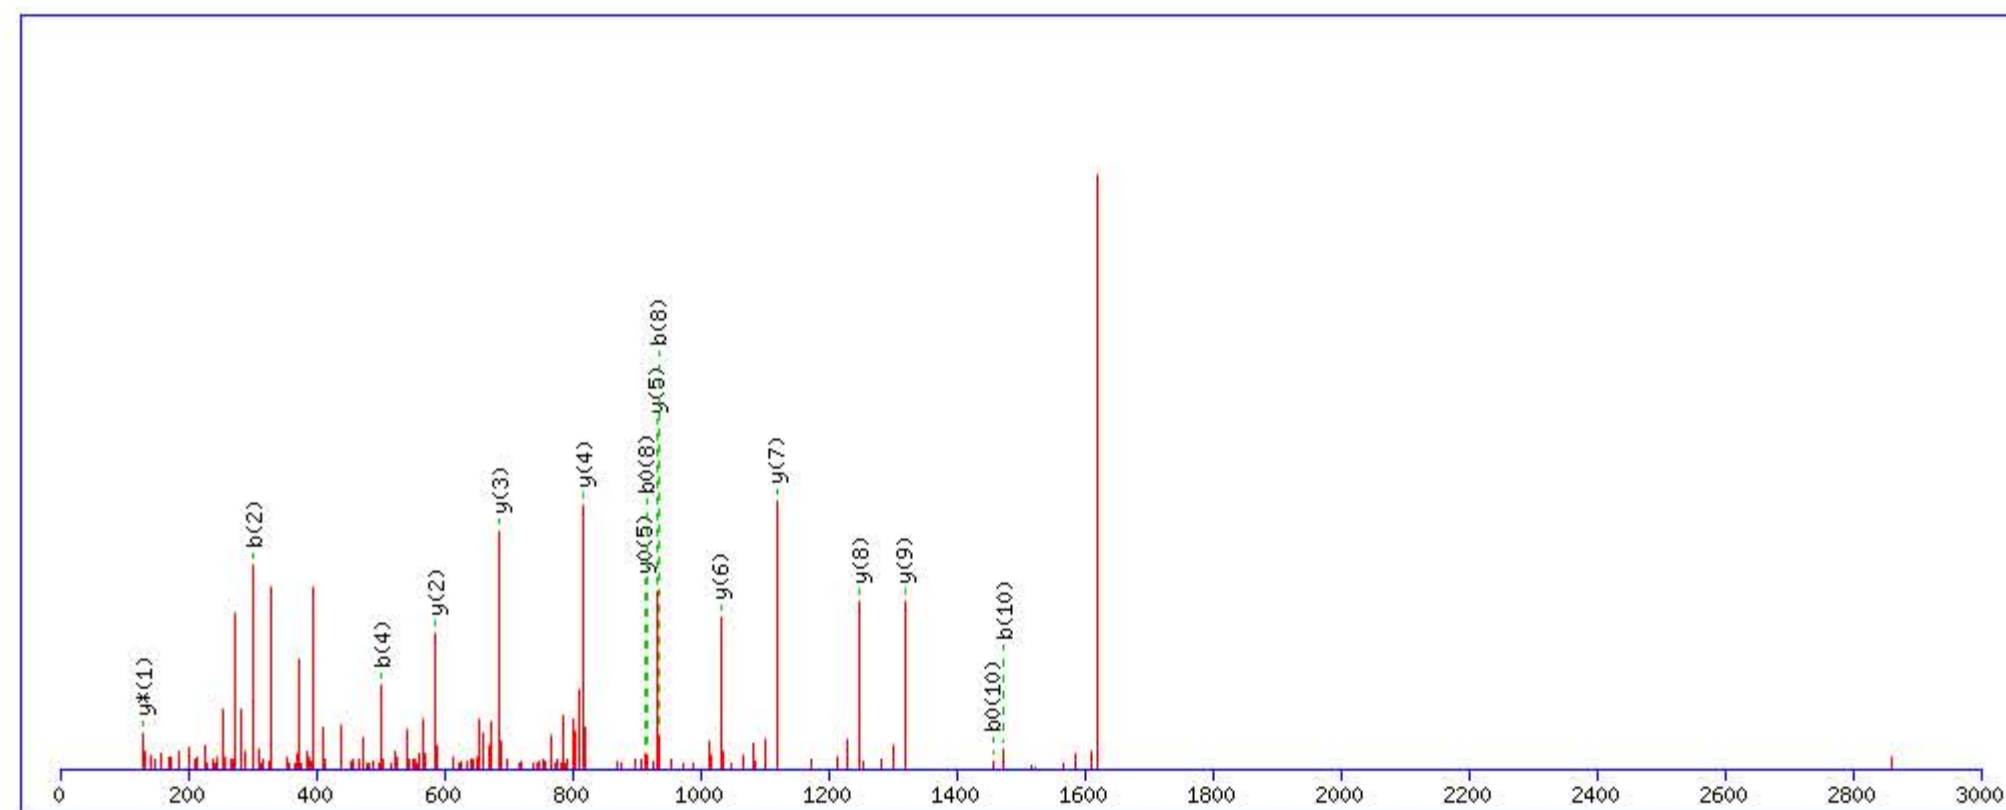

Monoisotopic mass of neutral peptide Mr(calc): 1619.768738

Fixed modifications: Carbamidomethyl (C) (apply to specified residues or termini only)

Variable modifications:

Q10 : Biotin:Thermo-21345 (Q)

Ions Score: 51 Expect: 0.00015

Matches : 16/98 fragment ions using 28 most intense peaks [\(help\)](#)

| #  | b                  | b <sup>++</sup> | b <sup>+</sup> | b <sup>+++</sup> | b <sup>0</sup>     | b <sup>0++</sup> | Seq. | y                  | y <sup>++</sup> | y <sup>+</sup>    | y <sup>+++</sup> | y <sup>0</sup>    | y <sup>0++</sup> | #  |
|----|--------------------|-----------------|----------------|------------------|--------------------|------------------|------|--------------------|-----------------|-------------------|------------------|-------------------|------------------|----|
| 1  | 116.034219         | 58.520748       |                |                  | 98.023654          | 49.515465        | D    |                    |                 |                   |                  |                   |                  | 11 |
| 2  | <b>302.113532</b>  | 151.560404      |                |                  | 284.102967         | 142.555122       | W    | 1505.749085        | 753.378180      | 1488.722536       | 744.864906       | 1487.738520       | 744.372898       | 10 |
| 3  | 373.150646         | 187.078961      |                |                  | 355.140081         | 178.073679       | A    | <b>1319.669772</b> | 660.338524      | 1302.643223       | 651.825250       | 1301.659207       | 651.333241       | 9  |
| 4  | <b>502.193239</b>  | 251.600258      |                |                  | 484.182674         | 242.594975       | E    | <b>1248.632658</b> | 624.819967      | 1231.606109       | 616.306693       | 1230.622093       | 615.814685       | 8  |
| 5  | 589.225267         | 295.116272      |                |                  | 571.214702         | 286.110989       | S    | <b>1119.590065</b> | 560.298671      | 1102.563516       | 551.785396       | 1101.579500       | 551.293388       | 7  |
| 6  | 690.272946         | 345.640111      |                |                  | 672.262381         | 336.634829       | T    | <b>1032.558037</b> | 516.782657      | 1015.531488       | 508.269382       | 1014.547472       | 507.777374       | 6  |
| 7  | 803.357010         | 402.182143      |                |                  | 785.346445         | 393.176861       | L    | <b>931.510358</b>  | 466.258817      | 914.483809        | 457.745543       | <b>913.499793</b> | 457.253535       | 5  |
| 8  | <b>934.397495</b>  | 467.702386      |                |                  | <b>916.386930</b>  | 458.697103       | M    | <b>818.426294</b>  | 409.716785      | 801.399745        | 401.203510       | 800.415729        | 400.711502       | 4  |
| 9  | 1035.445174        | 518.226225      |                |                  | 1017.434609        | 509.220942       | T    | <b>687.385809</b>  | 344.196543      | 670.359260        | 335.683268       | 669.375244        | 335.191260       | 3  |
| 10 | <b>1474.670500</b> | 737.838888      | 1457.643951    | 729.325614       | <b>1456.659935</b> | 728.833605       | Q    | <b>586.338130</b>  | 293.672703      | 569.311581        | 285.159429       |                   |                  | 2  |
| 11 |                    |                 |                |                  |                    |                  | K    | 147.112804         | 74.060040       | <b>130.086255</b> | 65.546765        |                   |                  | 1  |

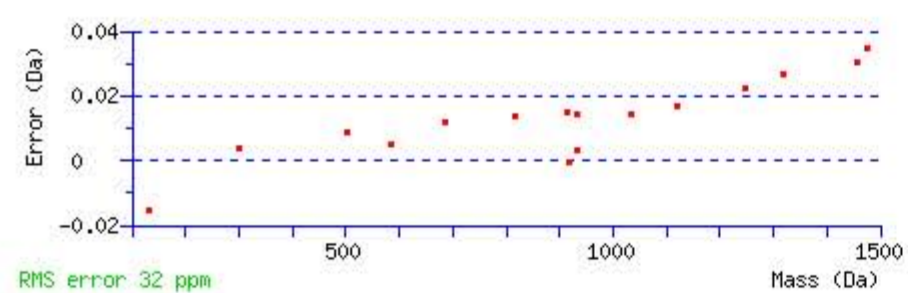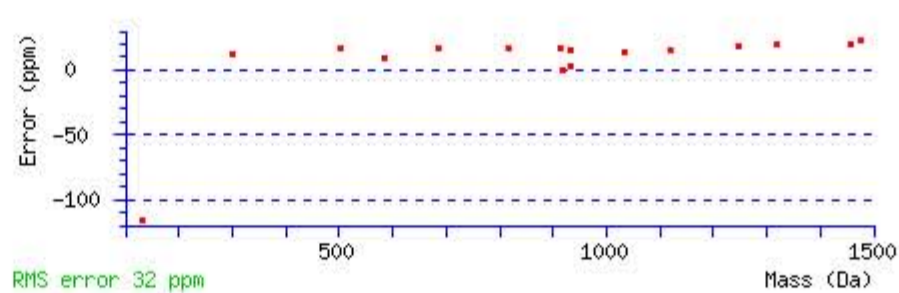

NCBI BLAST search of **DWAESTLMTQK**

(Parameters: blastp, nr protein database, expect=20000, no filter, PAM30)

Other BLAST [web gateways](#)

All matches to this query

| Score | Mr(calc):   | Delta     | Sequence                         |
|-------|-------------|-----------|----------------------------------|
| 51.0  | 1619.768738 | 0.018310  | <a href="#">DWAESTLMTQK</a>      |
| 9.8   | 1619.783340 | 0.003708  | <a href="#">MLGNEICLCIVGNK</a>   |
| 5.9   | 1619.805099 | -0.018051 | <a href="#">IMQEYQLEQK</a>       |
| 5.1   | 1619.793686 | -0.006638 | <a href="#">MEQPTSSINGEKRK</a>   |
| 3.3   | 1619.793716 | -0.006668 | <a href="#">LVCAVGS RNGTEETK</a> |

Mascot: <http://www.matrixscience.com/>



# MASCOT Search Results

## Peptide View

MS/MS Fragmentation of **QEDACQGDSSGGPHVTR**

Found in **FA10\_HUMAN**, Coagulation factor X OS=Homo sapiens GN=F10 PE=1 SV=2

Match to Query 54344: 2023.897032 from(675.639620,3+) rtinseconds(1280) index(55403)

Title: Locus:1.1.1.2751.25 File:"2013-07-02 CLN FXIII 60 min 1st F 4.wiff"

Data file C:\Program Files (x86)\Matrix Science\Mascot Daemon\mgf\4 FXIII 60 min 1st\mascot\_daemon\_merge.mgf

Click mouse within plot area to zoom in by factor of two about that point

Or, Plot from  to  Da

Label all possible matches  Label matches used for scoring

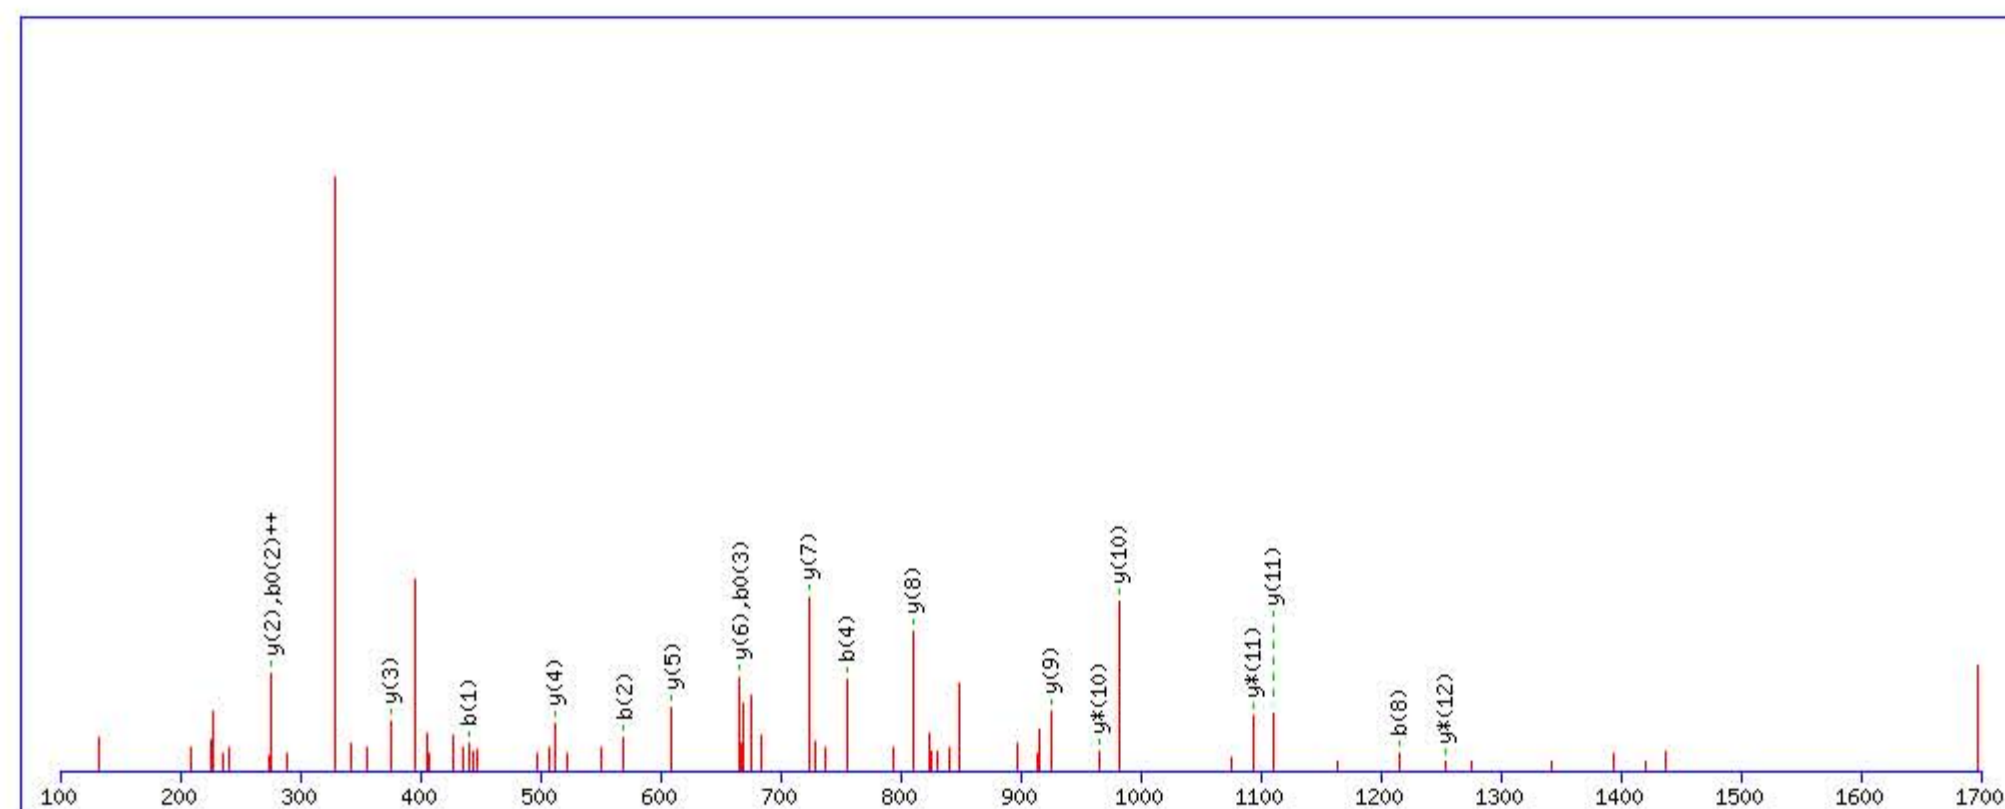

Monoisotopic mass of neutral peptide Mr(calc): 2023.884033

Fixed modifications: Carbamidomethyl (C) (apply to specified residues or termini only)

Variable modifications:

Q1 : Biotin:Thermo-21345 (Q)

Ions Score: 65 Expect: 2e-006

Matches : 19/176 fragment ions using 28 most intense peaks [\(help\)](#)

| #  | b                  | b <sup>++</sup> | b <sup>*</sup> | b <sup>*++</sup> | b <sup>0</sup>    | b <sup>0++</sup>  | Seq. | y                  | y <sup>++</sup> | y <sup>*</sup>     | y <sup>*++</sup> | y <sup>0</sup> | y <sup>0++</sup> | #  |
|----|--------------------|-----------------|----------------|------------------|-------------------|-------------------|------|--------------------|-----------------|--------------------|------------------|----------------|------------------|----|
| 1  | <b>440.232602</b>  | 220.619939      | 423.206053     | 212.106664       |                   |                   | Q    |                    |                 |                    |                  |                |                  | 16 |
| 2  | <b>569.275195</b>  | 285.141236      | 552.248646     | 276.627961       | 551.264630        | <b>276.135953</b> | E    | 1585.665961        | 793.336618      | 1568.639412        | 784.823344       | 1567.655396    | 784.331336       | 15 |
| 3  | 684.302138         | 342.654707      | 667.275589     | 334.141433       | <b>666.291573</b> | 333.649425        | D    | 1456.623368        | 728.815322      | 1439.596819        | 720.302047       | 1438.612803    | 719.810039       | 14 |
| 4  | <b>755.339252</b>  | 378.173264      | 738.312703     | 369.659989       | 737.328687        | 369.167982        | A    | 1341.596425        | 671.301851      | 1324.569876        | 662.788576       | 1323.585860    | 662.296568       | 13 |
| 5  | 915.369901         | 458.188589      | 898.343352     | 449.675314       | 897.359336        | 449.183306        | C    | 1270.559311        | 635.783294      | <b>1253.532762</b> | 627.270019       | 1252.548746    | 626.778011       | 12 |
| 6  | 1043.428479        | 522.217877      | 1026.401930    | 513.704603       | 1025.417914       | 513.212595        | Q    | <b>1110.528662</b> | 555.767969      | <b>1093.502113</b> | 547.254695       | 1092.518097    | 546.762686       | 11 |
| 7  | 1100.449943        | 550.728609      | 1083.423394    | 542.215335       | 1082.439378       | 541.723327        | G    | <b>982.470084</b>  | 491.738680      | <b>965.443535</b>  | 483.225406       | 964.459519     | 482.733398       | 10 |
| 8  | <b>1215.476886</b> | 608.242081      | 1198.450337    | 599.728807       | 1197.466321       | 599.236798        | D    | <b>925.448620</b>  | 463.227948      | 908.422071         | 454.714674       | 907.438055     | 454.222666       | 9  |
| 9  | 1302.508914        | 651.758095      | 1285.482365    | 643.244821       | 1284.498349       | 642.752813        | S    | <b>810.421677</b>  | 405.714477      | 793.395128         | 397.201202       | 792.411112     | 396.709194       | 8  |
| 10 | 1359.530378        | 680.268827      | 1342.503829    | 671.755553       | 1341.519813       | 671.263544        | G    | <b>723.389649</b>  | 362.198463      | 706.363100         | 353.685188       | 705.379084     | 353.193180       | 7  |
| 11 | 1416.551842        | 708.779559      | 1399.525293    | 700.266284       | 1398.541277       | 699.774276        | G    | <b>666.368185</b>  | 333.687731      | 649.341636         | 325.174456       | 648.357620     | 324.682448       | 6  |
| 12 | 1513.604606        | 757.305941      | 1496.578057    | 748.792667       | 1495.594041       | 748.300658        | P    | <b>609.346721</b>  | 305.176999      | 592.320172         | 296.663724       | 591.336156     | 296.171716       | 5  |
| 13 | 1650.663518        | 825.835397      | 1633.636969    | 817.322122       | 1632.652953       | 816.830114        | H    | <b>512.293957</b>  | 256.650617      | 495.267408         | 248.137342       | 494.283392     | 247.645334       | 4  |
| 14 | 1749.731932        | 875.369604      | 1732.705383    | 866.856330       | 1731.721367       | 866.364321        | V    | <b>375.235045</b>  | 188.121161      | 358.208496         | 179.607886       | 357.224480     | 179.115878       | 3  |
| 15 | 1850.779611        | 925.893443      | 1833.753062    | 917.380169       | 1832.769046       | 916.888161        | T    | <b>276.166631</b>  | 138.586953      | 259.140082         | 130.073679       | 258.156066     | 129.581671       | 2  |
| 16 |                    |                 |                |                  |                   |                   | R    | 175.118952         | 88.063114       | 158.092403         | 79.549839        |                |                  | 1  |

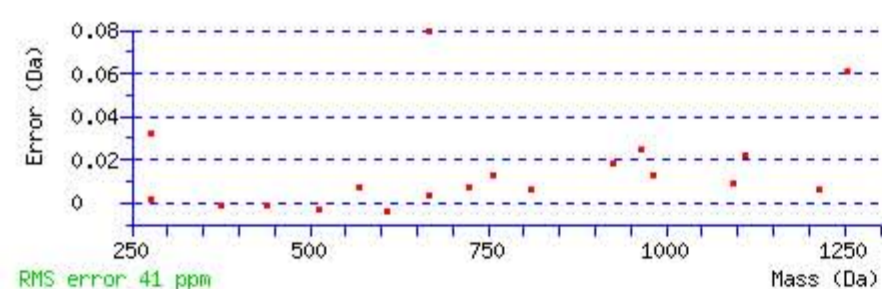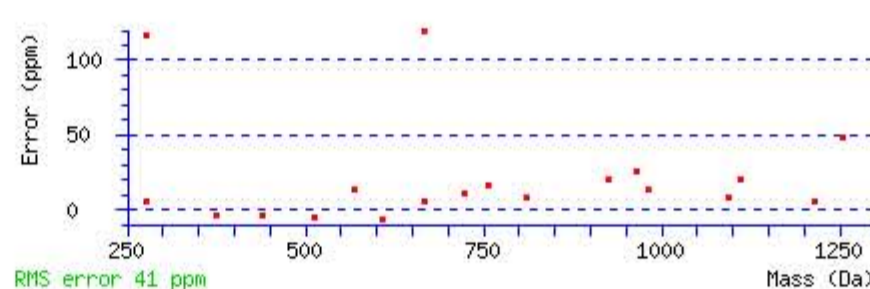

NCBI BLAST search of **QEDACQGDSSGGPHVTR**

(Parameters: blastp, nr protein database, expect=20000, no filter, PAM30)

Other BLAST [web gateways](#)

## All matches to this query

| Score | Mr(calc):   | Delta    | Sequence                          |
|-------|-------------|----------|-----------------------------------|
| 65.2  | 2023.884033 | 0.012999 | <a href="#">QEDACQGDSSGGPHVTR</a> |
| 49.4  | 2023.884033 | 0.012999 | <a href="#">QEDACQGDSSGGPHVTR</a> |



# MASCOT Search Results

## Peptide View

MS/MS Fragmentation of **YKDGDCETSPCQNQGK**

Found in **FA10\_HUMAN**, Coagulation factor X OS=Homo sapiens GN=F10 PE=1 SV=2

Match to Query 61242: 2325.000132 from(776.007320,3+) rtinseconds(1242) index(55139)

Title: Locus:1.1.1.2738.23 File:"2013-07-02 CLN FXIII 60 min 1st F 4.wiff"

Data file C:\Program Files (x86)\Matrix Science\Mascot Daemon\mgf\4 FXIII 60 min 1st\mascot\_daemon\_merge.mgf

Click mouse within plot area to zoom in by factor of two about that point

Or, Plot from  to  Da

Label all possible matches  Label matches used for scoring

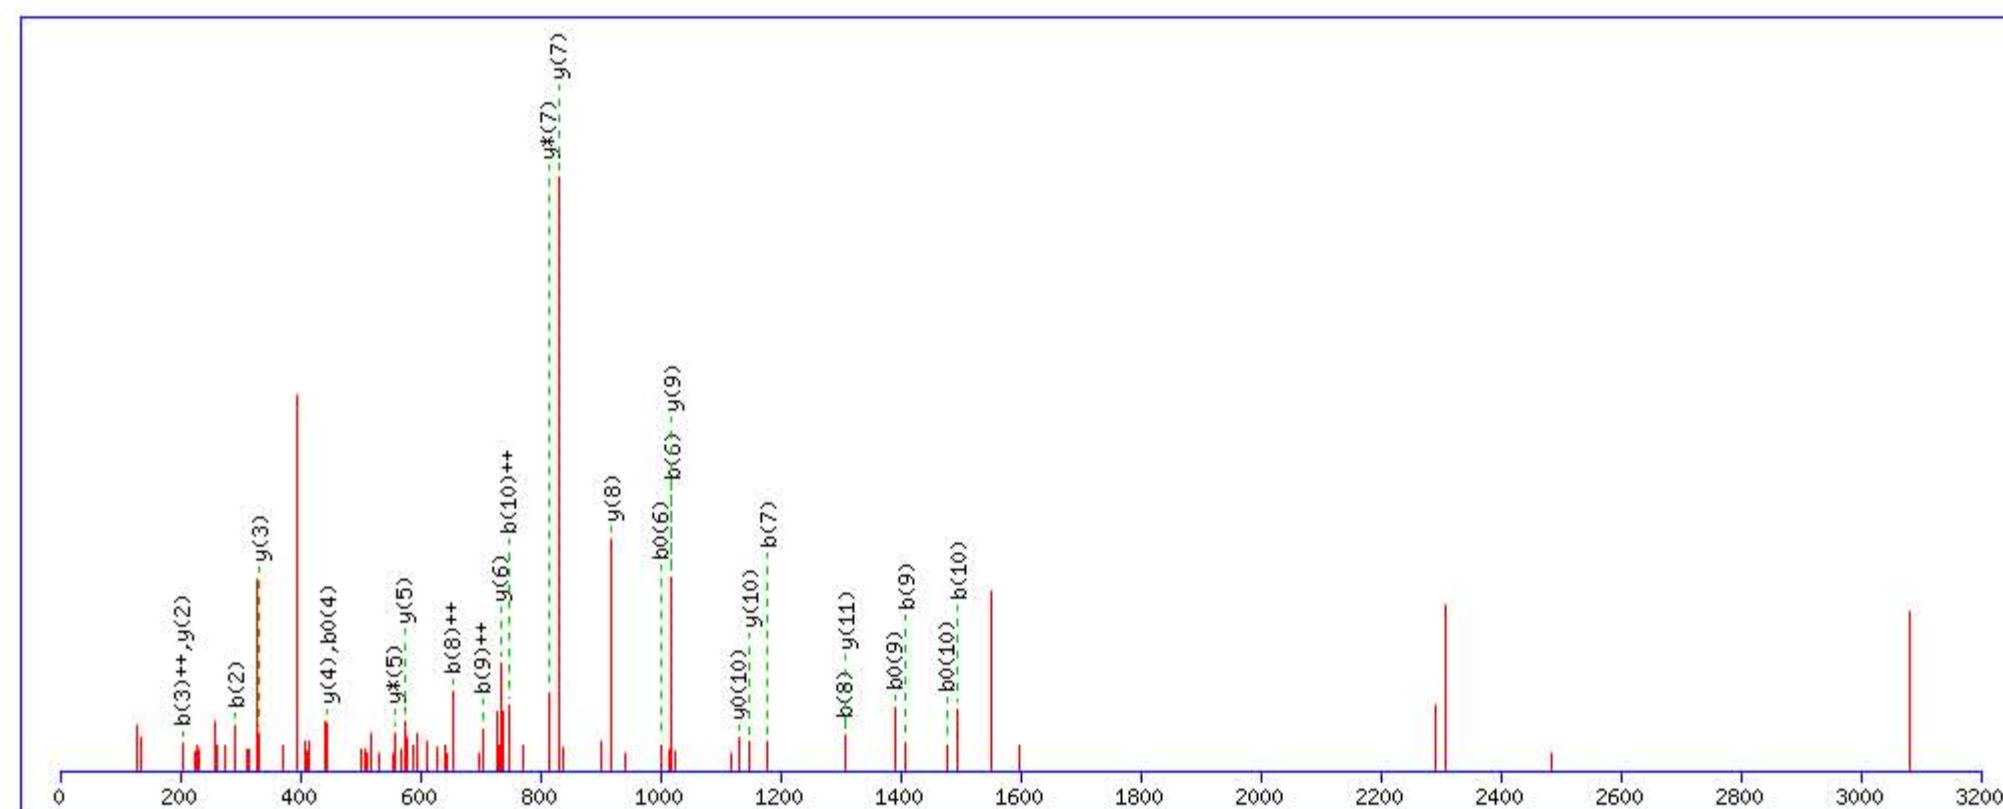

Monoisotopic mass of neutral peptide Mr(calc): 2324.982407

Fixed modifications: Carbamidomethyl (C) (apply to specified residues or termini only)

Variable modifications:

Q6 : Biotin:Thermo-21345 (Q)

Ions Score: 61 Expect: 2.8e-006

Matches : 27/172 fragment ions using 42 most intense peaks [\(help\)](#)

| #  | b                  | b <sup>++</sup>   | b <sup>*</sup> | b <sup>*++</sup> | b <sup>0</sup>     | b <sup>0++</sup> | Seq. | y                  | y <sup>++</sup> | y <sup>*</sup>    | y <sup>*++</sup> | y <sup>0</sup>     | y <sup>0++</sup> | #  |
|----|--------------------|-------------------|----------------|------------------|--------------------|------------------|------|--------------------|-----------------|-------------------|------------------|--------------------|------------------|----|
| 1  | 164.070605         | 82.538940         |                |                  |                    |                  | Y    |                    |                 |                   |                  |                    |                  | 17 |
| 2  | <b>292.165568</b>  | 146.586422        | 275.139019     | 138.073148       |                    |                  | K    | 2162.926352        | 1081.966814     | 2145.899803       | 1073.453539      | 2144.915787        | 1072.961531      | 16 |
| 3  | 407.192511         | <b>204.099894</b> | 390.165962     | 195.586619       | 389.181946         | 195.094611       | D    | 2034.831389        | 1017.919333     | 2017.804840       | 1009.406058      | 2016.820824        | 1008.914050      | 15 |
| 4  | 464.213975         | 232.610626        | 447.187426     | 224.097351       | <b>446.203410</b>  | 223.605343       | G    | 1919.804446        | 960.405861      | 1902.777897       | 951.892587       | 1901.793881        | 951.400579       | 14 |
| 5  | 579.240918         | 290.124097        | 562.214369     | 281.610823       | 561.230353         | 281.118815       | D    | 1862.782982        | 931.895129      | 1845.756433       | 923.381855       | 1844.772417        | 922.889847       | 13 |
| 6  | <b>1018.466244</b> | 509.736760        | 1001.439695    | 501.223486       | <b>1000.455679</b> | 500.731478       | Q    | 1747.756039        | 874.381658      | 1730.729490       | 865.868383       | 1729.745474        | 865.376375       | 12 |
| 7  | <b>1178.496893</b> | 589.752085        | 1161.470344    | 581.238810       | 1160.486328        | 580.746802       | C    | <b>1308.530713</b> | 654.768995      | 1291.504164       | 646.255720       | 1290.520148        | 645.763712       | 11 |
| 8  | <b>1307.539486</b> | <b>654.273381</b> | 1290.512937    | 645.760107       | 1289.528921        | 645.268098       | E    | <b>1148.500064</b> | 574.753670      | 1131.473515       | 566.240396       | <b>1130.489499</b> | 565.748388       | 10 |
| 9  | <b>1408.587165</b> | <b>704.797220</b> | 1391.560616    | 696.283946       | <b>1390.576600</b> | 695.791938       | T    | <b>1019.457471</b> | 510.232374      | 1002.430922       | 501.719099       | 1001.446906        | 501.227091       | 9  |
| 10 | <b>1495.619193</b> | <b>748.313235</b> | 1478.592644    | 739.799960       | <b>1477.608628</b> | 739.307952       | S    | <b>918.409792</b>  | 459.708534      | 901.383243        | 451.195260       | 900.399227         | 450.703252       | 8  |
| 11 | 1592.671957        | 796.839617        | 1575.645408    | 788.326342       | 1574.661392        | 787.834334       | P    | <b>831.377764</b>  | 416.192520      | <b>814.351215</b> | 407.679246       |                    |                  | 7  |
| 12 | 1752.702606        | 876.854941        | 1735.676057    | 868.341667       | 1734.692041        | 867.849659       | C    | <b>734.325000</b>  | 367.666138      | 717.298451        | 359.152864       |                    |                  | 6  |
| 13 | 1880.761184        | 940.884230        | 1863.734635    | 932.370956       | 1862.750619        | 931.878948       | Q    | <b>574.294351</b>  | 287.650814      | <b>557.267802</b> | 279.137539       |                    |                  | 5  |
| 14 | 1994.804111        | 997.905694        | 1977.777562    | 989.392419       | 1976.793546        | 988.900411       | N    | <b>446.235773</b>  | 223.621524      | 429.209224        | 215.108250       |                    |                  | 4  |
| 15 | 2122.862689        | 1061.934982       | 2105.836140    | 1053.421708      | 2104.852124        | 1052.929700      | Q    | <b>332.192846</b>  | 166.600061      | 315.166297        | 158.086787       |                    |                  | 3  |
| 16 | 2179.884153        | 1090.445714       | 2162.857604    | 1081.932440      | 2161.873588        | 1081.440432      | G    | <b>204.134268</b>  | 102.570772      | 187.107719        | 94.057497        |                    |                  | 2  |
| 17 |                    |                   |                |                  |                    |                  | K    | 147.112804         | 74.060040       | 130.086255        | 65.546765        |                    |                  | 1  |

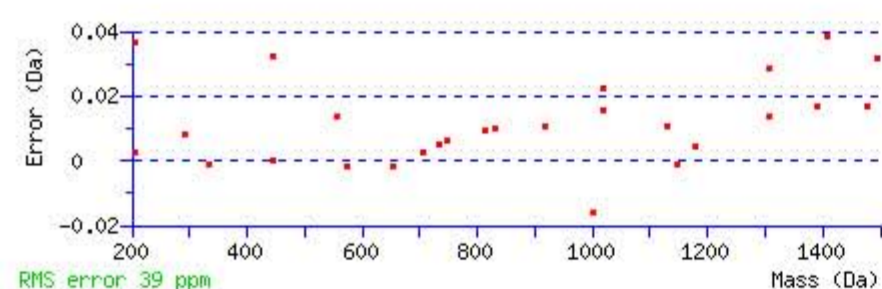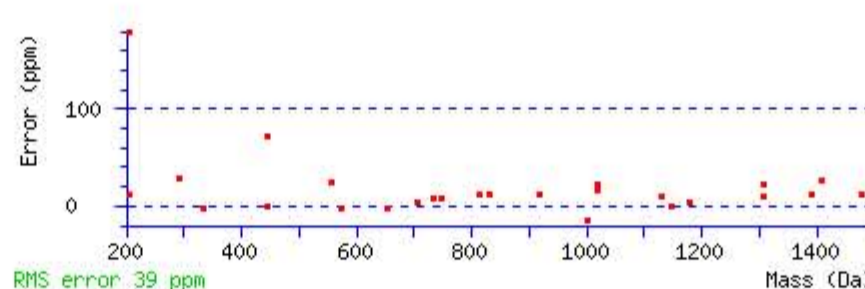

NCBI BLAST search of [YKDGDCETSPCQNQGK](#)

(Parameters: blastp, nr protein database, expect=20000, no filter, PAM30)

Other BLAST [web gateways](#)

All matches to this query

| Score | Mr(calc):   | Delta    | Sequence                         |
|-------|-------------|----------|----------------------------------|
| 61.0  | 2324.982407 | 0.017725 | <a href="#">YKDGDCETSPCQNQGK</a> |

Mascot: <http://www.matrixscience.com/>



# Mascot Search Results

## Peptide View

MS/MS Fragmentation of **NTEQEEGGGEAVHEVEVVIK**

Found in **FA10\_HUMAN**, Coagulation factor X OS=Homo sapiens GN=F10 PE=1 SV=2

Match to Query 62541: 2406.204642 from(803.075490,3+) rtinseconds(2161) index(61662)

Title: Locus:1.1.1.3057.17 File:"2013-07-02 CLN FXIII 60 min 1st F 4.wiff"

Data file C:\Program Files (x86)\Matrix Science\Mascot Daemon\mgf4 FXIII 60 min 1st\mascot\_daemon\_merge.mgf

Click mouse within plot area to zoom in by factor of two about that point

Or, Plot from  to  Da

Label all possible matches  Label matches used for scoring

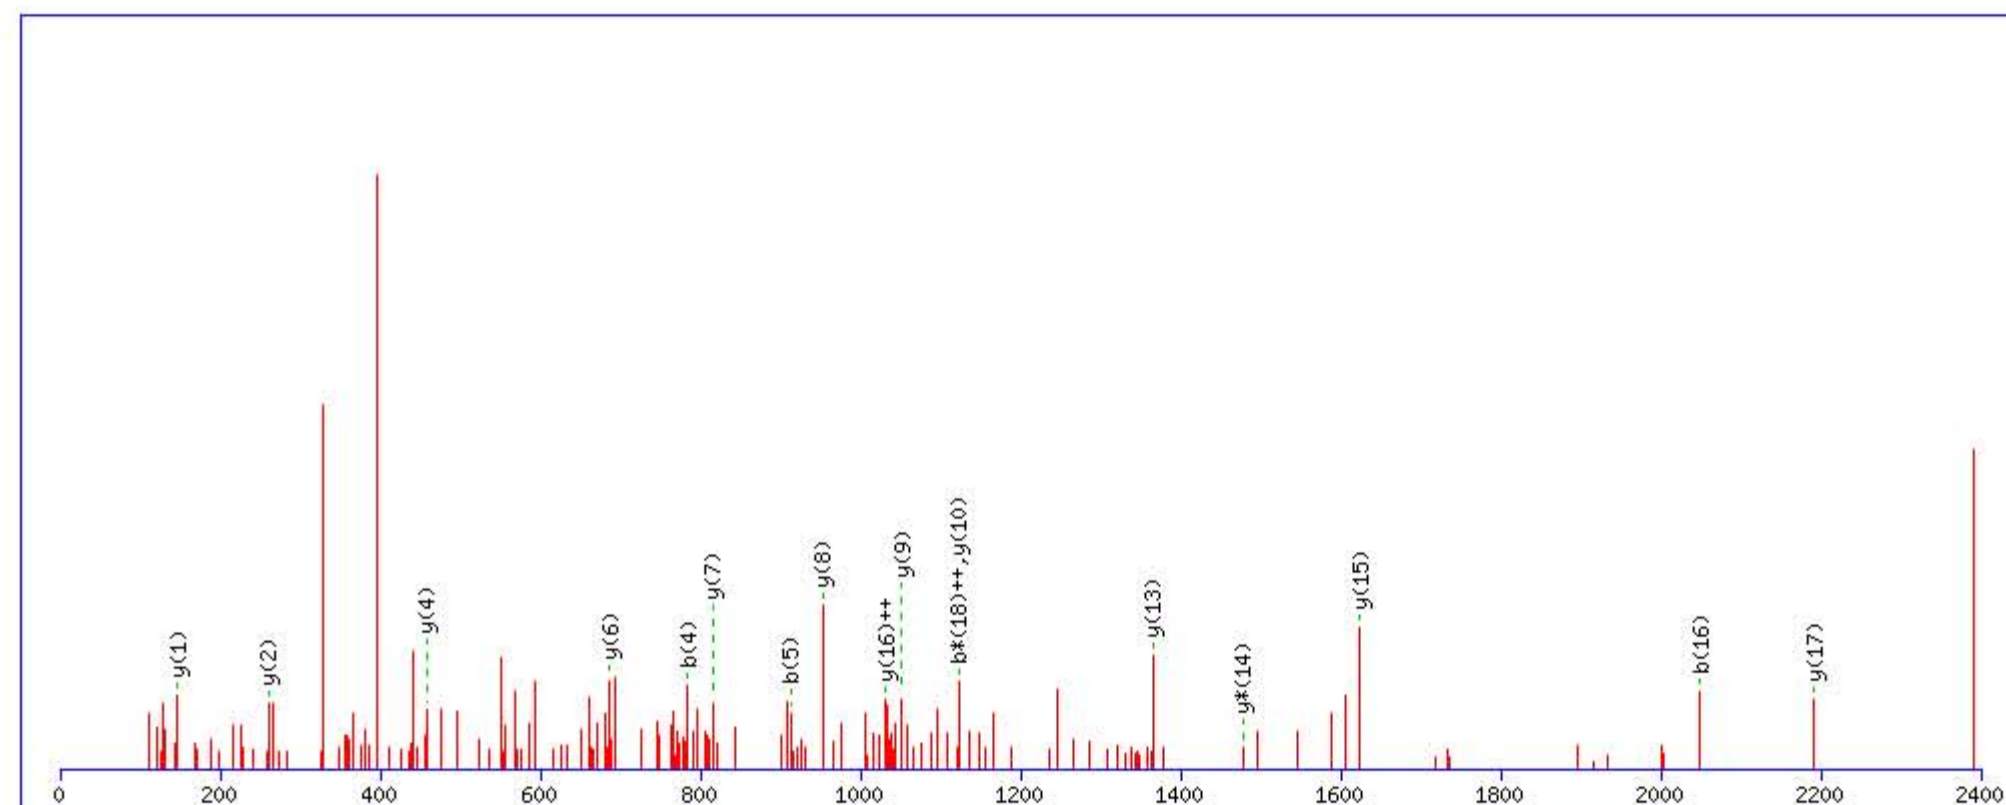

Monoisotopic mass of neutral peptide Mr(calc): 2406.173676

Fixed modifications: Carbamidomethyl (C) (apply to specified residues or termini only)

Variable modifications:

Q4 : Biotin:Thermo-21345 (Q)

Ions Score: 48 Expect: 4.7e-005

Matches : 17/206 fragment ions using 40 most intense peaks [\(help\)](#)

| #  | b                  | b <sup>++</sup> | b <sup>*</sup> | b <sup>*++</sup>   | b <sup>0</sup> | b <sup>0++</sup> | Seq. | y                  | y <sup>++</sup>    | y <sup>*</sup>     | y <sup>*++</sup> | y <sup>0</sup> | y <sup>0++</sup> | #  |
|----|--------------------|-----------------|----------------|--------------------|----------------|------------------|------|--------------------|--------------------|--------------------|------------------|----------------|------------------|----|
| 1  | 115.050203         | 58.028740       | 98.023654      | 49.515465          |                |                  | N    |                    |                    |                    |                  |                |                  | 19 |
| 2  | 216.097882         | 108.552579      | 199.071333     | 100.039305         | 198.087317     | 99.547296        | T    | 2293.138041        | 1147.072658        | 2276.111492        | 1138.559384      | 2275.127476    | 1138.067376      | 18 |
| 3  | 345.140475         | 173.073875      | 328.113926     | 164.560601         | 327.129910     | 164.068593       | E    | <b>2192.090362</b> | 1096.548819        | 2175.063813        | 1088.035544      | 2174.079797    | 1087.543536      | 17 |
| 4  | <b>784.365801</b>  | 392.686539      | 767.339252     | 384.173264         | 766.355236     | 383.681256       | Q    | 2063.047769        | <b>1032.027522</b> | 2046.021220        | 1023.514248      | 2045.037204    | 1023.022240      | 16 |
| 5  | <b>913.408394</b>  | 457.207835      | 896.381845     | 448.694561         | 895.397829     | 448.202553       | E    | <b>1623.822443</b> | 812.414860         | 1606.795894        | 803.901585       | 1605.811878    | 803.409577       | 15 |
| 6  | 1042.450987        | 521.729131      | 1025.424438    | 513.215857         | 1024.440422    | 512.723849       | E    | 1494.779850        | 747.893563         | <b>1477.753301</b> | 739.380289       | 1476.769285    | 738.888281       | 14 |
| 7  | 1099.472451        | 550.239863      | 1082.445902    | 541.726589         | 1081.461886    | 541.234581       | G    | <b>1365.737257</b> | 683.372267         | 1348.710708        | 674.858992       | 1347.726692    | 674.366984       | 13 |
| 8  | 1156.493915        | 578.750595      | 1139.467366    | 570.237321         | 1138.483350    | 569.745313       | G    | 1308.715793        | 654.861535         | 1291.689244        | 646.348260       | 1290.705228    | 645.856252       | 12 |
| 9  | 1285.536508        | 643.271892      | 1268.509959    | 634.758618         | 1267.525943    | 634.266609       | E    | 1251.694329        | 626.350803         | 1234.667780        | 617.837528       | 1233.683764    | 617.345520       | 11 |
| 10 | 1356.573622        | 678.790449      | 1339.547073    | 670.277175         | 1338.563057    | 669.785166       | A    | <b>1122.651736</b> | 561.829506         | 1105.625187        | 553.316232       | 1104.641171    | 552.824224       | 10 |
| 11 | 1455.642036        | 728.324656      | 1438.615487    | 719.811382         | 1437.631471    | 719.319373       | V    | <b>1051.614622</b> | 526.310949         | 1034.588073        | 517.797675       | 1033.604057    | 517.305667       | 9  |
| 12 | 1592.700948        | 796.854112      | 1575.674399    | 788.340838         | 1574.690383    | 787.848829       | H    | <b>952.546208</b>  | 476.776742         | 935.519659         | 468.263468       | 934.535643     | 467.771460       | 8  |
| 13 | 1721.743541        | 861.375409      | 1704.716992    | 852.862134         | 1703.732976    | 852.370126       | E    | <b>815.487296</b>  | 408.247286         | 798.460747         | 399.734012       | 797.476731     | 399.242004       | 7  |
| 14 | 1820.811955        | 910.909616      | 1803.785406    | 902.396341         | 1802.801390    | 901.904333       | V    | <b>686.444703</b>  | 343.725990         | 669.418154         | 335.212715       | 668.434138     | 334.720707       | 6  |
| 15 | 1949.854548        | 975.430912      | 1932.827999    | 966.917638         | 1931.843983    | 966.425630       | E    | 587.376289         | 294.191783         | 570.349740         | 285.678508       | 569.365724     | 285.186500       | 5  |
| 16 | <b>2048.922962</b> | 1024.965119     | 2031.896413    | 1016.451845        | 2030.912397    | 1015.959837      | V    | <b>458.333696</b>  | 229.670486         | 441.307147         | 221.157212       |                |                  | 4  |
| 17 | 2147.991376        | 1074.499326     | 2130.964827    | 1065.986051        | 2129.980811    | 1065.494043      | V    | 359.265282         | 180.136279         | 342.238733         | 171.623005       |                |                  | 3  |
| 18 | 2261.075440        | 1131.041358     | 2244.048891    | <b>1122.528083</b> | 2243.064875    | 1122.036075      | I    | <b>260.196868</b>  | 130.602072         | 243.170319         | 122.088798       |                |                  | 2  |
| 19 |                    |                 |                |                    |                |                  | K    | <b>147.112804</b>  | 74.060040          | 130.086255         | 65.546765        |                |                  | 1  |

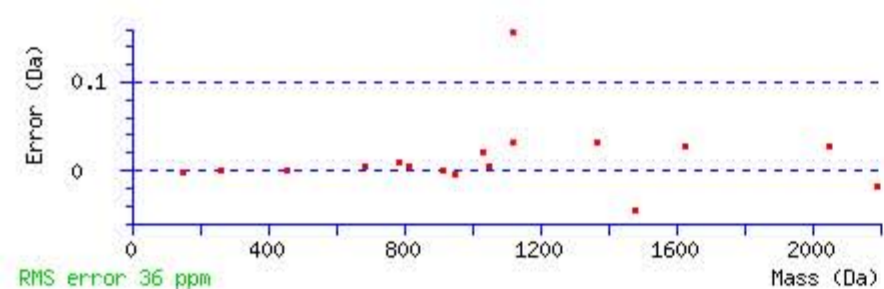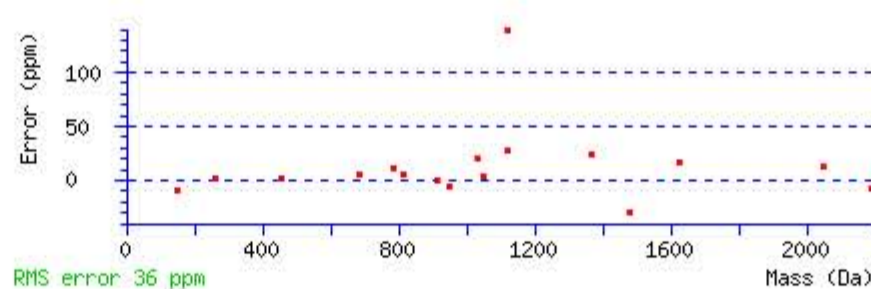

NCBI BLAST search of [NTEQEEGGGEAVHEVEVVIK](#)

(Parameters: blastp, nr protein database, expect=20000, no filter, PAM30)

Other BLAST [web gateways](#)

All matches to this query

| Score | Mr(calc):   | Delta     | Sequence                             |
|-------|-------------|-----------|--------------------------------------|
| 48.2  | 2406.173676 | 0.030966  | <a href="#">NTEQEEGGGEAVHEVEVVIK</a> |
| 2.1   | 2406.218338 | -0.013696 | <a href="#">EPVQMELSPPMGVVQK</a>     |

Mascot: <http://www.matrixscience.com/>



# MASCOT SCIENCE Mascot Search Results

## Peptide View

MS/MS Fragmentation of **LASQACR**

Found in **FA12\_HUMAN**, Coagulation factor XII OS=Homo sapiens GN=F12 PE=1 SV=3

Match to Query 23570: 1115.563268 from(558.788910,2+) rtinseconds(1344) index(74004)

Title: Locus:1.1.1.2682.23 File:"2013-07-02 CLN FXIII 60 min 1st FT.wiff"

Data file C:\Program Files (x86)\Matrix Science\Mascot Daemon\mgf\4 FXIII 60 min 1st\mascot\_daemon\_merge.mgf

Click mouse within plot area to zoom in by factor of two about that point

Or, Plot from  to  Da

Label all possible matches  Label matches used for scoring

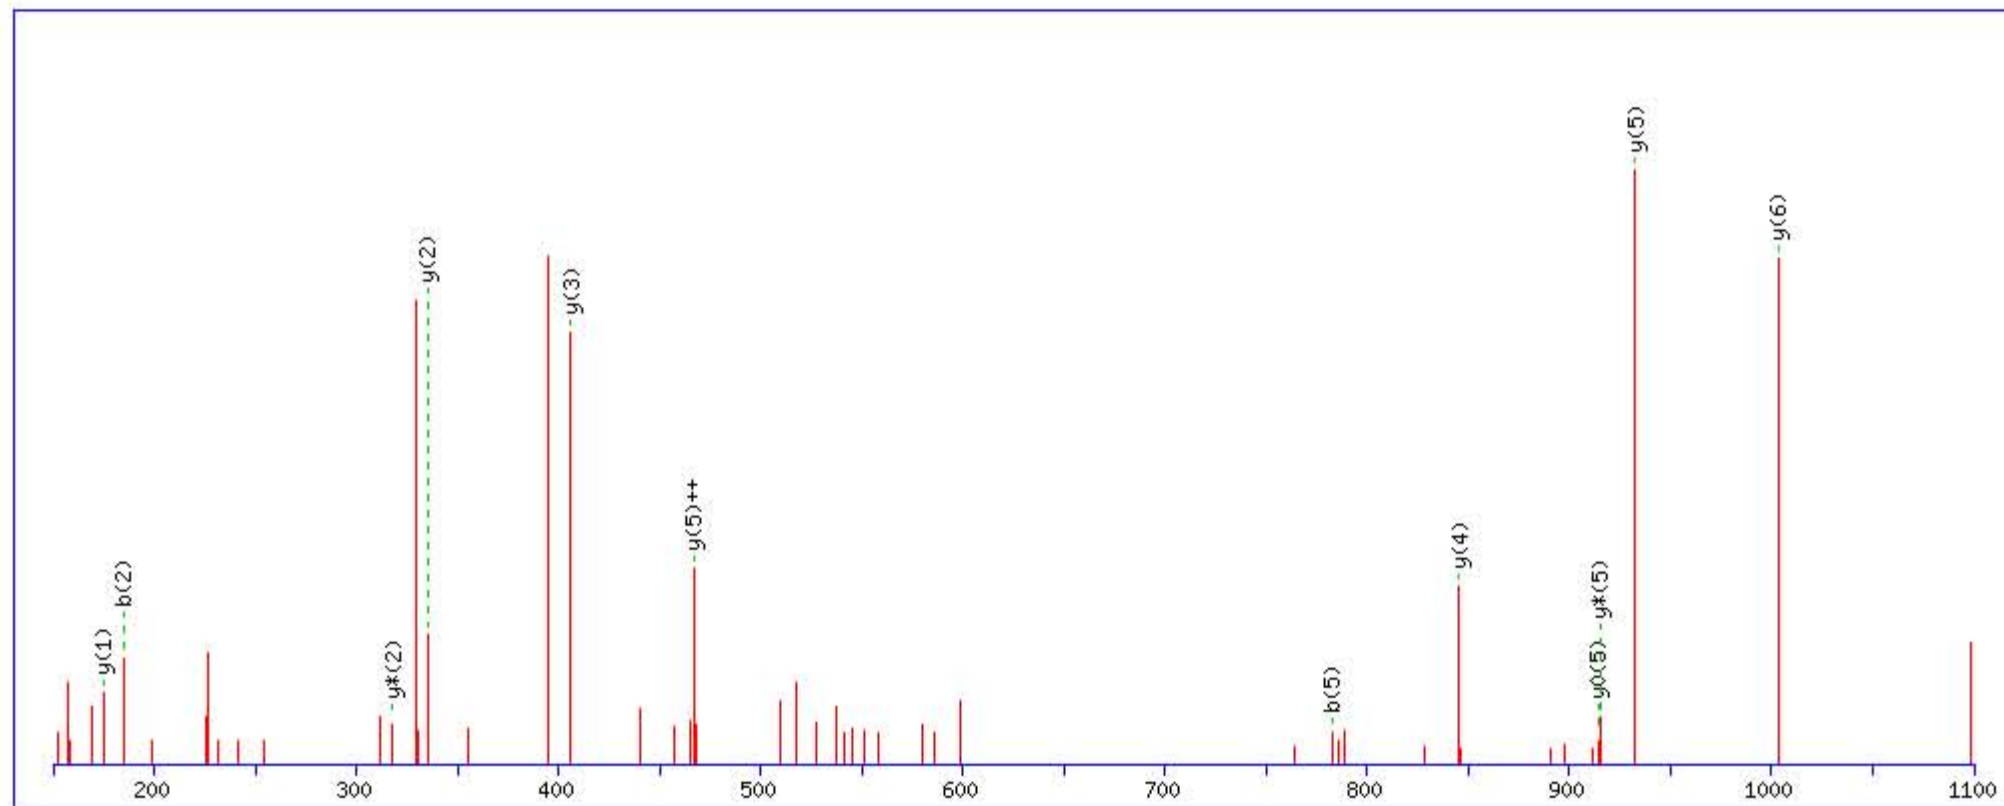

Monoisotopic mass of neutral peptide Mr(calc): 1115.557953

Fixed modifications: Carbamidomethyl (C) (apply to specified residues or termini only)

Variable modifications:

Q4 : Biotin:Thermo-21345 (Q)

Ions Score: 28 Expect: 0.032

Matches : 12/54 fragment ions using 30 most intense peaks [\(help\)](#)

| # | b                 | b <sup>++</sup> | b <sup>*</sup> | b <sup>*++</sup> | b <sup>0</sup> | b <sup>0++</sup> | Seq. | y                  | y <sup>++</sup>   | y <sup>*</sup>    | y <sup>*++</sup> | y <sup>0</sup>    | y <sup>0++</sup> | # |
|---|-------------------|-----------------|----------------|------------------|----------------|------------------|------|--------------------|-------------------|-------------------|------------------|-------------------|------------------|---|
| 1 | 114.091340        | 57.549308       |                |                  |                |                  | L    |                    |                   |                   |                  |                   |                  | 7 |
| 2 | <b>185.128454</b> | 93.067865       |                |                  |                |                  | A    | <b>1003.481183</b> | 502.244230        | 986.454634        | 493.730955       | 985.470618        | 493.238947       | 6 |
| 3 | 272.160482        | 136.583879      |                |                  | 254.149917     | 127.578596       | S    | <b>932.444069</b>  | <b>466.725673</b> | <b>915.417520</b> | 458.212398       | <b>914.433504</b> | 457.720390       | 5 |
| 4 | 711.385808        | 356.196542      | 694.359259     | 347.683268       | 693.375243     | 347.191260       | Q    | <b>845.412041</b>  | 423.209659        | 828.385492        | 414.696384       |                   |                  | 4 |
| 5 | <b>782.422922</b> | 391.715099      | 765.396373     | 383.201824       | 764.412357     | 382.709816       | A    | <b>406.186715</b>  | 203.596995        | 389.160166        | 195.083721       |                   |                  | 3 |
| 6 | 942.453571        | 471.730424      | 925.427022     | 463.217149       | 924.443006     | 462.725141       | C    | <b>335.149601</b>  | 168.078438        | <b>318.123052</b> | 159.565164       |                   |                  | 2 |
| 7 |                   |                 |                |                  |                |                  | R    | <b>175.118952</b>  | 88.063114         | 158.092403        | 79.549839        |                   |                  | 1 |

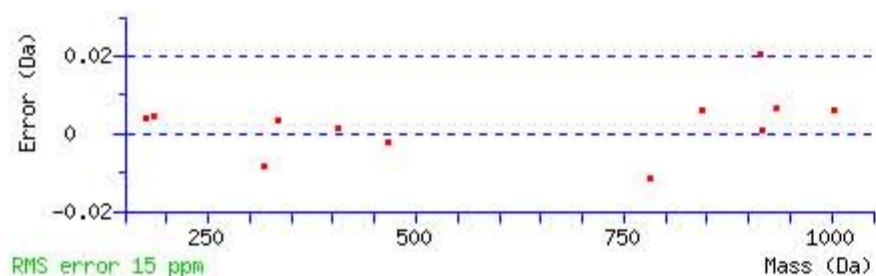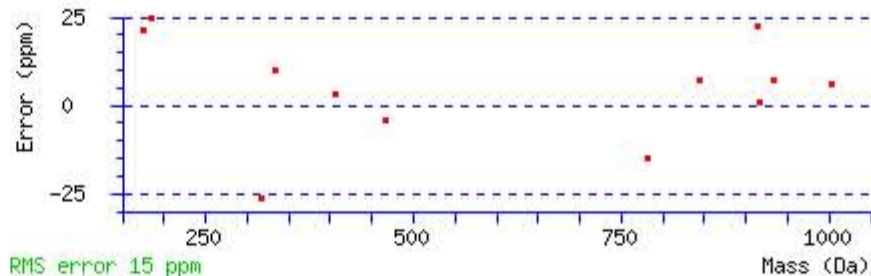

NCBI BLAST search of [LASQACR](#)

(Parameters: blastp, nr protein database, expect=20000, no filter, PAM30)

Other BLAST [web gateways](#)

All matches to this query

| Score | Mr(calc):   | Delta     | Sequence                   |
|-------|-------------|-----------|----------------------------|
| 27.7  | 1115.557953 | 0.005315  | <a href="#">LASQACR</a>    |
| 11.1  | 1115.579544 | -0.016276 | <a href="#">LAGSRRDGER</a> |
| 1.6   | 1115.550552 | 0.012716  | <a href="#">LAAGSRCPER</a> |
| 1.6   | 1115.546722 | 0.016546  | <a href="#">LAQDACK</a>    |



# MASCOT SCIENCE Mascot Search Results

## Peptide View

MS/MS Fragmentation of **TEQAAVAR**

Found in **FA12\_HUMAN**, Coagulation factor XII OS=Homo sapiens GN=F12 PE=1 SV=3

Match to Query 25917: 1155.607748 from(578.811150,2+) rtinseconds(1352) index(37819)

Title: Locus:1.1.1.2754.23 File:"2013-07-02 CLN FXIII 60 min 1st F 3.wiff"

Data file C:\Program Files (x86)\Matrix Science\Mascot Daemon\mgf\4 FXIII 60 min 1st\mascot\_daemon\_merge.mgf

Click mouse within plot area to zoom in by factor of two about that point

Or, Plot from  to  Da

Label all possible matches  Label matches used for scoring

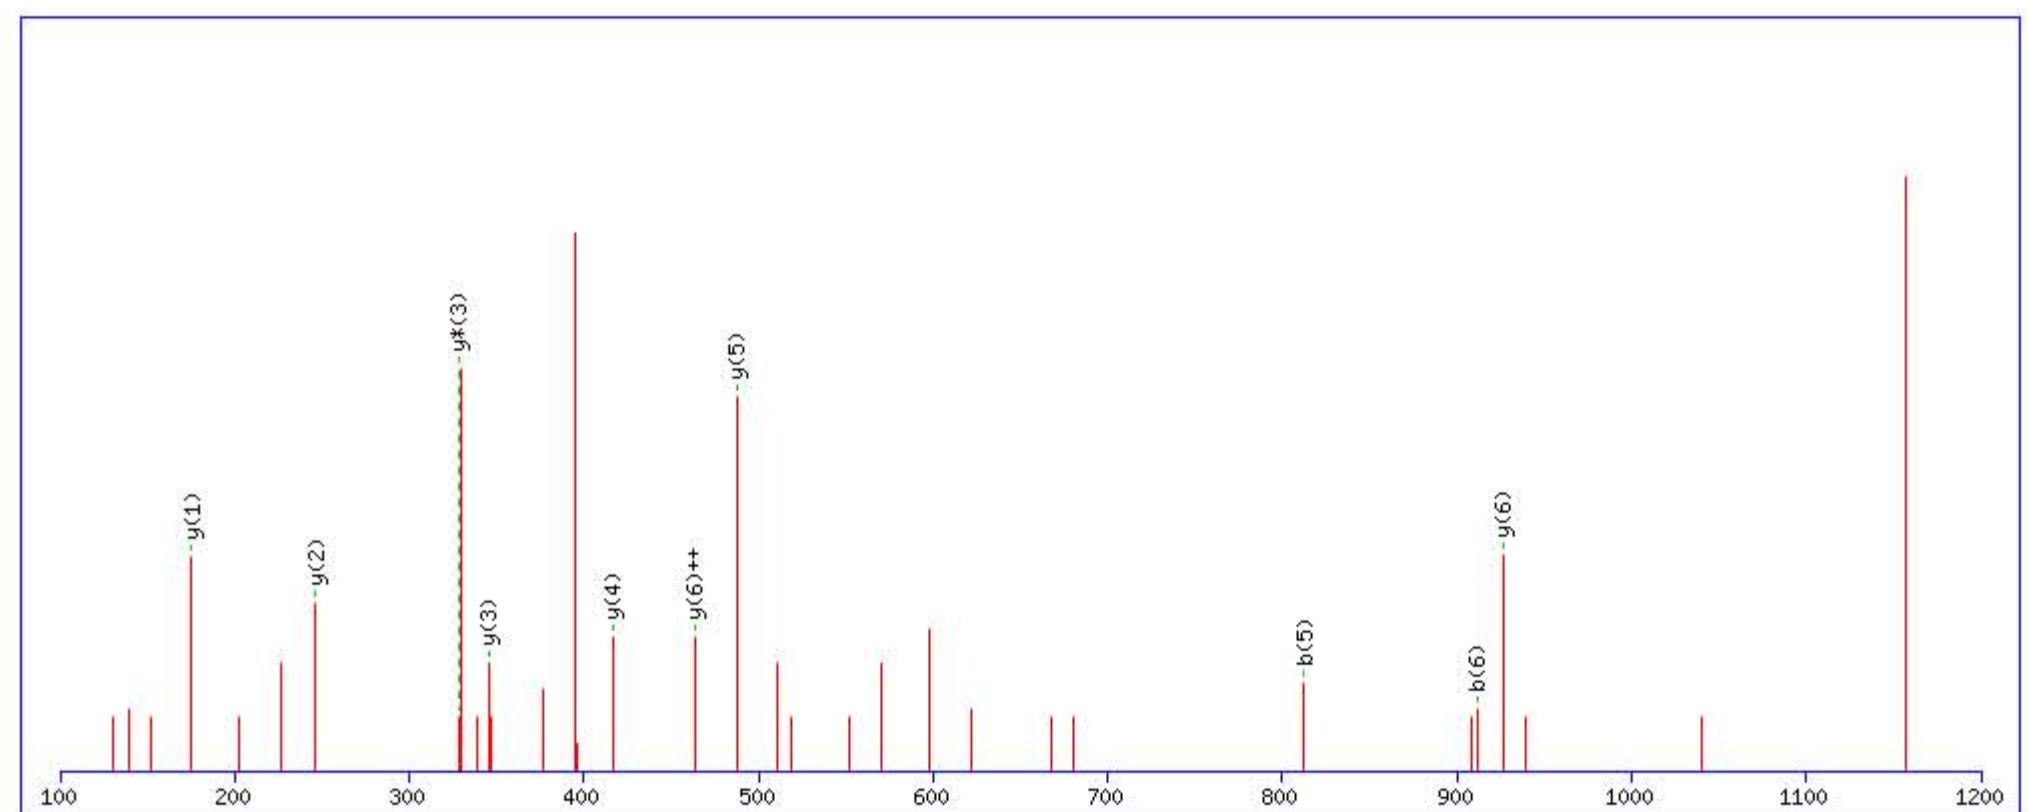

Monoisotopic mass of neutral peptide Mr(calc): 1155.607010

Fixed modifications: Carbamidomethyl (C) (apply to specified residues or termini only)

Variable modifications:

Q3 : Biotin:Thermo-21345 (Q)

Ions Score: 31 Expect: 0.019

Matches : 10/68 fragment ions using 23 most intense peaks [\(help\)](#)

| # | b                 | b <sup>++</sup> | b <sup>*</sup> | b <sup>*++</sup> | b <sup>0</sup> | b <sup>0++</sup> | Seq. | y                 | y <sup>++</sup>   | y <sup>*</sup>    | y <sup>*++</sup> | y <sup>0</sup> | y <sup>0++</sup> | # |
|---|-------------------|-----------------|----------------|------------------|----------------|------------------|------|-------------------|-------------------|-------------------|------------------|----------------|------------------|---|
| 1 | 102.054955        | 51.531116       |                |                  | 84.044390      | 42.525833        | T    |                   |                   |                   |                  |                |                  | 8 |
| 2 | 231.097548        | 116.052412      |                |                  | 213.086983     | 107.047130       | E    | 1055.566627       | 528.286951        | 1038.540078       | 519.773677       | 1037.556062    | 519.281669       | 7 |
| 3 | 670.322874        | 335.665075      | 653.296325     | 327.151801       | 652.312309     | 326.659793       | Q    | <b>926.524034</b> | <b>463.765655</b> | 909.497485        | 455.252380       |                |                  | 6 |
| 4 | 741.359988        | 371.183632      | 724.333439     | 362.670358       | 723.349423     | 362.178350       | A    | <b>487.298708</b> | 244.152992        | 470.272159        | 235.639717       |                |                  | 5 |
| 5 | <b>812.397102</b> | 406.702189      | 795.370553     | 398.188915       | 794.386537     | 397.696907       | A    | <b>416.261594</b> | 208.634435        | 399.235045        | 200.121160       |                |                  | 4 |
| 6 | <b>911.465516</b> | 456.236396      | 894.438967     | 447.723121       | 893.454951     | 447.231113       | V    | <b>345.224480</b> | 173.115878        | <b>328.197931</b> | 164.602603       |                |                  | 3 |
| 7 | 982.502630        | 491.754953      | 965.476081     | 483.241678       | 964.492065     | 482.749670       | A    | <b>246.156066</b> | 123.581671        | 229.129517        | 115.068396       |                |                  | 2 |
| 8 |                   |                 |                |                  |                |                  | R    | <b>175.118952</b> | 88.063114         | 158.092403        | 79.549839        |                |                  | 1 |

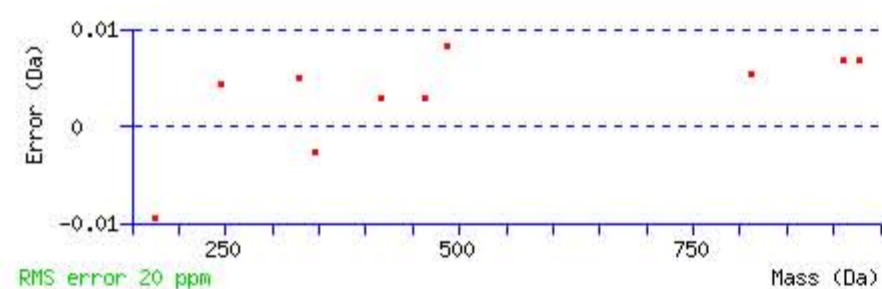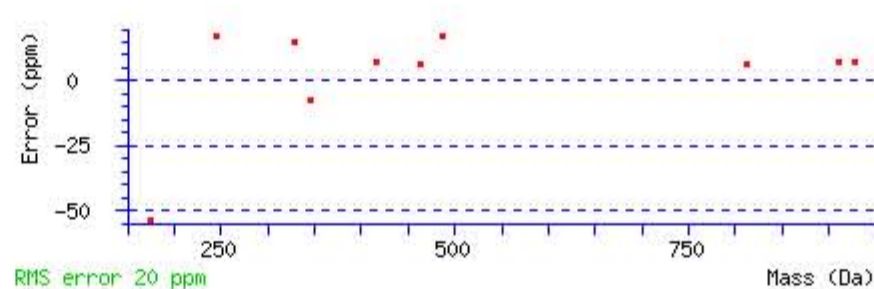

NCBI BLAST search of **TEQAAVAR**

(Parameters: blastp, nr protein database, expect=20000, no filter, PAM30)

Other BLAST [web gateways](#)

All matches to this query

| Score | Mr(calc):   | Delta     | Sequence                      |
|-------|-------------|-----------|-------------------------------|
| 30.7  | 1155.607010 | 0.000738  | <a href="#">TEQAAVAR</a>      |
| 11.5  | 1155.607025 | 0.000723  | <a href="#">VQDSAVAR</a>      |
| 8.2   | 1155.624771 | -0.017023 | <a href="#">LQSLPEGSLGR</a>   |
| 2.2   | 1155.622269 | -0.014521 | <a href="#">QAWLTAR</a>       |
| 1.0   | 1155.610855 | -0.003107 | <a href="#">GAGAGLSRPGSAR</a> |
| 0.4   | 1155.624756 | -0.017008 | <a href="#">ELEQQLAAVR</a>    |
| 0.4   | 1155.610840 | -0.003092 | <a href="#">GELPRDSRAR</a>    |
| 0.4   | 1155.624771 | -0.017023 | <a href="#">NLLDVIDQAR</a>    |
| 0.3   | 1155.599594 | 0.008154  | <a href="#">QAQGALAAAEAR</a>  |
| 0.1   | 1155.603653 | 0.004095  | <a href="#">FSEITPHAVR</a>    |

Mascot: <http://www.matrixscience.com/>



# MASCOT Search Results

## Peptide View

MS/MS Fragmentation of **CFEPQLLR**

Found in **FA12\_HUMAN**, Coagulation factor XII OS=Homo sapiens GN=F12 PE=1 SV=3

Match to Query 33619: 1372.712708 from(687.363630,2+) rtinseconds(2194) index(79893)

Title: Locus:1.1.1.2978.8 File:"2013-07-02 CLN FXIII 60 min 1st FT.wiff"

Data file C:\Program Files (x86)\Matrix Science\Mascot Daemon\mgf\4 FXIII 60 min 1st\mascot\_daemon\_merge.mgf

Click mouse within plot area to zoom in by factor of two about that point

Or, Plot from  to  Da

Label all possible matches  Label matches used for scoring

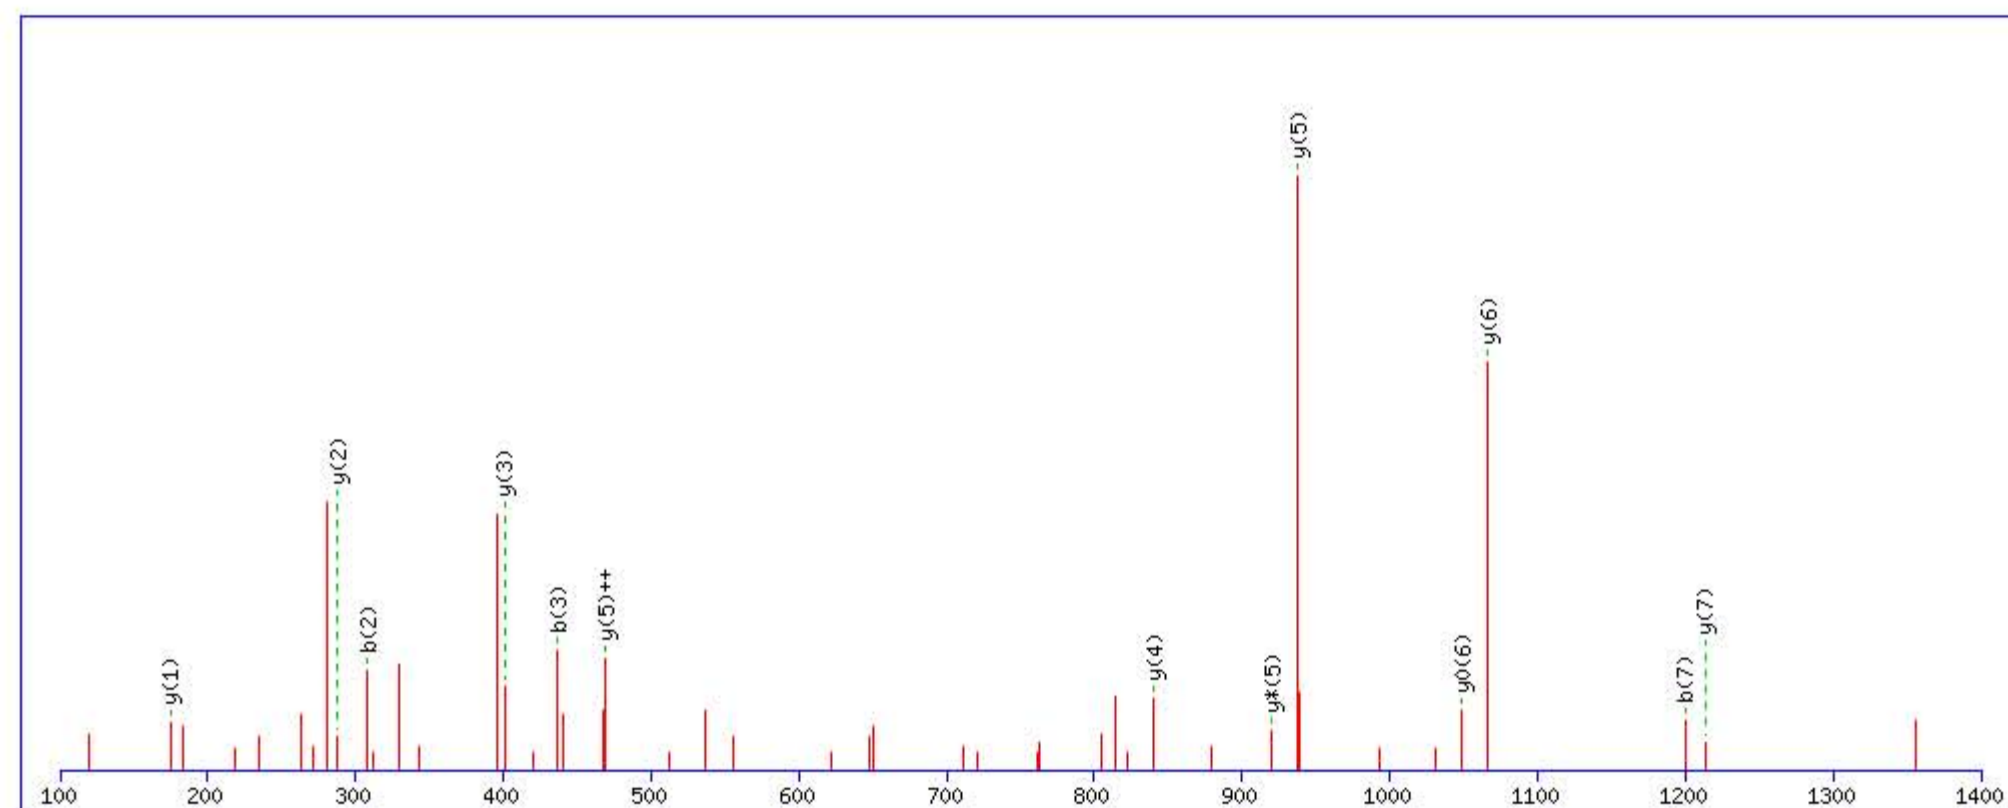

Monoisotopic mass of neutral peptide Mr(calc): 1372.699539

Fixed modifications: Carbamidomethyl (C) (apply to specified residues or termini only)

Variable modifications:

Q5 : Biotin:Thermo-21345 (Q)

Ions Score: 27 Expect: 0.027

Matches : 13/62 fragment ions using 39 most intense peaks [\(help\)](#)

| # | b                  | b <sup>++</sup> | b <sup>+</sup> | b <sup>*++</sup> | b <sup>0</sup> | b <sup>0++</sup> | Seq. | y                  | y <sup>++</sup>   | y <sup>+</sup>    | y <sup>*++</sup> | y <sup>0</sup>     | y <sup>0++</sup> | # |
|---|--------------------|-----------------|----------------|------------------|----------------|------------------|------|--------------------|-------------------|-------------------|------------------|--------------------|------------------|---|
| 1 | 161.037925         | 81.022600       |                |                  |                |                  | C    |                    |                   |                   |                  |                    |                  | 8 |
| 2 | <b>308.106339</b>  | 154.556807      |                |                  |                |                  | F    | <b>1213.676177</b> | 607.341726        | 1196.649628       | 598.828452       | 1195.665612        | 598.336444       | 7 |
| 3 | <b>437.148932</b>  | 219.078104      |                |                  | 419.138367     | 210.072822       | E    | <b>1066.607763</b> | 533.807519        | 1049.581214       | 525.294245       | <b>1048.597198</b> | 524.802237       | 6 |
| 4 | 534.201696         | 267.604486      |                |                  | 516.191131     | 258.599204       | P    | <b>937.565170</b>  | <b>469.286223</b> | <b>920.538621</b> | 460.772948       |                    |                  | 5 |
| 5 | 973.427022         | 487.217149      | 956.400473     | 478.703875       | 955.416457     | 478.211867       | Q    | <b>840.512406</b>  | 420.759841        | 823.485857        | 412.246566       |                    |                  | 4 |
| 6 | 1086.511086        | 543.759181      | 1069.484537    | 535.245907       | 1068.500521    | 534.753898       | L    | <b>401.287080</b>  | 201.147178        | 384.260531        | 192.633903       |                    |                  | 3 |
| 7 | <b>1199.595150</b> | 600.301213      | 1182.568601    | 591.787939       | 1181.584585    | 591.295930       | L    | <b>288.203016</b>  | 144.605146        | 271.176467        | 136.091871       |                    |                  | 2 |
| 8 |                    |                 |                |                  |                |                  | R    | <b>175.118952</b>  | 88.063114         | 158.092403        | 79.549839        |                    |                  | 1 |

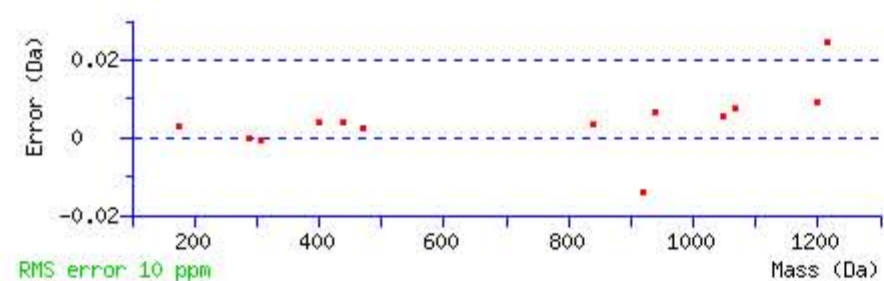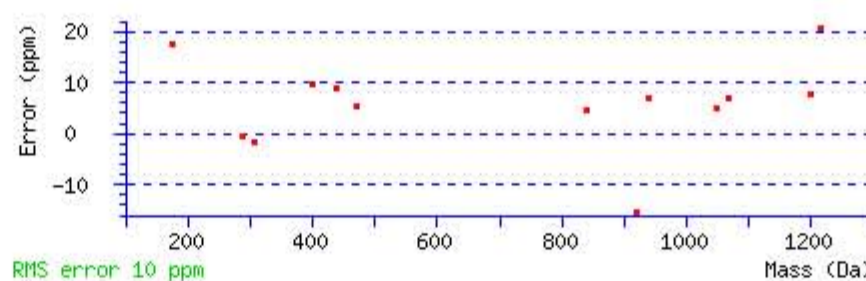

NCBI BLAST search of **CFEPQLLR**

(Parameters: blastp, nr protein database, expect=20000, no filter, PAM30)

Other BLAST [web gateways](#)

All matches to this query

| Score | Mr(calc):   | Delta     | Sequence                     |
|-------|-------------|-----------|------------------------------|
| 27.3  | 1372.699539 | 0.013169  | <a href="#">CFEPQLLR</a>     |
| 9.9   | 1372.710770 | 0.001938  | <a href="#">QPRMLDFR</a>     |
| 2.1   | 1372.703369 | 0.009339  | <a href="#">NPPKQEGHR</a>    |
| 2.1   | 1372.717331 | -0.004623 | <a href="#">QGLPVMVPVDFR</a> |
| 0.3   | 1372.692123 | 0.020585  | <a href="#">HIGNPEYLMKR</a>  |



**Mascot Search Results**

**Peptide View**

MS/MS Fragmentation of **AEHTVVLTVTGEPCHFPPQYHR**  
 Found in **FA12\_HUMAN**, Coagulation factor XII OS=Homo sapiens GN=F12 PE=1 SV=3

Match to Query 72157: 3064.503216 from(767.133080,4+) rtinseconds(2128) index(79391)  
 Title: Locus:1.1.1.2955.14 File:"2013-07-02 CLN FXIII 60 min 1st FT.wiff"  
 Data file C:\Program Files (x86)\Matrix Science\Mascot Daemon\mgf\4 FXIII 60 min 1st\mascot\_daemon\_merge.mgf

Click mouse within plot area to zoom in by factor of two about that point  
 Or, Plot from  to  Da   
 Label all possible matches  Label matches used for scoring

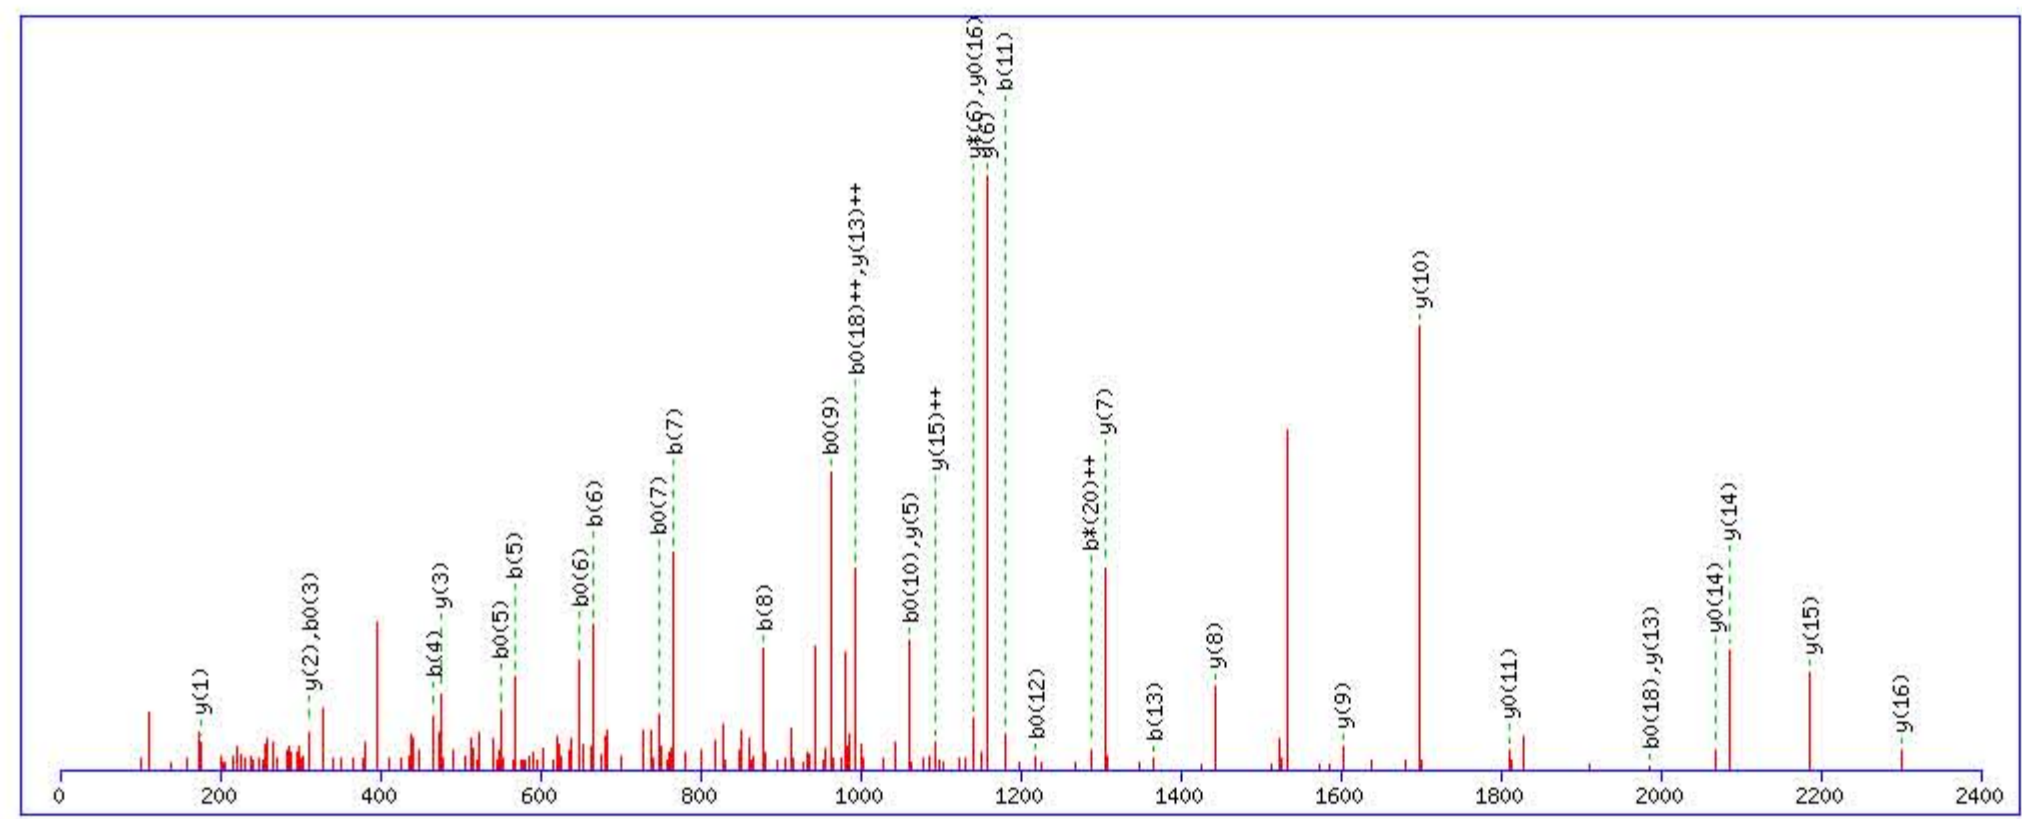

Monoisotopic mass of neutral peptide Mr(calc): 3064.468796  
 Fixed modifications: Carbamidomethyl (C) (apply to specified residues or termini only)  
 Variable modifications:  
 Q20 : Biotin:Thermo-21345 (Q)  
 Ions Score: 72 Expect: 1.7e-006  
 Matches : 36/204 fragment ions using 57 most intense peaks [\(help\)](#)

| #  | b           | b <sup>++</sup> | b <sup>*</sup> | b <sup>*++</sup> | b <sup>0</sup> | b <sup>0++</sup> | Seq. | y           | y <sup>++</sup> | y <sup>*</sup> | y <sup>*++</sup> | y <sup>0</sup> | y <sup>0++</sup> | #  |
|----|-------------|-----------------|----------------|------------------|----------------|------------------|------|-------------|-----------------|----------------|------------------|----------------|------------------|----|
| 1  | 72.044390   | 36.525833       |                |                  |                |                  | A    |             |                 |                |                  |                |                  | 23 |
| 2  | 201.086983  | 101.047130      |                |                  | 183.076418     | 92.041847        | E    | 2994.438934 | 1497.723105     | 2977.412385    | 1489.209830      | 2976.428369    | 1488.717822      | 22 |
| 3  | 330.129576  | 165.568426      |                |                  | 312.119011     | 156.563144       | E    | 2865.396341 | 1433.201808     | 2848.369792    | 1424.688534      | 2847.385776    | 1424.196526      | 21 |
| 4  | 467.188488  | 234.097882      |                |                  | 449.177923     | 225.092599       | H    | 2736.353748 | 1368.680512     | 2719.327199    | 1360.167237      | 2718.343183    | 1359.675229      | 20 |
| 5  | 568.236167  | 284.621722      |                |                  | 550.225602     | 275.616439       | T    | 2599.294836 | 1300.151056     | 2582.268287    | 1291.637781      | 2581.284271    | 1291.145773      | 19 |
| 6  | 667.304581  | 334.155929      |                |                  | 649.294016     | 325.150646       | V    | 2498.247157 | 1249.627216     | 2481.220608    | 1241.113942      | 2480.236592    | 1240.621934      | 18 |
| 7  | 766.372995  | 383.690136      |                |                  | 748.362430     | 374.684853       | V    | 2399.178743 | 1200.093009     | 2382.152194    | 1191.579735      | 2381.168178    | 1191.087727      | 17 |
| 8  | 879.457059  | 440.232168      |                |                  | 861.446494     | 431.226885       | L    | 2300.110329 | 1150.558802     | 2283.083780    | 1142.045528      | 2282.099764    | 1141.553520      | 16 |
| 9  | 980.504738  | 490.756007      |                |                  | 962.494173     | 481.750724       | T    | 2187.026265 | 1094.016770     | 2169.999716    | 1085.503496      | 2169.015700    | 1085.011488      | 15 |
| 10 | 1079.573152 | 540.290214      |                |                  | 1061.562587    | 531.284931       | V    | 2085.978586 | 1043.492931     | 2068.952037    | 1034.979656      | 2067.968021    | 1034.487648      | 14 |
| 11 | 1180.620831 | 590.814054      |                |                  | 1162.610266    | 581.808771       | T    | 1986.910172 | 993.958724      | 1969.883623    | 985.445450       | 1968.899607    | 984.953442       | 13 |
| 12 | 1237.642295 | 619.324785      |                |                  | 1219.631730    | 610.319503       | G    | 1885.862493 | 943.434885      | 1868.835944    | 934.921610       | 1867.851928    | 934.429602       | 12 |
| 13 | 1366.684888 | 683.846082      |                |                  | 1348.674323    | 674.840800       | E    | 1828.841029 | 914.924153      | 1811.814480    | 906.410878       | 1810.830464    | 905.918870       | 11 |
| 14 | 1463.737652 | 732.372464      |                |                  | 1445.727087    | 723.367182       | P    | 1699.798436 | 850.402856      | 1682.771887    | 841.889582       |                |                  | 10 |
| 15 | 1623.768301 | 812.387789      |                |                  | 1605.757736    | 803.382506       | C    | 1602.745672 | 801.876474      | 1585.719123    | 793.363200       |                |                  | 9  |
| 16 | 1760.827213 | 880.917245      |                |                  | 1742.816648    | 871.911962       | H    | 1442.715023 | 721.861150      | 1425.688474    | 713.347875       |                |                  | 8  |
| 17 | 1907.895627 | 954.451452      |                |                  | 1889.885062    | 945.446169       | F    | 1305.656111 | 653.331694      | 1288.629562    | 644.818419       |                |                  | 7  |
| 18 | 2004.948391 | 1002.977834     |                |                  | 1986.937826    | 993.972551       | P    | 1158.587697 | 579.797487      | 1141.561148    | 571.284212       |                |                  | 6  |
| 19 | 2152.016805 | 1076.512040     |                |                  | 2134.006240    | 1067.506758      | F    | 1061.534933 | 531.271105      | 1044.508384    | 522.757830       |                |                  | 5  |
| 20 | 2591.242131 | 1296.124703     | 2574.215582    | 1287.611429      | 2573.231566    | 1287.119421      | Q    | 914.466519  | 457.736898      | 897.439970     | 449.223623       |                |                  | 4  |
| 21 | 2754.305460 | 1377.656368     | 2737.278911    | 1369.143093      | 2736.294895    | 1368.651085      | Y    | 475.241193  | 238.124234      | 458.214644     | 229.610960       |                |                  | 3  |
| 22 | 2891.364372 | 1446.185824     | 2874.337823    | 1437.672549      | 2873.353807    | 1437.180541      | H    | 312.177864  | 156.592570      | 295.151315     | 148.079295       |                |                  | 2  |
| 23 |             |                 |                |                  |                |                  | R    | 175.118952  | 88.063114       | 158.092403     | 79.549839        |                |                  | 1  |

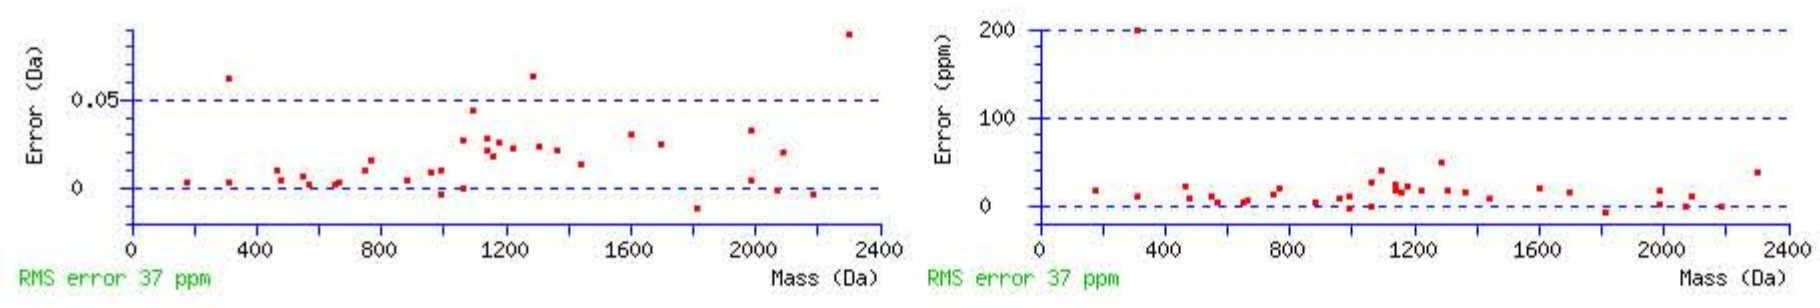

NCBI BLAST search of [AEHTVVLTVTGEPCHFPPQYHR](#)  
 (Parameters: blastp, nr protein database, expect=20000, no filter, PAM30)  
 Other BLAST [web gateways](#)

**All matches to this query**

| Score | Mr(calc):   | Delta    | Sequence                               |
|-------|-------------|----------|----------------------------------------|
| 71.8  | 3064.468796 | 0.034420 | <a href="#">AEHTVVLTVTGEPCHFPPQYHR</a> |



# MASCOT SCIENCE Mascot Search Results

## Peptide View

MS/MS Fragmentation of **AQMDLSGR**

Found in **F13A\_HUMAN**, Coagulation factor XIII A chain OS=Homo sapiens GN=F13A1 PE=1 SV=4

Match to Query 27745: 1203.576568 from(602.795560,2+) rtinseconds(1432) index(38371)

Title: Locus:1.1.1.2782.21 File:"2013-07-02 CLN FXIII 60 min 1st F 3.wiff"

Data file C:\Program Files (x86)\Matrix Science\Mascot Daemon\mgf4 FXIII 60 min 1st\mascot\_daemon\_merge.mgf

Click mouse within plot area to zoom in by factor of two about that point

Or, Plot from  to  Da

Label all possible matches  Label matches used for scoring

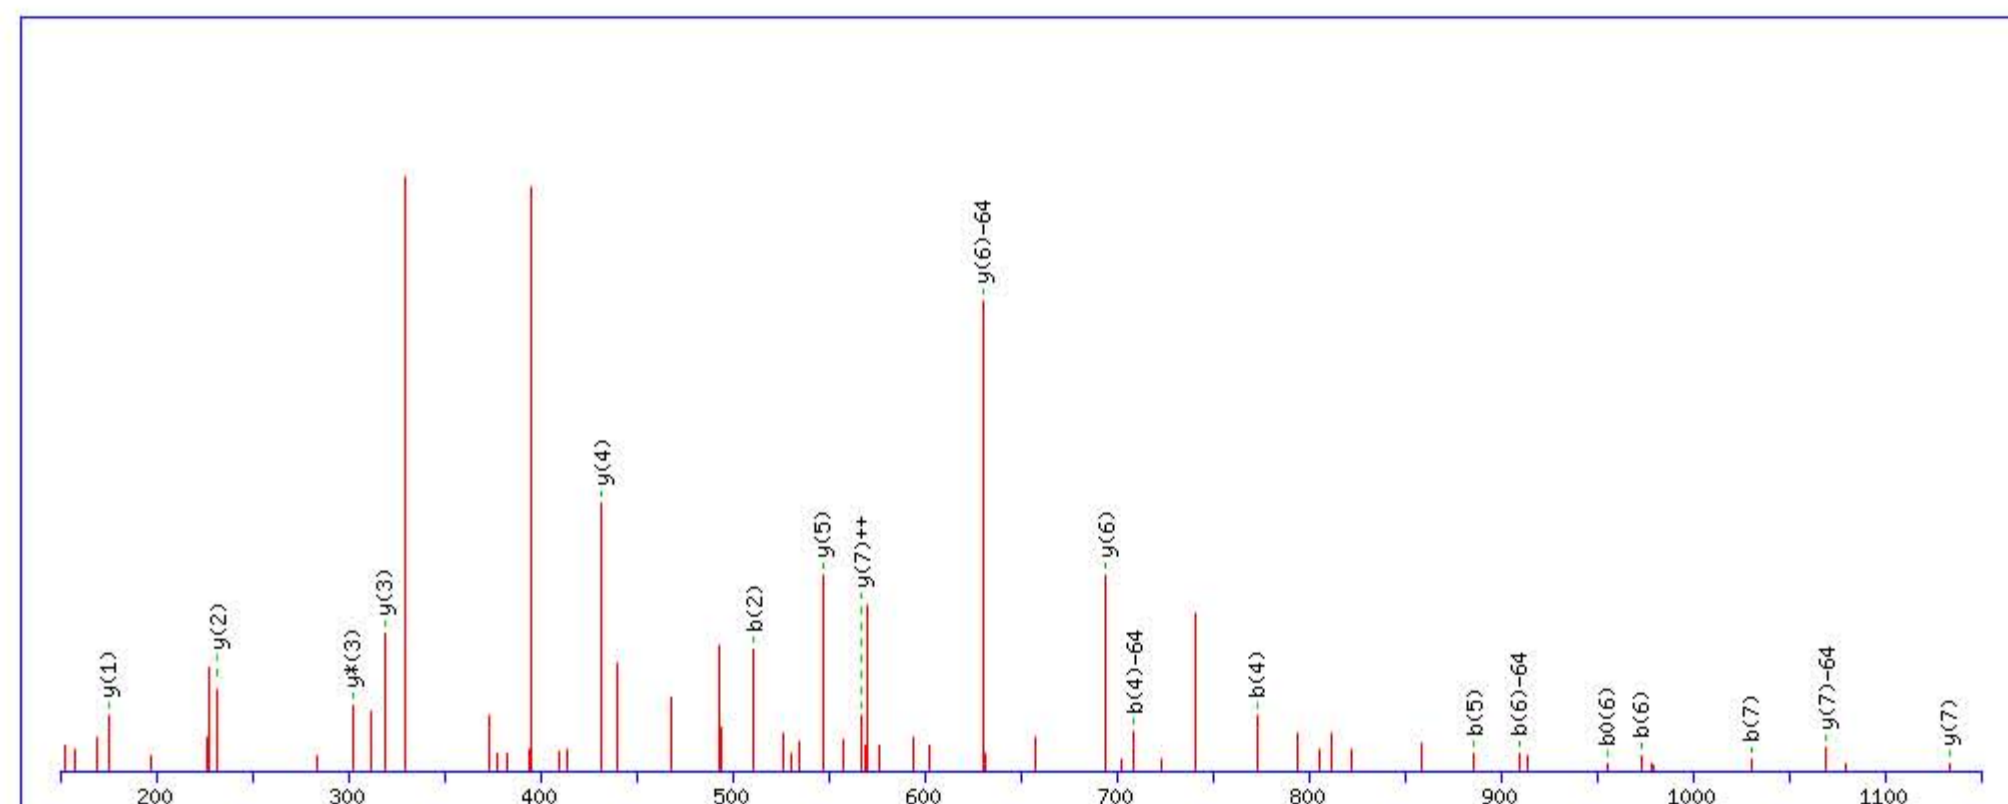

Monoisotopic mass of neutral peptide Mr(calc): 1203.574005

Fixed modifications: Carbamidomethyl (C) (apply to specified residues or termini only)

Variable modifications:

Q2 : Biotin:Thermo-21345 (Q)

M3 : Oxidation (M), with neutral losses 0.000000 (shown in table), 63.998285

Ions Score: 47 Expect: 0.00013

Matches : 19/112 fragment ions using 30 most intense peaks ([help](#))

| # | b                  | b <sup>++</sup> | b <sup>*</sup> | b <sup>+++</sup> | b <sup>0</sup>    | b <sup>0++</sup> | Seq. | y                  | y <sup>++</sup>   | y <sup>*</sup>    | y <sup>+++</sup> | y <sup>0</sup> | y <sup>0++</sup> | # |
|---|--------------------|-----------------|----------------|------------------|-------------------|------------------|------|--------------------|-------------------|-------------------|------------------|----------------|------------------|---|
| 1 | 72.044390          | 36.525833       |                |                  |                   |                  | A    |                    |                   |                   |                  |                |                  | 8 |
| 2 | <b>511.269716</b>  | 256.138496      | 494.243167     | 247.625221       |                   |                  | Q    | <b>1133.544177</b> | <b>567.275727</b> | 1116.517628       | 558.762452       | 1115.533612    | 558.270444       | 7 |
| 3 | 658.305116         | 329.656196      | 641.278567     | 321.142922       |                   |                  | M    | <b>694.318851</b>  | 347.663064        | 677.292302        | 339.149789       | 676.308286     | 338.657781       | 6 |
| 4 | <b>773.332059</b>  | 387.169668      | 756.305510     | 378.656393       | 755.321494        | 378.164385       | D    | <b>547.283451</b>  | 274.145364        | 530.256902        | 265.632089       | 529.272886     | 265.140081       | 5 |
| 5 | <b>886.416123</b>  | 443.711700      | 869.389574     | 435.198425       | 868.405558        | 434.706417       | L    | <b>432.256508</b>  | 216.631892        | 415.229959        | 208.118617       | 414.245943     | 207.626609       | 4 |
| 6 | <b>973.448151</b>  | 487.227713      | 956.421602     | 478.714439       | <b>955.437586</b> | 478.222431       | S    | <b>319.172444</b>  | 160.089860        | <b>302.145895</b> | 151.576585       | 301.161879     | 151.084577       | 3 |
| 7 | <b>1030.469615</b> | 515.738446      | 1013.443066    | 507.225171       | 1012.459050       | 506.733163       | G    | <b>232.140416</b>  | 116.573846        | 215.113867        | 108.060571       |                |                  | 2 |
| 8 |                    |                 |                |                  |                   |                  | R    | <b>175.118952</b>  | 88.063114         | 158.092403        | 79.549839        |                |                  | 1 |

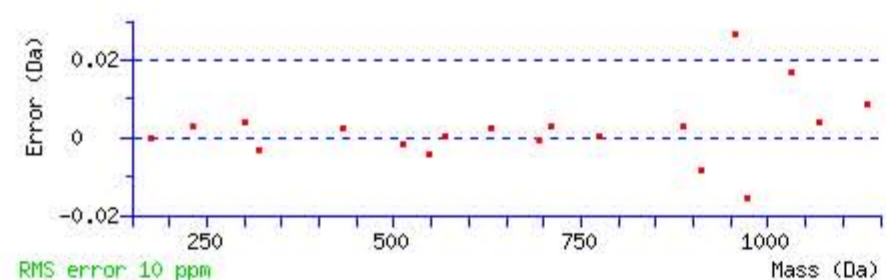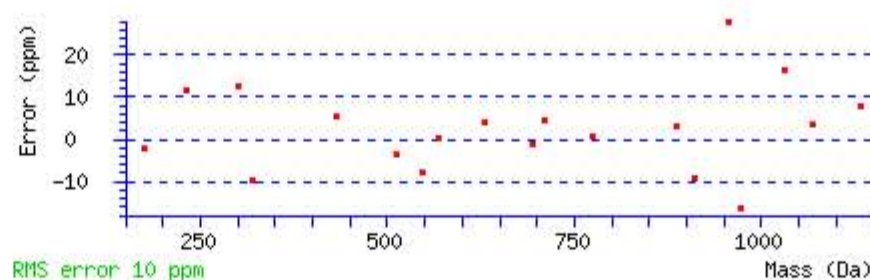

NCBI BLAST search of [AQMDLSGR](#)

(Parameters: blastp, nr protein database, expect=20000, no filter, PAM30)

Other BLAST [web gateways](#)

All matches to this query

| Score | Mr(calc):   | Delta     | Sequence                    |
|-------|-------------|-----------|-----------------------------|
| 47.2  | 1203.574005 | 0.002563  | <a href="#">AQMDLSGR</a>    |
| 5.5   | 1203.577820 | -0.001252 | <a href="#">EAQQRQAAMR</a>  |
| 5.2   | 1203.581848 | -0.005280 | <a href="#">ALCSAAQAAGR</a> |
| 1.4   | 1203.584351 | -0.007783 | <a href="#">SGSPISSEERR</a> |
| 0.6   | 1203.573090 | 0.003478  | <a href="#">ETAAAAEEKER</a> |



# MASCOT SEARCH RESULTS

## Peptide View

MS/MS Fragmentation of **FQEGQEEER**

Found in **F13A\_HUMAN**, Coagulation factor XIII A chain OS=Homo sapiens GN=F13A1 PE=1 SV=4

Match to Query 37384: 1461.661288 from(731.837920,2+) rtinseconds(1433) index(38375)

Title: Locus:1.1.1.2782.25 File:"2013-07-02 CLN FXIII 60 min 1st F 3.wiff"

Data file C:\Program Files (x86)\Matrix Science\Mascot Daemon\mgf4 FXIII 60 min 1st\mascot\_daemon\_merge.mgf

Click mouse within plot area to zoom in by factor of two about that point

Or, Plot from  to  Da

Label all possible matches  Label matches used for scoring

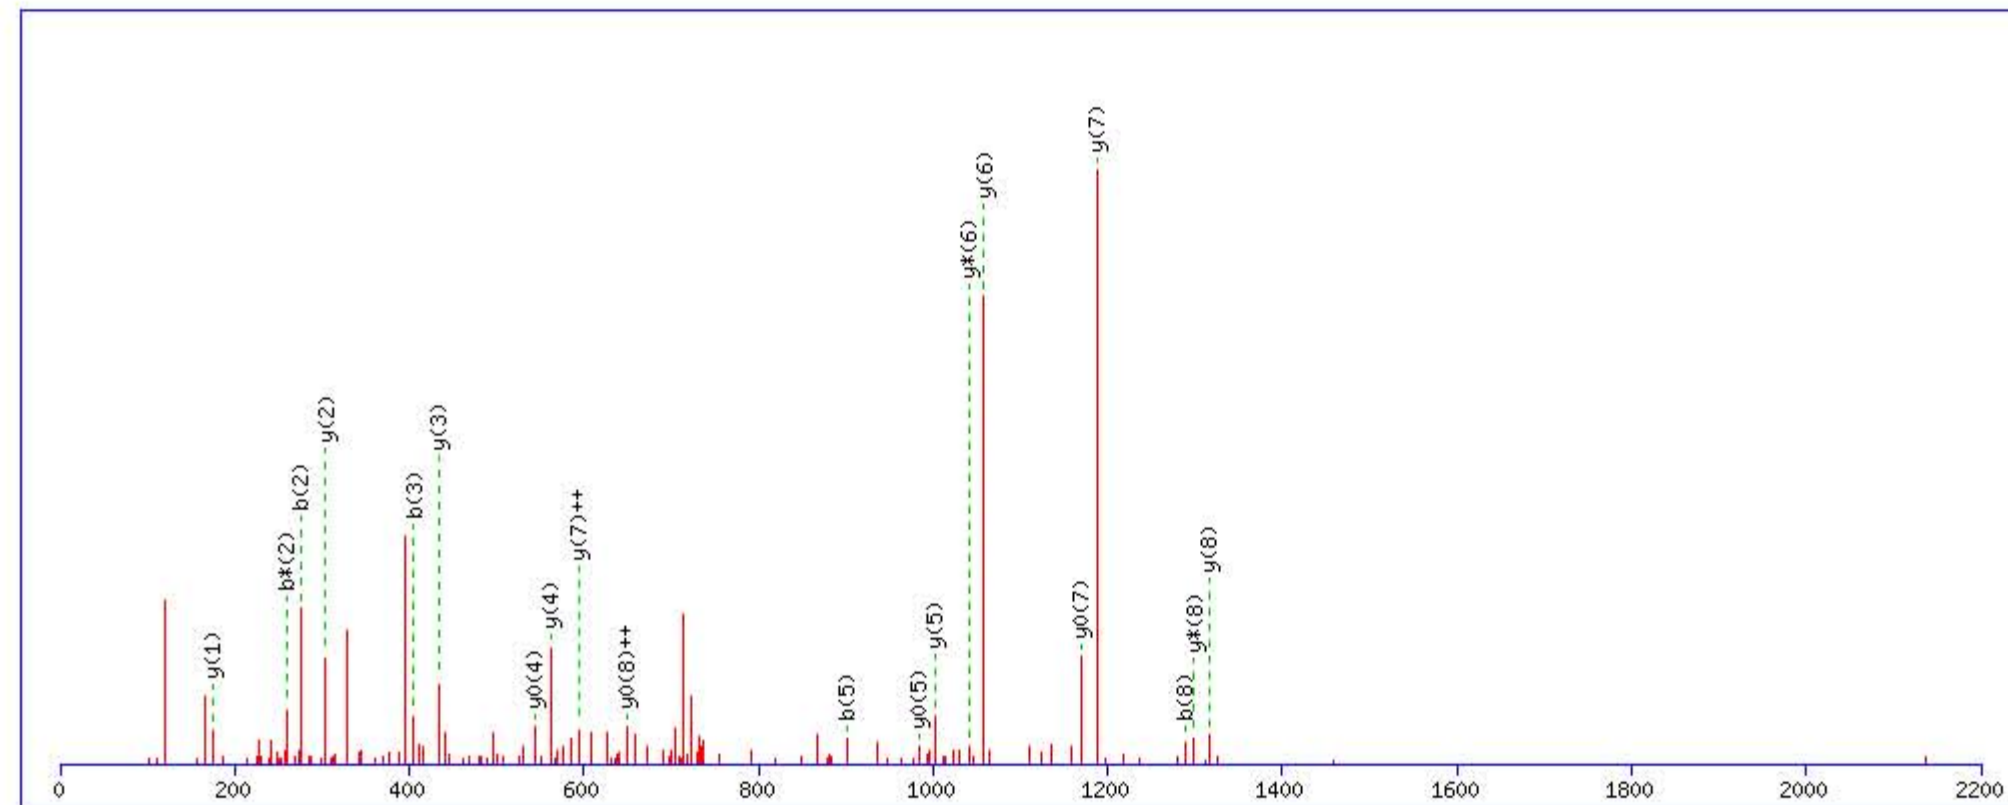

Monoisotopic mass of neutral peptide Mr(calc): 1461.655807

Fixed modifications: Carbamidomethyl (C) (apply to specified residues or termini only)

Variable modifications:

Q5 : Biotin:Thermo-21345 (Q)

Ions Score: 45 Expect: 0.00029

Matches : 20/88 fragment ions using 40 most intense peaks [\(help\)](#)

| # | b                  | b <sup>++</sup> | b <sup>*</sup>    | b <sup>+++</sup> | b <sup>0</sup> | b <sup>0++</sup> | Seq. | y                  | y <sup>++</sup>   | y <sup>*</sup>     | y <sup>+++</sup> | y <sup>0</sup>     | y <sup>0++</sup>  | # |
|---|--------------------|-----------------|-------------------|------------------|----------------|------------------|------|--------------------|-------------------|--------------------|------------------|--------------------|-------------------|---|
| 1 | 148.075690         | 74.541483       |                   |                  |                |                  | F    |                    |                   |                    |                  |                    |                   | 9 |
| 2 | <b>276.134268</b>  | 138.570772      | <b>259.107719</b> | 130.057497       |                |                  | Q    | <b>1315.594692</b> | 658.300984        | <b>1298.568143</b> | 649.787710       | 1297.584127        | <b>649.295702</b> | 8 |
| 3 | <b>405.176861</b>  | 203.092068      | 388.150312        | 194.578794       | 387.166296     | 194.086786       | E    | <b>1187.536114</b> | <b>594.271695</b> | 1170.509565        | 585.758421       | <b>1169.525549</b> | 585.266413        | 7 |
| 4 | 462.198325         | 231.602800      | 445.171776        | 223.089526       | 444.187760     | 222.597518       | G    | <b>1058.493521</b> | 529.750399        | <b>1041.466972</b> | 521.237124       | 1040.482956        | 520.745116        | 6 |
| 5 | <b>901.423651</b>  | 451.215464      | 884.397102        | 442.702189       | 883.413086     | 442.210181       | Q    | <b>1001.472057</b> | 501.239667        | 984.445508         | 492.726392       | <b>983.461492</b>  | 492.234384        | 5 |
| 6 | 1030.466244        | 515.736760      | 1013.439695       | 507.223485       | 1012.455679    | 506.731477       | E    | <b>562.246731</b>  | 281.627004        | 545.220182         | 273.113729       | <b>544.236166</b>  | 272.621721        | 4 |
| 7 | 1159.508837        | 580.258057      | 1142.482288       | 571.744782       | 1141.498272    | 571.252774       | E    | <b>433.204138</b>  | 217.105707        | 416.177589         | 208.592433       | 415.193573         | 208.100425        | 3 |
| 8 | <b>1288.551430</b> | 644.779353      | 1271.524881       | 636.266079       | 1270.540865    | 635.774071       | E    | <b>304.161545</b>  | 152.584411        | 287.134996         | 144.071136       | 286.150980         | 143.579128        | 2 |
| 9 |                    |                 |                   |                  |                |                  | R    | <b>175.118952</b>  | 88.063114         | 158.092403         | 79.549839        |                    |                   | 1 |

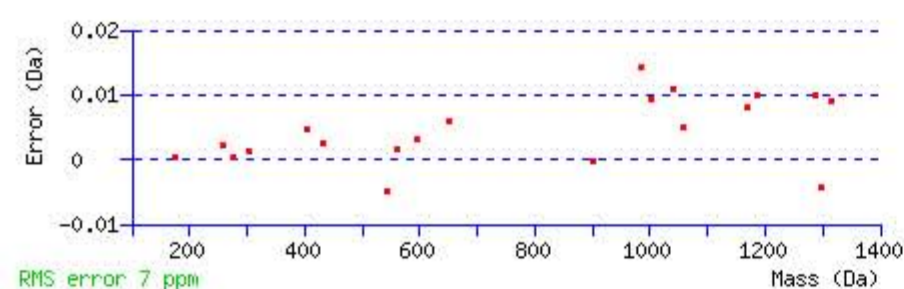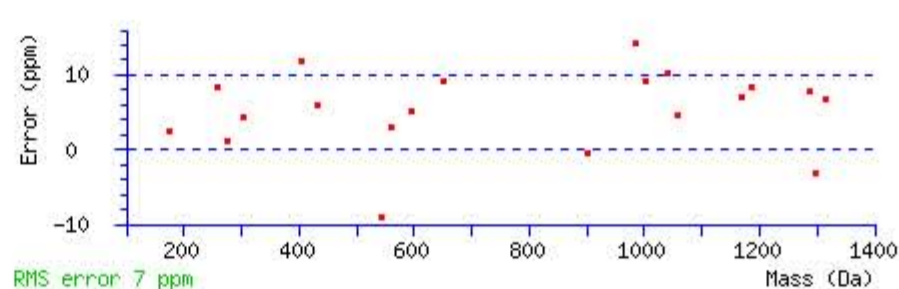

NCBI BLAST search of **FQEGQEEER**

(Parameters: blastp, nr protein database, expect=20000, no filter, PAM30)

Other BLAST [web gateways](#)

## All matches to this query

| Score | Mr(calc):   | Delta     | Sequence                       |
|-------|-------------|-----------|--------------------------------|
| 44.7  | 1461.655807 | 0.005481  | <a href="#">FQEGQEEER</a>      |
| 11.9  | 1461.640564 | 0.020724  | <a href="#">NSGTQSDGEEK</a>    |
| 7.9   | 1461.655807 | 0.005481  | <a href="#">FQEGQEEER</a>      |
| 6.8   | 1461.640564 | 0.020724  | <a href="#">VMTDVAGNPEEER</a>  |
| 3.7   | 1461.648392 | 0.012896  | <a href="#">HREELSDYEER</a>    |
| 2.5   | 1461.677811 | -0.016523 | <a href="#">MSQMASVPER</a>     |
| 0.4   | 1461.676956 | -0.015668 | <a href="#">MSGQVGDLSPSQEK</a> |
| 0.4   | 1461.647049 | 0.014239  | <a href="#">EEEEGEEKQVEK</a>   |



# MASCOT Search Results

## Peptide View

MS/MS Fragmentation of **HVYGELDVQIQR**

Found in **F13A\_HUMAN**, Coagulation factor XIII A chain OS=Homo sapiens GN=F13A1 PE=1 SV=4

Match to Query 47640: 1766.922522 from(589.981450,3+) rtinseconds(1910) index(41502)

Title: Locus:1.1.1.2949.11 File:"2013-07-02 CLN FXIII 60 min 1st F 3.wiff"

Data file C:\Program Files (x86)\Matrix Science\Mascot Daemon\mgf4 FXIII 60 min 1st\mascot\_daemon\_merge.mgf

Click mouse within plot area to zoom in by factor of two about that point

Or, Plot from  to  Da

Label all possible matches  Label matches used for scoring

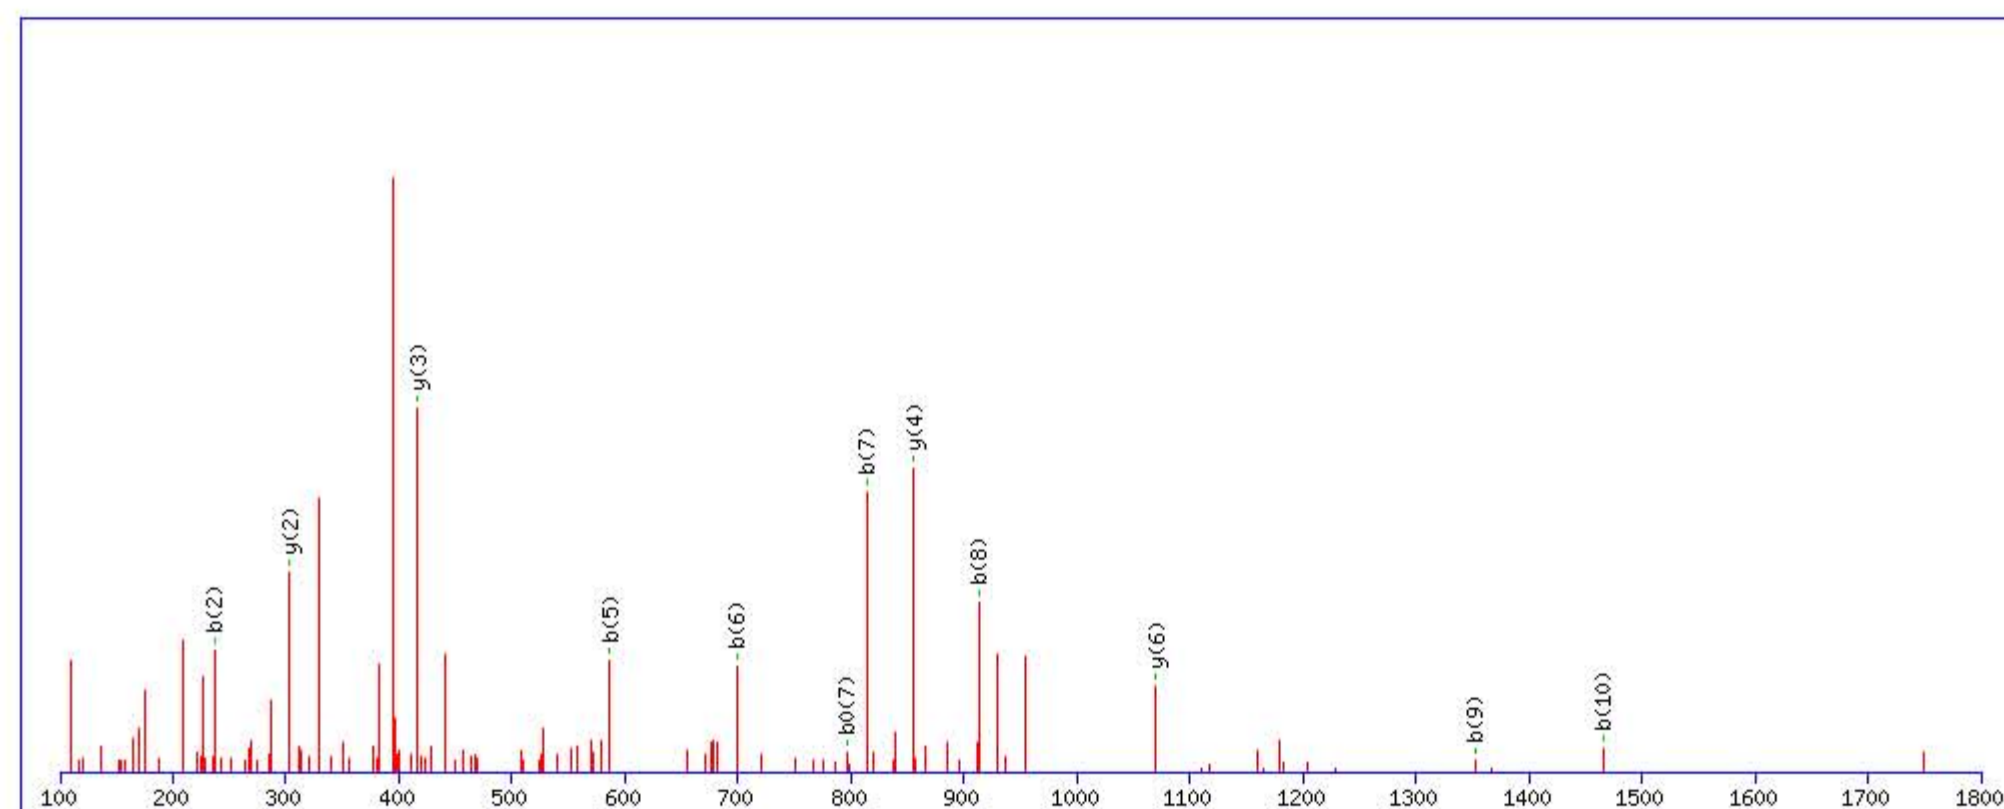

Monoisotopic mass of neutral peptide Mr(calc): 1766.913773

Fixed modifications: Carbamidomethyl (C) (apply to specified residues or termini only)

Variable modifications:

Q9 : Biotin:Thermo-21345 (Q)

Ions Score: 34 Expect: 0.0047

Matches : 12/98 fragment ions using 27 most intense peaks [\(help\)](#)

| #  | b                  | b <sup>++</sup> | b <sup>*</sup> | b <sup>++</sup> | b <sup>0</sup>    | b <sup>0++</sup> | Seq. | y                  | y <sup>++</sup> | y <sup>*</sup> | y <sup>++</sup> | y <sup>0</sup> | y <sup>0++</sup> | #  |
|----|--------------------|-----------------|----------------|-----------------|-------------------|------------------|------|--------------------|-----------------|----------------|-----------------|----------------|------------------|----|
| 1  | 138.066188         | 69.536732       |                |                 |                   |                  | H    |                    |                 |                |                 |                |                  | 12 |
| 2  | <b>237.134602</b>  | 119.070939      |                |                 |                   |                  | V    | 1630.862141        | 815.934708      | 1613.835592    | 807.421434      | 1612.851576    | 806.929426       | 11 |
| 3  | 400.197931         | 200.602603      |                |                 |                   |                  | Y    | 1531.793727        | 766.400501      | 1514.767178    | 757.887227      | 1513.783162    | 757.395219       | 10 |
| 4  | 457.219395         | 229.113335      |                |                 |                   |                  | G    | 1368.730398        | 684.868837      | 1351.703849    | 676.355563      | 1350.719833    | 675.863554       | 9  |
| 5  | <b>586.261988</b>  | 293.634632      |                |                 | 568.251423        | 284.629349       | E    | 1311.708934        | 656.358105      | 1294.682385    | 647.844830      | 1293.698369    | 647.352822       | 8  |
| 6  | <b>699.346052</b>  | 350.176664      |                |                 | 681.335487        | 341.171382       | L    | 1182.666341        | 591.836808      | 1165.639792    | 583.323534      | 1164.655776    | 582.831526       | 7  |
| 7  | <b>814.372995</b>  | 407.690136      |                |                 | <b>796.362430</b> | 398.684853       | D    | <b>1069.582277</b> | 535.294776      | 1052.555728    | 526.781502      | 1051.571712    | 526.289494       | 6  |
| 8  | <b>913.441409</b>  | 457.224342      |                |                 | 895.430844        | 448.219060       | V    | 954.555334         | 477.781305      | 937.528785     | 469.268030      |                |                  | 5  |
| 9  | <b>1352.666735</b> | 676.837006      | 1335.640186    | 668.323731      | 1334.656170       | 667.831723       | Q    | <b>855.486920</b>  | 428.247098      | 838.460371     | 419.733823      |                |                  | 4  |
| 10 | <b>1465.750799</b> | 733.379037      | 1448.724250    | 724.865763      | 1447.740234       | 724.373755       | I    | <b>416.261594</b>  | 208.634435      | 399.235045     | 200.121160      |                |                  | 3  |
| 11 | 1593.809377        | 797.408326      | 1576.782828    | 788.895052      | 1575.798812       | 788.403044       | Q    | <b>303.177530</b>  | 152.092403      | 286.150981     | 143.579128      |                |                  | 2  |
| 12 |                    |                 |                |                 |                   |                  | R    | 175.118952         | 88.063114       | 158.092403     | 79.549839       |                |                  | 1  |

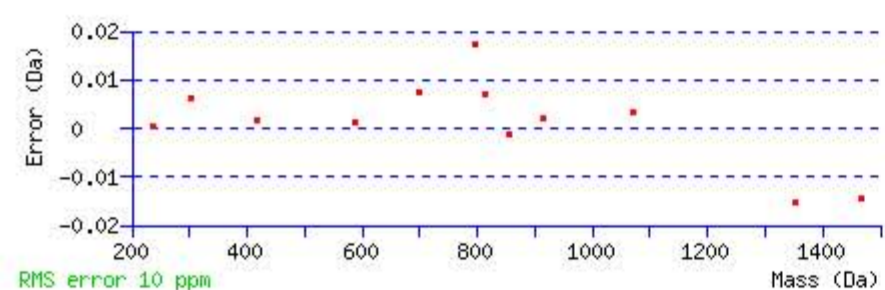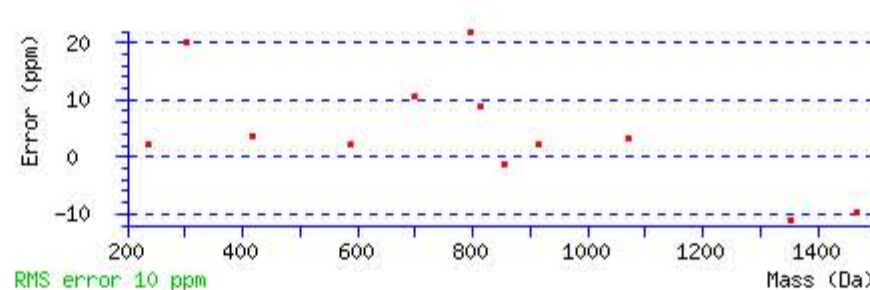

NCBI BLAST search of **HVYGELDVQIQR**

(Parameters: blastp, nr protein database, expect=20000, no filter, PAM30)

Other BLAST [web gateways](#)

All matches to this query

| Score | Mr(calc):   | Delta     | Sequence                       |
|-------|-------------|-----------|--------------------------------|
| 33.6  | 1766.913773 | 0.008749  | <a href="#">HVYGELDVQIQR</a>   |
| 14.3  | 1766.913773 | 0.008749  | <a href="#">HVYGELDVQIQR</a>   |
| 8.5   | 1766.946976 | -0.024454 | <a href="#">QDMARQLRK</a>      |
| 4.3   | 1766.946106 | -0.023584 | <a href="#">SQEQLRLQGER</a>    |
| 3.7   | 1766.934906 | -0.012384 | <a href="#">QITSPVSGINGDIR</a> |

Mascot: <http://www.matrixscience.com/>



# MASCOT SCIENCE Mascot Search Results

## Peptide View

MS/MS Fragmentation of **FQEGQEEER**

Found in **F13A\_HUMAN**, Coagulation factor XIII A chain OS=Homo sapiens GN=F13A1 PE=1 SV=4

Match to Query 47829: 1772.831472 from(591.951100,3+) rtinseconds(1838) index(77295)

Title: Locus:1.1.1.2854.9 File:"2013-07-02 CLN FXIII 60 min 1st FT.wiff"

Data file C:\Program Files (x86)\Matrix Science\Mascot Daemon\mgf\4 FXIII 60 min 1st\mascot\_daemon\_merge.mgf

Click mouse within plot area to zoom in by factor of two about that point

Or, Plot from  to  Da

Label all possible matches  Label matches used for scoring

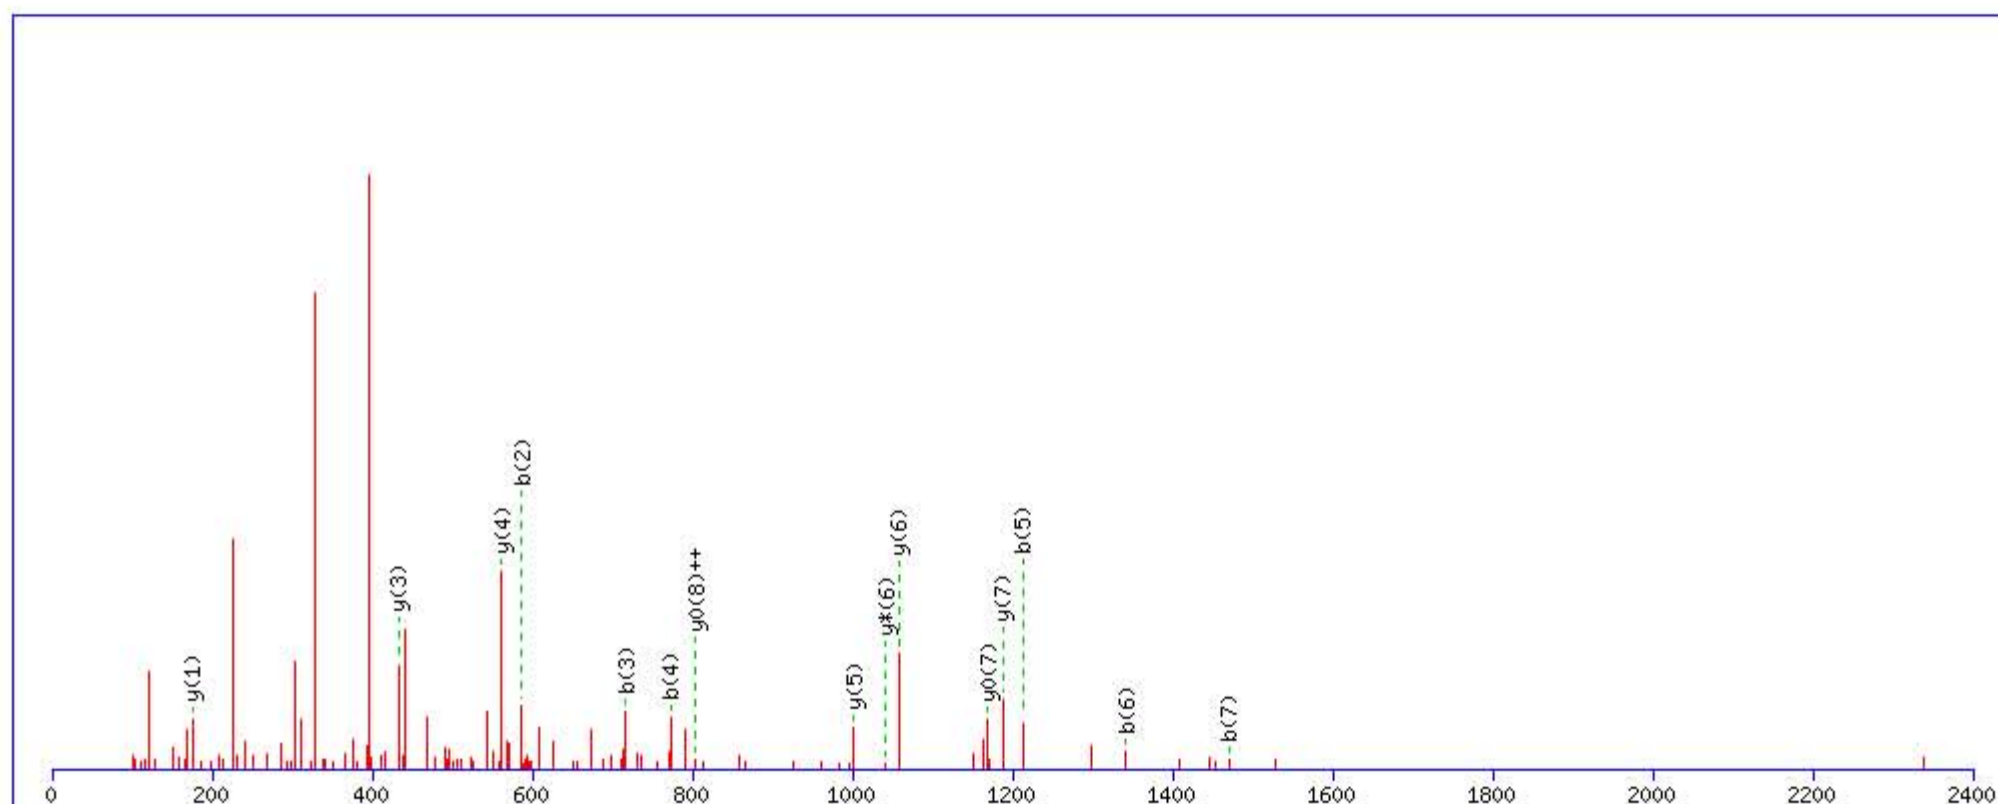

Monoisotopic mass of neutral peptide Mr(calc): 1772.822556

Fixed modifications: Carbamidomethyl (C) (apply to specified residues or termini only)

Variable modifications:

Q2 : Biotin:Thermo-21345 (Q)

Q5 : Biotin:Thermo-21345 (Q)

Ions Score: 30 Expect: 0.0029

Matches : 15/88 fragment ions using 28 most intense peaks [\(help\)](#)

| # | b                  | b <sup>++</sup> | b <sup>*</sup> | b <sup>*++</sup> | b <sup>0</sup> | b <sup>0++</sup> | Seq. | y                  | y <sup>++</sup> | y <sup>*</sup>     | y <sup>*++</sup> | y <sup>0</sup>     | y <sup>0++</sup>  | # |
|---|--------------------|-----------------|----------------|------------------|----------------|------------------|------|--------------------|-----------------|--------------------|------------------|--------------------|-------------------|---|
| 1 | 148.075690         | 74.541483       |                |                  |                |                  | F    |                    |                 |                    |                  |                    |                   | 9 |
| 2 | <b>587.301016</b>  | 294.154146      | 570.274467     | 285.640872       |                |                  | Q    | 1626.761440        | 813.884358      | 1609.734891        | 805.371084       | 1608.750875        | <b>804.879076</b> | 8 |
| 3 | <b>716.343609</b>  | 358.675443      | 699.317060     | 350.162168       | 698.333044     | 349.670160       | E    | <b>1187.536114</b> | 594.271695      | 1170.509565        | 585.758421       | <b>1169.525549</b> | 585.266413        | 7 |
| 4 | <b>773.365073</b>  | 387.186175      | 756.338524     | 378.672900       | 755.354508     | 378.180892       | G    | <b>1058.493521</b> | 529.750399      | <b>1041.466972</b> | 521.237124       | 1040.482956        | 520.745116        | 6 |
| 5 | <b>1212.590399</b> | 606.798837      | 1195.563850    | 598.285563       | 1194.579834    | 597.793555       | Q    | <b>1001.472057</b> | 501.239667      | 984.445508         | 492.726392       | 983.461492         | 492.234384        | 5 |
| 6 | <b>1341.632992</b> | 671.320134      | 1324.606443    | 662.806860       | 1323.622427    | 662.314852       | E    | <b>562.246731</b>  | 281.627004      | 545.220182         | 273.113729       | 544.236166         | 272.621721        | 4 |
| 7 | <b>1470.675585</b> | 735.841431      | 1453.649036    | 727.328156       | 1452.665020    | 726.836148       | E    | <b>433.204138</b>  | 217.105707      | 416.177589         | 208.592433       | 415.193573         | 208.100425        | 3 |
| 8 | 1599.718178        | 800.362727      | 1582.691629    | 791.849453       | 1581.707613    | 791.357445       | E    | 304.161545         | 152.584411      | 287.134996         | 144.071136       | 286.150980         | 143.579128        | 2 |
| 9 |                    |                 |                |                  |                |                  | R    | <b>175.118952</b>  | 88.063114       | 158.092403         | 79.549839        |                    |                   | 1 |

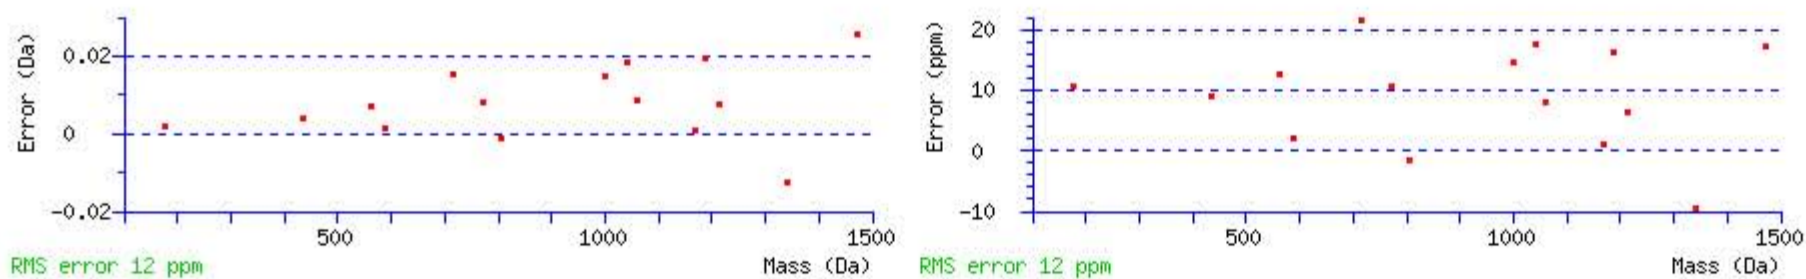

NCBI BLAST search of [FQEGQEEER](#)

(Parameters: blastp, nr protein database, expect=20000, no filter, PAM30)

Other BLAST [web gateways](#)

All matches to this query

| Score | Mr(calc):   | Delta    | Sequence                       |
|-------|-------------|----------|--------------------------------|
| 29.8  | 1772.822556 | 0.008916 | <a href="#">FQEGQEEER</a>      |
| 2.7   | 1772.828873 | 0.002599 | <a href="#">QAEQEATVAREEQR</a> |

Mascot: <http://www.matrixscience.com/>



# MASCOT Search Results

## Peptide View

MS/MS Fragmentation of **GTYPVPIVSELQSGK**

Found in **F13A\_HUMAN**, Coagulation factor XIII A chain OS=Homo sapiens GN=F13A1 PE=1 SV=4

Match to Query 52872: 1998.104142 from(667.041990,3+) rtinseconds(2729) index(46808)

Title: Locus:1.1.1.3233.10 File:"2013-07-02 CLN FXIII 60 min 1st F 3.wiff"

Data file C:\Program Files (x86)\Matrix Science\Mascot Daemon\mgf\4 FXIII 60 min 1st\mascot\_daemon\_merge.mgf

Click mouse within plot area to zoom in by factor of two about that point

Or, Plot from  to  Da

Label all possible matches  Label matches used for scoring

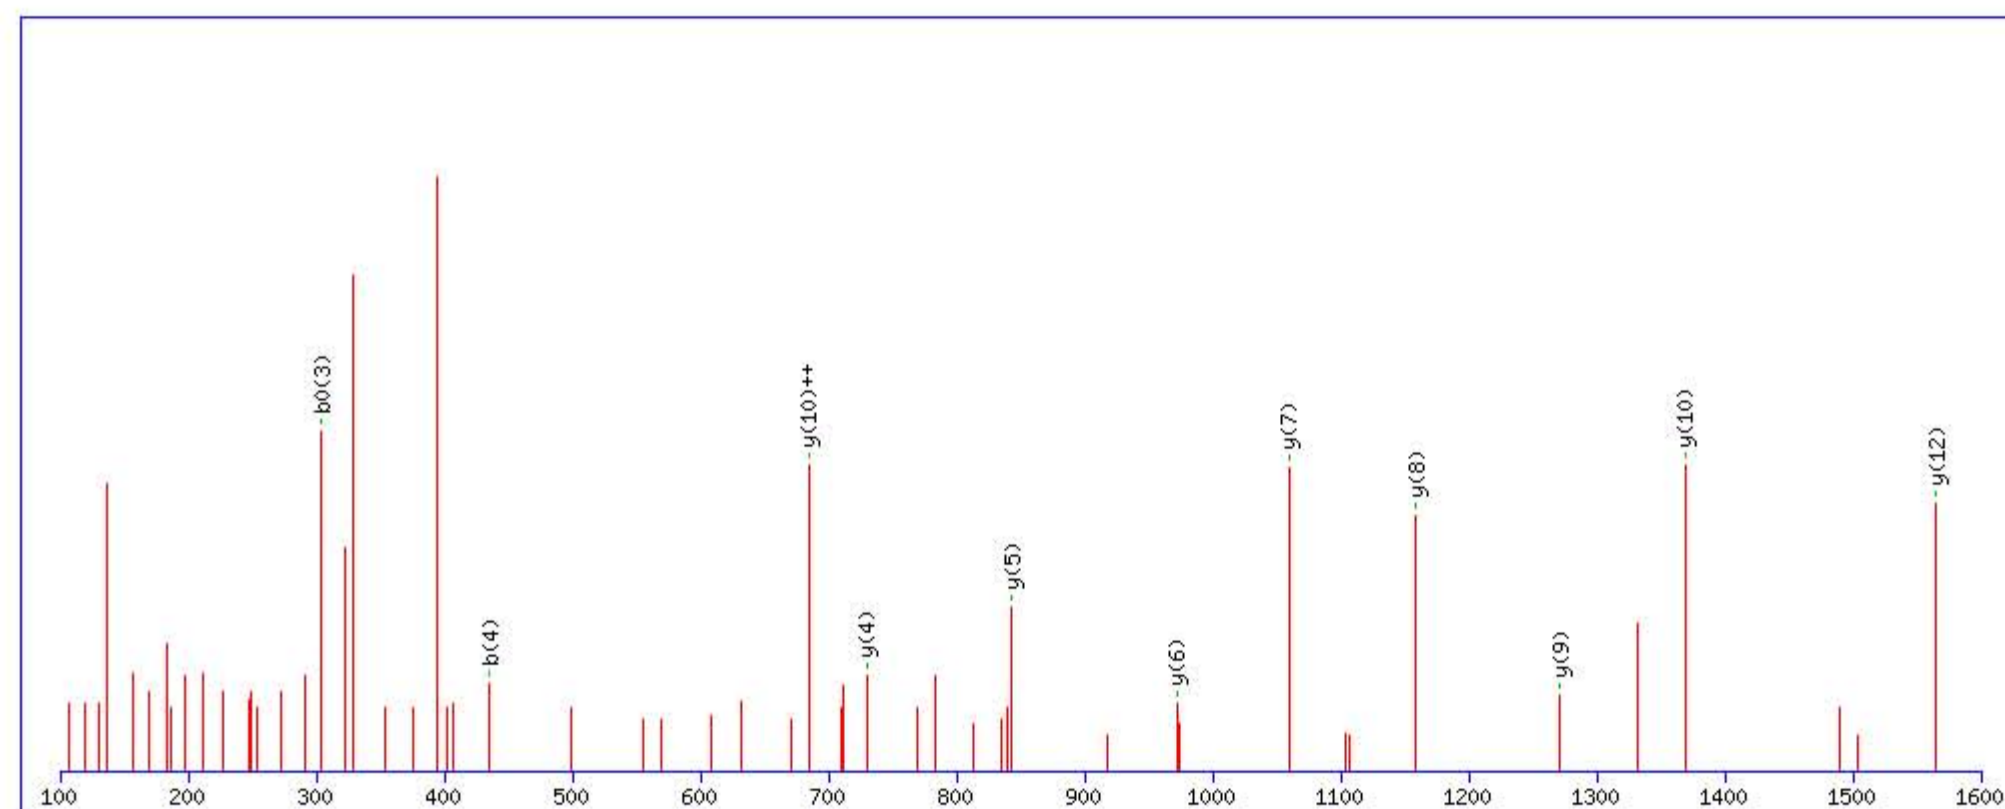

Monoisotopic mass of neutral peptide Mr(calc): 1998.085983

Fixed modifications: Carbamidomethyl (C) (apply to specified residues or termini only)

Variable modifications:

Q13 : Biotin:Thermo-21345 (Q)

Ions Score: 48 Expect: 3.3e-005

Matches : 11/150 fragment ions using 15 most intense peaks [\(help\)](#)

| #  | b                 | b <sup>++</sup> | b <sup>*</sup> | b <sup>*++</sup> | b <sup>0</sup>    | b <sup>0++</sup> | Seq.     | y                  | y <sup>++</sup>   | y <sup>*</sup> | y <sup>*++</sup> | y <sup>0</sup> | y <sup>0++</sup> | #  |
|----|-------------------|-----------------|----------------|------------------|-------------------|------------------|----------|--------------------|-------------------|----------------|------------------|----------------|------------------|----|
| 1  | 58.028740         | 29.518008       |                |                  |                   |                  | <b>G</b> |                    |                   |                |                  |                |                  | 16 |
| 2  | 159.076419        | 80.041847       |                |                  | 141.065854        | 71.036565        | <b>T</b> | 1942.071799        | 971.539538        | 1925.045250    | 963.026263       | 1924.061234    | 962.534255       | 15 |
| 3  | 322.139748        | 161.573512      |                |                  | <b>304.129183</b> | 152.568230       | <b>Y</b> | 1841.024120        | 921.015698        | 1823.997571    | 912.502424       | 1823.013555    | 912.010416       | 14 |
| 4  | <b>435.223812</b> | 218.115544      |                |                  | 417.213247        | 209.110262       | <b>I</b> | 1677.960791        | 839.484034        | 1660.934242    | 830.970759       | 1659.950226    | 830.478751       | 13 |
| 5  | 532.276576        | 266.641926      |                |                  | 514.266011        | 257.636644       | <b>P</b> | <b>1564.876727</b> | 782.942002        | 1547.850178    | 774.428727       | 1546.866162    | 773.936719       | 12 |
| 6  | 631.344990        | 316.176133      |                |                  | 613.334425        | 307.170851       | <b>V</b> | 1467.823963        | 734.415620        | 1450.797414    | 725.902345       | 1449.813398    | 725.410337       | 11 |
| 7  | 728.397754        | 364.702515      |                |                  | 710.387189        | 355.697233       | <b>P</b> | <b>1368.755549</b> | <b>684.881413</b> | 1351.729000    | 676.368138       | 1350.744984    | 675.876130       | 10 |
| 8  | 841.481818        | 421.244547      |                |                  | 823.471253        | 412.239265       | <b>I</b> | <b>1271.702785</b> | 636.355031        | 1254.676236    | 627.841756       | 1253.692220    | 627.349748       | 9  |
| 9  | 940.550232        | 470.778754      |                |                  | 922.539667        | 461.773472       | <b>V</b> | <b>1158.618721</b> | 579.812999        | 1141.592172    | 571.299724       | 1140.608156    | 570.807716       | 8  |
| 10 | 1027.582260       | 514.294768      |                |                  | 1009.571695       | 505.289486       | <b>S</b> | <b>1059.550307</b> | 530.278792        | 1042.523758    | 521.765517       | 1041.539742    | 521.273509       | 7  |
| 11 | 1156.624853       | 578.816065      |                |                  | 1138.614288       | 569.810782       | <b>E</b> | <b>972.518279</b>  | 486.762777        | 955.491730     | 478.249503       | 954.507714     | 477.757495       | 6  |
| 12 | 1269.708917       | 635.358096      |                |                  | 1251.698352       | 626.352814       | <b>L</b> | <b>843.475686</b>  | 422.241481        | 826.449137     | 413.728207       | 825.465121     | 413.236199       | 5  |
| 13 | 1708.934243       | 854.970759      | 1691.907694    | 846.457485       | 1690.923678       | 845.965477       | <b>Q</b> | <b>730.391622</b>  | 365.699449        | 713.365073     | 357.186175       | 712.381057     | 356.694167       | 4  |
| 14 | 1795.966271       | 898.486774      | 1778.939722    | 889.973499       | 1777.955706       | 889.481491       | <b>S</b> | 291.166296         | 146.086786        | 274.139747     | 137.573512       | 273.155731     | 137.081504       | 3  |
| 15 | 1852.987735       | 926.997505      | 1835.961186    | 918.484231       | 1834.977170       | 917.992223       | <b>G</b> | 204.134268         | 102.570772        | 187.107719     | 94.057497        |                |                  | 2  |
| 16 |                   |                 |                |                  |                   |                  | <b>K</b> | 147.112804         | 74.060040         | 130.086255     | 65.546765        |                |                  | 1  |

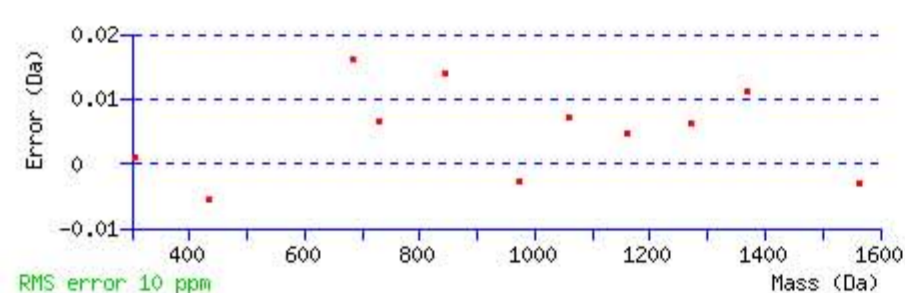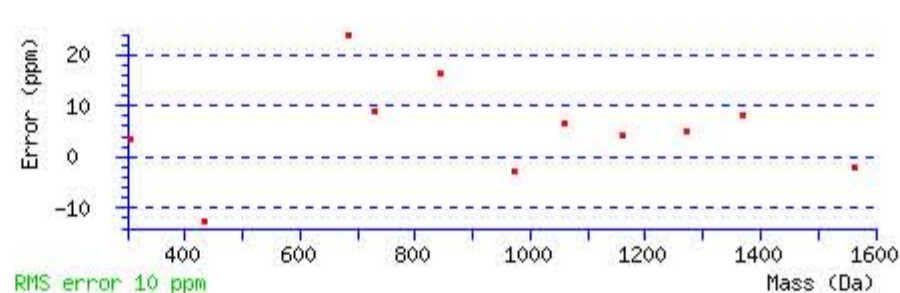

NCBI BLAST search of **GTYPVPIVSELQSGK**

(Parameters: blastp, nr protein database, expect=20000, no filter, PAM30)

Other BLAST [web gateways](#)

All matches to this query

| Score | Mr(calc):   | Delta    | Sequence                            |
|-------|-------------|----------|-------------------------------------|
| 47.9  | 1998.085983 | 0.018159 | <a href="#">GTYPVPIVSELQSGK</a>     |
| 0.1   | 1998.099731 | 0.004411 | <a href="#">GDEVVVELVENGKKVTVGK</a> |

Mascot: <http://www.matrixscience.com/>



# MASCOT Search Results

## Peptide View

MS/MS Fragmentation of **GVNLQEFLNVTSVHLFK**  
 Found in **F13A\_HUMAN**, Coagulation factor XIII A chain OS=Homo sapiens GN=F13A1 PE=1 SV=4

Match to Query 59447: 2255.238642 from(752.753490,3+) rtinseconds(2967) index(48700)  
 Title: Locus:1.1.1.3314.10 File:"2013-07-02 CLN FXIII 60 min 1st F 3.wiff"  
 Data file C:\Program Files (x86)\Matrix Science\Mascot Daemon\mgf\4 FXIII 60 min 1st\mascot\_daemon\_merge.mgf

Click mouse within plot area to zoom in by factor of two about that point

Or, Plot from  to  Da

Label all possible matches  Label matches used for scoring

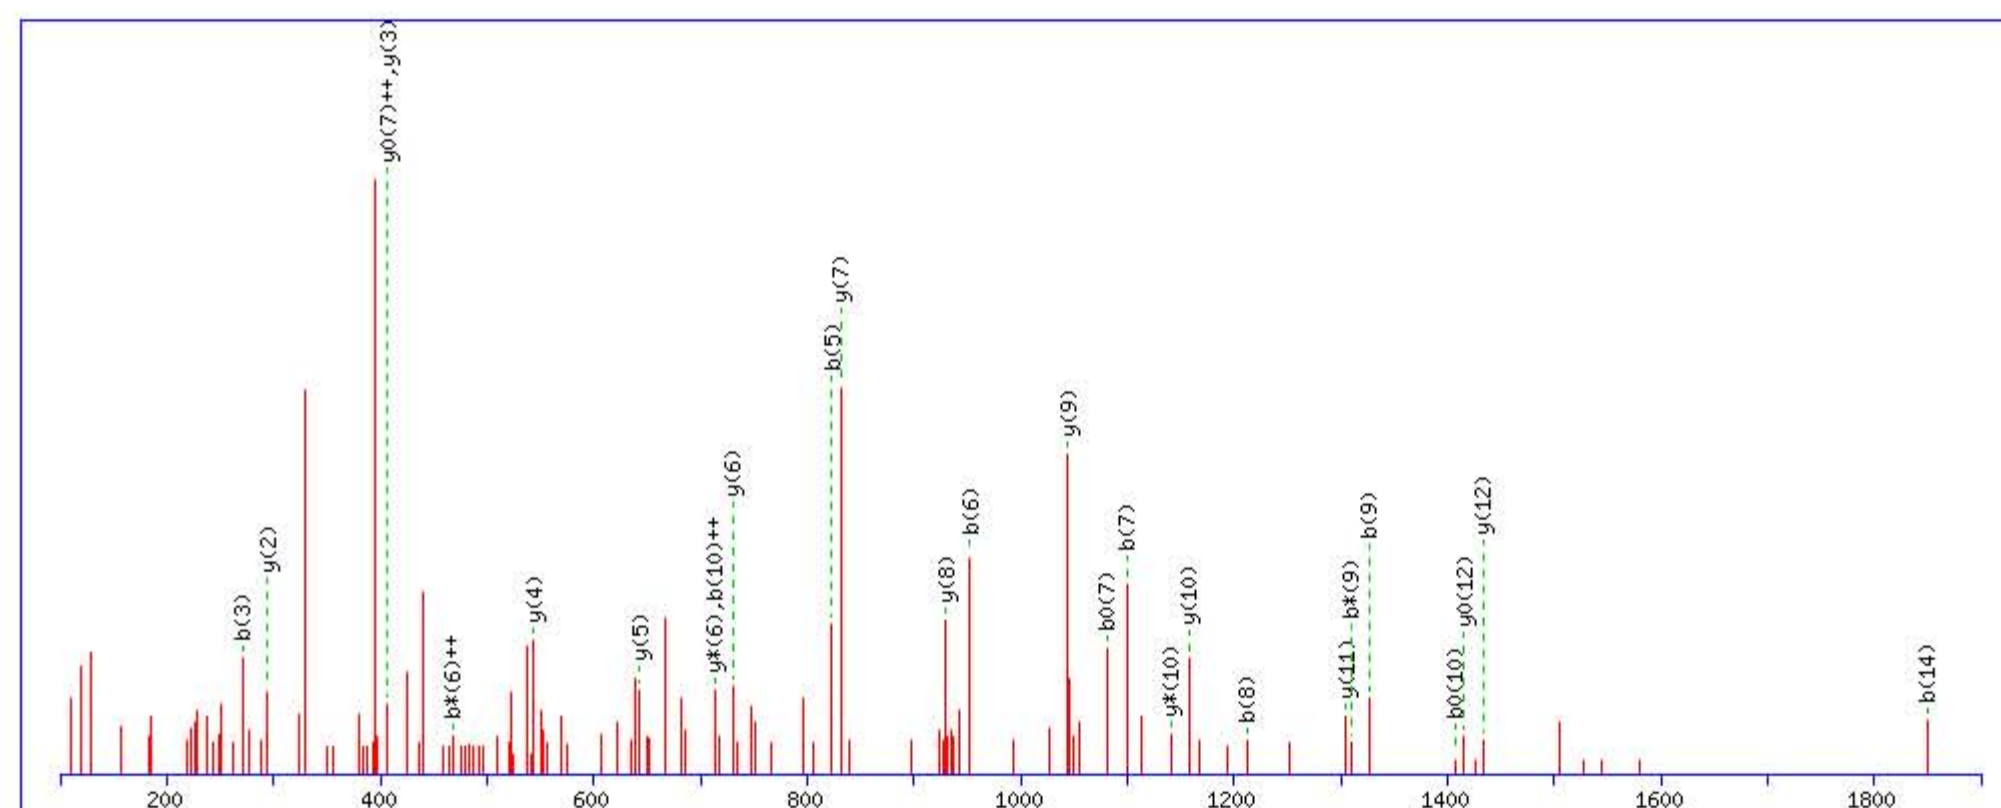

Monoisotopic mass of neutral peptide  $M_r(\text{calc})$ : 2255.213654  
 Fixed modifications: Carbamidomethyl (C) (apply to specified residues or termini only)  
 Variable modifications:  
 Q5 : Biotin:Thermo-21345 (Q)  
 Ions Score: 61 Expect: 1.1e-005  
 Matches : 27/168 fragment ions using 45 most intense peaks ([help](#))

| #  | b                  | b <sup>++</sup>   | b <sup>*</sup>     | b <sup>*++</sup>  | b <sup>0</sup>     | b <sup>0++</sup> | Seq. | y                  | y <sup>++</sup> | y <sup>*</sup>     | y <sup>*++</sup> | y <sup>0</sup>     | y <sup>0++</sup>  | #  |
|----|--------------------|-------------------|--------------------|-------------------|--------------------|------------------|------|--------------------|-----------------|--------------------|------------------|--------------------|-------------------|----|
| 1  | 58.028740          | 29.518008         |                    |                   |                    |                  | G    |                    |                 |                    |                  |                    |                   | 17 |
| 2  | 157.097154         | 79.052215         |                    |                   |                    |                  | V    | 2199.199458        | 1100.103367     | 2182.172909        | 1091.590092      | 2181.188893        | 1091.098084       | 16 |
| 3  | <b>271.140081</b>  | 136.073679        | 254.113532         | 127.560404        |                    |                  | N    | 2100.131044        | 1050.569160     | 2083.104495        | 1042.055885      | 2082.120479        | 1041.563877       | 15 |
| 4  | 384.224145         | 192.615711        | 367.197596         | 184.102436        |                    |                  | L    | 1986.088117        | 993.547697      | 1969.061568        | 985.034422       | 1968.077552        | 984.542414        | 14 |
| 5  | <b>823.449471</b>  | 412.228374        | 806.422922         | 403.715099        |                    |                  | Q    | 1873.004053        | 937.005665      | 1855.977504        | 928.492390       | 1854.993488        | 928.000382        | 13 |
| 6  | <b>952.492064</b>  | 476.749670        | 935.465515         | <b>468.236396</b> | 934.481499         | 467.744388       | E    | <b>1433.778727</b> | 717.393002      | 1416.752178        | 708.879727       | <b>1415.768162</b> | 708.387719        | 12 |
| 7  | <b>1099.560478</b> | 550.283877        | 1082.533929        | 541.770603        | <b>1081.549913</b> | 541.278595       | F    | <b>1304.736134</b> | 652.871705      | 1287.709585        | 644.358431       | 1286.725569        | 643.866423        | 11 |
| 8  | <b>1212.644542</b> | 606.825909        | 1195.617993        | 598.312635        | 1194.633977        | 597.820627       | L    | <b>1157.667720</b> | 579.337498      | <b>1140.641171</b> | 570.824224       | 1139.657155        | 570.332216        | 10 |
| 9  | <b>1326.687469</b> | 663.847373        | <b>1309.660920</b> | 655.334098        | 1308.676904        | 654.842090       | N    | <b>1044.583656</b> | 522.795466      | 1027.557107        | 514.282192       | 1026.573091        | 513.790184        | 9  |
| 10 | 1425.755883        | <b>713.381580</b> | 1408.729334        | 704.868305        | <b>1407.745318</b> | 704.376297       | V    | <b>930.540729</b>  | 465.774003      | 913.514180         | 457.260728       | 912.530164         | 456.768720        | 8  |
| 11 | 1526.803562        | 763.905419        | 1509.777013        | 755.392145        | 1508.792997        | 754.900137       | T    | <b>831.472315</b>  | 416.239796      | 814.445766         | 407.726521       | 813.461750         | <b>407.234513</b> | 7  |
| 12 | 1613.835590        | 807.421433        | 1596.809041        | 798.908159        | 1595.825025        | 798.416151       | S    | <b>730.424636</b>  | 365.715956      | <b>713.398087</b>  | 357.202682       | 712.414071         | 356.710674        | 6  |
| 13 | 1712.904004        | 856.955640        | 1695.877455        | 848.442366        | 1694.893439        | 847.950358       | V    | <b>643.392608</b>  | 322.199942      | 626.366059         | 313.686668       |                    |                   | 5  |
| 14 | <b>1849.962916</b> | 925.485096        | 1832.936367        | 916.971822        | 1831.952351        | 916.479814       | H    | <b>544.324194</b>  | 272.665735      | 527.297645         | 264.152461       |                    |                   | 4  |
| 15 | 1963.046980        | 982.027128        | 1946.020431        | 973.513854        | 1945.036415        | 973.021846       | L    | <b>407.265282</b>  | 204.136279      | 390.238733         | 195.623004       |                    |                   | 3  |
| 16 | 2110.115394        | 1055.561335       | 2093.088845        | 1047.048060       | 2092.104829        | 1046.556052      | F    | <b>294.181218</b>  | 147.594247      | 277.154669         | 139.080973       |                    |                   | 2  |
| 17 |                    |                   |                    |                   |                    |                  | K    | 147.112804         | 74.060040       | 130.086255         | 65.546765        |                    |                   | 1  |

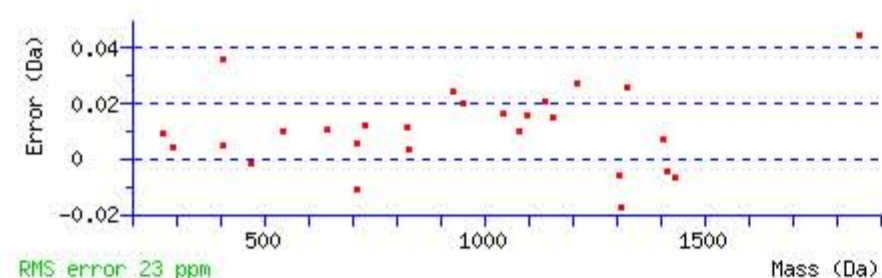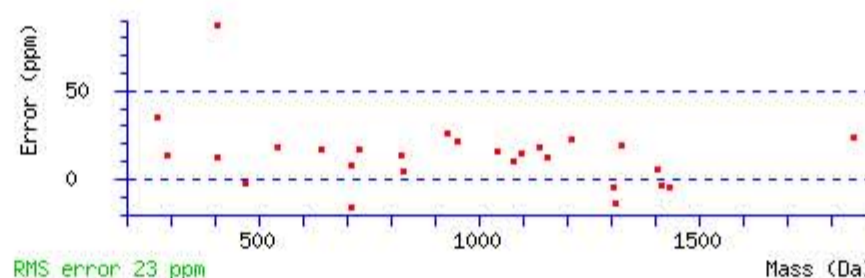

NCBI BLAST search of [GVNLQEFLNVTSVHLFK](#)  
 (Parameters: blastp, nr protein database, expect=20000, no filter, PAM30)  
 Other BLAST [web gateways](#)

## All matches to this query

| Score | $M_r(\text{calc})$ : | Delta    | Sequence                          |
|-------|----------------------|----------|-----------------------------------|
| 61.4  | 2255.213654          | 0.024988 | <a href="#">GVNLQEFLNVTSVHLFK</a> |



# Mascot Search Results

## Peptide View

MS/MS Fragmentation of **AVPPNNSNAEDDLPTVELQGVVPR**

Found in **F13A\_HUMAN**, Coagulation factor XIII A chain OS=Homo sapiens GN=F13A1 PE=1 SV=4

Match to Query 70682: 2912.508016 from(729.134280,4+) rtinseconds(2456) index(9982)

Title: Locus:1.1.1.2987.15 File:"2013-07-02 CLN FXIII 60 min 1st F 1.wiff"

Data file C:\Program Files (x86)\Matrix Science\Mascot Daemon\mgf4 FXIII 60 min 1st\mascot\_daemon\_merge.mgf

Click mouse within plot area to zoom in by factor of two about that point

Or, Plot from  to  Da

Label all possible matches  Label matches used for scoring

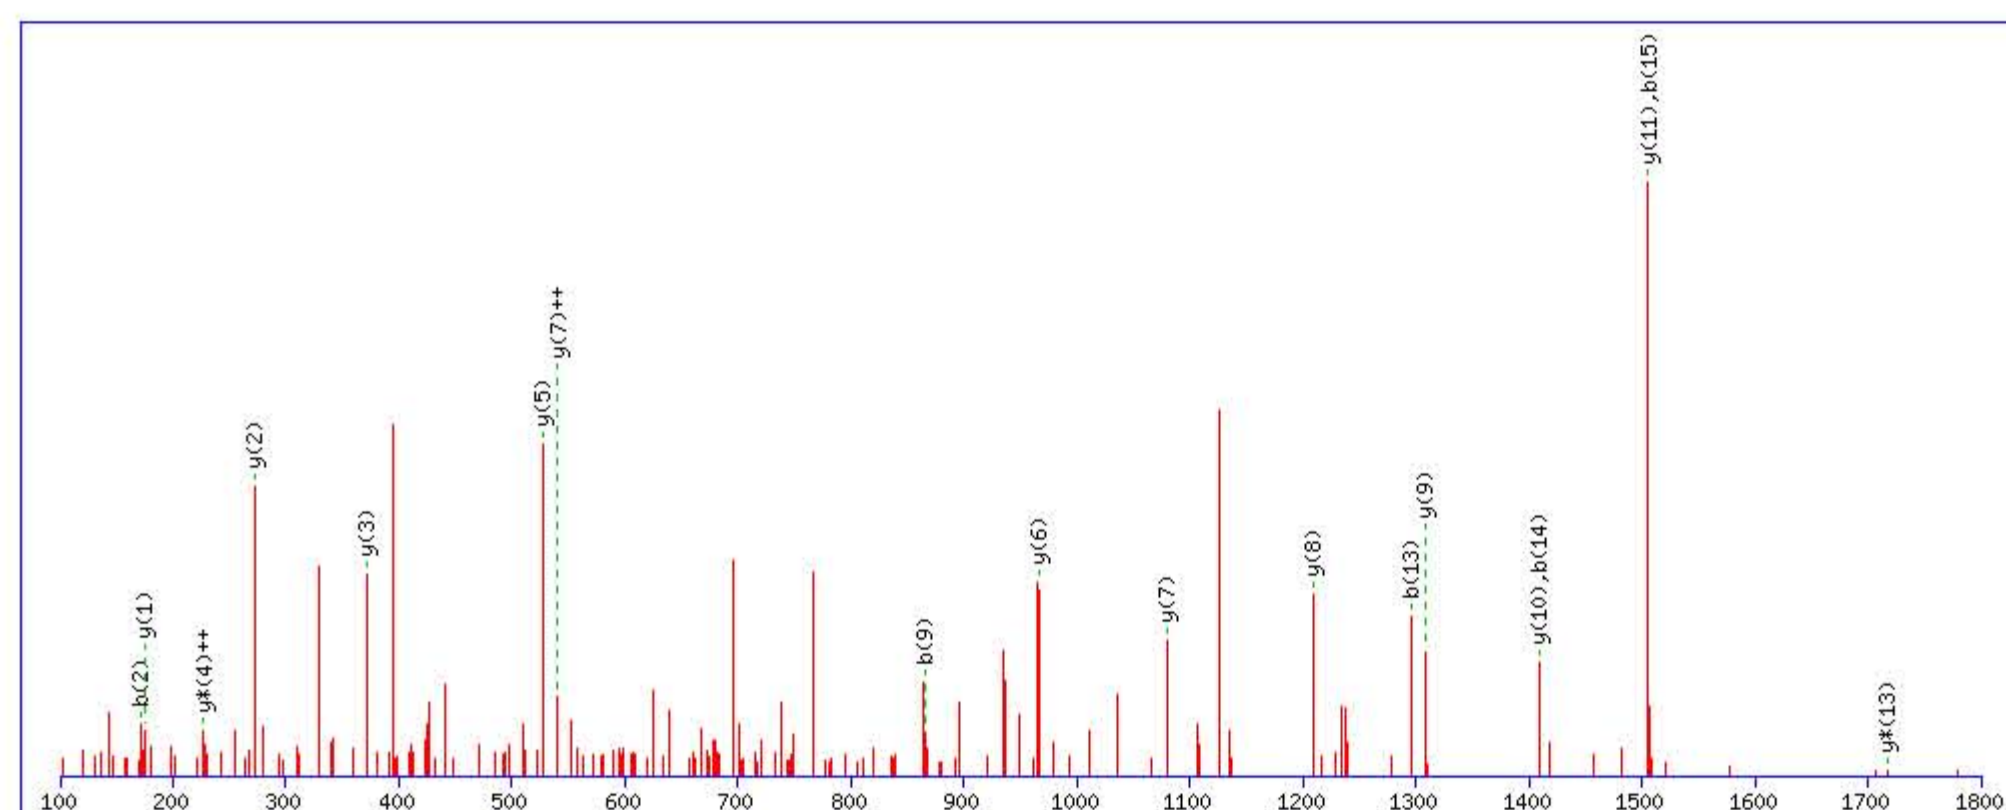

Monoisotopic mass of neutral peptide Mr(calc): 2912.470200

Fixed modifications: Carbamidomethyl (C) (apply to specified residues or termini only)

Variable modifications:

Q20 : Biotin:Thermo-21345 (Q)

Ions Score: 30 Expect: 0.027

Matches : 18/254 fragment ions using 47 most intense peaks [\(help\)](#)

| #  | b                  | b <sup>++</sup> | b <sup>+</sup> | b <sup>+++</sup> | b <sup>0</sup> | b <sup>0++</sup> | Seq. | y                  | y <sup>++</sup>   | y <sup>+</sup>     | y <sup>+++</sup>  | y <sup>0</sup> | y <sup>0++</sup> | #  |
|----|--------------------|-----------------|----------------|------------------|----------------|------------------|------|--------------------|-------------------|--------------------|-------------------|----------------|------------------|----|
| 1  | 72.044390          | 36.525833       |                |                  |                |                  | A    |                    |                   |                    |                   |                |                  | 25 |
| 2  | <b>171.112804</b>  | 86.060040       |                |                  |                |                  | V    | 2842.440370        | 1421.723823       | 2825.413821        | 1413.210548       | 2824.429805    | 1412.718540      | 24 |
| 3  | 268.165568         | 134.586422      |                |                  |                |                  | P    | 2743.371956        | 1372.189616       | 2726.345407        | 1363.676341       | 2725.361391    | 1363.184333      | 23 |
| 4  | 365.218332         | 183.112804      |                |                  |                |                  | P    | 2646.319192        | 1323.663234       | 2629.292643        | 1315.149959       | 2628.308627    | 1314.657951      | 22 |
| 5  | 479.261259         | 240.134267      | 462.234710     | 231.620993       |                |                  | N    | 2549.266428        | 1275.136852       | 2532.239879        | 1266.623577       | 2531.255863    | 1266.131569      | 21 |
| 6  | 593.304186         | 297.155731      | 576.277637     | 288.642457       |                |                  | N    | 2435.223501        | 1218.115388       | 2418.196952        | 1209.602114       | 2417.212936    | 1209.110106      | 20 |
| 7  | 680.336214         | 340.671745      | 663.309665     | 332.158471       | 662.325649     | 331.666463       | S    | 2321.180574        | 1161.093925       | 2304.154025        | 1152.580650       | 2303.170009    | 1152.088642      | 19 |
| 8  | 794.379141         | 397.693209      | 777.352592     | 389.179934       | 776.368576     | 388.687926       | N    | 2234.148546        | 1117.577911       | 2217.121997        | 1109.064636       | 2216.137981    | 1108.572628      | 18 |
| 9  | <b>865.416255</b>  | 433.211766      | 848.389706     | 424.698491       | 847.405690     | 424.206483       | A    | 2120.105619        | 1060.556447       | 2103.079070        | 1052.043173       | 2102.095054    | 1051.551165      | 17 |
| 10 | 936.453369         | 468.730323      | 919.426820     | 460.217048       | 918.442804     | 459.725040       | A    | 2049.068505        | 1025.037890       | 2032.041956        | 1016.524616       | 2031.057940    | 1016.032608      | 16 |
| 11 | 1065.495962        | 533.251619      | 1048.469413    | 524.738345       | 1047.485397    | 524.246336       | E    | 1978.031391        | 989.519333        | 1961.004842        | 981.006059        | 1960.020826    | 980.514051       | 15 |
| 12 | 1180.522905        | 590.765091      | 1163.496356    | 582.251816       | 1162.512340    | 581.759808       | D    | 1848.988798        | 924.998037        | 1831.962249        | 916.484762        | 1830.978233    | 915.992754       | 14 |
| 13 | <b>1295.549848</b> | 648.278562      | 1278.523299    | 639.765288       | 1277.539283    | 639.273280       | D    | 1733.961855        | 867.484565        | <b>1716.935306</b> | 858.971291        | 1715.951290    | 858.479283       | 13 |
| 14 | <b>1408.633912</b> | 704.820594      | 1391.607363    | 696.307320       | 1390.623347    | 695.815312       | L    | 1618.934912        | 809.971094        | 1601.908363        | 801.457819        | 1600.924347    | 800.965811       | 12 |
| 15 | <b>1505.686676</b> | 753.346976      | 1488.660127    | 744.833702       | 1487.676111    | 744.341694       | P    | <b>1505.850848</b> | 753.429062        | 1488.824299        | 744.915787        | 1487.840283    | 744.423779       | 11 |
| 16 | 1606.734355        | 803.870816      | 1589.707806    | 795.357541       | 1588.723790    | 794.865533       | T    | <b>1408.798084</b> | 704.902680        | 1391.771535        | 696.389405        | 1390.787519    | 695.897397       | 10 |
| 17 | 1705.802769        | 853.405023      | 1688.776220    | 844.891748       | 1687.792204    | 844.399740       | V    | <b>1307.750405</b> | 654.378840        | 1290.723856        | 645.865566        | 1289.739840    | 645.373558       | 9  |
| 18 | 1834.845362        | 917.926319      | 1817.818813    | 909.413045       | 1816.834797    | 908.921037       | E    | <b>1208.681991</b> | 604.844633        | 1191.655442        | 596.331359        | 1190.671426    | 595.839351       | 8  |
| 19 | 1947.929426        | 974.468351      | 1930.902877    | 965.955077       | 1929.918861    | 965.463069       | L    | <b>1079.639398</b> | <b>540.323337</b> | 1062.612849        | 531.810062        |                |                  | 7  |
| 20 | 2387.154752        | 1194.081014     | 2370.128203    | 1185.567739      | 2369.144187    | 1185.075731      | Q    | <b>966.555334</b>  | 483.781305        | 949.528785         | 475.268030        |                |                  | 6  |
| 21 | 2444.176216        | 1222.591746     | 2427.149667    | 1214.078471      | 2426.165651    | 1213.586463      | G    | <b>527.330008</b>  | 264.168642        | 510.303459         | 255.655367        |                |                  | 5  |
| 22 | 2543.244630        | 1272.125953     | 2526.218081    | 1263.612678      | 2525.234065    | 1263.120670      | V    | 470.308544         | 235.657910        | 453.281995         | <b>227.144635</b> |                |                  | 4  |
| 23 | 2642.313044        | 1321.660160     | 2625.286495    | 1313.146885      | 2624.302479    | 1312.654877      | V    | <b>371.240130</b>  | 186.123703        | 354.213581         | 177.610428        |                |                  | 3  |
| 24 | 2739.365808        | 1370.186542     | 2722.339259    | 1361.673267      | 2721.355243    | 1361.181259      | P    | <b>272.171716</b>  | 136.589496        | 255.145167         | 128.076221        |                |                  | 2  |
| 25 |                    |                 |                |                  |                |                  | R    | <b>175.118952</b>  | 88.063114         | 158.092403         | 79.549839         |                |                  | 1  |

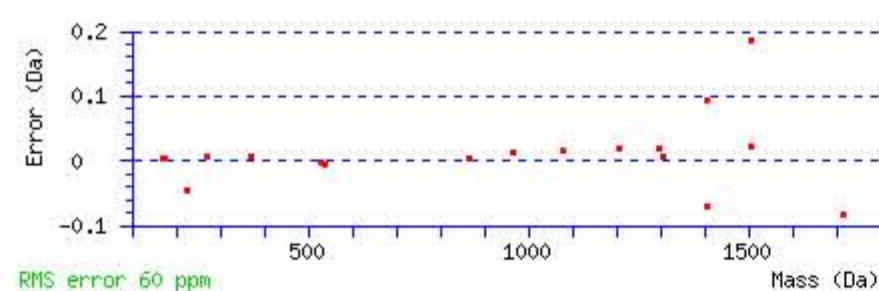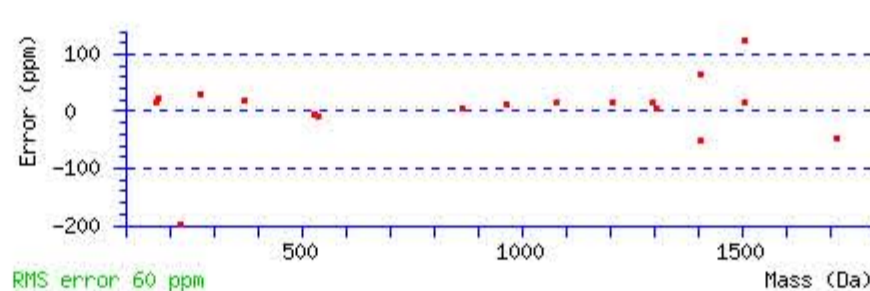

NCBI BLAST search of [AVPPNNSNAEDDLPTVELQGVVPR](#)

(Parameters: blastp, nr protein database, expect=20000, no filter, PAM30)

Other BLAST [web gateways](#)

All matches to this query

| Score | Mr(calc):   | Delta    | Sequence                                 |
|-------|-------------|----------|------------------------------------------|
| 29.9  | 2912.470200 | 0.037816 | <a href="#">AVPPNNSNAEDDLPTVELQGVVPR</a> |

Mascot: <http://www.matrixscience.com/>



# MASCOT Search Results

## Peptide View

MS/MS Fragmentation of **TIAVLLDDILQR**

Found in **CC126\_HUMAN**, Coiled-coil domain-containing protein 126 OS=Homo sapiens GN=CCDC126 PE=2 SV=2

Match to Query 23729: 1679.988672 from(561.003500,3+) rtinseconds(3072) index(13910)

Title: Locus:1.1.1.3199.5 File:"2013-07-02 CLN FXIII 60 min 1st F 1.wiff"

Data file C:\Program Files (x86)\Matrix Science\Mascot Daemon\mgf4 FXIII 60 min 1st\mascot\_daemon\_merge.mgf

Click mouse within plot area to zoom in by factor of two about that point

Or, Plot from  to  Da

Label all possible matches  Label matches used for scoring

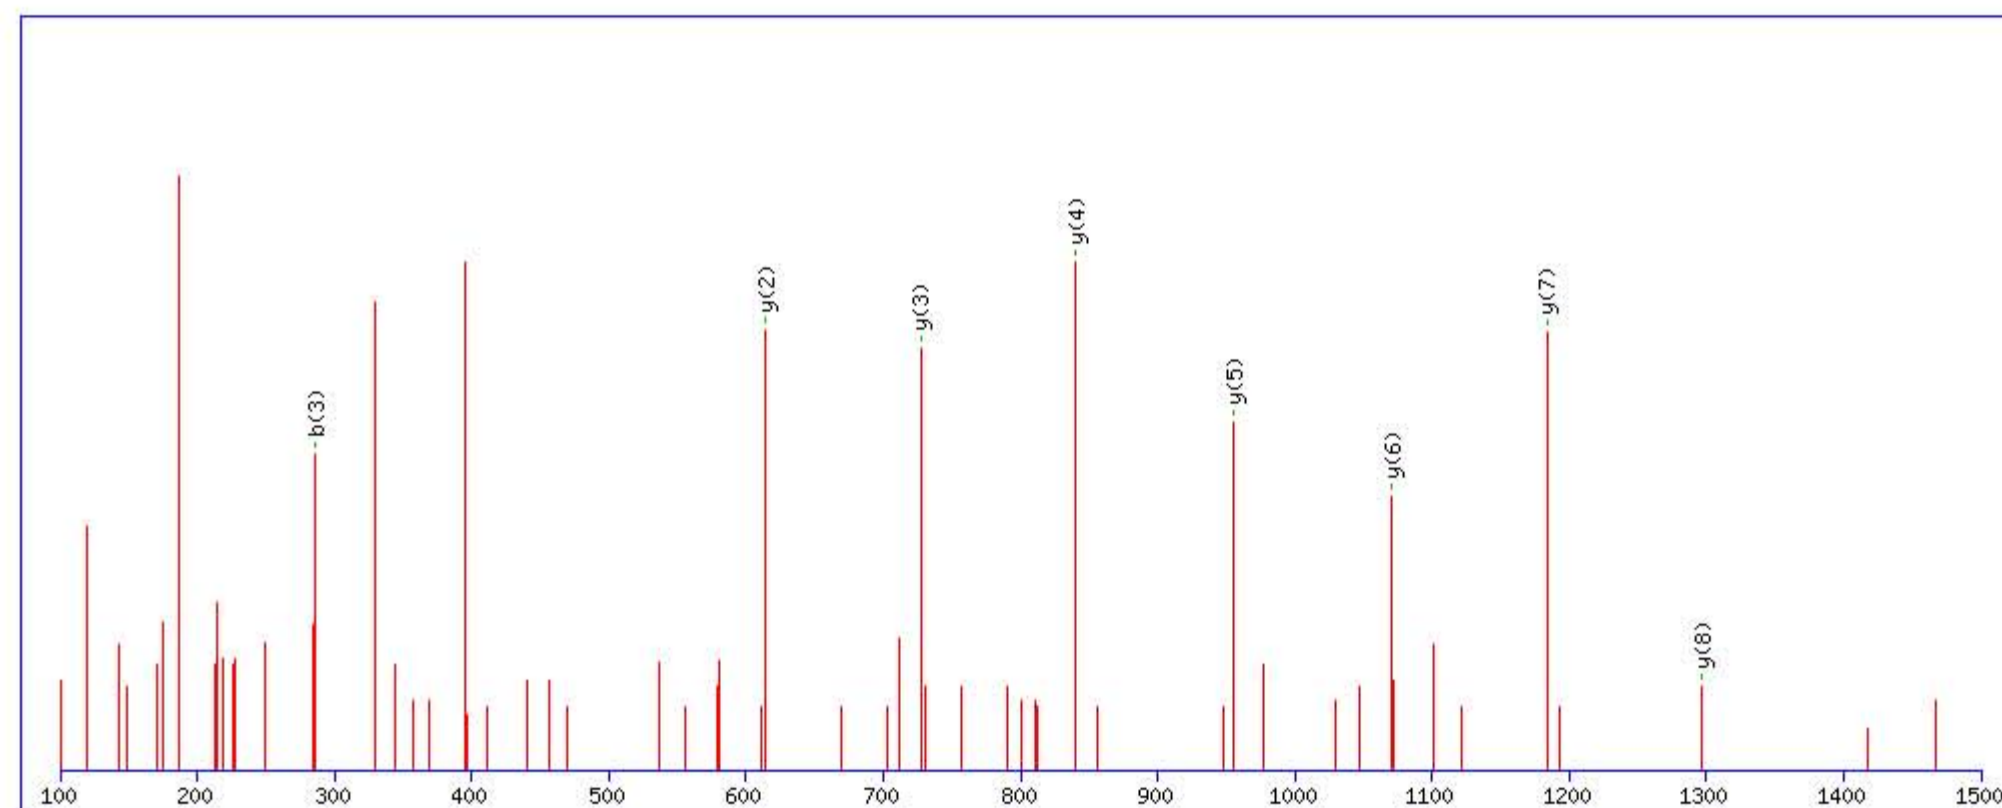

Monoisotopic mass of neutral peptide  $M_r(\text{calc})$ : 1679.964401

Fixed modifications: Carbamidomethyl (C) (apply to specified residues or termini only)

Variable modifications:

Q11 : Biotin:Thermo-21345 (Q)

Ions Score: 46 Expect: 0.00033

Matches : 8/104 fragment ions using 13 most intense peaks [\(help\)](#)

| #  | b                 | b <sup>++</sup> | b <sup>+</sup> | b <sup>*++</sup> | b <sup>0</sup> | b <sup>0++</sup> | Seq. | y                  | y <sup>++</sup> | y <sup>+</sup> | y <sup>*++</sup> | y <sup>0</sup> | y <sup>0++</sup> | #  |
|----|-------------------|-----------------|----------------|------------------|----------------|------------------|------|--------------------|-----------------|----------------|------------------|----------------|------------------|----|
| 1  | 102.054955        | 51.531116       |                |                  | 84.044390      | 42.525833        | T    |                    |                 |                |                  |                |                  | 12 |
| 2  | 215.139019        | 108.073147      |                |                  | 197.128454     | 99.067865        | I    | 1579.924012        | 790.465644      | 1562.897463    | 781.952370       | 1561.913447    | 781.460361       | 11 |
| 3  | <b>286.176133</b> | 143.591704      |                |                  | 268.165568     | 134.586422       | A    | 1466.839948        | 733.923612      | 1449.813399    | 725.410338       | 1448.829383    | 724.918330       | 10 |
| 4  | 385.244547        | 193.125912      |                |                  | 367.233982     | 184.120629       | V    | 1395.802834        | 698.405055      | 1378.776285    | 689.891780       | 1377.792269    | 689.399772       | 9  |
| 5  | 498.328611        | 249.667944      |                |                  | 480.318046     | 240.662661       | L    | <b>1296.734420</b> | 648.870848      | 1279.707871    | 640.357574       | 1278.723855    | 639.865566       | 8  |
| 6  | 611.412675        | 306.209976      |                |                  | 593.402110     | 297.204693       | L    | <b>1183.650356</b> | 592.328816      | 1166.623807    | 583.815541       | 1165.639791    | 583.323533       | 7  |
| 7  | 726.439618        | 363.723447      |                |                  | 708.429053     | 354.718165       | D    | <b>1070.566292</b> | 535.786784      | 1053.539743    | 527.273510       | 1052.555727    | 526.781501       | 6  |
| 8  | 841.466561        | 421.236919      |                |                  | 823.455996     | 412.231636       | D    | <b>955.539349</b>  | 478.273313      | 938.512800     | 469.760038       | 937.528784     | 469.268030       | 5  |
| 9  | 954.550625        | 477.778951      |                |                  | 936.540060     | 468.773668       | I    | <b>840.512406</b>  | 420.759841      | 823.485857     | 412.246567       |                |                  | 4  |
| 10 | 1067.634689       | 534.320983      |                |                  | 1049.624124    | 525.315700       | L    | <b>727.428342</b>  | 364.217809      | 710.401793     | 355.704535       |                |                  | 3  |
| 11 | 1506.860015       | 753.933646      | 1489.833466    | 745.420371       | 1488.849450    | 744.928363       | Q    | <b>614.344278</b>  | 307.675777      | 597.317729     | 299.162503       |                |                  | 2  |
| 12 |                   |                 |                |                  |                |                  | R    | 175.118952         | 88.063114       | 158.092403     | 79.549839        |                |                  | 1  |

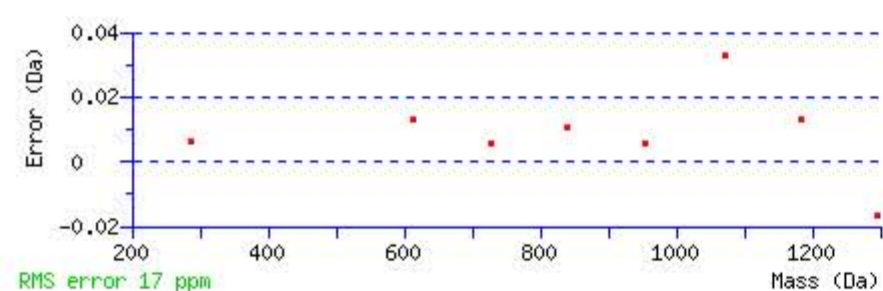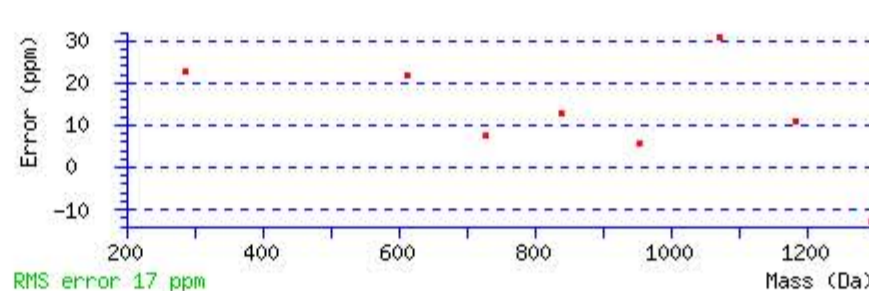

NCBI BLAST search of **TIAVLLDDILQR**

(Parameters: blastp, nr protein database, expect=20000, no filter, PAM30)

Other BLAST [web gateways](#)

All matches to this query

| Score | $M_r(\text{calc})$ : | Delta    | Sequence            |
|-------|----------------------|----------|---------------------|
| 46.1  | 1679.964401          | 0.024271 | <b>TIAVLLDDILQR</b> |

Mascot: <http://www.matrixscience.com/>



# MASCOT Search Results

## Peptide View

MS/MS Fragmentation of **QDACQGDSGGVFAVR**

Found in **C1R\_HUMAN**, Complement C1r subcomponent OS=Homo sapiens GN=C1R PE=1 SV=2

Match to Query 50211: 1876.864692 from(626.628840,3+) rtinseconds(1925) index(41623)

Title: Locus:1.1.1.2954.15 File:"2013-07-02 CLN FXIII 60 min 1st F 3.wiff"

Data file C:\Program Files (x86)\Matrix Science\Mascot Daemon\mgf4 FXIII 60 min 1st\mascot\_daemon\_merge.mgf

Click mouse within plot area to zoom in by factor of two about that point

Or, Plot from  to  Da

Label all possible matches  Label matches used for scoring

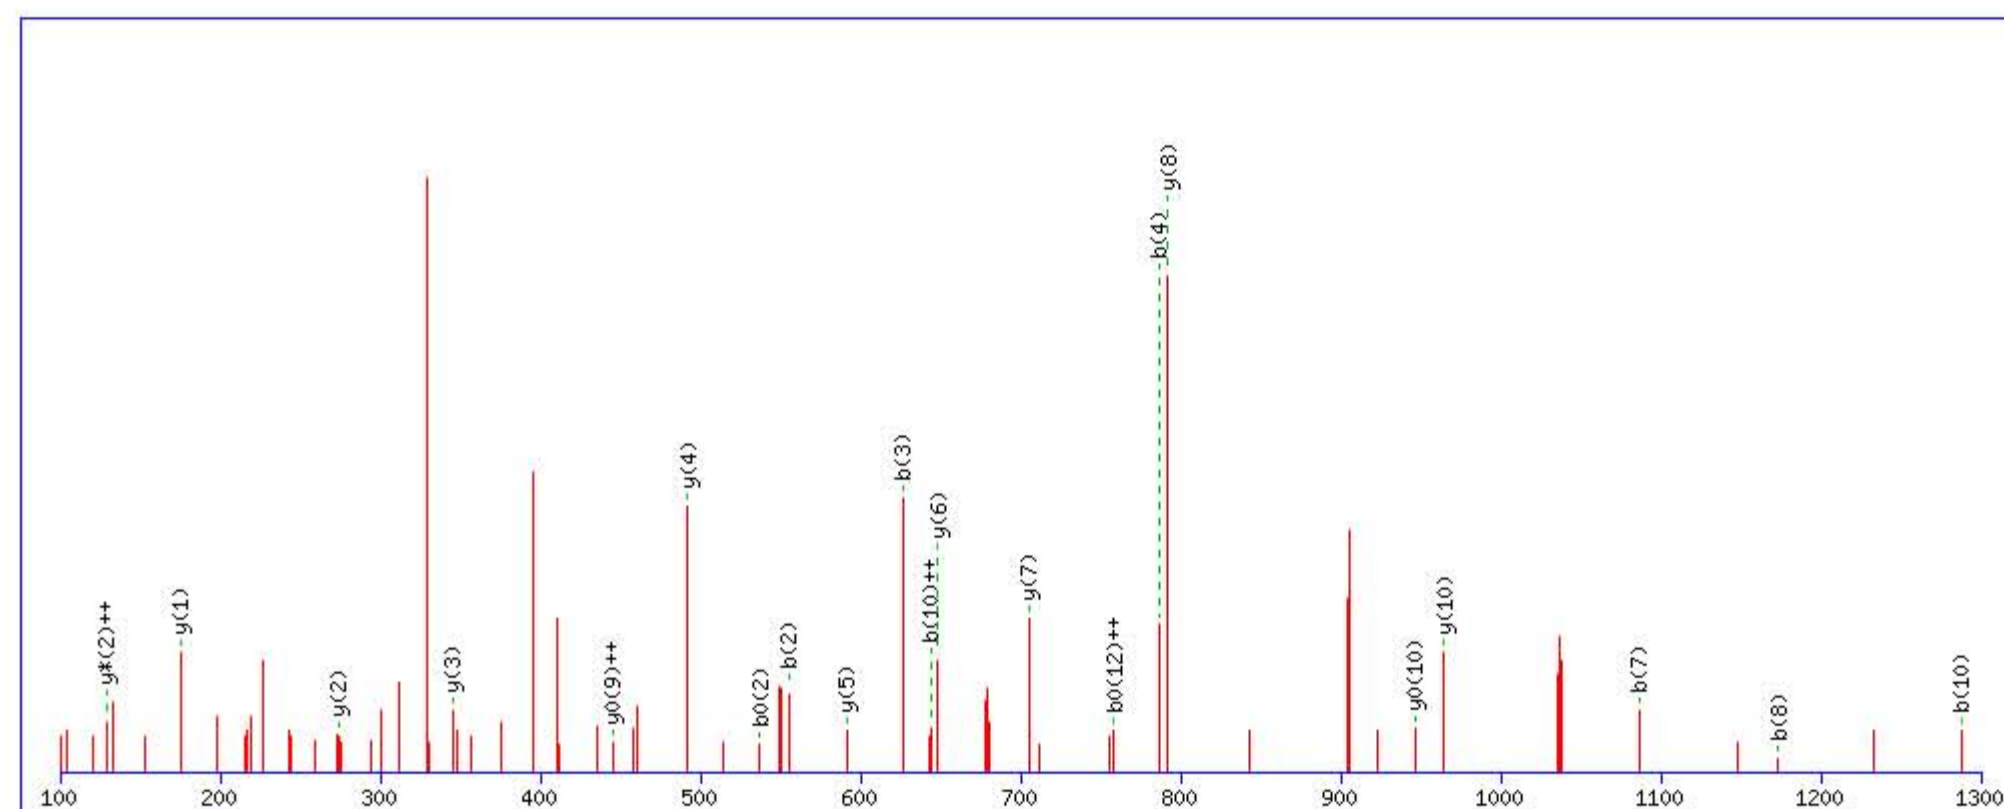

Monoisotopic mass of neutral peptide Mr(calc): 1876.856033

Fixed modifications: Carbamidomethyl (C) (apply to specified residues or termini only)

Variable modifications:

Q1 : Biotin:Thermo-21345 (Q)

Ions Score: 36 Expect: 0.0032

Matches : 21/152 fragment ions using 57 most intense peaks [\(help\)](#)

| #  | b                  | b <sup>++</sup>   | b <sup>*</sup> | b <sup>++</sup> | b <sup>0</sup>    | b <sup>0++</sup>  | Seq. | y                 | y <sup>++</sup> | y <sup>*</sup> | y <sup>++</sup>   | y <sup>0</sup>    | y <sup>0++</sup>  | #  |
|----|--------------------|-------------------|----------------|-----------------|-------------------|-------------------|------|-------------------|-----------------|----------------|-------------------|-------------------|-------------------|----|
| 1  | 440.232602         | 220.619939        | 423.206053     | 212.106664      |                   |                   | Q    |                   |                 |                |                   |                   |                   | 15 |
| 2  | <b>555.259545</b>  | 278.133411        | 538.232996     | 269.620136      | <b>537.248980</b> | 269.128128        | D    | 1438.637955       | 719.822616      | 1421.611406    | 711.309341        | 1420.627390       | 710.817333        | 14 |
| 3  | <b>626.296659</b>  | 313.651968        | 609.270110     | 305.138693      | 608.286094        | 304.646685        | A    | 1323.611012       | 662.309144      | 1306.584463    | 653.795870        | 1305.600447       | 653.303862        | 13 |
| 4  | <b>786.327308</b>  | 393.667292        | 769.300759     | 385.154018      | 768.316743        | 384.662010        | C    | 1252.573898       | 626.790587      | 1235.547349    | 618.277313        | 1234.563333       | 617.785305        | 12 |
| 5  | 914.385886         | 457.696581        | 897.359337     | 449.183307      | 896.375321        | 448.691299        | Q    | 1092.543249       | 546.775263      | 1075.516700    | 538.261988        | 1074.532684       | 537.769980        | 11 |
| 6  | 971.407350         | 486.207313        | 954.380801     | 477.694039      | 953.396785        | 477.202031        | G    | <b>964.484671</b> | 482.745974      | 947.458122     | 474.232699        | <b>946.474106</b> | 473.740691        | 10 |
| 7  | <b>1086.434293</b> | 543.720785        | 1069.407744    | 535.207510      | 1068.423728       | 534.715502        | D    | 907.463207        | 454.235242      | 890.436658     | 445.721967        | 889.452642        | <b>445.229959</b> | 9  |
| 8  | <b>1173.466321</b> | 587.236799        | 1156.439772    | 578.723524      | 1155.455756       | 578.231516        | S    | <b>792.436264</b> | 396.721770      | 775.409715     | 388.208496        | 774.425699        | 387.716488        | 8  |
| 9  | 1230.487785        | 615.747531        | 1213.461236    | 607.234256      | 1212.477220       | 606.742248        | G    | <b>705.404236</b> | 353.205756      | 688.377687     | 344.692482        |                   |                   | 7  |
| 10 | <b>1287.509249</b> | <b>644.258263</b> | 1270.482700    | 635.744988      | 1269.498684       | 635.252980        | G    | <b>648.382772</b> | 324.695024      | 631.356223     | 316.181750        |                   |                   | 6  |
| 11 | 1386.577663        | 693.792470        | 1369.551114    | 685.279195      | 1368.567098       | 684.787187        | V    | <b>591.361308</b> | 296.184292      | 574.334759     | 287.671018        |                   |                   | 5  |
| 12 | 1533.646077        | 767.326677        | 1516.619528    | 758.813402      | 1515.635512       | <b>758.321394</b> | F    | <b>492.292894</b> | 246.650085      | 475.266345     | 238.136811        |                   |                   | 4  |
| 13 | 1604.683191        | 802.845234        | 1587.656642    | 794.331959      | 1586.672626       | 793.839951        | A    | <b>345.224480</b> | 173.115878      | 328.197931     | 164.602603        |                   |                   | 3  |
| 14 | 1703.751605        | 852.379441        | 1686.725056    | 843.866166      | 1685.741040       | 843.374158        | V    | <b>274.187366</b> | 137.597321      | 257.160817     | <b>129.084047</b> |                   |                   | 2  |
| 15 |                    |                   |                |                 |                   |                   | R    | <b>175.118952</b> | 88.063114       | 158.092403     | 79.549839         |                   |                   | 1  |

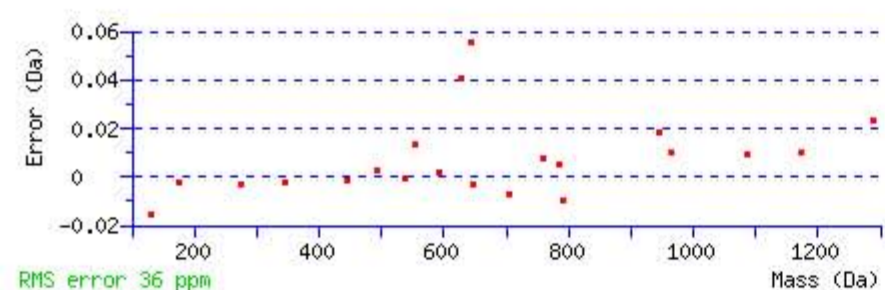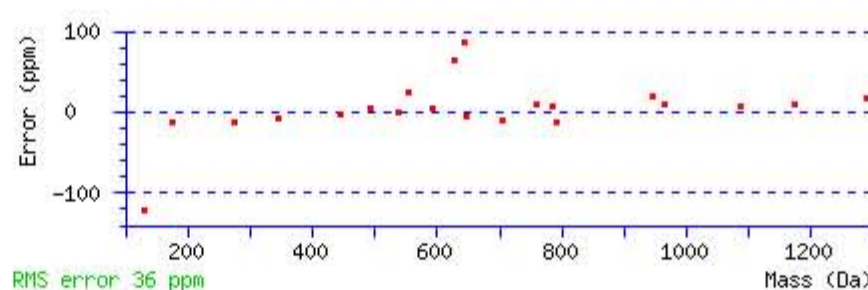

NCBI BLAST search of **QDACQGDSGGVFAVR**

(Parameters: blastp, nr protein database, expect=20000, no filter, PAM30)

Other BLAST [web gateways](#)

All matches to this query

| Score | Mr(calc):   | Delta    | Sequence                        |
|-------|-------------|----------|---------------------------------|
| 35.6  | 1876.856033 | 0.008659 | <a href="#">QDACQGDSGGVFAVR</a> |
| 28.6  | 1876.856033 | 0.008659 | <a href="#">QDACQGDSGGVFAVR</a> |

Mascot: <http://www.matrixscience.com/>



# MASCOT Search Results

## Peptide View

MS/MS Fragmentation of **ESEQGVYTCTAQQGIWK**

Found in **C1R\_HUMAN**, Complement C1r subcomponent OS=Homo sapiens GN=C1R PE=1 SV=2

Match to Query 57376: 2167.026102 from(723.349310,3+) rtinseconds(2156) index(43122)

Title: Locus:1.1.1.3034.22 File:"2013-07-02 CLN FXIII 60 min 1st F 3.wiff"

Data file C:\Program Files (x86)\Matrix Science\Mascot Daemon\mgf4 FXIII 60 min 1st\mascot\_daemon\_merge.mgf

Click mouse within plot area to zoom in by factor of two about that point

Or, Plot from  to  Da

Label all possible matches  Label matches used for scoring

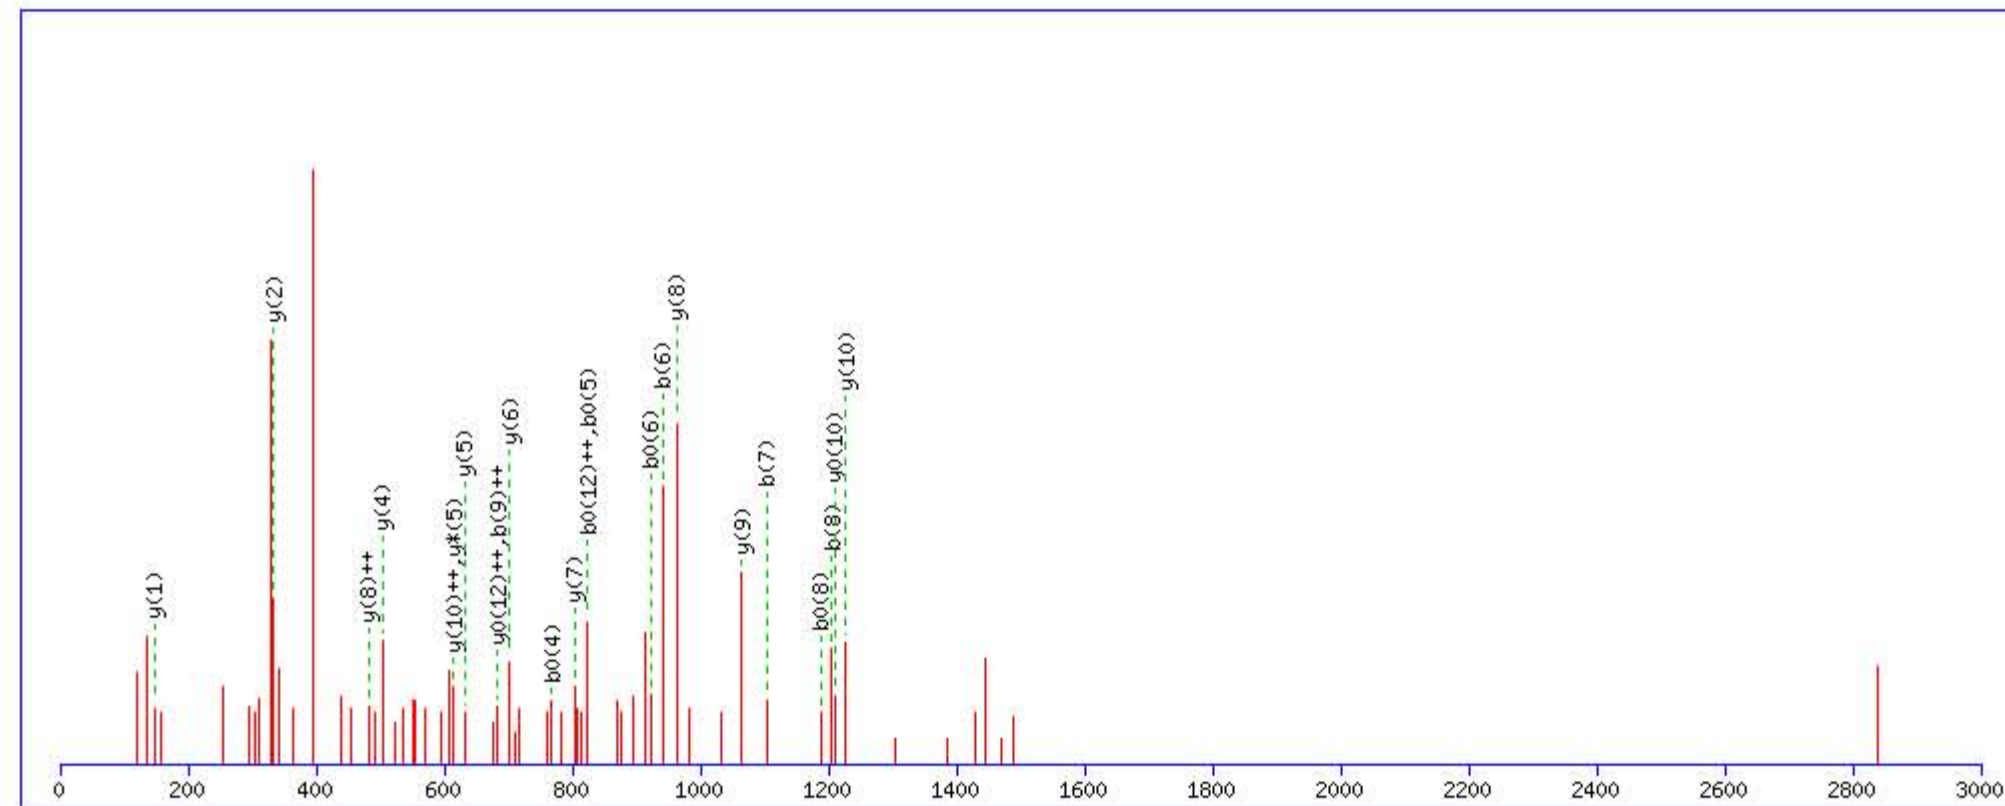

Monoisotopic mass of neutral peptide  $M_r(\text{calc})$ : 2167.007813

Fixed modifications: Carbamidomethyl (C) (apply to specified residues or termini only)

Variable modifications:

Q4 : Biotin:Thermo-21345 (Q)

Ions Score: 35 Expect: 0.0066

Matches : 23/162 fragment ions using 49 most intense peaks [\(help\)](#)

| #  | b           | b <sup>++</sup> | b <sup>*</sup> | b <sup>+++</sup> | b <sup>0</sup> | b <sup>0++</sup> | Seq. | y           | y <sup>++</sup> | y <sup>*</sup> | y <sup>+++</sup> | y <sup>0</sup> | y <sup>0++</sup> | #  |
|----|-------------|-----------------|----------------|------------------|----------------|------------------|------|-------------|-----------------|----------------|------------------|----------------|------------------|----|
| 1  | 130.049869  | 65.528572       |                |                  | 112.039304     | 56.523290        | E    |             |                 |                |                  |                |                  | 16 |
| 2  | 217.081897  | 109.044586      |                |                  | 199.071332     | 100.039304       | S    | 2038.972498 | 1019.989887     | 2021.945949    | 1011.476613      | 2020.961933    | 1010.984604      | 15 |
| 3  | 346.124490  | 173.565883      |                |                  | 328.113925     | 164.560600       | E    | 1951.940470 | 976.473873      | 1934.913921    | 967.960599       | 1933.929905    | 967.468591       | 14 |
| 4  | 785.349816  | 393.178546      | 768.323267     | 384.665272       | 767.339251     | 384.173264       | Q    | 1822.897877 | 911.952577      | 1805.871328    | 903.439302       | 1804.887312    | 902.947294       | 13 |
| 5  | 842.371280  | 421.689278      | 825.344731     | 413.176004       | 824.360715     | 412.683996       | G    | 1383.672551 | 692.339913      | 1366.646002    | 683.826639       | 1365.661986    | 683.334631       | 12 |
| 6  | 941.439694  | 471.223485      | 924.413145     | 462.710211       | 923.429129     | 462.218203       | V    | 1326.651087 | 663.829182      | 1309.624538    | 655.315907       | 1308.640522    | 654.823899       | 11 |
| 7  | 1104.503023 | 552.755150      | 1087.476474    | 544.241875       | 1086.492458    | 543.749867       | Y    | 1227.582673 | 614.294975      | 1210.556124    | 605.781700       | 1209.572108    | 605.289692       | 10 |
| 8  | 1205.550702 | 603.278989      | 1188.524153    | 594.765715       | 1187.540137    | 594.273707       | T    | 1064.519344 | 532.763310      | 1047.492795    | 524.250036       | 1046.508779    | 523.758028       | 9  |
| 9  | 1365.581351 | 683.294314      | 1348.554802    | 674.781039       | 1347.570786    | 674.289031       | C    | 963.471665  | 482.239471      | 946.445116     | 473.726196       | 945.461100     | 473.234188       | 8  |
| 10 | 1466.629030 | 733.818153      | 1449.602481    | 725.304879       | 1448.618465    | 724.812871       | T    | 803.441016  | 402.224146      | 786.414467     | 393.710872       | 785.430451     | 393.218864       | 7  |
| 11 | 1537.666144 | 769.336710      | 1520.639595    | 760.823436       | 1519.655579    | 760.331428       | A    | 702.393337  | 351.700307      | 685.366788     | 343.187032       |                |                  | 6  |
| 12 | 1665.724722 | 833.365999      | 1648.698173    | 824.852725       | 1647.714157    | 824.360717       | Q    | 631.356223  | 316.181750      | 614.329674     | 307.668475       |                |                  | 5  |
| 13 | 1722.746186 | 861.876731      | 1705.719637    | 853.363457       | 1704.735621    | 852.871449       | G    | 503.297645  | 252.152460      | 486.271096     | 243.639186       |                |                  | 4  |
| 14 | 1835.830250 | 918.418763      | 1818.803701    | 909.905489       | 1817.819685    | 909.413480       | I    | 446.276181  | 223.641728      | 429.249632     | 215.128454       |                |                  | 3  |
| 15 | 2021.909563 | 1011.458420     | 2004.883014    | 1002.945145      | 2003.898998    | 1002.453137      | W    | 333.192117  | 167.099696      | 316.165568     | 158.586422       |                |                  | 2  |
| 16 |             |                 |                |                  |                |                  | K    | 147.112804  | 74.060040       | 130.086255     | 65.546765        |                |                  | 1  |

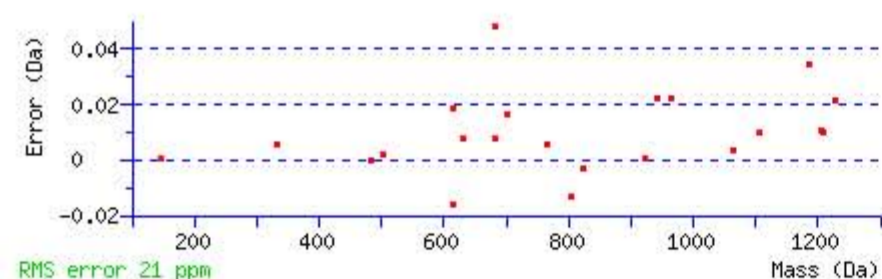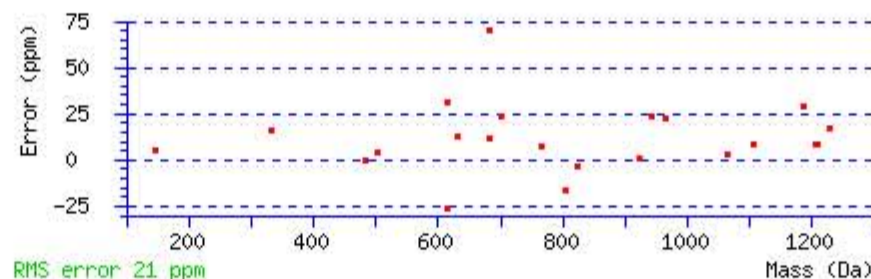

NCBI BLAST search of **ESEQGVYTCTAQQGIWK**

(Parameters: blastp, nr protein database, expect=20000, no filter, PAM30)

Other BLAST [web gateways](#)

All matches to this query

| Score | $M_r(\text{calc})$ : | Delta    | Sequence                          |
|-------|----------------------|----------|-----------------------------------|
| 34.6  | 2167.007813          | 0.018289 | <a href="#">ESEQGVYTCTAQQGIWK</a> |

Mascot: <http://www.matrixscience.com/>



# MASCOT Search Results

## Peptide View

MS/MS Fragmentation of **SNALDIIFQTDLTGQK**

Found in **CIS\_HUMAN**, Complement C1s subcomponent OS=Homo sapiens GN=C1S PE=1 SV=1

Match to Query 55521: 2074.097622 from(692.373150,3+) rtinseconds(2840) index(47657)

Title: Locus:1.1.1.3271.7 File:"2013-07-02 CLN FXIII 60 min 1st F 3.wiff"

Data file C:\Program Files (x86)\Matrix Science\Mascot Daemon\mgf\4 FXIII 60 min 1st\mascot\_daemon\_merge.mgf

Click mouse within plot area to zoom in by factor of two about that point

Or, Plot from  to  Da

Label all possible matches  Label matches used for scoring

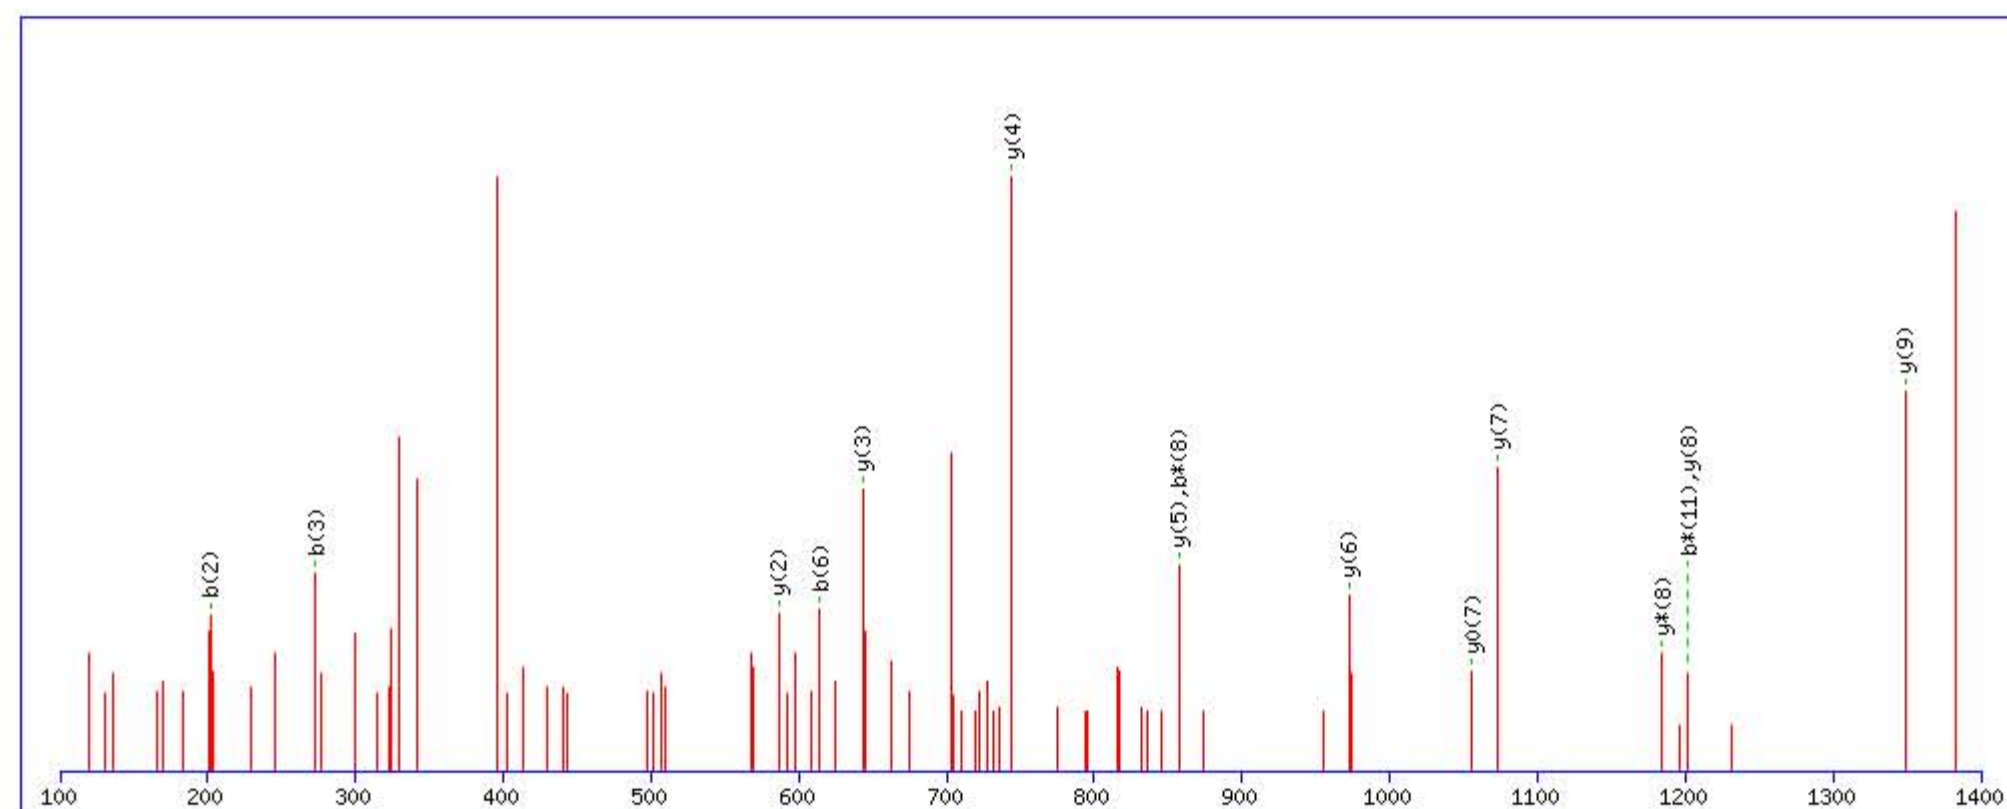

Monoisotopic mass of neutral peptide Mr(calc): 2074.076874

Fixed modifications: Carbamidomethyl (C) (apply to specified residues or termini only)

Variable modifications:

Q15 : Biotin:Thermo-21345 (Q)

Ions Score: 41 Expect: 0.00073

Matches : 15/172 fragment ions using 25 most intense peaks [\(help\)](#)

| #  | b                 | b <sup>++</sup> | b <sup>*</sup>     | b <sup>*++</sup> | b <sup>0</sup> | b <sup>0++</sup> | Seq. | y                  | y <sup>++</sup> | y <sup>*</sup>     | y <sup>*++</sup> | y <sup>0</sup>     | y <sup>0++</sup> | #  |
|----|-------------------|-----------------|--------------------|------------------|----------------|------------------|------|--------------------|-----------------|--------------------|------------------|--------------------|------------------|----|
| 1  | 88.039304         | 44.523290       |                    |                  | 70.028739      | 35.518008        | S    |                    |                 |                    |                  |                    |                  | 16 |
| 2  | <b>202.082231</b> | 101.544753      | 185.055682         | 93.031479        | 184.071666     | 92.539471        | N    | 1988.052127        | 994.529702      | 1971.025578        | 986.016427       | 1970.041562        | 985.524419       | 15 |
| 3  | <b>273.119345</b> | 137.063311      | 256.092796         | 128.550036       | 255.108780     | 128.058028       | A    | 1874.009200        | 937.508238      | 1856.982651        | 928.994964       | 1855.998635        | 928.502956       | 14 |
| 4  | 386.203409        | 193.605343      | 369.176860         | 185.092068       | 368.192844     | 184.600060       | L    | 1802.972086        | 901.989681      | 1785.945537        | 893.476407       | 1784.961521        | 892.984399       | 13 |
| 5  | 501.230352        | 251.118814      | 484.203803         | 242.605540       | 483.219787     | 242.113532       | D    | 1689.888022        | 845.447649      | 1672.861473        | 836.934375       | 1671.877457        | 836.442367       | 12 |
| 6  | <b>614.314416</b> | 307.660846      | 597.287867         | 299.147572       | 596.303851     | 298.655564       | I    | 1574.861079        | 787.934178      | 1557.834530        | 779.420903       | 1556.850514        | 778.928895       | 11 |
| 7  | 727.398480        | 364.202878      | 710.371931         | 355.689604       | 709.387915     | 355.197596       | I    | 1461.777015        | 731.392146      | 1444.750466        | 722.878871       | 1443.766450        | 722.386863       | 10 |
| 8  | 874.466894        | 437.737085      | <b>857.440345</b>  | 429.223811       | 856.456329     | 428.731803       | F    | <b>1348.692951</b> | 674.850114      | 1331.666402        | 666.336839       | 1330.682386        | 665.844831       | 9  |
| 9  | 1002.525472       | 501.766374      | 985.498923         | 493.253100       | 984.514907     | 492.761092       | Q    | <b>1201.624537</b> | 601.315907      | <b>1184.597988</b> | 592.802632       | 1183.613972        | 592.310624       | 8  |
| 10 | 1103.573151       | 552.290214      | 1086.546602        | 543.776939       | 1085.562586    | 543.284931       | T    | <b>1073.565959</b> | 537.286618      | 1056.539410        | 528.773343       | <b>1055.555394</b> | 528.281335       | 7  |
| 11 | 1218.600094       | 609.803685      | <b>1201.573545</b> | 601.290411       | 1200.589529    | 600.798403       | D    | <b>972.518280</b>  | 486.762778      | 955.491731         | 478.249504       | 954.507715         | 477.757496       | 6  |
| 12 | 1331.684158       | 666.345717      | 1314.657609        | 657.832443       | 1313.673593    | 657.340435       | L    | <b>857.491337</b>  | 429.249307      | 840.464788         | 420.736032       | 839.480772         | 420.244024       | 5  |
| 13 | 1432.731837       | 716.869557      | 1415.705288        | 708.356282       | 1414.721272    | 707.864274       | T    | <b>744.407273</b>  | 372.707275      | 727.380724         | 364.194000       | 726.396708         | 363.701992       | 4  |
| 14 | 1489.753301       | 745.380289      | 1472.726752        | 736.867014       | 1471.742736    | 736.375006       | G    | <b>643.359594</b>  | 322.183435      | 626.333045         | 313.670161       |                    |                  | 3  |
| 15 | 1928.978627       | 964.992952      | 1911.952078        | 956.479677       | 1910.968062    | 955.987669       | Q    | <b>586.338130</b>  | 293.672703      | 569.311581         | 285.159429       |                    |                  | 2  |
| 16 |                   |                 |                    |                  |                |                  | K    | 147.112804         | 74.060040       | 130.086255         | 65.546765        |                    |                  | 1  |

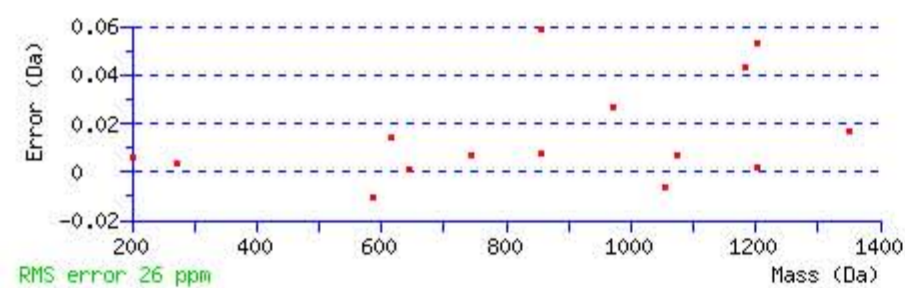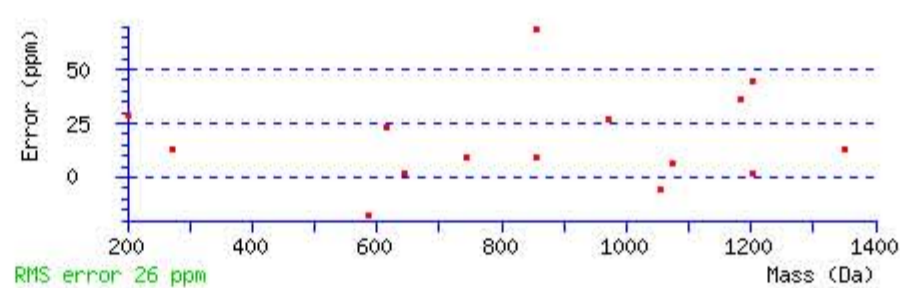

NCBI BLAST search of **SNALDIIFQTDLTGQK**

(Parameters: blastp, nr protein database, expect=20000, no filter, PAM30)

Other BLAST [web gateways](#)

## All matches to this query

| Score | Mr(calc):   | Delta     | Sequence                           |
|-------|-------------|-----------|------------------------------------|
| 41.3  | 2074.076874 | 0.020748  | <a href="#">SNALDIIFQTDLTGQK</a>   |
| 7.9   | 2074.076874 | 0.020748  | <a href="#">SNALDIIFQTDLTGQK</a>   |
| 7.8   | 2074.125122 | -0.027500 | <a href="#">ISVLPAYLSYDAPWPVRK</a> |



# MASCOT Search Results

## Peptide View

MS/MS Fragmentation of **SVQLTEK**

Found in **CO3\_HUMAN**, Complement C3 OS=Homo sapiens GN=C3 PE=1 SV=2

Match to Query 23557: 1114.606248 from(558.310400,2+) rtinseconds(1489) index(38785)

Title: Locus:1.1.1.2802.15 File:"2013-07-02 CLN FXIII 60 min 1st F 3.wiff"

Data file C:\Program Files (x86)\Matrix Science\Mascot Daemon\mgf4 FXIII 60 min 1st\mascot\_daemon\_merge.mgf

Click mouse within plot area to zoom in by factor of two about that point

Or, Plot from  to  Da

Label all possible matches  Label matches used for scoring

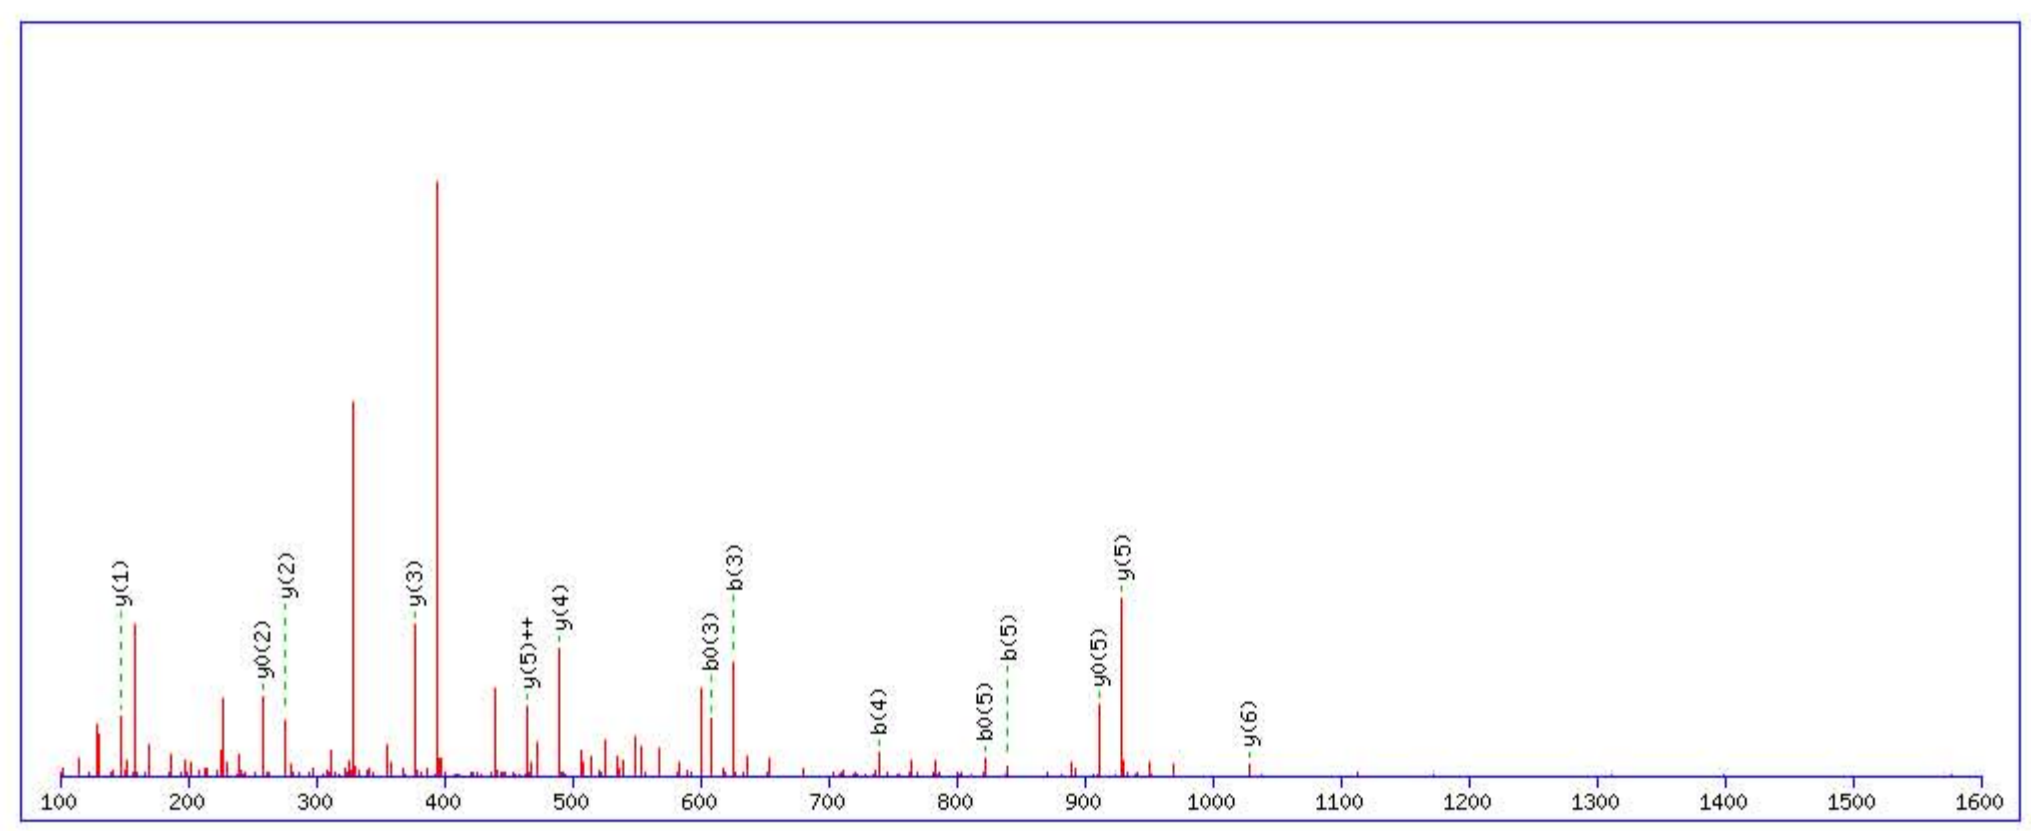

Monoisotopic mass of neutral peptide Mr(calc): 1114.605621

Fixed modifications: Carbamidomethyl (C) (apply to specified residues or termini only)

Variable modifications:

Q3 : Biotin:Thermo-21345 (Q)

Ions Score: 28 Expect: 0.032

Matches : 14/66 fragment ions using 30 most intense peaks [\(help\)](#)

| # | b          | b <sup>++</sup> | b <sup>*</sup> | b <sup>*++</sup> | b <sup>0</sup> | b <sup>0++</sup> | Seq. | y           | y <sup>++</sup> | y <sup>*</sup> | y <sup>*++</sup> | y <sup>0</sup> | y <sup>0++</sup> | # |
|---|------------|-----------------|----------------|------------------|----------------|------------------|------|-------------|-----------------|----------------|------------------|----------------|------------------|---|
| 1 | 88.039304  | 44.523290       |                |                  | 70.028739      | 35.518008        | S    |             |                 |                |                  |                |                  | 7 |
| 2 | 187.107718 | 94.057497       |                |                  | 169.097153     | 85.052214        | V    | 1028.580880 | 514.794078      | 1011.554331    | 506.280804       | 1010.570315    | 505.788796       | 6 |
| 3 | 626.333044 | 313.670160      | 609.306495     | 305.156885       | 608.322479     | 304.664877       | Q    | 929.512466  | 465.259871      | 912.485917     | 456.746597       | 911.501901     | 456.254589       | 5 |
| 4 | 739.417108 | 370.212192      | 722.390559     | 361.698917       | 721.406543     | 361.206909       | L    | 490.287140  | 245.647208      | 473.260591     | 237.133934       | 472.276575     | 236.641926       | 4 |
| 5 | 840.464787 | 420.736032      | 823.438238     | 412.222757       | 822.454222     | 411.730749       | T    | 377.203076  | 189.105176      | 360.176527     | 180.591902       | 359.192511     | 180.099894       | 3 |
| 6 | 969.507380 | 485.257328      | 952.480831     | 476.744054       | 951.496815     | 476.252046       | E    | 276.155397  | 138.581336      | 259.128848     | 130.068062       | 258.144832     | 129.576054       | 2 |
| 7 |            |                 |                |                  |                |                  | K    | 147.112804  | 74.060040       | 130.086255     | 65.546765        |                |                  | 1 |

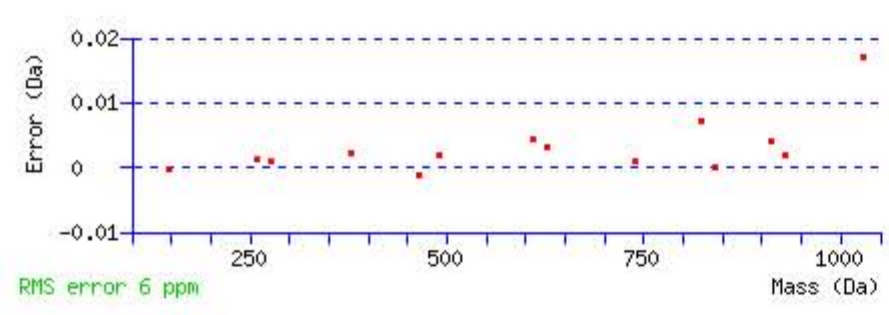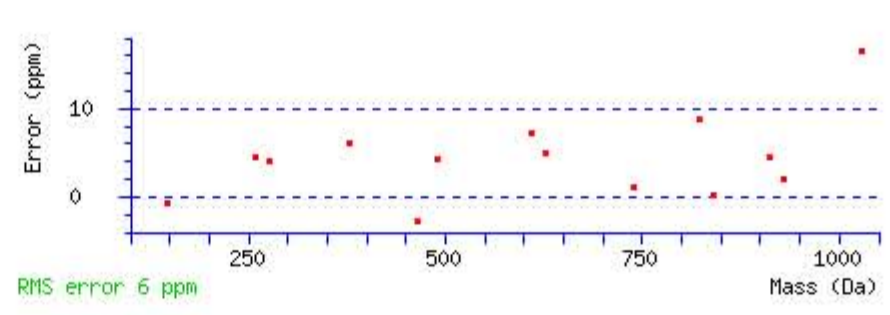

NCBI BLAST search of **SVQLTEK**

(Parameters: blastp, nr protein database, expect=20000, no filter, PAM30)

Other BLAST [web gateways](#)

### All matches to this query

| Score | Mr(calc):   | Delta     | Sequence                    |
|-------|-------------|-----------|-----------------------------|
| 28.4  | 1114.605621 | 0.000627  | <a href="#">SVQLTEK</a>     |
| 16.2  | 1114.613480 | -0.007232 | <a href="#">SVFAKHGLEK</a>  |
| 5.8   | 1114.609451 | -0.003203 | <a href="#">SVARLSPETR</a>  |
| 4.4   | 1114.591690 | 0.014558  | <a href="#">ASVHSMISRK</a>  |
| 3.9   | 1114.598236 | 0.008012  | <a href="#">SAVITSLDPGR</a> |
| 3.0   | 1114.609436 | -0.003188 | <a href="#">EGIKRQQEK</a>   |
| 2.9   | 1114.609451 | -0.003203 | <a href="#">LLQSALGGNSR</a> |
| 2.3   | 1114.616837 | -0.010589 | <a href="#">SPRLLCIEK</a>   |
| 1.3   | 1114.605621 | 0.000627  | <a href="#">LQTSVEK</a>     |



# MASCOT SCIENCE Mascot Search Results

## Peptide View

MS/MS Fragmentation of **NEQVEIR**

Found in **CO3\_HUMAN**, Complement C3 OS=Homo sapiens GN=C3 PE=1 SV=2

Match to Query 27643: 1197.619268 from(599.816910,2+) rtinseconds(1595) index(39486)

Title: Locus:1.1.1.2839.13 File:"2013-07-02 CLN FXIII 60 min 1st F 3.wiff"

Data file C:\Program Files (x86)\Matrix Science\Mascot Daemon\mgf4 FXIII 60 min 1st\mascot\_daemon\_merge.mgf

Click mouse within plot area to zoom in by factor of two about that point

Or, Plot from  to  Da

Label all possible matches  Label matches used for scoring

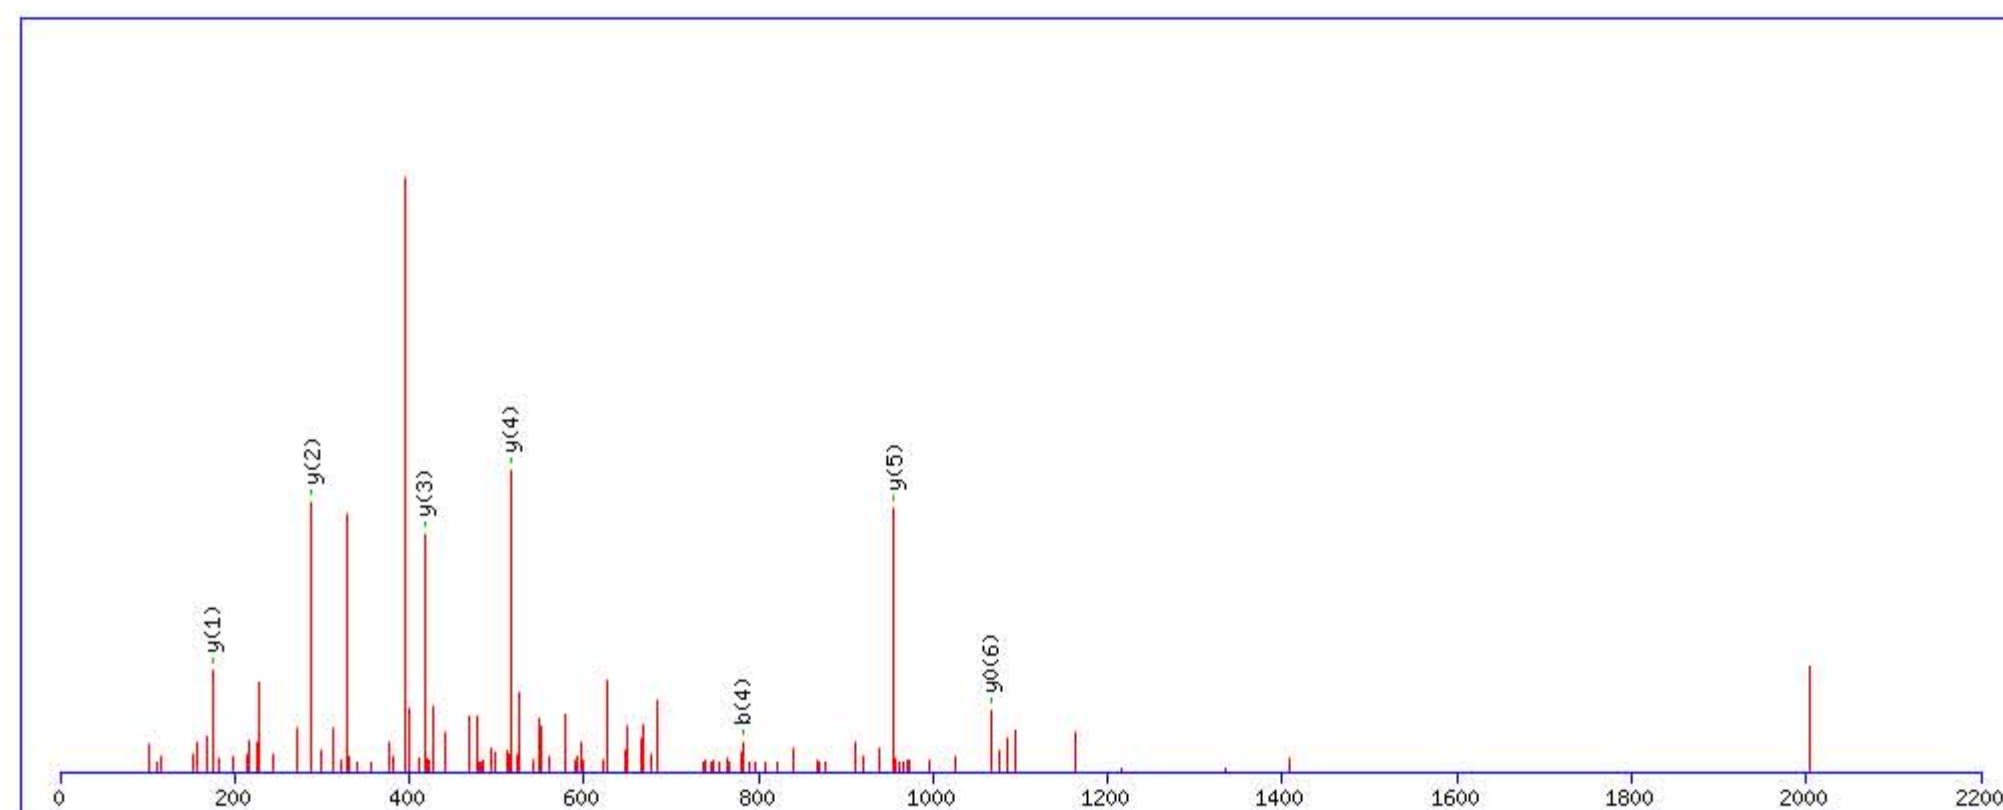

Monoisotopic mass of neutral peptide Mr(calc): 1197.617569

Fixed modifications: Carbamidomethyl (C) (apply to specified residues or termini only)

Variable modifications:

Q3 : Biotin:Thermo-21345 (Q)

Ions Score: 36 Expect: 0.0054

Matches : 7/66 fragment ions using 11 most intense peaks [\(help\)](#)

| # | b           | b <sup>++</sup> | b <sup>*</sup> | b <sup>*++</sup> | b <sup>0</sup> | b <sup>0++</sup> | Seq. | y           | y <sup>++</sup> | y <sup>*</sup> | y <sup>*++</sup> | y <sup>0</sup> | y <sup>0++</sup> | # |
|---|-------------|-----------------|----------------|------------------|----------------|------------------|------|-------------|-----------------|----------------|------------------|----------------|------------------|---|
| 1 | 115.050203  | 58.028740       | 98.023654      | 49.515465        |                |                  | N    |             |                 |                |                  |                |                  | 7 |
| 2 | 244.092796  | 122.550036      | 227.066247     | 114.036762       | 226.082231     | 113.544754       | E    | 1084.581942 | 542.794609      | 1067.555393    | 534.281335       | 1066.571377    | 533.789327       | 6 |
| 3 | 683.318122  | 342.162699      | 666.291573     | 333.649425       | 665.307557     | 333.157417       | Q    | 955.539349  | 478.273313      | 938.512800     | 469.760038       | 937.528784     | 469.268030       | 5 |
| 4 | 782.386536  | 391.696906      | 765.359987     | 383.183632       | 764.375971     | 382.691624       | V    | 516.314023  | 258.660650      | 499.287474     | 250.147375       | 498.303458     | 249.655367       | 4 |
| 5 | 911.429129  | 456.218203      | 894.402580     | 447.704928       | 893.418564     | 447.212920       | E    | 417.245609  | 209.126443      | 400.219060     | 200.613168       | 399.235044     | 200.121160       | 3 |
| 6 | 1024.513193 | 512.760235      | 1007.486644    | 504.246960       | 1006.502628    | 503.754952       | I    | 288.203016  | 144.605146      | 271.176467     | 136.091872       |                |                  | 2 |
| 7 |             |                 |                |                  |                |                  | R    | 175.118952  | 88.063114       | 158.092403     | 79.549840        |                |                  | 1 |

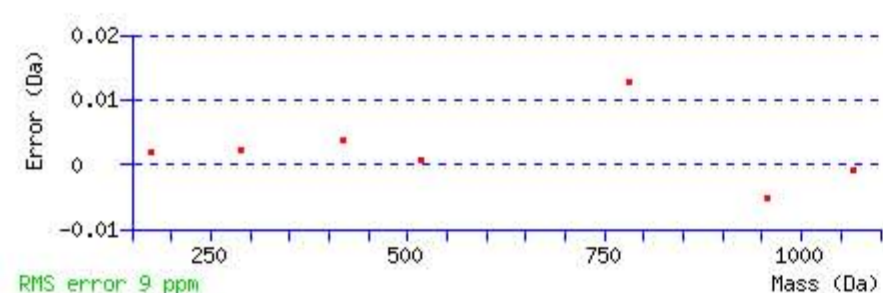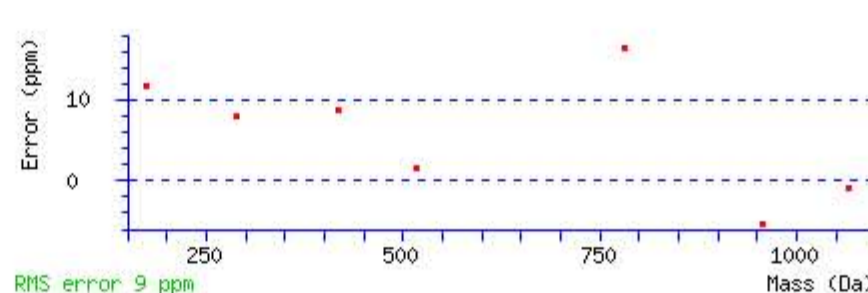

NCBI BLAST search of [NEQVEIR](#)

(Parameters: blastp, nr protein database, expect=20000, no filter, PAM30)

Other BLAST [web gateways](#)

All matches to this query

| Score | Mr(calc):   | Delta     | Sequence                     |
|-------|-------------|-----------|------------------------------|
| 35.6  | 1197.617569 | 0.001699  | <a href="#">NEQVEIR</a>      |
| 14.7  | 1197.636215 | -0.016947 | <a href="#">GVSQMPLR</a>     |
| 9.4   | 1197.617569 | 0.001699  | <a href="#">QEVNELR</a>      |
| 9.0   | 1197.617569 | 0.001699  | <a href="#">NQEDLLR</a>      |
| 8.1   | 1197.625443 | -0.006175 | <a href="#">WGS SLVKHER</a>  |
| 7.9   | 1197.617569 | 0.001699  | <a href="#">LQDNELR</a>      |
| 5.9   | 1197.621399 | -0.002131 | <a href="#">EKHSTQAKNR</a>   |
| 4.3   | 1197.628815 | -0.009547 | <a href="#">QLSMQVHALR</a>   |
| 2.2   | 1197.617584 | 0.001684  | <a href="#">QDL DQLR</a>     |
| 1.6   | 1197.635315 | -0.016047 | <a href="#">AAAAAETPEVLR</a> |

Mascot: <http://www.matrixscience.com/>



# MASCOT Search Results

## Peptide View

MS/MS Fragmentation of **TGLQEVEVK**

Found in **CO3\_HUMAN**, Complement C3 OS=Homo sapiens GN=C3 PE=1 SV=2

Match to Query 31201: 1312.713028 from(657.363790,2+) rtinseconds(1796) index(40727)

Title: Locus:1.1.1.2909.11 File:"2013-07-02 CLN FXIII 60 min 1st F 3.wiff"

Data file C:\Program Files (x86)\Matrix Science\Mascot Daemon\mgf4 FXIII 60 min 1st\mascot\_daemon\_merge.mgf

Click mouse within plot area to zoom in by factor of two about that point

Or, Plot from  to  Da

Label all possible matches  Label matches used for scoring

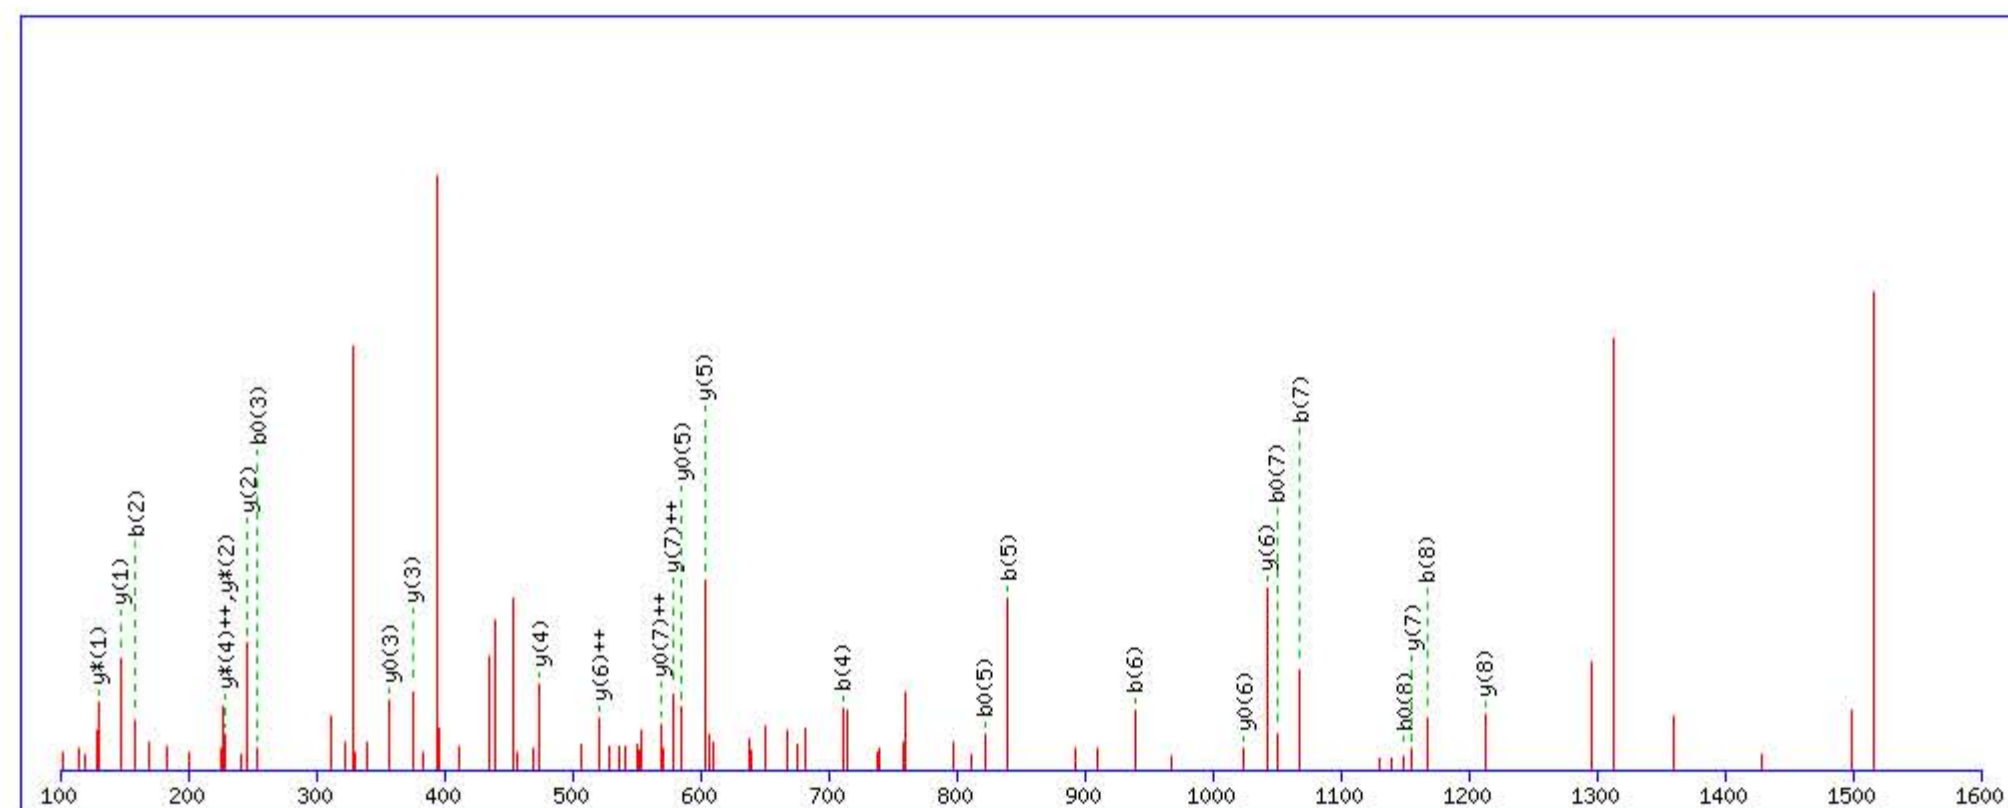

Monoisotopic mass of neutral peptide  $M_r(\text{calc})$ : 1312.706070

Fixed modifications: Carbamidomethyl (C) (apply to specified residues or termini only)

Variable modifications:

Q4 : Biotin:Thermo-21345 (Q)

Ions Score: 50 Expect: 0.0001

Matches : 27/86 fragment ions using 45 most intense peaks [\(help\)](#)

| # | b                  | b <sup>++</sup> | b <sup>*</sup> | b <sup>*++</sup> | b <sup>0</sup>     | b <sup>0++</sup> | Seq. | y                  | y <sup>++</sup>   | y <sup>*</sup>    | y <sup>*++</sup>  | y <sup>0</sup>     | y <sup>0++</sup>  | # |
|---|--------------------|-----------------|----------------|------------------|--------------------|------------------|------|--------------------|-------------------|-------------------|-------------------|--------------------|-------------------|---|
| 1 | 102.054955         | 51.531116       |                |                  | 84.044390          | 42.525833        | T    |                    |                   |                   |                   |                    |                   | 9 |
| 2 | <b>159.076419</b>  | 80.041847       |                |                  | 141.065854         | 71.036565        | G    | <b>1212.665672</b> | 606.836474        | 1195.639123       | 598.323200        | 1194.655107        | 597.831192        | 8 |
| 3 | 272.160483         | 136.583879      |                |                  | <b>254.149918</b>  | 127.578597       | L    | <b>1155.644208</b> | <b>578.325742</b> | 1138.617659       | 569.812468        | 1137.633643        | <b>569.320460</b> | 7 |
| 4 | <b>711.385809</b>  | 356.196543      | 694.359260     | 347.683268       | 693.375244         | 347.191260       | Q    | <b>1042.560144</b> | <b>521.783710</b> | 1025.533595       | 513.270436        | <b>1024.549579</b> | 512.778428        | 6 |
| 5 | <b>840.428402</b>  | 420.717839      | 823.401853     | 412.204565       | <b>822.417837</b>  | 411.712557       | E    | <b>603.334818</b>  | 302.171047        | 586.308269        | 293.657773        | <b>585.324253</b>  | 293.165765        | 5 |
| 6 | <b>939.496816</b>  | 470.252046      | 922.470267     | 461.738772       | 921.486251         | 461.246764       | V    | <b>474.292225</b>  | 237.649751        | 457.265676        | <b>229.136476</b> | 456.281660         | 228.644468        | 4 |
| 7 | <b>1068.539409</b> | 534.773343      | 1051.512860    | 526.260068       | <b>1050.528844</b> | 525.768060       | E    | <b>375.223811</b>  | 188.115544        | 358.197262        | 179.602269        | <b>357.213246</b>  | 179.110261        | 3 |
| 8 | <b>1167.607823</b> | 584.307550      | 1150.581274    | 575.794275       | <b>1149.597258</b> | 575.302267       | V    | <b>246.181218</b>  | 123.594247        | <b>229.154669</b> | 115.080973        |                    |                   | 2 |
| 9 |                    |                 |                |                  |                    |                  | K    | <b>147.112804</b>  | 74.060040         | <b>130.086255</b> | 65.546765         |                    |                   | 1 |

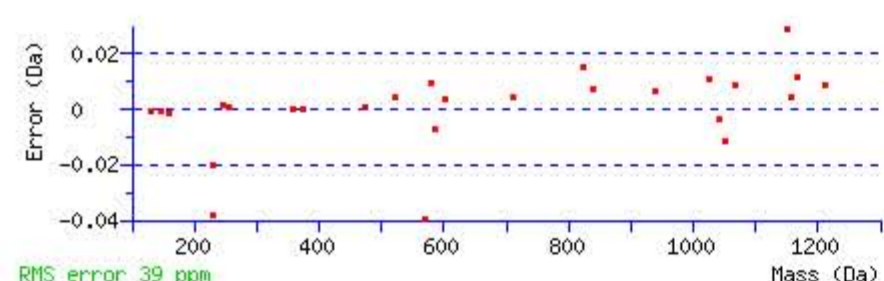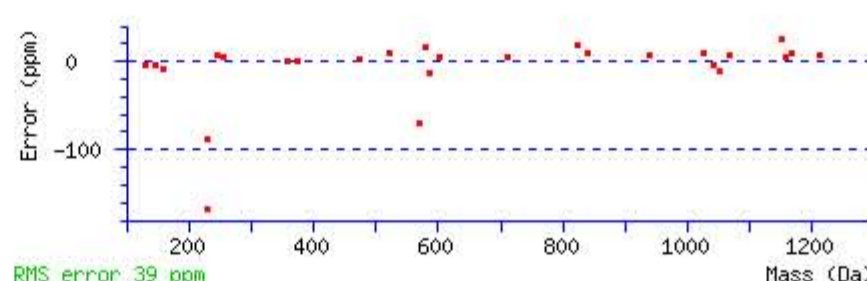

NCBI BLAST search of **TGLQEVEVK**

(Parameters: blastp, nr protein database, expect=20000, no filter, PAM30)

Other BLAST [web gateways](#)

All matches to this query

| Score | $M_r(\text{calc})$ : | Delta     | Sequence                    |
|-------|----------------------|-----------|-----------------------------|
| 49.6  | 1312.706070          | 0.006958  | <a href="#">TGLQEVEVK</a>   |
| 6.8   | 1312.699524          | 0.013504  | <a href="#">TIMHLMINNVK</a> |
| 5.7   | 1312.732544          | -0.019516 | <a href="#">VHLKWKMEVK</a>  |
| 5.5   | 1312.728516          | -0.015488 | <a href="#">KPQRGMPKVEK</a> |
| 3.9   | 1312.721130          | -0.008102 | <a href="#">QVEVLTNQRR</a>  |
| 2.9   | 1312.717300          | -0.004272 | <a href="#">ASLQTVDIR</a>   |
| 2.1   | 1312.721115          | -0.008087 | <a href="#">KKPQRDSQAQK</a> |
| 1.4   | 1312.713913          | -0.000885 | <a href="#">KVFEKYTTAAR</a> |
| 1.2   | 1312.732346          | -0.019318 | <a href="#">EARQRVQSLAR</a> |
| 1.1   | 1312.728546          | -0.015518 | <a href="#">QGSRGTAIVK</a>  |



# MASCOT SCIENCE Mascot Search Results

## Peptide View

MS/MS Fragmentation of **HQQTVTIPPK**

Found in **CO3\_HUMAN**, Complement C3 OS=Homo sapiens GN=C3 PE=1 SV=2

Match to Query 37318: 1458.798192 from(487.273340,3+) rtinseconds(1523) index(39032)

Title: Locus:1.1.1.2814.12 File:"2013-07-02 CLN FXIII 60 min 1st F 3.wiff"

Data file C:\Program Files (x86)\Matrix Science\Mascot Daemon\mgf4 FXIII 60 min 1st\mascot\_daemon\_merge.mgf

Click mouse within plot area to zoom in by factor of two about that point

Or, Plot from  to  Da

Label all possible matches  Label matches used for scoring

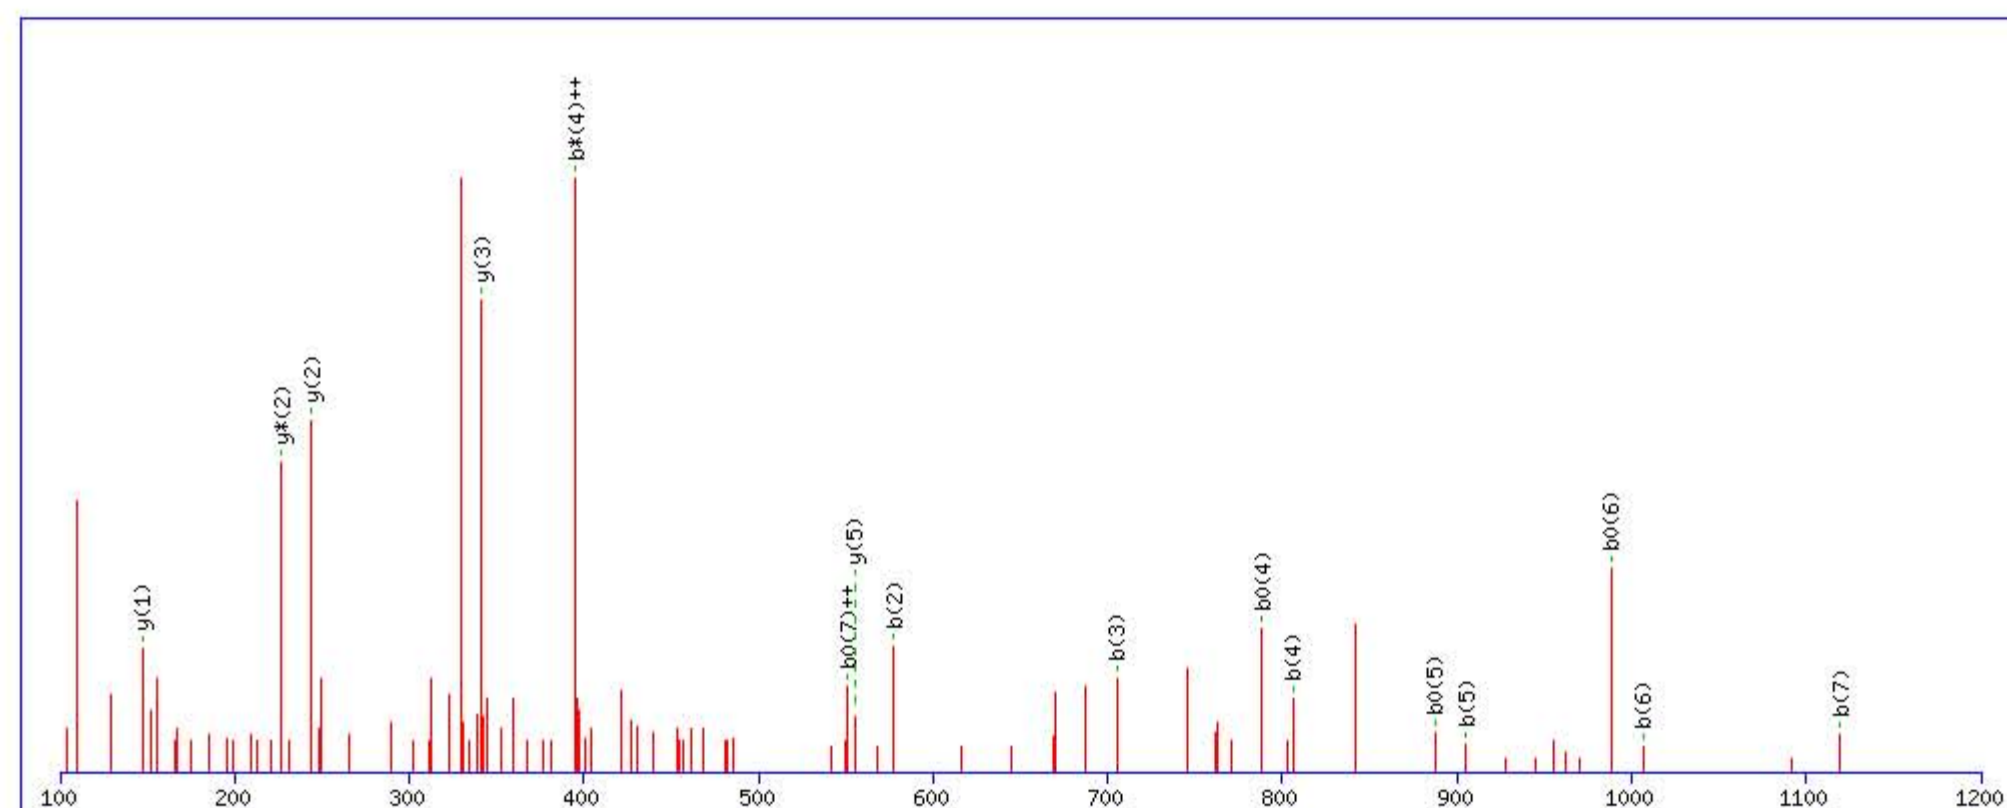

Monoisotopic mass of neutral peptide Mr(calc): 1458.801712

Fixed modifications: Carbamidomethyl (C) (apply to specified residues or termini only)

Variable modifications:

Q2 : Biotin:Thermo-21345 (Q)

Ions Score: 32 Expect: 0.015

Matches : 16/92 fragment ions using 30 most intense peaks [\(help\)](#)

| #  | b                  | b <sup>++</sup> | b <sup>*</sup> | b <sup>*++</sup>  | b <sup>0</sup>    | b <sup>0++</sup>  | Seq. | y                 | y <sup>++</sup> | y <sup>*</sup>    | y <sup>*++</sup> | y <sup>0</sup> | y <sup>0++</sup> | #  |
|----|--------------------|-----------------|----------------|-------------------|-------------------|-------------------|------|-------------------|-----------------|-------------------|------------------|----------------|------------------|----|
| 1  | 138.066188         | 69.536732       |                |                   |                   |                   | H    |                   |                 |                   |                  |                |                  | 10 |
| 2  | <b>577.291514</b>  | 289.149395      | 560.264965     | 280.636121        |                   |                   | Q    | 1322.750072       | 661.878674      | 1305.723523       | 653.365400       | 1304.739507    | 652.873392       | 9  |
| 3  | <b>705.350092</b>  | 353.178684      | 688.323543     | 344.665410        |                   |                   | Q    | 883.524746        | 442.266011      | 866.498197        | 433.752737       | 865.514181     | 433.260729       | 8  |
| 4  | <b>806.397771</b>  | 403.702524      | 789.371222     | <b>395.189249</b> | <b>788.387206</b> | 394.697241        | T    | 755.466168        | 378.236722      | 738.439619        | 369.723448       | 737.455603     | 369.231440       | 7  |
| 5  | <b>905.466185</b>  | 453.236731      | 888.439636     | 444.723456        | <b>887.455620</b> | 444.231448        | V    | 654.418489        | 327.712883      | 637.391940        | 319.199608       | 636.407924     | 318.707600       | 6  |
| 6  | <b>1006.513864</b> | 503.760570      | 989.487315     | 495.247296        | <b>988.503299</b> | 494.755288        | T    | <b>555.350075</b> | 278.178676      | 538.323526        | 269.665401       | 537.339510     | 269.173393       | 5  |
| 7  | <b>1119.597928</b> | 560.302602      | 1102.571379    | 551.789328        | 1101.587363       | <b>551.297319</b> | I    | 454.302396        | 227.654836      | 437.275847        | 219.141561       |                |                  | 4  |
| 8  | 1216.650692        | 608.828984      | 1199.624143    | 600.315710        | 1198.640127       | 599.823701        | P    | <b>341.218332</b> | 171.112804      | 324.191783        | 162.599530       |                |                  | 3  |
| 9  | 1313.703456        | 657.355366      | 1296.676907    | 648.842092        | 1295.692891       | 648.350083        | P    | <b>244.165568</b> | 122.586422      | <b>227.139019</b> | 114.073148       |                |                  | 2  |
| 10 |                    |                 |                |                   |                   |                   | K    | <b>147.112804</b> | 74.060040       | 130.086255        | 65.546765        |                |                  | 1  |

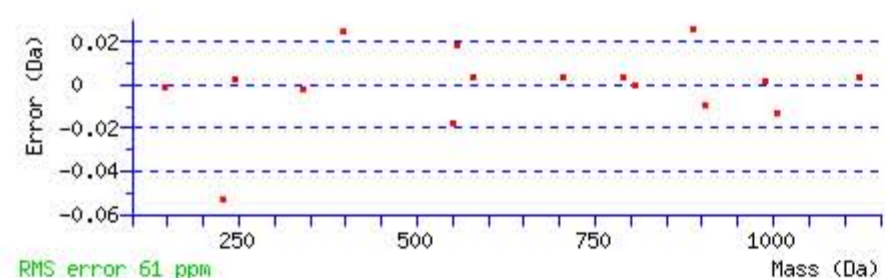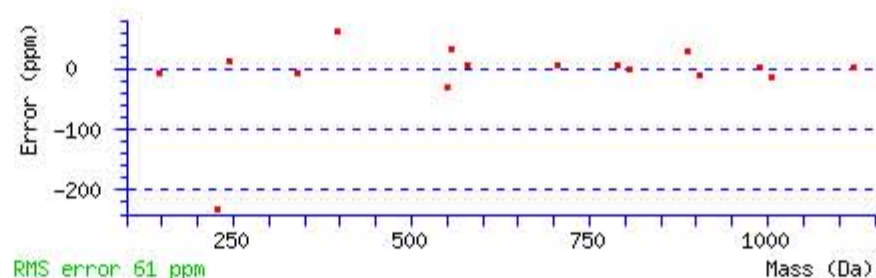

NCBI BLAST search of [HQQTVTIPPK](#)

(Parameters: blastp, nr protein database, expect=20000, no filter, PAM30)

Other BLAST [web gateways](#)

## All matches to this query

| Score | Mr(calc):   | Delta     | Sequence                   |
|-------|-------------|-----------|----------------------------|
| 31.6  | 1458.801712 | -0.003520 | <a href="#">HQQTVTIPPK</a> |
| 24.1  | 1458.801712 | -0.003520 | <a href="#">HQQTVTIPPK</a> |



# MASCOT Search Results

## Peptide View

MS/MS Fragmentation of **SGSDEVQVGQQR**

Found in **CO3\_HUMAN**, Complement C3 OS=Homo sapiens GN=C3 PE=1 SV=2

Match to Query 42186: 1599.775288 from(800.894920,2+) rtinseconds(1512) index(38942)

Title: Locus:1.1.1.2810.18 File:"2013-07-02 CLN FXIII 60 min 1st F 3.wiff"

Data file C:\Program Files (x86)\Matrix Science\Mascot Daemon\mgf\4 FXIII 60 min 1st\mascot\_daemon\_merge.mgf

Click mouse within plot area to zoom in by factor of two about that point

Or, Plot from  to  Da

Label all possible matches  Label matches used for scoring

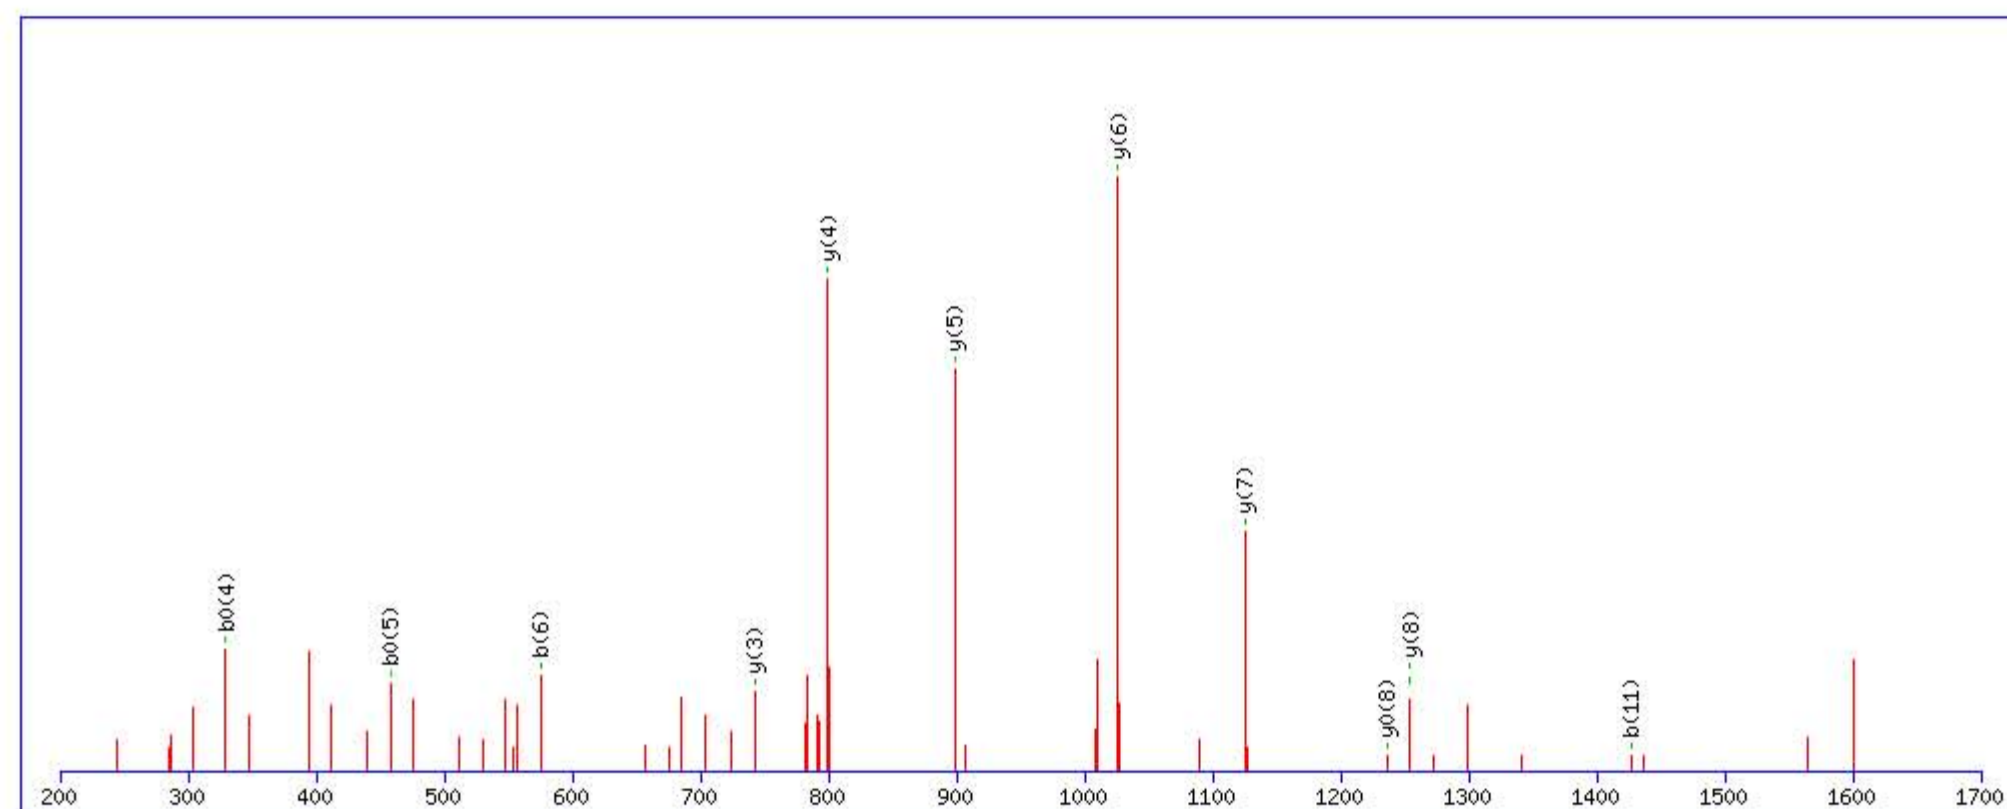

Monoisotopic mass of neutral peptide Mr(calc): 1599.767517

Fixed modifications: Carbamidomethyl (C) (apply to specified residues or termini only)

Variable modifications:

Q11 : Biotin:Thermo-21345 (Q)

Ions Score: 53 Expect: 8.7e-005

Matches : 11/106 fragment ions using 13 most intense peaks [\(help\)](#)

| #  | b           | b <sup>++</sup> | b <sup>*</sup> | b <sup>*++</sup> | b <sup>0</sup> | b <sup>0++</sup> | Seq. | y           | y <sup>++</sup> | y <sup>*</sup> | y <sup>*++</sup> | y <sup>0</sup> | y <sup>0++</sup> | #  |
|----|-------------|-----------------|----------------|------------------|----------------|------------------|------|-------------|-----------------|----------------|------------------|----------------|------------------|----|
| 1  | 88.039304   | 44.523290       |                |                  | 70.028739      | 35.518008        | S    |             |                 |                |                  |                |                  | 12 |
| 2  | 145.060768  | 73.034022       |                |                  | 127.050203     | 64.028740        | G    | 1513.742754 | 757.375015      | 1496.716205    | 748.861741       | 1495.732189    | 748.369733       | 11 |
| 3  | 232.092796  | 116.550036      |                |                  | 214.082231     | 107.544753       | S    | 1456.721290 | 728.864283      | 1439.694741    | 720.351009       | 1438.710725    | 719.859001       | 10 |
| 4  | 347.119739  | 174.063507      |                |                  | 329.109174     | 165.058225       | D    | 1369.689262 | 685.348269      | 1352.662713    | 676.834995       | 1351.678697    | 676.342987       | 9  |
| 5  | 476.162332  | 238.584804      |                |                  | 458.151767     | 229.579522       | E    | 1254.662319 | 627.834798      | 1237.635770    | 619.321523       | 1236.651754    | 618.829515       | 8  |
| 6  | 575.230746  | 288.119011      |                |                  | 557.220181     | 279.113729       | V    | 1125.619726 | 563.313501      | 1108.593177    | 554.800227       |                |                  | 7  |
| 7  | 703.289324  | 352.148300      | 686.262775     | 343.635026       | 685.278759     | 343.143018       | Q    | 1026.551312 | 513.779294      | 1009.524763    | 505.266020       |                |                  | 6  |
| 8  | 802.357738  | 401.682507      | 785.331189     | 393.169233       | 784.347173     | 392.677225       | V    | 898.492734  | 449.750005      | 881.466185     | 441.236731       |                |                  | 5  |
| 9  | 859.379202  | 430.193239      | 842.352653     | 421.679965       | 841.368637     | 421.187957       | G    | 799.424320  | 400.215798      | 782.397771     | 391.702524       |                |                  | 4  |
| 10 | 987.437780  | 494.222528      | 970.411231     | 485.709254       | 969.427215     | 485.217246       | Q    | 742.402856  | 371.705066      | 725.376307     | 363.191792       |                |                  | 3  |
| 11 | 1426.663106 | 713.835191      | 1409.636557    | 705.321917       | 1408.652541    | 704.829909       | Q    | 614.344278  | 307.675777      | 597.317729     | 299.162503       |                |                  | 2  |
| 12 |             |                 |                |                  |                |                  | R    | 175.118952  | 88.063114       | 158.092403     | 79.549839        |                |                  | 1  |

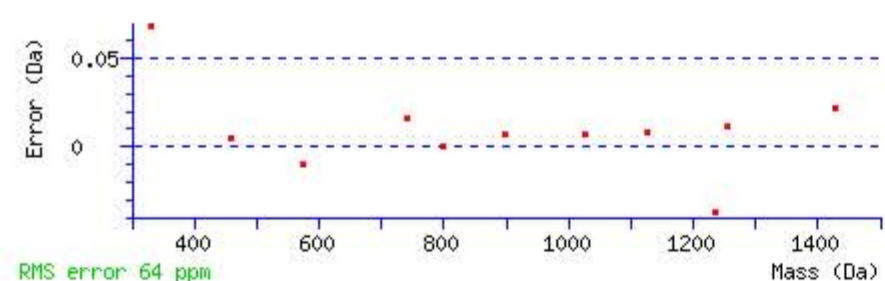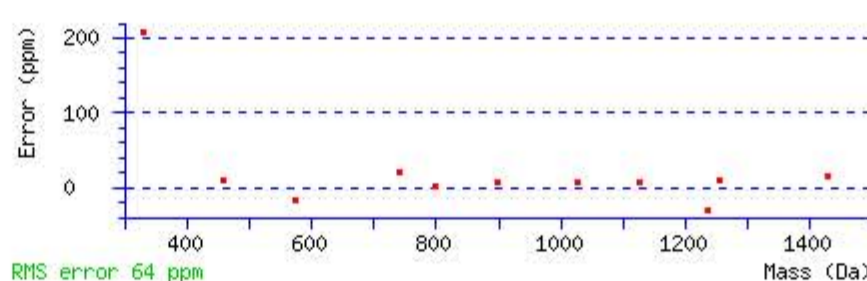

NCBI BLAST search of **SGSDEVQVGQQR**

(Parameters: blastp, nr protein database, expect=20000, no filter, PAM30)

Other BLAST [web gateways](#)

All matches to this query

| Score | Mr(calc):   | Delta     | Sequence                        |
|-------|-------------|-----------|---------------------------------|
| 52.9  | 1599.767517 | 0.007771  | <a href="#">SGSDEVQVGQQR</a>    |
| 52.9  | 1599.767517 | 0.007771  | <a href="#">SGSDEVQVGQQR</a>    |
| 18.6  | 1599.767517 | 0.007771  | <a href="#">SGSDEVQVGQQR</a>    |
| 11.5  | 1599.796677 | -0.021389 | <a href="#">DINDNPPIFPMTVK</a>  |
| 7.3   | 1599.774872 | 0.000416  | <a href="#">MAKEAIFQDTMRK</a>   |
| 1.2   | 1599.767471 | 0.007817  | <a href="#">AMNAANLNIPPSDTR</a> |
| 0.1   | 1599.753769 | 0.021519  | <a href="#">ASTFSCIMQKWGGK</a>  |



# MASCOT Search Results

## Peptide View

MS/MS Fragmentation of **SGSDEVQVGQQR**

Found in **CO3\_HUMAN**, Complement C3 OS=Homo sapiens GN=C3 PE=1 SV=2

Match to Query 42187: 1599.775288 from(800.894920,2+) rtinseconds(1501) index(38859)

Title: Locus:1.1.1.2806.14 File:"2013-07-02 CLN FXIII 60 min 1st F 3.wiff"

Data file C:\Program Files (x86)\Matrix Science\Mascot Daemon\mgf\4 FXIII 60 min 1st\mascot\_daemon\_merge.mgf

Click mouse within plot area to zoom in by factor of two about that point

Or, Plot from  to  Da

Label all possible matches  Label matches used for scoring

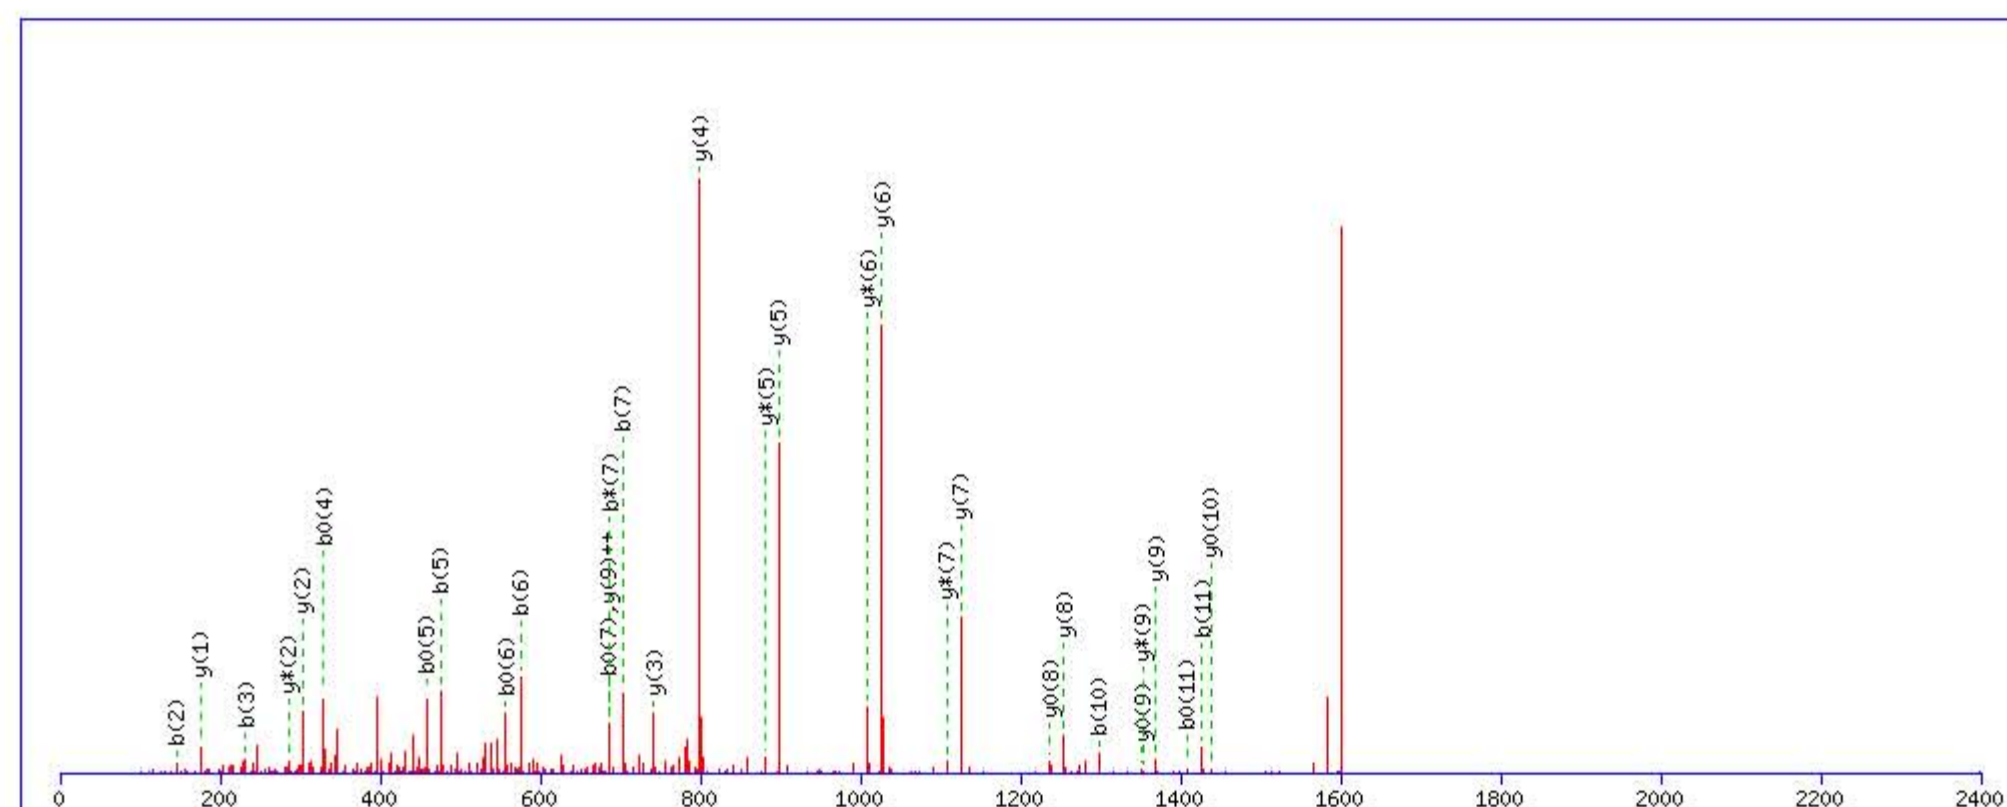

Monoisotopic mass of neutral peptide Mr(calc): 1599.767517

Fixed modifications: Carbamidomethyl (C) (apply to specified residues or termini only)

Variable modifications:

Q10 : Biotin:Thermo-21345 (Q)

Ions Score: 64 Expect: 6.6e-006

Matches : 31/106 fragment ions using 45 most intense peaks [\(help\)](#)

| #  | b                  | b <sup>++</sup> | b <sup>*</sup>    | b <sup>+++</sup> | b <sup>0</sup>     | b <sup>0++</sup> | Seq. | y                  | y <sup>++</sup>   | y <sup>*</sup>     | y <sup>+++</sup> | y <sup>0</sup>     | y <sup>0++</sup> | #  |
|----|--------------------|-----------------|-------------------|------------------|--------------------|------------------|------|--------------------|-------------------|--------------------|------------------|--------------------|------------------|----|
| 1  | 88.039304          | 44.523290       |                   |                  | 70.028739          | 35.518008        | S    |                    |                   |                    |                  |                    |                  | 12 |
| 2  | <b>145.060768</b>  | 73.034022       |                   |                  | 127.050203         | 64.028740        | G    | 1513.742754        | 757.375015        | 1496.716205        | 748.861741       | 1495.732189        | 748.369733       | 11 |
| 3  | <b>232.092796</b>  | 116.550036      |                   |                  | 214.082231         | 107.544753       | S    | 1456.721290        | 728.864283        | 1439.694741        | 720.351009       | <b>1438.710725</b> | 719.859001       | 10 |
| 4  | 347.119739         | 174.063507      |                   |                  | <b>329.109174</b>  | 165.058225       | D    | <b>1369.689262</b> | <b>685.348269</b> | <b>1352.662713</b> | 676.834995       | <b>1351.678697</b> | 676.342987       | 9  |
| 5  | <b>476.162332</b>  | 238.584804      |                   |                  | <b>458.151767</b>  | 229.579522       | E    | <b>1254.662319</b> | 627.834798        | 1237.635770        | 619.321523       | <b>1236.651754</b> | 618.829515       | 8  |
| 6  | <b>575.230746</b>  | 288.119011      |                   |                  | <b>557.220181</b>  | 279.113729       | V    | <b>1125.619726</b> | 563.313501        | <b>1108.593177</b> | 554.800227       |                    |                  | 7  |
| 7  | <b>703.289324</b>  | 352.148300      | <b>686.262775</b> | 343.635026       | <b>685.278759</b>  | 343.143018       | Q    | <b>1026.551312</b> | 513.779294        | <b>1009.524763</b> | 505.266020       |                    |                  | 6  |
| 8  | 802.357738         | 401.682507      | 785.331189        | 393.169233       | 784.347173         | 392.677225       | V    | <b>898.492734</b>  | 449.750005        | <b>881.466185</b>  | 441.236731       |                    |                  | 5  |
| 9  | 859.379202         | 430.193239      | 842.352653        | 421.679965       | 841.368637         | 421.187957       | G    | <b>799.424320</b>  | 400.215798        | 782.397771         | 391.702524       |                    |                  | 4  |
| 10 | <b>1298.604528</b> | 649.805902      | 1281.577979       | 641.292628       | 1280.593963        | 640.800620       | Q    | <b>742.402856</b>  | 371.705066        | 725.376307         | 363.191792       |                    |                  | 3  |
| 11 | <b>1426.663106</b> | 713.835191      | 1409.636557       | 705.321917       | <b>1408.652541</b> | 704.829909       | Q    | <b>303.177530</b>  | 152.092403        | <b>286.150981</b>  | 143.579129       |                    |                  | 2  |
| 12 |                    |                 |                   |                  |                    |                  | R    | <b>175.118952</b>  | 88.063114         | 158.092403         | 79.549839        |                    |                  | 1  |

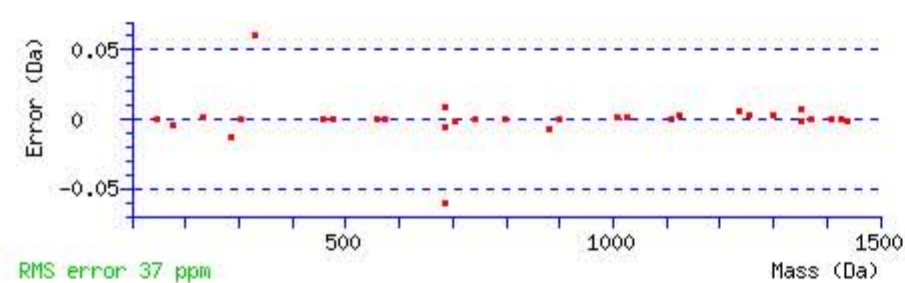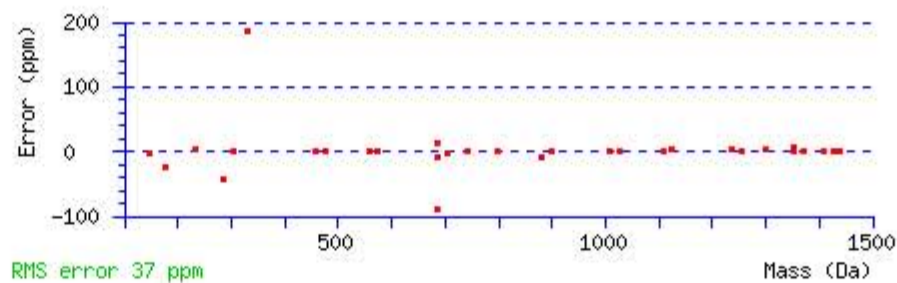

NCBI BLAST search of **SGSDEVQVGQQR**

(Parameters: blastp, nr protein database, expect=20000, no filter, PAM30)

Other BLAST [web gateways](#)

All matches to this query

| Score | Mr(calc):   | Delta     | Sequence                        |
|-------|-------------|-----------|---------------------------------|
| 64.1  | 1599.767517 | 0.007771  | <a href="#">SGSDEVQVGQQR</a>    |
| 56.9  | 1599.767517 | 0.007771  | <a href="#">SGSDEVQVGQQR</a>    |
| 33.1  | 1599.767517 | 0.007771  | <a href="#">SGSDEVQVGQQR</a>    |
| 11.4  | 1599.767471 | 0.007817  | <a href="#">AMNAANLNIPPSDTR</a> |
| 7.0   | 1599.792648 | -0.017360 | <a href="#">SSAEVTPDLQSR</a>    |
| 5.5   | 1599.779388 | -0.004100 | <a href="#">RFPDFSYITQNGR</a>   |
| 4.8   | 1599.767502 | 0.007786  | <a href="#">LHMLSSVDLNGQDR</a>  |
| 2.4   | 1599.771515 | 0.003773  | <a href="#">YVTSAPMPEPQAPGR</a> |
| 1.4   | 1599.753769 | 0.021519  | <a href="#">MPKFSMPGFKGEGR</a>  |
| 1.0   | 1599.793976 | -0.018688 | <a href="#">QRSSGIWENGR</a>     |



# MASCOT Search Results

## Peptide View

MS/MS Fragmentation of **ILLQGPVAQMTEDAVDAER**

Found in **CO3\_HUMAN**, Complement C3 OS=Homo sapiens GN=C3 PE=1 SV=2

Match to Query 44492: 2467.267962 from(823.429930,3+) rtinseconds(2668) index(46295)

Title: Locus:1.1.1.3212.22 File:"2013-07-02 CLN FXIII 60 min 1st F 3.wiff"

Data file C:\Program Files (x86)\Matrix Science\Mascot Daemon\mgf4 FXIII 60 min 1st\mascot\_daemon\_merge.mgf

Click mouse within plot area to zoom in by factor of two about that point

Or, Plot from  to  Da

Label all possible matches  Label matches used for scoring

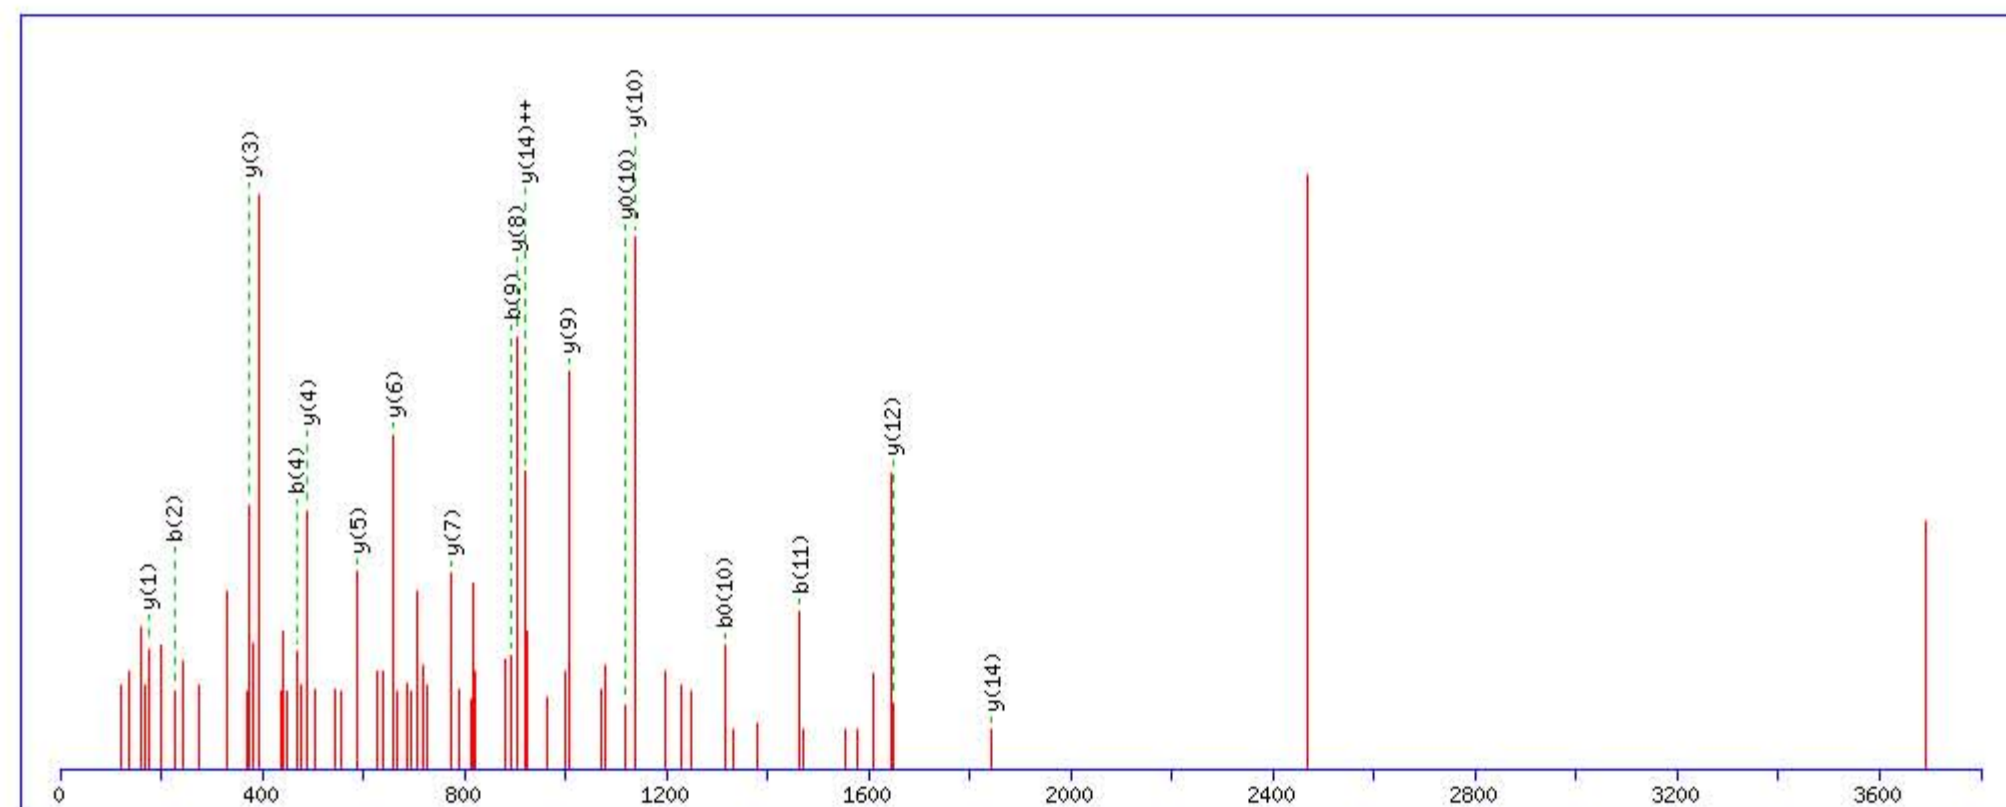

Monoisotopic mass of neutral peptide Mr(calc): 2467.245071

Fixed modifications: Carbamidomethyl (C) (apply to specified residues or termini only)

Variable modifications:

Q10 : Biotin:Thermo-21345 (Q)

Ions Score: 45 Expect: 0.0026

Matches : 18/210 fragment ions using 46 most intense peaks [\(help\)](#)

| #  | b                  | b <sup>++</sup> | b <sup>*</sup> | b <sup>*++</sup> | b <sup>0</sup>     | b <sup>0++</sup> | Seq. | y                  | y <sup>++</sup>   | y <sup>*</sup> | y <sup>*++</sup> | y <sup>0</sup>     | y <sup>0++</sup> | #  |
|----|--------------------|-----------------|----------------|------------------|--------------------|------------------|------|--------------------|-------------------|----------------|------------------|--------------------|------------------|----|
| 1  | 114.091340         | 57.549308       |                |                  |                    |                  | I    |                    |                   |                |                  |                    |                  | 20 |
| 2  | <b>227.175404</b>  | 114.091340      |                |                  |                    |                  | L    | 2355.168297        | 1178.087786       | 2338.141748    | 1169.574512      | 2337.157732        | 1169.082504      | 19 |
| 3  | 340.259468         | 170.633372      |                |                  |                    |                  | L    | 2242.084233        | 1121.545754       | 2225.057684    | 1113.032480      | 2224.073668        | 1112.540472      | 18 |
| 4  | <b>468.318046</b>  | 234.662661      | 451.291497     | 226.149386       |                    |                  | Q    | 2129.000169        | 1065.003722       | 2111.973620    | 1056.490448      | 2110.989604        | 1055.998440      | 17 |
| 5  | 525.339510         | 263.173393      | 508.312961     | 254.660119       |                    |                  | G    | 2000.941591        | 1000.974434       | 1983.915042    | 992.461159       | 1982.931026        | 991.969151       | 16 |
| 6  | 626.387189         | 313.697233      | 609.360640     | 305.183958       | 608.376624         | 304.691950       | T    | 1943.920127        | 972.463702        | 1926.893578    | 963.950427       | 1925.909562        | 963.458419       | 15 |
| 7  | 723.439953         | 362.223615      | 706.413404     | 353.710340       | 705.429388         | 353.218332       | P    | <b>1842.872448</b> | <b>921.939862</b> | 1825.845899    | 913.426588       | 1824.861883        | 912.934580       | 14 |
| 8  | 822.508367         | 411.757822      | 805.481818     | 403.244547       | 804.497802         | 402.752539       | V    | 1745.819684        | 873.413480        | 1728.793135    | 864.900206       | 1727.809119        | 864.408198       | 13 |
| 9  | <b>893.545481</b>  | 447.276379      | 876.518932     | 438.763104       | 875.534916         | 438.271096       | A    | <b>1646.751270</b> | 823.879273        | 1629.724721    | 815.365999       | 1628.740705        | 814.873991       | 12 |
| 10 | 1332.770807        | 666.889042      | 1315.744258    | 658.375767       | <b>1314.760242</b> | 657.883759       | Q    | 1575.714156        | 788.360716        | 1558.687607    | 779.847442       | 1557.703591        | 779.355434       | 11 |
| 11 | <b>1463.811292</b> | 732.409284      | 1446.784743    | 723.896010       | 1445.800727        | 723.404002       | M    | <b>1136.488830</b> | 568.748053        | 1119.462281    | 560.234779       | <b>1118.478265</b> | 559.742771       | 10 |
| 12 | 1564.858971        | 782.933124      | 1547.832422    | 774.419849       | 1546.848406        | 773.927841       | T    | <b>1005.448345</b> | 503.227811        | 988.421796     | 494.714536       | 987.437780         | 494.222528       | 9  |
| 13 | 1693.901564        | 847.454420      | 1676.875015    | 838.941146       | 1675.890999        | 838.449138       | E    | <b>904.400666</b>  | 452.703971        | 887.374117     | 444.190697       | 886.390101         | 443.698689       | 8  |
| 14 | 1808.928507        | 904.967892      | 1791.901958    | 896.454617       | 1790.917942        | 895.962609       | D    | <b>775.358073</b>  | 388.182675        | 758.331524     | 379.669400       | 757.347508         | 379.177392       | 7  |
| 15 | 1879.965621        | 940.486449      | 1862.939072    | 931.973174       | 1861.955056        | 931.481166       | A    | <b>660.331130</b>  | 330.669203        | 643.304581     | 322.155929       | 642.320565         | 321.663921       | 6  |
| 16 | 1979.034035        | 990.020656      | 1962.007486    | 981.507381       | 1961.023470        | 981.015373       | V    | <b>589.294016</b>  | 295.150646        | 572.267467     | 286.637372       | 571.283451         | 286.145364       | 5  |
| 17 | 2094.060978        | 1047.534127     | 2077.034429    | 1039.020852      | 2076.050413        | 1038.528844      | D    | <b>490.225602</b>  | 245.616439        | 473.199053     | 237.103165       | 472.215037         | 236.611157       | 4  |
| 18 | 2165.098092        | 1083.052684     | 2148.071543    | 1074.539409      | 2147.087527        | 1074.047402      | A    | <b>375.198659</b>  | 188.102968        | 358.172110     | 179.589693       | 357.188094         | 179.097685       | 3  |
| 19 | 2294.140685        | 1147.573981     | 2277.114136    | 1139.060706      | 2276.130120        | 1138.568698      | E    | 304.161545         | 152.584411        | 287.134996     | 144.071136       | 286.150980         | 143.579128       | 2  |
| 20 |                    |                 |                |                  |                    |                  | R    | <b>175.118952</b>  | 88.063114         | 158.092403     | 79.549839        |                    |                  | 1  |

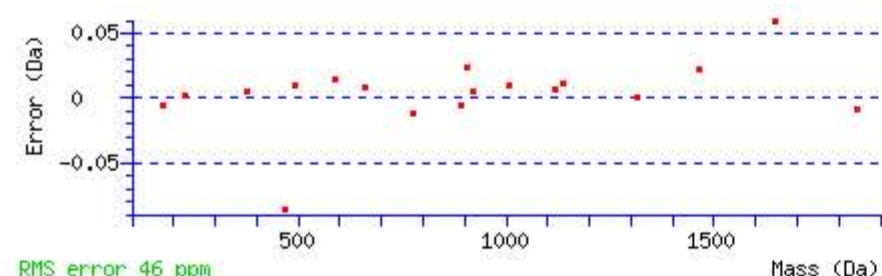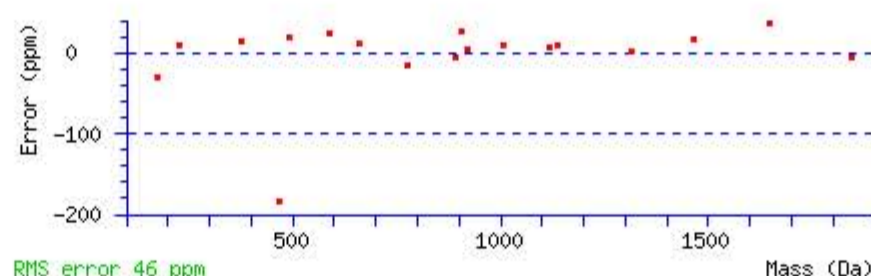

NCBI BLAST search of [ILLQGPVAQMTEDAVDAER](#)

(Parameters: blastp, nr protein database, expect=20000, no filter, PAM30)

Other BLAST [web gateways](#)

All matches to this query

| Score | Mr(calc):   | Delta    | Sequence                            |
|-------|-------------|----------|-------------------------------------|
| 45.0  | 2467.245071 | 0.022891 | <a href="#">ILLQGPVAQMTEDAVDAER</a> |
| 29.3  | 2467.245071 | 0.022891 | <a href="#">ILLQGPVAQMTEDAVDAER</a> |

Mascot: <http://www.matrixscience.com/>



# MASCOT SCIENCE Mascot Search Results

## Peptide View

MS/MS Fragmentation of **KQELSEAEQATR**

Found in **CO3\_HUMAN**, Complement C3 OS=Homo sapiens GN=C3 PE=1 SV=2

Match to Query 45809: 1699.857132 from(567.626320,3+) rtinseconds(1357) index(37846)

Title: Locus:1.1.1.2756.15 File:"2013-07-02 CLN FXIII 60 min 1st F 3.wiff"

Data file C:\Program Files (x86)\Matrix Science\Mascot Daemon\mgf\4 FXIII 60 min 1st\mascot\_daemon\_merge.mgf

Click mouse within plot area to zoom in by factor of two about that point

Or, Plot from  to  Da

Label all possible matches  Label matches used for scoring

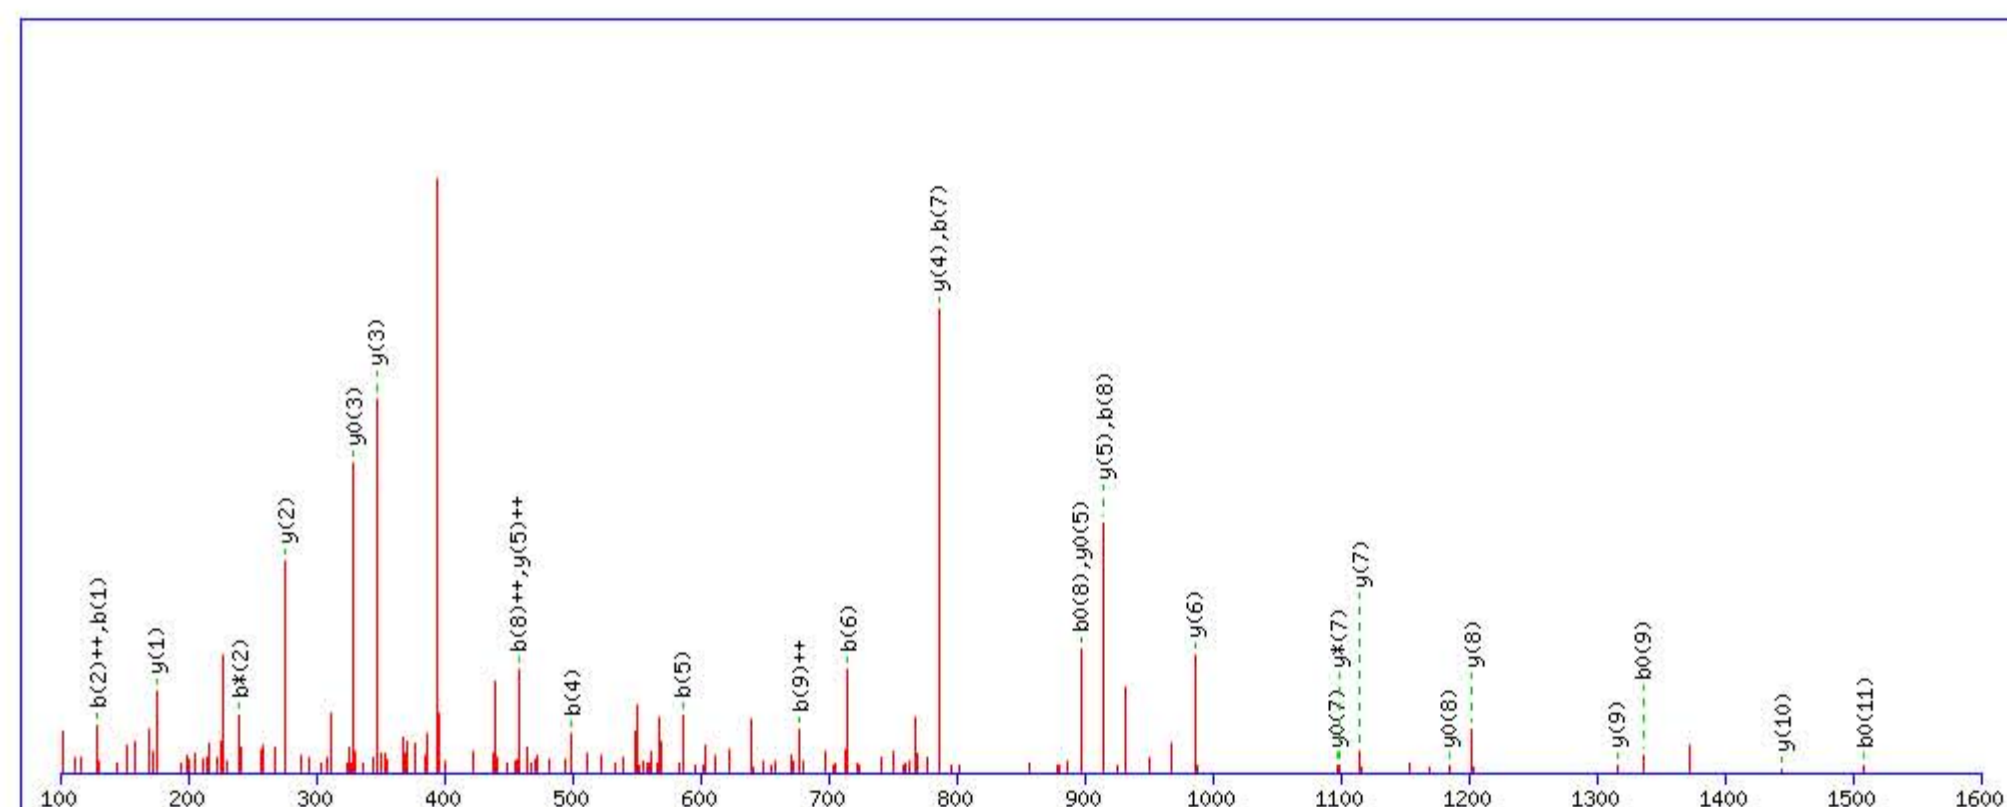

Monoisotopic mass of neutral peptide Mr(calc): 1699.856277

Fixed modifications: Carbamidomethyl (C) (apply to specified residues or termini only)

Variable modifications:

Q9 : Biotin:Thermo-21345 (Q)

Ions Score: 67 Expect: 3e-006

Matches : 29/126 fragment ions using 39 most intense peaks [\(help\)](#)

| #  | b           | b <sup>++</sup> | b <sup>*</sup> | b <sup>+++</sup> | b <sup>0</sup> | b <sup>0++</sup> | Seq. | y           | y <sup>++</sup> | y <sup>*</sup> | y <sup>+++</sup> | y <sup>0</sup> | y <sup>0++</sup> | #  |
|----|-------------|-----------------|----------------|------------------|----------------|------------------|------|-------------|-----------------|----------------|------------------|----------------|------------------|----|
| 1  | 129.102239  | 65.054757       | 112.075690     | 56.541483        |                |                  | K    |             |                 |                |                  |                |                  | 12 |
| 2  | 257.160817  | 129.084047      | 240.134268     | 120.570772       |                |                  | Q    | 1572.768634 | 786.887955      | 1555.742085    | 778.374681       | 1554.758069    | 777.882673       | 11 |
| 3  | 386.203410  | 193.605343      | 369.176861     | 185.092069       | 368.192845     | 184.600061       | E    | 1444.710056 | 722.858666      | 1427.683507    | 714.345392       | 1426.699491    | 713.853384       | 10 |
| 4  | 499.287474  | 250.147375      | 482.260925     | 241.634101       | 481.276909     | 241.142093       | L    | 1315.667463 | 658.337370      | 1298.640914    | 649.824095       | 1297.656898    | 649.332087       | 9  |
| 5  | 586.319502  | 293.663389      | 569.292953     | 285.150115       | 568.308937     | 284.658107       | S    | 1202.583399 | 601.795338      | 1185.556850    | 593.282063       | 1184.572834    | 592.790055       | 8  |
| 6  | 715.362095  | 358.184686      | 698.335546     | 349.671411       | 697.351530     | 349.179403       | E    | 1115.551371 | 558.279324      | 1098.524822    | 549.766049       | 1097.540806    | 549.274041       | 7  |
| 7  | 786.399209  | 393.703243      | 769.372660     | 385.189968       | 768.388644     | 384.697960       | A    | 986.508778  | 493.758027      | 969.482229     | 485.244753       | 968.498213     | 484.752745       | 6  |
| 8  | 915.441802  | 458.224539      | 898.415253     | 449.711265       | 897.431237     | 449.219257       | E    | 915.471664  | 458.239470      | 898.445115     | 449.726196       | 897.461099     | 449.234188       | 5  |
| 9  | 1354.667128 | 677.837202      | 1337.640579    | 669.323928       | 1336.656563    | 668.831920       | Q    | 786.429071  | 393.718174      | 769.402522     | 385.204899       | 768.418506     | 384.712891       | 4  |
| 10 | 1425.704242 | 713.355759      | 1408.677693    | 704.842485       | 1407.693677    | 704.350477       | A    | 347.203745  | 174.105510      | 330.177196     | 165.592236       | 329.193180     | 165.100228       | 3  |
| 11 | 1526.751921 | 763.879599      | 1509.725372    | 755.366324       | 1508.741356    | 754.874316       | T    | 276.166631  | 138.586953      | 259.140082     | 130.073679       | 258.156066     | 129.581671       | 2  |
| 12 |             |                 |                |                  |                |                  | R    | 175.118952  | 88.063114       | 158.092403     | 79.549839        |                |                  | 1  |

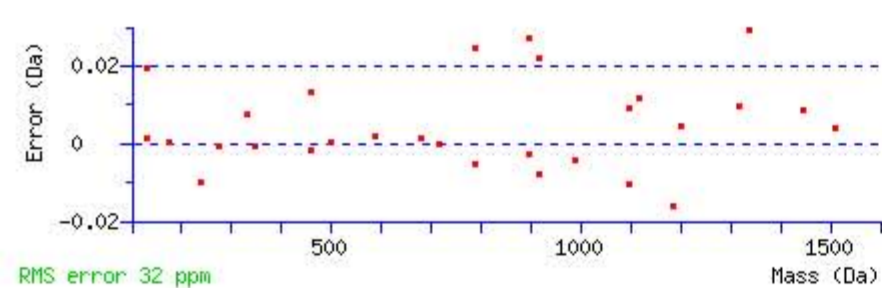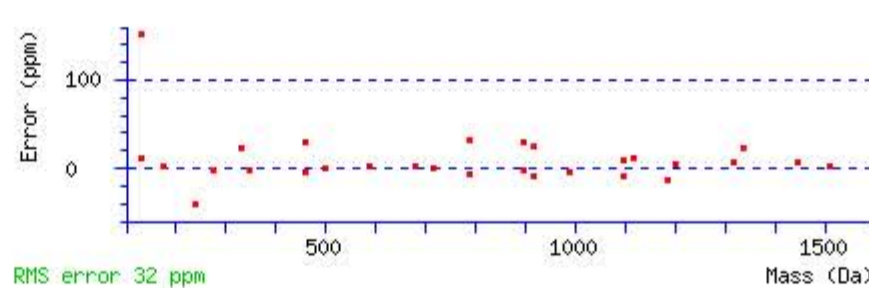

NCBI BLAST search of **KQELSEAEQATR**

(Parameters: blastp, nr protein database, expect=20000, no filter, PAM30)

Other BLAST [web gateways](#)

All matches to this query

| Score | Mr(calc):   | Delta     | Sequence                        |
|-------|-------------|-----------|---------------------------------|
| 67.1  | 1699.856277 | 0.000855  | <a href="#">KQELSEAEQATR</a>    |
| 14.3  | 1699.856277 | 0.000855  | <a href="#">KQELSEAEQATR</a>    |
| 7.8   | 1699.881424 | -0.024292 | <a href="#">LSSKELQEQA EK</a>   |
| 7.2   | 1699.845932 | 0.011200  | <a href="#">QAMQEQLSK</a>       |
| 6.8   | 1699.878754 | -0.021622 | <a href="#">ELQQRMQEEVRR</a>    |
| 6.1   | 1699.849792 | 0.007340  | <a href="#">QEMRTTQLGPGR</a>    |
| 4.5   | 1699.845932 | 0.011200  | <a href="#">QAMQEQLSK</a>       |
| 4.0   | 1699.874039 | -0.016907 | <a href="#">KEISVNDLNESSIPR</a> |
| 3.6   | 1699.874924 | -0.017792 | <a href="#">SQGMLALSISPNR</a>   |
| 2.7   | 1699.849792 | 0.007340  | <a href="#">QEMRTTQLGPGR</a>    |



# MASCOT Search Results

## Peptide View

MS/MS Fragmentation of **HQQTVTIPPK**

Found in **CO3\_HUMAN**, Complement C3 OS=Homo sapiens GN=C3 PE=1 SV=2

Match to Query 47759: 1769.974092 from(590.998640,3+) rtinseconds(1899) index(41399)

Title: Locus:1.1.1.2945.8 File:"2013-07-02 CLN FXIII 60 min 1st F 3.wiff"

Data file C:\Program Files (x86)\Matrix Science\Mascot Daemon\mgf4 FXIII 60 min 1st\mascot\_daemon\_merge.mgf

Click mouse within plot area to zoom in by factor of two about that point

Or, Plot from  to  Da

Label all possible matches  Label matches used for scoring

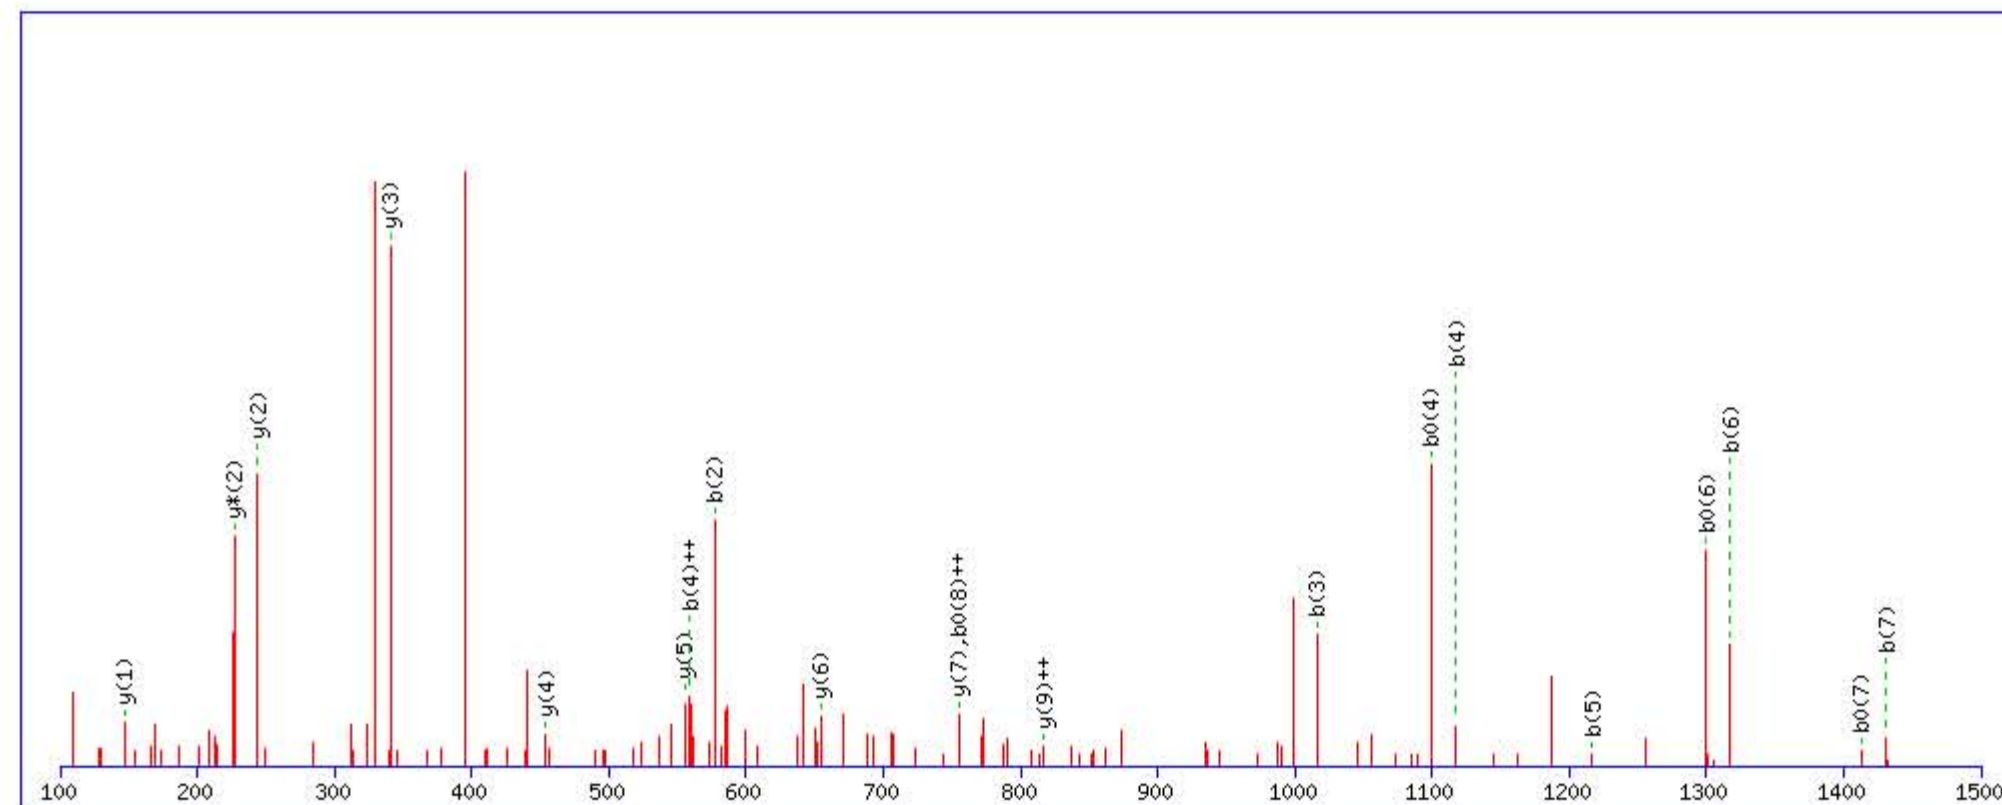

Monoisotopic mass of neutral peptide Mr(calc): 1769.968460

Fixed modifications: Carbamidomethyl (C) (apply to specified residues or termini only)

Variable modifications:

Q2 : Biotin:Thermo-21345 (Q)

Q3 : Biotin:Thermo-21345 (Q)

Ions Score: 28 Expect: 0.028

Matches : 20/92 fragment ions using 40 most intense peaks [\(help\)](#)

| #  | b                  | b <sup>++</sup>   | b <sup>*</sup> | b <sup>*++</sup> | b <sup>0</sup>     | b <sup>0++</sup>  | Seq. | y                 | y <sup>++</sup>   | y <sup>*</sup>    | y <sup>*++</sup> | y <sup>0</sup> | y <sup>0++</sup> | #  |
|----|--------------------|-------------------|----------------|------------------|--------------------|-------------------|------|-------------------|-------------------|-------------------|------------------|----------------|------------------|----|
| 1  | 138.066188         | 69.536732         |                |                  |                    |                   | H    |                   |                   |                   |                  |                |                  | 10 |
| 2  | <b>577.291514</b>  | 289.149395        | 560.264965     | 280.636121       |                    |                   | Q    | 1633.916820       | <b>817.462048</b> | 1616.890271       | 808.948774       | 1615.906255    | 808.456766       | 9  |
| 3  | <b>1016.516840</b> | 508.762058        | 999.490291     | 500.248784       |                    |                   | Q    | 1194.691494       | 597.849385        | 1177.664945       | 589.336111       | 1176.680929    | 588.844103       | 8  |
| 4  | <b>1117.564519</b> | <b>559.285898</b> | 1100.537970    | 550.772623       | <b>1099.553954</b> | 550.280615        | T    | <b>755.466168</b> | 378.236722        | 738.439619        | 369.723448       | 737.455603     | 369.231440       | 7  |
| 5  | <b>1216.632933</b> | 608.820105        | 1199.606384    | 600.306830       | 1198.622368        | 599.814822        | V    | <b>654.418489</b> | 327.712883        | 637.391940        | 319.199608       | 636.407924     | 318.707600       | 6  |
| 6  | <b>1317.680612</b> | 659.343944        | 1300.654063    | 650.830670       | <b>1299.670047</b> | 650.338662        | T    | <b>555.350075</b> | 278.178676        | 538.323526        | 269.665401       | 537.339510     | 269.173393       | 5  |
| 7  | <b>1430.764676</b> | 715.885976        | 1413.738127    | 707.372702       | <b>1412.754111</b> | 706.880694        | I    | <b>454.302396</b> | 227.654836        | 437.275847        | 219.141561       |                |                  | 4  |
| 8  | 1527.817440        | 764.412358        | 1510.790891    | 755.899084       | 1509.806875        | <b>755.407076</b> | P    | <b>341.218332</b> | 171.112804        | 324.191783        | 162.599530       |                |                  | 3  |
| 9  | 1624.870204        | 812.938740        | 1607.843655    | 804.425466       | 1606.859639        | 803.933458        | P    | <b>244.165568</b> | 122.586422        | <b>227.139019</b> | 114.073148       |                |                  | 2  |
| 10 |                    |                   |                |                  |                    |                   | K    | <b>147.112804</b> | 74.060040         | 130.086255        | 65.546765        |                |                  | 1  |

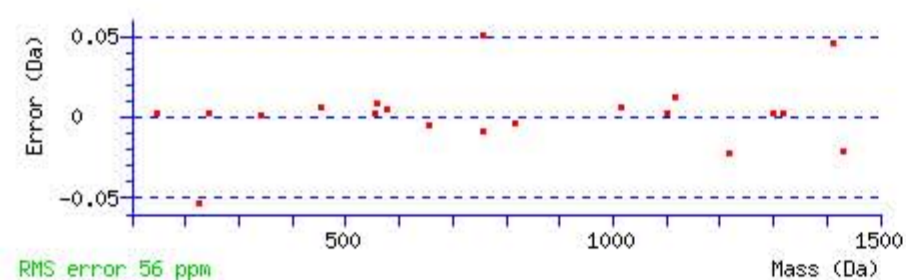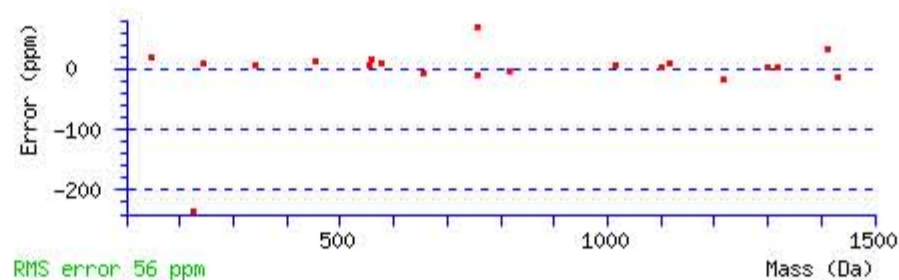

NCBI BLAST search of [HQQTVTIPPK](#)

(Parameters: blastp, nr protein database, expect=20000, no filter, PAM30)

Other BLAST [web gateways](#)

All matches to this query

| Score | Mr(calc):   | Delta    | Sequence                        |
|-------|-------------|----------|---------------------------------|
| 28.4  | 1769.968460 | 0.005632 | <a href="#">HQQTVTIPPK</a>      |
| 11.8  | 1769.961029 | 0.013063 | <a href="#">WMLSRDRASTLPLPK</a> |

Mascot: <http://www.matrixscience.com/>



# MASCOT Search Results

## Peptide View

MS/MS Fragmentation of **GQGILSVVTMYHAK**

Found in **CO3\_HUMAN**, Complement C3 OS=Homo sapiens GN=C3 PE=1 SV=2

Match to Query 48895: 1817.924892 from(606.982240,3+) rtinseconds(1786) index(40676)

Title: Locus:1.1.1.2906.8 File:"2013-07-02 CLN FXIII 60 min 1st F 3.wiff"

Data file C:\Program Files (x86)\Matrix Science\Mascot Daemon\mgf4 FXIII 60 min 1st\mascot\_daemon\_merge.mgf

Click mouse within plot area to zoom in by factor of two about that point

Or, Plot from  to  Da

Label all possible matches  Label matches used for scoring

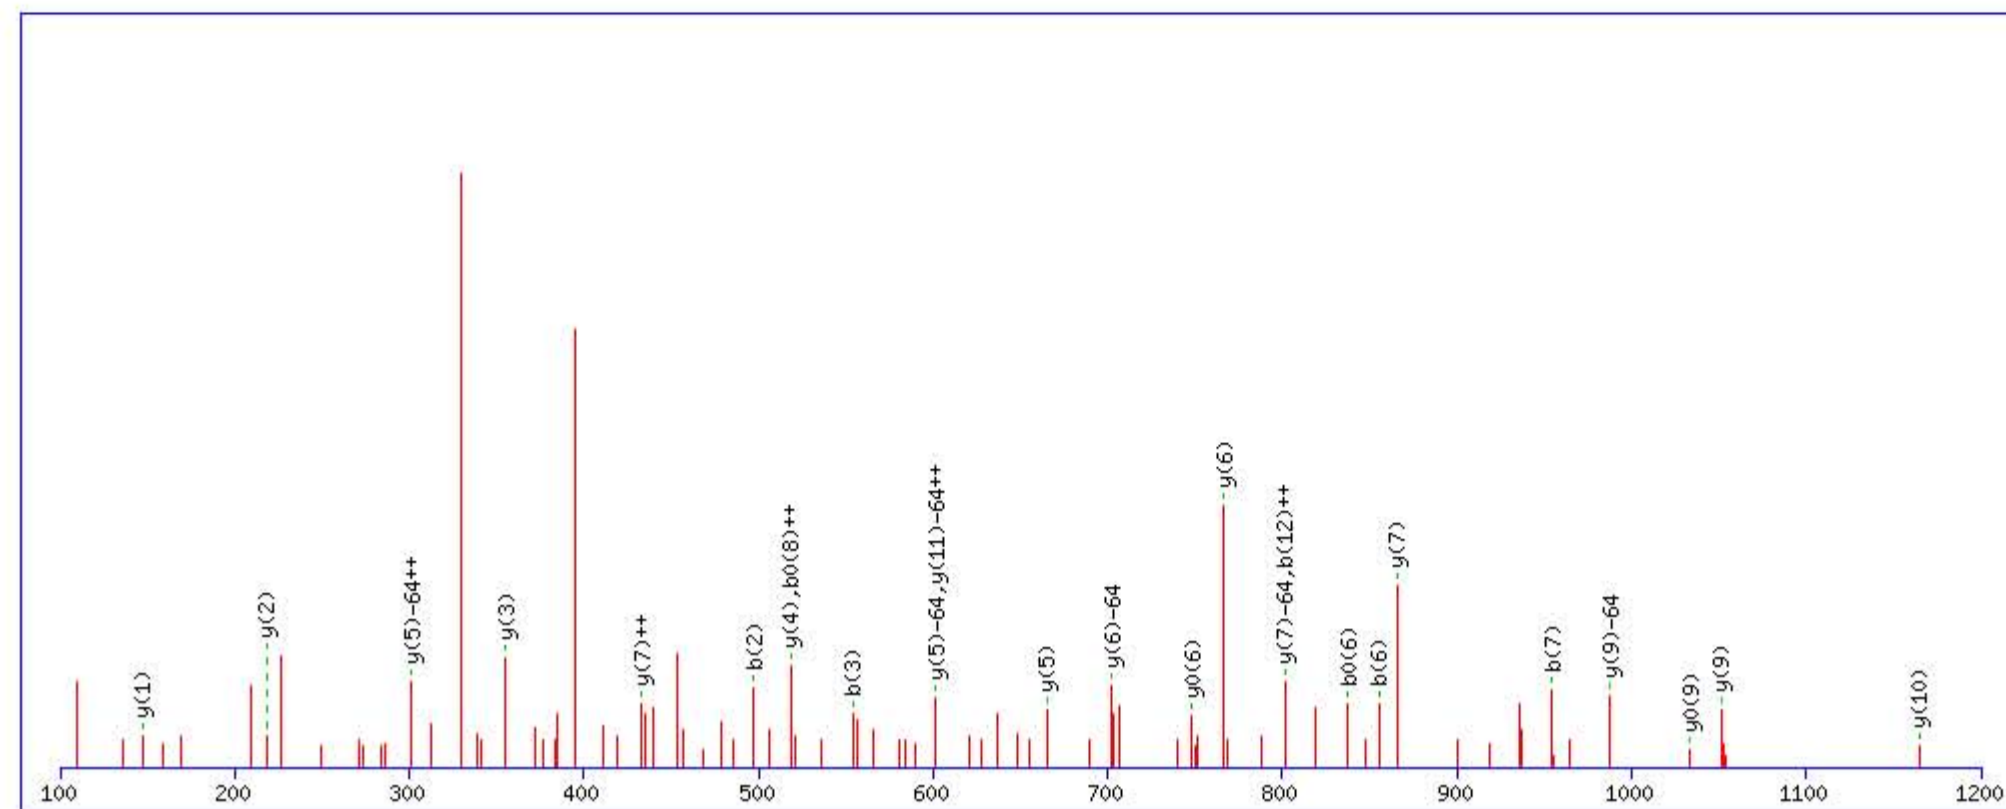

Monoisotopic mass of neutral peptide Mr(calc): 1817.916824

Fixed modifications: Carbamidomethyl (C) (apply to specified residues or termini only)

Variable modifications:

Q2 : Biotin:Thermo-21345 (Q)

M10 : Oxidation (M), with neutral losses 0.000000 (shown in table), 63.998285

Ions Score: 61 Expect: 2.5e-005

Matches : 25/214 fragment ions using 31 most intense peaks [\(help\)](#)

| #  | b                 | b <sup>++</sup>   | b <sup>*</sup> | b <sup>+++</sup> | b <sup>0</sup>    | b <sup>0++</sup>  | Seq. | y                  | y <sup>++</sup>   | y <sup>*</sup> | y <sup>+++</sup> | y <sup>0</sup>     | y <sup>0++</sup> | #  |
|----|-------------------|-------------------|----------------|------------------|-------------------|-------------------|------|--------------------|-------------------|----------------|------------------|--------------------|------------------|----|
| 1  | 58.028740         | 29.518008         |                |                  |                   |                   | G    |                    |                   |                |                  |                    |                  | 14 |
| 2  | <b>497.254066</b> | 249.130671        | 480.227517     | 240.617397       |                   |                   | Q    | 1761.902627        | 881.454952        | 1744.876078    | 872.941677       | 1743.892062        | 872.449669       | 13 |
| 3  | <b>554.275530</b> | 277.641403        | 537.248981     | 269.128129       |                   |                   | G    | 1322.677301        | 661.842289        | 1305.650752    | 653.329014       | 1304.666736        | 652.837006       | 12 |
| 4  | 655.323209        | 328.165243        | 638.296660     | 319.651968       | 637.312644        | 319.159960        | T    | 1265.655837        | 633.331557        | 1248.629288    | 624.818282       | 1247.645272        | 624.326274       | 11 |
| 5  | 768.407273        | 384.707275        | 751.380724     | 376.194000       | 750.396708        | 375.701992        | L    | <b>1164.608158</b> | 582.807717        | 1147.581609    | 574.294443       | 1146.597593        | 573.802435       | 10 |
| 6  | <b>855.439301</b> | 428.223289        | 838.412752     | 419.710014       | <b>837.428736</b> | 419.218006        | S    | <b>1051.524094</b> | 526.265685        | 1034.497545    | 517.752411       | <b>1033.513529</b> | 517.260403       | 9  |
| 7  | <b>954.507715</b> | 477.757496        | 937.481166     | 469.244221       | 936.497150        | 468.752213        | V    | 964.492066         | 482.749671        | 947.465517     | 474.236397       | 946.481501         | 473.744389       | 8  |
| 8  | 1053.576129       | 527.291703        | 1036.549580    | 518.778428       | 1035.565564       | <b>518.286420</b> | V    | <b>865.423652</b>  | <b>433.215464</b> | 848.397103     | 424.702190       | 847.413087         | 424.210182       | 7  |
| 9  | 1154.623808       | 577.815542        | 1137.597259    | 569.302268       | 1136.613243       | 568.810260        | T    | <b>766.355238</b>  | 383.681257        | 749.328689     | 375.167983       | <b>748.344673</b>  | 374.675975       | 6  |
| 10 | 1301.659208       | 651.333242        | 1284.632659    | 642.819968       | 1283.648643       | 642.327960        | M    | <b>665.307559</b>  | 333.157418        | 648.281010     | 324.644143       |                    |                  | 5  |
| 11 | 1464.722537       | 732.864907        | 1447.695988    | 724.351632       | 1446.711972       | 723.859624        | Y    | <b>518.272159</b>  | 259.639718        | 501.245610     | 251.126443       |                    |                  | 4  |
| 12 | 1601.781449       | <b>801.394363</b> | 1584.754900    | 792.881088       | 1583.770884       | 792.389080        | H    | <b>355.208830</b>  | 178.108053        | 338.182281     | 169.594778       |                    |                  | 3  |
| 13 | 1672.818563       | 836.912920        | 1655.792014    | 828.399645       | 1654.807998       | 827.907637        | A    | <b>218.149918</b>  | 109.578597        | 201.123369     | 101.065322       |                    |                  | 2  |
| 14 |                   |                   |                |                  |                   |                   | K    | <b>147.112804</b>  | 74.060040         | 130.086255     | 65.546765        |                    |                  | 1  |

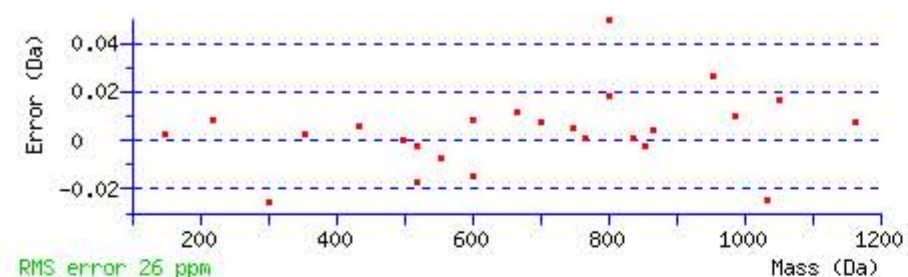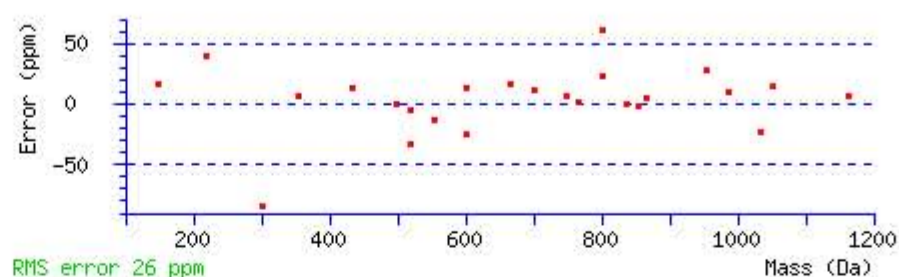

NCBI BLAST search of [GQGILSVVTMYHAK](#)

(Parameters: blastp, nr protein database, expect=20000, no filter, PAM30)

Other BLAST [web gateways](#)

All matches to this query

| Score | Mr(calc):   | Delta    | Sequence                       |
|-------|-------------|----------|--------------------------------|
| 60.5  | 1817.916824 | 0.008068 | <a href="#">GQGILSVVTMYHAK</a> |

Mascot: <http://www.matrixscience.com/>



# MASCOT Search Results

## Peptide View

MS/MS Fragmentation of **SGSDEVQVGQQR**

Found in **CO3\_HUMAN**, Complement C3 OS=Homo sapiens GN=C3 PE=1 SV=2

Match to Query 50875: 1910.940228 from(956.477390,2+) rtinseconds(1851) index(41009)

Title: Locus:1.1.1.2928.22 File:"2013-07-02 CLN FXIII 60 min 1st F 3.wiff"

Data file C:\Program Files (x86)\Matrix Science\Mascot Daemon\mgf4 FXIII 60 min 1st\mascot\_daemon\_merge.mgf

Click mouse within plot area to zoom in by factor of two about that point

Or, Plot from  to  Da

Label all possible matches  Label matches used for scoring

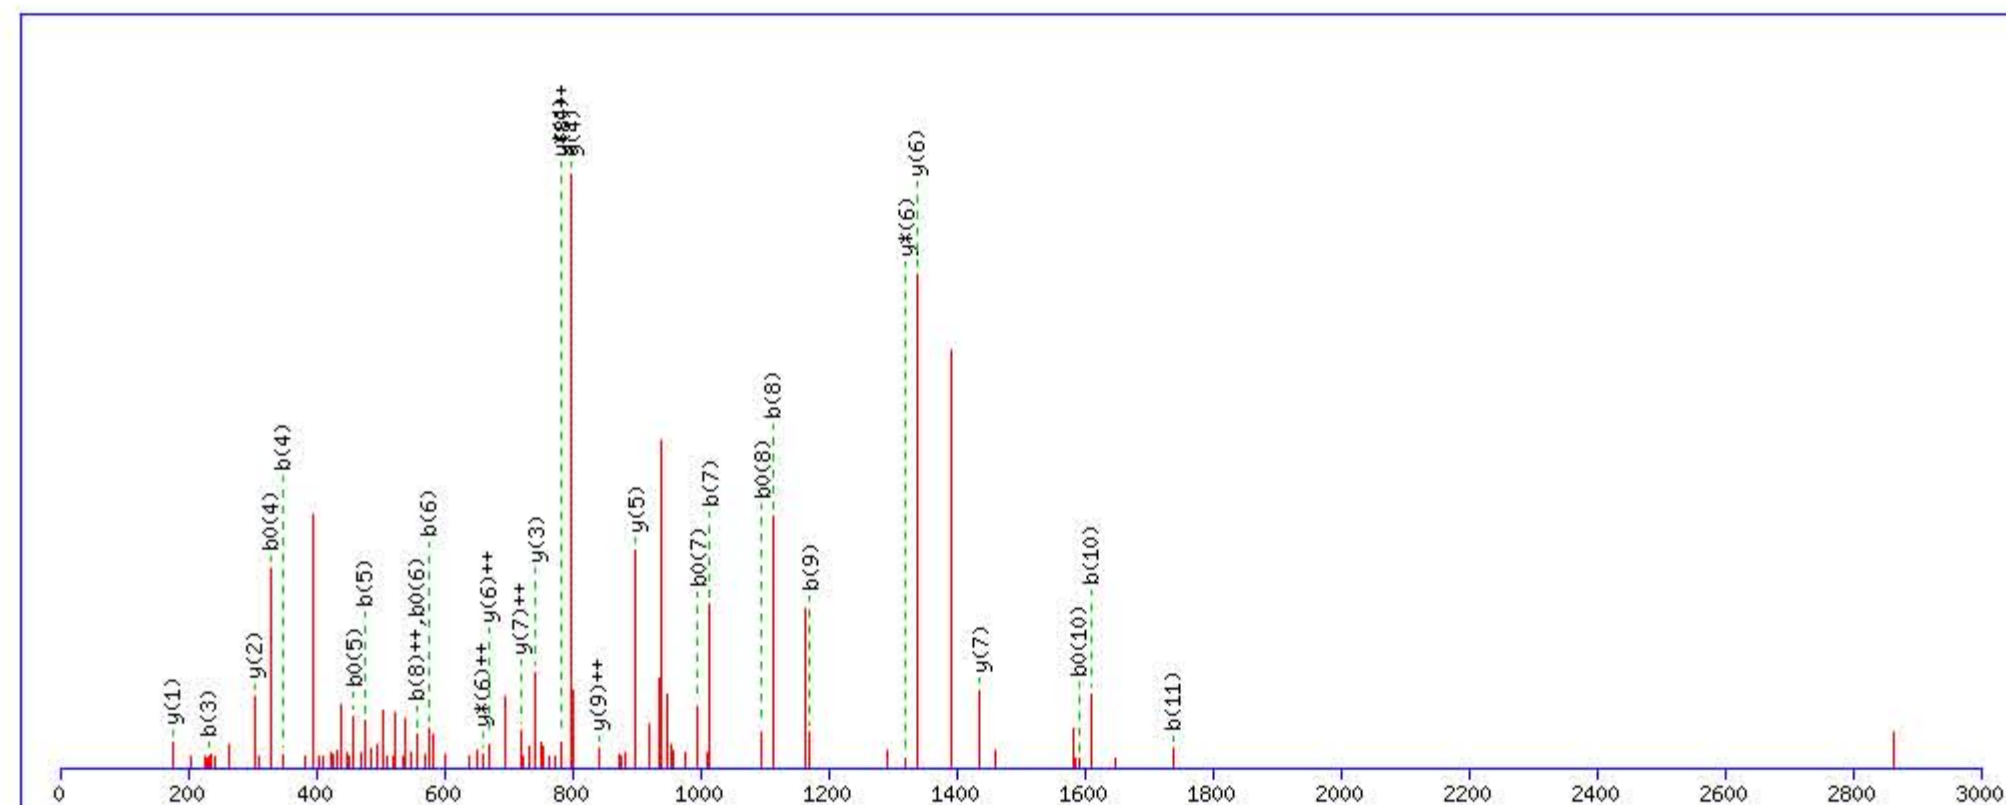

Monoisotopic mass of neutral peptide Mr(calc): 1910.934265

Fixed modifications: Carbamidomethyl (C) (apply to specified residues or termini only)

Variable modifications:

Q7 : Biotin:Thermo-21345 (Q)

Q10 : Biotin:Thermo-21345 (Q)

Ions Score: 38 Expect: 0.013

Matches : 30/106 fragment ions using 69 most intense peaks [\(help\)](#)

| #  | b                  | b <sup>++</sup>   | b <sup>*</sup> | b <sup>*++</sup> | b <sup>0</sup>     | b <sup>0++</sup> | Seq. | y                  | y <sup>++</sup>   | y <sup>*</sup>     | y <sup>*++</sup>  | y <sup>0</sup> | y <sup>0++</sup> | #  |
|----|--------------------|-------------------|----------------|------------------|--------------------|------------------|------|--------------------|-------------------|--------------------|-------------------|----------------|------------------|----|
| 1  | 88.039304          | 44.523290         |                |                  | 70.028739          | 35.518008        | S    |                    |                   |                    |                   |                |                  | 12 |
| 2  | 145.060768         | 73.034022         |                |                  | 127.050203         | 64.028740        | G    | 1824.909502        | 912.958389        | 1807.882953        | 904.445115        | 1806.898937    | 903.953107       | 11 |
| 3  | <b>232.092796</b>  | 116.550036        |                |                  | 214.082231         | 107.544753       | S    | 1767.888038        | 884.447657        | 1750.861489        | 875.934383        | 1749.877473    | 875.442375       | 10 |
| 4  | <b>347.119739</b>  | 174.063507        |                |                  | <b>329.109174</b>  | 165.058225       | D    | 1680.856010        | <b>840.931643</b> | 1663.829461        | 832.418369        | 1662.845445    | 831.926361       | 9  |
| 5  | <b>476.162332</b>  | 238.584804        |                |                  | <b>458.151767</b>  | 229.579522       | E    | 1565.829067        | <b>783.418172</b> | 1548.802518        | 774.904897        | 1547.818502    | 774.412889       | 8  |
| 6  | <b>575.230746</b>  | 288.119011        |                |                  | <b>557.220181</b>  | 279.113729       | V    | <b>1436.786474</b> | <b>718.896875</b> | 1419.759925        | 710.383601        |                |                  | 7  |
| 7  | <b>1014.456072</b> | 507.731674        | 997.429523     | 499.218400       | <b>996.445507</b>  | 498.726392       | Q    | <b>1337.718060</b> | <b>669.362668</b> | <b>1320.691511</b> | <b>660.849394</b> |                |                  | 6  |
| 8  | <b>1113.524486</b> | <b>557.265881</b> | 1096.497937    | 548.752607       | <b>1095.513921</b> | 548.260599       | V    | <b>898.492734</b>  | 449.750005        | 881.466185         | 441.236731        |                |                  | 5  |
| 9  | <b>1170.545950</b> | 585.776613        | 1153.519401    | 577.263339       | 1152.535385        | 576.771330       | G    | <b>799.424320</b>  | 400.215798        | <b>782.397771</b>  | 391.702524        |                |                  | 4  |
| 10 | <b>1609.771276</b> | 805.389276        | 1592.744727    | 796.876002       | <b>1591.760711</b> | 796.383994       | Q    | <b>742.402856</b>  | 371.705066        | 725.376307         | 363.191792        |                |                  | 3  |
| 11 | <b>1737.829854</b> | 869.418565        | 1720.803305    | 860.905291       | 1719.819289        | 860.413283       | Q    | <b>303.177530</b>  | 152.092403        | 286.150981         | 143.579129        |                |                  | 2  |
| 12 |                    |                   |                |                  |                    |                  | R    | <b>175.118952</b>  | 88.063114         | 158.092403         | 79.549839         |                |                  | 1  |

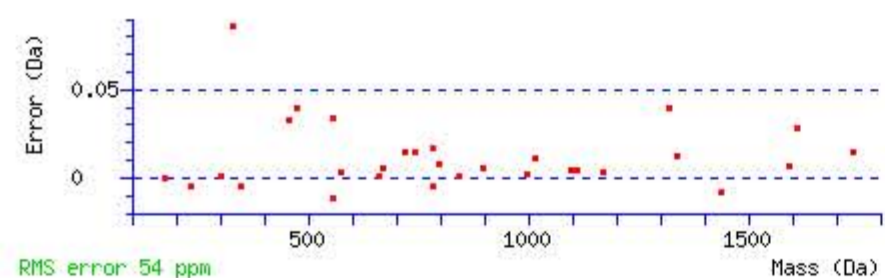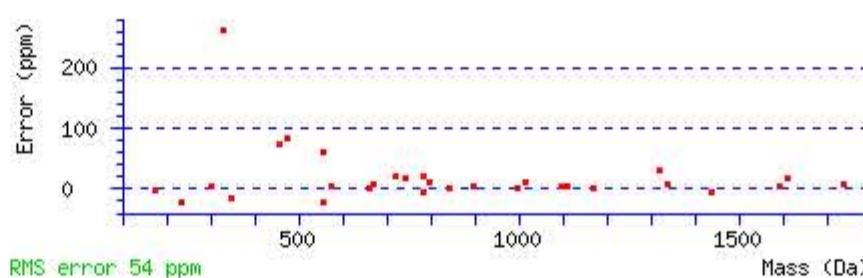

NCBI BLAST search of [SGSDEVQVGQQR](#)

(Parameters: blastp, nr protein database, expect=20000, no filter, PAM30)

Other BLAST [web gateways](#)

All matches to this query

| Score | Mr(calc):   | Delta     | Sequence                                 |
|-------|-------------|-----------|------------------------------------------|
| 37.5  | 1910.934265 | 0.005963  | <a href="#">SGSDEVQVGQQR</a>             |
| 31.6  | 1910.938263 | 0.001965  | <a href="#">YVTSAPMPEPQAPGR</a>          |
| 27.7  | 1910.934265 | 0.005963  | <a href="#">SGSDEVQVGQQR</a>             |
| 5.0   | 1910.934265 | 0.005963  | <a href="#">SGSDEVQVGQQR</a>             |
| 3.9   | 1910.930725 | 0.009503  | <a href="#">AGSGGLGGGAGGGQAGAGQGAALR</a> |
| 3.9   | 1910.963196 | -0.022968 | <a href="#">EQQRQEELKQR</a>              |
| 3.1   | 1910.913101 | 0.027127  | <a href="#">TLNMDMFTWEPRKAR</a>          |
| 2.7   | 1910.955811 | -0.015583 | <a href="#">RLAALGADPAARDSDAEGR</a>      |
| 2.3   | 1910.957382 | -0.017154 | <a href="#">DPWRFGNTPVQQR</a>            |
| 1.4   | 1910.938721 | 0.001507  | <a href="#">QEA EGLALDSPWHRFR</a>        |



# MASCOT Search Results

## Peptide View

MS/MS Fragmentation of **SGSDEVQVGQQR**

Found in **CO3\_HUMAN**, Complement C3 OS=Homo sapiens GN=C3 PE=1 SV=2

Match to Query 50876: 1910.943492 from(637.988440,3+) rtinseconds(1890) index(41325)

Title: Locus:1.1.1.2942.9 File:"2013-07-02 CLN FXIII 60 min 1st F 3.wiff"

Data file C:\Program Files (x86)\Matrix Science\Mascot Daemon\mgf4 FXIII 60 min 1st\mascot\_daemon\_merge.mgf

Click mouse within plot area to zoom in by factor of two about that point

Or, Plot from  to  Da

Label all possible matches  Label matches used for scoring

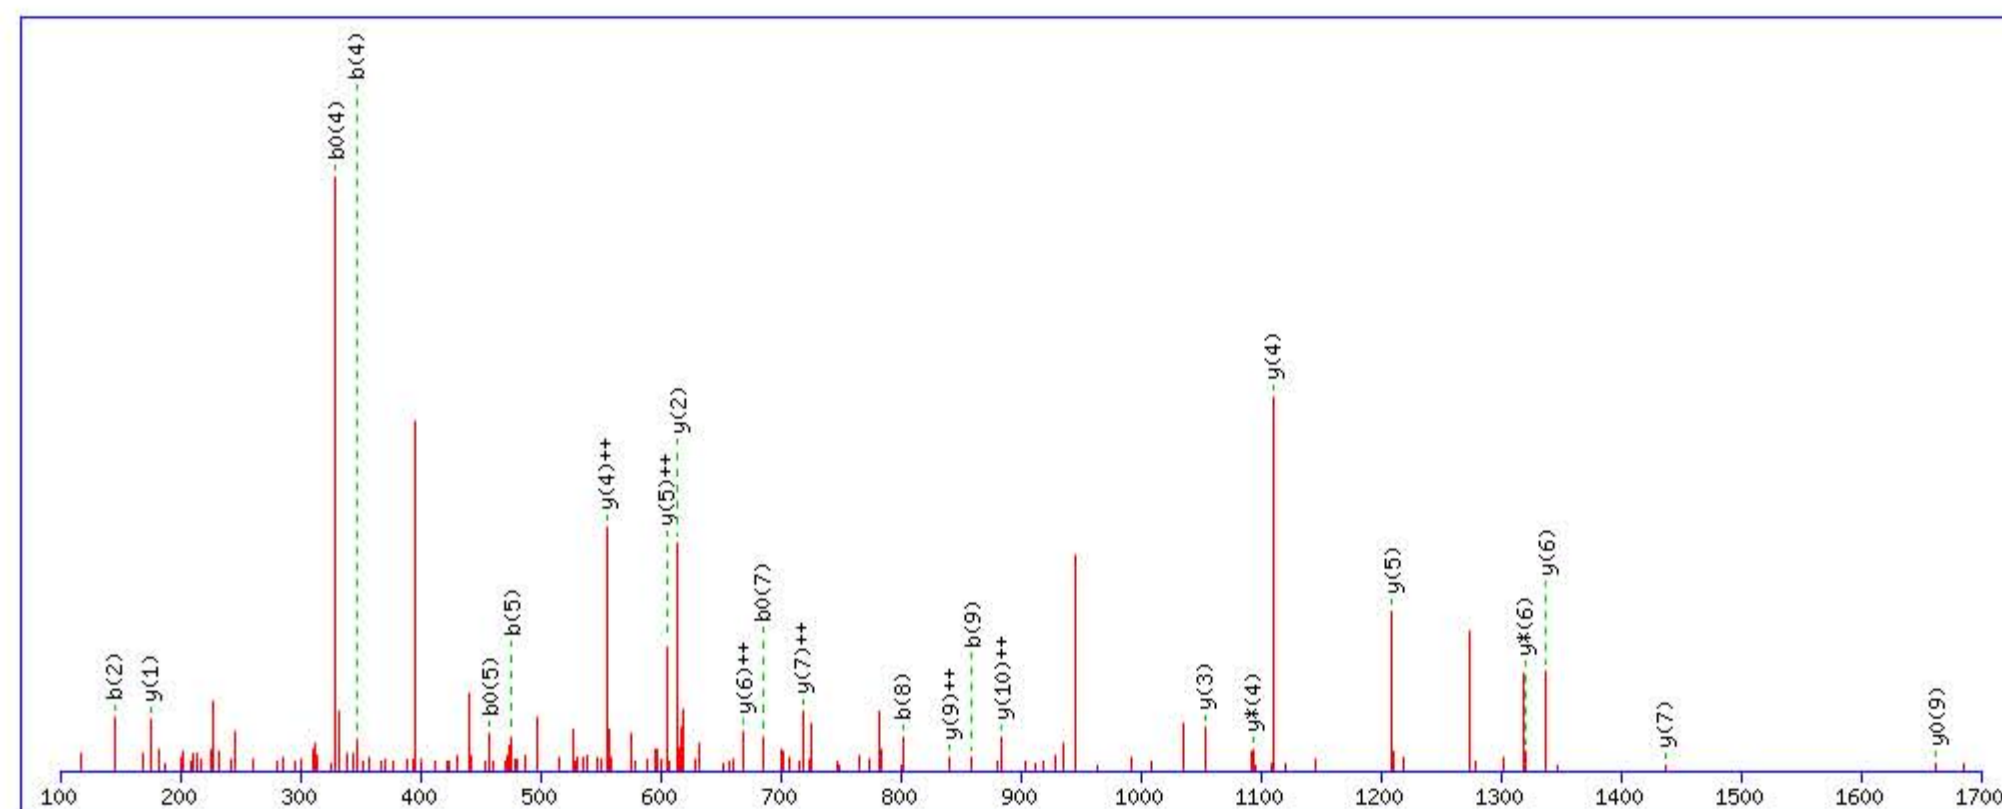

Monoisotopic mass of neutral peptide Mr(calc): 1910.934265

Fixed modifications: Carbamidomethyl (C) (apply to specified residues or termini only)

Variable modifications:

Q10 : Biotin:Thermo-21345 (Q)

Q11 : Biotin:Thermo-21345 (Q)

Ions Score: 27 Expect: 0.011

Matches : 24/106 fragment ions using 55 most intense peaks [\(help\)](#)

| #  | b                 | b <sup>++</sup> | b <sup>*</sup> | b <sup>*++</sup> | b <sup>0</sup>    | b <sup>0++</sup> | Seq. | y                  | y <sup>++</sup>   | y <sup>*</sup>     | y <sup>*++</sup> | y <sup>0</sup>     | y <sup>0++</sup> | #  |
|----|-------------------|-----------------|----------------|------------------|-------------------|------------------|------|--------------------|-------------------|--------------------|------------------|--------------------|------------------|----|
| 1  | 88.039304         | 44.523290       |                |                  | 70.028739         | 35.518008        | S    |                    |                   |                    |                  |                    |                  | 12 |
| 2  | <b>145.060768</b> | 73.034022       |                |                  | 127.050203        | 64.028740        | G    | 1824.909502        | 912.958389        | 1807.882953        | 904.445115       | 1806.898937        | 903.953107       | 11 |
| 3  | 232.092796        | 116.550036      |                |                  | 214.082231        | 107.544753       | S    | 1767.888038        | <b>884.447657</b> | 1750.861489        | 875.934383       | 1749.877473        | 875.442375       | 10 |
| 4  | <b>347.119739</b> | 174.063507      |                |                  | <b>329.109174</b> | 165.058225       | D    | 1680.856010        | <b>840.931643</b> | 1663.829461        | 832.418369       | <b>1662.845445</b> | 831.926361       | 9  |
| 5  | <b>476.162332</b> | 238.584804      |                |                  | <b>458.151767</b> | 229.579522       | E    | 1565.829067        | 783.418172        | 1548.802518        | 774.904897       | 1547.818502        | 774.412889       | 8  |
| 6  | 575.230746        | 288.119011      |                |                  | 557.220181        | 279.113729       | V    | <b>1436.786474</b> | <b>718.896875</b> | 1419.759925        | 710.383601       |                    |                  | 7  |
| 7  | 703.289324        | 352.148300      | 686.262775     | 343.635026       | <b>685.278759</b> | 343.143018       | Q    | <b>1337.718060</b> | <b>669.362668</b> | <b>1320.691511</b> | 660.849394       |                    |                  | 6  |
| 8  | <b>802.357738</b> | 401.682507      | 785.331189     | 393.169233       | 784.347173        | 392.677225       | V    | <b>1209.659482</b> | <b>605.333379</b> | 1192.632933        | 596.820105       |                    |                  | 5  |
| 9  | <b>859.379202</b> | 430.193239      | 842.352653     | 421.679965       | 841.368637        | 421.187957       | G    | <b>1110.591068</b> | <b>555.799172</b> | <b>1093.564519</b> | 547.285898       |                    |                  | 4  |
| 10 | 1298.604528       | 649.805902      | 1281.577979    | 641.292628       | 1280.593963       | 640.800620       | Q    | <b>1053.569604</b> | 527.288440        | 1036.543055        | 518.775166       |                    |                  | 3  |
| 11 | 1737.829854       | 869.418565      | 1720.803305    | 860.905291       | 1719.819289       | 860.413283       | Q    | <b>614.344278</b>  | 307.675777        | 597.317729         | 299.162503       |                    |                  | 2  |
| 12 |                   |                 |                |                  |                   |                  | R    | <b>175.118952</b>  | 88.063114         | 158.092403         | 79.549839        |                    |                  | 1  |

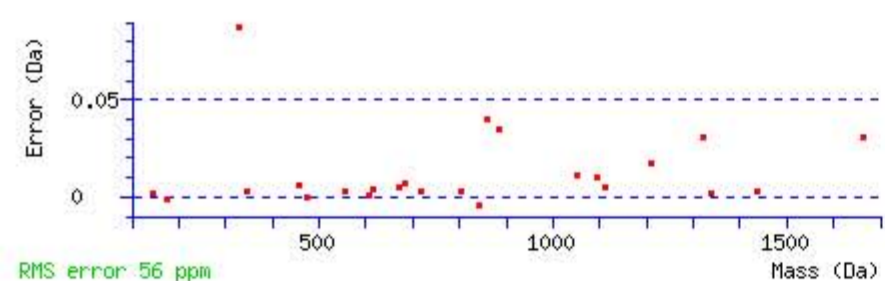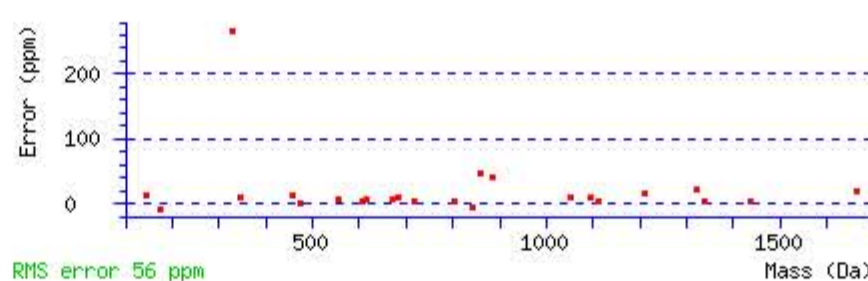

NCBI BLAST search of **SGSDEVQVGQQR**

(Parameters: blastp, nr protein database, expect=20000, no filter, PAM30)

Other BLAST [web gateways](#)

All matches to this query

| Score | Mr(calc):   | Delta     | Sequence                         |
|-------|-------------|-----------|----------------------------------|
| 27.0  | 1910.934265 | 0.009227  | <a href="#">SGSDEVQVGQQR</a>     |
| 6.0   | 1910.958542 | -0.015050 | <a href="#">TDDYGRDLSSVQTLTK</a> |
| 5.9   | 1910.934265 | 0.009227  | <a href="#">SGSDEVQVGQQR</a>     |
| 3.9   | 1910.934265 | 0.009227  | <a href="#">SGSDEVQVGQQR</a>     |

Mascot: <http://www.matrixscience.com/>



# MASCOT SCIENCE Mascot Search Results

## Peptide View

MS/MS Fragmentation of **SGIPIVTSPYQIHFTK**

Found in **CO3\_HUMAN**, Complement C3 OS=Homo sapiens GN=C3 PE=1 SV=2

Match to Query 56011: 2098.150092 from(700.390640,3+) rtinseconds(2322) index(44177)

Title: Locus:1.1.1.3092.21 File:"2013-07-02 CLN FXIII 60 min 1st F 3.wiff"

Data file C:\Program Files (x86)\Matrix Science\Mascot Daemon\mgf4 FXIII 60 min 1st\mascot\_daemon\_merge.mgf

Click mouse within plot area to zoom in by factor of two about that point

Or, Plot from  to  Da

Label all possible matches  Label matches used for scoring

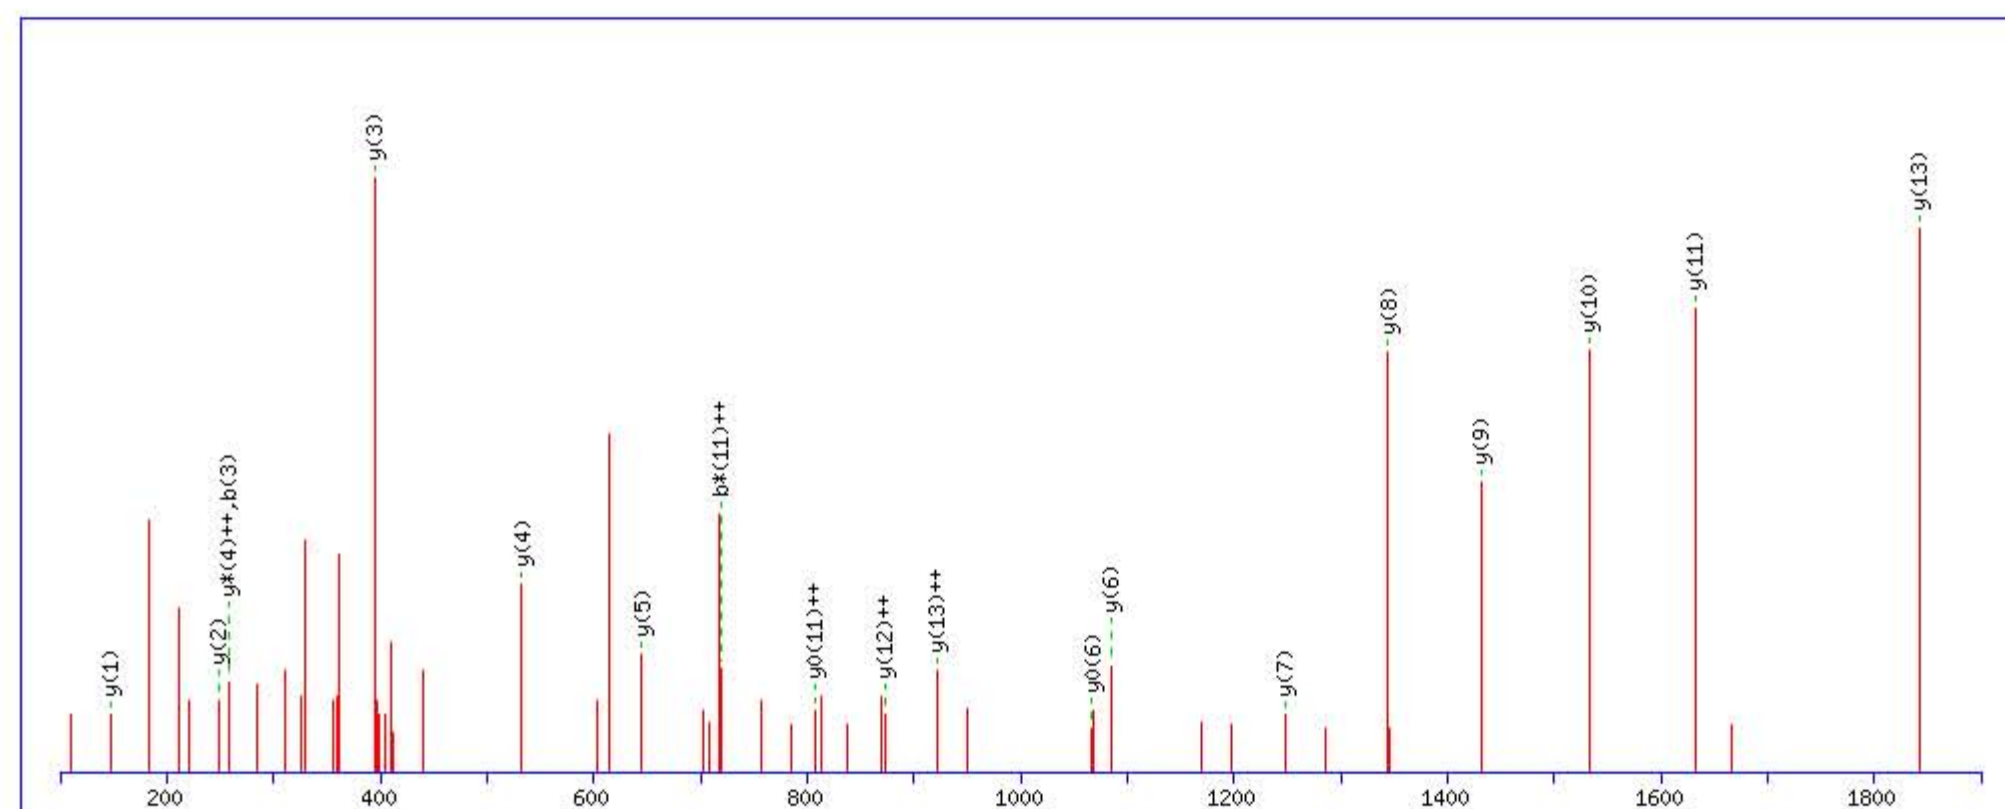

Monoisotopic mass of neutral peptide Mr(calc): 2098.128525

Fixed modifications: Carbamidomethyl (C) (apply to specified residues or termini only)

Variable modifications:

Q11 : Biotin:Thermo-21345 (Q)

Ions Score: 60 Expect: 1.8e-005

Matches : 19/158 fragment ions using 46 most intense peaks [\(help\)](#)

| #  | b                 | b <sup>++</sup> | b <sup>+</sup> | b <sup>+++</sup>  | b <sup>0</sup> | b <sup>0++</sup> | Seq. | y                  | y <sup>++</sup>   | y <sup>+</sup> | y <sup>+++</sup>  | y <sup>0</sup>     | y <sup>0++</sup>  | #  |
|----|-------------------|-----------------|----------------|-------------------|----------------|------------------|------|--------------------|-------------------|----------------|-------------------|--------------------|-------------------|----|
| 1  | 88.039304         | 44.523290       |                |                   | 70.028739      | 35.518008        | S    |                    |                   |                |                   |                    |                   | 16 |
| 2  | 145.060768        | 73.034022       |                |                   | 127.050203     | 64.028740        | G    | 2012.103769        | 1006.555523       | 1995.077220    | 998.042248        | 1994.093204        | 997.550240        | 15 |
| 3  | <b>258.144832</b> | 129.576054      |                |                   | 240.134267     | 120.570772       | I    | 1955.082305        | 978.044791        | 1938.055756    | 969.531516        | 1937.071740        | 969.039508        | 14 |
| 4  | 355.197596        | 178.102436      |                |                   | 337.187031     | 169.097154       | P    | <b>1841.998241</b> | <b>921.502759</b> | 1824.971692    | 912.989484        | 1823.987676        | 912.497476        | 13 |
| 5  | 468.281660        | 234.644468      |                |                   | 450.271095     | 225.639186       | I    | 1744.945477        | <b>872.976377</b> | 1727.918928    | 864.463102        | 1726.934912        | 863.971094        | 12 |
| 6  | 567.350074        | 284.178675      |                |                   | 549.339509     | 275.173393       | V    | <b>1631.861413</b> | 816.434345        | 1614.834864    | 807.921070        | 1613.850848        | <b>807.429062</b> | 11 |
| 7  | 668.397753        | 334.702515      |                |                   | 650.387188     | 325.697232       | T    | <b>1532.792999</b> | 766.900138        | 1515.766450    | 758.386863        | 1514.782434        | 757.894855        | 10 |
| 8  | 755.429781        | 378.218529      |                |                   | 737.419216     | 369.213246       | S    | <b>1431.745320</b> | 716.376298        | 1414.718771    | 707.863024        | 1413.734755        | 707.371016        | 9  |
| 9  | 852.482545        | 426.744911      |                |                   | 834.471980     | 417.739628       | P    | <b>1344.713292</b> | 672.860284        | 1327.686743    | 664.347010        | 1326.702727        | 663.855002        | 8  |
| 10 | 1015.545874       | 508.276575      |                |                   | 997.535309     | 499.271293       | Y    | <b>1247.660528</b> | 624.333902        | 1230.633979    | 615.820628        | 1229.649963        | 615.328620        | 7  |
| 11 | 1454.771200       | 727.889238      | 1437.744651    | <b>719.375964</b> | 1436.760635    | 718.883956       | Q    | <b>1084.597199</b> | 542.802238        | 1067.570650    | 534.288963        | <b>1066.586634</b> | 533.796955        | 6  |
| 12 | 1567.855264       | 784.431270      | 1550.828715    | 775.917996        | 1549.844699    | 775.425988       | I    | <b>645.371873</b>  | 323.189574        | 628.345324     | 314.676300        | 627.361308         | 314.184292        | 5  |
| 13 | 1704.914176       | 852.960726      | 1687.887627    | 844.447452        | 1686.903611    | 843.955444       | H    | <b>532.287809</b>  | 266.647542        | 515.261260     | <b>258.134268</b> | 514.277244         | 257.642260        | 4  |
| 14 | 1851.982590       | 926.494933      | 1834.956041    | 917.981659        | 1833.972025    | 917.489651       | F    | <b>395.228897</b>  | 198.118086        | 378.202348     | 189.604812        | 377.218332         | 189.112804        | 3  |
| 15 | 1953.030269       | 977.018773      | 1936.003720    | 968.505498        | 1935.019704    | 968.013490       | T    | <b>248.160483</b>  | 124.583879        | 231.133934     | 116.070605        | 230.149918         | 115.578597        | 2  |
| 16 |                   |                 |                |                   |                |                  | K    | <b>147.112804</b>  | 74.060040         | 130.086255     | 65.546765         |                    |                   | 1  |

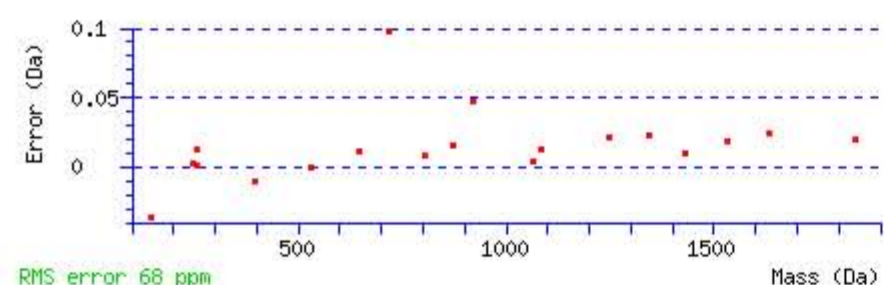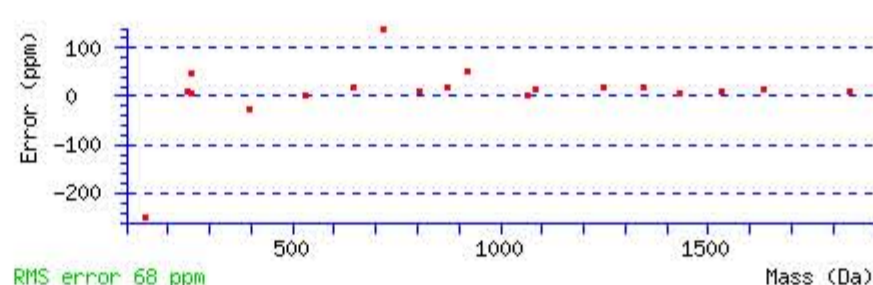

NCBI BLAST search of [SGIPIVTSPYQIHFTK](#)

(Parameters: blastp, nr protein database, expect=20000, no filter, PAM30)

Other BLAST [web gateways](#)

All matches to this query

| Score | Mr(calc):   | Delta    | Sequence                         |
|-------|-------------|----------|----------------------------------|
| 59.5  | 2098.128525 | 0.021567 | <a href="#">SGIPIVTSPYQIHFTK</a> |

Mascot: <http://www.matrixscience.com/>



# MASCOT Search Results

## Peptide View

MS/MS Fragmentation of **LSINTHPSQKPLSITVR**

Found in **CO3\_HUMAN**, Complement C3 OS=Homo sapiens GN=C3 PE=1 SV=2

Match to Query 58173: 2201.243736 from(551.318210,4+) rtinseconds(1859) index(41062)

Title: Locus:1.1.1.2931.16 File:"2013-07-02 CLN FXIII 60 min 1st F 3.wiff"

Data file C:\Program Files (x86)\Matrix Science\Mascot Daemon\mgf\4 FXIII 60 min 1st\mascot\_daemon\_merge.mgf

Click mouse within plot area to zoom in by factor of two about that point

Or, Plot from  to  Da

Label all possible matches  Label matches used for scoring

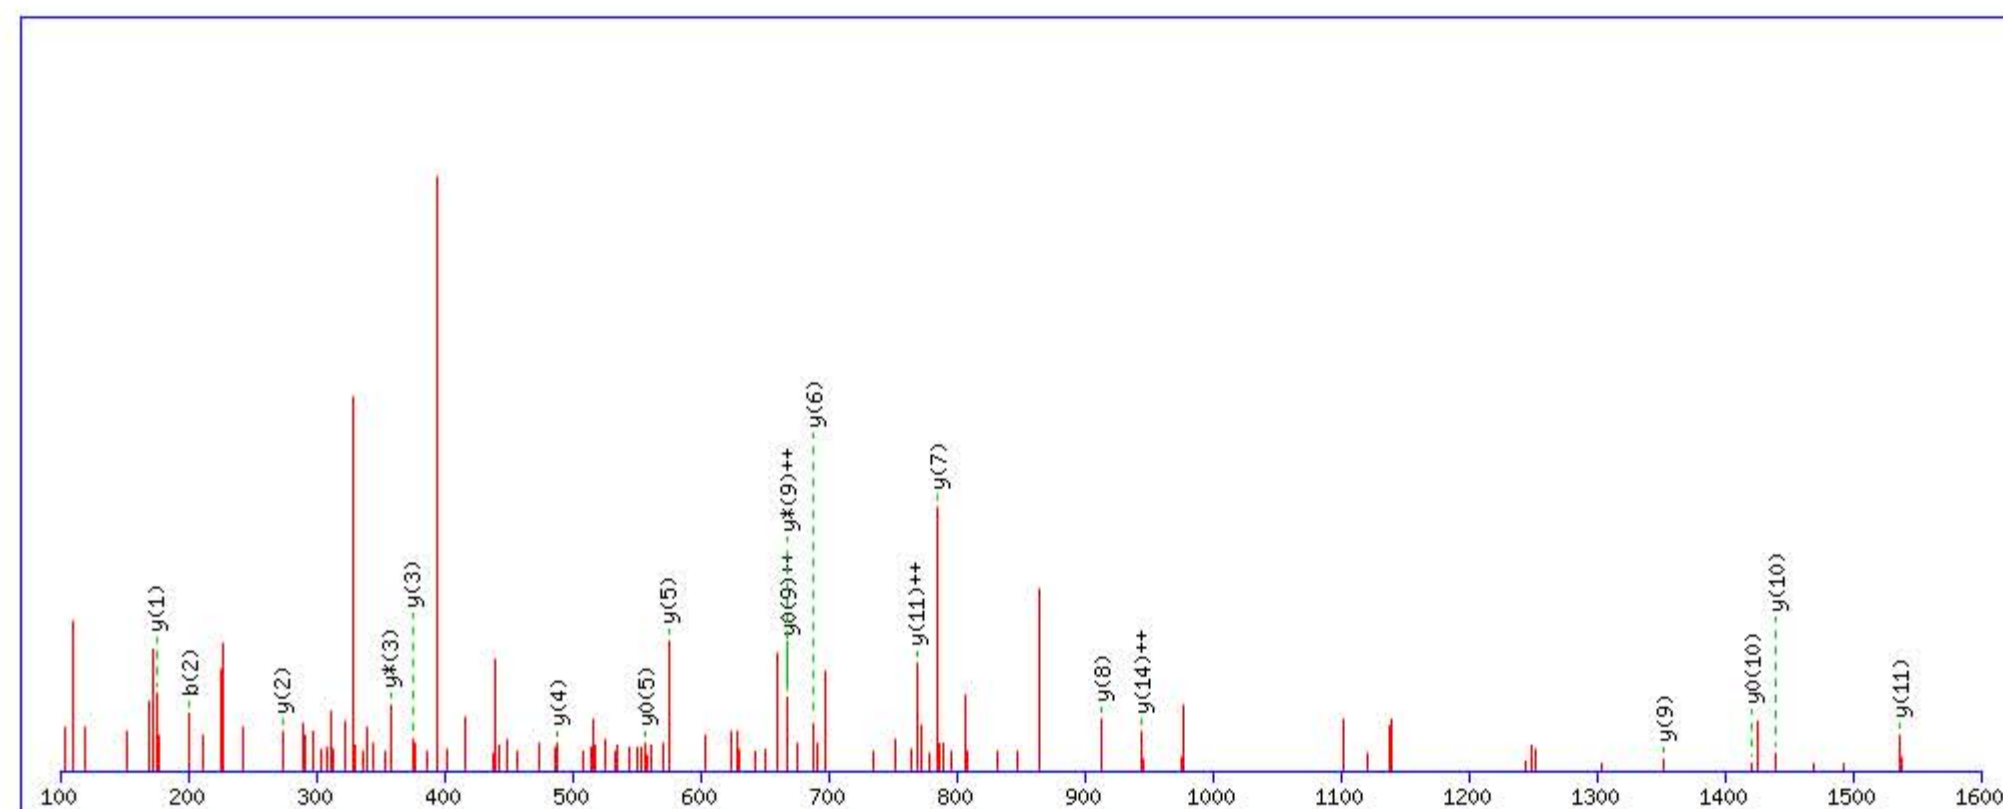

Monoisotopic mass of neutral peptide  $M_r(\text{calc})$ : 2201.235428

Fixed modifications: Carbamidomethyl (C) (apply to specified residues or termini only)

Variable modifications:

Q9 : Biotin:Thermo-21345 (Q)

Ions Score: 28 Expect: 0.013

Matches : 19/180 fragment ions using 75 most intense peaks [\(help\)](#)

| #  | b                 | b <sup>++</sup> | b <sup>*</sup> | b <sup>*++</sup> | b <sup>0</sup> | b <sup>0++</sup> | Seq. | y                  | y <sup>++</sup>   | y <sup>*</sup>    | y <sup>*++</sup>  | y <sup>0</sup>     | y <sup>0++</sup>  | #  |
|----|-------------------|-----------------|----------------|------------------|----------------|------------------|------|--------------------|-------------------|-------------------|-------------------|--------------------|-------------------|----|
| 1  | 114.091340        | 57.549308       |                |                  |                |                  | L    |                    |                   |                   |                   |                    |                   | 17 |
| 2  | <b>201.123368</b> | 101.065322      |                |                  | 183.112803     | 92.060039        | S    | 2089.158656        | 1045.082966       | 2072.132107       | 1036.569691       | 2071.148091        | 1036.077683       | 16 |
| 3  | 314.207432        | 157.607354      |                |                  | 296.196867     | 148.602071       | I    | 2002.126628        | 1001.566952       | 1985.100079       | 993.053678        | 1984.116063        | 992.561669        | 15 |
| 4  | 428.250359        | 214.628818      | 411.223810     | 206.115543       | 410.239794     | 205.623535       | N    | 1889.042564        | <b>945.024920</b> | 1872.016015       | 936.511646        | 1871.031999        | 936.019638        | 14 |
| 5  | 529.298038        | 265.152657      | 512.271489     | 256.639383       | 511.287473     | 256.147375       | T    | 1774.999637        | 888.003456        | 1757.973088       | 879.490182        | 1756.989072        | 878.998174        | 13 |
| 6  | 666.356950        | 333.682113      | 649.330401     | 325.168838       | 648.346385     | 324.676830       | H    | 1673.951958        | 837.479617        | 1656.925409       | 828.966343        | 1655.941393        | 828.474334        | 12 |
| 7  | 763.409714        | 382.208495      | 746.383165     | 373.695221       | 745.399149     | 373.203213       | P    | <b>1536.893046</b> | <b>768.950161</b> | 1519.866497       | 760.436887        | 1518.882481        | 759.944878        | 11 |
| 8  | 850.441742        | 425.724509      | 833.415193     | 417.211234       | 832.431177     | 416.719226       | S    | <b>1439.840282</b> | 720.423779        | 1422.813733       | 711.910505        | <b>1421.829717</b> | 711.418496        | 10 |
| 9  | 1289.667068       | 645.337172      | 1272.640519    | 636.823898       | 1271.656503    | 636.331889       | Q    | <b>1352.808254</b> | 676.907765        | 1335.781705       | <b>668.394491</b> | 1334.797689        | <b>667.902483</b> | 9  |
| 10 | 1417.762031       | 709.384654      | 1400.735482    | 700.871379       | 1399.751466    | 700.379371       | K    | <b>913.582928</b>  | 457.295102        | 896.556379        | 448.781828        | 895.572363         | 448.289820        | 8  |
| 11 | 1514.814795       | 757.911036      | 1497.788246    | 749.397761       | 1496.804230    | 748.905753       | P    | <b>785.487965</b>  | 393.247621        | 768.461416        | 384.734346        | 767.477400         | 384.242338        | 7  |
| 12 | 1627.898859       | 814.453067      | 1610.872310    | 805.939793       | 1609.888294    | 805.447785       | L    | <b>688.435201</b>  | 344.721239        | 671.408652        | 336.207964        | 670.424636         | 335.715956        | 6  |
| 13 | 1714.930887       | 857.969082      | 1697.904338    | 849.455807       | 1696.920322    | 848.963799       | S    | <b>575.351137</b>  | 288.179207        | 558.324588        | 279.665932        | <b>557.340572</b>  | 279.173924        | 5  |
| 14 | 1828.014951       | 914.511113      | 1810.988402    | 905.997839       | 1810.004386    | 905.505831       | I    | <b>488.319109</b>  | 244.663192        | 471.292560        | 236.149918        | 470.308544         | 235.657910        | 4  |
| 15 | 1929.062630       | 965.034953      | 1912.036081    | 956.521679       | 1911.052065    | 956.029670       | T    | <b>375.235045</b>  | 188.121161        | <b>358.208496</b> | 179.607886        | 357.224480         | 179.115878        | 3  |
| 16 | 2028.131044       | 1014.569160     | 2011.104495    | 1006.055886      | 2010.120479    | 1005.563878      | V    | <b>274.187366</b>  | 137.597321        | 257.160817        | 129.084047        |                    |                   | 2  |
| 17 |                   |                 |                |                  |                |                  | R    | <b>175.118952</b>  | 88.063114         | 158.092403        | 79.549839         |                    |                   | 1  |

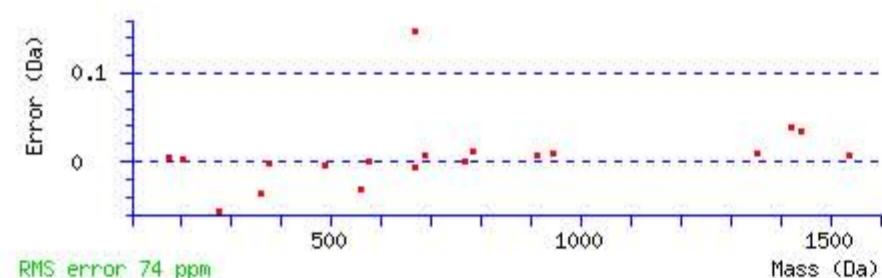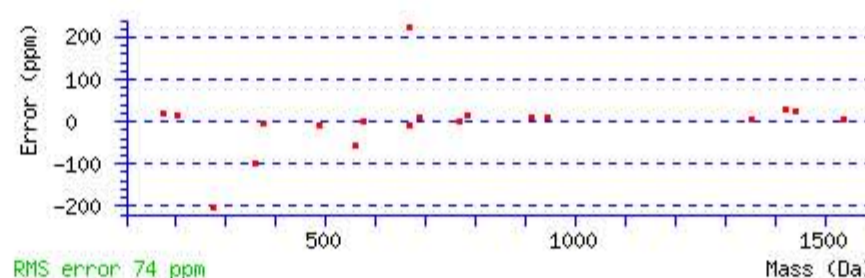

NCBI BLAST search of **LSINTHPSQKPLSITVR**

(Parameters: blastp, nr protein database, expect=20000, no filter, PAM30)

Other BLAST [web gateways](#)

All matches to this query

| Score | $M_r(\text{calc})$ : | Delta    | Sequence                          |
|-------|----------------------|----------|-----------------------------------|
| 27.7  | 2201.235428          | 0.008308 | <a href="#">LSINTHPSQKPLSITVR</a> |

Mascot: <http://www.matrixscience.com/>



# Mascot Search Results

## Peptide View

MS/MS Fragmentation of **DAPDHQELNLDVSLQLPSR**

Found in **CO3\_HUMAN**, Complement C3 OS=Homo sapiens GN=C3 PE=1 SV=2

Match to Query 63990: 2457.252282 from(820.091370,3+) rtinseconds(2647) index(46121)

Title: Locus:1.1.1.3205.19 File:"2013-07-02 CLN FXIII 60 min 1st F 3.wiff"

Data file C:\Program Files (x86)\Matrix Science\Mascot Daemon\mgf4 FXIII 60 min 1st\mascot\_daemon\_merge.mgf

Click mouse within plot area to zoom in by factor of two about that point

Or, Plot from  to  Da

Label all possible matches  Label matches used for scoring

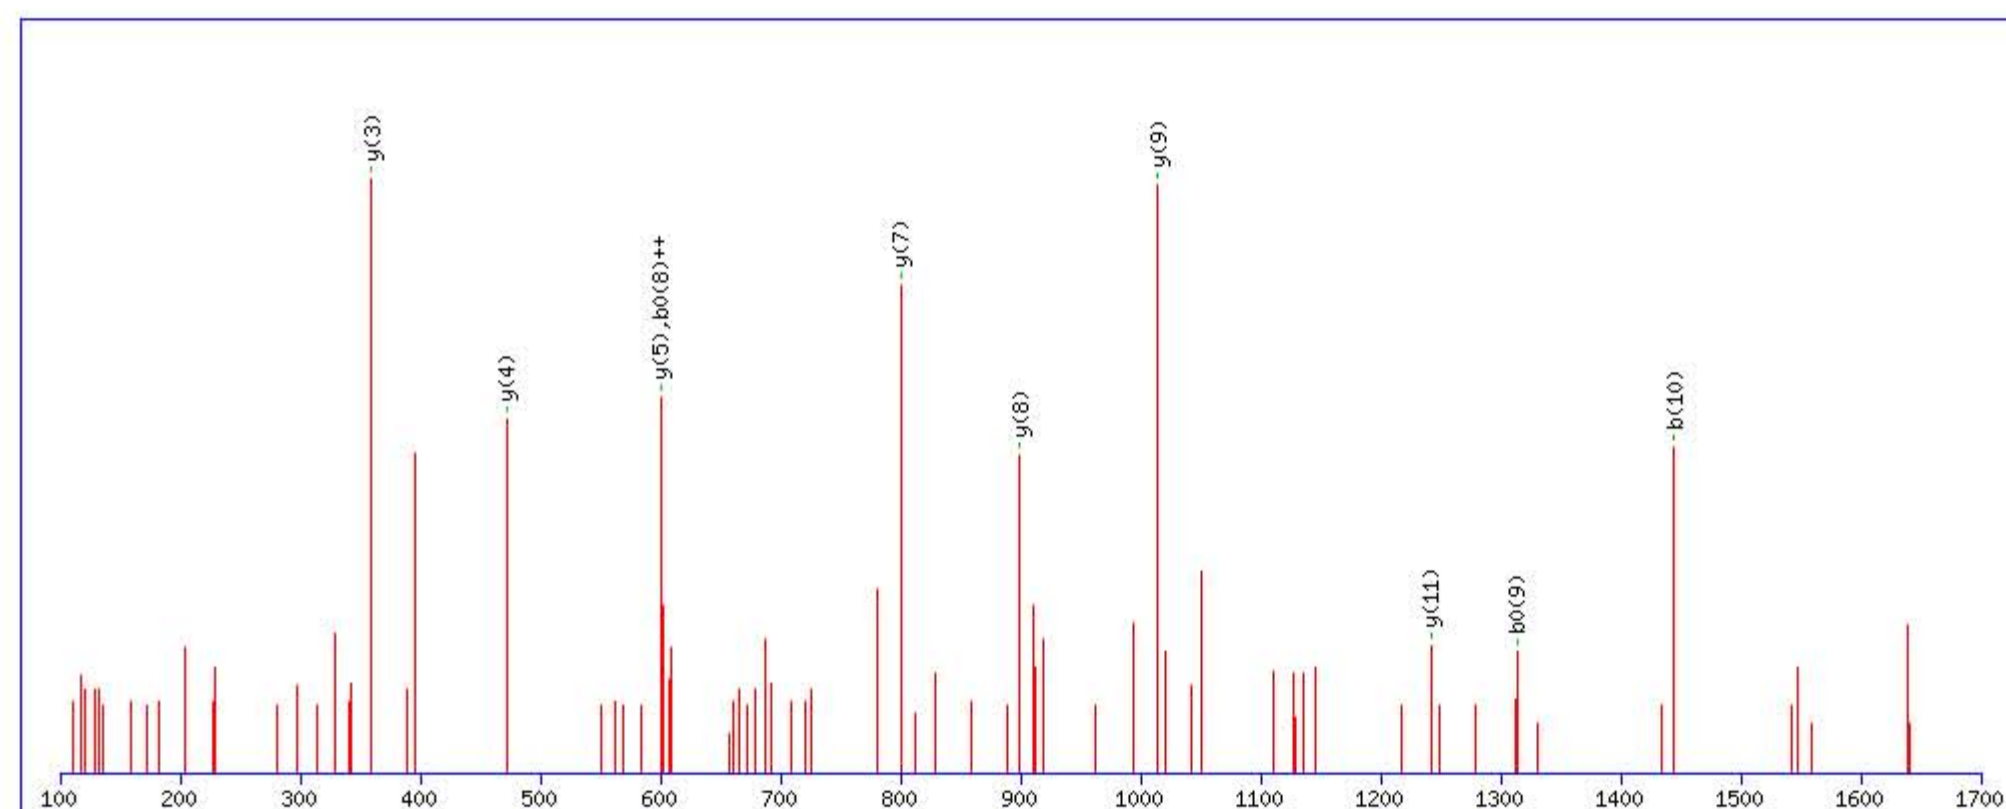

Monoisotopic mass of neutral peptide Mr(calc): 2457.232193

Fixed modifications: Carbamidomethyl (C) (apply to specified residues or termini only)

Variable modifications:

Q6 : Biotin:Thermo-21345 (Q)

Ions Score: 32 Expect: 0.0075

Matches : 10/204 fragment ions using 16 most intense peaks [\(help\)](#)

| #  | b           | b <sup>++</sup> | b <sup>*</sup> | b <sup>*++</sup> | b <sup>0</sup> | b <sup>0++</sup> | Seq. | y           | y <sup>++</sup> | y <sup>*</sup> | y <sup>*++</sup> | y <sup>0</sup> | y <sup>0++</sup> | #  |
|----|-------------|-----------------|----------------|------------------|----------------|------------------|------|-------------|-----------------|----------------|------------------|----------------|------------------|----|
| 1  | 116.034219  | 58.520748       |                |                  | 98.023654      | 49.515465        | D    |             |                 |                |                  |                |                  | 19 |
| 2  | 187.071333  | 94.039304       |                |                  | 169.060768     | 85.034022        | A    | 2343.212542 | 1172.109909     | 2326.185993    | 1163.596634      | 2325.201977    | 1163.104626      | 18 |
| 3  | 284.124097  | 142.565686      |                |                  | 266.113532     | 133.560404       | P    | 2272.175428 | 1136.591352     | 2255.148879    | 1128.078077      | 2254.164863    | 1127.586069      | 17 |
| 4  | 399.151040  | 200.079158      |                |                  | 381.140475     | 191.073875       | D    | 2175.122664 | 1088.064970     | 2158.096115    | 1079.551695      | 2157.112099    | 1079.059687      | 16 |
| 5  | 536.209952  | 268.608614      |                |                  | 518.199387     | 259.603332       | H    | 2060.095721 | 1030.551498     | 2043.069172    | 1022.038224      | 2042.085156    | 1021.546216      | 15 |
| 6  | 975.435278  | 488.221277      | 958.408729     | 479.708003       | 957.424713     | 479.215995       | Q    | 1923.036809 | 962.022043      | 1906.010260    | 953.508768       | 1905.026244    | 953.016760       | 14 |
| 7  | 1104.477871 | 552.742574      | 1087.451322    | 544.229299       | 1086.467306    | 543.737291       | E    | 1483.811483 | 742.409380      | 1466.784934    | 733.896105       | 1465.800918    | 733.404097       | 13 |
| 8  | 1217.561935 | 609.284606      | 1200.535386    | 600.771331       | 1199.551370    | 600.279323       | L    | 1354.768890 | 677.888083      | 1337.742341    | 669.374809       | 1336.758325    | 668.882801       | 12 |
| 9  | 1331.604862 | 666.306069      | 1314.578313    | 657.792795       | 1313.594297    | 657.300786       | N    | 1241.684826 | 621.346051      | 1224.658277    | 612.832777       | 1223.674261    | 612.340769       | 11 |
| 10 | 1444.688926 | 722.848101      | 1427.662377    | 714.334826       | 1426.678361    | 713.842818       | L    | 1127.641899 | 564.324588      | 1110.615350    | 555.811313       | 1109.631334    | 555.319305       | 10 |
| 11 | 1559.715869 | 780.361572      | 1542.689320    | 771.848298       | 1541.705304    | 771.356290       | D    | 1014.557835 | 507.782556      | 997.531286     | 499.269281       | 996.547270     | 498.777273       | 9  |
| 12 | 1658.784283 | 829.895780      | 1641.757734    | 821.382505       | 1640.773718    | 820.890497       | V    | 899.530892  | 450.269084      | 882.504343     | 441.755810       | 881.520327     | 441.263802       | 8  |
| 13 | 1745.816311 | 873.411794      | 1728.789762    | 864.898519       | 1727.805746    | 864.406511       | S    | 800.462478  | 400.734877      | 783.435929     | 392.221603       | 782.451913     | 391.729595       | 7  |
| 14 | 1858.900375 | 929.953825      | 1841.873826    | 921.440551       | 1840.889810    | 920.948543       | L    | 713.430450  | 357.218863      | 696.403901     | 348.705589       | 695.419885     | 348.213581       | 6  |
| 15 | 1986.958953 | 993.983115      | 1969.932404    | 985.469840       | 1968.948388    | 984.977832       | Q    | 600.346386  | 300.676831      | 583.319837     | 292.163557       | 582.335821     | 291.671549       | 5  |
| 16 | 2100.043017 | 1050.525146     | 2083.016468    | 1042.011872      | 2082.032452    | 1041.519864      | L    | 472.287808  | 236.647542      | 455.261259     | 228.134268       | 454.277243     | 227.642260       | 4  |
| 17 | 2197.095781 | 1099.051528     | 2180.069232    | 1090.538254      | 2179.085216    | 1090.046246      | P    | 359.203744  | 180.105510      | 342.177195     | 171.592236       | 341.193179     | 171.100228       | 3  |
| 18 | 2284.127809 | 1142.567542     | 2267.101260    | 1134.054268      | 2266.117244    | 1133.562260      | S    | 262.150980  | 131.579128      | 245.124431     | 123.065854       | 244.140415     | 122.573846       | 2  |
| 19 |             |                 |                |                  |                |                  | R    | 175.118952  | 88.063114       | 158.092403     | 79.549839        |                |                  | 1  |

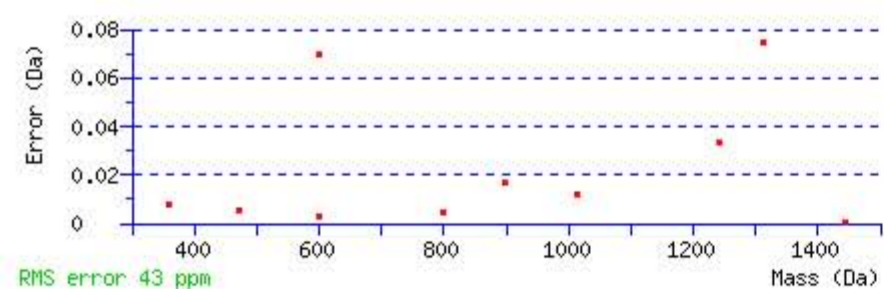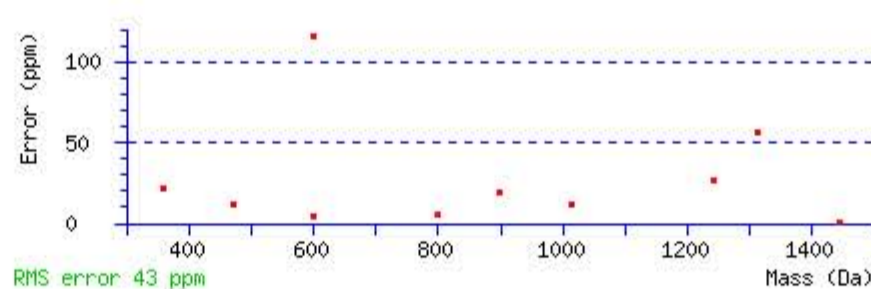

NCBI BLAST search of [DAPDHQELNLDVSLQLPSR](#)

(Parameters: blastp, nr protein database, expect=20000, no filter, PAM30)

Other BLAST [web gateways](#)

All matches to this query

| Score | Mr(calc):   | Delta    | Sequence                              |
|-------|-------------|----------|---------------------------------------|
| 31.6  | 2457.232193 | 0.020089 | <a href="#">DAPDHQELNLDVSLQLPSR</a>   |
| 9.0   | 2457.243423 | 0.008859 | <a href="#">TGLSDAFMILNPSDPVPSRRR</a> |

Mascot: <http://www.matrixscience.com/>



# MASCOT Search Results

## Peptide View

MS/MS Fragmentation of **ILLQGTPVAQMTEDAVDAER**

Found in **CO3\_HUMAN**, Complement C3 OS=Homo sapiens GN=C3 PE=1 SV=2

Match to Query 64320: 2467.275642 from(823.432490,3+) rtinseconds(2650) index(46142)

Title: Locus:1.1.1.3206.19 File:"2013-07-02 CLN FXIII 60 min 1st F 3.wiff"

Data file C:\Program Files (x86)\Matrix Science\Mascot Daemon\mgf4 FXIII 60 min 1st\mascot\_daemon\_merge.mgf

Click mouse within plot area to zoom in by factor of two about that point

Or, Plot from  to  Da

Label all possible matches  Label matches used for scoring

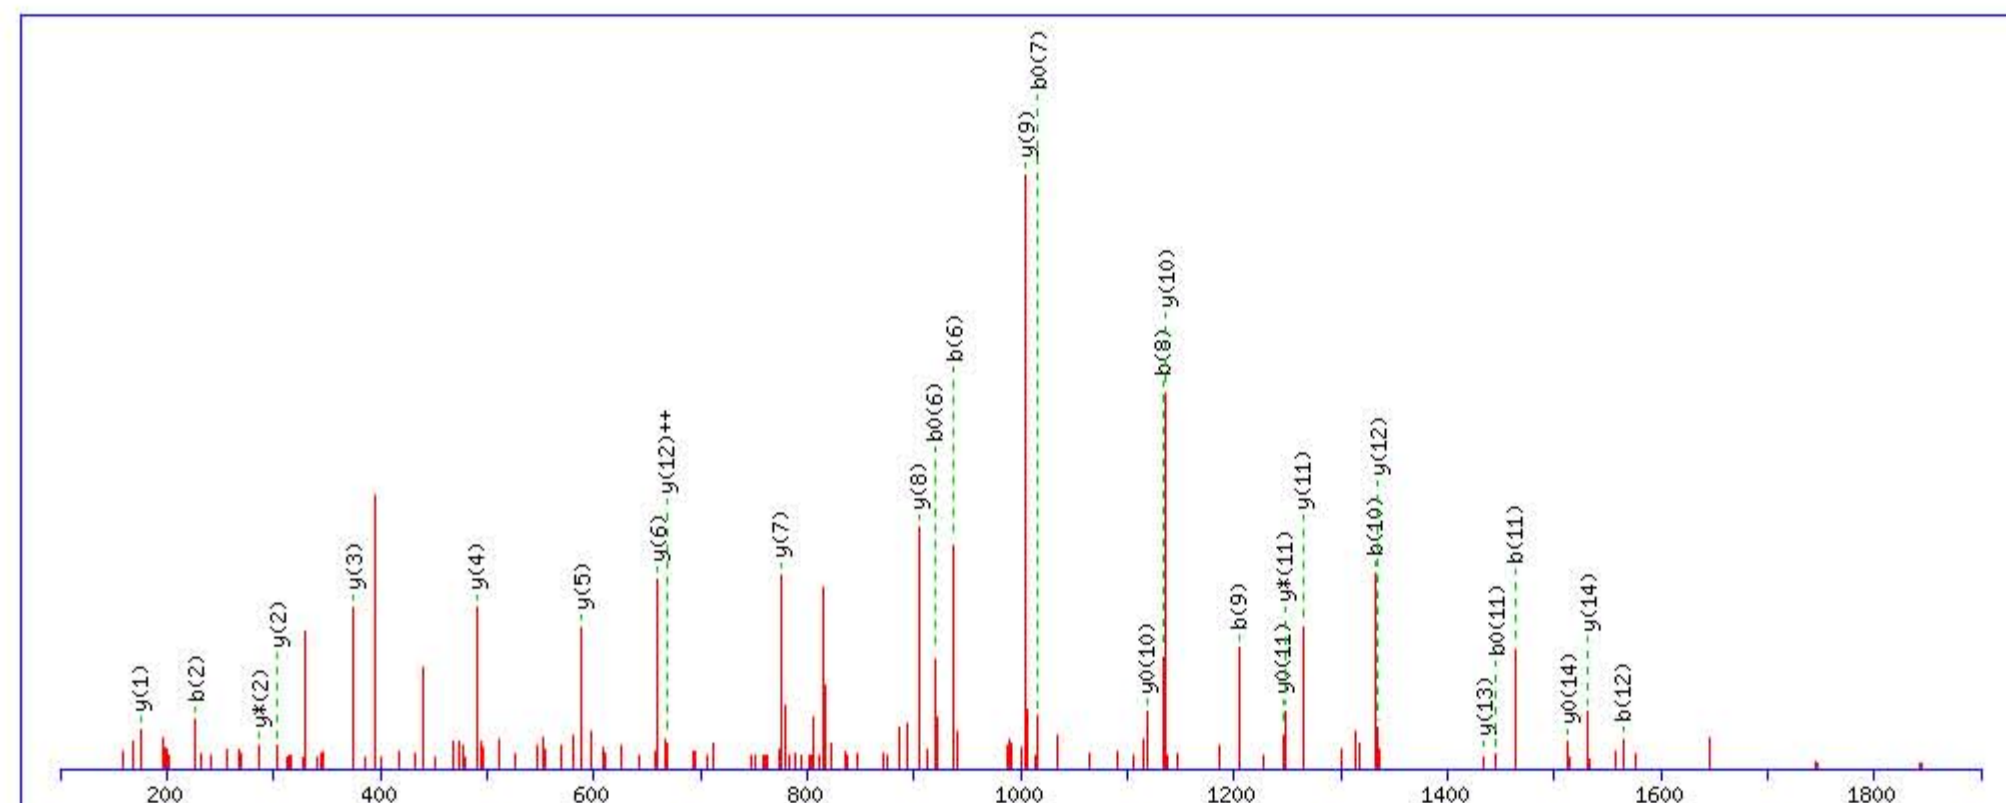

Monoisotopic mass of neutral peptide Mr(calc): 2467.245071

Fixed modifications: Carbamidomethyl (C) (apply to specified residues or termini only)

Variable modifications:

Q4 : Biotin:Thermo-21345 (Q)

Ions Score: 94 Expect: 1.2e-008

Matches : 30/210 fragment ions using 48 most intense peaks [\(help\)](#)

| #  | b                  | b <sup>++</sup> | b <sup>*</sup> | b <sup>*++</sup> | b <sup>0</sup>     | b <sup>0++</sup> | Seq. | y                  | y <sup>++</sup>   | y <sup>*</sup>     | y <sup>*++</sup> | y <sup>0</sup>     | y <sup>0++</sup> | #  |
|----|--------------------|-----------------|----------------|------------------|--------------------|------------------|------|--------------------|-------------------|--------------------|------------------|--------------------|------------------|----|
| 1  | 114.091340         | 57.549308       |                |                  |                    |                  | I    |                    |                   |                    |                  |                    |                  | 20 |
| 2  | <b>227.175404</b>  | 114.091340      |                |                  |                    |                  | L    | 2355.168297        | 1178.087786       | 2338.141748        | 1169.574512      | 2337.157732        | 1169.082504      | 19 |
| 3  | 340.259468         | 170.633372      |                |                  |                    |                  | L    | 2242.084233        | 1121.545754       | 2225.057684        | 1113.032480      | 2224.073668        | 1112.540472      | 18 |
| 4  | 779.484794         | 390.246035      | 762.458245     | 381.732760       |                    |                  | Q    | 2129.000169        | 1065.003722       | 2111.973620        | 1056.490448      | 2110.989604        | 1055.998440      | 17 |
| 5  | 836.506258         | 418.756767      | 819.479709     | 410.243493       |                    |                  | G    | 1689.774843        | 845.391060        | 1672.748294        | 836.877785       | 1671.764278        | 836.385777       | 16 |
| 6  | <b>937.553937</b>  | 469.280607      | 920.527388     | 460.767332       | <b>919.543372</b>  | 460.275324       | T    | 1632.753379        | 816.880328        | 1615.726830        | 808.367053       | 1614.742814        | 807.875045       | 15 |
| 7  | 1034.606701        | 517.806988      | 1017.580152    | 509.293714       | <b>1016.596136</b> | 508.801706       | P    | <b>1531.705700</b> | 766.356488        | 1514.679151        | 757.843214       | <b>1513.695135</b> | 757.351206       | 14 |
| 8  | <b>1133.675115</b> | 567.341196      | 1116.648566    | 558.827921       | 1115.664550        | 558.335913       | V    | <b>1434.652936</b> | 717.830106        | 1417.626387        | 709.316832       | 1416.642371        | 708.824824       | 13 |
| 9  | <b>1204.712229</b> | 602.859753      | 1187.685680    | 594.346478       | 1186.701664        | 593.854470       | A    | <b>1335.584522</b> | <b>668.295899</b> | 1318.557973        | 659.782625       | 1317.573957        | 659.290617       | 12 |
| 10 | <b>1332.770807</b> | 666.889042      | 1315.744258    | 658.375767       | 1314.760242        | 657.883759       | Q    | <b>1264.547408</b> | 632.777342        | <b>1247.520859</b> | 624.264068       | <b>1246.536843</b> | 623.772060       | 11 |
| 11 | <b>1463.811292</b> | 732.409284      | 1446.784743    | 723.896010       | <b>1445.800727</b> | 723.404002       | M    | <b>1136.488830</b> | 568.748053        | 1119.462281        | 560.234779       | <b>1118.478265</b> | 559.742771       | 10 |
| 12 | <b>1564.858971</b> | 782.933124      | 1547.832422    | 774.419849       | 1546.848406        | 773.927841       | T    | <b>1005.448345</b> | 503.227811        | 988.421796         | 494.714536       | 987.437780         | 494.222528       | 9  |
| 13 | 1693.901564        | 847.454420      | 1676.875015    | 838.941146       | 1675.890999        | 838.449138       | E    | <b>904.400666</b>  | 452.703971        | 887.374117         | 444.190697       | 886.390101         | 443.698689       | 8  |
| 14 | 1808.928507        | 904.967892      | 1791.901958    | 896.454617       | 1790.917942        | 895.962609       | D    | <b>775.358073</b>  | 388.182675        | 758.331524         | 379.669400       | 757.347508         | 379.177392       | 7  |
| 15 | 1879.965621        | 940.486449      | 1862.939072    | 931.973174       | 1861.955056        | 931.481166       | A    | <b>660.331130</b>  | 330.669203        | 643.304581         | 322.155929       | 642.320565         | 321.663921       | 6  |
| 16 | 1979.034035        | 990.020656      | 1962.007486    | 981.507381       | 1961.023470        | 981.015373       | V    | <b>589.294016</b>  | 295.150646        | 572.267467         | 286.637372       | 571.283451         | 286.145364       | 5  |
| 17 | 2094.060978        | 1047.534127     | 2077.034429    | 1039.020852      | 2076.050413        | 1038.528844      | D    | <b>490.225602</b>  | 245.616439        | 473.199053         | 237.103165       | 472.215037         | 236.611157       | 4  |
| 18 | 2165.098092        | 1083.052684     | 2148.071543    | 1074.539409      | 2147.087527        | 1074.047402      | A    | <b>375.198659</b>  | 188.102968        | 358.172110         | 179.589693       | 357.188094         | 179.097685       | 3  |
| 19 | 2294.140685        | 1147.573981     | 2277.114136    | 1139.060706      | 2276.130120        | 1138.568698      | E    | <b>304.161545</b>  | 152.584411        | <b>287.134996</b>  | 144.071136       | 286.150980         | 143.579128       | 2  |
| 20 |                    |                 |                |                  |                    |                  | R    | <b>175.118952</b>  | 88.063114         | 158.092403         | 79.549839        |                    |                  | 1  |

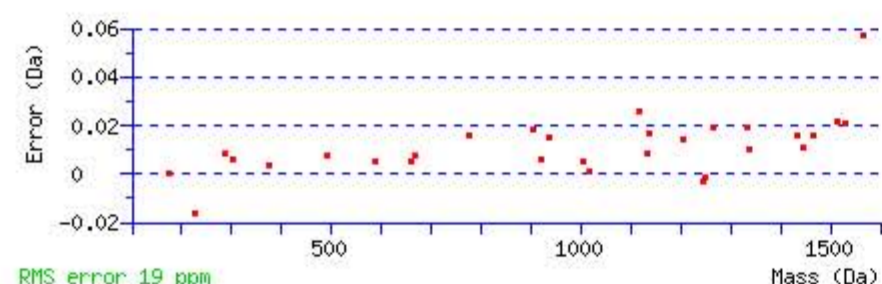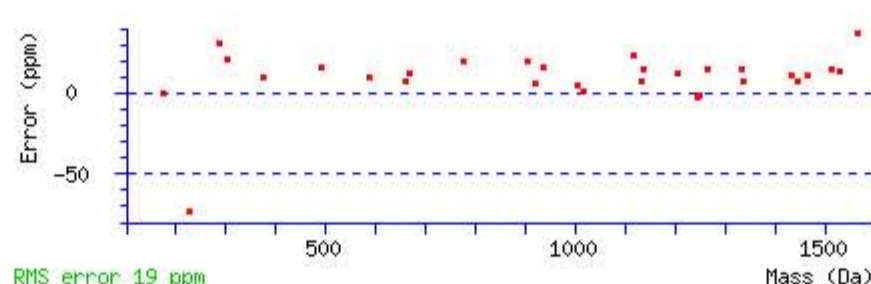

NCBI BLAST search of [ILLQGTPVAQMTEDAVDAER](#)

(Parameters: blastp, nr protein database, expect=20000, no filter, PAM30)

Other BLAST [web gateways](#)

All matches to this query

| Score | Mr(calc):   | Delta    | Sequence                             |
|-------|-------------|----------|--------------------------------------|
| 93.9  | 2467.245071 | 0.030571 | <a href="#">ILLQGTPVAQMTEDAVDAER</a> |
| 80.9  | 2467.245071 | 0.030571 | <a href="#">ILLQGTPVAQMTEDAVDAER</a> |



**MASCOT** Mascot Search Results

**Peptide View**

MS/MS Fragmentation of **VPVAVQGEDTVQSLTQGDGVAK**  
 Found in **CO3\_HUMAN**, Complement C3 OS=Homo sapiens GN=C3 PE=1 SV=2

Match to Query 65599: 2508.311652 from(837.111160,3+) rtinseconds(2213) index(43518)  
 Title: Locus:1.1.1.3054.20 File:"2013-07-02 CLN FXIII 60 min 1st F 3.wiff"  
 Data file C:\Program Files (x86)\Matrix Science\Mascot Daemon\mgf\4 FXIII 60 min 1st\mascot\_daemon\_merge.mgf

Click mouse within plot area to zoom in by factor of two about that point  
 Or, Plot from  to  Da   
 Label all possible matches  Label matches used for scoring

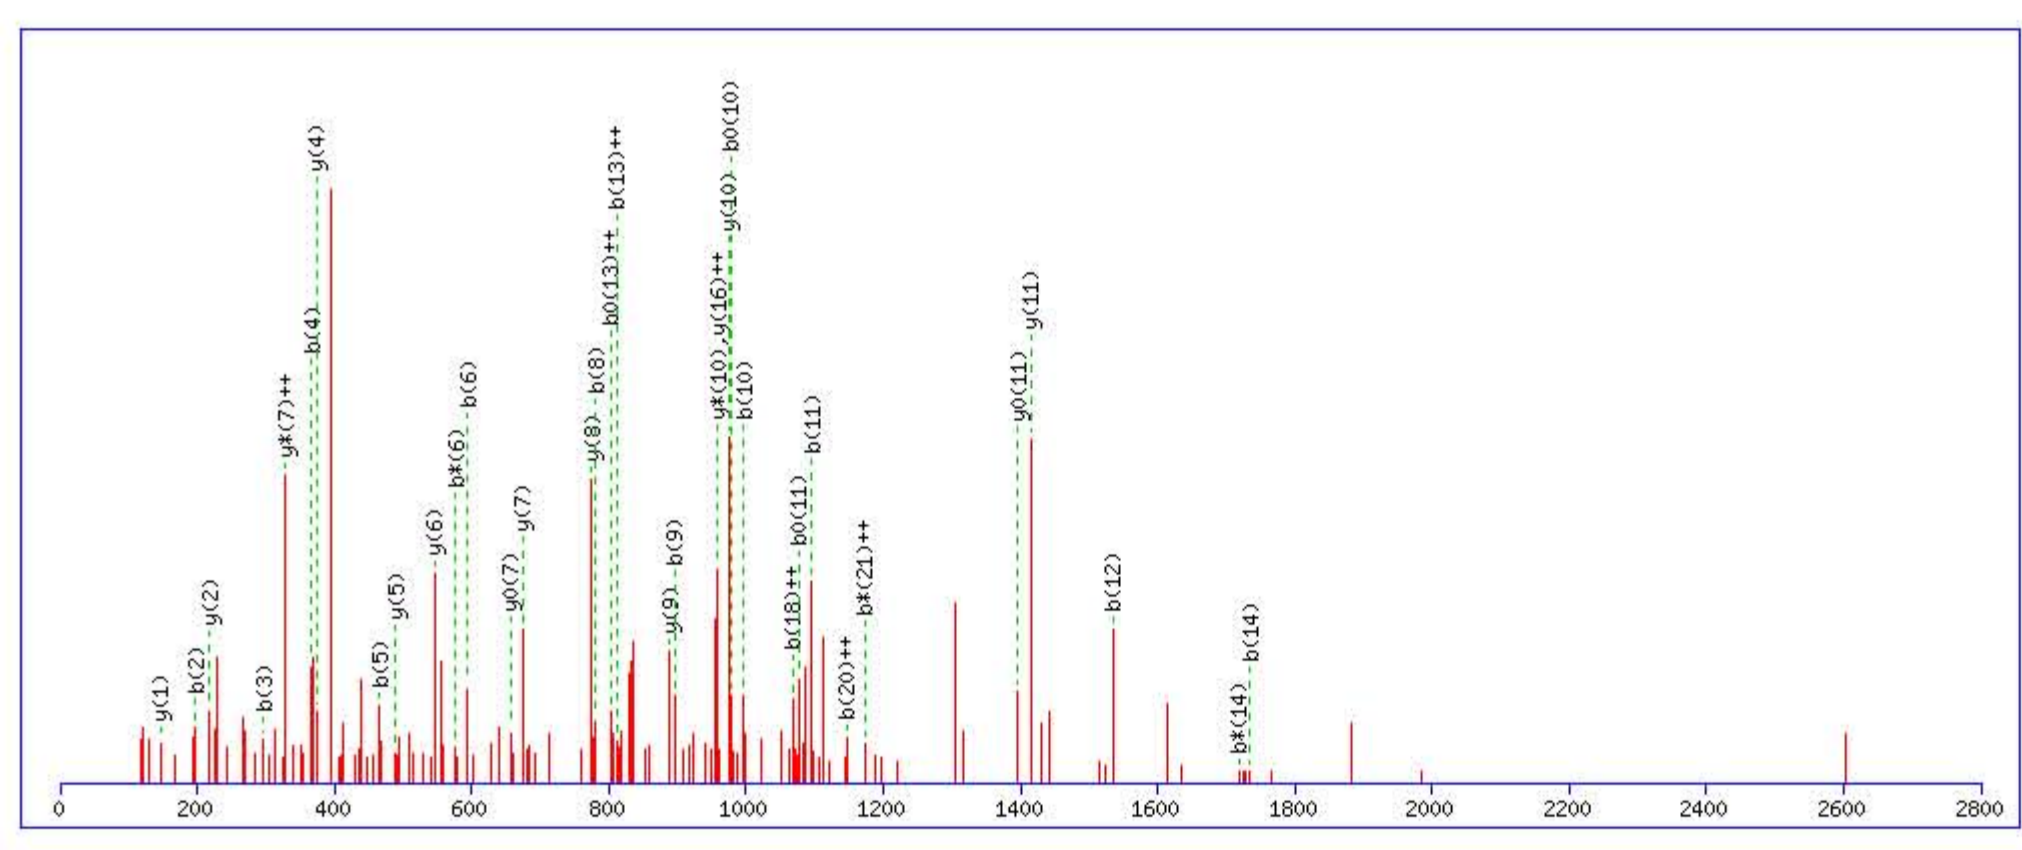

Monoisotopic mass of neutral peptide  $M_r(\text{calc})$ : 2508.289429  
 Fixed modifications: Carbamidomethyl (C) (apply to specified residues or termini only)  
 Variable modifications:  
 Q12 : Biotin:Thermo-21345 (Q)  
 Ions Score: 52 Expect: 0.00016  
 Matches : 35/220 fragment ions using 97 most intense peaks [\(help\)](#)

| #  | b                  | b <sup>++</sup>    | b <sup>*</sup>     | b <sup>*++</sup>   | b <sup>0</sup>     | b <sup>0++</sup>  | Seq. | y                  | y <sup>++</sup>   | y <sup>*</sup>    | y <sup>*++</sup>  | y <sup>0</sup>     | y <sup>0++</sup> | #  |
|----|--------------------|--------------------|--------------------|--------------------|--------------------|-------------------|------|--------------------|-------------------|-------------------|-------------------|--------------------|------------------|----|
| 1  | 100.075690         | 50.541483          |                    |                    |                    |                   | V    |                    |                   |                   |                   |                    |                  | 22 |
| 2  | <b>197.128454</b>  | 99.067865          |                    |                    |                    |                   | P    | 2410.228255        | 1205.617765       | 2393.201706       | 1197.104491       | 2392.217690        | 1196.612483      | 21 |
| 3  | <b>296.196868</b>  | 148.602072         |                    |                    |                    |                   | V    | 2313.175491        | 1157.091383       | 2296.148942       | 1148.578109       | 2295.164926        | 1148.086101      | 20 |
| 4  | <b>367.233982</b>  | 184.120629         |                    |                    |                    |                   | A    | 2214.107077        | 1107.557176       | 2197.080528       | 1099.043902       | 2196.096512        | 1098.551894      | 19 |
| 5  | <b>466.302396</b>  | 233.654836         |                    |                    |                    |                   | V    | 2143.069963        | 1072.038619       | 2126.043414       | 1063.525345       | 2125.059398        | 1063.033337      | 18 |
| 6  | <b>594.360974</b>  | 297.684125         | <b>577.334425</b>  | 289.170851         |                    |                   | Q    | 2044.001549        | 1022.504413       | 2026.975000       | 1013.991138       | 2025.990984        | 1013.499130      | 17 |
| 7  | 651.382438         | 326.194857         | 634.355889         | 317.681583         |                    |                   | G    | 1915.942971        | <b>958.475124</b> | 1898.916422       | 949.961849        | 1897.932406        | 949.469841       | 16 |
| 8  | <b>780.425031</b>  | 390.716154         | 763.398482         | 382.202879         | 762.414466         | 381.710871        | E    | 1858.921507        | 929.964391        | 1841.894958       | 921.451117        | 1840.910942        | 920.959109       | 15 |
| 9  | <b>895.451974</b>  | 448.229625         | 878.425425         | 439.716351         | 877.441409         | 439.224343        | D    | 1729.878914        | 865.443095        | 1712.852365       | 856.929821        | 1711.868349        | 856.437812       | 14 |
| 10 | <b>996.499653</b>  | 498.753465         | 979.473104         | 490.240190         | <b>978.489088</b>  | 489.748182        | T    | 1614.851971        | 807.929623        | 1597.825422       | 799.416349        | 1596.841406        | 798.924341       | 13 |
| 11 | <b>1095.568067</b> | 548.287672         | 1078.541518        | 539.774397         | <b>1077.557502</b> | 539.282389        | V    | 1513.804292        | 757.405784        | 1496.777743       | 748.892510        | 1495.793727        | 748.400502       | 12 |
| 12 | <b>1534.793393</b> | 767.900335         | 1517.766844        | 759.387060         | 1516.782828        | 758.895052        | Q    | <b>1414.735878</b> | 707.871577        | 1397.709329       | 699.358303        | <b>1396.725313</b> | 698.866294       | 11 |
| 13 | 1621.825421        | <b>811.416349</b>  | 1604.798872        | 802.903074         | 1603.814856        | <b>802.411066</b> | S    | <b>975.510552</b>  | 488.258914        | <b>958.484003</b> | 479.745639        | 957.499987         | 479.253631       | 10 |
| 14 | <b>1734.909485</b> | 867.958381         | <b>1717.882936</b> | 859.445106         | 1716.898920        | 858.953098        | L    | <b>888.478524</b>  | 444.742900        | 871.451975        | 436.229625        | 870.467959         | 435.737617       | 9  |
| 15 | 1835.957164        | 918.482220         | 1818.930615        | 909.968946         | 1817.946599        | 909.476938        | T    | <b>775.394460</b>  | 388.200868        | 758.367911        | 379.687593        | 757.383895         | 379.195585       | 8  |
| 16 | 1964.015742        | 982.511509         | 1946.989193        | 973.998235         | 1946.005177        | 973.506227        | Q    | <b>674.346781</b>  | 337.677029        | 657.320232        | <b>329.163754</b> | <b>656.336216</b>  | 328.671746       | 7  |
| 17 | 2021.037206        | 1011.022241        | 2004.010657        | 1002.508967        | 2003.026641        | 1002.016959       | G    | <b>546.288203</b>  | 273.647739        | 529.261654        | 265.134465        | 528.277638         | 264.642457       | 6  |
| 18 | 2136.064149        | <b>1068.535712</b> | 2119.037600        | 1060.022438        | 2118.053584        | 1059.530430       | D    | <b>489.266739</b>  | 245.137007        | 472.240190        | 236.623733        | 471.256174         | 236.131725       | 5  |
| 19 | 2193.085613        | 1097.046444        | 2176.059064        | 1088.533170        | 2175.075048        | 1088.041162       | G    | <b>374.239796</b>  | 187.623536        | 357.213247        | 179.110261        |                    |                  | 4  |
| 20 | 2292.154027        | <b>1146.580651</b> | 2275.127478        | 1138.067377        | 2274.143462        | 1137.575369       | V    | 317.218332         | 159.112804        | 300.191783        | 150.599530        |                    |                  | 3  |
| 21 | 2363.191141        | 1182.099208        | 2346.164592        | <b>1173.585934</b> | 2345.180576        | 1173.093926       | A    | <b>218.149918</b>  | 109.578597        | 201.123369        | 101.065323        |                    |                  | 2  |
| 22 |                    |                    |                    |                    |                    |                   | K    | <b>147.112804</b>  | 74.060040         | 130.086255        | 65.546765         |                    |                  | 1  |

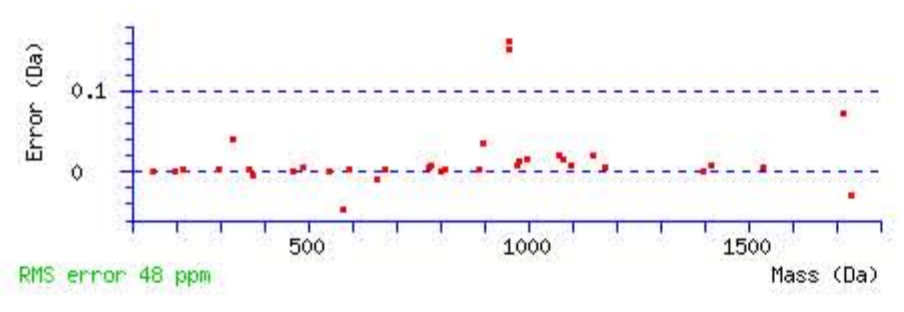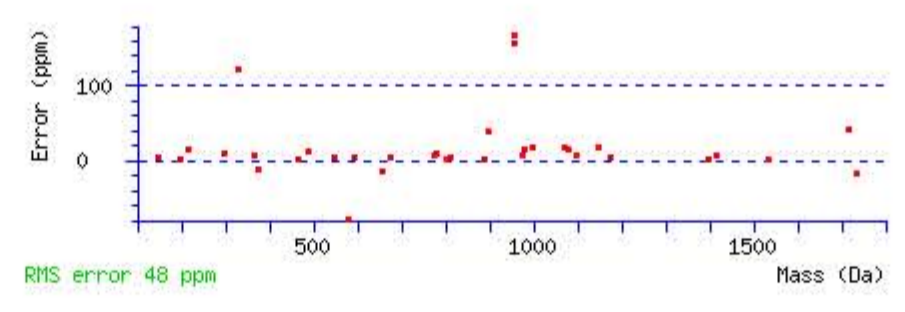

NCBI BLAST search of **VPVAVQGEDTVQSLTQGDGVAK**  
 (Parameters: blastp, nr protein database, expect=20000, no filter, PAM30)  
 Other BLAST [web gateways](#)

**All matches to this query**

| Score | $M_r(\text{calc})$ : | Delta    | Sequence                               |
|-------|----------------------|----------|----------------------------------------|
| 52.1  | 2508.289429          | 0.022223 | <a href="#">VPVAVQGEDTVQSLTQGDGVAK</a> |
| 22.1  | 2508.289429          | 0.022223 | <a href="#">VPVAVQGEDTVQSLTQGDGVAK</a> |
| 19.2  | 2508.289429          | 0.022223 | <a href="#">VPVAVQGEDTVQSLTQGDGVAK</a> |



# MASCOT Search Results

## Peptide View

MS/MS Fragmentation of **EDIPPADLSDQVPDTESETR**

Found in **CO3\_HUMAN**, Complement C3 OS=Homo sapiens GN=C3 PE=1 SV=2

Match to Query 65811: 2524.195062 from(842.405630,3+) rtinseconds(2084) index(42656)

Title: Locus:1.1.1.3009.16 File:"2013-07-02 CLN FXIII 60 min 1st F 3.wiff"

Data file C:\Program Files (x86)\Matrix Science\Mascot Daemon\mgf4 FXIII 60 min 1st\mascot\_daemon\_merge.mgf

Click mouse within plot area to zoom in by factor of two about that point

Or, Plot from  to  Da

Label all possible matches  Label matches used for scoring

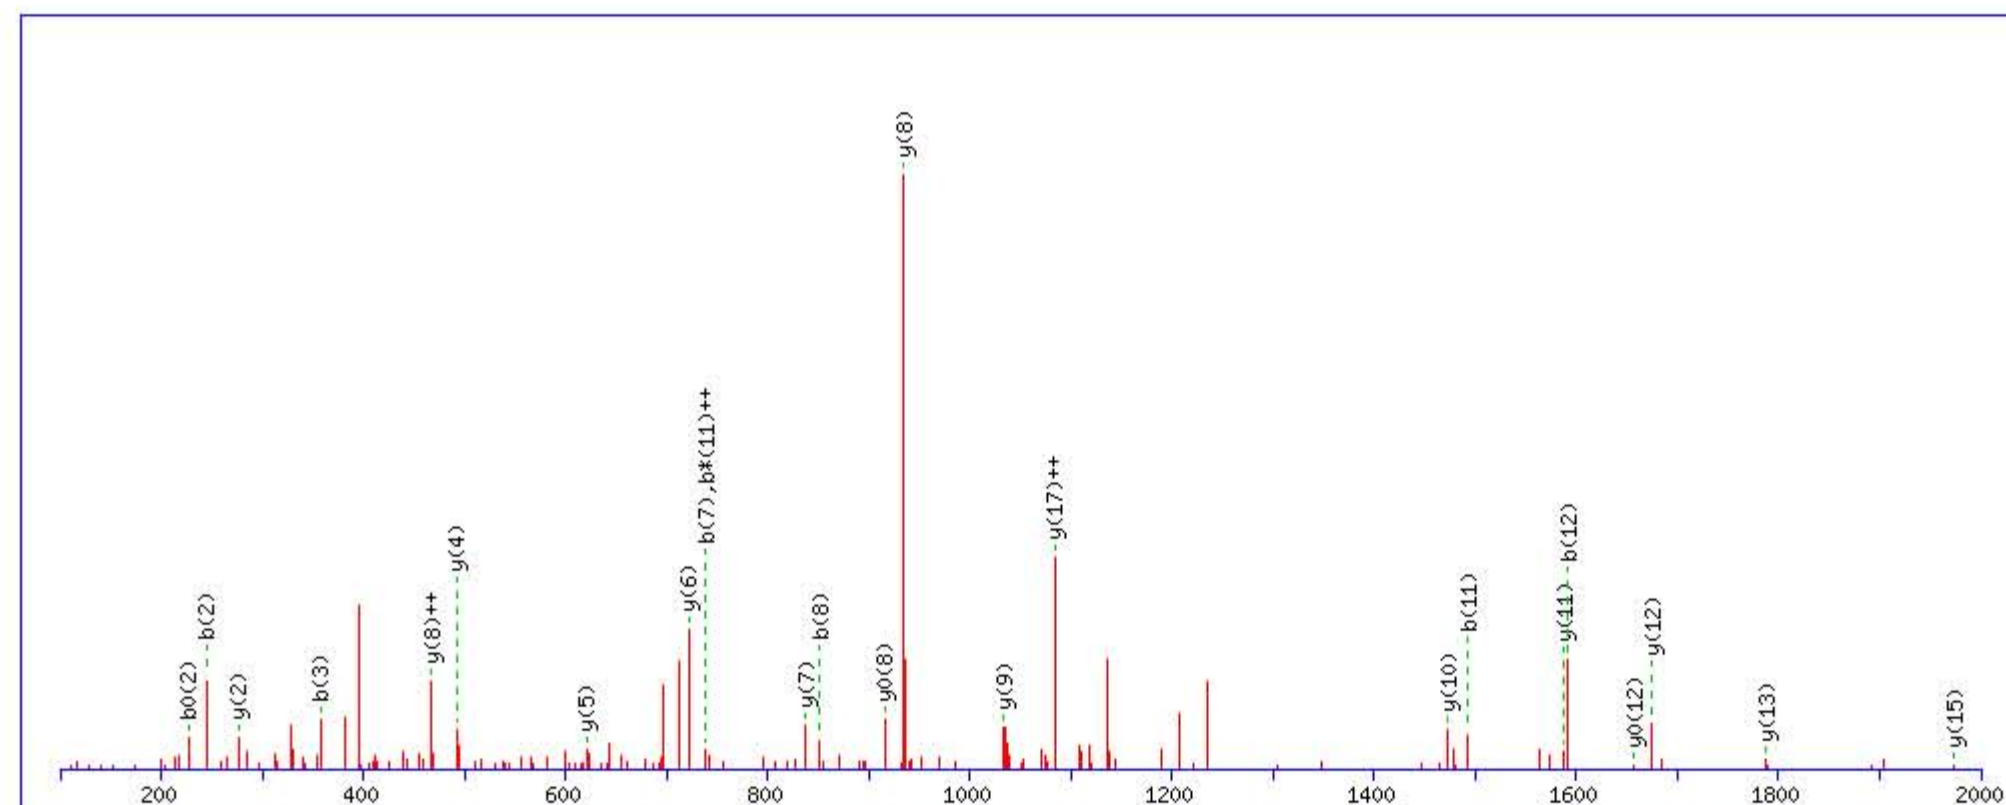

Monoisotopic mass of neutral peptide Mr(calc): 2524.163910

Fixed modifications: Carbamidomethyl (C) (apply to specified residues or termini only)

Variable modifications:

Q11 : Biotin:Thermo-21345 (Q)

Ions Score: 59 Expect: 2.6e-005

Matches : 24/206 fragment ions using 51 most intense peaks [\(help\)](#)

| #  | b                  | b <sup>++</sup> | b <sup>*</sup> | b <sup>*++</sup>  | b <sup>0</sup>    | b <sup>0++</sup> | Seq. | y                  | y <sup>++</sup>    | y <sup>*</sup> | y <sup>*++</sup> | y <sup>0</sup>     | y <sup>0++</sup> | #  |
|----|--------------------|-----------------|----------------|-------------------|-------------------|------------------|------|--------------------|--------------------|----------------|------------------|--------------------|------------------|----|
| 1  | 130.049869         | 65.528572       |                |                   | 112.039304        | 56.523290        | E    |                    |                    |                |                  |                    |                  | 20 |
| 2  | <b>245.076812</b>  | 123.042044      |                |                   | <b>227.066247</b> | 114.036762       | D    | 2396.128598        | 1198.567937        | 2379.102049    | 1190.054662      | 2378.118033        | 1189.562654      | 19 |
| 3  | <b>358.160876</b>  | 179.584076      |                |                   | 340.150311        | 170.578794       | I    | 2281.101655        | 1141.054465        | 2264.075106    | 1132.541191      | 2263.091090        | 1132.049183      | 18 |
| 4  | 455.213640         | 228.110458      |                |                   | 437.203075        | 219.105176       | P    | 2168.017591        | <b>1084.512433</b> | 2150.991042    | 1075.999159      | 2150.007026        | 1075.507151      | 17 |
| 5  | 552.266404         | 276.636840      |                |                   | 534.255839        | 267.631558       | P    | 2070.964827        | 1035.986051        | 2053.938278    | 1027.472777      | 2052.954262        | 1026.980769      | 16 |
| 6  | 623.303518         | 312.155397      |                |                   | 605.292953        | 303.150115       | A    | <b>1973.912063</b> | 987.459670         | 1956.885514    | 978.946395       | 1955.901498        | 978.454387       | 15 |
| 7  | <b>738.330461</b>  | 369.668869      |                |                   | 720.319896        | 360.663586       | D    | 1902.874949        | 951.941113         | 1885.848400    | 943.427838       | 1884.864384        | 942.935830       | 14 |
| 8  | <b>851.414525</b>  | 426.210901      |                |                   | 833.403960        | 417.205618       | L    | <b>1787.848006</b> | 894.427641         | 1770.821457    | 885.914367       | 1769.837441        | 885.422359       | 13 |
| 9  | 938.446553         | 469.726915      |                |                   | 920.435988        | 460.721632       | S    | <b>1674.763942</b> | 837.885609         | 1657.737393    | 829.372335       | <b>1656.753377</b> | 828.880327       | 12 |
| 10 | 1053.473496        | 527.240386      |                |                   | 1035.462931       | 518.235104       | D    | <b>1587.731914</b> | 794.369595         | 1570.705365    | 785.856321       | 1569.721349        | 785.364313       | 11 |
| 11 | <b>1492.698822</b> | 746.853049      | 1475.672273    | <b>738.339775</b> | 1474.688257       | 737.847767       | Q    | <b>1472.704971</b> | 736.856124         | 1455.678422    | 728.342849       | 1454.694406        | 727.850841       | 10 |
| 12 | <b>1591.767236</b> | 796.387256      | 1574.740687    | 787.873982        | 1573.756671       | 787.381974       | V    | <b>1033.479645</b> | 517.243461         | 1016.453096    | 508.730186       | 1015.469080        | 508.238178       | 9  |
| 13 | 1688.820000        | 844.913638      | 1671.793451    | 836.400364        | 1670.809435       | 835.908356       | P    | <b>934.411231</b>  | <b>467.709254</b>  | 917.384682     | 459.195979       | <b>916.400666</b>  | 458.703971       | 8  |
| 14 | 1803.846943        | 902.427110      | 1786.820394    | 893.913835        | 1785.836378       | 893.421827       | D    | <b>837.358467</b>  | 419.182872         | 820.331918     | 410.669597       | 819.347902         | 410.177589       | 7  |
| 15 | 1904.894622        | 952.950949      | 1887.868073    | 944.437675        | 1886.884057       | 943.945667       | T    | <b>722.331524</b>  | 361.669400         | 705.304975     | 353.156125       | 704.320959         | 352.664117       | 6  |
| 16 | 2033.937215        | 1017.472246     | 2016.910666    | 1008.958971       | 2015.926650       | 1008.466963      | E    | <b>621.283845</b>  | 311.145560         | 604.257296     | 302.632286       | 603.273280         | 302.140278       | 5  |
| 17 | 2120.969243        | 1060.988259     | 2103.942694    | 1052.474985       | 2102.958678       | 1051.982977      | S    | <b>492.241252</b>  | 246.624264         | 475.214703     | 238.110989       | 474.230687         | 237.618981       | 4  |
| 18 | 2250.011836        | 1125.509556     | 2232.985287    | 1116.996281       | 2232.001271       | 1116.504274      | E    | 405.209224         | 203.108250         | 388.182675     | 194.594975       | 387.198659         | 194.102967       | 3  |
| 19 | 2351.059515        | 1176.033395     | 2334.032966    | 1167.520121       | 2333.048950       | 1167.028113      | T    | <b>276.166631</b>  | 138.586953         | 259.140082     | 130.073679       | 258.156066         | 129.581671       | 2  |
| 20 |                    |                 |                |                   |                   |                  | R    | 175.118952         | 88.063114          | 158.092403     | 79.549839        |                    |                  | 1  |

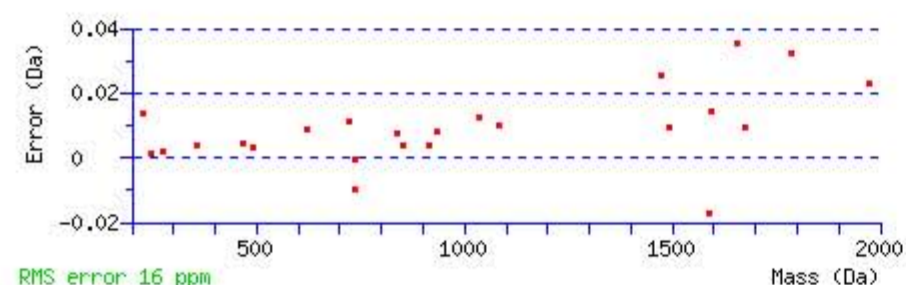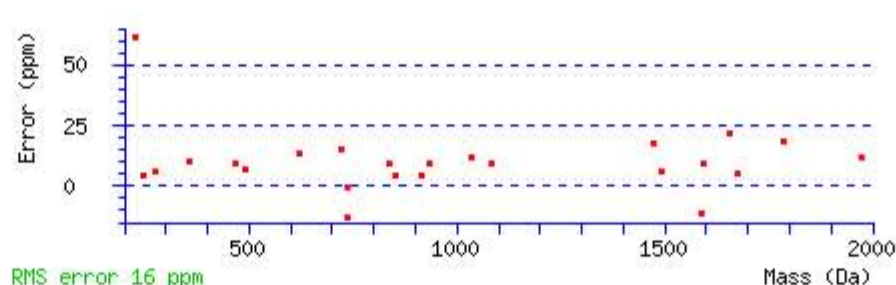

NCBI BLAST search of **EDIPPADLSDQVPDTESETR**

(Parameters: blastp, nr protein database, expect=20000, no filter, PAM30)

Other BLAST [web gateways](#)

All matches to this query

| Score | Mr(calc):   | Delta    | Sequence                             |
|-------|-------------|----------|--------------------------------------|
| 58.6  | 2524.163910 | 0.031152 | <a href="#">EDIPPADLSDQVPDTESETR</a> |

Mascot: <http://www.matrixscience.com/>



# MASCOT Search Results

## Peptide View

MS/MS Fragmentation of **VQLSNDFDEYIMAIEQTIK**  
 Found in **CO3\_HUMAN**, Complement C3 OS=Homo sapiens GN=C3 PE=1 SV=2

Match to Query 66219: 2567.293362 from(856.771730,3+) rtinseconds(3234) index(50759)  
 Title: Locus:1.1.1.3404.16 File:"2013-07-02 CLN FXIII 60 min 1st F 3.wiff"  
 Data file C:\Program Files (x86)\Matrix Science\Mascot Daemon\mgf\4 FXIII 60 min 1st\mascot\_daemon\_merge.mgf

Click mouse within plot area to zoom in by factor of two about that point  
 Or, Plot from  to  Da   
 Label all possible matches  Label matches used for scoring

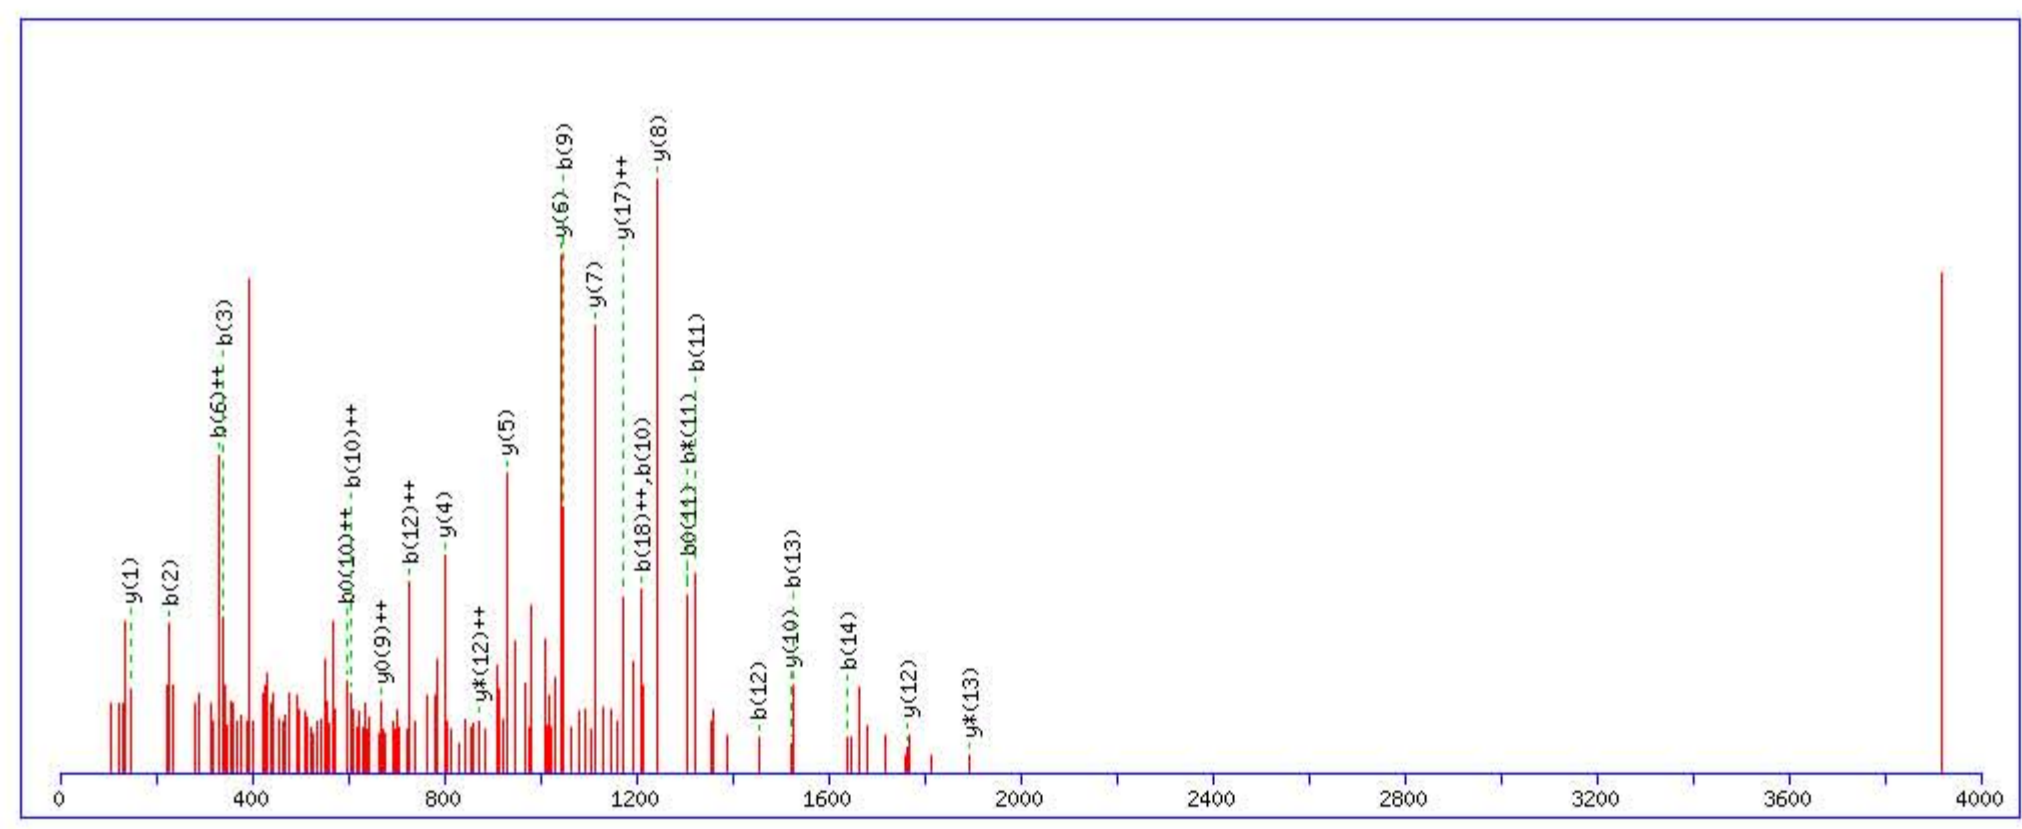

Monoisotopic mass of neutral peptide Mr(calc): 2567.265121  
 Fixed modifications: Carbamidomethyl (C) (apply to specified residues or termini only)  
 Variable modifications:  
 Q16 : Biotin:Thermo-21345 (Q)  
 Ions Score: 38 Expect: 0.0005  
 Matches : 27/204 fragment ions using 51 most intense peaks [\(help\)](#)

| #  | b                  | b <sup>++</sup>    | b <sup>+</sup>     | b <sup>+++</sup> | b <sup>0</sup>     | b <sup>0++</sup>  | Seq. | y                  | y <sup>++</sup>    | y <sup>+</sup>     | y <sup>+++</sup>  | y <sup>0</sup> | y <sup>0++</sup>  | #  |
|----|--------------------|--------------------|--------------------|------------------|--------------------|-------------------|------|--------------------|--------------------|--------------------|-------------------|----------------|-------------------|----|
| 1  | 100.075690         | 50.541483          |                    |                  |                    |                   | V    |                    |                    |                    |                   |                |                   | 19 |
| 2  | <b>228.134268</b>  | 114.570772         | 211.107719         | 106.057498       |                    |                   | Q    | 2469.204012        | 1235.105644        | 2452.177463        | 1226.592369       | 2451.193447    | 1226.100361       | 18 |
| 3  | <b>341.218332</b>  | 171.112804         | 324.191783         | 162.599530       |                    |                   | L    | 2341.145434        | <b>1171.076355</b> | 2324.118885        | 1162.563080       | 2323.134869    | 1162.071072       | 17 |
| 4  | 428.250360         | 214.628818         | 411.223811         | 206.115544       | 410.239795         | 205.623536        | S    | 2228.061370        | 1114.534323        | 2211.034821        | 1106.021048       | 2210.050805    | 1105.529040       | 16 |
| 5  | 542.293287         | 271.650282         | 525.266738         | 263.137007       | 524.282722         | 262.644999        | N    | 2141.029342        | 1071.018309        | 2124.002793        | 1062.505034       | 2123.018777    | 1062.013026       | 15 |
| 6  | 657.320230         | <b>329.163753</b>  | 640.293681         | 320.650479       | 639.309665         | 320.158471        | D    | 2026.986415        | 1013.996845        | 2009.959866        | 1005.483571       | 2008.975850    | 1004.991563       | 14 |
| 7  | 804.388644         | 402.697960         | 787.362095         | 394.184686       | 786.378079         | 393.692678        | F    | 1911.959472        | 956.483374         | <b>1894.932923</b> | 947.970099        | 1893.948907    | 947.478091        | 13 |
| 8  | 919.415587         | 460.211432         | 902.389038         | 451.698157       | 901.405022         | 451.206149        | D    | <b>1764.891058</b> | 882.949167         | 1747.864509        | <b>874.435893</b> | 1746.880493    | 873.943884        | 12 |
| 9  | <b>1048.458180</b> | 524.732728         | 1031.431631        | 516.219453       | 1030.447615        | 515.727445        | E    | 1649.864115        | 825.435695         | 1632.837566        | 816.922421        | 1631.853550    | 816.430413        | 11 |
| 10 | <b>1211.521509</b> | <b>606.264392</b>  | 1194.494960        | 597.751118       | 1193.510944        | <b>597.259110</b> | Y    | <b>1520.821522</b> | 760.914399         | 1503.794973        | 752.401125        | 1502.810957    | 751.909116        | 10 |
| 11 | <b>1324.605573</b> | 662.806424         | <b>1307.579024</b> | 654.293150       | <b>1306.595008</b> | 653.801142        | I    | 1357.758193        | 679.382734         | 1340.731644        | 670.869460        | 1339.747628    | <b>670.377452</b> | 9  |
| 12 | <b>1455.646058</b> | <b>728.326667</b>  | 1438.619509        | 719.813392       | 1437.635493        | 719.321384        | M    | <b>1244.674129</b> | 622.840703         | 1227.647580        | 614.327428        | 1226.663564    | 613.835420        | 8  |
| 13 | <b>1526.683172</b> | 763.845224         | 1509.656623        | 755.331949       | 1508.672607        | 754.839941        | A    | <b>1113.633644</b> | 557.320460         | 1096.607095        | 548.807186        | 1095.623079    | 548.315178        | 7  |
| 14 | <b>1639.767236</b> | 820.387256         | 1622.740687        | 811.873981       | 1621.756671        | 811.381973        | I    | <b>1042.596530</b> | 521.801903         | 1025.569981        | 513.288629        | 1024.585965    | 512.796621        | 6  |
| 15 | 1768.809829        | 884.908552         | 1751.783280        | 876.395278       | 1750.799264        | 875.903270        | E    | <b>929.512466</b>  | 465.259871         | 912.485917         | 456.746597        | 911.501901     | 456.254589        | 5  |
| 16 | 2208.035155        | 1104.521215        | 2191.008606        | 1096.007941      | 2190.024590        | 1095.515933       | Q    | <b>800.469873</b>  | 400.738575         | 783.443324         | 392.225300        | 782.459308     | 391.733292        | 4  |
| 17 | 2309.082834        | 1155.045055        | 2292.056285        | 1146.531780      | 2291.072269        | 1146.039772       | T    | 361.244547         | 181.125911         | 344.217998         | 172.612637        | 343.233982     | 172.120629        | 3  |
| 18 | 2422.166898        | <b>1211.587087</b> | 2405.140349        | 1203.073812      | 2404.156333        | 1202.581804       | I    | 260.196868         | 130.602072         | 243.170319         | 122.088798        |                |                   | 2  |
| 19 |                    |                    |                    |                  |                    |                   | K    | <b>147.112804</b>  | 74.060040          | 130.086255         | 65.546765         |                |                   | 1  |

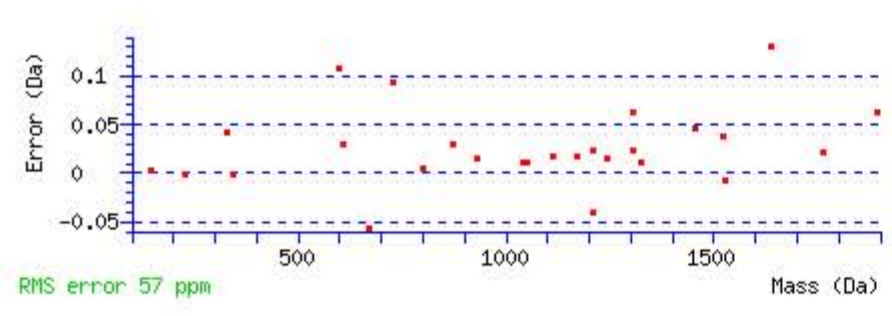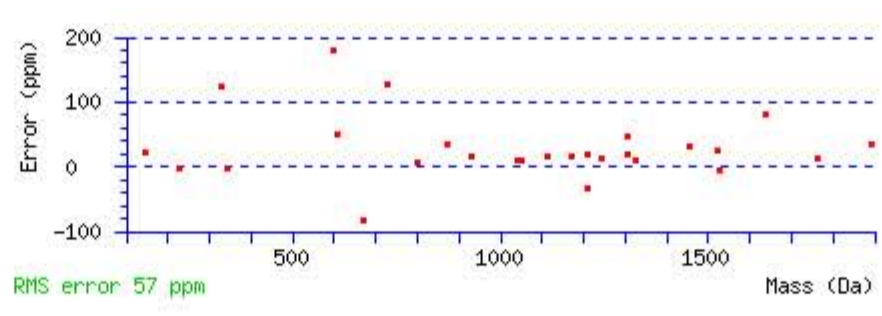

NCBI BLAST search of **VQLSNDFDEYIMAIEQTIK**  
 (Parameters: blastp, nr protein database, expect=20000, no filter, PAM30)  
 Other BLAST [web gateways](#)

### All matches to this query

| Score | Mr(calc):   | Delta    | Sequence                                |
|-------|-------------|----------|-----------------------------------------|
| 37.7  | 2567.265121 | 0.028241 | <a href="#">VQLSNDFDEYIMAIEQTIK</a>     |
| 2.5   | 2567.264923 | 0.028439 | <a href="#">IQSDLTSHEISLEEMKKHNQ GK</a> |



# Mascot Search Results

## Peptide View

MS/MS Fragmentation of **QKPDGVFQEDAPVIHQEMIGGLR**

Found in **CO3\_HUMAN**, Complement C3 OS=Homo sapiens GN=C3 PE=1 SV=2

Match to Query 70215: 2874.482652 from(959.168160,3+) rtinseconds(2202) index(43447)

Title: Locus:1.1.1.3050.17 File:"2013-07-02 CLN FXIII 60 min 1st F 3.wiff"

Data file C:\Program Files (x86)\Matrix Science\Mascot Daemon\mgf4 FXIII 60 min 1st\mascot\_daemon\_merge.mgf

Click mouse within plot area to zoom in by factor of two about that point

Or, Plot from  to  Da

Label all possible matches  Label matches used for scoring

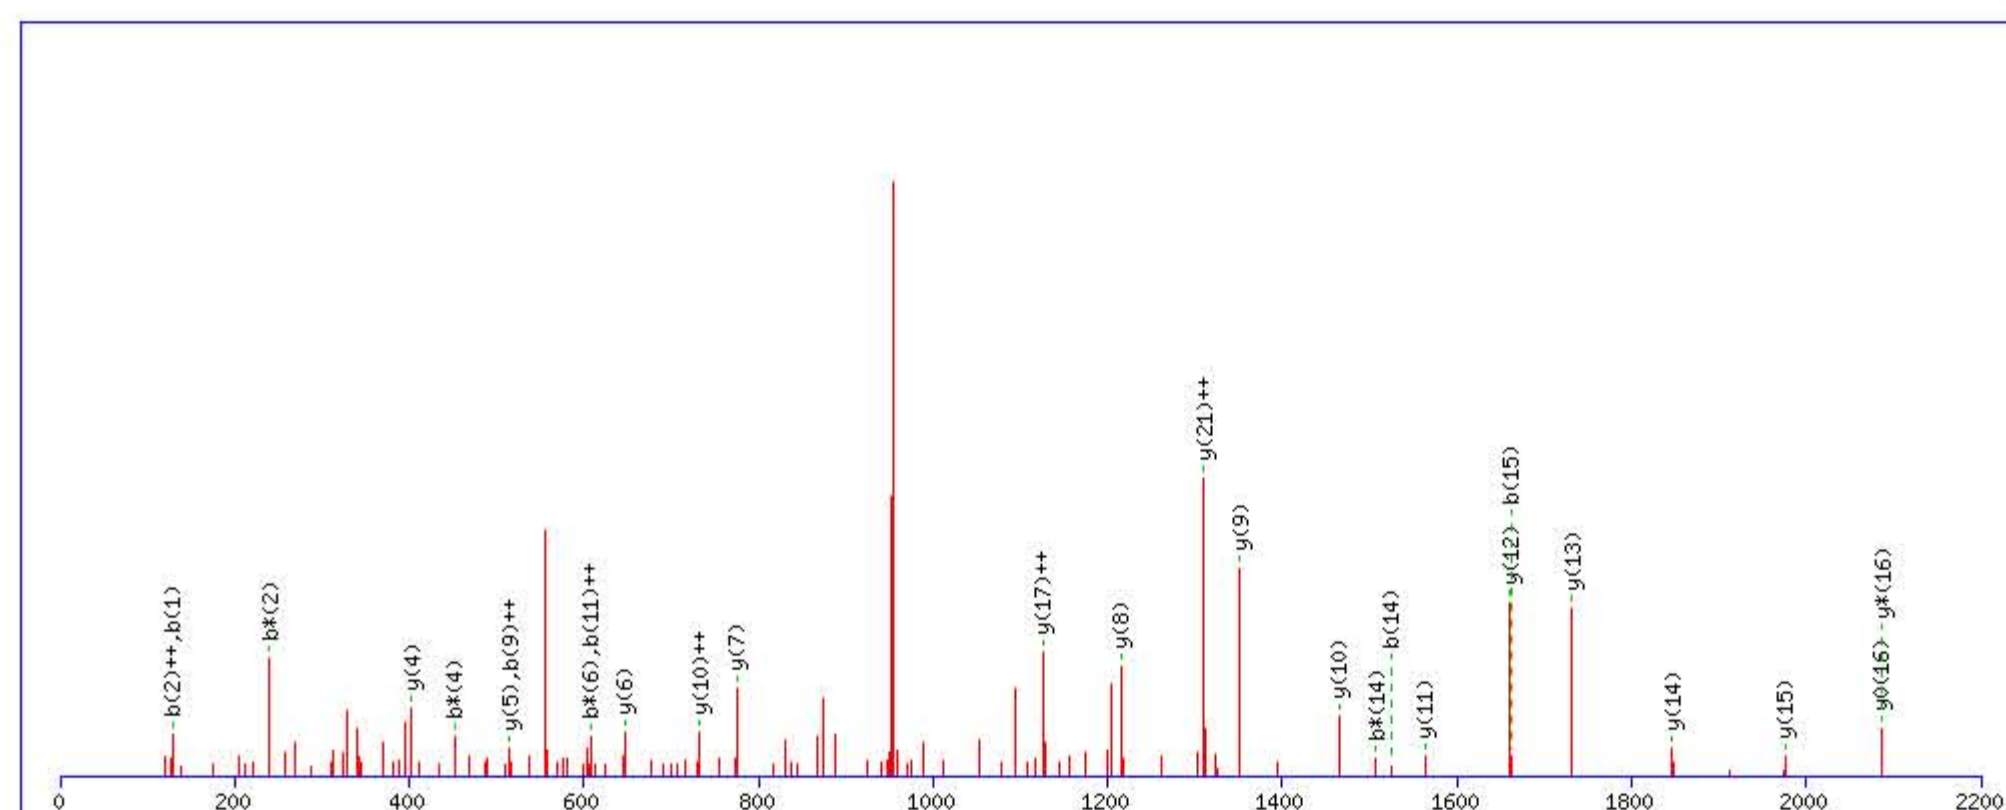

Monoisotopic mass of neutral peptide Mr(calc): 2874.452057

Fixed modifications: Carbamidomethyl (C) (apply to specified residues or termini only)

Variable modifications:

Q16 : Biotin:Thermo-21345 (Q)

Ions Score: 71 Expect: 5.1e-007

Matches : 27/246 fragment ions using 39 most intense peaks [\(help\)](#)

| #  | b           | b <sup>++</sup> | b <sup>+</sup> | b <sup>+++</sup> | b <sup>0</sup> | b <sup>0++</sup> | Seq. | y           | y <sup>++</sup> | y <sup>+</sup> | y <sup>+++</sup> | y <sup>0</sup> | y <sup>0++</sup> | #  |
|----|-------------|-----------------|----------------|------------------|----------------|------------------|------|-------------|-----------------|----------------|------------------|----------------|------------------|----|
| 1  | 129.065854  | 65.036565       | 112.039305     | 56.523291        |                |                  | Q    |             |                 |                |                  |                |                  | 23 |
| 2  | 257.160817  | 129.084047      | 240.134268     | 120.570772       |                |                  | K    | 2747.400756 | 1374.204016     | 2730.374207    | 1365.690741      | 2729.390191    | 1365.198733      | 22 |
| 3  | 354.213581  | 177.610429      | 337.187032     | 169.097154       |                |                  | P    | 2619.305793 | 1310.156534     | 2602.279244    | 1301.643260      | 2601.295228    | 1301.151252      | 21 |
| 4  | 469.240524  | 235.123900      | 452.213975     | 226.610626       | 451.229959     | 226.118618       | D    | 2522.253029 | 1261.630152     | 2505.226480    | 1253.116878      | 2504.242464    | 1252.624870      | 20 |
| 5  | 526.261988  | 263.634632      | 509.235439     | 255.121358       | 508.251423     | 254.629350       | G    | 2407.226086 | 1204.116681     | 2390.199537    | 1195.603406      | 2389.215521    | 1195.111398      | 19 |
| 6  | 625.330402  | 313.168839      | 608.303853     | 304.655565       | 607.319837     | 304.163557       | V    | 2350.204622 | 1175.605949     | 2333.178073    | 1167.092674      | 2332.194057    | 1166.600666      | 18 |
| 7  | 772.398816  | 386.703046      | 755.372267     | 378.189772       | 754.388251     | 377.697764       | F    | 2251.136208 | 1126.071742     | 2234.109659    | 1117.558467      | 2233.125643    | 1117.066459      | 17 |
| 8  | 900.457394  | 450.732335      | 883.430845     | 442.219061       | 882.446829     | 441.727053       | Q    | 2104.067794 | 1052.537535     | 2087.041245    | 1044.024260      | 2086.057229    | 1043.532252      | 16 |
| 9  | 1029.499987 | 515.253631      | 1012.473438    | 506.740357       | 1011.489422    | 506.248349       | E    | 1976.009216 | 988.508246      | 1958.982667    | 979.994972       | 1957.998651    | 979.502964       | 15 |
| 10 | 1144.526930 | 572.767103      | 1127.500381    | 564.253829       | 1126.516365    | 563.761821       | D    | 1846.966623 | 923.986950      | 1829.940074    | 915.473675       | 1828.956058    | 914.981667       | 14 |
| 11 | 1215.564044 | 608.285660      | 1198.537495    | 599.772386       | 1197.553479    | 599.280377       | A    | 1731.939680 | 866.473478      | 1714.913131    | 857.960204       | 1713.929115    | 857.468196       | 13 |
| 12 | 1312.616808 | 656.812042      | 1295.590259    | 648.298768       | 1294.606243    | 647.806760       | P    | 1660.902566 | 830.954921      | 1643.876017    | 822.441647       | 1642.892001    | 821.949639       | 12 |
| 13 | 1411.685222 | 706.346249      | 1394.658673    | 697.832975       | 1393.674657    | 697.340967       | V    | 1563.849802 | 782.428539      | 1546.823253    | 773.915265       | 1545.839237    | 773.423257       | 11 |
| 14 | 1524.769286 | 762.888281      | 1507.742737    | 754.375007       | 1506.758721    | 753.882998       | I    | 1464.781388 | 732.894332      | 1447.754839    | 724.381058       | 1446.770823    | 723.889050       | 10 |
| 15 | 1661.828198 | 831.417737      | 1644.801649    | 822.904463       | 1643.817633    | 822.412454       | H    | 1351.697324 | 676.352300      | 1334.670775    | 667.839026       | 1333.686759    | 667.347018       | 9  |
| 16 | 2101.053524 | 1051.030400     | 2084.026975    | 1042.517125      | 2083.042959    | 1042.025117      | Q    | 1214.638412 | 607.822844      | 1197.611863    | 599.309570       | 1196.627847    | 598.817562       | 8  |
| 17 | 2230.096117 | 1115.551696     | 2213.069568    | 1107.038422      | 2212.085552    | 1106.546414      | E    | 775.413086  | 388.210181      | 758.386537     | 379.696907       | 757.402521     | 379.204899       | 7  |
| 18 | 2361.136602 | 1181.071939     | 2344.110053    | 1172.558664      | 2343.126037    | 1172.066656      | M    | 646.370493  | 323.688885      | 629.343944     | 315.175610       |                |                  | 6  |
| 19 | 2474.220666 | 1237.613971     | 2457.194117    | 1229.100696      | 2456.210101    | 1228.608689      | I    | 515.330008  | 258.168642      | 498.303459     | 249.655368       |                |                  | 5  |
| 20 | 2531.242130 | 1266.124703     | 2514.215581    | 1257.611428      | 2513.231565    | 1257.119420      | G    | 402.245944  | 201.626610      | 385.219395     | 193.113335       |                |                  | 4  |
| 21 | 2588.263594 | 1294.635435     | 2571.237045    | 1286.122160      | 2570.253029    | 1285.630152      | G    | 345.224480  | 173.115878      | 328.197931     | 164.602603       |                |                  | 3  |
| 22 | 2701.347658 | 1351.177467     | 2684.321109    | 1342.664192      | 2683.337093    | 1342.172185      | L    | 288.203016  | 144.605146      | 271.176467     | 136.091872       |                |                  | 2  |
| 23 |             |                 |                |                  |                |                  | R    | 175.118952  | 88.063114       | 158.092403     | 79.549839        |                |                  | 1  |

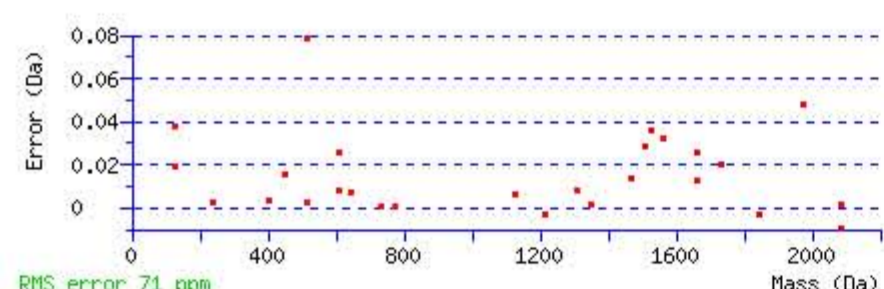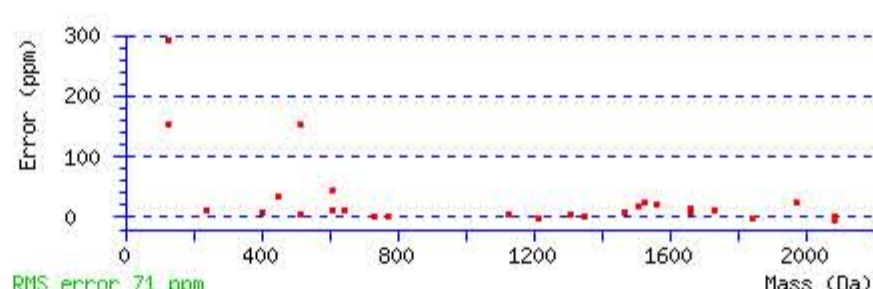

NCBI BLAST search of **QKPDGVFQEDAPVIHQEMIGGLR**

(Parameters: blastp, nr protein database, expect=20000, no filter, PAM30)

Other BLAST [web gateways](#)

All matches to this query

| Score | Mr(calc):   | Delta    | Sequence                                 |
|-------|-------------|----------|------------------------------------------|
| 71.3  | 2874.452057 | 0.030595 | <a href="#">QKPDGVFQEDAPVIHQEMIGGLR</a>  |
| 10.7  | 2874.452057 | 0.030595 | <a href="#">QKPDGVFQEDAPVIHQEMIGGLR</a>  |
| 4.1   | 2874.459396 | 0.023256 | <a href="#">QYIQLELPAFALACLMLMPHSEKR</a> |



# MASCOT Search Results

## Peptide View

MS/MS Fragmentation of **DTWVEHWPEEDECQDEENQK**

Found in **CO3\_HUMAN**, Complement C3 OS=Homo sapiens GN=C3 PE=1 SV=2

Match to Query 70712: 2913.221082 from(972.080970,3+) rtinseconds(2099) index(42739)

Title: Locus:1.1.1.3014.26 File:"2013-07-02 CLN FXIII 60 min 1st F 3.wiff"

Data file C:\Program Files (x86)\Matrix Science\Mascot Daemon\mgf4 FXIII 60 min 1st\mascot\_daemon\_merge.mgf

Click mouse within plot area to zoom in by factor of two about that point

Or, Plot from  to  Da

Label all possible matches  Label matches used for scoring

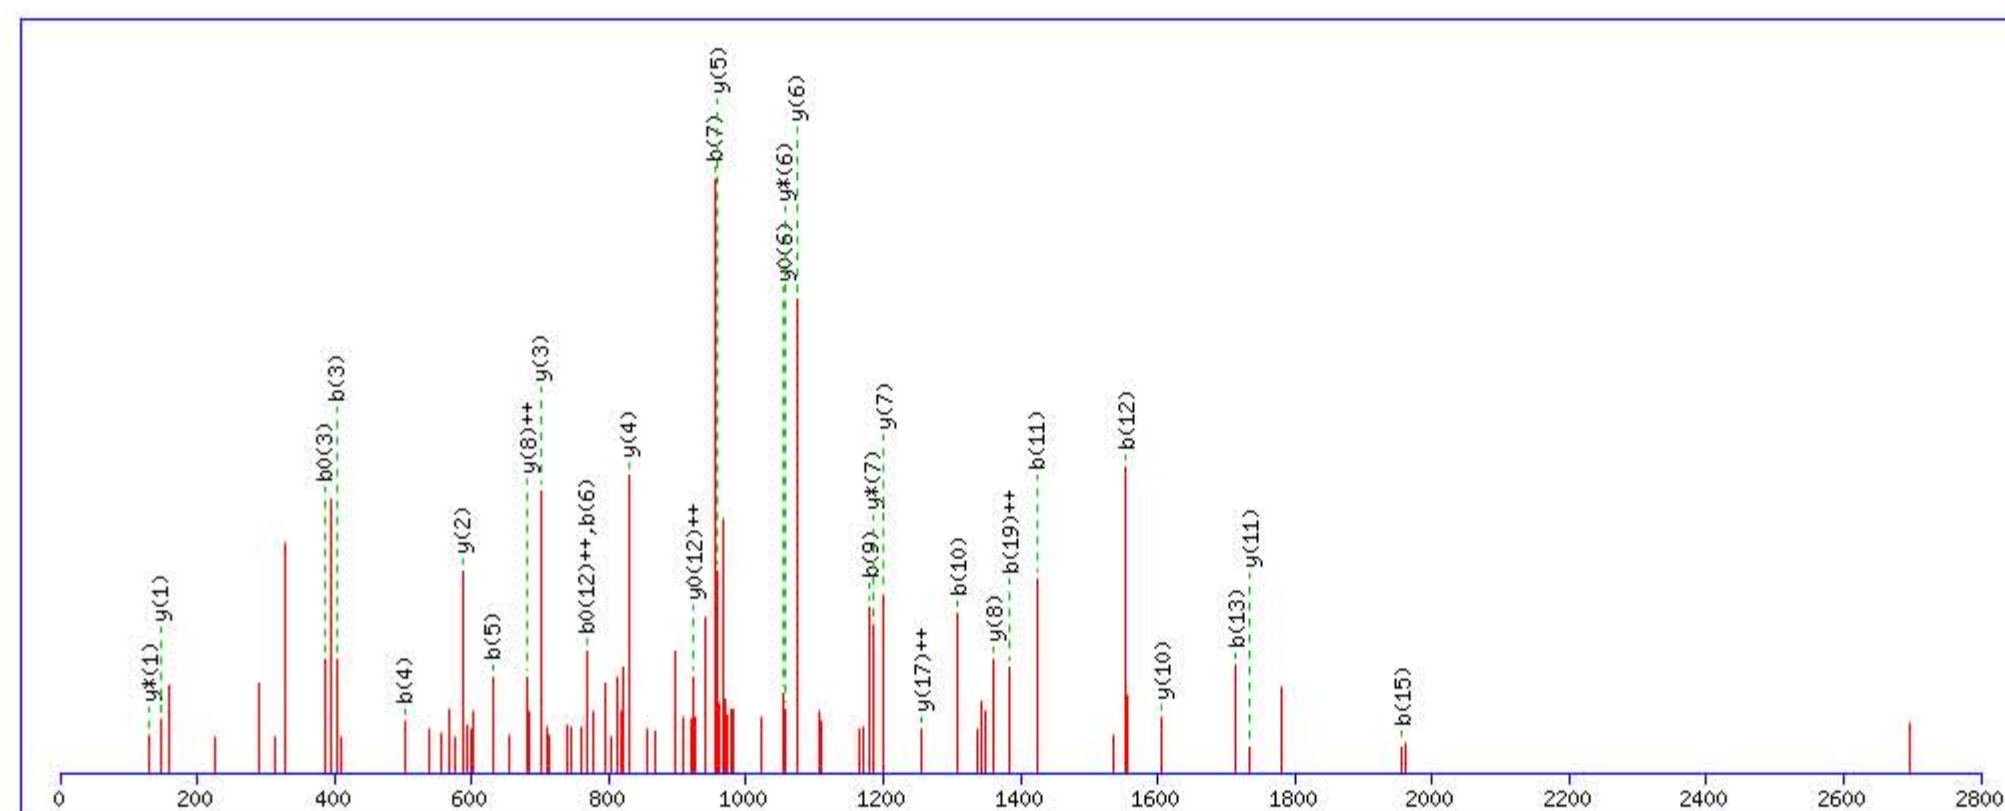

Monoisotopic mass of neutral peptide  $M_r(\text{calc})$ : 2913.185776

Fixed modifications: Carbamidomethyl (C) (apply to specified residues or termini only)

Variable modifications:

Q19 : Biotin:Thermo-21345 (Q)

Ions Score: 79 Expect: 2.6e-008

Matches : 31/196 fragment ions using 46 most intense peaks ([help](#))

| #  | b                  | b <sup>++</sup>    | b <sup>*</sup> | b <sup>*++</sup> | b <sup>0</sup>    | b <sup>0++</sup>  | Seq. | y                  | y <sup>++</sup>    | y <sup>*</sup>     | y <sup>*++</sup> | y <sup>0</sup>     | y <sup>0++</sup>  | #  |
|----|--------------------|--------------------|----------------|------------------|-------------------|-------------------|------|--------------------|--------------------|--------------------|------------------|--------------------|-------------------|----|
| 1  | 116.034219         | 58.520748          |                |                  | 98.023654         | 49.515465         | D    |                    |                    |                    |                  |                    |                   | 20 |
| 2  | 217.081898         | 109.044587         |                |                  | 199.071333        | 100.039304        | T    | 2799.166123        | 1400.086699        | 2782.139574        | 1391.573425      | 2781.155558        | 1391.081417       | 19 |
| 3  | <b>403.161211</b>  | 202.084244         |                |                  | <b>385.150646</b> | 193.078961        | W    | 2698.118444        | 1349.562860        | 2681.091895        | 1341.049585      | 2680.107879        | 1340.557577       | 18 |
| 4  | <b>502.229625</b>  | 251.618451         |                |                  | 484.219060        | 242.613168        | V    | 2512.039131        | <b>1256.523203</b> | 2495.012582        | 1248.009929      | 2494.028566        | 1247.517921       | 17 |
| 5  | <b>631.272218</b>  | 316.139747         |                |                  | 613.261653        | 307.134465        | E    | 2412.970717        | 1206.988996        | 2395.944168        | 1198.475722      | 2394.960152        | 1197.983714       | 16 |
| 6  | <b>768.331130</b>  | 384.669203         |                |                  | 750.320565        | 375.663921        | H    | 2283.928124        | 1142.467700        | 2266.901575        | 1133.954425      | 2265.917559        | 1133.462417       | 15 |
| 7  | <b>954.410443</b>  | 477.708860         |                |                  | 936.399878        | 468.703577        | W    | 2146.869212        | 1073.938244        | 2129.842663        | 1065.424969      | 2128.858647        | 1064.932961       | 14 |
| 8  | 1051.463207        | 526.235242         |                |                  | 1033.452642       | 517.229959        | P    | 1960.789899        | 980.898588         | 1943.763350        | 972.385313       | 1942.779334        | 971.893305        | 13 |
| 9  | <b>1180.505800</b> | 590.756538         |                |                  | 1162.495235       | 581.751256        | E    | 1863.737135        | 932.372206         | 1846.710586        | 923.858931       | 1845.726570        | <b>923.366923</b> | 12 |
| 10 | <b>1309.548393</b> | 655.277835         |                |                  | 1291.537828       | 646.272552        | E    | <b>1734.694542</b> | 867.850909         | 1717.667993        | 859.337635       | 1716.683977        | 858.845627        | 11 |
| 11 | <b>1424.575336</b> | 712.791306         |                |                  | 1406.564771       | 703.786024        | D    | <b>1605.651949</b> | 803.329613         | 1588.625400        | 794.816338       | 1587.641384        | 794.324330        | 10 |
| 12 | <b>1553.617929</b> | 777.312603         |                |                  | 1535.607364       | <b>768.307320</b> | E    | 1490.625006        | 745.816141         | 1473.598457        | 737.302867       | 1472.614441        | 736.810859        | 9  |
| 13 | <b>1713.648578</b> | 857.327927         |                |                  | 1695.638013       | 848.322645        | C    | <b>1361.582413</b> | <b>681.294845</b>  | 1344.555864        | 672.781570       | 1343.571848        | 672.289562        | 8  |
| 14 | 1841.707156        | 921.357216         | 1824.680607    | 912.843942       | 1823.696591       | 912.351934        | Q    | <b>1201.551764</b> | 601.279520         | <b>1184.525215</b> | 592.766246       | 1183.541199        | 592.274238        | 7  |
| 15 | <b>1956.734099</b> | 978.870688         | 1939.707550    | 970.357413       | 1938.723534       | 969.865405        | D    | <b>1073.493186</b> | 537.250231         | <b>1056.466637</b> | 528.736957       | <b>1055.482621</b> | 528.244949        | 6  |
| 16 | 2085.776692        | 1043.391984        | 2068.750143    | 1034.878709      | 2067.766127       | 1034.386701       | E    | <b>958.466243</b>  | 479.736760         | 941.439694         | 471.223485       | 940.455678         | 470.731477        | 5  |
| 17 | 2214.819285        | 1107.913280        | 2197.792736    | 1099.400006      | 2196.808720       | 1098.907998       | E    | <b>829.423650</b>  | 415.215463         | 812.397101         | 406.702189       | 811.413085         | 406.210181        | 4  |
| 18 | 2328.862212        | 1164.934744        | 2311.835663    | 1156.421469      | 2310.851647       | 1155.929461       | N    | <b>700.381057</b>  | 350.694167         | 683.354508         | 342.180892       |                    |                   | 3  |
| 19 | 2768.087538        | <b>1384.547407</b> | 2751.060989    | 1376.034132      | 2750.076973       | 1375.542125       | Q    | <b>586.338130</b>  | 293.672703         | 569.311581         | 285.159429       |                    |                   | 2  |
| 20 |                    |                    |                |                  |                   |                   | K    | <b>147.112804</b>  | 74.060040          | <b>130.086255</b>  | 65.546765        |                    |                   | 1  |

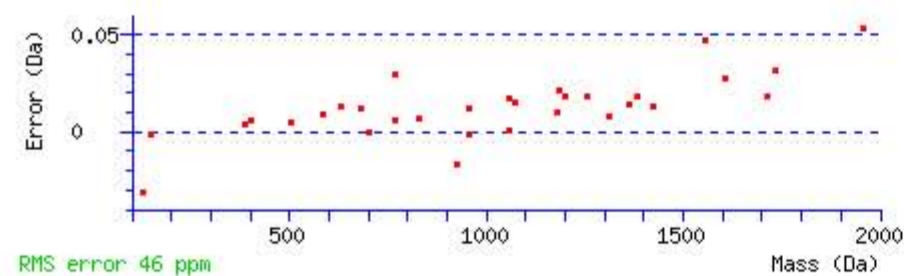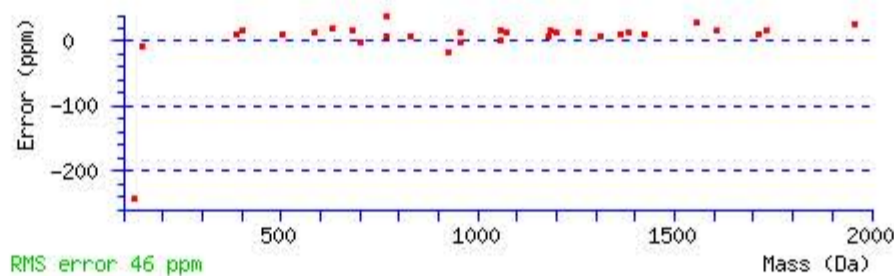

NCBI BLAST search of **DTWVEHWPEEDECQDEENQK**

(Parameters: blastp, nr protein database, expect=20000, no filter, PAM30)

Other BLAST [web gateways](#)

All matches to this query

| Score | $M_r(\text{calc})$ : | Delta    | Sequence                             |
|-------|----------------------|----------|--------------------------------------|
| 79.3  | 2913.185776          | 0.035306 | <a href="#">DTWVEHWPEEDECQDEENQK</a> |
| 39.3  | 2913.185776          | 0.035306 | <a href="#">DTWVEHWPEEDECQDEENQK</a> |

Mascot: <http://www.matrixscience.com/>



# {MATRIX} SCIENCE Mascot Search Results

## Peptide View

MS/MS Fragmentation of **GQAGLQR**

Found in **CO4A\_HUMAN**, Complement C4-A OS=Homo sapiens GN=C4A PE=1 SV=2

Match to Query 20649: 1039.558928 from(520.786740,2+) rtinseconds(1388) index(56120)

Title: Locus:1.1.1.2789.12 File:"2013-07-02 CLN FXIII 60 min 1st F 4.wiff"

Data file C:\Program Files (x86)\Matrix Science\Mascot Daemon\mgf4 FXIII 60 min 1st\mascot\_daemon\_merge.mgf

Click mouse within plot area to zoom in by factor of two about that point

Or, Plot from  to  Da

Label all possible matches  Label matches used for scoring

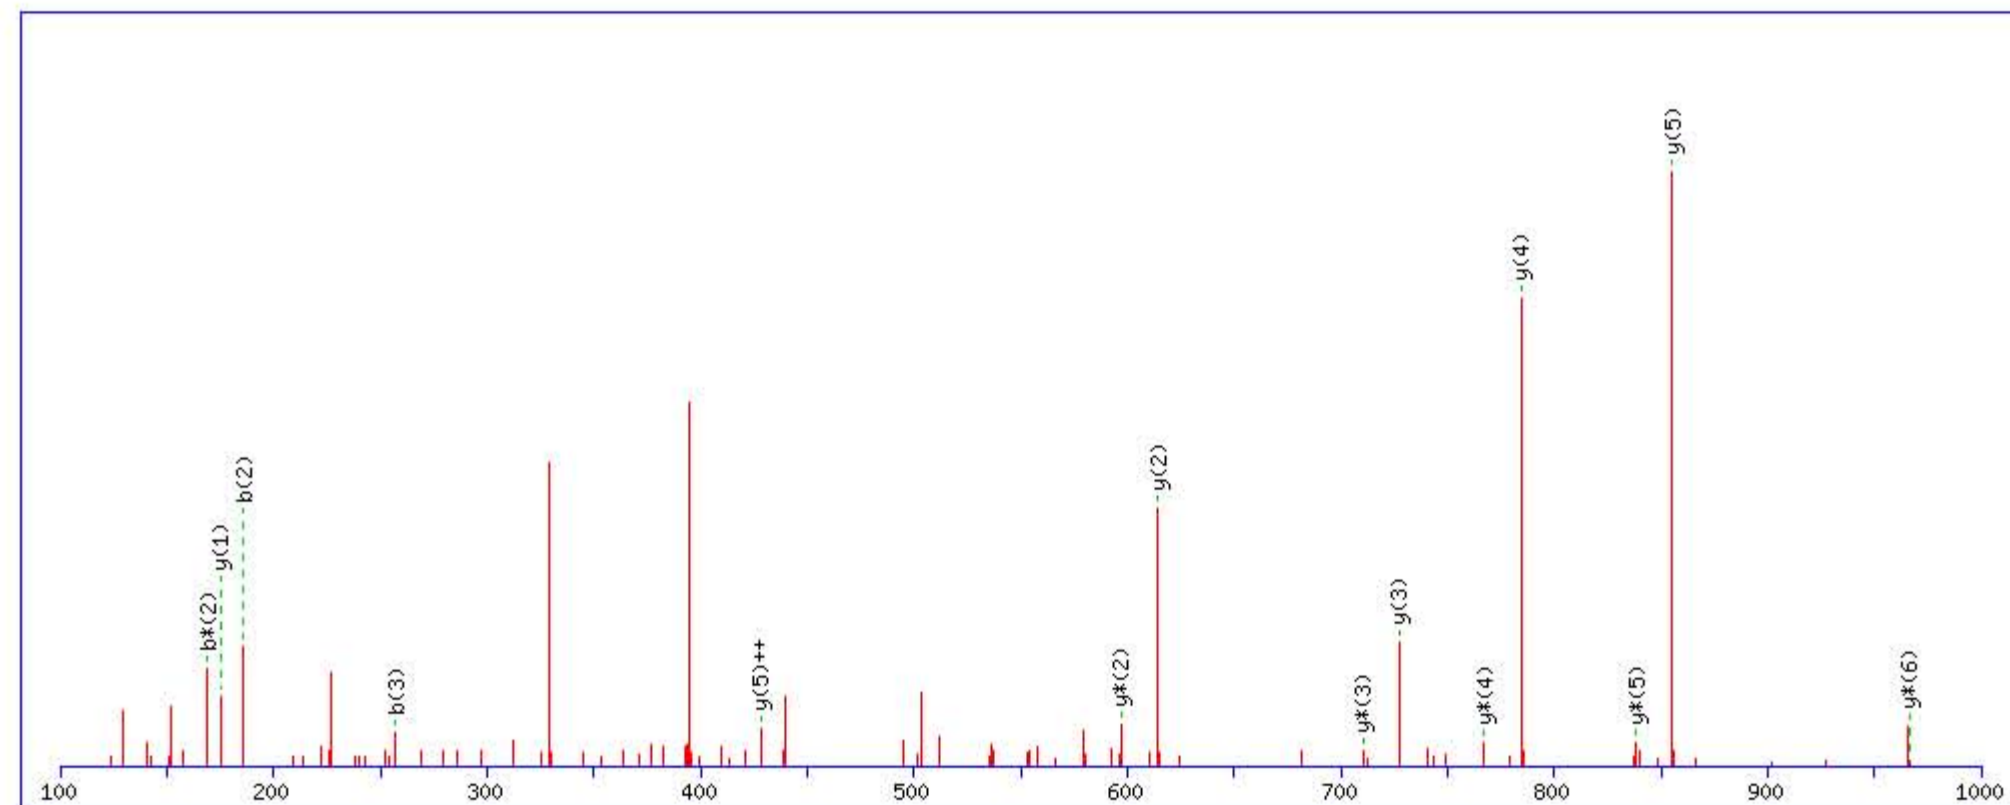

Monoisotopic mass of neutral peptide Mr(calc): 1039.559677

Fixed modifications: Carbamidomethyl (C) (apply to specified residues or termini only)

Variable modifications:

Q6 : Biotin:Thermo-21345 (Q)

Ions Score: 26 Expect: 0.034

Matches : 14/46 fragment ions using 27 most intense peaks [\(help\)](#)

| # | b                 | b <sup>++</sup> | b <sup>*</sup>    | b <sup>*++</sup> | Seq.     | y                 | y <sup>++</sup>   | y <sup>*</sup>    | y <sup>*++</sup> | #        |
|---|-------------------|-----------------|-------------------|------------------|----------|-------------------|-------------------|-------------------|------------------|----------|
| 1 | 58.028740         | 29.518008       |                   |                  | <b>G</b> |                   |                   |                   |                  | 7        |
| 2 | <b>186.087318</b> | 93.547297       | <b>169.060769</b> | 85.034023        | <b>Q</b> | 983.545498        | 492.276387        | <b>966.518949</b> | 483.763113       | <b>6</b> |
| 3 | <b>257.124432</b> | 129.065854      | 240.097883        | 120.552580       | <b>A</b> | <b>855.486920</b> | <b>428.247098</b> | <b>838.460371</b> | 419.733824       | <b>5</b> |
| 4 | 314.145896        | 157.576586      | 297.119347        | 149.063312       | <b>G</b> | <b>784.449806</b> | 392.728541        | <b>767.423257</b> | 384.215267       | <b>4</b> |
| 5 | 427.229960        | 214.118618      | 410.203411        | 205.605344       | <b>L</b> | <b>727.428342</b> | 364.217809        | <b>710.401793</b> | 355.704535       | <b>3</b> |
| 6 | 866.455286        | 433.731281      | 849.428737        | 425.218007       | <b>Q</b> | <b>614.344278</b> | 307.675777        | <b>597.317729</b> | 299.162503       | <b>2</b> |
| 7 |                   |                 |                   |                  | <b>R</b> | <b>175.118952</b> | 88.063114         | 158.092403        | 79.549840        | <b>1</b> |

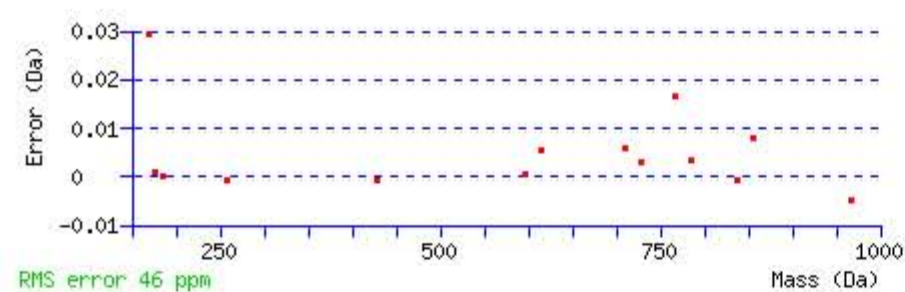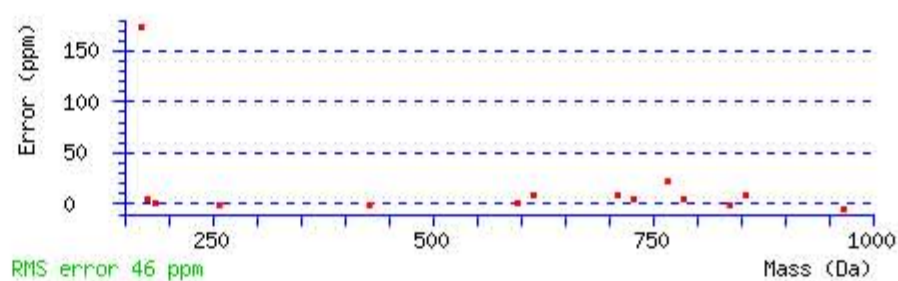

NCBI BLAST search of **GQAGLQR**

(Parameters: blastp, nr protein database, expect=20000, no filter, PAM30)

Other BLAST [web gateways](#)

All matches to this query

| Score | Mr(calc):   | Delta     | Sequence                   |
|-------|-------------|-----------|----------------------------|
| 26.0  | 1039.559677 | -0.000749 | <a href="#">GQAGLQR</a>    |
| 10.6  | 1039.559677 | -0.000749 | <a href="#">GQQIQR</a>     |
| 3.5   | 1039.559677 | -0.000749 | <a href="#">KGGPSQR</a>    |
| 3.3   | 1039.552277 | 0.006651  | <a href="#">QRAALDGGPR</a> |
| 3.2   | 1039.548431 | 0.010497  | <a href="#">SPEIQR</a>     |
| 2.9   | 1039.552277 | 0.006651  | <a href="#">GQPQELGRR</a>  |
| 2.0   | 1039.563492 | -0.004564 | <a href="#">AEGARARGPR</a> |
| 1.7   | 1039.548431 | 0.010497  | <a href="#">LSPEQR</a>     |

Mascot: <http://www.matrixscience.com/>



# MASCOT Search Results

## Peptide View

MS/MS Fragmentation of **GLESQTK**

Found in **CO4A\_HUMAN**, Complement C4-A OS=Homo sapiens GN=C4A PE=1 SV=2

Match to Query 21733: 1072.563828 from(537.289190,2+) rtinseconds(1411) index(56302)

Title: Locus:1.1.1.2797.16 File:"2013-07-02 CLN FXIII 60 min 1st F 4.wiff"

Data file C:\Program Files (x86)\Matrix Science\Mascot Daemon\mgf4 FXIII 60 min 1st\mascot\_daemon\_merge.mgf

Click mouse within plot area to zoom in by factor of two about that point

Or, Plot from  to  Da

Label all possible matches  Label matches used for scoring

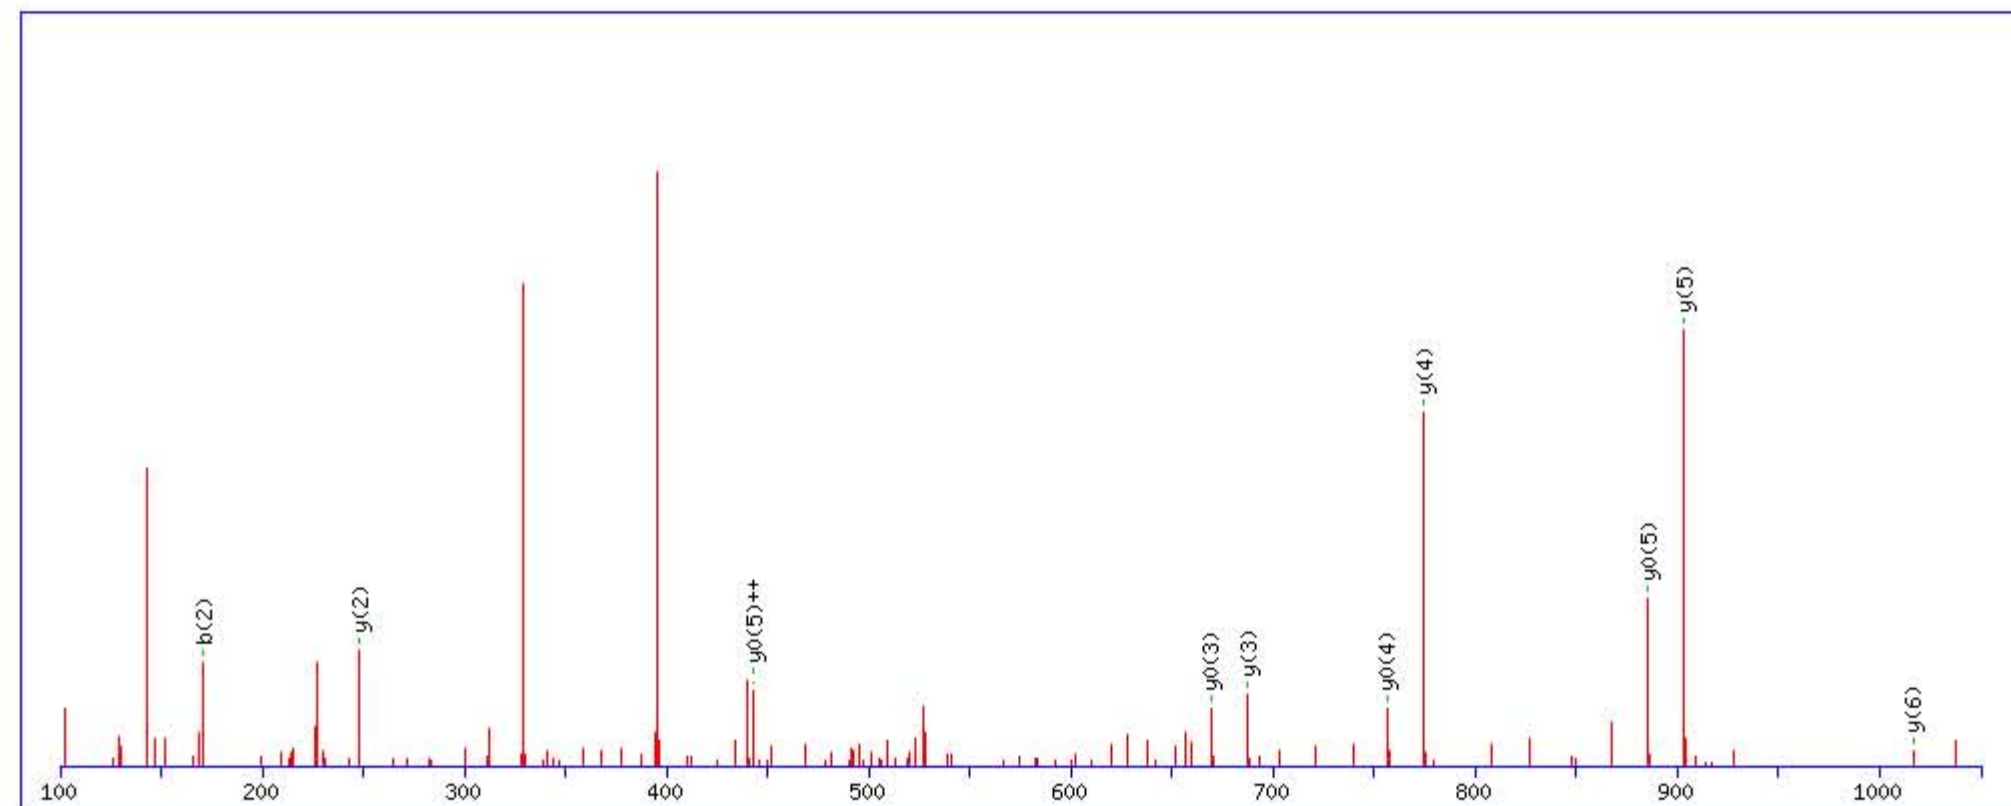

Monoisotopic mass of neutral peptide Mr(calc): 1072.558670

Fixed modifications: Carbamidomethyl (C) (apply to specified residues or termini only)

Variable modifications:

Q5 : Biotin:Thermo-21345 (Q)

Ions Score: 26 Expect: 0.039

Matches : 10/58 fragment ions using 20 most intense peaks [\(help\)](#)

| # | b          | b <sup>++</sup> | b <sup>*</sup> | b <sup>+++</sup> | b <sup>0</sup> | b <sup>0++</sup> | Seq. | y           | y <sup>++</sup> | y <sup>*</sup> | y <sup>+++</sup> | y <sup>0</sup> | y <sup>0++</sup> | # |
|---|------------|-----------------|----------------|------------------|----------------|------------------|------|-------------|-----------------|----------------|------------------|----------------|------------------|---|
| 1 | 58.028740  | 29.518008       |                |                  |                |                  | G    |             |                 |                |                  |                |                  | 7 |
| 2 | 171.112804 | 86.060040       |                |                  |                |                  | L    | 1016.544494 | 508.775885      | 999.517945     | 500.262611       | 998.533929     | 499.770603       | 6 |
| 3 | 300.155397 | 150.581336      |                |                  | 282.144832     | 141.576054       | E    | 903.460430  | 452.233853      | 886.433881     | 443.720579       | 885.449865     | 443.228571       | 5 |
| 4 | 387.187425 | 194.097351      |                |                  | 369.176860     | 185.092068       | S    | 774.417837  | 387.712557      | 757.391288     | 379.199282       | 756.407272     | 378.707274       | 4 |
| 5 | 826.412751 | 413.710014      | 809.386202     | 405.196739       | 808.402186     | 404.704731       | Q    | 687.385809  | 344.196543      | 670.359260     | 335.683268       | 669.375244     | 335.191260       | 3 |
| 6 | 927.460430 | 464.233853      | 910.433881     | 455.720579       | 909.449865     | 455.228571       | T    | 248.160483  | 124.583879      | 231.133934     | 116.070605       | 230.149918     | 115.578597       | 2 |
| 7 |            |                 |                |                  |                |                  | K    | 147.112804  | 74.060040       | 130.086255     | 65.546765        |                |                  | 1 |

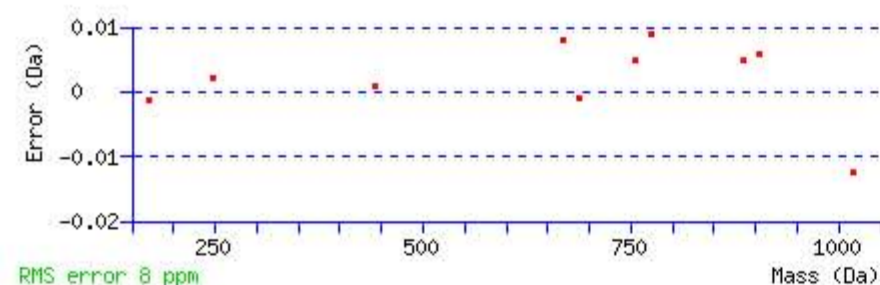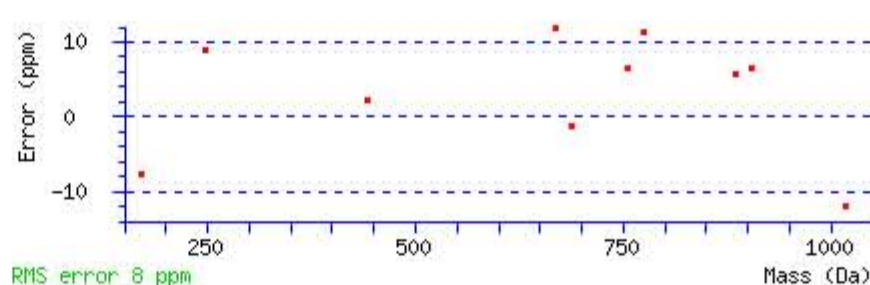

NCBI BLAST search of [GLESQTK](#)

(Parameters: blastp, nr protein database, expect=20000, no filter, PAM30)

Other BLAST [web gateways](#)

### All matches to this query

| Score | Mr(calc):   | Delta     | Sequence                    |
|-------|-------------|-----------|-----------------------------|
| 25.8  | 1072.558670 | 0.005158  | <a href="#">GLESQTK</a>     |
| 10.3  | 1072.558670 | 0.005158  | <a href="#">LGECPAVLISK</a> |
| 6.1   | 1072.558670 | 0.005158  | <a href="#">QSEGLTK</a>     |
| 5.7   | 1072.551254 | 0.012574  | <a href="#">KEAPRDETK</a>   |
| 3.6   | 1072.576431 | -0.012603 | <a href="#">VAEGQTLDLK</a>  |
| 3.3   | 1072.576447 | -0.012619 | <a href="#">LGGVLPDSTSK</a> |
| 3.1   | 1072.552155 | 0.011673  | <a href="#">QSCVLR</a>      |
| 2.6   | 1072.576462 | -0.012634 | <a href="#">TVVQEVVDGK</a>  |
| 2.1   | 1072.551285 | 0.012543  | <a href="#">GPRTTEPSTK</a>  |



# MASCOT SCIENCE Mascot Search Results

## Peptide View

MS/MS Fragmentation of **VQQPDCR**

Found in **CO4A\_HUMAN**, Complement C4-A OS=Homo sapiens GN=C4A PE=1 SV=2

Match to Query 28041: 1212.578148 from(607.296350,2+) rtinseconds(1245) index(55163)

Title: Locus:1.1.1.2739.24 File:"2013-07-02 CLN FXIII 60 min 1st F 4.wiff"

Data file C:\Program Files (x86)\Matrix Science\Mascot Daemon\mgf\4 FXIII 60 min 1st\mascot\_daemon\_merge.mgf

Click mouse within plot area to zoom in by factor of two about that point

Or, Plot from  to  Da

Label all possible matches  Label matches used for scoring

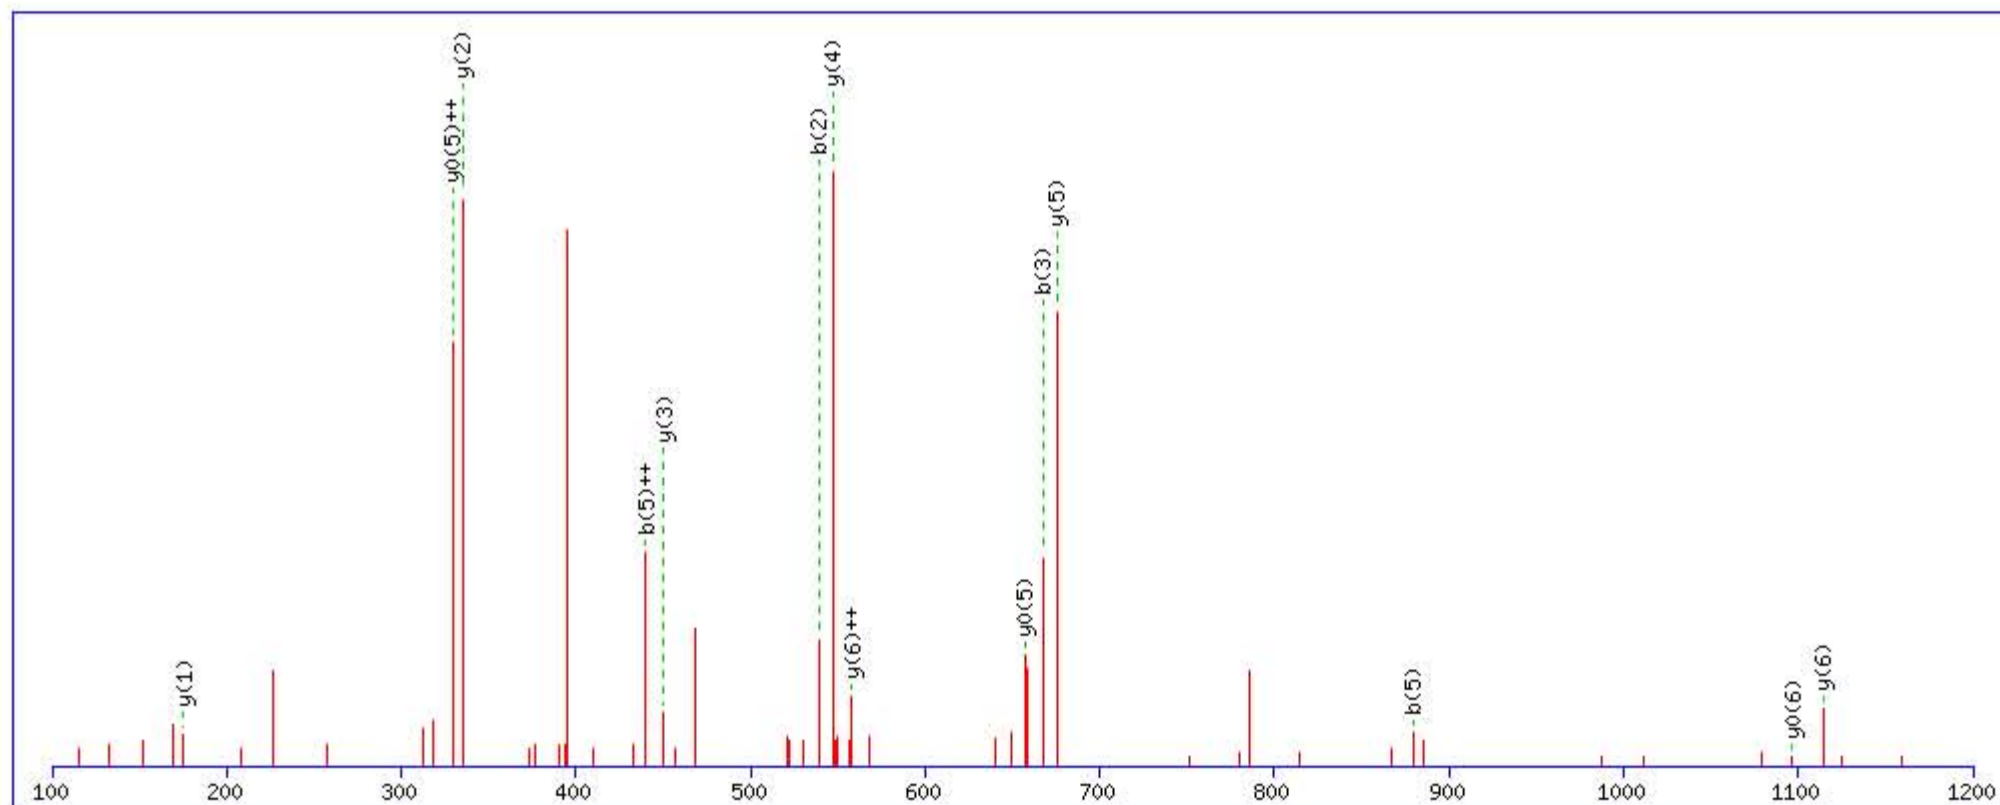

Monoisotopic mass of neutral peptide Mr(calc): 1212.574356

Fixed modifications: Carbamidomethyl (C) (apply to specified residues or termini only)

Variable modifications:

Q2 : Biotin:Thermo-21345 (Q)

Ions Score: 28 Expect: 0.0087

Matches : 14/58 fragment ions using 31 most intense peaks [\(help\)](#)

| # | b                 | b <sup>++</sup>   | b <sup>*</sup> | b <sup>*++</sup> | b <sup>0</sup> | b <sup>0++</sup> | Seq. | y                  | y <sup>++</sup>   | y <sup>*</sup> | y <sup>*++</sup> | y <sup>0</sup>     | y <sup>0++</sup>  | # |
|---|-------------------|-------------------|----------------|------------------|----------------|------------------|------|--------------------|-------------------|----------------|------------------|--------------------|-------------------|---|
| 1 | 100.075690        | 50.541483         |                |                  |                |                  | V    |                    |                   |                |                  |                    |                   | 7 |
| 2 | <b>539.301016</b> | 270.154146        | 522.274467     | 261.640872       |                |                  | Q    | <b>1114.513212</b> | <b>557.760244</b> | 1097.486663    | 549.246970       | <b>1096.502647</b> | 548.754962        | 6 |
| 3 | <b>667.359594</b> | 334.183435        | 650.333045     | 325.670161       |                |                  | Q    | <b>675.287886</b>  | 338.147581        | 658.261337     | 329.634307       | <b>657.277321</b>  | <b>329.142299</b> | 5 |
| 4 | 764.412358        | 382.709817        | 747.385809     | 374.196543       |                |                  | P    | <b>547.229308</b>  | 274.118292        | 530.202759     | 265.605018       | 529.218743         | 265.113010        | 4 |
| 5 | <b>879.439301</b> | <b>440.223289</b> | 862.412752     | 431.710014       | 861.428736     | 431.218006       | D    | <b>450.176544</b>  | 225.591910        | 433.149995     | 217.078635       | 432.165979         | 216.586627        | 3 |
| 6 | 1039.469950       | 520.238613        | 1022.443401    | 511.725339       | 1021.459385    | 511.233331       | C    | <b>335.149601</b>  | 168.078438        | 318.123052     | 159.565164       |                    |                   | 2 |
| 7 |                   |                   |                |                  |                |                  | R    | <b>175.118952</b>  | 88.063114         | 158.092403     | 79.549839        |                    |                   | 1 |

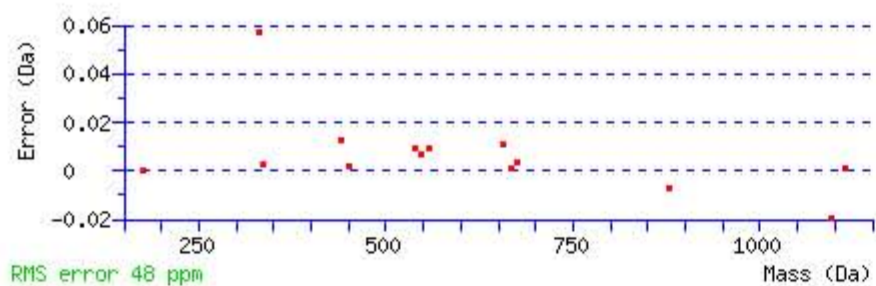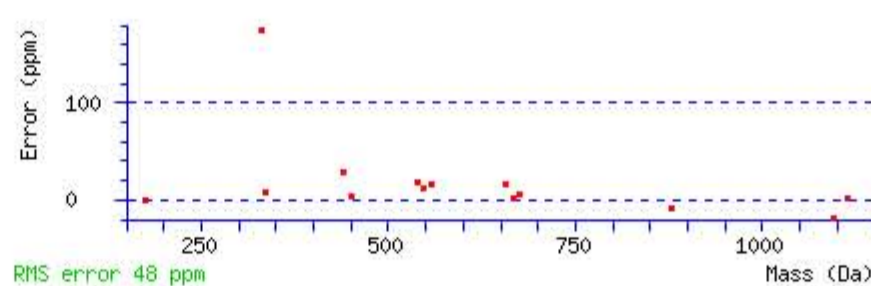

NCBI BLAST search of **VQQPDCR**

(Parameters: blastp, nr protein database, expect=20000, no filter, PAM30)

Other BLAST [web gateways](#)

All matches to this query

| Score | Mr(calc):   | Delta     | Sequence                    |
|-------|-------------|-----------|-----------------------------|
| 27.7  | 1212.574356 | 0.003792  | <a href="#">VQQPDCR</a>     |
| 13.3  | 1212.574356 | 0.003792  | <a href="#">VQQPDCR</a>     |
| 5.7   | 1212.596115 | -0.017967 | <a href="#">YFVEAGAMAVR</a> |



# MASCOT Search Results

## Peptide View

MS/MS Fragmentation of **VEYGFQVK**

Found in **CO4A\_HUMAN**, Complement C4-A OS=Homo sapiens GN=C4A PE=1 SV=2

Match to Query 30241: 1279.673988 from(640.844270,2+) rtinseconds(1956) index(60240)

Title: Locus:1.1.1.2986.11 File:"2013-07-02 CLN FXIII 60 min 1st F 4.wiff"

Data file C:\Program Files (x86)\Matrix Science\Mascot Daemon\mgf\4 FXIII 60 min 1st\mascot\_daemon\_merge.mgf

Click mouse within plot area to zoom in by factor of two about that point

Or, Plot from  to  Da

Label all possible matches  Label matches used for scoring

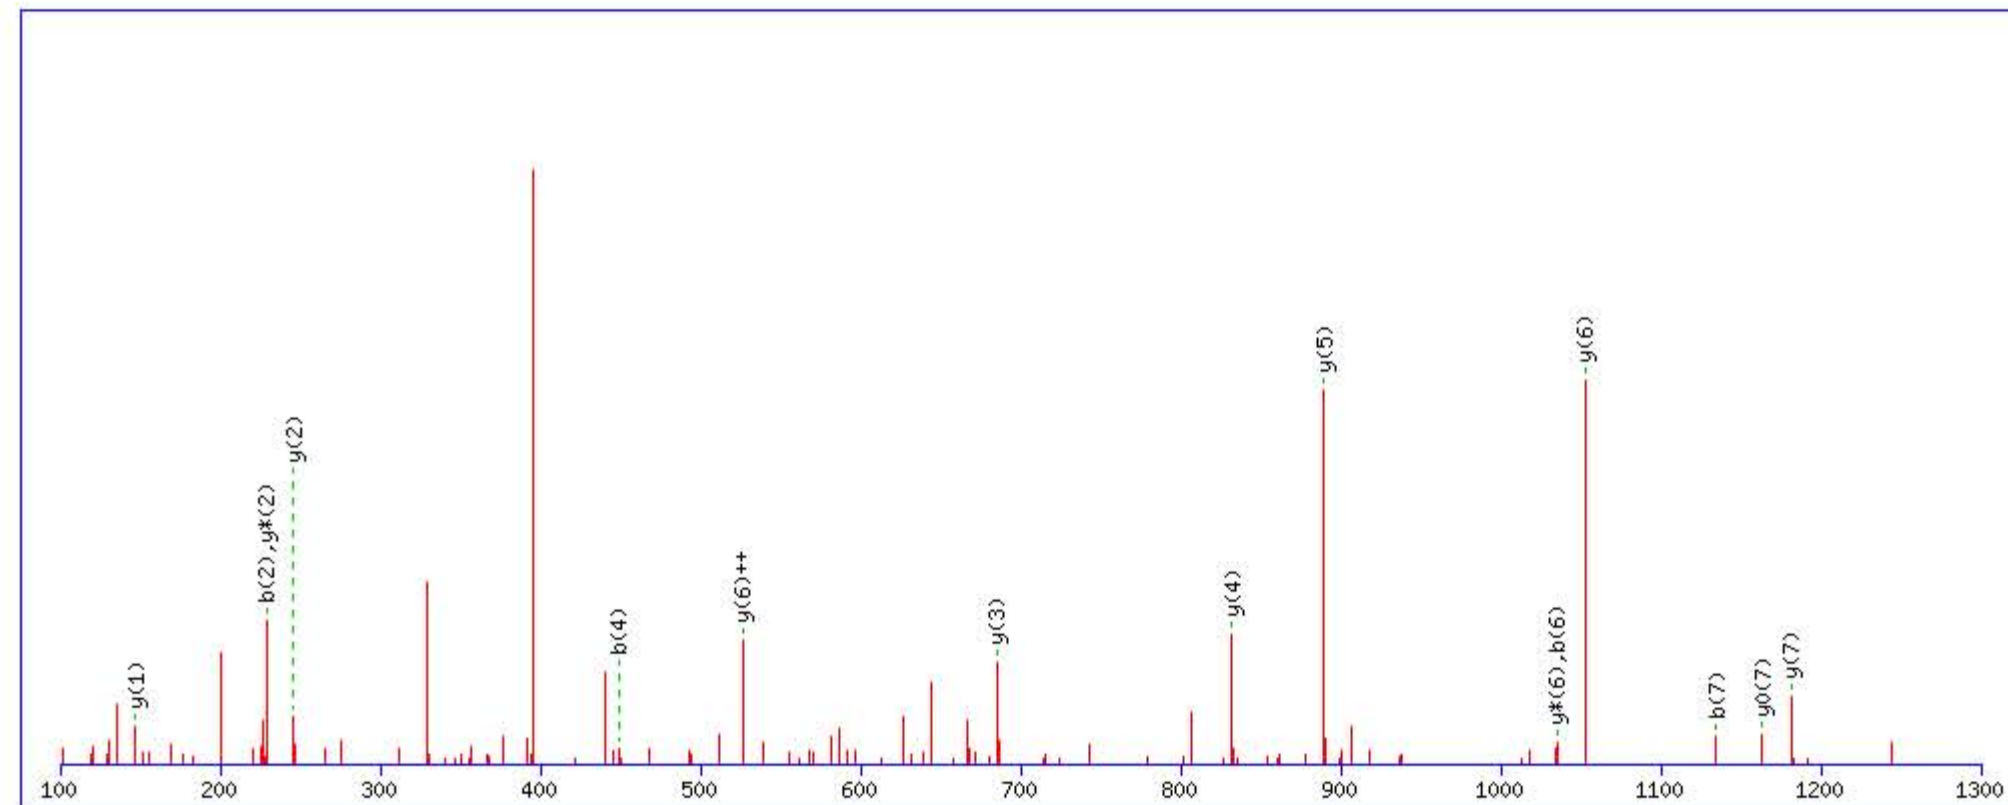

Monoisotopic mass of neutral peptide Mr(calc): 1279.663483

Fixed modifications: Carbamidomethyl (C) (apply to specified residues or termini only)

Variable modifications:

Q6 : Biotin:Thermo-21345 (Q)

Ions Score: 31 Expect: 0.0078

Matches : 15/60 fragment ions using 34 most intense peaks [\(help\)](#)

| # | b                  | b <sup>++</sup> | b <sup>*</sup> | b <sup>+++</sup> | b <sup>0</sup> | b <sup>0++</sup> | Seq. | y                  | y <sup>++</sup>   | y <sup>*</sup>     | y <sup>+++</sup> | y <sup>0</sup>     | y <sup>0++</sup> | # |
|---|--------------------|-----------------|----------------|------------------|----------------|------------------|------|--------------------|-------------------|--------------------|------------------|--------------------|------------------|---|
| 1 | 100.075690         | 50.541483       |                |                  |                |                  | V    |                    |                   |                    |                  |                    |                  | 8 |
| 2 | <b>229.118283</b>  | 115.062780      |                |                  | 211.107718     | 106.057497       | E    | <b>1181.602344</b> | 591.304810        | 1164.575795        | 582.791536       | <b>1163.591779</b> | 582.299528       | 7 |
| 3 | 392.181612         | 196.594444      |                |                  | 374.171047     | 187.589162       | Y    | <b>1052.559751</b> | <b>526.783514</b> | <b>1035.533202</b> | 518.270239       |                    |                  | 6 |
| 4 | <b>449.203076</b>  | 225.105176      |                |                  | 431.192511     | 216.099894       | G    | <b>889.496422</b>  | 445.251849        | 872.469873         | 436.738575       |                    |                  | 5 |
| 5 | 596.271490         | 298.639383      |                |                  | 578.260925     | 289.634101       | F    | <b>832.474958</b>  | 416.741117        | 815.448409         | 408.227843       |                    |                  | 4 |
| 6 | <b>1035.496816</b> | 518.252046      | 1018.470267    | 509.738772       | 1017.486251    | 509.246764       | Q    | <b>685.406544</b>  | 343.206910        | 668.379995         | 334.693636       |                    |                  | 3 |
| 7 | <b>1134.565230</b> | 567.786253      | 1117.538681    | 559.272979       | 1116.554665    | 558.780971       | V    | <b>246.181218</b>  | 123.594247        | <b>229.154669</b>  | 115.080973       |                    |                  | 2 |
| 8 |                    |                 |                |                  |                |                  | K    | <b>147.112804</b>  | 74.060040         | 130.086255         | 65.546765        |                    |                  | 1 |

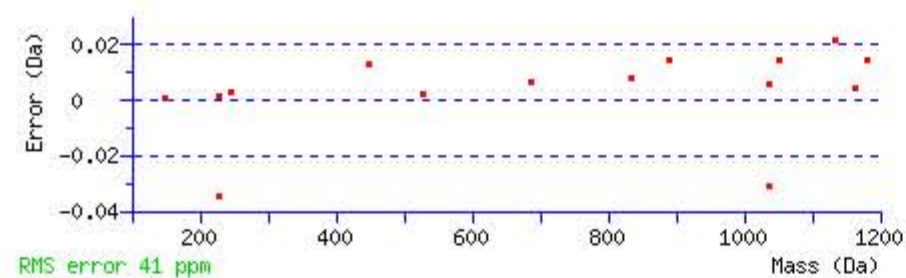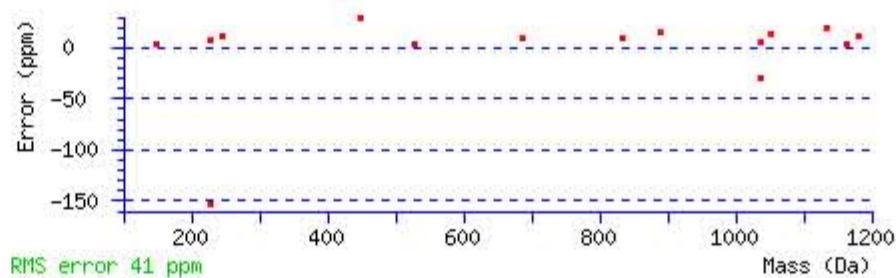

NCBI BLAST search of **VEYGFQVK**

(Parameters: blastp, nr protein database, expect=20000, no filter, PAM30)

Other BLAST [web gateways](#)

All matches to this query

| Score | Mr(calc):   | Delta     | Sequence                     |
|-------|-------------|-----------|------------------------------|
| 31.4  | 1279.663483 | 0.010505  | <a href="#">VEYGFQVK</a>     |
| 8.5   | 1279.684601 | -0.010613 | <a href="#">MSASAVFILDVK</a> |
| 7.6   | 1279.681229 | -0.007241 | <a href="#">EVTVKEWYVK</a>   |
| 6.6   | 1279.677216 | -0.003228 | <a href="#">VFKTIEDTQGKK</a> |
| 6.4   | 1279.663483 | 0.010505  | <a href="#">QFVGYLDK</a>     |
| 5.1   | 1279.659470 | 0.014518  | <a href="#">VCSFGKQVVEK</a>  |
| 4.9   | 1279.684601 | -0.010613 | <a href="#">TKPLMTEFSVK</a>  |
| 1.3   | 1279.687958 | -0.013970 | <a href="#">LIKSMESVMVK</a>  |
| 1.0   | 1279.666824 | 0.007164  | <a href="#">VKEWSLMIMK</a>   |



# Mascot Search Results

## Peptide View

MS/MS Fragmentation of **VVEEQESR**

Found in **CO4A\_HUMAN**, Complement C4-A OS=Homo sapiens GN=C4A PE=1 SV=2

Match to Query 30578: 1285.641668 from(643.828110,2+) rtinseconds(1333) index(55718)

Title: Locus:1.1.1.2770.17 File:"2013-07-02 CLN FXIII 60 min 1st F 4.wiff"

Data file C:\Program Files (x86)\Matrix Science\Mascot Daemon\mgf\4 FXIII 60 min 1st\mascot\_daemon\_merge.mgf

Click mouse within plot area to zoom in by factor of two about that point

Or, Plot from  to  Da

Label all possible matches  Label matches used for scoring

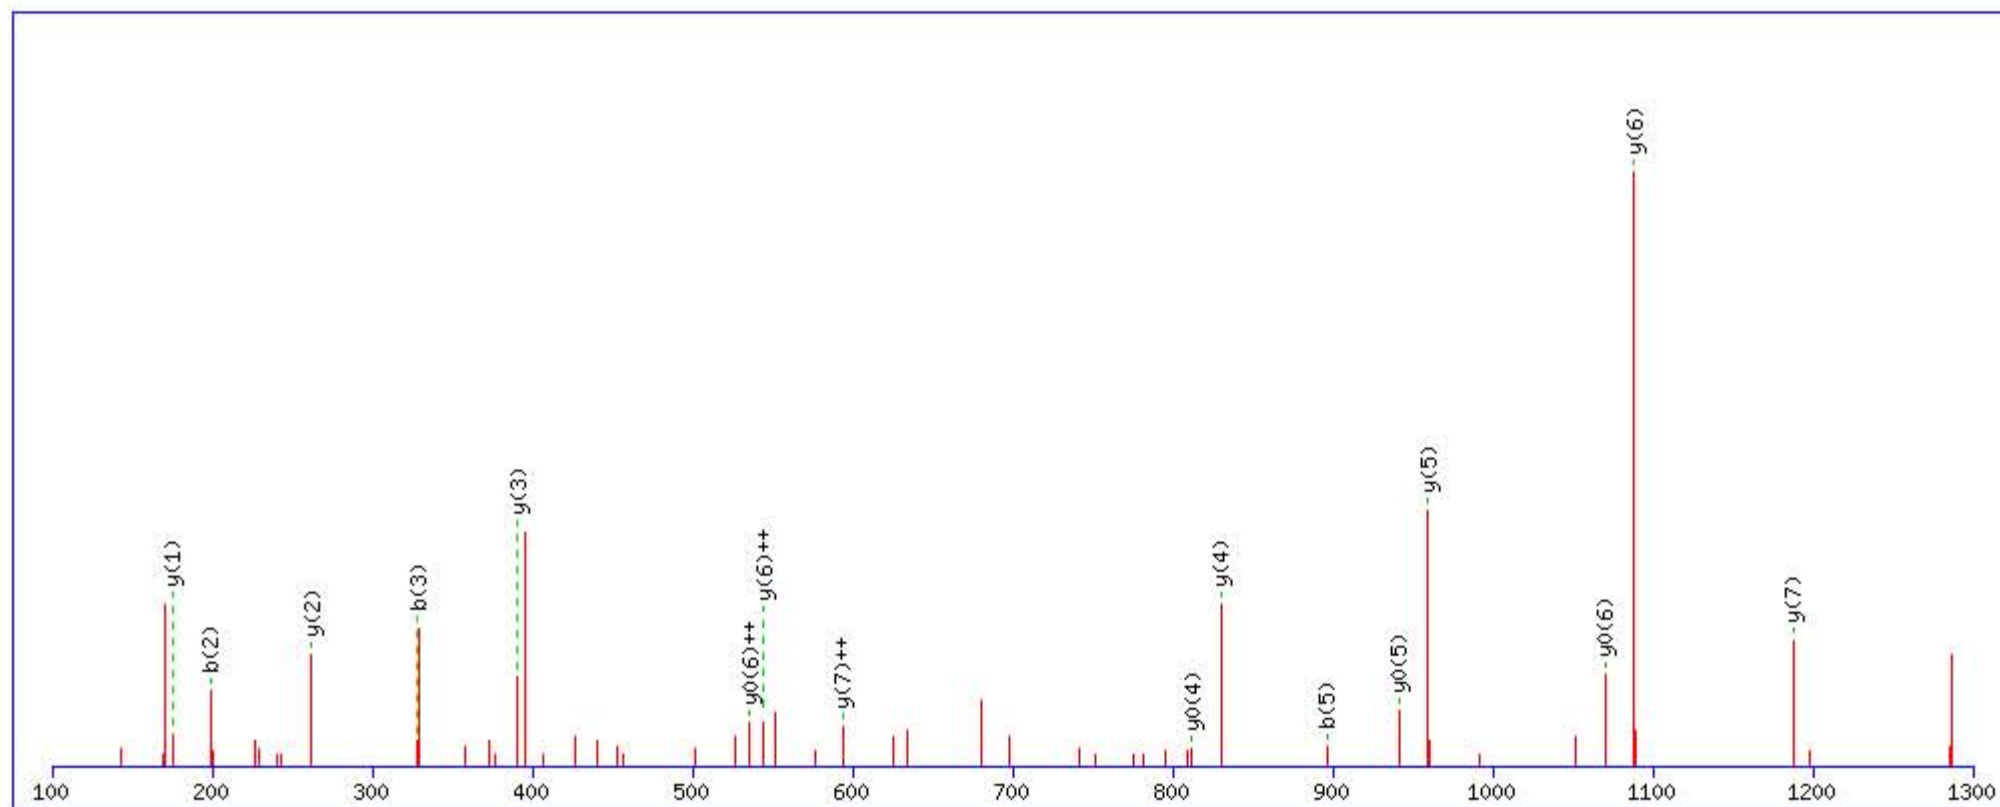

Monoisotopic mass of neutral peptide Mr(calc): 1285.633621

Fixed modifications: Carbamidomethyl (C) (apply to specified residues or termini only)

Variable modifications:

Q5 : Biotin:Thermo-21345 (Q)

Ions Score: 41 Expect: 0.0017

Matches : 16/70 fragment ions using 31 most intense peaks [\(help\)](#)

| # | b                 | b <sup>++</sup> | b <sup>+</sup> | b <sup>+++</sup> | b <sup>0</sup> | b <sup>0++</sup> | Seq. | y                  | y <sup>++</sup>   | y <sup>+</sup> | y <sup>+++</sup> | y <sup>0</sup>     | y <sup>0++</sup>  | # |
|---|-------------------|-----------------|----------------|------------------|----------------|------------------|------|--------------------|-------------------|----------------|------------------|--------------------|-------------------|---|
| 1 | 100.075690        | 50.541483       |                |                  |                |                  | V    |                    |                   |                |                  |                    |                   | 8 |
| 2 | <b>199.144104</b> | 100.075690      |                |                  |                |                  | V    | <b>1187.572499</b> | <b>594.289888</b> | 1170.545950    | 585.776613       | 1169.561934        | 585.284605        | 7 |
| 3 | <b>328.186697</b> | 164.596987      |                |                  | 310.176132     | 155.591704       | E    | <b>1088.504085</b> | <b>544.755681</b> | 1071.477536    | 536.242406       | <b>1070.493520</b> | <b>535.750398</b> | 6 |
| 4 | 457.229290        | 229.118283      |                |                  | 439.218725     | 220.113001       | E    | <b>959.461492</b>  | 480.234384        | 942.434943     | 471.721110       | <b>941.450927</b>  | 471.229102        | 5 |
| 5 | <b>896.454616</b> | 448.730946      | 879.428067     | 440.217672       | 878.444051     | 439.725664       | Q    | <b>830.418899</b>  | 415.713088        | 813.392350     | 407.199813       | <b>812.408334</b>  | 406.707805        | 4 |
| 6 | 1025.497209       | 513.252243      | 1008.470660    | 504.738968       | 1007.486644    | 504.246960       | E    | <b>391.193573</b>  | 196.100425        | 374.167024     | 187.587150       | 373.183008         | 187.095142        | 3 |
| 7 | 1112.529237       | 556.768257      | 1095.502688    | 548.254982       | 1094.518672    | 547.762974       | S    | <b>262.150980</b>  | 131.579128        | 245.124431     | 123.065854       | 244.140415         | 122.573846        | 2 |
| 8 |                   |                 |                |                  |                |                  | R    | <b>175.118952</b>  | 88.063114         | 158.092403     | 79.549839        |                    |                   | 1 |

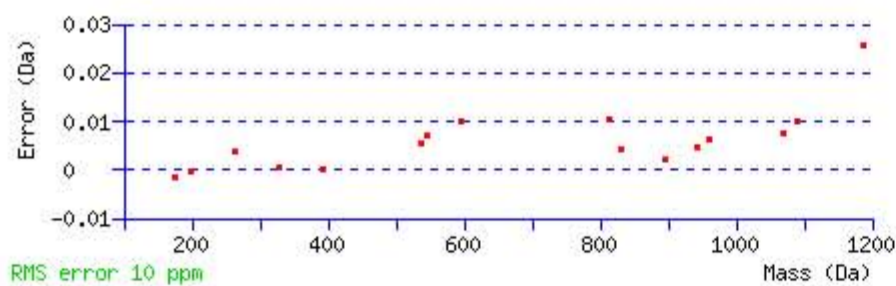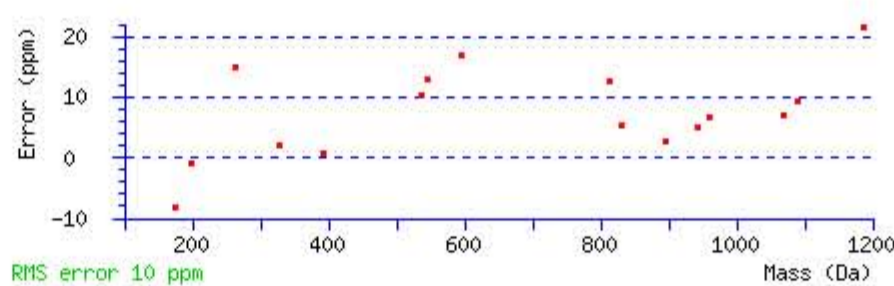

NCBI BLAST search of [VVEEQESR](#)

(Parameters: blastp, nr protein database, expect=20000, no filter, PAM30)

Other BLAST [web gateways](#)

All matches to this query

| Score | Mr(calc):   | Delta    | Sequence                 |
|-------|-------------|----------|--------------------------|
| 40.8  | 1285.633621 | 0.008047 | <a href="#">VVEEQESR</a> |

Mascot: <http://www.matrixscience.com/>



# MASCOT SCIENCE Mascot Search Results

## Peptide View

MS/MS Fragmentation of **CCQDGVTR**

Found in **CO4A\_HUMAN**, Complement C4-A OS=Homo sapiens GN=C4A PE=1 SV=2

Match to Query 31054: 1305.572508 from(653.793530,2+) rtinseconds(1349) index(55787)

Title: Locus:1.1.1.2775.14 File:"2013-07-02 CLN FXIII 60 min 1st F 4.wiff"

Data file C:\Program Files (x86)\Matrix Science\Mascot Daemon\mgf\4 FXIII 60 min 1st\mascot\_daemon\_merge.mgf

Click mouse within plot area to zoom in by factor of two about that point

Or, Plot from  to  Da

Label all possible matches  Label matches used for scoring

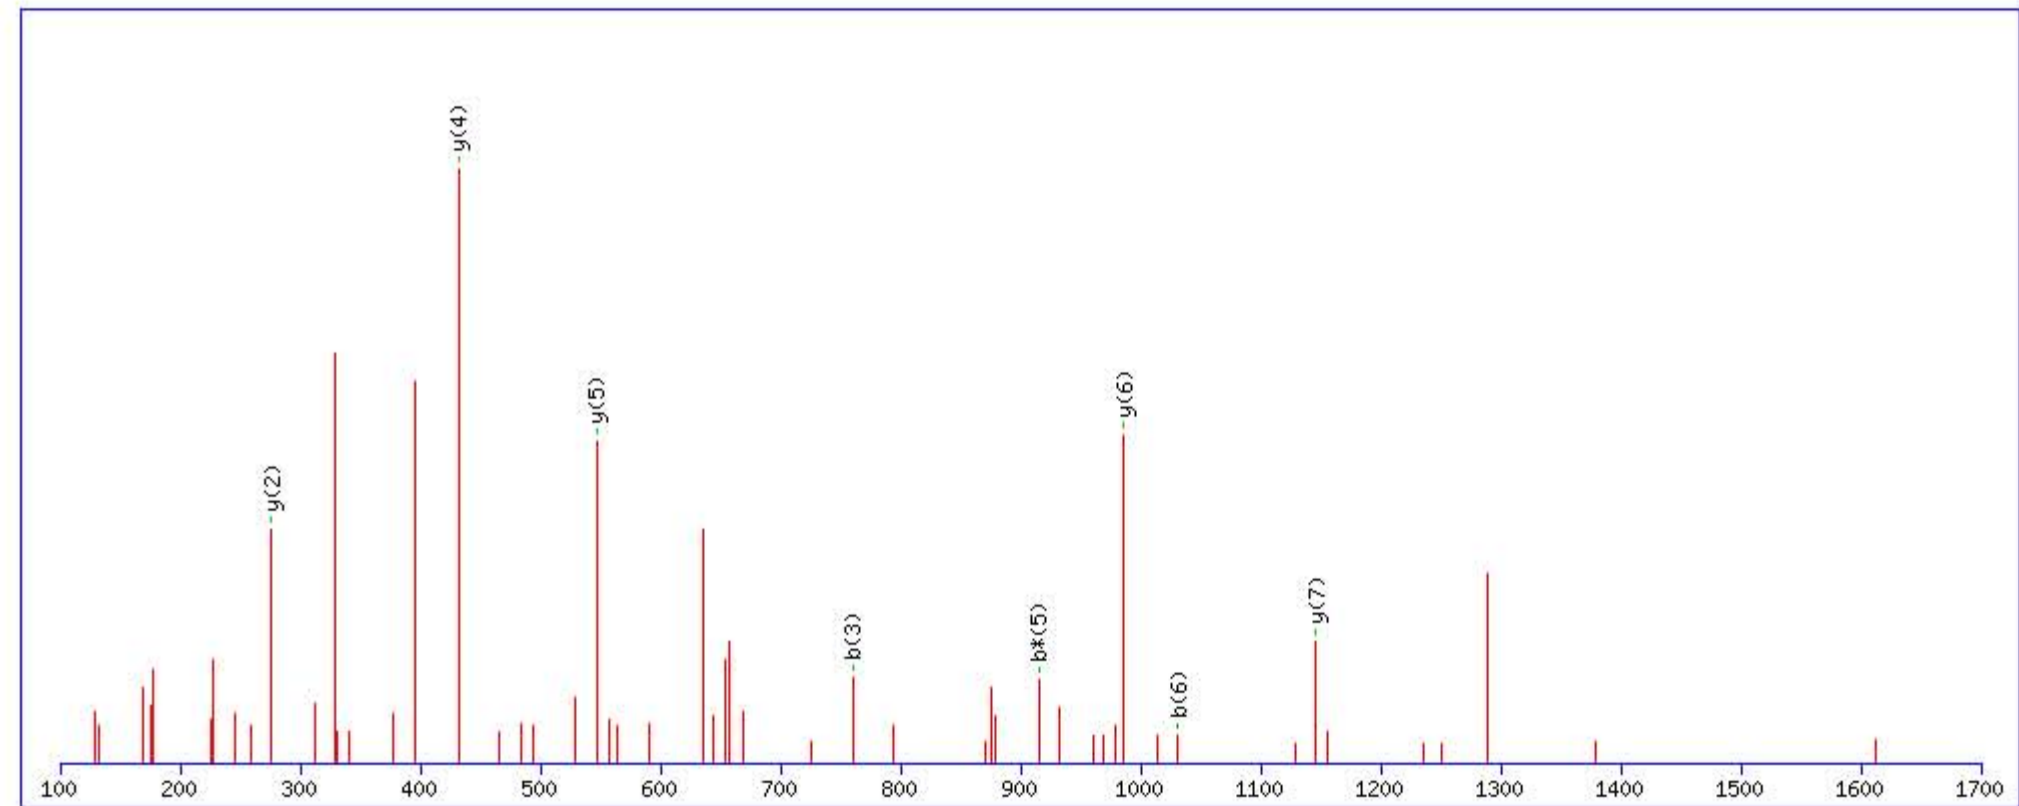

Monoisotopic mass of neutral peptide Mr(calc): 1305.562820

Fixed modifications: Carbamidomethyl (C) (apply to specified residues or termini only)

Variable modifications:

Q3 : Biotin:Thermo-21345 (Q)

Ions Score: 36 Expect: 0.0012

Matches : 8/72 fragment ions using 12 most intense peaks [\(help\)](#)

| # | b                  | b <sup>++</sup> | b <sup>*</sup>    | b <sup>*++</sup> | b <sup>0</sup> | b <sup>0++</sup> | Seq. | y                  | y <sup>++</sup> | y <sup>*</sup> | y <sup>*++</sup> | y <sup>0</sup> | y <sup>0++</sup> | # |
|---|--------------------|-----------------|-------------------|------------------|----------------|------------------|------|--------------------|-----------------|----------------|------------------|----------------|------------------|---|
| 1 | 161.037925         | 81.022600       |                   |                  |                |                  | C    |                    |                 |                |                  |                |                  | 8 |
| 2 | 321.068574         | 161.037925      |                   |                  |                |                  | C    | <b>1146.539427</b> | 573.773352      | 1129.512878    | 565.260077       | 1128.528862    | 564.768069       | 7 |
| 3 | <b>760.293900</b>  | 380.650588      | 743.267351        | 372.137314       |                |                  | Q    | <b>986.508778</b>  | 493.758027      | 969.482229     | 485.244753       | 968.498213     | 484.752745       | 6 |
| 4 | 875.320843         | 438.164060      | 858.294294        | 429.650785       | 857.310278     | 429.158777       | D    | <b>547.283452</b>  | 274.145364      | 530.256903     | 265.632090       | 529.272887     | 265.140082       | 5 |
| 5 | 932.342307         | 466.674792      | <b>915.315758</b> | 458.161517       | 914.331742     | 457.669509       | G    | <b>432.256509</b>  | 216.631893      | 415.229960     | 208.118618       | 414.245944     | 207.626610       | 4 |
| 6 | <b>1031.410721</b> | 516.208999      | 1014.384172       | 507.695724       | 1013.400156    | 507.203716       | V    | 375.235045         | 188.121161      | 358.208496     | 179.607886       | 357.224480     | 179.115878       | 3 |
| 7 | 1132.458400        | 566.732838      | 1115.431851       | 558.219564       | 1114.447835    | 557.727556       | T    | <b>276.166631</b>  | 138.586953      | 259.140082     | 130.073679       | 258.156066     | 129.581671       | 2 |
| 8 |                    |                 |                   |                  |                |                  | R    | 175.118952         | 88.063114       | 158.092403     | 79.549839        |                |                  | 1 |

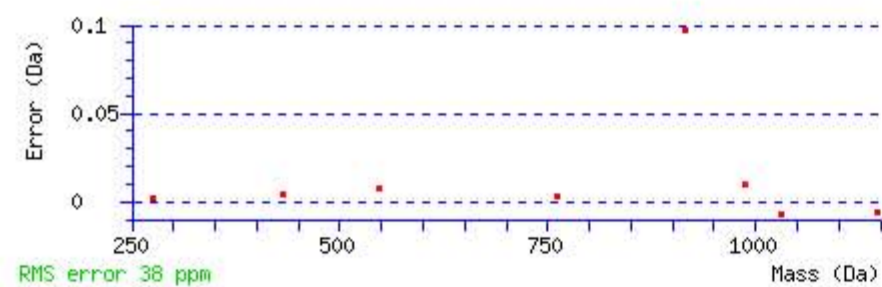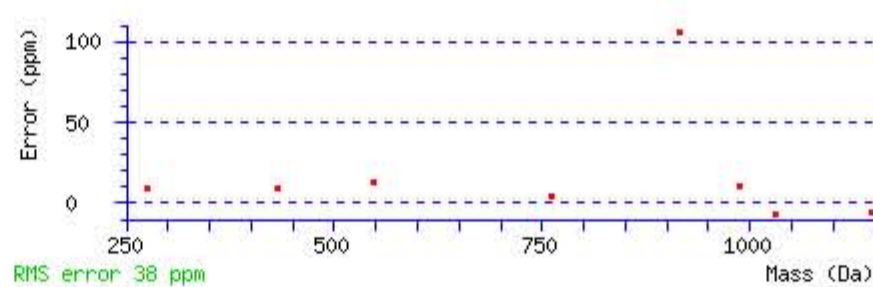

NCBI BLAST search of **CCQDGVTR**

(Parameters: blastp, nr protein database, expect=20000, no filter, PAM30)

Other BLAST [web gateways](#)

## All matches to this query

| Score | Mr(calc):   | Delta     | Sequence                     |
|-------|-------------|-----------|------------------------------|
| 36.1  | 1305.562820 | 0.009688  | <a href="#">CCQDGVTR</a>     |
| 8.8   | 1305.588409 | -0.015901 | <a href="#">CRSSTPADAWR</a>  |
| 2.8   | 1305.577194 | -0.004686 | <a href="#">CDAGWLADGSVR</a> |



# MASCOT SCIENCE Mascot Search Results

## Peptide View

MS/MS Fragmentation of **LGQYASPTAK**

Found in **CO4A\_HUMAN**, Complement C4-A OS=Homo sapiens GN=C4A PE=1 SV=2

Match to Query 31920: 1345.714648 from(673.864600,2+) rtinseconds(1540) index(57248)

Title: Locus:1.1.1.2842.15 File:"2013-07-02 CLN FXIII 60 min 1st F 4.wiff"

Data file C:\Program Files (x86)\Matrix Science\Mascot Daemon\mgf4 FXIII 60 min 1st\mascot\_daemon\_merge.mgf

Click mouse within plot area to zoom in by factor of two about that point

Or, Plot from  to  Da

Label all possible matches  Label matches used for scoring

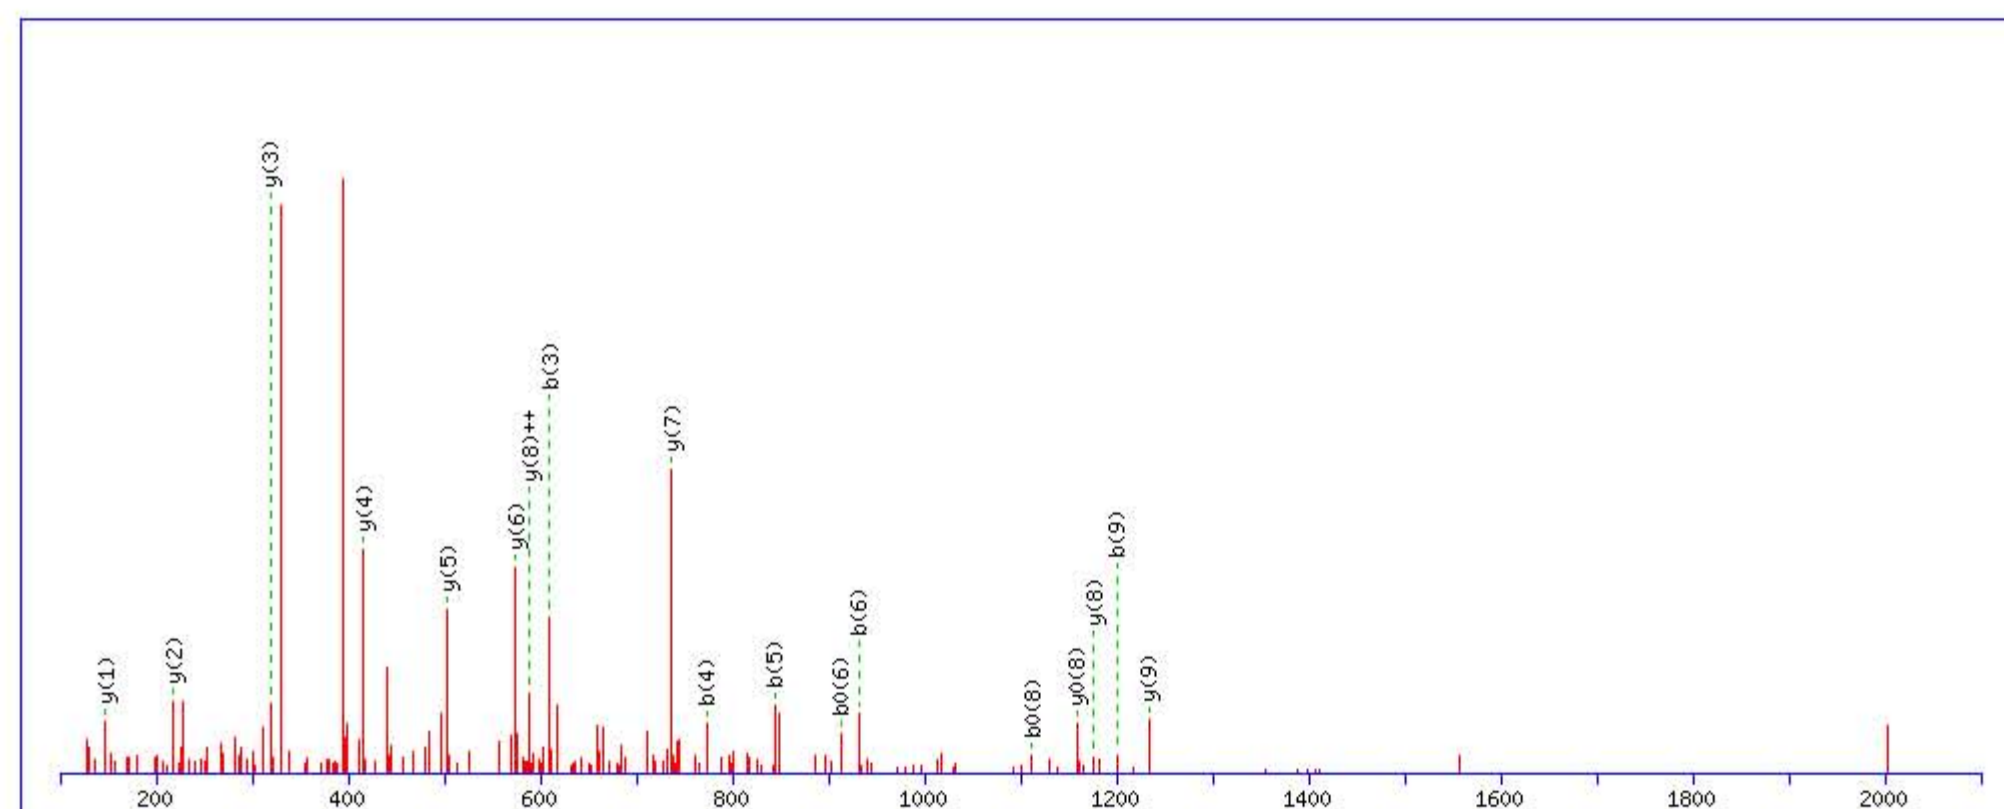

Monoisotopic mass of neutral peptide Mr(calc): 1345.706390

Fixed modifications: Carbamidomethyl (C) (apply to specified residues or termini only)

Variable modifications:

Q3 : Biotin:Thermo-21345 (Q)

Ions Score: 56 Expect: 5.3e-005

Matches : 18/90 fragment ions using 35 most intense peaks [\(help\)](#)

| #  | b           | b <sup>++</sup> | b <sup>+</sup> | b <sup>0++</sup> | b <sup>0</sup> | b <sup>0++</sup> | Seq. | y           | y <sup>++</sup> | y <sup>+</sup> | y <sup>0++</sup> | y <sup>0</sup> | y <sup>0++</sup> | #  |
|----|-------------|-----------------|----------------|------------------|----------------|------------------|------|-------------|-----------------|----------------|------------------|----------------|------------------|----|
| 1  | 114.091340  | 57.549308       |                |                  |                |                  | L    |             |                 |                |                  |                |                  | 10 |
| 2  | 171.112804  | 86.060040       |                |                  |                |                  | G    | 1233.629622 | 617.318449      | 1216.603073    | 608.805175       | 1215.619057    | 608.313167       | 9  |
| 3  | 610.338130  | 305.672703      | 593.311581     | 297.159429       |                |                  | Q    | 1176.608158 | 588.807717      | 1159.581609    | 580.294443       | 1158.597593    | 579.802435       | 8  |
| 4  | 773.401459  | 387.204368      | 756.374910     | 378.691093       |                |                  | Y    | 737.382832  | 369.195054      | 720.356283     | 360.681780       | 719.372267     | 360.189772       | 7  |
| 5  | 844.438573  | 422.722925      | 827.412024     | 414.209650       |                |                  | A    | 574.319503  | 287.663389      | 557.292954     | 279.150115       | 556.308938     | 278.658107       | 6  |
| 6  | 931.470601  | 466.238939      | 914.444052     | 457.725664       | 913.460036     | 457.233656       | S    | 503.282389  | 252.144832      | 486.255840     | 243.631558       | 485.271824     | 243.139550       | 5  |
| 7  | 1028.523365 | 514.765321      | 1011.496816    | 506.252046       | 1010.512800    | 505.760038       | P    | 416.250361  | 208.628818      | 399.223812     | 200.115544       | 398.239796     | 199.623536       | 4  |
| 8  | 1129.571044 | 565.289160      | 1112.544495    | 556.775886       | 1111.560479    | 556.283878       | T    | 319.197597  | 160.102436      | 302.171048     | 151.589162       | 301.187032     | 151.097154       | 3  |
| 9  | 1200.608158 | 600.807717      | 1183.581609    | 592.294443       | 1182.597593    | 591.802435       | A    | 218.149918  | 109.578597      | 201.123369     | 101.065322       |                |                  | 2  |
| 10 |             |                 |                |                  |                |                  | K    | 147.112804  | 74.060040       | 130.086255     | 65.546765        |                |                  | 1  |

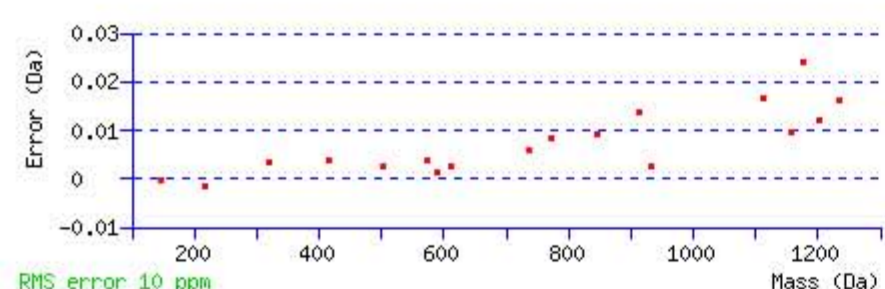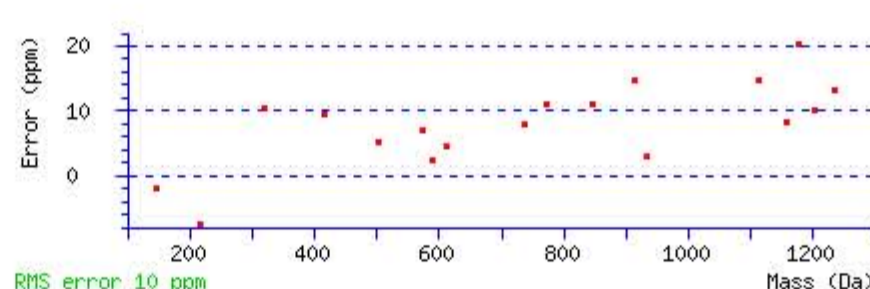

NCBI BLAST search of **LGQYASPTAK**

(Parameters: blastp, nr protein database, expect=20000, no filter, PAM30)

Other BLAST [web gateways](#)

All matches to this query

| Score | Mr(calc):   | Delta     | Sequence                       |
|-------|-------------|-----------|--------------------------------|
| 55.6  | 1345.706390 | 0.008258  | <a href="#">LGQYASPTAK</a>     |
| 9.5   | 1345.706390 | 0.008258  | <a href="#">LGQYDQALK</a>      |
| 9.2   | 1345.724182 | -0.009534 | <a href="#">LGAVPATSGPTTFK</a> |
| 8.3   | 1345.706406 | 0.008242  | <a href="#">QGLYTPQTK</a>      |
| 5.6   | 1345.727509 | -0.012861 | <a href="#">LGLMDNEIKVAK</a>   |
| 2.0   | 1345.717636 | -0.002988 | <a href="#">QMPQPTFTLRK</a>    |

Mascot: <http://www.matrixscience.com/>



# MASCOT SCIENCE Mascot Search Results

## Peptide View

MS/MS Fragmentation of **GLQDEDGYR**

Found in **CO4A\_HUMAN**, Complement C4-A OS=Homo sapiens GN=C4A PE=1 SV=2

Match to Query 33236: 1362.630168 from(682.322360,2+) rtinseconds(1683) index(58185)

Title: Locus:1.1.1.2892.9 File:"2013-07-02 CLN FXIII 60 min 1st F 4.wiff"

Data file C:\Program Files (x86)\Matrix Science\Mascot Daemon\mgf\4 FXIII 60 min 1st\mascot\_daemon\_merge.mgf

Click mouse within plot area to zoom in by factor of two about that point

Or, Plot from  to  Da

Label all possible matches  Label matches used for scoring

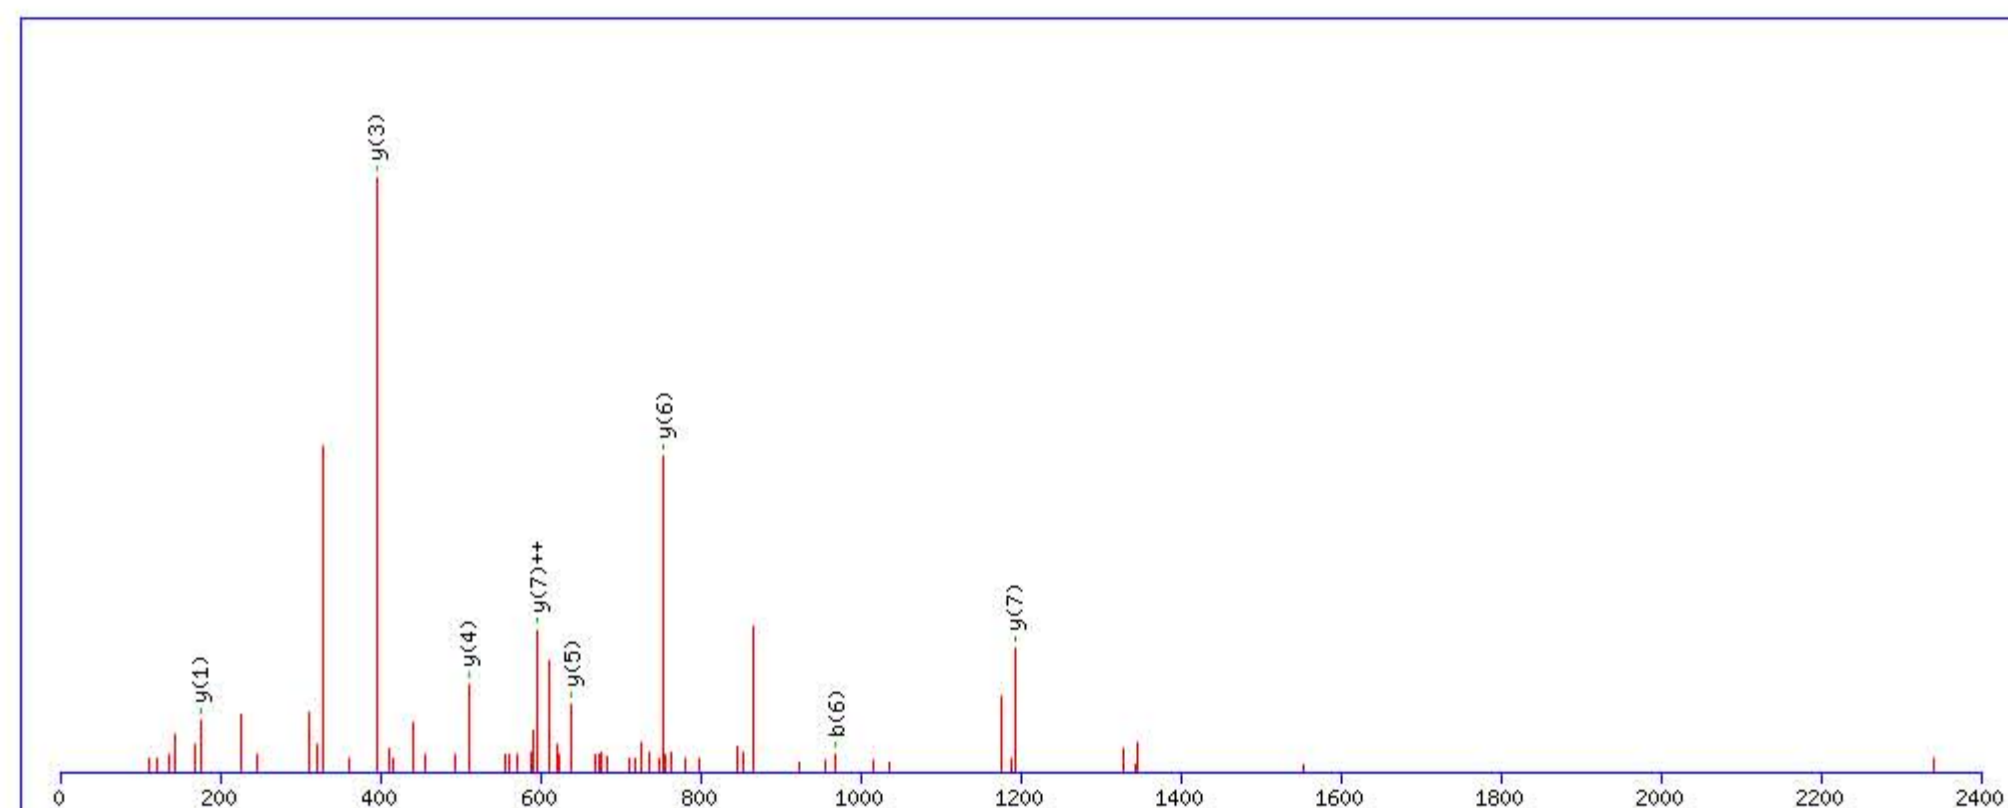

Monoisotopic mass of neutral peptide Mr(calc): 1362.623795

Fixed modifications: Carbamidomethyl (C) (apply to specified residues or termini only)

Variable modifications:

Q3 : Biotin:Thermo-21345 (Q)

Ions Score: 47 Expect: 7.7e-005

Matches : 8/80 fragment ions using 12 most intense peaks [\(help\)](#)

| # | b                 | b <sup>++</sup> | b <sup>*</sup> | b <sup>*++</sup> | b <sup>0</sup> | b <sup>0++</sup> | Seq.     | y                  | y <sup>++</sup>   | y <sup>*</sup> | y <sup>*++</sup> | y <sup>0</sup> | y <sup>0++</sup> | # |
|---|-------------------|-----------------|----------------|------------------|----------------|------------------|----------|--------------------|-------------------|----------------|------------------|----------------|------------------|---|
| 1 | 58.028740         | 29.518008       |                |                  |                |                  | <b>G</b> |                    |                   |                |                  |                |                  | 9 |
| 2 | 171.112804        | 86.060040       |                |                  |                |                  | <b>L</b> | 1306.609614        | 653.808445        | 1289.583065    | 645.295171       | 1288.599049    | 644.803163       | 8 |
| 3 | 610.338130        | 305.672703      | 593.311581     | 297.159429       |                |                  | <b>Q</b> | <b>1193.525550</b> | <b>597.266413</b> | 1176.499001    | 588.753139       | 1175.514985    | 588.261131       | 7 |
| 4 | 725.365073        | 363.186175      | 708.338524     | 354.672900       | 707.354508     | 354.180892       | <b>D</b> | <b>754.300224</b>  | 377.653750        | 737.273675     | 369.140476       | 736.289659     | 368.648468       | 6 |
| 5 | 854.407666        | 427.707471      | 837.381117     | 419.194197       | 836.397101     | 418.702189       | <b>E</b> | <b>639.273281</b>  | 320.140279        | 622.246732     | 311.627004       | 621.262716     | 311.134996       | 5 |
| 6 | <b>969.434609</b> | 485.220943      | 952.408060     | 476.707668       | 951.424044     | 476.215660       | <b>D</b> | <b>510.230688</b>  | 255.618982        | 493.204139     | 247.105707       | 492.220123     | 246.613700       | 4 |
| 7 | 1026.456073       | 513.731675      | 1009.429524    | 505.218400       | 1008.445508    | 504.726392       | <b>G</b> | <b>395.203745</b>  | 198.105511        | 378.177196     | 189.592236       |                |                  | 3 |
| 8 | 1189.519402       | 595.263339      | 1172.492853    | 586.750065       | 1171.508837    | 586.258057       | <b>Y</b> | 338.182281         | 169.594778        | 321.155732     | 161.081504       |                |                  | 2 |
| 9 |                   |                 |                |                  |                |                  | <b>R</b> | <b>175.118952</b>  | 88.063114         | 158.092403     | 79.549839        |                |                  | 1 |

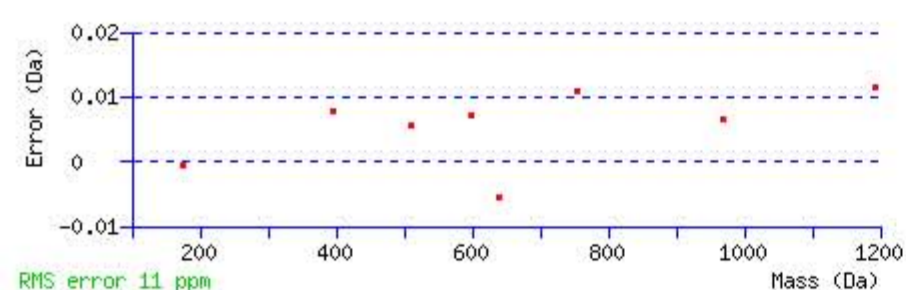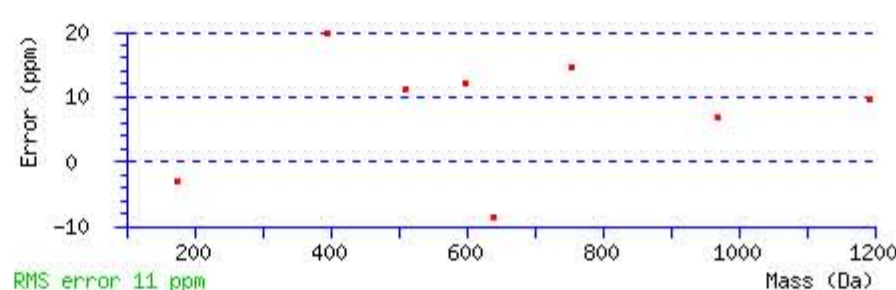

NCBI BLAST search of **GLQDEDGYR**

(Parameters: blastp, nr protein database, expect=20000, no filter, PAM30)

Other BLAST [web gateways](#)

All matches to this query

| Score | Mr(calc):   | Delta    | Sequence                       |
|-------|-------------|----------|--------------------------------|
| 46.6  | 1362.623795 | 0.006373 | <a href="#">GLQDEDGYR</a>      |
| 2.5   | 1362.623795 | 0.006373 | <a href="#">TGFLEIDEHMR</a>    |
| 0.1   | 1362.613251 | 0.016917 | <a href="#">MGAGATGRAMDGPR</a> |

Mascot: <http://www.matrixscience.com/>



# MASCOT Search Results

## Peptide View

MS/MS Fragmentation of **TEQWSTLPPETK**

Found in **CO4A\_HUMAN**, Complement C4-A OS=Homo sapiens GN=C4A PE=1 SV=2

Match to Query 46460: 1726.877708 from(864.446130,2+) rtinseconds(2031) index(60756)

Title: Locus:1.1.1.3012.9 File:"2013-07-02 CLN FXIII 60 min 1st F 4.wiff"

Data file C:\Program Files (x86)\Matrix Science\Mascot Daemon\mgf4 FXIII 60 min 1st\mascot\_daemon\_merge.mgf

Click mouse within plot area to zoom in by factor of two about that point

Or, Plot from  to  Da

Label all possible matches  Label matches used for scoring

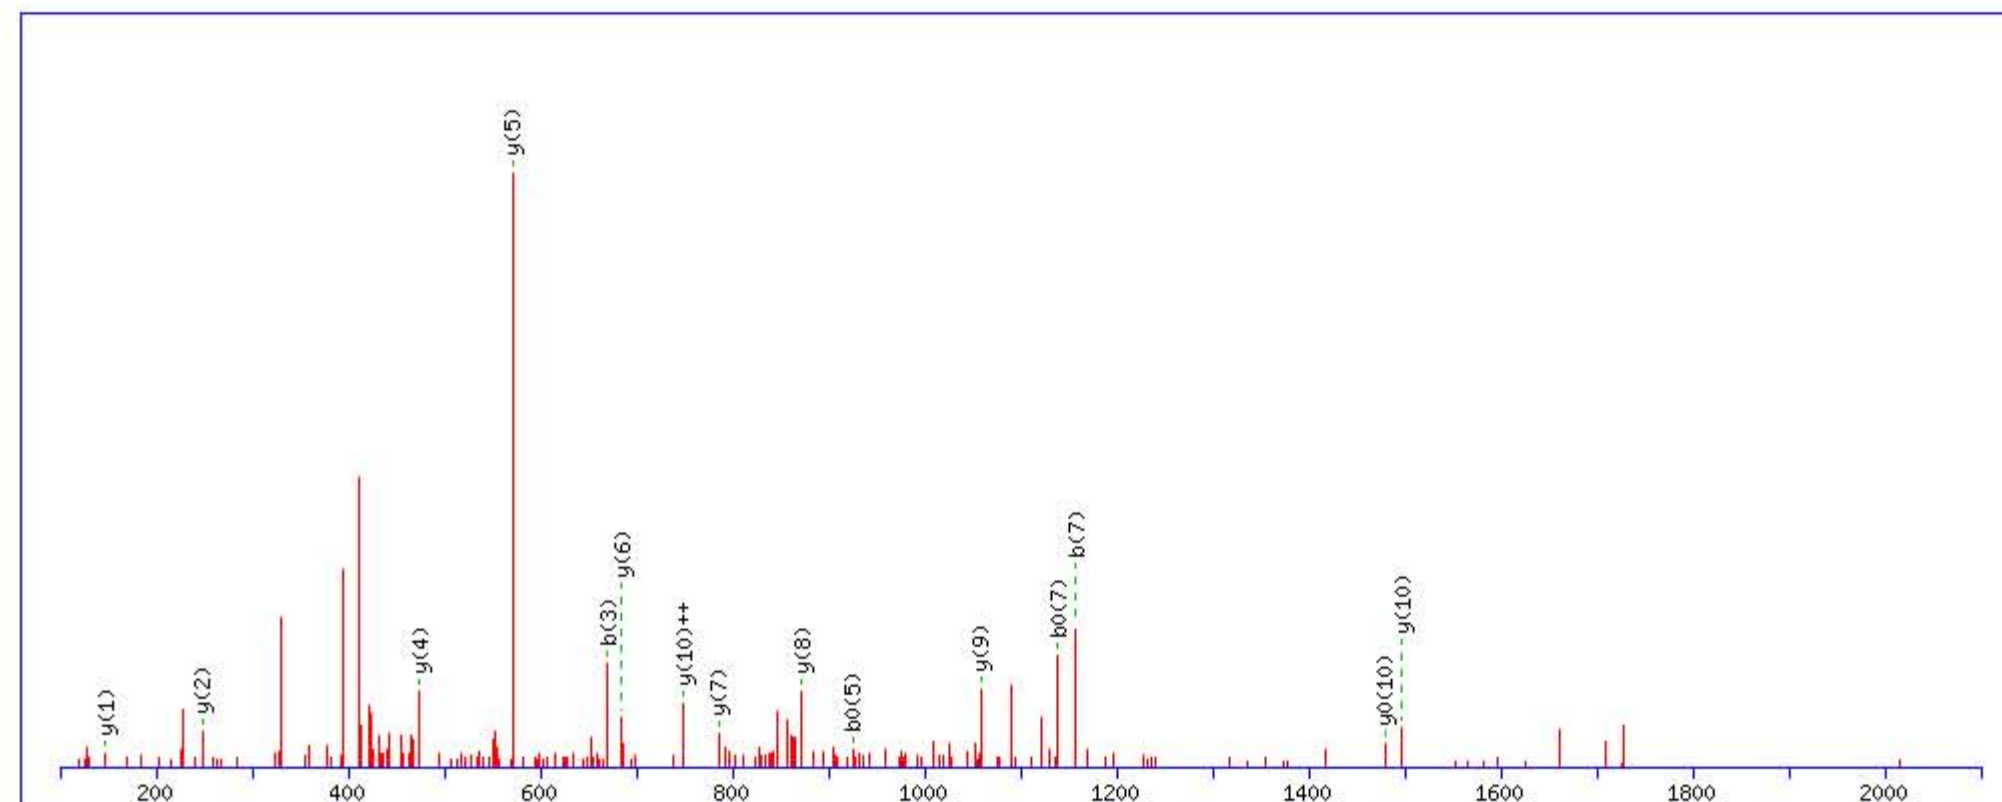

Monoisotopic mass of neutral peptide Mr(calc): 1726.860001

Fixed modifications: Carbamidomethyl (C) (apply to specified residues or termini only)

Variable modifications:

Q3 : Biotin:Thermo-21345 (Q)

Ions Score: 49 Expect: 5.9e-005

Matches : 15/126 fragment ions using 33 most intense peaks [\(help\)](#)

| #  | b                  | b <sup>++</sup> | b <sup>*</sup> | b <sup>*++</sup> | b <sup>0</sup>     | b <sup>0++</sup> | Seq. | y                  | y <sup>++</sup>   | y <sup>*</sup> | y <sup>*++</sup> | y <sup>0</sup>     | y <sup>0++</sup> | #  |
|----|--------------------|-----------------|----------------|------------------|--------------------|------------------|------|--------------------|-------------------|----------------|------------------|--------------------|------------------|----|
| 1  | 102.054955         | 51.531116       |                |                  | 84.044390          | 42.525833        | T    |                    |                   |                |                  |                    |                  | 12 |
| 2  | 231.097548         | 116.052412      |                |                  | 213.086983         | 107.047130       | E    | 1626.819607        | 813.913442        | 1609.793058    | 805.400167       | 1608.809042        | 804.908159       | 11 |
| 3  | <b>670.322874</b>  | 335.665075      | 653.296325     | 327.151801       | 652.312309         | 326.659793       | Q    | <b>1497.777014</b> | <b>749.392145</b> | 1480.750465    | 740.878871       | <b>1479.766449</b> | 740.386863       | 10 |
| 4  | 856.402187         | 428.704732      | 839.375638     | 420.191457       | 838.391622         | 419.699449       | W    | <b>1058.551688</b> | 529.779482        | 1041.525139    | 521.266208       | 1040.541123        | 520.774200       | 9  |
| 5  | 943.434215         | 472.220746      | 926.407666     | 463.707471       | <b>925.423650</b>  | 463.215463       | S    | <b>872.472375</b>  | 436.739826        | 855.445826     | 428.226551       | 854.461810         | 427.734543       | 8  |
| 6  | 1044.481894        | 522.744585      | 1027.455345    | 514.231311       | 1026.471329        | 513.739303       | T    | <b>785.440347</b>  | 393.223812        | 768.413798     | 384.710537       | 767.429782         | 384.218529       | 7  |
| 7  | <b>1157.565958</b> | 579.286617      | 1140.539409    | 570.773343       | <b>1139.555393</b> | 570.281334       | L    | <b>684.392668</b>  | 342.699972        | 667.366119     | 334.186698       | 666.382103         | 333.694690       | 6  |
| 8  | 1254.618722        | 627.812999      | 1237.592173    | 619.299725       | 1236.608157        | 618.807716       | P    | <b>571.308604</b>  | 286.157940        | 554.282055     | 277.644666       | 553.298039         | 277.152658       | 5  |
| 9  | 1351.671486        | 676.339381      | 1334.644937    | 667.826107       | 1333.660921        | 667.334098       | P    | <b>474.255840</b>  | 237.631558        | 457.229291     | 229.118284       | 456.245275         | 228.626276       | 4  |
| 10 | 1480.714079        | 740.860678      | 1463.687530    | 732.347403       | 1462.703514        | 731.855395       | E    | 377.203076         | 189.105176        | 360.176527     | 180.591902       | 359.192511         | 180.099894       | 3  |
| 11 | 1581.761758        | 791.384517      | 1564.735209    | 782.871243       | 1563.751193        | 782.379235       | T    | <b>248.160483</b>  | 124.583879        | 231.133934     | 116.070605       | 230.149918         | 115.578597       | 2  |
| 12 |                    |                 |                |                  |                    |                  | K    | <b>147.112804</b>  | 74.060040         | 130.086255     | 65.546765        |                    |                  | 1  |

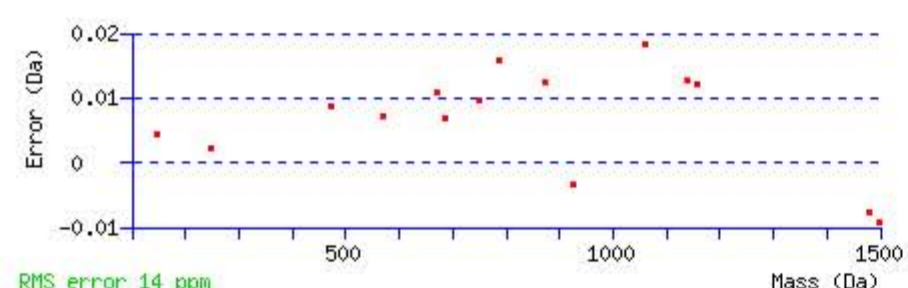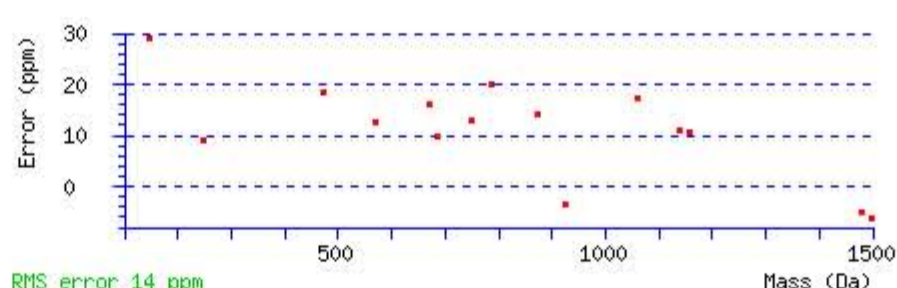

NCBI BLAST search of **TEQWSTLPPETK**

(Parameters: blastp, nr protein database, expect=20000, no filter, PAM30)

Other BLAST [web gateways](#)

All matches to this query

| Score | Mr(calc):   | Delta    | Sequence                        |
|-------|-------------|----------|---------------------------------|
| 49.3  | 1726.860001 | 0.017707 | <a href="#">TEQWSTLPPETK</a>    |
| 4.0   | 1726.867188 | 0.010520 | <a href="#">KDHAEMQAVIDAKQK</a> |
| 0.6   | 1726.853485 | 0.024223 | <a href="#">MASGHAFQPDLVK</a>   |

Mascot: <http://www.matrixscience.com/>



# MASCOT SEARCH RESULTS

## Peptide View

MS/MS Fragmentation of **GLEEELQFSLGSK**

Found in **CO4A\_HUMAN**, Complement C4-A OS=Homo sapiens GN=C4A PE=1 SV=2

Match to Query 47083: 1746.907452 from(583.309760,3+) rtinseconds(2523) index(64206)

Title: Locus:1.1.1.3183.5 File:"2013-07-02 CLN FXIII 60 min 1st F 4.wiff"

Data file C:\Program Files (x86)\Matrix Science\Mascot Daemon\mgf4 FXIII 60 min 1st\mascot\_daemon\_merge.mgf

Click mouse within plot area to zoom in by factor of two about that point

Or, Plot from  to  Da

Label all possible matches  Label matches used for scoring

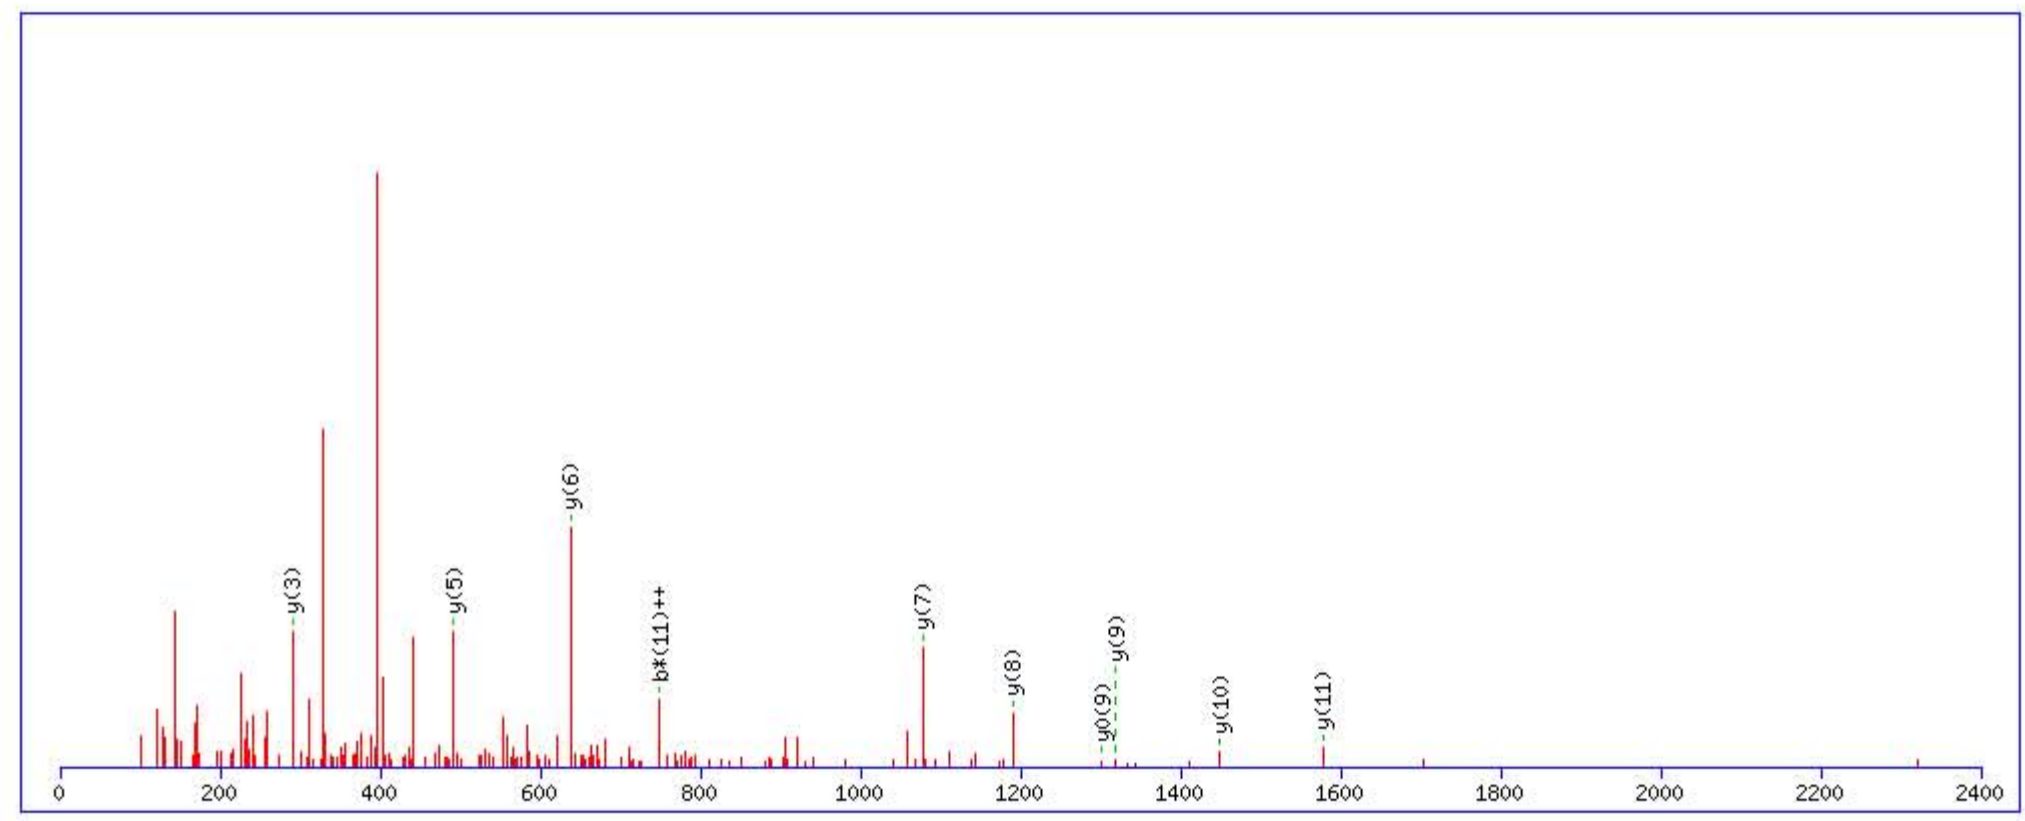

Monoisotopic mass of neutral peptide Mr(calc): 1746.886200

Fixed modifications: Carbamidomethyl (C) (apply to specified residues or termini only)

Variable modifications:

Q7 : Biotin:Thermo-21345 (Q)

Ions Score: 50 Expect: 3.7e-005

Matches : 10/126 fragment ions using 16 most intense peaks [\(help\)](#)

| #  | b           | b <sup>++</sup> | b <sup>*</sup> | b <sup>*++</sup>  | b <sup>0</sup> | b <sup>0++</sup> | Seq. | y                  | y <sup>++</sup> | y <sup>*</sup> | y <sup>*++</sup> | y <sup>0</sup>     | y <sup>0++</sup> | #  |
|----|-------------|-----------------|----------------|-------------------|----------------|------------------|------|--------------------|-----------------|----------------|------------------|--------------------|------------------|----|
| 1  | 58.028740   | 29.518008       |                |                   |                |                  | G    |                    |                 |                |                  |                    |                  | 13 |
| 2  | 171.112804  | 86.060040       |                |                   |                |                  | L    | 1690.872035        | 845.939656      | 1673.845486    | 837.426381       | 1672.861470        | 836.934373       | 12 |
| 3  | 300.155397  | 150.581336      |                |                   | 282.144832     | 141.576054       | E    | <b>1577.787971</b> | 789.397624      | 1560.761422    | 780.884349       | 1559.777406        | 780.392341       | 11 |
| 4  | 429.197990  | 215.102633      |                |                   | 411.187425     | 206.097351       | E    | <b>1448.745378</b> | 724.876327      | 1431.718829    | 716.363053       | 1430.734813        | 715.871045       | 10 |
| 5  | 558.240583  | 279.623930      |                |                   | 540.230018     | 270.618647       | E    | <b>1319.702785</b> | 660.355031      | 1302.676236    | 651.841756       | <b>1301.692220</b> | 651.349748       | 9  |
| 6  | 671.324647  | 336.165962      |                |                   | 653.314082     | 327.160679       | L    | <b>1190.660192</b> | 595.833734      | 1173.633643    | 587.320460       | 1172.649627        | 586.828452       | 8  |
| 7  | 1110.549973 | 555.778624      | 1093.523424    | 547.265350        | 1092.539408    | 546.773342       | Q    | <b>1077.576128</b> | 539.291702      | 1060.549579    | 530.778428       | 1059.565563        | 530.286419       | 7  |
| 8  | 1257.618387 | 629.312832      | 1240.591838    | 620.799557        | 1239.607822    | 620.307549       | F    | <b>638.350802</b>  | 319.679039      | 621.324253     | 311.165765       | 620.340237         | 310.673757       | 6  |
| 9  | 1344.650415 | 672.828846      | 1327.623866    | 664.315571        | 1326.639850    | 663.823563       | S    | <b>491.282388</b>  | 246.144832      | 474.255839     | 237.631557       | 473.271823         | 237.139549       | 5  |
| 10 | 1457.734479 | 729.370878      | 1440.707930    | 720.857603        | 1439.723914    | 720.365595       | L    | 404.250360         | 202.628818      | 387.223811     | 194.115543       | 386.239795         | 193.623535       | 4  |
| 11 | 1514.755943 | 757.881609      | 1497.729394    | <b>749.368335</b> | 1496.745378    | 748.876327       | G    | <b>291.166296</b>  | 146.086786      | 274.139747     | 137.573512       | 273.155731         | 137.081504       | 3  |
| 12 | 1601.787971 | 801.397624      | 1584.761422    | 792.884349        | 1583.777406    | 792.392341       | S    | 234.144832         | 117.576054      | 217.118283     | 109.062780       | 216.134267         | 108.570772       | 2  |
| 13 |             |                 |                |                   |                |                  | K    | 147.112804         | 74.060040       | 130.086255     | 65.546765        |                    |                  | 1  |

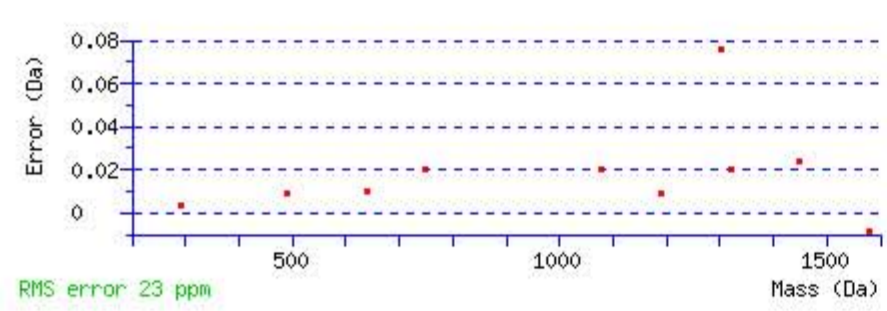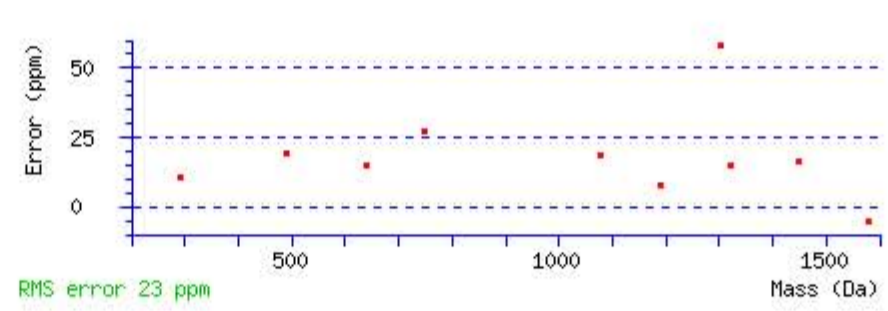

NCBI BLAST search of [GLEEELQFSLGSK](#)

(Parameters: blastp, nr protein database, expect=20000, no filter, PAM30)

Other BLAST [web gateways](#)

All matches to this query

| Score | Mr(calc):   | Delta    | Sequence                         |
|-------|-------------|----------|----------------------------------|
| 49.8  | 1746.886200 | 0.021252 | <a href="#">GLEEELQFSLGSK</a>    |
| 2.5   | 1746.891403 | 0.016049 | <a href="#">HSSVLFRRHQKLHSGD</a> |



# MASCOT SCIENCE Mascot Search Results

## Peptide View

MS/MS Fragmentation of **VLSLAQEQVGG SPEK**

Found in **CO4A\_HUMAN**, Complement C4-A OS=Homo sapiens GN=C4A PE=1 SV=2

Match to Query 49516: 1851.991572 from(618.337800,3+) rtinseconds(1956) index(60239)

Title: Locus:1.1.1.2986.10 File:"2013-07-02 CLN FXIII 60 min 1st F 4.wiff"

Data file C:\Program Files (x86)\Matrix Science\Mascot Daemon\mgf4 FXIII 60 min 1st\mascot\_daemon\_merge.mgf

Click mouse within plot area to zoom in by factor of two about that point

Or, Plot from  to  Da

Label all possible matches  Label matches used for scoring

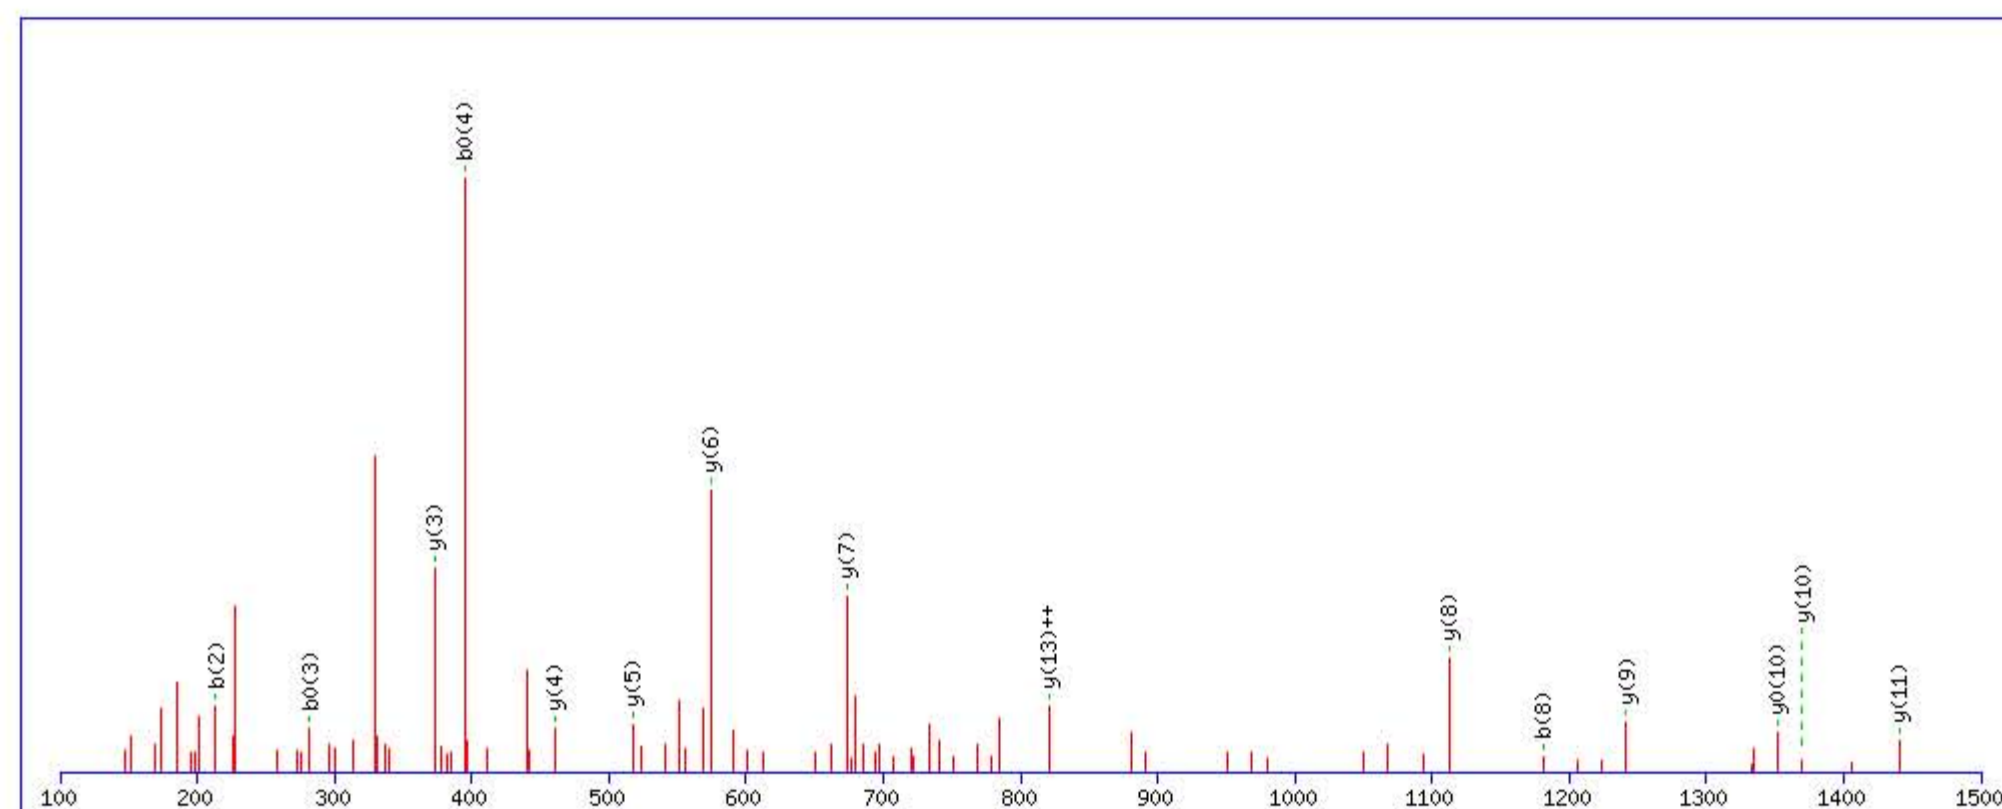

Monoisotopic mass of neutral peptide Mr(calc): 1851.976425

Fixed modifications: Carbamidomethyl (C) (apply to specified residues or termini only)

Variable modifications:

Q8 : Biotin:Thermo-21345 (Q)

Ions Score: 40 Expect: 0.0022

Matches : 15/152 fragment ions using 37 most intense peaks [\(help\)](#)

| #  | b                  | b <sup>++</sup> | b <sup>*</sup> | b <sup>*++</sup> | b <sup>0</sup>    | b <sup>0++</sup> | Seq. | y                  | y <sup>++</sup>   | y <sup>*</sup> | y <sup>*++</sup> | y <sup>0</sup>     | y <sup>0++</sup> | #  |
|----|--------------------|-----------------|----------------|------------------|-------------------|------------------|------|--------------------|-------------------|----------------|------------------|--------------------|------------------|----|
| 1  | 100.075690         | 50.541483       |                |                  |                   |                  | V    |                    |                   |                |                  |                    |                  | 15 |
| 2  | <b>213.159754</b>  | 107.083515      |                |                  |                   |                  | L    | 1753.915298        | 877.461287        | 1736.888749    | 868.948013       | 1735.904733        | 868.456004       | 14 |
| 3  | 300.191782         | 150.599529      |                |                  | <b>282.181217</b> | 141.594247       | S    | 1640.831234        | <b>820.919255</b> | 1623.804685    | 812.405981       | 1622.820669        | 811.913973       | 13 |
| 4  | 413.275846         | 207.141561      |                |                  | <b>395.265281</b> | 198.136279       | L    | 1553.799206        | 777.403241        | 1536.772657    | 768.889967       | 1535.788641        | 768.397958       | 12 |
| 5  | 484.312960         | 242.660118      |                |                  | 466.302395        | 233.654836       | A    | <b>1440.715142</b> | 720.861209        | 1423.688593    | 712.347935       | 1422.704577        | 711.855927       | 11 |
| 6  | 612.371538         | 306.689407      | 595.344989     | 298.176133       | 594.360973        | 297.684125       | Q    | <b>1369.678028</b> | 685.342652        | 1352.651479    | 676.829378       | <b>1351.667463</b> | 676.337370       | 10 |
| 7  | 741.414131         | 371.210704      | 724.387582     | 362.697429       | 723.403566        | 362.205421       | E    | <b>1241.619450</b> | 621.313363        | 1224.592901    | 612.800089       | 1223.608885        | 612.308080       | 9  |
| 8  | <b>1180.639457</b> | 590.823367      | 1163.612908    | 582.310092       | 1162.628892       | 581.818084       | Q    | <b>1112.576857</b> | 556.792066        | 1095.550308    | 548.278792       | 1094.566292        | 547.786784       | 8  |
| 9  | 1279.707871        | 640.357574      | 1262.681322    | 631.844299       | 1261.697306       | 631.352291       | V    | <b>673.351531</b>  | 337.179404        | 656.324982     | 328.666129       | 655.340966         | 328.174121       | 7  |
| 10 | 1336.729335        | 668.868306      | 1319.702786    | 660.355031       | 1318.718770       | 659.863023       | G    | <b>574.283117</b>  | 287.645197        | 557.256568     | 279.131922       | 556.272552         | 278.639914       | 6  |
| 11 | 1393.750799        | 697.379037      | 1376.724250    | 688.865763       | 1375.740234       | 688.373755       | G    | <b>517.261653</b>  | 259.134465        | 500.235104     | 250.621190       | 499.251088         | 250.129182       | 5  |
| 12 | 1480.782827        | 740.895052      | 1463.756278    | 732.381777       | 1462.772262       | 731.889769       | S    | <b>460.240189</b>  | 230.623732        | 443.213640     | 222.110458       | 442.229624         | 221.618450       | 4  |
| 13 | 1577.835591        | 789.421434      | 1560.809042    | 780.908159       | 1559.825026       | 780.416151       | P    | <b>373.208161</b>  | 187.107718        | 356.181612     | 178.594444       | 355.197596         | 178.102436       | 3  |
| 14 | 1706.878184        | 853.942730      | 1689.851635    | 845.429456       | 1688.867619       | 844.937447       | E    | 276.155397         | 138.581336        | 259.128848     | 130.068062       | 258.144832         | 129.576054       | 2  |
| 15 |                    |                 |                |                  |                   |                  | K    | 147.112804         | 74.060040         | 130.086255     | 65.546765        |                    |                  | 1  |

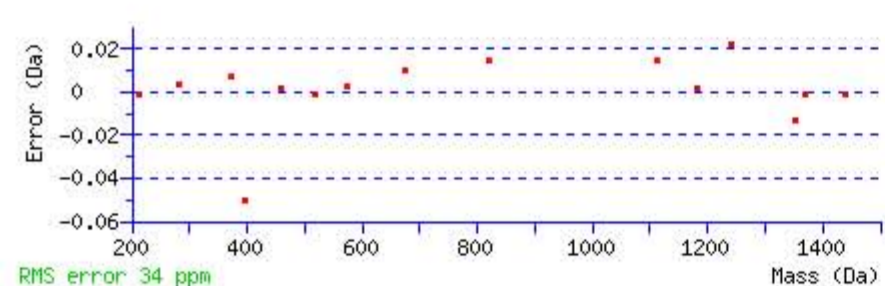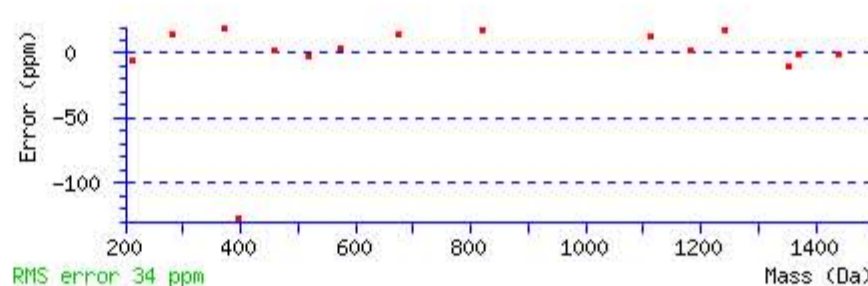

NCBI BLAST search of **VLSLAQEQVGG SPEK**

(Parameters: blastp, nr protein database, expect=20000, no filter, PAM30)

Other BLAST [web gateways](#)

All matches to this query

| Score | Mr(calc):   | Delta    | Sequence                         |
|-------|-------------|----------|----------------------------------|
| 40.3  | 1851.976425 | 0.015147 | <a href="#">VLSLAQEQVGG SPEK</a> |
| 23.7  | 1851.976425 | 0.015147 | <a href="#">VLSLAQEQVGG SPEK</a> |

Mascot: <http://www.matrixscience.com/>



# **MASCOT** Mascot Search Results

## Peptide View

MS/MS Fragmentation of **HLVPGAPFLLQALVR**

Found in **CO4A\_HUMAN**, Complement C4-A OS=Homo sapiens GN=C4A PE=1 SV=2

Match to Query 51553: 1941.164652 from(648.062160,3+) rtinseconds(2817) index(66281)

Title: Locus:1.1.1.3284.6 File:"2013-07-02 CLN FXIII 60 min 1st F 4.wiff"

Data file C:\Program Files (x86)\Matrix Science\Mascot Daemon\mgf4 FXIII 60 min 1st\mascot\_daemon\_merge.mgf

Click mouse within plot area to zoom in by factor of two about that point

Or, Plot from  to  Da

Label all possible matches  Label matches used for scoring

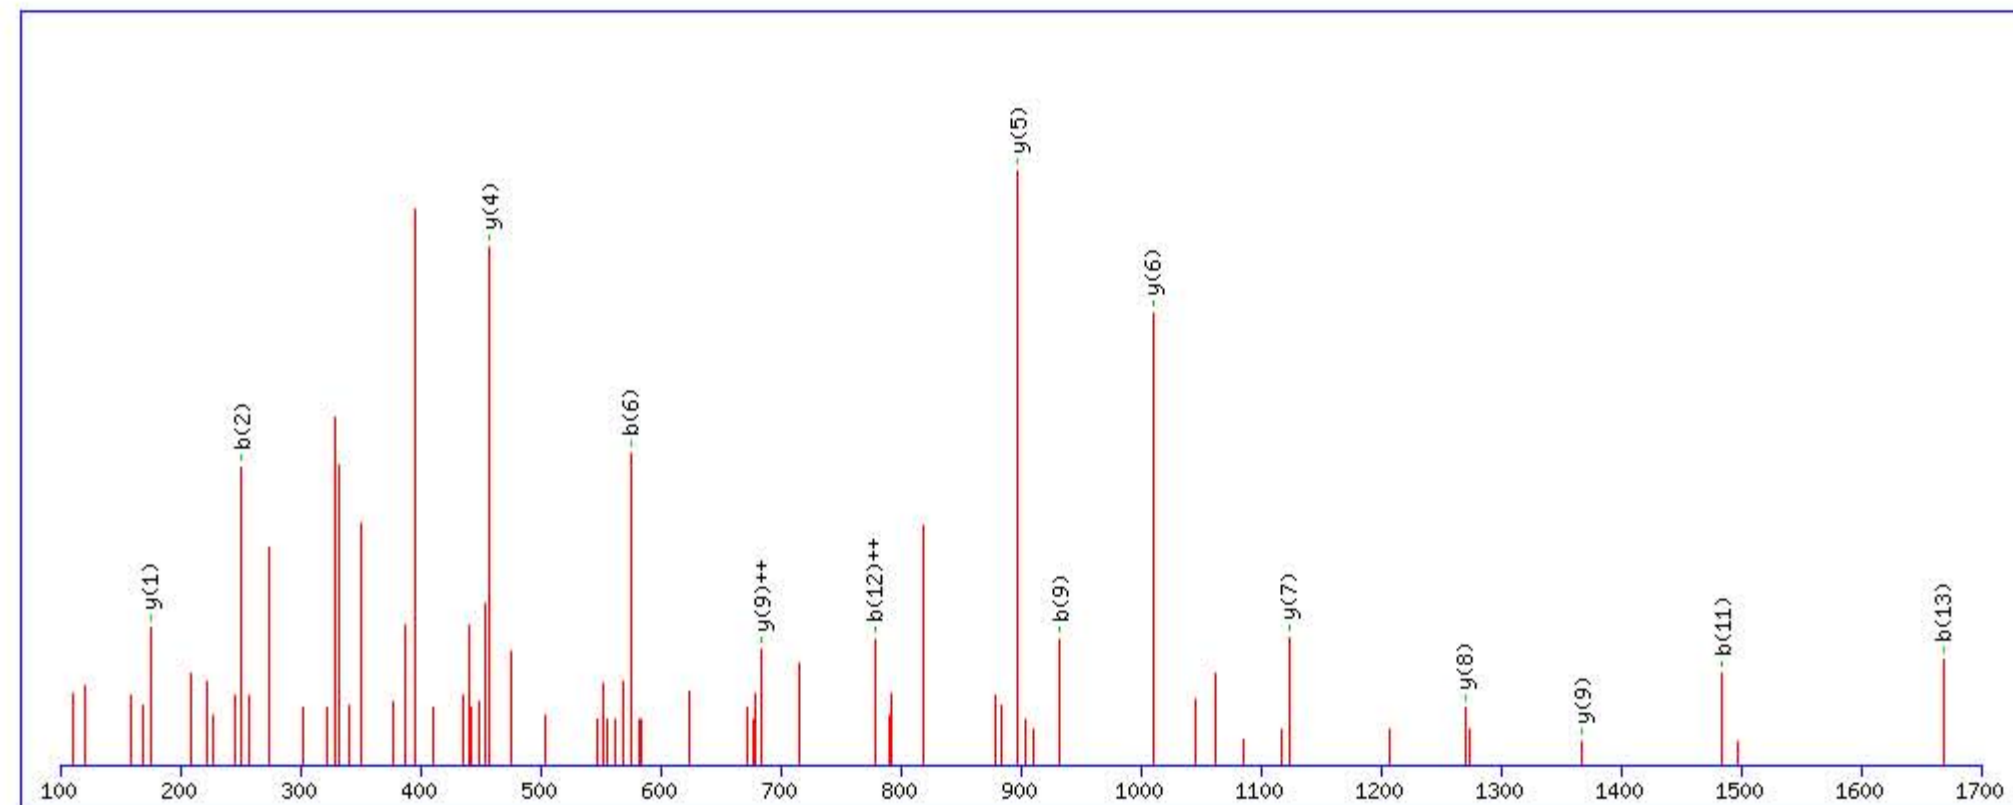

Monoisotopic mass of neutral peptide Mr(calc): 1941.138626

Fixed modifications: Carbamidomethyl (C) (apply to specified residues or termini only)

Variable modifications:

Q11 : Biotin:Thermo-21345 (Q)

Ions Score: 57 Expect: 2.7e-006

Matches : 14/92 fragment ions using 15 most intense peaks [\(help\)](#)

| #  | b                  | b <sup>++</sup>   | b <sup>*</sup> | b <sup>*++</sup> | Seq.     | y                  | y <sup>++</sup>   | y <sup>*</sup> | y <sup>*++</sup> | #  |
|----|--------------------|-------------------|----------------|------------------|----------|--------------------|-------------------|----------------|------------------|----|
| 1  | 138.066188         | 69.536732         |                |                  | <b>H</b> |                    |                   |                |                  | 15 |
| 2  | <b>251.150252</b>  | 126.078764        |                |                  | <b>L</b> | 1805.086996        | 903.047136        | 1788.060447    | 894.533862       | 14 |
| 3  | 350.218666         | 175.612971        |                |                  | <b>V</b> | 1692.002932        | 846.505104        | 1674.976383    | 837.991830       | 13 |
| 4  | 447.271430         | 224.139353        |                |                  | <b>P</b> | 1592.934518        | 796.970897        | 1575.907969    | 788.457623       | 12 |
| 5  | 504.292894         | 252.650085        |                |                  | <b>G</b> | 1495.881754        | 748.444515        | 1478.855205    | 739.931241       | 11 |
| 6  | <b>575.330008</b>  | 288.168642        |                |                  | <b>A</b> | 1438.860290        | 719.933783        | 1421.833741    | 711.420509       | 10 |
| 7  | 672.382772         | 336.695024        |                |                  | <b>P</b> | <b>1367.823176</b> | <b>684.415226</b> | 1350.796627    | 675.901952       | 9  |
| 8  | 819.451186         | 410.229231        |                |                  | <b>F</b> | <b>1270.770412</b> | 635.888844        | 1253.743863    | 627.375570       | 8  |
| 9  | <b>932.535250</b>  | 466.771263        |                |                  | <b>L</b> | <b>1123.701998</b> | 562.354637        | 1106.675449    | 553.841363       | 7  |
| 10 | 1045.619314        | 523.313295        |                |                  | <b>L</b> | <b>1010.617934</b> | 505.812605        | 993.591385     | 497.299331       | 6  |
| 11 | <b>1484.844640</b> | 742.925958        | 1467.818091    | 734.412684       | <b>Q</b> | <b>897.533870</b>  | 449.270573        | 880.507321     | 440.757298       | 5  |
| 12 | 1555.881754        | <b>778.444515</b> | 1538.855205    | 769.931241       | <b>A</b> | <b>458.308544</b>  | 229.657910        | 441.281995     | 221.144635       | 4  |
| 13 | <b>1668.965818</b> | 834.986547        | 1651.939269    | 826.473273       | <b>L</b> | 387.271430         | 194.139353        | 370.244881     | 185.626078       | 3  |
| 14 | 1768.034232        | 884.520754        | 1751.007683    | 876.007480       | <b>V</b> | 274.187366         | 137.597321        | 257.160817     | 129.084047       | 2  |
| 15 |                    |                   |                |                  | <b>R</b> | <b>175.118952</b>  | 88.063114         | 158.092403     | 79.549839        | 1  |

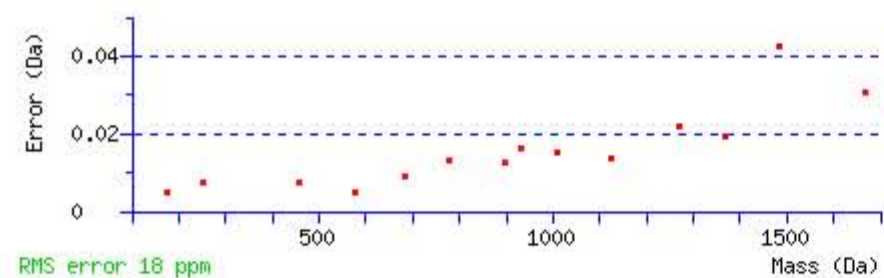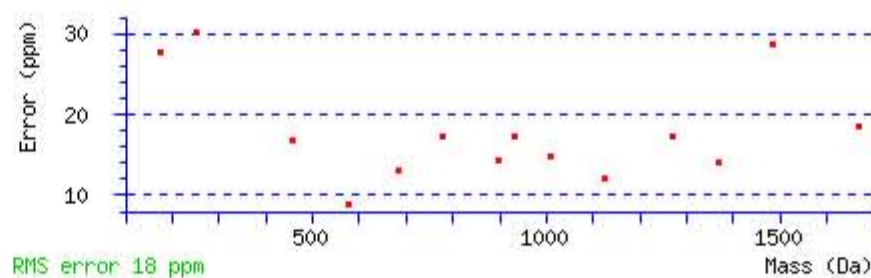

NCBI BLAST search of [HLVPGAPFLLQALVR](#)

(Parameters: blastp, nr protein database, expect=20000, no filter, PAM30)

Other BLAST [web gateways](#)

All matches to this query

| Score | Mr(calc):   | Delta    | Sequence                        |
|-------|-------------|----------|---------------------------------|
| 56.8  | 1941.138626 | 0.026026 | <a href="#">HLVPGAPFLLQALVR</a> |

Mascot: <http://www.matrixscience.com/>



# MASCOT SCIENCE Mascot Search Results

## Peptide View

MS/MS Fragmentation of **EPFLSCCQFAESLR**

Found in **CO4A\_HUMAN**, Complement C4-A OS=Homo sapiens GN=C4A PE=1 SV=2

Match to Query 55066: 2053.967052 from(685.662960,3+) rtinseconds(2451) index(63695)

Title: Locus:1.1.1.3158.9 File:"2013-07-02 CLN FXIII 60 min 1st F 4.wiff"

Data file C:\Program Files (x86)\Matrix Science\Mascot Daemon\mgf4 FXIII 60 min 1st\mascot\_daemon\_merge.mgf

Click mouse within plot area to zoom in by factor of two about that point

Or, Plot from  to  Da

Label all possible matches  Label matches used for scoring

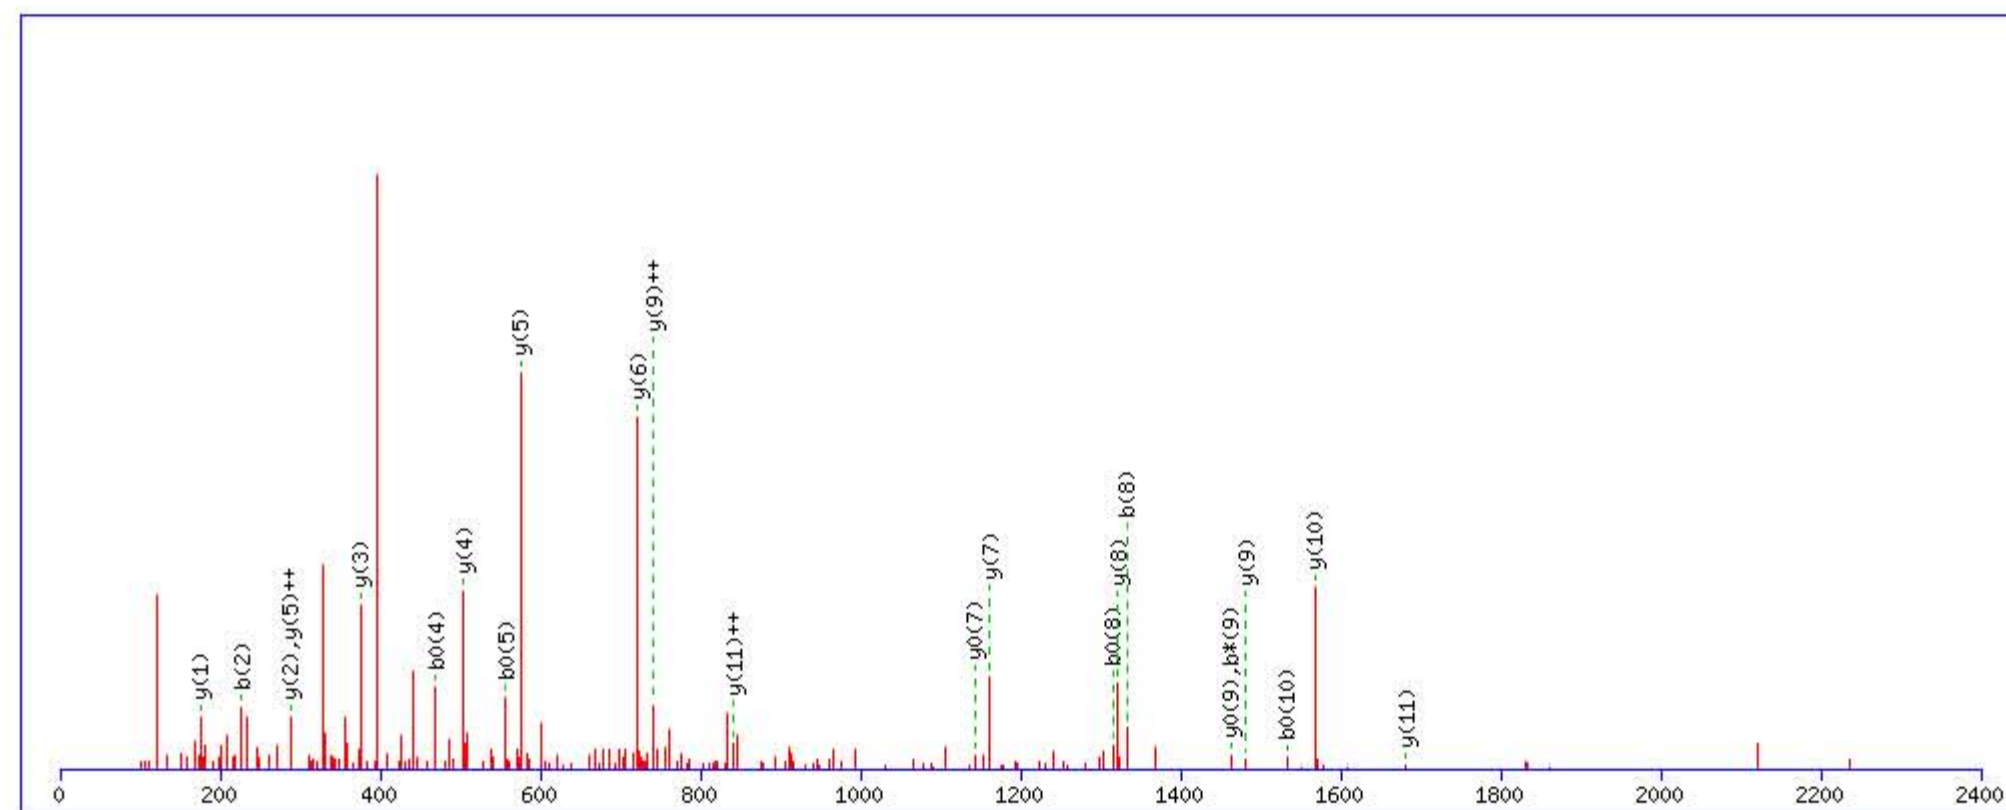

Monoisotopic mass of neutral peptide Mr(calc): 2053.942368

Fixed modifications: Carbamidomethyl (C) (apply to specified residues or termini only)

Variable modifications:

Q8 : Biotin:Thermo-21345 (Q)

Ions Score: 54 Expect: 9.5e-006

Matches : 23/138 fragment ions using 49 most intense peaks [\(help\)](#)

| #  | b                  | b <sup>++</sup> | b <sup>+</sup>     | b <sup>+++</sup> | b <sup>0</sup>     | b <sup>0++</sup> | Seq. | y                  | y <sup>++</sup>   | y <sup>+</sup> | y <sup>+++</sup> | y <sup>0</sup>     | y <sup>0++</sup> | #  |
|----|--------------------|-----------------|--------------------|------------------|--------------------|------------------|------|--------------------|-------------------|----------------|------------------|--------------------|------------------|----|
| 1  | 130.049869         | 65.528572       |                    |                  | 112.039304         | 56.523290        | E    |                    |                   |                |                  |                    |                  | 14 |
| 2  | <b>227.102633</b>  | 114.054954      |                    |                  | 209.092068         | 105.049672       | P    | 1925.907059        | 963.457168        | 1908.880510    | 954.943893       | 1907.896494        | 954.451885       | 13 |
| 3  | 374.171047         | 187.589161      |                    |                  | 356.160482         | 178.583879       | F    | 1828.854295        | 914.930786        | 1811.827746    | 906.417511       | 1810.843730        | 905.925503       | 12 |
| 4  | 487.255111         | 244.131193      |                    |                  | <b>469.244546</b>  | 235.125911       | L    | <b>1681.785881</b> | <b>841.396579</b> | 1664.759332    | 832.883304       | 1663.775316        | 832.391296       | 11 |
| 5  | 574.287139         | 287.647208      |                    |                  | <b>556.276574</b>  | 278.641925       | S    | <b>1568.701817</b> | 784.854547        | 1551.675268    | 776.341272       | 1550.691252        | 775.849264       | 10 |
| 6  | 734.317788         | 367.662532      |                    |                  | 716.307223         | 358.657250       | C    | <b>1481.669789</b> | <b>741.338533</b> | 1464.643240    | 732.825258       | <b>1463.659224</b> | 732.333250       | 9  |
| 7  | 894.348437         | 447.677857      |                    |                  | 876.337872         | 438.672574       | C    | <b>1321.639140</b> | 661.323208        | 1304.612591    | 652.809934       | 1303.628575        | 652.317926       | 8  |
| 8  | <b>1333.573763</b> | 667.290520      | 1316.547214        | 658.777245       | <b>1315.563198</b> | 658.285237       | Q    | <b>1161.608491</b> | 581.307884        | 1144.581942    | 572.794609       | <b>1143.597926</b> | 572.302601       | 7  |
| 9  | 1480.642177        | 740.824727      | <b>1463.615628</b> | 732.311452       | 1462.631612        | 731.819444       | F    | <b>722.383165</b>  | 361.695221        | 705.356616     | 353.181946       | 704.372600         | 352.689938       | 6  |
| 10 | 1551.679291        | 776.343284      | 1534.652742        | 767.830009       | <b>1533.668726</b> | 767.338001       | A    | <b>575.314751</b>  | <b>288.161014</b> | 558.288202     | 279.647739       | 557.304186         | 279.155731       | 5  |
| 11 | 1680.721884        | 840.864580      | 1663.695335        | 832.351306       | 1662.711319        | 831.859298       | E    | <b>504.277637</b>  | 252.642457        | 487.251088     | 244.129182       | 486.267072         | 243.637174       | 4  |
| 12 | 1767.753912        | 884.380594      | 1750.727363        | 875.867320       | 1749.743347        | 875.375312       | S    | <b>375.235044</b>  | 188.121160        | 358.208495     | 179.607885       | 357.224479         | 179.115877       | 3  |
| 13 | 1880.837976        | 940.922626      | 1863.811427        | 932.409352       | 1862.827411        | 931.917344       | L    | <b>288.203016</b>  | 144.605146        | 271.176467     | 136.091871       |                    |                  | 2  |
| 14 |                    |                 |                    |                  |                    |                  | R    | <b>175.118952</b>  | 88.063114         | 158.092403     | 79.549839        |                    |                  | 1  |

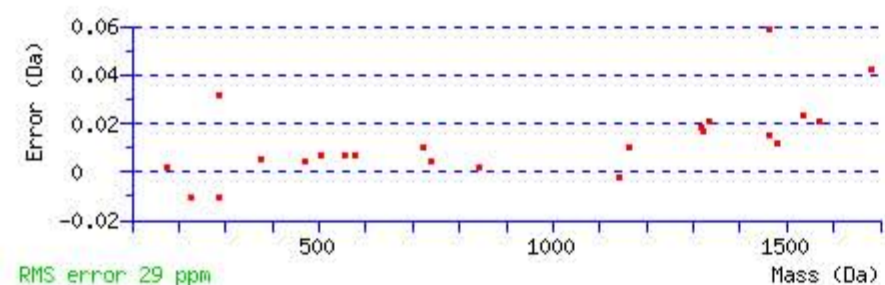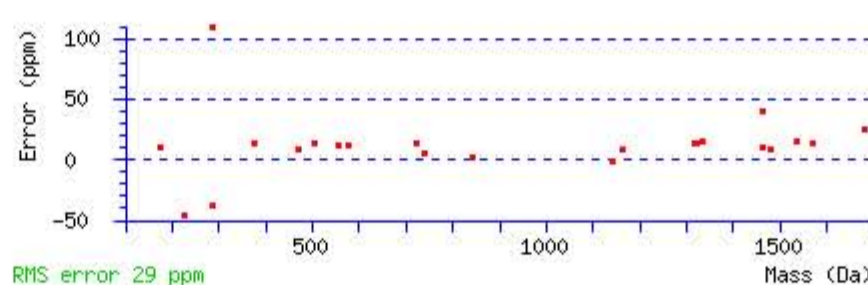

NCBI BLAST search of **EPFLSCCQFAESLR**

(Parameters: blastp, nr protein database, expect=20000, no filter, PAM30)

Other BLAST [web gateways](#)

All matches to this query

| Score | Mr(calc):   | Delta     | Sequence                         |
|-------|-------------|-----------|----------------------------------|
| 53.7  | 2053.942368 | 0.024684  | <a href="#">EPFLSCCQFAESLR</a>   |
| 0.1   | 2053.985703 | -0.018651 | <a href="#">ENENERFAHYLEKTFK</a> |

Mascot: <http://www.matrixscience.com/>



# MASCOT Search Results

## Peptide View

MS/MS Fragmentation of **LLATLCSAEVCQCAEGK**

Found in **CO4A\_HUMAN**, Complement C4-A OS=Homo sapiens GN=C4A PE=1 SV=2

Match to Query 58701: 2220.062382 from(741.028070,3+) rtinseconds(2112) index(79267)

Title: Locus:1.1.1.2949.23 File:"2013-07-02 CLN FXIII 60 min 1st FT.wiff"

Data file C:\Program Files (x86)\Matrix Science\Mascot Daemon\mgf\4 FXIII 60 min 1st\mascot\_daemon\_merge.mgf

Click mouse within plot area to zoom in by factor of two about that point

Or, Plot from 100 to 1800 Da Full range

Label all possible matches  Label matches used for scoring

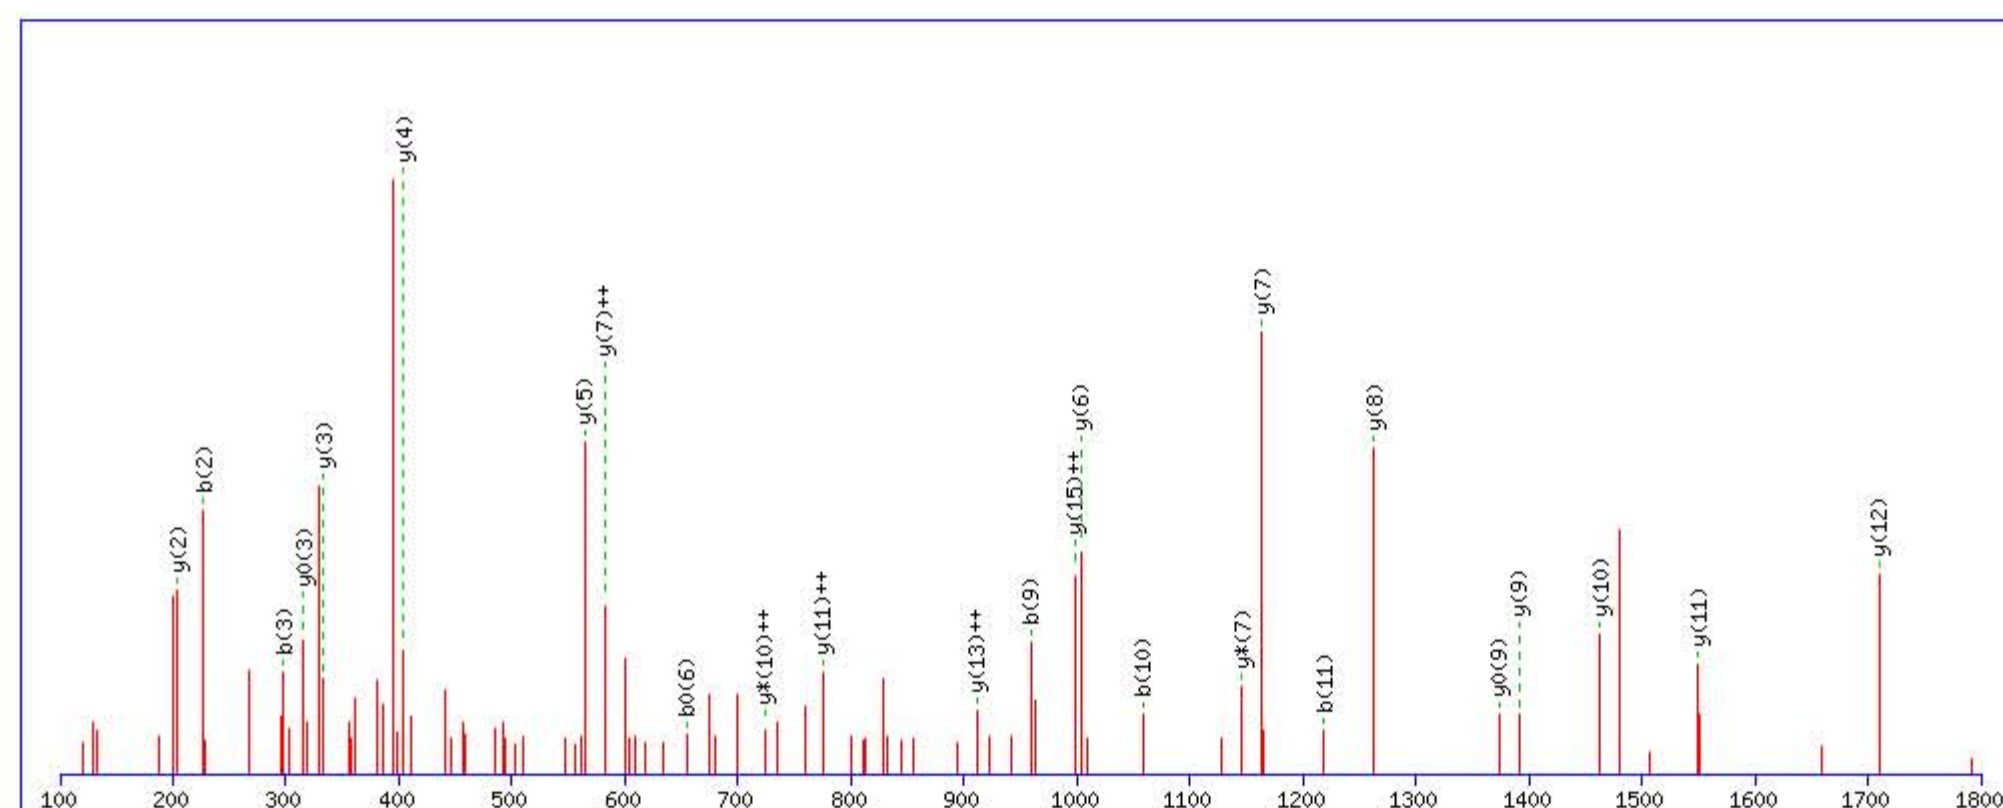

Monoisotopic mass of neutral peptide Mr(calc): 2220.041092

Fixed modifications: Carbamidomethyl (C) (apply to specified residues or termini only)

Variable modifications:

Q12 : Biotin:Thermo-21345 (Q)

Ions Score: 52 Expect: 0.00012

Matches : 25/160 fragment ions using 54 most intense peaks [\(help\)](#)

| #  | b                  | b <sup>++</sup> | b <sup>*</sup> | b <sup>+++</sup> | b <sup>0</sup>    | b <sup>0++</sup> | Seq. | y                  | y <sup>++</sup>   | y <sup>*</sup>     | y <sup>+++</sup>  | y <sup>0</sup>     | y <sup>0++</sup> | #  |
|----|--------------------|-----------------|----------------|------------------|-------------------|------------------|------|--------------------|-------------------|--------------------|-------------------|--------------------|------------------|----|
| 1  | 114.091340         | 57.549308       |                |                  |                   |                  | L    |                    |                   |                    |                   |                    |                  | 17 |
| 2  | <b>227.175404</b>  | 114.091340      |                |                  |                   |                  | L    | 2107.964318        | 1054.485797       | 2090.937769        | 1045.972522       | 2089.953753        | 1045.480514      | 16 |
| 3  | <b>298.212518</b>  | 149.609897      |                |                  |                   |                  | A    | 1994.880254        | <b>997.943765</b> | 1977.853705        | 989.430491        | 1976.869689        | 988.938483       | 15 |
| 4  | 399.260197         | 200.133737      |                |                  | 381.249632        | 191.128454       | T    | 1923.843140        | 962.425208        | 1906.816591        | 953.911934        | 1905.832575        | 953.419926       | 14 |
| 5  | 512.344261         | 256.675769      |                |                  | 494.333696        | 247.670486       | L    | 1822.795461        | <b>911.901369</b> | 1805.768912        | 903.388094        | 1804.784896        | 902.896086       | 13 |
| 6  | 672.374910         | 336.691093      |                |                  | <b>654.364345</b> | 327.685811       | C    | <b>1709.711397</b> | 855.359337        | 1692.684848        | 846.846062        | 1691.700832        | 846.354054       | 12 |
| 7  | 759.406938         | 380.207107      |                |                  | 741.396373        | 371.201825       | S    | <b>1549.680748</b> | <b>775.344012</b> | 1532.654199        | 766.830738        | 1531.670183        | 766.338730       | 11 |
| 8  | 830.444052         | 415.725664      |                |                  | 812.433487        | 406.720382       | A    | <b>1462.648720</b> | 731.827998        | 1445.622171        | <b>723.314724</b> | 1444.638155        | 722.822716       | 10 |
| 9  | <b>959.486645</b>  | 480.246961      |                |                  | 941.476080        | 471.241678       | E    | <b>1391.611606</b> | 696.309441        | 1374.585057        | 687.796167        | <b>1373.601041</b> | 687.304159       | 9  |
| 10 | <b>1058.555059</b> | 529.781168      |                |                  | 1040.544494       | 520.775885       | V    | <b>1262.569013</b> | 631.788145        | 1245.542464        | 623.274870        | 1244.558448        | 622.782862       | 8  |
| 11 | <b>1218.585708</b> | 609.796492      |                |                  | 1200.575143       | 600.791210       | C    | <b>1163.500599</b> | <b>582.253938</b> | <b>1146.474050</b> | 573.740663        | 1145.490034        | 573.248655       | 7  |
| 12 | 1657.811034        | 829.409155      | 1640.784485    | 820.895881       | 1639.800469       | 820.403873       | Q    | <b>1003.469950</b> | 502.238613        | 986.443401         | 493.725339        | 985.459385         | 493.233331       | 6  |
| 13 | 1817.841683        | 909.424480      | 1800.815134    | 900.911205       | 1799.831118       | 900.419197       | C    | <b>564.244624</b>  | 282.625950        | 547.218075         | 274.112676        | 546.234059         | 273.620668       | 5  |
| 14 | 1888.878797        | 944.943037      | 1871.852248    | 936.429762       | 1870.868232       | 935.937754       | A    | <b>404.213975</b>  | 202.610626        | 387.187426         | 194.097351        | 386.203410         | 193.605343       | 4  |
| 15 | 2017.921390        | 1009.464333     | 2000.894841    | 1000.951059      | 1999.910825       | 1000.459051      | E    | <b>333.176861</b>  | 167.092069        | 316.150312         | 158.578794        | <b>315.166296</b>  | 158.086786       | 3  |
| 16 | 2074.942854        | 1037.975065     | 2057.916305    | 1029.461790      | 2056.932289       | 1028.969782      | G    | <b>204.134268</b>  | 102.570772        | 187.107719         | 94.057497         |                    |                  | 2  |
| 17 |                    |                 |                |                  |                   |                  | K    | 147.112804         | 74.060040         | 130.086255         | 65.546765         |                    |                  | 1  |

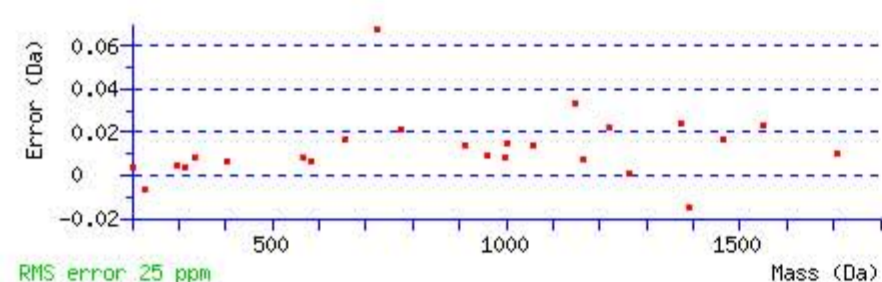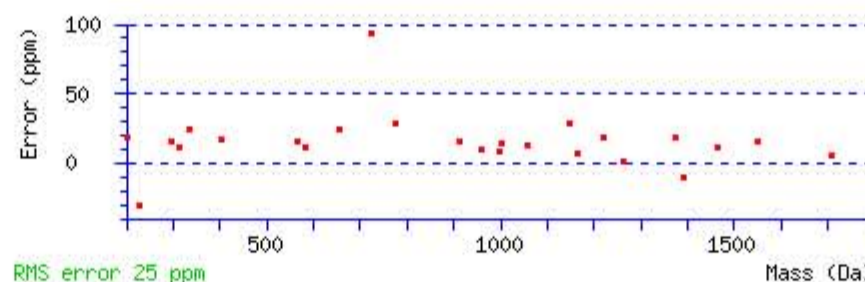

NCBI BLAST search of [LLATLCSAEVCQCAEGK](#)

(Parameters: blastp, nr protein database, expect=20000, no filter, PAM30)

Other BLAST [web gateways](#)

### All matches to this query

| Score | Mr(calc):   | Delta    | Sequence                          |
|-------|-------------|----------|-----------------------------------|
| 52.4  | 2220.041092 | 0.021290 | <a href="#">LLATLCSAEVCQCAEGK</a> |

Mascot: <http://www.matrixscience.com/>



# Mascot Search Results

## Peptide View

MS/MS Fragmentation of **GCGEQTMIIYLAPTLAASR**

Found in **CO4A\_HUMAN**, Complement C4-A OS=Homo sapiens GN=C4A PE=1 SV=2

Match to Query 59329: 2249.133942 from(750.718590,3+) rtinseconds(2480) index(63895)

Title: Locus:1.1.1.3168.14 File:"2013-07-02 CLN FXIII 60 min 1st F 4.wiff"

Data file C:\Program Files (x86)\Matrix Science\Mascot Daemon\mgf4 FXIII 60 min 1st\mascot\_daemon\_merge.mgf

Click mouse within plot area to zoom in by factor of two about that point

Or, Plot from  to  Da

Label all possible matches  Label matches used for scoring

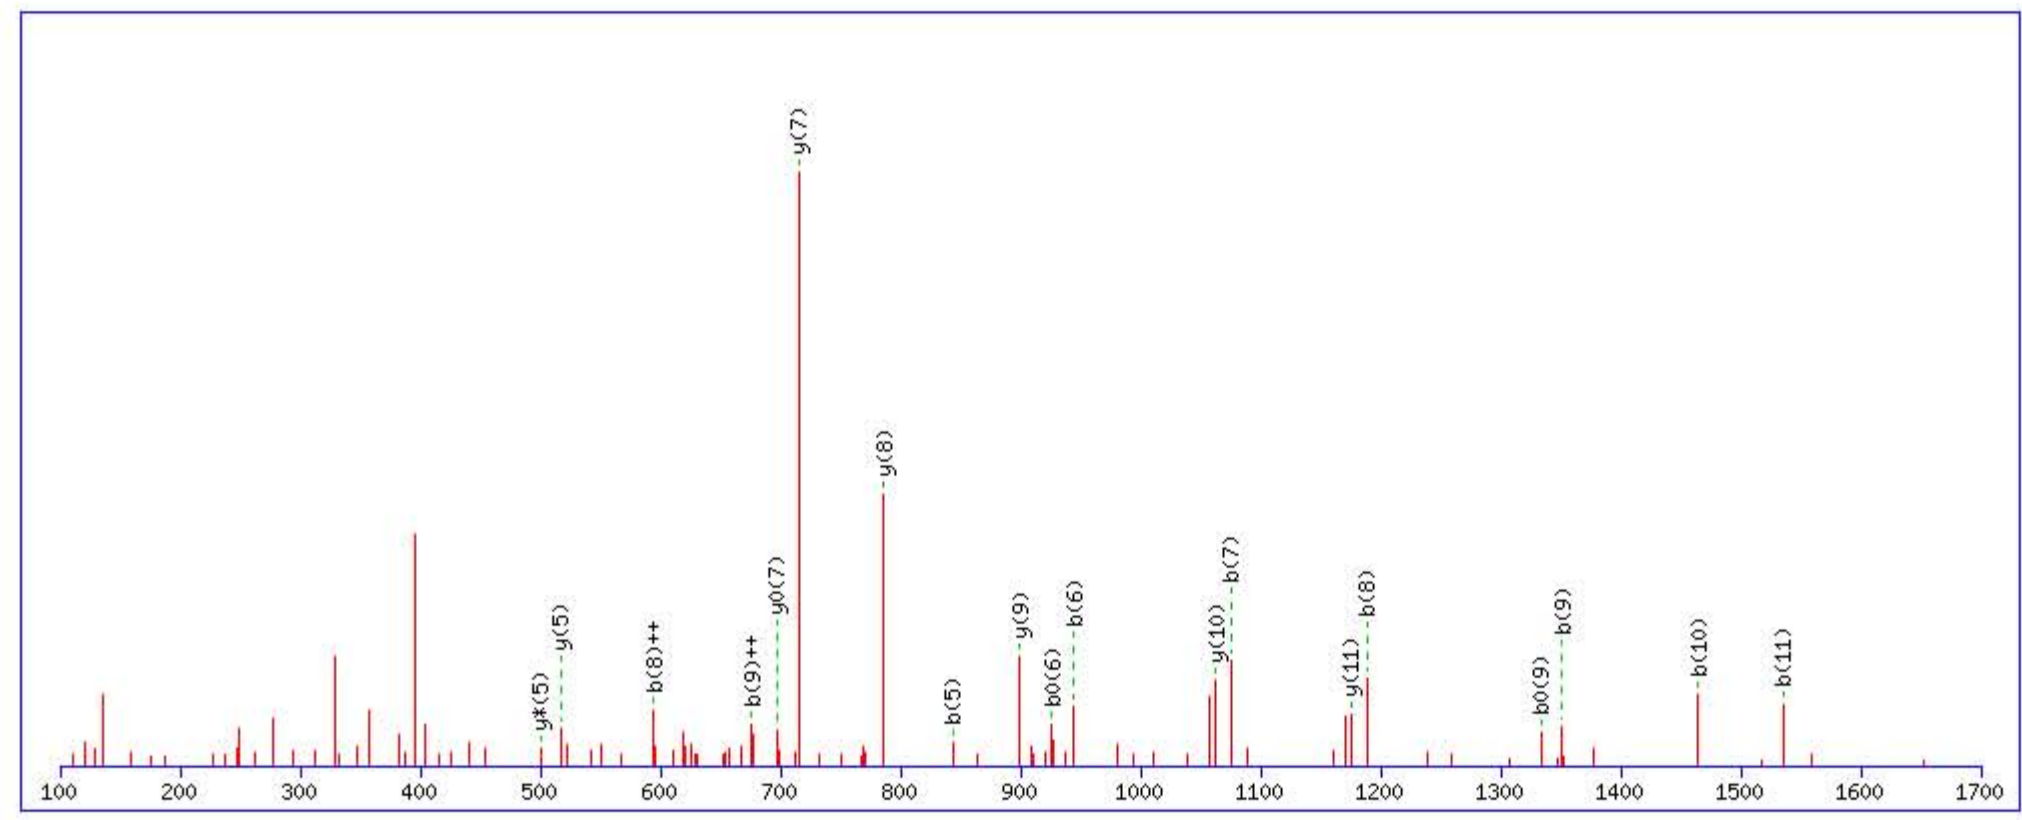

Monoisotopic mass of neutral peptide Mr(calc): 2249.100647

Fixed modifications: Carbamidomethyl (C) (apply to specified residues or termini only)

Variable modifications:

Q5 : Biotin:Thermo-21345 (Q)

Ions Score: 40 Expect: 0.0016

Matches : 19/188 fragment ions using 30 most intense peaks [\(help\)](#)

| #  | b                  | b <sup>++</sup>   | b <sup>*</sup> | b <sup>+++</sup> | b <sup>0</sup>     | b <sup>0++</sup> | Seq. | y                  | y <sup>++</sup> | y <sup>*</sup>    | y <sup>+++</sup> | y <sup>0</sup>    | y <sup>0++</sup> | #  |
|----|--------------------|-------------------|----------------|------------------|--------------------|------------------|------|--------------------|-----------------|-------------------|------------------|-------------------|------------------|----|
| 1  | 58.028740          | 29.518008         |                |                  |                    |                  | G    |                    |                 |                   |                  |                   |                  | 18 |
| 2  | 218.059389         | 109.533333        |                |                  |                    |                  | C    | 2193.086482        | 1097.046879     | 2176.059933       | 1088.533604      | 2175.075917       | 1088.041596      | 17 |
| 3  | 275.080853         | 138.044064        |                |                  |                    |                  | G    | 2033.055833        | 1017.031555     | 2016.029284       | 1008.518280      | 2015.045268       | 1008.026272      | 16 |
| 4  | 404.123446         | 202.565361        |                |                  | 386.112881         | 193.560079       | E    | 1976.034369        | 988.520822      | 1959.007820       | 980.007548       | 1958.023804       | 979.515540       | 15 |
| 5  | <b>843.348772</b>  | 422.178024        | 826.322223     | 413.664750       | 825.338207         | 413.172742       | Q    | 1846.991776        | 923.999526      | 1829.965227       | 915.486251       | 1828.981211       | 914.994243       | 14 |
| 6  | <b>944.396451</b>  | 472.701864        | 927.369902     | 464.188589       | <b>926.385886</b>  | 463.696581       | T    | 1407.766450        | 704.386863      | 1390.739901       | 695.873588       | 1389.755885       | 695.381580       | 13 |
| 7  | <b>1075.436936</b> | 538.222106        | 1058.410387    | 529.708832       | 1057.426371        | 529.216824       | M    | 1306.718771        | 653.863023      | 1289.692222       | 645.349749       | 1288.708206       | 644.857741       | 12 |
| 8  | <b>1188.521000</b> | <b>594.764138</b> | 1171.494451    | 586.250864       | 1170.510435        | 585.758855       | I    | <b>1175.678286</b> | 588.342781      | 1158.651737       | 579.829506       | 1157.667721       | 579.337498       | 11 |
| 9  | <b>1351.584329</b> | <b>676.295803</b> | 1334.557780    | 667.782528       | <b>1333.573764</b> | 667.290520       | Y    | <b>1062.594222</b> | 531.800749      | 1045.567673       | 523.287475       | 1044.583657       | 522.795466       | 10 |
| 10 | <b>1464.668393</b> | 732.837834        | 1447.641844    | 724.324560       | 1446.657828        | 723.832552       | L    | <b>899.530893</b>  | 450.269084      | 882.504344        | 441.755810       | 881.520328        | 441.263802       | 9  |
| 11 | <b>1535.705507</b> | 768.356391        | 1518.678958    | 759.843117       | 1517.694942        | 759.351109       | A    | <b>786.446829</b>  | 393.727053      | 769.420280        | 385.213778       | 768.436264        | 384.721770       | 8  |
| 12 | 1632.758271        | 816.882773        | 1615.731722    | 808.369499       | 1614.747706        | 807.877491       | P    | <b>715.409715</b>  | 358.208496      | 698.383166        | 349.695221       | <b>697.399150</b> | 349.203213       | 7  |
| 13 | 1733.805950        | 867.406613        | 1716.779401    | 858.893339       | 1715.795385        | 858.401330       | T    | 618.356951         | 309.682114      | 601.330402        | 301.168839       | 600.346386        | 300.676831       | 6  |
| 14 | 1846.890014        | 923.948645        | 1829.863465    | 915.435370       | 1828.879449        | 914.943362       | L    | <b>517.309272</b>  | 259.158274      | <b>500.282723</b> | 250.644999       | 499.298707        | 250.152991       | 5  |
| 15 | 1917.927128        | 959.467202        | 1900.900579    | 950.953927       | 1899.916563        | 950.461919       | A    | 404.225208         | 202.616242      | 387.198659        | 194.102967       | 386.214643        | 193.610959       | 4  |
| 16 | 1988.964242        | 994.985759        | 1971.937693    | 986.472484       | 1970.953677        | 985.980476       | A    | 333.188094         | 167.097685      | 316.161545        | 158.584410       | 315.177529        | 158.092402       | 3  |
| 17 | 2075.996270        | 1038.501773       | 2058.969721    | 1029.988498      | 2057.985705        | 1029.496490      | S    | 262.150980         | 131.579128      | 245.124431        | 123.065854       | 244.140415        | 122.573846       | 2  |
| 18 |                    |                   |                |                  |                    |                  | R    | 175.118952         | 88.063114       | 158.092403        | 79.549839        |                   |                  | 1  |

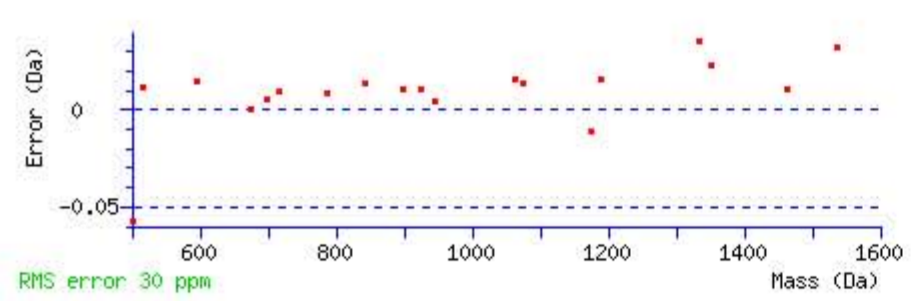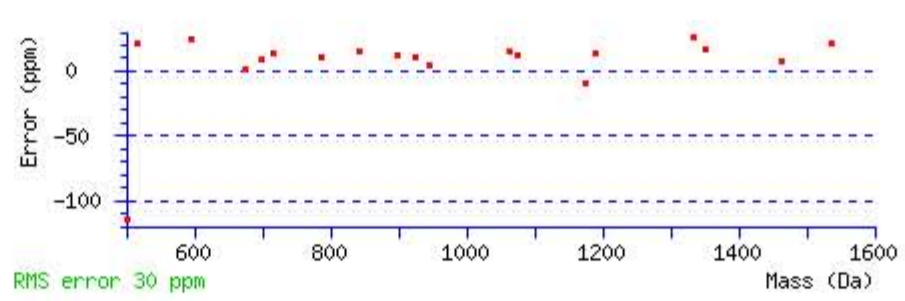

NCBI BLAST search of **GCGEQTMIIYLAPTLAASR**

(Parameters: blastp, nr protein database, expect=20000, no filter, PAM30)

Other BLAST [web gateways](#)

### All matches to this query

| Score | Mr(calc):   | Delta     | Sequence                              |
|-------|-------------|-----------|---------------------------------------|
| 39.7  | 2249.100647 | 0.033295  | <a href="#">GCGEQTMIIYLAPTLAASR</a>   |
| 9.3   | 2249.115051 | 0.018891  | <a href="#">YSTSLYASPSMVHEGVAVVPR</a> |
| 0.8   | 2249.137527 | -0.003585 | <a href="#">QKFERPICVSWSTDVKGGR</a>   |
| 0.2   | 2249.143570 | -0.009628 | <a href="#">TPPPQPPLISSMDSISQK</a>    |



# Mascot Search Results

## Peptide View

MS/MS Fragmentation of **DDPDAPLQPVTPLQLFEGR**

Found in **CO4A\_HUMAN**, Complement C4-A OS=Homo sapiens GN=C4A PE=1 SV=2

Match to Query 63019: 2418.258222 from(807.093350,3+) rtinseconds(2985) index(67691)

Title: Locus:1.1.1.3340.16 File:"2013-07-02 CLN FXIII 60 min 1st F 4.wiff"

Data file C:\Program Files (x86)\Matrix Science\Mascot Daemon\mgf4 FXIII 60 min 1st\mascot\_daemon\_merge.mgf

Click mouse within plot area to zoom in by factor of two about that point

Or, Plot from  to  Da

Label all possible matches  Label matches used for scoring

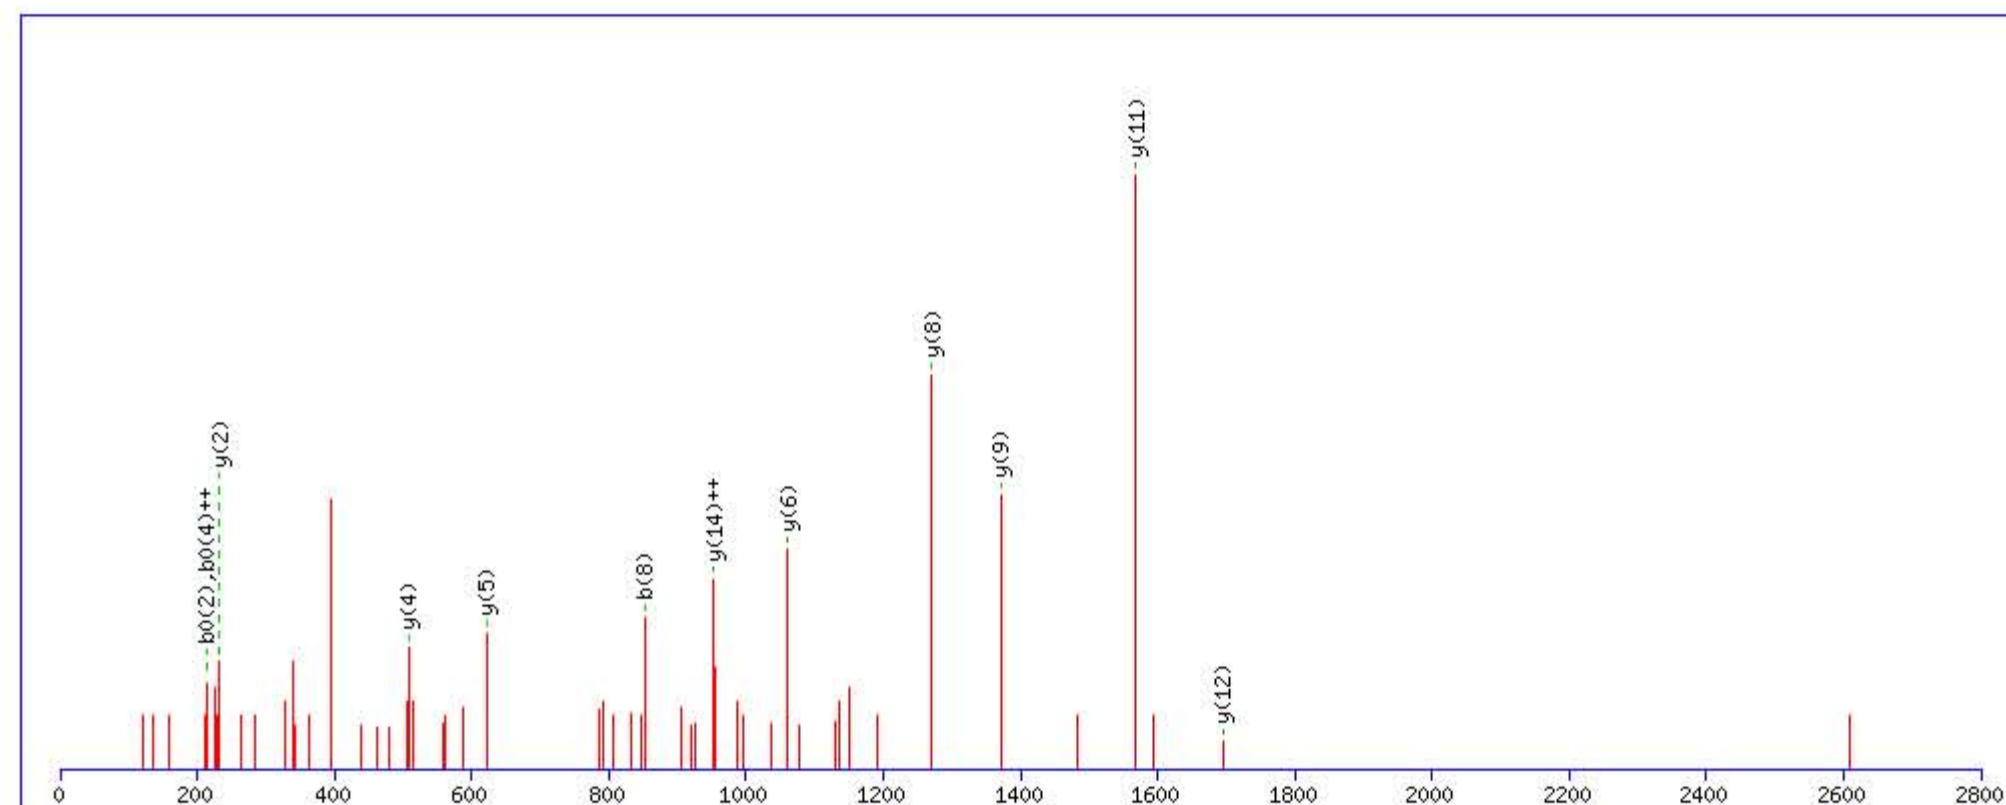

Monoisotopic mass of neutral peptide Mr(calc): 2418.225342

Fixed modifications: Carbamidomethyl (C) (apply to specified residues or termini only)

Variable modifications:

Q14 : Biotin:Thermo-21345 (Q)

Ions Score: 44 Expect: 0.00088

Matches : 12/198 fragment ions using 16 most intense peaks ([help](#))

| #  | b           | b <sup>++</sup> | b <sup>*</sup> | b <sup>*++</sup> | b <sup>0</sup> | b <sup>0++</sup> | Seq. | y           | y <sup>++</sup> | y <sup>*</sup> | y <sup>*++</sup> | y <sup>0</sup> | y <sup>0++</sup> | #  |
|----|-------------|-----------------|----------------|------------------|----------------|------------------|------|-------------|-----------------|----------------|------------------|----------------|------------------|----|
| 1  | 116.034219  | 58.520748       |                |                  | 98.023654      | 49.515465        | D    |             |                 |                |                  |                |                  | 19 |
| 2  | 231.061162  | 116.034219      |                |                  | 213.050597     | 107.028936       | D    | 2304.205668 | 1152.606472     | 2287.179119    | 1144.093197      | 2286.195103    | 1143.601189      | 18 |
| 3  | 328.113926  | 164.560601      |                |                  | 310.103361     | 155.555319       | P    | 2189.178725 | 1095.093000     | 2172.152176    | 1086.579726      | 2171.168160    | 1086.087718      | 17 |
| 4  | 443.140869  | 222.074073      |                |                  | 425.130304     | 213.068790       | D    | 2092.125961 | 1046.566618     | 2075.099412    | 1038.053344      | 2074.115396    | 1037.561336      | 16 |
| 5  | 514.177983  | 257.592630      |                |                  | 496.167418     | 248.587347       | A    | 1977.099018 | 989.053147      | 1960.072469    | 980.539873       | 1959.088453    | 980.047865       | 15 |
| 6  | 611.230747  | 306.119012      |                |                  | 593.220182     | 297.113729       | P    | 1906.061904 | 953.534590      | 1889.035355    | 945.021316       | 1888.051339    | 944.529308       | 14 |
| 7  | 724.314811  | 362.661044      |                |                  | 706.304246     | 353.655761       | L    | 1809.009140 | 905.008208      | 1791.982591    | 896.494934       | 1790.998575    | 896.002926       | 13 |
| 8  | 852.373389  | 426.690333      | 835.346840     | 418.177058       | 834.362824     | 417.685050       | Q    | 1695.925076 | 848.466176      | 1678.898527    | 839.952902       | 1677.914511    | 839.460894       | 12 |
| 9  | 949.426153  | 475.216715      | 932.399604     | 466.703440       | 931.415588     | 466.211432       | P    | 1567.866498 | 784.436887      | 1550.839949    | 775.923613       | 1549.855933    | 775.431605       | 11 |
| 10 | 1048.494567 | 524.750922      | 1031.468018    | 516.237647       | 1030.484002    | 515.745639       | V    | 1470.813734 | 735.910505      | 1453.787185    | 727.397231       | 1452.803169    | 726.905223       | 10 |
| 11 | 1149.542246 | 575.274761      | 1132.515697    | 566.761487       | 1131.531681    | 566.269479       | T    | 1371.745320 | 686.376298      | 1354.718771    | 677.863024       | 1353.734755    | 677.371016       | 9  |
| 12 | 1246.595010 | 623.801143      | 1229.568461    | 615.287869       | 1228.584445    | 614.795861       | P    | 1270.697641 | 635.852459      | 1253.671092    | 627.339184       | 1252.687076    | 626.847176       | 8  |
| 13 | 1359.679074 | 680.343175      | 1342.652525    | 671.829901       | 1341.668509    | 671.337893       | L    | 1173.644877 | 587.326077      | 1156.618328    | 578.812802       | 1155.634312    | 578.320794       | 7  |
| 14 | 1798.904400 | 899.955838      | 1781.877851    | 891.442564       | 1780.893835    | 890.950556       | Q    | 1060.560813 | 530.784045      | 1043.534264    | 522.270770       | 1042.550248    | 521.778762       | 6  |
| 15 | 1911.988464 | 956.497870      | 1894.961915    | 947.984596       | 1893.977899    | 947.492588       | L    | 621.335487  | 311.171382      | 604.308938     | 302.658107       | 603.324922     | 302.166099       | 5  |
| 16 | 2059.056878 | 1030.032077     | 2042.030329    | 1021.518803      | 2041.046313    | 1021.026794      | F    | 508.251423  | 254.629350      | 491.224874     | 246.116075       | 490.240858     | 245.624067       | 4  |
| 17 | 2188.099471 | 1094.553373     | 2171.072922    | 1086.040099      | 2170.088906    | 1085.548091      | E    | 361.183009  | 181.095142      | 344.156460     | 172.581868       | 343.172444     | 172.089860       | 3  |
| 18 | 2245.120935 | 1123.064105     | 2228.094386    | 1114.550831      | 2227.110370    | 1114.058823      | G    | 232.140416  | 116.573846      | 215.113867     | 108.060571       |                |                  | 2  |
| 19 |             |                 |                |                  |                |                  | R    | 175.118952  | 88.063114       | 158.092403     | 79.549839        |                |                  | 1  |

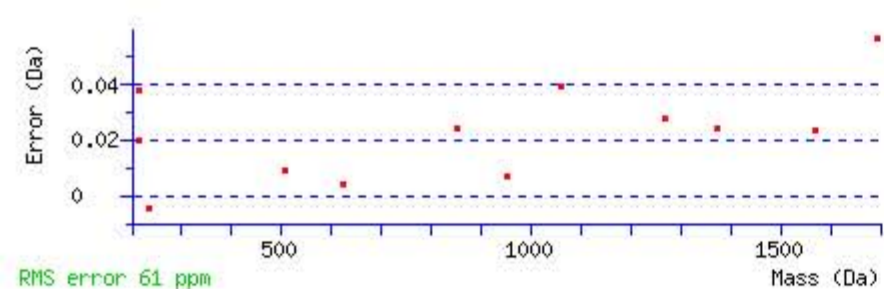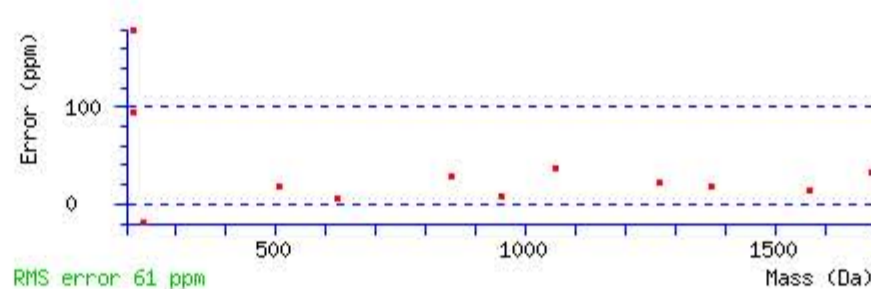

NCBI BLAST search of [DDPDAPLQPVTPLQLFEGR](#)

(Parameters: blastp, nr protein database, expect=20000, no filter, PAM30)

Other BLAST [web gateways](#)

All matches to this query

| Score | Mr(calc):   | Delta    | Sequence                            |
|-------|-------------|----------|-------------------------------------|
| 44.4  | 2418.225342 | 0.032880 | <a href="#">DDPDAPLQPVTPLQLFEGR</a> |
| 11.6  | 2418.225342 | 0.032880 | <a href="#">DDPDAPLQPVTPLQLFEGR</a> |

Mascot: <http://www.matrixscience.com/>



# MASCOT Search Results

## Peptide View

MS/MS Fragmentation of **AACAQLNDFLQEYGTQGCQV**

Found in **CO4A\_HUMAN**, Complement C4-A OS=Homo sapiens GN=C4A PE=1 SV=2

Match to Query 66392: 2583.193812 from(862.071880,3+) rtinseconds(2713) index(65399)

Title: Locus:1.1.1.3248.23 File:"2013-07-02 CLN FXIII 60 min 1st F 4.wiff"

Data file C:\Program Files (x86)\Matrix Science\Mascot Daemon\mgf4 FXIII 60 min 1st\mascot\_daemon\_merge.mgf

Click mouse within plot area to zoom in by factor of two about that point

Or, Plot from  to  Da

Label all possible matches  Label matches used for scoring

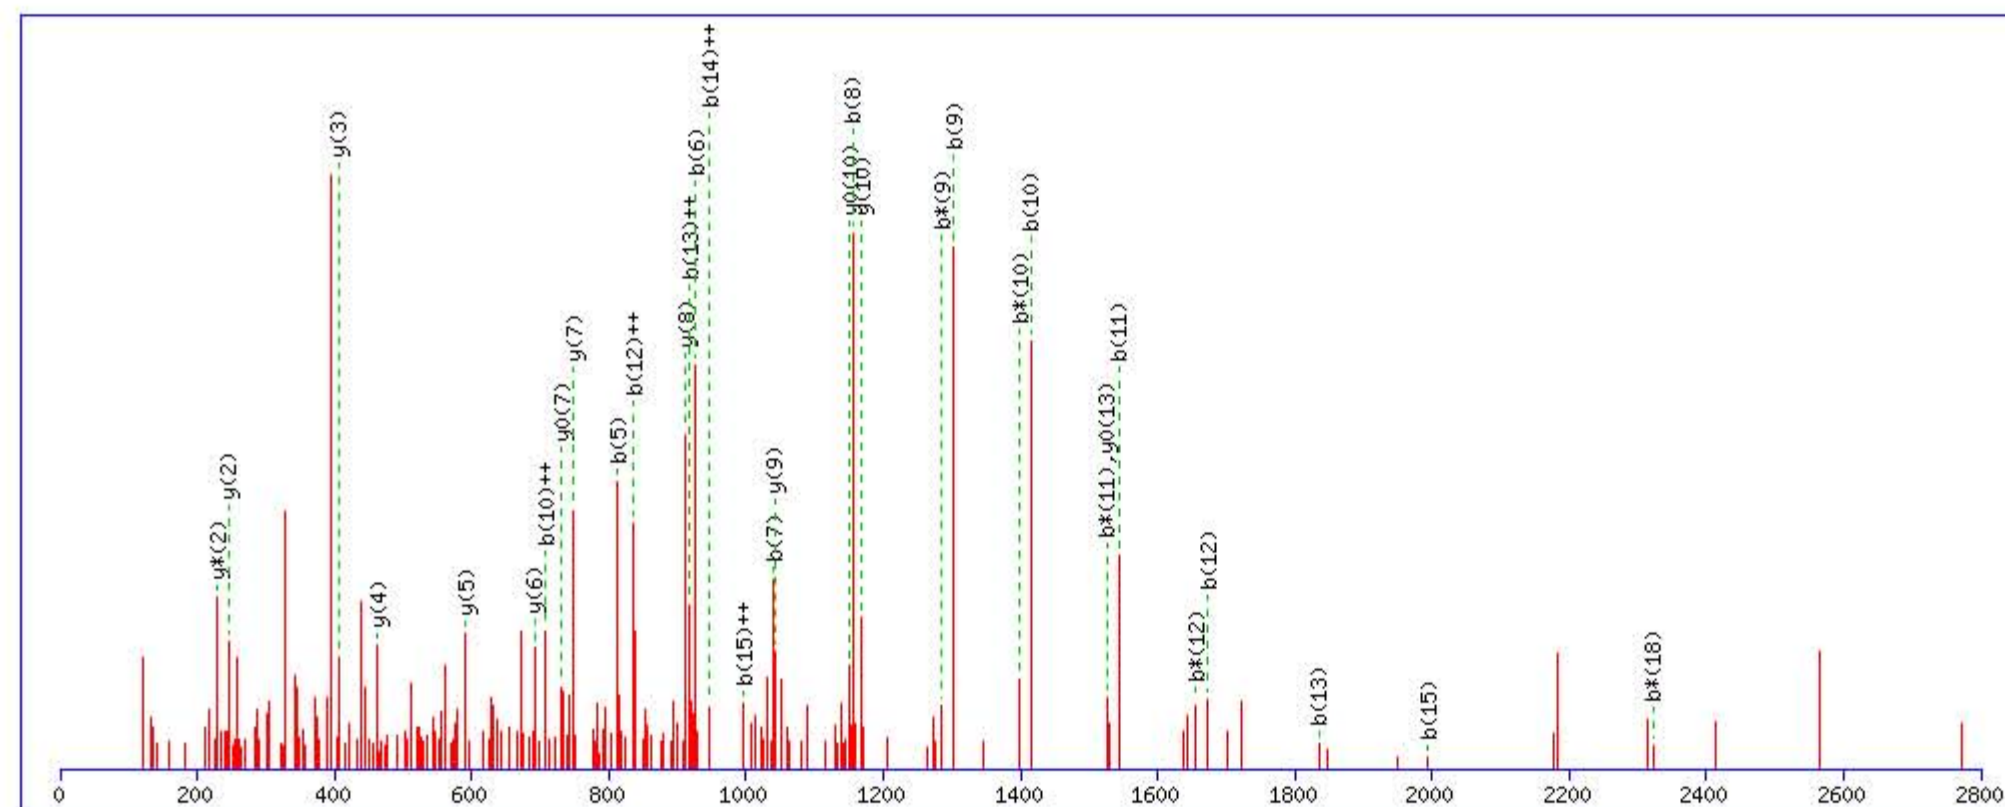

Monoisotopic mass of neutral peptide Mr(calc): 2583.155624

Fixed modifications: Carbamidomethyl (C) (apply to specified residues or termini only)

Variable modifications:

Q5 : Biotin:Thermo-21345 (Q)

Ions Score: 59 Expect: 1.8e-005

Matches : 33/194 fragment ions using 58 most intense peaks [\(help\)](#)

| #  | b                  | b <sup>++</sup>   | b <sup>*</sup>     | b <sup>*++</sup> | b <sup>0</sup> | b <sup>0++</sup> | Seq. | y                  | y <sup>++</sup> | y <sup>*</sup>    | y <sup>*++</sup> | y <sup>0</sup>     | y <sup>0++</sup> | #  |
|----|--------------------|-------------------|--------------------|------------------|----------------|------------------|------|--------------------|-----------------|-------------------|------------------|--------------------|------------------|----|
| 1  | 72.044390          | 36.525833         |                    |                  |                |                  | A    |                    |                 |                   |                  |                    |                  | 20 |
| 2  | 143.081504         | 72.044390         |                    |                  |                |                  | A    | 2513.125782        | 1257.066529     | 2496.099233       | 1248.553254      | 2495.115217        | 1248.061246      | 19 |
| 3  | 303.112153         | 152.059714        |                    |                  |                |                  | C    | 2442.088668        | 1221.547972     | 2425.062119       | 1213.034697      | 2424.078103        | 1212.542689      | 18 |
| 4  | 374.149267         | 187.578271        |                    |                  |                |                  | A    | 2282.058019        | 1141.532647     | 2265.031470       | 1133.019373      | 2264.047454        | 1132.527365      | 17 |
| 5  | <b>813.374593</b>  | 407.190935        | 796.348044         | 398.677660       |                |                  | Q    | 2211.020905        | 1106.014090     | 2193.994356       | 1097.500816      | 2193.010340        | 1097.008808      | 16 |
| 6  | <b>926.458657</b>  | 463.732967        | 909.432108         | 455.219692       |                |                  | L    | 1771.795579        | 886.401428      | 1754.769030       | 877.888153       | 1753.785014        | 877.396145       | 15 |
| 7  | <b>1040.501584</b> | 520.754430        | 1023.475035        | 512.241155       |                |                  | N    | 1658.711515        | 829.859396      | 1641.684966       | 821.346121       | 1640.700950        | 820.854113       | 14 |
| 8  | <b>1155.528527</b> | 578.267902        | 1138.501978        | 569.754627       | 1137.517962    | 569.262619       | D    | 1544.668588        | 772.837932      | 1527.642039       | 764.324658       | <b>1526.658023</b> | 763.832650       | 13 |
| 9  | <b>1302.596941</b> | 651.802109        | <b>1285.570392</b> | 643.288834       | 1284.586376    | 642.796826       | F    | 1429.641645        | 715.324460      | 1412.615096       | 706.811186       | 1411.631080        | 706.319178       | 12 |
| 10 | <b>1415.681005</b> | <b>708.344141</b> | <b>1398.654456</b> | 699.830866       | 1397.670440    | 699.338858       | L    | 1282.573231        | 641.790253      | 1265.546682       | 633.276979       | 1264.562666        | 632.784971       | 11 |
| 11 | <b>1543.739583</b> | 772.373430        | <b>1526.713034</b> | 763.860155       | 1525.729018    | 763.368147       | Q    | <b>1169.489167</b> | 585.248222      | 1152.462618       | 576.734947       | <b>1151.478602</b> | 576.242939       | 10 |
| 12 | <b>1672.782176</b> | <b>836.894726</b> | <b>1655.755627</b> | 828.381452       | 1654.771611    | 827.889444       | E    | <b>1041.430589</b> | 521.218932      | 1024.404040       | 512.705658       | 1023.420024        | 512.213650       | 9  |
| 13 | <b>1835.845505</b> | <b>918.426391</b> | 1818.818956        | 909.913116       | 1817.834940    | 909.421108       | Y    | <b>912.387996</b>  | 456.697636      | 895.361447        | 448.184361       | 894.377431         | 447.692353       | 8  |
| 14 | 1892.866969        | <b>946.937123</b> | 1875.840420        | 938.423848       | 1874.856404    | 937.931840       | G    | <b>749.324667</b>  | 375.165971      | 732.298118        | 366.652697       | <b>731.314102</b>  | 366.160689       | 7  |
| 15 | <b>1993.914648</b> | <b>997.460962</b> | 1976.888099        | 988.947688       | 1975.904083    | 988.455680       | T    | <b>692.303203</b>  | 346.655239      | 675.276654        | 338.141965       | 674.292638         | 337.649957       | 6  |
| 16 | 2121.973226        | 1061.490251       | 2104.946677        | 1052.976976      | 2103.962661    | 1052.484968      | Q    | <b>591.255524</b>  | 296.131400      | 574.228975        | 287.618125       |                    |                  | 5  |
| 17 | 2178.994690        | 1090.000983       | 2161.968141        | 1081.487708      | 2160.984125    | 1080.995700      | G    | <b>463.196946</b>  | 232.102111      | 446.170397        | 223.588836       |                    |                  | 4  |
| 18 | 2339.025339        | 1170.016307       | <b>2321.998790</b> | 1161.503033      | 2321.014774    | 1161.011025      | C    | <b>406.175482</b>  | 203.591379      | 389.148933        | 195.078104       |                    |                  | 3  |
| 19 | 2467.083917        | 1234.045596       | 2450.057368        | 1225.532322      | 2449.073352    | 1225.040314      | Q    | <b>246.144833</b>  | 123.576054      | <b>229.118284</b> | 115.062780       |                    |                  | 2  |
| 20 |                    |                   |                    |                  |                |                  | V    | 118.086255         | 59.546765       |                   |                  |                    |                  | 1  |

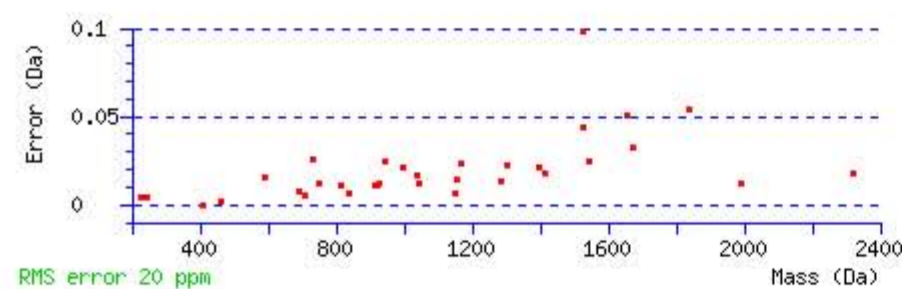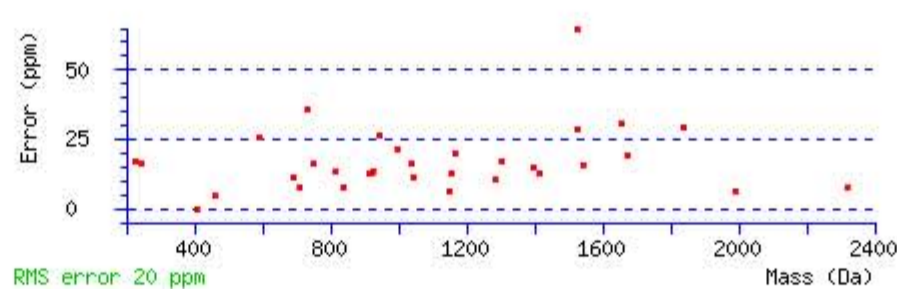

NCBI BLAST search of [AACAQLNDFLQEYGTQGCQV](#)

(Parameters: blastp, nr protein database, expect=20000, no filter, PAM30)

Other BLAST [web gateways](#)

All matches to this query

| Score | Mr(calc):   | Delta    | Sequence                             |
|-------|-------------|----------|--------------------------------------|
| 58.9  | 2583.155624 | 0.038188 | <a href="#">AACAQLNDFLQEYGTQGCQV</a> |
| 19.8  | 2583.155624 | 0.038188 | <a href="#">AACAQLNDFLQEYGTQGCQV</a> |

Mascot: <http://www.matrixscience.com/>



# *{MATRIX}* *{SCIENCE}* Mascot Search Results

## Peptide View

MS/MS Fragmentation of **GQAGLQR**

Found in **CO4A\_HUMAN**, Complement C4-A OS=Homo sapiens GN=C4A PE=1 SV=2

Match to Query 20649: 1039.558928 from(520.786740,2+) rtinseconds(1388) index(56120)

Title: Locus:1.1.1.2789.12 File:"2013-07-02 CLN FXIII 60 min 1st F 4.wiff"

Data file C:\Program Files (x86)\Matrix Science\Mascot Daemon\mgf4 FXIII 60 min 1st\mascot\_daemon\_merge.mgf

Click mouse within plot area to zoom in by factor of two about that point

Or, Plot from  to  Da

Label all possible matches  Label matches used for scoring



Monoisotopic mass of neutral peptide Mr(calc): 1039.559677

Fixed modifications: Carbamidomethyl (C) (apply to specified residues or termini only)

Variable modifications:

Q6 : Biotin:Thermo-21345 (Q)

Ions Score: 26 Expect: 0.034

Matches : 14/46 fragment ions using 27 most intense peaks [\(help\)](#)

| # | b                 | b <sup>++</sup> | b <sup>*</sup>    | b <sup>*++</sup> | Seq.     | y                 | y <sup>++</sup>   | y <sup>*</sup>    | y <sup>*++</sup> | #        |
|---|-------------------|-----------------|-------------------|------------------|----------|-------------------|-------------------|-------------------|------------------|----------|
| 1 | 58.028740         | 29.518008       |                   |                  | <b>G</b> |                   |                   |                   |                  | 7        |
| 2 | <b>186.087318</b> | 93.547297       | <b>169.060769</b> | 85.034023        | <b>Q</b> | 983.545498        | 492.276387        | <b>966.518949</b> | 483.763113       | <b>6</b> |
| 3 | <b>257.124432</b> | 129.065854      | 240.097883        | 120.552580       | <b>A</b> | <b>855.486920</b> | <b>428.247098</b> | <b>838.460371</b> | 419.733824       | <b>5</b> |
| 4 | 314.145896        | 157.576586      | 297.119347        | 149.063312       | <b>G</b> | <b>784.449806</b> | 392.728541        | <b>767.423257</b> | 384.215267       | <b>4</b> |
| 5 | 427.229960        | 214.118618      | 410.203411        | 205.605344       | <b>L</b> | <b>727.428342</b> | 364.217809        | <b>710.401793</b> | 355.704535       | <b>3</b> |
| 6 | 866.455286        | 433.731281      | 849.428737        | 425.218007       | <b>Q</b> | <b>614.344278</b> | 307.675777        | <b>597.317729</b> | 299.162503       | <b>2</b> |
| 7 |                   |                 |                   |                  | <b>R</b> | <b>175.118952</b> | 88.063114         | 158.092403        | 79.549840        | <b>1</b> |

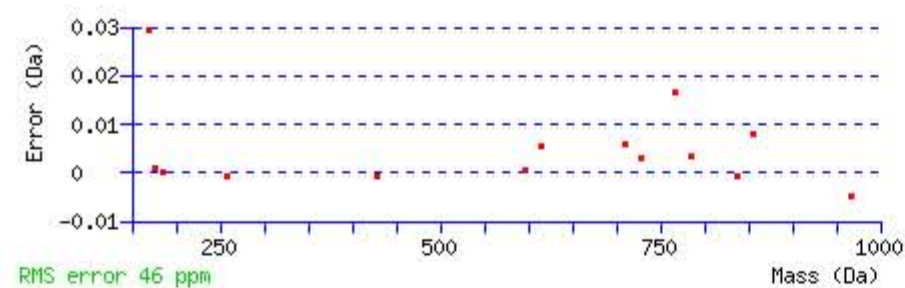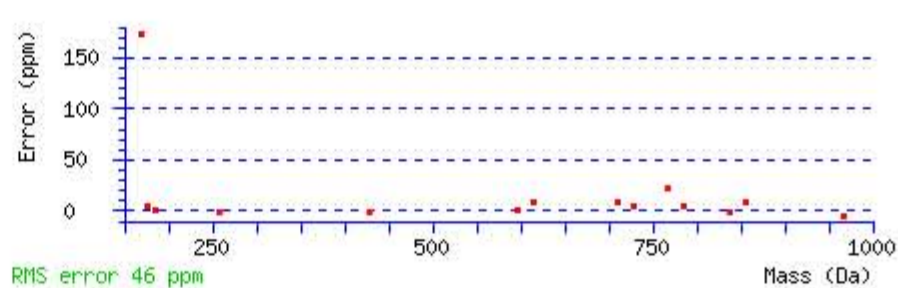

NCBI BLAST search of **GQAGLQR**

(Parameters: blastp, nr protein database, expect=20000, no filter, PAM30)

Other BLAST [web gateways](#)

All matches to this query

| Score | Mr(calc):   | Delta     | Sequence                   |
|-------|-------------|-----------|----------------------------|
| 26.0  | 1039.559677 | -0.000749 | <a href="#">GQAGLQR</a>    |
| 10.6  | 1039.559677 | -0.000749 | <a href="#">GQQIQR</a>     |
| 3.5   | 1039.559677 | -0.000749 | <a href="#">KGGPSQR</a>    |
| 3.3   | 1039.552277 | 0.006651  | <a href="#">QRAALDGGPR</a> |
| 3.2   | 1039.548431 | 0.010497  | <a href="#">SPEIQR</a>     |
| 2.9   | 1039.552277 | 0.006651  | <a href="#">GQPQELGRR</a>  |
| 2.0   | 1039.563492 | -0.004564 | <a href="#">AEGARARGPR</a> |
| 1.7   | 1039.548431 | 0.010497  | <a href="#">LSPEQR</a>     |

Mascot: <http://www.matrixscience.com/>



# MASCOT Search Results

## Peptide View

MS/MS Fragmentation of **GLESQTK**

Found in **CO4A\_HUMAN**, Complement C4-A OS=Homo sapiens GN=C4A PE=1 SV=2

Match to Query 21733: 1072.563828 from(537.289190,2+) rtinseconds(1411) index(56302)

Title: Locus:1.1.1.2797.16 File:"2013-07-02 CLN FXIII 60 min 1st F 4.wiff"

Data file C:\Program Files (x86)\Matrix Science\Mascot Daemon\mgf4 FXIII 60 min 1st\mascot\_daemon\_merge.mgf

Click mouse within plot area to zoom in by factor of two about that point

Or, Plot from  to  Da

Label all possible matches  Label matches used for scoring



Monoisotopic mass of neutral peptide Mr(calc): 1072.558670

Fixed modifications: Carbamidomethyl (C) (apply to specified residues or termini only)

Variable modifications:

Q5 : Biotin:Thermo-21345 (Q)

Ions Score: 26 Expect: 0.039

Matches : 10/58 fragment ions using 20 most intense peaks [\(help\)](#)

| # | b          | b <sup>++</sup> | b <sup>*</sup> | b <sup>+++</sup> | b <sup>0</sup> | b <sup>0++</sup> | Seq. | y           | y <sup>++</sup> | y <sup>*</sup> | y <sup>+++</sup> | y <sup>0</sup> | y <sup>0++</sup> | # |
|---|------------|-----------------|----------------|------------------|----------------|------------------|------|-------------|-----------------|----------------|------------------|----------------|------------------|---|
| 1 | 58.028740  | 29.518008       |                |                  |                |                  | G    |             |                 |                |                  |                |                  | 7 |
| 2 | 171.112804 | 86.060040       |                |                  |                |                  | L    | 1016.544494 | 508.775885      | 999.517945     | 500.262611       | 998.533929     | 499.770603       | 6 |
| 3 | 300.155397 | 150.581336      |                |                  | 282.144832     | 141.576054       | E    | 903.460430  | 452.233853      | 886.433881     | 443.720579       | 885.449865     | 443.228571       | 5 |
| 4 | 387.187425 | 194.097351      |                |                  | 369.176860     | 185.092068       | S    | 774.417837  | 387.712557      | 757.391288     | 379.199282       | 756.407272     | 378.707274       | 4 |
| 5 | 826.412751 | 413.710014      | 809.386202     | 405.196739       | 808.402186     | 404.704731       | Q    | 687.385809  | 344.196543      | 670.359260     | 335.683268       | 669.375244     | 335.191260       | 3 |
| 6 | 927.460430 | 464.233853      | 910.433881     | 455.720579       | 909.449865     | 455.228571       | T    | 248.160483  | 124.583879      | 231.133934     | 116.070605       | 230.149918     | 115.578597       | 2 |
| 7 |            |                 |                |                  |                |                  | K    | 147.112804  | 74.060040       | 130.086255     | 65.546765        |                |                  | 1 |

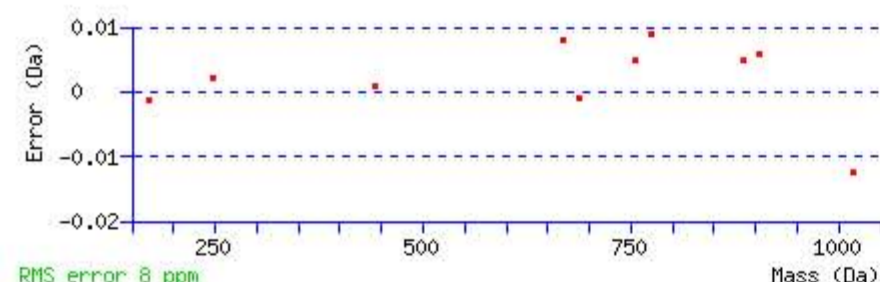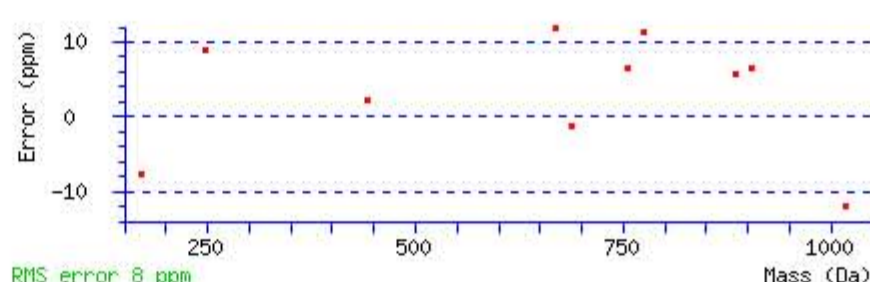

NCBI BLAST search of [GLESQTK](#)

(Parameters: blastp, nr protein database, expect=20000, no filter, PAM30)

Other BLAST [web gateways](#)

### All matches to this query

| Score | Mr(calc):   | Delta     | Sequence                    |
|-------|-------------|-----------|-----------------------------|
| 25.8  | 1072.558670 | 0.005158  | <a href="#">GLESQTK</a>     |
| 10.3  | 1072.558670 | 0.005158  | <a href="#">LGECPAVLISK</a> |
| 6.1   | 1072.558670 | 0.005158  | <a href="#">QSEGLTK</a>     |
| 5.7   | 1072.551254 | 0.012574  | <a href="#">KEAPRDETK</a>   |
| 3.6   | 1072.576431 | -0.012603 | <a href="#">VAEGQTLDLK</a>  |
| 3.3   | 1072.576447 | -0.012619 | <a href="#">LGGVLPDSTSK</a> |
| 3.1   | 1072.552155 | 0.011673  | <a href="#">QSCVLR</a>      |
| 2.6   | 1072.576462 | -0.012634 | <a href="#">TVVQEVVDGK</a>  |
| 2.1   | 1072.551285 | 0.012543  | <a href="#">GPRTTEPSTK</a>  |



# Mascot Search Results

## Peptide View

MS/MS Fragmentation of **VQQPDCR**

Found in **CO4A\_HUMAN**, Complement C4-A OS=Homo sapiens GN=C4A PE=1 SV=2

Match to Query 28041: 1212.578148 from(607.296350,2+) rtinseconds(1245) index(55163)

Title: Locus:1.1.1.2739.24 File:"2013-07-02 CLN FXIII 60 min 1st F 4.wiff"

Data file C:\Program Files (x86)\Matrix Science\Mascot Daemon\mgf\4 FXIII 60 min 1st\mascot\_daemon\_merge.mgf

Click mouse within plot area to zoom in by factor of two about that point

Or, Plot from  to  Da

Label all possible matches  Label matches used for scoring



Monoisotopic mass of neutral peptide Mr(calc): 1212.574356

Fixed modifications: Carbamidomethyl (C) (apply to specified residues or termini only)

Variable modifications:

Q2 : Biotin:Thermo-21345 (Q)

Ions Score: 28 Expect: 0.0087

Matches : 14/58 fragment ions using 31 most intense peaks [\(help\)](#)

| # | b                 | b <sup>++</sup>   | b <sup>*</sup> | b <sup>*++</sup> | b <sup>0</sup> | b <sup>0++</sup> | Seq. | y                  | y <sup>++</sup>   | y <sup>*</sup> | y <sup>*++</sup> | y <sup>0</sup>     | y <sup>0++</sup>  | # |
|---|-------------------|-------------------|----------------|------------------|----------------|------------------|------|--------------------|-------------------|----------------|------------------|--------------------|-------------------|---|
| 1 | 100.075690        | 50.541483         |                |                  |                |                  | V    |                    |                   |                |                  |                    |                   | 7 |
| 2 | <b>539.301016</b> | 270.154146        | 522.274467     | 261.640872       |                |                  | Q    | <b>1114.513212</b> | <b>557.760244</b> | 1097.486663    | 549.246970       | <b>1096.502647</b> | 548.754962        | 6 |
| 3 | <b>667.359594</b> | 334.183435        | 650.333045     | 325.670161       |                |                  | Q    | <b>675.287886</b>  | 338.147581        | 658.261337     | 329.634307       | <b>657.277321</b>  | <b>329.142299</b> | 5 |
| 4 | 764.412358        | 382.709817        | 747.385809     | 374.196543       |                |                  | P    | <b>547.229308</b>  | 274.118292        | 530.202759     | 265.605018       | 529.218743         | 265.113010        | 4 |
| 5 | <b>879.439301</b> | <b>440.223289</b> | 862.412752     | 431.710014       | 861.428736     | 431.218006       | D    | <b>450.176544</b>  | 225.591910        | 433.149995     | 217.078635       | 432.165979         | 216.586627        | 3 |
| 6 | 1039.469950       | 520.238613        | 1022.443401    | 511.725339       | 1021.459385    | 511.233331       | C    | <b>335.149601</b>  | 168.078438        | 318.123052     | 159.565164       |                    |                   | 2 |
| 7 |                   |                   |                |                  |                |                  | R    | <b>175.118952</b>  | 88.063114         | 158.092403     | 79.549839        |                    |                   | 1 |

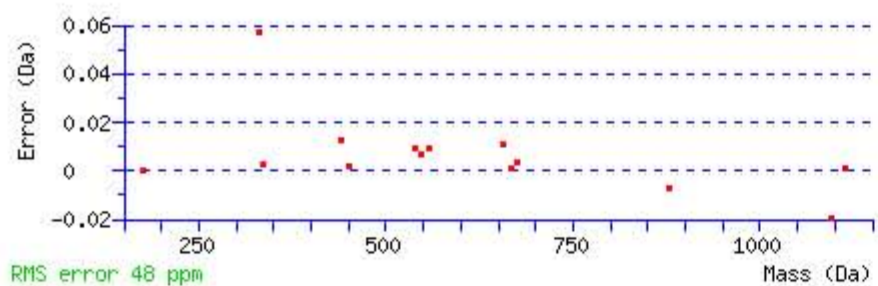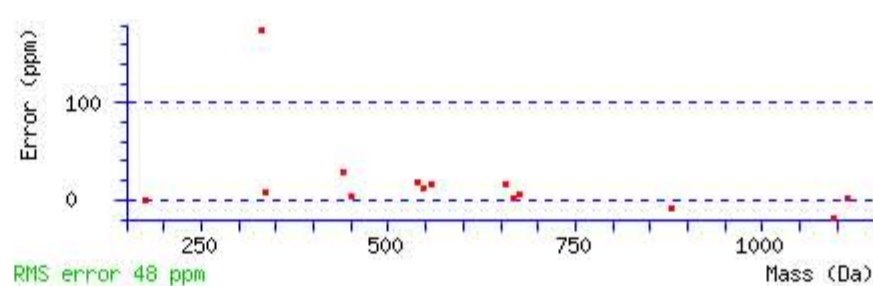

NCBI BLAST search of **VQQPDCR**

(Parameters: blastp, nr protein database, expect=20000, no filter, PAM30)

Other BLAST [web gateways](#)

All matches to this query

| Score | Mr(calc):   | Delta     | Sequence                    |
|-------|-------------|-----------|-----------------------------|
| 27.7  | 1212.574356 | 0.003792  | <a href="#">VQQPDCR</a>     |
| 13.3  | 1212.574356 | 0.003792  | <a href="#">VQQPDCR</a>     |
| 5.7   | 1212.596115 | -0.017967 | <a href="#">YFVEAGAMAVR</a> |



# MASCOT Search Results

## Peptide View

MS/MS Fragmentation of **VEYGFQVK**

Found in **CO4A\_HUMAN**, Complement C4-A OS=Homo sapiens GN=C4A PE=1 SV=2

Match to Query 30241: 1279.673988 from(640.844270,2+) rtinseconds(1956) index(60240)

Title: Locus:1.1.1.2986.11 File:"2013-07-02 CLN FXIII 60 min 1st F 4.wiff"

Data file C:\Program Files (x86)\Matrix Science\Mascot Daemon\mgf\4 FXIII 60 min 1st\mascot\_daemon\_merge.mgf

Click mouse within plot area to zoom in by factor of two about that point

Or, Plot from  to  Da

Label all possible matches  Label matches used for scoring



Monoisotopic mass of neutral peptide Mr(calc): 1279.663483

Fixed modifications: Carbamidomethyl (C) (apply to specified residues or termini only)

Variable modifications:

Q6 : Biotin:Thermo-21345 (Q)

Ions Score: 31 Expect: 0.0078

Matches : 15/60 fragment ions using 34 most intense peaks [\(help\)](#)

| # | b                  | b <sup>++</sup> | b <sup>*</sup> | b <sup>+++</sup> | b <sup>0</sup> | b <sup>0++</sup> | Seq. | y                  | y <sup>++</sup>   | y <sup>*</sup>     | y <sup>+++</sup> | y <sup>0</sup>     | y <sup>0++</sup> | # |
|---|--------------------|-----------------|----------------|------------------|----------------|------------------|------|--------------------|-------------------|--------------------|------------------|--------------------|------------------|---|
| 1 | 100.075690         | 50.541483       |                |                  |                |                  | V    |                    |                   |                    |                  |                    |                  | 8 |
| 2 | <b>229.118283</b>  | 115.062780      |                |                  | 211.107718     | 106.057497       | E    | <b>1181.602344</b> | 591.304810        | 1164.575795        | 582.791536       | <b>1163.591779</b> | 582.299528       | 7 |
| 3 | 392.181612         | 196.594444      |                |                  | 374.171047     | 187.589162       | Y    | <b>1052.559751</b> | <b>526.783514</b> | <b>1035.533202</b> | 518.270239       |                    |                  | 6 |
| 4 | <b>449.203076</b>  | 225.105176      |                |                  | 431.192511     | 216.099894       | G    | <b>889.496422</b>  | 445.251849        | 872.469873         | 436.738575       |                    |                  | 5 |
| 5 | 596.271490         | 298.639383      |                |                  | 578.260925     | 289.634101       | F    | <b>832.474958</b>  | 416.741117        | 815.448409         | 408.227843       |                    |                  | 4 |
| 6 | <b>1035.496816</b> | 518.252046      | 1018.470267    | 509.738772       | 1017.486251    | 509.246764       | Q    | <b>685.406544</b>  | 343.206910        | 668.379995         | 334.693636       |                    |                  | 3 |
| 7 | <b>1134.565230</b> | 567.786253      | 1117.538681    | 559.272979       | 1116.554665    | 558.780971       | V    | <b>246.181218</b>  | 123.594247        | <b>229.154669</b>  | 115.080973       |                    |                  | 2 |
| 8 |                    |                 |                |                  |                |                  | K    | <b>147.112804</b>  | 74.060040         | 130.086255         | 65.546765        |                    |                  | 1 |

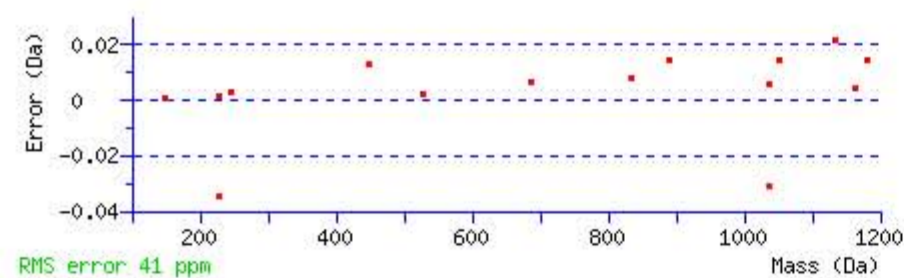

NCBI BLAST search of **VEYGFQVK**

(Parameters: blastp, nr protein database, expect=20000, no filter, PAM30)

Other BLAST [web gateways](#)

All matches to this query

| Score | Mr(calc):   | Delta     | Sequence                     |
|-------|-------------|-----------|------------------------------|
| 31.4  | 1279.663483 | 0.010505  | <a href="#">VEYGFQVK</a>     |
| 8.5   | 1279.684601 | -0.010613 | <a href="#">MSASAVFILDVK</a> |
| 7.6   | 1279.681229 | -0.007241 | <a href="#">EVTVKEWYVK</a>   |
| 6.6   | 1279.677216 | -0.003228 | <a href="#">VFKTEDITQGKK</a> |
| 6.4   | 1279.663483 | 0.010505  | <a href="#">QFVGYLDK</a>     |
| 5.1   | 1279.659470 | 0.014518  | <a href="#">VCSFGKQVVEK</a>  |
| 4.9   | 1279.684601 | -0.010613 | <a href="#">TKPLMTEFSVK</a>  |
| 1.3   | 1279.687958 | -0.013970 | <a href="#">LIKSMESVMVK</a>  |
| 1.0   | 1279.666824 | 0.007164  | <a href="#">VKEWSLMIMK</a>   |



# Mascot Search Results

## Peptide View

MS/MS Fragmentation of **VVEEQESR**

Found in **CO4A\_HUMAN**, Complement C4-A OS=Homo sapiens GN=C4A PE=1 SV=2

Match to Query 30578: 1285.641668 from(643.828110,2+) rtinseconds(1333) index(55718)

Title: Locus:1.1.1.2770.17 File:"2013-07-02 CLN FXIII 60 min 1st F 4.wiff"

Data file C:\Program Files (x86)\Matrix Science\Mascot Daemon\mgf\4 FXIII 60 min 1st\mascot\_daemon\_merge.mgf

Click mouse within plot area to zoom in by factor of two about that point

Or, Plot from  to  Da

Label all possible matches  Label matches used for scoring

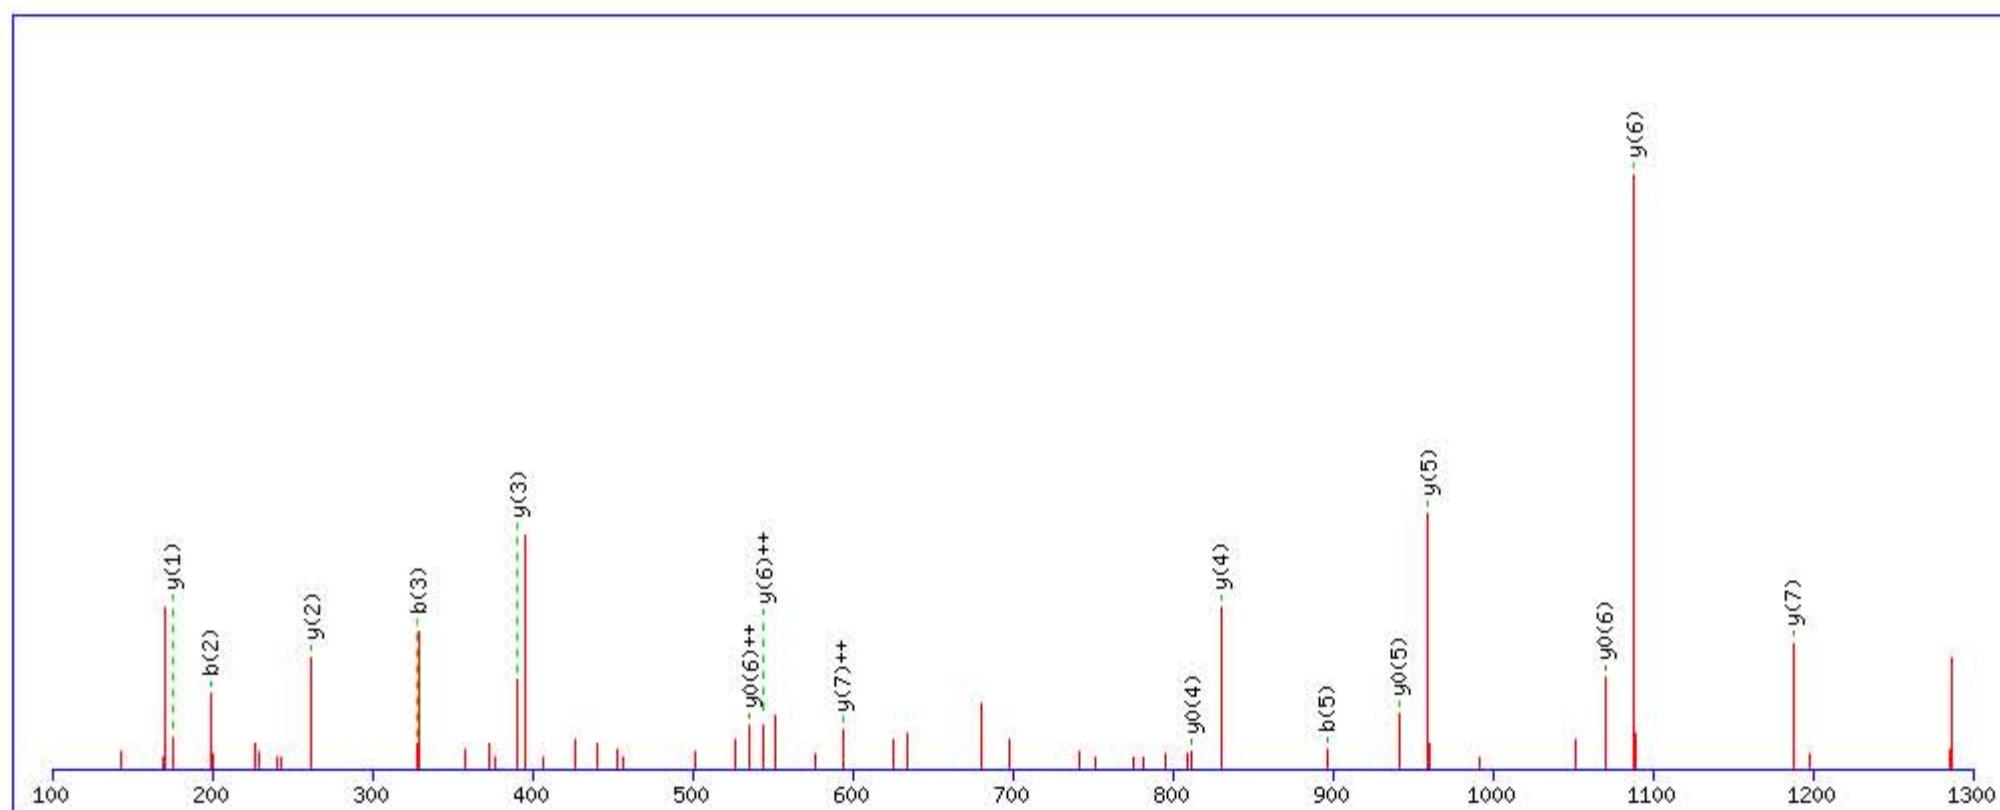

Monoisotopic mass of neutral peptide Mr(calc): 1285.633621

Fixed modifications: Carbamidomethyl (C) (apply to specified residues or termini only)

Variable modifications:

Q5 : Biotin:Thermo-21345 (Q)

Ions Score: 41 Expect: 0.0017

Matches : 16/70 fragment ions using 31 most intense peaks [\(help\)](#)

| # | b                 | b <sup>++</sup> | b <sup>+</sup> | b <sup>+++</sup> | b <sup>0</sup> | b <sup>0++</sup> | Seq. | y                  | y <sup>++</sup>   | y <sup>+</sup> | y <sup>+++</sup> | y <sup>0</sup>     | y <sup>0++</sup>  | # |
|---|-------------------|-----------------|----------------|------------------|----------------|------------------|------|--------------------|-------------------|----------------|------------------|--------------------|-------------------|---|
| 1 | 100.075690        | 50.541483       |                |                  |                |                  | V    |                    |                   |                |                  |                    |                   | 8 |
| 2 | <b>199.144104</b> | 100.075690      |                |                  |                |                  | V    | <b>1187.572499</b> | <b>594.289888</b> | 1170.545950    | 585.776613       | 1169.561934        | 585.284605        | 7 |
| 3 | <b>328.186697</b> | 164.596987      |                |                  | 310.176132     | 155.591704       | E    | <b>1088.504085</b> | <b>544.755681</b> | 1071.477536    | 536.242406       | <b>1070.493520</b> | <b>535.750398</b> | 6 |
| 4 | 457.229290        | 229.118283      |                |                  | 439.218725     | 220.113001       | E    | <b>959.461492</b>  | 480.234384        | 942.434943     | 471.721110       | <b>941.450927</b>  | 471.229102        | 5 |
| 5 | <b>896.454616</b> | 448.730946      | 879.428067     | 440.217672       | 878.444051     | 439.725664       | Q    | <b>830.418899</b>  | 415.713088        | 813.392350     | 407.199813       | <b>812.408334</b>  | 406.707805        | 4 |
| 6 | 1025.497209       | 513.252243      | 1008.470660    | 504.738968       | 1007.486644    | 504.246960       | E    | <b>391.193573</b>  | 196.100425        | 374.167024     | 187.587150       | 373.183008         | 187.095142        | 3 |
| 7 | 1112.529237       | 556.768257      | 1095.502688    | 548.254982       | 1094.518672    | 547.762974       | S    | <b>262.150980</b>  | 131.579128        | 245.124431     | 123.065854       | 244.140415         | 122.573846        | 2 |
| 8 |                   |                 |                |                  |                |                  | R    | <b>175.118952</b>  | 88.063114         | 158.092403     | 79.549839        |                    |                   | 1 |

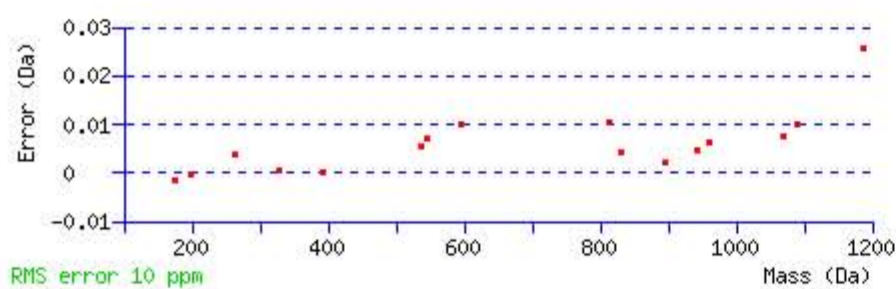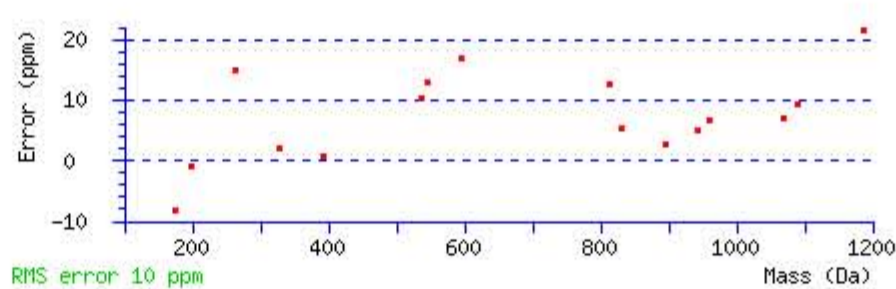

NCBI BLAST search of [VVEEQESR](#)

(Parameters: blastp, nr protein database, expect=20000, no filter, PAM30)

Other BLAST [web gateways](#)

All matches to this query

| Score | Mr(calc):   | Delta    | Sequence                 |
|-------|-------------|----------|--------------------------|
| 40.8  | 1285.633621 | 0.008047 | <a href="#">VVEEQESR</a> |

Mascot: <http://www.matrixscience.com/>



# MASCOT SCIENCE Mascot Search Results

## Peptide View

MS/MS Fragmentation of **CCQDGVTR**

Found in **CO4A\_HUMAN**, Complement C4-A OS=Homo sapiens GN=C4A PE=1 SV=2

Match to Query 31054: 1305.572508 from(653.793530,2+) rtinseconds(1349) index(55787)

Title: Locus:1.1.1.2775.14 File:"2013-07-02 CLN FXIII 60 min 1st F 4.wiff"

Data file C:\Program Files (x86)\Matrix Science\Mascot Daemon\mgf\4 FXIII 60 min 1st\mascot\_daemon\_merge.mgf

Click mouse within plot area to zoom in by factor of two about that point

Or, Plot from  to  Da

Label all possible matches  Label matches used for scoring



Monoisotopic mass of neutral peptide Mr(calc): 1305.562820

Fixed modifications: Carbamidomethyl (C) (apply to specified residues or termini only)

Variable modifications:

Q3 : Biotin:Thermo-21345 (Q)

Ions Score: 36 Expect: 0.0012

Matches : 8/72 fragment ions using 12 most intense peaks ([help](#))

| # | b                  | b <sup>++</sup> | b <sup>*</sup>    | b <sup>*++</sup> | b <sup>0</sup> | b <sup>0++</sup> | Seq. | y                  | y <sup>++</sup> | y <sup>*</sup> | y <sup>*++</sup> | y <sup>0</sup> | y <sup>0++</sup> | # |
|---|--------------------|-----------------|-------------------|------------------|----------------|------------------|------|--------------------|-----------------|----------------|------------------|----------------|------------------|---|
| 1 | 161.037925         | 81.022600       |                   |                  |                |                  | C    |                    |                 |                |                  |                |                  | 8 |
| 2 | 321.068574         | 161.037925      |                   |                  |                |                  | C    | <b>1146.539427</b> | 573.773352      | 1129.512878    | 565.260077       | 1128.528862    | 564.768069       | 7 |
| 3 | <b>760.293900</b>  | 380.650588      | 743.267351        | 372.137314       |                |                  | Q    | <b>986.508778</b>  | 493.758027      | 969.482229     | 485.244753       | 968.498213     | 484.752745       | 6 |
| 4 | 875.320843         | 438.164060      | 858.294294        | 429.650785       | 857.310278     | 429.158777       | D    | <b>547.283452</b>  | 274.145364      | 530.256903     | 265.632090       | 529.272887     | 265.140082       | 5 |
| 5 | 932.342307         | 466.674792      | <b>915.315758</b> | 458.161517       | 914.331742     | 457.669509       | G    | <b>432.256509</b>  | 216.631893      | 415.229960     | 208.118618       | 414.245944     | 207.626610       | 4 |
| 6 | <b>1031.410721</b> | 516.208999      | 1014.384172       | 507.695724       | 1013.400156    | 507.203716       | V    | 375.235045         | 188.121161      | 358.208496     | 179.607886       | 357.224480     | 179.115878       | 3 |
| 7 | 1132.458400        | 566.732838      | 1115.431851       | 558.219564       | 1114.447835    | 557.727556       | T    | <b>276.166631</b>  | 138.586953      | 259.140082     | 130.073679       | 258.156066     | 129.581671       | 2 |
| 8 |                    |                 |                   |                  |                |                  | R    | 175.118952         | 88.063114       | 158.092403     | 79.549839        |                |                  | 1 |

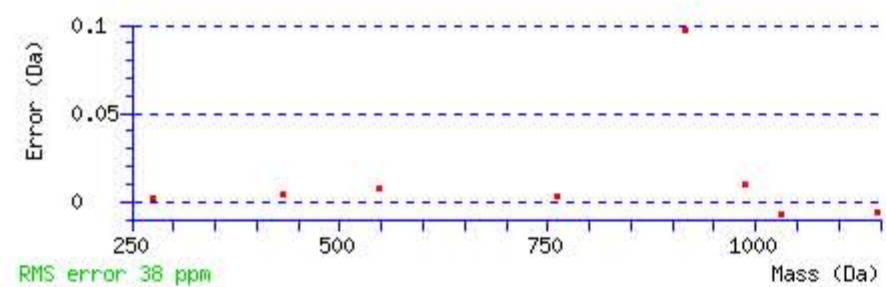

NCBI BLAST search of **CCQDGVTR**

(Parameters: blastp, nr protein database, expect=20000, no filter, PAM30)

Other BLAST [web gateways](#)

## All matches to this query

| Score | Mr(calc):   | Delta     | Sequence                     |
|-------|-------------|-----------|------------------------------|
| 36.1  | 1305.562820 | 0.009688  | <a href="#">CCQDGVTR</a>     |
| 8.8   | 1305.588409 | -0.015901 | <a href="#">CRSSTPADAWR</a>  |
| 2.8   | 1305.577194 | -0.004686 | <a href="#">CDAGWLADGSVR</a> |



# MASCOT SCIENCE Mascot Search Results

## Peptide View

MS/MS Fragmentation of **LGQYASPTAK**

Found in **CO4A\_HUMAN**, Complement C4-A OS=Homo sapiens GN=C4A PE=1 SV=2

Match to Query 31920: 1345.714648 from(673.864600,2+) rtinseconds(1540) index(57248)

Title: Locus:1.1.1.2842.15 File:"2013-07-02 CLN FXIII 60 min 1st F 4.wiff"

Data file C:\Program Files (x86)\Matrix Science\Mascot Daemon\mgf4 FXIII 60 min 1st\mascot\_daemon\_merge.mgf

Click mouse within plot area to zoom in by factor of two about that point

Or, Plot from  to  Da

Label all possible matches  Label matches used for scoring

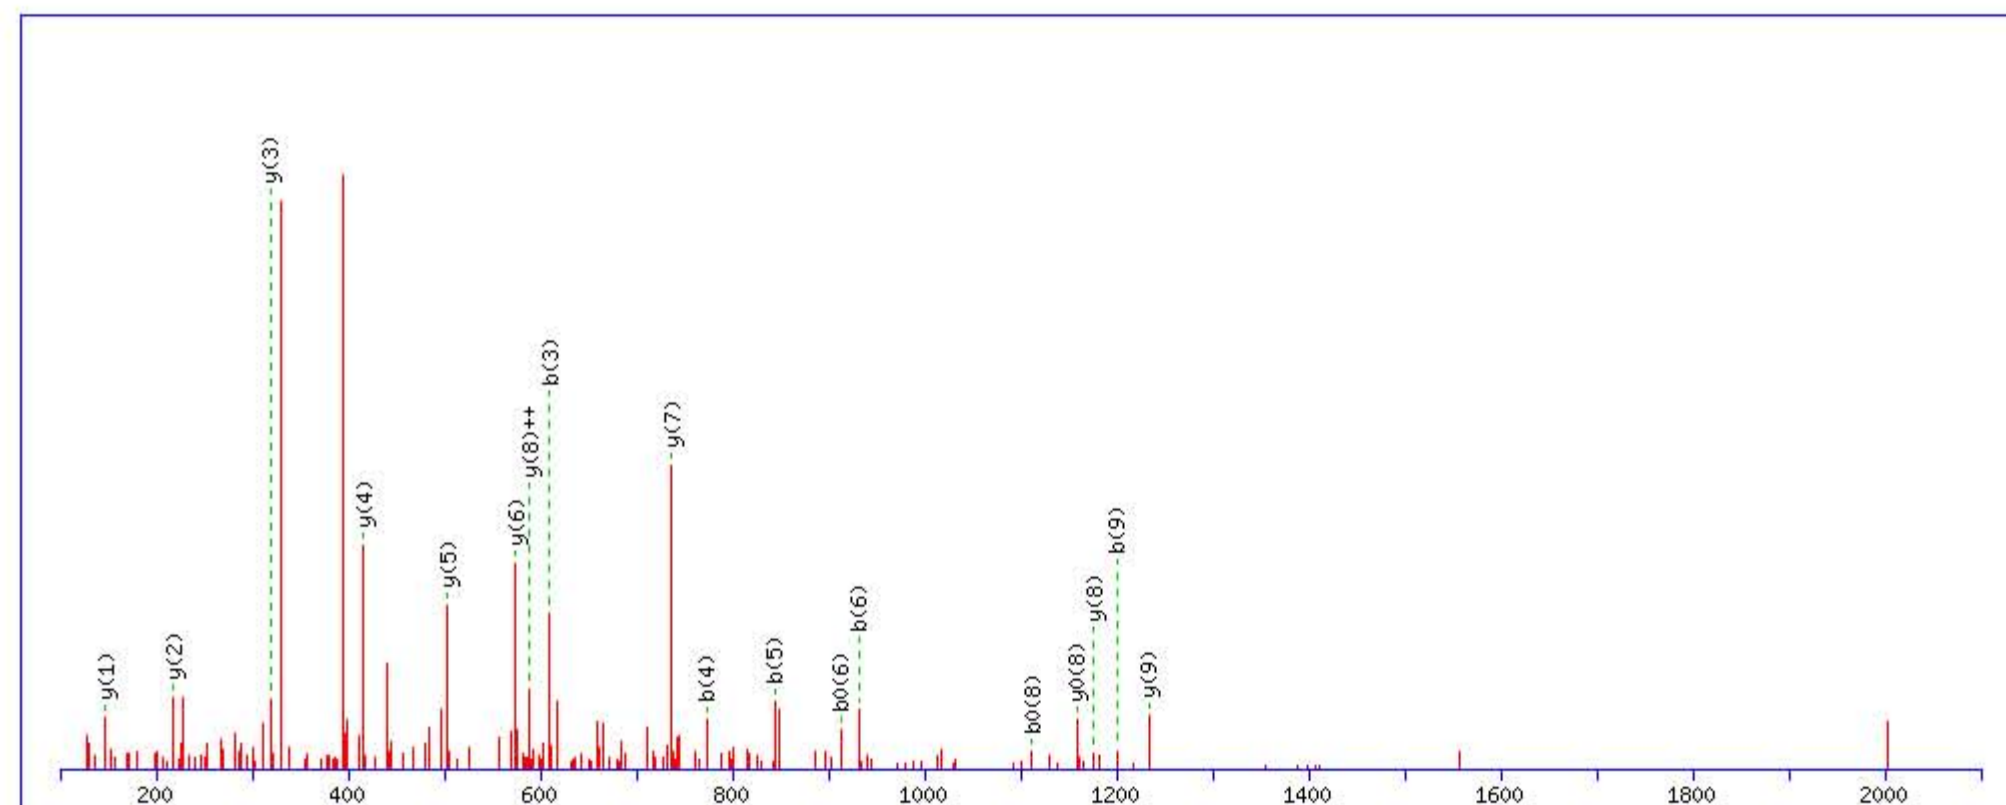

Monoisotopic mass of neutral peptide Mr(calc): 1345.706390

Fixed modifications: Carbamidomethyl (C) (apply to specified residues or termini only)

Variable modifications:

Q3 : Biotin:Thermo-21345 (Q)

Ions Score: 56 Expect: 5.3e-005

Matches : 18/90 fragment ions using 35 most intense peaks [\(help\)](#)

| #  | b           | b <sup>++</sup> | b <sup>+</sup> | b <sup>+++</sup> | b <sup>0</sup> | b <sup>0++</sup> | Seq. | y           | y <sup>++</sup> | y <sup>+</sup> | y <sup>+++</sup> | y <sup>0</sup> | y <sup>0++</sup> | #  |
|----|-------------|-----------------|----------------|------------------|----------------|------------------|------|-------------|-----------------|----------------|------------------|----------------|------------------|----|
| 1  | 114.091340  | 57.549308       |                |                  |                |                  | L    |             |                 |                |                  |                |                  | 10 |
| 2  | 171.112804  | 86.060040       |                |                  |                |                  | G    | 1233.629622 | 617.318449      | 1216.603073    | 608.805175       | 1215.619057    | 608.313167       | 9  |
| 3  | 610.338130  | 305.672703      | 593.311581     | 297.159429       |                |                  | Q    | 1176.608158 | 588.807717      | 1159.581609    | 580.294443       | 1158.597593    | 579.802435       | 8  |
| 4  | 773.401459  | 387.204368      | 756.374910     | 378.691093       |                |                  | Y    | 737.382832  | 369.195054      | 720.356283     | 360.681780       | 719.372267     | 360.189772       | 7  |
| 5  | 844.438573  | 422.722925      | 827.412024     | 414.209650       |                |                  | A    | 574.319503  | 287.663389      | 557.292954     | 279.150115       | 556.308938     | 278.658107       | 6  |
| 6  | 931.470601  | 466.238939      | 914.444052     | 457.725664       | 913.460036     | 457.233656       | S    | 503.282389  | 252.144832      | 486.255840     | 243.631558       | 485.271824     | 243.139550       | 5  |
| 7  | 1028.523365 | 514.765321      | 1011.496816    | 506.252046       | 1010.512800    | 505.760038       | P    | 416.250361  | 208.628818      | 399.223812     | 200.115544       | 398.239796     | 199.623536       | 4  |
| 8  | 1129.571044 | 565.289160      | 1112.544495    | 556.775886       | 1111.560479    | 556.283878       | T    | 319.197597  | 160.102436      | 302.171048     | 151.589162       | 301.187032     | 151.097154       | 3  |
| 9  | 1200.608158 | 600.807717      | 1183.581609    | 592.294443       | 1182.597593    | 591.802435       | A    | 218.149918  | 109.578597      | 201.123369     | 101.065322       |                |                  | 2  |
| 10 |             |                 |                |                  |                |                  | K    | 147.112804  | 74.060040       | 130.086255     | 65.546765        |                |                  | 1  |

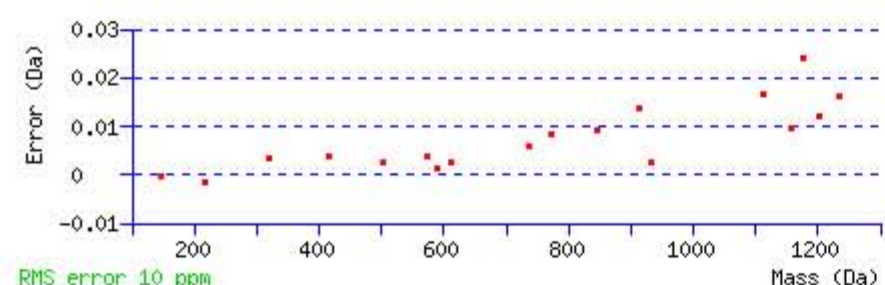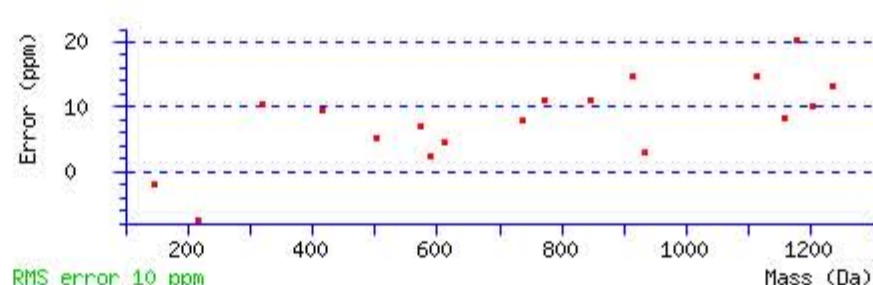

NCBI BLAST search of **LGQYASPTAK**

(Parameters: blastp, nr protein database, expect=20000, no filter, PAM30)

Other BLAST [web gateways](#)

## All matches to this query

| Score | Mr(calc):   | Delta     | Sequence                       |
|-------|-------------|-----------|--------------------------------|
| 55.6  | 1345.706390 | 0.008258  | <a href="#">LGQYASPTAK</a>     |
| 9.5   | 1345.706390 | 0.008258  | <a href="#">LGQYDQALK</a>      |
| 9.2   | 1345.724182 | -0.009534 | <a href="#">LGAVPATSGPTTFK</a> |
| 8.3   | 1345.706406 | 0.008242  | <a href="#">QGLYTPQTK</a>      |
| 5.6   | 1345.727509 | -0.012861 | <a href="#">LGLMDNEIKVAK</a>   |
| 2.0   | 1345.717636 | -0.002988 | <a href="#">QMPQPTFTLRK</a>    |



# MASCOT SCIENCE Mascot Search Results

## Peptide View

MS/MS Fragmentation of **GLQDEDGYR**

Found in **CO4A\_HUMAN**, Complement C4-A OS=Homo sapiens GN=C4A PE=1 SV=2

Match to Query 33236: 1362.630168 from(682.322360,2+) rtinseconds(1683) index(58185)

Title: Locus:1.1.1.2892.9 File:"2013-07-02 CLN FXIII 60 min 1st F 4.wiff"

Data file C:\Program Files (x86)\Matrix Science\Mascot Daemon\mgf\4 FXIII 60 min 1st\mascot\_daemon\_merge.mgf

Click mouse within plot area to zoom in by factor of two about that point

Or, Plot from  to  Da

Label all possible matches  Label matches used for scoring



Monoisotopic mass of neutral peptide Mr(calc): 1362.623795

Fixed modifications: Carbamidomethyl (C) (apply to specified residues or termini only)

Variable modifications:

Q3 : Biotin:Thermo-21345 (Q)

Ions Score: 47 Expect: 7.7e-005

Matches : 8/80 fragment ions using 12 most intense peaks [\(help\)](#)

| # | b                 | b <sup>++</sup> | b <sup>*</sup> | b <sup>*++</sup> | b <sup>0</sup> | b <sup>0++</sup> | Seq.     | y                  | y <sup>++</sup>   | y <sup>*</sup> | y <sup>*++</sup> | y <sup>0</sup> | y <sup>0++</sup> | # |
|---|-------------------|-----------------|----------------|------------------|----------------|------------------|----------|--------------------|-------------------|----------------|------------------|----------------|------------------|---|
| 1 | 58.028740         | 29.518008       |                |                  |                |                  | <b>G</b> |                    |                   |                |                  |                |                  | 9 |
| 2 | 171.112804        | 86.060040       |                |                  |                |                  | <b>L</b> | 1306.609614        | 653.808445        | 1289.583065    | 645.295171       | 1288.599049    | 644.803163       | 8 |
| 3 | 610.338130        | 305.672703      | 593.311581     | 297.159429       |                |                  | <b>Q</b> | <b>1193.525550</b> | <b>597.266413</b> | 1176.499001    | 588.753139       | 1175.514985    | 588.261131       | 7 |
| 4 | 725.365073        | 363.186175      | 708.338524     | 354.672900       | 707.354508     | 354.180892       | <b>D</b> | <b>754.300224</b>  | 377.653750        | 737.273675     | 369.140476       | 736.289659     | 368.648468       | 6 |
| 5 | 854.407666        | 427.707471      | 837.381117     | 419.194197       | 836.397101     | 418.702189       | <b>E</b> | <b>639.273281</b>  | 320.140279        | 622.246732     | 311.627004       | 621.262716     | 311.134996       | 5 |
| 6 | <b>969.434609</b> | 485.220943      | 952.408060     | 476.707668       | 951.424044     | 476.215660       | <b>D</b> | <b>510.230688</b>  | 255.618982        | 493.204139     | 247.105707       | 492.220123     | 246.613700       | 4 |
| 7 | 1026.456073       | 513.731675      | 1009.429524    | 505.218400       | 1008.445508    | 504.726392       | <b>G</b> | <b>395.203745</b>  | 198.105511        | 378.177196     | 189.592236       |                |                  | 3 |
| 8 | 1189.519402       | 595.263339      | 1172.492853    | 586.750065       | 1171.508837    | 586.258057       | <b>Y</b> | 338.182281         | 169.594778        | 321.155732     | 161.081504       |                |                  | 2 |
| 9 |                   |                 |                |                  |                |                  | <b>R</b> | <b>175.118952</b>  | 88.063114         | 158.092403     | 79.549839        |                |                  | 1 |



NCBI BLAST search of **GLQDEDGYR**

(Parameters: blastp, nr protein database, expect=20000, no filter, PAM30)

Other BLAST [web gateways](#)

All matches to this query

| Score | Mr(calc):   | Delta    | Sequence                       |
|-------|-------------|----------|--------------------------------|
| 46.6  | 1362.623795 | 0.006373 | <a href="#">GLQDEDGYR</a>      |
| 2.5   | 1362.623795 | 0.006373 | <a href="#">TGFLEIDEHMR</a>    |
| 0.1   | 1362.613251 | 0.016917 | <a href="#">MGAGATGRAMDGPR</a> |

Mascot: <http://www.matrixscience.com/>



# MASCOT Search Results

## Peptide View

MS/MS Fragmentation of **TEQWSTLPPETK**

Found in **CO4A\_HUMAN**, Complement C4-A OS=Homo sapiens GN=C4A PE=1 SV=2

Match to Query 46460: 1726.877708 from(864.446130,2+) rtinseconds(2031) index(60756)

Title: Locus:1.1.1.3012.9 File:"2013-07-02 CLN FXIII 60 min 1st F 4.wiff"

Data file C:\Program Files (x86)\Matrix Science\Mascot Daemon\mgf4 FXIII 60 min 1st\mascot\_daemon\_merge.mgf

Click mouse within plot area to zoom in by factor of two about that point

Or, Plot from  to  Da

Label all possible matches  Label matches used for scoring



Monoisotopic mass of neutral peptide Mr(calc): 1726.860001

Fixed modifications: Carbamidomethyl (C) (apply to specified residues or termini only)

Variable modifications:

Q3 : Biotin:Thermo-21345 (Q)

Ions Score: 49 Expect: 5.9e-005

Matches : 15/126 fragment ions using 33 most intense peaks [\(help\)](#)

| #  | b                  | b <sup>++</sup> | b <sup>*</sup> | b <sup>*++</sup> | b <sup>0</sup>     | b <sup>0++</sup> | Seq. | y                  | y <sup>++</sup>   | y <sup>*</sup> | y <sup>*++</sup> | y <sup>0</sup>     | y <sup>0++</sup> | #  |
|----|--------------------|-----------------|----------------|------------------|--------------------|------------------|------|--------------------|-------------------|----------------|------------------|--------------------|------------------|----|
| 1  | 102.054955         | 51.531116       |                |                  | 84.044390          | 42.525833        | T    |                    |                   |                |                  |                    |                  | 12 |
| 2  | 231.097548         | 116.052412      |                |                  | 213.086983         | 107.047130       | E    | 1626.819607        | 813.913442        | 1609.793058    | 805.400167       | 1608.809042        | 804.908159       | 11 |
| 3  | <b>670.322874</b>  | 335.665075      | 653.296325     | 327.151801       | 652.312309         | 326.659793       | Q    | <b>1497.777014</b> | <b>749.392145</b> | 1480.750465    | 740.878871       | <b>1479.766449</b> | 740.386863       | 10 |
| 4  | 856.402187         | 428.704732      | 839.375638     | 420.191457       | 838.391622         | 419.699449       | W    | <b>1058.551688</b> | 529.779482        | 1041.525139    | 521.266208       | 1040.541123        | 520.774200       | 9  |
| 5  | 943.434215         | 472.220746      | 926.407666     | 463.707471       | <b>925.423650</b>  | 463.215463       | S    | <b>872.472375</b>  | 436.739826        | 855.445826     | 428.226551       | 854.461810         | 427.734543       | 8  |
| 6  | 1044.481894        | 522.744585      | 1027.455345    | 514.231311       | 1026.471329        | 513.739303       | T    | <b>785.440347</b>  | 393.223812        | 768.413798     | 384.710537       | 767.429782         | 384.218529       | 7  |
| 7  | <b>1157.565958</b> | 579.286617      | 1140.539409    | 570.773343       | <b>1139.555393</b> | 570.281334       | L    | <b>684.392668</b>  | 342.699972        | 667.366119     | 334.186698       | 666.382103         | 333.694690       | 6  |
| 8  | 1254.618722        | 627.812999      | 1237.592173    | 619.299725       | 1236.608157        | 618.807716       | P    | <b>571.308604</b>  | 286.157940        | 554.282055     | 277.644666       | 553.298039         | 277.152658       | 5  |
| 9  | 1351.671486        | 676.339381      | 1334.644937    | 667.826107       | 1333.660921        | 667.334098       | P    | <b>474.255840</b>  | 237.631558        | 457.229291     | 229.118284       | 456.245275         | 228.626276       | 4  |
| 10 | 1480.714079        | 740.860678      | 1463.687530    | 732.347403       | 1462.703514        | 731.855395       | E    | 377.203076         | 189.105176        | 360.176527     | 180.591902       | 359.192511         | 180.099894       | 3  |
| 11 | 1581.761758        | 791.384517      | 1564.735209    | 782.871243       | 1563.751193        | 782.379235       | T    | <b>248.160483</b>  | 124.583879        | 231.133934     | 116.070605       | 230.149918         | 115.578597       | 2  |
| 12 |                    |                 |                |                  |                    |                  | K    | <b>147.112804</b>  | 74.060040         | 130.086255     | 65.546765        |                    |                  | 1  |

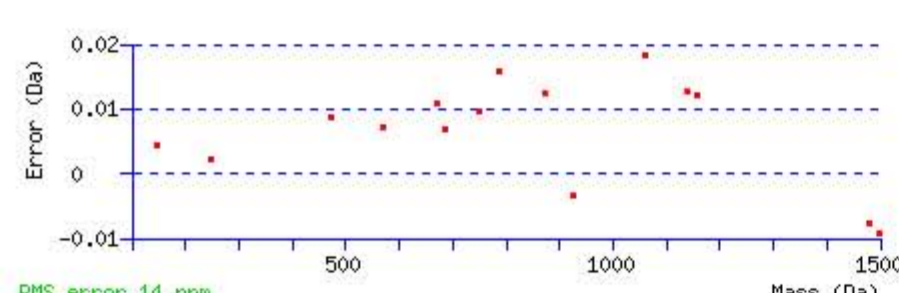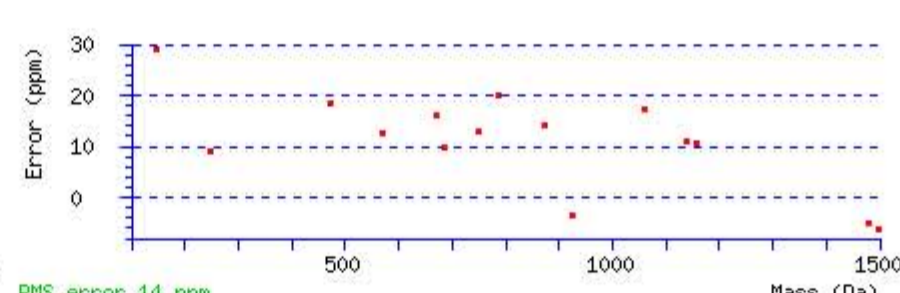

NCBI BLAST search of **TEQWSTLPPETK**

(Parameters: blastp, nr protein database, expect=20000, no filter, PAM30)

Other BLAST [web gateways](#)

All matches to this query

| Score | Mr(calc):   | Delta    | Sequence                        |
|-------|-------------|----------|---------------------------------|
| 49.3  | 1726.860001 | 0.017707 | <a href="#">TEQWSTLPPETK</a>    |
| 4.0   | 1726.867188 | 0.010520 | <a href="#">KDHAEMQAVIDAKQK</a> |
| 0.6   | 1726.853485 | 0.024223 | <a href="#">MASGHAFQPDLVK</a>   |



# MASCOT SEARCH RESULTS

## Peptide View

MS/MS Fragmentation of **GLEEELQFSLGSK**

Found in **CO4A\_HUMAN**, Complement C4-A OS=Homo sapiens GN=C4A PE=1 SV=2

Match to Query 47083: 1746.907452 from(583.309760,3+) rtinseconds(2523) index(64206)

Title: Locus:1.1.1.3183.5 File:"2013-07-02 CLN FXIII 60 min 1st F 4.wiff"

Data file C:\Program Files (x86)\Matrix Science\Mascot Daemon\mgf4 FXIII 60 min 1st\mascot\_daemon\_merge.mgf

Click mouse within plot area to zoom in by factor of two about that point

Or, Plot from  to  Da

Label all possible matches  Label matches used for scoring



Monoisotopic mass of neutral peptide Mr(calc): 1746.886200

Fixed modifications: Carbamidomethyl (C) (apply to specified residues or termini only)

Variable modifications:

Q7 : Biotin:Thermo-21345 (Q)

Ions Score: 50 Expect: 3.7e-005

Matches : 10/126 fragment ions using 16 most intense peaks [\(help\)](#)

| #  | b           | b <sup>++</sup> | b <sup>*</sup> | b <sup>*++</sup>  | b <sup>0</sup> | b <sup>0++</sup> | Seq. | y                  | y <sup>++</sup> | y <sup>*</sup> | y <sup>*++</sup> | y <sup>0</sup>     | y <sup>0++</sup> | #  |
|----|-------------|-----------------|----------------|-------------------|----------------|------------------|------|--------------------|-----------------|----------------|------------------|--------------------|------------------|----|
| 1  | 58.028740   | 29.518008       |                |                   |                |                  | G    |                    |                 |                |                  |                    |                  | 13 |
| 2  | 171.112804  | 86.060040       |                |                   |                |                  | L    | 1690.872035        | 845.939656      | 1673.845486    | 837.426381       | 1672.861470        | 836.934373       | 12 |
| 3  | 300.155397  | 150.581336      |                |                   | 282.144832     | 141.576054       | E    | <b>1577.787971</b> | 789.397624      | 1560.761422    | 780.884349       | 1559.777406        | 780.392341       | 11 |
| 4  | 429.197990  | 215.102633      |                |                   | 411.187425     | 206.097351       | E    | <b>1448.745378</b> | 724.876327      | 1431.718829    | 716.363053       | 1430.734813        | 715.871045       | 10 |
| 5  | 558.240583  | 279.623930      |                |                   | 540.230018     | 270.618647       | E    | <b>1319.702785</b> | 660.355031      | 1302.676236    | 651.841756       | <b>1301.692220</b> | 651.349748       | 9  |
| 6  | 671.324647  | 336.165962      |                |                   | 653.314082     | 327.160679       | L    | <b>1190.660192</b> | 595.833734      | 1173.633643    | 587.320460       | 1172.649627        | 586.828452       | 8  |
| 7  | 1110.549973 | 555.778624      | 1093.523424    | 547.265350        | 1092.539408    | 546.773342       | Q    | <b>1077.576128</b> | 539.291702      | 1060.549579    | 530.778428       | 1059.565563        | 530.286419       | 7  |
| 8  | 1257.618387 | 629.312832      | 1240.591838    | 620.799557        | 1239.607822    | 620.307549       | F    | <b>638.350802</b>  | 319.679039      | 621.324253     | 311.165765       | 620.340237         | 310.673757       | 6  |
| 9  | 1344.650415 | 672.828846      | 1327.623866    | 664.315571        | 1326.639850    | 663.823563       | S    | <b>491.282388</b>  | 246.144832      | 474.255839     | 237.631557       | 473.271823         | 237.139549       | 5  |
| 10 | 1457.734479 | 729.370878      | 1440.707930    | 720.857603        | 1439.723914    | 720.365595       | L    | 404.250360         | 202.628818      | 387.223811     | 194.115543       | 386.239795         | 193.623535       | 4  |
| 11 | 1514.755943 | 757.881609      | 1497.729394    | <b>749.368335</b> | 1496.745378    | 748.876327       | G    | <b>291.166296</b>  | 146.086786      | 274.139747     | 137.573512       | 273.155731         | 137.081504       | 3  |
| 12 | 1601.787971 | 801.397624      | 1584.761422    | 792.884349        | 1583.777406    | 792.392341       | S    | 234.144832         | 117.576054      | 217.118283     | 109.062780       | 216.134267         | 108.570772       | 2  |
| 13 |             |                 |                |                   |                |                  | K    | 147.112804         | 74.060040       | 130.086255     | 65.546765        |                    |                  | 1  |



NCBI BLAST search of **GLEEELQFSLGSK**

(Parameters: blastp, nr protein database, expect=20000, no filter, PAM30)

Other BLAST [web gateways](#)

All matches to this query

| Score | Mr(calc):   | Delta    | Sequence                         |
|-------|-------------|----------|----------------------------------|
| 49.8  | 1746.886200 | 0.021252 | <a href="#">GLEEELQFSLGSK</a>    |
| 2.5   | 1746.891403 | 0.016049 | <a href="#">HSSVLFRRHQKLHSGD</a> |



# MASCOT SCIENCE Mascot Search Results

## Peptide View

MS/MS Fragmentation of **VLSLAQEQVGGGSPEK**

Found in **CO4A\_HUMAN**, Complement C4-A OS=Homo sapiens GN=C4A PE=1 SV=2

Match to Query 49516: 1851.991572 from(618.337800,3+) rtinseconds(1956) index(60239)

Title: Locus:1.1.1.2986.10 File:"2013-07-02 CLN FXIII 60 min 1st F 4.wiff"

Data file C:\Program Files (x86)\Matrix Science\Mascot Daemon\mgf4 FXIII 60 min 1st\mascot\_daemon\_merge.mgf

Click mouse within plot area to zoom in by factor of two about that point

Or, Plot from  to  Da

Label all possible matches  Label matches used for scoring

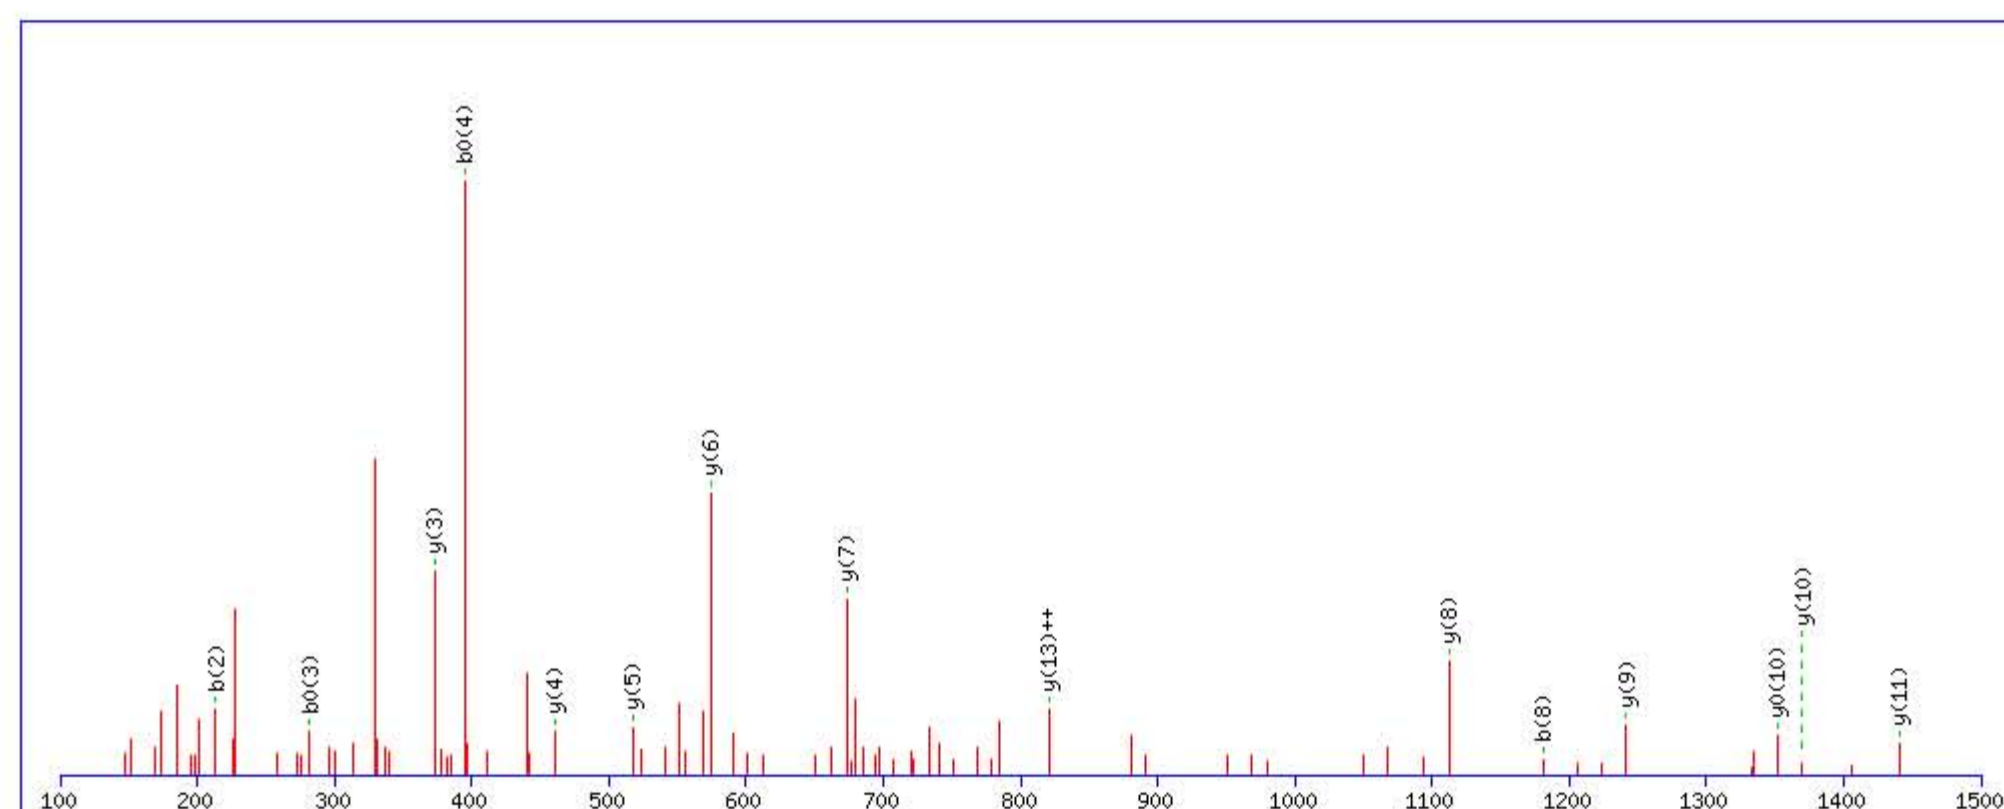

Monoisotopic mass of neutral peptide Mr(calc): 1851.976425

Fixed modifications: Carbamidomethyl (C) (apply to specified residues or termini only)

Variable modifications:

Q8 : Biotin:Thermo-21345 (Q)

Ions Score: 40 Expect: 0.0022

Matches : 15/152 fragment ions using 37 most intense peaks [\(help\)](#)

| #  | b                  | b <sup>++</sup> | b <sup>*</sup> | b <sup>*++</sup> | b <sup>0</sup>    | b <sup>0++</sup> | Seq. | y                  | y <sup>++</sup>   | y <sup>*</sup> | y <sup>*++</sup> | y <sup>0</sup>     | y <sup>0++</sup> | #  |
|----|--------------------|-----------------|----------------|------------------|-------------------|------------------|------|--------------------|-------------------|----------------|------------------|--------------------|------------------|----|
| 1  | 100.075690         | 50.541483       |                |                  |                   |                  | V    |                    |                   |                |                  |                    |                  | 15 |
| 2  | <b>213.159754</b>  | 107.083515      |                |                  |                   |                  | L    | 1753.915298        | 877.461287        | 1736.888749    | 868.948013       | 1735.904733        | 868.456004       | 14 |
| 3  | 300.191782         | 150.599529      |                |                  | <b>282.181217</b> | 141.594247       | S    | 1640.831234        | <b>820.919255</b> | 1623.804685    | 812.405981       | 1622.820669        | 811.913973       | 13 |
| 4  | 413.275846         | 207.141561      |                |                  | <b>395.265281</b> | 198.136279       | L    | 1553.799206        | 777.403241        | 1536.772657    | 768.889967       | 1535.788641        | 768.397958       | 12 |
| 5  | 484.312960         | 242.660118      |                |                  | 466.302395        | 233.654836       | A    | <b>1440.715142</b> | 720.861209        | 1423.688593    | 712.347935       | 1422.704577        | 711.855927       | 11 |
| 6  | 612.371538         | 306.689407      | 595.344989     | 298.176133       | 594.360973        | 297.684125       | Q    | <b>1369.678028</b> | 685.342652        | 1352.651479    | 676.829378       | <b>1351.667463</b> | 676.337370       | 10 |
| 7  | 741.414131         | 371.210704      | 724.387582     | 362.697429       | 723.403566        | 362.205421       | E    | <b>1241.619450</b> | 621.313363        | 1224.592901    | 612.800089       | 1223.608885        | 612.308080       | 9  |
| 8  | <b>1180.639457</b> | 590.823367      | 1163.612908    | 582.310092       | 1162.628892       | 581.818084       | Q    | <b>1112.576857</b> | 556.792066        | 1095.550308    | 548.278792       | 1094.566292        | 547.786784       | 8  |
| 9  | 1279.707871        | 640.357574      | 1262.681322    | 631.844299       | 1261.697306       | 631.352291       | V    | <b>673.351531</b>  | 337.179404        | 656.324982     | 328.666129       | 655.340966         | 328.174121       | 7  |
| 10 | 1336.729335        | 668.868306      | 1319.702786    | 660.355031       | 1318.718770       | 659.863023       | G    | <b>574.283117</b>  | 287.645197        | 557.256568     | 279.131922       | 556.272552         | 278.639914       | 6  |
| 11 | 1393.750799        | 697.379037      | 1376.724250    | 688.865763       | 1375.740234       | 688.373755       | G    | <b>517.261653</b>  | 259.134465        | 500.235104     | 250.621190       | 499.251088         | 250.129182       | 5  |
| 12 | 1480.782827        | 740.895052      | 1463.756278    | 732.381777       | 1462.772262       | 731.889769       | S    | <b>460.240189</b>  | 230.623732        | 443.213640     | 222.110458       | 442.229624         | 221.618450       | 4  |
| 13 | 1577.835591        | 789.421434      | 1560.809042    | 780.908159       | 1559.825026       | 780.416151       | P    | <b>373.208161</b>  | 187.107718        | 356.181612     | 178.594444       | 355.197596         | 178.102436       | 3  |
| 14 | 1706.878184        | 853.942730      | 1689.851635    | 845.429456       | 1688.867619       | 844.937447       | E    | 276.155397         | 138.581336        | 259.128848     | 130.068062       | 258.144832         | 129.576054       | 2  |
| 15 |                    |                 |                |                  |                   |                  | K    | 147.112804         | 74.060040         | 130.086255     | 65.546765        |                    |                  | 1  |

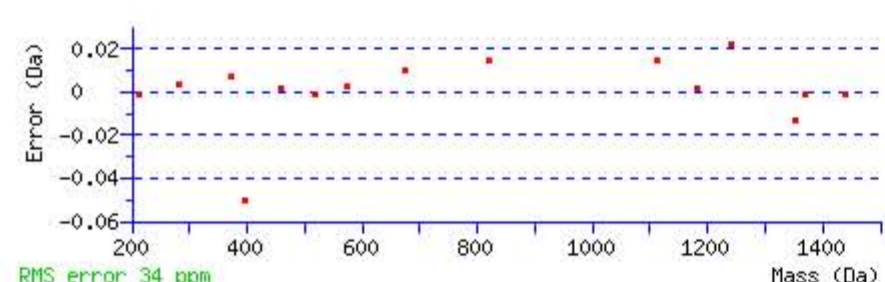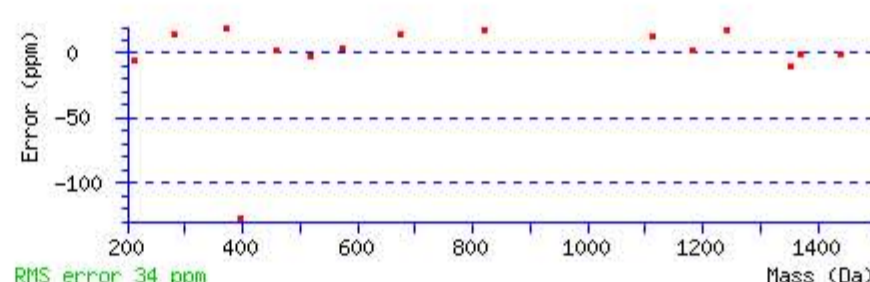

NCBI BLAST search of **VLSLAQEQVGGGSPEK**

(Parameters: blastp, nr protein database, expect=20000, no filter, PAM30)

Other BLAST [web gateways](#)

All matches to this query

| Score | Mr(calc):   | Delta    | Sequence                         |
|-------|-------------|----------|----------------------------------|
| 40.3  | 1851.976425 | 0.015147 | <a href="#">VLSLAQEQVGGGSPEK</a> |
| 23.7  | 1851.976425 | 0.015147 | <a href="#">VLSLAQEQVGGGSPEK</a> |

Mascot: <http://www.matrixscience.com/>



# **MASCOT** Mascot Search Results

## Peptide View

MS/MS Fragmentation of **HLVPGAPFLLQALVR**

Found in **CO4A\_HUMAN**, Complement C4-A OS=Homo sapiens GN=C4A PE=1 SV=2

Match to Query 51553: 1941.164652 from(648.062160,3+) rtinseconds(2817) index(66281)

Title: Locus:1.1.1.3284.6 File:"2013-07-02 CLN FXIII 60 min 1st F 4.wiff"

Data file C:\Program Files (x86)\Matrix Science\Mascot Daemon\mgf4 FXIII 60 min 1st\mascot\_daemon\_merge.mgf

Click mouse within plot area to zoom in by factor of two about that point

Or, Plot from  to  Da

Label all possible matches  Label matches used for scoring



Monoisotopic mass of neutral peptide Mr(calc): 1941.138626

Fixed modifications: Carbamidomethyl (C) (apply to specified residues or termini only)

Variable modifications:

Q11 : Biotin:Thermo-21345 (Q)

Ions Score: 57 Expect: 2.7e-006

Matches : 14/92 fragment ions using 15 most intense peaks [\(help\)](#)

| #  | b                  | b <sup>++</sup>   | b <sup>*</sup> | b <sup>*++</sup> | Seq.     | y                  | y <sup>++</sup>   | y <sup>*</sup> | y <sup>*++</sup> | #         |
|----|--------------------|-------------------|----------------|------------------|----------|--------------------|-------------------|----------------|------------------|-----------|
| 1  | 138.066188         | 69.536732         |                |                  | <b>H</b> |                    |                   |                |                  | <b>15</b> |
| 2  | <b>251.150252</b>  | 126.078764        |                |                  | <b>L</b> | 1805.086996        | 903.047136        | 1788.060447    | 894.533862       | <b>14</b> |
| 3  | 350.218666         | 175.612971        |                |                  | <b>V</b> | 1692.002932        | 846.505104        | 1674.976383    | 837.991830       | <b>13</b> |
| 4  | 447.271430         | 224.139353        |                |                  | <b>P</b> | 1592.934518        | 796.970897        | 1575.907969    | 788.457623       | <b>12</b> |
| 5  | 504.292894         | 252.650085        |                |                  | <b>G</b> | 1495.881754        | 748.444515        | 1478.855205    | 739.931241       | <b>11</b> |
| 6  | <b>575.330008</b>  | 288.168642        |                |                  | <b>A</b> | 1438.860290        | 719.933783        | 1421.833741    | 711.420509       | <b>10</b> |
| 7  | 672.382772         | 336.695024        |                |                  | <b>P</b> | <b>1367.823176</b> | <b>684.415226</b> | 1350.796627    | 675.901952       | <b>9</b>  |
| 8  | 819.451186         | 410.229231        |                |                  | <b>F</b> | <b>1270.770412</b> | 635.888844        | 1253.743863    | 627.375570       | <b>8</b>  |
| 9  | <b>932.535250</b>  | 466.771263        |                |                  | <b>L</b> | <b>1123.701998</b> | 562.354637        | 1106.675449    | 553.841363       | <b>7</b>  |
| 10 | 1045.619314        | 523.313295        |                |                  | <b>L</b> | <b>1010.617934</b> | 505.812605        | 993.591385     | 497.299331       | <b>6</b>  |
| 11 | <b>1484.844640</b> | 742.925958        | 1467.818091    | 734.412684       | <b>Q</b> | <b>897.533870</b>  | 449.270573        | 880.507321     | 440.757298       | <b>5</b>  |
| 12 | 1555.881754        | <b>778.444515</b> | 1538.855205    | 769.931241       | <b>A</b> | <b>458.308544</b>  | 229.657910        | 441.281995     | 221.144635       | <b>4</b>  |
| 13 | <b>1668.965818</b> | 834.986547        | 1651.939269    | 826.473273       | <b>L</b> | 387.271430         | 194.139353        | 370.244881     | 185.626078       | <b>3</b>  |
| 14 | 1768.034232        | 884.520754        | 1751.007683    | 876.007480       | <b>V</b> | 274.187366         | 137.597321        | 257.160817     | 129.084047       | <b>2</b>  |
| 15 |                    |                   |                |                  | <b>R</b> | <b>175.118952</b>  | 88.063114         | 158.092403     | 79.549839        | <b>1</b>  |



NCBI BLAST search of [HLVPGAPFLLQALVR](#)

(Parameters: blastp, nr protein database, expect=20000, no filter, PAM30)

Other BLAST [web gateways](#)

All matches to this query

| Score | Mr(calc):   | Delta    | Sequence                        |
|-------|-------------|----------|---------------------------------|
| 56.8  | 1941.138626 | 0.026026 | <a href="#">HLVPGAPFLLQALVR</a> |

Mascot: <http://www.matrixscience.com/>



# MASCOT SCIENCE Mascot Search Results

## Peptide View

MS/MS Fragmentation of **EPFLSCCQFAESLR**

Found in **CO4A\_HUMAN**, Complement C4-A OS=Homo sapiens GN=C4A PE=1 SV=2

Match to Query 55066: 2053.967052 from(685.662960,3+) rtinseconds(2451) index(63695)

Title: Locus:1.1.1.3158.9 File:"2013-07-02 CLN FXIII 60 min 1st F 4.wiff"

Data file C:\Program Files (x86)\Matrix Science\Mascot Daemon\mgf4 FXIII 60 min 1st\mascot\_daemon\_merge.mgf

Click mouse within plot area to zoom in by factor of two about that point

Or, Plot from  to  Da

Label all possible matches  Label matches used for scoring



Monoisotopic mass of neutral peptide Mr(calc): 2053.942368

Fixed modifications: Carbamidomethyl (C) (apply to specified residues or termini only)

Variable modifications:

Q8 : Biotin:Thermo-21345 (Q)

Ions Score: 54 Expect: 9.5e-006

Matches : 23/138 fragment ions using 49 most intense peaks [\(help\)](#)

| #  | b                  | b <sup>++</sup> | b <sup>+</sup>     | b <sup>+++</sup> | b <sup>0</sup>     | b <sup>0++</sup> | Seq. | y                  | y <sup>++</sup>   | y <sup>+</sup> | y <sup>+++</sup> | y <sup>0</sup>     | y <sup>0++</sup> | #  |
|----|--------------------|-----------------|--------------------|------------------|--------------------|------------------|------|--------------------|-------------------|----------------|------------------|--------------------|------------------|----|
| 1  | 130.049869         | 65.528572       |                    |                  | 112.039304         | 56.523290        | E    |                    |                   |                |                  |                    |                  | 14 |
| 2  | <b>227.102633</b>  | 114.054954      |                    |                  | 209.092068         | 105.049672       | P    | 1925.907059        | 963.457168        | 1908.880510    | 954.943893       | 1907.896494        | 954.451885       | 13 |
| 3  | 374.171047         | 187.589161      |                    |                  | 356.160482         | 178.583879       | F    | 1828.854295        | 914.930786        | 1811.827746    | 906.417511       | 1810.843730        | 905.925503       | 12 |
| 4  | 487.255111         | 244.131193      |                    |                  | <b>469.244546</b>  | 235.125911       | L    | <b>1681.785881</b> | <b>841.396579</b> | 1664.759332    | 832.883304       | 1663.775316        | 832.391296       | 11 |
| 5  | 574.287139         | 287.647208      |                    |                  | <b>556.276574</b>  | 278.641925       | S    | <b>1568.701817</b> | 784.854547        | 1551.675268    | 776.341272       | 1550.691252        | 775.849264       | 10 |
| 6  | 734.317788         | 367.662532      |                    |                  | 716.307223         | 358.657250       | C    | <b>1481.669789</b> | <b>741.338533</b> | 1464.643240    | 732.825258       | <b>1463.659224</b> | 732.333250       | 9  |
| 7  | 894.348437         | 447.677857      |                    |                  | 876.337872         | 438.672574       | C    | <b>1321.639140</b> | 661.323208        | 1304.612591    | 652.809934       | 1303.628575        | 652.317926       | 8  |
| 8  | <b>1333.573763</b> | 667.290520      | 1316.547214        | 658.777245       | <b>1315.563198</b> | 658.285237       | Q    | <b>1161.608491</b> | 581.307884        | 1144.581942    | 572.794609       | <b>1143.597926</b> | 572.302601       | 7  |
| 9  | 1480.642177        | 740.824727      | <b>1463.615628</b> | 732.311452       | 1462.631612        | 731.819444       | F    | <b>722.383165</b>  | 361.695221        | 705.356616     | 353.181946       | 704.372600         | 352.689938       | 6  |
| 10 | 1551.679291        | 776.343284      | 1534.652742        | 767.830009       | <b>1533.668726</b> | 767.338001       | A    | <b>575.314751</b>  | <b>288.161014</b> | 558.288202     | 279.647739       | 557.304186         | 279.155731       | 5  |
| 11 | 1680.721884        | 840.864580      | 1663.695335        | 832.351306       | 1662.711319        | 831.859298       | E    | <b>504.277637</b>  | 252.642457        | 487.251088     | 244.129182       | 486.267072         | 243.637174       | 4  |
| 12 | 1767.753912        | 884.380594      | 1750.727363        | 875.867320       | 1749.743347        | 875.375312       | S    | <b>375.235044</b>  | 188.121160        | 358.208495     | 179.607885       | 357.224479         | 179.115877       | 3  |
| 13 | 1880.837976        | 940.922626      | 1863.811427        | 932.409352       | 1862.827411        | 931.917344       | L    | <b>288.203016</b>  | 144.605146        | 271.176467     | 136.091871       |                    |                  | 2  |
| 14 |                    |                 |                    |                  |                    |                  | R    | <b>175.118952</b>  | 88.063114         | 158.092403     | 79.549839        |                    |                  | 1  |



NCBI BLAST search of [EPFLSCCQFAESLR](#)

(Parameters: blastp, nr protein database, expect=20000, no filter, PAM30)

Other BLAST [web gateways](#)

All matches to this query

| Score | Mr(calc):   | Delta     | Sequence                         |
|-------|-------------|-----------|----------------------------------|
| 53.7  | 2053.942368 | 0.024684  | <a href="#">EPFLSCCQFAESLR</a>   |
| 0.1   | 2053.985703 | -0.018651 | <a href="#">ENENERFAHYLEKTFK</a> |

Mascot: <http://www.matrixscience.com/>



# MASCOT Search Results

## Peptide View

MS/MS Fragmentation of **LLATLCSAEVCQCAEGK**

Found in **CO4A\_HUMAN**, Complement C4-A OS=Homo sapiens GN=C4A PE=1 SV=2

Match to Query 58701: 2220.062382 from(741.028070,3+) rtinseconds(2112) index(79267)

Title: Locus:1.1.1.2949.23 File:"2013-07-02 CLN FXIII 60 min 1st FT.wiff"

Data file C:\Program Files (x86)\Matrix Science\Mascot Daemon\mgf\4 FXIII 60 min 1st\mascot\_daemon\_merge.mgf

Click mouse within plot area to zoom in by factor of two about that point

Or, Plot from  to  Da

Label all possible matches  Label matches used for scoring



Monoisotopic mass of neutral peptide Mr(calc): 2220.041092

Fixed modifications: Carbamidomethyl (C) (apply to specified residues or termini only)

Variable modifications:

Q12 : Biotin:Thermo-21345 (Q)

Ions Score: 52 Expect: 0.00012

Matches : 25/160 fragment ions using 54 most intense peaks [\(help\)](#)

| #  | b                  | b <sup>++</sup> | b <sup>*</sup> | b <sup>+++</sup> | b <sup>0</sup>    | b <sup>0++</sup> | Seq. | y                  | y <sup>++</sup>   | y <sup>*</sup>     | y <sup>+++</sup>  | y <sup>0</sup>     | y <sup>0++</sup> | #  |
|----|--------------------|-----------------|----------------|------------------|-------------------|------------------|------|--------------------|-------------------|--------------------|-------------------|--------------------|------------------|----|
| 1  | 114.091340         | 57.549308       |                |                  |                   |                  | L    |                    |                   |                    |                   |                    |                  | 17 |
| 2  | <b>227.175404</b>  | 114.091340      |                |                  |                   |                  | L    | 2107.964318        | 1054.485797       | 2090.937769        | 1045.972522       | 2089.953753        | 1045.480514      | 16 |
| 3  | <b>298.212518</b>  | 149.609897      |                |                  |                   |                  | A    | 1994.880254        | <b>997.943765</b> | 1977.853705        | 989.430491        | 1976.869689        | 988.938483       | 15 |
| 4  | 399.260197         | 200.133737      |                |                  | 381.249632        | 191.128454       | T    | 1923.843140        | 962.425208        | 1906.816591        | 953.911934        | 1905.832575        | 953.419926       | 14 |
| 5  | 512.344261         | 256.675769      |                |                  | 494.333696        | 247.670486       | L    | 1822.795461        | <b>911.901369</b> | 1805.768912        | 903.388094        | 1804.784896        | 902.896086       | 13 |
| 6  | 672.374910         | 336.691093      |                |                  | <b>654.364345</b> | 327.685811       | C    | <b>1709.711397</b> | 855.359337        | 1692.684848        | 846.846062        | 1691.700832        | 846.354054       | 12 |
| 7  | 759.406938         | 380.207107      |                |                  | 741.396373        | 371.201825       | S    | <b>1549.680748</b> | <b>775.344012</b> | 1532.654199        | 766.830738        | 1531.670183        | 766.338730       | 11 |
| 8  | 830.444052         | 415.725664      |                |                  | 812.433487        | 406.720382       | A    | <b>1462.648720</b> | 731.827998        | 1445.622171        | <b>723.314724</b> | 1444.638155        | 722.822716       | 10 |
| 9  | <b>959.486645</b>  | 480.246961      |                |                  | 941.476080        | 471.241678       | E    | <b>1391.611606</b> | 696.309441        | 1374.585057        | 687.796167        | <b>1373.601041</b> | 687.304159       | 9  |
| 10 | <b>1058.555059</b> | 529.781168      |                |                  | 1040.544494       | 520.775885       | V    | <b>1262.569013</b> | 631.788145        | 1245.542464        | 623.274870        | 1244.558448        | 622.782862       | 8  |
| 11 | <b>1218.585708</b> | 609.796492      |                |                  | 1200.575143       | 600.791210       | C    | <b>1163.500599</b> | <b>582.253938</b> | <b>1146.474050</b> | 573.740663        | 1145.490034        | 573.248655       | 7  |
| 12 | 1657.811034        | 829.409155      | 1640.784485    | 820.895881       | 1639.800469       | 820.403873       | Q    | <b>1003.469950</b> | 502.238613        | 986.443401         | 493.725339        | 985.459385         | 493.233331       | 6  |
| 13 | 1817.841683        | 909.424480      | 1800.815134    | 900.911205       | 1799.831118       | 900.419197       | C    | <b>564.244624</b>  | 282.625950        | 547.218075         | 274.112676        | 546.234059         | 273.620668       | 5  |
| 14 | 1888.878797        | 944.943037      | 1871.852248    | 936.429762       | 1870.868232       | 935.937754       | A    | <b>404.213975</b>  | 202.610626        | 387.187426         | 194.097351        | 386.203410         | 193.605343       | 4  |
| 15 | 2017.921390        | 1009.464333     | 2000.894841    | 1000.951059      | 1999.910825       | 1000.459051      | E    | <b>333.176861</b>  | 167.092069        | 316.150312         | 158.578794        | <b>315.166296</b>  | 158.086786       | 3  |
| 16 | 2074.942854        | 1037.975065     | 2057.916305    | 1029.461790      | 2056.932289       | 1028.969782      | G    | <b>204.134268</b>  | 102.570772        | 187.107719         | 94.057497         |                    |                  | 2  |
| 17 |                    |                 |                |                  |                   |                  | K    | 147.112804         | 74.060040         | 130.086255         | 65.546765         |                    |                  | 1  |



NCBI BLAST search of [LLATLCSAEVCQCAEGK](#)

(Parameters: blastp, nr protein database, expect=20000, no filter, PAM30)

Other BLAST [web gateways](#)

## All matches to this query

| Score | Mr(calc):   | Delta    | Sequence                          |
|-------|-------------|----------|-----------------------------------|
| 52.4  | 2220.041092 | 0.021290 | <a href="#">LLATLCSAEVCQCAEGK</a> |

Mascot: <http://www.matrixscience.com/>



# Mascot Search Results

## Peptide View

MS/MS Fragmentation of **GCGEQTMIIYLAPTLAASR**

Found in **CO4A\_HUMAN**, Complement C4-A OS=Homo sapiens GN=C4A PE=1 SV=2

Match to Query 59329: 2249.133942 from(750.718590,3+) rtinseconds(2480) index(63895)

Title: Locus:1.1.1.3168.14 File:"2013-07-02 CLN FXIII 60 min 1st F 4.wiff"

Data file C:\Program Files (x86)\Matrix Science\Mascot Daemon\mgf4 FXIII 60 min 1st\mascot\_daemon\_merge.mgf

Click mouse within plot area to zoom in by factor of two about that point

Or, Plot from  to  Da

Label all possible matches  Label matches used for scoring



Monoisotopic mass of neutral peptide Mr(calc): 2249.100647

Fixed modifications: Carbamidomethyl (C) (apply to specified residues or termini only)

Variable modifications:

Q5 : Biotin:Thermo-21345 (Q)

Ions Score: 40 Expect: 0.0016

Matches : 19/188 fragment ions using 30 most intense peaks [\(help\)](#)

| #  | b                  | b <sup>++</sup>   | b <sup>*</sup> | b <sup>*++</sup> | b <sup>0</sup>     | b <sup>0++</sup> | Seq. | y                  | y <sup>++</sup> | y <sup>*</sup>    | y <sup>*++</sup> | y <sup>0</sup>    | y <sup>0++</sup> | #  |
|----|--------------------|-------------------|----------------|------------------|--------------------|------------------|------|--------------------|-----------------|-------------------|------------------|-------------------|------------------|----|
| 1  | 58.028740          | 29.518008         |                |                  |                    |                  | G    |                    |                 |                   |                  |                   |                  | 18 |
| 2  | 218.059389         | 109.533333        |                |                  |                    |                  | C    | 2193.086482        | 1097.046879     | 2176.059933       | 1088.533604      | 2175.075917       | 1088.041596      | 17 |
| 3  | 275.080853         | 138.044064        |                |                  |                    |                  | G    | 2033.055833        | 1017.031555     | 2016.029284       | 1008.518280      | 2015.045268       | 1008.026272      | 16 |
| 4  | 404.123446         | 202.565361        |                |                  | 386.112881         | 193.560079       | E    | 1976.034369        | 988.520822      | 1959.007820       | 980.007548       | 1958.023804       | 979.515540       | 15 |
| 5  | <b>843.348772</b>  | 422.178024        | 826.322223     | 413.664750       | 825.338207         | 413.172742       | Q    | 1846.991776        | 923.999526      | 1829.965227       | 915.486251       | 1828.981211       | 914.994243       | 14 |
| 6  | <b>944.396451</b>  | 472.701864        | 927.369902     | 464.188589       | <b>926.385886</b>  | 463.696581       | T    | 1407.766450        | 704.386863      | 1390.739901       | 695.873588       | 1389.755885       | 695.381580       | 13 |
| 7  | <b>1075.436936</b> | 538.222106        | 1058.410387    | 529.708832       | 1057.426371        | 529.216824       | M    | 1306.718771        | 653.863023      | 1289.692222       | 645.349749       | 1288.708206       | 644.857741       | 12 |
| 8  | <b>1188.521000</b> | <b>594.764138</b> | 1171.494451    | 586.250864       | 1170.510435        | 585.758855       | I    | <b>1175.678286</b> | 588.342781      | 1158.651737       | 579.829506       | 1157.667721       | 579.337498       | 11 |
| 9  | <b>1351.584329</b> | <b>676.295803</b> | 1334.557780    | 667.782528       | <b>1333.573764</b> | 667.290520       | Y    | <b>1062.594222</b> | 531.800749      | 1045.567673       | 523.287475       | 1044.583657       | 522.795466       | 10 |
| 10 | <b>1464.668393</b> | 732.837834        | 1447.641844    | 724.324560       | 1446.657828        | 723.832552       | L    | <b>899.530893</b>  | 450.269084      | 882.504344        | 441.755810       | 881.520328        | 441.263802       | 9  |
| 11 | <b>1535.705507</b> | 768.356391        | 1518.678958    | 759.843117       | 1517.694942        | 759.351109       | A    | <b>786.446829</b>  | 393.727053      | 769.420280        | 385.213778       | 768.436264        | 384.721770       | 8  |
| 12 | 1632.758271        | 816.882773        | 1615.731722    | 808.369499       | 1614.747706        | 807.877491       | P    | <b>715.409715</b>  | 358.208496      | 698.383166        | 349.695221       | <b>697.399150</b> | 349.203213       | 7  |
| 13 | 1733.805950        | 867.406613        | 1716.779401    | 858.893339       | 1715.795385        | 858.401330       | T    | 618.356951         | 309.682114      | 601.330402        | 301.168839       | 600.346386        | 300.676831       | 6  |
| 14 | 1846.890014        | 923.948645        | 1829.863465    | 915.435370       | 1828.879449        | 914.943362       | L    | <b>517.309272</b>  | 259.158274      | <b>500.282723</b> | 250.644999       | 499.298707        | 250.152991       | 5  |
| 15 | 1917.927128        | 959.467202        | 1900.900579    | 950.953927       | 1899.916563        | 950.461919       | A    | 404.225208         | 202.616242      | 387.198659        | 194.102967       | 386.214643        | 193.610959       | 4  |
| 16 | 1988.964242        | 994.985759        | 1971.937693    | 986.472484       | 1970.953677        | 985.980476       | A    | 333.188094         | 167.097685      | 316.161545        | 158.584410       | 315.177529        | 158.092402       | 3  |
| 17 | 2075.996270        | 1038.501773       | 2058.969721    | 1029.988498      | 2057.985705        | 1029.496490      | S    | 262.150980         | 131.579128      | 245.124431        | 123.065854       | 244.140415        | 122.573846       | 2  |
| 18 |                    |                   |                |                  |                    |                  | R    | 175.118952         | 88.063114       | 158.092403        | 79.549839        |                   |                  | 1  |



NCBI BLAST search of [GCGEQTMIIYLAPTLAASR](#)

(Parameters: blastp, nr protein database, expect=20000, no filter, PAM30)

Other BLAST [web gateways](#)

### All matches to this query

| Score | Mr(calc):   | Delta     | Sequence                              |
|-------|-------------|-----------|---------------------------------------|
| 39.7  | 2249.100647 | 0.033295  | <a href="#">GCGEQTMIIYLAPTLAASR</a>   |
| 9.3   | 2249.115051 | 0.018891  | <a href="#">YSTSLYASPSMVHEGVAVVPR</a> |
| 0.8   | 2249.137527 | -0.003585 | <a href="#">QKFERPICVSWSTDVKGGR</a>   |
| 0.2   | 2249.143570 | -0.009628 | <a href="#">TPPPQPPLISSMDSISQK</a>    |



# Mascot Search Results

## Peptide View

MS/MS Fragmentation of **DDPDAPLQPVTPLQLFEGR**

Found in **CO4A\_HUMAN**, Complement C4-A OS=Homo sapiens GN=C4A PE=1 SV=2

Match to Query 63019: 2418.258222 from(807.093350,3+) rtinseconds(2985) index(67691)

Title: Locus:1.1.1.3340.16 File:"2013-07-02 CLN FXIII 60 min 1st F 4.wiff"

Data file C:\Program Files (x86)\Matrix Science\Mascot Daemon\mgf4 FXIII 60 min 1st\mascot\_daemon\_merge.mgf

Click mouse within plot area to zoom in by factor of two about that point

Or, Plot from  to  Da

Label all possible matches  Label matches used for scoring



Monoisotopic mass of neutral peptide Mr(calc): 2418.225342

Fixed modifications: Carbamidomethyl (C) (apply to specified residues or termini only)

Variable modifications:

Q14 : Biotin:Thermo-21345 (Q)

Ions Score: 44 Expect: 0.00088

Matches : 12/198 fragment ions using 16 most intense peaks [\(help\)](#)

| #  | b           | b <sup>++</sup> | b <sup>*</sup> | b <sup>*++</sup> | b <sup>0</sup> | b <sup>0++</sup> | Seq. | y           | y <sup>++</sup> | y <sup>*</sup> | y <sup>*++</sup> | y <sup>0</sup> | y <sup>0++</sup> | #  |
|----|-------------|-----------------|----------------|------------------|----------------|------------------|------|-------------|-----------------|----------------|------------------|----------------|------------------|----|
| 1  | 116.034219  | 58.520748       |                |                  | 98.023654      | 49.515465        | D    |             |                 |                |                  |                |                  | 19 |
| 2  | 231.061162  | 116.034219      |                |                  | 213.050597     | 107.028936       | D    | 2304.205668 | 1152.606472     | 2287.179119    | 1144.093197      | 2286.195103    | 1143.601189      | 18 |
| 3  | 328.113926  | 164.560601      |                |                  | 310.103361     | 155.555319       | P    | 2189.178725 | 1095.093000     | 2172.152176    | 1086.579726      | 2171.168160    | 1086.087718      | 17 |
| 4  | 443.140869  | 222.074073      |                |                  | 425.130304     | 213.068790       | D    | 2092.125961 | 1046.566618     | 2075.099412    | 1038.053344      | 2074.115396    | 1037.561336      | 16 |
| 5  | 514.177983  | 257.592630      |                |                  | 496.167418     | 248.587347       | A    | 1977.099018 | 989.053147      | 1960.072469    | 980.539873       | 1959.088453    | 980.047865       | 15 |
| 6  | 611.230747  | 306.119012      |                |                  | 593.220182     | 297.113729       | P    | 1906.061904 | 953.534590      | 1889.035355    | 945.021316       | 1888.051339    | 944.529308       | 14 |
| 7  | 724.314811  | 362.661044      |                |                  | 706.304246     | 353.655761       | L    | 1809.009140 | 905.008208      | 1791.982591    | 896.494934       | 1790.998575    | 896.002926       | 13 |
| 8  | 852.373389  | 426.690333      | 835.346840     | 418.177058       | 834.362824     | 417.685050       | Q    | 1695.925076 | 848.466176      | 1678.898527    | 839.952902       | 1677.914511    | 839.460894       | 12 |
| 9  | 949.426153  | 475.216715      | 932.399604     | 466.703440       | 931.415588     | 466.211432       | P    | 1567.866498 | 784.436887      | 1550.839949    | 775.923613       | 1549.855933    | 775.431605       | 11 |
| 10 | 1048.494567 | 524.750922      | 1031.468018    | 516.237647       | 1030.484002    | 515.745639       | V    | 1470.813734 | 735.910505      | 1453.787185    | 727.397231       | 1452.803169    | 726.905223       | 10 |
| 11 | 1149.542246 | 575.274761      | 1132.515697    | 566.761487       | 1131.531681    | 566.269479       | T    | 1371.745320 | 686.376298      | 1354.718771    | 677.863024       | 1353.734755    | 677.371016       | 9  |
| 12 | 1246.595010 | 623.801143      | 1229.568461    | 615.287869       | 1228.584445    | 614.795861       | P    | 1270.697641 | 635.852459      | 1253.671092    | 627.339184       | 1252.687076    | 626.847176       | 8  |
| 13 | 1359.679074 | 680.343175      | 1342.652525    | 671.829901       | 1341.668509    | 671.337893       | L    | 1173.644877 | 587.326077      | 1156.618328    | 578.812802       | 1155.634312    | 578.320794       | 7  |
| 14 | 1798.904400 | 899.955838      | 1781.877851    | 891.442564       | 1780.893835    | 890.950556       | Q    | 1060.560813 | 530.784045      | 1043.534264    | 522.270770       | 1042.550248    | 521.778762       | 6  |
| 15 | 1911.988464 | 956.497870      | 1894.961915    | 947.984596       | 1893.977899    | 947.492588       | L    | 621.335487  | 311.171382      | 604.308938     | 302.658107       | 603.324922     | 302.166099       | 5  |
| 16 | 2059.056878 | 1030.032077     | 2042.030329    | 1021.518803      | 2041.046313    | 1021.026794      | F    | 508.251423  | 254.629350      | 491.224874     | 246.116075       | 490.240858     | 245.624067       | 4  |
| 17 | 2188.099471 | 1094.553373     | 2171.072922    | 1086.040099      | 2170.088906    | 1085.548091      | E    | 361.183009  | 181.095142      | 344.156460     | 172.581868       | 343.172444     | 172.089860       | 3  |
| 18 | 2245.120935 | 1123.064105     | 2228.094386    | 1114.550831      | 2227.110370    | 1114.058823      | G    | 232.140416  | 116.573846      | 215.113867     | 108.060571       |                |                  | 2  |
| 19 |             |                 |                |                  |                |                  | R    | 175.118952  | 88.063114       | 158.092403     | 79.549839        |                |                  | 1  |

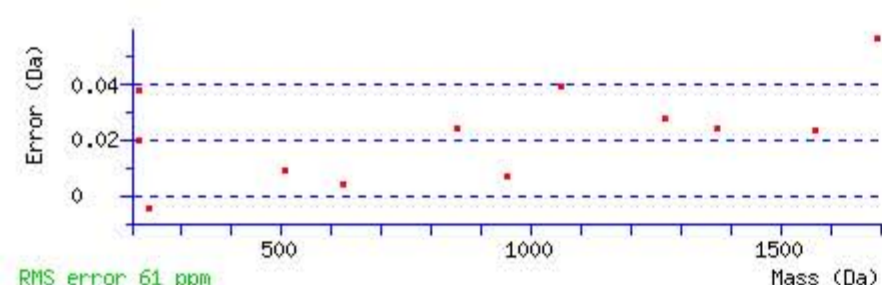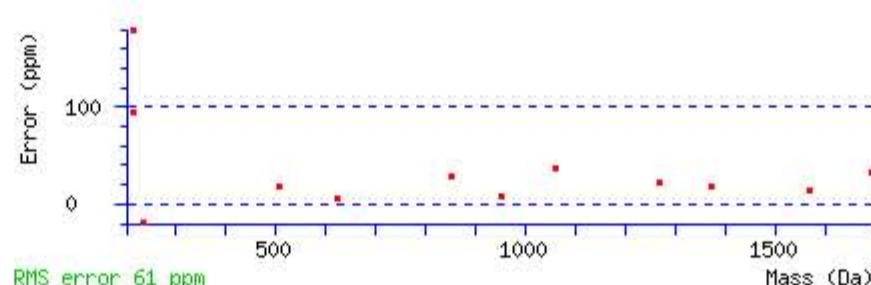

NCBI BLAST search of [DDPDAPLQPVTPLQLFEGR](#)

(Parameters: blastp, nr protein database, expect=20000, no filter, PAM30)

Other BLAST [web gateways](#)

All matches to this query

| Score | Mr(calc):   | Delta    | Sequence                            |
|-------|-------------|----------|-------------------------------------|
| 44.4  | 2418.225342 | 0.032880 | <a href="#">DDPDAPLQPVTPLQLFEGR</a> |
| 11.6  | 2418.225342 | 0.032880 | <a href="#">DDPDAPLQPVTPLQLFEGR</a> |

Mascot: <http://www.matrixscience.com/>



# MASCOT Search Results

## Peptide View

MS/MS Fragmentation of **AACAQLNDFLQEYGTQGCQV**

Found in **CO4A\_HUMAN**, Complement C4-A OS=Homo sapiens GN=C4A PE=1 SV=2

Match to Query 66392: 2583.193812 from(862.071880,3+) rtinseconds(2713) index(65399)

Title: Locus:1.1.1.3248.23 File:"2013-07-02 CLN FXIII 60 min 1st F 4.wiff"

Data file C:\Program Files (x86)\Matrix Science\Mascot Daemon\mgf\4 FXIII 60 min 1st\mascot\_daemon\_merge.mgf

Click mouse within plot area to zoom in by factor of two about that point

Or, Plot from  to  Da

Label all possible matches  Label matches used for scoring



Monoisotopic mass of neutral peptide Mr(calc): 2583.155624

Fixed modifications: Carbamidomethyl (C) (apply to specified residues or termini only)

Variable modifications:

Q5 : Biotin:Thermo-21345 (Q)

Ions Score: 59 Expect: 1.8e-005

Matches : 33/194 fragment ions using 58 most intense peaks [\(help\)](#)

| #  | b                  | b <sup>++</sup>   | b <sup>*</sup>     | b <sup>*++</sup> | b <sup>0</sup> | b <sup>0++</sup> | Seq. | y                  | y <sup>++</sup> | y <sup>*</sup>    | y <sup>*++</sup> | y <sup>0</sup>     | y <sup>0++</sup> | #  |
|----|--------------------|-------------------|--------------------|------------------|----------------|------------------|------|--------------------|-----------------|-------------------|------------------|--------------------|------------------|----|
| 1  | 72.044390          | 36.525833         |                    |                  |                |                  | A    |                    |                 |                   |                  |                    |                  | 20 |
| 2  | 143.081504         | 72.044390         |                    |                  |                |                  | A    | 2513.125782        | 1257.066529     | 2496.099233       | 1248.553254      | 2495.115217        | 1248.061246      | 19 |
| 3  | 303.112153         | 152.059714        |                    |                  |                |                  | C    | 2442.088668        | 1221.547972     | 2425.062119       | 1213.034697      | 2424.078103        | 1212.542689      | 18 |
| 4  | 374.149267         | 187.578271        |                    |                  |                |                  | A    | 2282.058019        | 1141.532647     | 2265.031470       | 1133.019373      | 2264.047454        | 1132.527365      | 17 |
| 5  | <b>813.374593</b>  | 407.190935        | 796.348044         | 398.677660       |                |                  | Q    | 2211.020905        | 1106.014090     | 2193.994356       | 1097.500816      | 2193.010340        | 1097.008808      | 16 |
| 6  | <b>926.458657</b>  | 463.732967        | 909.432108         | 455.219692       |                |                  | L    | 1771.795579        | 886.401428      | 1754.769030       | 877.888153       | 1753.785014        | 877.396145       | 15 |
| 7  | <b>1040.501584</b> | 520.754430        | 1023.475035        | 512.241155       |                |                  | N    | 1658.711515        | 829.859396      | 1641.684966       | 821.346121       | 1640.700950        | 820.854113       | 14 |
| 8  | <b>1155.528527</b> | 578.267902        | 1138.501978        | 569.754627       | 1137.517962    | 569.262619       | D    | 1544.668588        | 772.837932      | 1527.642039       | 764.324658       | <b>1526.658023</b> | 763.832650       | 13 |
| 9  | <b>1302.596941</b> | 651.802109        | <b>1285.570392</b> | 643.288834       | 1284.586376    | 642.796826       | F    | 1429.641645        | 715.324460      | 1412.615096       | 706.811186       | 1411.631080        | 706.319178       | 12 |
| 10 | <b>1415.681005</b> | <b>708.344141</b> | <b>1398.654456</b> | 699.830866       | 1397.670440    | 699.338858       | L    | 1282.573231        | 641.790253      | 1265.546682       | 633.276979       | 1264.562666        | 632.784971       | 11 |
| 11 | <b>1543.739583</b> | 772.373430        | <b>1526.713034</b> | 763.860155       | 1525.729018    | 763.368147       | Q    | <b>1169.489167</b> | 585.248222      | 1152.462618       | 576.734947       | <b>1151.478602</b> | 576.242939       | 10 |
| 12 | <b>1672.782176</b> | <b>836.894726</b> | <b>1655.755627</b> | 828.381452       | 1654.771611    | 827.889444       | E    | <b>1041.430589</b> | 521.218932      | 1024.404040       | 512.705658       | 1023.420024        | 512.213650       | 9  |
| 13 | <b>1835.845505</b> | <b>918.426391</b> | 1818.818956        | 909.913116       | 1817.834940    | 909.421108       | Y    | <b>912.387996</b>  | 456.697636      | 895.361447        | 448.184361       | 894.377431         | 447.692353       | 8  |
| 14 | 1892.866969        | <b>946.937123</b> | 1875.840420        | 938.423848       | 1874.856404    | 937.931840       | G    | <b>749.324667</b>  | 375.165971      | 732.298118        | 366.652697       | <b>731.314102</b>  | 366.160689       | 7  |
| 15 | <b>1993.914648</b> | <b>997.460962</b> | 1976.888099        | 988.947688       | 1975.904083    | 988.455680       | T    | <b>692.303203</b>  | 346.655239      | 675.276654        | 338.141965       | 674.292638         | 337.649957       | 6  |
| 16 | 2121.973226        | 1061.490251       | 2104.946677        | 1052.976976      | 2103.962661    | 1052.484968      | Q    | <b>591.255524</b>  | 296.131400      | 574.228975        | 287.618125       |                    |                  | 5  |
| 17 | 2178.994690        | 1090.000983       | 2161.968141        | 1081.487708      | 2160.984125    | 1080.995700      | G    | <b>463.196946</b>  | 232.102111      | 446.170397        | 223.588836       |                    |                  | 4  |
| 18 | 2339.025339        | 1170.016307       | <b>2321.998790</b> | 1161.503033      | 2321.014774    | 1161.011025      | C    | <b>406.175482</b>  | 203.591379      | 389.148933        | 195.078104       |                    |                  | 3  |
| 19 | 2467.083917        | 1234.045596       | 2450.057368        | 1225.532322      | 2449.073352    | 1225.040314      | Q    | <b>246.144833</b>  | 123.576054      | <b>229.118284</b> | 115.062780       |                    |                  | 2  |
| 20 |                    |                   |                    |                  |                |                  | V    | 118.086255         | 59.546765       |                   |                  |                    |                  | 1  |



NCBI BLAST search of [AACAQLNDFLQEYGTQGCQV](#)

(Parameters: blastp, nr protein database, expect=20000, no filter, PAM30)

Other BLAST [web gateways](#)

All matches to this query

| Score | Mr(calc):   | Delta    | Sequence                             |
|-------|-------------|----------|--------------------------------------|
| 58.9  | 2583.155624 | 0.038188 | <a href="#">AACAQLNDFLQEYGTQGCQV</a> |
| 19.8  | 2583.155624 | 0.038188 | <a href="#">AACAQLNDFLQEYGTQGCQV</a> |



# MASCOT SCIENCE Mascot Search Results

## Peptide View

MS/MS Fragmentation of **GEQIQLK**

Found in **COS\_HUMAN**, Complement C5 OS=Homo sapiens GN=C5 PE=1 SV=4

Match to Query 23949: 1125.623328 from(563.818940,2+) rtinseconds(1718) index(40221)

Title: Locus:1.1.1.2882.13 File:"2013-07-02 CLN FXIII 60 min 1st F 3.wiff"

Data file C:\Program Files (x86)\Matrix Science\Mascot Daemon\mgf\4 FXIII 60 min 1st\mascot\_daemon\_merge.mgf

Click mouse within plot area to zoom in by factor of two about that point

Or, Plot from  to  Da

Label all possible matches  Label matches used for scoring

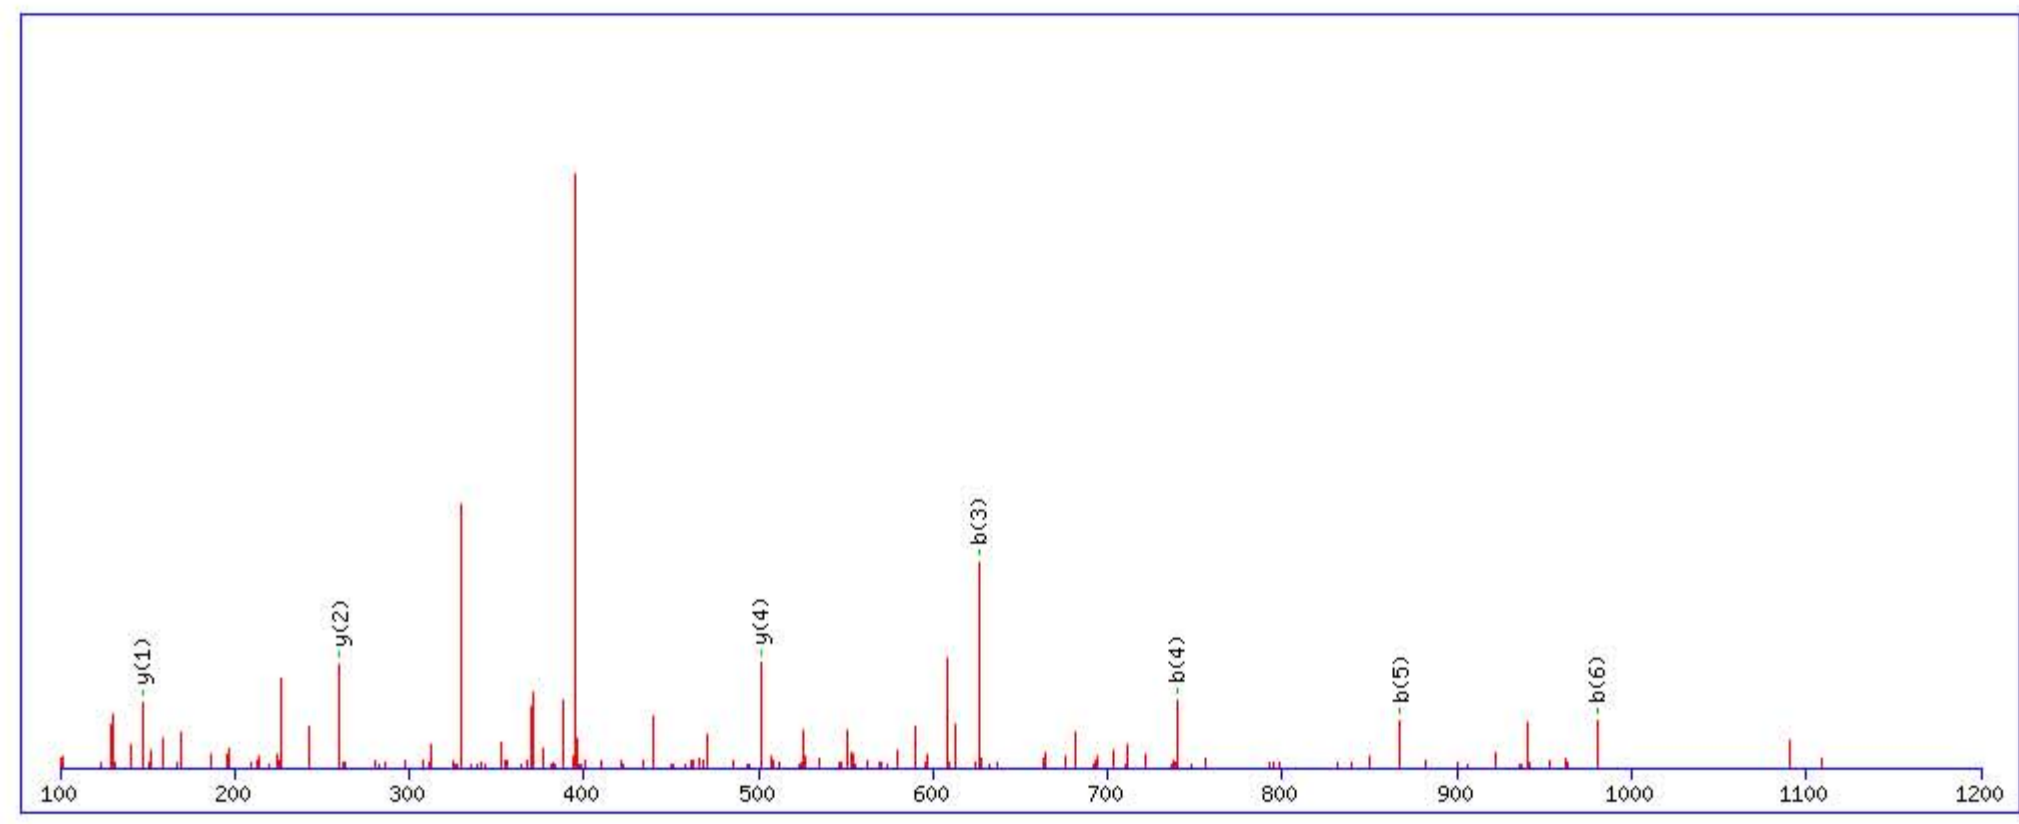

Monoisotopic mass of neutral peptide Mr(calc): 1125.621597

Fixed modifications: Carbamidomethyl (C) (apply to specified residues or termini only)

Variable modifications:

Q3 : Biotin:Thermo-21345 (Q)

Ions Score: 26 Expect: 0.05

Matches : 7/56 fragment ions using 11 most intense peaks [\(help\)](#)

| # | b                 | b <sup>++</sup> | b <sup>*</sup> | b <sup>*++</sup> | b <sup>0</sup> | b <sup>0++</sup> | Seq. | y                 | y <sup>++</sup> | y <sup>*</sup> | y <sup>*++</sup> | y <sup>0</sup> | y <sup>0++</sup> | # |
|---|-------------------|-----------------|----------------|------------------|----------------|------------------|------|-------------------|-----------------|----------------|------------------|----------------|------------------|---|
| 1 | 58.028740         | 29.518008       |                |                  |                |                  | G    |                   |                 |                |                  |                |                  | 7 |
| 2 | 187.071333        | 94.039305       |                |                  | 169.060768     | 85.034022        | E    | 1069.607429       | 535.307353      | 1052.580880    | 526.794078       | 1051.596864    | 526.302070       | 6 |
| 3 | <b>626.296659</b> | 313.651968      | 609.270110     | 305.138693       | 608.286094     | 304.646685       | Q    | 940.564836        | 470.786056      | 923.538287     | 462.272782       |                |                  | 5 |
| 4 | <b>739.380723</b> | 370.194000      | 722.354174     | 361.680725       | 721.370158     | 361.188717       | I    | <b>501.339510</b> | 251.173393      | 484.312961     | 242.660119       |                |                  | 4 |
| 5 | <b>867.439301</b> | 434.223289      | 850.412752     | 425.710014       | 849.428736     | 425.218006       | Q    | 388.255446        | 194.631361      | 371.228897     | 186.118087       |                |                  | 3 |
| 6 | <b>980.523365</b> | 490.765321      | 963.496816     | 482.252046       | 962.512800     | 481.760038       | L    | <b>260.196868</b> | 130.602072      | 243.170319     | 122.088798       |                |                  | 2 |
| 7 |                   |                 |                |                  |                |                  | K    | <b>147.112804</b> | 74.060040       | 130.086255     | 65.546766        |                |                  | 1 |

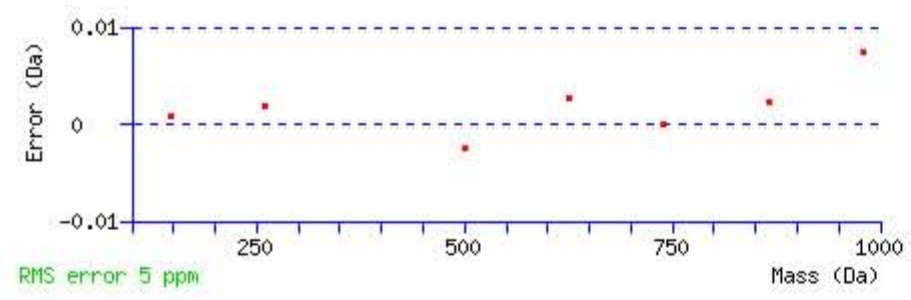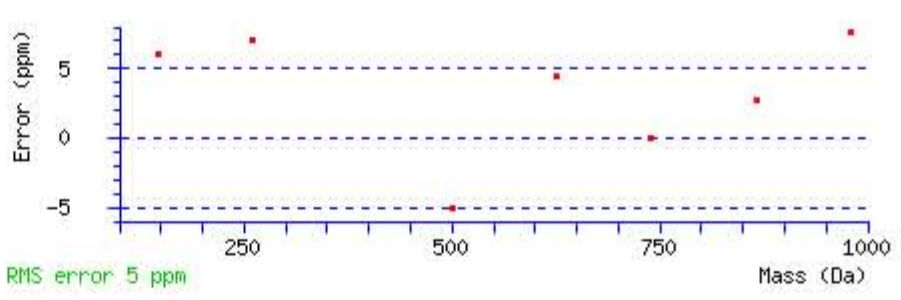

NCBI BLAST search of [GEQIQLK](#)

(Parameters: blastp, nr protein database, expect=20000, no filter, PAM30)

Other BLAST [web gateways](#)

### All matches to this query

| Score | Mr(calc):   | Delta     | Sequence                    |
|-------|-------------|-----------|-----------------------------|
| 26.4  | 1125.621597 | 0.001731  | <a href="#">GEQIQLK</a>     |
| 18.7  | 1125.607666 | 0.015662  | <a href="#">QMDRHAKIK</a>   |
| 13.0  | 1125.632828 | -0.009500 | <a href="#">KLCLSHLQK</a>   |
| 11.4  | 1125.621597 | 0.001731  | <a href="#">GQELIQK</a>     |
| 11.4  | 1125.639359 | -0.016031 | <a href="#">LDLLGNLPGSK</a> |
| 11.2  | 1125.621597 | 0.001731  | <a href="#">EQVAQLK</a>     |
| 10.8  | 1125.632813 | -0.009485 | <a href="#">EQAARK</a>      |
| 9.6   | 1125.621582 | 0.001746  | <a href="#">QNLEALK</a>     |
| 9.6   | 1125.621613 | 0.001715  | <a href="#">QVDVNIK</a>     |
| 8.4   | 1125.636856 | -0.013528 | <a href="#">WAAQVIK</a>     |



# MASCOT Search Results

## Peptide View

MS/MS Fragmentation of **TSGMQFCVK**

Found in **CO5\_HUMAN**, Complement C5 OS=Homo sapiens GN=C5 PE=1 SV=4

Match to Query 33478: 1367.645968 from(684.830260,2+) rtinseconds(1905) index(41458)

Title: Locus:1.1.1.2947.17 File:"2013-07-02 CLN FXIII 60 min 1st F 3.wiff"

Data file C:\Program Files (x86)\Matrix Science\Mascot Daemon\mgf\4 FXIII 60 min 1st\mascot\_daemon\_merge.mgf

Click mouse within plot area to zoom in by factor of two about that point

Or, Plot from  to  Da

Label all possible matches  Label matches used for scoring

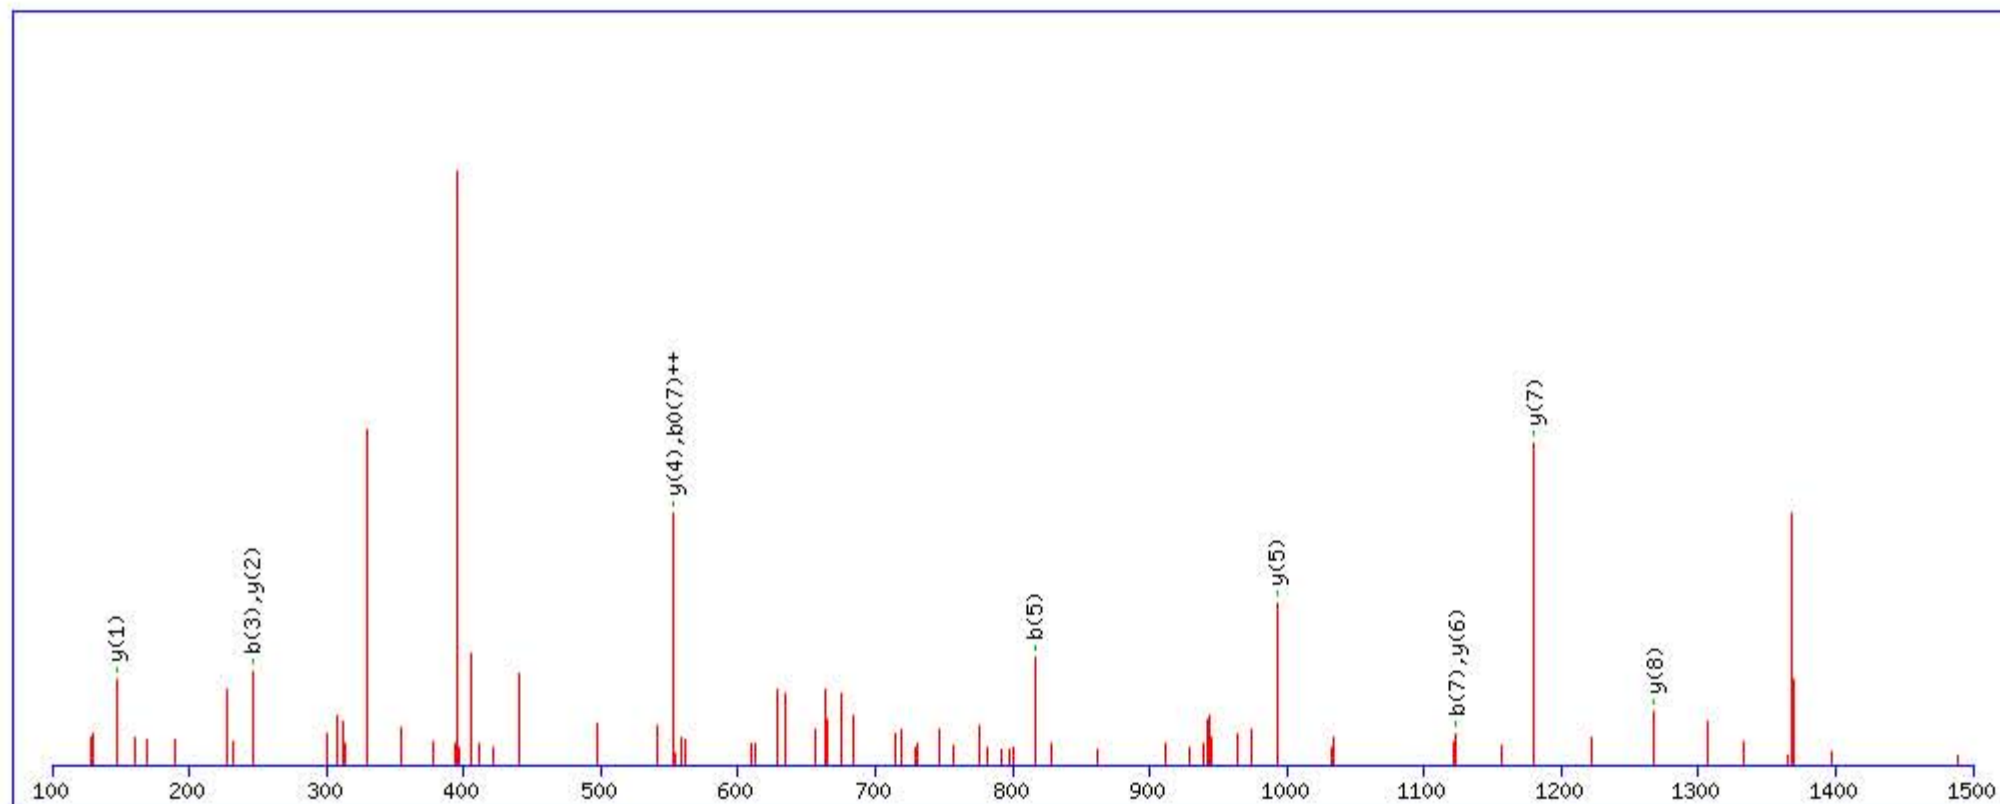

Monoisotopic mass of neutral peptide Mr(calc): 1367.639999

Fixed modifications: Carbamidomethyl (C) (apply to specified residues or termini only)

Variable modifications:

Q5 : Biotin:Thermo-21345 (Q)

Ions Score: 52 Expect: 3.2e-005

Matches : 11/74 fragment ions using 13 most intense peaks [\(help\)](#)

| # | b           | b <sup>++</sup> | b <sup>*</sup> | b <sup>*++</sup> | b <sup>0</sup> | b <sup>0++</sup> | Seq. | y           | y <sup>++</sup> | y <sup>*</sup> | y <sup>*++</sup> | y <sup>0</sup> | y <sup>0++</sup> | # |
|---|-------------|-----------------|----------------|------------------|----------------|------------------|------|-------------|-----------------|----------------|------------------|----------------|------------------|---|
| 1 | 102.054955  | 51.531116       |                |                  | 84.044390      | 42.525833        | T    |             |                 |                |                  |                |                  | 9 |
| 2 | 189.086983  | 95.047129       |                |                  | 171.076418     | 86.041847        | S    | 1267.599584 | 634.303430      | 1250.573035    | 625.790156       | 1249.589019    | 625.298148       | 8 |
| 3 | 246.108447  | 123.557861      |                |                  | 228.097882     | 114.552579       | G    | 1180.567556 | 590.787416      | 1163.541007    | 582.274142       |                |                  | 7 |
| 4 | 377.148932  | 189.078104      |                |                  | 359.138367     | 180.072822       | M    | 1123.546092 | 562.276684      | 1106.519543    | 553.763410       |                |                  | 6 |
| 5 | 816.374258  | 408.690767      | 799.347709     | 400.177493       | 798.363693     | 399.685485       | Q    | 992.505607  | 496.756442      | 975.479058     | 488.243167       |                |                  | 5 |
| 6 | 963.442672  | 482.224974      | 946.416123     | 473.711700       | 945.432107     | 473.219692       | F    | 553.280281  | 277.143779      | 536.253732     | 268.630504       |                |                  | 4 |
| 7 | 1123.473321 | 562.240298      | 1106.446772    | 553.727024       | 1105.462756    | 553.235016       | C    | 406.211867  | 203.609571      | 389.185318     | 195.096297       |                |                  | 3 |
| 8 | 1222.541735 | 611.774506      | 1205.515186    | 603.261231       | 1204.531170    | 602.769223       | V    | 246.181218  | 123.594247      | 229.154669     | 115.080973       |                |                  | 2 |
| 9 |             |                 |                |                  |                |                  | K    | 147.112804  | 74.060040       | 130.086255     | 65.546765        |                |                  | 1 |

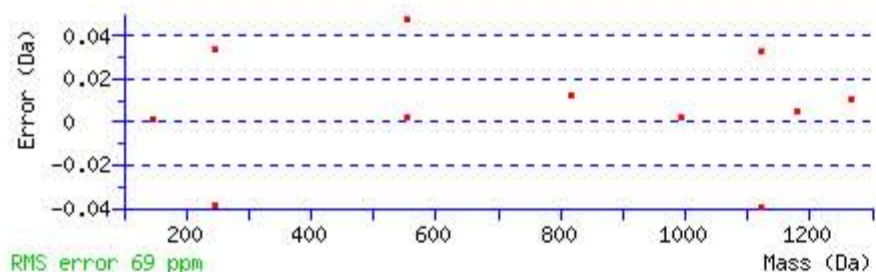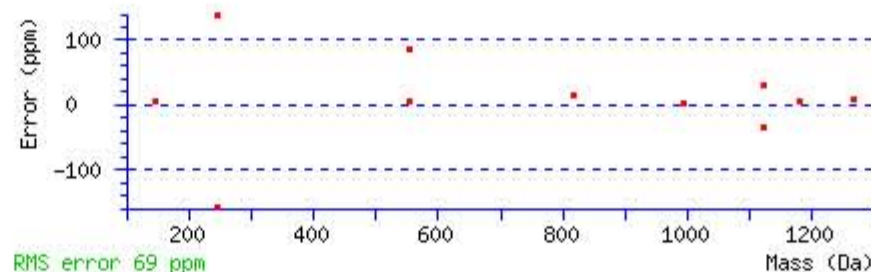

NCBI BLAST search of **TSGMQFCVK**

(Parameters: blastp, nr protein database, expect=20000, no filter, PAM30)

Other BLAST [web gateways](#)

All matches to this query

| Score | Mr(calc):   | Delta     | Sequence                    |
|-------|-------------|-----------|-----------------------------|
| 52.4  | 1367.639999 | 0.005969  | <a href="#">TSGMQFCVK</a>   |
| 4.3   | 1367.650314 | -0.004346 | <a href="#">TLQGERMENYK</a> |
| 1.4   | 1367.646484 | -0.000516 | <a href="#">QIMEETYK</a>    |



# MASCOT SEARCH RESULTS

## Peptide View

MS/MS Fragmentation of **AFTECCVVASQLR**

Found in **COS\_HUMAN**, Complement C5 OS=Homo sapiens GN=C5 PE=1 SV=4

Match to Query 49501: 1850.895012 from(617.972280,3+) rtinseconds(2161) index(43164)

Title: Locus:1.1.1.3036.14 File:"2013-07-02 CLN FXIII 60 min 1st F 3.wiff"

Data file C:\Program Files (x86)\Matrix Science\Mascot Daemon\mgf4 FXIII 60 min 1st\mascot\_daemon\_merge.mgf

Click mouse within plot area to zoom in by factor of two about that point

Or, Plot from  to  Da

Label all possible matches  Label matches used for scoring

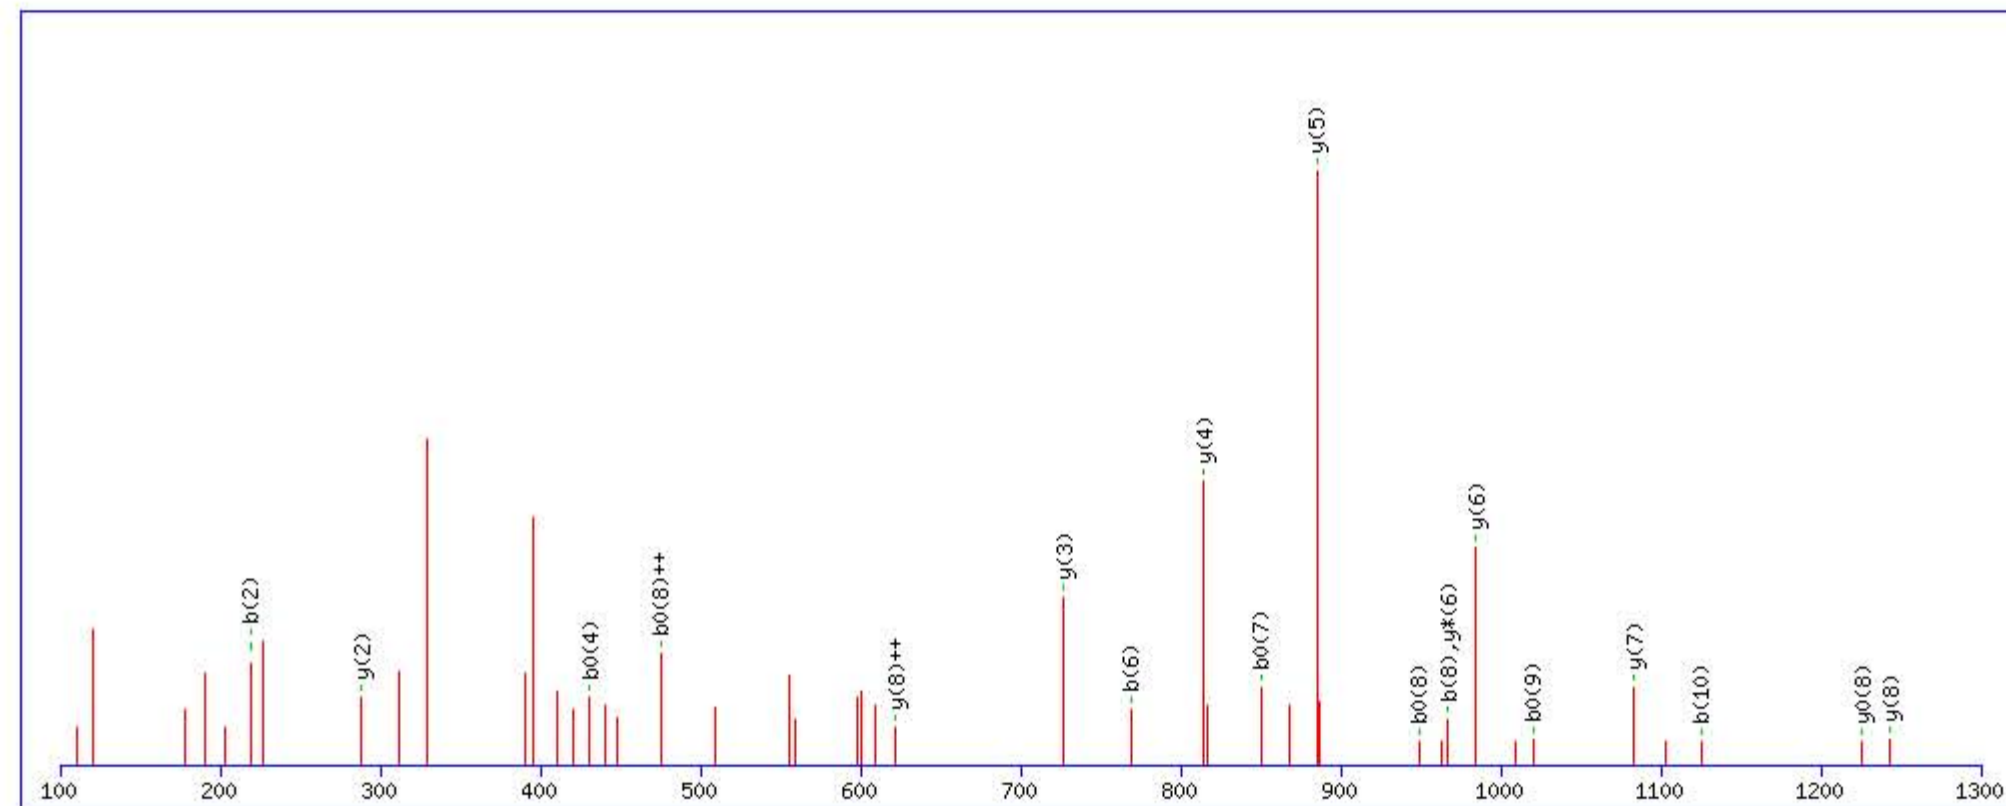

Monoisotopic mass of neutral peptide Mr(calc): 1850.884140

Fixed modifications: Carbamidomethyl (C) (apply to specified residues or termini only)

Variable modifications:

Q11 : Biotin:Thermo-21345 (Q)

Ions Score: 37 Expect: 0.00039

Matches : 19/114 fragment ions using 30 most intense peaks [\(help\)](#)

| #  | b                  | b <sup>++</sup> | b <sup>+</sup> | b <sup>+++</sup> | b <sup>0</sup>     | b <sup>0++</sup>  | Seq. | y                  | y <sup>++</sup>   | y <sup>+</sup>    | y <sup>+++</sup> | y <sup>0</sup>     | y <sup>0++</sup> | #  |
|----|--------------------|-----------------|----------------|------------------|--------------------|-------------------|------|--------------------|-------------------|-------------------|------------------|--------------------|------------------|----|
| 1  | 72.044390          | 36.525833       |                |                  |                    |                   | A    |                    |                   |                   |                  |                    |                  | 13 |
| 2  | <b>219.112804</b>  | 110.060040      |                |                  |                    |                   | F    | 1780.854296        | 890.930786        | 1763.827747       | 882.417512       | 1762.843731        | 881.925504       | 12 |
| 3  | 320.160483         | 160.583879      |                |                  | 302.149918         | 151.578597        | T    | 1633.785882        | 817.396579        | 1616.759333       | 808.883305       | 1615.775317        | 808.391297       | 11 |
| 4  | 449.203076         | 225.105176      |                |                  | <b>431.192511</b>  | 216.099894        | E    | 1532.738203        | 766.872740        | 1515.711654       | 758.359465       | 1514.727638        | 757.867457       | 10 |
| 5  | 609.233725         | 305.120501      |                |                  | 591.223160         | 296.115218        | C    | 1403.695610        | 702.351443        | 1386.669061       | 693.838169       | 1385.685045        | 693.346161       | 9  |
| 6  | <b>769.264374</b>  | 385.135825      |                |                  | 751.253809         | 376.130543        | C    | <b>1243.664961</b> | <b>622.336119</b> | 1226.638412       | 613.822844       | <b>1225.654396</b> | 613.330836       | 8  |
| 7  | 868.332788         | 434.670032      |                |                  | <b>850.322223</b>  | 425.664750        | V    | <b>1083.634312</b> | 542.320794        | 1066.607763       | 533.807520       | 1065.623747        | 533.315512       | 7  |
| 8  | <b>967.401202</b>  | 484.204239      |                |                  | <b>949.390637</b>  | <b>475.198957</b> | V    | <b>984.565898</b>  | 492.786587        | <b>967.539349</b> | 484.273313       | 966.555333         | 483.781305       | 6  |
| 9  | 1038.438316        | 519.722796      |                |                  | <b>1020.427751</b> | 510.717514        | A    | <b>885.497484</b>  | 443.252380        | 868.470935        | 434.739106       | 867.486919         | 434.247098       | 5  |
| 10 | <b>1125.470344</b> | 563.238810      |                |                  | 1107.459779        | 554.233528        | S    | <b>814.460370</b>  | 407.733823        | 797.433821        | 399.220549       | 796.449805         | 398.728541       | 4  |
| 11 | 1564.695670        | 782.851473      | 1547.669121    | 774.338199       | 1546.685105        | 773.846191        | Q    | <b>727.428342</b>  | 364.217809        | 710.401793        | 355.704535       |                    |                  | 3  |
| 12 | 1677.779734        | 839.393505      | 1660.753185    | 830.880231       | 1659.769169        | 830.388223        | L    | <b>288.203016</b>  | 144.605146        | 271.176467        | 136.091871       |                    |                  | 2  |
| 13 |                    |                 |                |                  |                    |                   | R    | 175.118952         | 88.063114         | 158.092403        | 79.549839        |                    |                  | 1  |

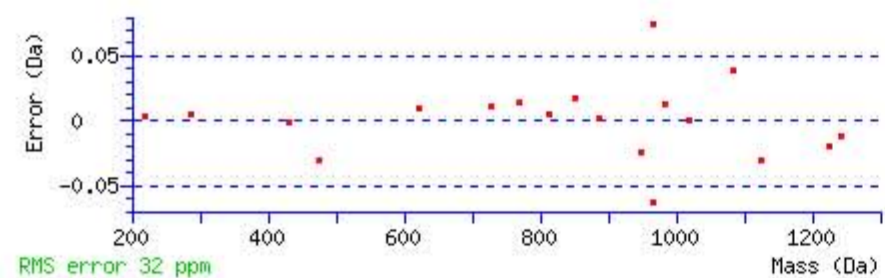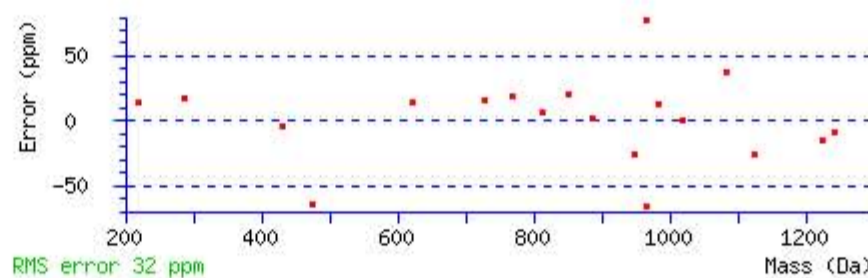

NCBI BLAST search of **AFTECCVVASQLR**

(Parameters: blastp, nr protein database, expect=20000, no filter, PAM30)

Other BLAST [web gateways](#)

All matches to this query

| Score | Mr(calc):   | Delta     | Sequence                            |
|-------|-------------|-----------|-------------------------------------|
| 36.8  | 1850.884140 | 0.010872  | <a href="#">AFTECCVVASQLR</a>       |
| 0.5   | 1850.893127 | 0.001885  | <a href="#">AMESTATAAVAAELVSADK</a> |
| 0.3   | 1850.901901 | -0.006889 | <a href="#">KSVEGRPMFVSPCVDK</a>    |

Mascot: <http://www.matrixscience.com/>



# MASCOT Search Results

## Peptide View

MS/MS Fragmentation of **MSAVEGICTSESPVIDHQGTK**

Found in **CO5\_HUMAN**, Complement C5 OS=Homo sapiens GN=C5 PE=1 SV=4

Match to Query 66127: 2556.220602 from(853.080810,3+) rtinseconds(1920) index(41582)

Title: Locus:1.1.1.2952.24 File:"2013-07-02 CLN FXIII 60 min 1st F 3.wiff"

Data file C:\Program Files (x86)\Matrix Science\Mascot Daemon\mgf\4 FXIII 60 min 1st\mascot\_daemon\_merge.mgf

Click mouse within plot area to zoom in by factor of two about that point

Or, Plot from  to  Da

Label all possible matches  Label matches used for scoring

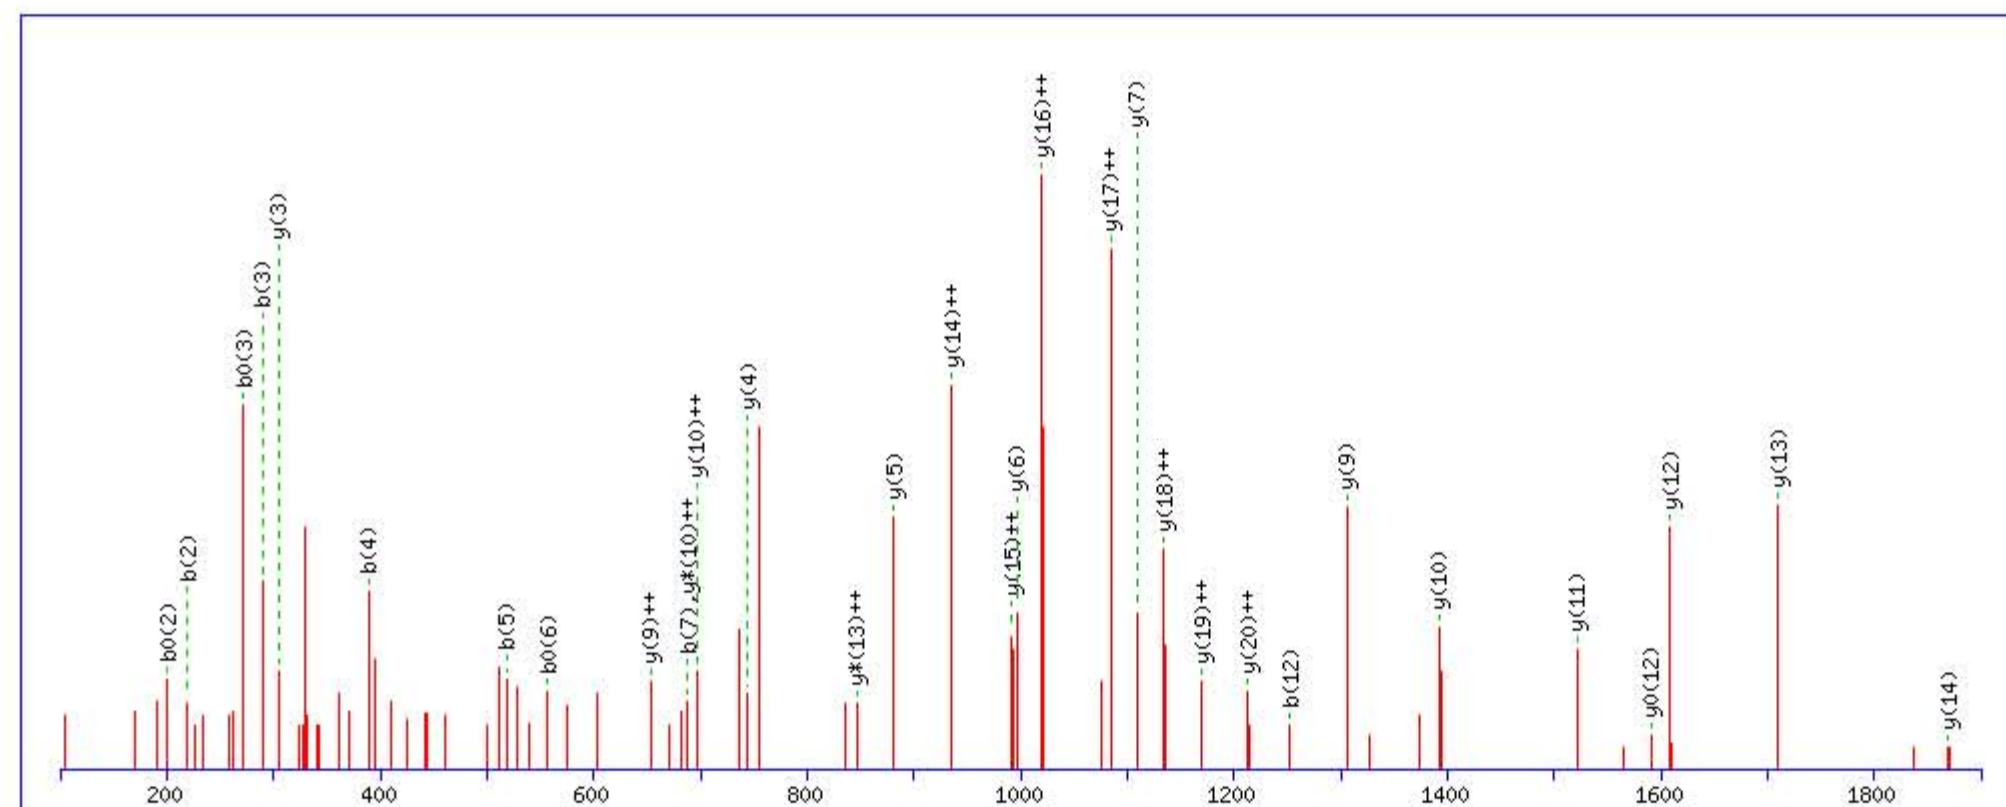

Monoisotopic mass of neutral peptide Mr(calc): 2556.202240

Fixed modifications: Carbamidomethyl (C) (apply to specified residues or termini only)

Variable modifications:

Q18 : Biotin:Thermo-21345 (Q)

Ions Score: 70 Expect: 2.4e-006

Matches : 32/202 fragment ions using 60 most intense peaks [\(help\)](#)

| #  | b                  | b <sup>++</sup> | b <sup>*</sup> | b <sup>*++</sup> | b <sup>0</sup>    | b <sup>0++</sup> | Seq. | y                  | y <sup>++</sup>    | y <sup>*</sup> | y <sup>*++</sup>  | y <sup>0</sup>     | y <sup>0++</sup> | #  |
|----|--------------------|-----------------|----------------|------------------|-------------------|------------------|------|--------------------|--------------------|----------------|-------------------|--------------------|------------------|----|
| 1  | 132.047761         | 66.527518       |                |                  |                   |                  | M    |                    |                    |                |                   |                    |                  | 21 |
| 2  | <b>219.079789</b>  | 110.043532      |                |                  | 201.069224        | 101.038250       | S    | 2426.169024        | <b>1213.588150</b> | 2409.142475    | 1205.074875       | 2408.158459        | 1204.582867      | 20 |
| 3  | <b>290.116903</b>  | 145.562089      |                |                  | <b>272.106338</b> | 136.556807       | A    | 2339.136996        | <b>1170.072136</b> | 2322.110447    | 1161.558861       | 2321.126431        | 1161.066853      | 19 |
| 4  | <b>389.185317</b>  | 195.096296      |                |                  | 371.174752        | 186.091014       | V    | 2268.099882        | <b>1134.553579</b> | 2251.073333    | 1126.040304       | 2250.089317        | 1125.548296      | 18 |
| 5  | <b>518.227910</b>  | 259.617593      |                |                  | 500.217345        | 250.612311       | E    | 2169.031468        | <b>1085.019372</b> | 2152.004919    | 1076.506097       | 2151.020903        | 1076.014089      | 17 |
| 6  | 575.249374         | 288.128325      |                |                  | <b>557.238809</b> | 279.123043       | G    | 2039.988875        | <b>1020.498076</b> | 2022.962326    | 1011.984801       | 2021.978310        | 1011.492793      | 16 |
| 7  | <b>688.333438</b>  | 344.670357      |                |                  | 670.322873        | 335.665075       | I    | 1982.967411        | <b>991.987343</b>  | 1965.940862    | 983.474069        | 1964.956846        | 982.982061       | 15 |
| 8  | 848.364087         | 424.685682      |                |                  | 830.353522        | 415.680399       | C    | <b>1869.883347</b> | <b>935.445312</b>  | 1852.856798    | 926.932037        | 1851.872782        | 926.440029       | 14 |
| 9  | 949.411766         | 475.209521      |                |                  | 931.401201        | 466.204239       | T    | <b>1709.852698</b> | 855.429987         | 1692.826149    | <b>846.916713</b> | 1691.842133        | 846.424704       | 13 |
| 10 | 1036.443794        | 518.725535      |                |                  | 1018.433229       | 509.720253       | S    | <b>1608.805019</b> | 804.906147         | 1591.778470    | 796.392873        | <b>1590.794454</b> | 795.900865       | 12 |
| 11 | 1165.486387        | 583.246832      |                |                  | 1147.475822       | 574.241549       | E    | <b>1521.772991</b> | 761.390133         | 1504.746442    | 752.876859        | 1503.762426        | 752.384851       | 11 |
| 12 | <b>1252.518415</b> | 626.762846      |                |                  | 1234.507850       | 617.757563       | S    | <b>1392.730398</b> | <b>696.868837</b>  | 1375.703849    | <b>688.355563</b> | 1374.719833        | 687.863554       | 10 |
| 13 | 1349.571179        | 675.289228      |                |                  | 1331.560614       | 666.283945       | P    | <b>1305.698370</b> | <b>653.352823</b>  | 1288.671821    | 644.839548        | 1287.687805        | 644.347540       | 9  |
| 14 | 1448.639593        | 724.823435      |                |                  | 1430.629028       | 715.818152       | V    | 1208.645606        | 604.826441         | 1191.619057    | 596.313166        | 1190.635041        | 595.821158       | 8  |
| 15 | 1561.723657        | 781.365467      |                |                  | 1543.713092       | 772.360184       | I    | <b>1109.577192</b> | 555.292234         | 1092.550643    | 546.778959        | 1091.566627        | 546.286951       | 7  |
| 16 | 1676.750600        | 838.878938      |                |                  | 1658.740035       | 829.873656       | D    | <b>996.493128</b>  | 498.750202         | 979.466579     | 490.236927        | 978.482563         | 489.744919       | 6  |
| 17 | 1813.809512        | 907.408394      |                |                  | 1795.798947       | 898.403112       | H    | <b>881.466185</b>  | 441.236730         | 864.439636     | 432.723456        | 863.455620         | 432.231448       | 5  |
| 18 | 2253.034838        | 1127.021057     | 2236.008289    | 1118.507782      | 2235.024273       | 1118.015774      | Q    | <b>744.407273</b>  | 372.707274         | 727.380724     | 364.194000        | 726.396708         | 363.701992       | 4  |
| 19 | 2310.056302        | 1155.531789     | 2293.029753    | 1147.018514      | 2292.045737       | 1146.526506      | G    | <b>305.181947</b>  | 153.094611         | 288.155398     | 144.581337        | 287.171382         | 144.089329       | 3  |
| 20 | 2411.103981        | 1206.055628     | 2394.077432    | 1197.542354      | 2393.093416       | 1197.050346      | T    | 248.160483         | 124.583879         | 231.133934     | 116.070605        | 230.149918         | 115.578597       | 2  |
| 21 |                    |                 |                |                  |                   |                  | K    | 147.112804         | 74.060040          | 130.086255     | 65.546765         |                    |                  | 1  |

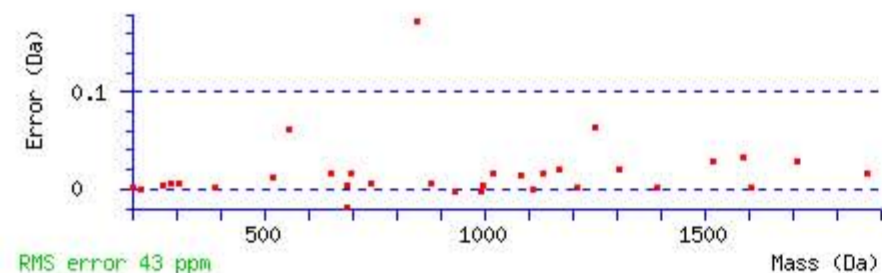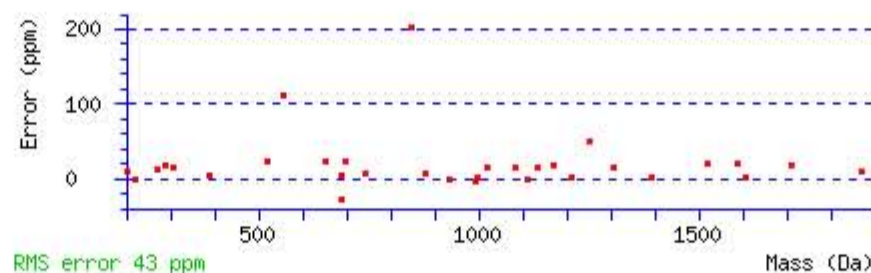

NCBI BLAST search of [MSAVEGICTSESPVIDHQGTK](#)

(Parameters: blastp, nr protein database, expect=20000, no filter, PAM30)

Other BLAST [web gateways](#)

All matches to this query

| Score | Mr(calc):   | Delta    | Sequence                              |
|-------|-------------|----------|---------------------------------------|
| 69.7  | 2556.202240 | 0.018362 | <a href="#">MSAVEGICTSESPVIDHQGTK</a> |

Mascot: <http://www.matrixscience.com/>



# MASCOT SEARCH RESULTS

## Peptide View

MS/MS Fragmentation of **QGDVECQR**

Found in **CO6\_HUMAN**, Complement component C6 OS=Homo sapiens GN=C6 PE=1 SV=3

Match to Query 30982: 1301.603068 from(651.808810,2+) rtinseconds(1326) index(19874)

Title: Locus:1.1.1.2416.18 File:"2013-07-02 CLN FXIII 60 min 1st F 2.wiff"

Data file C:\Program Files (x86)\Matrix Science\Mascot Daemon\mgf4 FXIII 60 min 1st\mascot\_daemon\_merge.mgf

Click mouse within plot area to zoom in by factor of two about that point

Or, Plot from  to  Da

Label all possible matches  Label matches used for scoring

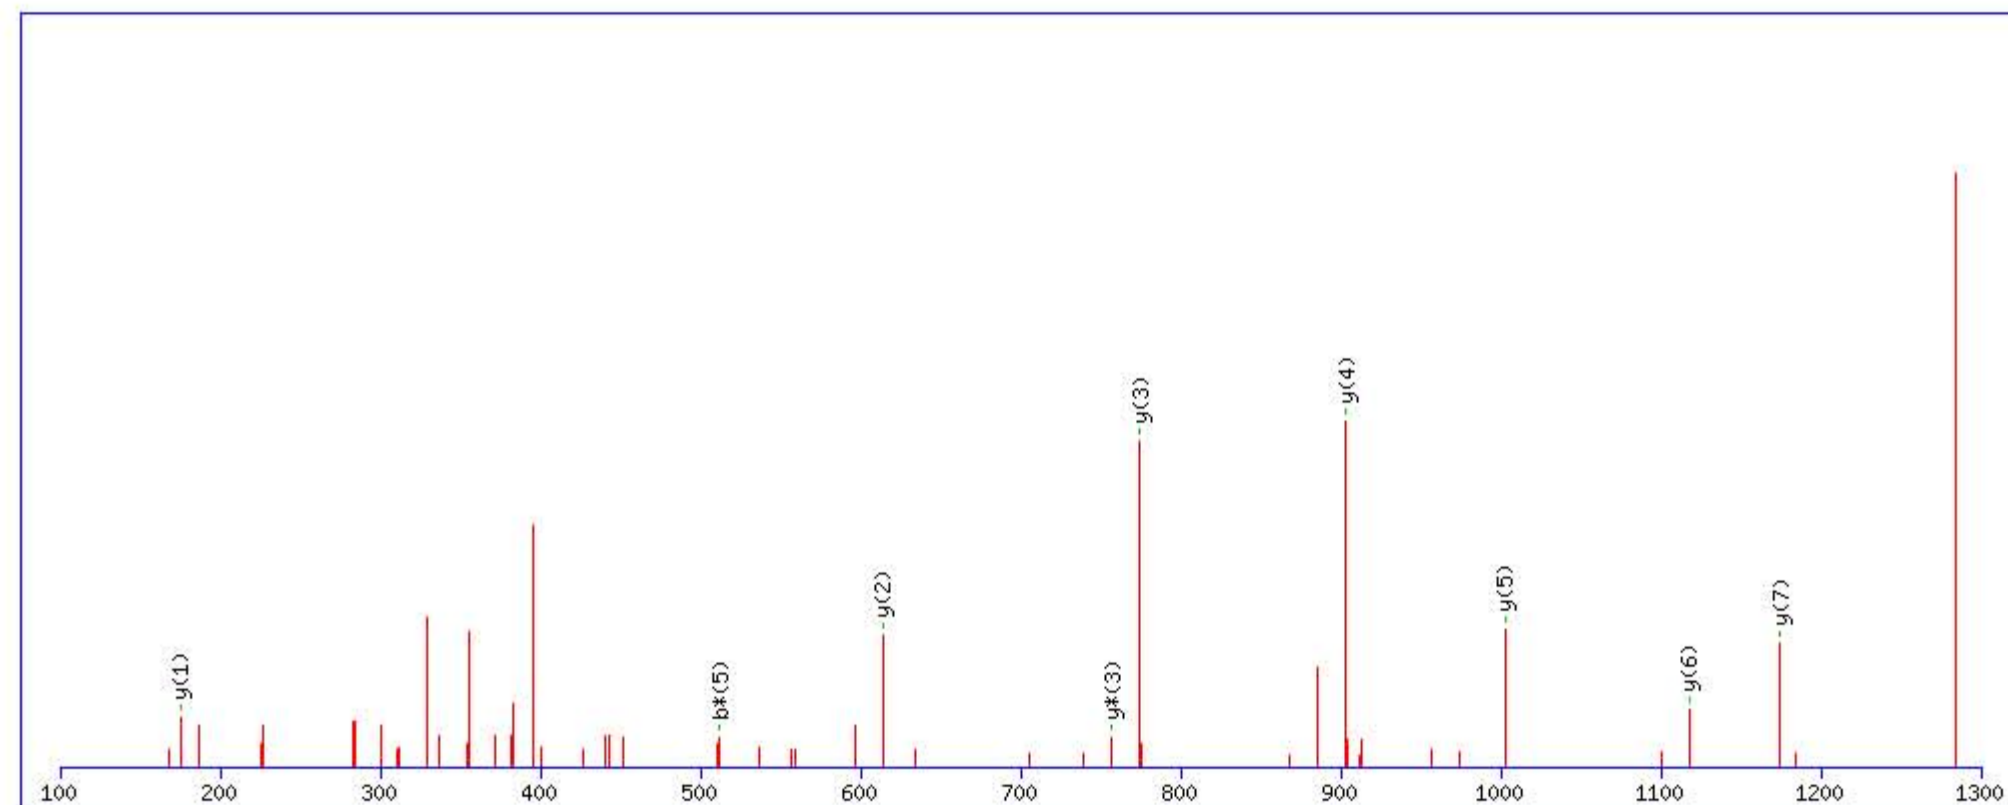

Monoisotopic mass of neutral peptide Mr(calc): 1301.585648

Fixed modifications: Carbamidomethyl (C) (apply to specified residues or termini only)

Variable modifications:

Q7 : Biotin:Thermo-21345 (Q)

Ions Score: 60 Expect: 8.8e-006

Matches : 9/74 fragment ions using 12 most intense peaks [\(help\)](#)

| # | b           | b <sup>++</sup> | b <sup>*</sup>    | b <sup>+++</sup> | b <sup>0</sup> | b <sup>0++</sup> | Seq. | y                  | y <sup>++</sup> | y <sup>*</sup>    | y <sup>+++</sup> | y <sup>0</sup> | y <sup>0++</sup> | # |
|---|-------------|-----------------|-------------------|------------------|----------------|------------------|------|--------------------|-----------------|-------------------|------------------|----------------|------------------|---|
| 1 | 129.065854  | 65.036565       | 112.039305        | 56.523291        |                |                  | Q    |                    |                 |                   |                  |                |                  | 8 |
| 2 | 186.087318  | 93.547297       | 169.060769        | 85.034023        |                |                  | G    | <b>1174.534341</b> | 587.770809      | 1157.507792       | 579.257534       | 1156.523776    | 578.765526       | 7 |
| 3 | 301.114261  | 151.060768      | 284.087712        | 142.547494       | 283.103696     | 142.055486       | D    | <b>1117.512877</b> | 559.260077      | 1100.486328       | 550.746802       | 1099.502312    | 550.254794       | 6 |
| 4 | 400.182675  | 200.594976      | 383.156126        | 192.081701       | 382.172110     | 191.589693       | V    | <b>1002.485934</b> | 501.746605      | 985.459385        | 493.233331       | 984.475369     | 492.741323       | 5 |
| 5 | 529.225268  | 265.116272      | <b>512.198719</b> | 256.602998       | 511.214703     | 256.110990       | E    | <b>903.417520</b>  | 452.212398      | 886.390971        | 443.699124       | 885.406955     | 443.207116       | 4 |
| 6 | 689.255917  | 345.131597      | 672.229368        | 336.618322       | 671.245352     | 336.126314       | C    | <b>774.374927</b>  | 387.691102      | <b>757.348378</b> | 379.177827       |                |                  | 3 |
| 7 | 1128.481243 | 564.744260      | 1111.454694       | 556.230985       | 1110.470678    | 555.738977       | Q    | <b>614.344278</b>  | 307.675777      | 597.317729        | 299.162503       |                |                  | 2 |
| 8 |             |                 |                   |                  |                |                  | R    | <b>175.118952</b>  | 88.063114       | 158.092403        | 79.549839        |                |                  | 1 |

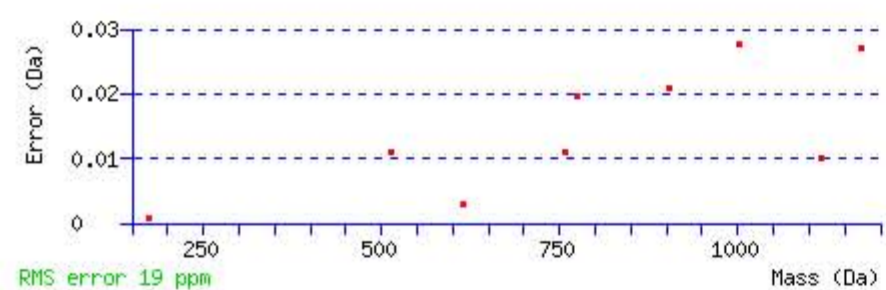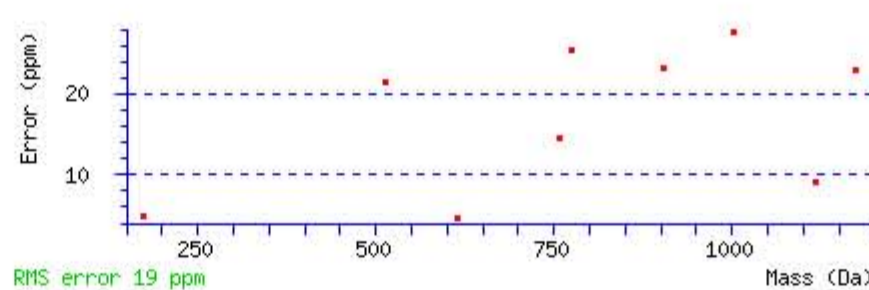

NCBI BLAST search of **QGDVECQR**

(Parameters: blastp, nr protein database, expect=20000, no filter, PAM30)

Other BLAST [web gateways](#)

All matches to this query

| Score | Mr(calc):   | Delta     | Sequence                       |
|-------|-------------|-----------|--------------------------------|
| 60.1  | 1301.585648 | 0.017420  | <a href="#">QGDVECQR</a>       |
| 15.8  | 1301.584763 | 0.018305  | <a href="#">KATEDAEGGDGPR</a>  |
| 13.3  | 1301.621994 | -0.018926 | <a href="#">AEKEACQR</a>       |
| 11.7  | 1301.584747 | 0.018321  | <a href="#">QESPSQENIDR</a>    |
| 2.0   | 1301.604263 | -0.001195 | <a href="#">CPAAMTVMHLR</a>    |
| 1.6   | 1301.604263 | -0.001195 | <a href="#">CPAAMTVMHLR</a>    |
| 0.2   | 1301.603378 | -0.000310 | <a href="#">KPEGTCPAAESR</a>   |
| 0.1   | 1301.603378 | -0.000310 | <a href="#">TIENNEQR</a>       |
| 0.0   | 1301.584763 | 0.018305  | <a href="#">ASPESAQSTDPGR</a>  |
| 0.0   | 1301.584778 | 0.018290  | <a href="#">GGSDSSLSEPGPGR</a> |



**MASCOT** SCIENCE Mascot Search Results

Peptide View

MS/MS Fragmentation of **SFGGQCR**

Found in **CO7\_HUMAN**, Complement component C7 OS=Homo sapiens GN=C7 PE=1 SV=2

Match to Query 23858: 1121.517208 from(561.765880,2+) rtinseconds(1477) index(3592)

Title: Locus:1.1.1.2646.14 File:"2013-07-02 CLN FXIII 60 min 1st F 1.wiff"

Data file C:\Program Files (x86)\Matrix Science\Mascot Daemon\mgf4 FXIII 60 min 1st\mascot\_daemon\_merge.mgf

Click mouse within plot area to zoom in by factor of two about that point

Or, Plot from 100 to 1050 Da Full range

Label all possible matches  Label matches used for scoring

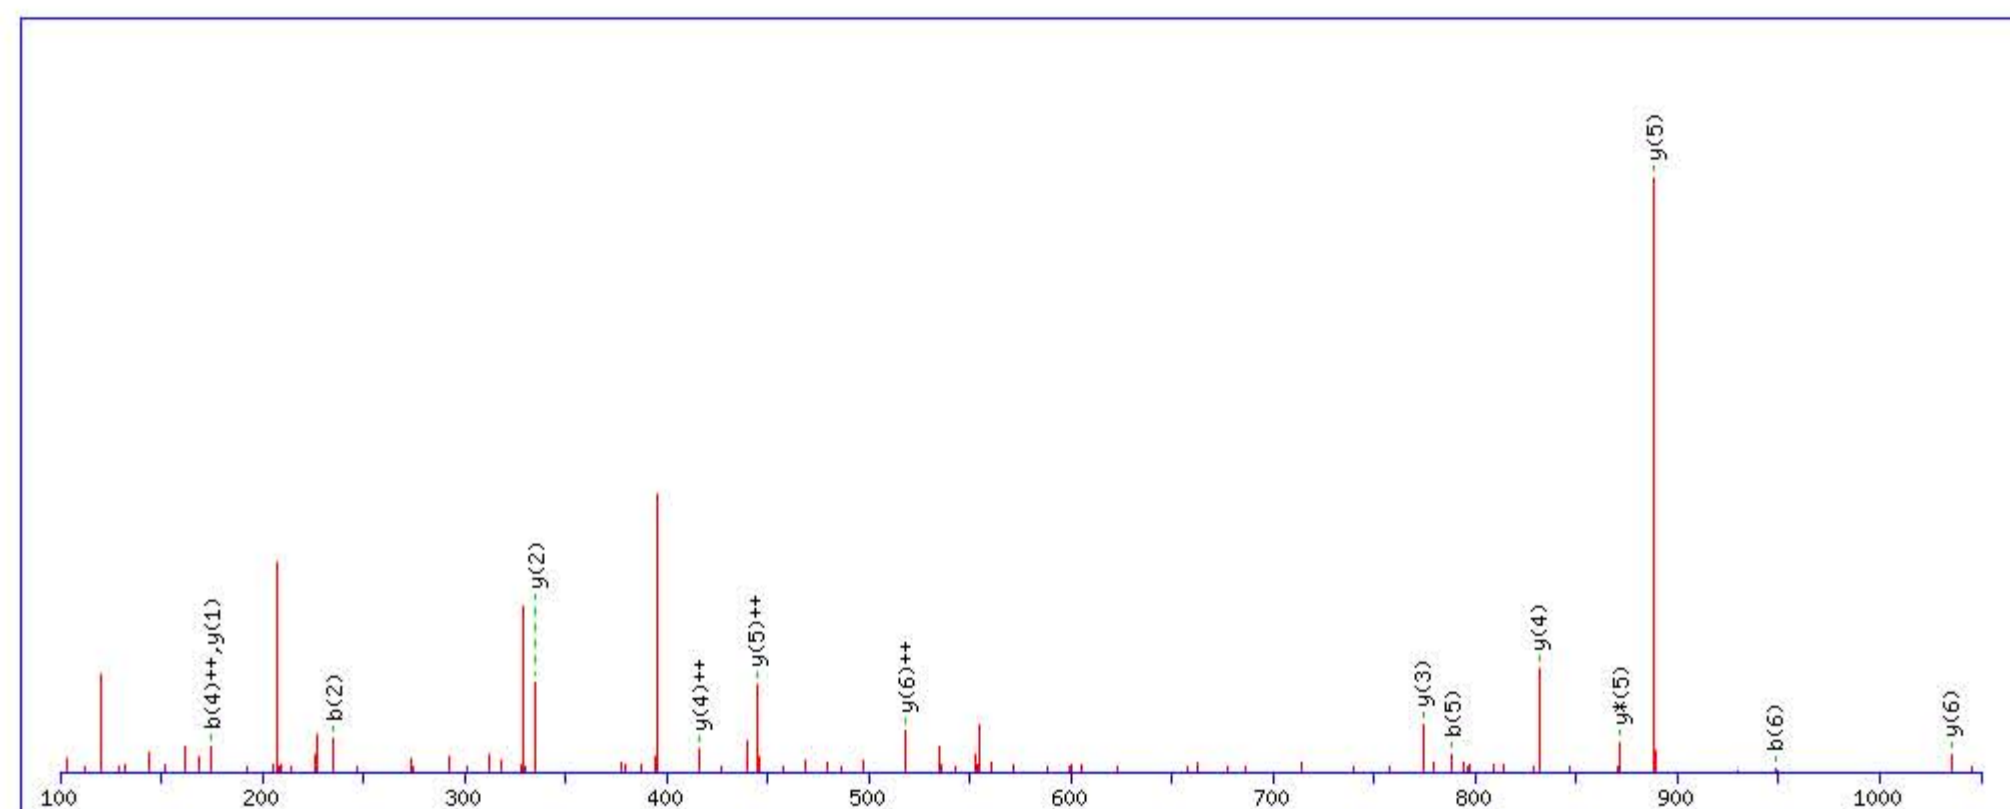

Monoisotopic mass of neutral peptide Mr(calc): 1121.511032

Fixed modifications: Carbamidomethyl (C) (apply to specified residues or termini only)

Variable modifications:

Q5 : Biotin:Thermo-21345 (Q)

Ions Score: 29 Expect: 0.0029

Matches : 14/52 fragment ions using 29 most intense peaks [\(help\)](#)

| # | b                 | b <sup>++</sup>   | b <sup>*</sup> | b <sup>*++</sup> | b <sup>0</sup> | b <sup>0++</sup> | Seq. | y                  | y <sup>++</sup>   | y <sup>*</sup>    | y <sup>*++</sup> | # |
|---|-------------------|-------------------|----------------|------------------|----------------|------------------|------|--------------------|-------------------|-------------------|------------------|---|
| 1 | 88.039304         | 44.523290         |                |                  | 70.028739      | 35.518008        | S    |                    |                   |                   |                  | 7 |
| 2 | <b>235.107718</b> | 118.057497        |                |                  | 217.097153     | 109.052214       | F    | <b>1035.486269</b> | <b>518.246773</b> | 1018.459720       | 509.733498       | 6 |
| 3 | 292.129182        | 146.568229        |                |                  | 274.118617     | 137.562946       | G    | <b>888.417855</b>  | <b>444.712566</b> | <b>871.391306</b> | 436.199291       | 5 |
| 4 | 349.150646        | <b>175.078961</b> |                |                  | 331.140081     | 166.073678       | G    | <b>831.396391</b>  | <b>416.201834</b> | 814.369842        | 407.688559       | 4 |
| 5 | <b>788.375972</b> | 394.691624        | 771.349423     | 386.178350       | 770.365407     | 385.686342       | Q    | <b>774.374927</b>  | 387.691102        | 757.348378        | 379.177827       | 3 |
| 6 | <b>948.406621</b> | 474.706949        | 931.380072     | 466.193674       | 930.396056     | 465.701666       | C    | <b>335.149601</b>  | 168.078438        | 318.123052        | 159.565164       | 2 |
| 7 |                   |                   |                |                  |                |                  | R    | <b>175.118952</b>  | 88.063114         | 158.092403        | 79.549839        | 1 |

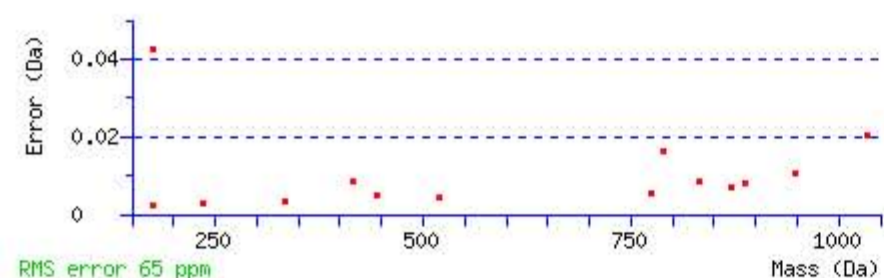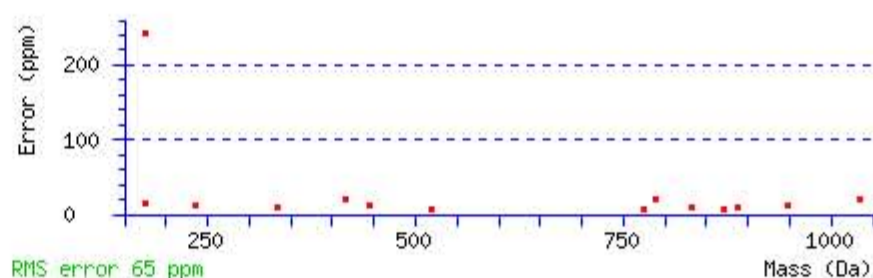

NCBI BLAST search of **SFGGQCR**

(Parameters: blastp, nr protein database, expect=20000, no filter, PAM30)

Other BLAST [web gateways](#)

All matches to this query

| Score | Mr(calc):   | Delta    | Sequence                  |
|-------|-------------|----------|---------------------------|
| 29.4  | 1121.511032 | 0.006176 | <a href="#">SFGGQCR</a>   |
| 2.3   | 1121.502274 | 0.014934 | <a href="#">MSVEEQIDR</a> |



# MASCOT Search Results

## Peptide View

MS/MS Fragmentation of **CFSGQCISK**

Found in **CO7\_HUMAN**, Complement component C7 OS=Homo sapiens GN=C7 PE=1 SV=2

Match to Query 34496: 1396.637728 from(699.326140,2+) rtinseconds(1626) index(4536)

Title: Locus:1.1.1.2698.13 File:"2013-07-02 CLN FXIII 60 min 1st F 1.wiff"

Data file C:\Program Files (x86)\Matrix Science\Mascot Daemon\mgf\4 FXIII 60 min 1st\mascot\_daemon\_merge.mgf

Click mouse within plot area to zoom in by factor of two about that point

Or, Plot from  to  Da

Label all possible matches  Label matches used for scoring

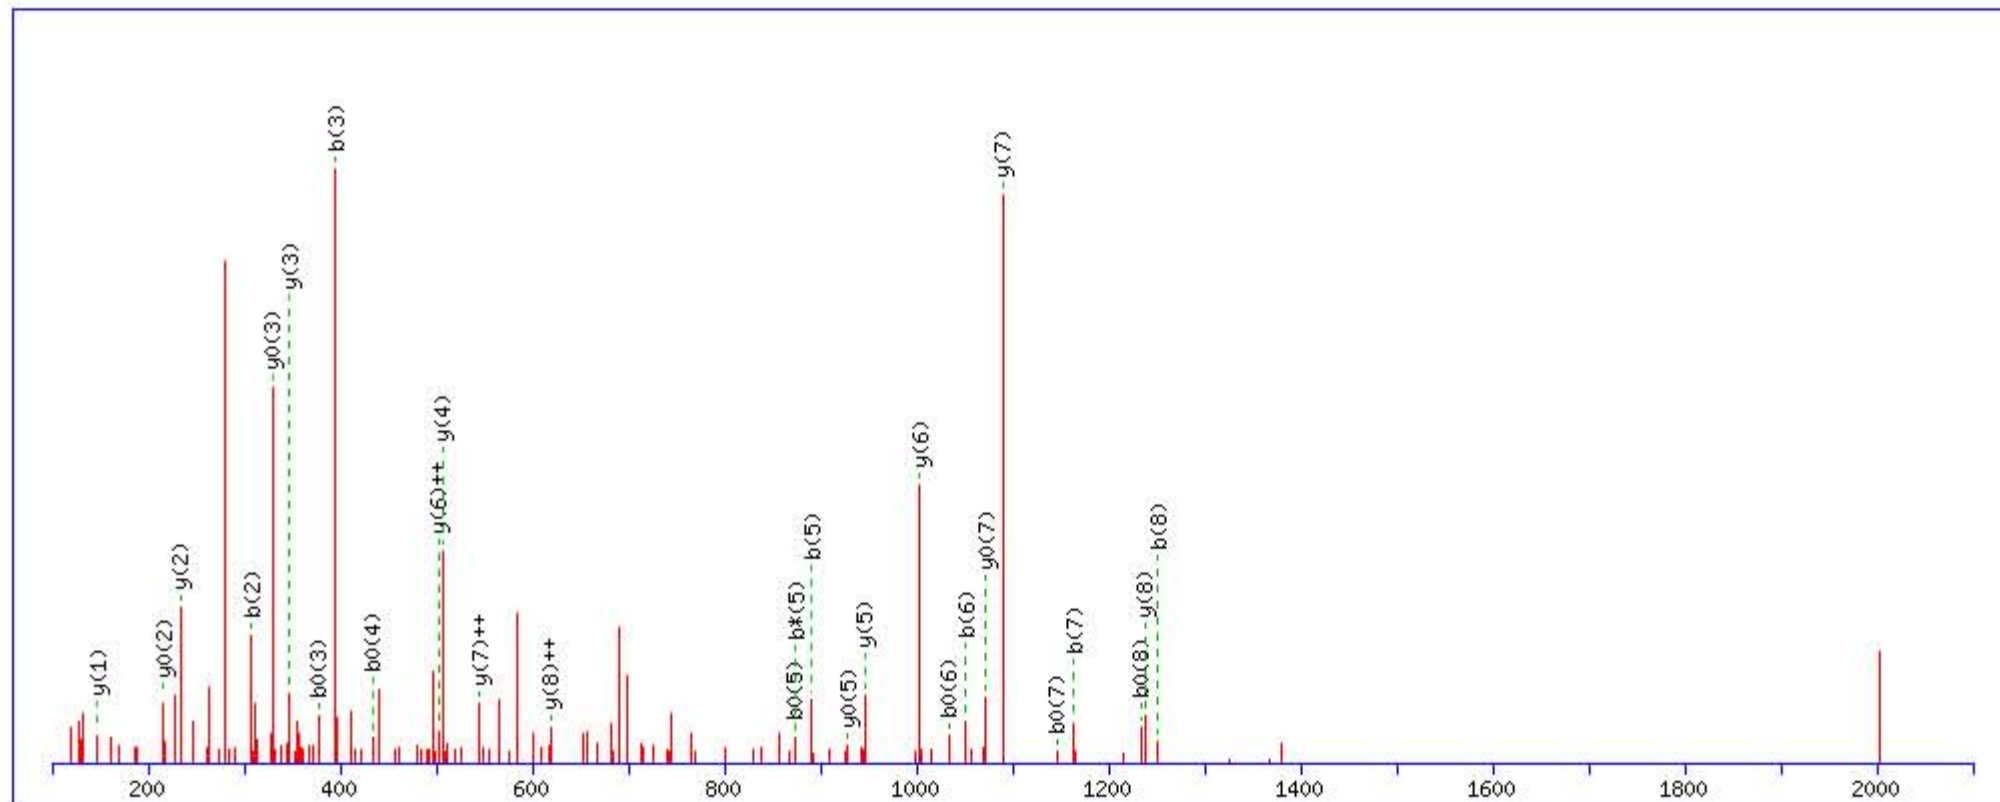

Monoisotopic mass of neutral peptide Mr(calc): 1396.630157

Fixed modifications: Carbamidomethyl (C) (apply to specified residues or termini only)

Variable modifications:

Q5 : Biotin:Thermo-21345 (Q)

Ions Score: 41 Expect: 0.00069

Matches : 28/82 fragment ions using 61 most intense peaks ([help](#))

| # | b                  | b <sup>++</sup> | b <sup>*</sup>    | b <sup>+++</sup> | b <sup>0</sup>     | b <sup>0++</sup> | Seq. | y                  | y <sup>++</sup>   | y <sup>*</sup> | y <sup>+++</sup> | y <sup>0</sup>     | y <sup>0++</sup> | # |
|---|--------------------|-----------------|-------------------|------------------|--------------------|------------------|------|--------------------|-------------------|----------------|------------------|--------------------|------------------|---|
| 1 | 161.037925         | 81.022600       |                   |                  |                    |                  | C    |                    |                   |                |                  |                    |                  | 9 |
| 2 | <b>308.106339</b>  | 154.556807      |                   |                  |                    |                  | F    | <b>1237.606777</b> | <b>619.307027</b> | 1220.580228    | 610.793752       | 1219.596212        | 610.301744       | 8 |
| 3 | <b>395.138367</b>  | 198.072821      |                   |                  | <b>377.127802</b>  | 189.067539       | S    | <b>1090.538363</b> | <b>545.772819</b> | 1073.511814    | 537.259545       | <b>1072.527798</b> | 536.767537       | 7 |
| 4 | 452.159831         | 226.583553      |                   |                  | <b>434.149266</b>  | 217.578271       | G    | <b>1003.506335</b> | <b>502.256806</b> | 986.479786     | 493.743531       | 985.495770         | 493.251523       | 6 |
| 5 | <b>891.385157</b>  | 446.196217      | <b>874.358608</b> | 437.682942       | <b>873.374592</b>  | 437.190934       | Q    | <b>946.484871</b>  | 473.746074        | 929.458322     | 465.232799       | <b>928.474306</b>  | 464.740791       | 5 |
| 6 | <b>1051.415806</b> | 526.211541      | 1034.389257       | 517.698267       | <b>1033.405241</b> | 517.206258       | C    | <b>507.259545</b>  | 254.133410        | 490.232996     | 245.620136       | 489.248980         | 245.128128       | 4 |
| 7 | <b>1164.499870</b> | 582.753573      | 1147.473321       | 574.240298       | <b>1146.489305</b> | 573.748290       | I    | <b>347.228896</b>  | 174.118086        | 330.202347     | 165.604811       | <b>329.218331</b>  | 165.112803       | 3 |
| 8 | <b>1251.531898</b> | 626.269587      | 1234.505349       | 617.756313       | <b>1233.521333</b> | 617.264304       | S    | <b>234.144832</b>  | 117.576054        | 217.118283     | 109.062780       | <b>216.134267</b>  | 108.570772       | 2 |
| 9 |                    |                 |                   |                  |                    |                  | K    | <b>147.112804</b>  | 74.060040         | 130.086255     | 65.546765        |                    |                  | 1 |

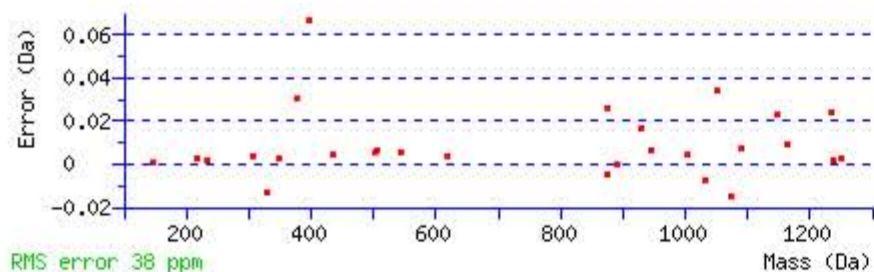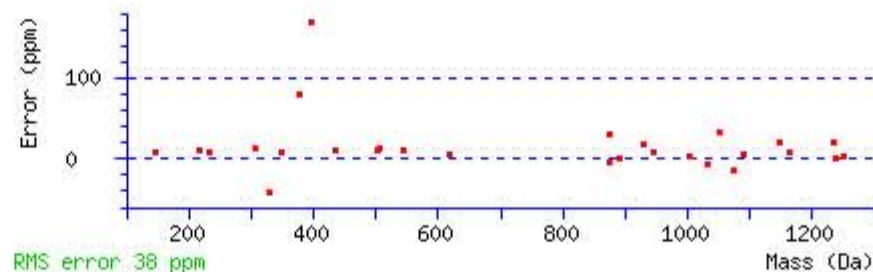

NCBI BLAST search of **CFSGQCISK**

(Parameters: blastp, nr protein database, expect=20000, no filter, PAM30)

Other BLAST [web gateways](#)

All matches to this query

| Score | Mr(calc):   | Delta    | Sequence                     |
|-------|-------------|----------|------------------------------|
| 41.2  | 1396.630157 | 0.007571 | <a href="#">CFSGQCISK</a>    |
| 15.1  | 1396.629272 | 0.008456 | <a href="#">QLSQAEATDFCK</a> |



# MASCOT Search Results

## Peptide View

MS/MS Fragmentation of **AASGTQNNVLR**

Found in **CO7\_HUMAN**, Complement component C7 OS=Homo sapiens GN=C7 PE=1 SV=2

Match to Query 36727: 1440.758568 from(721.386560,2+) rtinseconds(1535) index(3982)

Title: Locus:1.1.1.2666.21 File:"2013-07-02 CLN FXIII 60 min 1st F 1.wiff"

Data file C:\Program Files (x86)\Matrix Science\Mascot Daemon\mgf\4 FXIII 60 min 1st\mascot\_daemon\_merge.mgf

Click mouse within plot area to zoom in by factor of two about that point

Or, Plot from  to  Da

Label all possible matches  Label matches used for scoring

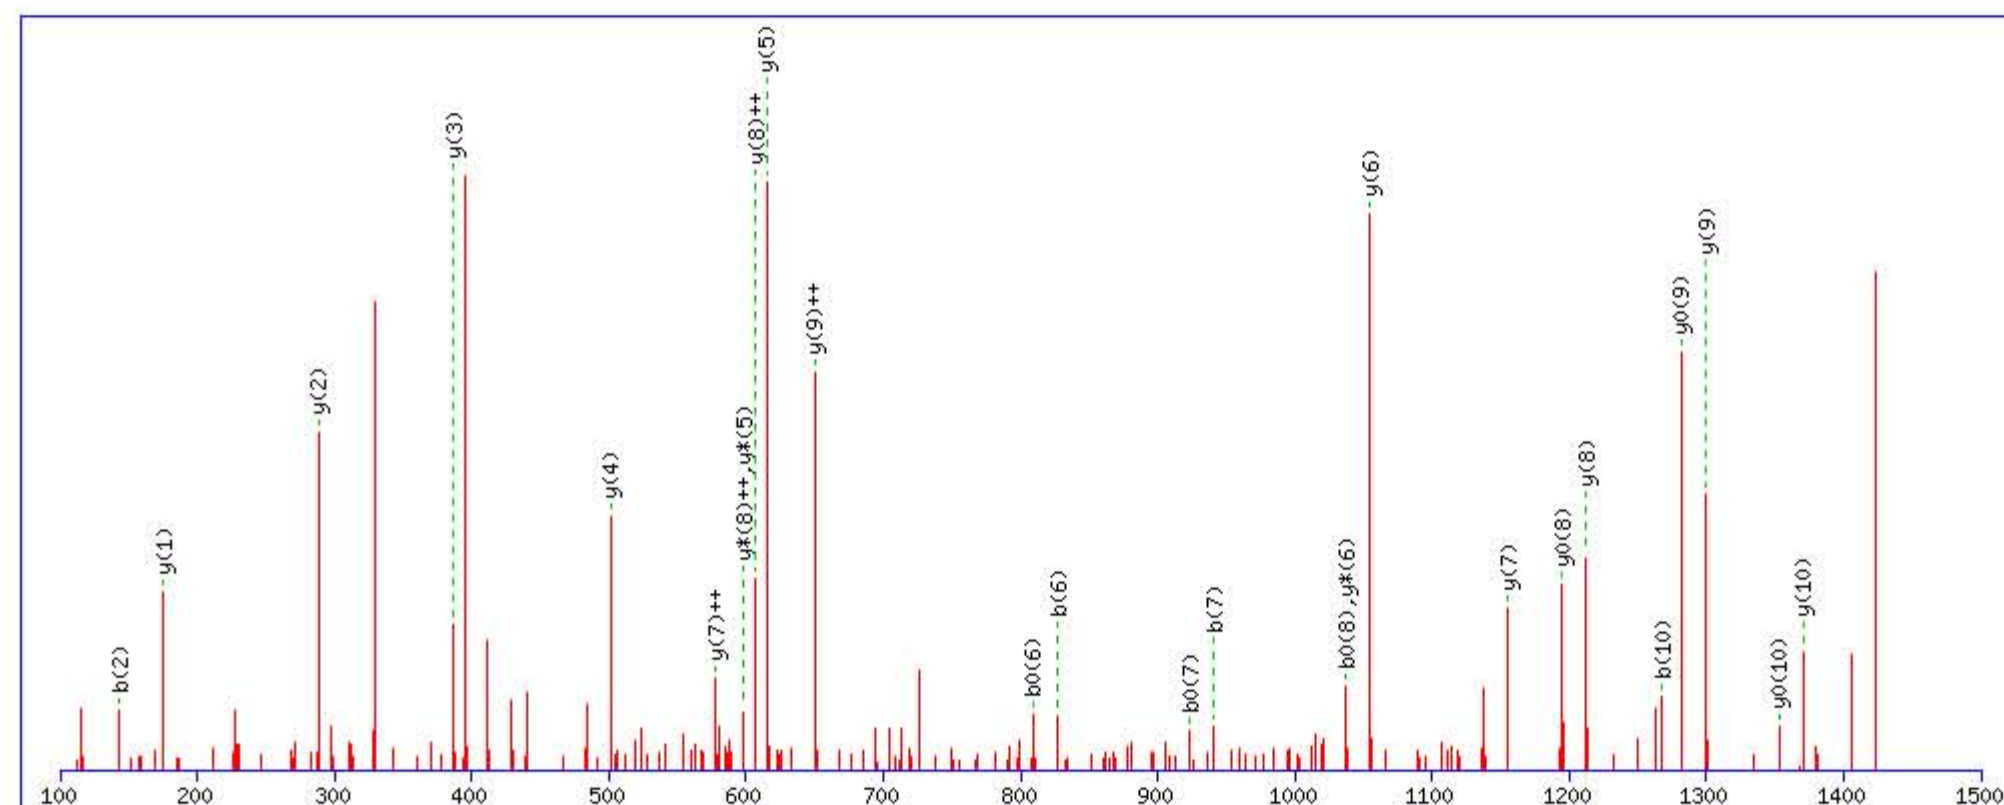

Monoisotopic mass of neutral peptide Mr(calc): 1440.750717

Fixed modifications: Carbamidomethyl (C) (apply to specified residues or termini only)

Variable modifications:

Q6 : Biotin:Thermo-21345 (Q)

Ions Score: 77 Expect: 2.7e-007

Matches : 26/94 fragment ions using 40 most intense peaks [\(help\)](#)

| #  | b                  | b <sup>++</sup> | b <sup>*</sup> | b <sup>+++</sup> | b <sup>0</sup>     | b <sup>0++</sup> | Seq. | y                  | y <sup>++</sup>   | y <sup>*</sup>     | y <sup>+++</sup>  | y <sup>0</sup>     | y <sup>0++</sup> | #  |
|----|--------------------|-----------------|----------------|------------------|--------------------|------------------|------|--------------------|-------------------|--------------------|-------------------|--------------------|------------------|----|
| 1  | 72.044390          | 36.525833       |                |                  |                    |                  | A    |                    |                   |                    |                   |                    |                  | 11 |
| 2  | <b>143.081504</b>  | 72.044390       |                |                  |                    |                  | A    | <b>1370.720895</b> | 685.864086        | 1353.694346        | 677.350811        | <b>1352.710330</b> | 676.858803       | 10 |
| 3  | 230.113532         | 115.560404      |                |                  | 212.102967         | 106.555121       | S    | <b>1299.683781</b> | <b>650.345529</b> | 1282.657232        | 641.832254        | <b>1281.673216</b> | 641.340246       | 9  |
| 4  | 287.134996         | 144.071136      |                |                  | 269.124431         | 135.065854       | G    | <b>1212.651753</b> | <b>606.829515</b> | 1195.625204        | <b>598.316240</b> | <b>1194.641188</b> | 597.824232       | 8  |
| 5  | 388.182675         | 194.594976      |                |                  | 370.172110         | 185.589693       | T    | <b>1155.630289</b> | <b>578.318783</b> | 1138.603740        | 569.805508        | 1137.619724        | 569.313500       | 7  |
| 6  | <b>827.408001</b>  | 414.207639      | 810.381452     | 405.694364       | <b>809.397436</b>  | 405.202356       | Q    | <b>1054.582610</b> | 527.794943        | <b>1037.556061</b> | 519.281669        |                    |                  | 6  |
| 7  | <b>941.450928</b>  | 471.229102      | 924.424379     | 462.715828       | <b>923.440363</b>  | 462.223820       | N    | <b>615.357284</b>  | 308.182280        | <b>598.330735</b>  | 299.669006        |                    |                  | 5  |
| 8  | 1055.493855        | 528.250566      | 1038.467306    | 519.737291       | <b>1037.483290</b> | 519.245283       | N    | <b>501.314357</b>  | 251.160816        | 484.287808         | 242.647542        |                    |                  | 4  |
| 9  | 1154.562269        | 577.784773      | 1137.535720    | 569.271498       | 1136.551704        | 568.779490       | V    | <b>387.271430</b>  | 194.139353        | 370.244881         | 185.626078        |                    |                  | 3  |
| 10 | <b>1267.646333</b> | 634.326805      | 1250.619784    | 625.813530       | 1249.635768        | 625.321522       | L    | <b>288.203016</b>  | 144.605146        | 271.176467         | 136.091871        |                    |                  | 2  |
| 11 |                    |                 |                |                  |                    |                  | R    | <b>175.118952</b>  | 88.063114         | 158.092403         | 79.549839         |                    |                  | 1  |

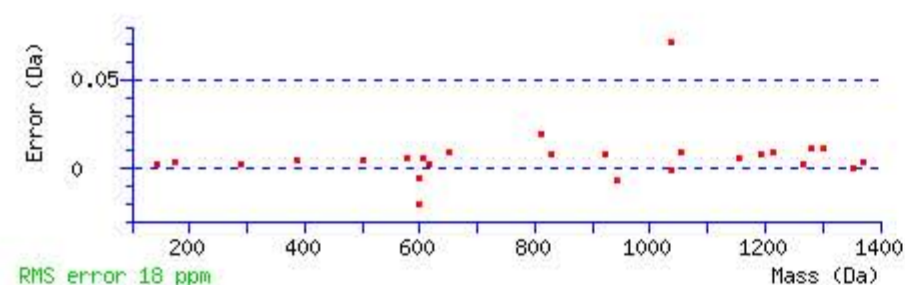

RMS error 18 ppm

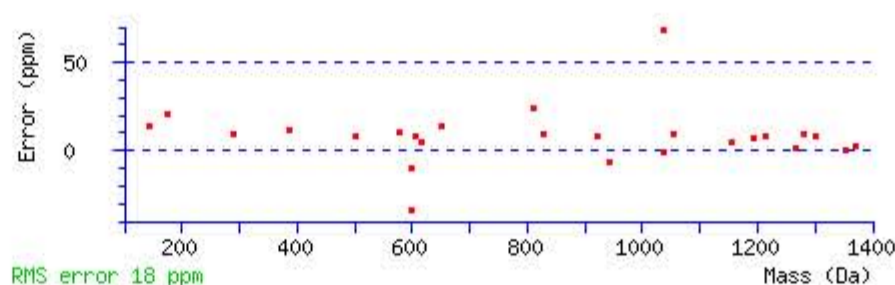

RMS error 18 ppm

NCBI BLAST search of **AASGTQNNVLR**

(Parameters: blastp, nr protein database, expect=20000, no filter, PAM30)

Other BLAST [web gateways](#)

## All matches to this query

| Score | Mr(calc):   | Delta     | Sequence                        |
|-------|-------------|-----------|---------------------------------|
| 76.5  | 1440.750717 | 0.007851  | <a href="#">AASGTQNNVLR</a>     |
| 6.1   | 1440.757202 | 0.001366  | <a href="#">NNLLQAELEELR</a>    |
| 5.5   | 1440.739487 | 0.019081  | <a href="#">AAVTGQDEAIR</a>     |
| 5.0   | 1440.779709 | -0.021141 | <a href="#">AAAGVGGSLRAQVER</a> |
| 4.5   | 1440.743317 | 0.015251  | <a href="#">TQHLSAARSSDLR</a>   |
| 4.5   | 1440.743515 | 0.015053  | <a href="#">FIQLLTEFQMR</a>     |
| 4.1   | 1440.764618 | -0.006050 | <a href="#">LEEEIQTLR</a>       |
| 1.3   | 1440.773163 | -0.014595 | <a href="#">KRALEAGAGCRPR</a>   |
| 1.3   | 1440.775864 | -0.017296 | <a href="#">ADILEMTVKHLR</a>    |
| 1.2   | 1440.754745 | 0.003823  | <a href="#">WEATQQVLR</a>       |



# MASCOT SEARCH RESULTS

## Peptide View

MS/MS Fragmentation of **LSGNVLSYTFQVK**

Found in **CO7\_HUMAN**, Complement component C7 OS=Homo sapiens GN=C7 PE=1 SV=2

Match to Query 47597: 1765.963332 from(589.661720,3+) rtinseconds(2444) index(9916)

Title: Locus:1.1.1.2983.9 File:"2013-07-02 CLN FXIII 60 min 1st F 1.wiff"

Data file C:\Program Files (x86)\Matrix Science\Mascot Daemon\mgf4 FXIII 60 min 1st\mascot\_daemon\_merge.mgf

Click mouse within plot area to zoom in by factor of two about that point

Or, Plot from  to  Da

Label all possible matches  Label matches used for scoring

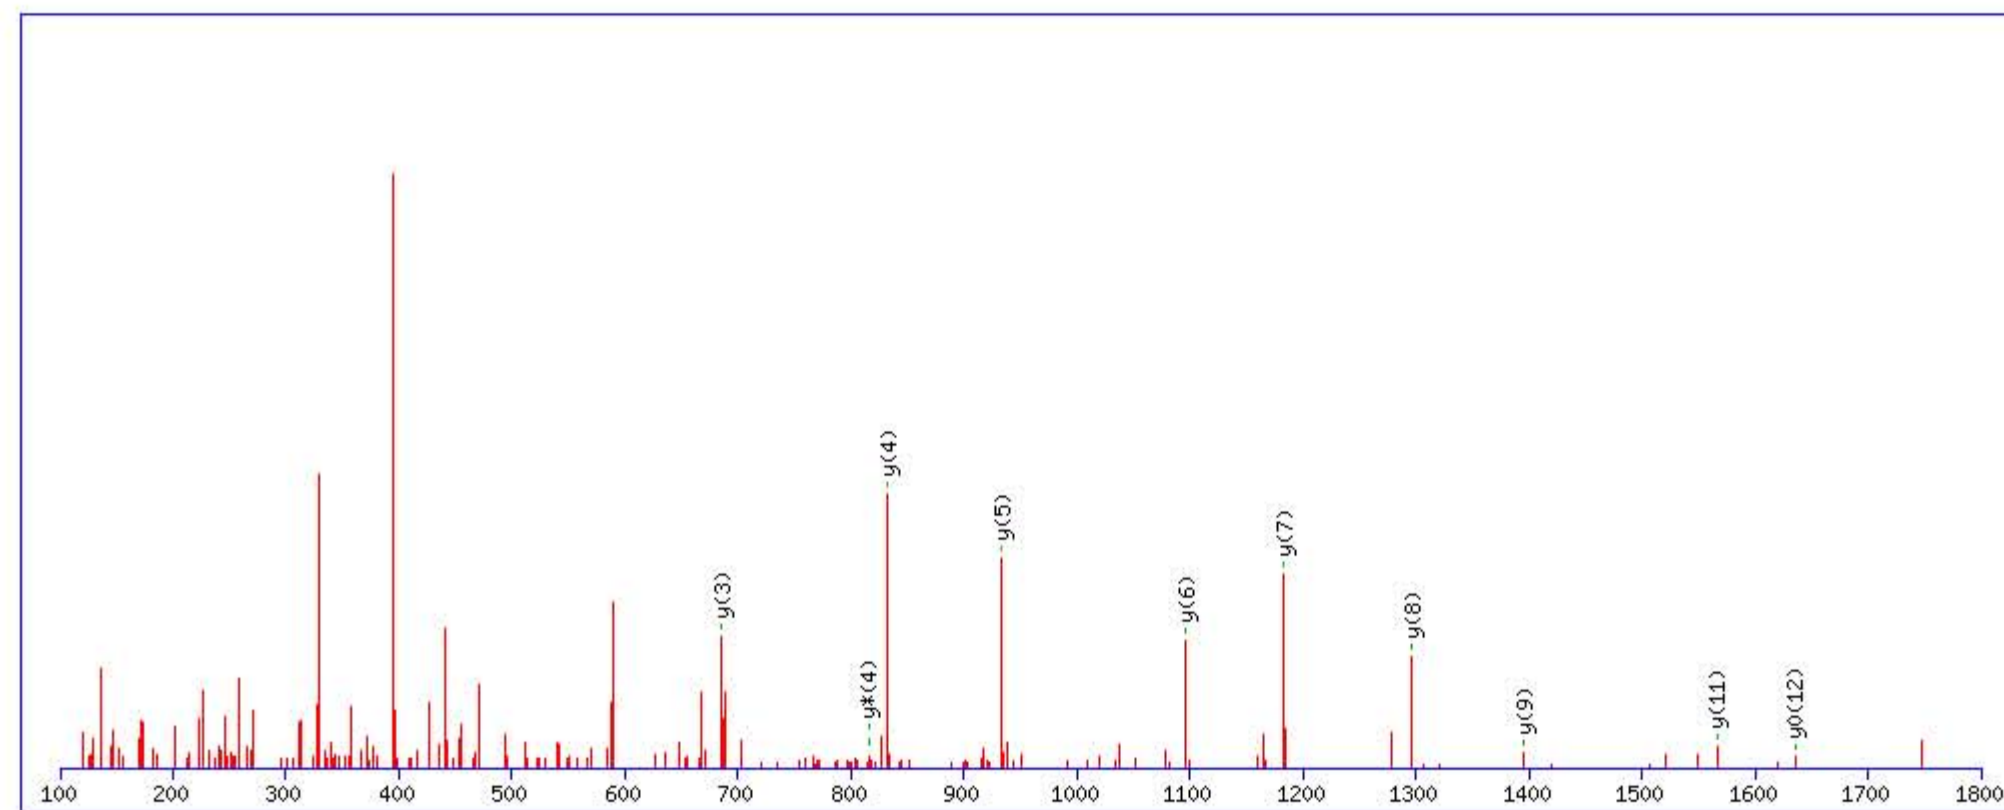

Monoisotopic mass of neutral peptide Mr(calc): 1765.943680

Fixed modifications: Carbamidomethyl (C) (apply to specified residues or termini only)

Variable modifications:

Q11 : Biotin:Thermo-21345 (Q)

Ions Score: 51 Expect: 2.2e-005

Matches : 10/128 fragment ions using 17 most intense peaks [\(help\)](#)

| #  | b           | b <sup>++</sup> | b <sup>*</sup> | b <sup>*++</sup> | b <sup>0</sup> | b <sup>0++</sup> | Seq. | y           | y <sup>++</sup> | y <sup>*</sup> | y <sup>*++</sup> | y <sup>0</sup> | y <sup>0++</sup> | #  |
|----|-------------|-----------------|----------------|------------------|----------------|------------------|------|-------------|-----------------|----------------|------------------|----------------|------------------|----|
| 1  | 114.091340  | 57.549308       |                |                  |                |                  | L    |             |                 |                |                  |                |                  | 13 |
| 2  | 201.123368  | 101.065322      |                |                  | 183.112803     | 92.060039        | S    | 1653.866891 | 827.437084      | 1636.840342    | 818.923809       | 1635.856326    | 818.431801       | 12 |
| 3  | 258.144832  | 129.576054      |                |                  | 240.134267     | 120.570771       | G    | 1566.834863 | 783.921070      | 1549.808314    | 775.407795       | 1548.824298    | 774.915787       | 11 |
| 4  | 372.187759  | 186.597517      | 355.161210     | 178.084243       | 354.177194     | 177.592235       | N    | 1509.813399 | 755.410338      | 1492.786850    | 746.897063       | 1491.802834    | 746.405055       | 10 |
| 5  | 471.256173  | 236.131724      | 454.229624     | 227.618450       | 453.245608     | 227.126442       | V    | 1395.770472 | 698.388874      | 1378.743923    | 689.875600       | 1377.759907    | 689.383592       | 9  |
| 6  | 584.340237  | 292.673757      | 567.313688     | 284.160482       | 566.329672     | 283.668474       | L    | 1296.702058 | 648.854667      | 1279.675509    | 640.341393       | 1278.691493    | 639.849385       | 8  |
| 7  | 671.372265  | 336.189771      | 654.345716     | 327.676496       | 653.361700     | 327.184488       | S    | 1183.617994 | 592.312635      | 1166.591445    | 583.799361       | 1165.607429    | 583.307353       | 7  |
| 8  | 834.435594  | 417.721435      | 817.409045     | 409.208161       | 816.425029     | 408.716153       | Y    | 1096.585966 | 548.796621      | 1079.559417    | 540.283347       | 1078.575401    | 539.791339       | 6  |
| 9  | 935.483273  | 468.245275      | 918.456724     | 459.732000       | 917.472708     | 459.239992       | T    | 933.522637  | 467.264957      | 916.496088     | 458.751682       | 915.512072     | 458.259674       | 5  |
| 10 | 1082.551687 | 541.779482      | 1065.525138    | 533.266207       | 1064.541122    | 532.774199       | F    | 832.474958  | 416.741117      | 815.448409     | 408.227843       |                |                  | 4  |
| 11 | 1521.777013 | 761.392145      | 1504.750464    | 752.878870       | 1503.766448    | 752.386862       | Q    | 685.406544  | 343.206910      | 668.379995     | 334.693636       |                |                  | 3  |
| 12 | 1620.845427 | 810.926352      | 1603.818878    | 802.413077       | 1602.834862    | 801.921069       | V    | 246.181218  | 123.594247      | 229.154669     | 115.080973       |                |                  | 2  |
| 13 |             |                 |                |                  |                |                  | K    | 147.112804  | 74.060040       | 130.086255     | 65.546765        |                |                  | 1  |

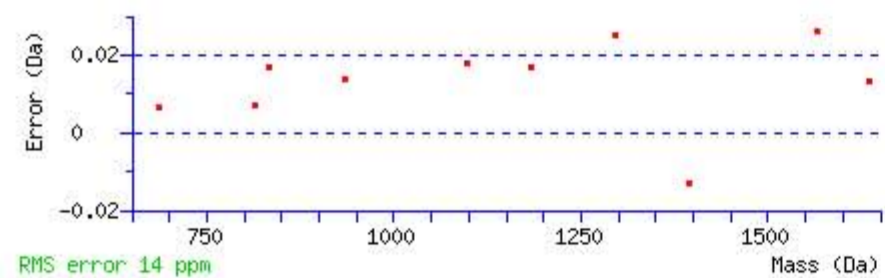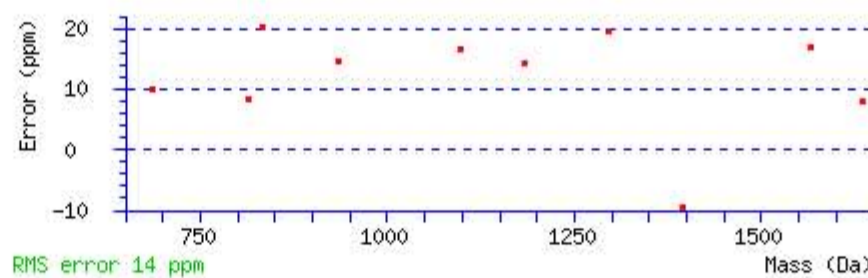

NCBI BLAST search of **LSGNVLSYTFQVK**

(Parameters: blastp, nr protein database, expect=20000, no filter, PAM30)

Other BLAST [web gateways](#)

## All matches to this query

| Score | Mr(calc):   | Delta     | Sequence                          |
|-------|-------------|-----------|-----------------------------------|
| 51.0  | 1765.943680 | 0.019652  | <a href="#">LSGNVLSYTFQVK</a>     |
| 1.3   | 1765.982544 | -0.019212 | <a href="#">SLQLDIIPASIPGSEVK</a> |
| 0.4   | 1765.940262 | 0.023070  | <a href="#">EAKLYLFQAQEWLK</a>    |
| 0.1   | 1765.950882 | 0.012450  | <a href="#">VTGNVSKKTNYLVMGR</a>  |

Mascot: <http://www.matrixscience.com/>



# MASCOT SEARCH RESULTS

## Peptide View

MS/MS Fragmentation of **EQTMSECEAGALR**

Found in **CO7\_HUMAN**, Complement component C7 OS=Homo sapiens GN=C7 PE=1 SV=2

Match to Query 48236: 1791.806528 from(896.910540,2+) rtinseconds(1715) index(5147)

Title: Locus:1.1.1.2729.21 File:"2013-07-02 CLN FXIII 60 min 1st F 1.wiff"

Data file C:\Program Files (x86)\Matrix Science\Mascot Daemon\mgf4 FXIII 60 min 1st\mascot\_daemon\_merge.mgf

Click mouse within plot area to zoom in by factor of two about that point

Or, Plot from  to  Da

Label all possible matches  Label matches used for scoring

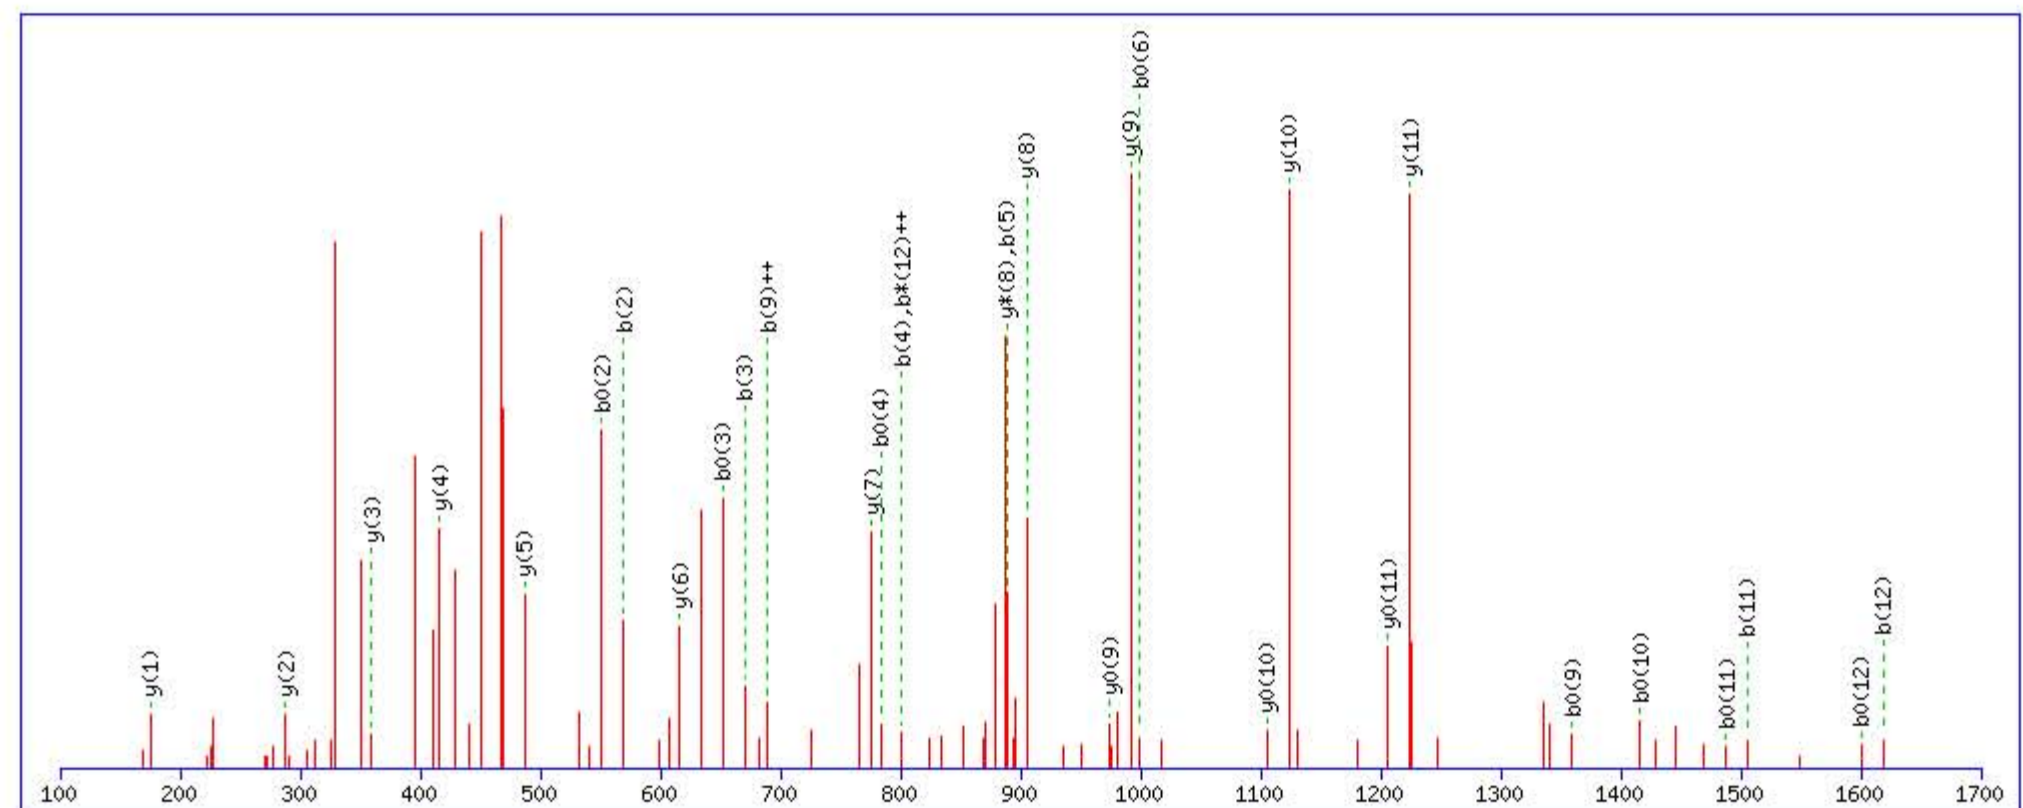

Monoisotopic mass of neutral peptide Mr(calc): 1791.795349

Fixed modifications: Carbamidomethyl (C) (apply to specified residues or termini only)

Variable modifications:

Q2 : Biotin:Thermo-21345 (Q)

Ions Score: 65 Expect: 5.6e-006

Matches : 31/132 fragment ions using 55 most intense peaks [\(help\)](#)

| #  | b                  | b <sup>++</sup>   | b <sup>*</sup> | b <sup>*++</sup>  | b <sup>0</sup>     | b <sup>0++</sup> | Seq. | y                  | y <sup>++</sup> | y <sup>*</sup>    | y <sup>*++</sup> | y <sup>0</sup>     | y <sup>0++</sup> | #  |
|----|--------------------|-------------------|----------------|-------------------|--------------------|------------------|------|--------------------|-----------------|-------------------|------------------|--------------------|------------------|----|
| 1  | 130.049869         | 65.528572         |                |                   | 112.039304         | 56.523290        | E    |                    |                 |                   |                  |                    |                  | 13 |
| 2  | <b>569.275195</b>  | 285.141236        | 552.248646     | 276.627961        | <b>551.264630</b>  | 276.135953       | Q    | 1663.760061        | 832.383668      | 1646.733512       | 823.870394       | 1645.749496        | 823.378386       | 12 |
| 3  | <b>670.322874</b>  | 335.665075        | 653.296325     | 327.151801        | <b>652.312309</b>  | 326.659793       | T    | <b>1224.534735</b> | 612.771005      | 1207.508186       | 604.257731       | <b>1206.524170</b> | 603.765723       | 11 |
| 4  | <b>801.363359</b>  | 401.185318        | 784.336810     | 392.672043        | <b>783.352794</b>  | 392.180035       | M    | <b>1123.487056</b> | 562.247166      | 1106.460507       | 553.733891       | <b>1105.476491</b> | 553.241883       | 10 |
| 5  | <b>888.395387</b>  | 444.701332        | 871.368838     | 436.188057        | 870.384822         | 435.696049       | S    | <b>992.446571</b>  | 496.726923      | 975.420022        | 488.213649       | <b>974.436006</b>  | 487.721641       | 9  |
| 6  | 1017.437980        | 509.222628        | 1000.411431    | 500.709354        | <b>999.427415</b>  | 500.217346       | E    | <b>905.414543</b>  | 453.210909      | <b>888.387994</b> | 444.697635       | 887.403978         | 444.205627       | 8  |
| 7  | 1177.468629        | 589.237953        | 1160.442080    | 580.724678        | 1159.458064        | 580.232670       | C    | <b>776.371950</b>  | 388.689613      | 759.345401        | 380.176338       | 758.361385         | 379.684330       | 7  |
| 8  | 1306.511222        | 653.759249        | 1289.484673    | 645.245974        | 1288.500657        | 644.753966       | E    | <b>616.341301</b>  | 308.674288      | 599.314752        | 300.161014       | 598.330736         | 299.669006       | 6  |
| 9  | 1377.548336        | <b>689.277806</b> | 1360.521787    | 680.764531        | <b>1359.537771</b> | 680.272523       | A    | <b>487.298708</b>  | 244.152992      | 470.272159        | 235.639717       |                    |                  | 5  |
| 10 | 1434.569800        | 717.788538        | 1417.543251    | 709.275263        | <b>1416.559235</b> | 708.783255       | G    | <b>416.261594</b>  | 208.634435      | 399.235045        | 200.121160       |                    |                  | 4  |
| 11 | <b>1505.606914</b> | 753.307095        | 1488.580365    | 744.793820        | <b>1487.596349</b> | 744.301812       | A    | <b>359.240130</b>  | 180.123703      | 342.213581        | 171.610428       |                    |                  | 3  |
| 12 | <b>1618.690978</b> | 809.849127        | 1601.664429    | <b>801.335852</b> | <b>1600.680413</b> | 800.843844       | L    | <b>288.203016</b>  | 144.605146      | 271.176467        | 136.091871       |                    |                  | 2  |
| 13 |                    |                   |                |                   |                    |                  | R    | <b>175.118952</b>  | 88.063114       | 158.092403        | 79.549839        |                    |                  | 1  |

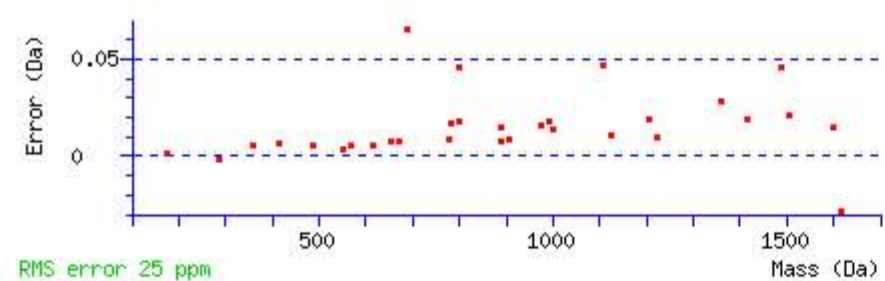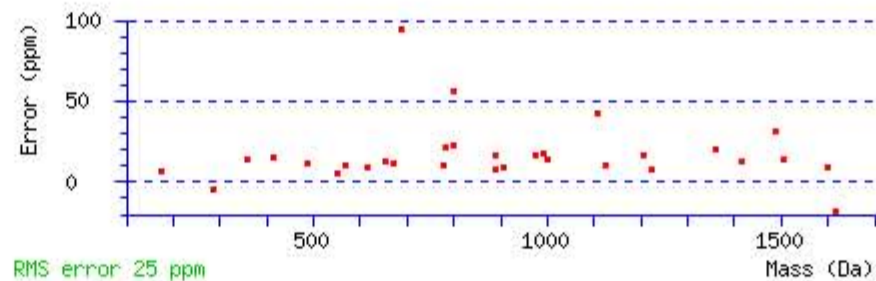

NCBI BLAST search of [EQTMSECEAGALR](#)

(Parameters: blastp, nr protein database, expect=20000, no filter, PAM30)

Other BLAST [web gateways](#)

All matches to this query

| Score | Mr(calc):   | Delta    | Sequence                      |
|-------|-------------|----------|-------------------------------|
| 65.3  | 1791.795349 | 0.011179 | <a href="#">EQTMSECEAGALR</a> |

Mascot: <http://www.matrixscience.com/>



# MASCOT Search Results

## Peptide View

MS/MS Fragmentation of **MPYECGPSLDVCAQDER**

Found in **CO7\_HUMAN**, Complement component C7 OS=Homo sapiens GN=C7 PE=1 SV=2

Match to Query 61496: 2337.019302 from(780.013710,3+) rtinseconds(2083) index(7552)

Title: Locus:1.1.1.2857.19 File:"2013-07-02 CLN FXIII 60 min 1st F 1.wiff"

Data file C:\Program Files (x86)\Matrix Science\Mascot Daemon\mgf4 FXIII 60 min 1st\mascot\_daemon\_merge.mgf

Click mouse within plot area to zoom in by factor of two about that point

Or, Plot from  to  Da

Label all possible matches  Label matches used for scoring

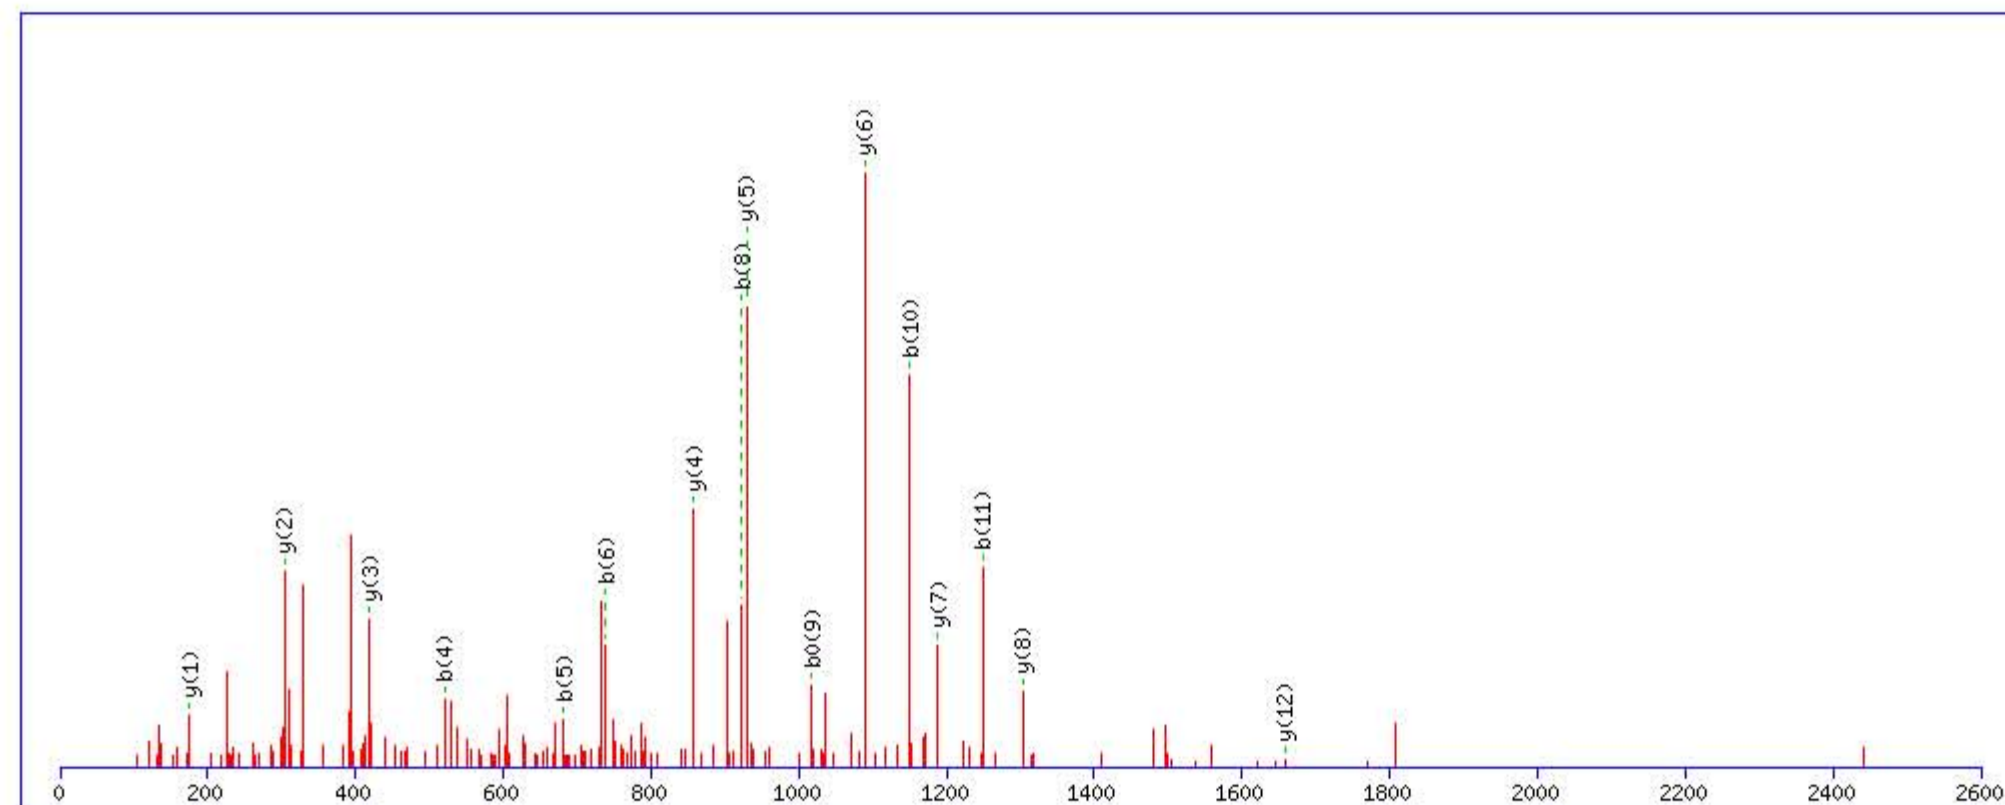

Monoisotopic mass of neutral peptide Mr(calc): 2336.989792

Fixed modifications: Carbamidomethyl (C) (apply to specified residues or termini only)

Variable modifications:

Q14 : Biotin:Thermo-21345 (Q)

Ions Score: 46 Expect: 0.00011

Matches : 16/158 fragment ions using 34 most intense peaks [\(help\)](#)

| #  | b                  | b <sup>++</sup> | b <sup>*</sup> | b <sup>***</sup> | b <sup>0</sup>     | b <sup>0++</sup> | Seq. | y                  | y <sup>++</sup> | y <sup>*</sup> | y <sup>***</sup> | y <sup>0</sup> | y <sup>0++</sup> | #  |
|----|--------------------|-----------------|----------------|------------------|--------------------|------------------|------|--------------------|-----------------|----------------|------------------|----------------|------------------|----|
| 1  | 132.047761         | 66.527518       |                |                  |                    |                  | M    |                    |                 |                |                  |                |                  | 17 |
| 2  | 229.100525         | 115.053900      |                |                  |                    |                  | P    | 2206.956589        | 1103.981932     | 2189.930040    | 1095.468658      | 2188.946024    | 1094.976650      | 16 |
| 3  | 392.163854         | 196.585565      |                |                  |                    |                  | Y    | 2109.903825        | 1055.455550     | 2092.877276    | 1046.942276      | 2091.893260    | 1046.450268      | 15 |
| 4  | <b>521.206447</b>  | 261.106862      |                |                  | 503.195882         | 252.101579       | E    | 1946.840496        | 973.923886      | 1929.813947    | 965.410612       | 1928.829931    | 964.918604       | 14 |
| 5  | <b>681.237096</b>  | 341.122186      |                |                  | 663.226531         | 332.116904       | C    | 1817.797903        | 909.402590      | 1800.771354    | 900.889315       | 1799.787338    | 900.397307       | 13 |
| 6  | <b>738.258560</b>  | 369.632918      |                |                  | 720.247995         | 360.627636       | G    | <b>1657.767254</b> | 829.387265      | 1640.740705    | 820.873991       | 1639.756689    | 820.381983       | 12 |
| 7  | 835.311324         | 418.159300      |                |                  | 817.300759         | 409.154018       | P    | 1600.745790        | 800.876533      | 1583.719241    | 792.363259       | 1582.735225    | 791.871251       | 11 |
| 8  | <b>922.343352</b>  | 461.675314      |                |                  | 904.332787         | 452.670032       | S    | 1503.693026        | 752.350151      | 1486.666477    | 743.836877       | 1485.682461    | 743.344869       | 10 |
| 9  | 1035.427416        | 518.217346      |                |                  | <b>1017.416851</b> | 509.212064       | L    | 1416.660998        | 708.834137      | 1399.634449    | 700.320863       | 1398.650433    | 699.828855       | 9  |
| 10 | <b>1150.454359</b> | 575.730818      |                |                  | 1132.443794        | 566.725535       | D    | <b>1303.576934</b> | 652.292105      | 1286.550385    | 643.778831       | 1285.566369    | 643.286823       | 8  |
| 11 | <b>1249.522773</b> | 625.265025      |                |                  | 1231.512208        | 616.259742       | V    | <b>1188.549991</b> | 594.778634      | 1171.523442    | 586.265359       | 1170.539426    | 585.773351       | 7  |
| 12 | 1409.553422        | 705.280349      |                |                  | 1391.542857        | 696.275067       | C    | <b>1089.481577</b> | 545.244427      | 1072.455028    | 536.731152       | 1071.471012    | 536.239144       | 6  |
| 13 | 1480.590536        | 740.798906      |                |                  | 1462.579971        | 731.793624       | A    | <b>929.450928</b>  | 465.229102      | 912.424379     | 456.715827       | 911.440363     | 456.223819       | 5  |
| 14 | 1919.815862        | 960.411569      | 1902.789313    | 951.898295       | 1901.805297        | 951.406287       | Q    | <b>858.413814</b>  | 429.710545      | 841.387265     | 421.197271       | 840.403249     | 420.705263       | 4  |
| 15 | 2034.842805        | 1017.925041     | 2017.816256    | 1009.411766      | 2016.832240        | 1008.919758      | D    | <b>419.188488</b>  | 210.097882      | 402.161939     | 201.584607       | 401.177923     | 201.092599       | 3  |
| 16 | 2163.885398        | 1082.446337     | 2146.858849    | 1073.933062      | 2145.874833        | 1073.441054      | E    | <b>304.161545</b>  | 152.584410      | 287.134996     | 144.071136       | 286.150980     | 143.579128       | 2  |
| 17 |                    |                 |                |                  |                    |                  | R    | <b>175.118952</b>  | 88.063114       | 158.092403     | 79.549839        |                |                  | 1  |

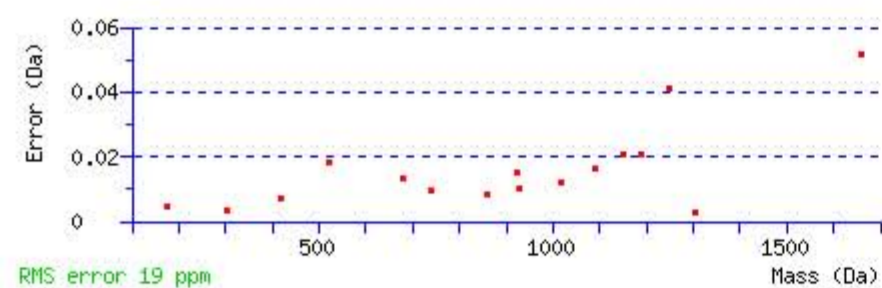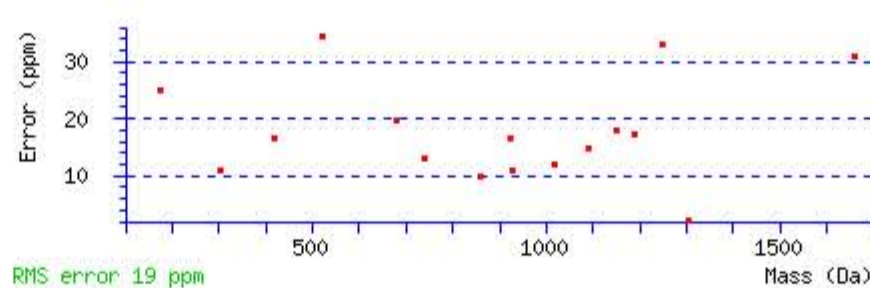

NCBI BLAST search of [MPYECGPSLDVCAQDER](#)

(Parameters: blastp, nr protein database, expect=20000, no filter, PAM30)

Other BLAST [web gateways](#)

## All matches to this query

| Score | Mr(calc):   | Delta    | Sequence                          |
|-------|-------------|----------|-----------------------------------|
| 46.3  | 2336.989792 | 0.029510 | <a href="#">MPYECGPSLDVCAQDER</a> |

Mascot: <http://www.matrixscience.com/>



# MASCOT Search Results

## Peptide View

MS/MS Fragmentation of **IACVLPVLM DGIQSH P QKPFYTVGEK**

Found in **CO7\_HUMAN**, Complement component C7 OS=Homo sapiens GN=C7 PE=1 SV=2

Match to Query 74705: 3237.719496 from(810.437150,4+) rtinseconds(2545) index(10452)

Title: Locus:1.1.1.3018.11 File:"2013-07-02 CLN FXIII 60 min 1st F 1.wiff"

Data file C:\Program Files (x86)\Matrix Science\Mascot Daemon\mgf4 FXIII 60 min 1st\mascot\_daemon\_merge.mgf

Click mouse within plot area to zoom in by factor of two about that point

Or, Plot from  to  Da

Label all possible matches  Label matches used for scoring

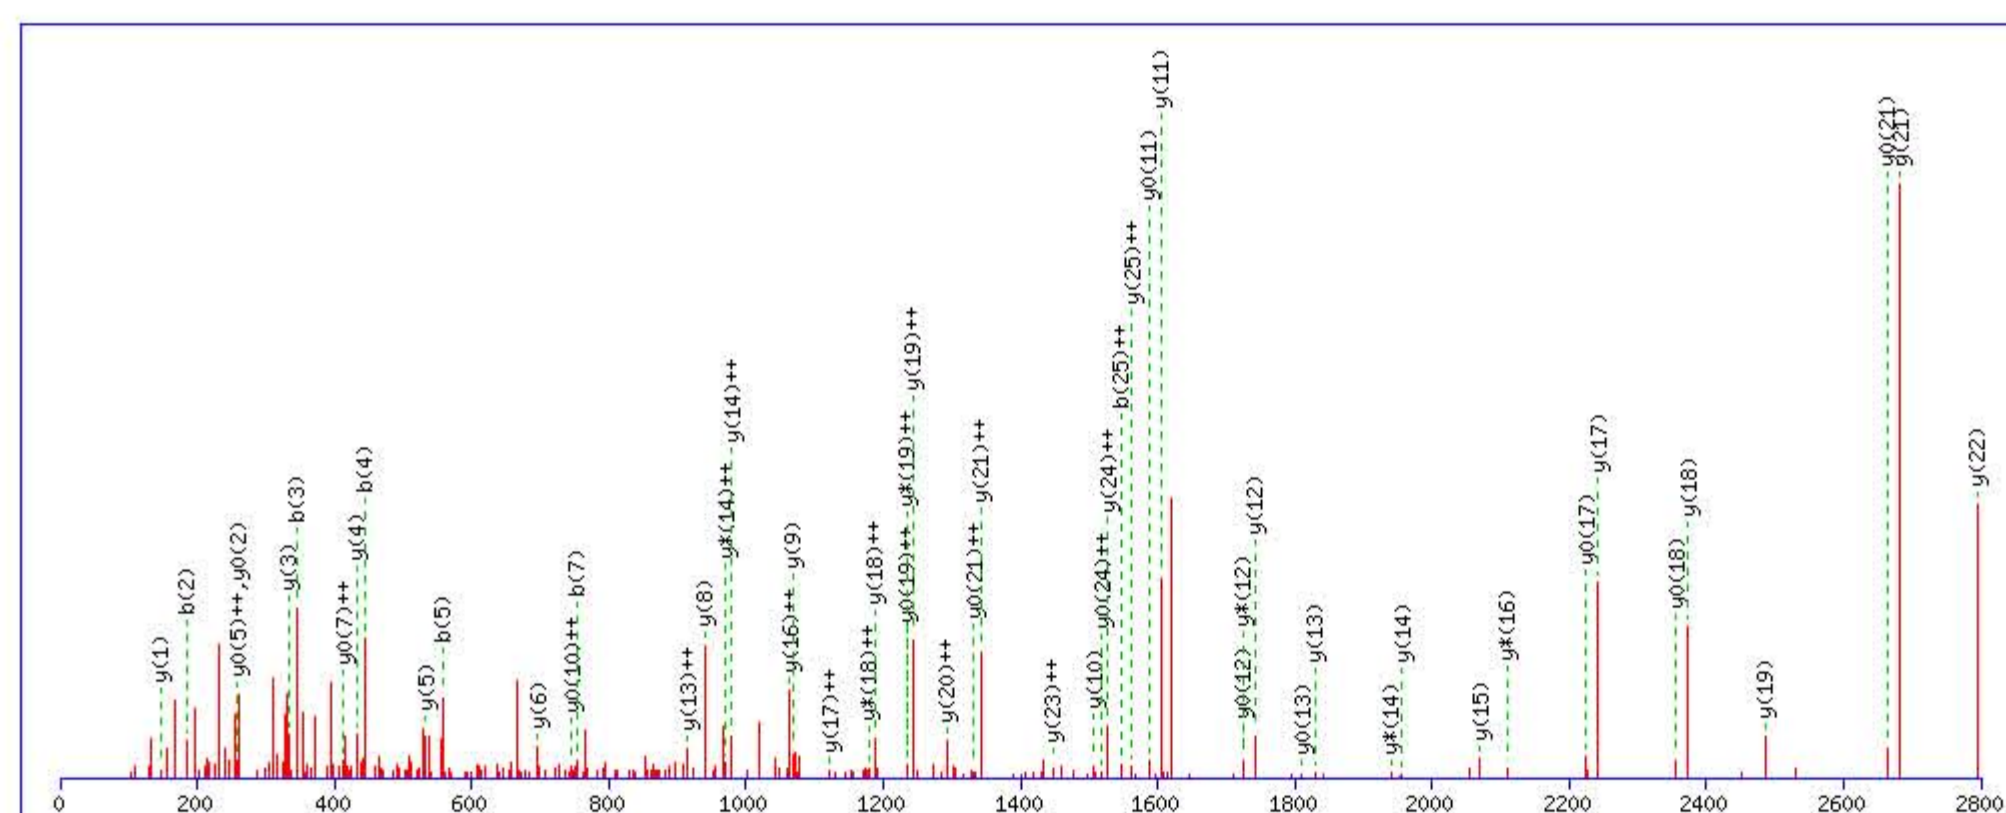

Monoisotopic mass of neutral peptide Mr(calc): 3237.675262

Fixed modifications: Carbamidomethyl (C) (apply to specified residues or termini only)

Variable modifications:

Q17 : Biotin:Thermo-21345 (Q)

Ions Score: 61 Expect: 1.5e-005

Matches : 54/256 fragment ions using 160 most intense peaks [\(help\)](#)

| #  | b                 | b <sup>++</sup>    | b <sup>*</sup> | b <sup>++</sup> | b <sup>0</sup> | b <sup>0++</sup> | Seq. | y                  | y <sup>++</sup>    | y <sup>*</sup>     | y <sup>++</sup>    | y <sup>0</sup>     | y <sup>0++</sup>   | #  |
|----|-------------------|--------------------|----------------|-----------------|----------------|------------------|------|--------------------|--------------------|--------------------|--------------------|--------------------|--------------------|----|
| 1  | 114.091340        | 57.549308          |                |                 |                |                  | I    |                    |                    |                    |                    |                    |                    | 26 |
| 2  | <b>185.128454</b> | 93.067865          |                |                 |                |                  | A    | 3125.598471        | <b>1563.302873</b> | 3108.571922        | 1554.789599        | 3107.587906        | 1554.297591        | 25 |
| 3  | <b>345.159103</b> | 173.083190         |                |                 |                |                  | C    | 3054.561357        | <b>1527.784316</b> | 3037.534808        | 1519.271042        | 3036.550792        | <b>1518.779034</b> | 24 |
| 4  | <b>444.227517</b> | 222.617397         |                |                 |                |                  | V    | 2894.530708        | <b>1447.768992</b> | 2877.504159        | 1439.255717        | 2876.520143        | 1438.763709        | 23 |
| 5  | <b>557.311581</b> | 279.159429         |                |                 |                |                  | L    | <b>2795.462294</b> | 1398.234785        | 2778.435745        | 1389.721510        | 2777.451729        | 1389.229502        | 22 |
| 6  | 654.364345        | 327.685811         |                |                 |                |                  | P    | <b>2682.378230</b> | <b>1341.692753</b> | 2665.351681        | 1333.179478        | <b>2664.367665</b> | <b>1332.687470</b> | 21 |
| 7  | <b>753.432759</b> | 377.220018         |                |                 |                |                  | V    | 2585.325466        | <b>1293.166371</b> | 2568.298917        | 1284.653096        | 2567.314901        | 1284.161088        | 20 |
| 8  | 866.516823        | 433.762050         |                |                 |                |                  | L    | <b>2486.257052</b> | <b>1243.632164</b> | 2469.230503        | <b>1235.118889</b> | 2468.246487        | <b>1234.626881</b> | 19 |
| 9  | 997.557308        | 499.282292         |                |                 |                |                  | M    | <b>2373.172988</b> | <b>1187.090132</b> | 2356.146439        | <b>1178.576857</b> | <b>2355.162423</b> | 1178.084849        | 18 |
| 10 | 1112.584251       | 556.795764         |                |                 | 1094.573686    | 547.790481       | D    | <b>2242.132503</b> | <b>1121.569889</b> | 2225.105954        | 1113.056615        | <b>2224.121938</b> | 1112.564607        | 17 |
| 11 | 1169.605715       | 585.306495         |                |                 | 1151.595150    | 576.301213       | G    | 2127.105560        | <b>1064.056418</b> | <b>2110.079011</b> | 1055.543143        | 2109.094995        | 1055.051135        | 16 |
| 12 | 1282.689779       | 641.848527         |                |                 | 1264.679214    | 632.843245       | I    | <b>2070.084096</b> | 1035.545686        | 2053.057547        | 1027.032411        | 2052.073531        | 1026.540403        | 15 |
| 13 | 1410.748357       | 705.877816         | 1393.721808    | 697.364542      | 1392.737792    | 696.872534       | Q    | <b>1957.000032</b> | <b>979.003654</b>  | <b>1939.973483</b> | <b>970.490380</b>  | 1938.989467        | 969.998371         | 14 |
| 14 | 1497.780385       | 749.393830         | 1480.753836    | 740.880556      | 1479.769820    | 740.388548       | S    | <b>1828.941454</b> | <b>914.974365</b>  | 1811.914905        | 906.461091         | <b>1810.930889</b> | 905.969083         | 13 |
| 15 | 1634.839297       | 817.923286         | 1617.812748    | 809.410012      | 1616.828732    | 808.918004       | H    | <b>1741.909426</b> | 871.458351         | <b>1724.882877</b> | 862.945077         | <b>1723.898861</b> | 862.453068         | 12 |
| 16 | 1731.892061       | 866.449668         | 1714.865512    | 857.936394      | 1713.881496    | 857.444386       | P    | <b>1604.850514</b> | 802.928895         | 1587.823965        | 794.415621         | <b>1586.839949</b> | 793.923612         | 11 |
| 17 | 2171.117387       | 1086.062331        | 2154.090838    | 1077.549057     | 2153.106822    | 1077.057049      | Q    | <b>1507.797750</b> | 754.402513         | 1490.771201        | 745.889239         | 1489.787185        | <b>745.397230</b>  | 10 |
| 18 | 2299.212350       | 1150.109813        | 2282.185801    | 1141.596538     | 2281.201785    | 1141.104530      | K    | <b>1068.572424</b> | 534.789850         | 1051.545875        | 526.276575         | 1050.561859        | 525.784567         | 9  |
| 19 | 2396.265114       | 1198.636195        | 2379.238565    | 1190.122920     | 2378.254549    | 1189.630912      | P    | <b>940.477461</b>  | 470.742368         | 923.450912         | 462.229094         | 922.466896         | 461.737086         | 8  |
| 20 | 2543.333528       | 1272.170402        | 2526.306979    | 1263.657127     | 2525.322963    | 1263.165119      | F    | 843.424697         | 422.215986         | 826.398148         | 413.702712         | 825.414132         | <b>413.210704</b>  | 7  |
| 21 | 2706.396857       | 1353.702066        | 2689.370308    | 1345.188792     | 2688.386292    | 1344.696784      | Y    | <b>696.356283</b>  | 348.681779         | 679.329734         | 340.168505         | 678.345718         | 339.676497         | 6  |
| 22 | 2807.444536       | 1404.225906        | 2790.417987    | 1395.712631     | 2789.433971    | 1395.220623      | T    | <b>533.292954</b>  | 267.150115         | 516.266405         | 258.636840         | 515.282389         | <b>258.144832</b>  | 5  |
| 23 | 2906.512950       | 1453.760113        | 2889.486401    | 1445.246838     | 2888.502385    | 1444.754830      | V    | <b>432.245275</b>  | 216.626275         | 415.218726         | 208.113001         | 414.234710         | 207.620993         | 4  |
| 24 | 2963.534414       | 1482.270845        | 2946.507865    | 1473.757570     | 2945.523849    | 1473.265562      | G    | <b>333.176861</b>  | 167.092069         | 316.150312         | 158.578794         | 315.166296         | 158.086786         | 3  |
| 25 | 3092.577007       | <b>1546.792141</b> | 3075.550458    | 1538.278867     | 3074.566442    | 1537.786859      | E    | 276.155397         | 138.581337         | 259.128848         | 130.068062         | <b>258.144832</b>  | 129.576054         | 2  |
| 26 |                   |                    |                |                 |                |                  | K    | <b>147.112804</b>  | 74.060040          | 130.086255         | 65.546765          |                    |                    | 1  |

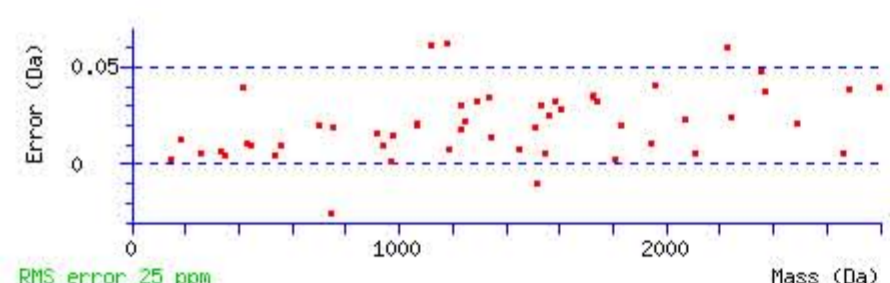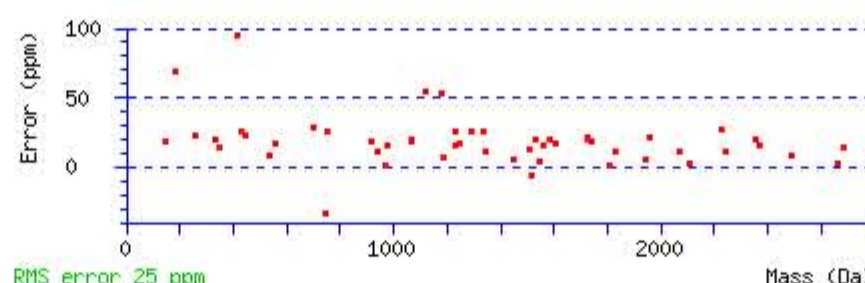

NCBI BLAST search of **IACVLPVLM DGIQSH P QKPFYTVGEK**

(Parameters: blastp, nr protein database, expect=20000, no filter, PAM30)

Other BLAST [web gateways](#)

All matches to this query

| Score | Mr(calc):   | Delta    | Sequence                                      |
|-------|-------------|----------|-----------------------------------------------|
| 61.2  | 3237.675262 | 0.044234 | <a href="#">IACVLPVLM DGIQSH P QKPFYTVGEK</a> |
| 40.0  | 3237.675262 | 0.044234 | <a href="#">IACVLPVLM DGIQSH P QKPFYTVGEK</a> |



# MASCOT Search Results

## Peptide View

MS/MS Fragmentation of **SVAVYGQYGGQPCVGNAFETQSCEPTR**

Found in **CO7\_HUMAN**, Complement component C7 OS=Homo sapiens GN=C7 PE=1 SV=2

Match to Query 75774: 3272.507136 from(819.134060,4+) rtinseconds(2152) index(8050)

Title: Locus:1.1.1.2881.24 File:"2013-07-02 CLN FXIII 60 min 1st F 1.wiff"

Data file C:\Program Files (x86)\Matrix Science\Mascot Daemon\mgf4 FXIII 60 min 1st\mascot\_daemon\_merge.mgf

Click mouse within plot area to zoom in by factor of two about that point

Or, Plot from  to  Da

Label all possible matches  Label matches used for scoring

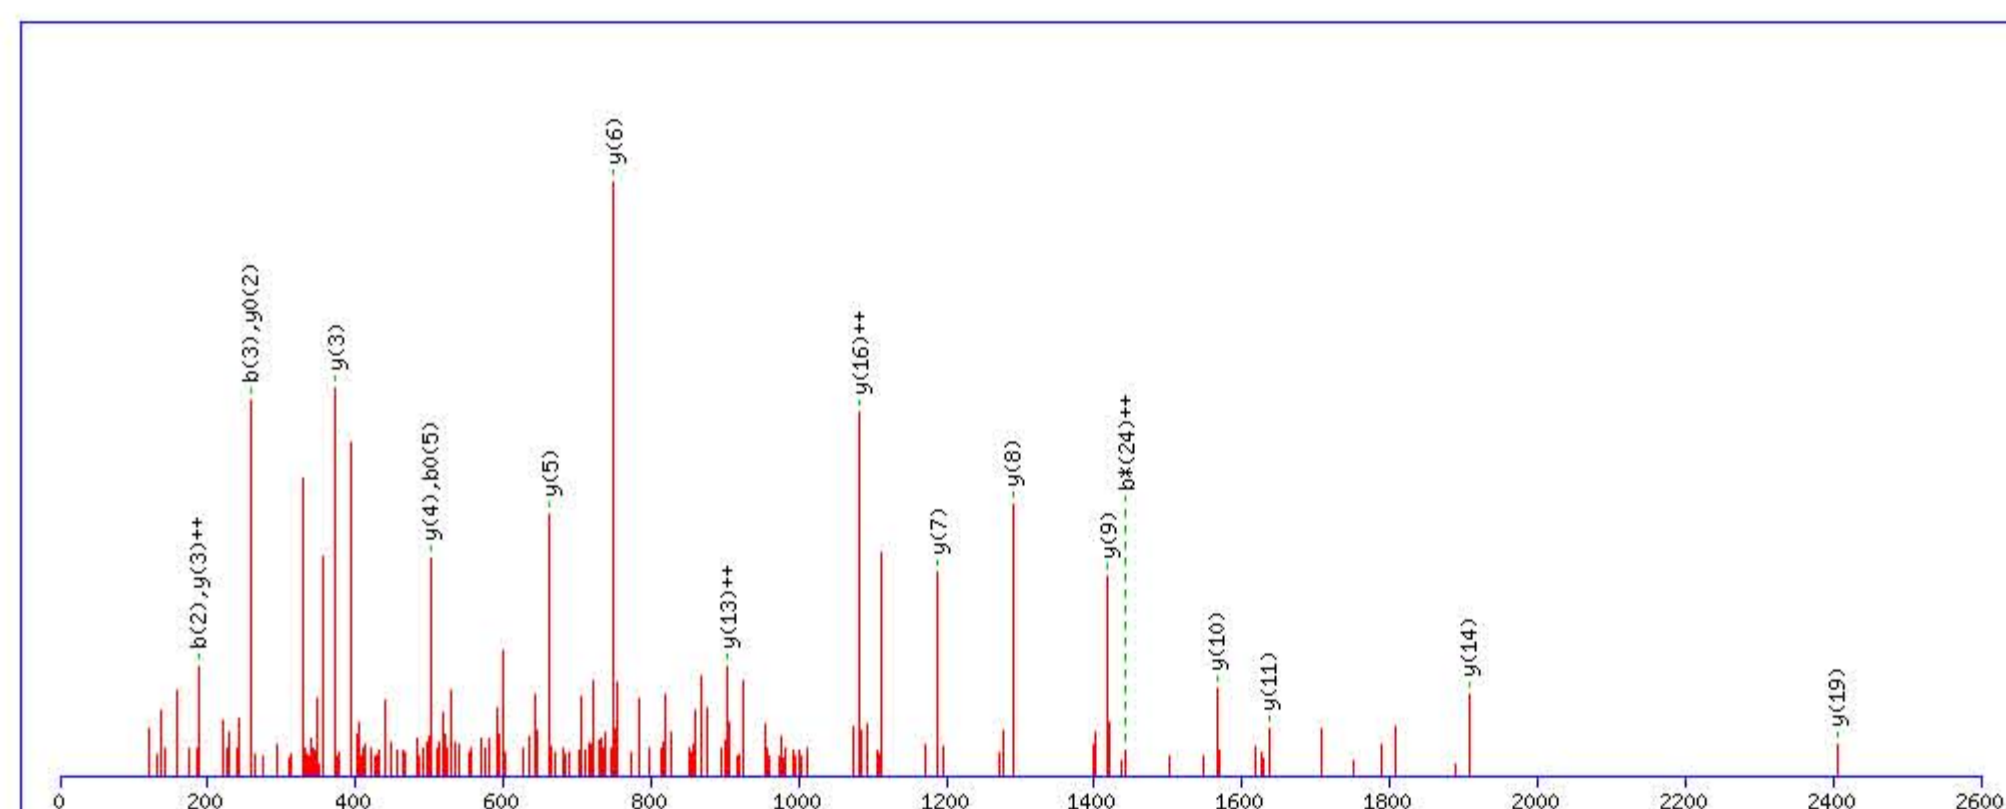

Monoisotopic mass of neutral peptide Mr(calc): 3272.468933

Fixed modifications: Carbamidomethyl (C) (apply to specified residues or termini only)

Variable modifications:

Q21 : Biotin:Thermo-21345 (Q)

Ions Score: 86 Expect: 3.4e-008

Matches : 19/298 fragment ions using 19 most intense peaks [\(help\)](#)

| #  | b                 | b <sup>++</sup> | b <sup>*</sup> | b <sup>*++</sup>   | b <sup>0</sup>    | b <sup>0++</sup> | Seq. | y                  | y <sup>++</sup>    | y <sup>*</sup> | y <sup>*++</sup> | y <sup>0</sup>    | y <sup>0++</sup> | #  |
|----|-------------------|-----------------|----------------|--------------------|-------------------|------------------|------|--------------------|--------------------|----------------|------------------|-------------------|------------------|----|
| 1  | 88.039304         | 44.523290       |                |                    | 70.028739         | 35.518008        | S    |                    |                    |                |                  |                   |                  | 27 |
| 2  | <b>187.107718</b> | 94.057497       |                |                    | 169.097153        | 85.052214        | V    | 3186.444157        | 1593.725716        | 3169.417608    | 1585.212442      | 3168.433592       | 1584.720434      | 26 |
| 3  | <b>258.144832</b> | 129.576054      |                |                    | 240.134267        | 120.570772       | A    | 3087.375743        | 1544.191509        | 3070.349194    | 1535.678235      | 3069.365178       | 1535.186227      | 25 |
| 4  | 357.213246        | 179.110261      |                |                    | 339.202681        | 170.104979       | V    | 3016.338629        | 1508.672952        | 2999.312080    | 1500.159678      | 2998.328064       | 1499.667670      | 24 |
| 5  | 520.276575        | 260.641926      |                |                    | <b>502.266010</b> | 251.636643       | Y    | 2917.270215        | 1459.138745        | 2900.243666    | 1450.625471      | 2899.259650       | 1450.133463      | 23 |
| 6  | 577.298039        | 289.152658      |                |                    | 559.287474        | 280.147375       | G    | 2754.206886        | 1377.607081        | 2737.180337    | 1369.093806      | 2736.196321       | 1368.601798      | 22 |
| 7  | 705.356617        | 353.181947      | 688.330068     | 344.668672         | 687.346052        | 344.176664       | Q    | 2697.185422        | 1349.096349        | 2680.158873    | 1340.583074      | 2679.174857       | 1340.091066      | 21 |
| 8  | 868.419946        | 434.713611      | 851.393397     | 426.200337         | 850.409381        | 425.708329       | Y    | 2569.126844        | 1285.067060        | 2552.100295    | 1276.553785      | 2551.116279       | 1276.061777      | 20 |
| 9  | 925.441410        | 463.224343      | 908.414861     | 454.711069         | 907.430845        | 454.219061       | G    | <b>2406.063515</b> | 1203.535395        | 2389.036966    | 1195.022121      | 2388.052950       | 1194.530113      | 19 |
| 10 | 982.462874        | 491.735075      | 965.436325     | 483.221801         | 964.452309        | 482.729793       | G    | 2349.042051        | 1175.024663        | 2332.015502    | 1166.511389      | 2331.031486       | 1166.019381      | 18 |
| 11 | 1110.521452       | 555.764364      | 1093.494903    | 547.251090         | 1092.510887       | 546.759082       | Q    | 2292.020587        | 1146.513931        | 2274.994038    | 1138.000657      | 2274.010022       | 1137.508649      | 17 |
| 12 | 1207.574216       | 604.290746      | 1190.547667    | 595.777472         | 1189.563651       | 595.285464       | P    | 2163.962009        | <b>1082.484642</b> | 2146.935460    | 1073.971368      | 2145.951444       | 1073.479360      | 16 |
| 13 | 1367.604865       | 684.306071      | 1350.578316    | 675.792796         | 1349.594300       | 675.300788       | C    | 2066.909245        | 1033.958260        | 2049.882696    | 1025.444986      | 2048.898680       | 1024.952978      | 15 |
| 14 | 1466.673279       | 733.840278      | 1449.646730    | 725.327003         | 1448.662714       | 724.834995       | V    | <b>1906.878596</b> | 953.942936         | 1889.852047    | 945.429662       | 1888.868031       | 944.937654       | 14 |
| 15 | 1523.694743       | 762.351010      | 1506.668194    | 753.837735         | 1505.684178       | 753.345727       | G    | 1807.810182        | <b>904.408729</b>  | 1790.783633    | 895.895455       | 1789.799617       | 895.403446       | 13 |
| 16 | 1637.737670       | 819.372473      | 1620.711121    | 810.859199         | 1619.727105       | 810.367191       | N    | 1750.788718        | 875.897997         | 1733.762169    | 867.384723       | 1732.778153       | 866.892715       | 12 |
| 17 | 1708.774784       | 854.891030      | 1691.748235    | 846.377756         | 1690.764219       | 845.885748       | A    | <b>1636.745791</b> | 818.876534         | 1619.719242    | 810.363259       | 1618.735226       | 809.871251       | 11 |
| 18 | 1855.843198       | 928.425237      | 1838.816649    | 919.911963         | 1837.832633       | 919.419955       | F    | <b>1565.708677</b> | 783.357977         | 1548.682128    | 774.844702       | 1547.698112       | 774.352694       | 10 |
| 19 | 1984.885791       | 992.946534      | 1967.859242    | 984.433259         | 1966.875226       | 983.941251       | E    | <b>1418.640263</b> | 709.823770         | 1401.613714    | 701.310495       | 1400.629698       | 700.818487       | 9  |
| 20 | 2085.933470       | 1043.470373     | 2068.906921    | 1034.957098        | 2067.922905       | 1034.465090      | T    | <b>1289.597670</b> | 645.302473         | 1272.571121    | 636.789199       | 1271.587105       | 636.297190       | 8  |
| 21 | 2525.158796       | 1263.083036     | 2508.132247    | 1254.569761        | 2507.148231       | 1254.077754      | Q    | <b>1188.549991</b> | 594.778634         | 1171.523442    | 586.265359       | 1170.539426       | 585.773351       | 7  |
| 22 | 2612.190824       | 1306.599050     | 2595.164275    | 1298.085776        | 2594.180259       | 1297.593768      | S    | <b>749.324665</b>  | 375.165970         | 732.298116     | 366.652696       | 731.314100        | 366.160688       | 6  |
| 23 | 2772.221473       | 1386.614374     | 2755.194924    | 1378.101100        | 2754.210908       | 1377.609092      | C    | <b>662.292637</b>  | 331.649956         | 645.266088     | 323.136682       | 644.282072        | 322.644674       | 5  |
| 24 | 2901.264066       | 1451.135671     | 2884.237517    | <b>1442.622396</b> | 2883.253501       | 1442.130389      | E    | <b>502.261988</b>  | 251.634632         | 485.235439     | 243.121357       | 484.251423        | 242.629349       | 4  |
| 25 | 2998.316830       | 1499.662053     | 2981.290281    | 1491.148778        | 2980.306265       | 1490.656771      | P    | <b>373.219395</b>  | <b>187.113335</b>  | 356.192846     | 178.600061       | 355.208830        | 178.108053       | 3  |
| 26 | 3099.364509       | 1550.185892     | 3082.337960    | 1541.672618        | 3081.353944       | 1541.180610      | T    | 276.166631         | 138.586953         | 259.140082     | 130.073679       | <b>258.156066</b> | 129.581671       | 2  |
| 27 |                   |                 |                |                    |                   |                  | R    | 175.118952         | 88.063114          | 158.092403     | 79.549839        |                   |                  | 1  |

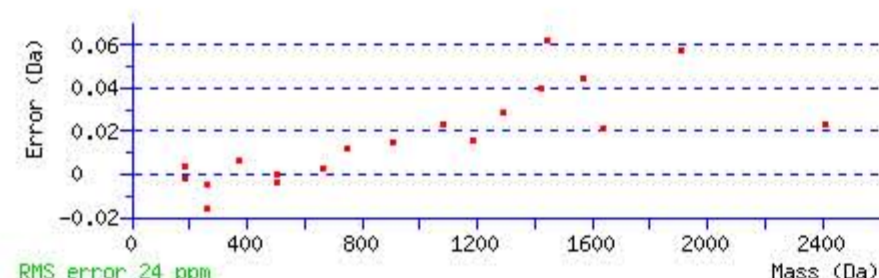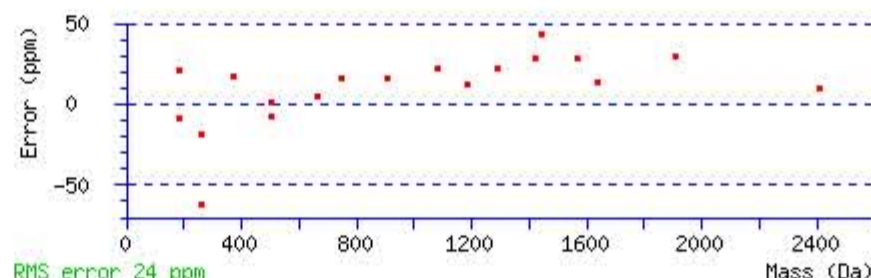

NCBI BLAST search of **SVAVYGQYGGQPCVGNAFETQSCEPTR**  
(Parameters: blastp, nr protein database, expect=20000, no filter, PAM30)

Other BLAST [web gateways](#)

## All matches to this query

| Score | Mr(calc):   | Delta    | Sequence                                    |
|-------|-------------|----------|---------------------------------------------|
| 85.8  | 3272.468933 | 0.038203 | <a href="#">SVAVYGQYGGQPCVGNAFETQSCEPTR</a> |
| 13.1  | 3272.468933 | 0.038203 | <a href="#">SVAVYGQYGGQPCVGNAFETQSCEPTR</a> |
| 6.8   | 3272.468933 | 0.038203 | <a href="#">SVAVYGQYGGQPCVGNAFETQSCEPTR</a> |



# MASCOT SCIENCE Mascot Search Results

## Peptide View

MS/MS Fragmentation of **AGIQER**

Found in **CO8A\_HUMAN**, Complement component C8 alpha chain OS=Homo sapiens GN=C8A PE=1 SV=2

Match to Query 18479: 983.520568 from(492.767560,2+) rtinseconds(1386) index(37988)

Title: Locus:1.1.1.2766.15 File:"2013-07-02 CLN FXIII 60 min 1st F 3.wiff"

Data file C:\Program Files (x86)\Matrix Science\Mascot Daemon\mgf4 FXIII 60 min 1st\mascot\_daemon\_merge.mgf

Click mouse within plot area to zoom in by factor of two about that point

Or, Plot from  to  Da

Label all possible matches  Label matches used for scoring

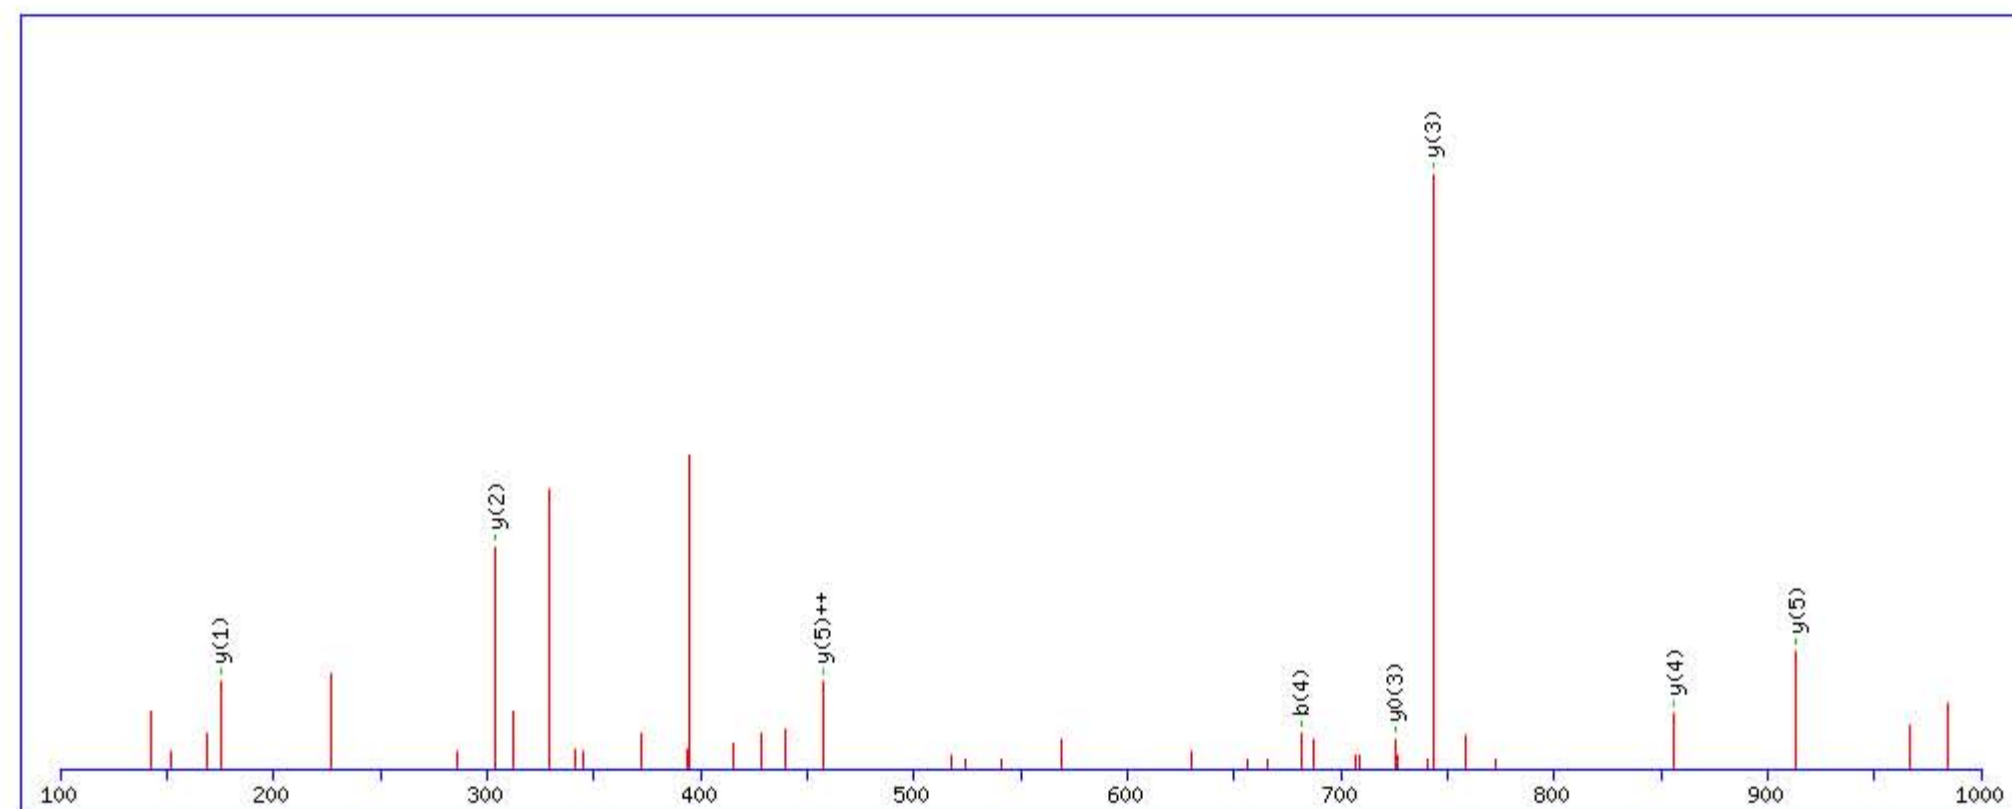

Monoisotopic mass of neutral peptide Mr(calc): 983.522217

Fixed modifications: Carbamidomethyl (C) (apply to specified residues or termini only)

Variable modifications:

Q4 : Biotin:Thermo-21345 (Q)

Ions Score: 27 Expect: 0.043

Matches : 8/44 fragment ions using 17 most intense peaks [\(help\)](#)

| # | b          | b <sup>++</sup> | b <sup>*</sup> | b <sup>+++</sup> | b <sup>0</sup> | b <sup>0++</sup> | Seq. | y          | y <sup>++</sup> | y <sup>*</sup> | y <sup>+++</sup> | y <sup>0</sup> | y <sup>0++</sup> | # |
|---|------------|-----------------|----------------|------------------|----------------|------------------|------|------------|-----------------|----------------|------------------|----------------|------------------|---|
| 1 | 72.044390  | 36.525833       |                |                  |                |                  | A    |            |                 |                |                  |                |                  | 6 |
| 2 | 129.065854 | 65.036565       |                |                  |                |                  | G    | 913.492399 | 457.249838      | 896.465850     | 448.736563       | 895.481834     | 448.244555       | 5 |
| 3 | 242.149918 | 121.578597      |                |                  |                |                  | I    | 856.470935 | 428.739106      | 839.444386     | 420.225831       | 838.460370     | 419.733823       | 4 |
| 4 | 681.375244 | 341.191260      | 664.348695     | 332.677986       |                |                  | Q    | 743.386871 | 372.197074      | 726.360322     | 363.683799       | 725.376306     | 363.191791       | 3 |
| 5 | 810.417837 | 405.712557      | 793.391288     | 397.199282       | 792.407272     | 396.707274       | E    | 304.161545 | 152.584411      | 287.134996     | 144.071136       | 286.150980     | 143.579128       | 2 |
| 6 |            |                 |                |                  |                |                  | R    | 175.118952 | 88.063114       | 158.092403     | 79.549840        |                |                  | 1 |

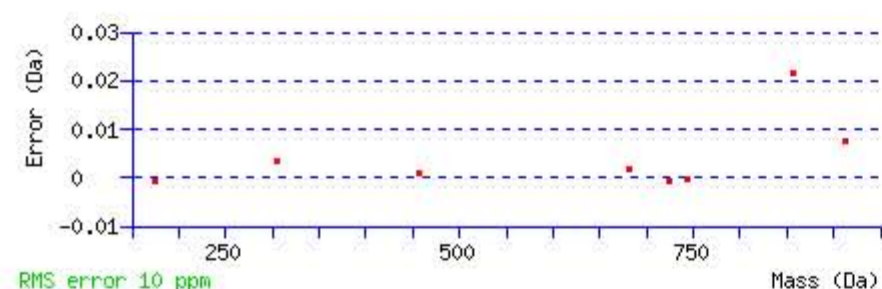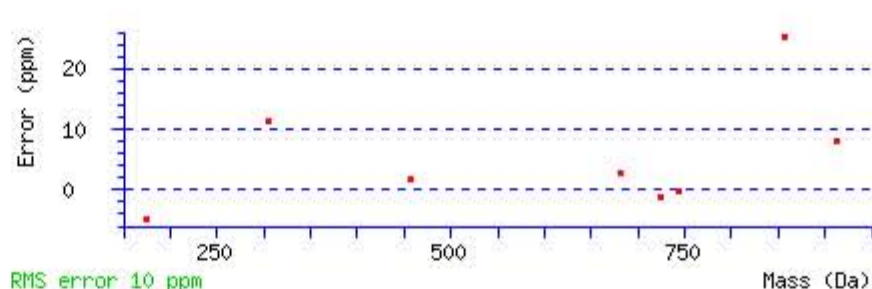

NCBI BLAST search of **AGIQER**

(Parameters: blastp, nr protein database, expect=20000, no filter, PAM30)

Other BLAST [web gateways](#)

## All matches to this query

| Score | Mr(calc):  | Delta     | Sequence                 |
|-------|------------|-----------|--------------------------|
| 26.7  | 983.522217 | -0.001649 | <a href="#">AGIQER</a>   |
| 15.9  | 983.522217 | -0.001649 | <a href="#">QIQER</a>    |
| 15.9  | 983.522217 | -0.001649 | <a href="#">QLQER</a>    |
| 15.7  | 983.522217 | -0.001649 | <a href="#">AGLEQR</a>   |
| 11.1  | 983.530090 | -0.009522 | <a href="#">QLLNHFGR</a> |
| 7.9   | 983.522217 | -0.001649 | <a href="#">IQQER</a>    |
| 7.9   | 983.522217 | -0.001649 | <a href="#">LQQER</a>    |
| 7.5   | 983.514832 | 0.005736  | <a href="#">QSVEKTHR</a> |
| 6.9   | 983.522202 | -0.001634 | <a href="#">KLMENPPR</a> |
| 6.9   | 983.522217 | -0.001649 | <a href="#">QLEQR</a>    |

Mascot: <http://www.matrixscience.com/>



# MASCOT Search Results

## Peptide View

MS/MS Fragmentation of **QAQCGQDFQCK**

Found in **CO8A\_HUMAN**, Complement component C8 alpha chain OS=Homo sapiens GN=C8A PE=1 SV=2

Match to Query 45335: 1679.738508 from(840.876530,2+) rtinseconds(1508) index(21253)

Title: Locus:1.1.1.2479.18 File:"2013-07-02 CLN FXIII 60 min 1st F 2.wiff"

Data file C:\Program Files (x86)\Matrix Science\Mascot Daemon\mgf4 FXIII 60 min 1st\mascot\_daemon\_merge.mgf

Click mouse within plot area to zoom in by factor of two about that point

Or, Plot from  to  Da

Label all possible matches  Label matches used for scoring

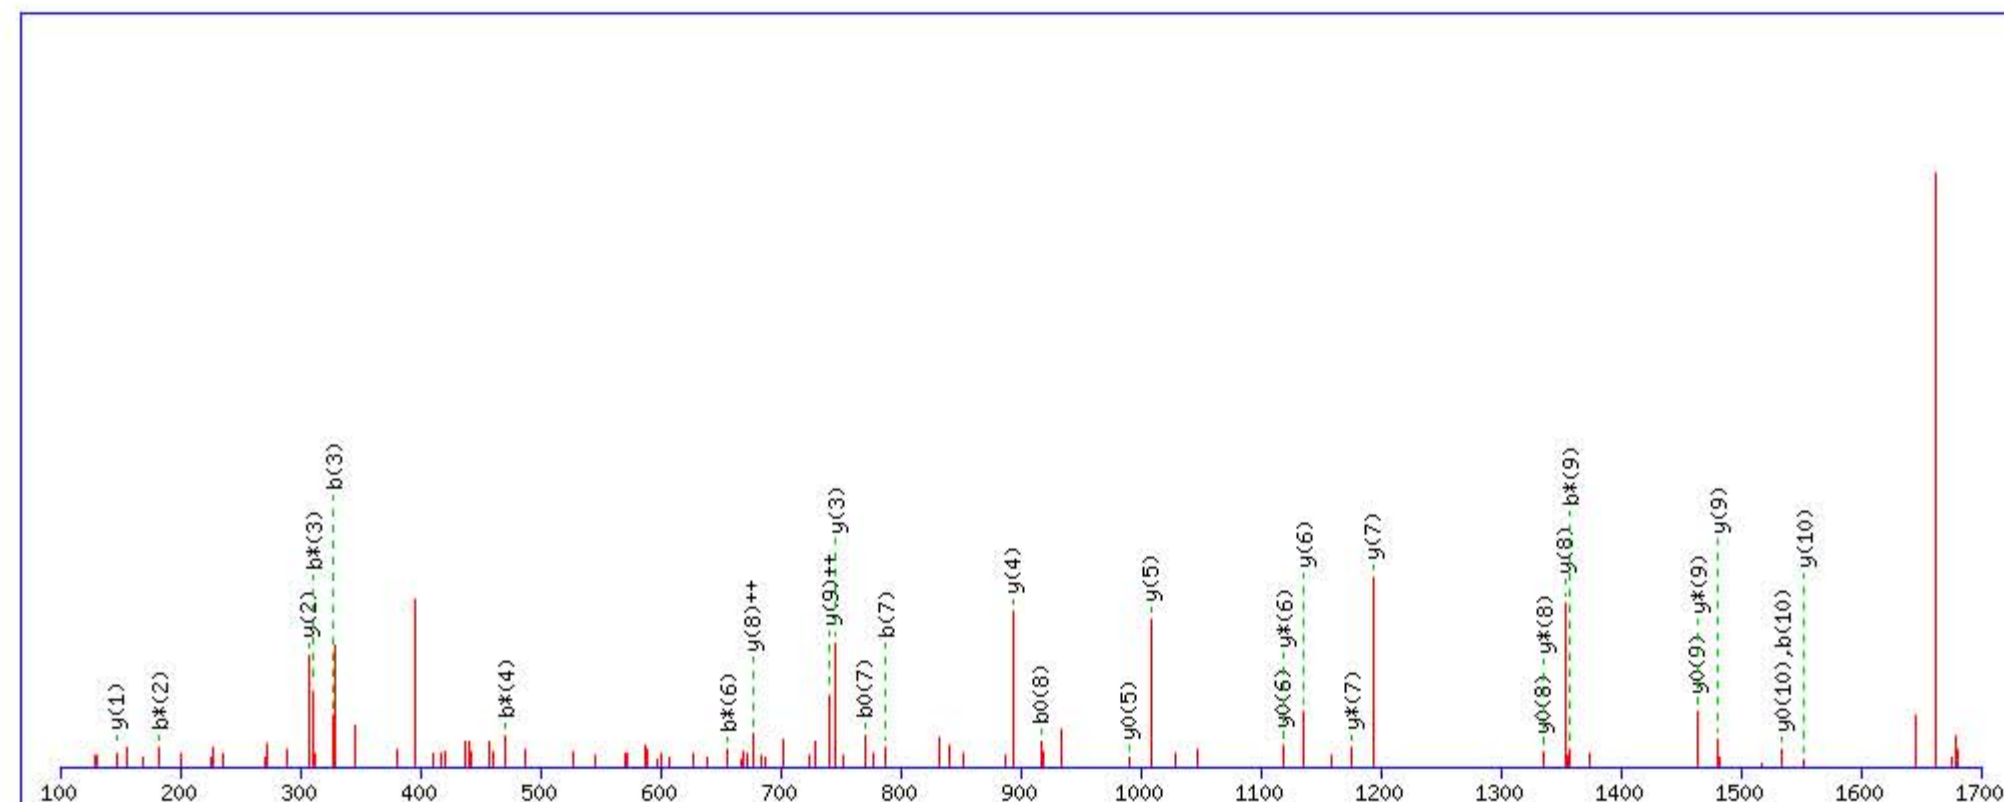

Monoisotopic mass of neutral peptide Mr(calc): 1679.721832

Fixed modifications: Carbamidomethyl (C) (apply to specified residues or termini only)

Variable modifications:

Q9 : Biotin:Thermo-21345 (Q)

Ions Score: 60 Expect: 6.1e-006

Matches : 31/100 fragment ions using 57 most intense peaks [\(help\)](#)

| #  | b           | b <sup>++</sup> | b <sup>*</sup> | b <sup>*++</sup> | b <sup>0</sup> | b <sup>0++</sup> | Seq. | y           | y <sup>++</sup> | y <sup>*</sup> | y <sup>*++</sup> | y <sup>0</sup> | y <sup>0++</sup> | #  |
|----|-------------|-----------------|----------------|------------------|----------------|------------------|------|-------------|-----------------|----------------|------------------|----------------|------------------|----|
| 1  | 129.065854  | 65.036565       | 112.039305     | 56.523291        |                |                  | Q    |             |                 |                |                  |                |                  | 11 |
| 2  | 200.102968  | 100.555122      | 183.076419     | 92.041848        |                |                  | A    | 1552.670519 | 776.838898      | 1535.643970    | 768.325623       | 1534.659954    | 767.833615       | 10 |
| 3  | 328.161546  | 164.584411      | 311.134997     | 156.071136       |                |                  | Q    | 1481.633405 | 741.320341      | 1464.606856    | 732.807066       | 1463.622840    | 732.315058       | 9  |
| 4  | 488.192195  | 244.599736      | 471.165646     | 236.086461       |                |                  | C    | 1353.574827 | 677.291052      | 1336.548278    | 668.777777       | 1335.564262    | 668.285769       | 8  |
| 5  | 545.213659  | 273.110468      | 528.187110     | 264.597193       |                |                  | G    | 1193.544178 | 597.275727      | 1176.517629    | 588.762453       | 1175.533613    | 588.270445       | 7  |
| 6  | 673.272237  | 337.139757      | 656.245688     | 328.626482       |                |                  | Q    | 1136.522714 | 568.764995      | 1119.496165    | 560.251721       | 1118.512149    | 559.759713       | 6  |
| 7  | 788.299180  | 394.653228      | 771.272631     | 386.139954       | 770.288615     | 385.647946       | D    | 1008.464136 | 504.735706      | 991.437587     | 496.222432       | 990.453571     | 495.730424       | 5  |
| 8  | 935.367594  | 468.187435      | 918.341045     | 459.674161       | 917.357029     | 459.182153       | F    | 893.437193  | 447.222235      | 876.410644     | 438.708960       |                |                  | 4  |
| 9  | 1374.592920 | 687.800098      | 1357.566371    | 679.286824       | 1356.582355    | 678.794816       | Q    | 746.368779  | 373.688028      | 729.342230     | 365.174753       |                |                  | 3  |
| 10 | 1534.623569 | 767.815423      | 1517.597020    | 759.302148       | 1516.613004    | 758.810140       | C    | 307.143453  | 154.075365      | 290.116904     | 145.562090       |                |                  | 2  |
| 11 |             |                 |                |                  |                |                  | K    | 147.112804  | 74.060040       | 130.086255     | 65.546765        |                |                  | 1  |

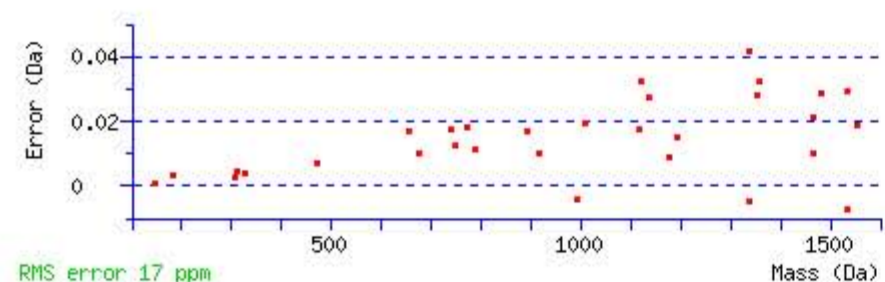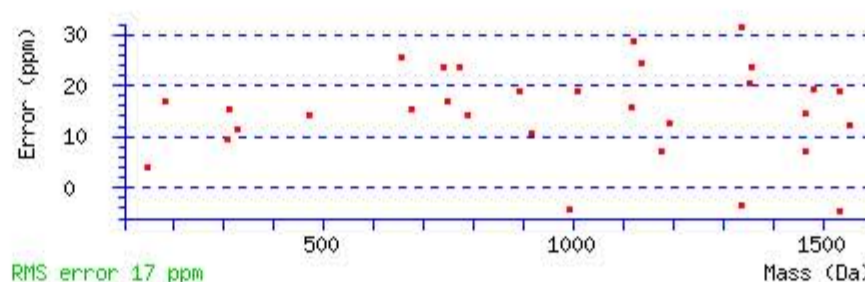

NCBI BLAST search of **QAQCGQDFQCK**

(Parameters: blastp, nr protein database, expect=20000, no filter, PAM30)

Other BLAST [web gateways](#)

All matches to this query

| Score | Mr(calc):   | Delta     | Sequence                        |
|-------|-------------|-----------|---------------------------------|
| 60.0  | 1679.721832 | 0.016676  | <a href="#">QAQCGQDFQCK</a>     |
| 25.1  | 1679.721832 | 0.016676  | <a href="#">QAQCGQDFQCK</a>     |
| 5.0   | 1679.760681 | -0.022173 | <a href="#">CGQAGDASLMELEKR</a> |
| 0.5   | 1679.740250 | -0.001742 | <a href="#">RGGGNEMNCCRTLK</a>  |

Mascot: <http://www.matrixscience.com/>



# MASCOT Search Results

## Peptide View

MS/MS Fragmentation of **LGSLGAACEQTQTEGAK**

Found in **CO8A\_HUMAN**, Complement component C8 alpha chain OS=Homo sapiens GN=C8A PE=1 SV=2

Match to Query 54503: 2030.982522 from(678.001450,3+) rtinseconds(1702) index(40093)

Title: Locus:1.1.1.2876.20 File:"2013-07-02 CLN FXIII 60 min 1st F 3.wiff"

Data file C:\Program Files (x86)\Matrix Science\Mascot Daemon\mgf\4 FXIII 60 min 1st\mascot\_daemon\_merge.mgf

Click mouse within plot area to zoom in by factor of two about that point

Or, Plot from  to  Da

Label all possible matches  Label matches used for scoring

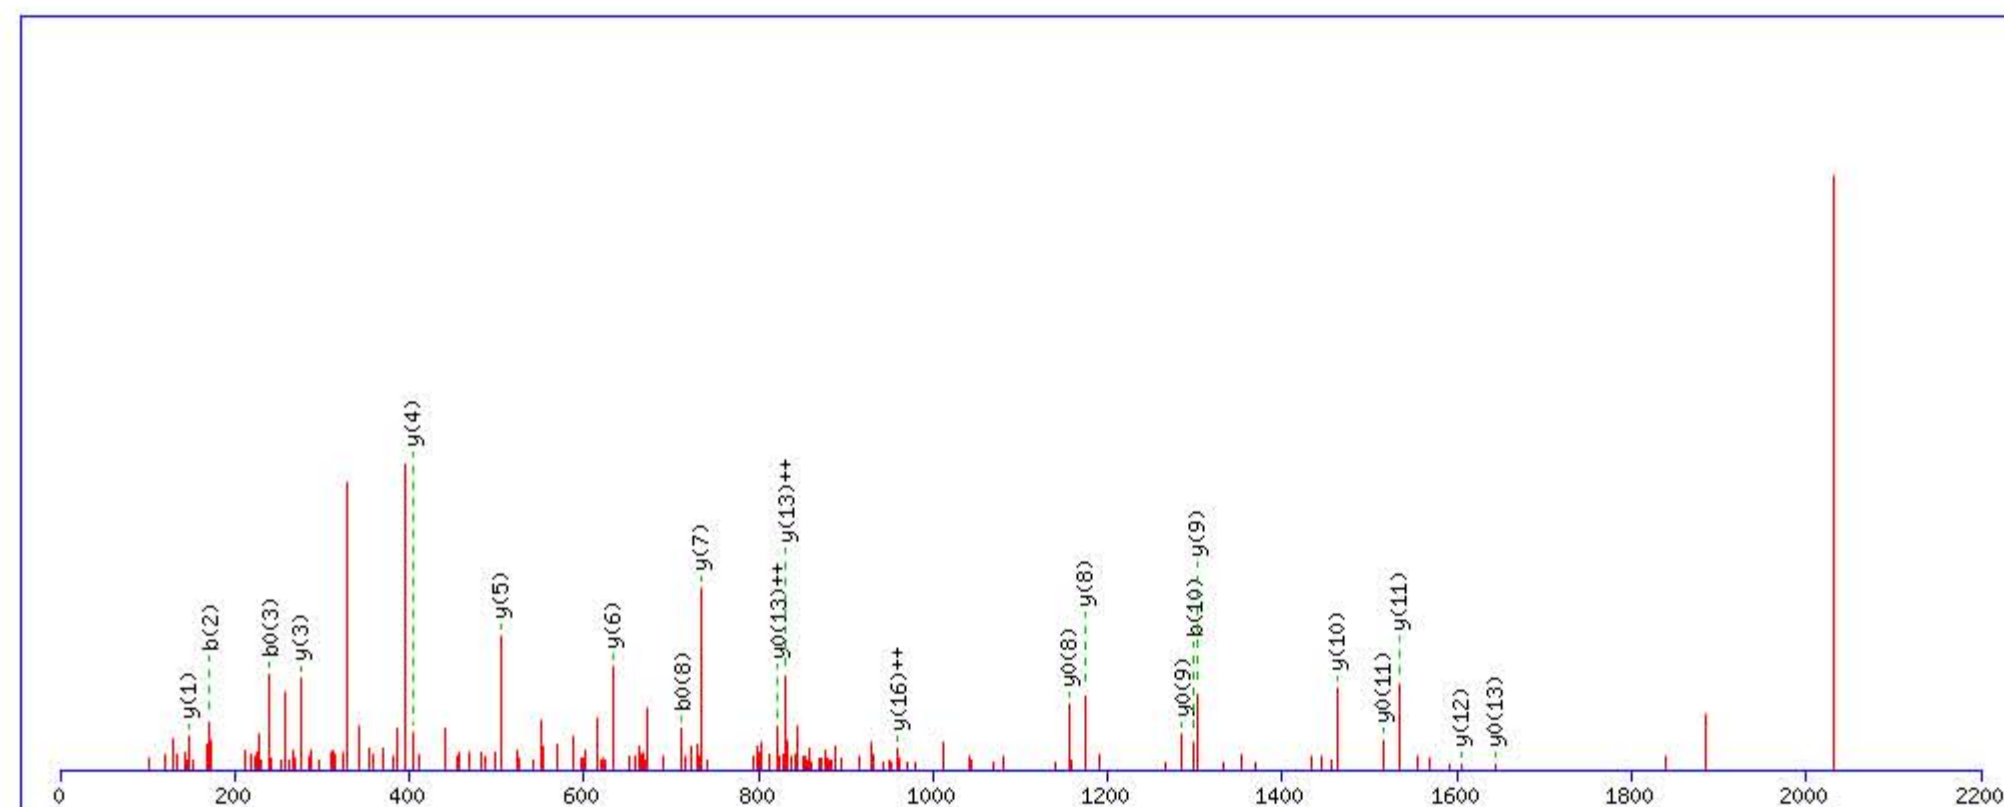

Monoisotopic mass of neutral peptide Mr(calc): 2030.976501

Fixed modifications: Carbamidomethyl (C) (apply to specified residues or termini only)

Variable modifications:

Q10 : Biotin:Thermo-21345 (Q)

Ions Score: 76 Expect: 1e-007

Matches : 22/164 fragment ions using 34 most intense peaks [\(help\)](#)

| #  | b                  | b <sup>++</sup> | b <sup>+</sup> | b <sup>+++</sup> | b <sup>0</sup>    | b <sup>0++</sup> | Seq. | y                  | y <sup>++</sup>   | y <sup>+</sup> | y <sup>+++</sup> | y <sup>0</sup>     | y <sup>0++</sup>  | #  |
|----|--------------------|-----------------|----------------|------------------|-------------------|------------------|------|--------------------|-------------------|----------------|------------------|--------------------|-------------------|----|
| 1  | 114.091340         | 57.549308       |                |                  |                   |                  | L    |                    |                   |                |                  |                    |                   | 17 |
| 2  | <b>171.112804</b>  | 86.060040       |                |                  |                   |                  | G    | 1918.899727        | <b>959.953502</b> | 1901.873178    | 951.440227       | 1900.889162        | 950.948219        | 16 |
| 3  | 258.144832         | 129.576054      |                |                  | <b>240.134267</b> | 120.570772       | S    | 1861.878263        | 931.442770        | 1844.851714    | 922.929495       | 1843.867698        | 922.437487        | 15 |
| 4  | 371.228896         | 186.118086      |                |                  | 353.218331        | 177.112804       | L    | 1774.846235        | 887.926756        | 1757.819686    | 879.413481       | 1756.835670        | 878.921473        | 14 |
| 5  | 428.250360         | 214.628818      |                |                  | 410.239795        | 205.623536       | G    | 1661.762171        | <b>831.384724</b> | 1644.735622    | 822.871449       | <b>1643.751606</b> | <b>822.379441</b> | 13 |
| 6  | 499.287474         | 250.147375      |                |                  | 481.276909        | 241.142093       | A    | <b>1604.740707</b> | 802.873992        | 1587.714158    | 794.360717       | 1586.730142        | 793.868709        | 12 |
| 7  | 570.324588         | 285.665932      |                |                  | 552.314023        | 276.660650       | A    | <b>1533.703593</b> | 767.355435        | 1516.677044    | 758.842160       | <b>1515.693028</b> | 758.350152        | 11 |
| 8  | 730.355237         | 365.681257      |                |                  | <b>712.344672</b> | 356.675974       | C    | <b>1462.666479</b> | 731.836878        | 1445.639930    | 723.323603       | 1444.655914        | 722.831595        | 10 |
| 9  | 859.397830         | 430.202553      |                |                  | 841.387265        | 421.197271       | E    | <b>1302.635830</b> | 651.821553        | 1285.609281    | 643.308279       | <b>1284.625265</b> | 642.816270        | 9  |
| 10 | <b>1298.623156</b> | 649.815216      | 1281.596607    | 641.301942       | 1280.612591       | 640.809934       | Q    | <b>1173.593237</b> | 587.300257        | 1156.566688    | 578.786982       | <b>1155.582672</b> | 578.294974        | 8  |
| 11 | 1399.670835        | 700.339056      | 1382.644286    | 691.825781       | 1381.660270       | 691.333773       | T    | <b>734.367911</b>  | 367.687594        | 717.341362     | 359.174319       | 716.357346         | 358.682311        | 7  |
| 12 | 1527.729413        | 764.368345      | 1510.702864    | 755.855070       | 1509.718848       | 755.363062       | Q    | <b>633.320232</b>  | 317.163754        | 616.293683     | 308.650480       | 615.309667         | 308.158472        | 6  |
| 13 | 1628.777092        | 814.892184      | 1611.750543    | 806.378910       | 1610.766527       | 805.886902       | T    | <b>505.261654</b>  | 253.134465        | 488.235105     | 244.621190       | 487.251089         | 244.129182        | 5  |
| 14 | 1757.819685        | 879.413481      | 1740.793136    | 870.900206       | 1739.809120       | 870.408198       | E    | <b>404.213975</b>  | 202.610625        | 387.187426     | 194.097351       | 386.203410         | 193.605343        | 4  |
| 15 | 1814.841149        | 907.924213      | 1797.814600    | 899.410938       | 1796.830584       | 898.918930       | G    | <b>275.171382</b>  | 138.089329        | 258.144833     | 129.576054       |                    |                   | 3  |
| 16 | 1885.878263        | 943.442770      | 1868.851714    | 934.929495       | 1867.867698       | 934.437487       | A    | 218.149918         | 109.578597        | 201.123369     | 101.065322       |                    |                   | 2  |
| 17 |                    |                 |                |                  |                   |                  | K    | <b>147.112804</b>  | 74.060040         | 130.086255     | 65.546765        |                    |                   | 1  |

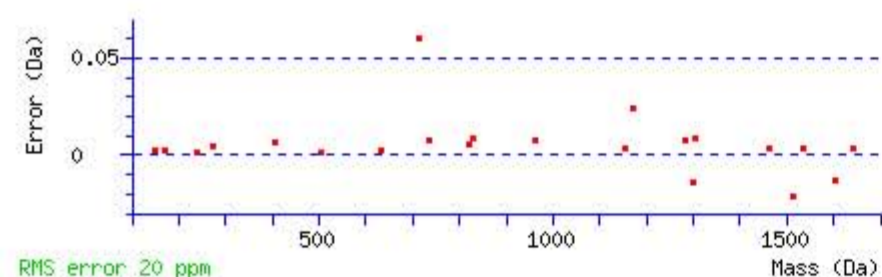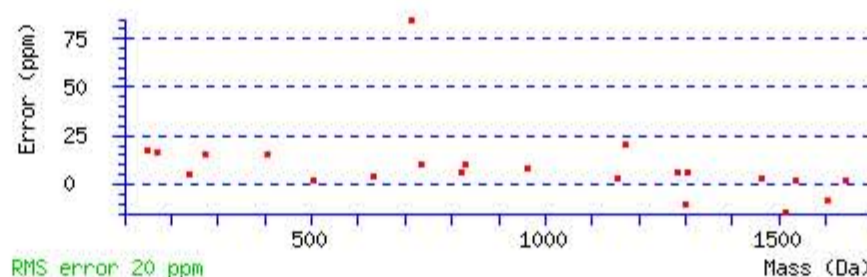

NCBI BLAST search of **LGSLGAACEQTQTEGAK**

(Parameters: blastp, nr protein database, expect=20000, no filter, PAM30)

Other BLAST [web gateways](#)

All matches to this query

| Score | Mr(calc):   | Delta    | Sequence                          |
|-------|-------------|----------|-----------------------------------|
| 75.8  | 2030.976501 | 0.006021 | <a href="#">LGSLGAACEQTQTEGAK</a> |
| 42.9  | 2030.976501 | 0.006021 | <a href="#">LGSLGAACEQTQTEGAK</a> |
| 1.2   | 2030.958710 | 0.023812 | <a href="#">QPMNAASGAAMSLGAEK</a> |

Mascot: <http://www.matrixscience.com/>



# Mascot Search Results

## Peptide View

MS/MS Fragmentation of **AIDEDCSQYEPPIGSQK**  
 Found in **CO8A\_HUMAN**, Complement component C8 alpha chain OS=Homo sapiens GN=C8A PE=1 SV=2

Match to Query 59288: 2247.034242 from(750.018690,3+) rtinseconds(1885) index(41289)  
 Title: Locus:1.1.1.2940.23 File:"2013-07-02 CLN FXIII 60 min 1st F 3.wiff"  
 Data file C:\Program Files (x86)\Matrix Science\Mascot Daemon\mgf4 FXIII 60 min 1st\mascot\_daemon\_merge.mgf

Click mouse within plot area to zoom in by factor of two about that point  
 Or, Plot from  to  Da   
 Label all possible matches  Label matches used for scoring

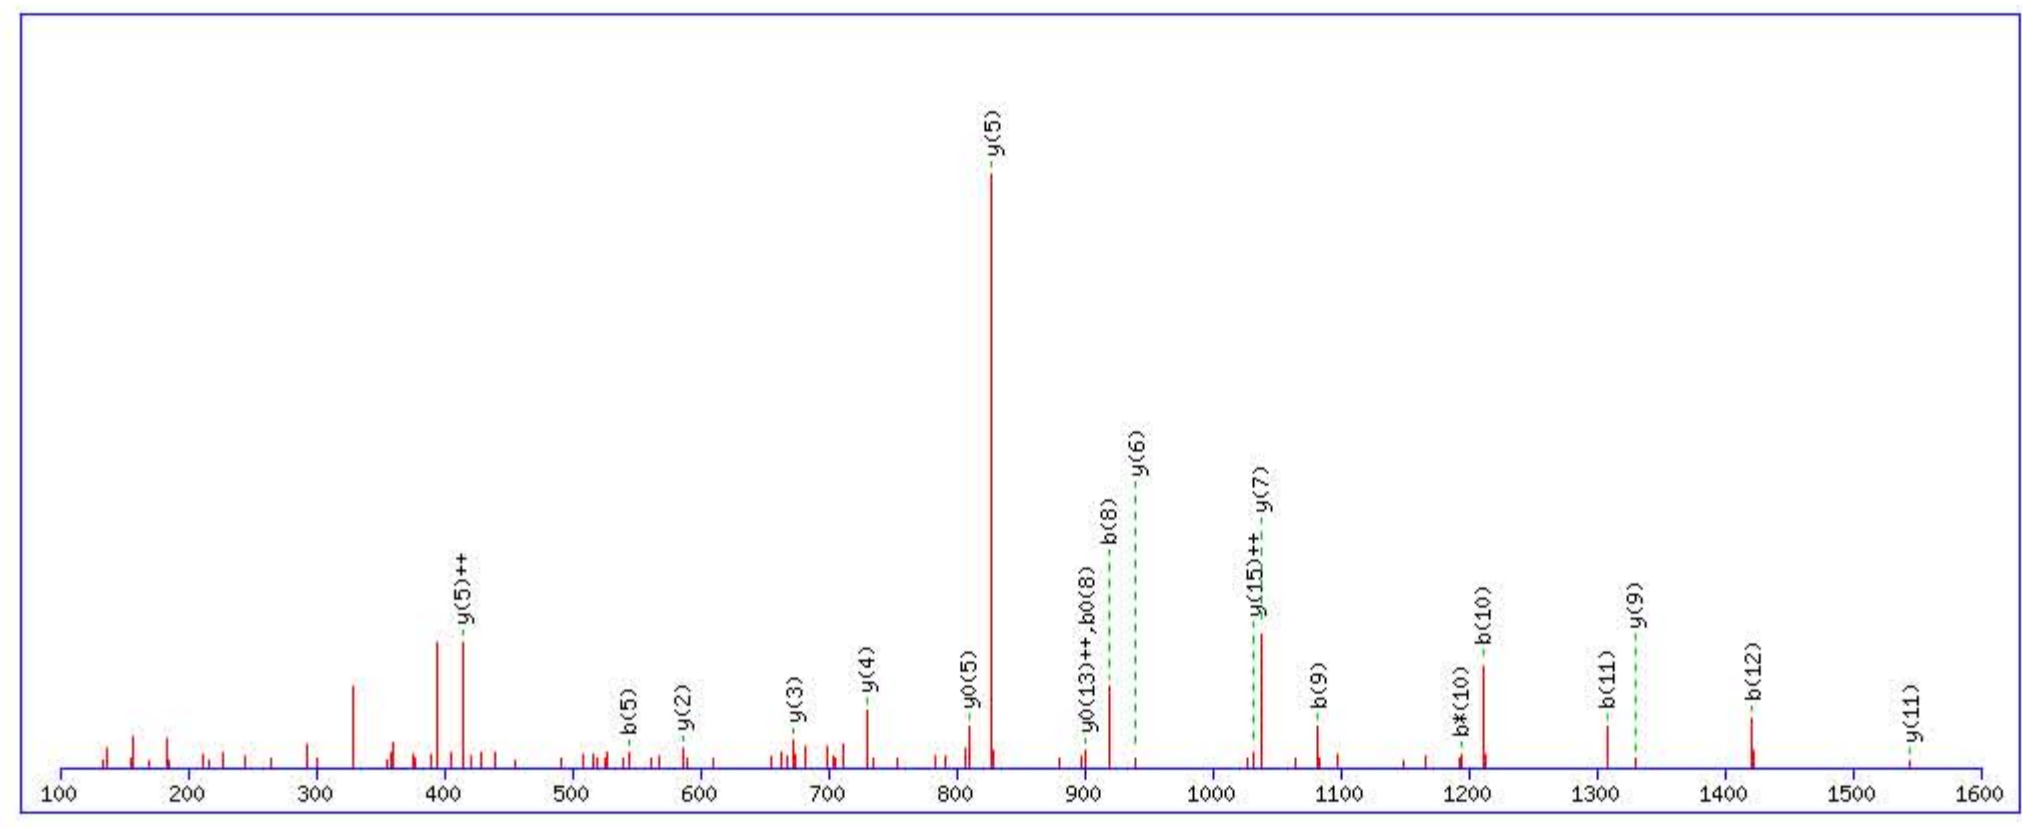

Monoisotopic mass of neutral peptide Mr(calc): 2247.018753  
 Fixed modifications: Carbamidomethyl (C) (apply to specified residues or termini only)  
 Variable modifications:  
 Q16 : Biotin:Thermo-21345 (Q)  
 Ions Score: 55 Expect: 1.4e-005  
 Matches : 20/170 fragment ions using 27 most intense peaks [\(help\)](#)

| #  | b                  | b <sup>++</sup> | b <sup>*</sup>     | b <sup>+++</sup> | b <sup>0</sup>    | b <sup>0++</sup> | Seq. | y                  | y <sup>++</sup>    | y <sup>*</sup> | y <sup>+++</sup> | y <sup>0</sup>    | y <sup>0++</sup>  | #  |
|----|--------------------|-----------------|--------------------|------------------|-------------------|------------------|------|--------------------|--------------------|----------------|------------------|-------------------|-------------------|----|
| 1  | 72.044390          | 36.525833       |                    |                  |                   |                  | A    |                    |                    |                |                  |                   |                   | 17 |
| 2  | 185.128454         | 93.067865       |                    |                  |                   |                  | I    | 2176.988934        | 1088.998105        | 2159.962385    | 1080.484830      | 2158.978369       | 1079.992822       | 16 |
| 3  | 300.155397         | 150.581336      |                    |                  | 282.144832        | 141.576054       | D    | 2063.904870        | <b>1032.456073</b> | 2046.878321    | 1023.942798      | 2045.894305       | 1023.450790       | 15 |
| 4  | 429.197990         | 215.102633      |                    |                  | 411.187425        | 206.097351       | E    | 1948.877927        | 974.942602         | 1931.851378    | 966.429327       | 1930.867362       | 965.937319        | 14 |
| 5  | <b>544.224933</b>  | 272.616105      |                    |                  | 526.214368        | 263.610822       | D    | 1819.835334        | 910.421305         | 1802.808785    | 901.908031       | 1801.824769       | <b>901.416022</b> | 13 |
| 6  | 704.255582         | 352.631429      |                    |                  | 686.245017        | 343.626147       | C    | 1704.808391        | 852.907833         | 1687.781842    | 844.394559       | 1686.797826       | 843.902551        | 12 |
| 7  | 791.287610         | 396.147443      |                    |                  | 773.277045        | 387.142161       | S    | <b>1544.777742</b> | 772.892509         | 1527.751193    | 764.379235       | 1526.767177       | 763.887227        | 11 |
| 8  | <b>919.346188</b>  | 460.176732      | 902.319639         | 451.663458       | <b>901.335623</b> | 451.171450       | Q    | 1457.745714        | 729.376495         | 1440.719165    | 720.863221       | 1439.735149       | 720.371212        | 10 |
| 9  | <b>1082.409517</b> | 541.708397      | 1065.382968        | 533.195122       | 1064.398952       | 532.703114       | Y    | <b>1329.687136</b> | 665.347206         | 1312.660587    | 656.833931       | 1311.676571       | 656.341923        | 9  |
| 10 | <b>1211.452110</b> | 606.229693      | <b>1194.425561</b> | 597.716419       | 1193.441545       | 597.224410       | E    | 1166.623807        | 583.815541         | 1149.597258    | 575.302267       | 1148.613242       | 574.810259        | 8  |
| 11 | <b>1308.504874</b> | 654.756075      | 1291.478325        | 646.242801       | 1290.494309       | 645.750792       | P    | <b>1037.581214</b> | 519.294245         | 1020.554665    | 510.780971       | 1019.570649       | 510.288963        | 7  |
| 12 | <b>1421.588938</b> | 711.298107      | 1404.562389        | 702.784832       | 1403.578373       | 702.292824       | I    | <b>940.528450</b>  | 470.767863         | 923.501901     | 462.254589       | 922.517885        | 461.762581        | 6  |
| 13 | 1518.641702        | 759.824489      | 1501.615153        | 751.311215       | 1500.631137       | 750.819206       | P    | <b>827.444386</b>  | <b>414.225831</b>  | 810.417837     | 405.712557       | <b>809.433821</b> | 405.220549        | 5  |
| 14 | 1575.663166        | 788.335221      | 1558.636617        | 779.821946       | 1557.652601       | 779.329938       | G    | <b>730.391622</b>  | 365.699449         | 713.365073     | 357.186175       | 712.381057        | 356.694167        | 4  |
| 15 | 1662.695194        | 831.851235      | 1645.668645        | 823.337961       | 1644.684629       | 822.845952       | S    | <b>673.370158</b>  | 337.188717         | 656.343609     | 328.675443       | 655.359593        | 328.183435        | 3  |
| 16 | 2101.920520        | 1051.463898     | 2084.893971        | 1042.950623      | 2083.909955       | 1042.458615      | Q    | <b>586.338130</b>  | 293.672703         | 569.311581     | 285.159429       |                   |                   | 2  |
| 17 |                    |                 |                    |                  |                   |                  | K    | 147.112804         | 74.060040          | 130.086255     | 65.546765        |                   |                   | 1  |

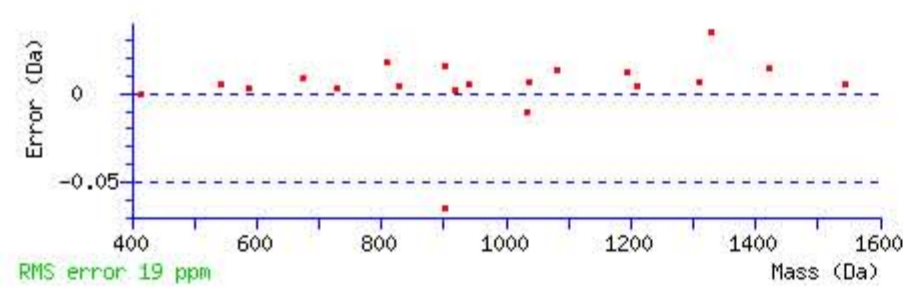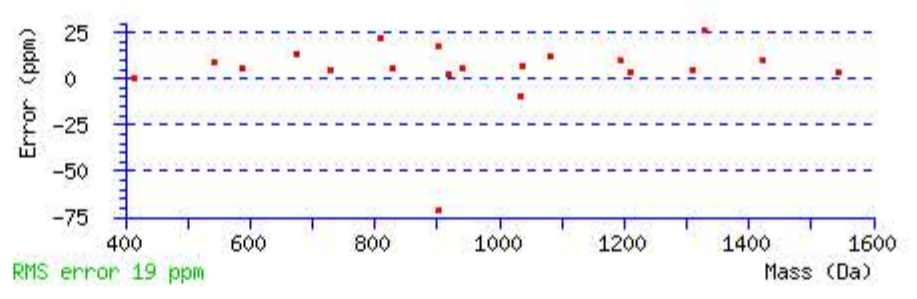

NCBI BLAST search of **AIDEDCSQYEPPIGSQK**  
 (Parameters: blastp, nr protein database, expect=20000, no filter, PAM30)  
 Other BLAST [web gateways](#)

### All matches to this query

| Score | Mr(calc):   | Delta     | Sequence                              |
|-------|-------------|-----------|---------------------------------------|
| 55.1  | 2247.018753 | 0.015489  | <a href="#">AIDEDCSQYEPPIGSQK</a>     |
| 3.1   | 2247.063034 | -0.028792 | <a href="#">VTDANDNPPVFSQDVYR</a>     |
| 1.2   | 2247.033356 | 0.000886  | <a href="#">RTVLELDRMEMSMDAFQK</a>    |
| 1.2   | 2247.005737 | 0.028505  | <a href="#">SDGAQGGVYACPCR</a>        |
| 0.8   | 2247.047760 | -0.013518 | <a href="#">FDPSAVPLPDTMDSLREAR</a>   |
| 0.8   | 2247.033813 | 0.000429  | <a href="#">QEEERQDGGQNESFKR</a>      |
| 0.8   | 2247.062378 | -0.028136 | <a href="#">QGTVALQEAQDTMQGTSR</a>    |
| 0.8   | 2247.062378 | -0.028136 | <a href="#">QGTVALQEAQDTMQGTSR</a>    |
| 0.6   | 2247.054901 | -0.020659 | <a href="#">QASAAEDRIRELEEAMAGER</a>  |
| 0.2   | 2247.026825 | 0.007417  | <a href="#">SDMICGYACLKGTAAAMRNTK</a> |



# MASCOT Search Results

## Peptide View

MS/MS Fragmentation of **AIDEDCSQYEPIPGSQK**  
 Found in **CO8A\_HUMAN**, Complement component C8 alpha chain OS=Homo sapiens GN=C8A PE=1 SV=2

Match to Query 66151: 2558.208942 from(853.743590,3+) rtinseconds(2130) index(42915)  
 Title: Locus:1.1.1.3025.16 File:"2013-07-02 CLN FXIII 60 min 1st F 3.wiff"  
 Data file C:\Program Files (x86)\Matrix Science\Mascot Daemon\mgf4 FXIII 60 min 1st\mascot\_daemon\_merge.mgf

Click mouse within plot area to zoom in by factor of two about that point  
 Or, Plot from  to  Da   
 Label all possible matches  Label matches used for scoring

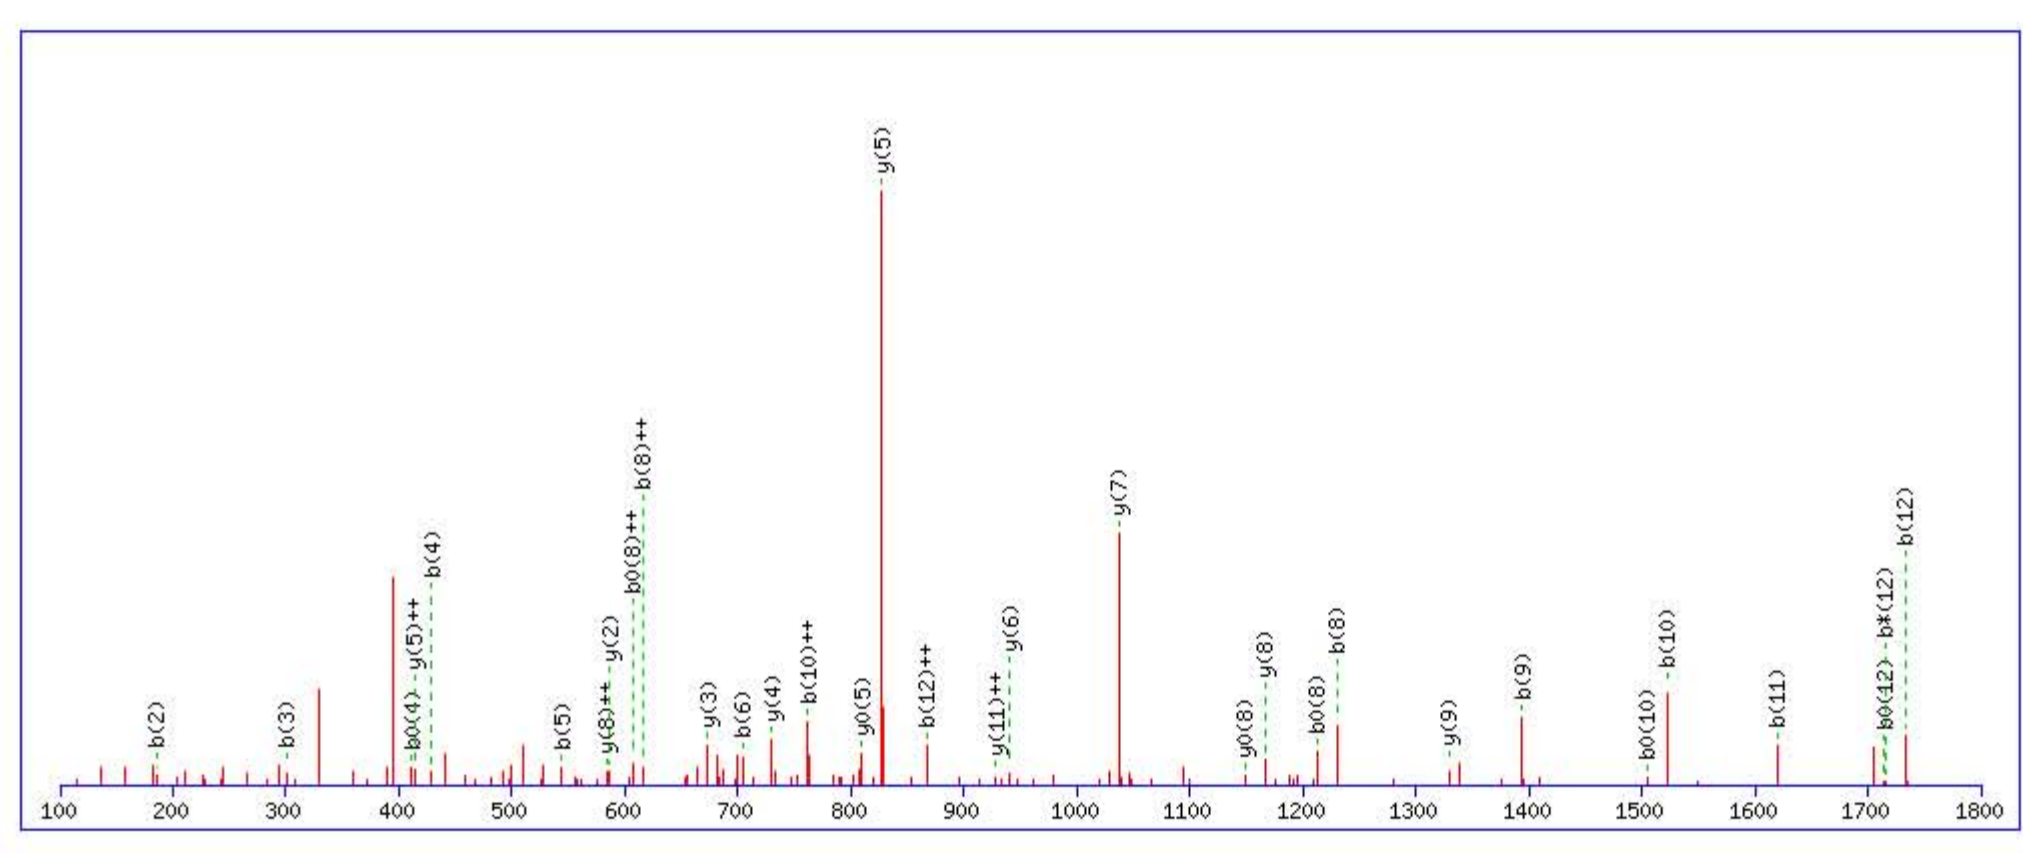

Monoisotopic mass of neutral peptide Mr(calc): 2558.185501  
 Fixed modifications: Carbamidomethyl (C) (apply to specified residues or termini only)  
 Variable modifications:  
 Q8 : Biotin:Thermo-21345 (Q)  
 Q16 : Biotin:Thermo-21345 (Q)  
 Ions Score: 41 Expect: 0.00022  
 Matches : 32/170 fragment ions using 73 most intense peaks [\(help\)](#)

| #  | b                  | b <sup>++</sup>   | b <sup>*</sup>     | b <sup>*++</sup> | b <sup>0</sup>     | b <sup>0++</sup>  | Seq. | y                  | y <sup>++</sup>   | y <sup>*</sup> | y <sup>*++</sup> | y <sup>0</sup>     | y <sup>0++</sup> | #  |
|----|--------------------|-------------------|--------------------|------------------|--------------------|-------------------|------|--------------------|-------------------|----------------|------------------|--------------------|------------------|----|
| 1  | 72.044390          | 36.525833         |                    |                  |                    |                   | A    |                    |                   |                |                  |                    |                  | 17 |
| 2  | <b>185.128454</b>  | 93.067865         |                    |                  |                    |                   | I    | 2488.155682        | 1244.581479       | 2471.129133    | 1236.068204      | 2470.145117        | 1235.576196      | 16 |
| 3  | <b>300.155397</b>  | 150.581336        |                    |                  | 282.144832         | 141.576054        | D    | 2375.071618        | 1188.039447       | 2358.045069    | 1179.526172      | 2357.061053        | 1179.034164      | 15 |
| 4  | <b>429.197990</b>  | 215.102633        |                    |                  | <b>411.187425</b>  | 206.097351        | E    | 2260.044675        | 1130.525975       | 2243.018126    | 1122.012701      | 2242.034110        | 1121.520693      | 14 |
| 5  | <b>544.224933</b>  | 272.616105        |                    |                  | 526.214368         | 263.610822        | D    | 2131.002082        | 1066.004679       | 2113.975533    | 1057.491404      | 2112.991517        | 1056.999396      | 13 |
| 6  | <b>704.255582</b>  | 352.631429        |                    |                  | 686.245017         | 343.626147        | C    | 2015.975139        | 1008.491208       | 1998.948590    | 999.977933       | 1997.964574        | 999.485925       | 12 |
| 7  | 791.287610         | 396.147443        |                    |                  | 773.277045         | 387.142161        | S    | 1855.944490        | <b>928.475883</b> | 1838.917941    | 919.962609       | 1837.933925        | 919.470601       | 11 |
| 8  | <b>1230.512936</b> | <b>615.760106</b> | 1213.486387        | 607.246832       | <b>1212.502371</b> | <b>606.754824</b> | Q    | 1768.912462        | 884.959869        | 1751.885913    | 876.446595       | 1750.901897        | 875.954587       | 10 |
| 9  | <b>1393.576265</b> | 697.291771        | 1376.549716        | 688.778496       | 1375.565700        | 688.286488        | Y    | <b>1329.687136</b> | 665.347206        | 1312.660587    | 656.833932       | 1311.676571        | 656.341924       | 9  |
| 10 | <b>1522.618858</b> | <b>761.813067</b> | 1505.592309        | 753.299793       | <b>1504.608293</b> | 752.807785        | E    | <b>1166.623807</b> | <b>583.815541</b> | 1149.597258    | 575.302267       | <b>1148.613242</b> | 574.810259       | 8  |
| 11 | <b>1619.671622</b> | 810.339449        | 1602.645073        | 801.826175       | 1601.661057        | 801.334167        | P    | <b>1037.581214</b> | 519.294245        | 1020.554665    | 510.780971       | 1019.570649        | 510.288963       | 7  |
| 12 | <b>1732.755686</b> | <b>866.881481</b> | <b>1715.729137</b> | 858.368207       | <b>1714.745121</b> | 857.876198        | I    | <b>940.528450</b>  | 470.767863        | 923.501901     | 462.254589       | 922.517885         | 461.762581       | 6  |
| 13 | 1829.808450        | 915.407863        | 1812.781901        | 906.894589       | 1811.797885        | 906.402581        | P    | <b>827.444386</b>  | <b>414.225831</b> | 810.417837     | 405.712557       | <b>809.433821</b>  | 405.220549       | 5  |
| 14 | 1886.829914        | 943.918595        | 1869.803365        | 935.405321       | 1868.819349        | 934.913312        | G    | <b>730.391622</b>  | 365.699449        | 713.365073     | 357.186175       | 712.381057         | 356.694167       | 4  |
| 15 | 1973.861942        | 987.434609        | 1956.835393        | 978.921335       | 1955.851377        | 978.429327        | S    | <b>673.370158</b>  | 337.188717        | 656.343609     | 328.675443       | 655.359593         | 328.183435       | 3  |
| 16 | 2413.087268        | 1207.047272       | 2396.060719        | 1198.533997      | 2395.076703        | 1198.041989       | Q    | <b>586.338130</b>  | 293.672703        | 569.311581     | 285.159429       |                    |                  | 2  |
| 17 |                    |                   |                    |                  |                    |                   | K    | 147.112804         | 74.060040         | 130.086255     | 65.546765        |                    |                  | 1  |

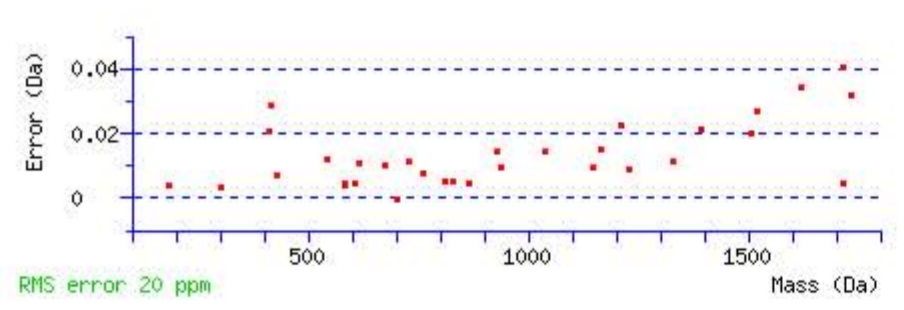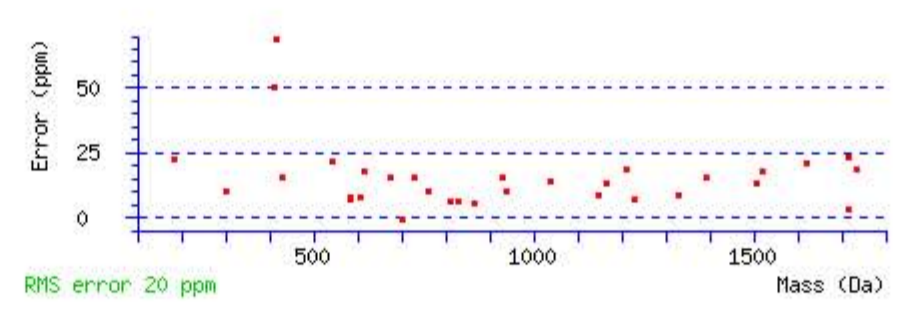

NCBI BLAST search of [AIDEDCSQYEPIPGSQK](#)  
 (Parameters: blastp, nr protein database, expect=20000, no filter, PAM30)  
 Other BLAST [web gateways](#)

### All matches to this query

| Score | Mr(calc):   | Delta    | Sequence                                   |
|-------|-------------|----------|--------------------------------------------|
| 40.5  | 2558.185501 | 0.023441 | <a href="#">AIDEDCSQYEPIPGSQK</a>          |
| 1.5   | 2558.171906 | 0.037036 | <a href="#">QGSQSGQSPGHGQRGSGSRQSPSYGR</a> |



# MASCOT Search Results

## Peptide View

MS/MS Fragmentation of **FGGTICSGDIWDQASCSSTTCVR**

Found in **CO8A\_HUMAN**, Complement component C8 alpha chain OS=Homo sapiens GN=C8A PE=1 SV=2

Match to Query 71330: 2962.312392 from(988.444740,3+) rtinseconds(2360) index(44487)

Title: Locus:1.1.1.3105.25 File:"2013-07-02 CLN FXIII 60 min 1st F 3.wiff"

Data file C:\Program Files (x86)\Matrix Science\Mascot Daemon\mgf4 FXIII 60 min 1st\mascot\_daemon\_merge.mgf

Click mouse within plot area to zoom in by factor of two about that point

Or, Plot from  to  Da

Label all possible matches  Label matches used for scoring

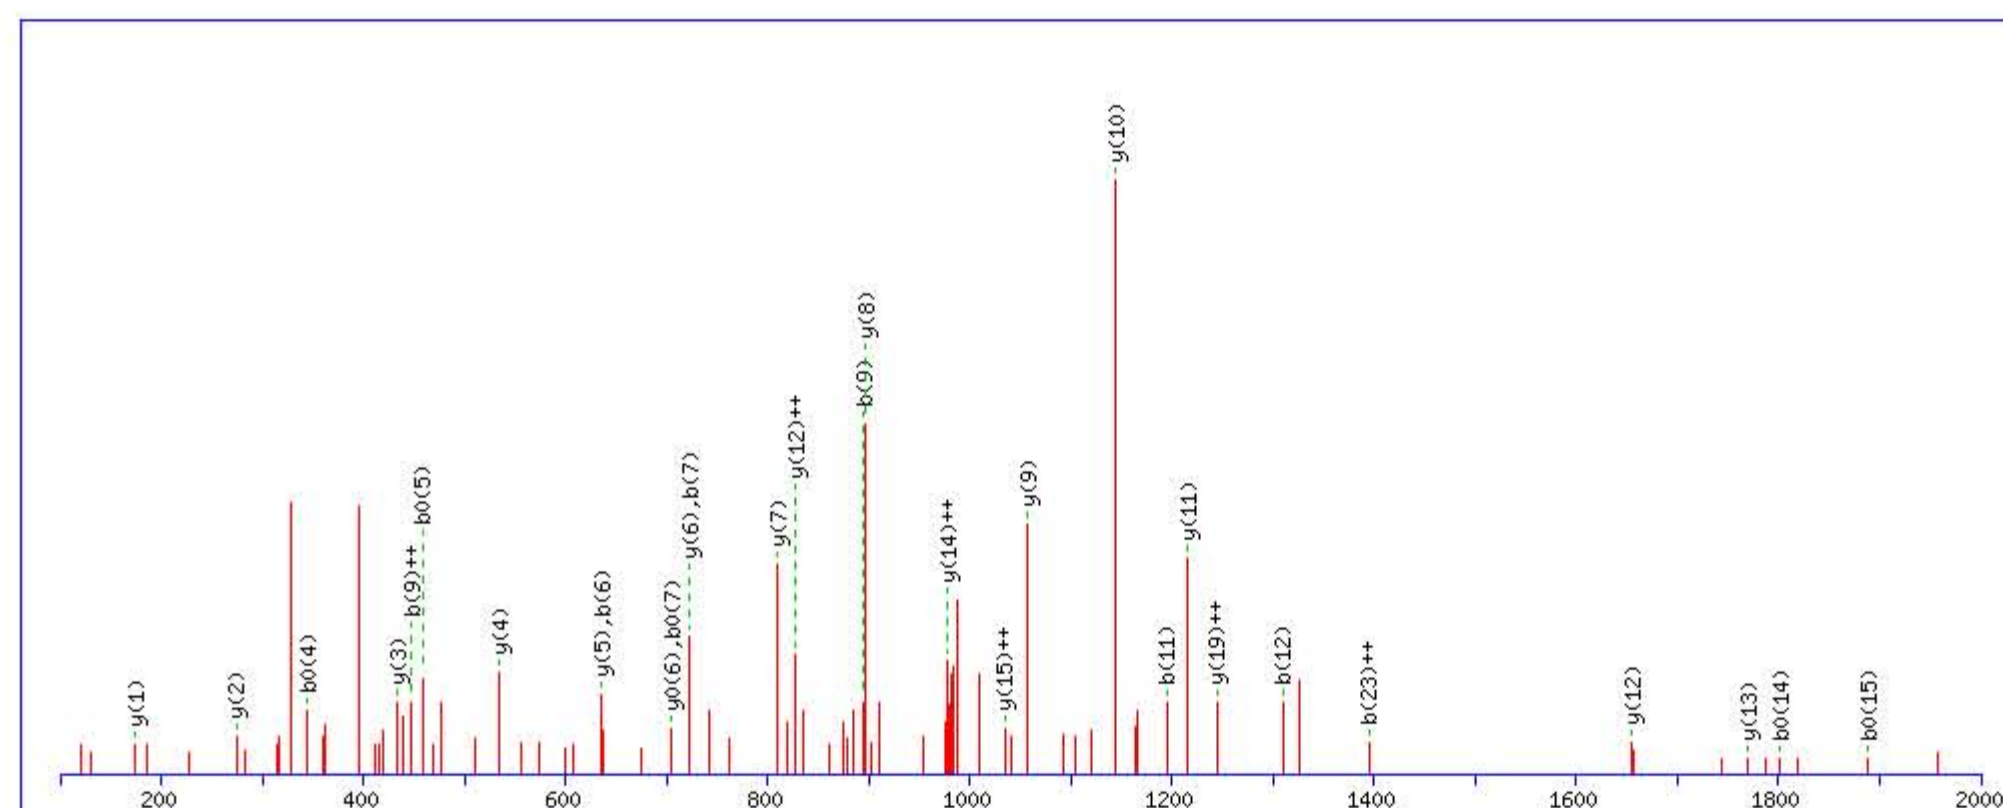

Monoisotopic mass of neutral peptide Mr(calc): 2962.271835

Fixed modifications: Carbamidomethyl (C) (apply to specified residues or termini only)

Variable modifications:

Q13 : Biotin:Thermo-21345 (Q)

Ions Score: 78 Expect: 1.2e-007

Matches : 30/240 fragment ions using 45 most intense peaks [\(help\)](#)

| #  | b           | b <sup>++</sup> | b <sup>*</sup> | b <sup>*++</sup> | b <sup>0</sup> | b <sup>0++</sup> | Seq. | y           | y <sup>++</sup> | y <sup>*</sup> | y <sup>*++</sup> | y <sup>0</sup> | y <sup>0++</sup> | #  |
|----|-------------|-----------------|----------------|------------------|----------------|------------------|------|-------------|-----------------|----------------|------------------|----------------|------------------|----|
| 1  | 148.075690  | 74.541483       |                |                  |                |                  | F    |             |                 |                |                  |                |                  | 24 |
| 2  | 205.097154  | 103.052215      |                |                  |                |                  | G    | 2816.210649 | 1408.608962     | 2799.184100    | 1400.095688      | 2798.200084    | 1399.603680      | 23 |
| 3  | 262.118618  | 131.562947      |                |                  |                |                  | G    | 2759.189185 | 1380.098230     | 2742.162636    | 1371.584956      | 2741.178620    | 1371.092948      | 22 |
| 4  | 363.166297  | 182.086786      |                |                  | 345.155732     | 173.081504       | T    | 2702.167721 | 1351.587498     | 2685.141172    | 1343.074224      | 2684.157156    | 1342.582216      | 21 |
| 5  | 476.250361  | 238.628818      |                |                  | 458.239796     | 229.623536       | I    | 2601.120042 | 1301.063659     | 2584.093493    | 1292.550384      | 2583.109477    | 1292.058376      | 20 |
| 6  | 636.281010  | 318.644143      |                |                  | 618.270445     | 309.638861       | C    | 2488.035978 | 1244.521627     | 2471.009429    | 1236.008352      | 2470.025413    | 1235.516344      | 19 |
| 7  | 723.313038  | 362.160157      |                |                  | 705.302473     | 353.154875       | S    | 2328.005329 | 1164.506302     | 2310.978780    | 1155.993028      | 2309.994764    | 1155.501020      | 18 |
| 8  | 780.334502  | 390.670889      |                |                  | 762.323937     | 381.665607       | G    | 2240.973301 | 1120.990288     | 2223.946752    | 1112.477014      | 2222.962736    | 1111.985006      | 17 |
| 9  | 895.361445  | 448.184361      |                |                  | 877.350880     | 439.179078       | D    | 2183.951837 | 1092.479556     | 2166.925288    | 1083.966282      | 2165.941272    | 1083.474274      | 16 |
| 10 | 1008.445509 | 504.726393      |                |                  | 990.434944     | 495.721110       | I    | 2068.924894 | 1034.966085     | 2051.898345    | 1026.452810      | 2050.914329    | 1025.968082      | 15 |
| 11 | 1194.524822 | 597.766049      |                |                  | 1176.514257    | 588.760767       | W    | 1955.840830 | 978.424053      | 1938.814281    | 969.910778       | 1937.830265    | 969.418770       | 14 |
| 12 | 1309.551765 | 655.279521      |                |                  | 1291.541200    | 646.274238       | D    | 1769.761517 | 885.384396      | 1752.734968    | 876.871122       | 1751.750952    | 876.379114       | 13 |
| 13 | 1748.777091 | 874.892184      | 1731.750542    | 866.378909       | 1730.766526    | 865.886901       | Q    | 1654.734574 | 827.870925      | 1637.708025    | 819.357650       | 1636.724009    | 818.865642       | 12 |
| 14 | 1819.814205 | 910.410741      | 1802.787656    | 901.897466       | 1801.803640    | 901.405458       | A    | 1215.509248 | 608.258262      | 1198.482699    | 599.744987       | 1197.498683    | 599.252979       | 11 |
| 15 | 1906.846233 | 953.926755      | 1889.819684    | 945.413480       | 1888.835668    | 944.921472       | S    | 1144.472134 | 572.739705      | 1127.445585    | 564.226430       | 1126.461569    | 563.734422       | 10 |
| 16 | 2066.876882 | 1033.942079     | 2049.850333    | 1025.428804      | 2048.866317    | 1024.936796      | C    | 1057.440106 | 529.223691      | 1040.413557    | 520.710416       | 1039.429541    | 520.218408       | 9  |
| 17 | 2153.908910 | 1077.458093     | 2136.882361    | 1068.944818      | 2135.898345    | 1068.452810      | S    | 897.409457  | 449.208366      | 880.382908     | 440.695092       | 879.398892     | 440.203084       | 8  |
| 18 | 2240.940938 | 1120.974107     | 2223.914389    | 1112.460832      | 2222.930373    | 1111.968825      | S    | 810.377429  | 405.692352      | 793.350880     | 397.179078       | 792.366864     | 396.687070       | 7  |
| 19 | 2327.972966 | 1164.490121     | 2310.946417    | 1155.976847      | 2309.962401    | 1155.484839      | S    | 723.345401  | 362.176338      | 706.318852     | 353.663064       | 705.334836     | 353.171056       | 6  |
| 20 | 2429.020645 | 1215.013960     | 2411.994096    | 1206.500686      | 2411.010080    | 1206.008678      | T    | 636.313373  | 318.660324      | 619.286824     | 310.147050       | 618.302808     | 309.655042       | 5  |
| 21 | 2530.068324 | 1265.537800     | 2513.041775    | 1257.024525      | 2512.057759    | 1256.532517      | T    | 535.265694  | 268.136485      | 518.239145     | 259.623210       | 517.255129     | 259.131202       | 4  |
| 22 | 2690.098973 | 1345.553124     | 2673.072424    | 1337.039850      | 2672.088408    | 1336.547842      | C    | 434.218015  | 217.612645      | 417.191466     | 209.099371       |                |                  | 3  |
| 23 | 2789.167387 | 1395.087331     | 2772.140838    | 1386.574057      | 2771.156822    | 1386.082049      | V    | 274.187366  | 137.597321      | 257.160817     | 129.084046       |                |                  | 2  |
| 24 |             |                 |                |                  |                |                  | R    | 175.118952  | 88.063114       | 158.092403     | 79.549839        |                |                  | 1  |

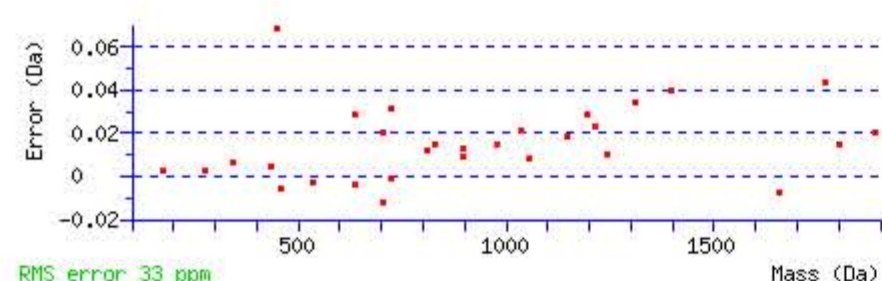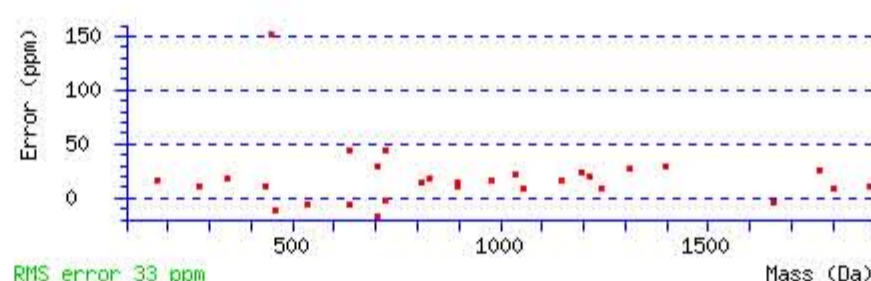

NCBI BLAST search of [FGGTICSGDIWDQASCSSTTCVR](#)

(Parameters: blastp, nr protein database, expect=20000, no filter, PAM30)

Other BLAST [web gateways](#)

## All matches to this query

| Score | Mr(calc):   | Delta    | Sequence                                |
|-------|-------------|----------|-----------------------------------------|
| 78.1  | 2962.271835 | 0.040557 | <a href="#">FGGTICSGDIWDQASCSSTTCVR</a> |

Mascot: <http://www.matrixscience.com/>



# MASCOT Search Results

## Peptide View

MS/MS Fragmentation of **CEGFVCAQTGR**

Found in **CO8B\_HUMAN**, Complement component C8 beta chain OS=Homo sapiens GN=C8B PE=1 SV=3

Match to Query 41890: 1594.723092 from(532.581640,3+) rtinseconds(1768) index(23133)

Title: Locus:1.1.1.2570.5 File:"2013-07-02 CLN FXIII 60 min 1st F 2.wiff"

Data file C:\Program Files (x86)\Matrix Science\Mascot Daemon\mgf4 FXIII 60 min 1st\mascot\_daemon\_merge.mgf

Click mouse within plot area to zoom in by factor of two about that point

Or, Plot from  to  Da

Label all possible matches  Label matches used for scoring

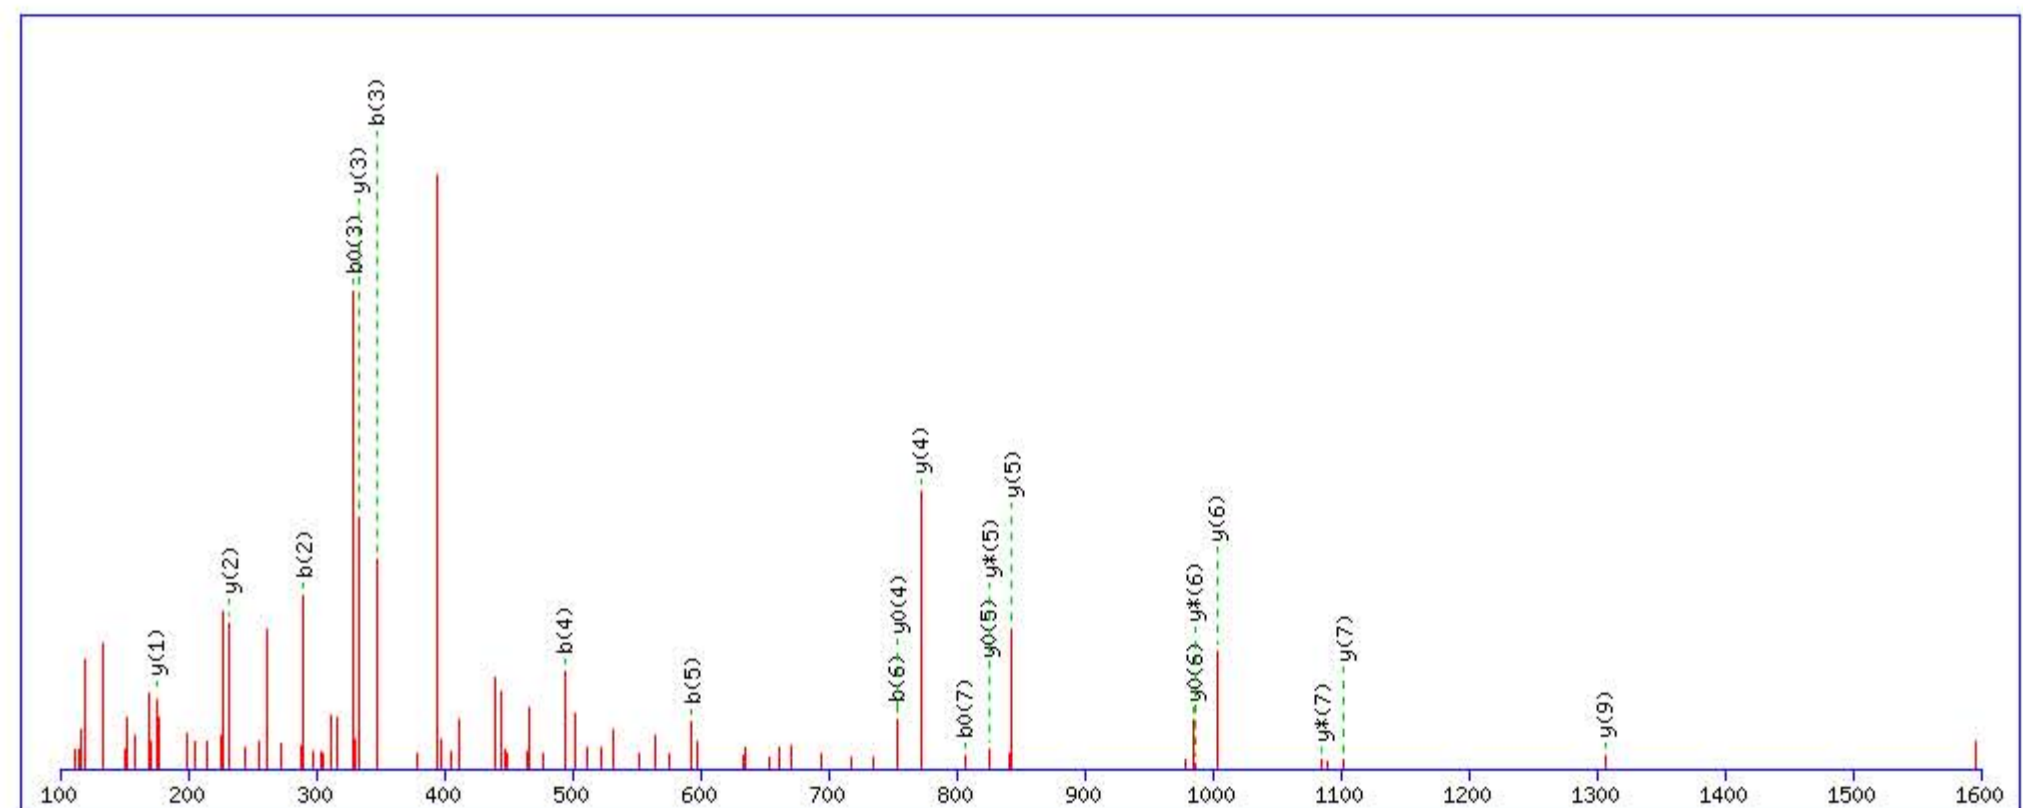

Monoisotopic mass of neutral peptide  $M_r(\text{calc})$ : 1594.705460

Fixed modifications: Carbamidomethyl (C) (apply to specified residues or termini only)

Variable modifications:

Q8 : Biotin:Thermo-21345 (Q)

Ions Score: 42 Expect: 0.00047

Matches : 21/100 fragment ions using 40 most intense peaks [\(help\)](#)

| #  | b                 | b <sup>++</sup> | b <sup>*</sup> | b <sup>*++</sup> | b <sup>0</sup>    | b <sup>0++</sup> | Seq. | y                  | y <sup>++</sup> | y <sup>*</sup>     | y <sup>*++</sup> | y <sup>0</sup>    | y <sup>0++</sup> | #  |
|----|-------------------|-----------------|----------------|------------------|-------------------|------------------|------|--------------------|-----------------|--------------------|------------------|-------------------|------------------|----|
| 1  | 161.037925        | 81.022600       |                |                  |                   |                  | C    |                    |                 |                    |                  |                   |                  | 11 |
| 2  | <b>290.080518</b> | 145.543897      |                |                  | 272.069953        | 136.538615       | E    | 1435.682069        | 718.344673      | 1418.655520        | 709.831398       | 1417.671504       | 709.339390       | 10 |
| 3  | <b>347.101982</b> | 174.054629      |                |                  | <b>329.091417</b> | 165.049347       | G    | <b>1306.639476</b> | 653.823376      | 1289.612927        | 645.310102       | 1288.628911       | 644.818094       | 9  |
| 4  | <b>494.170396</b> | 247.588836      |                |                  | 476.159831        | 238.583554       | F    | 1249.618012        | 625.312644      | 1232.591463        | 616.799370       | 1231.607447       | 616.307361       | 8  |
| 5  | <b>593.238810</b> | 297.123043      |                |                  | 575.228245        | 288.117761       | V    | <b>1102.549598</b> | 551.778437      | <b>1085.523049</b> | 543.265162       | 1084.539033       | 542.773154       | 7  |
| 6  | <b>753.269459</b> | 377.138368      |                |                  | 735.258894        | 368.133085       | C    | <b>1003.481184</b> | 502.244230      | <b>986.454635</b>  | 493.730955       | <b>985.470619</b> | 493.238947       | 6  |
| 7  | 824.306573        | 412.656925      |                |                  | <b>806.296008</b> | 403.651642       | A    | <b>843.450535</b>  | 422.228906      | <b>826.423986</b>  | 413.715631       | <b>825.439970</b> | 413.223623       | 5  |
| 8  | 1263.531899       | 632.269588      | 1246.505350    | 623.756313       | 1245.521334       | 623.264305       | Q    | <b>772.413421</b>  | 386.710349      | 755.386872         | 378.197074       | <b>754.402856</b> | 377.705066       | 4  |
| 9  | 1364.579578       | 682.793427      | 1347.553029    | 674.280153       | 1346.569013       | 673.788145       | T    | <b>333.188095</b>  | 167.097685      | 316.161546         | 158.584411       | 315.177530        | 158.092403       | 3  |
| 10 | 1421.601042       | 711.304159      | 1404.574493    | 702.790885       | 1403.590477       | 702.298877       | G    | <b>232.140416</b>  | 116.573846      | 215.113867         | 108.060571       |                   |                  | 2  |
| 11 |                   |                 |                |                  |                   |                  | R    | <b>175.118952</b>  | 88.063114       | 158.092403         | 79.549839        |                   |                  | 1  |

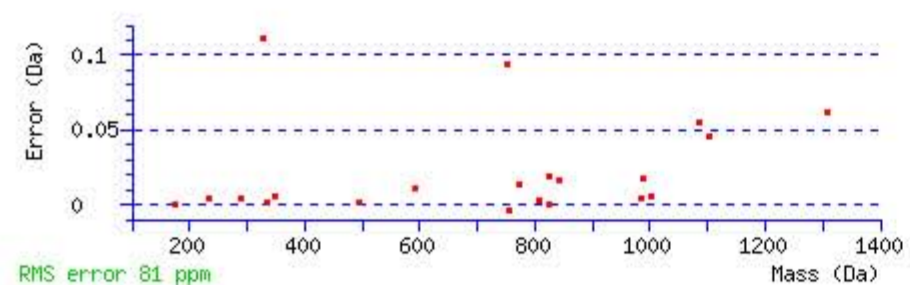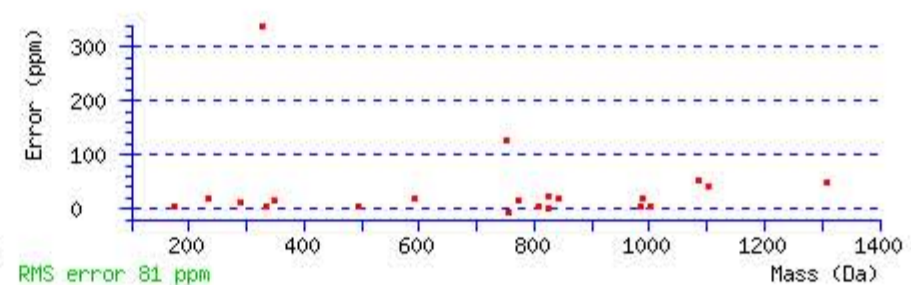

NCBI BLAST search of [CEGFVCAQTGR](#)

(Parameters: blastp, nr protein database, expect=20000, no filter, PAM30)

Other BLAST [web gateways](#)

All matches to this query

| Score | $M_r(\text{calc})$ : | Delta    | Sequence                    |
|-------|----------------------|----------|-----------------------------|
| 42.4  | 1594.705460          | 0.017632 | <a href="#">CEGFVCAQTGR</a> |

Mascot: <http://www.matrixscience.com/>



# MASCOT Search Results

## Peptide View

MS/MS Fragmentation of **KPYNVESYTPQTQ GK**

Found in **CO8B\_HUMAN**, Complement component C8 beta chain OS=Homo sapiens GN=C8B PE=1 SV=3

Match to Query 55008: 2050.045812 from(684.355880,3+) rtinseconds(1590) index(21823)

Title: Locus:1.1.1.2508.9 File:"2013-07-02 CLN FXIII 60 min 1st F 2.wiff"

Data file C:\Program Files (x86)\Matrix Science\Mascot Daemon\mgf\4 FXIII 60 min 1st\mascot\_daemon\_merge.mgf

Click mouse within plot area to zoom in by factor of two about that point

Or, Plot from  to  Da

Label all possible matches  Label matches used for scoring

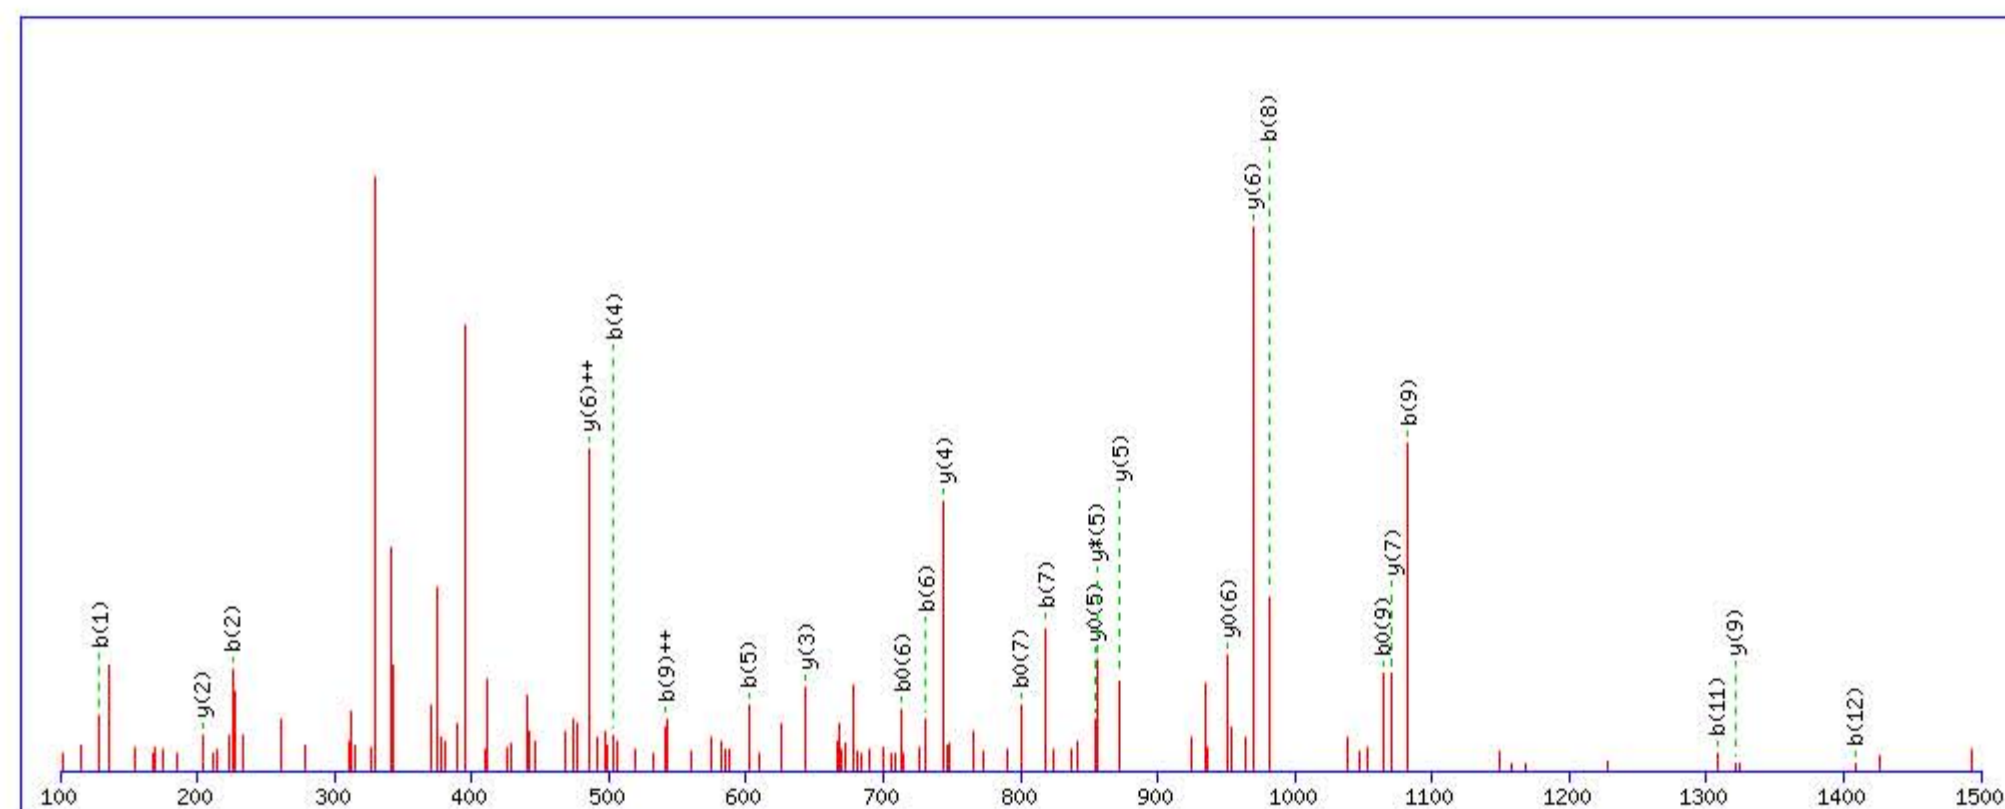

Monoisotopic mass of neutral peptide Mr(calc): 2050.019348

Fixed modifications: Carbamidomethyl (C) (apply to specified residues or termini only)

Variable modifications:

Q13 : Biotin:Thermo-21345 (Q)

Ions Score: 47 Expect: 4.6e-005

Matches : 25/152 fragment ions using 50 most intense peaks [\(help\)](#)

| #  | b                  | b <sup>++</sup>   | b <sup>*</sup> | b <sup>+++</sup> | b <sup>0</sup>     | b <sup>0++</sup> | Seq.     | y                  | y <sup>++</sup>   | y <sup>*</sup>    | y <sup>+++</sup> | y <sup>0</sup>    | y <sup>0++</sup> | #         |
|----|--------------------|-------------------|----------------|------------------|--------------------|------------------|----------|--------------------|-------------------|-------------------|------------------|-------------------|------------------|-----------|
| 1  | <b>129.102239</b>  | 65.054757         | 112.075690     | 56.541483        |                    |                  | <b>K</b> |                    |                   |                   |                  |                   |                  | <b>15</b> |
| 2  | <b>226.155003</b>  | 113.581139        | 209.128454     | 105.067865       |                    |                  | <b>P</b> | 1922.931678        | 961.969477        | 1905.905129       | 953.456203       | 1904.921113       | 952.964195       | <b>14</b> |
| 3  | 389.218332         | 195.112804        | 372.191783     | 186.599529       |                    |                  | <b>Y</b> | 1825.878914        | 913.443095        | 1808.852365       | 904.929821       | 1807.868349       | 904.437813       | <b>13</b> |
| 4  | <b>503.261259</b>  | 252.134267        | 486.234710     | 243.620993       |                    |                  | <b>N</b> | 1662.815585        | 831.911431        | 1645.789036       | 823.398156       | 1644.805020       | 822.906148       | <b>12</b> |
| 5  | <b>602.329673</b>  | 301.668475        | 585.303124     | 293.155200       |                    |                  | <b>V</b> | 1548.772658        | 774.889967        | 1531.746109       | 766.376693       | 1530.762093       | 765.884685       | <b>11</b> |
| 6  | <b>731.372266</b>  | 366.189771        | 714.345717     | 357.676497       | <b>713.361701</b>  | 357.184489       | <b>E</b> | 1449.704244        | 725.355760        | 1432.677695       | 716.842486       | 1431.693679       | 716.350478       | <b>10</b> |
| 7  | <b>818.404294</b>  | 409.705785        | 801.377745     | 401.192511       | <b>800.393729</b>  | 400.700503       | <b>S</b> | <b>1320.661651</b> | 660.834464        | 1303.635102       | 652.321189       | 1302.651086       | 651.829181       | <b>9</b>  |
| 8  | <b>981.467623</b>  | 491.237450        | 964.441074     | 482.724175       | 963.457058         | 482.232167       | <b>Y</b> | 1233.629623        | 617.318450        | 1216.603074       | 608.805175       | 1215.619058       | 608.313167       | <b>8</b>  |
| 9  | <b>1082.515302</b> | <b>541.761289</b> | 1065.488753    | 533.248015       | <b>1064.504737</b> | 532.756007       | <b>T</b> | <b>1070.566294</b> | 535.786785        | 1053.539745       | 527.273511       | 1052.555729       | 526.781503       | <b>7</b>  |
| 10 | 1179.568066        | 590.287671        | 1162.541517    | 581.774397       | 1161.557501        | 581.282389       | <b>P</b> | <b>969.518615</b>  | <b>485.262946</b> | 952.492066        | 476.749671       | <b>951.508050</b> | 476.257663       | <b>6</b>  |
| 11 | <b>1307.626644</b> | 654.316960        | 1290.600095    | 645.803686       | 1289.616079        | 645.311678       | <b>Q</b> | <b>872.465851</b>  | 436.736564        | <b>855.439302</b> | 428.223289       | <b>854.455286</b> | 427.731281       | <b>5</b>  |
| 12 | <b>1408.674323</b> | 704.840800        | 1391.647774    | 696.327525       | 1390.663758        | 695.835517       | <b>T</b> | <b>744.407273</b>  | 372.707275        | 727.380724        | 364.194000       | 726.396708        | 363.701992       | <b>4</b>  |
| 13 | 1847.899649        | 924.453463        | 1830.873100    | 915.940188       | 1829.889084        | 915.448180       | <b>Q</b> | <b>643.359594</b>  | 322.183435        | 626.333045        | 313.670161       |                   |                  | <b>3</b>  |
| 14 | 1904.921113        | 952.964195        | 1887.894564    | 944.450920       | 1886.910548        | 943.958912       | <b>G</b> | <b>204.134268</b>  | 102.570772        | 187.107719        | 94.057497        |                   |                  | <b>2</b>  |
| 15 |                    |                   |                |                  |                    |                  | <b>K</b> | 147.112804         | 74.060040         | 130.086255        | 65.546765        |                   |                  | <b>1</b>  |

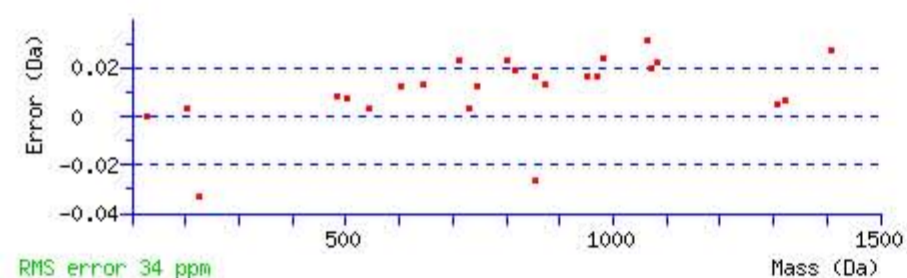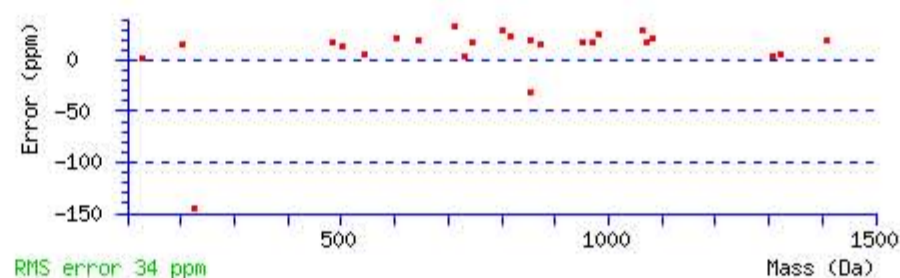

NCBI BLAST search of **KPYNVESYTPQTQ GK**

(Parameters: blastp, nr protein database, expect=20000, no filter, PAM30)

Other BLAST [web gateways](#)

## All matches to this query

| Score | Mr(calc):   | Delta    | Sequence                           |
|-------|-------------|----------|------------------------------------|
| 47.1  | 2050.019348 | 0.026464 | <a href="#">KPYNVESYTPQTQ GK</a>   |
| 26.6  | 2050.019348 | 0.026464 | <a href="#">KPYNVESYTPQTQ GK</a>   |
| 0.9   | 2050.025192 | 0.020620 | <a href="#">LKISNDGLQMEKDESSLK</a> |



# MASCOT Search Results

## Peptide View

MS/MS Fragmentation of **AGQLSVK**

Found in **CO8G\_HUMAN**, Complement component C8 gamma chain OS=Homo sapiens GN=C8G PE=1 SV=3

Match to Query 19349: 1012.582528 from(507.298540,2+) rtinseconds(1536) index(21474)

Title: Locus:1.1.1.2489.14 File:"2013-07-02 CLN FXIII 60 min 1st F 2.wiff"

Data file C:\Program Files (x86)\Matrix Science\Mascot Daemon\mgf\4 FXIII 60 min 1st\mascot\_daemon\_merge.mgf

Click mouse within plot area to zoom in by factor of two about that point

Or, Plot from  to  Da

Label all possible matches  Label matches used for scoring

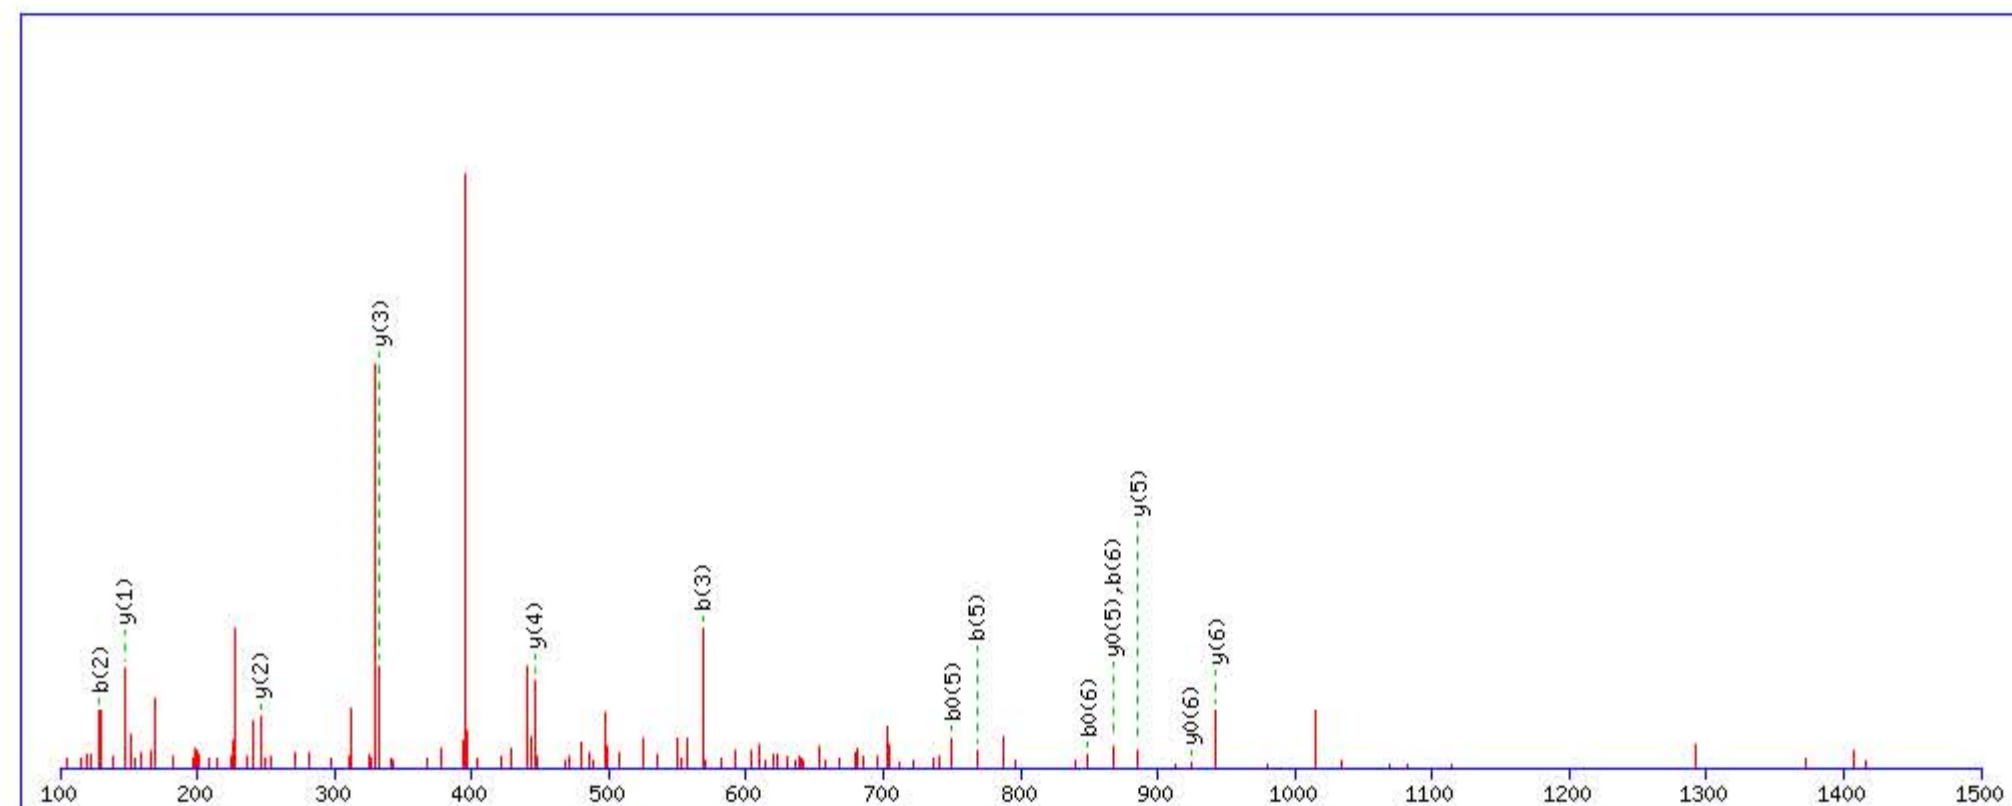

Monoisotopic mass of neutral peptide Mr(calc): 1012.573929

Fixed modifications: Carbamidomethyl (C) (apply to specified residues or termini only)

Variable modifications:

Q3 : Biotin:Thermo-21345 (Q)

Ions Score: 30 Expect: 0.017

Matches : 14/56 fragment ions using 27 most intense peaks [\(help\)](#)

| # | b                 | b <sup>++</sup> | b <sup>*</sup> | b <sup>*++</sup> | b <sup>0</sup>    | b <sup>0++</sup> | Seq. | y                 | y <sup>++</sup> | y <sup>*</sup> | y <sup>*++</sup> | y <sup>0</sup>    | y <sup>0++</sup> | # |
|---|-------------------|-----------------|----------------|------------------|-------------------|------------------|------|-------------------|-----------------|----------------|------------------|-------------------|------------------|---|
| 1 | 72.044390         | 36.525833       |                |                  |                   |                  | A    |                   |                 |                |                  |                   |                  | 7 |
| 2 | <b>129.065854</b> | 65.036565       |                |                  |                   |                  | G    | <b>942.544100</b> | 471.775688      | 925.517551     | 463.262414       | <b>924.533535</b> | 462.770406       | 6 |
| 3 | <b>568.291180</b> | 284.649228      | 551.264631     | 276.135954       |                   |                  | Q    | <b>885.522636</b> | 443.264956      | 868.496087     | 434.751682       | <b>867.512071</b> | 434.259674       | 5 |
| 4 | 681.375244        | 341.191260      | 664.348695     | 332.677986       |                   |                  | L    | <b>446.297310</b> | 223.652293      | 429.270761     | 215.139018       | 428.286745        | 214.647010       | 4 |
| 5 | <b>768.407272</b> | 384.707274      | 751.380723     | 376.194000       | <b>750.396707</b> | 375.701992       | S    | <b>333.213246</b> | 167.110261      | 316.186697     | 158.596986       | 315.202681        | 158.104978       | 3 |
| 6 | <b>867.475686</b> | 434.241481      | 850.449137     | 425.728207       | <b>849.465121</b> | 425.236199       | V    | <b>246.181218</b> | 123.594247      | 229.154669     | 115.080972       |                   |                  | 2 |
| 7 |                   |                 |                |                  |                   |                  | K    | <b>147.112804</b> | 74.060040       | 130.086255     | 65.546765        |                   |                  | 1 |

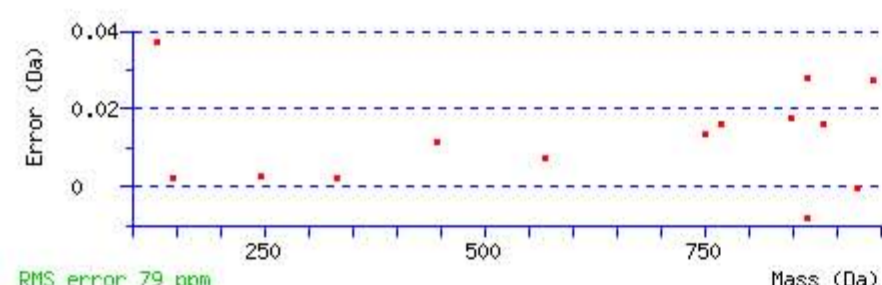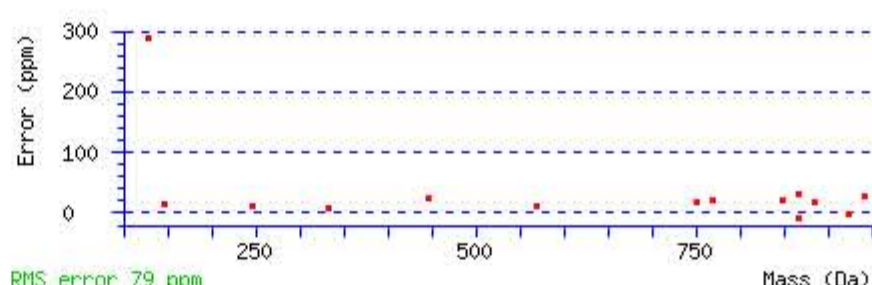

NCBI BLAST search of **AGQLSVK**

(Parameters: blastp, nr protein database, expect=20000, no filter, PAM30)

Other BLAST [web gateways](#)

All matches to this query

| Score | Mr(calc):   | Delta     | Sequence                   |
|-------|-------------|-----------|----------------------------|
| 29.8  | 1012.573929 | 0.008599  | <a href="#">AGQLSVK</a>    |
| 10.4  | 1012.573914 | 0.008614  | <a href="#">KEAQVK</a>     |
| 7.9   | 1012.591675 | -0.009147 | <a href="#">GAEAKTVLPK</a> |
| 7.5   | 1012.573929 | 0.008599  | <a href="#">QAGLVSK</a>    |
| 7.5   | 1012.573914 | 0.008614  | <a href="#">QKADIK</a>     |
| 7.5   | 1012.573914 | 0.008614  | <a href="#">QKADLK</a>     |
| 7.5   | 1012.573914 | 0.008614  | <a href="#">QKEGIK</a>     |
| 7.5   | 1012.573914 | 0.008614  | <a href="#">QKLEGK</a>     |
| 7.5   | 1012.585144 | -0.002616 | <a href="#">QKNGKK</a>     |
| 7.5   | 1012.589172 | -0.006644 | <a href="#">QKWVK</a>      |

Mascot: <http://www.matrixscience.com/>



# MASCOT Search Results

## Peptide View

MS/MS Fragmentation of **KLDGICWQVR**

Found in **CO8G\_HUMAN**, Complement component C8 gamma chain OS=Homo sapiens GN=C8G PE=1 SV=3

Match to Query 41445: 1584.832962 from(529.284930,3+) rtinseconds(2045) index(42403)

Title: Locus:1.1.1.2996.6 File:"2013-07-02 CLN FXIII 60 min 1st F 3.wiff"

Data file C:\Program Files (x86)\Matrix Science\Mascot Daemon\mgf4 FXIII 60 min 1st\mascot\_daemon\_merge.mgf

Click mouse within plot area to zoom in by factor of two about that point

Or, Plot from  to  Da

Label all possible matches  Label matches used for scoring

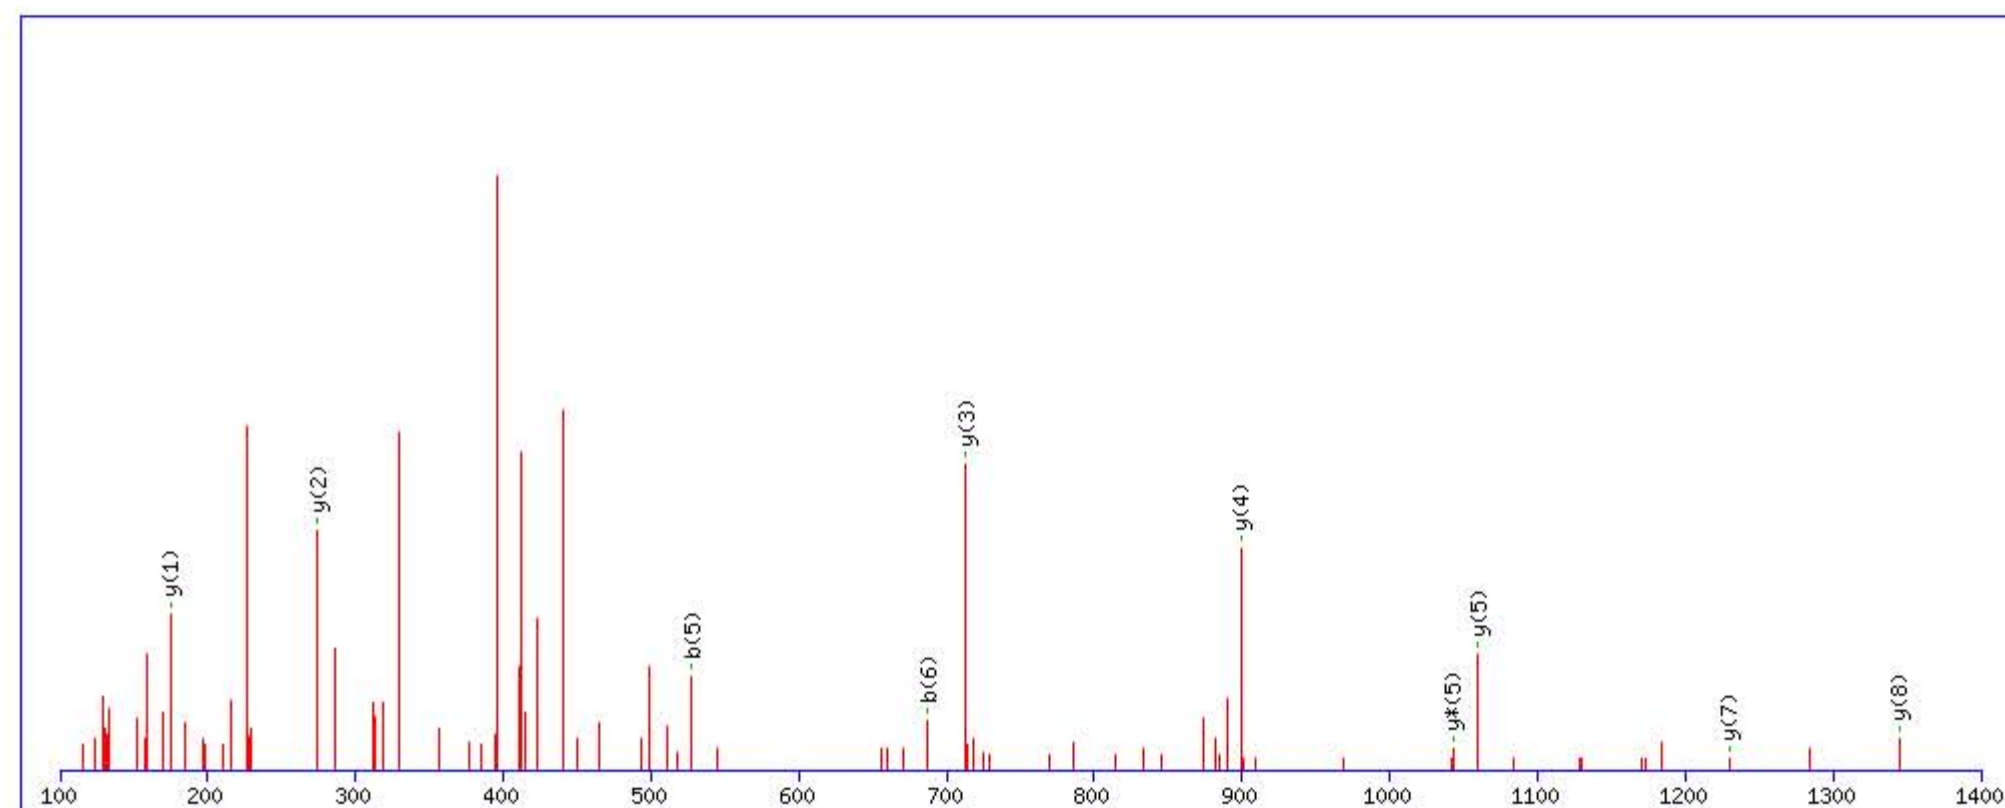

Monoisotopic mass of neutral peptide  $M_r(\text{calc})$ : 1584.826874

Fixed modifications: Carbamidomethyl (C) (apply to specified residues or termini only)

Variable modifications:

Q8 : Biotin:Thermo-21345 (Q)

Ions Score: 31 Expect: 0.0038

Matches : 10/90 fragment ions using 24 most intense peaks [\(help\)](#)

| #  | b                 | b <sup>++</sup> | b <sup>+</sup> | b <sup>*++</sup> | b <sup>0</sup> | b <sup>0++</sup> | Seq.     | y                  | y <sup>++</sup> | y <sup>+</sup>     | y <sup>*++</sup> | y <sup>0</sup> | y <sup>0++</sup> | #         |
|----|-------------------|-----------------|----------------|------------------|----------------|------------------|----------|--------------------|-----------------|--------------------|------------------|----------------|------------------|-----------|
| 1  | 129.102239        | 65.054757       | 112.075690     | 56.541483        |                |                  | <b>K</b> |                    |                 |                    |                  |                |                  | <b>10</b> |
| 2  | 242.186303        | 121.596790      | 225.159754     | 113.083515       |                |                  | <b>L</b> | 1457.739189        | 729.373233      | 1440.712640        | 720.859958       | 1439.728624    | 720.367950       | <b>9</b>  |
| 3  | 357.213246        | 179.110261      | 340.186697     | 170.596987       | 339.202681     | 170.104979       | <b>D</b> | <b>1344.655125</b> | 672.831201      | 1327.628576        | 664.317926       | 1326.644560    | 663.825918       | <b>8</b>  |
| 4  | 414.234710        | 207.620993      | 397.208161     | 199.107719       | 396.224145     | 198.615711       | <b>G</b> | <b>1229.628182</b> | 615.317729      | 1212.601633        | 606.804455       |                |                  | <b>7</b>  |
| 5  | <b>527.318774</b> | 264.163025      | 510.292225     | 255.649751       | 509.308209     | 255.157743       | <b>I</b> | 1172.606718        | 586.806997      | 1155.580169        | 578.293723       |                |                  | <b>6</b>  |
| 6  | <b>687.349423</b> | 344.178350      | 670.322874     | 335.665075       | 669.338858     | 335.173067       | <b>C</b> | <b>1059.522654</b> | 530.264965      | <b>1042.496105</b> | 521.751691       |                |                  | <b>5</b>  |
| 7  | 873.428736        | 437.218006      | 856.402187     | 428.704732       | 855.418171     | 428.212724       | <b>W</b> | <b>899.492005</b>  | 450.249641      | 882.465456         | 441.736366       |                |                  | <b>4</b>  |
| 8  | 1312.654062       | 656.830669      | 1295.627513    | 648.317395       | 1294.643497    | 647.825387       | <b>Q</b> | <b>713.412692</b>  | 357.209984      | 696.386143         | 348.696710       |                |                  | <b>3</b>  |
| 9  | 1411.722476       | 706.364876      | 1394.695927    | 697.851602       | 1393.711911    | 697.359594       | <b>V</b> | <b>274.187366</b>  | 137.597321      | 257.160817         | 129.084047       |                |                  | <b>2</b>  |
| 10 |                   |                 |                |                  |                |                  | <b>R</b> | <b>175.118952</b>  | 88.063114       | 158.092403         | 79.549839        |                |                  | <b>1</b>  |

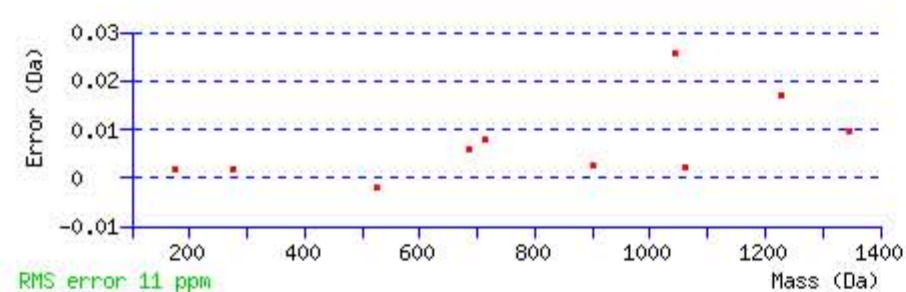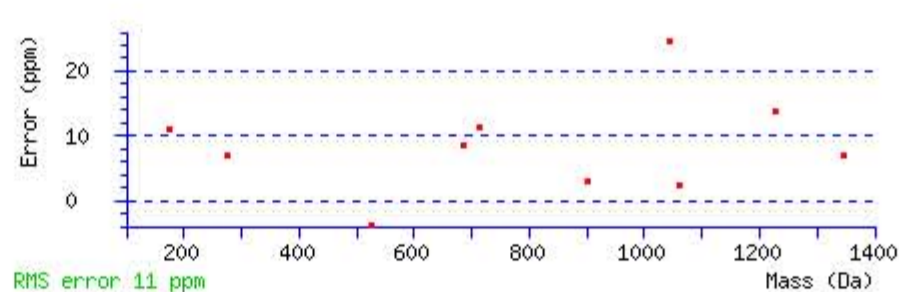

NCBI BLAST search of [KLDGICWQVR](#)

(Parameters: blastp, nr protein database, expect=20000, no filter, PAM30)

Other BLAST [web gateways](#)

All matches to this query

| Score | $M_r(\text{calc})$ : | Delta    | Sequence                      |
|-------|----------------------|----------|-------------------------------|
| 30.6  | 1584.826874          | 0.006088 | <a href="#">KLDGICWQVR</a>    |
| 4.7   | 1584.810730          | 0.022232 | <a href="#">KVSPDPQKSSDIR</a> |
| 4.6   | 1584.829346          | 0.003616 | <a href="#">QAESQINKQTK</a>   |

Mascot: <http://www.matrixscience.com/>



# MASCOT Search Results

## Peptide View

MS/MS Fragmentation of **SLPVSDSVLSGFQR**

Found in **CO8G\_HUMAN**, Complement component C8 gamma chain OS=Homo sapiens GN=C8G PE=1 SV=3

Match to Query 51252: 1931.004208 from(966.509380,2+) rtinseconds(2495) index(45280)

Title: Locus:1.1.1.3152.26 File:"2013-07-02 CLN FXIII 60 min 1st F 3.wiff"

Data file C:\Program Files (x86)\Matrix Science\Mascot Daemon\mgf\4 FXIII 60 min 1st\mascot\_daemon\_merge.mgf

Click mouse within plot area to zoom in by factor of two about that point

Or, Plot from  to  Da

Label all possible matches  Label matches used for scoring

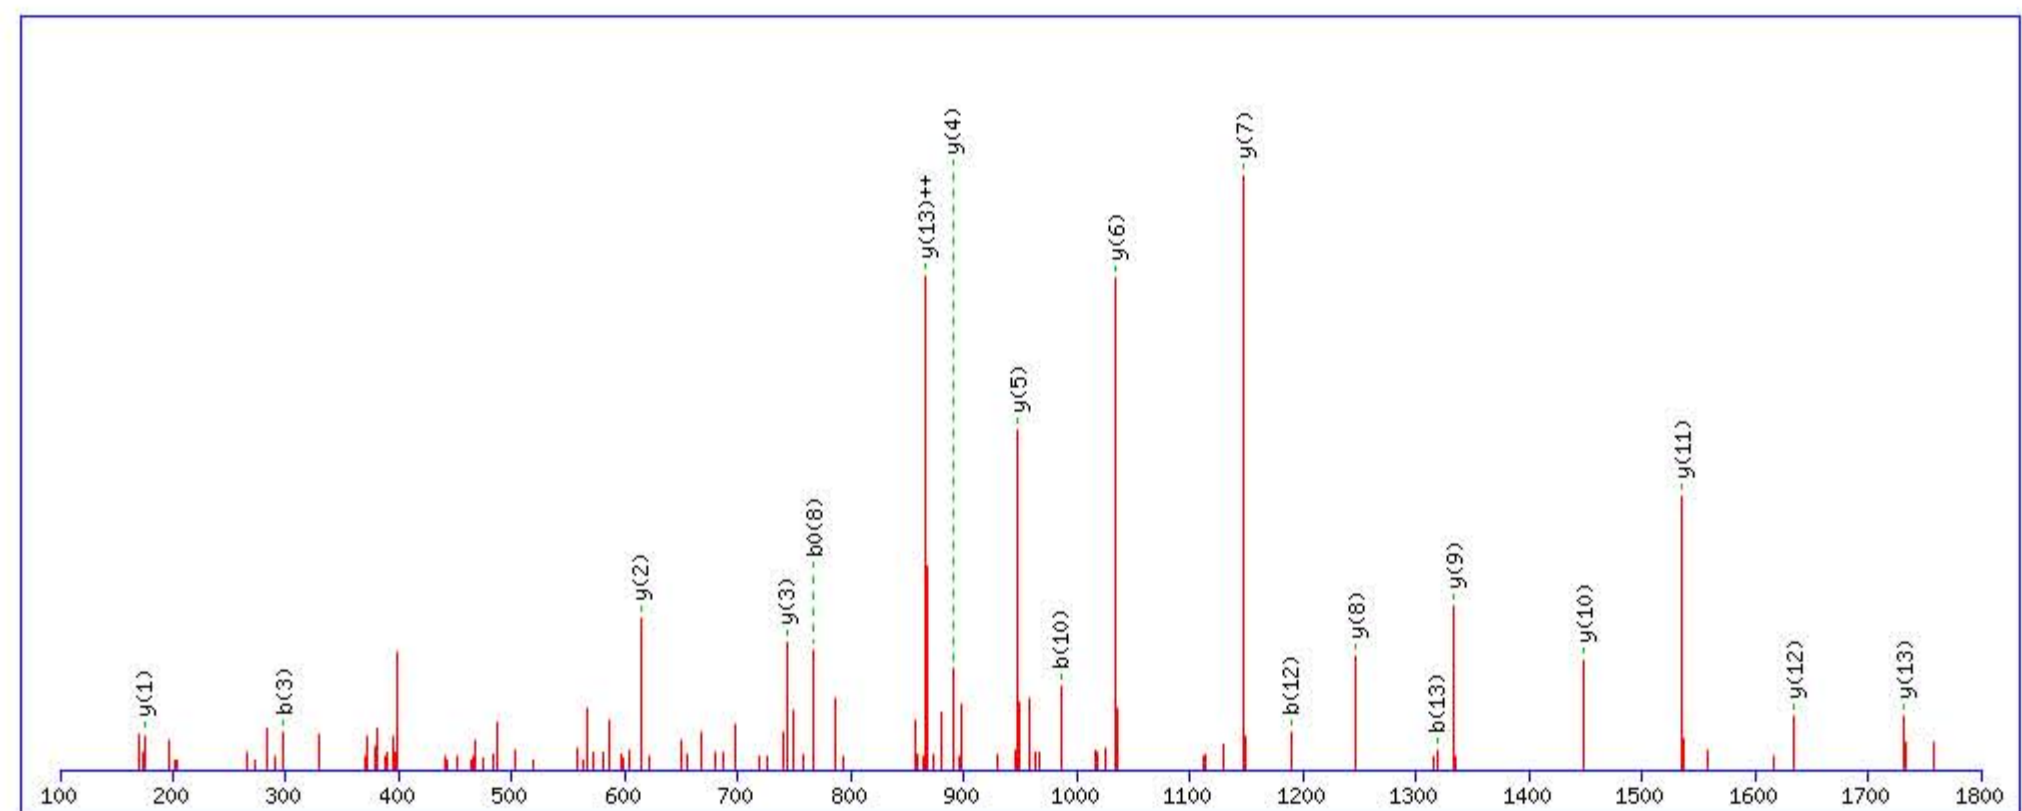

Monoisotopic mass of neutral peptide Mr(calc): 1930.982254

Fixed modifications: Carbamidomethyl (C) (apply to specified residues or termini only)

Variable modifications:

Q14 : Biotin:Thermo-21345 (Q)

Ions Score: 99 Expect: 1.5e-009

Matches : 19/138 fragment ions using 31 most intense peaks [\(help\)](#)

| #  | b                  | b <sup>++</sup> | b <sup>+</sup> | b <sup>+++</sup> | b <sup>0</sup>    | b <sup>0++</sup> | Seq. | y                  | y <sup>++</sup>   | y <sup>+</sup> | y <sup>+++</sup> | y <sup>0</sup> | y <sup>0++</sup> | #  |
|----|--------------------|-----------------|----------------|------------------|-------------------|------------------|------|--------------------|-------------------|----------------|------------------|----------------|------------------|----|
| 1  | 88.039304          | 44.523290       |                |                  | 70.028739         | 35.518008        | S    |                    |                   |                |                  |                |                  | 15 |
| 2  | 201.123368         | 101.065322      |                |                  | 183.112803        | 92.060039        | L    | 1844.957496        | 922.982386        | 1827.930947    | 914.469112       | 1826.946931    | 913.977104       | 14 |
| 3  | <b>298.176132</b>  | 149.591704      |                |                  | 280.165567        | 140.586422       | P    | <b>1731.873432</b> | <b>866.440354</b> | 1714.846883    | 857.927080       | 1713.862867    | 857.435072       | 13 |
| 4  | 397.244546         | 199.125911      |                |                  | 379.233981        | 190.120629       | V    | <b>1634.820668</b> | 817.913972        | 1617.794119    | 809.400698       | 1616.810103    | 808.908690       | 12 |
| 5  | 484.276574         | 242.641925      |                |                  | 466.266009        | 233.636643       | S    | <b>1535.752254</b> | 768.379765        | 1518.725705    | 759.866491       | 1517.741689    | 759.374483       | 11 |
| 6  | 599.303517         | 300.155397      |                |                  | 581.292952        | 291.150114       | D    | <b>1448.720226</b> | 724.863751        | 1431.693677    | 716.350477       | 1430.709661    | 715.858469       | 10 |
| 7  | 686.335545         | 343.671411      |                |                  | 668.324980        | 334.666128       | S    | <b>1333.693283</b> | 667.350280        | 1316.666734    | 658.837005       | 1315.682718    | 658.344997       | 9  |
| 8  | 785.403959         | 393.205618      |                |                  | <b>767.393394</b> | 384.200335       | V    | <b>1246.661255</b> | 623.834266        | 1229.634706    | 615.320991       | 1228.650690    | 614.828983       | 8  |
| 9  | 898.488023         | 449.747650      |                |                  | 880.477458        | 440.742367       | L    | <b>1147.592841</b> | 574.300059        | 1130.566292    | 565.786784       | 1129.582276    | 565.294776       | 7  |
| 10 | <b>985.520051</b>  | 493.263664      |                |                  | 967.509486        | 484.258381       | S    | <b>1034.508777</b> | 517.758027        | 1017.482228    | 509.244752       | 1016.498212    | 508.752744       | 6  |
| 11 | 1042.541515        | 521.774395      |                |                  | 1024.530950       | 512.769113       | G    | <b>947.476749</b>  | 474.242013        | 930.450200     | 465.728738       | 929.466184     | 465.236730       | 5  |
| 12 | <b>1189.609929</b> | 595.308603      |                |                  | 1171.599364       | 586.303320       | F    | <b>890.455285</b>  | 445.731281        | 873.428736     | 437.218006       | 872.444720     | 436.725998       | 4  |
| 13 | <b>1318.652522</b> | 659.829899      |                |                  | 1300.641957       | 650.824617       | E    | <b>743.386871</b>  | 372.197074        | 726.360322     | 363.683799       | 725.376306     | 363.191791       | 3  |
| 14 | 1757.877848        | 879.442562      | 1740.851299    | 870.929288       | 1739.867283       | 870.437280       | Q    | <b>614.344278</b>  | 307.675777        | 597.317729     | 299.162503       |                |                  | 2  |
| 15 |                    |                 |                |                  |                   |                  | R    | <b>175.118952</b>  | 88.063114         | 158.092403     | 79.549839        |                |                  | 1  |

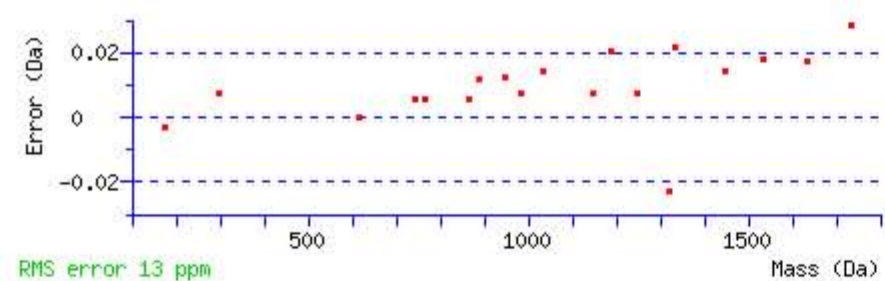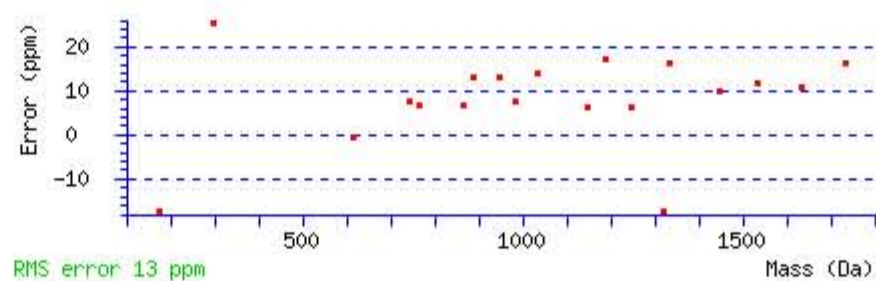

NCBI BLAST search of **SLPVSDSVLSGFQR**

(Parameters: blastp, nr protein database, expect=20000, no filter, PAM30)

Other BLAST [web gateways](#)

All matches to this query

| Score | Mr(calc):   | Delta     | Sequence                           |
|-------|-------------|-----------|------------------------------------|
| 99.1  | 1930.982254 | 0.021954  | <a href="#">SLPVSDSVLSGFQR</a>     |
| 4.8   | 1930.989410 | 0.014798  | <a href="#">EAQSQLIKSDEMQLR</a>    |
| 4.4   | 1931.000885 | 0.003323  | <a href="#">LSPVTACAGQTLQFK</a>    |
| 3.6   | 1931.026505 | -0.022297 | <a href="#">VPSPFGPREQSTYVLR</a>   |
| 0.1   | 1930.978195 | 0.026013  | <a href="#">VALSNISKDGNLMETAPR</a> |



# MASCOT Search Results

## Peptide View

MS/MS Fragmentation of **VQEAHLTEDQIFYFPK**

Found in **CO8G\_HUMAN**, Complement component C8 gamma chain OS=Homo sapiens GN=C8G PE=1 SV=3

Match to Query 60101: 2275.156812 from(759.392880,3+) rtinseconds(2366) index(44521)

Title: Locus:1.1.1.3107.14 File:"2013-07-02 CLN FXIII 60 min 1st F 3.wiff"

Data file C:\Program Files (x86)\Matrix Science\Mascot Daemon\mgf\4 FXIII 60 min 1st\mascot\_daemon\_merge.mgf

Click mouse within plot area to zoom in by factor of two about that point

Or, Plot from  to  Da

Label all possible matches  Label matches used for scoring

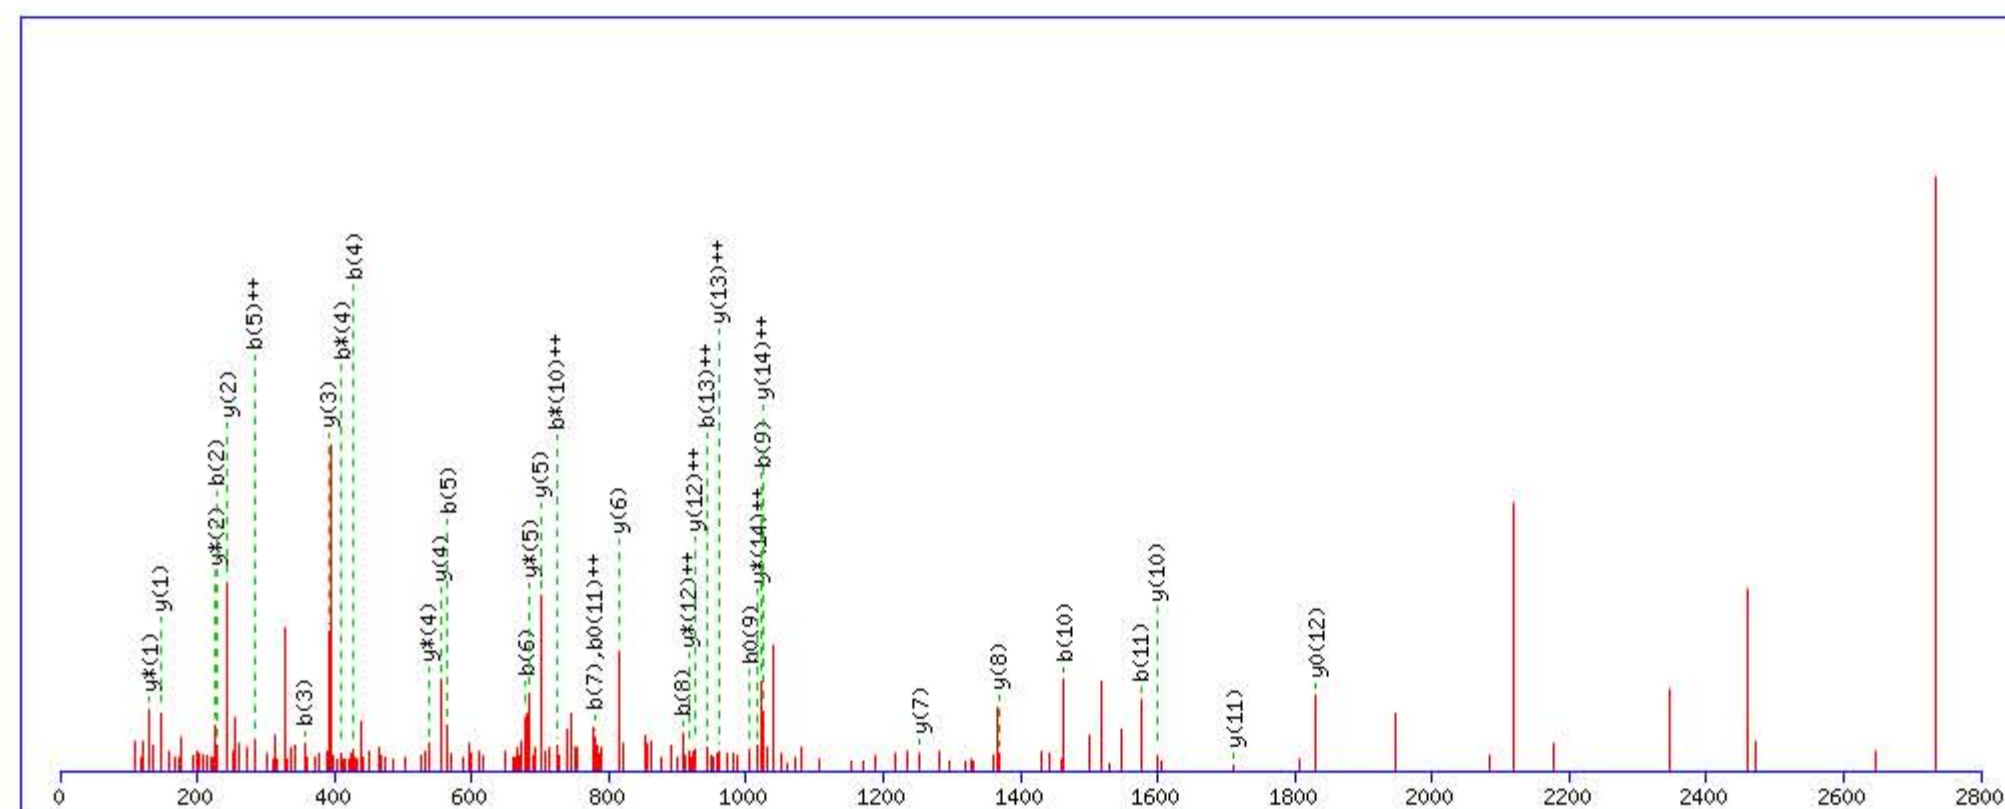

Monoisotopic mass of neutral peptide Mr(calc): 2275.134720

Fixed modifications: Carbamidomethyl (C) (apply to specified residues or termini only)

Variable modifications:

Q10 : Biotin:Thermo-21345 (Q)

Ions Score: 34 Expect: 0.012

Matches : 36/160 fragment ions using 105 most intense peaks [\(help\)](#)

| #  | b                  | b <sup>++</sup>   | b <sup>*</sup>    | b <sup>*++</sup>  | b <sup>0</sup>     | b <sup>0++</sup>  | Seq. | y                  | y <sup>++</sup>    | y <sup>*</sup>    | y <sup>*++</sup>   | y <sup>0</sup>     | y <sup>0++</sup> | #  |
|----|--------------------|-------------------|-------------------|-------------------|--------------------|-------------------|------|--------------------|--------------------|-------------------|--------------------|--------------------|------------------|----|
| 1  | 100.075690         | 50.541483         |                   |                   |                    |                   | V    |                    |                    |                   |                    |                    |                  | 16 |
| 2  | <b>228.134268</b>  | 114.570772        | 211.107719        | 106.057498        |                    |                   | Q    | 2177.073591        | 1089.040433        | 2160.047042       | 1080.527159        | 2159.063026        | 1080.035151      | 15 |
| 3  | <b>357.176861</b>  | 179.092069        | 340.150312        | 170.578794        | 339.166296         | 170.086786        | E    | 2049.015013        | <b>1025.011144</b> | 2031.988464       | <b>1016.497870</b> | 2031.004448        | 1016.005862      | 14 |
| 4  | <b>428.213975</b>  | 214.610626        | <b>411.187426</b> | 206.097351        | 410.203410         | 205.605343        | A    | 1919.972420        | <b>960.489848</b>  | 1902.945871       | 951.976573         | 1901.961855        | 951.484565       | 13 |
| 5  | <b>565.272887</b>  | <b>283.140082</b> | 548.246338        | 274.626807        | 547.262322         | 274.134799        | H    | 1848.935306        | <b>924.971291</b>  | 1831.908757       | <b>916.458016</b>  | <b>1830.924741</b> | 915.966008       | 12 |
| 6  | <b>678.356951</b>  | 339.682114        | 661.330402        | 331.168839        | 660.346386         | 330.676831        | L    | <b>1711.876394</b> | 856.441835         | 1694.849845       | 847.928561         | 1693.865829        | 847.436552       | 11 |
| 7  | <b>779.404630</b>  | 390.205953        | 762.378081        | 381.692679        | 761.394065         | 381.200671        | T    | <b>1598.792330</b> | 799.899803         | 1581.765781       | 791.386529         | 1580.781765        | 790.894521       | 10 |
| 8  | <b>908.447223</b>  | 454.727250        | 891.420674        | 446.213975        | 890.436658         | 445.721967        | E    | 1497.744651        | 749.375963         | 1480.718102       | 740.862689         | 1479.734086        | 740.370681       | 9  |
| 9  | <b>1023.474166</b> | 512.240721        | 1006.447617       | 503.727447        | <b>1005.463601</b> | 503.235439        | D    | <b>1368.702058</b> | 684.854667         | 1351.675509       | 676.341392         | 1350.691493        | 675.849384       | 8  |
| 10 | <b>1462.699492</b> | 731.853384        | 1445.672943       | <b>723.340110</b> | 1444.688927        | 722.848101        | Q    | <b>1253.675115</b> | 627.341195         | 1236.648566       | 618.827921         |                    |                  | 7  |
| 11 | <b>1575.783556</b> | 788.395416        | 1558.757007       | 779.882141        | 1557.772991        | <b>779.390133</b> | I    | <b>814.449789</b>  | 407.728533         | 797.423240        | 399.215258         |                    |                  | 6  |
| 12 | 1722.851970        | 861.929623        | 1705.825421       | 853.416349        | 1704.841405        | 852.924340        | F    | <b>701.365725</b>  | 351.186501         | <b>684.339176</b> | 342.673226         |                    |                  | 5  |
| 13 | 1885.915299        | <b>943.461288</b> | 1868.888750       | 934.948013        | 1867.904734        | 934.456005        | Y    | <b>554.297311</b>  | 277.652294         | <b>537.270762</b> | 269.139019         |                    |                  | 4  |
| 14 | 2032.983713        | 1016.995495       | 2015.957164       | 1008.482220       | 2014.973148        | 1007.990212       | F    | <b>391.233982</b>  | 196.120629         | 374.207433        | 187.607354         |                    |                  | 3  |
| 15 | 2130.036477        | 1065.521876       | 2113.009928       | 1057.008602       | 2112.025912        | 1056.516594       | P    | <b>244.165568</b>  | 122.586422         | <b>227.139019</b> | 114.073147         |                    |                  | 2  |
| 16 |                    |                   |                   |                   |                    |                   | K    | <b>147.112804</b>  | 74.060040          | <b>130.086255</b> | 65.546765          |                    |                  | 1  |

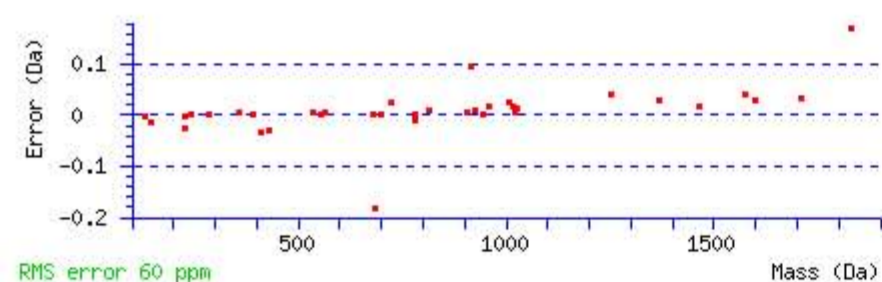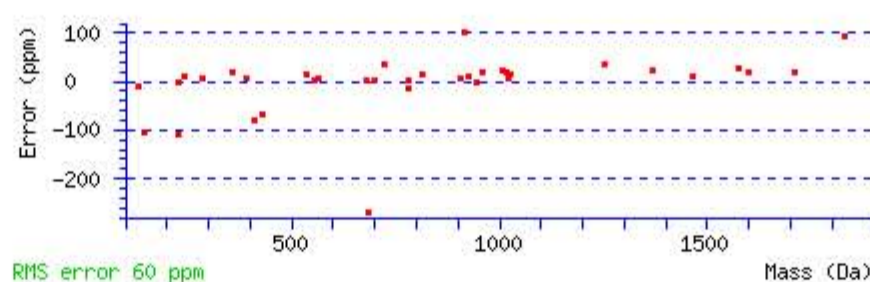

NCBI BLAST search of **VQEAHLTEDQIFYFPK**

(Parameters: blastp, nr protein database, expect=20000, no filter, PAM30)

Other BLAST [web gateways](#)

## All matches to this query

| Score | Mr(calc):   | Delta    | Sequence                         |
|-------|-------------|----------|----------------------------------|
| 34.2  | 2275.134720 | 0.022092 | <a href="#">VQEAHLTEDQIFYFPK</a> |
| 1.8   | 2275.134720 | 0.022092 | <a href="#">VQEAHLTEDQIFYFPK</a> |



# MASCOT Search Results

## Peptide View

MS/MS Fragmentation of **YGFCEAADQFHVLDEVR**

Found in **CO8G\_HUMAN**, Complement component C8 gamma chain OS=Homo sapiens GN=C8G PE=1 SV=3

Match to Query 61882: 2366.109222 from(789.710350,3+) rtinseconds(2531) index(45531)

Title: Locus:1.1.1.3165.5 File:"2013-07-02 CLN FXIII 60 min 1st F 3.wiff"

Data file C:\Program Files (x86)\Matrix Science\Mascot Daemon\mgf4 FXIII 60 min 1st\mascot\_daemon\_merge.mgf

Click mouse within plot area to zoom in by factor of two about that point

Or, Plot from  to  Da

Label all possible matches  Label matches used for scoring

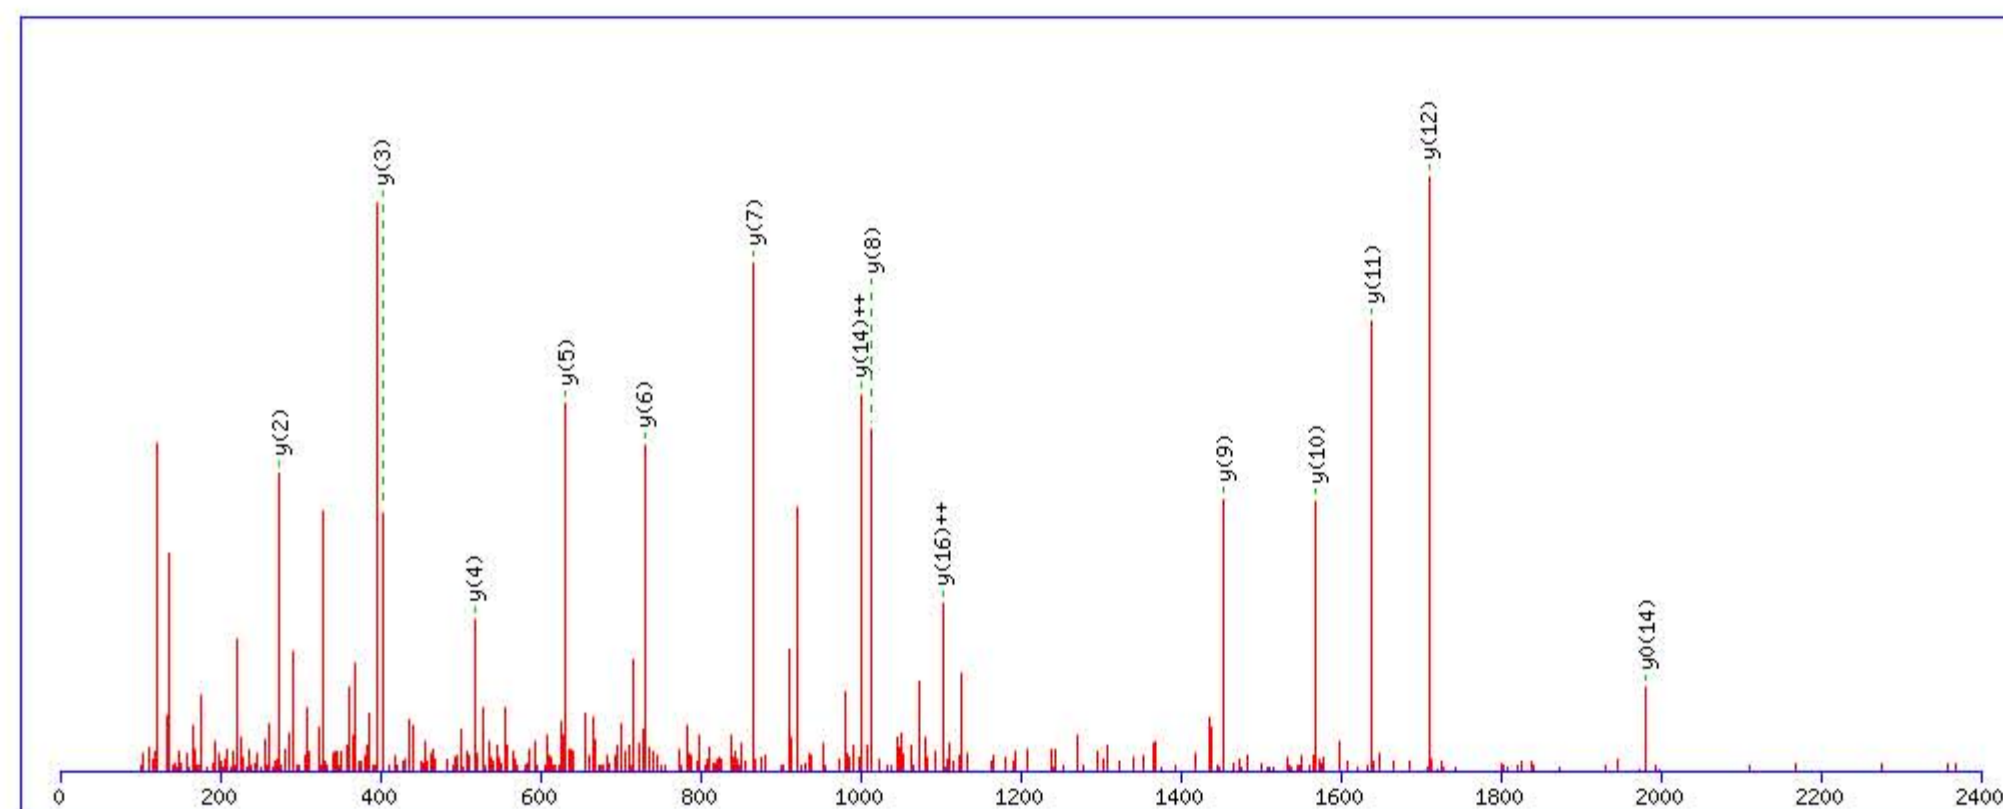

Monoisotopic mass of neutral peptide Mr(calc): 2366.082382

Fixed modifications: Carbamidomethyl (C) (apply to specified residues or termini only)

Variable modifications:

Q9 : Biotin:Thermo-21345 (Q)

Ions Score: 77 Expect: 3.3e-007

Matches : 14/164 fragment ions using 22 most intense peaks [\(help\)](#)

| #  | b           | b <sup>++</sup> | b <sup>*</sup> | b <sup>+++</sup> | b <sup>0</sup> | b <sup>0++</sup> | Seq. | y           | y <sup>++</sup> | y <sup>*</sup> | y <sup>+++</sup> | y <sup>0</sup> | y <sup>0++</sup> | #  |
|----|-------------|-----------------|----------------|------------------|----------------|------------------|------|-------------|-----------------|----------------|------------------|----------------|------------------|----|
| 1  | 164.070605  | 82.538940       |                |                  |                |                  | Y    |             |                 |                |                  |                |                  | 17 |
| 2  | 221.092069  | 111.049673      |                |                  |                |                  | G    | 2204.026323 | 1102.516799     | 2186.999774    | 1094.003525      | 2186.015758    | 1093.511517      | 16 |
| 3  | 368.160483  | 184.583879      |                |                  |                |                  | F    | 2147.004859 | 1074.006067     | 2129.978310    | 1065.492793      | 2128.994294    | 1065.000785      | 15 |
| 4  | 528.191132  | 264.599204      |                |                  |                |                  | C    | 1999.936445 | 1000.471860     | 1982.909896    | 991.958586       | 1981.925880    | 991.466578       | 14 |
| 5  | 657.233725  | 329.120501      |                |                  | 639.223160     | 320.115218       | E    | 1839.905796 | 920.456536      | 1822.879247    | 911.943261       | 1821.895231    | 911.451253       | 13 |
| 6  | 728.270839  | 364.639058      |                |                  | 710.260274     | 355.633775       | A    | 1710.863203 | 855.935239      | 1693.836654    | 847.421965       | 1692.852638    | 846.929957       | 12 |
| 7  | 799.307953  | 400.157615      |                |                  | 781.297388     | 391.152332       | A    | 1639.826089 | 820.416682      | 1622.799540    | 811.903408       | 1621.815524    | 811.411400       | 11 |
| 8  | 914.334896  | 457.671086      |                |                  | 896.324331     | 448.665803       | D    | 1568.788975 | 784.898125      | 1551.762426    | 776.384851       | 1550.778410    | 775.892843       | 10 |
| 9  | 1353.560222 | 677.283749      | 1336.533673    | 668.770474       | 1335.549657    | 668.278466       | Q    | 1453.762032 | 727.384654      | 1436.735483    | 718.871379       | 1435.751467    | 718.379371       | 9  |
| 10 | 1500.628636 | 750.817956      | 1483.602087    | 742.304682       | 1482.618071    | 741.812673       | F    | 1014.536706 | 507.771991      | 997.510157     | 499.258717       | 996.526141     | 498.766709       | 8  |
| 11 | 1637.687548 | 819.347412      | 1620.660999    | 810.834138       | 1619.676983    | 810.342129       | H    | 867.468292  | 434.237784      | 850.441743     | 425.724510       | 849.457727     | 425.232502       | 7  |
| 12 | 1736.755962 | 868.881619      | 1719.729413    | 860.368345       | 1718.745397    | 859.876336       | V    | 730.409380  | 365.708328      | 713.382831     | 357.195054       | 712.398815     | 356.703046       | 6  |
| 13 | 1849.840026 | 925.423651      | 1832.813477    | 916.910376       | 1831.829461    | 916.418368       | L    | 631.340966  | 316.174121      | 614.314417     | 307.660846       | 613.330401     | 307.168838       | 5  |
| 14 | 1964.866969 | 982.937122      | 1947.840420    | 974.423848       | 1946.856404    | 973.931840       | D    | 518.256902  | 259.632089      | 501.230353     | 251.118815       | 500.246337     | 250.626807       | 4  |
| 15 | 2093.909562 | 1047.458419     | 2076.883013    | 1038.945144      | 2075.898997    | 1038.453136      | E    | 403.229959  | 202.118617      | 386.203410     | 193.605343       | 385.219394     | 193.113335       | 3  |
| 16 | 2192.977976 | 1096.992626     | 2175.951427    | 1088.479351      | 2174.967411    | 1087.987343      | V    | 274.187366  | 137.597321      | 257.160817     | 129.084046       |                |                  | 2  |
| 17 |             |                 |                |                  |                |                  | R    | 175.118952  | 88.063114       | 158.092403     | 79.549839        |                |                  | 1  |

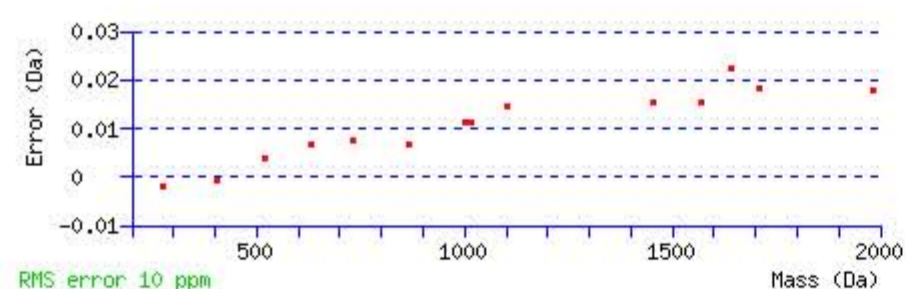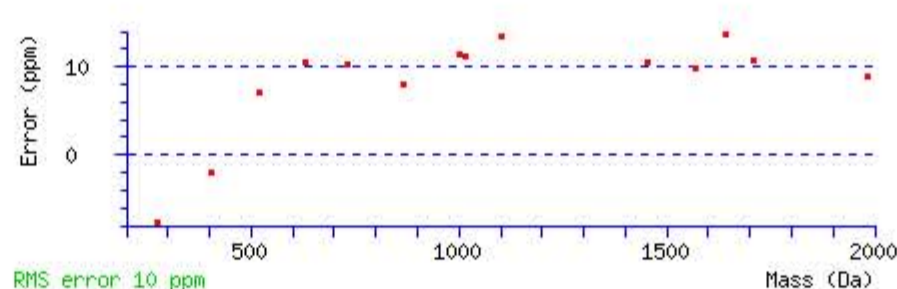

NCBI BLAST search of [YGFCEAADQFHVLDEVR](#)

(Parameters: blastp, nr protein database, expect=20000, no filter, PAM30)

Other BLAST [web gateways](#)

All matches to this query

| Score | Mr(calc):   | Delta    | Sequence                          |
|-------|-------------|----------|-----------------------------------|
| 77.5  | 2366.082382 | 0.026840 | <a href="#">YGFCEAADQFHVLDEVR</a> |

Mascot: <http://www.matrixscience.com/>



# MASCOT SEARCH RESULTS

## Peptide View

MS/MS Fragmentation of **TEHYEEQIEAFK**

Found in **CO9\_HUMAN**, Complement component C9 OS=Homo sapiens GN=C9 PE=1 SV=2

Match to Query 49148: 1833.869742 from(612.297190,3+) rtinseconds(1954) index(41850)

Title: Locus:1.1.1.2964.16 File:"2013-07-02 CLN FXIII 60 min 1st F 3.wiff"

Data file C:\Program Files (x86)\Matrix Science\Mascot Daemon\mgf\4 FXIII 60 min 1st\mascot\_daemon\_merge.mgf

Click mouse within plot area to zoom in by factor of two about that point

Or, Plot from  to  Da

Label all possible matches  Label matches used for scoring

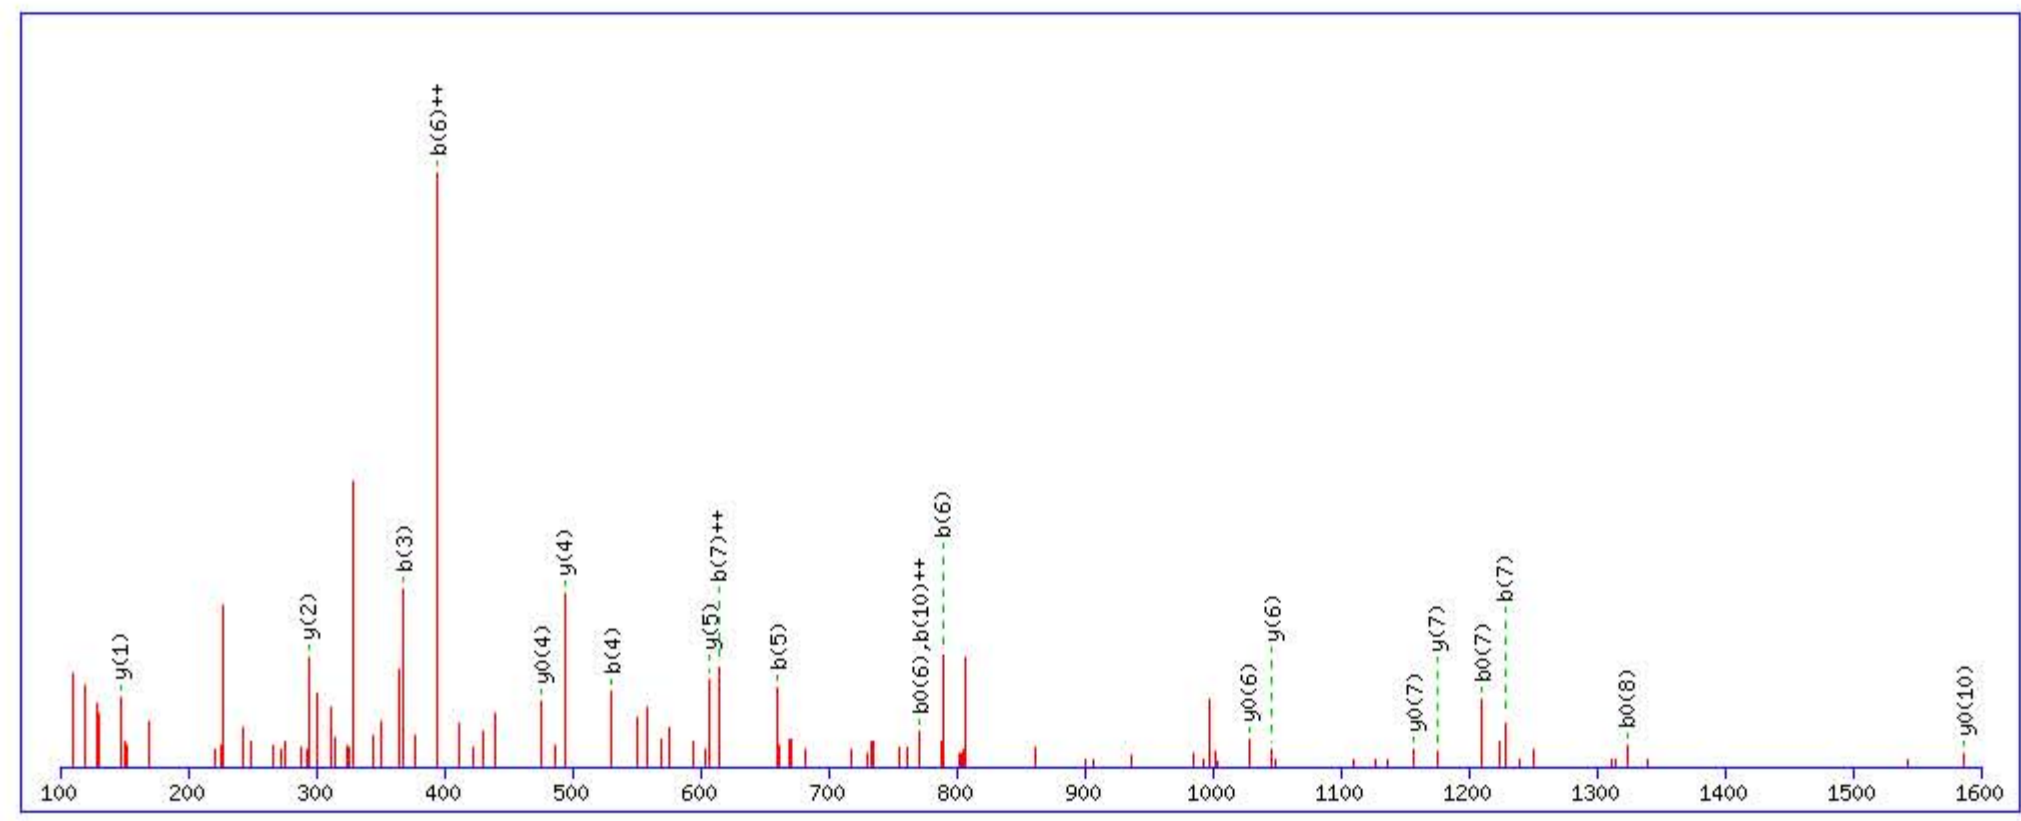

Monoisotopic mass of neutral peptide Mr(calc): 1833.860703

Fixed modifications: Carbamidomethyl (C) (apply to specified residues or termini only)

Variable modifications:

Q7 : Biotin:Thermo-21345 (Q)

Ions Score: 26 Expect: 0.0082

Matches : 21/114 fragment ions using 41 most intense peaks [\(help\)](#)

| #  | b                  | b <sup>++</sup>   | b <sup>*</sup> | b <sup>***</sup> | b <sup>0</sup>     | b <sup>0++</sup> | Seq. | y                  | y <sup>++</sup> | y <sup>*</sup> | y <sup>***</sup> | y <sup>0</sup>     | y <sup>0++</sup> | #  |
|----|--------------------|-------------------|----------------|------------------|--------------------|------------------|------|--------------------|-----------------|----------------|------------------|--------------------|------------------|----|
| 1  | 102.054955         | 51.531116         |                |                  | 84.044390          | 42.525833        | T    |                    |                 |                |                  |                    |                  | 12 |
| 2  | 231.097548         | 116.052412        |                |                  | 213.086983         | 107.047130       | E    | 1733.820335        | 867.413805      | 1716.793786    | 858.900531       | 1715.809770        | 858.408523       | 11 |
| 3  | <b>368.156460</b>  | 184.581868        |                |                  | 350.145895         | 175.576585       | H    | 1604.777742        | 802.892509      | 1587.751193    | 794.379235       | <b>1586.767177</b> | 793.887227       | 10 |
| 4  | <b>531.219789</b>  | 266.113533        |                |                  | 513.209224         | 257.108250       | Y    | 1467.718830        | 734.363053      | 1450.692281    | 725.849779       | 1449.708265        | 725.357771       | 9  |
| 5  | <b>660.262382</b>  | 330.634829        |                |                  | 642.251817         | 321.629547       | E    | 1304.655501        | 652.831389      | 1287.628952    | 644.318114       | 1286.644936        | 643.826106       | 8  |
| 6  | <b>789.304975</b>  | <b>395.156126</b> |                |                  | <b>771.294410</b>  | 386.150843       | E    | <b>1175.612908</b> | 588.310092      | 1158.586359    | 579.796817       | <b>1157.602343</b> | 579.304809       | 7  |
| 7  | <b>1228.530301</b> | <b>614.768789</b> | 1211.503752    | 606.255514       | <b>1210.519736</b> | 605.763506       | Q    | <b>1046.570315</b> | 523.788795      | 1029.543766    | 515.275521       | <b>1028.559750</b> | 514.783513       | 6  |
| 8  | 1341.614365        | 671.310820        | 1324.587816    | 662.797546       | <b>1323.603800</b> | 662.305538       | I    | <b>607.344989</b>  | 304.176132      | 590.318440     | 295.662858       | 589.334424         | 295.170850       | 5  |
| 9  | 1470.656958        | 735.832117        | 1453.630409    | 727.318842       | 1452.646393        | 726.826834       | E    | <b>494.260925</b>  | 247.634100      | 477.234376     | 239.120826       | <b>476.250360</b>  | 238.628818       | 4  |
| 10 | 1541.694072        | <b>771.350674</b> | 1524.667523    | 762.837399       | 1523.683507        | 762.345391       | A    | 365.218332         | 183.112804      | 348.191783     | 174.599530       |                    |                  | 3  |
| 11 | 1688.762486        | 844.884881        | 1671.735937    | 836.371606       | 1670.751921        | 835.879598       | F    | <b>294.181218</b>  | 147.594247      | 277.154669     | 139.080973       |                    |                  | 2  |
| 12 |                    |                   |                |                  |                    |                  | K    | <b>147.112804</b>  | 74.060040       | 130.086255     | 65.546765        |                    |                  | 1  |

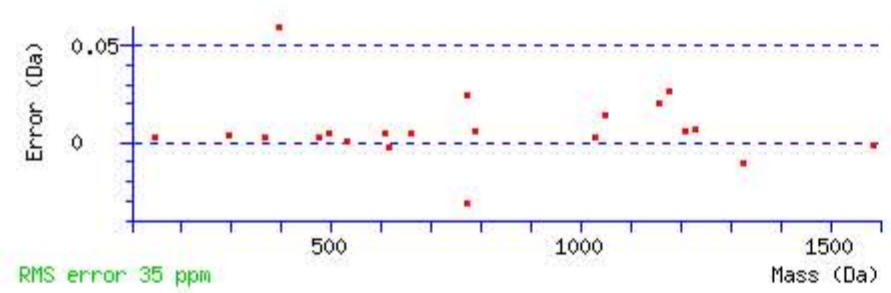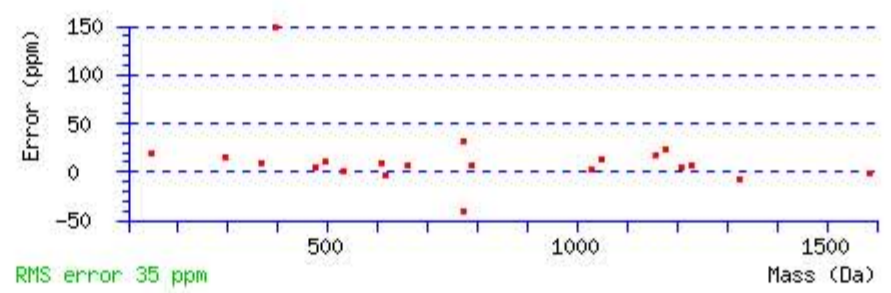

NCBI BLAST search of **TEHYEEQIEAFK**

(Parameters: blastp, nr protein database, expect=20000, no filter, PAM30)

Other BLAST [web gateways](#)

All matches to this query

| Score | Mr(calc):   | Delta     | Sequence                         |
|-------|-------------|-----------|----------------------------------|
| 26.1  | 1833.860703 | 0.009039  | <a href="#">TEHYEEQIEAFK</a>     |
| 3.6   | 1833.877808 | -0.008066 | <a href="#">ALSKGQNVTEEECLEK</a> |
| 0.5   | 1833.896942 | -0.027200 | <a href="#">STVNGVSWTNETQRQK</a> |

Mascot: <http://www.matrixscience.com/>



# MASCOT Search Results

## Peptide View

MS/MS Fragmentation of **TEHYEEQIEAFK**

Found in **CO9\_HUMAN**, Complement component C9 OS=Homo sapiens GN=C9 PE=1 SV=2

Match to Query 49152: 1833.877628 from(917.946090,2+) rtinseconds(1952) index(41832)

Title: Locus:1.1.1.2963.23 File:"2013-07-02 CLN FXIII 60 min 1st F 3.wiff"

Data file C:\Program Files (x86)\Matrix Science\Mascot Daemon\mgf4 FXIII 60 min 1st\mascot\_daemon\_merge.mgf

Click mouse within plot area to zoom in by factor of two about that point

Or, Plot from  to  Da

Label all possible matches  Label matches used for scoring

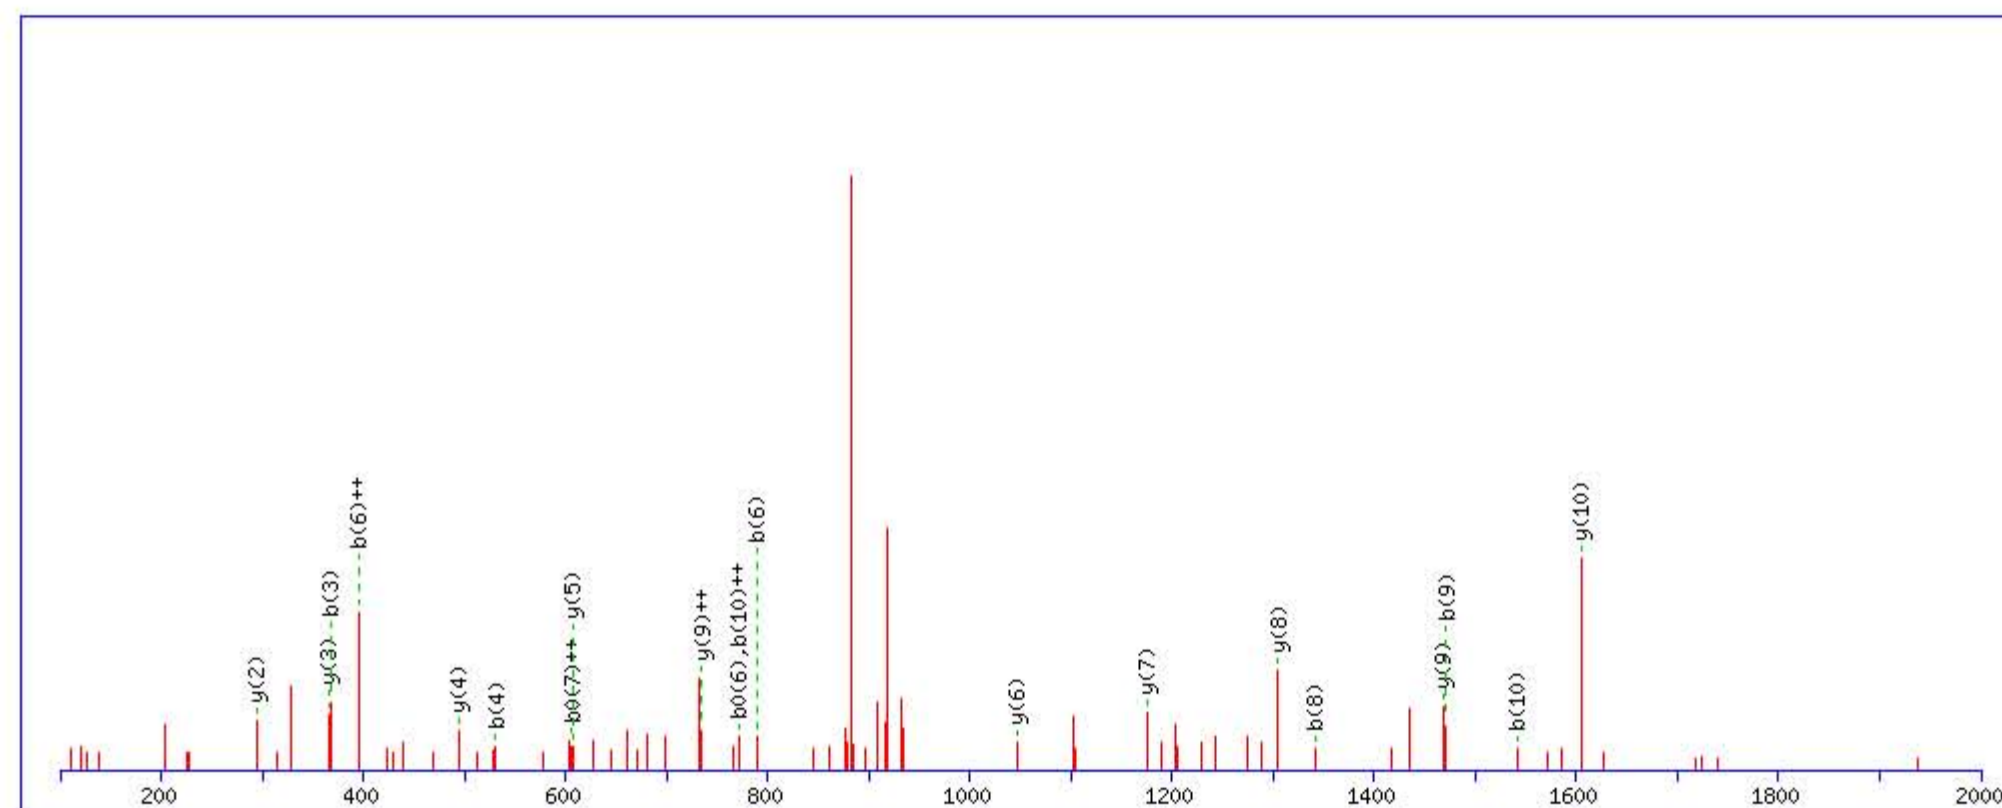

Monoisotopic mass of neutral peptide  $M_r(\text{calc})$ : 1833.860703

Fixed modifications: Carbamidomethyl (C) (apply to specified residues or termini only)

Variable modifications:

Q7 : Biotin:Thermo-21345 (Q)

Ions Score: 29 Expect: 0.031

Matches : 20/114 fragment ions using 59 most intense peaks [\(help\)](#)

| #  | b                  | b <sup>++</sup>   | b <sup>+</sup> | b <sup>*++</sup> | b <sup>0</sup>    | b <sup>0++</sup>  | Seq. | y                  | y <sup>++</sup>   | y <sup>+</sup> | y <sup>*++</sup> | y <sup>0</sup> | y <sup>0++</sup> | #  |
|----|--------------------|-------------------|----------------|------------------|-------------------|-------------------|------|--------------------|-------------------|----------------|------------------|----------------|------------------|----|
| 1  | 102.054955         | 51.531116         |                |                  | 84.044390         | 42.525833         | T    |                    |                   |                |                  |                |                  | 12 |
| 2  | 231.097548         | 116.052412        |                |                  | 213.086983        | 107.047130        | E    | 1733.820335        | 867.413805        | 1716.793786    | 858.900531       | 1715.809770    | 858.408523       | 11 |
| 3  | <b>368.156460</b>  | 184.581868        |                |                  | 350.145895        | 175.576585        | H    | <b>1604.777742</b> | 802.892509        | 1587.751193    | 794.379235       | 1586.767177    | 793.887227       | 10 |
| 4  | <b>531.219789</b>  | 266.113533        |                |                  | 513.209224        | 257.108250        | Y    | <b>1467.718830</b> | <b>734.363053</b> | 1450.692281    | 725.849779       | 1449.708265    | 725.357771       | 9  |
| 5  | 660.262382         | 330.634829        |                |                  | 642.251817        | 321.629547        | E    | <b>1304.655501</b> | 652.831389        | 1287.628952    | 644.318114       | 1286.644936    | 643.826106       | 8  |
| 6  | <b>789.304975</b>  | <b>395.156126</b> |                |                  | <b>771.294410</b> | 386.150843        | E    | <b>1175.612908</b> | 588.310092        | 1158.586359    | 579.796817       | 1157.602343    | 579.304809       | 7  |
| 7  | 1228.530301        | 614.768789        | 1211.503752    | 606.255514       | 1210.519736       | <b>605.763506</b> | Q    | <b>1046.570315</b> | 523.788795        | 1029.543766    | 515.275521       | 1028.559750    | 514.783513       | 6  |
| 8  | <b>1341.614365</b> | 671.310820        | 1324.587816    | 662.797546       | 1323.603800       | 662.305538        | I    | <b>607.344989</b>  | 304.176132        | 590.318440     | 295.662858       | 589.334424     | 295.170850       | 5  |
| 9  | <b>1470.656958</b> | 735.832117        | 1453.630409    | 727.318842       | 1452.646393       | 726.826834        | E    | <b>494.260925</b>  | 247.634100        | 477.234376     | 239.120826       | 476.250360     | 238.628818       | 4  |
| 10 | <b>1541.694072</b> | <b>771.350674</b> | 1524.667523    | 762.837399       | 1523.683507       | 762.345391        | A    | <b>365.218332</b>  | 183.112804        | 348.191783     | 174.599530       |                |                  | 3  |
| 11 | 1688.762486        | 844.884881        | 1671.735937    | 836.371606       | 1670.751921       | 835.879598        | F    | <b>294.181218</b>  | 147.594247        | 277.154669     | 139.080973       |                |                  | 2  |
| 12 |                    |                   |                |                  |                   |                   | K    | 147.112804         | 74.060040         | 130.086255     | 65.546765        |                |                  | 1  |

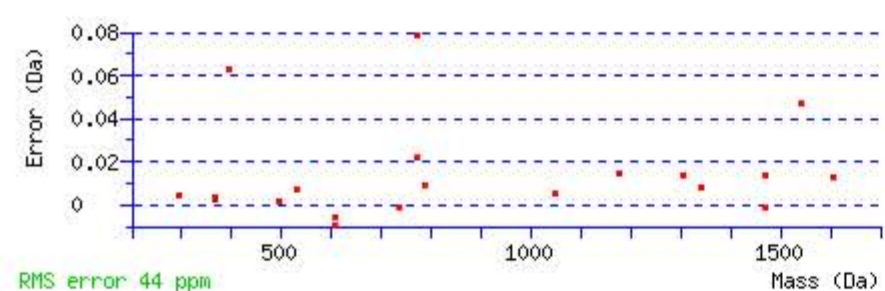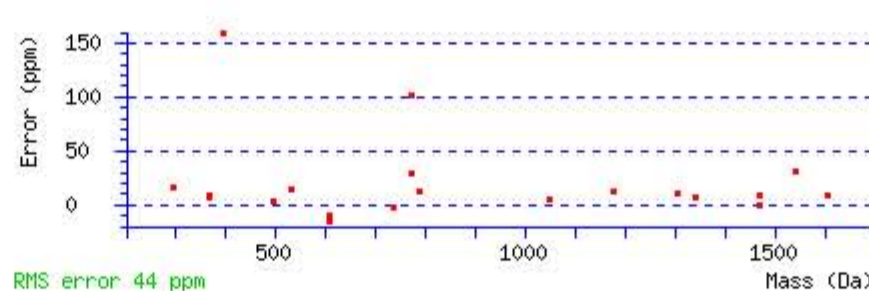

NCBI BLAST search of [TEHYEEQIEAFK](#)

(Parameters: blastp, nr protein database, expect=20000, no filter, PAM30)

Other BLAST [web gateways](#)

All matches to this query

| Score | $M_r(\text{calc})$ : | Delta    | Sequence                     |
|-------|----------------------|----------|------------------------------|
| 28.7  | 1833.860703          | 0.016925 | <a href="#">TEHYEEQIEAFK</a> |

Mascot: <http://www.matrixscience.com/>



# MASCOT Search Results

## Peptide View

MS/MS Fragmentation of **AEQCCEETASSISLHGK**

Found in **CO9\_HUMAN**, Complement component C9 OS=Homo sapiens GN=C9 PE=1 SV=2

Match to Query 58586: 2216.993862 from(740.005230,3+) rtinseconds(1533) index(39106)

Title: Locus:1.1.1.2817.17 File:"2013-07-02 CLN FXIII 60 min 1st F 3.wiff"

Data file C:\Program Files (x86)\Matrix Science\Mascot Daemon\mgf\4 FXIII 60 min 1st\mascot\_daemon\_merge.mgf

Click mouse within plot area to zoom in by factor of two about that point

Or, Plot from  to  Da

Label all possible matches  Label matches used for scoring

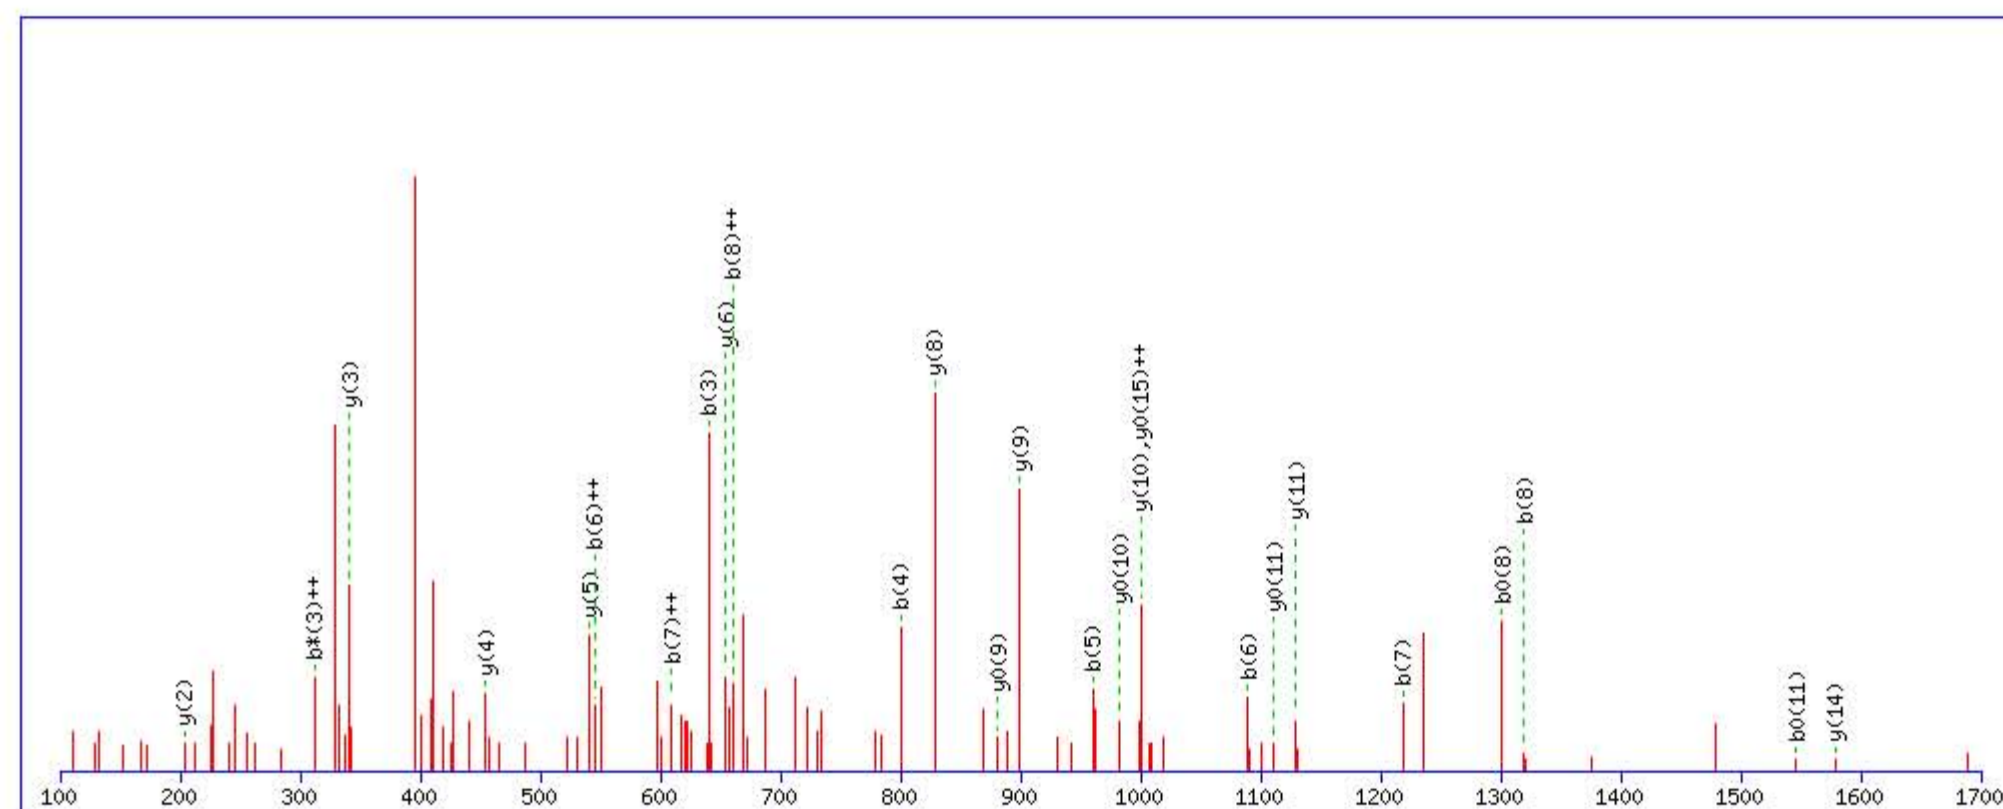

Monoisotopic mass of neutral peptide Mr(calc): 2216.986404

Fixed modifications: Carbamidomethyl (C) (apply to specified residues or termini only)

Variable modifications:

Q3 : Biotin:Thermo-21345 (Q)

Ions Score: 38 Expect: 0.0017

Matches : 26/178 fragment ions using 63 most intense peaks [\(help\)](#)

| #  | b                  | b <sup>++</sup>   | b <sup>*</sup> | b <sup>+++</sup>  | b <sup>0</sup>     | b <sup>0++</sup> | Seq. | y                  | y <sup>++</sup> | y <sup>*</sup> | y <sup>+++</sup> | y <sup>0</sup>     | y <sup>0++</sup>   | #  |
|----|--------------------|-------------------|----------------|-------------------|--------------------|------------------|------|--------------------|-----------------|----------------|------------------|--------------------|--------------------|----|
| 1  | 72.044390          | 36.525833         |                |                   |                    |                  | A    |                    |                 |                |                  |                    |                    | 17 |
| 2  | 201.086983         | 101.047130        |                |                   | 183.076418         | 92.041847        | E    | 2146.956588        | 1073.981932     | 2129.930039    | 1065.468657      | 2128.946023        | 1064.976649        | 16 |
| 3  | <b>640.312309</b>  | 320.659793        | 623.285760     | <b>312.146518</b> | 622.301744         | 311.654510       | Q    | 2017.913995        | 1009.460636     | 2000.887446    | 1000.947361      | 1999.903430        | <b>1000.455353</b> | 15 |
| 4  | <b>800.342958</b>  | 400.675117        | 783.316409     | 392.161843        | 782.332393         | 391.669835       | C    | <b>1578.688669</b> | 789.847972      | 1561.662120    | 781.334698       | 1560.678104        | 780.842690         | 14 |
| 5  | <b>960.373607</b>  | 480.690442        | 943.347058     | 472.177167        | 942.363042         | 471.685159       | C    | 1418.658020        | 709.832648      | 1401.631471    | 701.319374       | 1400.647455        | 700.827366         | 13 |
| 6  | <b>1089.416200</b> | <b>545.211738</b> | 1072.389651    | 536.698464        | 1071.405635        | 536.206456       | E    | 1258.627371        | 629.817323      | 1241.600822    | 621.304049       | 1240.616806        | 620.812041         | 12 |
| 7  | <b>1218.458793</b> | <b>609.733035</b> | 1201.432244    | 601.219760        | 1200.448228        | 600.727752       | E    | <b>1129.584778</b> | 565.296027      | 1112.558229    | 556.782753       | <b>1111.574213</b> | 556.290744         | 11 |
| 8  | <b>1319.506472</b> | <b>660.256874</b> | 1302.479923    | 651.743600        | <b>1301.495907</b> | 651.251592       | T    | <b>1000.542185</b> | 500.774731      | 983.515636     | 492.261456       | <b>982.531620</b>  | 491.769448         | 10 |
| 9  | 1390.543586        | 695.775431        | 1373.517037    | 687.262157        | 1372.533021        | 686.770149       | A    | <b>899.494506</b>  | 450.250891      | 882.467957     | 441.737617       | <b>881.483941</b>  | 441.245609         | 9  |
| 10 | 1477.575614        | 739.291445        | 1460.549065    | 730.778171        | 1459.565049        | 730.286163       | S    | <b>828.457392</b>  | 414.732334      | 811.430843     | 406.219060       | 810.446827         | 405.727052         | 8  |
| 11 | 1564.607642        | 782.807459        | 1547.581093    | 774.294185        | <b>1546.597077</b> | 773.802177       | S    | 741.425364         | 371.216320      | 724.398815     | 362.703045       | 723.414799         | 362.211037         | 7  |
| 12 | 1677.691706        | 839.349491        | 1660.665157    | 830.836217        | 1659.681141        | 830.344209       | I    | <b>654.393336</b>  | 327.700306      | 637.366787     | 319.187031       | 636.382771         | 318.695023         | 6  |
| 13 | 1764.723734        | 882.865505        | 1747.697185    | 874.352231        | 1746.713169        | 873.860223       | S    | <b>541.309272</b>  | 271.158274      | 524.282723     | 262.644999       | 523.298707         | 262.152991         | 5  |
| 14 | 1877.807798        | 939.407537        | 1860.781249    | 930.894263        | 1859.797233        | 930.402255       | L    | <b>454.277244</b>  | 227.642260      | 437.250695     | 219.128985       |                    |                    | 4  |
| 15 | 2014.866710        | 1007.936993       | 1997.840161    | 999.423719        | 1996.856145        | 998.931711       | H    | <b>341.193180</b>  | 171.100228      | 324.166631     | 162.586953       |                    |                    | 3  |
| 16 | 2071.888174        | 1036.447725       | 2054.861625    | 1027.934450       | 2053.877609        | 1027.442442      | G    | <b>204.134268</b>  | 102.570772      | 187.107719     | 94.057497        |                    |                    | 2  |
| 17 |                    |                   |                |                   |                    |                  | K    | 147.112804         | 74.060040       | 130.086255     | 65.546765        |                    |                    | 1  |

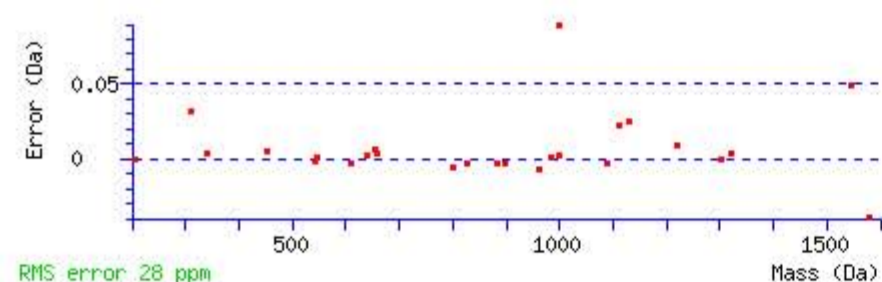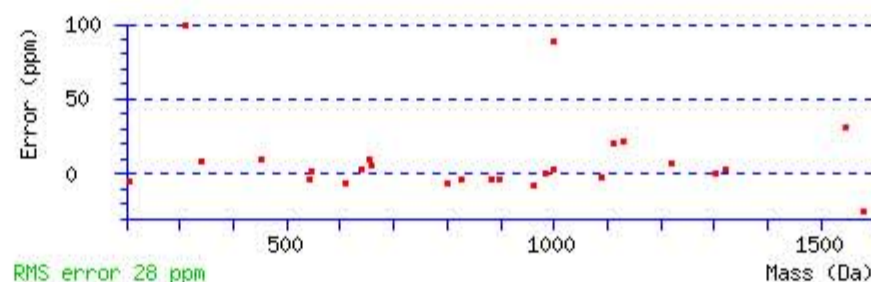

NCBI BLAST search of **AEQCCEETASSISLHGK**

(Parameters: blastp, nr protein database, expect=20000, no filter, PAM30)

Other BLAST [web gateways](#)

All matches to this query

| Score | Mr(calc):   | Delta    | Sequence                          |
|-------|-------------|----------|-----------------------------------|
| 37.6  | 2216.986404 | 0.007458 | <a href="#">AEQCCEETASSISLHGK</a> |

Mascot: <http://www.matrixscience.com/>



# MASCOT SCIENCE Mascot Search Results

## Peptide View

MS/MS Fragmentation of **VGSQYR**

Found in **CFAB\_HUMAN**, Complement factor B OS=Homo sapiens GN=CFB PE=1 SV=2

Match to Query 19817: 1019.525268 from(510.769910,2+) rtinseconds(1372) index(74227)

Title: Locus:1.1.1.2692.16 File:"2013-07-02 CLN FXIII 60 min 1st FT.wiff"

Data file C:\Program Files (x86)\Matrix Science\Mascot Daemon\mgf4 FXIII 60 min 1st\mascot\_daemon\_merge.mgf

Click mouse within plot area to zoom in by factor of two about that point

Or, Plot from  to  Da

Label all possible matches  Label matches used for scoring

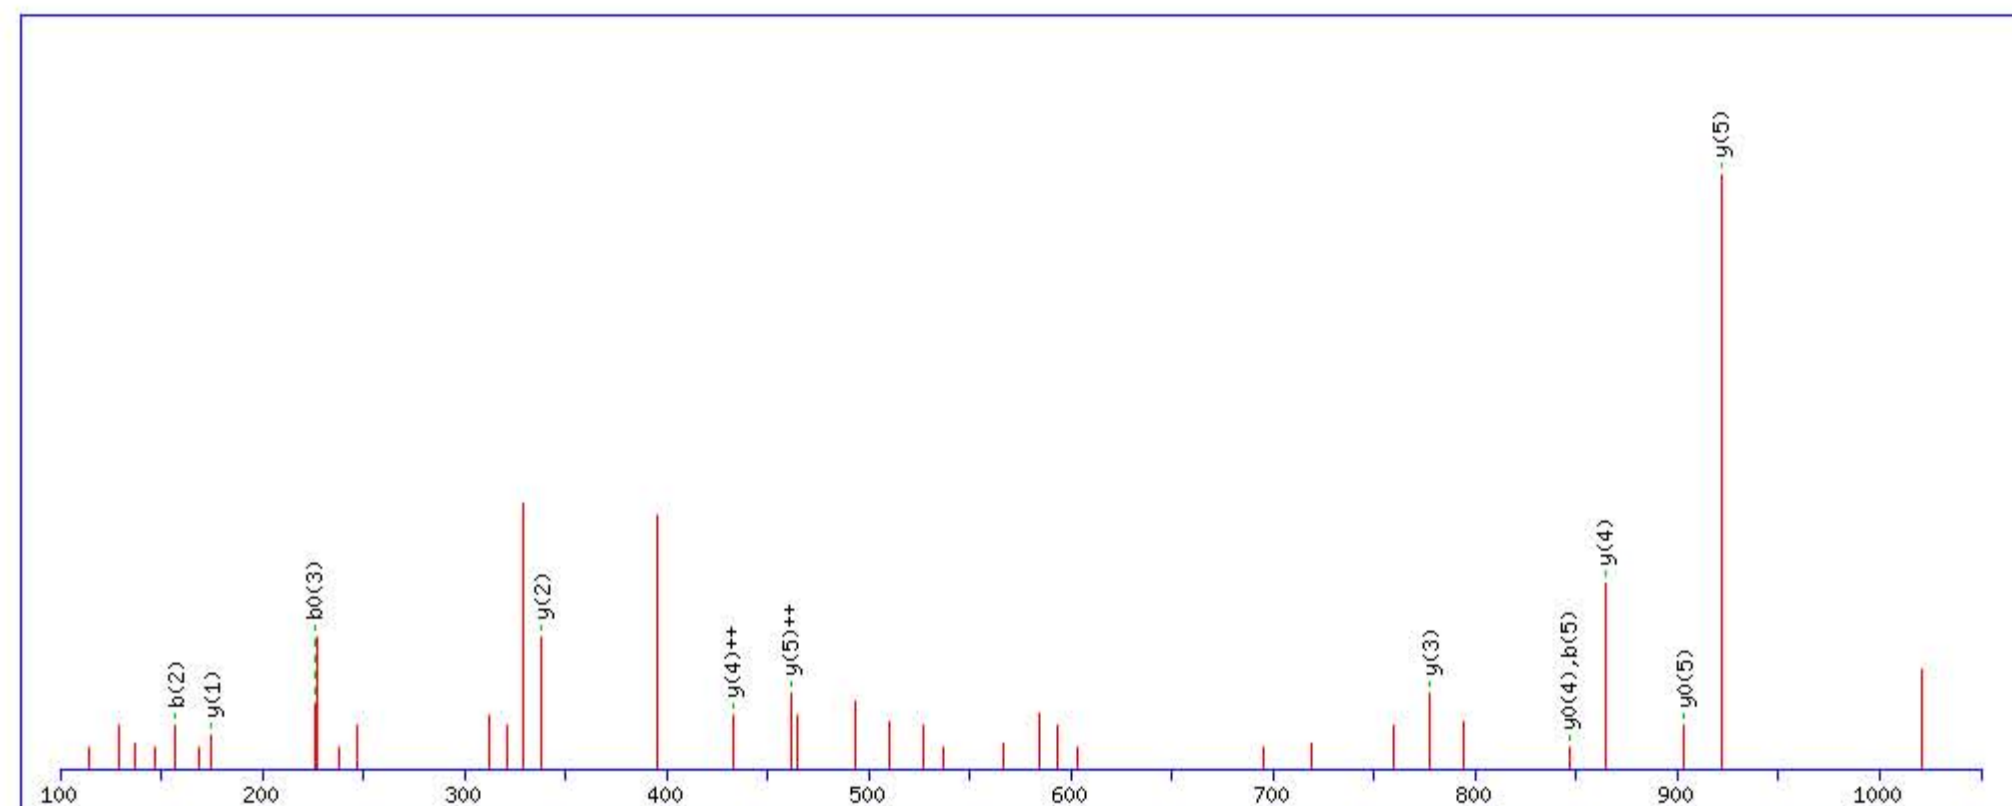

Monoisotopic mass of neutral peptide Mr(calc): 1019.522232

Fixed modifications: Carbamidomethyl (C) (apply to specified residues or termini only)

Variable modifications:

Q4 : Biotin:Thermo-21345 (Q)

Ions Score: 27 Expect: 0.045

Matches : 12/44 fragment ions using 23 most intense peaks ([help](#))

| # | b                 | b <sup>++</sup> | b <sup>*</sup> | b <sup>+++</sup> | b <sup>0</sup>    | b <sup>0++</sup> | Seq. | y                 | y <sup>++</sup>   | y <sup>*</sup> | y <sup>+++</sup> | y <sup>0</sup>    | y <sup>0++</sup> | # |
|---|-------------------|-----------------|----------------|------------------|-------------------|------------------|------|-------------------|-------------------|----------------|------------------|-------------------|------------------|---|
| 1 | 100.075690        | 50.541483       |                |                  |                   |                  | V    |                   |                   |                |                  |                   |                  | 6 |
| 2 | <b>157.097154</b> | 79.052215       |                |                  |                   |                  | G    | <b>921.461099</b> | <b>461.234188</b> | 904.434550     | 452.720913       | <b>903.450534</b> | 452.228905       | 5 |
| 3 | 244.129182        | 122.568229      |                |                  | <b>226.118617</b> | 113.562946       | S    | <b>864.439635</b> | <b>432.723456</b> | 847.413086     | 424.210181       | <b>846.429070</b> | 423.718173       | 4 |
| 4 | 683.354508        | 342.180892      | 666.327959     | 333.667618       | 665.343943        | 333.175610       | Q    | <b>777.407607</b> | 389.207442        | 760.381058     | 380.694167       |                   |                  | 3 |
| 5 | <b>846.417837</b> | 423.712557      | 829.391288     | 415.199282       | 828.407272        | 414.707274       | Y    | <b>338.182281</b> | 169.594778        | 321.155732     | 161.081504       |                   |                  | 2 |
| 6 |                   |                 |                |                  |                   |                  | R    | <b>175.118952</b> | 88.063114         | 158.092403     | 79.549839        |                   |                  | 1 |

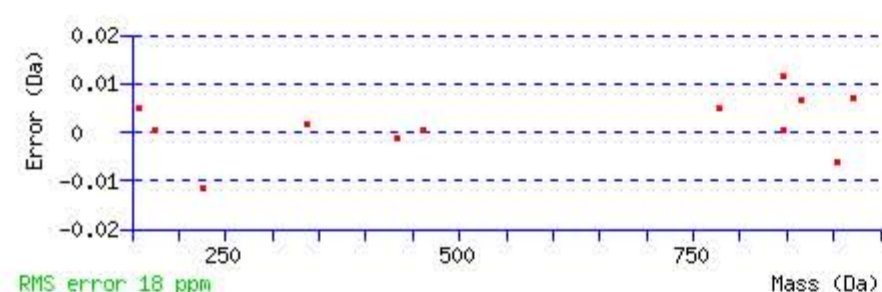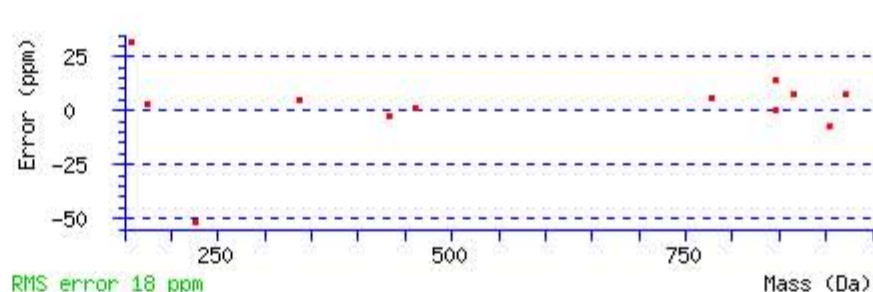

NCBI BLAST search of **VGSQYR**

(Parameters: blastp, nr protein database, expect=20000, no filter, PAM30)

Other BLAST [web gateways](#)

## All matches to this query

| Score | Mr(calc):   | Delta     | Sequence                    |
|-------|-------------|-----------|-----------------------------|
| 27.0  | 1019.522232 | 0.003036  | <a href="#">VGSQYR</a>      |
| 12.8  | 1019.533447 | -0.008179 | <a href="#">RSQYR</a>       |
| 8.9   | 1019.539993 | -0.014725 | <a href="#">VGEAFALTGR</a>  |
| 7.0   | 1019.510818 | 0.014450  | <a href="#">RSSVSSGGAGR</a> |
| 6.1   | 1019.512146 | 0.013122  | <a href="#">RSRGHHDR</a>    |
| 3.8   | 1019.529419 | -0.004151 | <a href="#">REGLMRSR</a>    |
| 3.2   | 1019.526062 | -0.000794 | <a href="#">KPHTAHSSR</a>   |
| 2.6   | 1019.533447 | -0.008179 | <a href="#">RQSYR</a>       |
| 1.8   | 1019.510803 | 0.014465  | <a href="#">RDTTRESR</a>    |
| 1.8   | 1019.529419 | -0.004151 | <a href="#">RMRESVSR</a>    |



# MASCOT Search Results

## Peptide View

MS/MS Fragmentation of **LPPTTTCQQQK**

Found in **CFAB\_HUMAN**, Complement factor B OS=Homo sapiens GN=CFB PE=1 SV=2

Match to Query 42700: 1611.815982 from(538.279270,3+) rtinseconds(1436) index(74767)

Title: Locus:1.1.1.2714.19 File:"2013-07-02 CLN FXIII 60 min 1st FT.wiff"

Data file C:\Program Files (x86)\Matrix Science\Mascot Daemon\mgf4 FXIII 60 min 1st\mascot\_daemon\_merge.mgf

Click mouse within plot area to zoom in by factor of two about that point

Or, Plot from  to  Da

Label all possible matches  Label matches used for scoring

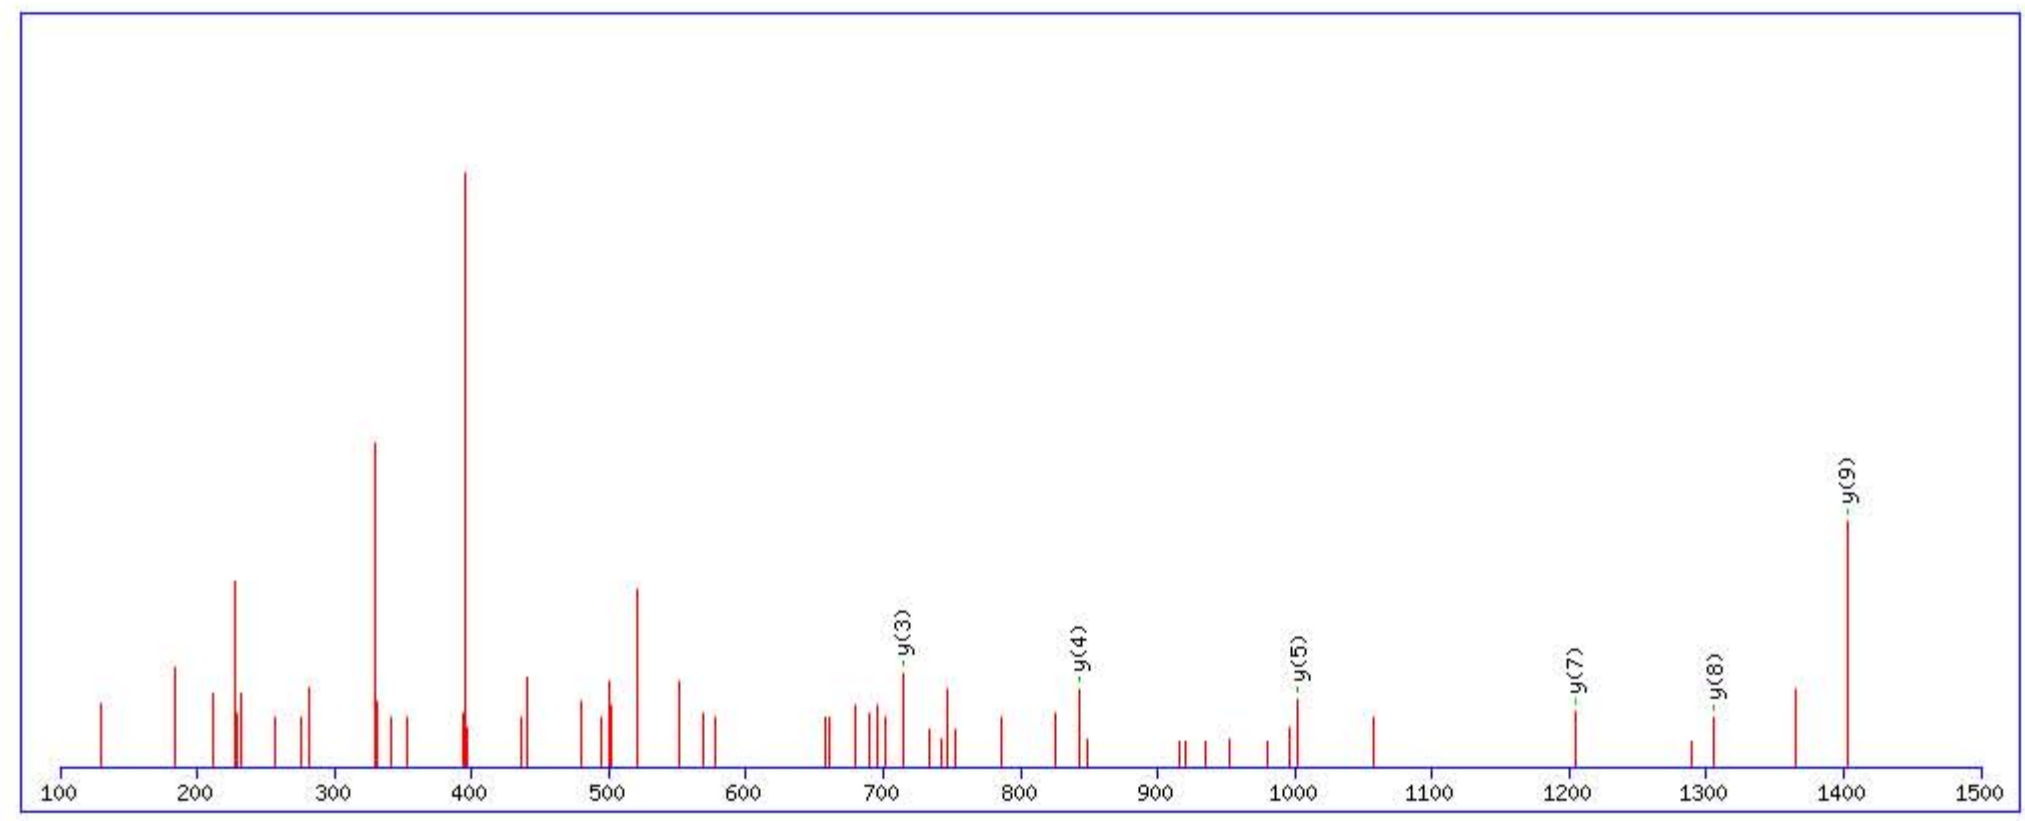

Monoisotopic mass of neutral peptide Mr(calc): 1611.811295

Fixed modifications: Carbamidomethyl (C) (apply to specified residues or termini only)

Variable modifications:

Q10 : Biotin:Thermo-21345 (Q)

Ions Score: 28 Expect: 0.0027

Matches : 6/90 fragment ions using 13 most intense peaks [\(help\)](#)

| #  | b           | b <sup>++</sup> | b <sup>*</sup> | b <sup>*++</sup> | b <sup>0</sup> | b <sup>0++</sup> | Seq. | y                  | y <sup>++</sup> | y <sup>*</sup> | y <sup>*++</sup> | y <sup>0</sup> | y <sup>0++</sup> | #  |
|----|-------------|-----------------|----------------|------------------|----------------|------------------|------|--------------------|-----------------|----------------|------------------|----------------|------------------|----|
| 1  | 114.091340  | 57.549308       |                |                  |                |                  | L    |                    |                 |                |                  |                |                  | 11 |
| 2  | 211.144104  | 106.075690      |                |                  |                |                  | P    | 1499.734500        | 750.370888      | 1482.707951    | 741.857614       | 1481.723935    | 741.365606       | 10 |
| 3  | 308.196868  | 154.602072      |                |                  |                |                  | P    | <b>1402.681736</b> | 701.844506      | 1385.655187    | 693.331232       | 1384.671171    | 692.839224       | 9  |
| 4  | 409.244547  | 205.125911      |                |                  | 391.233982     | 196.120629       | T    | <b>1305.628972</b> | 653.318124      | 1288.602423    | 644.804850       | 1287.618407    | 644.312842       | 8  |
| 5  | 510.292226  | 255.649751      |                |                  | 492.281661     | 246.644468       | T    | <b>1204.581293</b> | 602.794285      | 1187.554744    | 594.281010       | 1186.570728    | 593.789002       | 7  |
| 6  | 611.339905  | 306.173591      |                |                  | 593.329340     | 297.168308       | T    | 1103.533614        | 552.270445      | 1086.507065    | 543.757171       | 1085.523049    | 543.265163       | 6  |
| 7  | 771.370554  | 386.188915      |                |                  | 753.359989     | 377.183633       | C    | <b>1002.485935</b> | 501.746606      | 985.459386     | 493.233331       |                |                  | 5  |
| 8  | 899.429132  | 450.218204      | 882.402583     | 441.704930       | 881.418567     | 441.212922       | Q    | <b>842.455286</b>  | 421.731281      | 825.428737     | 413.218007       |                |                  | 4  |
| 9  | 1027.487710 | 514.247493      | 1010.461161    | 505.734219       | 1009.477145    | 505.242211       | Q    | <b>714.396708</b>  | 357.701992      | 697.370159     | 349.188718       |                |                  | 3  |
| 10 | 1466.713036 | 733.860156      | 1449.686487    | 725.346882       | 1448.702471    | 724.854874       | Q    | 586.338130         | 293.672703      | 569.311581     | 285.159429       |                |                  | 2  |
| 11 |             |                 |                |                  |                |                  | K    | 147.112804         | 74.060040       | 130.086255     | 65.546765        |                |                  | 1  |

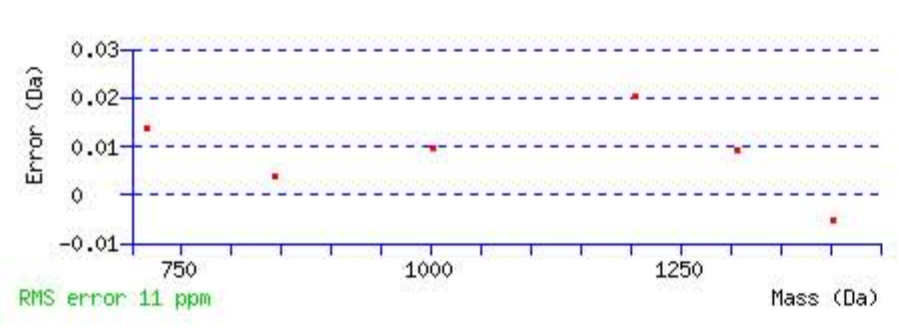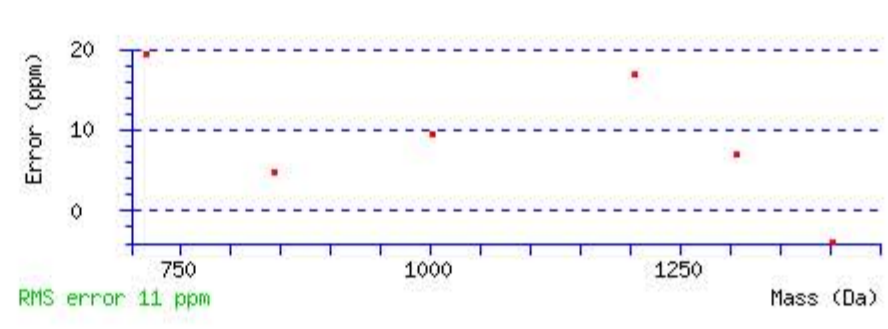

NCBI BLAST search of **LPPTTTCQQQK**

(Parameters: blastp, nr protein database, expect=20000, no filter, PAM30)

Other BLAST [web gateways](#)

### All matches to this query

| Score | Mr(calc):   | Delta    | Sequence                       |
|-------|-------------|----------|--------------------------------|
| 27.6  | 1611.811295 | 0.004687 | <a href="#">LPPTTTCQQQK</a>    |
| 27.6  | 1611.811295 | 0.004687 | <a href="#">LPPTTTCQQQK</a>    |
| 16.1  | 1611.811295 | 0.004687 | <a href="#">LPPTTTCQQQK</a>    |
| 0.1   | 1611.815094 | 0.000888 | <a href="#">NDVEGAKMHLRQAK</a> |



# MASCOT SCIENCE Mascot Search Results

## Peptide View

MS/MS Fragmentation of **LPPTTTCQQQK**

Found in **CFAB\_HUMAN**, Complement factor B OS=Homo sapiens GN=CFB PE=1 SV=2

Match to Query 42701: 1611.815982 from(538.279270,3+) rtinseconds(1427) index(74691)

Title: Locus:1.1.1.2711.18 File:"2013-07-02 CLN FXIII 60 min 1st FT.wiff"

Data file C:\Program Files (x86)\Matrix Science\Mascot Daemon\mgf\4 FXIII 60 min 1st\mascot\_daemon\_merge.mgf

Click mouse within plot area to zoom in by factor of two about that point

Or, Plot from  to  Da

Label all possible matches  Label matches used for scoring

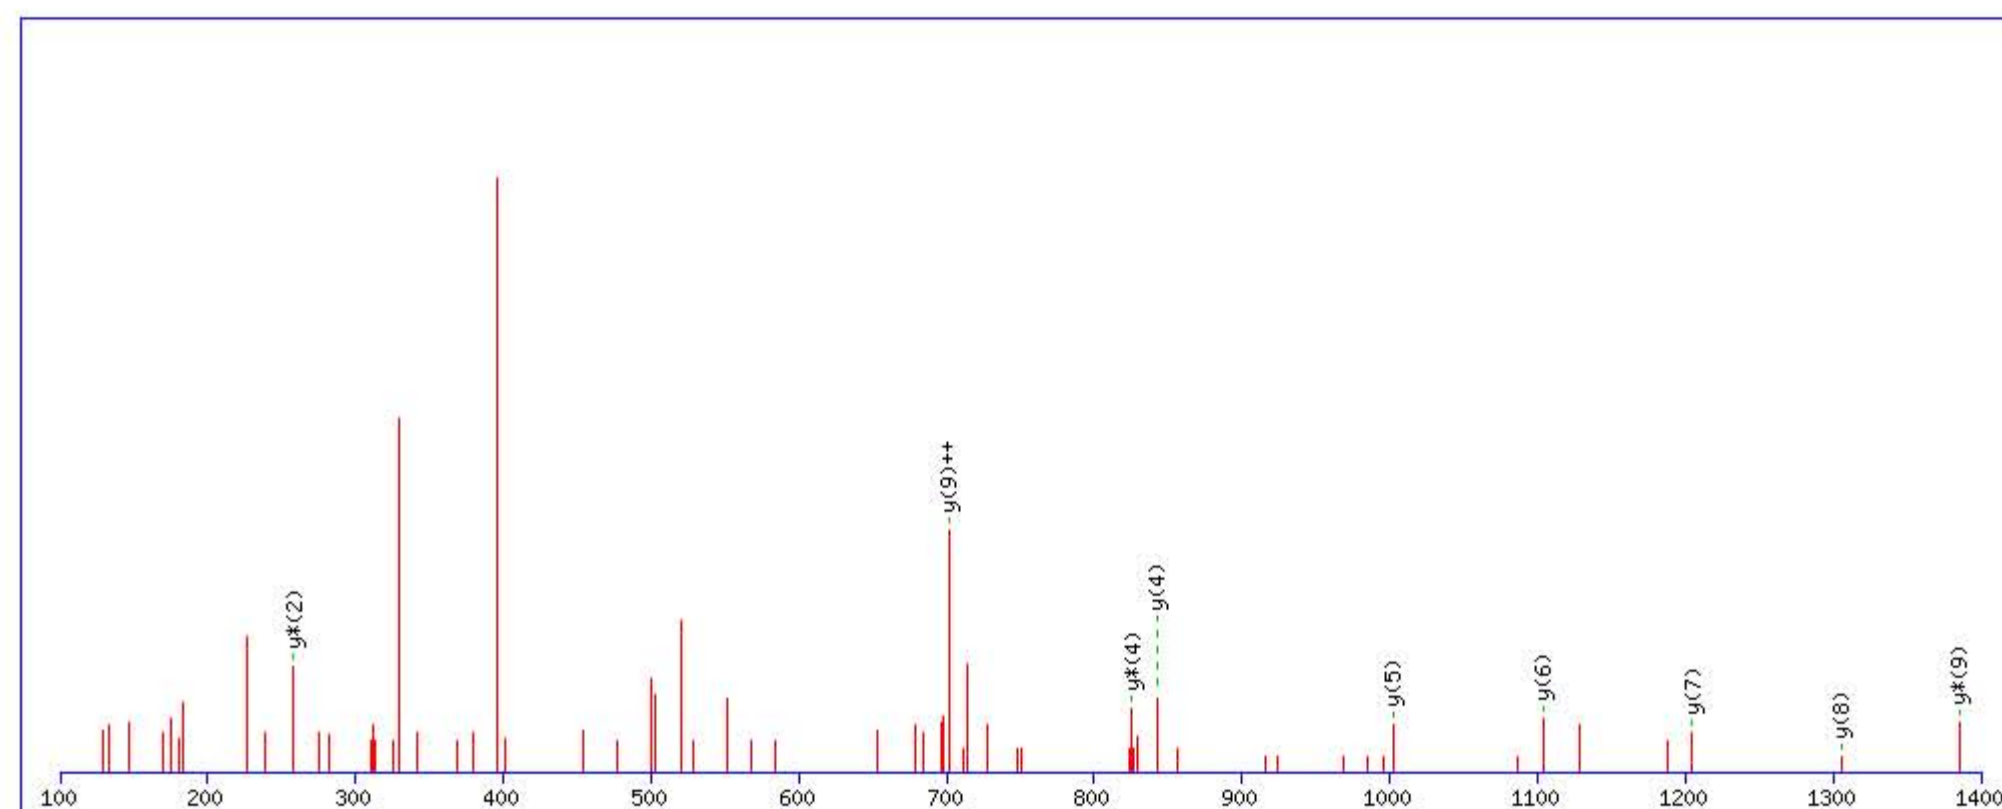

Monoisotopic mass of neutral peptide Mr(calc): 1611.811295

Fixed modifications: Carbamidomethyl (C) (apply to specified residues or termini only)

Variable modifications:

Q9 : Biotin:Thermo-21345 (Q)

Ions Score: 28 Expect: 0.045

Matches : 9/90 fragment ions using 13 most intense peaks [\(help\)](#)

| #  | b           | b <sup>++</sup> | b <sup>*</sup> | b <sup>+++</sup> | b <sup>0</sup> | b <sup>0++</sup> | Seq. | y           | y <sup>++</sup> | y <sup>*</sup> | y <sup>+++</sup> | y <sup>0</sup> | y <sup>0++</sup> | #  |
|----|-------------|-----------------|----------------|------------------|----------------|------------------|------|-------------|-----------------|----------------|------------------|----------------|------------------|----|
| 1  | 114.091340  | 57.549308       |                |                  |                |                  | L    |             |                 |                |                  |                |                  | 11 |
| 2  | 211.144104  | 106.075690      |                |                  |                |                  | P    | 1499.734500 | 750.370888      | 1482.707951    | 741.857614       | 1481.723935    | 741.365606       | 10 |
| 3  | 308.196868  | 154.602072      |                |                  |                |                  | P    | 1402.681736 | 701.844506      | 1385.655187    | 693.331232       | 1384.671171    | 692.839224       | 9  |
| 4  | 409.244547  | 205.125911      |                |                  | 391.233982     | 196.120629       | T    | 1305.628972 | 653.318124      | 1288.602423    | 644.804850       | 1287.618407    | 644.312842       | 8  |
| 5  | 510.292226  | 255.649751      |                |                  | 492.281661     | 246.644468       | T    | 1204.581293 | 602.794285      | 1187.554744    | 594.281010       | 1186.570728    | 593.789002       | 7  |
| 6  | 611.339905  | 306.173591      |                |                  | 593.329340     | 297.168308       | T    | 1103.533614 | 552.270445      | 1086.507065    | 543.757171       | 1085.523049    | 543.265163       | 6  |
| 7  | 771.370554  | 386.188915      |                |                  | 753.359989     | 377.183633       | C    | 1002.485935 | 501.746606      | 985.459386     | 493.233331       |                |                  | 5  |
| 8  | 899.429132  | 450.218204      | 882.402583     | 441.704930       | 881.418567     | 441.212922       | Q    | 842.455286  | 421.731281      | 825.428737     | 413.218007       |                |                  | 4  |
| 9  | 1338.654458 | 669.830867      | 1321.627909    | 661.317593       | 1320.643893    | 660.825585       | Q    | 714.396708  | 357.701992      | 697.370159     | 349.188718       |                |                  | 3  |
| 10 | 1466.713036 | 733.860156      | 1449.686487    | 725.346882       | 1448.702471    | 724.854874       | Q    | 275.171382  | 138.089329      | 258.144833     | 129.576055       |                |                  | 2  |
| 11 |             |                 |                |                  |                |                  | K    | 147.112804  | 74.060040       | 130.086255     | 65.546765        |                |                  | 1  |

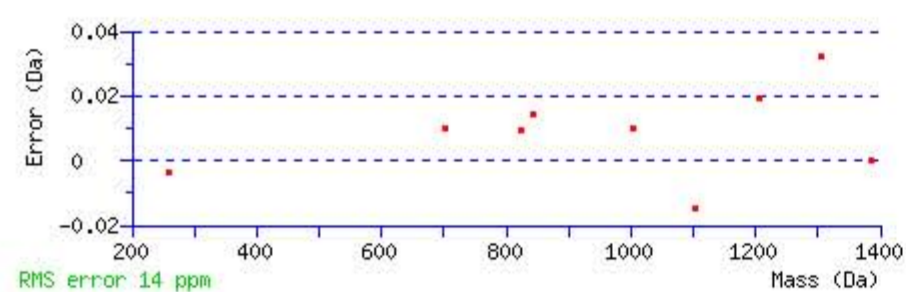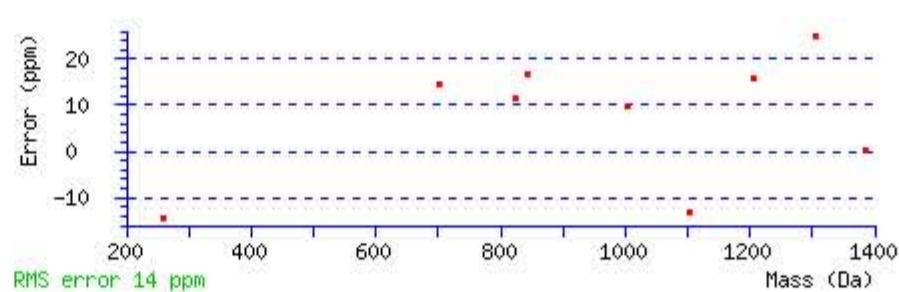

NCBI BLAST search of **LPPTTTCQQQK**

(Parameters: blastp, nr protein database, expect=20000, no filter, PAM30)

Other BLAST [web gateways](#)

All matches to this query

| Score | Mr(calc):   | Delta    | Sequence                    |
|-------|-------------|----------|-----------------------------|
| 27.6  | 1611.811295 | 0.004687 | <a href="#">LPPTTTCQQQK</a> |
| 27.6  | 1611.811295 | 0.004687 | <a href="#">LPPTTTCQQQK</a> |
| 24.4  | 1611.811295 | 0.004687 | <a href="#">LPPTTTCQQQK</a> |

Mascot: <http://www.matrixscience.com/>



# MASCOT Search Results

## Peptide View

MS/MS Fragmentation of **YGQTIKIPICLPCTEGTTR**

Found in **CFAB\_HUMAN**, Complement factor B OS=Homo sapiens GN=CFB PE=1 SV=2

Match to Query 63516: 2433.215322 from(812.079050,3+) rtinseconds(2060) index(78927)

Title: Locus:1.1.1.2931.22 File:"2013-07-02 CLN FXIII 60 min 1st FT.wiff"

Data file C:\Program Files (x86)\Matrix Science\Mascot Daemon\mgf4 FXIII 60 min 1st\mascot\_daemon\_merge.mgf

Click mouse within plot area to zoom in by factor of two about that point

Or, Plot from  to  Da

Label all possible matches  Label matches used for scoring

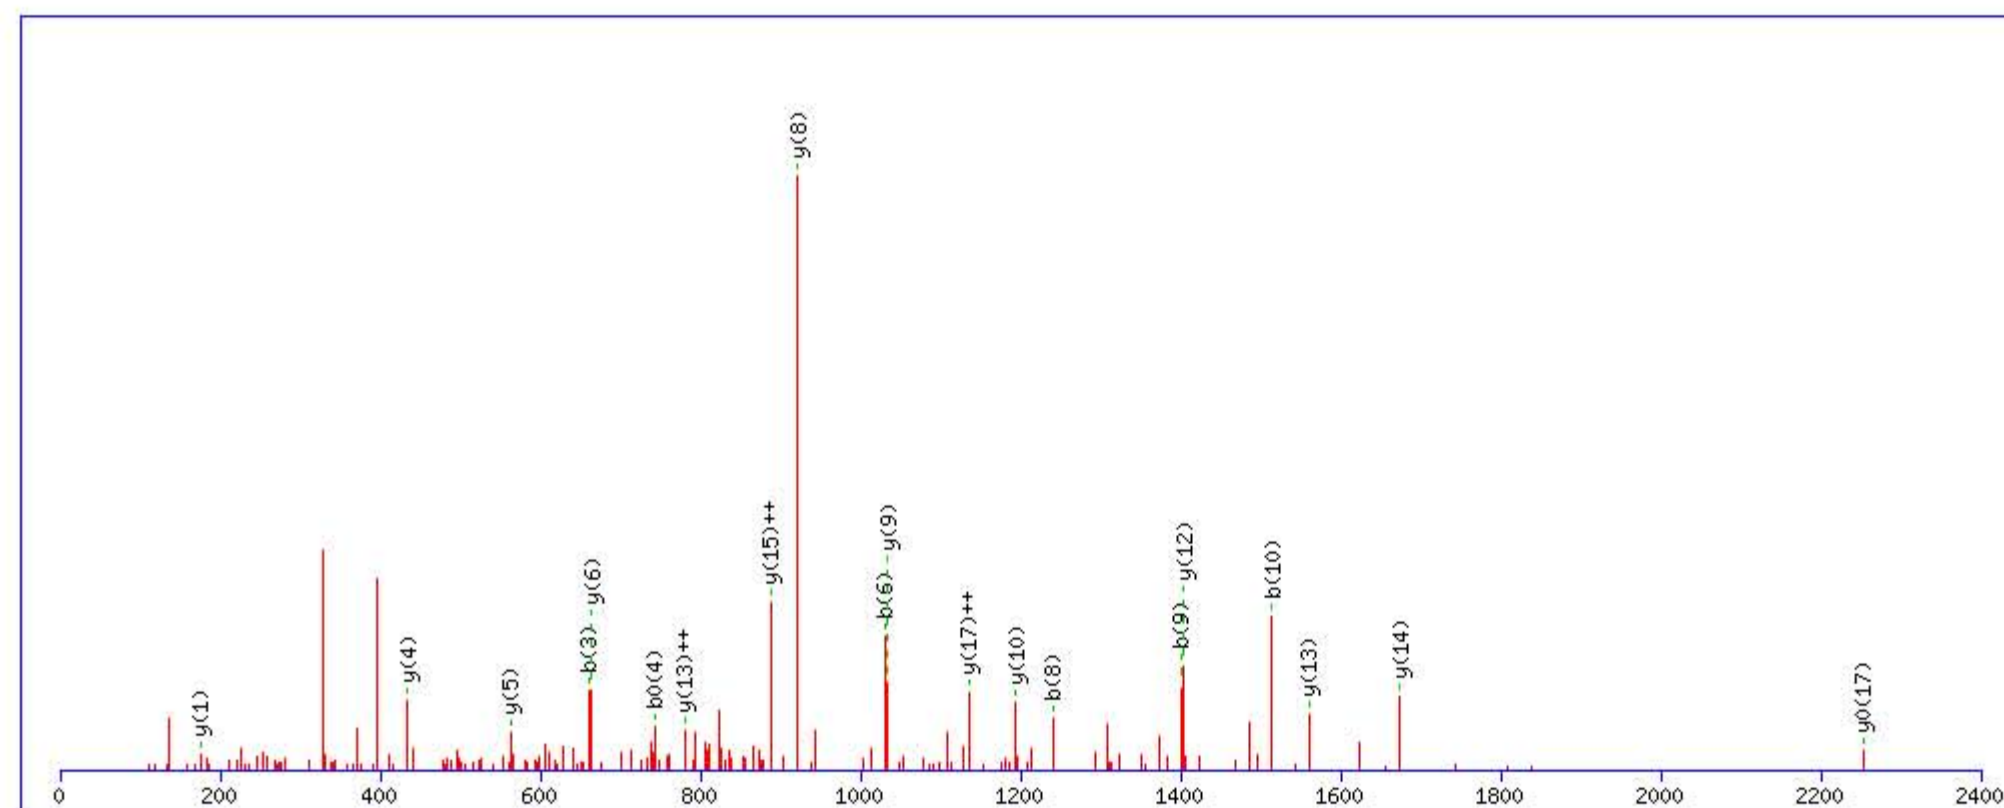

Monoisotopic mass of neutral peptide Mr(calc): 2433.196701

Fixed modifications: Carbamidomethyl (C) (apply to specified residues or termini only)

Variable modifications:

Q3 : Biotin:Thermo-21345 (Q)

Ions Score: 55 Expect: 8.5e-005

Matches : 20/192 fragment ions using 36 most intense peaks [\(help\)](#)

| #  | b                  | b <sup>++</sup> | b <sup>*</sup> | b <sup>***</sup> | b <sup>0</sup>    | b <sup>0++</sup> | Seq. | y                  | y <sup>++</sup>   | y <sup>*</sup> | y <sup>***</sup> | y <sup>0</sup> | y <sup>0++</sup> | #  |
|----|--------------------|-----------------|----------------|------------------|-------------------|------------------|------|--------------------|-------------------|----------------|------------------|----------------|------------------|----|
| 1  | 164.070605         | 82.538940       |                |                  |                   |                  | Y    |                    |                   |                |                  |                |                  | 18 |
| 2  | 221.092069         | 111.049673      |                |                  |                   |                  | G    | 2271.140644        | 1136.073960       | 2254.114095    | 1127.560685      | 2253.130079    | 1127.068677      | 17 |
| 3  | <b>660.317395</b>  | 330.662336      | 643.290846     | 322.149061       |                   |                  | Q    | 2214.119180        | 1107.563228       | 2197.092631    | 1099.049953      | 2196.108615    | 1098.557945      | 16 |
| 4  | 761.365074         | 381.186175      | 744.338525     | 372.672901       | <b>743.354509</b> | 372.180893       | T    | 1774.893854        | <b>887.950565</b> | 1757.867305    | 879.437290       | 1756.883289    | 878.945282       | 15 |
| 5  | 874.449138         | 437.728207      | 857.422589     | 429.214933       | 856.438573        | 428.722925       | I    | <b>1673.846175</b> | 837.426725        | 1656.819626    | 828.913451       | 1655.835610    | 828.421443       | 14 |
| 6  | <b>1030.550249</b> | 515.778763      | 1013.523700    | 507.265488       | 1012.539684       | 506.773480       | R    | <b>1560.762111</b> | <b>780.884693</b> | 1543.735562    | 772.371419       | 1542.751546    | 771.879411       | 13 |
| 7  | 1127.603013        | 564.305145      | 1110.576464    | 555.791870       | 1109.592448       | 555.299862       | P    | <b>1404.661000</b> | 702.834138        | 1387.634451    | 694.320863       | 1386.650435    | 693.828855       | 12 |
| 8  | <b>1240.687077</b> | 620.847177      | 1223.660528    | 612.333902       | 1222.676512       | 611.841894       | I    | 1307.608236        | 654.307756        | 1290.581687    | 645.794481       | 1289.597671    | 645.302473       | 11 |
| 9  | <b>1400.717726</b> | 700.862501      | 1383.691177    | 692.349227       | 1382.707161       | 691.857219       | C    | <b>1194.524172</b> | 597.765724        | 1177.497623    | 589.252449       | 1176.513607    | 588.760441       | 10 |
| 10 | <b>1513.801790</b> | 757.404533      | 1496.775241    | 748.891259       | 1495.791225       | 748.399250       | L    | <b>1034.493523</b> | 517.750399        | 1017.466974    | 509.237125       | 1016.482958    | 508.745117       | 9  |
| 11 | 1610.854554        | 805.930915      | 1593.828005    | 797.417641       | 1592.843989       | 796.925633       | P    | <b>921.409459</b>  | 461.208367        | 904.382910     | 452.695093       | 903.398894     | 452.203085       | 8  |
| 12 | 1770.885203        | 885.946240      | 1753.858654    | 877.432965       | 1752.874638       | 876.940957       | C    | 824.356695         | 412.681985        | 807.330146     | 404.168711       | 806.346130     | 403.676703       | 7  |
| 13 | 1871.932882        | 936.470079      | 1854.906333    | 927.956805       | 1853.922317       | 927.464797       | T    | <b>664.326046</b>  | 332.666661        | 647.299497     | 324.153386       | 646.315481     | 323.661378       | 6  |
| 14 | 2000.975475        | 1000.991376     | 1983.948926    | 992.478101       | 1982.964910       | 991.986093       | E    | <b>563.278367</b>  | 282.142821        | 546.251818     | 273.629547       | 545.267802     | 273.137539       | 5  |
| 15 | 2057.996939        | 1029.502107     | 2040.970390    | 1020.988833      | 2039.986374       | 1020.496825      | G    | <b>434.235774</b>  | 217.621525        | 417.209225     | 209.108250       | 416.225209     | 208.616242       | 4  |
| 16 | 2159.044618        | 1080.025947     | 2142.018069    | 1071.512672      | 2141.034053       | 1071.020664      | T    | 377.214310         | 189.110793        | 360.187761     | 180.597518       | 359.203745     | 180.105510       | 3  |
| 17 | 2260.092297        | 1130.549786     | 2243.065748    | 1122.036512      | 2242.081732       | 1121.544504      | T    | 276.166631         | 138.586953        | 259.140082     | 130.073679       | 258.156066     | 129.581671       | 2  |
| 18 |                    |                 |                |                  |                   |                  | R    | <b>175.118952</b>  | 88.063114         | 158.092403     | 79.549839        |                |                  | 1  |

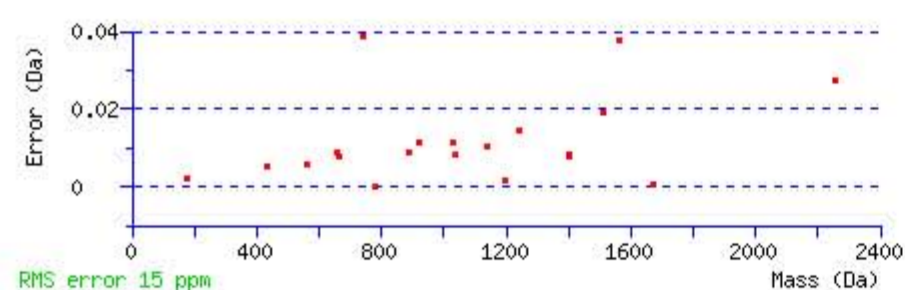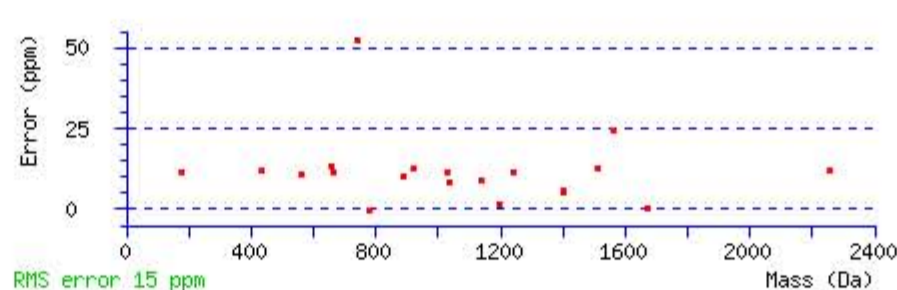

NCBI BLAST search of **YGQTIKIPICLPCTEGTTR**

(Parameters: blastp, nr protein database, expect=20000, no filter, PAM30)

Other BLAST [web gateways](#)

All matches to this query

| Score | Mr(calc):   | Delta    | Sequence                            |
|-------|-------------|----------|-------------------------------------|
| 55.5  | 2433.196701 | 0.018621 | <a href="#">YGQTIKIPICLPCTEGTTR</a> |

Mascot: <http://www.matrixscience.com/>



# MASCOT SCIENCE Mascot Search Results

## Peptide View

MS/MS Fragmentation of **EYHFGQAVR**

Found in **CFAH\_HUMAN**, Complement factor H OS=Homo sapiens GN=CFH PE=1 SV=4

Match to Query 35645: 1416.715408 from(709.364980,2+) rtinseconds(1676) index(22423)

Title: Locus:1.1.1.2538.10 File:"2013-07-02 CLN FXIII 60 min 1st F 2.wiff"

Data file C:\Program Files (x86)\Matrix Science\Mascot Daemon\mgf\4 FXIII 60 min 1st\mascot\_daemon\_merge.mgf

Click mouse within plot area to zoom in by factor of two about that point

Or, Plot from  to  Da

Label all possible matches  Label matches used for scoring

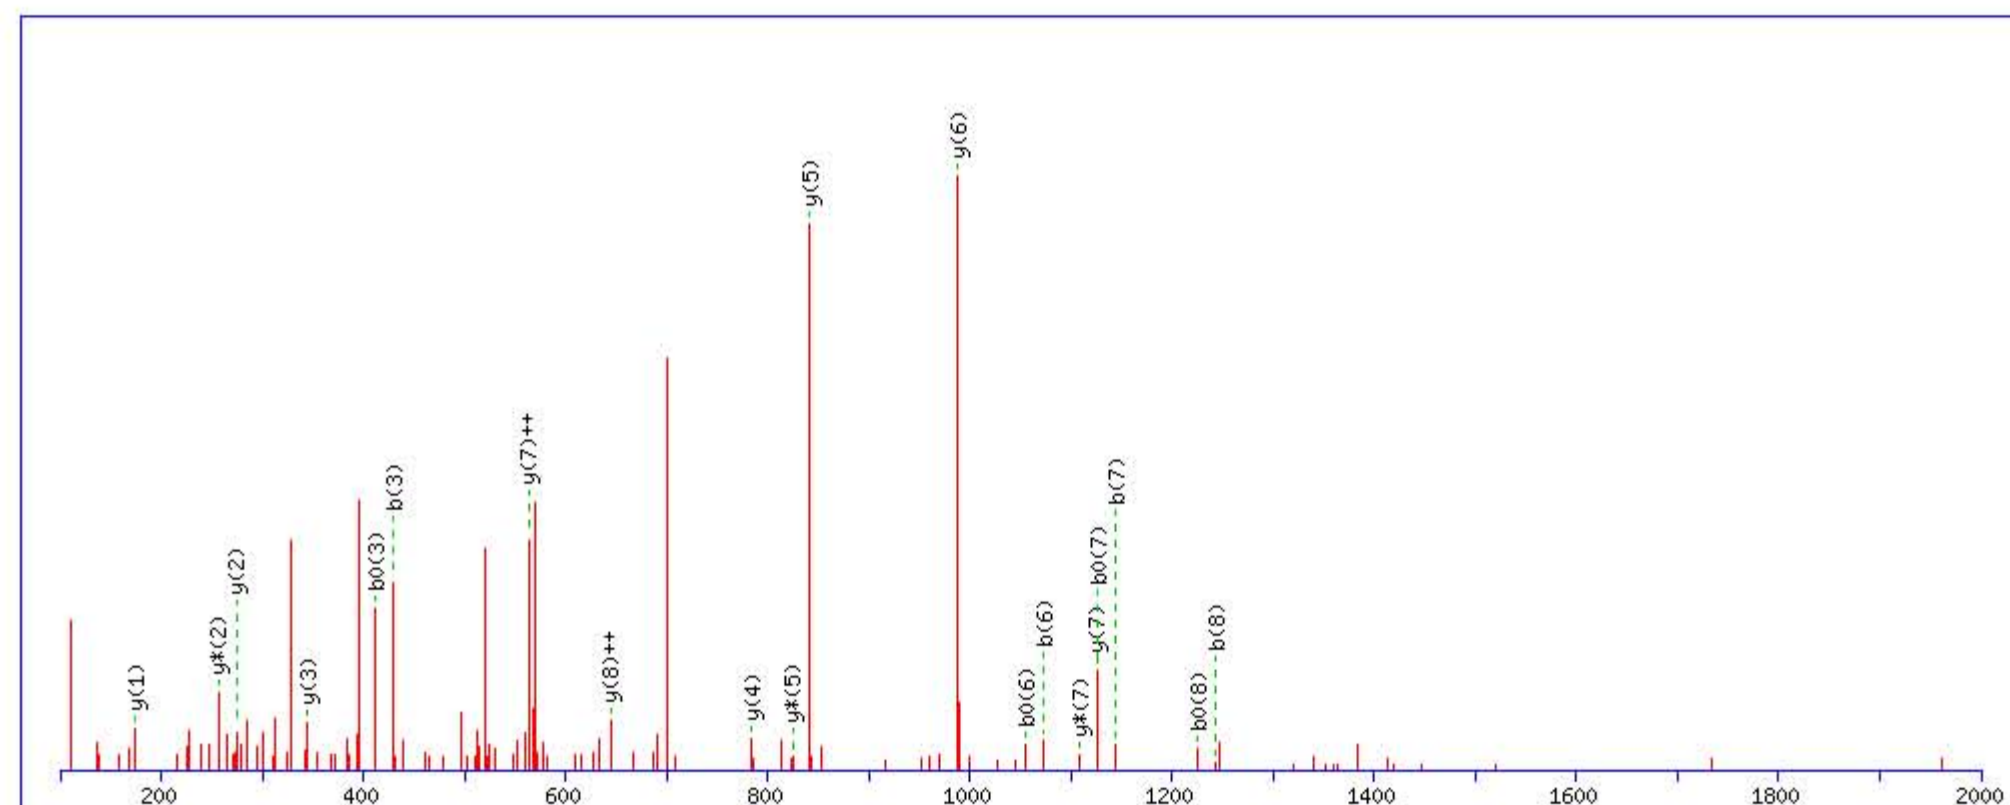

Monoisotopic mass of neutral peptide Mr(calc): 1416.697235

Fixed modifications: Carbamidomethyl (C) (apply to specified residues or termini only)

Variable modifications:

Q6 : Biotin:Thermo-21345 (Q)

Ions Score: 32 Expect: 0.0039

Matches : 20/70 fragment ions using 49 most intense peaks [\(help\)](#)

| # | b                  | b <sup>++</sup> | b <sup>+</sup> | b <sup>+++</sup> | b <sup>0</sup>     | b <sup>0++</sup> | Seq. | y                  | y <sup>++</sup>   | y <sup>+</sup>     | y <sup>+++</sup> | # |
|---|--------------------|-----------------|----------------|------------------|--------------------|------------------|------|--------------------|-------------------|--------------------|------------------|---|
| 1 | 130.049869         | 65.528572       |                |                  | 112.039304         | 56.523290        | E    |                    |                   |                    |                  | 9 |
| 2 | 293.113198         | 147.060237      |                |                  | 275.102633         | 138.054955       | Y    | 1288.661925        | 644.834601        | 1271.635376        | 636.321326       | 8 |
| 3 | <b>430.172110</b>  | 215.589693      |                |                  | <b>412.161545</b>  | 206.584411       | H    | <b>1125.598596</b> | <b>563.302936</b> | <b>1108.572047</b> | 554.789662       | 7 |
| 4 | 577.240524         | 289.123900      |                |                  | 559.229959         | 280.118618       | F    | <b>988.539684</b>  | 494.773480        | 971.513135         | 486.260206       | 6 |
| 5 | 634.261988         | 317.634632      |                |                  | 616.251423         | 308.629350       | G    | <b>841.471270</b>  | 421.239273        | <b>824.444721</b>  | 412.725999       | 5 |
| 6 | <b>1073.487314</b> | 537.247295      | 1056.460765    | 528.734021       | <b>1055.476749</b> | 528.242013       | Q    | <b>784.449806</b>  | 392.728541        | 767.423257         | 384.215267       | 4 |
| 7 | <b>1144.524428</b> | 572.765852      | 1127.497879    | 564.252578       | <b>1126.513863</b> | 563.760570       | A    | <b>345.224480</b>  | 173.115878        | 328.197931         | 164.602603       | 3 |
| 8 | <b>1243.592842</b> | 622.300059      | 1226.566293    | 613.786785       | <b>1225.582277</b> | 613.294777       | V    | <b>274.187366</b>  | 137.597321        | <b>257.160817</b>  | 129.084047       | 2 |
| 9 |                    |                 |                |                  |                    |                  | R    | <b>175.118952</b>  | 88.063114         | 158.092403         | 79.549839        | 1 |

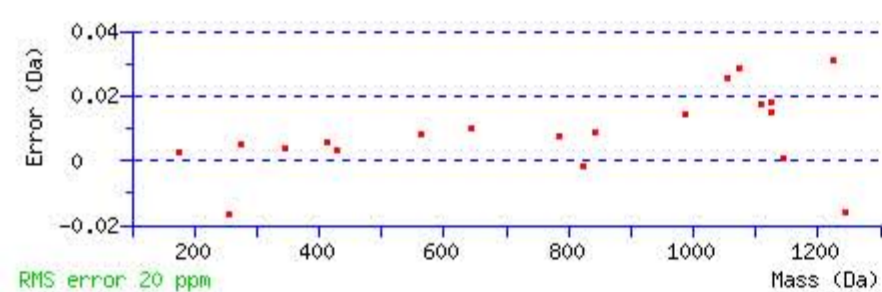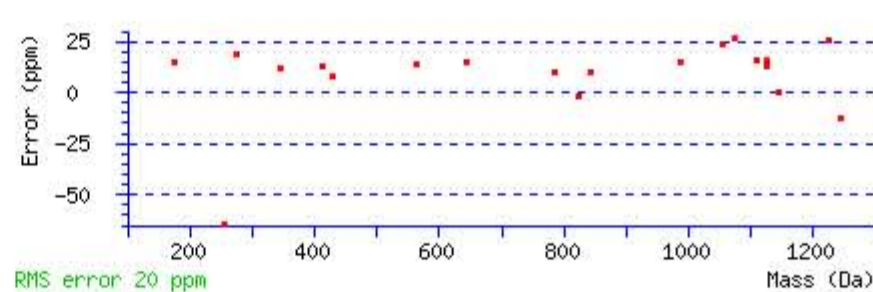

NCBI BLAST search of **EYHFGQAVR**

(Parameters: blastp, nr protein database, expect=20000, no filter, PAM30)

Other BLAST [web gateways](#)

All matches to this query

| Score | Mr(calc):   | Delta     | Sequence                      |
|-------|-------------|-----------|-------------------------------|
| 31.7  | 1416.697235 | 0.018173  | <a href="#">EYHFGQAVR</a>     |
| 5.6   | 1416.704453 | 0.010955  | <a href="#">YCATVRVQQHR</a>   |
| 0.3   | 1416.736130 | -0.020722 | <a href="#">GLAPGQEYQVTVR</a> |
| 0.2   | 1416.732086 | -0.016678 | <a href="#">EAVSQVRAEATTR</a> |

Mascot: <http://www.matrixscience.com/>



# MASCOT Search Results

## Peptide View

MS/MS Fragmentation of **TGDEITYQCR**

Found in **CFAH\_HUMAN**, Complement factor H OS=Homo sapiens GN=CFH PE=1 SV=4

Match to Query 39985: 1552.718348 from(777.366450,2+) rtinseconds(1670) index(22372)

Title: Locus:1.1.1.2536.7 File:"2013-07-02 CLN FXIII 60 min 1st F 2.wiff"

Data file C:\Program Files (x86)\Matrix Science\Mascot Daemon\mgf4 FXIII 60 min 1st\mascot\_daemon\_merge.mgf

Click mouse within plot area to zoom in by factor of two about that point

Or, Plot from  to  Da

Label all possible matches  Label matches used for scoring

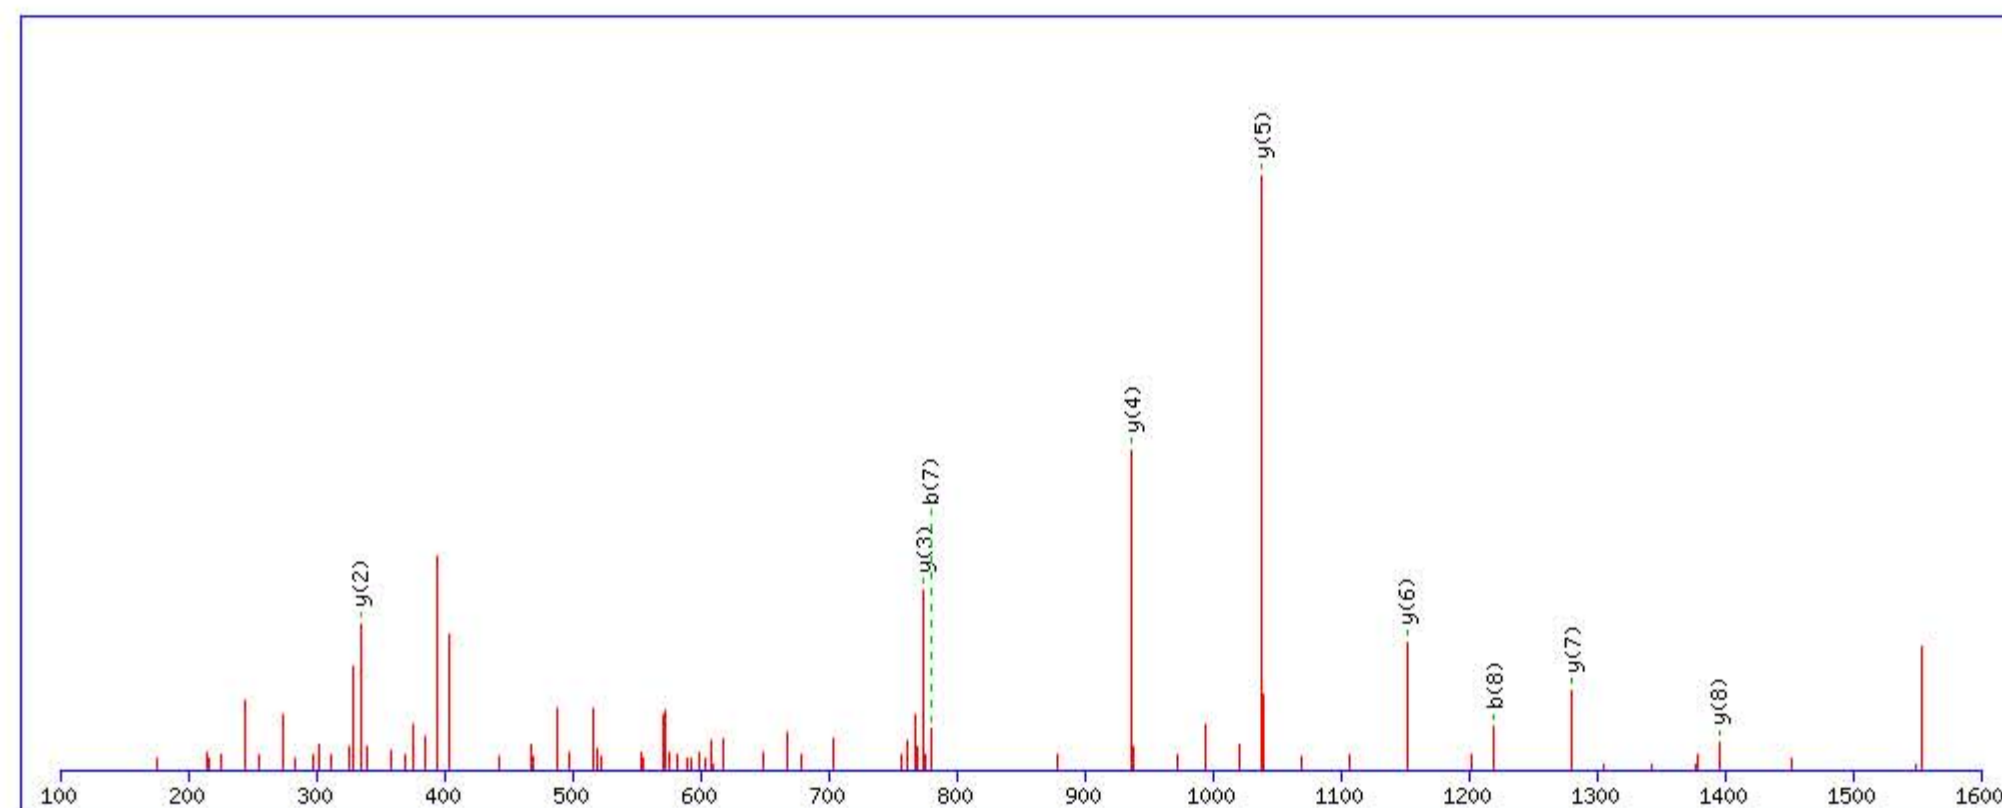

Monoisotopic mass of neutral peptide Mr(calc): 1552.701401

Fixed modifications: Carbamidomethyl (C) (apply to specified residues or termini only)

Variable modifications:

Q8 : Biotin:Thermo-21345 (Q)

Ions Score: 50 Expect: 8.3e-005

Matches : 9/86 fragment ions using 14 most intense peaks [\(help\)](#)

| #  | b                  | b <sup>++</sup> | b <sup>+</sup> | b <sup>*++</sup> | b <sup>0</sup> | b <sup>0++</sup> | Seq. | y                  | y <sup>++</sup> | y <sup>+</sup> | y <sup>*++</sup> | y <sup>0</sup> | y <sup>0++</sup> | #  |
|----|--------------------|-----------------|----------------|------------------|----------------|------------------|------|--------------------|-----------------|----------------|------------------|----------------|------------------|----|
| 1  | 102.054955         | 51.531116       |                |                  | 84.044390      | 42.525833        | T    |                    |                 |                |                  |                |                  | 10 |
| 2  | 159.076419         | 80.041847       |                |                  | 141.065854     | 71.036565        | G    | 1452.660999        | 726.834138      | 1435.634450    | 718.320863       | 1434.650434    | 717.828855       | 9  |
| 3  | 274.103362         | 137.555319      |                |                  | 256.092797     | 128.550037       | D    | <b>1395.639535</b> | 698.323406      | 1378.612986    | 689.810131       | 1377.628970    | 689.318123       | 8  |
| 4  | 403.145955         | 202.076616      |                |                  | 385.135390     | 193.071333       | E    | <b>1280.612592</b> | 640.809934      | 1263.586043    | 632.296660       | 1262.602027    | 631.804652       | 7  |
| 5  | 516.230019         | 258.618648      |                |                  | 498.219454     | 249.613365       | I    | <b>1151.569999</b> | 576.288638      | 1134.543450    | 567.775363       | 1133.559434    | 567.283355       | 6  |
| 6  | 617.277698         | 309.142487      |                |                  | 599.267133     | 300.137205       | T    | <b>1038.485935</b> | 519.746606      | 1021.459386    | 511.233331       | 1020.475370    | 510.741323       | 5  |
| 7  | <b>780.341027</b>  | 390.674152      |                |                  | 762.330462     | 381.668869       | Y    | <b>937.438256</b>  | 469.222766      | 920.411707     | 460.709492       |                |                  | 4  |
| 8  | <b>1219.566353</b> | 610.286815      | 1202.539804    | 601.773540       | 1201.555788    | 601.281532       | Q    | <b>774.374927</b>  | 387.691102      | 757.348378     | 379.177827       |                |                  | 3  |
| 9  | 1379.597002        | 690.302139      | 1362.570453    | 681.788865       | 1361.586437    | 681.296857       | C    | <b>335.149601</b>  | 168.078438      | 318.123052     | 159.565164       |                |                  | 2  |
| 10 |                    |                 |                |                  |                |                  | R    | 175.118952         | 88.063114       | 158.092403     | 79.549839        |                |                  | 1  |

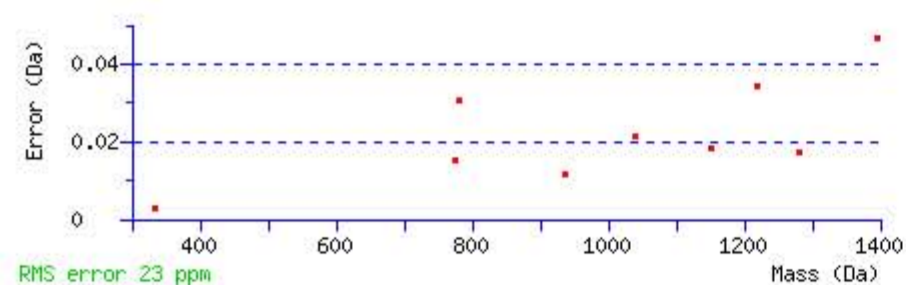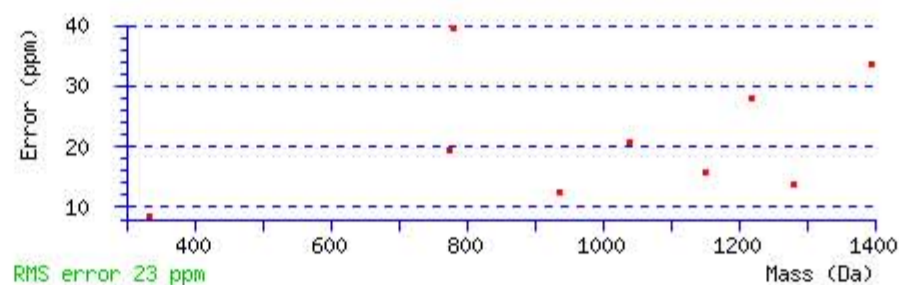

NCBI BLAST search of **TGDEITYQCR**

(Parameters: blastp, nr protein database, expect=20000, no filter, PAM30)

Other BLAST [web gateways](#)

All matches to this query

| Score | Mr(calc):   | Delta    | Sequence                        |
|-------|-------------|----------|---------------------------------|
| 50.4  | 1552.701401 | 0.016947 | <a href="#">TGDEITYQCR</a>      |
| 6.5   | 1552.715149 | 0.003199 | <a href="#">LTNGSSSCSGTVEVR</a> |
| 3.7   | 1552.716629 | 0.001719 | <a href="#">NEQPPLYCR</a>       |

Mascot: <http://www.matrixscience.com/>



# MASCOT SEARCH RESULTS

## Peptide View

MS/MS Fragmentation of **AGEQVITYTCATYYK**

Found in **CFAH\_HUMAN**, Complement factor H OS=Homo sapiens GN=CFH PE=1 SV=4

Match to Query 52124: 1964.914332 from(655.978720,3+) rtinseconds(1844) index(5926)

Title: Locus:1.1.1.2774.18 File:"2013-07-02 CLN FXIII 60 min 1st F 1.wiff"

Data file C:\Program Files (x86)\Matrix Science\Mascot Daemon\mgf4 FXIII 60 min 1st\mascot\_daemon\_merge.mgf

Click mouse within plot area to zoom in by factor of two about that point

Or, Plot from  to  Da

Label all possible matches  Label matches used for scoring

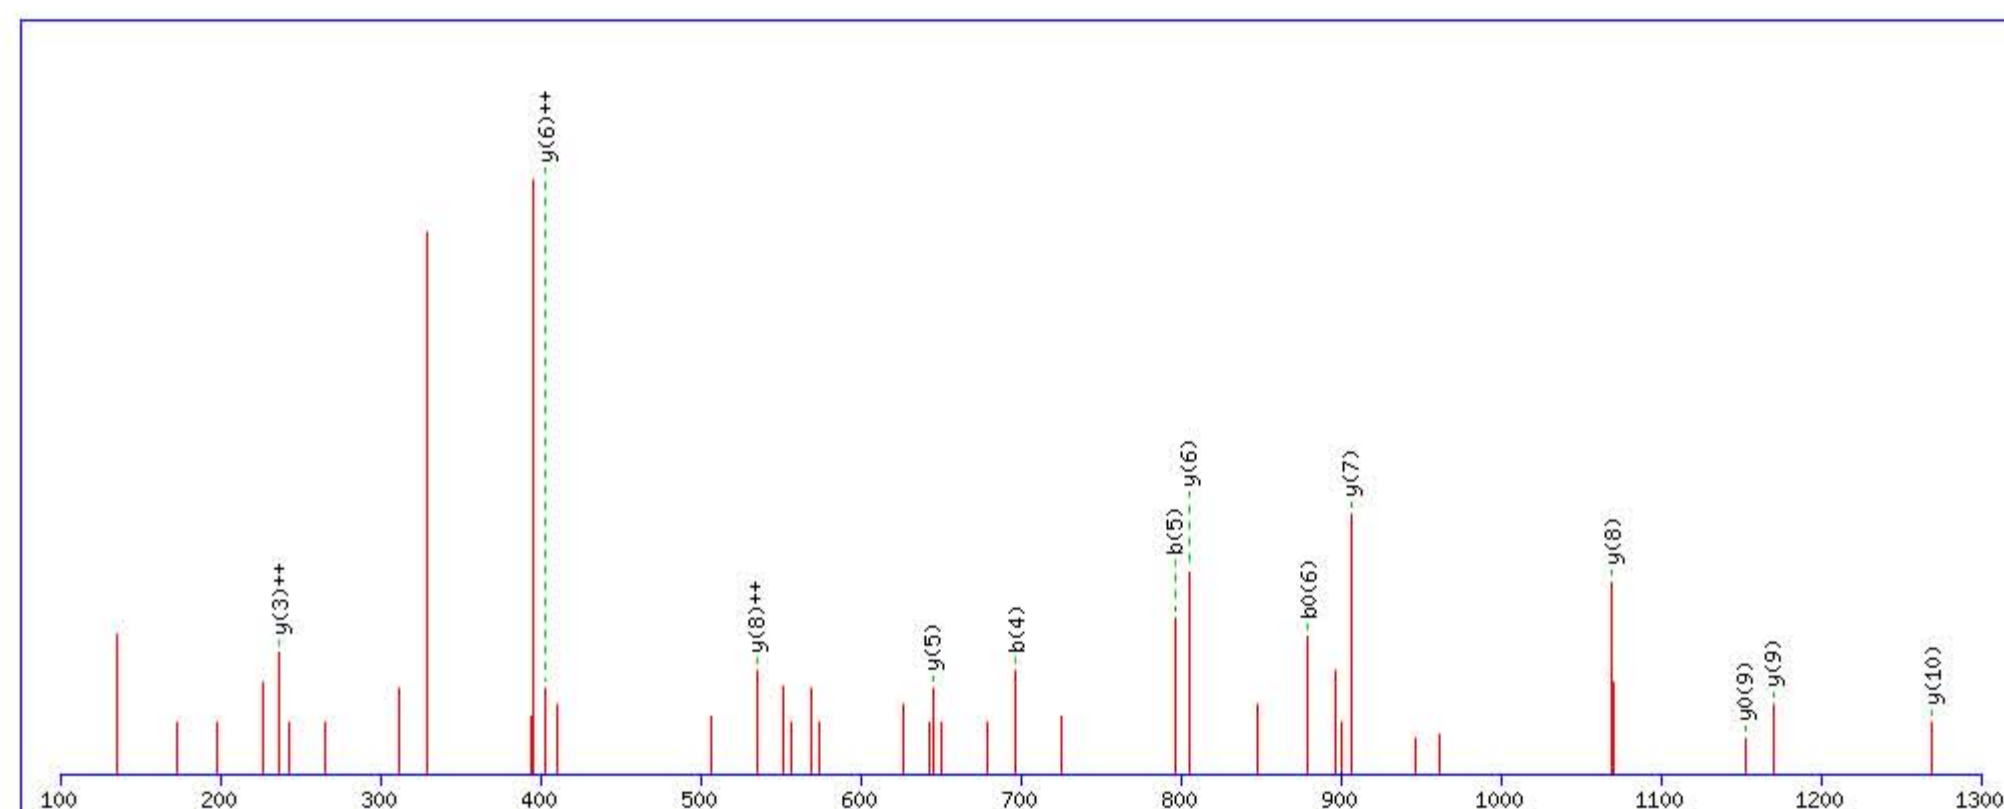

Monoisotopic mass of neutral peptide Mr(calc): 1964.901215

Fixed modifications: Carbamidomethyl (C) (apply to specified residues or termini only)

Variable modifications:

Q4 : Biotin:Thermo-21345 (Q)

Ions Score: 29 Expect: 0.018

Matches : 13/140 fragment ions using 23 most intense peaks [\(help\)](#)

| #  | b                 | b <sup>++</sup> | b <sup>*</sup> | b <sup>*++</sup> | b <sup>0</sup>    | b <sup>0++</sup> | Seq. | y                  | y <sup>++</sup>   | y <sup>*</sup> | y <sup>*++</sup> | y <sup>0</sup>     | y <sup>0++</sup> | #  |
|----|-------------------|-----------------|----------------|------------------|-------------------|------------------|------|--------------------|-------------------|----------------|------------------|--------------------|------------------|----|
| 1  | 72.044390         | 36.525833       |                |                  |                   |                  | A    |                    |                   |                |                  |                    |                  | 14 |
| 2  | 129.065854        | 65.036565       |                |                  |                   |                  | G    | 1894.871388        | 947.939332        | 1877.844839    | 939.426058       | 1876.860823        | 938.934050       | 13 |
| 3  | 258.108447        | 129.557862      |                |                  | 240.097882        | 120.552579       | E    | 1837.849924        | 919.428600        | 1820.823375    | 910.915326       | 1819.839359        | 910.423318       | 12 |
| 4  | <b>697.333773</b> | 349.170525      | 680.307224     | 340.657250       | 679.323208        | 340.165242       | Q    | 1708.807331        | 854.907304        | 1691.780782    | 846.394029       | 1690.796766        | 845.902021       | 11 |
| 5  | <b>796.402187</b> | 398.704732      | 779.375638     | 390.191457       | 778.391622        | 389.699449       | V    | <b>1269.582005</b> | 635.294641        | 1252.555456    | 626.781366       | 1251.571440        | 626.289358       | 10 |
| 6  | 897.449866        | 449.228571      | 880.423317     | 440.715297       | <b>879.439301</b> | 440.223289       | T    | <b>1170.513591</b> | 585.760434        | 1153.487042    | 577.247159       | <b>1152.503026</b> | 576.755151       | 9  |
| 7  | 1060.513195       | 530.760236      | 1043.486646    | 522.246961       | 1042.502630       | 521.754953       | Y    | <b>1069.465912</b> | <b>535.236594</b> | 1052.439363    | 526.723320       | 1051.455347        | 526.231312       | 8  |
| 8  | 1161.560874       | 581.284075      | 1144.534325    | 572.770801       | 1143.550309       | 572.278793       | T    | <b>906.402583</b>  | 453.704930        | 889.376034     | 445.191655       | 888.392018         | 444.699647       | 7  |
| 9  | 1321.591523       | 661.299400      | 1304.564974    | 652.786125       | 1303.580958       | 652.294117       | C    | <b>805.354904</b>  | <b>403.181090</b> | 788.328355     | 394.667816       | 787.344339         | 394.175808       | 6  |
| 10 | 1392.628637       | 696.817957      | 1375.602088    | 688.304682       | 1374.618072       | 687.812674       | A    | <b>645.324255</b>  | 323.165766        | 628.297706     | 314.652491       | 627.313690         | 314.160483       | 5  |
| 11 | 1493.676316       | 747.341796      | 1476.649767    | 738.828522       | 1475.665751       | 738.336514       | T    | 574.287141         | 287.647209        | 557.260592     | 279.133934       | 556.276576         | 278.641926       | 4  |
| 12 | 1656.739645       | 828.873461      | 1639.713096    | 820.360186       | 1638.729080       | 819.868178       | Y    | 473.239462         | <b>237.123369</b> | 456.212913     | 228.610095       |                    |                  | 3  |
| 13 | 1819.802974       | 910.405125      | 1802.776425    | 901.891851       | 1801.792409       | 901.399843       | Y    | 310.176133         | 155.591705        | 293.149584     | 147.078430       |                    |                  | 2  |
| 14 |                   |                 |                |                  |                   |                  | K    | 147.112804         | 74.060040         | 130.086255     | 65.546765        |                    |                  | 1  |

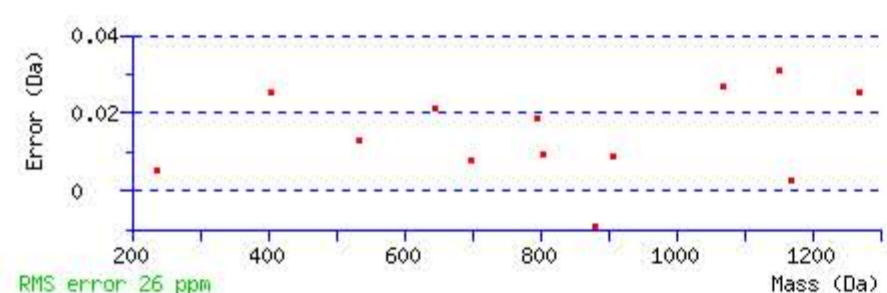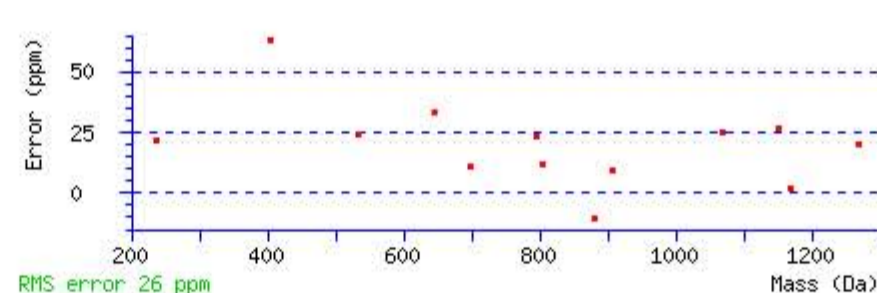

NCBI BLAST search of [AGEQVITYTCATYYK](#)

(Parameters: blastp, nr protein database, expect=20000, no filter, PAM30)

Other BLAST [web gateways](#)

### All matches to this query

| Score | Mr(calc):   | Delta    | Sequence                        |
|-------|-------------|----------|---------------------------------|
| 28.8  | 1964.901215 | 0.013117 | <a href="#">AGEQVITYTCATYYK</a> |

Mascot: <http://www.matrixscience.com/>



# {MATRIX} SCIENCE Mascot Search Results

## Peptide View

MS/MS Fragmentation of **VFCQPWQR**

Found in **CFAL\_HUMAN**, Complement factor I OS=Homo sapiens GN=CFI PE=1 SV=2

Match to Query 36370: 1430.706048 from(716.360300,2+) rtinseconds(2030) index(78702)

Title: Locus:1.1.1.2921.10 File:"2013-07-02 CLN FXIII 60 min 1st FT.wiff"

Data file C:\Program Files (x86)\Matrix Science\Mascot Daemon\mgf4 FXIII 60 min 1st\mascot\_daemon\_merge.mgf

Click mouse within plot area to zoom in by factor of two about that point

Or, Plot from  to  Da

Label all possible matches  Label matches used for scoring

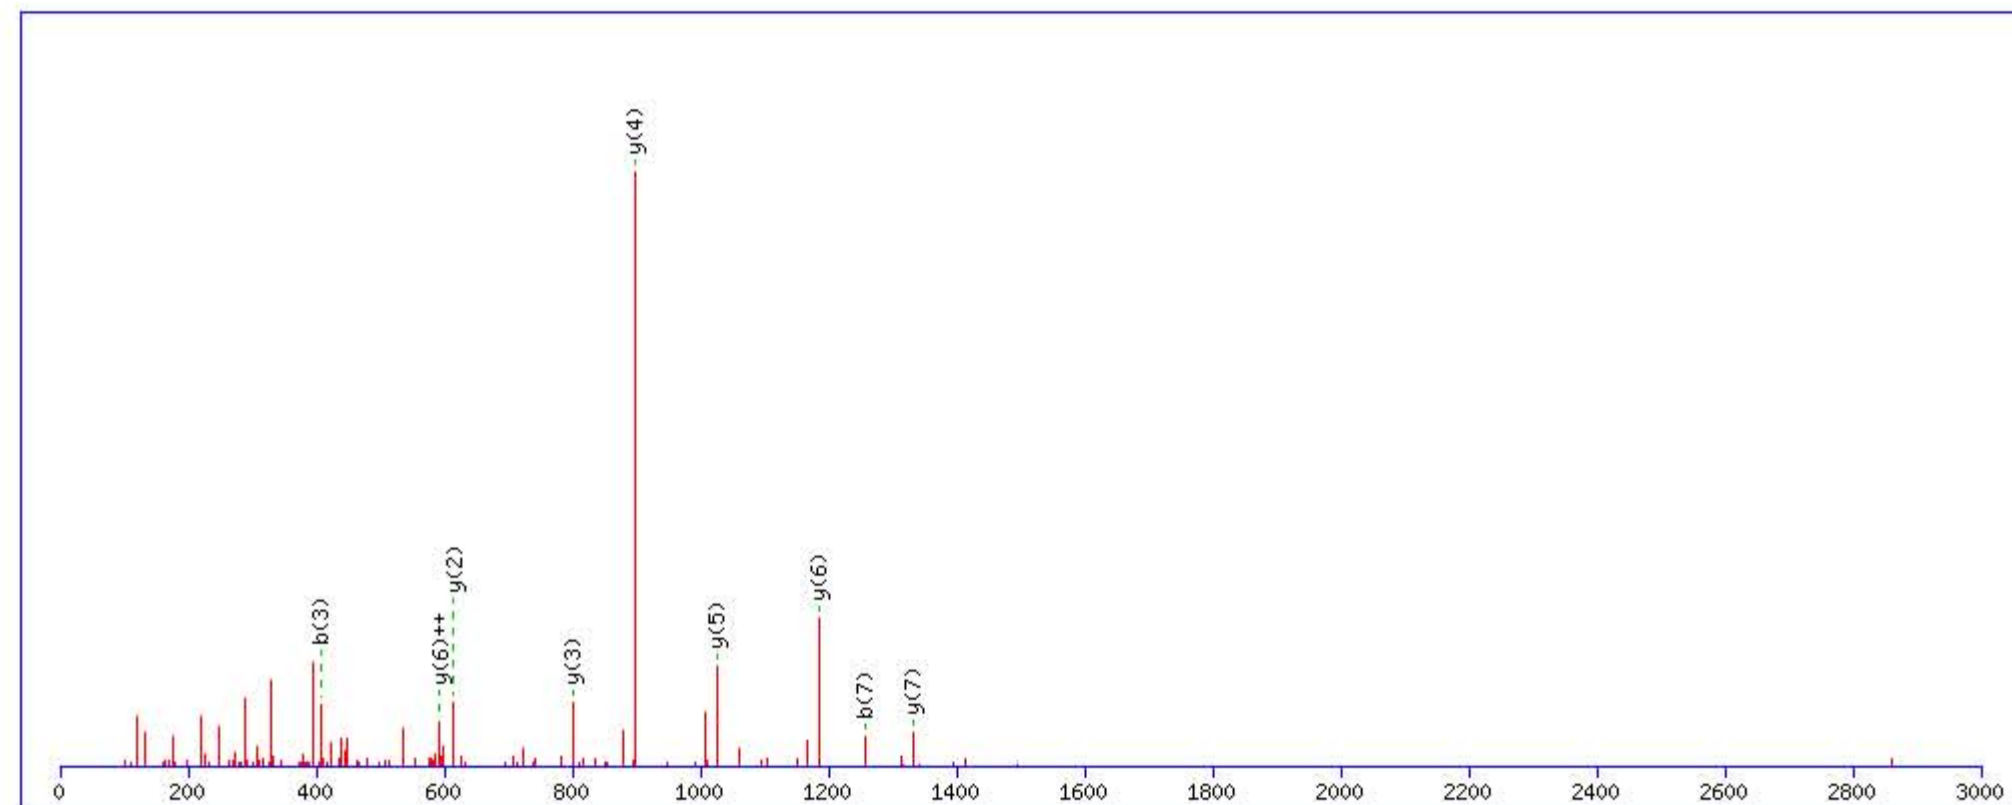

Monoisotopic mass of neutral peptide Mr(calc): 1430.695145

Fixed modifications: Carbamidomethyl (C) (apply to specified residues or termini only)

Variable modifications:

Q7 : Biotin:Thermo-21345 (Q)

Ions Score: 44 Expect: 0.00013

Matches : 9/50 fragment ions using 14 most intense peaks [\(help\)](#)

| # | b                  | b <sup>++</sup> | b <sup>*</sup> | b <sup>*++</sup> | Seq. | y                  | y <sup>++</sup>   | y <sup>*</sup> | y <sup>*++</sup> | # |
|---|--------------------|-----------------|----------------|------------------|------|--------------------|-------------------|----------------|------------------|---|
| 1 | 100.075690         | 50.541483       |                |                  | V    |                    |                   |                |                  | 8 |
| 2 | 247.144104         | 124.075690      |                |                  | F    | <b>1332.633996</b> | 666.820636        | 1315.607447    | 658.307362       | 7 |
| 3 | <b>407.174753</b>  | 204.091014      |                |                  | C    | <b>1185.565582</b> | <b>593.286429</b> | 1168.539033    | 584.773155       | 6 |
| 4 | 535.233331         | 268.120304      | 518.206782     | 259.607029       | Q    | <b>1025.534933</b> | 513.271105        | 1008.508384    | 504.757830       | 5 |
| 5 | 632.286095         | 316.646686      | 615.259546     | 308.133411       | P    | <b>897.476355</b>  | 449.241816        | 880.449806     | 440.728541       | 4 |
| 6 | 818.365408         | 409.686342      | 801.338859     | 401.173068       | W    | <b>800.423591</b>  | 400.715434        | 783.397042     | 392.202159       | 3 |
| 7 | <b>1257.590734</b> | 629.299005      | 1240.564185    | 620.785731       | Q    | <b>614.344278</b>  | 307.675777        | 597.317729     | 299.162503       | 2 |
| 8 |                    |                 |                |                  | R    | 175.118952         | 88.063114         | 158.092403     | 79.549839        | 1 |

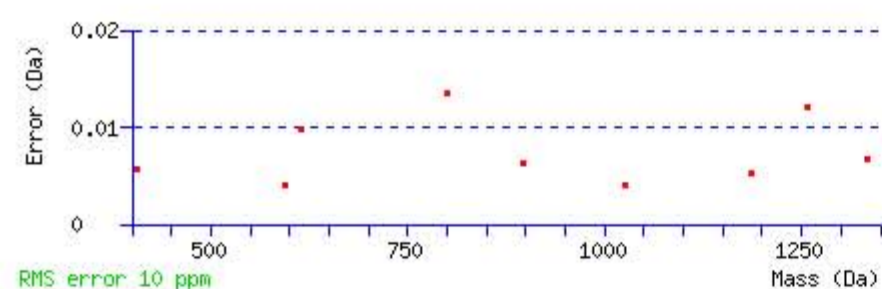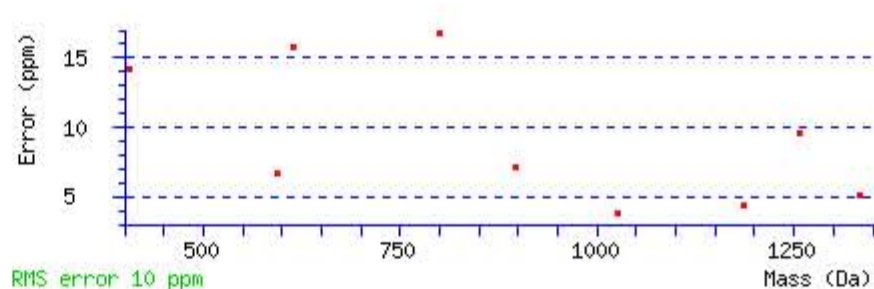

NCBI BLAST search of [VFCQPWQR](#)

(Parameters: blastp, nr protein database, expect=20000, no filter, PAM30)

Other BLAST [web gateways](#)

## All matches to this query

| Score | Mr(calc):   | Delta     | Sequence                       |
|-------|-------------|-----------|--------------------------------|
| 44.0  | 1430.695145 | 0.010903  | <a href="#">VFCQPWQR</a>       |
| 8.1   | 1430.695145 | 0.010903  | <a href="#">VFCQPWQR</a>       |
| 2.6   | 1430.693619 | 0.012429  | <a href="#">QLQTLSPGGGGNR</a>  |
| 1.6   | 1430.700989 | 0.005059  | <a href="#">DMGLMNAIGLQPR</a>  |
| 0.9   | 1430.726822 | -0.020774 | <a href="#">VFDVYLCFLQK</a>    |
| 0.5   | 1430.711319 | -0.005271 | <a href="#">RAKAEDENETLR</a>   |
| 0.2   | 1430.722565 | -0.016517 | <a href="#">REAGEAGAATSKQR</a> |

Mascot: <http://www.matrixscience.com/>



# MASCOT SCIENCE Mascot Search Results

## Peptide View

MS/MS Fragmentation of **SFPTYCQQK**

Found in **CFAI\_HUMAN**, Complement factor I OS=Homo sapiens GN=CFI PE=1 SV=2

Match to Query 37604: 1468.680468 from(735.347510,2+) rtinseconds(1754) index(76856)

Title: Locus:1.1.1.2825.18 File:"2013-07-02 CLN FXIII 60 min 1st FT.wiff"

Data file C:\Program Files (x86)\Matrix Science\Mascot Daemon\mgf\4 FXIII 60 min 1st\mascot\_daemon\_merge.mgf

Click mouse within plot area to zoom in by factor of two about that point

Or, Plot from  to  Da

Label all possible matches  Label matches used for scoring

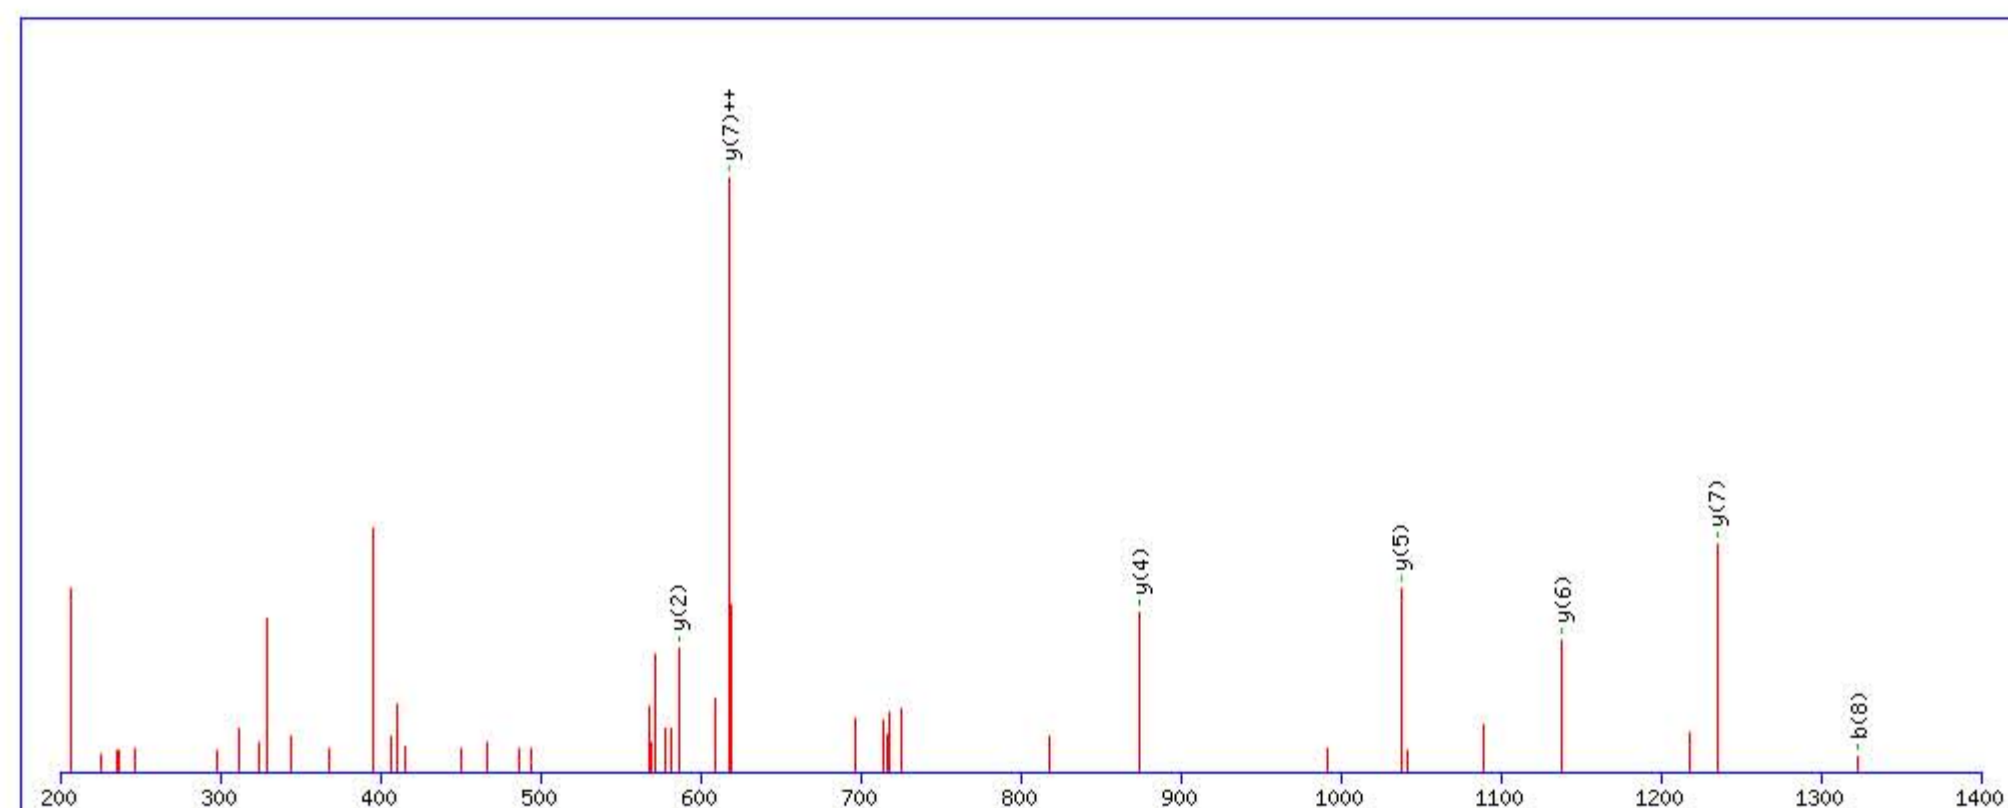

Monoisotopic mass of neutral peptide Mr(calc): 1468.684296

Fixed modifications: Carbamidomethyl (C) (apply to specified residues or termini only)

Variable modifications:

Q8 : Biotin:Thermo-21345 (Q)

Ions Score: 29 Expect: 0.0023

Matches : 7/74 fragment ions using 12 most intense peaks ([help](#))

| # | b                  | b <sup>++</sup> | b <sup>*</sup> | b <sup>*++</sup> | b <sup>0</sup> | b <sup>0++</sup> | Seq. | y                  | y <sup>++</sup>   | y <sup>*</sup> | y <sup>*++</sup> | y <sup>0</sup> | y <sup>0++</sup> | # |
|---|--------------------|-----------------|----------------|------------------|----------------|------------------|------|--------------------|-------------------|----------------|------------------|----------------|------------------|---|
| 1 | 88.039304          | 44.523290       |                |                  | 70.028739      | 35.518008        | S    |                    |                   |                |                  |                |                  | 9 |
| 2 | 235.107718         | 118.057497      |                |                  | 217.097153     | 109.052214       | F    | 1382.659543        | 691.833410        | 1365.632994    | 683.320135       | 1364.648978    | 682.828127       | 8 |
| 3 | 332.160482         | 166.583879      |                |                  | 314.149917     | 157.578596       | P    | <b>1235.591129</b> | <b>618.299203</b> | 1218.564580    | 609.785928       | 1217.580564    | 609.293920       | 7 |
| 4 | 433.208161         | 217.107718      |                |                  | 415.197596     | 208.102436       | T    | <b>1138.538365</b> | 569.772821        | 1121.511816    | 561.259546       | 1120.527800    | 560.767538       | 6 |
| 5 | 596.271490         | 298.639383      |                |                  | 578.260925     | 289.634101       | Y    | <b>1037.490686</b> | 519.248981        | 1020.464137    | 510.735707       |                |                  | 5 |
| 6 | 756.302139         | 378.654708      |                |                  | 738.291574     | 369.649425       | C    | <b>874.427357</b>  | 437.717317        | 857.400808     | 429.204042       |                |                  | 4 |
| 7 | 884.360717         | 442.683997      | 867.334168     | 434.170722       | 866.350152     | 433.678714       | Q    | 714.396708         | 357.701992        | 697.370159     | 349.188718       |                |                  | 3 |
| 8 | <b>1323.586043</b> | 662.296660      | 1306.559494    | 653.783385       | 1305.575478    | 653.291377       | Q    | <b>586.338130</b>  | 293.672703        | 569.311581     | 285.159428       |                |                  | 2 |
| 9 |                    |                 |                |                  |                |                  | K    | 147.112804         | 74.060040         | 130.086255     | 65.546765        |                |                  | 1 |

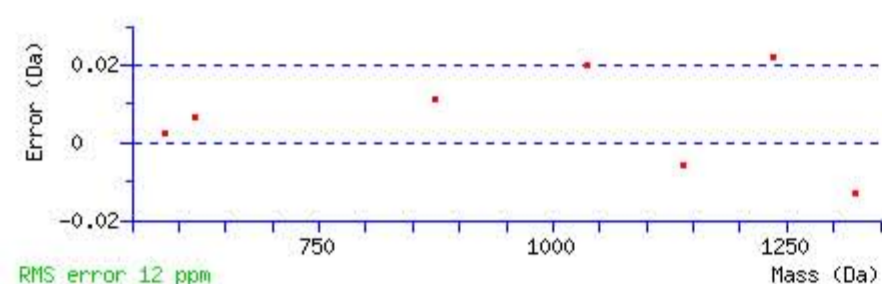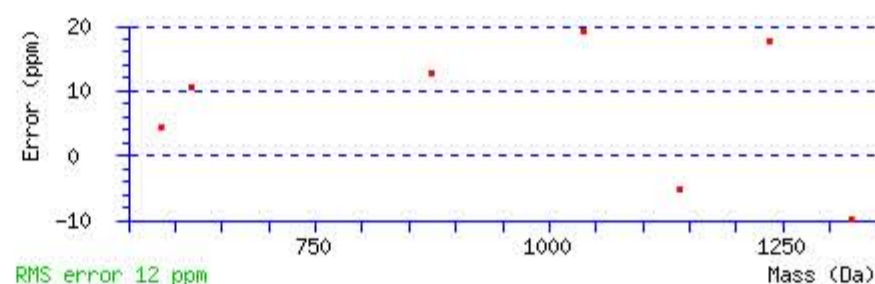

NCBI BLAST search of **SFPTYCQQK**

(Parameters: blastp, nr protein database, expect=20000, no filter, PAM30)

Other BLAST [web gateways](#)

All matches to this query

| Score | Mr(calc):   | Delta     | Sequence                       |
|-------|-------------|-----------|--------------------------------|
| 29.0  | 1468.684296 | -0.003828 | <a href="#">SFPTYCQQK</a>      |
| 18.0  | 1468.684296 | -0.003828 | <a href="#">SFPTYCQQK</a>      |
| 0.9   | 1468.671524 | 0.008944  | <a href="#">MEAETGSSVETGKK</a> |

Mascot: <http://www.matrixscience.com/>



# MASCOT Search Results

## Peptide View

MS/MS Fragmentation of **VTYTSQEDLVEK**

Found in **CFAI\_HUMAN**, Complement factor I OS=Homo sapiens GN=CFI PE=1 SV=2

Match to Query 46341: 1721.857152 from(574.959660,3+) rtinseconds(1883) index(77562)

Title: Locus:1.1.1.2870.19 File:"2013-07-02 CLN FXIII 60 min 1st FT.wiff"

Data file C:\Program Files (x86)\Matrix Science\Mascot Daemon\mgf4 FXIII 60 min 1st\mascot\_daemon\_merge.mgf

Click mouse within plot area to zoom in by factor of two about that point

Or, Plot from  to  Da

Label all possible matches  Label matches used for scoring

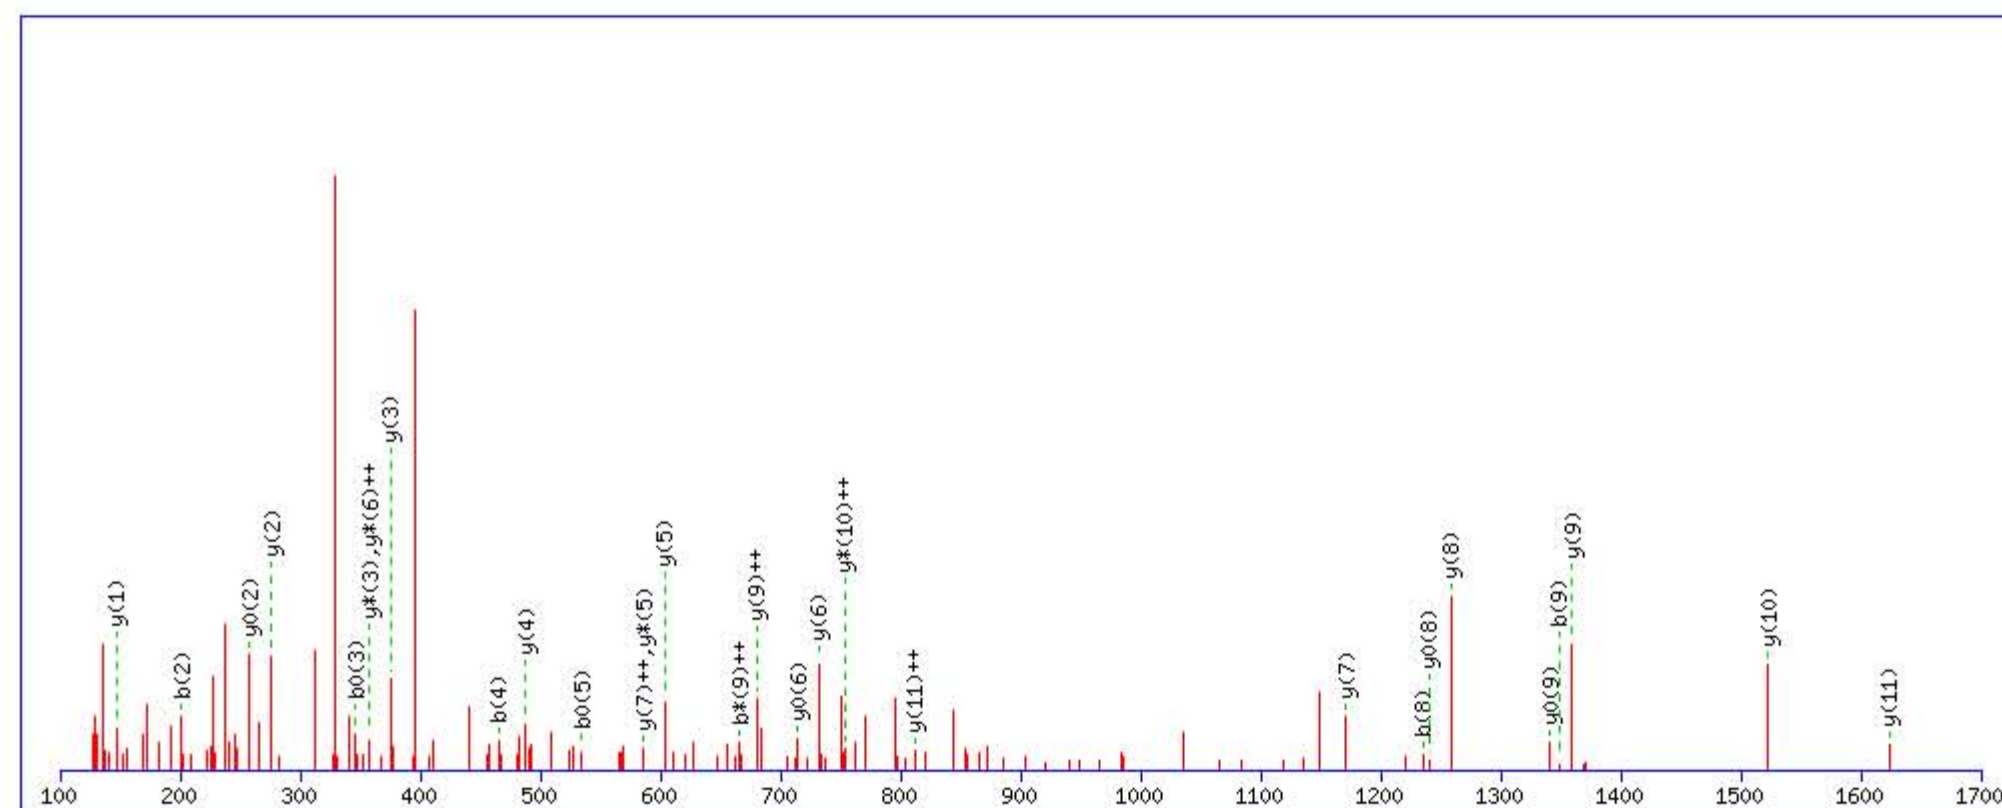

Monoisotopic mass of neutral peptide Mr(calc): 1721.854584

Fixed modifications: Carbamidomethyl (C) (apply to specified residues or termini only)

Variable modifications:

Q6 : Biotin:Thermo-21345 (Q)

Ions Score: 41 Expect: 0.0018

Matches : 29/118 fragment ions using 81 most intense peaks [\(help\)](#)

| #  | b                  | b <sup>++</sup> | b <sup>+</sup> | b <sup>*++</sup>  | b <sup>0</sup>    | b <sup>0++</sup> | Seq. | y                  | y <sup>++</sup>   | y <sup>+</sup>    | y <sup>*++</sup>  | y <sup>0</sup>     | y <sup>0++</sup> | #  |
|----|--------------------|-----------------|----------------|-------------------|-------------------|------------------|------|--------------------|-------------------|-------------------|-------------------|--------------------|------------------|----|
| 1  | 100.075690         | 50.541483       |                |                   |                   |                  | V    |                    |                   |                   |                   |                    |                  | 12 |
| 2  | <b>201.123369</b>  | 101.065322      |                |                   | 183.112804        | 92.060040        | T    | <b>1623.793452</b> | <b>812.400364</b> | 1606.766903       | 803.887090        | 1605.782887        | 803.395081       | 11 |
| 3  | 364.186698         | 182.596987      |                |                   | <b>346.176133</b> | 173.591705       | Y    | <b>1522.745773</b> | 761.876524        | 1505.719224       | <b>753.363250</b> | 1504.735208        | 752.871242       | 10 |
| 4  | <b>465.234377</b>  | 233.120827      |                |                   | 447.223812        | 224.115544       | T    | <b>1359.682444</b> | <b>680.344860</b> | 1342.655895       | 671.831585        | <b>1341.671879</b> | 671.339577       | 9  |
| 5  | 552.266405         | 276.636841      |                |                   | <b>534.255840</b> | 267.631558       | S    | <b>1258.634765</b> | 629.821021        | 1241.608216       | 621.307746        | <b>1240.624200</b> | 620.815738       | 8  |
| 6  | 991.491731         | 496.249504      | 974.465182     | 487.736229        | 973.481166        | 487.244221       | Q    | <b>1171.602737</b> | <b>586.305006</b> | 1154.576188       | 577.791732        | 1153.592172        | 577.299724       | 7  |
| 7  | 1120.534324        | 560.770800      | 1103.507775    | 552.257526        | 1102.523759       | 551.765517       | E    | <b>732.377411</b>  | 366.692343        | 715.350862        | <b>358.179069</b> | <b>714.366846</b>  | 357.687061       | 6  |
| 8  | <b>1235.561267</b> | 618.284272      | 1218.534718    | 609.770997        | 1217.550702       | 609.278989       | D    | <b>603.334818</b>  | 302.171047        | <b>586.308269</b> | 293.657773        | 585.324253         | 293.165765       | 5  |
| 9  | <b>1348.645331</b> | 674.826303      | 1331.618782    | <b>666.313029</b> | 1330.634766       | 665.821021       | L    | <b>488.307875</b>  | 244.657575        | 471.281326        | 236.144301        | 470.297310         | 235.652293       | 4  |
| 10 | 1447.713745        | 724.360511      | 1430.687196    | 715.847236        | 1429.703180       | 715.355228       | V    | <b>375.223811</b>  | 188.115543        | <b>358.197262</b> | 179.602269        | 357.213246         | 179.110261       | 3  |
| 11 | 1576.756338        | 788.881807      | 1559.729789    | 780.368533        | 1558.745773       | 779.876524       | E    | <b>276.155397</b>  | 138.581336        | 259.128848        | 130.068062        | <b>258.144832</b>  | 129.576054       | 2  |
| 12 |                    |                 |                |                   |                   |                  | K    | <b>147.112804</b>  | 74.060040         | 130.086255        | 65.546765         |                    |                  | 1  |

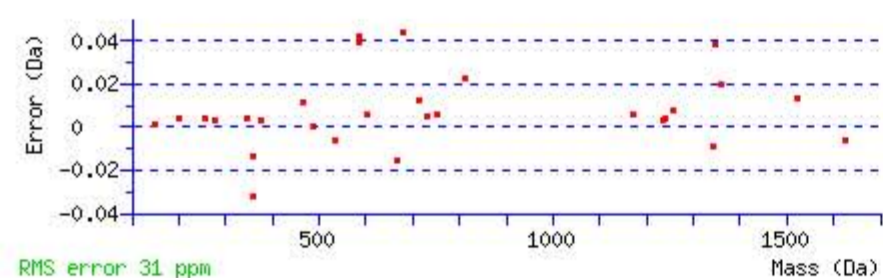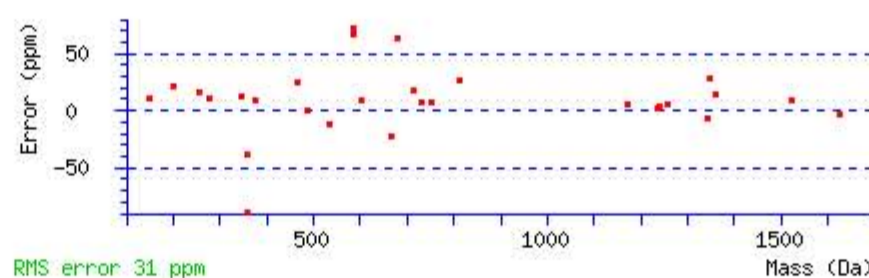

NCBI BLAST search of **VTYTSQEDLVEK**

(Parameters: blastp, nr protein database, expect=20000, no filter, PAM30)

Other BLAST [web gateways](#)

All matches to this query

| Score | Mr(calc):   | Delta    | Sequence                     |
|-------|-------------|----------|------------------------------|
| 41.3  | 1721.854584 | 0.002568 | <a href="#">VTYTSQEDLVEK</a> |

Mascot: <http://www.matrixscience.com/>



# MASCOT Search Results

## Peptide View

MS/MS Fragmentation of **HLQEALGLPAGR**

Found in **CLC11\_HUMAN**, C-type lectin domain family 11 member A OS=Homo sapiens GN=CLEC11A PE=1 SV=1

Match to Query 40644: 1571.868792 from(524.963540,3+) rtinseconds(1903) index(59793)

Title: Locus:1.1.1.2968.14 File:"2013-07-02 CLN FXIII 60 min 1st F 4.wiff"

Data file C:\Program Files (x86)\Matrix Science\Mascot Daemon\mgf4 FXIII 60 min 1st\mascot\_daemon\_merge.mgf

Click mouse within plot area to zoom in by factor of two about that point

Or, Plot from  to  Da

Label all possible matches  Label matches used for scoring

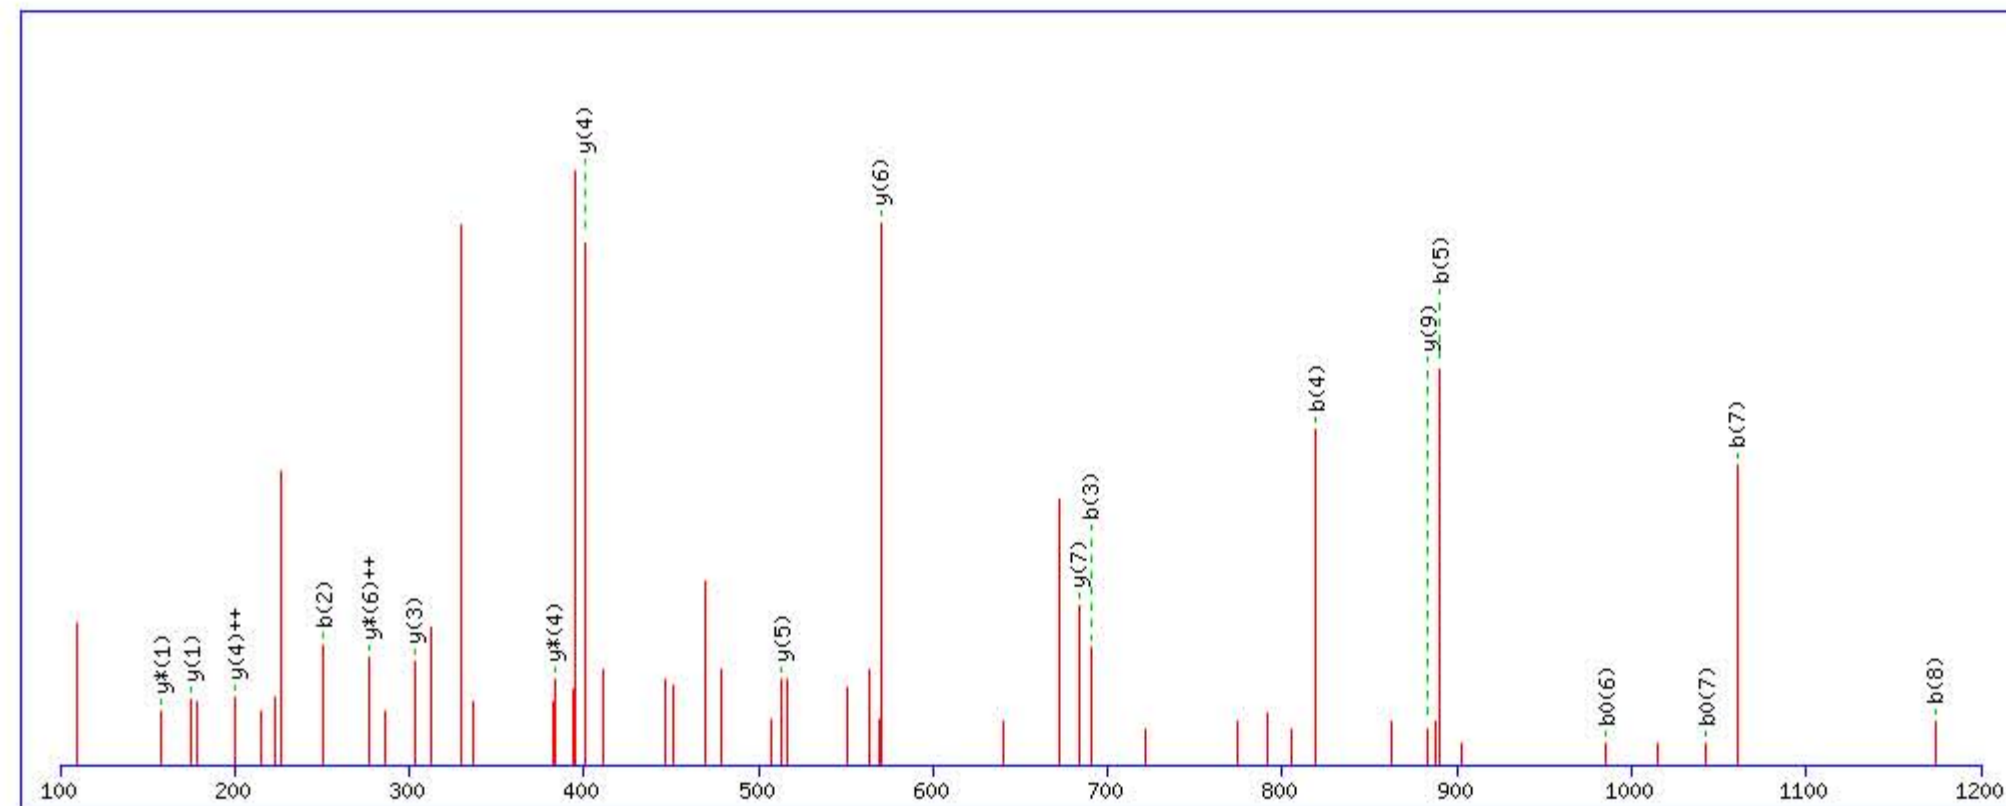

Monoisotopic mass of neutral peptide Mr(calc): 1571.860596

Fixed modifications: Carbamidomethyl (C) (apply to specified residues or termini only)

Variable modifications:

Q3 : Biotin:Thermo-21345 (Q)

Ions Score: 32 Expect: 0.0056

Matches : 19/106 fragment ions using 43 most intense peaks [\(help\)](#)

| #  | b                  | b <sup>++</sup> | b <sup>+</sup> | b <sup>+++</sup> | b <sup>0</sup>     | b <sup>0++</sup> | Seq. | y                 | y <sup>++</sup>   | y <sup>+</sup>    | y <sup>+++</sup>  | y <sup>0</sup> | y <sup>0++</sup> | #  |
|----|--------------------|-----------------|----------------|------------------|--------------------|------------------|------|-------------------|-------------------|-------------------|-------------------|----------------|------------------|----|
| 1  | 138.066188         | 69.536732       |                |                  |                    |                  | H    |                   |                   |                   |                   |                |                  | 12 |
| 2  | <b>251.150252</b>  | 126.078764      |                |                  |                    |                  | L    | 1435.808983       | 718.408129        | 1418.782434       | 709.894855        | 1417.798418    | 709.402847       | 11 |
| 3  | <b>690.375578</b>  | 345.691427      | 673.349029     | 337.178153       |                    |                  | Q    | 1322.724919       | 661.866098        | 1305.698370       | 653.352823        | 1304.714354    | 652.860815       | 10 |
| 4  | <b>819.418171</b>  | 410.212724      | 802.391622     | 401.699449       | 801.407606         | 401.207441       | E    | <b>883.499593</b> | 442.253434        | 866.473044        | 433.740160        | 865.489028     | 433.248152       | 9  |
| 5  | <b>890.455285</b>  | 445.731281      | 873.428736     | 437.218006       | 872.444720         | 436.725998       | A    | 754.457000        | 377.732138        | 737.430451        | 369.218863        |                |                  | 8  |
| 6  | 1003.539349        | 502.273313      | 986.512800     | 493.760038       | <b>985.528784</b>  | 493.268030       | L    | <b>683.419886</b> | 342.213581        | 666.393337        | 333.700306        |                |                  | 7  |
| 7  | <b>1060.560813</b> | 530.784045      | 1043.534264    | 522.270770       | <b>1042.550248</b> | 521.778762       | G    | <b>570.335822</b> | 285.671549        | 553.309273        | <b>277.158274</b> |                |                  | 6  |
| 8  | <b>1173.644877</b> | 587.326077      | 1156.618328    | 578.812802       | 1155.634312        | 578.320794       | L    | <b>513.314358</b> | 257.160817        | 496.287809        | 248.647542        |                |                  | 5  |
| 9  | 1270.697641        | 635.852459      | 1253.671092    | 627.339184       | 1252.687076        | 626.847176       | P    | <b>400.230294</b> | <b>200.618785</b> | <b>383.203745</b> | 192.105510        |                |                  | 4  |
| 10 | 1341.734755        | 671.371016      | 1324.708206    | 662.857741       | 1323.724190        | 662.365733       | A    | <b>303.177530</b> | 152.092403        | 286.150981        | 143.579128        |                |                  | 3  |
| 11 | 1398.756219        | 699.881747      | 1381.729670    | 691.368473       | 1380.745654        | 690.876465       | G    | 232.140416        | 116.573846        | 215.113867        | 108.060571        |                |                  | 2  |
| 12 |                    |                 |                |                  |                    |                  | R    | <b>175.118952</b> | 88.063114         | <b>158.092403</b> | 79.549839         |                |                  | 1  |

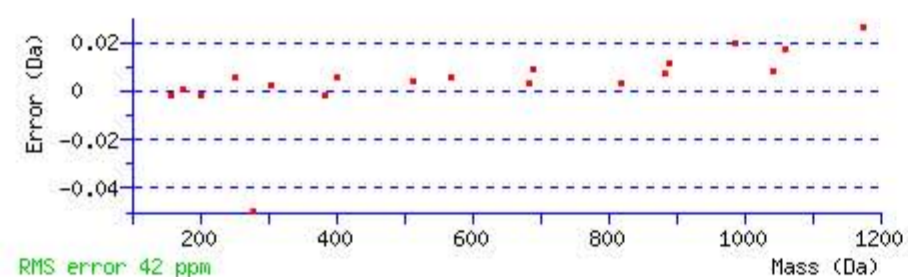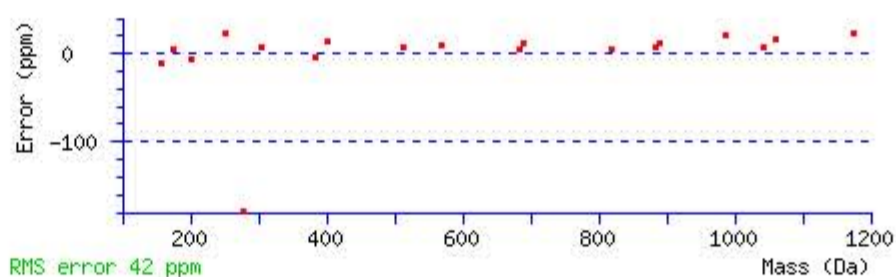

NCBI BLAST search of **HLQEALGLPAGR**

(Parameters: blastp, nr protein database, expect=20000, no filter, PAM30)

Other BLAST [web gateways](#)

All matches to this query

| Score | Mr(calc):   | Delta     | Sequence                        |
|-------|-------------|-----------|---------------------------------|
| 31.8  | 1571.860596 | 0.008196  | <a href="#">HLQEALGLPAGR</a>    |
| 7.4   | 1571.856567 | 0.012225  | <a href="#">QVRELQMRLDIR</a>    |
| 3.4   | 1571.878372 | -0.009580 | <a href="#">LTGRVLALSFDAPGR</a> |
| 1.8   | 1571.871826 | -0.003034 | <a href="#">THREPQLRPK</a>      |

Mascot: <http://www.matrixscience.com/>



# MASCOT Search Results

## Peptide View

MS/MS Fragmentation of **NEQESAVHPR**

Found in **DBNL\_HUMAN**, Drebrin-like protein OS=Homo sapiens GN=DBNL PE=1 SV=1

Match to Query 37885: 1476.724482 from(493.248770,3+) rtinseconds(1250) index(55194)

Title: Locus:1.1.1.2741.7 File:"2013-07-02 CLN FXIII 60 min 1st F 4.wiff"

Data file C:\Program Files (x86)\Matrix Science\Mascot Daemon\mgf4 FXIII 60 min 1st\mascot\_daemon\_merge.mgf

Click mouse within plot area to zoom in by factor of two about that point

Or, Plot from  to  Da

Label all possible matches  Label matches used for scoring

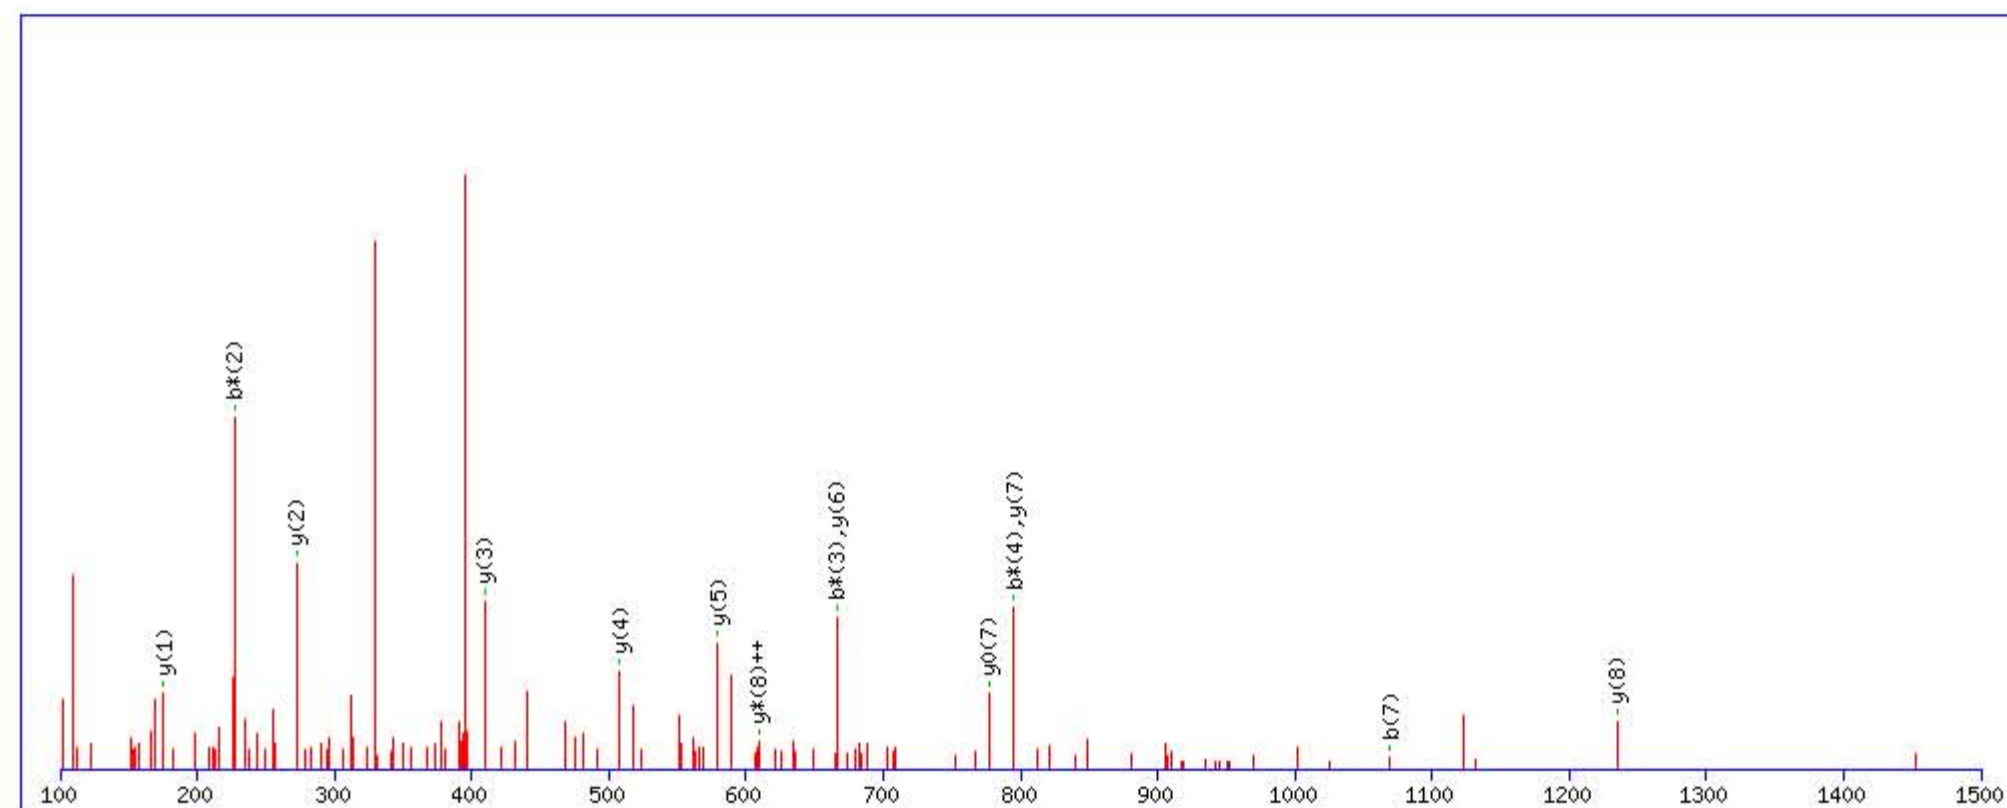

Monoisotopic mass of neutral peptide Mr(calc): 1476.714325

Fixed modifications: Carbamidomethyl (C) (apply to specified residues or termini only)

Variable modifications:

Q3 : Biotin:Thermo-21345 (Q)

Ions Score: 42 Expect: 0.0002

Matches : 14/96 fragment ions using 24 most intense peaks [\(help\)](#)

| #  | b           | b <sup>++</sup> | b <sup>*</sup> | b <sup>*++</sup> | b <sup>0</sup> | b <sup>0++</sup> | Seq. | y           | y <sup>++</sup> | y <sup>*</sup> | y <sup>*++</sup> | y <sup>0</sup> | y <sup>0++</sup> | #  |
|----|-------------|-----------------|----------------|------------------|----------------|------------------|------|-------------|-----------------|----------------|------------------|----------------|------------------|----|
| 1  | 115.050203  | 58.028740       | 98.023654      | 49.515465        |                |                  | N    |             |                 |                |                  |                |                  | 10 |
| 2  | 244.092796  | 122.550036      | 227.066247     | 114.036762       | 226.082231     | 113.544754       | E    | 1363.678696 | 682.342986      | 1346.652147    | 673.829712       | 1345.668131    | 673.337704       | 9  |
| 3  | 683.318122  | 342.162699      | 666.291573     | 333.649425       | 665.307557     | 333.157417       | Q    | 1234.636103 | 617.821690      | 1217.609554    | 609.308415       | 1216.625538    | 608.816407       | 8  |
| 4  | 812.360715  | 406.683996      | 795.334166     | 398.170721       | 794.350150     | 397.678713       | E    | 795.410777  | 398.209027      | 778.384228     | 389.695752       | 777.400212     | 389.203744       | 7  |
| 5  | 899.392743  | 450.200010      | 882.366194     | 441.686735       | 881.382178     | 441.194727       | S    | 666.368184  | 333.687730      | 649.341635     | 325.174456       | 648.357619     | 324.682448       | 6  |
| 6  | 970.429857  | 485.718567      | 953.403308     | 477.205292       | 952.419292     | 476.713284       | A    | 579.336156  | 290.171716      | 562.309607     | 281.658442       |                |                  | 5  |
| 7  | 1069.498271 | 535.252774      | 1052.471722    | 526.739499       | 1051.487706    | 526.247491       | V    | 508.299042  | 254.653159      | 491.272493     | 246.139884       |                |                  | 4  |
| 8  | 1206.557183 | 603.782230      | 1189.530634    | 595.268955       | 1188.546618    | 594.776947       | H    | 409.230628  | 205.118952      | 392.204079     | 196.605677       |                |                  | 3  |
| 9  | 1303.609947 | 652.308612      | 1286.583398    | 643.795337       | 1285.599382    | 643.303329       | P    | 272.171716  | 136.589496      | 255.145167     | 128.076221       |                |                  | 2  |
| 10 |             |                 |                |                  |                |                  | R    | 175.118952  | 88.063114       | 158.092403     | 79.549839        |                |                  | 1  |

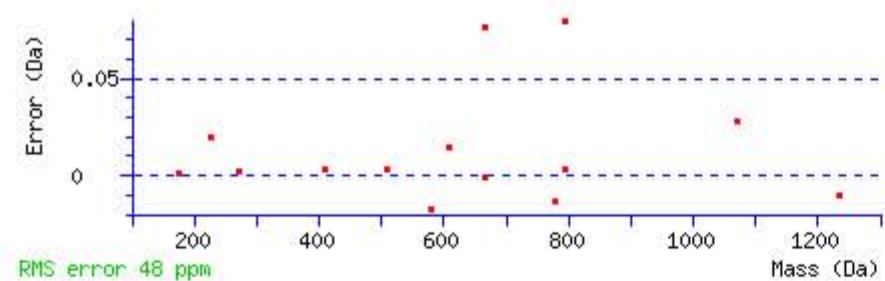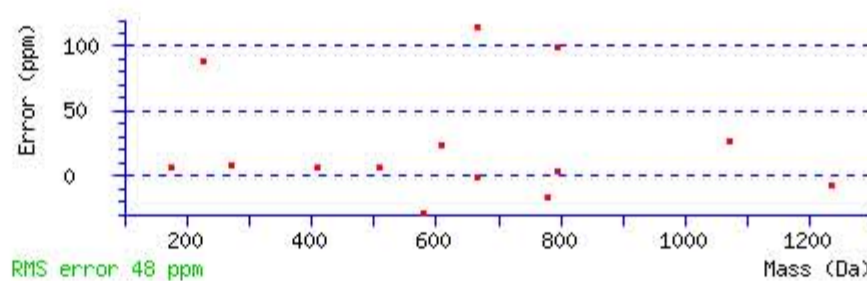

NCBI BLAST search of [NEQESAVHPR](#)

(Parameters: blastp, nr protein database, expect=20000, no filter, PAM30)

Other BLAST [web gateways](#)

All matches to this query

| Score | Mr(calc):   | Delta     | Sequence                      |
|-------|-------------|-----------|-------------------------------|
| 41.8  | 1476.714325 | 0.010157  | <a href="#">NEQESAVHPR</a>    |
| 2.3   | 1476.745987 | -0.021505 | <a href="#">LVKEVPPEEYSER</a> |



# MASCOT Search Results

## Peptide View

MS/MS Fragmentation of **ADQVCINLR**

Found in **FBLN3\_HUMAN**, EGF-containing fibulin-like extracellular matrix protein 1 OS=Homo sapiens GN=EFEMP1 PE=1 SV=2

Match to Query 34542: 1398.726948 from(700.370750,2+) rtinseconds(1996) index(60515)

Title: Locus:1.1.1.3000.11 File:"2013-07-02 CLN FXIII 60 min 1st F 4.wiff"

Data file C:\Program Files (x86)\Matrix Science\Mascot Daemon\mgf4 FXIII 60 min 1st\mascot\_daemon\_merge.mgf

Click mouse within plot area to zoom in by factor of two about that point

Or, Plot from  to  Da

Label all possible matches  Label matches used for scoring

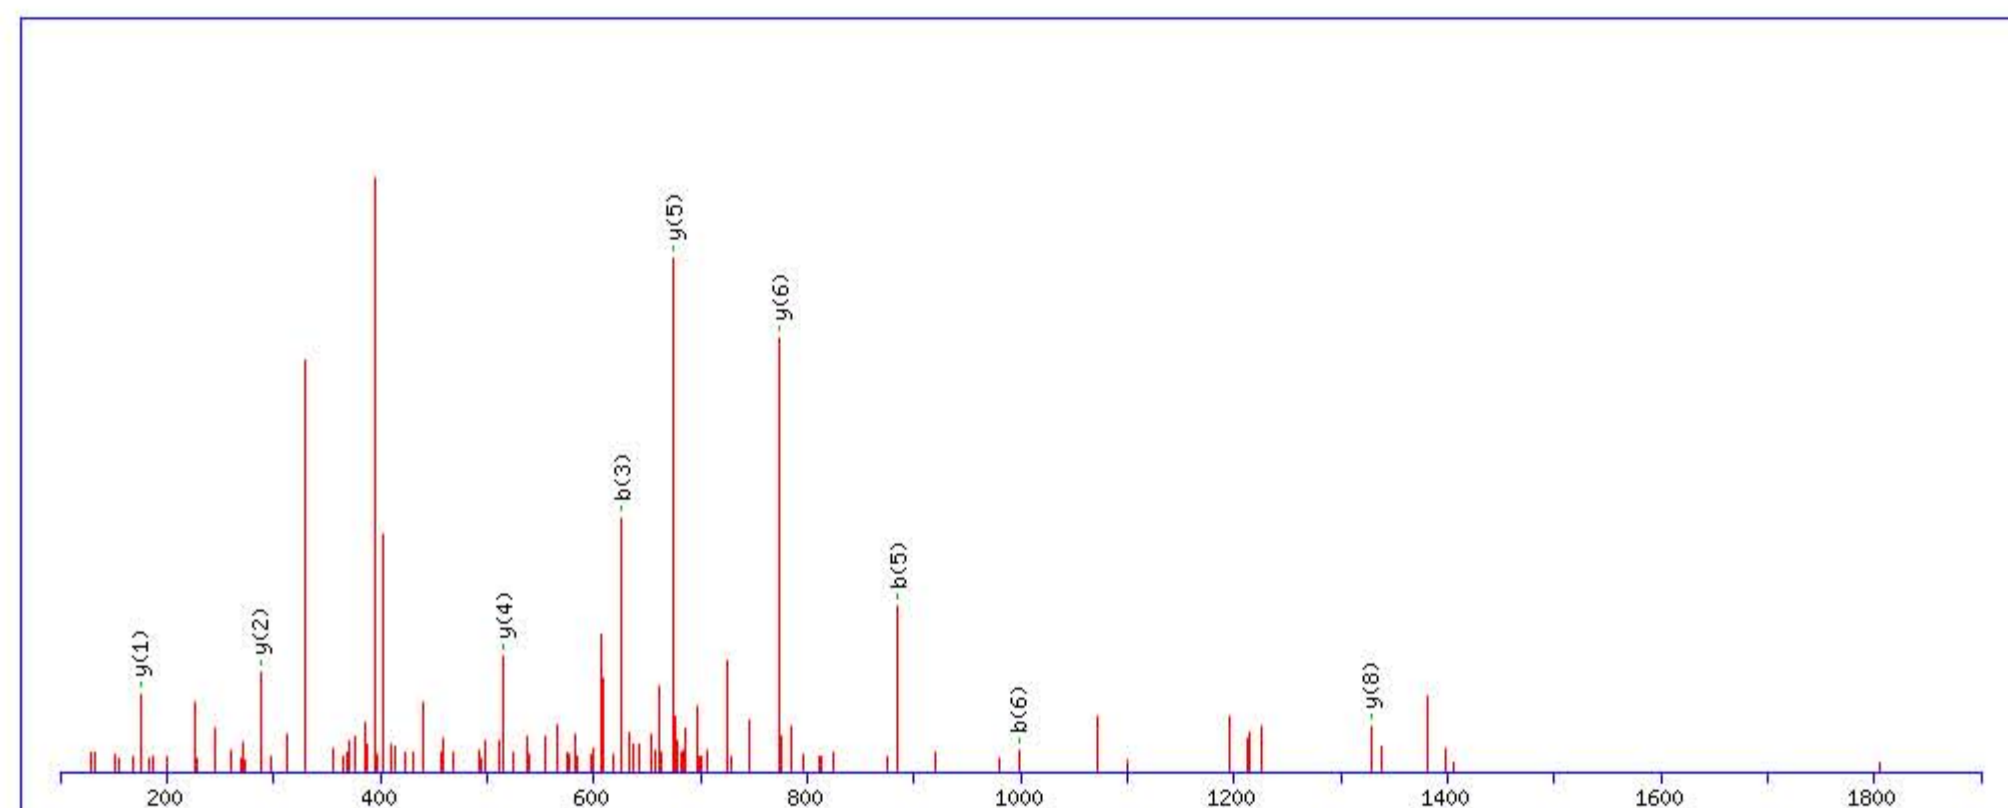

Monoisotopic mass of neutral peptide Mr(calc): 1398.711166

Fixed modifications: Carbamidomethyl (C) (apply to specified residues or termini only)

Variable modifications:

Q3 : Biotin:Thermo-21345 (Q)

Ions Score: 45 Expect: 0.0002

Matches : 9/76 fragment ions using 13 most intense peaks [\(help\)](#)

| # | b                 | b <sup>++</sup> | b <sup>*</sup> | b <sup>*++</sup> | b <sup>0</sup> | b <sup>0++</sup> | Seq. | y                  | y <sup>++</sup> | y <sup>*</sup> | y <sup>*++</sup> | y <sup>0</sup> | y <sup>0++</sup> | # |
|---|-------------------|-----------------|----------------|------------------|----------------|------------------|------|--------------------|-----------------|----------------|------------------|----------------|------------------|---|
| 1 | 72.044390         | 36.525833       |                |                  |                |                  | A    |                    |                 |                |                  |                |                  | 9 |
| 2 | 187.071333        | 94.039304       |                |                  | 169.060768     | 85.034022        | D    | <b>1328.681339</b> | 664.844308      | 1311.654790    | 656.331033       | 1310.670774    | 655.839025       | 8 |
| 3 | <b>626.296659</b> | 313.651968      | 609.270110     | 305.138693       | 608.286094     | 304.646685       | Q    | 1213.654396        | 607.330836      | 1196.627847    | 598.817562       |                |                  | 7 |
| 4 | 725.365073        | 363.186175      | 708.338524     | 354.672900       | 707.354508     | 354.180892       | V    | <b>774.429070</b>  | 387.718173      | 757.402521     | 379.204898       |                |                  | 6 |
| 5 | <b>885.395722</b> | 443.201499      | 868.369173     | 434.688225       | 867.385157     | 434.196217       | C    | <b>675.360656</b>  | 338.183966      | 658.334107     | 329.670691       |                |                  | 5 |
| 6 | <b>998.479786</b> | 499.743531      | 981.453237     | 491.230257       | 980.469221     | 490.738249       | I    | <b>515.330007</b>  | 258.168641      | 498.303458     | 249.655367       |                |                  | 4 |
| 7 | 1112.522713       | 556.764995      | 1095.496164    | 548.251720       | 1094.512148    | 547.759712       | N    | 402.245943         | 201.626609      | 385.219394     | 193.113335       |                |                  | 3 |
| 8 | 1225.606777       | 613.307027      | 1208.580228    | 604.793752       | 1207.596212    | 604.301744       | L    | <b>288.203016</b>  | 144.605146      | 271.176467     | 136.091871       |                |                  | 2 |
| 9 |                   |                 |                |                  |                |                  | R    | <b>175.118952</b>  | 88.063114       | 158.092403     | 79.549839        |                |                  | 1 |

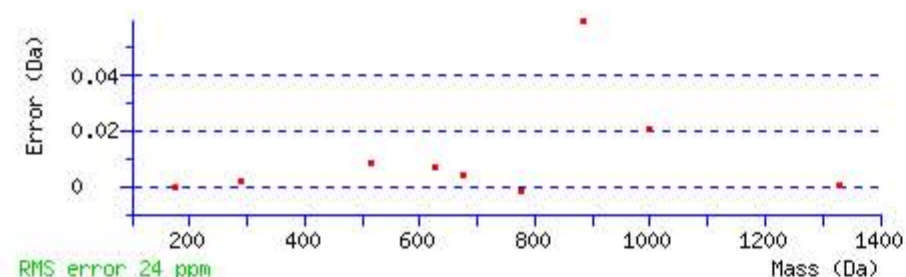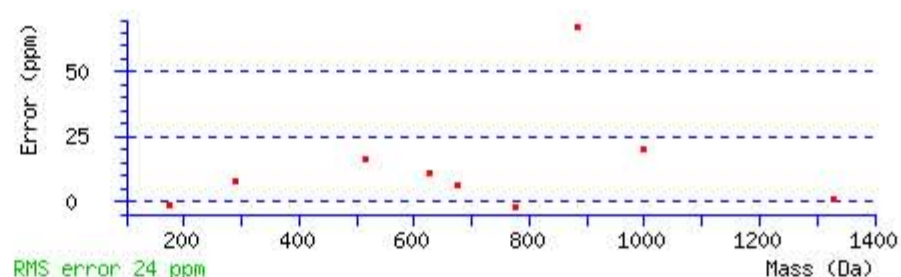

NCBI BLAST search of [ADQVCINLR](#)

(Parameters: blastp, nr protein database, expect=20000, no filter, PAM30)

Other BLAST [web gateways](#)

## All matches to this query

| Score | Mr(calc):   | Delta     | Sequence                         |
|-------|-------------|-----------|----------------------------------|
| 45.4  | 1398.711166 | 0.015782  | <a href="#">ADQVCINLR</a>        |
| 5.6   | 1398.740143 | -0.013195 | <a href="#">QITAREGASR</a>       |
| 4.8   | 1398.723038 | 0.003910  | <a href="#">ILACAPLYHWR</a>      |
| 3.3   | 1398.746643 | -0.019695 | <a href="#">EEIEREVNILR</a>      |
| 3.0   | 1398.721497 | 0.005451  | <a href="#">QGRLAEEAADLR</a>     |
| 2.1   | 1398.740814 | -0.013866 | <a href="#">QPFQSWLQIPR</a>      |
| 1.1   | 1398.721527 | 0.005421  | <a href="#">AATASAGAGGIDGKPR</a> |
| 1.1   | 1398.729584 | -0.002636 | <a href="#">WLAPDGLIFPDR</a>     |
| 0.7   | 1398.710251 | 0.016697  | <a href="#">IAAEIAQAEQAR</a>     |
| 0.3   | 1398.726227 | 0.000721  | <a href="#">APGRASGRVCAAR</a>    |



**Peptide View**

MS/MS Fragmentation of **RGEQCVDIDECTIPPYCHQR**

Found in **FBLN3\_HUMAN**, EGF-containing fibulin-like extracellular matrix protein 1 OS=Homo sapiens GN=EFEMP1 PE=1 SV=2

Match to Query 69466: 2843.279816 from(711.827230,4+) rtinseconds(1742) index(40391)  
 Title: Locus:1.1.1.2890.18 File:"2013-07-02 CLN FXIII 60 min 1st F 3.wiff"  
 Data file C:\Program Files (x86)\Matrix Science\Mascot Daemon\mgf\4 FXIII 60 min 1st\mascot\_daemon\_merge.mgf

Click mouse within plot area to zoom in by factor of two about that point  
 Or, Plot from  to  Da   
 Label all possible matches  Label matches used for scoring

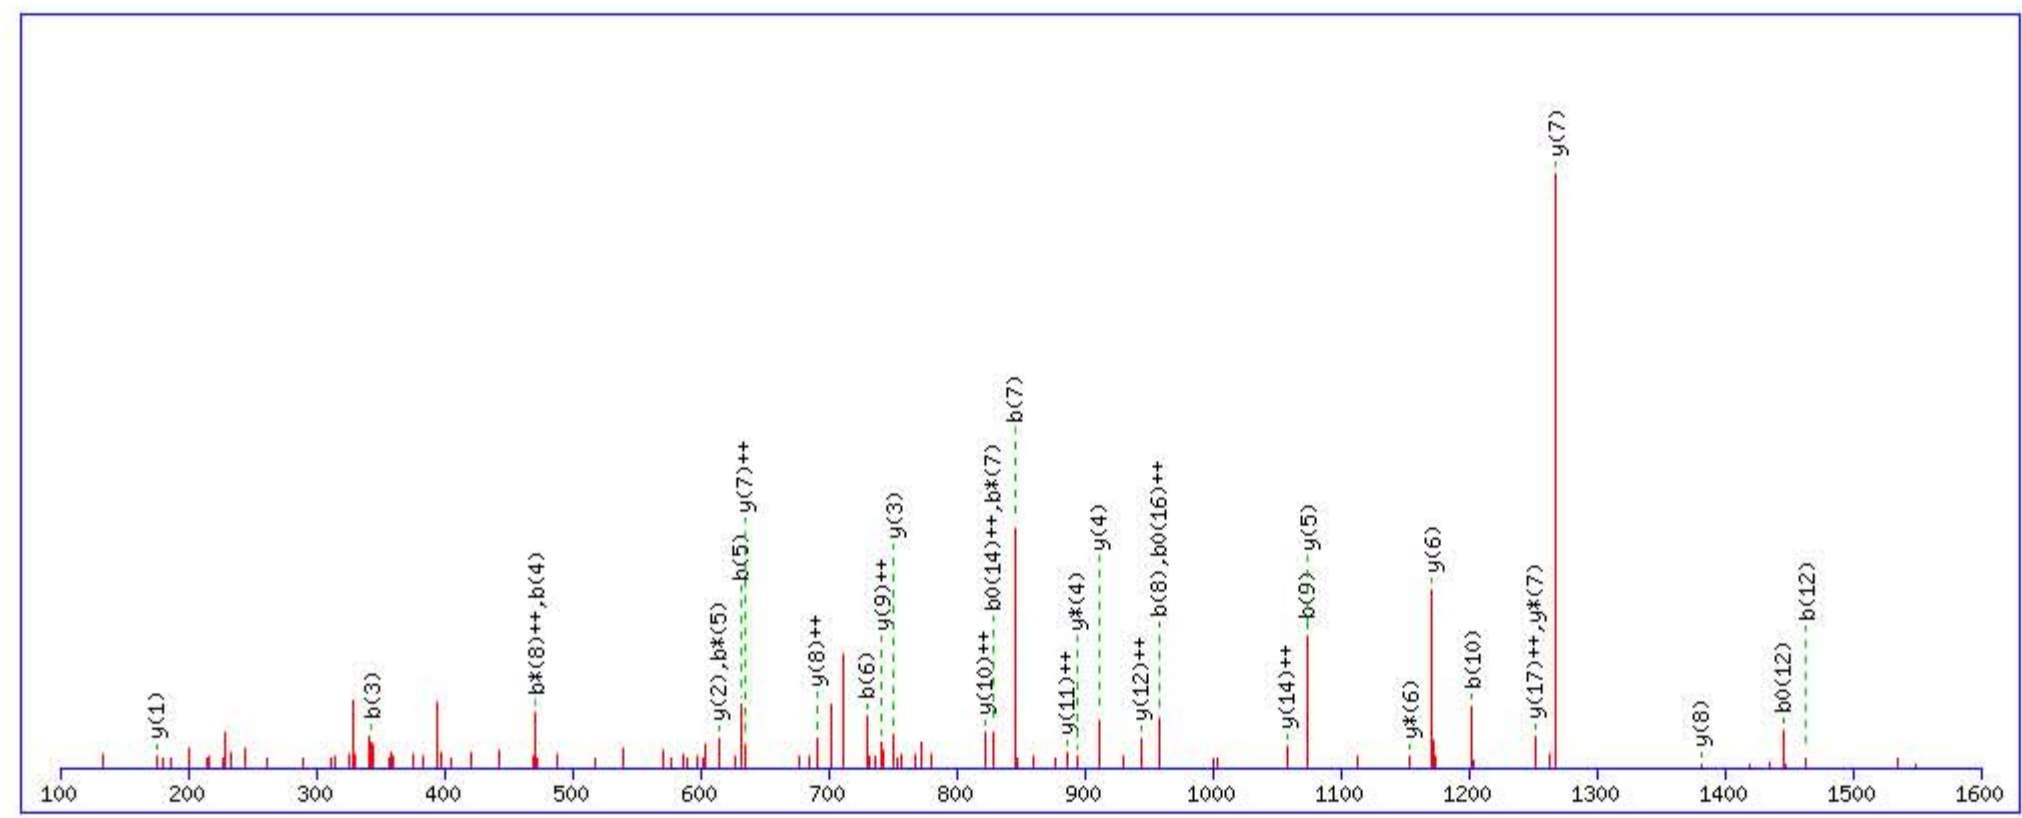

Monoisotopic mass of neutral peptide Mr(calc): 2843.261169  
 Fixed modifications: Carbamidomethyl (C) (apply to specified residues or termini only)  
 Variable modifications:  
 Q19 : Biotin:Thermo-21345 (Q)  
 Ions Score: 49 Expect: 9e-005  
 Matches : 34/208 fragment ions using 65 most intense peaks [\(help\)](#)

| #  | b                  | b <sup>++</sup> | b <sup>+</sup>    | b <sup>+++</sup>  | b <sup>0</sup>     | b <sup>0++</sup> | Seq. | y                  | y <sup>++</sup>    | y <sup>+</sup>     | y <sup>+++</sup> | y <sup>0</sup> | y <sup>0++</sup> | #  |
|----|--------------------|-----------------|-------------------|-------------------|--------------------|------------------|------|--------------------|--------------------|--------------------|------------------|----------------|------------------|----|
| 1  | 157.108387         | 79.057831       | 140.081838        | 70.544557         |                    |                  | R    |                    |                    |                    |                  |                |                  | 20 |
| 2  | 214.129851         | 107.568564      | 197.103302        | 99.055289         |                    |                  | G    | 2688.167329        | 1344.587302        | 2671.140780        | 1336.074028      | 2670.156764    | 1335.582020      | 19 |
| 3  | <b>343.172444</b>  | 172.089860      | 326.145895        | 163.576585        | 325.161879         | 163.084577       | E    | 2631.145865        | 1316.076570        | 2614.119316        | 1307.563296      | 2613.135300    | 1307.071288      | 18 |
| 4  | <b>471.231022</b>  | 236.119149      | 454.204473        | 227.605875        | 453.220457         | 227.113867       | Q    | 2502.103272        | <b>1251.555274</b> | 2485.076723        | 1243.041999      | 2484.092707    | 1242.549991      | 17 |
| 5  | <b>631.261671</b>  | 316.134474      | <b>614.235122</b> | 307.621199        | 613.251106         | 307.129191       | C    | 2374.044694        | 1187.525985        | 2357.018145        | 1179.012710      | 2356.034129    | 1178.520702      | 16 |
| 6  | <b>730.330085</b>  | 365.668681      | 713.303536        | 357.155406        | 712.319520         | 356.663398       | V    | 2214.014045        | 1107.510660        | 2196.987496        | 1098.997386      | 2196.003480    | 1098.505378      | 15 |
| 7  | <b>845.357028</b>  | 423.182152      | <b>828.330479</b> | 414.668878        | 827.346463         | 414.176870       | D    | 2114.945631        | <b>1057.976453</b> | 2097.919082        | 1049.463179      | 2096.935066    | 1048.971171      | 14 |
| 8  | <b>958.441092</b>  | 479.724184      | 941.414543        | <b>471.210910</b> | 940.430527         | 470.718902       | I    | 1999.918688        | 1000.462982        | 1982.892139        | 991.949708       | 1981.908123    | 991.457700       | 13 |
| 9  | <b>1073.468035</b> | 537.237656      | 1056.441486       | 528.724381        | 1055.457470        | 528.232373       | D    | 1886.834624        | <b>943.920950</b>  | 1869.808075        | 935.407676       | 1868.824059    | 934.915668       | 12 |
| 10 | <b>1202.510628</b> | 601.758952      | 1185.484079       | 593.245678        | 1184.500063        | 592.753670       | E    | 1771.807681        | <b>886.407479</b>  | 1754.781132        | 877.894204       | 1753.797116    | 877.402196       | 11 |
| 11 | 1362.541277        | 681.774277      | 1345.514728       | 673.261002        | 1344.530712        | 672.768994       | C    | 1642.765088        | <b>821.886182</b>  | 1625.738539        | 813.372908       | 1624.754523    | 812.880900       | 10 |
| 12 | <b>1463.588956</b> | 732.298116      | 1446.562407       | 723.784842        | <b>1445.578391</b> | 723.292834       | T    | 1482.734439        | <b>741.870858</b>  | 1465.707890        | 733.357583       | 1464.723874    | 732.865575       | 9  |
| 13 | 1576.673020        | 788.840148      | 1559.646471       | 780.326874        | 1558.662455        | 779.834866       | I    | <b>1381.686760</b> | <b>691.347018</b>  | 1364.660211        | 682.833744       |                |                  | 8  |
| 14 | 1673.725784        | 837.366530      | 1656.699235       | 828.853256        | 1655.715219        | 828.361248       | P    | <b>1268.602696</b> | <b>634.804986</b>  | <b>1251.576147</b> | 626.291712       |                |                  | 7  |
| 15 | 1770.778548        | 885.892912      | 1753.751999       | 877.379638        | 1752.767983        | 876.887630       | P    | <b>1171.549932</b> | 586.278604         | <b>1154.523383</b> | 577.765330       |                |                  | 6  |
| 16 | 1933.841877        | 967.424577      | 1916.815328       | 958.911302        | 1915.831312        | 958.419294       | Y    | <b>1074.497168</b> | 537.752222         | 1057.470619        | 529.238948       |                |                  | 5  |
| 17 | 2093.872526        | 1047.439901     | 2076.845977       | 1038.926626       | 2075.861961        | 1038.434618      | C    | <b>911.433839</b>  | 456.220558         | <b>894.407290</b>  | 447.707283       |                |                  | 4  |
| 18 | 2230.931438        | 1115.969357     | 2213.904889       | 1107.456082       | 2212.920873        | 1106.964074      | H    | <b>751.403190</b>  | 376.205233         | 734.376641         | 367.691959       |                |                  | 3  |
| 19 | 2670.156764        | 1335.582020     | 2653.130215       | 1327.068746       | 2652.146199        | 1326.576738      | Q    | <b>614.344278</b>  | 307.675777         | 597.317729         | 299.162503       |                |                  | 2  |
| 20 |                    |                 |                   |                   |                    |                  | R    | <b>175.118952</b>  | 88.063114          | 158.092403         | 79.549839        |                |                  | 1  |

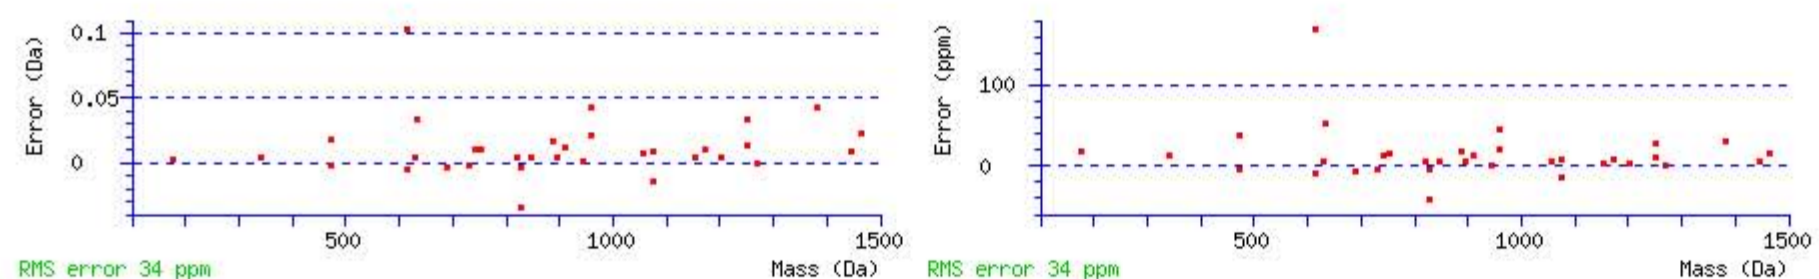

NCBI BLAST search of **RGEQCVDIDECTIPPYCHQR**  
 (Parameters: blastp, nr protein database, expect=20000, no filter, PAM30)  
 Other BLAST [web gateways](#)

**All matches to this query**

| Score | Mr(calc):   | Delta    | Sequence                             |
|-------|-------------|----------|--------------------------------------|
| 49.5  | 2843.261169 | 0.018647 | <a href="#">RGEQCVDIDECTIPPYCHQR</a> |



# MASCOT Search Results

## Peptide View

MS/MS Fragmentation of **LLPAQLPAEK**

Found in **ECM1\_HUMAN**, Extracellular matrix protein 1 OS=Homo sapiens GN=ECM1 PE=1 SV=2

Match to Query 34167: 1389.818748 from(695.916650,2+) rtinseconds(1996) index(6974)

Title: Locus:1.1.1.2827.16 File:"2013-07-02 CLN FXIII 60 min 1st F 1.wiff"

Data file C:\Program Files (x86)\Matrix Science\Mascot Daemon\mgf4 FXIII 60 min 1st\mascot\_daemon\_merge.mgf

Click mouse within plot area to zoom in by factor of two about that point

Or, Plot from  to  Da

Label all possible matches  Label matches used for scoring

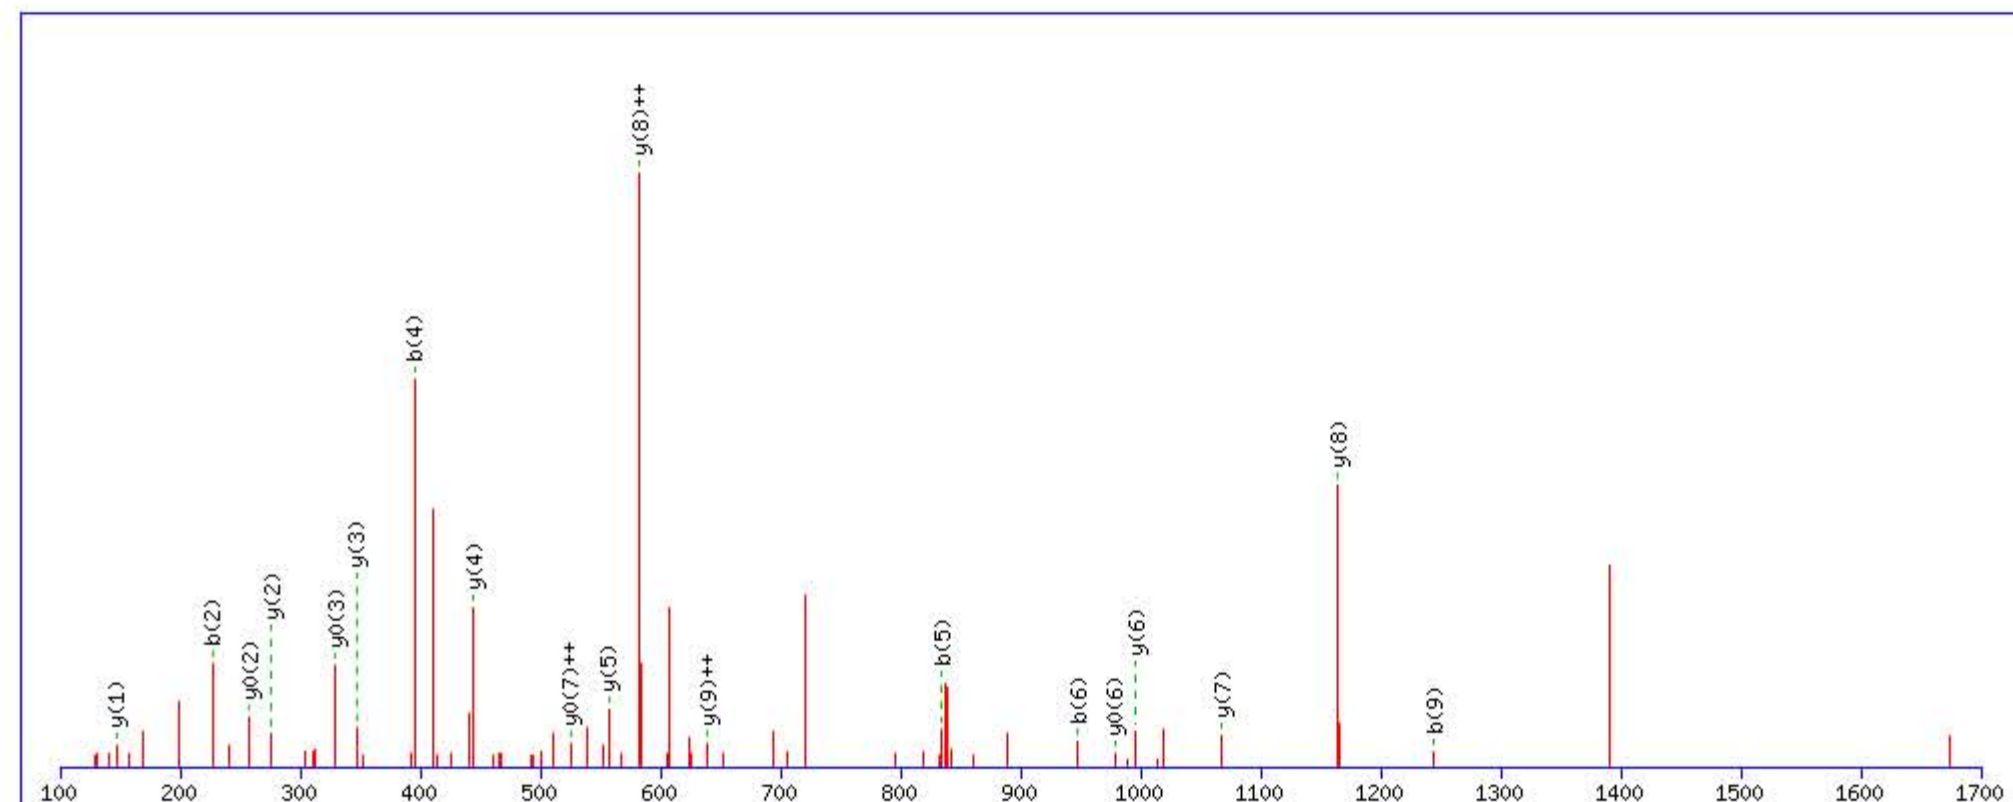

Monoisotopic mass of neutral peptide Mr(calc): 1389.805359

Fixed modifications: Carbamidomethyl (C) (apply to specified residues or termini only)

Variable modifications:

Q5 : Biotin:Thermo-21345 (Q)

Ions Score: 45 Expect: 7e-005

Matches : 19/82 fragment ions using 38 most intense peaks [\(help\)](#)

| #  | b                  | b <sup>++</sup> | b <sup>*</sup> | b <sup>*++</sup> | b <sup>0</sup> | b <sup>0++</sup> | Seq. | y                  | y <sup>++</sup>   | y <sup>*</sup> | y <sup>*++</sup> | y <sup>0</sup>    | y <sup>0++</sup>  | #  |
|----|--------------------|-----------------|----------------|------------------|----------------|------------------|------|--------------------|-------------------|----------------|------------------|-------------------|-------------------|----|
| 1  | 114.091340         | 57.549308       |                |                  |                |                  | L    |                    |                   |                |                  |                   |                   | 10 |
| 2  | <b>227.175404</b>  | 114.091340      |                |                  |                |                  | L    | 1277.728607        | <b>639.367942</b> | 1260.702058    | 630.854667       | 1259.718042       | 630.362659        | 9  |
| 3  | 324.228168         | 162.617722      |                |                  |                |                  | P    | <b>1164.644543</b> | <b>582.825909</b> | 1147.617994    | 574.312635       | 1146.633978       | 573.820627        | 8  |
| 4  | <b>395.265282</b>  | 198.136279      |                |                  |                |                  | A    | <b>1067.591779</b> | 534.299527        | 1050.565230    | 525.786253       | 1049.581214       | <b>525.294245</b> | 7  |
| 5  | <b>834.490608</b>  | 417.748942      | 817.464059     | 409.235668       |                |                  | Q    | <b>996.554665</b>  | 498.780970        | 979.528116     | 490.267696       | <b>978.544100</b> | 489.775688        | 6  |
| 6  | <b>947.574672</b>  | 474.290974      | 930.548123     | 465.777700       |                |                  | L    | <b>557.329339</b>  | 279.168307        | 540.302790     | 270.655033       | 539.318774        | 270.163025        | 5  |
| 7  | 1044.627436        | 522.817356      | 1027.600887    | 514.304082       |                |                  | P    | <b>444.245275</b>  | 222.626275        | 427.218726     | 214.113001       | 426.234710        | 213.620993        | 4  |
| 8  | 1115.664550        | 558.335913      | 1098.638001    | 549.822639       |                |                  | A    | <b>347.192511</b>  | 174.099893        | 330.165962     | 165.586619       | <b>329.181946</b> | 165.094611        | 3  |
| 9  | <b>1244.707143</b> | 622.857209      | 1227.680594    | 614.343935       | 1226.696578    | 613.851927       | E    | <b>276.155397</b>  | 138.581336        | 259.128848     | 130.068062       | <b>258.144832</b> | 129.576054        | 2  |
| 10 |                    |                 |                |                  |                |                  | K    | <b>147.112804</b>  | 74.060040         | 130.086255     | 65.546765        |                   |                   | 1  |

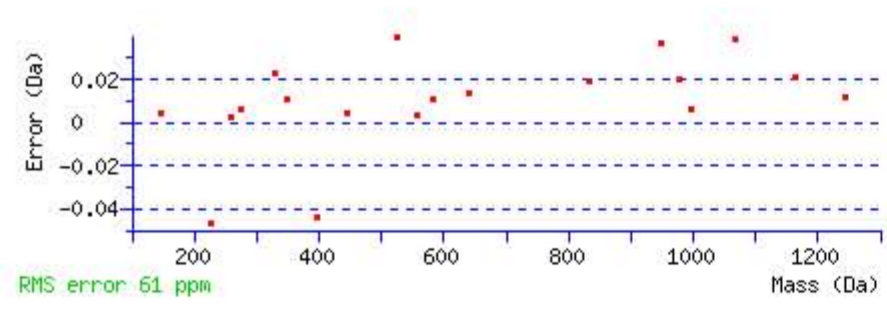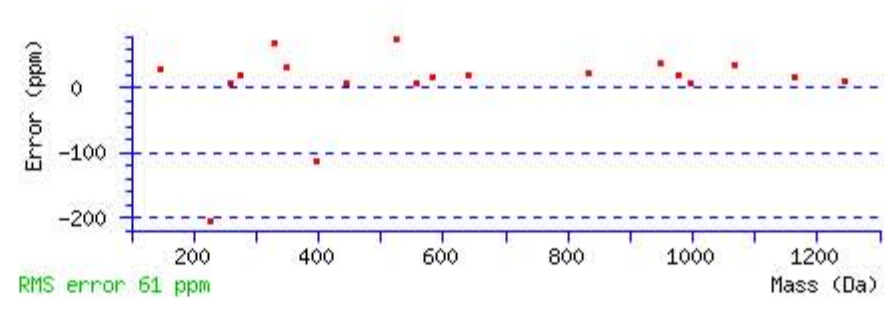

NCBI BLAST search of **LLPAQLPAEK**

(Parameters: blastp, nr protein database, expect=20000, no filter, PAM30)

Other BLAST [web gateways](#)

### All matches to this query

| Score | Mr(calc):   | Delta     | Sequence                      |
|-------|-------------|-----------|-------------------------------|
| 45.3  | 1389.805359 | 0.013389  | <a href="#">LLPAQLPAEK</a>    |
| 1.0   | 1389.823135 | -0.004387 | <a href="#">ILIVITDGQKYK</a>  |
| 0.5   | 1389.816605 | 0.002143  | <a href="#">ILGPLPKHMIQK</a>  |
| 0.5   | 1389.805359 | 0.013389  | <a href="#">LLSSYLQKK</a>     |
| 0.4   | 1389.834366 | -0.015618 | <a href="#">ILQKSPLPPGNVK</a> |



# MASCOT Search Results

## Peptide View

MS/MS Fragmentation of **NLPATDPLQR**

Found in **ECM1\_HUMAN**, Extracellular matrix protein 1 OS=Homo sapiens GN=ECM1 PE=1 SV=2

Match to Query 36572: 1434.768102 from(479.263310,3+) rtinseconds(1964) index(6806)

Title: Locus:1.1.1.2816.8 File:"2013-07-02 CLN FXIII 60 min 1st F 1.wiff"

Data file C:\Program Files (x86)\Matrix Science\Mascot Daemon\mgf4 FXIII 60 min 1st\mascot\_daemon\_merge.mgf

Click mouse within plot area to zoom in by factor of two about that point

Or, Plot from  to  Da

Label all possible matches  Label matches used for scoring

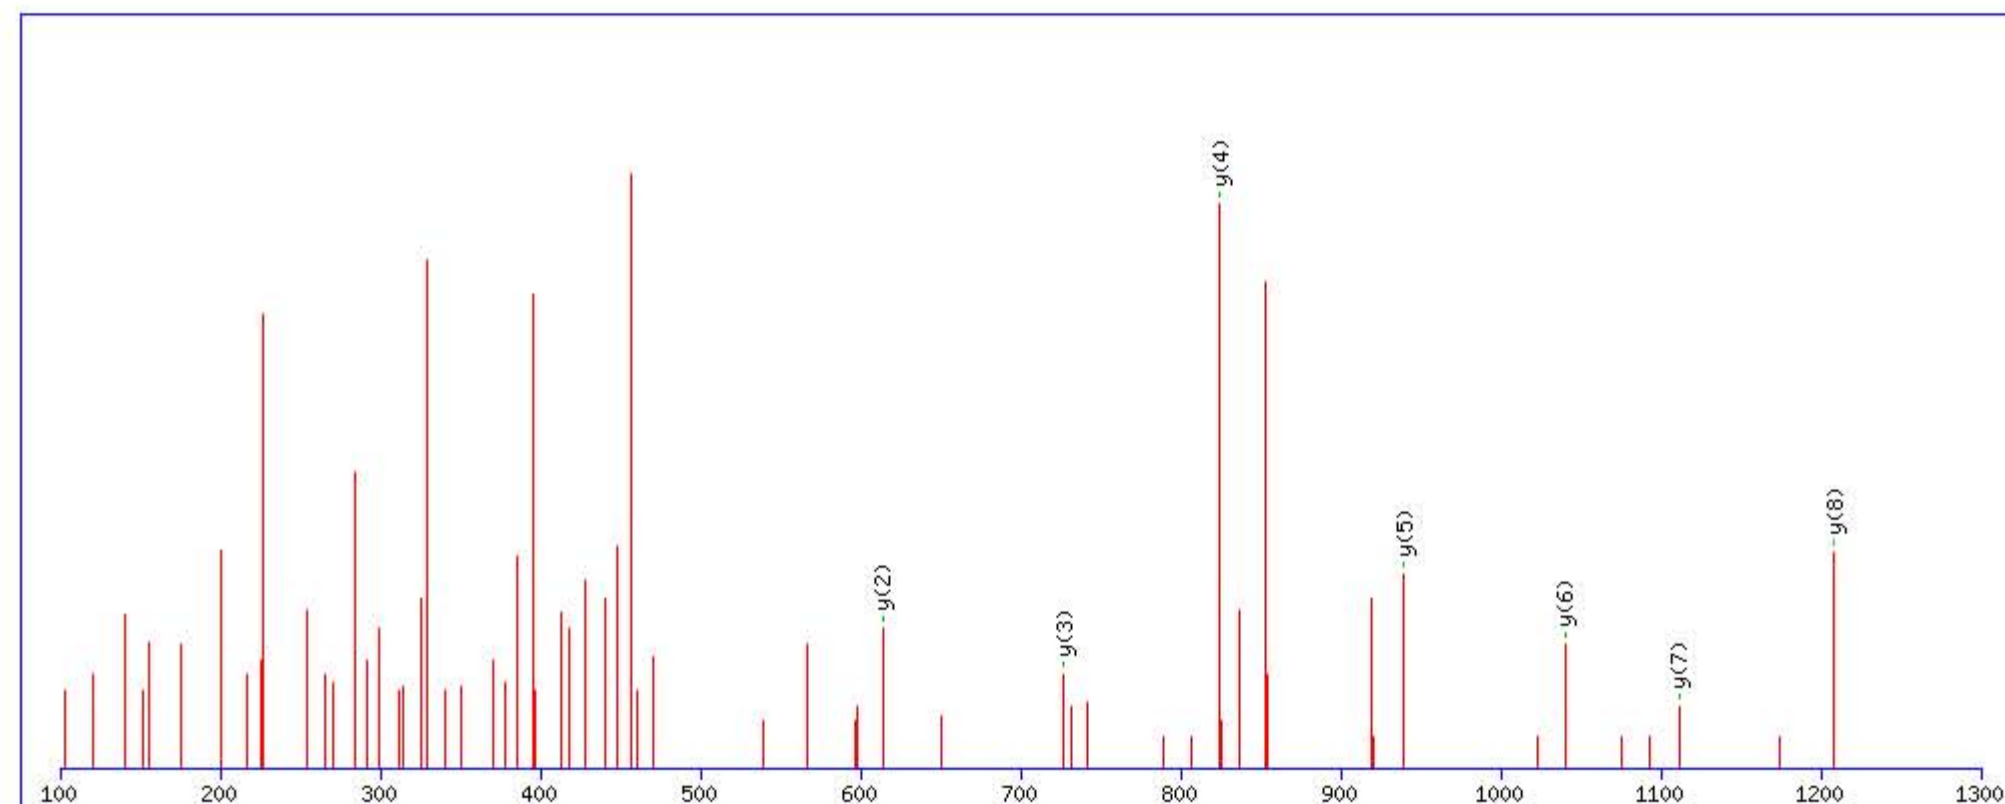

Monoisotopic mass of neutral peptide Mr(calc): 1434.765305

Fixed modifications: Carbamidomethyl (C) (apply to specified residues or termini only)

Variable modifications:

Q9 : Biotin:Thermo-21345 (Q)

Ions Score: 46 Expect: 0.00062

Matches : 7/92 fragment ions using 12 most intense peaks [\(help\)](#)

| #  | b           | b <sup>++</sup> | b <sup>*</sup> | b <sup>*++</sup> | b <sup>0</sup> | b <sup>0++</sup> | Seq. | y                  | y <sup>++</sup> | y <sup>*</sup> | y <sup>*++</sup> | y <sup>0</sup> | y <sup>0++</sup> | #  |
|----|-------------|-----------------|----------------|------------------|----------------|------------------|------|--------------------|-----------------|----------------|------------------|----------------|------------------|----|
| 1  | 115.050203  | 58.028740       | 98.023654      | 49.515465        |                |                  | N    |                    |                 |                |                  |                |                  | 10 |
| 2  | 228.134267  | 114.570771      | 211.107718     | 106.057497       |                |                  | L    | 1321.729670        | 661.368473      | 1304.703121    | 652.855199       | 1303.719105    | 652.363190       | 9  |
| 3  | 325.187031  | 163.097153      | 308.160482     | 154.583879       |                |                  | P    | <b>1208.645606</b> | 604.826441      | 1191.619057    | 596.313166       | 1190.635041    | 595.821158       | 8  |
| 4  | 396.224145  | 198.615710      | 379.197596     | 190.102436       |                |                  | A    | <b>1111.592842</b> | 556.300059      | 1094.566293    | 547.786784       | 1093.582277    | 547.294776       | 7  |
| 5  | 497.271824  | 249.139550      | 480.245275     | 240.626275       | 479.261259     | 240.134267       | T    | <b>1040.555728</b> | 520.781502      | 1023.529179    | 512.268227       | 1022.545163    | 511.776220       | 6  |
| 6  | 612.298767  | 306.653022      | 595.272218     | 298.139747       | 594.288202     | 297.647739       | D    | <b>939.508049</b>  | 470.257662      | 922.481500     | 461.744388       | 921.497484     | 461.252380       | 5  |
| 7  | 709.351531  | 355.179404      | 692.324982     | 346.666129       | 691.340966     | 346.174121       | P    | <b>824.481106</b>  | 412.744191      | 807.454557     | 404.230916       |                |                  | 4  |
| 8  | 822.435595  | 411.721436      | 805.409046     | 403.208161       | 804.425030     | 402.716153       | L    | <b>727.428342</b>  | 364.217809      | 710.401793     | 355.704534       |                |                  | 3  |
| 9  | 1261.660921 | 631.334098      | 1244.634372    | 622.820824       | 1243.650356    | 622.328816       | Q    | <b>614.344278</b>  | 307.675777      | 597.317729     | 299.162502       |                |                  | 2  |
| 10 |             |                 |                |                  |                |                  | R    | 175.118952         | 88.063114       | 158.092403     | 79.549839        |                |                  | 1  |

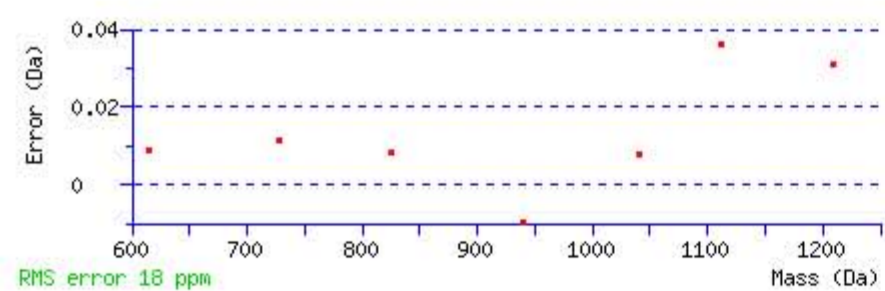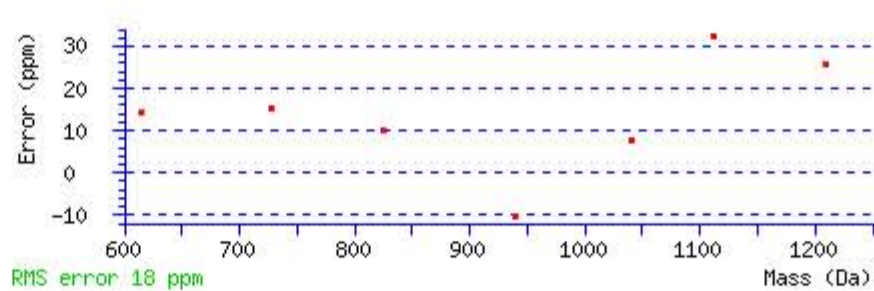

NCBI BLAST search of [NLPATDPLQR](#)

(Parameters: blastp, nr protein database, expect=20000, no filter, PAM30)

Other BLAST [web gateways](#)

## All matches to this query

| Score | Mr(calc):   | Delta    | Sequence                   |
|-------|-------------|----------|----------------------------|
| 45.7  | 1434.765305 | 0.002797 | <a href="#">NLPATDPLQR</a> |

Mascot: <http://www.matrixscience.com/>



# MASCOT SEARCH RESULTS

## Peptide View

MS/MS Fragmentation of **VTPNLMGHLCGNQR**

Found in **ECM1\_HUMAN**, Extracellular matrix protein 1 OS=Homo sapiens GN=ECM1 PE=1 SV=2

Match to Query 50719: 1906.940472 from(636.654100,3+) rtinseconds(1870) index(41159)

Title: Locus:1.1.1.2935.18 File:"2013-07-02 CLN FXIII 60 min 1st F 3.wiff"

Data file C:\Program Files (x86)\Matrix Science\Mascot Daemon\mgf4 FXIII 60 min 1st\mascot\_daemon\_merge.mgf

Click mouse within plot area to zoom in by factor of two about that point

Or, Plot from  to  Da

Label all possible matches  Label matches used for scoring

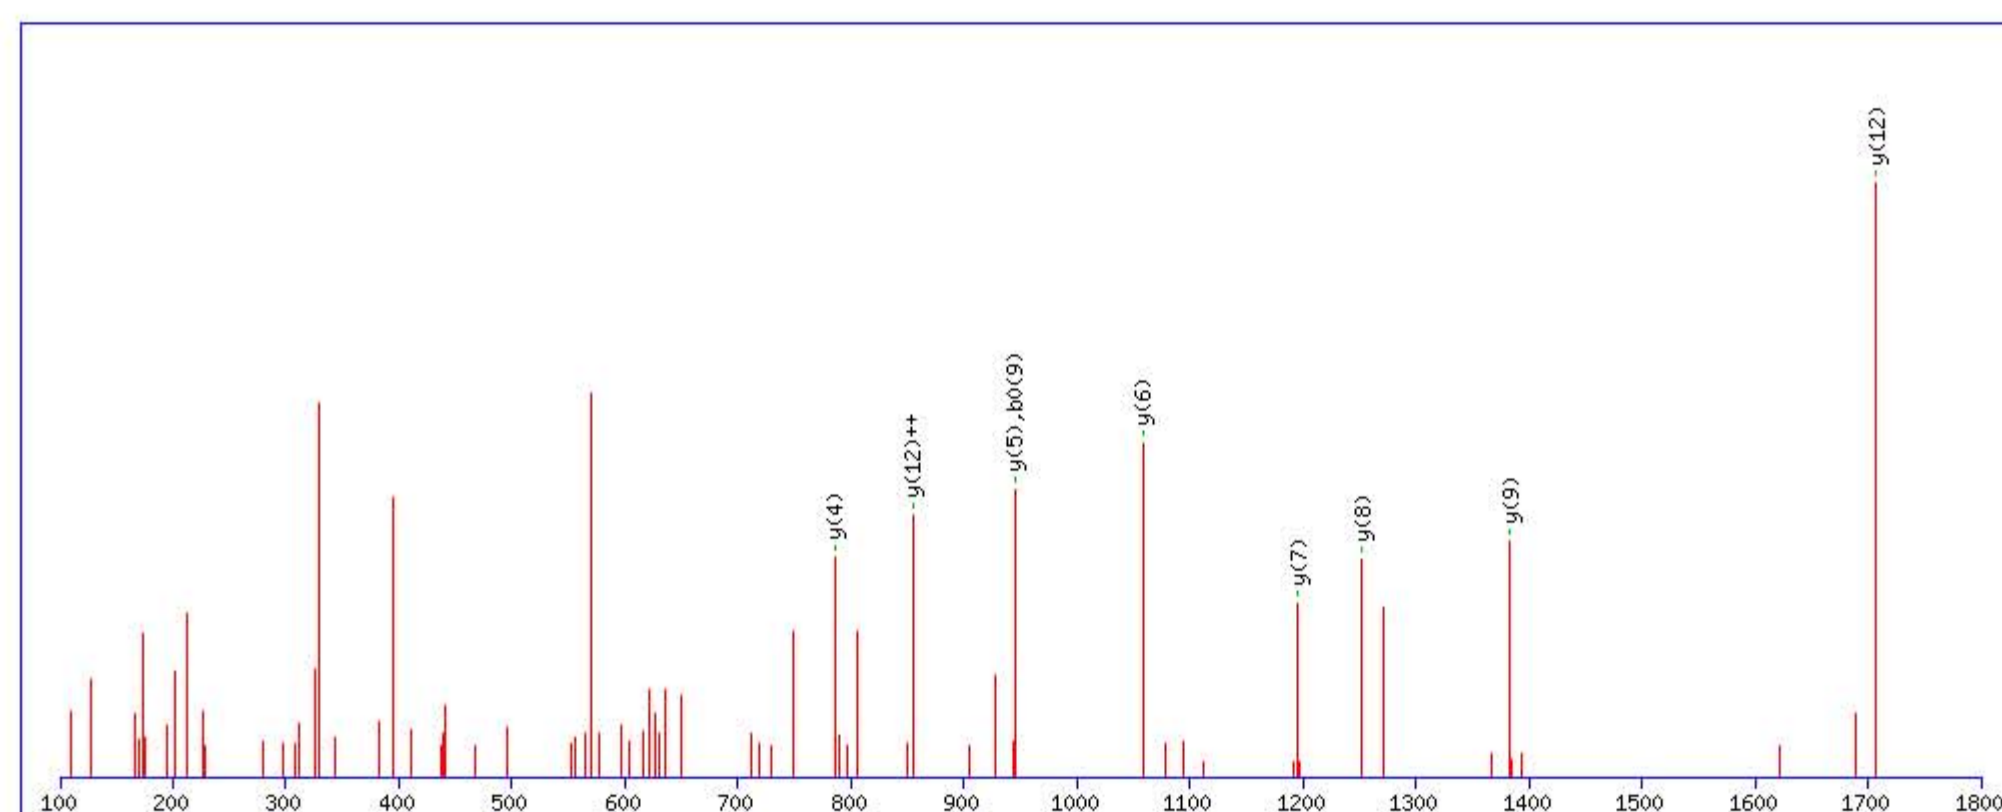

Monoisotopic mass of neutral peptide Mr(calc): 1906.932816

Fixed modifications: Carbamidomethyl (C) (apply to specified residues or termini only)

Variable modifications:

Q13 : Biotin:Thermo-21345 (Q)

Ions Score: 42 Expect: 0.0016

Matches : 9/124 fragment ions using 14 most intense peaks [\(help\)](#)

| #  | b           | b <sup>++</sup> | b <sup>*</sup> | b <sup>+++</sup> | b <sup>0</sup>    | b <sup>0++</sup> | Seq. | y                  | y <sup>++</sup>   | y <sup>*</sup> | y <sup>+++</sup> | y <sup>0</sup> | y <sup>0++</sup> | #  |
|----|-------------|-----------------|----------------|------------------|-------------------|------------------|------|--------------------|-------------------|----------------|------------------|----------------|------------------|----|
| 1  | 100.075690  | 50.541483       |                |                  |                   |                  | V    |                    |                   |                |                  |                |                  | 14 |
| 2  | 201.123369  | 101.065322      |                |                  | 183.112804        | 92.060040        | T    | 1808.871677        | 904.939477        | 1791.845128    | 896.426202       | 1790.861112    | 895.934194       | 13 |
| 3  | 298.176133  | 149.591704      |                |                  | 280.165568        | 140.586422       | P    | <b>1707.823998</b> | <b>854.415637</b> | 1690.797449    | 845.902363       |                |                  | 12 |
| 4  | 412.219060  | 206.613168      | 395.192511     | 198.099894       | 394.208495        | 197.607886       | N    | 1610.771234        | 805.889255        | 1593.744685    | 797.375981       |                |                  | 11 |
| 5  | 525.303124  | 263.155200      | 508.276575     | 254.641926       | 507.292559        | 254.149918       | L    | 1496.728307        | 748.867792        | 1479.701758    | 740.354517       |                |                  | 10 |
| 6  | 656.343609  | 328.675443      | 639.317060     | 320.162168       | 638.333044        | 319.670160       | M    | <b>1383.644243</b> | 692.325760        | 1366.617694    | 683.812485       |                |                  | 9  |
| 7  | 713.365073  | 357.186175      | 696.338524     | 348.672900       | 695.354508        | 348.180892       | G    | <b>1252.603758</b> | 626.805517        | 1235.577209    | 618.292243       |                |                  | 8  |
| 8  | 850.423985  | 425.715631      | 833.397436     | 417.202356       | 832.413420        | 416.710348       | H    | <b>1195.582294</b> | 598.294785        | 1178.555745    | 589.781511       |                |                  | 7  |
| 9  | 963.508049  | 482.257663      | 946.481500     | 473.744388       | <b>945.497484</b> | 473.252380       | L    | <b>1058.523382</b> | 529.765329        | 1041.496833    | 521.252055       |                |                  | 6  |
| 10 | 1123.538698 | 562.272987      | 1106.512149    | 553.759713       | 1105.528133       | 553.267705       | C    | <b>945.439318</b>  | 473.223297        | 928.412769     | 464.710023       |                |                  | 5  |
| 11 | 1180.560162 | 590.783719      | 1163.533613    | 582.270445       | 1162.549597       | 581.778437       | G    | <b>785.408669</b>  | 393.207973        | 768.382120     | 384.694698       |                |                  | 4  |
| 12 | 1294.603089 | 647.805183      | 1277.576540    | 639.291908       | 1276.592524       | 638.799900       | N    | 728.387205         | 364.697241        | 711.360656     | 356.183966       |                |                  | 3  |
| 13 | 1733.828415 | 867.417846      | 1716.801866    | 858.904571       | 1715.817850       | 858.412563       | Q    | 614.344278         | 307.675777        | 597.317729     | 299.162503       |                |                  | 2  |
| 14 |             |                 |                |                  |                   |                  | R    | 175.118952         | 88.063114         | 158.092403     | 79.549839        |                |                  | 1  |

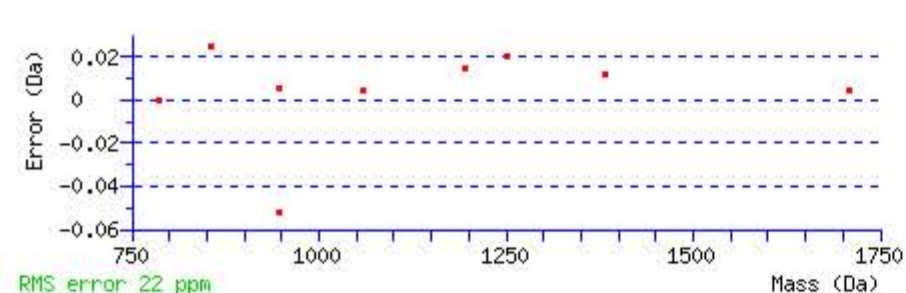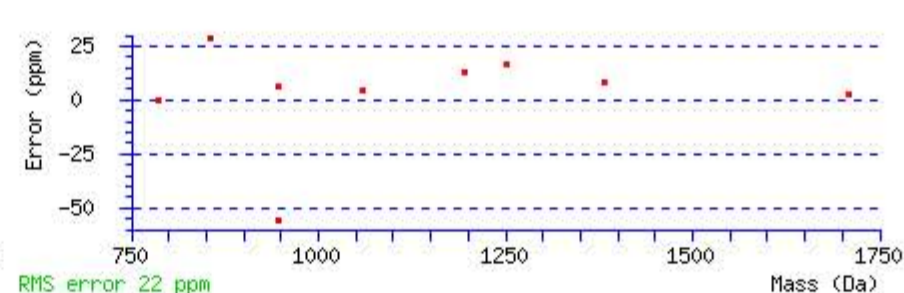

NCBI BLAST search of **VTPNLMGHLCGNQR**

(Parameters: blastp, nr protein database, expect=20000, no filter, PAM30)

Other BLAST [web gateways](#)

### All matches to this query

| Score | Mr(calc):   | Delta    | Sequence                       |
|-------|-------------|----------|--------------------------------|
| 41.9  | 1906.932816 | 0.007656 | <a href="#">VTPNLMGHLCGNQR</a> |

Mascot: <http://www.matrixscience.com/>



# MASCOT Search Results

## Peptide View

MS/MS Fragmentation of **EVGPPLPQEAVPLQK**

Found in **ECM1\_HUMAN**, Extracellular matrix protein 1 OS=Homo sapiens GN=ECM1 PE=1 SV=2

Match to Query 50931: 1912.067742 from(638.363190,3+) rtinseconds(2197) index(8377)

Title: Locus:1.1.1.2897.11 File:"2013-07-02 CLN FXIII 60 min 1st F 1.wiff"

Data file C:\Program Files (x86)\Matrix Science\Mascot Daemon\mgf4 FXIII 60 min 1st\mascot\_daemon\_merge.mgf

Click mouse within plot area to zoom in by factor of two about that point

Or, Plot from  to  Da

Label all possible matches  Label matches used for scoring

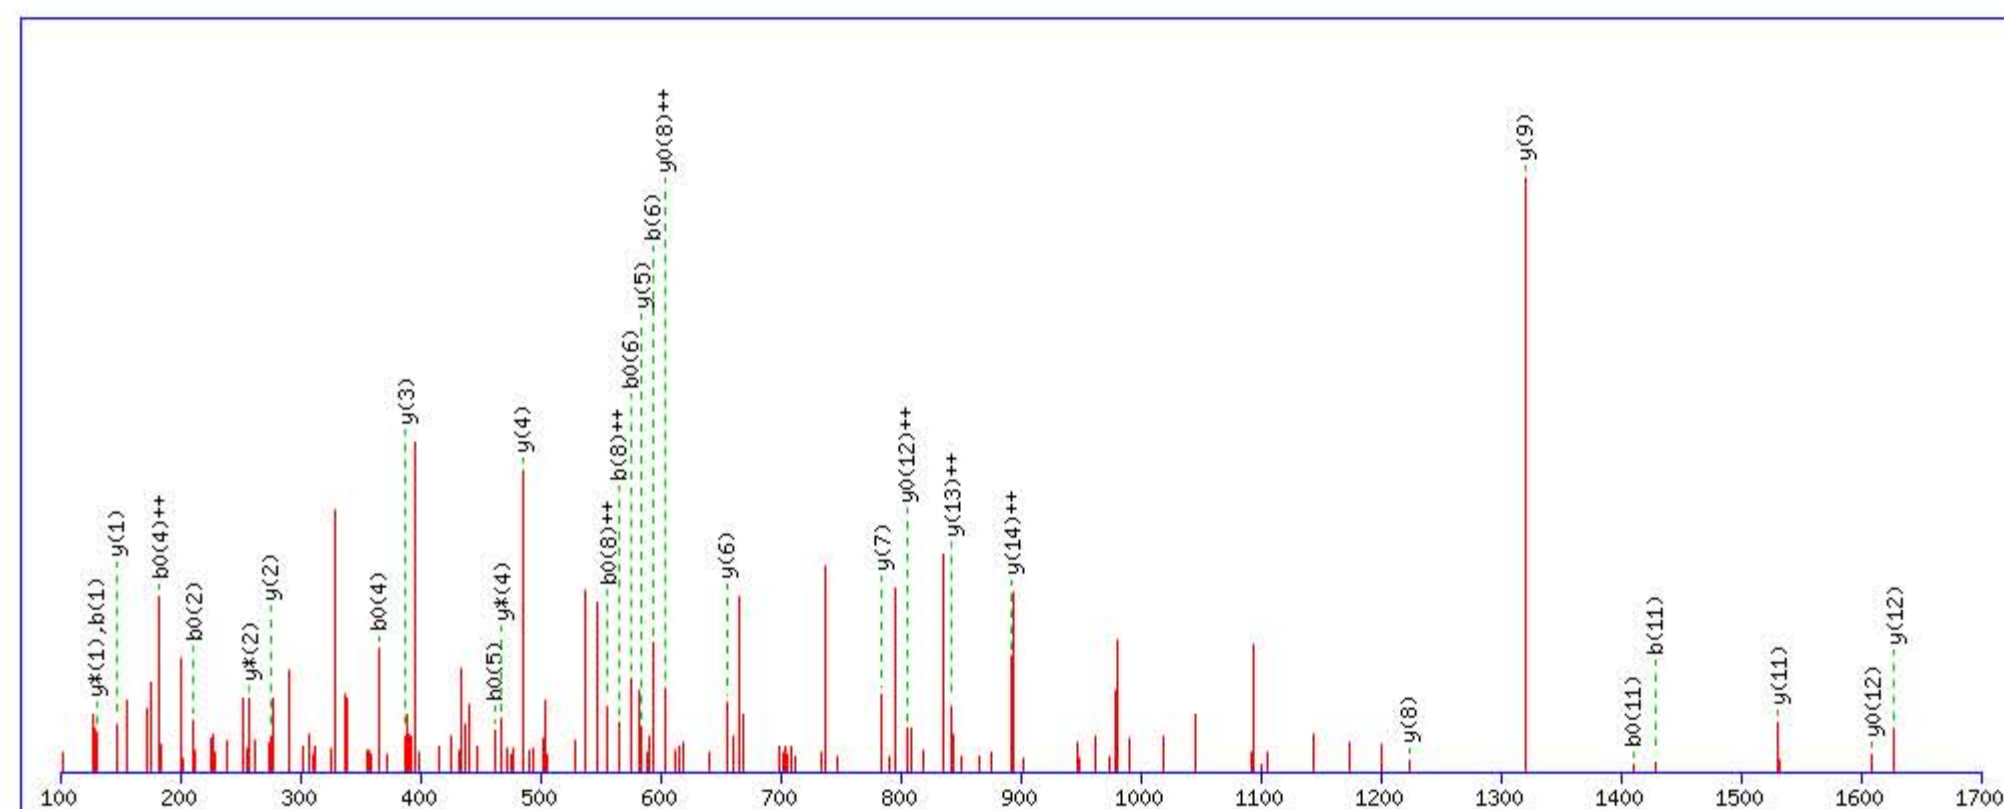

Monoisotopic mass of neutral peptide Mr(calc): 1912.049194

Fixed modifications: Carbamidomethyl (C) (apply to specified residues or termini only)

Variable modifications:

Q8 : Biotin:Thermo-21345 (Q)

Ions Score: 31 Expect: 0.011

Matches : 30/142 fragment ions using 99 most intense peaks [\(help\)](#)

| #  | b           | b <sup>++</sup> | b <sup>*</sup> | b <sup>++</sup> | b <sup>0</sup> | b <sup>0++</sup> | Seq. | y           | y <sup>++</sup> | y <sup>*</sup> | y <sup>++</sup> | y <sup>0</sup> | y <sup>0++</sup> | #  |
|----|-------------|-----------------|----------------|-----------------|----------------|------------------|------|-------------|-----------------|----------------|-----------------|----------------|------------------|----|
| 1  | 130.049869  | 65.528572       |                |                 | 112.039304     | 56.523290        | E    |             |                 |                |                 |                |                  | 15 |
| 2  | 229.118283  | 115.062780      |                |                 | 211.107718     | 106.057497       | V    | 1784.013891 | 892.510583      | 1766.987342    | 883.997309      | 1766.003326    | 883.505301       | 14 |
| 3  | 286.139747  | 143.573512      |                |                 | 268.129182     | 134.568229       | G    | 1684.945477 | 842.976377      | 1667.918928    | 834.463102      | 1666.934912    | 833.971094       | 13 |
| 4  | 383.192511  | 192.099894      |                |                 | 365.181946     | 183.094611       | P    | 1627.924013 | 814.465645      | 1610.897464    | 805.952370      | 1609.913448    | 805.460362       | 12 |
| 5  | 480.245275  | 240.626276      |                |                 | 462.234710     | 231.620993       | P    | 1530.871249 | 765.939263      | 1513.844700    | 757.425988      | 1512.860684    | 756.933980       | 11 |
| 6  | 593.329339  | 297.168308      |                |                 | 575.318774     | 288.163025       | L    | 1433.818485 | 717.412881      | 1416.791936    | 708.899606      | 1415.807920    | 708.407598       | 10 |
| 7  | 690.382103  | 345.694690      |                |                 | 672.371538     | 336.689407       | P    | 1320.734421 | 660.870848      | 1303.707872    | 652.357574      | 1302.723856    | 651.865566       | 9  |
| 8  | 1129.607429 | 565.307353      | 1112.580880    | 556.794078      | 1111.596864    | 556.302070       | Q    | 1223.681657 | 612.344466      | 1206.655108    | 603.831192      | 1205.671092    | 603.339184       | 8  |
| 9  | 1258.650022 | 629.828649      | 1241.623473    | 621.315375      | 1240.639457    | 620.823367       | E    | 784.456331  | 392.731803      | 767.429782     | 384.218529      | 766.445766     | 383.726521       | 7  |
| 10 | 1329.687136 | 665.347206      | 1312.660587    | 656.833932      | 1311.676571    | 656.341924       | A    | 655.413738  | 328.210507      | 638.387189     | 319.697232      |                |                  | 6  |
| 11 | 1428.755550 | 714.881413      | 1411.729001    | 706.368139      | 1410.744985    | 705.876131       | V    | 584.376624  | 292.691950      | 567.350075     | 284.178676      |                |                  | 5  |
| 12 | 1525.808314 | 763.407795      | 1508.781765    | 754.894521      | 1507.797749    | 754.402513       | P    | 485.308210  | 243.157743      | 468.281661     | 234.644468      |                |                  | 4  |
| 13 | 1638.892378 | 819.949827      | 1621.865829    | 811.436553      | 1620.881813    | 810.944545       | L    | 388.255446  | 194.631361      | 371.228897     | 186.118086      |                |                  | 3  |
| 14 | 1766.950956 | 883.979116      | 1749.924407    | 875.465842      | 1748.940391    | 874.973833       | Q    | 275.171382  | 138.089329      | 258.144833     | 129.576054      |                |                  | 2  |
| 15 |             |                 |                |                 |                |                  | K    | 147.112804  | 74.060040       | 130.086255     | 65.546765       |                |                  | 1  |

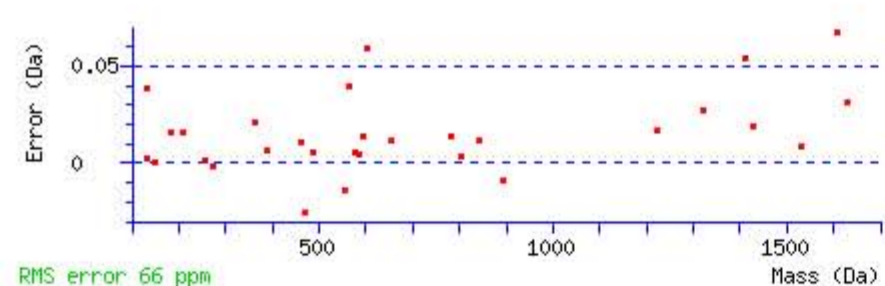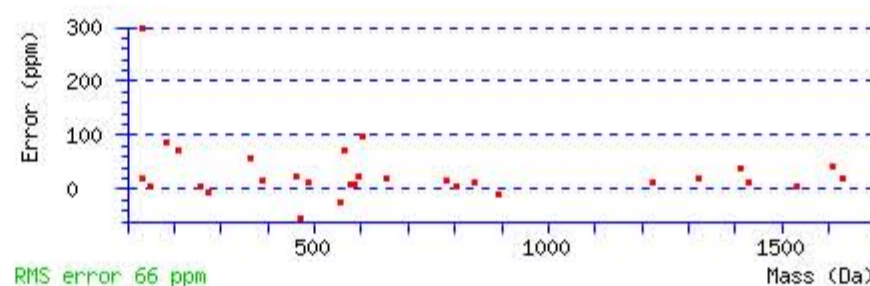

NCBI BLAST search of **EVGPPLPQEAVPLQK**

(Parameters: blastp, nr protein database, expect=20000, no filter, PAM30)

Other BLAST [web gateways](#)

All matches to this query

| Score | Mr(calc):   | Delta    | Sequence                        |
|-------|-------------|----------|---------------------------------|
| 30.8  | 1912.049194 | 0.018548 | <a href="#">EVGPPLPQEAVPLQK</a> |
| 6.7   | 1912.049194 | 0.018548 | <a href="#">EVGPPLPQEAVPLQK</a> |

Mascot: <http://www.matrixscience.com/>



# MASCOT Search Results

## Peptide View

MS/MS Fragmentation of **FSCFQEEAPQPHYQLR**

Found in **ECM1\_HUMAN**, Extracellular matrix protein 1 OS=Homo sapiens GN=ECM1 PE=1 SV=2

Match to Query 61609: 2347.101882 from(783.374570,3+) rtinseconds(1911) index(41510)

Title: Locus:1.1.1.2949.19 File:"2013-07-02 CLN FXIII 60 min 1st F 3.wiff"

Data file C:\Program Files (x86)\Matrix Science\Mascot Daemon\mgf\4 FXIII 60 min 1st\mascot\_daemon\_merge.mgf

Click mouse within plot area to zoom in by factor of two about that point

Or, Plot from  to  Da

Label all possible matches  Label matches used for scoring

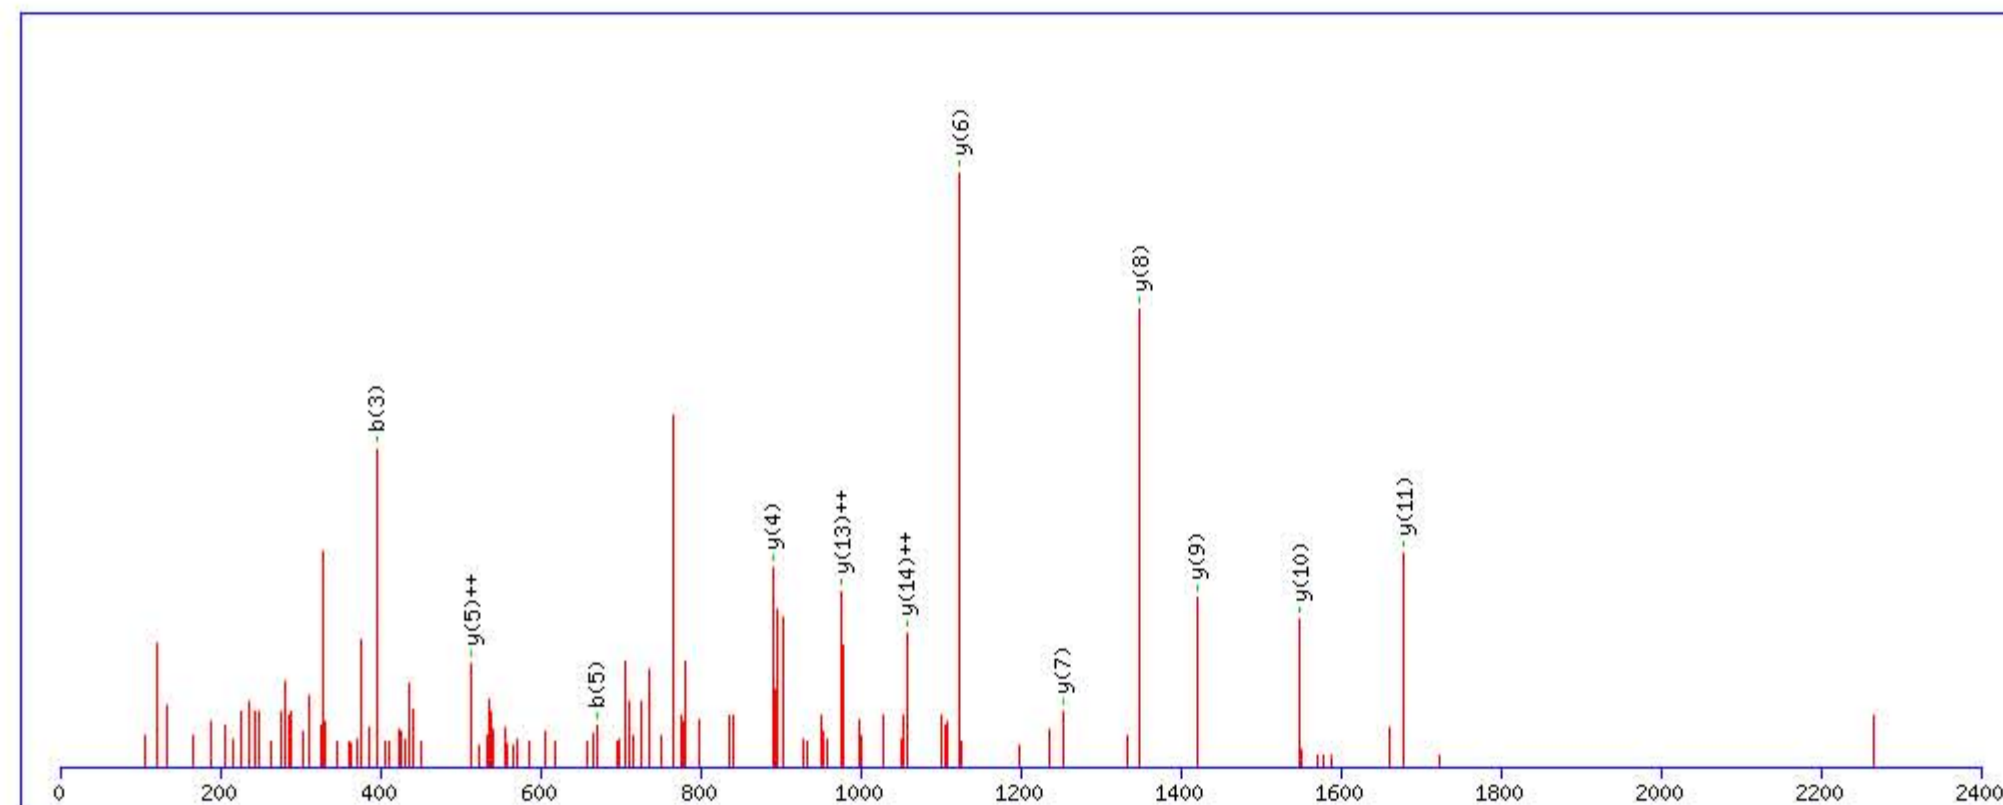

Monoisotopic mass of neutral peptide Mr(calc): 2347.087784

Fixed modifications: Carbamidomethyl (C) (apply to specified residues or termini only)

Variable modifications:

Q14 : Biotin:Thermo-21345 (Q)

Ions Score: 42 Expect: 0.0011

Matches : 12/152 fragment ions using 18 most intense peaks [\(help\)](#)

| #  | b                 | b <sup>++</sup> | b <sup>*</sup> | b <sup>+++</sup> | b <sup>0</sup> | b <sup>0++</sup> | Seq. | y                  | y <sup>++</sup>    | y <sup>*</sup> | y <sup>+++</sup> | y <sup>0</sup> | y <sup>0++</sup> | #  |
|----|-------------------|-----------------|----------------|------------------|----------------|------------------|------|--------------------|--------------------|----------------|------------------|----------------|------------------|----|
| 1  | 148.075690        | 74.541483       |                |                  |                |                  | F    |                    |                    |                |                  |                |                  | 16 |
| 2  | 235.107718        | 118.057497      |                |                  | 217.097153     | 109.052214       | S    | 2201.026658        | 1101.016967        | 2184.000109    | 1092.503692      | 2183.016093    | 1092.011684      | 15 |
| 3  | <b>395.138367</b> | 198.072821      |                |                  | 377.127802     | 189.067539       | C    | 2113.994630        | <b>1057.500953</b> | 2096.968081    | 1048.987678      | 2095.984065    | 1048.495670      | 14 |
| 4  | 542.206781        | 271.607029      |                |                  | 524.196216     | 262.601746       | F    | 1953.963981        | <b>977.485629</b>  | 1936.937432    | 968.972354       | 1935.953416    | 968.480346       | 13 |
| 5  | <b>670.265359</b> | 335.636318      | 653.238810     | 327.123043       | 652.254794     | 326.631035       | Q    | 1806.895567        | 903.951422         | 1789.869018    | 895.438147       | 1788.885002    | 894.946139       | 12 |
| 6  | 799.307952        | 400.157614      | 782.281403     | 391.644340       | 781.297387     | 391.152332       | E    | <b>1678.836989</b> | 839.922133         | 1661.810440    | 831.408858       | 1660.826424    | 830.916850       | 11 |
| 7  | 928.350545        | 464.678911      | 911.323996     | 456.165636       | 910.339980     | 455.673628       | E    | <b>1549.794396</b> | 775.400836         | 1532.767847    | 766.887562       | 1531.783831    | 766.395554       | 10 |
| 8  | 999.387659        | 500.197468      | 982.361110     | 491.684193       | 981.377094     | 491.192185       | A    | <b>1420.751803</b> | 710.879540         | 1403.725254    | 702.366265       |                |                  | 9  |
| 9  | 1096.440423       | 548.723850      | 1079.413874    | 540.210575       | 1078.429858    | 539.718567       | P    | <b>1349.714689</b> | 675.360983         | 1332.688140    | 666.847708       |                |                  | 8  |
| 10 | 1224.499001       | 612.753138      | 1207.472452    | 604.239864       | 1206.488436    | 603.747856       | Q    | <b>1252.661925</b> | 626.834601         | 1235.635376    | 618.321326       |                |                  | 7  |
| 11 | 1321.551765       | 661.279520      | 1304.525216    | 652.766246       | 1303.541200    | 652.274238       | P    | <b>1124.603347</b> | 562.805312         | 1107.576798    | 554.292037       |                |                  | 6  |
| 12 | 1458.610677       | 729.808976      | 1441.584128    | 721.295702       | 1440.600112    | 720.803694       | H    | 1027.550583        | <b>514.278930</b>  | 1010.524034    | 505.765655       |                |                  | 5  |
| 13 | 1621.674006       | 811.340641      | 1604.647457    | 802.827367       | 1603.663441    | 802.335358       | Y    | <b>890.491671</b>  | 445.749474         | 873.465122     | 437.236199       |                |                  | 4  |
| 14 | 2060.899332       | 1030.953304     | 2043.872783    | 1022.440030      | 2042.888767    | 1021.948022      | Q    | 727.428342         | 364.217809         | 710.401793     | 355.704535       |                |                  | 3  |
| 15 | 2173.983396       | 1087.495336     | 2156.956847    | 1078.982061      | 2155.972831    | 1078.490053      | L    | 288.203016         | 144.605146         | 271.176467     | 136.091872       |                |                  | 2  |
| 16 |                   |                 |                |                  |                |                  | R    | 175.118952         | 88.063114          | 158.092403     | 79.549839        |                |                  | 1  |

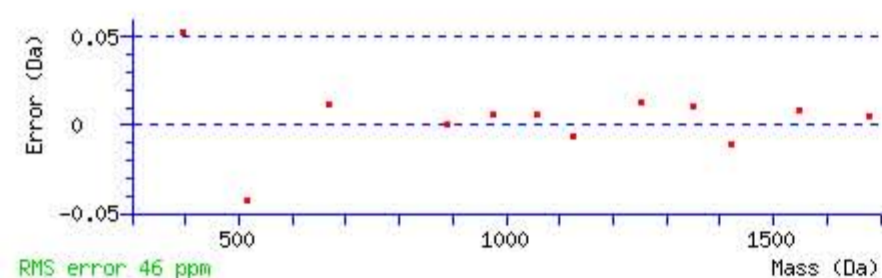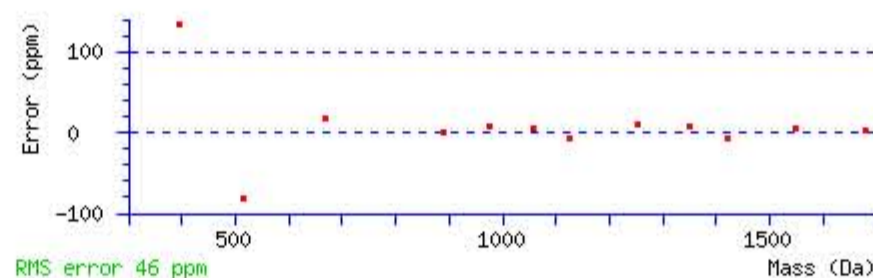

NCBI BLAST search of **FSCFQEEAPQPHYQLR**

(Parameters: blastp, nr protein database, expect=20000, no filter, PAM30)

Other BLAST [web gateways](#)

## All matches to this query

| Score | Mr(calc):   | Delta    | Sequence                         |
|-------|-------------|----------|----------------------------------|
| 41.9  | 2347.087784 | 0.014098 | <a href="#">FSCFQEEAPQPHYQLR</a> |
| 17.3  | 2347.087784 | 0.014098 | <a href="#">FSCFQEEAPQPHYQLR</a> |

Mascot: <http://www.matrixscience.com/>



# MASCOT Search Results

## Peptide View

MS/MS Fragmentation of **IFFESVYGQCK**

Found in **FETUB\_HUMAN**, Fetuin-B OS=Homo sapiens GN=FETUB PE=1 SV=2

Match to Query 45518: 1687.827808 from(844.921180,2+) rtinseconds(2324) index(80738)

Title: Locus:1.1.1.3023.14 File:"2013-07-02 CLN FXIII 60 min 1st FT.wiff"

Data file C:\Program Files (x86)\Matrix Science\Mascot Daemon\mgf4 FXIII 60 min 1st\mascot\_daemon\_merge.mgf

Click mouse within plot area to zoom in by factor of two about that point

Or, Plot from  to  Da

Label all possible matches  Label matches used for scoring

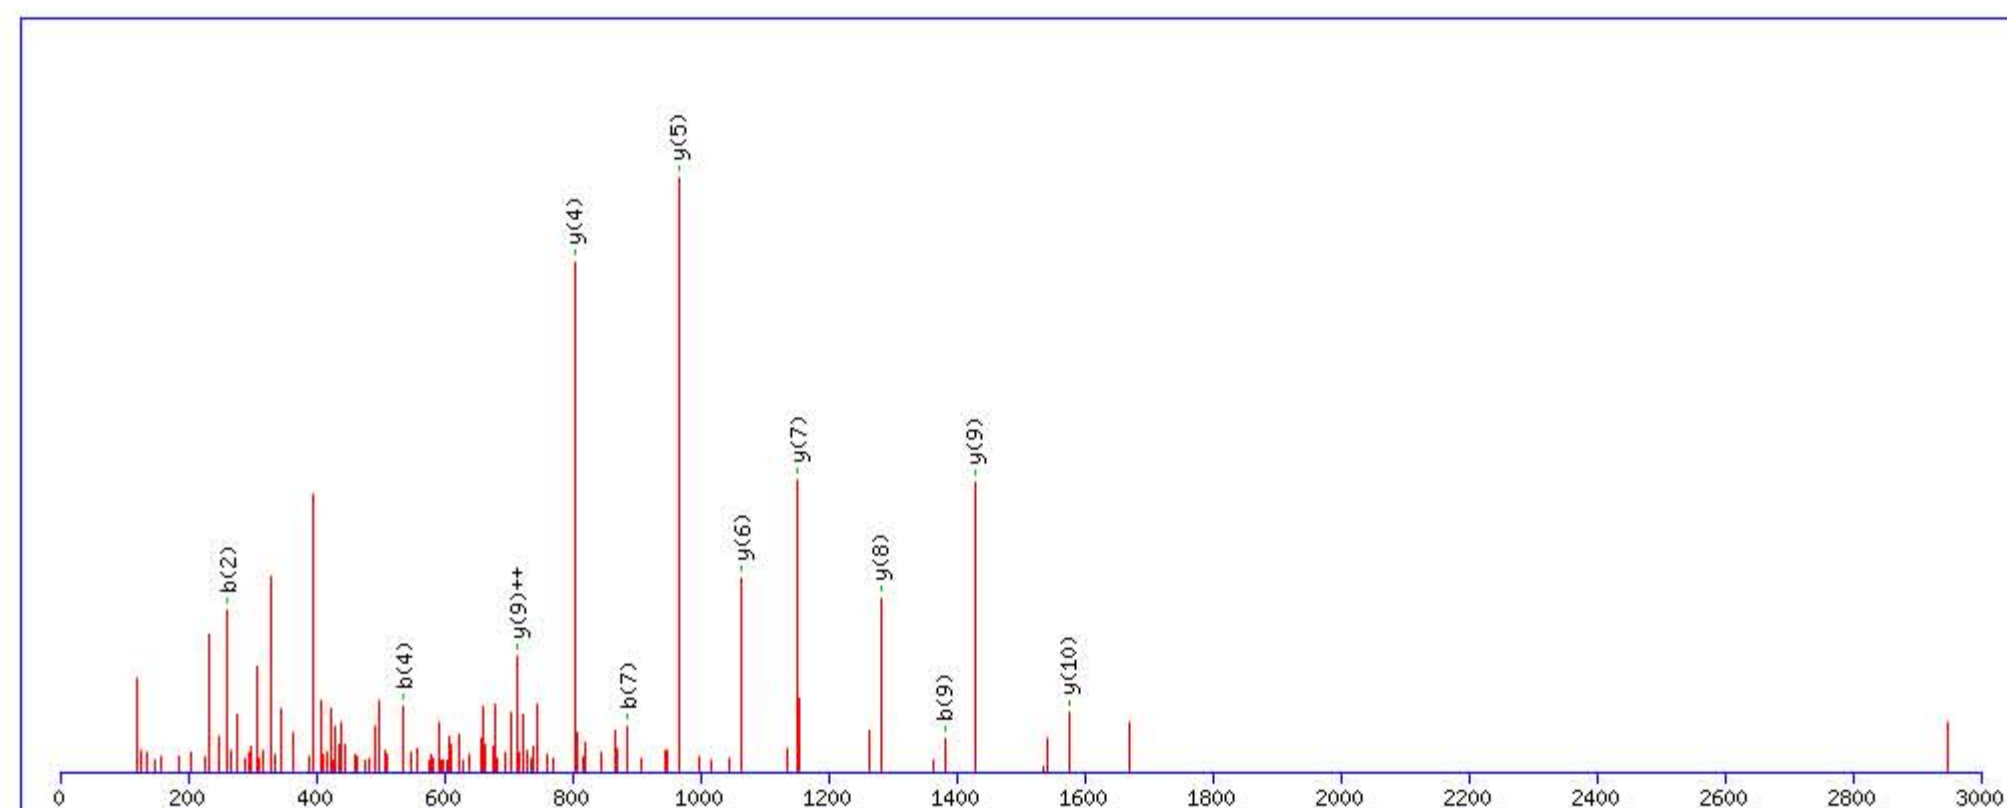

Monoisotopic mass of neutral peptide  $M_r(\text{calc})$ : 1687.810226

Fixed modifications: Carbamidomethyl (C) (apply to specified residues or termini only)

Variable modifications:

Q9 : Biotin:Thermo-21345 (Q)

Ions Score: 52 Expect: 0.00014

Matches : 12/86 fragment ions using 16 most intense peaks [\(help\)](#)

| #  | b                  | b <sup>++</sup> | b <sup>*</sup> | b <sup>*++</sup> | b <sup>0</sup> | b <sup>0++</sup> | Seq. | y                  | y <sup>++</sup>   | y <sup>*</sup> | y <sup>*++</sup> | y <sup>0</sup> | y <sup>0++</sup> | #  |
|----|--------------------|-----------------|----------------|------------------|----------------|------------------|------|--------------------|-------------------|----------------|------------------|----------------|------------------|----|
| 1  | 114.091340         | 57.549308       |                |                  |                |                  | I    |                    |                   |                |                  |                |                  | 11 |
| 2  | <b>261.159754</b>  | 131.083515      |                |                  |                |                  | F    | <b>1575.733435</b> | 788.370356        | 1558.706886    | 779.857081       | 1557.722870    | 779.365073       | 10 |
| 3  | 408.228168         | 204.617722      |                |                  |                |                  | F    | <b>1428.665021</b> | <b>714.836149</b> | 1411.638472    | 706.322874       | 1410.654456    | 705.830866       | 9  |
| 4  | <b>537.270761</b>  | 269.139019      |                |                  | 519.260196     | 260.133736       | E    | <b>1281.596607</b> | 641.301942        | 1264.570058    | 632.788667       | 1263.586042    | 632.296659       | 8  |
| 5  | 624.302789         | 312.655033      |                |                  | 606.292224     | 303.649750       | S    | <b>1152.554014</b> | 576.780645        | 1135.527465    | 568.267371       | 1134.543449    | 567.775363       | 7  |
| 6  | 723.371203         | 362.189239      |                |                  | 705.360638     | 353.183957       | V    | <b>1065.521986</b> | 533.264631        | 1048.495437    | 524.751357       |                |                  | 6  |
| 7  | <b>886.434532</b>  | 443.720904      |                |                  | 868.423967     | 434.715622       | Y    | <b>966.453572</b>  | 483.730424        | 949.427023     | 475.217150       |                |                  | 5  |
| 8  | 943.455996         | 472.231636      |                |                  | 925.445431     | 463.226354       | G    | <b>803.390243</b>  | 402.198760        | 786.363694     | 393.685485       |                |                  | 4  |
| 9  | <b>1382.681322</b> | 691.844299      | 1365.654773    | 683.331025       | 1364.670757    | 682.839017       | Q    | 746.368779         | 373.688028        | 729.342230     | 365.174753       |                |                  | 3  |
| 10 | 1542.711971        | 771.859624      | 1525.685422    | 763.346349       | 1524.701406    | 762.854341       | C    | 307.143453         | 154.075365        | 290.116904     | 145.562090       |                |                  | 2  |
| 11 |                    |                 |                |                  |                |                  | K    | 147.112804         | 74.060040         | 130.086255     | 65.546765        |                |                  | 1  |

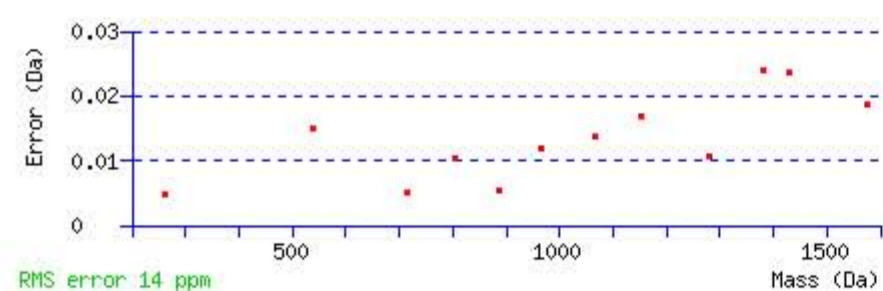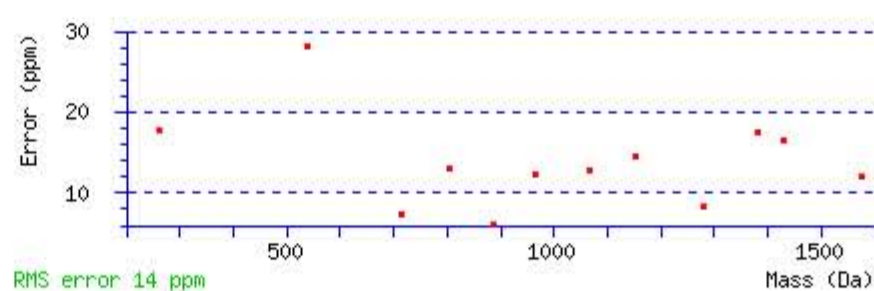

NCBI BLAST search of **IFFESVYGQCK**

(Parameters: blastp, nr protein database, expect=20000, no filter, PAM30)

Other BLAST [web gateways](#)

All matches to this query

| Score | $M_r(\text{calc})$ : | Delta    | Sequence                    |
|-------|----------------------|----------|-----------------------------|
| 52.1  | 1687.810226          | 0.017582 | <a href="#">IFFESVYGQCK</a> |

Mascot: <http://www.matrixscience.com/>



# MASCOT Search Results

## Peptide View

MS/MS Fragmentation of **QLEQVIK**

Found in **FIBA\_HUMAN**, Fibrinogen alpha chain OS=Homo sapiens GN=FGA PE=1 SV=2

Match to Query 28837: 1238.714648 from(620.364600,2+) rtinseconds(1744) index(58681)

Title: Locus:1.1.1.2913.8 File:"2013-07-02 CLN FXIII 60 min 1st F 4.wiff"

Data file C:\Program Files (x86)\Matrix Science\Mascot Daemon\mgf4 FXIII 60 min 1st\mascot\_daemon\_merge.mgf

Click mouse within plot area to zoom in by factor of two about that point

Or, Plot from  to  Da

Label all possible matches  Label matches used for scoring

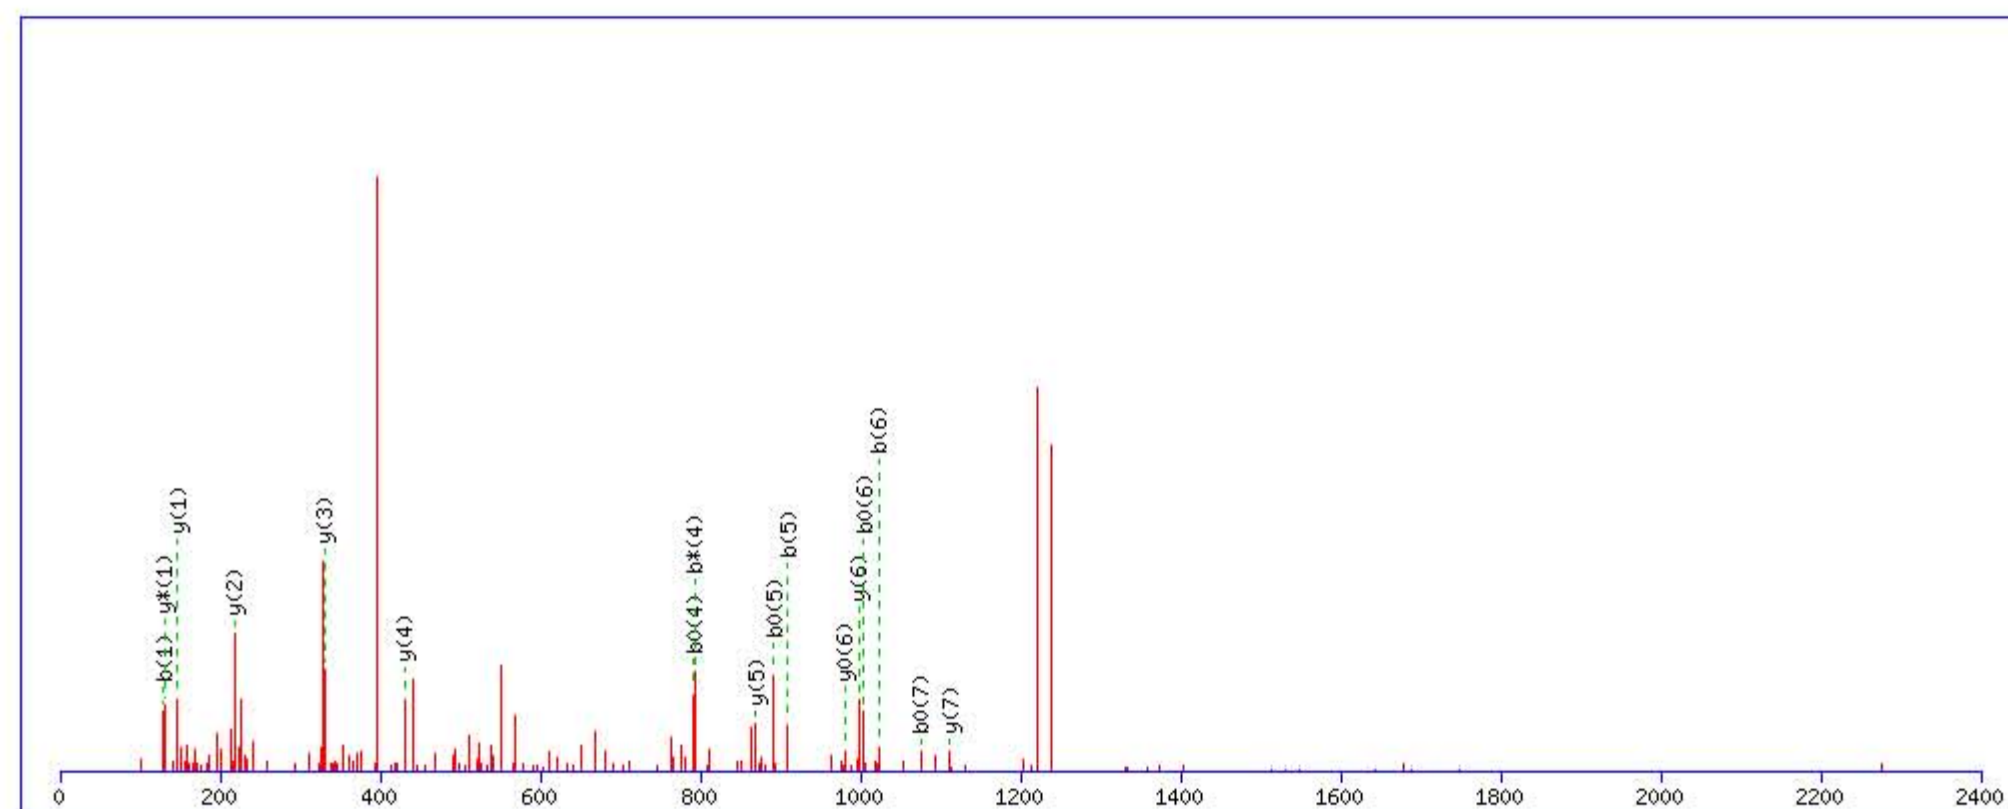

Monoisotopic mass of neutral peptide Mr(calc): 1238.705658

Fixed modifications: Carbamidomethyl (C) (apply to specified residues or termini only)

Variable modifications:

Q4 : Biotin:Thermo-21345 (Q)

Ions Score: 38 Expect: 0.0023

Matches : 17/70 fragment ions using 36 most intense peaks [\(help\)](#)

| # | b           | b <sup>++</sup> | b <sup>*</sup> | b <sup>+++</sup> | b <sup>0</sup> | b <sup>0++</sup> | Seq. | y           | y <sup>++</sup> | y <sup>*</sup> | y <sup>+++</sup> | y <sup>0</sup> | y <sup>0++</sup> | # |
|---|-------------|-----------------|----------------|------------------|----------------|------------------|------|-------------|-----------------|----------------|------------------|----------------|------------------|---|
| 1 | 129.065854  | 65.036565       | 112.039305     | 56.523291        |                |                  | Q    |             |                 |                |                  |                |                  | 8 |
| 2 | 242.149918  | 121.578597      | 225.123369     | 113.065323       |                |                  | L    | 1111.654379 | 556.330828      | 1094.627830    | 547.817553       | 1093.643814    | 547.325545       | 7 |
| 3 | 371.192511  | 186.099894      | 354.165962     | 177.586619       | 353.181946     | 177.094611       | E    | 998.570315  | 499.788796      | 981.543766     | 491.275521       | 980.559750     | 490.783513       | 6 |
| 4 | 810.417837  | 405.712557      | 793.391288     | 397.199282       | 792.407272     | 396.707274       | Q    | 869.527722  | 435.267499      | 852.501173     | 426.754225       |                |                  | 5 |
| 5 | 909.486251  | 455.246764      | 892.459702     | 446.733489       | 891.475686     | 446.241481       | V    | 430.302396  | 215.654836      | 413.275847     | 207.141562       |                |                  | 4 |
| 6 | 1022.570315 | 511.788796      | 1005.543766    | 503.275521       | 1004.559750    | 502.783513       | I    | 331.233982  | 166.120629      | 314.207433     | 157.607355       |                |                  | 3 |
| 7 | 1093.607429 | 547.307353      | 1076.580880    | 538.794078       | 1075.596864    | 538.302070       | A    | 218.149918  | 109.578597      | 201.123369     | 101.065323       |                |                  | 2 |
| 8 |             |                 |                |                  |                |                  | K    | 147.112804  | 74.060040       | 130.086255     | 65.546765        |                |                  | 1 |

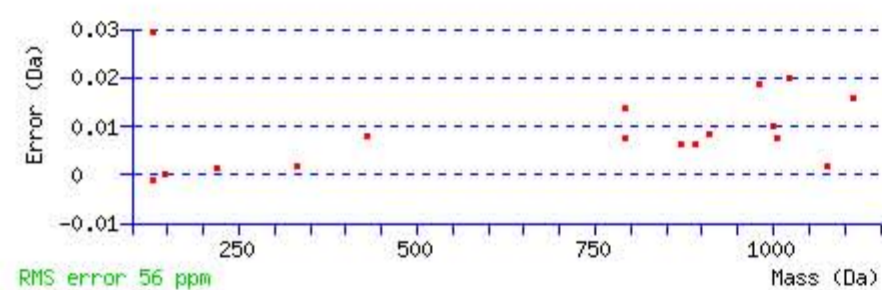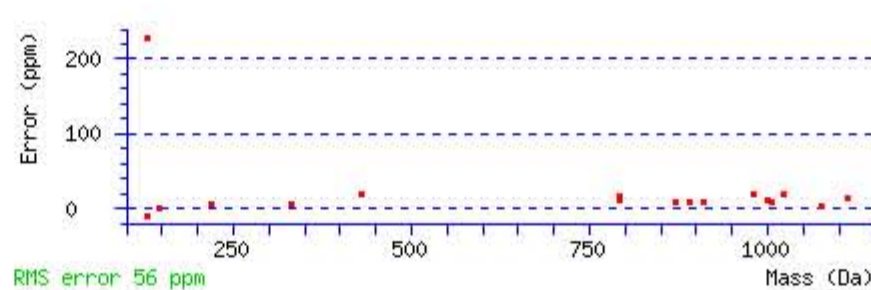

NCBI BLAST search of **QLEQVIK**

(Parameters: blastp, nr protein database, expect=20000, no filter, PAM30)

Other BLAST [web gateways](#)

All matches to this query

| Score | Mr(calc):   | Delta     | Sequence                     |
|-------|-------------|-----------|------------------------------|
| 37.8  | 1238.705658 | 0.008990  | <a href="#">QLEQVIK</a>      |
| 14.9  | 1238.705658 | 0.008990  | <a href="#">QLEQVIK</a>      |
| 9.3   | 1238.698257 | 0.016391  | <a href="#">IHADASSKVLAK</a> |
| 8.1   | 1238.716904 | -0.002256 | <a href="#">DRVQVAIK</a>     |
| 6.0   | 1238.702301 | 0.012347  | <a href="#">DVFKKGFSLAK</a>  |
| 5.8   | 1238.698273 | 0.016375  | <a href="#">GHVTQLKESLK</a>  |
| 5.1   | 1238.728119 | -0.013471 | <a href="#">QEVRRLLK</a>     |
| 4.5   | 1238.705658 | 0.008990  | <a href="#">QIAQEIVK</a>     |
| 3.7   | 1238.720917 | -0.006269 | <a href="#">QLWLQLK</a>      |
| 2.8   | 1238.709473 | 0.005175  | <a href="#">NDLRPANKLAK</a>  |



# MASCOT Search Results

## Peptide View

MS/MS Fragmentation of **NSLFYQK**

Found in **FIBA\_HUMAN**, Fibrinogen alpha chain OS=Homo sapiens GN=FGA PE=1 SV=2

Match to Query 31759: 1338.677028 from(670.345790,2+) rtinseconds(2045) index(7316)

Title: Locus:1.1.1.2844.14 File:"2013-07-02 CLN FXIII 60 min 1st F 1.wiff"

Data file C:\Program Files (x86)\Matrix Science\Mascot Daemon\mgf4 FXIII 60 min 1st\mascot\_daemon\_merge.mgf

Click mouse within plot area to zoom in by factor of two about that point

Or, Plot from  to  Da

Label all possible matches  Label matches used for scoring

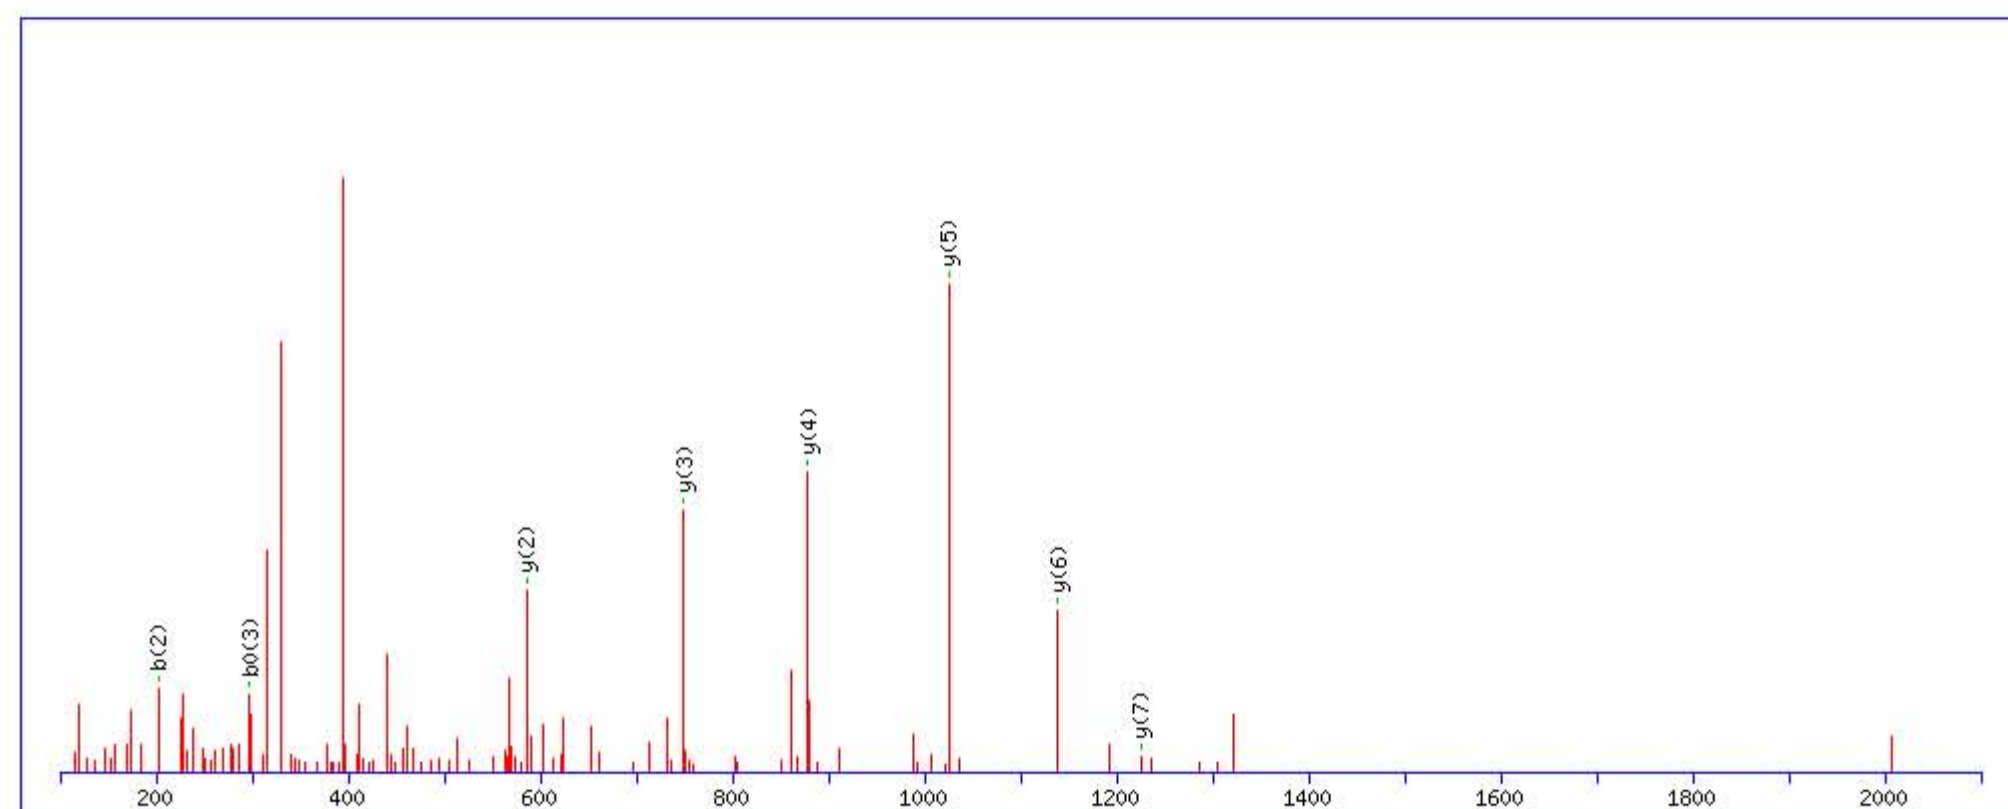

Monoisotopic mass of neutral peptide Mr(calc): 1338.664185

Fixed modifications: Carbamidomethyl (C) (apply to specified residues or termini only)

Variable modifications:

Q7 : Biotin:Thermo-21345 (Q)

Ions Score: 42 Expect: 0.0012

Matches : 8/76 fragment ions using 13 most intense peaks ([help](#))

| # | b                 | b <sup>++</sup> | b <sup>*</sup> | b <sup>*++</sup> | b <sup>0</sup>    | b <sup>0++</sup> | Seq. | y                  | y <sup>++</sup> | y <sup>*</sup> | y <sup>*++</sup> | y <sup>0</sup> | y <sup>0++</sup> | # |
|---|-------------------|-----------------|----------------|------------------|-------------------|------------------|------|--------------------|-----------------|----------------|------------------|----------------|------------------|---|
| 1 | 115.050203        | 58.028740       | 98.023654      | 49.515465        |                   |                  | N    |                    |                 |                |                  |                |                  | 8 |
| 2 | <b>202.082231</b> | 101.544753      | 185.055682     | 93.031479        | 184.071666        | 92.539471        | S    | <b>1225.628558</b> | 613.317917      | 1208.602009    | 604.804643       | 1207.617993    | 604.312635       | 7 |
| 3 | 315.166295        | 158.086785      | 298.139746     | 149.573511       | <b>297.155730</b> | 149.081503       | L    | <b>1138.596530</b> | 569.801903      | 1121.569981    | 561.288629       | 1120.585965    | 560.796621       | 6 |
| 4 | 462.234709        | 231.620993      | 445.208160     | 223.107718       | 444.224144        | 222.615710       | F    | <b>1025.512466</b> | 513.259871      | 1008.485917    | 504.746597       | 1007.501901    | 504.254589       | 5 |
| 5 | 591.277302        | 296.142289      | 574.250753     | 287.629015       | 573.266737        | 287.137007       | E    | <b>878.444052</b>  | 439.725664      | 861.417503     | 431.212390       | 860.433487     | 430.720382       | 4 |
| 6 | 754.340631        | 377.673954      | 737.314082     | 369.160679       | 736.330066        | 368.668671       | Y    | <b>749.401459</b>  | 375.204368      | 732.374910     | 366.691093       |                |                  | 3 |
| 7 | 1193.565957       | 597.286617      | 1176.539408    | 588.773342       | 1175.555392       | 588.281334       | Q    | <b>586.338130</b>  | 293.672703      | 569.311581     | 285.159429       |                |                  | 2 |
| 8 |                   |                 |                |                  |                   |                  | K    | 147.112804         | 74.060040       | 130.086255     | 65.546765        |                |                  | 1 |

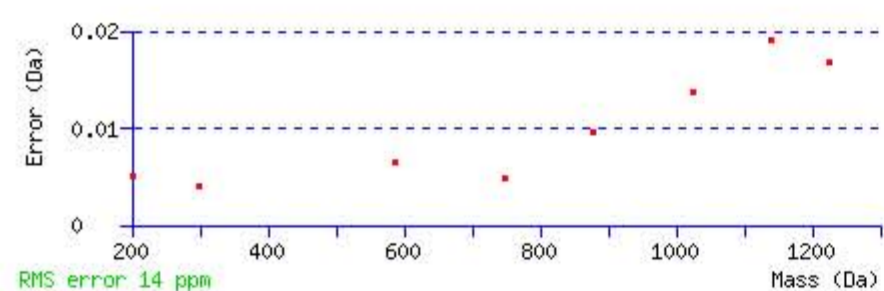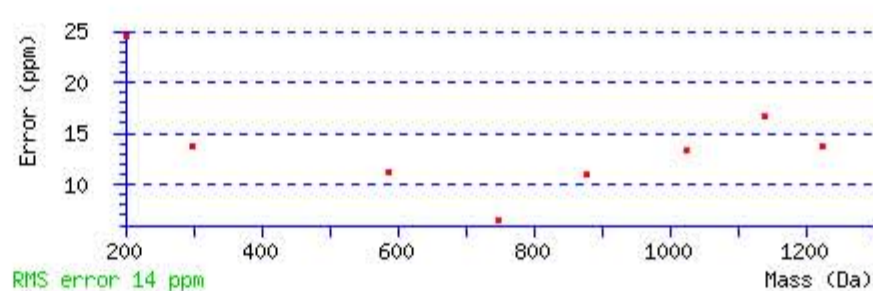

NCBI BLAST search of **NSLFYQK**

(Parameters: blastp, nr protein database, expect=20000, no filter, PAM30)

Other BLAST [web gateways](#)

All matches to this query

| Score | Mr(calc):   | Delta     | Sequence                      |
|-------|-------------|-----------|-------------------------------|
| 42.1  | 1338.664185 | 0.012843  | <a href="#">NSLFYQK</a>       |
| 13.7  | 1338.660172 | 0.016856  | <a href="#">NSMFTAGKGVAEK</a> |
| 5.2   | 1338.660172 | 0.016856  | <a href="#">BTVYLQMBSLR</a>   |
| 2.7   | 1338.666672 | 0.010356  | <a href="#">ESIKDLADYASK</a>  |
| 2.0   | 1338.682632 | -0.005604 | <a href="#">NLSRMQSRFGK</a>   |
| 1.3   | 1338.686188 | -0.009160 | <a href="#">TVKMMYQK</a>      |

Mascot: <http://www.matrixscience.com/>



# MASCOT Search Results

## Peptide View

MS/MS Fragmentation of **ALTDMPQMR**

Found in **FIBA\_HUMAN**, Fibrinogen alpha chain OS=Homo sapiens GN=FGA PE=1 SV=2

Match to Query 34007: 1388.664508 from(695.339530,2+) rtinseconds(1642) index(39721)

Title: Locus:1.1.1.2855.9 File:"2013-07-02 CLN FXIII 60 min 1st F 3.wiff"

Data file C:\Program Files (x86)\Matrix Science\Mascot Daemon\mgf4 FXIII 60 min 1st\mascot\_daemon\_merge.mgf

Click mouse within plot area to zoom in by factor of two about that point

Or, Plot from  to  Da

Label all possible matches  Label matches used for scoring

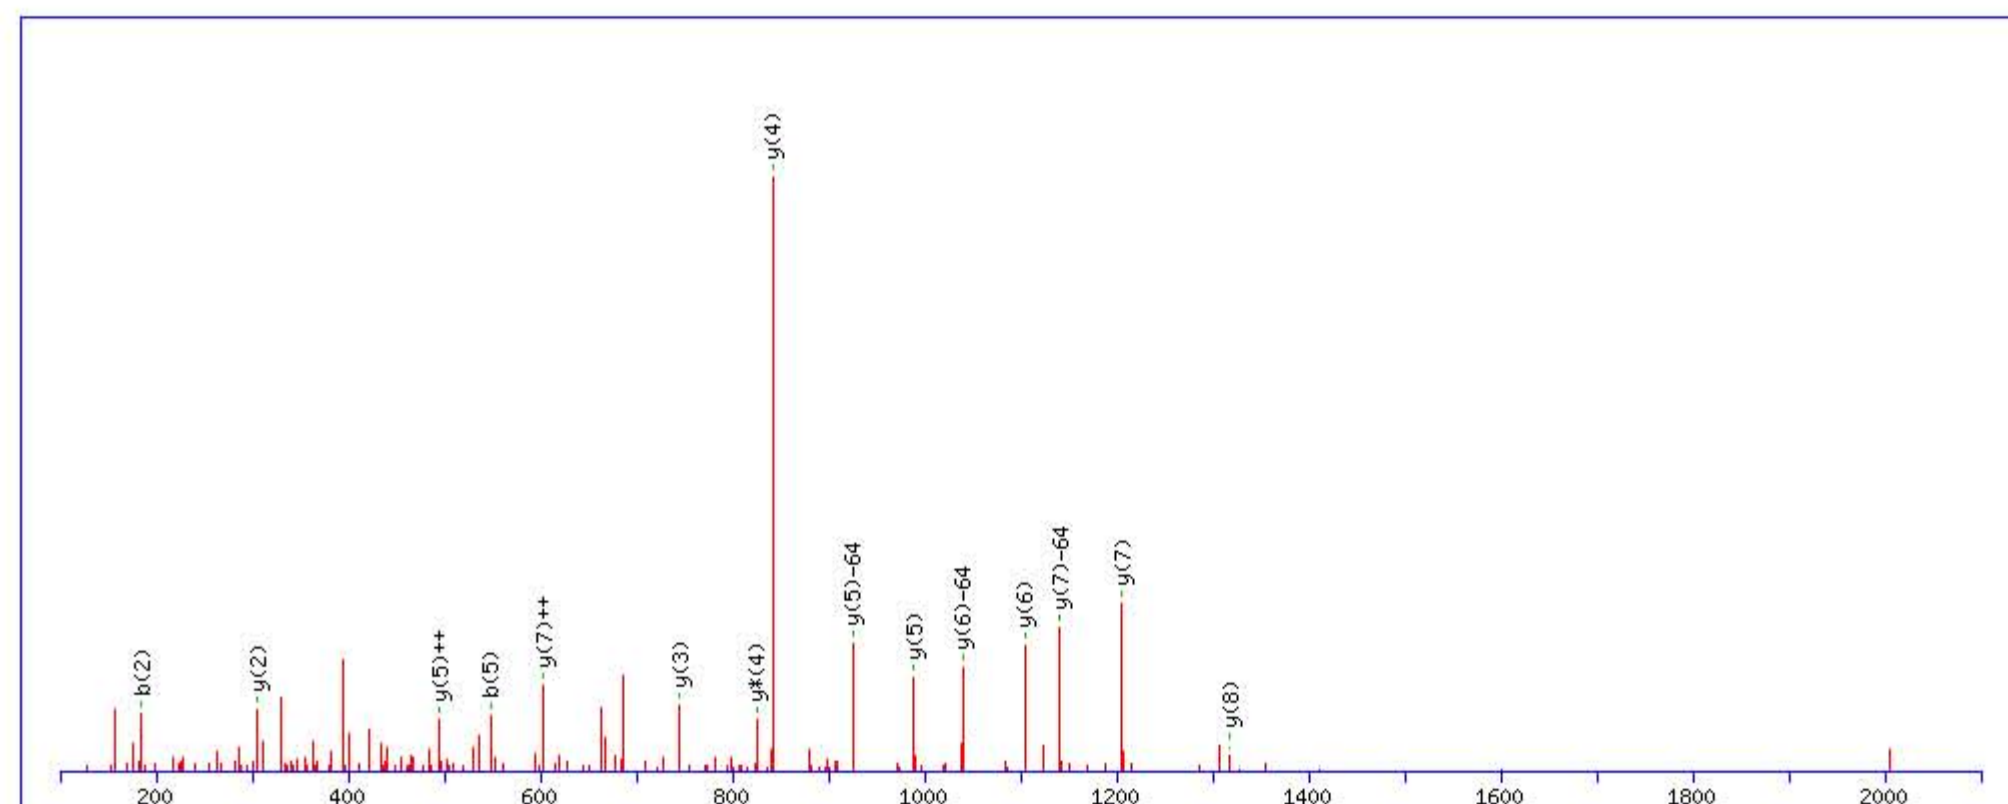

Monoisotopic mass of neutral peptide Mr(calc): 1388.661438

Fixed modifications: Carbamidomethyl (C) (apply to specified residues or termini only)

Variable modifications:

M5 : Oxidation (M), with neutral losses 0.000000 (shown in table), 63.998285

Q7 : Biotin:Thermo-21345 (Q)

Ions Score: 54 Expect: 2.1e-005

Matches : 15/112 fragment ions using 25 most intense peaks ([help](#))

| # | b                 | b <sup>++</sup> | b <sup>+</sup> | b <sup>+++</sup> | b <sup>0</sup> | b <sup>0++</sup> | Seq. | y                  | y <sup>++</sup>   | y <sup>+</sup>    | y <sup>+++</sup> | y <sup>0</sup> | y <sup>0++</sup> | # |
|---|-------------------|-----------------|----------------|------------------|----------------|------------------|------|--------------------|-------------------|-------------------|------------------|----------------|------------------|---|
| 1 | 72.044390         | 36.525833       |                |                  |                |                  | A    |                    |                   |                   |                  |                |                  | 9 |
| 2 | <b>185.128454</b> | 93.067865       |                |                  |                |                  | L    | <b>1318.631613</b> | 659.819445        | 1301.605064       | 651.306170       | 1300.621048    | 650.814162       | 8 |
| 3 | 286.176133        | 143.591704      |                |                  | 268.165568     | 134.586422       | T    | <b>1205.547549</b> | <b>603.277413</b> | 1188.521000       | 594.764138       | 1187.536984    | 594.272130       | 7 |
| 4 | 401.203076        | 201.105176      |                |                  | 383.192511     | 192.099894       | D    | <b>1104.499870</b> | 552.753573        | 1087.473321       | 544.240298       | 1086.489305    | 543.748290       | 6 |
| 5 | <b>548.238476</b> | 274.622876      |                |                  | 530.227911     | 265.617594       | M    | <b>989.472927</b>  | <b>495.240102</b> | 972.446378        | 486.726827       |                |                  | 5 |
| 6 | 645.291240        | 323.149258      |                |                  | 627.280675     | 314.143976       | P    | <b>842.437527</b>  | 421.722402        | <b>825.410978</b> | 413.209127       |                |                  | 4 |
| 7 | 1084.516566       | 542.761921      | 1067.490017    | 534.248647       | 1066.506001    | 533.756639       | Q    | <b>745.384763</b>  | 373.196020        | 728.358214        | 364.682745       |                |                  | 3 |
| 8 | 1215.557051       | 608.282164      | 1198.530502    | 599.768889       | 1197.546486    | 599.276881       | M    | <b>306.159437</b>  | 153.583356        | 289.132888        | 145.070082       |                |                  | 2 |
| 9 |                   |                 |                |                  |                |                  | R    | 175.118952         | 88.063114         | 158.092403        | 79.549839        |                |                  | 1 |

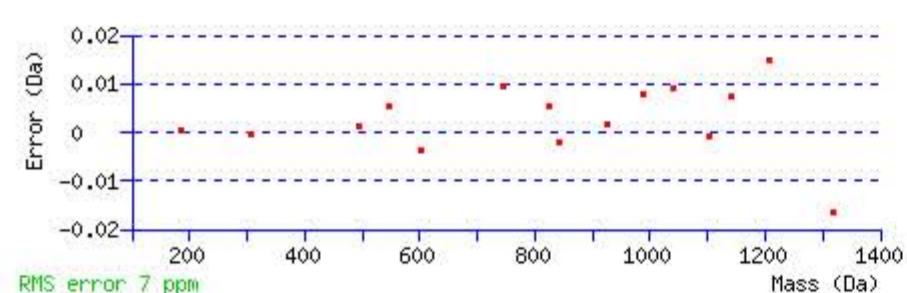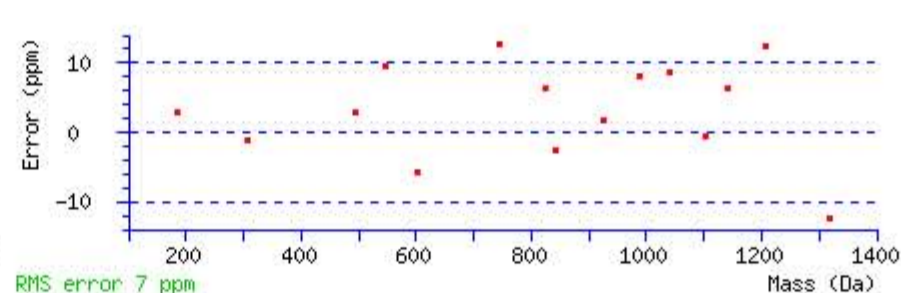

NCBI BLAST search of [ALTDMPQMR](#)

(Parameters: blastp, nr protein database, expect=20000, no filter, PAM30)

Other BLAST [web gateways](#)

## All matches to this query

| Score | Mr(calc):   | Delta     | Sequence                      |
|-------|-------------|-----------|-------------------------------|
| 53.7  | 1388.661438 | 0.003070  | <a href="#">ALTDMPQMR</a>     |
| 17.4  | 1388.661438 | 0.003070  | <a href="#">ALTDMPQMR</a>     |
| 3.7   | 1388.669296 | -0.004788 | <a href="#">DREPFQMR</a>      |
| 3.0   | 1388.660568 | 0.003940  | <a href="#">SEMTASPLVGPER</a> |



# MASCOT Search Results

## Peptide View

MS/MS Fragmentation of **QFTSSTSYNR**

Found in **FIBA\_HUMAN**, Fibrinogen alpha chain OS=Homo sapiens GN=FGA PE=1 SV=2

Match to Query 38553: 1500.708008 from(751.361280,2+) rtinseconds(1535) index(39124)

Title: Locus:1.1.1.2818.17 File:"2013-07-02 CLN FXIII 60 min 1st F 3.wiff"

Data file C:\Program Files (x86)\Matrix Science\Mascot Daemon\mgf\4 FXIII 60 min 1st\mascot\_daemon\_merge.mgf

Click mouse within plot area to zoom in by factor of two about that point

Or, Plot from  to  Da

Label all possible matches  Label matches used for scoring

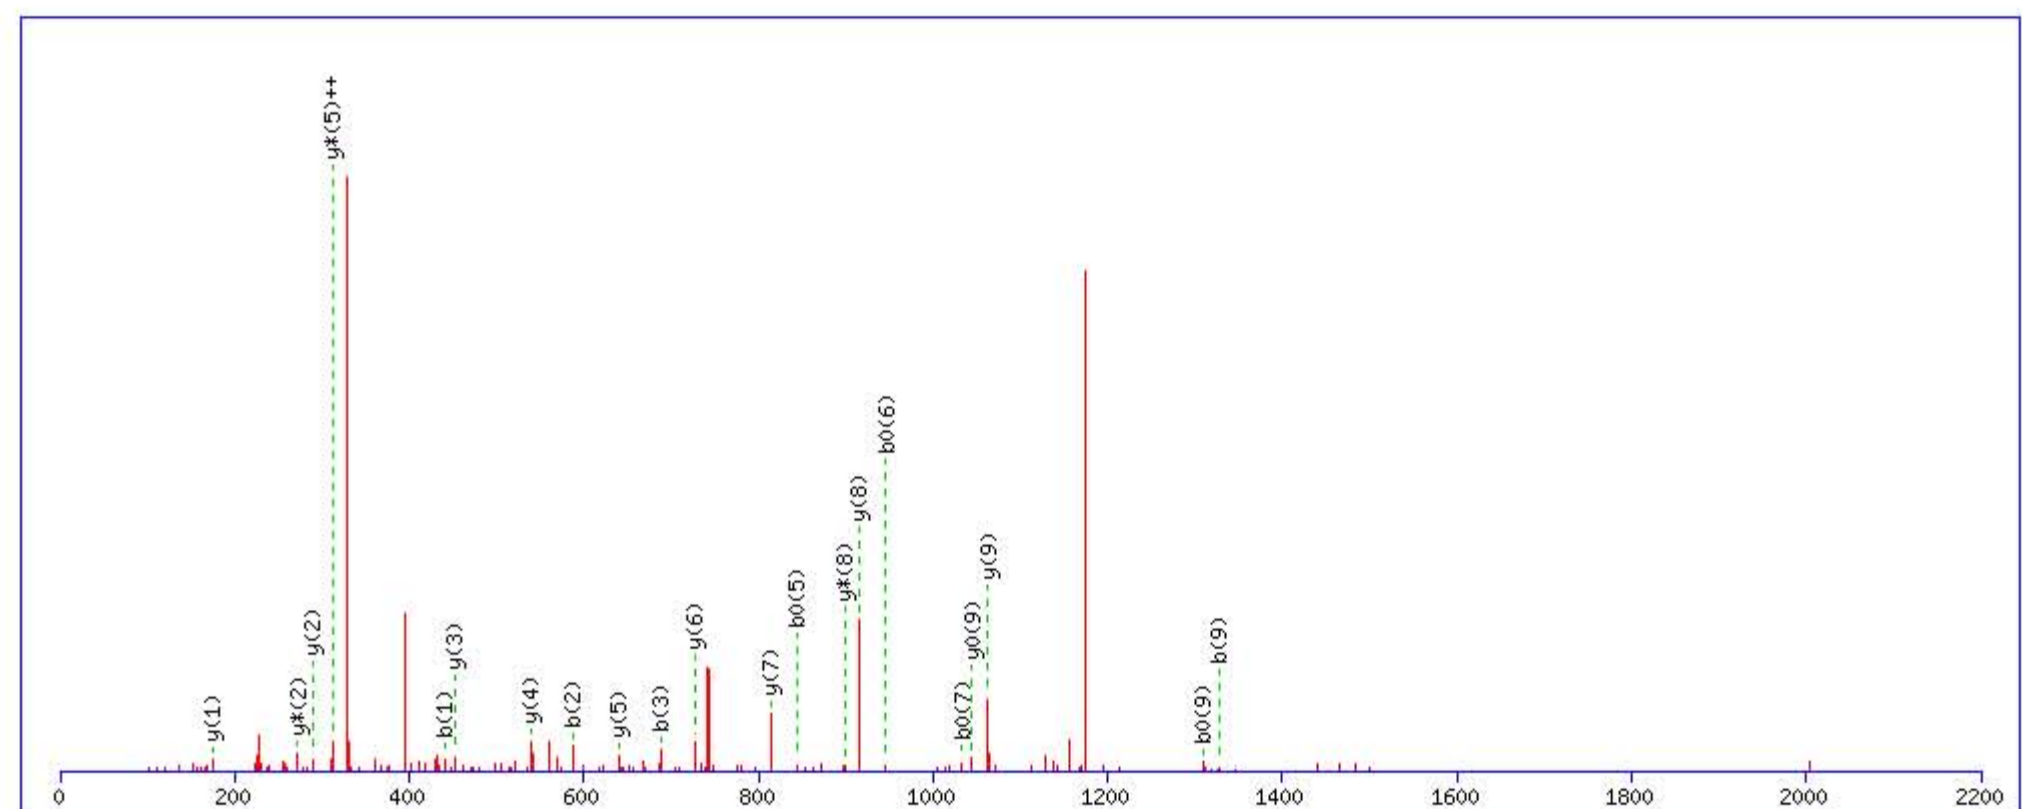

Monoisotopic mass of neutral peptide Mr(calc): 1500.703110

Fixed modifications: Carbamidomethyl (C) (apply to specified residues or termini only)

Variable modifications:

Q1 : Biotin:Thermo-21345 (Q)

Ions Score: 45 Expect: 0.00029

Matches : 21/98 fragment ions using 52 most intense peaks [\(help\)](#)

| #  | b           | b <sup>++</sup> | b <sup>*</sup> | b <sup>*++</sup> | b <sup>0</sup> | b <sup>0++</sup> | Seq. | y           | y <sup>++</sup> | y <sup>*</sup> | y <sup>*++</sup> | y <sup>0</sup> | y <sup>0++</sup> | #  |
|----|-------------|-----------------|----------------|------------------|----------------|------------------|------|-------------|-----------------|----------------|------------------|----------------|------------------|----|
| 1  | 440.232602  | 220.619939      | 423.206053     | 212.106664       |                |                  | Q    |             |                 |                |                  |                |                  | 10 |
| 2  | 587.301016  | 294.154146      | 570.274467     | 285.640872       |                |                  | F    | 1062.485064 | 531.746170      | 1045.458515    | 523.232896       | 1044.474499    | 522.740887       | 9  |
| 3  | 688.348695  | 344.677986      | 671.322146     | 336.164711       | 670.338130     | 335.672703       | T    | 915.416650  | 458.211963      | 898.390101     | 449.698689       | 897.406085     | 449.206681       | 8  |
| 4  | 775.380723  | 388.194000      | 758.354174     | 379.680725       | 757.370158     | 379.188717       | S    | 814.368971  | 407.688124      | 797.342422     | 399.174849       | 796.358406     | 398.682841       | 7  |
| 5  | 862.412751  | 431.710014      | 845.386202     | 423.196739       | 844.402186     | 422.704731       | S    | 727.336943  | 364.172110      | 710.310394     | 355.658835       | 709.326378     | 355.166827       | 6  |
| 6  | 963.460430  | 482.233853      | 946.433881     | 473.720578       | 945.449865     | 473.228570       | T    | 640.304915  | 320.656096      | 623.278366     | 312.142821       | 622.294350     | 311.650813       | 5  |
| 7  | 1050.492458 | 525.749867      | 1033.465909    | 517.236593       | 1032.481893    | 516.744584       | S    | 539.257236  | 270.132256      | 522.230687     | 261.618982       | 521.246671     | 261.126974       | 4  |
| 8  | 1213.555787 | 607.281532      | 1196.529238    | 598.768257       | 1195.545222    | 598.276249       | Y    | 452.225208  | 226.616242      | 435.198659     | 218.102967       |                |                  | 3  |
| 9  | 1327.598714 | 664.302995      | 1310.572165    | 655.789721       | 1309.588149    | 655.297712       | N    | 289.161879  | 145.084577      | 272.135330     | 136.571303       |                |                  | 2  |
| 10 |             |                 |                |                  |                |                  | R    | 175.118952  | 88.063114       | 158.092403     | 79.549839        |                |                  | 1  |

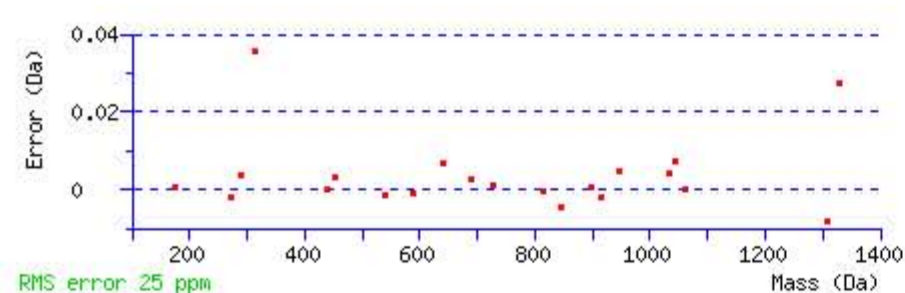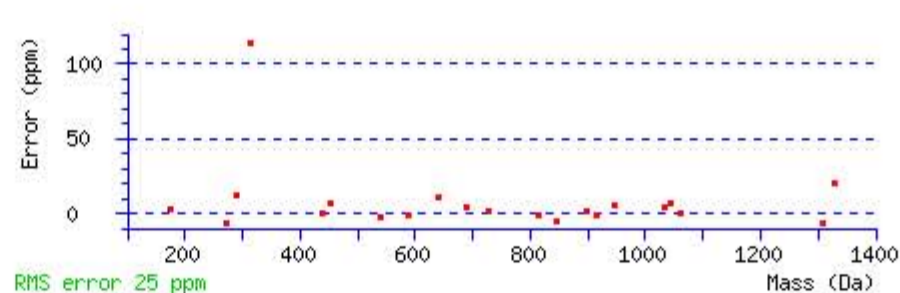

NCBI BLAST search of **QFTSSTSYNR**

(Parameters: blastp, nr protein database, expect=20000, no filter, PAM30)

Other BLAST [web gateways](#)

All matches to this query

| Score | Mr(calc):   | Delta     | Sequence                        |
|-------|-------------|-----------|---------------------------------|
| 45.0  | 1500.703110 | 0.004898  | <a href="#">QFTSSTSYNR</a>      |
| 6.8   | 1500.725571 | -0.017563 | <a href="#">HQSHAEAGPR</a>      |
| 5.8   | 1500.728043 | -0.020035 | <a href="#">EEARTTPGREEAR</a>   |
| 3.5   | 1500.699768 | 0.008240  | <a href="#">AEAGSGGPGFTFTFR</a> |
| 3.2   | 1500.702927 | 0.005081  | <a href="#">REAPTGRDQSGDR</a>   |
| 2.1   | 1500.724869 | -0.016861 | <a href="#">SKIEDYFPEFAR</a>    |
| 0.8   | 1500.724228 | -0.016220 | <a href="#">EQLSSSDTAPR</a>     |
| 0.5   | 1500.725586 | -0.017578 | <a href="#">IGQICKNDFGGHR</a>   |

Mascot: <http://www.matrixscience.com/>



# MASCOT SEARCH RESULTS

## Peptide View

MS/MS Fragmentation of **QLEQVIAK**

Found in **FIBA\_HUMAN**, Fibrinogen alpha chain OS=Homo sapiens GN=FGA PE=1 SV=2

Match to Query 39946: 1549.894228 from(775.954390,2+) rtinseconds(2095) index(61199)

Title: Locus:1.1.1.3034.19 File:"2013-07-02 CLN FXIII 60 min 1st F 4.wiff"

Data file C:\Program Files (x86)\Matrix Science\Mascot Daemon\mgf4 FXIII 60 min 1st\mascot\_daemon\_merge.mgf

Click mouse within plot area to zoom in by factor of two about that point

Or, Plot from  to  Da

Label all possible matches  Label matches used for scoring

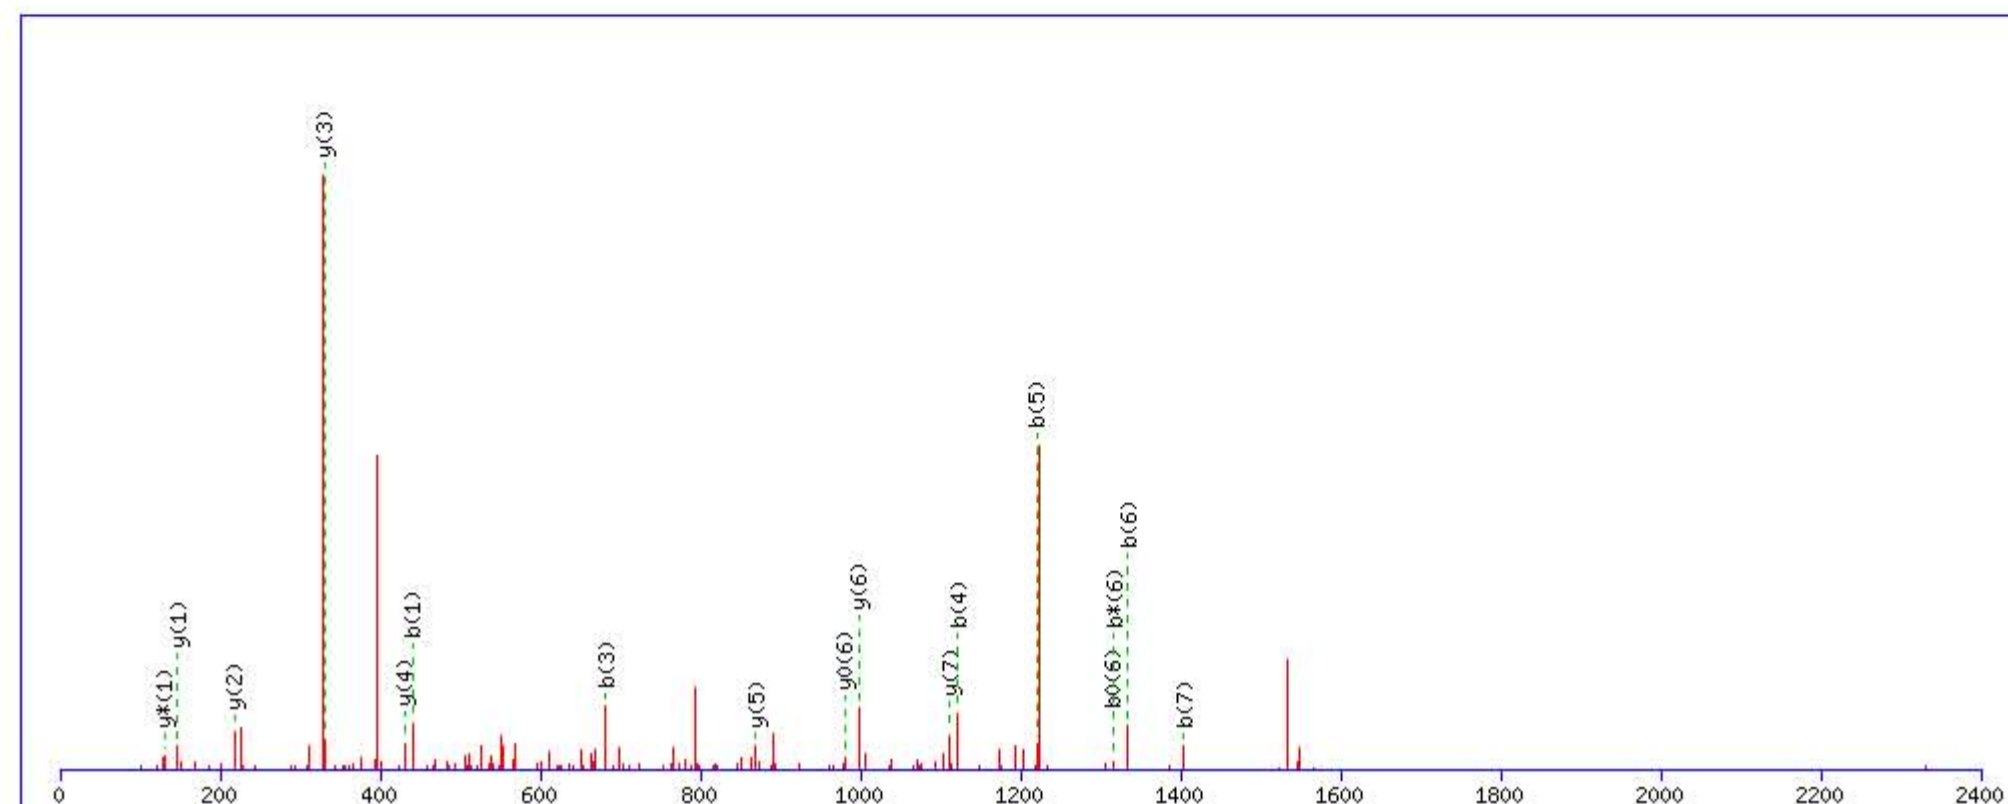

Monoisotopic mass of neutral peptide Mr(calc): 1549.872406

Fixed modifications: Carbamidomethyl (C) (apply to specified residues or termini only)

Variable modifications:

Q1 : Biotin:Thermo-21345 (Q)

Q4 : Biotin:Thermo-21345 (Q)

Ions Score: 28 Expect: 0.017

Matches : 17/70 fragment ions using 43 most intense peaks [\(help\)](#)

| # | b           | b <sup>++</sup> | b <sup>*</sup> | b <sup>*++</sup> | b <sup>0</sup> | b <sup>0++</sup> | Seq. | y           | y <sup>++</sup> | y <sup>*</sup> | y <sup>*++</sup> | y <sup>0</sup> | y <sup>0++</sup> | # |
|---|-------------|-----------------|----------------|------------------|----------------|------------------|------|-------------|-----------------|----------------|------------------|----------------|------------------|---|
| 1 | 440.232602  | 220.619939      | 423.206053     | 212.106664       |                |                  | Q    |             |                 |                |                  |                |                  | 8 |
| 2 | 553.316666  | 277.161971      | 536.290117     | 268.648697       |                |                  | L    | 1111.654379 | 556.330828      | 1094.627830    | 547.817553       | 1093.643814    | 547.325545       | 7 |
| 3 | 682.359259  | 341.683268      | 665.332710     | 333.169993       | 664.348694     | 332.677985       | E    | 998.570315  | 499.788796      | 981.543766     | 491.275521       | 980.559750     | 490.783513       | 6 |
| 4 | 1121.584585 | 561.295931      | 1104.558036    | 552.782656       | 1103.574020    | 552.290648       | Q    | 869.527722  | 435.267499      | 852.501173     | 426.754225       |                |                  | 5 |
| 5 | 1220.652999 | 610.830138      | 1203.626450    | 602.316863       | 1202.642434    | 601.824855       | V    | 430.302396  | 215.654836      | 413.275847     | 207.141561       |                |                  | 4 |
| 6 | 1333.737063 | 667.372170      | 1316.710514    | 658.858895       | 1315.726498    | 658.366887       | I    | 331.233982  | 166.120629      | 314.207433     | 157.607354       |                |                  | 3 |
| 7 | 1404.774177 | 702.890727      | 1387.747628    | 694.377452       | 1386.763612    | 693.885444       | A    | 218.149918  | 109.578597      | 201.123369     | 101.065322       |                |                  | 2 |
| 8 |             |                 |                |                  |                |                  | K    | 147.112804  | 74.060040       | 130.086255     | 65.546765        |                |                  | 1 |

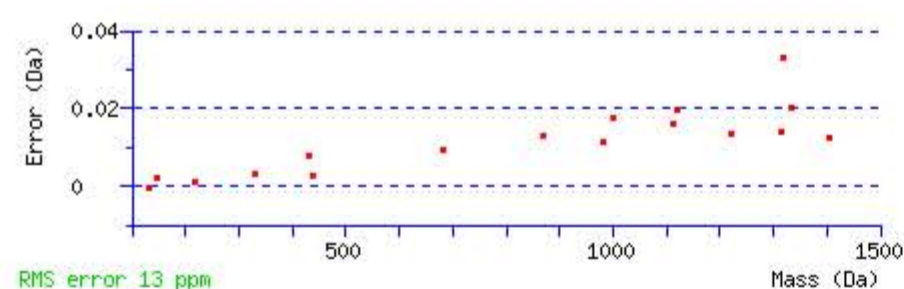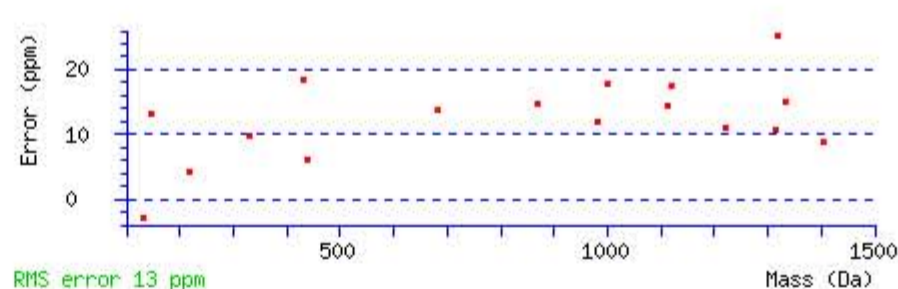

NCBI BLAST search of **QLEQVIAK**

(Parameters: blastp, nr protein database, expect=20000, no filter, PAM30)

Other BLAST [web gateways](#)

## All matches to this query

| Score | Mr(calc):   | Delta     | Sequence                         |
|-------|-------------|-----------|----------------------------------|
| 27.9  | 1549.872406 | 0.021822  | <a href="#">QLEQVIAK</a>         |
| 8.5   | 1549.907944 | -0.013716 | <a href="#">VKTTGIETKFSVK</a>    |
| 6.4   | 1549.876251 | 0.017977  | <a href="#">LVDINLVRCHALK</a>    |
| 6.3   | 1549.893967 | 0.000261  | <a href="#">LIRENHELKSAIK</a>    |
| 5.9   | 1549.886810 | 0.007418  | <a href="#">YVIGIGVGAGAYVLAK</a> |
| 5.1   | 1549.886795 | 0.007433  | <a href="#">KGNLVYIIDFGLAK</a>   |
| 4.2   | 1549.887665 | 0.006563  | <a href="#">QLWLQLK</a>          |
| 4.1   | 1549.890152 | 0.004076  | <a href="#">AQEILSQLPIK</a>      |
| 3.5   | 1549.872406 | 0.021822  | <a href="#">QIAQEIVK</a>         |
| 1.4   | 1549.907944 | -0.013716 | <a href="#">EYVVKPVPITSPAVSK</a> |



# Mascot Search Results

## Peptide View

MS/MS Fragmentation of **NPSSSGTGGTATWKPSSGPGSTGWSNSGSSGTGSTGNQNPSPRPGSTGTWNPSSER**  
 Found in **FIBA\_HUMAN**, Fibrinogen alpha chain OS=Homo sapiens GN=FGA PE=1 SV=2

Match to Query 88601: 5844.691920 from(1169.945660,5+) rtinseconds(1719) index(5175)  
 Title: Locus:1.1.1.2730.24 File:"2013-07-02 CLN FXIII 60 min 1st F 1.wiff"  
 Data file C:\Program Files (x86)\Matrix Science\Mascot Daemon\mgf4 FXIII 60 min 1st\mascot\_daemon\_merge.mgf

Click mouse within plot area to zoom in by factor of two about that point  
 Or, Plot from  to  Da  Full range  
 Label all possible matches  Label matches used for scoring

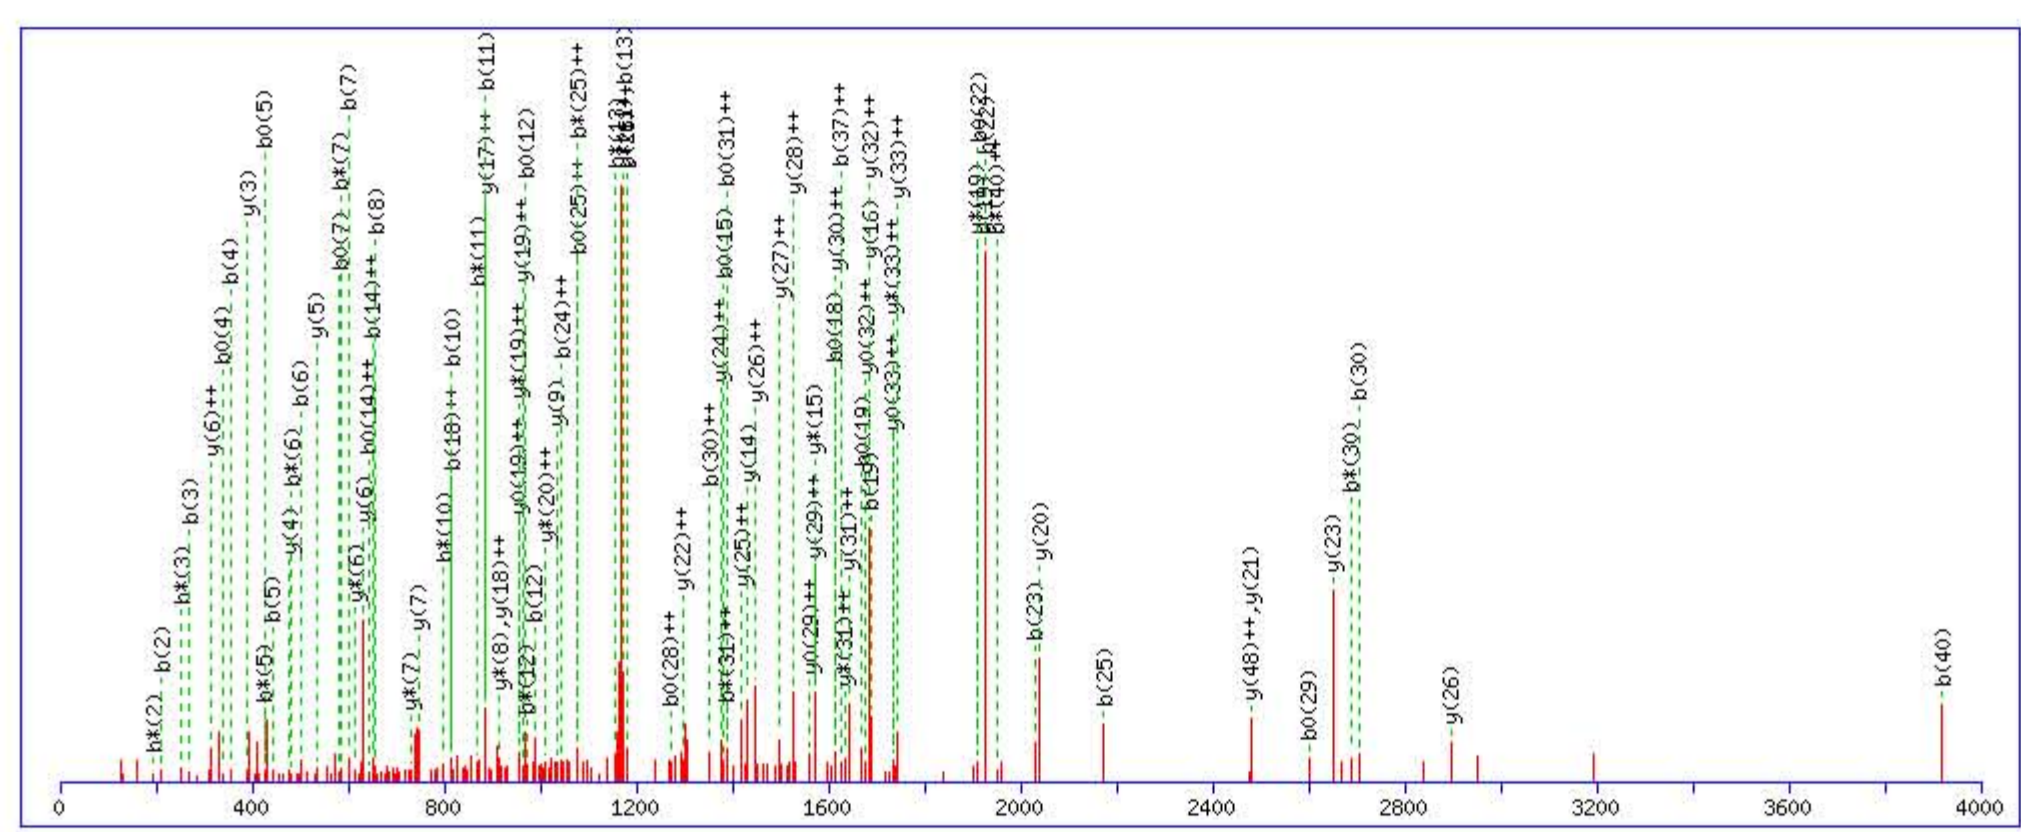

Monoisotopic mass of neutral peptide Mr(calc): 5844.608032  
 Fixed modifications: Carbamidomethyl (C) (apply to specified residues or termini only)  
 Variable modifications:  
 Q39 : Biotin:Thermo-21345 (Q)  
 Ions Score: 82 Expect: 4.7e-008  
 Matches : 92/688 fragment ions using 190 most intense peaks [\(help\)](#)

| #  | b                  | b <sup>++</sup>    | b <sup>+</sup>     | b <sup>++</sup>    | b <sup>0</sup>     | b <sup>0++</sup>   | Seq. | y                  | y <sup>++</sup>    | y <sup>+</sup>     | y <sup>++</sup>    | y <sup>0</sup> | y <sup>0++</sup>   | #  |
|----|--------------------|--------------------|--------------------|--------------------|--------------------|--------------------|------|--------------------|--------------------|--------------------|--------------------|----------------|--------------------|----|
| 1  | 115.050203         | 58.028740          | 98.023654          | 49.515465          |                    |                    | N    |                    |                    |                    |                    |                |                    | 59 |
| 2  | <b>212.102967</b>  | 106.555121         | <b>195.076418</b>  | 98.041847          |                    |                    | P    | 5731.572302        | 2866.289789        | 5714.545753        | 2857.776515        | 5713.561737    | 2857.284507        | 58 |
| 3  | <b>269.124431</b>  | 135.065853         | <b>252.097882</b>  | 126.552579         |                    |                    | G    | 5634.519538        | 2817.763407        | 5617.492989        | 2809.250133        | 5616.508973    | 2808.758125        | 57 |
| 4  | <b>356.156459</b>  | 178.581867         | 339.129910         | 170.068593         | <b>338.145894</b>  | 169.576585         | S    | 5577.498074        | 2789.252675        | 5560.471525        | 2780.739401        | 5559.487509    | 2780.247393        | 56 |
| 5  | <b>443.188487</b>  | 222.097881         | <b>426.161938</b>  | 213.584607         | <b>425.177922</b>  | 213.092599         | S    | 5490.466046        | 2745.736661        | 5473.439497        | 2737.223387        | 5472.455481    | 2736.731379        | 55 |
| 6  | <b>500.209951</b>  | 250.608613         | <b>483.183402</b>  | 242.095339         | 482.199386         | 241.603331         | G    | 5403.434018        | 2702.220647        | 5386.407469        | 2693.707373        | 5385.423453    | 2693.215365        | 54 |
| 7  | <b>601.257630</b>  | 301.132453         | <b>584.231081</b>  | 292.619178         | <b>583.247065</b>  | 292.127170         | T    | 5346.412554        | 2673.709915        | 5329.386005        | 2665.196641        | 5328.401989    | 2664.704633        | 53 |
| 8  | <b>658.279094</b>  | 329.643185         | 641.252545         | 321.129910         | 640.268529         | 320.637903         | G    | 5245.364875        | 2623.186076        | 5228.338326        | 2614.672801        | 5227.354310    | 2614.180793        | 52 |
| 9  | 715.300558         | 358.153917         | 698.274009         | 349.640643         | 697.289993         | 349.148635         | G    | 5188.343411        | 2594.675344        | 5171.316862        | 2586.162069        | 5170.332846    | 2585.670061        | 51 |
| 10 | <b>816.348237</b>  | 408.677757         | <b>799.321688</b>  | 400.164482         | 798.337672         | 399.672474         | T    | 5131.321947        | 2566.164612        | 5114.295398        | 2557.651337        | 5113.311382    | 2557.159329        | 50 |
| 11 | <b>887.385351</b>  | 444.196314         | <b>870.358802</b>  | 435.683039         | 869.374786         | 435.191031         | A    | 5030.274268        | 2515.640772        | 5013.247719        | 2507.127498        | 5012.263703    | 2506.635490        | 49 |
| 12 | <b>988.433030</b>  | 494.720153         | <b>971.406481</b>  | 486.206879         | <b>970.422465</b>  | 485.714871         | T    | 4959.237154        | <b>2480.122215</b> | 4942.210605        | 2471.608941        | 4941.226589    | 2471.116933        | 48 |
| 13 | <b>1174.512343</b> | 587.759810         | <b>1157.485794</b> | 579.246535         | 1156.501778        | 578.754527         | W    | 4858.189475        | 2429.598376        | 4841.162926        | 2421.085101        | 4840.178910    | 2420.593093        | 47 |
| 14 | 1302.607306        | <b>651.807291</b>  | 1285.580757        | 643.294017         | 1284.596741        | <b>642.802009</b>  | K    | 4672.110162        | 2336.558719        | 4655.083613        | 2328.045445        | 4654.099597    | 2327.553437        | 46 |
| 15 | 1399.660070        | 700.333673         | 1382.633521        | 691.820399         | <b>1381.649505</b> | 691.328391         | P    | 4544.015199        | 2272.511238        | 4526.988650        | 2263.997963        | 4526.004634    | 2263.505955        | 45 |
| 16 | 1456.681534        | 728.844405         | 1439.654985        | 720.331131         | 1438.670969        | 719.839123         | G    | 4446.962435        | 2223.984856        | 4429.935886        | 2215.471581        | 4428.951870    | 2214.979573        | 44 |
| 17 | 1543.713562        | 772.360419         | 1526.687013        | 763.847145         | 1525.702997        | 763.355137         | S    | 4389.940971        | 2195.474124        | 4372.914422        | 2186.960849        | 4371.930406    | 2186.468841        | 43 |
| 18 | 1630.745590        | <b>815.876433</b>  | 1613.719041        | 807.363159         | <b>1612.735025</b> | 806.871151         | S    | 4302.908943        | 2151.958110        | 4285.882394        | 2143.444835        | 4284.898378    | 2142.952827        | 42 |
| 19 | <b>1687.767054</b> | 844.387165         | 1670.740505        | 835.873891         | <b>1669.756489</b> | 835.381883         | G    | 4215.876915        | 2108.442096        | 4198.850366        | 2099.928821        | 4197.866350    | 2099.436813        | 41 |
| 20 | 1784.819818        | 892.913547         | 1767.793269        | 884.400273         | 1766.809253        | 883.908265         | P    | 4158.855451        | 2079.931364        | 4141.828902        | 2071.418089        | 4140.844886    | 2070.926081        | 40 |
| 21 | 1841.841282        | 921.424279         | 1824.814733        | 912.911005         | 1823.830717        | 912.418997         | G    | 4061.802687        | 2031.404982        | 4044.776138        | 2022.891707        | 4043.792122    | 2022.399699        | 39 |
| 22 | <b>1928.873310</b> | 964.940293         | 1911.846761        | 956.427019         | <b>1910.862745</b> | 955.935011         | S    | 4004.781223        | 2002.894250        | 3987.754674        | 1994.380975        | 3986.770658    | 1993.888967        | 38 |
| 23 | <b>2029.920989</b> | 1015.464133        | 2012.894440        | 1006.950858        | 2011.910424        | 1006.458850        | T    | 3917.749195        | 1959.378236        | 3900.722646        | 1950.864961        | 3899.738630    | 1950.372953        | 37 |
| 24 | 2086.942453        | <b>1043.974865</b> | 2069.915904        | 1035.461590        | 2068.931888        | 1034.969582        | G    | 3816.701516        | 1908.854396        | 3799.674967        | 1900.341122        | 3798.690951    | 1899.849114        | 36 |
| 25 | <b>2173.974481</b> | 1087.490879        | 2156.947932        | <b>1078.977604</b> | 2155.963916        | <b>1078.485596</b> | S    | 3759.680052        | 1880.343664        | 3742.653503        | 1871.830389        | 3741.669487    | 1871.338382        | 35 |
| 26 | 2360.053794        | <b>1180.530535</b> | 2343.027245        | 1172.017261        | 2342.043229        | 1171.525253        | W    | 3672.648024        | 1836.827650        | 3655.621475        | 1828.314375        | 3654.637459    | 1827.822367        | 34 |
| 27 | 2474.096721        | 1237.551999        | 2457.070172        | 1229.038724        | 2456.086156        | 1228.546716        | N    | 3486.568711        | <b>1743.787993</b> | 3469.542162        | <b>1735.274719</b> | 3468.558146    | <b>1734.782711</b> | 33 |
| 28 | 2561.128749        | 1281.068013        | 2544.102200        | 1272.554738        | 2543.118184        | <b>1272.062730</b> | S    | 3372.525784        | <b>1686.766530</b> | 3355.499235        | 1678.253255        | 3354.515219    | <b>1677.761247</b> | 32 |
| 29 | 2618.150213        | 1309.578745        | 2601.123664        | 1301.065470        | <b>2600.139648</b> | 1300.573462        | G    | 3285.493756        | <b>1643.250516</b> | 3268.467207        | <b>1634.737241</b> | 3267.483191    | 1634.245233        | 31 |
| 30 | <b>2705.182241</b> | <b>1353.094759</b> | <b>2688.155692</b> | 1344.581484        | 2687.171676        | 1344.089476        | S    | 3228.472292        | <b>1614.739784</b> | 3211.445743        | 1606.226509        | 3210.461727    | 1605.734501        | 30 |
| 31 | 2792.214269        | 1396.610773        | 2775.187720        | <b>1388.097498</b> | 2774.203704        | <b>1387.605490</b> | S    | 3141.440264        | <b>1571.223770</b> | 3124.413715        | 1562.710495        | 3123.429699    | <b>1562.218487</b> | 29 |
| 32 | 2849.235733        | 1425.121505        | 2832.209184        | 1416.608230        | 2831.225168        | 1416.116222        | G    | 3054.408236        | <b>1527.707756</b> | 3037.381687        | 1519.194481        | 3036.397671    | 1518.702473        | 28 |
| 33 | 2950.283412        | 1475.645344        | 2933.256863        | 1467.132069        | 2932.272847        | 1466.640062        | T    | 2997.386772        | <b>1499.197024</b> | 2980.360223        | 1490.683749        | 2979.376207    | 1490.191741        | 27 |
| 34 | 3007.304876        | 1504.156076        | 2990.278327        | 1495.642801        | 2989.294311        | 1495.150794        | G    | <b>2896.339093</b> | <b>1448.673184</b> | 2879.312544        | 1440.159910        | 2878.328528    | 1439.667902        | 26 |
| 35 | 3094.336904        | 1547.672090        | 3077.310355        | 1539.158815        | 3076.326339        | 1538.666808        | S    | 2839.317629        | <b>1420.162453</b> | 2822.291080        | 1411.649178        | 2821.307064    | 1411.157170        | 25 |
| 36 | 3195.384583        | 1598.195929        | 3178.358034        | 1589.682655        | 3177.374018        | 1589.190647        | T    | 2752.285601        | <b>1376.646438</b> | 2735.259052        | 1368.133164        | 2734.275036    | 1367.641156        | 24 |
| 37 | 3252.406047        | <b>1626.706661</b> | 3235.379498        | 1618.193387        | 3234.395482        | 1617.701379        | G    | <b>2651.237922</b> | 1326.122599        | 2634.211373        | 1317.609325        | 2633.227357    | 1317.117317        | 23 |
| 38 | 3366.448974        | 1683.728125        | 3349.422425        | 1675.214850        | 3348.438409        | 1674.722842        | N    | 2594.216458        | <b>1297.611867</b> | 2577.189909        | 1289.098593        | 2576.205893    | 1288.606585        | 22 |
| 39 | 3805.674300        | 1903.340788        | 3788.647751        | 1894.827513        | 3787.663735        | 1894.335506        | Q    | <b>2480.173531</b> | 1240.590404        | 2463.146982        | 1232.077129        | 2462.162966    | 1231.585121        | 21 |
| 40 | <b>3919.717227</b> | 1960.362252        | 3902.690678        | <b>1951.848977</b> | 3901.706662        | 1951.356969        | N    | <b>2040.948205</b> | 1020.977741        | 2023.921656        | <b>1012.464466</b> | 2022.937640    | 1011.972458        | 20 |
| 41 | 4016.769991        | 2008.888634        | 3999.743442        | 2000.375359        | 3998.759426        | 1999.883351        | P    | <b>1926.905278</b> | <b>963.956277</b>  | <b>1909.878729</b> | <b>955.443003</b>  | 1908.894713    | <b>954.950995</b>  | 19 |
| 42 | 4073.791455        | 2037.399365        | 4056.764906        | 2028.886091        | 4055.780890        | 2028.394083        | G    | 1829.852514        | <b>915.429895</b>  | 1812.825965        | 906.916621         | 1811.841949    | 906.424613         | 18 |
| 43 | 4160.823483        | 2080.915380        | 4143.796934        | 2072.402105        | 4142.812918        | 2071.910097        | S    | 1772.831050        | <b>886.919163</b>  | 1755.804501        | 878.405889         | 1754.820485    | 877.913881         | 17 |
| 44 | 4257.876247        | 2129.441762        | 4240.849698        | 2120.928487        | 4239.865682        | 2120.436479        | P    | <b>1685.799022</b> | 843.403149         | 1668.772473        | 834.889875         | 1667.788457    | 834.397867         | 16 |
| 45 | 4413.977358        | 2207.492317        | 4396.950809        | 2198.979043        | 4395.966793        | 2198.487035        | R    | 1588.746258        | 794.876767         | <b>1571.719709</b> | 786.363493         | 1570.735693    | 785.871485         | 15 |
| 46 | 4511.030122        | 2256.018699        | 4494.003573        | 2247.505425        | 4493.019557        | 2247.013417        | P    | <b>1432.645147</b> | 716.826212         | 1415.618598        | 708.312937         | 1414.634582    | 707.820929         | 14 |
| 47 | 4568.051586        | 2284.529431        | 4551.025037        | 2276.016157        | 4550.041021        | 2275.524149        | G    | 1335.592383        | 668.299830         | 1318.565834        | 659.786555         | 1317.581818    | 659.294547         | 13 |
| 48 | 4655.083614        | 2328.045445        | 4638.057065        | 2319.532171        | 4637.073049        | 2319.040163        | S    | 1278.570919        | 639.789098         | 1261.544370        | 631.275823         | 1260.560354    | 630.783815         | 12 |
| 49 | 4756.131293        | 2378.569285        | 4739.104744        | 2370.056010        | 4738.120728        | 2369.564002        | T    | 1191.538891        | 596.273084         | <b>1174.512342</b> | 587.759809         | 1173.528326    | 587.267801         | 11 |
| 50 | 4813.152757        | 2407.080017        | 4796.126208        | 2398.566742        | 4795.142192        | 2398.074734        | G    | 1090.491212        | 545.749244         | 1073.464663        | 537.235970         | 1072.480647    | 536.743962         | 10 |
| 51 | 4914.200436        | 2457.603856        | 4897.173887        | 2449.090582        | 4896.189871        | 2448.598574        | T    | <b>1033.469748</b> | 517.238512         | 1016.443199        | 508.725238         | 1015.459183    | 508.233230         | 9  |
| 52 | 5100.279749        | 2550.643513        | 5083.253200        | 2542.130238        | 5082.269184        | 2541.638230        | W    | 932.422069         | 466.714673         | <b>915.395520</b>  | 458.201398         | 914.411504</   |                    |    |



# Mascot Search Results

## Peptide View

MS/MS Fragmentation of **GSAGHWTSESSVSGSTGQWHSESGSFRPDSPGSGNARPNPDWGTFFEEVSGNVSPGTR**  
 Found in **FIBA\_HUMAN**, Fibrinogen alpha chain OS=Homo sapiens GN=FGA PE=1 SV=2

Match to Query 89008: 6284.865264 from(1048.484820,6+) rtinseconds(2024) index(42279)  
 Title: Locus:1.1.1.2988.15 File:"2013-07-02 CLN FXIII 60 min 1st F 3.wiff"  
 Data file C:\Program Files (x86)\Matrix Science\Mascot Daemon\mgf4 FXIII 60 min 1st\mascot\_daemon\_merge.mgf

Click mouse within plot area to zoom in by factor of two about that point

Or, Plot from  to  Da

Label all possible matches  Label matches used for scoring

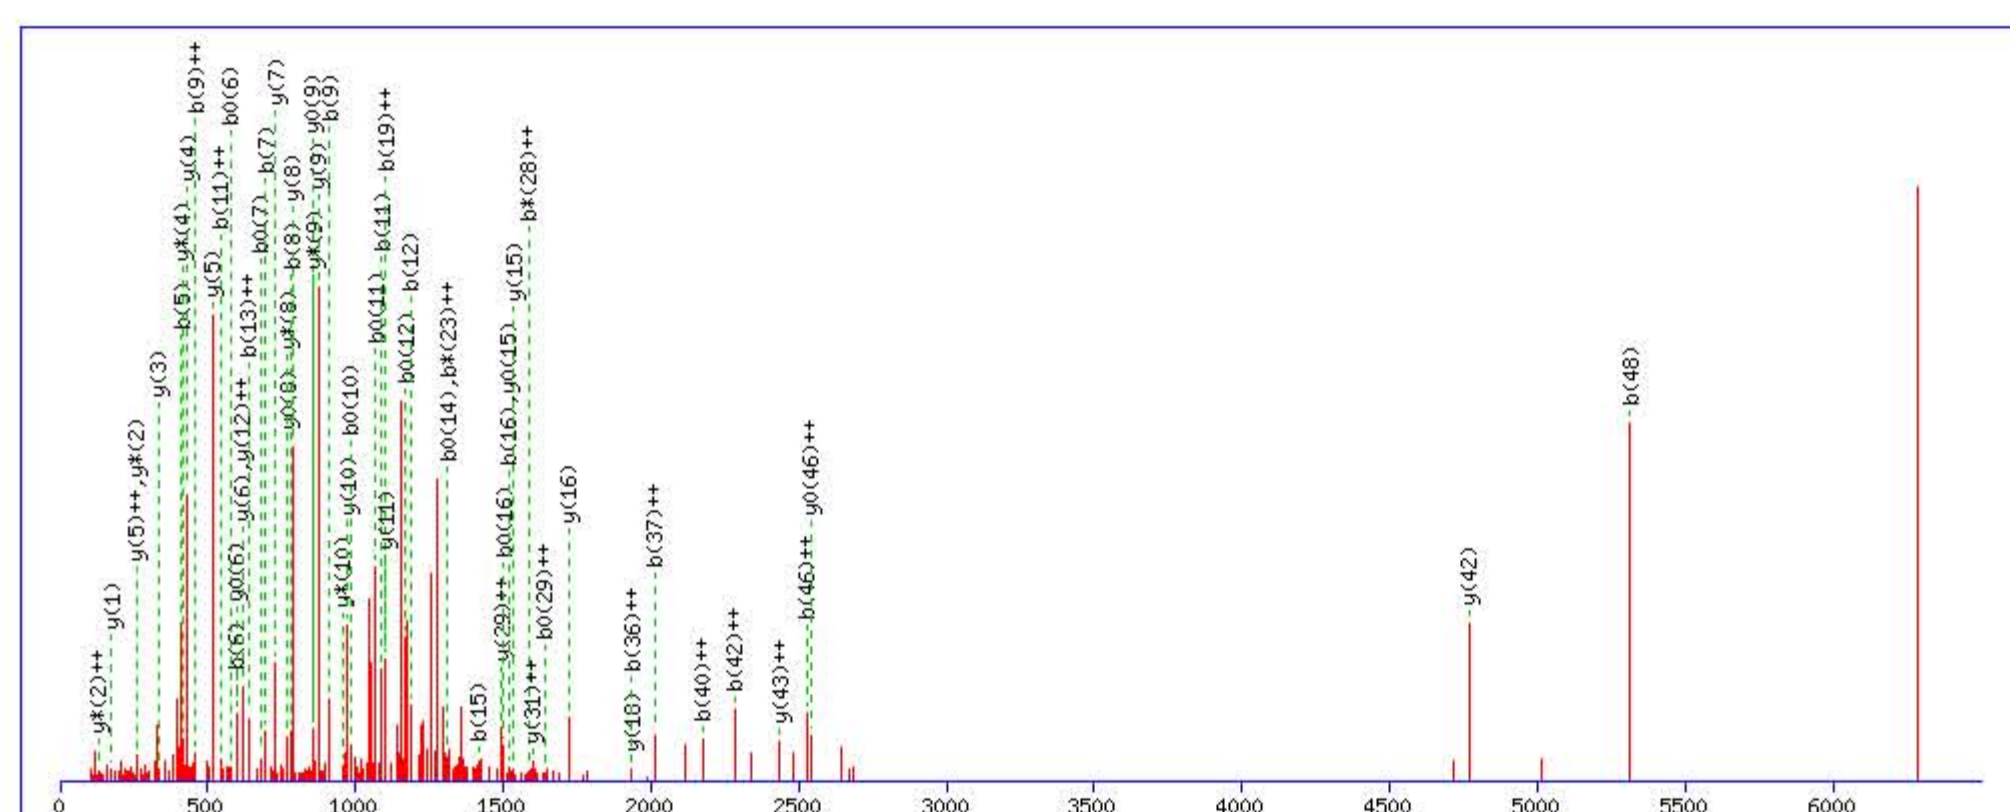

Monoisotopic mass of neutral peptide Mr(calc): 6284.792847  
 Fixed modifications: Carbamidomethyl (C) (apply to specified residues or termini only)  
 Variable modifications:  
 Q18 : Biotin:Thermo-21345 (Q)  
 Ions Score: 44 Expect: 0.00023  
 Matches : 59/646 fragment ions using 119 most intense peaks [\(help\)](#)

| #  | b                  | b <sup>++</sup>    | b <sup>*</sup> | b <sup>+++</sup>   | b <sup>0</sup>     | b <sup>0++</sup>   | Seq. | y                  | y <sup>++</sup>    | y <sup>*</sup>    | y <sup>+++</sup> | y <sup>0</sup>     | y <sup>0++</sup>   | #  |
|----|--------------------|--------------------|----------------|--------------------|--------------------|--------------------|------|--------------------|--------------------|-------------------|------------------|--------------------|--------------------|----|
| 1  | 58.028740          | 29.518008          |                |                    |                    |                    | G    |                    |                    |                   |                  |                    |                    | 58 |
| 2  | 145.060768         | 73.034022          |                |                    | 127.050203         | 64.028740          | S    | 6228.778603        | 3114.892940        | 6211.752054       | 3106.379665      | 6210.768038        | 3105.887657        | 57 |
| 3  | 216.097882         | 108.552579         |                |                    | 198.087317         | 99.547296          | A    | 6141.746575        | 3071.376926        | 6124.720026       | 3062.863651      | 6123.736010        | 3062.371643        | 56 |
| 4  | 273.119346         | 137.063311         |                |                    | 255.108781         | 128.058029         | G    | 6070.709461        | 3035.858369        | 6053.682912       | 3027.345094      | 6052.698896        | 3026.853086        | 55 |
| 5  | <b>410.178258</b>  | 205.592767         |                |                    | 392.167693         | 196.587484         | H    | 6013.687997        | 3007.347637        | 5996.661448       | 2998.834362      | 5995.677432        | 2998.342354        | 54 |
| 6  | <b>596.257571</b>  | 298.632424         |                |                    | <b>578.247006</b>  | 289.627141         | W    | 5876.629085        | 2938.818181        | 5859.602536       | 2930.304906      | 5858.618520        | 2929.812898        | 53 |
| 7  | <b>697.305250</b>  | 349.156263         |                |                    | <b>679.294685</b>  | 340.150981         | T    | 5690.549772        | 2845.778524        | 5673.523223       | 2837.265250      | 5672.539207        | 2836.773242        | 52 |
| 8  | <b>784.337278</b>  | 392.672277         |                |                    | 766.326713         | 383.666995         | S    | 5589.502093        | 2795.254685        | 5572.475544       | 2786.741410      | 5571.491528        | 2786.249402        | 51 |
| 9  | <b>913.379871</b>  | <b>457.193574</b>  |                |                    | 895.369306         | 448.188291         | E    | 5502.470065        | 2751.738671        | 5485.443516       | 2743.225396      | 5484.459500        | 2742.733388        | 50 |
| 10 | 1000.411899        | 500.709588         |                |                    | <b>982.401334</b>  | 491.704305         | S    | 5373.427472        | 2687.217374        | 5356.400923       | 2678.704100      | 5355.416907        | 2678.212092        | 49 |
| 11 | <b>1087.443927</b> | <b>544.225602</b>  |                |                    | <b>1069.433362</b> | 535.220319         | S    | 5286.395444        | 2643.701360        | 5269.368895       | 2635.188086      | 5268.384879        | 2634.696078        | 48 |
| 12 | <b>1186.512341</b> | 593.759809         |                |                    | <b>1168.501776</b> | 584.754526         | V    | 5199.363416        | 2600.185346        | 5182.336867       | 2591.672072      | 5181.352851        | 2591.180064        | 47 |
| 13 | 1273.544369        | <b>637.275823</b>  |                |                    | 1255.533804        | 628.270540         | S    | 5100.295002        | 2550.651139        | 5083.268453       | 2542.137865      | 5082.284437        | <b>2541.645857</b> | 46 |
| 14 | 1330.565833        | 665.786555         |                |                    | <b>1312.555268</b> | 656.781272         | G    | 5013.262974        | 2507.135125        | 4996.236425       | 2498.621851      | 4995.252409        | 2498.129843        | 45 |
| 15 | <b>1417.597861</b> | 709.302569         |                |                    | 1399.587296        | 700.297286         | S    | 4956.241510        | 2478.624393        | 4939.214961       | 2470.111119      | 4938.230945        | 2469.619111        | 44 |
| 16 | <b>1518.645540</b> | 759.826408         |                |                    | <b>1500.634975</b> | 750.821126         | T    | 4869.209482        | <b>2435.108379</b> | 4852.182933       | 2426.595105      | 4851.198917        | 2426.103097        | 43 |
| 17 | 1575.667004        | 788.337140         |                |                    | 1557.656439        | 779.331858         | G    | <b>4768.161803</b> | 2384.584540        | 4751.135254       | 2376.071265      | 4750.151238        | 2375.579257        | 42 |
| 18 | 2014.892330        | 1007.949803        | 1997.865781    | 999.436529         | 1996.881765        | 998.944521         | Q    | 4711.140339        | 2356.073808        | 4694.113790       | 2347.560533      | 4693.129774        | 2347.068525        | 41 |
| 19 | 2200.971643        | <b>1100.989460</b> | 2183.945094    | 1092.476185        | 2182.961078        | 1091.984177        | W    | 4271.915013        | 2136.461145        | 4254.888464       | 2127.947870      | 4253.904448        | 2127.455862        | 40 |
| 20 | 2338.030555        | 1169.518916        | 2321.004006    | 1161.005641        | 2320.019990        | 1160.513633        | H    | 4085.835700        | 2043.421488        | 4068.809151       | 2034.908214      | 4067.825135        | 2034.416206        | 39 |
| 21 | 2425.062583        | 1213.034930        | 2408.036034    | 1204.521655        | 2407.052018        | 1204.029647        | S    | 3948.776788        | 1974.892032        | 3931.750239       | 1966.378758      | 3930.766223        | 1965.886750        | 38 |
| 22 | 2554.105176        | 1277.556226        | 2537.078627    | 1269.042952        | 2536.094611        | 1268.550944        | E    | 3861.744760        | 1931.376018        | 3844.718211       | 1922.862744      | 3843.734195        | 1922.370736        | 37 |
| 23 | 2641.137204        | 1321.072240        | 2624.110655    | <b>1312.558966</b> | 2623.126639        | 1312.066958        | S    | 3732.702167        | 1866.854722        | 3715.675618       | 1858.341447      | 3714.691602        | 1857.849439        | 36 |
| 24 | 2698.158668        | 1349.582972        | 2681.132119    | 1341.069698        | 2680.148103        | 1340.577690        | G    | 3645.670139        | 1823.338708        | 3628.643590       | 1814.825433      | 3627.659574        | 1814.333425        | 35 |
| 25 | 2785.190696        | 1393.098986        | 2768.164147    | 1384.585712        | 2767.180131        | 1384.093704        | S    | 3588.648675        | 1794.827976        | 3571.622126       | 1786.314701      | 3570.638110        | 1785.822693        | 34 |
| 26 | 2932.259110        | 1466.633193        | 2915.232561    | 1458.119919        | 2914.248545        | 1457.627911        | F    | 3501.616647        | 1751.311962        | 3484.590098       | 1742.798687      | 3483.606082        | 1742.306679        | 33 |
| 27 | 3088.360221        | 1544.683749        | 3071.333672    | 1536.170474        | 3070.349656        | 1535.678466        | R    | 3354.548233        | 1677.777755        | 3337.521684       | 1669.264480      | 3336.537668        | 1668.772472        | 32 |
| 28 | 3185.412985        | 1593.210131        | 3168.386436    | <b>1584.696856</b> | 3167.402420        | 1584.204848        | P    | 3198.447122        | <b>1599.727199</b> | 3181.420573       | 1591.213925      | 3180.436557        | 1590.721917        | 31 |
| 29 | 3300.439928        | 1650.723602        | 3283.413379    | 1642.210327        | 3282.429363        | <b>1641.718320</b> | D    | 3101.394358        | 1551.200817        | 3084.367809       | 1542.687543      | 3083.383793        | 1542.195535        | 30 |
| 30 | 3387.471956        | 1694.239616        | 3370.445407    | 1685.726342        | 3369.461391        | 1685.234334        | S    | 2986.367415        | <b>1493.687346</b> | 2969.340866       | 1485.174071      | 2968.356850        | 1484.682063        | 29 |
| 31 | 3484.524720        | 1742.765998        | 3467.498171    | 1734.252724        | 3466.514155        | 1733.760716        | P    | 2899.335387        | 1450.171332        | 2882.308838       | 1441.658057      | 2881.324822        | 1441.166049        | 28 |
| 32 | 3541.546184        | 1771.276730        | 3524.519635    | 1762.763456        | 3523.535619        | 1762.271448        | G    | 2802.282623        | 1401.644950        | 2785.256074       | 1393.131675      | 2784.272058        | 1392.639667        | 27 |
| 33 | 3628.578212        | 1814.792744        | 3611.551663    | 1806.279470        | 3610.567647        | 1805.787462        | S    | 2745.261159        | 1373.134218        | 2728.234610       | 1364.620943      | 2727.250594        | 1364.128935        | 26 |
| 34 | 3685.599676        | 1843.303476        | 3668.573127    | 1834.790202        | 3667.589111        | 1834.298194        | G    | 2658.229131        | 1329.618204        | 2641.202582       | 1321.104929      | 2640.218566        | 1320.612921        | 25 |
| 35 | 3799.642603        | 1900.324940        | 3782.616054    | 1891.811665        | 3781.632038        | 1891.319657        | N    | 2601.207667        | 1301.107472        | 2584.181118       | 1292.594197      | 2583.197102        | 1292.102189        | 24 |
| 36 | 3870.679717        | <b>1935.843497</b> | 3853.653168    | 1927.330222        | 3852.669152        | 1926.838214        | A    | 2487.164740        | 1244.086008        | 2470.138191       | 1235.572734      | 2469.154175        | 1235.080726        | 23 |
| 37 | 4026.780828        | <b>2013.894052</b> | 4009.754279    | 2005.380778        | 4008.770263        | 2004.888770        | R    | 2416.127626        | 1208.567451        | 2399.101077       | 1200.054177      | 2398.117061        | 1199.562169        | 22 |
| 38 | 4123.833592        | 2062.420434        | 4106.807043    | 2053.907160        | 4105.823027        | 2053.415152        | P    | 2260.026515        | 1130.516896        | 2242.999966       | 1122.003621      | 2242.015950        | 1121.511613        | 21 |
| 39 | 4237.876519        | 2119.441898        | 4220.849970    | 2110.928623        | 4219.865954        | 2110.436615        | N    | 2162.973751        | 1081.990514        | 2145.947202       | 1073.477239      | 2144.963186        | 1072.985231        | 20 |
| 40 | 4351.919446        | <b>2176.463361</b> | 4334.892897    | 2167.950087        | 4333.908881        | 2167.458079        | N    | 2048.930824        | 1024.969050        | 2031.904275       | 1016.455776      | 2030.920259        | 1015.963768        | 19 |
| 41 | 4448.972210        | 2224.989743        | 4431.945661    | 2216.476469        | 4430.961645        | 2215.984461        | P    | <b>1934.887897</b> | 967.947587         | 1917.861348       | 959.434312       | 1916.877332        | 958.942304         | 18 |
| 42 | 4563.999153        | <b>2282.503215</b> | 4546.972604    | 2273.989940        | 4545.988588        | 2273.497932        | D    | 1837.835133        | 919.421205         | 1820.808584       | 910.907930       | 1819.824568        | 910.415922         | 17 |
| 43 | 4750.078466        | 2375.542871        | 4733.051917    | 2367.029597        | 4732.067901        | 2366.537589        | W    | <b>1722.808190</b> | 861.907733         | 1705.781641       | 853.394459       | 1704.797625        | 852.902451         | 16 |
| 44 | 4807.099930        | 2404.053603        | 4790.073381    | 2395.540329        | 4789.089365        | 2395.048321        | G    | <b>1536.728877</b> | 768.868077         | 1519.702328       | 760.354802       | <b>1518.718312</b> | 759.862794         | 15 |
| 45 | 4908.147609        | 2454.577443        | 4891.121060    | 2446.064168        | 4890.137044        | 2445.572160        | T    | 1479.707413        | 740.357345         | 1462.680864       | 731.844070       | 1461.696848        | 731.352062         | 14 |
| 46 | 5055.216023        | <b>2528.111650</b> | 5038.189474    | 2519.598375        | 5037.205458        | 2519.106367        | F    | 1378.659734        | 689.833505         | 1361.633185       | 681.320231       | 1360.649169        | 680.828223         | 13 |
| 47 | 5184.258616        | 2592.632946        | 5167.232067    | 2584.119672        | 5166.248051        | 2583.627664        | E    | 1231.591320        | <b>616.299298</b>  | 1214.564771       | 607.786024       | 1213.580755        | 607.294016         | 12 |
| 48 | <b>5313.301209</b> | 2657.154243        | 5296.274660    | 2648.640968        | 5295.290644        | 2648.148960        | E    | <b>1102.548727</b> | 551.778002         | 1085.522178       | 543.264727       | 1084.538162        | 542.772719         | 11 |
| 49 | 5412.369623        | 2706.688450        | 5395.343074    | 2698.175175        | 5394.359058        | 2697.683167        | V    | <b>973.506134</b>  | 487.256705         | <b>956.479585</b> | 478.743431       | 955.495569         | 478.251423         | 10 |
| 50 | 5499.401651        | 2750.204464        | 5482.375102    | 2741.691189        | 5481.391086        | 2741.199181        | S    | <b>874.437720</b>  | 437.722498         | <b>857.411171</b> | 429.209224       | <b>856.427155</b>  | 428.717216         | 9  |
| 51 | 5556.423115        | 2778.715196        | 5539.396566    | 2770.201921        | 5538.412550        | 2769.709913        | G    | <b>787.405692</b>  | 394.206484         | <b>770.379143</b> | 385.693210       | <b>769.395127</b>  | 385.201202         | 8  |
| 52 | 5670.466042        | 2835.736659        | 5653.439493    | 2827.223385        | 5652.455477        | 2826.731377        | N    | <b>730.384228</b>  | 365.695752         | 713.357679        | 357.182478       | 712.373663         | 356.690470         | 7  |
| 53 | 5769.534456        | 2885.270866        | 5752.507907    | 2876.757592        | 5751.523891        | 2876.265584        | V    | <b>616.341301</b>  | 308.674289         | 599.314752        | 300.161014       | <b>598.330736</b>  | 299.669006         | 6  |
| 54 | 5856.566484        | 2928.786880        | 5839.539935    | 2920.273606        | 5838.555919        | 2919.781598        | S    | <b>517.272887</b>  | <b>259.140082</b>  | 500.246338        | 250.626807       | 499.262322         | 250.134799         | 5  |
| 55 | 5953.619248        | 2977.313262        | 5936.592699    | 2968.799988        | 5935.608683        | 2968.307980        | P    |                    |                    |                   |                  |                    |                    |    |



# MASCOT SCIENCE Mascot Search Results

## Peptide View

MS/MS Fragmentation of **YLQEIYNSNNQK**

Found in **FIBG\_HUMAN**, Fibrinogen gamma chain OS=Homo sapiens GN=FGG PE=1 SV=3

Match to Query 48989: 1823.914572 from(608.978800,3+) rtinseconds(1825) index(23526)

Title: Locus:1.1.1.2590.5 File:"2013-07-02 CLN FXIII 60 min 1st F 2.wiff"

Data file C:\Program Files (x86)\Matrix Science\Mascot Daemon\mgf4 FXIII 60 min 1st\mascot\_daemon\_merge.mgf

Click mouse within plot area to zoom in by factor of two about that point

Or, Plot from  to  Da

Label all possible matches  Label matches used for scoring

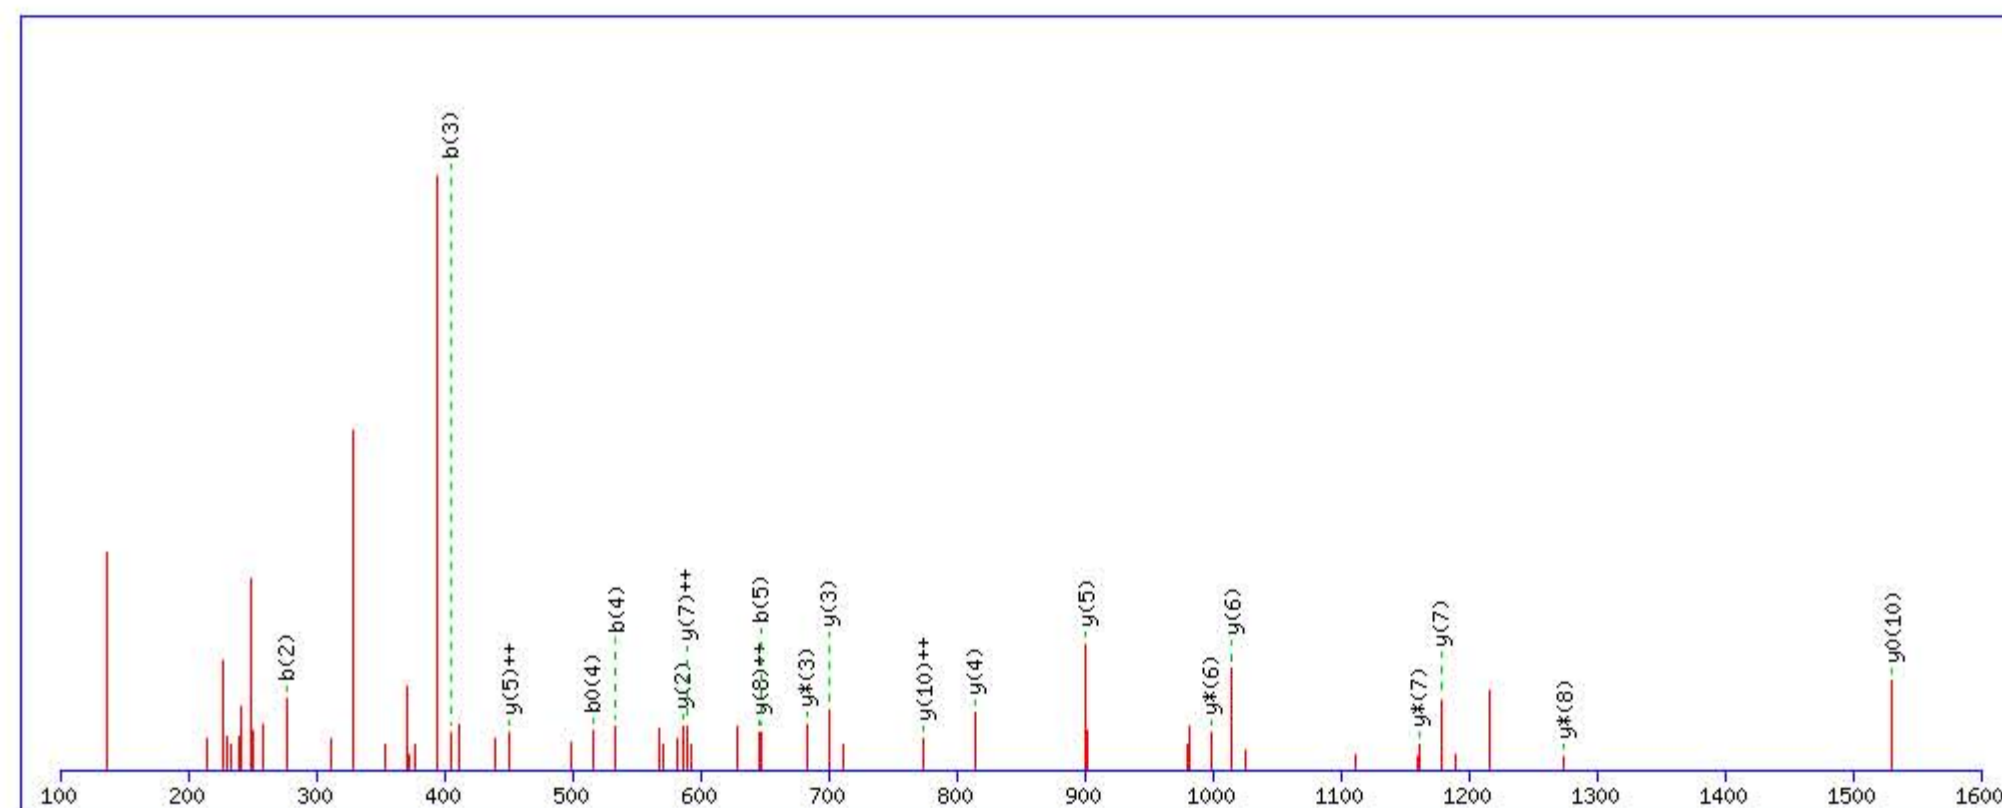

Monoisotopic mass of neutral peptide Mr(calc): 1823.887573

Fixed modifications: Carbamidomethyl (C) (apply to specified residues or termini only)

Variable modifications:

Q11 : Biotin:Thermo-21345 (Q)

Ions Score: 27 Expect: 0.052

Matches : 20/114 fragment ions using 39 most intense peaks [\(help\)](#)

| #  | b                 | b <sup>++</sup> | b <sup>+</sup> | b <sup>*++</sup> | b <sup>0</sup>    | b <sup>0++</sup> | Seq. | y                  | y <sup>++</sup>   | y <sup>+</sup>     | y <sup>*++</sup> | y <sup>0</sup>     | y <sup>0++</sup> | #  |
|----|-------------------|-----------------|----------------|------------------|-------------------|------------------|------|--------------------|-------------------|--------------------|------------------|--------------------|------------------|----|
| 1  | 164.070605        | 82.538940       |                |                  |                   |                  | Y    |                    |                   |                    |                  |                    |                  | 12 |
| 2  | <b>277.154669</b> | 139.080973      |                |                  |                   |                  | L    | 1661.831567        | 831.419422        | 1644.805018        | 822.906147       | 1643.821002        | 822.414139       | 11 |
| 3  | <b>405.213247</b> | 203.110262      | 388.186698     | 194.596987       |                   |                  | Q    | 1548.747503        | <b>774.877390</b> | 1531.720954        | 766.364115       | <b>1530.736938</b> | 765.872107       | 10 |
| 4  | <b>534.255840</b> | 267.631558      | 517.229291     | 259.118284       | <b>516.245275</b> | 258.626276       | E    | 1420.688925        | 710.848100        | 1403.662376        | 702.334826       | 1402.678360        | 701.842818       | 9  |
| 5  | <b>647.339904</b> | 324.173590      | 630.313355     | 315.660316       | 629.329339        | 315.168308       | I    | 1291.646332        | <b>646.326804</b> | <b>1274.619783</b> | 637.813530       | 1273.635767        | 637.321522       | 8  |
| 6  | 810.403233        | 405.705255      | 793.376684     | 397.191980       | 792.392668        | 396.699972       | Y    | <b>1178.562268</b> | <b>589.784772</b> | <b>1161.535719</b> | 581.271498       | 1160.551703        | 580.779489       | 7  |
| 7  | 924.446160        | 462.726718      | 907.419611     | 454.213443       | 906.435595        | 453.721435       | N    | <b>1015.498939</b> | 508.253108        | <b>998.472390</b>  | 499.739833       | 997.488374         | 499.247825       | 6  |
| 8  | 1011.478188       | 506.242732      | 994.451639     | 497.729457       | 993.467623        | 497.237449       | S    | <b>901.456012</b>  | <b>451.231644</b> | 884.429463         | 442.718370       | 883.445447         | 442.226362       | 5  |
| 9  | 1125.521115       | 563.264196      | 1108.494566    | 554.750921       | 1107.510550       | 554.258913       | N    | <b>814.423984</b>  | 407.715630        | 797.397435         | 399.202356       |                    |                  | 4  |
| 10 | 1239.564042       | 620.285659      | 1222.537493    | 611.772385       | 1221.553477       | 611.280376       | N    | <b>700.381057</b>  | 350.694167        | <b>683.354508</b>  | 342.180892       |                    |                  | 3  |
| 11 | 1678.789368       | 839.898322      | 1661.762819    | 831.385048       | 1660.778803       | 830.893039       | Q    | <b>586.338130</b>  | 293.672703        | 569.311581         | 285.159429       |                    |                  | 2  |
| 12 |                   |                 |                |                  |                   |                  | K    | 147.112804         | 74.060040         | 130.086255         | 65.546765        |                    |                  | 1  |

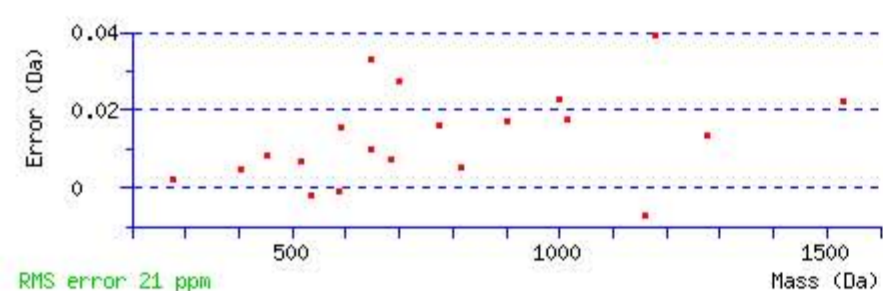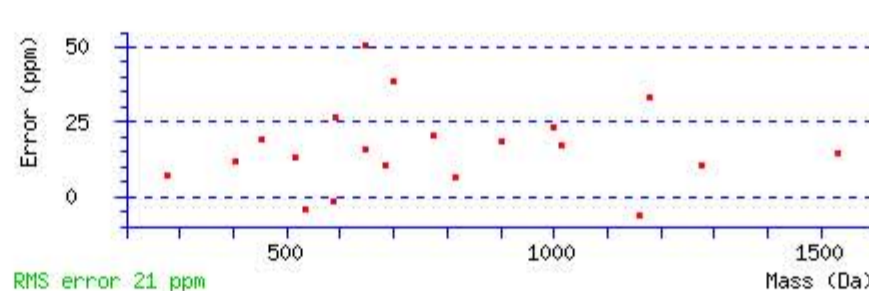

NCBI BLAST search of [YLQEIYNSNNQK](#)

(Parameters: blastp, nr protein database, expect=20000, no filter, PAM30)

Other BLAST [web gateways](#)

All matches to this query

| Score | Mr(calc):   | Delta    | Sequence                     |
|-------|-------------|----------|------------------------------|
| 27.0  | 1823.887573 | 0.026999 | <a href="#">YLQEIYNSNNQK</a> |

Mascot: <http://www.matrixscience.com/>



# MASCOT Search Results

## Peptide View

MS/MS Fragmentation of **LTIGEGQQHHLGGAK**

Found in **FIBG\_HUMAN**, Fibrinogen gamma chain OS=Homo sapiens GN=FGG PE=1 SV=3

Match to Query 49846: 1855.977096 from(465.001550,4+) rtinseconds(1468) index(56687)

Title: Locus:1.1.1.2817.8 File:"2013-07-02 CLN FXIII 60 min 1st F 4.wiff"

Data file C:\Program Files (x86)\Matrix Science\Mascot Daemon\mgf\4 FXIII 60 min 1st\mascot\_daemon\_merge.mgf

Click mouse within plot area to zoom in by factor of two about that point

Or, Plot from  to  Da

Label all possible matches  Label matches used for scoring

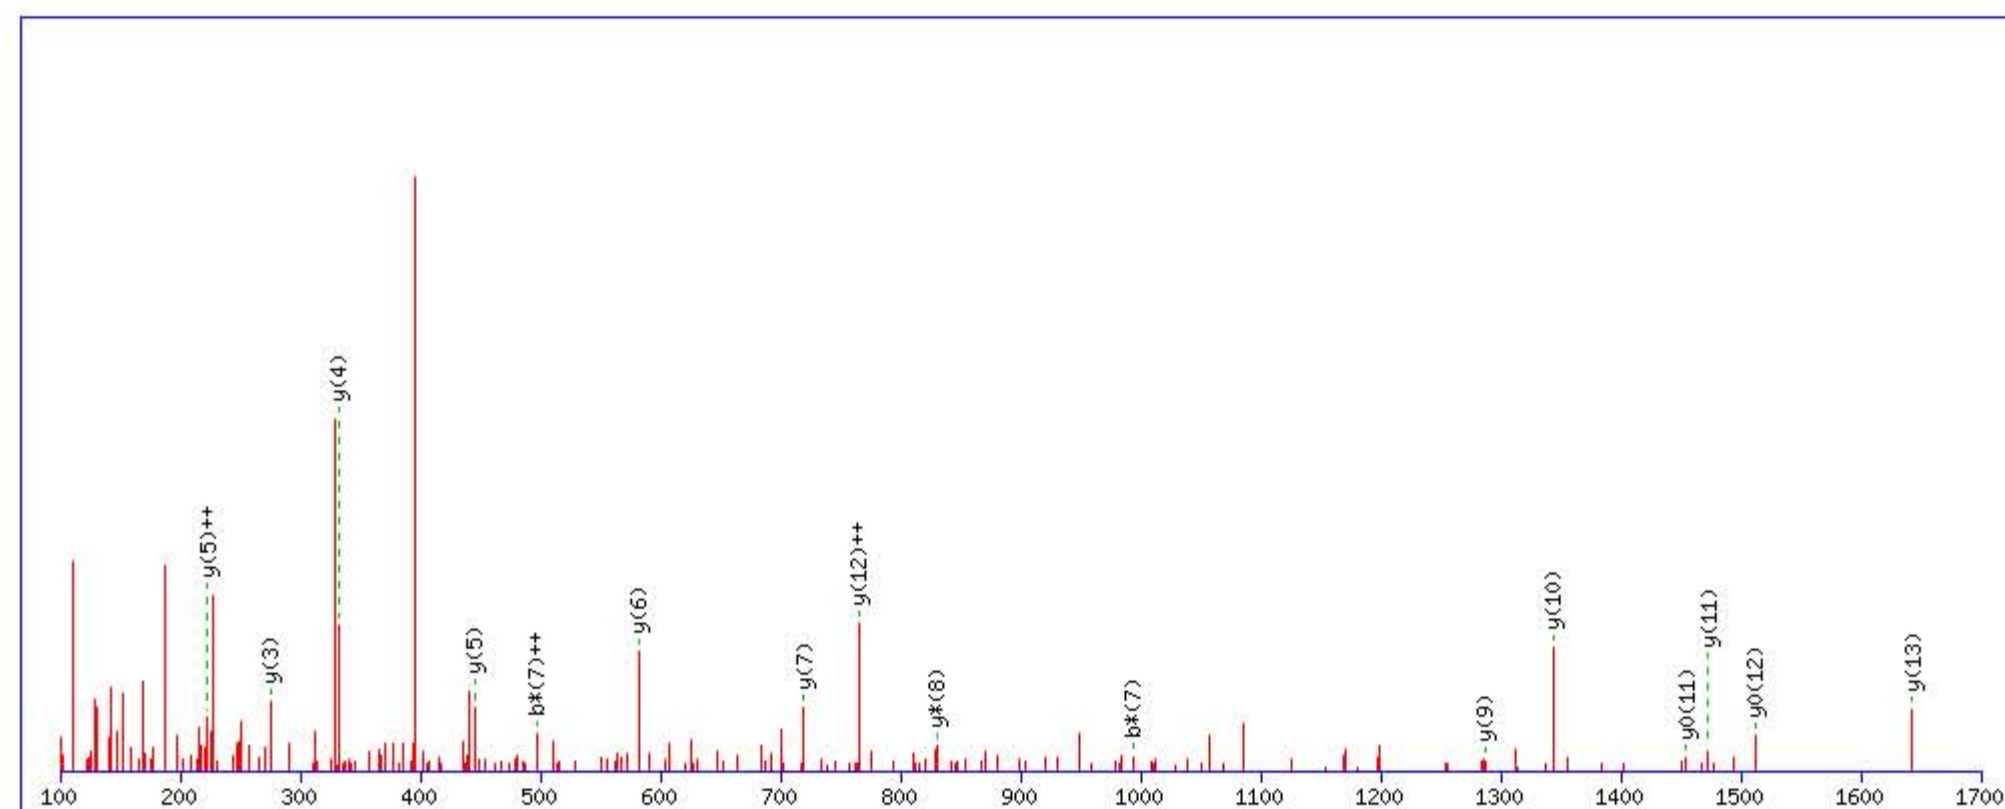

Monoisotopic mass of neutral peptide Mr(calc): 1855.972687

Fixed modifications: Carbamidomethyl (C) (apply to specified residues or termini only)

Variable modifications:

Q7 : Biotin:Thermo-21345 (Q)

Ions Score: 31 Expect: 0.002

Matches : 16/134 fragment ions using 44 most intense peaks [\(help\)](#)

| #  | b           | b <sup>++</sup> | b <sup>*</sup>    | b <sup>*++</sup>  | b <sup>0</sup> | b <sup>0++</sup> | Seq. | y                  | y <sup>++</sup>   | y <sup>*</sup>    | y <sup>*++</sup> | y <sup>0</sup>     | y <sup>0++</sup> | #  |
|----|-------------|-----------------|-------------------|-------------------|----------------|------------------|------|--------------------|-------------------|-------------------|------------------|--------------------|------------------|----|
| 1  | 114.091340  | 57.549308       |                   |                   |                |                  | L    |                    |                   |                   |                  |                    |                  | 15 |
| 2  | 215.139019  | 108.073147      |                   |                   | 197.128454     | 99.067865        | T    | 1743.895902        | 872.451589        | 1726.869353       | 863.938314       | 1725.885337        | 863.446306       | 14 |
| 3  | 328.223083  | 164.615179      |                   |                   | 310.212518     | 155.609897       | I    | <b>1642.848223</b> | 821.927749        | 1625.821674       | 813.414475       | 1624.837658        | 812.922467       | 13 |
| 4  | 385.244547  | 193.125911      |                   |                   | 367.233982     | 184.120629       | G    | 1529.764159        | <b>765.385717</b> | 1512.737610       | 756.872443       | <b>1511.753594</b> | 756.380435       | 12 |
| 5  | 514.287140  | 257.647208      |                   |                   | 496.276575     | 248.641926       | E    | <b>1472.742695</b> | 736.874985        | 1455.716146       | 728.361711       | <b>1454.732130</b> | 727.869703       | 11 |
| 6  | 571.308604  | 286.157940      |                   |                   | 553.298039     | 277.152658       | G    | <b>1343.700102</b> | 672.353689        | 1326.673553       | 663.840414       |                    |                  | 10 |
| 7  | 1010.533930 | 505.770603      | <b>993.507381</b> | <b>497.257329</b> | 992.523365     | 496.765321       | Q    | <b>1286.678638</b> | 643.842957        | 1269.652089       | 635.329682       |                    |                  | 9  |
| 8  | 1138.592508 | 569.799892      | 1121.565959       | 561.286618        | 1120.581943    | 560.794609       | Q    | 847.453312         | 424.230294        | <b>830.426763</b> | 415.717019       |                    |                  | 8  |
| 9  | 1275.651420 | 638.329348      | 1258.624871       | 629.816074        | 1257.640855    | 629.324065       | H    | <b>719.394734</b>  | 360.201005        | 702.368185        | 351.687730       |                    |                  | 7  |
| 10 | 1412.710332 | 706.858804      | 1395.683783       | 698.345530        | 1394.699767    | 697.853521       | H    | <b>582.335822</b>  | 291.671549        | 565.309273        | 283.158274       |                    |                  | 6  |
| 11 | 1525.794396 | 763.400836      | 1508.767847       | 754.887561        | 1507.783831    | 754.395553       | L    | <b>445.276910</b>  | <b>223.142093</b> | 428.250361        | 214.628818       |                    |                  | 5  |
| 12 | 1582.815860 | 791.911568      | 1565.789311       | 783.398293        | 1564.805295    | 782.906285       | G    | <b>332.192846</b>  | 166.600061        | 315.166297        | 158.086786       |                    |                  | 4  |
| 13 | 1639.837324 | 820.422300      | 1622.810775       | 811.909025        | 1621.826759    | 811.417017       | G    | <b>275.171382</b>  | 138.089329        | 258.144833        | 129.576054       |                    |                  | 3  |
| 14 | 1710.874438 | 855.940857      | 1693.847889       | 847.427582        | 1692.863873    | 846.935574       | A    | 218.149918         | 109.578597        | 201.123369        | 101.065322       |                    |                  | 2  |
| 15 |             |                 |                   |                   |                |                  | K    | 147.112804         | 74.060040         | 130.086255        | 65.546765        |                    |                  | 1  |

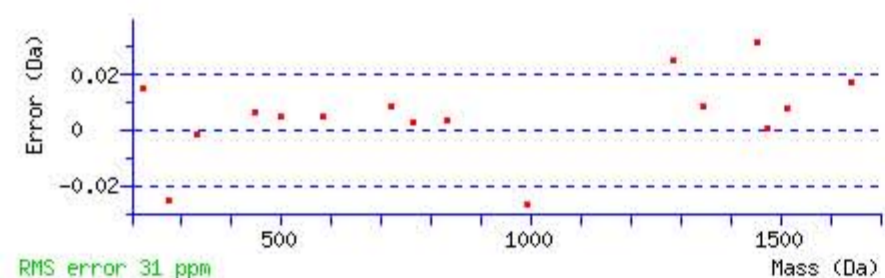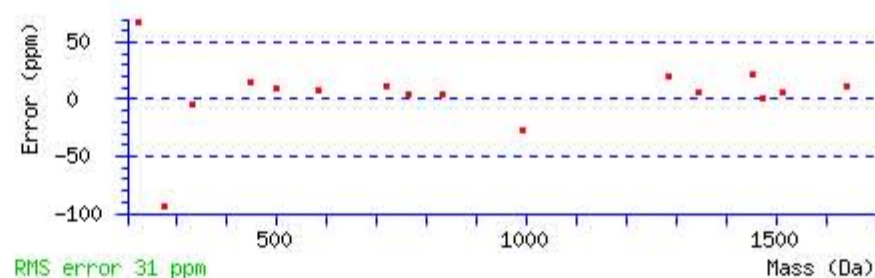

NCBI BLAST search of **LTIGEGQQHHLGGAK**

(Parameters: blastp, nr protein database, expect=20000, no filter, PAM30)

Other BLAST [web gateways](#)

All matches to this query

| Score | Mr(calc):   | Delta    | Sequence                          |
|-------|-------------|----------|-----------------------------------|
| 30.6  | 1855.972687 | 0.004409 | <a href="#">LTIGEGQQHHLGGAK</a>   |
| 28.6  | 1855.972687 | 0.004409 | <a href="#">LTIGEGQQHHLGGAK</a>   |
| 1.9   | 1855.967957 | 0.009139 | <a href="#">EDKEAFAIVPVSPAQVR</a> |

Mascot: <http://www.matrixscience.com/>



# MASCOT Search Results

## Peptide View

MS/MS Fragmentation of **LTIGEGQQHHLGGAK**

Found in **FIBG\_HUMAN**, Fibrinogen gamma chain OS=Homo sapiens GN=FGG PE=1 SV=3

Match to Query 49869: 1855.994952 from(619.672260,3+) rtinseconds(1471) index(21009)

Title: Locus:1.1.1.2466.20 File:"2013-07-02 CLN FXIII 60 min 1st F 2.wiff"

Data file C:\Program Files (x86)\Matrix Science\Mascot Daemon\mgf\4 FXIII 60 min 1st\mascot\_daemon\_merge.mgf

Click mouse within plot area to zoom in by factor of two about that point

Or, Plot from  to  Da

Label all possible matches  Label matches used for scoring

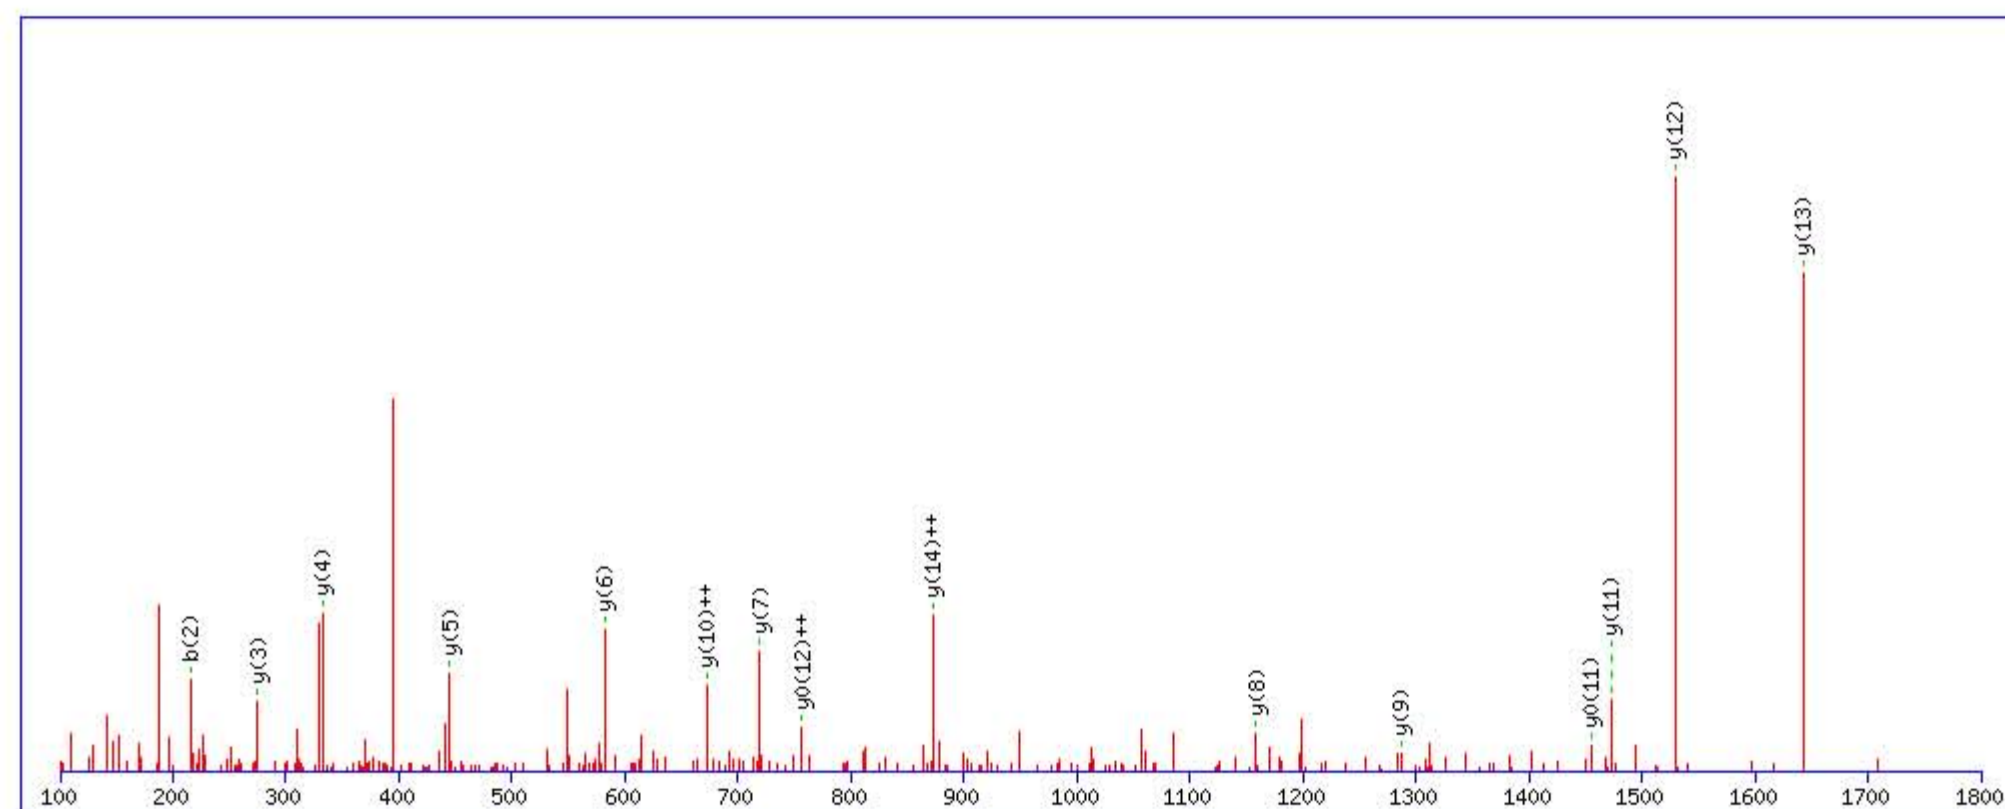

Monoisotopic mass of neutral peptide Mr(calc): 1855.972687

Fixed modifications: Carbamidomethyl (C) (apply to specified residues or termini only)

Variable modifications:

Q8 : Biotin:Thermo-21345 (Q)

Ions Score: 56 Expect: 6.2e-006

Matches : 15/134 fragment ions using 33 most intense peaks [\(help\)](#)

| #  | b           | b <sup>++</sup> | b <sup>*</sup> | b <sup>*++</sup> | b <sup>0</sup> | b <sup>0++</sup> | Seq. | y           | y <sup>++</sup> | y <sup>*</sup> | y <sup>*++</sup> | y <sup>0</sup> | y <sup>0++</sup> | #  |
|----|-------------|-----------------|----------------|------------------|----------------|------------------|------|-------------|-----------------|----------------|------------------|----------------|------------------|----|
| 1  | 114.091340  | 57.549308       |                |                  |                |                  | L    |             |                 |                |                  |                |                  | 15 |
| 2  | 215.139019  | 108.073147      |                |                  | 197.128454     | 99.067865        | T    | 1743.895902 | 872.451589      | 1726.869353    | 863.938314       | 1725.885337    | 863.446306       | 14 |
| 3  | 328.223083  | 164.615179      |                |                  | 310.212518     | 155.609897       | I    | 1642.848223 | 821.927749      | 1625.821674    | 813.414475       | 1624.837658    | 812.922467       | 13 |
| 4  | 385.244547  | 193.125911      |                |                  | 367.233982     | 184.120629       | G    | 1529.764159 | 765.385717      | 1512.737610    | 756.872443       | 1511.753594    | 756.380435       | 12 |
| 5  | 514.287140  | 257.647208      |                |                  | 496.276575     | 248.641926       | E    | 1472.742695 | 736.874985      | 1455.716146    | 728.361711       | 1454.732130    | 727.869703       | 11 |
| 6  | 571.308604  | 286.157940      |                |                  | 553.298039     | 277.152658       | G    | 1343.700102 | 672.353689      | 1326.673553    | 663.840414       |                |                  | 10 |
| 7  | 699.367182  | 350.187229      | 682.340633     | 341.673955       | 681.356617     | 341.181947       | Q    | 1286.678638 | 643.842957      | 1269.652089    | 635.329682       |                |                  | 9  |
| 8  | 1138.592508 | 569.799892      | 1121.565959    | 561.286618       | 1120.581943    | 560.794609       | Q    | 1158.620060 | 579.813668      | 1141.593511    | 571.300393       |                |                  | 8  |
| 9  | 1275.651420 | 638.329348      | 1258.624871    | 629.816074       | 1257.640855    | 629.324065       | H    | 719.394734  | 360.201005      | 702.368185     | 351.687730       |                |                  | 7  |
| 10 | 1412.710332 | 706.858804      | 1395.683783    | 698.345530       | 1394.699767    | 697.853521       | H    | 582.335822  | 291.671549      | 565.309273     | 283.158274       |                |                  | 6  |
| 11 | 1525.794396 | 763.400836      | 1508.767847    | 754.887561       | 1507.783831    | 754.395553       | L    | 445.276910  | 223.142093      | 428.250361     | 214.628818       |                |                  | 5  |
| 12 | 1582.815860 | 791.911568      | 1565.789311    | 783.398293       | 1564.805295    | 782.906285       | G    | 332.192846  | 166.600061      | 315.166297     | 158.086786       |                |                  | 4  |
| 13 | 1639.837324 | 820.422300      | 1622.810775    | 811.909025       | 1621.826759    | 811.417017       | G    | 275.171382  | 138.089329      | 258.144833     | 129.576054       |                |                  | 3  |
| 14 | 1710.874438 | 855.940857      | 1693.847889    | 847.427582       | 1692.863873    | 846.935574       | A    | 218.149918  | 109.578597      | 201.123369     | 101.065322       |                |                  | 2  |
| 15 |             |                 |                |                  |                |                  | K    | 147.112804  | 74.060040       | 130.086255     | 65.546765        |                |                  | 1  |

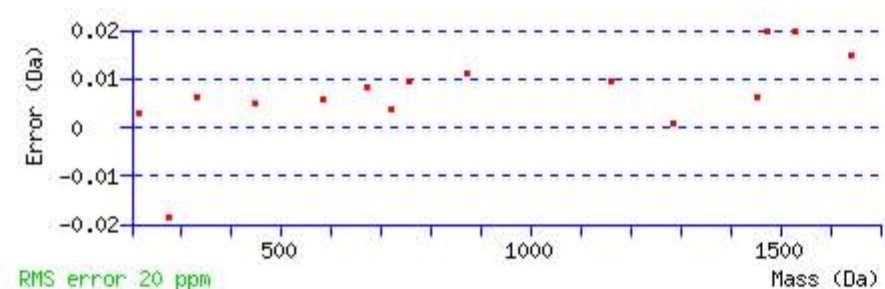

RMS error 20 ppm

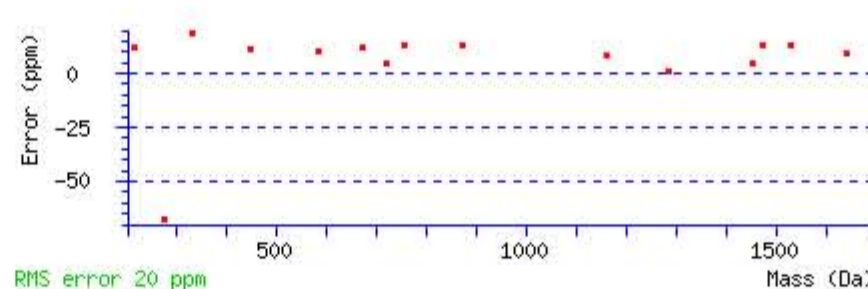

RMS error 20 ppm

NCBI BLAST search of **LTIGEGQQHHLGGAK**

(Parameters: blastp, nr protein database, expect=20000, no filter, PAM30)

Other BLAST [web gateways](#)

All matches to this query

| Score | Mr(calc):   | Delta    | Sequence                          |
|-------|-------------|----------|-----------------------------------|
| 56.0  | 1855.972687 | 0.022265 | <a href="#">LTIGEGQQHHLGGAK</a>   |
| 44.8  | 1855.972687 | 0.022265 | <a href="#">LTIGEGQQHHLGGAK</a>   |
| 0.5   | 1855.979202 | 0.015750 | <a href="#">ITIVENVGSVEGLAYHR</a> |

Mascot: <http://www.matrixscience.com/>



# MASCOT Search Results

## Peptide View

MS/MS Fragmentation of **LTIGEGQQHHLGGAK**

Found in **FIBG\_HUMAN**, Fibrinogen gamma chain OS=Homo sapiens GN=FGG PE=1 SV=3

Match to Query 57421: 2167.145216 from(542.793580,4+) rtinseconds(1753) index(40451)

Title: Locus:1.1.1.2894.8 File:"2013-07-02 CLN FXIII 60 min 1st F 3.wiff"

Data file C:\Program Files (x86)\Matrix Science\Mascot Daemon\mgf\4 FXIII 60 min 1st\mascot\_daemon\_merge.mgf

Click mouse within plot area to zoom in by factor of two about that point

Or, Plot from  to  Da

Label all possible matches  Label matches used for scoring

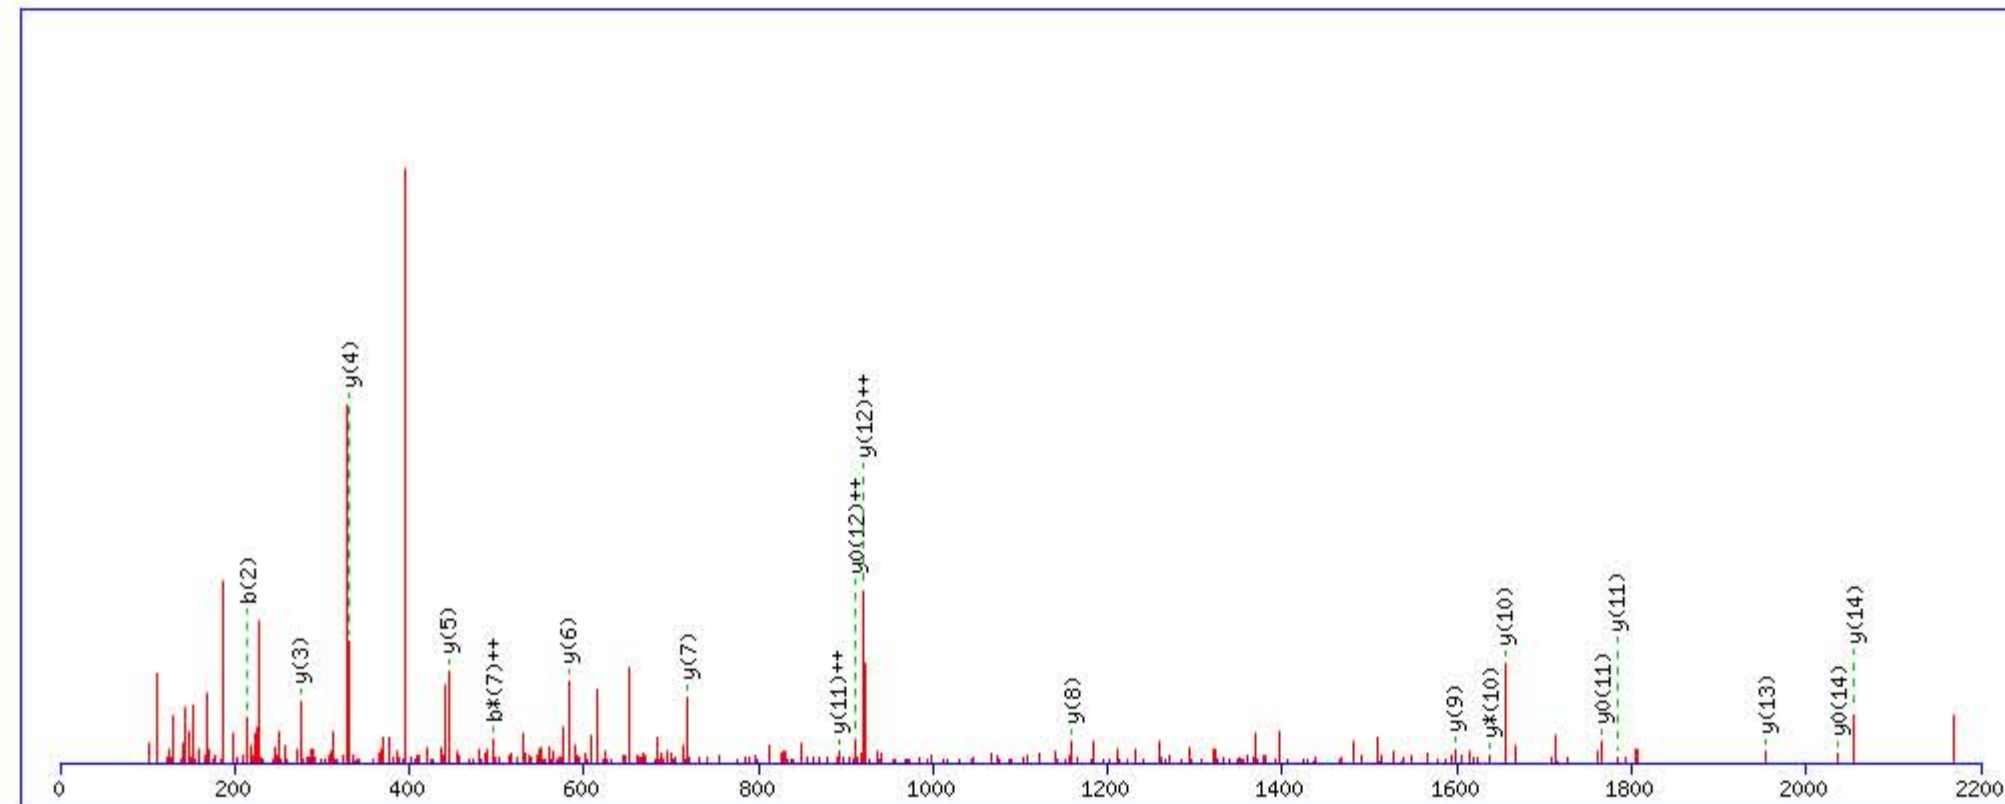

Monoisotopic mass of neutral peptide Mr(calc): 2167.139435

Fixed modifications: Carbamidomethyl (C) (apply to specified residues or termini only)

Variable modifications:

Q7 : Biotin:Thermo-21345 (Q)

Q8 : Biotin:Thermo-21345 (Q)

Ions Score: 27 Expect: 0.05

Matches : 19/134 fragment ions using 73 most intense peaks [\(help\)](#)

| #  | b           | b <sup>++</sup> | b <sup>+</sup> | b <sup>+++</sup> | b <sup>0</sup> | b <sup>0++</sup> | Seq. | y           | y <sup>++</sup> | y <sup>+</sup> | y <sup>+++</sup> | y <sup>0</sup> | y <sup>0++</sup> | #  |
|----|-------------|-----------------|----------------|------------------|----------------|------------------|------|-------------|-----------------|----------------|------------------|----------------|------------------|----|
| 1  | 114.091340  | 57.549308       |                |                  |                |                  | L    |             |                 |                |                  |                |                  | 15 |
| 2  | 215.139019  | 108.073147      |                |                  | 197.128454     | 99.067865        | T    | 2055.062650 | 1028.034963     | 2038.036101    | 1019.521688      | 2037.052085    | 1019.029680      | 14 |
| 3  | 328.223083  | 164.615179      |                |                  | 310.212518     | 155.609897       | I    | 1954.014971 | 977.511123      | 1936.988422    | 968.997849       | 1936.004406    | 968.505841       | 13 |
| 4  | 385.244547  | 193.125911      |                |                  | 367.233982     | 184.120629       | G    | 1840.930907 | 920.969091      | 1823.904358    | 912.455817       | 1822.920342    | 911.963809       | 12 |
| 5  | 514.287140  | 257.647208      |                |                  | 496.276575     | 248.641926       | E    | 1783.909443 | 892.458359      | 1766.882894    | 883.945085       | 1765.898878    | 883.453077       | 11 |
| 6  | 571.308604  | 286.157940      |                |                  | 553.298039     | 277.152658       | G    | 1654.866850 | 827.937063      | 1637.840301    | 819.423788       |                |                  | 10 |
| 7  | 1010.533930 | 505.770603      | 993.507381     | 497.257329       | 992.523365     | 496.765321       | Q    | 1597.845386 | 799.426331      | 1580.818837    | 790.913056       |                |                  | 9  |
| 8  | 1449.759256 | 725.383266      | 1432.732707    | 716.869992       | 1431.748691    | 716.377984       | Q    | 1158.620060 | 579.813668      | 1141.593511    | 571.300393       |                |                  | 8  |
| 9  | 1586.818168 | 793.912722      | 1569.791619    | 785.399448       | 1568.807603    | 784.907440       | H    | 719.394734  | 360.201005      | 702.368185     | 351.687730       |                |                  | 7  |
| 10 | 1723.877080 | 862.442178      | 1706.850531    | 853.928904       | 1705.866515    | 853.436895       | H    | 582.335822  | 291.671549      | 565.309273     | 283.158274       |                |                  | 6  |
| 11 | 1836.961144 | 918.984210      | 1819.934595    | 910.470936       | 1818.950579    | 909.978927       | L    | 445.276910  | 223.142093      | 428.250361     | 214.628818       |                |                  | 5  |
| 12 | 1893.982608 | 947.494942      | 1876.956059    | 938.981667       | 1875.972043    | 938.489659       | G    | 332.192846  | 166.600061      | 315.166297     | 158.086786       |                |                  | 4  |
| 13 | 1951.004072 | 976.005674      | 1933.977523    | 967.492399       | 1932.993507    | 967.000391       | G    | 275.171382  | 138.089329      | 258.144833     | 129.576054       |                |                  | 3  |
| 14 | 2022.041186 | 1011.524231     | 2005.014637    | 1003.010956      | 2004.030621    | 1002.518948      | A    | 218.149918  | 109.578597      | 201.123369     | 101.065322       |                |                  | 2  |
| 15 |             |                 |                |                  |                |                  | K    | 147.112804  | 74.060040       | 130.086255     | 65.546765        |                |                  | 1  |

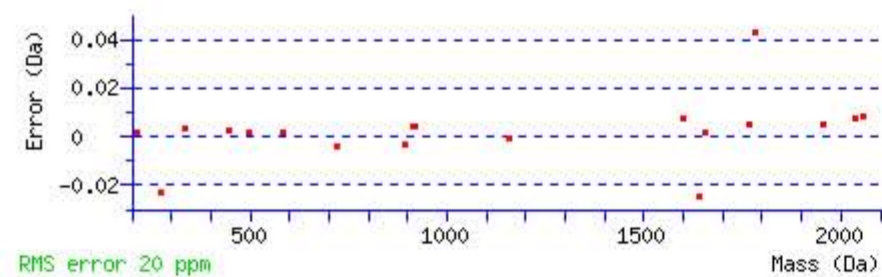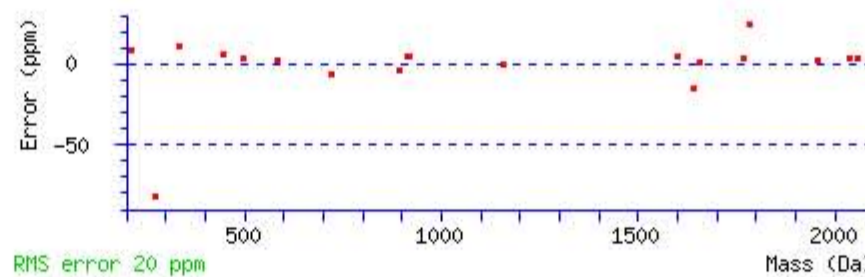

NCBI BLAST search of **LTIGEGQQHHLGGAK**

(Parameters: blastp, nr protein database, expect=20000, no filter, PAM30)

Other BLAST [web gateways](#)

## All matches to this query

| Score | Mr(calc):   | Delta    | Sequence               |
|-------|-------------|----------|------------------------|
| 26.9  | 2167.139435 | 0.005781 | <b>LTIGEGQQHHLGGAK</b> |



# MASCOT SEARCH RESULTS

## Peptide View

MS/MS Fragmentation of **IGDQWDK**

Found in **FINC\_HUMAN**, Fibronectin OS=Homo sapiens GN=FN1 PE=1 SV=4

Match to Query 26556: 1171.574528 from(586.794540,2+) rtinseconds(1784) index(40661)

Title: Locus:1.1.1.2905.15 File:"2013-07-02 CLN FXIII 60 min 1st F 3.wiff"

Data file C:\Program Files (x86)\Matrix Science\Mascot Daemon\mgf\4 FXIII 60 min 1st\mascot\_daemon\_merge.mgf

Click mouse within plot area to zoom in by factor of two about that point

Or, Plot from  to  Da

Label all possible matches  Label matches used for scoring

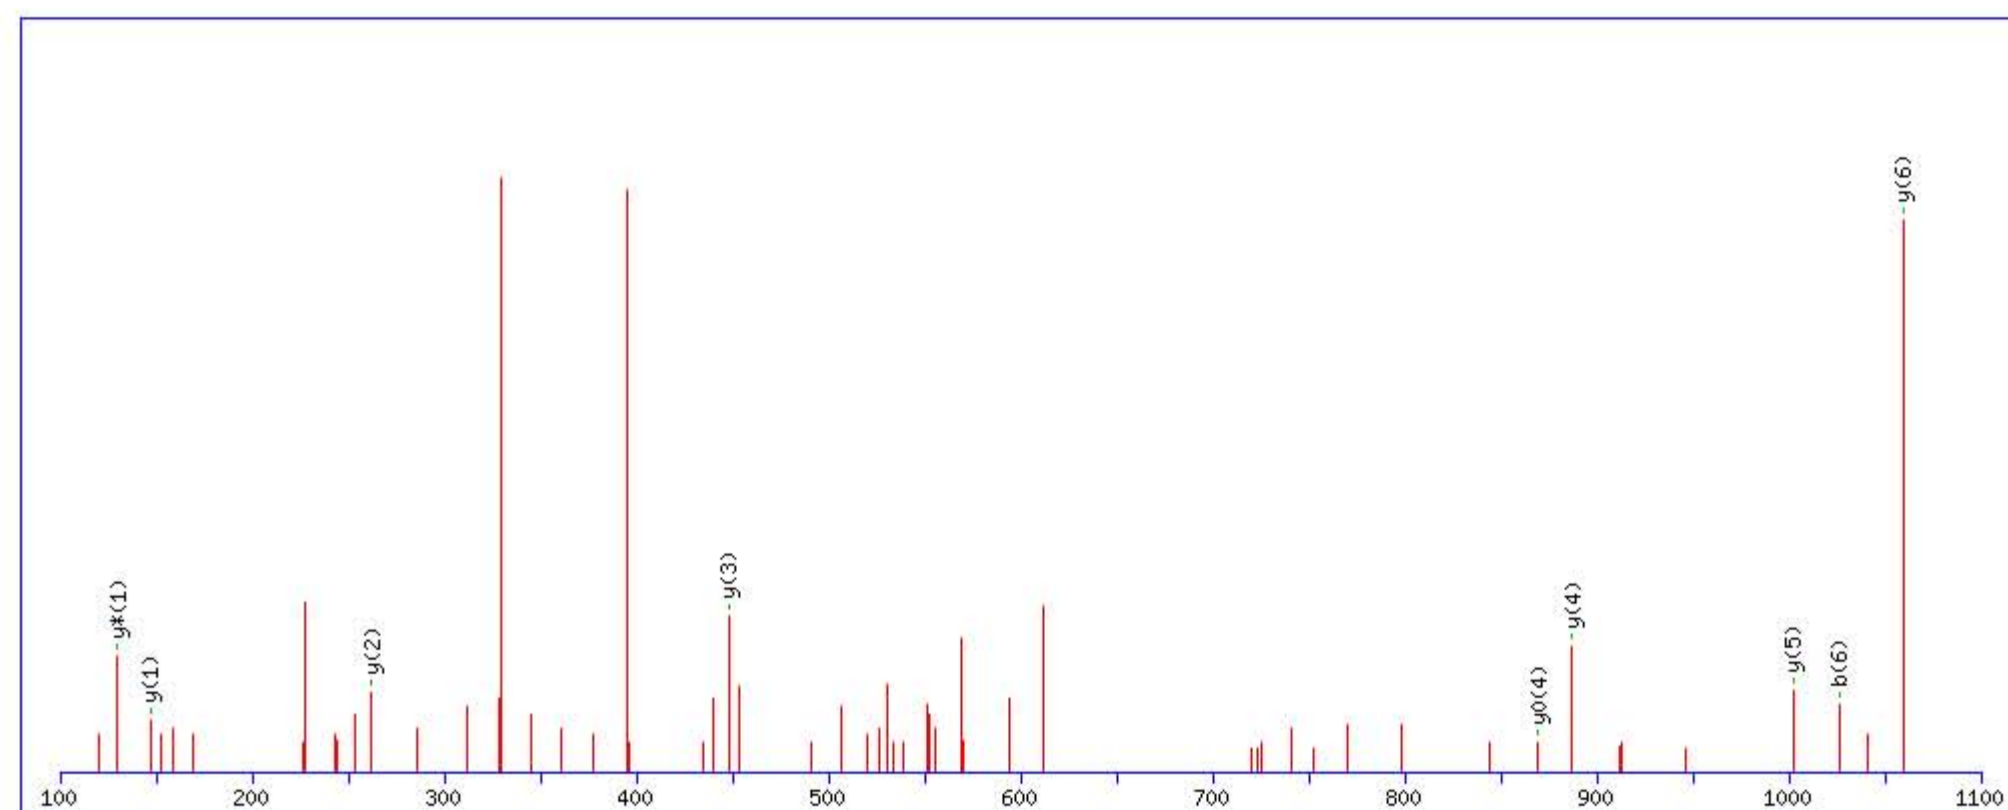

Monoisotopic mass of neutral peptide Mr(calc): 1171.569580

Fixed modifications: Carbamidomethyl (C) (apply to specified residues or termini only)

Variable modifications:

Q4 : Biotin:Thermo-21345 (Q)

Ions Score: 32 Expect: 0.0093

Matches : 9/60 fragment ions using 18 most intense peaks [\(help\)](#)

| # | b           | b <sup>++</sup> | b <sup>*</sup> | b <sup>+++</sup> | b <sup>0</sup> | b <sup>0++</sup> | Seq. | y           | y <sup>++</sup> | y <sup>*</sup> | y <sup>+++</sup> | y <sup>0</sup> | y <sup>0++</sup> | # |
|---|-------------|-----------------|----------------|------------------|----------------|------------------|------|-------------|-----------------|----------------|------------------|----------------|------------------|---|
| 1 | 114.091340  | 57.549308       |                |                  |                |                  | I    |             |                 |                |                  |                |                  | 7 |
| 2 | 171.112804  | 86.060040       |                |                  |                |                  | G    | 1059.492793 | 530.250035      | 1042.466244    | 521.736760       | 1041.482228    | 521.244752       | 6 |
| 3 | 286.139747  | 143.573512      |                |                  | 268.129182     | 134.568229       | D    | 1002.471329 | 501.739303      | 985.444780     | 493.226028       | 984.460764     | 492.734020       | 5 |
| 4 | 725.365073  | 363.186175      | 708.338524     | 354.672900       | 707.354508     | 354.180892       | Q    | 887.444386  | 444.225831      | 870.417837     | 435.712557       | 869.433821     | 435.220549       | 4 |
| 5 | 911.444386  | 456.225831      | 894.417837     | 447.712557       | 893.433821     | 447.220549       | W    | 448.219060  | 224.613168      | 431.192511     | 216.099894       | 430.208495     | 215.607886       | 3 |
| 6 | 1026.471329 | 513.739303      | 1009.444780    | 505.226028       | 1008.460764    | 504.734020       | D    | 262.139747  | 131.573512      | 245.113198     | 123.060237       | 244.129182     | 122.568229       | 2 |
| 7 |             |                 |                |                  |                |                  | K    | 147.112804  | 74.060040       | 130.086255     | 65.546765        |                |                  | 1 |

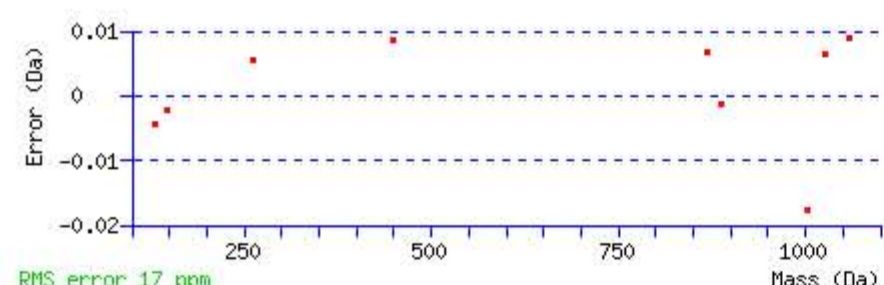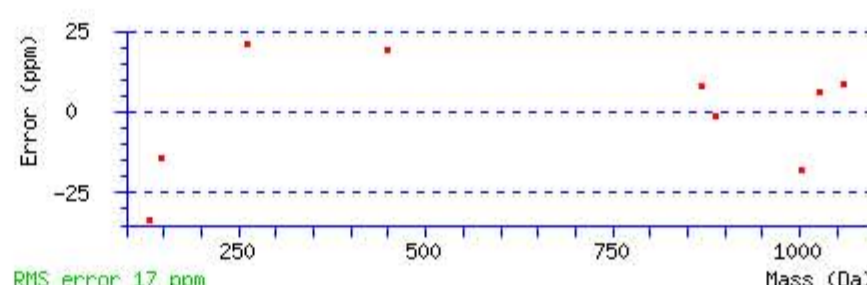

NCBI BLAST search of **IGDQWDK**

(Parameters: blastp, nr protein database, expect=20000, no filter, PAM30)

Other BLAST [web gateways](#)

All matches to this query

| Score | Mr(calc):   | Delta     | Sequence                     |
|-------|-------------|-----------|------------------------------|
| 31.7  | 1171.569580 | 0.004948  | <a href="#">IGDQWDK</a>      |
| 9.4   | 1171.590714 | -0.016186 | <a href="#">GEVQVSDK</a>     |
| 9.1   | 1171.569565 | 0.004963  | <a href="#">LGPEWSQPMK</a>   |
| 6.8   | 1171.576096 | -0.001568 | <a href="#">LYFSDATLDK</a>   |
| 6.4   | 1171.590698 | -0.016170 | <a href="#">LPALSGQDMPK</a>  |
| 4.6   | 1171.590683 | -0.016155 | <a href="#">ELCADNPILK</a>   |
| 3.5   | 1171.590668 | -0.016140 | <a href="#">EKAEQEK</a>      |
| 3.5   | 1171.590668 | -0.016140 | <a href="#">EKAQEEK</a>      |
| 2.6   | 1171.583328 | -0.008800 | <a href="#">GEVGDPGQKGTK</a> |
| 2.4   | 1171.583298 | -0.008770 | <a href="#">EPGVERSSPSK</a>  |

Mascot: <http://www.matrixscience.com/>



# MASCOT SCIENCE Mascot Search Results

## Peptide View

MS/MS Fragmentation of **WCGTTQNYDADQK**

Found in **FN1\_HUMAN**, Fibronectin OS=Homo sapiens GN=FN1 PE=1 SV=4

Match to Query 50504: 1896.816522 from(633.279450,3+) rtinseconds(1650) index(39769)

Title: Locus:1.1.1.2858.16 File:"2013-07-02 CLN FXIII 60 min 1st F 3.wiff"

Data file C:\Program Files (x86)\Matrix Science\Mascot Daemon\mgf4 FXIII 60 min 1st\mascot\_daemon\_merge.mgf

Click mouse within plot area to zoom in by factor of two about that point

Or, Plot from  to  Da

Label all possible matches  Label matches used for scoring

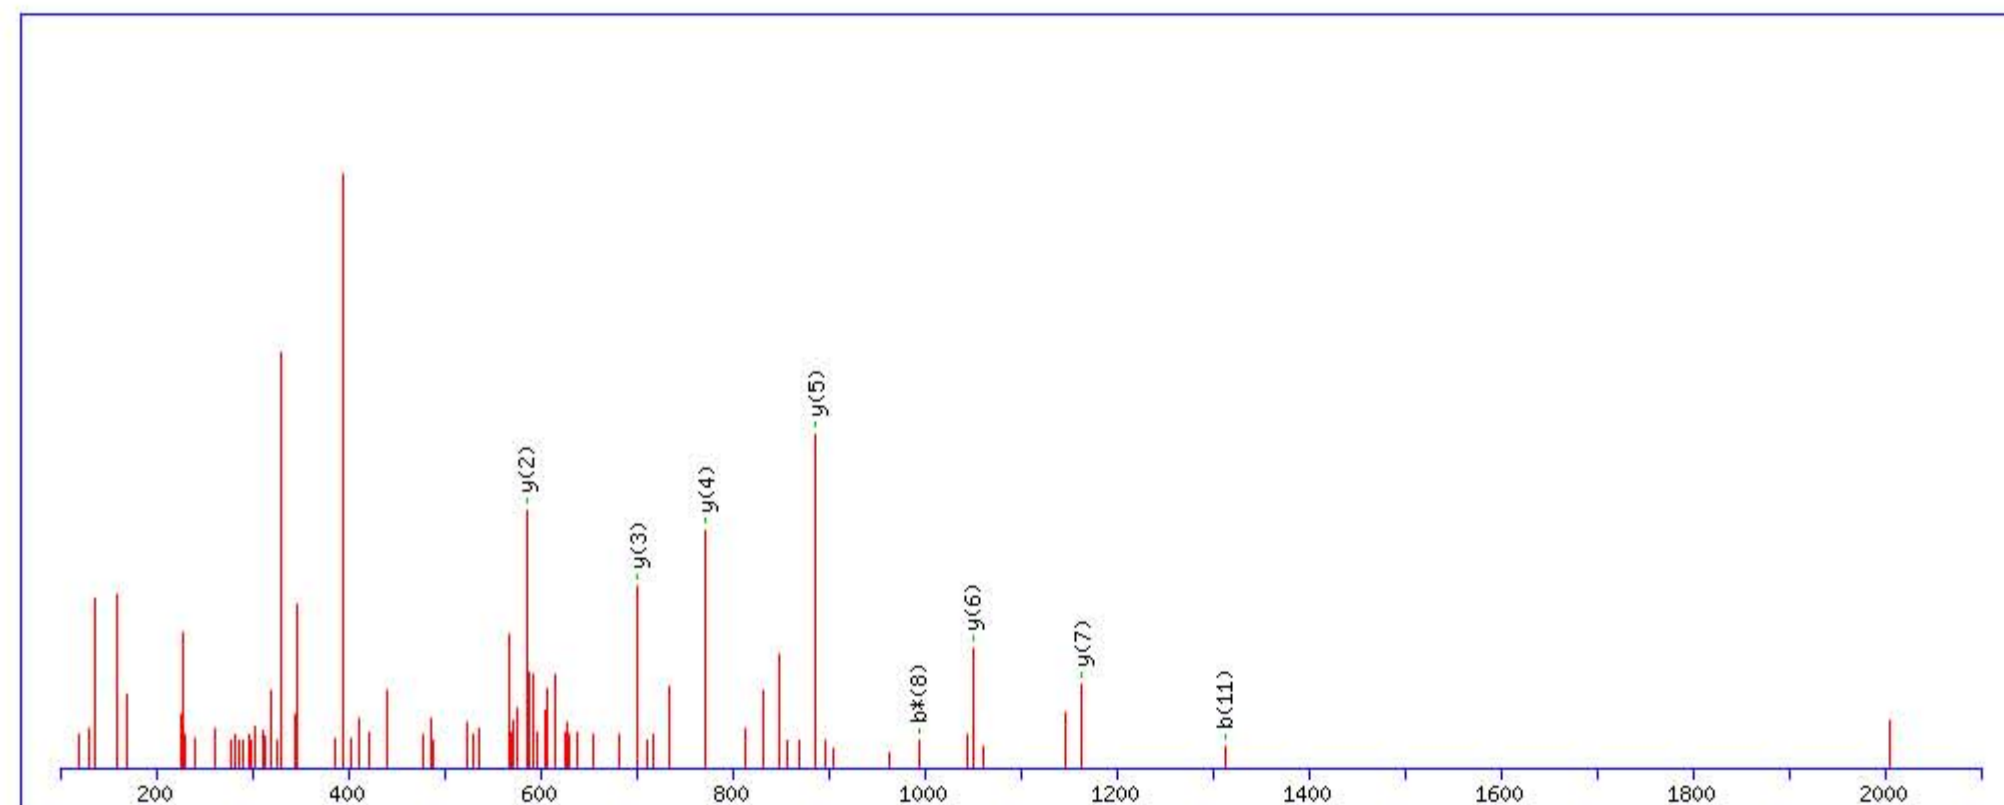

Monoisotopic mass of neutral peptide Mr(calc): 1896.813477

Fixed modifications: Carbamidomethyl (C) (apply to specified residues or termini only)

Variable modifications:

Q12 : Biotin:Thermo-21345 (Q)

Ions Score: 36 Expect: 0.0012

Matches : 8/124 fragment ions using 12 most intense peaks ([help](#))

| #  | b                  | b <sup>++</sup> | b <sup>*</sup>    | b <sup>*++</sup> | b <sup>0</sup> | b <sup>0++</sup> | Seq. | y                  | y <sup>++</sup> | y <sup>*</sup> | y <sup>*++</sup> | y <sup>0</sup> | y <sup>0++</sup> | #  |
|----|--------------------|-----------------|-------------------|------------------|----------------|------------------|------|--------------------|-----------------|----------------|------------------|----------------|------------------|----|
| 1  | 187.086589         | 94.046932       |                   |                  |                |                  | W    |                    |                 |                |                  |                |                  | 13 |
| 2  | 347.117238         | 174.062257      |                   |                  |                |                  | C    | 1711.741435        | 856.374356      | 1694.714886    | 847.861081       | 1693.730870    | 847.369073       | 12 |
| 3  | 404.138702         | 202.572989      |                   |                  |                |                  | G    | 1551.710786        | 776.359031      | 1534.684237    | 767.845757       | 1533.700221    | 767.353749       | 11 |
| 4  | 505.186381         | 253.096828      |                   |                  | 487.175816     | 244.091546       | T    | 1494.689322        | 747.848299      | 1477.662773    | 739.335025       | 1476.678757    | 738.843017       | 10 |
| 5  | 606.234060         | 303.620668      |                   |                  | 588.223495     | 294.615386       | T    | 1393.641643        | 697.324460      | 1376.615094    | 688.811185       | 1375.631078    | 688.319177       | 9  |
| 6  | 734.292638         | 367.649957      | 717.266089        | 359.136683       | 716.282073     | 358.644675       | Q    | 1292.593964        | 646.800620      | 1275.567415    | 638.287346       | 1274.583399    | 637.795338       | 8  |
| 7  | 848.335565         | 424.671421      | 831.309016        | 416.158146       | 830.325000     | 415.666138       | N    | <b>1164.535386</b> | 582.771331      | 1147.508837    | 574.258057       | 1146.524821    | 573.766049       | 7  |
| 8  | 1011.398894        | 506.203085      | <b>994.372345</b> | 497.689810       | 993.388329     | 497.197802       | Y    | <b>1050.492459</b> | 525.749868      | 1033.465910    | 517.236593       | 1032.481894    | 516.744585       | 6  |
| 9  | 1126.425837        | 563.716557      | 1109.399288       | 555.203282       | 1108.415272    | 554.711274       | D    | <b>887.429130</b>  | 444.218203      | 870.402581     | 435.704929       | 869.418565     | 435.212921       | 5  |
| 10 | 1197.462951        | 599.235114      | 1180.436402       | 590.721839       | 1179.452386    | 590.229831       | A    | <b>772.402187</b>  | 386.704732      | 755.375638     | 378.191457       | 754.391622     | 377.699449       | 4  |
| 11 | <b>1312.489894</b> | 656.748585      | 1295.463345       | 648.235311       | 1294.479329    | 647.743303       | D    | <b>701.365073</b>  | 351.186175      | 684.338524     | 342.672900       | 683.354508     | 342.180892       | 3  |
| 12 | 1751.715220        | 876.361248      | 1734.688671       | 867.847974       | 1733.704655    | 867.355966       | Q    | <b>586.338130</b>  | 293.672703      | 569.311581     | 285.159429       |                |                  | 2  |
| 13 |                    |                 |                   |                  |                |                  | K    | 147.112804         | 74.060040       | 130.086255     | 65.546765        |                |                  | 1  |

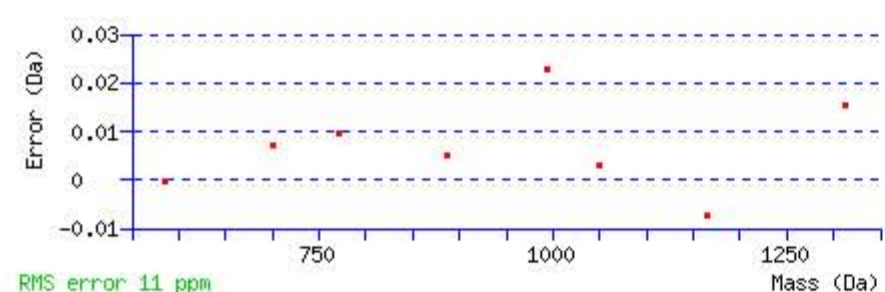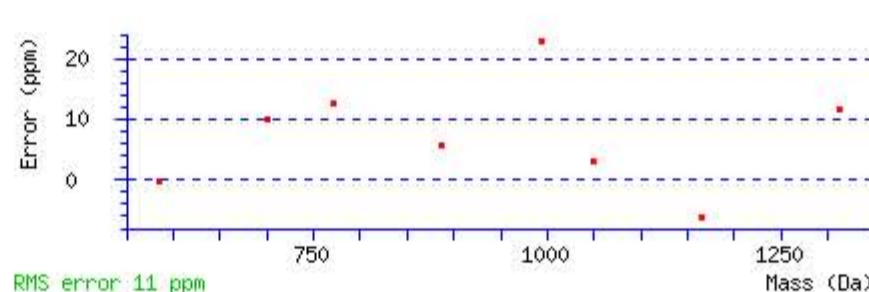

NCBI BLAST search of [WCGTTQNYDADQK](#)

(Parameters: blastp, nr protein database, expect=20000, no filter, PAM30)

Other BLAST [web gateways](#)

## All matches to this query

| Score | Mr(calc):   | Delta    | Sequence                      |
|-------|-------------|----------|-------------------------------|
| 35.8  | 1896.813477 | 0.003045 | <a href="#">WCGTTQNYDADQK</a> |

Mascot: <http://www.matrixscience.com/>



# MASCOT Search Results

## Peptide View

MS/MS Fragmentation of **LLCQCLGFGSGHFR**

Found in **FINC\_HUMAN**, Fibronectin OS=Homo sapiens GN=FN1 PE=1 SV=4

Match to Query 52001: 1961.955102 from(654.992310,3+) rtinseconds(2150) index(43069)

Title: Locus:1.1.1.3032.19 File:"2013-07-02 CLN FXIII 60 min 1st F 3.wiff"

Data file C:\Program Files (x86)\Matrix Science\Mascot Daemon\mgf4 FXIII 60 min 1st\mascot\_daemon\_merge.mgf

Click mouse within plot area to zoom in by factor of two about that point

Or, Plot from  to  Da

Label all possible matches  Label matches used for scoring

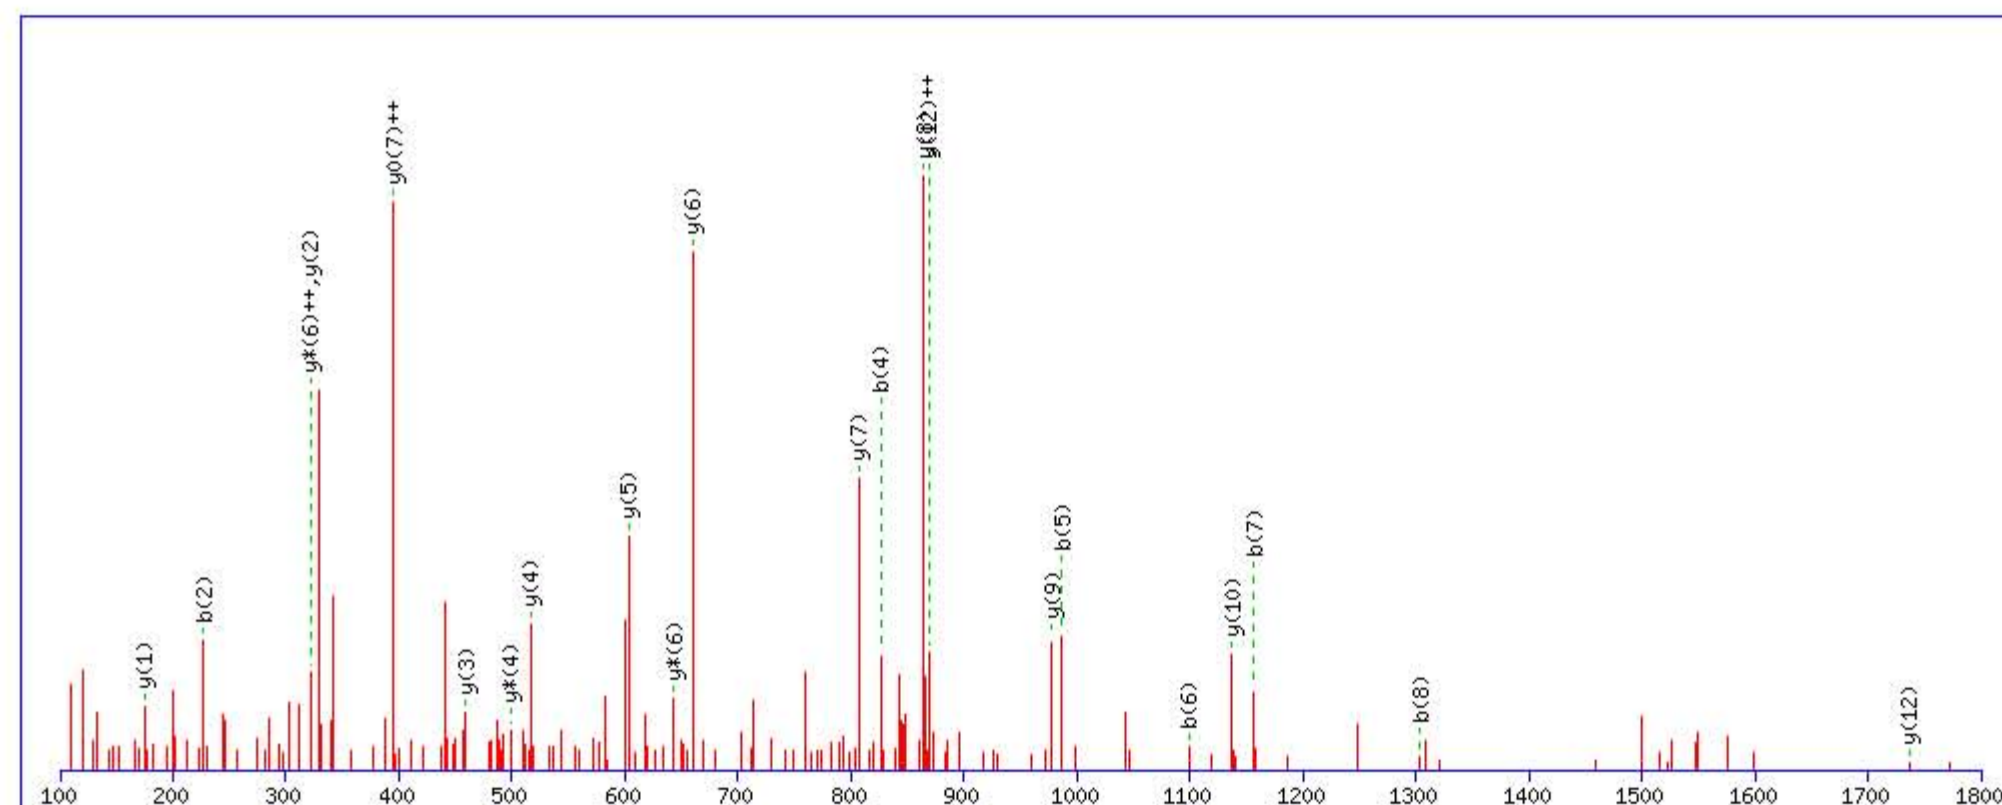

Monoisotopic mass of neutral peptide Mr(calc): 1961.942673

Fixed modifications: Carbamidomethyl (C) (apply to specified residues or termini only)

Variable modifications:

Q4 : Biotin:Thermo-21345 (Q)

Ions Score: 48 Expect: 0.00034

Matches : 22/124 fragment ions using 55 most intense peaks [\(help\)](#)

| #  | b                  | b <sup>++</sup> | b <sup>*</sup> | b <sup>*++</sup> | b <sup>0</sup> | b <sup>0++</sup> | Seq. | y                  | y <sup>++</sup>   | y <sup>*</sup>    | y <sup>*++</sup>  | y <sup>0</sup> | y <sup>0++</sup>  | #  |
|----|--------------------|-----------------|----------------|------------------|----------------|------------------|------|--------------------|-------------------|-------------------|-------------------|----------------|-------------------|----|
| 1  | 114.091340         | 57.549308       |                |                  |                |                  | L    |                    |                   |                   |                   |                |                   | 14 |
| 2  | <b>227.175404</b>  | 114.091340      |                |                  |                |                  | L    | 1849.865864        | 925.436570        | 1832.839315       | 916.923296        | 1831.855299    | 916.431288        | 13 |
| 3  | 387.206053         | 194.106664      |                |                  |                |                  | C    | <b>1736.781800</b> | <b>868.894538</b> | 1719.755251       | 860.381264        | 1718.771235    | 859.889255        | 12 |
| 4  | <b>826.431379</b>  | 413.719328      | 809.404830     | 405.206053       |                |                  | Q    | 1576.751151        | 788.879213        | 1559.724602       | 780.365939        | 1558.740586    | 779.873931        | 11 |
| 5  | <b>986.462028</b>  | 493.734652      | 969.435479     | 485.221378       |                |                  | C    | <b>1137.525825</b> | 569.266550        | 1120.499276       | 560.753276        | 1119.515260    | 560.261268        | 10 |
| 6  | <b>1099.546092</b> | 550.276684      | 1082.519543    | 541.763410       |                |                  | L    | <b>977.495176</b>  | 489.251226        | 960.468627        | 480.737952        | 959.484611     | 480.245944        | 9  |
| 7  | <b>1156.567556</b> | 578.787416      | 1139.541007    | 570.274142       |                |                  | G    | <b>864.411112</b>  | 432.709194        | 847.384563        | 424.195920        | 846.400547     | 423.703912        | 8  |
| 8  | <b>1303.635970</b> | 652.321623      | 1286.609421    | 643.808349       |                |                  | F    | <b>807.389648</b>  | 404.198462        | 790.363099        | 395.685188        | 789.379083     | <b>395.193180</b> | 7  |
| 9  | 1360.657434        | 680.832355      | 1343.630885    | 672.319081       |                |                  | G    | <b>660.321234</b>  | 330.664255        | <b>643.294685</b> | <b>322.150981</b> | 642.310669     | 321.658973        | 6  |
| 10 | 1447.689462        | 724.348369      | 1430.662913    | 715.835095       | 1429.678897    | 715.343087       | S    | <b>603.299770</b>  | 302.153523        | 586.273221        | 293.640249        | 585.289205     | 293.148241        | 5  |
| 11 | 1504.710926        | 752.859101      | 1487.684377    | 744.345827       | 1486.700361    | 743.853818       | G    | <b>516.267742</b>  | 258.637509        | <b>499.241193</b> | 250.124235        |                |                   | 4  |
| 12 | 1641.769838        | 821.388557      | 1624.743289    | 812.875283       | 1623.759273    | 812.383274       | H    | <b>459.246278</b>  | 230.126777        | 442.219729        | 221.613502        |                |                   | 3  |
| 13 | 1788.838252        | 894.922764      | 1771.811703    | 886.409490       | 1770.827687    | 885.917482       | F    | <b>322.187366</b>  | 161.597321        | 305.160817        | 153.084047        |                |                   | 2  |
| 14 |                    |                 |                |                  |                |                  | R    | <b>175.118952</b>  | 88.063114         | 158.092403        | 79.549839         |                |                   | 1  |

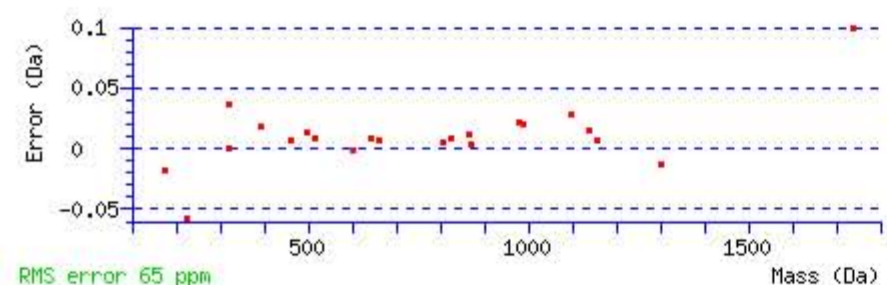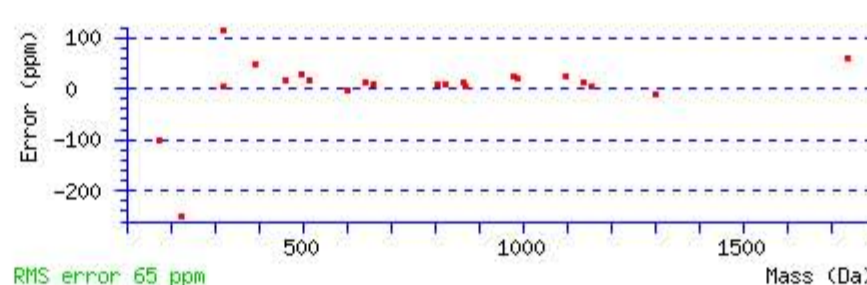

NCBI BLAST search of **LLCQCLGFGSGHFR**

(Parameters: blastp, nr protein database, expect=20000, no filter, PAM30)

Other BLAST [web gateways](#)

All matches to this query

| Score | Mr(calc):   | Delta    | Sequence                       |
|-------|-------------|----------|--------------------------------|
| 48.5  | 1961.942673 | 0.012429 | <a href="#">LLCQCLGFGSGHFR</a> |

Mascot: <http://www.matrixscience.com/>



# MASCOT SCIENCE Mascot Search Results

## Peptide View

MS/MS Fragmentation of **YSFCTDHTVLVQTR**

Found in **FINC\_HUMAN**, Fibronectin OS=Homo sapiens GN=FN1 PE=1 SV=4

Match to Query 54619: 2036.993952 from(680.005260,3+) rtinseconds(1983) index(42014)

Title: Locus:1.1.1.2974.7 File:"2013-07-02 CLN FXIII 60 min 1st F 3.wiff"

Data file C:\Program Files (x86)\Matrix Science\Mascot Daemon\mgf4 FXIII 60 min 1st\mascot\_daemon\_merge.mgf

Click mouse within plot area to zoom in by factor of two about that point

Or, Plot from  to  Da

Label all possible matches  Label matches used for scoring

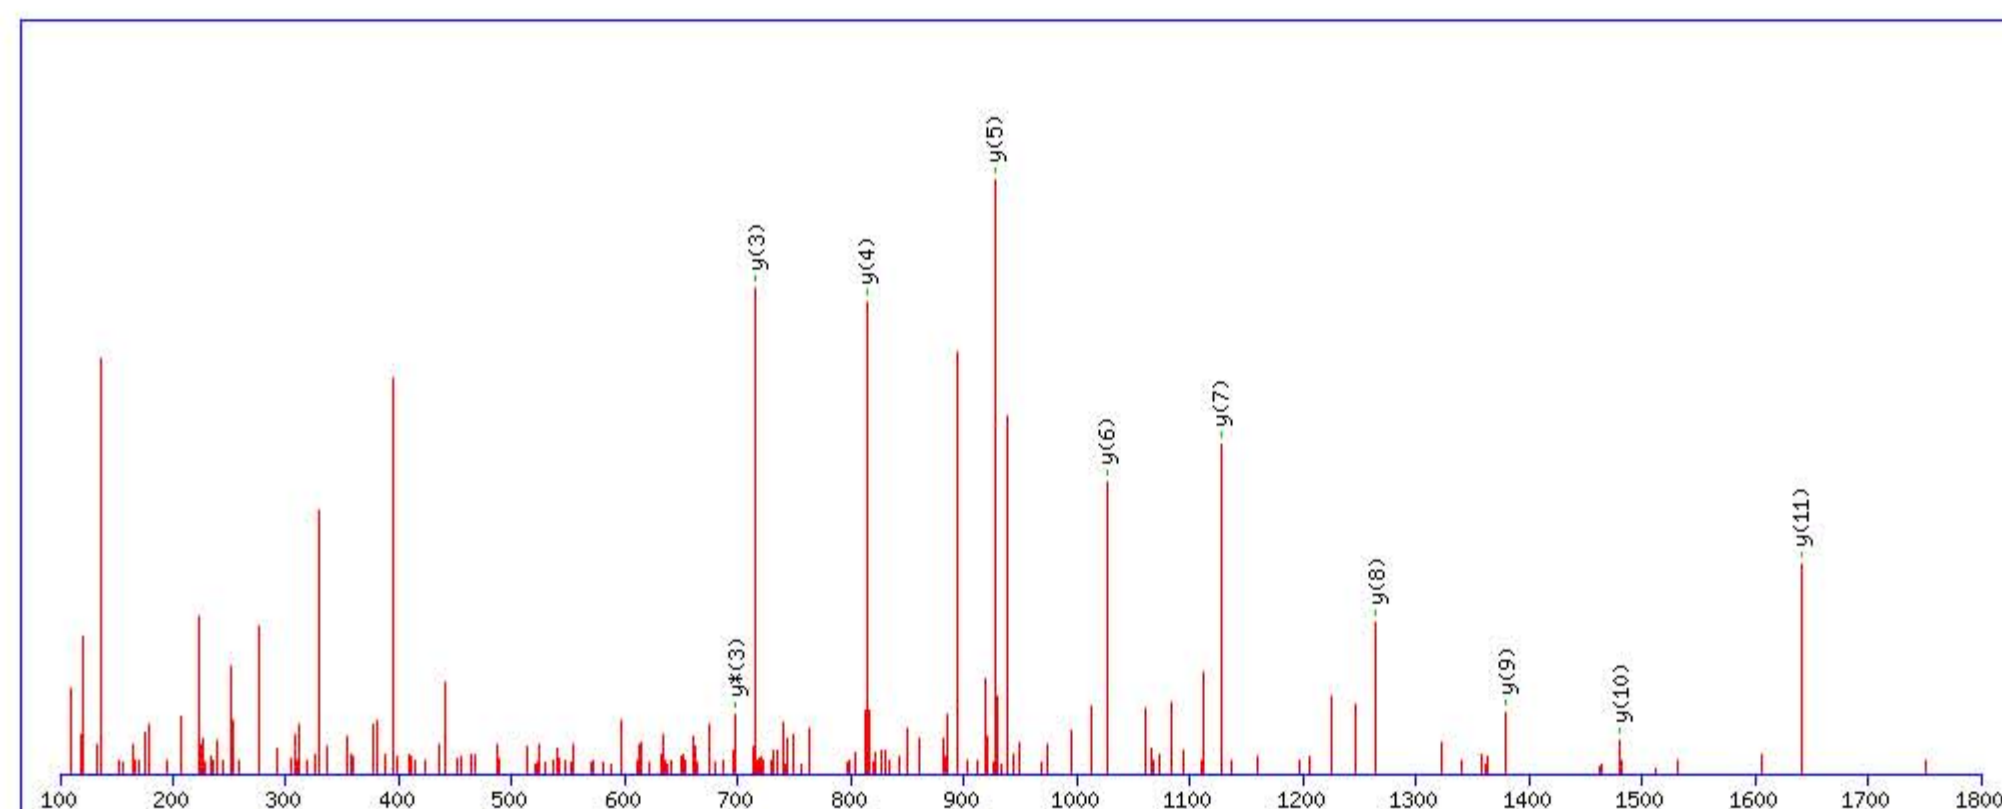

Monoisotopic mass of neutral peptide Mr(calc): 2036.981232

Fixed modifications: Carbamidomethyl (C) (apply to specified residues or termini only)

Variable modifications:

Q12 : Biotin:Thermo-21345 (Q)

Ions Score: 59 Expect: 2.7e-005

Matches : 10/130 fragment ions using 17 most intense peaks [\(help\)](#)

| #  | b           | b <sup>++</sup> | b <sup>*</sup> | b <sup>*++</sup> | b <sup>0</sup> | b <sup>0++</sup> | Seq. | y                  | y <sup>++</sup> | y <sup>*</sup>    | y <sup>*++</sup> | y <sup>0</sup> | y <sup>0++</sup> | #  |
|----|-------------|-----------------|----------------|------------------|----------------|------------------|------|--------------------|-----------------|-------------------|------------------|----------------|------------------|----|
| 1  | 164.070605  | 82.538940       |                |                  |                |                  | Y    |                    |                 |                   |                  |                |                  | 14 |
| 2  | 251.102633  | 126.054954      |                |                  | 233.092068     | 117.049672       | S    | 1874.925153        | 937.966215      | 1857.898604       | 929.452940       | 1856.914588    | 928.960932       | 13 |
| 3  | 398.171047  | 199.589161      |                |                  | 380.160482     | 190.583879       | F    | 1787.893125        | 894.450201      | 1770.866576       | 885.936926       | 1769.882560    | 885.444918       | 12 |
| 4  | 558.201696  | 279.604486      |                |                  | 540.191131     | 270.599204       | C    | <b>1640.824711</b> | 820.915994      | 1623.798162       | 812.402719       | 1622.814146    | 811.910711       | 11 |
| 5  | 659.249375  | 330.128326      |                |                  | 641.238810     | 321.123043       | T    | <b>1480.794062</b> | 740.900669      | 1463.767513       | 732.387395       | 1462.783497    | 731.895387       | 10 |
| 6  | 774.276318  | 387.641797      |                |                  | 756.265753     | 378.636515       | D    | <b>1379.746383</b> | 690.376830      | 1362.719834       | 681.863555       | 1361.735818    | 681.371547       | 9  |
| 7  | 911.335230  | 456.171253      |                |                  | 893.324665     | 447.165971       | H    | <b>1264.719440</b> | 632.863358      | 1247.692891       | 624.350084       | 1246.708875    | 623.858076       | 8  |
| 8  | 1012.382909 | 506.695093      |                |                  | 994.372344     | 497.689810       | T    | <b>1127.660528</b> | 564.333902      | 1110.633979       | 555.820628       | 1109.649963    | 555.328620       | 7  |
| 9  | 1111.451323 | 556.229300      |                |                  | 1093.440758    | 547.224017       | V    | <b>1026.612849</b> | 513.810063      | 1009.586300       | 505.296788       | 1008.602284    | 504.804780       | 6  |
| 10 | 1224.535387 | 612.771331      |                |                  | 1206.524822    | 603.766049       | L    | <b>927.544435</b>  | 464.275856      | 910.517886        | 455.762581       | 909.533870     | 455.270573       | 5  |
| 11 | 1323.603801 | 662.305539      |                |                  | 1305.593236    | 653.300256       | V    | <b>814.460371</b>  | 407.733824      | 797.433822        | 399.220549       | 796.449806     | 398.728541       | 4  |
| 12 | 1762.829127 | 881.918202      | 1745.802578    | 873.404927       | 1744.818562    | 872.912919       | Q    | <b>715.391957</b>  | 358.199617      | <b>698.365408</b> | 349.686342       | 697.381392     | 349.194334       | 3  |
| 13 | 1863.876806 | 932.442041      | 1846.850257    | 923.928767       | 1845.866241    | 923.436759       | T    | 276.166631         | 138.586953      | 259.140082        | 130.073679       | 258.156066     | 129.581671       | 2  |
| 14 |             |                 |                |                  |                |                  | R    | 175.118952         | 88.063114       | 158.092403        | 79.549839        |                |                  | 1  |

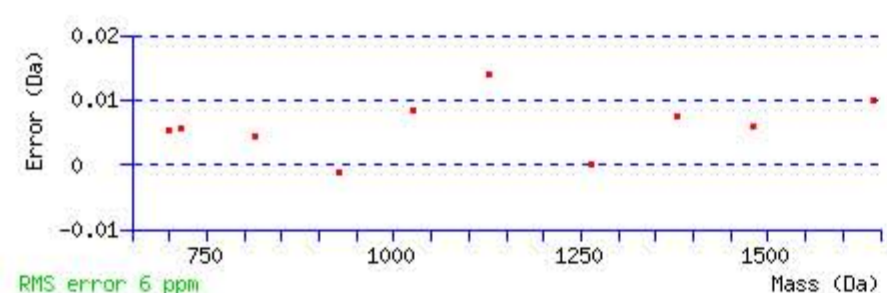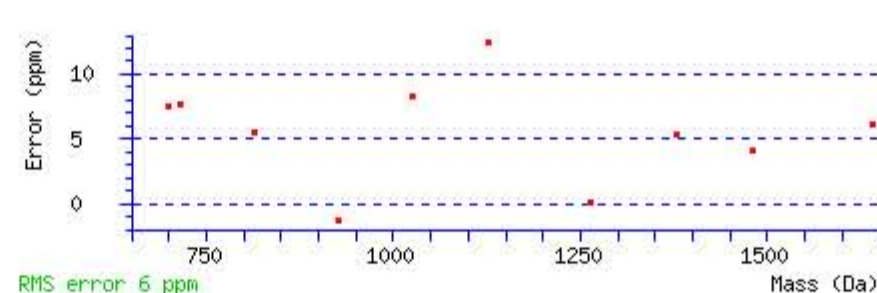

NCBI BLAST search of **YSFCTDHTVLVQTR**

(Parameters: blastp, nr protein database, expect=20000, no filter, PAM30)

Other BLAST [web gateways](#)

### All matches to this query

| Score | Mr(calc):   | Delta    | Sequence                       |
|-------|-------------|----------|--------------------------------|
| 59.0  | 2036.981232 | 0.012720 | <a href="#">YSFCTDHTVLVQTR</a> |

Mascot: <http://www.matrixscience.com/>



# MASCOT Search Results

## Peptide View

MS/MS Fragmentation of **HTSVQTTSSGSGPFTDVR**

Found in **FINC\_HUMAN**, Fibronectin OS=Homo sapiens GN=FN1 PE=1 SV=4

Match to Query 57604: 2174.060408 from(1088.037480,2+) rtinseconds(1651) index(39773)

Title: Locus:1.1.1.2858.20 File:"2013-07-02 CLN FXIII 60 min 1st F 3.wiff"

Data file C:\Program Files (x86)\Matrix Science\Mascot Daemon\mgf4 FXIII 60 min 1st\mascot\_daemon\_merge.mgf

Click mouse within plot area to zoom in by factor of two about that point

Or, Plot from  to  Da

Label all possible matches  Label matches used for scoring

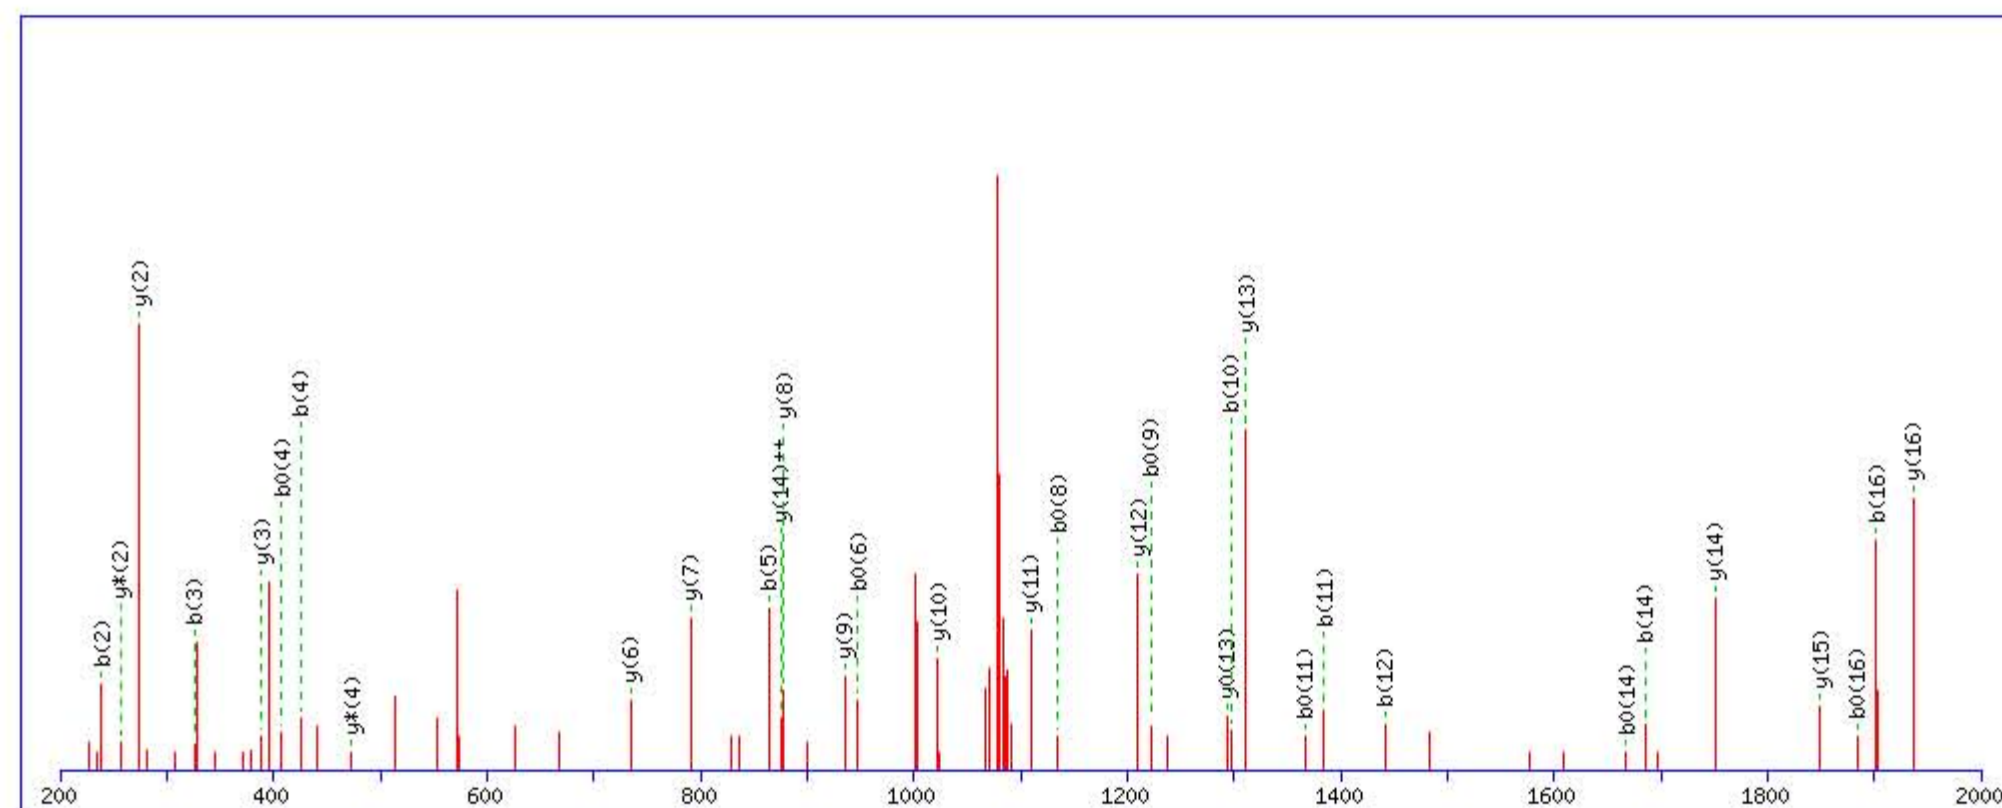

Monoisotopic mass of neutral peptide Mr(calc): 2174.042664

Fixed modifications: Carbamidomethyl (C) (apply to specified residues or termini only)

Variable modifications:

Q5 : Biotin:Thermo-21345 (Q)

Ions Score: 84 Expect: 9.2e-008

Matches : 33/190 fragment ions using 59 most intense peaks [\(help\)](#)

| #  | b                  | b <sup>++</sup> | b <sup>*</sup> | b <sup>***</sup> | b <sup>0</sup>     | b <sup>0++</sup> | Seq. | y                  | y <sup>++</sup>   | y <sup>*</sup>    | y <sup>***</sup> | y <sup>0</sup>     | y <sup>0++</sup> | #  |
|----|--------------------|-----------------|----------------|------------------|--------------------|------------------|------|--------------------|-------------------|-------------------|------------------|--------------------|------------------|----|
| 1  | 138.066188         | 69.536732       |                |                  |                    |                  | H    |                    |                   |                   |                  |                    |                  | 18 |
| 2  | <b>239.113867</b>  | 120.060571      |                |                  | 221.103302         | 111.055289       | T    | 2037.990983        | 1019.499130       | 2020.964434       | 1010.985855      | 2019.980418        | 1010.493847      | 17 |
| 3  | <b>326.145895</b>  | 163.576585      |                |                  | 308.135330         | 154.571303       | S    | <b>1936.943304</b> | 968.975290        | 1919.916755       | 960.462016       | 1918.932739        | 959.970008       | 16 |
| 4  | <b>425.214309</b>  | 213.110792      |                |                  | <b>407.203744</b>  | 204.105510       | V    | <b>1849.911276</b> | 925.459276        | 1832.884727       | 916.946002       | 1831.900711        | 916.453994       | 15 |
| 5  | <b>864.439635</b>  | 432.723456      | 847.413086     | 424.210181       | 846.429070         | 423.718173       | Q    | <b>1750.842862</b> | <b>875.925069</b> | 1733.816313       | 867.411795       | 1732.832297        | 866.919787       | 14 |
| 6  | 965.487314         | 483.247295      | 948.460765     | 474.734021       | <b>947.476749</b>  | 474.242013       | T    | <b>1311.617536</b> | 656.312406        | 1294.590987       | 647.799132       | <b>1293.606971</b> | 647.307124       | 13 |
| 7  | 1066.534993        | 533.771135      | 1049.508444    | 525.257860       | 1048.524428        | 524.765852       | T    | <b>1210.569857</b> | 605.788567        | 1193.543308       | 597.275292       | 1192.559292        | 596.783284       | 12 |
| 8  | 1153.567021        | 577.287149      | 1136.540472    | 568.773874       | <b>1135.556456</b> | 568.281866       | S    | <b>1109.522178</b> | 555.264727        | 1092.495629       | 546.751453       | 1091.511613        | 546.259445       | 11 |
| 9  | 1240.599049        | 620.803163      | 1223.572500    | 612.289888       | <b>1222.588484</b> | 611.797880       | S    | <b>1022.490150</b> | 511.748713        | 1005.463601       | 503.235439       | 1004.479585        | 502.743431       | 10 |
| 10 | <b>1297.620513</b> | 649.313895      | 1280.593964    | 640.800620       | 1279.609948        | 640.308612       | G    | <b>935.458122</b>  | 468.232699        | 918.431573        | 459.719425       | 917.447557         | 459.227417       | 9  |
| 11 | <b>1384.652541</b> | 692.829909      | 1367.625992    | 684.316634       | <b>1366.641976</b> | 683.824626       | S    | <b>878.436658</b>  | 439.721967        | 861.410109        | 431.208693       | 860.426093         | 430.716685       | 8  |
| 12 | <b>1441.674005</b> | 721.340641      | 1424.647456    | 712.827366       | 1423.663440        | 712.335358       | G    | <b>791.404630</b>  | 396.205953        | 774.378081        | 387.692679       | 773.394065         | 387.200671       | 7  |
| 13 | 1538.726769        | 769.867023      | 1521.700220    | 761.353748       | 1520.716204        | 760.861740       | P    | <b>734.383166</b>  | 367.695221        | 717.356617        | 359.181947       | 716.372601         | 358.689939       | 6  |
| 14 | <b>1685.795183</b> | 843.401230      | 1668.768634    | 834.887955       | <b>1667.784618</b> | 834.395947       | F    | 637.330402         | 319.168839        | 620.303853        | 310.655565       | 619.319837         | 310.163557       | 5  |
| 15 | 1786.842862        | 893.925069      | 1769.816313    | 885.411795       | 1768.832297        | 884.919787       | T    | 490.261988         | 245.634632        | <b>473.235439</b> | 237.121358       | 472.251423         | 236.629350       | 4  |
| 16 | <b>1901.869805</b> | 951.438541      | 1884.843256    | 942.925266       | <b>1883.859240</b> | 942.433258       | D    | <b>389.214309</b>  | 195.110793        | 372.187760        | 186.597518       | 371.203744         | 186.105510       | 3  |
| 17 | 2000.938219        | 1000.972748     | 1983.911670    | 992.459473       | 1982.927654        | 991.967465       | V    | <b>274.187366</b>  | 137.597321        | <b>257.160817</b> | 129.084047       |                    |                  | 2  |
| 18 |                    |                 |                |                  |                    |                  | R    | 175.118952         | 88.063114         | 158.092403        | 79.549839        |                    |                  | 1  |

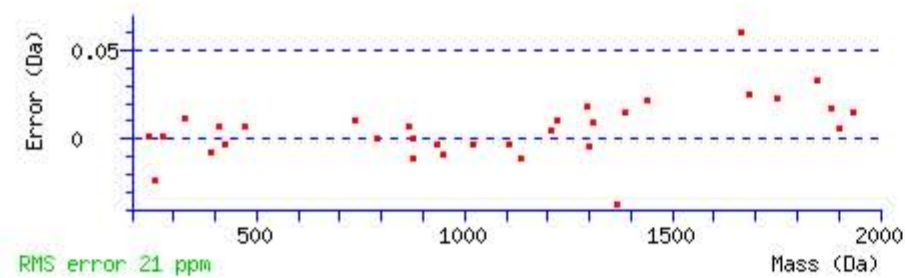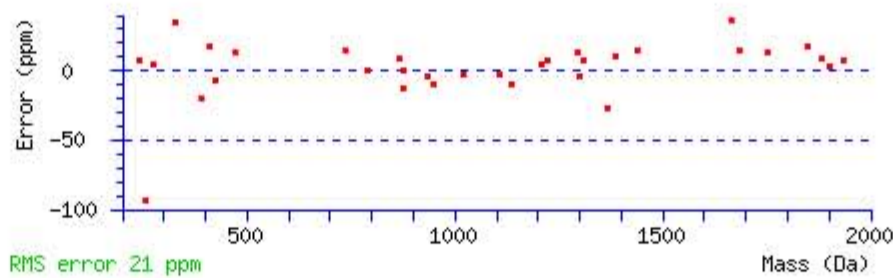

NCBI BLAST search of [HTSVQTTSSGSGPFTDVR](#)

(Parameters: blastp, nr protein database, expect=20000, no filter, PAM30)

Other BLAST [web gateways](#)

All matches to this query

| Score | Mr(calc):   | Delta    | Sequence                           |
|-------|-------------|----------|------------------------------------|
| 84.3  | 2174.042664 | 0.017744 | <a href="#">HTSVQTTSSGSGPFTDVR</a> |

Mascot: <http://www.matrixscience.com/>



# MASCOT Search Results

## Peptide View

MS/MS Fragmentation of **EYLGAICSCTCFGGQR**

Found in **FINC\_HUMAN**, Fibronectin OS=Homo sapiens GN=FN1 PE=1 SV=4

Match to Query 57930: 2188.968582 from(730.663470,3+) rtinseconds(2159) index(43148)

Title: Locus:1.1.1.3035.23 File:"2013-07-02 CLN FXIII 60 min 1st F 3.wiff"

Data file C:\Program Files (x86)\Matrix Science\Mascot Daemon\mgf4 FXIII 60 min 1st\mascot\_daemon\_merge.mgf

Click mouse within plot area to zoom in by factor of two about that point

Or, Plot from  to  Da

Label all possible matches  Label matches used for scoring

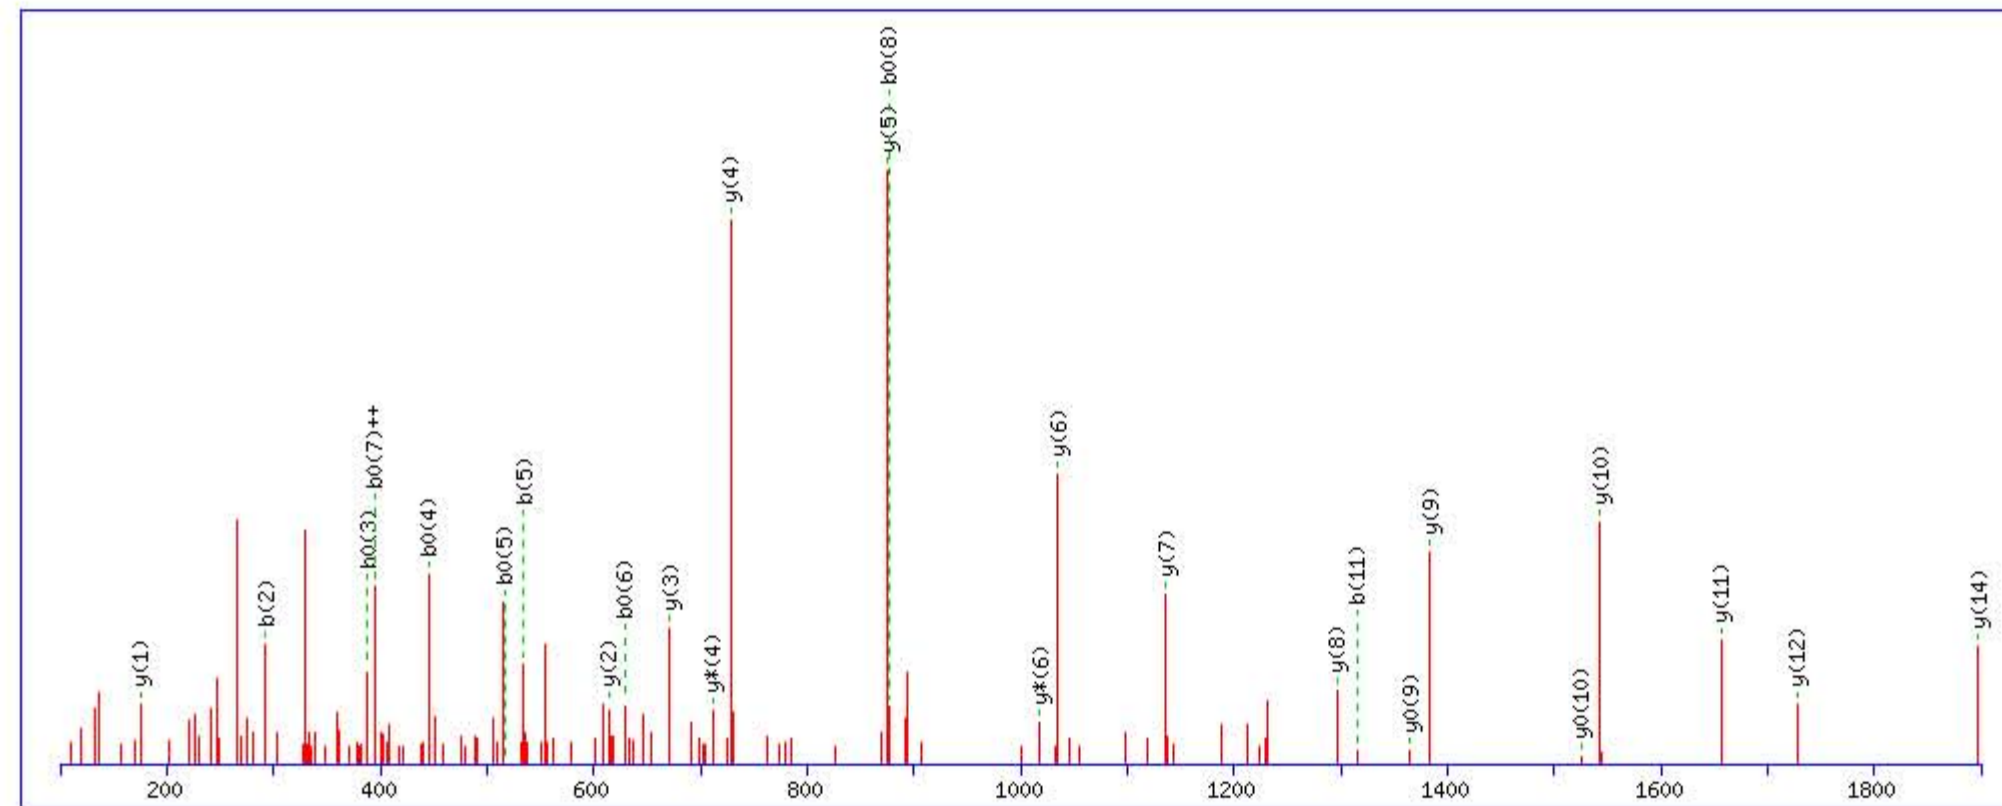

Monoisotopic mass of neutral peptide Mr(calc): 2188.952637

Fixed modifications: Carbamidomethyl (C) (apply to specified residues or termini only)

Variable modifications:

Q15 : Biotin:Thermo-21345 (Q)

Ions Score: 91 Expect: 7.1e-009

Matches : 26/140 fragment ions using 43 most intense peaks [\(help\)](#)

| #  | b                  | b <sup>++</sup> | b <sup>*</sup> | b <sup>+++</sup> | b <sup>0</sup>    | b <sup>0++</sup>  | Seq. | y                  | y <sup>++</sup> | y <sup>*</sup>     | y <sup>+++</sup> | y <sup>0</sup>     | y <sup>0++</sup> | #  |
|----|--------------------|-----------------|----------------|------------------|-------------------|-------------------|------|--------------------|-----------------|--------------------|------------------|--------------------|------------------|----|
| 1  | 130.049869         | 65.528572       |                |                  | 112.039304        | 56.523290         | E    |                    |                 |                    |                  |                    |                  | 16 |
| 2  | <b>293.113198</b>  | 147.060237      |                |                  | 275.102633        | 138.054955        | Y    | 2060.917309        | 1030.962292     | 2043.890760        | 1022.449018      | 2042.906744        | 1021.957010      | 15 |
| 3  | 406.197262         | 203.602269      |                |                  | <b>388.186697</b> | 194.596987        | L    | <b>1897.853980</b> | 949.430628      | 1880.827431        | 940.917354       | 1879.843415        | 940.425346       | 14 |
| 4  | 463.218726         | 232.113001      |                |                  | <b>445.208161</b> | 223.107719        | G    | 1784.769916        | 892.888596      | 1767.743367        | 884.375322       | 1766.759351        | 883.883314       | 13 |
| 5  | <b>534.255840</b>  | 267.631558      |                |                  | <b>516.245275</b> | 258.626276        | A    | <b>1727.748452</b> | 864.377864      | 1710.721903        | 855.864590       | 1709.737887        | 855.372582       | 12 |
| 6  | 647.339904         | 324.173590      |                |                  | <b>629.329339</b> | 315.168308        | I    | <b>1656.711338</b> | 828.859307      | 1639.684789        | 820.346033       | 1638.700773        | 819.854025       | 11 |
| 7  | 807.370553         | 404.188915      |                |                  | 789.359988        | <b>395.183632</b> | C    | <b>1543.627274</b> | 772.317275      | 1526.600725        | 763.804001       | <b>1525.616709</b> | 763.311993       | 10 |
| 8  | 894.402581         | 447.704929      |                |                  | <b>876.392016</b> | 438.699646        | S    | <b>1383.596625</b> | 692.301951      | 1366.570076        | 683.788676       | <b>1365.586060</b> | 683.296668       | 9  |
| 9  | 1054.433230        | 527.720253      |                |                  | 1036.422665       | 518.714971        | C    | <b>1296.564597</b> | 648.785937      | 1279.538048        | 640.272662       | 1278.554032        | 639.780654       | 8  |
| 10 | 1155.480909        | 578.244093      |                |                  | 1137.470344       | 569.238810        | T    | <b>1136.533948</b> | 568.770612      | 1119.507399        | 560.257338       | 1118.523383        | 559.765330       | 7  |
| 11 | <b>1315.511558</b> | 658.259417      |                |                  | 1297.500993       | 649.254135        | C    | <b>1035.486269</b> | 518.246773      | <b>1018.459720</b> | 509.733498       |                    |                  | 6  |
| 12 | 1462.579972        | 731.793624      |                |                  | 1444.569407       | 722.788342        | F    | <b>875.455620</b>  | 438.231448      | 858.429071         | 429.718174       |                    |                  | 5  |
| 13 | 1519.601436        | 760.304356      |                |                  | 1501.590871       | 751.299074        | G    | <b>728.387206</b>  | 364.697241      | <b>711.360657</b>  | 356.183967       |                    |                  | 4  |
| 14 | 1576.622900        | 788.815088      |                |                  | 1558.612335       | 779.809806        | G    | <b>671.365742</b>  | 336.186509      | 654.339193         | 327.673235       |                    |                  | 3  |
| 15 | 2015.848226        | 1008.427751     | 1998.821677    | 999.914477       | 1997.837661       | 999.422469        | Q    | <b>614.344278</b>  | 307.675777      | 597.317729         | 299.162503       |                    |                  | 2  |
| 16 |                    |                 |                |                  |                   |                   | R    | <b>175.118952</b>  | 88.063114       | 158.092403         | 79.549839        |                    |                  | 1  |

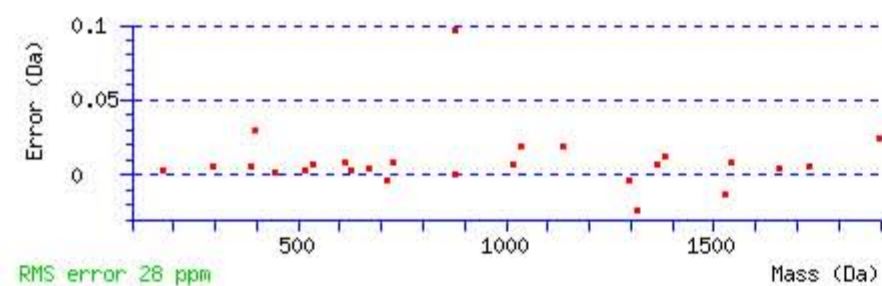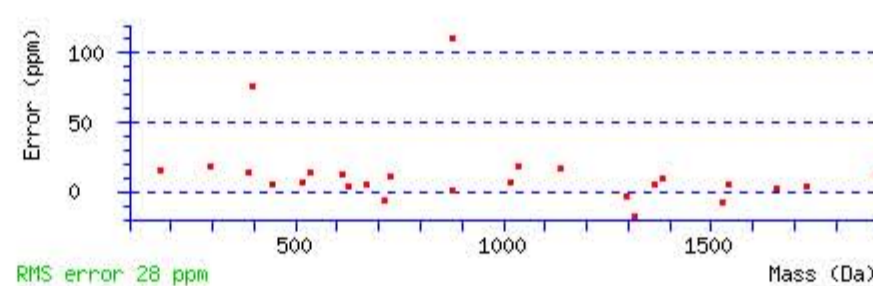

NCBI BLAST search of [EYLGAICSCTCFGGQR](#)

(Parameters: blastp, nr protein database, expect=20000, no filter, PAM30)

Other BLAST [web gateways](#)

All matches to this query

| Score | Mr(calc):   | Delta    | Sequence                         |
|-------|-------------|----------|----------------------------------|
| 90.5  | 2188.952637 | 0.015945 | <a href="#">EYLGAICSCTCFGGQR</a> |

Mascot: <http://www.matrixscience.com/>



# MASCOT SCIENCE Mascot Search Results

## Peptide View

MS/MS Fragmentation of **QDGHLCSTTSNYEQDQK**  
 Found in **FINC\_HUMAN**, Fibronectin OS=Homo sapiens GN=FN1 PE=1 SV=4

Match to Query 65572: 2507.100792 from(836.707540,3+) rtinseconds(1751) index(40443)  
 Title: Locus:1.1.1.2893.18 File:"2013-07-02 CLN FXIII 60 min 1st F 3.wiff"  
 Data file C:\Program Files (x86)\Matrix Science\Mascot Daemon\mgf4 FXIII 60 min 1st\mascot\_daemon\_merge.mgf

Click mouse within plot area to zoom in by factor of two about that point  
 Or, Plot from  to  Da   
 Label all possible matches  Label matches used for scoring

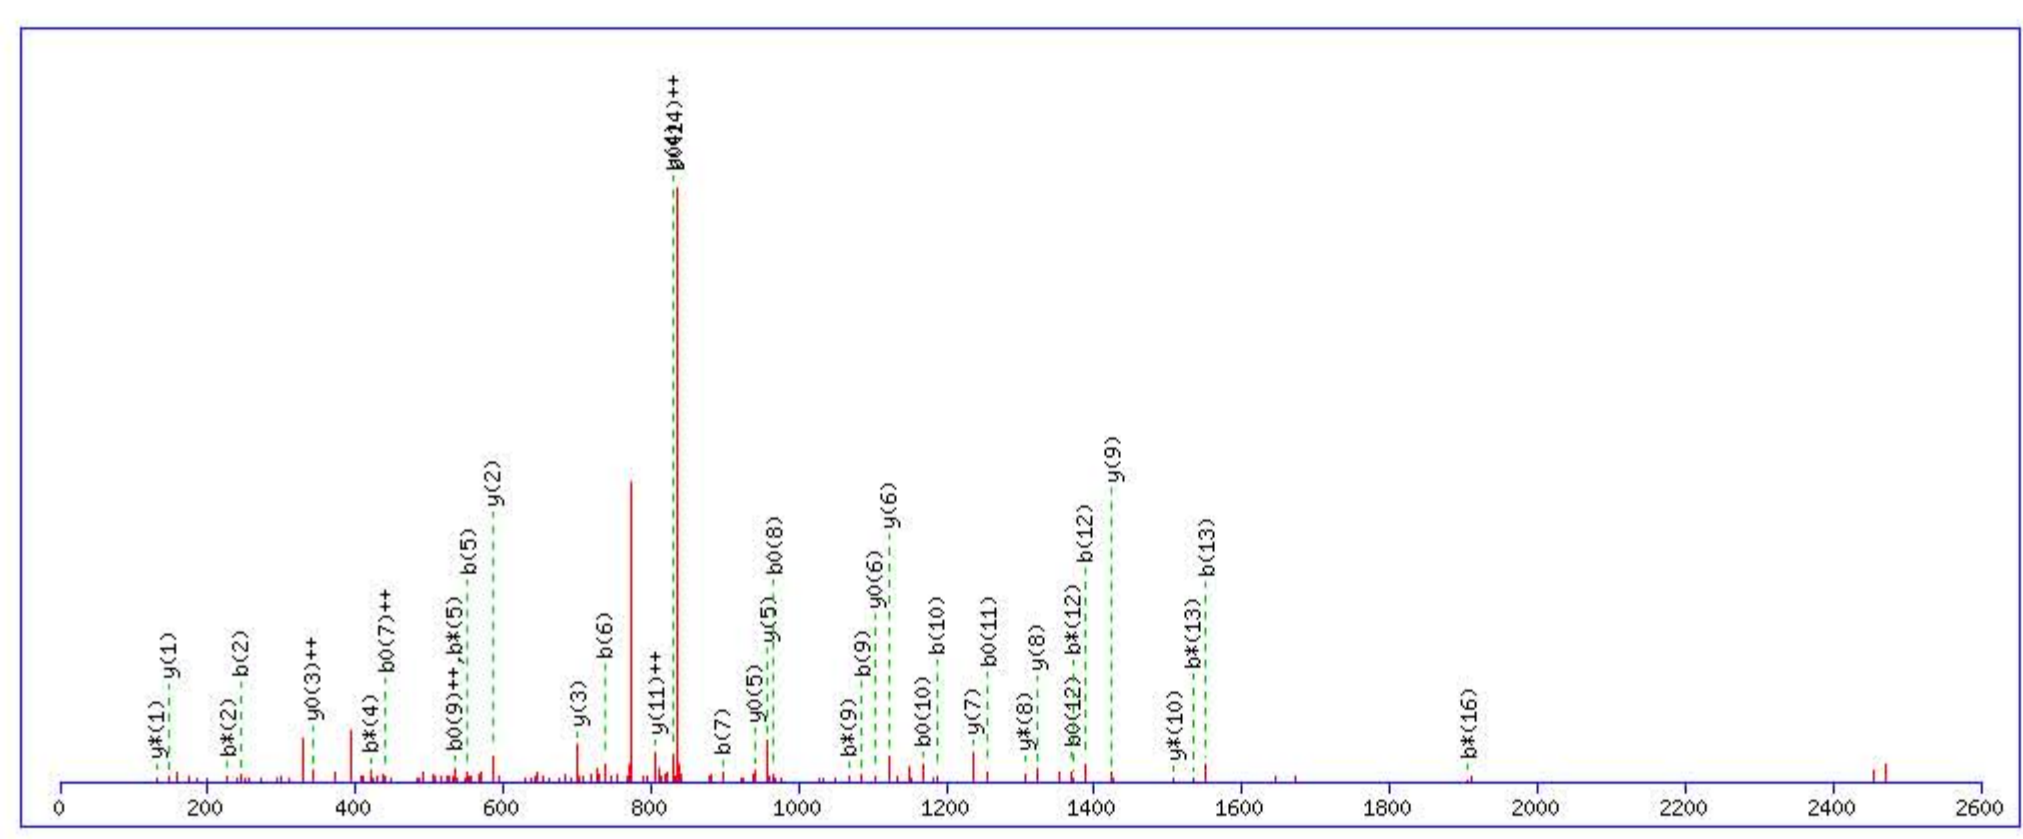

Monoisotopic mass of neutral peptide Mr(calc): 2507.084564  
 Fixed modifications: Carbamidomethyl (C) (apply to specified residues or termini only)  
 Variable modifications:  
 Q17 : Biotin:Thermo-21345 (Q)  
 Ions Score: 39 Expect: 0.0007  
 Matches : 38/198 fragment ions using 75 most intense peaks [\(help\)](#)

| #  | b                  | b <sup>++</sup> | b <sup>*</sup>     | b <sup>*++</sup> | b <sup>0</sup>     | b <sup>0++</sup>  | Seq. | y                  | y <sup>++</sup>   | y <sup>*</sup>     | y <sup>*++</sup> | y <sup>0</sup>     | y <sup>0++</sup>  | #  |
|----|--------------------|-----------------|--------------------|------------------|--------------------|-------------------|------|--------------------|-------------------|--------------------|------------------|--------------------|-------------------|----|
| 1  | 129.065854         | 65.036565       | 112.039305         | 56.523291        |                    |                   | Q    |                    |                   |                    |                  |                    |                   | 18 |
| 2  | <b>244.092797</b>  | 122.550037      | <b>227.066248</b>  | 114.036762       | 226.082232         | 113.544754        | D    | 2380.033259        | 1190.520267       | 2363.006710        | 1182.006993      | 2362.022694        | 1181.514985       | 17 |
| 3  | 301.114261         | 151.060768      | 284.087712         | 142.547494       | 283.103696         | 142.055486        | G    | 2265.006316        | 1133.006796       | 2247.979767        | 1124.493521      | 2246.995751        | 1124.001513       | 16 |
| 4  | 438.173173         | 219.590224      | <b>421.146624</b>  | 211.076950       | 420.162608         | 210.584942        | H    | 2207.984852        | 1104.496064       | 2190.958303        | 1095.982789      | 2189.974287        | 1095.490781       | 15 |
| 5  | <b>551.257237</b>  | 276.132257      | <b>534.230688</b>  | 267.618982       | 533.246672         | 267.126974        | L    | 2070.925940        | 1035.966608       | 2053.899391        | 1027.453333      | 2052.915375        | 1026.961325       | 14 |
| 6  | <b>737.336550</b>  | 369.171913      | 720.310001         | 360.658639       | 719.325985         | 360.166631        | W    | 1957.841876        | 979.424576        | 1940.815327        | 970.911302       | 1939.831311        | 970.419294        | 13 |
| 7  | <b>897.367199</b>  | 449.187238      | 880.340650         | 440.673963       | 879.356634         | <b>440.181955</b> | C    | 1771.762563        | 886.384920        | 1754.736014        | 877.871645       | 1753.751998        | 877.379637        | 12 |
| 8  | 984.399227         | 492.703252      | 967.372678         | 484.189977       | <b>966.388662</b>  | 483.697969        | S    | 1611.731914        | <b>806.369595</b> | 1594.705365        | 797.856321       | 1593.721349        | 797.364313        | 11 |
| 9  | <b>1085.446906</b> | 543.227091      | <b>1068.420357</b> | 534.713817       | 1067.436341        | <b>534.221808</b> | T    | 1524.699886        | 762.853581        | <b>1507.673337</b> | 754.340307       | 1506.689321        | 753.848299        | 10 |
| 10 | <b>1186.494585</b> | 593.750930      | 1169.468036        | 585.237656       | <b>1168.484020</b> | 584.745648        | T    | <b>1423.652207</b> | 712.329742        | 1406.625658        | 703.816467       | 1405.641642        | 703.324459        | 9  |
| 11 | 1273.526613        | 637.266945      | 1256.500064        | 628.753670       | <b>1255.516048</b> | 628.261662        | S    | <b>1322.604528</b> | 661.805902        | <b>1305.577979</b> | 653.292628       | 1304.593963        | 652.800620        | 8  |
| 12 | <b>1387.569540</b> | 694.288408      | <b>1370.542991</b> | 685.775134       | <b>1369.558975</b> | 685.283125        | N    | <b>1235.572500</b> | 618.289888        | 1218.545951        | 609.776614       | 1217.561935        | 609.284606        | 7  |
| 13 | <b>1550.632869</b> | 775.820073      | <b>1533.606320</b> | 767.306798       | 1532.622304        | 766.814790        | Y    | <b>1121.529573</b> | 561.268425        | 1104.503024        | 552.755150       | <b>1103.519008</b> | 552.263142        | 6  |
| 14 | 1679.675462        | 840.341369      | 1662.648913        | 831.828095       | 1661.664897        | <b>831.336086</b> | E    | <b>958.466244</b>  | 479.736760        | 941.439695         | 471.223486       | <b>940.455679</b>  | 470.731478        | 5  |
| 15 | 1807.734040        | 904.370658      | 1790.707491        | 895.857384       | 1789.723475        | 895.365376        | Q    | <b>829.423651</b>  | 415.215464        | 812.397102         | 406.702189       | 811.413086         | 406.210181        | 4  |
| 16 | 1922.760983        | 961.884130      | <b>1905.734434</b> | 953.370855       | 1904.750418        | 952.878847        | D    | <b>701.365073</b>  | 351.186175        | 684.338524         | 342.672900       | 683.354508         | <b>342.180892</b> | 3  |
| 17 | 2361.986309        | 1181.496792     | 2344.959760        | 1172.983518      | 2343.975744        | 1172.491510       | Q    | <b>586.338130</b>  | 293.672703        | 569.311581         | 285.159429       |                    |                   | 2  |
| 18 |                    |                 |                    |                  |                    |                   | K    | <b>147.112804</b>  | 74.060040         | <b>130.086255</b>  | 65.546765        |                    |                   | 1  |

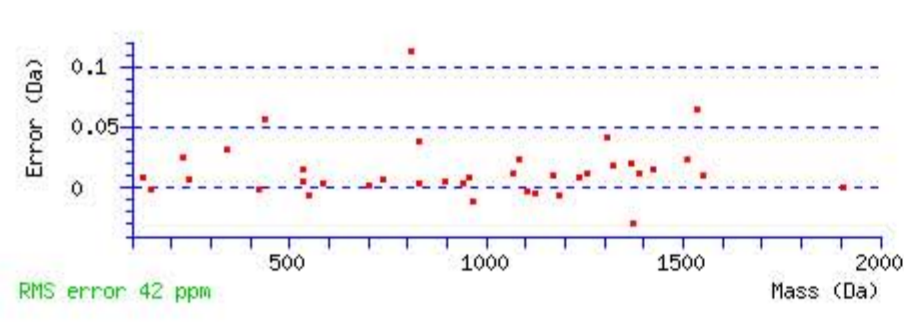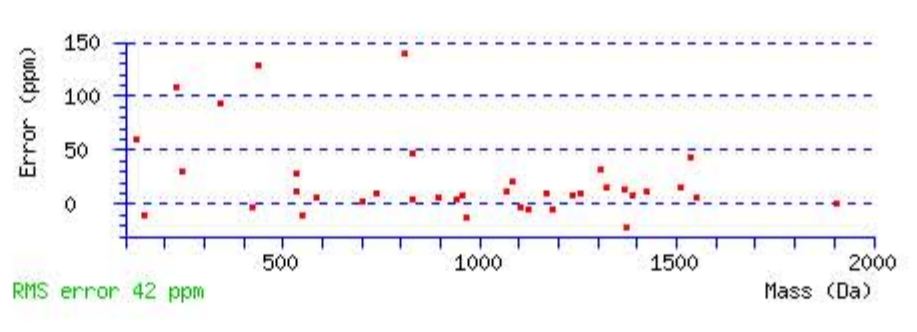

NCBI BLAST search of [QDGHLCSTTSNYEQDQK](#)  
 (Parameters: blastp, nr protein database, expect=20000, no filter, PAM30)  
 Other BLAST [web gateways](#)

### All matches to this query

| Score | Mr(calc):   | Delta    | Sequence                          |
|-------|-------------|----------|-----------------------------------|
| 39.1  | 2507.084564 | 0.016228 | <a href="#">QDGHLCSTTSNYEQDQK</a> |
| 25.2  | 2507.084564 | 0.016228 | <a href="#">QDGHLCSTTSNYEQDQK</a> |



**MASCOT** Mascot Search Results

**Peptide View**

MS/MS Fragmentation of **RPGGEPSPGTTGQSYNQYSQR**  
 Found in **FINC\_HUMAN**, Fibronectin OS=Homo sapiens GN=FN1 PE=1 SV=4

Match to Query 67538: 2706.253482 from(903.091770,3+) rtinseconds(1453) index(38549)  
 Title: Locus:1.1.1.2789.26 File:"2013-07-02 CLN FXIII 60 min 1st F 3.wiff"  
 Data file C:\Program Files (x86)\Matrix Science\Mascot Daemon\mgf\4 FXIII 60 min 1st\mascot\_daemon\_merge.mgf

Click mouse within plot area to zoom in by factor of two about that point  
 Or, Plot from  to  Da   
 Label all possible matches  Label matches used for scoring

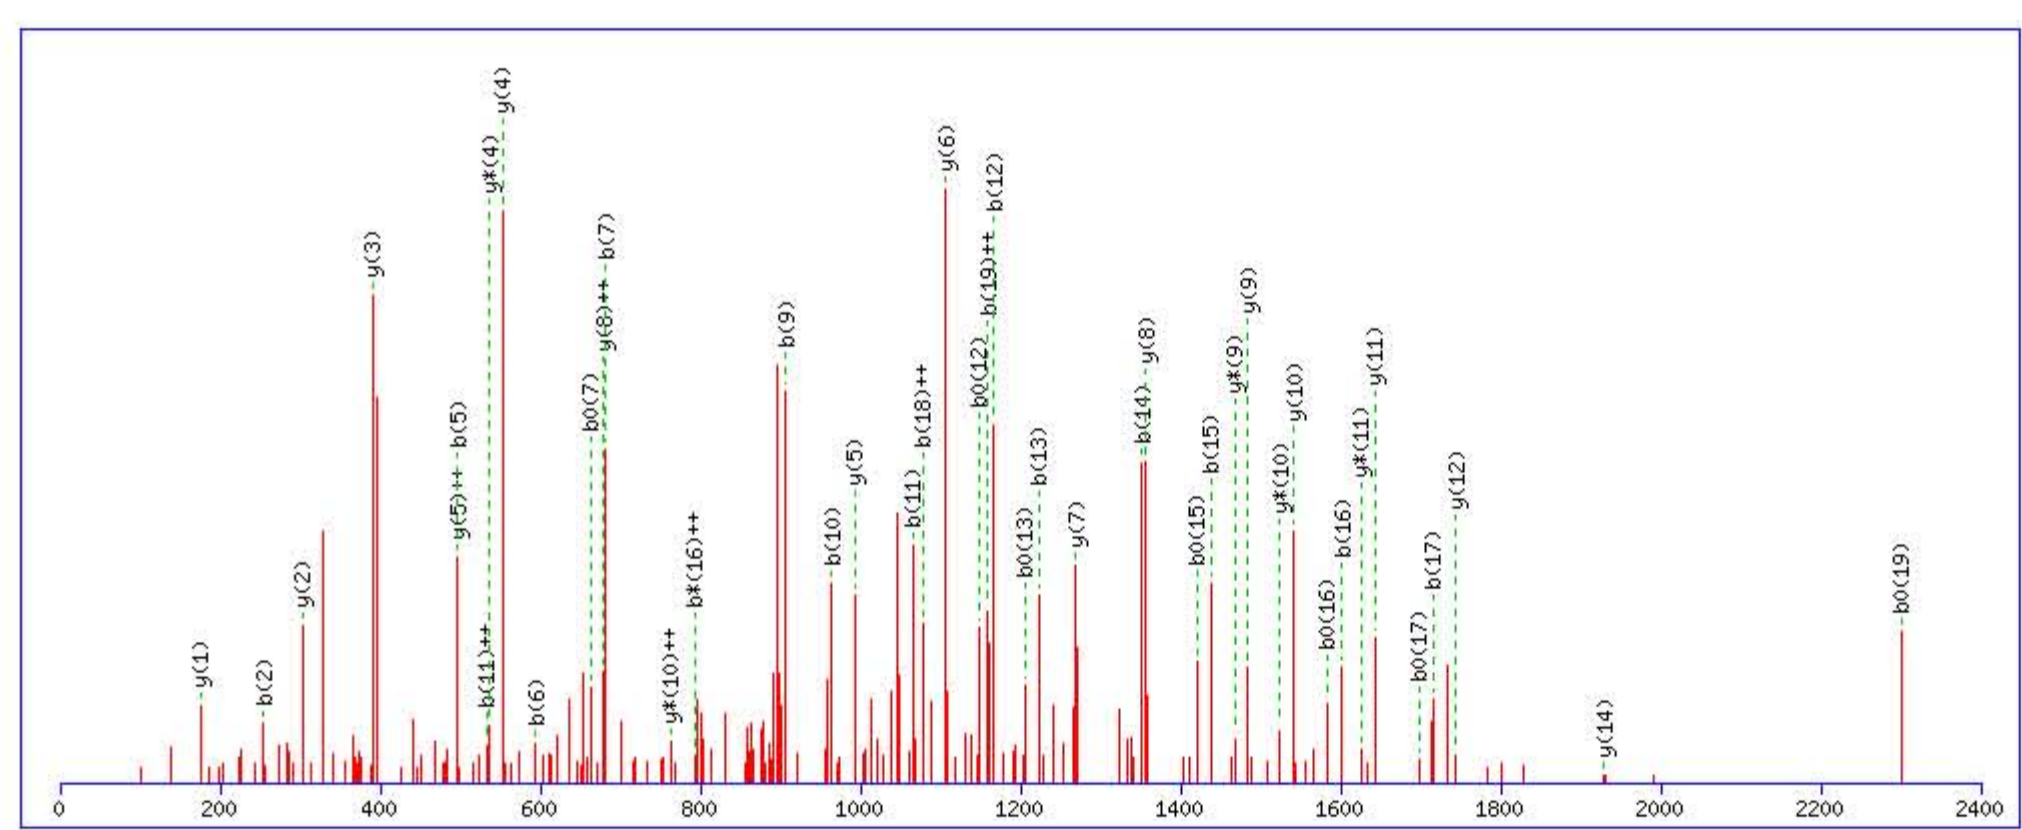

Monoisotopic mass of neutral peptide Mr(calc): 2706.245621  
 Fixed modifications: Carbamidomethyl (C) (apply to specified residues or termini only)  
 Variable modifications:  
 Q18 : Biotin:Thermo-21345 (Q)  
 Ions Score: 90 Expect: 1.3e-008  
 Matches : 44/240 fragment ions using 74 most intense peaks [\(help\)](#)

| #  | b                  | b <sup>++</sup>    | b <sup>*</sup> | b <sup>*++</sup>  | b <sup>0</sup>     | b <sup>0++</sup> | Seq. | y                  | y <sup>++</sup>   | y <sup>*</sup>     | y <sup>*++</sup>  | y <sup>0</sup> | y <sup>0++</sup> | #  |
|----|--------------------|--------------------|----------------|-------------------|--------------------|------------------|------|--------------------|-------------------|--------------------|-------------------|----------------|------------------|----|
| 1  | 157.108387         | 79.057831          | 140.081838     | 70.544557         |                    |                  | R    |                    |                   |                    |                   |                |                  | 22 |
| 2  | <b>254.161151</b>  | 127.584213         | 237.134602     | 119.070939        |                    |                  | P    | 2551.151795        | 1276.079535       | 2534.125246        | 1267.566261       | 2533.141230    | 1267.074253      | 21 |
| 3  | 311.182615         | 156.094945         | 294.156066     | 147.581671        |                    |                  | G    | 2454.099031        | 1227.553153       | 2437.072482        | 1219.039879       | 2436.088466    | 1218.547871      | 20 |
| 4  | 368.204079         | 184.605677         | 351.177530     | 176.092403        |                    |                  | G    | 2397.077567        | 1199.042421       | 2380.051018        | 1190.529147       | 2379.067002    | 1190.037139      | 19 |
| 5  | <b>497.246672</b>  | 249.126974         | 480.220123     | 240.613700        | 479.236107         | 240.121692       | E    | 2340.056103        | 1170.531689       | 2323.029554        | 1162.018415       | 2322.045538    | 1161.526407      | 18 |
| 6  | <b>594.299436</b>  | 297.653356         | 577.272887     | 289.140082        | 576.288871         | 288.648074       | P    | 2211.013510        | 1106.010393       | 2193.986961        | 1097.497118       | 2193.002945    | 1097.005110      | 17 |
| 7  | <b>681.331464</b>  | 341.169370         | 664.304915     | 332.656095        | <b>663.320899</b>  | 332.164087       | S    | 2113.960746        | 1057.484011       | 2096.934197        | 1048.970736       | 2095.950181    | 1048.478728      | 16 |
| 8  | 778.384228         | 389.695752         | 761.357679     | 381.182478        | 760.373663         | 380.690470       | P    | 2026.928718        | 1013.967997       | 2009.902169        | 1005.454723       | 2008.918153    | 1004.962715      | 15 |
| 9  | <b>907.426821</b>  | 454.217049         | 890.400272     | 445.703774        | 889.416256         | 445.211766       | E    | <b>1929.875954</b> | 965.441615        | 1912.849405        | 956.928341        | 1911.865389    | 956.436333       | 14 |
| 10 | <b>964.448285</b>  | 482.727781         | 947.421736     | 474.214506        | 946.437720         | 473.722498       | G    | 1800.833361        | 900.920319        | 1783.806812        | 892.407044        | 1782.822796    | 891.915036       | 13 |
| 11 | <b>1065.495964</b> | <b>533.251620</b>  | 1048.469415    | 524.738346        | 1047.485399        | 524.246337       | T    | <b>1743.811897</b> | 872.409587        | 1726.785348        | 863.896312        | 1725.801332    | 863.404304       | 12 |
| 12 | <b>1166.543643</b> | 583.775460         | 1149.517094    | 575.262185        | <b>1148.533078</b> | 574.770177       | T    | <b>1642.764218</b> | 821.885747        | <b>1625.737669</b> | 813.372473        | 1624.753653    | 812.880465       | 11 |
| 13 | <b>1223.565107</b> | 612.286191         | 1206.538558    | 603.772917        | <b>1205.554542</b> | 603.280909       | G    | <b>1541.716539</b> | 771.361908        | <b>1524.689990</b> | <b>762.848633</b> | 1523.705974    | 762.356625       | 10 |
| 14 | <b>1351.623685</b> | 676.315480         | 1334.597136    | 667.802206        | 1333.613120        | 667.310198       | Q    | <b>1484.695075</b> | 742.851176        | <b>1467.668526</b> | 734.337901        | 1466.684510    | 733.845893       | 9  |
| 15 | <b>1438.655713</b> | 719.831494         | 1421.629164    | 711.318220        | <b>1420.645148</b> | 710.826212       | S    | <b>1356.636497</b> | <b>678.821887</b> | 1339.609948        | 670.308612        | 1338.625932    | 669.816604       | 8  |
| 16 | <b>1601.719042</b> | 801.363159         | 1584.692493    | <b>792.849885</b> | <b>1583.708477</b> | 792.357876       | Y    | <b>1269.604469</b> | 635.305873        | 1252.577920        | 626.792598        | 1251.593904    | 626.300590       | 7  |
| 17 | <b>1715.761969</b> | 858.384622         | 1698.735420    | 849.871348        | <b>1697.751404</b> | 849.379340       | N    | <b>1106.541140</b> | 553.774208        | 1089.514591        | 545.260934        | 1088.530575    | 544.768926       | 6  |
| 18 | 2154.987295        | <b>1077.997285</b> | 2137.960746    | 1069.484011       | 2136.976730        | 1068.992003      | Q    | <b>992.498213</b>  | <b>496.752745</b> | 975.471664         | 488.239470        | 974.487648     | 487.747462       | 5  |
| 19 | 2318.050624        | <b>1159.528950</b> | 2301.024075    | 1151.015675       | <b>2300.040059</b> | 1150.523667      | Y    | <b>553.272887</b>  | 277.140082        | <b>536.246338</b>  | 268.626807        | 535.262322     | 268.134799       | 4  |
| 20 | 2405.082652        | 1203.044964        | 2388.056103    | 1194.531689       | 2387.072087        | 1194.039681      | S    | <b>390.209558</b>  | 195.608417        | 373.183009         | 187.095143        | 372.198993     | 186.603135       | 3  |
| 21 | 2533.141230        | 1267.074253        | 2516.114681    | 1258.560978       | 2515.130665        | 1258.068971      | Q    | <b>303.177530</b>  | 152.092403        | 286.150981         | 143.579129        |                |                  | 2  |
| 22 |                    |                    |                |                   |                    |                  | R    | <b>175.118952</b>  | 88.063114         | 158.092403         | 79.549839         |                |                  | 1  |

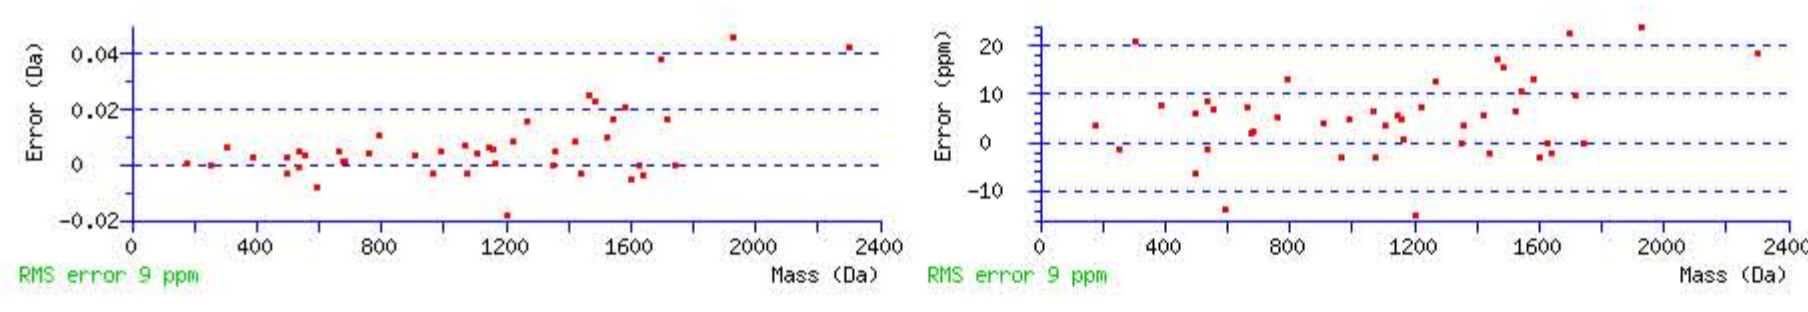

NCBI BLAST search of [RPGGEPSPGTTGQSYNQYSQR](#)  
 (Parameters: blastp, nr protein database, expect=20000, no filter, PAM30)  
 Other BLAST [web gateways](#)

**All matches to this query**

| Score | Mr(calc):   | Delta    | Sequence                              |
|-------|-------------|----------|---------------------------------------|
| 90.5  | 2706.245621 | 0.007861 | <a href="#">RPGGEPSPGTTGQSYNQYSQR</a> |
| 70.9  | 2706.245621 | 0.007861 | <a href="#">RPGGEPSPGTTGQSYNQYSQR</a> |
| 41.1  | 2706.245621 | 0.007861 | <a href="#">RPGGEPSPGTTGQSYNQYSQR</a> |



**MASCOT** Mascot Search Results

**Peptide View**

MS/MS Fragmentation of **RPGGEPSPGTTGQSYNQYSQR**  
 Found in **FINC\_HUMAN**, Fibronectin OS=Homo sapiens GN=FN1 PE=1 SV=4

Match to Query 67539: 2706.253482 from(903.091770,3+) rtinseconds(1462) index(38613)  
 Title: Locus:1.1.1.2792.15 File:"2013-07-02 CLN FXIII 60 min 1st F 3.wiff"  
 Data file C:\Program Files (x86)\Matrix Science\Mascot Daemon\mgf4 FXIII 60 min 1st\mascot\_daemon\_merge.mgf

Click mouse within plot area to zoom in by factor of two about that point  
 Or, Plot from 0 to 2800 Da Full range  
 Label all possible matches  Label matches used for scoring

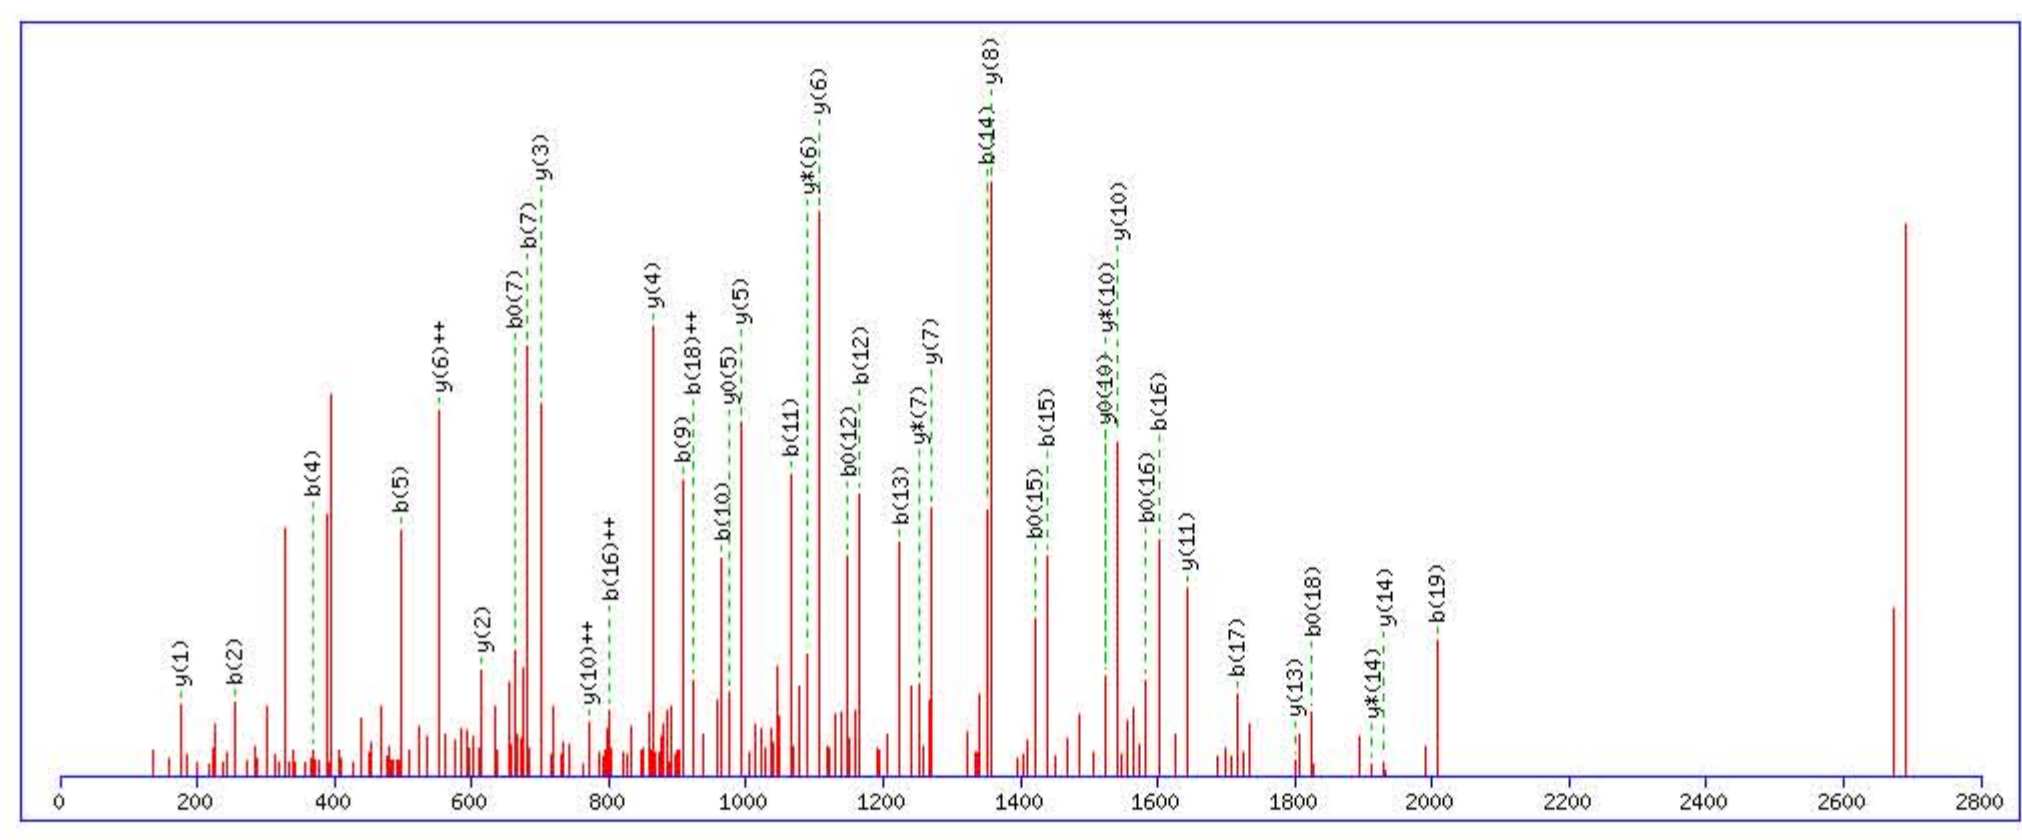

Monoisotopic mass of neutral peptide Mr(calc): 2706.245621  
 Fixed modifications: Carbamidomethyl (C) (apply to specified residues or termini only)  
 Variable modifications:  
 Q21 : Biotin:Thermo-21345 (Q)  
 Ions Score: 114 Expect: 4.8e-011  
 Matches : 41/240 fragment ions using 58 most intense peaks [\(help\)](#)

| #  | b                  | b <sup>++</sup>   | b <sup>+</sup> | b <sup>+++</sup> | b <sup>0</sup>     | b <sup>0++</sup> | Seq. | y                  | y <sup>++</sup>   | y <sup>+</sup>     | y <sup>+++</sup> | y <sup>0</sup>     | y <sup>0++</sup> | #  |
|----|--------------------|-------------------|----------------|------------------|--------------------|------------------|------|--------------------|-------------------|--------------------|------------------|--------------------|------------------|----|
| 1  | 157.108387         | 79.057831         | 140.081838     | 70.544557        |                    |                  | R    |                    |                   |                    |                  |                    |                  | 22 |
| 2  | <b>254.161151</b>  | 127.584213        | 237.134602     | 119.070939       |                    |                  | P    | 2551.151795        | 1276.079535       | 2534.125246        | 1267.566261      | 2533.141230        | 1267.074253      | 21 |
| 3  | 311.182615         | 156.094945        | 294.156066     | 147.581671       |                    |                  | G    | 2454.099031        | 1227.553153       | 2437.072482        | 1219.039879      | 2436.088466        | 1218.547871      | 20 |
| 4  | <b>368.204079</b>  | 184.605677        | 351.177530     | 176.092403       |                    |                  | G    | 2397.077567        | 1199.042421       | 2380.051018        | 1190.529147      | 2379.067002        | 1190.037139      | 19 |
| 5  | <b>497.246672</b>  | 249.126974        | 480.220123     | 240.613700       | 479.236107         | 240.121692       | E    | 2340.056103        | 1170.531689       | 2323.029554        | 1162.018415      | 2322.045538        | 1161.526407      | 18 |
| 6  | 594.299436         | 297.653356        | 577.272887     | 289.140082       | 576.288871         | 288.648074       | P    | 2211.013510        | 1106.010393       | 2193.986961        | 1097.497118      | 2193.002945        | 1097.005110      | 17 |
| 7  | <b>681.331464</b>  | 341.169370        | 664.304915     | 332.656095       | <b>663.320899</b>  | 332.164087       | S    | 2113.960746        | 1057.484011       | 2096.934197        | 1048.970736      | 2095.950181        | 1048.478728      | 16 |
| 8  | 778.384228         | 389.695752        | 761.357679     | 381.182478       | 760.373663         | 380.690470       | P    | 2026.928718        | 1013.967997       | 2009.902169        | 1005.454723      | 2008.918153        | 1004.962715      | 15 |
| 9  | <b>907.426821</b>  | 454.217049        | 890.400272     | 445.703774       | 889.416256         | 445.211766       | E    | <b>1929.875954</b> | 965.441615        | <b>1912.849405</b> | 956.928341       | 1911.865389        | 956.436333       | 14 |
| 10 | <b>964.448285</b>  | 482.727781        | 947.421736     | 474.214506       | 946.437720         | 473.722498       | G    | <b>1800.833361</b> | 900.920319        | 1783.806812        | 892.407044       | 1782.822796        | 891.915036       | 13 |
| 11 | <b>1065.495964</b> | 533.251620        | 1048.469415    | 524.738346       | 1047.485399        | 524.246337       | T    | 1743.811897        | 872.409587        | 1726.785348        | 863.896312       | 1725.801332        | 863.404304       | 12 |
| 12 | <b>1166.543643</b> | 583.775460        | 1149.517094    | 575.262185       | <b>1148.533078</b> | 574.770177       | T    | <b>1642.764218</b> | 821.885747        | 1625.737669        | 813.372473       | 1624.753653        | 812.880465       | 11 |
| 13 | <b>1223.565107</b> | 612.286191        | 1206.538558    | 603.772917       | 1205.554542        | 603.280909       | G    | <b>1541.716539</b> | <b>771.361908</b> | <b>1524.689990</b> | 762.848633       | <b>1523.705974</b> | 762.356625       | 10 |
| 14 | <b>1351.623685</b> | 676.315480        | 1334.597136    | 667.802206       | 1333.613120        | 667.310198       | Q    | 1484.695075        | 742.851176        | 1467.668526        | 734.337901       | 1466.684510        | 733.845893       | 9  |
| 15 | <b>1438.655713</b> | 719.831494        | 1421.629164    | 711.318220       | <b>1420.645148</b> | 710.826212       | S    | <b>1356.636497</b> | 678.821887        | 1339.609948        | 670.308612       | 1338.625932        | 669.816604       | 8  |
| 16 | <b>1601.719042</b> | <b>801.363159</b> | 1584.692493    | 792.849885       | <b>1583.708477</b> | 792.357876       | Y    | <b>1269.604469</b> | 635.305873        | <b>1252.577920</b> | 626.792598       | 1251.593904        | 626.300590       | 7  |
| 17 | <b>1715.761969</b> | 858.384622        | 1698.735420    | 849.871348       | 1697.751404        | 849.379340       | N    | <b>1106.541140</b> | <b>553.774208</b> | <b>1089.514591</b> | 545.260934       | 1088.530575        | 544.768926       | 6  |
| 18 | 1843.820547        | <b>922.413912</b> | 1826.793998    | 913.900637       | <b>1825.809982</b> | 913.408629       | Q    | <b>992.498213</b>  | 496.752745        | 975.471664         | 488.239470       | <b>974.487648</b>  | 487.747462       | 5  |
| 19 | <b>2006.883876</b> | 1003.945576       | 1989.857327    | 995.432302       | 1988.873311        | 994.940294       | Y    | <b>864.439635</b>  | 432.723456        | 847.413086         | 424.210181       | 846.429070         | 423.718173       | 4  |
| 20 | 2093.915904        | 1047.461590       | 2076.889355    | 1038.948315      | 2075.905339        | 1038.456307      | S    | <b>701.376306</b>  | 351.191791        | 684.349757         | 342.678517       | 683.365741         | 342.186509       | 3  |
| 21 | 2533.141230        | 1267.074253       | 2516.114681    | 1258.560978      | 2515.130665        | 1258.068971      | Q    | <b>614.344278</b>  | 307.675777        | 597.317729         | 299.162503       |                    |                  | 2  |
| 22 |                    |                   |                |                  |                    |                  | R    | <b>175.118952</b>  | 88.063114         | 158.092403         | 79.549839        |                    |                  | 1  |

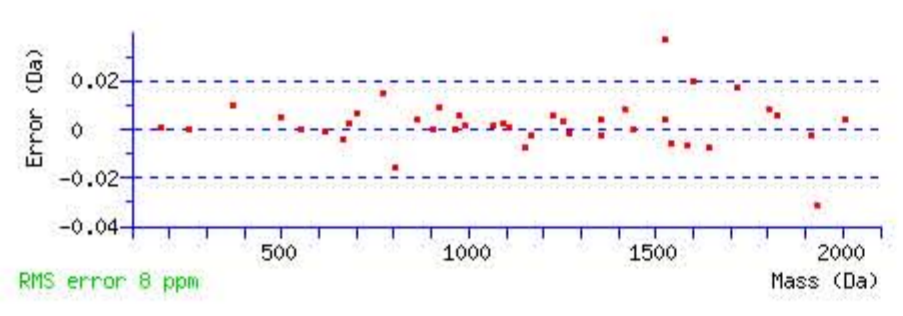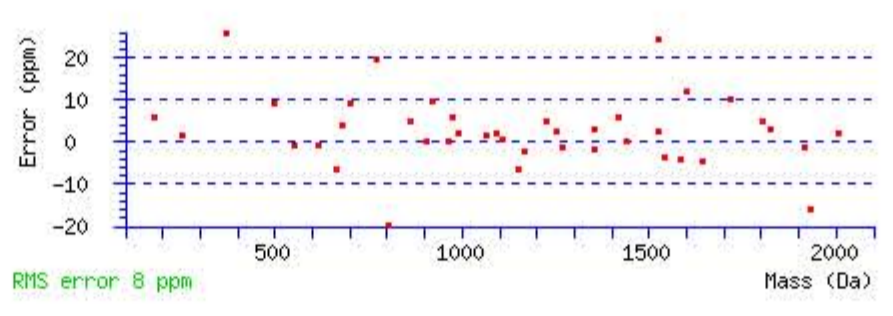

NCBI BLAST search of **RPGGEPSPGTTGQSYNQYSQR**  
 (Parameters: blastp, nr protein database, expect=20000, no filter, PAM30)  
 Other BLAST [web gateways](#)

**All matches to this query**

| Score | Mr(calc):   | Delta     | Sequence                                 |
|-------|-------------|-----------|------------------------------------------|
| 114.1 | 2706.245621 | 0.007861  | <a href="#">RPGGEPSPGTTGQSYNQYSQR</a>    |
| 102.4 | 2706.245621 | 0.007861  | <a href="#">RPGGEPSPGTTGQSYNQYSQR</a>    |
| 49.4  | 2706.245621 | 0.007861  | <a href="#">RPGGEPSPGTTGQSYNQYSQR</a>    |
| 4.0   | 2706.262695 | -0.009213 | <a href="#">ALRQLKPGQNSCRSDSESASGESK</a> |



# MASCOT Search Results

## Peptide View

MS/MS Fragmentation of **RPGGEPSPGTTGQSYNQYSQR**  
 Found in **FINC\_HUMAN**, Fibronectin OS=Homo sapiens GN=FN1 PE=1 SV=4

Match to Query 67541: 2706.259092 from(903.093640,3+) rtinseconds(1470) index(38665)  
 Title: Locus:1.1.1.2795.15 File:"2013-07-02 CLN FXIII 60 min 1st F 3.wiff"  
 Data file C:\Program Files (x86)\Matrix Science\Mascot Daemon\mgf4 FXIII 60 min 1st\mascot\_daemon\_merge.mgf

Click mouse within plot area to zoom in by factor of two about that point  
 Or, Plot from  to  Da   
 Label all possible matches  Label matches used for scoring

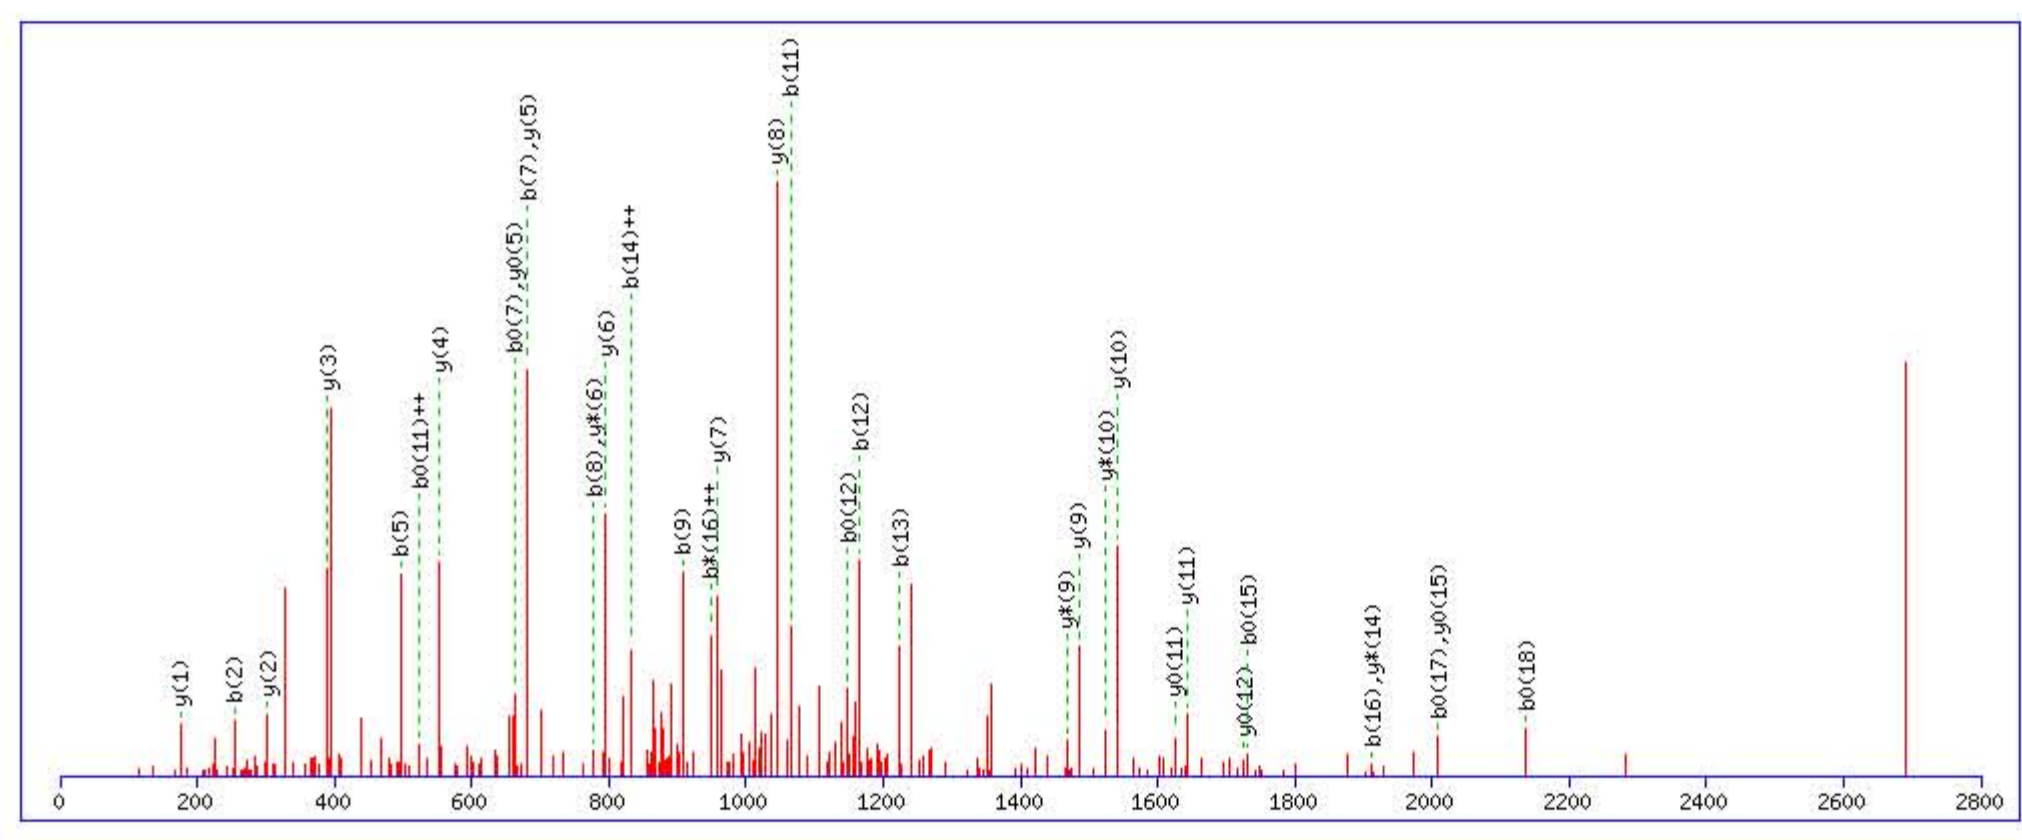

Monoisotopic mass of neutral peptide Mr(calc): 2706.245621  
 Fixed modifications: Carbamidomethyl (C) (apply to specified residues or termini only)  
 Variable modifications:  
 Q14 : Biotin:Thermo-21345 (Q)  
 Ions Score: 88 Expect: 8e-009  
 Matches : 36/240 fragment ions using 41 most intense peaks [\(help\)](#)

| #  | b                  | b <sup>++</sup>   | b <sup>+</sup> | b <sup>+++</sup>  | b <sup>0</sup>     | b <sup>0++</sup>  | Seq. | y                  | y <sup>++</sup> | y <sup>+</sup>     | y <sup>+++</sup> | y <sup>0</sup>     | y <sup>0++</sup> | #  |
|----|--------------------|-------------------|----------------|-------------------|--------------------|-------------------|------|--------------------|-----------------|--------------------|------------------|--------------------|------------------|----|
| 1  | 157.108387         | 79.057831         | 140.081838     | 70.544557         |                    |                   | R    |                    |                 |                    |                  |                    |                  | 22 |
| 2  | <b>254.161151</b>  | 127.584213        | 237.134602     | 119.070939        |                    |                   | P    | 2551.151795        | 1276.079535     | 2534.125246        | 1267.566261      | 2533.141230        | 1267.074253      | 21 |
| 3  | 311.182615         | 156.094945        | 294.156066     | 147.581671        |                    |                   | G    | 2454.099031        | 1227.553153     | 2437.072482        | 1219.039879      | 2436.088466        | 1218.547871      | 20 |
| 4  | 368.204079         | 184.605677        | 351.177530     | 176.092403        |                    |                   | G    | 2397.077567        | 1199.042421     | 2380.051018        | 1190.529147      | 2379.067002        | 1190.037139      | 19 |
| 5  | <b>497.246672</b>  | 249.126974        | 480.220123     | 240.613700        | 479.236107         | 240.121692        | E    | 2340.056103        | 1170.531689     | 2323.029554        | 1162.018415      | 2322.045538        | 1161.526407      | 18 |
| 6  | 594.299436         | 297.653356        | 577.272887     | 289.140082        | 576.288871         | 288.648074        | P    | 2211.013510        | 1106.010393     | 2193.986961        | 1097.497118      | 2193.002945        | 1097.005110      | 17 |
| 7  | <b>681.331464</b>  | 341.169370        | 664.304915     | 332.656095        | <b>663.320899</b>  | 332.164087        | S    | 2113.960746        | 1057.484011     | 2096.934197        | 1048.970736      | 2095.950181        | 1048.478728      | 16 |
| 8  | <b>778.384228</b>  | 389.695752        | 761.357679     | 381.182478        | 760.373663         | 380.690470        | P    | 2026.928718        | 1013.967997     | 2009.902169        | 1005.454723      | <b>2008.918153</b> | 1004.962715      | 15 |
| 9  | <b>907.426821</b>  | 454.217049        | 890.400272     | 445.703774        | 889.416256         | 445.211766        | E    | 1929.875954        | 965.441615      | <b>1912.849405</b> | 956.928341       | 1911.865389        | 956.436333       | 14 |
| 10 | 964.448285         | 482.727781        | 947.421736     | 474.214506        | 946.437720         | 473.722498        | G    | 1800.833361        | 900.920319      | 1783.806812        | 892.407044       | 1782.822796        | 891.915036       | 13 |
| 11 | <b>1065.495964</b> | 533.251620        | 1048.469415    | 524.738346        | 1047.485399        | <b>524.246337</b> | T    | 1743.811897        | 872.409587      | 1726.785348        | 863.896312       | <b>1725.801332</b> | 863.404304       | 12 |
| 12 | <b>1166.543643</b> | 583.775460        | 1149.517094    | 575.262185        | <b>1148.533078</b> | 574.770177        | T    | <b>1642.764218</b> | 821.885747      | 1625.737669        | 813.372473       | <b>1624.753653</b> | 812.880465       | 11 |
| 13 | <b>1223.565107</b> | 612.286191        | 1206.538558    | 603.772917        | 1205.554542        | 603.280909        | G    | <b>1541.716539</b> | 771.361908      | <b>1524.689990</b> | 762.848633       | 1523.705974        | 762.356625       | 10 |
| 14 | 1662.790433        | <b>831.898854</b> | 1645.763884    | 823.385580        | 1644.779868        | 822.893572        | Q    | <b>1484.695075</b> | 742.851176      | <b>1467.668526</b> | 734.337901       | 1466.684510        | 733.845893       | 9  |
| 15 | 1749.822461        | 875.414869        | 1732.795912    | 866.901594        | <b>1731.811896</b> | 866.409586        | S    | <b>1045.469749</b> | 523.238513      | 1028.443200        | 514.725238       | 1027.459184        | 514.233230       | 8  |
| 16 | <b>1912.885790</b> | 956.946533        | 1895.859241    | <b>948.433259</b> | 1894.875225        | 947.941251        | Y    | <b>958.437721</b>  | 479.722499      | 941.411172         | 471.209224       | 940.427156         | 470.717216       | 7  |
| 17 | 2026.928717        | 1013.967997       | 2009.902168    | 1005.454722       | <b>2008.918152</b> | 1004.962714       | N    | <b>795.374392</b>  | 398.190834      | <b>778.347843</b>  | 389.677560       | 777.363827         | 389.185552       | 6  |
| 18 | 2154.987295        | 1077.997285       | 2137.960746    | 1069.484011       | <b>2136.976730</b> | 1068.992003       | Q    | <b>681.331465</b>  | 341.169371      | 664.304916         | 332.656096       | <b>663.320900</b>  | 332.164088       | 5  |
| 19 | 2318.050624        | 1159.528950       | 2301.024075    | 1151.015675       | 2300.040059        | 1150.523667       | Y    | <b>553.272887</b>  | 277.140082      | 536.246338         | 268.626807       | 535.262322         | 268.134799       | 4  |
| 20 | 2405.082652        | 1203.044964       | 2388.056103    | 1194.531689       | 2387.072087        | 1194.039681       | S    | <b>390.209558</b>  | 195.608417      | 373.183009         | 187.095143       | 372.198993         | 186.603135       | 3  |
| 21 | 2533.141230        | 1267.074253       | 2516.114681    | 1258.560978       | 2515.130665        | 1258.068971       | Q    | <b>303.177530</b>  | 152.092403      | 286.150981         | 143.579129       |                    |                  | 2  |
| 22 |                    |                   |                |                   |                    |                   | R    | <b>175.118952</b>  | 88.063114       | 158.092403         | 79.549839        |                    |                  | 1  |

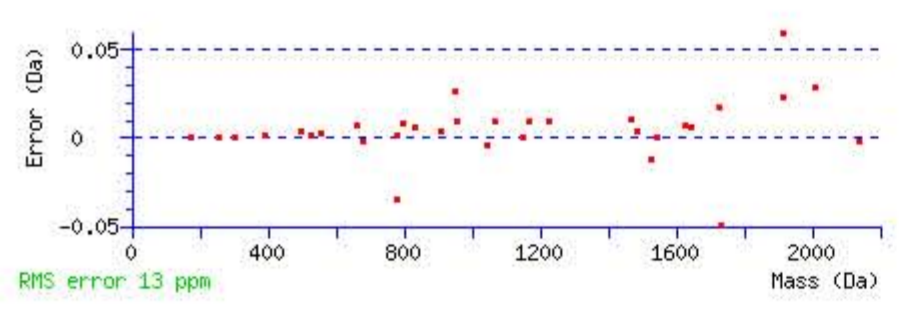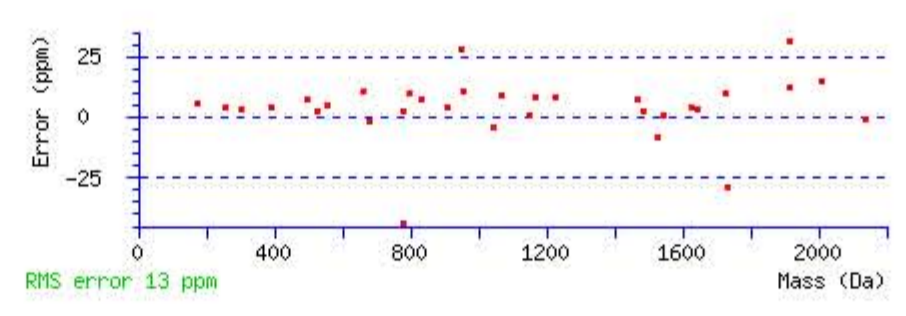

NCBI BLAST search of [RPGGEPSPGTTGQSYNQYSQR](#)  
 (Parameters: blastp, nr protein database, expect=20000, no filter, PAM30)  
 Other BLAST [web gateways](#)

### All matches to this query

| Score | Mr(calc):   | Delta    | Sequence                              |
|-------|-------------|----------|---------------------------------------|
| 88.3  | 2706.245621 | 0.013471 | <a href="#">RPGGEPSPGTTGQSYNQYSQR</a> |
| 71.8  | 2706.245621 | 0.013471 | <a href="#">RPGGEPSPGTTGQSYNQYSQR</a> |
| 61.4  | 2706.245621 | 0.013471 | <a href="#">RPGGEPSPGTTGQSYNQYSQR</a> |
| 2.0   | 2706.246658 | 0.012434 | <a href="#">MAQKMSFGFYKYSNMEFVR</a>   |



# Mascot Search Results

## Peptide View

MS/MS Fragmentation of **HRPRPYPPNVGEEIQIGHIPR**

Found in **FINC\_HUMAN**, Fibronectin OS=Homo sapiens GN=FN1 PE=1 SV=4

Match to Query 68428: 2772.493416 from(694.130630,4+) rtinseconds(1736) index(40345)

Title: Locus:1.1.1.2888.18 File:"2013-07-02 CLN FXIII 60 min 1st F 3.wiff"

Data file C:\Program Files (x86)\Matrix Science\Mascot Daemon\mgf\4 FXIII 60 min 1st\mascot\_daemon\_merge.mgf

Click mouse within plot area to zoom in by factor of two about that point

Or, Plot from  to  Da

Label all possible matches  Label matches used for scoring

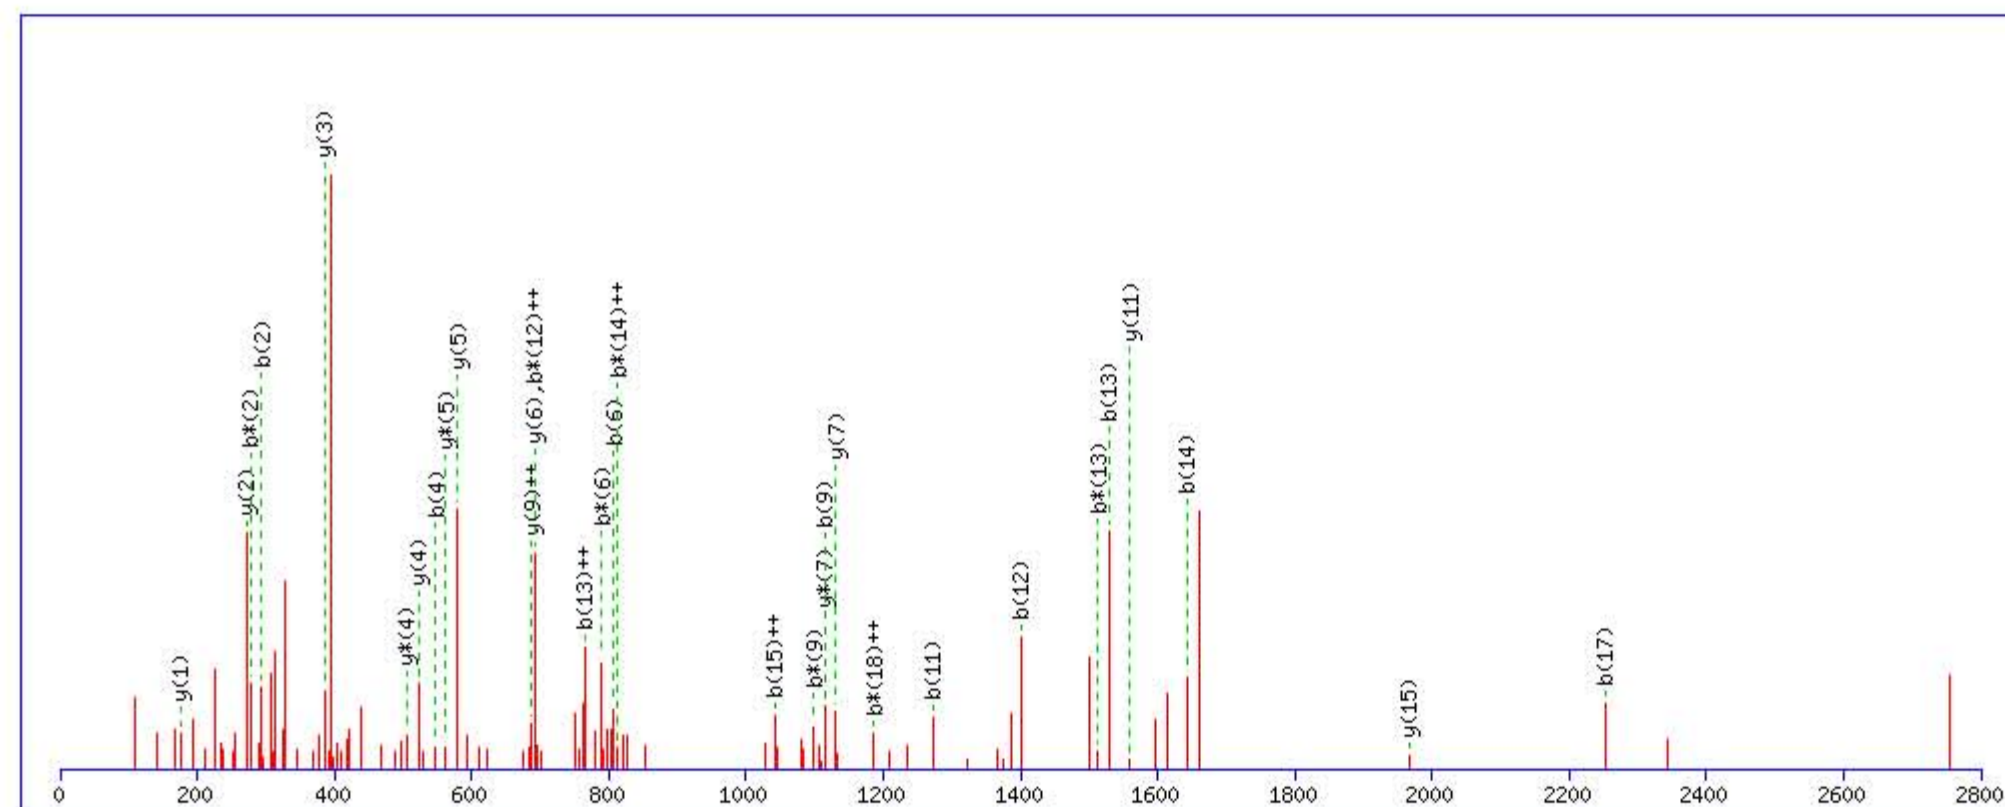

Monoisotopic mass of neutral peptide Mr(calc): 2772.475815

Fixed modifications: Carbamidomethyl (C) (apply to specified residues or termini only)

Variable modifications:

Q15 : Biotin:Thermo-21345 (Q)

Ions Score: 45 Expect: 0.00058

Matches : 31/200 fragment ions using 70 most intense peaks [\(help\)](#)

| #  | b                  | b <sup>++</sup>    | b <sup>*</sup>     | b <sup>+++</sup>   | b <sup>0</sup> | b <sup>0++</sup> | Seq. | y                  | y <sup>++</sup>   | y <sup>*</sup>     | y <sup>+++</sup> | y <sup>0</sup> | y <sup>0++</sup> | #  |
|----|--------------------|--------------------|--------------------|--------------------|----------------|------------------|------|--------------------|-------------------|--------------------|------------------|----------------|------------------|----|
| 1  | 138.066188         | 69.536732          |                    |                    |                |                  | H    |                    |                   |                    |                  |                |                  | 21 |
| 2  | <b>294.167299</b>  | 147.587288         | <b>277.140750</b>  | 139.074013         |                |                  | R    | 2636.424208        | 1318.715742       | 2619.397659        | 1310.202467      | 2618.413643    | 1309.710459      | 20 |
| 3  | 391.220063         | 196.113670         | 374.193514         | 187.600395         |                |                  | P    | 2480.323097        | 1240.665186       | 2463.296548        | 1232.151912      | 2462.312532    | 1231.659904      | 19 |
| 4  | <b>547.321174</b>  | 274.164225         | 530.294625         | 265.650951         |                |                  | R    | 2383.270333        | 1192.138804       | 2366.243784        | 1183.625530      | 2365.259768    | 1183.133522      | 18 |
| 5  | 644.373938         | 322.690607         | 627.347389         | 314.177333         |                |                  | P    | 2227.169222        | 1114.088249       | 2210.142673        | 1105.574974      | 2209.158657    | 1105.082966      | 17 |
| 6  | <b>807.437267</b>  | 404.222272         | <b>790.410718</b>  | 395.708997         |                |                  | Y    | 2130.116458        | 1065.561867       | 2113.089909        | 1057.048592      | 2112.105893    | 1056.556584      | 16 |
| 7  | 904.490031         | 452.748654         | 887.463482         | 444.235379         |                |                  | P    | <b>1967.053129</b> | 984.030203        | 1950.026580        | 975.516928       | 1949.042564    | 975.024920       | 15 |
| 8  | 1001.542795        | 501.275036         | 984.516246         | 492.761761         |                |                  | P    | 1870.000365        | 935.503821        | 1852.973816        | 926.990546       | 1851.989800    | 926.498538       | 14 |
| 9  | <b>1115.585722</b> | 558.296499         | <b>1098.559173</b> | 549.783225         |                |                  | N    | 1772.947601        | 886.977439        | 1755.921052        | 878.464164       | 1754.937036    | 877.972156       | 13 |
| 10 | 1214.654136        | 607.830706         | 1197.627587        | 599.317432         |                |                  | V    | 1658.904674        | 829.955975        | 1641.878125        | 821.442701       | 1640.894109    | 820.950693       | 12 |
| 11 | <b>1271.675600</b> | 636.341438         | 1254.649051        | 627.828164         |                |                  | G    | <b>1559.836260</b> | 780.421768        | 1542.809711        | 771.908494       | 1541.825695    | 771.416486       | 11 |
| 12 | <b>1400.718193</b> | 700.862735         | 1383.691644        | <b>692.349460</b>  | 1382.707628    | 691.857452       | E    | 1502.814796        | 751.911036        | 1485.788247        | 743.397762       | 1484.804231    | 742.905754       | 10 |
| 13 | <b>1529.760786</b> | <b>765.384031</b>  | <b>1512.734237</b> | 756.870757         | 1511.750221    | 756.378749       | E    | 1373.772203        | <b>687.389740</b> | 1356.745654        | 678.876465       | 1355.761638    | 678.384457       | 9  |
| 14 | <b>1642.844850</b> | 821.926063         | 1625.818301        | <b>813.412789</b>  | 1624.834285    | 812.920781       | I    | 1244.729610        | 622.868443        | 1227.703061        | 614.355169       |                |                  | 8  |
| 15 | 2082.070176        | <b>1041.538726</b> | 2065.043627        | 1033.025451        | 2064.059611    | 1032.533444      | Q    | <b>1131.645546</b> | 566.326411        | <b>1114.618997</b> | 557.813137       |                |                  | 7  |
| 16 | 2195.154240        | 1098.080758        | 2178.127691        | 1089.567484        | 2177.143675    | 1089.075476      | I    | <b>692.420220</b>  | 346.713748        | 675.393671         | 338.200474       |                |                  | 6  |
| 17 | <b>2252.175704</b> | 1126.591490        | 2235.149155        | 1118.078215        | 2234.165139    | 1117.586208      | G    | <b>579.336156</b>  | 290.171716        | <b>562.309607</b>  | 281.658442       |                |                  | 5  |
| 18 | 2389.234616        | 1195.120946        | 2372.208067        | <b>1186.607671</b> | 2371.224051    | 1186.115664      | H    | <b>522.314692</b>  | 261.660984        | <b>505.288143</b>  | 253.147710       |                |                  | 4  |
| 19 | 2502.318680        | 1251.662978        | 2485.292131        | 1243.149704        | 2484.308115    | 1242.657696      | I    | <b>385.255780</b>  | 193.131528        | 368.229231         | 184.618254       |                |                  | 3  |
| 20 | 2599.371444        | 1300.189360        | 2582.344895        | 1291.676086        | 2581.360879    | 1291.184078      | P    | <b>272.171716</b>  | 136.589496        | 255.145167         | 128.076221       |                |                  | 2  |
| 21 |                    |                    |                    |                    |                |                  | R    | <b>175.118952</b>  | 88.063114         | 158.092403         | 79.549839        |                |                  | 1  |

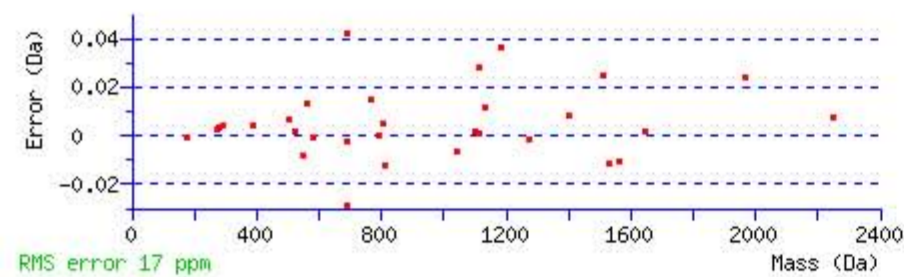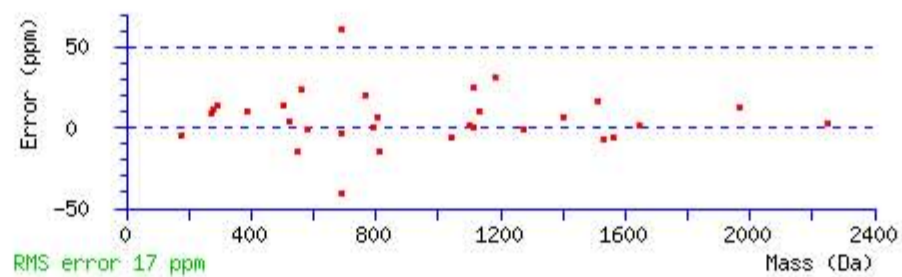

NCBI BLAST search of [HRPRPYPPNVGEEIQIGHIPR](#)

(Parameters: blastp, nr protein database, expect=20000, no filter, PAM30)

Other BLAST [web gateways](#)

All matches to this query

| Score | Mr(calc):   | Delta    | Sequence                              |
|-------|-------------|----------|---------------------------------------|
| 44.8  | 2772.475815 | 0.017601 | <a href="#">HRPRPYPPNVGEEIQIGHIPR</a> |

Mascot: <http://www.matrixscience.com/>



**MATRIX SCIENCE Mascot Search Results**

**Peptide View**

MS/MS Fragmentation of **RPGGEPSPGTTGQSYNQYSQR**  
 Found in **FINC\_HUMAN**, Fibronectin OS=Homo sapiens GN=FN1 PE=1 SV=4

Match to Query 71781: 3017.431816 from(755.365230,4+) rtinseconds(1777) index(40604)  
 Title: Locus:1.1.1.2902.23 File:"2013-07-02 CLN FXIII 60 min 1st F 3.wiff"  
 Data file C:\Program Files (x86)\Matrix Science\Mascot Daemon\mgf\4 FXIII 60 min 1st\mascot\_daemon\_merge.mgf

Click mouse within plot area to zoom in by factor of two about that point  
 Or, Plot from  to  Da   
 Label all possible matches  Label matches used for scoring

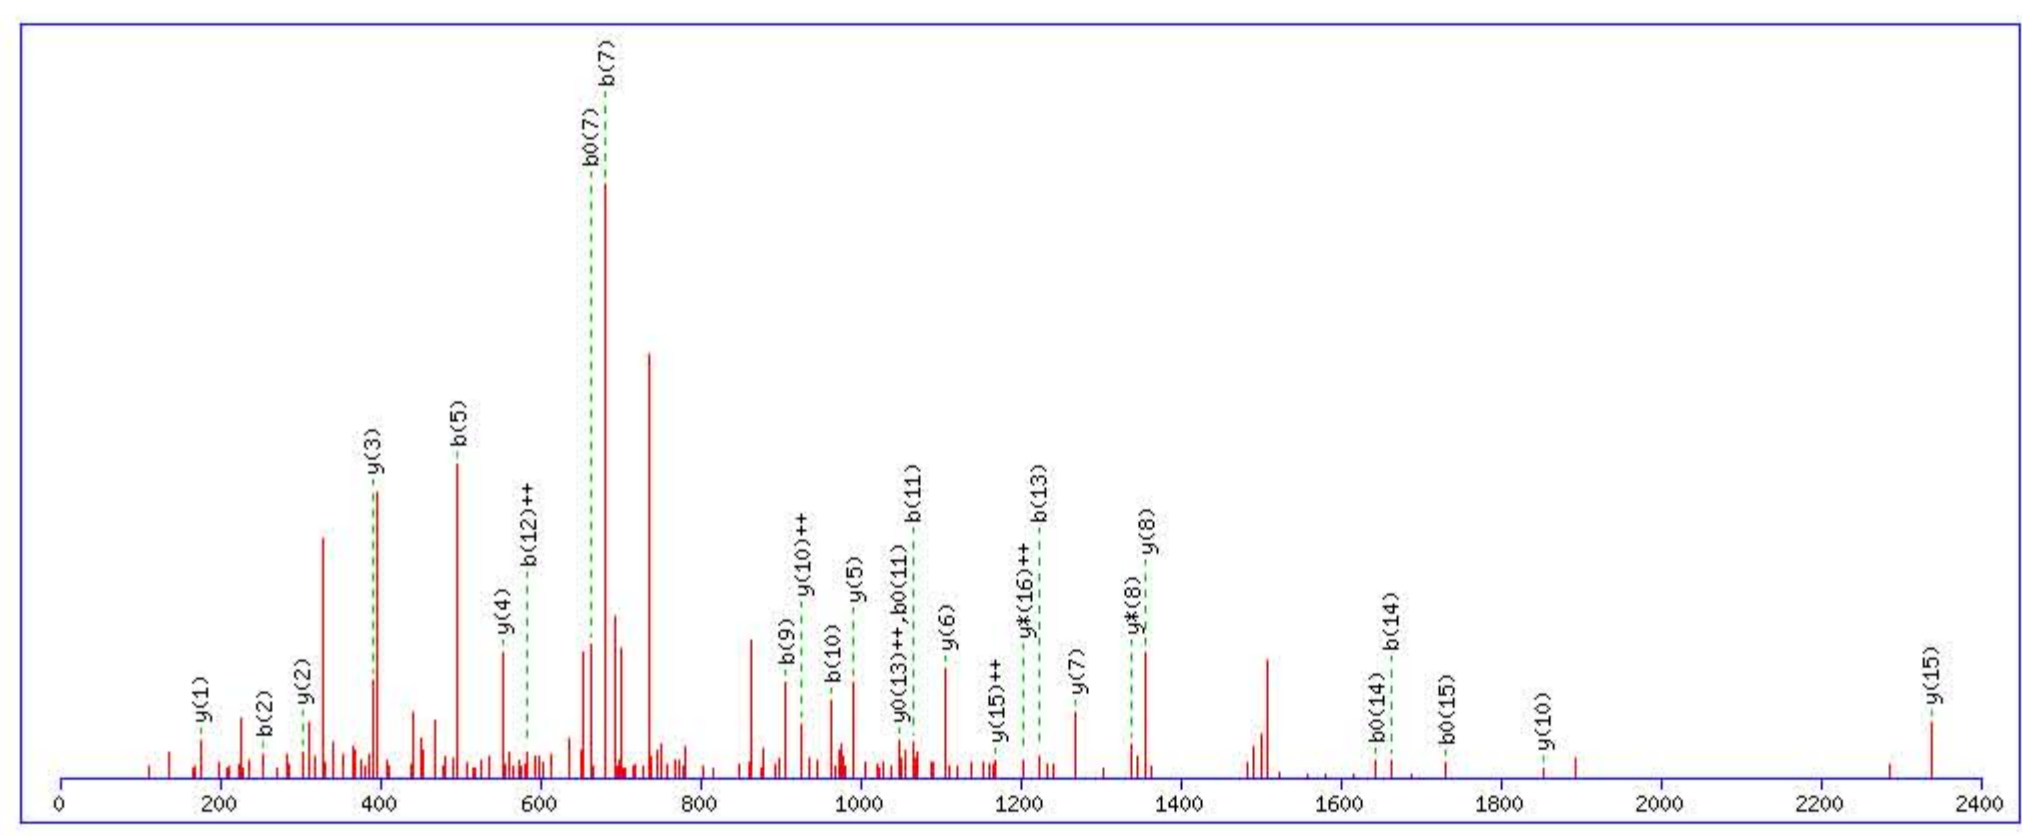

Monoisotopic mass of neutral peptide Mr(calc): 3017.412369  
 Fixed modifications: Carbamidomethyl (C) (apply to specified residues or termini only)  
 Variable modifications:  
 Q14 : Biotin:Thermo-21345 (Q)  
 Q18 : Biotin:Thermo-21345 (Q)  
 Ions Score: 58 Expect: 3.1e-005  
 Matches : 28/240 fragment ions using 54 most intense peaks [\(help\)](#)

| #  | b                  | b <sup>++</sup>   | b <sup>+</sup> | b <sup>*++</sup> | b <sup>0</sup>     | b <sup>0++</sup> | Seq. | y                  | y <sup>++</sup>    | y <sup>+</sup>     | y <sup>*++</sup>   | y <sup>0</sup> | y <sup>0++</sup>   | #  |
|----|--------------------|-------------------|----------------|------------------|--------------------|------------------|------|--------------------|--------------------|--------------------|--------------------|----------------|--------------------|----|
| 1  | 157.108387         | 79.057831         | 140.081838     | 70.544557        |                    |                  | R    |                    |                    |                    |                    |                |                    | 22 |
| 2  | <b>254.161151</b>  | 127.584213        | 237.134602     | 119.070939       |                    |                  | P    | 2862.318543        | 1431.662909        | 2845.291994        | 1423.149635        | 2844.307978    | 1422.657627        | 21 |
| 3  | 311.182615         | 156.094945        | 294.156066     | 147.581671       |                    |                  | G    | 2765.265779        | 1383.136527        | 2748.239230        | 1374.623253        | 2747.255214    | 1374.131245        | 20 |
| 4  | 368.204079         | 184.605677        | 351.177530     | 176.092403       |                    |                  | G    | 2708.244315        | 1354.625795        | 2691.217766        | 1346.112521        | 2690.233750    | 1345.620513        | 19 |
| 5  | <b>497.246672</b>  | 249.126974        | 480.220123     | 240.613700       | 479.236107         | 240.121692       | E    | 2651.222851        | 1326.115063        | 2634.196302        | 1317.601789        | 2633.212286    | 1317.109781        | 18 |
| 6  | 594.299436         | 297.653356        | 577.272887     | 289.140082       | 576.288871         | 288.648074       | P    | 2522.180258        | 1261.593767        | 2505.153709        | 1253.080492        | 2504.169693    | 1252.588484        | 17 |
| 7  | <b>681.331464</b>  | 341.169370        | 664.304915     | 332.656095       | <b>663.320899</b>  | 332.164087       | S    | 2425.127494        | 1213.067385        | 2408.100945        | <b>1204.554110</b> | 2407.116929    | 1204.062102        | 16 |
| 8  | 778.384228         | 389.695752        | 761.357679     | 381.182478       | 760.373663         | 380.690470       | P    | <b>2338.095466</b> | <b>1169.551371</b> | 2321.068917        | 1161.038096        | 2320.084901    | 1160.546088        | 15 |
| 9  | <b>907.426821</b>  | 454.217049        | 890.400272     | 445.703774       | 889.416256         | 445.211766       | E    | 2241.042702        | 1121.024989        | 2224.016153        | 1112.511714        | 2223.032137    | 1112.019706        | 14 |
| 10 | <b>964.448285</b>  | 482.727781        | 947.421736     | 474.214506       | 946.437720         | 473.722498       | G    | 2112.000109        | 1056.503692        | 2094.973560        | 1047.990418        | 2093.989544    | <b>1047.498410</b> | 13 |
| 11 | <b>1065.495964</b> | 533.251620        | 1048.469415    | 524.738346       | <b>1047.485399</b> | 524.246337       | T    | 2054.978645        | 1027.992960        | 2037.952096        | 1019.479686        | 2036.968080    | 1018.987678        | 12 |
| 12 | 1166.543643        | <b>583.775460</b> | 1149.517094    | 575.262185       | 1148.533078        | 574.770177       | T    | 1953.930966        | 977.469121         | 1936.904417        | 968.955847         | 1935.920401    | 968.463839         | 11 |
| 13 | <b>1223.565107</b> | 612.286191        | 1206.538558    | 603.772917       | 1205.554542        | 603.280909       | G    | <b>1852.883287</b> | <b>926.945282</b>  | 1835.856738        | 918.432007         | 1834.872722    | 917.939999         | 10 |
| 14 | <b>1662.790433</b> | 831.898854        | 1645.763884    | 823.385580       | <b>1644.779868</b> | 822.893572       | Q    | 1795.861823        | 898.434550         | 1778.835274        | 889.921275         | 1777.851258    | 889.429267         | 9  |
| 15 | 1749.822461        | 875.414869        | 1732.795912    | 866.901594       | <b>1731.811896</b> | 866.409586       | S    | <b>1356.636497</b> | 678.821887         | <b>1339.609948</b> | 670.308612         | 1338.625932    | 669.816604         | 8  |
| 16 | 1912.885790        | 956.946533        | 1895.859241    | 948.433259       | 1894.875225        | 947.941251       | Y    | <b>1269.604469</b> | 635.305873         | 1252.577920        | 626.792598         | 1251.593904    | 626.300590         | 7  |
| 17 | 2026.928717        | 1013.967997       | 2009.902168    | 1005.454722      | 2008.918152        | 1004.962714      | N    | <b>1106.541140</b> | 553.774208         | 1089.514591        | 545.260934         | 1088.530575    | 544.768926         | 6  |
| 18 | 2466.154043        | 1233.580659       | 2449.127494    | 1225.067385      | 2448.143478        | 1224.575377      | Q    | <b>992.498213</b>  | 496.752745         | 975.471664         | 488.239470         | 974.487648     | 487.747462         | 5  |
| 19 | 2629.217372        | 1315.112324       | 2612.190823    | 1306.599049      | 2611.206807        | 1306.107041      | Y    | <b>553.272887</b>  | 277.140082         | 536.246338         | 268.626807         | 535.262322     | 268.134799         | 4  |
| 20 | 2716.249400        | 1358.628338       | 2699.222851    | 1350.115063      | 2698.238835        | 1349.623056      | S    | <b>390.209558</b>  | 195.608417         | 373.183009         | 187.095143         | 372.198993     | 186.603135         | 3  |
| 21 | 2844.307978        | 1422.657627       | 2827.281429    | 1414.144353      | 2826.297413        | 1413.652345      | Q    | <b>303.177530</b>  | 152.092403         | 286.150981         | 143.579129         |                |                    | 2  |
| 22 |                    |                   |                |                  |                    |                  | R    | <b>175.118952</b>  | 88.063114          | 158.092403         | 79.549839          |                |                    | 1  |

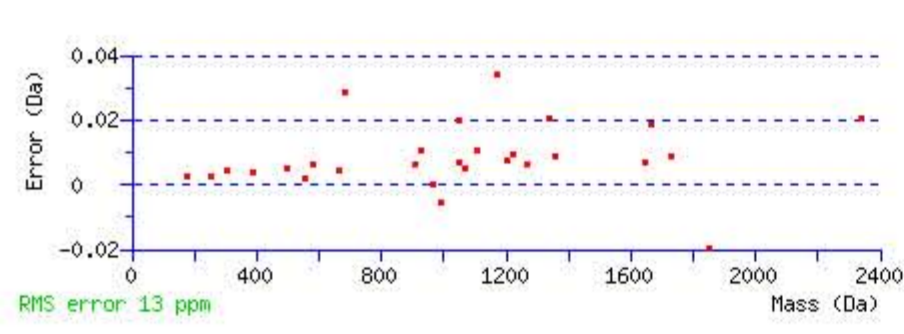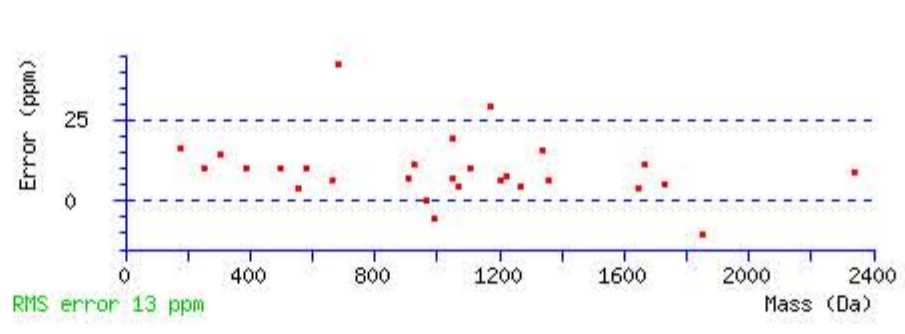

NCBI BLAST search of **RPGGEPSPGTTGQSYNQYSQR**  
 (Parameters: blastp, nr protein database, expect=20000, no filter, PAM30)  
 Other BLAST [web gateways](#)

**All matches to this query**

| Score | Mr(calc):   | Delta    | Sequence                              |
|-------|-------------|----------|---------------------------------------|
| 58.2  | 3017.412369 | 0.019447 | <a href="#">RPGGEPSPGTTGQSYNQYSQR</a> |
| 47.0  | 3017.412369 | 0.019447 | <a href="#">RPGGEPSPGTTGQSYNQYSQR</a> |
| 26.6  | 3017.412369 | 0.019447 | <a href="#">RPGGEPSPGTTGQSYNQYSQR</a> |



**MATRIX SCIENCE Mascot Search Results**

**Peptide View**

MS/MS Fragmentation of **RPGGEPSPGTTGQSYNQYSQR**  
 Found in **FINC\_HUMAN**, Fibronectin OS=Homo sapiens GN=FN1 PE=1 SV=4

Match to Query 71782: 3017.439852 from(1006.820560,3+) rtinseconds(1779) index(40621)  
 Title: Locus:1.1.1.2903.15 File:"2013-07-02 CLN FXIII 60 min 1st F 3.wiff"  
 Data file C:\Program Files (x86)\Matrix Science\Mascot Daemon\mgf\4 FXIII 60 min 1st\mascot\_daemon\_merge.mgf

Click mouse within plot area to zoom in by factor of two about that point  
 Or, Plot from  to  Da   
 Label all possible matches  Label matches used for scoring

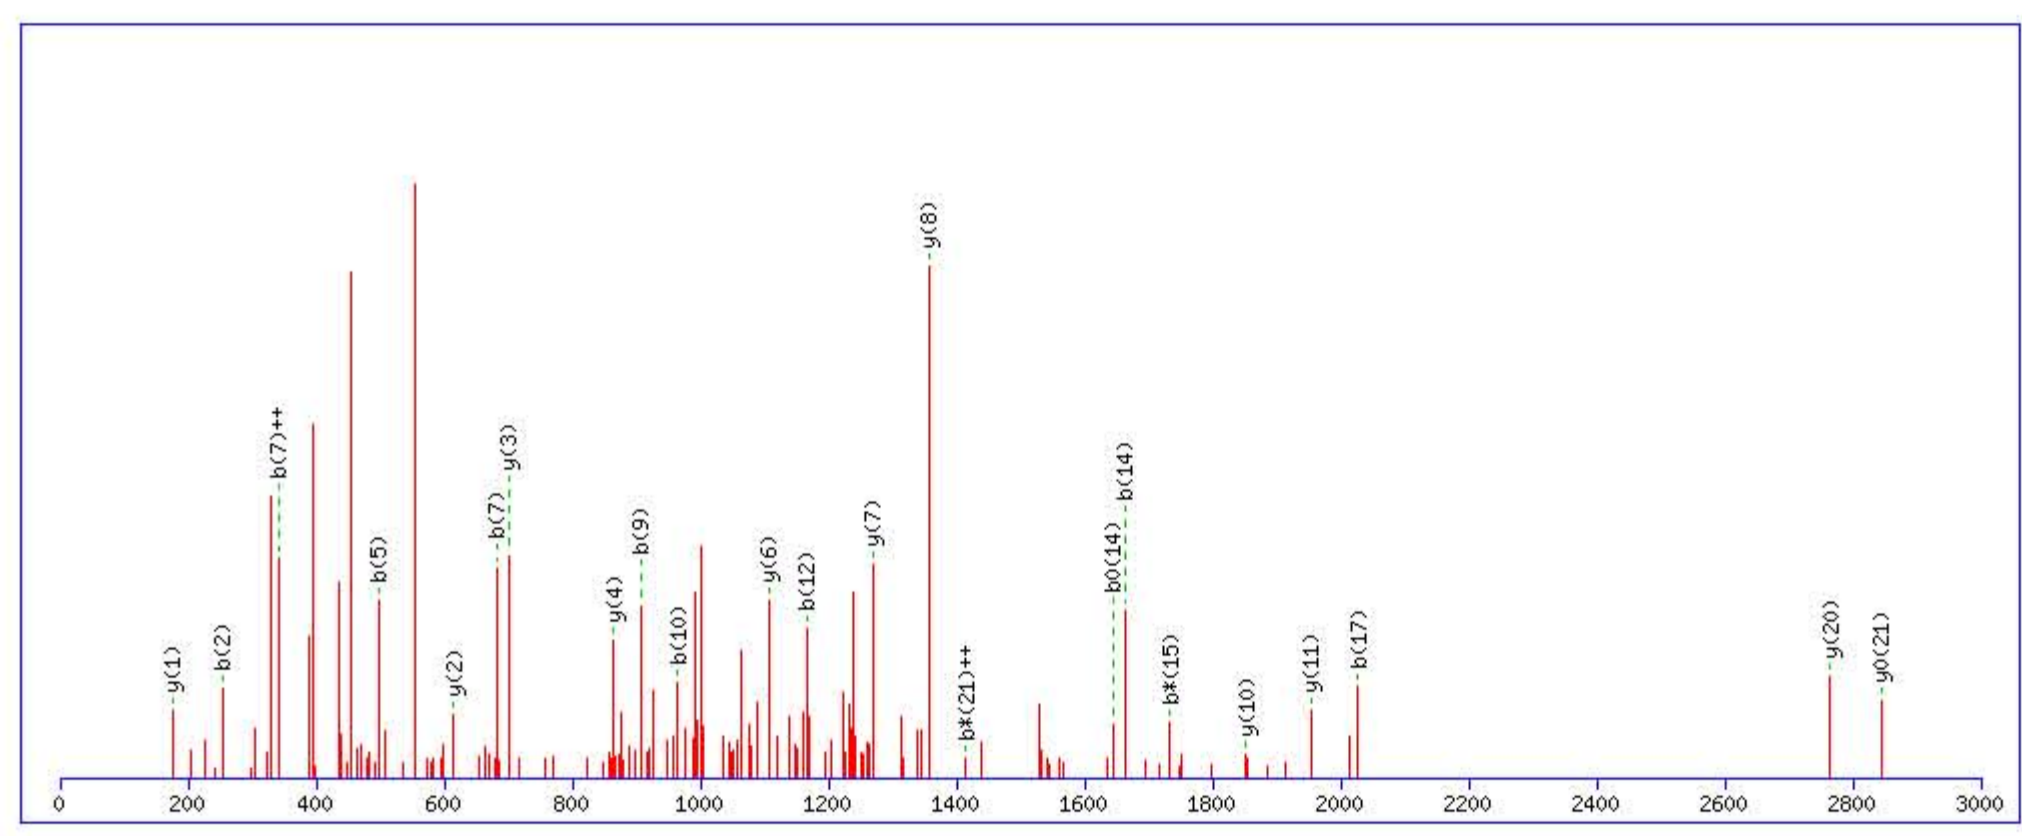

Monoisotopic mass of neutral peptide Mr(calc): 3017.412369  
 Fixed modifications: Carbamidomethyl (C) (apply to specified residues or termini only)  
 Variable modifications:  
 Q14 : Biotin:Thermo-21345 (Q)  
 Q21 : Biotin:Thermo-21345 (Q)  
 Ions Score: 63 Expect: 1.1e-005  
 Matches : 24/240 fragment ions using 40 most intense peaks [\(help\)](#)

| #  | b                  | b <sup>++</sup>   | b <sup>+</sup>     | b <sup>+++</sup>   | b <sup>0</sup>     | b <sup>0++</sup> | Seq. | y                  | y <sup>++</sup> | y <sup>+</sup> | y <sup>+++</sup> | y <sup>0</sup>     | y <sup>0++</sup> | #  |
|----|--------------------|-------------------|--------------------|--------------------|--------------------|------------------|------|--------------------|-----------------|----------------|------------------|--------------------|------------------|----|
| 1  | 157.108387         | 79.057831         | 140.081838         | 70.544557          |                    |                  | R    |                    |                 |                |                  |                    |                  | 22 |
| 2  | <b>254.161151</b>  | 127.584213        | 237.134602         | 119.070939         |                    |                  | P    | 2862.318543        | 1431.662909     | 2845.291994    | 1423.149635      | <b>2844.307978</b> | 1422.657627      | 21 |
| 3  | 311.182615         | 156.094945        | 294.156066         | 147.581671         |                    |                  | G    | <b>2765.265779</b> | 1383.136527     | 2748.239230    | 1374.623253      | 2747.255214        | 1374.131245      | 20 |
| 4  | 368.204079         | 184.605677        | 351.177530         | 176.092403         |                    |                  | G    | 2708.244315        | 1354.625795     | 2691.217766    | 1346.112521      | 2690.233750        | 1345.620513      | 19 |
| 5  | <b>497.246672</b>  | 249.126974        | 480.220123         | 240.613700         | 479.236107         | 240.121692       | E    | 2651.222851        | 1326.115063     | 2634.196302    | 1317.601789      | 2633.212286        | 1317.109781      | 18 |
| 6  | 594.299436         | 297.653356        | 577.272887         | 289.140082         | 576.288871         | 288.648074       | P    | 2522.180258        | 1261.593767     | 2505.153709    | 1253.080492      | 2504.169693        | 1252.588484      | 17 |
| 7  | <b>681.331464</b>  | <b>341.169370</b> | 664.304915         | 332.656095         | 663.320899         | 332.164087       | S    | 2425.127494        | 1213.067385     | 2408.100945    | 1204.554110      | 2407.116929        | 1204.062102      | 16 |
| 8  | 778.384228         | 389.695752        | 761.357679         | 381.182478         | 760.373663         | 380.690470       | P    | 2338.095466        | 1169.551371     | 2321.068917    | 1161.038096      | 2320.084901        | 1160.546088      | 15 |
| 9  | <b>907.426821</b>  | 454.217049        | 890.400272         | 445.703774         | 889.416256         | 445.211766       | E    | 2241.042702        | 1121.024989     | 2224.016153    | 1112.511714      | 2223.032137        | 1112.019706      | 14 |
| 10 | <b>964.448285</b>  | 482.727781        | 947.421736         | 474.214506         | 946.437720         | 473.722498       | G    | 2112.000109        | 1056.503692     | 2094.973560    | 1047.990418      | 2093.989544        | 1047.498410      | 13 |
| 11 | 1065.495964        | 533.251620        | 1048.469415        | 524.738346         | 1047.485399        | 524.246337       | T    | 2054.978645        | 1027.992960     | 2037.952096    | 1019.479686      | 2036.968080        | 1018.987678      | 12 |
| 12 | <b>1166.543643</b> | 583.775460        | 1149.517094        | 575.262185         | 1148.533078        | 574.770177       | T    | <b>1953.930966</b> | 977.469121      | 1936.904417    | 968.955847       | 1935.920401        | 968.463839       | 11 |
| 13 | 1223.565107        | 612.286191        | 1206.538558        | 603.772917         | 1205.554542        | 603.280909       | G    | <b>1852.883287</b> | 926.945282      | 1835.856738    | 918.432007       | 1834.872722        | 917.939999       | 10 |
| 14 | <b>1662.790433</b> | 831.898854        | 1645.763884        | 823.385580         | <b>1644.779868</b> | 822.893572       | Q    | 1795.861823        | 898.434550      | 1778.835274    | 889.921275       | 1777.851258        | 889.429267       | 9  |
| 15 | 1749.822461        | 875.414869        | <b>1732.795912</b> | 866.901594         | 1731.811896        | 866.409586       | S    | <b>1356.636497</b> | 678.821887      | 1339.609948    | 670.308612       | 1338.625932        | 669.816604       | 8  |
| 16 | 1912.885790        | 956.946533        | 1895.859241        | 948.433259         | 1894.875225        | 947.941251       | Y    | <b>1269.604469</b> | 635.305873      | 1252.577920    | 626.792598       | 1251.593904        | 626.300590       | 7  |
| 17 | <b>2026.928717</b> | 1013.967997       | 2009.902168        | 1005.454722        | 2008.918152        | 1004.962714      | N    | <b>1106.541140</b> | 553.774208      | 1089.514591    | 545.260934       | 1088.530575        | 544.768926       | 6  |
| 18 | 2154.987295        | 1077.997285       | 2137.960746        | 1069.484011        | 2136.976730        | 1068.992003      | Q    | 992.498213         | 496.752745      | 975.471664     | 488.239470       | 974.487648         | 487.747462       | 5  |
| 19 | 2318.050624        | 1159.528950       | 2301.024075        | 1151.015675        | 2300.040059        | 1150.523667      | Y    | <b>864.439635</b>  | 432.723456      | 847.413086     | 424.210181       | 846.429070         | 423.718173       | 4  |
| 20 | 2405.082652        | 1203.044964       | 2388.056103        | 1194.531689        | 2387.072087        | 1194.039681      | S    | <b>701.376306</b>  | 351.191791      | 684.349757     | 342.678517       | 683.365741         | 342.186509       | 3  |
| 21 | <b>2844.307978</b> | 1422.657627       | 2827.281429        | <b>1414.144353</b> | 2826.297413        | 1413.652345      | Q    | <b>614.344278</b>  | 307.675777      | 597.317729     | 299.162503       |                    |                  | 2  |
| 22 |                    |                   |                    |                    |                    |                  | R    | <b>175.118952</b>  | 88.063114       | 158.092403     | 79.549839        |                    |                  | 1  |

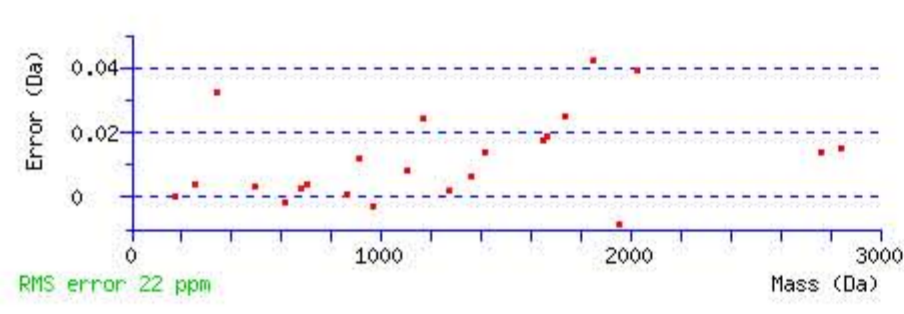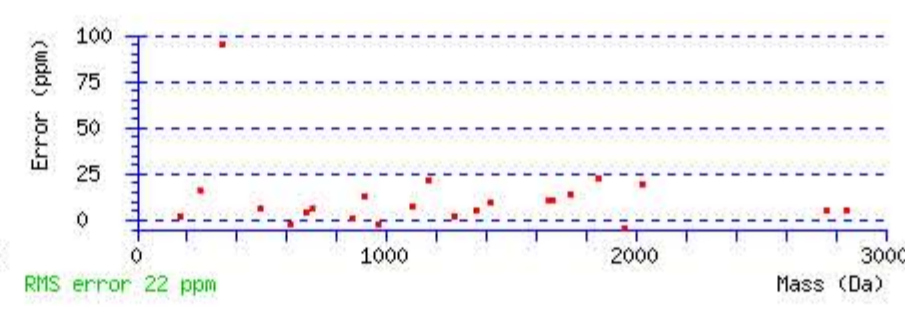

NCBI BLAST search of **RPGGEPSPGTTGQSYNQYSQR**  
 (Parameters: blastp, nr protein database, expect=20000, no filter, PAM30)  
 Other BLAST [web gateways](#)

**All matches to this query**

| Score | Mr(calc):   | Delta    | Sequence                              |
|-------|-------------|----------|---------------------------------------|
| 62.7  | 3017.412369 | 0.027483 | <a href="#">RPGGEPSPGTTGQSYNQYSQR</a> |
| 48.4  | 3017.412369 | 0.027483 | <a href="#">RPGGEPSPGTTGQSYNQYSQR</a> |
| 30.9  | 3017.412369 | 0.027483 | <a href="#">RPGGEPSPGTTGQSYNQYSQR</a> |



**MASCOT** Mascot Search Results

**Peptide View**

MS/MS Fragmentation of **TDELPQLVTLPHPNLHGPEILDVPSTVQK**  
 Found in **FINC\_HUMAN**, Fibronectin OS=Homo sapiens GN=FN1 PE=1 SV=4

Match to Query 77879: 3497.906736 from(875.483960,4+) rtinseconds(2569) index(45668)  
 Title: Locus:1.1.1.3178.18 File:"2013-07-02 CLN FXIII 60 min 1st F 3.wiff"  
 Data file C:\Program Files (x86)\Matrix Science\Mascot Daemon\mgf4 FXIII 60 min 1st\mascot\_daemon\_merge.mgf

Click mouse within plot area to zoom in by factor of two about that point  
 Or, Plot from  to  Da   
 Label all possible matches  Label matches used for scoring

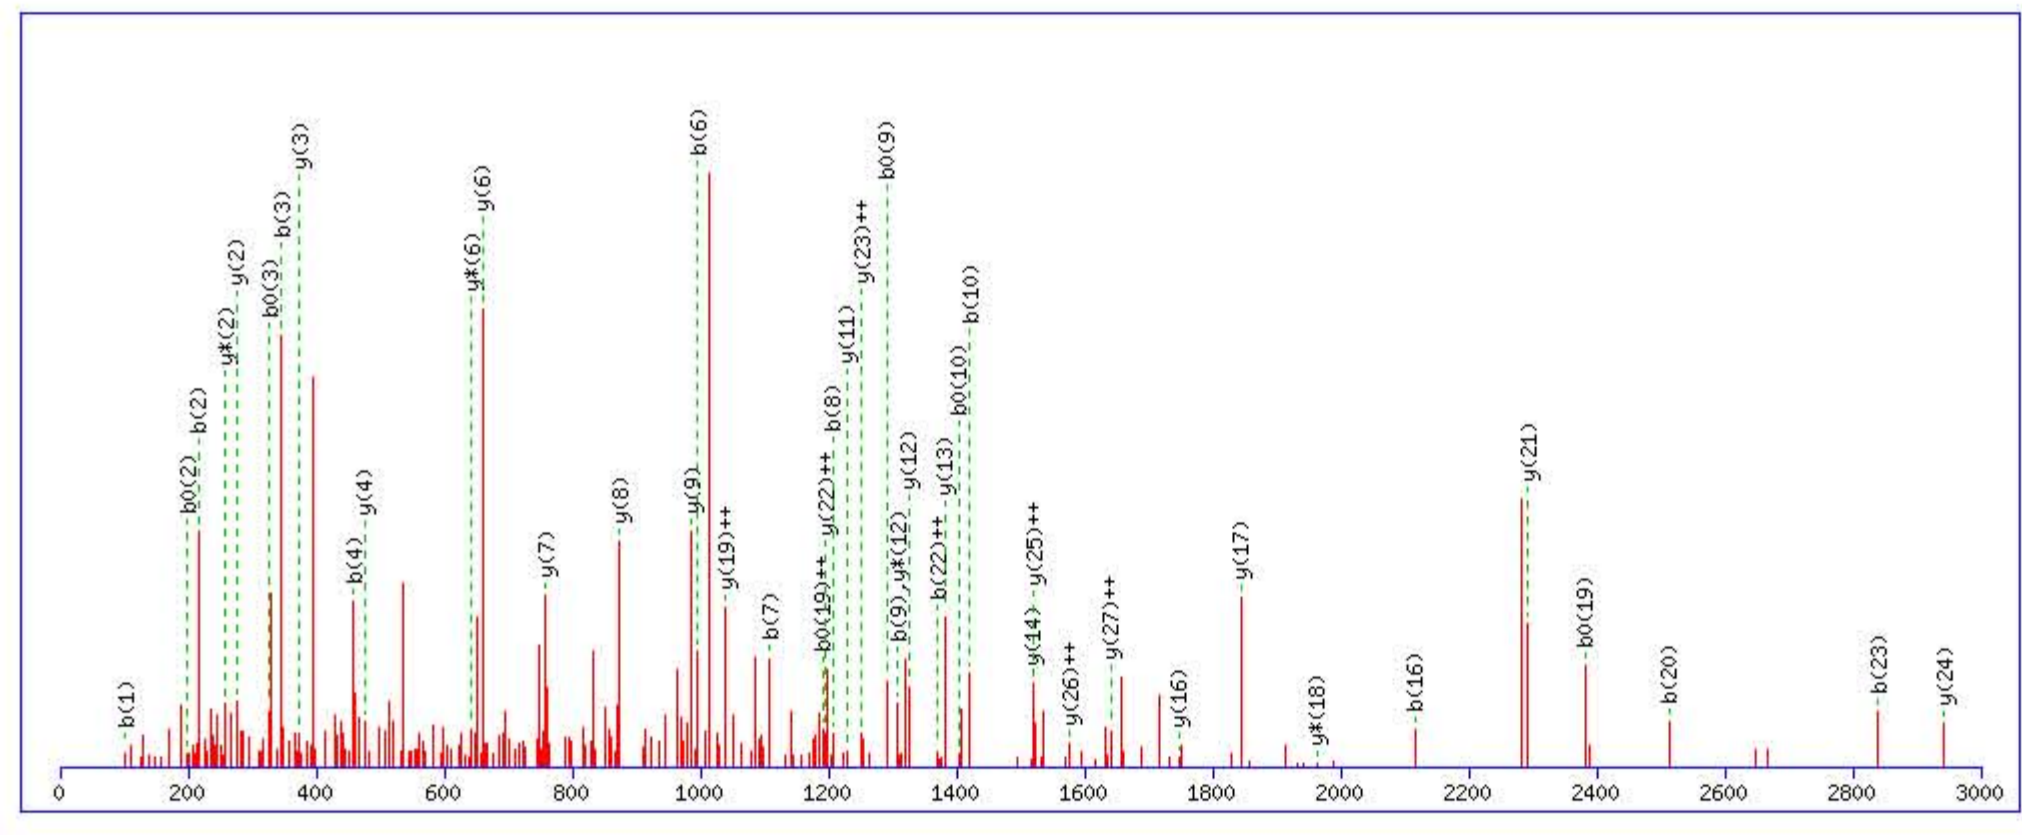

Monoisotopic mass of neutral peptide Mr(calc): 3497.859238  
 Fixed modifications: Carbamidomethyl (C) (apply to specified residues or termini only)  
 Variable modifications:  
 Q6 : Biotin:Thermo-21345 (Q)  
 Ions Score: 61 Expect: 6.4e-006  
 Matches : 44/320 fragment ions using 121 most intense peaks [\(help\)](#)

| #  | b           | b <sup>++</sup> | b <sup>+</sup> | b <sup>+++</sup> | b <sup>0</sup> | b <sup>0++</sup> | Seq. | y           | y <sup>++</sup> | y <sup>+</sup> | y <sup>+++</sup> | y <sup>0</sup> | y <sup>0++</sup> | #  |
|----|-------------|-----------------|----------------|------------------|----------------|------------------|------|-------------|-----------------|----------------|------------------|----------------|------------------|----|
| 1  | 102.054955  | 51.531116       |                |                  | 84.044390      | 42.525833        | T    |             |                 |                |                  |                |                  | 29 |
| 2  | 217.081898  | 109.044587      |                |                  | 199.071333     | 100.039304       | D    | 3397.818827 | 1699.413051     | 3380.792278    | 1690.899777      | 3379.808262    | 1690.407769      | 28 |
| 3  | 346.124491  | 173.565883      |                |                  | 328.113926     | 164.560601       | E    | 3282.791884 | 1641.899580     | 3265.765335    | 1633.386305      | 3264.781319    | 1632.894297      | 27 |
| 4  | 459.208555  | 230.107915      |                |                  | 441.197990     | 221.102633       | L    | 3153.749291 | 1577.378283     | 3136.722742    | 1568.865009      | 3135.738726    | 1568.373001      | 26 |
| 5  | 556.261319  | 278.634298      |                |                  | 538.250754     | 269.629015       | P    | 3040.665227 | 1520.836251     | 3023.638678    | 1512.322977      | 3022.654662    | 1511.830969      | 25 |
| 6  | 995.486645  | 498.246961      | 978.460096     | 489.733686       | 977.476080     | 489.241678       | Q    | 2943.612463 | 1472.309869     | 2926.585914    | 1463.796595      | 2925.601898    | 1463.304587      | 24 |
| 7  | 1108.570709 | 554.788993      | 1091.544160    | 546.275718       | 1090.560144    | 545.783710       | L    | 2504.387137 | 1252.697206     | 2487.360588    | 1244.183932      | 2486.376572    | 1243.691924      | 23 |
| 8  | 1207.639123 | 604.323200      | 1190.612574    | 595.809925       | 1189.628558    | 595.317917       | V    | 2391.303073 | 1196.155174     | 2374.276524    | 1187.641900      | 2373.292508    | 1187.149892      | 22 |
| 9  | 1308.686802 | 654.847039      | 1291.660253    | 646.333765       | 1290.676237    | 645.841757       | T    | 2292.234659 | 1146.620967     | 2275.208110    | 1138.107693      | 2274.224094    | 1137.615685      | 21 |
| 10 | 1421.770866 | 711.389071      | 1404.744317    | 702.875797       | 1403.760301    | 702.383789       | L    | 2191.186980 | 1096.097128     | 2174.160431    | 1087.583853      | 2173.176415    | 1087.091845      | 20 |
| 11 | 1518.823630 | 759.915453      | 1501.797081    | 751.402179       | 1500.813065    | 750.910171       | P    | 2078.102916 | 1039.555096     | 2061.076367    | 1031.041821      | 2060.092351    | 1030.549813      | 19 |
| 12 | 1655.882542 | 828.444909      | 1638.855993    | 819.931635       | 1637.871977    | 819.439627       | H    | 1981.050152 | 991.028714      | 1964.023603    | 982.515440       | 1963.039587    | 982.023432       | 18 |
| 13 | 1752.935306 | 876.971291      | 1735.908757    | 868.458017       | 1734.924741    | 867.966009       | P    | 1843.991240 | 922.499258      | 1826.964691    | 913.985984       | 1825.980675    | 913.493976       | 17 |
| 14 | 1866.978233 | 933.992755      | 1849.951684    | 925.479480       | 1848.967668    | 924.987472       | N    | 1746.938476 | 873.972876      | 1729.911927    | 865.459602       | 1728.927911    | 864.967594       | 16 |
| 15 | 1980.062297 | 990.534787      | 1963.035748    | 982.021512       | 1962.051732    | 981.529504       | L    | 1632.895549 | 816.951413      | 1615.869000    | 808.438138       | 1614.884984    | 807.946130       | 15 |
| 16 | 2117.121209 | 1059.064242     | 2100.094660    | 1050.550968      | 2099.110644    | 1050.058960      | H    | 1519.811485 | 760.409381      | 1502.784936    | 751.896106       | 1501.800920    | 751.404098       | 14 |
| 17 | 2174.142673 | 1087.574974     | 2157.116124    | 1079.061700      | 2156.132108    | 1078.569692      | G    | 1382.752573 | 691.879925      | 1365.726024    | 683.366650       | 1364.742008    | 682.874642       | 13 |
| 18 | 2271.195437 | 1136.101356     | 2254.168888    | 1127.588082      | 2253.184872    | 1127.096074      | P    | 1325.731109 | 663.369193      | 1308.704560    | 654.855918       | 1307.720544    | 654.363910       | 12 |
| 19 | 2400.238030 | 1200.622653     | 2383.211481    | 1192.109378      | 2382.227465    | 1191.617370      | E    | 1228.678345 | 614.842811      | 1211.651796    | 606.329536       | 1210.667780    | 605.837528       | 11 |
| 20 | 2513.322094 | 1257.164685     | 2496.295545    | 1248.651410      | 2495.311529    | 1248.159402      | I    | 1099.635752 | 550.321514      | 1082.609203    | 541.808240       | 1081.625187    | 541.316231       | 10 |
| 21 | 2626.406158 | 1313.706717     | 2609.379609    | 1305.193442      | 2608.395593    | 1304.701435      | L    | 986.551688  | 493.779482      | 969.525139     | 485.266207       | 968.541123     | 484.774199       | 9  |
| 22 | 2741.433101 | 1371.220188     | 2724.406552    | 1362.706914      | 2723.422536    | 1362.214906      | D    | 873.467624  | 437.237450      | 856.441075     | 428.724175       | 855.457059     | 428.232167       | 8  |
| 23 | 2840.501515 | 1420.754395     | 2823.474966    | 1412.241121      | 2822.490950    | 1411.749113      | V    | 758.440681  | 379.723978      | 741.414132     | 371.210704       | 740.430116     | 370.718696       | 7  |
| 24 | 2937.554279 | 1469.280777     | 2920.527730    | 1460.767503      | 2919.543714    | 1460.275495      | P    | 659.372267  | 330.189772      | 642.345718     | 321.676497       | 641.361702     | 321.184489       | 6  |
| 25 | 3024.586307 | 1512.796791     | 3007.559758    | 1504.283517      | 3006.575742    | 1503.791509      | S    | 562.319503  | 281.663389      | 545.292954     | 273.150115       | 544.308938     | 272.658107       | 5  |
| 26 | 3125.633986 | 1563.320631     | 3108.607437    | 1554.807356      | 3107.623421    | 1554.315348      | T    | 475.287475  | 238.147375      | 458.260926     | 229.634101       | 457.276910     | 229.142093       | 4  |
| 27 | 3224.702400 | 1612.854838     | 3207.675851    | 1604.341563      | 3206.691835    | 1603.849555      | V    | 374.239796  | 187.623536      | 357.213247     | 179.110261       |                |                  | 3  |
| 28 | 3352.760978 | 1676.884127     | 3335.734429    | 1668.370852      | 3334.750413    | 1667.878844      | Q    | 275.171382  | 138.089329      | 258.144833     | 129.576055       |                |                  | 2  |
| 29 |             |                 |                |                  |                |                  | K    | 147.112804  | 74.060040       | 130.086255     | 65.546765        |                |                  | 1  |

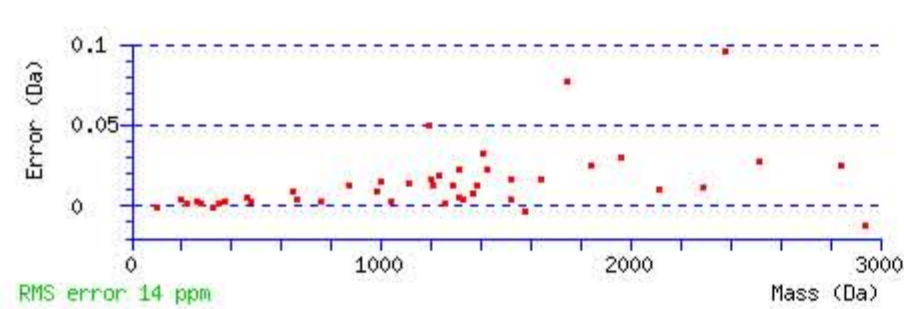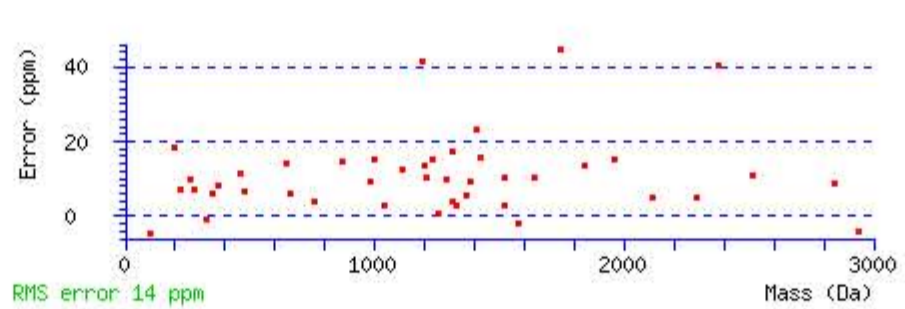

NCBI BLAST search of **TDELPQLVTLPHPNLHGPEILDVPSTVQK**  
 (Parameters: blastp, nr protein database, expect=20000, no filter, PAM30)  
 Other BLAST [web gateways](#)

**All matches to this query**

| Score | Mr(calc):   | Delta    | Sequence                                      |
|-------|-------------|----------|-----------------------------------------------|
| 61.2  | 3497.859238 | 0.047498 | <a href="#">TDELPQLVTLPHPNLHGPEILDVPSTVQK</a> |



# MASCOT Search Results

## Peptide View

MS/MS Fragmentation of **SAATLQQEK**

Found in **FBLN1\_HUMAN**, Fibulin-1 OS=Homo sapiens GN=FBLN1 PE=1 SV=4

Match to Query 30580: 1285.673088 from(643.843820,2+) rtinseconds(1456) index(38571)

Title: Locus:1.1.1.2790.23 File:"2013-07-02 CLN FXIII 60 min 1st F 3.wiff"

Data file C:\Program Files (x86)\Matrix Science\Mascot Daemon\mgf4 FXIII 60 min 1st\mascot\_daemon\_merge.mgf

Click mouse within plot area to zoom in by factor of two about that point

Or, Plot from  to  Da

Label all possible matches  Label matches used for scoring

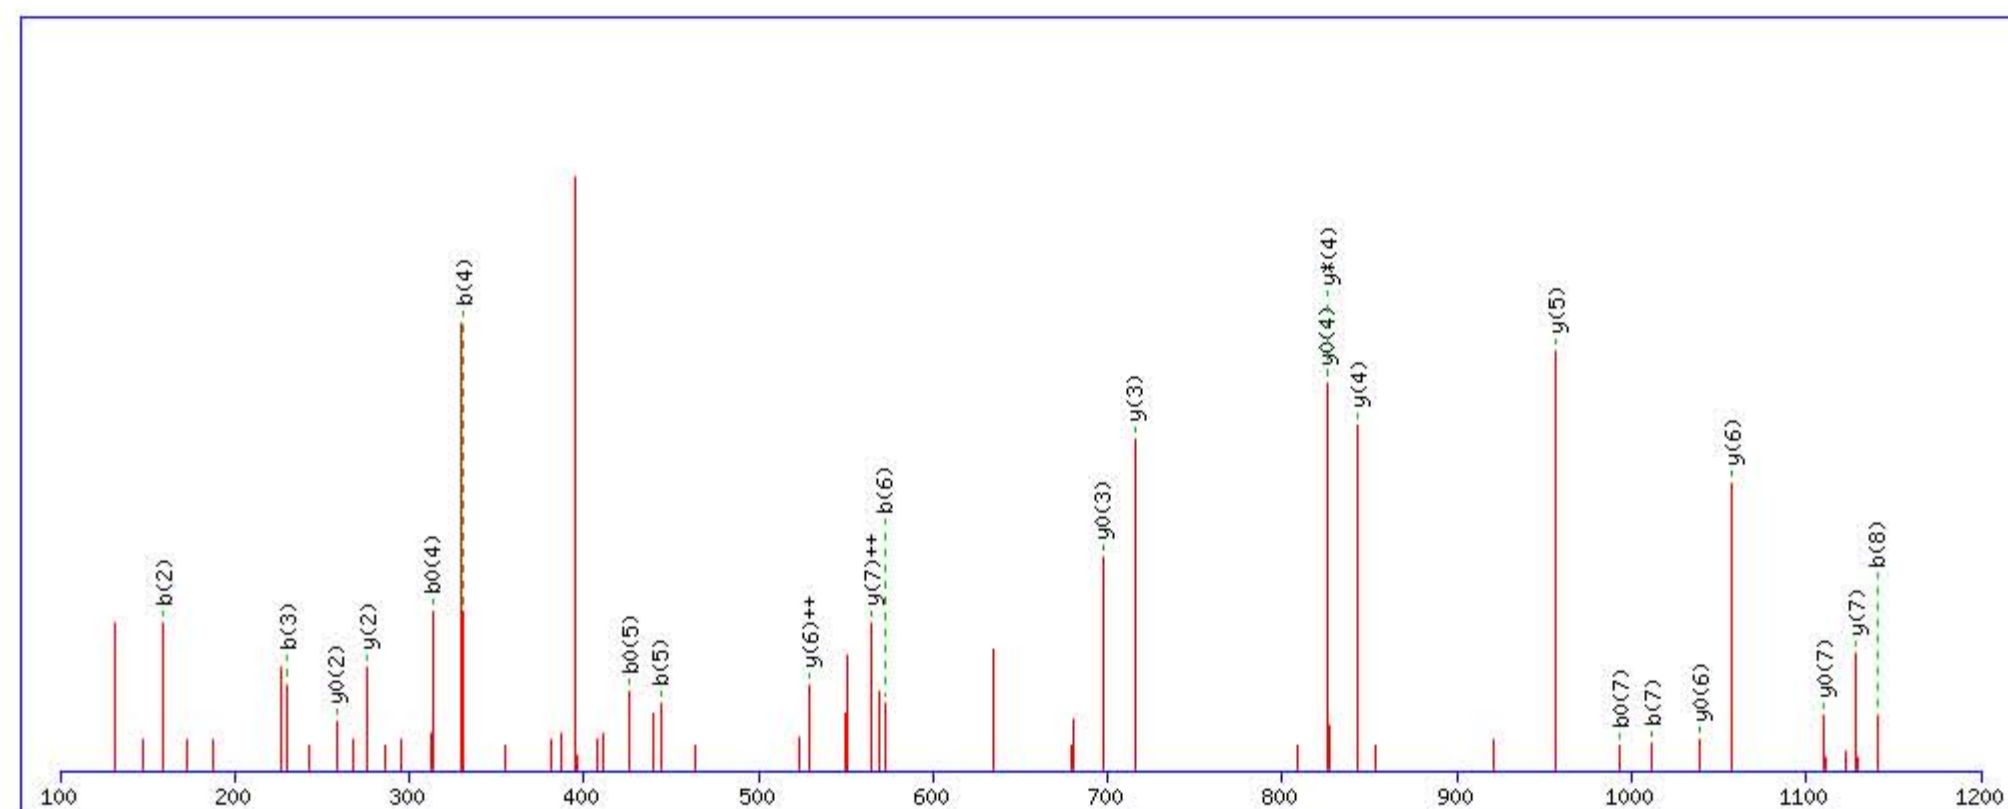

Monoisotopic mass of neutral peptide Mr(calc): 1285.669998

Fixed modifications: Carbamidomethyl (C) (apply to specified residues or termini only)

Variable modifications:

Q7 : Biotin:Thermo-21345 (Q)

Ions Score: 45 Expect: 0.00055

Matches : 24/84 fragment ions using 39 most intense peaks [\(help\)](#)

| # | b                  | b <sup>++</sup> | b <sup>*</sup> | b <sup>*++</sup> | b <sup>0</sup>    | b <sup>0++</sup> | Seq. | y                  | y <sup>++</sup>   | y <sup>*</sup>    | y <sup>*++</sup> | y <sup>0</sup>     | y <sup>0++</sup> | # |
|---|--------------------|-----------------|----------------|------------------|-------------------|------------------|------|--------------------|-------------------|-------------------|------------------|--------------------|------------------|---|
| 1 | 88.039304          | 44.523290       |                |                  | 70.028739         | 35.518008        | S    |                    |                   |                   |                  |                    |                  | 9 |
| 2 | <b>159.076418</b>  | 80.041847       |                |                  | 141.065853        | 71.036564        | A    | 1199.645272        | 600.326274        | 1182.618723       | 591.813000       | 1181.634707        | 591.320991       | 8 |
| 3 | <b>230.113532</b>  | 115.560404      |                |                  | 212.102967        | 106.555121       | A    | <b>1128.608158</b> | <b>564.807717</b> | 1111.581609       | 556.294443       | <b>1110.597593</b> | 555.802435       | 7 |
| 4 | <b>331.161211</b>  | 166.084243      |                |                  | <b>313.150646</b> | 157.078961       | T    | <b>1057.571044</b> | <b>529.289160</b> | 1040.544495       | 520.775886       | <b>1039.560479</b> | 520.283878       | 6 |
| 5 | <b>444.245275</b>  | 222.626275      |                |                  | <b>426.234710</b> | 213.620993       | L    | <b>956.523365</b>  | 478.765321        | 939.496816        | 470.252046       | 938.512800         | 469.760038       | 5 |
| 6 | <b>572.303853</b>  | 286.655565      | 555.277304     | 278.142290       | 554.293288        | 277.650282       | Q    | <b>843.439301</b>  | 422.223289        | <b>826.412752</b> | 413.710014       | <b>825.428736</b>  | 413.218006       | 4 |
| 7 | <b>1011.529179</b> | 506.268228      | 994.502630     | 497.754953       | <b>993.518614</b> | 497.262945       | Q    | <b>715.380723</b>  | 358.194000        | 698.354174        | 349.680725       | <b>697.370158</b>  | 349.188717       | 3 |
| 8 | <b>1140.571772</b> | 570.789524      | 1123.545223    | 562.276250       | 1122.561207       | 561.784242       | E    | <b>276.155397</b>  | 138.581336        | 259.128848        | 130.068062       | <b>258.144832</b>  | 129.576054       | 2 |
| 9 |                    |                 |                |                  |                   |                  | K    | 147.112804         | 74.060040         | 130.086255        | 65.546765        |                    |                  | 1 |

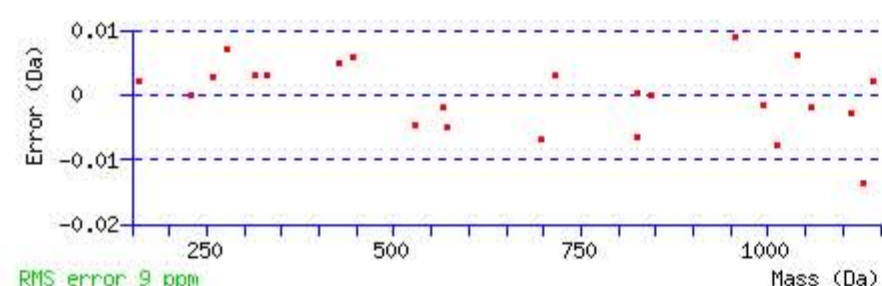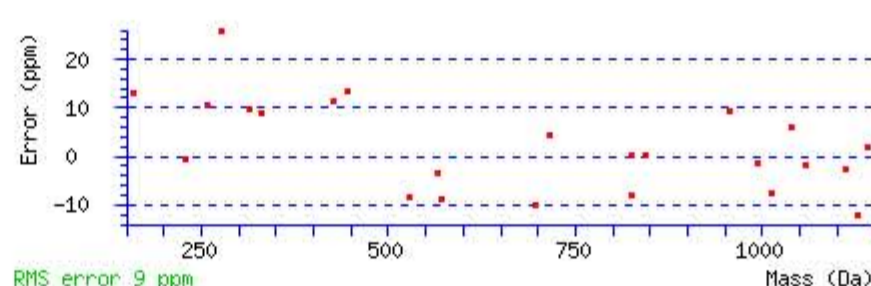

NCBI BLAST search of [SAATLQQEK](#)

(Parameters: blastp, nr protein database, expect=20000, no filter, PAM30)

Other BLAST [web gateways](#)

### All matches to this query

| Score | Mr(calc):   | Delta     | Sequence                     |
|-------|-------------|-----------|------------------------------|
| 44.8  | 1285.669998 | 0.003090  | <a href="#">SAATLQQEK</a>    |
| 31.5  | 1285.669998 | 0.003090  | <a href="#">SAATLQQEK</a>    |
| 9.4   | 1285.669998 | 0.003090  | <a href="#">ASLDQGKEK</a>    |
| 8.9   | 1285.673859 | -0.000771 | <a href="#">NDVGGQRSLVNK</a> |
| 7.0   | 1285.688614 | -0.015526 | <a href="#">SMANQLLAK</a>    |
| 4.2   | 1285.685074 | -0.011986 | <a href="#">RGVSETAPASRR</a> |
| 2.6   | 1285.662598 | 0.010490  | <a href="#">EARSQVKPEK</a>   |
| 0.5   | 1285.685074 | -0.011986 | <a href="#">TRNLSGEPTR</a>   |
| 0.3   | 1285.671326 | 0.001762  | <a href="#">MRRLANTAPAW</a>  |



# MASCOT Search Results

## Peptide View

MS/MS Fragmentation of **MCVDVNECQR**

Found in **FBLN1\_HUMAN**, Fibulin-1 OS=Homo sapiens GN=FBLN1 PE=1 SV=4

Match to Query 43031: 1620.692052 from(541.237960,3+) rtinseconds(1695) index(40048)

Title: Locus:1.1.1.2874.8 File:"2013-07-02 CLN FXIII 60 min 1st F 3.wiff"

Data file C:\Program Files (x86)\Matrix Science\Mascot Daemon\mgf4 FXIII 60 min 1st\mascot\_daemon\_merge.mgf

Click mouse within plot area to zoom in by factor of two about that point

Or, Plot from  to  Da

Label all possible matches  Label matches used for scoring

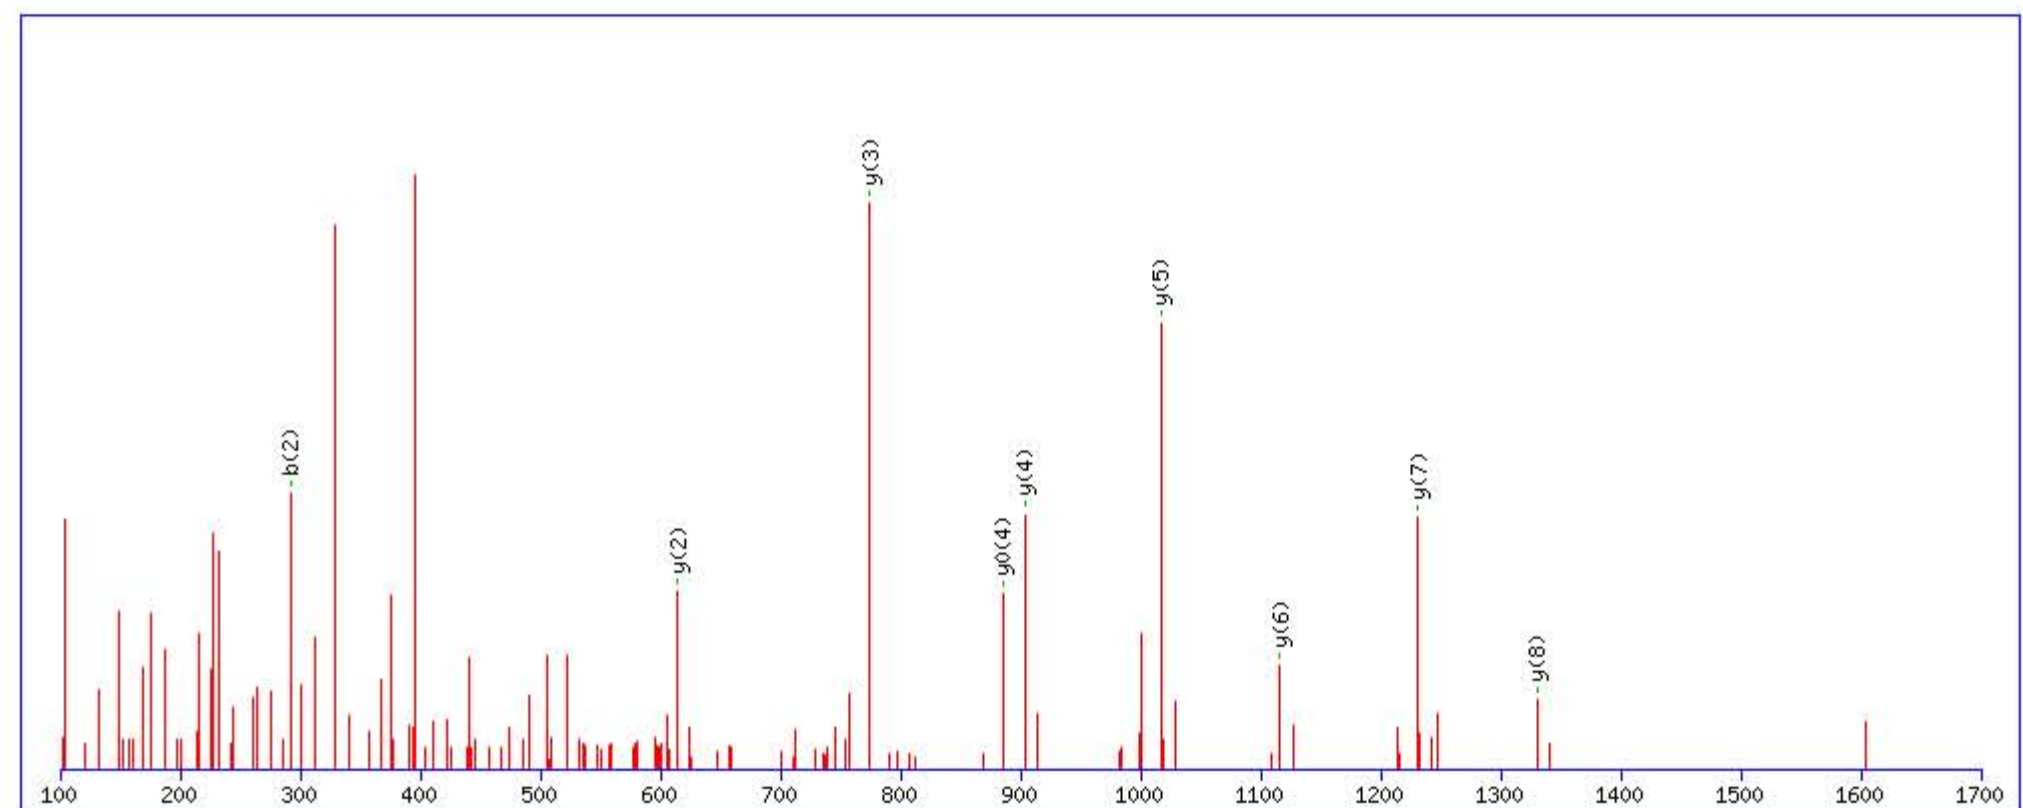

Monoisotopic mass of neutral peptide Mr(calc): 1620.688080

Fixed modifications: Carbamidomethyl (C) (apply to specified residues or termini only)

Variable modifications:

Q9 : Biotin:Thermo-21345 (Q)

Ions Score: 51 Expect: 3.8e-005

Matches : 9/86 fragment ions using 14 most intense peaks [\(help\)](#)

| #  | b                 | b <sup>++</sup> | b <sup>*</sup> | b <sup>*++</sup> | b <sup>0</sup> | b <sup>0++</sup> | Seq. | y                  | y <sup>++</sup> | y <sup>*</sup> | y <sup>*++</sup> | y <sup>0</sup>    | y <sup>0++</sup> | #  |
|----|-------------------|-----------------|----------------|------------------|----------------|------------------|------|--------------------|-----------------|----------------|------------------|-------------------|------------------|----|
| 1  | 132.047761        | 66.527518       |                |                  |                |                  | M    |                    |                 |                |                  |                   |                  | 10 |
| 2  | <b>292.078410</b> | 146.542843      |                |                  |                |                  | C    | 1490.654867        | 745.831072      | 1473.628318    | 737.317797       | 1472.644302       | 736.825789       | 9  |
| 3  | 391.146824        | 196.077050      |                |                  |                |                  | V    | <b>1330.624218</b> | 665.815747      | 1313.597669    | 657.302473       | 1312.613653       | 656.810464       | 8  |
| 4  | 506.173767        | 253.590522      |                |                  | 488.163202     | 244.585239       | D    | <b>1231.555804</b> | 616.281540      | 1214.529255    | 607.768265       | 1213.545239       | 607.276257       | 7  |
| 5  | 605.242181        | 303.124729      |                |                  | 587.231616     | 294.119446       | V    | <b>1116.528861</b> | 558.768069      | 1099.502312    | 550.254794       | 1098.518296       | 549.762786       | 6  |
| 6  | 719.285108        | 360.146192      | 702.258559     | 351.632918       | 701.274543     | 351.140910       | N    | <b>1017.460447</b> | 509.233861      | 1000.433898    | 500.720587       | 999.449882        | 500.228579       | 5  |
| 7  | 848.327701        | 424.667489      | 831.301152     | 416.154214       | 830.317136     | 415.662206       | E    | <b>903.417520</b>  | 452.212398      | 886.390971     | 443.699123       | <b>885.406955</b> | 443.207115       | 4  |
| 8  | 1008.358350       | 504.682813      | 991.331801     | 496.169539       | 990.347785     | 495.677531       | C    | <b>774.374927</b>  | 387.691102      | 757.348378     | 379.177827       |                   |                  | 3  |
| 9  | 1447.583676       | 724.295476      | 1430.557127    | 715.782202       | 1429.573111    | 715.290193       | Q    | <b>614.344278</b>  | 307.675777      | 597.317729     | 299.162502       |                   |                  | 2  |
| 10 |                   |                 |                |                  |                |                  | R    | 175.118952         | 88.063114       | 158.092403     | 79.549839        |                   |                  | 1  |

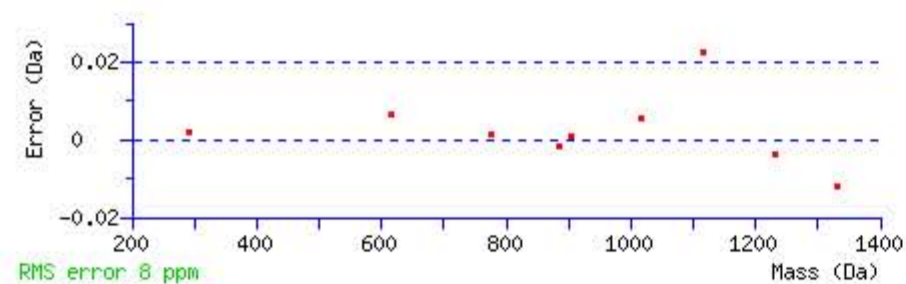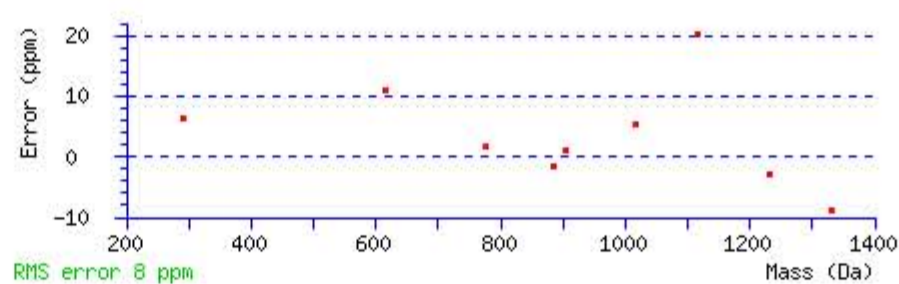

NCBI BLAST search of **MCVDVNECQR**

(Parameters: blastp, nr protein database, expect=20000, no filter, PAM30)

Other BLAST [web gateways](#)

All matches to this query

| Score | Mr(calc):   | Delta    | Sequence                        |
|-------|-------------|----------|---------------------------------|
| 50.5  | 1620.688080 | 0.003972 | <a href="#">MCVDVNECQR</a>      |
| 2.8   | 1620.678024 | 0.014028 | <a href="#">QSGRPGCCGGRCGGR</a> |

Mascot: <http://www.matrixscience.com/>



# MASCOT Search Results

## Peptide View

MS/MS Fragmentation of **MVQEQCCHSQLEELHLCATGISLANEQDR**  
 Found in **FBLN1\_HUMAN**, Fibulin-1 OS=Homo sapiens GN=FBLN1 PE=1 SV=4

Match to Query 79328: 3653.647016 from(914.419030,4+) rtinseconds(1952) index(41831)  
 Title: Locus:1.1.1.2963.22 File:"2013-07-02 CLN FXIII 60 min 1st F 3.wiff"  
 Data file C:\Program Files (x86)\Matrix Science\Mascot Daemon\mgf4 FXIII 60 min 1st\mascot\_daemon\_merge.mgf

Click mouse within plot area to zoom in by factor of two about that point

Or, Plot from  to  Da

Label all possible matches  Label matches used for scoring

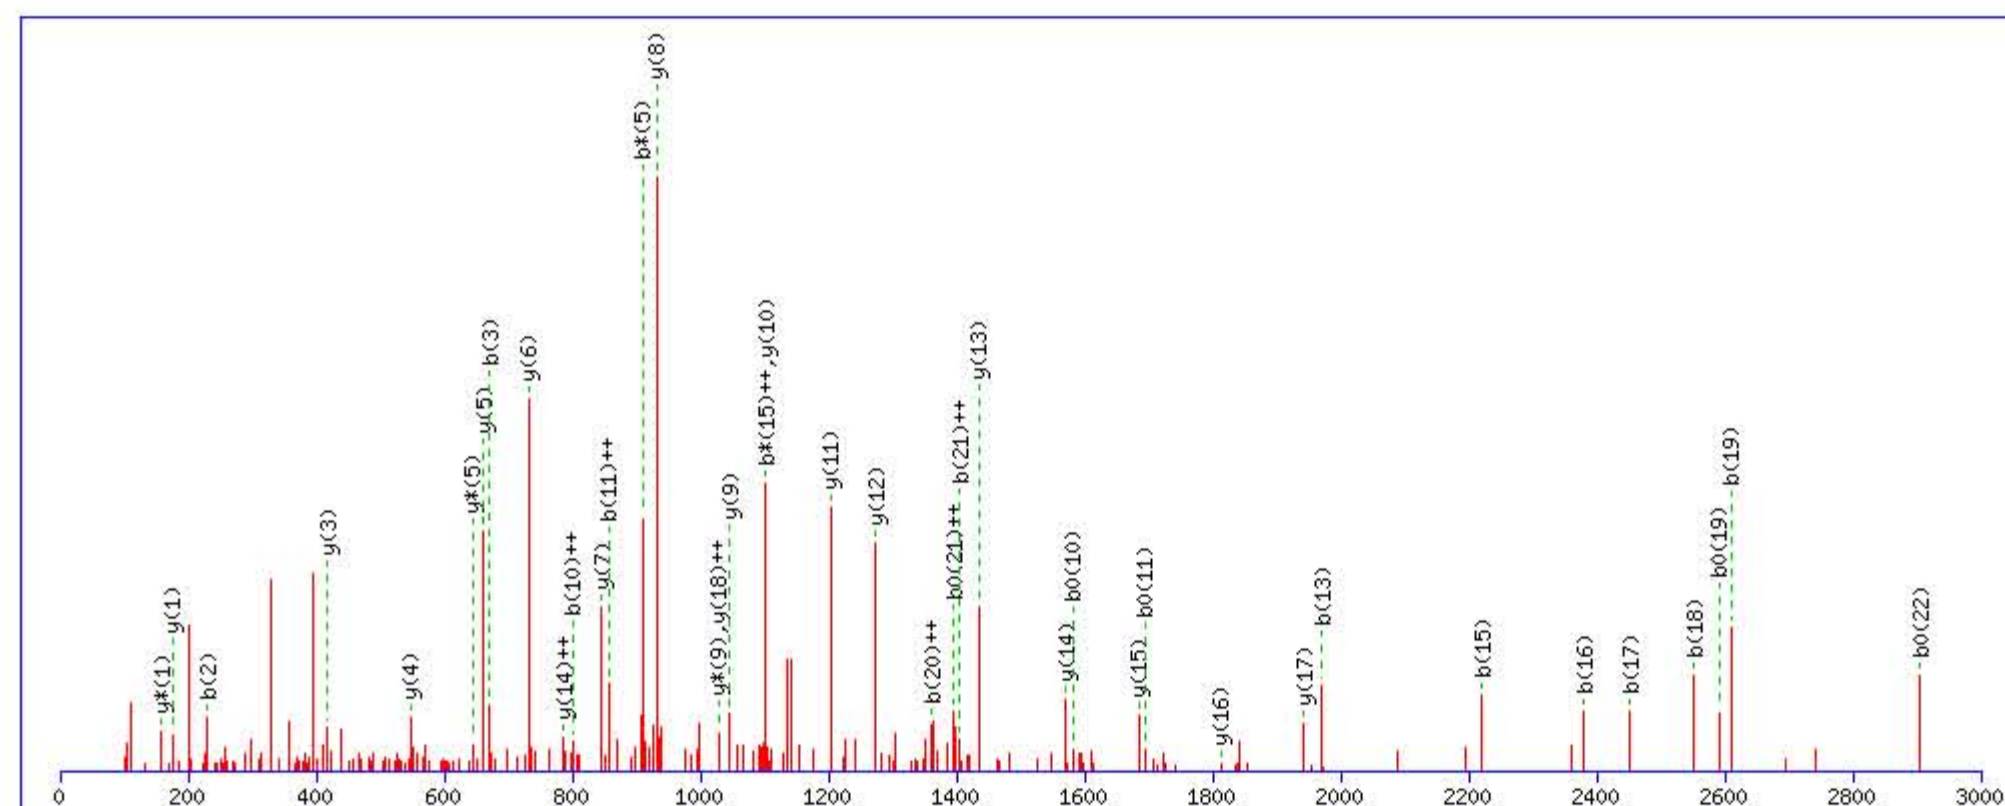

Monoisotopic mass of neutral peptide Mr(calc): 3653.615311  
 Fixed modifications: Carbamidomethyl (C) (apply to specified residues or termini only)  
 Variable modifications:  
 Q3 : Biotin:Thermo-21345 (Q)  
 Ions Score: 84 Expect: 1.8e-008  
 Matches : 40/312 fragment ions using 70 most intense peaks [\(help\)](#)

| #  | b                  | b <sup>++</sup>    | b <sup>*</sup>    | b <sup>*++</sup>   | b <sup>0</sup>     | b <sup>0++</sup>   | Seq. | y                  | y <sup>++</sup>    | y <sup>*</sup>     | y <sup>*++</sup> | y <sup>0</sup> | y <sup>0++</sup> | #  |
|----|--------------------|--------------------|-------------------|--------------------|--------------------|--------------------|------|--------------------|--------------------|--------------------|------------------|----------------|------------------|----|
| 1  | 132.047761         | 66.527518          |                   |                    |                    |                    | M    |                    |                    |                    |                  |                |                  | 28 |
| 2  | <b>231.116175</b>  | 116.061725         |                   |                    |                    |                    | V    | 3523.582122        | 1762.294699        | 3506.555573        | 1753.781424      | 3505.571557    | 1753.289416      | 27 |
| 3  | <b>670.341501</b>  | 335.674389         | 653.314952        | 327.161114         |                    |                    | Q    | 3424.513708        | 1712.760492        | 3407.487159        | 1704.247217      | 3406.503143    | 1703.755209      | 26 |
| 4  | 799.384094         | 400.195685         | 782.357545        | 391.682411         | 781.373529         | 391.190403         | E    | 2985.288382        | 1493.147829        | 2968.261833        | 1484.634554      | 2967.277817    | 1484.142546      | 25 |
| 5  | 927.442672         | 464.224974         | <b>910.416123</b> | 455.711700         | 909.432107         | 455.219692         | Q    | 2856.245789        | 1428.626532        | 2839.219240        | 1420.113258      | 2838.235224    | 1419.621250      | 24 |
| 6  | 1087.473321        | 544.240299         | 1070.446772       | 535.727024         | 1069.462756        | 535.235016         | C    | 2728.187211        | 1364.597243        | 2711.160662        | 1356.083969      | 2710.176646    | 1355.591961      | 23 |
| 7  | 1247.503970        | 624.255623         | 1230.477421       | 615.742349         | 1229.493405        | 615.250341         | C    | 2568.156562        | 1284.581919        | 2551.130013        | 1276.068644      | 2550.145997    | 1275.576636      | 22 |
| 8  | 1384.562882        | 692.785079         | 1367.536333       | 684.271805         | 1366.552317        | 683.779797         | H    | 2408.125913        | 1204.566594        | 2391.099364        | 1196.053320      | 2390.115348    | 1195.561312      | 21 |
| 9  | 1471.594910        | 736.301093         | 1454.568361       | 727.787819         | 1453.584345        | 727.295811         | S    | 2271.067001        | 1136.037138        | 2254.040452        | 1127.523864      | 2253.056436    | 1127.031856      | 20 |
| 10 | 1599.653488        | <b>800.330382</b>  | 1582.626939       | 791.817108         | <b>1581.642923</b> | 791.325100         | Q    | 2184.034973        | 1092.521124        | 2167.008424        | 1084.007850      | 2166.024408    | 1083.515842      | 19 |
| 11 | 1712.737552        | <b>856.872414</b>  | 1695.711003       | 848.359140         | <b>1694.726987</b> | 847.867132         | L    | 2055.976395        | <b>1028.491835</b> | 2038.949846        | 1019.978561      | 2037.965830    | 1019.486553      | 18 |
| 12 | 1841.780145        | 921.393711         | 1824.753596       | 912.880436         | 1823.769580        | 912.388428         | E    | <b>1942.892331</b> | 971.949804         | 1925.865782        | 963.436529       | 1924.881766    | 962.944521       | 17 |
| 13 | <b>1970.822738</b> | 985.915007         | 1953.796189       | 977.401733         | 1952.812173        | 976.909725         | E    | <b>1813.849738</b> | 907.428507         | 1796.823189        | 898.915233       | 1795.839173    | 898.423225       | 16 |
| 14 | 2083.906802        | 1042.457039        | 2066.880253       | 1033.943764        | 2065.896237        | 1033.451756        | L    | <b>1684.807145</b> | 842.907211         | 1667.780596        | 834.393936       | 1666.796580    | 833.901928       | 15 |
| 15 | <b>2220.965714</b> | 1110.986495        | 2203.939165       | <b>1102.473220</b> | 2202.955149        | 1101.981212        | H    | <b>1571.723081</b> | <b>786.365179</b>  | 1554.696532        | 777.851904       | 1553.712516    | 777.359896       | 14 |
| 16 | <b>2380.996363</b> | 1191.001819        | 2363.969814       | 1182.488545        | 2362.985798        | 1181.996537        | C    | <b>1434.664169</b> | 717.835723         | 1417.637620        | 709.322448       | 1416.653604    | 708.830440       | 13 |
| 17 | <b>2452.033477</b> | 1226.520376        | 2435.006928       | 1218.007102        | 2434.022912        | 1217.515094        | A    | <b>1274.633520</b> | 637.820398         | 1257.606971        | 629.307124       | 1256.622955    | 628.815116       | 12 |
| 18 | <b>2553.081156</b> | 1277.044216        | 2536.054607       | 1268.530941        | 2535.070591        | 1268.038933        | T    | <b>1203.596406</b> | 602.301841         | 1186.569857        | 593.788567       | 1185.585841    | 593.296559       | 11 |
| 19 | <b>2610.102620</b> | 1305.554948        | 2593.076071       | 1297.041673        | <b>2592.092055</b> | 1296.549665        | G    | <b>1102.548727</b> | 551.778002         | 1085.522178        | 543.264727       | 1084.538162    | 542.772719       | 10 |
| 20 | 2723.186684        | <b>1362.096980</b> | 2706.160135       | 1353.583705        | 2705.176119        | 1353.091697        | I    | <b>1045.527263</b> | 523.267270         | <b>1028.500714</b> | 514.753995       | 1027.516698    | 514.261987       | 9  |
| 21 | 2810.218712        | <b>1405.612994</b> | 2793.192163       | 1397.099719        | 2792.208147        | <b>1396.607711</b> | S    | <b>932.443199</b>  | 466.725238         | 915.416650         | 458.211963       | 914.432634     | 457.719955       | 8  |
| 22 | 2923.302776        | 1462.155026        | 2906.276227       | 1453.641751        | <b>2905.292211</b> | 1453.149743        | L    | <b>845.411171</b>  | 423.209224         | 828.384622         | 414.695949       | 827.400606     | 414.203941       | 7  |
| 23 | 2994.339890        | 1497.673583        | 2977.313341       | 1489.160308        | 2976.329325        | 1488.668301        | A    | <b>732.327107</b>  | 366.667192         | 715.300558         | 358.153917       | 714.316542     | 357.661909       | 6  |
| 24 | 3108.382817        | 1554.695047        | 3091.356268       | 1546.181772        | 3090.372252        | 1545.689764        | N    | <b>661.289993</b>  | 331.148635         | <b>644.263444</b>  | 322.635360       | 643.279428     | 322.143352       | 5  |
| 25 | 3237.425410        | 1619.216343        | 3220.398861       | 1610.703069        | 3219.414845        | 1610.211061        | E    | <b>547.247066</b>  | 274.127171         | 530.220517         | 265.613897       | 529.236501     | 265.121889       | 4  |
| 26 | 3365.483988        | 1683.245632        | 3348.457439       | 1674.732358        | 3347.473423        | 1674.240350        | Q    | <b>418.204473</b>  | 209.605874         | 401.177924         | 201.092600       | 400.193908     | 200.600592       | 3  |
| 27 | 3480.510931        | 1740.759104        | 3463.484382       | 1732.245829        | 3462.500366        | 1731.753821        | D    | 290.145895         | 145.576585         | 273.119346         | 137.063311       | 272.135330     | 136.571303       | 2  |
| 28 |                    |                    |                   |                    |                    |                    | R    | <b>175.118952</b>  | 88.063114          | <b>158.092403</b>  | 79.549839        |                |                  | 1  |

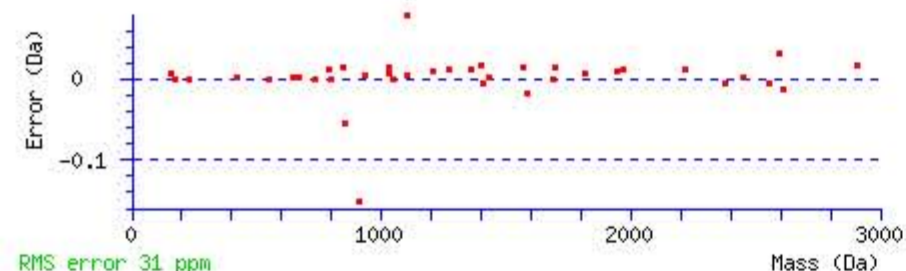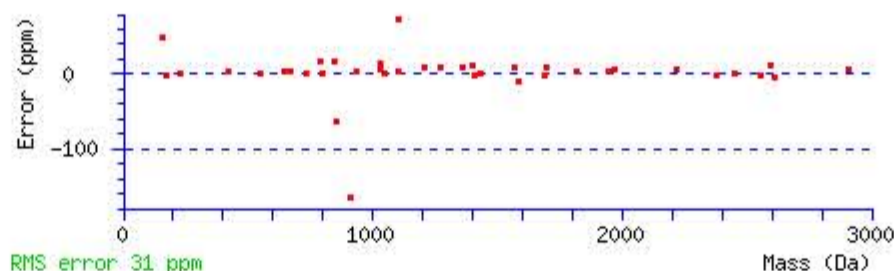

NCBI BLAST search of **MVQEQCCHSQLEELHLCATGISLANEQDR**  
 (Parameters: blastp, nr protein database, expect=20000, no filter, PAM30)  
 Other BLAST [web gateways](#)

## All matches to this query

| Score | Mr(calc):   | Delta     | Sequence                                          |
|-------|-------------|-----------|---------------------------------------------------|
| 84.0  | 3653.615311 | 0.031705  | <a href="#">MVQEQCCHSQLEELHLCATGISLANEQDR</a>     |
| 84.0  | 3653.615311 | 0.031705  | <a href="#">MVQEQCCHSQLEELHLCATGISLANEQDR</a>     |
| 83.9  | 3653.615311 | 0.031705  | <a href="#">MVQEQCCHSQLEELHLCATGISLANEQDR</a>     |
| 1.4   | 3653.684525 | -0.037509 | <a href="#">FTDRETEAAAGTLAHMGFAPPTSFSHFTDQELR</a> |



**MASCOT** Mascot Search Results

Peptide View

MS/MS Fragmentation of **MVQEQCCHS**QLEELHCATGISLANEQDR  
 Found in **FBLN1\_HUMAN**, Fibulin-1 OS=Homo sapiens GN=FBLN1 PE=1 SV=4

Match to Query 79329: 3653.647016 from(914.419030,4+) rtinseconds(1961) index(41905)  
 Title: Locus:1.1.1.2966.21 File:"2013-07-02 CLN FXIII 60 min 1st F 3.wiff"  
 Data file C:\Program Files (x86)\Matrix Science\Mascot Daemon\mgf4 FXIII 60 min 1st\mascot\_daemon\_merge.mgf

Click mouse within plot area to zoom in by factor of two about that point  
 Or, Plot from  to  Da   
 Label all possible matches  Label matches used for scoring

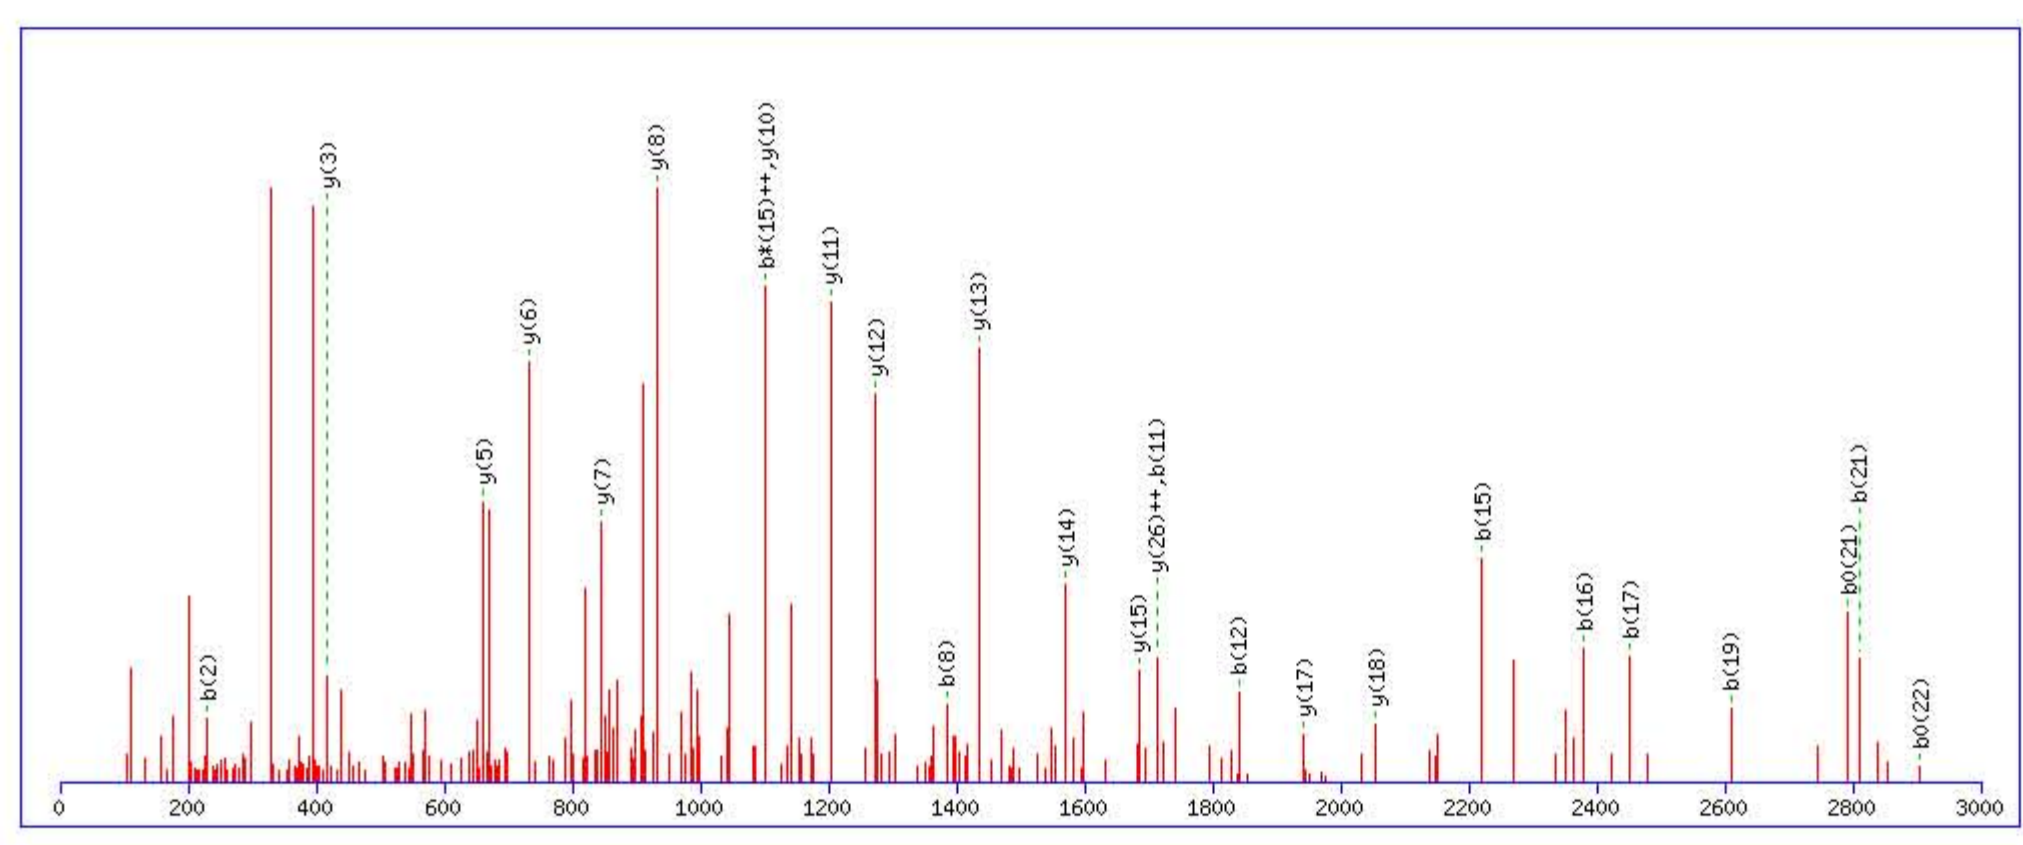

Monoisotopic mass of neutral peptide Mr(calc): 3653.615311  
 Fixed modifications: Carbamidomethyl (C) (apply to specified residues or termini only)  
 Variable modifications:  
 Q5 : Biotin:Thermo-21345 (Q)  
 Ions Score: 112 Expect: 6.5e-011  
 Matches : 26/312 fragment ions using 28 most intense peaks [\(help\)](#)

| #  | b                  | b <sup>++</sup> | b <sup>*</sup> | b <sup>*++</sup>   | b <sup>0</sup>     | b <sup>0++</sup> | Seq. | y                  | y <sup>++</sup>    | y <sup>*</sup> | y <sup>*++</sup> | y <sup>0</sup> | y <sup>0++</sup> | #  |
|----|--------------------|-----------------|----------------|--------------------|--------------------|------------------|------|--------------------|--------------------|----------------|------------------|----------------|------------------|----|
| 1  | 132.047761         | 66.527518       |                |                    |                    |                  | M    |                    |                    |                |                  |                |                  | 28 |
| 2  | <b>231.116175</b>  | 116.061725      |                |                    |                    |                  | V    | 3523.582122        | 1762.294699        | 3506.555573    | 1753.781424      | 3505.571557    | 1753.289416      | 27 |
| 3  | 359.174753         | 180.091015      | 342.148204     | 171.577740         |                    |                  | Q    | 3424.513708        | <b>1712.760492</b> | 3407.487159    | 1704.247217      | 3406.503143    | 1703.755209      | 26 |
| 4  | 488.217346         | 244.612311      | 471.190797     | 236.099037         | 470.206781         | 235.607029       | E    | 3296.455130        | 1648.731203        | 3279.428581    | 1640.217928      | 3278.444565    | 1639.725920      | 25 |
| 5  | 927.442672         | 464.224974      | 910.416123     | 455.711700         | 909.432107         | 455.219692       | Q    | 3167.412537        | 1584.209906        | 3150.385988    | 1575.696632      | 3149.401972    | 1575.204624      | 24 |
| 6  | 1087.473321        | 544.240298      | 1070.446772    | 535.727024         | 1069.462756        | 535.235016       | C    | 2728.187211        | 1364.597243        | 2711.160662    | 1356.083969      | 2710.176646    | 1355.591961      | 23 |
| 7  | 1247.503970        | 624.255623      | 1230.477421    | 615.742349         | 1229.493405        | 615.250340       | C    | 2568.156562        | 1284.581919        | 2551.130013    | 1276.068644      | 2550.145997    | 1275.576636      | 22 |
| 8  | <b>1384.562882</b> | 692.785079      | 1367.536333    | 684.271805         | 1366.552317        | 683.779796       | H    | 2408.125913        | 1204.566594        | 2391.099364    | 1196.053320      | 2390.115348    | 1195.561312      | 21 |
| 9  | 1471.594910        | 736.301093      | 1454.568361    | 727.787819         | 1453.584345        | 727.295811       | S    | 2271.067001        | 1136.037138        | 2254.040452    | 1127.523864      | 2253.056436    | 1127.031856      | 20 |
| 10 | 1599.653488        | 800.330382      | 1582.626939    | 791.817108         | 1581.642923        | 791.325100       | Q    | 2184.034973        | 1092.521124        | 2167.008424    | 1084.007850      | 2166.024408    | 1083.515842      | 19 |
| 11 | <b>1712.737552</b> | 856.872414      | 1695.711003    | 848.359140         | 1694.726987        | 847.867132       | L    | <b>2055.976395</b> | 1028.491835        | 2038.949846    | 1019.978561      | 2037.965830    | 1019.486553      | 18 |
| 12 | <b>1841.780145</b> | 921.393711      | 1824.753596    | 912.880436         | 1823.769580        | 912.388428       | E    | <b>1942.892331</b> | 971.949804         | 1925.865782    | 963.436529       | 1924.881766    | 962.944521       | 17 |
| 13 | 1970.822738        | 985.915007      | 1953.796189    | 977.401733         | 1952.812173        | 976.909725       | E    | 1813.849738        | 907.428507         | 1796.823189    | 898.915233       | 1795.839173    | 898.423225       | 16 |
| 14 | 2083.906802        | 1042.457039     | 2066.880253    | 1033.943764        | 2065.896237        | 1033.451756      | L    | <b>1684.807145</b> | 842.907211         | 1667.780596    | 834.393936       | 1666.796580    | 833.901928       | 15 |
| 15 | <b>2220.965714</b> | 1110.986495     | 2203.939165    | <b>1102.473220</b> | 2202.955149        | 1101.981212      | H    | <b>1571.723081</b> | 786.365179         | 1554.696532    | 777.851904       | 1553.712516    | 777.359896       | 14 |
| 16 | <b>2380.996363</b> | 1191.001819     | 2363.969814    | 1182.488545        | 2362.985798        | 1181.996537      | C    | <b>1434.664169</b> | 717.835723         | 1417.637620    | 709.322448       | 1416.653604    | 708.830440       | 13 |
| 17 | <b>2452.033477</b> | 1226.520376     | 2435.006928    | 1218.007102        | 2434.022912        | 1217.515094      | A    | <b>1274.633520</b> | 637.820398         | 1257.606971    | 629.307124       | 1256.622955    | 628.815116       | 12 |
| 18 | 2553.081156        | 1277.044216     | 2536.054607    | 1268.530941        | 2535.070591        | 1268.038933      | T    | <b>1203.596406</b> | 602.301841         | 1186.569857    | 593.788567       | 1185.585841    | 593.296559       | 11 |
| 19 | <b>2610.102620</b> | 1305.554948     | 2593.076071    | 1297.041673        | 2592.092055        | 1296.549665      | G    | <b>1102.548727</b> | 551.778002         | 1085.522178    | 543.264727       | 1084.538162    | 542.772719       | 10 |
| 20 | 2723.186684        | 1362.096980     | 2706.160135    | 1353.583705        | 2705.176119        | 1353.091697      | I    | 1045.527263        | 523.267270         | 1028.500714    | 514.753995       | 1027.516698    | 514.261987       | 9  |
| 21 | <b>2810.218712</b> | 1405.612994     | 2793.192163    | 1397.099719        | <b>2792.208147</b> | 1396.607711      | S    | <b>932.443199</b>  | 466.725238         | 915.416650     | 458.211963       | 914.432634     | 457.719955       | 8  |
| 22 | 2923.302776        | 1462.155026     | 2906.276227    | 1453.641751        | <b>2905.292211</b> | 1453.149743      | L    | <b>845.411171</b>  | 423.209224         | 828.384622     | 414.695949       | 827.400606     | 414.203941       | 7  |
| 23 | 2994.339890        | 1497.673583     | 2977.313341    | 1489.160308        | 2976.329325        | 1488.668301      | A    | <b>732.327107</b>  | 366.667192         | 715.300558     | 358.153917       | 714.316542     | 357.661909       | 6  |
| 24 | 3108.382817        | 1554.695047     | 3091.356268    | 1546.181772        | 3090.372252        | 1545.689764      | N    | <b>661.289993</b>  | 331.148635         | 644.263444     | 322.635360       | 643.279428     | 322.143352       | 5  |
| 25 | 3237.425410        | 1619.216343     | 3220.398861    | 1610.703069        | 3219.414845        | 1610.211061      | E    | 547.247066         | 274.127171         | 530.220517     | 265.613897       | 529.236501     | 265.121889       | 4  |
| 26 | 3365.483988        | 1683.245632     | 3348.457439    | 1674.732358        | 3347.473423        | 1674.240350      | Q    | <b>418.204473</b>  | 209.605874         | 401.177924     | 201.092600       | 400.193908     | 200.600592       | 3  |
| 27 | 3480.510931        | 1740.759104     | 3463.484382    | 1732.245829        | 3462.500366        | 1731.753821      | D    | 290.145895         | 145.576585         | 273.119346     | 137.063311       | 272.135330     | 136.571303       | 2  |
| 28 |                    |                 |                |                    |                    |                  | R    | 175.118952         | 88.063114          | 158.092403     | 79.549839        |                |                  | 1  |

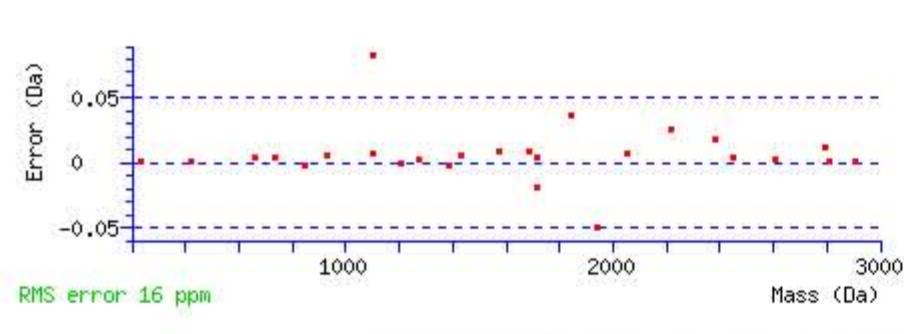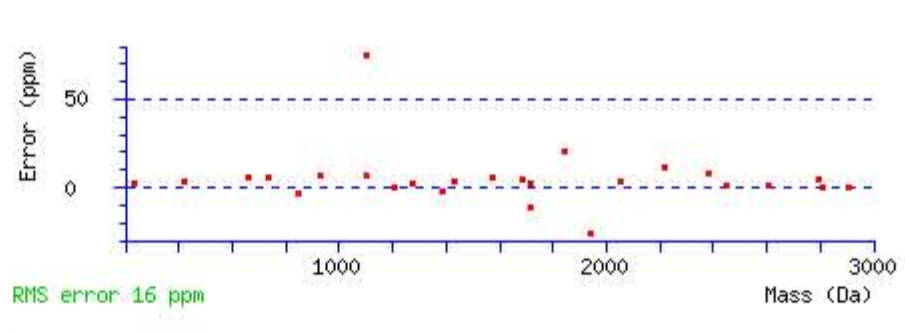

NCBI BLAST search of **MVQEQCCHS**QLEELHCATGISLANEQDR  
 (Parameters: blastp, nr protein database, expect=20000, no filter, PAM30)  
 Other BLAST [web gateways](#)

All matches to this query

| Score | Mr(calc):   | Delta    | Sequence                                      |
|-------|-------------|----------|-----------------------------------------------|
| 112.0 | 3653.615311 | 0.031705 | <a href="#">MVQEQCCHS</a> QLEELHCATGISLANEQDR |
| 112.0 | 3653.615311 | 0.031705 | <a href="#">MVQEQCCHS</a> QLEELHCATGISLANEQDR |
| 100.1 | 3653.615311 | 0.031705 | <a href="#">MVQEQCCHS</a> QLEELHCATGISLANEQDR |



# MASCOT Search Results

## Peptide View

MS/MS Fragmentation of **MVQEQCCHSQLEELHCATGISLANEQDR**  
 Found in **FBLN1\_HUMAN**, Fibulin-1 OS=Homo sapiens GN=FBLN1 PE=1 SV=4

Match to Query 79330: 3653.662736 from(914.422960,4+) rtinseconds(2067) index(42549)  
 Title: Locus:1.1.1.3003.19 File:"2013-07-02 CLN FXIII 60 min 1st F 3.wiff"  
 Data file C:\Program Files (x86)\Matrix Science\Mascot Daemon\mgf\4 FXIII 60 min 1st\mascot\_daemon\_merge.mgf

Click mouse within plot area to zoom in by factor of two about that point

Or, Plot from  to  Da

Label all possible matches  Label matches used for scoring

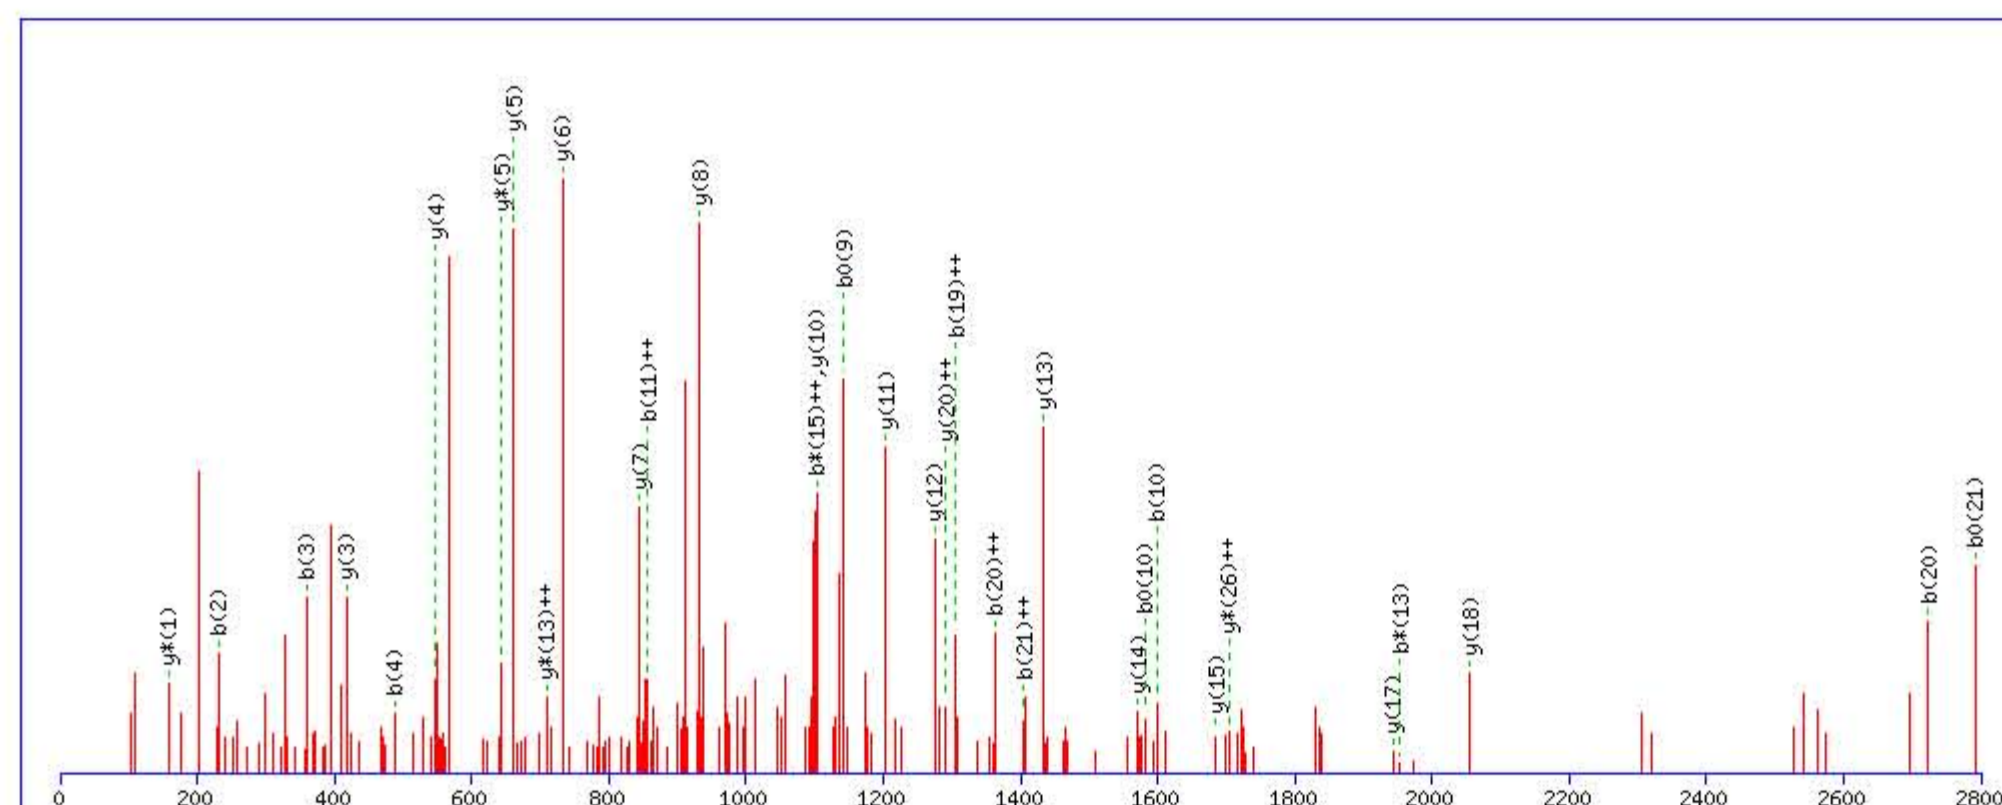

Monoisotopic mass of neutral peptide Mr(calc): 3653.615311  
 Fixed modifications: Carbamidomethyl (C) (apply to specified residues or termini only)  
 Variable modifications:  
 Q10 : Biotin:Thermo-21345 (Q)  
 Ions Score: 60 Expect: 1.2e-005  
 Matches : 33/312 fragment ions using 66 most intense peaks [\(help\)](#)

| #  | b                  | b <sup>++</sup>    | b <sup>*</sup>     | b <sup>*++</sup>   | b <sup>0</sup>     | b <sup>0++</sup> | Seq. | y                  | y <sup>++</sup>    | y <sup>*</sup>    | y <sup>*++</sup>   | y <sup>0</sup> | y <sup>0++</sup> | #  |
|----|--------------------|--------------------|--------------------|--------------------|--------------------|------------------|------|--------------------|--------------------|-------------------|--------------------|----------------|------------------|----|
| 1  | 132.047761         | 66.527518          |                    |                    |                    |                  | M    |                    |                    |                   |                    |                |                  | 28 |
| 2  | <b>231.116175</b>  | 116.061725         |                    |                    |                    |                  | V    | 3523.582122        | 1762.294699        | 3506.555573       | 1753.781424        | 3505.571557    | 1753.289416      | 27 |
| 3  | <b>359.174753</b>  | 180.091015         | 342.148204         | 171.577740         |                    |                  | Q    | 3424.513708        | 1712.760492        | 3407.487159       | <b>1704.247217</b> | 3406.503143    | 1703.755209      | 26 |
| 4  | <b>488.217346</b>  | 244.612311         | 471.190797         | 236.099037         | 470.206781         | 235.607029       | E    | 3296.455130        | 1648.731203        | 3279.428581       | 1640.217928        | 3278.444565    | 1639.725920      | 25 |
| 5  | 616.275924         | 308.641600         | 599.249375         | 300.128326         | 598.265359         | 299.636318       | Q    | 3167.412537        | 1584.209906        | 3150.385988       | 1575.696632        | 3149.401972    | 1575.204624      | 24 |
| 6  | 776.306573         | 388.656925         | 759.280024         | 380.143650         | 758.296008         | 379.651642       | C    | 3039.353959        | 1520.180617        | 3022.327410       | 1511.667343        | 3021.343394    | 1511.175335      | 23 |
| 7  | 936.337222         | 468.672249         | 919.310673         | 460.158975         | 918.326657         | 459.666967       | C    | 2879.323310        | 1440.165293        | 2862.296761       | 1431.652018        | 2861.312745    | 1431.160010      | 22 |
| 8  | 1073.396134        | 537.201705         | 1056.369585        | 528.688431         | 1055.385569        | 528.196423       | H    | 2719.292661        | 1360.149968        | 2702.266112       | 1351.636694        | 2701.282096    | 1351.144686      | 21 |
| 9  | 1160.428162        | 580.717719         | 1143.401613        | 572.204445         | <b>1142.417597</b> | 571.712437       | S    | 2582.233749        | <b>1291.620512</b> | 2565.207200       | 1283.107238        | 2564.223184    | 1282.615230      | 20 |
| 10 | <b>1599.653488</b> | 800.330382         | 1582.626939        | 791.817108         | <b>1581.642923</b> | 791.325100       | Q    | 2495.201721        | 1248.104498        | 2478.175172       | 1239.591224        | 2477.191156    | 1239.099216      | 19 |
| 11 | 1712.737552        | <b>856.872414</b>  | 1695.711003        | 848.359140         | 1694.726987        | 847.867132       | L    | <b>2055.976395</b> | 1028.491835        | 2038.949846       | 1019.978561        | 2037.965830    | 1019.486553      | 18 |
| 12 | 1841.780145        | 921.393711         | 1824.753596        | 912.880436         | 1823.769580        | 912.388428       | E    | <b>1942.892331</b> | 971.949804         | 1925.865782       | 963.436529         | 1924.881766    | 962.944521       | 17 |
| 13 | 1970.822738        | 985.915007         | <b>1953.796189</b> | 977.401733         | 1952.812173        | 976.909725       | E    | 1813.849738        | 907.428507         | 1796.823189       | 898.915233         | 1795.839173    | 898.423225       | 16 |
| 14 | 2083.906802        | 1042.457039        | 2066.880253        | 1033.943764        | 2065.896237        | 1033.451756      | L    | <b>1684.807145</b> | 842.907211         | 1667.780596       | 834.393936         | 1666.796580    | 833.901928       | 15 |
| 15 | 2220.965714        | 1110.986495        | 2203.939165        | <b>1102.473220</b> | 2202.955149        | 1101.981212      | H    | <b>1571.723081</b> | 786.365179         | 1554.696532       | 777.851904         | 1553.712516    | 777.359896       | 14 |
| 16 | 2380.996363        | 1191.001819        | 2363.969814        | 1182.488545        | 2362.985798        | 1181.996537      | C    | <b>1434.664169</b> | 717.835723         | 1417.637620       | <b>709.322448</b>  | 1416.653604    | 708.830440       | 13 |
| 17 | 2452.033477        | 1226.520376        | 2435.006928        | 1218.007102        | 2434.022912        | 1217.515094      | A    | <b>1274.633520</b> | 637.820398         | 1257.606971       | 629.307124         | 1256.622955    | 628.815116       | 12 |
| 18 | 2553.081156        | 1277.044216        | 2536.054607        | 1268.530941        | 2535.070591        | 1268.038933      | T    | <b>1203.596406</b> | 602.301841         | 1186.569857       | 593.788567         | 1185.585841    | 593.296559       | 11 |
| 19 | 2610.102620        | <b>1305.554948</b> | 2593.076071        | 1297.041673        | 2592.092055        | 1296.549665      | G    | <b>1102.548727</b> | 551.778002         | 1085.522178       | 543.264727         | 1084.538162    | 542.772719       | 10 |
| 20 | <b>2723.186684</b> | <b>1362.096980</b> | 2706.160135        | 1353.583705        | 2705.176119        | 1353.091697      | I    | 1045.527263        | 523.267270         | 1028.500714       | 514.753995         | 1027.516698    | 514.261987       | 9  |
| 21 | 2810.218712        | <b>1405.612994</b> | 2793.192163        | 1397.099719        | <b>2792.208147</b> | 1396.607711      | S    | <b>932.443199</b>  | 466.725238         | 915.416650        | 458.211963         | 914.432634     | 457.719955       | 8  |
| 22 | 2923.302776        | 1462.155026        | 2906.276227        | 1453.641751        | 2905.292211        | 1453.149743      | L    | <b>845.411171</b>  | 423.209224         | 828.384622        | 414.695949         | 827.400606     | 414.203941       | 7  |
| 23 | 2994.339890        | 1497.673583        | 2977.313341        | 1489.160308        | 2976.329325        | 1488.668301      | A    | <b>732.327107</b>  | 366.667192         | 715.300558        | 358.153917         | 714.316542     | 357.661909       | 6  |
| 24 | 3108.382817        | 1554.695047        | 3091.356268        | 1546.181772        | 3090.372252        | 1545.689764      | N    | <b>661.289993</b>  | 331.148635         | <b>644.263444</b> | 322.635360         | 643.279428     | 322.143352       | 5  |
| 25 | 3237.425410        | 1619.216343        | 3220.398861        | 1610.703069        | 3219.414845        | 1610.211061      | E    | <b>547.247066</b>  | 274.127171         | 530.220517        | 265.613897         | 529.236501     | 265.121889       | 4  |
| 26 | 3365.483988        | 1683.245632        | 3348.457439        | 1674.732358        | 3347.473423        | 1674.240350      | Q    | <b>418.204473</b>  | 209.605874         | 401.177924        | 201.092600         | 400.193908     | 200.600592       | 3  |
| 27 | 3480.510931        | 1740.759104        | 3463.484382        | 1732.245829        | 3462.500366        | 1731.753821      | D    | 290.145895         | 145.576585         | 273.119346        | 137.063311         | 272.135330     | 136.571303       | 2  |
| 28 |                    |                    |                    |                    |                    |                  | R    | 175.118952         | 88.063114          | <b>158.092403</b> | 79.549839          |                |                  | 1  |

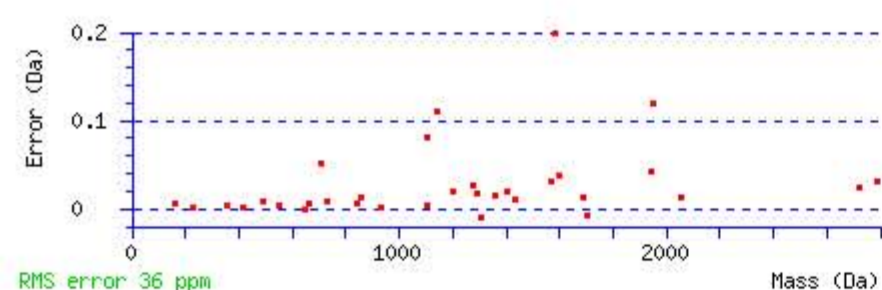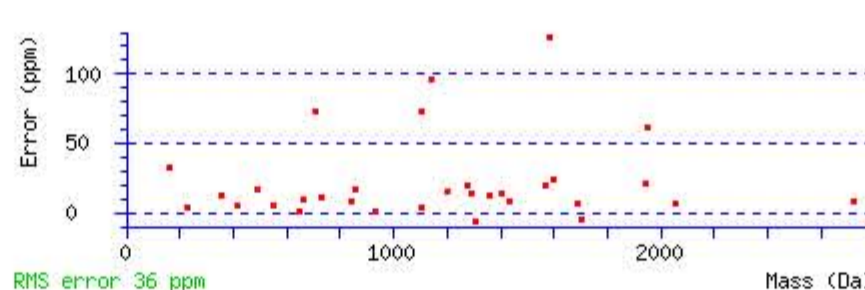

NCBI BLAST search of [MVQEQCCHSQLEELHCATGISLANEQDR](#)  
 (Parameters: blastp, nr protein database, expect=20000, no filter, PAM30)  
 Other BLAST [web gateways](#)

## All matches to this query

| Score | Mr(calc):   | Delta    | Sequence                                     |
|-------|-------------|----------|----------------------------------------------|
| 59.7  | 3653.615311 | 0.047425 | <a href="#">MVQEQCCHSQLEELHCATGISLANEQDR</a> |
| 59.6  | 3653.615311 | 0.047425 | <a href="#">MVQEQCCHSQLEELHCATGISLANEQDR</a> |
| 56.6  | 3653.615311 | 0.047425 | <a href="#">MVQEQCCHSQLEELHCATGISLANEQDR</a> |



# MASCOT Search Results

## Peptide View

MS/MS Fragmentation of **KSQLVYQSR**

Found in **LG3BP\_HUMAN**, Galectin-3-binding protein OS=Homo sapiens GN=LGALS3BP PE=1 SV=1

Match to Query 35746: 1418.780188 from(710.397370,2+) rtinseconds(1461) index(56642)

Title: Locus:1.1.1.2814.25 File:"2013-07-02 CLN FXIII 60 min 1st F 4.wiff"

Data file C:\Program Files (x86)\Matrix Science\Mascot Daemon\mgf\4 FXIII 60 min 1st\mascot\_daemon\_merge.mgf

Click mouse within plot area to zoom in by factor of two about that point

Or, Plot from  to  Da

Label all possible matches  Label matches used for scoring

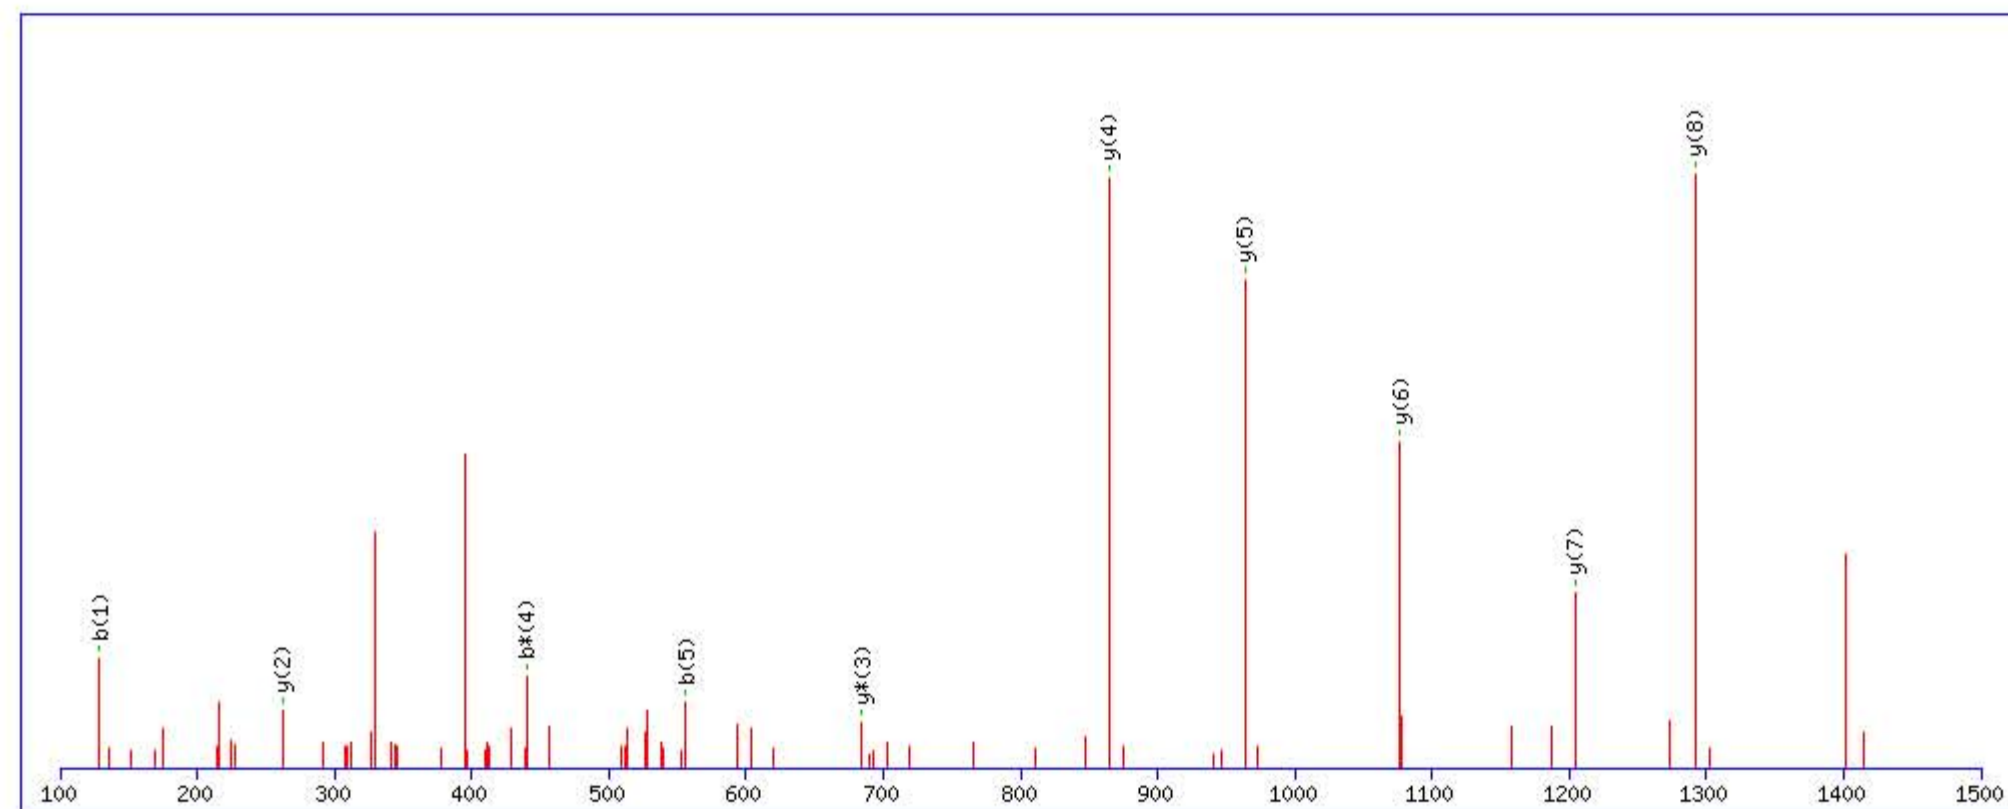

Monoisotopic mass of neutral peptide Mr(calc): 1418.770386

Fixed modifications: Carbamidomethyl (C) (apply to specified residues or termini only)

Variable modifications:

Q7 : Biotin:Thermo-21345 (Q)

Ions Score: 51 Expect: 0.00012

Matches : 10/92 fragment ions using 13 most intense peaks [\(help\)](#)

| # | b                 | b <sup>++</sup> | b*                | b <sup>+++</sup> | b <sup>0</sup> | b <sup>0++</sup> | Seq.     | y                  | y <sup>++</sup> | y*                | y <sup>+++</sup> | y <sup>0</sup> | y <sup>0++</sup> | #        |
|---|-------------------|-----------------|-------------------|------------------|----------------|------------------|----------|--------------------|-----------------|-------------------|------------------|----------------|------------------|----------|
| 1 | <b>129.102239</b> | 65.054757       | 112.075690        | 56.541483        |                |                  | <b>K</b> |                    |                 |                   |                  |                |                  | <b>9</b> |
| 2 | 216.134267        | 108.570771      | 199.107718        | 100.057497       | 198.123702     | 99.565489        | <b>S</b> | <b>1291.682719</b> | 646.344998      | 1274.656170       | 637.831723       | 1273.672154    | 637.339715       | <b>8</b> |
| 3 | 344.192845        | 172.600060      | 327.166296        | 164.086786       | 326.182280     | 163.594778       | <b>Q</b> | <b>1204.650691</b> | 602.828984      | 1187.624142       | 594.315709       | 1186.640126    | 593.823701       | <b>7</b> |
| 4 | 457.276909        | 229.142092      | <b>440.250360</b> | 220.628818       | 439.266344     | 220.136810       | <b>L</b> | <b>1076.592113</b> | 538.799695      | 1059.565564       | 530.286420       | 1058.581548    | 529.794412       | <b>6</b> |
| 5 | <b>556.345323</b> | 278.676300      | 539.318774        | 270.163025       | 538.334758     | 269.671017       | <b>V</b> | <b>963.508049</b>  | 482.257663      | 946.481500        | 473.744388       | 945.497484     | 473.252380       | <b>5</b> |
| 6 | 719.408652        | 360.207964      | 702.382103        | 351.694690       | 701.398087     | 351.202682       | <b>Y</b> | <b>864.439635</b>  | 432.723456      | 847.413086        | 424.210181       | 846.429070     | 423.718173       | <b>4</b> |
| 7 | 1158.633978       | 579.820627      | 1141.607429       | 571.307353       | 1140.623413    | 570.815345       | <b>Q</b> | 701.376306         | 351.191791      | <b>684.349757</b> | 342.678517       | 683.365741     | 342.186509       | <b>3</b> |
| 8 | 1245.666006       | 623.336641      | 1228.639457       | 614.823367       | 1227.655441    | 614.331359       | <b>S</b> | <b>262.150980</b>  | 131.579128      | 245.124431        | 123.065854       | 244.140415     | 122.573846       | <b>2</b> |
| 9 |                   |                 |                   |                  |                |                  | <b>R</b> | 175.118952         | 88.063114       | 158.092403        | 79.549839        |                |                  | <b>1</b> |

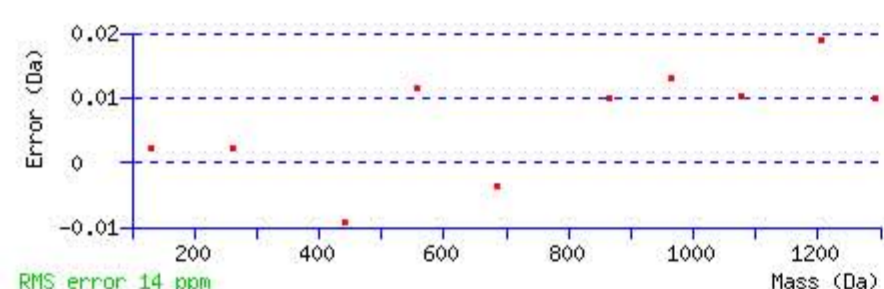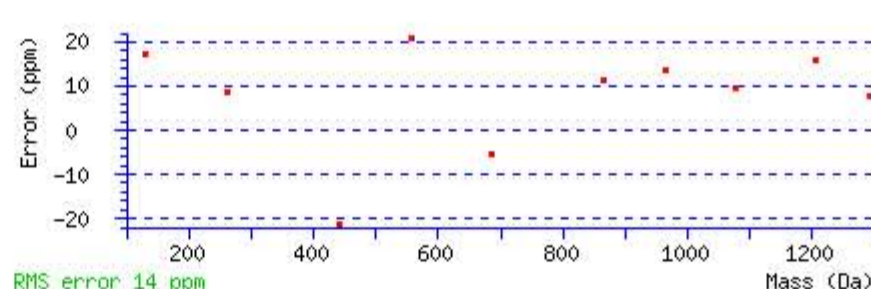

NCBI BLAST search of **KSQLVYQSR**

(Parameters: blastp, nr protein database, expect=20000, no filter, PAM30)

Other BLAST [web gateways](#)

## All matches to this query

| Score | Mr(calc):   | Delta     | Sequence                      |
|-------|-------------|-----------|-------------------------------|
| 51.2  | 1418.770386 | 0.009802  | <a href="#">KSQLVYQSR</a>     |
| 15.3  | 1418.770386 | 0.009802  | <a href="#">KSQLVYQSR</a>     |
| 8.7   | 1418.788147 | -0.007959 | <a href="#">QSQVDRLYVALK</a>  |
| 5.9   | 1418.780273 | -0.000085 | <a href="#">TNQLMETLKTIK</a>  |
| 3.1   | 1418.799377 | -0.019189 | <a href="#">QRKLLPVDHGK</a>   |
| 3.1   | 1418.799347 | -0.019159 | <a href="#">KNIEIYIQRSR</a>   |
| 3.0   | 1418.774231 | 0.005957  | <a href="#">KGRPPGHILSSDR</a> |
| 0.8   | 1418.787659 | -0.007471 | <a href="#">KEILLAMLMDK</a>   |



# MASCOT SEARCH RESULTS

## Peptide View

MS/MS Fragmentation of **SQLVYQSR**

Found in **LG3BP\_HUMAN**, Galectin-3-binding protein OS=Homo sapiens GN=LGALS3BP PE=1 SV=1

Match to Query 42236: 1601.861108 from(801.937830,2+) rtinseconds(2043) index(60841)

Title: Locus:1.1.1.3016.15 File:"2013-07-02 CLN FXIII 60 min 1st F 4.wiff"

Data file C:\Program Files (x86)\Matrix Science\Mascot Daemon\mgf4 FXIII 60 min 1st\mascot\_daemon\_merge.mgf

Click mouse within plot area to zoom in by factor of two about that point

Or, Plot from  to  Da

Label all possible matches  Label matches used for scoring

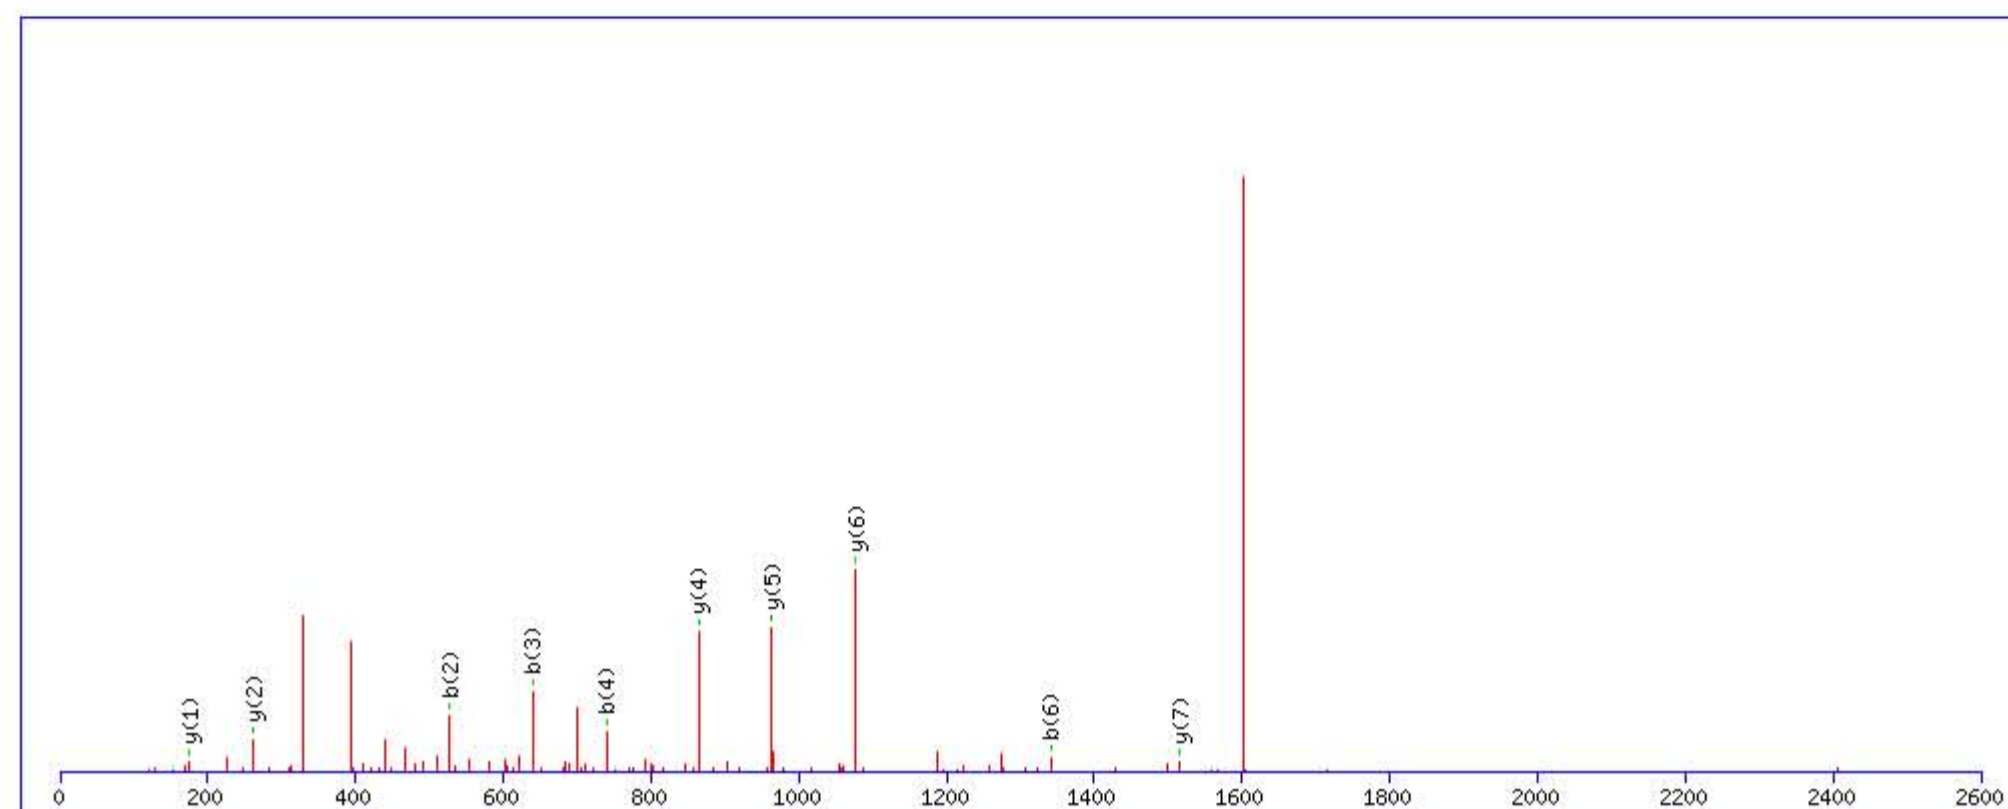

Monoisotopic mass of neutral peptide Mr(calc): 1601.842178

Fixed modifications: Carbamidomethyl (C) (apply to specified residues or termini only)

Variable modifications:

Q2 : Biotin:Thermo-21345 (Q)

Q6 : Biotin:Thermo-21345 (Q)

Ions Score: 40 Expect: 0.0024

Matches : 10/80 fragment ions using 15 most intense peaks [\(help\)](#)

| # | b                  | b <sup>++</sup> | b <sup>*</sup> | b <sup>+++</sup> | b <sup>0</sup> | b <sup>0++</sup> | Seq. | y                  | y <sup>++</sup> | y <sup>*</sup> | y <sup>+++</sup> | y <sup>0</sup> | y <sup>0++</sup> | # |
|---|--------------------|-----------------|----------------|------------------|----------------|------------------|------|--------------------|-----------------|----------------|------------------|----------------|------------------|---|
| 1 | 88.039304          | 44.523290       |                |                  | 70.028739      | 35.518008        | S    |                    |                 |                |                  |                |                  | 8 |
| 2 | <b>527.264630</b>  | 264.135953      | 510.238081     | 255.622679       | 509.254065     | 255.130671       | Q    | <b>1515.817439</b> | 758.412358      | 1498.790890    | 749.899083       | 1497.806874    | 749.407075       | 7 |
| 3 | <b>640.348694</b>  | 320.677985      | 623.322145     | 312.164711       | 622.338129     | 311.672703       | L    | <b>1076.592113</b> | 538.799695      | 1059.565564    | 530.286420       | 1058.581548    | 529.794412       | 6 |
| 4 | <b>739.417108</b>  | 370.212192      | 722.390559     | 361.698917       | 721.406543     | 361.206909       | V    | <b>963.508049</b>  | 482.257663      | 946.481500     | 473.744388       | 945.497484     | 473.252380       | 5 |
| 5 | 902.480437         | 451.743856      | 885.453888     | 443.230582       | 884.469872     | 442.738574       | Y    | <b>864.439635</b>  | 432.723456      | 847.413086     | 424.210181       | 846.429070     | 423.718173       | 4 |
| 6 | <b>1341.705763</b> | 671.356520      | 1324.679214    | 662.843245       | 1323.695198    | 662.351237       | Q    | 701.376306         | 351.191791      | 684.349757     | 342.678517       | 683.365741     | 342.186509       | 3 |
| 7 | 1428.737791        | 714.872534      | 1411.711242    | 706.359259       | 1410.727226    | 705.867251       | S    | <b>262.150980</b>  | 131.579128      | 245.124431     | 123.065854       | 244.140415     | 122.573846       | 2 |
| 8 |                    |                 |                |                  |                |                  | R    | <b>175.118952</b>  | 88.063114       | 158.092403     | 79.549839        |                |                  | 1 |

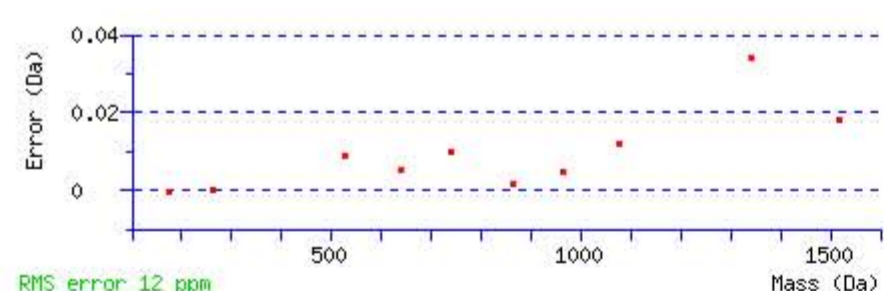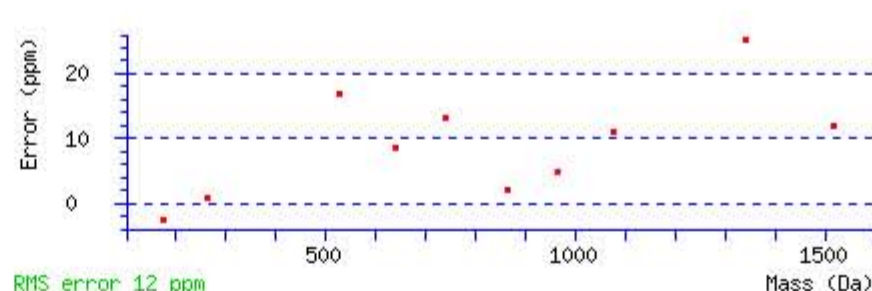

NCBI BLAST search of **SQLVYQSR**

(Parameters: blastp, nr protein database, expect=20000, no filter, PAM30)

Other BLAST [web gateways](#)

All matches to this query

| Score | Mr(calc):   | Delta     | Sequence                       |
|-------|-------------|-----------|--------------------------------|
| 39.6  | 1601.842178 | 0.018930  | <a href="#">SQLVYQSR</a>       |
| 13.5  | 1601.846024 | 0.015084  | <a href="#">RFVLSCSLLSHQR</a>  |
| 3.9   | 1601.852051 | 0.009057  | <a href="#">SQISELNLLMK</a>    |
| 2.9   | 1601.841995 | 0.019113  | <a href="#">RPGTMTLQDGRKSR</a> |
| 2.0   | 1601.871155 | -0.010047 | <a href="#">FNQANTILKSR</a>    |
| 1.8   | 1601.855881 | 0.005227  | <a href="#">ELQRLQQAETMKK</a>  |
| 0.4   | 1601.867126 | -0.006018 | <a href="#">RLGLAQKLMQASR</a>  |

Mascot: <http://www.matrixscience.com/>



# MASCOT SCIENCE Mascot Search Results

## Peptide View

MS/MS Fragmentation of **ELSEALGQIFDSQR**

Found in **LG3BP\_HUMAN**, Galectin-3-binding protein OS=Homo sapiens GN=LGALS3BP PE=1 SV=1

Match to Query 50602: 1902.976302 from(635.332710,3+) rtinseconds(2670) index(65059)

Title: Locus:1.1.1.3234.3 File:"2013-07-02 CLN FXIII 60 min 1st F 4.wiff"

Data file C:\Program Files (x86)\Matrix Science\Mascot Daemon\mgf4 FXIII 60 min 1st\mascot\_daemon\_merge.mgf

Click mouse within plot area to zoom in by factor of two about that point

Or, Plot from  to  Da

Label all possible matches  Label matches used for scoring

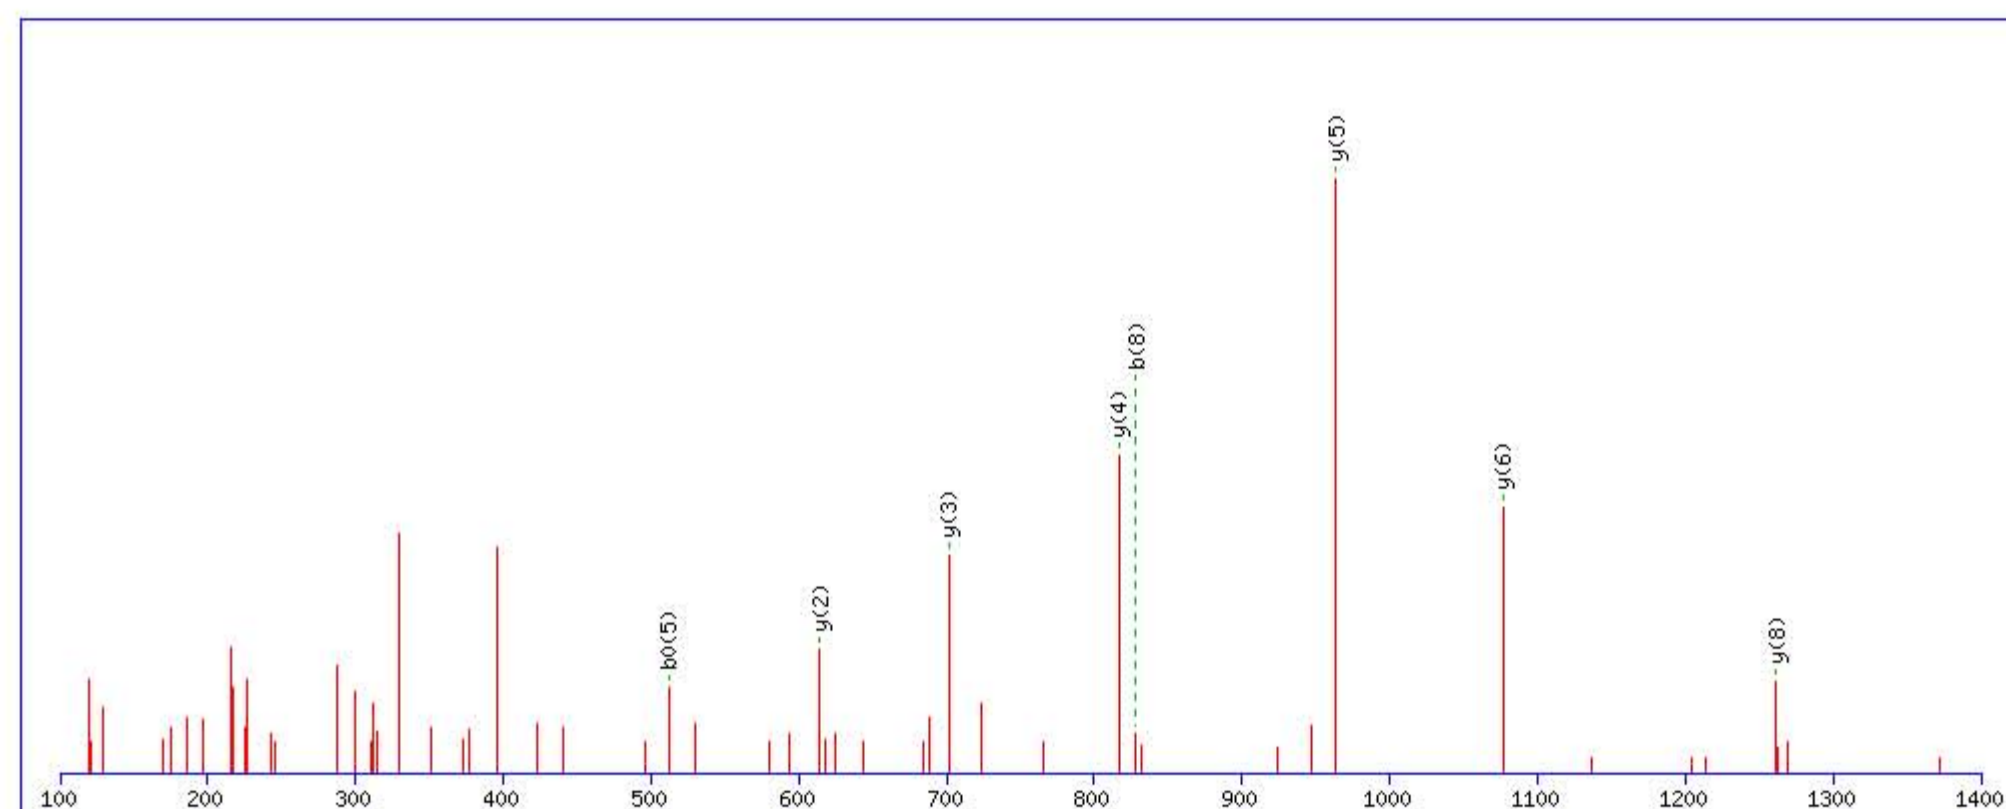

Monoisotopic mass of neutral peptide Mr(calc): 1902.950928

Fixed modifications: Carbamidomethyl (C) (apply to specified residues or termini only)

Variable modifications:

Q13 : Biotin:Thermo-21345 (Q)

Ions Score: 36 Expect: 0.0068

Matches : 8/138 fragment ions using 13 most intense peaks [\(help\)](#)

| #  | b           | b <sup>++</sup> | b <sup>+</sup> | b <sup>+++</sup> | b <sup>0</sup> | b <sup>0++</sup> | Seq. | y           | y <sup>++</sup> | y <sup>+</sup> | y <sup>+++</sup> | y <sup>0</sup> | y <sup>0++</sup> | #  |
|----|-------------|-----------------|----------------|------------------|----------------|------------------|------|-------------|-----------------|----------------|------------------|----------------|------------------|----|
| 1  | 130.049869  | 65.528572       |                |                  | 112.039304     | 56.523290        | E    |             |                 |                |                  |                |                  | 14 |
| 2  | 243.133933  | 122.070605      |                |                  | 225.123368     | 113.065322       | L    | 1774.915632 | 887.961454      | 1757.889083    | 879.448180       | 1756.905067    | 878.956172       | 13 |
| 3  | 330.165961  | 165.586618      |                |                  | 312.155396     | 156.581336       | S    | 1661.831568 | 831.419422      | 1644.805019    | 822.906148       | 1643.821003    | 822.414140       | 12 |
| 4  | 459.208554  | 230.107915      |                |                  | 441.197989     | 221.102633       | E    | 1574.799540 | 787.903408      | 1557.772991    | 779.390134       | 1556.788975    | 778.898126       | 11 |
| 5  | 530.245668  | 265.626472      |                |                  | 512.235103     | 256.621190       | A    | 1445.756947 | 723.382112      | 1428.730398    | 714.868837       | 1427.746382    | 714.376829       | 10 |
| 6  | 643.329732  | 322.168504      |                |                  | 625.319167     | 313.163222       | L    | 1374.719833 | 687.863555      | 1357.693284    | 679.350280       | 1356.709268    | 678.858272       | 9  |
| 7  | 700.351196  | 350.679236      |                |                  | 682.340631     | 341.673954       | G    | 1261.635769 | 631.321523      | 1244.609220    | 622.808248       | 1243.625204    | 622.316240       | 8  |
| 8  | 828.409774  | 414.708525      | 811.383225     | 406.195251       | 810.399209     | 405.703243       | Q    | 1204.614305 | 602.810791      | 1187.587756    | 594.297516       | 1186.603740    | 593.805508       | 7  |
| 9  | 941.493838  | 471.250557      | 924.467289     | 462.737283       | 923.483273     | 462.245275       | I    | 1076.555727 | 538.781502      | 1059.529178    | 530.268227       | 1058.545162    | 529.776219       | 6  |
| 10 | 1088.562252 | 544.784764      | 1071.535703    | 536.271490       | 1070.551687    | 535.779482       | F    | 963.471663  | 482.239470      | 946.445114     | 473.726195       | 945.461098     | 473.234187       | 5  |
| 11 | 1203.589195 | 602.298236      | 1186.562646    | 593.784961       | 1185.578630    | 593.292953       | D    | 816.403249  | 408.705263      | 799.376700     | 400.191988       | 798.392684     | 399.699980       | 4  |
| 12 | 1290.621223 | 645.814250      | 1273.594674    | 637.300975       | 1272.610658    | 636.808967       | S    | 701.376306  | 351.191791      | 684.349757     | 342.678517       | 683.365741     | 342.186509       | 3  |
| 13 | 1729.846549 | 865.426913      | 1712.820000    | 856.913638       | 1711.835984    | 856.421630       | Q    | 614.344278  | 307.675777      | 597.317729     | 299.162503       |                |                  | 2  |
| 14 |             |                 |                |                  |                |                  | R    | 175.118952  | 88.063114       | 158.092403     | 79.549839        |                |                  | 1  |

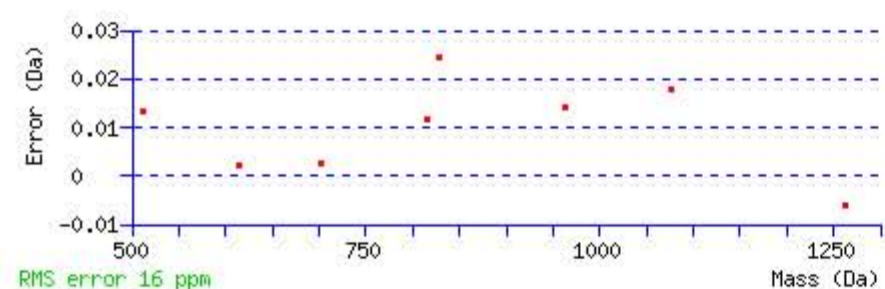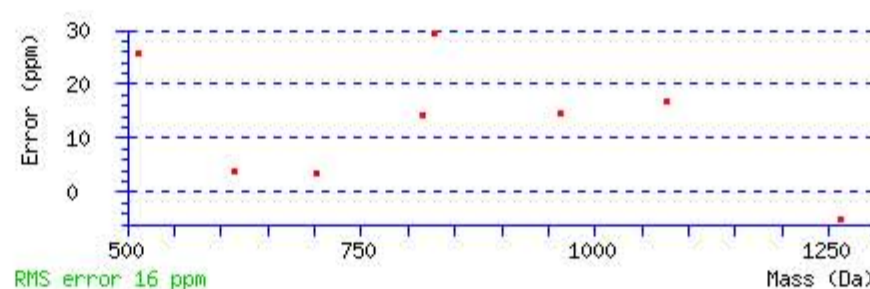

NCBI BLAST search of **ELSEALGQIFDSQR**

(Parameters: blastp, nr protein database, expect=20000, no filter, PAM30)

Other BLAST [web gateways](#)

All matches to this query

| Score | Mr(calc):   | Delta    | Sequence                       |
|-------|-------------|----------|--------------------------------|
| 35.9  | 1902.950928 | 0.025374 | <a href="#">ELSEALGQIFDSQR</a> |
| 2.5   | 1902.950928 | 0.025374 | <a href="#">ELSEALGQIFDSQR</a> |

Mascot: <http://www.matrixscience.com/>



# MASCOT Search Results

## Peptide View

MS/MS Fragmentation of **YSSDYFQAPSDYR**

Found in **LG3BP\_HUMAN**, Galectin-3-binding protein OS=Homo sapiens GN=LGALS3BP PE=1 SV=1

Match to Query 50785: 1908.848892 from(637.290240,3+) rtinseconds(2071) index(42576)

Title: Locus:1.1.1.3005.9 File:"2013-07-02 CLN FXIII 60 min 1st F 3.wiff"

Data file C:\Program Files (x86)\Matrix Science\Mascot Daemon\mgf4 FXIII 60 min 1st\mascot\_daemon\_merge.mgf

Click mouse within plot area to zoom in by factor of two about that point

Or, Plot from  to  Da

Label all possible matches  Label matches used for scoring

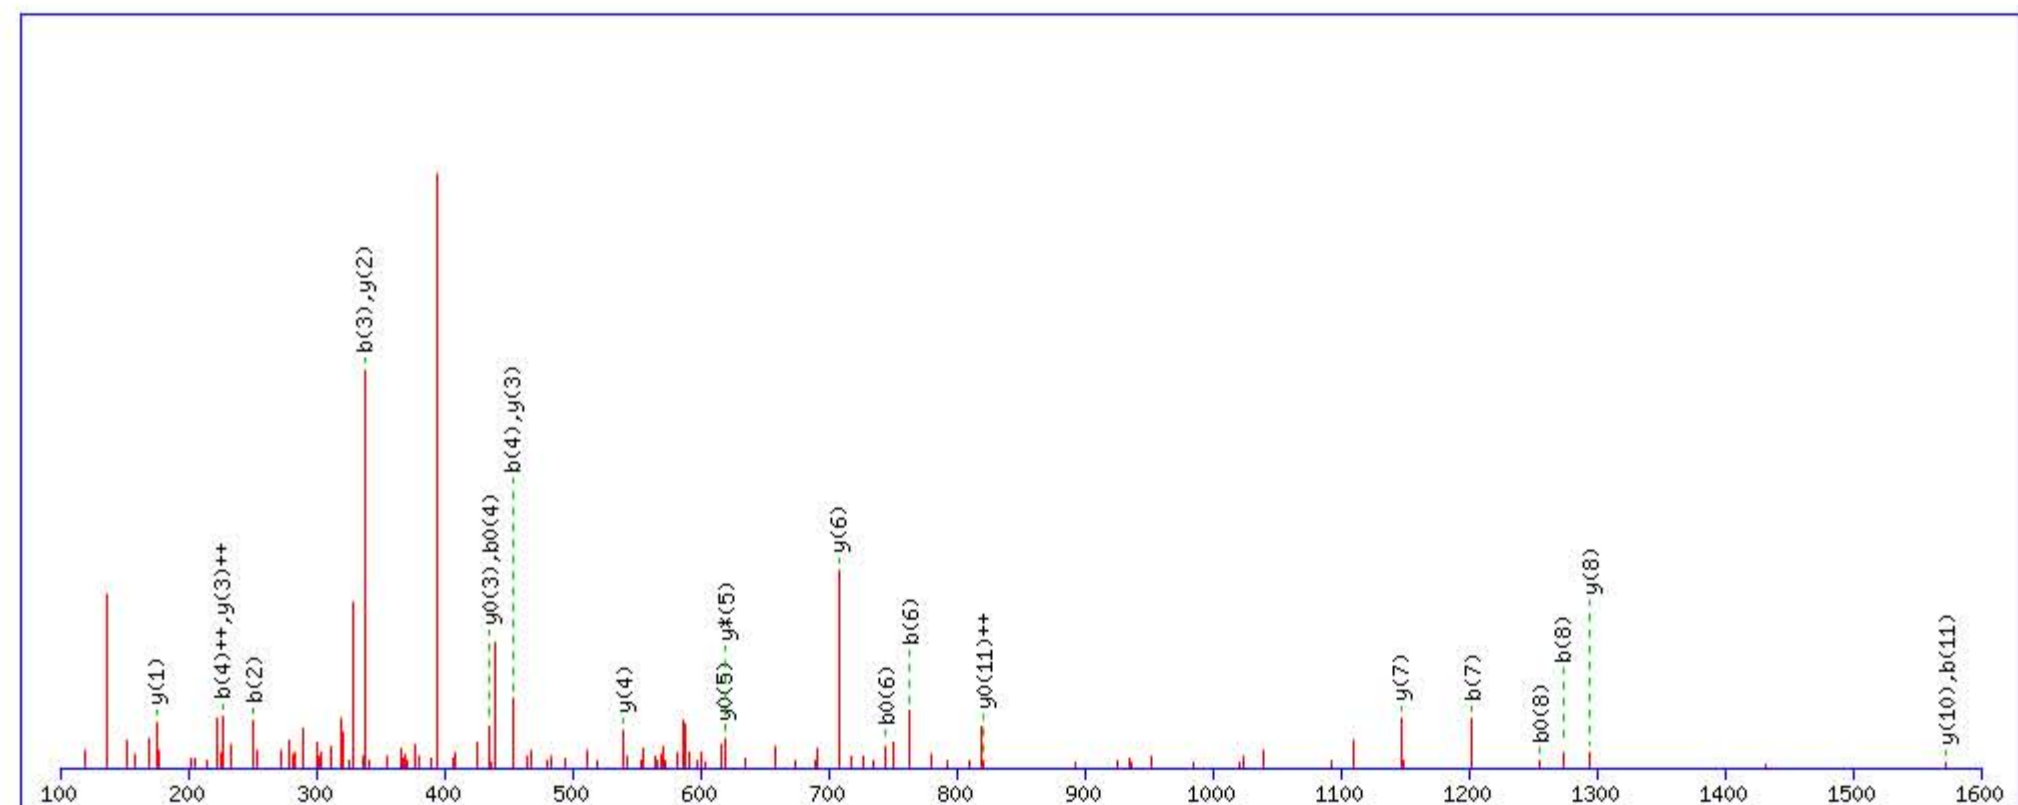

Monoisotopic mass of neutral peptide Mr(calc): 1908.835236

Fixed modifications: Carbamidomethyl (C) (apply to specified residues or termini only)

Variable modifications:

Q7 : Biotin:Thermo-21345 (Q)

Ions Score: 40 Expect: 0.0007

Matches : 24/126 fragment ions using 38 most intense peaks [\(help\)](#)

| #  | b                  | b <sup>++</sup>   | b <sup>*</sup> | b <sup>*++</sup> | b <sup>0</sup>     | b <sup>0++</sup> | Seq. | y                  | y <sup>++</sup>   | y <sup>*</sup>    | y <sup>*++</sup> | y <sup>0</sup>    | y <sup>0++</sup>  | #  |
|----|--------------------|-------------------|----------------|------------------|--------------------|------------------|------|--------------------|-------------------|-------------------|------------------|-------------------|-------------------|----|
| 1  | 164.070605         | 82.538940         |                |                  |                    |                  | Y    |                    |                   |                   |                  |                   |                   | 13 |
| 2  | <b>251.102633</b>  | 126.054954        |                |                  | 233.092068         | 117.049672       | S    | 1746.779198        | 873.893237        | 1729.752649       | 865.379963       | 1728.768633       | 864.887955        | 12 |
| 3  | <b>338.134661</b>  | 169.570968        |                |                  | 320.124096         | 160.565686       | S    | 1659.747170        | 830.377223        | 1642.720621       | 821.863949       | 1641.736605       | <b>821.371941</b> | 11 |
| 4  | <b>453.161604</b>  | <b>227.084440</b> |                |                  | <b>435.151039</b>  | 218.079158       | D    | <b>1572.715142</b> | 786.861209        | 1555.688593       | 778.347935       | 1554.704577       | 777.855927        | 10 |
| 5  | 616.224933         | 308.616105        |                |                  | 598.214368         | 299.610822       | Y    | 1457.688199        | 729.347738        | 1440.661650       | 720.834463       | 1439.677634       | 720.342455        | 9  |
| 6  | <b>763.293347</b>  | 382.150312        |                |                  | <b>745.282782</b>  | 373.145029       | F    | <b>1294.624870</b> | 647.816073        | 1277.598321       | 639.302799       | 1276.614305       | 638.810791        | 8  |
| 7  | <b>1202.518673</b> | 601.762975        | 1185.492124    | 593.249700       | 1184.508108        | 592.757692       | Q    | <b>1147.556456</b> | 574.281866        | 1130.529907       | 565.768592       | 1129.545891       | 565.276584        | 7  |
| 8  | <b>1273.555787</b> | 637.281532        | 1256.529238    | 628.768257       | <b>1255.545222</b> | 628.276249       | A    | <b>708.331130</b>  | 354.669203        | 691.304581        | 346.155929       | 690.320565        | 345.663921        | 6  |
| 9  | 1370.608551        | 685.807914        | 1353.582002    | 677.294639       | 1352.597986        | 676.802631       | P    | 637.294016         | 319.150646        | <b>620.267467</b> | 310.637372       | <b>619.283451</b> | 310.145364        | 5  |
| 10 | 1457.640579        | 729.323928        | 1440.614030    | 720.810653       | 1439.630014        | 720.318645       | S    | <b>540.241252</b>  | 270.624264        | 523.214703        | 262.110990       | 522.230687        | 261.618982        | 4  |
| 11 | <b>1572.667522</b> | 786.837399        | 1555.640973    | 778.324125       | 1554.656957        | 777.832117       | D    | <b>453.209224</b>  | <b>227.108250</b> | 436.182675        | 218.594976       | <b>435.198659</b> | 218.102968        | 3  |
| 12 | 1735.730851        | 868.369064        | 1718.704302    | 859.855789       | 1717.720286        | 859.363781       | Y    | <b>338.182281</b>  | 169.594778        | 321.155732        | 161.081504       |                   |                   | 2  |
| 13 |                    |                   |                |                  |                    |                  | R    | <b>175.118952</b>  | 88.063114         | 158.092403        | 79.549839        |                   |                   | 1  |

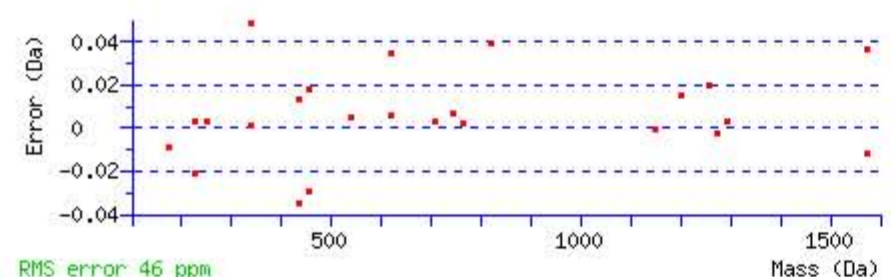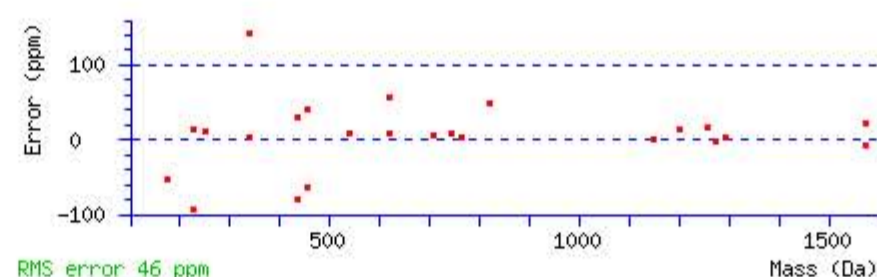

NCBI BLAST search of [YSSDYFQAPSDYR](#)

(Parameters: blastp, nr protein database, expect=20000, no filter, PAM30)

Other BLAST [web gateways](#)

All matches to this query

| Score | Mr(calc):   | Delta    | Sequence                      |
|-------|-------------|----------|-------------------------------|
| 40.2  | 1908.835236 | 0.013656 | <a href="#">YSSDYFQAPSDYR</a> |

Mascot: <http://www.matrixscience.com/>



# MASCOT SEARCH RESULTS

## Peptide View

MS/MS Fragmentation of **TGAQELLR**

Found in **GELS\_HUMAN**, Gelsolin OS=Homo sapiens GN=GSN PE=1 SV=1

Match to Query 27650: 1197.667508 from(599.841030,2+) rtinseconds(1867) index(6117)

Title: Locus:1.1.1.2782.18 File:"2013-07-02 CLN FXIII 60 min 1st F 1.wiff"

Data file C:\Program Files (x86)\Matrix Science\Mascot Daemon\mgf4 FXIII 60 min 1st\mascot\_daemon\_merge.mgf

Click mouse within plot area to zoom in by factor of two about that point

Or, Plot from  to  Da

Label all possible matches  Label matches used for scoring

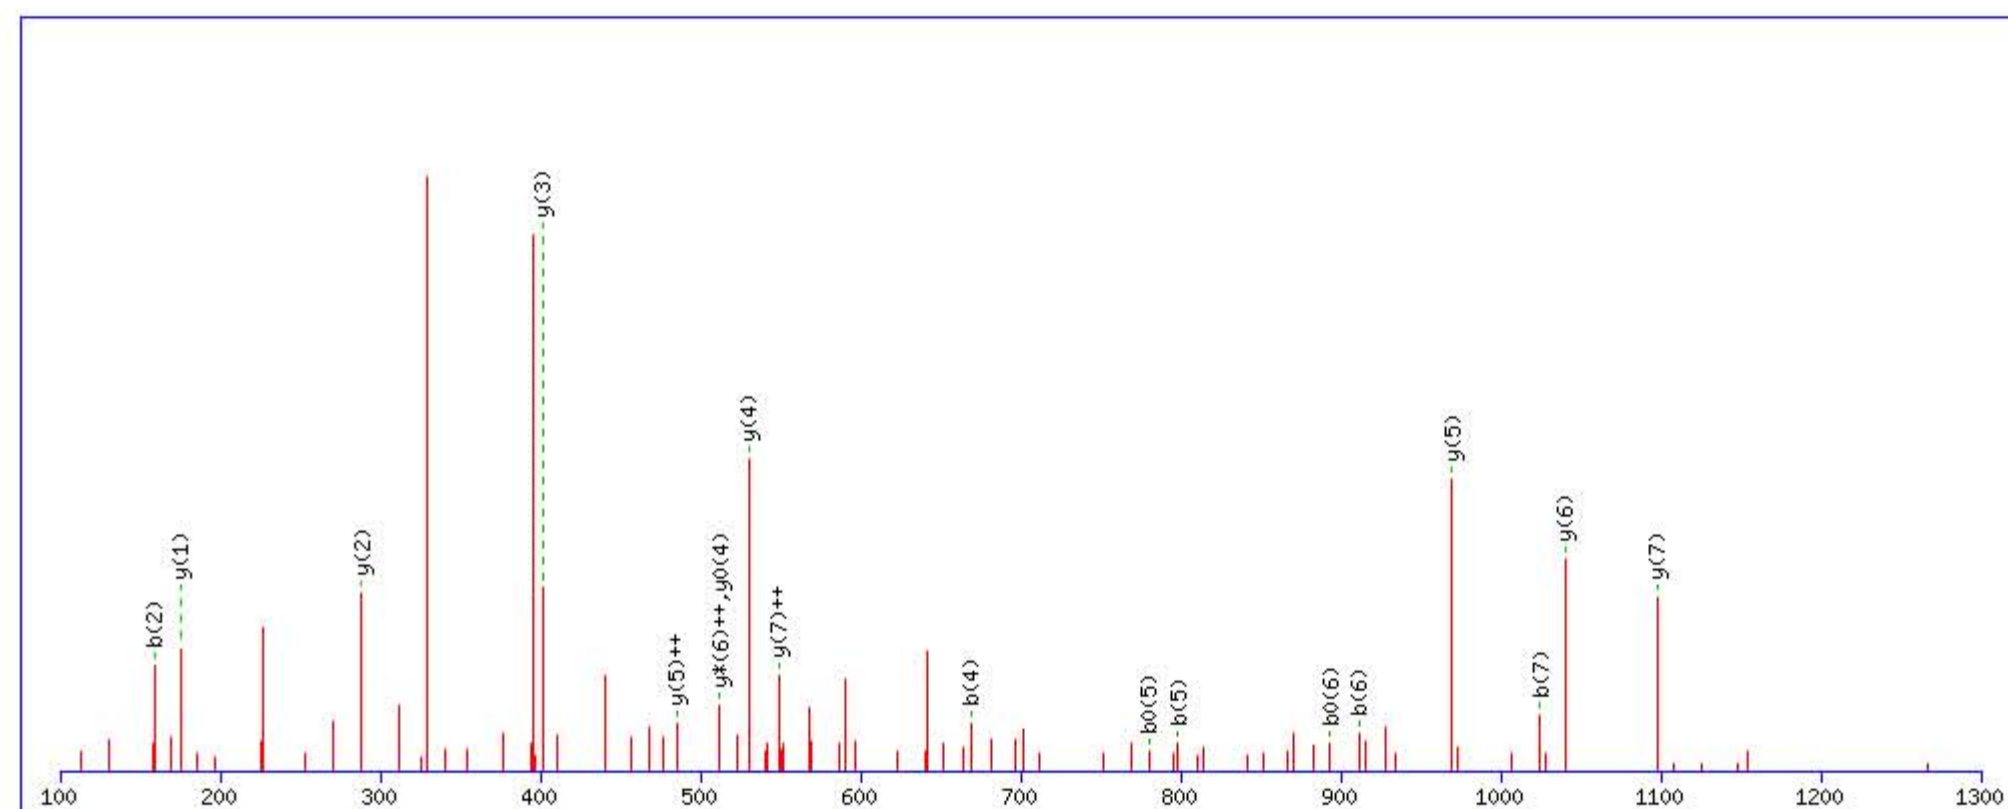

Monoisotopic mass of neutral peptide Mr(calc): 1197.653961

Fixed modifications: Carbamidomethyl (C) (apply to specified residues or termini only)

Variable modifications:

Q4 : Biotin:Thermo-21345 (Q)

Ions Score: 42 Expect: 0.0016

Matches : 18/72 fragment ions using 33 most intense peaks [\(help\)](#)

| # | b           | b <sup>++</sup> | b <sup>*</sup> | b <sup>+++</sup> | b <sup>0</sup> | b <sup>0++</sup> | Seq. | y           | y <sup>++</sup> | y <sup>*</sup> | y <sup>+++</sup> | y <sup>0</sup> | y <sup>0++</sup> | # |
|---|-------------|-----------------|----------------|------------------|----------------|------------------|------|-------------|-----------------|----------------|------------------|----------------|------------------|---|
| 1 | 102.054955  | 51.531116       |                |                  | 84.044390      | 42.525833        | T    |             |                 |                |                  |                |                  | 8 |
| 2 | 159.076419  | 80.041847       |                |                  | 141.065854     | 71.036565        | G    | 1097.613577 | 549.310427      | 1080.587028    | 540.797152       | 1079.603012    | 540.305144       | 7 |
| 3 | 230.113533  | 115.560404      |                |                  | 212.102968     | 106.555122       | A    | 1040.592113 | 520.799695      | 1023.565564    | 512.286420       | 1022.581548    | 511.794412       | 6 |
| 4 | 669.338859  | 335.173068      | 652.312310     | 326.659793       | 651.328294     | 326.167785       | Q    | 969.554999  | 485.281138      | 952.528450     | 476.767863       | 951.544434     | 476.275855       | 5 |
| 5 | 798.381452  | 399.694364      | 781.354903     | 391.181090       | 780.370887     | 390.689082       | E    | 530.329673  | 265.668475      | 513.303124     | 257.155200       | 512.319108     | 256.663192       | 4 |
| 6 | 911.465516  | 456.236396      | 894.438967     | 447.723122       | 893.454951     | 447.231114       | L    | 401.287080  | 201.147178      | 384.260531     | 192.633903       |                |                  | 3 |
| 7 | 1024.549580 | 512.778428      | 1007.523031    | 504.265153       | 1006.539015    | 503.773145       | L    | 288.203016  | 144.605146      | 271.176467     | 136.091871       |                |                  | 2 |
| 8 |             |                 |                |                  |                |                  | R    | 175.118952  | 88.063114       | 158.092403     | 79.549839        |                |                  | 1 |

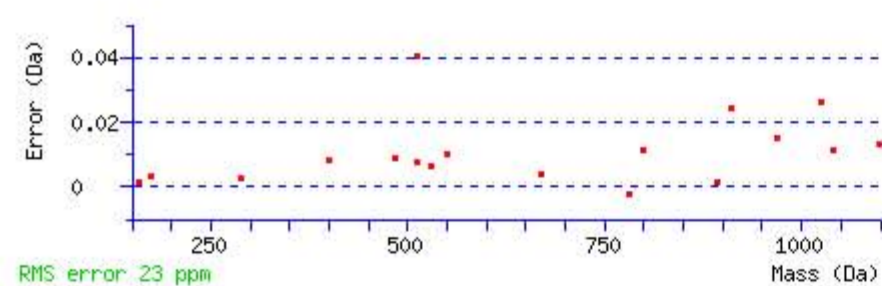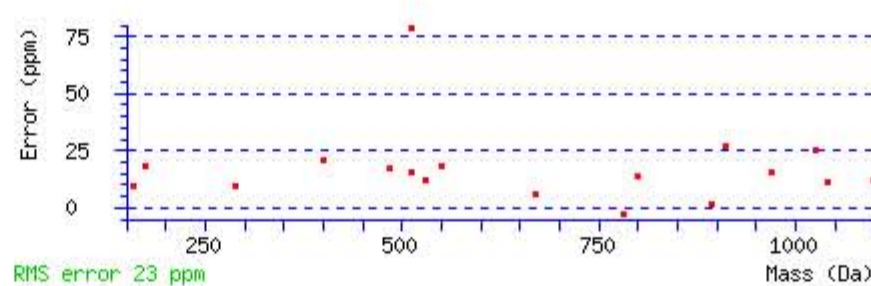

NCBI BLAST search of **TGAQELLR**

(Parameters: blastp, nr protein database, expect=20000, no filter, PAM30)

Other BLAST [web gateways](#)

All matches to this query

| Score | Mr(calc):   | Delta     | Sequence                    |
|-------|-------------|-----------|-----------------------------|
| 41.7  | 1197.653961 | 0.013547  | <a href="#">TGAQELLR</a>    |
| 17.3  | 1197.653961 | 0.013547  | <a href="#">QTQEILR</a>     |
| 16.6  | 1197.653961 | 0.013547  | <a href="#">QTQEILR</a>     |
| 12.1  | 1197.671692 | -0.004184 | <a href="#">LGLENAEALIR</a> |
| 8.5   | 1197.653961 | 0.013547  | <a href="#">QQEITIR</a>     |
| 7.7   | 1197.653961 | 0.013547  | <a href="#">QTEQLLR</a>     |
| 7.5   | 1197.671722 | -0.004214 | <a href="#">GTLDPVEKALR</a> |
| 7.2   | 1197.653961 | 0.013547  | <a href="#">TQQLER</a>      |
| 6.9   | 1197.657776 | 0.009732  | <a href="#">AAADALNRQIR</a> |
| 6.9   | 1197.671707 | -0.004199 | <a href="#">EAQDIILQLR</a>  |



# MATRIX SCIENCE Mascot Search Results

## Peptide View

MS/MS Fragmentation of **GASQAGAPQGR**

Found in **GELS\_HUMAN**, Gelsolin OS=Homo sapiens GN=GSN PE=1 SV=1

Match to Query 31151: 1309.662642 from(437.561490,3+) rtinseconds(1204) index(1657)

Title: Locus:1.1.1.2551.11 File:"2013-07-02 CLN FXIII 60 min 1st F 1.wiff"

Data file C:\Program Files (x86)\Matrix Science\Mascot Daemon\mgf4 FXIII 60 min 1st\mascot\_daemon\_merge.mgf

Click mouse within plot area to zoom in by factor of two about that point

Or, Plot from  to  Da

Label all possible matches  Label matches used for scoring

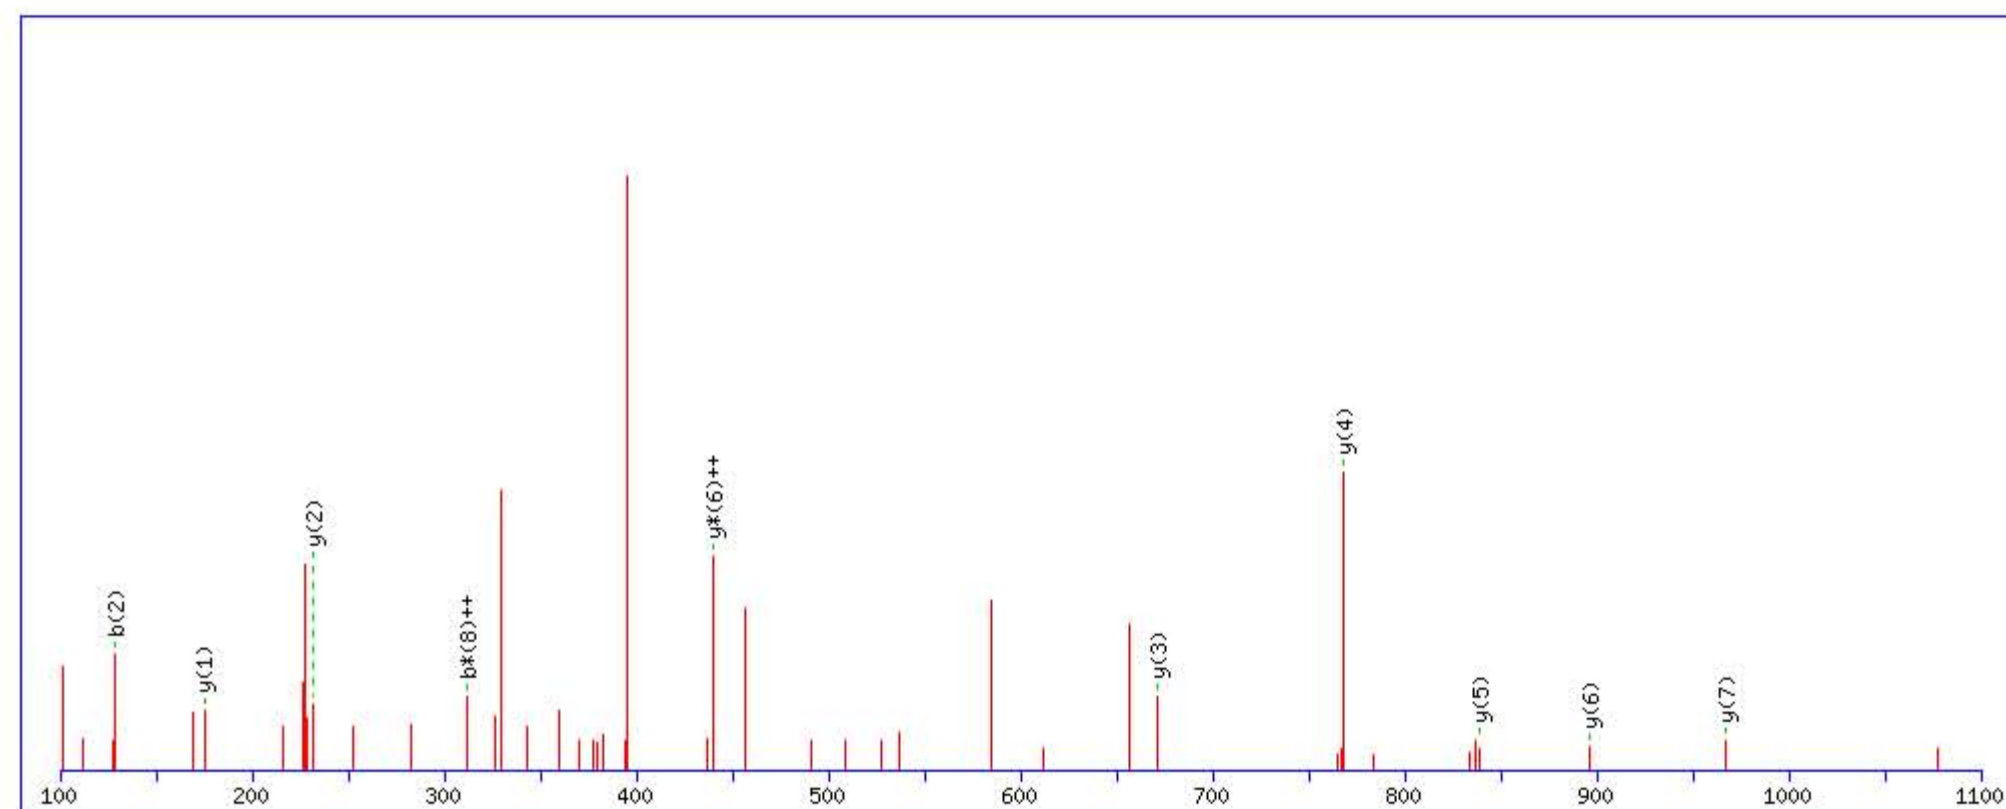

Monoisotopic mass of neutral peptide Mr(calc): 1309.656097

Fixed modifications: Carbamidomethyl (C) (apply to specified residues or termini only)

Variable modifications:

Q9 : Biotin:Thermo-21345 (Q)

Ions Score: 28 Expect: 0.029

Matches : 10/94 fragment ions using 26 most intense peaks [\(help\)](#)

| #  | b                 | b <sup>++</sup> | b <sup>+</sup> | b <sup>+++</sup>  | b <sup>0</sup> | b <sup>0++</sup> | Seq.     | y                 | y <sup>++</sup> | y <sup>+</sup> | y <sup>+++</sup>  | y <sup>0</sup> | y <sup>0++</sup> | #  |
|----|-------------------|-----------------|----------------|-------------------|----------------|------------------|----------|-------------------|-----------------|----------------|-------------------|----------------|------------------|----|
| 1  | 58.028740         | 29.518008       |                |                   |                |                  | <b>G</b> |                   |                 |                |                   |                |                  | 11 |
| 2  | <b>129.065854</b> | 65.036565       |                |                   |                |                  | <b>A</b> | 1253.641918       | 627.324597      | 1236.615369    | 618.811323        | 1235.631353    | 618.319315       | 10 |
| 3  | 216.097882        | 108.552579      |                |                   | 198.087317     | 99.547296        | <b>S</b> | 1182.604804       | 591.806040      | 1165.578255    | 583.292765        | 1164.594239    | 582.800757       | 9  |
| 4  | 344.156460        | 172.581868      | 327.129911     | 164.068593        | 326.145895     | 163.576585       | <b>Q</b> | 1095.572776       | 548.290026      | 1078.546227    | 539.776752        |                |                  | 8  |
| 5  | 415.193574        | 208.100425      | 398.167025     | 199.587150        | 397.183009     | 199.095142       | <b>A</b> | <b>967.514198</b> | 484.260737      | 950.487649     | 475.747462        |                |                  | 7  |
| 6  | 472.215038        | 236.611157      | 455.188489     | 228.097882        | 454.204473     | 227.605874       | <b>G</b> | <b>896.477084</b> | 448.742180      | 879.450535     | <b>440.228906</b> |                |                  | 6  |
| 7  | 543.252152        | 272.129714      | 526.225603     | 263.616440        | 525.241587     | 263.124432       | <b>A</b> | <b>839.455620</b> | 420.231448      | 822.429071     | 411.718173        |                |                  | 5  |
| 8  | 640.304916        | 320.656096      | 623.278367     | <b>312.142822</b> | 622.294351     | 311.650814       | <b>P</b> | <b>768.418506</b> | 384.712891      | 751.391957     | 376.199616        |                |                  | 4  |
| 9  | 1079.530242       | 540.268759      | 1062.503693    | 531.755485        | 1061.519677    | 531.263477       | <b>Q</b> | <b>671.365742</b> | 336.186509      | 654.339193     | 327.673234        |                |                  | 3  |
| 10 | 1136.551706       | 568.779491      | 1119.525157    | 560.266217        | 1118.541141    | 559.774208       | <b>G</b> | <b>232.140416</b> | 116.573846      | 215.113867     | 108.060571        |                |                  | 2  |
| 11 |                   |                 |                |                   |                |                  | <b>R</b> | <b>175.118952</b> | 88.063114       | 158.092403     | 79.549839         |                |                  | 1  |

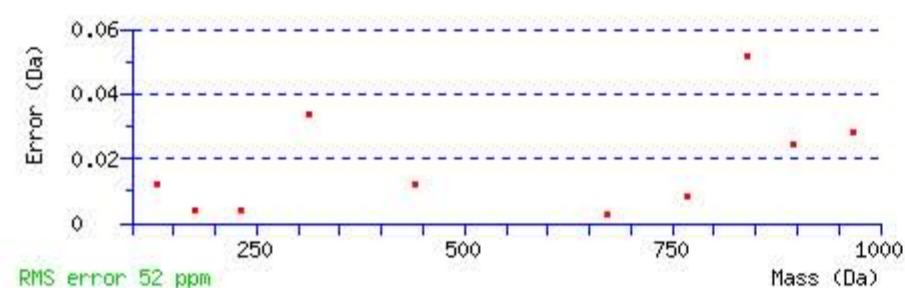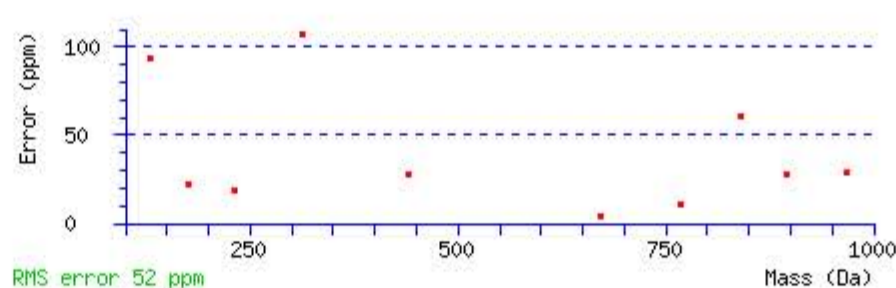

NCBI BLAST search of **GASQAGAPQGR**

(Parameters: blastp, nr protein database, expect=20000, no filter, PAM30)

Other BLAST [web gateways](#)

All matches to this query

| Score | Mr(calc):   | Delta    | Sequence                    |
|-------|-------------|----------|-----------------------------|
| 28.4  | 1309.656097 | 0.006545 | <a href="#">GASQAGAPQGR</a> |
| 24.0  | 1309.656097 | 0.006545 | <a href="#">GASQAGAPQGR</a> |

Mascot: <http://www.matrixscience.com/>



# MASCOT Search Results

## Peptide View

MS/MS Fragmentation of **QTQVSVLPEGGETPLFK**

Found in **GELS\_HUMAN**, Gelsolin OS=Homo sapiens GN=GSN PE=1 SV=1

Match to Query 63850: 2451.318822 from(818.113550,3+) rtinseconds(2584) index(45789)

Title: Locus:1.1.1.3183.19 File:"2013-07-02 CLN FXIII 60 min 1st F 3.wiff"

Data file C:\Program Files (x86)\Matrix Science\Mascot Daemon\mgf4 FXIII 60 min 1st\mascot\_daemon\_merge.mgf

Click mouse within plot area to zoom in by factor of two about that point

Or, Plot from  to  Da

Label all possible matches  Label matches used for scoring

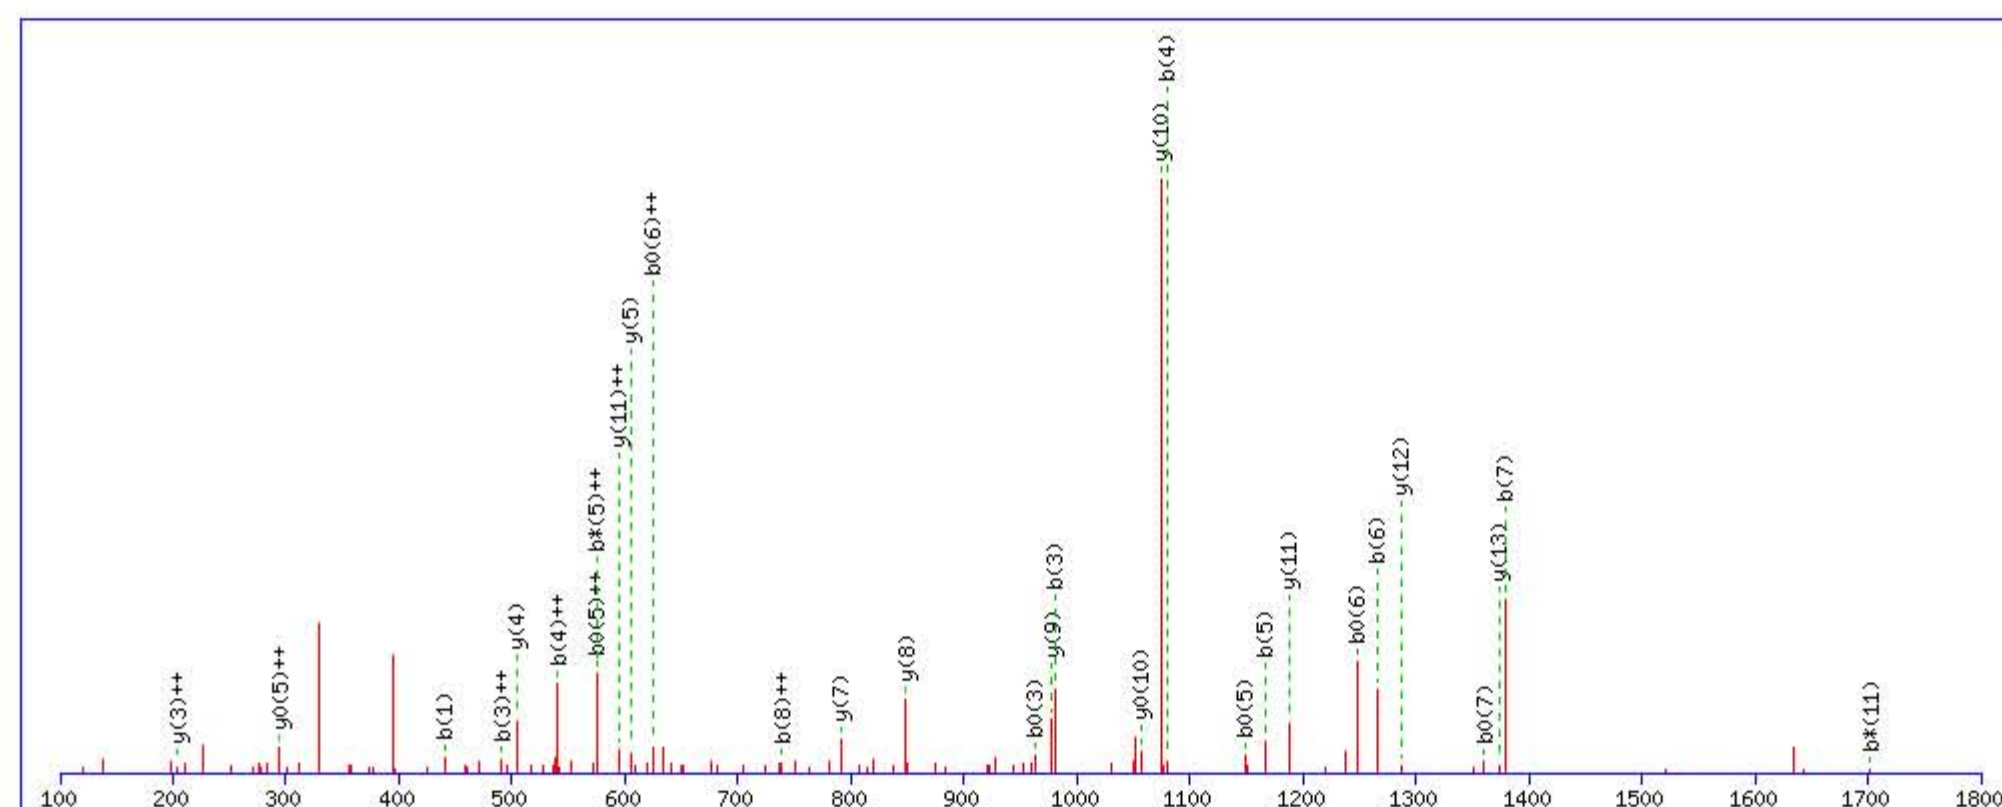

Monoisotopic mass of neutral peptide Mr(calc): 2451.290588

Fixed modifications: Carbamidomethyl (C) (apply to specified residues or termini only)

Variable modifications:

Q1 : Biotin:Thermo-21345 (Q)

Q3 : Biotin:Thermo-21345 (Q)

Ions Score: 39 Expect: 0.00024

Matches : 31/182 fragment ions using 68 most intense peaks [\(help\)](#)

| #  | b           | b <sup>++</sup> | b <sup>+</sup> | b <sup>*++</sup> | b <sup>0</sup> | b <sup>0++</sup> | Seq. | y           | y <sup>++</sup> | y <sup>+</sup> | y <sup>*++</sup> | y <sup>0</sup> | y <sup>0++</sup> | #  |
|----|-------------|-----------------|----------------|------------------|----------------|------------------|------|-------------|-----------------|----------------|------------------|----------------|------------------|----|
| 1  | 440.232602  | 220.619939      | 423.206053     | 212.106664       |                |                  | Q    |             |                 |                |                  |                |                  | 17 |
| 2  | 541.280281  | 271.143779      | 524.253732     | 262.630504       | 523.269716     | 262.138496       | T    | 2013.072528 | 1007.039902     | 1996.045979    | 998.526628       | 1995.061963    | 998.034620       | 16 |
| 3  | 980.505607  | 490.756442      | 963.479058     | 482.243167       | 962.495042     | 481.751159       | Q    | 1912.024849 | 956.516063      | 1894.998300    | 948.002788       | 1894.014284    | 947.510780       | 15 |
| 4  | 1079.574021 | 540.290649      | 1062.547472    | 531.777374       | 1061.563456    | 531.285366       | V    | 1472.799523 | 736.903400      | 1455.772974    | 728.390125       | 1454.788958    | 727.898117       | 14 |
| 5  | 1166.606049 | 583.806663      | 1149.579500    | 575.293388       | 1148.595484    | 574.801380       | S    | 1373.731109 | 687.369193      | 1356.704560    | 678.855918       | 1355.720544    | 678.363910       | 13 |
| 6  | 1265.674463 | 633.340870      | 1248.647914    | 624.827595       | 1247.663898    | 624.335587       | V    | 1286.699081 | 643.853179      | 1269.672532    | 635.339904       | 1268.688516    | 634.847896       | 12 |
| 7  | 1378.758527 | 689.882902      | 1361.731978    | 681.369627       | 1360.747962    | 680.877619       | L    | 1187.630667 | 594.318971      | 1170.604118    | 585.805697       | 1169.620102    | 585.313689       | 11 |
| 8  | 1475.811291 | 738.409284      | 1458.784742    | 729.896009       | 1457.800726    | 729.404001       | P    | 1074.546603 | 537.776940      | 1057.520054    | 529.263665       | 1056.536038    | 528.771657       | 10 |
| 9  | 1604.853884 | 802.930580      | 1587.827335    | 794.417306       | 1586.843319    | 793.925298       | E    | 977.493839  | 489.250558      | 960.467290     | 480.737283       | 959.483274     | 480.245275       | 9  |
| 10 | 1661.875348 | 831.441312      | 1644.848799    | 822.928038       | 1643.864783    | 822.436030       | G    | 848.451246  | 424.729261      | 831.424697     | 416.215986       | 830.440681     | 415.723978       | 8  |
| 11 | 1718.896812 | 859.952044      | 1701.870263    | 851.438770       | 1700.886247    | 850.946762       | G    | 791.429782  | 396.218529      | 774.403233     | 387.705254       | 773.419217     | 387.213246       | 7  |
| 12 | 1847.939405 | 924.473341      | 1830.912856    | 915.960066       | 1829.928840    | 915.468058       | E    | 734.408318  | 367.707797      | 717.381769     | 359.194523       | 716.397753     | 358.702515       | 6  |
| 13 | 1948.987084 | 974.997180      | 1931.960535    | 966.483906       | 1930.976519    | 965.991898       | T    | 605.365725  | 303.186500      | 588.339176     | 294.673226       | 587.355160     | 294.181218       | 5  |
| 14 | 2046.039848 | 1023.523562     | 2029.013299    | 1015.010288      | 2028.029283    | 1014.518280      | P    | 504.318046  | 252.662661      | 487.291497     | 244.149386       |                |                  | 4  |
| 15 | 2159.123912 | 1080.065594     | 2142.097363    | 1071.552319      | 2141.113347    | 1071.060311      | L    | 407.265282  | 204.136279      | 390.238733     | 195.623004       |                |                  | 3  |
| 16 | 2306.192326 | 1153.599801     | 2289.165777    | 1145.086526      | 2288.181761    | 1144.594518      | F    | 294.181218  | 147.594247      | 277.154669     | 139.080972       |                |                  | 2  |
| 17 |             |                 |                |                  |                |                  | K    | 147.112804  | 74.060040       | 130.086255     | 65.546765        |                |                  | 1  |

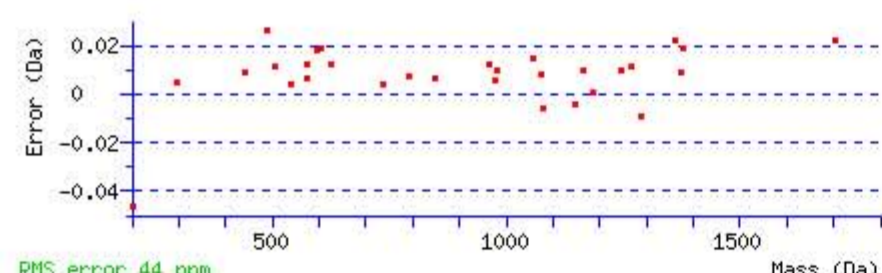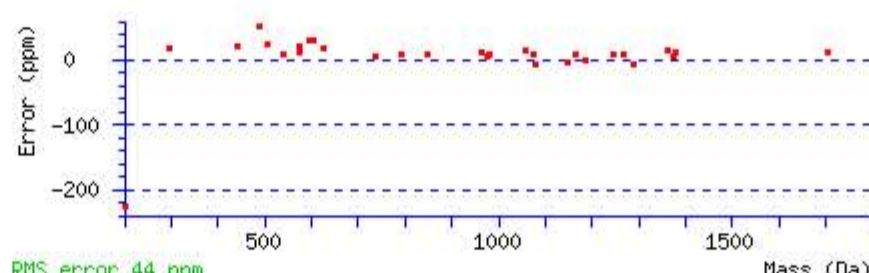

NCBI BLAST search of **QTQVSVLPEGGETPLFK**

(Parameters: blastp, nr protein database, expect=20000, no filter, PAM30)

Other BLAST [web gateways](#)

## All matches to this query

| Score | Mr(calc):   | Delta    | Sequence                               |
|-------|-------------|----------|----------------------------------------|
| 38.7  | 2451.290588 | 0.028234 | <a href="#">QTQVSVLPEGGETPLFK</a>      |
| 0.1   | 2451.301590 | 0.017232 | <a href="#">ATKRISHMPSRPELSAVATDLR</a> |

Mascot: <http://www.matrixscience.com/>



# MASCOT Search Results

## Peptide View

MS/MS Fragmentation of **DPDQTDGLGLSYLSSHIANVER**  
 Found in **GELS\_HUMAN**, Gelsolin OS=Homo sapiens GN=GSN PE=1 SV=1

Match to Query 67469: 2697.345672 from(900.122500,3+) rtinseconds(2542) index(10440)  
 Title: Locus:1.1.1.3017.7 File:"2013-07-02 CLN FXIII 60 min 1st F 1.wiff"  
 Data file C:\Program Files (x86)\Matrix Science\Mascot Daemon\mgf4 FXIII 60 min 1st\mascot\_daemon\_merge.mgf

Click mouse within plot area to zoom in by factor of two about that point  
 Or, Plot from  to  Da   
 Label all possible matches  Label matches used for scoring

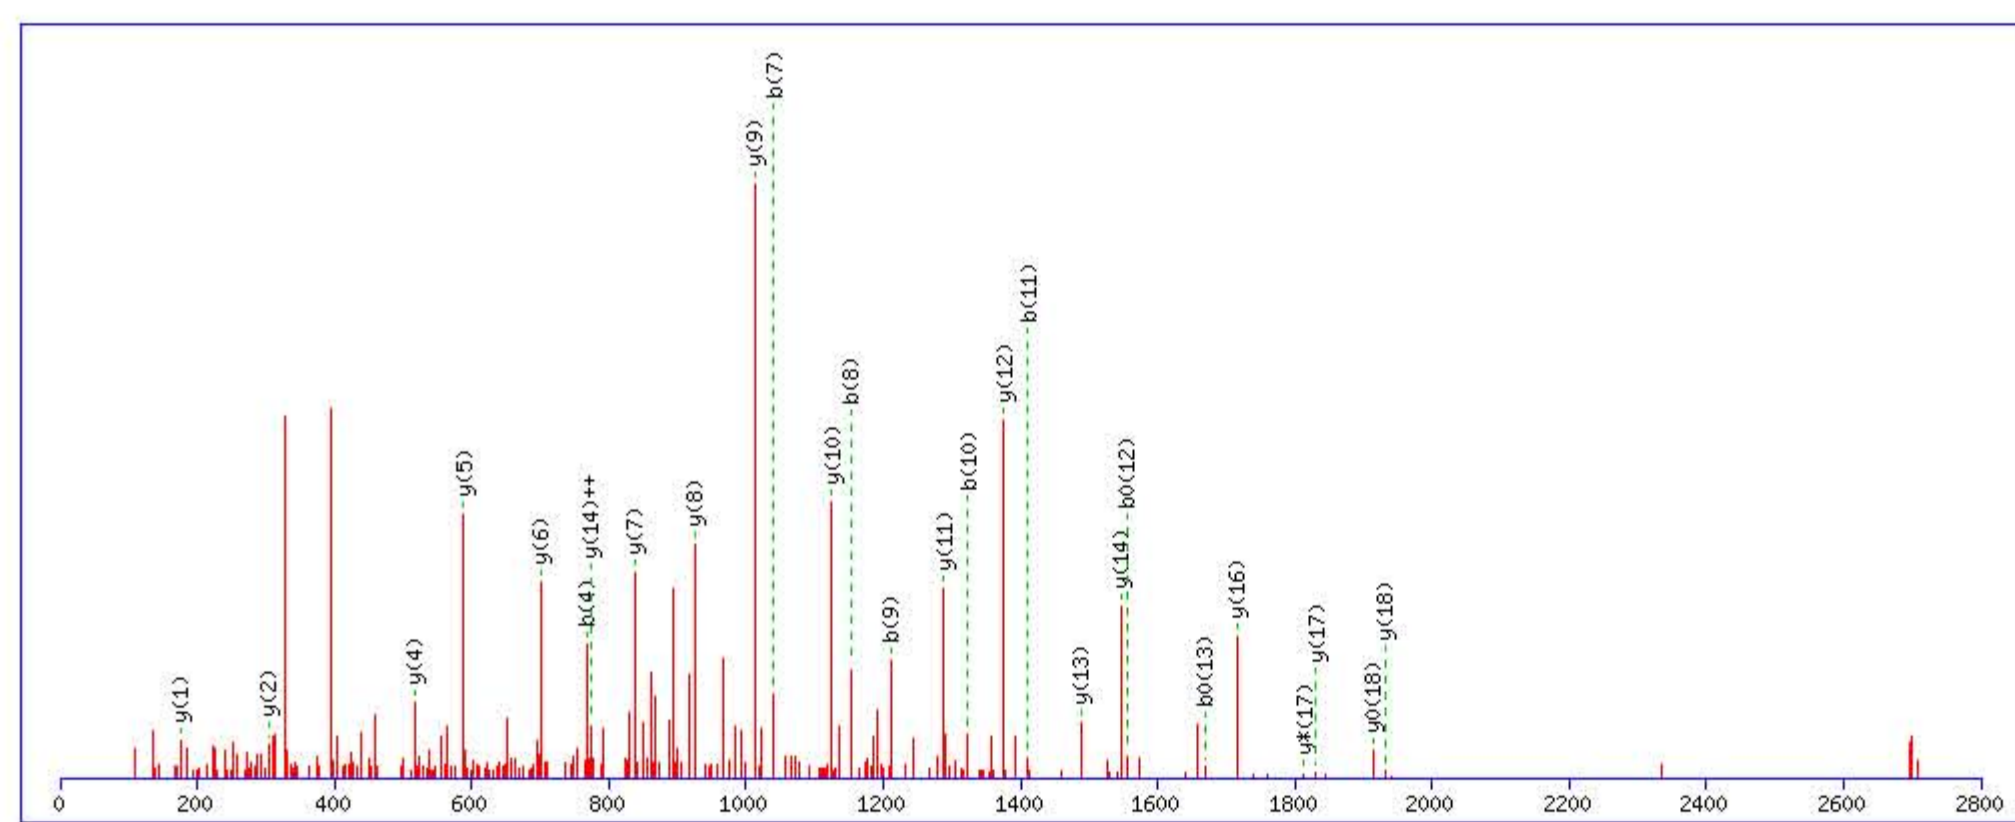

Monoisotopic mass of neutral peptide Mr(calc): 2697.306824  
 Fixed modifications: Carbamidomethyl (C) (apply to specified residues or termini only)  
 Variable modifications:  
 Q4 : Biotin:Thermo-21345 (Q)  
 Ions Score: 120 Expect: 2.9e-011  
 Matches : 27/244 fragment ions using 40 most intense peaks [\(help\)](#)

| #  | b                  | b <sup>++</sup> | b <sup>*</sup> | b <sup>*++</sup> | b <sup>0</sup>     | b <sup>0++</sup> | Seq. | y                  | y <sup>++</sup>   | y <sup>*</sup>     | y <sup>*++</sup> | y <sup>0</sup>     | y <sup>0++</sup> | #  |
|----|--------------------|-----------------|----------------|------------------|--------------------|------------------|------|--------------------|-------------------|--------------------|------------------|--------------------|------------------|----|
| 1  | 116.034219         | 58.520748       |                |                  | 98.023654          | 49.515465        | D    |                    |                   |                    |                  |                    |                  | 22 |
| 2  | 213.086983         | 107.047129      |                |                  | 195.076418         | 98.041847        | P    | 2583.287164        | 1292.147220       | 2566.260615        | 1283.633945      | 2565.276599        | 1283.141937      | 21 |
| 3  | 328.113926         | 164.560601      |                |                  | 310.103361         | 155.555319       | D    | 2486.234400        | 1243.620838       | 2469.207851        | 1235.107563      | 2468.223835        | 1234.615555      | 20 |
| 4  | <b>767.339252</b>  | 384.173264      | 750.312703     | 375.659989       | 749.328687         | 375.167982       | Q    | 2371.207457        | 1186.107366       | 2354.180908        | 1177.594092      | 2353.196892        | 1177.102084      | 19 |
| 5  | 868.386931         | 434.697104      | 851.360382     | 426.183829       | 850.376366         | 425.691821       | T    | <b>1931.982131</b> | 966.494704        | 1914.955582        | 957.981429       | <b>1913.971566</b> | 957.489421       | 18 |
| 6  | 983.413874         | 492.210575      | 966.387325     | 483.697300       | 965.403309         | 483.205292       | D    | <b>1830.934452</b> | 915.970864        | <b>1813.907903</b> | 907.457590       | 1812.923887        | 906.965581       | 17 |
| 7  | <b>1040.435338</b> | 520.721307      | 1023.408789    | 512.208032       | 1022.424773        | 511.716025       | G    | <b>1715.907509</b> | 858.457392        | 1698.880960        | 849.944118       | 1697.896944        | 849.452110       | 16 |
| 8  | <b>1153.519402</b> | 577.263339      | 1136.492853    | 568.750065       | 1135.508837        | 568.258056       | L    | 1658.886045        | 829.946661        | 1641.859496        | 821.433386       | 1640.875480        | 820.941378       | 15 |
| 9  | <b>1210.540866</b> | 605.774071      | 1193.514317    | 597.260796       | 1192.530301        | 596.768788       | G    | <b>1545.801981</b> | <b>773.404629</b> | 1528.775432        | 764.891354       | 1527.791416        | 764.399346       | 14 |
| 10 | <b>1323.624930</b> | 662.316103      | 1306.598381    | 653.802828       | 1305.614365        | 653.310820       | L    | <b>1488.780517</b> | 744.893897        | 1471.753968        | 736.380622       | 1470.769952        | 735.888614       | 13 |
| 11 | <b>1410.656958</b> | 705.832117      | 1393.630409    | 697.318842       | 1392.646393        | 696.826834       | S    | <b>1375.696453</b> | 688.351865        | 1358.669904        | 679.838590       | 1357.685888        | 679.346582       | 12 |
| 12 | 1573.720287        | 787.363781      | 1556.693738    | 778.850507       | <b>1555.709722</b> | 778.358499       | Y    | <b>1288.664425</b> | 644.835851        | 1271.637876        | 636.322576       | 1270.653860        | 635.830568       | 11 |
| 13 | 1686.804351        | 843.905813      | 1669.777802    | 835.392539       | <b>1668.793786</b> | 834.900531       | L    | <b>1125.601096</b> | 563.304186        | 1108.574547        | 554.790912       | 1107.590531        | 554.298904       | 10 |
| 14 | 1773.836379        | 887.421827      | 1756.809830    | 878.908553       | 1755.825814        | 878.416545       | S    | <b>1012.517032</b> | 506.762154        | 995.490483         | 498.248880       | 994.506467         | 497.756872       | 9  |
| 15 | 1860.868407        | 930.937841      | 1843.841858    | 922.424567       | 1842.857842        | 921.932559       | S    | <b>925.485004</b>  | 463.246140        | 908.458455         | 454.732866       | 907.474439         | 454.240858       | 8  |
| 16 | 1997.927319        | 999.467297      | 1980.900770    | 990.954023       | 1979.916754        | 990.462015       | H    | <b>838.452976</b>  | 419.730126        | 821.426427         | 411.216852       | 820.442411         | 410.724844       | 7  |
| 17 | 2111.011383        | 1056.009329     | 2093.984834    | 1047.496055      | 2093.000818        | 1047.004047      | I    | <b>701.394064</b>  | 351.200670        | 684.367515         | 342.687396       | 683.383499         | 342.195388       | 6  |
| 18 | 2182.048497        | 1091.527886     | 2165.021948    | 1083.014612      | 2164.037932        | 1082.522604      | A    | <b>588.310000</b>  | 294.658638        | 571.283451         | 286.145364       | 570.299435         | 285.653356       | 5  |
| 19 | 2296.091424        | 1148.549350     | 2279.064875    | 1140.036075      | 2278.080859        | 1139.544067      | N    | <b>517.272886</b>  | 259.140081        | 500.246337         | 250.626806       | 499.262321         | 250.134798       | 4  |
| 20 | 2395.159838        | 1198.083557     | 2378.133289    | 1189.570282      | 2377.149273        | 1189.078274      | V    | 403.229959         | 202.118617        | 386.203410         | 193.605343       | 385.219394         | 193.113335       | 3  |
| 21 | 2524.202431        | 1262.604853     | 2507.175882    | 1254.091579      | 2506.191866        | 1253.599571      | E    | <b>304.161545</b>  | 152.584411        | 287.134996         | 144.071136       | 286.150980         | 143.579128       | 2  |
| 22 |                    |                 |                |                  |                    |                  | R    | <b>175.118952</b>  | 88.063114         | 158.092403         | 79.549839        |                    |                  | 1  |

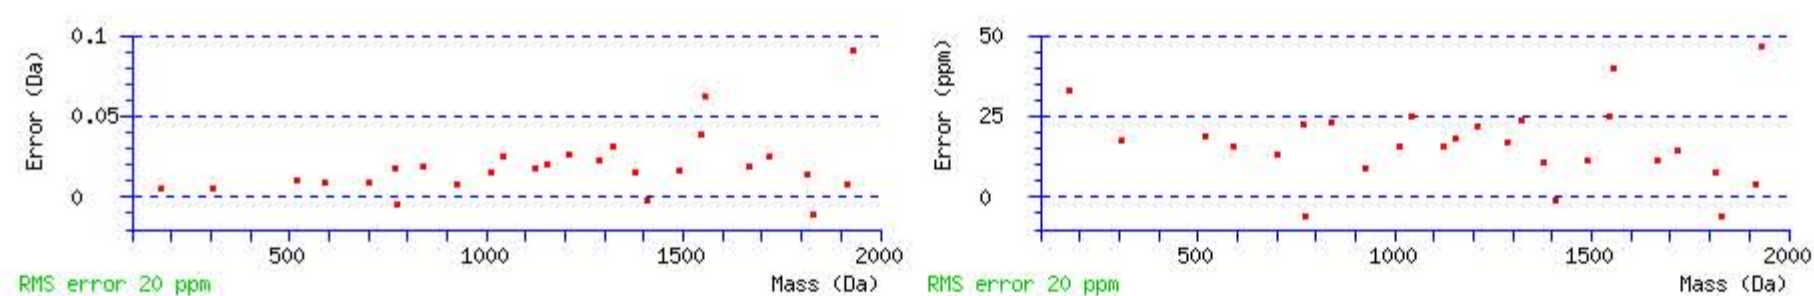

NCBI BLAST search of **DPDQTDGLGLSYLSSHIANVER**  
 (Parameters: blastp, nr protein database, expect=20000, no filter, PAM30)  
 Other BLAST [web gateways](#)

### All matches to this query

| Score | Mr(calc):   | Delta    | Sequence                               |
|-------|-------------|----------|----------------------------------------|
| 120.0 | 2697.306824 | 0.038848 | <a href="#">DPDQTDGLGLSYLSSHIANVER</a> |



# MASCOT Search Results

## Peptide View

MS/MS Fragmentation of **VPFDAATLHTSTAMAAQHGMDDDDGTGQK**  
 Found in **GELS\_HUMAN**, Gelsolin OS=Homo sapiens GN=GSN PE=1 SV=1

Match to Query 73262: 3183.477576 from(796.876670,4+) rtinseconds(1934) index(6623)  
 Title: Locus:1.1.1.2805.22 File:"2013-07-02 CLN FXIII 60 min 1st F 1.wiff"  
 Data file C:\Program Files (x86)\Matrix Science\Mascot Daemon\mgf4 FXIII 60 min 1st\mascot\_daemon\_merge.mgf

Click mouse within plot area to zoom in by factor of two about that point

Or, Plot from 0 to 2400 Da Full range

Label all possible matches  Label matches used for scoring

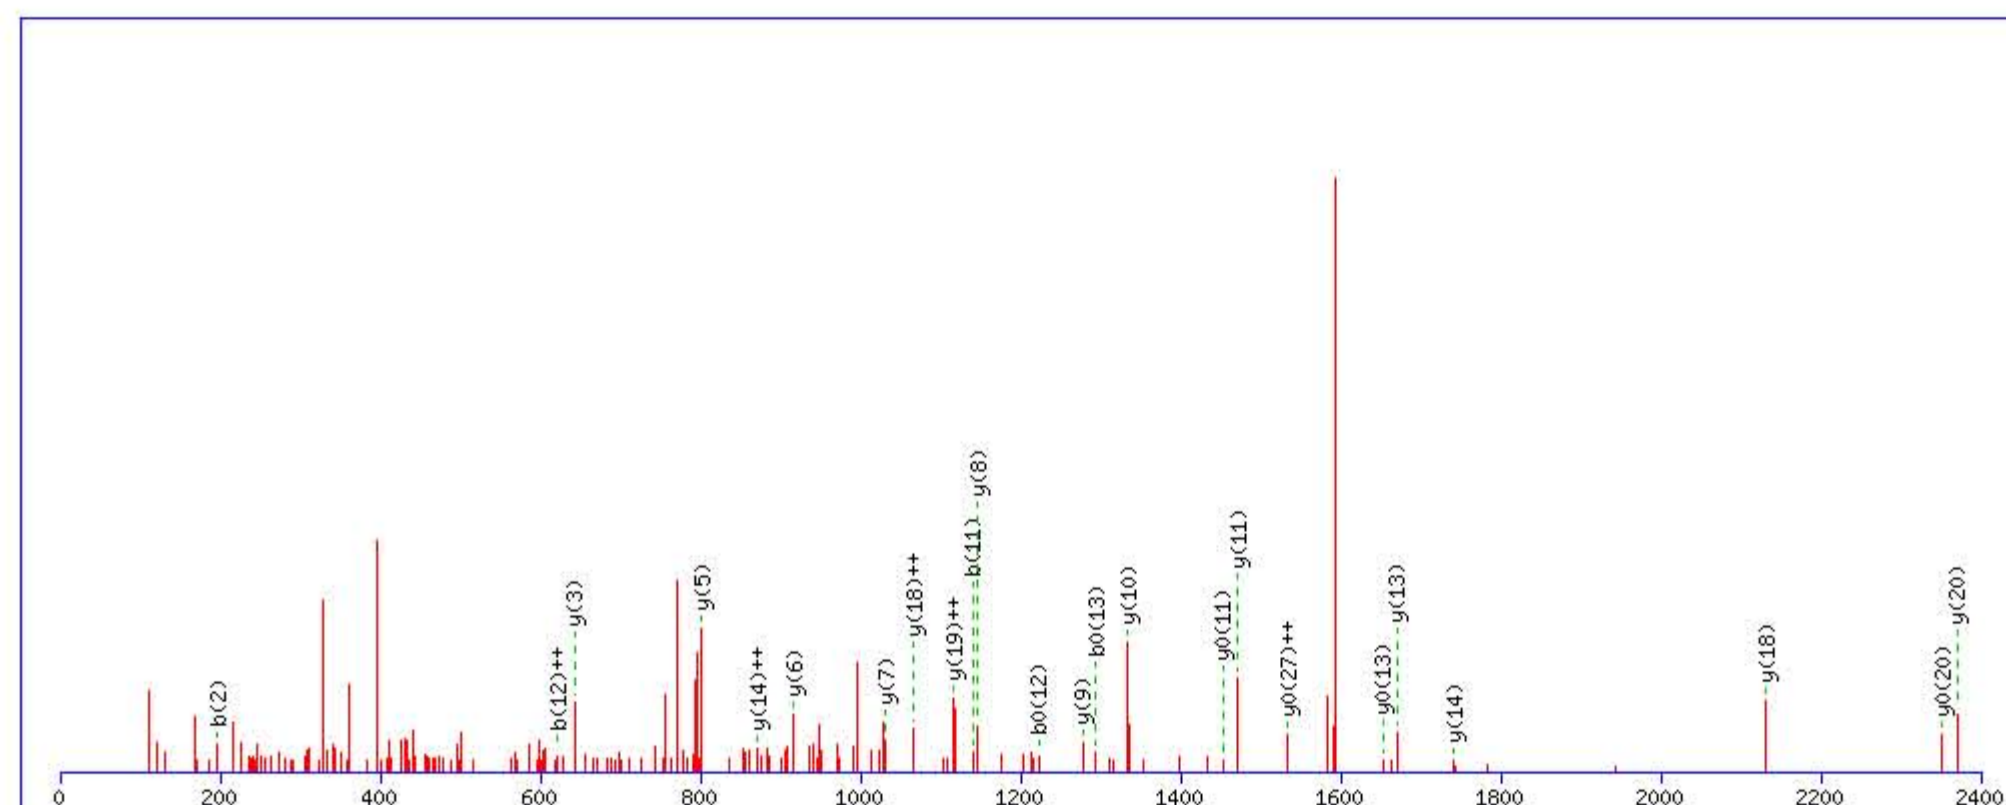

Monoisotopic mass of neutral peptide Mr(calc): 3183.442383  
 Fixed modifications: Carbamidomethyl (C) (apply to specified residues or termini only)  
 Variable modifications:  
 Q27 : Biotin:Thermo-21345 (Q)  
 Ions Score: 38 Expect: 0.0024  
 Matches : 24/280 fragment ions using 69 most intense peaks [\(help\)](#)

| #  | b                  | b <sup>++</sup>   | b <sup>*</sup> | b <sup>***</sup> | b <sup>0</sup>     | b <sup>0++</sup> | Seq. | y                  | y <sup>++</sup>    | y <sup>*</sup> | y <sup>***</sup> | y <sup>0</sup>     | y <sup>0++</sup>   | #  |
|----|--------------------|-------------------|----------------|------------------|--------------------|------------------|------|--------------------|--------------------|----------------|------------------|--------------------|--------------------|----|
| 1  | 100.075690         | 50.541483         |                |                  |                    |                  | V    |                    |                    |                |                  |                    |                    | 28 |
| 2  | <b>197.128454</b>  | 99.067865         |                |                  |                    |                  | P    | 3085.381222        | 1543.194249        | 3068.354673    | 1534.680974      | 3067.370657        | <b>1534.188966</b> | 27 |
| 3  | 344.196868         | 172.602072        |                |                  |                    |                  | F    | 2988.328458        | 1494.667867        | 2971.301909    | 1486.154592      | 2970.317893        | 1485.662584        | 26 |
| 4  | 459.223811         | 230.115543        |                |                  | 441.213246         | 221.110261       | D    | 2841.260044        | 1421.133660        | 2824.233495    | 1412.620385      | 2823.249479        | 1412.128377        | 25 |
| 5  | 530.260925         | 265.634101        |                |                  | 512.250360         | 256.628818       | A    | 2726.233101        | 1363.620188        | 2709.206552    | 1355.106914      | 2708.222536        | 1354.614906        | 24 |
| 6  | 601.298039         | 301.152658        |                |                  | 583.287474         | 292.147375       | A    | 2655.195987        | 1328.101631        | 2638.169438    | 1319.588357      | 2637.185422        | 1319.096349        | 23 |
| 7  | 702.345718         | 351.676497        |                |                  | 684.335153         | 342.671215       | T    | 2584.158873        | 1292.583074        | 2567.132324    | 1284.069800      | 2566.148308        | 1283.577792        | 22 |
| 8  | 815.429782         | 408.218529        |                |                  | 797.419217         | 399.213247       | L    | 2483.111194        | 1242.059235        | 2466.084645    | 1233.545960      | 2465.100629        | 1233.053952        | 21 |
| 9  | 952.488694         | 476.747985        |                |                  | 934.478129         | 467.742703       | H    | <b>2370.027130</b> | 1185.517203        | 2353.000581    | 1177.003928      | <b>2352.016565</b> | 1176.511920        | 20 |
| 10 | 1053.536373        | 527.271824        |                |                  | 1035.525808        | 518.266542       | T    | 2232.968218        | <b>1116.987747</b> | 2215.941669    | 1108.474472      | 2214.957653        | 1107.982464        | 19 |
| 11 | <b>1140.568401</b> | 570.787839        |                |                  | 1122.557836        | 561.782556       | S    | <b>2131.920539</b> | <b>1066.463907</b> | 2114.893990    | 1057.950633      | 2113.909974        | 1057.458625        | 18 |
| 12 | 1241.616080        | <b>621.311678</b> |                |                  | <b>1223.605515</b> | 612.306396       | T    | 2044.888511        | 1022.947893        | 2027.861962    | 1014.434619      | 2026.877946        | 1013.942611        | 17 |
| 13 | 1312.653194        | 656.830235        |                |                  | <b>1294.642629</b> | 647.824952       | A    | 1943.840832        | 972.424054         | 1926.814283    | 963.910779       | 1925.830267        | 963.418771         | 16 |
| 14 | 1443.693679        | 722.350478        |                |                  | 1425.683114        | 713.345195       | M    | 1872.803718        | 936.905497         | 1855.777169    | 928.392222       | 1854.793153        | 927.900214         | 15 |
| 15 | 1514.730793        | 757.869035        |                |                  | 1496.720228        | 748.863752       | A    | <b>1741.763233</b> | <b>871.385254</b>  | 1724.736684    | 862.871980       | 1723.752668        | 862.379972         | 14 |
| 16 | 1585.767907        | 793.387591        |                |                  | 1567.757342        | 784.382309       | A    | <b>1670.726119</b> | 835.866697         | 1653.699570    | 827.353423       | <b>1652.715554</b> | 826.861415         | 13 |
| 17 | 1713.826485        | 857.416880        | 1696.799936    | 848.903606       | 1695.815920        | 848.411598       | Q    | 1599.689005        | 800.348140         | 1582.662456    | 791.834866       | 1581.678440        | 791.342858         | 12 |
| 18 | 1850.885397        | 925.946336        | 1833.858848    | 917.433062       | 1832.874832        | 916.941054       | H    | <b>1471.630427</b> | 736.318851         | 1454.603878    | 727.805577       | <b>1453.619862</b> | 727.313569         | 11 |
| 19 | 1907.906861        | 954.457068        | 1890.880312    | 945.943794       | 1889.896296        | 945.451786       | G    | <b>1334.571515</b> | 667.789395         | 1317.544966    | 659.276121       | 1316.560950        | 658.784113         | 10 |
| 20 | 2038.947346        | 1019.977311       | 2021.920797    | 1011.464036      | 2020.936781        | 1010.972028      | M    | <b>1277.550051</b> | 639.278663         | 1260.523502    | 630.765389       | 1259.539486        | 630.273381         | 9  |
| 21 | 2153.974289        | 1077.490782       | 2136.947740    | 1068.977508      | 2135.963724        | 1068.485500      | D    | <b>1146.509566</b> | 573.758421         | 1129.483017    | 565.245146       | 1128.499001        | 564.753138         | 8  |
| 22 | 2269.001232        | 1135.004254       | 2251.974683    | 1126.490979      | 2250.990667        | 1125.998971      | D    | <b>1031.482623</b> | 516.244949         | 1014.456074    | 507.731675       | 1013.472058        | 507.239667         | 7  |
| 23 | 2384.028175        | 1192.517725       | 2367.001626    | 1184.004451      | 2366.017610        | 1183.512443      | D    | <b>916.455680</b>  | 458.731478         | 899.429131     | 450.218203       | 898.445115         | 449.726195         | 6  |
| 24 | 2441.049639        | 1221.028457       | 2424.023090    | 1212.515183      | 2423.039074        | 1212.023175      | G    | <b>801.428737</b>  | 401.218007         | 784.402188     | 392.704732       | 783.418172         | 392.212724         | 5  |
| 25 | 2542.097318        | 1271.552297       | 2525.070769    | 1263.039022      | 2524.086753        | 1262.547014      | T    | 744.407273         | 372.707275         | 727.380724     | 364.194000       | 726.396708         | 363.701992         | 4  |
| 26 | 2599.118782        | 1300.063029       | 2582.092233    | 1291.549754      | 2581.108217        | 1291.057746      | G    | <b>643.359594</b>  | 322.183435         | 626.333045     | 313.670161       |                    |                    | 3  |
| 27 | 3038.344108        | 1519.675692       | 3021.317559    | 1511.162417      | 3020.333543        | 1510.670409      | Q    | 586.338130         | 293.672703         | 569.311581     | 285.159429       |                    |                    | 2  |
| 28 |                    |                   |                |                  |                    |                  | K    | 147.112804         | 74.060040          | 130.086255     | 65.546765        |                    |                    | 1  |

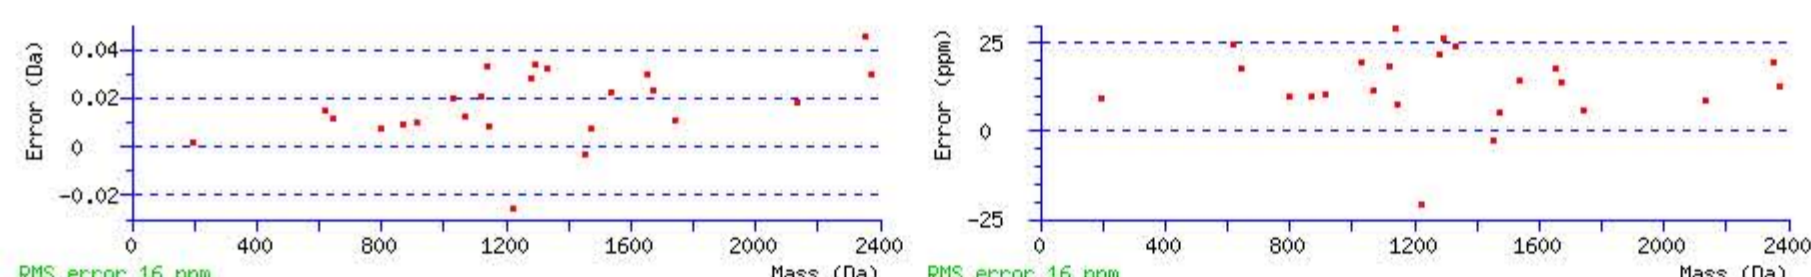

NCBI BLAST search of **VPFDAATLHTSTAMAAQHGMDDDDGTGQK**  
 (Parameters: blastp, nr protein database, expect=20000, no filter, PAM30)  
 Other BLAST [web gateways](#)

### All matches to this query

| Score | Mr(calc):   | Delta    | Sequence                                      |
|-------|-------------|----------|-----------------------------------------------|
| 37.9  | 3183.442383 | 0.035193 | <a href="#">VPFDAATLHTSTAMAAQHGMDDDDGTGQK</a> |
| 5.3   | 3183.442383 | 0.035193 | <a href="#">VPFDAATLHTSTAMAAQHGMDDDDGTGQK</a> |



# MASCOT Search Results

## Peptide View

MS/MS Fragmentation of **VIHDNFGIVEGLMTTVHAITATQK**  
 Found in **G3P\_HUMAN**, Glyceraldehyde-3-phosphate dehydrogenase OS=Homo sapiens GN=GAPDH PE=1 SV=3

Match to Query 70634: 2905.559296 from(727.397100,4+) rtinseconds(3068) index(68142)  
 Title: Locus:1.1.1.3369.9 File:"2013-07-02 CLN FXIII 60 min 1st F 4.wiff"  
 Data file C:\Program Files (x86)\Matrix Science\Mascot Daemon\mgf\4 FXIII 60 min 1st\mascot\_daemon\_merge.mgf

Click mouse within plot area to zoom in by factor of two about that point  
 Or, Plot from  to  Da   
 Label all possible matches  Label matches used for scoring

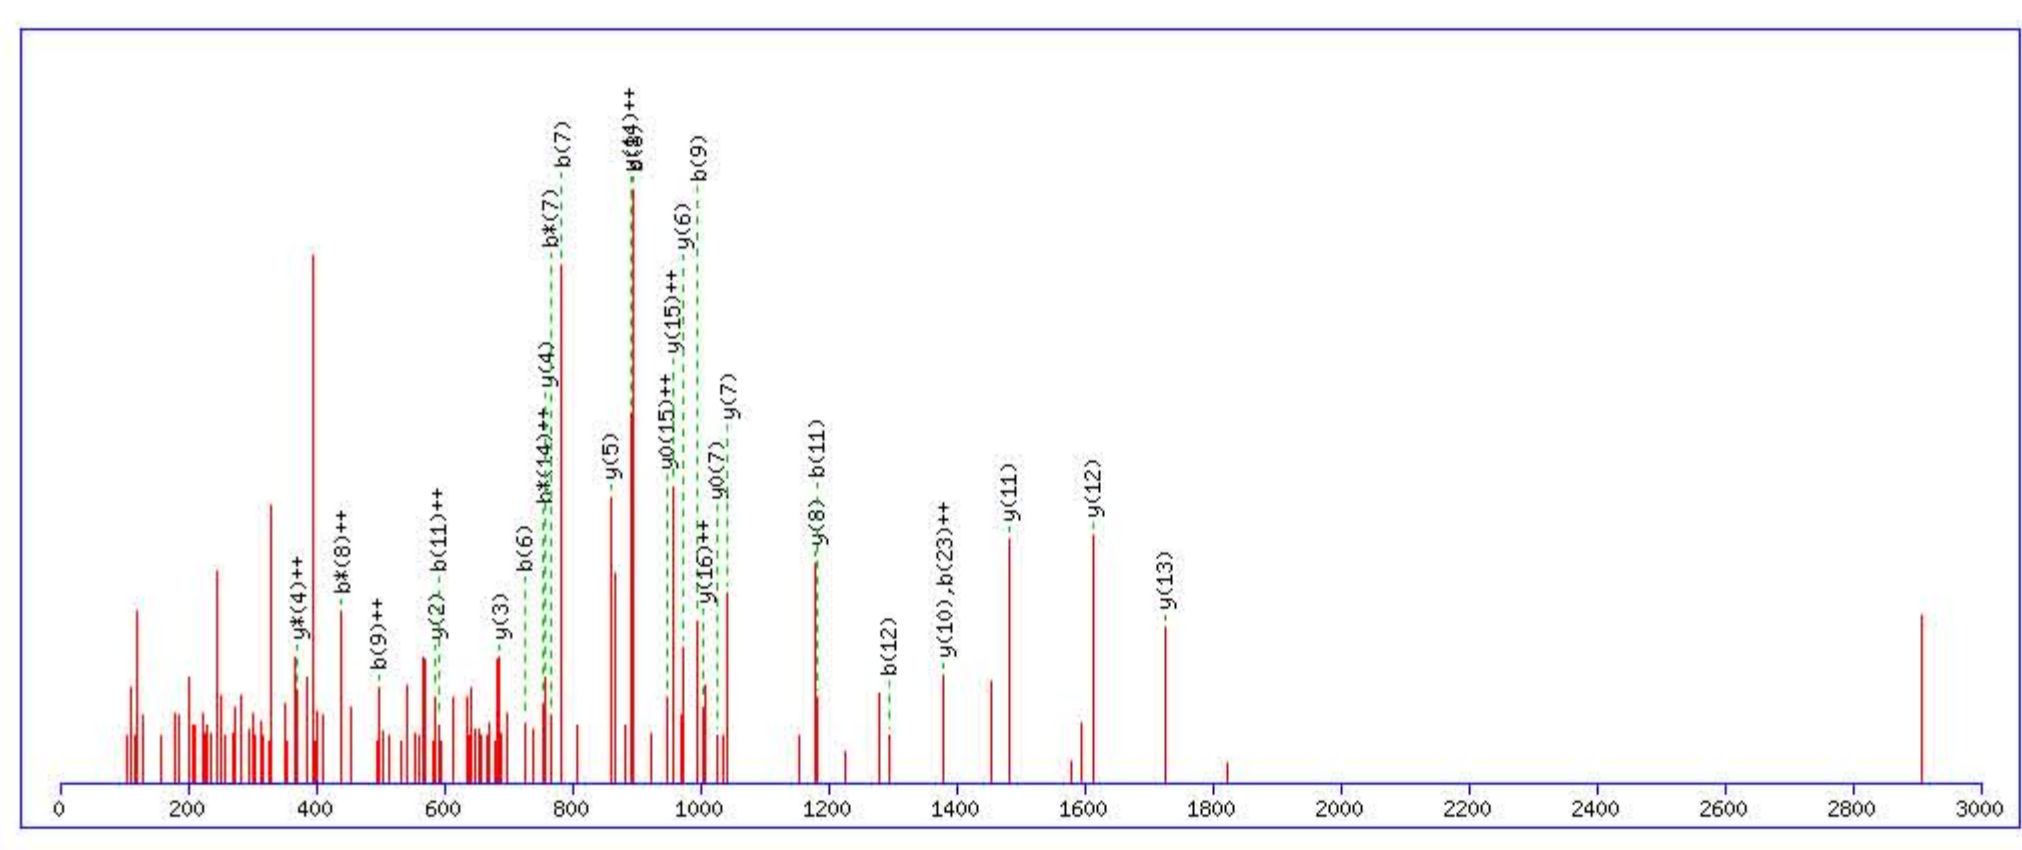

Monoisotopic mass of neutral peptide Mr(calc): 2905.519424  
 Fixed modifications: Carbamidomethyl (C) (apply to specified residues or termini only)  
 Variable modifications: Q23 : Biotin:Thermo-21345 (Q)  
 Ions Score: 45 Expect: 0.00054  
 Matches : 29/258 fragment ions using 66 most intense peaks [\(help\)](#)

| #  | b                  | b <sup>++</sup>    | b <sup>*</sup>    | b <sup>*++</sup>  | b <sup>0</sup> | b <sup>0++</sup> | Seq. | y                  | y <sup>++</sup>    | y <sup>*</sup> | y <sup>*++</sup>  | y <sup>0</sup>     | y <sup>0++</sup>  | #  |
|----|--------------------|--------------------|-------------------|-------------------|----------------|------------------|------|--------------------|--------------------|----------------|-------------------|--------------------|-------------------|----|
| 1  | 100.075690         | 50.541483          |                   |                   |                |                  | V    |                    |                    |                |                   |                    |                   | 24 |
| 2  | 213.159754         | 107.083515         |                   |                   |                |                  | I    | 2807.458272        | 1404.232774        | 2790.431723    | 1395.719499       | 2789.447707        | 1395.227491       | 23 |
| 3  | 350.218666         | 175.612971         |                   |                   |                |                  | H    | 2694.374208        | 1347.690742        | 2677.347659    | 1339.177467       | 2676.363643        | 1338.685459       | 22 |
| 4  | 465.245609         | 233.126443         |                   |                   | 447.235044     | 224.121160       | D    | 2557.315296        | 1279.161286        | 2540.288747    | 1270.648011       | 2539.304731        | 1270.156003       | 21 |
| 5  | 579.288536         | 290.147906         | 562.261987        | 281.634632        | 561.277971     | 281.142624       | N    | 2442.288353        | 1221.647814        | 2425.261804    | 1213.134540       | 2424.277788        | 1212.642532       | 20 |
| 6  | <b>726.356950</b>  | 363.682113         | 709.330401        | 355.168838        | 708.346385     | 354.676830       | F    | 2328.245426        | 1164.626351        | 2311.218877    | 1156.113076       | 2310.234861        | 1155.621068       | 19 |
| 7  | <b>783.378414</b>  | 392.192845         | <b>766.351865</b> | 383.679571        | 765.367849     | 383.187563       | G    | 2181.177012        | 1091.092144        | 2164.150463    | 1082.578869       | 2163.166447        | 1082.086861       | 18 |
| 8  | <b>896.462478</b>  | 448.734877         | 879.435929        | <b>440.221603</b> | 878.451913     | 439.729595       | I    | 2124.155548        | 1062.581412        | 2107.128999    | 1054.068137       | 2106.144983        | 1053.576129       | 17 |
| 9  | <b>995.530892</b>  | <b>498.269084</b>  | 978.504343        | 489.755810        | 977.520327     | 489.263802       | V    | 2011.071484        | <b>1006.039380</b> | 1994.044935    | 997.526105        | 1993.060919        | 997.034097        | 16 |
| 10 | 1124.573485        | 562.790381         | 1107.546936       | 554.277106        | 1106.562920    | 553.785098       | E    | 1912.003070        | <b>956.505173</b>  | 1894.976521    | 947.991899        | 1893.992505        | <b>947.499890</b> | 15 |
| 11 | <b>1181.594949</b> | <b>591.301113</b>  | 1164.568400       | 582.787838        | 1163.584384    | 582.295830       | G    | 1782.960477        | <b>891.983876</b>  | 1765.933928    | 883.470602        | 1764.949912        | 882.978594        | 14 |
| 12 | <b>1294.679013</b> | 647.843144         | 1277.652464       | 639.329870        | 1276.668448    | 638.837862       | L    | <b>1725.939013</b> | 863.473144         | 1708.912464    | 854.959870        | 1707.928448        | 854.467862        | 13 |
| 13 | 1425.719498        | 713.363387         | 1408.692949       | 704.850113        | 1407.708933    | 704.358104       | M    | <b>1612.854949</b> | 806.931113         | 1595.828400    | 798.417838        | 1594.844384        | 797.925830        | 12 |
| 14 | 1526.767177        | 763.887227         | 1509.740628       | <b>755.373952</b> | 1508.756612    | 754.881944       | T    | <b>1481.814464</b> | 741.410870         | 1464.787915    | 732.897596        | 1463.803899        | 732.405588        | 11 |
| 15 | 1627.814856        | 814.411066         | 1610.788307       | 805.897792        | 1609.804291    | 805.405783       | T    | <b>1380.766785</b> | 690.887031         | 1363.740236    | 682.373756        | 1362.756220        | 681.881748        | 10 |
| 16 | 1726.883270        | 863.945273         | 1709.856721       | 855.431999        | 1708.872705    | 854.939991       | V    | 1279.719106        | 640.363191         | 1262.692557    | 631.849917        | 1261.708541        | 631.357909        | 9  |
| 17 | 1863.942182        | 932.474729         | 1846.915633       | 923.961455        | 1845.931617    | 923.469447       | H    | <b>1180.650692</b> | 590.828984         | 1163.624143    | 582.315710        | 1162.640127        | 581.823701        | 8  |
| 18 | 1934.979296        | 967.993286         | 1917.952747       | 959.480012        | 1916.968731    | 958.988003       | A    | <b>1043.591780</b> | 522.299528         | 1026.565231    | 513.786254        | <b>1025.581215</b> | 513.294245        | 7  |
| 19 | 2048.063360        | 1024.535318        | 2031.036811       | 1016.022044       | 2030.052795    | 1015.530036      | I    | <b>972.554666</b>  | 486.780971         | 955.528117     | 478.267697        | 954.544101         | 477.775689        | 6  |
| 20 | 2149.111039        | 1075.059157        | 2132.084490       | 1066.545883       | 2131.100474    | 1066.053875      | T    | <b>859.470602</b>  | 430.238939         | 842.444053     | 421.725665        | 841.460037         | 421.233657        | 5  |
| 21 | 2220.148153        | 1110.577714        | 2203.121604       | 1102.064440       | 2202.137588    | 1101.572432      | A    | <b>758.422923</b>  | 379.715100         | 741.396374     | <b>371.201825</b> | 740.412358         | 370.709817        | 4  |
| 22 | 2321.195832        | 1161.101554        | 2304.169283       | 1152.588279       | 2303.185267    | 1152.096271      | T    | <b>687.385809</b>  | 344.196543         | 670.359260     | 335.683268        | 669.375244         | 335.191260        | 3  |
| 23 | 2760.421158        | <b>1380.714217</b> | 2743.394609       | 1372.200942       | 2742.410593    | 1371.708934      | Q    | <b>586.338130</b>  | 293.672703         | 569.311581     | 285.159429        |                    |                   | 2  |
| 24 |                    |                    |                   |                   |                |                  | K    | 147.112804         | 74.060040          | 130.086255     | 65.546765         |                    |                   | 1  |

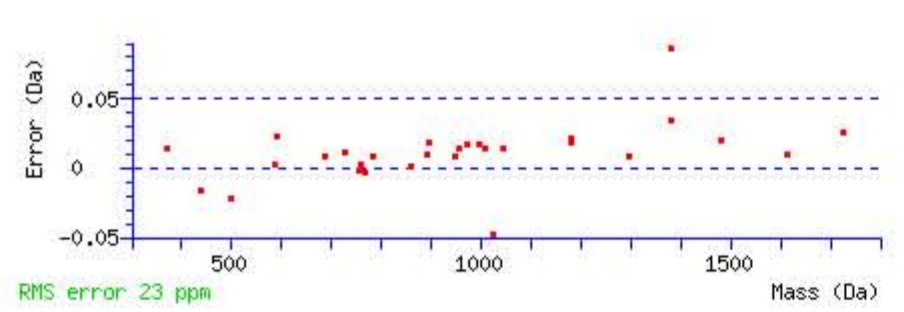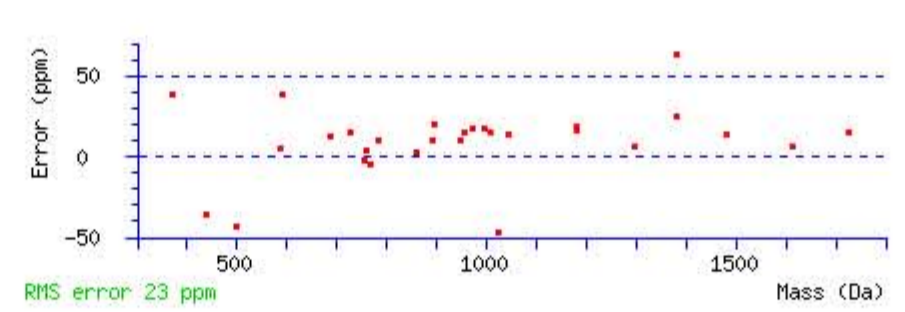

NCBI BLAST search of **VIHDNFGIVEGLMTTVHAITATQK**  
 (Parameters: blastp, nr protein database, expect=20000, no filter, PAM30)  
 Other BLAST [web gateways](#)

### All matches to this query

| Score | Mr(calc):   | Delta    | Sequence                                 |
|-------|-------------|----------|------------------------------------------|
| 44.8  | 2905.519424 | 0.039872 | <a href="#">VIHDNFGIVEGLMTTVHAITATQK</a> |



# MASCOT Search Results

## Peptide View

MS/MS Fragmentation of **YVMLPVADQYDCITHYEGSTCPK**  
 Found in **HPTR\_HUMAN**, Haptoglobin-related protein OS=Homo sapiens GN=HPR PE=1 SV=2

Match to Query 72122: 3057.413142 from(1020.144990,3+) rtinseconds(2443) index(44926)  
 Title: Locus:1.1.1.3134.13 File:"2013-07-02 CLN FXIII 60 min 1st F 3.wiff"  
 Data file C:\Program Files (x86)\Matrix Science\Mascot Daemon\mgf4 FXIII 60 min 1st\mascot\_daemon\_merge.mgf

Click mouse within plot area to zoom in by factor of two about that point  
 Or, Plot from  to  Da   
 Label all possible matches  Label matches used for scoring

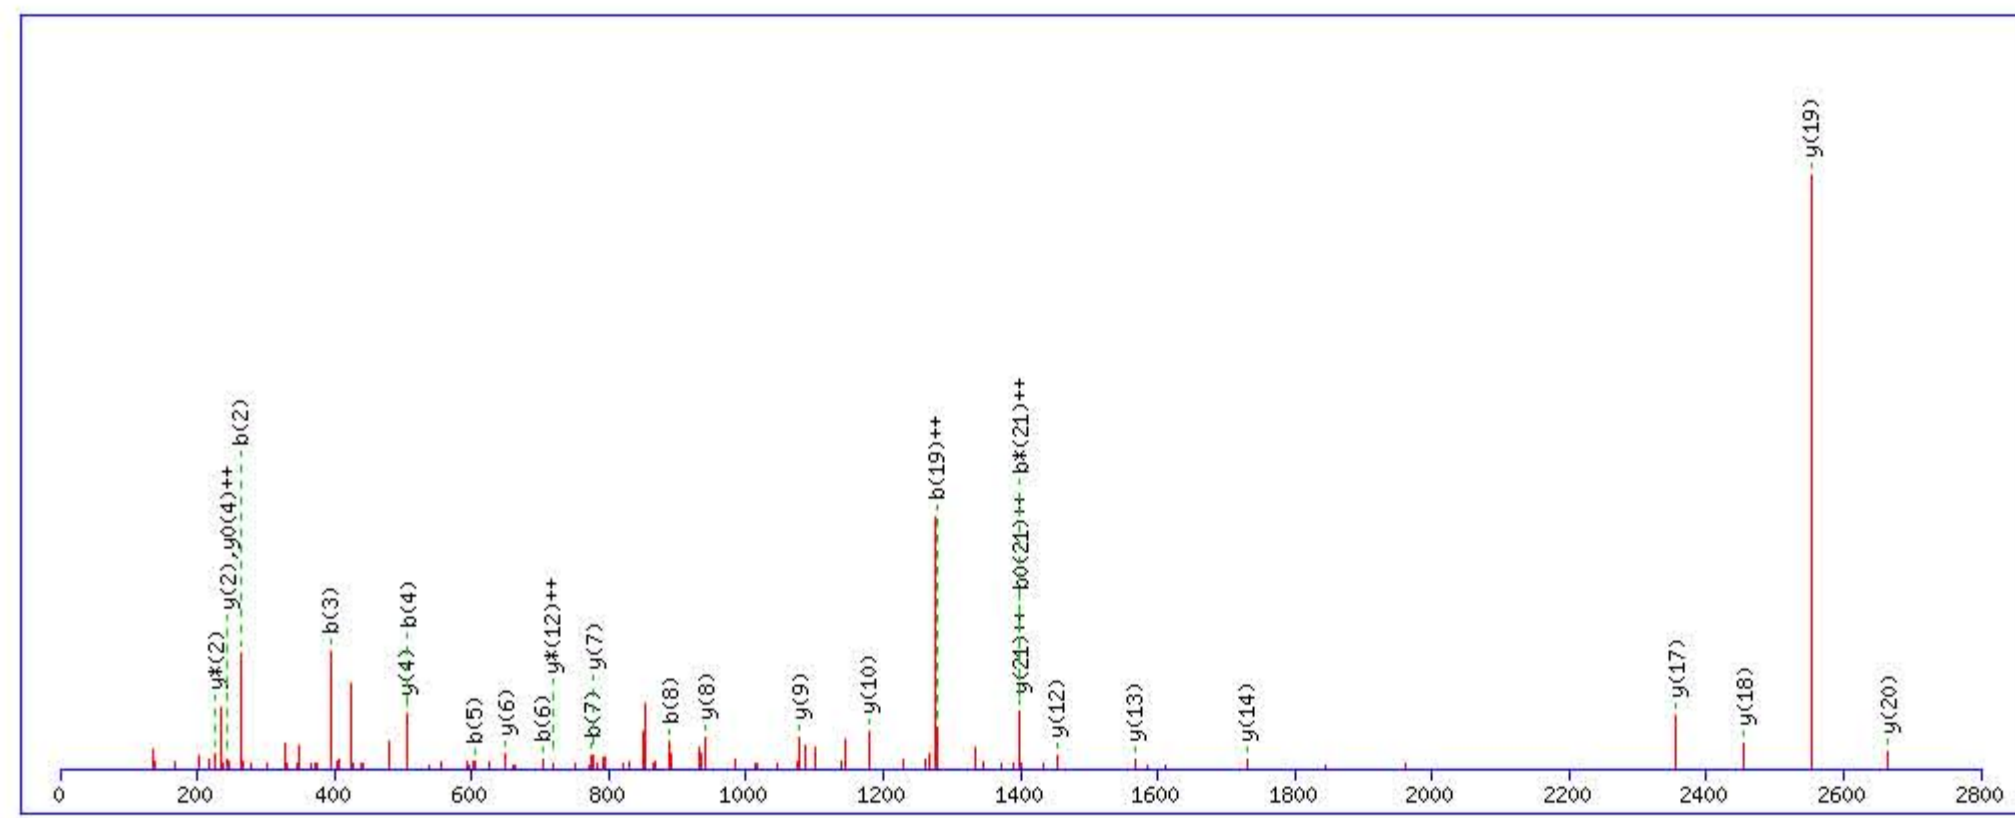

Monoisotopic mass of neutral peptide Mr(calc): 3057.374466  
 Fixed modifications: Carbamidomethyl (C) (apply to specified residues or termini only)  
 Variable modifications:  
 Q9 : Biotin:Thermo-21345 (Q)  
 Ions Score: 74 Expect: 6.4e-007  
 Matches : 28/228 fragment ions using 51 most intense peaks [\(help\)](#)

| #  | b                 | b <sup>++</sup>    | b <sup>*</sup> | b <sup>*++</sup>   | b <sup>0</sup> | b <sup>0++</sup>   | Seq. | y                  | y <sup>++</sup>    | y <sup>*</sup>    | y <sup>*++</sup>  | y <sup>0</sup> | y <sup>0++</sup>  | #  |
|----|-------------------|--------------------|----------------|--------------------|----------------|--------------------|------|--------------------|--------------------|-------------------|-------------------|----------------|-------------------|----|
| 1  | 164.070605        | 82.538940          |                |                    |                |                    | Y    |                    |                    |                   |                   |                |                   | 23 |
| 2  | <b>263.139019</b> | 132.073148         |                |                    |                |                    | V    | 2895.318410        | 1448.162843        | 2878.291861       | 1439.649568       | 2877.307845    | 1439.157560       | 22 |
| 3  | <b>394.179504</b> | 197.593390         |                |                    |                |                    | M    | 2796.249996        | <b>1398.628636</b> | 2779.223447       | 1390.115361       | 2778.239431    | 1389.623353       | 21 |
| 4  | <b>507.263568</b> | 254.135422         |                |                    |                |                    | L    | <b>2665.209511</b> | 1333.108393        | 2648.182962       | 1324.595119       | 2647.198946    | 1324.103111       | 20 |
| 5  | <b>604.316332</b> | 302.661804         |                |                    |                |                    | P    | <b>2552.125447</b> | 1276.566361        | 2535.098898       | 1268.053087       | 2534.114882    | 1267.561079       | 19 |
| 6  | <b>703.384746</b> | 352.196011         |                |                    |                |                    | V    | <b>2455.072683</b> | 1228.039979        | 2438.046134       | 1219.526705       | 2437.062118    | 1219.034697       | 18 |
| 7  | <b>774.421860</b> | 387.714568         |                |                    |                |                    | A    | <b>2356.004269</b> | 1178.505772        | 2338.977720       | 1169.992498       | 2337.993704    | 1169.500490       | 17 |
| 8  | <b>889.448803</b> | 445.228040         |                |                    | 871.438238     | 436.222757         | D    | 2284.967155        | 1142.987215        | 2267.940606       | 1134.473941       | 2266.956590    | 1133.981933       | 16 |
| 9  | 1328.674129       | 664.840703         | 1311.647580    | 656.327428         | 1310.663564    | 655.835420         | Q    | 2169.940212        | 1085.473744        | 2152.913663       | 1076.960469       | 2151.929647    | 1076.468461       | 15 |
| 10 | 1491.737458       | 746.372367         | 1474.710909    | 737.859093         | 1473.726893    | 737.367085         | Y    | <b>1730.714886</b> | 865.861081         | 1713.688337       | 857.347807        | 1712.704321    | 856.855799        | 14 |
| 11 | 1606.764401       | 803.885839         | 1589.737852    | 795.372564         | 1588.753836    | 794.880556         | D    | <b>1567.651557</b> | 784.329417         | 1550.625008       | 775.816142        | 1549.640992    | 775.324134        | 13 |
| 12 | 1766.795050       | 883.901163         | 1749.768501    | 875.387889         | 1748.784485    | 874.895881         | C    | <b>1452.624614</b> | 726.815945         | 1435.598065       | <b>718.302671</b> | 1434.614049    | 717.810663        | 12 |
| 13 | 1879.879114       | 940.443195         | 1862.852565    | 931.929921         | 1861.868549    | 931.437913         | I    | 1292.593965        | 646.800621         | 1275.567416       | 638.287346        | 1274.583400    | 637.795338        | 11 |
| 14 | 1980.926793       | 990.967035         | 1963.900244    | 982.453760         | 1962.916228    | 981.961752         | T    | <b>1179.509901</b> | 590.258589         | 1162.483352       | 581.745314        | 1161.499336    | 581.253306        | 10 |
| 15 | 2117.985705       | 1059.496490        | 2100.959156    | 1050.983216        | 2099.975140    | 1050.491208        | H    | <b>1078.462222</b> | 539.734749         | 1061.435673       | 531.221475        | 1060.451657    | 530.729467        | 9  |
| 16 | 2281.049034       | 1141.028155        | 2264.022485    | 1132.514880        | 2263.038469    | 1132.022872        | Y    | <b>941.403310</b>  | 471.205293         | 924.376761        | 462.692018        | 923.392745     | 462.200010        | 8  |
| 17 | 2410.091627       | 1205.549452        | 2393.065078    | 1197.036177        | 2392.081062    | 1196.544169        | E    | <b>778.339981</b>  | 389.673628         | 761.313432        | 381.160354        | 760.329416     | 380.668346        | 7  |
| 18 | 2467.113091       | 1234.060184        | 2450.086542    | 1225.546909        | 2449.102526    | 1225.054901        | G    | <b>649.297388</b>  | 325.152332         | 632.270839        | 316.639057        | 631.286823     | 316.147049        | 6  |
| 19 | 2554.145119       | <b>1277.576198</b> | 2537.118570    | 1269.062923        | 2536.134554    | 1268.570915        | S    | 592.275924         | 296.641600         | 575.249375        | 288.128325        | 574.265359     | 287.636317        | 5  |
| 20 | 2655.192798       | 1328.100037        | 2638.166249    | 1319.586762        | 2637.182233    | 1319.094754        | T    | <b>505.243896</b>  | 253.125586         | 488.217347        | 244.612311        | 487.233331     | <b>244.120303</b> | 4  |
| 21 | 2815.223447       | 1408.115361        | 2798.196898    | <b>1399.602087</b> | 2797.212882    | <b>1399.110079</b> | C    | 404.196217         | 202.601746         | 387.169668        | 194.088472        |                |                   | 3  |
| 22 | 2912.276211       | 1456.641743        | 2895.249662    | 1448.128469        | 2894.265646    | 1447.636461        | P    | <b>244.165568</b>  | 122.586422         | <b>227.139019</b> | 114.073148        |                |                   | 2  |
| 23 |                   |                    |                |                    |                |                    | K    | 147.112804         | 74.060040          | 130.086255        | 65.546765         |                |                   | 1  |

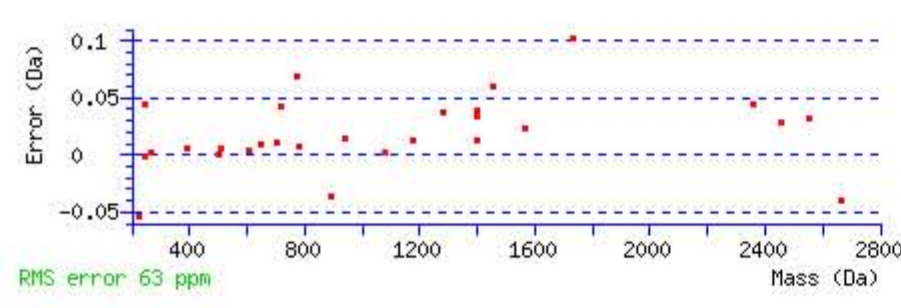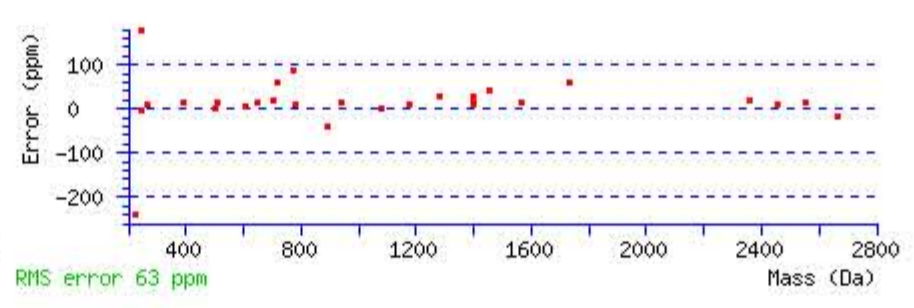

NCBI BLAST search of **YVMLPVADQYDCITHYEGSTCPK**  
 (Parameters: blastp, nr protein database, expect=20000, no filter, PAM30)  
 Other BLAST [web gateways](#)

### All matches to this query

| Score | Mr(calc):   | Delta    | Sequence                                |
|-------|-------------|----------|-----------------------------------------|
| 73.8  | 3057.374466 | 0.038676 | <a href="#">YVMLPVADQYDCITHYEGSTCPK</a> |



# MASCOT SCIENCE Mascot Search Results

## Peptide View

MS/MS Fragmentation of **TYFPHFDSLHGSAQVK**  
 Found in **HBA\_HUMAN**, Hemoglobin subunit alpha OS=Homo sapiens GN=HBA1 PE=1 SV=2

Match to Query 56870: 2144.069376 from(537.024620,4+) rtinseconds(2050) index(7355)  
 Title: Locus:1.1.1.2846.10 File:"2013-07-02 CLN FXIII 60 min 1st F 1.wiff"  
 Data file C:\Program Files (x86)\Matrix Science\Mascot Daemon\mgf\4 FXIII 60 min 1st\mascot\_daemon\_merge.mgf

Click mouse within plot area to zoom in by factor of two about that point  
 Or, Plot from  to  Da   
 Label all possible matches  Label matches used for scoring

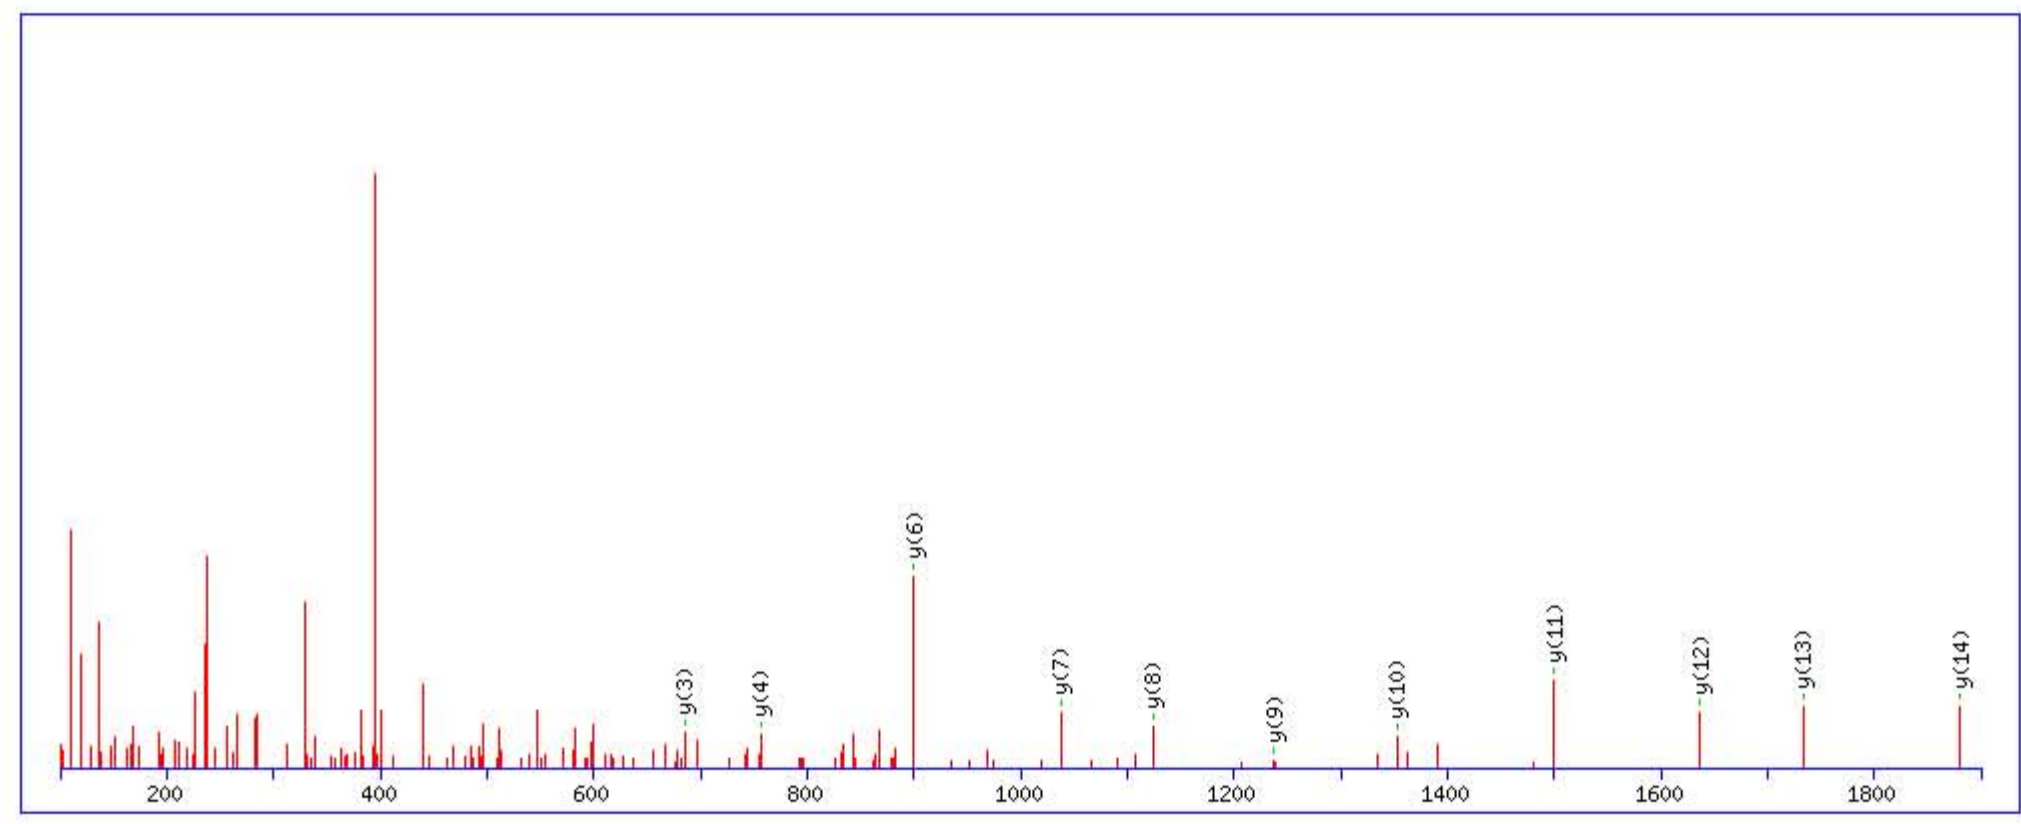

Monoisotopic mass of neutral peptide Mr(calc): 2144.051346  
 Fixed modifications: Carbamidomethyl (C) (apply to specified residues or termini only)  
 Variable modifications:  
 Q14 : Biotin:Thermo-21345 (Q)  
 Ions Score: 80 Expect: 2.6e-007  
 Matches : 11/146 fragment ions using 17 most intense peaks [\(help\)](#)

| #  | b           | b <sup>++</sup> | b <sup>*</sup> | b <sup>*++</sup> | b <sup>0</sup> | b <sup>0++</sup> | Seq. | y                  | y <sup>++</sup> | y <sup>*</sup> | y <sup>*++</sup> | y <sup>0</sup> | y <sup>0++</sup> | #  |
|----|-------------|-----------------|----------------|------------------|----------------|------------------|------|--------------------|-----------------|----------------|------------------|----------------|------------------|----|
| 1  | 102.054955  | 51.531116       |                |                  | 84.044390      | 42.525833        | T    |                    |                 |                |                  |                |                  | 16 |
| 2  | 265.118284  | 133.062780      |                |                  | 247.107719     | 124.057498       | Y    | 2044.010930        | 1022.509103     | 2026.984381    | 1013.995829      | 2026.000365    | 1013.503821      | 15 |
| 3  | 412.186698  | 206.596987      |                |                  | 394.176133     | 197.591705       | F    | <b>1880.947601</b> | 940.977438      | 1863.921052    | 932.464164       | 1862.937036    | 931.972156       | 14 |
| 4  | 509.239462  | 255.123369      |                |                  | 491.228897     | 246.118087       | P    | <b>1733.879187</b> | 867.443231      | 1716.852638    | 858.929957       | 1715.868622    | 858.437949       | 13 |
| 5  | 646.298374  | 323.652825      |                |                  | 628.287809     | 314.647543       | H    | <b>1636.826423</b> | 818.916849      | 1619.799874    | 810.403575       | 1618.815858    | 809.911567       | 12 |
| 6  | 793.366788  | 397.187032      |                |                  | 775.356223     | 388.181750       | F    | <b>1499.767511</b> | 750.387393      | 1482.740962    | 741.874119       | 1481.756946    | 741.382111       | 11 |
| 7  | 908.393731  | 454.700504      |                |                  | 890.383166     | 445.695221       | D    | <b>1352.699097</b> | 676.853186      | 1335.672548    | 668.339912       | 1334.688532    | 667.847904       | 10 |
| 8  | 1021.477795 | 511.242536      |                |                  | 1003.467230    | 502.237253       | L    | <b>1237.672154</b> | 619.339715      | 1220.645605    | 610.826441       | 1219.661589    | 610.334433       | 9  |
| 9  | 1108.509823 | 554.758550      |                |                  | 1090.499258    | 545.753267       | S    | <b>1124.588090</b> | 562.797683      | 1107.561541    | 554.284409       | 1106.577525    | 553.792400       | 8  |
| 10 | 1245.568735 | 623.288006      |                |                  | 1227.558170    | 614.282723       | H    | <b>1037.556062</b> | 519.281669      | 1020.529513    | 510.768394       | 1019.545497    | 510.276386       | 7  |
| 11 | 1302.590199 | 651.798738      |                |                  | 1284.579634    | 642.793455       | G    | <b>900.497150</b>  | 450.752213      | 883.470601     | 442.238938       | 882.486585     | 441.746930       | 6  |
| 12 | 1389.622227 | 695.314752      |                |                  | 1371.611662    | 686.309469       | S    | 843.475686         | 422.241481      | 826.449137     | 413.728207       | 825.465121     | 413.236199       | 5  |
| 13 | 1460.659341 | 730.833309      |                |                  | 1442.648776    | 721.828026       | A    | <b>756.443658</b>  | 378.725467      | 739.417109     | 370.212192       |                |                  | 4  |
| 14 | 1899.884667 | 950.445972      | 1882.858118    | 941.932697       | 1881.874102    | 941.440689       | Q    | <b>685.406544</b>  | 343.206910      | 668.379995     | 334.693635       |                |                  | 3  |
| 15 | 1998.953081 | 999.980179      | 1981.926532    | 991.466904       | 1980.942516    | 990.974896       | V    | 246.181218         | 123.594247      | 229.154669     | 115.080972       |                |                  | 2  |
| 16 |             |                 |                |                  |                |                  | K    | 147.112804         | 74.060040       | 130.086255     | 65.546765        |                |                  | 1  |

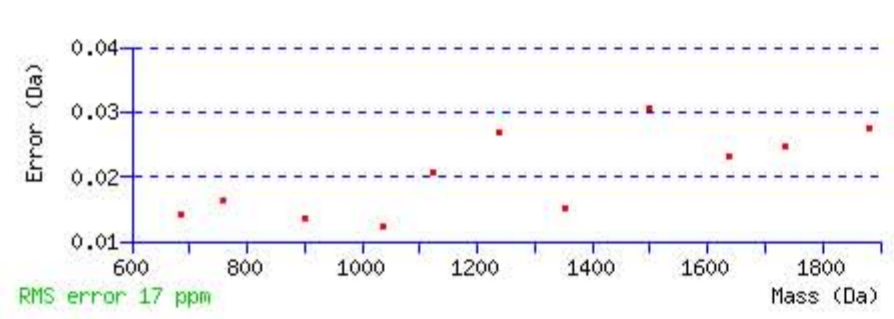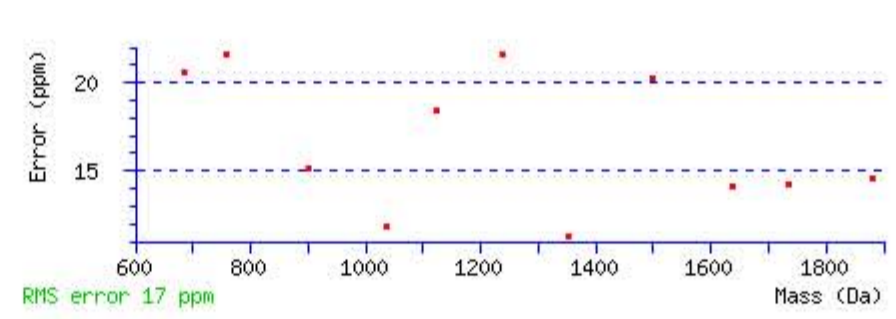

NCBI BLAST search of **TYFPHFDSLHGSAQVK**  
 (Parameters: blastp, nr protein database, expect=20000, no filter, PAM30)  
 Other BLAST [web gateways](#)

### All matches to this query

| Score | Mr(calc):   | Delta    | Sequence                         |
|-------|-------------|----------|----------------------------------|
| 80.3  | 2144.051346 | 0.018030 | <a href="#">TYFPHFDSLHGSAQVK</a> |



# MASCOT SEARCH RESULTS

## Peptide View

MS/MS Fragmentation of **EFTPPVQAAYQK**

Found in **HBB\_HUMAN**, Hemoglobin subunit beta OS=Homo sapiens GN=HBB PE=1 SV=2

Match to Query 45534: 1688.881668 from(845.448110,2+) rtinseconds(1989) index(6936)

Title: Locus:1.1.1.2824.16 File:"2013-07-02 CLN FXIII 60 min 1st F 1.wiff"

Data file C:\Program Files (x86)\Matrix Science\Mascot Daemon\mgf\4 FXIII 60 min 1st\mascot\_daemon\_merge.mgf

Click mouse within plot area to zoom in by factor of two about that point

Or, Plot from 100 to 1900 Da Full range

Label all possible matches  Label matches used for scoring

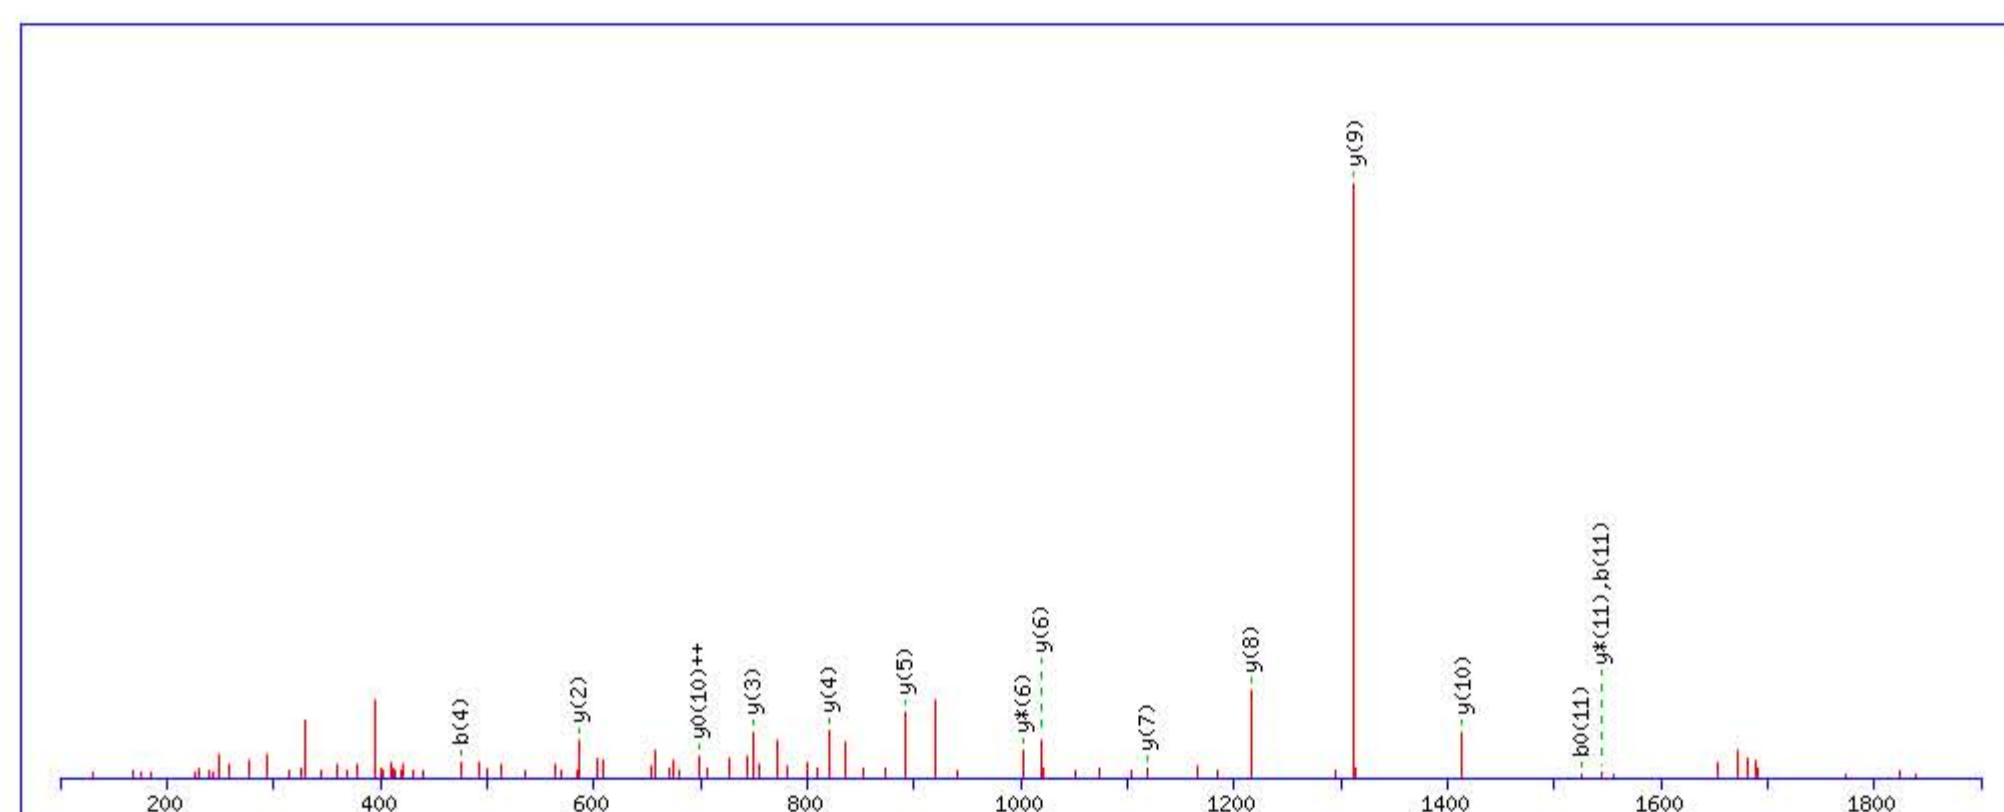

Monoisotopic mass of neutral peptide Mr(calc): 1688.859604

Fixed modifications: Carbamidomethyl (C) (apply to specified residues or termini only)

Variable modifications:

Q11 : Biotin:Thermo-21345 (Q)

Ions Score: 53 Expect: 3.7e-005

Matches : 15/102 fragment ions using 30 most intense peaks [\(help\)](#)

| #  | b           | b <sup>++</sup> | b <sup>*</sup> | b <sup>+++</sup> | b <sup>0</sup> | b <sup>0++</sup> | Seq. | y           | y <sup>++</sup> | y <sup>*</sup> | y <sup>+++</sup> | y <sup>0</sup> | y <sup>0++</sup> | #  |
|----|-------------|-----------------|----------------|------------------|----------------|------------------|------|-------------|-----------------|----------------|------------------|----------------|------------------|----|
| 1  | 130.049869  | 65.528572       |                |                  | 112.039304     | 56.523290        | E    |             |                 |                |                  |                |                  | 12 |
| 2  | 277.118283  | 139.062779      |                |                  | 259.107718     | 130.057497       | F    | 1560.824300 | 780.915788      | 1543.797751    | 772.402514       | 1542.813735    | 771.910506       | 11 |
| 3  | 378.165962  | 189.586619      |                |                  | 360.155397     | 180.581336       | T    | 1413.755886 | 707.381581      | 1396.729337    | 698.868307       | 1395.745321    | 698.376299       | 10 |
| 4  | 475.218726  | 238.113001      |                |                  | 457.208161     | 229.107719       | P    | 1312.708207 | 656.857742      | 1295.681658    | 648.344467       |                |                  | 9  |
| 5  | 572.271490  | 286.639383      |                |                  | 554.260925     | 277.634101       | P    | 1215.655443 | 608.331360      | 1198.628894    | 599.818085       |                |                  | 8  |
| 6  | 671.339904  | 336.173590      |                |                  | 653.329339     | 327.168308       | V    | 1118.602679 | 559.804978      | 1101.576130    | 551.291703       |                |                  | 7  |
| 7  | 799.398482  | 400.202879      | 782.371933     | 391.689605       | 781.387917     | 391.197597       | Q    | 1019.534265 | 510.270771      | 1002.507716    | 501.757496       |                |                  | 6  |
| 8  | 870.435596  | 435.721436      | 853.409047     | 427.208162       | 852.425031     | 426.716154       | A    | 891.475687  | 446.241482      | 874.449138     | 437.728207       |                |                  | 5  |
| 9  | 941.472710  | 471.239993      | 924.446161     | 462.726719       | 923.462145     | 462.234711       | A    | 820.438573  | 410.722925      | 803.412024     | 402.209650       |                |                  | 4  |
| 10 | 1104.536039 | 552.771658      | 1087.509490    | 544.258383       | 1086.525474    | 543.766375       | Y    | 749.401459  | 375.204368      | 732.374910     | 366.691093       |                |                  | 3  |
| 11 | 1543.761365 | 772.384321      | 1526.734816    | 763.871046       | 1525.750800    | 763.379038       | Q    | 586.338130  | 293.672703      | 569.311581     | 285.159429       |                |                  | 2  |
| 12 |             |                 |                |                  |                |                  | K    | 147.112804  | 74.060040       | 130.086255     | 65.546765        |                |                  | 1  |

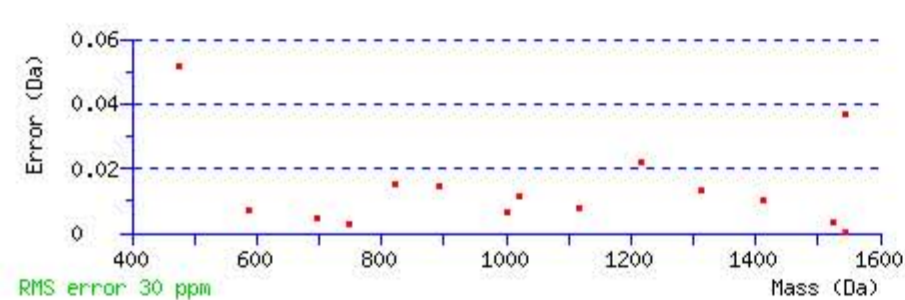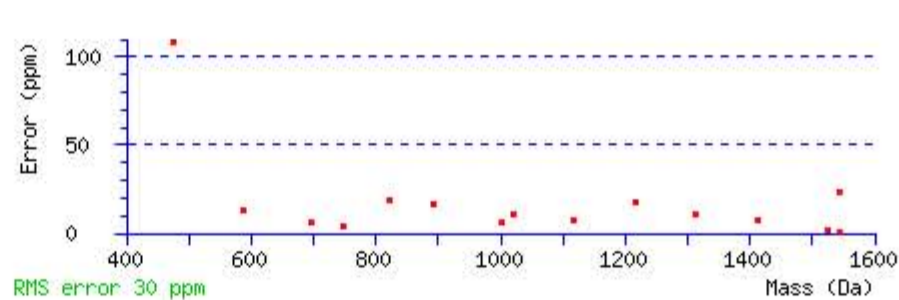

NCBI BLAST search of **EFTPPVQAAYQK**

(Parameters: blastp, nr protein database, expect=20000, no filter, PAM30)

Other BLAST [web gateways](#)

All matches to this query

| Score | Mr(calc):   | Delta     | Sequence                         |
|-------|-------------|-----------|----------------------------------|
| 53.1  | 1688.859604 | 0.022064  | <a href="#">EFTPPVQAAYQK</a>     |
| 25.2  | 1688.859604 | 0.022064  | <a href="#">EFTPPVQAAYQK</a>     |
| 5.5   | 1688.891937 | -0.010269 | <a href="#">ILYEALERQQK</a>      |
| 4.3   | 1688.891937 | -0.010269 | <a href="#">DCGAAAEPFLKAKAK</a>  |
| 2.3   | 1688.887955 | -0.006287 | <a href="#">STVPDAVTKCRSAGIK</a> |
| 2.2   | 1688.870819 | 0.010849  | <a href="#">YLFIFSVANMRNSK</a>   |
| 1.9   | 1688.880692 | 0.000976  | <a href="#">EEAQKLLLEQYK</a>     |
| 0.8   | 1688.896667 | -0.014999 | <a href="#">RFGNQITMQRK</a>      |
| 0.8   | 1688.878052 | 0.003616  | <a href="#">ITLFNHMRITDTRGK</a>  |
| 0.6   | 1688.866837 | 0.014831  | <a href="#">GGDVVVVAQNRMTLK</a>  |



# MASCOT Search Results

## Peptide View

MS/MS Fragmentation of **YYCFQGNQFLR**

Found in **HEMO\_HUMAN**, Hemopexin OS=Homo sapiens GN=HPX PE=1 SV=2

Match to Query 48515: 1805.854048 from(903.934300,2+) rtinseconds(2289) index(80527)

Title: Locus:1.1.1.3011.17 File:"2013-07-02 CLN FXIII 60 min 1st FT.wiff"

Data file C:\Program Files (x86)\Matrix Science\Mascot Daemon\mgf\4 FXIII 60 min 1st\mascot\_daemon\_merge.mgf

Click mouse within plot area to zoom in by factor of two about that point

Or, Plot from  to  Da

Label all possible matches  Label matches used for scoring

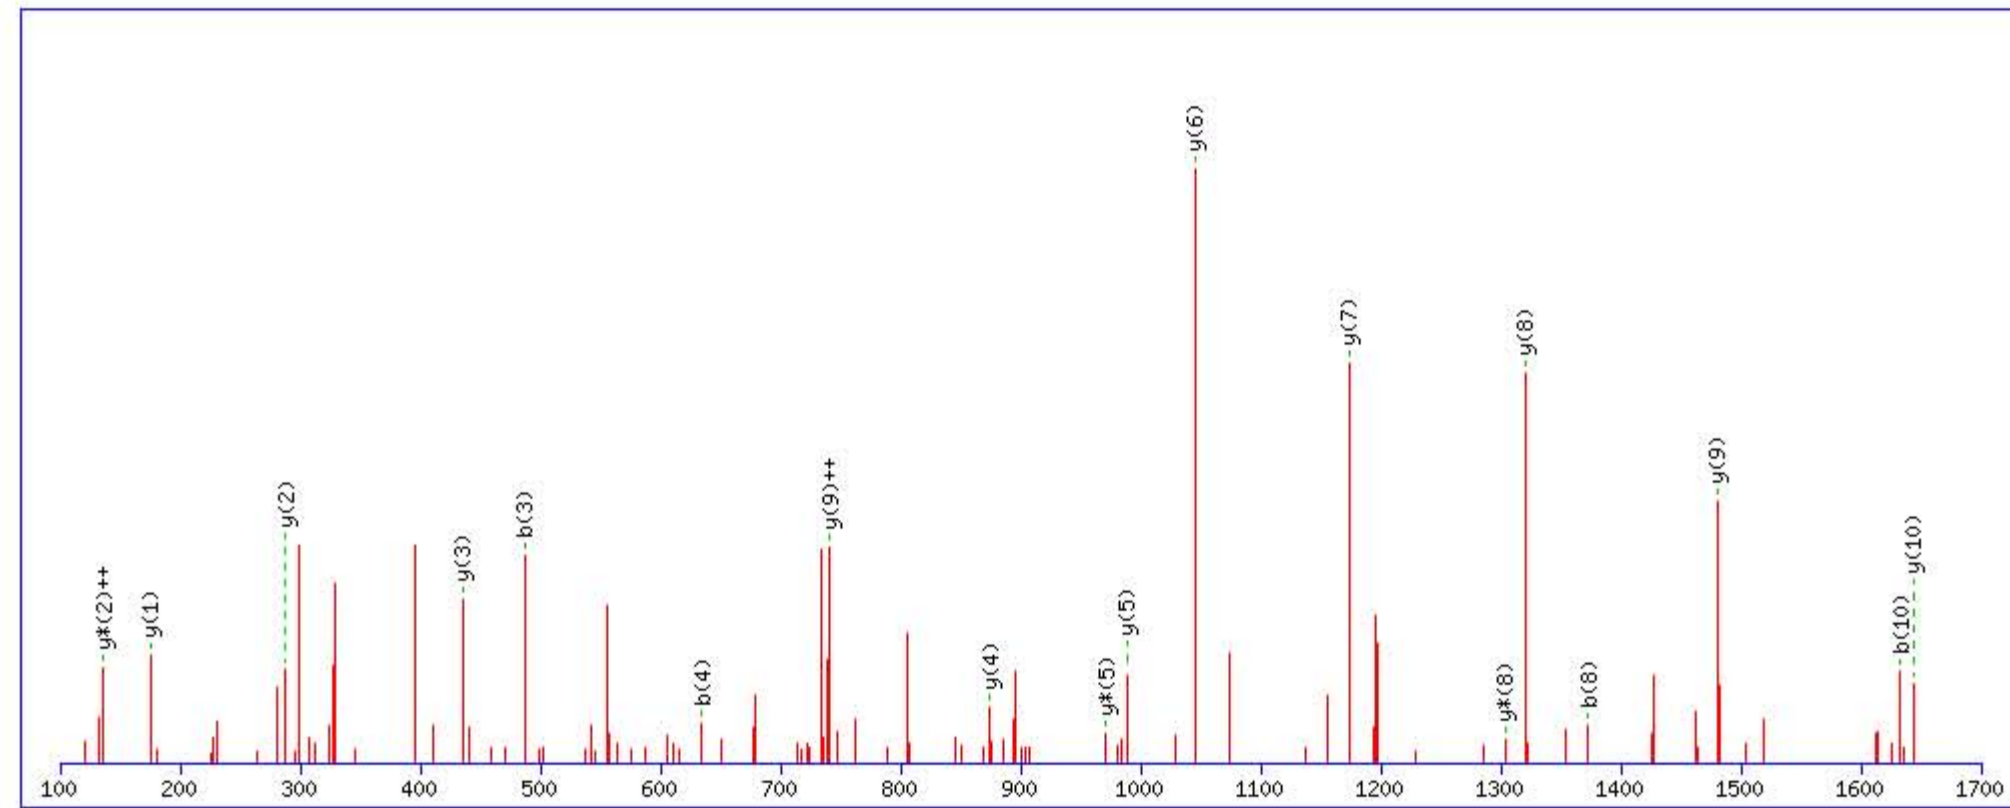

Monoisotopic mass of neutral peptide Mr(calc): 1805.838165

Fixed modifications: Carbamidomethyl (C) (apply to specified residues or termini only)

Variable modifications:

Q8 : Biotin:Thermo-21345 (Q)

Ions Score: 64 Expect: 2e-006

Matches : 18/72 fragment ions using 32 most intense peaks [\(help\)](#)

| #  | b           | b <sup>++</sup> | b <sup>*</sup> | b <sup>*++</sup> | Seq. | y           | y <sup>++</sup> | y <sup>*</sup> | y <sup>*++</sup> | #  |
|----|-------------|-----------------|----------------|------------------|------|-------------|-----------------|----------------|------------------|----|
| 1  | 164.070605  | 82.538940       |                |                  | Y    |             |                 |                |                  | 11 |
| 2  | 327.133934  | 164.070605      |                |                  | Y    | 1643.782117 | 822.394697      | 1626.755568    | 813.881422       | 10 |
| 3  | 487.164583  | 244.085930      |                |                  | C    | 1480.718788 | 740.863032      | 1463.692239    | 732.349758       | 9  |
| 4  | 634.232997  | 317.620137      |                |                  | F    | 1320.688139 | 660.847708      | 1303.661590    | 652.334433       | 8  |
| 5  | 762.291575  | 381.649426      | 745.265026     | 373.136151       | Q    | 1173.619725 | 587.313501      | 1156.593176    | 578.800226       | 7  |
| 6  | 819.313039  | 410.160158      | 802.286490     | 401.646883       | G    | 1045.561147 | 523.284212      | 1028.534598    | 514.770937       | 6  |
| 7  | 933.355966  | 467.181621      | 916.329417     | 458.668347       | N    | 988.539683  | 494.773480      | 971.513134     | 486.260205       | 5  |
| 8  | 1372.581292 | 686.794284      | 1355.554743    | 678.281010       | Q    | 874.496756  | 437.752016      | 857.470207     | 429.238742       | 4  |
| 9  | 1519.649706 | 760.328491      | 1502.623157    | 751.815217       | F    | 435.271430  | 218.139353      | 418.244881     | 209.626078       | 3  |
| 10 | 1632.733770 | 816.870523      | 1615.707221    | 808.357249       | L    | 288.203016  | 144.605146      | 271.176467     | 136.091871       | 2  |
| 11 |             |                 |                |                  | R    | 175.118952  | 88.063114       | 158.092403     | 79.549839        | 1  |

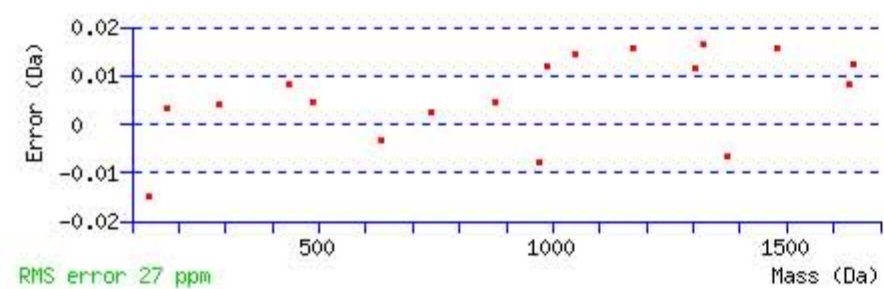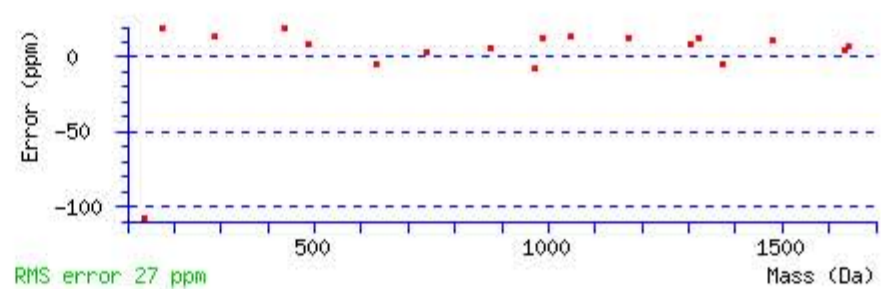

NCBI BLAST search of [YYCFQGNQFLR](#)

(Parameters: blastp, nr protein database, expect=20000, no filter, PAM30)

Other BLAST [web gateways](#)

## All matches to this query

| Score | Mr(calc):   | Delta     | Sequence                          |
|-------|-------------|-----------|-----------------------------------|
| 63.9  | 1805.838165 | 0.015883  | <a href="#">YYCFQGNQFLR</a>       |
| 38.3  | 1805.838165 | 0.015883  | <a href="#">YYCFQGNQFLR</a>       |
| 2.8   | 1805.845383 | 0.008665  | <a href="#">WGTRGGFNGQMER</a>     |
| 2.1   | 1805.873032 | -0.018984 | <a href="#">VSTGDNWNGIMKDTLR</a>  |
| 1.7   | 1805.830154 | 0.023894  | <a href="#">VSLHCGKSGGGDGCFLR</a> |
| 1.2   | 1805.844055 | 0.009993  | <a href="#">LLQAPFTDCGDGPMRLR</a> |
| 0.4   | 1805.877045 | -0.022997 | <a href="#">MFITHGVYEPEKPSR</a>   |



# MASCOT Search Results

## Peptide View

MS/MS Fragmentation of **GECQAEGVLFFQGDR**

Found in **HEMO\_HUMAN**, Hemopexin OS=Homo sapiens GN=HPX PE=1 SV=2

Match to Query 54323: 2022.952268 from(1012.483410,2+) rtinseconds(2402) index(81273)

Title: Locus:1.1.1.3050.19 File:"2013-07-02 CLN FXIII 60 min 1st FT.wiff"

Data file C:\Program Files (x86)\Matrix Science\Mascot Daemon\mgf4 FXIII 60 min 1st\mascot\_daemon\_merge.mgf

Click mouse within plot area to zoom in by factor of two about that point

Or, Plot from  to  Da

Label all possible matches  Label matches used for scoring

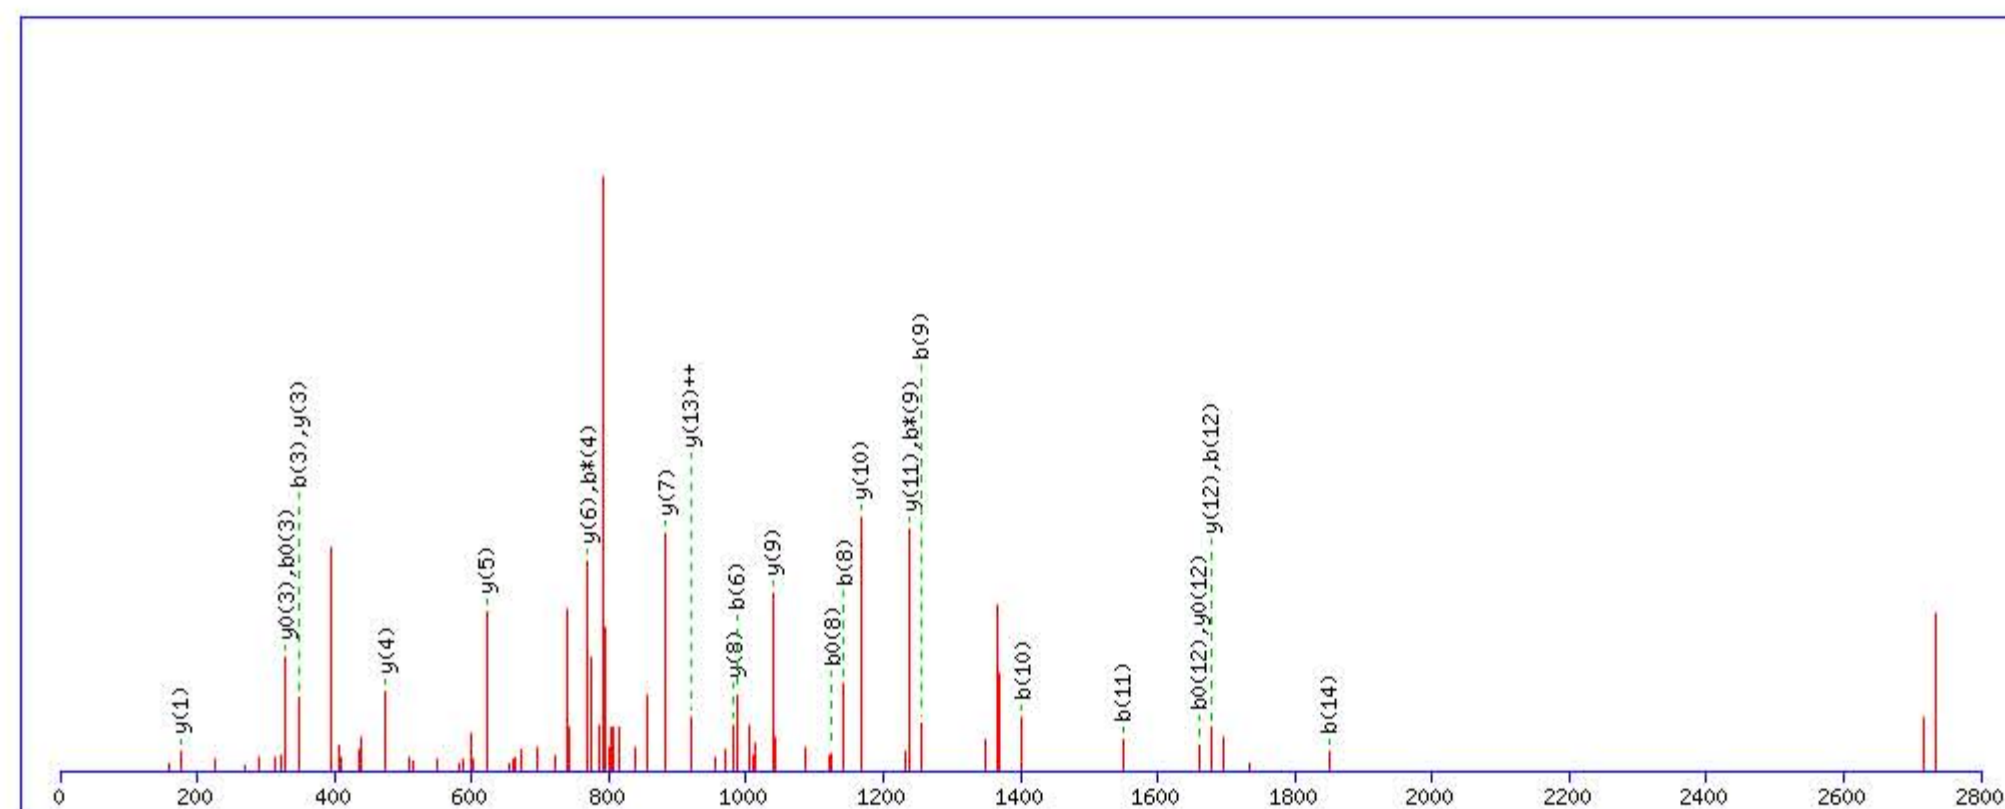

Monoisotopic mass of neutral peptide Mr(calc): 2022.929184

Fixed modifications: Carbamidomethyl (C) (apply to specified residues or termini only)

Variable modifications:

Q4 : Biotin:Thermo-21345 (Q)

Ions Score: 58 Expect: 1.1e-005

Matches : 27/158 fragment ions using 44 most intense peaks [\(help\)](#)

| #  | b                  | b <sup>++</sup> | b <sup>*</sup>     | b <sup>*++</sup> | b <sup>0</sup>     | b <sup>0++</sup> | Seq. | y                  | y <sup>++</sup>   | y <sup>*</sup> | y <sup>*++</sup> | y <sup>0</sup>     | y <sup>0++</sup> | #  |
|----|--------------------|-----------------|--------------------|------------------|--------------------|------------------|------|--------------------|-------------------|----------------|------------------|--------------------|------------------|----|
| 1  | 58.028740          | 29.518008       |                    |                  |                    |                  | G    |                    |                   |                |                  |                    |                  | 15 |
| 2  | 187.071333         | 94.039305       |                    |                  | 169.060768         | 85.034022        | E    | 1966.914982        | 983.961129        | 1949.888433    | 975.447855       | 1948.904417        | 974.955847       | 14 |
| 3  | <b>347.101982</b>  | 174.054629      |                    |                  | <b>329.091417</b>  | 165.049347       | C    | 1837.872389        | <b>919.439833</b> | 1820.845840    | 910.926558       | 1819.861824        | 910.434550       | 13 |
| 4  | 786.327308         | 393.667292      | <b>769.300759</b>  | 385.154018       | 768.316743         | 384.662010       | Q    | <b>1677.841740</b> | 839.424508        | 1660.815191    | 830.911234       | <b>1659.831175</b> | 830.419226       | 12 |
| 5  | 857.364422         | 429.185849      | 840.337873         | 420.672575       | 839.353857         | 420.180567       | A    | <b>1238.616414</b> | 619.811845        | 1221.589865    | 611.298571       | 1220.605849        | 610.806563       | 11 |
| 6  | <b>986.407015</b>  | 493.707146      | 969.380466         | 485.193871       | 968.396450         | 484.701863       | E    | <b>1167.579300</b> | 584.293288        | 1150.552751    | 575.780014       | 1149.568735        | 575.288006       | 10 |
| 7  | 1043.428479        | 522.217878      | 1026.401930        | 513.704603       | 1025.417914        | 513.212595       | G    | <b>1038.536707</b> | 519.771992        | 1021.510158    | 511.258717       | 1020.526142        | 510.766709       | 9  |
| 8  | <b>1142.496893</b> | 571.752085      | 1125.470344        | 563.238810       | <b>1124.486328</b> | 562.746802       | V    | <b>981.515243</b>  | 491.261260        | 964.488694     | 482.747985       | 963.504678         | 482.255977       | 8  |
| 9  | <b>1255.580957</b> | 628.294117      | <b>1238.554408</b> | 619.780842       | 1237.570392        | 619.288834       | L    | <b>882.446829</b>  | 441.727053        | 865.420280     | 433.213778       | 864.436264         | 432.721770       | 7  |
| 10 | <b>1402.649371</b> | 701.828324      | 1385.622822        | 693.315049       | 1384.638806        | 692.823041       | F    | <b>769.362765</b>  | 385.185021        | 752.336216     | 376.671746       | 751.352200         | 376.179738       | 6  |
| 11 | <b>1549.717785</b> | 775.362531      | 1532.691236        | 766.849256       | 1531.707220        | 766.357248       | F    | <b>622.294351</b>  | 311.650814        | 605.267802     | 303.137539       | 604.283786         | 302.645531       | 5  |
| 12 | <b>1677.776363</b> | 839.391820      | 1660.749814        | 830.878545       | <b>1659.765798</b> | 830.386537       | Q    | <b>475.225937</b>  | 238.116606        | 458.199388     | 229.603332       | 457.215372         | 229.111324       | 4  |
| 13 | 1734.797827        | 867.902552      | 1717.771278        | 859.389277       | 1716.787262        | 858.897269       | G    | <b>347.167359</b>  | 174.087317        | 330.140810     | 165.574043       | <b>329.156794</b>  | 165.082035       | 3  |
| 14 | <b>1849.824770</b> | 925.416023      | 1832.798221        | 916.902749       | 1831.814205        | 916.410741       | D    | 290.145895         | 145.576585        | 273.119346     | 137.063311       | 272.135330         | 136.571303       | 2  |
| 15 |                    |                 |                    |                  |                    |                  | R    | <b>175.118952</b>  | 88.063114         | 158.092403     | 79.549839        |                    |                  | 1  |

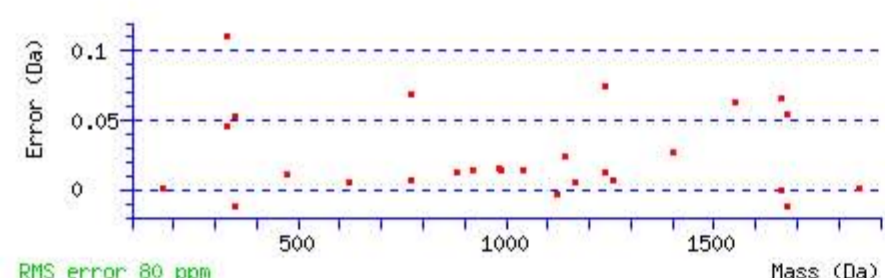

RMS error 80 ppm

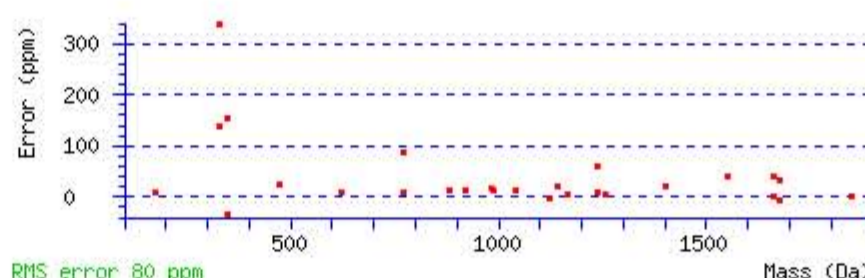

RMS error 80 ppm

NCBI BLAST search of **GECQAEGVLFFQGDR**

(Parameters: blastp, nr protein database, expect=20000, no filter, PAM30)

Other BLAST [web gateways](#)

All matches to this query

| Score | Mr(calc):   | Delta     | Sequence                        |
|-------|-------------|-----------|---------------------------------|
| 57.7  | 2022.929184 | 0.023084  | <a href="#">GECQAEGVLFFQGDR</a> |
| 11.7  | 2022.929184 | 0.023084  | <a href="#">GECQAEGVLFFQGDR</a> |
| 5.0   | 2022.980133 | -0.027865 | <a href="#">QHMEQKEQATAR</a>    |
| 4.9   | 2022.950317 | 0.001951  | <a href="#">NMSFVNDLTVTQDGR</a> |



# MASCOT Search Results

## Peptide View

MS/MS Fragmentation of **LLQDEFPGIPSPLDAAVECHR**

Found in **HEMO\_HUMAN**, Hemopexin OS=Homo sapiens GN=HPX PE=1 SV=2

Match to Query 67251: 2674.355682 from(892.459170,3+) rtinseconds(2646) index(82572)

Title: Locus:1.1.1.3135.13 File:"2013-07-02 CLN FXIII 60 min 1st FT.wiff"

Data file C:\Program Files (x86)\Matrix Science\Mascot Daemon\mgf\4 FXIII 60 min 1st\mascot\_daemon\_merge.mgf

Click mouse within plot area to zoom in by factor of two about that point

Or, Plot from  to  Da

Label all possible matches  Label matches used for scoring

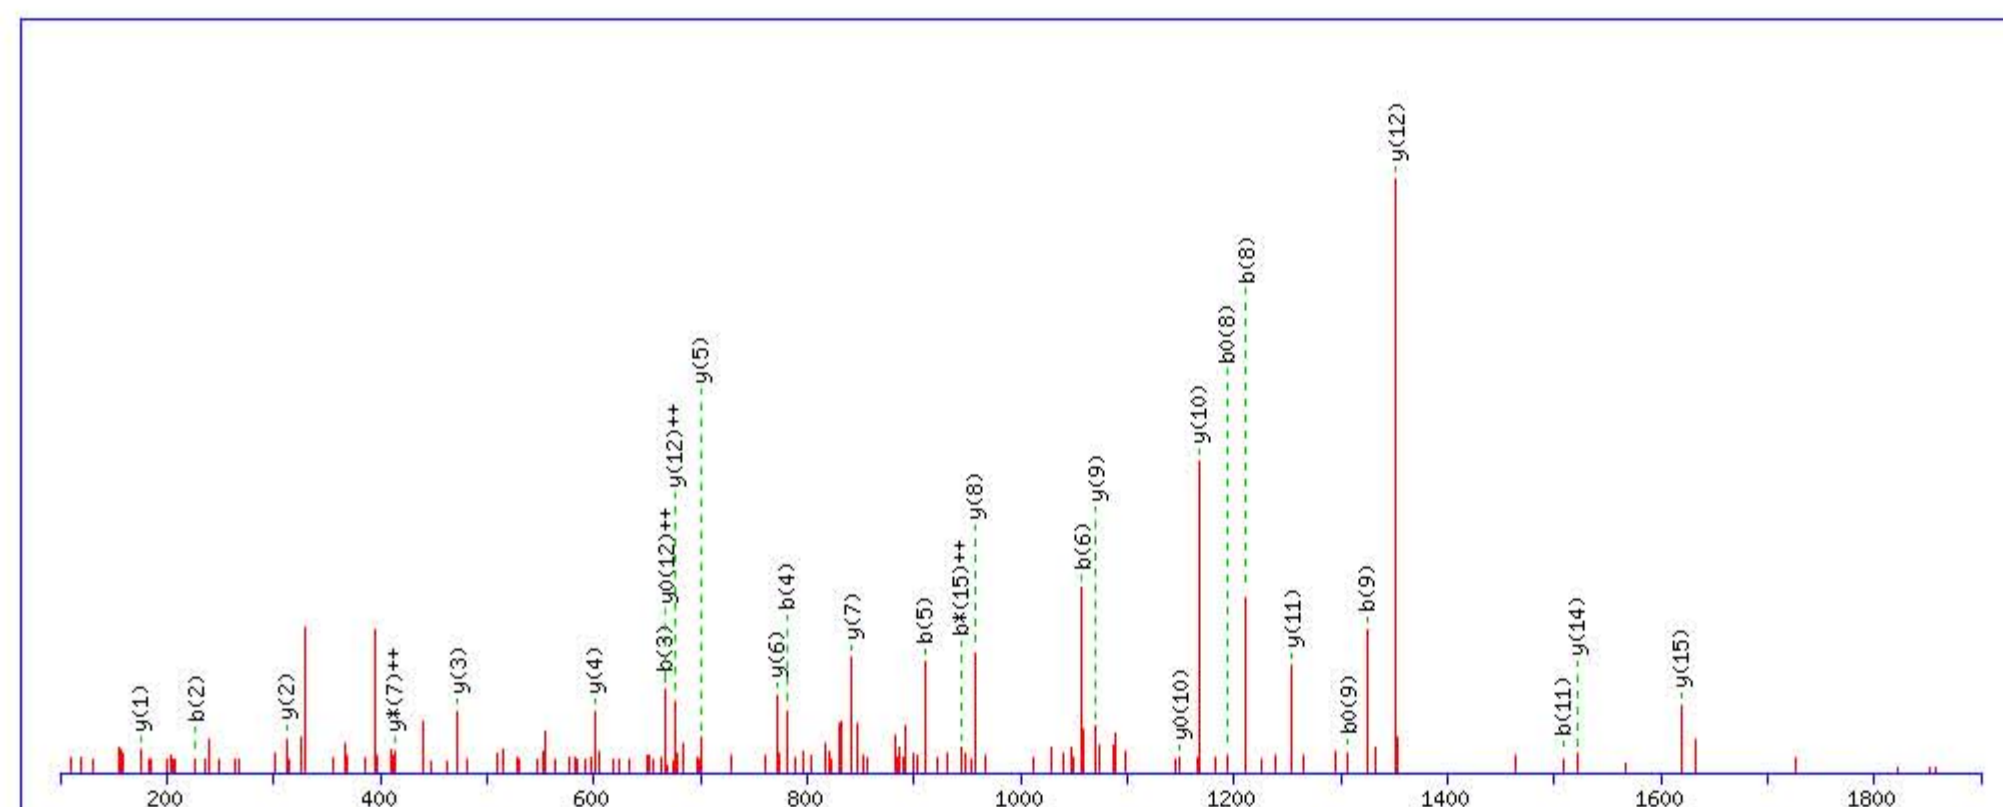

Monoisotopic mass of neutral peptide Mr(calc): 2674.324722

Fixed modifications: Carbamidomethyl (C) (apply to specified residues or termini only)

Variable modifications:

Q3 : Biotin:Thermo-21345 (Q)

Ions Score: 76 Expect: 7.3e-007

Matches : 29/224 fragment ions using 62 most intense peaks [\(help\)](#)

| #  | b                  | b <sup>++</sup> | b <sup>*</sup> | b <sup>*++</sup>  | b <sup>0</sup>     | b <sup>0++</sup> | Seq. | y                  | y <sup>++</sup>   | y <sup>*</sup> | y <sup>*++</sup>  | y <sup>0</sup>     | y <sup>0++</sup>  | #  |
|----|--------------------|-----------------|----------------|-------------------|--------------------|------------------|------|--------------------|-------------------|----------------|-------------------|--------------------|-------------------|----|
| 1  | 114.091340         | 57.549308       |                |                   |                    |                  | L    |                    |                   |                |                   |                    |                   | 21 |
| 2  | <b>227.175404</b>  | 114.091340      |                |                   |                    |                  | L    | 2562.247943        | 1281.627609       | 2545.221394    | 1273.114335       | 2544.237378        | 1272.622327       | 20 |
| 3  | <b>666.400730</b>  | 333.704003      | 649.374181     | 325.190729        |                    |                  | Q    | 2449.163879        | 1225.085577       | 2432.137330    | 1216.572303       | 2431.153314        | 1216.080295       | 19 |
| 4  | <b>781.427673</b>  | 391.217475      | 764.401124     | 382.704200        | 763.417108         | 382.212192       | D    | 2009.938553        | 1005.472914       | 1992.912004    | 996.959640        | 1991.927988        | 996.467632        | 18 |
| 5  | <b>910.470266</b>  | 455.738771      | 893.443717     | 447.225497        | 892.459701         | 446.733489       | E    | 1894.911610        | 947.959443        | 1877.885061    | 939.446169        | 1876.901045        | 938.954160        | 17 |
| 6  | <b>1057.538680</b> | 529.272978      | 1040.512131    | 520.759704        | 1039.528115        | 520.267696       | F    | 1765.869017        | 883.438146        | 1748.842468    | 874.924872        | 1747.858452        | 874.432864        | 16 |
| 7  | 1154.591444        | 577.799360      | 1137.564895    | 569.286086        | 1136.580879        | 568.794078       | P    | <b>1618.800603</b> | 809.903939        | 1601.774054    | 801.390665        | 1600.790038        | 800.898657        | 15 |
| 8  | <b>1211.612908</b> | 606.310092      | 1194.586359    | 597.796818        | <b>1193.602343</b> | 597.304810       | G    | <b>1521.747839</b> | 761.377557        | 1504.721290    | 752.864283        | 1503.737274        | 752.372275        | 14 |
| 9  | <b>1324.696972</b> | 662.852124      | 1307.670423    | 654.338850        | <b>1306.686407</b> | 653.846841       | I    | 1464.726375        | 732.866825        | 1447.699826    | 724.353551        | 1446.715810        | 723.861543        | 13 |
| 10 | 1421.749736        | 711.378506      | 1404.723187    | 702.865232        | 1403.739171        | 702.373223       | P    | <b>1351.642311</b> | <b>676.324793</b> | 1334.615762    | 667.811519        | 1333.631746        | <b>667.319511</b> | 12 |
| 11 | <b>1508.781764</b> | 754.894520      | 1491.755215    | 746.381246        | 1490.771199        | 745.889238       | S    | <b>1254.589547</b> | 627.798411        | 1237.562998    | 619.285137        | 1236.578982        | 618.793129        | 11 |
| 12 | 1605.834528        | 803.420902      | 1588.807979    | 794.907628        | 1587.823963        | 794.415620       | P    | <b>1167.557519</b> | 584.282397        | 1150.530970    | 575.769123        | <b>1149.546954</b> | 575.277115        | 10 |
| 13 | 1718.918592        | 859.962934      | 1701.892043    | 851.449660        | 1700.908027        | 850.957652       | L    | <b>1070.504755</b> | 535.756015        | 1053.478206    | 527.242741        | 1052.494190        | 526.750733        | 9  |
| 14 | 1833.945535        | 917.476406      | 1816.918986    | 908.963131        | 1815.934970        | 908.471123       | D    | <b>957.420691</b>  | 479.213983        | 940.394142     | 470.700709        | 939.410126         | 470.208701        | 8  |
| 15 | 1904.982649        | 952.994963      | 1887.956100    | <b>944.481688</b> | 1886.972084        | 943.989680       | A    | <b>842.393748</b>  | 421.700512        | 825.367199     | <b>413.187237</b> | 824.383183         | 412.695229        | 7  |
| 16 | 1976.019763        | 988.513520      | 1958.993214    | 980.000245        | 1958.009198        | 979.508237       | A    | <b>771.356634</b>  | 386.181955        | 754.330085     | 377.668680        | 753.346069         | 377.176672        | 6  |
| 17 | 2075.088177        | 1038.047726     | 2058.061628    | 1029.534452       | 2057.077612        | 1029.042444      | V    | <b>700.319520</b>  | 350.663398        | 683.292971     | 342.150123        | 682.308955         | 341.658115        | 5  |
| 18 | 2204.130770        | 1102.569023     | 2187.104221    | 1094.055748       | 2186.120205        | 1093.563740      | E    | <b>601.251106</b>  | 301.129191        | 584.224557     | 292.615916        | 583.240541         | 292.123908        | 4  |
| 19 | 2364.161419        | 1182.584347     | 2347.134870    | 1174.071073       | 2346.150854        | 1173.579065      | C    | <b>472.208513</b>  | 236.607894        | 455.181964     | 228.094620        |                    |                   | 3  |
| 20 | 2501.220331        | 1251.113803     | 2484.193782    | 1242.600529       | 2483.209766        | 1242.108521      | H    | <b>312.177864</b>  | 156.592570        | 295.151315     | 148.079295        |                    |                   | 2  |
| 21 |                    |                 |                |                   |                    |                  | R    | <b>175.118952</b>  | 88.063114         | 158.092403     | 79.549839         |                    |                   | 1  |

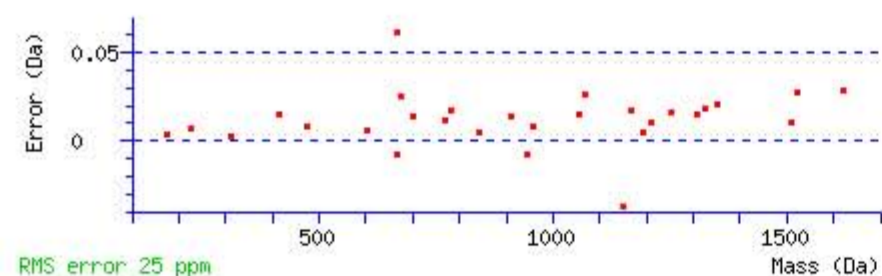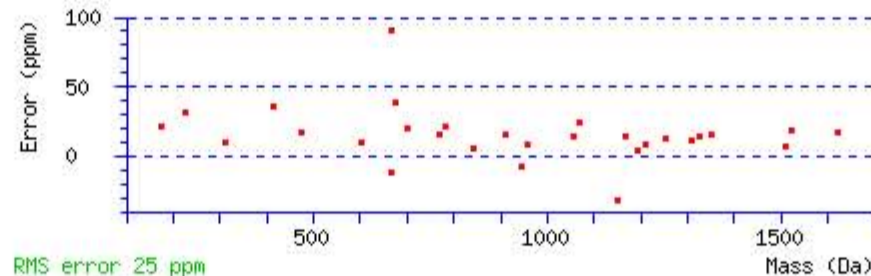

NCBI BLAST search of [LLQDEFPGIPSPLDAAVECHR](#)

(Parameters: blastp, nr protein database, expect=20000, no filter, PAM30)

Other BLAST [web gateways](#)

All matches to this query

| Score | Mr(calc):   | Delta    | Sequence                              |
|-------|-------------|----------|---------------------------------------|
| 75.9  | 2674.324722 | 0.030960 | <a href="#">LLQDEFPGIPSPLDAAVECHR</a> |

Mascot: <http://www.matrixscience.com/>



# MASCOT Search Results

## Peptide View

MS/MS Fragmentation of **TLEAQLTPR**

Found in **HEP2\_HUMAN**, Heparin cofactor 2 OS=Homo sapiens GN=SERPIND1 PE=1 SV=3

Match to Query 31767: 1338.738828 from(670.376690,2+) rtinseconds(1925) index(41624)

Title: Locus:1.1.1.2954.16 File:"2013-07-02 CLN FXIII 60 min 1st F 3.wiff"

Data file C:\Program Files (x86)\Matrix Science\Mascot Daemon\mgf\4 FXIII 60 min 1st\mascot\_daemon\_merge.mgf

Click mouse within plot area to zoom in by factor of two about that point

Or, Plot from  to  Da

Label all possible matches  Label matches used for scoring

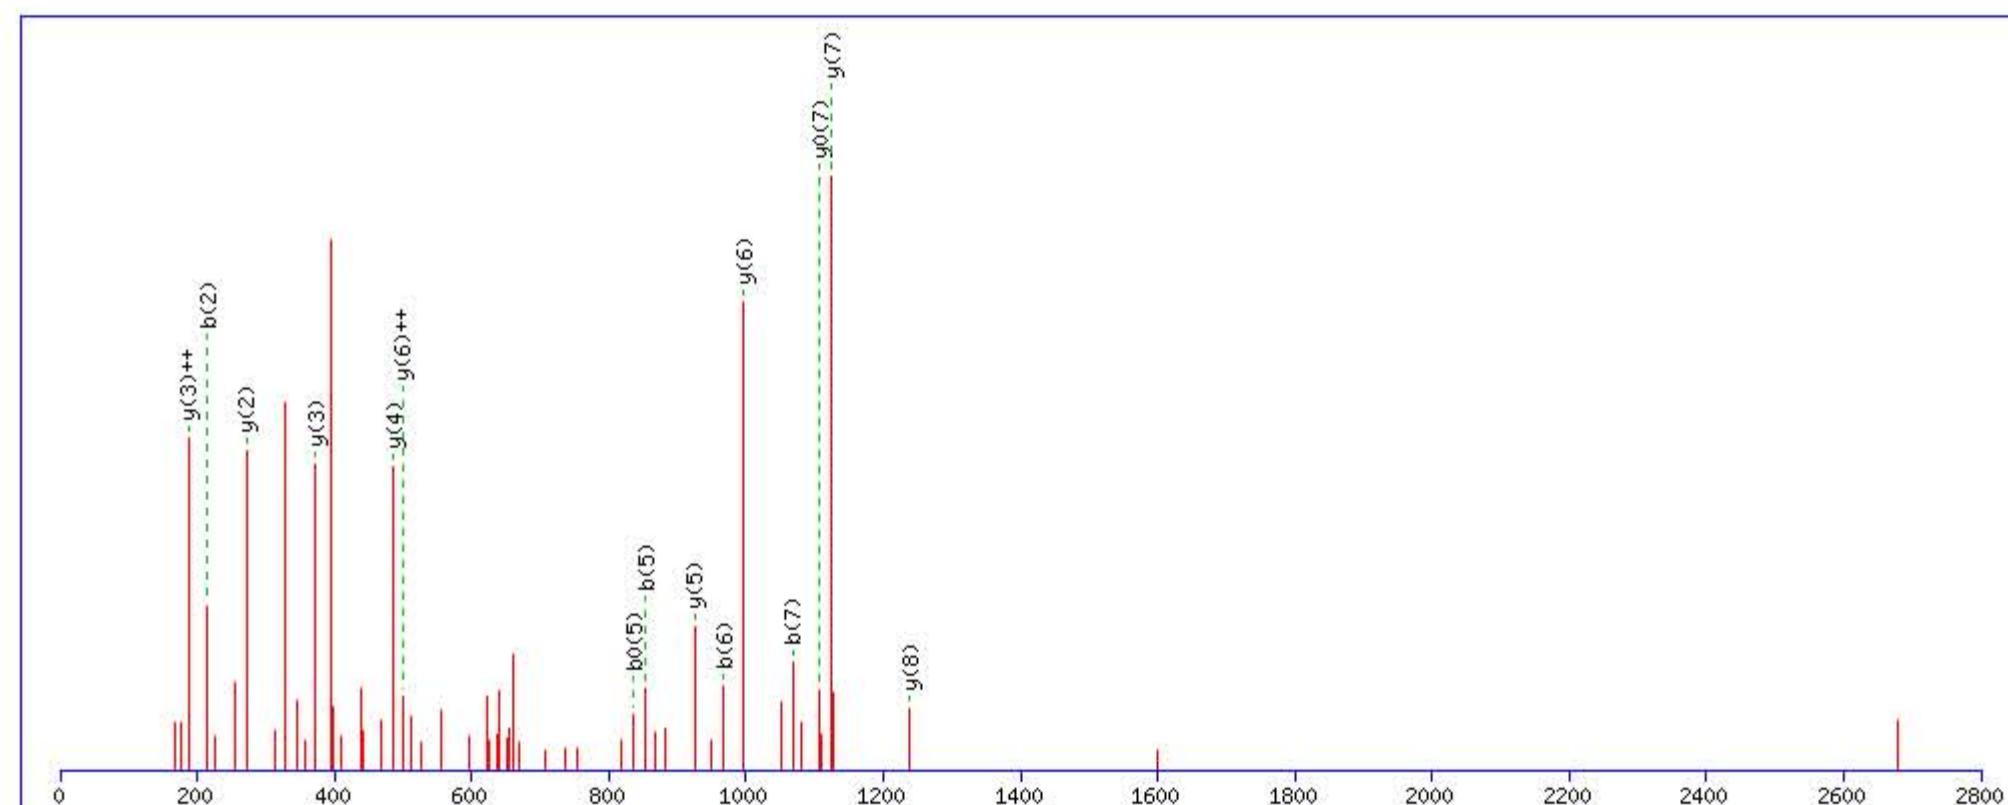

Monoisotopic mass of neutral peptide Mr(calc): 1338.732941

Fixed modifications: Carbamidomethyl (C) (apply to specified residues or termini only)

Variable modifications:

Q5 : Biotin:Thermo-21345 (Q)

Ions Score: 55 Expect: 4.8e-005

Matches : 15/84 fragment ions using 21 most intense peaks [\(help\)](#)

| # | b                  | b <sup>++</sup> | b <sup>+</sup> | b <sup>*++</sup> | b <sup>0</sup>    | b <sup>0++</sup> | Seq. | y                  | y <sup>++</sup>   | y <sup>+</sup> | y <sup>*++</sup> | y <sup>0</sup>     | y <sup>0++</sup> | # |
|---|--------------------|-----------------|----------------|------------------|-------------------|------------------|------|--------------------|-------------------|----------------|------------------|--------------------|------------------|---|
| 1 | 102.054955         | 51.531116       |                |                  | 84.044390         | 42.525833        | T    |                    |                   |                |                  |                    |                  | 9 |
| 2 | <b>215.139019</b>  | 108.073147      |                |                  | 197.128454        | 99.067865        | L    | <b>1238.692556</b> | 619.849916        | 1221.666007    | 611.336642       | 1220.681991        | 610.844633       | 8 |
| 3 | 344.181612         | 172.594444      |                |                  | 326.171047        | 163.589162       | E    | <b>1125.608492</b> | 563.307884        | 1108.581943    | 554.794610       | <b>1107.597927</b> | 554.302602       | 7 |
| 4 | 415.218726         | 208.113001      |                |                  | 397.208161        | 199.107719       | A    | <b>996.565899</b>  | <b>498.786588</b> | 979.539350     | 490.273313       | 978.555334         | 489.781305       | 6 |
| 5 | <b>854.444052</b>  | 427.725664      | 837.417503     | 419.212390       | <b>836.433487</b> | 418.720382       | Q    | <b>925.528785</b>  | 463.268031        | 908.502236     | 454.754756       | 907.518220         | 454.262748       | 5 |
| 6 | <b>967.528116</b>  | 484.267696      | 950.501567     | 475.754422       | 949.517551        | 475.262414       | L    | <b>486.303459</b>  | 243.655367        | 469.276910     | 235.142093       | 468.292894         | 234.650085       | 4 |
| 7 | <b>1068.575795</b> | 534.791536      | 1051.549246    | 526.278261       | 1050.565230       | 525.786253       | T    | <b>373.219395</b>  | <b>187.113335</b> | 356.192846     | 178.600061       | 355.208830         | 178.108053       | 3 |
| 8 | 1165.628559        | 583.317918      | 1148.602010    | 574.804643       | 1147.617994       | 574.312635       | P    | <b>272.171716</b>  | 136.589496        | 255.145167     | 128.076221       |                    |                  | 2 |
| 9 |                    |                 |                |                  |                   |                  | R    | 175.118952         | 88.063114         | 158.092403     | 79.549839        |                    |                  | 1 |

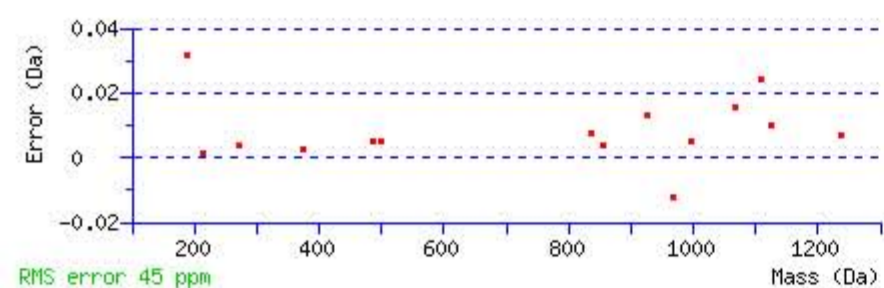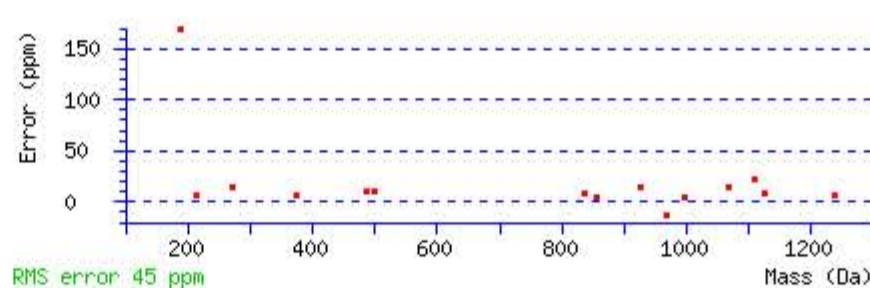

NCBI BLAST search of **TLEAQLTPR**

(Parameters: blastp, nr protein database, expect=20000, no filter, PAM30)

Other BLAST [web gateways](#)

## All matches to this query

| Score | Mr(calc):   | Delta    | Sequence                    |
|-------|-------------|----------|-----------------------------|
| 55.2  | 1338.732941 | 0.005887 | <a href="#">TLEAQLTPR</a>   |
| 8.6   | 1338.732956 | 0.005872 | <a href="#">VDLQSLPTR</a>   |
| 8.5   | 1338.725555 | 0.013273 | <a href="#">VDTVAEHLTRK</a> |
| 0.5   | 1338.732941 | 0.005887 | <a href="#">TDRIYAMKVVK</a> |

Mascot: <http://www.matrixscience.com/>



# MASCOT Search Results

## Peptide View

MS/MS Fragmentation of **GGETAQSADPQWEQLNKK**

Found in **HEP2\_HUMAN**, Heparin cofactor 2 OS=Homo sapiens GN=SERPIND1 PE=1 SV=3

Match to Query 60277: 2283.078312 from(762.033380,3+) rtinseconds(1880) index(41240)

Title: Locus:1.1.1.2938.24 File:"2013-07-02 CLN FXIII 60 min 1st F 3.wiff"

Data file C:\Program Files (x86)\Matrix Science\Mascot Daemon\mgf\4 FXIII 60 min 1st\mascot\_daemon\_merge.mgf

Click mouse within plot area to zoom in by factor of two about that point

Or, Plot from  to  Da

Label all possible matches  Label matches used for scoring

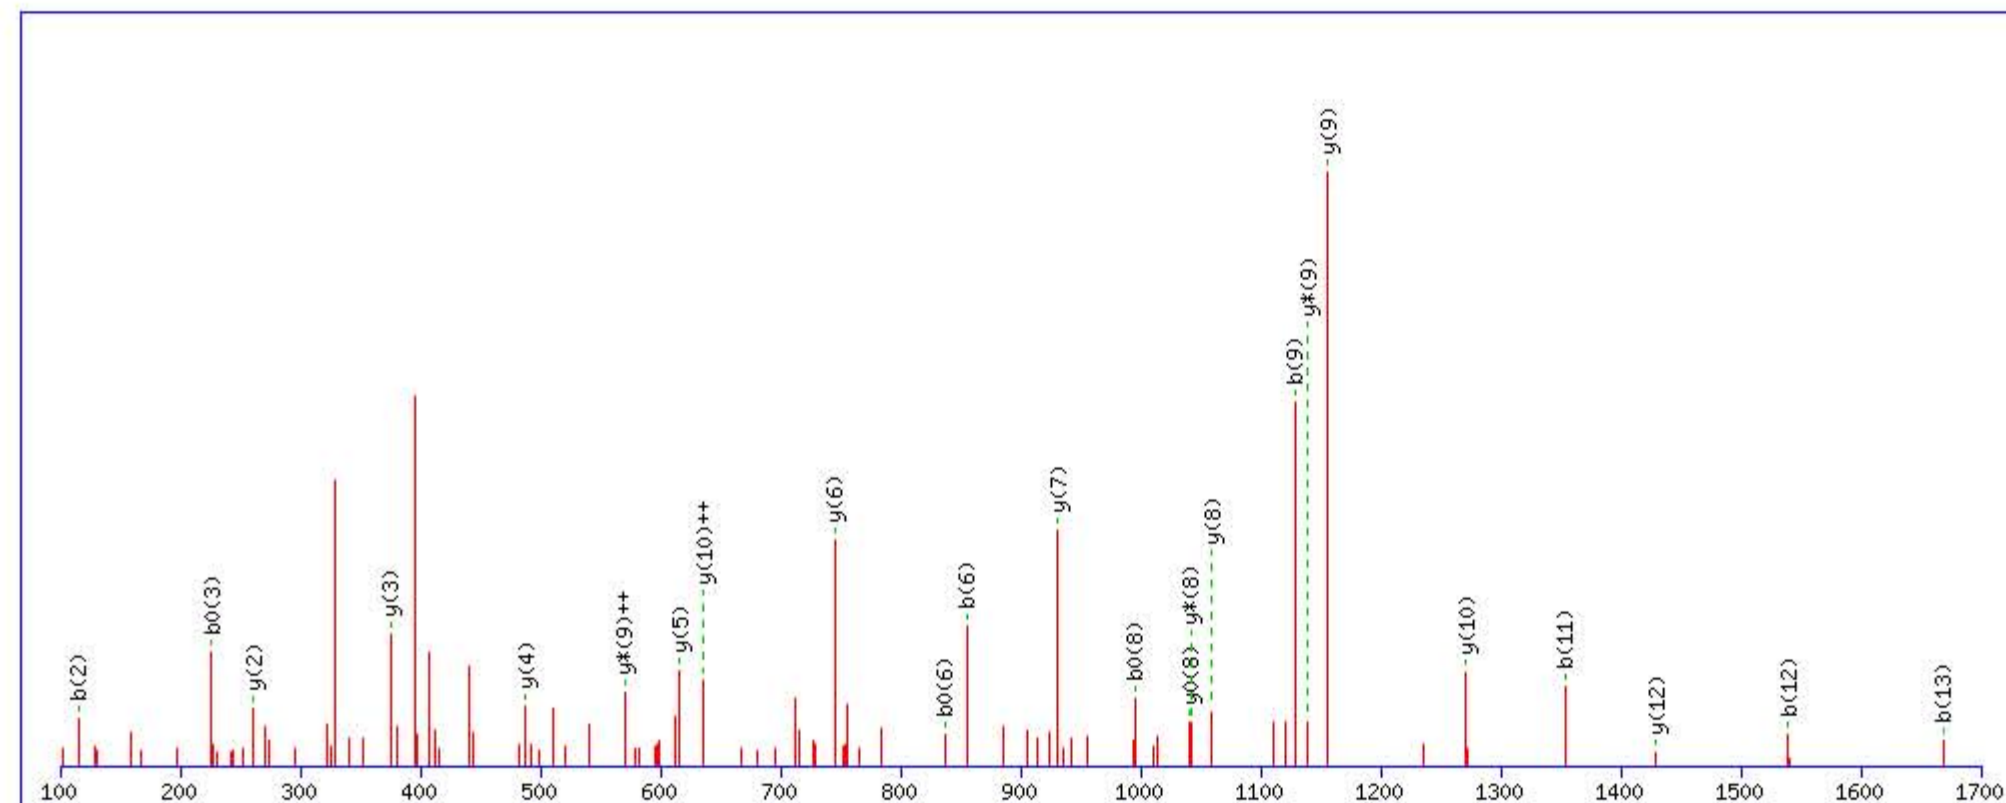

Monoisotopic mass of neutral peptide Mr(calc): 2283.058975

Fixed modifications: Carbamidomethyl (C) (apply to specified residues or termini only)

Variable modifications:

Q6 : Biotin:Thermo-21345 (Q)

Ions Score: 56 Expect: 4.8e-005

Matches : 24/180 fragment ions using 41 most intense peaks [\(help\)](#)

| #  | b                  | b <sup>++</sup> | b <sup>+</sup> | b <sup>+++</sup> | b <sup>0</sup>    | b <sup>0++</sup> | Seq.     | y                  | y <sup>++</sup>   | y <sup>+</sup>     | y <sup>+++</sup>  | y <sup>0</sup>     | y <sup>0++</sup> | #  |
|----|--------------------|-----------------|----------------|------------------|-------------------|------------------|----------|--------------------|-------------------|--------------------|-------------------|--------------------|------------------|----|
| 1  | 58.028740          | 29.518008       |                |                  |                   |                  | <b>G</b> |                    |                   |                    |                   |                    |                  | 18 |
| 2  | <b>115.050204</b>  | 58.028740       |                |                  |                   |                  | <b>G</b> | 2227.044809        | 1114.026042       | 2210.018260        | 1105.512768       | 2209.034244        | 1105.020760      | 17 |
| 3  | 244.092797         | 122.550037      |                |                  | <b>226.082232</b> | 113.544754       | <b>E</b> | 2170.023345        | 1085.515310       | 2152.996796        | 1077.002036       | 2152.012780        | 1076.510028      | 16 |
| 4  | 345.140476         | 173.073876      |                |                  | 327.129911        | 164.068594       | <b>T</b> | 2040.980752        | 1020.994014       | 2023.954203        | 1012.480740       | 2022.970187        | 1011.988732      | 15 |
| 5  | 416.177590         | 208.592433      |                |                  | 398.167025        | 199.587151       | <b>A</b> | 1939.933073        | 970.470175        | 1922.906524        | 961.956900        | 1921.922508        | 961.464892       | 14 |
| 6  | <b>855.402916</b>  | 428.205096      | 838.376367     | 419.691822       | <b>837.392351</b> | 419.199814       | <b>Q</b> | 1868.895959        | 934.951618        | 1851.869410        | 926.438343        | 1850.885394        | 925.946335       | 13 |
| 7  | 942.434944         | 471.721110      | 925.408395     | 463.207836       | 924.424379        | 462.715828       | <b>S</b> | <b>1429.670633</b> | 715.338955        | 1412.644084        | 706.825680        | 1411.660068        | 706.333672       | 12 |
| 8  | 1013.472058        | 507.239667      | 996.445509     | 498.726393       | <b>995.461493</b> | 498.234385       | <b>A</b> | 1342.638605        | 671.822941        | 1325.612056        | 663.309666        | 1324.628040        | 662.817658       | 11 |
| 9  | <b>1128.499001</b> | 564.753139      | 1111.472452    | 556.239864       | 1110.488436       | 555.747856       | <b>D</b> | <b>1271.601491</b> | <b>636.304384</b> | 1254.574942        | 627.791109        | 1253.590926        | 627.299101       | 10 |
| 10 | 1225.551765        | 613.279521      | 1208.525216    | 604.766246       | 1207.541200       | 604.274238       | <b>P</b> | <b>1156.574548</b> | 578.790912        | <b>1139.547999</b> | <b>570.277638</b> | 1138.563983        | 569.785630       | 9  |
| 11 | <b>1353.610343</b> | 677.308810      | 1336.583794    | 668.795535       | 1335.599778       | 668.303527       | <b>Q</b> | <b>1059.521784</b> | 530.264530        | <b>1042.495235</b> | 521.751256        | <b>1041.511219</b> | 521.259248       | 8  |
| 12 | <b>1539.689656</b> | 770.348466      | 1522.663107    | 761.835192       | 1521.679091       | 761.343184       | <b>W</b> | <b>931.463206</b>  | 466.235241        | 914.436657         | 457.721967        | 913.452641         | 457.229959       | 7  |
| 13 | <b>1668.732249</b> | 834.869762      | 1651.705700    | 826.356488       | 1650.721684       | 825.864480       | <b>E</b> | <b>745.383893</b>  | 373.195585        | 728.357344         | 364.682310        | 727.373328         | 364.190302       | 6  |
| 14 | 1796.790827        | 898.899052      | 1779.764278    | 890.385777       | 1778.780262       | 889.893769       | <b>Q</b> | <b>616.341300</b>  | 308.674288        | 599.314751         | 300.161014        |                    |                  | 5  |
| 15 | 1909.874891        | 955.441083      | 1892.848342    | 946.927809       | 1891.864326       | 946.435801       | <b>L</b> | <b>488.282722</b>  | 244.644999        | 471.256173         | 236.131725        |                    |                  | 4  |
| 16 | 2023.917818        | 1012.462547     | 2006.891269    | 1003.949273      | 2005.907253       | 1003.457265      | <b>N</b> | <b>375.198658</b>  | 188.102967        | 358.172109         | 179.589693        |                    |                  | 3  |
| 17 | 2137.960745        | 1069.484010     | 2120.934196    | 1060.970736      | 2119.950180       | 1060.478728      | <b>N</b> | <b>261.155731</b>  | 131.081504        | 244.129182         | 122.568229        |                    |                  | 2  |
| 18 |                    |                 |                |                  |                   |                  | <b>K</b> | 147.112804         | 74.060040         | 130.086255         | 65.546765         |                    |                  | 1  |

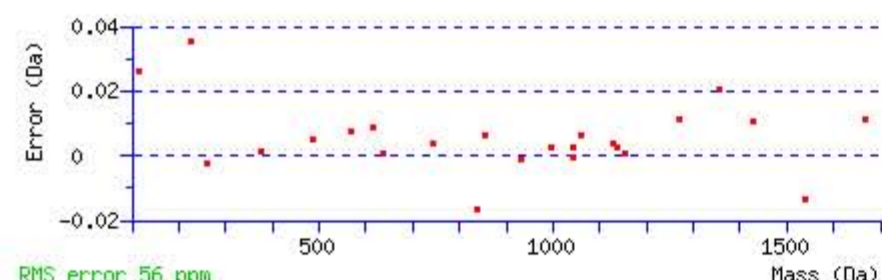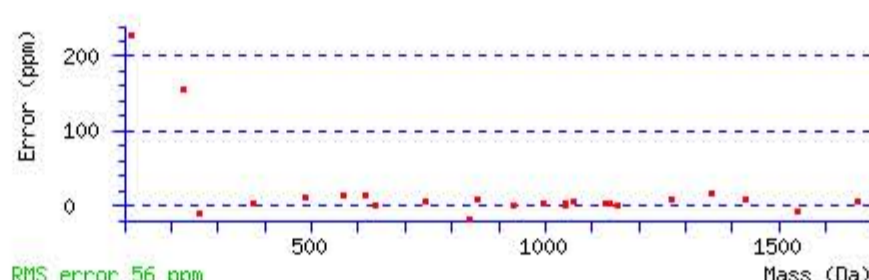

NCBI BLAST search of [GGETAQSADPQWEQLNKK](#)

(Parameters: blastp, nr protein database, expect=20000, no filter, PAM30)

Other BLAST [web gateways](#)

All matches to this query

| Score | Mr(calc):   | Delta    | Sequence                           |
|-------|-------------|----------|------------------------------------|
| 55.5  | 2283.058975 | 0.019337 | <a href="#">GGETAQSADPQWEQLNKK</a> |
| 10.7  | 2283.058975 | 0.019337 | <a href="#">GGETAQSADPQWEQLNKK</a> |



# MASCOT Search Results

## Peptide View

MS/MS Fragmentation of **VQLSPDLLATLPEPASPGR**

Found in **HGFA\_HUMAN**, Hepatocyte growth factor activator OS=Homo sapiens GN=HGFA PE=1 SV=1

Match to Query 59977: 2271.258762 from(758.093530,3+) rtinseconds(2648) index(10991)

Title: Locus:1.1.1.3054.18 File:"2013-07-02 CLN FXIII 60 min 1st F 1.wiff"

Data file C:\Program Files (x86)\Matrix Science\Mascot Daemon\mgf4 FXIII 60 min 1st\mascot\_daemon\_merge.mgf

Click mouse within plot area to zoom in by factor of two about that point

Or, Plot from  to  Da

Label all possible matches  Label matches used for scoring

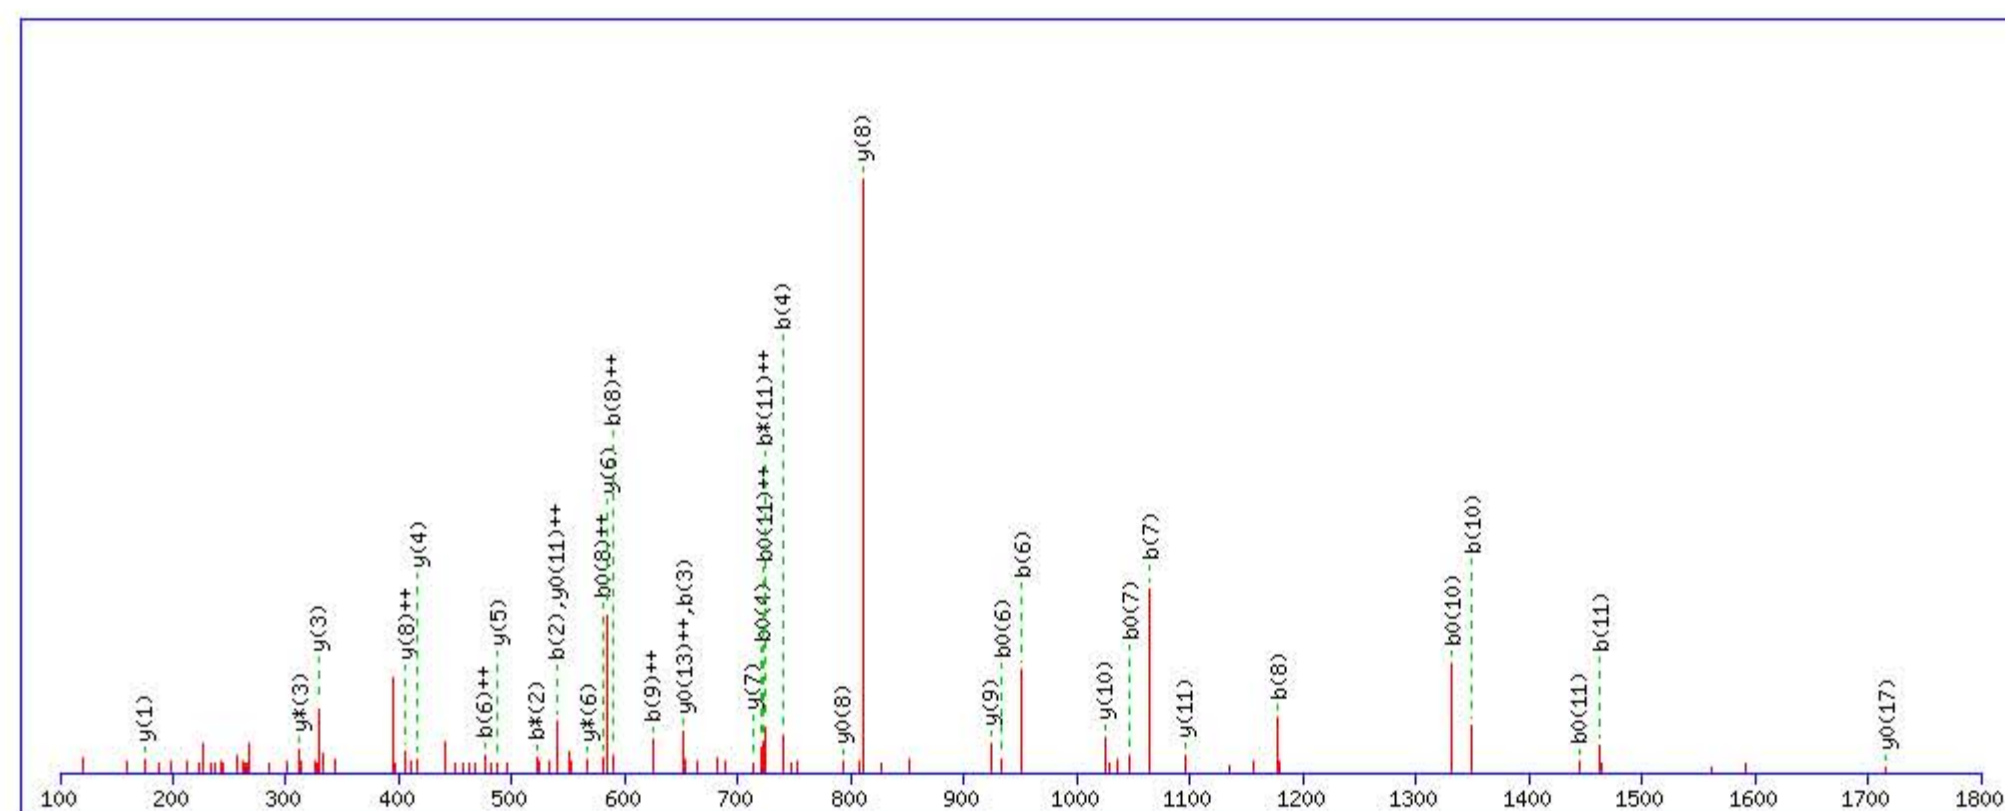

Monoisotopic mass of neutral peptide Mr(calc): 2271.229675

Fixed modifications: Carbamidomethyl (C) (apply to specified residues or termini only)

Variable modifications:

Q2 : Biotin:Thermo-21345 (Q)

Ions Score: 56 Expect: 2.4e-005

Matches : 37/202 fragment ions using 71 most intense peaks [\(help\)](#)

| #  | b                  | b <sup>++</sup>   | b <sup>*</sup>    | b <sup>+++</sup>  | b <sup>0</sup>     | b <sup>0++</sup>  | Seq. | y                  | y <sup>++</sup>   | y <sup>*</sup>    | y <sup>+++</sup> | y <sup>0</sup>     | y <sup>0++</sup>  | #  |
|----|--------------------|-------------------|-------------------|-------------------|--------------------|-------------------|------|--------------------|-------------------|-------------------|------------------|--------------------|-------------------|----|
| 1  | 100.075690         | 50.541483         |                   |                   |                    |                   | V    |                    |                   |                   |                  |                    |                   | 19 |
| 2  | <b>539.301016</b>  | 270.154146        | <b>522.274467</b> | 261.640872        |                    |                   | Q    | 2173.168553        | 1087.087914       | 2156.142004       | 1078.574640      | 2155.157988        | 1078.082632       | 18 |
| 3  | <b>652.385080</b>  | 326.696178        | 635.358531        | 318.182904        |                    |                   | L    | 1733.943227        | 867.475252        | 1716.916678       | 858.961977       | <b>1715.932662</b> | 858.469969        | 17 |
| 4  | <b>739.417108</b>  | 370.212192        | 722.390559        | 361.698918        | <b>721.406543</b>  | 361.206910        | S    | 1620.859163        | 810.933219        | 1603.832614       | 802.419945       | 1602.848598        | 801.927937        | 16 |
| 5  | 836.469872         | 418.738574        | 819.443323        | 410.225300        | 818.459307         | 409.733292        | P    | 1533.827135        | 767.417206        | 1516.800586       | 758.903931       | 1515.816570        | 758.411923        | 15 |
| 6  | <b>951.496815</b>  | <b>476.252046</b> | 934.470266        | 467.738771        | <b>933.486250</b>  | 467.246763        | D    | 1436.774371        | 718.890824        | 1419.747822       | 710.377549       | 1418.763806        | 709.885541        | 14 |
| 7  | <b>1064.580879</b> | 532.794078        | 1047.554330       | 524.280803        | <b>1046.570314</b> | 523.788795        | L    | 1321.747428        | 661.377352        | 1304.720879       | 652.864078       | 1303.736863        | <b>652.372069</b> | 13 |
| 8  | <b>1177.664943</b> | <b>589.336110</b> | 1160.638394       | 580.822835        | 1159.654378        | <b>580.330827</b> | L    | 1208.663364        | 604.835320        | 1191.636815       | 596.322046       | 1190.652799        | 595.830038        | 12 |
| 9  | 1248.702057        | <b>624.854667</b> | 1231.675508       | 616.341392        | 1230.691492        | 615.849384        | A    | <b>1095.579300</b> | 548.293288        | 1078.552751       | 539.780014       | 1077.568735        | <b>539.288006</b> | 11 |
| 10 | <b>1349.749736</b> | 675.378506        | 1332.723187       | 666.865232        | <b>1331.739171</b> | 666.373223        | T    | <b>1024.542186</b> | 512.774731        | 1007.515637       | 504.261456       | 1006.531621        | 503.769448        | 10 |
| 11 | <b>1462.833800</b> | 731.920538        | 1445.807251       | <b>723.407264</b> | <b>1444.823235</b> | <b>722.915255</b> | L    | <b>923.494507</b>  | 462.250892        | 906.467958        | 453.737617       | 905.483942         | 453.245609        | 9  |
| 12 | 1559.886564        | 780.446920        | 1542.860015       | 771.933646        | 1541.875999        | 771.441637        | P    | <b>810.410443</b>  | <b>405.708860</b> | 793.383894        | 397.195585       | <b>792.399878</b>  | 396.703577        | 8  |
| 13 | 1688.929157        | 844.968216        | 1671.902608       | 836.454942        | 1670.918592        | 835.962934        | E    | <b>713.357679</b>  | 357.182478        | 696.331130        | 348.669203       | 695.347114         | 348.177195        | 7  |
| 14 | 1785.981921        | 893.494598        | 1768.955372       | 884.981324        | 1767.971356        | 884.489316        | P    | <b>584.315086</b>  | 292.661181        | <b>567.288537</b> | 284.147907       | 566.304521         | 283.655899        | 6  |
| 15 | 1857.019035        | 929.013155        | 1839.992486       | 920.499881        | 1839.008470        | 920.007873        | A    | <b>487.262322</b>  | 244.134799        | 470.235773        | 235.621525       | 469.251757         | 235.129517        | 5  |
| 16 | 1944.051063        | 972.529169        | 1927.024514       | 964.015895        | 1926.040498        | 963.523887        | S    | <b>416.225208</b>  | 208.616242        | 399.198659        | 200.102968       | 398.214643         | 199.610960        | 4  |
| 17 | 2041.103827        | 1021.055552       | 2024.077278       | 1012.542277       | 2023.093262        | 1012.050269       | P    | <b>329.193180</b>  | 165.100228        | <b>312.166631</b> | 156.586954       |                    |                   | 3  |
| 18 | 2098.125291        | 1049.566283       | 2081.098742       | 1041.053009       | 2080.114726        | 1040.561001       | G    | 232.140416         | 116.573846        | 215.113867        | 108.060572       |                    |                   | 2  |
| 19 |                    |                   |                   |                   |                    |                   | R    | <b>175.118952</b>  | 88.063114         | 158.092403        | 79.549839        |                    |                   | 1  |

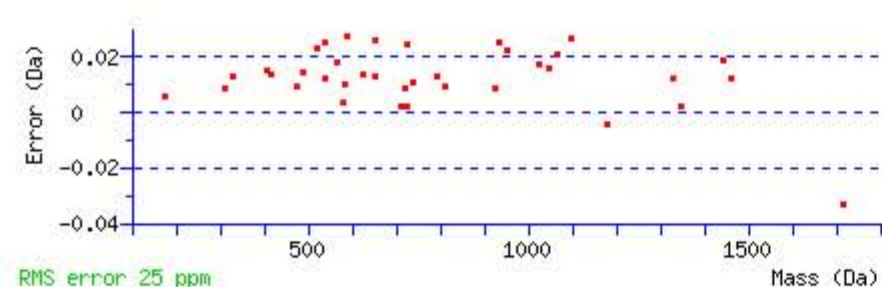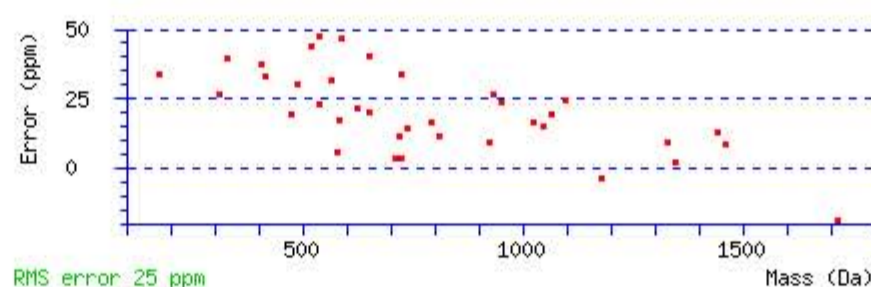

NCBI BLAST search of [VQLSPDLLATLPEPASPGR](#)

(Parameters: blastp, nr protein database, expect=20000, no filter, PAM30)

Other BLAST [web gateways](#)

All matches to this query

| Score | Mr(calc):   | Delta     | Sequence                             |
|-------|-------------|-----------|--------------------------------------|
| 56.1  | 2271.229675 | 0.029087  | <a href="#">VQLSPDLLATLPEPASPGR</a>  |
| 6.5   | 2271.226303 | 0.032459  | <a href="#">IAKSDPPTLLTPSKWSVEFR</a> |
| 3.2   | 2271.277283 | -0.018521 | <a href="#">IIQGDIIASNGLLHILDR</a>   |



# MASCOT Search Results

## Peptide View

MS/MS Fragmentation of **QEATTVSCFR**

Found in **HGFL\_HUMAN**, Hepatocyte growth factor-like protein OS=Homo sapiens GN=MST1 PE=1 SV=2

Match to Query 38917: 1508.717532 from(503.913120,3+) rtinseconds(1748) index(76806)

Title: Locus:1.1.1.2823.7 File:"2013-07-02 CLN FXIII 60 min 1st FT.wiff"

Data file C:\Program Files (x86)\Matrix Science\Mascot Daemon\mgf4 FXIII 60 min 1st\mascot\_daemon\_merge.mgf

Click mouse within plot area to zoom in by factor of two about that point

Or, Plot from  to  Da

Label all possible matches  Label matches used for scoring

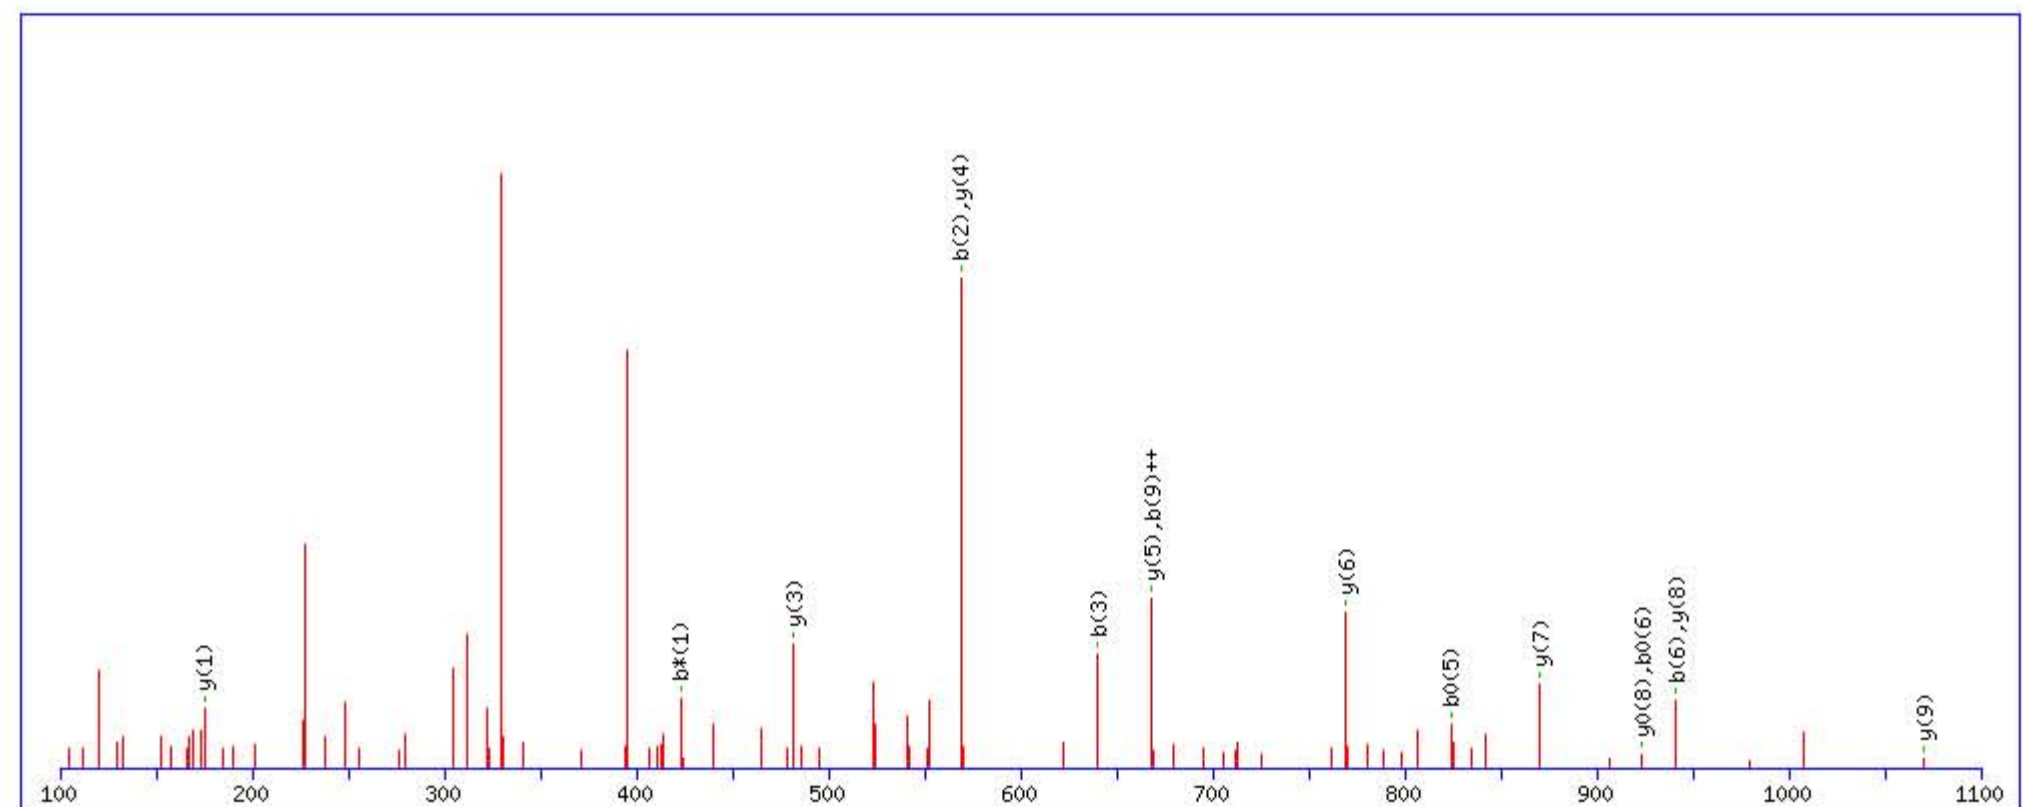

Monoisotopic mass of neutral peptide Mr(calc): 1508.711578

Fixed modifications: Carbamidomethyl (C) (apply to specified residues or termini only)

Variable modifications:

Q1 : Biotin:Thermo-21345 (Q)

Ions Score: 54 Expect: 6.4e-005

Matches : 16/100 fragment ions using 20 most intense peaks [\(help\)](#)

| #  | b                 | b <sup>++</sup>   | b <sup>*</sup>    | b <sup>*++</sup> | b <sup>0</sup>    | b <sup>0++</sup> | Seq. | y                  | y <sup>++</sup> | y <sup>*</sup> | y <sup>*++</sup> | y <sup>0</sup>    | y <sup>0++</sup> | #  |
|----|-------------------|-------------------|-------------------|------------------|-------------------|------------------|------|--------------------|-----------------|----------------|------------------|-------------------|------------------|----|
| 1  | 440.232602        | 220.619939        | <b>423.206053</b> | 212.106664       |                   |                  | Q    |                    |                 |                |                  |                   |                  | 10 |
| 2  | <b>569.275195</b> | 285.141236        | 552.248646        | 276.627961       | 551.264630        | 276.135953       | E    | <b>1070.493522</b> | 535.750399      | 1053.466973    | 527.237125       | 1052.482957       | 526.745117       | 9  |
| 3  | <b>640.312309</b> | 320.659793        | 623.285760        | 312.146518       | 622.301744        | 311.654510       | A    | <b>941.450929</b>  | 471.229103      | 924.424380     | 462.715828       | <b>923.440364</b> | 462.223820       | 8  |
| 4  | 741.359988        | 371.183632        | 724.333439        | 362.670358       | 723.349423        | 362.178350       | T    | <b>870.413815</b>  | 435.710546      | 853.387266     | 427.197271       | 852.403250        | 426.705263       | 7  |
| 5  | 842.407667        | 421.707472        | 825.381118        | 413.194197       | <b>824.397102</b> | 412.702189       | T    | <b>769.366136</b>  | 385.186706      | 752.339587     | 376.673432       | 751.355571        | 376.181424       | 6  |
| 6  | <b>941.476081</b> | 471.241679        | 924.449532        | 462.728404       | <b>923.465516</b> | 462.236396       | V    | <b>668.318457</b>  | 334.662867      | 651.291908     | 326.149592       | 650.307892        | 325.657584       | 5  |
| 7  | 1028.508109       | 514.757693        | 1011.481560       | 506.244418       | 1010.497544       | 505.752410       | S    | <b>569.250043</b>  | 285.128660      | 552.223494     | 276.615385       | 551.239478        | 276.123377       | 4  |
| 8  | 1188.538758       | 594.773017        | 1171.512209       | 586.259743       | 1170.528193       | 585.767735       | C    | <b>482.218015</b>  | 241.612646      | 465.191466     | 233.099371       |                   |                  | 3  |
| 9  | 1335.607172       | <b>668.307224</b> | 1318.580623       | 659.793950       | 1317.596607       | 659.301942       | F    | 322.187366         | 161.597321      | 305.160817     | 153.084047       |                   |                  | 2  |
| 10 |                   |                   |                   |                  |                   |                  | R    | <b>175.118952</b>  | 88.063114       | 158.092403     | 79.549839        |                   |                  | 1  |

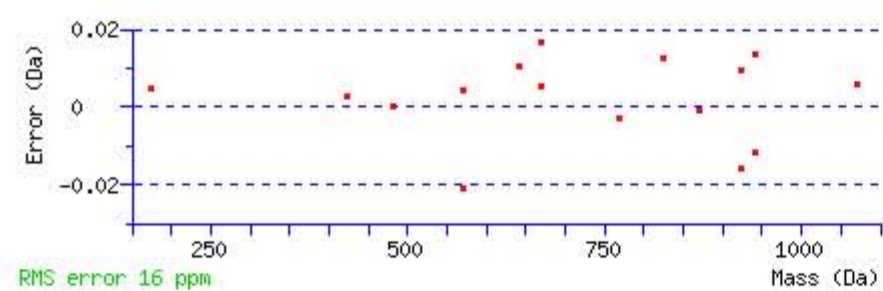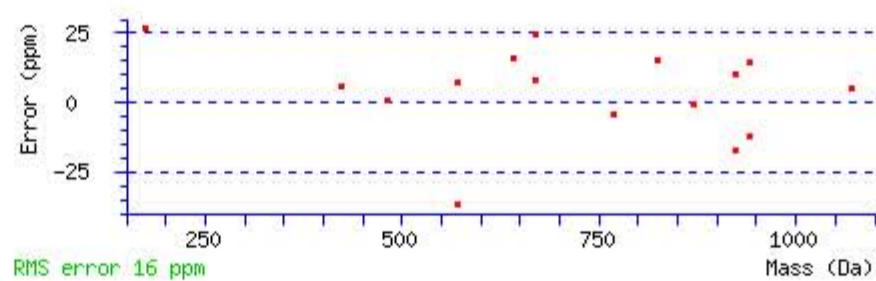

NCBI BLAST search of **QEATTVSCFR**

(Parameters: blastp, nr protein database, expect=20000, no filter, PAM30)

Other BLAST [web gateways](#)

All matches to this query

| Score | Mr(calc):   | Delta    | Sequence                   |
|-------|-------------|----------|----------------------------|
| 54.1  | 1508.711578 | 0.005954 | <a href="#">QEATTVSCFR</a> |

Mascot: <http://www.matrixscience.com/>



# MASCOT Search Results

## Peptide View

MS/MS Fragmentation of **FTCACPDQFK**

Found in **HABP2\_HUMAN**, Hyaluronan-binding protein 2 OS=Homo sapiens GN=HABP2 PE=1 SV=1

Match to Query 41378: 1583.711648 from(792.863100,2+) rtinseconds(1854) index(59397)

Title: Locus:1.1.1.2951.18 File:"2013-07-02 CLN FXIII 60 min 1st F 4.wiff"

Data file C:\Program Files (x86)\Matrix Science\Mascot Daemon\mgf4 FXIII 60 min 1st\mascot\_daemon\_merge.mgf

Click mouse within plot area to zoom in by factor of two about that point

Or, Plot from  to  Da

Label all possible matches  Label matches used for scoring

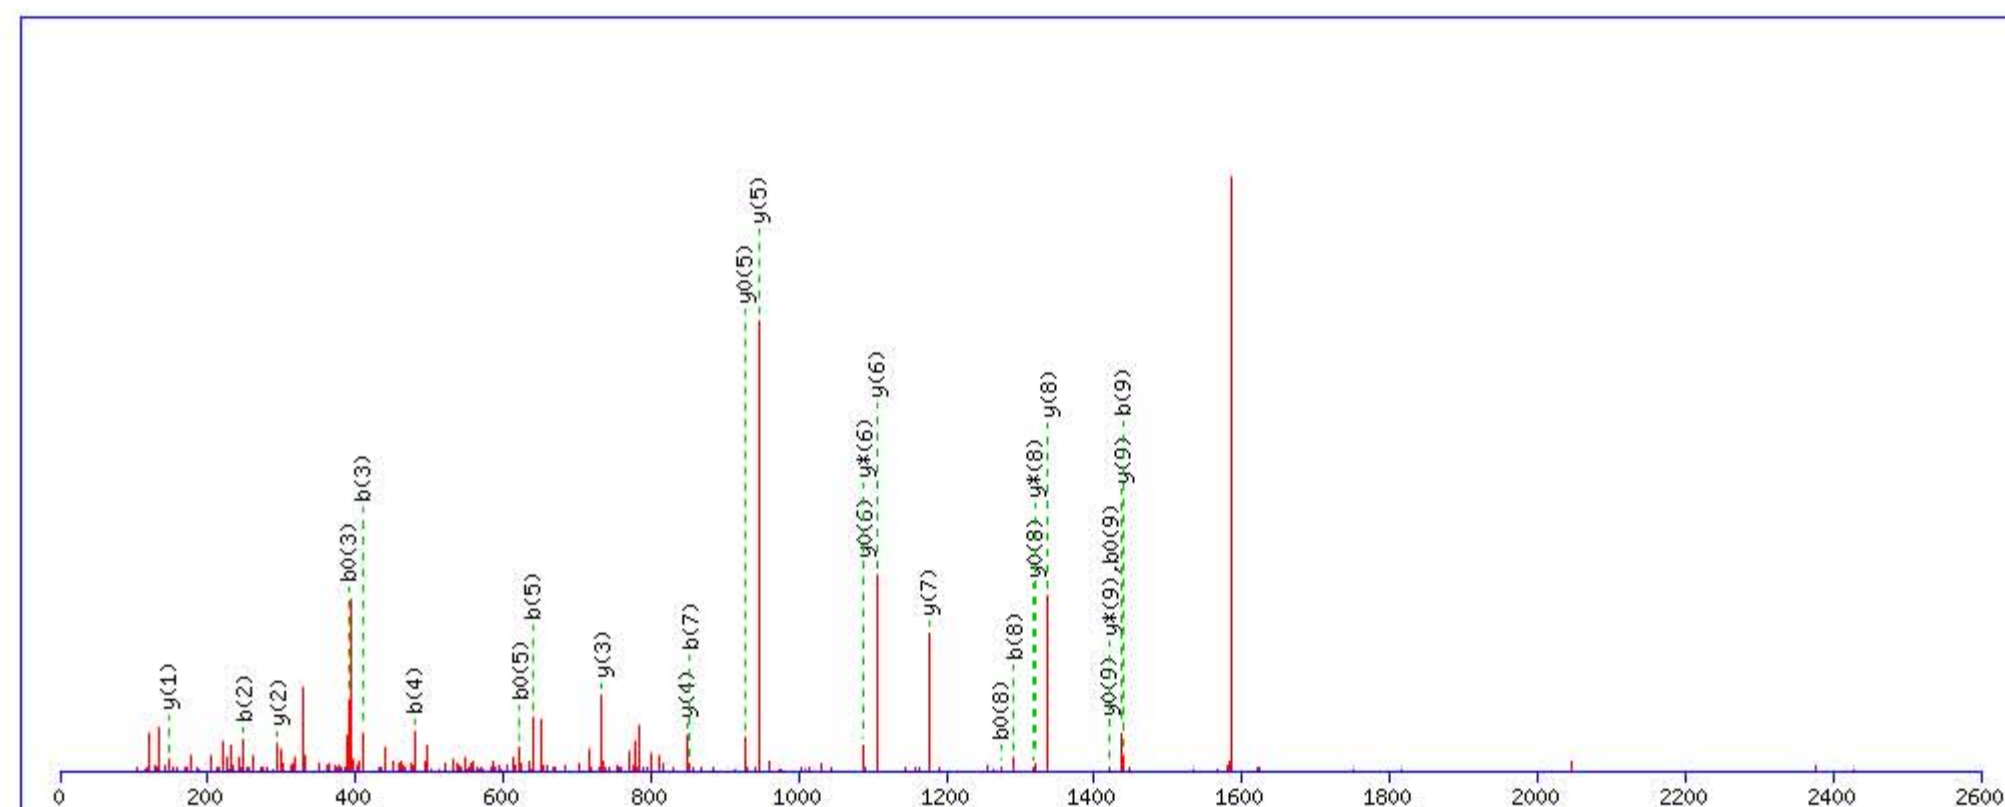

Monoisotopic mass of neutral peptide Mr(calc): 1583.693497

Fixed modifications: Carbamidomethyl (C) (apply to specified residues or termini only)

Variable modifications:

Q8 : Biotin:Thermo-21345 (Q)

Ions Score: 44 Expect: 0.00034

Matches : 27/86 fragment ions using 59 most intense peaks ([help](#))

| #  | b                  | b <sup>++</sup> | b <sup>*</sup> | b <sup>*++</sup> | b <sup>0</sup>     | b <sup>0++</sup> | Seq. | y                  | y <sup>++</sup> | y <sup>*</sup>     | y <sup>*++</sup> | y <sup>0</sup>     | y <sup>0++</sup> | #  |
|----|--------------------|-----------------|----------------|------------------|--------------------|------------------|------|--------------------|-----------------|--------------------|------------------|--------------------|------------------|----|
| 1  | 148.075690         | 74.541483       |                |                  |                    |                  | F    |                    |                 |                    |                  |                    |                  | 10 |
| 2  | <b>249.123369</b>  | 125.065322      |                |                  | 231.112804         | 116.060040       | T    | <b>1437.632342</b> | 719.319809      | <b>1420.605793</b> | 710.806535       | <b>1419.621777</b> | 710.314527       | 9  |
| 3  | <b>409.154018</b>  | 205.080647      |                |                  | <b>391.143453</b>  | 196.075365       | C    | <b>1336.584663</b> | 668.795970      | <b>1319.558114</b> | 660.282695       | <b>1318.574098</b> | 659.790687       | 8  |
| 4  | <b>480.191132</b>  | 240.599204      |                |                  | 462.180567         | 231.593921       | A    | <b>1176.554014</b> | 588.780645      | 1159.527465        | 580.267371       | 1158.543449        | 579.775363       | 7  |
| 5  | <b>640.221781</b>  | 320.614529      |                |                  | <b>622.211216</b>  | 311.609246       | C    | <b>1105.516900</b> | 553.262088      | <b>1088.490351</b> | 544.748814       | <b>1087.506335</b> | 544.256806       | 6  |
| 6  | 737.274545         | 369.140911      |                |                  | 719.263980         | 360.135628       | P    | <b>945.486251</b>  | 473.246764      | 928.459702         | 464.733489       | <b>927.475686</b>  | 464.241481       | 5  |
| 7  | <b>852.301488</b>  | 426.654382      |                |                  | 834.290923         | 417.649100       | D    | <b>848.433487</b>  | 424.720382      | 831.406938         | 416.207107       | 830.422922         | 415.715099       | 4  |
| 8  | <b>1291.526814</b> | 646.267045      | 1274.500265    | 637.753771       | <b>1273.516249</b> | 637.261763       | Q    | <b>733.406544</b>  | 367.206910      | 716.379995         | 358.693636       |                    |                  | 3  |
| 9  | <b>1438.595228</b> | 719.801252      | 1421.568679    | 711.287978       | <b>1420.584663</b> | 710.795970       | F    | <b>294.181218</b>  | 147.594247      | 277.154669         | 139.080973       |                    |                  | 2  |
| 10 |                    |                 |                |                  |                    |                  | K    | <b>147.112804</b>  | 74.060040       | 130.086255         | 65.546765        |                    |                  | 1  |

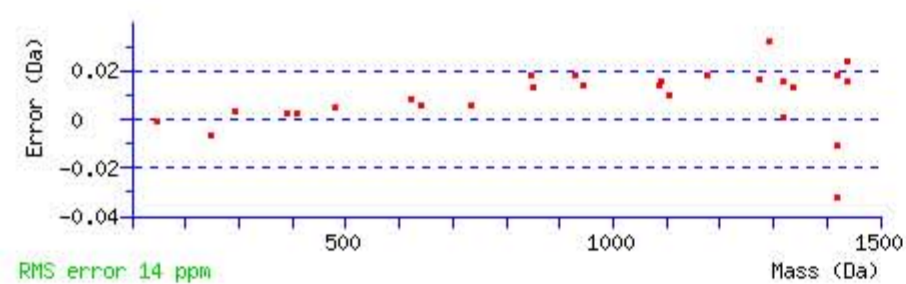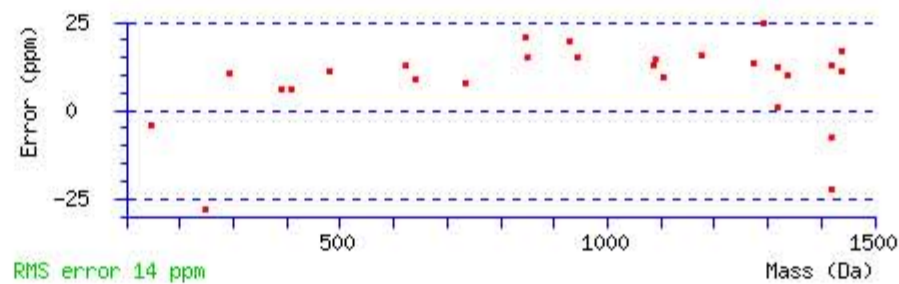

NCBI BLAST search of **FTCACPDQFK**

(Parameters: blastp, nr protein database, expect=20000, no filter, PAM30)

Other BLAST [web gateways](#)

All matches to this query

| Score | Mr(calc):   | Delta    | Sequence                   |
|-------|-------------|----------|----------------------------|
| 44.1  | 1583.693497 | 0.018151 | <a href="#">FTCACPDQFK</a> |

Mascot: <http://www.matrixscience.com/>



# MASCOT Search Results

## Peptide View

MS/MS Fragmentation of **GQCLITQSPYYR**

Found in **HABP2\_HUMAN**, Hyaluronan-binding protein 2 OS=Homo sapiens GN=HABP2 PE=1 SV=1

Match to Query 50461: 1892.945862 from(631.989230,3+) rtinseconds(2059) index(60982)

Title: Locus:1.1.1.3022.8 File:"2013-07-02 CLN FXIII 60 min 1st F 4.wiff"

Data file C:\Program Files (x86)\Matrix Science\Mascot Daemon\mgf4 FXIII 60 min 1st\mascot\_daemon\_merge.mgf

Click mouse within plot area to zoom in by factor of two about that point

Or, Plot from  to  Da

Label all possible matches  Label matches used for scoring

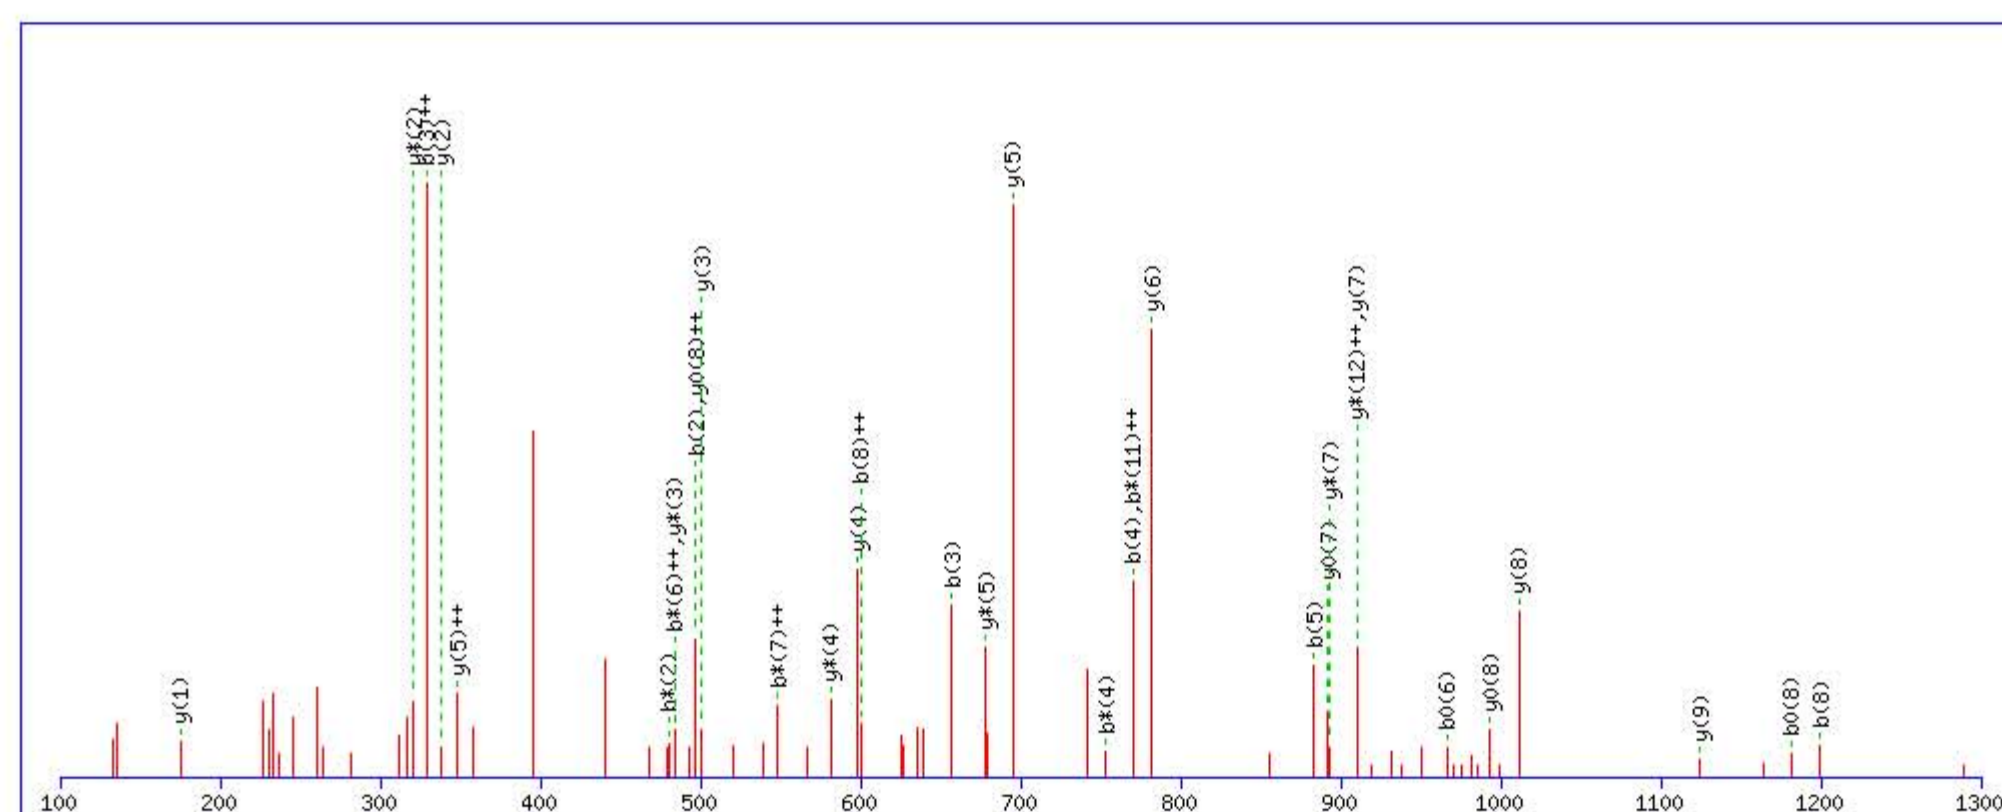

Monoisotopic mass of neutral peptide Mr(calc): 1892.927704

Fixed modifications: Carbamidomethyl (C) (apply to specified residues or termini only)

Variable modifications:

Q2 : Biotin:Thermo-21345 (Q)

Ions Score: 50 Expect: 0.00023

Matches : 33/122 fragment ions using 48 most intense peaks [\(help\)](#)

| #  | b           | b <sup>++</sup> | b <sup>*</sup> | b <sup>*++</sup> | b <sup>0</sup> | b <sup>0++</sup> | Seq. | y           | y <sup>++</sup> | y <sup>*</sup> | y <sup>*++</sup> | y <sup>0</sup> | y <sup>0++</sup> | #  |
|----|-------------|-----------------|----------------|------------------|----------------|------------------|------|-------------|-----------------|----------------|------------------|----------------|------------------|----|
| 1  | 58.028740   | 29.518008       |                |                  |                |                  | G    |             |                 |                |                  |                |                  | 13 |
| 2  | 497.254066  | 249.130671      | 480.227517     | 240.617397       |                |                  | Q    | 1836.913526 | 918.960401      | 1819.886977    | 910.447127       | 1818.902961    | 909.955119       | 12 |
| 3  | 657.284715  | 329.145996      | 640.258166     | 320.632721       |                |                  | C    | 1397.688200 | 699.347738      | 1380.661651    | 690.834464       | 1379.677635    | 690.342456       | 11 |
| 4  | 770.368779  | 385.688028      | 753.342230     | 377.174753       |                |                  | L    | 1237.657551 | 619.332414      | 1220.631002    | 610.819139       | 1219.646986    | 610.327131       | 10 |
| 5  | 883.452843  | 442.230060      | 866.426294     | 433.716785       |                |                  | I    | 1124.573487 | 562.790382      | 1107.546938    | 554.277107       | 1106.562922    | 553.785099       | 9  |
| 6  | 984.500522  | 492.753899      | 967.473973     | 484.240625       | 966.489957     | 483.748617       | T    | 1011.489423 | 506.248350      | 994.462874     | 497.735075       | 993.478858     | 497.243067       | 8  |
| 7  | 1112.559100 | 556.783188      | 1095.532551    | 548.269914       | 1094.548535    | 547.777906       | Q    | 910.441744  | 455.724510      | 893.415195     | 447.211236       | 892.431179     | 446.719228       | 7  |
| 8  | 1199.591128 | 600.299202      | 1182.564579    | 591.785928       | 1181.580563    | 591.293920       | S    | 782.383166  | 391.695221      | 765.356617     | 383.181947       | 764.372601     | 382.689939       | 6  |
| 9  | 1296.643892 | 648.825584      | 1279.617343    | 640.312310       | 1278.633327    | 639.820302       | P    | 695.351138  | 348.179207      | 678.324589     | 339.665933       |                |                  | 5  |
| 10 | 1393.696656 | 697.351966      | 1376.670107    | 688.838692       | 1375.686091    | 688.346684       | P    | 598.298374  | 299.652825      | 581.271825     | 291.139551       |                |                  | 4  |
| 11 | 1556.759985 | 778.883631      | 1539.733436    | 770.370356       | 1538.749420    | 769.878348       | Y    | 501.245610  | 251.126443      | 484.219061     | 242.613169       |                |                  | 3  |
| 12 | 1719.823314 | 860.415295      | 1702.796765    | 851.902021       | 1701.812749    | 851.410013       | Y    | 338.182281  | 169.594778      | 321.155732     | 161.081504       |                |                  | 2  |
| 13 |             |                 |                |                  |                |                  | R    | 175.118952  | 88.063114       | 158.092403     | 79.549839        |                |                  | 1  |

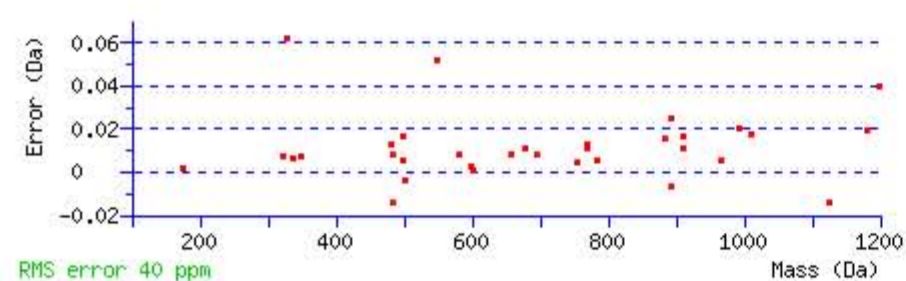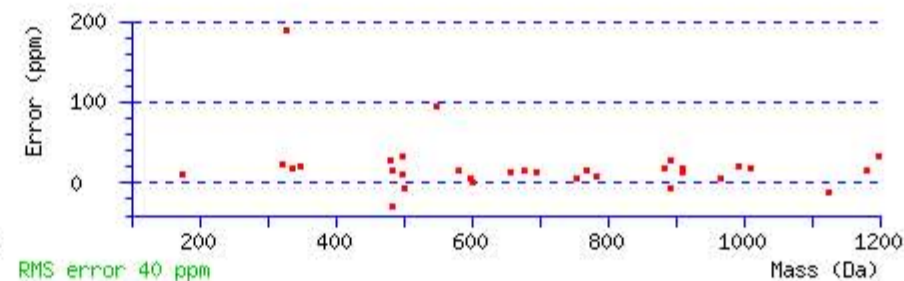

NCBI BLAST search of [GQCLITQSPYYR](#)

(Parameters: blastp, nr protein database, expect=20000, no filter, PAM30)

Other BLAST [web gateways](#)

All matches to this query

| Score | Mr(calc):   | Delta    | Sequence                     |
|-------|-------------|----------|------------------------------|
| 50.2  | 1892.927704 | 0.018158 | <a href="#">GQCLITQSPYYR</a> |
| 12.8  | 1892.927704 | 0.018158 | <a href="#">GQCLITQSPYYR</a> |

Mascot: <http://www.matrixscience.com/>



# Mascot Search Results

## Peptide View

MS/MS Fragmentation of **KGDTFSCMVGHEALPLAFTQK**

Found in **IGHA1\_HUMAN**, Ig alpha-1 chain C region OS=Homo sapiens GN=IGHA1 PE=1 SV=2

Match to Query 67025: 2647.331802 from(883.451210,3+) rtinseconds(2337) index(44302)

Title: Locus:1.1.1.3097.24 File:"2013-07-02 CLN FXIII 60 min 1st F 3.wiff"

Data file C:\Program Files (x86)\Matrix Science\Mascot Daemon\mgf\4 FXIII 60 min 1st\mascot\_daemon\_merge.mgf

Click mouse within plot area to zoom in by factor of two about that point

Or, Plot from  to  Da

Label all possible matches  Label matches used for scoring

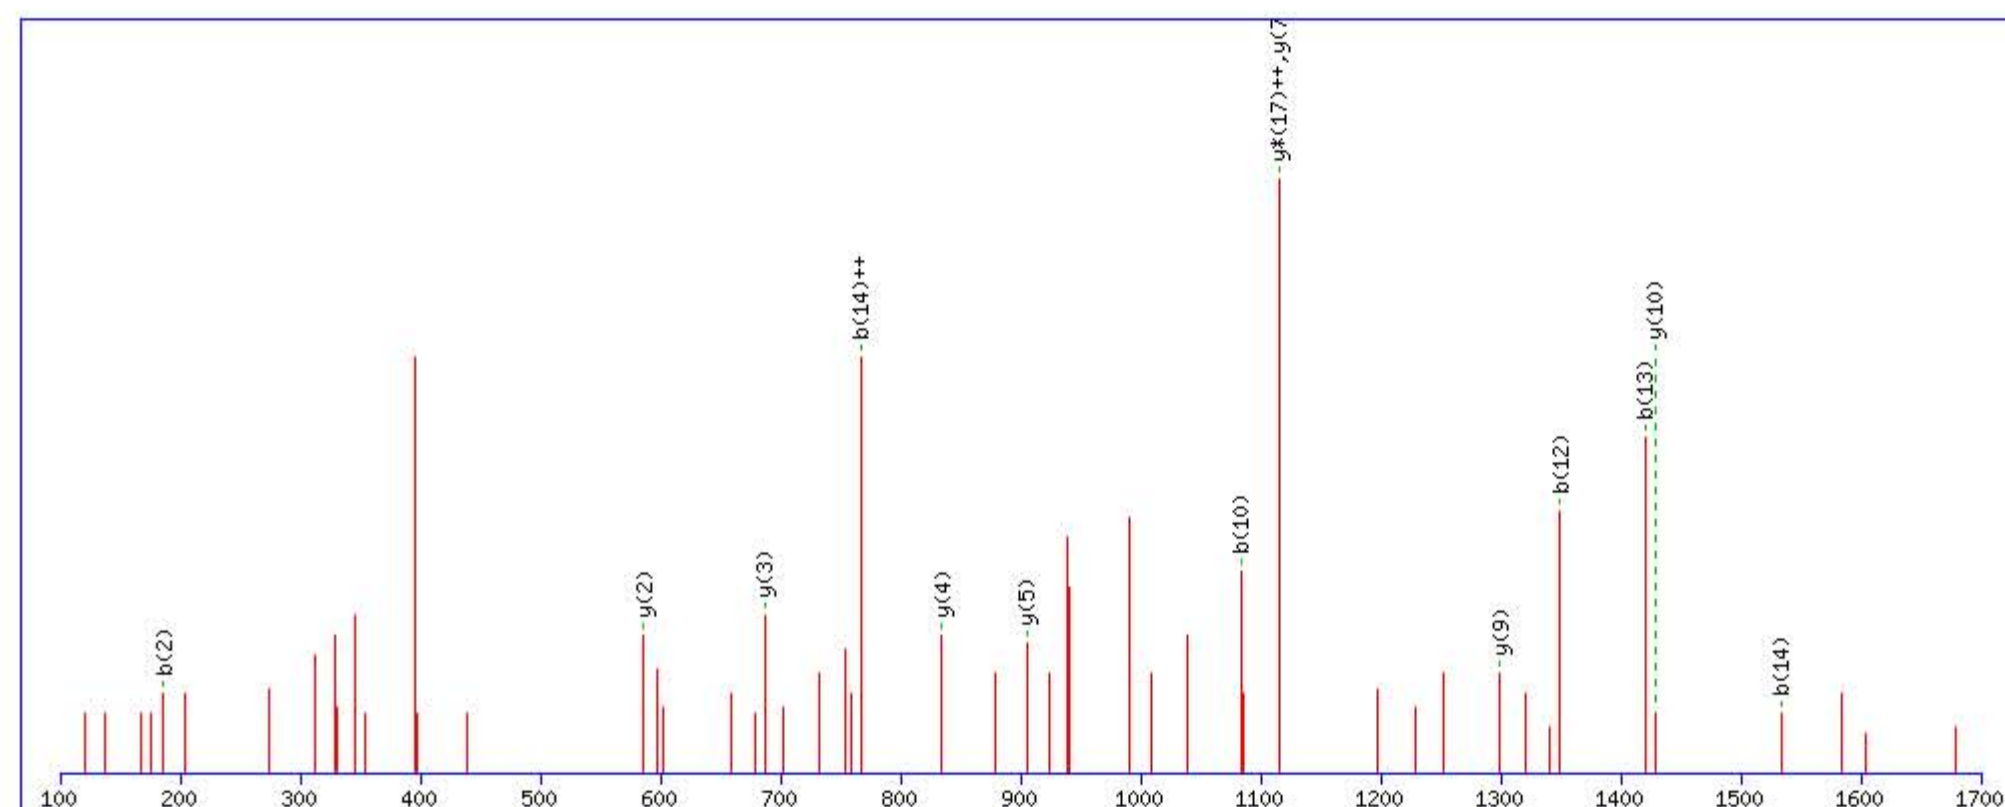

Monoisotopic mass of neutral peptide Mr(calc): 2647.296082

Fixed modifications: Carbamidomethyl (C) (apply to specified residues or termini only)

Variable modifications:

Q20 : Biotin:Thermo-21345 (Q)

Ions Score: 29 Expect: 0.036

Matches : 14/232 fragment ions using 29 most intense peaks [\(help\)](#)

| #  | b                  | b <sup>++</sup>   | b <sup>*</sup> | b <sup>*++</sup> | b <sup>0</sup> | b <sup>0++</sup> | Seq.     | y                  | y <sup>++</sup> | y <sup>*</sup> | y <sup>*++</sup>   | y <sup>0</sup> | y <sup>0++</sup> | #         |
|----|--------------------|-------------------|----------------|------------------|----------------|------------------|----------|--------------------|-----------------|----------------|--------------------|----------------|------------------|-----------|
| 1  | 129.102239         | 65.054757         | 112.075690     | 56.541483        |                |                  | <b>K</b> |                    |                 |                |                    |                |                  | <b>21</b> |
| 2  | <b>186.123703</b>  | 93.565489         | 169.097154     | 85.052215        |                |                  | <b>G</b> | 2520.208388        | 1260.607832     | 2503.181839    | 1252.094557        | 2502.197823    | 1251.602549      | <b>20</b> |
| 3  | 301.150646         | 151.078961        | 284.124097     | 142.565687       | 283.140081     | 142.073679       | <b>D</b> | 2463.186924        | 1232.097100     | 2446.160375    | 1223.583825        | 2445.176359    | 1223.091817      | <b>19</b> |
| 4  | 402.198325         | 201.602801        | 385.171776     | 193.089526       | 384.187760     | 192.597518       | <b>T</b> | 2348.159981        | 1174.583628     | 2331.133432    | 1166.070354        | 2330.149416    | 1165.578346      | <b>18</b> |
| 5  | 549.266739         | 275.137008        | 532.240190     | 266.623733       | 531.256174     | 266.131725       | <b>F</b> | 2247.112302        | 1124.059789     | 2230.085753    | <b>1115.546514</b> | 2229.101737    | 1115.054506      | <b>17</b> |
| 6  | 636.298767         | 318.653022        | 619.272218     | 310.139747       | 618.288202     | 309.647739       | <b>S</b> | 2100.043888        | 1050.525582     | 2083.017339    | 1042.012307        | 2082.033323    | 1041.520299      | <b>16</b> |
| 7  | 796.329416         | 398.668346        | 779.302867     | 390.155072       | 778.318851     | 389.663064       | <b>C</b> | 2013.011860        | 1007.009568     | 1995.985311    | 998.496294         | 1995.001295    | 998.004286       | <b>15</b> |
| 8  | 927.369901         | 464.188589        | 910.343352     | 455.675314       | 909.359336     | 455.183306       | <b>M</b> | 1852.981211        | 926.994244      | 1835.954662    | 918.480969         | 1834.970646    | 917.988961       | <b>14</b> |
| 9  | 1026.438315        | 513.722796        | 1009.411766    | 505.209521       | 1008.427750    | 504.717513       | <b>V</b> | 1721.940726        | 861.474001      | 1704.914177    | 852.960727         | 1703.930161    | 852.468719       | <b>13</b> |
| 10 | <b>1083.459779</b> | 542.233528        | 1066.433230    | 533.720253       | 1065.449214    | 533.228245       | <b>G</b> | 1622.872312        | 811.939794      | 1605.845763    | 803.426520         | 1604.861747    | 802.934512       | <b>12</b> |
| 11 | 1220.518691        | 610.762984        | 1203.492142    | 602.249709       | 1202.508126    | 601.757701       | <b>H</b> | 1565.850848        | 783.429062      | 1548.824299    | 774.915788         | 1547.840283    | 774.423780       | <b>11</b> |
| 12 | <b>1349.561284</b> | 675.284280        | 1332.534735    | 666.771006       | 1331.550719    | 666.278998       | <b>E</b> | <b>1428.791936</b> | 714.899606      | 1411.765387    | 706.386332         | 1410.781371    | 705.894324       | <b>10</b> |
| 13 | <b>1420.598398</b> | 710.802837        | 1403.571849    | 702.289563       | 1402.587833    | 701.797555       | <b>A</b> | <b>1299.749343</b> | 650.378310      | 1282.722794    | 641.865035         | 1281.738778    | 641.373027       | <b>9</b>  |
| 14 | <b>1533.682462</b> | <b>767.344869</b> | 1516.655913    | 758.831595       | 1515.671897    | 758.339587       | <b>L</b> | 1228.712229        | 614.859753      | 1211.685680    | 606.346478         | 1210.701664    | 605.854470       | <b>8</b>  |
| 15 | 1630.735226        | 815.871251        | 1613.708677    | 807.357977       | 1612.724661    | 806.865969       | <b>P</b> | <b>1115.628165</b> | 558.317721      | 1098.601616    | 549.804446         | 1097.617600    | 549.312438       | <b>7</b>  |
| 16 | 1743.819290        | 872.413283        | 1726.792741    | 863.900009       | 1725.808725    | 863.408000       | <b>L</b> | 1018.575401        | 509.791339      | 1001.548852    | 501.278064         | 1000.564836    | 500.786056       | <b>6</b>  |
| 17 | 1814.856404        | 907.931840        | 1797.829855    | 899.418566       | 1796.845839    | 898.926557       | <b>A</b> | <b>905.491337</b>  | 453.249307      | 888.464788     | 444.736032         | 887.480772     | 444.244024       | <b>5</b>  |
| 18 | 1961.924818        | 981.466047        | 1944.898269    | 972.952773       | 1943.914253    | 972.460764       | <b>F</b> | <b>834.454223</b>  | 417.730750      | 817.427674     | 409.217475         | 816.443658     | 408.725467       | <b>4</b>  |
| 19 | 2062.972497        | 1031.989886       | 2045.945948    | 1023.476612      | 2044.961932    | 1022.984604      | <b>T</b> | <b>687.385809</b>  | 344.196543      | 670.359260     | 335.683268         | 669.375244     | 335.191260       | <b>3</b>  |
| 20 | 2502.197823        | 1251.602549       | 2485.171274    | 1243.089275      | 2484.187258    | 1242.597267      | <b>Q</b> | <b>586.338130</b>  | 293.672703      | 569.311581     | 285.159429         |                |                  | <b>2</b>  |
| 21 |                    |                   |                |                  |                |                  | <b>K</b> | 147.112804         | 74.060040       | 130.086255     | 65.546765          |                |                  | <b>1</b>  |

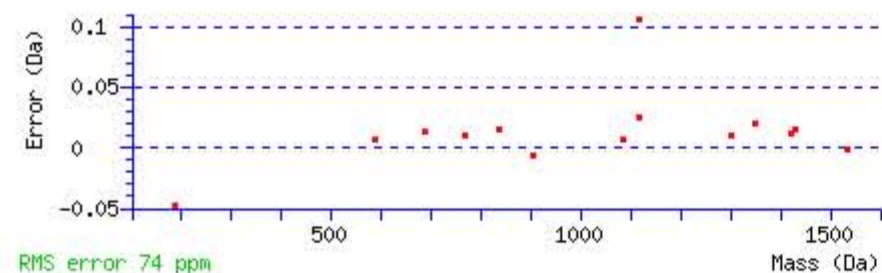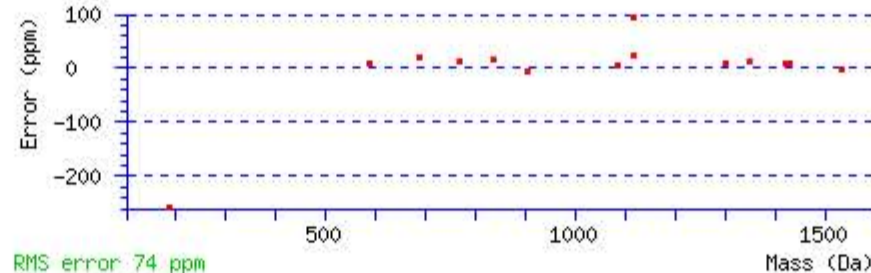

NCBI BLAST search of **KGDTFSCMVGHEALPLAFTQK**

(Parameters: blastp, nr protein database, expect=20000, no filter, PAM30)

Other BLAST [web gateways](#)

## All matches to this query

| Score | Mr(calc):   | Delta    | Sequence                     |
|-------|-------------|----------|------------------------------|
| 29.4  | 2647.296082 | 0.035720 | <b>KGDTFSCMVGHEALPLAFTQK</b> |



# MASCOT Search Results

## Peptide View

MS/MS Fragmentation of **NFPPSQDASGDLYTTSSQLTLPATQCLAGK**  
 Found in **IGHA1\_HUMAN**, Ig alpha-1 chain C region OS=Homo sapiens GN=IGHA1 PE=1 SV=2

Match to Query 77658: 3478.717136 from(870.686560,4+) rtinseconds(2575) index(45717)  
 Title: Locus:1.1.1.3180.21 File:"2013-07-02 CLN FXIII 60 min 1st F 3.wiff"  
 Data file C:\Program Files (x86)\Matrix Science\Mascot Daemon\mgf4 FXIII 60 min 1st\mascot\_daemon\_merge.mgf

Click mouse within plot area to zoom in by factor of two about that point  
 Or, Plot from  to  Da   
 Label all possible matches  Label matches used for scoring

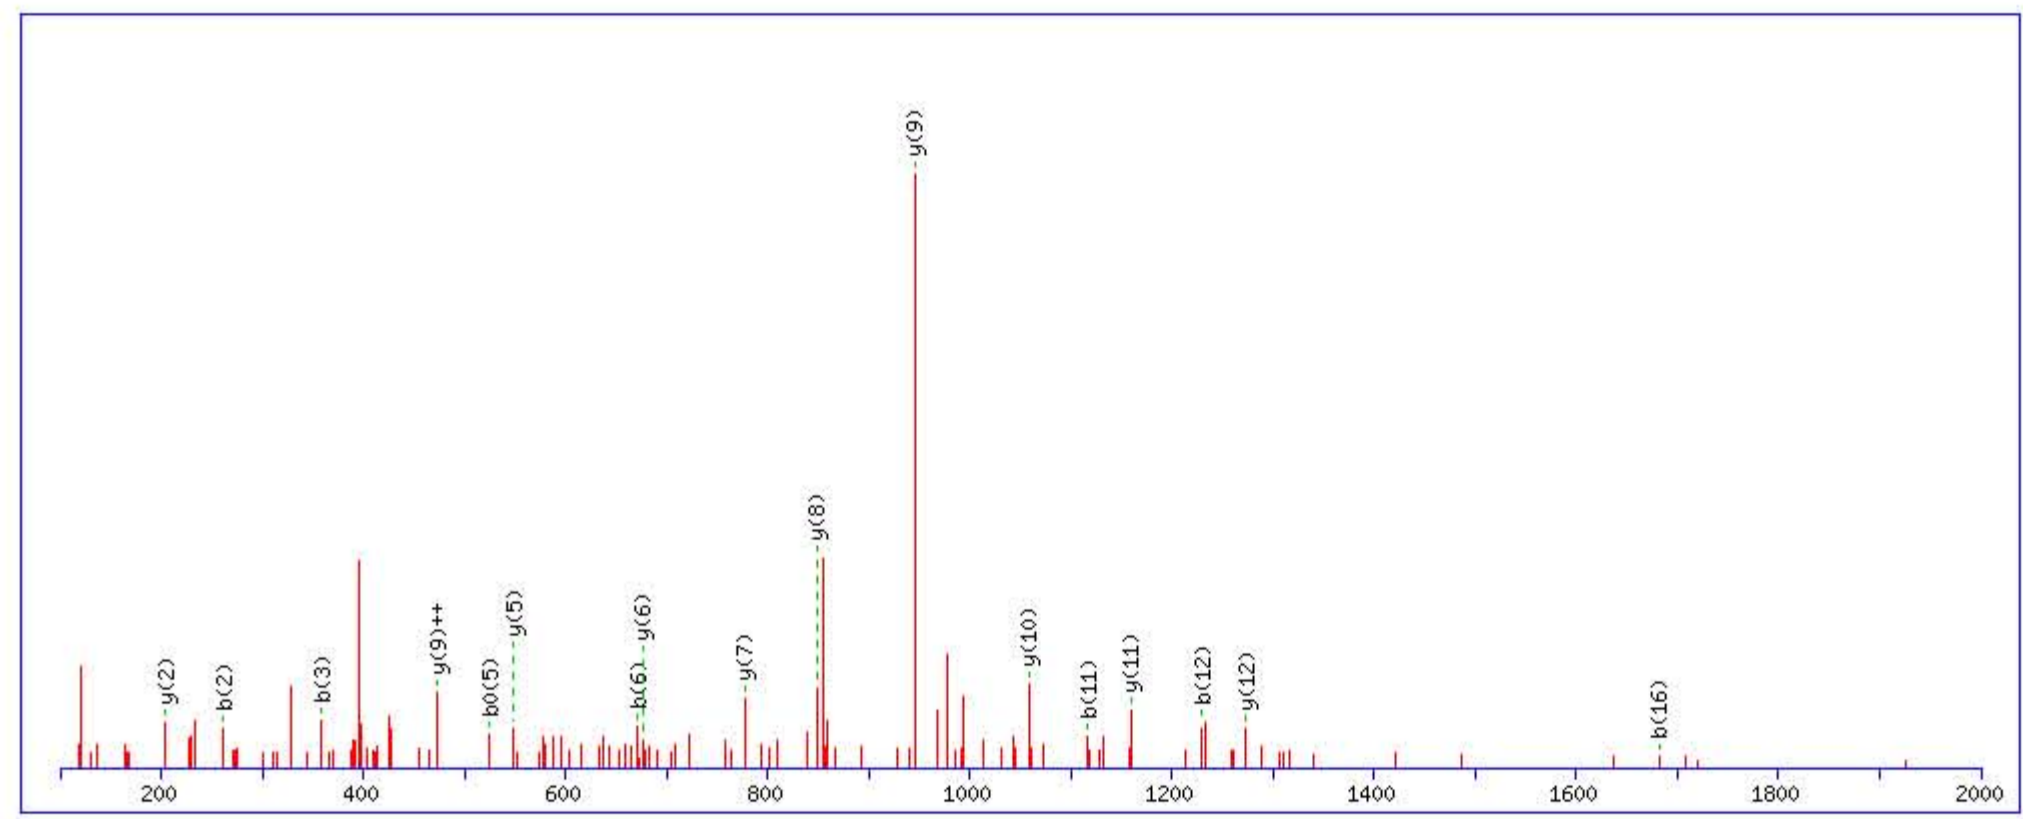

Monoisotopic mass of neutral peptide Mr(calc): 3478.674866  
 Fixed modifications: Carbamidomethyl (C) (apply to specified residues or termini only)  
 Variable modifications:  
 Q18 : Biotin:Thermo-21345 (Q)  
 Ions Score: 34 Expect: 0.0094  
 Matches : 17/328 fragment ions using 44 most intense peaks ([help](#))

| #  | b                  | b <sup>++</sup> | b <sup>*</sup> | b <sup>*++</sup> | b <sup>0</sup>    | b <sup>0++</sup> | Seq. | y                  | y <sup>++</sup>   | y <sup>*</sup> | y <sup>*++</sup> | y <sup>0</sup> | y <sup>0++</sup> | #  |
|----|--------------------|-----------------|----------------|------------------|-------------------|------------------|------|--------------------|-------------------|----------------|------------------|----------------|------------------|----|
| 1  | 115.050203         | 58.028740       | 98.023654      | 49.515465        |                   |                  | N    |                    |                   |                |                  |                |                  | 30 |
| 2  | <b>262.118617</b>  | 131.562946      | 245.092068     | 123.049672       |                   |                  | F    | 3365.639210        | 1683.323243       | 3348.612661    | 1674.809968      | 3347.628645    | 1674.317960      | 29 |
| 3  | <b>359.171381</b>  | 180.089328      | 342.144832     | 171.576054       |                   |                  | P    | 3218.570796        | 1609.789036       | 3201.544247    | 1601.275761      | 3200.560231    | 1600.783753      | 28 |
| 4  | 456.224145         | 228.615710      | 439.197596     | 220.102436       |                   |                  | P    | 3121.518032        | 1561.262654       | 3104.491483    | 1552.749379      | 3103.507467    | 1552.257371      | 27 |
| 5  | 543.256173         | 272.131725      | 526.229624     | 263.618450       | <b>525.245608</b> | 263.126442       | S    | 3024.465268        | 1512.736272       | 3007.438719    | 1504.222997      | 3006.454703    | 1503.730989      | 26 |
| 6  | <b>671.314751</b>  | 336.161014      | 654.288202     | 327.647739       | 653.304186        | 327.155731       | Q    | 2937.433240        | 1469.220258       | 2920.406691    | 1460.706983      | 2919.422675    | 1460.214975      | 25 |
| 7  | 786.341694         | 393.674485      | 769.315145     | 385.161210       | 768.331129        | 384.669202       | D    | 2809.374662        | 1405.190969       | 2792.348113    | 1396.677694      | 2791.364097    | 1396.185686      | 24 |
| 8  | 857.378808         | 429.193042      | 840.352259     | 420.679767       | 839.368243        | 420.187759       | A    | 2694.347719        | 1347.677497       | 2677.321170    | 1339.164223      | 2676.337154    | 1338.672215      | 23 |
| 9  | 944.410836         | 472.709056      | 927.384287     | 464.195781       | 926.400271        | 463.703773       | S    | 2623.310605        | 1312.158941       | 2606.284056    | 1303.645666      | 2605.300040    | 1303.153658      | 22 |
| 10 | 1001.432300        | 501.219788      | 984.405751     | 492.706513       | 983.421735        | 492.214505       | G    | 2536.278577        | 1268.642926       | 2519.252028    | 1260.129652      | 2518.268012    | 1259.637644      | 21 |
| 11 | <b>1116.459243</b> | 558.733260      | 1099.432694    | 550.219985       | 1098.448678       | 549.727977       | D    | 2479.257113        | 1240.132195       | 2462.230564    | 1231.618920      | 2461.246548    | 1231.126912      | 20 |
| 12 | <b>1229.543307</b> | 615.275291      | 1212.516758    | 606.762017       | 1211.532742       | 606.270009       | L    | 2364.230170        | 1182.618723       | 2347.203621    | 1174.105448      | 2346.219605    | 1173.613440      | 19 |
| 13 | 1392.606636        | 696.806956      | 1375.580087    | 688.293682       | 1374.596071       | 687.801673       | Y    | 2251.146106        | 1126.076691       | 2234.119557    | 1117.563416      | 2233.135541    | 1117.071408      | 18 |
| 14 | 1493.654315        | 747.330796      | 1476.627766    | 738.817521       | 1475.643750       | 738.325513       | T    | 2088.082777        | 1044.545026       | 2071.056228    | 1036.031752      | 2070.072212    | 1035.539744      | 17 |
| 15 | 1594.701994        | 797.854635      | 1577.675445    | 789.341361       | 1576.691429       | 788.849353       | T    | 1987.035098        | 994.021187        | 1970.008549    | 985.507913       | 1969.024533    | 985.015905       | 16 |
| 16 | <b>1681.734022</b> | 841.370649      | 1664.707473    | 832.857375       | 1663.723457       | 832.365367       | S    | 1885.987419        | 943.497348        | 1868.960870    | 934.984073       | 1867.976854    | 934.492065       | 15 |
| 17 | 1768.766050        | 884.886663      | 1751.739501    | 876.373389       | 1750.755485       | 875.881381       | S    | 1798.955391        | 899.981334        | 1781.928842    | 891.468059       | 1780.944826    | 890.976051       | 14 |
| 18 | 2207.991376        | 1104.499326     | 2190.964827    | 1095.986051      | 2189.980811       | 1095.494043      | Q    | 1711.923363        | 856.465320        | 1694.896814    | 847.952045       | 1693.912798    | 847.460037       | 13 |
| 19 | 2321.075440        | 1161.041358     | 2304.048891    | 1152.528083      | 2303.064875       | 1152.036075      | L    | <b>1272.698037</b> | 636.852657        | 1255.671488    | 628.339382       | 1254.687472    | 627.847374       | 12 |
| 20 | 2422.123119        | 1211.565197     | 2405.096570    | 1203.051923      | 2404.112554       | 1202.559915      | T    | <b>1159.613973</b> | 580.310625        | 1142.587424    | 571.797350       | 1141.603408    | 571.305342       | 11 |
| 21 | 2535.207183        | 1268.107229     | 2518.180634    | 1259.593955      | 2517.196618       | 1259.101947      | L    | <b>1058.566294</b> | 529.786785        | 1041.539745    | 521.273511       | 1040.555729    | 520.781503       | 10 |
| 22 | 2632.259947        | 1316.633611     | 2615.233398    | 1308.120337      | 2614.249382       | 1307.628329      | P    | <b>945.482230</b>  | <b>473.244753</b> | 928.455681     | 464.731479       | 927.471665     | 464.239471       | 9  |
| 23 | 2703.297061        | 1352.152169     | 2686.270512    | 1343.638894      | 2685.286496       | 1343.146886      | A    | <b>848.429466</b>  | 424.718371        | 831.402917     | 416.205097       | 830.418901     | 415.713089       | 8  |
| 24 | 2804.344740        | 1402.676008     | 2787.318191    | 1394.162733      | 2786.334175       | 1393.670725      | T    | <b>777.392352</b>  | 389.199814        | 760.365803     | 380.686540       | 759.381787     | 380.194532       | 7  |
| 25 | 2932.403318        | 1466.705297     | 2915.376769    | 1458.192022      | 2914.392753       | 1457.700015      | Q    | <b>676.344673</b>  | 338.675975        | 659.318124     | 330.162700       |                |                  | 6  |
| 26 | 3092.433967        | 1546.720621     | 3075.407418    | 1538.207347      | 3074.423402       | 1537.715339      | C    | <b>548.286095</b>  | 274.646686        | 531.259546     | 266.133411       |                |                  | 5  |
| 27 | 3205.518031        | 1603.262653     | 3188.491482    | 1594.749379      | 3187.507466       | 1594.257371      | L    | 388.255446         | 194.631361        | 371.228897     | 186.118087       |                |                  | 4  |
| 28 | 3276.555145        | 1638.781211     | 3259.528596    | 1630.267936      | 3258.544580       | 1629.775928      | A    | 275.171382         | 138.089329        | 258.144833     | 129.576055       |                |                  | 3  |
| 29 | 3333.576609        | 1667.291943     | 3316.550060    | 1658.778668      | 3315.566044       | 1658.286660      | G    | <b>204.134268</b>  | 102.570772        | 187.107719     | 94.057497        |                |                  | 2  |
| 30 |                    |                 |                |                  |                   |                  | K    | 147.112804         | 74.060040         | 130.086255     | 65.546765        |                |                  | 1  |

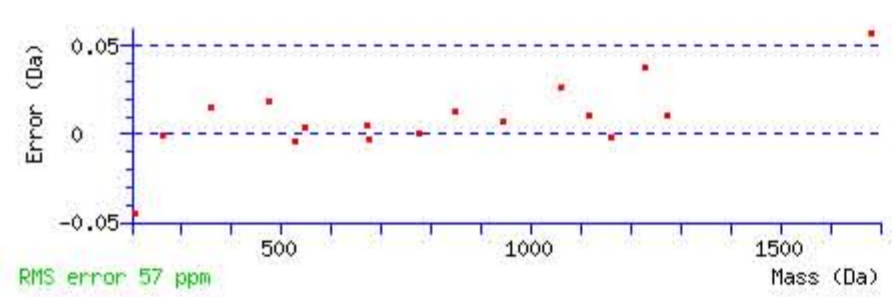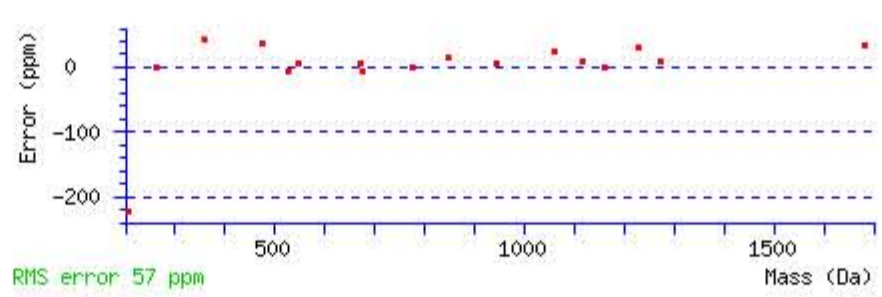

NCBI BLAST search of **NFPPSQDASGDLYTTSSQLTLPATQCLAGK**  
 (Parameters: blastp, nr protein database, expect=20000, no filter, PAM30)  
 Other BLAST [web gateways](#)

### All matches to this query

| Score | Mr(calc):   | Delta    | Sequence                                       |
|-------|-------------|----------|------------------------------------------------|
| 34.4  | 3478.674866 | 0.042270 | <a href="#">NFPPSQDASGDLYTTSSQLTLPATQCLAGK</a> |
| 20.1  | 3478.674866 | 0.042270 | <a href="#">NFPPSQDASGDLYTTSSQLTLPATQCLAGK</a> |
| 2.8   | 3478.674866 | 0.042270 | <a href="#">NFPPSQDASGDLYTTSSQLTLPATQCLAGK</a> |



# **MASCOT** Mascot Search Results

## Peptide View

MS/MS Fragmentation of **EPAAQAPVK**  
 Found in **IGHD\_HUMAN**, Ig delta chain C region OS=Homo sapiens GN=IGHD PE=1 SV=2

Match to Query 28242: 1220.663928 from(611.339240,2+) rtinseconds(1431) index(74721)  
 Title: Locus:1.1.1.2712.23 File:"2013-07-02 CLN FXIII 60 min 1st FT.wiff"  
 Data file C:\Program Files (x86)\Matrix Science\Mascot Daemon\mgf4 FXIII 60 min 1st\mascot\_daemon\_merge.mgf

Click mouse within plot area to zoom in by factor of two about that point  
 Or, Plot from  to  Da   
 Label all possible matches  Label matches used for scoring

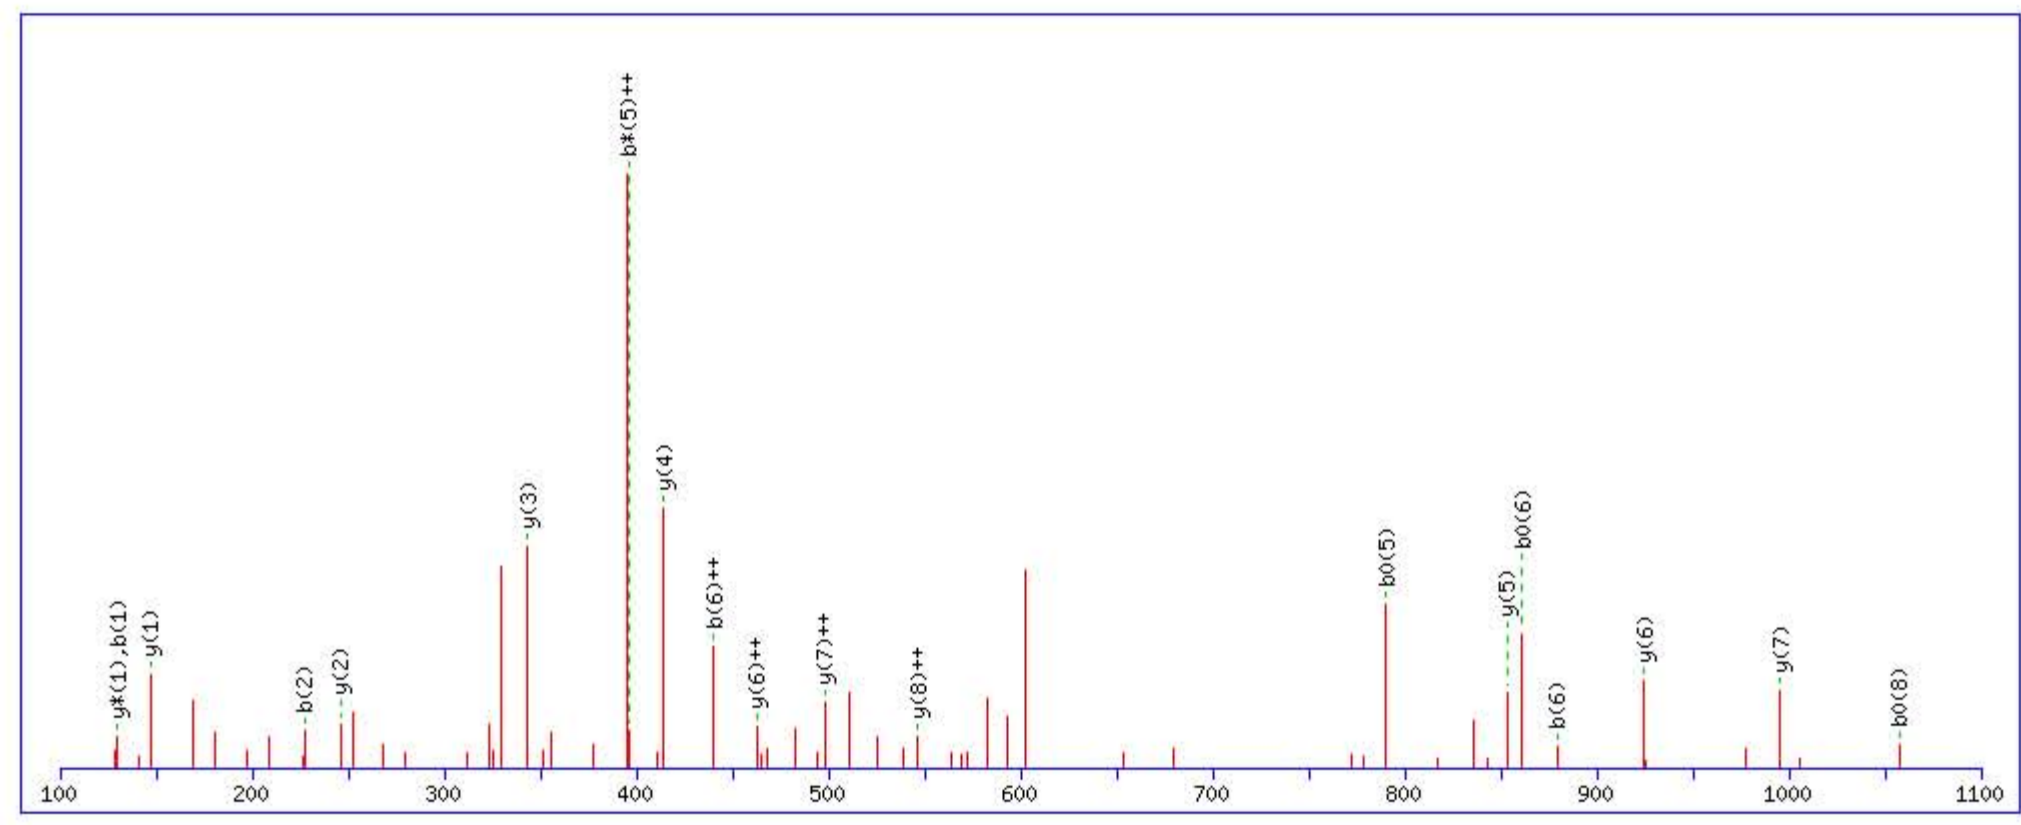

Monoisotopic mass of neutral peptide Mr(calc): 1220.658707  
 Fixed modifications: Carbamidomethyl (C) (apply to specified residues or termini only)  
 Variable modifications:  
 Q5 : Biotin:Thermo-21345 (Q)  
 Ions Score: 38 Expect: 0.0023  
 Matches : 19/72 fragment ions using 40 most intense peaks [\(help\)](#)

| # | b                 | b <sup>++</sup>   | b <sup>*</sup> | b <sup>*++</sup>  | b <sup>0</sup>     | b <sup>0++</sup> | Seq.     | y                 | y <sup>++</sup>   | y <sup>*</sup>    | y <sup>*++</sup> | #        |
|---|-------------------|-------------------|----------------|-------------------|--------------------|------------------|----------|-------------------|-------------------|-------------------|------------------|----------|
| 1 | <b>130.049869</b> | 65.528572         |                |                   | 112.039304         | 56.523290        | <b>E</b> |                   |                   |                   |                  | <b>9</b> |
| 2 | <b>227.102633</b> | 114.054954        |                |                   | 209.092068         | 105.049672       | <b>P</b> | 1092.623414       | <b>546.815345</b> | 1075.596865       | 538.302071       | <b>8</b> |
| 3 | 298.139747        | 149.573512        |                |                   | 280.129182         | 140.568229       | <b>A</b> | <b>995.570650</b> | <b>498.288963</b> | 978.544101        | 489.775689       | <b>7</b> |
| 4 | 369.176861        | 185.092068        |                |                   | 351.166296         | 176.086786       | <b>A</b> | <b>924.533536</b> | <b>462.770406</b> | 907.506987        | 454.257132       | <b>6</b> |
| 5 | 808.402187        | 404.704732        | 791.375638     | <b>396.191457</b> | <b>790.391622</b>  | 395.699449       | <b>Q</b> | <b>853.496422</b> | 427.251849        | 836.469873        | 418.738575       | <b>5</b> |
| 6 | <b>879.439301</b> | <b>440.223289</b> | 862.412752     | 431.710014        | <b>861.428736</b>  | 431.218006       | <b>A</b> | <b>414.271096</b> | 207.639186        | 397.244547        | 199.125911       | <b>4</b> |
| 7 | 976.492065        | 488.749671        | 959.465516     | 480.236396        | 958.481500         | 479.744388       | <b>P</b> | <b>343.233982</b> | 172.120629        | 326.207433        | 163.607354       | <b>3</b> |
| 8 | 1075.560479       | 538.283878        | 1058.533930    | 529.770603        | <b>1057.549914</b> | 529.278595       | <b>V</b> | <b>246.181218</b> | 123.594247        | 229.154669        | 115.080972       | <b>2</b> |
| 9 |                   |                   |                |                   |                    |                  | <b>K</b> | <b>147.112804</b> | 74.060040         | <b>130.086255</b> | 65.546765        | <b>1</b> |

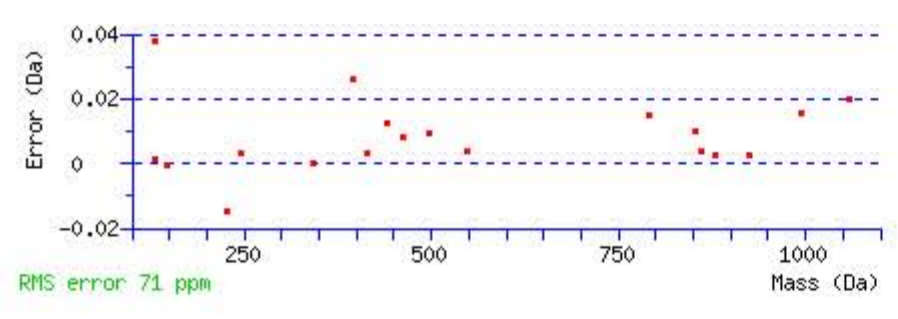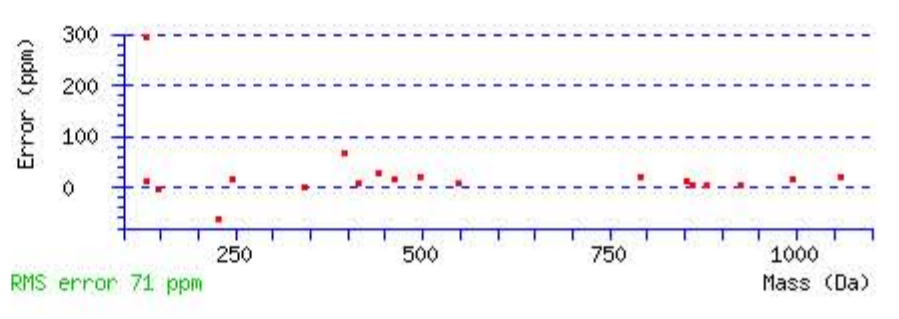

NCBI BLAST search of **EPAAQAPVK**  
 (Parameters: blastp, nr protein database, expect=20000, no filter, PAM30)  
 Other BLAST [web gateways](#)

### All matches to this query

| Score | Mr(calc):   | Delta     | Sequence                     |
|-------|-------------|-----------|------------------------------|
| 38.4  | 1220.658707 | 0.005221  | <a href="#">EPAAQAPVK</a>    |
| 10.3  | 1220.658722 | 0.005206  | <a href="#">EQNVPVPK</a>     |
| 4.3   | 1220.676468 | -0.012540 | <a href="#">AEPPPSKPTVAK</a> |
| 2.1   | 1220.658722 | 0.005206  | <a href="#">QPNLPDVK</a>     |
| 2.1   | 1220.651321 | 0.012607  | <a href="#">GQVLIAASSYGR</a> |
| 1.7   | 1220.654663 | 0.009265  | <a href="#">QASKKTAMAAAK</a> |
| 1.4   | 1220.666580 | -0.002652 | <a href="#">EPAIVRFFSR</a>   |
| 0.7   | 1220.651306 | 0.012622  | <a href="#">ILSHTEEHKK</a>   |



# Mascot Search Results

## Peptide View

MS/MS Fragmentation of **SLWNAGTSVTCTLNHPSLPPQR**

Found in **IGHD\_HUMAN**, Ig delta chain C region OS=Homo sapiens GN=IGHD PE=1 SV=2

Match to Query 68075: 2746.399962 from(916.473930,3+) rtinseconds(2221) index(8542)

Title: Locus:1.1.1.2905.25 File:"2013-07-02 CLN FXIII 60 min 1st F 1.wiff"

Data file C:\Program Files (x86)\Matrix Science\Mascot Daemon\mgf4 FXIII 60 min 1st\mascot\_daemon\_merge.mgf

Click mouse within plot area to zoom in by factor of two about that point

Or, Plot from  to  Da

Label all possible matches  Label matches used for scoring

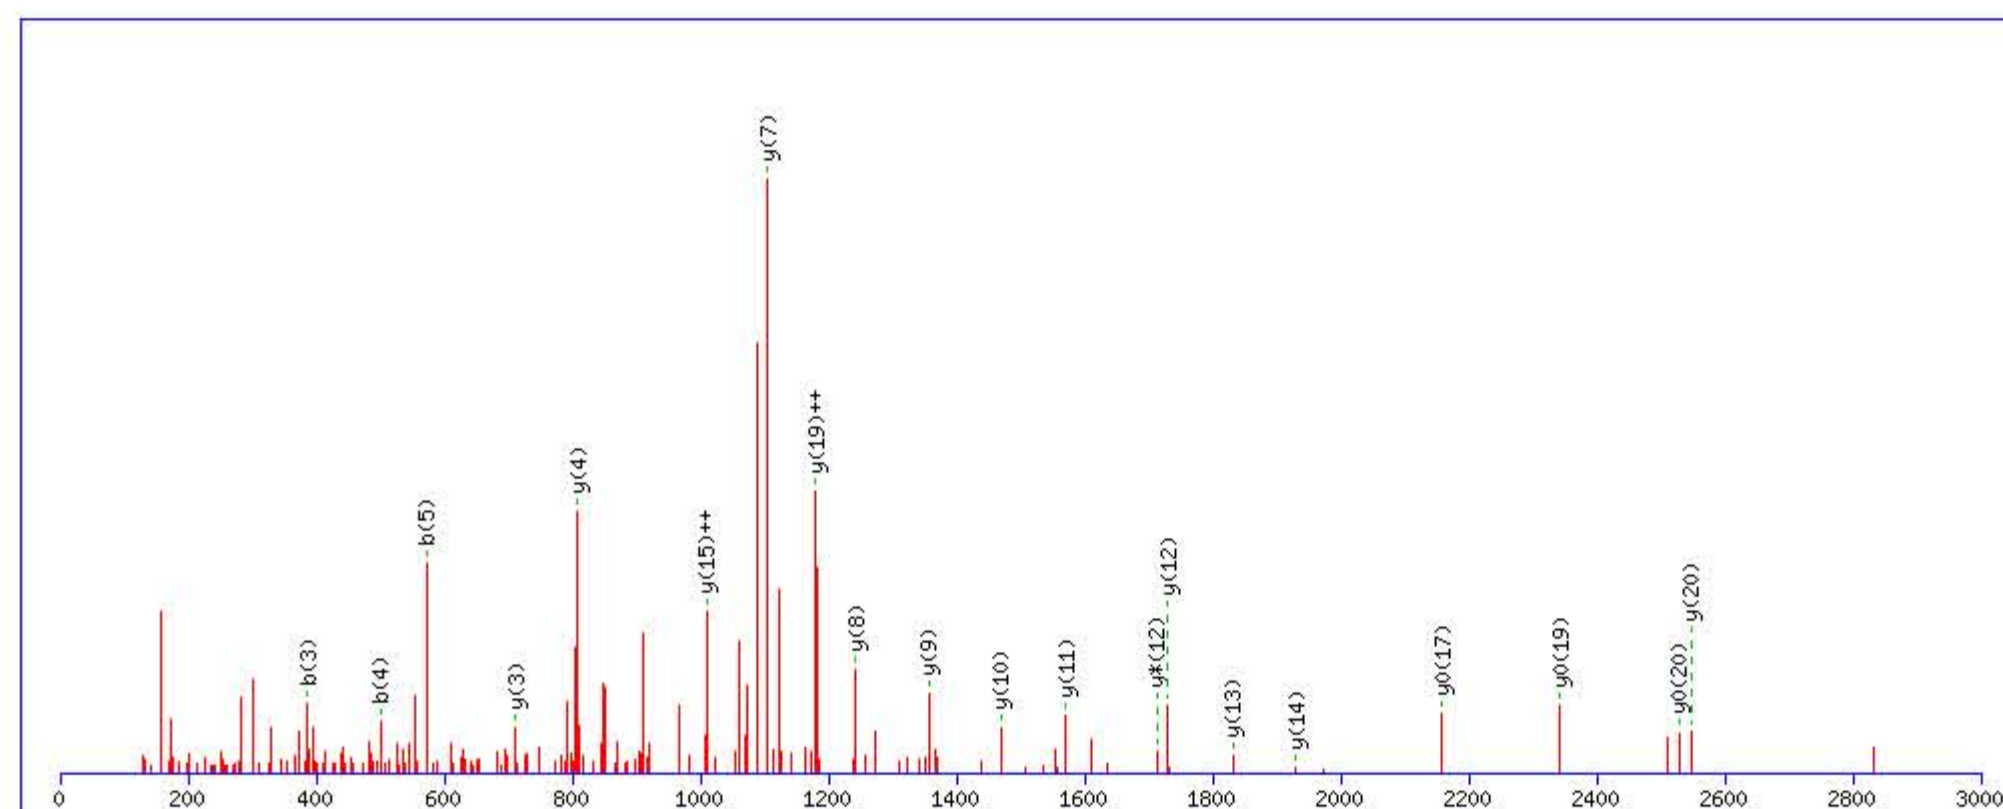

Monoisotopic mass of neutral peptide Mr(calc): 2746.368332

Fixed modifications: Carbamidomethyl (C) (apply to specified residues or termini only)

Variable modifications:

Q21 : Biotin:Thermo-21345 (Q)

Ions Score: 91 Expect: 2.4e-008

Matches : 20/236 fragment ions using 23 most intense peaks [\(help\)](#)

| #  | b                 | b <sup>++</sup> | b <sup>*</sup> | b <sup>*++</sup> | b <sup>0</sup> | b <sup>0++</sup> | Seq. | y                  | y <sup>++</sup>    | y <sup>*</sup>     | y <sup>*++</sup> | y <sup>0</sup>     | y <sup>0++</sup> | #  |
|----|-------------------|-----------------|----------------|------------------|----------------|------------------|------|--------------------|--------------------|--------------------|------------------|--------------------|------------------|----|
| 1  | 88.039304         | 44.523290       |                |                  | 70.028739      | 35.518008        | S    |                    |                    |                    |                  |                    |                  | 22 |
| 2  | 201.123368        | 101.065322      |                |                  | 183.112803     | 92.060039        | L    | 2660.343575        | 1330.675425        | 2643.317026        | 1322.162151      | 2642.333010        | 1321.670143      | 21 |
| 3  | <b>387.202681</b> | 194.104978      |                |                  | 369.192116     | 185.099696       | W    | <b>2547.259511</b> | 1274.133393        | 2530.232962        | 1265.620119      | <b>2529.248946</b> | 1265.128111      | 20 |
| 4  | <b>501.245608</b> | 251.126442      | 484.219059     | 242.613168       | 483.235043     | 242.121160       | N    | 2361.180198        | <b>1181.093737</b> | 2344.153649        | 1172.580462      | <b>2343.169633</b> | 1172.088454      | 19 |
| 5  | <b>572.282722</b> | 286.644999      | 555.256173     | 278.131725       | 554.272157     | 277.639717       | A    | 2247.137271        | 1124.072273        | 2230.110722        | 1115.558999      | 2229.126706        | 1115.066991      | 18 |
| 6  | 629.304186        | 315.155731      | 612.277637     | 306.642457       | 611.293621     | 306.150449       | G    | 2176.100157        | 1088.553716        | 2159.073608        | 1080.040442      | <b>2158.089592</b> | 1079.548434      | 17 |
| 7  | 730.351865        | 365.679571      | 713.325316     | 357.166296       | 712.341300     | 356.674288       | T    | 2119.078693        | 1060.042984        | 2102.052144        | 1051.529710      | 2101.068128        | 1051.037702      | 16 |
| 8  | 817.383893        | 409.195585      | 800.357344     | 400.682310       | 799.373328     | 400.190302       | S    | 2018.031014        | <b>1009.519145</b> | 2001.004465        | 1001.005871      | 2000.020449        | 1000.513863      | 15 |
| 9  | 916.452307        | 458.729792      | 899.425758     | 450.216517       | 898.441742     | 449.724509       | V    | <b>1930.998986</b> | 966.003131         | 1913.972437        | 957.489857       | 1912.988421        | 956.997849       | 14 |
| 10 | 1017.499986       | 509.253631      | 1000.473437    | 500.740357       | 999.489421     | 500.248349       | T    | <b>1831.930572</b> | 916.468924         | 1814.904023        | 907.955650       | 1813.920007        | 907.463642       | 13 |
| 11 | 1177.530635       | 589.268956      | 1160.504086    | 580.755681       | 1159.520070    | 580.263673       | C    | <b>1730.882893</b> | 865.945085         | <b>1713.856344</b> | 857.431810       | 1712.872328        | 856.939802       | 12 |
| 12 | 1278.578314       | 639.792795      | 1261.551765    | 631.279521       | 1260.567749    | 630.787513       | T    | <b>1570.852244</b> | 785.929760         | 1553.825695        | 777.416486       | 1552.841679        | 776.924478       | 11 |
| 13 | 1391.662378       | 696.334827      | 1374.635829    | 687.821553       | 1373.651813    | 687.329545       | L    | <b>1469.804565</b> | 735.405921         | 1452.778016        | 726.892646       | 1451.794000        | 726.400638       | 10 |
| 14 | 1505.705305       | 753.356291      | 1488.678756    | 744.843016       | 1487.694740    | 744.351008       | N    | <b>1356.720501</b> | 678.863889         | 1339.693952        | 670.350614       | 1338.709936        | 669.858606       | 9  |
| 15 | 1642.764217       | 821.885746      | 1625.737668    | 813.372472       | 1624.753652    | 812.880464       | H    | <b>1242.677574</b> | 621.842425         | 1225.651025        | 613.329151       | 1224.667009        | 612.837143       | 8  |
| 16 | 1739.816981       | 870.412128      | 1722.790432    | 861.898854       | 1721.806416    | 861.406846       | P    | <b>1105.618662</b> | 553.312969         | 1088.592113        | 544.799695       | 1087.608097        | 544.307687       | 7  |
| 17 | 1826.849009       | 913.928143      | 1809.822460    | 905.414868       | 1808.838444    | 904.922860       | S    | 1008.565898        | 504.786587         | 991.539349         | 496.273313       | 990.555333         | 495.781305       | 6  |
| 18 | 1939.933073       | 970.470174      | 1922.906524    | 961.956900       | 1921.922508    | 961.464892       | L    | 921.533870         | 461.270573         | 904.507321         | 452.757299       |                    |                  | 5  |
| 19 | 2036.985837       | 1018.996557     | 2019.959288    | 1010.483282      | 2018.975272    | 1009.991274      | P    | <b>808.449806</b>  | 404.728541         | 791.423257         | 396.215267       |                    |                  | 4  |
| 20 | 2134.038601       | 1067.522938     | 2117.012052    | 1059.009664      | 2116.028036    | 1058.517656      | P    | <b>711.397042</b>  | 356.202159         | 694.370493         | 347.688885       |                    |                  | 3  |
| 21 | 2573.263927       | 1287.135601     | 2556.237378    | 1278.622327      | 2555.253362    | 1278.130319      | Q    | 614.344278         | 307.675777         | 597.317729         | 299.162503       |                    |                  | 2  |
| 22 |                   |                 |                |                  |                |                  | R    | 175.118952         | 88.063114          | 158.092403         | 79.549839        |                    |                  | 1  |

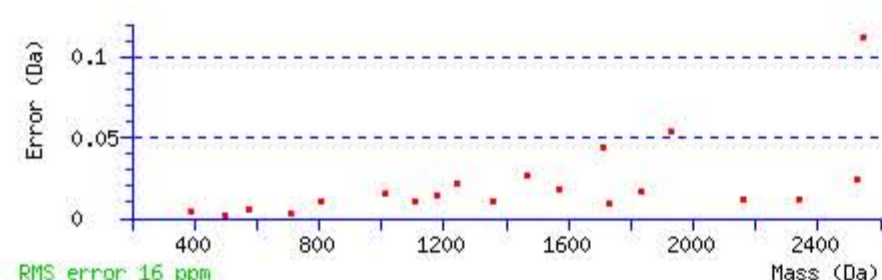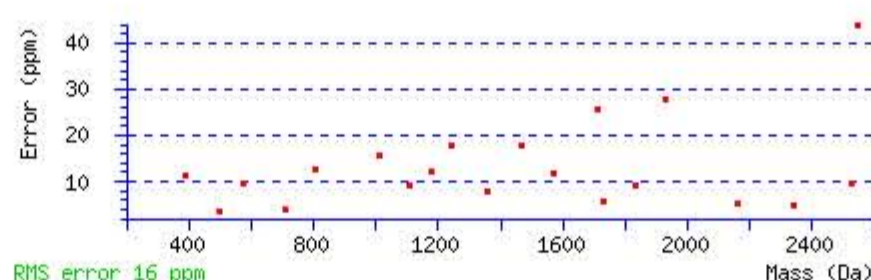

NCBI BLAST search of **SLWNAGTSVTCTLNHPSLPPQR**

(Parameters: blastp, nr protein database, expect=20000, no filter, PAM30)

Other BLAST [web gateways](#)

All matches to this query

| Score | Mr(calc):   | Delta    | Sequence                               |
|-------|-------------|----------|----------------------------------------|
| 90.8  | 2746.368332 | 0.031630 | <a href="#">SLWNAGTSVTCTLNHPSLPPQR</a> |



# MASCOT SCIENCE Mascot Search Results

## Peptide View

MS/MS Fragmentation of **NQVSLTCLVK**

Found in **IGHG1\_HUMAN**, Ig gamma-1 chain C region OS=Homo sapiens GN=IGHG1 PE=1 SV=1

Match to Query 37736: 1471.800048 from(736.907300,2+) rtinseconds(2225) index(80100)

Title: Locus:1.1.1.2989.8 File:"2013-07-02 CLN FXIII 60 min 1st FT.wiff"

Data file C:\Program Files (x86)\Matrix Science\Mascot Daemon\mgf4 FXIII 60 min 1st\mascot\_daemon\_merge.mgf

Click mouse within plot area to zoom in by factor of two about that point

Or, Plot from  to  Da

Label all possible matches  Label matches used for scoring

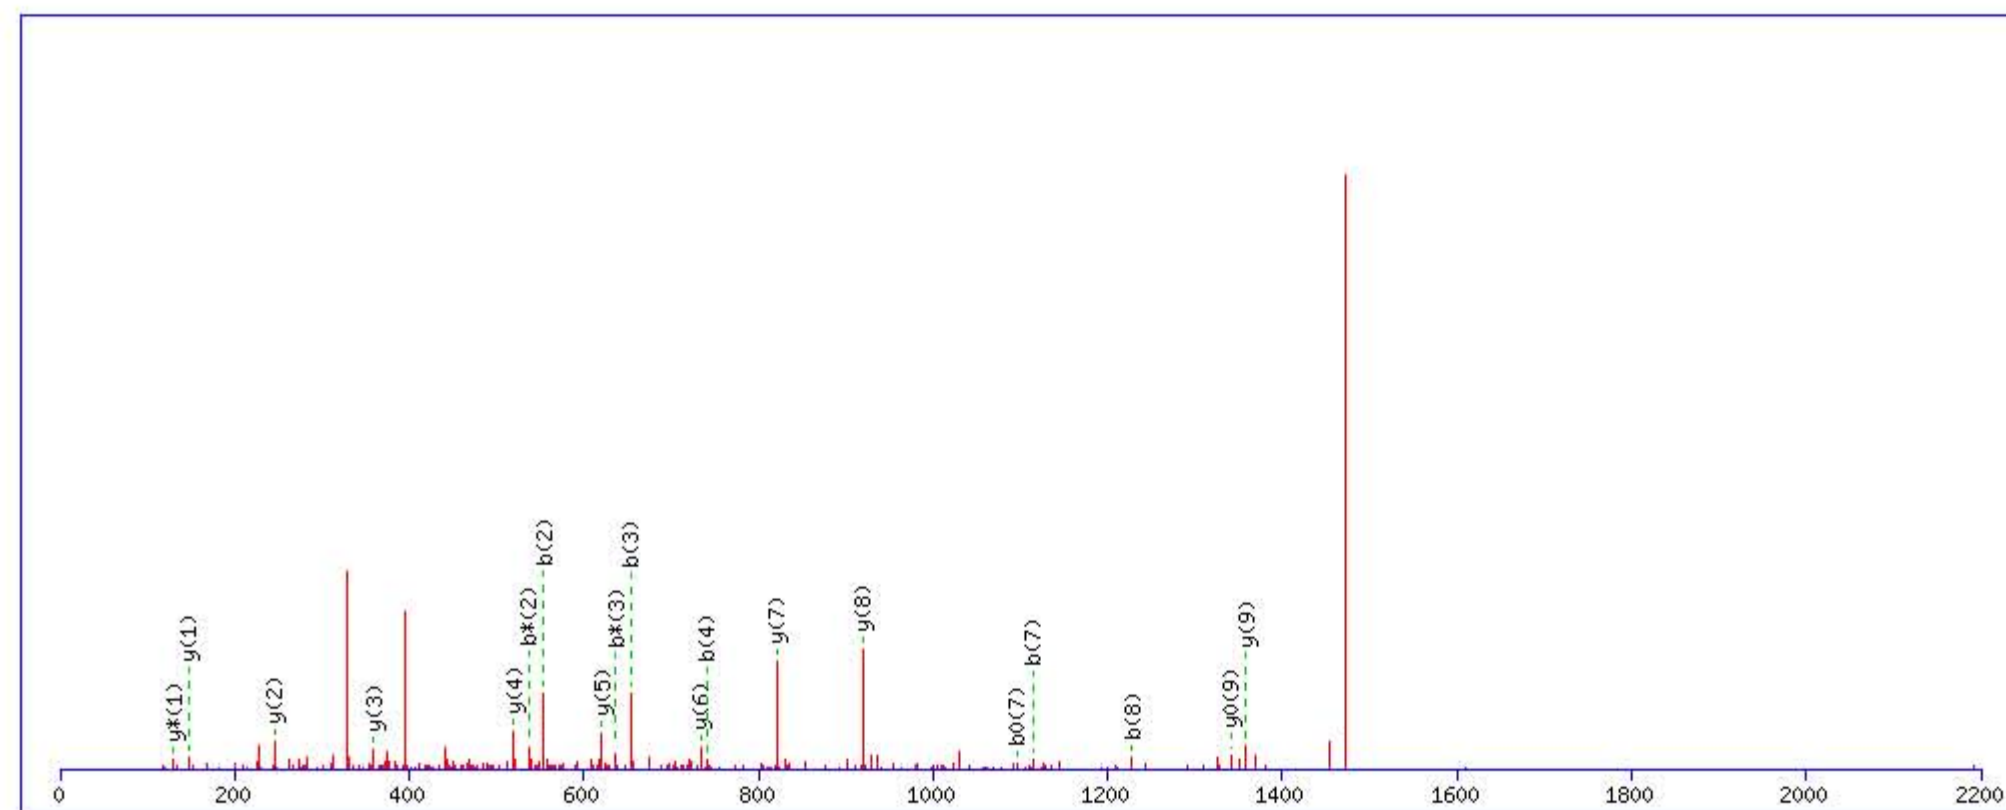

Monoisotopic mass of neutral peptide Mr(calc): 1471.789093

Fixed modifications: Carbamidomethyl (C) (apply to specified residues or termini only)

Variable modifications:

Q2 : Biotin:Thermo-21345 (Q)

Ions Score: 51 Expect: 6e-005

Matches : 19/94 fragment ions using 40 most intense peaks [\(help\)](#)

| #  | b                  | b <sup>++</sup> | b <sup>+</sup>    | b <sup>+++</sup> | b <sup>0</sup>     | b <sup>0++</sup> | Seq. | y                  | y <sup>++</sup> | y <sup>+</sup>    | y <sup>+++</sup> | y <sup>0</sup>     | y <sup>0++</sup> | #  |
|----|--------------------|-----------------|-------------------|------------------|--------------------|------------------|------|--------------------|-----------------|-------------------|------------------|--------------------|------------------|----|
| 1  | 115.050203         | 58.028740       | 98.023654         | 49.515465        |                    |                  | N    |                    |                 |                   |                  |                    |                  | 10 |
| 2  | <b>554.275529</b>  | 277.641403      | <b>537.248980</b> | 269.128128       |                    |                  | Q    | <b>1358.753442</b> | 679.880359      | 1341.726893       | 671.367085       | <b>1340.742877</b> | 670.875076       | 9  |
| 3  | <b>653.343943</b>  | 327.175610      | <b>636.317394</b> | 318.662335       |                    |                  | V    | <b>919.528116</b>  | 460.267696      | 902.501567        | 451.754421       | 901.517551         | 451.262413       | 8  |
| 4  | <b>740.375971</b>  | 370.691623      | 723.349422        | 362.178349       | 722.365406         | 361.686341       | S    | <b>820.459702</b>  | 410.733489      | 803.433153        | 402.220215       | 802.449137         | 401.728207       | 7  |
| 5  | 853.460035         | 427.233656      | 836.433486        | 418.720381       | 835.449470         | 418.228373       | L    | <b>733.427674</b>  | 367.217475      | 716.401125        | 358.704201       | 715.417109         | 358.212193       | 6  |
| 6  | 954.507714         | 477.757495      | 937.481165        | 469.244220       | 936.497149         | 468.752212       | T    | <b>620.343610</b>  | 310.675443      | 603.317061        | 302.162169       | 602.333045         | 301.670161       | 5  |
| 7  | <b>1114.538363</b> | 557.772819      | 1097.511814       | 549.259545       | <b>1096.527798</b> | 548.767537       | C    | <b>519.295931</b>  | 260.151604      | 502.269382        | 251.638329       |                    |                  | 4  |
| 8  | <b>1227.622427</b> | 614.314851      | 1210.595878       | 605.801577       | 1209.611862        | 605.309569       | L    | <b>359.265282</b>  | 180.136279      | 342.238733        | 171.623004       |                    |                  | 3  |
| 9  | 1326.690841        | 663.849058      | 1309.664292       | 655.335784       | 1308.680276        | 654.843776       | V    | <b>246.181218</b>  | 123.594247      | 229.154669        | 115.080973       |                    |                  | 2  |
| 10 |                    |                 |                   |                  |                    |                  | K    | <b>147.112804</b>  | 74.060040       | <b>130.086255</b> | 65.546765        |                    |                  | 1  |

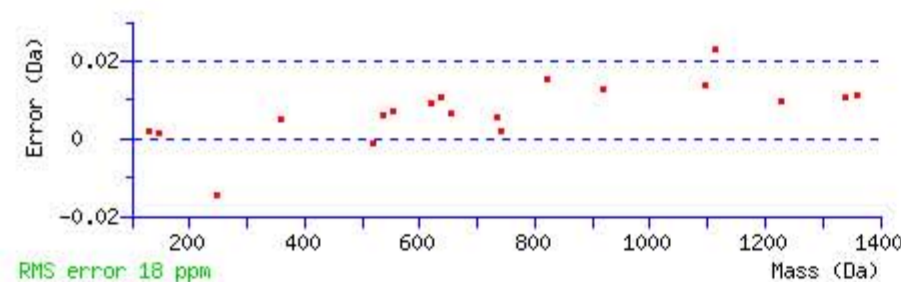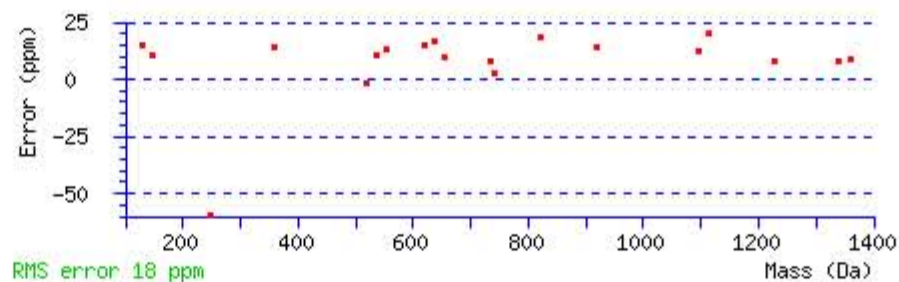

NCBI BLAST search of **NQVSLTCLVK**

(Parameters: blastp, nr protein database, expect=20000, no filter, PAM30)

Other BLAST [web gateways](#)

All matches to this query

| Score | Mr(calc):   | Delta     | Sequence                       |
|-------|-------------|-----------|--------------------------------|
| 51.3  | 1471.789093 | 0.010955  | <a href="#">NQVSLTCLVK</a>     |
| 5.9   | 1471.792908 | 0.007140  | <a href="#">NITINCVKGINAR</a>  |
| 4.4   | 1471.797592 | 0.002456  | <a href="#">KYFWDRAFLVK</a>    |
| 3.9   | 1471.803467 | -0.003419 | <a href="#">EKQGPLLDLFGQK</a>  |
| 0.2   | 1471.806793 | -0.006745 | <a href="#">AAALLAKQAEMEVK</a> |
| 0.1   | 1471.792221 | 0.007827  | <a href="#">NESIPLSPFEVK</a>   |

Mascot: <http://www.matrixscience.com/>



# MASCOT Search Results

## Peptide View

MS/MS Fragmentation of **EPQVYTLPPSR**

Found in **IGHG1\_HUMAN**, Ig gamma-1 chain C region OS=Homo sapiens GN=IGHG1 PE=1 SV=1

Match to Query 42103: 1596.834552 from(533.285460,3+) rtinseconds(1979) index(78345)

Title: Locus:1.1.1.2903.14 File:"2013-07-02 CLN FXIII 60 min 1st FT.wiff"

Data file C:\Program Files (x86)\Matrix Science\Mascot Daemon\mgf4 FXIII 60 min 1st\mascot\_daemon\_merge.mgf

Click mouse within plot area to zoom in by factor of two about that point

Or, Plot from  to  Da

Label all possible matches  Label matches used for scoring

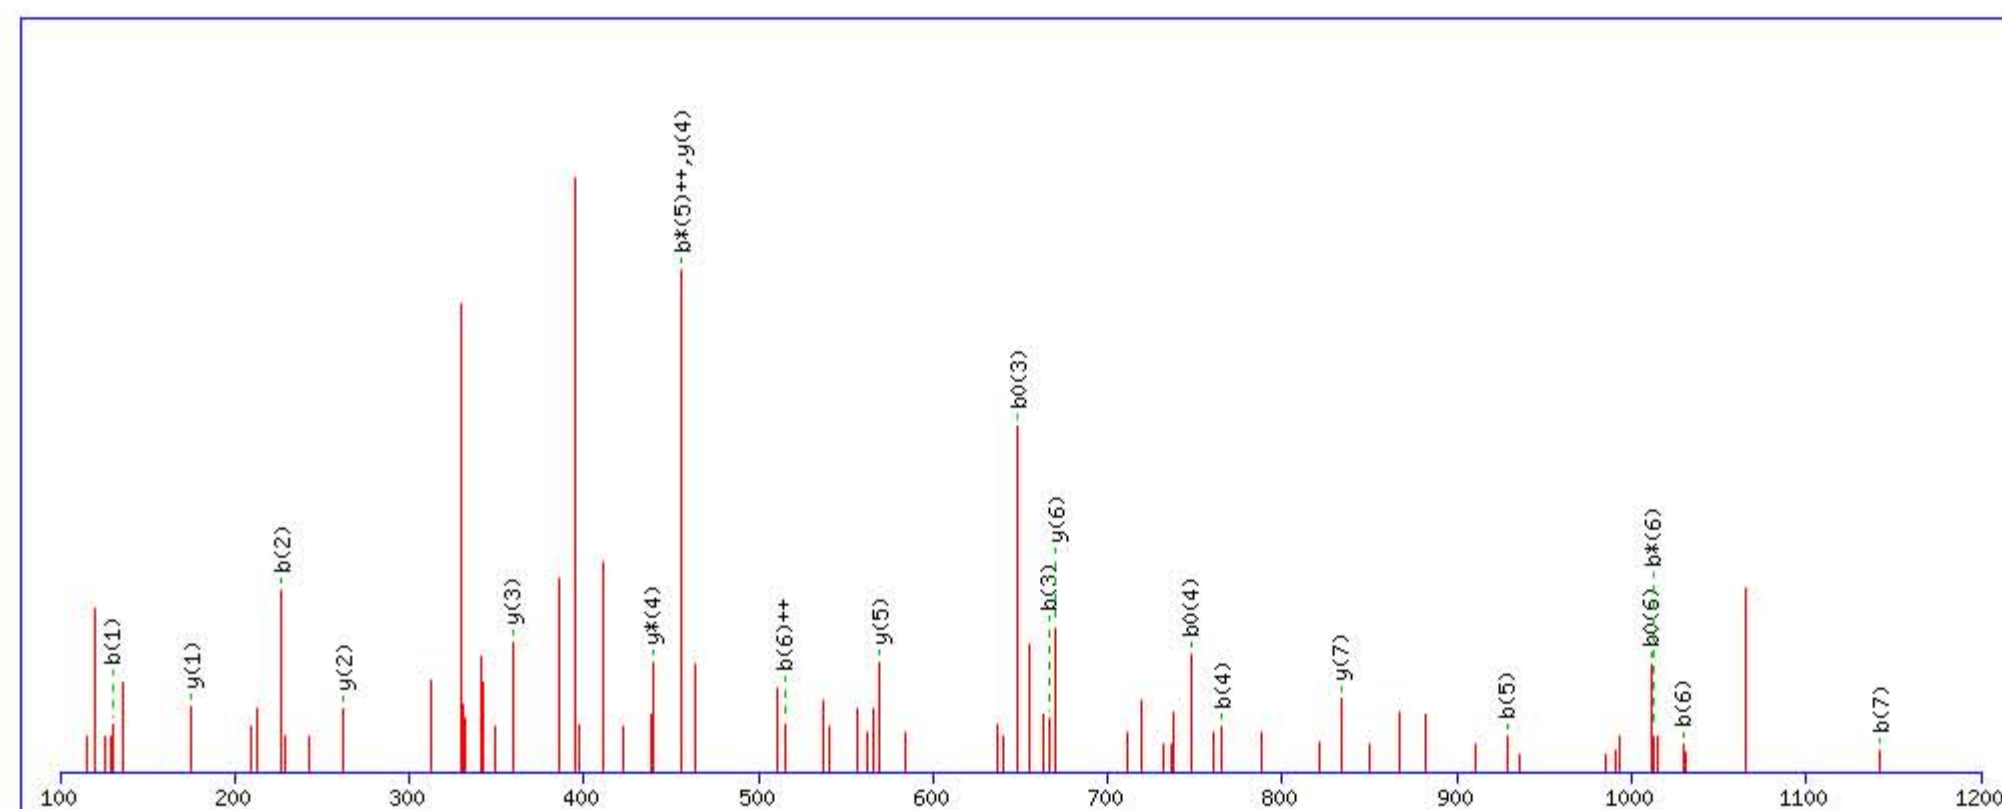

Monoisotopic mass of neutral peptide Mr(calc): 1596.833389

Fixed modifications: Carbamidomethyl (C) (apply to specified residues or termini only)

Variable modifications:

Q3 : Biotin:Thermo-21345 (Q)

Ions Score: 33 Expect: 0.0021

Matches : 21/114 fragment ions using 49 most intense peaks [\(help\)](#)

| #  | b           | b <sup>++</sup> | b <sup>*</sup> | b <sup>*++</sup> | b <sup>0</sup> | b <sup>0++</sup> | Seq. | y           | y <sup>++</sup> | y <sup>*</sup> | y <sup>*++</sup> | y <sup>0</sup> | y <sup>0++</sup> | #  |
|----|-------------|-----------------|----------------|------------------|----------------|------------------|------|-------------|-----------------|----------------|------------------|----------------|------------------|----|
| 1  | 130.049869  | 65.528572       |                |                  | 112.039304     | 56.523290        | E    |             |                 |                |                  |                |                  | 11 |
| 2  | 227.102633  | 114.054954      |                |                  | 209.092068     | 105.049672       | P    | 1468.798084 | 734.902680      | 1451.771535    | 726.389406       | 1450.787519    | 725.897398       | 10 |
| 3  | 666.327959  | 333.667618      | 649.301410     | 325.154343       | 648.317394     | 324.662335       | Q    | 1371.745320 | 686.376298      | 1354.718771    | 677.863024       | 1353.734755    | 677.371016       | 9  |
| 4  | 765.396373  | 383.201825      | 748.369824     | 374.688550       | 747.385808     | 374.196542       | V    | 932.519994  | 466.763635      | 915.493445     | 458.250361       | 914.509429     | 457.758353       | 8  |
| 5  | 928.459702  | 464.733489      | 911.433153     | 456.220215       | 910.449137     | 455.728207       | Y    | 833.451580  | 417.229428      | 816.425031     | 408.716154       | 815.441015     | 408.224146       | 7  |
| 6  | 1029.507381 | 515.257329      | 1012.480832    | 506.744054       | 1011.496816    | 506.252046       | T    | 670.388251  | 335.697764      | 653.361702     | 327.184489       | 652.377686     | 326.692481       | 6  |
| 7  | 1142.591445 | 571.799361      | 1125.564896    | 563.286086       | 1124.580880    | 562.794078       | L    | 569.340572  | 285.173924      | 552.314023     | 276.660650       | 551.330007     | 276.168642       | 5  |
| 8  | 1239.644209 | 620.325743      | 1222.617660    | 611.812468       | 1221.633644    | 611.320460       | P    | 456.256508  | 228.631892      | 439.229959     | 220.118618       | 438.245943     | 219.626610       | 4  |
| 9  | 1336.696973 | 668.852125      | 1319.670424    | 660.338850       | 1318.686408    | 659.846842       | P    | 359.203744  | 180.105510      | 342.177195     | 171.592236       | 341.193179     | 171.100228       | 3  |
| 10 | 1423.729001 | 712.368139      | 1406.702452    | 703.854864       | 1405.718436    | 703.362856       | S    | 262.150980  | 131.579128      | 245.124431     | 123.065854       | 244.140415     | 122.573846       | 2  |
| 11 |             |                 |                |                  |                |                  | R    | 175.118952  | 88.063114       | 158.092403     | 79.549839        |                |                  | 1  |

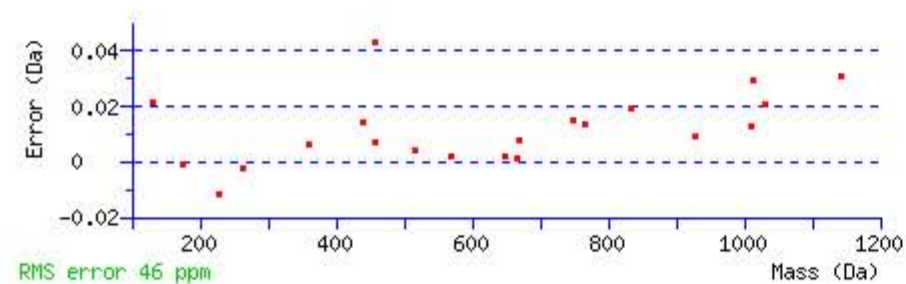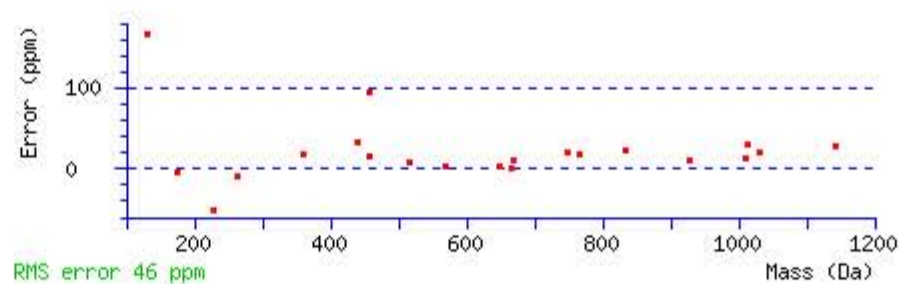

NCBI BLAST search of **EPQVYTLPPSR**

(Parameters: blastp, nr protein database, expect=20000, no filter, PAM30)

Other BLAST [web gateways](#)

All matches to this query

| Score | Mr(calc):   | Delta     | Sequence                        |
|-------|-------------|-----------|---------------------------------|
| 32.7  | 1596.833389 | 0.001163  | <a href="#">EPQVYTLPPSR</a>     |
| 4.2   | 1596.855850 | -0.021298 | <a href="#">MLLLTRSPTAWHR</a>   |
| 3.1   | 1596.825974 | 0.008578  | <a href="#">KLSLDLEAQWAPSPR</a> |

Mascot: <http://www.matrixscience.com/>



# MASCOT Search Results

## Peptide View

MS/MS Fragmentation of **WQQGNVFSCSVMEALHNHYTQK**

Found in **IGHG1\_HUMAN**, Ig gamma-1 chain C region OS=Homo sapiens GN=IGHG1 PE=1 SV=1

Match to Query 72537: 3111.448470 from(623.296970,5+) rtinseconds(2044) index(78812)

Title: Locus:1.1.1.2926.11 File:"2013-07-02 CLN FXIII 60 min 1st FT.wiff"

Data file C:\Program Files (x86)\Matrix Science\Mascot Daemon\mgf4 FXIII 60 min 1st\mascot\_daemon\_merge.mgf

Click mouse within plot area to zoom in by factor of two about that point

Or, Plot from  to  Da

Label all possible matches  Label matches used for scoring

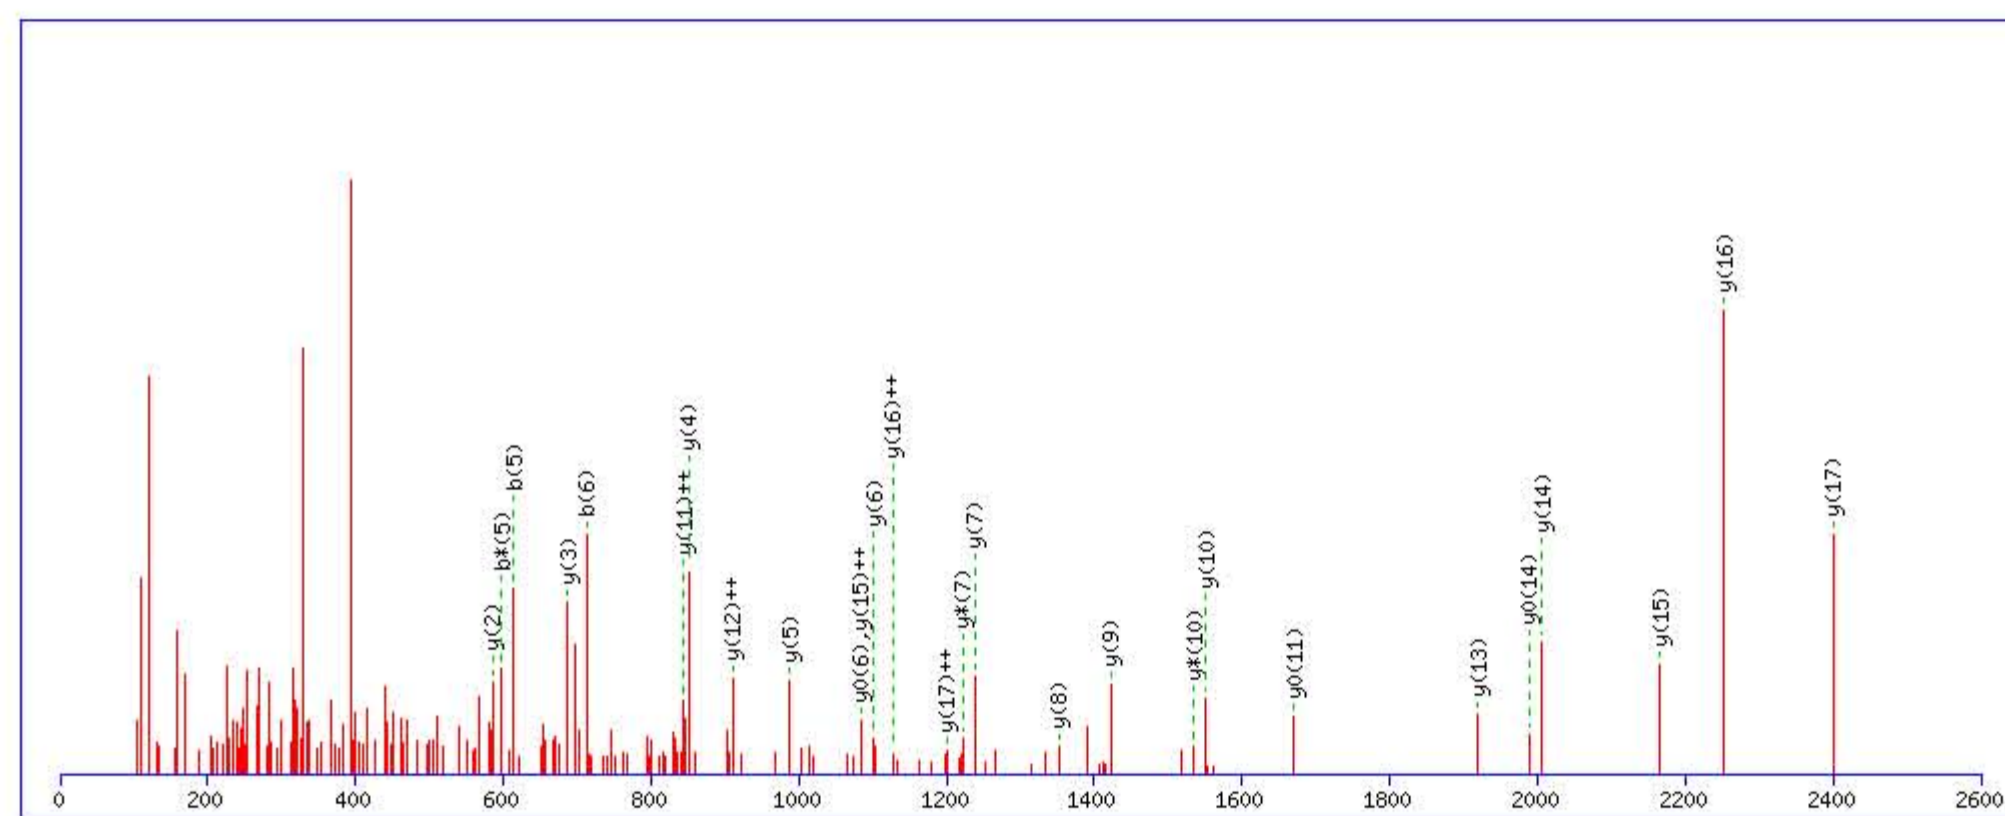

Monoisotopic mass of neutral peptide Mr(calc): 3111.426590

Fixed modifications: Carbamidomethyl (C) (apply to specified residues or termini only)

Variable modifications:

Q22 : Biotin:Thermo-21345 (Q)

Ions Score: 97 Expect: 3e-009

Matches : 27/244 fragment ions using 37 most intense peaks [\(help\)](#)

| #  | b                 | b <sup>++</sup> | b <sup>*</sup>    | b <sup>*++</sup> | b <sup>0</sup> | b <sup>0++</sup> | Seq. | y                  | y <sup>++</sup>    | y <sup>*</sup>     | y <sup>*++</sup> | y <sup>0</sup>     | y <sup>0++</sup> | #  |
|----|-------------------|-----------------|-------------------|------------------|----------------|------------------|------|--------------------|--------------------|--------------------|------------------|--------------------|------------------|----|
| 1  | 187.086589        | 94.046932       |                   |                  |                |                  | W    |                    |                    |                    |                  |                    |                  | 23 |
| 2  | 315.145167        | 158.076222      | 298.118618        | 149.562947       |                |                  | Q    | 2926.354551        | 1463.680913        | 2909.328002        | 1455.167639      | 2908.343986        | 1454.675631      | 22 |
| 3  | 443.203745        | 222.105511      | 426.177196        | 213.592236       |                |                  | Q    | 2798.295973        | 1399.651624        | 2781.269424        | 1391.138350      | 2780.285408        | 1390.646342      | 21 |
| 4  | 500.225209        | 250.616243      | 483.198660        | 242.102968       |                |                  | G    | 2670.237395        | 1335.622335        | 2653.210846        | 1327.109061      | 2652.226830        | 1326.617053      | 20 |
| 5  | <b>614.268136</b> | 307.637706      | <b>597.241587</b> | 299.124432       |                |                  | N    | 2613.215931        | 1307.111603        | 2596.189382        | 1298.598329      | 2595.205366        | 1298.106321      | 19 |
| 6  | <b>713.336550</b> | 357.171913      | 696.310001        | 348.658639       |                |                  | V    | 2499.173004        | 1250.090140        | 2482.146455        | 1241.576865      | 2481.162439        | 1241.084857      | 18 |
| 7  | 860.404964        | 430.706120      | 843.378415        | 422.192845       |                |                  | F    | <b>2400.104590</b> | <b>1200.555933</b> | 2383.078041        | 1192.042658      | 2382.094025        | 1191.550650      | 17 |
| 8  | 947.436992        | 474.222134      | 930.410443        | 465.708859       | 929.426427     | 465.216851       | S    | <b>2253.036176</b> | <b>1127.021726</b> | 2236.009627        | 1118.508451      | 2235.025611        | 1118.016443      | 16 |
| 9  | 1107.467641       | 554.237459      | 1090.441092       | 545.724184       | 1089.457076    | 545.232176       | C    | <b>2166.004148</b> | <b>1083.505712</b> | 2148.977599        | 1074.992437      | 2147.993583        | 1074.500429      | 15 |
| 10 | 1194.499669       | 597.753473      | 1177.473120       | 589.240198       | 1176.489104    | 588.748190       | S    | <b>2005.973499</b> | 1003.490388        | 1988.946950        | 994.977113       | <b>1987.962934</b> | 994.485105       | 14 |
| 11 | 1293.568083       | 647.287680      | 1276.541534       | 638.774405       | 1275.557518    | 638.282397       | V    | <b>1918.941471</b> | 959.974373         | 1901.914922        | 951.461099       | 1900.930906        | 950.969091       | 13 |
| 12 | 1424.608568       | 712.807922      | 1407.582019       | 704.294648       | 1406.598003    | 703.802640       | M    | 1819.873057        | <b>910.440166</b>  | 1802.846508        | 901.926892       | 1801.862492        | 901.434884       | 12 |
| 13 | 1561.667480       | 781.337378      | 1544.640931       | 772.824104       | 1543.656915    | 772.332096       | H    | 1688.832572        | <b>844.919924</b>  | 1671.806023        | 836.406649       | <b>1670.822007</b> | 835.914641       | 11 |
| 14 | 1690.710073       | 845.858675      | 1673.683524       | 837.345400       | 1672.699508    | 836.853392       | E    | <b>1551.773660</b> | 776.390468         | <b>1534.747111</b> | 767.877193       | 1533.763095        | 767.385185       | 10 |
| 15 | 1761.747187       | 881.377231      | 1744.720638       | 872.863957       | 1743.736622    | 872.371949       | A    | <b>1422.731067</b> | 711.869171         | 1405.704518        | 703.355897       | 1404.720502        | 702.863889       | 9  |
| 16 | 1874.831251       | 937.919263      | 1857.804702       | 929.405989       | 1856.820686    | 928.913981       | L    | <b>1351.693953</b> | 676.350615         | 1334.667404        | 667.837340       | 1333.683388        | 667.345332       | 8  |
| 17 | 2011.890163       | 1006.448719     | 1994.863614       | 997.935445       | 1993.879598    | 997.443437       | H    | <b>1238.609889</b> | 619.808583         | <b>1221.583340</b> | 611.295308       | 1220.599324        | 610.803300       | 7  |
| 18 | 2125.933090       | 1063.470183     | 2108.906541       | 1054.956908      | 2107.922525    | 1054.464900      | N    | <b>1101.550977</b> | 551.279127         | 1084.524428        | 542.765852       | <b>1083.540412</b> | 542.273844       | 6  |
| 19 | 2262.992002       | 1131.999639     | 2245.965453       | 1123.486364      | 2244.981437    | 1122.994356      | H    | <b>987.508050</b>  | 494.257663         | 970.481501         | 485.744389       | 969.497485         | 485.252381       | 5  |
| 20 | 2426.055331       | 1213.531303     | 2409.028782       | 1205.018029      | 2408.044766    | 1204.526021      | Y    | <b>850.449138</b>  | 425.728207         | 833.422589         | 417.214933       | 832.438573         | 416.722925       | 4  |
| 21 | 2527.103010       | 1264.055143     | 2510.076461       | 1255.541868      | 2509.092445    | 1255.049860      | T    | <b>687.385809</b>  | 344.196543         | 670.359260         | 335.683268       | 669.375244         | 335.191260       | 3  |
| 22 | 2966.328336       | 1483.667806     | 2949.301787       | 1475.154531      | 2948.317771    | 1474.662523      | Q    | <b>586.338130</b>  | 293.672703         | 569.311581         | 285.159429       |                    |                  | 2  |
| 23 |                   |                 |                   |                  |                |                  | K    | 147.112804         | 74.060040          | 130.086255         | 65.546765        |                    |                  | 1  |

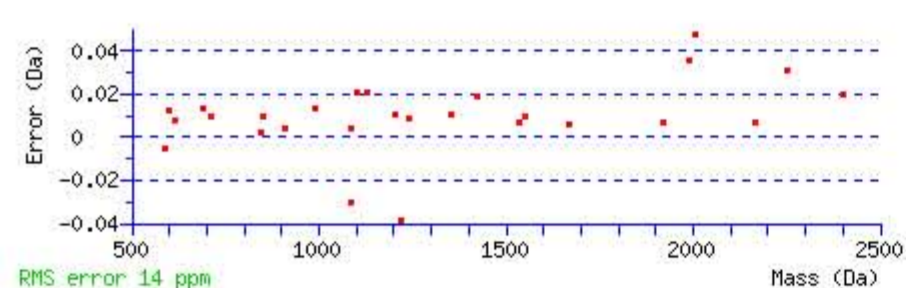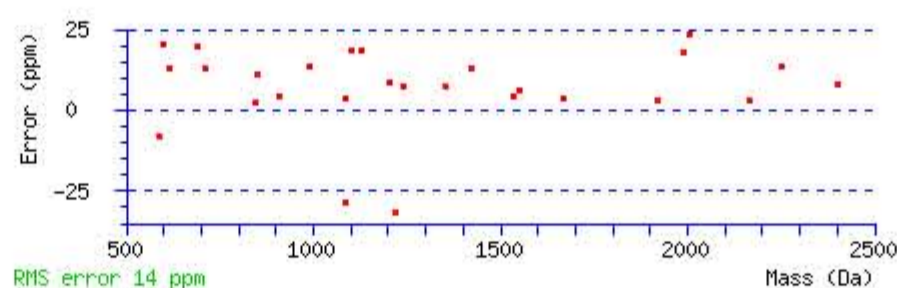

NCBI BLAST search of **WQQGNVFSCSVMEALHNHYTQK**

(Parameters: blastp, nr protein database, expect=20000, no filter, PAM30)

Other BLAST [web gateways](#)

All matches to this query

| Score | Mr(calc):   | Delta    | Sequence                               |
|-------|-------------|----------|----------------------------------------|
| 97.4  | 3111.426590 | 0.021880 | <a href="#">WQQGNVFSCSVMEALHNHYTQK</a> |

Mascot: <http://www.matrixscience.com/>



# MASCOT SCIENCE Mascot Search Results

## Peptide View

MS/MS Fragmentation of **NQVSLTCLVK**

Found in **IGHG1\_HUMAN**, Ig gamma-1 chain C region OS=Homo sapiens GN=IGHG1 PE=1 SV=1

Match to Query 37736: 1471.800048 from(736.907300,2+) rtinseconds(2225) index(80100)

Title: Locus:1.1.1.2989.8 File:"2013-07-02 CLN FXIII 60 min 1st FT.wiff"

Data file C:\Program Files (x86)\Matrix Science\Mascot Daemon\mgf4 FXIII 60 min 1st\mascot\_daemon\_merge.mgf

Click mouse within plot area to zoom in by factor of two about that point

Or, Plot from  to  Da

Label all possible matches  Label matches used for scoring

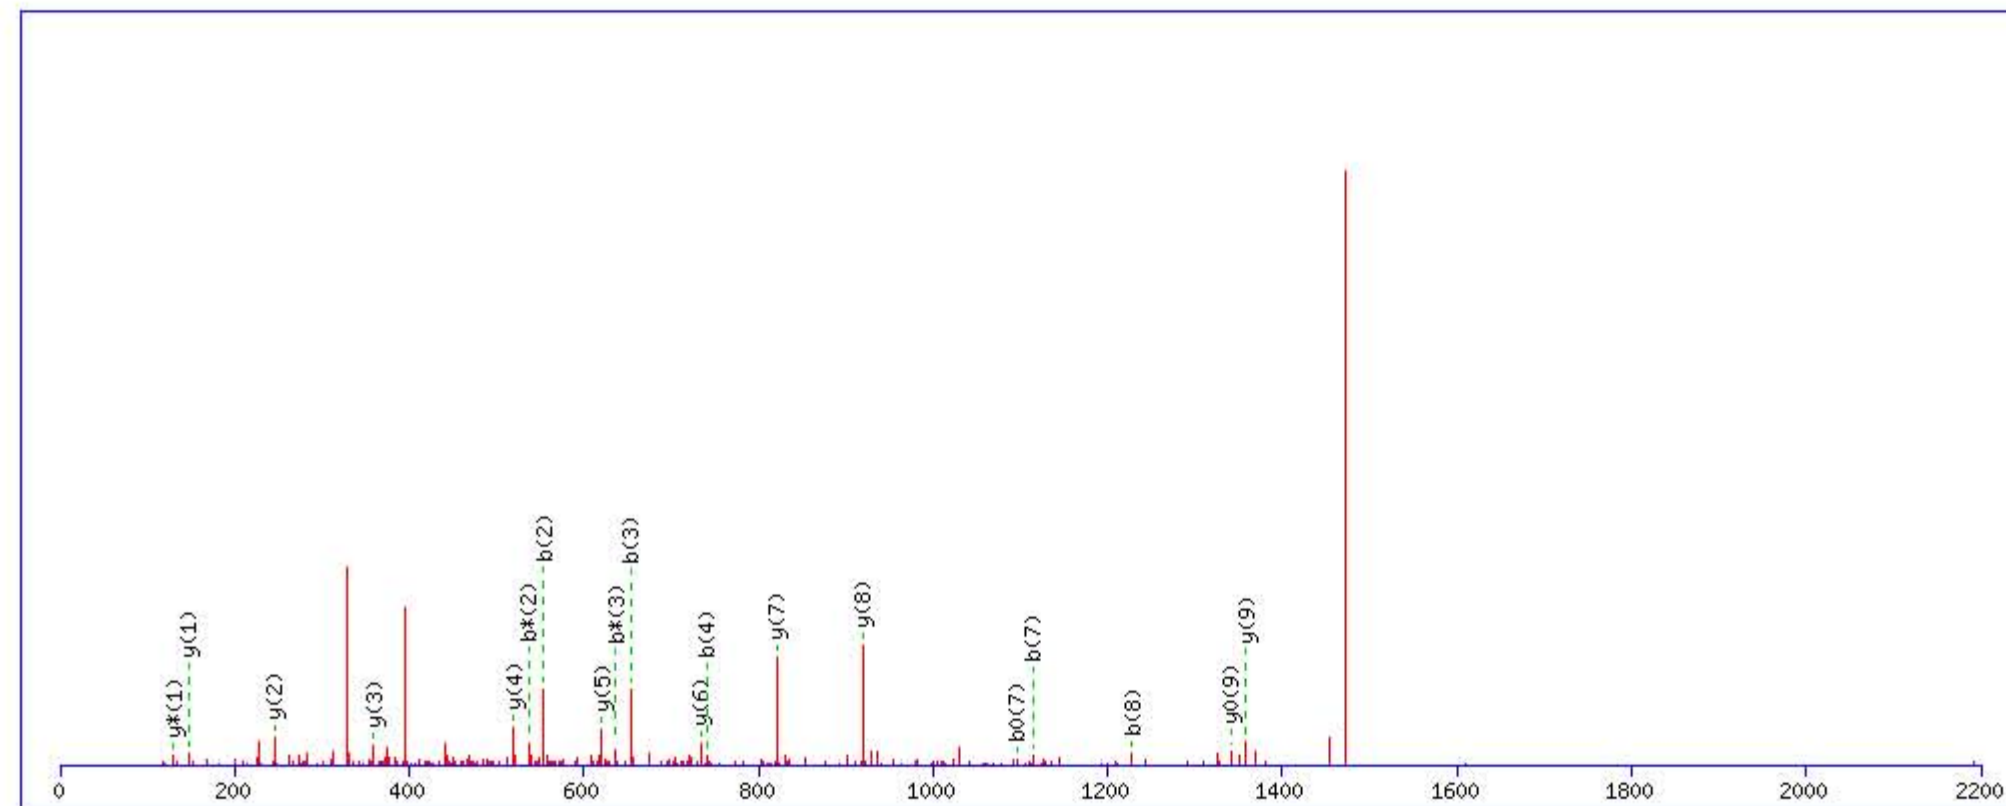

Monoisotopic mass of neutral peptide Mr(calc): 1471.789093

Fixed modifications: Carbamidomethyl (C) (apply to specified residues or termini only)

Variable modifications:

Q2 : Biotin:Thermo-21345 (Q)

Ions Score: 51 Expect: 6e-005

Matches : 19/94 fragment ions using 40 most intense peaks [\(help\)](#)

| #  | b                  | b <sup>++</sup> | b <sup>+</sup>    | b <sup>+++</sup> | b <sup>0</sup>     | b <sup>0++</sup> | Seq. | y                  | y <sup>++</sup> | y <sup>+</sup>    | y <sup>+++</sup> | y <sup>0</sup>     | y <sup>0++</sup> | #  |
|----|--------------------|-----------------|-------------------|------------------|--------------------|------------------|------|--------------------|-----------------|-------------------|------------------|--------------------|------------------|----|
| 1  | 115.050203         | 58.028740       | 98.023654         | 49.515465        |                    |                  | N    |                    |                 |                   |                  |                    |                  | 10 |
| 2  | <b>554.275529</b>  | 277.641403      | <b>537.248980</b> | 269.128128       |                    |                  | Q    | <b>1358.753442</b> | 679.880359      | 1341.726893       | 671.367085       | <b>1340.742877</b> | 670.875076       | 9  |
| 3  | <b>653.343943</b>  | 327.175610      | <b>636.317394</b> | 318.662335       |                    |                  | V    | <b>919.528116</b>  | 460.267696      | 902.501567        | 451.754421       | 901.517551         | 451.262413       | 8  |
| 4  | <b>740.375971</b>  | 370.691623      | 723.349422        | 362.178349       | 722.365406         | 361.686341       | S    | <b>820.459702</b>  | 410.733489      | 803.433153        | 402.220215       | 802.449137         | 401.728207       | 7  |
| 5  | 853.460035         | 427.233656      | 836.433486        | 418.720381       | 835.449470         | 418.228373       | L    | <b>733.427674</b>  | 367.217475      | 716.401125        | 358.704201       | 715.417109         | 358.212193       | 6  |
| 6  | 954.507714         | 477.757495      | 937.481165        | 469.244220       | 936.497149         | 468.752212       | T    | <b>620.343610</b>  | 310.675443      | 603.317061        | 302.162169       | 602.333045         | 301.670161       | 5  |
| 7  | <b>1114.538363</b> | 557.772819      | 1097.511814       | 549.259545       | <b>1096.527798</b> | 548.767537       | C    | <b>519.295931</b>  | 260.151604      | 502.269382        | 251.638329       |                    |                  | 4  |
| 8  | <b>1227.622427</b> | 614.314851      | 1210.595878       | 605.801577       | 1209.611862        | 605.309569       | L    | <b>359.265282</b>  | 180.136279      | 342.238733        | 171.623004       |                    |                  | 3  |
| 9  | 1326.690841        | 663.849058      | 1309.664292       | 655.335784       | 1308.680276        | 654.843776       | V    | <b>246.181218</b>  | 123.594247      | 229.154669        | 115.080973       |                    |                  | 2  |
| 10 |                    |                 |                   |                  |                    |                  | K    | <b>147.112804</b>  | 74.060040       | <b>130.086255</b> | 65.546765        |                    |                  | 1  |



NCBI BLAST search of **NQVSLTCLVK**

(Parameters: blastp, nr protein database, expect=20000, no filter, PAM30)

Other BLAST [web gateways](#)

All matches to this query

| Score | Mr(calc):   | Delta     | Sequence                       |
|-------|-------------|-----------|--------------------------------|
| 51.3  | 1471.789093 | 0.010955  | <a href="#">NQVSLTCLVK</a>     |
| 5.9   | 1471.792908 | 0.007140  | <a href="#">NITINCVKGINAR</a>  |
| 4.4   | 1471.797592 | 0.002456  | <a href="#">KYFWDRAFLVK</a>    |
| 3.9   | 1471.803467 | -0.003419 | <a href="#">EKQGPLLDLFGQK</a>  |
| 0.2   | 1471.806793 | -0.006745 | <a href="#">AAALLAKQAEMEVK</a> |
| 0.1   | 1471.792221 | 0.007827  | <a href="#">NESIPLSPFEVK</a>   |

Mascot: <http://www.matrixscience.com/>



# MASCOT Search Results

## Peptide View

MS/MS Fragmentation of **EPQVYTLPPSR**

Found in **IGHG1\_HUMAN**, Ig gamma-1 chain C region OS=Homo sapiens GN=IGHG1 PE=1 SV=1

Match to Query 42103: 1596.834552 from(533.285460,3+) rtinseconds(1979) index(78345)

Title: Locus:1.1.1.2903.14 File:"2013-07-02 CLN FXIII 60 min 1st FT.wiff"

Data file C:\Program Files (x86)\Matrix Science\Mascot Daemon\mgf4 FXIII 60 min 1st\mascot\_daemon\_merge.mgf

Click mouse within plot area to zoom in by factor of two about that point

Or, Plot from  to  Da

Label all possible matches  Label matches used for scoring



Monoisotopic mass of neutral peptide Mr(calc): 1596.833389

Fixed modifications: Carbamidomethyl (C) (apply to specified residues or termini only)

Variable modifications:

Q3 : Biotin:Thermo-21345 (Q)

Ions Score: 33 Expect: 0.0021

Matches : 21/114 fragment ions using 49 most intense peaks [\(help\)](#)

| #  | b           | b <sup>++</sup> | b <sup>*</sup> | b <sup>*++</sup> | b <sup>0</sup> | b <sup>0++</sup> | Seq. | y           | y <sup>++</sup> | y <sup>*</sup> | y <sup>*++</sup> | y <sup>0</sup> | y <sup>0++</sup> | #  |
|----|-------------|-----------------|----------------|------------------|----------------|------------------|------|-------------|-----------------|----------------|------------------|----------------|------------------|----|
| 1  | 130.049869  | 65.528572       |                |                  | 112.039304     | 56.523290        | E    |             |                 |                |                  |                |                  | 11 |
| 2  | 227.102633  | 114.054954      |                |                  | 209.092068     | 105.049672       | P    | 1468.798084 | 734.902680      | 1451.771535    | 726.389406       | 1450.787519    | 725.897398       | 10 |
| 3  | 666.327959  | 333.667618      | 649.301410     | 325.154343       | 648.317394     | 324.662335       | Q    | 1371.745320 | 686.376298      | 1354.718771    | 677.863024       | 1353.734755    | 677.371016       | 9  |
| 4  | 765.396373  | 383.201825      | 748.369824     | 374.688550       | 747.385808     | 374.196542       | V    | 932.519994  | 466.763635      | 915.493445     | 458.250361       | 914.509429     | 457.758353       | 8  |
| 5  | 928.459702  | 464.733489      | 911.433153     | 456.220215       | 910.449137     | 455.728207       | Y    | 833.451580  | 417.229428      | 816.425031     | 408.716154       | 815.441015     | 408.224146       | 7  |
| 6  | 1029.507381 | 515.257329      | 1012.480832    | 506.744054       | 1011.496816    | 506.252046       | T    | 670.388251  | 335.697764      | 653.361702     | 327.184489       | 652.377686     | 326.692481       | 6  |
| 7  | 1142.591445 | 571.799361      | 1125.564896    | 563.286086       | 1124.580880    | 562.794078       | L    | 569.340572  | 285.173924      | 552.314023     | 276.660650       | 551.330007     | 276.168642       | 5  |
| 8  | 1239.644209 | 620.325743      | 1222.617660    | 611.812468       | 1221.633644    | 611.320460       | P    | 456.256508  | 228.631892      | 439.229959     | 220.118618       | 438.245943     | 219.626610       | 4  |
| 9  | 1336.696973 | 668.852125      | 1319.670424    | 660.338850       | 1318.686408    | 659.846842       | P    | 359.203744  | 180.105510      | 342.177195     | 171.592236       | 341.193179     | 171.100228       | 3  |
| 10 | 1423.729001 | 712.368139      | 1406.702452    | 703.854864       | 1405.718436    | 703.362856       | S    | 262.150980  | 131.579128      | 245.124431     | 123.065854       | 244.140415     | 122.573846       | 2  |
| 11 |             |                 |                |                  |                |                  | R    | 175.118952  | 88.063114       | 158.092403     | 79.549839        |                |                  | 1  |



NCBI BLAST search of **EPQVYTLPPSR**

(Parameters: blastp, nr protein database, expect=20000, no filter, PAM30)

Other BLAST [web gateways](#)

All matches to this query

| Score | Mr(calc):   | Delta     | Sequence                        |
|-------|-------------|-----------|---------------------------------|
| 32.7  | 1596.833389 | 0.001163  | <a href="#">EPQVYTLPPSR</a>     |
| 4.2   | 1596.855850 | -0.021298 | <a href="#">MLLLTRSPTAWHR</a>   |
| 3.1   | 1596.825974 | 0.008578  | <a href="#">KLSLDLEAQWAPSPR</a> |

Mascot: <http://www.matrixscience.com/>



# MASCOT Search Results

## Peptide View

MS/MS Fragmentation of **WQQGNVFSCSVMEALHNHYTQK**

Found in **IGHG1\_HUMAN**, Ig gamma-1 chain C region OS=Homo sapiens GN=IGHG1 PE=1 SV=1

Match to Query 72537: 3111.448470 from(623.296970,5+) rtinseconds(2044) index(78812)

Title: Locus:1.1.1.2926.11 File:"2013-07-02 CLN FXIII 60 min 1st FT.wiff"

Data file C:\Program Files (x86)\Matrix Science\Mascot Daemon\mgf4 FXIII 60 min 1st\mascot\_daemon\_merge.mgf

Click mouse within plot area to zoom in by factor of two about that point

Or, Plot from  to  Da

Label all possible matches  Label matches used for scoring



Monoisotopic mass of neutral peptide Mr(calc): 3111.426590

Fixed modifications: Carbamidomethyl (C) (apply to specified residues or termini only)

Variable modifications:

Q22 : Biotin:Thermo-21345 (Q)

Ions Score: 97 Expect: 3e-009

Matches : 27/244 fragment ions using 37 most intense peaks [\(help\)](#)

| #  | b                 | b <sup>++</sup> | b <sup>*</sup>    | b <sup>*++</sup> | b <sup>0</sup> | b <sup>0++</sup> | Seq. | y                  | y <sup>++</sup>    | y <sup>*</sup>     | y <sup>*++</sup> | y <sup>0</sup>     | y <sup>0++</sup> | #  |
|----|-------------------|-----------------|-------------------|------------------|----------------|------------------|------|--------------------|--------------------|--------------------|------------------|--------------------|------------------|----|
| 1  | 187.086589        | 94.046932       |                   |                  |                |                  | W    |                    |                    |                    |                  |                    |                  | 23 |
| 2  | 315.145167        | 158.076222      | 298.118618        | 149.562947       |                |                  | Q    | 2926.354551        | 1463.680913        | 2909.328002        | 1455.167639      | 2908.343986        | 1454.675631      | 22 |
| 3  | 443.203745        | 222.105511      | 426.177196        | 213.592236       |                |                  | Q    | 2798.295973        | 1399.651624        | 2781.269424        | 1391.138350      | 2780.285408        | 1390.646342      | 21 |
| 4  | 500.225209        | 250.616243      | 483.198660        | 242.102968       |                |                  | G    | 2670.237395        | 1335.622335        | 2653.210846        | 1327.109061      | 2652.226830        | 1326.617053      | 20 |
| 5  | <b>614.268136</b> | 307.637706      | <b>597.241587</b> | 299.124432       |                |                  | N    | 2613.215931        | 1307.111603        | 2596.189382        | 1298.598329      | 2595.205366        | 1298.106321      | 19 |
| 6  | <b>713.336550</b> | 357.171913      | 696.310001        | 348.658639       |                |                  | V    | 2499.173004        | 1250.090140        | 2482.146455        | 1241.576865      | 2481.162439        | 1241.084857      | 18 |
| 7  | 860.404964        | 430.706120      | 843.378415        | 422.192845       |                |                  | F    | <b>2400.104590</b> | <b>1200.555933</b> | 2383.078041        | 1192.042658      | 2382.094025        | 1191.550650      | 17 |
| 8  | 947.436992        | 474.222134      | 930.410443        | 465.708859       | 929.426427     | 465.216851       | S    | <b>2253.036176</b> | <b>1127.021726</b> | 2236.009627        | 1118.508451      | 2235.025611        | 1118.016443      | 16 |
| 9  | 1107.467641       | 554.237459      | 1090.441092       | 545.724184       | 1089.457076    | 545.232176       | C    | <b>2166.004148</b> | <b>1083.505712</b> | 2148.977599        | 1074.992437      | 2147.993583        | 1074.500429      | 15 |
| 10 | 1194.499669       | 597.753473      | 1177.473120       | 589.240198       | 1176.489104    | 588.748190       | S    | <b>2005.973499</b> | 1003.490388        | 1988.946950        | 994.977113       | <b>1987.962934</b> | 994.485105       | 14 |
| 11 | 1293.568083       | 647.287680      | 1276.541534       | 638.774405       | 1275.557518    | 638.282397       | V    | <b>1918.941471</b> | 959.974373         | 1901.914922        | 951.461099       | 1900.930906        | 950.969091       | 13 |
| 12 | 1424.608568       | 712.807922      | 1407.582019       | 704.294648       | 1406.598003    | 703.802640       | M    | 1819.873057        | <b>910.440166</b>  | 1802.846508        | 901.926892       | 1801.862492        | 901.434884       | 12 |
| 13 | 1561.667480       | 781.337378      | 1544.640931       | 772.824104       | 1543.656915    | 772.332096       | H    | 1688.832572        | <b>844.919924</b>  | 1671.806023        | 836.406649       | <b>1670.822007</b> | 835.914641       | 11 |
| 14 | 1690.710073       | 845.858675      | 1673.683524       | 837.345400       | 1672.699508    | 836.853392       | E    | <b>1551.773660</b> | 776.390468         | <b>1534.747111</b> | 767.877193       | 1533.763095        | 767.385185       | 10 |
| 15 | 1761.747187       | 881.377231      | 1744.720638       | 872.863957       | 1743.736622    | 872.371949       | A    | <b>1422.731067</b> | 711.869171         | 1405.704518        | 703.355897       | 1404.720502        | 702.863889       | 9  |
| 16 | 1874.831251       | 937.919263      | 1857.804702       | 929.405989       | 1856.820686    | 928.913981       | L    | <b>1351.693953</b> | 676.350615         | 1334.667404        | 667.837340       | 1333.683388        | 667.345332       | 8  |
| 17 | 2011.890163       | 1006.448719     | 1994.863614       | 997.935445       | 1993.879598    | 997.443437       | H    | <b>1238.609889</b> | 619.808583         | <b>1221.583340</b> | 611.295308       | 1220.599324        | 610.803300       | 7  |
| 18 | 2125.933090       | 1063.470183     | 2108.906541       | 1054.956908      | 2107.922525    | 1054.464900      | N    | <b>1101.550977</b> | 551.279127         | 1084.524428        | 542.765852       | <b>1083.540412</b> | 542.273844       | 6  |
| 19 | 2262.992002       | 1131.999639     | 2245.965453       | 1123.486364      | 2244.981437    | 1122.994356      | H    | <b>987.508050</b>  | 494.257663         | 970.481501         | 485.744389       | 969.497485         | 485.252381       | 5  |
| 20 | 2426.055331       | 1213.531303     | 2409.028782       | 1205.018029      | 2408.044766    | 1204.526021      | Y    | <b>850.449138</b>  | 425.728207         | 833.422589         | 417.214933       | 832.438573         | 416.722925       | 4  |
| 21 | 2527.103010       | 1264.055143     | 2510.076461       | 1255.541868      | 2509.092445    | 1255.049860      | T    | <b>687.385809</b>  | 344.196543         | 670.359260         | 335.683268       | 669.375244         | 335.191260       | 3  |
| 22 | 2966.328336       | 1483.667806     | 2949.301787       | 1475.154531      | 2948.317771    | 1474.662523      | Q    | <b>586.338130</b>  | 293.672703         | 569.311581         | 285.159429       |                    |                  | 2  |
| 23 |                   |                 |                   |                  |                |                  | K    | 147.112804         | 74.060040          | 130.086255         | 65.546765        |                    |                  | 1  |



NCBI BLAST search of **WQQGNVFSCSVMEALHNHYTQK**

(Parameters: blastp, nr protein database, expect=20000, no filter, PAM30)

Other BLAST [web gateways](#)

All matches to this query

| Score | Mr(calc):   | Delta    | Sequence                               |
|-------|-------------|----------|----------------------------------------|
| 97.4  | 3111.426590 | 0.021880 | <a href="#">WQQGNVFSCSVMEALHNHYTQK</a> |

Mascot: <http://www.matrixscience.com/>



# MASCOT SCIENCE Mascot Search Results

## Peptide View

MS/MS Fragmentation of **NQVSLTCLVK**

Found in **IGHG1\_HUMAN**, Ig gamma-1 chain C region OS=Homo sapiens GN=IGHG1 PE=1 SV=1

Match to Query 37736: 1471.800048 from(736.907300,2+) rtinseconds(2225) index(80100)

Title: Locus:1.1.1.2989.8 File:"2013-07-02 CLN FXIII 60 min 1st FT.wiff"

Data file C:\Program Files (x86)\Matrix Science\Mascot Daemon\mgf4 FXIII 60 min 1st\mascot\_daemon\_merge.mgf

Click mouse within plot area to zoom in by factor of two about that point

Or, Plot from  to  Da

Label all possible matches  Label matches used for scoring



Monoisotopic mass of neutral peptide Mr(calc): 1471.789093

Fixed modifications: Carbamidomethyl (C) (apply to specified residues or termini only)

Variable modifications:

Q2 : Biotin:Thermo-21345 (Q)

Ions Score: 51 Expect: 6e-005

Matches : 19/94 fragment ions using 40 most intense peaks [\(help\)](#)

| #  | b                  | b <sup>++</sup> | b <sup>+</sup>    | b <sup>+++</sup> | b <sup>0</sup>     | b <sup>0++</sup> | Seq. | y                  | y <sup>++</sup> | y <sup>+</sup>    | y <sup>+++</sup> | y <sup>0</sup>     | y <sup>0++</sup> | #  |
|----|--------------------|-----------------|-------------------|------------------|--------------------|------------------|------|--------------------|-----------------|-------------------|------------------|--------------------|------------------|----|
| 1  | 115.050203         | 58.028740       | 98.023654         | 49.515465        |                    |                  | N    |                    |                 |                   |                  |                    |                  | 10 |
| 2  | <b>554.275529</b>  | 277.641403      | <b>537.248980</b> | 269.128128       |                    |                  | Q    | <b>1358.753442</b> | 679.880359      | 1341.726893       | 671.367085       | <b>1340.742877</b> | 670.875076       | 9  |
| 3  | <b>653.343943</b>  | 327.175610      | <b>636.317394</b> | 318.662335       |                    |                  | V    | <b>919.528116</b>  | 460.267696      | 902.501567        | 451.754421       | 901.517551         | 451.262413       | 8  |
| 4  | <b>740.375971</b>  | 370.691623      | 723.349422        | 362.178349       | 722.365406         | 361.686341       | S    | <b>820.459702</b>  | 410.733489      | 803.433153        | 402.220215       | 802.449137         | 401.728207       | 7  |
| 5  | 853.460035         | 427.233656      | 836.433486        | 418.720381       | 835.449470         | 418.228373       | L    | <b>733.427674</b>  | 367.217475      | 716.401125        | 358.704201       | 715.417109         | 358.212193       | 6  |
| 6  | 954.507714         | 477.757495      | 937.481165        | 469.244220       | 936.497149         | 468.752212       | T    | <b>620.343610</b>  | 310.675443      | 603.317061        | 302.162169       | 602.333045         | 301.670161       | 5  |
| 7  | <b>1114.538363</b> | 557.772819      | 1097.511814       | 549.259545       | <b>1096.527798</b> | 548.767537       | C    | <b>519.295931</b>  | 260.151604      | 502.269382        | 251.638329       |                    |                  | 4  |
| 8  | <b>1227.622427</b> | 614.314851      | 1210.595878       | 605.801577       | 1209.611862        | 605.309569       | L    | <b>359.265282</b>  | 180.136279      | 342.238733        | 171.623004       |                    |                  | 3  |
| 9  | 1326.690841        | 663.849058      | 1309.664292       | 655.335784       | 1308.680276        | 654.843776       | V    | <b>246.181218</b>  | 123.594247      | 229.154669        | 115.080973       |                    |                  | 2  |
| 10 |                    |                 |                   |                  |                    |                  | K    | <b>147.112804</b>  | 74.060040       | <b>130.086255</b> | 65.546765        |                    |                  | 1  |



NCBI BLAST search of **NQVSLTCLVK**

(Parameters: blastp, nr protein database, expect=20000, no filter, PAM30)

Other BLAST [web gateways](#)

## All matches to this query

| Score | Mr(calc):   | Delta     | Sequence                       |
|-------|-------------|-----------|--------------------------------|
| 51.3  | 1471.789093 | 0.010955  | <a href="#">NQVSLTCLVK</a>     |
| 5.9   | 1471.792908 | 0.007140  | <a href="#">NITINCVKGINAR</a>  |
| 4.4   | 1471.797592 | 0.002456  | <a href="#">KYFWDRAFLVK</a>    |
| 3.9   | 1471.803467 | -0.003419 | <a href="#">EKQGPLLDLFGQK</a>  |
| 0.2   | 1471.806793 | -0.006745 | <a href="#">AAALLAKQAEMEVK</a> |
| 0.1   | 1471.792221 | 0.007827  | <a href="#">NESIPLSPFEVK</a>   |



# MASCOT Search Results

## Peptide View

MS/MS Fragmentation of **EPQVYTLPPSR**

Found in **IGHG1\_HUMAN**, Ig gamma-1 chain C region OS=Homo sapiens GN=IGHG1 PE=1 SV=1

Match to Query 42103: 1596.834552 from(533.285460,3+) rtinseconds(1979) index(78345)

Title: Locus:1.1.1.2903.14 File:"2013-07-02 CLN FXIII 60 min 1st FT.wiff"

Data file C:\Program Files (x86)\Matrix Science\Mascot Daemon\mgf4 FXIII 60 min 1st\mascot\_daemon\_merge.mgf

Click mouse within plot area to zoom in by factor of two about that point

Or, Plot from  to  Da

Label all possible matches  Label matches used for scoring

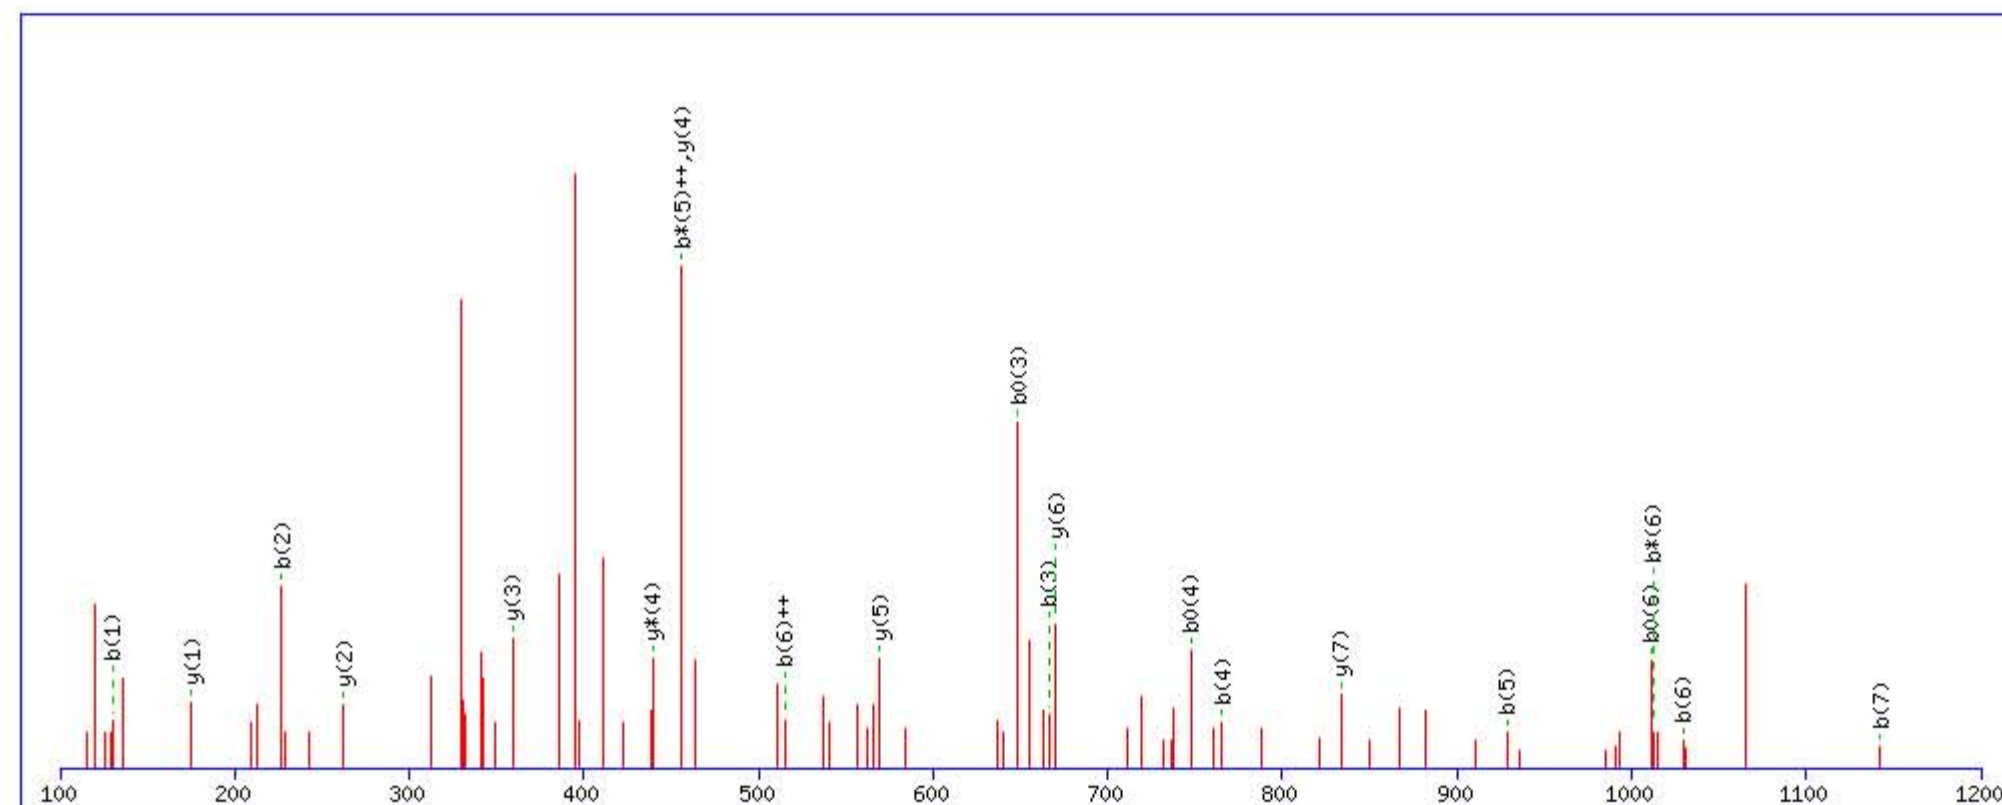

Monoisotopic mass of neutral peptide Mr(calc): 1596.833389

Fixed modifications: Carbamidomethyl (C) (apply to specified residues or termini only)

Variable modifications:

Q3 : Biotin:Thermo-21345 (Q)

Ions Score: 33 Expect: 0.0021

Matches : 21/114 fragment ions using 49 most intense peaks [\(help\)](#)

| #  | b           | b <sup>++</sup> | b <sup>*</sup> | b <sup>*++</sup> | b <sup>0</sup> | b <sup>0++</sup> | Seq. | y           | y <sup>++</sup> | y <sup>*</sup> | y <sup>*++</sup> | y <sup>0</sup> | y <sup>0++</sup> | #  |
|----|-------------|-----------------|----------------|------------------|----------------|------------------|------|-------------|-----------------|----------------|------------------|----------------|------------------|----|
| 1  | 130.049869  | 65.528572       |                |                  | 112.039304     | 56.523290        | E    |             |                 |                |                  |                |                  | 11 |
| 2  | 227.102633  | 114.054954      |                |                  | 209.092068     | 105.049672       | P    | 1468.798084 | 734.902680      | 1451.771535    | 726.389406       | 1450.787519    | 725.897398       | 10 |
| 3  | 666.327959  | 333.667618      | 649.301410     | 325.154343       | 648.317394     | 324.662335       | Q    | 1371.745320 | 686.376298      | 1354.718771    | 677.863024       | 1353.734755    | 677.371016       | 9  |
| 4  | 765.396373  | 383.201825      | 748.369824     | 374.688550       | 747.385808     | 374.196542       | V    | 932.519994  | 466.763635      | 915.493445     | 458.250361       | 914.509429     | 457.758353       | 8  |
| 5  | 928.459702  | 464.733489      | 911.433153     | 456.220215       | 910.449137     | 455.728207       | Y    | 833.451580  | 417.229428      | 816.425031     | 408.716154       | 815.441015     | 408.224146       | 7  |
| 6  | 1029.507381 | 515.257329      | 1012.480832    | 506.744054       | 1011.496816    | 506.252046       | T    | 670.388251  | 335.697764      | 653.361702     | 327.184489       | 652.377686     | 326.692481       | 6  |
| 7  | 1142.591445 | 571.799361      | 1125.564896    | 563.286086       | 1124.580880    | 562.794078       | L    | 569.340572  | 285.173924      | 552.314023     | 276.660650       | 551.330007     | 276.168642       | 5  |
| 8  | 1239.644209 | 620.325743      | 1222.617660    | 611.812468       | 1221.633644    | 611.320460       | P    | 456.256508  | 228.631892      | 439.229959     | 220.118618       | 438.245943     | 219.626610       | 4  |
| 9  | 1336.696973 | 668.852125      | 1319.670424    | 660.338850       | 1318.686408    | 659.846842       | P    | 359.203744  | 180.105510      | 342.177195     | 171.592236       | 341.193179     | 171.100228       | 3  |
| 10 | 1423.729001 | 712.368139      | 1406.702452    | 703.854864       | 1405.718436    | 703.362856       | S    | 262.150980  | 131.579128      | 245.124431     | 123.065854       | 244.140415     | 122.573846       | 2  |
| 11 |             |                 |                |                  |                |                  | R    | 175.118952  | 88.063114       | 158.092403     | 79.549839        |                |                  | 1  |



NCBI BLAST search of **EPQVYTLPPSR**

(Parameters: blastp, nr protein database, expect=20000, no filter, PAM30)

Other BLAST [web gateways](#)

All matches to this query

| Score | Mr(calc):   | Delta     | Sequence                        |
|-------|-------------|-----------|---------------------------------|
| 32.7  | 1596.833389 | 0.001163  | <a href="#">EPQVYTLPPSR</a>     |
| 4.2   | 1596.855850 | -0.021298 | <a href="#">MLLLTRSPTAWHR</a>   |
| 3.1   | 1596.825974 | 0.008578  | <a href="#">KLSLDLEAQWAPSPR</a> |

Mascot: <http://www.matrixscience.com/>



# MASCOT Search Results

## Peptide View

MS/MS Fragmentation of **VYACEVTHQGLSSPVTK**

Found in **IGKC\_HUMAN**, Ig kappa chain C region OS=Homo sapiens GN=IGKC PE=1 SV=1

Match to Query 57890: 2186.103162 from(729.708330,3+) rtinseconds(1772) index(76970)

Title: Locus:1.1.1.2831.21 File:"2013-07-02 CLN FXIII 60 min 1st FT.wiff"

Data file C:\Program Files (x86)\Matrix Science\Mascot Daemon\mgf\4 FXIII 60 min 1st\mascot\_daemon\_merge.mgf

Click mouse within plot area to zoom in by factor of two about that point

Or, Plot from  to  Da

Label all possible matches  Label matches used for scoring

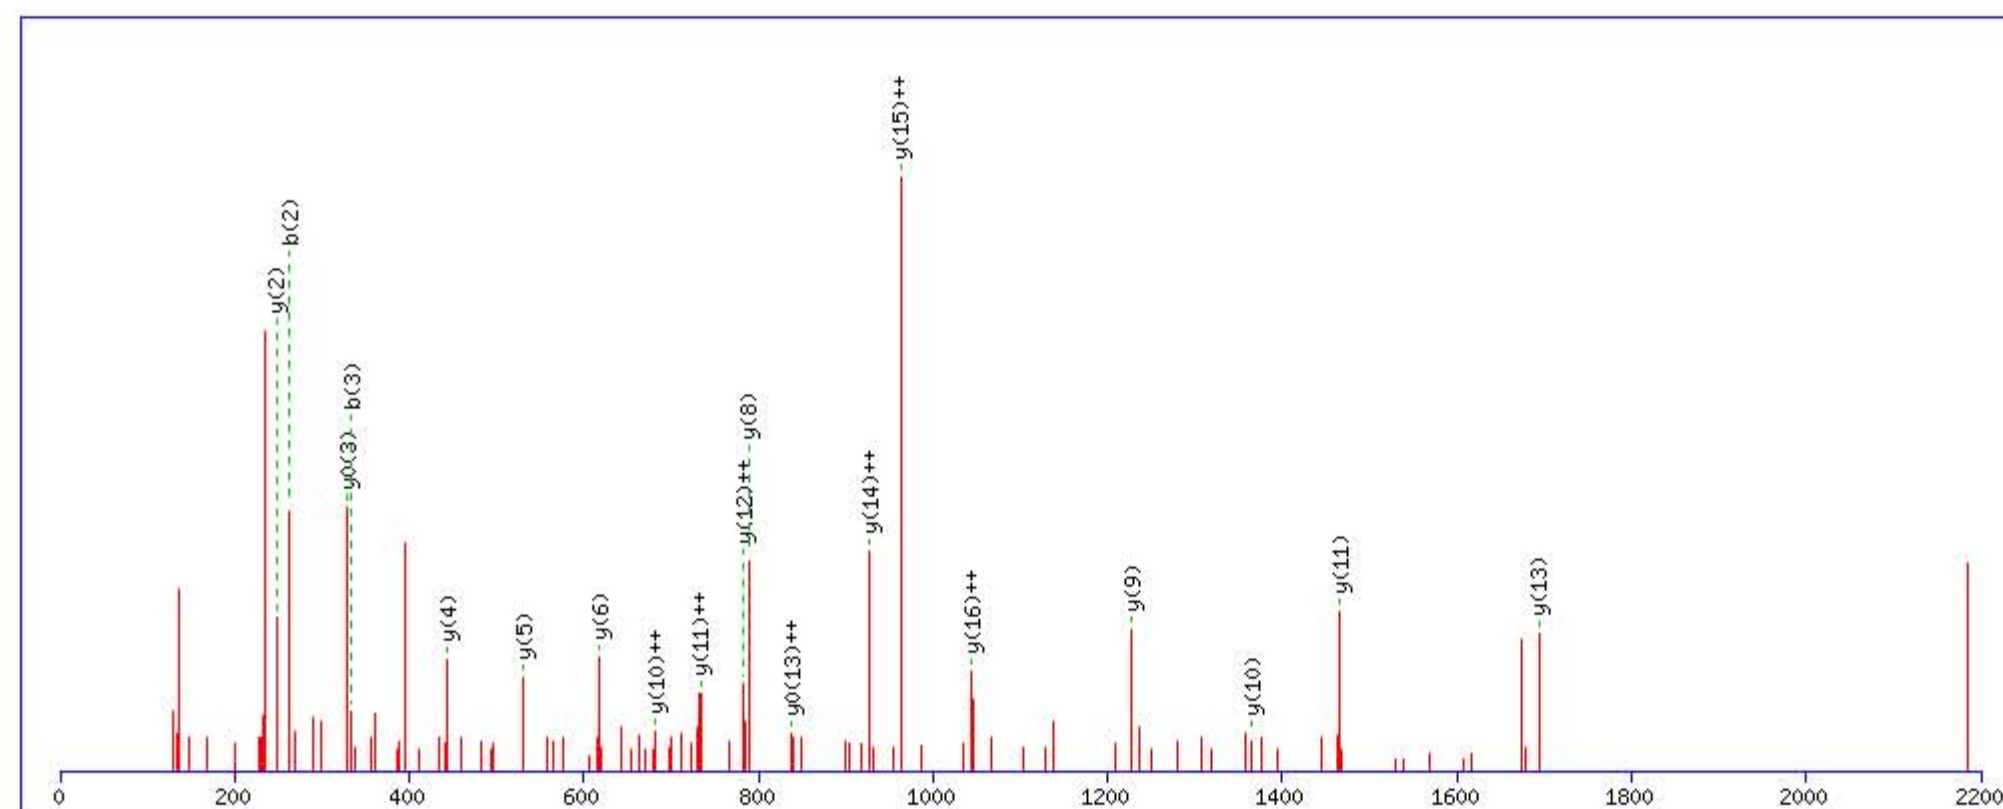

Monoisotopic mass of neutral peptide Mr(calc): 2186.086411

Fixed modifications: Carbamidomethyl (C) (apply to specified residues or termini only)

Variable modifications:

Q9 : Biotin:Thermo-21345 (Q)

Ions Score: 41 Expect: 0.0021

Matches : 19/166 fragment ions using 48 most intense peaks [\(help\)](#)

| #  | b                 | b <sup>++</sup> | b <sup>*</sup> | b <sup>*++</sup> | b <sup>0</sup> | b <sup>0++</sup> | Seq. | y                  | y <sup>++</sup>    | y <sup>*</sup> | y <sup>*++</sup> | y <sup>0</sup>    | y <sup>0++</sup>  | #  |
|----|-------------------|-----------------|----------------|------------------|----------------|------------------|------|--------------------|--------------------|----------------|------------------|-------------------|-------------------|----|
| 1  | 100.075690        | 50.541483       |                |                  |                |                  | V    |                    |                    |                |                  |                   |                   | 17 |
| 2  | <b>263.139019</b> | 132.073148      |                |                  |                |                  | Y    | 2088.025261        | <b>1044.516268</b> | 2070.998712    | 1036.002994      | 2070.014696       | 1035.510986       | 16 |
| 3  | <b>334.176133</b> | 167.591704      |                |                  |                |                  | A    | 1924.961932        | <b>962.984604</b>  | 1907.935383    | 954.471330       | 1906.951367       | 953.979322        | 15 |
| 4  | 494.206782        | 247.607029      |                |                  |                |                  | C    | 1853.924818        | <b>927.466047</b>  | 1836.898269    | 918.952773       | 1835.914253       | 918.460765        | 14 |
| 5  | 623.249375        | 312.128326      |                |                  | 605.238810     | 303.123043       | E    | <b>1693.894169</b> | 847.450723         | 1676.867620    | 838.937448       | 1675.883604       | <b>838.445440</b> | 13 |
| 6  | 722.317789        | 361.662533      |                |                  | 704.307224     | 352.657250       | V    | 1564.851576        | <b>782.929426</b>  | 1547.825027    | 774.416152       | 1546.841011       | 773.924144        | 12 |
| 7  | 823.365468        | 412.186372      |                |                  | 805.354903     | 403.181090       | T    | <b>1465.783162</b> | <b>733.395219</b>  | 1448.756613    | 724.881945       | 1447.772597       | 724.389937        | 11 |
| 8  | 960.424380        | 480.715828      |                |                  | 942.413815     | 471.710546       | H    | <b>1364.735483</b> | <b>682.871380</b>  | 1347.708934    | 674.358105       | 1346.724918       | 673.866097        | 10 |
| 9  | 1399.649706       | 700.328491      | 1382.623157    | 691.815217       | 1381.639141    | 691.323208       | Q    | <b>1227.676571</b> | 614.341924         | 1210.650022    | 605.828649       | 1209.666006       | 605.336641        | 9  |
| 10 | 1456.671170       | 728.839223      | 1439.644621    | 720.325948       | 1438.660605    | 719.833940       | G    | <b>788.451245</b>  | 394.729261         | 771.424696     | 386.215986       | 770.440680        | 385.723978        | 8  |
| 11 | 1569.755234       | 785.381255      | 1552.728685    | 776.867980       | 1551.744669    | 776.375972       | L    | 731.429781         | 366.218529         | 714.403232     | 357.705254       | 713.419216        | 357.213246        | 7  |
| 12 | 1656.787262       | 828.897269      | 1639.760713    | 820.383994       | 1638.776697    | 819.891986       | S    | <b>618.345717</b>  | 309.676497         | 601.319168     | 301.163222       | 600.335152        | 300.671214        | 6  |
| 13 | 1743.819290       | 872.413283      | 1726.792741    | 863.900009       | 1725.808725    | 863.408000       | S    | <b>531.313689</b>  | 266.160483         | 514.287140     | 257.647208       | 513.303124        | 257.155200        | 5  |
| 14 | 1840.872054       | 920.939665      | 1823.845505    | 912.426391       | 1822.861489    | 911.934382       | P    | <b>444.281661</b>  | 222.644469         | 427.255112     | 214.131194       | 426.271096        | 213.639186        | 4  |
| 15 | 1939.940468       | 970.473872      | 1922.913919    | 961.960598       | 1921.929903    | 961.468590       | V    | 347.228897         | 174.118087         | 330.202348     | 165.604812       | <b>329.218332</b> | 165.112804        | 3  |
| 16 | 2040.988147       | 1020.997712     | 2023.961598    | 1012.484437      | 2022.977582    | 1011.992429      | T    | <b>248.160483</b>  | 124.583880         | 231.133934     | 116.070605       | 230.149918        | 115.578597        | 2  |
| 17 |                   |                 |                |                  |                |                  | K    | 147.112804         | 74.060040          | 130.086255     | 65.546766        |                   |                   | 1  |

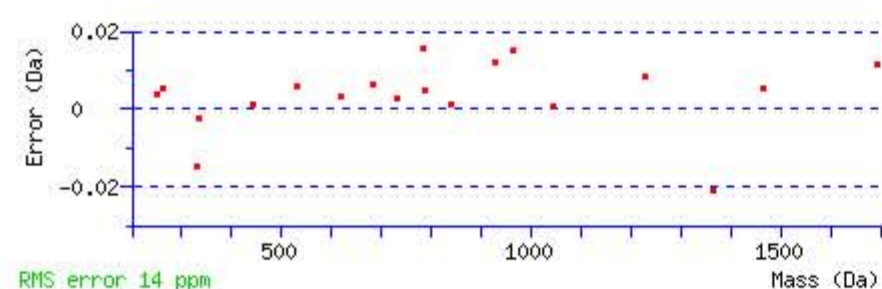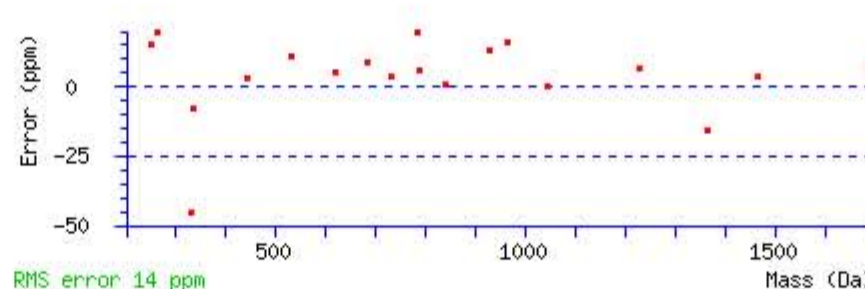

NCBI BLAST search of **VYACEVTHQGLSSPVTK**

(Parameters: blastp, nr protein database, expect=20000, no filter, PAM30)

Other BLAST [web gateways](#)

All matches to this query

| Score | Mr(calc):   | Delta    | Sequence                          |
|-------|-------------|----------|-----------------------------------|
| 41.5  | 2186.086411 | 0.016751 | <a href="#">VYACEVTHQGLSSPVTK</a> |

Mascot: <http://www.matrixscience.com/>



# MASCOT Search Results

## Peptide View

MS/MS Fragmentation of **TVAAPSVFIFPPSDEQLK**  
 Found in **IGKC\_HUMAN**, Ig kappa chain C region OS=Homo sapiens GN=IGKC PE=1 SV=1

Match to Query 59485: 2256.210732 from(753.077520,3+) rtinseconds(2651) index(82598)  
 Title: Locus:1.1.1.3137.14 File:"2013-07-02 CLN FXIII 60 min 1st FT.wiff"  
 Data file C:\Program Files (x86)\Matrix Science\Mascot Daemon\mgf4 FXIII 60 min 1st\mascot\_daemon\_merge.mgf

Click mouse within plot area to zoom in by factor of two about that point  
 Or, Plot from  to  Da   
 Label all possible matches  Label matches used for scoring

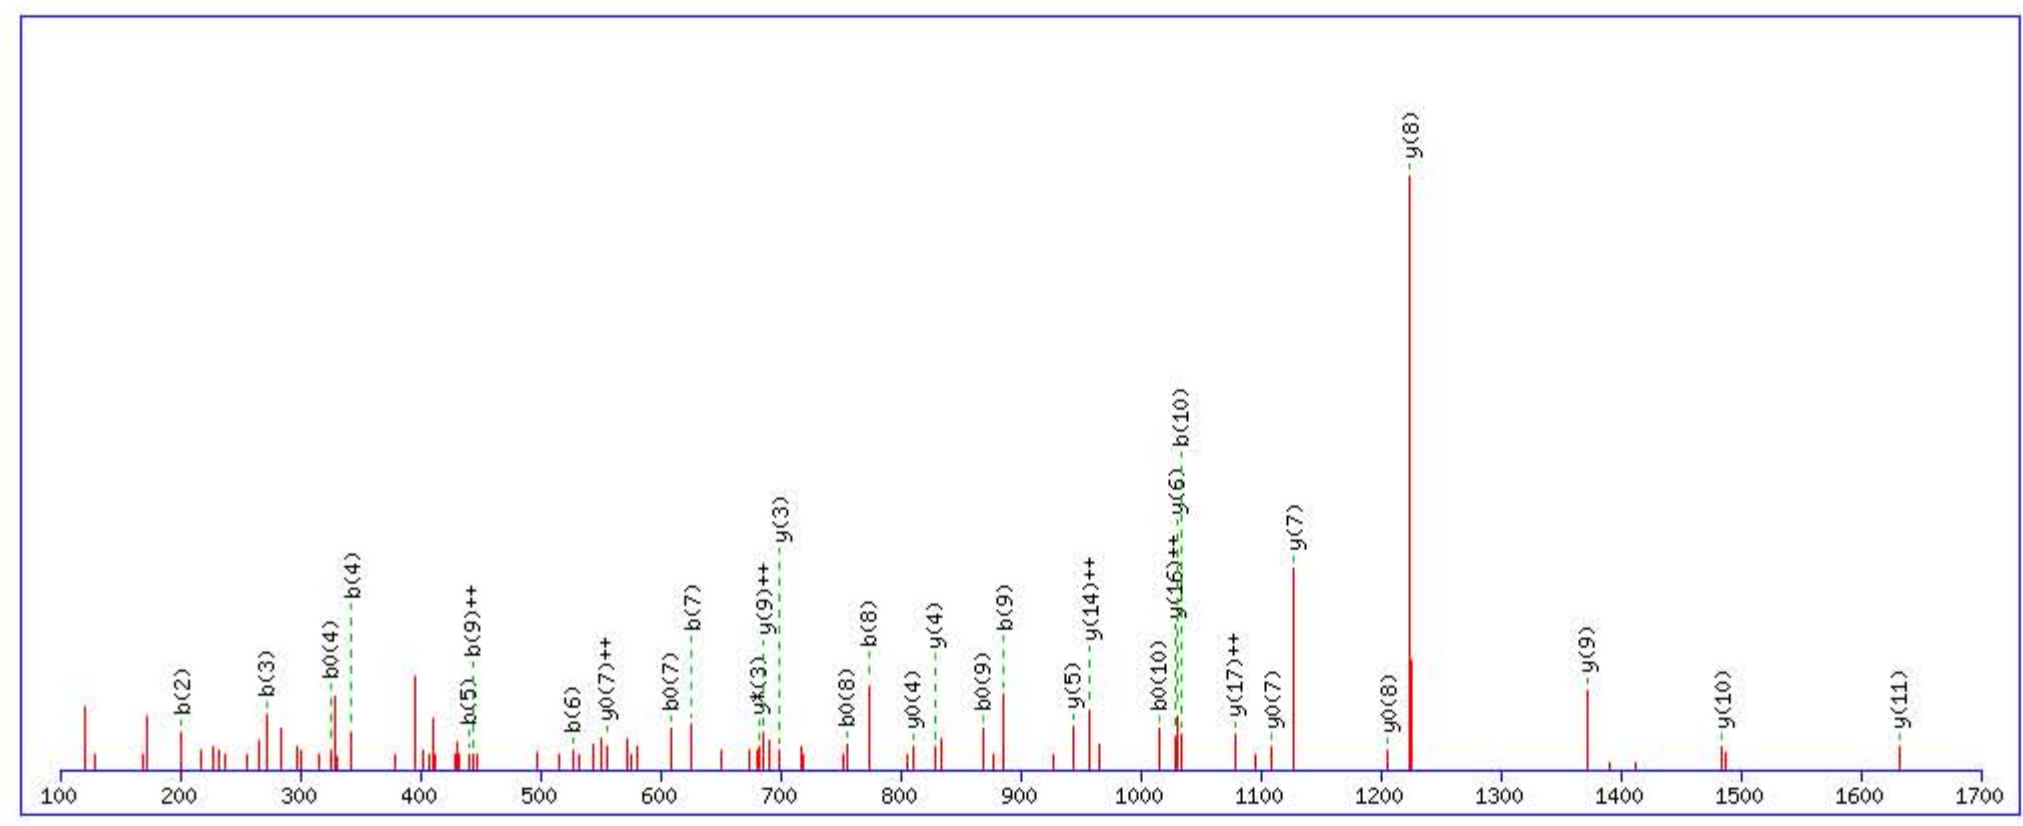

Monoisotopic mass of neutral peptide Mr(calc): 2256.186432  
 Fixed modifications: Carbamidomethyl (C) (apply to specified residues or termini only)  
 Variable modifications:  
 Q16 : Biotin:Thermo-21345 (Q)  
 Ions Score: 45 Expect: 0.00058  
 Matches : 33/168 fragment ions using 76 most intense peaks [\(help\)](#)

| #  | b                  | b <sup>++</sup>   | b <sup>*</sup> | b <sup>+++</sup> | b <sup>0</sup>     | b <sup>0++</sup> | Seq. | y                  | y <sup>++</sup>    | y <sup>*</sup>    | y <sup>+++</sup> | y <sup>0</sup>     | y <sup>0++</sup>  | #  |
|----|--------------------|-------------------|----------------|------------------|--------------------|------------------|------|--------------------|--------------------|-------------------|------------------|--------------------|-------------------|----|
| 1  | 102.054955         | 51.531116         |                |                  | 84.044390          | 42.525833        | T    |                    |                    |                   |                  |                    |                   | 18 |
| 2  | <b>201.123369</b>  | 101.065322        |                |                  | 183.112804         | 92.060040        | V    | 2156.146026        | <b>1078.576651</b> | 2139.119477       | 1070.063377      | 2138.135461        | 1069.571369       | 17 |
| 3  | <b>272.160483</b>  | 136.583879        |                |                  | 254.149918         | 127.578597       | A    | 2057.077612        | <b>1029.042444</b> | 2040.051063       | 1020.529170      | 2039.067047        | 1020.037162       | 16 |
| 4  | <b>343.197597</b>  | 172.102437        |                |                  | <b>325.187032</b>  | 163.097154       | A    | 1986.040498        | 993.523887         | 1969.013949       | 985.010613       | 1968.029933        | 984.518605        | 15 |
| 5  | <b>440.250361</b>  | 220.628819        |                |                  | 422.239796         | 211.623536       | P    | 1915.003384        | <b>958.005330</b>  | 1897.976835       | 949.492056       | 1896.992819        | 949.000048        | 14 |
| 6  | <b>527.282389</b>  | 264.144833        |                |                  | 509.271824         | 255.139550       | S    | 1817.950620        | 909.478948         | 1800.924071       | 900.965674       | 1799.940055        | 900.473666        | 13 |
| 7  | <b>626.350803</b>  | 313.679040        |                |                  | <b>608.340238</b>  | 304.673757       | V    | 1730.918592        | 865.962934         | 1713.892043       | 857.449660       | 1712.908027        | 856.957652        | 12 |
| 8  | <b>773.419217</b>  | 387.213247        |                |                  | <b>755.408652</b>  | 378.207964       | F    | <b>1631.850178</b> | 816.428727         | 1614.823629       | 807.915453       | 1613.839613        | 807.423445        | 11 |
| 9  | <b>886.503281</b>  | <b>443.755279</b> |                |                  | <b>868.492716</b>  | 434.749996       | I    | <b>1484.781764</b> | 742.894520         | 1467.755215       | 734.381246       | 1466.771199        | 733.889238        | 10 |
| 10 | <b>1033.571695</b> | 517.289486        |                |                  | <b>1015.561130</b> | 508.284203       | F    | <b>1371.697700</b> | <b>686.352488</b>  | 1354.671151       | 677.839214       | 1353.687135        | 677.347206        | 9  |
| 11 | 1130.624459        | 565.815868        |                |                  | 1112.613894        | 556.810585       | P    | <b>1224.629286</b> | 612.818281         | 1207.602737       | 604.305007       | <b>1206.618721</b> | 603.812999        | 8  |
| 12 | 1227.677223        | 614.342250        |                |                  | 1209.666658        | 605.336967       | P    | <b>1127.576522</b> | 564.291899         | 1110.549973       | 555.778625       | <b>1109.565957</b> | <b>555.286617</b> | 7  |
| 13 | 1314.709251        | 657.858264        |                |                  | 1296.698686        | 648.852981       | S    | <b>1030.523758</b> | 515.765517         | 1013.497209       | 507.252243       | 1012.513193        | 506.760235        | 6  |
| 14 | 1429.736194        | 715.371735        |                |                  | 1411.725629        | 706.366453       | D    | <b>943.491730</b>  | 472.249503         | 926.465181        | 463.736229       | 925.481165         | 463.244221        | 5  |
| 15 | 1558.778787        | 779.893032        |                |                  | 1540.768222        | 770.887749       | E    | <b>828.464787</b>  | 414.736032         | 811.438238        | 406.222757       | <b>810.454222</b>  | 405.730749        | 4  |
| 16 | 1998.004113        | 999.505695        | 1980.977564    | 990.992420       | 1979.993548        | 990.500412       | Q    | <b>699.422194</b>  | 350.214735         | <b>682.395645</b> | 341.701461       |                    |                   | 3  |
| 17 | 2111.088177        | 1056.047727       | 2094.061628    | 1047.534452      | 2093.077612        | 1047.042444      | L    | 260.196868         | 130.602072         | 243.170319        | 122.088798       |                    |                   | 2  |
| 18 |                    |                   |                |                  |                    |                  | K    | 147.112804         | 74.060040          | 130.086255        | 65.546765        |                    |                   | 1  |

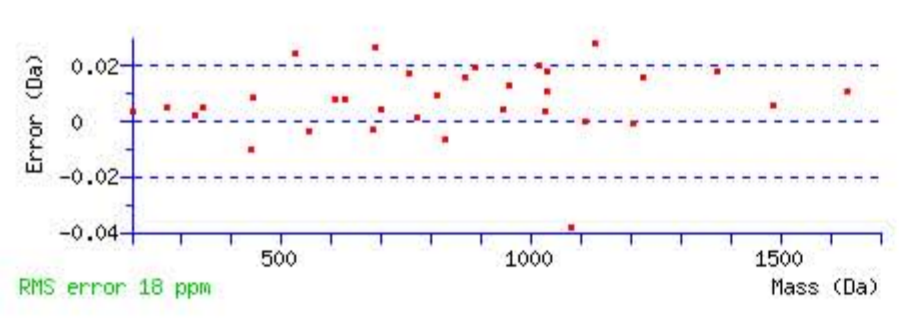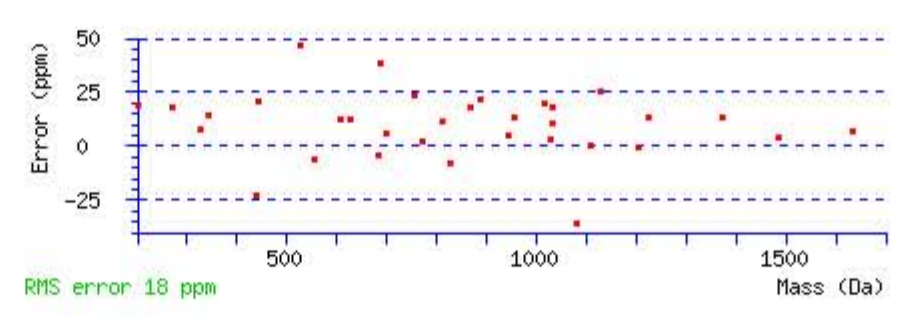

NCBI BLAST search of [TVAAPSVFIFPPSDEQLK](#)  
 (Parameters: blastp, nr protein database, expect=20000, no filter, PAM30)  
 Other BLAST [web gateways](#)

### All matches to this query

| Score | Mr(calc):   | Delta    | Sequence                           |
|-------|-------------|----------|------------------------------------|
| 45.4  | 2256.186432 | 0.024300 | <a href="#">TVAAPSVFIFPPSDEQLK</a> |



# MASCOT SCIENCE Mascot Search Results

## Peptide View

MS/MS Fragmentation of **LICQATGFSPR**

Found in **IGHM\_HUMAN**, Ig mu chain C region OS=Homo sapiens GN=IGHM PE=1 SV=3

Match to Query 40173: 1559.805448 from(780.910000,2+) rtinseconds(1969) index(41950)  
 Title: Locus:1.1.1.2969.9 File:"2013-07-02 CLN FXIII 60 min 1st F 3.wiff"

Data file C:\Program Files (x86)\Matrix Science\Mascot Daemon\mgf4 FXIII 60 min 1st\mascot\_daemon\_merge.mgf

Click mouse within plot area to zoom in by factor of two about that point

Or, Plot from  to  Da

Label all possible matches  Label matches used for scoring

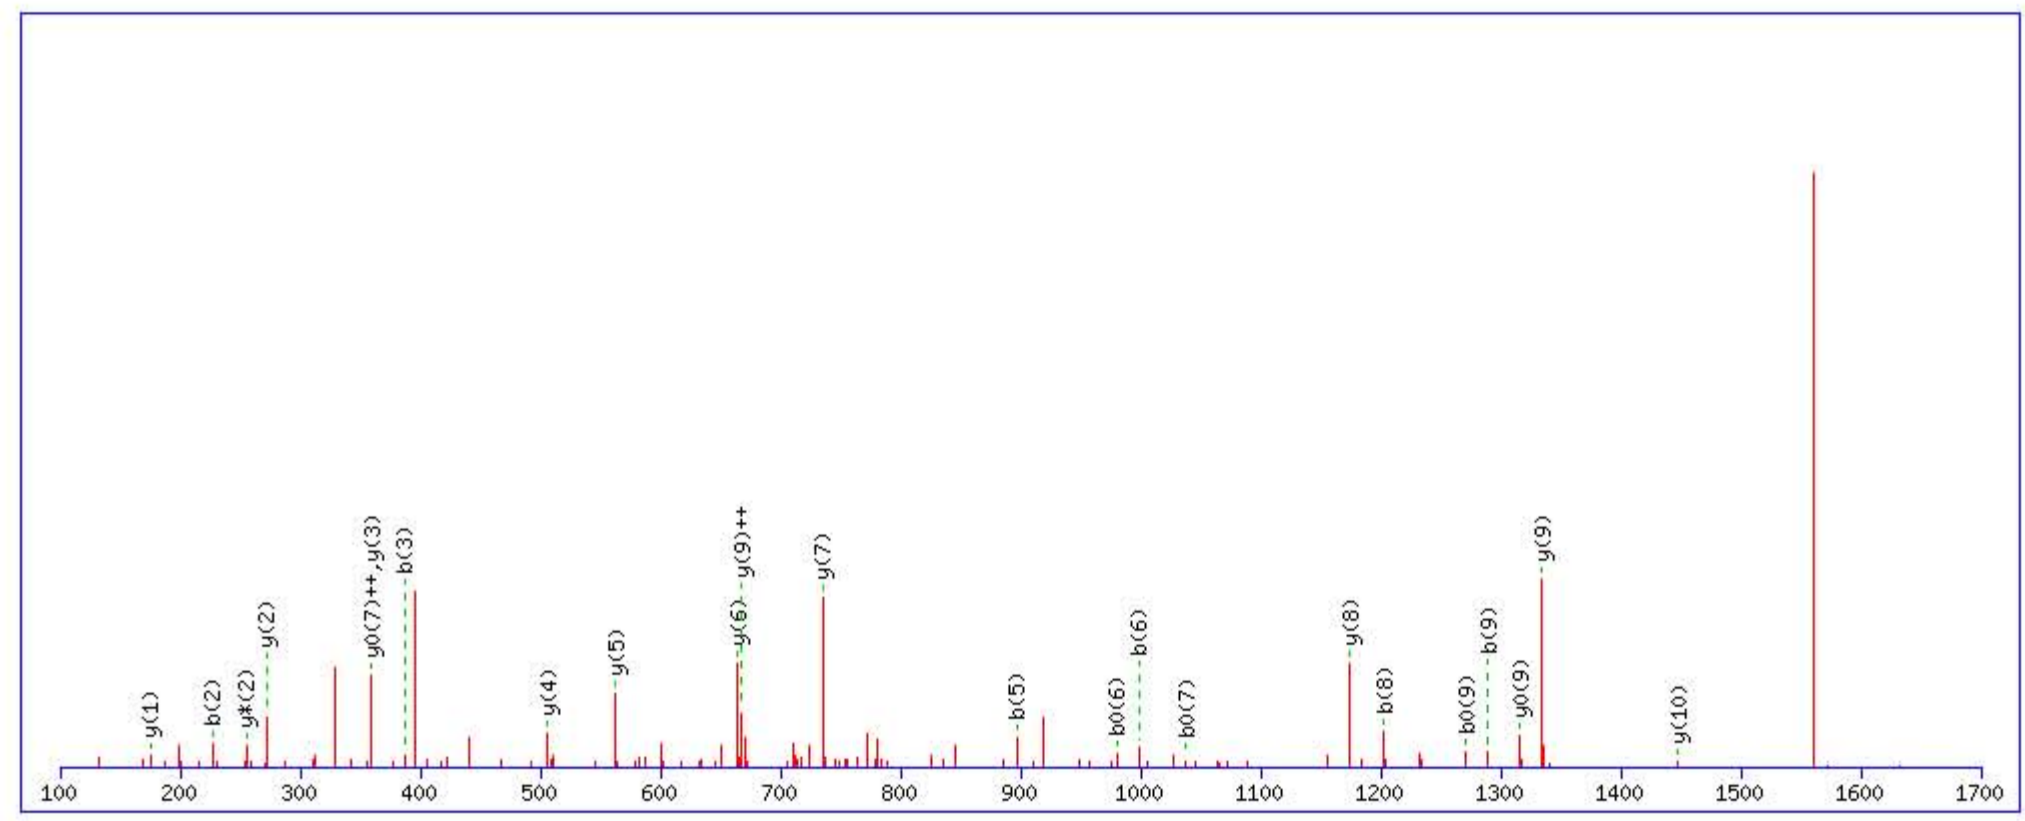

Monoisotopic mass of neutral peptide Mr(calc): 1559.795242

Fixed modifications: Carbamidomethyl (C) (apply to specified residues or termini only)

Variable modifications:

Q4 : Biotin:Thermo-21345 (Q)

Ions Score: 64 Expect: 6e-006

Matches : 23/100 fragment ions using 40 most intense peaks [\(help\)](#)

| #  | b                  | b <sup>++</sup> | b <sup>*</sup> | b <sup>***</sup> | b <sup>0</sup>     | b <sup>0++</sup> | Seq. | y                  | y <sup>++</sup>   | y <sup>*</sup>    | y <sup>***</sup> | y <sup>0</sup>     | y <sup>0++</sup>  | #  |
|----|--------------------|-----------------|----------------|------------------|--------------------|------------------|------|--------------------|-------------------|-------------------|------------------|--------------------|-------------------|----|
| 1  | 114.091340         | 57.549308       |                |                  |                    |                  | L    |                    |                   |                   |                  |                    |                   | 11 |
| 2  | <b>227.175404</b>  | 114.091340      |                |                  |                    |                  | I    | <b>1447.718454</b> | 724.362865        | 1430.691905       | 715.849591       | 1429.707889        | 715.357583        | 10 |
| 3  | <b>387.206053</b>  | 194.106664      |                |                  |                    |                  | C    | <b>1334.634390</b> | <b>667.820833</b> | 1317.607841       | 659.307559       | <b>1316.623825</b> | 658.815551        | 9  |
| 4  | 826.431379         | 413.719328      | 809.404830     | 405.206053       |                    |                  | Q    | <b>1174.603741</b> | 587.805509        | 1157.577192       | 579.292234       | 1156.593176        | 578.800226        | 8  |
| 5  | <b>897.468493</b>  | 449.237885      | 880.441944     | 440.724610       |                    |                  | A    | <b>735.378415</b>  | 368.192846        | 718.351866        | 359.679571       | 717.367850         | <b>359.187563</b> | 7  |
| 6  | <b>998.516172</b>  | 499.761724      | 981.489623     | 491.248449       | <b>980.505607</b>  | 490.756441       | T    | <b>664.341301</b>  | 332.674289        | 647.314752        | 324.161014       | 646.330736         | 323.669006        | 6  |
| 7  | 1055.537636        | 528.272456      | 1038.511087    | 519.759182       | <b>1037.527071</b> | 519.267174       | G    | <b>563.293622</b>  | 282.150449        | 546.267073        | 273.637175       | 545.283057         | 273.145167        | 5  |
| 8  | <b>1202.606050</b> | 601.806663      | 1185.579501    | 593.293389       | 1184.595485        | 592.801381       | F    | <b>506.272158</b>  | 253.639717        | 489.245609        | 245.126443       | 488.261593         | 244.634435        | 4  |
| 9  | <b>1289.638078</b> | 645.322677      | 1272.611529    | 636.809403       | <b>1271.627513</b> | 636.317395       | S    | <b>359.203744</b>  | 180.105510        | 342.177195        | 171.592236       | 341.193179         | 171.100228        | 3  |
| 10 | 1386.690842        | 693.849059      | 1369.664293    | 685.335785       | 1368.680277        | 684.843777       | P    | <b>272.171716</b>  | 136.589496        | <b>255.145167</b> | 128.076221       |                    |                   | 2  |
| 11 |                    |                 |                |                  |                    |                  | R    | <b>175.118952</b>  | 88.063114         | 158.092403        | 79.549839        |                    |                   | 1  |

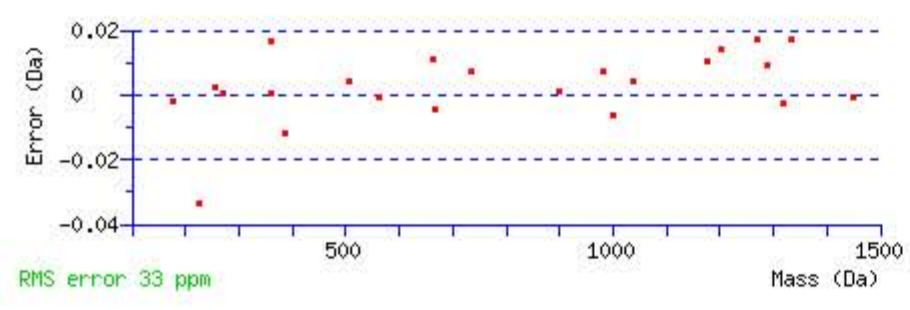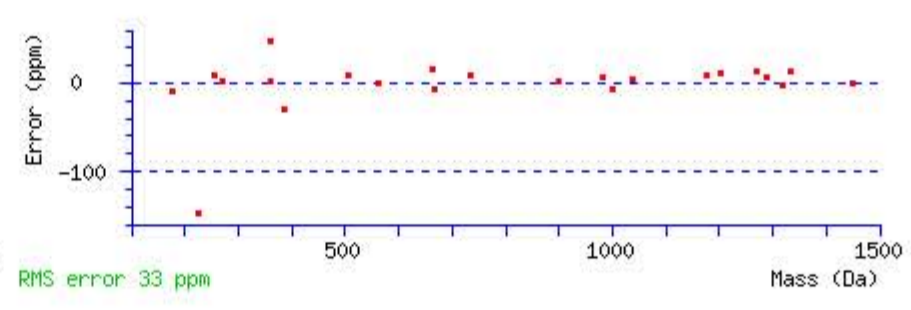

NCBI BLAST search of **LICQATGFSPR**

(Parameters: blastp, nr protein database, expect=20000, no filter, PAM30)

Other BLAST [web gateways](#)

### All matches to this query

| Score | Mr(calc):   | Delta     | Sequence                       |
|-------|-------------|-----------|--------------------------------|
| 64.3  | 1559.795242 | 0.010206  | <a href="#">LICQATGFSPR</a>    |
| 8.3   | 1559.808960 | -0.003512 | <a href="#">LDRLSGLADQMVAR</a> |
| 7.7   | 1559.820190 | -0.014742 | <a href="#">MTRSATQAAKQVPR</a> |
| 3.0   | 1559.812943 | -0.007495 | <a href="#">EPMNIYNLNAIR</a>   |



# MASCOT Search Results

## Peptide View

MS/MS Fragmentation of **YAATSQVLLPSK**

Found in **IGHM\_HUMAN**, Ig mu chain C region OS=Homo sapiens GN=IGHM PE=1 SV=3

Match to Query 41545: 1587.883468 from(794.949010,2+) rtinseconds(2020) index(42255)

Title: Locus:1.1.1.2987.16 File:"2013-07-02 CLN FXIII 60 min 1st F 3.wiff"

Data file C:\Program Files (x86)\Matrix Science\Mascot Daemon\mgf\4 FXIII 60 min 1st\mascot\_daemon\_merge.mgf

Click mouse within plot area to zoom in by factor of two about that point

Or, Plot from  to  Da

Label all possible matches  Label matches used for scoring

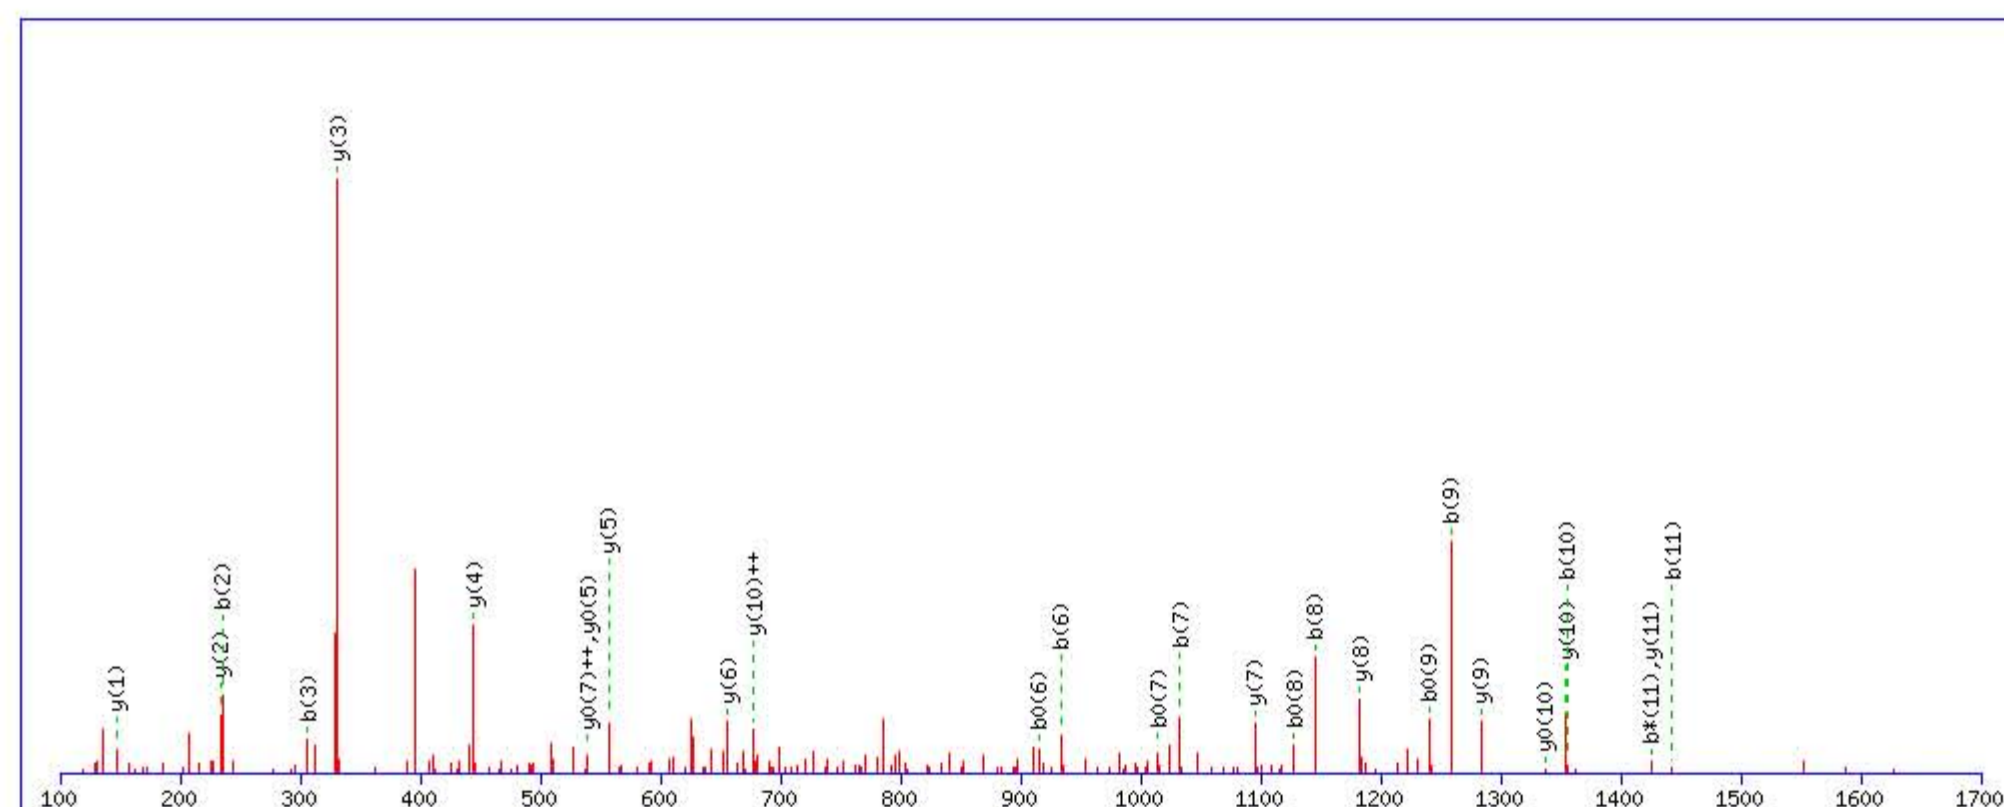

Monoisotopic mass of neutral peptide Mr(calc): 1587.869431

Fixed modifications: Carbamidomethyl (C) (apply to specified residues or termini only)

Variable modifications:

Q6 : Biotin:Thermo-21345 (Q)

Ions Score: 81 Expect: 1.6e-007

Matches : 28/114 fragment ions using 43 most intense peaks [\(help\)](#)

| #  | b                  | b <sup>++</sup> | b <sup>*</sup>     | b <sup>+++</sup> | b <sup>0</sup>     | b <sup>0++</sup> | Seq. | y                  | y <sup>++</sup>   | y <sup>*</sup> | y <sup>+++</sup> | y <sup>0</sup>     | y <sup>0++</sup>  | #  |
|----|--------------------|-----------------|--------------------|------------------|--------------------|------------------|------|--------------------|-------------------|----------------|------------------|--------------------|-------------------|----|
| 1  | 164.070605         | 82.538940       |                    |                  |                    |                  | Y    |                    |                   |                |                  |                    |                   | 12 |
| 2  | <b>235.107719</b>  | 118.057498      |                    |                  |                    |                  | A    | <b>1425.813399</b> | 713.410337        | 1408.786850    | 704.897063       | 1407.802834        | 704.405055        | 11 |
| 3  | <b>306.144833</b>  | 153.576055      |                    |                  |                    |                  | A    | <b>1354.776285</b> | <b>677.891780</b> | 1337.749736    | 669.378506       | <b>1336.765720</b> | 668.886498        | 10 |
| 4  | 407.192512         | 204.099894      |                    |                  | 389.181947         | 195.094612       | T    | <b>1283.739171</b> | 642.373223        | 1266.712622    | 633.859949       | 1265.728606        | 633.367941        | 9  |
| 5  | 494.224540         | 247.615908      |                    |                  | 476.213975         | 238.610626       | S    | <b>1182.691492</b> | 591.849384        | 1165.664943    | 583.336110       | 1164.680927        | 582.844101        | 8  |
| 6  | <b>933.449866</b>  | 467.228571      | 916.423317         | 458.715297       | <b>915.439301</b>  | 458.223289       | Q    | <b>1095.659464</b> | 548.333370        | 1078.632915    | 539.820096       | 1077.648899        | <b>539.328088</b> | 7  |
| 7  | <b>1032.518280</b> | 516.762778      | 1015.491731        | 508.249504       | <b>1014.507715</b> | 507.757496       | V    | <b>656.434138</b>  | 328.720707        | 639.407589     | 320.207432       | 638.423573         | 319.715424        | 6  |
| 8  | <b>1145.602344</b> | 573.304810      | 1128.575795        | 564.791536       | <b>1127.591779</b> | 564.299527       | L    | <b>557.365724</b>  | 279.186500        | 540.339175     | 270.673226       | <b>539.355159</b>  | 270.181218        | 5  |
| 9  | <b>1258.686408</b> | 629.846842      | 1241.659859        | 621.333567       | <b>1240.675843</b> | 620.841559       | L    | <b>444.281660</b>  | 222.644468        | 427.255111     | 214.131193       | 426.271095         | 213.639186        | 4  |
| 10 | <b>1355.739172</b> | 678.373224      | 1338.712623        | 669.859949       | 1337.728607        | 669.367941       | P    | <b>331.197596</b>  | 166.102436        | 314.171047     | 157.589162       | 313.187031         | 157.097154        | 3  |
| 11 | <b>1442.771200</b> | 721.889238      | <b>1425.744651</b> | 713.375964       | 1424.760635        | 712.883955       | S    | <b>234.144832</b>  | 117.576054        | 217.118283     | 109.062780       | 216.134267         | 108.570772        | 2  |
| 12 |                    |                 |                    |                  |                    |                  | K    | <b>147.112804</b>  | 74.060040         | 130.086255     | 65.546765        |                    |                   | 1  |

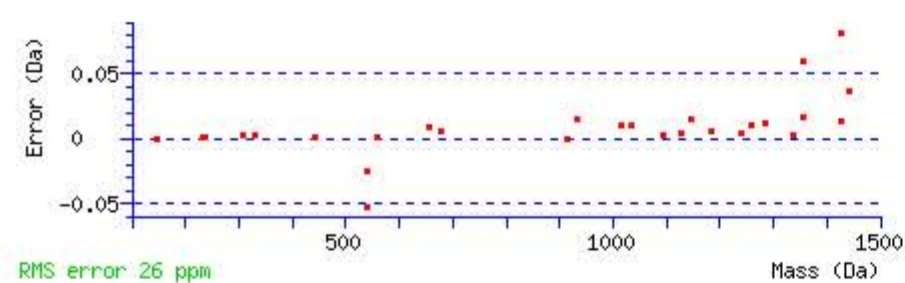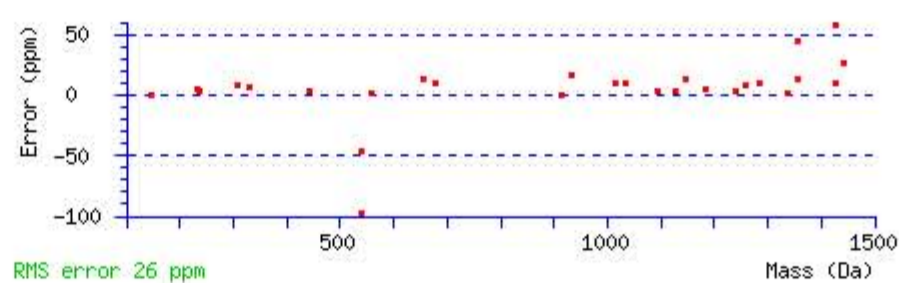

NCBI BLAST search of **YAATSQVLLPSK**

(Parameters: blastp, nr protein database, expect=20000, no filter, PAM30)

Other BLAST [web gateways](#)

All matches to this query

| Score | Mr(calc):   | Delta     | Sequence                        |
|-------|-------------|-----------|---------------------------------|
| 80.5  | 1587.869431 | 0.014037  | <a href="#">YAATSQVLLPSK</a>    |
| 14.5  | 1587.862045 | 0.021423  | <a href="#">VTGQNQEQFLLAK</a>   |
| 9.0   | 1587.865402 | 0.018066  | <a href="#">ENGLRDILAVLTMK</a>  |
| 7.0   | 1587.890533 | -0.007065 | <a href="#">EPTTKAEMLKIIISK</a> |
| 6.3   | 1587.891220 | -0.007752 | <a href="#">TIQTIVFLYSLYK</a>   |
| 5.2   | 1587.862030 | 0.021438  | <a href="#">EDAKLSFKHVSSLK</a>  |
| 5.1   | 1587.862045 | 0.021423  | <a href="#">DGASLSPATLFIQIR</a> |
| 2.6   | 1587.862045 | 0.021423  | <a href="#">SKDLTAADVVKQWK</a>  |
| 2.3   | 1587.870773 | 0.012695  | <a href="#">FSWMKLLAHKVGR</a>   |
| 2.1   | 1587.873276 | 0.010192  | <a href="#">DLLTGEQFIQLRR</a>   |



# MASCOT Search Results

## Peptide View

MS/MS Fragmentation of **YVTSAPMPEPQAPGR**

Found in **IGHM\_HUMAN**, Ig mu chain C region OS=Homo sapiens GN=IGHM PE=1 SV=3

Match to Query 50875: 1910.940228 from(956.477390,2+) rtinseconds(1851) index(41009)

Title: Locus:1.1.1.2928.22 File:"2013-07-02 CLN FXIII 60 min 1st F 3.wiff"

Data file C:\Program Files (x86)\Matrix Science\Mascot Daemon\mgf4 FXIII 60 min 1st\mascot\_daemon\_merge.mgf

Click mouse within plot area to zoom in by factor of two about that point

Or, Plot from  to  Da

Label all possible matches  Label matches used for scoring

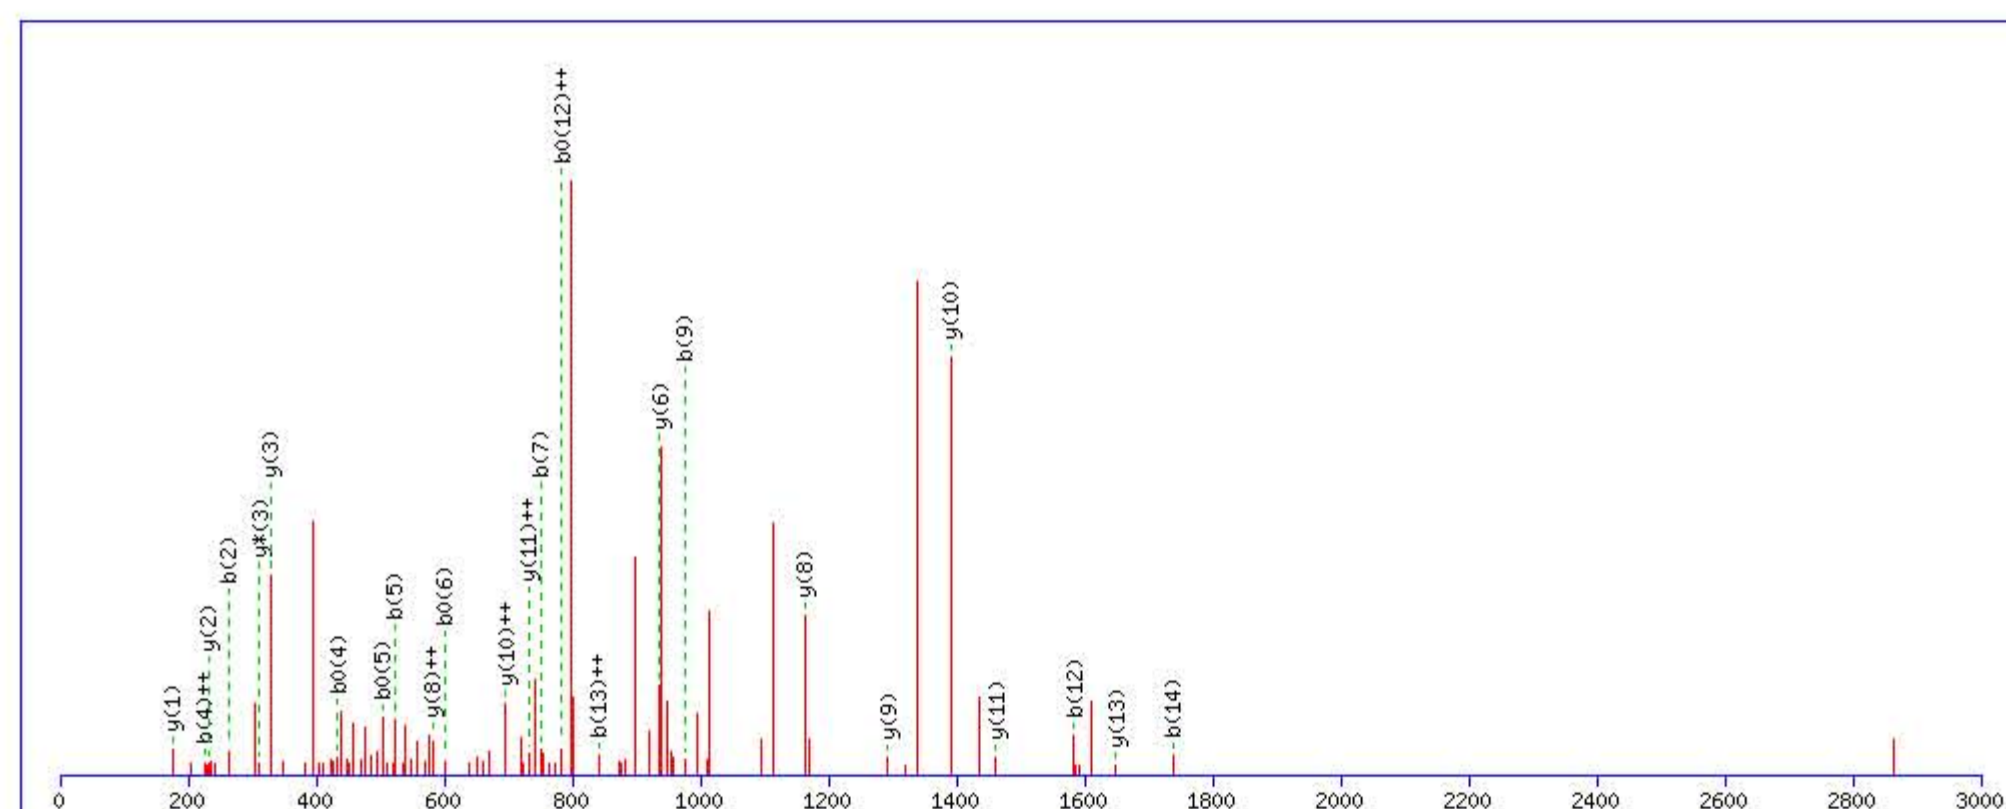

Monoisotopic mass of neutral peptide Mr(calc): 1910.938263

Fixed modifications: Carbamidomethyl (C) (apply to specified residues or termini only)

Variable modifications:

Q11 : Biotin:Thermo-21345 (Q)

Ions Score: 32 Expect: 0.053

Matches : 25/132 fragment ions using 69 most intense peaks [\(help\)](#)

| #  | b                  | b <sup>++</sup>   | b <sup>+</sup> | b <sup>+++</sup> | b <sup>0</sup>    | b <sup>0++</sup>  | Seq. | y                  | y <sup>++</sup>   | y <sup>*</sup>    | y <sup>+++</sup> | y <sup>0</sup> | y <sup>0++</sup> | #  |
|----|--------------------|-------------------|----------------|------------------|-------------------|-------------------|------|--------------------|-------------------|-------------------|------------------|----------------|------------------|----|
| 1  | 164.070605         | 82.538940         |                |                  |                   |                   | Y    |                    |                   |                   |                  |                |                  | 15 |
| 2  | <b>263.139019</b>  | 132.073148        |                |                  |                   |                   | V    | 1748.882225        | 874.944750        | 1731.855676       | 866.431476       | 1730.871660    | 865.939468       | 14 |
| 3  | 364.186698         | 182.596987        |                |                  | 346.176133        | 173.591705        | T    | <b>1649.813811</b> | 825.410543        | 1632.787262       | 816.897269       | 1631.803246    | 816.405261       | 13 |
| 4  | 451.218726         | <b>226.113001</b> |                |                  | <b>433.208161</b> | 217.107719        | S    | 1548.766132        | 774.886704        | 1531.739583       | 766.373430       | 1530.755567    | 765.881421       | 12 |
| 5  | <b>522.255840</b>  | 261.631558        |                |                  | <b>504.245275</b> | 252.626276        | A    | <b>1461.734104</b> | <b>731.370690</b> | 1444.707555       | 722.857416       | 1443.723539    | 722.365407       | 11 |
| 6  | 619.308604         | 310.157940        |                |                  | <b>601.298039</b> | 301.152658        | P    | <b>1390.696990</b> | <b>695.852133</b> | 1373.670441       | 687.338859       | 1372.686425    | 686.846850       | 10 |
| 7  | <b>750.349089</b>  | 375.678183        |                |                  | 732.338524        | 366.672900        | M    | <b>1293.644226</b> | 647.325751        | 1276.617677       | 638.812477       | 1275.633661    | 638.320468       | 9  |
| 8  | 847.401853         | 424.204565        |                |                  | 829.391288        | 415.199282        | P    | <b>1162.603741</b> | <b>581.805508</b> | 1145.577192       | 573.292234       | 1144.593176    | 572.800226       | 8  |
| 9  | <b>976.444446</b>  | 488.725861        |                |                  | 958.433881        | 479.720579        | E    | 1065.550977        | 533.279126        | 1048.524428       | 524.765852       | 1047.540412    | 524.273844       | 7  |
| 10 | 1073.497210        | 537.252243        |                |                  | 1055.486645       | 528.246961        | P    | <b>936.508384</b>  | 468.757830        | 919.481835        | 460.244555       |                |                  | 6  |
| 11 | 1512.722536        | 756.864906        | 1495.695987    | 748.351632       | 1494.711971       | 747.859624        | Q    | 839.455620         | 420.231448        | 822.429071        | 411.718173       |                |                  | 5  |
| 12 | <b>1583.759650</b> | 792.383463        | 1566.733101    | 783.870189       | 1565.749085       | <b>783.378180</b> | A    | 400.230294         | 200.618785        | 383.203745        | 192.105510       |                |                  | 4  |
| 13 | 1680.812414        | <b>840.909845</b> | 1663.785865    | 832.396571       | 1662.801849       | 831.904563        | P    | <b>329.193180</b>  | 165.100228        | <b>312.166631</b> | 156.586953       |                |                  | 3  |
| 14 | <b>1737.833878</b> | 869.420577        | 1720.807329    | 860.907303       | 1719.823313       | 860.415294        | G    | <b>232.140416</b>  | 116.573846        | 215.113867        | 108.060571       |                |                  | 2  |
| 15 |                    |                   |                |                  |                   |                   | R    | <b>175.118952</b>  | 88.063114         | 158.092403        | 79.549839        |                |                  | 1  |

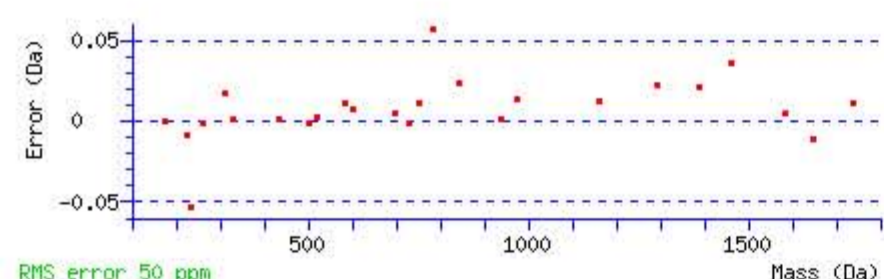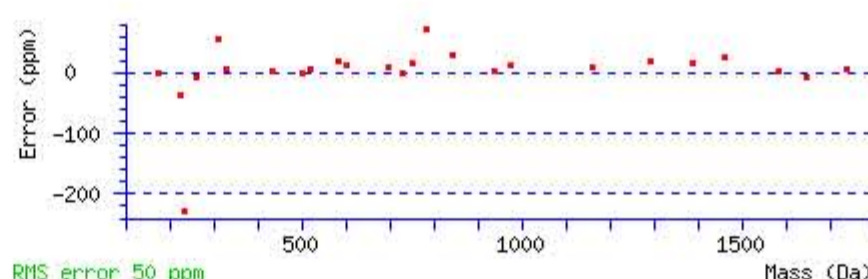

NCBI BLAST search of **YVTSAPMPEPQAPGR**

(Parameters: blastp, nr protein database, expect=20000, no filter, PAM30)

Other BLAST [web gateways](#)

All matches to this query

| Score | Mr(calc):   | Delta     | Sequence                                  |
|-------|-------------|-----------|-------------------------------------------|
| 37.5  | 1910.934265 | 0.005963  | <a href="#">SGSDEVQVGQQR</a>              |
| 31.6  | 1910.938263 | 0.001965  | <a href="#">YVTSAPMPEPQAPGR</a>           |
| 27.7  | 1910.934265 | 0.005963  | <a href="#">SGSDEVQVGQQR</a>              |
| 5.0   | 1910.934265 | 0.005963  | <a href="#">SGSDEVQVGQQR</a>              |
| 3.9   | 1910.930725 | 0.009503  | <a href="#">AGSGGLGGGAGGGQGAGAGQGAALR</a> |
| 3.9   | 1910.963196 | -0.022968 | <a href="#">EQQRQEELEKQR</a>              |
| 3.1   | 1910.913101 | 0.027127  | <a href="#">TLNMDMFTWEPRKAR</a>           |
| 2.7   | 1910.955811 | -0.015583 | <a href="#">RLAALGADPAARDSDAEGR</a>       |
| 2.3   | 1910.957382 | -0.017154 | <a href="#">DPWRFGNTPVQQR</a>             |
| 1.4   | 1910.938721 | 0.001507  | <a href="#">QEA EGLALDSPWHRFR</a>         |



# MASCOT SCIENCE Mascot Search Results

## Peptide View

MS/MS Fragmentation of **LICQATGFSPR**

Found in **IGHM\_HUMAN**, Ig mu chain C region OS=Homo sapiens GN=IGHM PE=1 SV=3

Match to Query 40173: 1559.805448 from(780.910000,2+) rtinseconds(1969) index(41950)  
 Title: Locus:1.1.1.2969.9 File:"2013-07-02 CLN FXIII 60 min 1st F 3.wiff"

Data file C:\Program Files (x86)\Matrix Science\Mascot Daemon\mgf4 FXIII 60 min 1st\mascot\_daemon\_merge.mgf

Click mouse within plot area to zoom in by factor of two about that point

Or, Plot from  to  Da

Label all possible matches  Label matches used for scoring



Monoisotopic mass of neutral peptide Mr(calc): 1559.795242

Fixed modifications: Carbamidomethyl (C) (apply to specified residues or termini only)

Variable modifications:

Q4 : Biotin:Thermo-21345 (Q)

Ions Score: 64 Expect: 6e-006

Matches : 23/100 fragment ions using 40 most intense peaks [\(help\)](#)

| #  | b                  | b <sup>++</sup> | b <sup>*</sup> | b <sup>*++</sup> | b <sup>0</sup>     | b <sup>0++</sup> | Seq. | y                  | y <sup>++</sup>   | y <sup>*</sup>    | y <sup>*++</sup> | y <sup>0</sup>     | y <sup>0++</sup>  | #  |
|----|--------------------|-----------------|----------------|------------------|--------------------|------------------|------|--------------------|-------------------|-------------------|------------------|--------------------|-------------------|----|
| 1  | 114.091340         | 57.549308       |                |                  |                    |                  | L    |                    |                   |                   |                  |                    |                   | 11 |
| 2  | <b>227.175404</b>  | 114.091340      |                |                  |                    |                  | I    | <b>1447.718454</b> | 724.362865        | 1430.691905       | 715.849591       | 1429.707889        | 715.357583        | 10 |
| 3  | <b>387.206053</b>  | 194.106664      |                |                  |                    |                  | C    | <b>1334.634390</b> | <b>667.820833</b> | 1317.607841       | 659.307559       | <b>1316.623825</b> | 658.815551        | 9  |
| 4  | 826.431379         | 413.719328      | 809.404830     | 405.206053       |                    |                  | Q    | <b>1174.603741</b> | 587.805509        | 1157.577192       | 579.292234       | 1156.593176        | 578.800226        | 8  |
| 5  | <b>897.468493</b>  | 449.237885      | 880.441944     | 440.724610       |                    |                  | A    | <b>735.378415</b>  | 368.192846        | 718.351866        | 359.679571       | 717.367850         | <b>359.187563</b> | 7  |
| 6  | <b>998.516172</b>  | 499.761724      | 981.489623     | 491.248449       | <b>980.505607</b>  | 490.756441       | T    | <b>664.341301</b>  | 332.674289        | 647.314752        | 324.161014       | 646.330736         | 323.669006        | 6  |
| 7  | 1055.537636        | 528.272456      | 1038.511087    | 519.759182       | <b>1037.527071</b> | 519.267174       | G    | <b>563.293622</b>  | 282.150449        | 546.267073        | 273.637175       | 545.283057         | 273.145167        | 5  |
| 8  | <b>1202.606050</b> | 601.806663      | 1185.579501    | 593.293389       | 1184.595485        | 592.801381       | F    | <b>506.272158</b>  | 253.639717        | 489.245609        | 245.126443       | 488.261593         | 244.634435        | 4  |
| 9  | <b>1289.638078</b> | 645.322677      | 1272.611529    | 636.809403       | <b>1271.627513</b> | 636.317395       | S    | <b>359.203744</b>  | 180.105510        | 342.177195        | 171.592236       | 341.193179         | 171.100228        | 3  |
| 10 | 1386.690842        | 693.849059      | 1369.664293    | 685.335785       | 1368.680277        | 684.843777       | P    | <b>272.171716</b>  | 136.589496        | <b>255.145167</b> | 128.076221       |                    |                   | 2  |
| 11 |                    |                 |                |                  |                    |                  | R    | <b>175.118952</b>  | 88.063114         | 158.092403        | 79.549839        |                    |                   | 1  |



NCBI BLAST search of **LICQATGFSPR**

(Parameters: blastp, nr protein database, expect=20000, no filter, PAM30)

Other BLAST [web gateways](#)

### All matches to this query

| Score | Mr(calc):   | Delta     | Sequence                       |
|-------|-------------|-----------|--------------------------------|
| 64.3  | 1559.795242 | 0.010206  | <a href="#">LICQATGFSPR</a>    |
| 8.3   | 1559.808960 | -0.003512 | <a href="#">LDRLSGLADQMVAR</a> |
| 7.7   | 1559.820190 | -0.014742 | <a href="#">MTRSATQAAKQVPR</a> |
| 3.0   | 1559.812943 | -0.007495 | <a href="#">EPMNIYNLNAIR</a>   |



# MASCOT Search Results

## Peptide View

MS/MS Fragmentation of **YVTSAPMPEPQAPGR**

Found in **IGHM\_HUMAN**, Ig mu chain C region OS=Homo sapiens GN=IGHM PE=1 SV=3

Match to Query 50875: 1910.940228 from(956.477390,2+) rtinseconds(1851) index(41009)

Title: Locus:1.1.1.2928.22 File:"2013-07-02 CLN FXIII 60 min 1st F 3.wiff"

Data file C:\Program Files (x86)\Matrix Science\Mascot Daemon\mgf4 FXIII 60 min 1st\mascot\_daemon\_merge.mgf

Click mouse within plot area to zoom in by factor of two about that point

Or, Plot from  to  Da

Label all possible matches  Label matches used for scoring

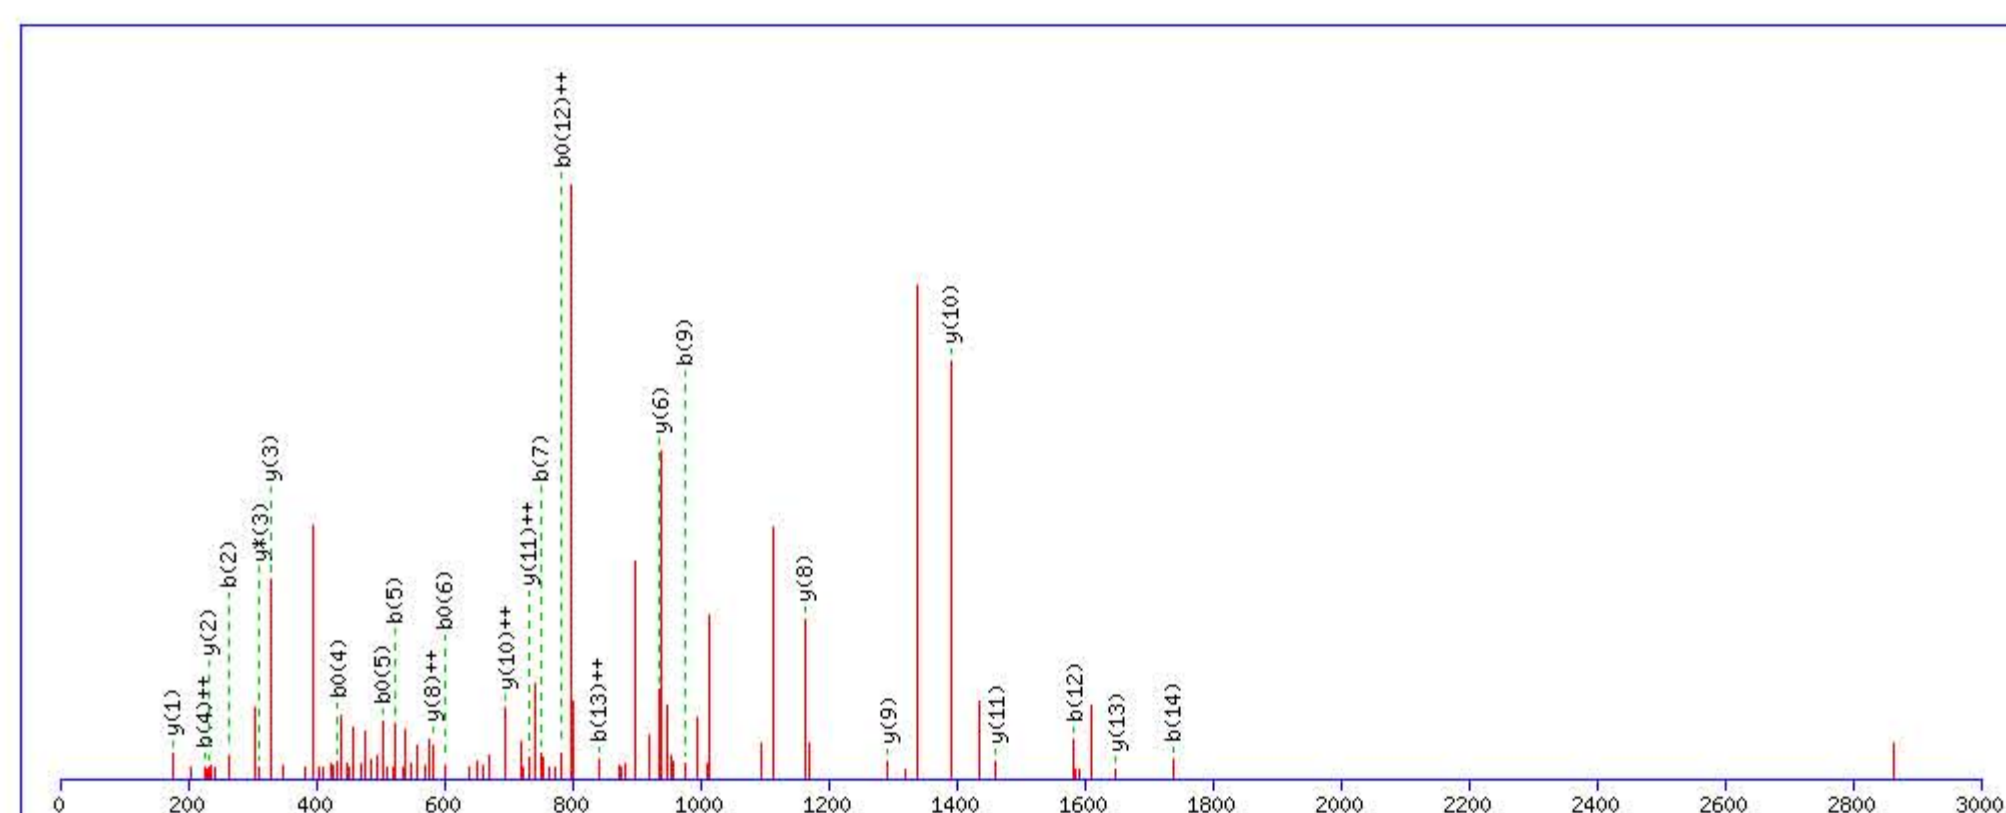

Monoisotopic mass of neutral peptide Mr(calc): 1910.938263

Fixed modifications: Carbamidomethyl (C) (apply to specified residues or termini only)

Variable modifications:

Q11 : Biotin:Thermo-21345 (Q)

Ions Score: 32 Expect: 0.053

Matches : 25/132 fragment ions using 69 most intense peaks [\(help\)](#)

| #  | b                  | b <sup>++</sup>   | b <sup>+</sup> | b <sup>+++</sup> | b <sup>0</sup>    | b <sup>0++</sup>  | Seq. | y                  | y <sup>++</sup>   | y <sup>*</sup>    | y <sup>+++</sup> | y <sup>0</sup> | y <sup>0++</sup> | #  |
|----|--------------------|-------------------|----------------|------------------|-------------------|-------------------|------|--------------------|-------------------|-------------------|------------------|----------------|------------------|----|
| 1  | 164.070605         | 82.538940         |                |                  |                   |                   | Y    |                    |                   |                   |                  |                |                  | 15 |
| 2  | <b>263.139019</b>  | 132.073148        |                |                  |                   |                   | V    | 1748.882225        | 874.944750        | 1731.855676       | 866.431476       | 1730.871660    | 865.939468       | 14 |
| 3  | 364.186698         | 182.596987        |                |                  | 346.176133        | 173.591705        | T    | <b>1649.813811</b> | 825.410543        | 1632.787262       | 816.897269       | 1631.803246    | 816.405261       | 13 |
| 4  | 451.218726         | <b>226.113001</b> |                |                  | <b>433.208161</b> | 217.107719        | S    | 1548.766132        | 774.886704        | 1531.739583       | 766.373430       | 1530.755567    | 765.881421       | 12 |
| 5  | <b>522.255840</b>  | 261.631558        |                |                  | <b>504.245275</b> | 252.626276        | A    | <b>1461.734104</b> | <b>731.370690</b> | 1444.707555       | 722.857416       | 1443.723539    | 722.365407       | 11 |
| 6  | 619.308604         | 310.157940        |                |                  | <b>601.298039</b> | 301.152658        | P    | <b>1390.696990</b> | <b>695.852133</b> | 1373.670441       | 687.338859       | 1372.686425    | 686.846850       | 10 |
| 7  | <b>750.349089</b>  | 375.678183        |                |                  | 732.338524        | 366.672900        | M    | <b>1293.644226</b> | 647.325751        | 1276.617677       | 638.812477       | 1275.633661    | 638.320468       | 9  |
| 8  | 847.401853         | 424.204565        |                |                  | 829.391288        | 415.199282        | P    | <b>1162.603741</b> | <b>581.805508</b> | 1145.577192       | 573.292234       | 1144.593176    | 572.800226       | 8  |
| 9  | <b>976.444446</b>  | 488.725861        |                |                  | 958.433881        | 479.720579        | E    | 1065.550977        | 533.279126        | 1048.524428       | 524.765852       | 1047.540412    | 524.273844       | 7  |
| 10 | 1073.497210        | 537.252243        |                |                  | 1055.486645       | 528.246961        | P    | <b>936.508384</b>  | 468.757830        | 919.481835        | 460.244555       |                |                  | 6  |
| 11 | 1512.722536        | 756.864906        | 1495.695987    | 748.351632       | 1494.711971       | 747.859624        | Q    | 839.455620         | 420.231448        | 822.429071        | 411.718173       |                |                  | 5  |
| 12 | <b>1583.759650</b> | 792.383463        | 1566.733101    | 783.870189       | 1565.749085       | <b>783.378180</b> | A    | 400.230294         | 200.618785        | 383.203745        | 192.105510       |                |                  | 4  |
| 13 | 1680.812414        | <b>840.909845</b> | 1663.785865    | 832.396571       | 1662.801849       | 831.904563        | P    | <b>329.193180</b>  | 165.100228        | <b>312.166631</b> | 156.586953       |                |                  | 3  |
| 14 | <b>1737.833878</b> | 869.420577        | 1720.807329    | 860.907303       | 1719.823313       | 860.415294        | G    | <b>232.140416</b>  | 116.573846        | 215.113867        | 108.060571       |                |                  | 2  |
| 15 |                    |                   |                |                  |                   |                   | R    | <b>175.118952</b>  | 88.063114         | 158.092403        | 79.549839        |                |                  | 1  |

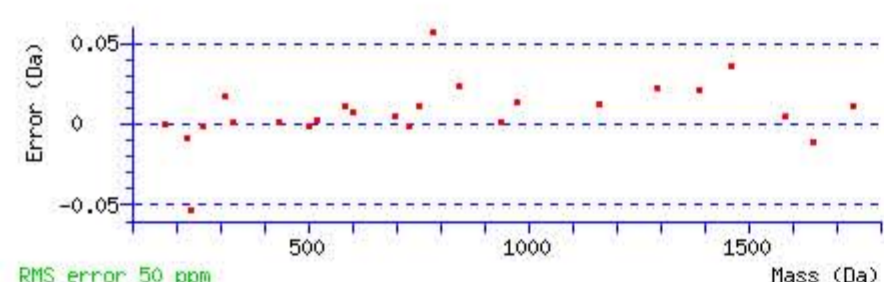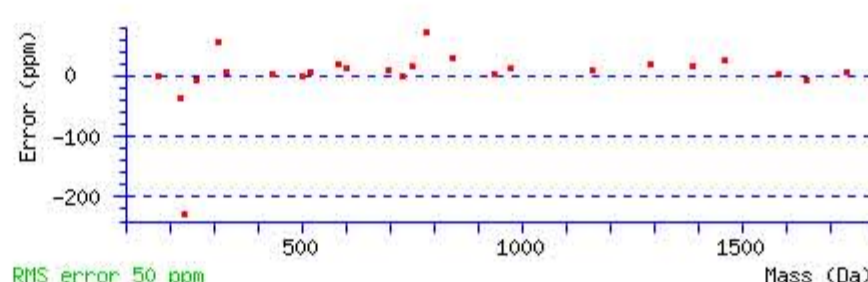

NCBI BLAST search of **YVTSAPMPEPQAPGR**

(Parameters: blastp, nr protein database, expect=20000, no filter, PAM30)

Other BLAST [web gateways](#)

All matches to this query

| Score | Mr(calc):   | Delta     | Sequence                                  |
|-------|-------------|-----------|-------------------------------------------|
| 37.5  | 1910.934265 | 0.005963  | <a href="#">SGSDEVQVGQQR</a>              |
| 31.6  | 1910.938263 | 0.001965  | <a href="#">YVTSAPMPEPQAPGR</a>           |
| 27.7  | 1910.934265 | 0.005963  | <a href="#">SGSDEVQVGQQR</a>              |
| 5.0   | 1910.934265 | 0.005963  | <a href="#">SGSDEVQVGQQR</a>              |
| 3.9   | 1910.930725 | 0.009503  | <a href="#">AGSGGLGGGAGGGQGAGAGQGAALR</a> |
| 3.9   | 1910.963196 | -0.022968 | <a href="#">EQQRQEELEKQR</a>              |
| 3.1   | 1910.913101 | 0.027127  | <a href="#">TLNMDMFTWEPRKAR</a>           |
| 2.7   | 1910.955811 | -0.015583 | <a href="#">RLAALGADPAARDSDAEGR</a>       |
| 2.3   | 1910.957382 | -0.017154 | <a href="#">DPWRFGNTPVQQR</a>             |
| 1.4   | 1910.938721 | 0.001507  | <a href="#">QEA EGLALDSPWHRFR</a>         |



# MASCOT Search Results

## Peptide View

MS/MS Fragmentation of **GAQTLVVPNC DHR**

Found in **IBP6\_HUMAN**, Insulin-like growth factor-binding protein 6 OS=Homo sapiens GN=IGFBP6 PE=1 SV=1

Match to Query 49323: 1840.882752 from(614.634860,3+) rtinseconds(1743) index(76775)

Title: Locus:1.1.1.2821.14 File:"2013-07-02 CLN FXIII 60 min 1st FT.wiff"

Data file C:\Program Files (x86)\Matrix Science\Mascot Daemon\mgf4 FXIII 60 min 1st\mascot\_daemon\_merge.mgf

Click mouse within plot area to zoom in by factor of two about that point

Or, Plot from  to  Da

Label all possible matches  Label matches used for scoring

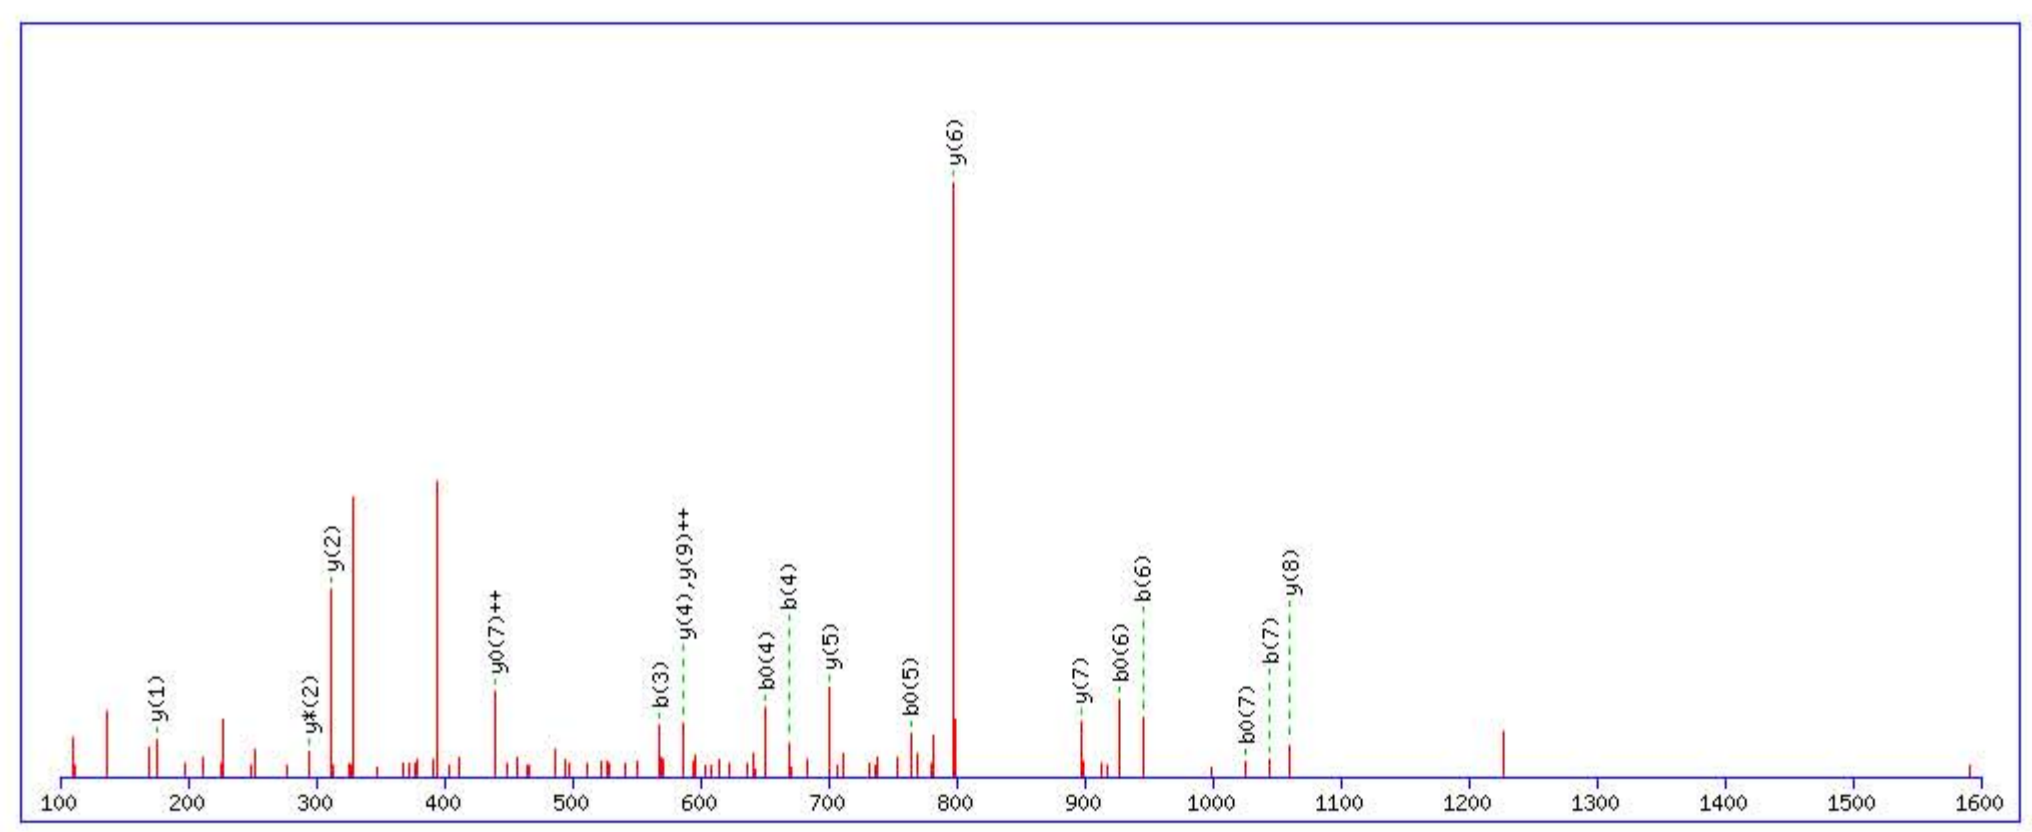

Monoisotopic mass of neutral peptide Mr(calc): 1840.871262

Fixed modifications: Carbamidomethyl (C) (apply to specified residues or termini only)

Variable modifications:

Q3 : Biotin:Thermo-21345 (Q)

Ions Score: 35 Expect: 0.0014

Matches : 18/130 fragment ions using 32 most intense peaks [\(help\)](#)

| #  | b                  | b <sup>++</sup> | b <sup>*</sup> | b <sup>*++</sup> | b <sup>0</sup>     | b <sup>0++</sup> | Seq. | y                  | y <sup>++</sup>   | y <sup>*</sup>    | y <sup>*++</sup> | y <sup>0</sup> | y <sup>0++</sup>  | #  |
|----|--------------------|-----------------|----------------|------------------|--------------------|------------------|------|--------------------|-------------------|-------------------|------------------|----------------|-------------------|----|
| 1  | 58.028740          | 29.518008       |                |                  |                    |                  | G    |                    |                   |                   |                  |                |                   | 13 |
| 2  | 129.065854         | 65.036565       |                |                  |                    |                  | A    | 1784.857073        | 892.932175        | 1767.830524       | 884.418900       | 1766.846508    | 883.926892        | 12 |
| 3  | <b>568.291180</b>  | 284.649228      | 551.264631     | 276.135954       |                    |                  | Q    | 1713.819959        | 857.413618        | 1696.793410       | 848.900343       | 1695.809394    | 848.408335        | 11 |
| 4  | <b>669.338859</b>  | 335.173068      | 652.312310     | 326.659793       | <b>651.328294</b>  | 326.167785       | T    | 1274.594633        | 637.800955        | 1257.568084       | 629.287680       | 1256.584068    | 628.795672        | 10 |
| 5  | 782.422923         | 391.715100      | 765.396374     | 383.201825       | <b>764.412358</b>  | 382.709817       | L    | 1173.546954        | <b>587.277115</b> | 1156.520405       | 578.763841       | 1155.536389    | 578.271833        | 9  |
| 6  | <b>945.486252</b>  | 473.246764      | 928.459703     | 464.733490       | <b>927.475687</b>  | 464.241482       | Y    | <b>1060.462890</b> | 530.735083        | 1043.436341       | 522.221809       | 1042.452325    | 521.729801        | 8  |
| 7  | <b>1044.554666</b> | 522.780971      | 1027.528117    | 514.267697       | <b>1026.544101</b> | 513.775689       | V    | <b>897.399561</b>  | 449.203419        | 880.373012        | 440.690144       | 879.388996     | <b>440.198136</b> | 7  |
| 8  | 1141.607430        | 571.307353      | 1124.580881    | 562.794079       | 1123.596865        | 562.302071       | P    | <b>798.331147</b>  | 399.669212        | 781.304598        | 391.155937       | 780.320582     | 390.663929        | 6  |
| 9  | 1255.650357        | 628.328817      | 1238.623808    | 619.815542       | 1237.639792        | 619.323534       | N    | <b>701.278383</b>  | 351.142830        | 684.251834        | 342.629555       | 683.267818     | 342.137547        | 5  |
| 10 | 1415.681006        | 708.344141      | 1398.654457    | 699.830867       | 1397.670441        | 699.338859       | C    | <b>587.235456</b>  | 294.121366        | 570.208907        | 285.608092       | 569.224891     | 285.116084        | 4  |
| 11 | 1530.707949        | 765.857613      | 1513.681400    | 757.344338       | 1512.697384        | 756.852330       | D    | 427.204807         | 214.106041        | 410.178258        | 205.592767       | 409.194242     | 205.100759        | 3  |
| 12 | 1667.766861        | 834.387069      | 1650.740312    | 825.873794       | 1649.756296        | 825.381786       | H    | <b>312.177864</b>  | 156.592570        | <b>295.151315</b> | 148.079295       |                |                   | 2  |
| 13 |                    |                 |                |                  |                    |                  | R    | <b>175.118952</b>  | 88.063114         | 158.092403        | 79.549839        |                |                   | 1  |

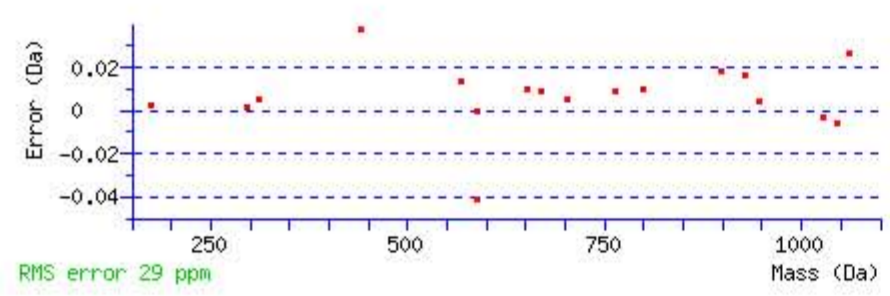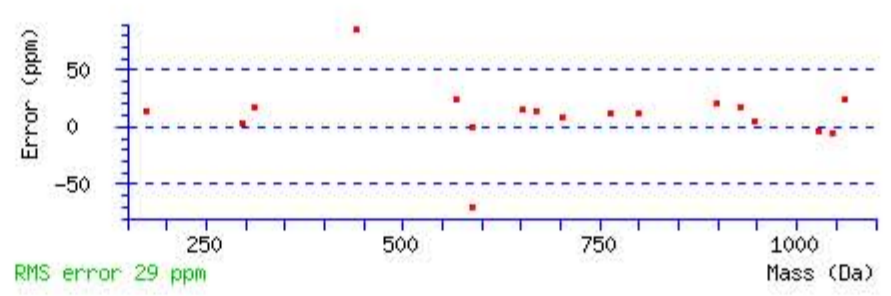

NCBI BLAST search of **GAQTLVVPNC DHR**

(Parameters: blastp, nr protein database, expect=20000, no filter, PAM30)

Other BLAST [web gateways](#)

All matches to this query

| Score | Mr(calc):   | Delta     | Sequence                        |
|-------|-------------|-----------|---------------------------------|
| 34.5  | 1840.871262 | 0.011490  | <a href="#">GAQTLVVPNC DHR</a>  |
| 3.8   | 1840.887650 | -0.004898 | <a href="#">AALSASEGEEVPQDK</a> |
| 0.3   | 1840.910141 | -0.027389 | <a href="#">RTSMPLLNDPQSPDR</a> |



# MASCOT Search Results

## Peptide View

MS/MS Fragmentation of **HLDSVLQQLQTEVYR**

Found in **IBP6\_HUMAN**, Insulin-like growth factor-binding protein 6 OS=Homo sapiens GN=IGFBP6 PE=1 SV=1

Match to Query 56814: 2139.142152 from(714.054660,3+) rtinseconds(2550) index(82080)

Title: Locus:1.1.1.3102.6 File:"2013-07-02 CLN FXIII 60 min 1st FT.wiff"

Data file C:\Program Files (x86)\Matrix Science\Mascot Daemon\mgf4 FXIII 60 min 1st\mascot\_daemon\_merge.mgf

Click mouse within plot area to zoom in by factor of two about that point

Or, Plot from  to  Da

Label all possible matches  Label matches used for scoring

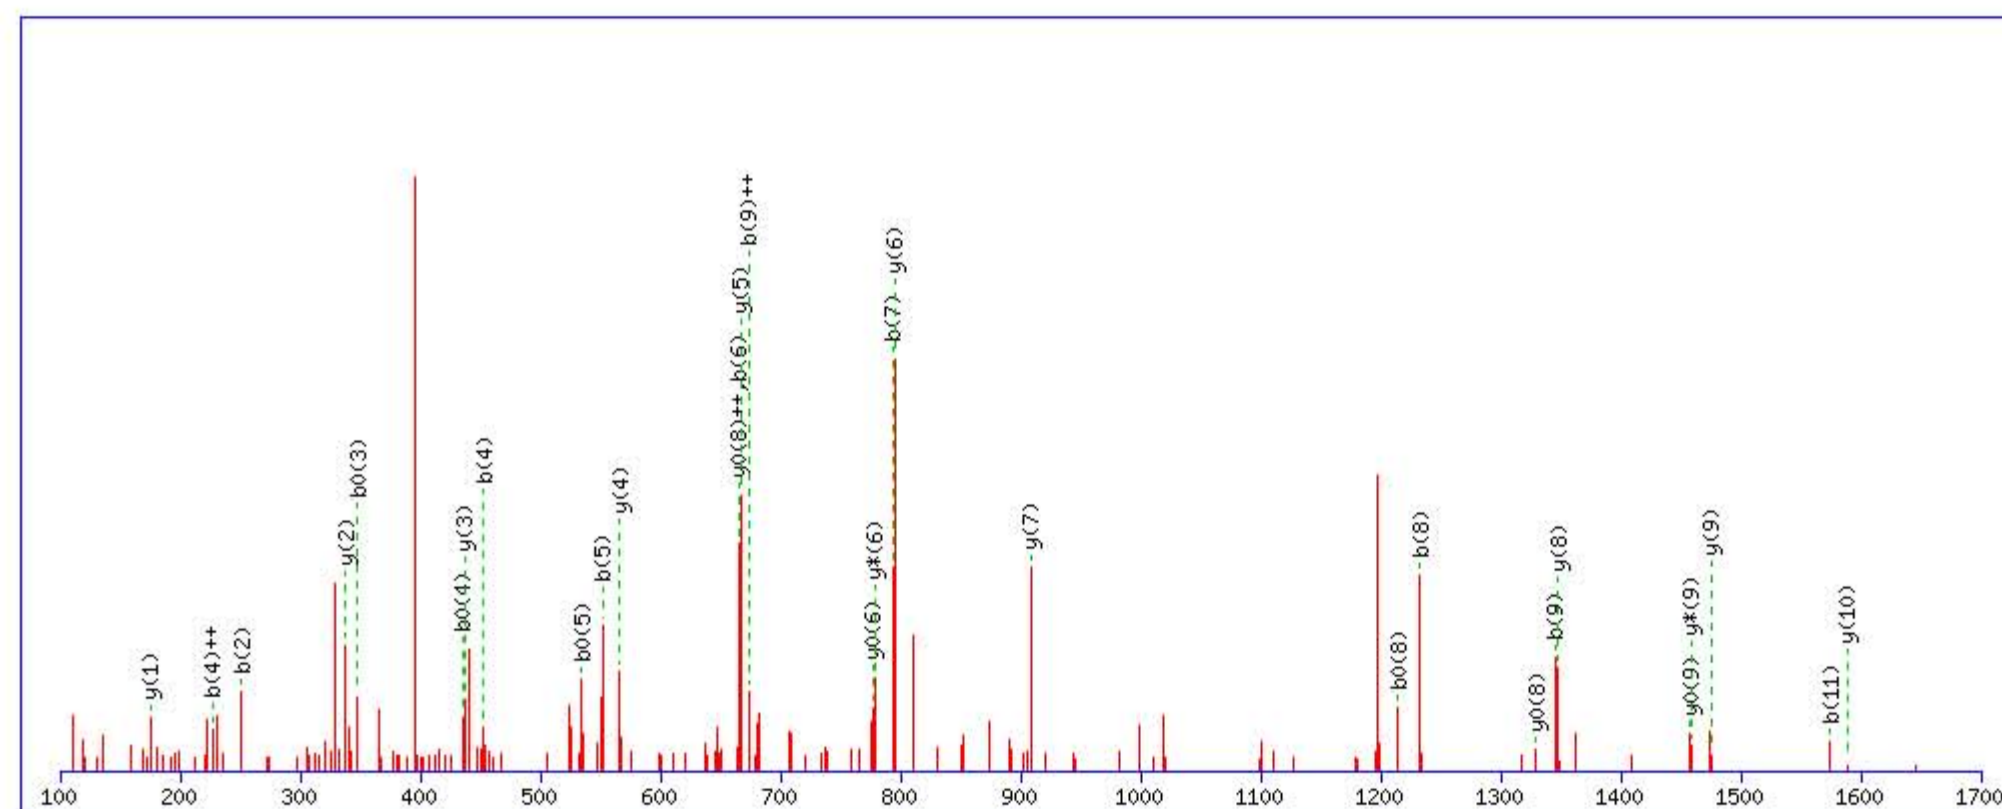

Monoisotopic mass of neutral peptide Mr(calc): 2139.114655

Fixed modifications: Carbamidomethyl (C) (apply to specified residues or termini only)

Variable modifications:

Q8 : Biotin:Thermo-21345 (Q)

Ions Score: 48 Expect: 3e-005

Matches : 30/146 fragment ions using 58 most intense peaks [\(help\)](#)

| #  | b                  | b <sup>++</sup>   | b <sup>*</sup> | b <sup>*++</sup> | b <sup>0</sup>     | b <sup>0++</sup> | Seq. | y                  | y <sup>++</sup> | y <sup>*</sup>     | y <sup>*++</sup> | y <sup>0</sup>     | y <sup>0++</sup>  | #  |
|----|--------------------|-------------------|----------------|------------------|--------------------|------------------|------|--------------------|-----------------|--------------------|------------------|--------------------|-------------------|----|
| 1  | 138.066188         | 69.536732         |                |                  |                    |                  | H    |                    |                 |                    |                  |                    |                   | 15 |
| 2  | <b>251.150252</b>  | 126.078764        |                |                  |                    |                  | L    | 2003.063026        | 1002.035151     | 1986.036477        | 993.521877       | 1985.052461        | 993.029869        | 14 |
| 3  | 366.177195         | 183.592235        |                |                  | 348.166630         | 174.586953       | D    | 1889.978962        | 945.493119      | 1872.952413        | 936.979845       | 1871.968397        | 936.487836        | 13 |
| 4  | <b>453.209223</b>  | <b>227.108250</b> |                |                  | <b>435.198658</b>  | 218.102967       | S    | 1774.952019        | 887.979648      | 1757.925470        | 879.466373       | 1756.941454        | 878.974365        | 12 |
| 5  | <b>552.277637</b>  | 276.642457        |                |                  | <b>534.267072</b>  | 267.637174       | V    | 1687.919991        | 844.463634      | 1670.893442        | 835.950359       | 1669.909426        | 835.458351        | 11 |
| 6  | <b>665.361701</b>  | 333.184489        |                |                  | 647.351136         | 324.179206       | L    | <b>1588.851577</b> | 794.929427      | 1571.825028        | 786.416152       | 1570.841012        | 785.924144        | 10 |
| 7  | <b>793.420279</b>  | 397.213778        | 776.393730     | 388.700503       | 775.409714         | 388.208495       | Q    | <b>1475.767513</b> | 738.387395      | <b>1458.740964</b> | 729.874120       | <b>1457.756948</b> | 729.382112        | 9  |
| 8  | <b>1232.645605</b> | 616.826440        | 1215.619056    | 608.313166       | <b>1214.635040</b> | 607.821158       | Q    | <b>1347.708935</b> | 674.358105      | 1330.682386        | 665.844831       | <b>1329.698370</b> | <b>665.352823</b> | 8  |
| 9  | <b>1345.729669</b> | <b>673.368472</b> | 1328.703120    | 664.855198       | 1327.719104        | 664.363190       | L    | <b>908.483609</b>  | 454.745443      | 891.457060         | 446.232168       | 890.473044         | 445.740160        | 7  |
| 10 | 1473.788247        | 737.397761        | 1456.761698    | 728.884487       | 1455.777682        | 728.392479       | Q    | <b>795.399545</b>  | 398.203411      | <b>778.372996</b>  | 389.690136       | <b>777.388980</b>  | 389.198128        | 6  |
| 11 | <b>1574.835926</b> | 787.921601        | 1557.809377    | 779.408326       | 1556.825361        | 778.916318       | T    | <b>667.340967</b>  | 334.174122      | 650.314418         | 325.660847       | 649.330402         | 325.168839        | 5  |
| 12 | 1703.878519        | 852.442897        | 1686.851970    | 843.929623       | 1685.867954        | 843.437615       | E    | <b>566.293288</b>  | 283.650282      | 549.266739         | 275.137008       | 548.282723         | 274.645000        | 4  |
| 13 | 1802.946933        | 901.977104        | 1785.920384    | 893.463830       | 1784.936368        | 892.971822       | V    | <b>437.250695</b>  | 219.128986      | 420.224146         | 210.615711       |                    |                   | 3  |
| 14 | 1966.010262        | 983.508769        | 1948.983713    | 974.995494       | 1947.999697        | 974.503486       | Y    | <b>338.182281</b>  | 169.594779      | 321.155732         | 161.081504       |                    |                   | 2  |
| 15 |                    |                   |                |                  |                    |                  | R    | <b>175.118952</b>  | 88.063114       | 158.092403         | 79.549840        |                    |                   | 1  |

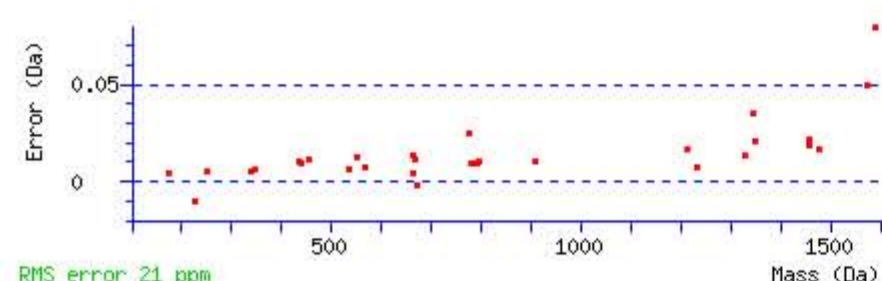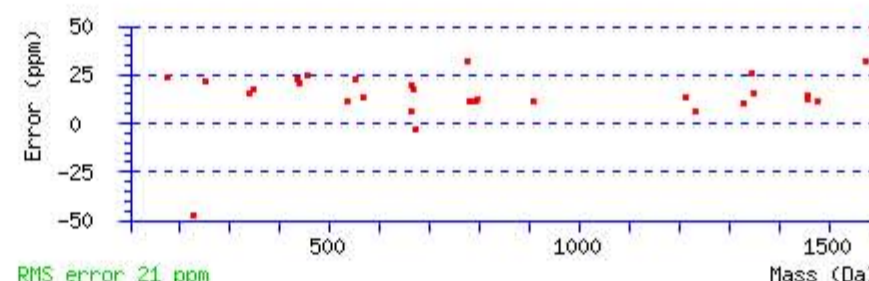

NCBI BLAST search of **HLDSVLQQLQTEVYR**

(Parameters: blastp, nr protein database, expect=20000, no filter, PAM30)

Other BLAST [web gateways](#)

All matches to this query

| Score | Mr(calc):   | Delta    | Sequence                         |
|-------|-------------|----------|----------------------------------|
| 48.5  | 2139.114655 | 0.027497 | <a href="#">HLDSVLQQLQTEVYR</a>  |
| 37.9  | 2139.114655 | 0.027497 | <a href="#">HLDSVLQQLQTEVYR</a>  |
| 24.4  | 2139.114655 | 0.027497 | <a href="#">HLDSVLQQLQTEVYR</a>  |
| 0.3   | 2139.122025 | 0.020127 | <a href="#">FNVETMAQLLNIPPNK</a> |



# MASCOT SEARCH RESULTS

## Peptide View

MS/MS Fragmentation of **LAELPADALGPLQR**

Found in **ALS\_HUMAN**, Insulin-like growth factor-binding protein complex acid labile subunit OS=Homo sapiens GN=IGFALS PE=1 SV=1

Match to Query 47889: 1773.996042 from(592.339290,3+) rtinseconds(2450) index(44945)

Title: Locus:1.1.1.3137.4 File:"2013-07-02 CLN FXIII 60 min 1st F 3.wiff"

Data file C:\Program Files (x86)\Matrix Science\Mascot Daemon\mgf4 FXIII 60 min 1st\mascot\_daemon\_merge.mgf

Click mouse within plot area to zoom in by factor of two about that point

Or, Plot from  to  Da

Label all possible matches  Label matches used for scoring

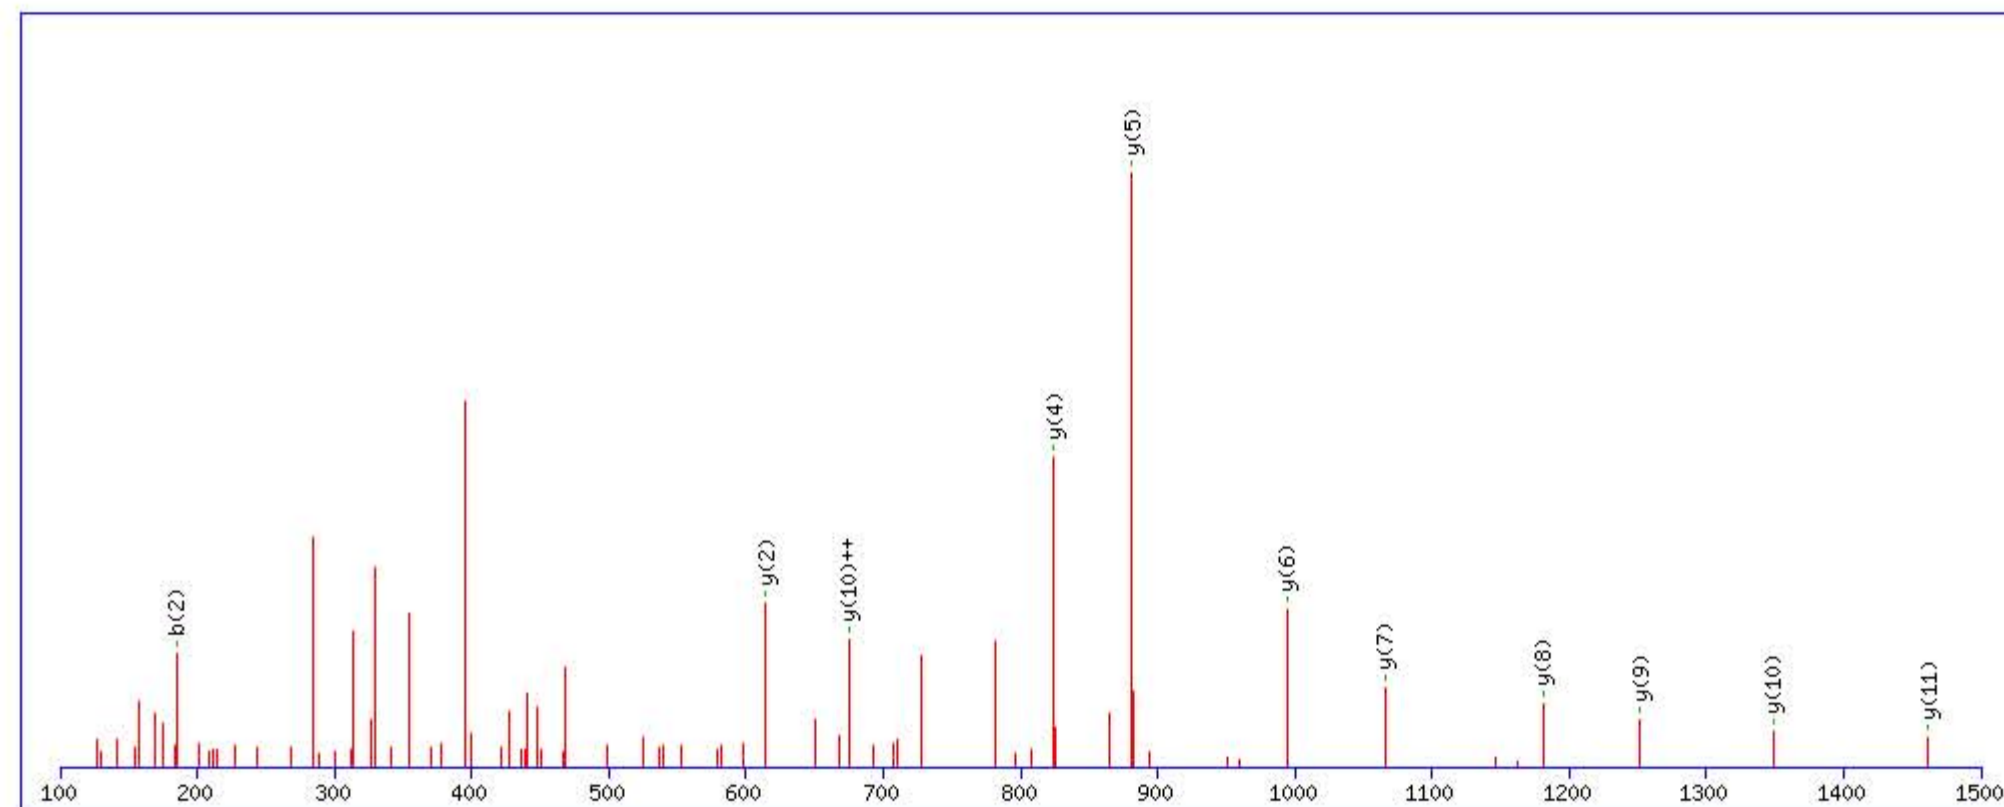

Monoisotopic mass of neutral peptide Mr(calc): 1773.981094

Fixed modifications: Carbamidomethyl (C) (apply to specified residues or termini only)

Variable modifications:

Q13 : Biotin:Thermo-21345 (Q)

Ions Score: 77 Expect: 2.3e-007

Matches : 11/114 fragment ions using 14 most intense peaks [\(help\)](#)

| #  | b                 | b <sup>++</sup> | b <sup>*</sup> | b <sup>+++</sup> | b <sup>0</sup> | b <sup>0++</sup> | Seq. | y                  | y <sup>++</sup>   | y <sup>*</sup> | y <sup>+++</sup> | y <sup>0</sup> | y <sup>0++</sup> | #  |
|----|-------------------|-----------------|----------------|------------------|----------------|------------------|------|--------------------|-------------------|----------------|------------------|----------------|------------------|----|
| 1  | 114.091340        | 57.549308       |                |                  |                |                  | L    |                    |                   |                |                  |                |                  | 14 |
| 2  | <b>185.128454</b> | 93.067865       |                |                  |                |                  | A    | 1661.904340        | 831.455808        | 1644.877791    | 822.942534       | 1643.893775    | 822.450526       | 13 |
| 3  | 314.171047        | 157.589161      |                |                  | 296.160482     | 148.583879       | E    | 1590.867226        | 795.937251        | 1573.840677    | 787.423977       | 1572.856661    | 786.931969       | 12 |
| 4  | 427.255111        | 214.131193      |                |                  | 409.244546     | 205.125911       | L    | <b>1461.824633</b> | 731.415955        | 1444.798084    | 722.902680       | 1443.814068    | 722.410672       | 11 |
| 5  | 524.307875        | 262.657576      |                |                  | 506.297310     | 253.652293       | P    | <b>1348.740569</b> | <b>674.873922</b> | 1331.714020    | 666.360648       | 1330.730004    | 665.868640       | 10 |
| 6  | 595.344989        | 298.176133      |                |                  | 577.334424     | 289.170850       | A    | <b>1251.687805</b> | 626.347540        | 1234.661256    | 617.834266       | 1233.677240    | 617.342258       | 9  |
| 7  | 710.371932        | 355.689604      |                |                  | 692.361367     | 346.684322       | D    | <b>1180.650691</b> | 590.828984        | 1163.624142    | 582.315709       | 1162.640126    | 581.823701       | 8  |
| 8  | 781.409046        | 391.208161      |                |                  | 763.398481     | 382.202879       | A    | <b>1065.623748</b> | 533.315512        | 1048.597199    | 524.802238       |                |                  | 7  |
| 9  | 894.493110        | 447.750193      |                |                  | 876.482545     | 438.744911       | L    | <b>994.586634</b>  | 497.796955        | 977.560085     | 489.283681       |                |                  | 6  |
| 10 | 951.514574        | 476.260925      |                |                  | 933.504009     | 467.255643       | G    | <b>881.502570</b>  | 441.254923        | 864.476021     | 432.741649       |                |                  | 5  |
| 11 | 1048.567338       | 524.787307      |                |                  | 1030.556773    | 515.782025       | P    | <b>824.481106</b>  | 412.744191        | 807.454557     | 404.230916       |                |                  | 4  |
| 12 | 1161.651402       | 581.329339      |                |                  | 1143.640837    | 572.324056       | L    | 727.428342         | 364.217809        | 710.401793     | 355.704534       |                |                  | 3  |
| 13 | 1600.876728       | 800.942002      | 1583.850179    | 792.428728       | 1582.866163    | 791.936719       | Q    | <b>614.344278</b>  | 307.675777        | 597.317729     | 299.162503       |                |                  | 2  |
| 14 |                   |                 |                |                  |                |                  | R    | 175.118952         | 88.063114         | 158.092403     | 79.549839        |                |                  | 1  |

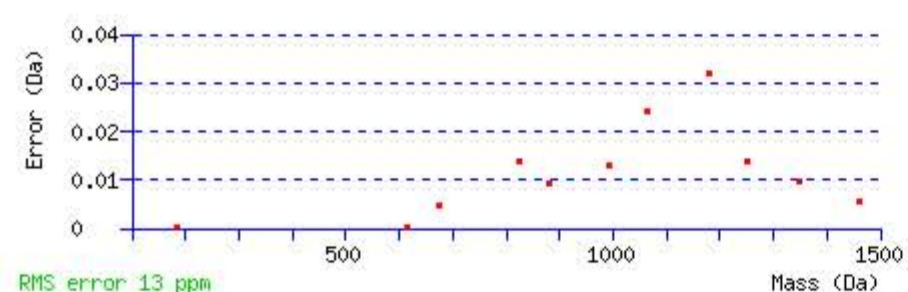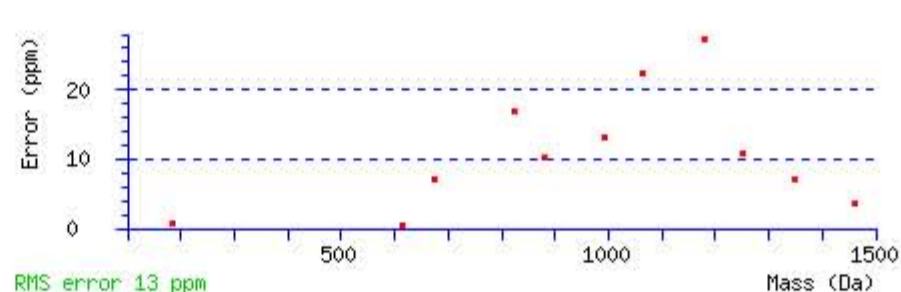

NCBI BLAST search of [LAELPADALGPLQR](#)

(Parameters: blastp, nr protein database, expect=20000, no filter, PAM30)

Other BLAST [web gateways](#)

All matches to this query

| Score | Mr(calc):   | Delta    | Sequence                       |
|-------|-------------|----------|--------------------------------|
| 77.4  | 1773.981094 | 0.014948 | <a href="#">LAELPADALGPLQR</a> |

Mascot: <http://www.matrixscience.com/>



# MASCOT Search Results

## Peptide View

MS/MS Fragmentation of **SFEGLGQLEVLTDHNQLQEVK**

Found in **ALS\_HUMAN**, Insulin-like growth factor-binding protein complex acid labile subunit OS=Homo sapiens GN=IGFALS PE=1 SV=1

Match to Query 68874: 2807.486022 from(936.835950,3+) rtinseconds(2683) index(46419)  
 Title: Locus:1.1.1.3217.21 File:"2013-07-02 CLN FXIII 60 min 1st F 3.wiff"  
 Data file C:\Program Files (x86)\Matrix Science\Mascot Daemon\mgf4 FXIII 60 min 1st\mascot\_daemon\_merge.mgf

Click mouse within plot area to zoom in by factor of two about that point  
 Or, Plot from  to  Da   
 Label all possible matches  Label matches used for scoring

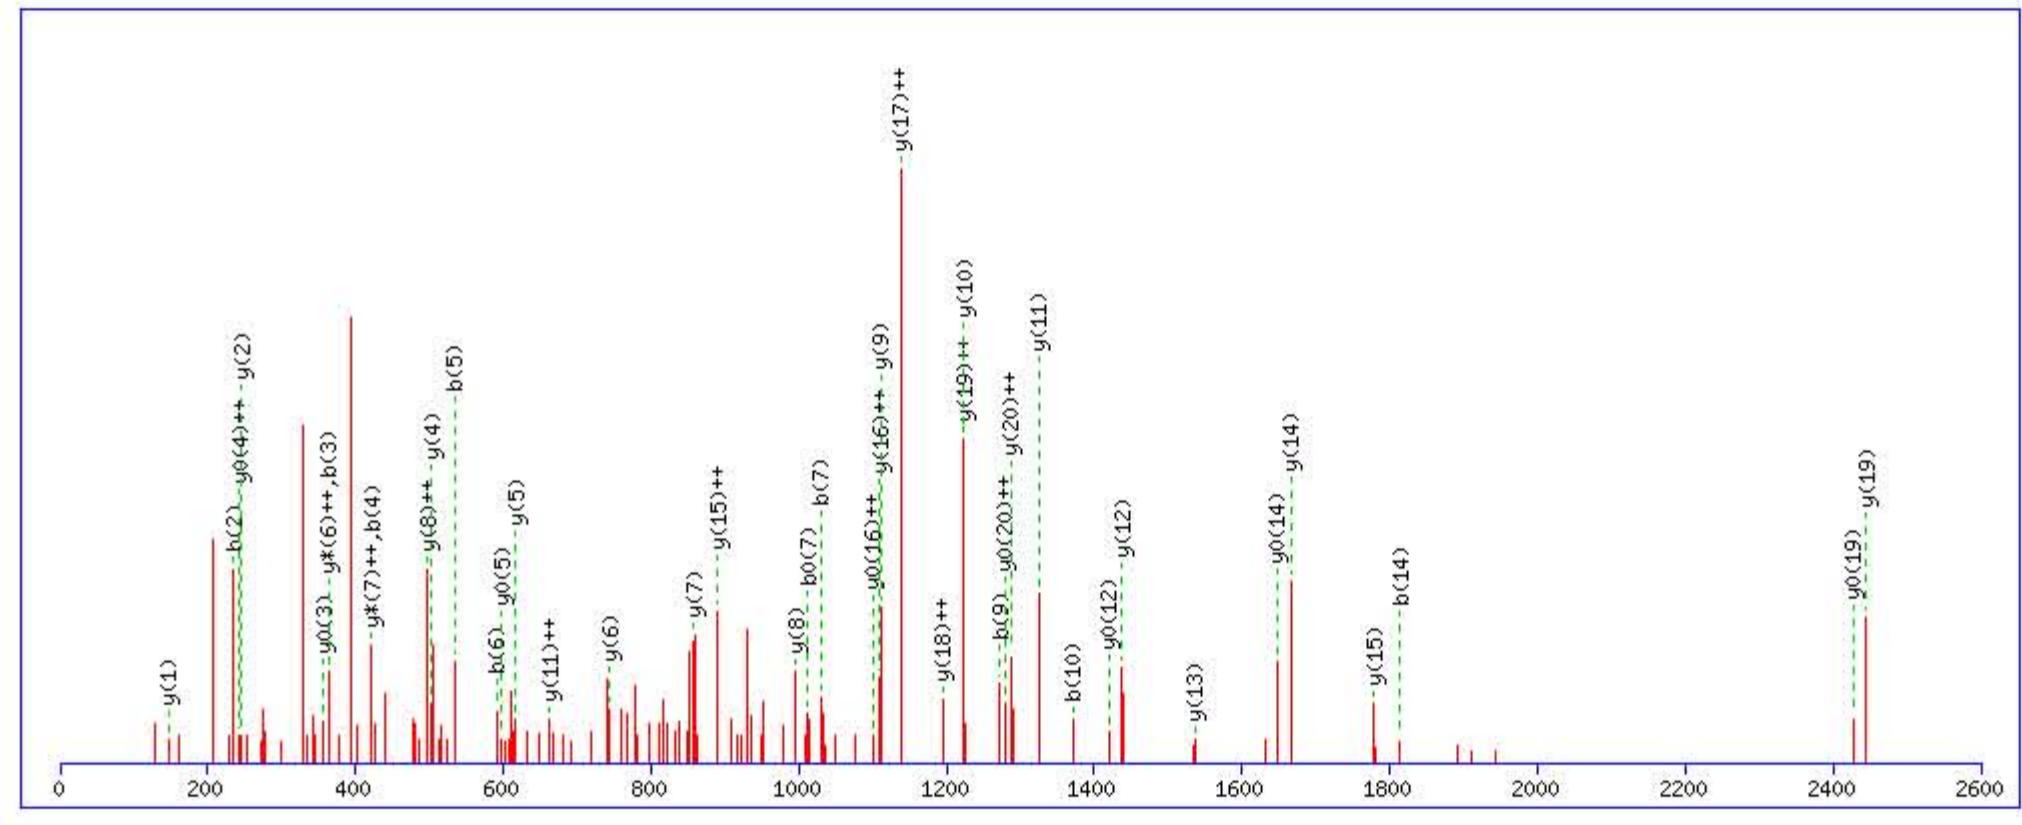

Monoisotopic mass of neutral peptide Mr(calc): 2807.452759  
 Fixed modifications: Carbamidomethyl (C) (apply to specified residues or termini only)  
 Variable modifications:  
 Q7 : Biotin:Thermo-21345 (Q)  
 Ions Score: 72 Expect: 1.3e-006  
 Matches : 43/236 fragment ions using 87 most intense peaks [\(help\)](#)

| #  | b                  | b <sup>++</sup> | b <sup>*</sup> | b <sup>*++</sup> | b <sup>0</sup>     | b <sup>0++</sup> | Seq. | y                  | y <sup>++</sup>    | y <sup>*</sup> | y <sup>*++</sup>  | y <sup>0</sup>     | y <sup>0++</sup>   | #  |
|----|--------------------|-----------------|----------------|------------------|--------------------|------------------|------|--------------------|--------------------|----------------|-------------------|--------------------|--------------------|----|
| 1  | 88.039304          | 44.523290       |                |                  | 70.028739          | 35.518008        | S    |                    |                    |                |                   |                    |                    | 22 |
| 2  | <b>235.107718</b>  | 118.057497      |                |                  | 217.097153         | 109.052214       | F    | 2721.428016        | 1361.217646        | 2704.401467    | 1352.704371       | 2703.417451        | 1352.212363        | 21 |
| 3  | <b>364.150311</b>  | 182.578793      |                |                  | 346.139746         | 173.573511       | E    | 2574.359602        | <b>1287.683439</b> | 2557.333053    | 1279.170164       | 2556.349037        | <b>1278.678156</b> | 20 |
| 4  | <b>421.171775</b>  | 211.089525      |                |                  | 403.161210         | 202.084243       | G    | <b>2445.317009</b> | <b>1223.162142</b> | 2428.290460    | 1214.648868       | <b>2427.306444</b> | 1214.156860        | 19 |
| 5  | <b>534.255839</b>  | 267.631558      |                |                  | 516.245274         | 258.626275       | L    | 2388.295545        | <b>1194.651410</b> | 2371.268996    | 1186.138136       | 2370.284980        | 1185.646128        | 18 |
| 6  | <b>591.277303</b>  | 296.142290      |                |                  | 573.266738         | 287.137007       | G    | 2275.211481        | <b>1138.109378</b> | 2258.184932    | 1129.596104       | 2257.200916        | 1129.104096        | 17 |
| 7  | <b>1030.502629</b> | 515.754953      | 1013.476080    | 507.241678       | <b>1012.492064</b> | 506.749670       | Q    | 2218.190017        | <b>1109.598646</b> | 2201.163468    | 1101.085372       | 2200.179452        | <b>1100.593364</b> | 16 |
| 8  | 1143.586693        | 572.296985      | 1126.560144    | 563.783710       | 1125.576128        | 563.291702       | L    | <b>1778.964691</b> | <b>889.985984</b>  | 1761.938142    | 881.472709        | 1760.954126        | 880.980701         | 15 |
| 9  | <b>1272.629286</b> | 636.818281      | 1255.602737    | 628.305007       | 1254.618721        | 627.812999       | E    | <b>1665.880627</b> | 833.443952         | 1648.854078    | 824.930677        | <b>1647.870062</b> | 824.438669         | 14 |
| 10 | <b>1371.697700</b> | 686.352488      | 1354.671151    | 677.839214       | 1353.687135        | 677.347206       | V    | <b>1536.838034</b> | 768.922655         | 1519.811485    | 760.409381        | 1518.827469        | 759.917373         | 13 |
| 11 | 1484.781764        | 742.894520      | 1467.755215    | 734.381246       | 1466.771199        | 733.889238       | L    | <b>1437.769620</b> | 719.388448         | 1420.743071    | 710.875174        | <b>1419.759055</b> | 710.383166         | 12 |
| 12 | 1585.829443        | 793.418360      | 1568.802894    | 784.905085       | 1567.818878        | 784.413077       | T    | <b>1324.685556</b> | <b>662.846416</b>  | 1307.659007    | 654.333142        | 1306.674991        | 653.841134         | 11 |
| 13 | 1698.913507        | 849.960392      | 1681.886958    | 841.447117       | 1680.902942        | 840.955109       | L    | <b>1223.637877</b> | 612.322577         | 1206.611328    | 603.809302        | 1205.627312        | 603.317294         | 10 |
| 14 | <b>1813.940450</b> | 907.473863      | 1796.913901    | 898.960589       | 1795.929885        | 898.468581       | D    | <b>1110.553813</b> | 555.780545         | 1093.527264    | 547.267270        | 1092.543248        | 546.775262         | 9  |
| 15 | 1950.999362        | 976.003319      | 1933.972813    | 967.490045       | 1932.988797        | 966.998037       | H    | <b>995.526870</b>  | <b>498.267073</b>  | 978.500321     | 489.753799        | 977.516305         | 489.261791         | 8  |
| 16 | 2065.042289        | 1033.024782     | 2048.015740    | 1024.511508      | 2047.031724        | 1024.019500      | N    | <b>858.467958</b>  | 429.737617         | 841.441409     | <b>421.224343</b> | 840.457393         | 420.732335         | 7  |
| 17 | 2193.100867        | 1097.054072     | 2176.074318    | 1088.540797      | 2175.090302        | 1088.048789      | Q    | <b>744.425031</b>  | 372.716154         | 727.398482     | <b>364.202879</b> | 726.414466         | 363.710871         | 6  |
| 18 | 2306.184931        | 1153.596104     | 2289.158382    | 1145.082829      | 2288.174366        | 1144.590821      | L    | <b>616.366453</b>  | 308.686865         | 599.339904     | 300.173590        | <b>598.355888</b>  | 299.681582         | 5  |
| 19 | 2434.243509        | 1217.625393     | 2417.216960    | 1209.112118      | 2416.232944        | 1208.620110      | Q    | <b>503.282389</b>  | 252.144833         | 486.255840     | 243.631558        | 485.271824         | <b>243.139550</b>  | 4  |
| 20 | 2563.286102        | 1282.146689     | 2546.259553    | 1273.633415      | 2545.275537        | 1273.141407      | E    | 375.223811         | 188.115543         | 358.197262     | 179.602269        | <b>357.213246</b>  | 179.110261         | 3  |
| 21 | 2662.354516        | 1331.680896     | 2645.327967    | 1323.167622      | 2644.343951        | 1322.675614      | V    | <b>246.181218</b>  | 123.594247         | 229.154669     | 115.080972        |                    |                    | 2  |
| 22 |                    |                 |                |                  |                    |                  | K    | <b>147.112804</b>  | 74.060040          | 130.086255     | 65.546765         |                    |                    | 1  |

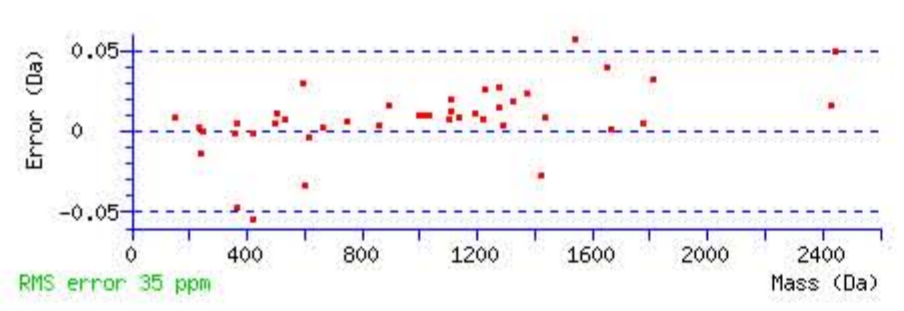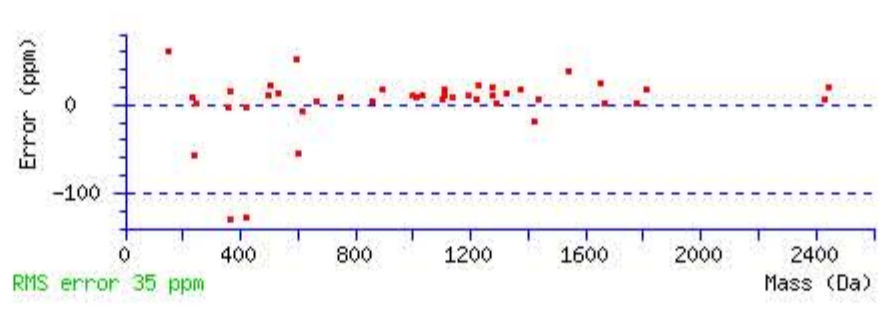

NCBI BLAST search of **SFEGLGQLEVLTDHNQLQEVK**  
 (Parameters: blastp, nr protein database, expect=20000, no filter, PAM30)  
 Other BLAST [web gateways](#)

### All matches to this query

| Score | Mr(calc):   | Delta    | Sequence                              |
|-------|-------------|----------|---------------------------------------|
| 72.0  | 2807.452759 | 0.033263 | <a href="#">SFEGLGQLEVLTDHNQLQEVK</a> |
| 5.2   | 2807.452759 | 0.033263 | <a href="#">SFEGLGQLEVLTDHNQLQEVK</a> |



# MASCOT Search Results

## Peptide View

MS/MS Fragmentation of **ELAAQTIK**

Found in **ITIH1\_HUMAN**, Inter-alpha-trypsin inhibitor heavy chain H1 OS=Homo sapiens GN=ITIH1 PE=1 SV=3

Match to Query 27183: 1183.671048 from(592.842800,2+) rtinseconds(1695) index(58271)

Title: Locus:1.1.1.2896.7 File:"2013-07-02 CLN FXIII 60 min 1st F 4.wiff"

Data file C:\Program Files (x86)\Matrix Science\Mascot Daemon\mgf4 FXIII 60 min 1st\mascot\_daemon\_merge.mgf

Click mouse within plot area to zoom in by factor of two about that point

Or, Plot from  to  Da

Label all possible matches  Label matches used for scoring

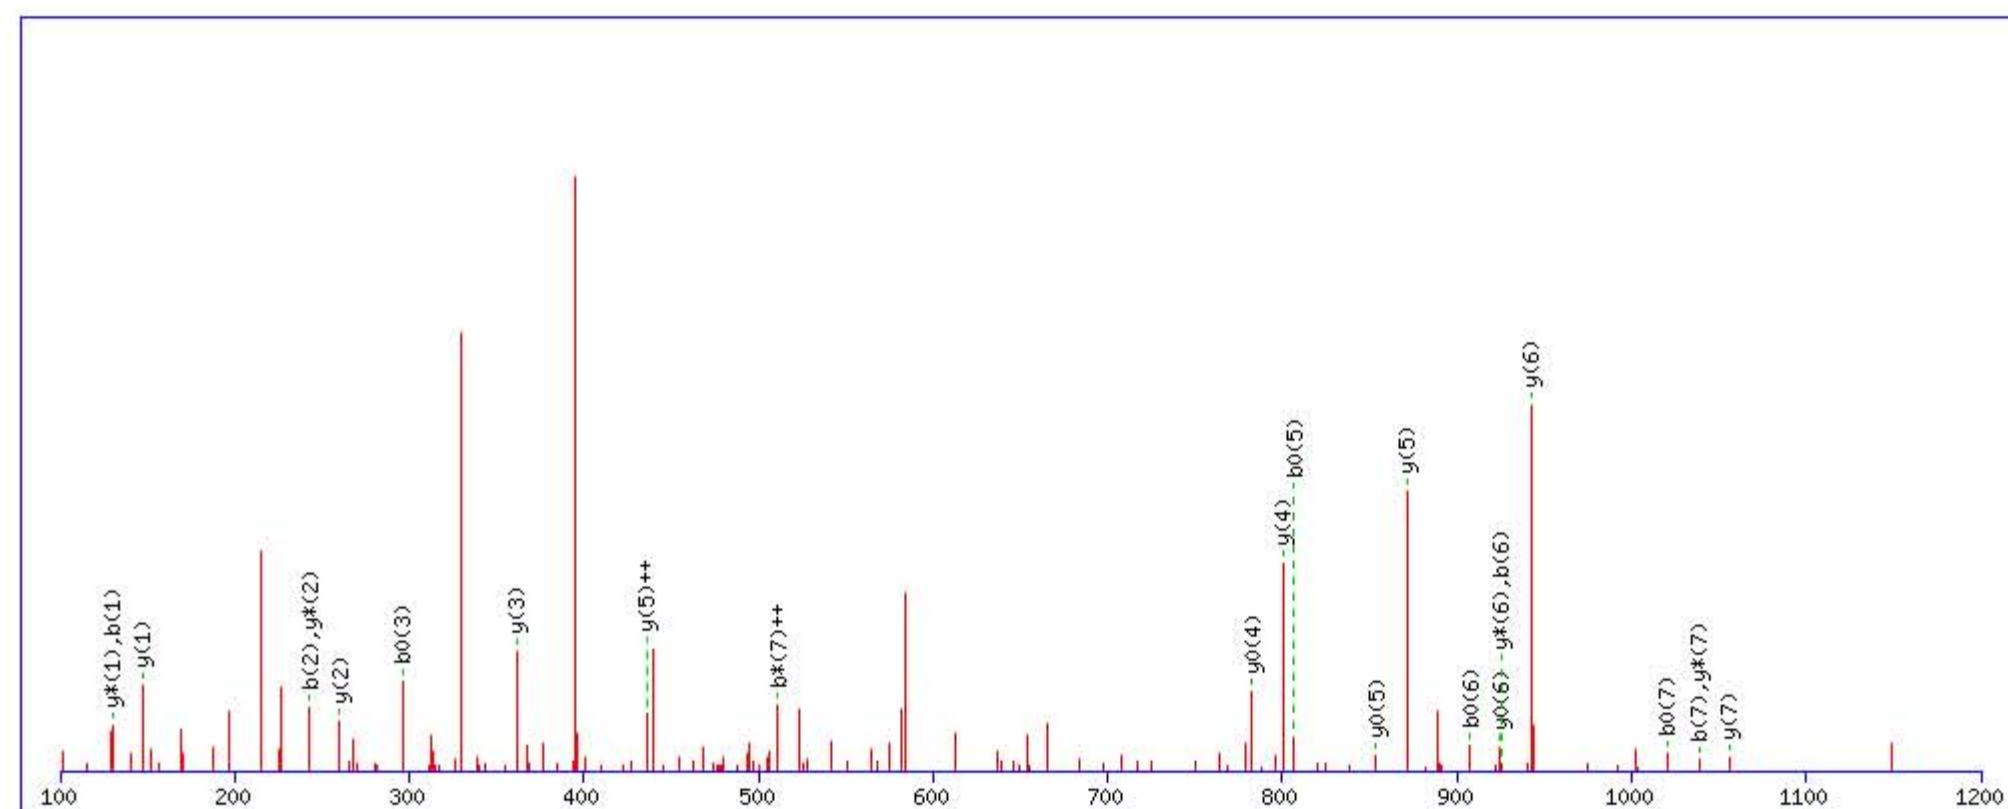

Monoisotopic mass of neutral peptide Mr(calc): 1183.663452

Fixed modifications: Carbamidomethyl (C) (apply to specified residues or termini only)

Variable modifications:

Q5 : Biotin:Thermo-21345 (Q)

Ions Score: 30 Expect: 0.02

Matches : 24/72 fragment ions using 51 most intense peaks [\(help\)](#)

| # | b           | b <sup>++</sup> | b <sup>*</sup> | b <sup>+++</sup> | b <sup>0</sup> | b <sup>0++</sup> | Seq. | y           | y <sup>++</sup> | y <sup>*</sup> | y <sup>+++</sup> | y <sup>0</sup> | y <sup>0++</sup> | # |
|---|-------------|-----------------|----------------|------------------|----------------|------------------|------|-------------|-----------------|----------------|------------------|----------------|------------------|---|
| 1 | 130.049869  | 65.528572       |                |                  | 112.039304     | 56.523290        | E    |             |                 |                |                  |                |                  | 8 |
| 2 | 243.133933  | 122.070605      |                |                  | 225.123368     | 113.065322       | L    | 1055.628165 | 528.317720      | 1038.601616    | 519.804446       | 1037.617600    | 519.312438       | 7 |
| 3 | 314.171047  | 157.589161      |                |                  | 296.160482     | 148.583879       | A    | 942.544101  | 471.775689      | 925.517552     | 463.262414       | 924.533536     | 462.770406       | 6 |
| 4 | 385.208161  | 193.107718      |                |                  | 367.197596     | 184.102436       | A    | 871.506987  | 436.257132      | 854.480438     | 427.743857       | 853.496422     | 427.251849       | 5 |
| 5 | 824.433487  | 412.720382      | 807.406938     | 404.207107       | 806.422922     | 403.715099       | Q    | 800.469873  | 400.738575      | 783.443324     | 392.225300       | 782.459308     | 391.733292       | 4 |
| 6 | 925.481166  | 463.244221      | 908.454617     | 454.730947       | 907.470601     | 454.238939       | T    | 361.244547  | 181.125911      | 344.217998     | 172.612637       | 343.233982     | 172.120629       | 3 |
| 7 | 1038.565230 | 519.786253      | 1021.538681    | 511.272978       | 1020.554665    | 510.780970       | I    | 260.196868  | 130.602072      | 243.170319     | 122.088797       |                |                  | 2 |
| 8 |             |                 |                |                  |                |                  | K    | 147.112804  | 74.060040       | 130.086255     | 65.546765        |                |                  | 1 |

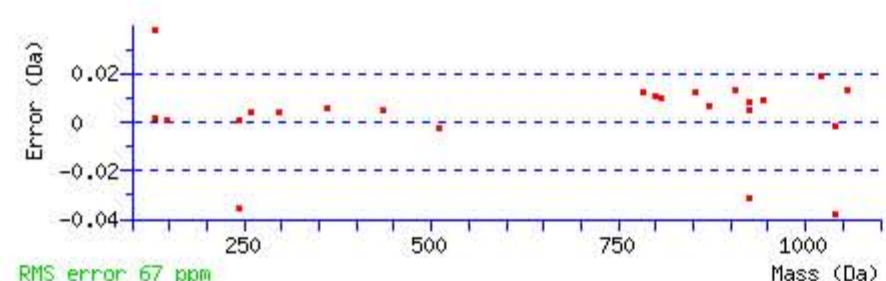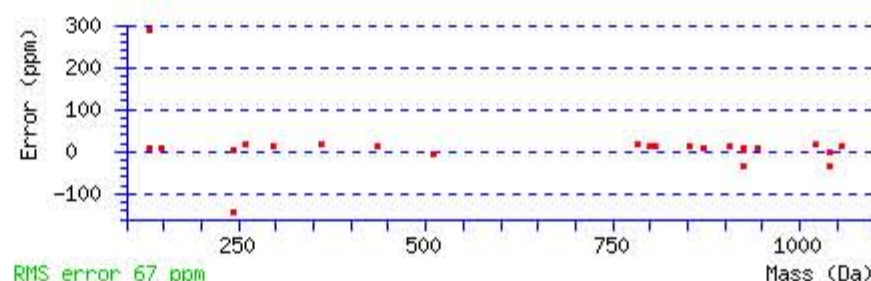

NCBI BLAST search of [ELAAQTIK](#)

(Parameters: blastp, nr protein database, expect=20000, no filter, PAM30)

Other BLAST [web gateways](#)

All matches to this query

| Score | Mr(calc):   | Delta     | Sequence                     |
|-------|-------------|-----------|------------------------------|
| 30.3  | 1183.663452 | 0.007596  | <a href="#">ELAAQTIK</a>     |
| 25.2  | 1183.663452 | 0.007596  | <a href="#">ELAAQITK</a>     |
| 12.6  | 1183.663467 | 0.007581  | <a href="#">TQLSPSIK</a>     |
| 7.0   | 1183.681198 | -0.010150 | <a href="#">LEALLEAAGIGK</a> |
| 6.5   | 1183.660080 | 0.010968  | <a href="#">AIEVAISPWK</a>   |
| 6.5   | 1183.667282 | 0.003766  | <a href="#">GKQASEPALRK</a>  |
| 5.3   | 1183.663452 | 0.007596  | <a href="#">LEQAATLK</a>     |
| 4.5   | 1183.656937 | 0.014111  | <a href="#">MRPQTLK</a>      |
| 4.4   | 1183.674698 | -0.003650 | <a href="#">TQVRELK</a>      |
| 3.4   | 1183.667297 | 0.003751  | <a href="#">EPTGRVEIRK</a>   |



# MASCOT Search Results

## Peptide View

MS/MS Fragmentation of **LDAQASFLPK**

Found in **ITIH1\_HUMAN**, Inter-alpha-trypsin inhibitor heavy chain H1 OS=Homo sapiens GN=ITIH1 PE=1 SV=3

Match to Query 34574: 1399.765468 from(700.890010,2+) rtinseconds(2167) index(61710)

Title: Locus:1.1.1.3059.15 File:"2013-07-02 CLN FXIII 60 min 1st F 4.wiff"

Data file C:\Program Files (x86)\Matrix Science\Mascot Daemon\mgf\4 FXIII 60 min 1st\mascot\_daemon\_merge.mgf

Click mouse within plot area to zoom in by factor of two about that point

Or, Plot from  to  Da

Label all possible matches  Label matches used for scoring

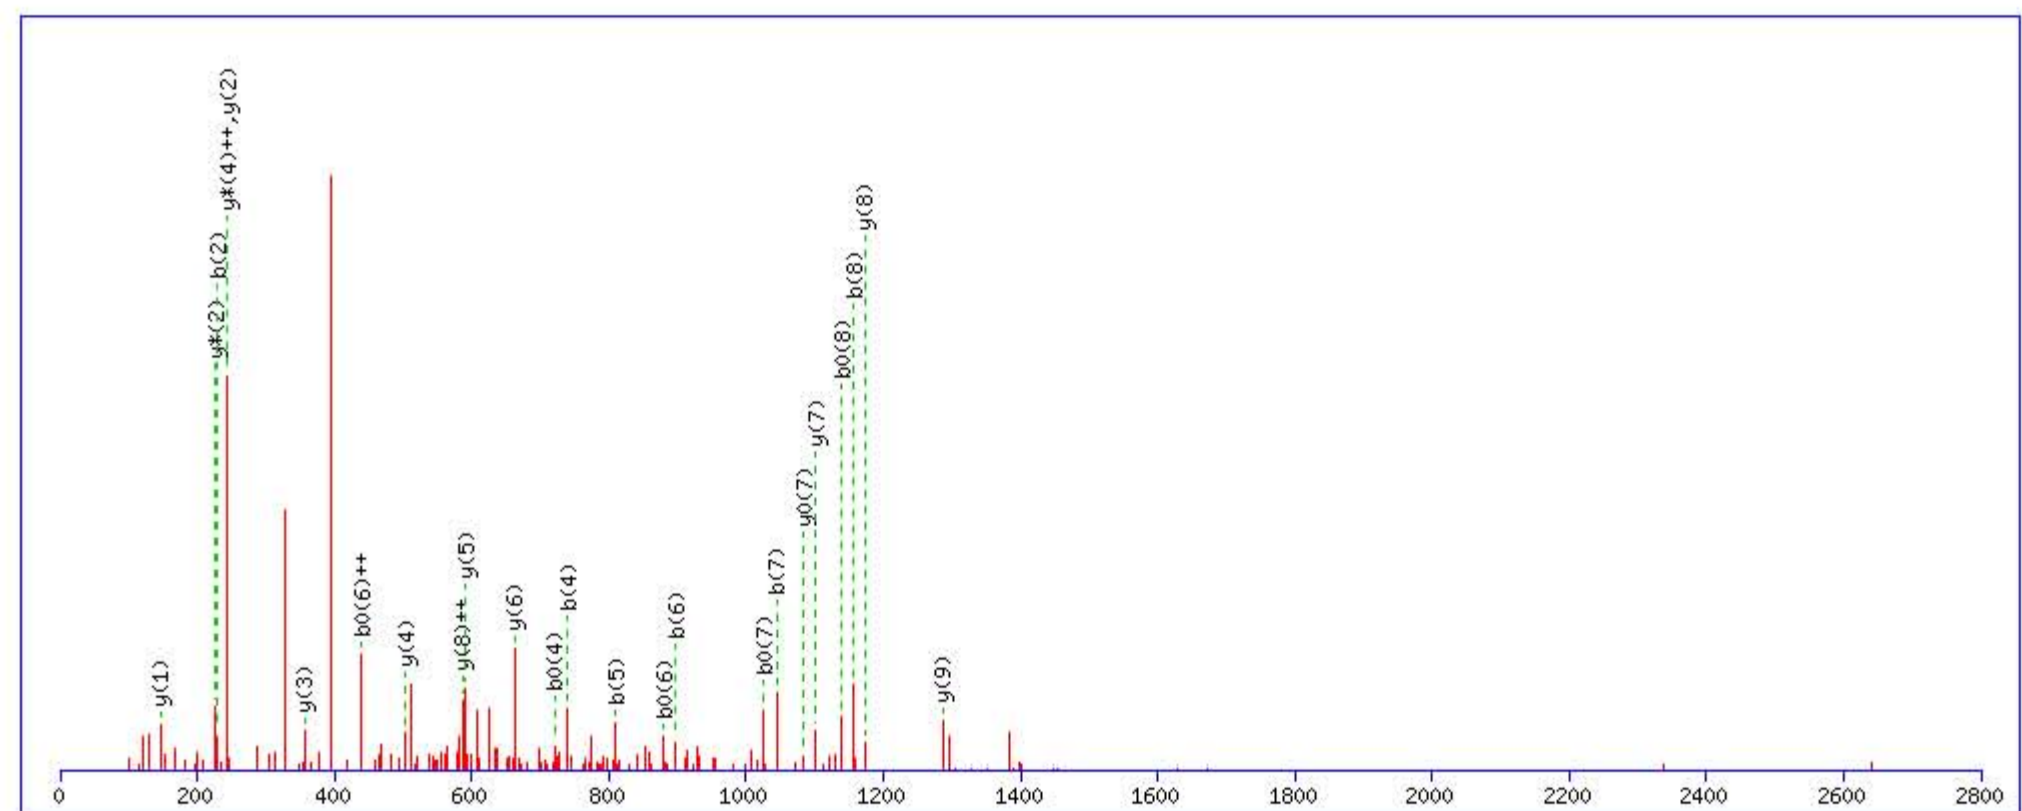

Monoisotopic mass of neutral peptide Mr(calc): 1399.753342

Fixed modifications: Carbamidomethyl (C) (apply to specified residues or termini only)

Variable modifications:

Q4 : Biotin:Thermo-21345 (Q)

Ions Score: 47 Expect: 0.00015

Matches : 24/92 fragment ions using 51 most intense peaks [\(help\)](#)

| #  | b                  | b <sup>++</sup> | b <sup>+</sup> | b <sup>+++</sup> | b <sup>0</sup>     | b <sup>0++</sup>  | Seq. | y                  | y <sup>++</sup>   | y <sup>+</sup>    | y <sup>+++</sup>  | y <sup>0</sup>     | y <sup>0++</sup> | #  |
|----|--------------------|-----------------|----------------|------------------|--------------------|-------------------|------|--------------------|-------------------|-------------------|-------------------|--------------------|------------------|----|
| 1  | 114.091340         | 57.549308       |                |                  |                    |                   | L    |                    |                   |                   |                   |                    |                  | 10 |
| 2  | <b>229.118283</b>  | 115.062779      |                |                  | 211.107718         | 106.057497        | D    | <b>1287.676571</b> | 644.341924        | 1270.650022       | 635.828649        | 1269.666006        | 635.336641       | 9  |
| 3  | 300.155397         | 150.581336      |                |                  | 282.144832         | 141.576054        | A    | <b>1172.649628</b> | <b>586.828452</b> | 1155.623079       | 578.315178        | 1154.639063        | 577.823169       | 8  |
| 4  | <b>739.380723</b>  | 370.194000      | 722.354174     | 361.680725       | <b>721.370158</b>  | 361.188717        | Q    | <b>1101.612514</b> | 551.309895        | 1084.585965       | 542.796621        | <b>1083.601949</b> | 542.304612       | 7  |
| 5  | <b>810.417837</b>  | 405.712557      | 793.391288     | 397.199282       | 792.407272         | 396.707274        | A    | <b>662.387188</b>  | 331.697232        | 645.360639        | 323.183957        | 644.376623         | 322.691949       | 6  |
| 6  | <b>897.449865</b>  | 449.228570      | 880.423316     | 440.715296       | <b>879.439300</b>  | <b>440.223288</b> | S    | <b>591.350074</b>  | 296.178675        | 574.323525        | 287.665400        | 573.339509         | 287.173392       | 5  |
| 7  | <b>1044.518279</b> | 522.762777      | 1027.491730    | 514.249503       | <b>1026.507714</b> | 513.757495        | F    | <b>504.318046</b>  | 252.662661        | 487.291497        | <b>244.149386</b> |                    |                  | 4  |
| 8  | <b>1157.602343</b> | 579.304809      | 1140.575794    | 570.791535       | <b>1139.591778</b> | 570.299527        | L    | <b>357.249632</b>  | 179.128454        | 340.223083        | 170.615179        |                    |                  | 3  |
| 9  | 1254.655107        | 627.831191      | 1237.628558    | 619.317917       | 1236.644542        | 618.825909        | P    | <b>244.165568</b>  | 122.586422        | <b>227.139019</b> | 114.073148        |                    |                  | 2  |
| 10 |                    |                 |                |                  |                    |                   | K    | <b>147.112804</b>  | 74.060040         | 130.086255        | 65.546765         |                    |                  | 1  |

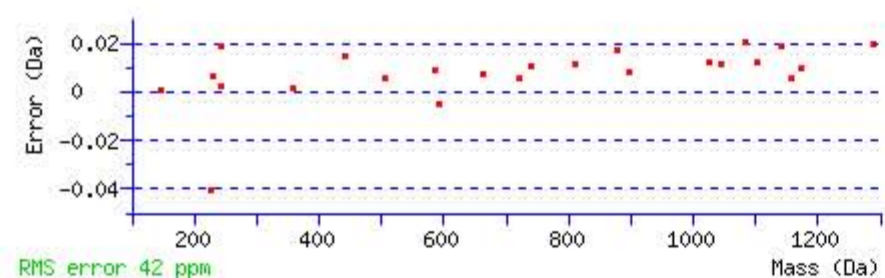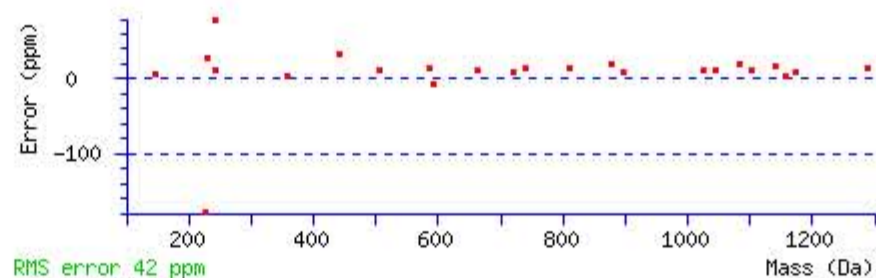

NCBI BLAST search of [LDAQASFLPK](#)

(Parameters: blastp, nr protein database, expect=20000, no filter, PAM30)

Other BLAST [web gateways](#)

## All matches to this query

| Score | Mr(calc):   | Delta     | Sequence                      |
|-------|-------------|-----------|-------------------------------|
| 47.0  | 1399.753342 | 0.012126  | <a href="#">LDAQASFLPK</a>    |
| 6.0   | 1399.785660 | -0.020192 | <a href="#">LNENIKNAMLIK</a>  |
| 5.3   | 1399.753342 | 0.012126  | <a href="#">LLDFAASQPK</a>    |
| 5.3   | 1399.755859 | 0.009609  | <a href="#">LSTPDLTQISPK</a>  |
| 4.4   | 1399.745972 | 0.019496  | <a href="#">IDAATGIPVTTWR</a> |
| 4.4   | 1399.755814 | 0.009654  | <a href="#">KTELGPLKEEEK</a>  |
| 2.5   | 1399.771103 | -0.005635 | <a href="#">QKEPSVLFVFPK</a>  |
| 2.4   | 1399.771973 | -0.006505 | <a href="#">IWQGMLTIK</a>     |
| 2.4   | 1399.756714 | 0.008754  | <a href="#">LSQVPMSALK</a>    |
| 2.3   | 1399.782318 | -0.016850 | <a href="#">RGFLAQEELLPK</a>  |



# MASCOT Search Results

## Peptide View

MS/MS Fragmentation of **FAHYVVTSQVVNTANEAR**

Found in **ITIH1\_HUMAN**, Inter-alpha-trypsin inhibitor heavy chain H1 OS=Homo sapiens GN=ITIH1 PE=1 SV=3

Match to Query 61007: 2316.190332 from(773.070720,3+) rtinseconds(1924) index(59977)

Title: Locus:1.1.1.2975.23 File:"2013-07-02 CLN FXIII 60 min 1st F 4.wiff"

Data file C:\Program Files (x86)\Matrix Science\Mascot Daemon\mgf4 FXIII 60 min 1st\mascot\_daemon\_merge.mgf

Click mouse within plot area to zoom in by factor of two about that point

Or, Plot from  to  Da

Label all possible matches  Label matches used for scoring

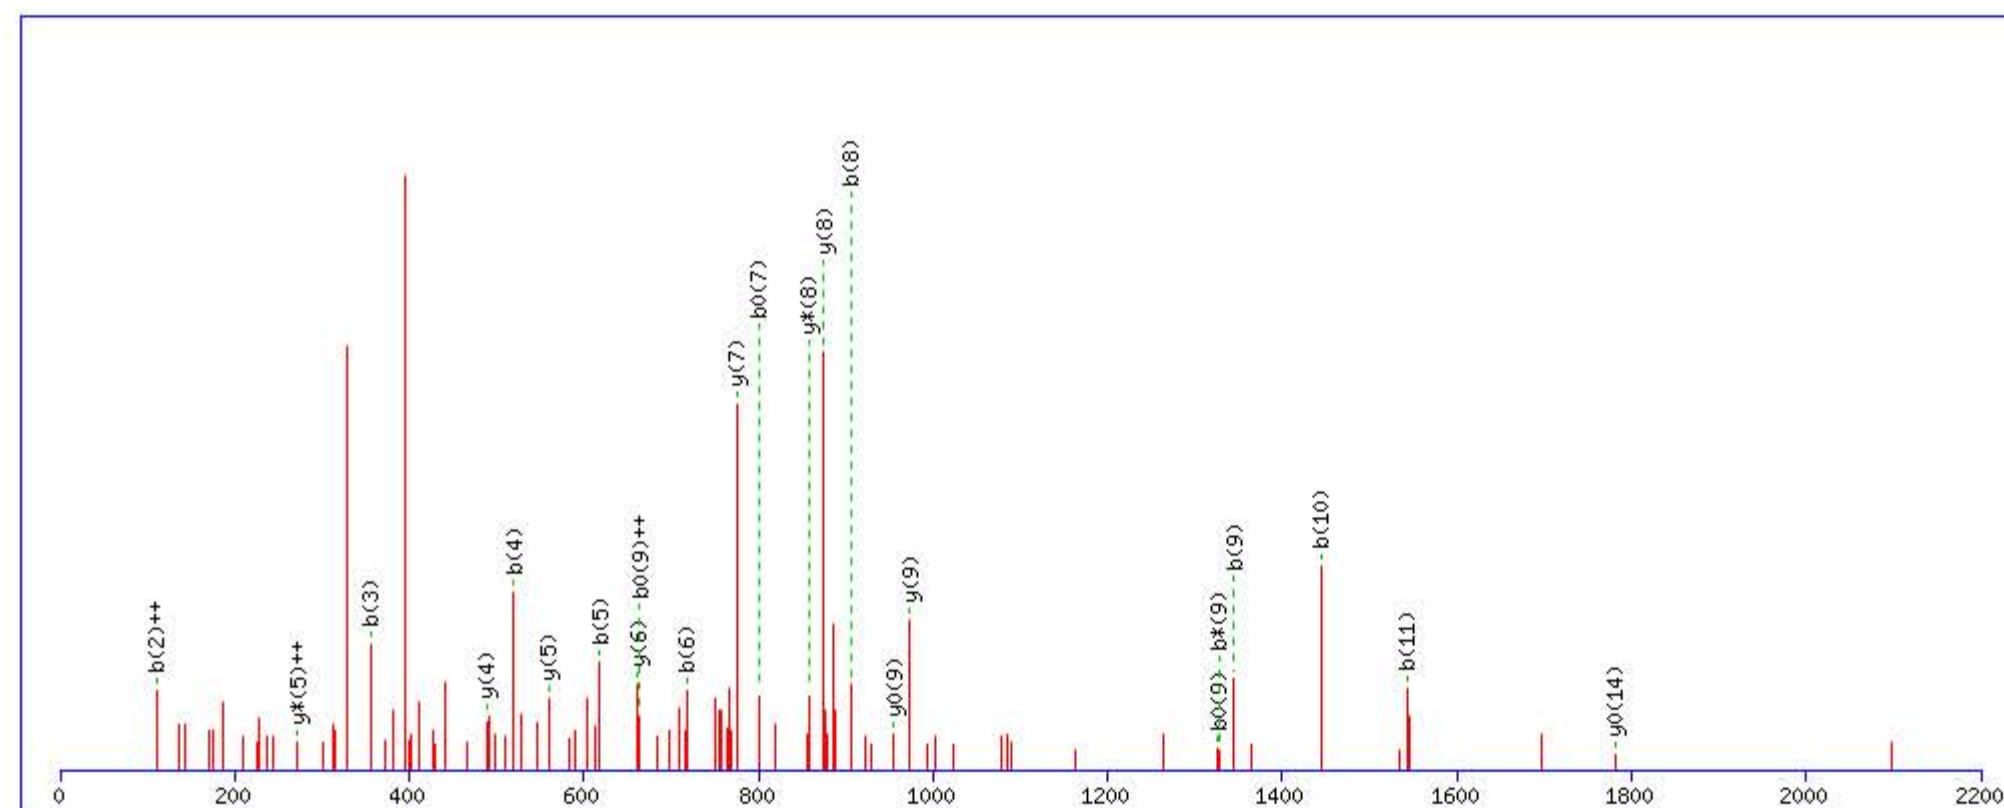

Monoisotopic mass of neutral peptide Mr(calc): 2316.168488

Fixed modifications: Carbamidomethyl (C) (apply to specified residues or termini only)

Variable modifications:

Q9 : Biotin:Thermo-21345 (Q)

Ions Score: 30 Expect: 0.024

Matches : 23/172 fragment ions using 54 most intense peaks [\(help\)](#)

| #  | b           | b <sup>++</sup> | b <sup>*</sup> | b <sup>***</sup> | b <sup>0</sup> | b <sup>0++</sup> | Seq. | y           | y <sup>++</sup> | y <sup>*</sup> | y <sup>***</sup> | y <sup>0</sup> | y <sup>0++</sup> | #  |
|----|-------------|-----------------|----------------|------------------|----------------|------------------|------|-------------|-----------------|----------------|------------------|----------------|------------------|----|
| 1  | 148.075690  | 74.541483       |                |                  |                |                  | F    |             |                 |                |                  |                |                  | 18 |
| 2  | 219.112804  | 110.060040      |                |                  |                |                  | A    | 2170.107350 | 1085.557313     | 2153.080801    | 1077.044038      | 2152.096785    | 1076.552030      | 17 |
| 3  | 356.171716  | 178.589496      |                |                  |                |                  | H    | 2099.070236 | 1050.038756     | 2082.043687    | 1041.525481      | 2081.059671    | 1041.033473      | 16 |
| 4  | 519.235045  | 260.121161      |                |                  |                |                  | Y    | 1962.011324 | 981.509300      | 1944.984775    | 972.996026       | 1944.000759    | 972.504018       | 15 |
| 5  | 618.303459  | 309.655368      |                |                  |                |                  | V    | 1798.947995 | 899.977636      | 1781.921446    | 891.464361       | 1780.937430    | 890.972353       | 14 |
| 6  | 717.371873  | 359.189575      |                |                  |                |                  | V    | 1699.879581 | 850.443429      | 1682.853032    | 841.930154       | 1681.869016    | 841.438146       | 13 |
| 7  | 818.419552  | 409.713414      |                |                  | 800.408987     | 400.708132       | T    | 1600.811167 | 800.909222      | 1583.784618    | 792.395947       | 1582.800602    | 791.903939       | 12 |
| 8  | 905.451580  | 453.229428      |                |                  | 887.441015     | 444.224146       | S    | 1499.763488 | 750.385382      | 1482.736939    | 741.872108       | 1481.752923    | 741.380100       | 11 |
| 9  | 1344.676906 | 672.842091      | 1327.650357    | 664.328817       | 1326.666341    | 663.836808       | Q    | 1412.731460 | 706.869368      | 1395.704911    | 698.356094       | 1394.720895    | 697.864086       | 10 |
| 10 | 1443.745320 | 722.376298      | 1426.718771    | 713.863024       | 1425.734755    | 713.371016       | V    | 973.506134  | 487.256705      | 956.479585     | 478.743431       | 955.495569     | 478.251423       | 9  |
| 11 | 1542.813734 | 771.910505      | 1525.787185    | 763.397231       | 1524.803169    | 762.905223       | V    | 874.437720  | 437.722498      | 857.411171     | 429.209224       | 856.427155     | 428.717216       | 8  |
| 12 | 1656.856661 | 828.931969      | 1639.830112    | 820.418694       | 1638.846096    | 819.926686       | N    | 775.369306  | 388.188291      | 758.342757     | 379.675017       | 757.358741     | 379.183009       | 7  |
| 13 | 1757.904340 | 879.455808      | 1740.877791    | 870.942534       | 1739.893775    | 870.450526       | T    | 661.326379  | 331.166828      | 644.299830     | 322.653553       | 643.315814     | 322.161545       | 6  |
| 14 | 1828.941454 | 914.974365      | 1811.914905    | 906.461091       | 1810.930889    | 905.969083       | A    | 560.278700  | 280.642988      | 543.252151     | 272.129714       | 542.268135     | 271.637706       | 5  |
| 15 | 1942.984381 | 971.995829      | 1925.957832    | 963.482554       | 1924.973816    | 962.990546       | N    | 489.241586  | 245.124431      | 472.215037     | 236.611157       | 471.231021     | 236.119149       | 4  |
| 16 | 2072.026974 | 1036.517125     | 2055.000425    | 1028.003850      | 2054.016409    | 1027.511842      | E    | 375.198659  | 188.102968      | 358.172110     | 179.589693       | 357.188094     | 179.097685       | 3  |
| 17 | 2143.064088 | 1072.035682     | 2126.037539    | 1063.522407      | 2125.053523    | 1063.030399      | A    | 246.156066  | 123.581671      | 229.129517     | 115.068397       |                |                  | 2  |
| 18 |             |                 |                |                  |                |                  | R    | 175.118952  | 88.063114       | 158.092403     | 79.549839        |                |                  | 1  |

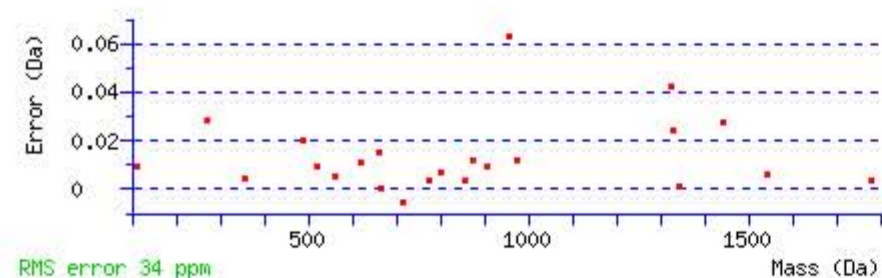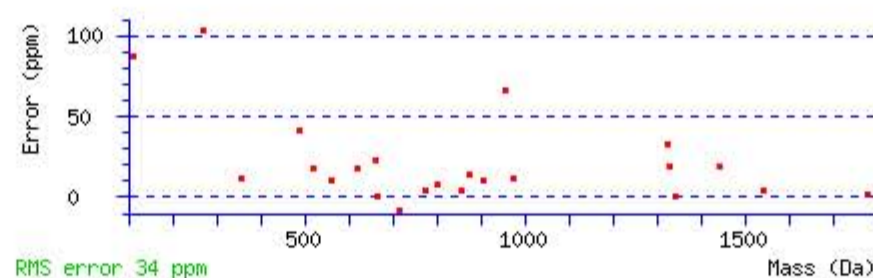

NCBI BLAST search of [FAHYVVTSQVVNTANEAR](#)

(Parameters: blastp, nr protein database, expect=20000, no filter, PAM30)

Other BLAST [web gateways](#)

## All matches to this query

| Score | Mr(calc):   | Delta    | Sequence                           |
|-------|-------------|----------|------------------------------------|
| 30.4  | 2316.168488 | 0.021844 | <a href="#">FAHYVVTSQVVNTANEAR</a> |

Mascot: <http://www.matrixscience.com/>



# MASCOT Search Results

## Peptide View

MS/MS Fragmentation of **GMADQDGLKPTIDKPSEDSPPLEMLGPR**  
 Found in **ITIH1\_HUMAN**, Inter-alpha-trypsin inhibitor heavy chain H1 OS=Homo sapiens GN=ITIH1 PE=1 SV=3

Match to Query 76174: 3304.656256 from(827.171340,4+) rtinseconds(2207) index(62024)  
 Title: Locus:1.1.1.3073.19 File:"2013-07-02 CLN FXIII 60 min 1st F 4.wiff"  
 Data file C:\Program Files (x86)\Matrix Science\Mascot Daemon\mgf4 FXIII 60 min 1st\mascot\_daemon\_merge.mgf

Click mouse within plot area to zoom in by factor of two about that point

Or, Plot from  to  Da

Label all possible matches  Label matches used for scoring

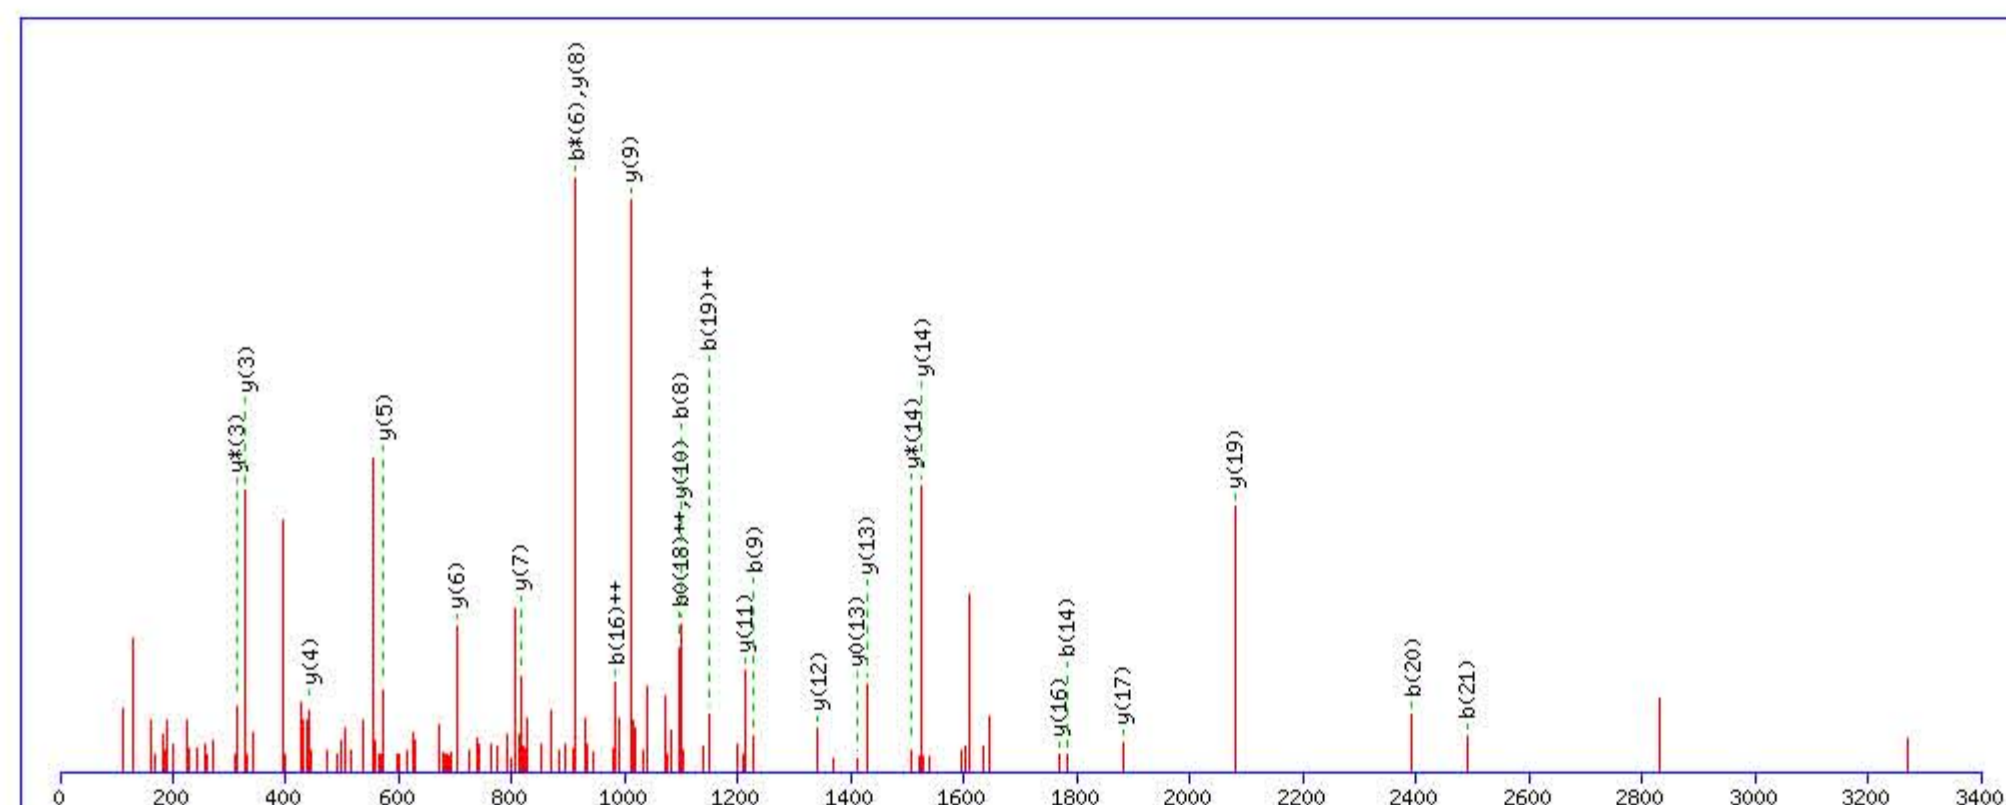

Monoisotopic mass of neutral peptide Mr(calc): 3304.614151  
 Fixed modifications: Carbamidomethyl (C) (apply to specified residues or termini only)  
 Variable modifications:  
 Q5 : Biotin:Thermo-21345 (Q)  
 Ions Score: 106 Expect: 1.3e-010  
 Matches : 27/300 fragment ions using 39 most intense peaks [\(help\)](#)

| #  | b           | b <sup>++</sup> | b <sup>*</sup> | b <sup>*++</sup> | b <sup>0</sup> | b <sup>0++</sup> | Seq. | y           | y <sup>++</sup> | y <sup>*</sup> | y <sup>*++</sup> | y <sup>0</sup> | y <sup>0++</sup> | #  |
|----|-------------|-----------------|----------------|------------------|----------------|------------------|------|-------------|-----------------|----------------|------------------|----------------|------------------|----|
| 1  | 58.028740   | 29.518008       |                |                  |                |                  | G    |             |                 |                |                  |                |                  | 28 |
| 2  | 189.069225  | 95.038250       |                |                  |                |                  | M    | 3248.599985 | 1624.803630     | 3231.573436    | 1616.290356      | 3230.589420    | 1615.798348      | 27 |
| 3  | 260.106339  | 130.556807      |                |                  |                |                  | A    | 3117.559500 | 1559.283388     | 3100.532951    | 1550.770113      | 3099.548935    | 1550.278105      | 26 |
| 4  | 375.133282  | 188.070279      |                |                  | 357.122717     | 179.064997       | D    | 3046.522386 | 1523.764831     | 3029.495837    | 1515.251556      | 3028.511821    | 1514.759548      | 25 |
| 5  | 814.358608  | 407.682942      | 797.332059     | 399.169668       | 796.348043     | 398.677660       | Q    | 2931.495443 | 1466.251359     | 2914.468894    | 1457.738085      | 2913.484878    | 1457.246077      | 24 |
| 6  | 929.385551  | 465.196414      | 912.359002     | 456.683139       | 911.374986     | 456.191131       | D    | 2492.270117 | 1246.638696     | 2475.243568    | 1238.125422      | 2474.259552    | 1237.633414      | 23 |
| 7  | 986.407015  | 493.707146      | 969.380466     | 485.193871       | 968.396450     | 484.701863       | G    | 2377.243174 | 1189.125225     | 2360.216625    | 1180.611950      | 2359.232609    | 1180.119942      | 22 |
| 8  | 1099.491079 | 550.249177      | 1082.464530    | 541.735903       | 1081.480514    | 541.243895       | L    | 2320.221710 | 1160.614493     | 2303.195161    | 1152.101218      | 2302.211145    | 1151.609210      | 21 |
| 9  | 1227.586042 | 614.296659      | 1210.559493    | 605.783385       | 1209.575477    | 605.291376       | K    | 2207.137646 | 1104.072461     | 2190.111097    | 1095.559186      | 2189.127081    | 1095.067178      | 20 |
| 10 | 1324.638806 | 662.823041      | 1307.612257    | 654.309767       | 1306.628241    | 653.817758       | P    | 2079.042683 | 1040.024980     | 2062.016134    | 1031.511705      | 2061.032118    | 1031.019697      | 19 |
| 11 | 1425.686485 | 713.346881      | 1408.659936    | 704.833606       | 1407.675920    | 704.341598       | T    | 1981.989919 | 991.498598      | 1964.963370    | 982.985323       | 1963.979354    | 982.493315       | 18 |
| 12 | 1538.770549 | 769.888912      | 1521.744000    | 761.375638       | 1520.759984    | 760.883630       | I    | 1880.942240 | 940.974758      | 1863.915691    | 932.461484       | 1862.931675    | 931.969476       | 17 |
| 13 | 1653.797492 | 827.402384      | 1636.770943    | 818.889110       | 1635.786927    | 818.397101       | D    | 1767.858176 | 884.432726      | 1750.831627    | 875.919452       | 1749.847611    | 875.427444       | 16 |
| 14 | 1781.892455 | 891.449865      | 1764.865906    | 882.936591       | 1763.881890    | 882.444583       | K    | 1652.831233 | 826.919255      | 1635.804684    | 818.405980       | 1634.820668    | 817.913972       | 15 |
| 15 | 1878.945219 | 939.976248      | 1861.918670    | 931.462973       | 1860.934654    | 930.970965       | P    | 1524.736270 | 762.871773      | 1507.709721    | 754.358499       | 1506.725705    | 753.866491       | 14 |
| 16 | 1965.977247 | 983.492262      | 1948.950698    | 974.978987       | 1947.966682    | 974.486979       | S    | 1427.683506 | 714.345391      | 1410.656957    | 705.832117       | 1409.672941    | 705.340109       | 13 |
| 17 | 2095.019840 | 1048.013558     | 2077.993291    | 1039.500283      | 2077.009275    | 1039.008275      | E    | 1340.651478 | 670.829377      | 1323.624929    | 662.316103       | 1322.640913    | 661.824095       | 12 |
| 18 | 2210.046783 | 1105.527029     | 2193.020234    | 1097.013755      | 2192.036218    | 1096.521747      | D    | 1211.608885 | 606.308081      | 1194.582336    | 597.794806       | 1193.598320    | 597.302798       | 11 |
| 19 | 2297.078811 | 1149.043043     | 2280.052262    | 1140.529769      | 2279.068246    | 1140.037761      | S    | 1096.581942 | 548.794609      | 1079.555393    | 540.281335       | 1078.571377    | 539.789327       | 10 |
| 20 | 2394.131575 | 1197.569425     | 2377.105026    | 1189.056151      | 2376.121010    | 1188.564143      | P    | 1009.549914 | 505.278595      | 992.523365     | 496.765321       | 991.539349     | 496.273313       | 9  |
| 21 | 2491.184339 | 1246.095807     | 2474.157790    | 1237.582533      | 2473.173774    | 1237.090525      | P    | 912.497150  | 456.752213      | 895.470601     | 448.238939       | 894.486585     | 447.746931       | 8  |
| 22 | 2604.268403 | 1302.637839     | 2587.241854    | 1294.124565      | 2586.257838    | 1293.632557      | L    | 815.444386  | 408.225831      | 798.417837     | 399.712557       | 797.433821     | 399.220549       | 7  |
| 23 | 2733.310996 | 1367.159136     | 2716.284447    | 1358.645861      | 2715.300431    | 1358.153854      | E    | 702.360322  | 351.683799      | 685.333773     | 343.170525       | 684.349757     | 342.678517       | 6  |
| 24 | 2864.351481 | 1432.679379     | 2847.324932    | 1424.166104      | 2846.340916    | 1423.674096      | M    | 573.317729  | 287.162503      | 556.291180     | 278.649228       |                |                  | 5  |
| 25 | 2977.435545 | 1489.221411     | 2960.408996    | 1480.708136      | 2959.424980    | 1480.216128      | L    | 442.277244  | 221.642260      | 425.250695     | 213.128986       |                |                  | 4  |
| 26 | 3034.457009 | 1517.732143     | 3017.430460    | 1509.218868      | 3016.446444    | 1508.726860      | G    | 329.193180  | 165.100228      | 312.166631     | 156.586953       |                |                  | 3  |
| 27 | 3131.509773 | 1566.258525     | 3114.483224    | 1557.745250      | 3113.499208    | 1557.253242      | P    | 272.171716  | 136.589496      | 255.145167     | 128.076221       |                |                  | 2  |
| 28 |             |                 |                |                  |                |                  | R    | 175.118952  | 88.063114       | 158.092403     | 79.549839        |                |                  | 1  |

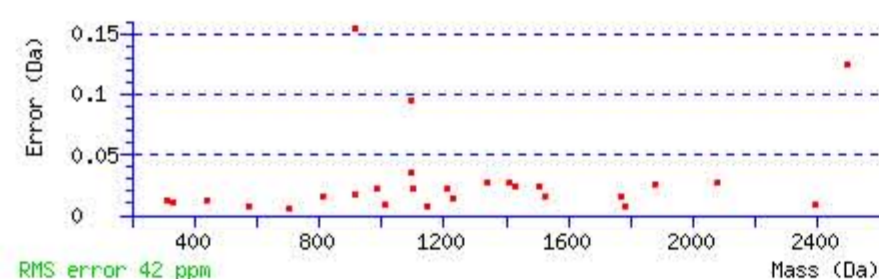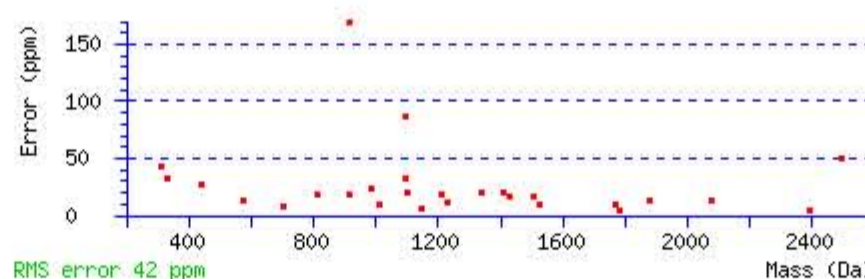

NCBI BLAST search of **GMADQDGLKPTIDKPSEDSPPLEMLGPR**  
 (Parameters: blastp, nr protein database, expect=20000, no filter, PAM30)  
 Other BLAST [web gateways](#)

### All matches to this query

| Score | Mr(calc):   | Delta     | Sequence                               |
|-------|-------------|-----------|----------------------------------------|
| 106.1 | 3304.614151 | 0.042105  | <b>GMADQDGLKPTIDKPSEDSPPLEMLGPR</b>    |
| 0.8   | 3304.683334 | -0.027078 | <b>QNAIVAKMEDPLSNRAPDSLENVISNAVPGR</b> |



**MASCOT SEARCH RESULTS**

**Peptide View**

MS/MS Fragmentation of **GHVLFRTVSQQQSCPTCSTSLNGHFK**  
 Found in **ITIH1\_HUMAN**, Inter-alpha-trypsin inhibitor heavy chain H1 OS=Homo sapiens GN=ITIH1 PE=1 SV=3

Match to Query 77860: 3496.755870 from(700.358450,5+) rtinseconds(1930) index(60020)  
 Title: Locus:1.1.1.2977.16 File:"2013-07-02 CLN FXIII 60 min 1st F 4.wiff"  
 Data file C:\Program Files (x86)\Matrix Science\Mascot Daemon\mgf4 FXIII 60 min 1st\mascot\_daemon\_merge.mgf

Click mouse within plot area to zoom in by factor of two about that point  
 Or, Plot from  to  Da   
 Label all possible matches  Label matches used for scoring

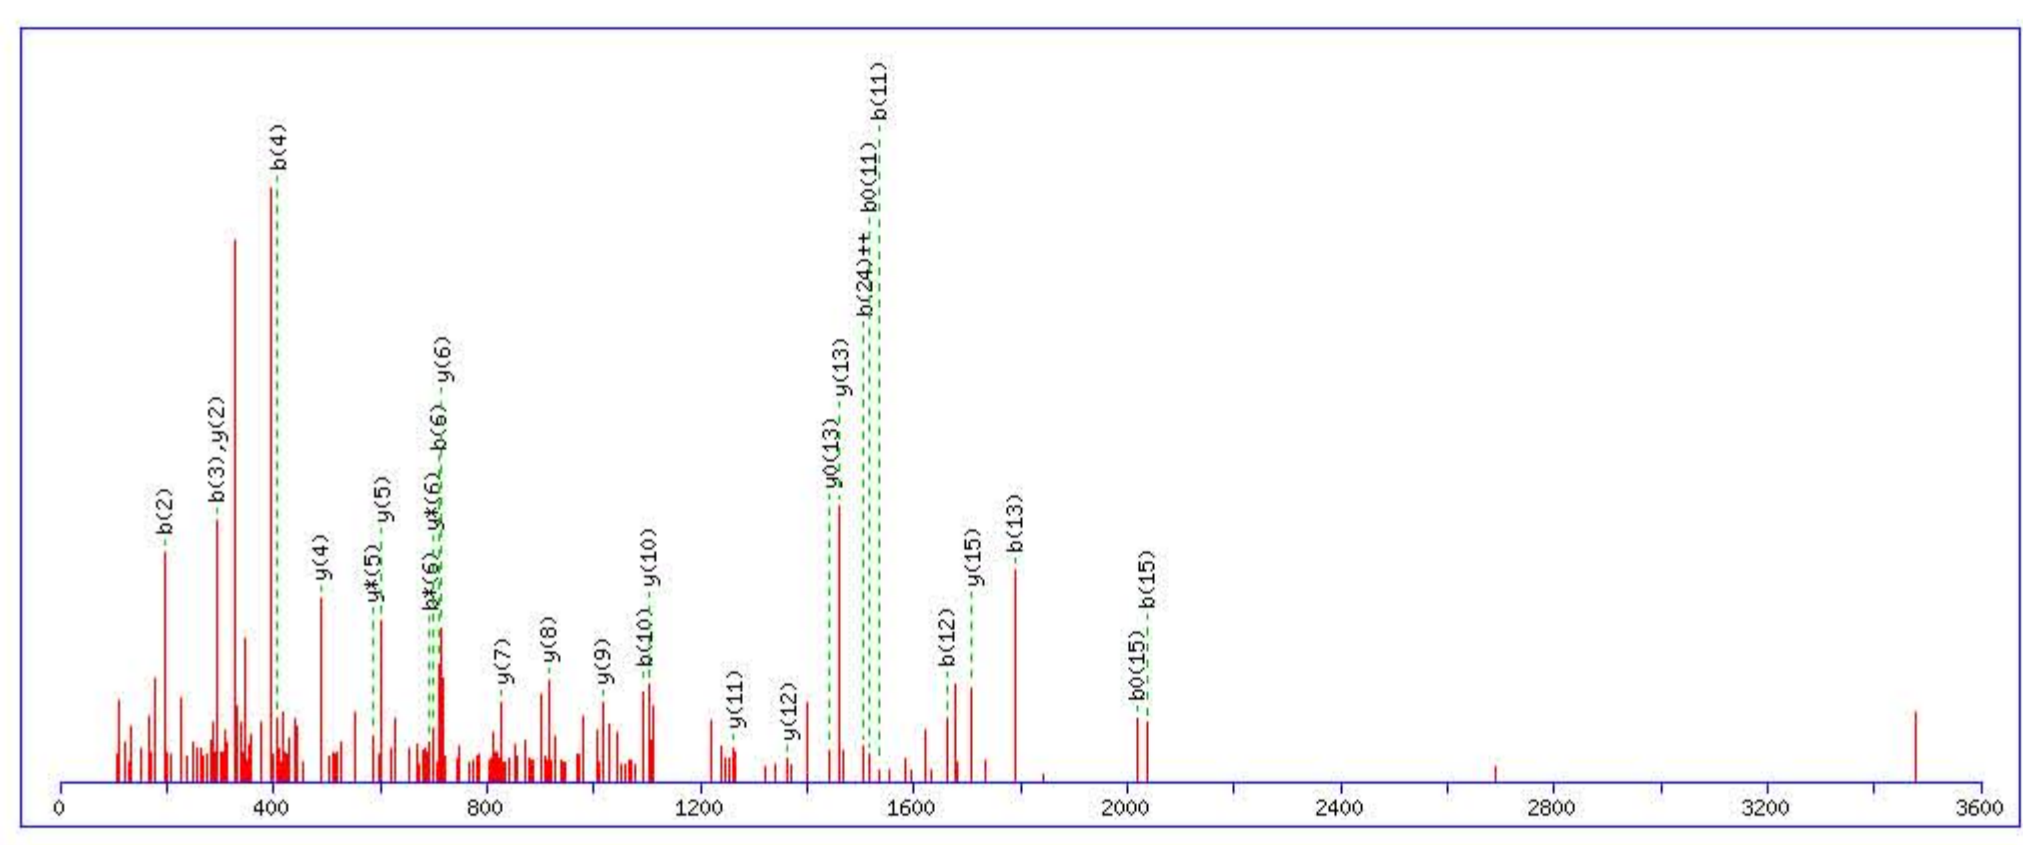

Monoisotopic mass of neutral peptide Mr(calc): 3496.716660  
 Fixed modifications: Carbamidomethyl (C) (apply to specified residues or termini only)  
 Variable modifications:  
 Q11 : Biotin:Thermo-21345 (Q)  
 Ions Score: 49 Expect: 0.00034  
 Matches : 28/286 fragment ions using 70 most intense peaks [\(help\)](#)

| #  | b                  | b <sup>++</sup>    | b <sup>*</sup>    | b <sup>*++</sup> | b <sup>0</sup>     | b <sup>0++</sup> | Seq. | y                  | y <sup>++</sup> | y <sup>*</sup>    | y <sup>*++</sup> | y <sup>0</sup>     | y <sup>0++</sup> | #  |
|----|--------------------|--------------------|-------------------|------------------|--------------------|------------------|------|--------------------|-----------------|-------------------|------------------|--------------------|------------------|----|
| 1  | 58.028740          | 29.518008          |                   |                  |                    |                  | G    |                    |                 |                   |                  |                    |                  | 28 |
| 2  | <b>195.087652</b>  | 98.047464          |                   |                  |                    |                  | H    | 3440.702435        | 1720.854855     | 3423.675886       | 1712.341581      | 3422.691870        | 1711.849573      | 27 |
| 3  | <b>294.156066</b>  | 147.581671         |                   |                  |                    |                  | V    | 3303.643523        | 1652.325399     | 3286.616974       | 1643.812125      | 3285.632958        | 1643.320117      | 26 |
| 4  | <b>407.240130</b>  | 204.123703         |                   |                  |                    |                  | L    | 3204.575109        | 1602.791192     | 3187.548560       | 1594.277918      | 3186.564544        | 1593.785910      | 25 |
| 5  | 554.308544         | 277.657910         |                   |                  |                    |                  | F    | 3091.491045        | 1546.249160     | 3074.464496       | 1537.735886      | 3073.480480        | 1537.243878      | 24 |
| 6  | <b>710.409655</b>  | 355.708466         | <b>693.383106</b> | 347.195191       |                    |                  | R    | 2944.422631        | 1472.714953     | 2927.396082       | 1464.201679      | 2926.412066        | 1463.709671      | 23 |
| 7  | 807.462419         | 404.234848         | 790.435870        | 395.721573       |                    |                  | P    | 2788.321520        | 1394.664398     | 2771.294971       | 1386.151123      | 2770.310955        | 1385.659115      | 22 |
| 8  | 908.510098         | 454.758687         | 891.483549        | 446.245413       | 890.499533         | 445.753405       | T    | 2691.268756        | 1346.138016     | 2674.242207       | 1337.624741      | 2673.258191        | 1337.132733      | 21 |
| 9  | 1007.578512        | 504.292894         | 990.551963        | 495.779620       | 989.567947         | 495.287612       | V    | 2590.221077        | 1295.614176     | 2573.194528       | 1287.100902      | 2572.210512        | 1286.608894      | 20 |
| 10 | <b>1094.610540</b> | 547.808908         | 1077.583991       | 539.295634       | 1076.599975        | 538.803626       | S    | 2491.152663        | 1246.079969     | 2474.126114       | 1237.566695      | 2473.142098        | 1237.074687      | 19 |
| 11 | <b>1533.835866</b> | 767.421571         | 1516.809317       | 758.908297       | <b>1515.825301</b> | 758.416289       | Q    | 2404.120635        | 1202.563955     | 2387.094086       | 1194.050681      | 2386.110070        | 1193.558673      | 18 |
| 12 | <b>1661.894444</b> | 831.450860         | 1644.867895       | 822.937586       | 1643.883879        | 822.445578       | Q    | 1964.895309        | 982.951292      | 1947.868760       | 974.438018       | 1946.884744        | 973.946010       | 17 |
| 13 | <b>1789.953022</b> | 895.480149         | 1772.926473       | 886.966875       | 1771.942457        | 886.474867       | Q    | 1836.836731        | 918.922003      | 1819.810182       | 910.408729       | 1818.826166        | 909.916721       | 16 |
| 14 | 1876.985050        | 938.996163         | 1859.958501       | 930.482889       | 1858.974485        | 929.990881       | S    | <b>1708.778153</b> | 854.892714      | 1691.751604       | 846.379440       | 1690.767588        | 845.887432       | 15 |
| 15 | <b>2037.015699</b> | 1019.011488        | 2019.989150       | 1010.498213      | <b>2019.005134</b> | 1010.006205      | C    | 1621.746125        | 811.376700      | 1604.719576       | 802.863426       | 1603.735560        | 802.371418       | 14 |
| 16 | 2134.068463        | 1067.537869        | 2117.041914       | 1059.024595      | 2116.057898        | 1058.532587      | P    | <b>1461.715476</b> | 731.361376      | 1444.688927       | 722.848101       | <b>1443.704911</b> | 722.356093       | 13 |
| 17 | 2235.116142        | 1118.061709        | 2218.089593       | 1109.548434      | 2217.105577        | 1109.056426      | T    | <b>1364.662712</b> | 682.834994      | 1347.636163       | 674.321719       | 1346.652147        | 673.829711       | 12 |
| 18 | 2395.146791        | 1198.077033        | 2378.120242       | 1189.563759      | 2377.136226        | 1189.071751      | C    | <b>1263.615033</b> | 632.311154      | 1246.588484       | 623.797880       | 1245.604468        | 623.305872       | 11 |
| 19 | 2482.178819        | 1241.593047        | 2465.152270       | 1233.079773      | 2464.168254        | 1232.587765      | S    | <b>1103.584384</b> | 552.295830      | 1086.557835       | 543.782556       | 1085.573819        | 543.290548       | 10 |
| 20 | 2583.226498        | 1292.116887        | 2566.199949       | 1283.603612      | 2565.215933        | 1283.111604      | T    | <b>1016.552356</b> | 508.779816      | 999.525807        | 500.266541       | 998.541791         | 499.774533       | 9  |
| 21 | 2670.258526        | 1335.632901        | 2653.231977       | 1327.119626      | 2652.247961        | 1326.627618      | S    | <b>915.504677</b>  | 458.255977      | 898.478128        | 449.742702       | 897.494112         | 449.250694       | 8  |
| 22 | 2783.342590        | 1392.174933        | 2766.316041       | 1383.661658      | 2765.332025        | 1383.169650      | L    | <b>828.472649</b>  | 414.739963      | 811.446100        | 406.226688       |                    |                  | 7  |
| 23 | 2896.426654        | 1448.716965        | 2879.400105       | 1440.203690      | 2878.416089        | 1439.711682      | L    | <b>715.388585</b>  | 358.197930      | <b>698.362036</b> | 349.684656       |                    |                  | 6  |
| 24 | 3010.469581        | <b>1505.738428</b> | 2993.443032       | 1497.225154      | 2992.459016        | 1496.733146      | N    | <b>602.304521</b>  | 301.655898      | <b>585.277972</b> | 293.142624       |                    |                  | 5  |
| 25 | 3067.491045        | 1534.249160        | 3050.464496       | 1525.735886      | 3049.480480        | 1525.243878      | G    | <b>488.261594</b>  | 244.634435      | 471.235045        | 236.121160       |                    |                  | 4  |
| 26 | 3204.549957        | 1602.778616        | 3187.523408       | 1594.265342      | 3186.539392        | 1593.773334      | H    | 431.240130         | 216.123703      | 414.213581        | 207.610428       |                    |                  | 3  |
| 27 | 3351.618371        | 1676.312823        | 3334.591822       | 1667.799549      | 3333.607806        | 1667.307541      | F    | <b>294.181218</b>  | 147.594247      | 277.154669        | 139.080972       |                    |                  | 2  |
| 28 |                    |                    |                   |                  |                    |                  | K    | 147.112804         | 74.060040       | 130.086255        | 65.546765        |                    |                  | 1  |

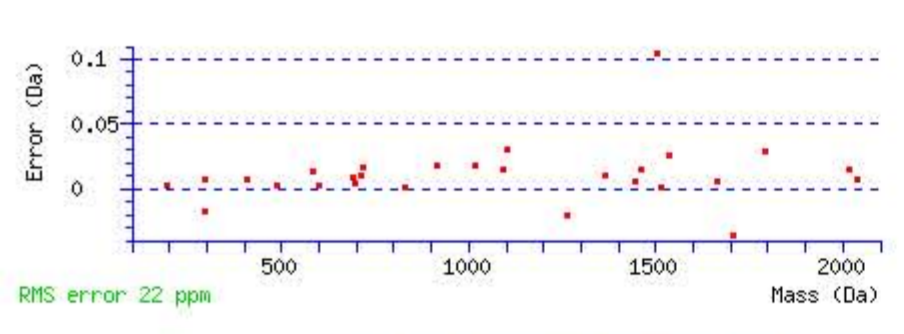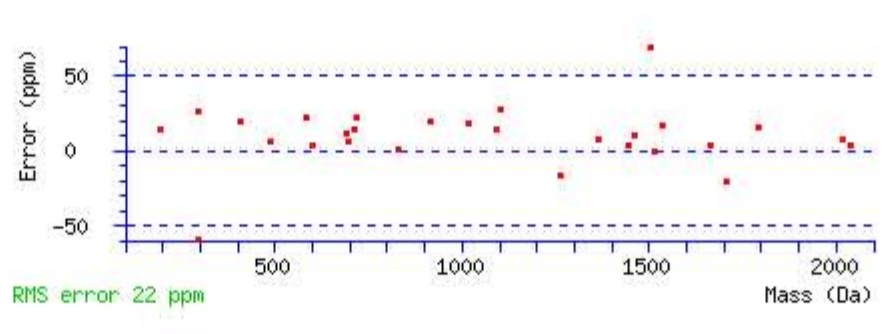

NCBI BLAST search of **GHVLFRTVSQQQSCPTCSTSLNGHFK**  
 (Parameters: blastp, nr protein database, expect=20000, no filter, PAM30)  
 Other BLAST [web gateways](#)

**All matches to this query**

| Score | Mr(calc):   | Delta    | Sequence                                   |
|-------|-------------|----------|--------------------------------------------|
| 48.8  | 3496.716660 | 0.039210 | <a href="#">GHVLFRTVSQQQSCPTCSTSLNGHFK</a> |
| 48.1  | 3496.716660 | 0.039210 | <a href="#">GHVLFRTVSQQQSCPTCSTSLNGHFK</a> |
| 44.0  | 3496.716660 | 0.039210 | <a href="#">GHVLFRTVSQQQSCPTCSTSLNGHFK</a> |



# MASCOT Search Results

## Peptide View

MS/MS Fragmentation of **TQVADAK**

Found in **ITIH2\_HUMAN**, Inter-alpha-trypsin inhibitor heavy chain H2 OS=Homo sapiens GN=ITIH2 PE=1 SV=2

Match to Query 20726: 1042.549908 from(522.282230,2+) rtinseconds(1256) index(55231)

Title: Locus:1.1.1.2743.13 File:"2013-07-02 CLN FXIII 60 min 1st F 4.wiff"

Data file C:\Program Files (x86)\Matrix Science\Mascot Daemon\mgf\4 FXIII 60 min 1st\mascot\_daemon\_merge.mgf

Click mouse within plot area to zoom in by factor of two about that point

Or, Plot from  to  Da

Label all possible matches  Label matches used for scoring

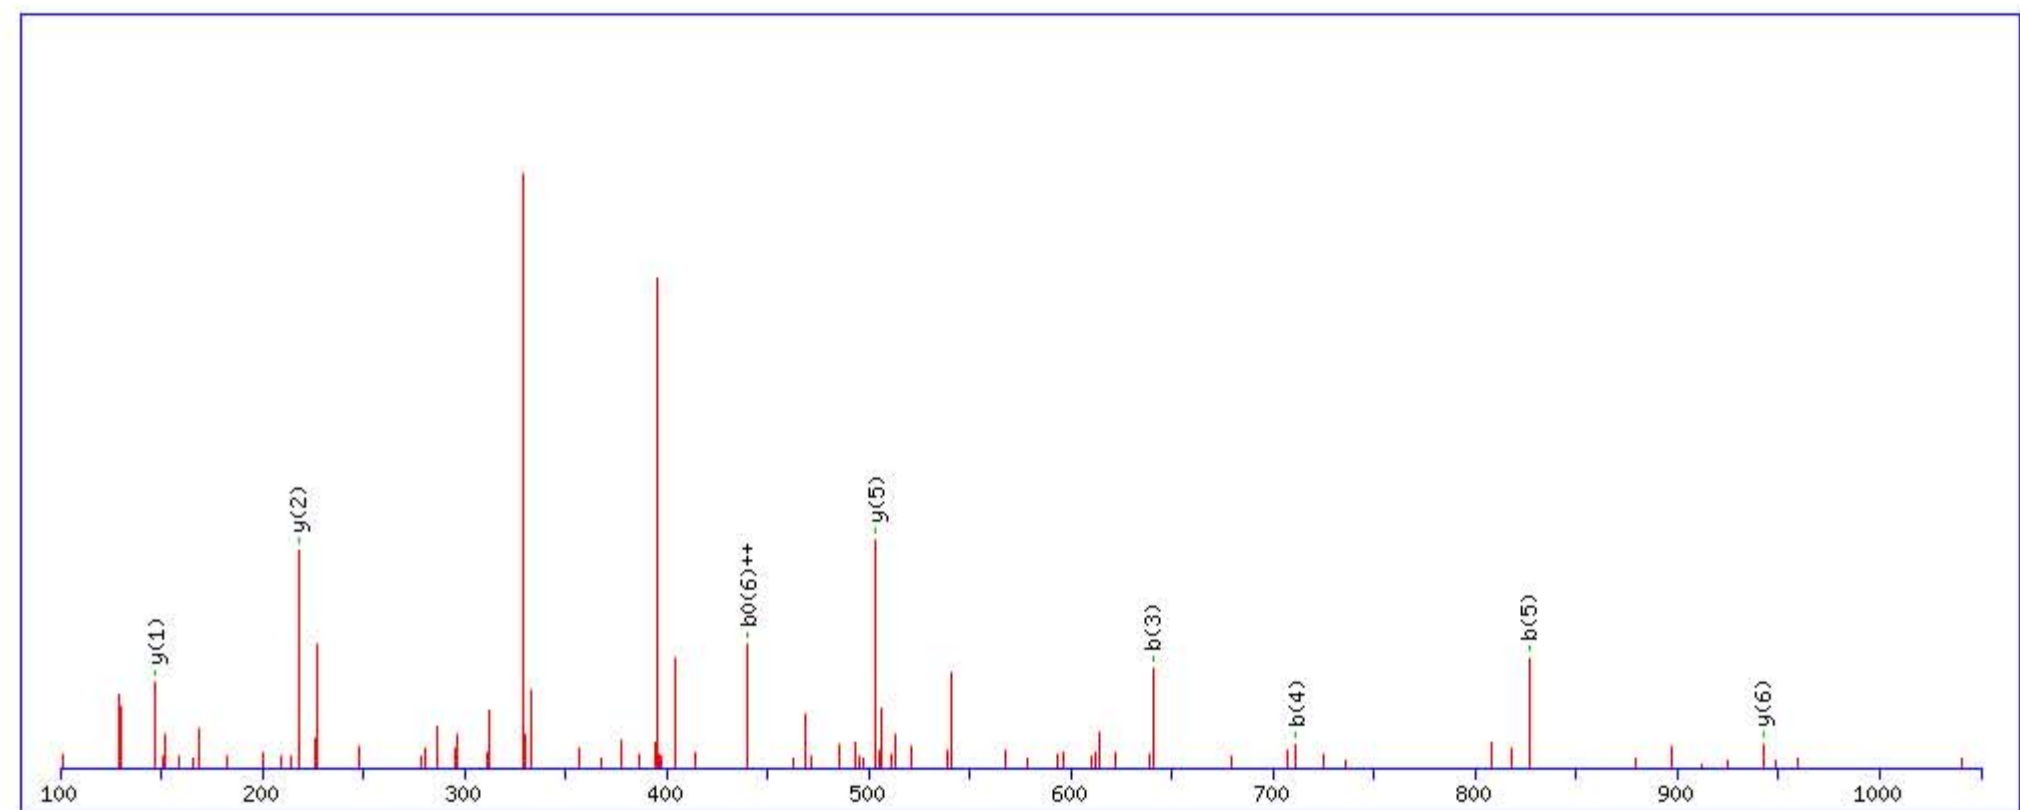

Monoisotopic mass of neutral peptide Mr(calc): 1042.548111

Fixed modifications: Carbamidomethyl (C) (apply to specified residues or termini only)

Variable modifications:

Q2 : Biotin:Thermo-21345 (Q)

Ions Score: 34 Expect: 0.0096

Matches : 8/66 fragment ions using 10 most intense peaks [\(help\)](#)

| # | b                 | b <sup>++</sup> | b <sup>*</sup> | b <sup>+++</sup> | b <sup>0</sup> | b <sup>0++</sup>  | Seq. | y                 | y <sup>++</sup> | y <sup>*</sup> | y <sup>+++</sup> | y <sup>0</sup> | y <sup>0++</sup> | # |
|---|-------------------|-----------------|----------------|------------------|----------------|-------------------|------|-------------------|-----------------|----------------|------------------|----------------|------------------|---|
| 1 | 102.054955        | 51.531116       |                |                  | 84.044390      | 42.525833         | T    |                   |                 |                |                  |                |                  | 7 |
| 2 | 541.280281        | 271.143779      | 524.253732     | 262.630504       | 523.269716     | 262.138496        | Q    | <b>942.507715</b> | 471.757496      | 925.481166     | 463.244221       | 924.497150     | 462.752213       | 6 |
| 3 | <b>640.348695</b> | 320.677986      | 623.322146     | 312.164711       | 622.338130     | 311.672703        | V    | <b>503.282389</b> | 252.144832      | 486.255840     | 243.631558       | 485.271824     | 243.139550       | 5 |
| 4 | <b>711.385809</b> | 356.196543      | 694.359260     | 347.683268       | 693.375244     | 347.191260        | A    | 404.213975        | 202.610625      | 387.187426     | 194.097351       | 386.203410     | 193.605343       | 4 |
| 5 | <b>826.412752</b> | 413.710014      | 809.386203     | 405.196739       | 808.402187     | 404.704731        | D    | 333.176861        | 167.092068      | 316.150312     | 158.578794       | 315.166296     | 158.086786       | 3 |
| 6 | 897.449866        | 449.228571      | 880.423317     | 440.715296       | 879.439301     | <b>440.223288</b> | A    | <b>218.149918</b> | 109.578597      | 201.123369     | 101.065322       |                |                  | 2 |
| 7 |                   |                 |                |                  |                |                   | K    | <b>147.112804</b> | 74.060040       | 130.086255     | 65.546765        |                |                  | 1 |

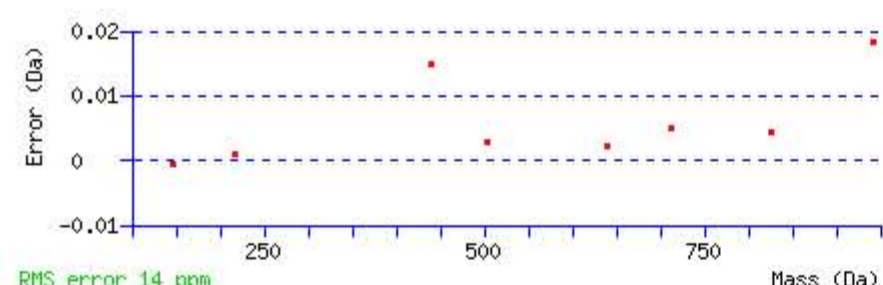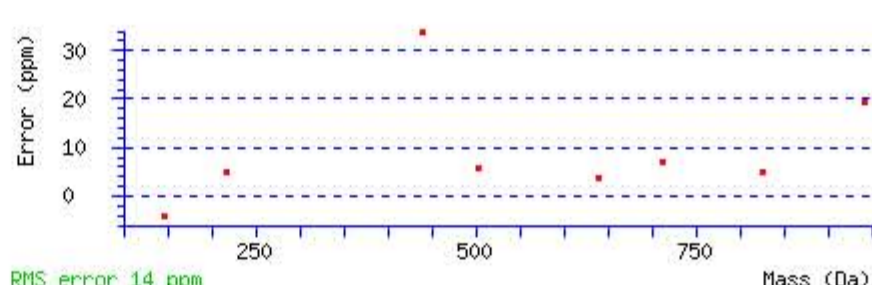

NCBI BLAST search of **TQVADAK**

(Parameters: blastp, nr protein database, expect=20000, no filter, PAM30)

Other BLAST [web gateways](#)

## All matches to this query

| Score | Mr(calc):   | Delta    | Sequence                   |
|-------|-------------|----------|----------------------------|
| 34.0  | 1042.548111 | 0.001797 | <a href="#">TQVADAK</a>    |
| 13.2  | 1042.548096 | 0.001812 | <a href="#">SLQADAK</a>    |
| 10.2  | 1042.540726 | 0.009182 | <a href="#">KPVSEVGDGR</a> |
| 9.4   | 1042.540680 | 0.009228 | <a href="#">TPEERAAAAK</a> |
| 8.7   | 1042.540680 | 0.009228 | <a href="#">EAEKRPADK</a>  |
| 6.9   | 1042.548080 | 0.001828 | <a href="#">EKEQAK</a>     |
| 6.6   | 1042.540680 | 0.009228 | <a href="#">SLENPAERK</a>  |
| 5.5   | 1042.548080 | 0.001828 | <a href="#">KEQEAK</a>     |
| 5.5   | 1042.548080 | 0.001828 | <a href="#">KQEEAK</a>     |
| 5.3   | 1042.548096 | 0.001812 | <a href="#">ISAQDAK</a>    |



# {MATRIX} SCIENCE Mascot Search Results

## Peptide View

MS/MS Fragmentation of **ALYAQAR**

Found in **ITIH2\_HUMAN**, Inter-alpha-trypsin inhibitor heavy chain H2 OS=Homo sapiens GN=ITIH2 PE=1 SV=2

Match to Query 22541: 1102.599948 from(552.307250,2+) rtinseconds(1617) index(57695)

Title: Locus:1.1.1.2869.5 File:"2013-07-02 CLN FXIII 60 min 1st F 4.wiff"

Data file C:\Program Files (x86)\Matrix Science\Mascot Daemon\mgf\4 FXIII 60 min 1st\mascot\_daemon\_merge.mgf

Click mouse within plot area to zoom in by factor of two about that point

Or, Plot from  to  Da

Label all possible matches  Label matches used for scoring

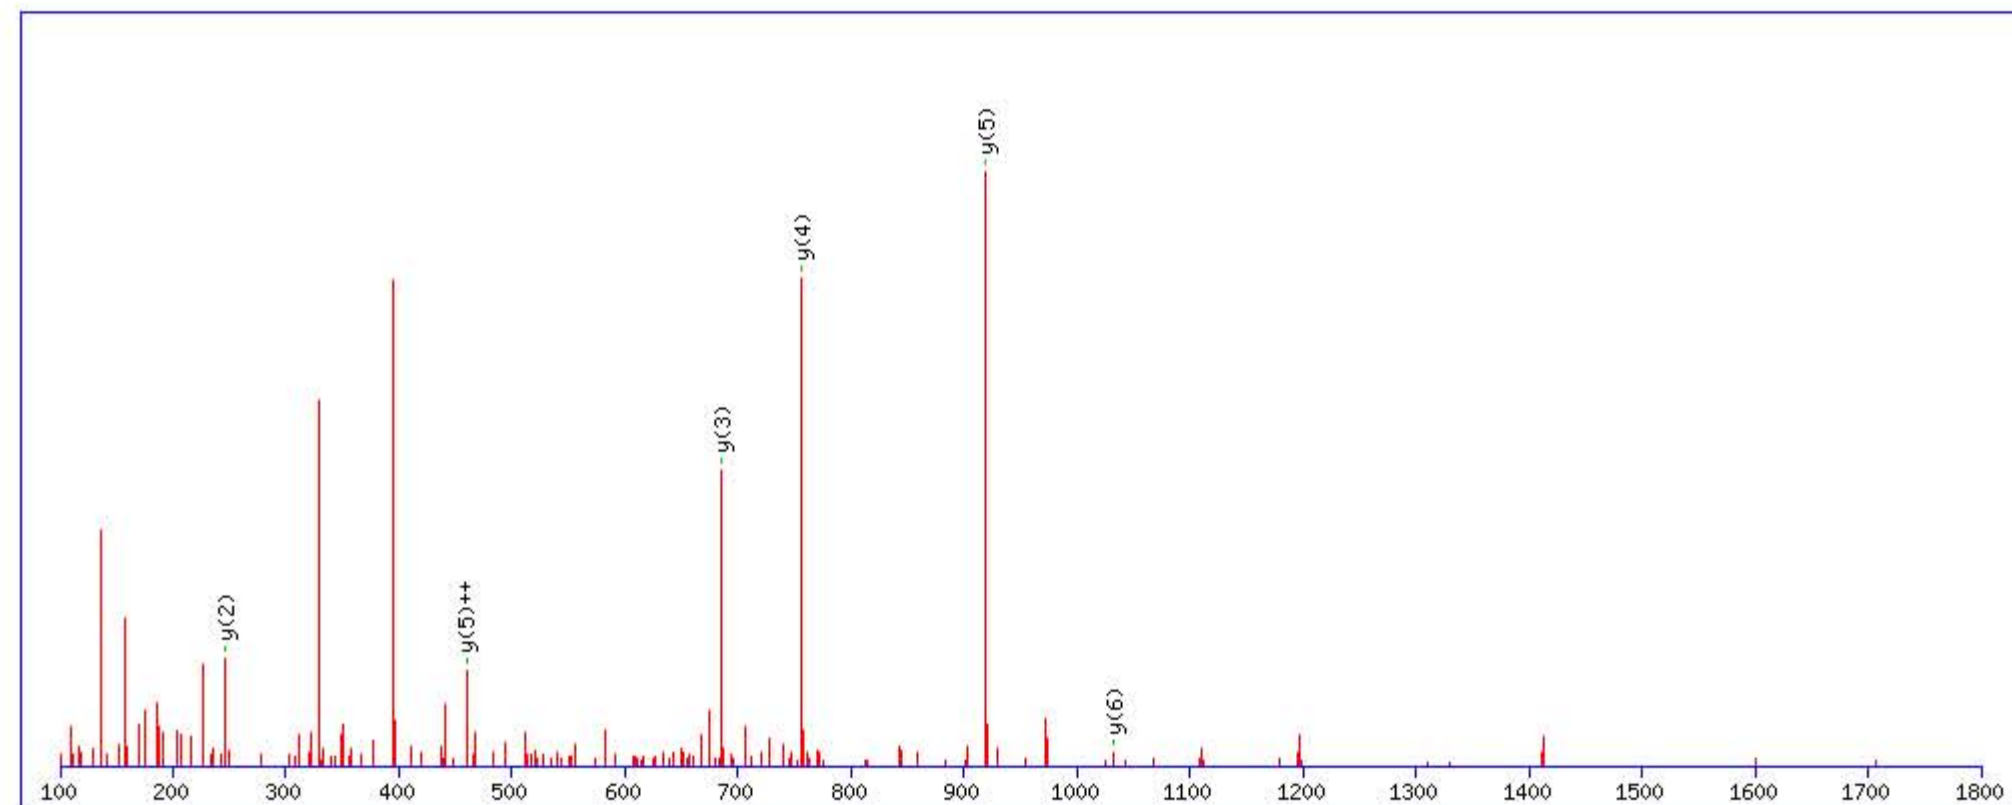

Monoisotopic mass of neutral peptide Mr(calc): 1102.595703

Fixed modifications: Carbamidomethyl (C) (apply to specified residues or termini only)

Variable modifications:

Q5 : Biotin:Thermo-21345 (Q)

Ions Score: 34 Expect: 0.0045

Matches : 6/40 fragment ions using 10 most intense peaks [\(help\)](#)

| # | b          | b <sup>++</sup> | b <sup>+</sup> | b <sup>***</sup> | Seq. | y                  | y <sup>++</sup>   | y <sup>+</sup> | y <sup>***</sup> | # |
|---|------------|-----------------|----------------|------------------|------|--------------------|-------------------|----------------|------------------|---|
| 1 | 72.044390  | 36.525833       |                |                  | A    |                    |                   |                |                  | 7 |
| 2 | 185.128454 | 93.067865       |                |                  | L    | <b>1032.565899</b> | 516.786588        | 1015.539350    | 508.273313       | 6 |
| 3 | 348.191783 | 174.599529      |                |                  | Y    | <b>919.481835</b>  | <b>460.244556</b> | 902.455286     | 451.731281       | 5 |
| 4 | 419.228897 | 210.118087      |                |                  | A    | <b>756.418506</b>  | 378.712891        | 739.391957     | 370.199617       | 4 |
| 5 | 858.454223 | 429.730750      | 841.427674     | 421.217475       | Q    | <b>685.381392</b>  | 343.194334        | 668.354843     | 334.681060       | 3 |
| 6 | 929.491337 | 465.249307      | 912.464788     | 456.736032       | A    | <b>246.156066</b>  | 123.581671        | 229.129517     | 115.068397       | 2 |
| 7 |            |                 |                |                  | R    | 175.118952         | 88.063114         | 158.092403     | 79.549840        | 1 |

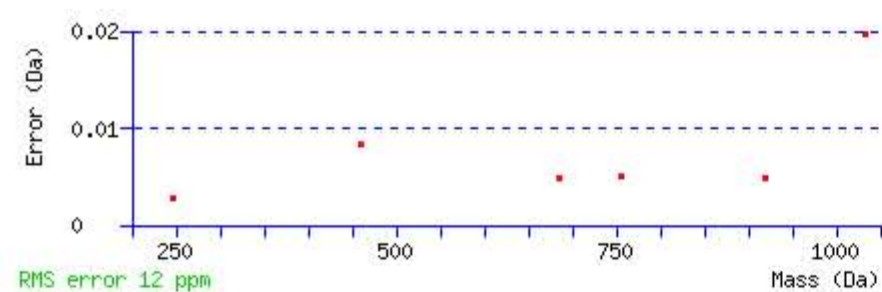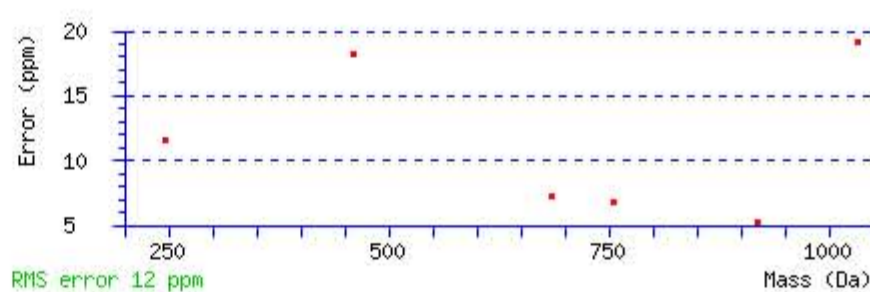

NCBI BLAST search of [ALYAQAR](#)

(Parameters: blastp, nr protein database, expect=20000, no filter, PAM30)

Other BLAST [web gateways](#)

## All matches to this query

| Score | Mr(calc):   | Delta     | Sequence                   |
|-------|-------------|-----------|----------------------------|
| 33.6  | 1102.595703 | 0.004245  | <a href="#">ALYAQAR</a>    |
| 8.1   | 1102.602234 | -0.002286 | <a href="#">AIELGYNPVK</a> |
| 4.0   | 1102.598190 | 0.001758  | <a href="#">LAERSEASLK</a> |
| 3.0   | 1102.613495 | -0.013547 | <a href="#">SFIAVPVTNR</a> |
| 2.9   | 1102.598221 | 0.001727  | <a href="#">LAGSLATDLR</a> |
| 2.8   | 1102.613464 | -0.013516 | <a href="#">AIPEKYGAVR</a> |
| 2.8   | 1102.613495 | -0.013547 | <a href="#">ALTQGPLTFR</a> |
| 0.4   | 1102.602921 | -0.002973 | <a href="#">LLRQRMDR</a>   |

Mascot: <http://www.matrixscience.com/>



# Mascot Search Results

## Peptide View

MS/MS Fragmentation of **VQSTITSR**

Found in **ITIH2\_HUMAN**, Inter-alpha-trypsin inhibitor heavy chain H2 OS=Homo sapiens GN=ITIH2 PE=1 SV=2

Match to Query 27708: 1201.653948 from(601.834250,2+) rtinseconds(1460) index(56636)

Title: Locus:1.1.1.2814.19 File:"2013-07-02 CLN FXIII 60 min 1st F 4.wiff"

Data file C:\Program Files (x86)\Matrix Science\Mascot Daemon\mgf\4 FXIII 60 min 1st\mascot\_daemon\_merge.mgf

Click mouse within plot area to zoom in by factor of two about that point

Or, Plot from  to  Da

Label all possible matches  Label matches used for scoring

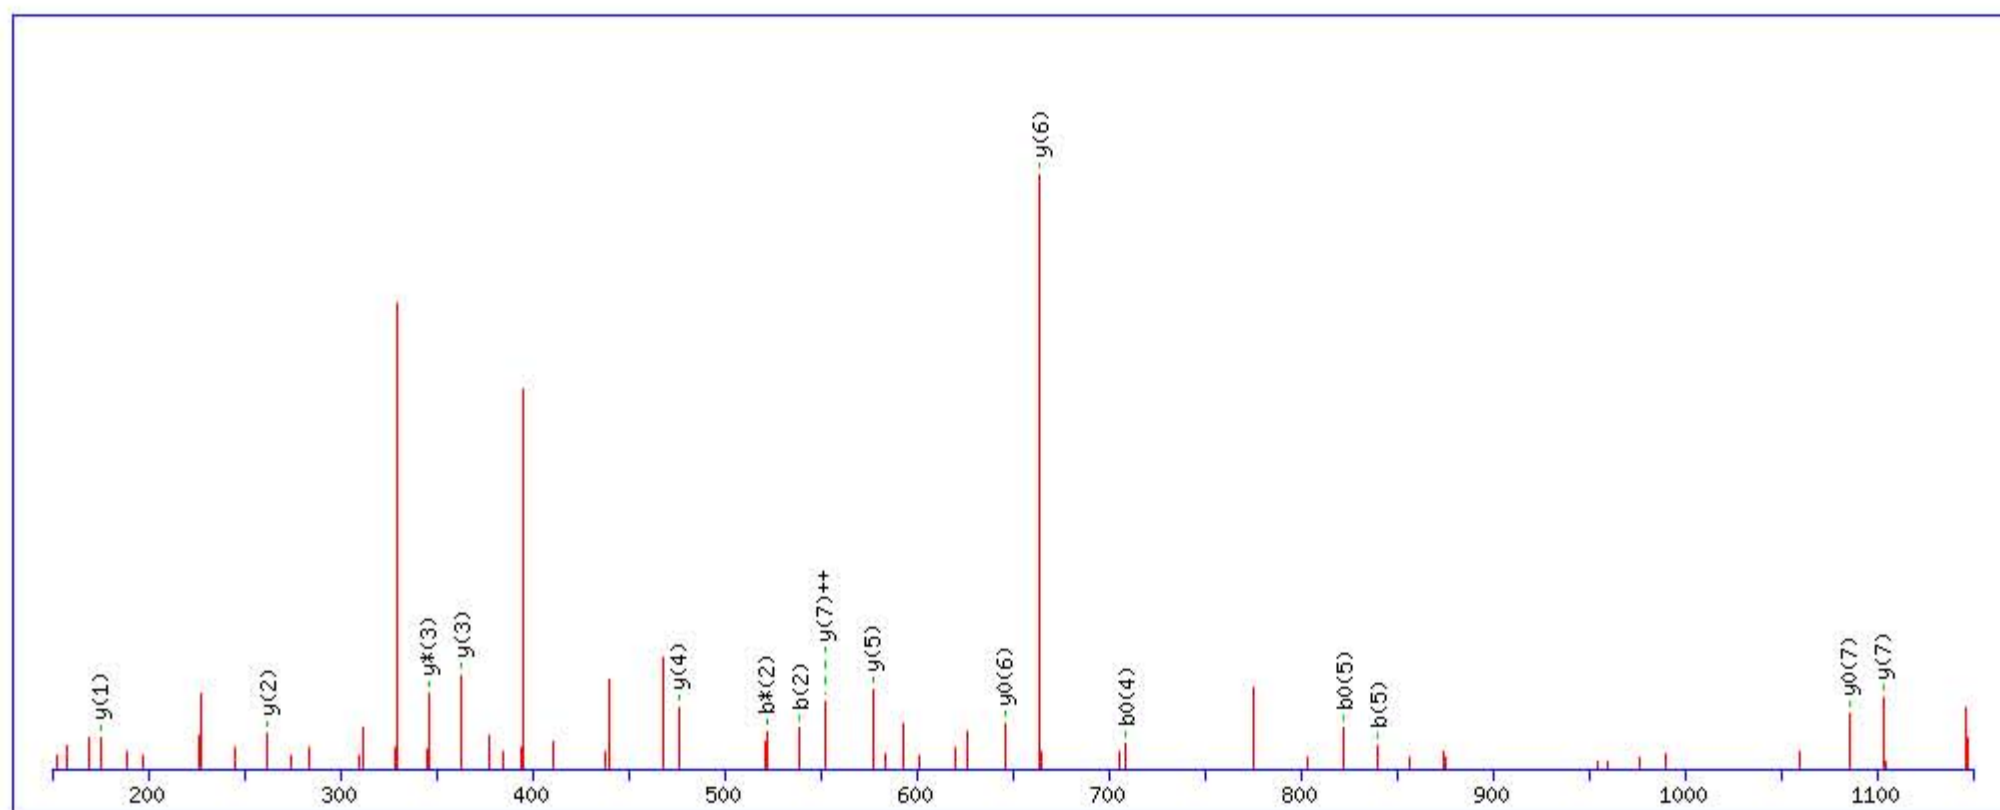

Monoisotopic mass of neutral peptide Mr(calc): 1201.648895

Fixed modifications: Carbamidomethyl (C) (apply to specified residues or termini only)

Variable modifications:

Q2 : Biotin:Thermo-21345 (Q)

Ions Score: 33 Expect: 0.01

Matches : 16/76 fragment ions using 39 most intense peaks [\(help\)](#)

| # | b                 | b <sup>++</sup> | b <sup>+</sup>    | b <sup>+++</sup> | b <sup>0</sup>    | b <sup>0++</sup> | Seq. | y                  | y <sup>++</sup>   | y <sup>+</sup>    | y <sup>+++</sup> | y <sup>0</sup>     | y <sup>0++</sup> | # |
|---|-------------------|-----------------|-------------------|------------------|-------------------|------------------|------|--------------------|-------------------|-------------------|------------------|--------------------|------------------|---|
| 1 | 100.075690        | 50.541483       |                   |                  |                   |                  | V    |                    |                   |                   |                  |                    |                  | 8 |
| 2 | <b>539.301016</b> | 270.154146      | <b>522.274467</b> | 261.640872       |                   |                  | Q    | <b>1103.587756</b> | <b>552.297516</b> | 1086.561207       | 543.784242       | <b>1085.577191</b> | 543.292234       | 7 |
| 3 | 626.333044        | 313.670160      | 609.306495        | 305.156886       | 608.322479        | 304.664878       | S    | <b>664.362430</b>  | 332.684853        | 647.335881        | 324.171579       | <b>646.351865</b>  | 323.679571       | 6 |
| 4 | 727.380723        | 364.194000      | 710.354174        | 355.680725       | <b>709.370158</b> | 355.188717       | T    | <b>577.330402</b>  | 289.168839        | 560.303853        | 280.655565       | 559.319837         | 280.163557       | 5 |
| 5 | <b>840.464787</b> | 420.736032      | 823.438238        | 412.222757       | <b>822.454222</b> | 411.730749       | I    | <b>476.282723</b>  | 238.645000        | 459.256174        | 230.131725       | 458.272158         | 229.639717       | 4 |
| 6 | 941.512466        | 471.259871      | 924.485917        | 462.746597       | 923.501901        | 462.254589       | T    | <b>363.198659</b>  | 182.102968        | <b>346.172110</b> | 173.589693       | 345.188094         | 173.097685       | 3 |
| 7 | 1028.544494       | 514.775885      | 1011.517945       | 506.262611       | 1010.533929       | 505.770603       | S    | <b>262.150980</b>  | 131.579128        | 245.124431        | 123.065854       | 244.140415         | 122.573846       | 2 |
| 8 |                   |                 |                   |                  |                   |                  | R    | <b>175.118952</b>  | 88.063114         | 158.092403        | 79.549839        |                    |                  | 1 |

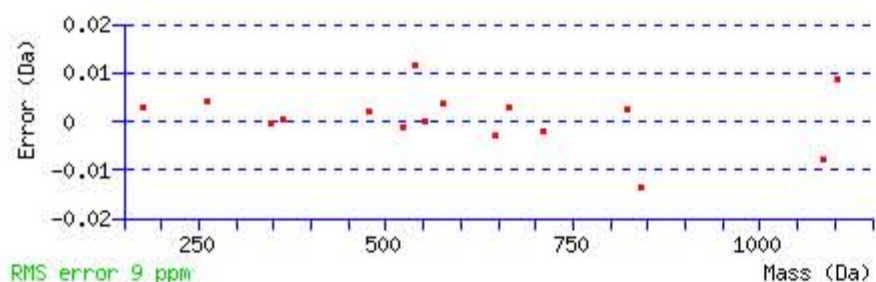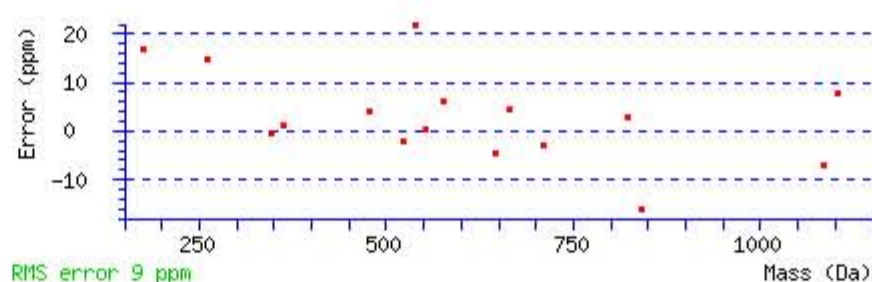

NCBI BLAST search of [VQSTITSR](#)

(Parameters: blastp, nr protein database, expect=20000, no filter, PAM30)

Other BLAST [web gateways](#)

All matches to this query

| Score | Mr(calc):   | Delta    | Sequence                 |
|-------|-------------|----------|--------------------------|
| 33.3  | 1201.648895 | 0.005053 | <a href="#">VQSTITSR</a> |

Mascot: <http://www.matrixscience.com/>



# MASCOT Search Results

## Peptide View

MS/MS Fragmentation of **MATTMIQSK**

Found in **ITIH2\_HUMAN**, Inter-alpha-trypsin inhibitor heavy chain H2 OS=Homo sapiens GN=ITIH2 PE=1 SV=2

Match to Query 31705: 1336.667308 from(669.340930,2+) rtinseconds(1483) index(56786)

Title: Locus:1.1.1.2822.15 File:"2013-07-02 CLN FXIII 60 min 1st F 4.wiff"

Data file C:\Program Files (x86)\Matrix Science\Mascot Daemon\mgf4 FXIII 60 min 1st\mascot\_daemon\_merge.mgf

Click mouse within plot area to zoom in by factor of two about that point

Or, Plot from  to  Da

Label all possible matches  Label matches used for scoring

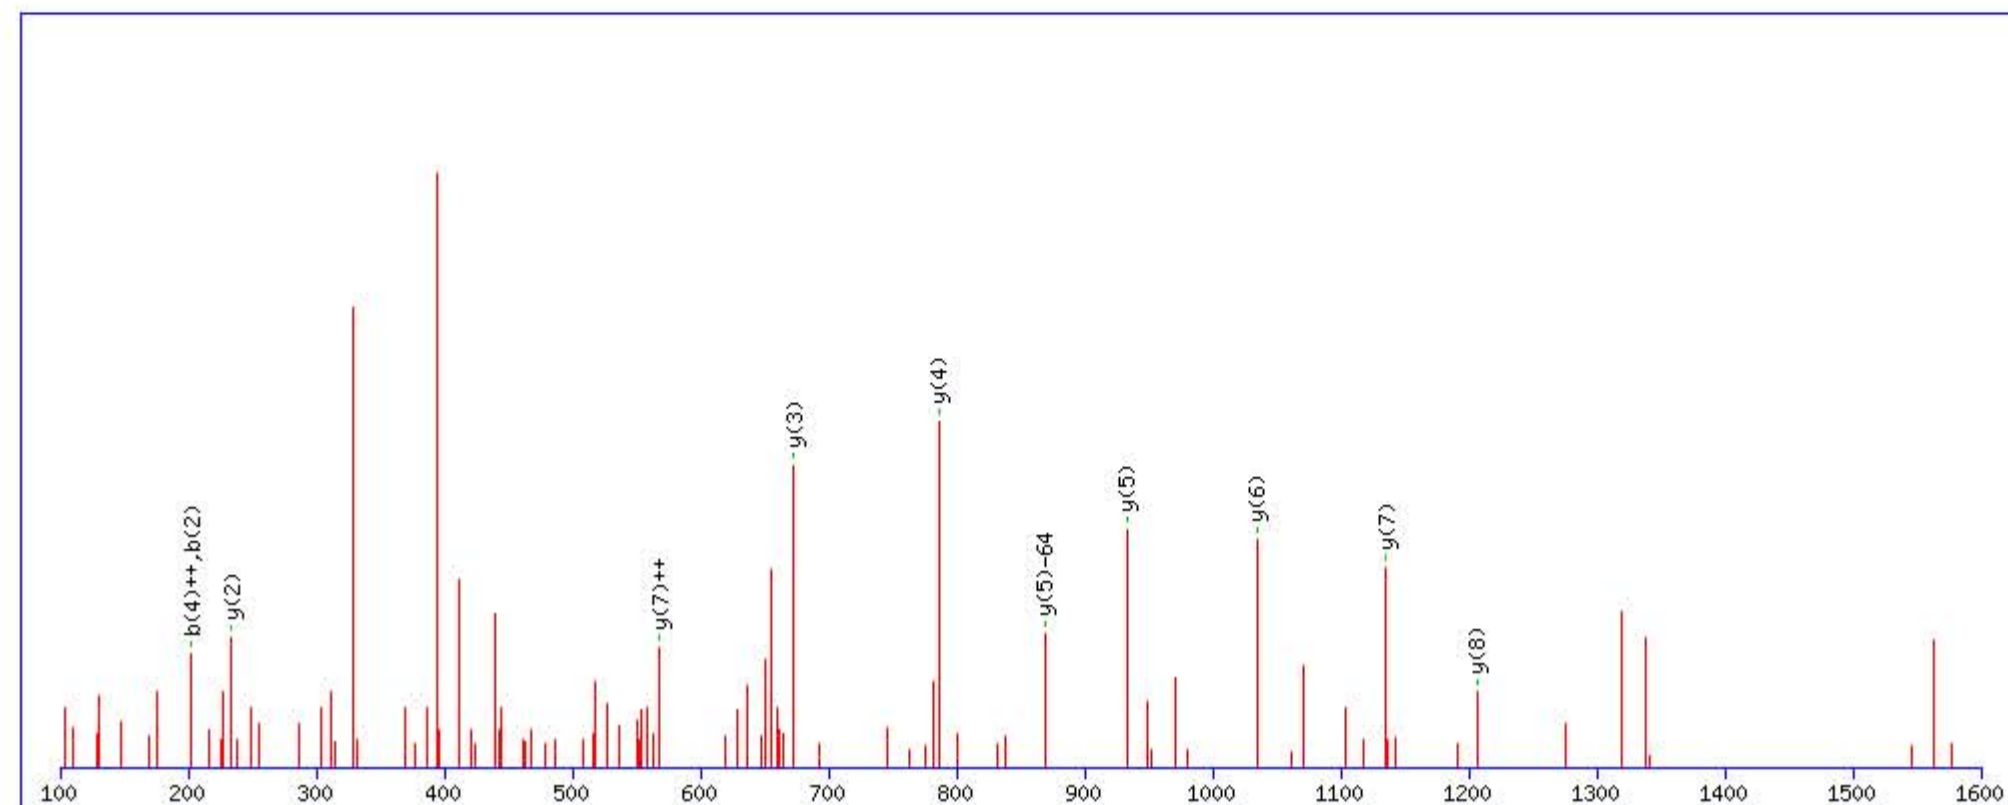

Monoisotopic mass of neutral peptide Mr(calc): 1336.655289

Fixed modifications: Carbamidomethyl (C) (apply to specified residues or termini only)

Variable modifications:

M5 : Oxidation (M), with neutral losses 0.000000 (shown in table), 63.998285

Q7 : Biotin:Thermo-21345 (Q)

Ions Score: 60 Expect: 5.1e-006

Matches : 11/122 fragment ions using 13 most intense peaks [\(help\)](#)

| # | b                 | b <sup>++</sup>   | b <sup>*</sup> | b <sup>***</sup> | b <sup>0</sup> | b <sup>0++</sup> | Seq. | y                  | y <sup>++</sup>   | y <sup>*</sup> | y <sup>***</sup> | y <sup>0</sup> | y <sup>0++</sup> | # |
|---|-------------------|-------------------|----------------|------------------|----------------|------------------|------|--------------------|-------------------|----------------|------------------|----------------|------------------|---|
| 1 | 132.047761        | 66.527518         |                |                  |                |                  | M    |                    |                   |                |                  |                |                  | 9 |
| 2 | <b>203.084875</b> | 102.046075        |                |                  |                |                  | A    | <b>1206.622094</b> | 603.814685        | 1189.595545    | 595.301411       | 1188.611529    | 594.809403       | 8 |
| 3 | 304.132554        | 152.569915        |                |                  | 286.121989     | 143.564632       | T    | <b>1135.584980</b> | <b>568.296128</b> | 1118.558431    | 559.782854       | 1117.574415    | 559.290846       | 7 |
| 4 | 405.180233        | <b>203.093754</b> |                |                  | 387.169668     | 194.088472       | T    | <b>1034.537301</b> | 517.772289        | 1017.510752    | 509.259014       | 1016.526736    | 508.767006       | 6 |
| 5 | 552.215633        | 276.611455        |                |                  | 534.205068     | 267.606172       | M    | <b>933.489622</b>  | 467.248449        | 916.463073     | 458.735175       | 915.479057     | 458.243167       | 5 |
| 6 | 665.299697        | 333.153487        |                |                  | 647.289132     | 324.148204       | I    | <b>786.454222</b>  | 393.730749        | 769.427673     | 385.217475       | 768.443657     | 384.725467       | 4 |
| 7 | 1104.525023       | 552.766149        | 1087.498474    | 544.252875       | 1086.514458    | 543.760867       | Q    | <b>673.370158</b>  | 337.188717        | 656.343609     | 328.675443       | 655.359593     | 328.183435       | 3 |
| 8 | 1191.557051       | 596.282164        | 1174.530502    | 587.768889       | 1173.546486    | 587.276881       | S    | <b>234.144832</b>  | 117.576054        | 217.118283     | 109.062780       | 216.134267     | 108.570772       | 2 |
| 9 |                   |                   |                |                  |                |                  | K    | 147.112804         | 74.060040         | 130.086255     | 65.546765        |                |                  | 1 |

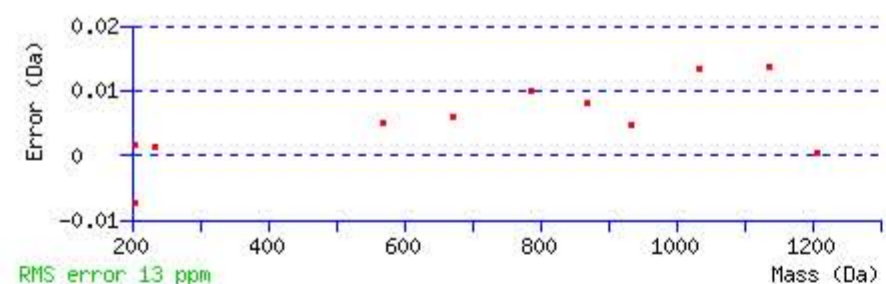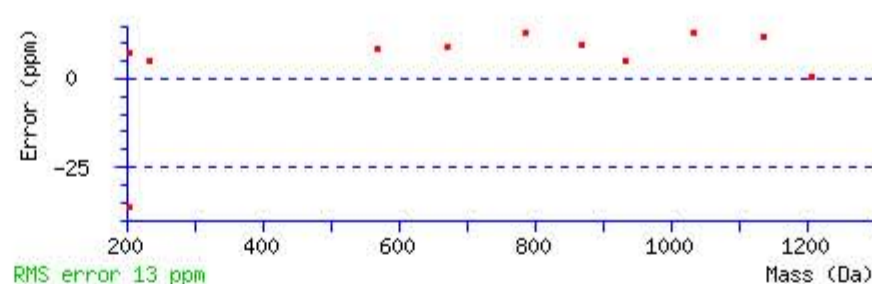

NCBI BLAST search of [MATTMIQSK](#)

(Parameters: blastp, nr protein database, expect=20000, no filter, PAM30)

Other BLAST [web gateways](#)

All matches to this query

| Score | Mr(calc):   | Delta     | Sequence                      |
|-------|-------------|-----------|-------------------------------|
| 60.4  | 1336.655289 | 0.012019  | <a href="#">MATTMIQSK</a>     |
| 3.7   | 1336.680923 | -0.013615 | <a href="#">QSVPYGMATVIR</a>  |
| 2.4   | 1336.662308 | 0.005000  | <a href="#">KDTWGVVSSGSSK</a> |
| 2.3   | 1336.655289 | 0.012019  | <a href="#">MATTMIQSK</a>     |
| 2.3   | 1336.662262 | 0.005046  | <a href="#">GYQEQLASLNSK</a>  |
| 0.3   | 1336.684937 | -0.017629 | <a href="#">QFFEIQSK</a>      |

Mascot: <http://www.matrixscience.com/>



# MASCOT Search Results

## Peptide View

MS/MS Fragmentation of **LSNENHGIAQR**

Found in **ITIH2\_HUMAN**, Inter-alpha-trypsin inhibitor heavy chain H2 OS=Homo sapiens GN=ITIH2 PE=1 SV=2

Match to Query 39900: 1548.783222 from(517.268350,3+) rtinseconds(1337) index(37692)

Title: Locus:1.1.1.2749.21 File:"2013-07-02 CLN FXIII 60 min 1st F 3.wiff"

Data file C:\Program Files (x86)\Matrix Science\Mascot Daemon\mgf4 FXIII 60 min 1st\mascot\_daemon\_merge.mgf

Click mouse within plot area to zoom in by factor of two about that point

Or, Plot from  to  Da

Label all possible matches  Label matches used for scoring

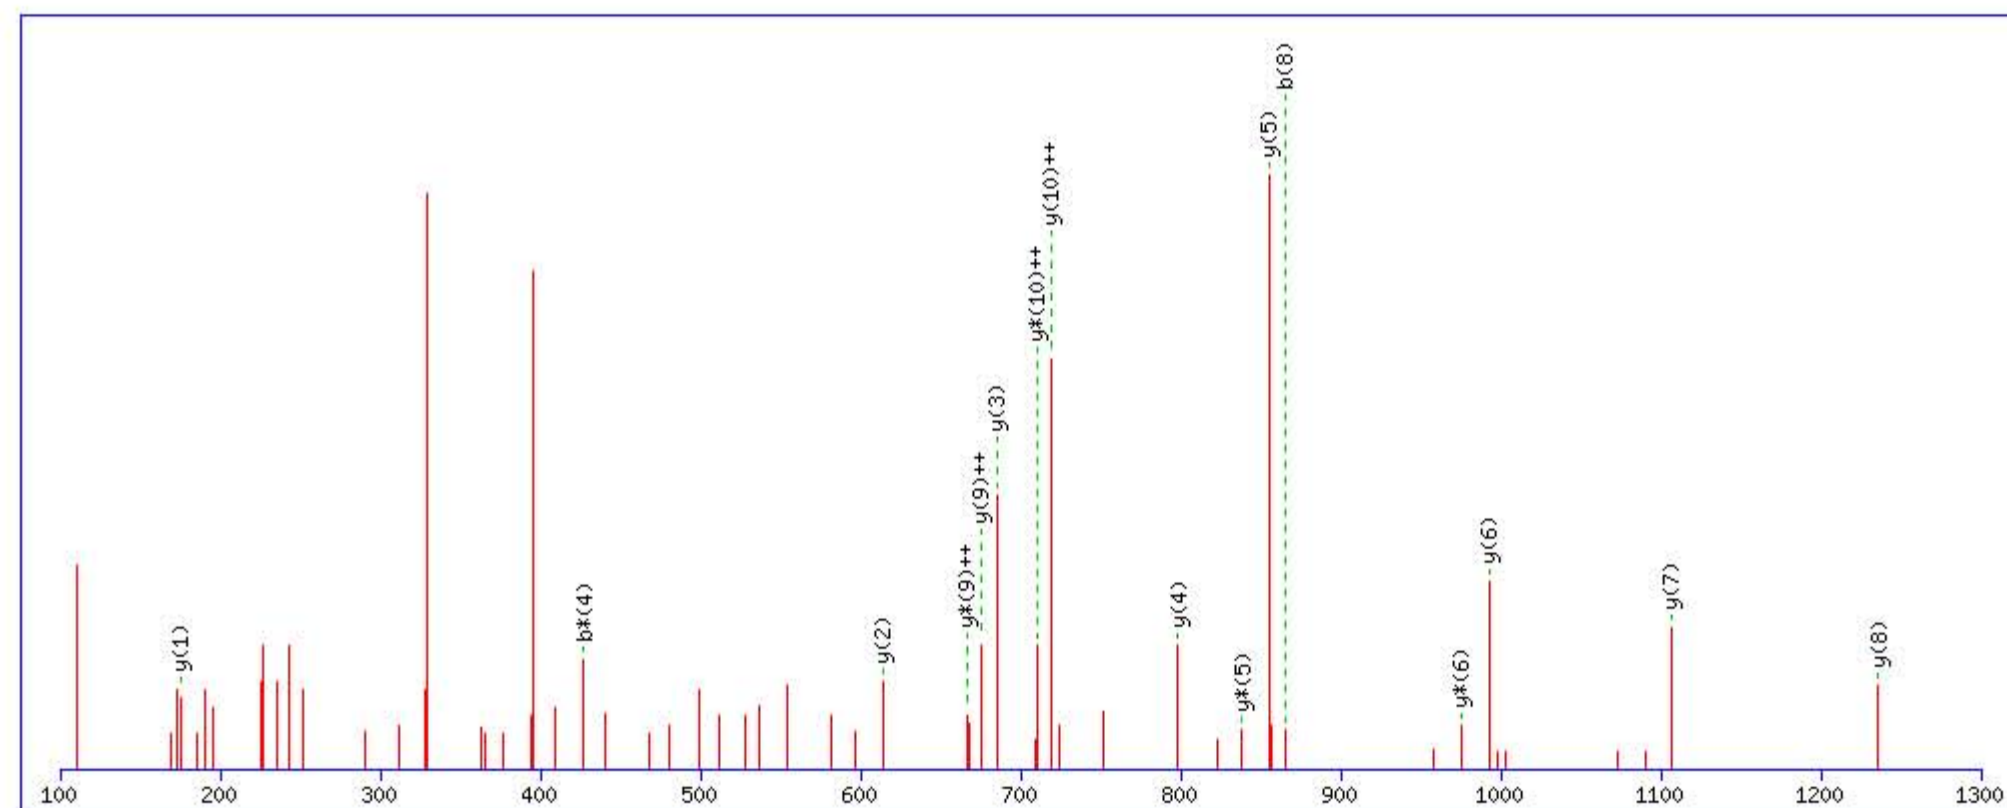

Monoisotopic mass of neutral peptide  $M_r(\text{calc})$ : 1548.783066

Fixed modifications: Carbamidomethyl (C) (apply to specified residues or termini only)

Variable modifications:

Q10 : Biotin:Thermo-21345 (Q)

Ions Score: 33 Expect: 0.012

Matches : 16/100 fragment ions using 40 most intense peaks ([help](#))

| #  | b           | b <sup>++</sup> | b <sup>*</sup> | b <sup>*++</sup> | b <sup>0</sup> | b <sup>0++</sup> | Seq. | y           | y <sup>++</sup> | y <sup>*</sup> | y <sup>*++</sup> | y <sup>0</sup> | y <sup>0++</sup> | #  |
|----|-------------|-----------------|----------------|------------------|----------------|------------------|------|-------------|-----------------|----------------|------------------|----------------|------------------|----|
| 1  | 114.091340  | 57.549308       |                |                  |                |                  | L    |             |                 |                |                  |                |                  | 11 |
| 2  | 201.123368  | 101.065322      |                |                  | 183.112803     | 92.060039        | S    | 1436.706307 | 718.856792      | 1419.679758    | 710.343517       | 1418.695742    | 709.851509       | 10 |
| 3  | 315.166295  | 158.086785      | 298.139746     | 149.573511       | 297.155730     | 149.081503       | N    | 1349.674279 | 675.340778      | 1332.647730    | 666.827503       | 1331.663714    | 666.335495       | 9  |
| 4  | 444.208888  | 222.608082      | 427.182339     | 214.094808       | 426.198323     | 213.602800       | E    | 1235.631352 | 618.319314      | 1218.604803    | 609.806040       | 1217.620787    | 609.314032       | 8  |
| 5  | 558.251815  | 279.629546      | 541.225266     | 271.116271       | 540.241250     | 270.624263       | N    | 1106.588759 | 553.798018      | 1089.562210    | 545.284743       |                |                  | 7  |
| 6  | 695.310727  | 348.159002      | 678.284178     | 339.645727       | 677.300162     | 339.153719       | H    | 992.545832  | 496.776554      | 975.519283     | 488.263280       |                |                  | 6  |
| 7  | 752.332191  | 376.669734      | 735.305642     | 368.156459       | 734.321626     | 367.664451       | G    | 855.486920  | 428.247098      | 838.460371     | 419.733824       |                |                  | 5  |
| 8  | 865.416255  | 433.211766      | 848.389706     | 424.698491       | 847.405690     | 424.206483       | I    | 798.465456  | 399.736366      | 781.438907     | 391.223092       |                |                  | 4  |
| 9  | 936.453369  | 468.730323      | 919.426820     | 460.217048       | 918.442804     | 459.725040       | A    | 685.381392  | 343.194334      | 668.354843     | 334.681060       |                |                  | 3  |
| 10 | 1375.678695 | 688.342986      | 1358.652146    | 679.829711       | 1357.668130    | 679.337703       | Q    | 614.344278  | 307.675777      | 597.317729     | 299.162503       |                |                  | 2  |
| 11 |             |                 |                |                  |                |                  | R    | 175.118952  | 88.063114       | 158.092403     | 79.549839        |                |                  | 1  |

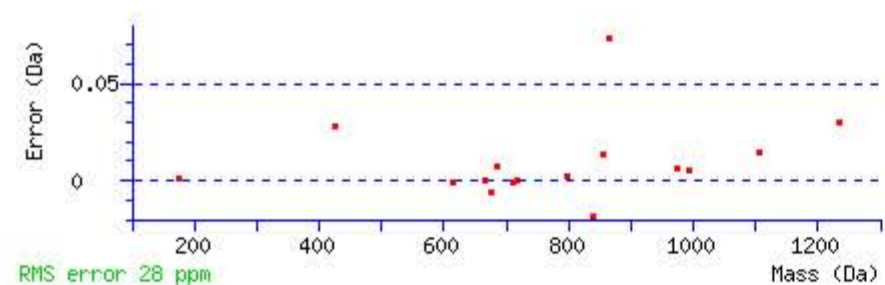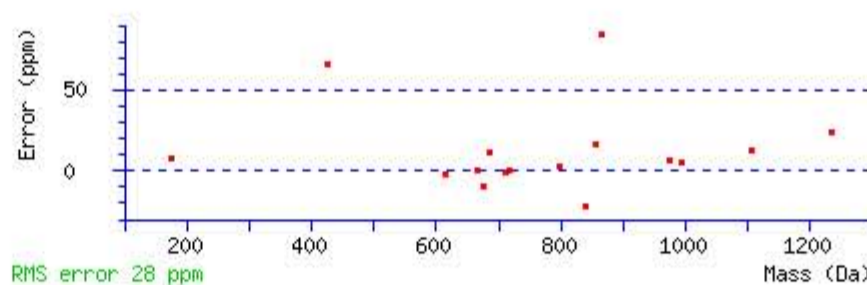

NCBI BLAST search of [LSNENHGIAQR](#)

(Parameters: blastp, nr protein database, expect=20000, no filter, PAM30)

Other BLAST [web gateways](#)

All matches to this query

| Score | $M_r(\text{calc})$ : | Delta    | Sequence                    |
|-------|----------------------|----------|-----------------------------|
| 33.1  | 1548.783066          | 0.000156 | <a href="#">LSNENHGIAQR</a> |

Mascot: <http://www.matrixscience.com/>



# MATRIX SCIENCE Mascot Search Results

## Peptide View

MS/MS Fragmentation of **FYNQVSTPLLR**

Found in **ITIH2\_HUMAN**, Inter-alpha-trypsin inhibitor heavy chain H2 OS=Homo sapiens GN=ITIH2 PE=1 SV=2

Match to Query 44577: 1647.901268 from(824.957910,2+) rtinseconds(2250) index(62376)

Title: Locus:1.1.1.3088.16 File:"2013-07-02 CLN FXIII 60 min 1st F 4.wiff"

Data file C:\Program Files (x86)\Matrix Science\Mascot Daemon\mgf4 FXIII 60 min 1st\mascot\_daemon\_merge.mgf

Click mouse within plot area to zoom in by factor of two about that point

Or, Plot from  to  Da

Label all possible matches  Label matches used for scoring

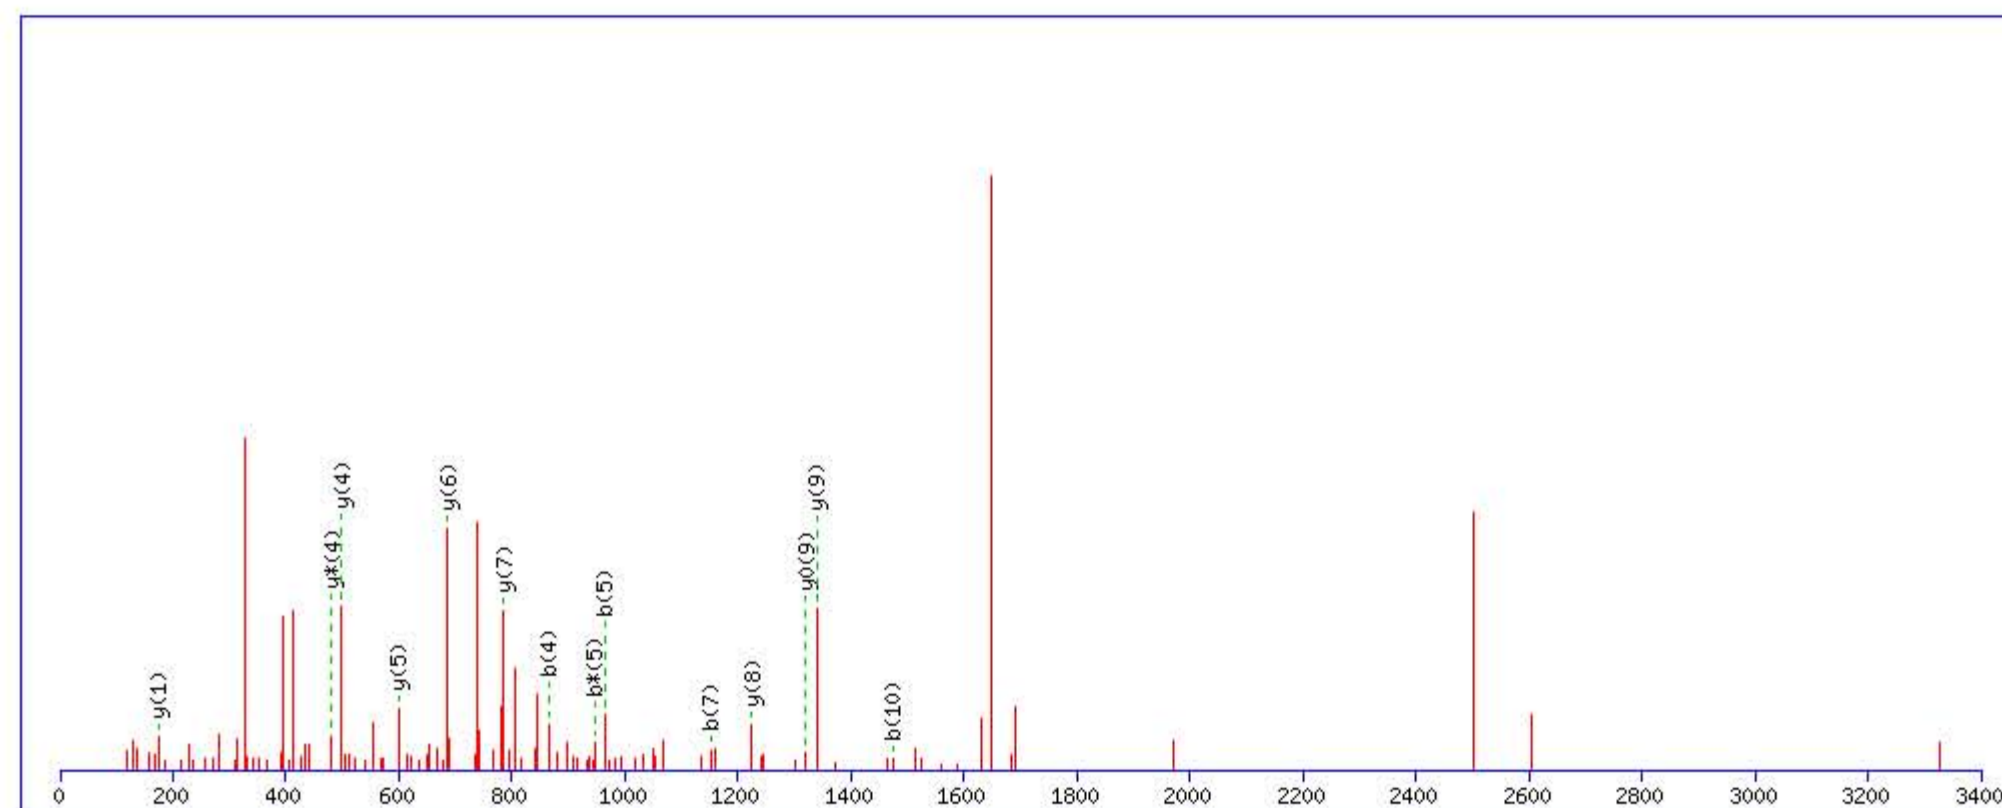

Monoisotopic mass of neutral peptide Mr(calc): 1647.880676

Fixed modifications: Carbamidomethyl (C) (apply to specified residues or termini only)

Variable modifications:

Q4 : Biotin:Thermo-21345 (Q)

Ions Score: 33 Expect: 0.0014

Matches : 14/98 fragment ions using 32 most intense peaks [\(help\)](#)

| #  | b                  | b <sup>++</sup> | b <sup>+</sup>    | b <sup>*++</sup> | b <sup>0</sup> | b <sup>0++</sup> | Seq. | y                  | y <sup>++</sup> | y <sup>+</sup>    | y <sup>*++</sup> | y <sup>0</sup>     | y <sup>0++</sup> | #  |
|----|--------------------|-----------------|-------------------|------------------|----------------|------------------|------|--------------------|-----------------|-------------------|------------------|--------------------|------------------|----|
| 1  | 148.075690         | 74.541483       |                   |                  |                |                  | F    |                    |                 |                   |                  |                    |                  | 11 |
| 2  | 311.139019         | 156.073148      |                   |                  |                |                  | Y    | 1501.819547        | 751.413411      | 1484.792998       | 742.900137       | 1483.808982        | 742.408129       | 10 |
| 3  | 425.181946         | 213.094611      | 408.155397        | 204.581337       |                |                  | N    | <b>1338.756218</b> | 669.881747      | 1321.729669       | 661.368472       | <b>1320.745653</b> | 660.876464       | 9  |
| 4  | <b>864.407272</b>  | 432.707274      | 847.380723        | 424.194000       |                |                  | Q    | <b>1224.713291</b> | 612.860283      | 1207.686742       | 604.347009       | 1206.702726        | 603.855001       | 8  |
| 5  | <b>963.475686</b>  | 482.241481      | <b>946.449137</b> | 473.728207       |                |                  | V    | <b>785.487965</b>  | 393.247620      | 768.461416        | 384.734346       | 767.477400         | 384.242338       | 7  |
| 6  | 1050.507714        | 525.757495      | 1033.481165       | 517.244221       | 1032.497149    | 516.752213       | S    | <b>686.419551</b>  | 343.713414      | 669.393002        | 335.200139       | 668.408986         | 334.708131       | 6  |
| 7  | <b>1151.555393</b> | 576.281335      | 1134.528844       | 567.768060       | 1133.544828    | 567.276052       | T    | <b>599.387523</b>  | 300.197399      | 582.360974        | 291.684125       | 581.376958         | 291.192117       | 5  |
| 8  | 1248.608157        | 624.807717      | 1231.581608       | 616.294442       | 1230.597592    | 615.802434       | P    | <b>498.339844</b>  | 249.673560      | <b>481.313295</b> | 241.160285       |                    |                  | 4  |
| 9  | 1361.692221        | 681.349749      | 1344.665672       | 672.836474       | 1343.681656    | 672.344466       | L    | 401.287080         | 201.147178      | 384.260531        | 192.633903       |                    |                  | 3  |
| 10 | <b>1474.776285</b> | 737.891780      | 1457.749736       | 729.378506       | 1456.765720    | 728.886498       | L    | 288.203016         | 144.605146      | 271.176467        | 136.091871       |                    |                  | 2  |
| 11 |                    |                 |                   |                  |                |                  | R    | <b>175.118952</b>  | 88.063114       | 158.092403        | 79.549839        |                    |                  | 1  |

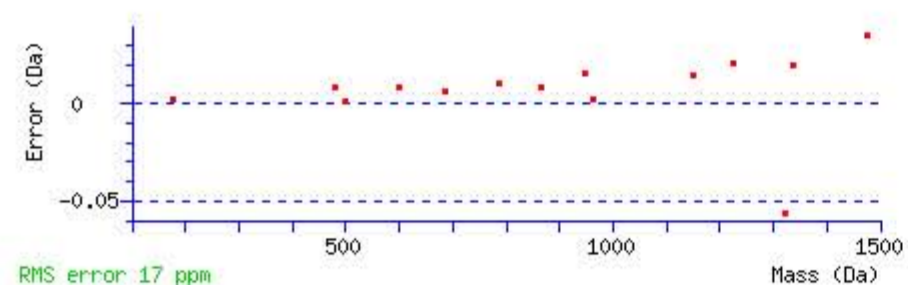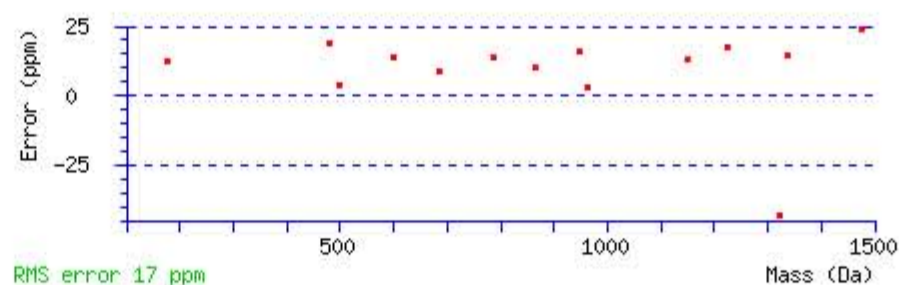

NCBI BLAST search of **FYNQVSTPLLR**

(Parameters: blastp, nr protein database, expect=20000, no filter, PAM30)

Other BLAST [web gateways](#)

All matches to this query

| Score | Mr(calc):   | Delta    | Sequence                       |
|-------|-------------|----------|--------------------------------|
| 33.0  | 1647.880676 | 0.020592 | <a href="#">FYNQVSTPLLR</a>    |
| 2.7   | 1647.880508 | 0.020760 | <a href="#">VTHSVQTDLSHLRR</a> |

Mascot: <http://www.matrixscience.com/>



# MASCOT Search Results

## Peptide View

MS/MS Fragmentation of **IYGNQDTSSQLK**

Found in **ITIH2\_HUMAN**, Inter-alpha-trypsin inhibitor heavy chain H2 OS=Homo sapiens GN=ITIH2 PE=1 SV=2

Match to Query 44937: 1663.839148 from(832.926850,2+) rtinseconds(1618) index(57705)

Title: Locus:1.1.1.2869.15 File:"2013-07-02 CLN FXIII 60 min 1st F 4.wiff"

Data file C:\Program Files (x86)\Matrix Science\Mascot Daemon\mgf4 FXIII 60 min 1st\mascot\_daemon\_merge.mgf

Click mouse within plot area to zoom in by factor of two about that point

Or, Plot from  to  Da

Label all possible matches  Label matches used for scoring

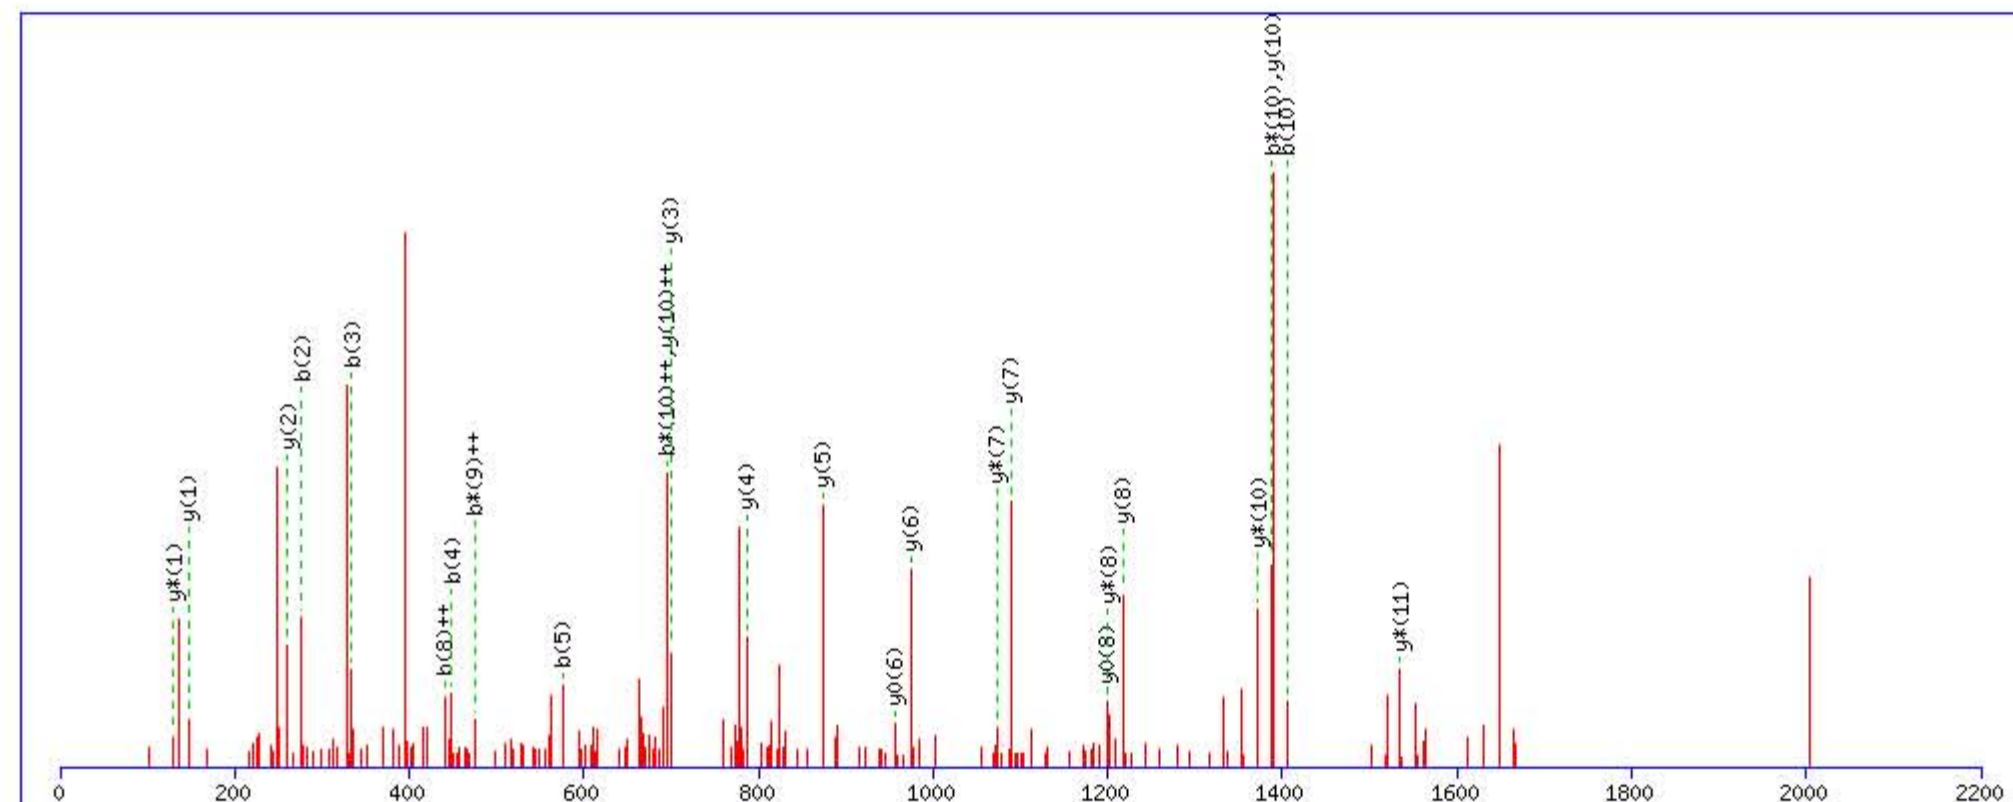

Monoisotopic mass of neutral peptide Mr(calc): 1663.823944

Fixed modifications: Carbamidomethyl (C) (apply to specified residues or termini only)

Variable modifications:

Q10 : Biotin:Thermo-21345 (Q)

Ions Score: 47 Expect: 0.00011

Matches : 26/110 fragment ions using 47 most intense peaks [\(help\)](#)

| #  | b           | b <sup>++</sup> | b <sup>*</sup> | b <sup>*++</sup> | b <sup>0</sup> | b <sup>0++</sup> | Seq. | y           | y <sup>++</sup> | y <sup>*</sup> | y <sup>*++</sup> | y <sup>0</sup> | y <sup>0++</sup> | #  |
|----|-------------|-----------------|----------------|------------------|----------------|------------------|------|-------------|-----------------|----------------|------------------|----------------|------------------|----|
| 1  | 114.091340  | 57.549308       |                |                  |                |                  | I    |             |                 |                |                  |                |                  | 12 |
| 2  | 277.154669  | 139.080973      |                |                  |                |                  | Y    | 1551.747170 | 776.377223      | 1534.720621    | 767.863948       | 1533.736605    | 767.371940       | 11 |
| 3  | 334.176133  | 167.591704      |                |                  |                |                  | G    | 1388.683841 | 694.845558      | 1371.657292    | 686.332284       | 1370.673276    | 685.840276       | 10 |
| 4  | 448.219060  | 224.613168      | 431.192511     | 216.099894       |                |                  | N    | 1331.662377 | 666.334826      | 1314.635828    | 657.821552       | 1313.651812    | 657.329544       | 9  |
| 5  | 576.277638  | 288.642457      | 559.251089     | 280.129183       |                |                  | Q    | 1217.619450 | 609.313363      | 1200.592901    | 600.800088       | 1199.608885    | 600.308080       | 8  |
| 6  | 691.304581  | 346.155929      | 674.278032     | 337.642654       | 673.294016     | 337.150646       | D    | 1089.560872 | 545.284074      | 1072.534323    | 536.770799       | 1071.550307    | 536.278791       | 7  |
| 7  | 792.352260  | 396.679768      | 775.325711     | 388.166494       | 774.341695     | 387.674486       | T    | 974.533929  | 487.770602      | 957.507380     | 479.257328       | 956.523364     | 478.765320       | 6  |
| 8  | 879.384288  | 440.195782      | 862.357739     | 431.682507       | 861.373723     | 431.190499       | S    | 873.486250  | 437.246763      | 856.459701     | 428.733488       | 855.475685     | 428.241480       | 5  |
| 9  | 966.416316  | 483.711796      | 949.389767     | 475.198521       | 948.405751     | 474.706513       | S    | 786.454222  | 393.730749      | 769.427673     | 385.217474       | 768.443657     | 384.725466       | 4  |
| 10 | 1405.641642 | 703.324459      | 1388.615093    | 694.811184       | 1387.631077    | 694.319176       | Q    | 699.422194  | 350.214735      | 682.395645     | 341.701460       |                |                  | 3  |
| 11 | 1518.725706 | 759.866491      | 1501.699157    | 751.353216       | 1500.715141    | 750.861208       | L    | 260.196868  | 130.602072      | 243.170319     | 122.088797       |                |                  | 2  |
| 12 |             |                 |                |                  |                |                  | K    | 147.112804  | 74.060040       | 130.086255     | 65.546765        |                |                  | 1  |

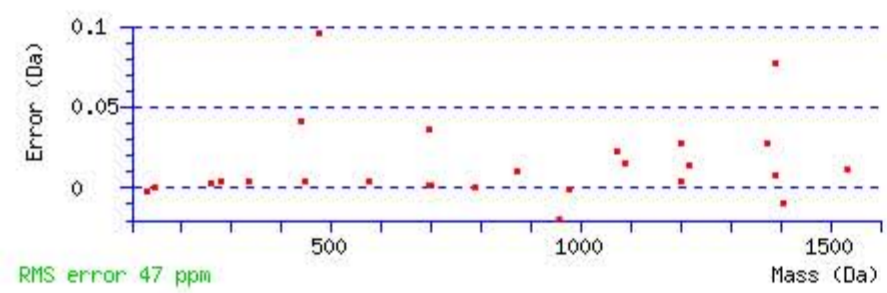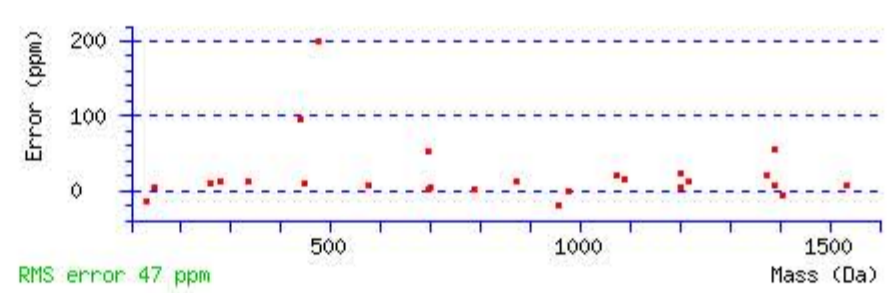

NCBI BLAST search of **IYGNQDTSSQLK**

(Parameters: blastp, nr protein database, expect=20000, no filter, PAM30)

Other BLAST [web gateways](#)

### All matches to this query

| Score | Mr(calc):   | Delta     | Sequence                       |
|-------|-------------|-----------|--------------------------------|
| 46.9  | 1663.823944 | 0.015204  | <a href="#">IYGNQDTSSQLK</a>   |
| 24.8  | 1663.823944 | 0.015204  | <a href="#">IYGNQDTSSQLK</a>   |
| 4.5   | 1663.863663 | -0.024515 | <a href="#">EAQKEMQKIMTSLK</a> |



**MASCOT** Mascot Search Results

**Peptide View**

MS/MS Fragmentation of **SILQMSLDHHIVTPLTSLVIENEAGDER**  
 Found in **ITIH2\_HUMAN**, Inter-alpha-trypsin inhibitor heavy chain H2 OS=Homo sapiens GN=ITIH2 PE=1 SV=2

Match to Query 46194: 3427.778696 from(857.951950,4+) rtinseconds(2697) index(65276)  
 Title: Locus:1.1.1.3243.14 File:"2013-07-02 CLN FXIII 60 min 1st F 4.wiff"  
 Data file C:\Program Files (x86)\Matrix Science\Mascot Daemon\mgf4 FXIII 60 min 1st\mascot\_daemon\_merge.mgf

Click mouse within plot area to zoom in by factor of two about that point  
 Or, Plot from  to  Da   
 Label all possible matches  Label matches used for scoring

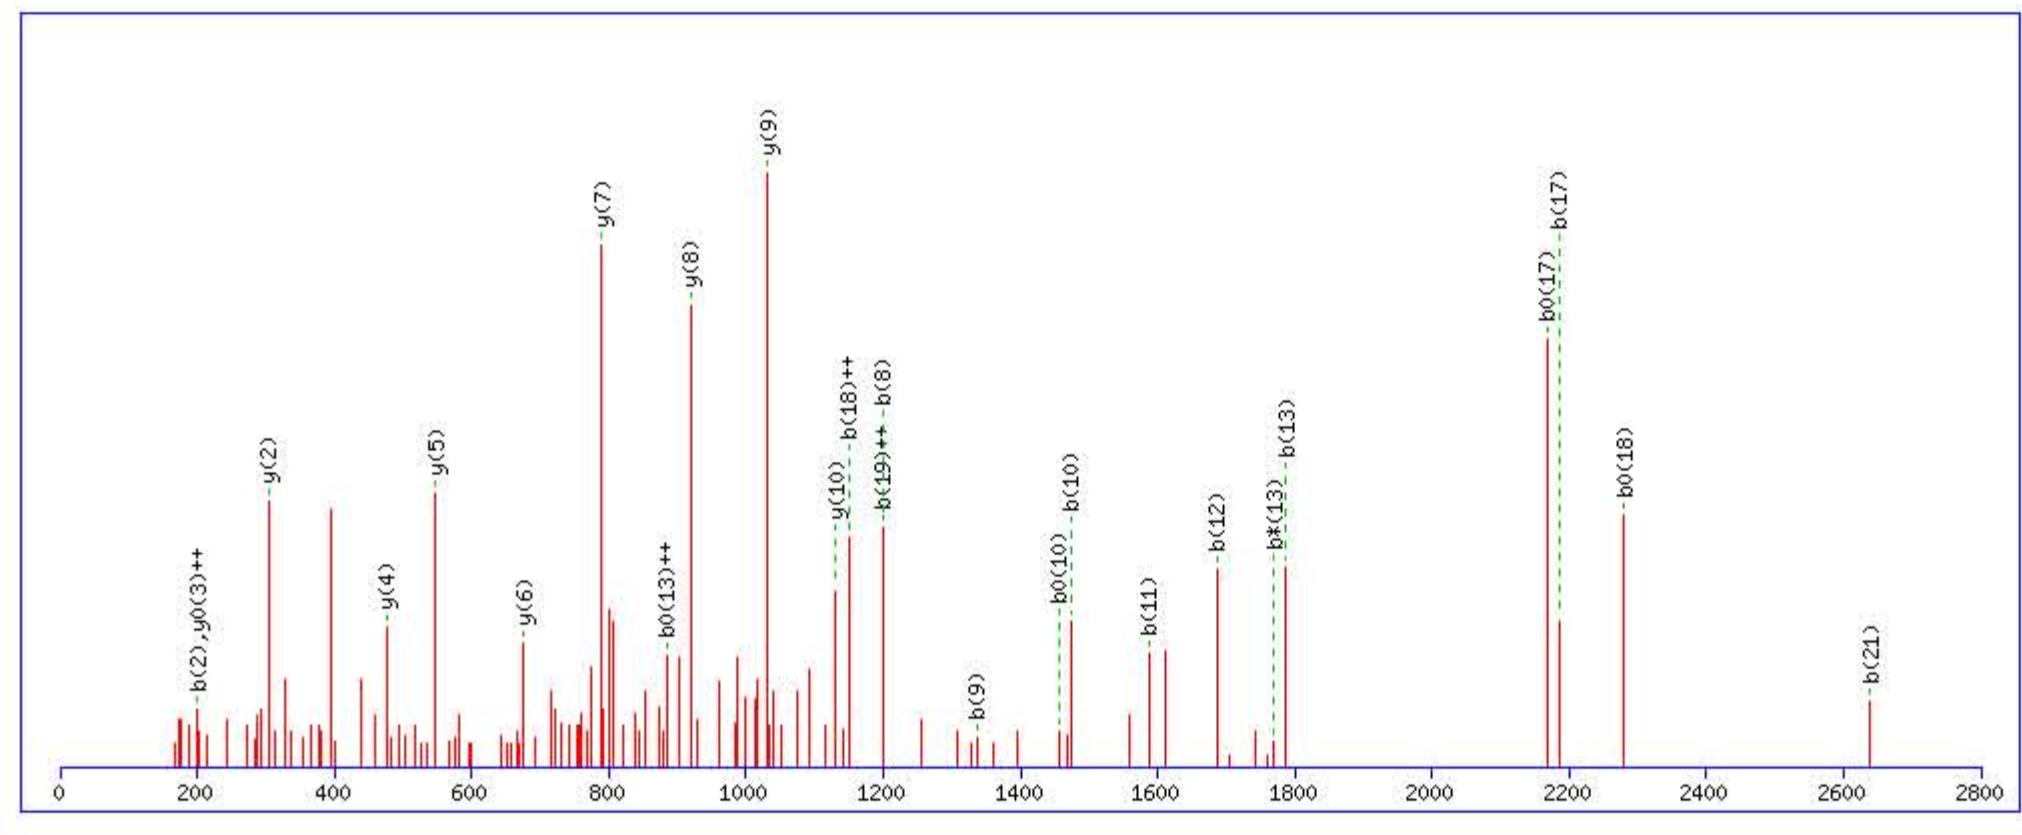

Monoisotopic mass of neutral peptide Mr(calc): 3427.747940  
 Fixed modifications: Carbamidomethyl (C) (apply to specified residues or termini only)  
 Variable modifications:  
 Q4 : Biotin:Thermo-21345 (Q)  
 Ions Score: 67 Expect: 6.1e-007  
 Matches : 25/316 fragment ions using 38 most intense peaks [\(help\)](#)

| #  | b                  | b <sup>++</sup>    | b <sup>+</sup>     | b <sup>+++</sup> | b <sup>0</sup>     | b <sup>0++</sup>  | Seq. | y                  | y <sup>++</sup> | y <sup>+</sup> | y <sup>+++</sup> | y <sup>0</sup> | y <sup>0++</sup>  | #  |
|----|--------------------|--------------------|--------------------|------------------|--------------------|-------------------|------|--------------------|-----------------|----------------|------------------|----------------|-------------------|----|
| 1  | 88.039304          | 44.523290          |                    |                  | 70.028739          | 35.518008         | S    |                    |                 |                |                  |                |                   | 28 |
| 2  | <b>201.123368</b>  | 101.065322         |                    |                  | 183.112803         | 92.060039         | I    | 3341.723211        | 1671.365243     | 3324.696662    | 1662.851969      | 3323.712646    | 1662.359961       | 27 |
| 3  | 314.207432         | 157.607354         |                    |                  | 296.196867         | 148.602071        | L    | 3228.639147        | 1614.823211     | 3211.612598    | 1606.309937      | 3210.628582    | 1605.817929       | 26 |
| 4  | 753.432758         | 377.220017         | 736.406209         | 368.706743       | 735.422193         | 368.214735        | Q    | 3115.555083        | 1558.281179     | 3098.528534    | 1549.767905      | 3097.544518    | 1549.275897       | 25 |
| 5  | 884.473243         | 442.740260         | 867.446694         | 434.226985       | 866.462678         | 433.734977        | M    | 2676.329757        | 1338.668516     | 2659.303208    | 1330.155242      | 2658.319192    | 1329.663234       | 24 |
| 6  | 971.505271         | 486.256274         | 954.478722         | 477.742999       | 953.494706         | 477.250991        | S    | 2545.289272        | 1273.148274     | 2528.262723    | 1264.634999      | 2527.278707    | 1264.142991       | 23 |
| 7  | 1084.589335        | 542.798305         | 1067.562786        | 534.285031       | 1066.578770        | 533.793023        | L    | 2458.257244        | 1229.632260     | 2441.230695    | 1221.118985      | 2440.246679    | 1220.626977       | 22 |
| 8  | <b>1199.616278</b> | 600.311777         | 1182.589729        | 591.798503       | 1181.605713        | 591.306494        | D    | 2345.173180        | 1173.090228     | 2328.146631    | 1164.576953      | 2327.162615    | 1164.084945       | 21 |
| 9  | <b>1336.675190</b> | 668.841233         | 1319.648641        | 660.327959       | 1318.664625        | 659.835950        | H    | 2230.146237        | 1115.576756     | 2213.119688    | 1107.063482      | 2212.135672    | 1106.571474       | 20 |
| 10 | <b>1473.734102</b> | 737.370689         | 1456.707553        | 728.857415       | <b>1455.723537</b> | 728.365406        | H    | 2093.087325        | 1047.047300     | 2076.060776    | 1038.534026      | 2075.076760    | 1038.042018       | 19 |
| 11 | <b>1586.818166</b> | 793.912721         | 1569.791617        | 785.399446       | 1568.807601        | 784.907438        | I    | 1956.028413        | 978.517845      | 1939.001864    | 970.004570       | 1938.017848    | 969.512562        | 18 |
| 12 | <b>1685.886580</b> | 843.446928         | 1668.860031        | 834.933653       | 1667.876015        | 834.441645        | V    | 1842.944349        | 921.975813      | 1825.917800    | 913.462538       | 1824.933784    | 912.970530        | 17 |
| 13 | <b>1786.934259</b> | 893.970767         | <b>1769.907710</b> | 885.457493       | 1768.923694        | <b>884.965485</b> | T    | 1743.875935        | 872.441606      | 1726.849386    | 863.928331       | 1725.865370    | 863.436323        | 16 |
| 14 | 1883.987023        | 942.497149         | 1866.960474        | 933.983875       | 1865.976458        | 933.491867        | P    | 1642.828256        | 821.917766      | 1625.801707    | 813.404492       | 1624.817691    | 812.912484        | 15 |
| 15 | 1997.071087        | 999.039181         | 1980.044538        | 990.525907       | 1979.060522        | 990.033899        | L    | 1545.775492        | 773.391384      | 1528.748943    | 764.878110       | 1527.764927    | 764.386102        | 14 |
| 16 | 2098.118766        | 1049.563021        | 2081.092217        | 1041.049746      | 2080.108201        | 1040.557738       | T    | 1432.691428        | 716.849352      | 1415.664879    | 708.336078       | 1414.680863    | 707.844070        | 13 |
| 17 | <b>2185.150794</b> | 1093.079035        | 2168.124245        | 1084.565760      | <b>2167.140229</b> | 1084.073752       | S    | 1331.643749        | 666.325513      | 1314.617200    | 657.812238       | 1313.633184    | 657.320230        | 12 |
| 18 | 2298.234858        | <b>1149.621067</b> | 2281.208309        | 1141.107792      | <b>2280.224293</b> | 1140.615784       | L    | 1244.611721        | 622.809499      | 1227.585172    | 614.296224       | 1226.601156    | 613.804216        | 11 |
| 19 | 2397.303272        | <b>1199.155274</b> | 2380.276723        | 1190.641999      | 2379.292707        | 1190.149991       | V    | <b>1131.527657</b> | 566.267467      | 1114.501108    | 557.754192       | 1113.517092    | 557.262184        | 10 |
| 20 | 2510.387336        | 1255.697306        | 2493.360787        | 1247.184031      | 2492.376771        | 1246.692023       | I    | <b>1032.459243</b> | 516.733260      | 1015.432694    | 508.219985       | 1014.448678    | 507.727977        | 9  |
| 21 | <b>2639.429929</b> | 1320.218602        | 2622.403380        | 1311.705328      | 2621.419364        | 1311.213320       | E    | <b>919.375179</b>  | 460.191228      | 902.348630     | 451.677953       | 901.364614     | 451.185945        | 8  |
| 22 | 2753.472856        | 1377.240066        | 2736.446307        | 1368.726791      | 2735.462291        | 1368.234783       | N    | <b>790.332586</b>  | 395.669931      | 773.306037     | 387.156657       | 772.322021     | 386.664649        | 7  |
| 23 | 2882.515449        | 1441.761362        | 2865.488900        | 1433.248088      | 2864.504884        | 1432.756080       | E    | <b>676.289659</b>  | 338.648468      | 659.263110     | 330.135193       | 658.279094     | 329.643185        | 6  |
| 24 | 2953.552563        | 1477.279920        | 2936.526014        | 1468.766645      | 2935.541998        | 1468.274637       | A    | <b>547.247066</b>  | 274.127171      | 530.220517     | 265.613897       | 529.236501     | 265.121889        | 5  |
| 25 | 3010.574027        | 1505.790652        | 2993.547478        | 1497.277377      | 2992.563462        | 1496.785369       | G    | <b>476.209952</b>  | 238.608614      | 459.183403     | 230.095339       | 458.199387     | 229.603331        | 4  |
| 26 | 3125.600970        | 1563.304123        | 3108.574421        | 1554.790848      | 3107.590405        | 1554.298840       | D    | 419.188488         | 210.097882      | 402.161939     | 201.584607       | 401.177923     | <b>201.092599</b> | 3  |
| 27 | 3254.643563        | 1627.825420        | 3237.617014        | 1619.312145      | 3236.632998        | 1618.820137       | E    | <b>304.161545</b>  | 152.584411      | 287.134996     | 144.071136       | 286.150980     | 143.579128        | 2  |
| 28 |                    |                    |                    |                  |                    |                   | R    | 175.118952         | 88.063114       | 158.092403     | 79.549839        |                |                   | 1  |

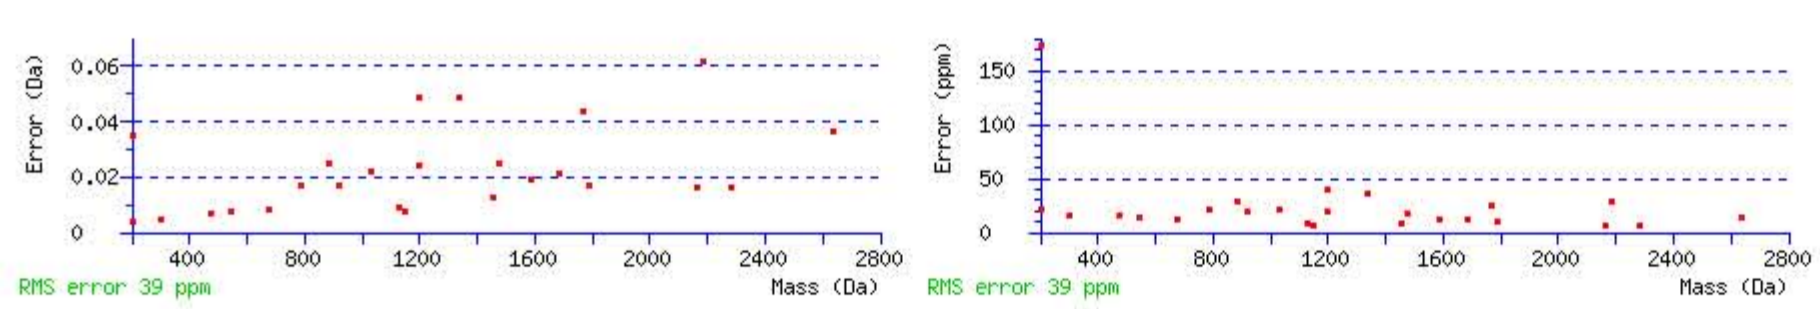

NCBI BLAST search of **SILQMSLDHHIVTPLTSLVIENEAGDER**  
 (Parameters: blastp, nr protein database, expect=20000, no filter, PAM30)  
 Other BLAST [web gateways](#)

**All matches to this query**

| Score | Mr(calc):   | Delta     | Sequence                                     |
|-------|-------------|-----------|----------------------------------------------|
| 66.8  | 3427.747940 | 0.030756  | <a href="#">SILQMSLDHHIVTPLTSLVIENEAGDER</a> |
| 0.6   | 3427.793747 | -0.015051 | <a href="#">PLWVFFVILILSNSSHCSPPPPLTLRMR</a> |



# MASCOT SCIENCE Mascot Search Results

## Peptide View

MS/MS Fragmentation of **AHVSFKPTVAQQR**

Found in **ITIH2\_HUMAN**, Inter-alpha-trypsin inhibitor heavy chain H2 OS=Homo sapiens GN=ITIH2 PE=1 SV=2

Match to Query 47958: 1778.960892 from(593.994240,3+) rtinseconds(1459) index(38595)

Title: Locus:1.1.1.2791.22 File:"2013-07-02 CLN FXIII 60 min 1st F 3.wiff"

Data file C:\Program Files (x86)\Matrix Science\Mascot Daemon\mgf4 FXIII 60 min 1st\mascot\_daemon\_merge.mgf

Click mouse within plot area to zoom in by factor of two about that point

Or, Plot from  to  Da

Label all possible matches  Label matches used for scoring

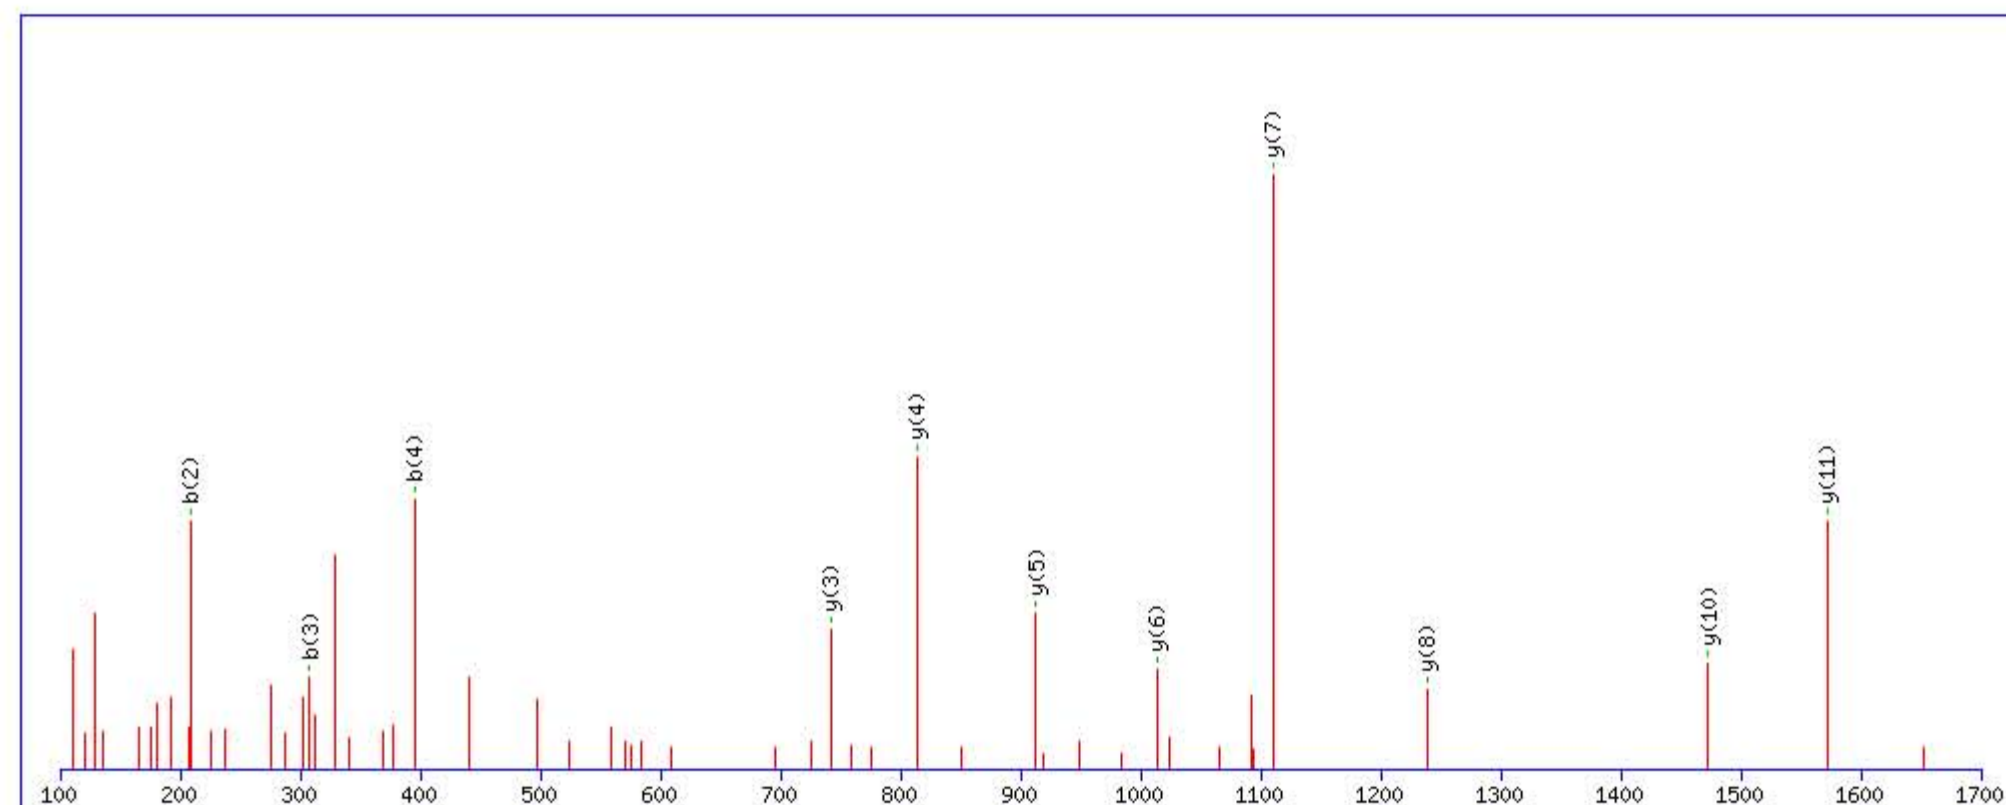

Monoisotopic mass of neutral peptide Mr(calc): 1778.961395

Fixed modifications: Carbamidomethyl (C) (apply to specified residues or termini only)

Variable modifications:

Q12 : Biotin:Thermo-21345 (Q)

Ions Score: 62 Expect: 1.4e-006

Matches : 11/118 fragment ions using 15 most intense peaks [\(help\)](#)

| #  | b                 | b <sup>++</sup> | b <sup>+</sup> | b <sup>+++</sup> | b <sup>0</sup> | b <sup>0++</sup> | Seq. | y                  | y <sup>++</sup> | y <sup>+</sup> | y <sup>+++</sup> | y <sup>0</sup> | y <sup>0++</sup> | #  |
|----|-------------------|-----------------|----------------|------------------|----------------|------------------|------|--------------------|-----------------|----------------|------------------|----------------|------------------|----|
| 1  | 72.044390         | 36.525833       |                |                  |                |                  | A    |                    |                 |                |                  |                |                  | 13 |
| 2  | <b>209.103302</b> | 105.055289      |                |                  |                |                  | H    | 1708.931558        | 854.969417      | 1691.905009    | 846.456143       | 1690.920993    | 845.964135       | 12 |
| 3  | <b>308.171716</b> | 154.589496      |                |                  |                |                  | V    | <b>1571.872646</b> | 786.439961      | 1554.846097    | 777.926687       | 1553.862081    | 777.434679       | 11 |
| 4  | <b>395.203744</b> | 198.105510      |                |                  | 377.193179     | 189.100227       | S    | <b>1472.804232</b> | 736.905754      | 1455.777683    | 728.392480       | 1454.793667    | 727.900472       | 10 |
| 5  | 542.272158        | 271.639717      |                |                  | 524.261593     | 262.634435       | F    | 1385.772204        | 693.389740      | 1368.745655    | 684.876466       | 1367.761639    | 684.384458       | 9  |
| 6  | 670.367121        | 335.687199      | 653.340572     | 327.173924       | 652.356556     | 326.681916       | K    | <b>1238.703790</b> | 619.855533      | 1221.677241    | 611.342259       | 1220.693225    | 610.850251       | 8  |
| 7  | 767.419885        | 384.213581      | 750.393336     | 375.700306       | 749.409320     | 375.208298       | P    | <b>1110.608827</b> | 555.808052      | 1093.582278    | 547.294777       | 1092.598262    | 546.802769       | 7  |
| 8  | 868.467564        | 434.737420      | 851.441015     | 426.224146       | 850.456999     | 425.732138       | T    | <b>1013.556063</b> | 507.281670      | 996.529514     | 498.768395       | 995.545498     | 498.276387       | 6  |
| 9  | 967.535978        | 484.271627      | 950.509429     | 475.758353       | 949.525413     | 475.266345       | V    | <b>912.508384</b>  | 456.757830      | 895.481835     | 448.244556       |                |                  | 5  |
| 10 | 1038.573092       | 519.790184      | 1021.546543    | 511.276910       | 1020.562527    | 510.784902       | A    | <b>813.439970</b>  | 407.223623      | 796.413421     | 398.710349       |                |                  | 4  |
| 11 | 1166.631670       | 583.819473      | 1149.605121    | 575.306199       | 1148.621105    | 574.814191       | Q    | <b>742.402856</b>  | 371.705066      | 725.376307     | 363.191792       |                |                  | 3  |
| 12 | 1605.856996       | 803.432136      | 1588.830447    | 794.918862       | 1587.846431    | 794.426854       | Q    | 614.344278         | 307.675777      | 597.317729     | 299.162503       |                |                  | 2  |
| 13 |                   |                 |                |                  |                |                  | R    | 175.118952         | 88.063114       | 158.092403     | 79.549839        |                |                  | 1  |

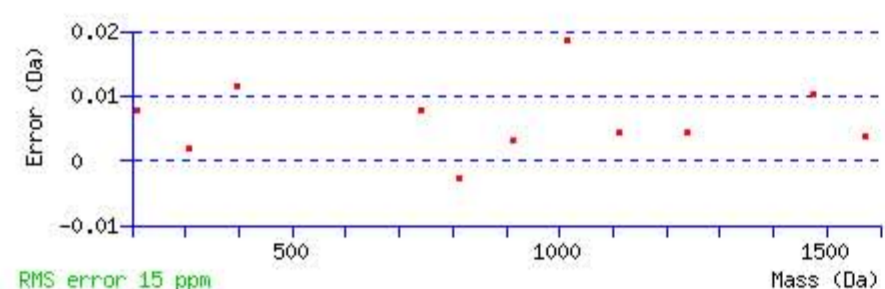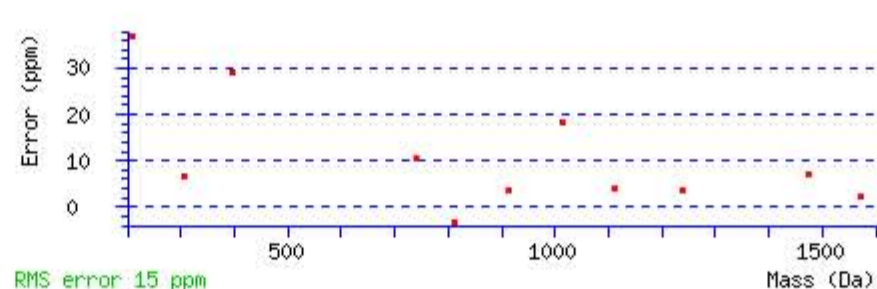

NCBI BLAST search of **AHVSFKPTVAQQR**

(Parameters: blastp, nr protein database, expect=20000, no filter, PAM30)

Other BLAST [web gateways](#)

All matches to this query

| Score | Mr(calc):   | Delta     | Sequence                          |
|-------|-------------|-----------|-----------------------------------|
| 62.4  | 1778.961395 | -0.000503 | <a href="#">AHVSFKPTVAQQR</a>     |
| 62.4  | 1778.961395 | -0.000503 | <a href="#">AHVSFKPTVAQQR</a>     |
| 0.1   | 1778.934906 | 0.025986  | <a href="#">NSAPVSVSAVRTSFMVK</a> |

Mascot: <http://www.matrixscience.com/>



# MASCOT Search Results

## Peptide View

MS/MS Fragmentation of **AHVSFKPTVAQQR**

Found in **ITIH2\_HUMAN**, Inter-alpha-trypsin inhibitor heavy chain H2 OS=Homo sapiens GN=ITIH2 PE=1 SV=2

Match to Query 47966: 1778.972202 from(593.998010,3+) rtinseconds(1385) index(56100)

Title: Locus:1.1.1.2788.17 File:"2013-07-02 CLN FXIII 60 min 1st F 4.wiff"

Data file C:\Program Files (x86)\Matrix Science\Mascot Daemon\mgf4 FXIII 60 min 1st\mascot\_daemon\_merge.mgf

Click mouse within plot area to zoom in by factor of two about that point

Or, Plot from  to  Da

Label all possible matches  Label matches used for scoring

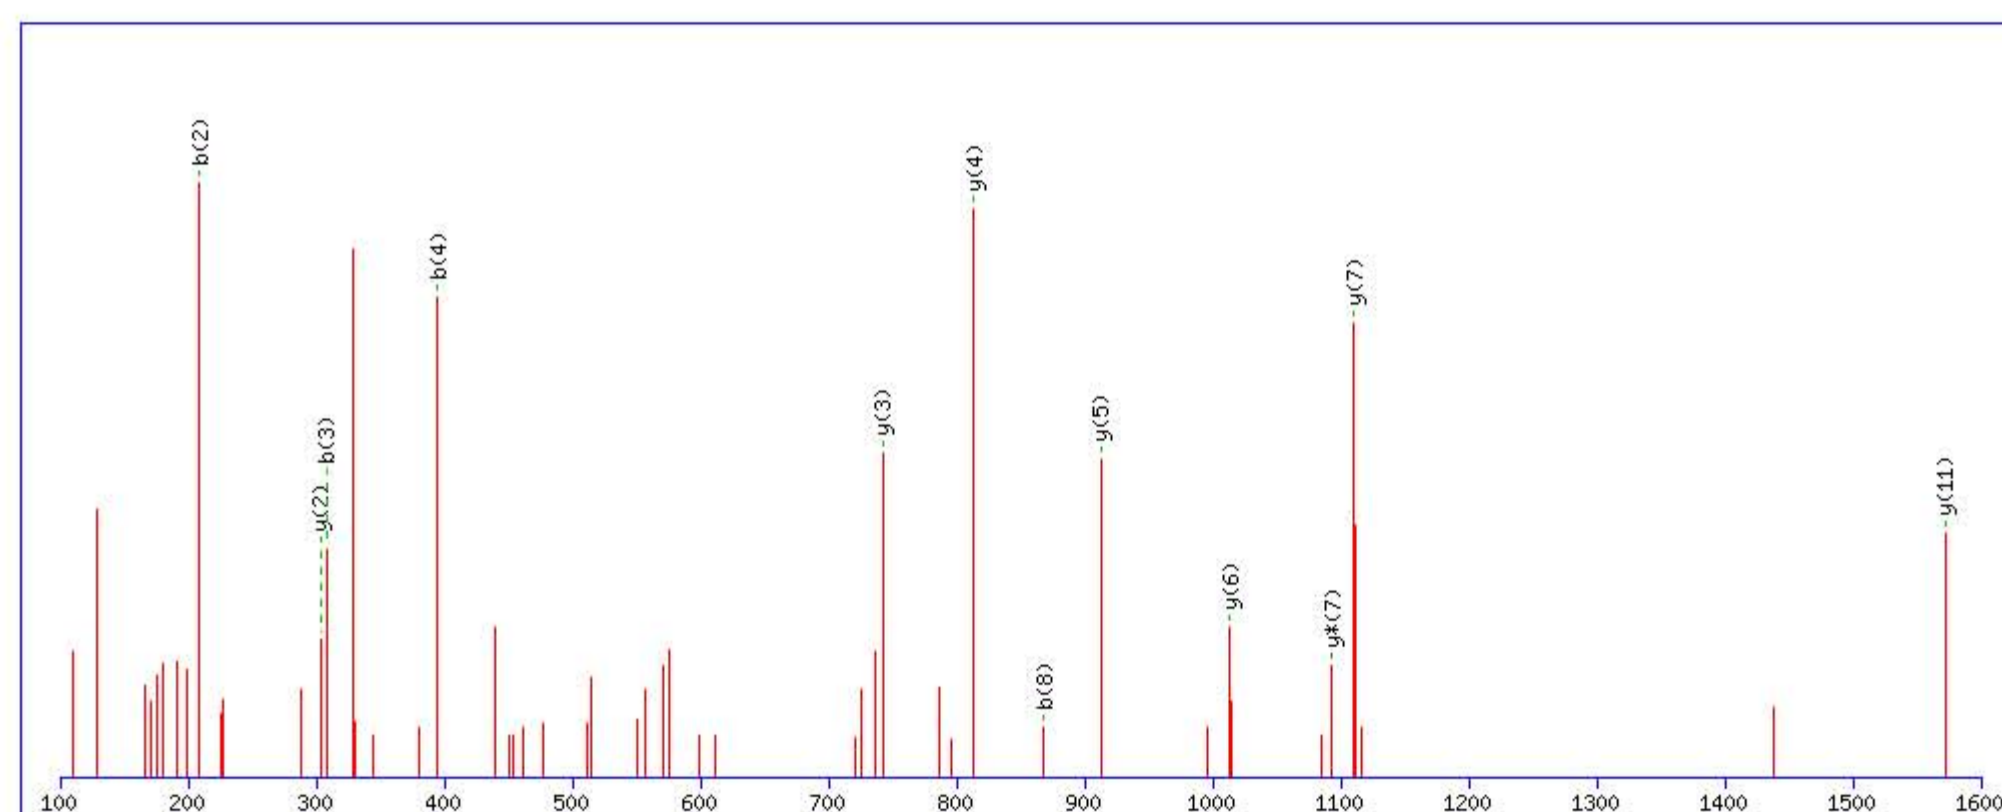

Monoisotopic mass of neutral peptide Mr(calc): 1778.961395

Fixed modifications: Carbamidomethyl (C) (apply to specified residues or termini only)

Variable modifications:

Q11 : Biotin:Thermo-21345 (Q)

Ions Score: 38 Expect: 0.0032

Matches : 12/118 fragment ions using 23 most intense peaks [\(help\)](#)

| #  | b                 | b <sup>++</sup> | b <sup>*</sup> | b <sup>*++</sup> | b <sup>0</sup> | b <sup>0++</sup> | Seq. | y                  | y <sup>++</sup> | y <sup>*</sup>     | y <sup>*++</sup> | y <sup>0</sup> | y <sup>0++</sup> | #  |
|----|-------------------|-----------------|----------------|------------------|----------------|------------------|------|--------------------|-----------------|--------------------|------------------|----------------|------------------|----|
| 1  | 72.044390         | 36.525833       |                |                  |                |                  | A    |                    |                 |                    |                  |                |                  | 13 |
| 2  | <b>209.103302</b> | 105.055289      |                |                  |                |                  | H    | 1708.931558        | 854.969417      | 1691.905009        | 846.456143       | 1690.920993    | 845.964135       | 12 |
| 3  | <b>308.171716</b> | 154.589496      |                |                  |                |                  | V    | <b>1571.872646</b> | 786.439961      | 1554.846097        | 777.926687       | 1553.862081    | 777.434679       | 11 |
| 4  | <b>395.203744</b> | 198.105510      |                |                  | 377.193179     | 189.100227       | S    | 1472.804232        | 736.905754      | 1455.777683        | 728.392480       | 1454.793667    | 727.900472       | 10 |
| 5  | 542.272158        | 271.639717      |                |                  | 524.261593     | 262.634435       | F    | 1385.772204        | 693.389740      | 1368.745655        | 684.876466       | 1367.761639    | 684.384458       | 9  |
| 6  | 670.367121        | 335.687199      | 653.340572     | 327.173924       | 652.356556     | 326.681916       | K    | 1238.703790        | 619.855533      | 1221.677241        | 611.342259       | 1220.693225    | 610.850251       | 8  |
| 7  | 767.419885        | 384.213581      | 750.393336     | 375.700306       | 749.409320     | 375.208298       | P    | <b>1110.608827</b> | 555.808052      | <b>1093.582278</b> | 547.294777       | 1092.598262    | 546.802769       | 7  |
| 8  | <b>868.467564</b> | 434.737420      | 851.441015     | 426.224146       | 850.456999     | 425.732138       | T    | <b>1013.556063</b> | 507.281670      | 996.529514         | 498.768395       | 995.545498     | 498.276387       | 6  |
| 9  | 967.535978        | 484.271627      | 950.509429     | 475.758353       | 949.525413     | 475.266345       | V    | <b>912.508384</b>  | 456.757830      | 895.481835         | 448.244556       |                |                  | 5  |
| 10 | 1038.573092       | 519.790184      | 1021.546543    | 511.276910       | 1020.562527    | 510.784902       | A    | <b>813.439970</b>  | 407.223623      | 796.413421         | 398.710349       |                |                  | 4  |
| 11 | 1477.798418       | 739.402847      | 1460.771869    | 730.889573       | 1459.787853    | 730.397565       | Q    | <b>742.402856</b>  | 371.705066      | 725.376307         | 363.191792       |                |                  | 3  |
| 12 | 1605.856996       | 803.432136      | 1588.830447    | 794.918862       | 1587.846431    | 794.426854       | Q    | <b>303.177530</b>  | 152.092403      | 286.150981         | 143.579129       |                |                  | 2  |
| 13 |                   |                 |                |                  |                |                  | R    | 175.118952         | 88.063114       | 158.092403         | 79.549839        |                |                  | 1  |

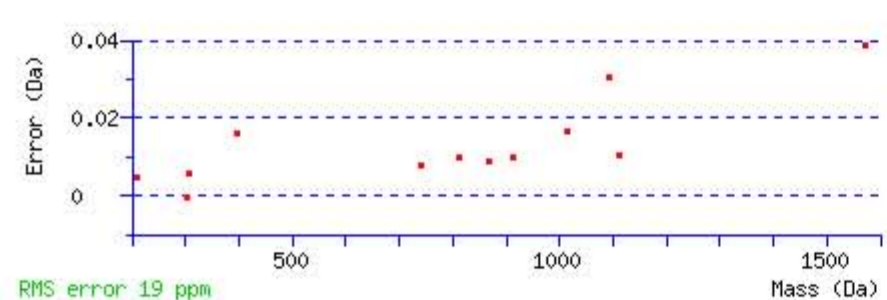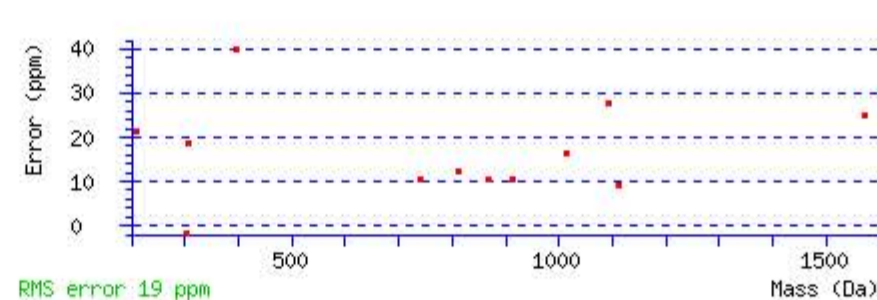

NCBI BLAST search of **AHVSFKPTVAQQR**

(Parameters: blastp, nr protein database, expect=20000, no filter, PAM30)

Other BLAST [web gateways](#)

All matches to this query

| Score | Mr(calc):   | Delta    | Sequence                      |
|-------|-------------|----------|-------------------------------|
| 37.7  | 1778.961395 | 0.010807 | <a href="#">AHVSFKPTVAQQR</a> |
| 36.2  | 1778.961395 | 0.010807 | <a href="#">AHVSFKPTVAQQR</a> |



# MASCOT SEARCH RESULTS

## Peptide View

MS/MS Fragmentation of **IYGNQDTSSQLK**

Found in **ITIH2\_HUMAN**, Inter-alpha-trypsin inhibitor heavy chain H2 OS=Homo sapiens GN=ITIH2 PE=1 SV=2

Match to Query 52365: 1975.009662 from(659.343830,3+) rtinseconds(1970) index(60353)

Title: Locus:1.1.1.2991.5 File:"2013-07-02 CLN FXIII 60 min 1st F 4.wiff"

Data file C:\Program Files (x86)\Matrix Science\Mascot Daemon\mgf4 FXIII 60 min 1st\mascot\_daemon\_merge.mgf

Click mouse within plot area to zoom in by factor of two about that point

Or, Plot from  to  Da

Label all possible matches  Label matches used for scoring

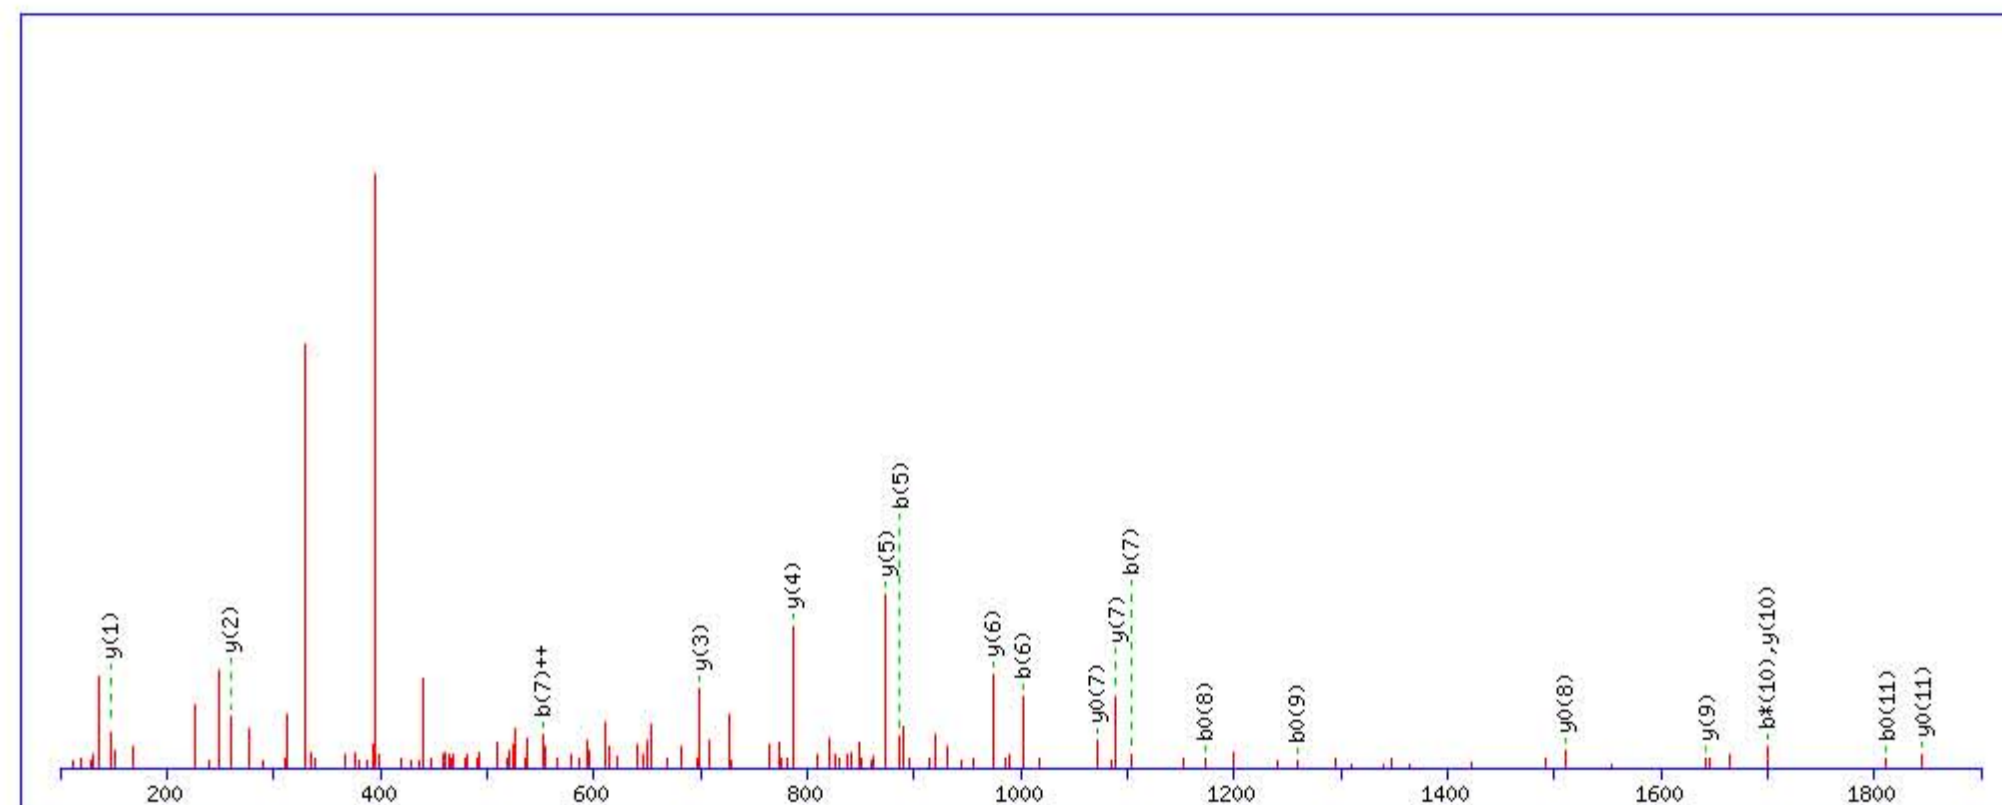

Monoisotopic mass of neutral peptide Mr(calc): 1974.990692

Fixed modifications: Carbamidomethyl (C) (apply to specified residues or termini only)

Variable modifications:

Q5 : Biotin:Thermo-21345 (Q)

Q10 : Biotin:Thermo-21345 (Q)

Ions Score: 33 Expect: 0.014

Matches : 20/110 fragment ions using 48 most intense peaks [\(help\)](#)

| #  | b           | b <sup>++</sup> | b <sup>*</sup> | b <sup>*++</sup> | b <sup>0</sup> | b <sup>0++</sup> | Seq. | y           | y <sup>++</sup> | y <sup>*</sup> | y <sup>*++</sup> | y <sup>0</sup> | y <sup>0++</sup> | #  |
|----|-------------|-----------------|----------------|------------------|----------------|------------------|------|-------------|-----------------|----------------|------------------|----------------|------------------|----|
| 1  | 114.091340  | 57.549308       |                |                  |                |                  | I    |             |                 |                |                  |                |                  | 12 |
| 2  | 277.154669  | 139.080973      |                |                  |                |                  | Y    | 1862.913918 | 931.960597      | 1845.887369    | 923.447323       | 1844.903353    | 922.955315       | 11 |
| 3  | 334.176133  | 167.591704      |                |                  |                |                  | G    | 1699.850589 | 850.428933      | 1682.824040    | 841.915658       | 1681.840024    | 841.423650       | 10 |
| 4  | 448.219060  | 224.613168      | 431.192511     | 216.099894       |                |                  | N    | 1642.829125 | 821.918201      | 1625.802576    | 813.404926       | 1624.818560    | 812.912918       | 9  |
| 5  | 887.444386  | 444.225831      | 870.417837     | 435.712557       |                |                  | Q    | 1528.786198 | 764.896737      | 1511.759649    | 756.383463       | 1510.775633    | 755.891455       | 8  |
| 6  | 1002.471329 | 501.739303      | 985.444780     | 493.226028       | 984.460764     | 492.734020       | D    | 1089.560872 | 545.284074      | 1072.534323    | 536.770800       | 1071.550307    | 536.278792       | 7  |
| 7  | 1103.519008 | 552.263142      | 1086.492459    | 543.749868       | 1085.508443    | 543.257860       | T    | 974.533929  | 487.770603      | 957.507380     | 479.257328       | 956.523364     | 478.765320       | 6  |
| 8  | 1190.551036 | 595.779156      | 1173.524487    | 587.265882       | 1172.540471    | 586.773874       | S    | 873.486250  | 437.246763      | 856.459701     | 428.733489       | 855.475685     | 428.241481       | 5  |
| 9  | 1277.583064 | 639.295170      | 1260.556515    | 630.781896       | 1259.572499    | 630.289888       | S    | 786.454222  | 393.730749      | 769.427673     | 385.217475       | 768.443657     | 384.725467       | 4  |
| 10 | 1716.808390 | 858.907833      | 1699.781841    | 850.394559       | 1698.797825    | 849.902551       | Q    | 699.422194  | 350.214735      | 682.395645     | 341.701461       |                |                  | 3  |
| 11 | 1829.892454 | 915.449865      | 1812.865905    | 906.936591       | 1811.881889    | 906.444583       | L    | 260.196868  | 130.602072      | 243.170319     | 122.088797       |                |                  | 2  |
| 12 |             |                 |                |                  |                |                  | K    | 147.112804  | 74.060040       | 130.086255     | 65.546765        |                |                  | 1  |

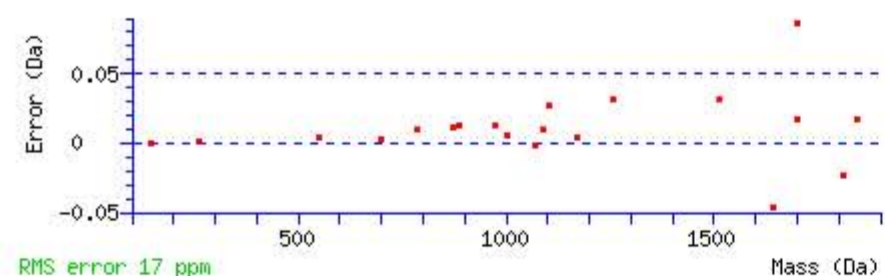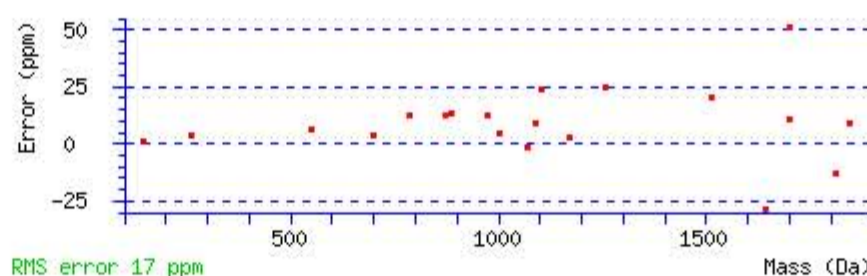

NCBI BLAST search of **IYGNQDTSSQLK**

(Parameters: blastp, nr protein database, expect=20000, no filter, PAM30)

Other BLAST [web gateways](#)

All matches to this query

| Score | Mr(calc):   | Delta    | Sequence                     |
|-------|-------------|----------|------------------------------|
| 32.7  | 1974.990692 | 0.018970 | <a href="#">IYGNQDTSSQLK</a> |

Mascot: <http://www.matrixscience.com/>



# MASCOT SEARCH RESULTS

## Peptide View

MS/MS Fragmentation of **AHVSFKPTVAQQR**

Found in **ITIH2\_HUMAN**, Inter-alpha-trypsin inhibitor heavy chain H2 OS=Homo sapiens GN=ITIH2 PE=1 SV=2

Match to Query 55875: 2090.136736 from(523.541460,4+) rtinseconds(1732) index(58580)

Title: Locus:1.1.1.2909.7 File:"2013-07-02 CLN FXIII 60 min 1st F 4.wiff"

Data file C:\Program Files (x86)\Matrix Science\Mascot Daemon\mgf4 FXIII 60 min 1st\mascot\_daemon\_merge.mgf

Click mouse within plot area to zoom in by factor of two about that point

Or, Plot from  to  Da

Label all possible matches  Label matches used for scoring

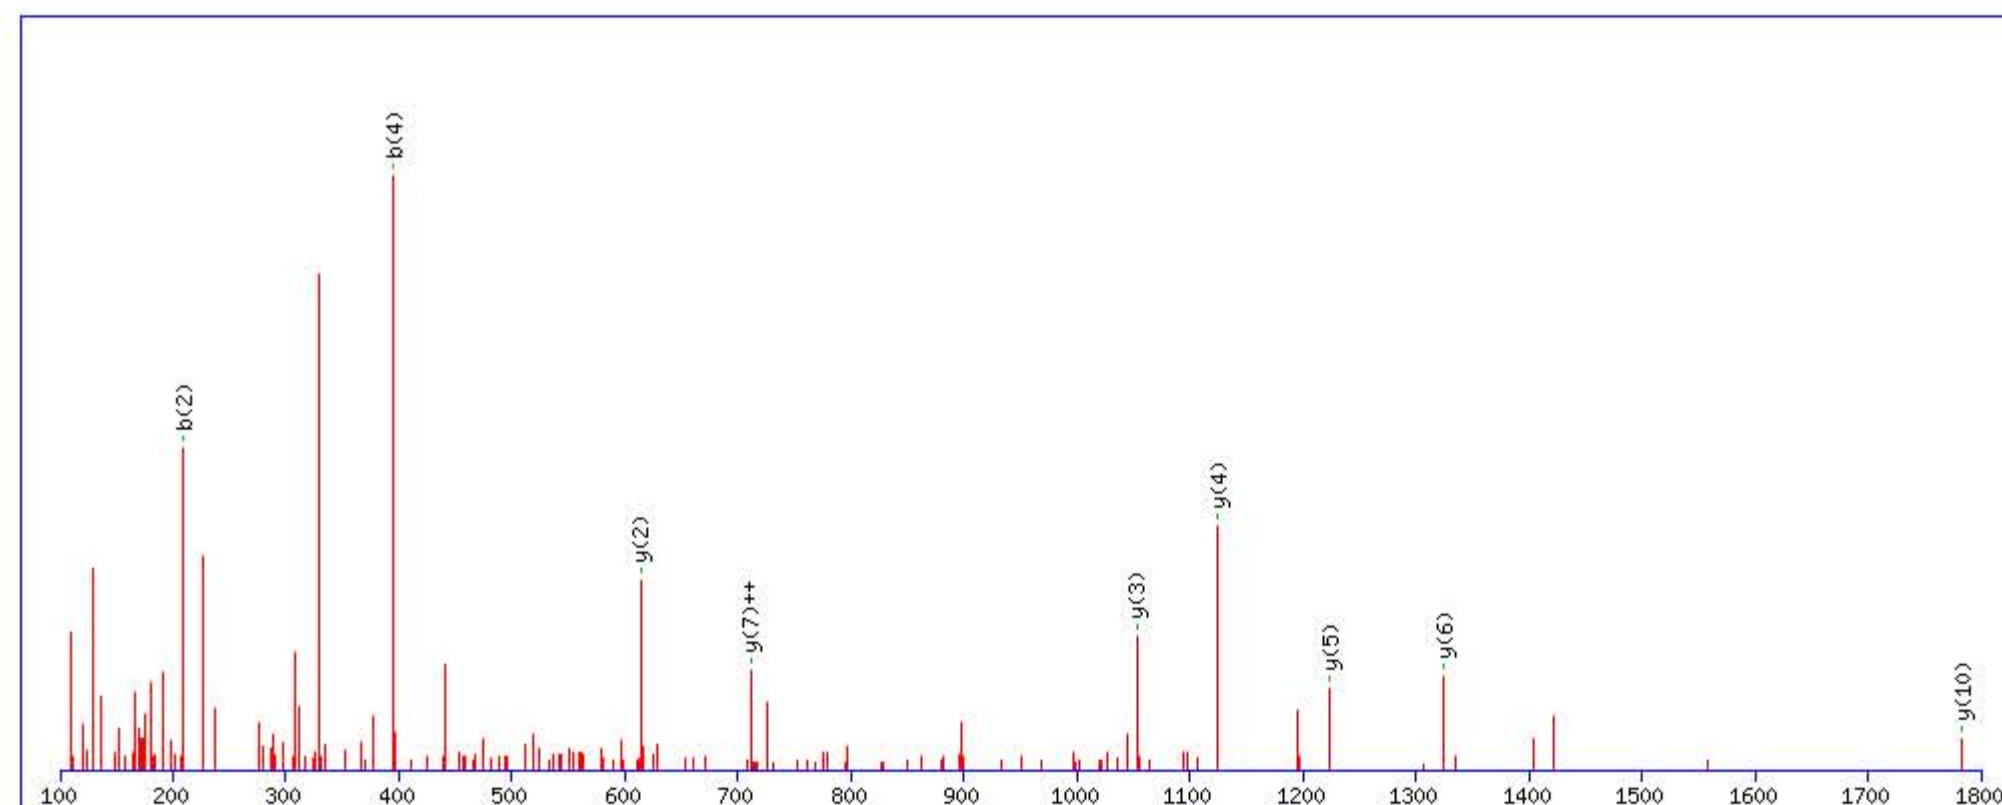

Monoisotopic mass of neutral peptide Mr(calc): 2090.128143

Fixed modifications: Carbamidomethyl (C) (apply to specified residues or termini only)

Variable modifications:

Q11 : Biotin:Thermo-21345 (Q)

Q12 : Biotin:Thermo-21345 (Q)

Ions Score: 29 Expect: 0.026

Matches : 9/118 fragment ions using 16 most intense peaks [\(help\)](#)

| #  | b                 | b <sup>++</sup> | b <sup>*</sup> | b <sup>+++</sup> | b <sup>0</sup> | b <sup>0++</sup> | Seq. | y                  | y <sup>++</sup>   | y <sup>*</sup> | y <sup>+++</sup> | y <sup>0</sup> | y <sup>0++</sup> | #  |
|----|-------------------|-----------------|----------------|------------------|----------------|------------------|------|--------------------|-------------------|----------------|------------------|----------------|------------------|----|
| 1  | 72.044390         | 36.525833       |                |                  |                |                  | A    |                    |                   |                |                  |                |                  | 13 |
| 2  | <b>209.103302</b> | 105.055289      |                |                  |                |                  | H    | 2020.098306        | 1010.552791       | 2003.071757    | 1002.039517      | 2002.087741    | 1001.547509      | 12 |
| 3  | 308.171716        | 154.589496      |                |                  |                |                  | V    | 1883.039394        | 942.023335        | 1866.012845    | 933.510061       | 1865.028829    | 933.018053       | 11 |
| 4  | <b>395.203744</b> | 198.105510      |                |                  | 377.193179     | 189.100227       | S    | <b>1783.970980</b> | 892.489128        | 1766.944431    | 883.975854       | 1765.960415    | 883.483846       | 10 |
| 5  | 542.272158        | 271.639717      |                |                  | 524.261593     | 262.634435       | F    | 1696.938952        | 848.973114        | 1679.912403    | 840.459840       | 1678.928387    | 839.967832       | 9  |
| 6  | 670.367121        | 335.687199      | 653.340572     | 327.173924       | 652.356556     | 326.681916       | K    | 1549.870538        | 775.438907        | 1532.843989    | 766.925633       | 1531.859973    | 766.433625       | 8  |
| 7  | 767.419885        | 384.213581      | 750.393336     | 375.700306       | 749.409320     | 375.208298       | P    | 1421.775575        | <b>711.391426</b> | 1404.749026    | 702.878151       | 1403.765010    | 702.386143       | 7  |
| 8  | 868.467564        | 434.737420      | 851.441015     | 426.224146       | 850.456999     | 425.732138       | T    | <b>1324.722811</b> | 662.865044        | 1307.696262    | 654.351769       | 1306.712246    | 653.859761       | 6  |
| 9  | 967.535978        | 484.271627      | 950.509429     | 475.758353       | 949.525413     | 475.266345       | V    | <b>1223.675132</b> | 612.341204        | 1206.648583    | 603.827930       |                |                  | 5  |
| 10 | 1038.573092       | 519.790184      | 1021.546543    | 511.276910       | 1020.562527    | 510.784902       | A    | <b>1124.606718</b> | 562.806997        | 1107.580169    | 554.293723       |                |                  | 4  |
| 11 | 1477.798418       | 739.402847      | 1460.771869    | 730.889573       | 1459.787853    | 730.397565       | Q    | <b>1053.569604</b> | 527.288440        | 1036.543055    | 518.775166       |                |                  | 3  |
| 12 | 1917.023744       | 959.015510      | 1899.997195    | 950.502236       | 1899.013179    | 950.010228       | Q    | <b>614.344278</b>  | 307.675777        | 597.317729     | 299.162503       |                |                  | 2  |
| 13 |                   |                 |                |                  |                |                  | R    | 175.118952         | 88.063114         | 158.092403     | 79.549839        |                |                  | 1  |

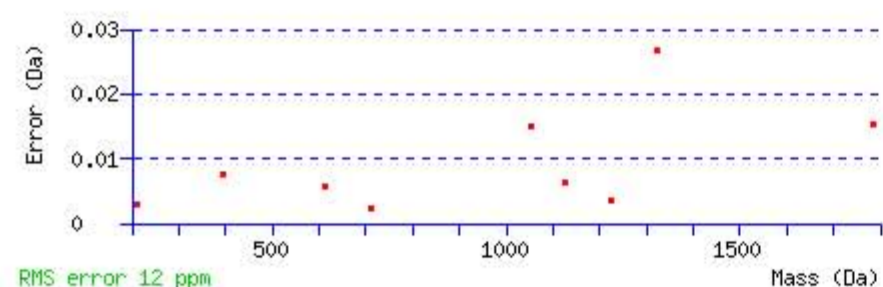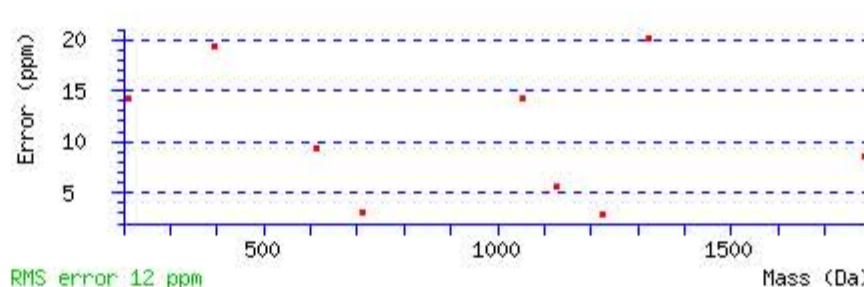

NCBI BLAST search of **AHVSFKPTVAQQR**

(Parameters: blastp, nr protein database, expect=20000, no filter, PAM30)

Other BLAST [web gateways](#)

All matches to this query

| Score | Mr(calc):   | Delta    | Sequence                      |
|-------|-------------|----------|-------------------------------|
| 28.5  | 2090.128143 | 0.008593 | <a href="#">AHVSFKPTVAQQR</a> |

Mascot: <http://www.matrixscience.com/>



# MASCOT SEARCH RESULTS

## Peptide View

MS/MS Fragmentation of **AEDHFSVIDFNQIR**

Found in **ITIH2\_HUMAN**, Inter-alpha-trypsin inhibitor heavy chain H2 OS=Homo sapiens GN=ITIH2 PE=1 SV=2

Match to Query 56375: 2115.042222 from(706.021350,3+) rtinseconds(2232) index(62231)

Title: Locus:1.1.1.3082.11 File:"2013-07-02 CLN FXIII 60 min 1st F 4.wiff"

Data file C:\Program Files (x86)\Matrix Science\Mascot Daemon\mgf4 FXIII 60 min 1st\mascot\_daemon\_merge.mgf

Click mouse within plot area to zoom in by factor of two about that point

Or, Plot from  to  Da

Label all possible matches  Label matches used for scoring

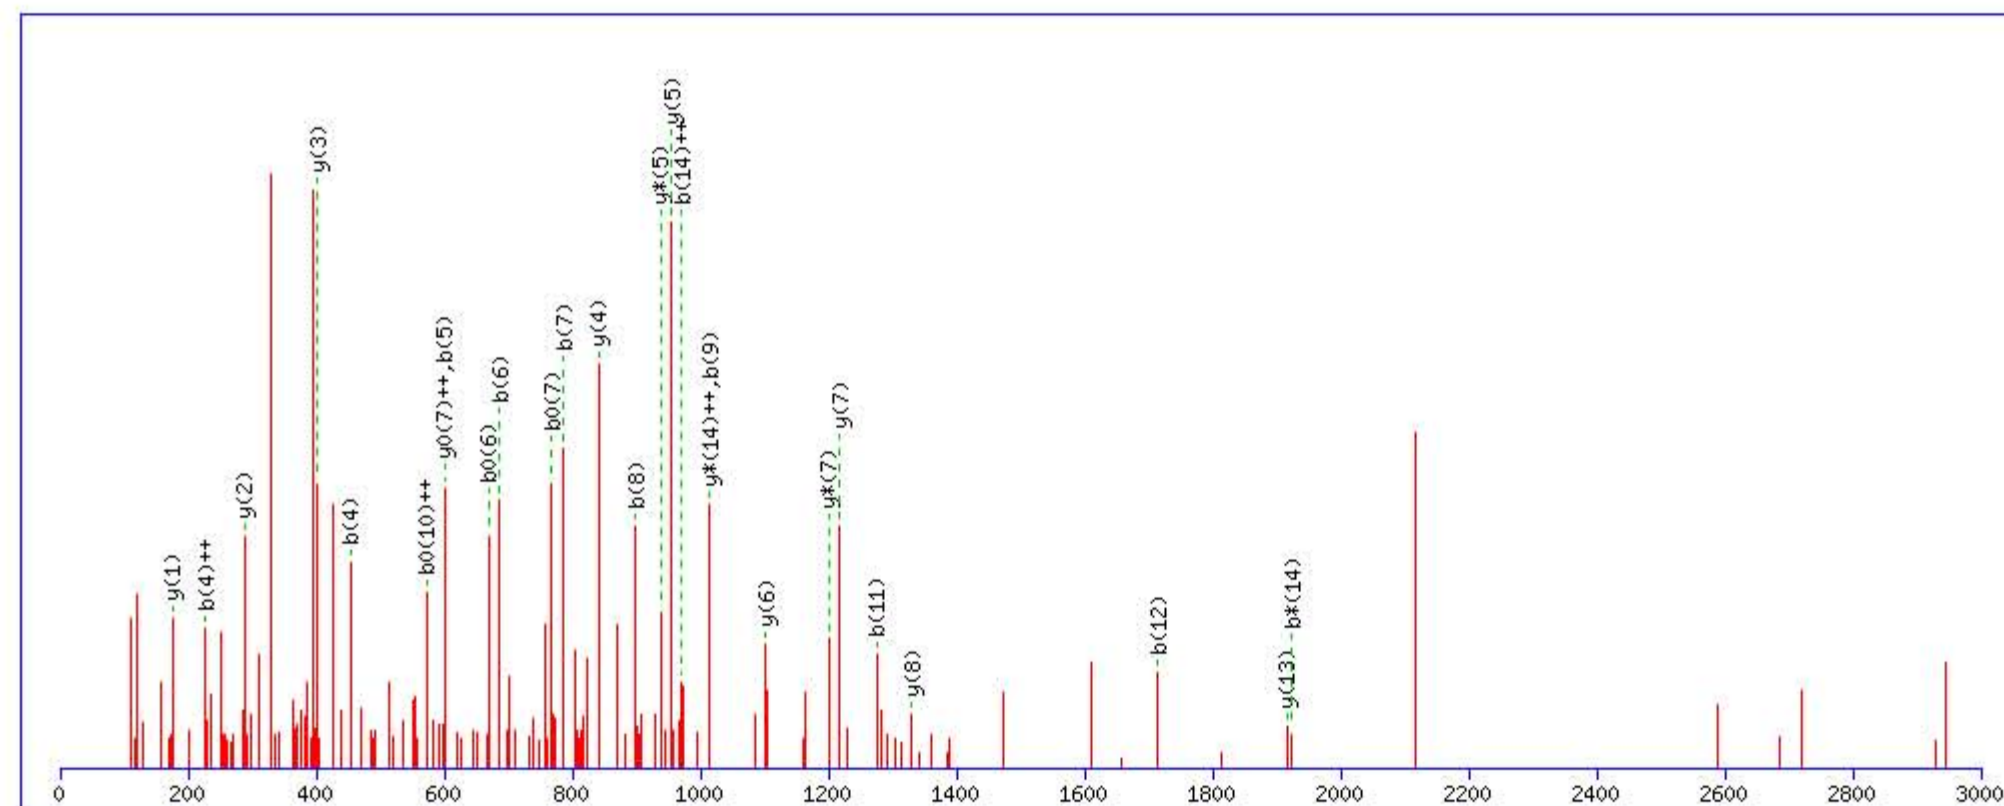

Monoisotopic mass of neutral peptide Mr(calc): 2115.020752

Fixed modifications: Carbamidomethyl (C) (apply to specified residues or termini only)

Variable modifications:

Q12 : Biotin:Thermo-21345 (Q)

Ions Score: 50 Expect: 3.1e-005

Matches : 27/134 fragment ions using 48 most intense peaks [\(help\)](#)

| #  | b           | b <sup>++</sup> | b <sup>*</sup> | b <sup>++</sup> | b <sup>0</sup> | b <sup>0++</sup> | Seq. | y           | y <sup>++</sup> | y <sup>*</sup> | y <sup>++</sup> | y <sup>0</sup> | y <sup>0++</sup> | #  |
|----|-------------|-----------------|----------------|-----------------|----------------|------------------|------|-------------|-----------------|----------------|-----------------|----------------|------------------|----|
| 1  | 72.044390   | 36.525833       |                |                 |                |                  | A    |             |                 |                |                 |                |                  | 15 |
| 2  | 201.086983  | 101.047130      |                |                 | 183.076418     | 92.041847        | E    | 2044.990921 | 1022.999099     | 2027.964372    | 1014.485824     | 2026.980356    | 1013.993816      | 14 |
| 3  | 316.113926  | 158.560601      |                |                 | 298.103361     | 149.555319       | D    | 1915.948328 | 958.477802      | 1898.921779    | 949.964528      | 1897.937763    | 949.472519       | 13 |
| 4  | 453.172838  | 227.090057      |                |                 | 435.162273     | 218.084775       | H    | 1800.921385 | 900.964331      | 1783.894836    | 892.451056      | 1782.910820    | 891.959048       | 12 |
| 5  | 600.241252  | 300.624264      |                |                 | 582.230687     | 291.618982       | F    | 1663.862473 | 832.434874      | 1646.835924    | 823.921600      | 1645.851908    | 823.429592       | 11 |
| 6  | 687.273280  | 344.140278      |                |                 | 669.262715     | 335.134996       | S    | 1516.794059 | 758.900668      | 1499.767510    | 750.387393      | 1498.783494    | 749.895385       | 10 |
| 7  | 786.341694  | 393.674485      |                |                 | 768.331129     | 384.669202       | V    | 1429.762031 | 715.384654      | 1412.735482    | 706.871379      | 1411.751466    | 706.379371       | 9  |
| 8  | 899.425758  | 450.216517      |                |                 | 881.415193     | 441.211234       | I    | 1330.693617 | 665.850447      | 1313.667068    | 657.337172      | 1312.683052    | 656.845164       | 8  |
| 9  | 1014.452701 | 507.729988      |                |                 | 996.442136     | 498.724706       | D    | 1217.609553 | 609.308415      | 1200.583004    | 600.795140      | 1199.598988    | 600.303132       | 7  |
| 10 | 1161.521115 | 581.264196      |                |                 | 1143.510550    | 572.258913       | F    | 1102.582610 | 551.794943      | 1085.556061    | 543.281669      |                |                  | 6  |
| 11 | 1275.564042 | 638.285659      | 1258.537493    | 629.772385      | 1257.553477    | 629.280376       | N    | 955.514196  | 478.260736      | 938.487647     | 469.747462      |                |                  | 5  |
| 12 | 1714.789368 | 857.898322      | 1697.762819    | 849.385048      | 1696.778803    | 848.893039       | Q    | 841.471269  | 421.239273      | 824.444720     | 412.725998      |                |                  | 4  |
| 13 | 1828.832295 | 914.919785      | 1811.805746    | 906.406511      | 1810.821730    | 905.914503       | N    | 402.245943  | 201.626610      | 385.219394     | 193.113335      |                |                  | 3  |
| 14 | 1941.916359 | 971.461817      | 1924.889810    | 962.948543      | 1923.905794    | 962.456535       | I    | 288.203016  | 144.605146      | 271.176467     | 136.091872      |                |                  | 2  |
| 15 |             |                 |                |                 |                |                  | R    | 175.118952  | 88.063114       | 158.092403     | 79.549840       |                |                  | 1  |

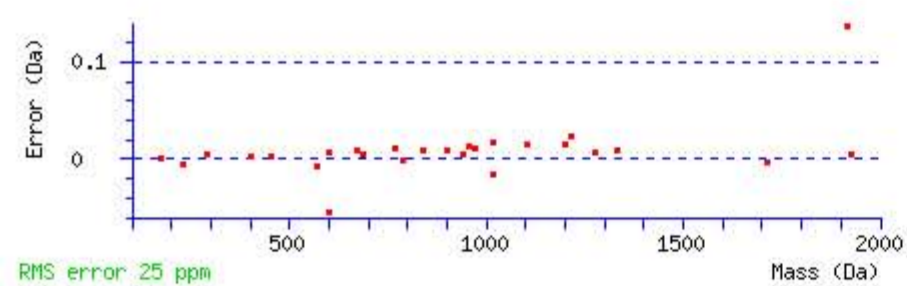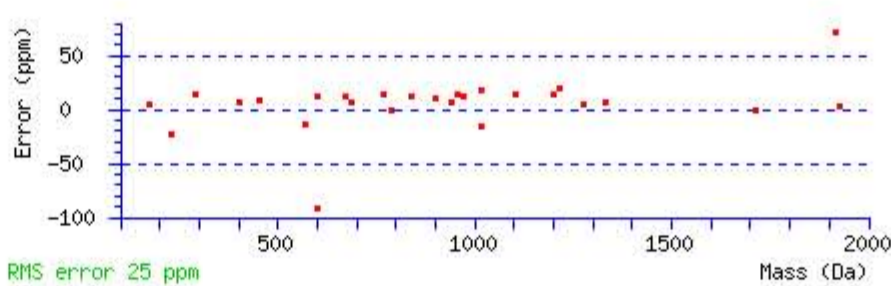

NCBI BLAST search of **AEDHFSVIDFNQIR**

(Parameters: blastp, nr protein database, expect=20000, no filter, PAM30)

Other BLAST [web gateways](#)

All matches to this query

| Score | Mr(calc):   | Delta    | Sequence                       |
|-------|-------------|----------|--------------------------------|
| 50.3  | 2115.020752 | 0.021470 | <a href="#">AEDHFSVIDFNQIR</a> |
| 2.2   | 2115.033981 | 0.008241 | <a href="#">ESADRQVLMQEEIK</a> |

Mascot: <http://www.matrixscience.com/>



# MASCOT Search Results

## Peptide View

MS/MS Fragmentation of **NVQFNYPHTSVTDVTDQNNFHNHYFGGSEIVVAGK**  
 Found in **ITIH2\_HUMAN**, Inter-alpha-trypsin inhibitor heavy chain H2 OS=Homo sapiens GN=ITIH2 PE=1 SV=2

Match to Query 81203: 3993.969616 from(999.499680,4+) rtinseconds(2360) index(63158)  
 Title: Locus:1.1.1.3126.24 File:"2013-07-02 CLN FXIII 60 min 1st F 4.wiff"  
 Data file C:\Program Files (x86)\Matrix Science\Mascot Daemon\mgf4 FXIII 60 min 1st\mascot\_daemon\_merge.mgf

Click mouse within plot area to zoom in by factor of two about that point

Or, Plot from  to  Da

Label all possible matches  Label matches used for scoring

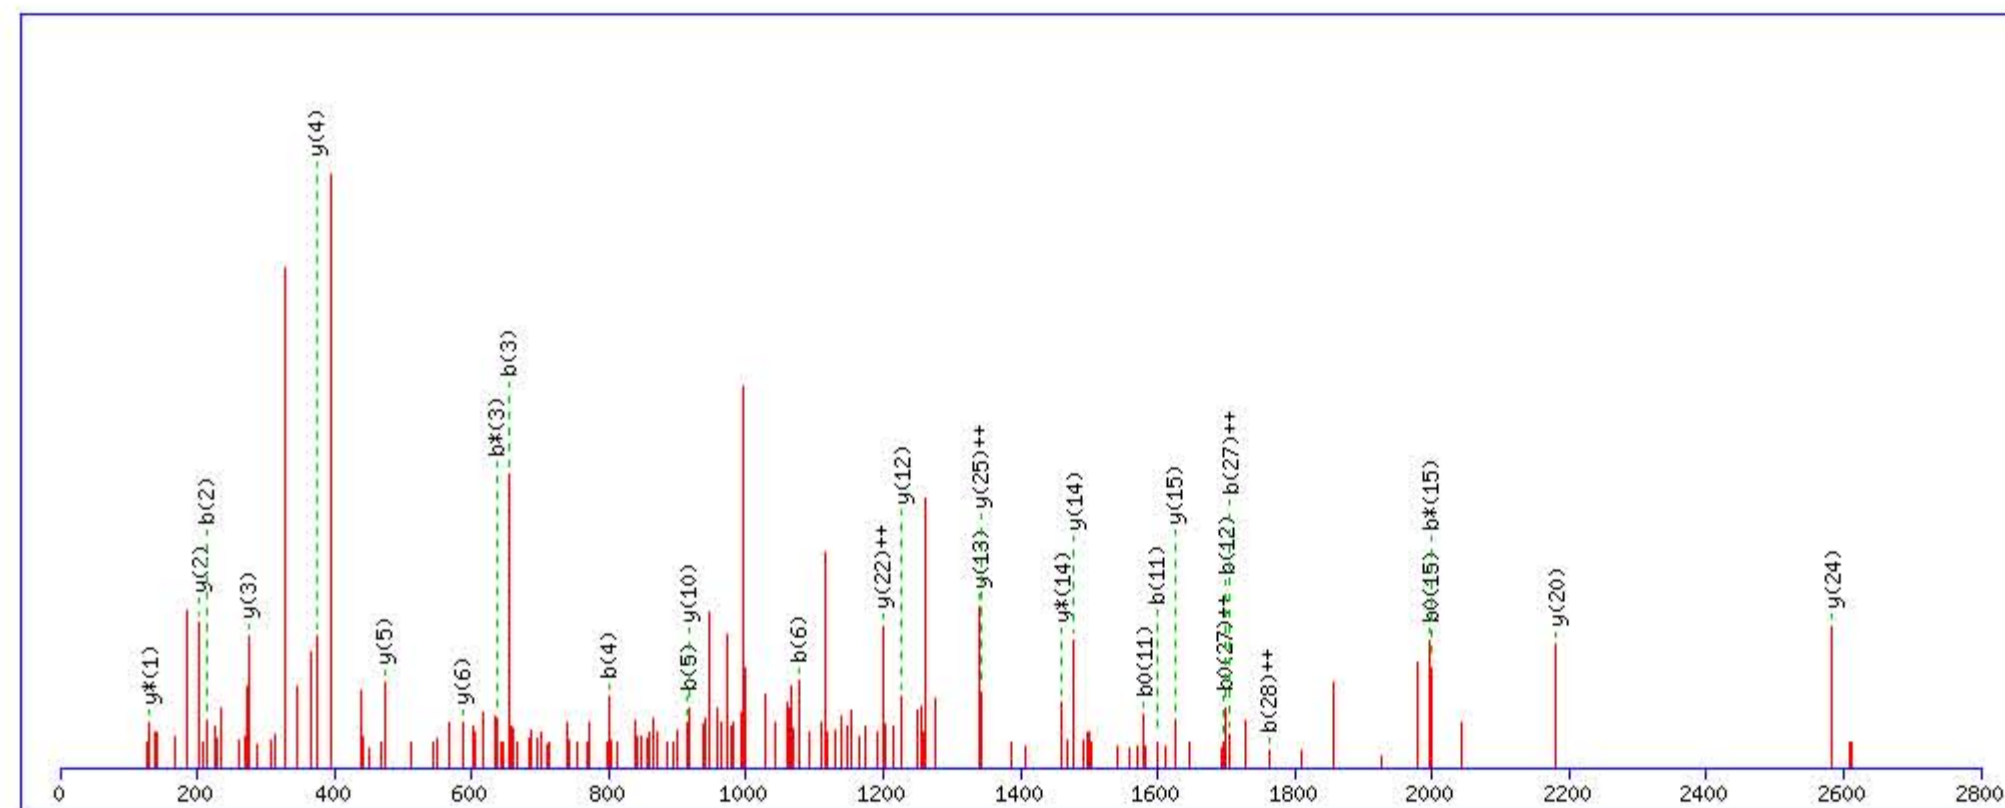

Monoisotopic mass of neutral peptide Mr(calc): 3993.910858  
 Fixed modifications: Carbamidomethyl (C) (apply to specified residues or termini only)  
 Variable modifications:  
 Q3 : Biotin:Thermo-21345 (Q)  
 Ions Score: 42 Expect: 0.0014  
 Matches : 30/356 fragment ions using 79 most intense peaks [\(help\)](#)

| #  | b                  | b <sup>++</sup>    | b*                 | b <sup>+++</sup> | b <sup>0</sup>     | b <sup>0++</sup>   | Seq. | y                  | y <sup>++</sup>    | y*                 | y <sup>+++</sup> | y <sup>0</sup> | y <sup>0++</sup> | #  |
|----|--------------------|--------------------|--------------------|------------------|--------------------|--------------------|------|--------------------|--------------------|--------------------|------------------|----------------|------------------|----|
| 1  | 115.050203         | 58.028740          | 98.023654          | 49.515465        |                    |                    | N    |                    |                    |                    |                  |                |                  | 33 |
| 2  | <b>214.118617</b>  | 107.562947         | 197.092068         | 99.049672        |                    |                    | V    | 3880.875173        | 1940.941224        | 3863.848624        | 1932.427950      | 3862.864608    | 1931.935942      | 32 |
| 3  | <b>653.343943</b>  | 327.175610         | <b>636.317394</b>  | 318.662335       |                    |                    | Q    | 3781.806759        | 1891.407017        | 3764.780210        | 1882.893743      | 3763.796194    | 1882.401735      | 31 |
| 4  | <b>800.412357</b>  | 400.709817         | 783.385808         | 392.196542       |                    |                    | F    | 3342.581433        | 1671.794354        | 3325.554884        | 1663.281080      | 3324.570868    | 1662.789072      | 30 |
| 5  | <b>914.455284</b>  | 457.731280         | 897.428735         | 449.218006       |                    |                    | N    | 3195.513019        | 1598.260147        | 3178.486470        | 1589.746873      | 3177.502454    | 1589.254865      | 29 |
| 6  | <b>1077.518613</b> | 539.262945         | 1060.492064        | 530.749670       |                    |                    | Y    | 3081.470092        | 1541.238684        | 3064.443543        | 1532.725409      | 3063.459527    | 1532.233401      | 28 |
| 7  | 1174.571377        | 587.789327         | 1157.544828        | 579.276052       |                    |                    | P    | 2918.406763        | 1459.707019        | 2901.380214        | 1451.193745      | 2900.396198    | 1450.701737      | 27 |
| 8  | 1311.630289        | 656.318783         | 1294.603740        | 647.805508       |                    |                    | H    | 2821.353999        | 1411.180637        | 2804.327450        | 1402.667363      | 2803.343434    | 1402.175355      | 26 |
| 9  | 1412.677968        | 706.842622         | 1395.651419        | 698.329348       | 1394.667403        | 697.837339         | T    | 2684.295087        | <b>1342.651181</b> | 2667.268538        | 1334.137907      | 2666.284522    | 1333.645899      | 25 |
| 10 | 1499.709996        | 750.358636         | 1482.683447        | 741.845362       | 1481.699431        | 741.353354         | S    | <b>2583.247408</b> | 1292.127342        | 2566.220859        | 1283.614067      | 2565.236843    | 1283.122059      | 24 |
| 11 | <b>1598.778410</b> | 799.892843         | 1581.751861        | 791.379569       | <b>1580.767845</b> | 790.887561         | V    | 2496.215380        | 1248.611328        | 2479.188831        | 1240.098053      | 2478.204815    | 1239.606045      | 23 |
| 12 | <b>1699.826089</b> | 850.416683         | 1682.799540        | 841.903408       | 1681.815524        | 841.411400         | T    | 2397.146966        | <b>1199.077121</b> | 2380.120417        | 1190.563846      | 2379.136401    | 1190.071838      | 22 |
| 13 | 1814.853032        | 907.930154         | 1797.826483        | 899.416880       | 1796.842467        | 898.924872         | D    | 2296.099287        | 1148.553281        | 2279.072738        | 1140.040007      | 2278.088722    | 1139.547999      | 21 |
| 14 | 1913.921446        | 957.464361         | 1896.894897        | 948.951087       | 1895.910881        | 948.459079         | V    | <b>2181.072344</b> | 1091.039810        | 2164.045795        | 1082.526535      | 2163.061779    | 1082.034527      | 20 |
| 15 | 2014.969125        | 1007.988201        | <b>1997.942576</b> | 999.474926       | <b>1996.958560</b> | 998.982918         | T    | 2082.003930        | 1041.505603        | 2064.977381        | 1032.992328      | 2063.993365    | 1032.500320      | 19 |
| 16 | 2143.027703        | 1072.017490        | 2126.001154        | 1063.504215      | 2125.017138        | 1063.012207        | Q    | 1980.956251        | 990.981763         | 1963.929702        | 982.468489       | 1962.945686    | 981.976481       | 18 |
| 17 | 2257.070630        | 1129.038953        | 2240.044081        | 1120.525678      | 2239.060065        | 1120.033671        | N    | 1852.897673        | 926.952474         | 1835.871124        | 918.439200       | 1834.887108    | 917.947192       | 17 |
| 18 | 2371.113557        | 1186.060417        | 2354.087008        | 1177.547142      | 2353.102992        | 1177.055134        | N    | 1738.854746        | 869.931011         | 1721.828197        | 861.417736       | 1720.844181    | 860.925728       | 16 |
| 19 | 2518.181971        | 1259.594623        | 2501.155422        | 1251.081349      | 2500.171406        | 1250.589341        | F    | <b>1624.811819</b> | 812.909547         | 1607.785270        | 804.396273       | 1606.801254    | 803.904265       | 15 |
| 20 | 2655.240883        | 1328.124079        | 2638.214334        | 1319.610805      | 2637.230318        | 1319.118797        | H    | <b>1477.743405</b> | 739.375340         | <b>1460.716856</b> | 730.862066       | 1459.732840    | 730.370058       | 14 |
| 21 | 2769.283810        | 1385.145543        | 2752.257261        | 1376.632268      | 2751.273245        | 1376.140260        | N    | <b>1340.684493</b> | 670.845885         | 1323.657944        | 662.332610       | 1322.673928    | 661.840602       | 13 |
| 22 | 2932.347139        | 1466.677207        | 2915.320590        | 1458.163933      | 2914.336574        | 1457.671925        | Y    | <b>1226.641566</b> | 613.824421         | 1209.615017        | 605.311147       | 1208.631001    | 604.819139       | 12 |
| 23 | 3079.415553        | 1540.211414        | 3062.389004        | 1531.698140      | 3061.404988        | 1531.206132        | F    | 1063.578237        | 532.292757         | 1046.551688        | 523.779482       | 1045.567672    | 523.287474       | 11 |
| 24 | 3136.437017        | 1568.722146        | 3119.410468        | 1560.208872      | 3118.426452        | 1559.716864        | G    | <b>916.509823</b>  | 458.758550         | 899.483274         | 450.245275       | 898.499258     | 449.753267       | 10 |
| 25 | 3193.458481        | 1597.232878        | 3176.431932        | 1588.719604      | 3175.447916        | 1588.227596        | G    | 859.488359         | 430.247818         | 842.461810         | 421.734543       | 841.477794     | 421.242535       | 9  |
| 26 | 3280.490509        | 1640.748892        | 3263.463960        | 1632.235618      | 3262.479944        | 1631.743610        | S    | 802.466895         | 401.737086         | 785.440346         | 393.223811       | 784.456330     | 392.731803       | 8  |
| 27 | 3409.533102        | <b>1705.270189</b> | 3392.506553        | 1696.756914      | 3391.522537        | <b>1696.264906</b> | E    | 715.434867         | 358.221072         | 698.408318         | 349.707797       | 697.424302     | 349.215789       | 7  |
| 28 | 3522.617166        | <b>1761.812221</b> | 3505.590617        | 1753.298946      | 3504.606601        | 1752.806938        | I    | <b>586.392274</b>  | 293.699775         | 569.365725         | 285.186501       |                |                  | 6  |
| 29 | 3621.685580        | 1811.346428        | 3604.659031        | 1802.833153      | 3603.675015        | 1802.341145        | V    | <b>473.308210</b>  | 237.157743         | 456.281661         | 228.644468       |                |                  | 5  |
| 30 | 3720.753994        | 1860.880635        | 3703.727445        | 1852.367360      | 3702.743429        | 1851.875352        | V    | <b>374.239796</b>  | 187.623536         | 357.213247         | 179.110261       |                |                  | 4  |
| 31 | 3791.791108        | 1896.399192        | 3774.764559        | 1887.885917      | 3773.780543        | 1887.393909        | A    | <b>275.171382</b>  | 138.089329         | 258.144833         | 129.576055       |                |                  | 3  |
| 32 | 3848.812572        | 1924.909924        | 3831.786023        | 1916.396649      | 3830.802007        | 1915.904641        | G    | <b>204.134268</b>  | 102.570772         | 187.107719         | 94.057497        |                |                  | 2  |
| 33 |                    |                    |                    |                  |                    |                    | K    | 147.112804         | 74.060040          | <b>130.086255</b>  | 65.546765        |                |                  | 1  |

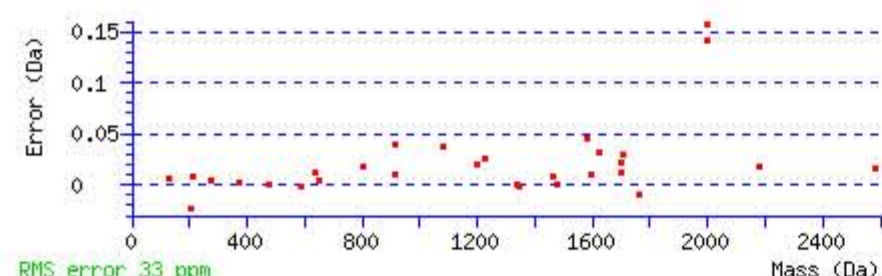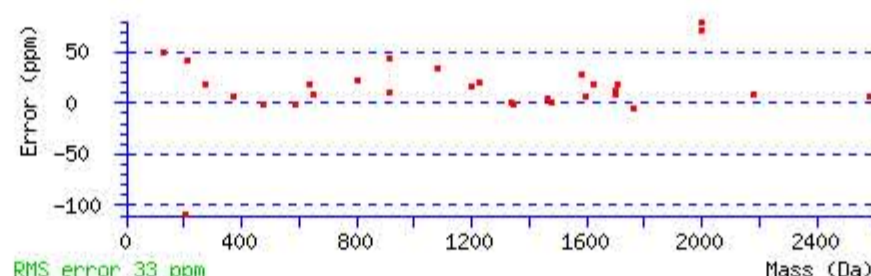

NCBI BLAST search of [NVQFNYPHTSVTDVTDQNNFHNHYFGGSEIVVAGK](#)  
 (Parameters: blastp, nr protein database, expect=20000, no filter, PAM30)  
 Other BLAST [web gateways](#)

## All matches to this query

| Score | Mr(calc):   | Delta    | Sequence                                            |
|-------|-------------|----------|-----------------------------------------------------|
| 42.2  | 3993.910858 | 0.058758 | <a href="#">NVQFNYPHTSVTDVTDQNNFHNHYFGGSEIVVAGK</a> |
| 7.8   | 3993.910858 | 0.058758 | <a href="#">NVQFNYPHTSVTDVTDQNNFHNHYFGGSEIVVAGK</a> |



# MASCOT SEARCH RESULTS

## Peptide View

MS/MS Fragmentation of **GHVSFKPSLDQQR**

Found in **ITIH3\_HUMAN**, Inter-alpha-trypsin inhibitor heavy chain H3 OS=Homo sapiens GN=ITIH3 PE=1 SV=2

Match to Query 48630: 1808.945352 from(603.989060,3+) rtinseconds(1529) index(57152)

Title: Locus:1.1.1.2838.19 File:"2013-07-02 CLN FXIII 60 min 1st F 4.wiff"

Data file C:\Program Files (x86)\Matrix Science\Mascot Daemon\mgf4 FXIII 60 min 1st\mascot\_daemon\_merge.mgf

Click mouse within plot area to zoom in by factor of two about that point

Or, Plot from  to  Da

Label all possible matches  Label matches used for scoring

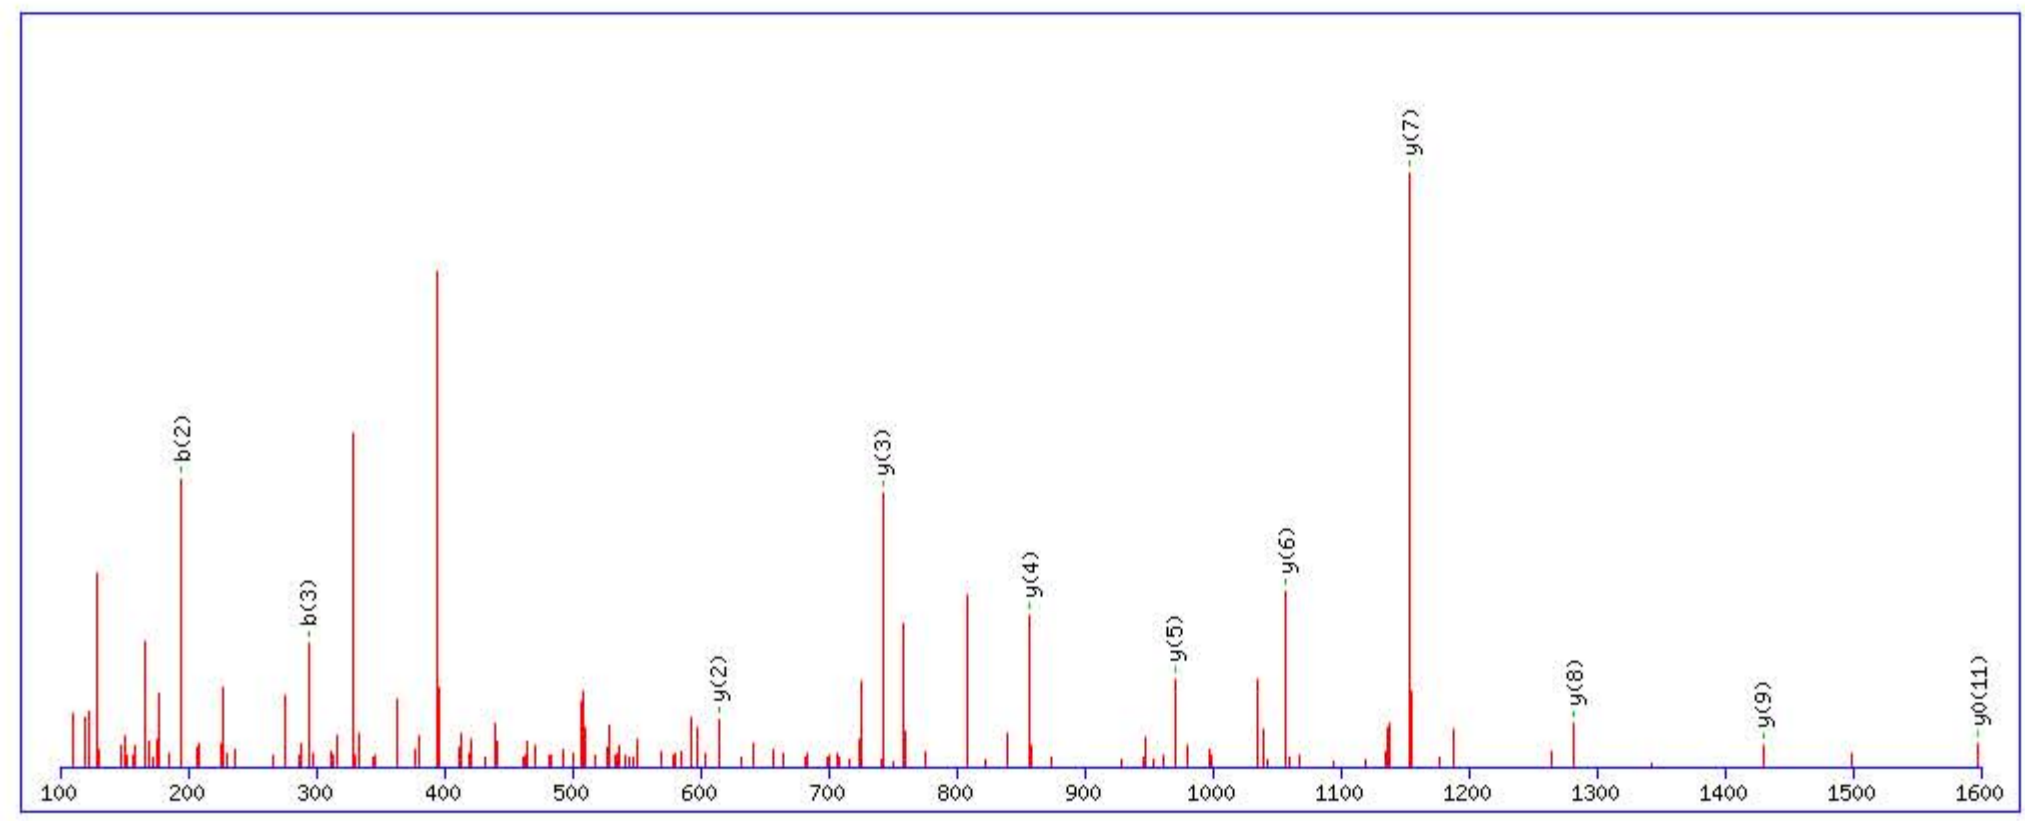

Monoisotopic mass of neutral peptide Mr(calc): 1808.935577

Fixed modifications: Carbamidomethyl (C) (apply to specified residues or termini only)

Variable modifications:

Q12 : Biotin:Thermo-21345 (Q)

Ions Score: 60 Expect: 2.6e-005

Matches : 11/122 fragment ions using 15 most intense peaks [\(help\)](#)

| #  | b                 | b <sup>++</sup> | b <sup>*</sup> | b <sup>*++</sup> | b <sup>0</sup> | b <sup>0++</sup> | Seq. | y                  | y <sup>++</sup> | y <sup>*</sup> | y <sup>*++</sup> | y <sup>0</sup>     | y <sup>0++</sup> | #  |
|----|-------------------|-----------------|----------------|------------------|----------------|------------------|------|--------------------|-----------------|----------------|------------------|--------------------|------------------|----|
| 1  | 58.028740         | 29.518008       |                |                  |                |                  | G    |                    |                 |                |                  |                    |                  | 13 |
| 2  | <b>195.087652</b> | 98.047464       |                |                  |                |                  | H    | 1752.921386        | 876.964331      | 1735.894837    | 868.451057       | 1734.910821        | 867.959049       | 12 |
| 3  | <b>294.156066</b> | 147.581671      |                |                  |                |                  | V    | 1615.862474        | 808.434875      | 1598.835925    | 799.921601       | <b>1597.851909</b> | 799.429593       | 11 |
| 4  | 381.188094        | 191.097685      |                |                  | 363.177529     | 182.092403       | S    | 1516.794060        | 758.900668      | 1499.767511    | 750.387394       | 1498.783495        | 749.895386       | 10 |
| 5  | 528.256508        | 264.631892      |                |                  | 510.245943     | 255.626610       | F    | <b>1429.762032</b> | 715.384654      | 1412.735483    | 706.871380       | 1411.751467        | 706.379372       | 9  |
| 6  | 656.351471        | 328.679374      | 639.324922     | 320.166099       | 638.340906     | 319.674091       | K    | <b>1282.693618</b> | 641.850447      | 1265.667069    | 633.337173       | 1264.683053        | 632.845165       | 8  |
| 7  | 753.404235        | 377.205756      | 736.377686     | 368.692481       | 735.393670     | 368.200473       | P    | <b>1154.598655</b> | 577.802966      | 1137.572106    | 569.289691       | 1136.588090        | 568.797683       | 7  |
| 8  | 840.436263        | 420.721770      | 823.409714     | 412.208495       | 822.425698     | 411.716487       | S    | <b>1057.545891</b> | 529.276584      | 1040.519342    | 520.763309       | 1039.535326        | 520.271301       | 6  |
| 9  | 953.520327        | 477.263802      | 936.493778     | 468.750527       | 935.509762     | 468.258519       | L    | <b>970.513863</b>  | 485.760570      | 953.487314     | 477.247295       | 952.503298         | 476.755287       | 5  |
| 10 | 1068.547270       | 534.777273      | 1051.520721    | 526.263999       | 1050.536705    | 525.771991       | D    | <b>857.429799</b>  | 429.218538      | 840.403250     | 420.705263       | 839.419234         | 420.213255       | 4  |
| 11 | 1196.605848       | 598.806562      | 1179.579299    | 590.293288       | 1178.595283    | 589.801279       | Q    | <b>742.402856</b>  | 371.705066      | 725.376307     | 363.191792       |                    |                  | 3  |
| 12 | 1635.831174       | 818.419225      | 1618.804625    | 809.905951       | 1617.820609    | 809.413943       | Q    | <b>614.344278</b>  | 307.675777      | 597.317729     | 299.162503       |                    |                  | 2  |
| 13 |                   |                 |                |                  |                |                  | R    | 175.118952         | 88.063114       | 158.092403     | 79.549839        |                    |                  | 1  |

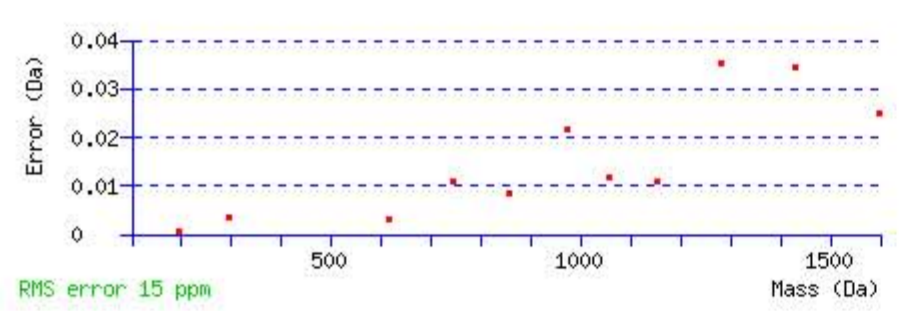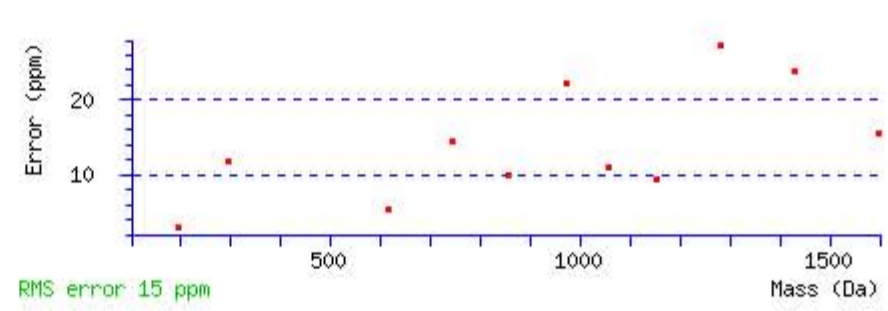

NCBI BLAST search of **GHVSFKPSLDQQR**

(Parameters: blastp, nr protein database, expect=20000, no filter, PAM30)

Other BLAST [web gateways](#)

All matches to this query

| Score | Mr(calc):   | Delta    | Sequence                      |
|-------|-------------|----------|-------------------------------|
| 60.0  | 1808.935577 | 0.009775 | <a href="#">GHVSFKPSLDQQR</a> |
| 46.0  | 1808.935577 | 0.009775 | <a href="#">GHVSFKPSLDQQR</a> |



# MASCOT Search Results

## Peptide View

MS/MS Fragmentation of **KGHVSFKPSLDQQR**

Found in **ITIH3\_HUMAN**, Inter-alpha-trypsin inhibitor heavy chain H3 OS=Homo sapiens GN=ITIH3 PE=1 SV=2

Match to Query 51445: 1937.037736 from(485.266710,4+) rtinseconds(1439) index(56489)

Title: Locus:1.1.1.2807.4 File:"2013-07-02 CLN FXIII 60 min 1st F 4.wiff"

Data file C:\Program Files (x86)\Matrix Science\Mascot Daemon\mgf4 FXIII 60 min 1st\mascot\_daemon\_merge.mgf

Click mouse within plot area to zoom in by factor of two about that point

Or, Plot from  to  Da

Label all possible matches  Label matches used for scoring

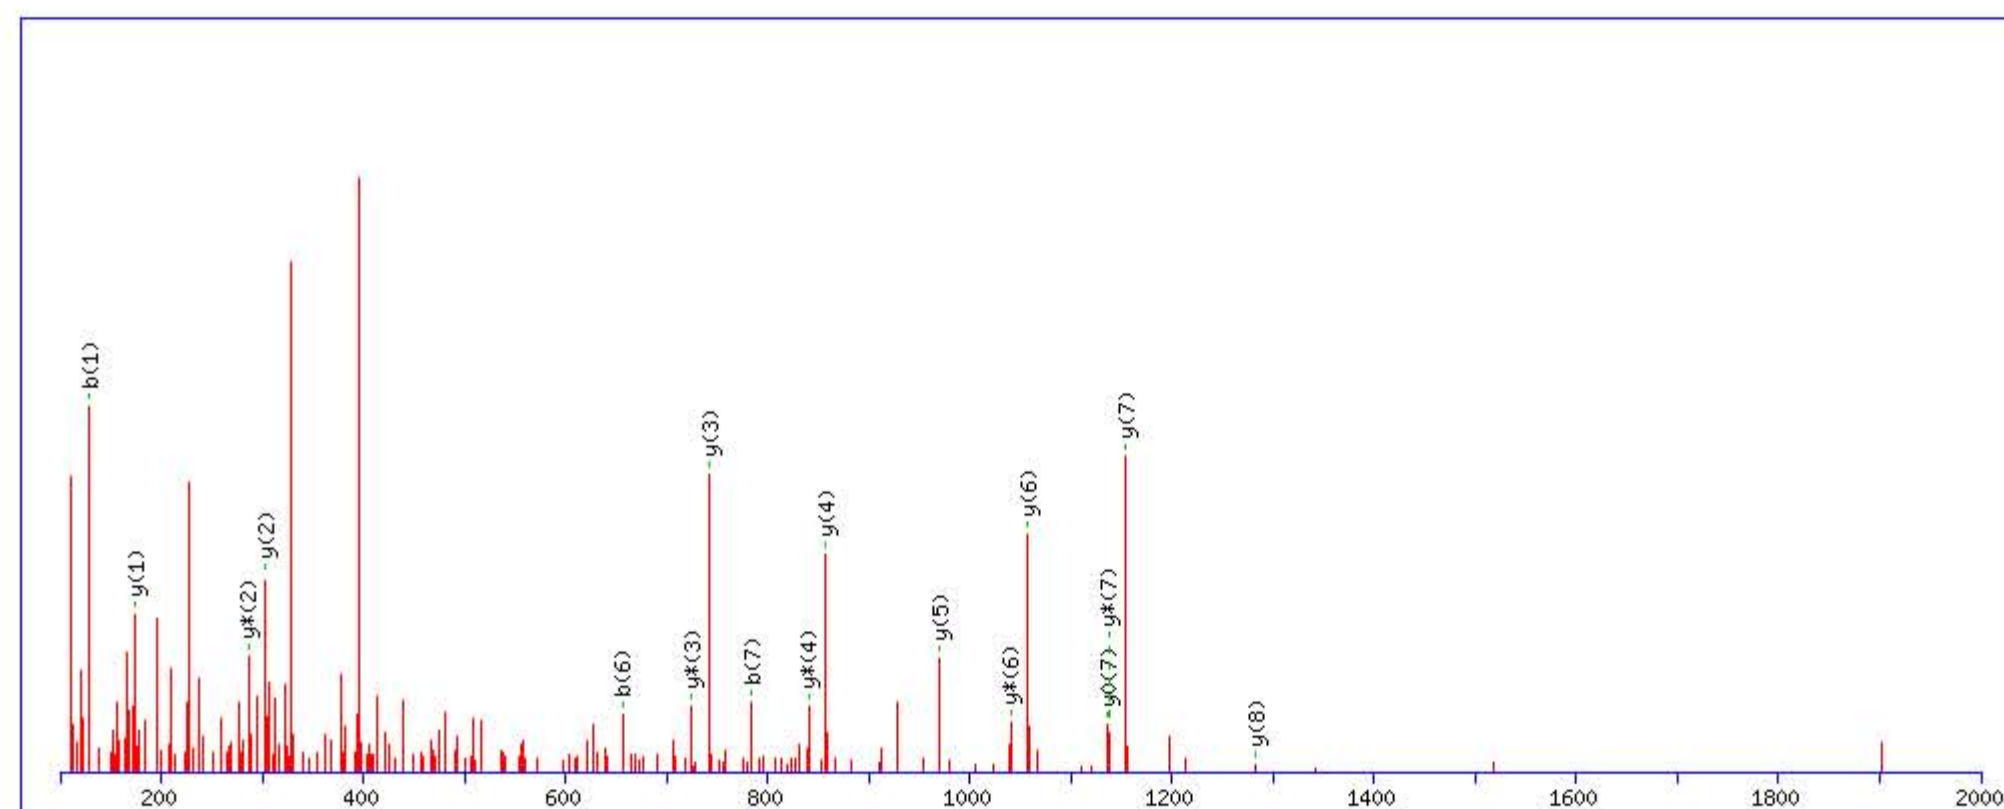

Monoisotopic mass of neutral peptide Mr(calc): 1937.030533

Fixed modifications: Carbamidomethyl (C) (apply to specified residues or termini only)

Variable modifications:

Q12 : Biotin:Thermo-21345 (Q)

Ions Score: 35 Expect: 0.00053

Matches : 17/142 fragment ions using 38 most intense peaks [\(help\)](#)

| #  | b                 | b <sup>++</sup> | b <sup>*</sup> | b <sup>*++</sup> | b <sup>0</sup> | b <sup>0++</sup> | Seq.     | y                  | y <sup>++</sup> | y <sup>*</sup>     | y <sup>*++</sup> | y <sup>0</sup>     | y <sup>0++</sup> | #         |
|----|-------------------|-----------------|----------------|------------------|----------------|------------------|----------|--------------------|-----------------|--------------------|------------------|--------------------|------------------|-----------|
| 1  | <b>129.102239</b> | 65.054757       | 112.075690     | 56.541483        |                |                  | <b>K</b> |                    |                 |                    |                  |                    |                  | <b>14</b> |
| 2  | 186.123703        | 93.565489       | 169.097154     | 85.052215        |                |                  | <b>G</b> | 1809.942850        | 905.475063      | 1792.916301        | 896.961789       | 1791.932285        | 896.469781       | <b>13</b> |
| 3  | 323.182615        | 162.094945      | 306.156066     | 153.581671       |                |                  | <b>H</b> | 1752.921386        | 876.964331      | 1735.894837        | 868.451057       | 1734.910821        | 867.959049       | <b>12</b> |
| 4  | 422.251029        | 211.629153      | 405.224480     | 203.115878       |                |                  | <b>V</b> | 1615.862474        | 808.434875      | 1598.835925        | 799.921601       | 1597.851909        | 799.429593       | <b>11</b> |
| 5  | 509.283057        | 255.145167      | 492.256508     | 246.631892       | 491.272492     | 246.139884       | <b>S</b> | 1516.794060        | 758.900668      | 1499.767511        | 750.387394       | 1498.783495        | 749.895386       | <b>10</b> |
| 6  | <b>656.351471</b> | 328.679374      | 639.324922     | 320.166099       | 638.340906     | 319.674091       | <b>F</b> | 1429.762032        | 715.384654      | 1412.735483        | 706.871380       | 1411.751467        | 706.379372       | <b>9</b>  |
| 7  | <b>784.446434</b> | 392.726855      | 767.419885     | 384.213581       | 766.435869     | 383.721573       | <b>K</b> | <b>1282.693618</b> | 641.850447      | 1265.667069        | 633.337173       | 1264.683053        | 632.845165       | <b>8</b>  |
| 8  | 881.499198        | 441.253237      | 864.472649     | 432.739963       | 863.488633     | 432.247955       | <b>P</b> | <b>1154.598655</b> | 577.802966      | <b>1137.572106</b> | 569.289691       | <b>1136.588090</b> | 568.797683       | <b>7</b>  |
| 9  | 968.531226        | 484.769251      | 951.504677     | 476.255977       | 950.520661     | 475.763969       | <b>S</b> | <b>1057.545891</b> | 529.276584      | <b>1040.519342</b> | 520.763309       | 1039.535326        | 520.271301       | <b>6</b>  |
| 10 | 1081.615290       | 541.311283      | 1064.588741    | 532.798009       | 1063.604725    | 532.306000       | <b>L</b> | <b>970.513863</b>  | 485.760570      | 953.487314         | 477.247295       | 952.503298         | 476.755287       | <b>5</b>  |
| 11 | 1196.642233       | 598.824755      | 1179.615684    | 590.311480       | 1178.631668    | 589.819472       | <b>D</b> | <b>857.429799</b>  | 429.218538      | <b>840.403250</b>  | 420.705263       | 839.419234         | 420.213255       | <b>4</b>  |
| 12 | 1635.867559       | 818.437418      | 1618.841010    | 809.924143       | 1617.856994    | 809.432135       | <b>Q</b> | <b>742.402856</b>  | 371.705066      | <b>725.376307</b>  | 363.191792       |                    |                  | <b>3</b>  |
| 13 | 1763.926137       | 882.466707      | 1746.899588    | 873.953432       | 1745.915572    | 873.461424       | <b>Q</b> | <b>303.177530</b>  | 152.092403      | <b>286.150981</b>  | 143.579129       |                    |                  | <b>2</b>  |
| 14 |                   |                 |                |                  |                |                  | <b>R</b> | <b>175.118952</b>  | 88.063114       | 158.092403         | 79.549839        |                    |                  | <b>1</b>  |

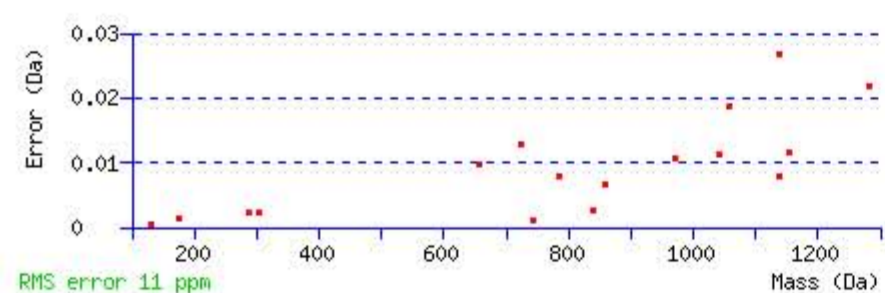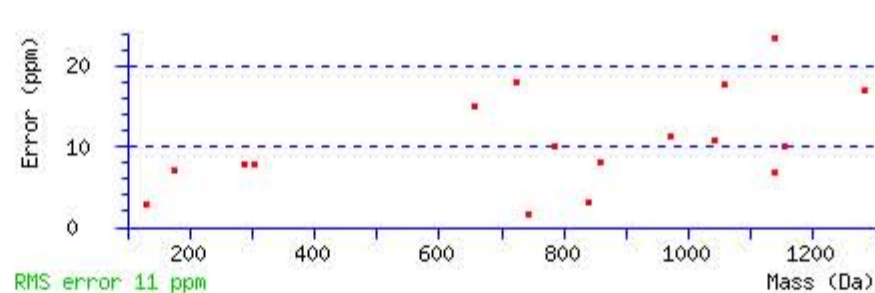

NCBI BLAST search of **KGHVSFKPSLDQQR**

(Parameters: blastp, nr protein database, expect=20000, no filter, PAM30)

Other BLAST [web gateways](#)

All matches to this query

| Score | Mr(calc):   | Delta     | Sequence                          |
|-------|-------------|-----------|-----------------------------------|
| 35.3  | 1937.030533 | 0.007203  | <a href="#">KGHVSFKPSLDQQR</a>    |
| 25.8  | 1937.030533 | 0.007203  | <a href="#">KGHVSFKPSLDQQR</a>    |
| 0.4   | 1937.051620 | -0.013884 | <a href="#">QPLEREQCLALLALGAR</a> |

Mascot: <http://www.matrixscience.com/>



# MASCOT Search Results

## Peptide View

MS/MS Fragmentation of **EHLVQATPENLQEAR**

Found in **ITIH3\_HUMAN**, Inter-alpha-trypsin inhibitor heavy chain H3 OS=Homo sapiens GN=ITIH3 PE=1 SV=2

Match to Query 54861: 2045.053272 from(682.691700,3+) rtinseconds(1712) index(58410)

Title: Locus:1.1.1.2902.9 File:"2013-07-02 CLN FXIII 60 min 1st F 4.wiff"

Data file C:\Program Files (x86)\Matrix Science\Mascot Daemon\mgf4 FXIII 60 min 1st\mascot\_daemon\_merge.mgf

Click mouse within plot area to zoom in by factor of two about that point

Or, Plot from  to  Da

Label all possible matches  Label matches used for scoring

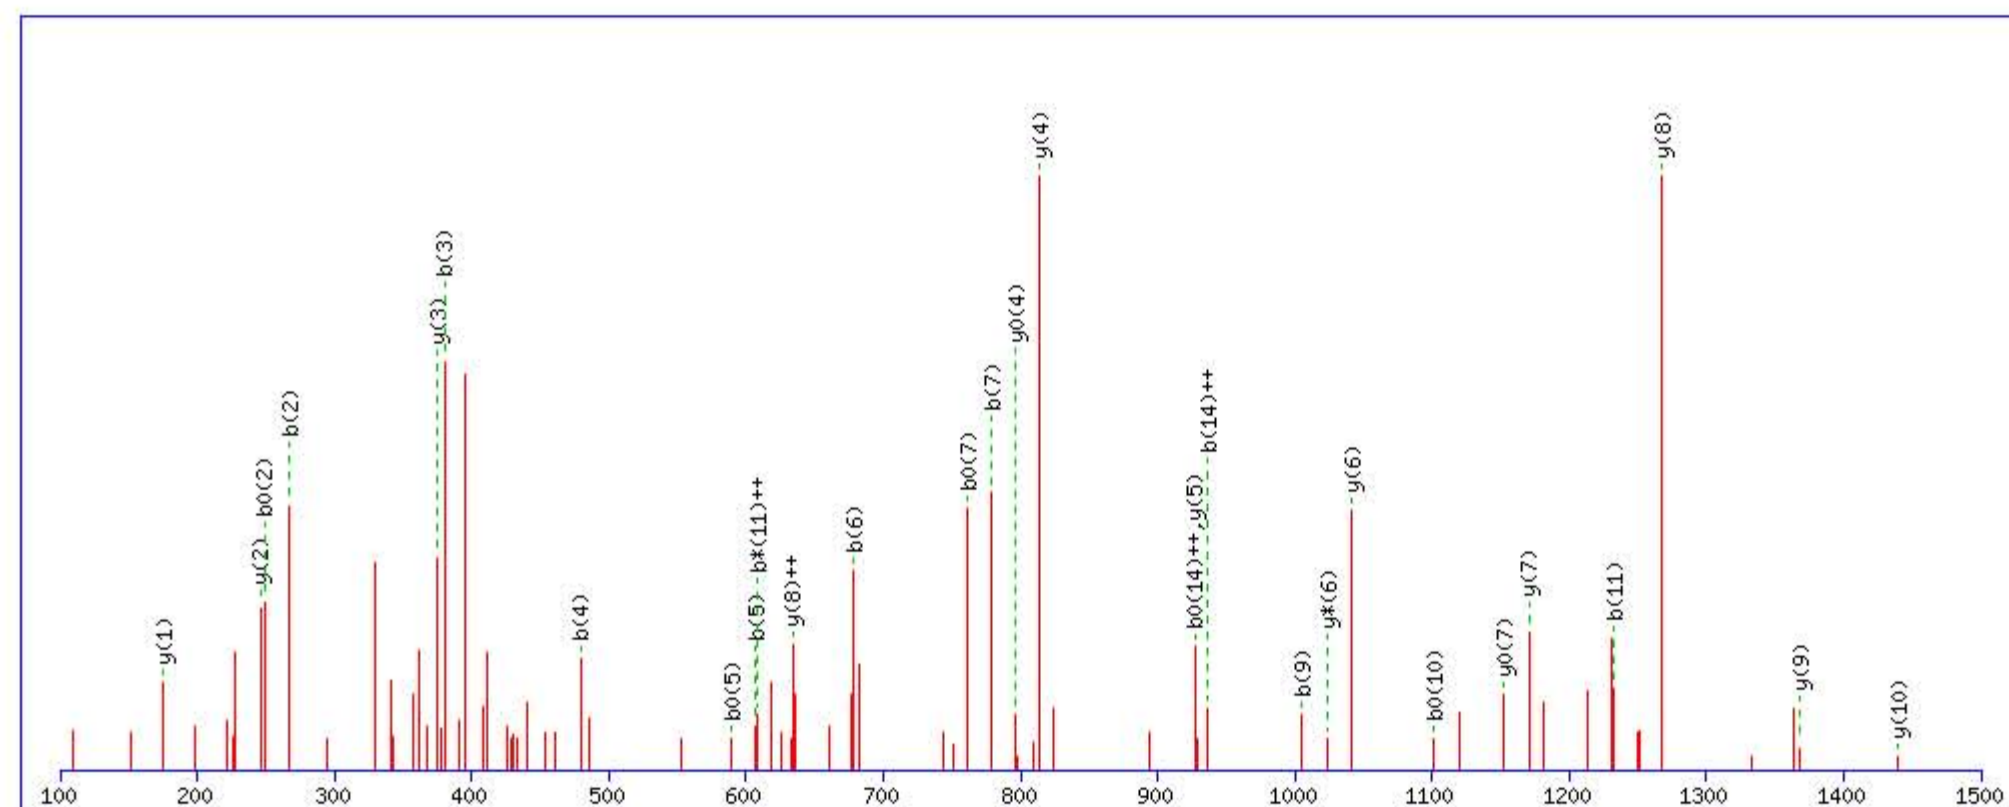

Monoisotopic mass of neutral peptide Mr(calc): 2045.036377

Fixed modifications: Carbamidomethyl (C) (apply to specified residues or termini only)

Variable modifications:

Q12 : Biotin:Thermo-21345 (Q)

Ions Score: 73 Expect: 4.6e-007

Matches : 29/156 fragment ions using 40 most intense peaks [\(help\)](#)

| #  | b                  | b <sup>++</sup>   | b <sup>+</sup> | b <sup>+++</sup>  | b <sup>0</sup>     | b <sup>0++</sup>  | Seq. | y                  | y <sup>++</sup>   | y <sup>+</sup>     | y <sup>+++</sup> | y <sup>0</sup>     | y <sup>0++</sup> | #  |
|----|--------------------|-------------------|----------------|-------------------|--------------------|-------------------|------|--------------------|-------------------|--------------------|------------------|--------------------|------------------|----|
| 1  | 130.049869         | 65.528572         |                |                   | 112.039304         | 56.523290         | E    |                    |                   |                    |                  |                    |                  | 15 |
| 2  | <b>267.108781</b>  | 134.058028        |                |                   | <b>249.098216</b>  | 125.052746        | H    | 1917.001094        | 959.004185        | 1899.974545        | 950.490911       | 1898.990529        | 949.998903       | 14 |
| 3  | <b>380.192845</b>  | 190.600060        |                |                   | 362.182280         | 181.594778        | L    | 1779.942182        | 890.474729        | 1762.915633        | 881.961455       | 1761.931617        | 881.469447       | 13 |
| 4  | <b>479.261259</b>  | 240.134267        |                |                   | 461.250694         | 231.128985        | V    | 1666.858118        | 833.932697        | 1649.831569        | 825.419423       | 1648.847553        | 824.927415       | 12 |
| 5  | <b>607.319837</b>  | 304.163557        | 590.293288     | 295.650282        | <b>589.309272</b>  | 295.158274        | Q    | 1567.789704        | 784.398490        | 1550.763155        | 775.885216       | 1549.779139        | 775.393208       | 11 |
| 6  | <b>678.356951</b>  | 339.682114        | 661.330402     | 331.168839        | 660.346386         | 330.676831        | A    | <b>1439.731126</b> | 720.369201        | 1422.704577        | 711.855927       | 1421.720561        | 711.363919       | 10 |
| 7  | <b>779.404630</b>  | 390.205953        | 762.378081     | 381.692679        | <b>761.394065</b>  | 381.200671        | T    | <b>1368.694012</b> | 684.850644        | 1351.667463        | 676.337370       | 1350.683447        | 675.845362       | 9  |
| 8  | 876.457394         | 438.732335        | 859.430845     | 430.219061        | 858.446829         | 429.727053        | P    | <b>1267.646333</b> | <b>634.326805</b> | 1250.619784        | 625.813530       | 1249.635768        | 625.321522       | 8  |
| 9  | <b>1005.499987</b> | 503.253632        | 988.473438     | 494.740357        | 987.489422         | 494.248349        | E    | <b>1170.593569</b> | 585.800423        | 1153.567020        | 577.287148       | <b>1152.583004</b> | 576.795140       | 7  |
| 10 | 1119.542914        | 560.275095        | 1102.516365    | 551.761821        | <b>1101.532349</b> | 551.269813        | N    | <b>1041.550976</b> | 521.279126        | <b>1024.524427</b> | 512.765852       | 1023.540411        | 512.273844       | 6  |
| 11 | <b>1232.626978</b> | 616.817127        | 1215.600429    | <b>608.303853</b> | 1214.616413        | 607.811845        | L    | <b>927.508049</b>  | 464.257663        | 910.481500         | 455.744388       | 909.497484         | 455.252380       | 5  |
| 12 | 1671.852304        | 836.429790        | 1654.825755    | 827.916516        | 1653.841739        | 827.424508        | Q    | <b>814.423985</b>  | 407.715631        | 797.397436         | 399.202356       | <b>796.413420</b>  | 398.710348       | 4  |
| 13 | 1800.894897        | 900.951087        | 1783.868348    | 892.437812        | 1782.884332        | 891.945804        | E    | <b>375.198659</b>  | 188.102968        | 358.172110         | 179.589693       | 357.188094         | 179.097685       | 3  |
| 14 | 1871.932011        | <b>936.469644</b> | 1854.905462    | 927.956369        | 1853.921446        | <b>927.464361</b> | A    | <b>246.156066</b>  | 123.581671        | 229.129517         | 115.068396       |                    |                  | 2  |
| 15 |                    |                   |                |                   |                    |                   | R    | <b>175.118952</b>  | 88.063114         | 158.092403         | 79.549839        |                    |                  | 1  |

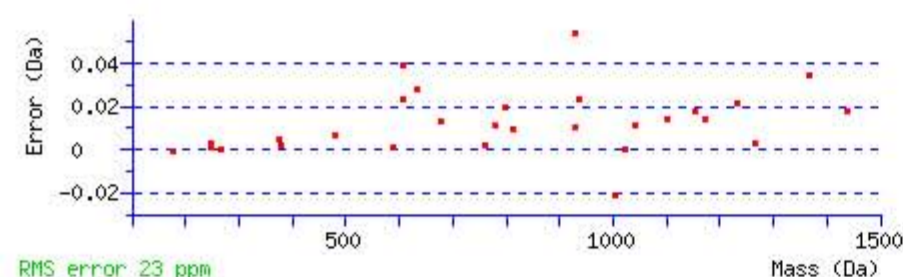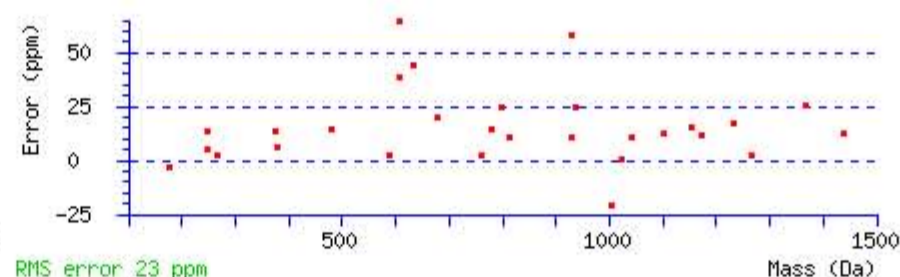

NCBI BLAST search of **EHLVQATPENLQEAR**

(Parameters: blastp, nr protein database, expect=20000, no filter, PAM30)

Other BLAST [web gateways](#)

All matches to this query

| Score | Mr(calc):   | Delta     | Sequence                           |
|-------|-------------|-----------|------------------------------------|
| 72.6  | 2045.036377 | 0.016895  | <a href="#">EHLVQATPENLQEAR</a>    |
| 4.8   | 2045.051193 | 0.002079  | <a href="#">VVGGYLLMLAYACVTMLR</a> |
| 3.0   | 2045.082687 | -0.029415 | <a href="#">QDTTGKIIISIDTSSLR</a>  |
| 2.6   | 2045.036377 | 0.016895  | <a href="#">EHLVQATPENLQEAR</a>    |
| 0.8   | 2045.040421 | 0.012851  | <a href="#">QIEFNFPSQAITSR</a>     |

Mascot: <http://www.matrixscience.com/>



# MASCOT SEARCH RESULTS

## Peptide View

MS/MS Fragmentation of **GHVSFKPSLDQQR**

Found in **ITIH3\_HUMAN**, Inter-alpha-trypsin inhibitor heavy chain H3 OS=Homo sapiens GN=ITIH3 PE=1 SV=2

Match to Query 56445: 2120.126202 from(707.716010,3+) rtinseconds(1856) index(59420)

Title: Locus:1.1.1.2952.16 File:"2013-07-02 CLN FXIII 60 min 1st F 4.wiff"

Data file C:\Program Files (x86)\Matrix Science\Mascot Daemon\mgf4 FXIII 60 min 1st\mascot\_daemon\_merge.mgf

Click mouse within plot area to zoom in by factor of two about that point

Or, Plot from  to  Da

Label all possible matches  Label matches used for scoring

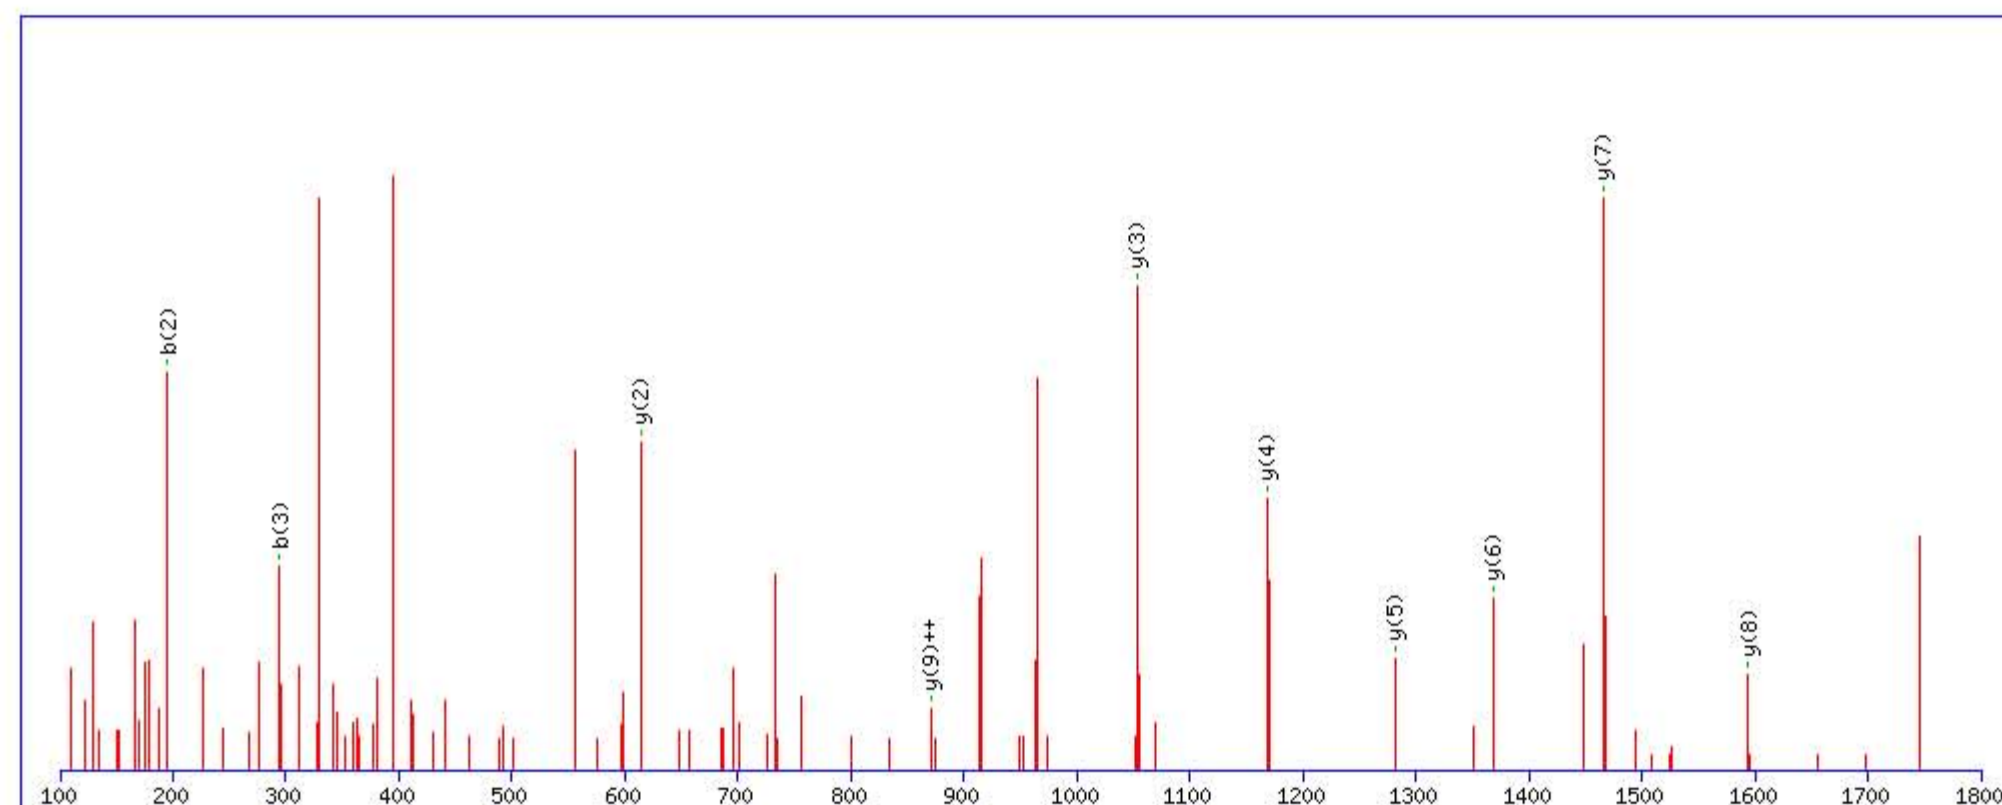

Monoisotopic mass of neutral peptide Mr(calc): 2120.102325

Fixed modifications: Carbamidomethyl (C) (apply to specified residues or termini only)

Variable modifications:

Q11 : Biotin:Thermo-21345 (Q)

Q12 : Biotin:Thermo-21345 (Q)

Ions Score: 36 Expect: 0.006

Matches : 10/122 fragment ions using 17 most intense peaks [\(help\)](#)

| #  | b           | b <sup>++</sup> | b <sup>*</sup> | b <sup>+++</sup> | b <sup>0</sup> | b <sup>0++</sup> | Seq. | y           | y <sup>++</sup> | y <sup>*</sup> | y <sup>+++</sup> | y <sup>0</sup> | y <sup>0++</sup> | #  |
|----|-------------|-----------------|----------------|------------------|----------------|------------------|------|-------------|-----------------|----------------|------------------|----------------|------------------|----|
| 1  | 58.028740   | 29.518008       |                |                  |                |                  | G    |             |                 |                |                  |                |                  | 13 |
| 2  | 195.087652  | 98.047464       |                |                  |                |                  | H    | 2064.088134 | 1032.547705     | 2047.061585    | 1024.034430      | 2046.077569    | 1023.542422      | 12 |
| 3  | 294.156066  | 147.581671      |                |                  |                |                  | V    | 1927.029222 | 964.018249      | 1910.002673    | 955.504975       | 1909.018657    | 955.012967       | 11 |
| 4  | 381.188094  | 191.097685      |                |                  | 363.177529     | 182.092403       | S    | 1827.960808 | 914.484042      | 1810.934259    | 905.970768       | 1809.950243    | 905.478760       | 10 |
| 5  | 528.256508  | 264.631892      |                |                  | 510.245943     | 255.626610       | F    | 1740.928780 | 870.968028      | 1723.902231    | 862.454754       | 1722.918215    | 861.962746       | 9  |
| 6  | 656.351471  | 328.679374      | 639.324922     | 320.166099       | 638.340906     | 319.674091       | K    | 1593.860366 | 797.433821      | 1576.833817    | 788.920547       | 1575.849801    | 788.428539       | 8  |
| 7  | 753.404235  | 377.205756      | 736.377686     | 368.692481       | 735.393670     | 368.200473       | P    | 1465.765403 | 733.386340      | 1448.738854    | 724.873065       | 1447.754838    | 724.381057       | 7  |
| 8  | 840.436263  | 420.721770      | 823.409714     | 412.208495       | 822.425698     | 411.716487       | S    | 1368.712639 | 684.859958      | 1351.686090    | 676.346683       | 1350.702074    | 675.854675       | 6  |
| 9  | 953.520327  | 477.263802      | 936.493778     | 468.750527       | 935.509762     | 468.258519       | L    | 1281.680611 | 641.343944      | 1264.654062    | 632.830669       | 1263.670046    | 632.338661       | 5  |
| 10 | 1068.547270 | 534.777273      | 1051.520721    | 526.263999       | 1050.536705    | 525.771991       | D    | 1168.596547 | 584.801912      | 1151.569998    | 576.288637       | 1150.585982    | 575.796629       | 4  |
| 11 | 1507.772596 | 754.389936      | 1490.746047    | 745.876662       | 1489.762031    | 745.384654       | Q    | 1053.569604 | 527.288440      | 1036.543055    | 518.775166       |                |                  | 3  |
| 12 | 1946.997922 | 974.002599      | 1929.971373    | 965.489325       | 1928.987357    | 964.997317       | Q    | 614.344278  | 307.675777      | 597.317729     | 299.162503       |                |                  | 2  |
| 13 |             |                 |                |                  |                |                  | R    | 175.118952  | 88.063114       | 158.092403     | 79.549839        |                |                  | 1  |

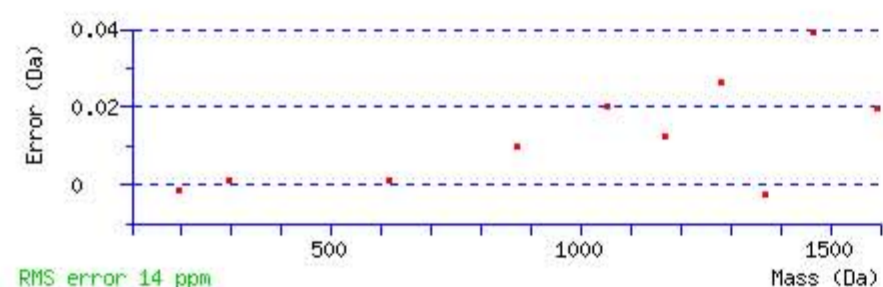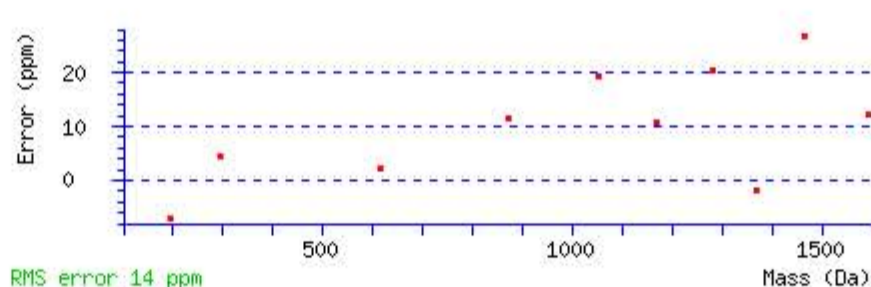

NCBI BLAST search of [GHVSFKPSLDQQR](#)

(Parameters: blastp, nr protein database, expect=20000, no filter, PAM30)

Other BLAST [web gateways](#)

All matches to this query

| Score | Mr(calc):   | Delta    | Sequence                      |
|-------|-------------|----------|-------------------------------|
| 35.9  | 2120.102325 | 0.023877 | <a href="#">GHVSFKPSLDQQR</a> |

Mascot: <http://www.matrixscience.com/>



# MASCOT Search Results

## Peptide View

MS/MS Fragmentation of **SPEQQETVLDGNLIIR**

Found in **ITIH4\_HUMAN**, Inter-alpha-trypsin inhibitor heavy chain H4 OS=Homo sapiens GN=ITIH4 PE=1 SV=4

Match to Query 56497: 2122.134582 from(708.385470,3+) rtinseconds(2338) index(9314)

Title: Locus:1.1.1.2946.8 File:"2013-07-02 CLN FXIII 60 min 1st F 1.wiff"

Data file C:\Program Files (x86)\Matrix Science\Mascot Daemon\mgf4 FXIII 60 min 1st\mascot\_daemon\_merge.mgf

Click mouse within plot area to zoom in by factor of two about that point

Or, Plot from  to  Da

Label all possible matches  Label matches used for scoring

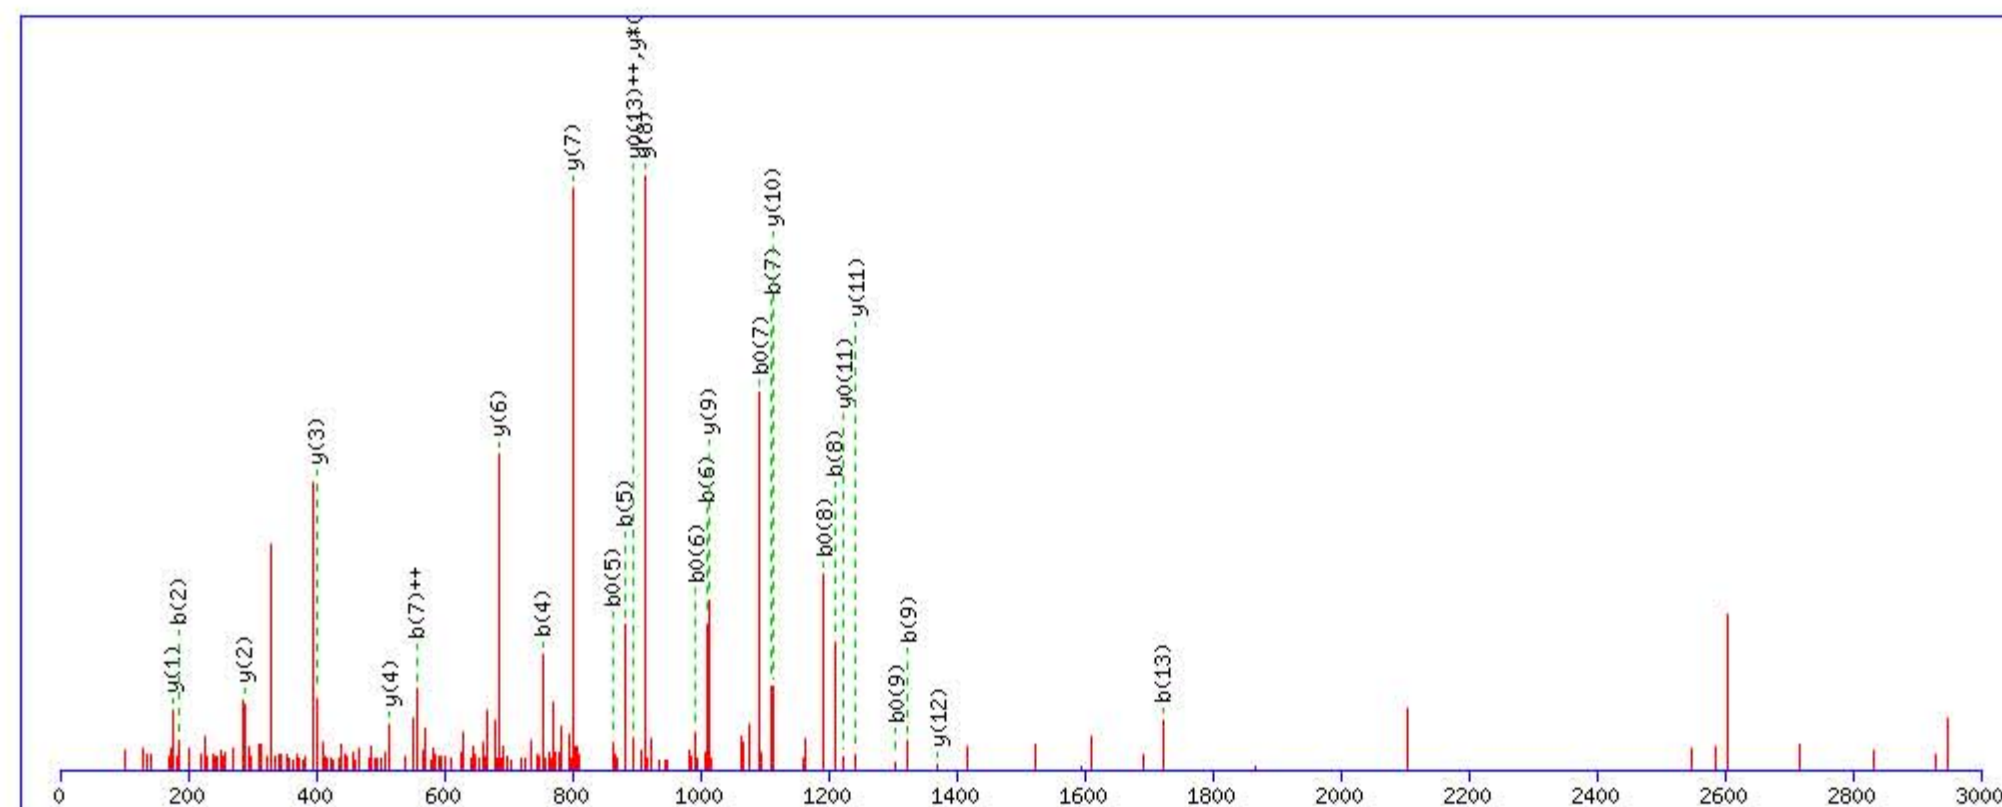

Monoisotopic mass of neutral peptide Mr(calc): 2122.109222

Fixed modifications: Carbamidomethyl (C) (apply to specified residues or termini only)

Variable modifications:

Q4 : Biotin:Thermo-21345 (Q)

Ions Score: 66 Expect: 1.3e-006

Matches : 28/162 fragment ions using 47 most intense peaks [\(help\)](#)

| #  | b                  | b <sup>++</sup>   | b <sup>*</sup> | b <sup>*++</sup> | b <sup>0</sup>     | b <sup>0++</sup> | Seq. | y                  | y <sup>++</sup> | y <sup>*</sup>    | y <sup>*++</sup> | y <sup>0</sup>     | y <sup>0++</sup>  | #  |
|----|--------------------|-------------------|----------------|------------------|--------------------|------------------|------|--------------------|-----------------|-------------------|------------------|--------------------|-------------------|----|
| 1  | 88.039304          | 44.523290         |                |                  | 70.028739          | 35.518008        | S    |                    |                 |                   |                  |                    |                   | 16 |
| 2  | <b>185.092068</b>  | 93.049672         |                |                  | 167.081503         | 84.044389        | P    | 2036.084489        | 1018.545882     | 2019.057940       | 1010.032608      | 2018.073924        | 1009.540600       | 15 |
| 3  | 314.134661         | 157.570968        |                |                  | 296.124096         | 148.565686       | E    | 1939.031725        | 970.019500      | 1922.005176       | 961.506226       | 1921.021160        | 961.014218        | 14 |
| 4  | <b>753.359987</b>  | 377.183632        | 736.333438     | 368.670357       | 735.349422         | 368.178349       | Q    | 1809.989132        | 905.498204      | 1792.962583       | 896.984929       | 1791.978567        | <b>896.492921</b> | 13 |
| 5  | <b>881.418565</b>  | 441.212921        | 864.392016     | 432.699646       | <b>863.408000</b>  | 432.207638       | Q    | <b>1370.763806</b> | 685.885541      | 1353.737257       | 677.372266       | 1352.753241        | 676.880258        | 12 |
| 6  | <b>1010.461158</b> | 505.734217        | 993.434609     | 497.220943       | <b>992.450593</b>  | 496.728935       | E    | <b>1242.705228</b> | 621.856252      | 1225.678679       | 613.342977       | <b>1224.694663</b> | 612.850969        | 11 |
| 7  | <b>1111.508837</b> | <b>556.258057</b> | 1094.482288    | 547.744782       | <b>1093.498272</b> | 547.252774       | T    | <b>1113.662635</b> | 557.334955      | 1096.636086       | 548.821681       | 1095.652070        | 548.329673        | 10 |
| 8  | <b>1210.577251</b> | 605.792264        | 1193.550702    | 597.278989       | <b>1192.566686</b> | 596.786981       | V    | <b>1012.614956</b> | 506.811116      | 995.588407        | 498.297841       | 994.604391         | 497.805833        | 9  |
| 9  | <b>1323.661315</b> | 662.334296        | 1306.634766    | 653.821021       | <b>1305.650750</b> | 653.329013       | L    | <b>913.546542</b>  | 457.276909      | <b>896.519993</b> | 448.763634       | 895.535977         | 448.271626        | 8  |
| 10 | 1438.688258        | 719.847767        | 1421.661709    | 711.334493       | 1420.677693        | 710.842485       | D    | <b>800.462478</b>  | 400.734877      | 783.435929        | 392.221602       | 782.451913         | 391.729594        | 7  |
| 11 | 1495.709722        | 748.358499        | 1478.683173    | 739.845225       | 1477.699157        | 739.353217       | G    | <b>685.435535</b>  | 343.221405      | 668.408986        | 334.708131       |                    |                   | 6  |
| 12 | 1609.752649        | 805.379963        | 1592.726100    | 796.866688       | 1591.742084        | 796.374680       | N    | 628.414071         | 314.710673      | 611.387522        | 306.197399       |                    |                   | 5  |
| 13 | <b>1722.836713</b> | 861.921994        | 1705.810164    | 853.408720       | 1704.826148        | 852.916712       | L    | <b>514.371144</b>  | 257.689210      | 497.344595        | 249.175935       |                    |                   | 4  |
| 14 | 1835.920777        | 918.464026        | 1818.894228    | 909.950752       | 1817.910212        | 909.458744       | I    | <b>401.287080</b>  | 201.147178      | 384.260531        | 192.633903       |                    |                   | 3  |
| 15 | 1949.004841        | 975.006058        | 1931.978292    | 966.492784       | 1930.994276        | 966.000776       | I    | <b>288.203016</b>  | 144.605146      | 271.176467        | 136.091871       |                    |                   | 2  |
| 16 |                    |                   |                |                  |                    |                  | R    | <b>175.118952</b>  | 88.063114       | 158.092403        | 79.549839        |                    |                   | 1  |

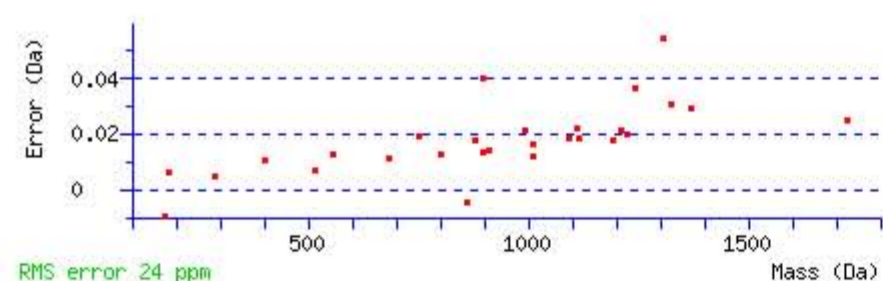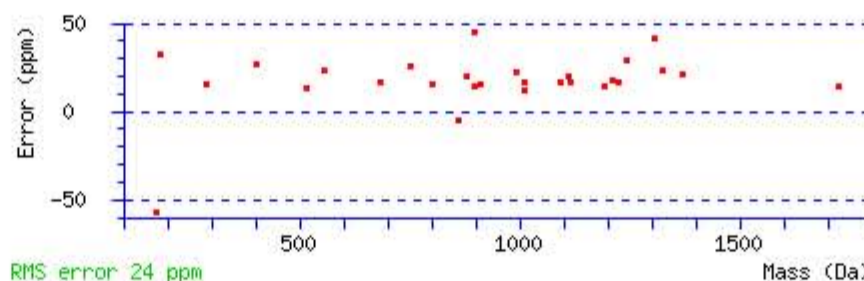

NCBI BLAST search of [SPEQQETVLDGNLIIR](#)

(Parameters: blastp, nr protein database, expect=20000, no filter, PAM30)

Other BLAST [web gateways](#)

All matches to this query

| Score | Mr(calc):   | Delta     | Sequence                         |
|-------|-------------|-----------|----------------------------------|
| 65.5  | 2122.109222 | 0.025360  | <a href="#">SPEQQETVLDGNLIIR</a> |
| 52.9  | 2122.109222 | 0.025360  | <a href="#">SPEQQETVLDGNLIIR</a> |
| 2.9   | 2122.156799 | -0.022217 | <a href="#">AERAALEELVKLOGER</a> |
| 2.5   | 2122.164246 | -0.029664 | <a href="#">TVIPIVNHSSKMTIQK</a> |

Mascot: <http://www.matrixscience.com/>



# MASCOT Search Results

## Peptide View

MS/MS Fragmentation of **QLGLPGPPDVPDHAAYHPFR**

Found in **ITIH4\_HUMAN**, Inter-alpha-trypsin inhibitor heavy chain H4 OS=Homo sapiens GN=ITIH4 PE=1 SV=4

Match to Query 65269: 2494.274816 from(624.575980,4+) rtinseconds(2140) index(7943)

Title: Locus:1.1.1.2877.17 File:"2013-07-02 CLN FXIII 60 min 1st F 1.wiff"

Data file C:\Program Files (x86)\Matrix Science\Mascot Daemon\mgf4 FXIII 60 min 1st\mascot\_daemon\_merge.mgf

Click mouse within plot area to zoom in by factor of two about that point

Or, Plot from  to  Da

Label all possible matches  Label matches used for scoring

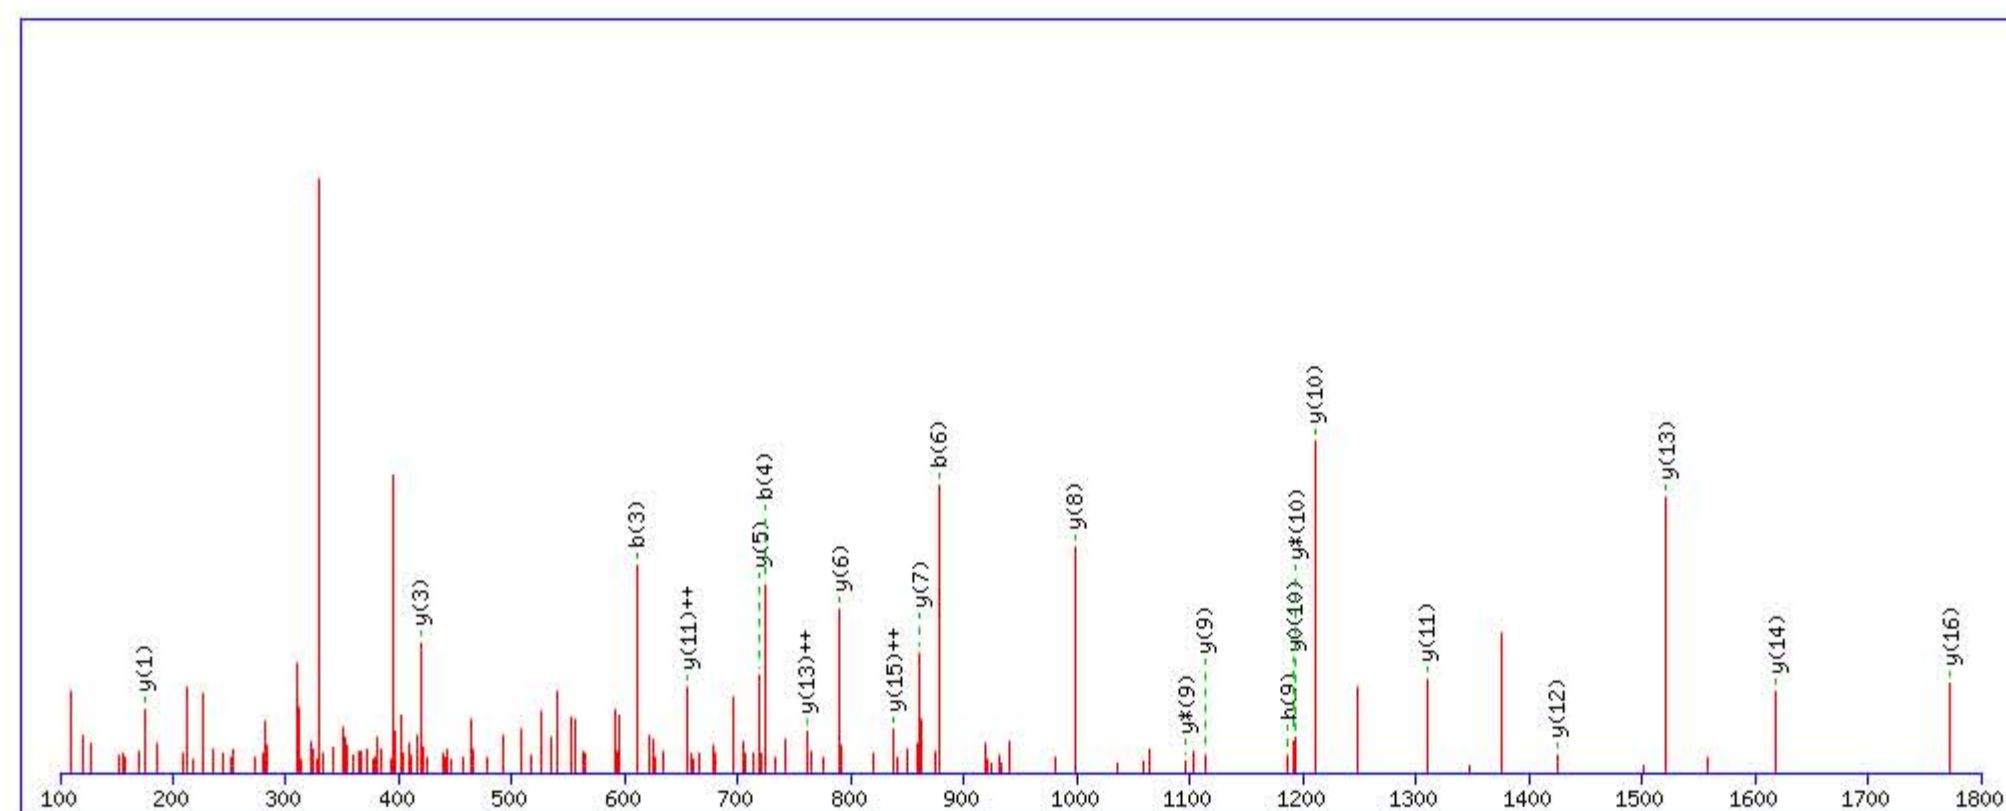

Monoisotopic mass of neutral peptide Mr(calc): 2494.257980

Fixed modifications: Carbamidomethyl (C) (apply to specified residues or termini only)

Variable modifications:

Q1 : Biotin:Thermo-21345 (Q)

Ions Score: 61 Expect: 2.3e-006

Matches : 23/196 fragment ions using 56 most intense peaks [\(help\)](#)

| #  | b                  | b <sup>++</sup> | b <sup>*</sup> | b <sup>*++</sup> | b <sup>0</sup> | b <sup>0++</sup> | Seq. | y                  | y <sup>++</sup>   | y <sup>*</sup>     | y <sup>*++</sup> | y <sup>0</sup>     | y <sup>0++</sup> | #  |
|----|--------------------|-----------------|----------------|------------------|----------------|------------------|------|--------------------|-------------------|--------------------|------------------|--------------------|------------------|----|
| 1  | 440.232602         | 220.619939      | 423.206053     | 212.106664       |                |                  | Q    |                    |                   |                    |                  |                    |                  | 20 |
| 2  | 553.316666         | 277.161971      | 536.290117     | 268.648697       |                |                  | L    | 2056.039923        | 1028.523599       | 2039.013374        | 1020.010325      | 2038.029358        | 1019.518317      | 19 |
| 3  | <b>610.338130</b>  | 305.672703      | 593.311581     | 297.159429       |                |                  | G    | 1942.955859        | 971.981568        | 1925.929310        | 963.468293       | 1924.945294        | 962.976285       | 18 |
| 4  | <b>723.422194</b>  | 362.214735      | 706.395645     | 353.701461       |                |                  | L    | 1885.934395        | 943.470836        | 1868.907846        | 934.957561       | 1867.923830        | 934.465553       | 17 |
| 5  | 820.474958         | 410.741117      | 803.448409     | 402.227843       |                |                  | P    | <b>1772.850331</b> | 886.928804        | 1755.823782        | 878.415529       | 1754.839766        | 877.923521       | 16 |
| 6  | <b>877.496422</b>  | 439.251849      | 860.469873     | 430.738575       |                |                  | G    | 1675.797567        | <b>838.402422</b> | 1658.771018        | 829.889147       | 1657.787002        | 829.397139       | 15 |
| 7  | 974.549186         | 487.778231      | 957.522637     | 479.264957       |                |                  | P    | <b>1618.776103</b> | 809.891690        | 1601.749554        | 801.378415       | 1600.765538        | 800.886407       | 14 |
| 8  | 1071.601950        | 536.304613      | 1054.575401    | 527.791339       |                |                  | P    | <b>1521.723339</b> | <b>761.365308</b> | 1504.696790        | 752.852033       | 1503.712774        | 752.360025       | 13 |
| 9  | <b>1186.628893</b> | 593.818085      | 1169.602344    | 585.304810       | 1168.618328    | 584.812802       | D    | <b>1424.670575</b> | 712.838926        | 1407.644026        | 704.325651       | 1406.660010        | 703.833643       | 12 |
| 10 | 1285.697307        | 643.352292      | 1268.670758    | 634.839017       | 1267.686742    | 634.347009       | V    | <b>1309.643632</b> | <b>655.325454</b> | 1292.617083        | 646.812180       | 1291.633067        | 646.320172       | 11 |
| 11 | 1382.750071        | 691.878674      | 1365.723522    | 683.365399       | 1364.739506    | 682.873391       | P    | <b>1210.575218</b> | 605.791247        | <b>1193.548669</b> | 597.277973       | <b>1192.564653</b> | 596.785964       | 10 |
| 12 | 1497.777014        | 749.392145      | 1480.750465    | 740.878871       | 1479.766449    | 740.386863       | D    | <b>1113.522454</b> | 557.264865        | <b>1096.495905</b> | 548.751591       | 1095.511889        | 548.259582       | 9  |
| 13 | 1634.835926        | 817.921601      | 1617.809377    | 809.408327       | 1616.825361    | 808.916319       | H    | <b>998.495511</b>  | 499.751393        | 981.468962         | 491.238119       |                    |                  | 8  |
| 14 | 1705.873040        | 853.440158      | 1688.846491    | 844.926884       | 1687.862475    | 844.434876       | A    | <b>861.436599</b>  | 431.221937        | 844.410050         | 422.708663       |                    |                  | 7  |
| 15 | 1776.910154        | 888.958715      | 1759.883605    | 880.445441       | 1758.899589    | 879.953433       | A    | <b>790.399485</b>  | 395.703380        | 773.372936         | 387.190106       |                    |                  | 6  |
| 16 | 1939.973483        | 970.490380      | 1922.946934    | 961.977105       | 1921.962918    | 961.485097       | Y    | <b>719.362371</b>  | 360.184823        | 702.335822         | 351.671549       |                    |                  | 5  |
| 17 | 2077.032395        | 1039.019836     | 2060.005846    | 1030.506561      | 2059.021830    | 1030.014553      | H    | 556.299042         | 278.653159        | 539.272493         | 270.139884       |                    |                  | 4  |
| 18 | 2174.085159        | 1087.546218     | 2157.058610    | 1079.032943      | 2156.074594    | 1078.540935      | P    | <b>419.240130</b>  | 210.123703        | 402.213581         | 201.610428       |                    |                  | 3  |
| 19 | 2321.153573        | 1161.080424     | 2304.127024    | 1152.567150      | 2303.143008    | 1152.075142      | F    | 322.187366         | 161.597321        | 305.160817         | 153.084046       |                    |                  | 2  |
| 20 |                    |                 |                |                  |                |                  | R    | <b>175.118952</b>  | 88.063114         | 158.092403         | 79.549839        |                    |                  | 1  |

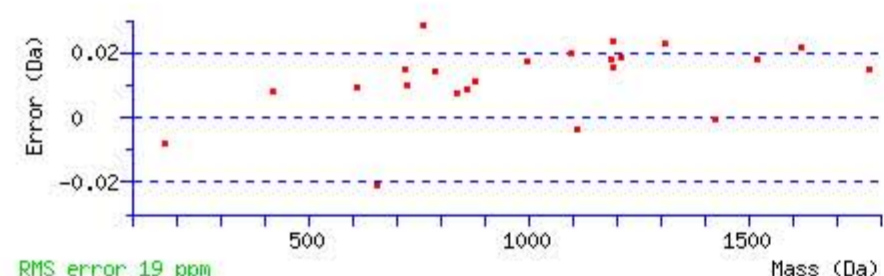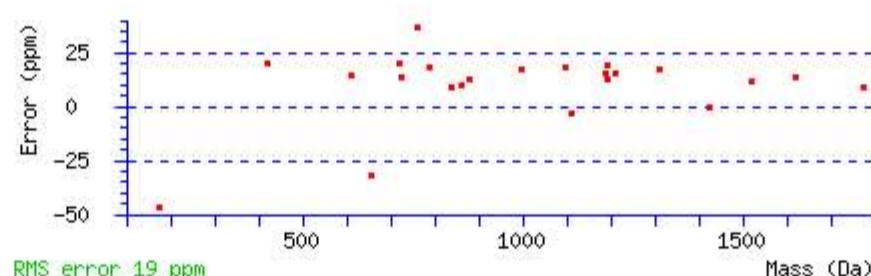

NCBI BLAST search of **QLGLPGPPDVPDHAAYHPFR**

(Parameters: blastp, nr protein database, expect=20000, no filter, PAM30)

Other BLAST [web gateways](#)

All matches to this query

| Score | Mr(calc):   | Delta     | Sequence                               |
|-------|-------------|-----------|----------------------------------------|
| 61.2  | 2494.257980 | 0.016836  | <a href="#">QLGLPGPPDVPDHAAYHPFR</a>   |
| 1.0   | 2494.278381 | -0.003565 | <a href="#">MSAPLDAALHALQEEQARLKMR</a> |



**Mascot Search Results**

**Peptide View**

MS/MS Fragmentation of **QGPVNLLSDPEQGVEVTGQYER**  
 Found in **ITIH4\_HUMAN**, Inter-alpha-trypsin inhibitor heavy chain H4 OS=Homo sapiens GN=ITIH4 PE=1 SV=4

Match to Query 67847: 2725.372062 from(909.464630,3+) rtinseconds(2379) index(81122)  
 Title: Locus:1.1.1.3042.25 File:"2013-07-02 CLN FXIII 60 min 1st FT.wiff"  
 Data file C:\Program Files (x86)\Matrix Science\Mascot Daemon\mgf\4 FXIII 60 min 1st\mascot\_daemon\_merge.mgf

Click mouse within plot area to zoom in by factor of two about that point  
 Or, Plot from  to  Da   
 Label all possible matches  Label matches used for scoring

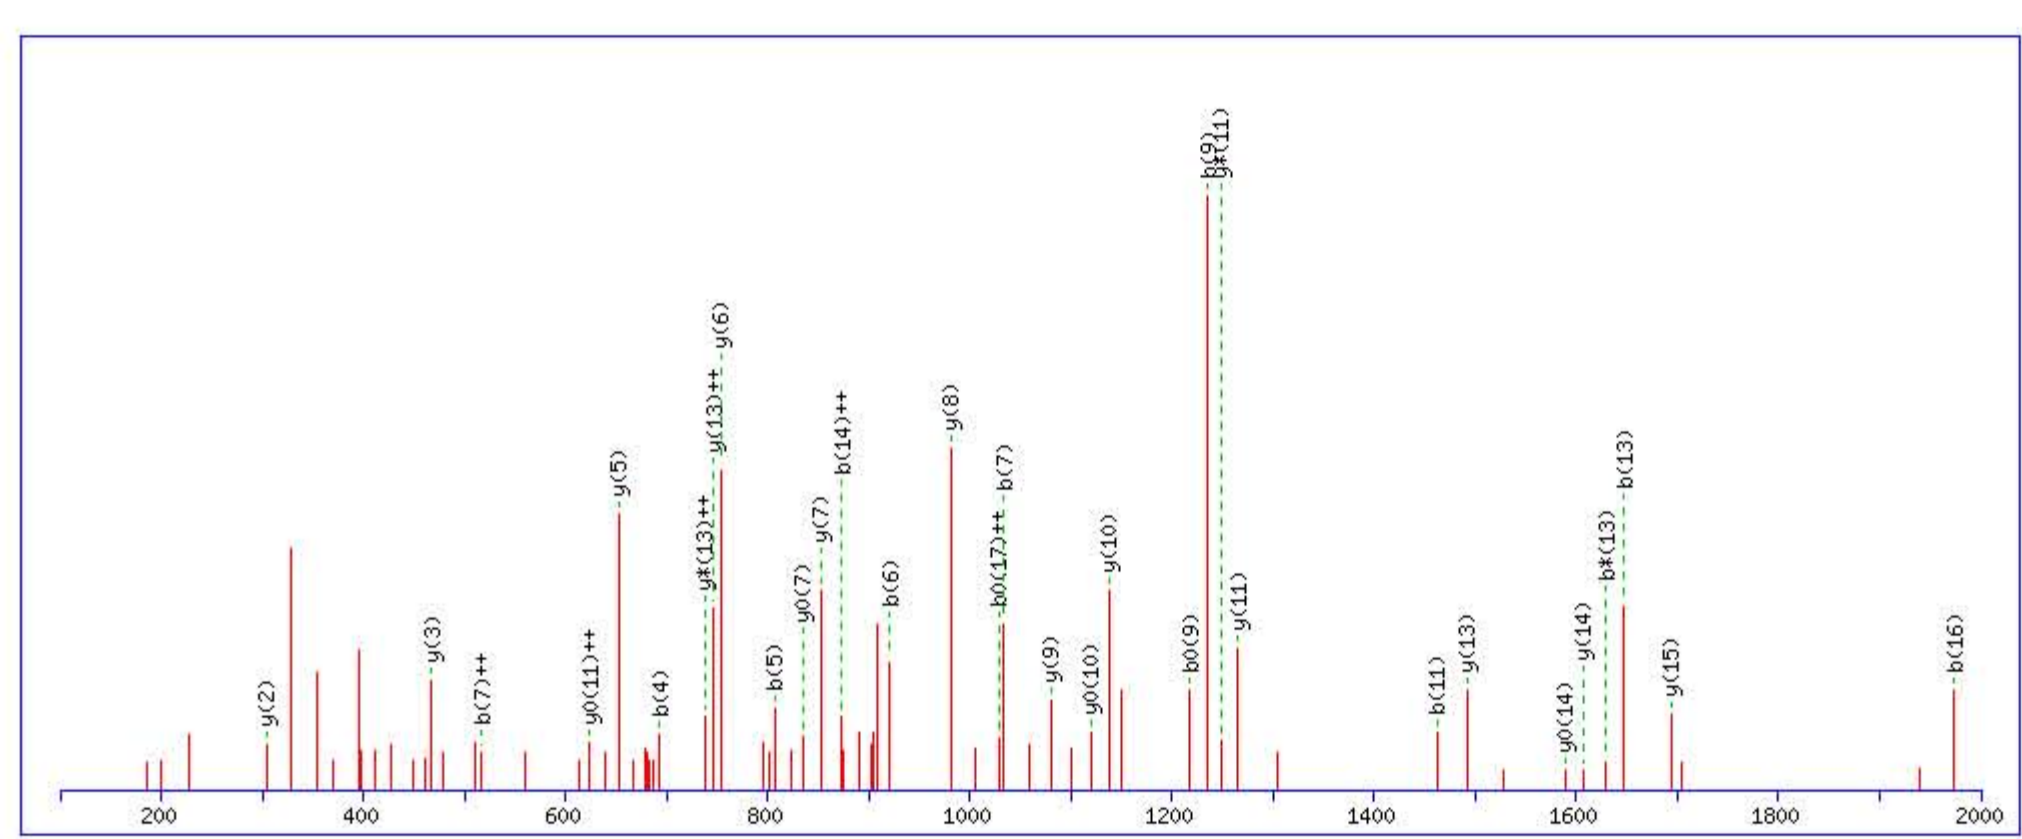

Monoisotopic mass of neutral peptide Mr(calc): 2725.338135  
 Fixed modifications: Carbamidomethyl (C) (apply to specified residues or termini only)  
 Variable modifications:  
 Q1 : Biotin:Thermo-21345 (Q)  
 Ions Score: 67 Expect: 6.3e-006  
 Matches : 32/236 fragment ions using 55 most intense peaks [\(help\)](#)

| #  | b                  | b <sup>++</sup>   | b <sup>*</sup>     | b <sup>*++</sup> | b <sup>0</sup>     | b <sup>0++</sup>   | Seq. | y                  | y <sup>++</sup>   | y <sup>*</sup>     | y <sup>*++</sup>  | y <sup>0</sup>     | y <sup>0++</sup>  | #  |
|----|--------------------|-------------------|--------------------|------------------|--------------------|--------------------|------|--------------------|-------------------|--------------------|-------------------|--------------------|-------------------|----|
| 1  | 440.232602         | 220.619939        | 423.206053         | 212.106664       |                    |                    | Q    |                    |                   |                    |                   |                    |                   | 22 |
| 2  | 497.254066         | 249.130671        | 480.227517         | 240.617396       |                    |                    | G    | 2287.120083        | 1144.063679       | 2270.093534        | 1135.550405       | 2269.109518        | 1135.058397       | 21 |
| 3  | 594.306830         | 297.657053        | 577.280281         | 289.143779       |                    |                    | P    | 2230.098619        | 1115.552947       | 2213.072070        | 1107.039673       | 2212.088054        | 1106.547665       | 20 |
| 4  | <b>693.375244</b>  | 347.191260        | 676.348695         | 338.677985       |                    |                    | V    | 2133.045855        | 1067.026565       | 2116.019306        | 1058.513291       | 2115.035290        | 1058.021283       | 19 |
| 5  | <b>807.418171</b>  | 404.212723        | 790.391622         | 395.699449       |                    |                    | N    | 2033.977441        | 1017.492359       | 2016.950892        | 1008.979084       | 2015.966876        | 1008.487076       | 18 |
| 6  | <b>920.502235</b>  | 460.754755        | 903.475686         | 452.241481       |                    |                    | L    | 1919.934514        | 960.470895        | 1902.907965        | 951.957621        | 1901.923949        | 951.465613        | 17 |
| 7  | <b>1033.586299</b> | <b>517.296787</b> | 1016.559750        | 508.783513       |                    |                    | L    | 1806.850450        | 903.928863        | 1789.823901        | 895.415589        | 1788.839885        | 894.923581        | 16 |
| 8  | 1120.618327        | 560.812801        | 1103.591778        | 552.299527       | 1102.607762        | 551.807519         | S    | <b>1693.766386</b> | 847.386831        | 1676.739837        | 838.873557        | 1675.755821        | 838.381549        | 15 |
| 9  | <b>1235.645270</b> | 618.326273        | 1218.618721        | 609.812999       | <b>1217.634705</b> | 609.320990         | D    | <b>1606.734358</b> | 803.870817        | 1589.707809        | 795.357543        | <b>1588.723793</b> | 794.865535        | 14 |
| 10 | 1332.698034        | 666.852655        | 1315.671485        | 658.339381       | 1314.687469        | 657.847373         | P    | <b>1491.707415</b> | <b>746.357346</b> | 1474.680866        | <b>737.844071</b> | 1473.696850        | 737.352063        | 13 |
| 11 | <b>1461.740627</b> | 731.373951        | 1444.714078        | 722.860677       | 1443.730062        | 722.368669         | E    | 1394.654651        | 697.830964        | 1377.628102        | 689.317689        | 1376.644086        | 688.825681        | 12 |
| 12 | 1589.799205        | 795.403241        | 1572.772656        | 786.889966       | 1571.788640        | 786.397958         | Q    | <b>1265.612058</b> | 633.309667        | <b>1248.585509</b> | 624.796393        | 1247.601493        | <b>624.304385</b> | 11 |
| 13 | <b>1646.820669</b> | 823.913973        | <b>1629.794120</b> | 815.400698       | 1628.810104        | 814.908690         | G    | <b>1137.553480</b> | 569.280378        | 1120.526931        | 560.767104        | <b>1119.542915</b> | 560.275096        | 10 |
| 14 | 1745.889083        | <b>873.448180</b> | 1728.862534        | 864.934905       | 1727.878518        | 864.442897         | V    | <b>1080.532016</b> | 540.769646        | 1063.505467        | 532.256372        | 1062.521451        | 531.764364        | 9  |
| 15 | 1874.931676        | 937.969476        | 1857.905127        | 929.456202       | 1856.921111        | 928.964193         | E    | <b>981.463602</b>  | 491.235439        | 964.437053         | 482.722165        | 963.453037         | 482.230157        | 8  |
| 16 | <b>1974.000090</b> | 987.503683        | 1956.973541        | 978.990409       | 1955.989525        | 978.498401         | V    | <b>852.421009</b>  | 426.714143        | 835.394460         | 418.200868        | <b>834.410444</b>  | 417.708860        | 7  |
| 17 | 2075.047769        | 1038.027522       | 2058.021220        | 1029.514248      | 2057.037204        | <b>1029.022240</b> | T    | <b>753.352595</b>  | 377.179936        | 736.326046         | 368.666661        | 735.342030         | 368.174653        | 6  |
| 18 | 2132.069233        | 1066.538254       | 2115.042684        | 1058.024980      | 2114.058668        | 1057.532972        | G    | <b>652.304916</b>  | 326.656096        | 635.278367         | 318.142822        | 634.294351         | 317.650814        | 5  |
| 19 | 2260.127811        | 1130.567543       | 2243.101262        | 1122.054269      | 2242.117246        | 1121.562261        | Q    | 595.283452         | 298.145364        | 578.256903         | 289.632090        | 577.272887         | 289.140082        | 4  |
| 20 | 2423.191140        | 1212.099208       | 2406.164591        | 1203.585933      | 2405.180575        | 1203.093925        | Y    | <b>467.224874</b>  | 234.116075        | 450.198325         | 225.602801        | 449.214309         | 225.110793        | 3  |
| 21 | 2552.233733        | 1276.620504       | 2535.207184        | 1268.107230      | 2534.223168        | 1267.615222        | E    | <b>304.161545</b>  | 152.584411        | 287.134996         | 144.071136        | 286.150980         | 143.579128        | 2  |
| 22 |                    |                   |                    |                  |                    |                    | R    | 175.118952         | 88.063114         | 158.092403         | 79.549839         |                    |                   | 1  |

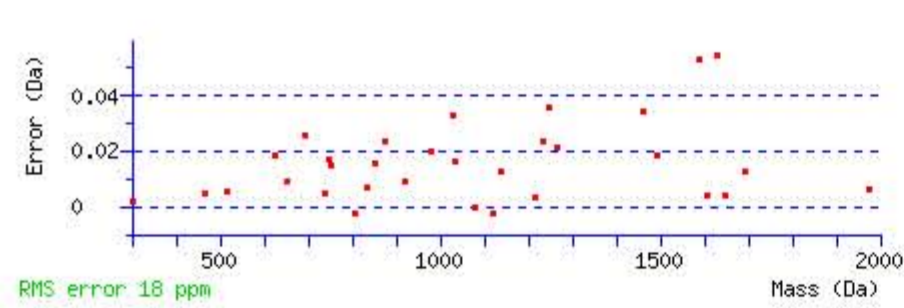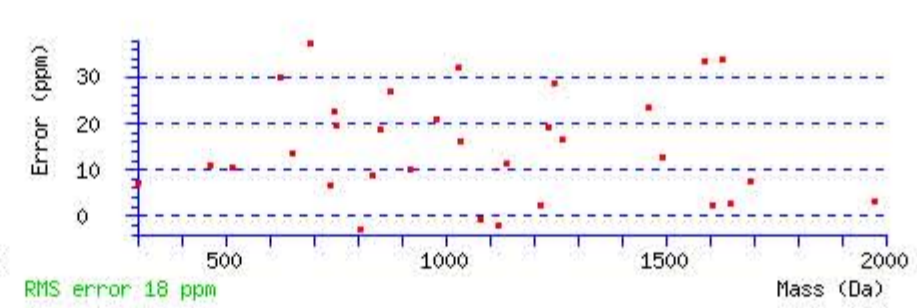

NCBI BLAST search of **QGPVNLLSDPEQGVEVTGQYER**  
 (Parameters: blastp, nr protein database, expect=20000, no filter, PAM30)  
 Other BLAST [web gateways](#)

**All matches to this query**

| Score | Mr(calc):   | Delta    | Sequence                               |
|-------|-------------|----------|----------------------------------------|
| 66.6  | 2725.338135 | 0.033927 | <a href="#">QGPVNLLSDPEQGVEVTGQYER</a> |
| 19.4  | 2725.338135 | 0.033927 | <a href="#">QGPVNLLSDPEQGVEVTGQYER</a> |



# MASCOT Search Results

## Peptide View

MS/MS Fragmentation of **EGDCPVQSGK**

Found in **KNG1\_HUMAN**, Kininogen-1 OS=Homo sapiens GN=KNG1 PE=1 SV=2

Match to Query 33950: 1386.631228 from(694.322890,2+) rtinseconds(1341) index(37722)

Title: Locus:1.1.1.2750.26 File:"2013-07-02 CLN FXIII 60 min 1st F 3.wiff"

Data file C:\Program Files (x86)\Matrix Science\Mascot Daemon\mgf4 FXIII 60 min 1st\mascot\_daemon\_merge.mgf

Click mouse within plot area to zoom in by factor of two about that point

Or, Plot from  to  Da

Label all possible matches  Label matches used for scoring

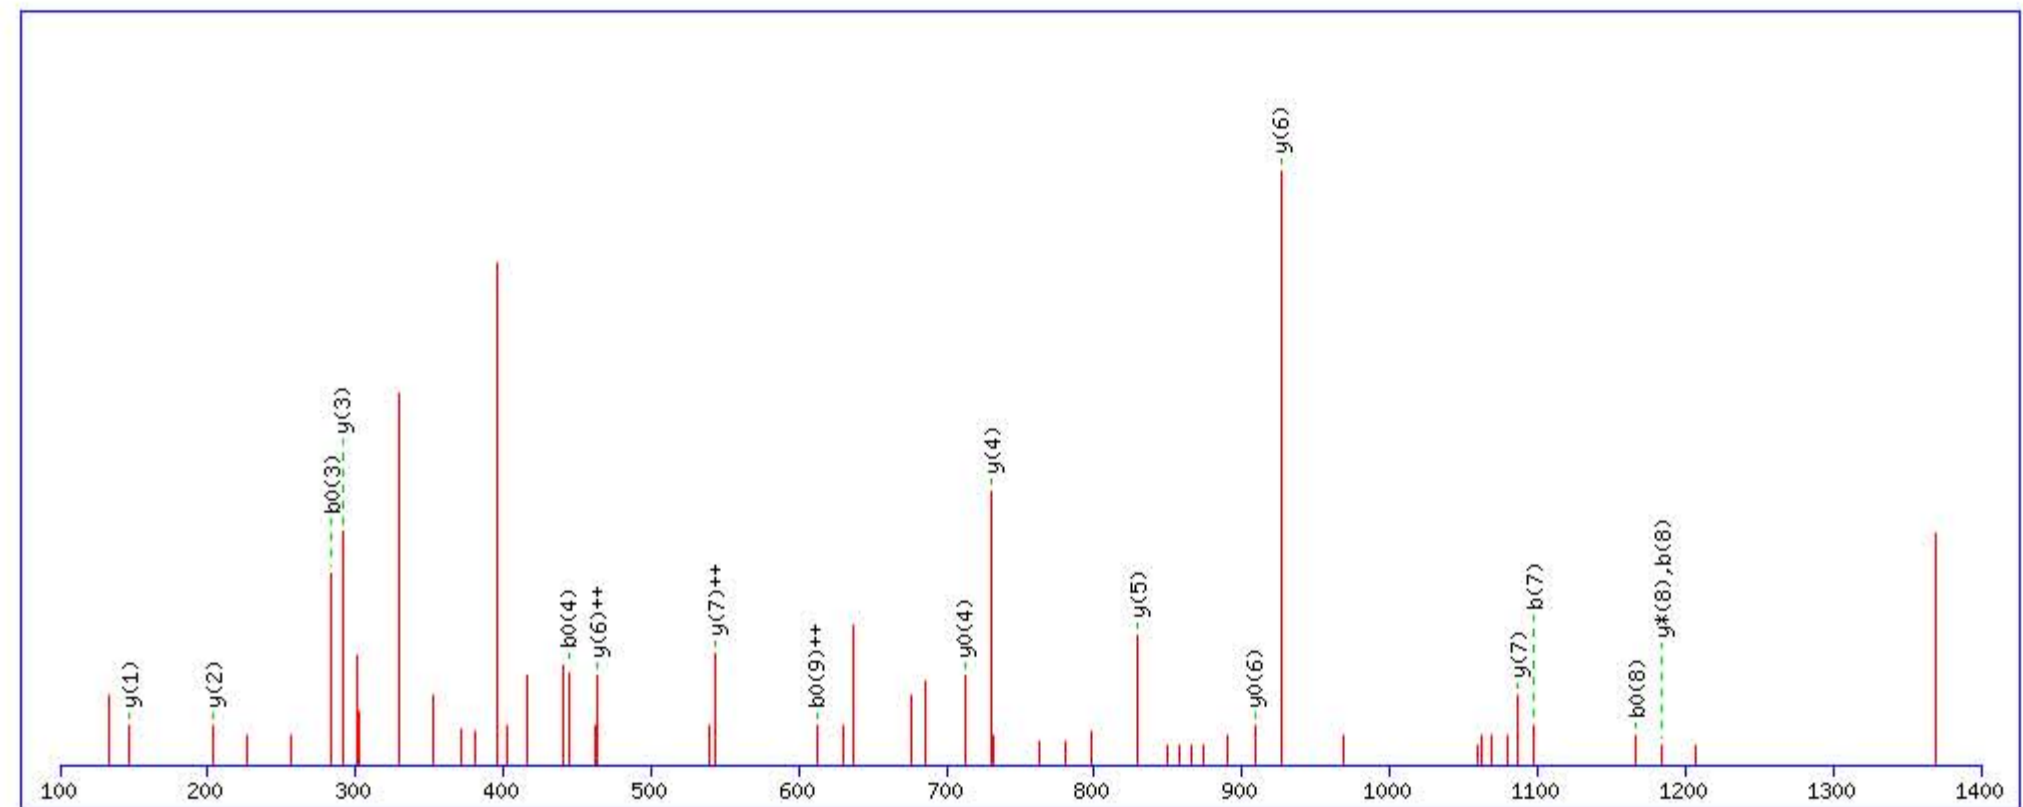

Monoisotopic mass of neutral peptide  $M_r(\text{calc})$ : 1386.627182

Fixed modifications: Carbamidomethyl (C) (apply to specified residues or termini only)

Variable modifications:

Q7 : Biotin:Thermo-21345 (Q)

Ions Score: 41 Expect: 0.00029

Matches : 18/92 fragment ions using 32 most intense peaks [\(help\)](#)

| #  | b           | b <sup>++</sup> | b <sup>*</sup> | b <sup>*++</sup> | b <sup>0</sup> | b <sup>0++</sup> | Seq. | y           | y <sup>++</sup> | y <sup>*</sup> | y <sup>*++</sup> | y <sup>0</sup> | y <sup>0++</sup> | #  |
|----|-------------|-----------------|----------------|------------------|----------------|------------------|------|-------------|-----------------|----------------|------------------|----------------|------------------|----|
| 1  | 130.049869  | 65.528572       |                |                  | 112.039304     | 56.523290        | E    |             |                 |                |                  |                |                  | 10 |
| 2  | 187.071333  | 94.039305       |                |                  | 169.060768     | 85.034022        | G    | 1258.591856 | 629.799566      | 1241.565307    | 621.286292       | 1240.581291    | 620.794284       | 9  |
| 3  | 302.098276  | 151.552776      |                |                  | 284.087711     | 142.547494       | D    | 1201.570392 | 601.288834      | 1184.543843    | 592.775560       | 1183.559827    | 592.283552       | 8  |
| 4  | 462.128925  | 231.568101      |                |                  | 444.118360     | 222.562818       | C    | 1086.543449 | 543.775363      | 1069.516900    | 535.262088       | 1068.532884    | 534.770080       | 7  |
| 5  | 559.181689  | 280.094483      |                |                  | 541.171124     | 271.089200       | P    | 926.512800  | 463.760038      | 909.486251     | 455.246764       | 908.502235     | 454.754756       | 6  |
| 6  | 658.250103  | 329.628690      |                |                  | 640.239538     | 320.623407       | V    | 829.460036  | 415.233656      | 812.433487     | 406.720382       | 811.449471     | 406.228374       | 5  |
| 7  | 1097.475429 | 549.241353      | 1080.448880    | 540.728078       | 1079.464864    | 540.236070       | Q    | 730.391622  | 365.699449      | 713.365073     | 357.186175       | 712.381057     | 356.694167       | 4  |
| 8  | 1184.507457 | 592.757367      | 1167.480908    | 584.244092       | 1166.496892    | 583.752084       | S    | 291.166296  | 146.086786      | 274.139747     | 137.573512       | 273.155731     | 137.081504       | 3  |
| 9  | 1241.528921 | 621.268099      | 1224.502372    | 612.754824       | 1223.518356    | 612.262816       | G    | 204.134268  | 102.570772      | 187.107719     | 94.057497        |                |                  | 2  |
| 10 |             |                 |                |                  |                |                  | K    | 147.112804  | 74.060040       | 130.086255     | 65.546765        |                |                  | 1  |

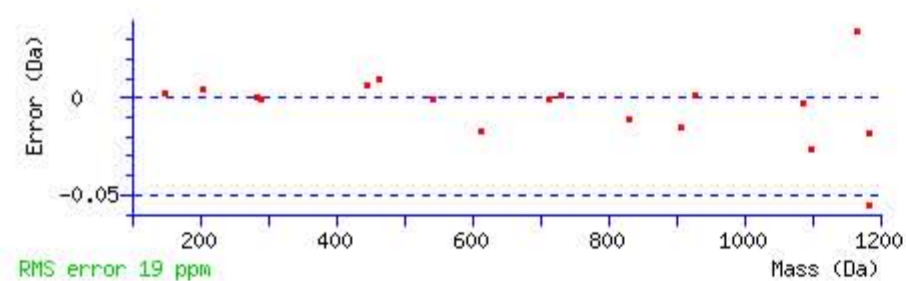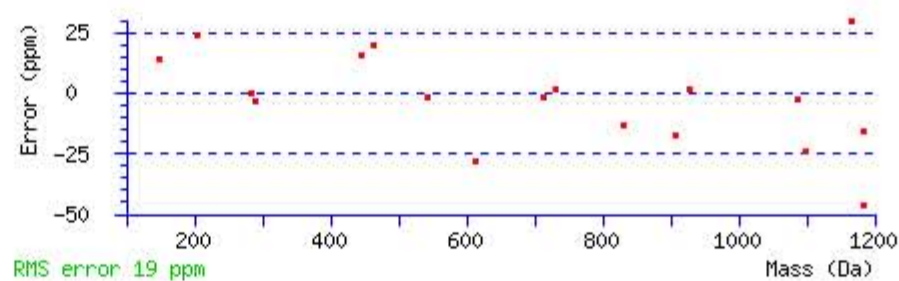

NCBI BLAST search of **EGDCPVQSGK**

(Parameters: blastp, nr protein database, expect=20000, no filter, PAM30)

Other BLAST [web gateways](#)

All matches to this query

| Score | $M_r(\text{calc})$ : | Delta     | Sequence                   |
|-------|----------------------|-----------|----------------------------|
| 40.5  | 1386.627182          | 0.004046  | <a href="#">EGDCPVQSGK</a> |
| 2.9   | 1386.650269          | -0.019041 | <a href="#">YRNFSYLHCK</a> |



# Mascot Search Results

## Peptide View

MS/MS Fragmentation of **TWQDCEYK**

Found in **KNG1\_HUMAN**, Kininogen-1 OS=Homo sapiens GN=KNG1 PE=1 SV=2

Match to Query 36673: 1439.633568 from(720.824060,2+) rtinseconds(1768) index(40538)

Title: Locus:1.1.1.2899.19 File:"2013-07-02 CLN FXIII 60 min 1st F 3.wiff"

Data file C:\Program Files (x86)\Matrix Science\Mascot Daemon\mgf\4 FXIII 60 min 1st\mascot\_daemon\_merge.mgf

Click mouse within plot area to zoom in by factor of two about that point

Or, Plot from  to  Da

Label all possible matches  Label matches used for scoring

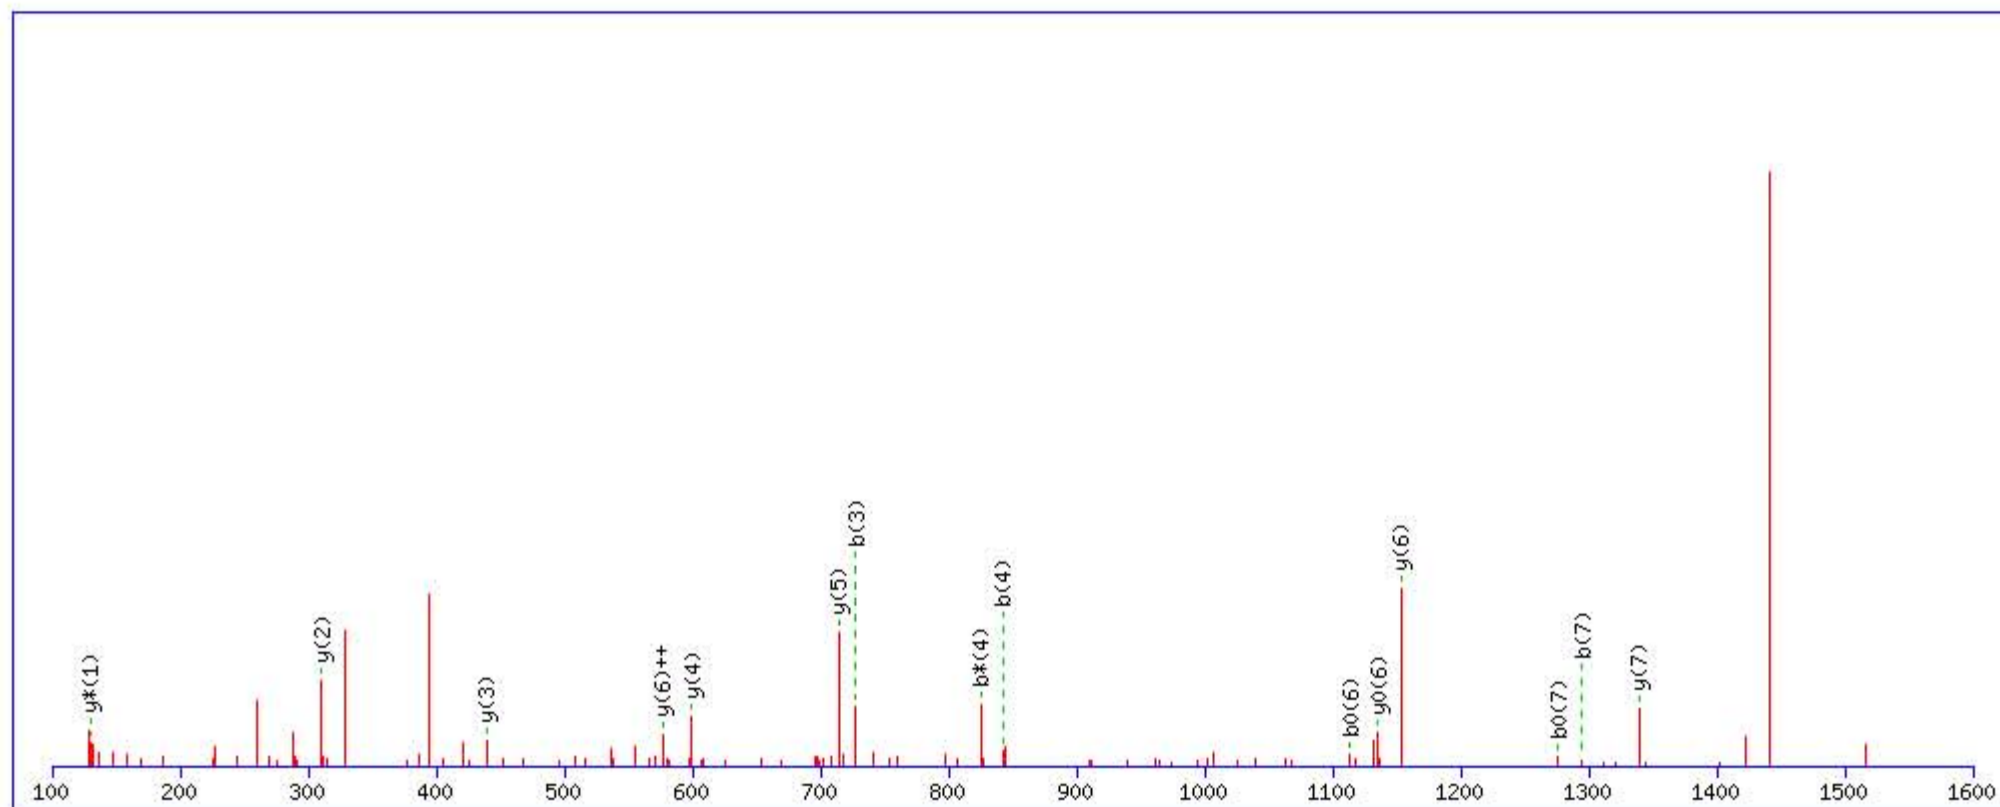

Monoisotopic mass of neutral peptide Mr(calc): 1439.621353

Fixed modifications: Carbamidomethyl (C) (apply to specified residues or termini only)

Variable modifications:

Q3 : Biotin:Thermo-21345 (Q)

Ions Score: 33 Expect: 0.0029

Matches : 15/76 fragment ions using 26 most intense peaks [\(help\)](#)

| # | b           | b <sup>++</sup> | b <sup>+</sup> | b <sup>+++</sup> | b <sup>0</sup> | b <sup>0++</sup> | Seq. | y           | y <sup>++</sup> | y <sup>+</sup> | y <sup>+++</sup> | y <sup>0</sup> | y <sup>0++</sup> | # |
|---|-------------|-----------------|----------------|------------------|----------------|------------------|------|-------------|-----------------|----------------|------------------|----------------|------------------|---|
| 1 | 102.054955  | 51.531116       |                |                  | 84.044390      | 42.525833        | T    |             |                 |                |                  |                |                  | 8 |
| 2 | 288.134268  | 144.570772      |                |                  | 270.123703     | 135.565490       | W    | 1339.580957 | 670.294117      | 1322.554408    | 661.780842       | 1321.570392    | 661.288834       | 7 |
| 3 | 727.359594  | 364.183435      | 710.333045     | 355.670161       | 709.349029     | 355.178153       | Q    | 1153.501644 | 577.254460      | 1136.475095    | 568.741186       | 1135.491079    | 568.249178       | 6 |
| 4 | 842.386537  | 421.696907      | 825.359988     | 413.183632       | 824.375972     | 412.691624       | D    | 714.276318  | 357.641797      | 697.249769     | 349.128523       | 696.265753     | 348.636515       | 5 |
| 5 | 1002.417186 | 501.712231      | 985.390637     | 493.198957       | 984.406621     | 492.706949       | C    | 599.249375  | 300.128326      | 582.222826     | 291.615051       | 581.238810     | 291.123043       | 4 |
| 6 | 1131.459779 | 566.233528      | 1114.433230    | 557.720253       | 1113.449214    | 557.228245       | E    | 439.218726  | 220.113001      | 422.192177     | 211.599727       | 421.208161     | 211.107719       | 3 |
| 7 | 1294.523108 | 647.765192      | 1277.496559    | 639.251918       | 1276.512543    | 638.759910       | Y    | 310.176133  | 155.591705      | 293.149584     | 147.078430       |                |                  | 2 |
| 8 |             |                 |                |                  |                |                  | K    | 147.112804  | 74.060040       | 130.086255     | 65.546765        |                |                  | 1 |

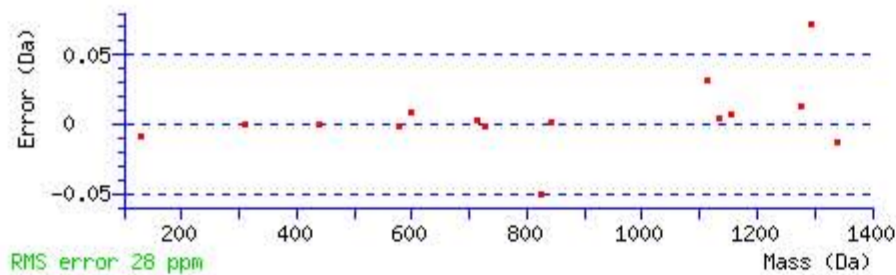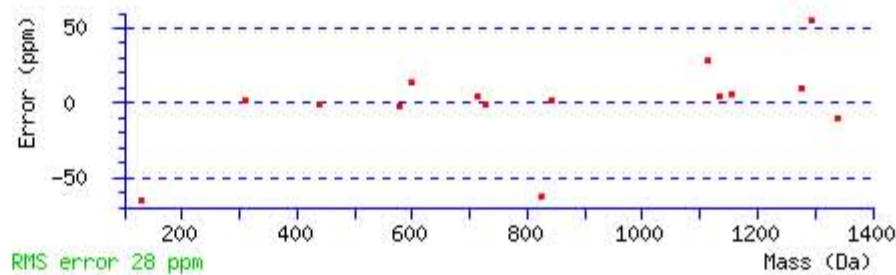

NCBI BLAST search of [TWQDCEYK](#)

(Parameters: blastp, nr protein database, expect=20000, no filter, PAM30)

Other BLAST [web gateways](#)

All matches to this query

| Score | Mr(calc):   | Delta    | Sequence                 |
|-------|-------------|----------|--------------------------|
| 33.1  | 1439.621353 | 0.012215 | <a href="#">TWQDCEYK</a> |



# MASCOT Search Results

## Peptide View

MS/MS Fragmentation of **SVSEINPTTQMK**

Found in **KNG1\_HUMAN**, Kininogen-1 OS=Homo sapiens GN=KNG1 PE=1 SV=2

Match to Query 44488: 1644.832968 from(823.423760,2+) rtinseconds(1816) index(40828)

Title: Locus:1.1.1.2916.11 File:"2013-07-02 CLN FXIII 60 min 1st F 3.wiff"

Data file C:\Program Files (x86)\Matrix Science\Mascot Daemon\mgf4 FXIII 60 min 1st\mascot\_daemon\_merge.mgf

Click mouse within plot area to zoom in by factor of two about that point

Or, Plot from  to  Da

Label all possible matches  Label matches used for scoring

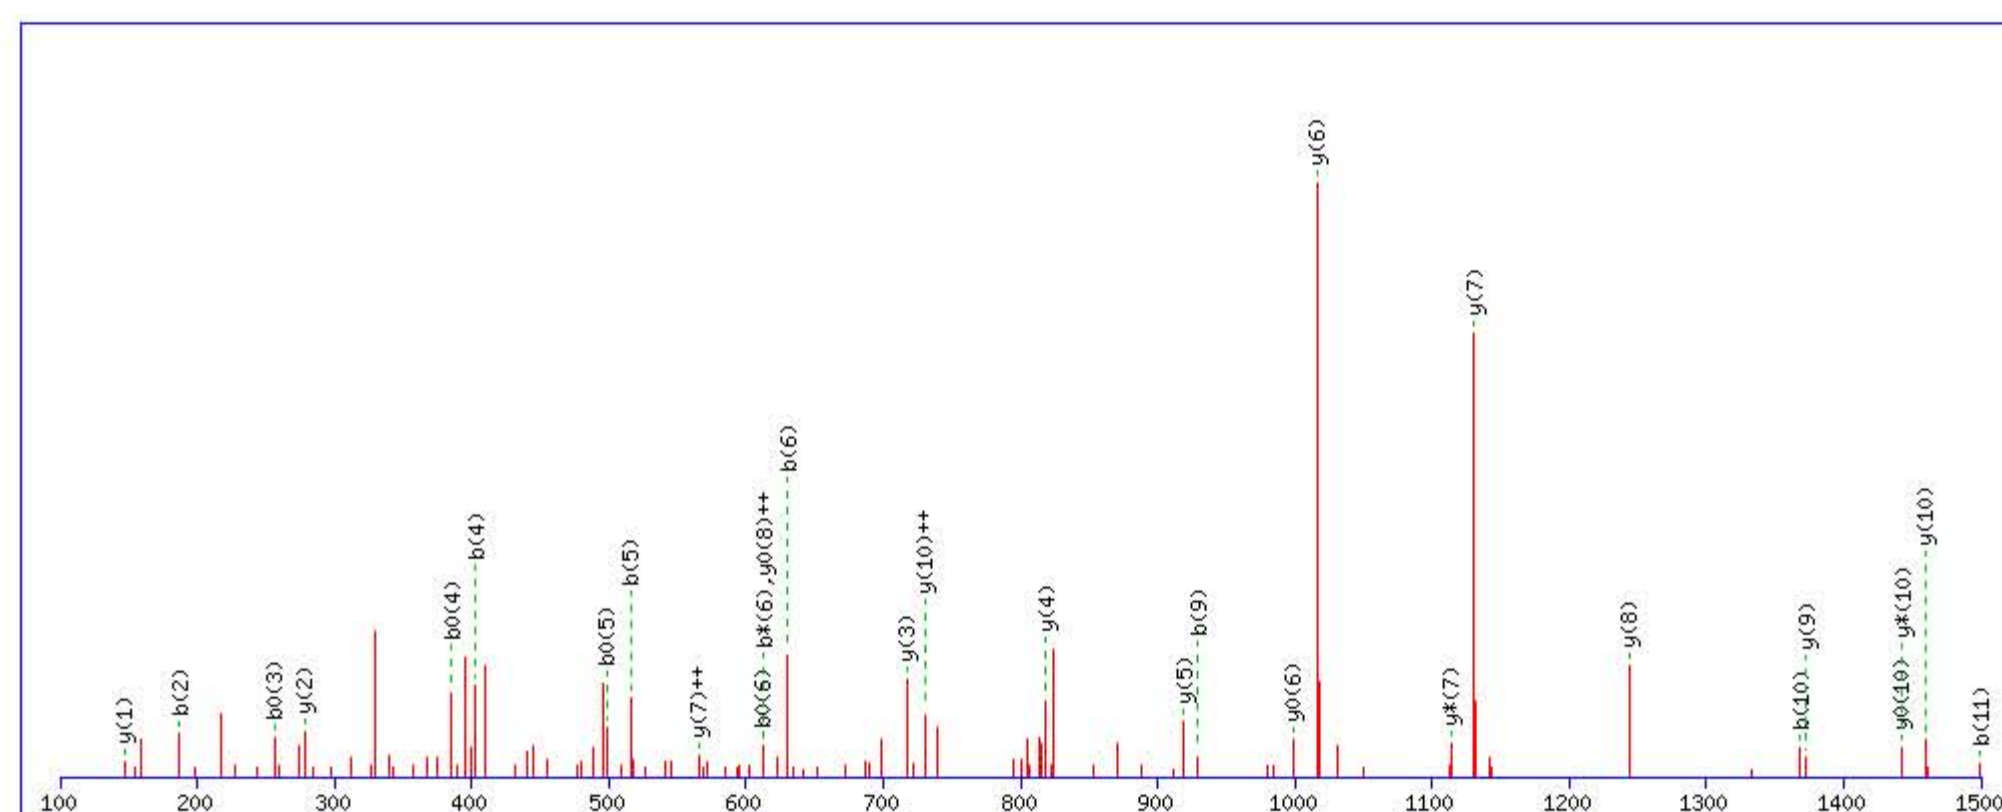

Monoisotopic mass of neutral peptide Mr(calc): 1644.821503

Fixed modifications: Carbamidomethyl (C) (apply to specified residues or termini only)

Variable modifications:

Q10 : Biotin:Thermo-21345 (Q)

Ions Score: 65 Expect: 1.6e-006

Matches : 29/116 fragment ions using 50 most intense peaks [\(help\)](#)

| #  | b                  | b <sup>++</sup> | b <sup>*</sup>    | b <sup>*++</sup> | b <sup>0</sup>    | b <sup>0++</sup> | Seq. | y                  | y <sup>++</sup>   | y <sup>*</sup>     | y <sup>*++</sup> | y <sup>0</sup>     | y <sup>0++</sup>  | #  |
|----|--------------------|-----------------|-------------------|------------------|-------------------|------------------|------|--------------------|-------------------|--------------------|------------------|--------------------|-------------------|----|
| 1  | 88.039304          | 44.523290       |                   |                  | 70.028739         | 35.518008        | S    |                    |                   |                    |                  |                    |                   | 12 |
| 2  | <b>187.107718</b>  | 94.057497       |                   |                  | 169.097153        | 85.052214        | V    | 1558.796763        | 779.902020        | 1541.770214        | 771.388745       | 1540.786198        | 770.896737        | 11 |
| 3  | 274.139746         | 137.573511      |                   |                  | <b>256.129181</b> | 128.568229       | S    | <b>1459.728349</b> | <b>730.367813</b> | <b>1442.701800</b> | 721.854538       | <b>1441.717784</b> | 721.362530        | 10 |
| 4  | <b>403.182339</b>  | 202.094808      |                   |                  | <b>385.171774</b> | 193.089525       | E    | <b>1372.696321</b> | 686.851799        | 1355.669772        | 678.338524       | 1354.685756        | 677.846516        | 9  |
| 5  | <b>516.266403</b>  | 258.636840      |                   |                  | <b>498.255838</b> | 249.631557       | I    | <b>1243.653728</b> | 622.330502        | 1226.627179        | 613.817228       | 1225.643163        | <b>613.325220</b> | 8  |
| 6  | <b>630.309330</b>  | 315.658303      | <b>613.282781</b> | 307.145029       | <b>612.298765</b> | 306.653021       | N    | <b>1130.569664</b> | <b>565.788470</b> | <b>1113.543115</b> | 557.275196       | 1112.559099        | 556.783188        | 7  |
| 7  | 727.362094         | 364.184685      | 710.335545        | 355.671411       | 709.351529        | 355.179403       | P    | <b>1016.526737</b> | 508.767007        | 999.500188         | 500.253732       | <b>998.516172</b>  | 499.761724        | 6  |
| 8  | 828.409773         | 414.708525      | 811.383224        | 406.195250       | 810.399208        | 405.703242       | T    | <b>919.473973</b>  | 460.240625        | 902.447424         | 451.727350       | 901.463408         | 451.235342        | 5  |
| 9  | <b>929.457452</b>  | 465.232364      | 912.430903        | 456.719090       | 911.446887        | 456.227082       | T    | <b>818.426294</b>  | 409.716785        | 801.399745         | 401.203511       | 800.415729         | 400.711503        | 4  |
| 10 | <b>1368.682778</b> | 684.845027      | 1351.656229       | 676.331753       | 1350.672213       | 675.839745       | Q    | <b>717.378615</b>  | 359.192946        | 700.352066         | 350.679671       |                    |                   | 3  |
| 11 | <b>1499.723263</b> | 750.365270      | 1482.696714       | 741.851995       | 1481.712698       | 741.359987       | M    | <b>278.153289</b>  | 139.580282        | 261.126740         | 131.067008       |                    |                   | 2  |
| 12 |                    |                 |                   |                  |                   |                  | K    | <b>147.112804</b>  | 74.060040         | 130.086255         | 65.546765        |                    |                   | 1  |

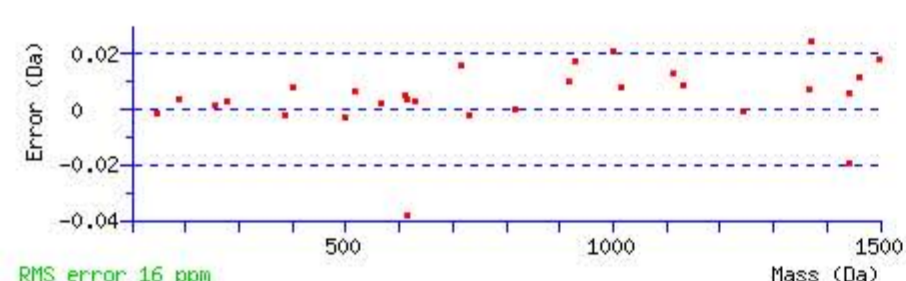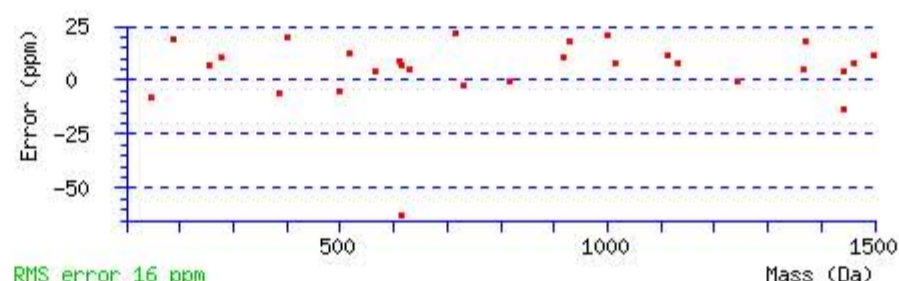

NCBI BLAST search of **SVSEINPTTQMK**

(Parameters: blastp, nr protein database, expect=20000, no filter, PAM30)

Other BLAST [web gateways](#)

All matches to this query

| Score | Mr(calc):   | Delta     | Sequence                        |
|-------|-------------|-----------|---------------------------------|
| 64.8  | 1644.821503 | 0.011465  | <a href="#">SVSEINPTTQMK</a>    |
| 2.8   | 1644.847092 | -0.014124 | <a href="#">LLSAIYSKQENHDK</a>  |
| 0.8   | 1644.810745 | 0.022223  | <a href="#">VSDGENVIISHFNSK</a> |

Mascot: <http://www.matrixscience.com/>



# MASCOT Search Results

## Peptide View

MS/MS Fragmentation of **YNSQNQSNNQFVLYR**

Found in **KNG1\_HUMAN**, Kininogen-1 OS=Homo sapiens GN=KNG1 PE=1 SV=2

Match to Query 57849: 2185.065342 from(729.362390,3+) rtinseconds(2106) index(42779)

Title: Locus:1.1.1.3017.16 File:"2013-07-02 CLN FXIII 60 min 1st F 3.wiff"

Data file C:\Program Files (x86)\Matrix Science\Mascot Daemon\mgf4 FXIII 60 min 1st\mascot\_daemon\_merge.mgf

Click mouse within plot area to zoom in by factor of two about that point

Or, Plot from  to  Da

Label all possible matches  Label matches used for scoring

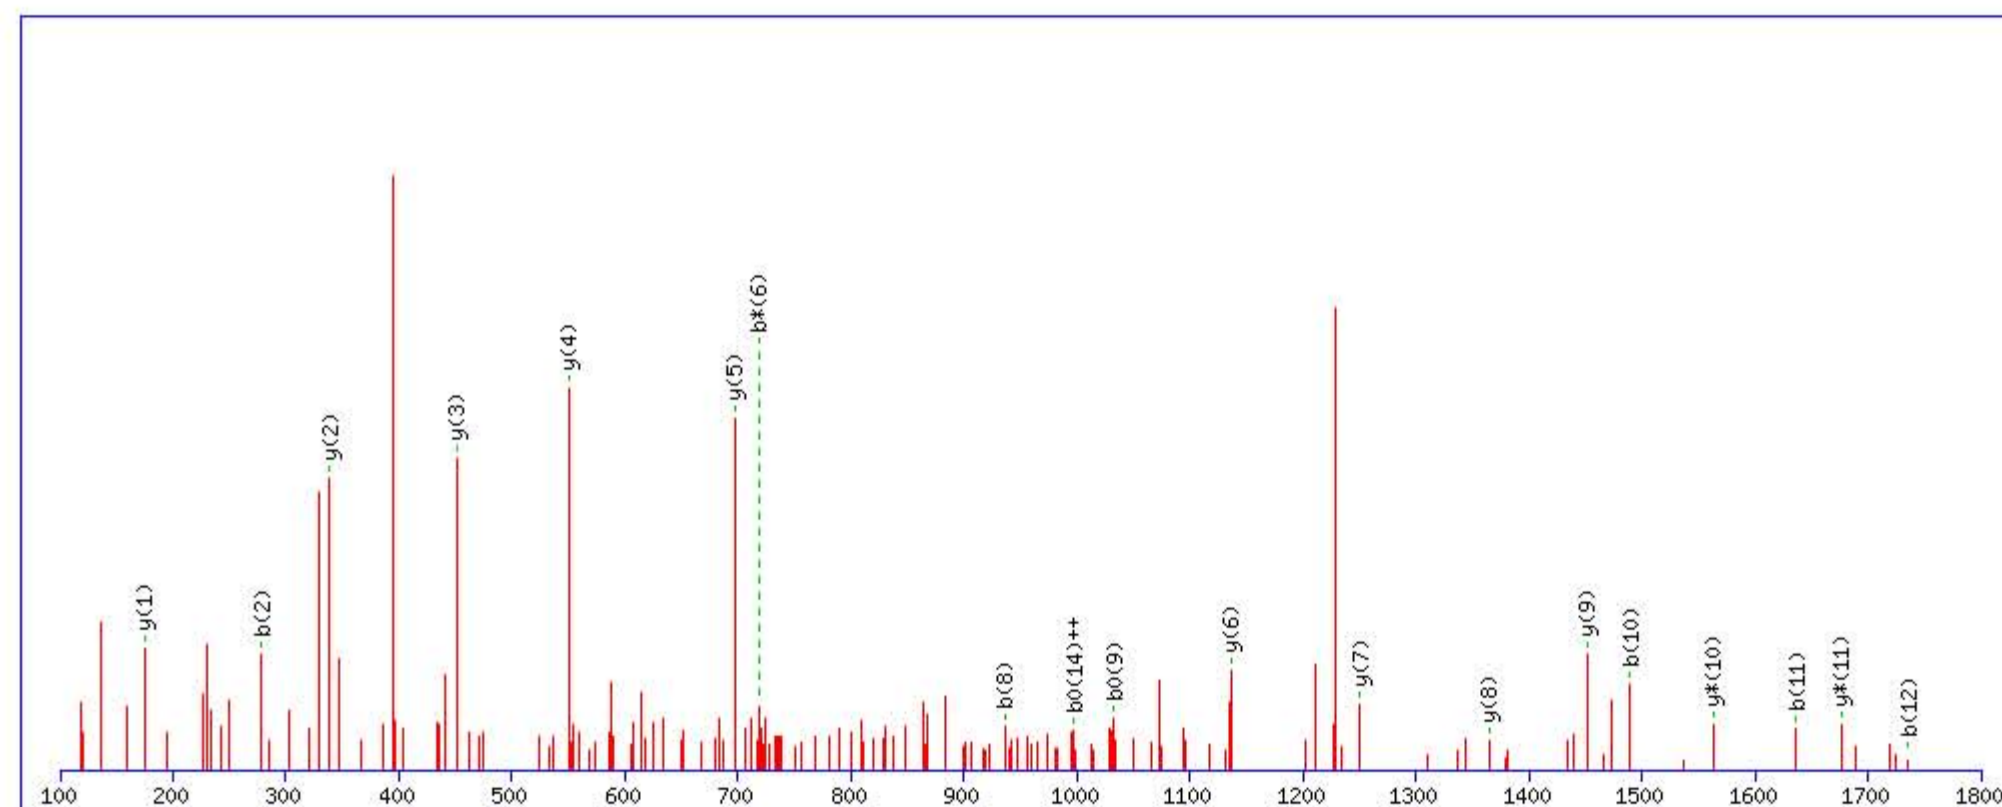

Monoisotopic mass of neutral peptide Mr(calc): 2185.037445

Fixed modifications: Carbamidomethyl (C) (apply to specified residues or termini only)

Variable modifications:

Q10 : Biotin:Thermo-21345 (Q)

Ions Score: 47 Expect: 0.0004

Matches : 19/146 fragment ions using 34 most intense peaks [\(help\)](#)

| #  | b                  | b <sup>++</sup> | b*                | b <sup>+++</sup> | b <sup>0</sup>     | b <sup>0++</sup>  | Seq. | y                  | y <sup>++</sup> | y*                 | y <sup>+++</sup> | y <sup>0</sup> | y <sup>0++</sup> | #  |
|----|--------------------|-----------------|-------------------|------------------|--------------------|-------------------|------|--------------------|-----------------|--------------------|------------------|----------------|------------------|----|
| 1  | 164.070605         | 82.538940       |                   |                  |                    |                   | Y    |                    |                 |                    |                  |                |                  | 15 |
| 2  | <b>278.113532</b>  | 139.560404      | 261.086983        | 131.047130       |                    |                   | N    | 2022.981419        | 1011.994348     | 2005.954870        | 1003.481073      | 2004.970854    | 1002.989065      | 14 |
| 3  | 365.145560         | 183.076418      | 348.119011        | 174.563144       | 347.134995         | 174.071136        | S    | 1908.938492        | 954.972884      | 1891.911943        | 946.459610       | 1890.927927    | 945.967602       | 13 |
| 4  | 493.204138         | 247.105707      | 476.177589        | 238.592433       | 475.193573         | 238.100425        | Q    | 1821.906464        | 911.456870      | 1804.879915        | 902.943596       | 1803.895899    | 902.451588       | 12 |
| 5  | 607.247065         | 304.127171      | 590.220516        | 295.613896       | 589.236500         | 295.121888        | N    | 1693.847886        | 847.427581      | <b>1676.821337</b> | 838.914307       | 1675.837321    | 838.422299       | 11 |
| 6  | 735.305643         | 368.156460      | <b>718.279094</b> | 359.643185       | 717.295078         | 359.151177        | Q    | 1579.804959        | 790.406118      | <b>1562.778410</b> | 781.892843       | 1561.794394    | 781.400835       | 10 |
| 7  | 822.337671         | 411.672474      | 805.311122        | 403.159199       | 804.327106         | 402.667191        | S    | <b>1451.746381</b> | 726.376829      | 1434.719832        | 717.863554       | 1433.735816    | 717.371546       | 9  |
| 8  | <b>936.380598</b>  | 468.693937      | 919.354049        | 460.180662       | 918.370033         | 459.688654        | N    | <b>1364.714353</b> | 682.860815      | 1347.687804        | 674.347540       |                |                  | 8  |
| 9  | 1050.423525        | 525.715400      | 1033.396976       | 517.202126       | <b>1032.412960</b> | 516.710118        | N    | <b>1250.671426</b> | 625.839351      | 1233.644877        | 617.326077       |                |                  | 7  |
| 10 | <b>1489.648851</b> | 745.328064      | 1472.622302       | 736.814789       | 1471.638286        | 736.322781        | Q    | <b>1136.628499</b> | 568.817888      | 1119.601950        | 560.304613       |                |                  | 6  |
| 11 | <b>1636.717265</b> | 818.862271      | 1619.690716       | 810.348996       | 1618.706700        | 809.856988        | F    | <b>697.403173</b>  | 349.205225      | 680.376624         | 340.691950       |                |                  | 5  |
| 12 | <b>1735.785679</b> | 868.396478      | 1718.759130       | 859.883203       | 1717.775114        | 859.391195        | V    | <b>550.334759</b>  | 275.671018      | 533.308210         | 267.157743       |                |                  | 4  |
| 13 | 1848.869743        | 924.938510      | 1831.843194       | 916.425235       | 1830.859178        | 915.933227        | L    | <b>451.266345</b>  | 226.136811      | 434.239796         | 217.623536       |                |                  | 3  |
| 14 | 2011.933072        | 1006.470174     | 1994.906523       | 997.956900       | 1993.922507        | <b>997.464892</b> | Y    | <b>338.182281</b>  | 169.594779      | 321.155732         | 161.081504       |                |                  | 2  |
| 15 |                    |                 |                   |                  |                    |                   | R    | <b>175.118952</b>  | 88.063114       | 158.092403         | 79.549840        |                |                  | 1  |

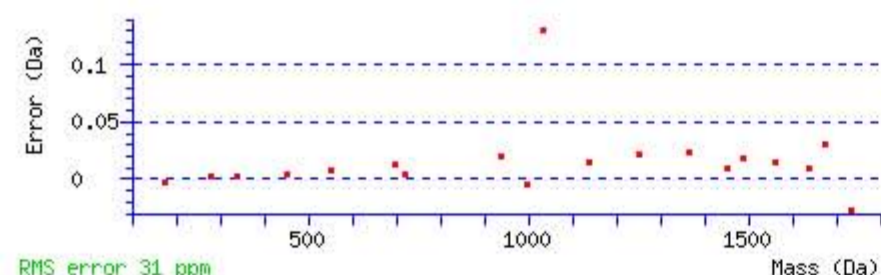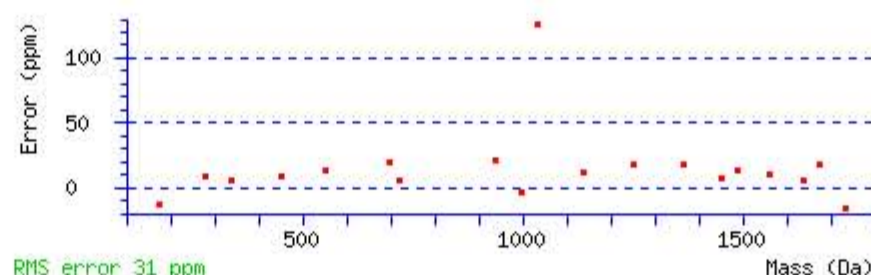

NCBI BLAST search of [YNSQNQSNNQFVLYR](#)

(Parameters: blastp, nr protein database, expect=20000, no filter, PAM30)

Other BLAST [web gateways](#)

All matches to this query

| Score | Mr(calc):   | Delta    | Sequence                        |
|-------|-------------|----------|---------------------------------|
| 47.4  | 2185.037445 | 0.027897 | <a href="#">YNSQNQSNNQFVLYR</a> |
| 12.3  | 2185.037445 | 0.027897 | <a href="#">YNSQNQSNNQFVLYR</a> |
| 12.2  | 2185.037445 | 0.027897 | <a href="#">YNSQNQSNNQFVLYR</a> |

Mascot: <http://www.matrixscience.com/>



# Mascot Search Results

## Peptide View

MS/MS Fragmentation of **GHGLGHGHEQQHGLGHGHK**

Found in **KNG1\_HUMAN**, Kininogen-1 OS=Homo sapiens GN=KNG1 PE=1 SV=2

Match to Query 60482: 2290.104656 from(573.533440,4+) rtinseconds(754) index(35417)

Title: Locus:1.1.1.2466.3 File:"2013-07-02 CLN FXIII 60 min 1st F 3.wiff"

Data file C:\Program Files (x86)\Matrix Science\Mascot Daemon\mgf4 FXIII 60 min 1st\mascot\_daemon\_merge.mgf

Click mouse within plot area to zoom in by factor of two about that point

Or, Plot from  to  Da

Label all possible matches  Label matches used for scoring

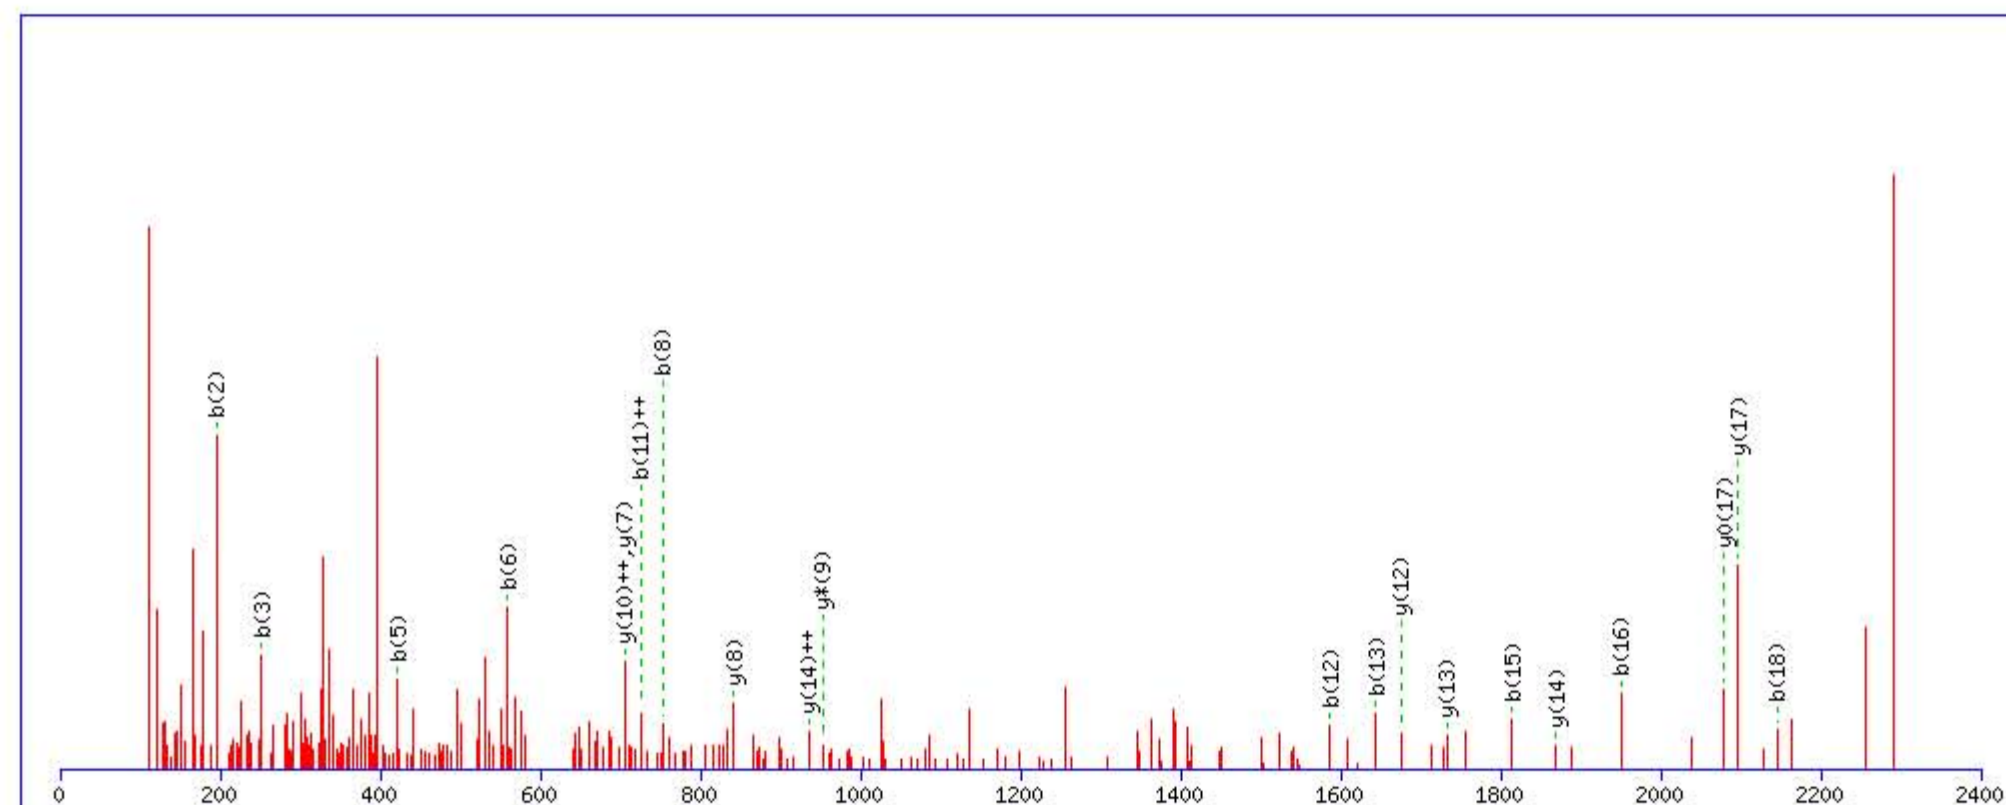

Monoisotopic mass of neutral peptide Mr(calc): 2290.103897

Fixed modifications: Carbamidomethyl (C) (apply to specified residues or termini only)

Variable modifications:

Q10 : Biotin:Thermo-21345 (Q)

Ions Score: 48 Expect: 0.0004

Matches : 21/162 fragment ions using 42 most intense peaks [\(help\)](#)

| #  | b                  | b <sup>++</sup>   | b <sup>*</sup> | b <sup>+++</sup> | b <sup>0</sup> | b <sup>0++</sup> | Seq. | y                  | y <sup>++</sup>   | y <sup>*</sup>    | y <sup>+++</sup> | y <sup>0</sup>     | y <sup>0++</sup> | #  |
|----|--------------------|-------------------|----------------|------------------|----------------|------------------|------|--------------------|-------------------|-------------------|------------------|--------------------|------------------|----|
| 1  | 58.028740          | 29.518008         |                |                  |                |                  | G    |                    |                   |                   |                  |                    |                  | 19 |
| 2  | <b>195.087652</b>  | 98.047464         |                |                  |                |                  | H    | 2234.089685        | 1117.548480       | 2217.063136       | 1109.035206      | 2216.079120        | 1108.543198      | 18 |
| 3  | <b>252.109116</b>  | 126.558196        |                |                  |                |                  | G    | <b>2097.030773</b> | 1049.019024       | 2080.004224       | 1040.505750      | <b>2079.020208</b> | 1040.013742      | 17 |
| 4  | 365.193180         | 183.100228        |                |                  |                |                  | L    | 2040.009309        | 1020.508293       | 2022.982760       | 1011.995018      | 2021.998744        | 1011.503010      | 16 |
| 5  | <b>422.214644</b>  | 211.610960        |                |                  |                |                  | G    | 1926.925245        | 963.966261        | 1909.898696       | 955.452986       | 1908.914680        | 954.960978       | 15 |
| 6  | <b>559.273556</b>  | 280.140416        |                |                  |                |                  | H    | <b>1869.903781</b> | <b>935.455529</b> | 1852.877232       | 926.942254       | 1851.893216        | 926.450246       | 14 |
| 7  | 616.295020         | 308.651148        |                |                  |                |                  | G    | <b>1732.844869</b> | 866.926073        | 1715.818320       | 858.412798       | 1714.834304        | 857.920790       | 13 |
| 8  | <b>753.353932</b>  | 377.180604        |                |                  |                |                  | H    | <b>1675.823405</b> | 838.415341        | 1658.796856       | 829.902066       | 1657.812840        | 829.410058       | 12 |
| 9  | 882.396525         | 441.701901        |                |                  | 864.385960     | 432.696618       | E    | 1538.764493        | 769.885885        | 1521.737944       | 761.372610       | 1520.753928        | 760.880602       | 11 |
| 10 | 1321.621851        | 661.314564        | 1304.595302    | 652.801289       | 1303.611286    | 652.309281       | Q    | 1409.721900        | <b>705.364588</b> | 1392.695351       | 696.851314       |                    |                  | 10 |
| 11 | 1449.680429        | <b>725.343853</b> | 1432.653880    | 716.830578       | 1431.669864    | 716.338570       | Q    | 970.496574         | 485.751925        | <b>953.470025</b> | 477.238651       |                    |                  | 9  |
| 12 | <b>1586.739341</b> | 793.873309        | 1569.712792    | 785.360034       | 1568.728776    | 784.868026       | H    | <b>842.437996</b>  | 421.722636        | 825.411447        | 413.209361       |                    |                  | 8  |
| 13 | <b>1643.760805</b> | 822.384041        | 1626.734256    | 813.870766       | 1625.750240    | 813.378758       | G    | <b>705.379084</b>  | 353.193180        | 688.352535        | 344.679905       |                    |                  | 7  |
| 14 | 1756.844869        | 878.926073        | 1739.818320    | 870.412798       | 1738.834304    | 869.920790       | L    | 648.357620         | 324.682448        | 631.331071        | 316.169174       |                    |                  | 6  |
| 15 | <b>1813.866333</b> | 907.436804        | 1796.839784    | 898.923530       | 1795.855768    | 898.431522       | G    | 535.273556         | 268.140416        | 518.247007        | 259.627142       |                    |                  | 5  |
| 16 | <b>1950.925245</b> | 975.966260        | 1933.898696    | 967.452986       | 1932.914680    | 966.960978       | H    | 478.252092         | 239.629684        | 461.225543        | 231.116410       |                    |                  | 4  |
| 17 | 2007.946709        | 1004.476992       | 1990.920160    | 995.963718       | 1989.936144    | 995.471710       | G    | 341.193180         | 171.100228        | 324.166631        | 162.586954       |                    |                  | 3  |
| 18 | <b>2145.005621</b> | 1073.006448       | 2127.979072    | 1064.493174      | 2126.995056    | 1064.001166      | H    | 284.171716         | 142.589496        | 267.145167        | 134.076222       |                    |                  | 2  |
| 19 |                    |                   |                |                  |                |                  | K    | 147.112804         | 74.060040         | 130.086255        | 65.546765        |                    |                  | 1  |

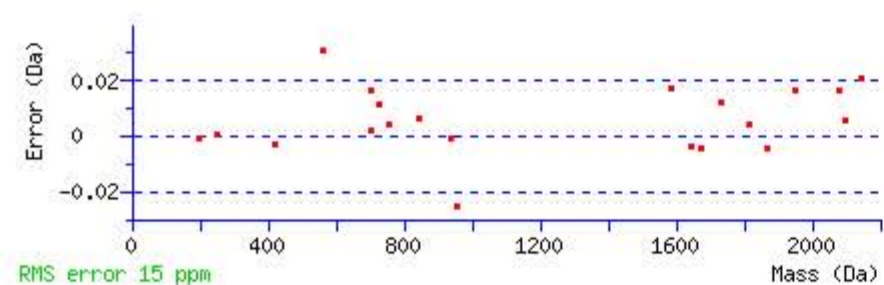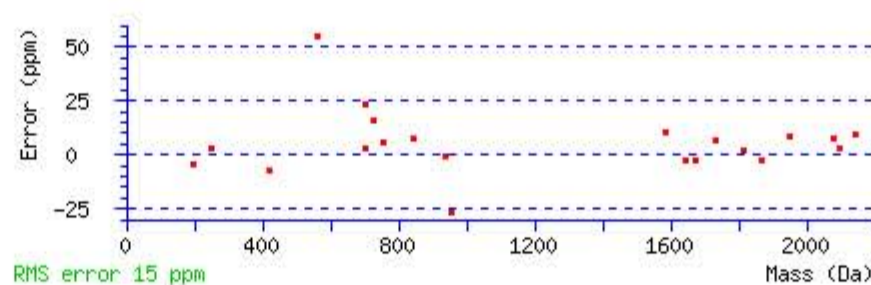

NCBI BLAST search of [GHGLGHGHEQQHGLGHGHK](#)

(Parameters: blastp, nr protein database, expect=20000, no filter, PAM30)

Other BLAST [web gateways](#)

All matches to this query

| Score | Mr(calc):   | Delta    | Sequence                            |
|-------|-------------|----------|-------------------------------------|
| 47.7  | 2290.103897 | 0.000759 | <a href="#">GHGLGHGHEQQHGLGHGHK</a> |
| 46.0  | 2290.103897 | 0.000759 | <a href="#">GHGLGHGHEQQHGLGHGHK</a> |



# MASCOT Search Results

## Peptide View

MS/MS Fragmentation of **FKLDDDDLEHQGGHVLDDHGK**  
 Found in **KNG1\_HUMAN**, Kininogen-1 OS=Homo sapiens GN=KNG1 PE=1 SV=2

Match to Query 66683: 2607.273616 from(652.825680,4+) rtinseconds(1707) index(40132)  
 Title: Locus:1.1.1.2878.11 File:"2013-07-02 CLN FXIII 60 min 1st F 3.wiff"  
 Data file C:\Program Files (x86)\Matrix Science\Mascot Daemon\mgf4 FXIII 60 min 1st\mascot\_daemon\_merge.mgf

Click mouse within plot area to zoom in by factor of two about that point  
 Or, Plot from  to  Da   
 Label all possible matches  Label matches used for scoring

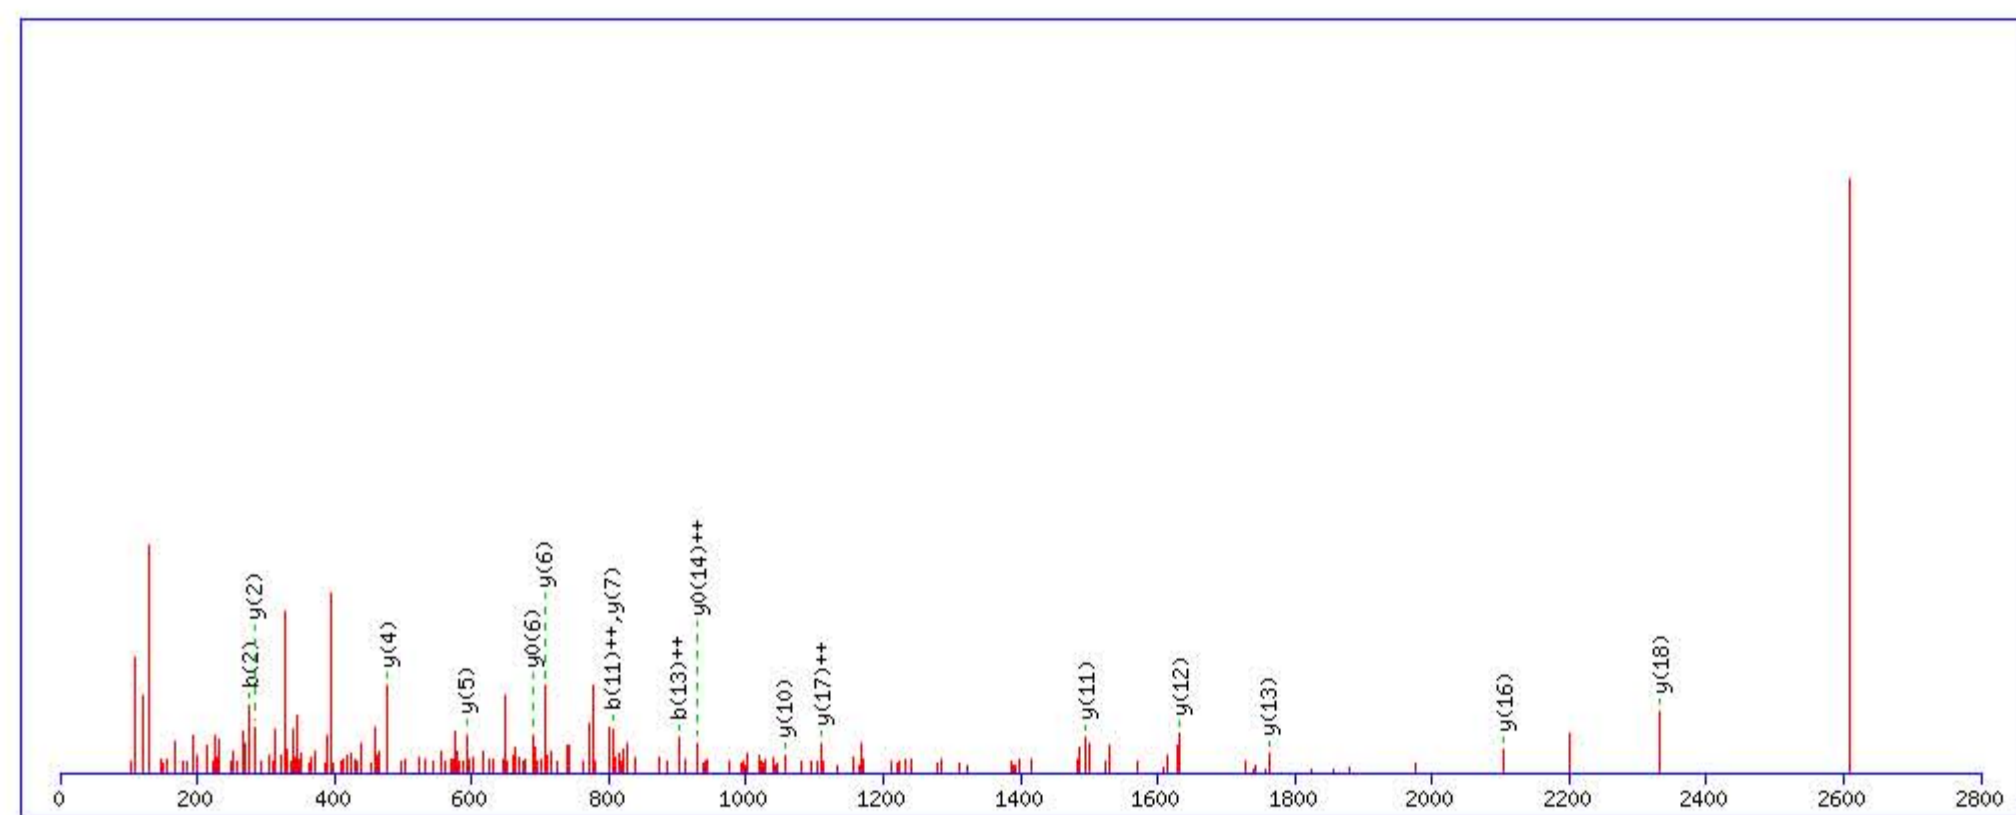

Monoisotopic mass of neutral peptide Mr(calc): 2607.265259  
 Fixed modifications: Carbamidomethyl (C) (apply to specified residues or termini only)  
 Variable modifications:  
 Q10 : Biotin:Thermo-21345 (Q)  
 Ions Score: 41 Expect: 0.00017  
 Matches : 17/212 fragment ions using 40 most intense peaks [\(help\)](#)

| #  | b                 | b <sup>++</sup>   | b <sup>*</sup> | b <sup>*++</sup> | b <sup>0</sup> | b <sup>0++</sup> | Seq. | y                  | y <sup>++</sup>    | y <sup>*</sup> | y <sup>*++</sup> | y <sup>0</sup>    | y <sup>0++</sup>  | #  |
|----|-------------------|-------------------|----------------|------------------|----------------|------------------|------|--------------------|--------------------|----------------|------------------|-------------------|-------------------|----|
| 1  | 148.075690        | 74.541483         |                |                  |                |                  | F    |                    |                    |                |                  |                   |                   | 20 |
| 2  | <b>276.170653</b> | 138.588964        | 259.144104     | 130.075690       |                |                  | K    | 2461.204104        | 1231.105690        | 2444.177555    | 1222.592415      | 2443.193539       | 1222.100407       | 19 |
| 3  | 389.254717        | 195.130996        | 372.228168     | 186.617722       |                |                  | L    | <b>2333.109141</b> | 1167.058208        | 2316.082592    | 1158.544934      | 2315.098576       | 1158.052926       | 18 |
| 4  | 504.281660        | 252.644468        | 487.255111     | 244.131193       | 486.271095     | 243.639186       | D    | 2220.025077        | <b>1110.516176</b> | 2202.998528    | 1102.002902      | 2202.014512       | 1101.510894       | 17 |
| 5  | 619.308603        | 310.157940        | 602.282054     | 301.644665       | 601.298038     | 301.152657       | D    | <b>2104.998134</b> | 1053.002705        | 2087.971585    | 1044.489430      | 2086.987569       | 1043.997422       | 16 |
| 6  | 734.335546        | 367.671411        | 717.308997     | 359.158137       | 716.324981     | 358.666129       | D    | 1989.971191        | 995.489233         | 1972.944642    | 986.975959       | 1971.960626       | 986.483951        | 15 |
| 7  | 847.419610        | 424.213443        | 830.393061     | 415.700169       | 829.409045     | 415.208161       | L    | 1874.944248        | 937.975762         | 1857.917699    | 929.462487       | 1856.933683       | <b>928.970479</b> | 14 |
| 8  | 976.462203        | 488.734740        | 959.435654     | 480.221465       | 958.451638     | 479.729457       | E    | <b>1761.860184</b> | 881.433730         | 1744.833635    | 872.920455       | 1743.849619       | 872.428447        | 13 |
| 9  | 1113.521115       | 557.264196        | 1096.494566    | 548.750921       | 1095.510550    | 548.258913       | H    | <b>1632.817591</b> | 816.912433         | 1615.791042    | 808.399159       | 1614.807026       | 807.907151        | 12 |
| 10 | 1552.746441       | 776.876859        | 1535.719892    | 768.363584       | 1534.735876    | 767.871576       | Q    | <b>1495.758679</b> | 748.382977         | 1478.732130    | 739.869703       | 1477.748114       | 739.377695        | 11 |
| 11 | 1609.767905       | <b>805.387590</b> | 1592.741356    | 796.874316       | 1591.757340    | 796.382308       | G    | <b>1056.533353</b> | 528.770314         | 1039.506804    | 520.257040       | 1038.522788       | 519.765032        | 10 |
| 12 | 1666.789369       | 833.898322        | 1649.762820    | 825.385048       | 1648.778804    | 824.893040       | G    | 999.511889         | 500.259582         | 982.485340     | 491.746308       | 981.501324        | 491.254300        | 9  |
| 13 | 1803.848281       | <b>902.427778</b> | 1786.821732    | 893.914504       | 1785.837716    | 893.422496       | H    | 942.490425         | 471.748850         | 925.463876     | 463.235576       | 924.479860        | 462.743568        | 8  |
| 14 | 1902.916695       | 951.961985        | 1885.890146    | 943.448711       | 1884.906130    | 942.956703       | V    | <b>805.431513</b>  | 403.219394         | 788.404964     | 394.706120       | 787.420948        | 394.214112        | 7  |
| 15 | 2016.000759       | 1008.504017       | 1998.974210    | 999.990743       | 1997.990194    | 999.498735       | L    | <b>706.363099</b>  | 353.685187         | 689.336550     | 345.171913       | <b>688.352534</b> | 344.679905        | 6  |
| 16 | 2131.027702       | 1066.017489       | 2114.001153    | 1057.504214      | 2113.017137    | 1057.012206      | D    | <b>593.279035</b>  | 297.143155         | 576.252486     | 288.629881       | 575.268470        | 288.137873        | 5  |
| 17 | 2268.086614       | 1134.546945       | 2251.060065    | 1126.033670      | 2250.076049    | 1125.541662      | H    | <b>478.252092</b>  | 239.629684         | 461.225543     | 231.116409       |                   |                   | 4  |
| 18 | 2325.108078       | 1163.057677       | 2308.081529    | 1154.544402      | 2307.097513    | 1154.052394      | G    | 341.193180         | 171.100228         | 324.166631     | 162.586953       |                   |                   | 3  |
| 19 | 2462.166990       | 1231.587133       | 2445.140441    | 1223.073858      | 2444.156425    | 1222.581850      | H    | <b>284.171716</b>  | 142.589496         | 267.145167     | 134.076221       |                   |                   | 2  |
| 20 |                   |                   |                |                  |                |                  | K    | 147.112804         | 74.060040          | 130.086255     | 65.546765        |                   |                   | 1  |

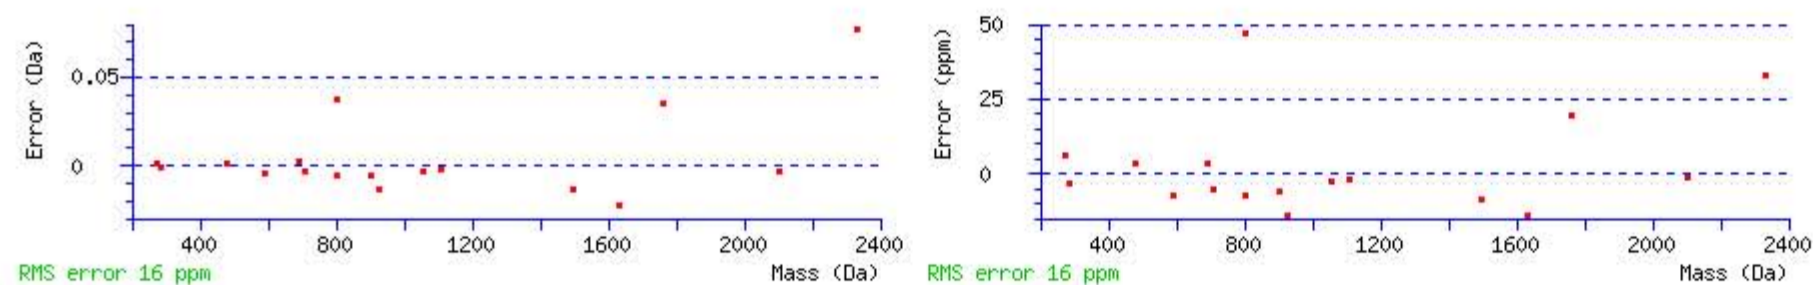

NCBI BLAST search of **FKLDDDDLEHQGGHVLDDHGK**  
 (Parameters: blastp, nr protein database, expect=20000, no filter, PAM30)  
 Other BLAST [web gateways](#)

### All matches to this query

| Score | Mr(calc):   | Delta    | Sequence                               |
|-------|-------------|----------|----------------------------------------|
| 40.9  | 2607.265259 | 0.008357 | <a href="#">FKLDDDDLEHQGGHVLDDHGK</a>  |
| 0.8   | 2607.256714 | 0.016902 | <a href="#">KMTAADVSRHMNTLQLQMEVTR</a> |



# MASCOT Search Results

## Peptide View

MS/MS Fragmentation of **FSVATQTCQITPAEGPVVTAQYDCLGCVHPISTQSPDLEPILR**  
 Found in **KNG1\_HUMAN**, Kininogen-1 OS=Homo sapiens GN=KNG1 PE=1 SV=2

Match to Query 87461: 5066.537620 from(1014.314800,5+) rtinseconds(2627) index(46038)  
 Title: Locus:1.1.1.3198.6 File:"2013-07-02 CLN FXIII 60 min 1st F 3.wiff"  
 Data file C:\Program Files (x86)\Matrix Science\Mascot Daemon\mgf4 FXIII 60 min 1st\mascot\_daemon\_merge.mgf

Click mouse within plot area to zoom in by factor of two about that point  
 Or, Plot from  to  Da   
 Label all possible matches  Label matches used for scoring

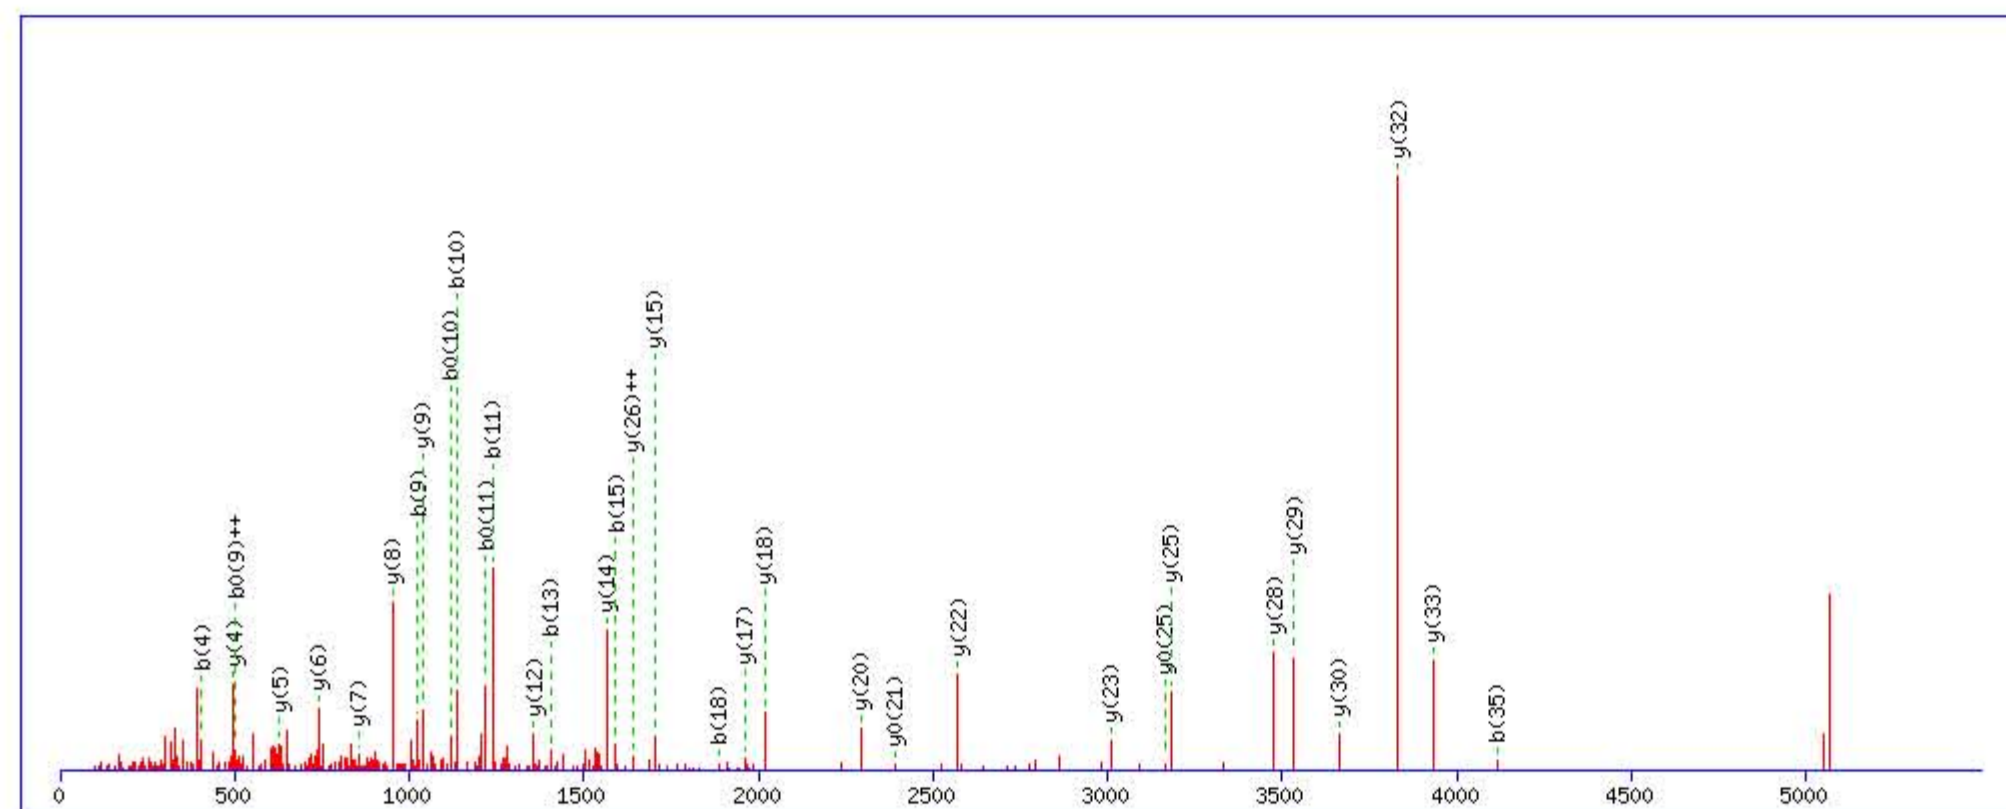

Monoisotopic mass of neutral peptide **Mr(calc)**: 5066.465057  
 Fixed modifications: Carbamidomethyl (C) (apply to specified residues or termini only)  
 Variable modifications:  
 Q21 : Biotin:Thermo-21345 (Q)  
 Ions Score: 110 Expect: 1.8e-010  
 Matches : 34/484 fragment ions using 62 most intense peaks [\(help\)](#)

| #  | b                  | b <sup>++</sup> | b <sup>*</sup> | b <sup>+++</sup> | b <sup>0</sup>     | b <sup>0++</sup>  | Seq. | y                  | y <sup>++</sup>    | y <sup>*</sup> | y <sup>+++</sup> | y <sup>0</sup>     | y <sup>0++</sup> | #  |
|----|--------------------|-----------------|----------------|------------------|--------------------|-------------------|------|--------------------|--------------------|----------------|------------------|--------------------|------------------|----|
| 1  | 148.075690         | 74.541483       |                |                  |                    |                   | F    |                    |                    |                |                  |                    |                  | 43 |
| 2  | 235.107718         | 118.057497      |                |                  | 217.097153         | 109.052214        | S    | 4920.403881        | 2460.705578        | 4903.377332    | 2452.192304      | 4902.393316        | 2451.700296      | 42 |
| 3  | 334.176132         | 167.591704      |                |                  | 316.165567         | 158.586422        | V    | 4833.371853        | 2417.189565        | 4816.345304    | 2408.676290      | 4815.361288        | 2408.184282      | 41 |
| 4  | <b>405.213246</b>  | 203.110261      |                |                  | 387.202681         | 194.104978        | A    | 4734.303439        | 2367.655357        | 4717.276890    | 2359.142083      | 4716.292874        | 2358.650075      | 40 |
| 5  | 506.260925         | 253.634100      |                |                  | 488.250360         | 244.628818        | T    | 4663.266325        | 2332.136800        | 4646.239776    | 2323.623526      | 4645.255760        | 2323.131518      | 39 |
| 6  | 634.319503         | 317.663390      | 617.292954     | 309.150115       | 616.308938         | 308.658107        | Q    | 4562.218646        | 2281.612961        | 4545.192097    | 2273.099686      | 4544.208081        | 2272.607679      | 38 |
| 7  | 735.367182         | 368.187229      | 718.340633     | 359.673955       | 717.356617         | 359.181947        | T    | 4434.160068        | 2217.583672        | 4417.133519    | 2209.070397      | 4416.149503        | 2208.578390      | 37 |
| 8  | 895.397831         | 448.202554      | 878.371282     | 439.689279       | 877.387266         | 439.197271        | C    | 4333.112389        | 2167.059833        | 4316.085840    | 2158.546558      | 4315.101824        | 2158.054550      | 36 |
| 9  | <b>1023.456409</b> | 512.231843      | 1006.429860    | 503.718568       | 1005.445844        | <b>503.226560</b> | Q    | 4173.081740        | 2087.044508        | 4156.055191    | 2078.531233      | 4155.071175        | 2078.039226      | 35 |
| 10 | <b>1136.540473</b> | 568.773875      | 1119.513924    | 560.260600       | <b>1118.529908</b> | 559.768592        | I    | 4045.023162        | 2023.015219        | 4027.996613    | 2014.501944      | 4027.012597        | 2014.009936      | 34 |
| 11 | <b>1237.588152</b> | 619.297714      | 1220.561603    | 610.784440       | <b>1219.577587</b> | 610.292432        | T    | <b>3931.939098</b> | 1966.473187        | 3914.912549    | 1957.959912      | 3913.928533        | 1957.467904      | 33 |
| 12 | 1334.640916        | 667.824096      | 1317.614367    | 659.310822       | 1316.630351        | 658.818814        | P    | <b>3830.891419</b> | 1915.949347        | 3813.864870    | 1907.436073      | 3812.880854        | 1906.944065      | 32 |
| 13 | <b>1405.678030</b> | 703.342653      | 1388.651481    | 694.829379       | 1387.667465        | 694.337371        | A    | 3733.838655        | 1867.422965        | 3716.812106    | 1858.909691      | 3715.828090        | 1858.417683      | 31 |
| 14 | 1534.720623        | 767.863949      | 1517.694074    | 759.350675       | 1516.710058        | 758.858667        | E    | <b>3662.801541</b> | 1831.904408        | 3645.774992    | 1823.391134      | 3644.790976        | 1822.899126      | 30 |
| 15 | <b>1591.742087</b> | 796.374681      | 1574.715538    | 787.861407       | 1573.731522        | 787.369399        | G    | <b>3533.758948</b> | 1767.383112        | 3516.732399    | 1758.869837      | 3515.748383        | 1758.377829      | 29 |
| 16 | 1688.794851        | 844.901063      | 1671.768302    | 836.387789       | 1670.784286        | 835.895781        | P    | <b>3476.737484</b> | 1738.872380        | 3459.710935    | 1730.359105      | 3458.726919        | 1729.867097      | 28 |
| 17 | 1787.863265        | 894.435271      | 1770.836716    | 885.921996       | 1769.852700        | 885.429988        | V    | 3379.684720        | 1690.345998        | 3362.658171    | 1681.832723      | 3361.674155        | 1681.340715      | 27 |
| 18 | <b>1886.931679</b> | 943.969478      | 1869.905130    | 935.456203       | 1868.921114        | 934.964195        | V    | 3280.616306        | <b>1640.811791</b> | 3263.589757    | 1632.298516      | 3262.605741        | 1631.806508      | 26 |
| 19 | 1987.979358        | 994.493317      | 1970.952809    | 985.980043       | 1969.968793        | 985.488035        | T    | <b>3181.547892</b> | 1591.277584        | 3164.521343    | 1582.764309      | <b>3163.537327</b> | 1582.272301      | 25 |
| 20 | 2059.016472        | 1030.011874     | 2041.989923    | 1021.498600      | 2041.005907        | 1021.006591       | A    | 3080.500213        | 1540.753744        | 3063.473664    | 1532.240470      | 3062.489648        | 1531.748462      | 24 |
| 21 | 2498.241798        | 1249.624537     | 2481.215249    | 1241.111262      | 2480.231233        | 1240.619254       | Q    | <b>3009.463099</b> | 1505.235187        | 2992.436550    | 1496.721913      | 2991.452534        | 1496.229905      | 23 |
| 22 | 2661.305127        | 1331.156202     | 2644.278578    | 1322.642927      | 2643.294562        | 1322.150919       | Y    | <b>2570.237773</b> | 1285.622524        | 2553.211224    | 1277.109250      | 2552.227208        | 1276.617242      | 22 |
| 23 | 2776.332070        | 1388.669673     | 2759.305521    | 1380.156398      | 2758.321505        | 1379.664390       | D    | 2407.174444        | 1204.090860        | 2390.147895    | 1195.577585      | <b>2389.163879</b> | 1195.085577      | 21 |
| 24 | 2936.362719        | 1468.684997     | 2919.336170    | 1460.171723      | 2918.352154        | 1459.679715       | C    | <b>2292.147501</b> | 1146.577388        | 2275.120952    | 1138.064114      | 2274.136936        | 1137.572106      | 20 |
| 25 | 3049.446783        | 1525.227029     | 3032.420234    | 1516.713755      | 3031.436218        | 1516.221747       | L    | 2132.116852        | 1066.562064        | 2115.090303    | 1058.048789      | 2114.106287        | 1057.556781      | 19 |
| 26 | 3106.468247        | 1553.737761     | 3089.441698    | 1545.224487      | 3088.457682        | 1544.732479       | G    | <b>2019.032788</b> | 1010.020032        | 2002.006239    | 1001.506757      | 2001.022223        | 1001.014749      | 18 |
| 27 | 3266.498896        | 1633.753086     | 3249.472347    | 1625.239811      | 3248.488331        | 1624.747803       | C    | <b>1962.011324</b> | 981.509300         | 1944.984775    | 972.996025       | 1944.000759        | 972.504017       | 17 |
| 28 | 3365.567310        | 1683.287293     | 3348.540761    | 1674.774018      | 3347.556745        | 1674.282010       | V    | 1801.980675        | 901.493975         | 1784.954126    | 892.980701       | 1783.970110        | 892.488693       | 16 |
| 29 | 3502.626222        | 1751.816749     | 3485.599673    | 1743.303474      | 3484.615657        | 1742.811466       | H    | <b>1702.912261</b> | 851.959768         | 1685.885712    | 843.446494       | 1684.901696        | 842.954486       | 15 |
| 30 | 3599.678986        | 1800.343131     | 3582.652437    | 1791.829856      | 3581.668421        | 1791.337848       | P    | <b>1565.853349</b> | 783.430312         | 1548.826800    | 774.917038       | 1547.842784        | 774.425030       | 14 |
| 31 | 3712.763050        | 1856.885163     | 3695.736501    | 1848.371888      | 3694.752485        | 1847.879880       | I    | 1468.800585        | 734.903930         | 1451.774036    | 726.390656       | 1450.790020        | 725.898648       | 13 |
| 32 | 3799.795078        | 1900.401177     | 3782.768529    | 1891.887902      | 3781.784513        | 1891.395894       | S    | <b>1355.716521</b> | 678.361898         | 1338.689972    | 669.848624       | 1337.705956        | 669.356616       | 12 |
| 33 | 3900.842757        | 1950.925016     | 3883.816208    | 1942.411742      | 3882.832192        | 1941.919734       | T    | 1268.684493        | 634.845884         | 1251.657944    | 626.332610       | 1250.673928        | 625.840602       | 11 |
| 34 | 4028.901335        | 2014.954305     | 4011.874786    | 2006.441031      | 4010.890770        | 2005.949023       | Q    | 1167.636814        | 584.322045         | 1150.610265    | 575.808770       | 1149.626249        | 575.316762       | 10 |
| 35 | <b>4115.933363</b> | 2058.470320     | 4098.906814    | 2049.957045      | 4097.922798        | 2049.465037       | S    | <b>1039.578236</b> | 520.292756         | 1022.551687    | 511.779481       | 1021.567671        | 511.287473       | 9  |
| 36 | 4212.986127        | 2106.996702     | 4195.959578    | 2098.483427      | 4194.975562        | 2097.991419       | P    | <b>952.546208</b>  | 476.776742         | 935.519659     | 468.263467       | 934.535643         | 467.771459       | 8  |
| 37 | 4328.013070        | 2164.510173     | 4310.986521    | 2155.996899      | 4310.002505        | 2155.504891       | D    | <b>855.493444</b>  | 428.250360         | 838.466895     | 419.737085       | 837.482879         | 419.245077       | 7  |
| 38 | 4441.097134        | 2221.052205     | 4424.070585    | 2212.538930      | 4423.086569        | 2212.046923       | L    | <b>740.466501</b>  | 370.736888         | 723.439952     | 362.223614       | 722.455936         | 361.731606       | 6  |
| 39 | 4570.139727        | 2285.573502     | 4553.113178    | 2277.060227      | 4552.129162        | 2276.568219       | E    | <b>627.382437</b>  | 314.194856         | 610.355888     | 305.681582       | 609.371872         | 305.189574       | 5  |
| 40 | 4667.192491        | 2334.099884     | 4650.165942    | 2325.586609      | 4649.181926        | 2325.094601       | P    | <b>498.339844</b>  | 249.673560         | 481.313295     | 241.160285       |                    |                  | 4  |
| 41 | 4780.276555        | 2390.641915     | 4763.250006    | 2382.128641      | 4762.265990        | 2381.636633       | I    | 401.287080         | 201.147178         | 384.260531     | 192.633903       |                    |                  | 3  |
| 42 | 4893.360619        | 2447.183947     | 4876.334070    | 2438.670673      | 4875.350054        | 2438.178665       | L    | 288.203016         | 144.605146         | 271.176467     | 136.091871       |                    |                  | 2  |
| 43 |                    |                 |                |                  |                    |                   | R    | 175.118952         | 88.063114          | 158.092403     | 79.549839        |                    |                  | 1  |

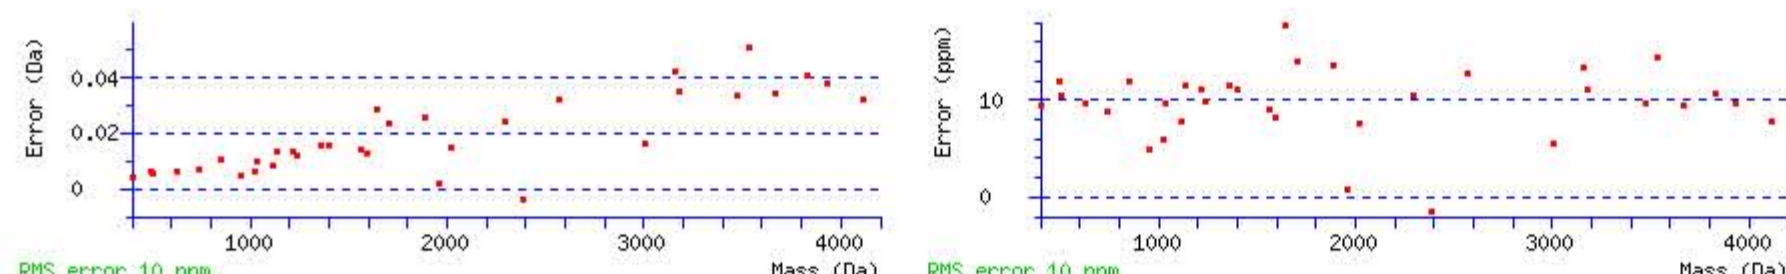

NCBI BLAST search of **FSVATQTCQITPAEGPVVTAQYDCLGCVHPISTQSPDLEPILR**  
 (Parameters: blastp, nr protein database, expect=20000, no filter, PAM30)  
 Other BLAST [web gateways](#)

## All matches to this query

| Score | Mr(calc):   | Delta    | Sequence                                                    |
|-------|-------------|----------|-------------------------------------------------------------|
| 110.2 | 5066.465057 | 0.072563 | <a href="#">FSVATQTCQITPAEGPVVTAQYDCLGCVHPISTQSPDLEPILR</a> |
| 50.9  | 5066.465057 | 0.072563 | <a href="#">FSVATQTCQITPAEGPVVTAQYDCLGCVHPISTQSPDLEPILR</a> |
| 33.1  | 5066.465057 | 0.072563 | <a href="#">FSVATQTCQITPAEGPVVTAQYDCLGCVHPISTQSPDLEPILR</a> |
| 33.1  | 5066.465057 | 0.072563 | <a href="#">FSVATQTCQITPAEGPVVTAQYDCLGCVHPISTQSPDLEPILR</a> |



# MASCOT Search Results

## Peptide View

MS/MS Fragmentation of **VECSDNLFTQR**

Found in **MASPI\_HUMAN**, Mannan-binding lectin serine protease 1 OS=Homo sapiens GN=MASP1 PE=1 SV=3

Match to Query 45320: 1678.791912 from(560.604580,3+) rtinseconds(2073) index(61068)

Title: Locus:1.1.1.3027.7 File:"2013-07-02 CLN FXIII 60 min 1st F 4.wiff"

Data file C:\Program Files (x86)\Matrix Science\Mascot Daemon\mgf4 FXIII 60 min 1st\mascot\_daemon\_merge.mgf

Click mouse within plot area to zoom in by factor of two about that point

Or, Plot from  to  Da

Label all possible matches  Label matches used for scoring

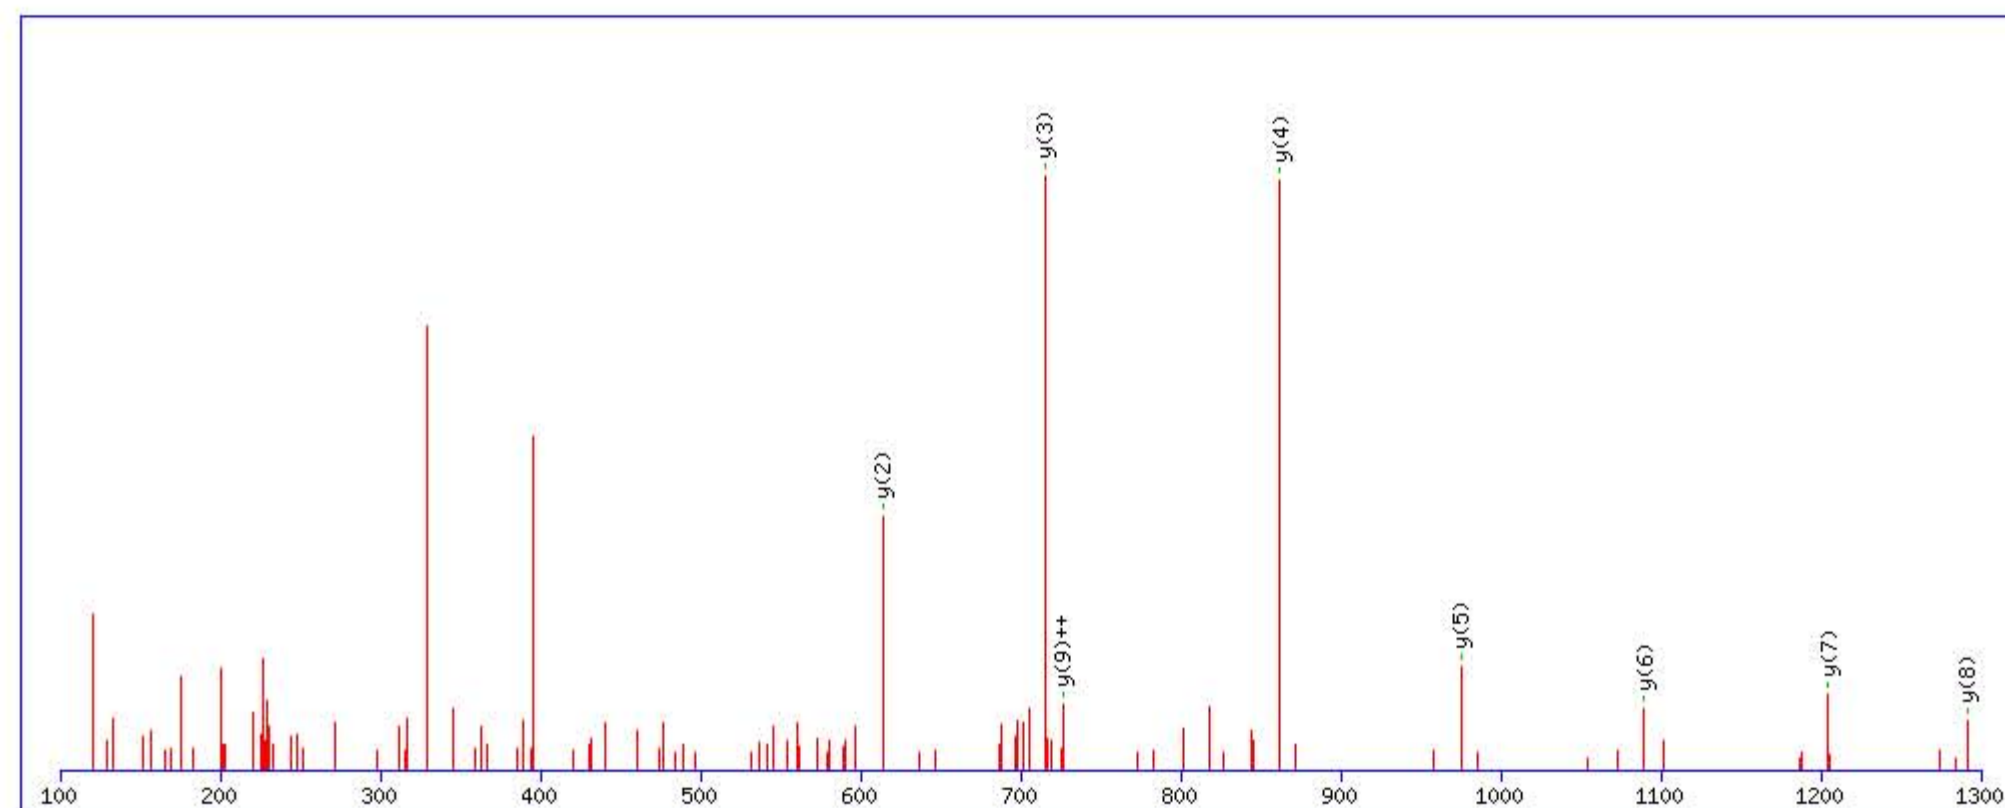

Monoisotopic mass of neutral peptide  $M_r(\text{calc})$ : 1678.780716

Fixed modifications: Carbamidomethyl (C) (apply to specified residues or termini only)

Variable modifications:

Q10 : Biotin:Thermo-21345 (Q)

Ions Score: 49 Expect: 0.0001

Matches : 8/104 fragment ions using 12 most intense peaks [\(help\)](#)

| #  | b           | b <sup>++</sup> | b <sup>+</sup> | b <sup>*++</sup> | b <sup>0</sup> | b <sup>0++</sup> | Seq. | y           | y <sup>++</sup> | y <sup>+</sup> | y <sup>*++</sup> | y <sup>0</sup> | y <sup>0++</sup> | #  |
|----|-------------|-----------------|----------------|------------------|----------------|------------------|------|-------------|-----------------|----------------|------------------|----------------|------------------|----|
| 1  | 100.075690  | 50.541483       |                |                  |                |                  | V    |             |                 |                |                  |                |                  | 11 |
| 2  | 229.118283  | 115.062780      |                |                  | 211.107718     | 106.057497       | E    | 1580.719575 | 790.863426      | 1563.693026    | 782.350151       | 1562.709010    | 781.858143       | 10 |
| 3  | 389.148932  | 195.078104      |                |                  | 371.138367     | 186.072822       | C    | 1451.676982 | 726.342129      | 1434.650433    | 717.828855       | 1433.666417    | 717.336847       | 9  |
| 4  | 476.180960  | 238.594118      |                |                  | 458.170395     | 229.588835       | S    | 1291.646333 | 646.326805      | 1274.619784    | 637.813530       | 1273.635768    | 637.321522       | 8  |
| 5  | 591.207903  | 296.107590      |                |                  | 573.197338     | 287.102307       | D    | 1204.614305 | 602.810791      | 1187.587756    | 594.297516       | 1186.603740    | 593.805508       | 7  |
| 6  | 705.250830  | 353.129053      | 688.224281     | 344.615778       | 687.240265     | 344.123770       | N    | 1089.587362 | 545.297319      | 1072.560813    | 536.784045       | 1071.576797    | 536.292037       | 6  |
| 7  | 818.334894  | 409.671085      | 801.308345     | 401.157810       | 800.324329     | 400.665802       | L    | 975.544435  | 488.275856      | 958.517886     | 479.762581       | 957.533870     | 479.270573       | 5  |
| 8  | 965.403308  | 483.205292      | 948.376759     | 474.692017       | 947.392743     | 474.200009       | F    | 862.460371  | 431.733824      | 845.433822     | 423.220549       | 844.449806     | 422.728541       | 4  |
| 9  | 1066.450987 | 533.729131      | 1049.424438    | 525.215857       | 1048.440422    | 524.723849       | T    | 715.391957  | 358.199617      | 698.365408     | 349.686342       | 697.381392     | 349.194334       | 3  |
| 10 | 1505.676313 | 753.341795      | 1488.649764    | 744.828520       | 1487.665748    | 744.336512       | Q    | 614.344278  | 307.675777      | 597.317729     | 299.162503       |                |                  | 2  |
| 11 |             |                 |                |                  |                |                  | R    | 175.118952  | 88.063114       | 158.092403     | 79.549839        |                |                  | 1  |

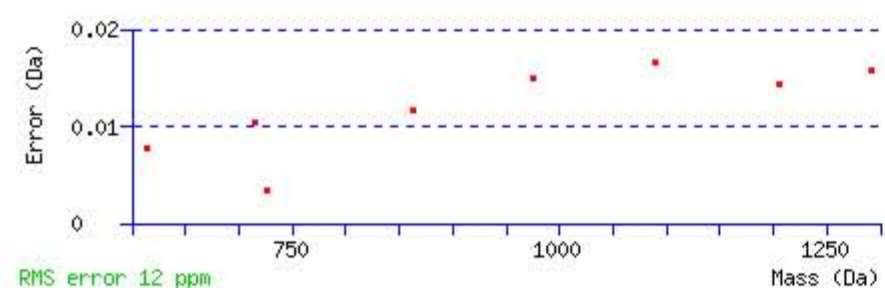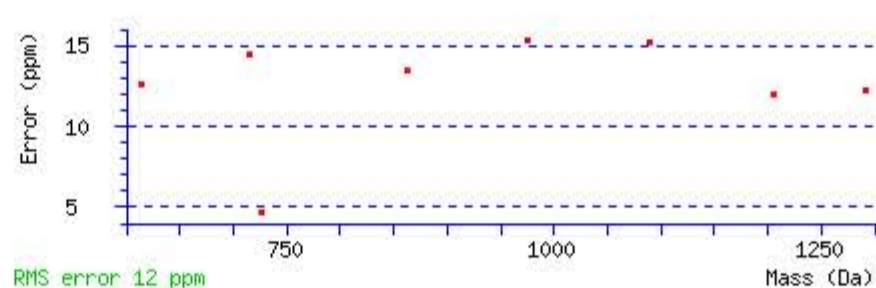

NCBI BLAST search of **VECSDNLFTQR**

(Parameters: blastp, nr protein database, expect=20000, no filter, PAM30)

Other BLAST [web gateways](#)

All matches to this query

| Score | $M_r(\text{calc})$ : | Delta    | Sequence                       |
|-------|----------------------|----------|--------------------------------|
| 49.2  | 1678.780716          | 0.011196 | <a href="#">VECSDNLFTQR</a>    |
| 6.7   | 1678.769455          | 0.022457 | <a href="#">VWDKEGEMEVAMQK</a> |



# Mascot Search Results

## Peptide View

MS/MS Fragmentation of **APEPISTQSHSVLILFHSDNSGENR**

Found in **MASPI\_HUMAN**, Mannan-binding lectin serine protease 1 OS=Homo sapiens GN=MASPI PE=1 SV=3

Match to Query 72046: 3045.534936 from(762.391010,4+) rtinseconds(2207) index(62019)

Title: Locus:1.1.1.3073.14 File:"2013-07-02 CLN FXIII 60 min 1st F 4.wiff"

Data file C:\Program Files (x86)\Matrix Science\Mascot Daemon\mgf4 FXIII 60 min 1st\mascot\_daemon\_merge.mgf

Click mouse within plot area to zoom in by factor of two about that point

Or, Plot from  to  Da

Label all possible matches  Label matches used for scoring

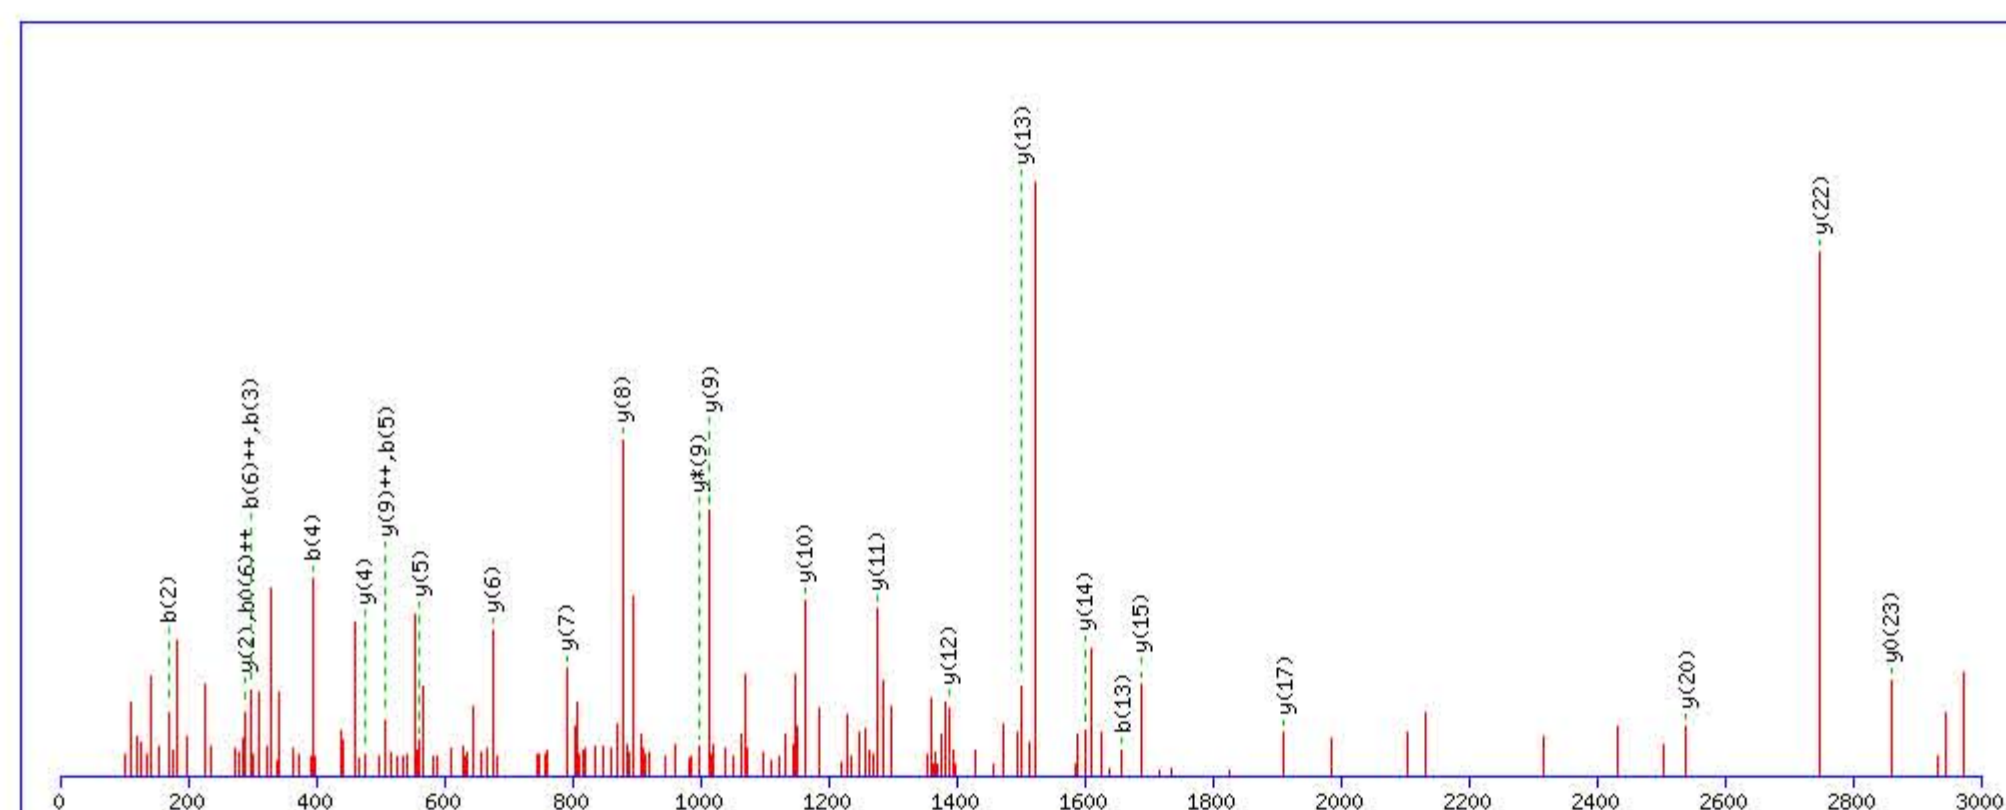

Monoisotopic mass of neutral peptide Mr(calc): 3045.497803

Fixed modifications: Carbamidomethyl (C) (apply to specified residues or termini only)

Variable modifications:

Q8 : Biotin:Thermo-21345 (Q)

Ions Score: 56 Expect: 6.9e-005

Matches : 26/266 fragment ions using 82 most intense peaks [\(help\)](#)

| #  | b                  | b <sup>++</sup>   | b <sup>+</sup> | b <sup>*++</sup> | b <sup>0</sup> | b <sup>0++</sup>  | Seq. | y                  | y <sup>++</sup>   | y <sup>+</sup>    | y <sup>*++</sup> | y <sup>0</sup>     | y <sup>0++</sup> | #  |
|----|--------------------|-------------------|----------------|------------------|----------------|-------------------|------|--------------------|-------------------|-------------------|------------------|--------------------|------------------|----|
| 1  | 72.044390          | 36.525833         |                |                  |                |                   | A    |                    |                   |                   |                  |                    |                  | 25 |
| 2  | <b>169.097154</b>  | 85.052215         |                |                  |                |                   | P    | 2975.467980        | 1488.237628       | 2958.441431       | 1479.724353      | 2957.457415        | 1479.232345      | 24 |
| 3  | <b>298.139747</b>  | 149.573512        |                |                  | 280.129182     | 140.568229        | E    | 2878.415216        | 1439.711246       | 2861.388667       | 1431.197971      | <b>2860.404651</b> | 1430.705963      | 23 |
| 4  | <b>395.192511</b>  | 198.099894        |                |                  | 377.181946     | 189.094611        | P    | <b>2749.372623</b> | 1375.189949       | 2732.346074       | 1366.676675      | 2731.362058        | 1366.184667      | 22 |
| 5  | <b>508.276575</b>  | 254.641926        |                |                  | 490.266010     | 245.636643        | I    | 2652.319859        | 1326.663567       | 2635.293310       | 1318.150293      | 2634.309294        | 1317.658285      | 21 |
| 6  | 595.308603         | <b>298.157940</b> |                |                  | 577.298038     | <b>289.152657</b> | S    | <b>2539.235795</b> | 1270.121535       | 2522.209246       | 1261.608261      | 2521.225230        | 1261.116253      | 20 |
| 7  | 696.356282         | 348.681779        |                |                  | 678.345717     | 339.676497        | T    | 2452.203767        | 1226.605521       | 2435.177218       | 1218.092247      | 2434.193202        | 1217.600239      | 19 |
| 8  | 1135.581608        | 568.294442        | 1118.555059    | 559.781168       | 1117.571043    | 559.289160        | Q    | 2351.156088        | 1176.081682       | 2334.129539       | 1167.568407      | 2333.145523        | 1167.076399      | 18 |
| 9  | 1222.613636        | 611.810456        | 1205.587087    | 603.297182       | 1204.603071    | 602.805174        | S    | <b>1911.930762</b> | 956.469019        | 1894.904213       | 947.955745       | 1893.920197        | 947.463737       | 17 |
| 10 | 1359.672548        | 680.339912        | 1342.645999    | 671.826638       | 1341.661983    | 671.334630        | H    | 1824.898734        | 912.953005        | 1807.872185       | 904.439731       | 1806.888169        | 903.947723       | 16 |
| 11 | 1446.704576        | 723.855926        | 1429.678027    | 715.342652       | 1428.694011    | 714.850644        | S    | <b>1687.839822</b> | 844.423549        | 1670.813273       | 835.910275       | 1669.829257        | 835.418267       | 15 |
| 12 | 1545.772990        | 773.390133        | 1528.746441    | 764.876859       | 1527.762425    | 764.384851        | V    | <b>1600.807794</b> | 800.907535        | 1583.781245       | 792.394261       | 1582.797229        | 791.902253       | 14 |
| 13 | <b>1658.857054</b> | 829.932165        | 1641.830505    | 821.418891       | 1640.846489    | 820.926883        | L    | <b>1501.739380</b> | 751.373328        | 1484.712831       | 742.860054       | 1483.728815        | 742.368045       | 13 |
| 14 | 1771.941118        | 886.474197        | 1754.914569    | 877.960923       | 1753.930553    | 877.468915        | I    | <b>1388.655316</b> | 694.831296        | 1371.628767       | 686.318022       | 1370.644751        | 685.826014       | 12 |
| 15 | 1885.025182        | 943.016229        | 1867.998633    | 934.502955       | 1867.014617    | 934.010947        | L    | <b>1275.571252</b> | 638.289264        | 1258.544703       | 629.775990       | 1257.560687        | 629.283982       | 11 |
| 16 | 2032.093596        | 1016.550436       | 2015.067047    | 1008.037162      | 2014.083031    | 1007.545154       | F    | <b>1162.487188</b> | 581.747232        | 1145.460639       | 573.233958       | 1144.476623        | 572.741950       | 10 |
| 17 | 2169.152508        | 1085.079892       | 2152.125959    | 1076.566617      | 2151.141943    | 1076.074610       | H    | <b>1015.418774</b> | <b>508.213025</b> | <b>998.392225</b> | 499.699751       | 997.408209         | 499.207743       | 9  |
| 18 | 2256.184536        | 1128.595906       | 2239.157987    | 1120.082631      | 2238.173971    | 1119.590624       | S    | <b>878.359862</b>  | 439.683569        | 861.333313        | 431.170295       | 860.349297         | 430.678287       | 8  |
| 19 | 2371.211479        | 1186.109377       | 2354.184930    | 1177.596103      | 2353.200914    | 1177.104095       | D    | <b>791.327834</b>  | 396.167555        | 774.301285        | 387.654280       | 773.317269         | 387.162272       | 7  |
| 20 | 2485.254406        | 1243.130841       | 2468.227857    | 1234.617566      | 2467.243841    | 1234.125558       | N    | <b>676.300891</b>  | 338.654084        | 659.274342        | 330.140809       | 658.290326         | 329.648801       | 6  |
| 21 | 2572.286434        | 1286.646855       | 2555.259885    | 1278.133580      | 2554.275869    | 1277.641572       | S    | <b>562.257964</b>  | 281.632620        | 545.231415        | 273.119346       | 544.247399         | 272.627338       | 5  |
| 22 | 2629.307898        | 1315.157587       | 2612.281349    | 1306.644312      | 2611.297333    | 1306.152304       | G    | <b>475.225936</b>  | 238.116606        | 458.199387        | 229.603331       | 457.215371         | 229.111323       | 4  |
| 23 | 2758.350491        | 1379.678884       | 2741.323942    | 1371.165609      | 2740.339926    | 1370.673601       | E    | 418.204472         | 209.605874        | 401.177923        | 201.092600       | 400.193907         | 200.600592       | 3  |
| 24 | 2872.393418        | 1436.700347       | 2855.366869    | 1428.187072      | 2854.382853    | 1427.695064       | N    | <b>289.161879</b>  | 145.084577        | 272.135330        | 136.571303       |                    |                  | 2  |
| 25 |                    |                   |                |                  |                |                   | R    | 175.118952         | 88.063114         | 158.092403        | 79.549839        |                    |                  | 1  |

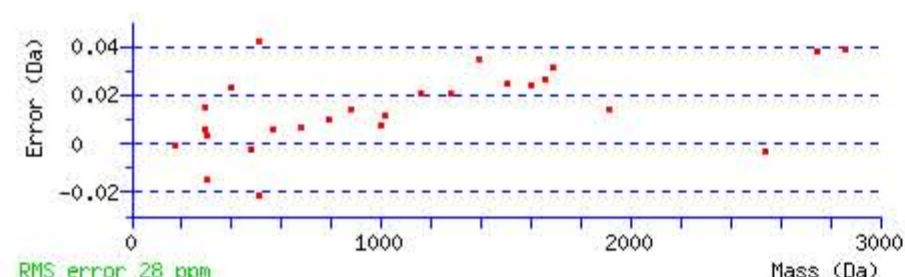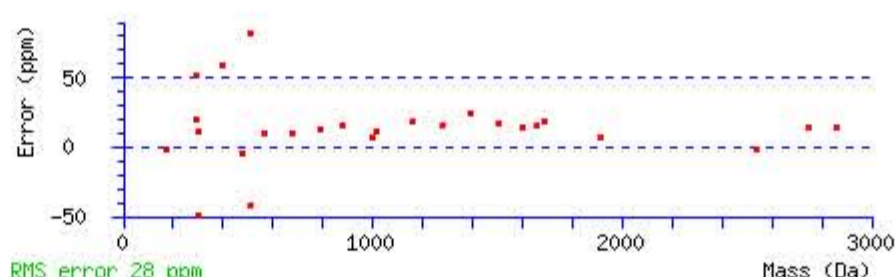

NCBI BLAST search of [APEPISTQSHSVLILFHSDNSGENR](#)

(Parameters: blastp, nr protein database, expect=20000, no filter, PAM30)

Other BLAST [web gateways](#)

### All matches to this query

| Score | Mr(calc):   | Delta    | Sequence                                  |
|-------|-------------|----------|-------------------------------------------|
| 55.9  | 3045.497803 | 0.037133 | <a href="#">APEPISTQSHSVLILFHSDNSGENR</a> |



# MASCOT Search Results

## Peptide View

MS/MS Fragmentation of **VLSIAQAHSPAFSCEQVR**

Found in **CD14\_HUMAN**, Monocyte differentiation antigen CD14 OS=Homo sapiens GN=CD14 PE=1 SV=2

Match to Query 60893: 2310.172512 from(771.064780,3+) rtinseconds(1958) index(41882)

Title: Locus:1.1.1.2965.23 File:"2013-07-02 CLN FXIII 60 min 1st F 3.wiff"

Data file C:\Program Files (x86)\Matrix Science\Mascot Daemon\mgf4 FXIII 60 min 1st\mascot\_daemon\_merge.mgf

Click mouse within plot area to zoom in by factor of two about that point

Or, Plot from  to  Da

Label all possible matches  Label matches used for scoring

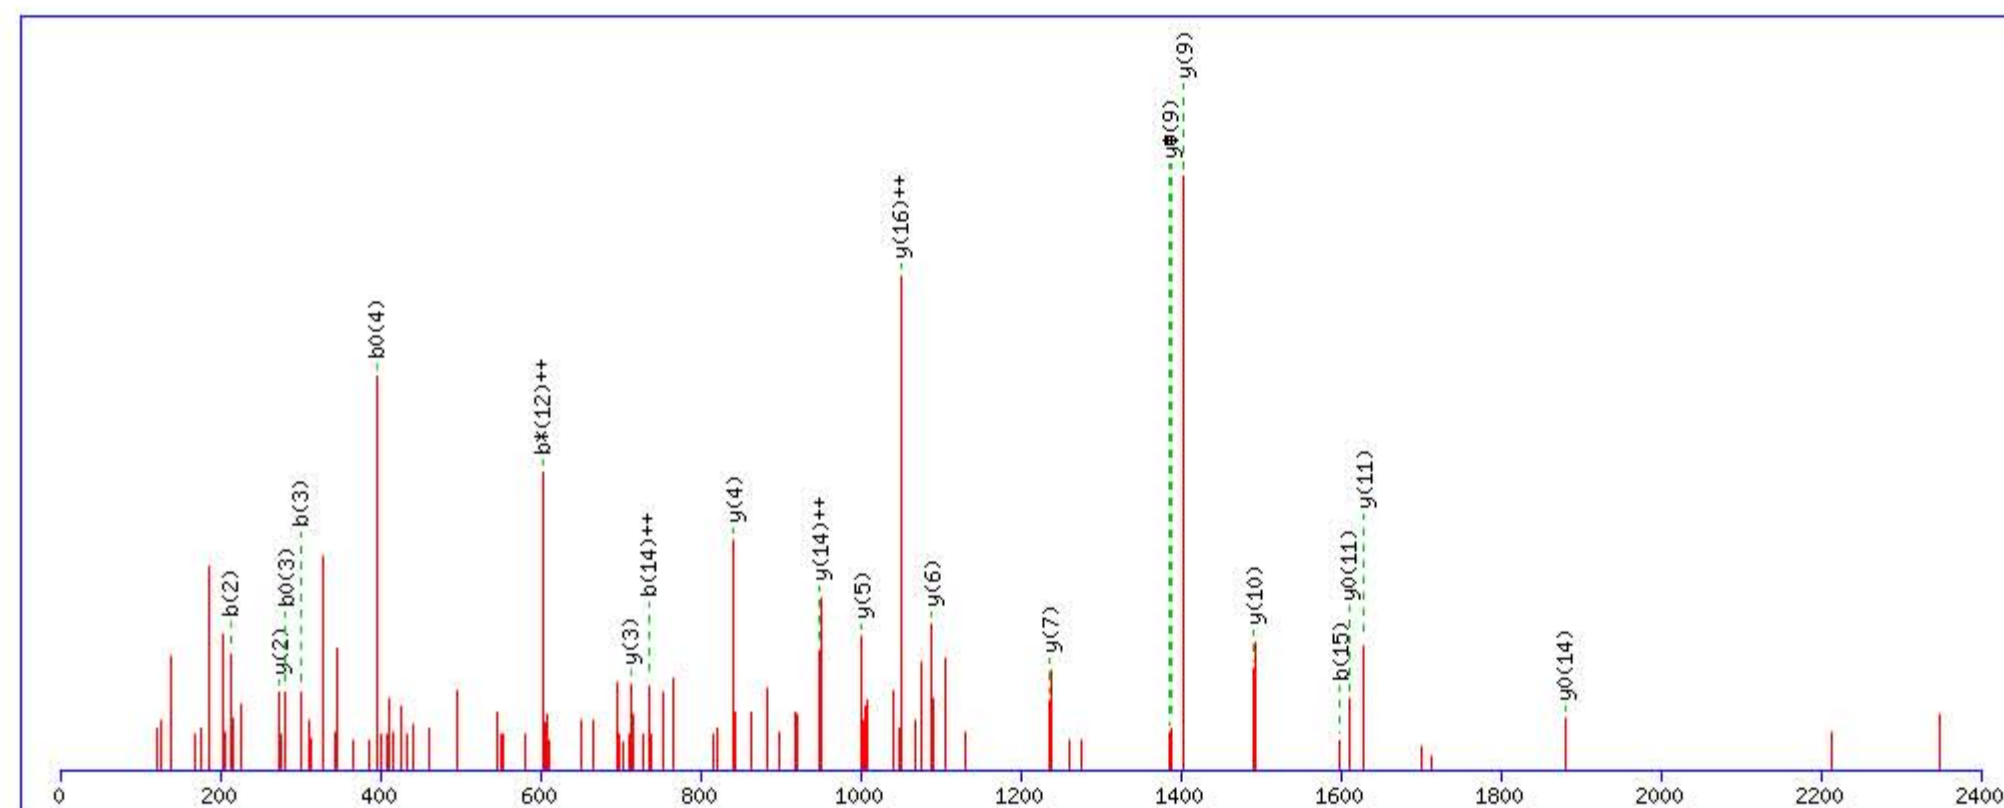

Monoisotopic mass of neutral peptide Mr(calc): 2310.161285

Fixed modifications: Carbamidomethyl (C) (apply to specified residues or termini only)

Variable modifications:

Q16 : Biotin:Thermo-21345 (Q)

Ions Score: 37 Expect: 0.0051

Matches : 22/184 fragment ions using 46 most intense peaks [\(help\)](#)

| #  | b                  | b <sup>++</sup>   | b <sup>*</sup> | b <sup>*++</sup>  | b <sup>0</sup>    | b <sup>0++</sup> | Seq. | y                  | y <sup>++</sup>    | y <sup>*</sup>     | y <sup>*++</sup> | y <sup>0</sup>     | y <sup>0++</sup> | #  |
|----|--------------------|-------------------|----------------|-------------------|-------------------|------------------|------|--------------------|--------------------|--------------------|------------------|--------------------|------------------|----|
| 1  | 100.075690         | 50.541483         |                |                   |                   |                  | V    |                    |                    |                    |                  |                    |                  | 18 |
| 2  | <b>213.159754</b>  | 107.083515        |                |                   |                   |                  | L    | 2212.100156        | 1106.553716        | 2195.073607        | 1098.040441      | 2194.089591        | 1097.548433      | 17 |
| 3  | <b>300.191782</b>  | 150.599529        |                |                   | <b>282.181217</b> | 141.594247       | S    | 2099.016092        | <b>1050.011684</b> | 2081.989543        | 1041.498409      | 2081.005527        | 1041.006401      | 16 |
| 4  | 413.275846         | 207.141561        |                |                   | <b>395.265281</b> | 198.136279       | I    | 2011.984064        | 1006.495670        | 1994.957515        | 997.982396       | 1993.973499        | 997.490388       | 15 |
| 5  | 484.312960         | 242.660118        |                |                   | 466.302395        | 233.654836       | A    | 1898.900000        | <b>949.953638</b>  | 1881.873451        | 941.440364       | <b>1880.889435</b> | 940.948356       | 14 |
| 6  | 612.371538         | 306.689407        | 595.344989     | 298.176133        | 594.360973        | 297.684125       | Q    | 1827.862886        | 914.435081         | 1810.836337        | 905.921807       | 1809.852321        | 905.429799       | 13 |
| 7  | 683.408652         | 342.207964        | 666.382103     | 333.694690        | 665.398087        | 333.202682       | A    | 1699.804308        | 850.405792         | 1682.777759        | 841.892518       | 1681.793743        | 841.400510       | 12 |
| 8  | 820.467564         | 410.737420        | 803.441015     | 402.224146        | 802.456999        | 401.732138       | H    | <b>1628.767194</b> | 814.887235         | 1611.740645        | 806.373961       | <b>1610.756629</b> | 805.881953       | 11 |
| 9  | 907.499592         | 454.253434        | 890.473043     | 445.740160        | 889.489027        | 445.248152       | S    | <b>1491.708282</b> | 746.357779         | 1474.681733        | 737.844505       | 1473.697717        | 737.352497       | 10 |
| 10 | 1004.552356        | 502.779816        | 987.525807     | 494.266542        | 986.541791        | 493.774534       | P    | <b>1404.676254</b> | 702.841765         | <b>1387.649705</b> | 694.328491       | <b>1386.665689</b> | 693.836483       | 9  |
| 11 | 1075.589470        | 538.298373        | 1058.562921    | 529.785099        | 1057.578905       | 529.293091       | A    | 1307.623490        | 654.315383         | 1290.596941        | 645.802109       | 1289.612925        | 645.310101       | 8  |
| 12 | 1222.657884        | 611.832580        | 1205.631335    | <b>603.319306</b> | 1204.647319       | 602.827298       | F    | <b>1236.586376</b> | 618.796826         | 1219.559827        | 610.283552       | 1218.575811        | 609.791544       | 7  |
| 13 | 1309.689912        | 655.348594        | 1292.663363    | 646.835320        | 1291.679347       | 646.343312       | S    | <b>1089.517962</b> | 545.262619         | 1072.491413        | 536.749345       | 1071.507397        | 536.257337       | 6  |
| 14 | 1469.720561        | <b>735.363919</b> | 1452.694012    | 726.850644        | 1451.709996       | 726.358636       | C    | <b>1002.485934</b> | 501.746605         | 985.459385         | 493.233331       | 984.475369         | 492.741323       | 5  |
| 15 | <b>1598.763154</b> | 799.885215        | 1581.736605    | 791.371941        | 1580.752589       | 790.879933       | E    | <b>842.455285</b>  | 421.731281         | 825.428736         | 413.218006       | 824.444720         | 412.725998       | 4  |
| 16 | 2037.988480        | 1019.497878       | 2020.961931    | 1010.984604       | 2019.977915       | 1010.492596      | Q    | <b>713.412692</b>  | 357.209984         | 696.386143         | 348.696710       |                    |                  | 3  |
| 17 | 2137.056894        | 1069.032085       | 2120.030345    | 1060.518811       | 2119.046329       | 1060.026803      | V    | <b>274.187366</b>  | 137.597321         | 257.160817         | 129.084046       |                    |                  | 2  |
| 18 |                    |                   |                |                   |                   |                  | R    | 175.118952         | 88.063114          | 158.092403         | 79.549839        |                    |                  | 1  |

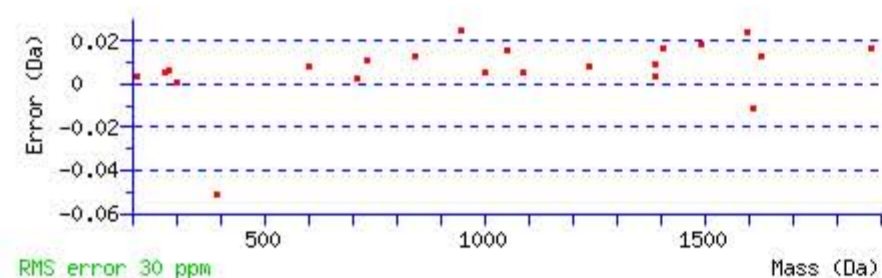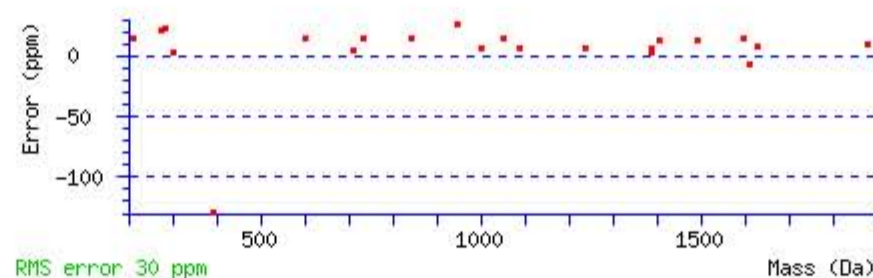

NCBI BLAST search of [VLSIAQAHSPAFSCEQVR](#)

(Parameters: blastp, nr protein database, expect=20000, no filter, PAM30)

Other BLAST [web gateways](#)

All matches to this query

| Score | Mr(calc):   | Delta    | Sequence                           |
|-------|-------------|----------|------------------------------------|
| 37.4  | 2310.161285 | 0.011227 | <a href="#">VLSIAQAHSPAFSCEQVR</a> |



# MASCOT Search Results

## Peptide View

MS/MS Fragmentation of **IIGLDQVAGMSETALPGAFK**

Found in **MYH9\_HUMAN**, Myosin-9 OS=Homo sapiens GN=MYH9 PE=1 SV=4

Match to Query 61307: 2328.250902 from(777.090910,3+) rtinseconds(2830) index(66390)

Title: Locus:1.1.1.3288.15 File:"2013-07-02 CLN FXIII 60 min 1st F 4.wiff"

Data file C:\Program Files (x86)\Matrix Science\Mascot Daemon\mgf4 FXIII 60 min 1st\mascot\_daemon\_merge.mgf

Click mouse within plot area to zoom in by factor of two about that point

Or, Plot from  to  Da

Label all possible matches  Label matches used for scoring

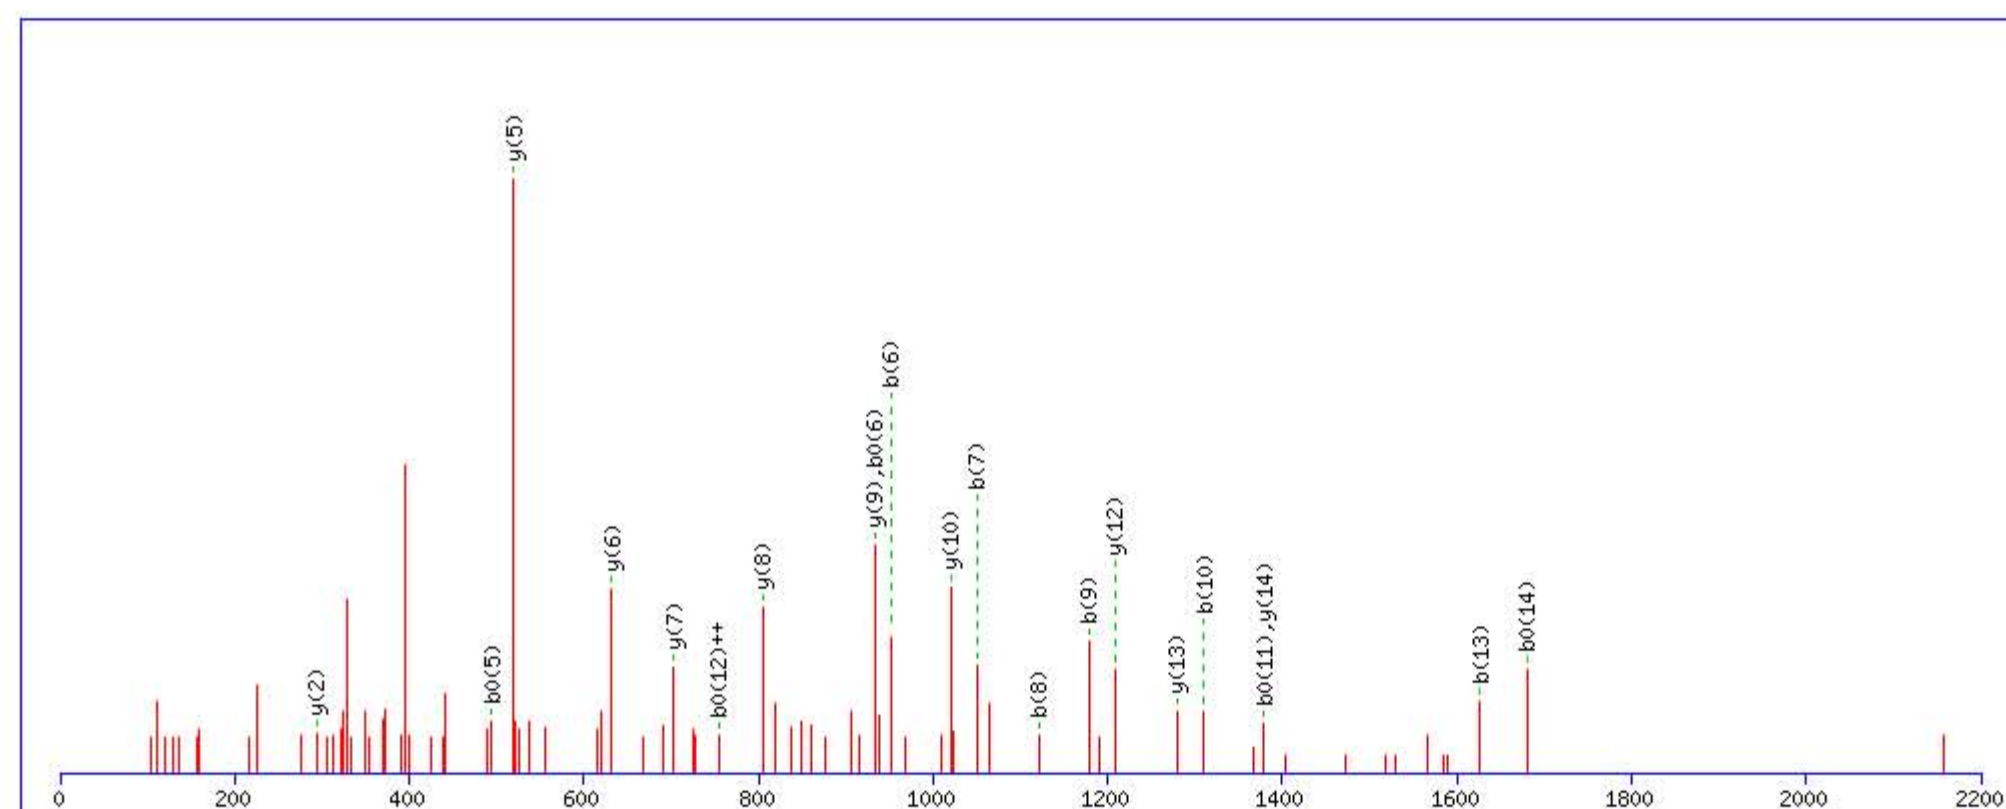

Monoisotopic mass of neutral peptide Mr(calc): 2328.222153

Fixed modifications: Carbamidomethyl (C) (apply to specified residues or termini only)

Variable modifications:

Q6 : Biotin:Thermo-21345 (Q)

Ions Score: 61 Expect: 1.7e-005

Matches : 21/196 fragment ions using 32 most intense peaks [\(help\)](#)

| #  | b                  | b <sup>++</sup> | b <sup>*</sup> | b <sup>*++</sup> | b <sup>0</sup>     | b <sup>0++</sup>  | Seq. | y                  | y <sup>++</sup> | y <sup>*</sup> | y <sup>*++</sup> | y <sup>0</sup> | y <sup>0++</sup> | #  |
|----|--------------------|-----------------|----------------|------------------|--------------------|-------------------|------|--------------------|-----------------|----------------|------------------|----------------|------------------|----|
| 1  | 114.091340         | 57.549308       |                |                  |                    |                   | I    |                    |                 |                |                  |                |                  | 20 |
| 2  | 227.175404         | 114.091340      |                |                  |                    |                   | I    | 2216.145376        | 1108.576326     | 2199.118827    | 1100.063051      | 2198.134811    | 1099.571043      | 19 |
| 3  | 284.196868         | 142.602072      |                |                  |                    |                   | G    | 2103.061312        | 1052.034294     | 2086.034763    | 1043.521019      | 2085.050747    | 1043.029011      | 18 |
| 4  | 397.280932         | 199.144104      |                |                  |                    |                   | L    | 2046.039848        | 1023.523562     | 2029.013299    | 1015.010288      | 2028.029283    | 1014.518279      | 17 |
| 5  | 512.307875         | 256.657576      |                |                  | 494.297310         | 247.652293        | D    | 1932.955784        | 966.981530      | 1915.929235    | 958.468255       | 1914.945219    | 957.976247       | 16 |
| 6  | <b>951.533201</b>  | 476.270239      | 934.506652     | 467.756964       | <b>933.522636</b>  | 467.264956        | Q    | 1817.928841        | 909.468058      | 1800.902292    | 900.954784       | 1799.918276    | 900.462776       | 15 |
| 7  | <b>1050.601615</b> | 525.804446      | 1033.575066    | 517.291171       | 1032.591050        | 516.799163        | V    | <b>1378.703515</b> | 689.855395      | 1361.676966    | 681.342121       | 1360.692950    | 680.850113       | 14 |
| 8  | <b>1121.638729</b> | 561.323003      | 1104.612180    | 552.809728       | 1103.628164        | 552.317720        | A    | <b>1279.635101</b> | 640.321188      | 1262.608552    | 631.807914       | 1261.624536    | 631.315906       | 13 |
| 9  | <b>1178.660193</b> | 589.833734      | 1161.633644    | 581.320460       | 1160.649628        | 580.828452        | G    | <b>1208.597987</b> | 604.802631      | 1191.571438    | 596.289357       | 1190.587422    | 595.797349       | 12 |
| 10 | <b>1309.700678</b> | 655.353977      | 1292.674129    | 646.840703       | 1291.690113        | 646.348694        | M    | 1151.576523        | 576.291900      | 1134.549974    | 567.778625       | 1133.565958    | 567.286617       | 11 |
| 11 | 1396.732706        | 698.869991      | 1379.706157    | 690.356717       | <b>1378.722141</b> | 689.864709        | S    | <b>1020.536038</b> | 510.771657      | 1003.509489    | 502.258382       | 1002.525473    | 501.766374       | 10 |
| 12 | 1525.775299        | 763.391288      | 1508.748750    | 754.878013       | 1507.764734        | <b>754.386005</b> | E    | <b>933.504010</b>  | 467.255643      | 916.477461     | 458.742368       | 915.493445     | 458.250360       | 9  |
| 13 | <b>1626.822978</b> | 813.915127      | 1609.796429    | 805.401853       | 1608.812413        | 804.909845        | T    | <b>804.461417</b>  | 402.734346      | 787.434868     | 394.221072       | 786.450852     | 393.729064       | 8  |
| 14 | 1697.860092        | 849.433684      | 1680.833543    | 840.920410       | <b>1679.849527</b> | 840.428402        | A    | <b>703.413738</b>  | 352.210507      | 686.387189     | 343.697232       |                |                  | 7  |
| 15 | 1810.944156        | 905.975716      | 1793.917607    | 897.462442       | 1792.933591        | 896.970434        | L    | <b>632.376624</b>  | 316.691950      | 615.350075     | 308.178675       |                |                  | 6  |
| 16 | 1907.996920        | 954.502098      | 1890.970371    | 945.988824       | 1889.986355        | 945.496816        | P    | <b>519.292560</b>  | 260.149918      | 502.266011     | 251.636643       |                |                  | 5  |
| 17 | 1965.018384        | 983.012830      | 1947.991835    | 974.499556       | 1947.007819        | 974.007547        | G    | 422.239796         | 211.623536      | 405.213247     | 203.110261       |                |                  | 4  |
| 18 | 2036.055498        | 1018.531387     | 2019.028949    | 1010.018113      | 2018.044933        | 1009.526105       | A    | 365.218332         | 183.112804      | 348.191783     | 174.599529       |                |                  | 3  |
| 19 | 2183.123912        | 1092.065594     | 2166.097363    | 1083.552319      | 2165.113347        | 1083.060311       | F    | <b>294.181218</b>  | 147.594247      | 277.154669     | 139.080972       |                |                  | 2  |
| 20 |                    |                 |                |                  |                    |                   | K    | 147.112804         | 74.060040       | 130.086255     | 65.546765        |                |                  | 1  |

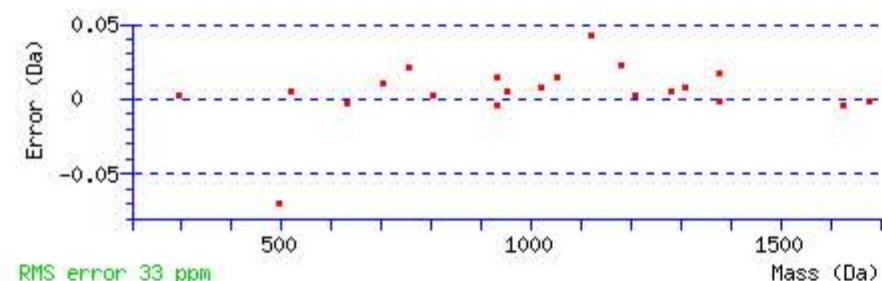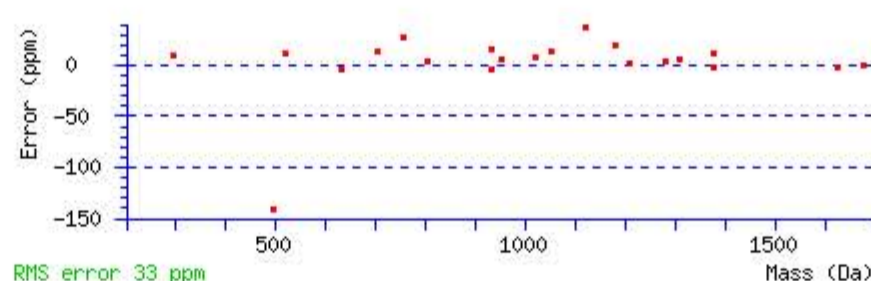

NCBI BLAST search of **IIGLDQVAGMSETALPGAFK**

(Parameters: blastp, nr protein database, expect=20000, no filter, PAM30)

Other BLAST [web gateways](#)

All matches to this query

| Score | Mr(calc):   | Delta    | Sequence                             |
|-------|-------------|----------|--------------------------------------|
| 60.7  | 2328.222153 | 0.028749 | <a href="#">IIGLDQVAGMSETALPGAFK</a> |

Mascot: <http://www.matrixscience.com/>



# MASCOT Search Results

## Peptide View

MS/MS Fragmentation of **SPEQLR**

Found in **GNPTG\_HUMAN**, N-acetylglucosamine-1-phosphotransferase subunit gamma OS=Homo sapiens GN=GNPTG PE=1 SV=1

Match to Query 20638: 1039.548488 from(520.781520,2+) rtinseconds(1450) index(38519)

Title: Locus:1.1.1.2788.21 File:"2013-07-02 CLN FXIII 60 min 1st F 3.wiff"

Data file C:\Program Files (x86)\Matrix Science\Mascot Daemon\mgf4 FXIII 60 min 1st\mascot\_daemon\_merge.mgf

Click mouse within plot area to zoom in by factor of two about that point

Or, Plot from  to  Da

Label all possible matches  Label matches used for scoring

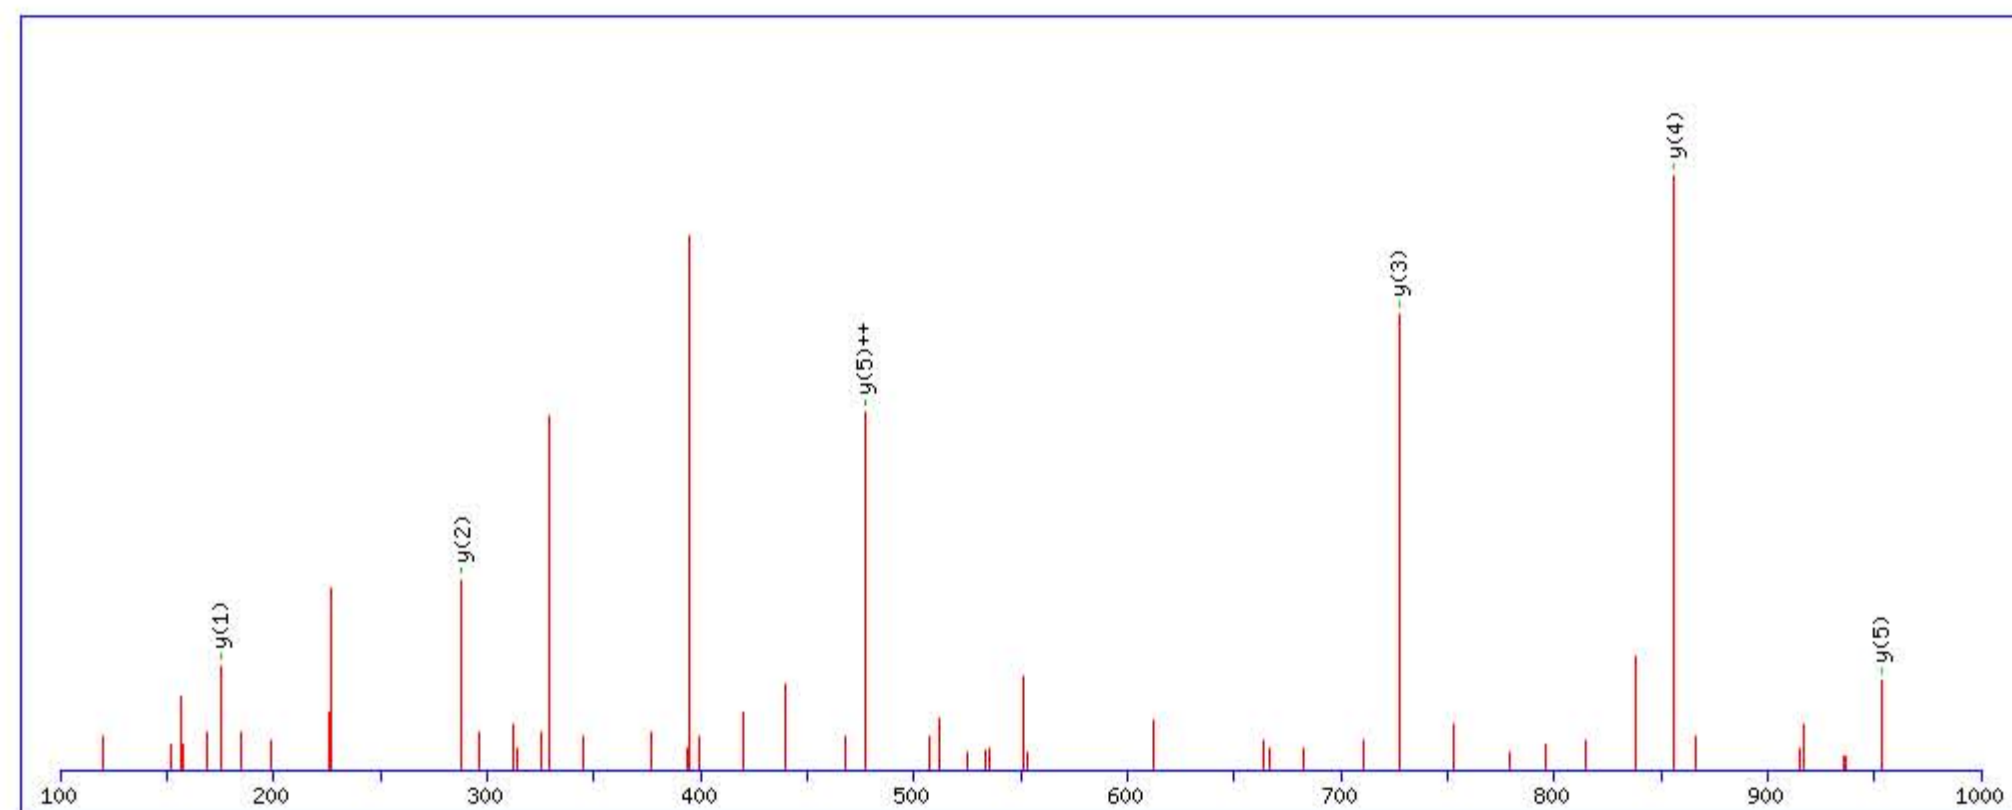

Monoisotopic mass of neutral peptide Mr(calc): 1039.548431

Fixed modifications: Carbamidomethyl (C) (apply to specified residues or termini only)

Variable modifications:

Q4 : Biotin:Thermo-21345 (Q)

Ions Score: 37 Expect: 0.0029

Matches : 6/48 fragment ions using 9 most intense peaks ([help](#))

| # | b          | b <sup>++</sup> | b <sup>*</sup> | b <sup>+++</sup> | b <sup>0</sup> | b <sup>0++</sup> | Seq. | y                 | y <sup>++</sup>   | y <sup>*</sup> | y <sup>+++</sup> | y <sup>0</sup> | y <sup>0++</sup> | # |
|---|------------|-----------------|----------------|------------------|----------------|------------------|------|-------------------|-------------------|----------------|------------------|----------------|------------------|---|
| 1 | 88.039304  | 44.523290       |                |                  | 70.028739      | 35.518008        | S    |                   |                   |                |                  |                |                  | 6 |
| 2 | 185.092068 | 93.049672       |                |                  | 167.081503     | 84.044389        | P    | <b>953.523699</b> | <b>477.265488</b> | 936.497150     | 468.752213       | 935.513134     | 468.260205       | 5 |
| 3 | 314.134661 | 157.570968      |                |                  | 296.124096     | 148.565686       | E    | <b>856.470935</b> | 428.739106        | 839.444386     | 420.225831       | 838.460370     | 419.733823       | 4 |
| 4 | 753.359987 | 377.183632      | 736.333438     | 368.670357       | 735.349422     | 368.178349       | Q    | <b>727.428342</b> | 364.217809        | 710.401793     | 355.704535       |                |                  | 3 |
| 5 | 866.444051 | 433.725664      | 849.417502     | 425.212389       | 848.433486     | 424.720381       | L    | <b>288.203016</b> | 144.605146        | 271.176467     | 136.091872       |                |                  | 2 |
| 6 |            |                 |                |                  |                |                  | R    | <b>175.118952</b> | 88.063114         | 158.092403     | 79.549840        |                |                  | 1 |

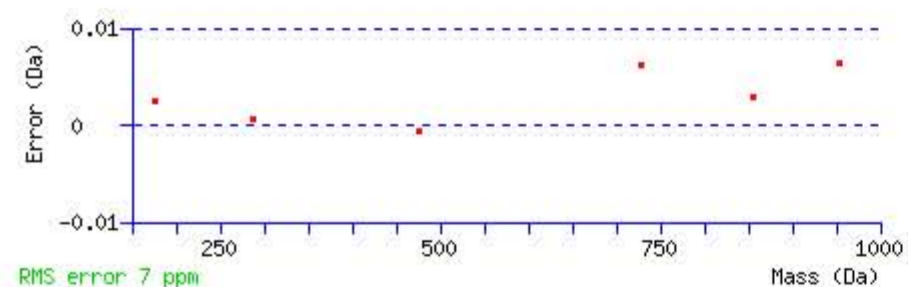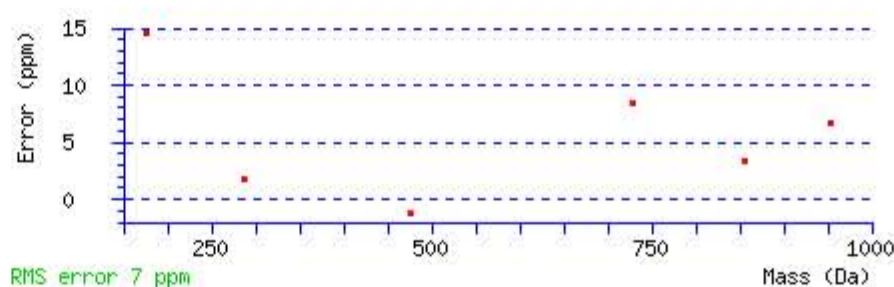

NCBI BLAST search of **SPEQLR**

(Parameters: blastp, nr protein database, expect=20000, no filter, PAM30)

Other BLAST [web gateways](#)

## All matches to this query

| Score | Mr(calc):   | Delta     | Sequence                   |
|-------|-------------|-----------|----------------------------|
| 37.1  | 1039.548431 | 0.000057  | <a href="#">SPEQLR</a>     |
| 23.4  | 1039.548431 | 0.000057  | <a href="#">SPEIQR</a>     |
| 19.8  | 1039.541031 | 0.007457  | <a href="#">ALESNHILR</a>  |
| 17.6  | 1039.563492 | -0.015004 | <a href="#">SSLERHRR</a>   |
| 7.3   | 1039.533813 | 0.014675  | <a href="#">EALFYELR</a>   |
| 6.6   | 1039.563492 | -0.015004 | <a href="#">SSHLRERR</a>   |
| 5.4   | 1039.559662 | -0.011174 | <a href="#">SVILNHMAR</a>  |
| 4.7   | 1039.541061 | 0.007427  | <a href="#">SSRVTFSTR</a>  |
| 2.7   | 1039.541046 | 0.007442  | <a href="#">ALQSGPPQSR</a> |
| 2.5   | 1039.541061 | 0.007427  | <a href="#">SPRTTVHDK</a>  |



# MASCOT Search Results

## Peptide View

MS/MS Fragmentation of **KGEQCVHTASGPR**

Found in **NOTC2\_HUMAN**, Neurogenic locus notch homolog protein 2 OS=Homo sapiens GN=NOTCH2 PE=1 SV=3

Match to Query 46699: 1736.839376 from(435.217120,4+) rtinseconds(1067) index(36004)

Title: Locus:1.1.1.2655.7 File:"2013-07-02 CLN FXIII 60 min 1st F 3.wiff"

Data file C:\Program Files (x86)\Matrix Science\Mascot Daemon\mgf4 FXIII 60 min 1st\mascot\_daemon\_merge.mgf

Click mouse within plot area to zoom in by factor of two about that point

Or, Plot from  to  Da

Label all possible matches  Label matches used for scoring

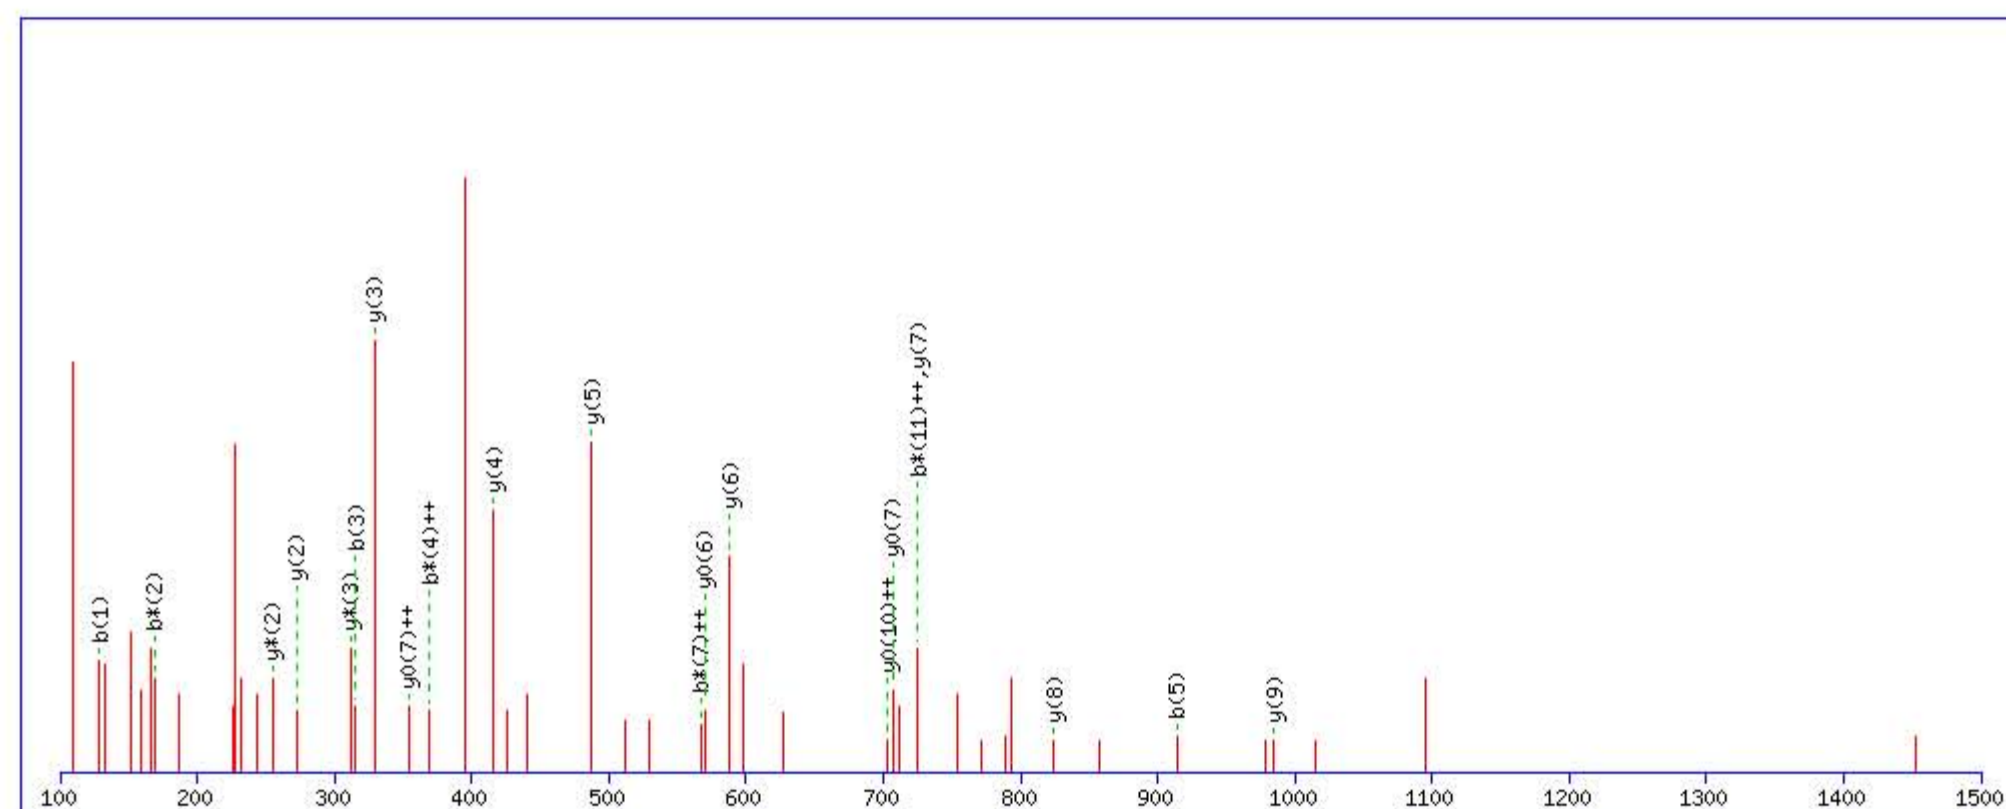

Monoisotopic mass of neutral peptide Mr(calc): 1736.845047

Fixed modifications: Carbamidomethyl (C) (apply to specified residues or termini only)

Variable modifications:

Q4 : Biotin:Thermo-21345 (Q)

Ions Score: 35 Expect: 0.0059

Matches : 21/134 fragment ions using 45 most intense peaks [\(help\)](#)

| #  | b           | b <sup>++</sup> | b <sup>*</sup> | b <sup>*++</sup> | b <sup>0</sup> | b <sup>0++</sup> | Seq. | y           | y <sup>++</sup> | y <sup>*</sup> | y <sup>*++</sup> | y <sup>0</sup> | y <sup>0++</sup> | #  |
|----|-------------|-----------------|----------------|------------------|----------------|------------------|------|-------------|-----------------|----------------|------------------|----------------|------------------|----|
| 1  | 129.102239  | 65.054757       | 112.075690     | 56.541483        |                |                  | K    |             |                 |                |                  |                |                  | 13 |
| 2  | 186.123703  | 93.565489       | 169.097154     | 85.052215        |                |                  | G    | 1609.757359 | 805.382318      | 1592.730810    | 796.869043       | 1591.746794    | 796.377035       | 12 |
| 3  | 315.166296  | 158.086786      | 298.139747     | 149.573512       | 297.155731     | 149.081504       | E    | 1552.735895 | 776.871586      | 1535.709346    | 768.358311       | 1534.725330    | 767.866303       | 11 |
| 4  | 754.391622  | 377.699449      | 737.365073     | 369.186175       | 736.381057     | 368.694167       | Q    | 1423.693302 | 712.350289      | 1406.666753    | 703.837015       | 1405.682737    | 703.345007       | 10 |
| 5  | 914.422271  | 457.714774      | 897.395722     | 449.201499       | 896.411706     | 448.709491       | C    | 984.467976  | 492.737626      | 967.441427     | 484.224352       | 966.457411     | 483.732344       | 9  |
| 6  | 1013.490685 | 507.248981      | 996.464136     | 498.735706       | 995.480120     | 498.243698       | V    | 824.437327  | 412.722302      | 807.410778     | 404.209027       | 806.426762     | 403.717019       | 8  |
| 7  | 1150.549597 | 575.778437      | 1133.523048    | 567.265162       | 1132.539032    | 566.773154       | H    | 725.368913  | 363.188095      | 708.342364     | 354.674820       | 707.358348     | 354.182812       | 7  |
| 8  | 1251.597276 | 626.302276      | 1234.570727    | 617.789002       | 1233.586711    | 617.296994       | T    | 588.310001  | 294.658639      | 571.283452     | 286.145364       | 570.299436     | 285.653356       | 6  |
| 9  | 1322.634390 | 661.820833      | 1305.607841    | 653.307559       | 1304.623825    | 652.815551       | A    | 487.262322  | 244.134799      | 470.235773     | 235.621524       | 469.251757     | 235.129516       | 5  |
| 10 | 1409.666418 | 705.336847      | 1392.639869    | 696.823573       | 1391.655853    | 696.331565       | S    | 416.225208  | 208.616242      | 399.198659     | 200.102967       | 398.214643     | 199.610959       | 4  |
| 11 | 1466.687882 | 733.847579      | 1449.661333    | 725.334305       | 1448.677317    | 724.842297       | G    | 329.193180  | 165.100228      | 312.166631     | 156.586953       |                |                  | 3  |
| 12 | 1563.740646 | 782.373961      | 1546.714097    | 773.860687       | 1545.730081    | 773.368679       | P    | 272.171716  | 136.589496      | 255.145167     | 128.076221       |                |                  | 2  |
| 13 |             |                 |                |                  |                |                  | R    | 175.118952  | 88.063114       | 158.092403     | 79.549839        |                |                  | 1  |

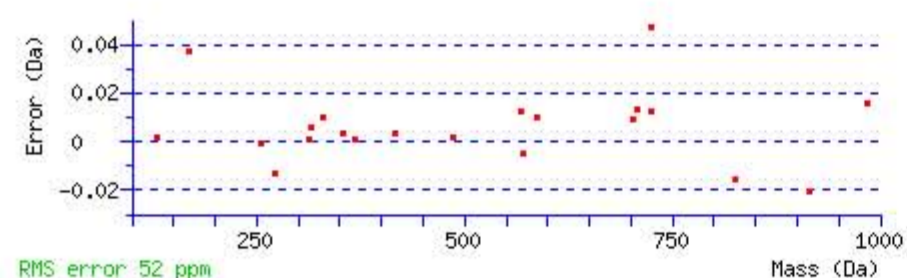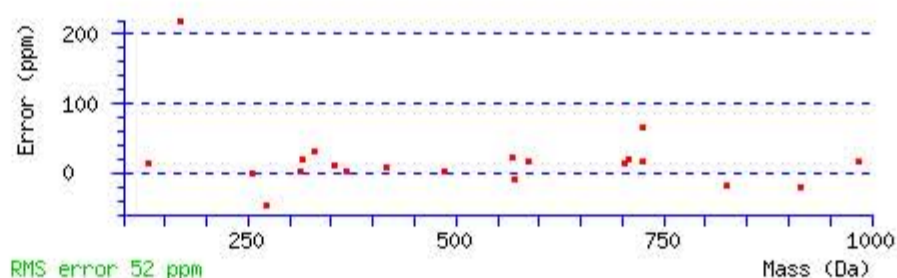

NCBI BLAST search of **KGEQCVHTASGPR**

(Parameters: blastp, nr protein database, expect=20000, no filter, PAM30)

Other BLAST [web gateways](#)

All matches to this query

| Score | Mr(calc):   | Delta     | Sequence                      |
|-------|-------------|-----------|-------------------------------|
| 34.9  | 1736.845047 | -0.005671 | <a href="#">KGEQCVHTASGPR</a> |

Mascot: <http://www.matrixscience.com/>



# MASCOT Search Results

## Peptide View

MS/MS Fragmentation of **RPYQEGTPCSQCPSGYHCK**

Found in **PII6\_HUMAN**, Peptidase inhibitor 16 OS=Homo sapiens GN=PII6 PE=1 SV=1

Match to Query 66782: 2622.140176 from(656.542320,4+) rtinseconds(1292) index(37366)

Title: Locus:1.1.1.2733.13 File:"2013-07-02 CLN FXIII 60 min 1st F 3.wiff"

Data file C:\Program Files (x86)\Matrix Science\Mascot Daemon\mgf4 FXIII 60 min 1st\mascot\_daemon\_merge.mgf

Click mouse within plot area to zoom in by factor of two about that point

Or, Plot from  to  Da

Label all possible matches  Label matches used for scoring

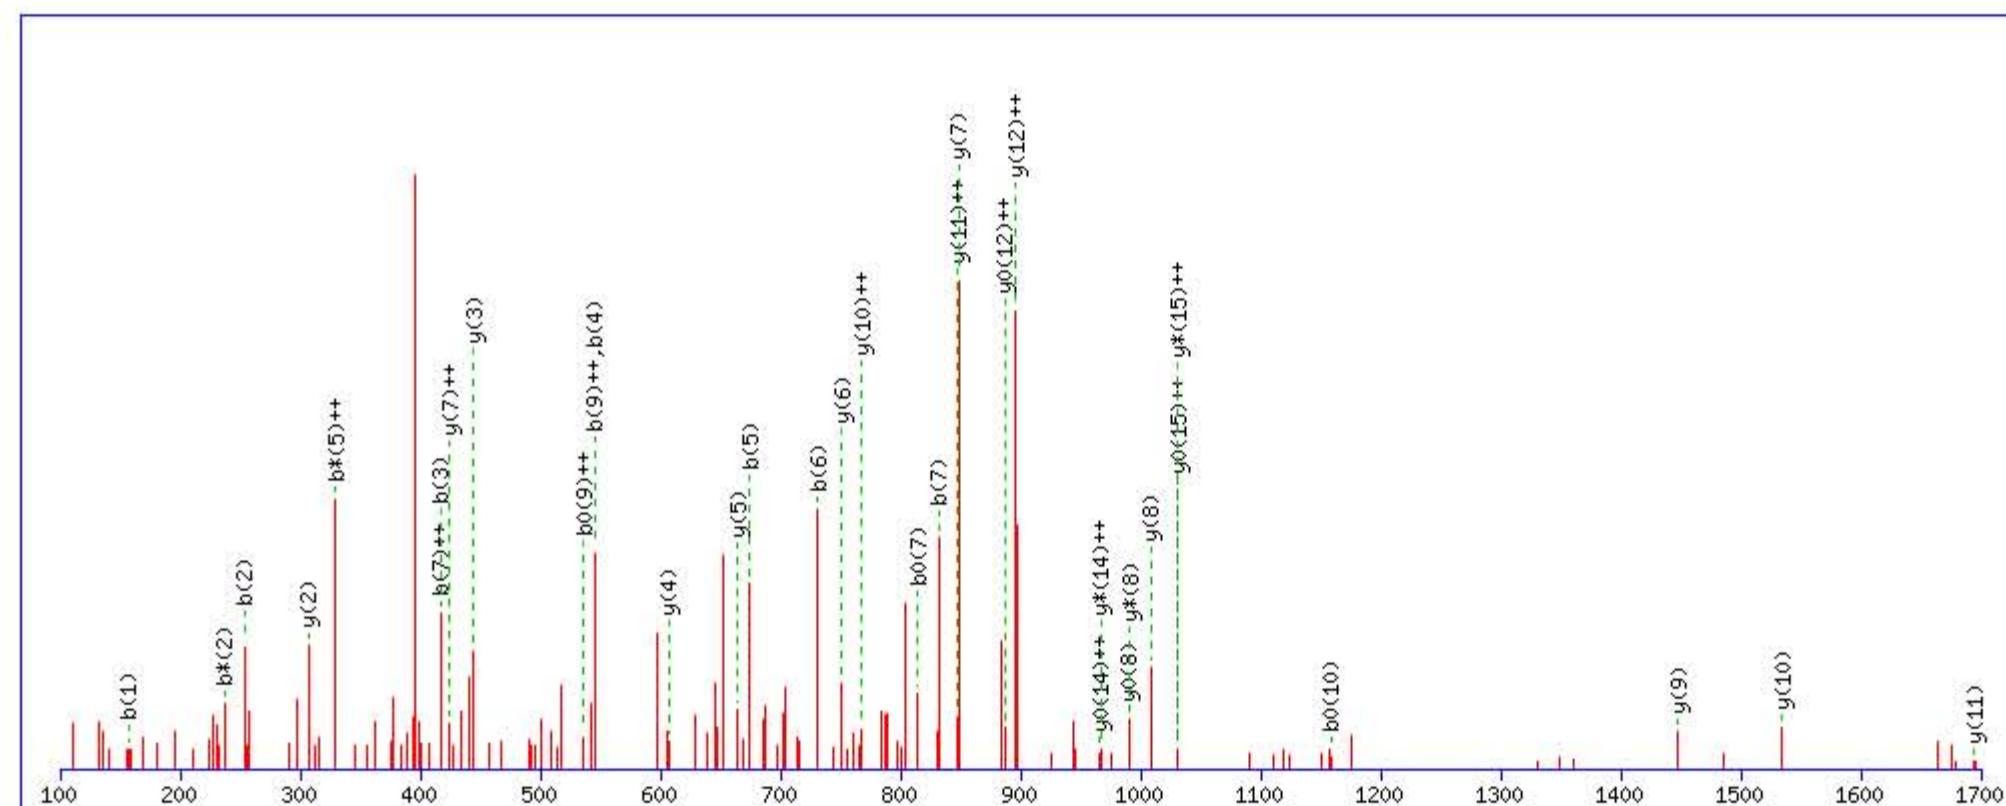

Monoisotopic mass of neutral peptide Mr(calc): 2622.123611

Fixed modifications: Carbamidomethyl (C) (apply to specified residues or termini only)

Variable modifications:

Q11 : Biotin:Thermo-21345 (Q)

Ions Score: 39 Expect: 0.0006

Matches : 35/198 fragment ions using 93 most intense peaks [\(help\)](#)

| #  | b                 | b <sup>++</sup>   | b <sup>+</sup>    | b <sup>+++</sup>  | b <sup>0</sup>     | b <sup>0++</sup>  | Seq. | y                  | y <sup>++</sup>   | y <sup>+</sup>    | y <sup>+++</sup>   | y <sup>0</sup>    | y <sup>0++</sup>   | #  |
|----|-------------------|-------------------|-------------------|-------------------|--------------------|-------------------|------|--------------------|-------------------|-------------------|--------------------|-------------------|--------------------|----|
| 1  | <b>157.108387</b> | 79.057831         | 140.081838        | 70.544557         |                    |                   | R    |                    |                   |                   |                    |                   |                    | 19 |
| 2  | <b>254.161151</b> | 127.584213        | <b>237.134602</b> | 119.070939        |                    |                   | P    | 2467.029773        | 1234.018524       | 2450.003224       | 1225.505250        | 2449.019208       | 1225.013242        | 18 |
| 3  | <b>417.224480</b> | 209.115878        | 400.197931        | 200.602604        |                    |                   | Y    | 2369.977009        | 1185.492142       | 2352.950460       | 1176.978868        | 2351.966444       | 1176.486860        | 17 |
| 4  | <b>545.283058</b> | 273.145167        | 528.256509        | 264.631893        |                    |                   | Q    | 2206.913680        | 1103.960478       | 2189.887131       | 1095.447203        | 2188.903115       | 1094.955195        | 16 |
| 5  | <b>674.325651</b> | 337.666464        | 657.299102        | <b>329.153189</b> | 656.315086         | 328.661181        | E    | 2078.855102        | 1039.931189       | 2061.828553       | <b>1031.417914</b> | 2060.844537       | <b>1030.925906</b> | 15 |
| 6  | <b>731.347115</b> | 366.177196        | 714.320566        | 357.663921        | 713.336550         | 357.171913        | G    | 1949.812509        | 975.409892        | 1932.785960       | <b>966.896618</b>  | 1931.801944       | <b>966.404610</b>  | 14 |
| 7  | <b>832.394794</b> | <b>416.701035</b> | 815.368245        | 408.187761        | <b>814.384229</b>  | 407.695753        | T    | 1892.791045        | 946.899160        | 1875.764496       | 938.385886         | 1874.780480       | 937.893878         | 13 |
| 8  | 929.447558        | 465.227417        | 912.421009        | 456.714143        | 911.436993         | 456.222135        | P    | 1791.743366        | <b>896.375321</b> | 1774.716817       | 887.862047         | 1773.732801       | <b>887.370038</b>  | 12 |
| 9  | 1089.478207       | <b>545.242742</b> | 1072.451658       | 536.729467        | 1071.467642        | <b>536.237459</b> | C    | <b>1694.690602</b> | <b>847.848939</b> | 1677.664053       | 839.335665         | 1676.680037       | 838.843656         | 11 |
| 10 | 1176.510235       | 588.758756        | 1159.483686       | 580.245481        | <b>1158.499670</b> | 579.753473        | S    | <b>1534.659953</b> | <b>767.833614</b> | 1517.633404       | 759.320340         | 1516.649388       | 758.828332         | 10 |
| 11 | 1615.735561       | 808.371419        | 1598.709012       | 799.858144        | 1597.724996        | 799.366136        | Q    | <b>1447.627925</b> | 724.317600        | 1430.601376       | 715.804326         | 1429.617360       | 715.312318         | 9  |
| 12 | 1775.766210       | 888.386743        | 1758.739661       | 879.873469        | 1757.755645        | 879.381461        | C    | <b>1008.402599</b> | 504.704937        | <b>991.376050</b> | 496.191663         | <b>990.392034</b> | 495.699655         | 8  |
| 13 | 1872.818974       | 936.913125        | 1855.792425       | 928.399851        | 1854.808409        | 927.907843        | P    | <b>848.371950</b>  | <b>424.689613</b> | 831.345401        | 416.176338         | 830.361385        | 415.684330         | 7  |
| 14 | 1959.851002       | 980.429139        | 1942.824453       | 971.915865        | 1941.840437        | 971.423857        | S    | <b>751.319186</b>  | 376.163231        | 734.292637        | 367.649956         | 733.308621        | 367.157948         | 6  |
| 15 | 2016.872466       | 1008.939871       | 1999.845917       | 1000.426597       | 1998.861901        | 999.934589        | G    | <b>664.287158</b>  | 332.647217        | 647.260609        | 324.133942         |                   |                    | 5  |
| 16 | 2179.935795       | 1090.471535       | 2162.909246       | 1081.958261       | 2161.925230        | 1081.466253       | Y    | <b>607.265694</b>  | 304.136485        | 590.239145        | 295.623210         |                   |                    | 4  |
| 17 | 2316.994707       | 1159.000991       | 2299.968158       | 1150.487717       | 2298.984142        | 1149.995709       | H    | <b>444.202365</b>  | 222.604820        | 427.175816        | 214.091546         |                   |                    | 3  |
| 18 | 2477.025356       | 1239.016316       | 2459.998807       | 1230.503041       | 2459.014791        | 1230.011033       | C    | <b>307.143453</b>  | 154.075364        | 290.116904        | 145.562090         |                   |                    | 2  |
| 19 |                   |                   |                   |                   |                    |                   | K    | 147.112804         | 74.060040         | 130.086255        | 65.546765          |                   |                    | 1  |

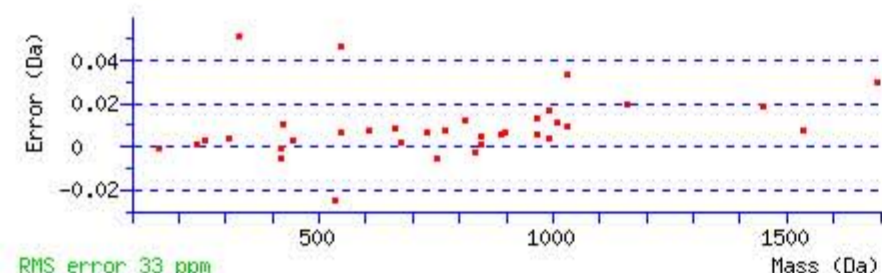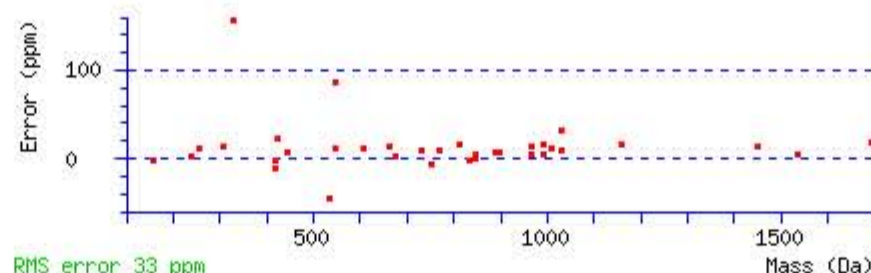

NCBI BLAST search of **RPYQEGTPCSQCPSGYHCK**

(Parameters: blastp, nr protein database, expect=20000, no filter, PAM30)

Other BLAST [web gateways](#)

All matches to this query

| Score | Mr(calc):   | Delta    | Sequence                            |
|-------|-------------|----------|-------------------------------------|
| 39.1  | 2622.123611 | 0.016565 | <a href="#">RPYQEGTPCSQCPSGYHCK</a> |

Mascot: <http://www.matrixscience.com/>



# MASCOT Search Results

## Peptide View

MS/MS Fragmentation of **QVLLVGAPTYDDVSK**

Found in **PHLD\_HUMAN**, Phosphatidylinositol-glycan-specific phospholipase D OS=Homo sapiens GN=GPLD1 PE=1 SV=3

Match to Query 50952: 1915.026222 from(639.349350,3+) rtinseconds(2283) index(43958)

Title: Locus:1.1.1.3079.5 File:"2013-07-02 CLN FXIII 60 min 1st F 3.wiff"

Data file C:\Program Files (x86)\Matrix Science\Mascot Daemon\mgf\4 FXIII 60 min 1st\mascot\_daemon\_merge.mgf

Click mouse within plot area to zoom in by factor of two about that point

Or, Plot from  to  Da

Label all possible matches  Label matches used for scoring

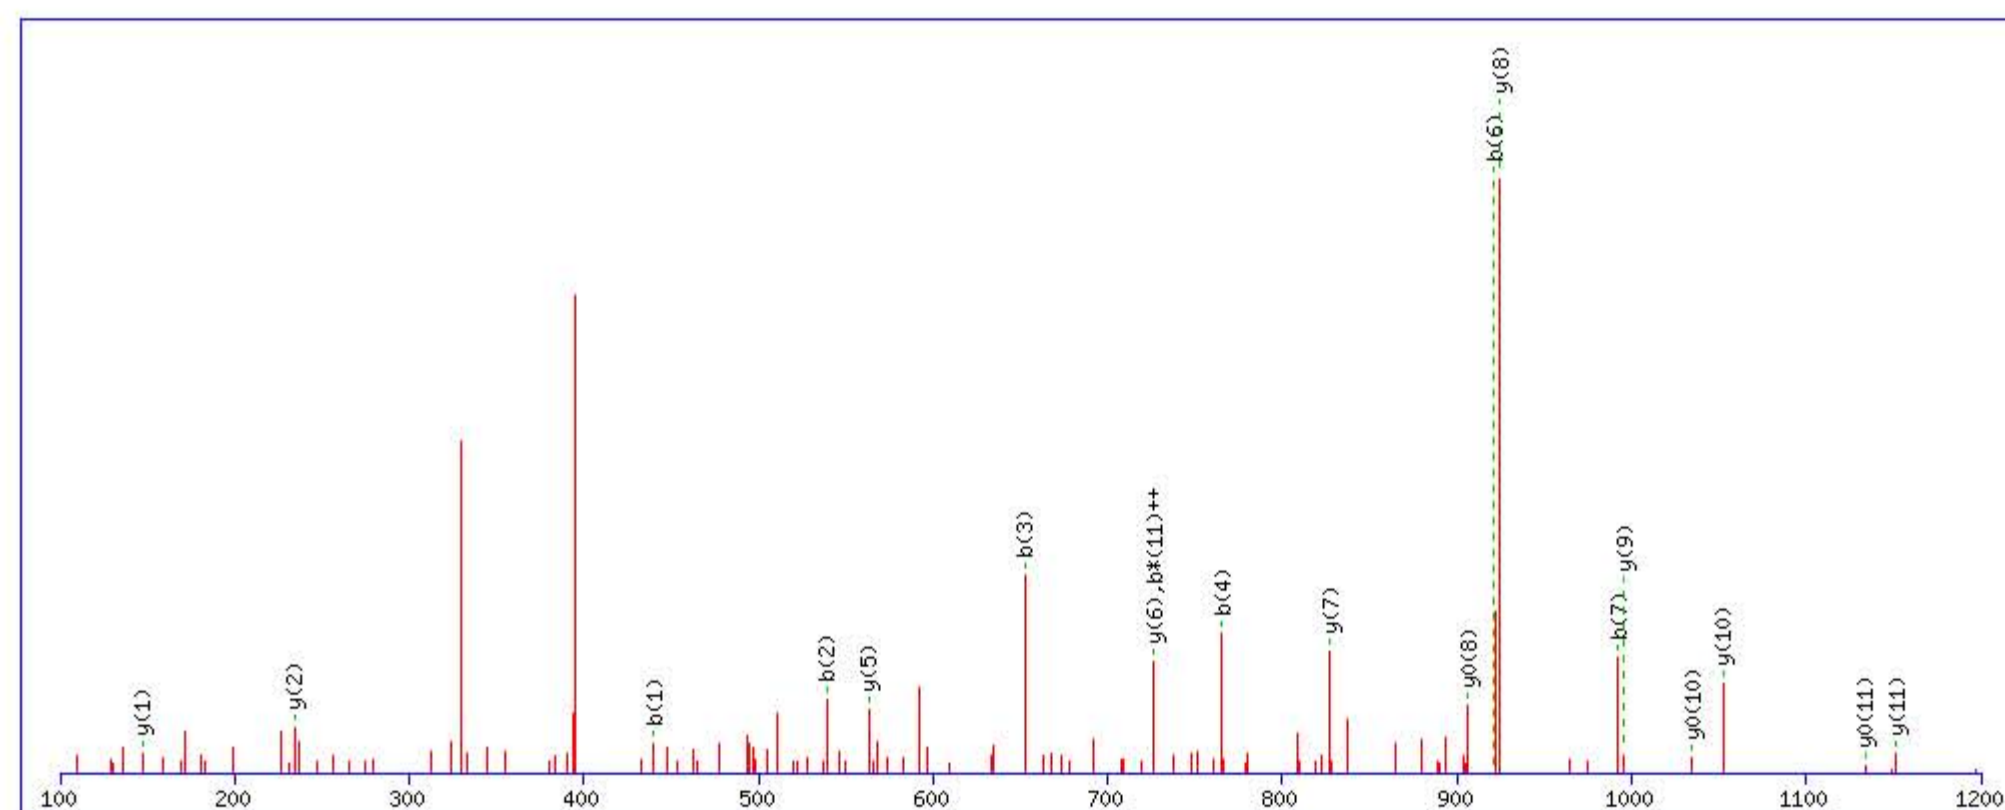

Monoisotopic mass of neutral peptide Mr(calc): 1915.012497

Fixed modifications: Carbamidomethyl (C) (apply to specified residues or termini only)

Variable modifications:

Q1 : Biotin:Thermo-21345 (Q)

Ions Score: 45 Expect: 9e-005

Matches : 19/150 fragment ions using 42 most intense peaks [\(help\)](#)

| #  | b                 | b <sup>++</sup> | b <sup>*</sup> | b <sup>+++</sup>  | b <sup>0</sup> | b <sup>0++</sup> | Seq.     | y                  | y <sup>++</sup> | y <sup>*</sup> | y <sup>+++</sup> | y <sup>0</sup>     | y <sup>0++</sup> | #         |
|----|-------------------|-----------------|----------------|-------------------|----------------|------------------|----------|--------------------|-----------------|----------------|------------------|--------------------|------------------|-----------|
| 1  | <b>440.232602</b> | 220.619939      | 423.206053     | 212.106664        |                |                  | <b>Q</b> |                    |                 |                |                  |                    |                  | <b>15</b> |
| 2  | <b>539.301016</b> | 270.154146      | 522.274467     | 261.640872        |                |                  | <b>V</b> | 1476.794438        | 738.900857      | 1459.767889    | 730.387583       | 1458.783873        | 729.895575       | <b>14</b> |
| 3  | <b>652.385080</b> | 326.696178      | 635.358531     | 318.182904        |                |                  | <b>L</b> | 1377.726024        | 689.366650      | 1360.699475    | 680.853376       | 1359.715459        | 680.361368       | <b>13</b> |
| 4  | <b>765.469144</b> | 383.238210      | 748.442595     | 374.724936        |                |                  | <b>L</b> | 1264.641960        | 632.824618      | 1247.615411    | 624.311344       | 1246.631395        | 623.819336       | <b>12</b> |
| 5  | 864.537558        | 432.772417      | 847.511009     | 424.259143        |                |                  | <b>V</b> | <b>1151.557896</b> | 576.282586      | 1134.531347    | 567.769312       | <b>1133.547331</b> | 567.277304       | <b>11</b> |
| 6  | <b>921.559022</b> | 461.283149      | 904.532473     | 452.769875        |                |                  | <b>G</b> | <b>1052.489482</b> | 526.748379      | 1035.462933    | 518.235105       | <b>1034.478917</b> | 517.743097       | <b>10</b> |
| 7  | <b>992.596136</b> | 496.801706      | 975.569587     | 488.288432        |                |                  | <b>A</b> | <b>995.468018</b>  | 498.237647      | 978.441469     | 489.724373       | 977.457453         | 489.232365       | <b>9</b>  |
| 8  | 1089.648900       | 545.328088      | 1072.622351    | 536.814814        |                |                  | <b>P</b> | <b>924.430904</b>  | 462.719090      | 907.404355     | 454.205816       | <b>906.420339</b>  | 453.713808       | <b>8</b>  |
| 9  | 1190.696579       | 595.851927      | 1173.670030    | 587.338653        | 1172.686014    | 586.846645       | <b>T</b> | <b>827.378140</b>  | 414.192708      | 810.351591     | 405.679434       | 809.367575         | 405.187426       | <b>7</b>  |
| 10 | 1353.759908       | 677.383592      | 1336.733359    | 668.870318        | 1335.749343    | 668.378310       | <b>Y</b> | <b>726.330461</b>  | 363.668869      | 709.303912     | 355.155594       | 708.319896         | 354.663586       | <b>6</b>  |
| 11 | 1468.786851       | 734.897064      | 1451.760302    | <b>726.383789</b> | 1450.776286    | 725.891781       | <b>D</b> | <b>563.267132</b>  | 282.137204      | 546.240583     | 273.623930       | 545.256567         | 273.131922       | <b>5</b>  |
| 12 | 1583.813794       | 792.410535      | 1566.787245    | 783.897261        | 1565.803229    | 783.405253       | <b>D</b> | 448.240189         | 224.623733      | 431.213640     | 216.110458       | 430.229624         | 215.618450       | <b>4</b>  |
| 13 | 1682.882208       | 841.944742      | 1665.855659    | 833.431468        | 1664.871643    | 832.939460       | <b>V</b> | 333.213246         | 167.110261      | 316.186697     | 158.596987       | 315.202681         | 158.104979       | <b>3</b>  |
| 14 | 1769.914236       | 885.460756      | 1752.887687    | 876.947482        | 1751.903671    | 876.455474       | <b>S</b> | <b>234.144832</b>  | 117.576054      | 217.118283     | 109.062780       | 216.134267         | 108.570772       | <b>2</b>  |
| 15 |                   |                 |                |                   |                |                  | <b>K</b> | <b>147.112804</b>  | 74.060040       | 130.086255     | 65.546765        |                    |                  | <b>1</b>  |

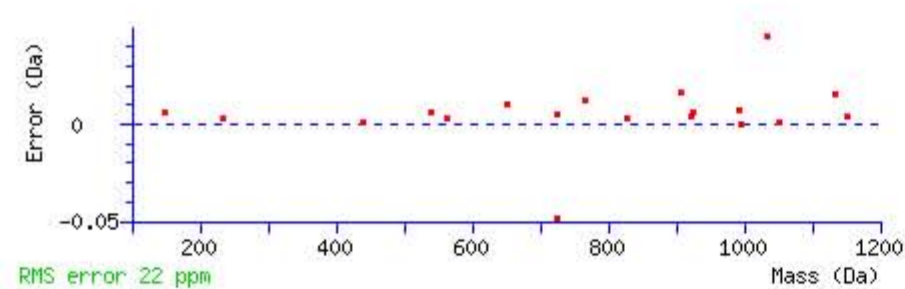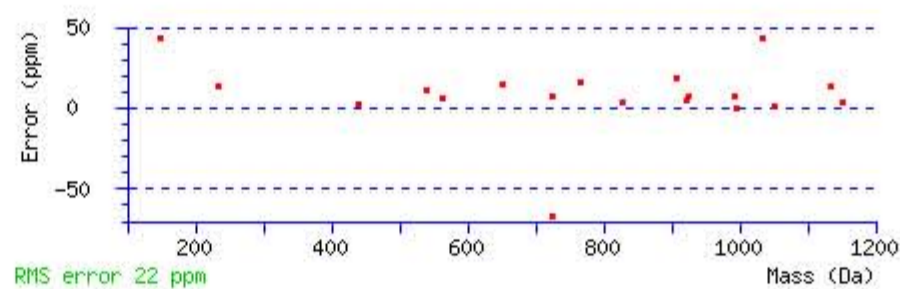

NCBI BLAST search of **QVLLVGAPTYDDVSK**

(Parameters: blastp, nr protein database, expect=20000, no filter, PAM30)

Other BLAST [web gateways](#)

All matches to this query

| Score | Mr(calc):   | Delta     | Sequence                        |
|-------|-------------|-----------|---------------------------------|
| 44.6  | 1915.012497 | 0.013725  | <a href="#">QVLLVGAPTYDDVSK</a> |
| 1.4   | 1915.038925 | -0.012703 | <a href="#">CYALFLNLINKYQKK</a> |

Mascot: <http://www.matrixscience.com/>



# MASCOT Search Results

## Peptide View

MS/MS Fragmentation of **VSSVEECQK**

Found in **KLKB1\_HUMAN**, Plasma kallikrein OS=Homo sapiens GN=KLKB1 PE=1 SV=1

Match to Query 33692: 1375.650668 from(688.832610,2+) rtinseconds(1358) index(37850)

Title: Locus:1.1.1.2756.19 File:"2013-07-02 CLN FXIII 60 min 1st F 3.wiff"

Data file C:\Program Files (x86)\Matrix Science\Mascot Daemon\mgf\4 FXIII 60 min 1st\mascot\_daemon\_merge.mgf

Click mouse within plot area to zoom in by factor of two about that point

Or, Plot from  to  Da

Label all possible matches  Label matches used for scoring

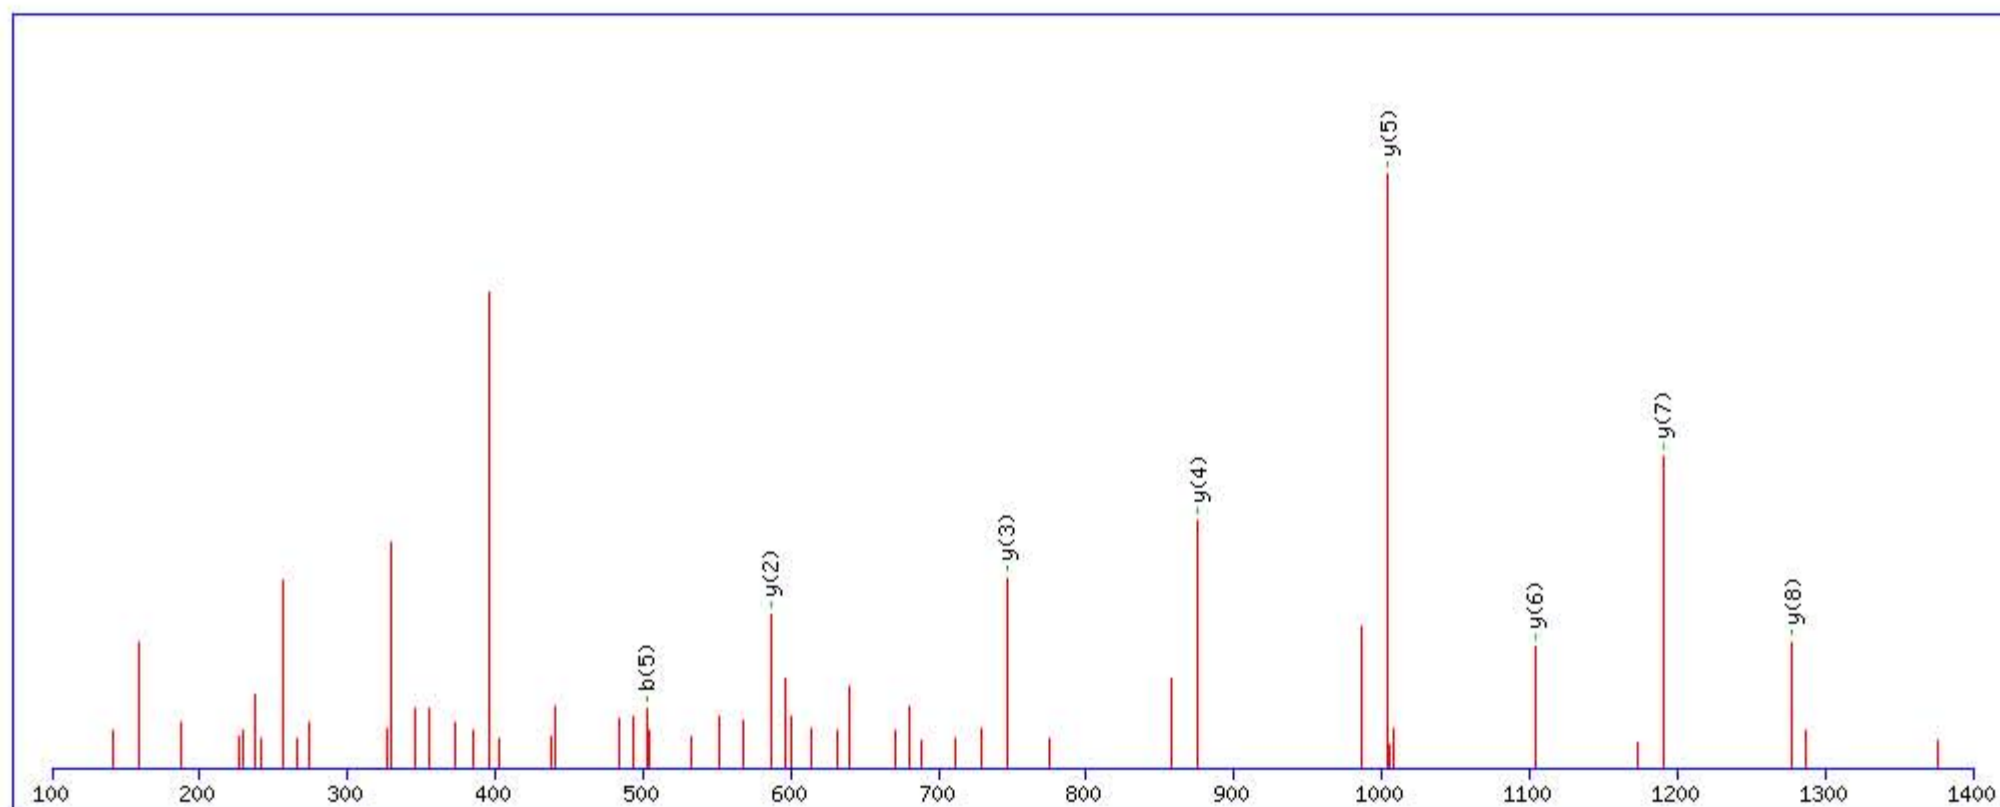

Monoisotopic mass of neutral peptide Mr(calc): 1375.647568

Fixed modifications: Carbamidomethyl (C) (apply to specified residues or termini only)

Variable modifications:

Q8 : Biotin:Thermo-21345 (Q)

Ions Score: 57 Expect: 1.9e-005

Matches : 8/74 fragment ions using 12 most intense peaks ([help](#))

| # | b                 | b <sup>++</sup> | b <sup>*</sup> | b <sup>***</sup> | b <sup>0</sup> | b <sup>0++</sup> | Seq. | y                  | y <sup>++</sup> | y <sup>*</sup> | y <sup>***</sup> | y <sup>0</sup> | y <sup>0++</sup> | # |
|---|-------------------|-----------------|----------------|------------------|----------------|------------------|------|--------------------|-----------------|----------------|------------------|----------------|------------------|---|
| 1 | 100.075690        | 50.541483       |                |                  |                |                  | V    |                    |                 |                |                  |                |                  | 9 |
| 2 | 187.107718        | 94.057497       |                |                  | 169.097153     | 85.052214        | S    | <b>1277.586435</b> | 639.296856      | 1260.559886    | 630.783581       | 1259.575870    | 630.291573       | 8 |
| 3 | 274.139746        | 137.573511      |                |                  | 256.129181     | 128.568229       | S    | <b>1190.554407</b> | 595.780842      | 1173.527858    | 587.267567       | 1172.543842    | 586.775559       | 7 |
| 4 | 373.208160        | 187.107718      |                |                  | 355.197595     | 178.102436       | V    | <b>1103.522379</b> | 552.264828      | 1086.495830    | 543.751553       | 1085.511814    | 543.259545       | 6 |
| 5 | <b>502.250753</b> | 251.629015      |                |                  | 484.240188     | 242.623732       | E    | <b>1004.453965</b> | 502.730621      | 987.427416     | 494.217346       | 986.443400     | 493.725338       | 5 |
| 6 | 631.293346        | 316.150311      |                |                  | 613.282781     | 307.145029       | E    | <b>875.411372</b>  | 438.209324      | 858.384823     | 429.696050       | 857.400807     | 429.204042       | 4 |
| 7 | 791.323995        | 396.165636      |                |                  | 773.313430     | 387.160353       | C    | <b>746.368779</b>  | 373.688028      | 729.342230     | 365.174753       |                |                  | 3 |
| 8 | 1230.549321       | 615.778299      | 1213.522772    | 607.265024       | 1212.538756    | 606.773016       | Q    | <b>586.338130</b>  | 293.672703      | 569.311581     | 285.159429       |                |                  | 2 |
| 9 |                   |                 |                |                  |                |                  | K    | 147.112804         | 74.060040       | 130.086255     | 65.546765        |                |                  | 1 |

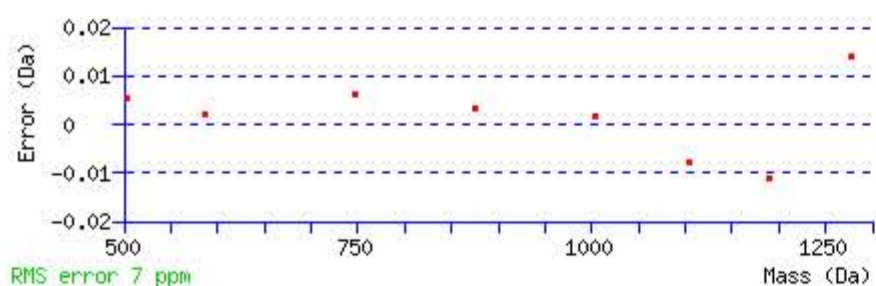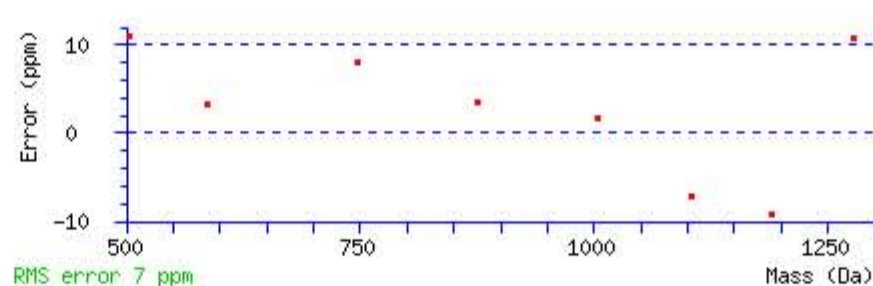

NCBI BLAST search of **VSSVEECQK**

(Parameters: blastp, nr protein database, expect=20000, no filter, PAM30)

Other BLAST [web gateways](#)

All matches to this query

| Score | Mr(calc):   | Delta     | Sequence                  |
|-------|-------------|-----------|---------------------------|
| 57.2  | 1375.647568 | 0.003100  | <a href="#">VSSVEECQK</a> |
| 6.8   | 1375.662827 | -0.012159 | <a href="#">GFSIPECQK</a> |

Mascot: <http://www.matrixscience.com/>



# MASCOT Search Results

## Peptide View

MS/MS Fragmentation of **VNIPLVTNEECQK**

Found in **KLKB1\_HUMAN**, Plasma kallikrein OS=Homo sapiens GN=KLKB1 PE=1 SV=1

Match to Query 49763: 1853.959328 from(927.986940,2+) rtinseconds(2138) index(79453)

Title: Locus:1.1.1.2958.25 File:"2013-07-02 CLN FXIII 60 min 1st FT.wiff"

Data file C:\Program Files (x86)\Matrix Science\Mascot Daemon\mgf4 FXIII 60 min 1st\mascot\_daemon\_merge.mgf

Click mouse within plot area to zoom in by factor of two about that point

Or, Plot from  to  Da

Label all possible matches  Label matches used for scoring

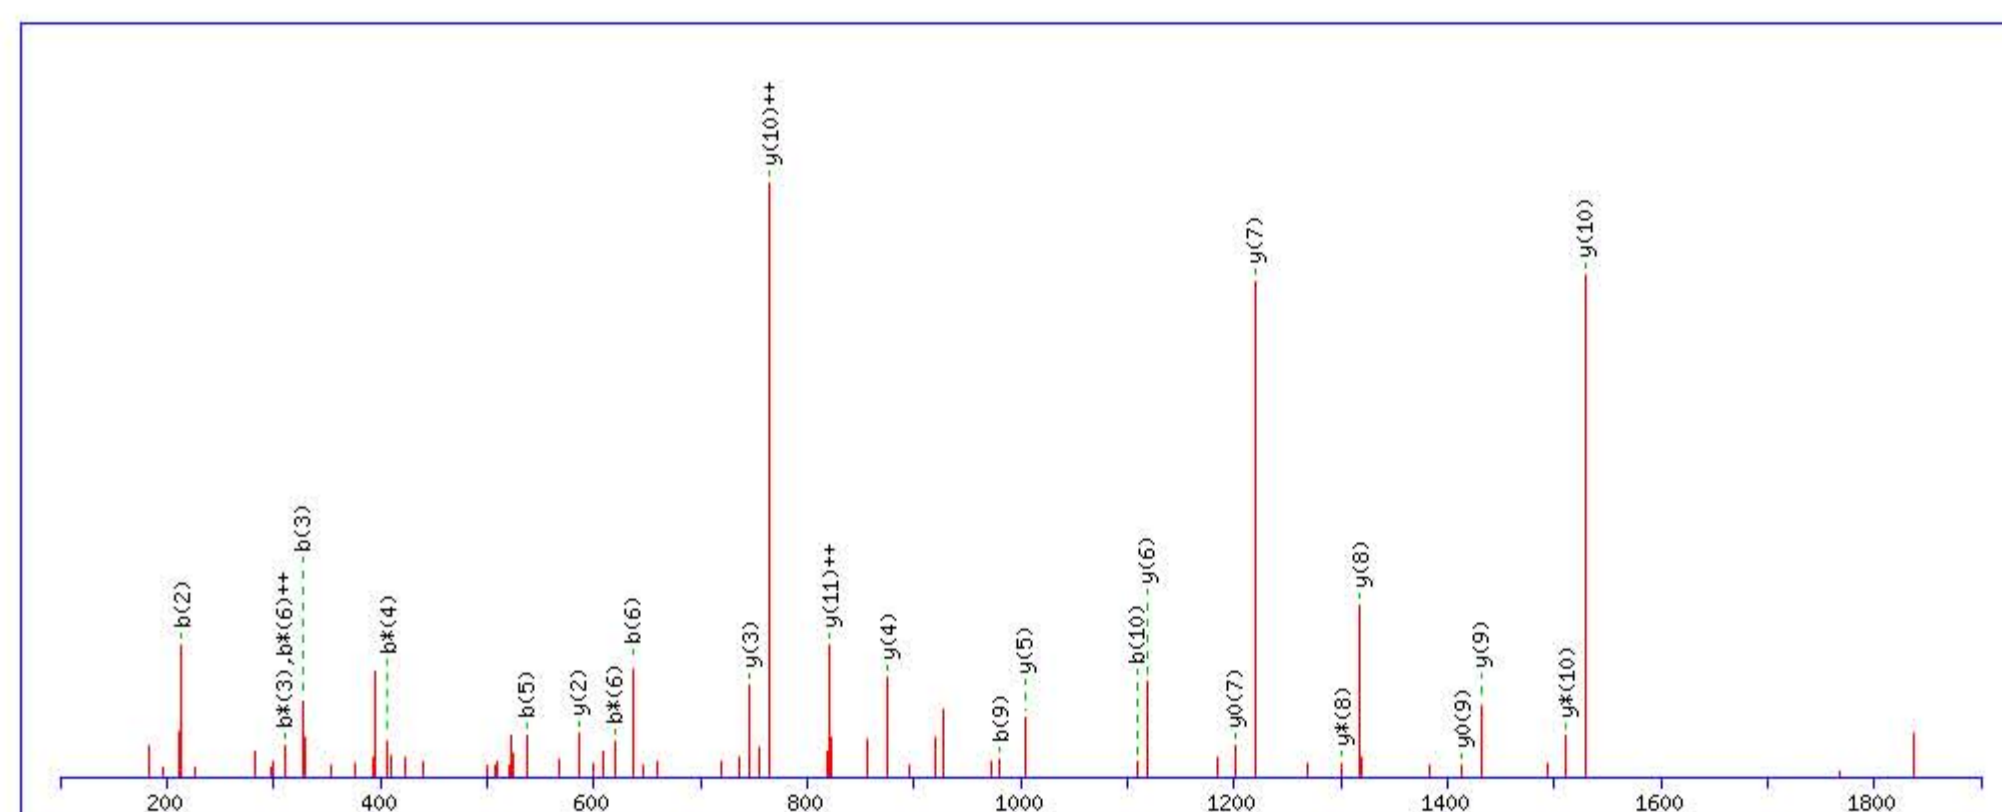

Monoisotopic mass of neutral peptide Mr(calc): 1853.937927

Fixed modifications: Carbamidomethyl (C) (apply to specified residues or termini only)

Variable modifications:

Q12 : Biotin:Thermo-21345 (Q)

Ions Score: 56 Expect: 8.4e-006

Matches : 25/124 fragment ions using 42 most intense peaks [\(help\)](#)

| #  | b                  | b <sup>++</sup> | b <sup>*</sup>    | b <sup>*++</sup>  | b <sup>0</sup> | b <sup>0++</sup> | Seq. | y                  | y <sup>++</sup>   | y <sup>*</sup>     | y <sup>*++</sup> | y <sup>0</sup>     | y <sup>0++</sup> | #  |
|----|--------------------|-----------------|-------------------|-------------------|----------------|------------------|------|--------------------|-------------------|--------------------|------------------|--------------------|------------------|----|
| 1  | 100.075690         | 50.541483       |                   |                   |                |                  | V    |                    |                   |                    |                  |                    |                  | 13 |
| 2  | <b>214.118617</b>  | 107.562947      | 197.092068        | 99.049672         |                |                  | N    | 1755.876804        | 878.442040        | 1738.850255        | 869.928766       | 1737.866239        | 869.436758       | 12 |
| 3  | <b>327.202681</b>  | 164.104978      | <b>310.176132</b> | 155.591704        |                |                  | I    | 1641.833877        | <b>821.420577</b> | 1624.807328        | 812.907302       | 1623.823312        | 812.415294       | 11 |
| 4  | 424.255445         | 212.631360      | <b>407.228896</b> | 204.118086        |                |                  | P    | <b>1528.749813</b> | <b>764.878545</b> | <b>1511.723264</b> | 756.365270       | 1510.739248        | 755.873262       | 10 |
| 5  | <b>537.339509</b>  | 269.173393      | 520.312960        | 260.660118        |                |                  | L    | <b>1431.697049</b> | 716.352163        | 1414.670500        | 707.838888       | <b>1413.686484</b> | 707.346880       | 9  |
| 6  | <b>636.407923</b>  | 318.707600      | <b>619.381374</b> | <b>310.194325</b> |                |                  | V    | <b>1318.612985</b> | 659.810131        | <b>1301.586436</b> | 651.296856       | 1300.602420        | 650.804848       | 8  |
| 7  | 737.455602         | 369.231439      | 720.429053        | 360.718165        | 719.445037     | 360.226157       | T    | <b>1219.544571</b> | 610.275924        | 1202.518022        | 601.762649       | <b>1201.534006</b> | 601.270641       | 7  |
| 8  | 851.498529         | 426.252903      | 834.471980        | 417.739628        | 833.487964     | 417.247620       | N    | <b>1118.496892</b> | 559.752084        | 1101.470343        | 551.238810       | 1100.486327        | 550.746802       | 6  |
| 9  | <b>980.541122</b>  | 490.774199      | 963.514573        | 482.260924        | 962.530557     | 481.768916       | E    | <b>1004.453965</b> | 502.730621        | 987.427416         | 494.217346       | 986.443400         | 493.725338       | 5  |
| 10 | <b>1109.583715</b> | 555.295496      | 1092.557166       | 546.782221        | 1091.573150    | 546.290213       | E    | <b>875.411372</b>  | 438.209324        | 858.384823         | 429.696050       | 857.400807         | 429.204042       | 4  |
| 11 | 1269.614364        | 635.310820      | 1252.587815       | 626.797546        | 1251.603799    | 626.305538       | C    | <b>746.368779</b>  | 373.688028        | 729.342230         | 365.174753       |                    |                  | 3  |
| 12 | 1708.839690        | 854.923483      | 1691.813141       | 846.410209        | 1690.829125    | 845.918201       | Q    | <b>586.338130</b>  | 293.672703        | 569.311581         | 285.159429       |                    |                  | 2  |
| 13 |                    |                 |                   |                   |                |                  | K    | 147.112804         | 74.060040         | 130.086255         | 65.546765        |                    |                  | 1  |

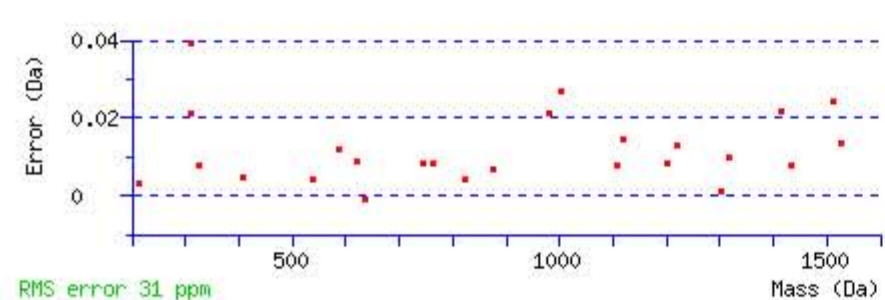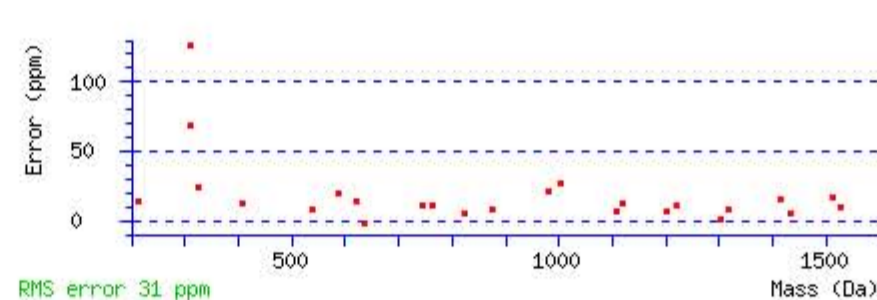

NCBI BLAST search of **VNIPLVTNEECQK**

(Parameters: blastp, nr protein database, expect=20000, no filter, PAM30)

Other BLAST [web gateways](#)

All matches to this query

| Score | Mr(calc):   | Delta    | Sequence                         |
|-------|-------------|----------|----------------------------------|
| 55.9  | 1853.937927 | 0.021401 | <a href="#">VNIPLVTNEECQK</a>    |
| 1.8   | 1853.934341 | 0.024987 | <a href="#">RGLSNPNELQAIDSNR</a> |

Mascot: <http://www.matrixscience.com/>



# MASCOT Search Results

## Peptide View

MS/MS Fragmentation of **QCGHQISACHR**

Found in **KLKB1\_HUMAN**, Plasma kallikrein OS=Homo sapiens GN=KLKB1 PE=1 SV=1

Match to Query 52355: 1974.912376 from(494.735370,4+) rtinseconds(1421) index(38269)

Title: Locus:1.1.1.2778.19 File:"2013-07-02 CLN FXIII 60 min 1st F 3.wiff"

Data file C:\Program Files (x86)\Matrix Science\Mascot Daemon\mgf4 FXIII 60 min 1st\mascot\_daemon\_merge.mgf

Click mouse within plot area to zoom in by factor of two about that point

Or, Plot from  to  Da

Label all possible matches  Label matches used for scoring

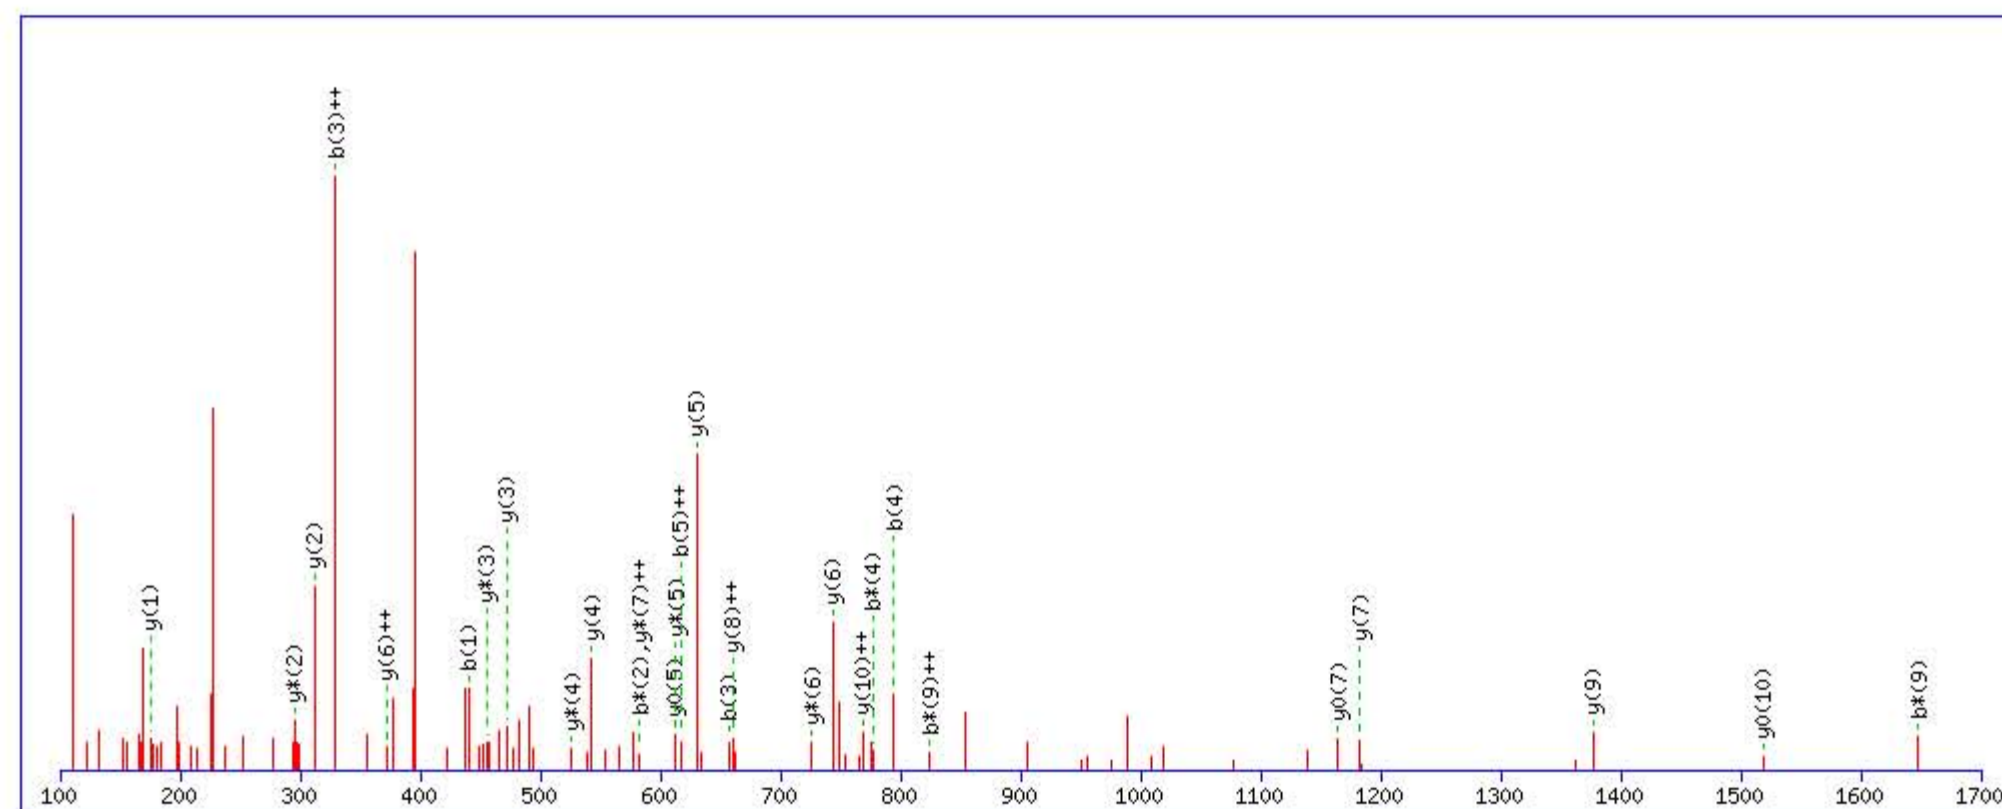

Monoisotopic mass of neutral peptide Mr(calc): 1974.916122

Fixed modifications: Carbamidomethyl (C) (apply to specified residues or termini only)

Variable modifications:

Q1 : Biotin:Thermo-21345 (Q)

Q5 : Biotin:Thermo-21345 (Q)

Ions Score: 27 Expect: 0.026

Matches : 29/100 fragment ions using 68 most intense peaks [\(help\)](#)

| #  | b           | b <sup>++</sup> | b <sup>*</sup> | b <sup>*++</sup> | b <sup>0</sup> | b <sup>0++</sup> | Seq. | y           | y <sup>++</sup> | y <sup>*</sup> | y <sup>*++</sup> | y <sup>0</sup> | y <sup>0++</sup> | #  |
|----|-------------|-----------------|----------------|------------------|----------------|------------------|------|-------------|-----------------|----------------|------------------|----------------|------------------|----|
| 1  | 440.232602  | 220.619939      | 423.206053     | 212.106664       |                |                  | Q    |             |                 |                |                  |                |                  | 11 |
| 2  | 600.263251  | 300.635264      | 583.236702     | 292.121989       |                |                  | C    | 1536.698070 | 768.852673      | 1519.671521    | 760.339399       | 1518.687505    | 759.847391       | 10 |
| 3  | 657.284715  | 329.145996      | 640.258166     | 320.632721       |                |                  | G    | 1376.667421 | 688.837349      | 1359.640872    | 680.324074       | 1358.656856    | 679.832066       | 9  |
| 4  | 794.343627  | 397.675452      | 777.317078     | 389.162177       |                |                  | H    | 1319.645957 | 660.326617      | 1302.619408    | 651.813342       | 1301.635392    | 651.321334       | 8  |
| 5  | 1233.568953 | 617.288115      | 1216.542404    | 608.774840       |                |                  | Q    | 1182.587045 | 591.797161      | 1165.560496    | 583.283886       | 1164.576480    | 582.791878       | 7  |
| 6  | 1346.653017 | 673.830147      | 1329.626468    | 665.316872       |                |                  | I    | 743.361719  | 372.184498      | 726.335170     | 363.671223       | 725.351154     | 363.179215       | 6  |
| 7  | 1433.685045 | 717.346161      | 1416.658496    | 708.832886       | 1415.674480    | 708.340878       | S    | 630.277655  | 315.642466      | 613.251106     | 307.129191       | 612.267090     | 306.637183       | 5  |
| 8  | 1504.722159 | 752.864718      | 1487.695610    | 744.351443       | 1486.711594    | 743.859435       | A    | 543.245627  | 272.126452      | 526.219078     | 263.613177       |                |                  | 4  |
| 9  | 1664.752808 | 832.880042      | 1647.726259    | 824.366768       | 1646.742243    | 823.874760       | C    | 472.208513  | 236.607894      | 455.181964     | 228.094620       |                |                  | 3  |
| 10 | 1801.811720 | 901.409498      | 1784.785171    | 892.896224       | 1783.801155    | 892.404216       | H    | 312.177864  | 156.592570      | 295.151315     | 148.079295       |                |                  | 2  |
| 11 |             |                 |                |                  |                |                  | R    | 175.118952  | 88.063114       | 158.092403     | 79.549839        |                |                  | 1  |

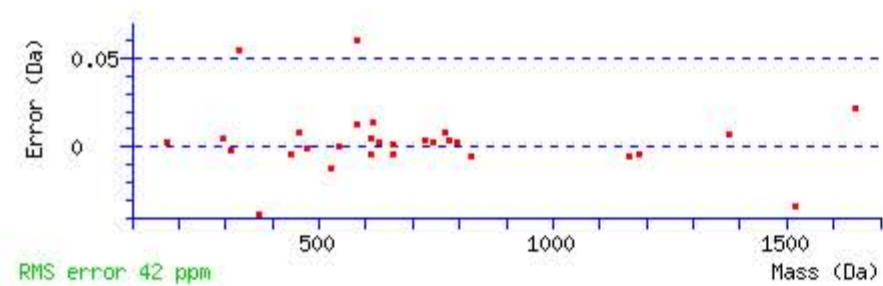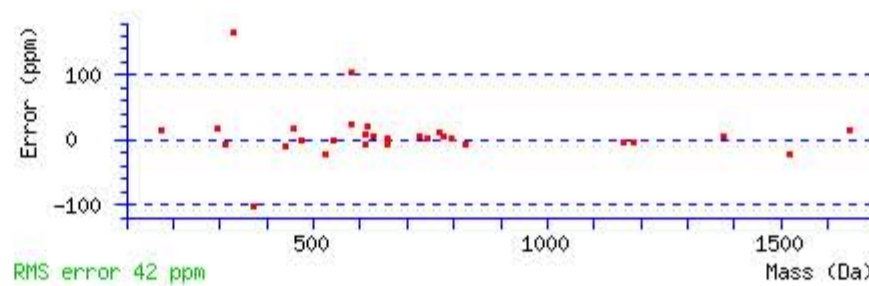

NCBI BLAST search of **QCGHQISACHR**

(Parameters: blastp, nr protein database, expect=20000, no filter, PAM30)

Other BLAST [web gateways](#)

All matches to this query

| Score | Mr(calc):   | Delta     | Sequence                    |
|-------|-------------|-----------|-----------------------------|
| 27.0  | 1974.916122 | -0.003746 | <a href="#">QCGHQISACHR</a> |

Mascot: <http://www.matrixscience.com/>



# MASCOT Search Results

## Peptide View

MS/MS Fragmentation of **GGDVASMYTPNAQYCQMR**

Found in **KLKB1\_HUMAN**, Plasma kallikrein OS=Homo sapiens GN=KLKB1 PE=1 SV=1

Match to Query 61802: 2359.038882 from(787.353570,3+) rtinseconds(2047) index(42417)

Title: Locus:1.1.1.2996.20 File:"2013-07-02 CLN FXIII 60 min 1st F 3.wiff"

Data file C:\Program Files (x86)\Matrix Science\Mascot Daemon\mgf4 FXIII 60 min 1st\mascot\_daemon\_merge.mgf

Click mouse within plot area to zoom in by factor of two about that point

Or, Plot from  to  Da

Label all possible matches  Label matches used for scoring

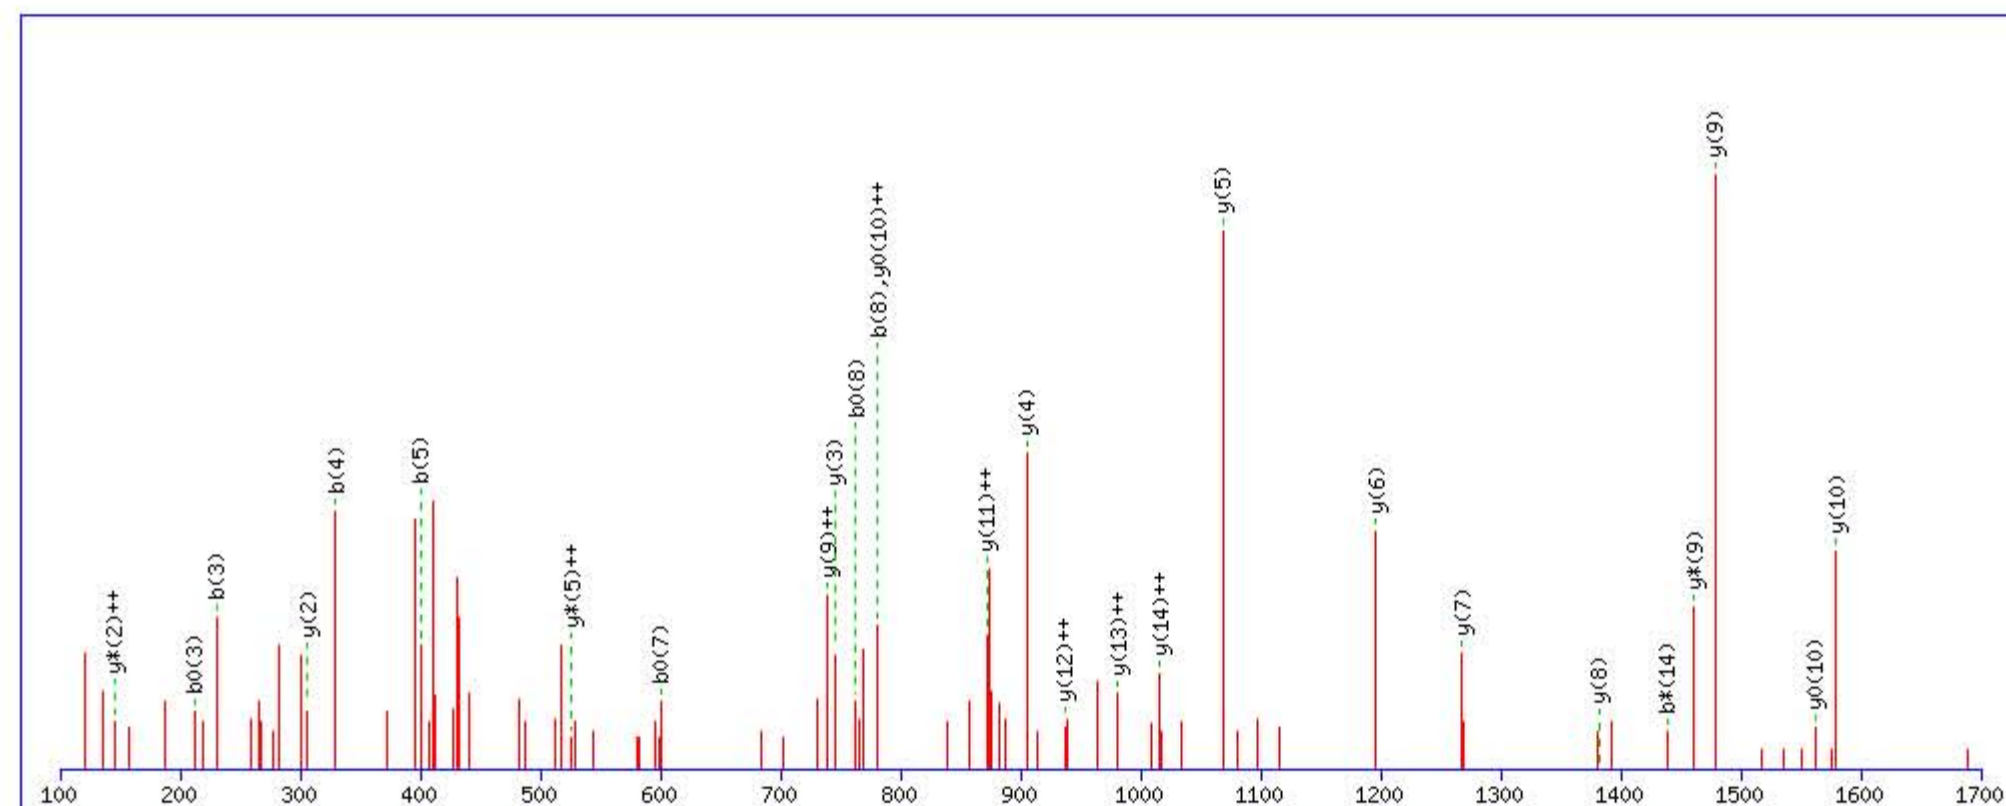

Monoisotopic mass of neutral peptide Mr(calc): 2359.021759

Fixed modifications: Carbamidomethyl (C) (apply to specified residues or termini only)

Variable modifications:

Q16 : Biotin:Thermo-21345 (Q)

Ions Score: 31 Expect: 0.0049

Matches : 27/162 fragment ions using 71 most intense peaks [\(help\)](#)

| #  | b                 | b <sup>++</sup> | b <sup>+</sup>     | b <sup>+++</sup> | b <sup>0</sup>    | b <sup>0++</sup> | Seq.     | y                  | y <sup>++</sup>    | y <sup>+</sup>     | y <sup>+++</sup>  | y <sup>0</sup>     | y <sup>0++</sup>  | #  |
|----|-------------------|-----------------|--------------------|------------------|-------------------|------------------|----------|--------------------|--------------------|--------------------|-------------------|--------------------|-------------------|----|
| 1  | 58.028740         | 29.518008       |                    |                  |                   |                  | <b>G</b> |                    |                    |                    |                   |                    |                   | 18 |
| 2  | 115.050204        | 58.028740       |                    |                  |                   |                  | <b>G</b> | 2303.007580        | 1152.007428        | 2285.981031        | 1143.494153       | 2284.997015        | 1143.002145       | 17 |
| 3  | <b>230.077147</b> | 115.542211      |                    |                  | <b>212.066582</b> | 106.536929       | <b>D</b> | 2245.986116        | 1123.496696        | 2228.959567        | 1114.983421       | 2227.975551        | 1114.491413       | 16 |
| 4  | <b>329.145561</b> | 165.076418      |                    |                  | 311.134996        | 156.071136       | <b>V</b> | 2130.959173        | 1065.983224        | 2113.932624        | 1057.469950       | 2112.948608        | 1056.977942       | 15 |
| 5  | <b>400.182675</b> | 200.594975      |                    |                  | 382.172110        | 191.589693       | <b>A</b> | 2031.890759        | <b>1016.449018</b> | 2014.864210        | 1007.935743       | 2013.880194        | 1007.443735       | 14 |
| 6  | 487.214703        | 244.110989      |                    |                  | 469.204138        | 235.105707       | <b>S</b> | 1960.853645        | <b>980.930461</b>  | 1943.827096        | 972.417186        | 1942.843080        | 971.925178        | 13 |
| 7  | 618.255188        | 309.631232      |                    |                  | <b>600.244623</b> | 300.625949       | <b>M</b> | 1873.821617        | <b>937.414447</b>  | 1856.795068        | 928.901172        | 1855.811052        | 928.409164        | 12 |
| 8  | <b>781.318517</b> | 391.162896      |                    |                  | <b>763.307952</b> | 382.157614       | <b>Y</b> | 1742.781132        | <b>871.894204</b>  | 1725.754583        | 863.380930        | 1724.770567        | 862.888922        | 11 |
| 9  | 882.366196        | 441.686736      |                    |                  | 864.355631        | 432.681453       | <b>T</b> | <b>1579.717803</b> | 790.362540         | 1562.691254        | 781.849265        | <b>1561.707238</b> | <b>781.357257</b> | 10 |
| 10 | 979.418960        | 490.213118      |                    |                  | 961.408395        | 481.207835       | <b>P</b> | <b>1478.670124</b> | <b>739.838700</b>  | <b>1461.643575</b> | 731.325426        |                    |                   | 9  |
| 11 | 1093.461887       | 547.234581      | 1076.435338        | 538.721307       | 1075.451322       | 538.229299       | <b>N</b> | <b>1381.617360</b> | 691.312318         | 1364.590811        | 682.799044        |                    |                   | 8  |
| 12 | 1164.499001       | 582.753138      | 1147.472452        | 574.239864       | 1146.488436       | 573.747856       | <b>A</b> | <b>1267.574433</b> | 634.290855         | 1250.547884        | 625.777580        |                    |                   | 7  |
| 13 | 1292.557579       | 646.782428      | 1275.531030        | 638.269153       | 1274.547014       | 637.777145       | <b>Q</b> | <b>1196.537319</b> | 598.772298         | 1179.510770        | 590.259023        |                    |                   | 6  |
| 14 | 1455.620908       | 728.314092      | <b>1438.594359</b> | 719.800818       | 1437.610343       | 719.308810       | <b>Y</b> | <b>1068.478741</b> | 534.743009         | 1051.452192        | <b>526.229734</b> |                    |                   | 5  |
| 15 | 1615.651557       | 808.329417      | 1598.625008        | 799.816142       | 1597.640992       | 799.324134       | <b>C</b> | <b>905.415412</b>  | 453.211344         | 888.388863         | 444.698070        |                    |                   | 4  |
| 16 | 2054.876883       | 1027.942079     | 2037.850334        | 1019.428805      | 2036.866318       | 1018.936797      | <b>Q</b> | <b>745.384763</b>  | 373.196020         | 728.358214         | 364.682745        |                    |                   | 3  |
| 17 | 2185.917368       | 1093.462322     | 2168.890819        | 1084.949047      | 2167.906803       | 1084.457039      | <b>M</b> | <b>306.159437</b>  | 153.583356         | 289.132888         | <b>145.070082</b> |                    |                   | 2  |
| 18 |                   |                 |                    |                  |                   |                  | <b>R</b> | 175.118952         | 88.063114          | 158.092403         | 79.549839         |                    |                   | 1  |

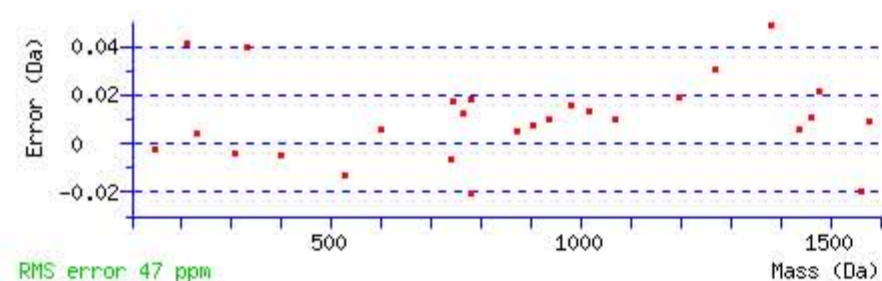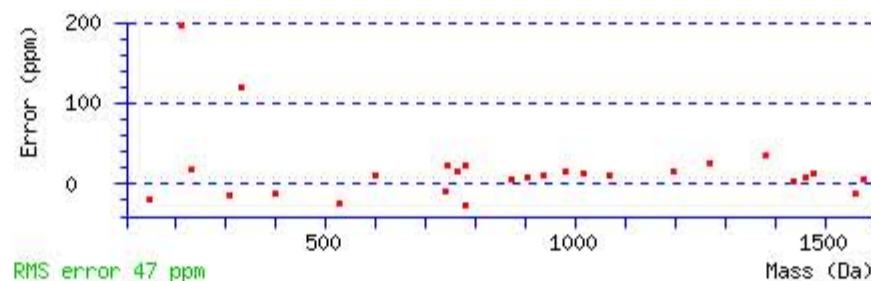

NCBI BLAST search of [GGDVASMYTPNAQYCQMR](#)

(Parameters: blastp, nr protein database, expect=20000, no filter, PAM30)

Other BLAST [web gateways](#)

All matches to this query

| Score | Mr(calc):   | Delta    | Sequence                           |
|-------|-------------|----------|------------------------------------|
| 31.0  | 2359.021759 | 0.017123 | <a href="#">GGDVASMYTPNAQYCQMR</a> |
| 14.0  | 2359.021759 | 0.017123 | <a href="#">GGDVASMYTPNAQYCQMR</a> |

Mascot: <http://www.matrixscience.com/>



# MASCOT Search Results

## Peptide View

MS/MS Fragmentation of **DFTCVHQALK**

Found in **IC1\_HUMAN**, Plasma protease C1 inhibitor OS=Homo sapiens GN=SERPING1 PE=1 SV=2

Match to Query 39444: 1528.762128 from(765.388340,2+) rtinseconds(1802) index(40763)

Title: Locus:1.1.1.2911.19 File:"2013-07-02 CLN FXIII 60 min 1st F 3.wiff"

Data file C:\Program Files (x86)\Matrix Science\Mascot Daemon\mgf\4 FXIII 60 min 1st\mascot\_daemon\_merge.mgf

Click mouse within plot area to zoom in by factor of two about that point

Or, Plot from  to  Da

Label all possible matches  Label matches used for scoring

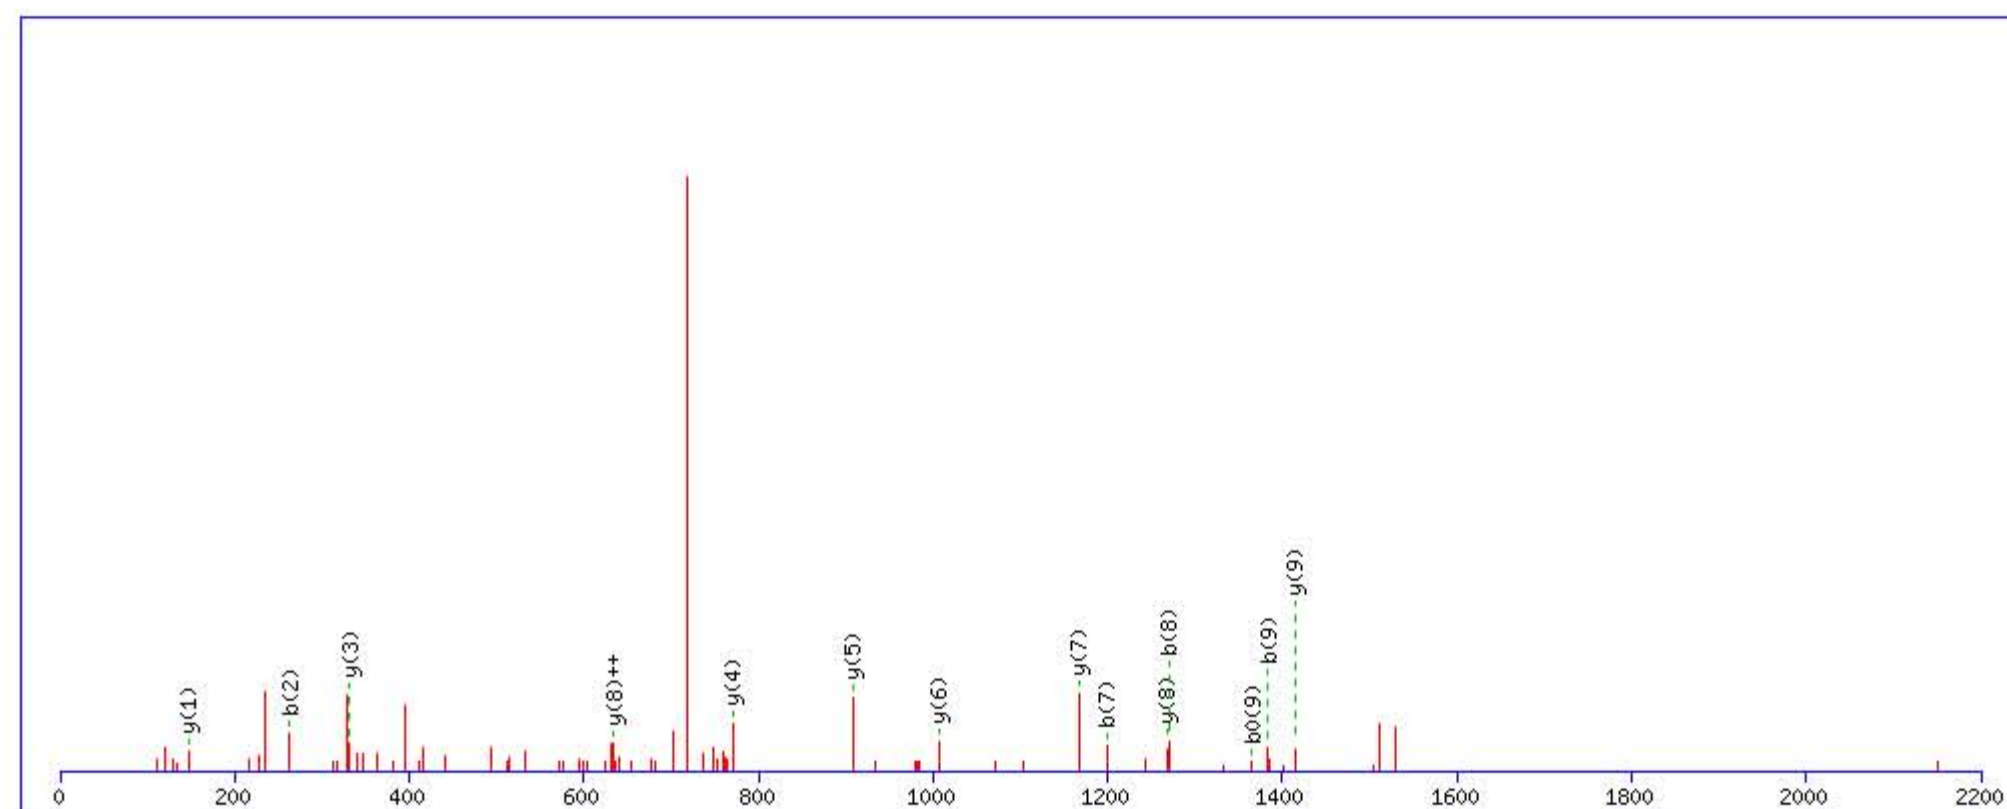

Monoisotopic mass of neutral peptide Mr(calc): 1528.753052

Fixed modifications: Carbamidomethyl (C) (apply to specified residues or termini only)

Variable modifications:

Q7 : Biotin:Thermo-21345 (Q)

Ions Score: 33 Expect: 0.0026

Matches : 14/82 fragment ions using 40 most intense peaks [\(help\)](#)

| #  | b                  | b <sup>++</sup> | b <sup>*</sup> | b <sup>*++</sup> | b <sup>0</sup>     | b <sup>0++</sup> | Seq. | y                  | y <sup>++</sup>   | y <sup>*</sup> | y <sup>*++</sup> | y <sup>0</sup> | y <sup>0++</sup> | #  |
|----|--------------------|-----------------|----------------|------------------|--------------------|------------------|------|--------------------|-------------------|----------------|------------------|----------------|------------------|----|
| 1  | 116.034219         | 58.520748       |                |                  | 98.023654          | 49.515465        | D    |                    |                   |                |                  |                |                  | 10 |
| 2  | <b>263.102633</b>  | 132.054954      |                |                  | 245.092068         | 123.049672       | F    | <b>1414.733376</b> | 707.870326        | 1397.706827    | 699.357051       | 1396.722811    | 698.865043       | 9  |
| 3  | 364.150312         | 182.578794      |                |                  | 346.139747         | 173.573512       | T    | <b>1267.664962</b> | <b>634.336119</b> | 1250.638413    | 625.822844       | 1249.654397    | 625.330836       | 8  |
| 4  | 524.180961         | 262.594119      |                |                  | 506.170396         | 253.588836       | C    | <b>1166.617283</b> | 583.812279        | 1149.590734    | 575.299005       |                |                  | 7  |
| 5  | 623.249375         | 312.128326      |                |                  | 605.238810         | 303.123043       | V    | <b>1006.586634</b> | 503.796955        | 989.560085     | 495.283680       |                |                  | 6  |
| 6  | 760.308287         | 380.657782      |                |                  | 742.297722         | 371.652499       | H    | <b>907.518220</b>  | 454.262748        | 890.491671     | 445.749473       |                |                  | 5  |
| 7  | <b>1199.533613</b> | 600.270444      | 1182.507064    | 591.757170       | 1181.523048        | 591.265162       | Q    | <b>770.459308</b>  | 385.733292        | 753.432759     | 377.220017       |                |                  | 4  |
| 8  | <b>1270.570727</b> | 635.789001      | 1253.544178    | 627.275727       | 1252.560162        | 626.783719       | A    | <b>331.233982</b>  | 166.120629        | 314.207433     | 157.607354       |                |                  | 3  |
| 9  | <b>1383.654791</b> | 692.331033      | 1366.628242    | 683.817759       | <b>1365.644226</b> | 683.325751       | L    | 260.196868         | 130.602072        | 243.170319     | 122.088797       |                |                  | 2  |
| 10 |                    |                 |                |                  |                    |                  | K    | <b>147.112804</b>  | 74.060040         | 130.086255     | 65.546765        |                |                  | 1  |

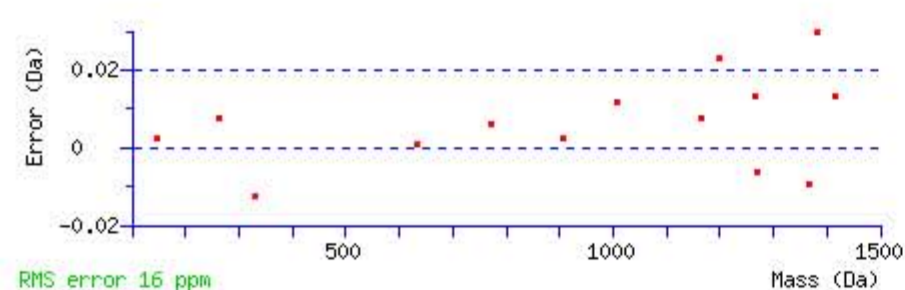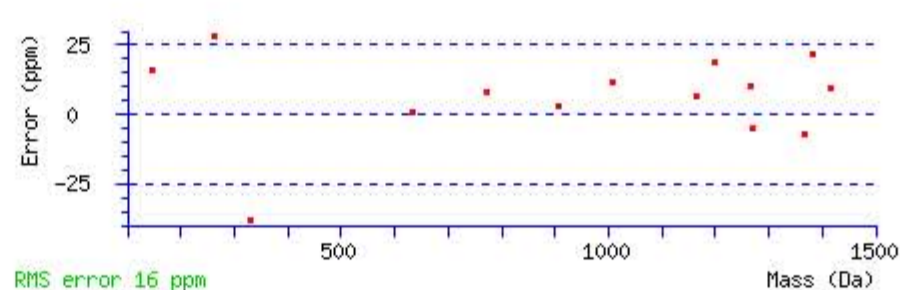

NCBI BLAST search of **DFTCVHQALK**

(Parameters: blastp, nr protein database, expect=20000, no filter, PAM30)

Other BLAST [web gateways](#)

All matches to this query

| Score | Mr(calc):   | Delta     | Sequence                       |
|-------|-------------|-----------|--------------------------------|
| 32.7  | 1528.753052 | 0.009076  | <a href="#">DFTCVHQALK</a>     |
| 4.9   | 1528.755524 | 0.006604  | <a href="#">QQNEGDSIISK</a>    |
| 4.5   | 1528.744293 | 0.017835  | <a href="#">KDYTSGAMLTGELK</a> |
| 0.9   | 1528.755524 | 0.006604  | <a href="#">QQNEGDSIISK</a>    |
| 0.7   | 1528.773254 | -0.011126 | <a href="#">QEDILNGKENEIK</a>  |
| 0.3   | 1528.773254 | -0.011126 | <a href="#">ENLQLNQETEAIK</a>  |
| 0.3   | 1528.755524 | 0.006604  | <a href="#">DQKATPLGPQEMAK</a> |
| 0.3   | 1528.780685 | -0.018557 | <a href="#">KYMATVTSISGDLK</a> |



# MASCOT Search Results

## Peptide View

MS/MS Fragmentation of **GVTSVSQIFHSPDLAIR**

Found in **IC1\_HUMAN**, Plasma protease C1 inhibitor OS=Homo sapiens GN=SERPING1 PE=1 SV=2

Match to Query 56782: 2137.149016 from(535.294530,4+) rtinseconds(2312) index(44108)

Title: Locus:1.1.1.3089.4 File:"2013-07-02 CLN FXIII 60 min 1st F 3.wiff"

Data file C:\Program Files (x86)\Matrix Science\Mascot Daemon\mgf4 FXIII 60 min 1st\mascot\_daemon\_merge.mgf

Click mouse within plot area to zoom in by factor of two about that point

Or, Plot from  to  Da

Label all possible matches  Label matches used for scoring

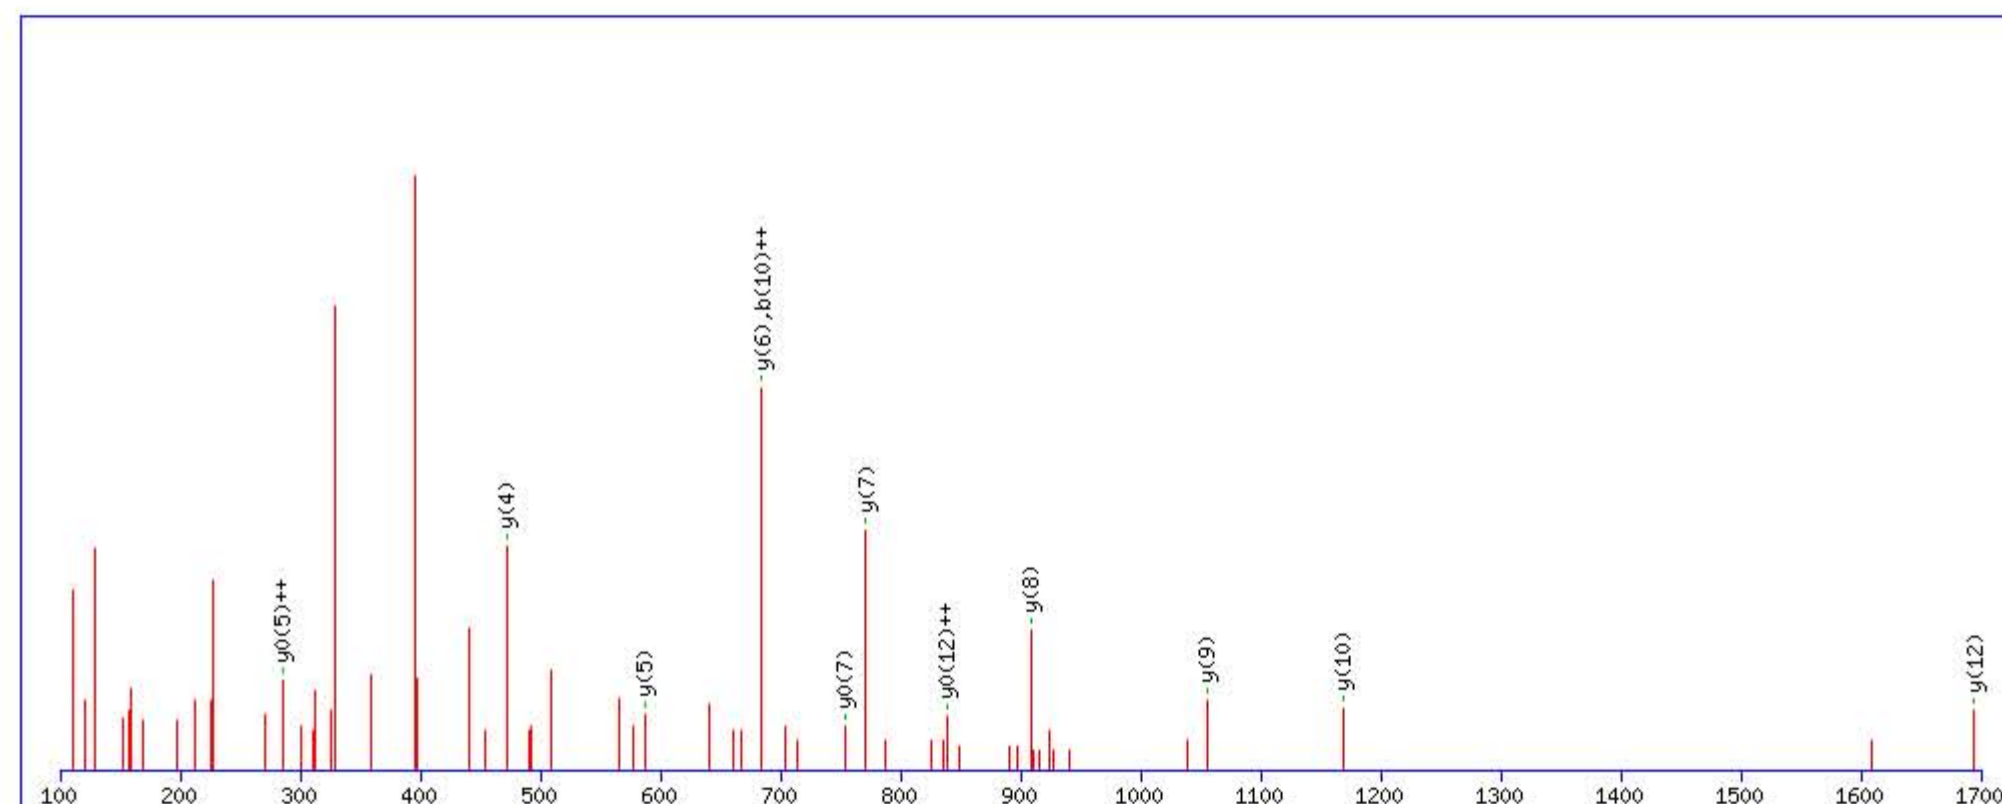

Monoisotopic mass of neutral peptide Mr(calc): 2137.135406

Fixed modifications: Carbamidomethyl (C) (apply to specified residues or termini only)

Variable modifications:

Q7 : Biotin:Thermo-21345 (Q)

Ions Score: 39 Expect: 0.0027

Matches : 12/168 fragment ions using 23 most intense peaks [\(help\)](#)

| #  | b           | b <sup>++</sup>   | b <sup>*</sup> | b <sup>*++</sup> | b <sup>0</sup> | b <sup>0++</sup> | Seq.     | y                  | y <sup>++</sup> | y <sup>*</sup> | y <sup>*++</sup> | y <sup>0</sup>    | y <sup>0++</sup>  | #  |
|----|-------------|-------------------|----------------|------------------|----------------|------------------|----------|--------------------|-----------------|----------------|------------------|-------------------|-------------------|----|
| 1  | 58.028740   | 29.518008         |                |                  |                |                  | <b>G</b> |                    |                 |                |                  |                   |                   | 17 |
| 2  | 157.097154  | 79.052215         |                |                  |                |                  | <b>V</b> | 2081.121208        | 1041.064242     | 2064.094659    | 1032.550967      | 2063.110643       | 1032.058959       | 16 |
| 3  | 258.144833  | 129.576055        |                |                  | 240.134268     | 120.570772       | <b>T</b> | 1982.052794        | 991.530035      | 1965.026245    | 983.016761       | 1964.042229       | 982.524753        | 15 |
| 4  | 345.176861  | 173.092068        |                |                  | 327.166296     | 164.086786       | <b>S</b> | 1881.005115        | 941.006196      | 1863.978566    | 932.492921       | 1862.994550       | 932.000913        | 14 |
| 5  | 444.245275  | 222.626275        |                |                  | 426.234710     | 213.620993       | <b>V</b> | 1793.973087        | 897.490182      | 1776.946538    | 888.976907       | 1775.962522       | 888.484899        | 13 |
| 6  | 531.277303  | 266.142290        |                |                  | 513.266738     | 257.137007       | <b>S</b> | <b>1694.904673</b> | 847.955975      | 1677.878124    | 839.442700       | 1676.894108       | <b>838.950692</b> | 12 |
| 7  | 970.502629  | 485.754953        | 953.476080     | 477.241678       | 952.492064     | 476.749670       | <b>Q</b> | 1607.872645        | 804.439961      | 1590.846096    | 795.926686       | 1589.862080       | 795.434678        | 11 |
| 8  | 1083.586693 | 542.296985        | 1066.560144    | 533.783710       | 1065.576128    | 533.291702       | <b>I</b> | <b>1168.647319</b> | 584.827298      | 1151.620770    | 576.314023       | 1150.636754       | 575.822015        | 10 |
| 9  | 1230.655107 | 615.831192        | 1213.628558    | 607.317917       | 1212.644542    | 606.825909       | <b>F</b> | <b>1055.563255</b> | 528.285266      | 1038.536706    | 519.771991       | 1037.552690       | 519.279983        | 9  |
| 10 | 1367.714019 | <b>684.360648</b> | 1350.687470    | 675.847373       | 1349.703454    | 675.355365       | <b>H</b> | <b>908.494841</b>  | 454.751059      | 891.468292     | 446.237784       | 890.484276        | 445.745776        | 8  |
| 11 | 1454.746047 | 727.876662        | 1437.719498    | 719.363387       | 1436.735482    | 718.871379       | <b>S</b> | <b>771.435929</b>  | 386.221603      | 754.409380     | 377.708328       | <b>753.425364</b> | 377.216320        | 7  |
| 12 | 1551.798811 | 776.403044        | 1534.772262    | 767.889769       | 1533.788246    | 767.397761       | <b>P</b> | <b>684.403901</b>  | 342.705589      | 667.377352     | 334.192314       | 666.393336        | 333.700306        | 6  |
| 13 | 1666.825754 | 833.916515        | 1649.799205    | 825.403241       | 1648.815189    | 824.911233       | <b>D</b> | <b>587.351137</b>  | 294.179207      | 570.324588     | 285.665932       | 569.340572        | <b>285.173924</b> | 5  |
| 14 | 1779.909818 | 890.458547        | 1762.883269    | 881.945273       | 1761.899253    | 881.453265       | <b>L</b> | <b>472.324194</b>  | 236.665735      | 455.297645     | 228.152460       |                   |                   | 4  |
| 15 | 1850.946932 | 925.977104        | 1833.920383    | 917.463830       | 1832.936367    | 916.971822       | <b>A</b> | 359.240130         | 180.123703      | 342.213581     | 171.610429       |                   |                   | 3  |
| 16 | 1964.030996 | 982.519136        | 1947.004447    | 974.005862       | 1946.020431    | 973.513853       | <b>I</b> | 288.203016         | 144.605146      | 271.176467     | 136.091872       |                   |                   | 2  |
| 17 |             |                   |                |                  |                |                  | <b>R</b> | 175.118952         | 88.063114       | 158.092403     | 79.549840        |                   |                   | 1  |

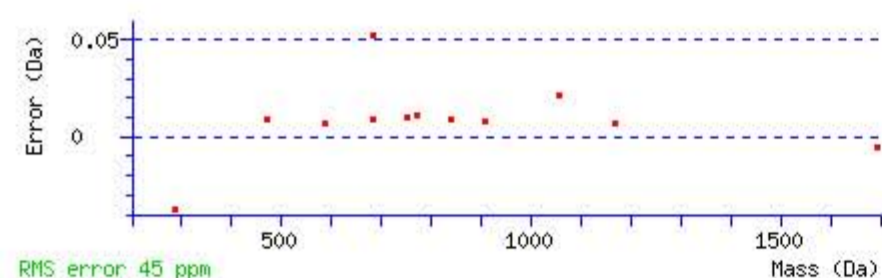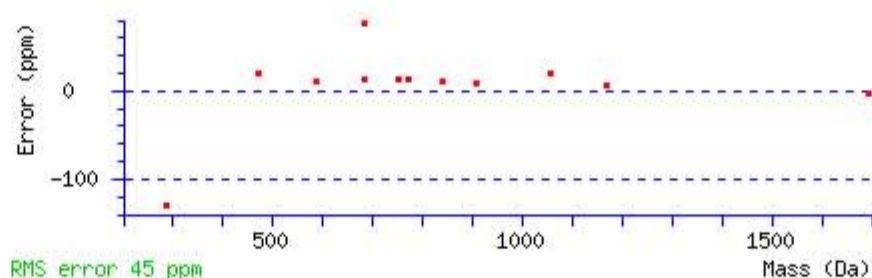

NCBI BLAST search of [GVTSVSQIFHSPDLAIR](#)

(Parameters: blastp, nr protein database, expect=20000, no filter, PAM30)

Other BLAST [web gateways](#)

## All matches to this query

| Score | Mr(calc):   | Delta    | Sequence                          |
|-------|-------------|----------|-----------------------------------|
| 38.8  | 2137.135406 | 0.013610 | <a href="#">GVTSVSQIFHSPDLAIR</a> |



# MASCOT Search Results

## Peptide View

MS/MS Fragmentation of **EAQLPVIENK**

Found in **PLMN\_HUMAN**, Plasminogen OS=Homo sapiens GN=PLG PE=1 SV=2

Match to Query 37055: 1450.791908 from(726.403230,2+) rtinseconds(1958) index(41880)

Title: Locus:1.1.1.2965.21 File:"2013-07-02 CLN FXIII 60 min 1st F 3.wiff"

Data file C:\Program Files (x86)\Matrix Science\Mascot Daemon\mgf\4 FXIII 60 min 1st\mascot\_daemon\_merge.mgf

Click mouse within plot area to zoom in by factor of two about that point

Or, Plot from  to  Da

Label all possible matches  Label matches used for scoring

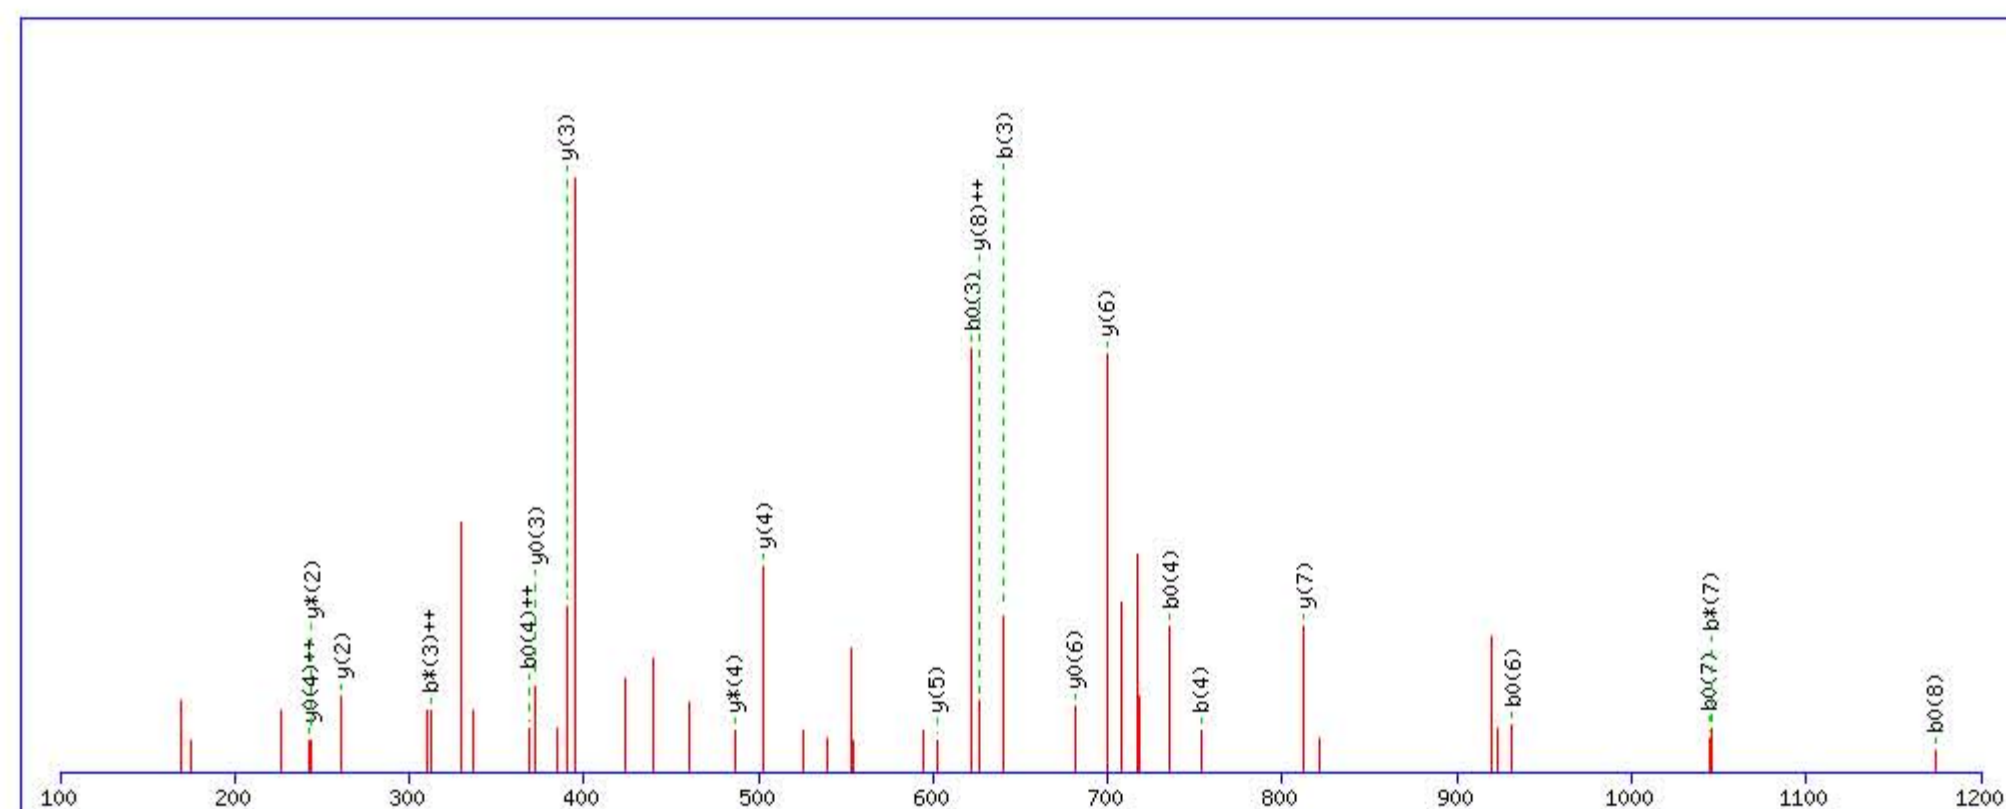

Monoisotopic mass of neutral peptide Mr(calc): 1450.785355

Fixed modifications: Carbamidomethyl (C) (apply to specified residues or termini only)

Variable modifications:

Q3 : Biotin:Thermo-21345 (Q)

Ions Score: 27 Expect: 0.0084

Matches : 22/100 fragment ions using 45 most intense peaks [\(help\)](#)

| #  | b                 | b <sup>++</sup> | b <sup>*</sup>     | b <sup>*++</sup>  | b <sup>0</sup>     | b <sup>0++</sup>  | Seq. | y                 | y <sup>++</sup>   | y <sup>*</sup>    | y <sup>*++</sup> | y <sup>0</sup>    | y <sup>0++</sup>  | #  |
|----|-------------------|-----------------|--------------------|-------------------|--------------------|-------------------|------|-------------------|-------------------|-------------------|------------------|-------------------|-------------------|----|
| 1  | 130.049869        | 65.528572       |                    |                   | 112.039304         | 56.523290         | E    |                   |                   |                   |                  |                   |                   | 10 |
| 2  | 201.086983        | 101.047130      |                    |                   | 183.076418         | 92.041847         | A    | 1322.750070       | 661.878673        | 1305.723521       | 653.365398       | 1304.739505       | 652.873390        | 9  |
| 3  | <b>640.312309</b> | 320.659793      | 623.285760         | <b>312.146518</b> | <b>622.301744</b>  | 311.654510        | Q    | 1251.712956       | <b>626.360116</b> | 1234.686407       | 617.846841       | 1233.702391       | 617.354833        | 8  |
| 4  | <b>753.396373</b> | 377.201825      | 736.369824         | 368.688550        | <b>735.385808</b>  | <b>368.196542</b> | L    | <b>812.487630</b> | 406.747453        | 795.461081        | 398.234178       | 794.477065        | 397.742170        | 7  |
| 5  | 850.449137        | 425.728207      | 833.422588         | 417.214932        | 832.438572         | 416.722924        | P    | <b>699.403566</b> | 350.205421        | 682.377017        | 341.692146       | <b>681.393001</b> | 341.200138        | 6  |
| 6  | 949.517551        | 475.262414      | 932.491002         | 466.749139        | <b>931.506986</b>  | 466.257131        | V    | <b>602.350802</b> | 301.679039        | 585.324253        | 293.165764       | 584.340237        | 292.673756        | 5  |
| 7  | 1062.601615       | 531.804446      | <b>1045.575066</b> | 523.291171        | <b>1044.591050</b> | 522.799163        | I    | <b>503.282388</b> | 252.144832        | <b>486.255839</b> | 243.631557       | 485.271823        | <b>243.139549</b> | 4  |
| 8  | 1191.644208       | 596.325742      | 1174.617659        | 587.812468        | <b>1173.633643</b> | 587.320459        | E    | <b>390.198324</b> | 195.602800        | 373.171775        | 187.089525       | <b>372.187759</b> | 186.597517        | 3  |
| 9  | 1305.687135       | 653.347205      | 1288.660586        | 644.833931        | 1287.676570        | 644.341923        | N    | <b>261.155731</b> | 131.081503        | <b>244.129182</b> | 122.568229       |                   |                   | 2  |
| 10 |                   |                 |                    |                   |                    |                   | K    | 147.112804        | 74.060040         | 130.086255        | 65.546765        |                   |                   | 1  |

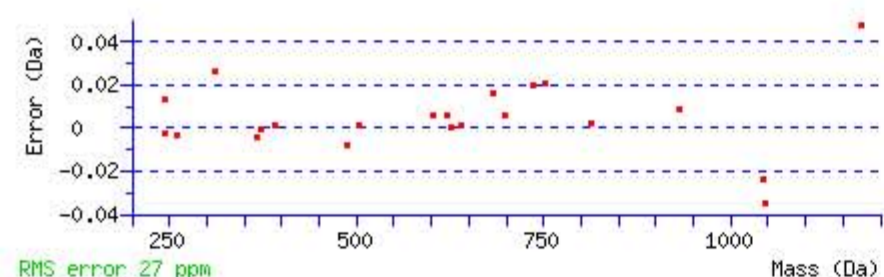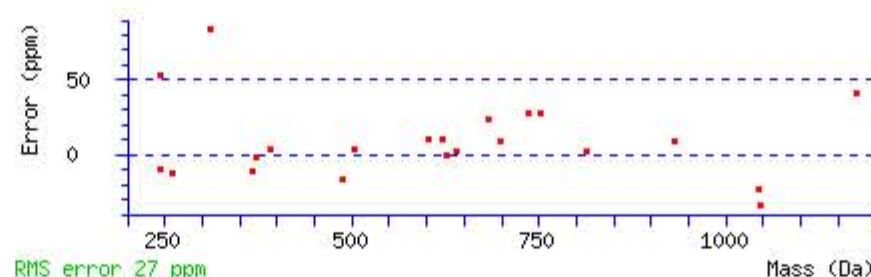

NCBI BLAST search of [EAQLPVIENK](#)

(Parameters: blastp, nr protein database, expect=20000, no filter, PAM30)

Other BLAST [web gateways](#)

All matches to this query

| Score | Mr(calc):   | Delta     | Sequence                      |
|-------|-------------|-----------|-------------------------------|
| 26.8  | 1450.785355 | 0.006553  | <a href="#">EAQLPVIENK</a>    |
| 4.3   | 1450.811661 | -0.019753 | <a href="#">ILNGHSLTRRER</a>  |
| 0.6   | 1450.789215 | 0.002693  | <a href="#">NSSHTLLQVLSPR</a> |
| 0.1   | 1450.796600 | -0.004692 | <a href="#">QISAVHKETK</a>    |



# MASCOT SEARCH RESULTS

## Peptide View

MS/MS Fragmentation of **EQQCVIMAENR**

Found in **PLGB\_HUMAN**, Plasminogen-like protein B OS=Homo sapiens GN=PLGLB1 PE=1 SV=1

Match to Query 45515: 1687.789812 from(563.603880,3+) rtinseconds(1800) index(77144)

Title: Locus:1.1.1.2841.6 File:"2013-07-02 CLN FXIII 60 min 1st FT.wiff"

Data file C:\Program Files (x86)\Matrix Science\Mascot Daemon\mgf\4 FXIII 60 min 1st\mascot\_daemon\_merge.mgf

Click mouse within plot area to zoom in by factor of two about that point

Or, Plot from  to  Da

Label all possible matches  Label matches used for scoring

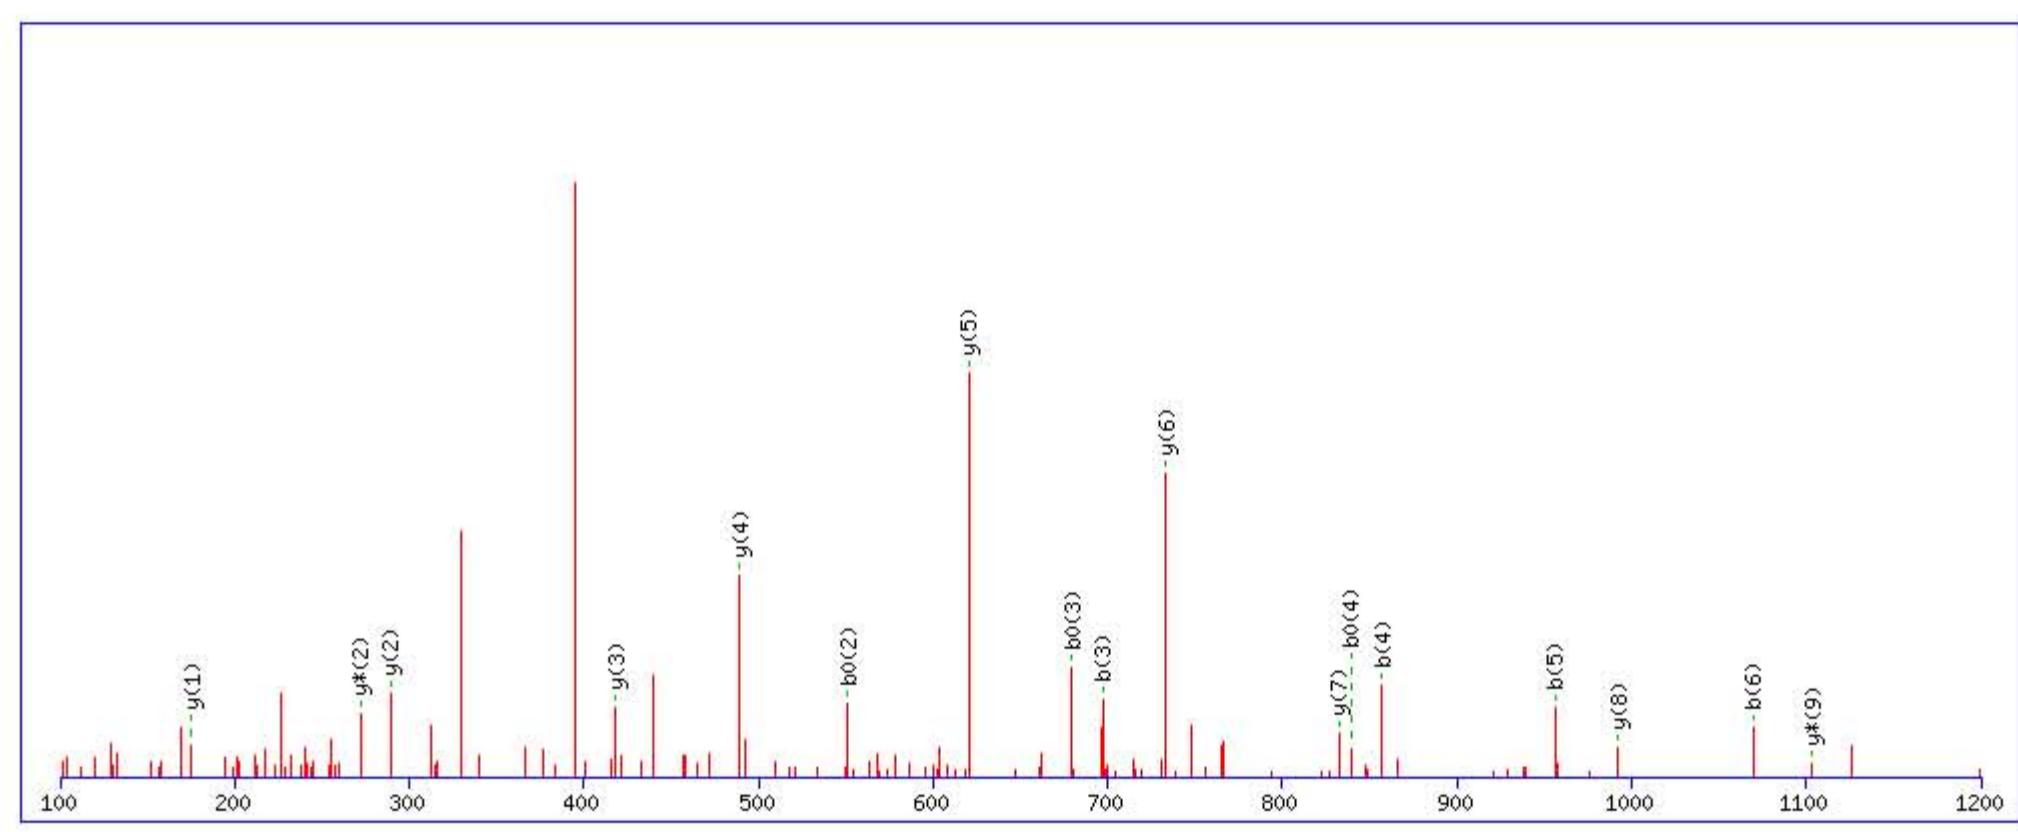

Monoisotopic mass of neutral peptide Mr(calc): 1687.784393

Fixed modifications: Carbamidomethyl (C) (apply to specified residues or termini only)

Variable modifications:

Q2 : Biotin:Thermo-21345 (Q)

Ions Score: 45 Expect: 7.8e-005

Matches : 17/114 fragment ions using 31 most intense peaks [\(help\)](#)

| #  | b           | b <sup>++</sup> | b <sup>+</sup> | b <sup>+++</sup> | b <sup>0</sup> | b <sup>0++</sup> | Seq. | y           | y <sup>++</sup> | y <sup>+</sup> | y <sup>+++</sup> | y <sup>0</sup> | y <sup>0++</sup> | #  |
|----|-------------|-----------------|----------------|------------------|----------------|------------------|------|-------------|-----------------|----------------|------------------|----------------|------------------|----|
| 1  | 130.049869  | 65.528572       |                |                  | 112.039304     | 56.523290        | E    |             |                 |                |                  |                |                  | 11 |
| 2  | 569.275195  | 285.141236      | 552.248646     | 276.627961       | 551.264630     | 276.135953       | Q    | 1559.749102 | 780.378189      | 1542.722553    | 771.864915       | 1541.738537    | 771.372907       | 10 |
| 3  | 697.333773  | 349.170525      | 680.307224     | 340.657250       | 679.323208     | 340.165242       | Q    | 1120.523776 | 560.765526      | 1103.497227    | 552.252252       | 1102.513211    | 551.760244       | 9  |
| 4  | 857.364422  | 429.185849      | 840.337873     | 420.672575       | 839.353857     | 420.180567       | C    | 992.465198  | 496.736237      | 975.438649     | 488.222963       | 974.454633     | 487.730955       | 8  |
| 5  | 956.432836  | 478.720056      | 939.406287     | 470.206782       | 938.422271     | 469.714774       | V    | 832.434549  | 416.720913      | 815.408000     | 408.207638       | 814.423984     | 407.715630       | 7  |
| 6  | 1069.516900 | 535.262088      | 1052.490351    | 526.748814       | 1051.506335    | 526.256806       | I    | 733.366135  | 367.186706      | 716.339586     | 358.673431       | 715.355570     | 358.181423       | 6  |
| 7  | 1200.557385 | 600.782331      | 1183.530836    | 592.269056       | 1182.546820    | 591.777048       | M    | 620.282071  | 310.644674      | 603.255522     | 302.131399       | 602.271506     | 301.639391       | 5  |
| 8  | 1271.594499 | 636.300888      | 1254.567950    | 627.787613       | 1253.583934    | 627.295605       | A    | 489.241586  | 245.124431      | 472.215037     | 236.611156       | 471.231021     | 236.119148       | 4  |
| 9  | 1400.637092 | 700.822184      | 1383.610543    | 692.308910       | 1382.626527    | 691.816902       | E    | 418.204472  | 209.605874      | 401.177923     | 201.092600       | 400.193907     | 200.600592       | 3  |
| 10 | 1514.680019 | 757.843648      | 1497.653470    | 749.330373       | 1496.669454    | 748.838365       | N    | 289.161879  | 145.084577      | 272.135330     | 136.571303       |                |                  | 2  |
| 11 |             |                 |                |                  |                |                  | R    | 175.118952  | 88.063114       | 158.092403     | 79.549839        |                |                  | 1  |

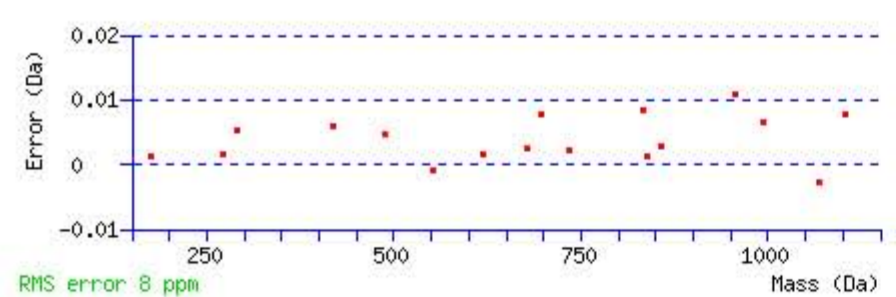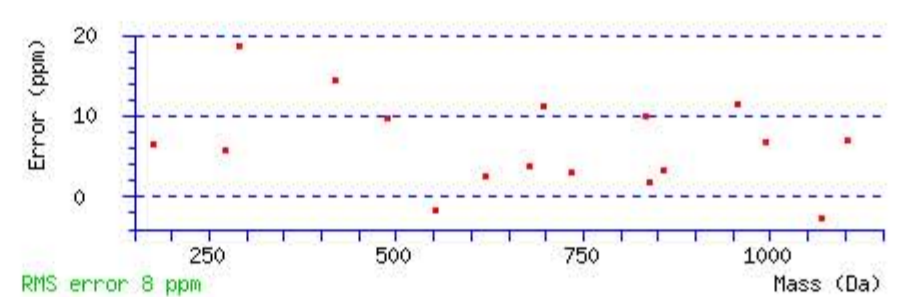

NCBI BLAST search of [EQQCVIMAENR](#)

(Parameters: blastp, nr protein database, expect=20000, no filter, PAM30)

Other BLAST [web gateways](#)

### All matches to this query

| Score | Mr(calc):   | Delta    | Sequence                          |
|-------|-------------|----------|-----------------------------------|
| 45.0  | 1687.784393 | 0.005419 | <a href="#">EQQCVIMAENR</a>       |
| 41.2  | 1687.784393 | 0.005419 | <a href="#">EQQCVIMAENR</a>       |
| 1.1   | 1687.776093 | 0.013719 | <a href="#">QQEEAQAAAAAASAESR</a> |
| 1.0   | 1687.787552 | 0.002260 | <a href="#">GASEDGEYFLMIRGK</a>   |
| 0.8   | 1687.773666 | 0.016146 | <a href="#">TTGPPSGQMPDNPPHR</a>  |



# MASCOT Search Results

## Peptide View

MS/MS Fragmentation of **APWCHTTNSQVR**

Found in **PLMN\_HUMAN**, Plasminogen OS=Homo sapiens GN=PLG PE=1 SV=2

Match to Query 47630: 1766.840592 from(589.954140,3+) rtinseconds(1511) index(75329)  
 Title: Locus:1.1.1.2740.16 File:"2013-07-02 CLN FXIII 60 min 1st FT.wiff"

Data file C:\Program Files (x86)\Matrix Science\Mascot Daemon\mgf4 FXIII 60 min 1st\mascot\_daemon\_merge.mgf

Click mouse within plot area to zoom in by factor of two about that point

Or, Plot from  to  Da

Label all possible matches  Label matches used for scoring

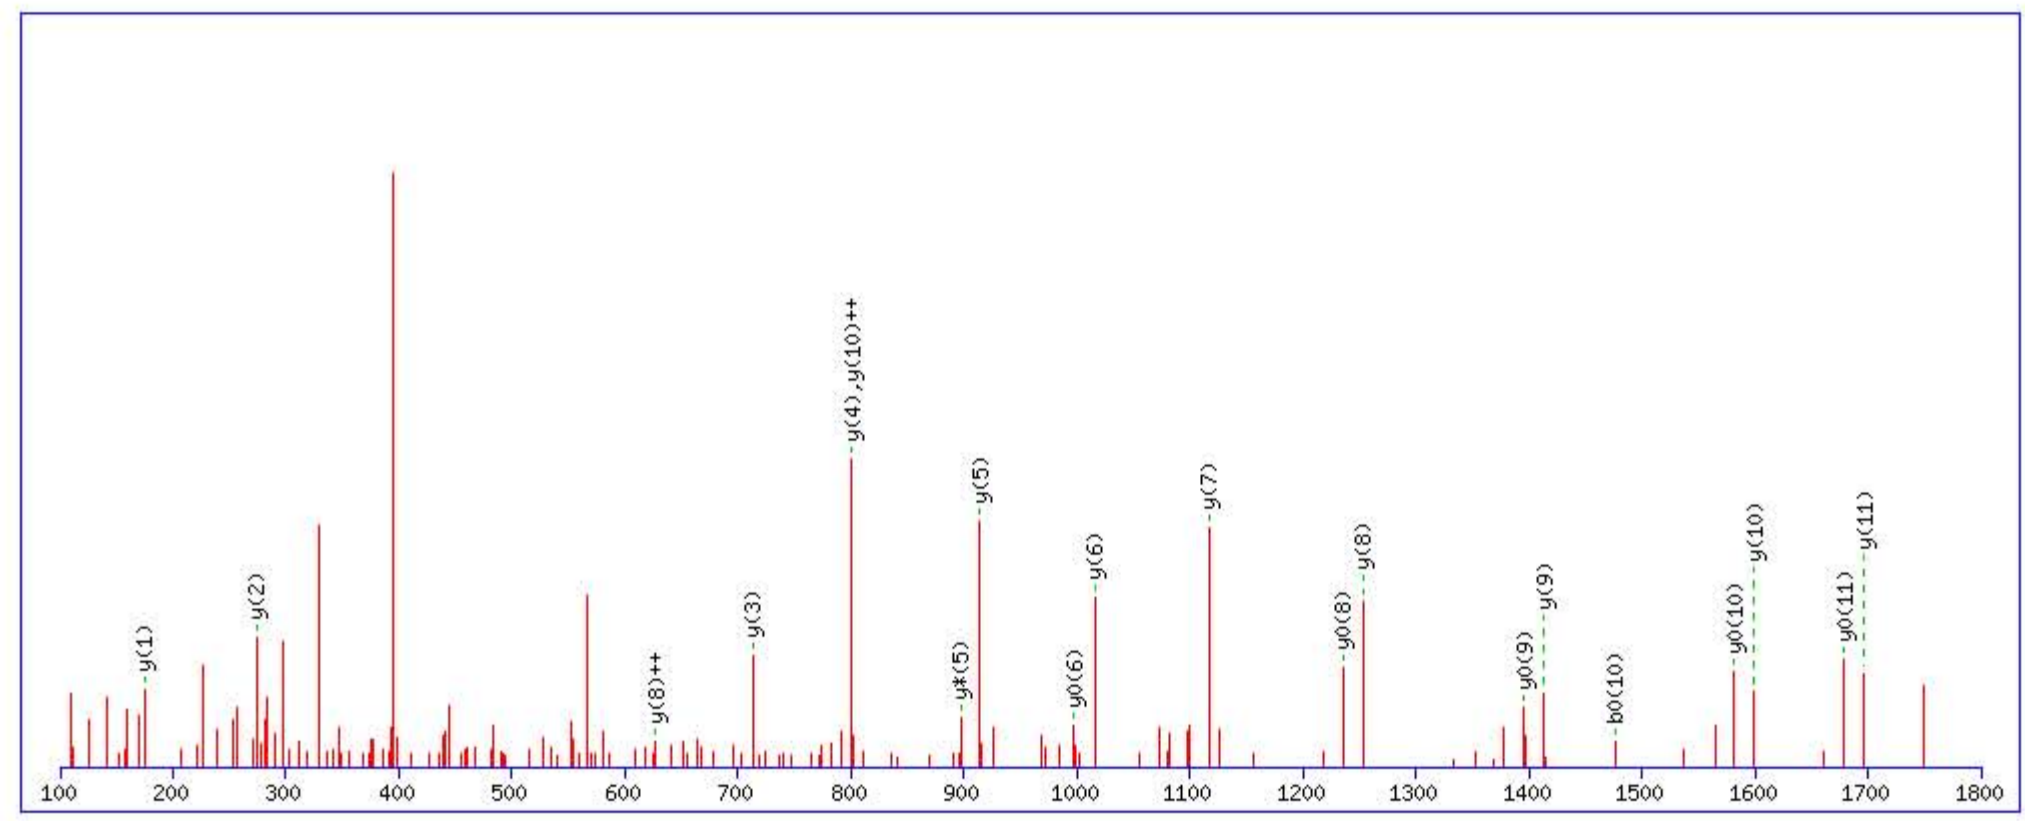

Monoisotopic mass of neutral peptide Mr(calc): 1766.834488

Fixed modifications: Carbamidomethyl (C) (apply to specified residues or termini only)

Variable modifications:

Q10 : Biotin:Thermo-21345 (Q)

Ions Score: 77 Expect: 2.2e-007

Matches : 20/102 fragment ions using 33 most intense peaks [\(help\)](#)

| #  | b           | b <sup>++</sup> | b <sup>*</sup> | b <sup>*++</sup> | b <sup>0</sup> | b <sup>0++</sup> | Seq. | y           | y <sup>++</sup> | y <sup>*</sup> | y <sup>*++</sup> | y <sup>0</sup> | y <sup>0++</sup> | #  |
|----|-------------|-----------------|----------------|------------------|----------------|------------------|------|-------------|-----------------|----------------|------------------|----------------|------------------|----|
| 1  | 72.044390   | 36.525833       |                |                  |                |                  | A    |             |                 |                |                  |                |                  | 12 |
| 2  | 169.097154  | 85.052215       |                |                  |                |                  | P    | 1696.804643 | 848.905960      | 1679.778094    | 840.392685       | 1678.794078    | 839.900677       | 11 |
| 3  | 355.176467  | 178.091872      |                |                  |                |                  | W    | 1599.751879 | 800.379578      | 1582.725330    | 791.866303       | 1581.741314    | 791.374295       | 10 |
| 4  | 515.207116  | 258.107196      |                |                  |                |                  | C    | 1413.672566 | 707.339921      | 1396.646017    | 698.826647       | 1395.662001    | 698.334639       | 9  |
| 5  | 652.266028  | 326.636652      |                |                  |                |                  | H    | 1253.641917 | 627.324597      | 1236.615368    | 618.811322       | 1235.631352    | 618.319314       | 8  |
| 6  | 753.313707  | 377.160492      |                |                  | 735.303142     | 368.155209       | T    | 1116.583005 | 558.795141      | 1099.556456    | 550.281866       | 1098.572440    | 549.789858       | 7  |
| 7  | 854.361386  | 427.684331      |                |                  | 836.350821     | 418.679049       | T    | 1015.535326 | 508.271301      | 998.508777     | 499.758027       | 997.524761     | 499.266019       | 6  |
| 8  | 968.404313  | 484.705795      | 951.377764     | 476.192520       | 950.393748     | 475.700512       | N    | 914.487647  | 457.747462      | 897.461098     | 449.234187       | 896.477082     | 448.742179       | 5  |
| 9  | 1055.436341 | 528.221809      | 1038.409792    | 519.708534       | 1037.425776    | 519.216526       | S    | 800.444720  | 400.725998      | 783.418171     | 392.212724       | 782.434155     | 391.720716       | 4  |
| 10 | 1494.661667 | 747.834472      | 1477.635118    | 739.321197       | 1476.651102    | 738.829189       | Q    | 713.412692  | 357.209984      | 696.386143     | 348.696710       |                |                  | 3  |
| 11 | 1593.730081 | 797.368679      | 1576.703532    | 788.855404       | 1575.719516    | 788.363396       | V    | 274.187366  | 137.597321      | 257.160817     | 129.084047       |                |                  | 2  |
| 12 |             |                 |                |                  |                |                  | R    | 175.118952  | 88.063114       | 158.092403     | 79.549839        |                |                  | 1  |

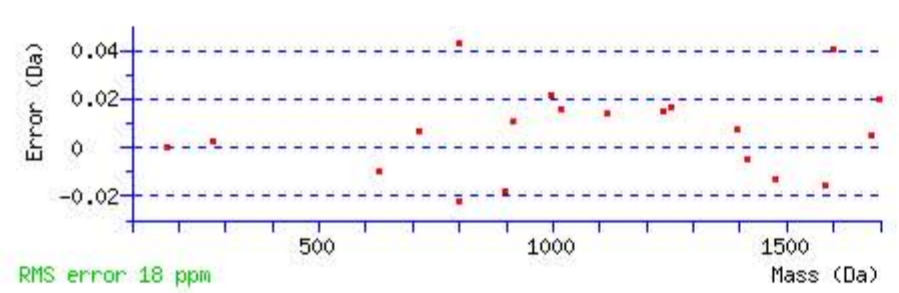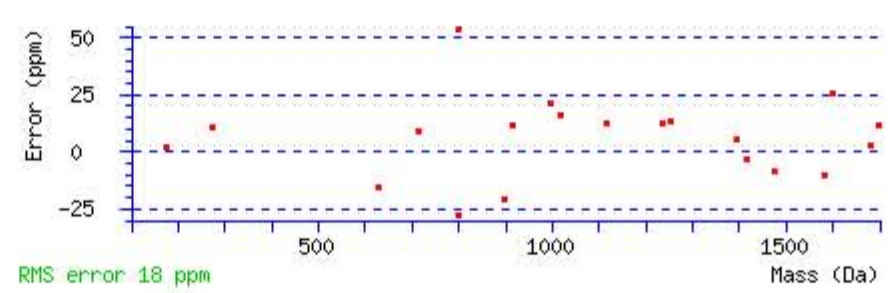

NCBI BLAST search of **APWCHTTNSQVR**

(Parameters: blastp, nr protein database, expect=20000, no filter, PAM30)

Other BLAST [web gateways](#)

All matches to this query

| Score | Mr(calc):   | Delta    | Sequence                         |
|-------|-------------|----------|----------------------------------|
| 76.7  | 1766.834488 | 0.006104 | <a href="#">APWCHTTNSQVR</a>     |
| 5.4   | 1766.829758 | 0.010834 | <a href="#">WSPSPPTAMPSPEDLR</a> |
| 0.6   | 1766.833115 | 0.007477 | <a href="#">SMLEVNYPMENGIVR</a>  |



# MASCOT SCIENCE Mascot Search Results

## Peptide View

MS/MS Fragmentation of **EQQCHEMAENR**

Found in **PLGB\_HUMAN**, Plasminogen-like protein B OS=Homo sapiens GN=PLGLB1 PE=1 SV=1

Match to Query 52899: 1998.971022 from(667.330950,3+) rtinseconds(2119) index(79326)

Title: Locus:1.1.1.2952.16 File:"2013-07-02 CLN FXIII 60 min 1st FT.wiff"

Data file C:\Program Files (x86)\Matrix Science\Mascot Daemon\mgf\4 FXIII 60 min 1st\mascot\_daemon\_merge.mgf

Click mouse within plot area to zoom in by factor of two about that point

Or, Plot from  to  Da

Label all possible matches  Label matches used for scoring

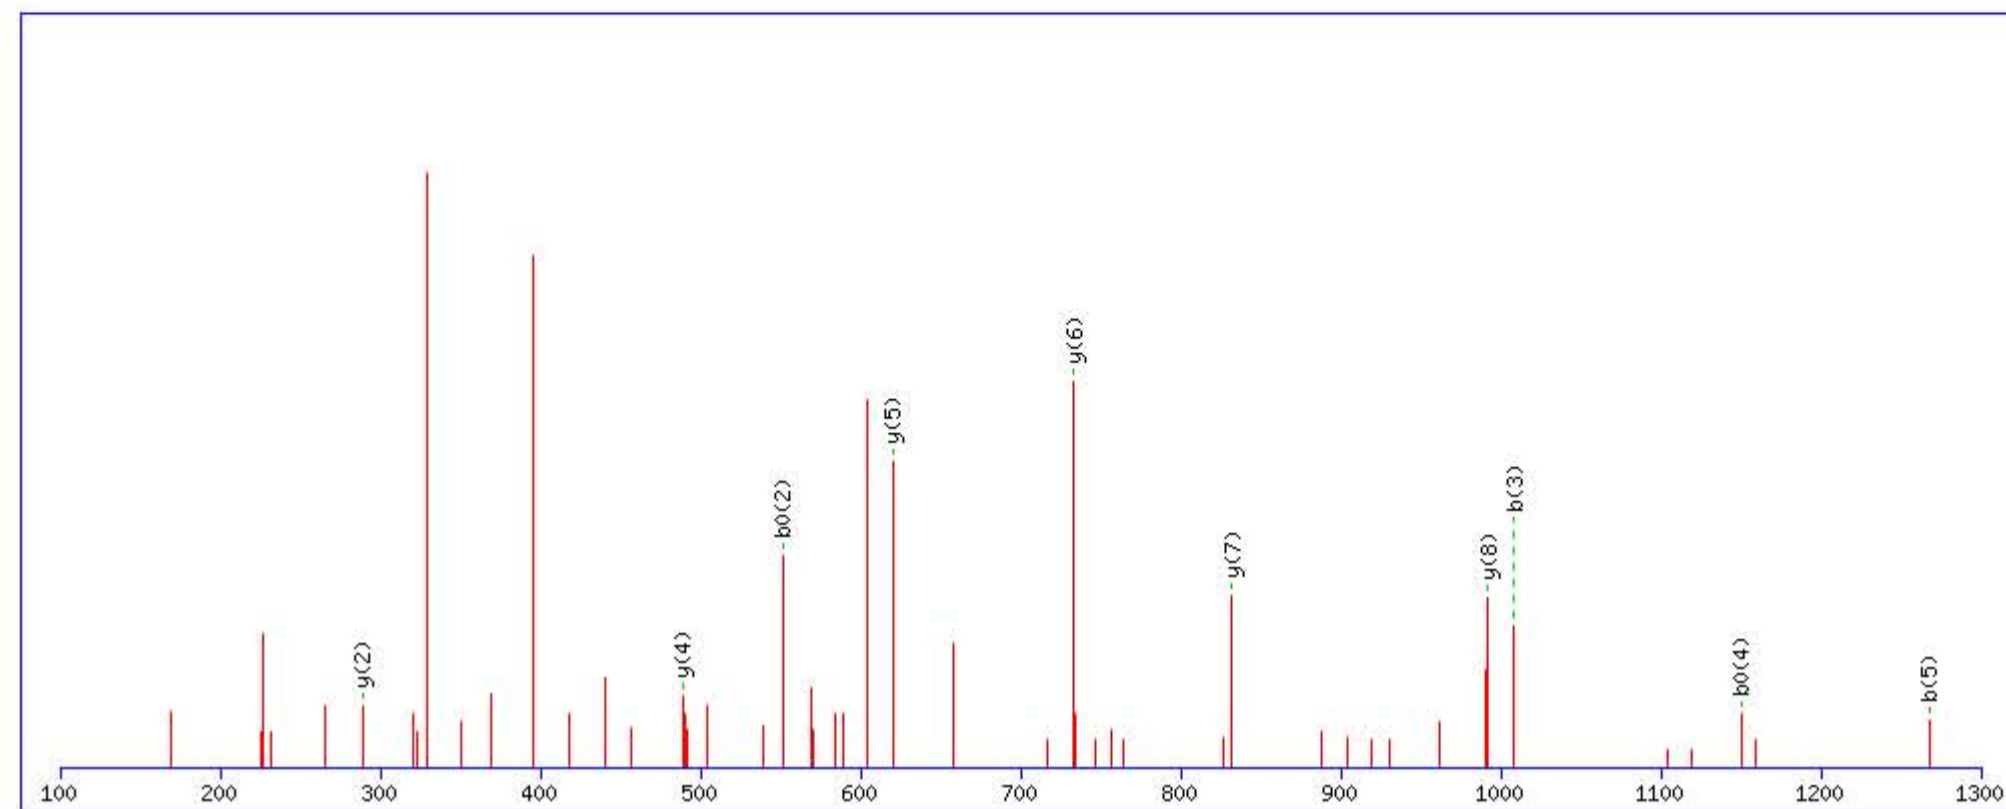

Monoisotopic mass of neutral peptide Mr(calc): 1998.951141

Fixed modifications: Carbamidomethyl (C) (apply to specified residues or termini only)

Variable modifications:

Q2 : Biotin:Thermo-21345 (Q)

Q3 : Biotin:Thermo-21345 (Q)

Ions Score: 25 Expect: 0.0052

Matches : 10/114 fragment ions using 21 most intense peaks [\(help\)](#)

| #  | b                  | b <sup>++</sup> | b <sup>*</sup> | b <sup>*++</sup> | b <sup>0</sup>     | b <sup>0++</sup> | Seq. | y                 | y <sup>++</sup> | y <sup>*</sup> | y <sup>*++</sup> | y <sup>0</sup> | y <sup>0++</sup> | #  |
|----|--------------------|-----------------|----------------|------------------|--------------------|------------------|------|-------------------|-----------------|----------------|------------------|----------------|------------------|----|
| 1  | 130.049869         | 65.528572       |                |                  | 112.039304         | 56.523290        | E    |                   |                 |                |                  |                |                  | 11 |
| 2  | 569.275195         | 285.141236      | 552.248646     | 276.627961       | <b>551.264630</b>  | 276.135953       | Q    | 1870.915850       | 935.961563      | 1853.889301    | 927.448288       | 1852.905285    | 926.956280       | 10 |
| 3  | <b>1008.500521</b> | 504.753899      | 991.473972     | 496.240624       | 990.489956         | 495.748616       | Q    | 1431.690524       | 716.348900      | 1414.663975    | 707.835625       | 1413.679959    | 707.343617       | 9  |
| 4  | 1168.531170        | 584.769223      | 1151.504621    | 576.255949       | <b>1150.520605</b> | 575.763940       | C    | <b>992.465198</b> | 496.736237      | 975.438649     | 488.222962       | 974.454633     | 487.730954       | 8  |
| 5  | <b>1267.599584</b> | 634.303430      | 1250.573035    | 625.790156       | 1249.589019        | 625.298148       | V    | <b>832.434549</b> | 416.720912      | 815.408000     | 408.207638       | 814.423984     | 407.715630       | 7  |
| 6  | 1380.683648        | 690.845462      | 1363.657099    | 682.332188       | 1362.673083        | 681.840179       | I    | <b>733.366135</b> | 367.186705      | 716.339586     | 358.673431       | 715.355570     | 358.181423       | 6  |
| 7  | 1511.724133        | 756.365704      | 1494.697584    | 747.852430       | 1493.713568        | 747.360422       | M    | <b>620.282071</b> | 310.644673      | 603.255522     | 302.131399       | 602.271506     | 301.639391       | 5  |
| 8  | 1582.761247        | 791.884261      | 1565.734698    | 783.370987       | 1564.750682        | 782.878979       | A    | <b>489.241586</b> | 245.124431      | 472.215037     | 236.611156       | 471.231021     | 236.119148       | 4  |
| 9  | 1711.803840        | 856.405558      | 1694.777291    | 847.892283       | 1693.793275        | 847.400275       | E    | 418.204472        | 209.605874      | 401.177923     | 201.092599       | 400.193907     | 200.600591       | 3  |
| 10 | 1825.846767        | 913.427021      | 1808.820218    | 904.913747       | 1807.836202        | 904.421739       | N    | <b>289.161879</b> | 145.084577      | 272.135330     | 136.571303       |                |                  | 2  |
| 11 |                    |                 |                |                  |                    |                  | R    | 175.118952        | 88.063114       | 158.092403     | 79.549839        |                |                  | 1  |

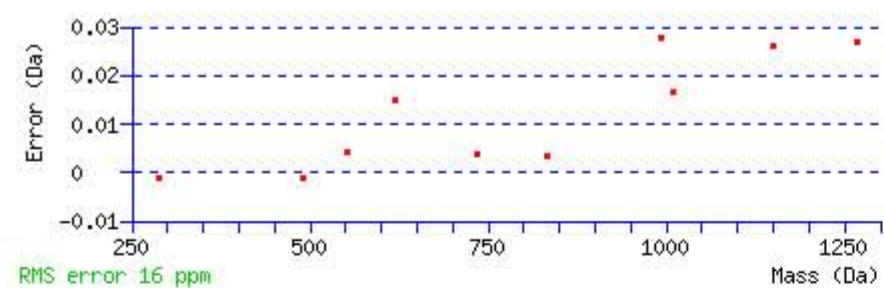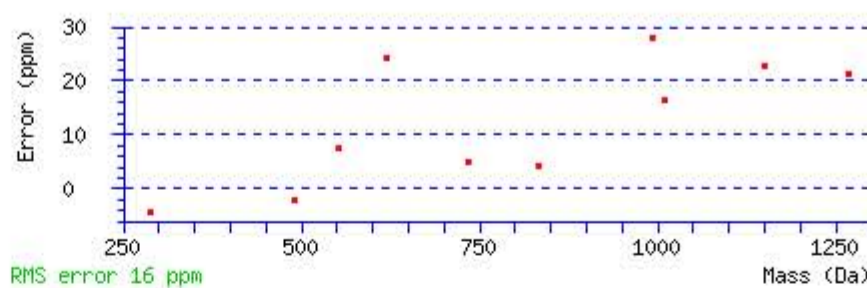

NCBI BLAST search of **EQQCHEMAENR**

(Parameters: blastp, nr protein database, expect=20000, no filter, PAM30)

Other BLAST [web gateways](#)

All matches to this query

| Score | Mr(calc):   | Delta     | Sequence                       |
|-------|-------------|-----------|--------------------------------|
| 25.3  | 1998.951141 | 0.019881  | <a href="#">EQQCHEMAENR</a>    |
| 0.9   | 1998.980133 | -0.009111 | <a href="#">MNPQQRMAAIGTDK</a> |
| 0.9   | 1998.980133 | -0.009111 | <a href="#">MNPQQRMAAIGTDK</a> |
| 0.9   | 1998.980133 | -0.009111 | <a href="#">MNPQQRMAAIGTDK</a> |

Mascot: <http://www.matrixscience.com/>



# MASCOT SEARCH RESULTS

## Peptide View

MS/MS Fragmentation of **CTTPPPSSGPTYQCLK**

Found in **PLMN\_HUMAN**, Plasminogen OS=Homo sapiens GN=PLG PE=1 SV=2

Match to Query 56202: 2103.990372 from(702.337400,3+) rtinseconds(1758) index(76880)

Title: Locus:1.1.1.2826.19 File:"2013-07-02 CLN FXIII 60 min 1st FT.wiff"

Data file C:\Program Files (x86)\Matrix Science\Mascot Daemon\mgf\4 FXIII 60 min 1st\mascot\_daemon\_merge.mgf

Click mouse within plot area to zoom in by factor of two about that point

Or, Plot from  to  Da

Label all possible matches  Label matches used for scoring

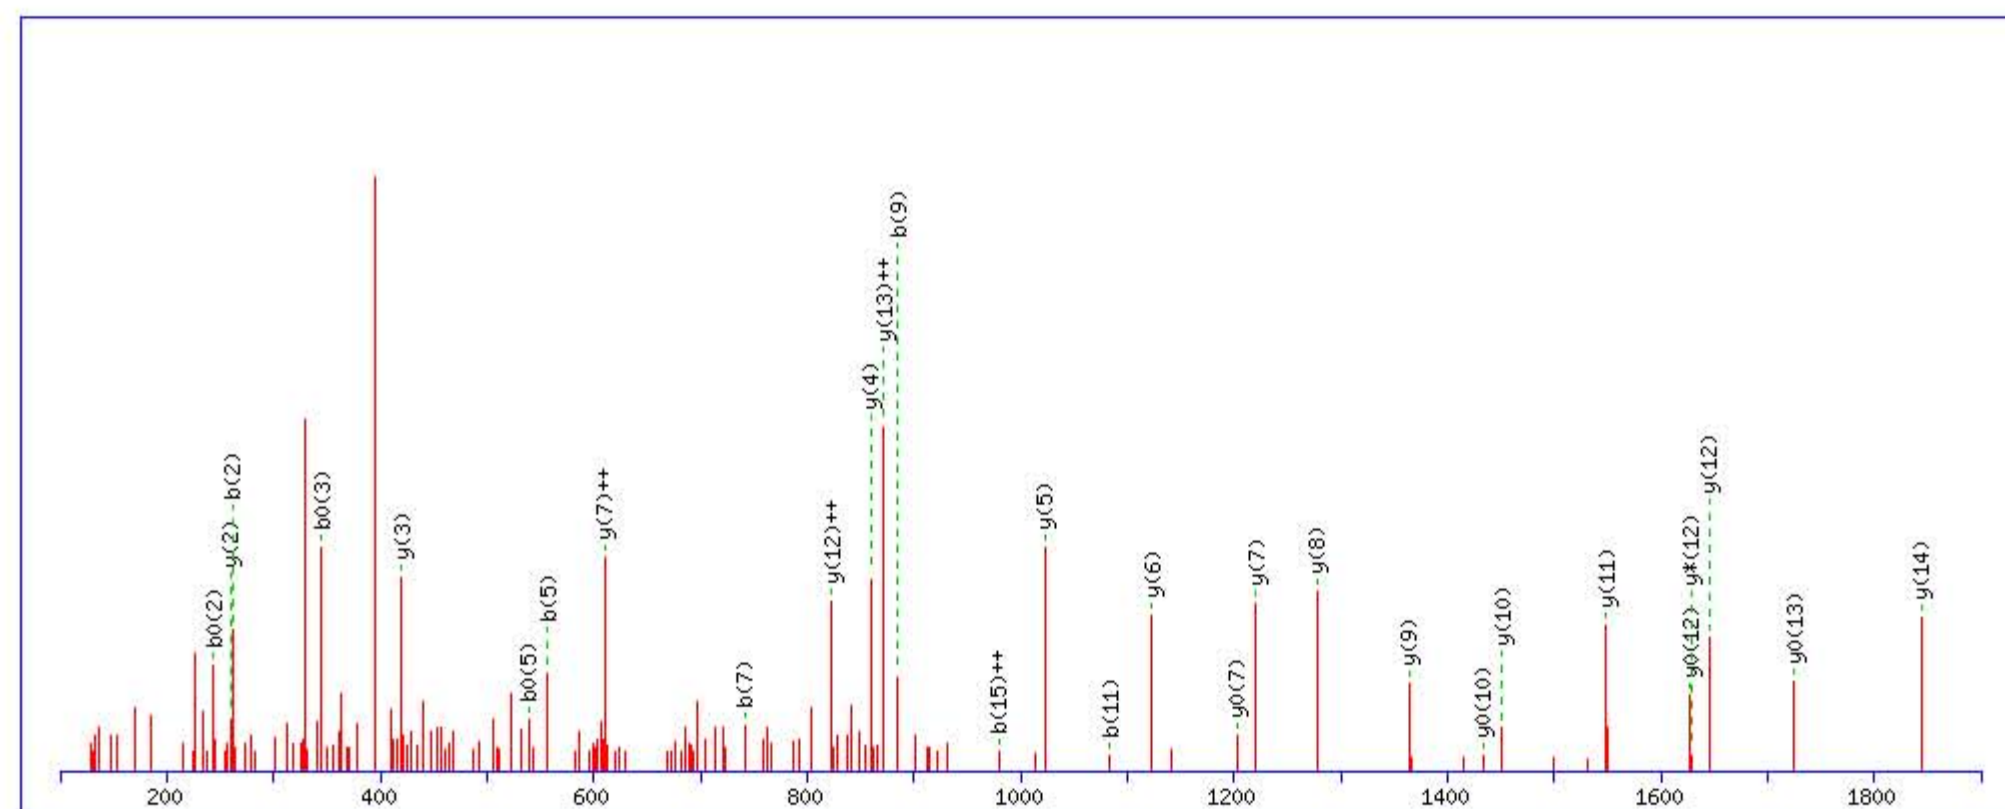

Monoisotopic mass of neutral peptide Mr(calc): 2103.979172

Fixed modifications: Carbamidomethyl (C) (apply to specified residues or termini only)

Variable modifications:

Q13 : Biotin:Thermo-21345 (Q)

Ions Score: 66 Expect: 2e-006

Matches : 29/144 fragment ions using 57 most intense peaks [\(help\)](#)

| #  | b                  | b <sup>++</sup>   | b <sup>*</sup> | b <sup>*++</sup> | b <sup>0</sup>    | b <sup>0++</sup> | Seq. | y                  | y <sup>++</sup>   | y <sup>*</sup>     | y <sup>*++</sup> | y <sup>0</sup>     | y <sup>0++</sup> | #  |
|----|--------------------|-------------------|----------------|------------------|-------------------|------------------|------|--------------------|-------------------|--------------------|------------------|--------------------|------------------|----|
| 1  | 161.037925         | 81.022600         |                |                  |                   |                  | C    |                    |                   |                    |                  |                    |                  | 16 |
| 2  | <b>262.085604</b>  | 131.546440        |                |                  | 244.075039        | 122.541158       | T    | 1944.955785        | 972.981531        | 1927.929236        | 964.468256       | 1926.945220        | 963.976248       | 15 |
| 3  | 363.133283         | 182.070280        |                |                  | 345.122718        | 173.064997       | T    | <b>1843.908106</b> | 922.457691        | 1826.881557        | 913.944417       | 1825.897541        | 913.452409       | 14 |
| 4  | 460.186047         | 230.596661        |                |                  | 442.175482        | 221.591379       | P    | 1742.860427        | <b>871.933852</b> | 1725.833878        | 863.420577       | <b>1724.849862</b> | 862.928569       | 13 |
| 5  | <b>557.238811</b>  | 279.123044        |                |                  | <b>539.228246</b> | 270.117761       | P    | <b>1645.807663</b> | <b>823.407470</b> | <b>1628.781114</b> | 814.894195       | <b>1627.797098</b> | 814.402187       | 12 |
| 6  | 654.291575         | 327.649426        |                |                  | 636.281010        | 318.644143       | P    | <b>1548.754899</b> | 774.881088        | 1531.728350        | 766.367813       | 1530.744334        | 765.875805       | 11 |
| 7  | <b>741.323603</b>  | 371.165440        |                |                  | 723.313038        | 362.160157       | S    | <b>1451.702135</b> | 726.354706        | 1434.675586        | 717.841431       | <b>1433.691570</b> | 717.349423       | 10 |
| 8  | 828.355631         | 414.681454        |                |                  | 810.345066        | 405.676171       | S    | <b>1364.670107</b> | 682.838692        | 1347.643558        | 674.325417       | 1346.659542        | 673.833409       | 9  |
| 9  | <b>885.377095</b>  | 443.192186        |                |                  | 867.366530        | 434.186903       | G    | <b>1277.638079</b> | 639.322678        | 1260.611530        | 630.809403       | 1259.627514        | 630.317395       | 8  |
| 10 | 982.429859         | 491.718568        |                |                  | 964.419294        | 482.713285       | P    | <b>1220.616615</b> | <b>610.811946</b> | 1203.590066        | 602.298671       | <b>1202.606050</b> | 601.806663       | 7  |
| 11 | <b>1083.477538</b> | 542.242407        |                |                  | 1065.466973       | 533.237125       | T    | <b>1123.563851</b> | 562.285564        | 1106.537302        | 553.772289       | 1105.553286        | 553.280281       | 6  |
| 12 | 1246.540867        | 623.774072        |                |                  | 1228.530302       | 614.768789       | Y    | <b>1022.516172</b> | 511.761724        | 1005.489623        | 503.248450       |                    |                  | 5  |
| 13 | 1685.766193        | 843.386735        | 1668.739644    | 834.873460       | 1667.755628       | 834.381452       | Q    | <b>859.452843</b>  | 430.230060        | 842.426294         | 421.716785       |                    |                  | 4  |
| 14 | 1845.796842        | 923.402059        | 1828.770293    | 914.888785       | 1827.786277       | 914.396777       | C    | <b>420.227517</b>  | 210.617396        | 403.200968         | 202.104122       |                    |                  | 3  |
| 15 | 1958.880906        | <b>979.944091</b> | 1941.854357    | 971.430817       | 1940.870341       | 970.938809       | L    | <b>260.196868</b>  | 130.602072        | 243.170319         | 122.088797       |                    |                  | 2  |
| 16 |                    |                   |                |                  |                   |                  | K    | 147.112804         | 74.060040         | 130.086255         | 65.546765        |                    |                  | 1  |

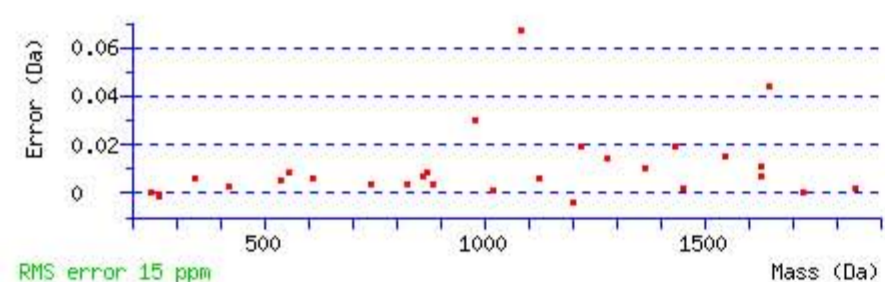

RMS error 15 ppm

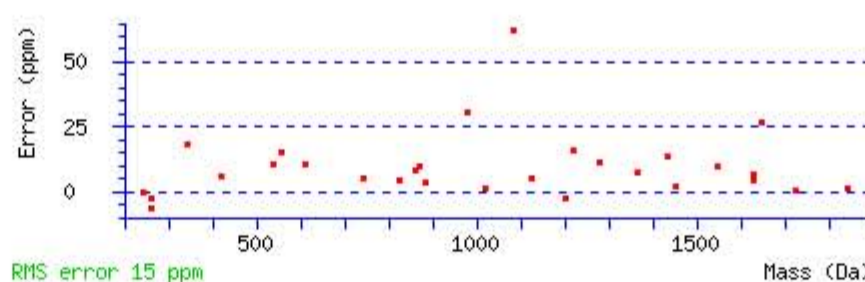

RMS error 15 ppm

NCBI BLAST search of [CTTPPPSSGPTYQCLK](#)

(Parameters: blastp, nr protein database, expect=20000, no filter, PAM30)

Other BLAST [web gateways](#)

## All matches to this query

| Score | Mr(calc):   | Delta    | Sequence                           |
|-------|-------------|----------|------------------------------------|
| 66.0  | 2103.979172 | 0.011200 | <a href="#">CTTPPPSSGPTYQCLK</a>   |
| 5.2   | 2103.964554 | 0.025818 | <a href="#">TAADTPAIMNWDLFFTMK</a> |

Mascot: <http://www.matrixscience.com/>



# MASCOT Search Results

## Peptide View

MS/MS Fragmentation of **ATTVTGTPCQDWAAQEPHR**

Found in **PLMN\_HUMAN**, Plasminogen OS=Homo sapiens GN=PLG PE=1 SV=2

Match to Query 63553: 2436.141102 from(813.054310,3+) rtinseconds(1818) index(77219)

Title: Locus:1.1.1.2847.15 File:"2013-07-02 CLN FXIII 60 min 1st FT.wiff"

Data file C:\Program Files (x86)\Matrix Science\Mascot Daemon\mgf4 FXIII 60 min 1st\mascot\_daemon\_merge.mgf

Click mouse within plot area to zoom in by factor of two about that point

Or, Plot from  to  Da

Label all possible matches  Label matches used for scoring

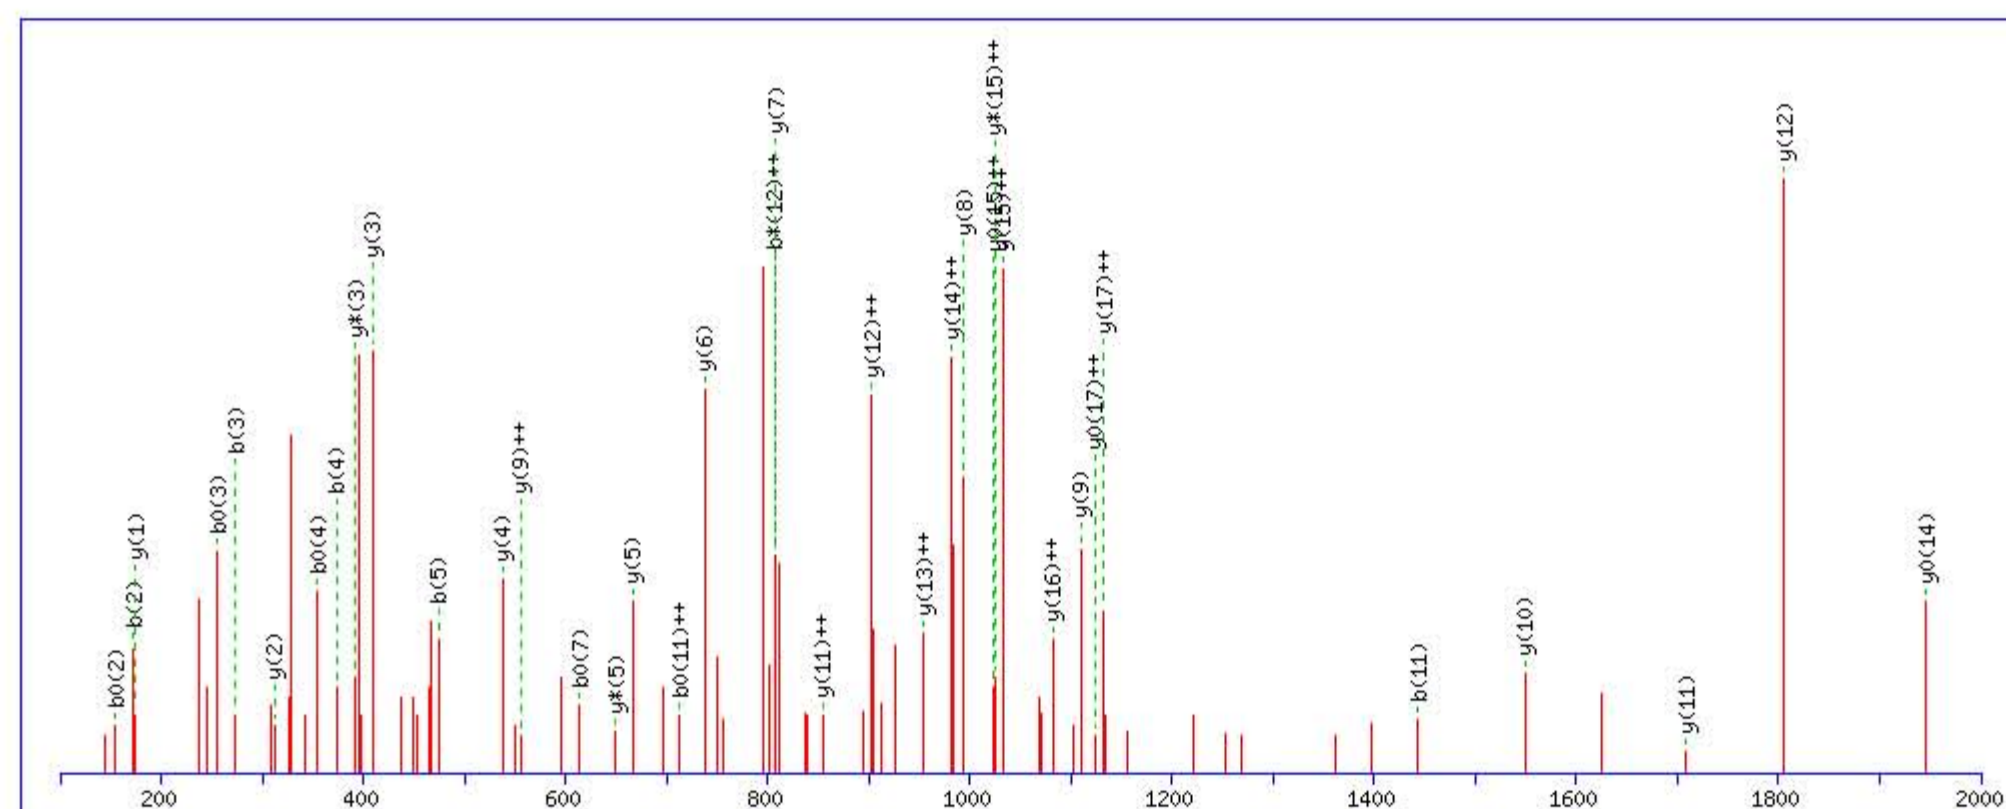

Monoisotopic mass of neutral peptide Mr(calc): 2436.131470

Fixed modifications: Carbamidomethyl (C) (apply to specified residues or termini only)

Variable modifications:

Q10 : Biotin:Thermo-21345 (Q)

Ions Score: 61 Expect: 1.3e-005

Matches : 37/190 fragment ions using 83 most intense peaks [\(help\)](#)

| #  | b                  | b <sup>++</sup> | b <sup>*</sup> | b <sup>*++</sup>  | b <sup>0</sup> | b <sup>0++</sup> | Seq. | y                  | y <sup>++</sup>    | y <sup>*</sup>    | y <sup>*++</sup>   | y <sup>0</sup>     | y <sup>0++</sup>   | #  |
|----|--------------------|-----------------|----------------|-------------------|----------------|------------------|------|--------------------|--------------------|-------------------|--------------------|--------------------|--------------------|----|
| 1  | 72.044390          | 36.525833       |                |                   |                |                  | A    |                    |                    |                   |                    |                    |                    | 19 |
| 2  | <b>173.092069</b>  | 87.049672       |                |                   | 155.081504     | 78.044390        | T    | 2366.101616        | 1183.554446        | 2349.075067       | 1175.041171        | 2348.091051        | 1174.549163        | 18 |
| 3  | <b>274.139748</b>  | 137.573512      |                |                   | 256.129183     | 128.568230       | T    | 2265.053937        | <b>1133.030606</b> | 2248.027388       | 1124.517332        | 2247.043372        | <b>1124.025324</b> | 17 |
| 4  | <b>373.208162</b>  | 187.107719      |                |                   | 355.197597     | 178.102437       | V    | 2164.006258        | <b>1082.506767</b> | 2146.979709       | 1073.993492        | 2145.995693        | 1073.501484        | 16 |
| 5  | <b>474.255841</b>  | 237.631559      |                |                   | 456.245276     | 228.626276       | T    | 2064.937844        | <b>1032.972560</b> | 2047.911295       | <b>1024.459285</b> | 2046.927279        | <b>1023.967277</b> | 15 |
| 6  | 531.277305         | 266.142291      |                |                   | 513.266740     | 257.137008       | G    | 1963.890165        | <b>982.448721</b>  | 1946.863616       | 973.935446         | <b>1945.879600</b> | 973.443438         | 14 |
| 7  | 632.324984         | 316.666130      |                |                   | 614.314419     | 307.660848       | T    | 1906.868701        | <b>953.937989</b>  | 1889.842152       | 945.424714         | 1888.858136        | 944.932706         | 13 |
| 8  | 729.377748         | 365.192512      |                |                   | 711.367183     | 356.187230       | P    | <b>1805.821022</b> | <b>903.414149</b>  | 1788.794473       | 894.900875         | 1787.810457        | 894.408867         | 12 |
| 9  | 889.408397         | 445.207837      |                |                   | 871.397832     | 436.202554       | C    | <b>1708.768258</b> | <b>854.887767</b>  | 1691.741709       | 846.374493         | 1690.757693        | 845.882485         | 11 |
| 10 | 1328.633723        | 664.820500      | 1311.607174    | 656.307225        | 1310.623158    | 655.815217       | Q    | <b>1548.737609</b> | 774.872443         | 1531.711060       | 766.359168         | 1530.727044        | 765.867160         | 10 |
| 11 | <b>1443.660666</b> | 722.333971      | 1426.634117    | 713.820697        | 1425.650101    | 713.328689       | D    | <b>1109.512283</b> | <b>555.259780</b>  | 1092.485734       | 546.746505         | 1091.501718        | 546.254497         | 9  |
| 12 | 1629.739979        | 815.373628      | 1612.713430    | <b>806.860353</b> | 1611.729414    | 806.368345       | W    | <b>994.485340</b>  | 497.746308         | 977.458791        | 489.233034         | 976.474775         | 488.741026         | 8  |
| 13 | 1700.777093        | 850.892185      | 1683.750544    | 842.378910        | 1682.766528    | 841.886902       | A    | <b>808.406027</b>  | 404.706652         | 791.379478        | 396.193377         | 790.395462         | 395.701369         | 7  |
| 14 | 1771.814207        | 886.410742      | 1754.787658    | 877.897467        | 1753.803642    | 877.405459       | A    | <b>737.368913</b>  | 369.188095         | 720.342364        | 360.674820         | 719.358348         | 360.182812         | 6  |
| 15 | 1899.872785        | 950.440031      | 1882.846236    | 941.926756        | 1881.862220    | 941.434748       | Q    | <b>666.331799</b>  | 333.669538         | <b>649.305250</b> | 325.156263         | 648.321234         | 324.664255         | 5  |
| 16 | 2028.915378        | 1014.961327     | 2011.888829    | 1006.448053       | 2010.904813    | 1005.956045      | E    | <b>538.273221</b>  | 269.640249         | 521.246672        | 261.126974         | 520.262656         | 260.634966         | 4  |
| 17 | 2125.968142        | 1063.487709     | 2108.941593    | 1054.974434       | 2107.957577    | 1054.482427      | P    | <b>409.230628</b>  | 205.118952         | <b>392.204079</b> | 196.605677         |                    |                    | 3  |
| 18 | 2263.027054        | 1132.017165     | 2246.000505    | 1123.503890       | 2245.016489    | 1123.011883      | H    | <b>312.177864</b>  | 156.592570         | 295.151315        | 148.079295         |                    |                    | 2  |
| 19 |                    |                 |                |                   |                |                  | R    | <b>175.118952</b>  | 88.063114          | 158.092403        | 79.549839          |                    |                    | 1  |

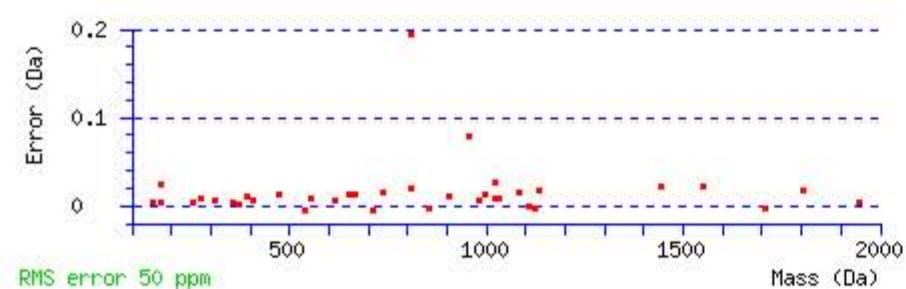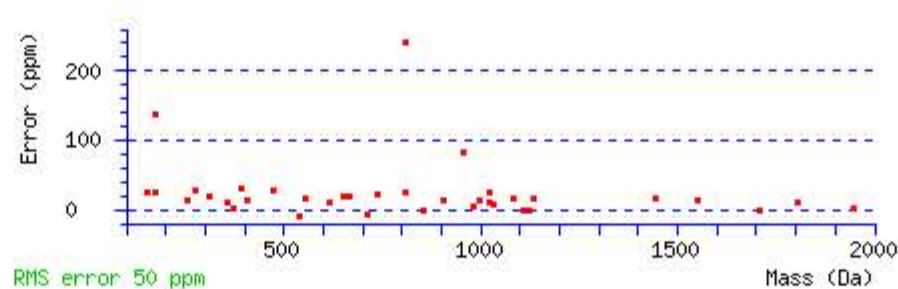

NCBI BLAST search of [ATTVTGTPCQDWAAQEPHR](#)

(Parameters: blastp, nr protein database, expect=20000, no filter, PAM30)

Other BLAST [web gateways](#)

All matches to this query

| Score | Mr(calc):   | Delta    | Sequence                            |
|-------|-------------|----------|-------------------------------------|
| 60.8  | 2436.131470 | 0.009632 | <a href="#">ATTVTGTPCQDWAAQEPHR</a> |
| 24.5  | 2436.131470 | 0.009632 | <a href="#">ATTVTGTPCQDWAAQEPHR</a> |



# Mascot Search Results

## Peptide View

MS/MS Fragmentation of **ATTVTGTPCQDWAAQEPHR**

Found in **PLMN\_HUMAN**, Plasminogen OS=Homo sapiens GN=PLG PE=1 SV=2

Match to Query 63555: 2436.149352 from(813.057060,3+) rtinseconds(1858) index(77395)

Title: Locus:1.1.1.2861.20 File:"2013-07-02 CLN FXIII 60 min 1st FT.wiff"

Data file C:\Program Files (x86)\Matrix Science\Mascot Daemon\mgf4 FXIII 60 min 1st\mascot\_daemon\_merge.mgf

Click mouse within plot area to zoom in by factor of two about that point

Or, Plot from  to  Da

Label all possible matches  Label matches used for scoring

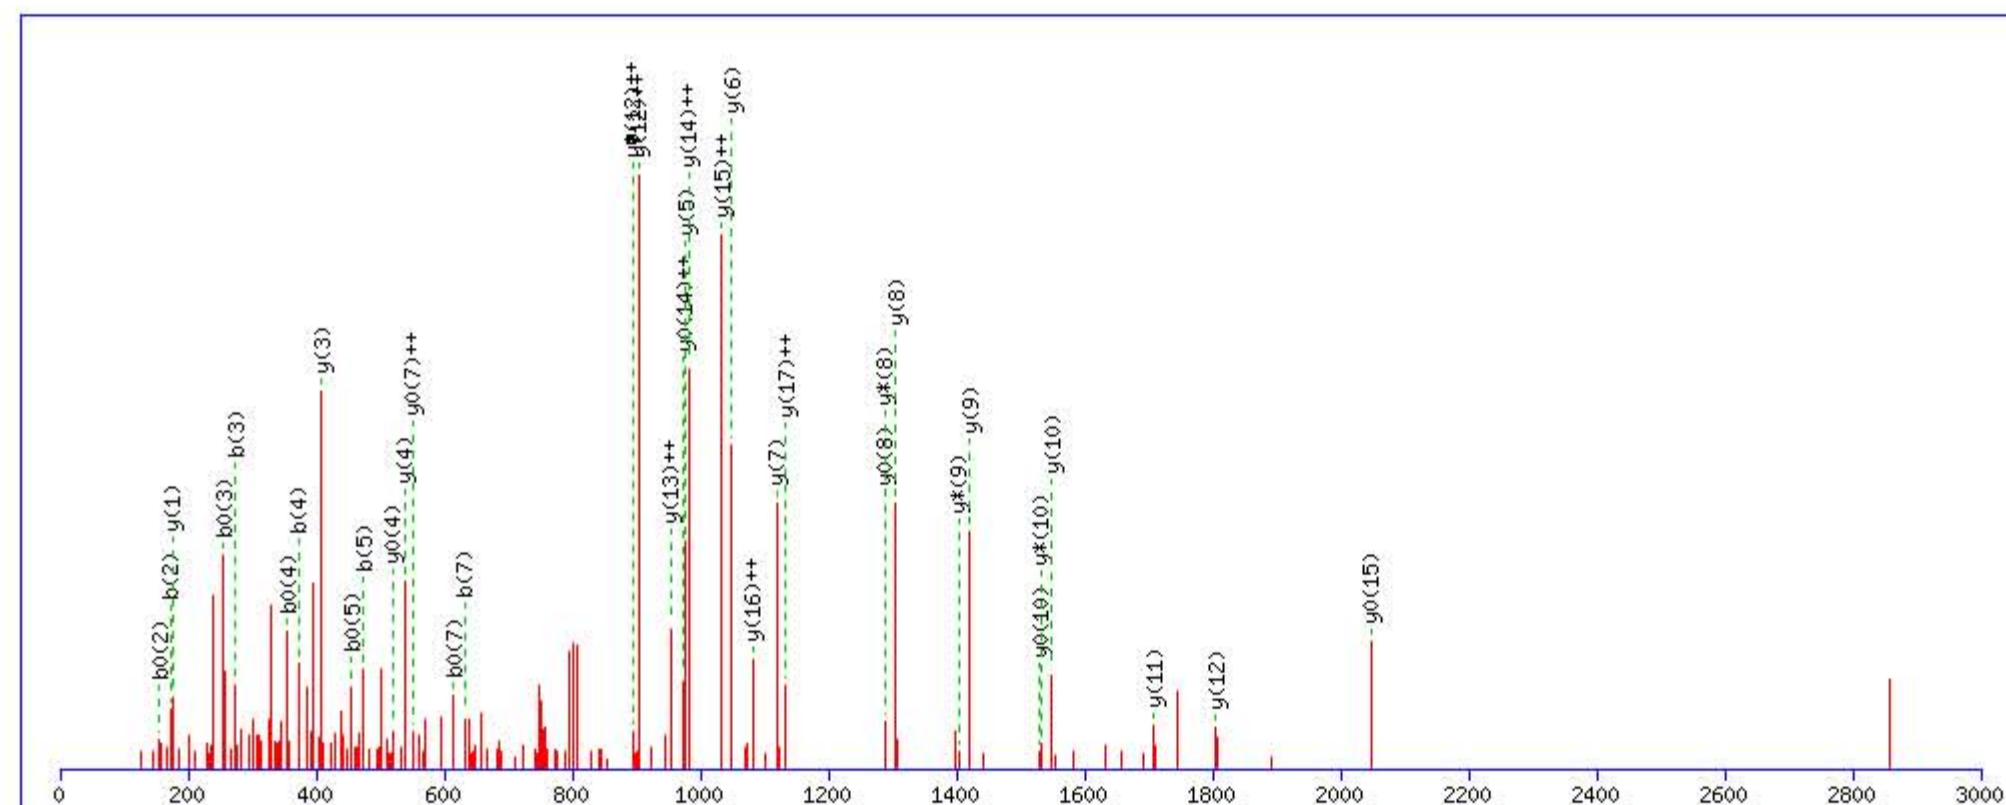

Monoisotopic mass of neutral peptide Mr(calc): 2436.131470

Fixed modifications: Carbamidomethyl (C) (apply to specified residues or termini only)

Variable modifications:

Q15 : Biotin:Thermo-21345 (Q)

Ions Score: 58 Expect: 3.1e-005

Matches : 38/190 fragment ions using 75 most intense peaks [\(help\)](#)

| #  | b                 | b <sup>++</sup> | b <sup>*</sup> | b <sup>*++</sup> | b <sup>0</sup>    | b <sup>0++</sup> | Seq. | y                  | y <sup>++</sup>    | y <sup>*</sup>     | y <sup>*++</sup>  | y <sup>0</sup>     | y <sup>0++</sup>  | #  |
|----|-------------------|-----------------|----------------|------------------|-------------------|------------------|------|--------------------|--------------------|--------------------|-------------------|--------------------|-------------------|----|
| 1  | 72.044390         | 36.525833       |                |                  |                   |                  | A    |                    |                    |                    |                   |                    |                   | 19 |
| 2  | <b>173.092069</b> | 87.049672       |                |                  | 155.081504        | 78.044390        | T    | 2366.101616        | 1183.554446        | 2349.075067        | 1175.041171       | 2348.091051        | 1174.549163       | 18 |
| 3  | <b>274.139748</b> | 137.573512      |                |                  | <b>256.129183</b> | 128.568230       | T    | 2265.053937        | <b>1133.030606</b> | 2248.027388        | 1124.517332       | 2247.043372        | 1124.025324       | 17 |
| 4  | <b>373.208162</b> | 187.107719      |                |                  | <b>355.197597</b> | 178.102437       | V    | 2164.006258        | <b>1082.506767</b> | 2146.979709        | 1073.993492       | 2145.995693        | 1073.501484       | 16 |
| 5  | <b>474.255841</b> | 237.631559      |                |                  | <b>456.245276</b> | 228.626276       | T    | 2064.937844        | <b>1032.972560</b> | 2047.911295        | 1024.459285       | <b>2046.927279</b> | 1023.967277       | 15 |
| 6  | 531.277305        | 266.142291      |                |                  | 513.266740        | 257.137008       | G    | 1963.890165        | <b>982.448721</b>  | 1946.863616        | 973.935446        | 1945.879600        | <b>973.443438</b> | 14 |
| 7  | <b>632.324984</b> | 316.666130      |                |                  | <b>614.314419</b> | 307.660848       | T    | 1906.868701        | <b>953.937989</b>  | 1889.842152        | 945.424714        | 1888.858136        | 944.932706        | 13 |
| 8  | 729.377748        | 365.192512      |                |                  | 711.367183        | 356.187230       | P    | <b>1805.821022</b> | <b>903.414149</b>  | 1788.794473        | <b>894.900875</b> | 1787.810457        | <b>894.408867</b> | 12 |
| 9  | 889.408397        | 445.207837      |                |                  | 871.397832        | 436.202554       | C    | <b>1708.768258</b> | 854.887767         | 1691.741709        | 846.374493        | 1690.757693        | 845.882485        | 11 |
| 10 | 1017.466975       | 509.237126      | 1000.440426    | 500.723851       | 999.456410        | 500.231843       | Q    | <b>1548.737609</b> | 774.872443         | <b>1531.711060</b> | 766.359168        | <b>1530.727044</b> | 765.867160        | 10 |
| 11 | 1132.493918       | 566.750597      | 1115.467369    | 558.237323       | 1114.483353       | 557.745315       | D    | <b>1420.679031</b> | 710.843154         | <b>1403.652482</b> | 702.329879        | 1402.668466        | 701.837871        | 9  |
| 12 | 1318.573231       | 659.790254      | 1301.546682    | 651.276979       | 1300.562666       | 650.784971       | W    | <b>1305.652088</b> | 653.329682         | <b>1288.625539</b> | 644.816408        | <b>1287.641523</b> | 644.324400        | 8  |
| 13 | 1389.610345       | 695.308811      | 1372.583796    | 686.795536       | 1371.599780       | 686.303528       | A    | <b>1119.572775</b> | 560.290026         | 1102.546226        | 551.776751        | 1101.562210        | <b>551.284743</b> | 7  |
| 14 | 1460.647459       | 730.827368      | 1443.620910    | 722.314093       | 1442.636894       | 721.822085       | A    | <b>1048.535661</b> | 524.771469         | 1031.509112        | 516.258194        | 1030.525096        | 515.766186        | 6  |
| 15 | 1899.872785       | 950.440031      | 1882.846236    | 941.926756       | 1881.862220       | 941.434748       | Q    | <b>977.498547</b>  | 489.252912         | 960.471998         | 480.739637        | 959.487982         | 480.247629        | 5  |
| 16 | 2028.915378       | 1014.961327     | 2011.888829    | 1006.448053      | 2010.904813       | 1005.956045      | E    | <b>538.273221</b>  | 269.640249         | 521.246672         | 261.126974        | <b>520.262656</b>  | 260.634966        | 4  |
| 17 | 2125.968142       | 1063.487709     | 2108.941593    | 1054.974434      | 2107.957577       | 1054.482427      | P    | <b>409.230628</b>  | 205.118952         | 392.204079         | 196.605677        |                    |                   | 3  |
| 18 | 2263.027054       | 1132.017165     | 2246.000505    | 1123.503890      | 2245.016489       | 1123.011883      | H    | 312.177864         | 156.592570         | 295.151315         | 148.079295        |                    |                   | 2  |
| 19 |                   |                 |                |                  |                   |                  | R    | <b>175.118952</b>  | 88.063114          | 158.092403         | 79.549839         |                    |                   | 1  |

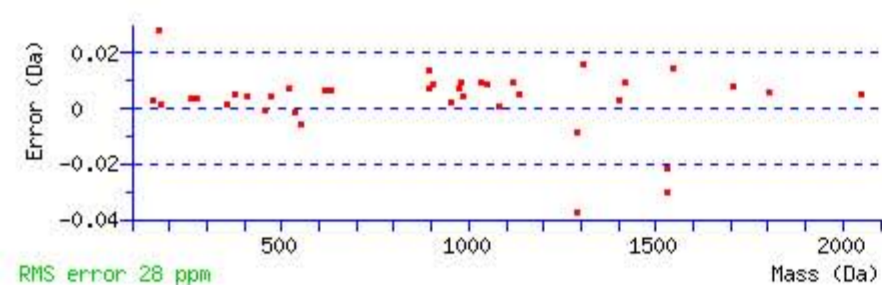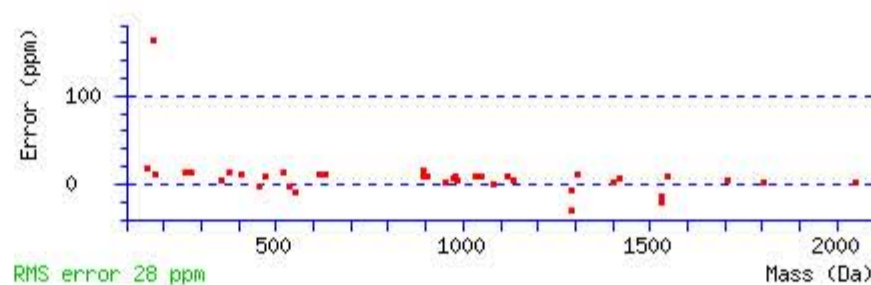

NCBI BLAST search of [ATTVTGTPCQDWAAQEPHR](#)

(Parameters: blastp, nr protein database, expect=20000, no filter, PAM30)

Other BLAST [web gateways](#)

All matches to this query

| Score | Mr(calc):   | Delta    | Sequence                            |
|-------|-------------|----------|-------------------------------------|
| 57.6  | 2436.131470 | 0.017882 | <a href="#">ATTVTGTPCQDWAAQEPHR</a> |
| 23.8  | 2436.131470 | 0.017882 | <a href="#">ATTVTGTPCQDWAAQEPHR</a> |



# MASCOT Search Results

## Peptide View

MS/MS Fragmentation of **VVGGCVAHPHSWPWQVSLR**

Found in **PLMN\_HUMAN**, Plasminogen OS=Homo sapiens GN=PLG PE=1 SV=2

Match to Query 64752: 2482.273902 from(828.431910,3+) rtinseconds(2200) index(79937)

Title: Locus:1.1.1.2980.13 File:"2013-07-02 CLN FXIII 60 min 1st FT.wiff"

Data file C:\Program Files (x86)\Matrix Science\Mascot Daemon\mgf4 FXIII 60 min 1st\mascot\_daemon\_merge.mgf

Click mouse within plot area to zoom in by factor of two about that point

Or, Plot from  to  Da

Label all possible matches  Label matches used for scoring

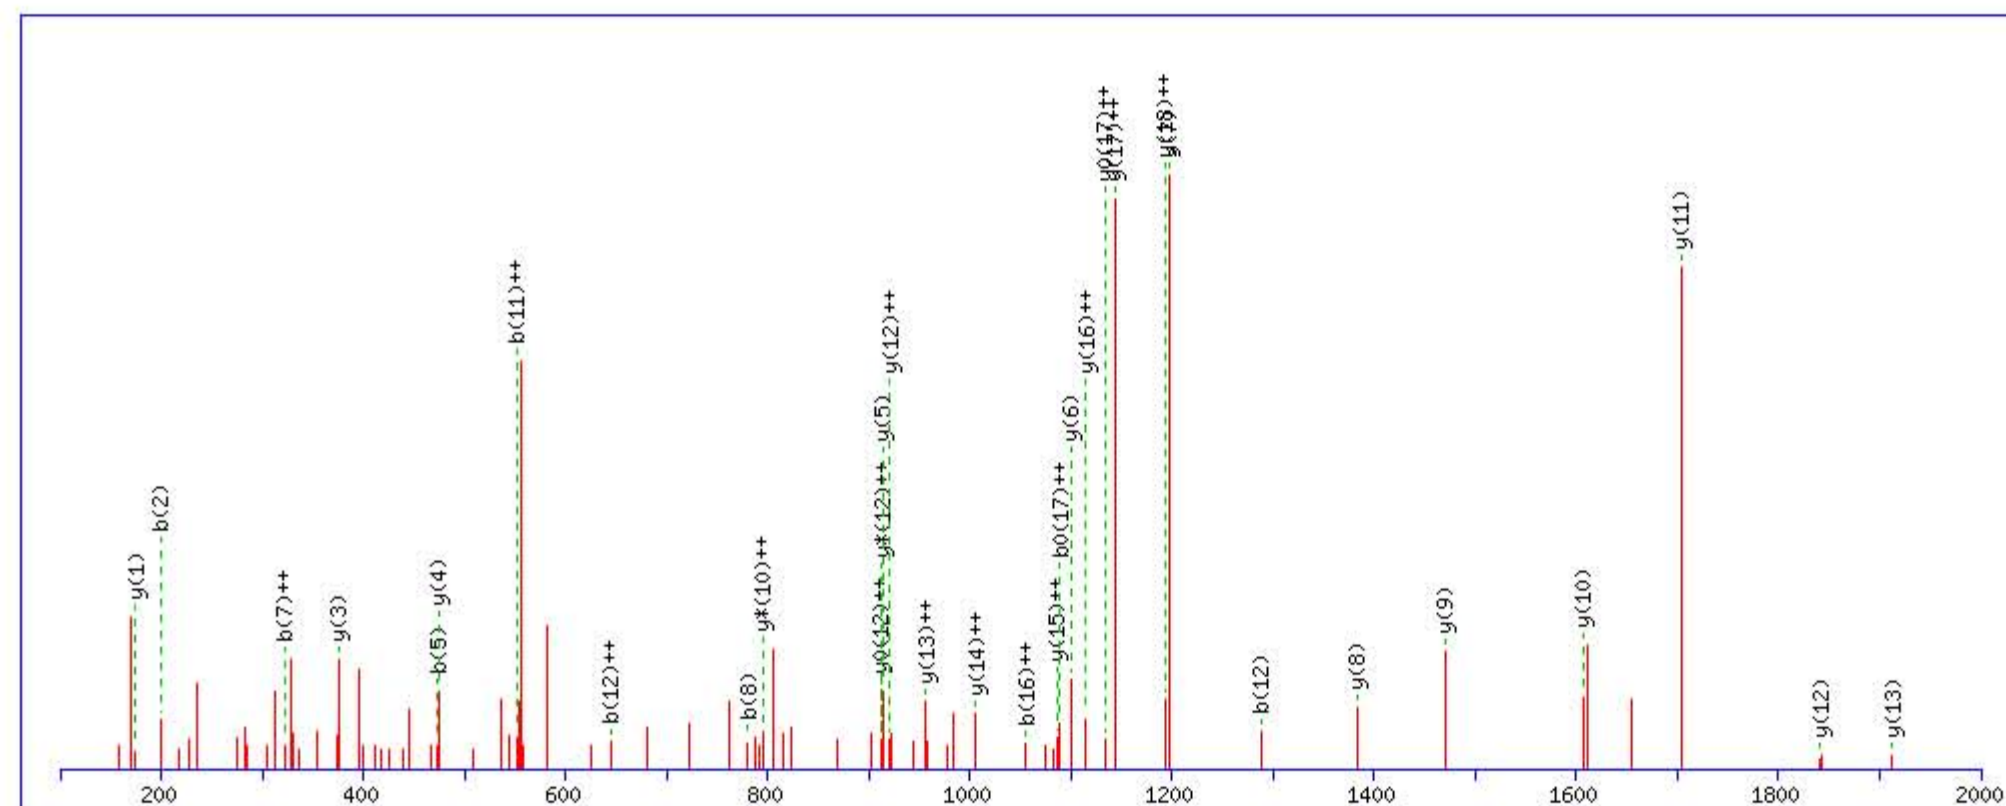

Monoisotopic mass of neutral peptide Mr(calc): 2482.251480

Fixed modifications: Carbamidomethyl (C) (apply to specified residues or termini only)

Variable modifications:

Q15 : Biotin:Thermo-21345 (Q)

Ions Score: 49 Expect: 0.00036

Matches : 32/164 fragment ions using 87 most intense peaks [\(help\)](#)

| #  | b                  | b <sup>++</sup>    | b <sup>+</sup> | b <sup>+++</sup> | b <sup>0</sup> | b <sup>0++</sup>   | Seq. | y                  | y <sup>++</sup>    | y <sup>+</sup> | y <sup>+++</sup>  | y <sup>0</sup> | y <sup>0++</sup>   | #  |
|----|--------------------|--------------------|----------------|------------------|----------------|--------------------|------|--------------------|--------------------|----------------|-------------------|----------------|--------------------|----|
| 1  | 100.075690         | 50.541483          |                |                  |                |                    | V    |                    |                    |                |                   |                |                    | 19 |
| 2  | <b>199.144104</b>  | 100.075690         |                |                  |                |                    | V    | 2384.190309        | <b>1192.598792</b> | 2367.163760    | 1184.085518       | 2366.179744    | 1183.593510        | 18 |
| 3  | 256.165568         | 128.586422         |                |                  |                |                    | G    | 2285.121895        | <b>1143.064585</b> | 2268.095346    | 1134.551311       | 2267.111330    | <b>1134.059303</b> | 17 |
| 4  | 313.187032         | 157.097154         |                |                  |                |                    | G    | 2228.100431        | <b>1114.553853</b> | 2211.073882    | 1106.040579       | 2210.089866    | 1105.548571        | 16 |
| 5  | <b>473.217681</b>  | 237.112479         |                |                  |                |                    | C    | 2171.078967        | <b>1086.043121</b> | 2154.052418    | 1077.529847       | 2153.068402    | 1077.037839        | 15 |
| 6  | 572.286095         | 286.646686         |                |                  |                |                    | V    | 2011.048318        | <b>1006.027797</b> | 1994.021769    | 997.514523        | 1993.037753    | 997.022515         | 14 |
| 7  | 643.323209         | <b>322.165243</b>  |                |                  |                |                    | A    | <b>1911.979904</b> | <b>956.493590</b>  | 1894.953355    | 947.980316        | 1893.969339    | 947.488308         | 13 |
| 8  | <b>780.382121</b>  | 390.694699         |                |                  |                |                    | H    | <b>1840.942790</b> | <b>920.975033</b>  | 1823.916241    | <b>912.461759</b> | 1822.932225    | <b>911.969751</b>  | 12 |
| 9  | 877.434885         | 439.221081         |                |                  |                |                    | P    | <b>1703.883878</b> | 852.445577         | 1686.857329    | 843.932303        | 1685.873313    | 843.440295         | 11 |
| 10 | 1014.493797        | 507.750537         |                |                  |                |                    | H    | <b>1606.831114</b> | 803.919195         | 1589.804565    | <b>795.405921</b> | 1588.820549    | 794.913913         | 10 |
| 11 | 1101.525825        | <b>551.266550</b>  |                |                  | 1083.515260    | 542.261268         | S    | <b>1469.772202</b> | 735.389739         | 1452.745653    | 726.876465        | 1451.761637    | 726.384457         | 9  |
| 12 | <b>1287.605138</b> | <b>644.306207</b>  |                |                  | 1269.594573    | 635.300924         | W    | <b>1382.740174</b> | 691.873725         | 1365.713625    | 683.360451        | 1364.729609    | 682.868443         | 8  |
| 13 | 1384.657902        | 692.832589         |                |                  | 1366.647337    | 683.827306         | P    | <b>1196.660861</b> | 598.834069         | 1179.634312    | 590.320794        | 1178.650296    | 589.828786         | 7  |
| 14 | 1570.737215        | 785.872245         |                |                  | 1552.726650    | 776.866963         | W    | <b>1099.608097</b> | 550.307687         | 1082.581548    | 541.794412        | 1081.597532    | 541.302404         | 6  |
| 15 | 2009.962541        | 1005.484909        | 1992.935992    | 996.971634       | 1991.951976    | 996.479626         | Q    | <b>913.528784</b>  | 457.268030         | 896.502235     | 448.754756        | 895.518219     | 448.262748         | 5  |
| 16 | 2109.030955        | <b>1055.019115</b> | 2092.004406    | 1046.505841      | 2091.020390    | 1046.013833        | V    | <b>474.303458</b>  | 237.655367         | 457.276909     | 229.142092        | 456.292893     | 228.650084         | 4  |
| 17 | 2196.062983        | 1098.535129        | 2179.036434    | 1090.021855      | 2178.052418    | <b>1089.529847</b> | S    | <b>375.235044</b>  | 188.121160         | 358.208495     | 179.607886        | 357.224479     | 179.115878         | 3  |
| 18 | 2309.147047        | 1155.077161        | 2292.120498    | 1146.563887      | 2291.136482    | 1146.071879        | L    | 288.203016         | 144.605146         | 271.176467     | 136.091872        |                |                    | 2  |
| 19 |                    |                    |                |                  |                |                    | R    | <b>175.118952</b>  | 88.063114          | 158.092403     | 79.549839         |                |                    | 1  |

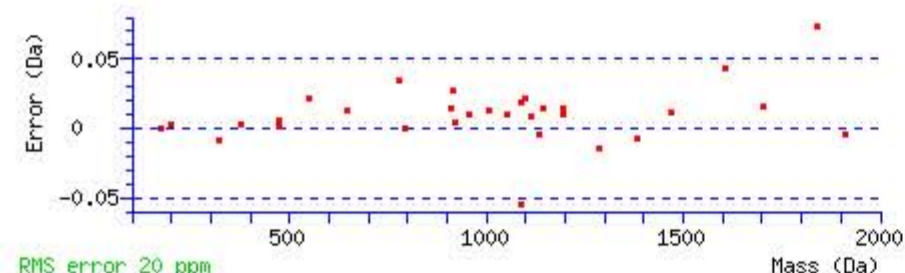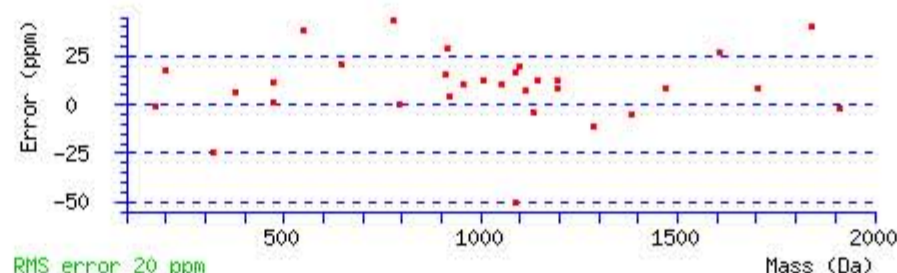

NCBI BLAST search of [VVGGCVAHPHSWPWQVSLR](#)

(Parameters: blastp, nr protein database, expect=20000, no filter, PAM30)

Other BLAST [web gateways](#)

All matches to this query

| Score | Mr(calc):   | Delta    | Sequence                            |
|-------|-------------|----------|-------------------------------------|
| 49.3  | 2482.251480 | 0.022422 | <a href="#">VVGGCVAHPHSWPWQVSLR</a> |

Mascot: <http://www.matrixscience.com/>



# MASCOT Search Results

## Peptide View

MS/MS Fragmentation of **NPDNDPQGPWCYTIDPEKR**  
 Found in **PLMN\_HUMAN**, Plasminogen OS=Homo sapiens GN=PLG PE=1 SV=2

Match to Query 66606: 2600.165442 from(867.729090,3+) rtinseconds(1942) index(78055)  
 Title: Locus:1.1.1.2890.26 File:"2013-07-02 CLN FXIII 60 min 1st FT.wiff"  
 Data file C:\Program Files (x86)\Matrix Science\Mascot Daemon\mgf4 FXIII 60 min 1st\mascot\_daemon\_merge.mgf

Click mouse within plot area to zoom in by factor of two about that point

Or, Plot from  to  Da

Label all possible matches  Label matches used for scoring

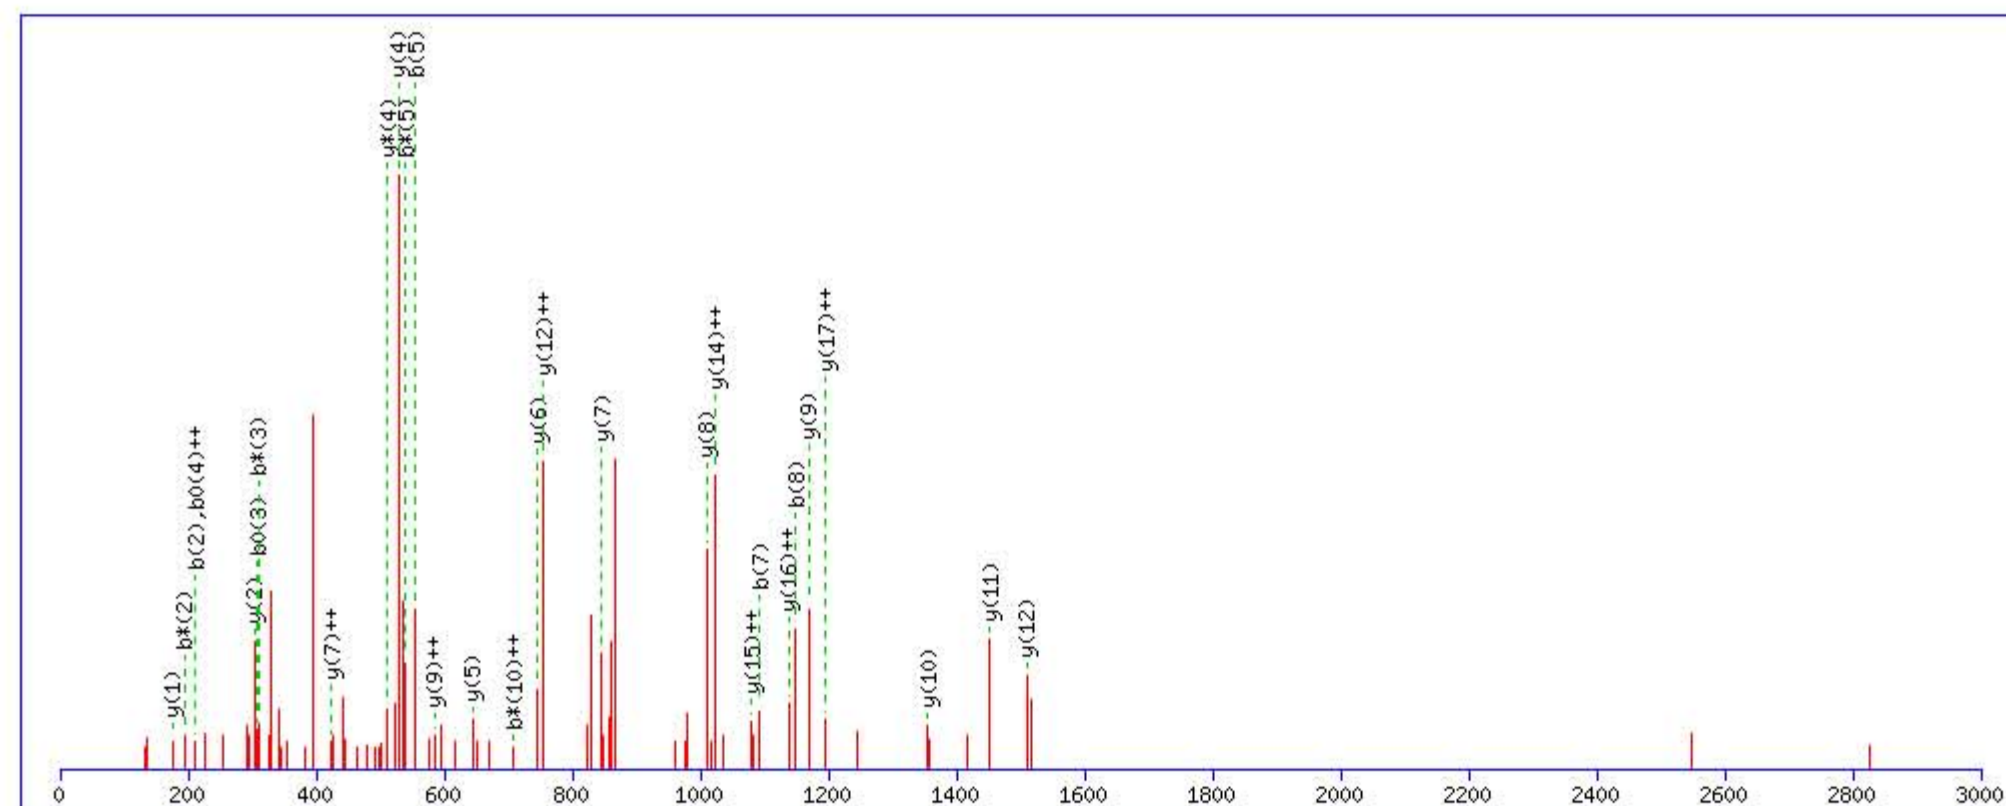

Monoisotopic mass of neutral peptide Mr(calc): 2600.142410  
 Fixed modifications: Carbamidomethyl (C) (apply to specified residues or termini only)  
 Variable modifications:  
 Q7 : Biotin:Thermo-21345 (Q)  
 Ions Score: 49 Expect: 0.00011  
 Matches : 29/208 fragment ions using 64 most intense peaks [\(help\)](#)

| #  | b                  | b <sup>++</sup> | b <sup>+</sup>    | b <sup>+++</sup>  | b <sup>0</sup>    | b <sup>0++</sup>  | Seq. | y                  | y <sup>++</sup>    | y <sup>+</sup>    | y <sup>+++</sup> | y <sup>0</sup> | y <sup>0++</sup> | #  |
|----|--------------------|-----------------|-------------------|-------------------|-------------------|-------------------|------|--------------------|--------------------|-------------------|------------------|----------------|------------------|----|
| 1  | 115.050203         | 58.028740       | 98.023654         | 49.515465         |                   |                   | N    |                    |                    |                   |                  |                |                  | 19 |
| 2  | <b>212.102967</b>  | 106.555121      | <b>195.076418</b> | 98.041847         |                   |                   | P    | 2487.106759        | 1244.057017        | 2470.080210       | 1235.543743      | 2469.096194    | 1235.051735      | 18 |
| 3  | 327.129910         | 164.068593      | <b>310.103361</b> | 155.555319        | <b>309.119345</b> | 155.063311        | D    | 2390.053995        | <b>1195.530635</b> | 2373.027446       | 1187.017361      | 2372.043430    | 1186.525353      | 17 |
| 4  | 441.172837         | 221.090057      | 424.146288        | 212.576782        | 423.162272        | <b>212.084774</b> | N    | 2275.027052        | <b>1138.017164</b> | 2258.000503       | 1129.503889      | 2257.016487    | 1129.011881      | 16 |
| 5  | <b>556.199780</b>  | 278.603528      | <b>539.173231</b> | 270.090254        | 538.189215        | 269.598246        | D    | 2160.984125        | <b>1080.995700</b> | 2143.957576       | 1072.482426      | 2142.973560    | 1071.990418      | 15 |
| 6  | 653.252544         | 327.129910      | 636.225995        | 318.616636        | 635.241979        | 318.124628        | P    | 2045.957182        | <b>1023.482229</b> | 2028.930633       | 1014.968955      | 2027.946617    | 1014.476946      | 14 |
| 7  | <b>1092.477870</b> | 546.742573      | 1075.451321       | 538.229299        | 1074.467305       | 537.737290        | Q    | 1948.904418        | 974.955847         | 1931.877869       | 966.442572       | 1930.893853    | 965.950564       | 13 |
| 8  | <b>1149.499334</b> | 575.253305      | 1132.472785       | 566.740030        | 1131.488769       | 566.248022        | G    | <b>1509.679092</b> | <b>755.343184</b>  | 1492.652543       | 746.829910       | 1491.668527    | 746.337902       | 12 |
| 9  | 1246.552098        | 623.779687      | 1229.525549       | 615.266413        | 1228.541533       | 614.774404        | P    | <b>1452.657628</b> | 726.832452         | 1435.631079       | 718.319178       | 1434.647063    | 717.827170       | 11 |
| 10 | 1432.631411        | 716.819343      | 1415.604862       | <b>708.306069</b> | 1414.620846       | 707.814061        | W    | <b>1355.604864</b> | 678.306070         | 1338.578315       | 669.792796       | 1337.594299    | 669.300788       | 10 |
| 11 | 1592.662060        | 796.834668      | 1575.635511       | 788.321394        | 1574.651495       | 787.829385        | C    | <b>1169.525551</b> | <b>585.266414</b>  | 1152.499002       | 576.753139       | 1151.514986    | 576.261131       | 9  |
| 12 | 1755.725389        | 878.366333      | 1738.698840       | 869.853058        | 1737.714824       | 869.361050        | Y    | <b>1009.494902</b> | 505.251089         | 992.468353        | 496.737815       | 991.484337     | 496.245807       | 8  |
| 13 | 1856.773068        | 928.890172      | 1839.746519       | 920.376898        | 1838.762503       | 919.884889        | T    | <b>846.431573</b>  | <b>423.719425</b>  | 829.405024        | 415.206150       | 828.421008     | 414.714142       | 7  |
| 14 | 1957.820747        | 979.414012      | 1940.794198       | 970.900737        | 1939.810182       | 970.408729        | T    | <b>745.383894</b>  | 373.195585         | 728.357345        | 364.682311       | 727.373329     | 364.190303       | 6  |
| 15 | 2072.847690        | 1036.927483     | 2055.821141       | 1028.414208       | 2054.837125       | 1027.922200       | D    | <b>644.336215</b>  | 322.671746         | 627.309666        | 314.158471       | 626.325650     | 313.666463       | 5  |
| 16 | 2169.900454        | 1085.453865     | 2152.873905       | 1076.940590       | 2151.889889       | 1076.448582       | P    | <b>529.309272</b>  | 265.158274         | <b>512.282723</b> | 256.645000       | 511.298707     | 256.152992       | 4  |
| 17 | 2298.943047        | 1149.975161     | 2281.916498       | 1141.461887       | 2280.932482       | 1140.969879       | E    | 432.256508         | 216.631892         | 415.229959        | 208.118618       | 414.245943     | 207.626610       | 3  |
| 18 | 2427.038010        | 1214.022643     | 2410.011461       | 1205.509368       | 2409.027445       | 1205.017360       | K    | <b>303.213915</b>  | 152.110595         | 286.187366        | 143.597321       |                |                  | 2  |
| 19 |                    |                 |                   |                   |                   |                   | R    | <b>175.118952</b>  | 88.063114          | 158.092403        | 79.549839        |                |                  | 1  |

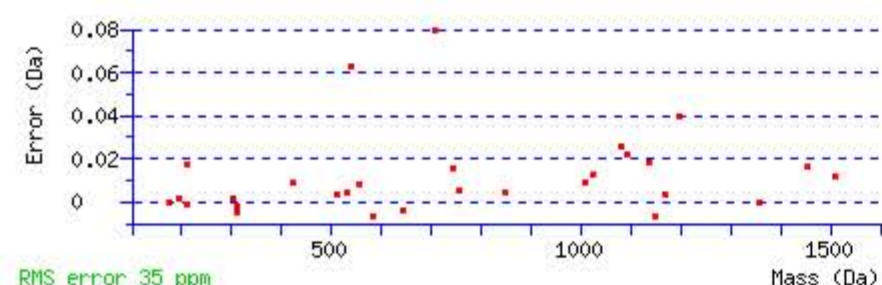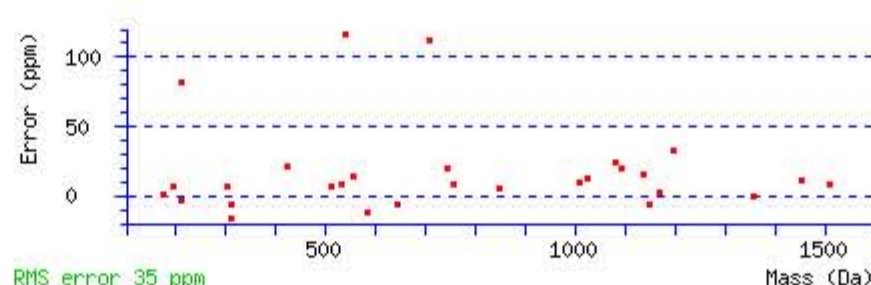

NCBI BLAST search of [NPDNDPQGPWCYTIDPEKR](#)  
 (Parameters: blastp, nr protein database, expect=20000, no filter, PAM30)  
 Other BLAST [web gateways](#)

### All matches to this query

| Score | Mr(calc):   | Delta    | Sequence                            |
|-------|-------------|----------|-------------------------------------|
| 49.2  | 2600.142410 | 0.023032 | <a href="#">NPDNDPQGPWCYTIDPEKR</a> |



# MASCOT Search Results

## Peptide View

MS/MS Fragmentation of **VILGAHQEVNLEPHVQEIIEVSR**

Found in **PLMN\_HUMAN**, Plasminogen OS=Homo sapiens GN=PLG PE=1 SV=2

Match to Query 68869: 2806.505172 from(936.509000,3+) rtinseconds(2074) index(79021)

Title: Locus:1.1.1.2936.12 File:"2013-07-02 CLN FXIII 60 min 1st FT.wiff"

Data file C:\Program Files (x86)\Matrix Science\Mascot Daemon\mgf4 FXIII 60 min 1st\mascot\_daemon\_merge.mgf

Click mouse within plot area to zoom in by factor of two about that point

Or, Plot from  to  Da

Label all possible matches  Label matches used for scoring

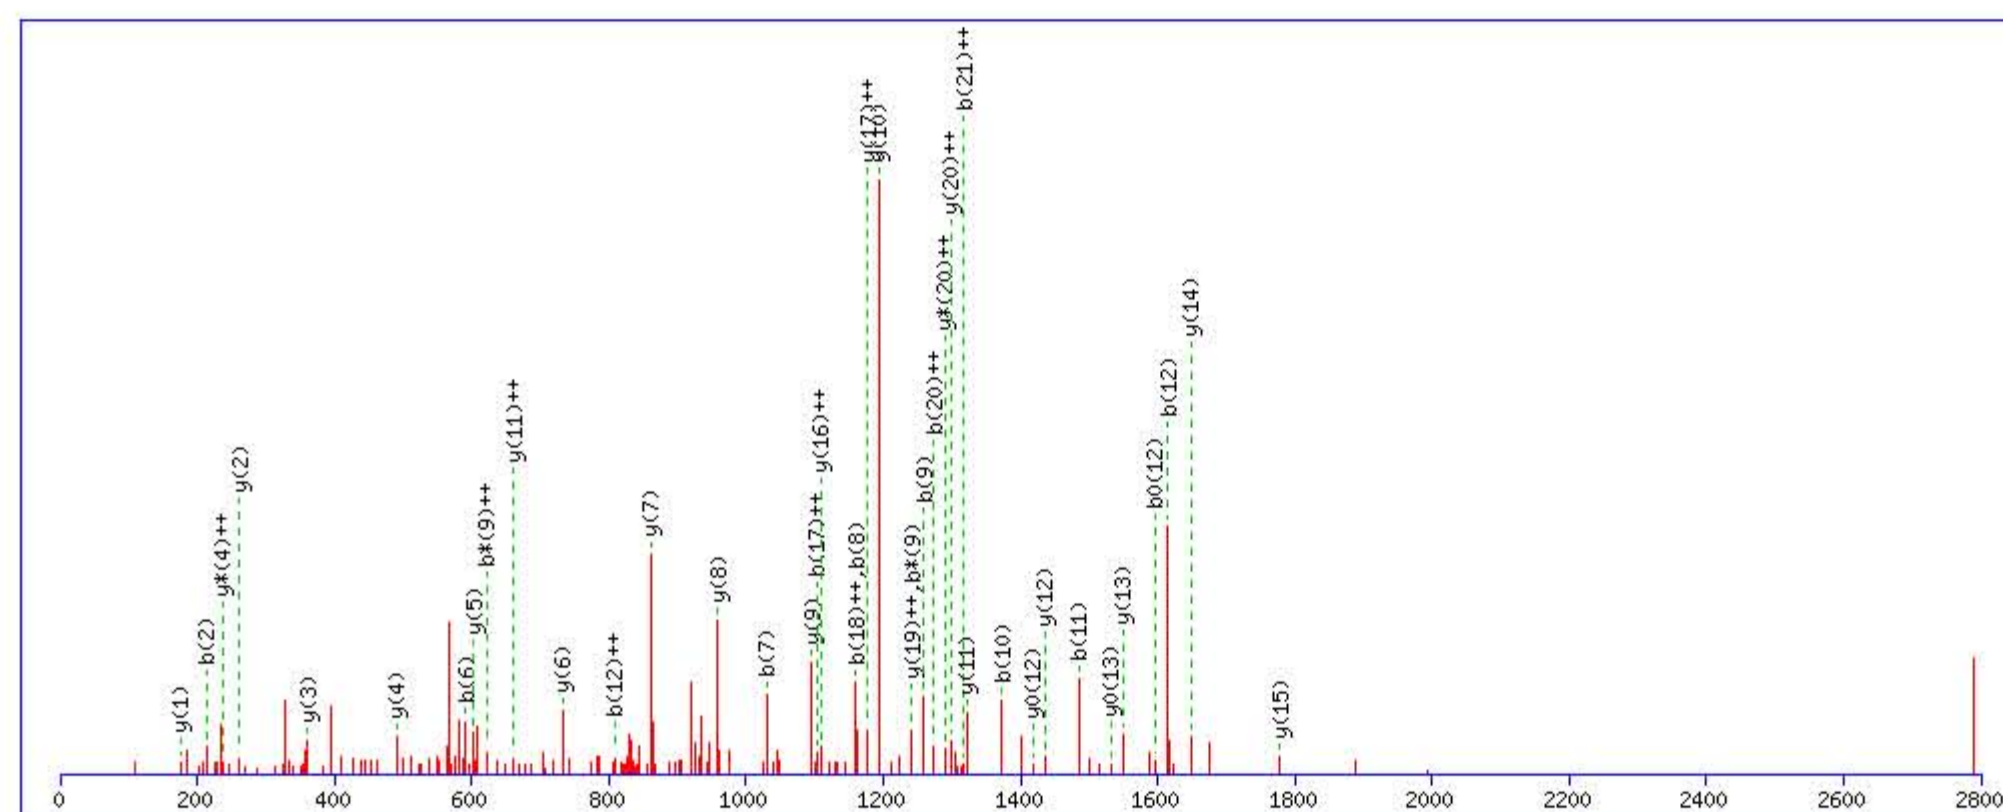

Monoisotopic mass of neutral peptide Mr(calc): 2806.479965

Fixed modifications: Carbamidomethyl (C) (apply to specified residues or termini only)

Variable modifications:

Q7 : Biotin:Thermo-21345 (Q)

Ions Score: 72 Expect: 1.1e-006

Matches : 40/224 fragment ions using 84 most intense peaks [\(help\)](#)

| #  | b                  | b <sup>++</sup>    | b <sup>*</sup>     | b <sup>*++</sup>  | b <sup>0</sup>     | b <sup>0++</sup> | Seq. | y                  | y <sup>++</sup>    | y <sup>*</sup> | y <sup>*++</sup>   | y <sup>0</sup>     | y <sup>0++</sup> | #  |
|----|--------------------|--------------------|--------------------|-------------------|--------------------|------------------|------|--------------------|--------------------|----------------|--------------------|--------------------|------------------|----|
| 1  | 100.075690         | 50.541483          |                    |                   |                    |                  | V    |                    |                    |                |                    |                    |                  | 22 |
| 2  | <b>213.159754</b>  | 107.083515         |                    |                   |                    |                  | I    | 2708.418847        | 1354.713061        | 2691.392298    | 1346.199787        | 2690.408282        | 1345.707779      | 21 |
| 3  | 326.243818         | 163.625547         |                    |                   |                    |                  | L    | 2595.334783        | <b>1298.171029</b> | 2578.308234    | <b>1289.657755</b> | 2577.324218        | 1289.165747      | 20 |
| 4  | 383.265282         | 192.136279         |                    |                   |                    |                  | G    | 2482.250719        | <b>1241.628997</b> | 2465.224170    | 1233.115723        | 2464.240154        | 1232.623715      | 19 |
| 5  | 454.302396         | 227.654836         |                    |                   |                    |                  | A    | 2425.229255        | 1213.118265        | 2408.202706    | 1204.604991        | 2407.218690        | 1204.112983      | 18 |
| 6  | <b>591.361308</b>  | 296.184292         |                    |                   |                    |                  | H    | 2354.192141        | <b>1177.599708</b> | 2337.165592    | 1169.086434        | 2336.181576        | 1168.594426      | 17 |
| 7  | <b>1030.586634</b> | 515.796955         | 1013.560085        | 507.283681        |                    |                  | Q    | 2217.133229        | <b>1109.070252</b> | 2200.106680    | 1100.556978        | 2199.122664        | 1100.064970      | 16 |
| 8  | <b>1159.629227</b> | 580.318252         | 1142.602678        | 571.804977        | 1141.618662        | 571.312969       | E    | <b>1777.907903</b> | 889.457590         | 1760.881354    | 880.944315         | 1759.897338        | 880.452307       | 15 |
| 9  | <b>1258.697641</b> | 629.852459         | <b>1241.671092</b> | <b>621.339184</b> | 1240.687076        | 620.847176       | V    | <b>1648.865310</b> | 824.936293         | 1631.838761    | 816.423019         | 1630.854745        | 815.931011       | 14 |
| 10 | <b>1372.740568</b> | 686.873922         | 1355.714019        | 678.360648        | 1354.730003        | 677.868640       | N    | <b>1549.796896</b> | 775.402086         | 1532.770347    | 766.888812         | <b>1531.786331</b> | 766.396804       | 13 |
| 11 | <b>1485.824632</b> | 743.415954         | 1468.798083        | 734.902680        | 1467.814067        | 734.410672       | L    | <b>1435.753969</b> | 718.380623         | 1418.727420    | 709.867348         | <b>1417.743404</b> | 709.375340       | 12 |
| 12 | <b>1614.867225</b> | <b>807.937251</b>  | 1597.840676        | 799.423976        | <b>1596.856660</b> | 798.931968       | E    | <b>1322.669905</b> | <b>661.838591</b>  | 1305.643356    | 653.325316         | 1304.659340        | 652.833308       | 11 |
| 13 | 1711.919989        | 856.463633         | 1694.893440        | 847.950358        | 1693.909424        | 847.458350       | P    | <b>1193.627312</b> | 597.317294         | 1176.600763    | 588.804020         | 1175.616747        | 588.312012       | 10 |
| 14 | 1848.978901        | 924.993089         | 1831.952352        | 916.479814        | 1830.968336        | 915.987806       | H    | <b>1096.574548</b> | 548.790912         | 1079.547999    | 540.277638         | 1078.563983        | 539.785630       | 9  |
| 15 | 1948.047315        | 974.527296         | 1931.020766        | 966.014021        | 1930.036750        | 965.522013       | V    | <b>959.515636</b>  | 480.261456         | 942.489087     | 471.748182         | 941.505071         | 471.256174       | 8  |
| 16 | 2076.105893        | 1038.556584        | 2059.079344        | 1030.043310       | 2058.095328        | 1029.551302      | Q    | <b>860.447222</b>  | 430.727249         | 843.420673     | 422.213975         | 842.436657         | 421.721967       | 7  |
| 17 | 2205.148486        | <b>1103.077881</b> | 2188.121937        | 1094.564606       | 2187.137921        | 1094.072598      | E    | <b>732.388644</b>  | 366.697960         | 715.362095     | 358.184686         | 714.378079         | 357.692678       | 6  |
| 18 | 2318.232550        | <b>1159.619913</b> | 2301.206001        | 1151.106638       | 2300.221985        | 1150.614631      | I    | <b>603.346051</b>  | 302.176664         | 586.319502     | 293.663389         | 585.335486         | 293.171381       | 5  |
| 19 | 2447.275143        | 1224.141210        | 2430.248594        | 1215.627935       | 2429.264578        | 1215.135927      | E    | <b>490.261987</b>  | 245.634631         | 473.235438     | <b>237.121357</b>  | 472.251422         | 236.629349       | 4  |
| 20 | 2546.343557        | <b>1273.675417</b> | 2529.317008        | 1265.162142       | 2528.332992        | 1264.670134      | V    | <b>361.219394</b>  | 181.113335         | 344.192845     | 172.600060         | 343.208829         | 172.108052       | 3  |
| 21 | 2633.375585        | <b>1317.191431</b> | 2616.349036        | 1308.678156       | 2615.365020        | 1308.186148      | S    | <b>262.150980</b>  | 131.579128         | 245.124431     | 123.065854         | 244.140415         | 122.573846       | 2  |
| 22 |                    |                    |                    |                   |                    |                  | R    | <b>175.118952</b>  | 88.063114          | 158.092403     | 79.549839          |                    |                  | 1  |

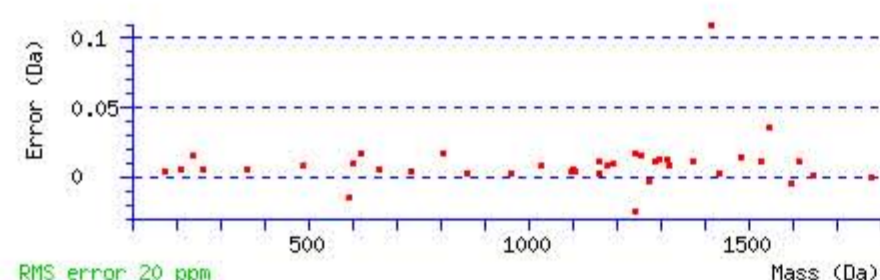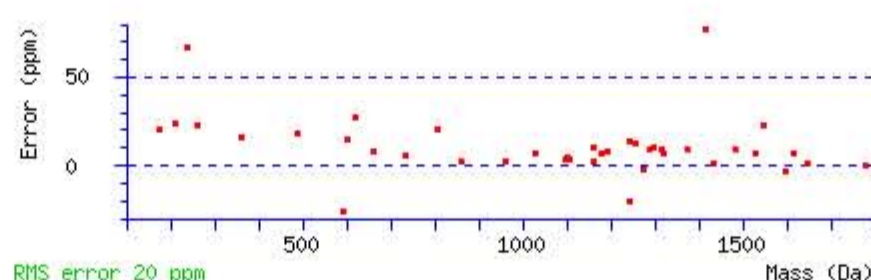

NCBI BLAST search of [VILGAHQEVNLEPHVQEIIEVSR](#)

(Parameters: blastp, nr protein database, expect=20000, no filter, PAM30)

Other BLAST [web gateways](#)

All matches to this query

| Score | Mr(calc):   | Delta    | Sequence                                |
|-------|-------------|----------|-----------------------------------------|
| 72.0  | 2806.479965 | 0.025207 | <a href="#">VILGAHQEVNLEPHVQEIIEVSR</a> |
| 7.1   | 2806.479965 | 0.025207 | <a href="#">VILGAHQEVNLEPHVQEIIEVSR</a> |



**Peptide View**

MS/MS Fragmentation of **VILGAHQEVNLEPHVQEIEVSR**  
 Found in **PLMN\_HUMAN**, Plasminogen OS=Homo sapiens GN=PLG PE=1 SV=2

Match to Query 68870: 2806.505296 from(702.633600,4+) rtinseconds(2048) index(78835)  
 Title: Locus:1.1.1.2927.13 File:"2013-07-02 CLN FXIII 60 min 1st FT.wiff"  
 Data file C:\Program Files (x86)\Matrix Science\Mascot Daemon\mgf4 FXIII 60 min 1st\mascot\_daemon\_merge.mgf

Click mouse within plot area to zoom in by factor of two about that point  
 Or, Plot from  to  Da   
 Label all possible matches  Label matches used for scoring

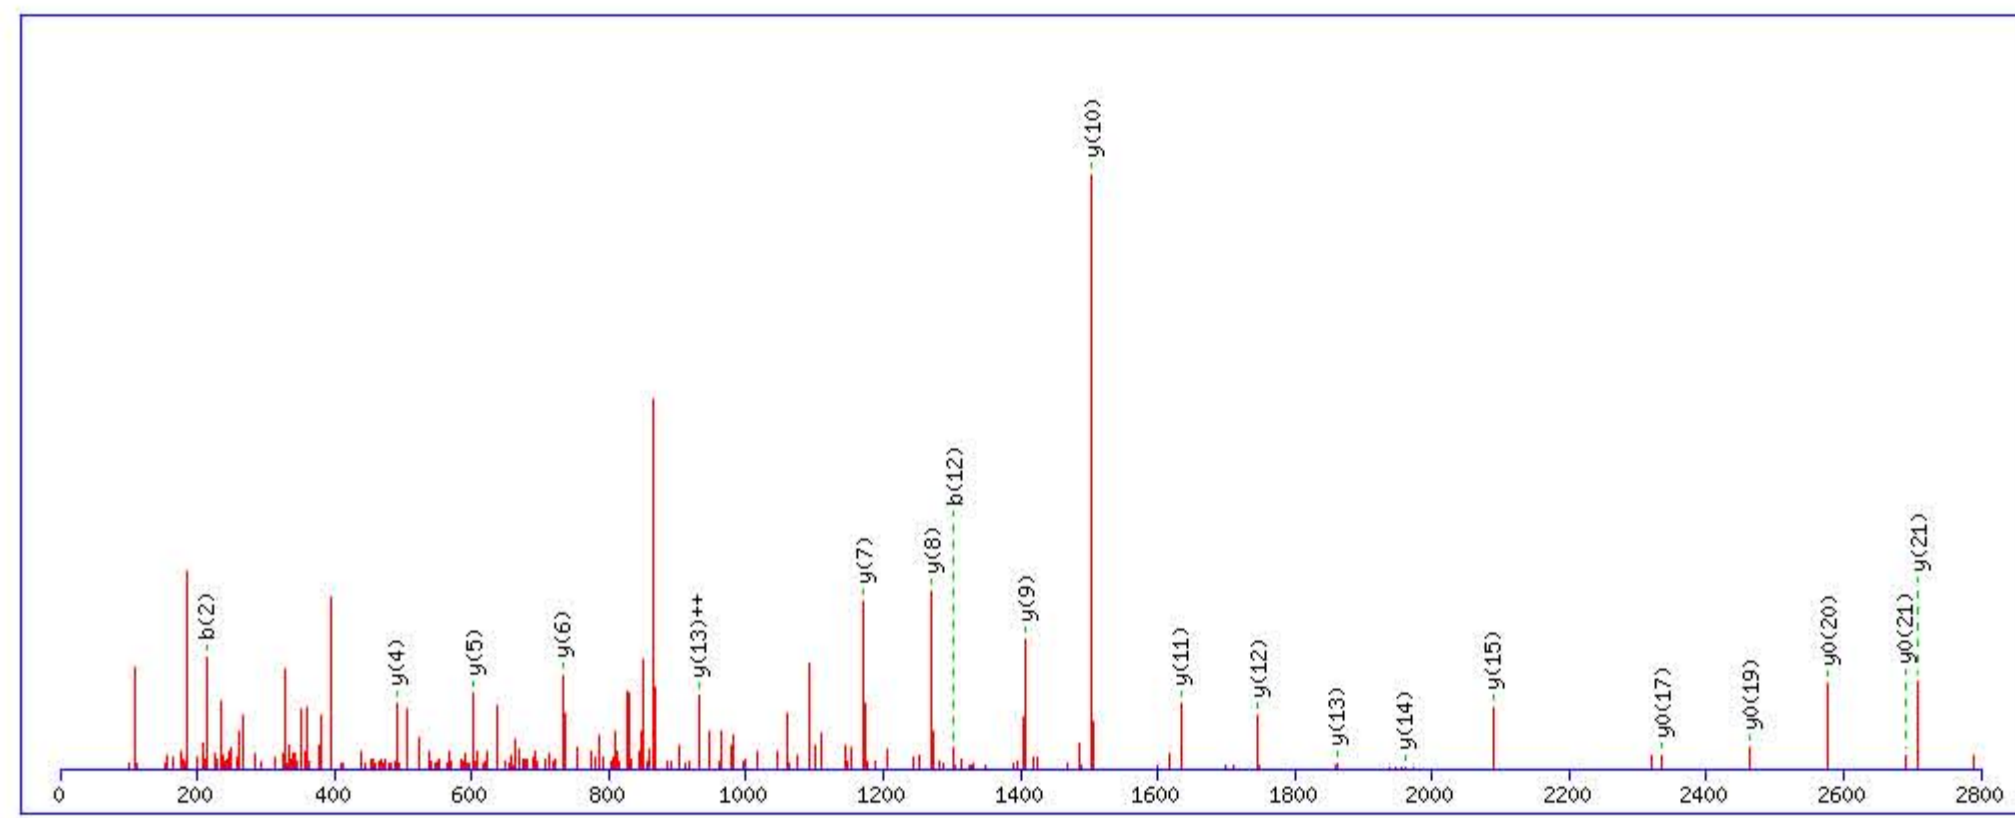

Monoisotopic mass of neutral peptide Mr(calc): 2806.479965  
 Fixed modifications: Carbamidomethyl (C) (apply to specified residues or termini only)  
 Variable modifications:  
 Q16 : Biotin:Thermo-21345 (Q)  
 Ions Score: 102 Expect: 1.2e-009  
 Matches : 20/224 fragment ions using 25 most intense peaks [\(help\)](#)

| #  | b                  | b <sup>++</sup> | b <sup>*</sup> | b <sup>*++</sup> | b <sup>0</sup> | b <sup>0++</sup> | Seq. | y                  | y <sup>++</sup>   | y <sup>*</sup> | y <sup>*++</sup> | y <sup>0</sup>     | y <sup>0++</sup> | #  |
|----|--------------------|-----------------|----------------|------------------|----------------|------------------|------|--------------------|-------------------|----------------|------------------|--------------------|------------------|----|
| 1  | 100.075690         | 50.541483       |                |                  |                |                  | V    |                    |                   |                |                  |                    |                  | 22 |
| 2  | <b>213.159754</b>  | 107.083515      |                |                  |                |                  | I    | <b>2708.418847</b> | 1354.713061       | 2691.392298    | 1346.199787      | <b>2690.408282</b> | 1345.707779      | 21 |
| 3  | 326.243818         | 163.625547      |                |                  |                |                  | L    | 2595.334783        | 1298.171029       | 2578.308234    | 1289.657755      | <b>2577.324218</b> | 1289.165747      | 20 |
| 4  | 383.265282         | 192.136279      |                |                  |                |                  | G    | 2482.250719        | 1241.628997       | 2465.224170    | 1233.115723      | <b>2464.240154</b> | 1232.623715      | 19 |
| 5  | 454.302396         | 227.654836      |                |                  |                |                  | A    | 2425.229255        | 1213.118265       | 2408.202706    | 1204.604991      | 2407.218690        | 1204.112983      | 18 |
| 6  | 591.361308         | 296.184292      |                |                  |                |                  | H    | 2354.192141        | 1177.599708       | 2337.165592    | 1169.086434      | <b>2336.181576</b> | 1168.594426      | 17 |
| 7  | 719.419886         | 360.213581      | 702.393337     | 351.700307       |                |                  | Q    | 2217.133229        | 1109.070252       | 2200.106680    | 1100.556978      | 2199.122664        | 1100.064970      | 16 |
| 8  | 848.462479         | 424.734878      | 831.435930     | 416.221603       | 830.451914     | 415.729595       | E    | <b>2089.074651</b> | 1045.040963       | 2072.048102    | 1036.527689      | 2071.064086        | 1036.035681      | 15 |
| 9  | 947.530893         | 474.269085      | 930.504344     | 465.755810       | 929.520328     | 465.263802       | V    | <b>1960.032058</b> | 980.519667        | 1943.005509    | 972.006393       | 1942.021493        | 971.514385       | 14 |
| 10 | 1061.573820        | 531.290548      | 1044.547271    | 522.777274       | 1043.563255    | 522.285266       | N    | <b>1860.963644</b> | <b>930.985460</b> | 1843.937095    | 922.472186       | 1842.953079        | 921.980178       | 13 |
| 11 | 1174.657884        | 587.832580      | 1157.631335    | 579.319306       | 1156.647319    | 578.827297       | L    | <b>1746.920717</b> | 873.963997        | 1729.894168    | 865.450722       | 1728.910152        | 864.958714       | 12 |
| 12 | <b>1303.700477</b> | 652.353877      | 1286.673928    | 643.840602       | 1285.689912    | 643.348594       | E    | <b>1633.836653</b> | 817.421965        | 1616.810104    | 808.908690       | 1615.826088        | 808.416682       | 11 |
| 13 | 1400.753241        | 700.880259      | 1383.726692    | 692.366984       | 1382.742676    | 691.874976       | P    | <b>1504.794060</b> | 752.900668        | 1487.767511    | 744.387394       | 1486.783495        | 743.895386       | 10 |
| 14 | 1537.812153        | 769.409715      | 1520.785604    | 760.896440       | 1519.801588    | 760.404432       | H    | <b>1407.741296</b> | 704.374286        | 1390.714747    | 695.861012       | 1389.730731        | 695.369004       | 9  |
| 15 | 1636.880567        | 818.943922      | 1619.854018    | 810.430647       | 1618.870002    | 809.938639       | V    | <b>1270.682384</b> | 635.844830        | 1253.655835    | 627.331556       | 1252.671819        | 626.839548       | 8  |
| 16 | 2076.105893        | 1038.556584     | 2059.079344    | 1030.043310      | 2058.095328    | 1029.551302      | Q    | <b>1171.613970</b> | 586.310623        | 1154.587421    | 577.797349       | 1153.603405        | 577.305341       | 7  |
| 17 | 2205.148486        | 1103.077881     | 2188.121937    | 1094.564606      | 2187.137921    | 1094.072598      | E    | <b>732.388644</b>  | 366.697960        | 715.362095     | 358.184686       | 714.378079         | 357.692678       | 6  |
| 18 | 2318.232550        | 1159.619913     | 2301.206001    | 1151.106638      | 2300.221985    | 1150.614631      | I    | <b>603.346051</b>  | 302.176664        | 586.319502     | 293.663389       | 585.335486         | 293.171381       | 5  |
| 19 | 2447.275143        | 1224.141210     | 2430.248594    | 1215.627935      | 2429.264578    | 1215.135927      | E    | <b>490.261987</b>  | 245.634631        | 473.235438     | 237.121357       | 472.251422         | 236.629349       | 4  |
| 20 | 2546.343557        | 1273.675417     | 2529.317008    | 1265.162142      | 2528.332992    | 1264.670134      | V    | 361.219394         | 181.113335        | 344.192845     | 172.600060       | 343.208829         | 172.108052       | 3  |
| 21 | 2633.375585        | 1317.191431     | 2616.349036    | 1308.678156      | 2615.365020    | 1308.186148      | S    | 262.150980         | 131.579128        | 245.124431     | 123.065854       | 244.140415         | 122.573846       | 2  |
| 22 |                    |                 |                |                  |                |                  | R    | 175.118952         | 88.063114         | 158.092403     | 79.549839        |                    |                  | 1  |

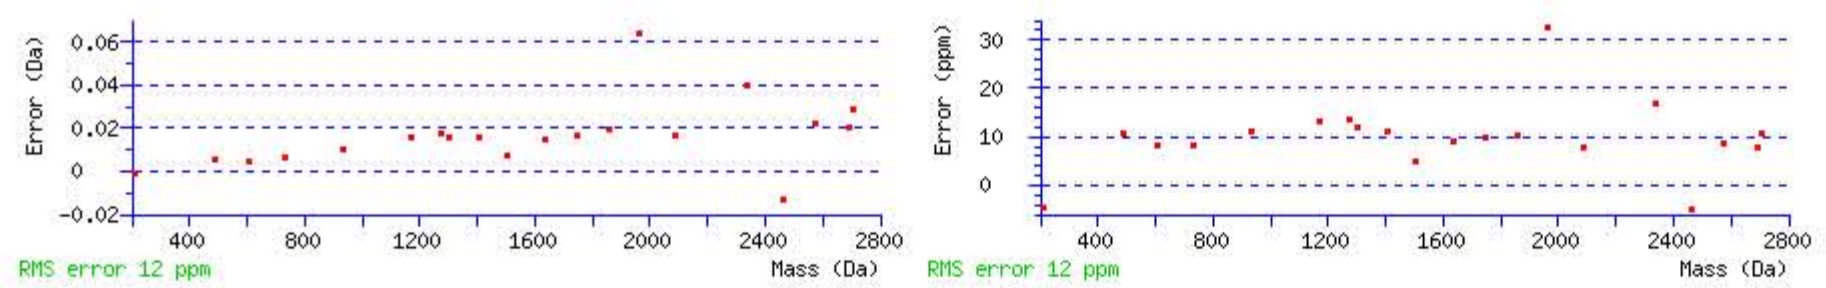

NCBI BLAST search of [VILGAHQEVNLEPHVQEIEVSR](#)  
 (Parameters: blastp, nr protein database, expect=20000, no filter, PAM30)  
 Other BLAST [web gateways](#)

**All matches to this query**

| Score | Mr(calc):   | Delta    | Sequence                               |
|-------|-------------|----------|----------------------------------------|
| 101.7 | 2806.479965 | 0.025331 | <a href="#">VILGAHQEVNLEPHVQEIEVSR</a> |
| 3.8   | 2806.479965 | 0.025331 | <a href="#">VILGAHQEVNLEPHVQEIEVSR</a> |



# Mascot Search Results

## Peptide View

MS/MS Fragmentation of **TMSGLECAWDSQSPHAHGYIPSK**

Found in **PLMN\_HUMAN**, Plasminogen OS=Homo sapiens GN=PLG PE=1 SV=2

Match to Query 71590: 2997.382776 from(750.352970,4+) rtinseconds(1982) index(78376)

Title: Locus:1.1.1.2904.20 File:"2013-07-02 CLN FXIII 60 min 1st FT.wiff"

Data file C:\Program Files (x86)\Matrix Science\Mascot Daemon\mgf4 FXIII 60 min 1st\mascot\_daemon\_merge.mgf

Click mouse within plot area to zoom in by factor of two about that point

Or, Plot from  to  Da

Label all possible matches  Label matches used for scoring

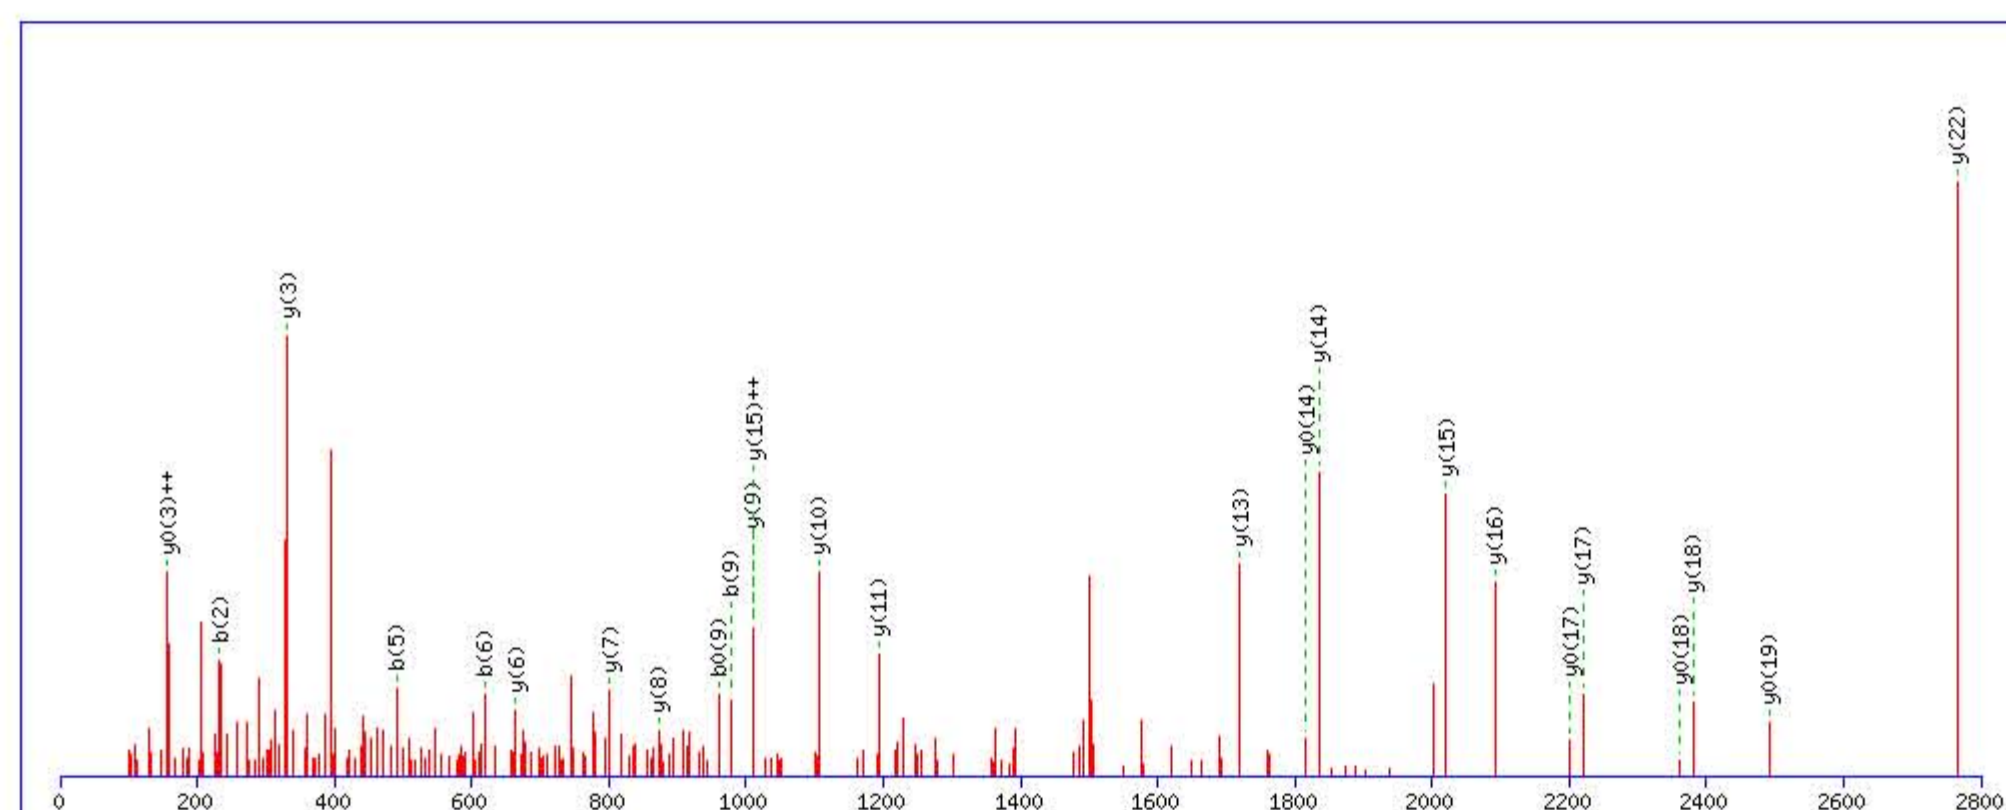

Monoisotopic mass of neutral peptide Mr(calc): 2997.357162

Fixed modifications: Carbamidomethyl (C) (apply to specified residues or termini only)

Variable modifications:

Q13 : Biotin:Thermo-21345 (Q)

Ions Score: 80 Expect: 1.3e-007

Matches : 25/260 fragment ions using 46 most intense peaks [\(help\)](#)

| #  | b                 | b <sup>++</sup> | b <sup>+</sup> | b <sup>+++</sup> | b <sup>0</sup>    | b <sup>0++</sup> | Seq. | y                  | y <sup>++</sup>    | y <sup>+</sup> | y <sup>+++</sup> | y <sup>0</sup>     | y <sup>0++</sup>  | #  |
|----|-------------------|-----------------|----------------|------------------|-------------------|------------------|------|--------------------|--------------------|----------------|------------------|--------------------|-------------------|----|
| 1  | 102.054955        | 51.531116       |                |                  | 84.044390         | 42.525833        | T    |                    |                    |                |                  |                    |                   | 24 |
| 2  | <b>233.095440</b> | 117.051358      |                |                  | 215.084875        | 108.046076       | M    | 2897.316768        | 1449.162022        | 2880.290219    | 1440.648748      | 2879.306203        | 1440.156740       | 23 |
| 3  | 320.127468        | 160.567372      |                |                  | 302.116903        | 151.562089       | S    | <b>2766.276283</b> | 1383.641780        | 2749.249734    | 1375.128505      | 2748.265718        | 1374.636497       | 22 |
| 4  | 377.148932        | 189.078104      |                |                  | 359.138367        | 180.072821       | G    | 2679.244255        | 1340.125766        | 2662.217706    | 1331.612491      | 2661.233690        | 1331.120483       | 21 |
| 5  | <b>490.232996</b> | 245.620136      |                |                  | 472.222431        | 236.614853       | L    | 2622.222791        | 1311.615034        | 2605.196242    | 1303.101759      | 2604.212226        | 1302.609751       | 20 |
| 6  | <b>619.275589</b> | 310.141433      |                |                  | 601.265024        | 301.136150       | E    | 2509.138727        | 1255.073002        | 2492.112178    | 1246.559727      | <b>2491.128162</b> | 1246.067719       | 19 |
| 7  | 779.306238        | 390.156757      |                |                  | 761.295673        | 381.151475       | C    | <b>2380.096134</b> | 1190.551705        | 2363.069585    | 1182.038431      | <b>2362.085569</b> | 1181.546423       | 18 |
| 8  | 907.364816        | 454.186046      | 890.338267     | 445.672772       | 889.354251        | 445.180764       | Q    | <b>2220.065485</b> | 1110.536381        | 2203.038936    | 1102.023106      | <b>2202.054920</b> | 1101.531098       | 17 |
| 9  | <b>978.401930</b> | 489.704603      | 961.375381     | 481.191329       | <b>960.391365</b> | 480.699321       | A    | <b>2092.006907</b> | 1046.507092        | 2074.980358    | 1037.993817      | 2073.996342        | 1037.501809       | 16 |
| 10 | 1164.481243       | 582.744260      | 1147.454694    | 574.230985       | 1146.470678       | 573.738977       | W    | <b>2020.969793</b> | <b>1010.988535</b> | 2003.943244    | 1002.475260      | 2002.959228        | 1001.983252       | 15 |
| 11 | 1279.508186       | 640.257731      | 1262.481637    | 631.744457       | 1261.497621       | 631.252449       | D    | <b>1834.890480</b> | 917.948878         | 1817.863931    | 909.435604       | <b>1816.879915</b> | 908.943596        | 14 |
| 12 | 1366.540214       | 683.773745      | 1349.513665    | 675.260471       | 1348.529649       | 674.768463       | S    | <b>1719.863537</b> | 860.435407         | 1702.836988    | 851.922132       | 1701.852972        | 851.430124        | 13 |
| 13 | 1805.765540       | 903.386408      | 1788.738991    | 894.873134       | 1787.754975       | 894.381126       | Q    | 1632.831509        | 816.919393         | 1615.804960    | 808.406118       | 1614.820944        | 807.914110        | 12 |
| 14 | 1892.797568       | 946.902422      | 1875.771019    | 938.389148       | 1874.787003       | 937.897140       | S    | <b>1193.606183</b> | 597.306730         | 1176.579634    | 588.793455       | 1175.595618        | 588.301447        | 11 |
| 15 | 1989.850332       | 995.428804      | 1972.823783    | 986.915530       | 1971.839767       | 986.423522       | P    | <b>1106.574155</b> | 553.790716         | 1089.547606    | 545.277441       | 1088.563590        | 544.785433        | 10 |
| 16 | 2126.909244       | 1063.958260     | 2109.882695    | 1055.444986      | 2108.898679       | 1054.952978      | H    | <b>1009.521391</b> | 505.264334         | 992.494842     | 496.751059       | 991.510826         | 496.259051        | 9  |
| 17 | 2197.946358       | 1099.476817     | 2180.919809    | 1090.963543      | 2179.935793       | 1090.471535      | A    | <b>872.462479</b>  | 436.734878         | 855.435930     | 428.221603       | 854.451914         | 427.729595        | 8  |
| 18 | 2335.005270       | 1168.006273     | 2317.978721    | 1159.492999      | 2316.994705       | 1159.000991      | H    | <b>801.425365</b>  | 401.216321         | 784.398816     | 392.703046       | 783.414800         | 392.211038        | 7  |
| 19 | 2392.026734       | 1196.517005     | 2375.000185    | 1188.003731      | 2374.016169       | 1187.511723      | G    | <b>664.366453</b>  | 332.686865         | 647.339904     | 324.173590       | 646.355888         | 323.681582        | 6  |
| 20 | 2555.090063       | 1278.048670     | 2538.063514    | 1269.535395      | 2537.079498       | 1269.043387      | Y    | 607.344989         | 304.176133         | 590.318440     | 295.662858       | 589.334424         | 295.170850        | 5  |
| 21 | 2668.174127       | 1334.590702     | 2651.147578    | 1326.077427      | 2650.163562       | 1325.585419      | I    | 444.281660         | 222.644468         | 427.255111     | 214.131194       | 426.271095         | 213.639186        | 4  |
| 22 | 2765.226891       | 1383.117084     | 2748.200342    | 1374.603809      | 2747.216326       | 1374.111801      | P    | <b>331.197596</b>  | 166.102436         | 314.171047     | 157.589162       | 313.187031         | <b>157.097154</b> | 3  |
| 23 | 2852.258919       | 1426.633098     | 2835.232370    | 1418.119823      | 2834.248354       | 1417.627815      | S    | 234.144832         | 117.576054         | 217.118283     | 109.062780       | 216.134267         | 108.570772        | 2  |
| 24 |                   |                 |                |                  |                   |                  | K    | 147.112804         | 74.060040          | 130.086255     | 65.546765        |                    |                   | 1  |

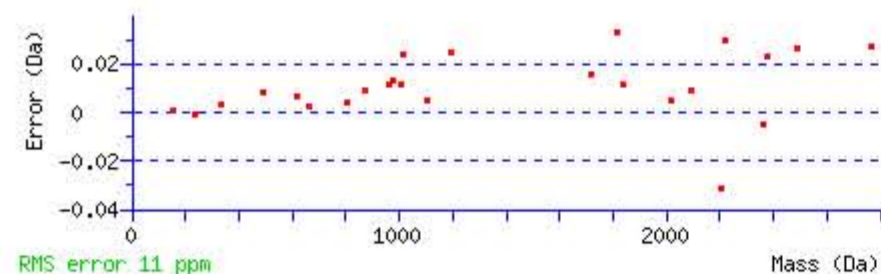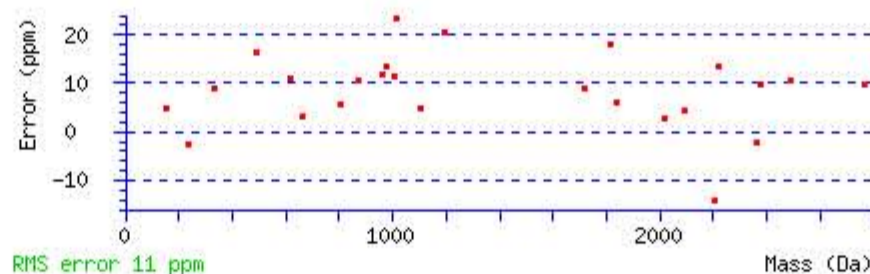

NCBI BLAST search of **TMSGLECAWDSQSPHAHGYIPSK**

(Parameters: blastp, nr protein database, expect=20000, no filter, PAM30)

Other BLAST [web gateways](#)

## All matches to this query

| Score | Mr(calc):   | Delta    | Sequence                                |
|-------|-------------|----------|-----------------------------------------|
| 80.3  | 2997.357162 | 0.025614 | <a href="#">TMSGLECAWDSQSPHAHGYIPSK</a> |
| 35.2  | 2997.357162 | 0.025614 | <a href="#">TMSGLECAWDSQSPHAHGYIPSK</a> |



# Mascot Search Results

## Peptide View

MS/MS Fragmentation of **GNVAVTVSGHTCQHWSAQTPHTHNR**  
 Found in **PLMN\_HUMAN**, Plasminogen OS=Homo sapiens GN=PLG PE=1 SV=2

Match to Query 72401: 3092.465484 from(516.418190,6+) rtinseconds(1401) index(74471)  
 Title: Locus:1.1.1.2702.17 File:"2013-07-02 CLN FXIII 60 min 1st FT.wiff"  
 Data file C:\Program Files (x86)\Matrix Science\Mascot Daemon\mgf4 FXIII 60 min 1st\mascot\_daemon\_merge.mgf

Click mouse within plot area to zoom in by factor of two about that point  
 Or, Plot from  to  Da   
 Label all possible matches  Label matches used for scoring

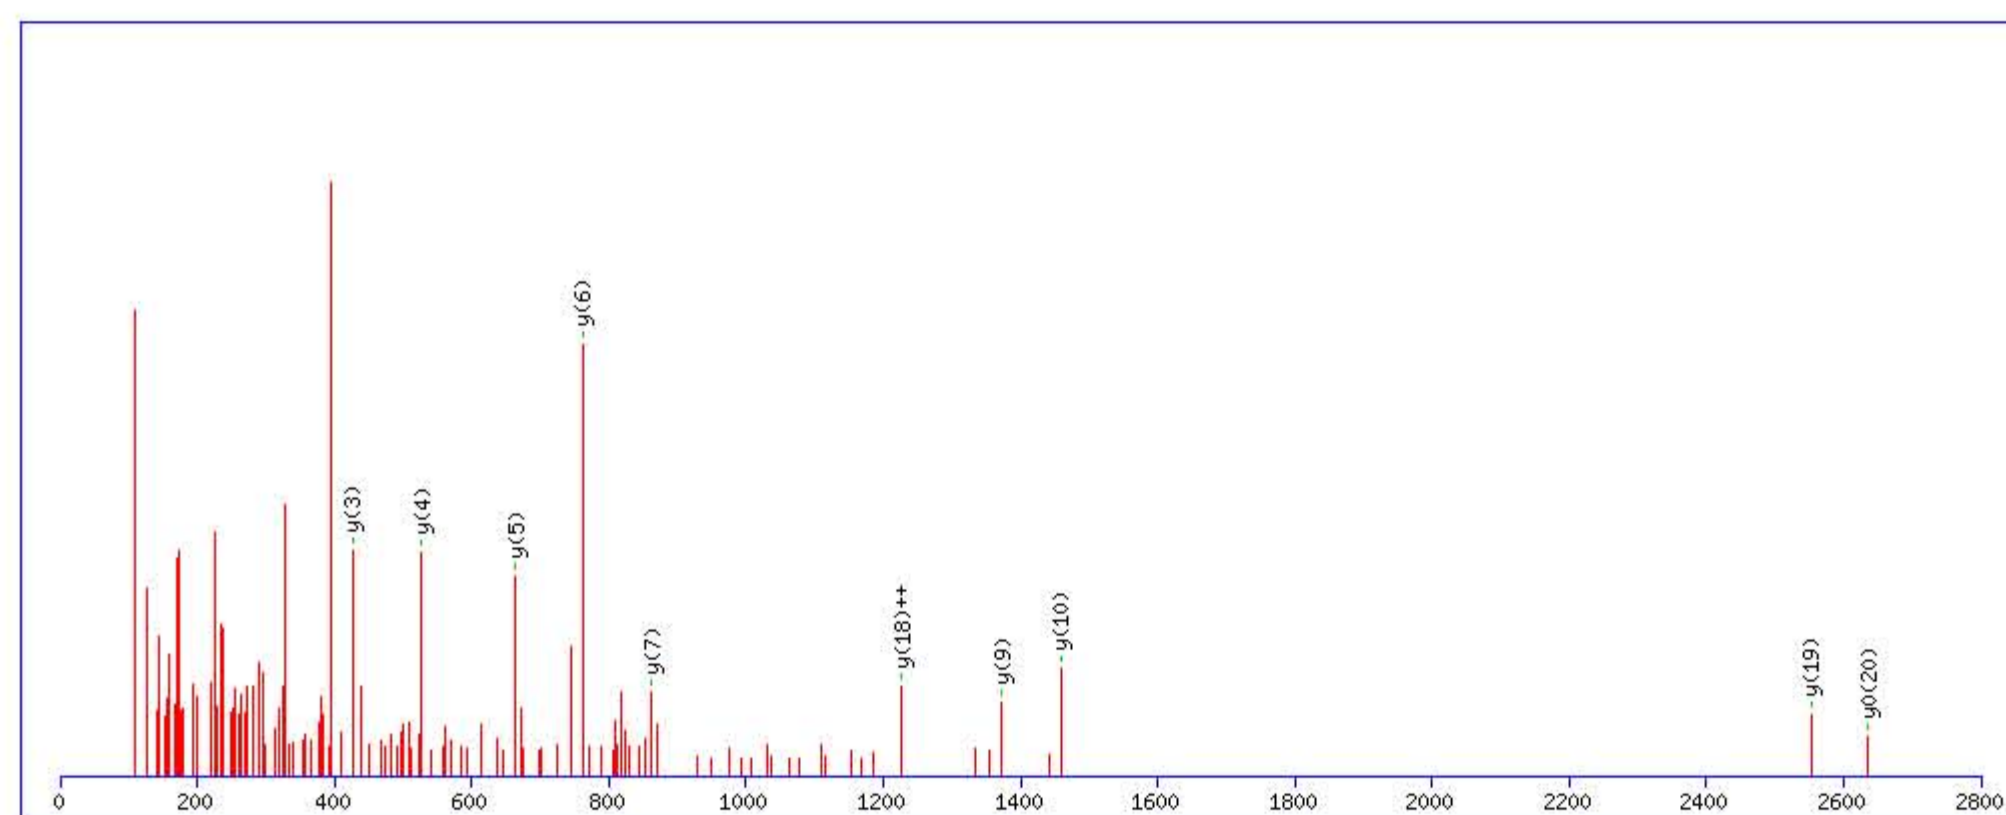

Monoisotopic mass of neutral peptide Mr(calc): 3092.457016  
 Fixed modifications: Carbamidomethyl (C) (apply to specified residues or termini only)  
 Variable modifications:  
 Q18 : Biotin:Thermo-21345 (Q)  
 Ions Score: 40 Expect: 0.002  
 Matches : 10/270 fragment ions using 16 most intense peaks [\(help\)](#)

| #  | b           | b <sup>++</sup> | b <sup>+</sup> | b <sup>+++</sup> | b <sup>0</sup> | b <sup>0++</sup> | Seq. | y           | y <sup>++</sup> | y <sup>+</sup> | y <sup>+++</sup> | y <sup>0</sup> | y <sup>0++</sup> | #  |
|----|-------------|-----------------|----------------|------------------|----------------|------------------|------|-------------|-----------------|----------------|------------------|----------------|------------------|----|
| 1  | 58.028740   | 29.518008       |                |                  |                |                  | G    |             |                 |                |                  |                |                  | 25 |
| 2  | 172.071667  | 86.539471       | 155.045118     | 78.026197        |                |                  | N    | 3036.442790 | 1518.725033     | 3019.416241    | 1510.211758      | 3018.432225    | 1509.719750      | 24 |
| 3  | 271.140081  | 136.073679      | 254.113532     | 127.560404       |                |                  | V    | 2922.399863 | 1461.703569     | 2905.373314    | 1453.190295      | 2904.389298    | 1452.698287      | 23 |
| 4  | 342.177195  | 171.592236      | 325.150646     | 163.078961       |                |                  | A    | 2823.331449 | 1412.169362     | 2806.304900    | 1403.656088      | 2805.320884    | 1403.164080      | 22 |
| 5  | 441.245609  | 221.126443      | 424.219060     | 212.613168       |                |                  | V    | 2752.294335 | 1376.650805     | 2735.267786    | 1368.137531      | 2734.283770    | 1367.645523      | 21 |
| 6  | 542.293288  | 271.650282      | 525.266739     | 263.137008       | 524.282723     | 262.645000       | T    | 2653.225921 | 1327.116598     | 2636.199372    | 1318.603324      | 2635.215356    | 1318.111316      | 20 |
| 7  | 641.361702  | 321.184489      | 624.335153     | 312.671215       | 623.351137     | 312.179207       | V    | 2552.178242 | 1276.592759     | 2535.151693    | 1268.079484      | 2534.167677    | 1267.587476      | 19 |
| 8  | 728.393730  | 364.700503      | 711.367181     | 356.187229       | 710.383165     | 355.695221       | S    | 2453.109828 | 1227.058552     | 2436.083279    | 1218.545277      | 2435.099263    | 1218.053269      | 18 |
| 9  | 785.415194  | 393.211235      | 768.388645     | 384.697961       | 767.404629     | 384.205953       | G    | 2366.077800 | 1183.542538     | 2349.051251    | 1175.029263      | 2348.067235    | 1174.537255      | 17 |
| 10 | 922.474106  | 461.740691      | 905.447557     | 453.227417       | 904.463541     | 452.735409       | H    | 2309.056336 | 1155.031806     | 2292.029787    | 1146.518531      | 2291.045771    | 1146.026523      | 16 |
| 11 | 1023.521785 | 512.264530      | 1006.495236    | 503.751256       | 1005.511220    | 503.259248       | T    | 2171.997424 | 1086.502350     | 2154.970875    | 1077.989075      | 2153.986859    | 1077.497067      | 15 |
| 12 | 1183.552434 | 592.279855      | 1166.525885    | 583.766581       | 1165.541869    | 583.274572       | C    | 2070.949745 | 1035.978510     | 2053.923196    | 1027.465236      | 2052.939180    | 1026.973228      | 14 |
| 13 | 1311.611012 | 656.309144      | 1294.584463    | 647.795870       | 1293.600447    | 647.303862       | Q    | 1910.919096 | 955.963186      | 1893.892547    | 947.449911       | 1892.908531    | 946.957903       | 13 |
| 14 | 1448.669924 | 724.838600      | 1431.643375    | 716.325326       | 1430.659359    | 715.833318       | H    | 1782.860518 | 891.933897      | 1765.833969    | 883.420622       | 1764.849953    | 882.928614       | 12 |
| 15 | 1634.749237 | 817.878257      | 1617.722688    | 809.364982       | 1616.738672    | 808.872974       | W    | 1645.801606 | 823.404441      | 1628.775057    | 814.891166       | 1627.791041    | 814.399158       | 11 |
| 16 | 1721.781265 | 861.394271      | 1704.754716    | 852.880996       | 1703.770700    | 852.388988       | S    | 1459.722293 | 730.364784      | 1442.695744    | 721.851510       | 1441.711728    | 721.359502       | 10 |
| 17 | 1792.818379 | 896.912828      | 1775.791830    | 888.399553       | 1774.807814    | 887.907545       | A    | 1372.690265 | 686.848770      | 1355.663716    | 678.335496       | 1354.679700    | 677.843488       | 9  |
| 18 | 2232.043705 | 1116.525490     | 2215.017156    | 1108.012216      | 2214.033140    | 1107.520208      | Q    | 1301.653151 | 651.330213      | 1284.626602    | 642.816939       | 1283.642586    | 642.324931       | 8  |
| 19 | 2333.091384 | 1167.049330     | 2316.064835    | 1158.536055      | 2315.080819    | 1158.044047      | T    | 862.427825  | 431.717550      | 845.401276     | 423.204276       | 844.417260     | 422.712268       | 7  |
| 20 | 2430.144148 | 1215.575712     | 2413.117599    | 1207.062437      | 2412.133583    | 1206.570429      | P    | 761.380146  | 381.193711      | 744.353597     | 372.680436       | 743.369581     | 372.188428       | 6  |
| 21 | 2567.203060 | 1284.105168     | 2550.176511    | 1275.591893      | 2549.192495    | 1275.099885      | H    | 664.327382  | 332.667329      | 647.300833     | 324.154054       | 646.316817     | 323.662046       | 5  |
| 22 | 2668.250739 | 1334.629007     | 2651.224190    | 1326.115733      | 2650.240174    | 1325.623725      | T    | 527.268470  | 264.137873      | 510.241921     | 255.624598       | 509.257905     | 255.132590       | 4  |
| 23 | 2805.309651 | 1403.158463     | 2788.283102    | 1394.645189      | 2787.299086    | 1394.153181      | H    | 426.220791  | 213.614033      | 409.194242     | 205.100759       |                |                  | 3  |
| 24 | 2919.352578 | 1460.179927     | 2902.326029    | 1451.666652      | 2901.342013    | 1451.174644      | N    | 289.161879  | 145.084577      | 272.135330     | 136.571303       |                |                  | 2  |
| 25 |             |                 |                |                  |                |                  | R    | 175.118952  | 88.063114       | 158.092403     | 79.549839        |                |                  | 1  |

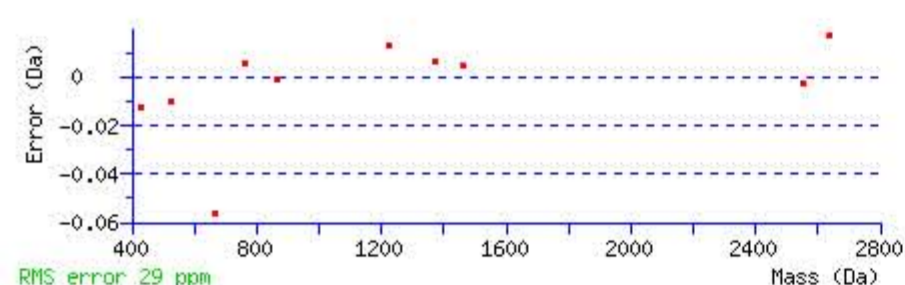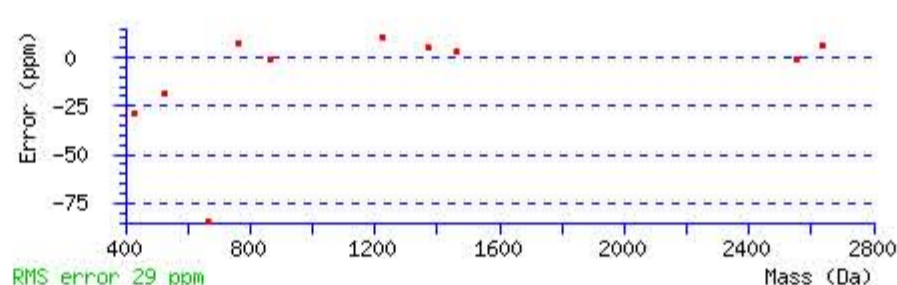

NCBI BLAST search of [GNVAVTVSGHTCQHWSAQTPHTHNR](#)  
 (Parameters: blastp, nr protein database, expect=20000, no filter, PAM30)  
 Other BLAST [web gateways](#)

## All matches to this query

| Score | Mr(calc):   | Delta    | Sequence                                  |
|-------|-------------|----------|-------------------------------------------|
| 40.2  | 3092.457016 | 0.008468 | <a href="#">GNVAVTVSGHTCQHWSAQTPHTHNR</a> |
| 20.0  | 3092.457016 | 0.008468 | <a href="#">GNVAVTVSGHTCQHWSAQTPHTHNR</a> |



# MASCOT Search Results

## Peptide View

MS/MS Fragmentation of **GNVAVTVSGHTCQHWSAQTPHTHNR**  
 Found in **PLMN\_HUMAN**, Plasminogen OS=Homo sapiens GN=PLG PE=1 SV=2

Match to Query 72404: 3092.468870 from(619.501050,5+) rtinseconds(1437) index(74770)  
 Title: Locus:1.1.1.2714.22 File:"2013-07-02 CLN FXIII 60 min 1st FT.wiff"  
 Data file C:\Program Files (x86)\Matrix Science\Mascot Daemon\mgf4 FXIII 60 min 1st\mascot\_daemon\_merge.mgf

Click mouse within plot area to zoom in by factor of two about that point  
 Or, Plot from  to  Da   
 Label all possible matches  Label matches used for scoring

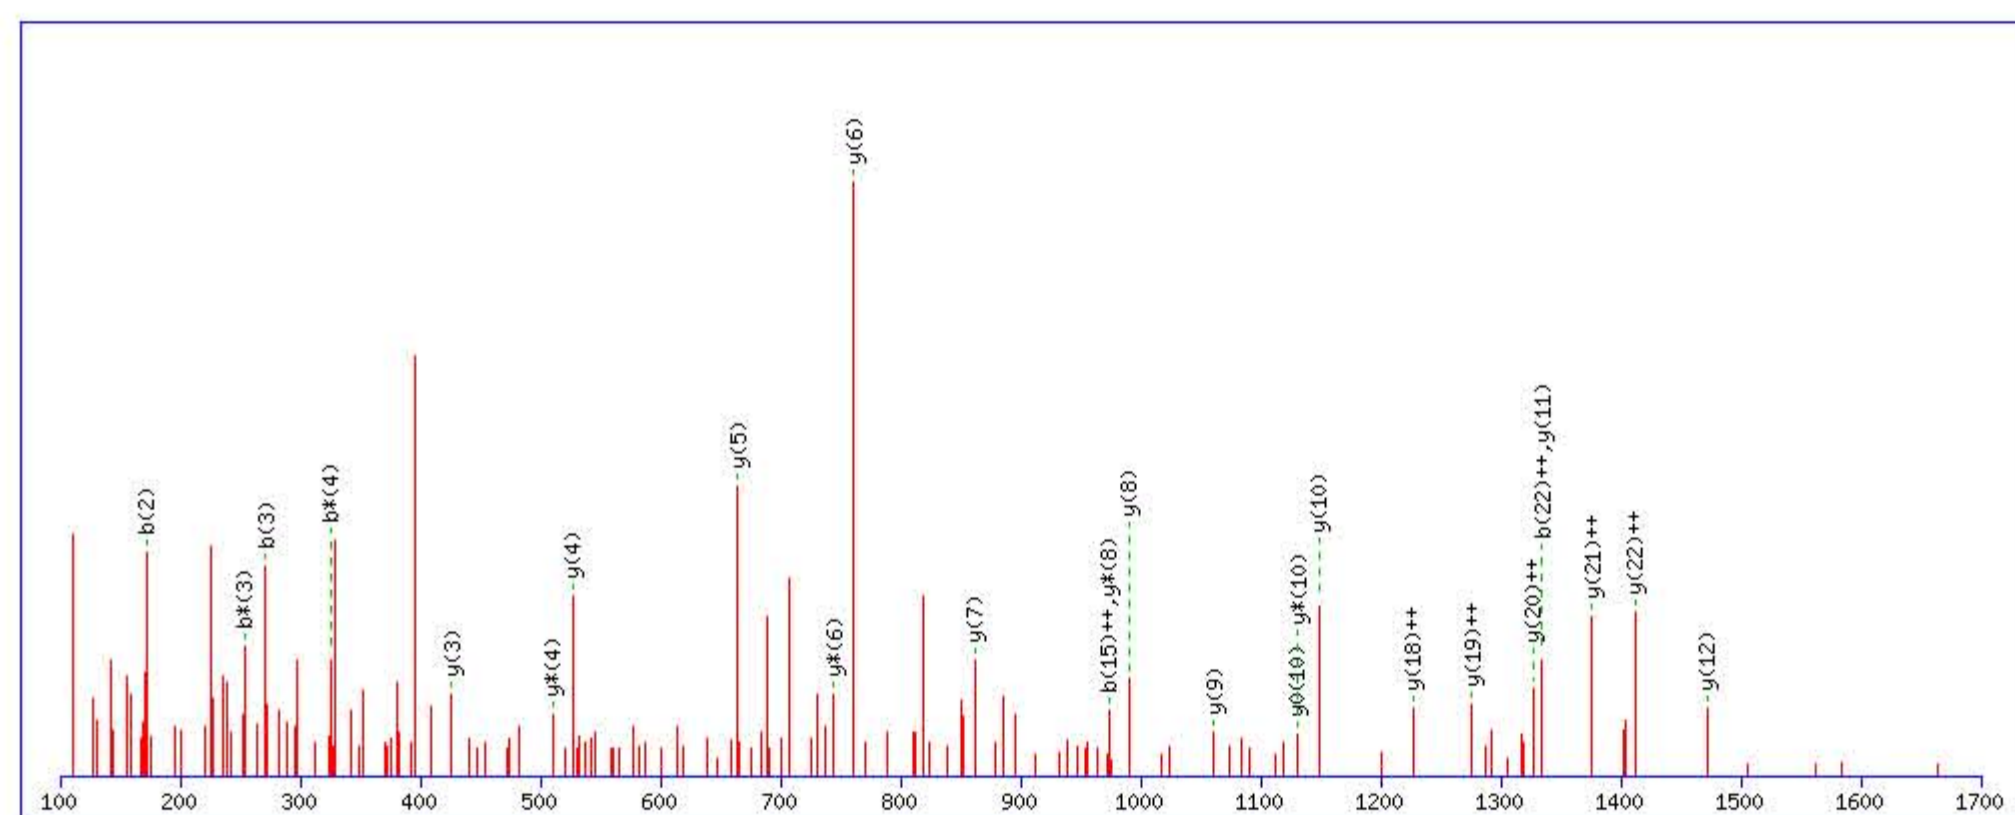

Monoisotopic mass of neutral peptide Mr(calc): 3092.457016  
 Fixed modifications: Carbamidomethyl (C) (apply to specified residues or termini only)  
 Variable modifications:  
 Q13 : Biotin:Thermo-21345 (Q)  
 Ions Score: 47 Expect: 0.00047  
 Matches : 26/270 fragment ions using 45 most intense peaks [\(help\)](#)

| #  | b           | b <sup>++</sup> | b <sup>+</sup> | b <sup>+++</sup> | b <sup>0</sup> | b <sup>0++</sup> | Seq. | y           | y <sup>++</sup> | y <sup>+</sup> | y <sup>+++</sup> | y <sup>0</sup> | y <sup>0++</sup> | #  |
|----|-------------|-----------------|----------------|------------------|----------------|------------------|------|-------------|-----------------|----------------|------------------|----------------|------------------|----|
| 1  | 58.028740   | 29.518008       |                |                  |                |                  | G    |             |                 |                |                  |                |                  | 25 |
| 2  | 172.071667  | 86.539471       | 155.045118     | 78.026197        |                |                  | N    | 3036.442790 | 1518.725033     | 3019.416241    | 1510.211758      | 3018.432225    | 1509.719750      | 24 |
| 3  | 271.140081  | 136.073679      | 254.113532     | 127.560404       |                |                  | V    | 2922.399863 | 1461.703569     | 2905.373314    | 1453.190295      | 2904.389298    | 1452.698287      | 23 |
| 4  | 342.177195  | 171.592236      | 325.150646     | 163.078961       |                |                  | A    | 2823.331449 | 1412.169362     | 2806.304900    | 1403.656088      | 2805.320884    | 1403.164080      | 22 |
| 5  | 441.245609  | 221.126443      | 424.219060     | 212.613168       |                |                  | V    | 2752.294335 | 1376.650805     | 2735.267786    | 1368.137531      | 2734.283770    | 1367.645523      | 21 |
| 6  | 542.293288  | 271.650282      | 525.266739     | 263.137008       | 524.282723     | 262.645000       | T    | 2653.225921 | 1327.116598     | 2636.199372    | 1318.603324      | 2635.215356    | 1318.111316      | 20 |
| 7  | 641.361702  | 321.184489      | 624.335153     | 312.671215       | 623.351137     | 312.179207       | V    | 2552.178242 | 1276.592759     | 2535.151693    | 1268.079484      | 2534.167677    | 1267.587476      | 19 |
| 8  | 728.393730  | 364.700503      | 711.367181     | 356.187229       | 710.383165     | 355.695221       | S    | 2453.109828 | 1227.058552     | 2436.083279    | 1218.545277      | 2435.099263    | 1218.053269      | 18 |
| 9  | 785.415194  | 393.211235      | 768.388645     | 384.697961       | 767.404629     | 384.205953       | G    | 2366.077800 | 1183.542538     | 2349.051251    | 1175.029263      | 2348.067235    | 1174.537255      | 17 |
| 10 | 922.474106  | 461.740691      | 905.447557     | 453.227417       | 904.463541     | 452.735409       | H    | 2309.056336 | 1155.031806     | 2292.029787    | 1146.518531      | 2291.045771    | 1146.026523      | 16 |
| 11 | 1023.521785 | 512.264530      | 1006.495236    | 503.751256       | 1005.511220    | 503.259248       | T    | 2171.997424 | 1086.502350     | 2154.970875    | 1077.989075      | 2153.986859    | 1077.497067      | 15 |
| 12 | 1183.552434 | 592.279855      | 1166.525885    | 583.766581       | 1165.541869    | 583.274572       | C    | 2070.949745 | 1035.978510     | 2053.923196    | 1027.465236      | 2052.939180    | 1026.973228      | 14 |
| 13 | 1622.777760 | 811.892518      | 1605.751211    | 803.379244       | 1604.767195    | 802.887236       | Q    | 1910.919096 | 955.963186      | 1893.892547    | 947.449911       | 1892.908531    | 946.957903       | 13 |
| 14 | 1759.836672 | 880.421974      | 1742.810123    | 871.908700       | 1741.826107    | 871.416692       | H    | 1471.693770 | 736.350523      | 1454.667221    | 727.837248       | 1453.683205    | 727.345240       | 12 |
| 15 | 1945.915985 | 973.461631      | 1928.889436    | 964.948356       | 1927.905420    | 964.456348       | W    | 1334.634858 | 667.821067      | 1317.608309    | 659.307792       | 1316.624293    | 658.815784       | 11 |
| 16 | 2032.948013 | 1016.977645     | 2015.921464    | 1008.464370      | 2014.937448    | 1007.972362      | S    | 1148.555545 | 574.781410      | 1131.528996    | 566.268136       | 1130.544980    | 565.776128       | 10 |
| 17 | 2103.985127 | 1052.496201     | 2086.958578    | 1043.982927      | 2085.974562    | 1043.490919      | A    | 1061.523517 | 531.265396      | 1044.496968    | 522.752122       | 1043.512952    | 522.260114       | 9  |
| 18 | 2232.043705 | 1116.525490     | 2215.017156    | 1108.012216      | 2214.033140    | 1107.520208      | Q    | 990.486403  | 495.746839      | 973.459854     | 487.233565       | 972.475838     | 486.741557       | 8  |
| 19 | 2333.091384 | 1167.049330     | 2316.064835    | 1158.536055      | 2315.080819    | 1158.044047      | T    | 862.427825  | 431.717550      | 845.401276     | 423.204276       | 844.417260     | 422.712268       | 7  |
| 20 | 2430.144148 | 1215.575712     | 2413.117599    | 1207.062437      | 2412.133583    | 1206.570429      | P    | 761.380146  | 381.193711      | 744.353597     | 372.680436       | 743.369581     | 372.188428       | 6  |
| 21 | 2567.203060 | 1284.105168     | 2550.176511    | 1275.591893      | 2549.192495    | 1275.099885      | H    | 664.327382  | 332.667329      | 647.300833     | 324.154054       | 646.316817     | 323.662046       | 5  |
| 22 | 2668.250739 | 1334.629007     | 2651.224190    | 1326.115733      | 2650.240174    | 1325.623725      | T    | 527.268470  | 264.137873      | 510.241921     | 255.624598       | 509.257905     | 255.132590       | 4  |
| 23 | 2805.309651 | 1403.158463     | 2788.283102    | 1394.645189      | 2787.299086    | 1394.153181      | H    | 426.220791  | 213.614033      | 409.194242     | 205.100759       |                |                  | 3  |
| 24 | 2919.352578 | 1460.179927     | 2902.326029    | 1451.666652      | 2901.342013    | 1451.174644      | N    | 289.161879  | 145.084577      | 272.135330     | 136.571303       |                |                  | 2  |
| 25 |             |                 |                |                  |                |                  | R    | 175.118952  | 88.063114       | 158.092403     | 79.549839        |                |                  | 1  |

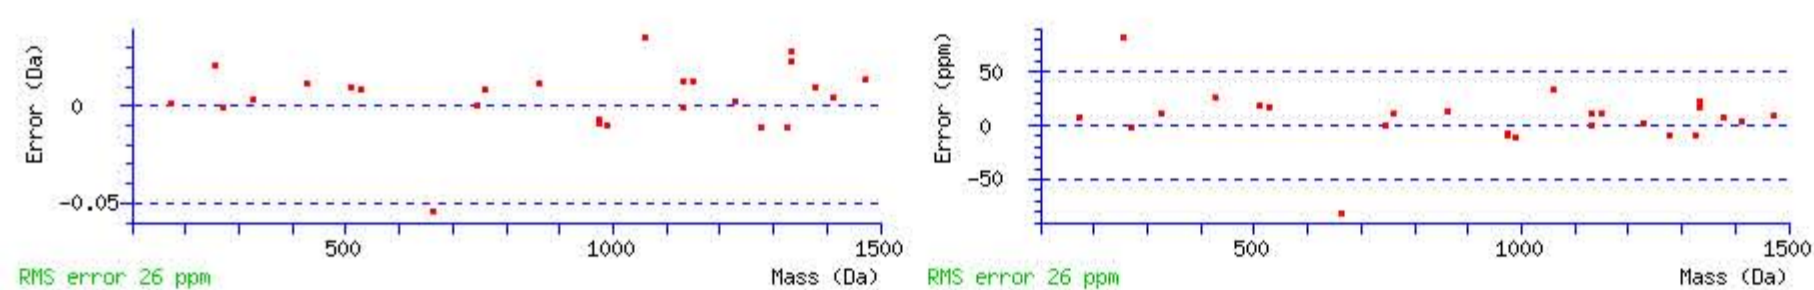

NCBI BLAST search of **GNVAVTVSGHTCQHWSAQTPHTHNR**  
 (Parameters: blastp, nr protein database, expect=20000, no filter, PAM30)  
 Other BLAST [web gateways](#)

### All matches to this query

| Score | Mr(calc):   | Delta    | Sequence                                  |
|-------|-------------|----------|-------------------------------------------|
| 46.6  | 3092.457016 | 0.011854 | <a href="#">GNVAVTVSGHTCQHWSAQTPHTHNR</a> |
| 14.6  | 3092.457016 | 0.011854 | <a href="#">GNVAVTVSGHTCQHWSAQTPHTHNR</a> |



**Mascot Search Results**

**Peptide View**

MS/MS Fragmentation of **TMSGLECAWDSQSPHAHGYIPSK**  
 Found in **PLMN\_HUMAN**, Plasminogen OS=Homo sapiens GN=PLG PE=1 SV=2

Match to Query 76203: 3308.567096 from(828.149050,4+) rtinseconds(2135) index(79429)  
 Title: Locus:1.1.1.2957.18 File:"2013-07-02 CLN FXIII 60 min 1st FT.wiff"  
 Data file C:\Program Files (x86)\Matrix Science\Mascot Daemon\mgf\4 FXIII 60 min 1st\mascot\_daemon\_merge.mgf

Click mouse within plot area to zoom in by factor of two about that point  
 Or, Plot from  to  Da   
 Label all possible matches  Label matches used for scoring

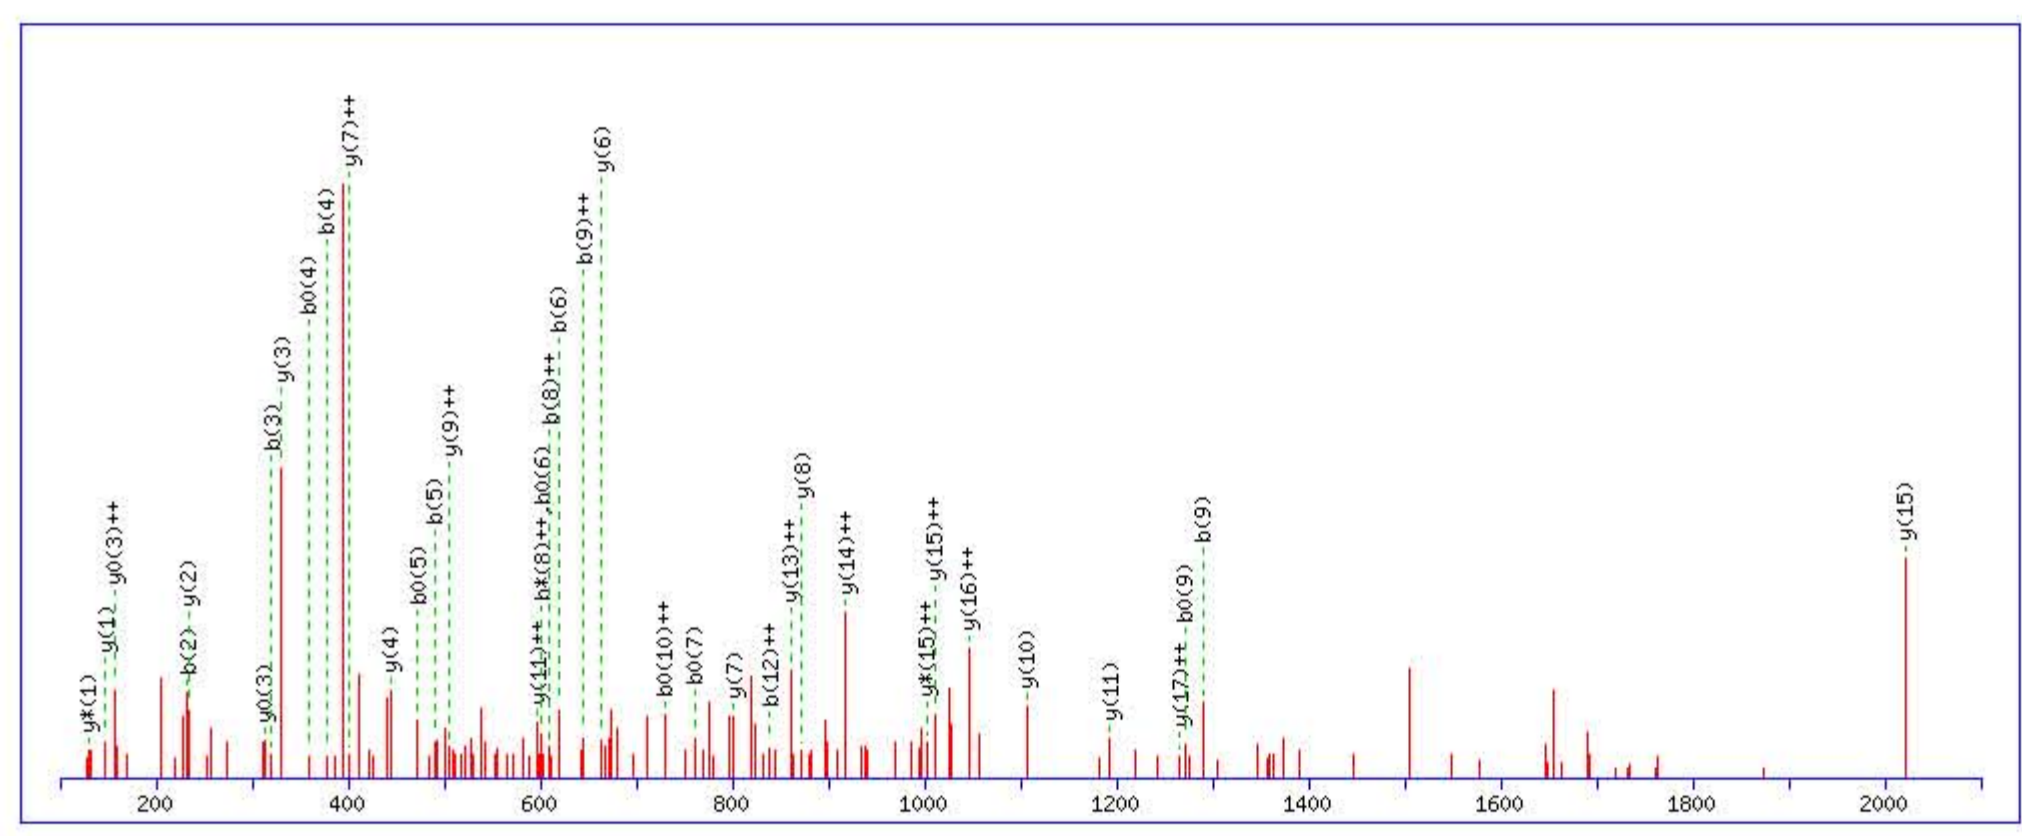

Monoisotopic mass of neutral peptide Mr(calc): 3308.523911  
 Fixed modifications: Carbamidomethyl (C) (apply to specified residues or termini only)  
 Variable modifications:  
 Q8 : Biotin:Thermo-21345 (Q)  
 Q13 : Biotin:Thermo-21345 (Q)  
 Ions Score: 29 Expect: 0.026  
 Matches : 38/260 fragment ions using 123 most intense peaks [\(help\)](#)

| #  | b                  | b <sup>++</sup>   | b <sup>+</sup> | b <sup>*++</sup>  | b <sup>0</sup>     | b <sup>0++</sup>  | Seq. | y                  | y <sup>++</sup>    | y <sup>+</sup>    | y <sup>*++</sup>   | y <sup>0</sup>    | y <sup>0++</sup>  | #  |
|----|--------------------|-------------------|----------------|-------------------|--------------------|-------------------|------|--------------------|--------------------|-------------------|--------------------|-------------------|-------------------|----|
| 1  | 102.054955         | 51.531116         |                |                   | 84.044390          | 42.525833         | T    |                    |                    |                   |                    |                   |                   | 24 |
| 2  | <b>233.095440</b>  | 117.051358        |                |                   | 215.084875         | 108.046076        | M    | 3208.483516        | 1604.745396        | 3191.456967       | 1596.232121        | 3190.472951       | 1595.740114       | 23 |
| 3  | <b>320.127468</b>  | 160.567372        |                |                   | 302.116903         | 151.562089        | S    | 3077.443031        | 1539.225154        | 3060.416482       | 1530.711879        | 3059.432466       | 1530.219871       | 22 |
| 4  | <b>377.148932</b>  | 189.078104        |                |                   | <b>359.138367</b>  | 180.072821        | G    | 2990.411003        | 1495.709140        | 2973.384454       | 1487.195865        | 2972.400438       | 1486.703857       | 21 |
| 5  | <b>490.232996</b>  | 245.620136        |                |                   | <b>472.222431</b>  | 236.614853        | L    | 2933.389539        | 1467.198408        | 2916.362990       | 1458.685133        | 2915.378974       | 1458.193125       | 20 |
| 6  | <b>619.275589</b>  | 310.141433        |                |                   | <b>601.265024</b>  | 301.136150        | E    | 2820.305475        | 1410.656376        | 2803.278926       | 1402.143101        | 2802.294910       | 1401.651093       | 19 |
| 7  | 779.306238         | 390.156757        |                |                   | <b>761.295673</b>  | 381.151475        | C    | 2691.262882        | 1346.135079        | 2674.236333       | 1337.621804        | 2673.252317       | 1337.129796       | 18 |
| 8  | 1218.531564        | <b>609.769420</b> | 1201.505015    | <b>601.256146</b> | 1200.520999        | 600.764138        | Q    | 2531.232233        | <b>1266.119755</b> | 2514.205684       | 1257.606480        | 2513.221668       | 1257.114472       | 17 |
| 9  | <b>1289.568678</b> | <b>645.287977</b> | 1272.542129    | 636.774703        | <b>1271.558113</b> | 636.282695        | A    | 2092.006907        | <b>1046.507091</b> | 2074.980358       | 1037.993817        | 2073.996342       | 1037.501809       | 16 |
| 10 | 1475.647991        | 738.327634        | 1458.621442    | 729.814359        | 1457.637426        | <b>729.322351</b> | W    | <b>2020.969793</b> | <b>1010.988535</b> | 2003.943244       | <b>1002.475260</b> | 2002.959228       | 1001.983252       | 15 |
| 11 | 1590.674934        | 795.841105        | 1573.648385    | 787.327831        | 1572.664369        | 786.835823        | D    | 1834.890480        | <b>917.948878</b>  | 1817.863931       | 909.435604         | 1816.879915       | 908.943596        | 14 |
| 12 | 1677.706962        | <b>839.357119</b> | 1660.680413    | 830.843845        | 1659.696397        | 830.351837        | S    | 1719.863537        | <b>860.435407</b>  | 1702.836988       | 851.922132         | 1701.852972       | 851.430124        | 13 |
| 13 | 2116.932288        | 1058.969782       | 2099.905739    | 1050.456507       | 2098.921723        | 1049.964499       | Q    | 1632.831509        | 816.919393         | 1615.804960       | 808.406118         | 1614.820944       | 807.914110        | 12 |
| 14 | 2203.964316        | 1102.485796       | 2186.937767    | 1093.972521       | 2185.953751        | 1093.480513       | S    | <b>1193.606183</b> | <b>597.306730</b>  | 1176.579634       | 588.793455         | 1175.595618       | 588.301447        | 11 |
| 15 | 2301.017080        | 1151.012178       | 2283.990531    | 1142.498903       | 2283.006515        | 1142.006895       | P    | <b>1106.574155</b> | 553.790716         | 1089.547606       | 545.277441         | 1088.563590       | 544.785433        | 10 |
| 16 | 2438.075992        | 1219.541634       | 2421.049443    | 1211.028359       | 2420.065427        | 1210.536351       | H    | 1009.521391        | <b>505.264334</b>  | 992.494842        | 496.751059         | 991.510826        | 496.259051        | 9  |
| 17 | 2509.113106        | 1255.060191       | 2492.086557    | 1246.546917       | 2491.102541        | 1246.054909       | A    | <b>872.462479</b>  | 436.734878         | 855.435930        | 428.221603         | 854.451914        | 427.729595        | 8  |
| 18 | 2646.172018        | 1323.589647       | 2629.145469    | 1315.076372       | 2628.161453        | 1314.584365       | H    | <b>801.425365</b>  | <b>401.216321</b>  | 784.398816        | 392.703046         | 783.414800        | 392.211038        | 7  |
| 19 | 2703.193482        | 1352.100379       | 2686.166933    | 1343.587104       | 2685.182917        | 1343.095097       | G    | <b>664.366453</b>  | 332.686865         | 647.339904        | 324.173590         | 646.355888        | 323.681582        | 6  |
| 20 | 2866.256811        | 1433.632044       | 2849.230262    | 1425.118769       | 2848.246246        | 1424.626761       | Y    | 607.344989         | 304.176133         | 590.318440        | 295.662858         | 589.334424        | 295.170850        | 5  |
| 21 | 2979.340875        | 1490.174076       | 2962.314326    | 1481.660801       | 2961.330310        | 1481.168793       | I    | <b>444.281660</b>  | 222.644468         | 427.255111        | 214.131194         | 426.271095        | 213.639186        | 4  |
| 22 | 3076.393639        | 1538.700458       | 3059.367090    | 1530.187183       | 3058.383074        | 1529.695175       | P    | <b>331.197596</b>  | 166.102436         | 314.171047        | 157.589162         | <b>313.187031</b> | <b>157.097154</b> | 3  |
| 23 | 3163.425667        | 1582.216472       | 3146.399118    | 1573.703197       | 3145.415102        | 1573.211189       | S    | <b>234.144832</b>  | 117.576054         | 217.118283        | 109.062780         | 216.134267        | 108.570772        | 2  |
| 24 |                    |                   |                |                   |                    |                   | K    | <b>147.112804</b>  | 74.060040          | <b>130.086255</b> | 65.546765          |                   |                   | 1  |

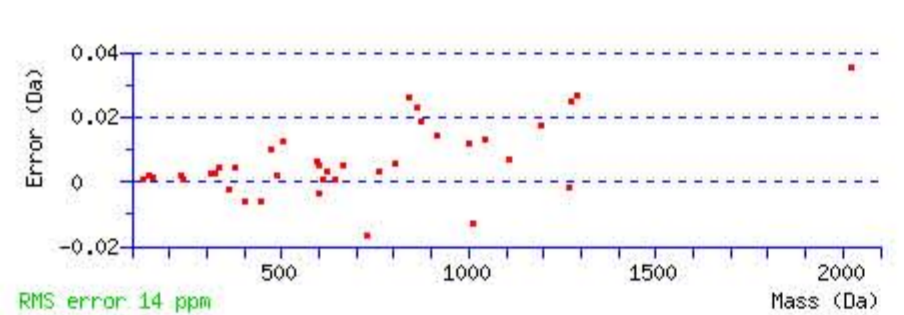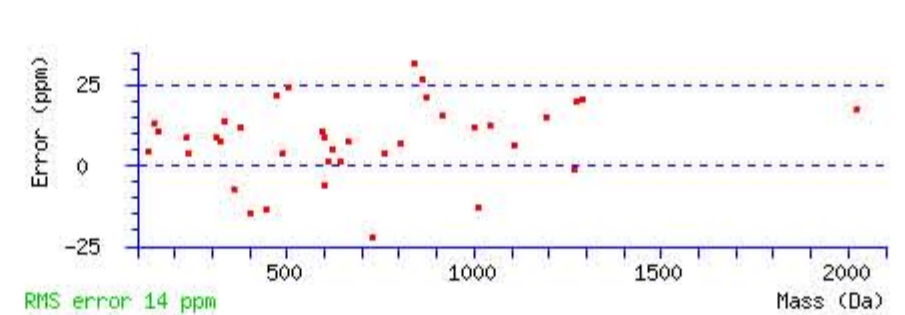

NCBI BLAST search of **TMSGLECAWDSQSPHAHGYIPSK**  
 (Parameters: blastp, nr protein database, expect=20000, no filter, PAM30)  
 Other BLAST [web gateways](#)

**All matches to this query**

| Score | Mr(calc):   | Delta    | Sequence                                |
|-------|-------------|----------|-----------------------------------------|
| 29.1  | 3308.523911 | 0.043185 | <a href="#">TMSGLECAWDSQSPHAHGYIPSK</a> |



# MASCOT Search Results

## Peptide View

MS/MS Fragmentation of **KLYDYCDVPQCAAPSFDCGKQVEPK**  
 Found in **PLMN\_HUMAN**, Plasminogen OS=Homo sapiens GN=PLG PE=1 SV=2

Match to Query 76689: 3382.574136 from(846.650810,4+) rtinseconds(1927) index(77930)  
 Title: Locus:1.1.1.2885.26 File:"2013-07-02 CLN FXIII 60 min 1st FT.wiff"  
 Data file C:\Program Files (x86)\Matrix Science\Mascot Daemon\mgf4 FXIII 60 min 1st\mascot\_daemon\_merge.mgf

Click mouse within plot area to zoom in by factor of two about that point  
 Or, Plot from  to  Da   
 Label all possible matches  Label matches used for scoring

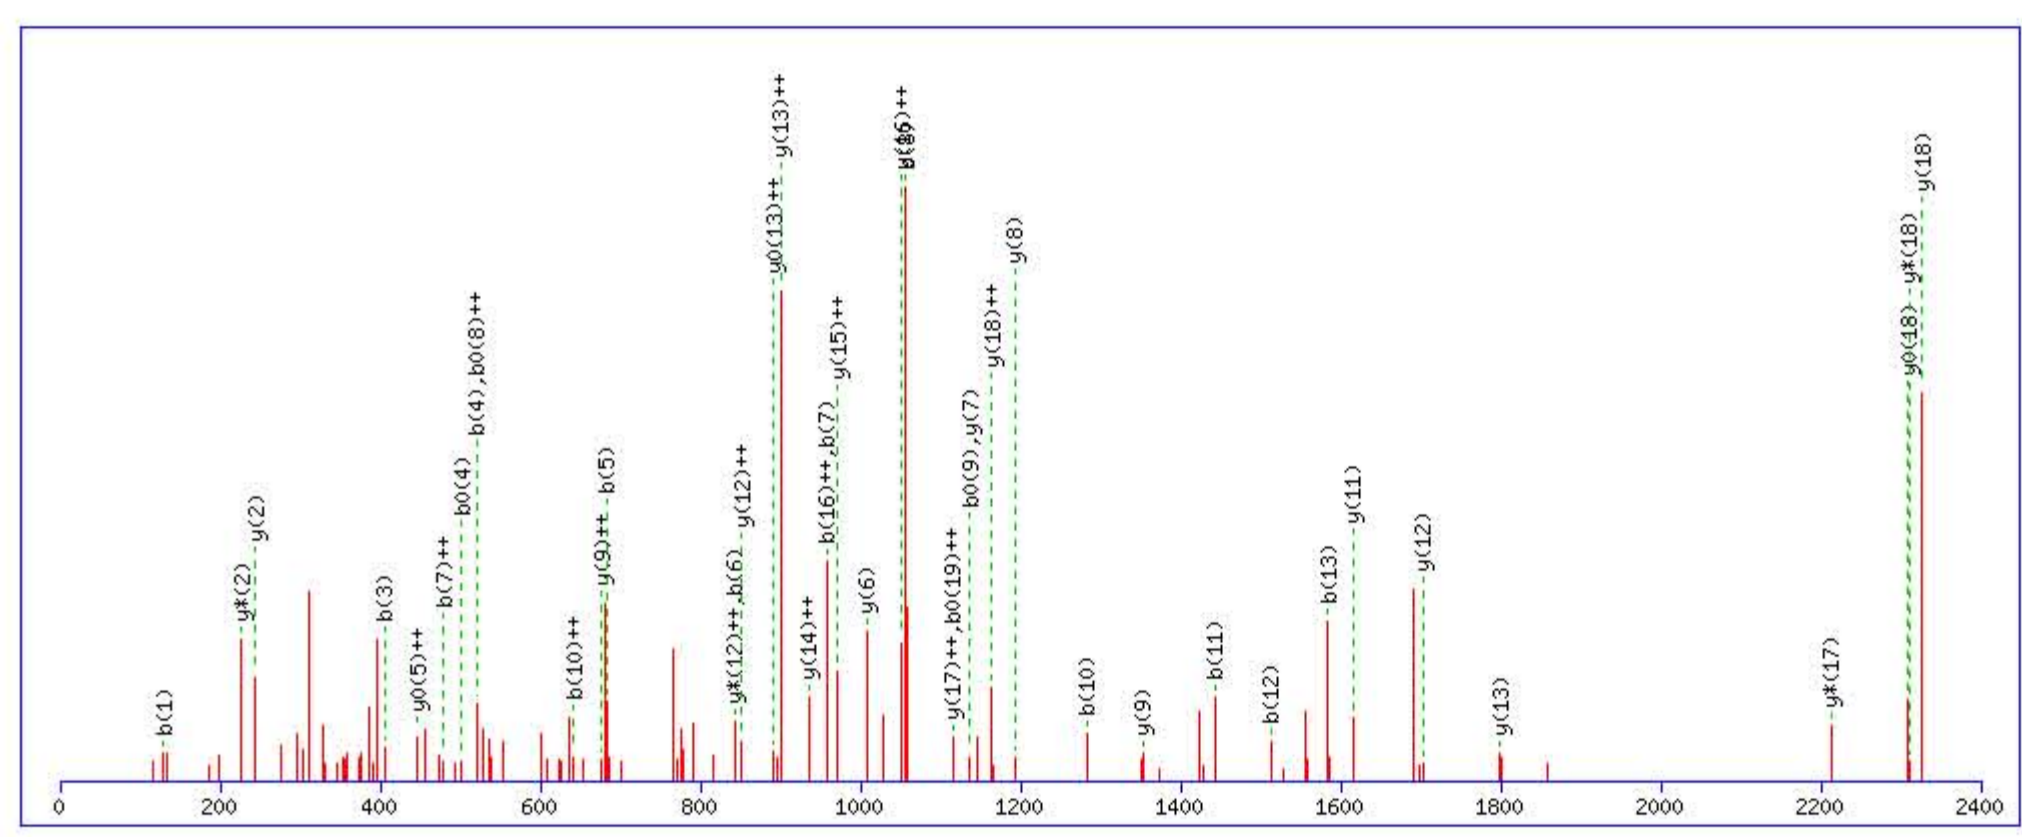

Monoisotopic mass of neutral peptide Mr(calc): 3382.549469  
 Fixed modifications: Carbamidomethyl (C) (apply to specified residues or termini only)  
 Variable modifications:  
 Q22 : Biotin:Thermo-21345 (Q)  
 Ions Score: 48 Expect: 0.00024  
 Matches : 42/290 fragment ions using 91 most intense peaks [\(help\)](#)

| #  | b                  | b <sup>++</sup>   | b <sup>*</sup> | b <sup>+++</sup> | b <sup>0</sup>     | b <sup>0++</sup>   | Seq.     | y                  | y <sup>++</sup>    | y <sup>*</sup>     | y <sup>+++</sup>  | y <sup>0</sup>     | y <sup>0++</sup>  | #         |
|----|--------------------|-------------------|----------------|------------------|--------------------|--------------------|----------|--------------------|--------------------|--------------------|-------------------|--------------------|-------------------|-----------|
| 1  | <b>129.102239</b>  | 65.054757         | 112.075690     | 56.541483        |                    |                    | <b>K</b> |                    |                    |                    |                   |                    |                   | <b>26</b> |
| 2  | 242.186303         | 121.596790        | 225.159754     | 113.083515       |                    |                    | <b>L</b> | 3255.461780        | 1628.234528        | 3238.435231        | 1619.721253       | 3237.451215        | 1619.229245       | <b>25</b> |
| 3  | <b>405.249632</b>  | 203.128454        | 388.223083     | 194.615180       |                    |                    | <b>Y</b> | 3142.377716        | 1571.692496        | 3125.351167        | 1563.179221       | 3124.367151        | 1562.687213       | <b>24</b> |
| 4  | <b>520.276575</b>  | 260.641926        | 503.250026     | 252.128651       | <b>502.266010</b>  | 251.636643         | <b>D</b> | 2979.314387        | 1490.160831        | 2962.287838        | 1481.647557       | 2961.303822        | 1481.155549       | <b>23</b> |
| 5  | <b>683.339904</b>  | 342.173590        | 666.313355     | 333.660316       | 665.329339         | 333.168308         | <b>Y</b> | 2864.287444        | 1432.647360        | 2847.260895        | 1424.134085       | 2846.276879        | 1423.642077       | <b>22</b> |
| 6  | <b>843.370553</b>  | 422.188915        | 826.344004     | 413.675640       | 825.359988         | 413.183632         | <b>C</b> | 2701.224115        | 1351.115695        | 2684.197566        | 1342.602421       | 2683.213550        | 1342.110413       | <b>21</b> |
| 7  | <b>958.397496</b>  | <b>479.702386</b> | 941.370947     | 471.189112       | 940.386931         | 470.697104         | <b>D</b> | 2541.193466        | 1271.100371        | 2524.166917        | 1262.587096       | 2523.182901        | 1262.095089       | <b>20</b> |
| 8  | <b>1057.465910</b> | 529.236593        | 1040.439361    | 520.723319       | 1039.455345        | <b>520.231311</b>  | <b>V</b> | 2426.166523        | 1213.586899        | 2409.139974        | 1205.073625       | 2408.155958        | 1204.581617       | <b>19</b> |
| 9  | 1154.518674        | 577.762975        | 1137.492125    | 569.249701       | <b>1136.508109</b> | 568.757693         | <b>P</b> | <b>2327.098109</b> | <b>1164.052692</b> | <b>2310.071560</b> | 1155.539418       | <b>2309.087544</b> | 1155.047410       | <b>18</b> |
| 10 | <b>1282.577252</b> | <b>641.792264</b> | 1265.550703    | 633.278990       | 1264.566687        | 632.786982         | <b>Q</b> | 2230.045345        | <b>1115.526310</b> | <b>2213.018796</b> | 1107.013036       | 2212.034780        | 1106.521028       | <b>17</b> |
| 11 | <b>1442.607901</b> | 721.807589        | 1425.581352    | 713.294314       | 1424.597336        | 712.802306         | <b>C</b> | 2101.986767        | <b>1051.497021</b> | 2084.960218        | 1042.983747       | 2083.976202        | 1042.491739       | <b>16</b> |
| 12 | <b>1513.645015</b> | 757.326146        | 1496.618466    | 748.812871       | 1495.634450        | 748.320863         | <b>A</b> | 1941.956118        | <b>971.481697</b>  | 1924.929569        | 962.968423        | 1923.945553        | 962.476415        | <b>15</b> |
| 13 | <b>1584.682129</b> | 792.844703        | 1567.655580    | 784.331428       | 1566.671564        | 783.839420         | <b>A</b> | 1870.919004        | <b>935.963140</b>  | 1853.892455        | 927.449866        | 1852.908439        | 926.957858        | <b>14</b> |
| 14 | 1681.734893        | 841.371085        | 1664.708344    | 832.857810       | 1663.724328        | 832.365802         | <b>P</b> | <b>1799.881890</b> | <b>900.444583</b>  | 1782.855341        | 891.931309        | 1781.871325        | <b>891.439301</b> | <b>13</b> |
| 15 | 1768.766921        | 884.887099        | 1751.740372    | 876.373824       | 1750.756356        | 875.881816         | <b>S</b> | <b>1702.829126</b> | <b>851.918201</b>  | 1685.802577        | <b>843.404927</b> | 1684.818561        | 842.912919        | <b>12</b> |
| 16 | 1915.835335        | <b>958.421306</b> | 1898.808786    | 949.908031       | 1897.824770        | 949.416023         | <b>F</b> | <b>1615.797098</b> | 808.402187         | 1598.770549        | 799.888913        | 1597.786533        | 799.396905        | <b>11</b> |
| 17 | 2030.862278        | 1015.934777       | 2013.835729    | 1007.421503      | 2012.851713        | 1006.929495        | <b>D</b> | 1468.728684        | 734.867980         | 1451.702135        | 726.354706        | 1450.718119        | 725.862698        | <b>10</b> |
| 18 | 2190.892927        | 1095.950102       | 2173.866378    | 1087.436827      | 2172.882362        | 1086.944819        | <b>C</b> | <b>1353.701741</b> | <b>677.354509</b>  | 1336.675192        | 668.841234        | 1335.691176        | 668.349226        | <b>9</b>  |
| 19 | 2247.914391        | 1124.460834       | 2230.887842    | 1115.947559      | 2229.903826        | <b>1115.455551</b> | <b>G</b> | <b>1193.671092</b> | 597.339184         | 1176.644543        | 588.825910        | 1175.660527        | 588.333902        | <b>8</b>  |
| 20 | 2376.009354        | 1188.508315       | 2358.982805    | 1179.995041      | 2357.998789        | 1179.503033        | <b>K</b> | <b>1136.649628</b> | 568.828452         | 1119.623079        | 560.315178        | 1118.639063        | 559.823170        | <b>7</b>  |
| 21 | 2473.062118        | 1237.034697       | 2456.035569    | 1228.521423      | 2455.051553        | 1228.029415        | <b>P</b> | <b>1008.554665</b> | 504.780971         | 991.528116         | 496.267696        | 990.544100         | 495.775688        | <b>6</b>  |
| 22 | 2912.287444        | 1456.647360       | 2895.260895    | 1448.134086      | 2894.276879        | 1447.642078        | <b>Q</b> | 911.501901         | 456.254589         | 894.475352         | 447.741314        | 893.491336         | <b>447.249306</b> | <b>5</b>  |
| 23 | 3011.355858        | 1506.181567       | 2994.329309    | 1497.668293      | 2993.345293        | 1497.176285        | <b>V</b> | 472.276575         | 236.641925         | 455.250026         | 228.128651        | 454.266010         | 227.636643        | <b>4</b>  |
| 24 | 3140.398451        | 1570.702864       | 3123.371902    | 1562.189589      | 3122.387886        | 1561.697581        | <b>E</b> | 373.208161         | 187.107719         | 356.181612         | 178.594444        | 355.197596         | 178.102436        | <b>3</b>  |
| 25 | 3237.451215        | 1619.229246       | 3220.424666    | 1610.715971      | 3219.440650        | 1610.223963        | <b>P</b> | <b>244.165568</b>  | 122.586422         | <b>227.139019</b>  | 114.073148        |                    |                   | <b>2</b>  |
| 26 |                    |                   |                |                  |                    |                    | <b>K</b> | 147.112804         | 74.060040          | 130.086255         | 65.546765         |                    |                   | <b>1</b>  |

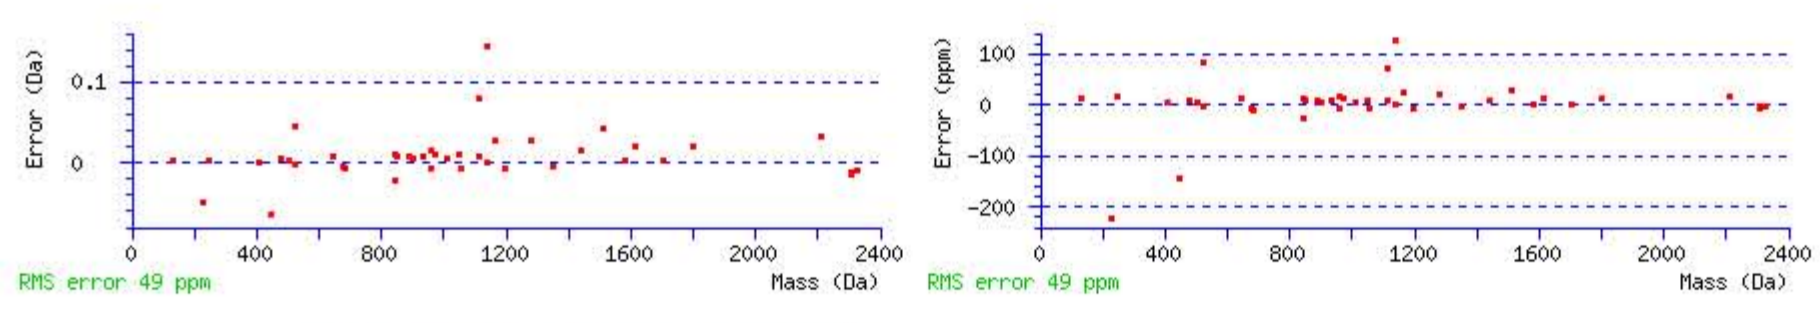

NCBI BLAST search of **KLYDYCDVPQCAAPSFDCGKQVEPK**  
 (Parameters: blastp, nr protein database, expect=20000, no filter, PAM30)  
 Other BLAST [web gateways](#)

### All matches to this query

| Score | Mr(calc):   | Delta    | Sequence                                  |
|-------|-------------|----------|-------------------------------------------|
| 47.6  | 3382.549469 | 0.024667 | <a href="#">KLYDYCDVPQCAAPSFDCGKQVEPK</a> |
| 3.3   | 3382.549469 | 0.024667 | <a href="#">KLYDYCDVPQCAAPSFDCGKQVEPK</a> |



**MASCOT** Mascot Search Results

**Peptide View**

MS/MS Fragmentation of **KLYDYCDVPQCAAPSFDCGKQPVEPK**  
 Found in **PLMN\_HUMAN**, Plasminogen OS=Homo sapiens GN=PLG PE=1 SV=2

Match to Query 76690: 3382.582416 from(846.652880,4+) rtinseconds(1980) index(78355)  
 Title: Locus:1.1.1.2903.24 File:"2013-07-02 CLN FXIII 60 min 1st FT.wiff"  
 Data file C:\Program Files (x86)\Matrix Science\Mascot Daemon\mgf4 FXIII 60 min 1st\mascot\_daemon\_merge.mgf

Click mouse within plot area to zoom in by factor of two about that point  
 Or, Plot from  to  Da   
 Label all possible matches  Label matches used for scoring

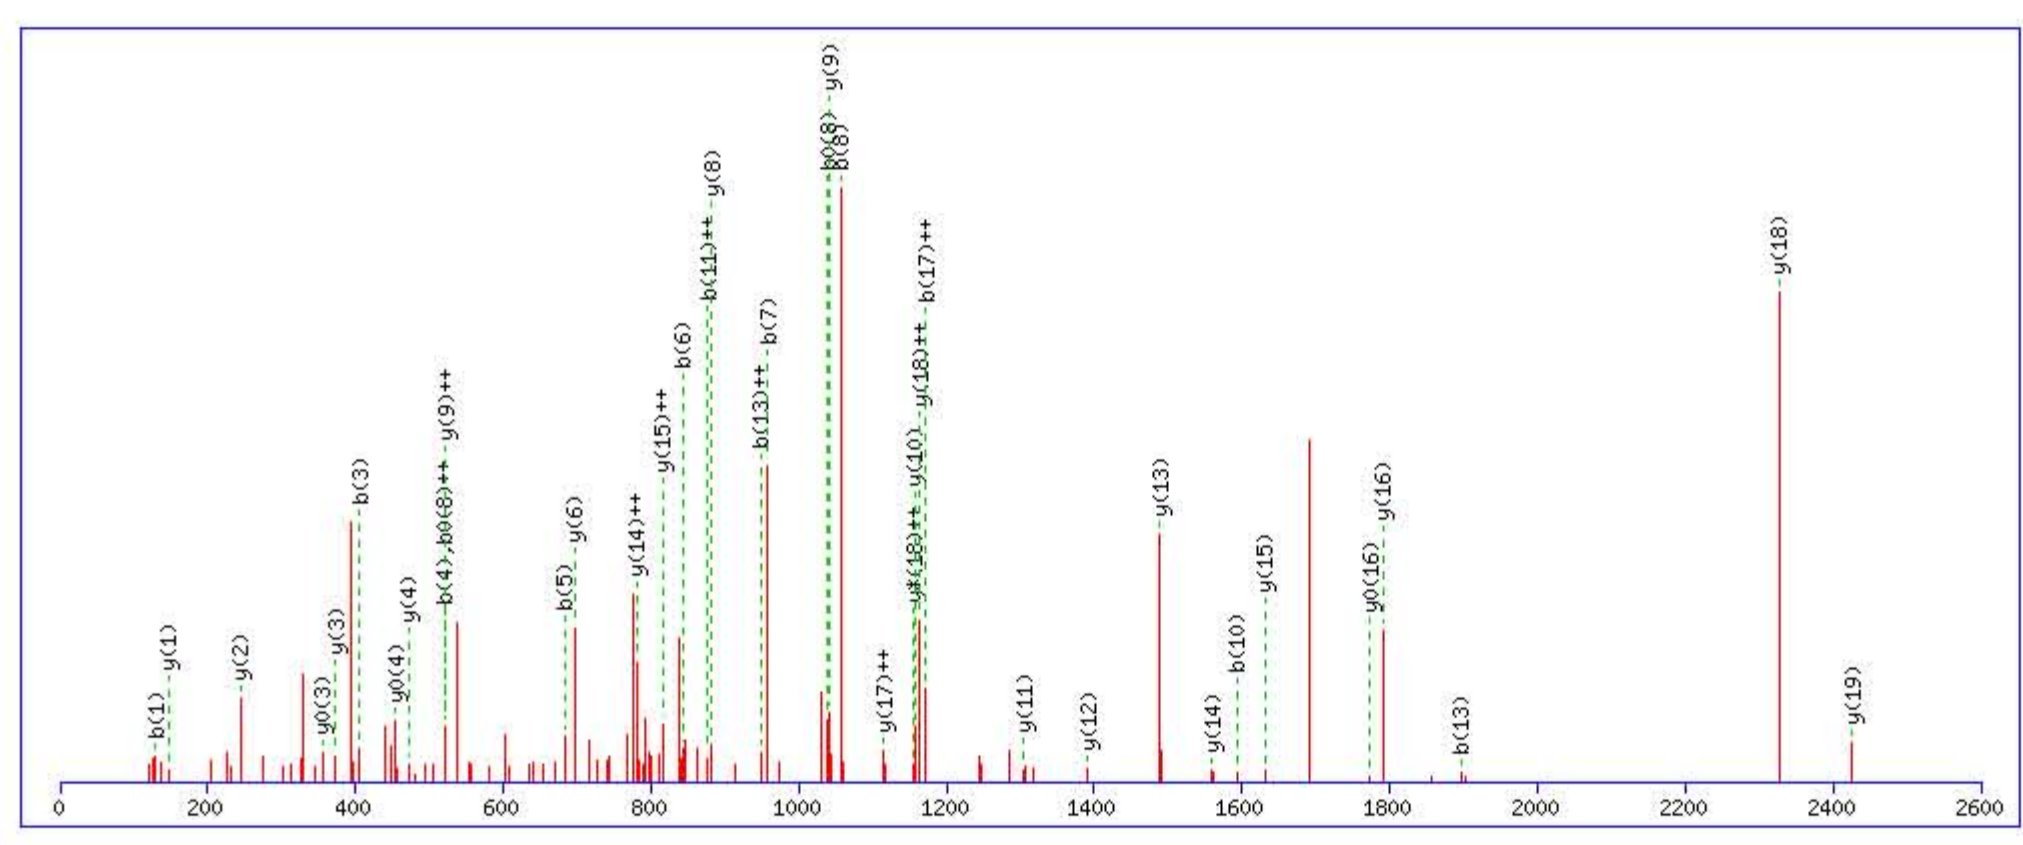

Monoisotopic mass of neutral peptide Mr(calc): 3382.549469  
 Fixed modifications: Carbamidomethyl (C) (apply to specified residues or termini only)  
 Variable modifications:  
 Q10 : Biotin:Thermo-21345 (Q)  
 Ions Score: 75 Expect: 1.4e-007  
 Matches : 39/290 fragment ions using 86 most intense peaks [\(help\)](#)

| #  | b           | b <sup>++</sup> | b <sup>*</sup> | b <sup>*++</sup> | b <sup>0</sup> | b <sup>0++</sup> | Seq. | y           | y <sup>++</sup> | y <sup>*</sup> | y <sup>*++</sup> | y <sup>0</sup> | y <sup>0++</sup> | #  |
|----|-------------|-----------------|----------------|------------------|----------------|------------------|------|-------------|-----------------|----------------|------------------|----------------|------------------|----|
| 1  | 129.102239  | 65.054757       | 112.075690     | 56.541483        |                |                  | K    |             |                 |                |                  |                |                  | 26 |
| 2  | 242.186303  | 121.596790      | 225.159754     | 113.083515       |                |                  | L    | 3255.461780 | 1628.234528     | 3238.435231    | 1619.721253      | 3237.451215    | 1619.229245      | 25 |
| 3  | 405.249632  | 203.128454      | 388.223083     | 194.615180       |                |                  | Y    | 3142.377716 | 1571.692496     | 3125.351167    | 1563.179221      | 3124.367151    | 1562.687213      | 24 |
| 4  | 520.276575  | 260.641926      | 503.250026     | 252.128651       | 502.266010     | 251.636643       | D    | 2979.314387 | 1490.160831     | 2962.287838    | 1481.647557      | 2961.303822    | 1481.155549      | 23 |
| 5  | 683.339904  | 342.173590      | 666.313355     | 333.660316       | 665.329339     | 333.168308       | Y    | 2864.287444 | 1432.647360     | 2847.260895    | 1424.134085      | 2846.276879    | 1423.642077      | 22 |
| 6  | 843.370553  | 422.188915      | 826.344004     | 413.675640       | 825.359988     | 413.183632       | C    | 2701.224115 | 1351.115695     | 2684.197566    | 1342.602421      | 2683.213550    | 1342.110413      | 21 |
| 7  | 958.397496  | 479.702386      | 941.370947     | 471.189112       | 940.386931     | 470.697104       | D    | 2541.193466 | 1271.100371     | 2524.166917    | 1262.587096      | 2523.182901    | 1262.095088      | 20 |
| 8  | 1057.465910 | 529.236593      | 1040.439361    | 520.723319       | 1039.455345    | 520.231311       | V    | 2426.166523 | 1213.586899     | 2409.139974    | 1205.073625      | 2408.155958    | 1204.581617      | 19 |
| 9  | 1154.518674 | 577.762975      | 1137.492125    | 569.249701       | 1136.508109    | 568.757693       | P    | 2327.098109 | 1164.052692     | 2310.071560    | 1155.539418      | 2309.087544    | 1155.047410      | 18 |
| 10 | 1593.744000 | 797.375638      | 1576.717451    | 788.862364       | 1575.733435    | 788.370356       | Q    | 2230.045345 | 1115.526310     | 2213.018796    | 1107.013036      | 2212.034780    | 1106.521028      | 17 |
| 11 | 1753.774649 | 877.390963      | 1736.748100    | 868.877688       | 1735.764084    | 868.385680       | C    | 1790.820019 | 895.913647      | 1773.793470    | 887.400373       | 1772.809454    | 886.908365       | 16 |
| 12 | 1824.811763 | 912.909520      | 1807.785214    | 904.396245       | 1806.801198    | 903.904237       | A    | 1630.789370 | 815.898323      | 1613.762821    | 807.385048       | 1612.778805    | 806.893040       | 15 |
| 13 | 1895.848877 | 948.428077      | 1878.822328    | 939.914802       | 1877.838312    | 939.422794       | A    | 1559.752256 | 780.379766      | 1542.725707    | 771.866491       | 1541.741691    | 771.374483       | 14 |
| 14 | 1992.901641 | 996.954459      | 1975.875092    | 988.441184       | 1974.891076    | 987.949176       | P    | 1488.715142 | 744.861209      | 1471.688593    | 736.347934       | 1470.704577    | 735.855926       | 13 |
| 15 | 2079.933669 | 1040.470472     | 2062.907120    | 1031.957198      | 2061.923104    | 1031.465190      | S    | 1391.662378 | 696.334827      | 1374.635829    | 687.821552       | 1373.651813    | 687.329544       | 12 |
| 16 | 2227.002083 | 1114.004679     | 2209.975534    | 1105.491405      | 2208.991518    | 1104.999397      | F    | 1304.630350 | 652.818813      | 1287.603801    | 644.305538       | 1286.619785    | 643.813530       | 11 |
| 17 | 2342.029026 | 1171.518151     | 2325.002477    | 1163.004876      | 2324.018461    | 1162.512868      | D    | 1157.561936 | 579.284606      | 1140.535387    | 570.771331       | 1139.551371    | 570.279323       | 10 |
| 18 | 2502.059675 | 1251.533475     | 2485.033126    | 1243.020201      | 2484.049110    | 1242.528193      | C    | 1042.534993 | 521.771135      | 1025.508444    | 513.257860       | 1024.524428    | 512.765852       | 9  |
| 19 | 2559.081139 | 1280.044207     | 2542.054590    | 1271.530933      | 2541.070574    | 1271.038925      | G    | 882.504344  | 441.755810      | 865.477795     | 433.242536       | 864.493779     | 432.750528       | 8  |
| 20 | 2687.176102 | 1344.091689     | 2670.149553    | 1335.578414      | 2669.165537    | 1335.086406      | K    | 825.482880  | 413.245078      | 808.456331     | 404.731804       | 807.472315     | 404.239796       | 7  |
| 21 | 2784.228866 | 1392.618071     | 2767.202317    | 1384.104796      | 2766.218301    | 1383.612788      | P    | 697.387917  | 349.197597      | 680.361368     | 340.684322       | 679.377352     | 340.192314       | 6  |
| 22 | 2912.287444 | 1456.647360     | 2895.260895    | 1448.134085      | 2894.276879    | 1447.642077      | Q    | 600.335153  | 300.671215      | 583.308604     | 292.157940       | 582.324588     | 291.665932       | 5  |
| 23 | 3011.355858 | 1506.181567     | 2994.329309    | 1497.668292      | 2993.345293    | 1497.176284      | V    | 472.276575  | 236.641925      | 455.250026     | 228.128651       | 454.266010     | 227.636643       | 4  |
| 24 | 3140.398451 | 1570.702863     | 3123.371902    | 1562.189589      | 3122.387886    | 1561.697581      | E    | 373.208161  | 187.107719      | 356.181612     | 178.594444       | 355.197596     | 178.102436       | 3  |
| 25 | 3237.451215 | 1619.229245     | 3220.424666    | 1610.715971      | 3219.440650    | 1610.223963      | P    | 244.165568  | 122.586422      | 227.139019     | 114.073148       |                |                  | 2  |
| 26 |             |                 |                |                  |                |                  | K    | 147.112804  | 74.060040       | 130.086255     | 65.546765        |                |                  | 1  |

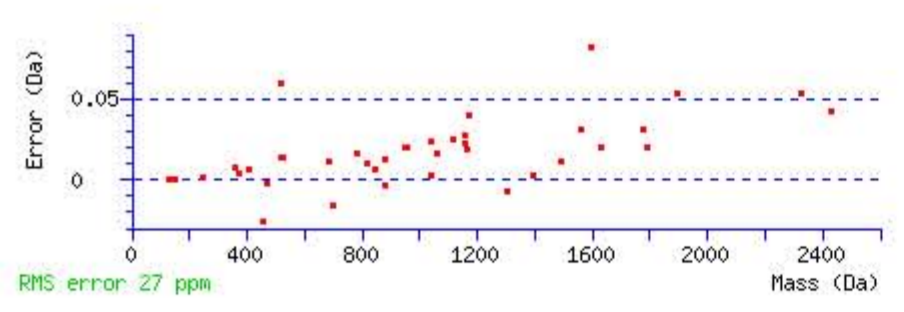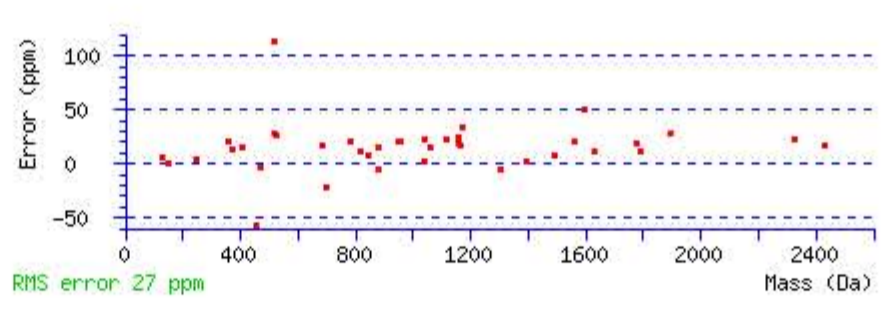

NCBI BLAST search of **KLYDYCDVPQCAAPSFDCGKQPVEPK**  
 (Parameters: blastp, nr protein database, expect=20000, no filter, PAM30)  
 Other BLAST [web gateways](#)

**All matches to this query**

| Score | Mr(calc):   | Delta     | Sequence                                      |
|-------|-------------|-----------|-----------------------------------------------|
| 74.7  | 3382.549469 | 0.032947  | <a href="#">KLYDYCDVPQCAAPSFDCGKQPVEPK</a>    |
| 11.1  | 3382.549469 | 0.032947  | <a href="#">KLYDYCDVPQCAAPSFDCGKQPVEPK</a>    |
| 1.6   | 3382.580414 | 0.002002  | <a href="#">HLYPNTPYAYTFWYMMNARSKNVGWR</a>    |
| 1.6   | 3382.580414 | 0.002002  | <a href="#">HLYPNTPYAYTFWYMMNARSKNVGWR</a>    |
| 0.4   | 3382.595993 | -0.013577 | <a href="#">GSTSNFYSQLGLESIPQLCENRVLREDNR</a> |



# Mascot Search Results

## Peptide View

MS/MS Fragmentation of **GNVAVTVSGHTCQHWSAQTPHTHNR**

Found in **PLMN\_HUMAN**, Plasminogen OS=Homo sapiens GN=PLG PE=1 SV=2

Match to Query 76999: 3403.637270 from(681.734730,5+) rtinseconds(1643) index(76167)

Title: Locus:1.1.1.2786.16 File:"2013-07-02 CLN FXIII 60 min 1st FT.wiff"

Data file C:\Program Files (x86)\Matrix Science\Mascot Daemon\mgf4 FXIII 60 min 1st\mascot\_daemon\_merge.mgf

Click mouse within plot area to zoom in by factor of two about that point

Or, Plot from  to  Da

Label all possible matches  Label matches used for scoring

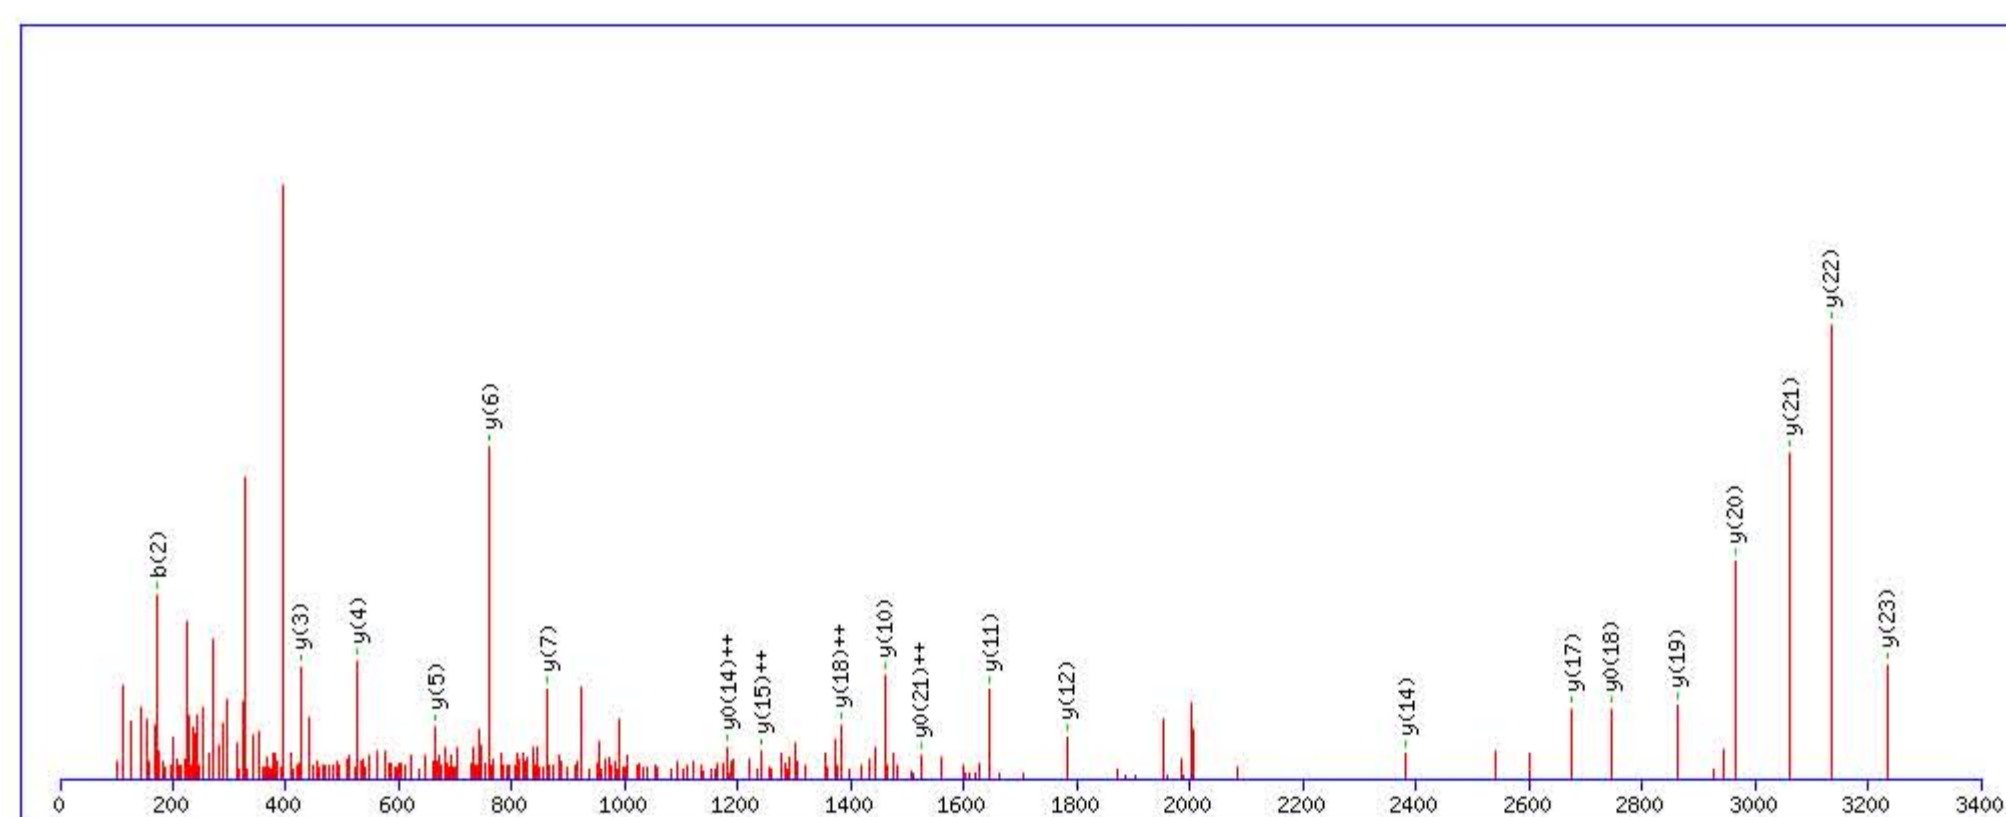

Monoisotopic mass of neutral peptide Mr(calc): 3403.623764

Fixed modifications: Carbamidomethyl (C) (apply to specified residues or termini only)

Variable modifications:

Q13 : Biotin:Thermo-21345 (Q)

Q18 : Biotin:Thermo-21345 (Q)

Ions Score: 109 Expect: 3.5e-010

Matches : 21/270 fragment ions using 29 most intense peaks [\(help\)](#)

| #  | b           | b <sup>++</sup> | b <sup>+</sup> | b <sup>+++</sup> | b <sup>0</sup> | b <sup>0++</sup> | Seq. | y           | y <sup>++</sup> | y <sup>+</sup> | y <sup>+++</sup> | y <sup>0</sup> | y <sup>0++</sup> | #  |
|----|-------------|-----------------|----------------|------------------|----------------|------------------|------|-------------|-----------------|----------------|------------------|----------------|------------------|----|
| 1  | 58.028740   | 29.518008       |                |                  |                |                  | G    |             |                 |                |                  |                |                  | 25 |
| 2  | 172.071667  | 86.539471       | 155.045118     | 78.026197        |                |                  | N    | 3347.609538 | 1674.308407     | 3330.582989    | 1665.795132      | 3329.598973    | 1665.303124      | 24 |
| 3  | 271.140081  | 136.073679      | 254.113532     | 127.560404       |                |                  | V    | 3233.566611 | 1617.286943     | 3216.540062    | 1608.773669      | 3215.556046    | 1608.281661      | 23 |
| 4  | 342.177195  | 171.592236      | 325.150646     | 163.078961       |                |                  | A    | 3134.498197 | 1567.752736     | 3117.471648    | 1559.239462      | 3116.487632    | 1558.747454      | 22 |
| 5  | 441.245609  | 221.126443      | 424.219060     | 212.613168       |                |                  | V    | 3063.461083 | 1532.234179     | 3046.434534    | 1523.720905      | 3045.450518    | 1523.228897      | 21 |
| 6  | 542.293288  | 271.650282      | 525.266739     | 263.137008       | 524.282723     | 262.645000       | T    | 2964.392669 | 1482.699972     | 2947.366120    | 1474.186698      | 2946.382104    | 1473.694690      | 20 |
| 7  | 641.361702  | 321.184489      | 624.335153     | 312.671215       | 623.351137     | 312.179207       | V    | 2863.344990 | 1432.176133     | 2846.318441    | 1423.662858      | 2845.334425    | 1423.170850      | 19 |
| 8  | 728.393730  | 364.700503      | 711.367181     | 356.187229       | 710.383165     | 355.695221       | S    | 2764.276576 | 1382.641926     | 2747.250027    | 1374.128651      | 2746.266011    | 1373.636643      | 18 |
| 9  | 785.415194  | 393.211235      | 768.388645     | 384.697961       | 767.404629     | 384.205953       | G    | 2677.244548 | 1339.125912     | 2660.217999    | 1330.612637      | 2659.233983    | 1330.120629      | 17 |
| 10 | 922.474106  | 461.740691      | 905.447557     | 453.227417       | 904.463541     | 452.735409       | H    | 2620.223084 | 1310.615180     | 2603.196535    | 1302.101905      | 2602.212519    | 1301.609897      | 16 |
| 11 | 1023.521785 | 512.264530      | 1006.495236    | 503.751256       | 1005.511220    | 503.259248       | T    | 2483.164172 | 1242.085724     | 2466.137623    | 1233.572449      | 2465.153607    | 1233.080441      | 15 |
| 12 | 1183.552434 | 592.279855      | 1166.525885    | 583.766581       | 1165.541869    | 583.274572       | C    | 2382.116493 | 1191.561884     | 2365.089944    | 1183.048610      | 2364.105928    | 1182.556602      | 14 |
| 13 | 1622.777760 | 811.892518      | 1605.751211    | 803.379244       | 1604.767195    | 802.887236       | Q    | 2222.085844 | 1111.546560     | 2205.059295    | 1103.033285      | 2204.075279    | 1102.541277      | 13 |
| 14 | 1759.836672 | 880.421974      | 1742.810123    | 871.908700       | 1741.826107    | 871.416692       | H    | 1782.860518 | 891.933897      | 1765.833969    | 883.420622       | 1764.849953    | 882.928614       | 12 |
| 15 | 1945.915985 | 973.461631      | 1928.889436    | 964.948356       | 1927.905420    | 964.456348       | W    | 1645.801606 | 823.404441      | 1628.775057    | 814.891166       | 1627.791041    | 814.399158       | 11 |
| 16 | 2032.948013 | 1016.977645     | 2015.921464    | 1008.464370      | 2014.937448    | 1007.972362      | S    | 1459.722293 | 730.364784      | 1442.695744    | 721.851510       | 1441.711728    | 721.359502       | 10 |
| 17 | 2103.985127 | 1052.496201     | 2086.958578    | 1043.982927      | 2085.974562    | 1043.490919      | A    | 1372.690265 | 686.848770      | 1355.663716    | 678.335496       | 1354.679700    | 677.843488       | 9  |
| 18 | 2543.210453 | 1272.108865     | 2526.183904    | 1263.595590      | 2525.199888    | 1263.103582      | Q    | 1301.653151 | 651.330213      | 1284.626602    | 642.816939       | 1283.642586    | 642.324931       | 8  |
| 19 | 2644.258132 | 1322.632704     | 2627.231583    | 1314.119429      | 2626.247567    | 1313.627421      | T    | 862.427825  | 431.717550      | 845.401276     | 423.204276       | 844.417260     | 422.712268       | 7  |
| 20 | 2741.310896 | 1371.159086     | 2724.284347    | 1362.645811      | 2723.300331    | 1362.153803      | P    | 761.380146  | 381.193711      | 744.353597     | 372.680436       | 743.369581     | 372.188428       | 6  |
| 21 | 2878.369808 | 1439.688542     | 2861.343259    | 1431.175267      | 2860.359243    | 1430.683259      | H    | 664.327382  | 332.667329      | 647.300833     | 324.154054       | 646.316817     | 323.662046       | 5  |
| 22 | 2979.417487 | 1490.212381     | 2962.390938    | 1481.699107      | 2961.406922    | 1481.207099      | T    | 527.268470  | 264.137873      | 510.241921     | 255.624598       | 509.257905     | 255.132590       | 4  |
| 23 | 3116.476399 | 1558.741837     | 3099.449850    | 1550.228563      | 3098.465834    | 1549.736555      | H    | 426.220791  | 213.614033      | 409.194242     | 205.100759       |                |                  | 3  |
| 24 | 3230.519326 | 1615.763301     | 3213.492777    | 1607.250026      | 3212.508761    | 1606.758018      | N    | 289.161879  | 145.084577      | 272.135330     | 136.571303       |                |                  | 2  |
| 25 |             |                 |                |                  |                |                  | R    | 175.118952  | 88.063114       | 158.092403     | 79.549839        |                |                  | 1  |

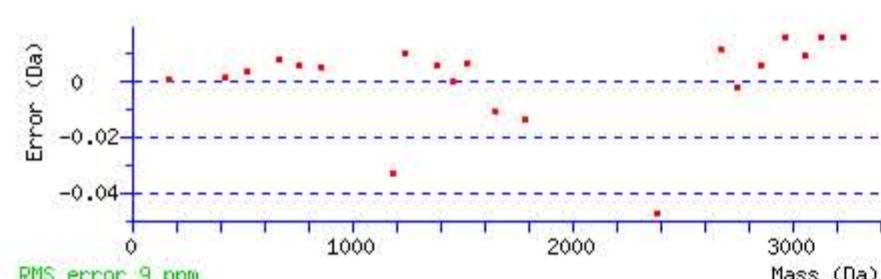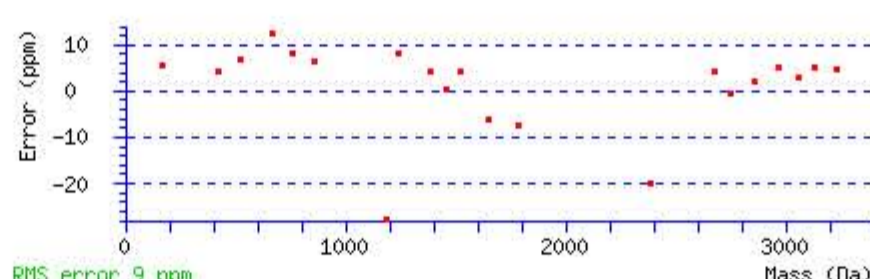

NCBI BLAST search of **GNVAVTVSGHTCQHWSAQTPHTHNR**

(Parameters: blastp, nr protein database, expect=20000, no filter, PAM30)

Other BLAST [web gateways](#)

All matches to this query

| Score | Mr(calc):   | Delta    | Sequence                                  |
|-------|-------------|----------|-------------------------------------------|
| 108.8 | 3403.623764 | 0.013506 | <a href="#">GNVAVTVSGHTCQHWSAQTPHTHNR</a> |

Mascot: <http://www.matrixscience.com/>



**Mascot Search Results**

**Peptide View**

MS/MS Fragmentation of **VQSTELCAGHLAGGTDSCQGDSGGPLVCFEK**  
 Found in **PLMN\_HUMAN**, Plasminogen OS=Homo sapiens GN=PLG PE=1 SV=2

Match to Query 78346: 3547.618936 from(887.912010,4+) rtinseconds(2167) index(79697)  
 Title: Locus:1.1.1.2968.26 File:"2013-07-02 CLN FXIII 60 min 1st FT.wiff"  
 Data file C:\Program Files (x86)\Matrix Science\Mascot Daemon\mgf4 FXIII 60 min 1st\mascot\_daemon\_merge.mgf

Click mouse within plot area to zoom in by factor of two about that point  
 Or, Plot from  to  Da   
 Label all possible matches  Label matches used for scoring

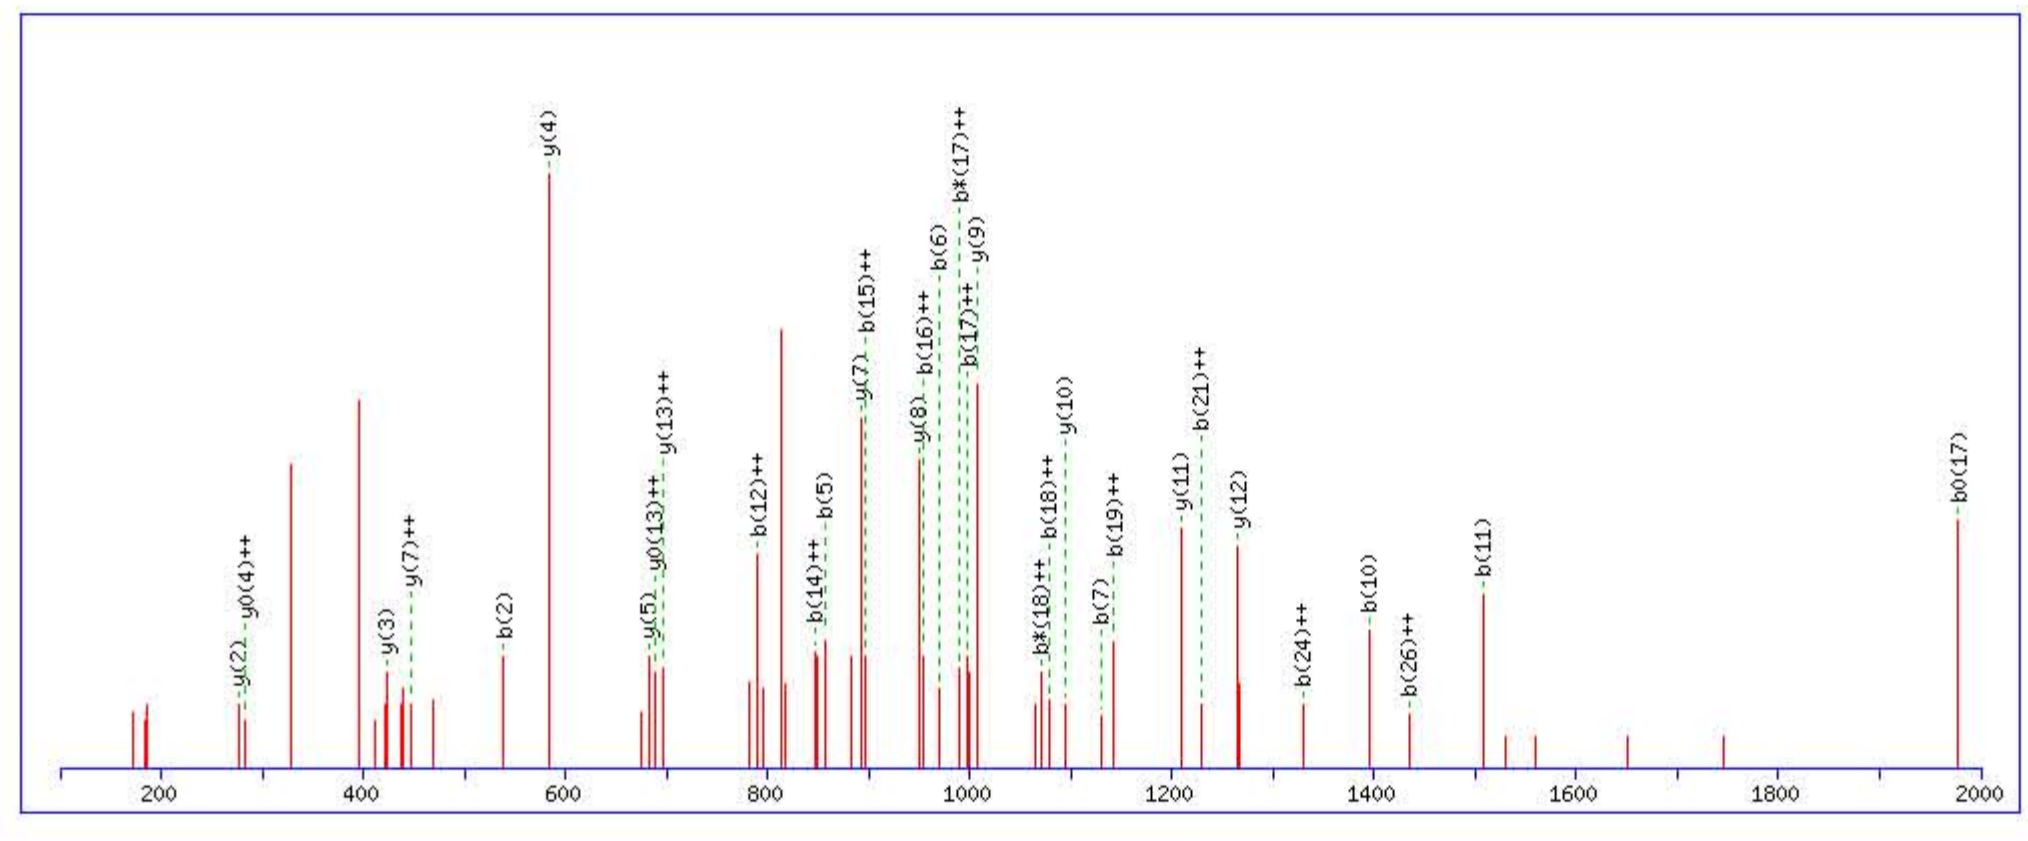

Monoisotopic mass of neutral peptide Mr(calc): 3547.584061  
 Fixed modifications: Carbamidomethyl (C) (apply to specified residues or termini only)  
 Variable modifications:  
 Q2 : Biotin:Thermo-21345 (Q)  
 Ions Score: 71 Expect: 8.2e-007  
 Matches : 33/352 fragment ions using 57 most intense peaks [\(help\)](#)

| #  | b                  | b <sup>++</sup>    | b <sup>*</sup> | b <sup>***</sup>   | b <sup>0</sup>     | b <sup>0++</sup> | Seq. | y                  | y <sup>++</sup>   | y <sup>*</sup> | y <sup>***</sup> | y <sup>0</sup> | y <sup>0++</sup>  | #  |
|----|--------------------|--------------------|----------------|--------------------|--------------------|------------------|------|--------------------|-------------------|----------------|------------------|----------------|-------------------|----|
| 1  | 100.075690         | 50.541483          |                |                    |                    |                  | V    |                    |                   |                |                  |                |                   | 31 |
| 2  | <b>539.301016</b>  | 270.154146         | 522.274467     | 261.640872         |                    |                  | Q    | 3449.522877        | 1725.265076       | 3432.496328    | 1716.751802      | 3431.512312    | 1716.259794       | 30 |
| 3  | 626.333044         | 313.670160         | 609.306495     | 305.156886         | 608.322479         | 304.664878       | S    | 3010.297551        | 1505.652413       | 2993.271002    | 1497.139139      | 2992.286986    | 1496.647131       | 29 |
| 4  | 727.380723         | 364.194000         | 710.354174     | 355.680725         | 709.370158         | 355.188717       | T    | 2923.265523        | 1462.136399       | 2906.238974    | 1453.623125      | 2905.254958    | 1453.131117       | 28 |
| 5  | <b>856.423316</b>  | 428.715296         | 839.396767     | 420.202022         | 838.412751         | 419.710014       | E    | 2822.217844        | 1411.612560       | 2805.191295    | 1403.099285      | 2804.207279    | 1402.607277       | 27 |
| 6  | <b>969.507380</b>  | 485.257328         | 952.480831     | 476.744054         | 951.496815         | 476.252046       | L    | 2693.175251        | 1347.091263       | 2676.148702    | 1338.577989      | 2675.164686    | 1338.085981       | 26 |
| 7  | <b>1129.538029</b> | 565.272653         | 1112.511480    | 556.759378         | 1111.527464        | 556.267370       | C    | 2580.091187        | 1290.549231       | 2563.064638    | 1282.035957      | 2562.080622    | 1281.543949       | 25 |
| 8  | 1200.575143        | 600.791210         | 1183.548594    | 592.277935         | 1182.564578        | 591.785927       | A    | 2420.060538        | 1210.533907       | 2403.033989    | 1202.020632      | 2402.049973    | 1201.528624       | 24 |
| 9  | 1257.596607        | 629.301942         | 1240.570058    | 620.788667         | 1239.586042        | 620.296659       | G    | 2349.023424        | 1175.015350       | 2331.996875    | 1166.502075      | 2331.012859    | 1166.010067       | 23 |
| 10 | <b>1394.655519</b> | 697.831397         | 1377.628970    | 689.318123         | 1376.644954        | 688.826115       | H    | 2292.001960        | 1146.504618       | 2274.975411    | 1137.991343      | 2273.991395    | 1137.499335       | 22 |
| 11 | <b>1507.739583</b> | 754.373429         | 1490.713034    | 745.860155         | 1489.729018        | 745.368147       | L    | 2154.943048        | 1077.975162       | 2137.916499    | 1069.461887      | 2136.932483    | 1068.969879       | 21 |
| 12 | 1578.776697        | <b>789.891986</b>  | 1561.750148    | 781.378712         | 1560.766132        | 780.886704       | A    | 2041.858984        | 1021.433130       | 2024.832435    | 1012.919855      | 2023.848419    | 1012.427847       | 20 |
| 13 | 1635.798161        | 818.402718         | 1618.771612    | 809.889444         | 1617.787596        | 809.397436       | G    | 1970.821870        | 985.914573        | 1953.795321    | 977.401298       | 1952.811305    | 976.909290        | 19 |
| 14 | 1692.819625        | <b>846.913450</b>  | 1675.793076    | 838.400176         | 1674.809060        | 837.908168       | G    | 1913.800406        | 957.403841        | 1896.773857    | 948.890566       | 1895.789841    | 948.398558        | 18 |
| 15 | 1793.867304        | <b>897.437290</b>  | 1776.840755    | 888.924015         | 1775.856739        | 888.432007       | T    | 1856.778942        | 928.893109        | 1839.752393    | 920.379835       | 1838.768377    | 919.887826        | 17 |
| 16 | 1908.894247        | <b>954.950761</b>  | 1891.867698    | 946.437487         | 1890.883682        | 945.945479       | D    | 1755.731263        | 878.369269        | 1738.704714    | 869.855995       | 1737.720698    | 869.363987        | 16 |
| 17 | 1995.926275        | <b>998.466775</b>  | 1978.899726    | <b>989.953501</b>  | <b>1977.915710</b> | 989.461493       | S    | 1640.704320        | 820.855798        | 1623.677771    | 812.342523       | 1622.693755    | 811.850515        | 15 |
| 18 | 2155.956924        | <b>1078.482100</b> | 2138.930375    | <b>1069.968825</b> | 2137.946359        | 1069.476817      | C    | 1553.672292        | 777.339784        | 1536.645743    | 768.826509       | 1535.661727    | 768.334501        | 14 |
| 19 | 2284.015502        | <b>1142.511389</b> | 2266.988953    | 1133.998114        | 2266.004937        | 1133.506106      | Q    | 1393.641643        | <b>697.324459</b> | 1376.615094    | 688.811185       | 1375.631078    | <b>688.319177</b> | 13 |
| 20 | 2341.036966        | 1171.022121        | 2324.010417    | 1162.508846        | 2323.026401        | 1162.016838      | G    | <b>1265.583065</b> | 633.295170        | 1248.556516    | 624.781896       | 1247.572500    | 624.289888        | 12 |
| 21 | 2456.063909        | <b>1228.535592</b> | 2439.037360    | 1220.022318        | 2438.053344        | 1219.530310      | D    | <b>1208.561601</b> | 604.784438        | 1191.535052    | 596.271164       | 1190.551036    | 595.779156        | 11 |
| 22 | 2543.095937        | 1272.051606        | 2526.069388    | 1263.538332        | 2525.085372        | 1263.046324      | S    | <b>1093.534658</b> | 547.270967        | 1076.508109    | 538.757692       | 1075.524093    | 538.265684        | 10 |
| 23 | 2600.117401        | 1300.562338        | 2583.090852    | 1292.049064        | 2582.106836        | 1291.557056      | G    | <b>1006.502630</b> | 503.754953        | 989.476081     | 495.241678       | 988.492065     | 494.749670        | 9  |
| 24 | 2657.138865        | <b>1329.073070</b> | 2640.112316    | 1320.559796        | 2639.128300        | 1320.067788      | G    | <b>949.481166</b>  | 475.244221        | 932.454617     | 466.730946       | 931.470601     | 466.238938        | 8  |
| 25 | 2754.191629        | 1377.599452        | 2737.165080    | 1369.086178        | 2736.181064        | 1368.594170      | P    | <b>892.459702</b>  | <b>446.733489</b> | 875.433153     | 438.220214       | 874.449137     | 437.728206        | 7  |
| 26 | 2867.275693        | <b>1434.141484</b> | 2850.249144    | 1425.628210        | 2849.265128        | 1425.136202      | L    | 795.406938         | 398.207107        | 778.380389     | 389.693832       | 777.396373     | 389.201824        | 6  |
| 27 | 2966.344107        | 1483.675691        | 2949.317558    | 1475.162417        | 2948.333542        | 1474.670409      | V    | <b>682.322874</b>  | 341.665075        | 665.296325     | 333.151800       | 664.312309     | 332.659792        | 5  |
| 28 | 3126.374756        | 1563.691016        | 3109.348207    | 1555.177741        | 3108.364191        | 1554.685733      | C    | <b>583.254460</b>  | 292.130868        | 566.227911     | 283.617593       | 565.243895     | <b>283.125585</b> | 4  |
| 29 | 3273.443170        | 1637.225223        | 3256.416621    | 1628.711948        | 3255.432605        | 1628.219940      | F    | <b>423.223811</b>  | 212.115543        | 406.197262     | 203.602269       | 405.213246     | 203.110261        | 3  |
| 30 | 3402.485763        | 1701.746519        | 3385.459214    | 1693.233245        | 3384.475198        | 1692.741237      | E    | <b>276.155397</b>  | 138.581337        | 259.128848     | 130.068062       | 258.144832     | 129.576054        | 2  |
| 31 |                    |                    |                |                    |                    |                  | K    | 147.112804         | 74.060040         | 130.086255     | 65.546765        |                |                   | 1  |

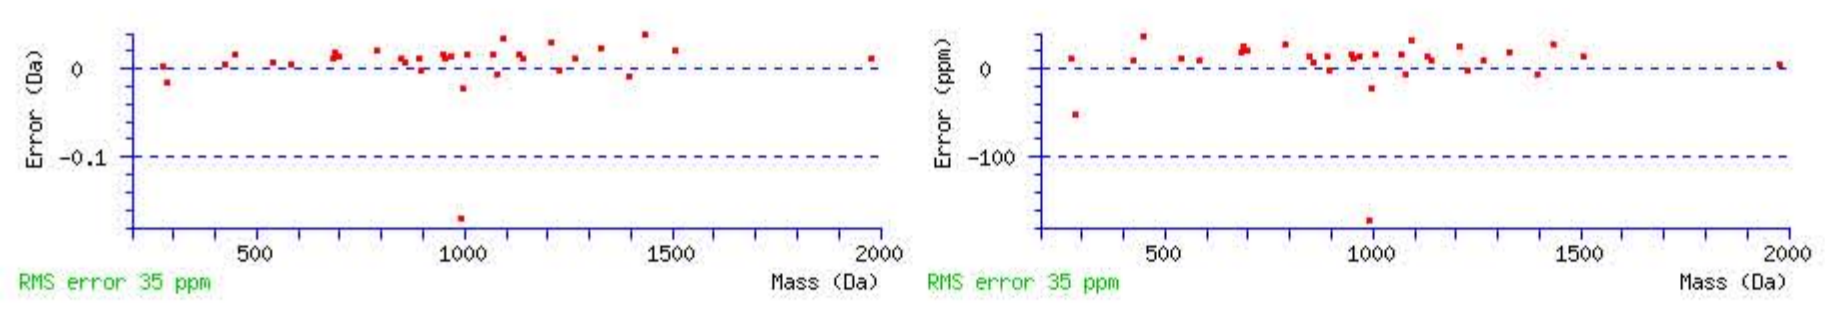

NCBI BLAST search of **VQSTELCAGHLAGGTDSCQGDSGGPLVCFEK**  
 (Parameters: blastp, nr protein database, expect=20000, no filter, PAM30)  
 Other BLAST [web gateways](#)

**All matches to this query**

| Score | Mr(calc):   | Delta    | Sequence                                        |
|-------|-------------|----------|-------------------------------------------------|
| 71.3  | 3547.584061 | 0.034875 | <a href="#">VQSTELCAGHLAGGTDSCQGDSGGPLVCFEK</a> |
| 32.8  | 3547.584061 | 0.034875 | <a href="#">VQSTELCAGHLAGGTDSCQGDSGGPLVCFEK</a> |



# MASCOT Search Results

## Peptide View

MS/MS Fragmentation of **TCNHPVPQHGGPFCAGDATR**

Found in **PROP\_HUMAN**, Properdin OS=Homo sapiens GN=CFP PE=1 SV=2

Match to Query 65057: 2489.126496 from(623.288900,4+) rtinseconds(1499) index(75253)

Title: Locus:1.1.1.2736.11 File:"2013-07-02 CLN FXIII 60 min 1st FT.wiff"

Data file C:\Program Files (x86)\Matrix Science\Mascot Daemon\mgf\4 FXIII 60 min 1st\mascot\_daemon\_merge.mgf

Click mouse within plot area to zoom in by factor of two about that point

Or, Plot from  to  Da

Label all possible matches  Label matches used for scoring

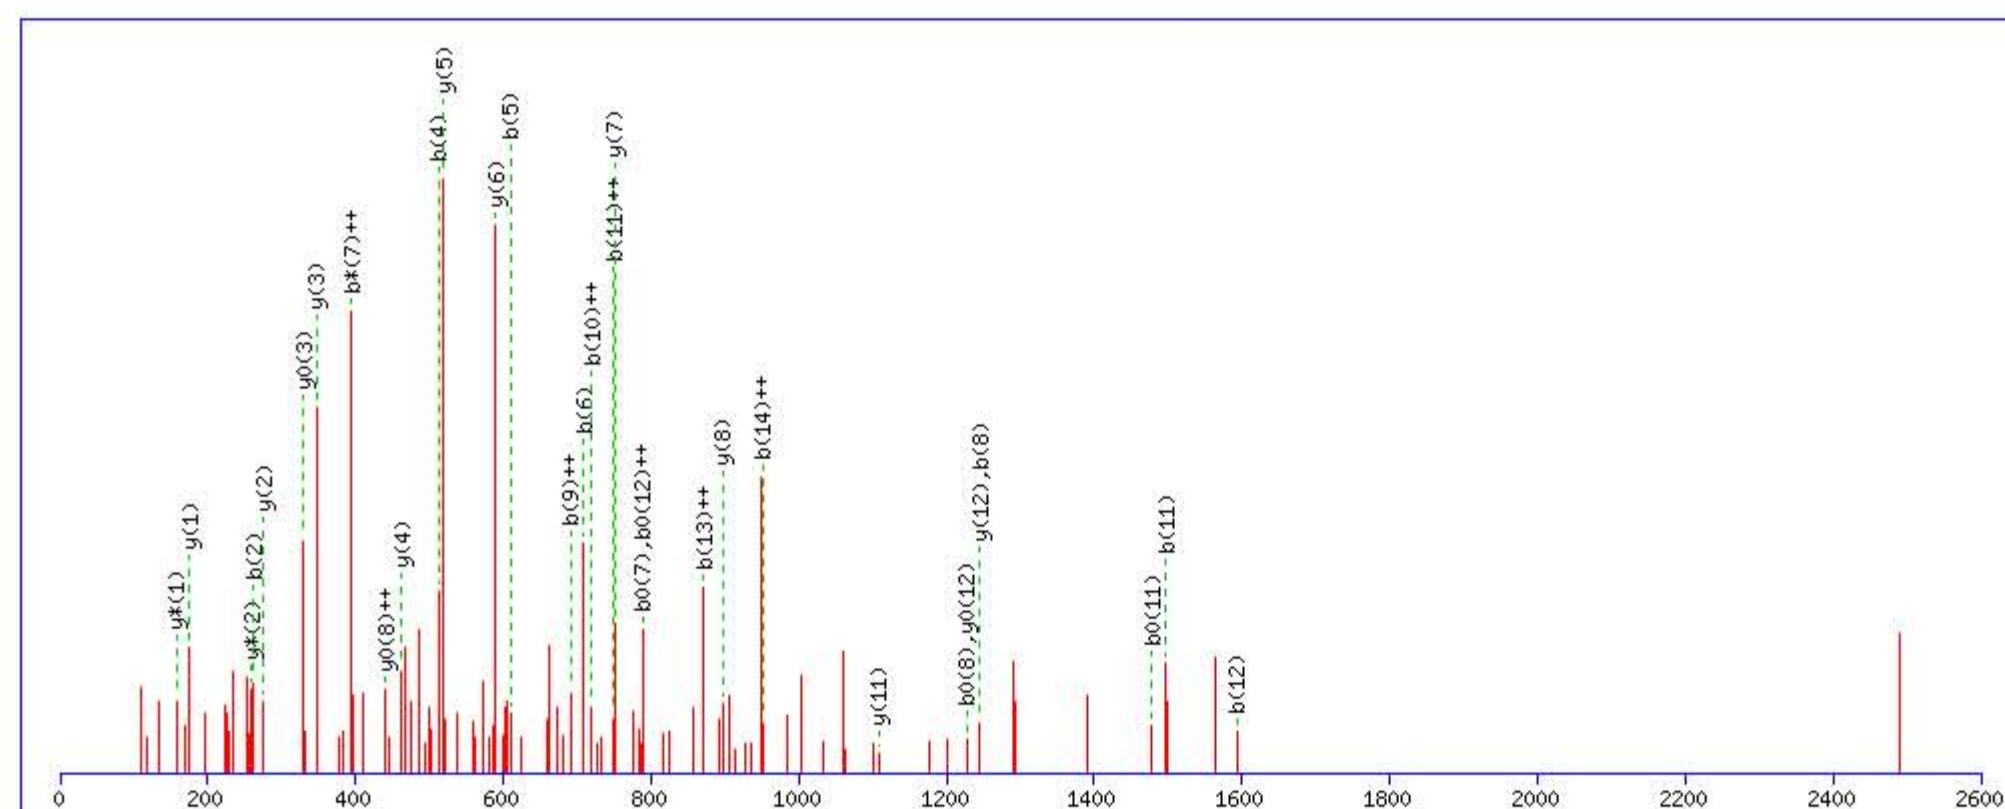

Monoisotopic mass of neutral peptide Mr(calc): 2489.115128

Fixed modifications: Carbamidomethyl (C) (apply to specified residues or termini only)

Variable modifications:

Q8 : Biotin:Thermo-21345 (Q)

Ions Score: 50 Expect: 9.5e-005

Matches : 32/222 fragment ions using 64 most intense peaks [\(help\)](#)

| #  | b                  | b <sup>++</sup>   | b <sup>*</sup> | b <sup>+++</sup>  | b <sup>0</sup>     | b <sup>0++</sup>  | Seq. | y                  | y <sup>++</sup> | y <sup>*</sup>    | y <sup>+++</sup> | y <sup>0</sup>     | y <sup>0++</sup>  | #  |
|----|--------------------|-------------------|----------------|-------------------|--------------------|-------------------|------|--------------------|-----------------|-------------------|------------------|--------------------|-------------------|----|
| 1  | 102.054955         | 51.531116         |                |                   | 84.044390          | 42.525833         | T    |                    |                 |                   |                  |                    |                   | 20 |
| 2  | <b>262.085604</b>  | 131.546440        |                |                   | 244.075039         | 122.541158        | C    | 2389.074689        | 1195.040982     | 2372.048140       | 1186.527708      | 2371.064124        | 1186.035700       | 19 |
| 3  | 376.128531         | 188.567904        | 359.101982     | 180.054629        | 358.117966         | 179.562621        | N    | 2229.044040        | 1115.025658     | 2212.017491       | 1106.512383      | 2211.033475        | 1106.020375       | 18 |
| 4  | <b>513.187443</b>  | 257.097360        | 496.160894     | 248.584085        | 495.176878         | 248.092077        | H    | 2115.001113        | 1058.004194     | 2097.974564       | 1049.490920      | 2096.990548        | 1048.998912       | 17 |
| 5  | <b>610.240207</b>  | 305.623742        | 593.213658     | 297.110467        | 592.229642         | 296.618459        | P    | 1977.942201        | 989.474739      | 1960.915652       | 980.961464       | 1959.931636        | 980.469456        | 16 |
| 6  | <b>709.308621</b>  | 355.157949        | 692.282072     | 346.644674        | 691.298056         | 346.152666        | V    | 1880.889437        | 940.948357      | 1863.862888       | 932.435082       | 1862.878872        | 931.943074        | 15 |
| 7  | 806.361385         | 403.684331        | 789.334836     | <b>395.171056</b> | <b>788.350820</b>  | 394.679048        | P    | 1781.821023        | 891.414150      | 1764.794474       | 882.900875       | 1763.810458        | 882.408867        | 14 |
| 8  | <b>1245.586711</b> | 623.296994        | 1228.560162    | 614.783719        | <b>1227.576146</b> | 614.291711        | Q    | 1684.768259        | 842.887768      | 1667.741710       | 834.374493       | 1666.757694        | 833.882485        | 13 |
| 9  | 1382.645623        | <b>691.826450</b> | 1365.619074    | 683.313175        | 1364.635058        | 682.821167        | H    | <b>1245.542933</b> | 623.275105      | 1228.516384       | 614.761830       | <b>1227.532368</b> | 614.269822        | 12 |
| 10 | 1439.667087        | <b>720.337182</b> | 1422.640538    | 711.823907        | 1421.656522        | 711.331899        | G    | <b>1108.484021</b> | 554.745649      | 1091.457472       | 546.232374       | 1090.473456        | 545.740366        | 11 |
| 11 | <b>1496.688551</b> | <b>748.847914</b> | 1479.662002    | 740.334639        | <b>1478.677986</b> | 739.842631        | G    | 1051.462557        | 526.234917      | 1034.436008       | 517.721642       | 1033.451992        | 517.229634        | 10 |
| 12 | <b>1593.741315</b> | 797.374296        | 1576.714766    | 788.861021        | 1575.730750        | <b>788.369013</b> | P    | 994.441093         | 497.724185      | 977.414544        | 489.210910       | 976.430528         | 488.718902        | 9  |
| 13 | 1740.809729        | <b>870.908503</b> | 1723.783180    | 862.395228        | 1722.799164        | 861.903220        | F    | <b>897.388329</b>  | 449.197803      | 880.361780        | 440.684528       | 879.377764         | <b>440.192520</b> | 8  |
| 14 | 1900.840378        | <b>950.923827</b> | 1883.813829    | 942.410553        | 1882.829813        | 941.918545        | C    | <b>750.319915</b>  | 375.663596      | 733.293366        | 367.150321       | 732.309350         | 366.658313        | 7  |
| 15 | 1971.877492        | 986.442384        | 1954.850943    | 977.929110        | 1953.866927        | 977.437102        | A    | <b>590.289266</b>  | 295.648271      | 573.262717        | 287.134997       | 572.278701         | 286.642989        | 6  |
| 16 | 2028.898956        | 1014.953116       | 2011.872407    | 1006.439842       | 2010.888391        | 1005.947834       | G    | <b>519.252152</b>  | 260.129714      | 502.225603        | 251.616440       | 501.241587         | 251.124432        | 5  |
| 17 | 2143.925899        | 1072.466587       | 2126.899350    | 1063.953313       | 2125.915334        | 1063.461305       | D    | <b>462.230688</b>  | 231.618982      | 445.204139        | 223.105707       | 444.220123         | 222.613700        | 4  |
| 18 | 2214.963013        | 1107.985144       | 2197.936464    | 1099.471870       | 2196.952448        | 1098.979862       | A    | <b>347.203745</b>  | 174.105510      | 330.177196        | 165.592236       | <b>329.193180</b>  | 165.100228        | 3  |
| 19 | 2316.010692        | 1158.508984       | 2298.984143    | 1149.995709       | 2298.000127        | 1149.503701       | T    | <b>276.166631</b>  | 138.586953      | <b>259.140082</b> | 130.073679       | 258.156066         | 129.581671        | 2  |
| 20 |                    |                   |                |                   |                    |                   | R    | <b>175.118952</b>  | 88.063114       | <b>158.092403</b> | 79.549839        |                    |                   | 1  |

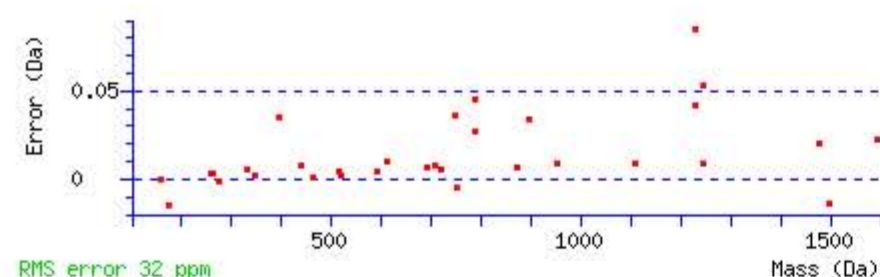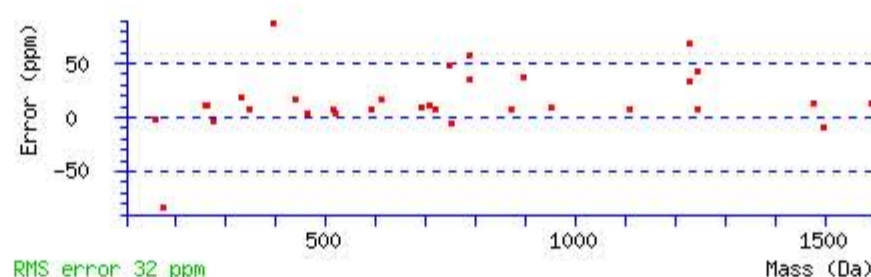

NCBI BLAST search of [TCNHPVPQHGGPFCAGDATR](#)

(Parameters: blastp, nr protein database, expect=20000, no filter, PAM30)

Other BLAST [web gateways](#)

All matches to this query

| Score | Mr(calc):   | Delta    | Sequence                             |
|-------|-------------|----------|--------------------------------------|
| 49.6  | 2489.115128 | 0.011368 | <a href="#">TCNHPVPQHGGPFCAGDATR</a> |



# Mascot Search Results

## Peptide View

MS/MS Fragmentation of **KCSAPEPSQKPPGKPCPLAYEQR**

Found in **PROP\_HUMAN**, Properdin OS=Homo sapiens GN=CFP PE=1 SV=2

Match to Query 71547: 2992.483220 from(599.503920,5+) rtinseconds(1425) index(74673)

Title: Locus:1.1.1.2710.25 File:"2013-07-02 CLN FXIII 60 min 1st FT.wiff"

Data file C:\Program Files (x86)\Matrix Science\Mascot Daemon\mgf4 FXIII 60 min 1st\mascot\_daemon\_merge.mgf

Click mouse within plot area to zoom in by factor of two about that point

Or, Plot from  to  Da

Label all possible matches  Label matches used for scoring

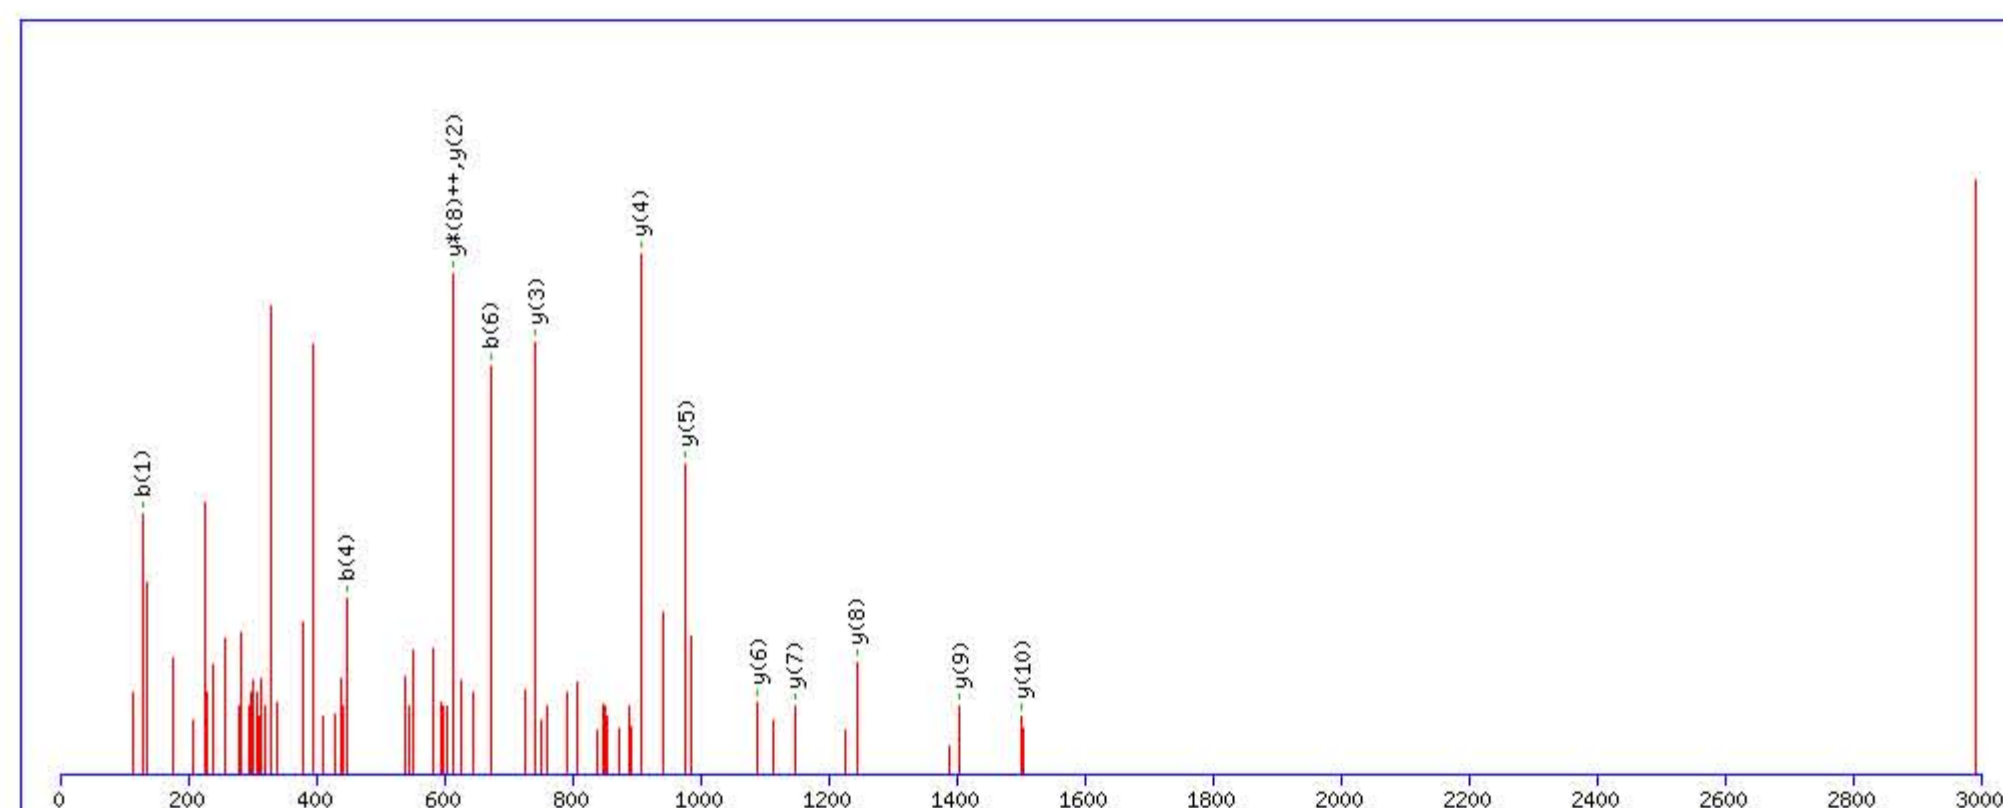

Monoisotopic mass of neutral peptide Mr(calc): 2992.472107

Fixed modifications: Carbamidomethyl (C) (apply to specified residues or termini only)

Variable modifications:

Q23 : Biotin:Thermo-21345 (Q)

Ions Score: 65 Expect: 8.1e-006

Matches : 13/268 fragment ions using 15 most intense peaks [\(help\)](#)

| #  | b           | b <sup>++</sup> | b <sup>*</sup> | b <sup>*++</sup> | b <sup>0</sup> | b <sup>0++</sup> | Seq. | y           | y <sup>++</sup> | y <sup>*</sup> | y <sup>*++</sup> | y <sup>0</sup> | y <sup>0++</sup> | #  |
|----|-------------|-----------------|----------------|------------------|----------------|------------------|------|-------------|-----------------|----------------|------------------|----------------|------------------|----|
| 1  | 129.102239  | 65.054757       | 112.075690     | 56.541483        |                |                  | K    |             |                 |                |                  |                |                  | 24 |
| 2  | 289.132888  | 145.070082      | 272.106339     | 136.556808       |                |                  | C    | 2865.384455 | 1433.195865     | 2848.357906    | 1424.682591      | 2847.373890    | 1424.190583      | 23 |
| 3  | 376.164916  | 188.586096      | 359.138367     | 180.072822       | 358.154351     | 179.580814       | S    | 2705.353806 | 1353.180541     | 2688.327257    | 1344.667266      | 2687.343241    | 1344.175258      | 22 |
| 4  | 447.202030  | 224.104653      | 430.175481     | 215.591378       | 429.191465     | 215.099370       | A    | 2618.321778 | 1309.664527     | 2601.295229    | 1301.151252      | 2600.311213    | 1300.659244      | 21 |
| 5  | 544.254794  | 272.631035      | 527.228245     | 264.117761       | 526.244229     | 263.625753       | P    | 2547.284664 | 1274.145970     | 2530.258115    | 1265.632695      | 2529.274099    | 1265.140687      | 20 |
| 6  | 673.297387  | 337.152332      | 656.270838     | 328.639057       | 655.286822     | 328.147049       | E    | 2450.231900 | 1225.619588     | 2433.205351    | 1217.106313      | 2432.221335    | 1216.614305      | 19 |
| 7  | 770.350151  | 385.678714      | 753.323602     | 377.165439       | 752.339586     | 376.673431       | P    | 2321.189307 | 1161.098292     | 2304.162758    | 1152.585017      | 2303.178742    | 1152.093009      | 18 |
| 8  | 857.382179  | 429.194728      | 840.355630     | 420.681453       | 839.371614     | 420.189445       | S    | 2224.136543 | 1112.571909     | 2207.109994    | 1104.058635      | 2206.125978    | 1103.566627      | 17 |
| 9  | 985.440757  | 493.224017      | 968.414208     | 484.710742       | 967.430192     | 484.218734       | Q    | 2137.104515 | 1069.055895     | 2120.077966    | 1060.542621      | 2119.093950    | 1060.050613      | 16 |
| 10 | 1113.535720 | 557.271498      | 1096.509171    | 548.758224       | 1095.525155    | 548.266216       | K    | 2009.045937 | 1005.026607     | 1992.019388    | 996.513332       | 1991.035372    | 996.021324       | 15 |
| 11 | 1210.588484 | 605.797880      | 1193.561935    | 597.284606       | 1192.577919    | 596.792598       | P    | 1880.950974 | 940.979125      | 1863.924425    | 932.465851       | 1862.940409    | 931.973843       | 14 |
| 12 | 1307.641248 | 654.324262      | 1290.614699    | 645.810988       | 1289.630683    | 645.318980       | P    | 1783.898210 | 892.452743      | 1766.871661    | 883.939469       | 1765.887645    | 883.447461       | 13 |
| 13 | 1364.662712 | 682.834994      | 1347.636163    | 674.321720       | 1346.652147    | 673.829712       | G    | 1686.845446 | 843.926361      | 1669.818897    | 835.413087       | 1668.834881    | 834.921079       | 12 |
| 14 | 1492.757675 | 746.882476      | 1475.731126    | 738.369201       | 1474.747110    | 737.877193       | K    | 1629.823982 | 815.415629      | 1612.797433    | 806.902355       | 1611.813417    | 806.410347       | 11 |
| 15 | 1589.810439 | 795.408858      | 1572.783890    | 786.895583       | 1571.799874    | 786.403575       | P    | 1501.729019 | 751.368148      | 1484.702470    | 742.854873       | 1483.718454    | 742.362865       | 10 |
| 16 | 1749.841088 | 875.424182      | 1732.814539    | 866.910908       | 1731.830523    | 866.418900       | C    | 1404.676255 | 702.841766      | 1387.649706    | 694.328491       | 1386.665690    | 693.836483       | 9  |
| 17 | 1846.893852 | 923.950564      | 1829.867303    | 915.437290       | 1828.883287    | 914.945282       | P    | 1244.645606 | 622.826441      | 1227.619057    | 614.313167       | 1226.635041    | 613.821159       | 8  |
| 18 | 1903.915316 | 952.461296      | 1886.888767    | 943.948022       | 1885.904751    | 943.456014       | G    | 1147.592842 | 574.300059      | 1130.566293    | 565.786785       | 1129.582277    | 565.294777       | 7  |
| 19 | 2016.999380 | 1009.003328     | 1999.972831    | 1000.490054      | 1998.988815    | 999.998045       | L    | 1090.571378 | 545.789327      | 1073.544829    | 537.276053       | 1072.560813    | 536.784045       | 6  |
| 20 | 2088.036494 | 1044.521885     | 2071.009945    | 1036.008610      | 2070.025929    | 1035.516602      | A    | 977.487314  | 489.247295      | 960.460765     | 480.734021       | 959.476749     | 480.242013       | 5  |
| 21 | 2251.099823 | 1126.053549     | 2234.073274    | 1117.540275      | 2233.089258    | 1117.048267      | Y    | 906.450200  | 453.728738      | 889.423651     | 445.215464       | 888.439635     | 444.723456       | 4  |
| 22 | 2380.142416 | 1190.574846     | 2363.115867    | 1182.061571      | 2362.131851    | 1181.569564      | E    | 743.386871  | 372.197074      | 726.360322     | 363.683799       | 725.376306     | 363.191791       | 3  |
| 23 | 2819.367742 | 1410.187509     | 2802.341193    | 1401.674235      | 2801.357177    | 1401.182227      | Q    | 614.344278  | 307.675777      | 597.317729     | 299.162503       |                |                  | 2  |
| 24 |             |                 |                |                  |                |                  | R    | 175.118952  | 88.063114       | 158.092403     | 79.549839        |                |                  | 1  |

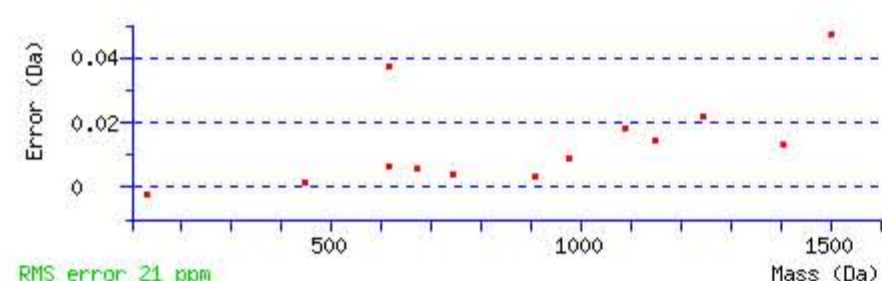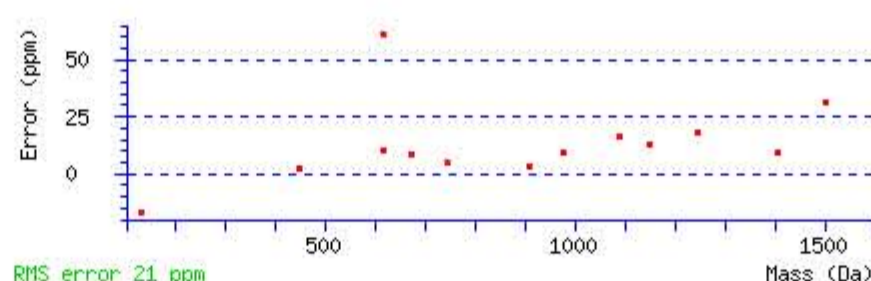

NCBI BLAST search of [KCSAPEPSQKPPGKPCPLAYEQR](#)

(Parameters: blastp, nr protein database, expect=20000, no filter, PAM30)

Other BLAST [web gateways](#)

## All matches to this query

| Score | Mr(calc):   | Delta    | Sequence                                |
|-------|-------------|----------|-----------------------------------------|
| 65.5  | 2992.472107 | 0.011113 | <a href="#">KCSAPEPSQKPPGKPCPLAYEQR</a> |

Mascot: <http://www.matrixscience.com/>



# MASCOT SEARCH RESULTS

## Peptide View

MS/MS Fragmentation of **ECLQTCR**

Found in **AMBP\_HUMAN**, Protein AMBP OS=Homo sapiens GN=AMBP PE=1 SV=1

Match to Query 30126: 1276.573728 from(639.294140,2+) rtinseconds(1433) index(38374)

Title: Locus:1.1.1.2782.24 File:"2013-07-02 CLN FXIII 60 min 1st F 3.wiff"

Data file C:\Program Files (x86)\Matrix Science\Mascot Daemon\mgf\4 FXIII 60 min 1st\mascot\_daemon\_merge.mgf

Click mouse within plot area to zoom in by factor of two about that point

Or, Plot from  to  Da

Label all possible matches  Label matches used for scoring

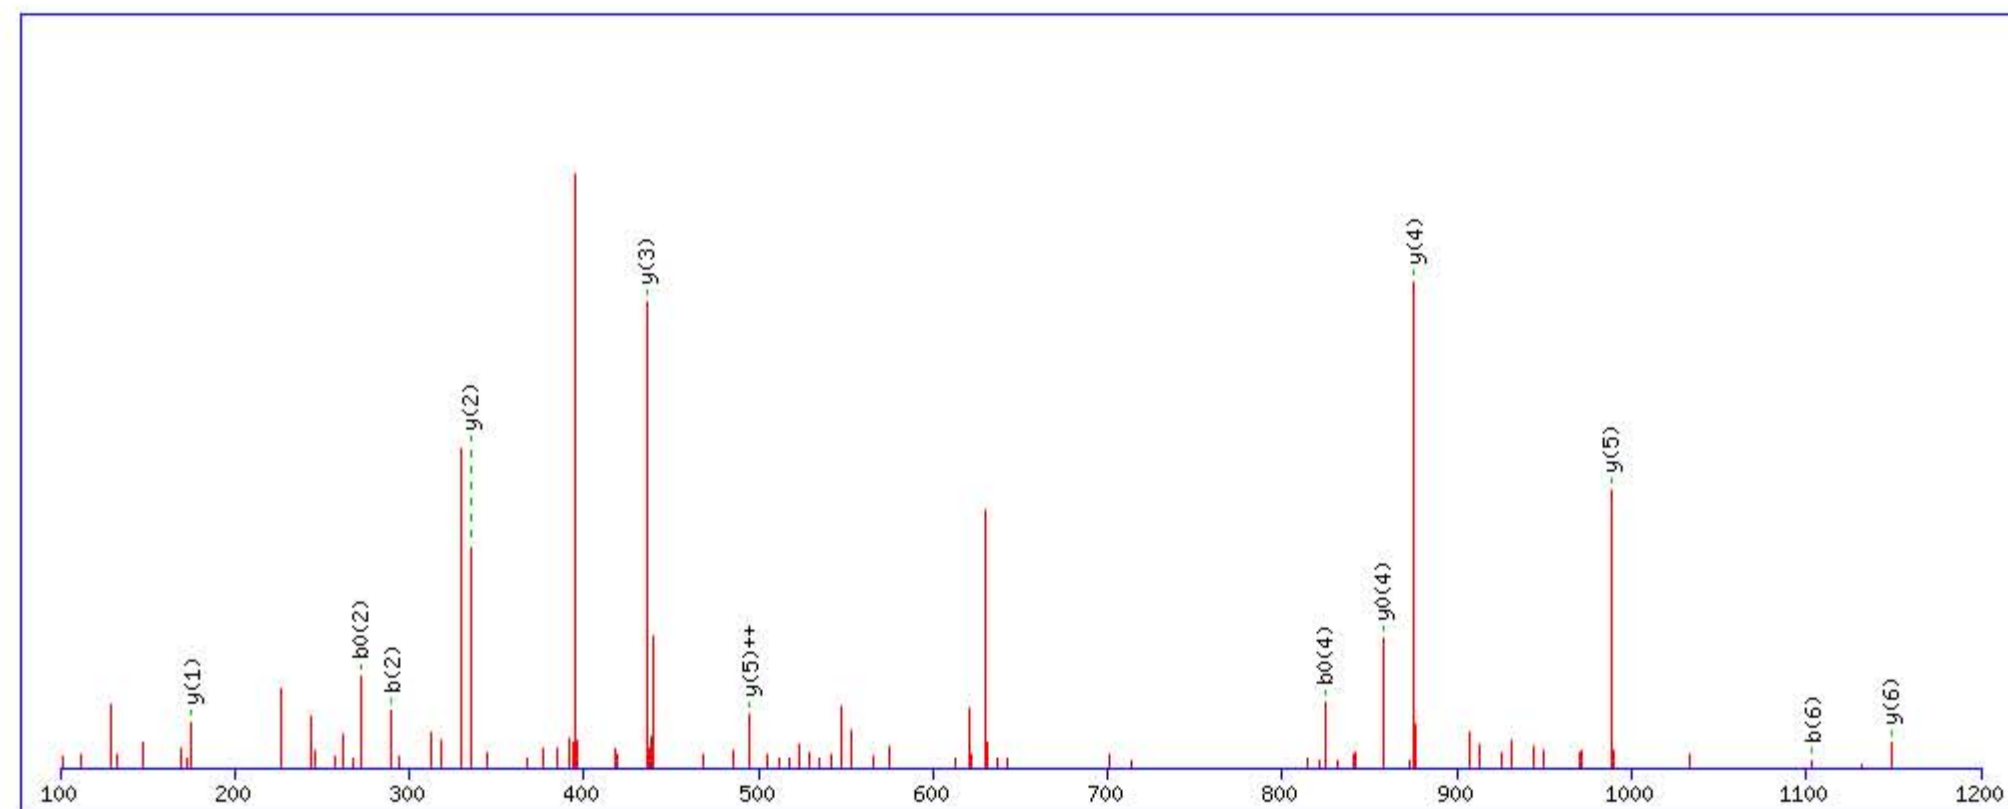

Monoisotopic mass of neutral peptide Mr(calc): 1276.572632

Fixed modifications: Carbamidomethyl (C) (apply to specified residues or termini only)

Variable modifications:

Q4 : Biotin:Thermo-21345 (Q)

Ions Score: 30 Expect: 0.0064

Matches : 12/62 fragment ions using 29 most intense peaks [\(help\)](#)

| # | b                  | b <sup>++</sup> | b <sup>*</sup> | b <sup>+++</sup> | b <sup>0</sup>    | b <sup>0++</sup> | Seq. | y                  | y <sup>++</sup>   | y <sup>*</sup> | y <sup>+++</sup> | y <sup>0</sup>    | y <sup>0++</sup> | # |
|---|--------------------|-----------------|----------------|------------------|-------------------|------------------|------|--------------------|-------------------|----------------|------------------|-------------------|------------------|---|
| 1 | 130.049869         | 65.528572       |                |                  | 112.039304        | 56.523290        | E    |                    |                   |                |                  |                   |                  | 7 |
| 2 | <b>290.080518</b>  | 145.543897      |                |                  | <b>272.069953</b> | 136.538615       | C    | <b>1148.537319</b> | 574.772298        | 1131.510770    | 566.259023       | 1130.526754       | 565.767015       | 6 |
| 3 | 403.164582         | 202.085929      |                |                  | 385.154017        | 193.080647       | L    | <b>988.506670</b>  | <b>494.756973</b> | 971.480121     | 486.243699       | 970.496105        | 485.751691       | 5 |
| 4 | 842.389908         | 421.698592      | 825.363359     | 413.185318       | <b>824.379343</b> | 412.693310       | Q    | <b>875.422606</b>  | 438.214941        | 858.396057     | 429.701667       | <b>857.412041</b> | 429.209659       | 4 |
| 5 | 943.437587         | 472.222432      | 926.411038     | 463.709157       | 925.427022        | 463.217149       | T    | <b>436.197280</b>  | 218.602278        | 419.170731     | 210.089003       | 418.186715        | 209.596995       | 3 |
| 6 | <b>1103.468236</b> | 552.237756      | 1086.441687    | 543.724482       | 1085.457671       | 543.232474       | C    | <b>335.149601</b>  | 168.078438        | 318.123052     | 159.565164       |                   |                  | 2 |
| 7 |                    |                 |                |                  |                   |                  | R    | <b>175.118952</b>  | 88.063114         | 158.092403     | 79.549839        |                   |                  | 1 |

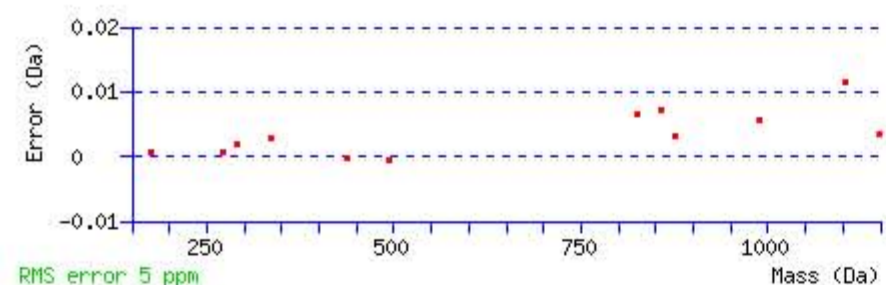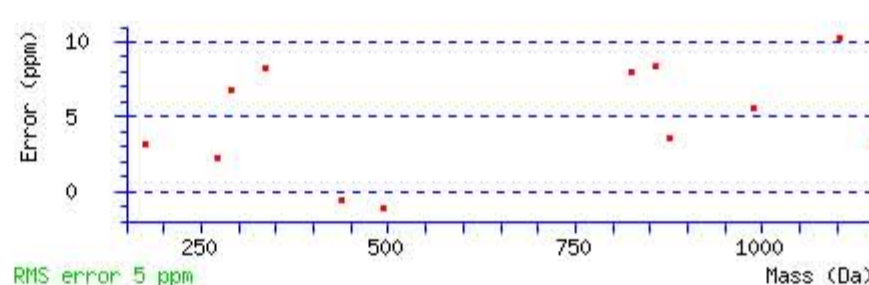

NCBI BLAST search of **ECLQTCR**

(Parameters: blastp, nr protein database, expect=20000, no filter, PAM30)

Other BLAST [web gateways](#)

All matches to this query

| Score | Mr(calc):   | Delta     | Sequence                      |
|-------|-------------|-----------|-------------------------------|
| 30.0  | 1276.572632 | 0.001096  | <a href="#">ECLQTCR</a>       |
| 11.6  | 1276.590393 | -0.016665 | <a href="#">TMHTSVMALDR</a>   |
| 9.9   | 1276.583862 | -0.010134 | <a href="#">KMSLSCHVCR</a>    |
| 6.9   | 1276.560516 | 0.013212  | <a href="#">QQVPSEDSMEK</a>   |
| 6.3   | 1276.587006 | -0.013278 | <a href="#">EDGTWAPMRSK</a>   |
| 5.7   | 1276.579605 | -0.005877 | <a href="#">EEQRSPFNDR</a>    |
| 5.6   | 1276.571762 | 0.001966  | <a href="#">AGAESPTMSVDGR</a> |
| 5.6   | 1276.590393 | -0.016665 | <a href="#">TMHTSVMALDR</a>   |
| 4.0   | 1276.569229 | 0.004499  | <a href="#">MTGRYEMYAR</a>    |
| 1.6   | 1276.558029 | 0.015699  | <a href="#">AGTVMFEYGMR</a>   |

Mascot: <http://www.matrixscience.com/>



# MASCOT Search Results

## Peptide View

MS/MS Fragmentation of **KEDSCQLGYSAGPCMGMTSR**  
 Found in **AMBP\_HUMAN**, Protein AMBP OS=Homo sapiens GN=AMBP PE=1 SV=1

Match to Query 66052: 2545.121742 from(849.381190,3+) rtinseconds(1854) index(59399)  
 Title: Locus:1.1.1.2951.20 File:"2013-07-02 CLN FXIII 60 min 1st F 4.wiff"  
 Data file C:\Program Files (x86)\Matrix Science\Mascot Daemon\mgf4 FXIII 60 min 1st\mascot\_daemon\_merge.mgf

Click mouse within plot area to zoom in by factor of two about that point  
 Or, Plot from  to  Da   
 Label all possible matches  Label matches used for scoring

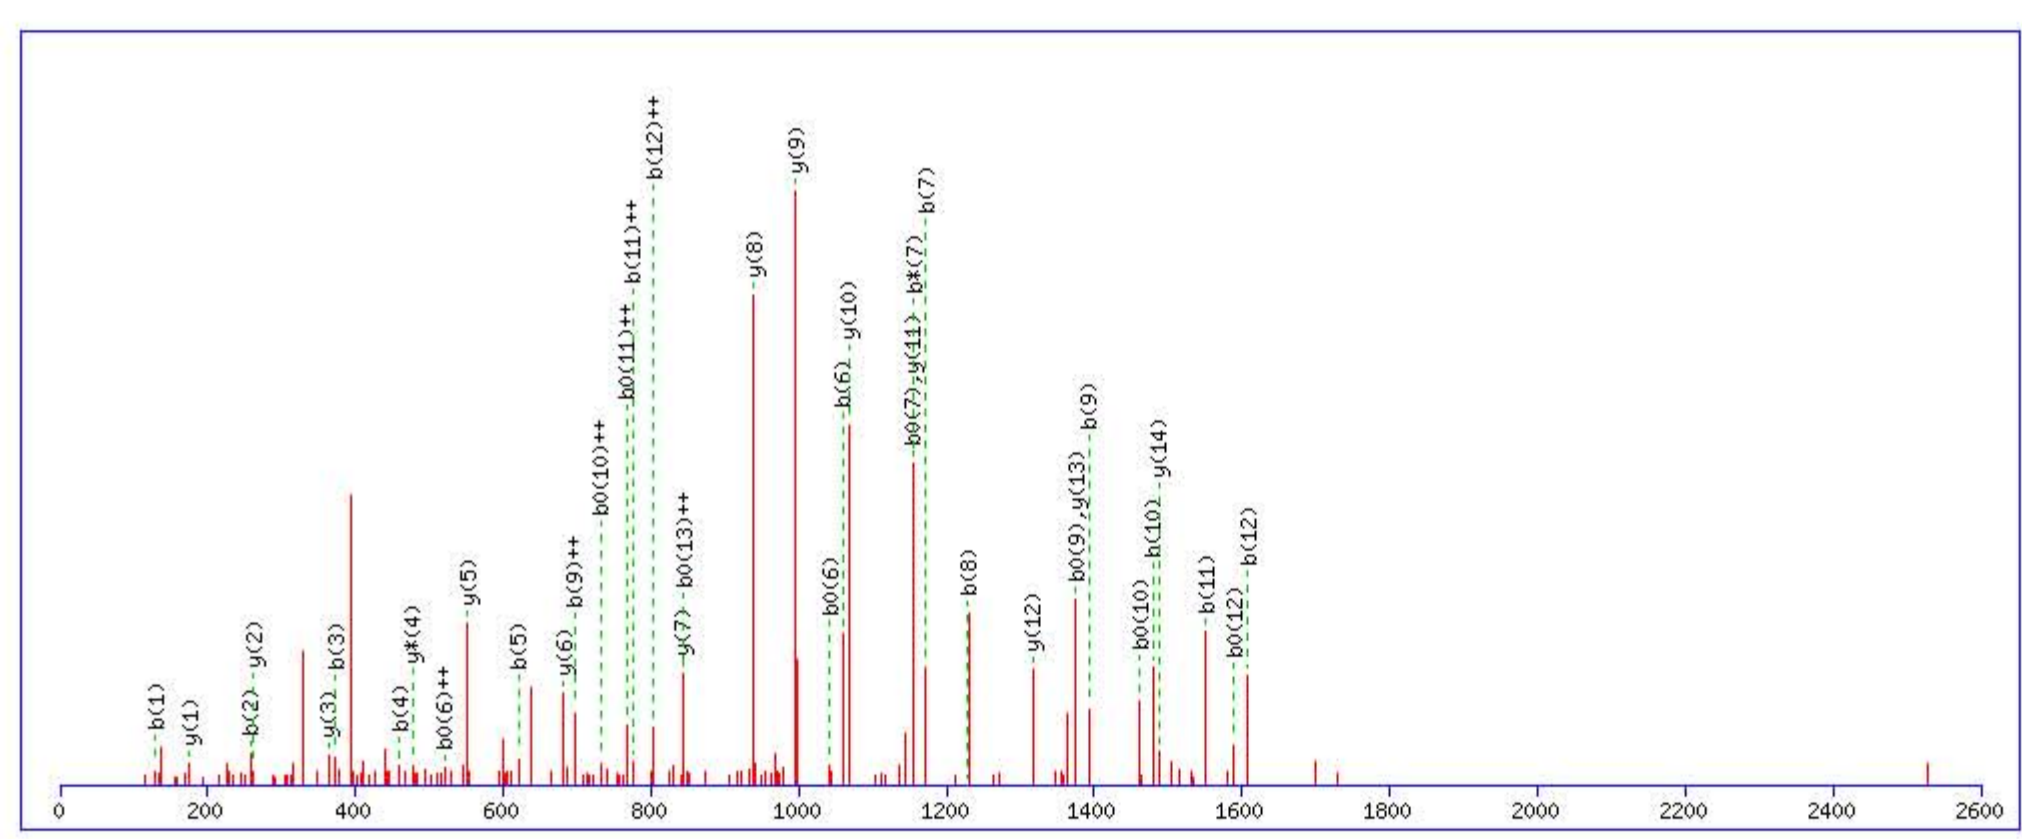

Monoisotopic mass of neutral peptide Mr(calc): 2545.089188  
 Fixed modifications: Carbamidomethyl (C) (apply to specified residues or termini only)  
 Variable modifications:  
 Q6 : Biotin:Thermo-21345 (Q)  
 Ions Score: 99 Expect: 6.2e-010  
 Matches : 39/224 fragment ions using 63 most intense peaks [\(help\)](#)

| #  | b                  | b <sup>++</sup>   | b <sup>*</sup>     | b <sup>+++</sup> | b <sup>0</sup>     | b <sup>0++</sup>  | Seq.     | y                  | y <sup>++</sup> | y <sup>*</sup>    | y <sup>+++</sup> | y <sup>0</sup> | y <sup>0++</sup> | #         |
|----|--------------------|-------------------|--------------------|------------------|--------------------|-------------------|----------|--------------------|-----------------|-------------------|------------------|----------------|------------------|-----------|
| 1  | <b>129.102239</b>  | 65.054757         | 112.075690         | 56.541483        |                    |                   | <b>K</b> |                    |                 |                   |                  |                |                  | <b>20</b> |
| 2  | <b>258.144832</b>  | 129.576054        | 241.118283         | 121.062780       | 240.134267         | 120.570772        | <b>E</b> | 2418.001508        | 1209.504392     | 2400.974959       | 1200.991117      | 2399.990943    | 1200.499109      | <b>19</b> |
| 3  | <b>373.171775</b>  | 187.089526        | 356.145226         | 178.576251       | 355.161210         | 178.084243        | <b>D</b> | 2288.958915        | 1144.983095     | 2271.932366       | 1136.469821      | 2270.948350    | 1135.977813      | <b>18</b> |
| 4  | <b>460.203803</b>  | 230.605540        | 443.177254         | 222.092265       | 442.193238         | 221.600257        | <b>S</b> | 2173.931972        | 1087.469624     | 2156.905423       | 1078.956349      | 2155.921407    | 1078.464341      | <b>17</b> |
| 5  | <b>620.234452</b>  | 310.620864        | 603.207903         | 302.107590       | 602.223887         | 301.615582        | <b>C</b> | 2086.899944        | 1043.953610     | 2069.873395       | 1035.440335      | 2068.889379    | 1034.948327      | <b>16</b> |
| 6  | <b>1059.459778</b> | 530.233527        | 1042.433229        | 521.720253       | <b>1041.449213</b> | <b>521.228245</b> | <b>Q</b> | 1926.869295        | 963.938286      | 1909.842746       | 955.425011       | 1908.858730    | 954.933003       | <b>15</b> |
| 7  | <b>1172.543842</b> | 586.775559        | <b>1155.517293</b> | 578.262285       | <b>1154.533277</b> | 577.770277        | <b>L</b> | <b>1487.643969</b> | 744.325623      | 1470.617420       | 735.812348       | 1469.633404    | 735.320340       | <b>14</b> |
| 8  | <b>1229.565306</b> | 615.286291        | 1212.538757        | 606.773017       | 1211.554741        | 606.281008        | <b>G</b> | <b>1374.559905</b> | 687.783591      | 1357.533356       | 679.270316       | 1356.549340    | 678.778308       | <b>13</b> |
| 9  | <b>1392.628635</b> | <b>696.817956</b> | 1375.602086        | 688.304681       | <b>1374.618070</b> | 687.812673        | <b>Y</b> | <b>1317.538441</b> | 659.272859      | 1300.511892       | 650.759584       | 1299.527876    | 650.267576       | <b>12</b> |
| 10 | <b>1479.660663</b> | 740.333970        | 1462.634114        | 731.820695       | <b>1461.650098</b> | <b>731.328687</b> | <b>S</b> | <b>1154.475112</b> | 577.741194      | 1137.448563       | 569.227920       | 1136.464547    | 568.735912       | <b>11</b> |
| 11 | <b>1550.697777</b> | <b>775.852527</b> | 1533.671228        | 767.339252       | 1532.687212        | <b>766.847244</b> | <b>A</b> | <b>1067.443084</b> | 534.225180      | 1050.416535       | 525.711906       | 1049.432519    | 525.219898       | <b>10</b> |
| 12 | <b>1607.719241</b> | <b>804.363259</b> | 1590.692692        | 795.849984       | <b>1589.708676</b> | 795.357976        | <b>G</b> | <b>996.405970</b>  | 498.706623      | 979.379421        | 490.193349       | 978.395405     | 489.701341       | <b>9</b>  |
| 13 | 1704.772005        | 852.889641        | 1687.745456        | 844.376366       | 1686.761440        | <b>843.884358</b> | <b>P</b> | <b>939.384506</b>  | 470.195891      | 922.357957        | 461.682617       | 921.373941     | 461.190609       | <b>8</b>  |
| 14 | 1864.802654        | 932.904965        | 1847.776105        | 924.391691       | 1846.792089        | 923.899683        | <b>C</b> | <b>842.331742</b>  | 421.669509      | 825.305193        | 413.156235       | 824.321177     | 412.664227       | <b>7</b>  |
| 15 | 1995.843139        | 998.425208        | 1978.816590        | 989.911933       | 1977.832574        | 989.419925        | <b>M</b> | <b>682.301093</b>  | 341.654185      | 665.274544        | 333.140910       | 664.290528     | 332.648902       | <b>6</b>  |
| 16 | 2052.864603        | 1026.935939       | 2035.838054        | 1018.422665      | 2034.854038        | 1017.930657       | <b>G</b> | <b>551.260608</b>  | 276.133942      | 534.234059        | 267.620668       | 533.250043     | 267.128660       | <b>5</b>  |
| 17 | 2183.905088        | 1092.456182       | 2166.878539        | 1083.942907      | 2165.894523        | 1083.450899       | <b>M</b> | 494.239144         | 247.623210      | <b>477.212595</b> | 239.109935       | 476.228579     | 238.617927       | <b>4</b>  |
| 18 | 2284.952767        | 1142.980021       | 2267.926218        | 1134.466747      | 2266.942202        | 1133.974739       | <b>T</b> | <b>363.198659</b>  | 182.102967      | 346.172110        | 173.589693       | 345.188094     | 173.097685       | <b>3</b>  |
| 19 | 2371.984795        | 1186.496035       | 2354.958246        | 1177.982761      | 2353.974230        | 1177.490753       | <b>S</b> | <b>262.150980</b>  | 131.579128      | 245.124431        | 123.065854       | 244.140415     | 122.573846       | <b>2</b>  |
| 20 |                    |                   |                    |                  |                    |                   | <b>R</b> | <b>175.118952</b>  | 88.063114       | 158.092403        | 79.549839        |                |                  | <b>1</b>  |

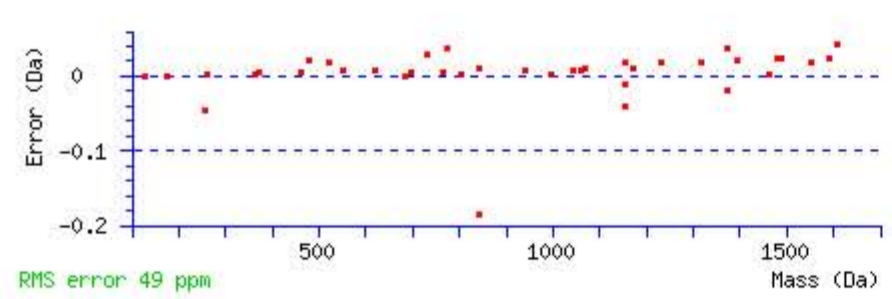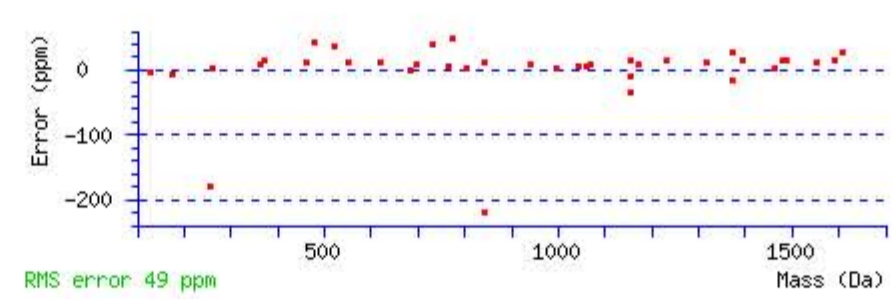

NCBI BLAST search of **KEDSCQLGYSAGPCMGMTSR**  
 (Parameters: blastp, nr protein database, expect=20000, no filter, PAM30)  
 Other BLAST [web gateways](#)

### All matches to this query

| Score | Mr(calc):   | Delta    | Sequence                                 |
|-------|-------------|----------|------------------------------------------|
| 99.0  | 2545.089188 | 0.032554 | <a href="#">KEDSCQLGYSAGPCMGMTSR</a>     |
| 0.8   | 2545.119553 | 0.002189 | <a href="#">MTCGSGFGGRAFSCISACGPRPGR</a> |



# **MASCOT** Mascot Search Results

## Peptide View

MS/MS Fragmentation of **GTAIEQR**

Found in **HEG1\_HUMAN**, Protein HEG homolog 1 OS=Homo sapiens GN=HEG1 PE=1 SV=3

Match to Query 22120: 1084.566648 from(543.290600,2+) rtinseconds(1429) index(38345)

Title: Locus:1.1.1.2781.20 File:"2013-07-02 CLN FXIII 60 min 1st F 3.wiff"

Data file C:\Program Files (x86)\Matrix Science\Mascot Daemon\mgf4 FXIII 60 min 1st\mascot\_daemon\_merge.mgf

Click mouse within plot area to zoom in by factor of two about that point

Or, Plot from  to  Da

Label all possible matches  Label matches used for scoring

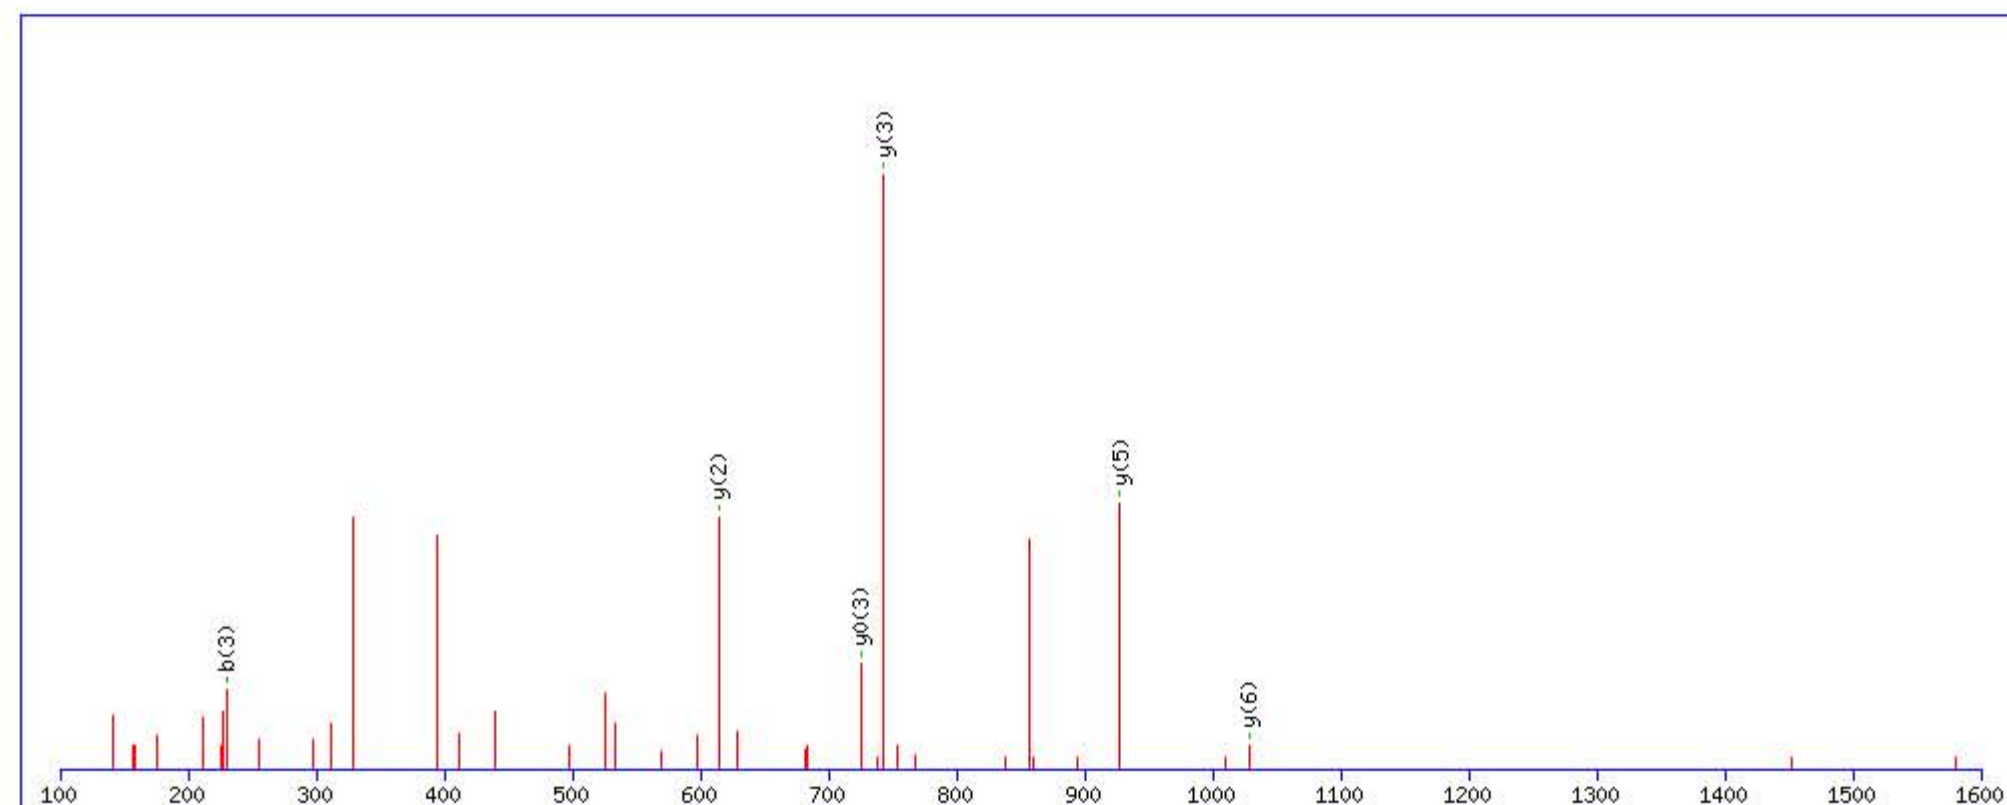

Monoisotopic mass of neutral peptide Mr(calc): 1084.569901

Fixed modifications: Carbamidomethyl (C) (apply to specified residues or termini only)

Variable modifications:

Q6 : Biotin:Thermo-21345 (Q)

Ions Score: 30 Expect: 0.016

Matches : 6/56 fragment ions using 9 most intense peaks [\(help\)](#)

| # | b                 | b <sup>++</sup> | b <sup>*</sup> | b <sup>*++</sup> | b <sup>0</sup> | b <sup>0++</sup> | Seq.     | y                  | y <sup>++</sup> | y <sup>*</sup> | y <sup>*++</sup> | y <sup>0</sup>    | y <sup>0++</sup> | # |
|---|-------------------|-----------------|----------------|------------------|----------------|------------------|----------|--------------------|-----------------|----------------|------------------|-------------------|------------------|---|
| 1 | 58.028740         | 29.518008       |                |                  |                |                  | <b>G</b> |                    |                 |                |                  |                   |                  | 7 |
| 2 | 159.076419        | 80.041847       |                |                  | 141.065854     | 71.036565        | <b>T</b> | <b>1028.555728</b> | 514.781502      | 1011.529179    | 506.268228       | 1010.545163       | 505.776220       | 6 |
| 3 | <b>230.113533</b> | 115.560404      |                |                  | 212.102968     | 106.555122       | <b>A</b> | <b>927.508049</b>  | 464.257663      | 910.481500     | 455.744388       | 909.497484        | 455.252380       | 5 |
| 4 | 343.197597        | 172.102436      |                |                  | 325.187032     | 163.097154       | <b>I</b> | 856.470935         | 428.739106      | 839.444386     | 420.225831       | 838.460370        | 419.733823       | 4 |
| 5 | 472.240190        | 236.623733      |                |                  | 454.229625     | 227.618450       | <b>E</b> | <b>743.386871</b>  | 372.197074      | 726.360322     | 363.683799       | <b>725.376306</b> | 363.191791       | 3 |
| 6 | 911.465516        | 456.236396      | 894.438967     | 447.723122       | 893.454951     | 447.231114       | <b>Q</b> | <b>614.344278</b>  | 307.675777      | 597.317729     | 299.162503       |                   |                  | 2 |
| 7 |                   |                 |                |                  |                |                  | <b>R</b> | 175.118952         | 88.063114       | 158.092403     | 79.549840        |                   |                  | 1 |

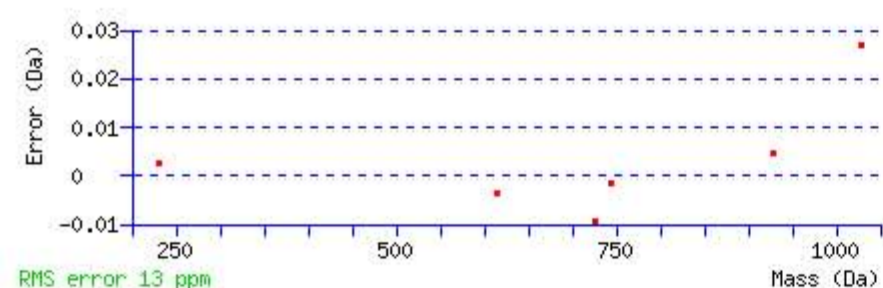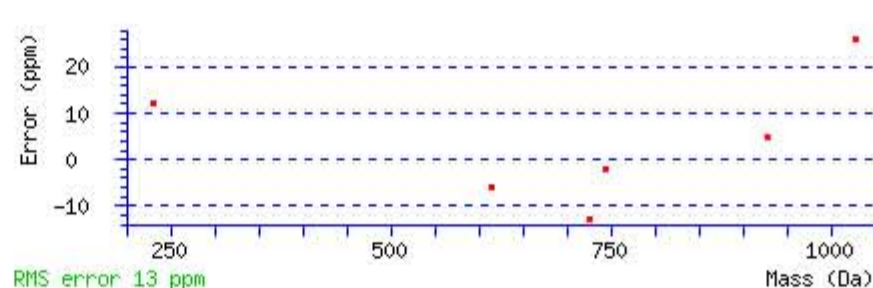

NCBI BLAST search of **GTAIEQR**

(Parameters: blastp, nr protein database, expect=20000, no filter, PAM30)

Other BLAST [web gateways](#)

## All matches to this query

| Score | Mr(calc):   | Delta     | Sequence                   |
|-------|-------------|-----------|----------------------------|
| 30.1  | 1084.569901 | -0.003253 | <a href="#">GTAIEQR</a>    |
| 10.4  | 1084.569885 | -0.003237 | <a href="#">ASAEIQR</a>    |
| 6.0   | 1084.569916 | -0.003268 | <a href="#">TKMDLGGHVK</a> |
| 1.2   | 1084.569885 | -0.003237 | <a href="#">QELAASR</a>    |
| 1.2   | 1084.569901 | -0.003253 | <a href="#">QELAGTR</a>    |

Mascot: <http://www.matrixscience.com/>



# MASCOT SEARCH RESULTS

## Peptide View

MS/MS Fragmentation of **VGALSQLR**

Found in **MENT\_HUMAN**, Protein MENT OS=Homo sapiens GN=MENT PE=2 SV=1

Match to Query 25893: 1153.665608 from(577.840080,2+) rtinseconds(1898) index(41398)

Title: Locus:1.1.1.2945.7 File:"2013-07-02 CLN FXIII 60 min 1st F 3.wiff"

Data file C:\Program Files (x86)\Matrix Science\Mascot Daemon\mgf4 FXIII 60 min 1st\mascot\_daemon\_merge.mgf

Click mouse within plot area to zoom in by factor of two about that point

Or, Plot from  to  Da

Label all possible matches  Label matches used for scoring

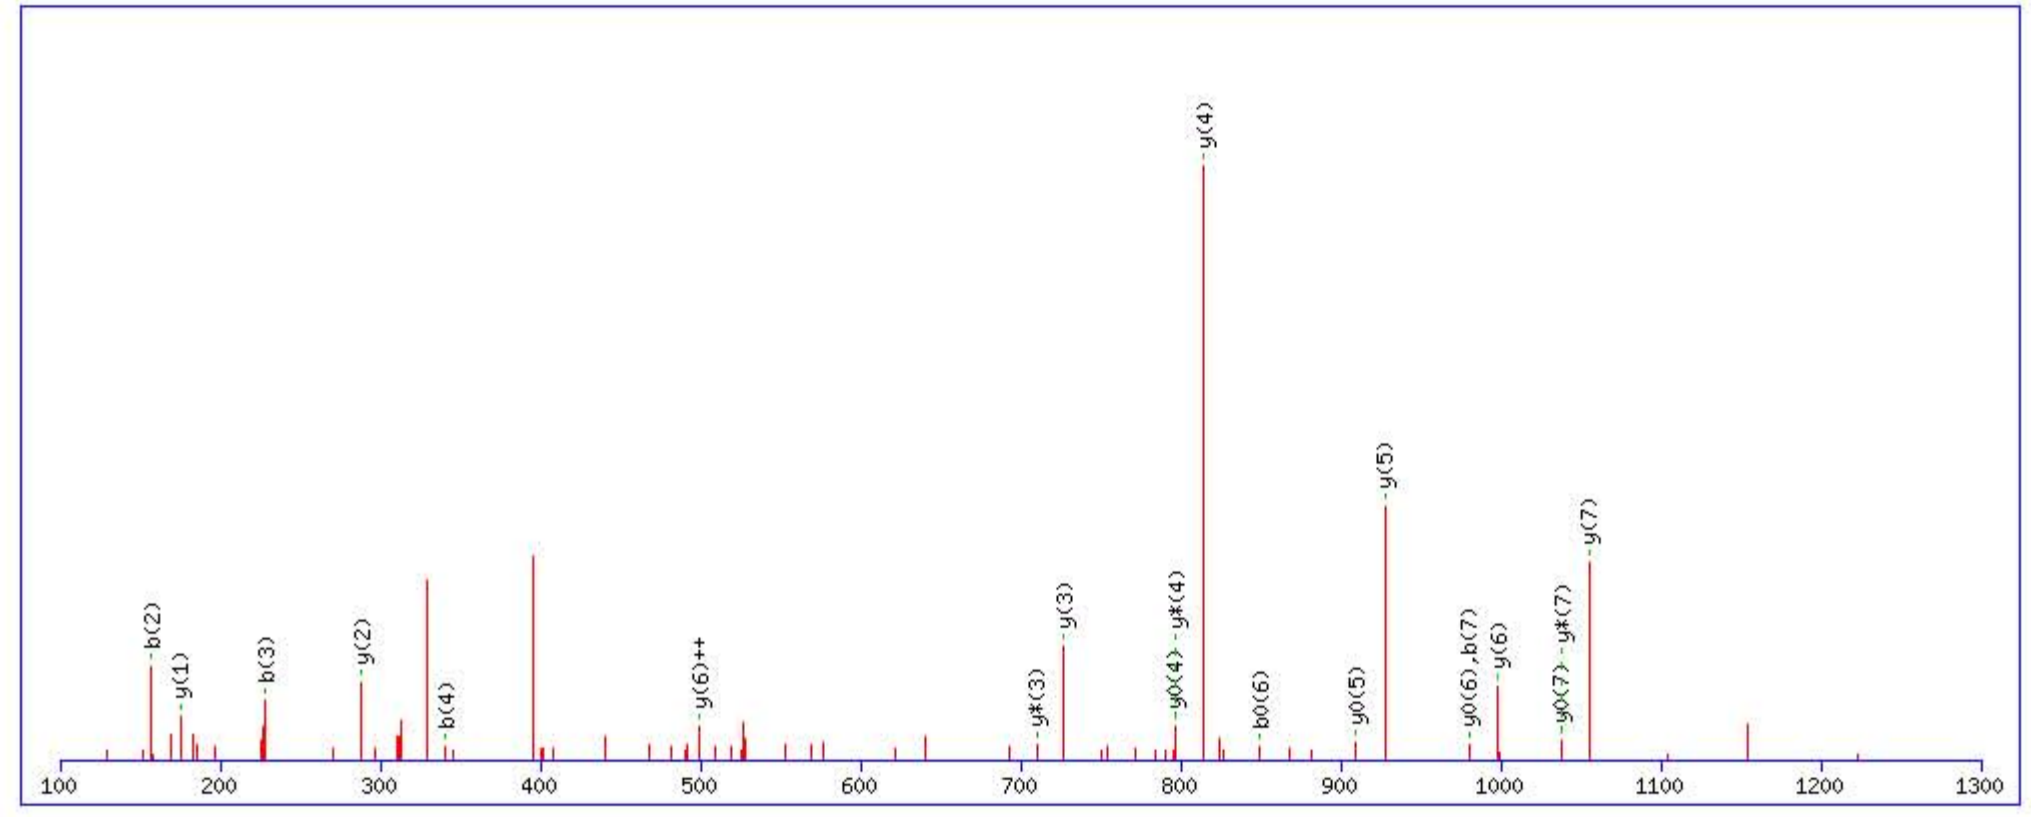

Monoisotopic mass of neutral peptide Mr(calc): 1153.664139

Fixed modifications: Carbamidomethyl (C) (apply to specified residues or termini only)

Variable modifications:

Q6 : Biotin:Thermo-21345 (Q)

Ions Score: 49 Expect: 0.00021

Matches : 20/60 fragment ions using 30 most intense peaks [\(help\)](#)

| # | b          | b <sup>++</sup> | b <sup>*</sup> | b <sup>*++</sup> | b <sup>0</sup> | b <sup>0++</sup> | Seq. | y           | y <sup>++</sup> | y <sup>*</sup> | y <sup>*++</sup> | y <sup>0</sup> | y <sup>0++</sup> | # |
|---|------------|-----------------|----------------|------------------|----------------|------------------|------|-------------|-----------------|----------------|------------------|----------------|------------------|---|
| 1 | 100.075690 | 50.541483       |                |                  |                |                  | V    |             |                 |                |                  |                |                  | 8 |
| 2 | 157.097154 | 79.052215       |                |                  |                |                  | G    | 1055.603012 | 528.305144      | 1038.576463    | 519.791870       | 1037.592447    | 519.299862       | 7 |
| 3 | 228.134268 | 114.570772      |                |                  |                |                  | A    | 998.581548  | 499.794412      | 981.554999     | 491.281138       | 980.570983     | 490.789130       | 6 |
| 4 | 341.218332 | 171.112804      |                |                  |                |                  | L    | 927.544434  | 464.275855      | 910.517885     | 455.762581       | 909.533869     | 455.270573       | 5 |
| 5 | 428.250360 | 214.628818      |                |                  | 410.239795     | 205.623535       | S    | 814.460370  | 407.733823      | 797.433821     | 399.220549       | 796.449805     | 398.728541       | 4 |
| 6 | 867.475686 | 434.241481      | 850.449137     | 425.728207       | 849.465121     | 425.236199       | Q    | 727.428342  | 364.217809      | 710.401793     | 355.704535       |                |                  | 3 |
| 7 | 980.559750 | 490.783513      | 963.533201     | 482.270239       | 962.549185     | 481.778231       | L    | 288.203016  | 144.605146      | 271.176467     | 136.091872       |                |                  | 2 |
| 8 |            |                 |                |                  |                |                  | R    | 175.118952  | 88.063114       | 158.092403     | 79.549840        |                |                  | 1 |

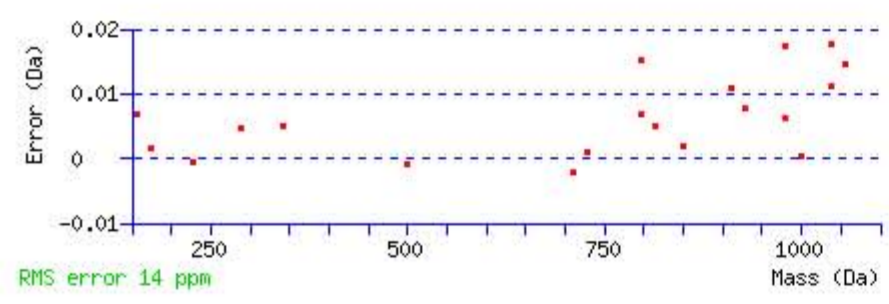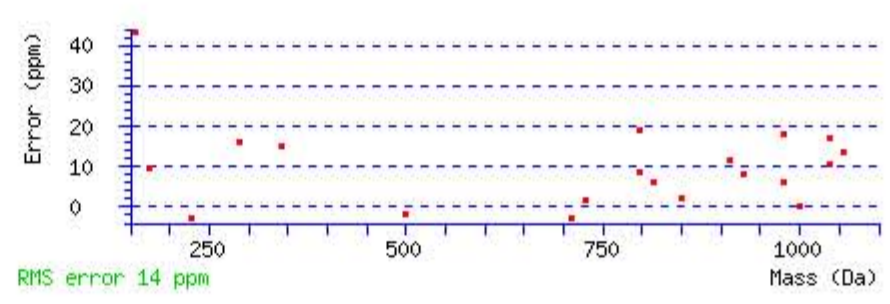

NCBI BLAST search of **VGALSQLR**

(Parameters: blastp, nr protein database, expect=20000, no filter, PAM30)

Other BLAST [web gateways](#)

All matches to this query

| Score | Mr(calc):   | Delta     | Sequence                    |
|-------|-------------|-----------|-----------------------------|
| 48.8  | 1153.664139 | 0.001469  | <a href="#">VGALSQLR</a>    |
| 15.4  | 1153.667953 | -0.002345 | <a href="#">RANPNSIRVK</a>  |
| 13.2  | 1153.675354 | -0.009746 | <a href="#">RALLSQR</a>     |
| 13.2  | 1153.675369 | -0.009761 | <a href="#">RALTVQR</a>     |
| 11.4  | 1153.681885 | -0.016277 | <a href="#">VQKLTALPLR</a>  |
| 11.4  | 1153.664124 | 0.001484  | <a href="#">VKQEALR</a>     |
| 11.0  | 1153.681870 | -0.016262 | <a href="#">RALENLLPTK</a>  |
| 8.7   | 1153.656723 | 0.008885  | <a href="#">RPSADPGKKAK</a> |
| 6.8   | 1153.675369 | -0.009761 | <a href="#">QTVRALR</a>     |
| 6.6   | 1153.660767 | 0.004841  | <a href="#">VPTAAGAWLLR</a> |



# MASCOT SEARCH RESULTS

## Peptide View

MS/MS Fragmentation of **ETAASLLQAGYK**

Found in **THRB\_HUMAN**, Prothrombin OS=Homo sapiens GN=F2 PE=1 SV=2

Match to Query 40247: 1561.823248 from(781.918900,2+) rtinseconds(2095) index(61200)

Title: Locus:1.1.1.3034.20 File:"2013-07-02 CLN FXIII 60 min 1st F 4.wiff"

Data file C:\Program Files (x86)\Matrix Science\Mascot Daemon\mgf4 FXIII 60 min 1st\mascot\_daemon\_merge.mgf

Click mouse within plot area to zoom in by factor of two about that point

Or, Plot from  to  Da

Label all possible matches  Label matches used for scoring

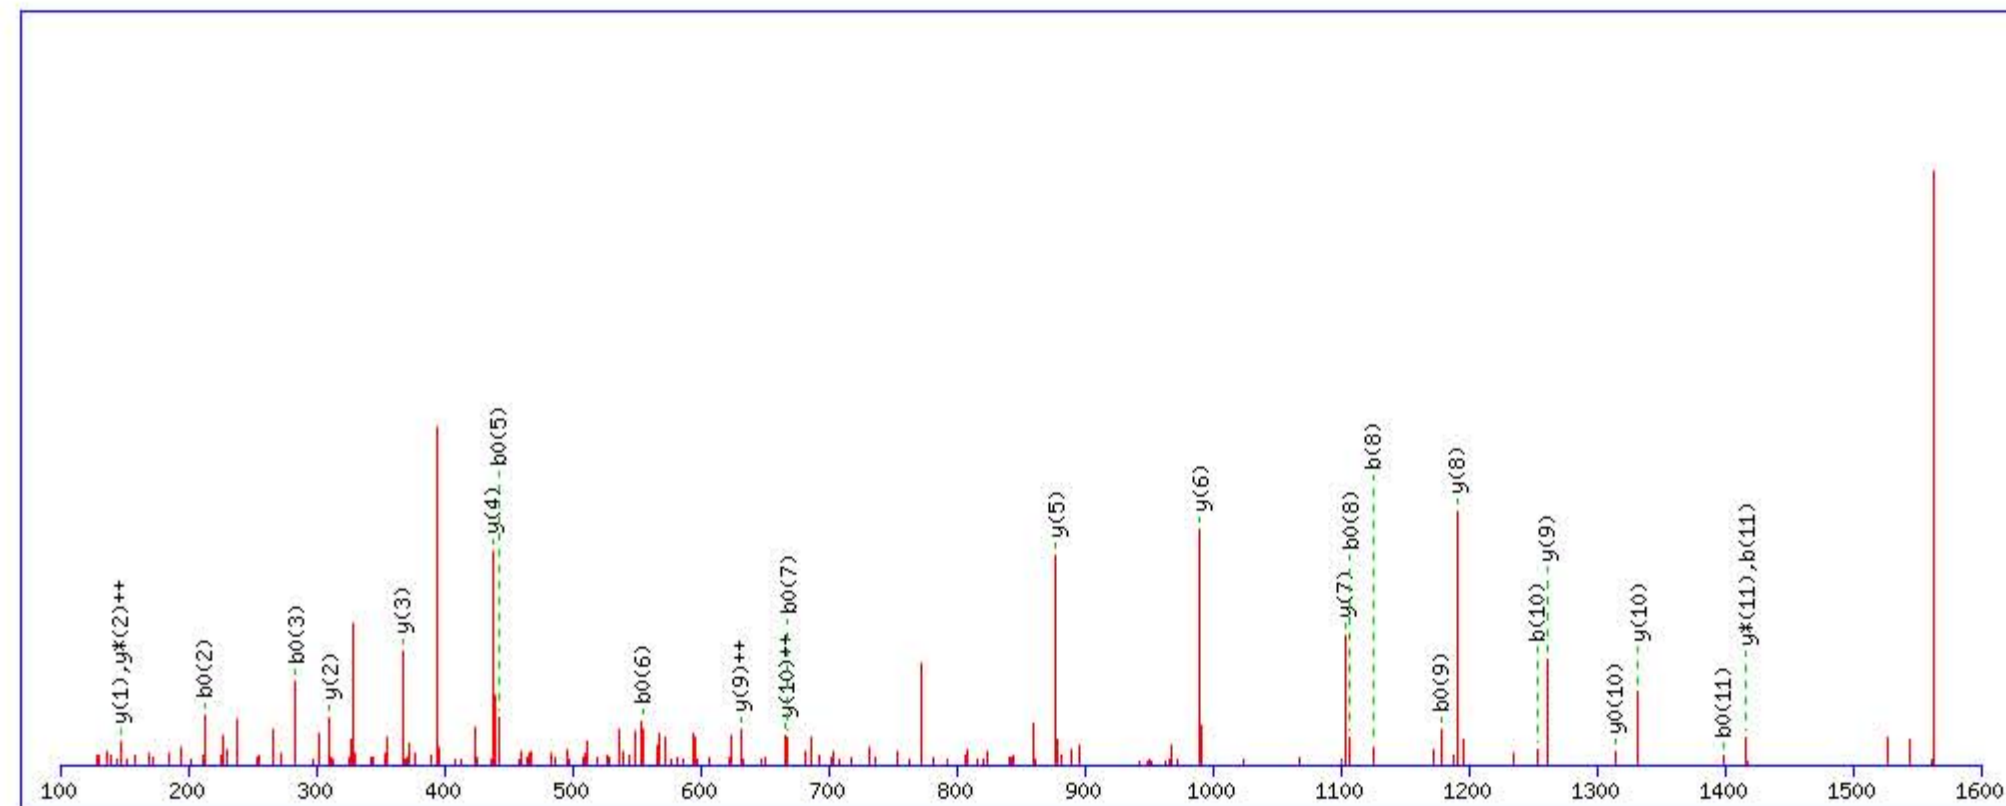

Monoisotopic mass of neutral peptide Mr(calc): 1561.817383

Fixed modifications: Carbamidomethyl (C) (apply to specified residues or termini only)

Variable modifications:

Q8 : Biotin:Thermo-21345 (Q)

Ions Score: 73 Expect: 5.2e-007

Matches : 26/104 fragment ions using 41 most intense peaks [\(help\)](#)

| #  | b           | b <sup>++</sup> | b <sup>+</sup> | b <sup>+++</sup> | b <sup>0</sup> | b <sup>0++</sup> | Seq. | y           | y <sup>++</sup> | y <sup>+</sup> | y <sup>+++</sup> | y <sup>0</sup> | y <sup>0++</sup> | #  |
|----|-------------|-----------------|----------------|------------------|----------------|------------------|------|-------------|-----------------|----------------|------------------|----------------|------------------|----|
| 1  | 130.049869  | 65.528572       |                |                  | 112.039304     | 56.523290        | E    |             |                 |                |                  |                |                  | 12 |
| 2  | 231.097548  | 116.052412      |                |                  | 213.086983     | 107.047130       | T    | 1433.782100 | 717.394688      | 1416.755551    | 708.881414       | 1415.771535    | 708.389406       | 11 |
| 3  | 302.134662  | 151.570969      |                |                  | 284.124097     | 142.565687       | A    | 1332.734421 | 666.870848      | 1315.707872    | 658.357574       | 1314.723856    | 657.865566       | 10 |
| 4  | 373.171776  | 187.089526      |                |                  | 355.161211     | 178.084243       | A    | 1261.697307 | 631.352292      | 1244.670758    | 622.839017       | 1243.686742    | 622.347009       | 9  |
| 5  | 460.203804  | 230.605540      |                |                  | 442.193239     | 221.600257       | S    | 1190.660193 | 595.833734      | 1173.633644    | 587.320460       | 1172.649628    | 586.828452       | 8  |
| 6  | 573.287868  | 287.147572      |                |                  | 555.277303     | 278.142290       | L    | 1103.628165 | 552.317721      | 1086.601616    | 543.804446       |                |                  | 7  |
| 7  | 686.371932  | 343.689604      |                |                  | 668.361367     | 334.684322       | L    | 990.544101  | 495.775689      | 973.517552     | 487.262414       |                |                  | 6  |
| 8  | 1125.597258 | 563.302267      | 1108.570709    | 554.788993       | 1107.586693    | 554.296985       | Q    | 877.460037  | 439.233657      | 860.433488     | 430.720382       |                |                  | 5  |
| 9  | 1196.634372 | 598.820824      | 1179.607823    | 590.307550       | 1178.623807    | 589.815541       | A    | 438.234711  | 219.620993      | 421.208162     | 211.107719       |                |                  | 4  |
| 10 | 1253.655836 | 627.331556      | 1236.629287    | 618.818282       | 1235.645271    | 618.326273       | G    | 367.197597  | 184.102436      | 350.171048     | 175.589162       |                |                  | 3  |
| 11 | 1416.719165 | 708.863221      | 1399.692616    | 700.349946       | 1398.708600    | 699.857938       | Y    | 310.176133  | 155.591705      | 293.149584     | 147.078430       |                |                  | 2  |
| 12 |             |                 |                |                  |                |                  | K    | 147.112804  | 74.060040       | 130.086255     | 65.546765        |                |                  | 1  |

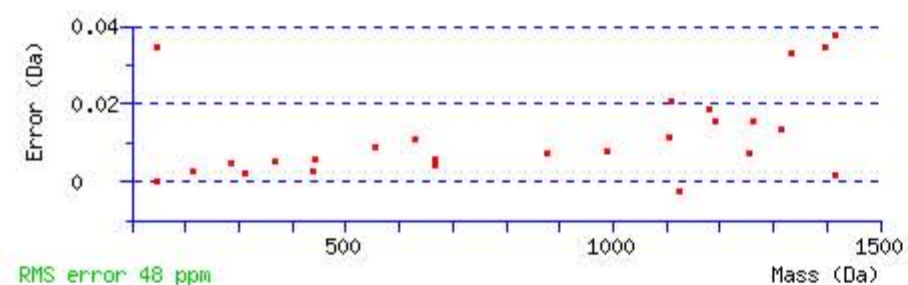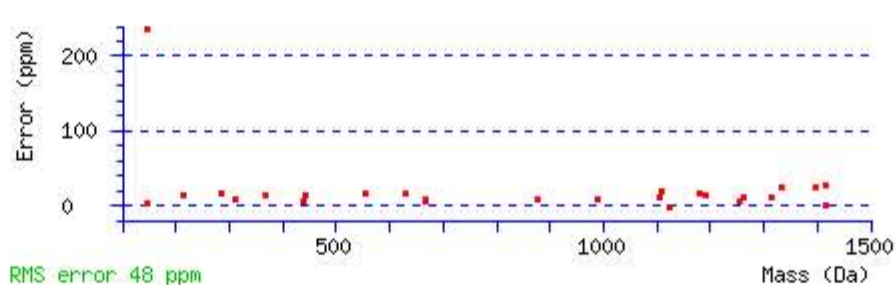

NCBI BLAST search of **ETAASLLQAGYK**

(Parameters: blastp, nr protein database, expect=20000, no filter, PAM30)

Other BLAST [web gateways](#)

All matches to this query

| Score | Mr(calc):   | Delta     | Sequence                      |
|-------|-------------|-----------|-------------------------------|
| 73.5  | 1561.817383 | 0.005865  | <a href="#">ETAASLLQAGYK</a>  |
| 6.3   | 1561.817398 | 0.005850  | <a href="#">VLPEVLEKQCGYK</a> |
| 3.5   | 1561.824799 | -0.001551 | <a href="#">QDLLFLDMLK</a>    |
| 3.3   | 1561.835144 | -0.011896 | <a href="#">ILKGDQLLQEDYK</a> |



# MASCOT SCIENCE Mascot Search Results

## Peptide View

MS/MS Fragmentation of **TATSEYQTFNPR**

Found in **THRB\_HUMAN**, Prothrombin OS=Homo sapiens GN=F2 PE=1 SV=2

Match to Query 50115: 1871.911968 from(936.963260,2+) rtinseconds(2222) index(62151)

Title: Locus:1.1.1.3078.24 File:"2013-07-02 CLN FXIII 60 min 1st F 4.wiff"

Data file C:\Program Files (x86)\Matrix Science\Mascot Daemon\mgf4 FXIII 60 min 1st\mascot\_daemon\_merge.mgf

Click mouse within plot area to zoom in by factor of two about that point

Or, Plot from  to  Da

Label all possible matches  Label matches used for scoring

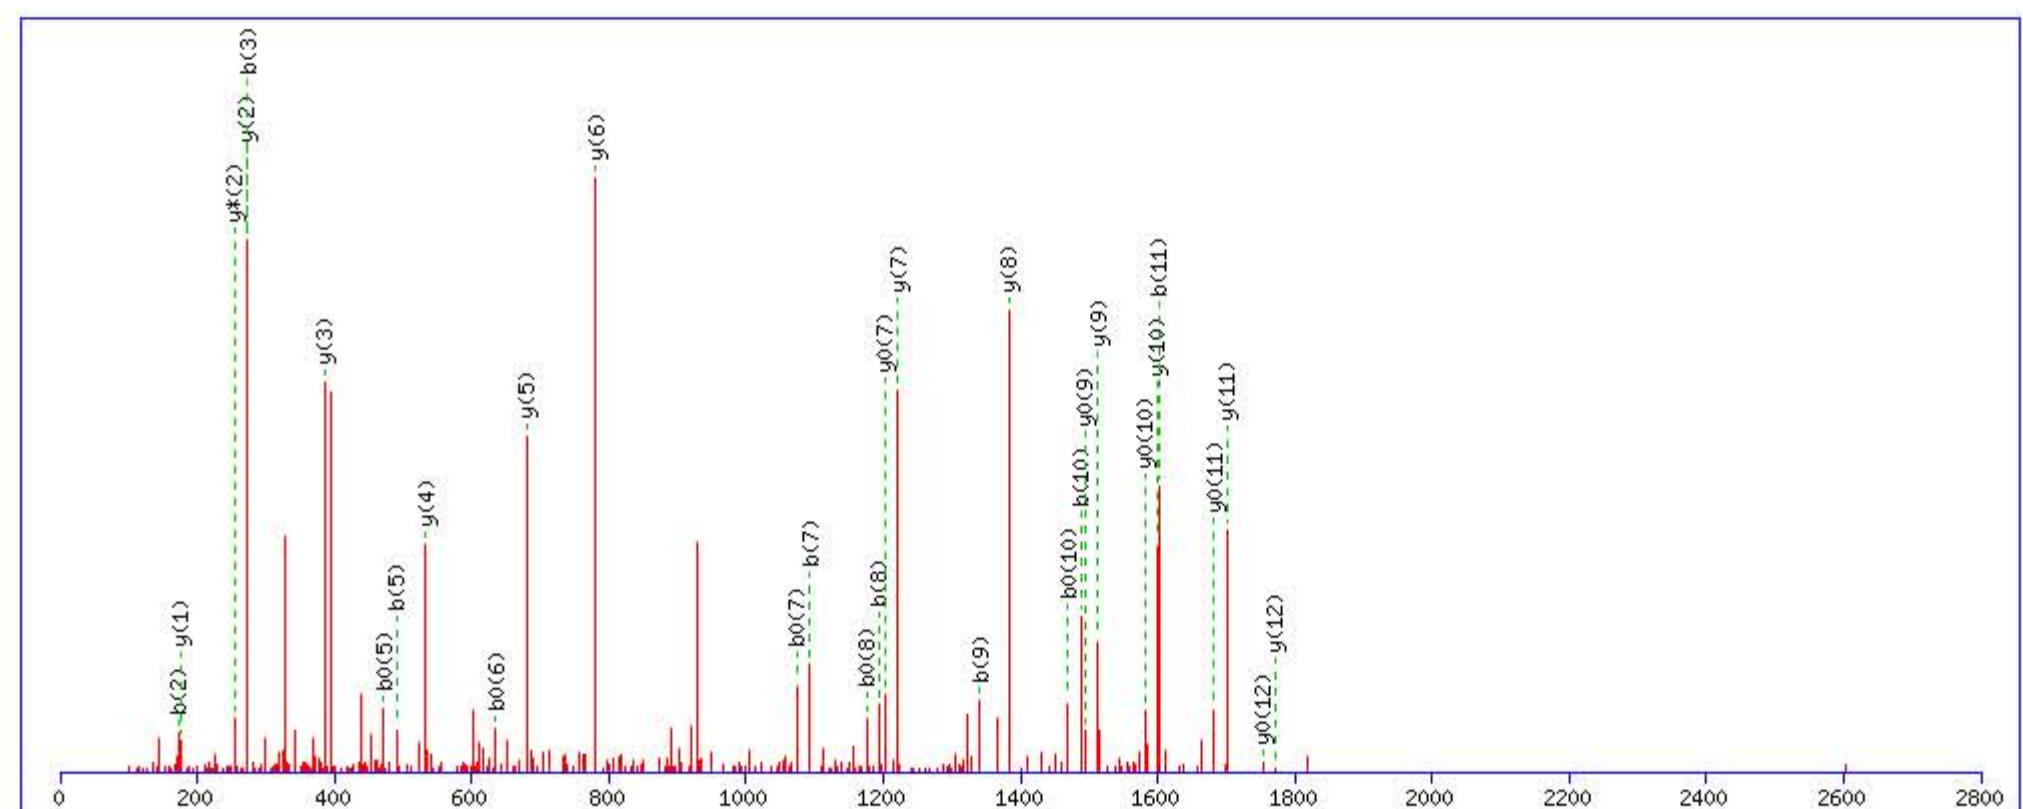

Monoisotopic mass of neutral peptide Mr(calc): 1871.887619

Fixed modifications: Carbamidomethyl (C) (apply to specified residues or termini only)

Variable modifications:

Q7 : Biotin:Thermo-21345 (Q)

Ions Score: 87 Expect: 4.2e-008

Matches : 31/122 fragment ions using 52 most intense peaks [\(help\)](#)

| #  | b                  | b <sup>++</sup> | b <sup>*</sup> | b <sup>*++</sup> | b <sup>0</sup>     | b <sup>0++</sup> | Seq. | y                  | y <sup>++</sup> | y <sup>*</sup>    | y <sup>*++</sup> | y <sup>0</sup>     | y <sup>0++</sup> | #  |
|----|--------------------|-----------------|----------------|------------------|--------------------|------------------|------|--------------------|-----------------|-------------------|------------------|--------------------|------------------|----|
| 1  | 102.054955         | 51.531116       |                |                  | 84.044390          | 42.525833        | T    |                    |                 |                   |                  |                    |                  | 13 |
| 2  | <b>173.092069</b>  | 87.049672       |                |                  | 155.081504         | 78.044390        | A    | <b>1771.847219</b> | 886.427248      | 1754.820670       | 877.913973       | <b>1753.836654</b> | 877.421965       | 12 |
| 3  | <b>274.139748</b>  | 137.573512      |                |                  | 256.129183         | 128.568230       | T    | <b>1700.810105</b> | 850.908691      | 1683.783556       | 842.395416       | <b>1682.799540</b> | 841.903408       | 11 |
| 4  | 361.171776         | 181.089526      |                |                  | 343.161211         | 172.084243       | S    | <b>1599.762426</b> | 800.384851      | 1582.735877       | 791.871577       | <b>1581.751861</b> | 791.379569       | 10 |
| 5  | <b>490.214369</b>  | 245.610822      |                |                  | <b>472.203804</b>  | 236.605540       | E    | <b>1512.730398</b> | 756.868837      | 1495.703849       | 748.355563       | <b>1494.719833</b> | 747.863555       | 9  |
| 6  | 653.277698         | 327.142487      |                |                  | <b>635.267133</b>  | 318.137205       | Y    | <b>1383.687805</b> | 692.347541      | 1366.661256       | 683.834266       | 1365.677240        | 683.342258       | 8  |
| 7  | <b>1092.503024</b> | 546.755150      | 1075.476475    | 538.241876       | <b>1074.492459</b> | 537.749868       | Q    | <b>1220.624476</b> | 610.815876      | 1203.597927       | 602.302602       | <b>1202.613911</b> | 601.810594       | 7  |
| 8  | <b>1193.550703</b> | 597.278990      | 1176.524154    | 588.765715       | <b>1175.540138</b> | 588.273707       | T    | <b>781.399150</b>  | 391.203213      | 764.372601        | 382.689939       | 763.388585         | 382.197931       | 6  |
| 9  | <b>1340.619117</b> | 670.813197      | 1323.592568    | 662.299922       | 1322.608552        | 661.807914       | F    | <b>680.351471</b>  | 340.679374      | 663.324922        | 332.166099       |                    |                  | 5  |
| 10 | <b>1487.687531</b> | 744.347404      | 1470.660982    | 735.834129       | <b>1469.676966</b> | 735.342121       | F    | <b>533.283057</b>  | 267.145167      | 516.256508        | 258.631892       |                    |                  | 4  |
| 11 | <b>1601.730458</b> | 801.368867      | 1584.703909    | 792.855593       | 1583.719893        | 792.363585       | N    | <b>386.214643</b>  | 193.610959      | 369.188094        | 185.097685       |                    |                  | 3  |
| 12 | 1698.783222        | 849.895249      | 1681.756673    | 841.381975       | 1680.772657        | 840.889967       | P    | <b>272.171716</b>  | 136.589496      | <b>255.145167</b> | 128.076221       |                    |                  | 2  |
| 13 |                    |                 |                |                  |                    |                  | R    | <b>175.118952</b>  | 88.063114       | 158.092403        | 79.549839        |                    |                  | 1  |

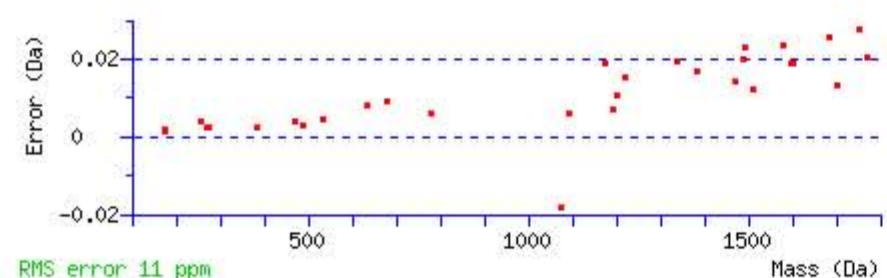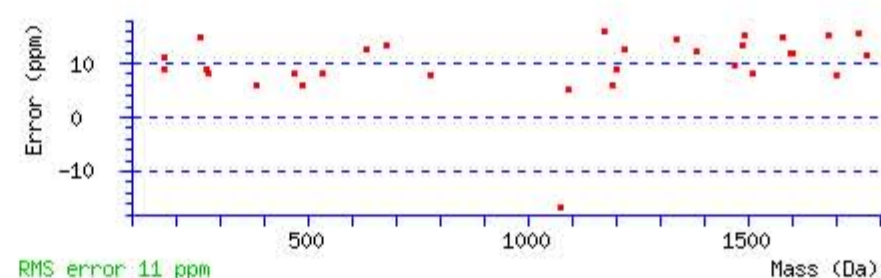

NCBI BLAST search of [TATSEYQTFNPR](#)

(Parameters: blastp, nr protein database, expect=20000, no filter, PAM30)

Other BLAST [web gateways](#)

All matches to this query

| Score | Mr(calc):   | Delta    | Sequence                     |
|-------|-------------|----------|------------------------------|
| 87.2  | 1871.887619 | 0.024349 | <a href="#">TATSEYQTFNPR</a> |

Mascot: <http://www.matrixscience.com/>



# Mascot Search Results

## Peptide View

MS/MS Fragmentation of **KSPQELLCGASLISDR**

Found in **THRB\_HUMAN**, Prothrombin OS=Homo sapiens GN=F2 PE=1 SV=2

Match to Query 55699: 2084.094972 from(695.705600,3+) rtinseconds(2224) index(62162)

Title: Locus:1.1.1.3079.12 File:"2013-07-02 CLN FXIII 60 min 1st F 4.wiff"

Data file C:\Program Files (x86)\Matrix Science\Mascot Daemon\mgf4 FXIII 60 min 1st\mascot\_daemon\_merge.mgf

Click mouse within plot area to zoom in by factor of two about that point

Or, Plot from  to  Da

Label all possible matches  Label matches used for scoring

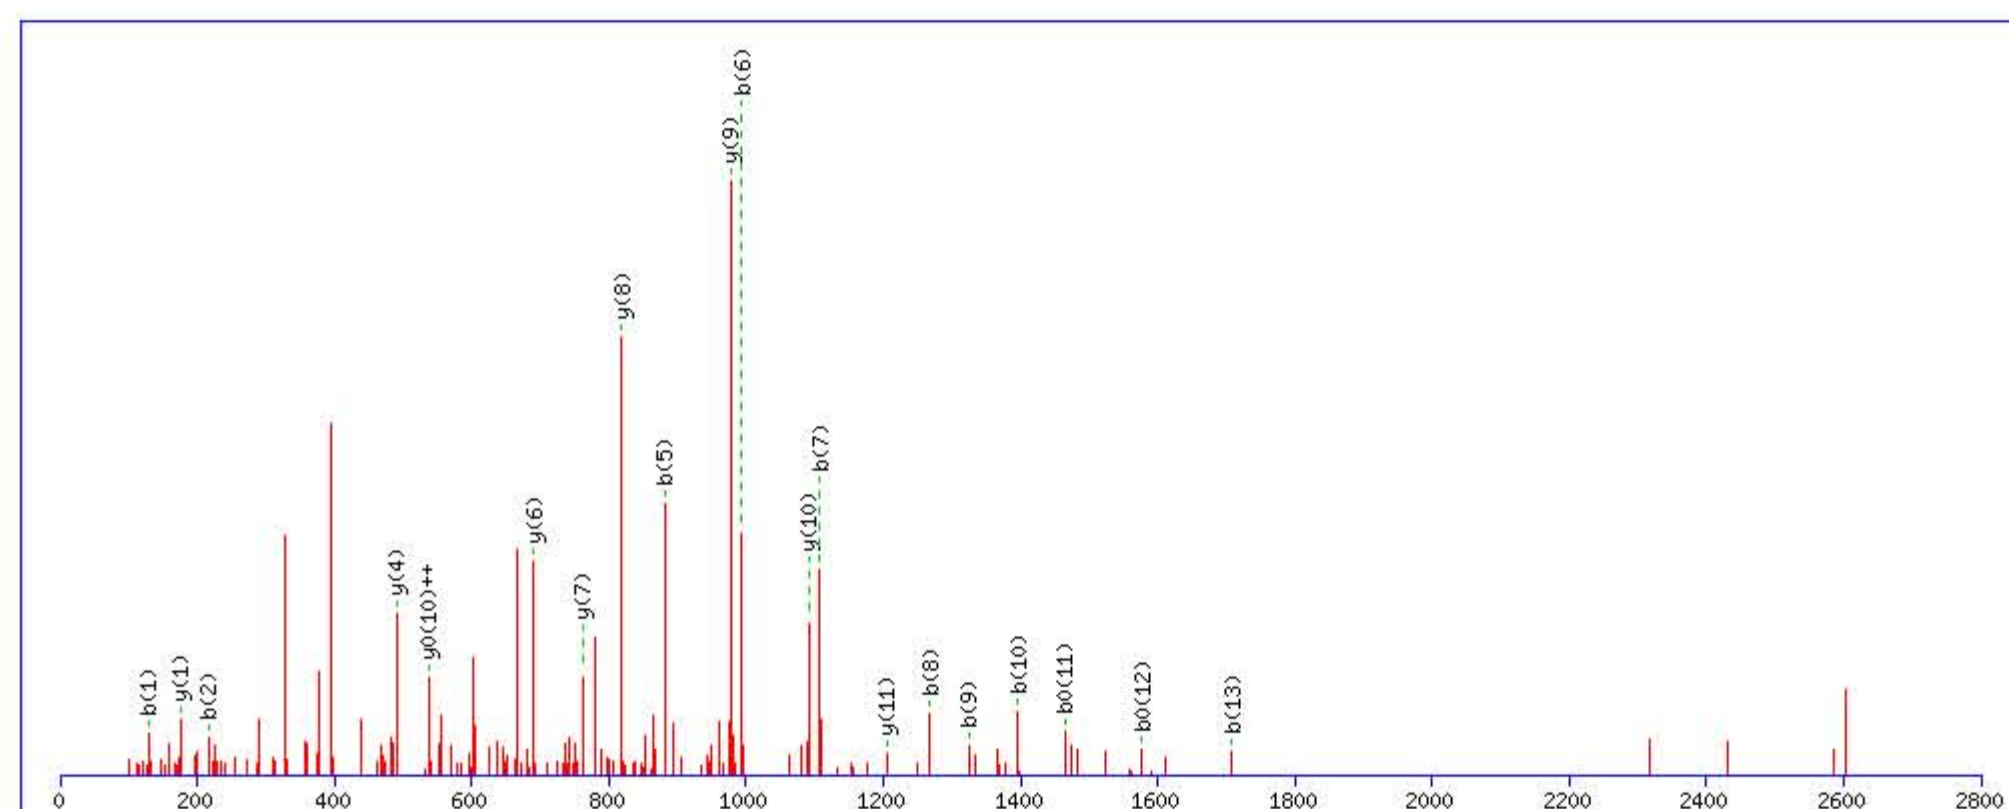

Monoisotopic mass of neutral peptide Mr(calc): 2084.075806

Fixed modifications: Carbamidomethyl (C) (apply to specified residues or termini only)

Variable modifications:

Q4 : Biotin:Thermo-21345 (Q)

Ions Score: 62 Expect: 5.4e-006

Matches : 20/176 fragment ions using 32 most intense peaks [\(help\)](#)

| #  | b                  | b <sup>++</sup> | b <sup>+</sup> | b <sup>++</sup> | b <sup>0</sup>     | b <sup>0++</sup> | Seq.     | y                  | y <sup>++</sup> | y <sup>+</sup> | y <sup>++</sup> | y <sup>0</sup> | y <sup>0++</sup>  | #         |
|----|--------------------|-----------------|----------------|-----------------|--------------------|------------------|----------|--------------------|-----------------|----------------|-----------------|----------------|-------------------|-----------|
| 1  | <b>129.102239</b>  | 65.054757       | 112.075690     | 56.541483       |                    |                  | <b>K</b> |                    |                 |                |                 |                |                   | <b>16</b> |
| 2  | <b>216.134267</b>  | 108.570771      | 199.107718     | 100.057497      | 198.123702         | 99.565489        | <b>S</b> | 1956.988145        | 978.997711      | 1939.961596    | 970.484436      | 1938.977580    | 969.992428        | <b>15</b> |
| 3  | 313.187031         | 157.097153      | 296.160482     | 148.583879      | 295.176466         | 148.091871       | <b>P</b> | 1869.956117        | 935.481697      | 1852.929568    | 926.968422      | 1851.945552    | 926.476414        | <b>14</b> |
| 4  | 752.412357         | 376.709817      | 735.385808     | 368.196542      | 734.401792         | 367.704534       | <b>Q</b> | 1772.903353        | 886.955314      | 1755.876804    | 878.442040      | 1754.892788    | 877.950032        | <b>13</b> |
| 5  | <b>881.454950</b>  | 441.231113      | 864.428401     | 432.717839      | 863.444385         | 432.225831       | <b>E</b> | 1333.678027        | 667.342652      | 1316.651478    | 658.829377      | 1315.667462    | 658.337369        | <b>12</b> |
| 6  | <b>994.539014</b>  | 497.773145      | 977.512465     | 489.259871      | 976.528449         | 488.767863       | <b>L</b> | <b>1204.635434</b> | 602.821355      | 1187.608885    | 594.308081      | 1186.624869    | 593.816073        | <b>11</b> |
| 7  | <b>1107.623078</b> | 554.315177      | 1090.596529    | 545.801903      | 1089.612513        | 545.309895       | <b>L</b> | <b>1091.551370</b> | 546.279323      | 1074.524821    | 537.766049      | 1073.540805    | <b>537.274040</b> | <b>10</b> |
| 8  | <b>1267.653727</b> | 634.330502      | 1250.627178    | 625.817227      | 1249.643162        | 625.325219       | <b>C</b> | <b>978.467306</b>  | 489.737291      | 961.440757     | 481.224017      | 960.456741     | 480.732009        | <b>9</b>  |
| 9  | <b>1324.675191</b> | 662.841234      | 1307.648642    | 654.327959      | 1306.664626        | 653.835951       | <b>G</b> | <b>818.436657</b>  | 409.721967      | 801.410108     | 401.208692      | 800.426092     | 400.716684        | <b>8</b>  |
| 10 | <b>1395.712305</b> | 698.359791      | 1378.685756    | 689.846516      | 1377.701740        | 689.354508       | <b>A</b> | <b>761.415193</b>  | 381.211235      | 744.388644     | 372.697960      | 743.404628     | 372.205952        | <b>7</b>  |
| 11 | 1482.744333        | 741.875805      | 1465.717784    | 733.362530      | <b>1464.733768</b> | 732.870522       | <b>S</b> | <b>690.378079</b>  | 345.692678      | 673.351530     | 337.179403      | 672.367514     | 336.687395        | <b>6</b>  |
| 12 | 1595.828397        | 798.417837      | 1578.801848    | 789.904562      | <b>1577.817832</b> | 789.412554       | <b>L</b> | 603.346051         | 302.176664      | 586.319502     | 293.663389      | 585.335486     | 293.171381        | <b>5</b>  |
| 13 | <b>1708.912461</b> | 854.959868      | 1691.885912    | 846.446594      | 1690.901896        | 845.954586       | <b>I</b> | <b>490.261987</b>  | 245.634631      | 473.235438     | 237.121357      | 472.251422     | 236.629349        | <b>4</b>  |
| 14 | 1795.944489        | 898.475883      | 1778.917940    | 889.962608      | 1777.933924        | 889.470600       | <b>S</b> | 377.177923         | 189.092600      | 360.151374     | 180.579325      | 359.167358     | 180.087317        | <b>3</b>  |
| 15 | 1910.971432        | 955.989354      | 1893.944883    | 947.476080      | 1892.960867        | 946.984072       | <b>D</b> | 290.145895         | 145.576585      | 273.119346     | 137.063311      | 272.135330     | 136.571303        | <b>2</b>  |
| 16 |                    |                 |                |                 |                    |                  | <b>R</b> | <b>175.118952</b>  | 88.063114       | 158.092403     | 79.549839       |                |                   | <b>1</b>  |

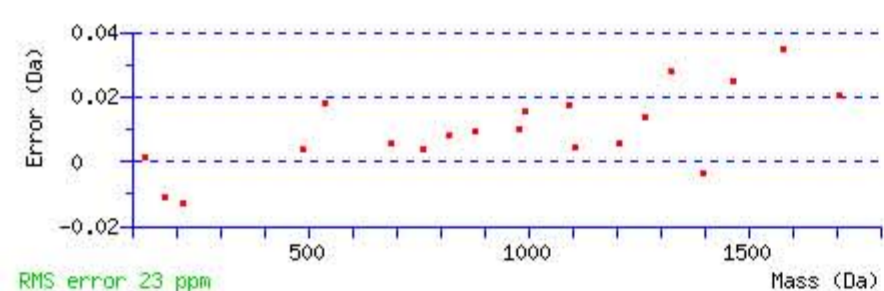

RMS error 23 ppm

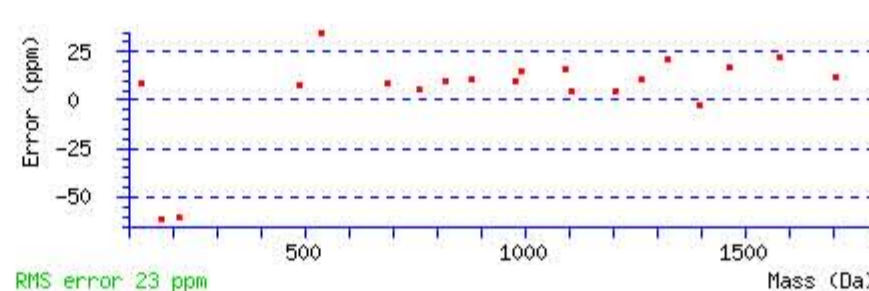

RMS error 23 ppm

NCBI BLAST search of **KSPQELLCGASLISDR**

(Parameters: blastp, nr protein database, expect=20000, no filter, PAM30)

Other BLAST [web gateways](#)

## All matches to this query

| Score | Mr(calc):   | Delta     | Sequence                            |
|-------|-------------|-----------|-------------------------------------|
| 61.6  | 2084.075806 | 0.019166  | <a href="#">KSPQELLCGASLISDR</a>    |
| 5.2   | 2084.097565 | -0.002593 | <a href="#">KEFIMAELIQTEKAYVR</a>   |
| 5.2   | 2084.097565 | -0.002593 | <a href="#">KEFIMAELLQTEKAYVR</a>   |
| 2.7   | 2084.113541 | -0.018569 | <a href="#">LQGQQQLIHQNR</a>        |
| 2.7   | 2084.113541 | -0.018569 | <a href="#">LQGQQQLIHQNR</a>        |
| 2.7   | 2084.113541 | -0.018569 | <a href="#">LQGQQQLIHQNR</a>        |
| 2.7   | 2084.113541 | -0.018569 | <a href="#">LQGQQQLIHQNR</a>        |
| 2.4   | 2084.090225 | 0.004747  | <a href="#">SKYDVPGPPLNVTITDVNR</a> |
| 1.3   | 2084.083679 | 0.011293  | <a href="#">EDLISFLCGKVPPRNSR</a>   |



# MASCOT Search Results

## Peptide View

MS/MS Fragmentation of **HQDFNSAVQLVENFCR**

Found in **THRB\_HUMAN**, Prothrombin OS=Homo sapiens GN=F2 PE=1 SV=2

Match to Query 60016: 2274.085422 from(759.035750,3+) rtinseconds(2558) index(64329)

Title: Locus:1.1.1.3195.7 File:"2013-07-02 CLN FXIII 60 min 1st F 4.wiff"

Data file C:\Program Files (x86)\Matrix Science\Mascot Daemon\mgf4 FXIII 60 min 1st\mascot\_daemon\_merge.mgf

Click mouse within plot area to zoom in by factor of two about that point

Or, Plot from  to  Da

Label all possible matches  Label matches used for scoring

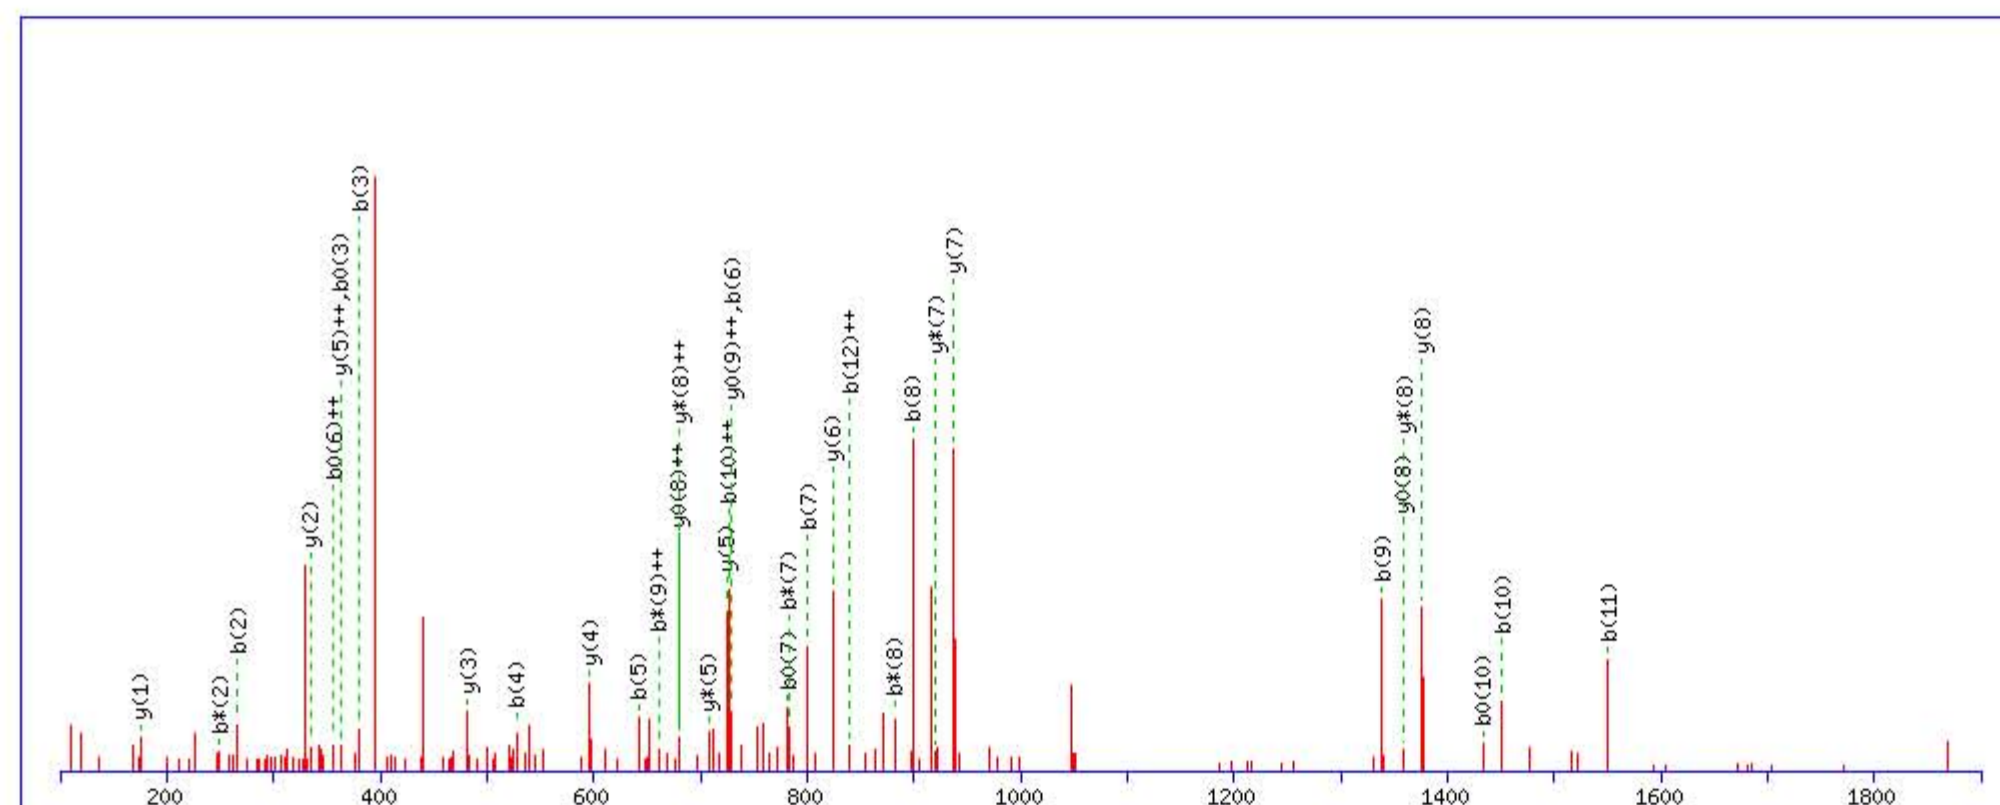

Monoisotopic mass of neutral peptide Mr(calc): 2274.067398

Fixed modifications: Carbamidomethyl (C) (apply to specified residues or termini only)

Variable modifications:

Q9 : Biotin:Thermo-21345 (Q)

Ions Score: 37 Expect: 0.0042

Matches : 36/166 fragment ions using 93 most intense peaks [\(help\)](#)

| #  | b                  | b <sup>++</sup>   | b <sup>*</sup>    | b <sup>*++</sup>  | b <sup>0</sup>     | b <sup>0++</sup>  | Seq. | y                  | y <sup>++</sup>   | y <sup>*</sup>     | y <sup>*++</sup>  | y <sup>0</sup>     | y <sup>0++</sup>  | #  |
|----|--------------------|-------------------|-------------------|-------------------|--------------------|-------------------|------|--------------------|-------------------|--------------------|-------------------|--------------------|-------------------|----|
| 1  | 138.066188         | 69.536732         |                   |                   |                    |                   | H    |                    |                   |                    |                   |                    |                   | 16 |
| 2  | <b>266.124766</b>  | 133.566021        | <b>249.098217</b> | 125.052746        |                    |                   | Q    | 2138.015757        | 1069.511516       | 2120.989208        | 1060.998242       | 2120.005192        | 1060.506234       | 15 |
| 3  | <b>381.151709</b>  | 191.079492        | 364.125160        | 182.566218        | <b>363.141144</b>  | 182.074210        | D    | 2009.957179        | 1005.482228       | 1992.930630        | 996.968953        | 1991.946614        | 996.476945        | 14 |
| 4  | <b>528.220123</b>  | 264.613700        | 511.193574        | 256.100425        | 510.209558         | 255.608417        | F    | 1894.930236        | 947.968756        | 1877.903687        | 939.455482        | 1876.919671        | 938.963474        | 13 |
| 5  | <b>642.263050</b>  | 321.635163        | 625.236501        | 313.121889        | 624.252485         | 312.629881        | N    | 1747.861822        | 874.434549        | 1730.835273        | 865.921275        | 1729.851257        | 865.429267        | 12 |
| 6  | <b>729.295078</b>  | 365.151177        | 712.268529        | 356.637903        | 711.284513         | <b>356.145895</b> | S    | 1633.818895        | 817.413086        | 1616.792346        | 808.899811        | 1615.808330        | 808.407803        | 11 |
| 7  | <b>800.332192</b>  | 400.669734        | <b>783.305643</b> | 392.156459        | <b>782.321627</b>  | 391.664451        | A    | 1546.786867        | 773.897072        | 1529.760318        | 765.383797        | 1528.776302        | 764.891789        | 10 |
| 8  | <b>899.400606</b>  | 450.203941        | <b>882.374057</b> | 441.690666        | 881.390041         | 441.198658        | V    | 1475.749753        | 738.378515        | 1458.723204        | 729.865240        | 1457.739188        | <b>729.373232</b> | 9  |
| 9  | <b>1338.625932</b> | 669.816604        | 1321.599383       | <b>661.303330</b> | 1320.615367        | 660.811322        | Q    | <b>1376.681339</b> | 688.844308        | <b>1359.654790</b> | <b>680.331033</b> | <b>1358.670774</b> | <b>679.839025</b> | 8  |
| 10 | <b>1451.709996</b> | <b>726.358636</b> | 1434.683447       | 717.845362        | <b>1433.699431</b> | 717.353354        | L    | <b>937.456013</b>  | 469.231645        | <b>920.429464</b>  | 460.718370        | 919.445448         | 460.226362        | 7  |
| 11 | <b>1550.778410</b> | 775.892843        | 1533.751861       | 767.379569        | 1532.767845        | 766.887561        | V    | <b>824.371949</b>  | 412.689613        | 807.345400         | 404.176338        | 806.361384         | 403.684330        | 6  |
| 12 | 1679.821003        | <b>840.414140</b> | 1662.794454       | 831.900865        | 1661.810438        | 831.408857        | E    | <b>725.303535</b>  | <b>363.155406</b> | <b>708.276986</b>  | 354.642131        | 707.292970         | 354.150123        | 5  |
| 13 | 1793.863930        | 897.435603        | 1776.837381       | 888.922329        | 1775.853365        | 888.430321        | N    | <b>596.260942</b>  | 298.634109        | 579.234393         | 290.120835        |                    |                   | 4  |
| 14 | 1940.932344        | 970.969810        | 1923.905795       | 962.456536        | 1922.921779        | 961.964528        | F    | <b>482.218015</b>  | 241.612646        | 465.191466         | 233.099371        |                    |                   | 3  |
| 15 | 2100.962993        | 1050.985135       | 2083.936444       | 1042.471860       | 2082.952428        | 1041.979852       | C    | <b>335.149601</b>  | 168.078438        | 318.123052         | 159.565164        |                    |                   | 2  |
| 16 |                    |                   |                   |                   |                    |                   | R    | <b>175.118952</b>  | 88.063114         | 158.092403         | 79.549839         |                    |                   | 1  |

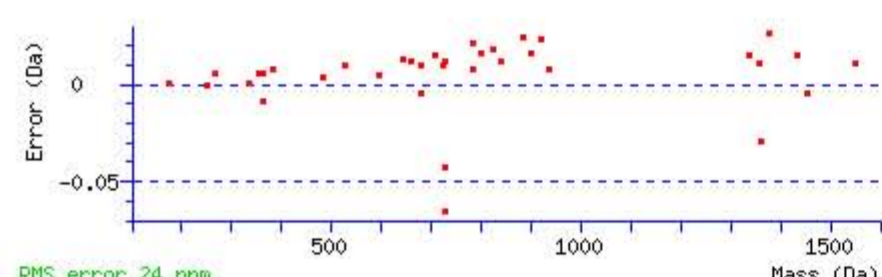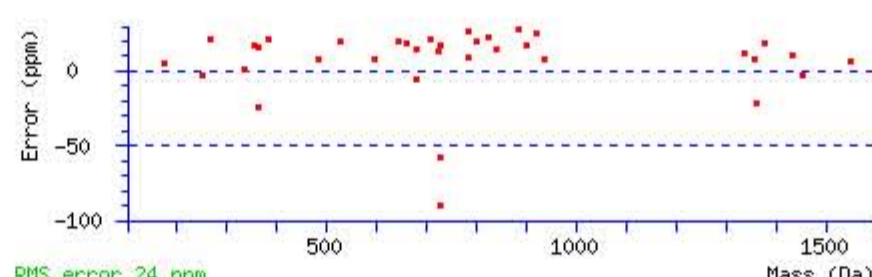

NCBI BLAST search of **HQDFNSAVQLVENFCR**

(Parameters: blastp, nr protein database, expect=20000, no filter, PAM30)

Other BLAST [web gateways](#)

All matches to this query

| Score | Mr(calc):   | Delta    | Sequence                         |
|-------|-------------|----------|----------------------------------|
| 37.2  | 2274.067398 | 0.018024 | <a href="#">HQDFNSAVQLVENFCR</a> |
| 8.5   | 2274.067398 | 0.018024 | <a href="#">HQDFNSAVQLVENFCR</a> |

Mascot: <http://www.matrixscience.com/>



# Mascot Search Results

## Peptide View

MS/MS Fragmentation of **LAVTTHGLPCLAWASAQAK**

Found in **THRB\_HUMAN**, Prothrombin OS=Homo sapiens GN=F2 PE=1 SV=2

Match to Query 60793: 2305.240182 from(769.420670,3+) rtinseconds(2354) index(63105)

Title: Locus:1.1.1.3124.21 File:"2013-07-02 CLN FXIII 60 min 1st F 4.wiff"

Data file C:\Program Files (x86)\Matrix Science\Mascot Daemon\mgf\4 FXIII 60 min 1st\mascot\_daemon\_merge.mgf

Click mouse within plot area to zoom in by factor of two about that point

Or, Plot from  to  Da

Label all possible matches  Label matches used for scoring

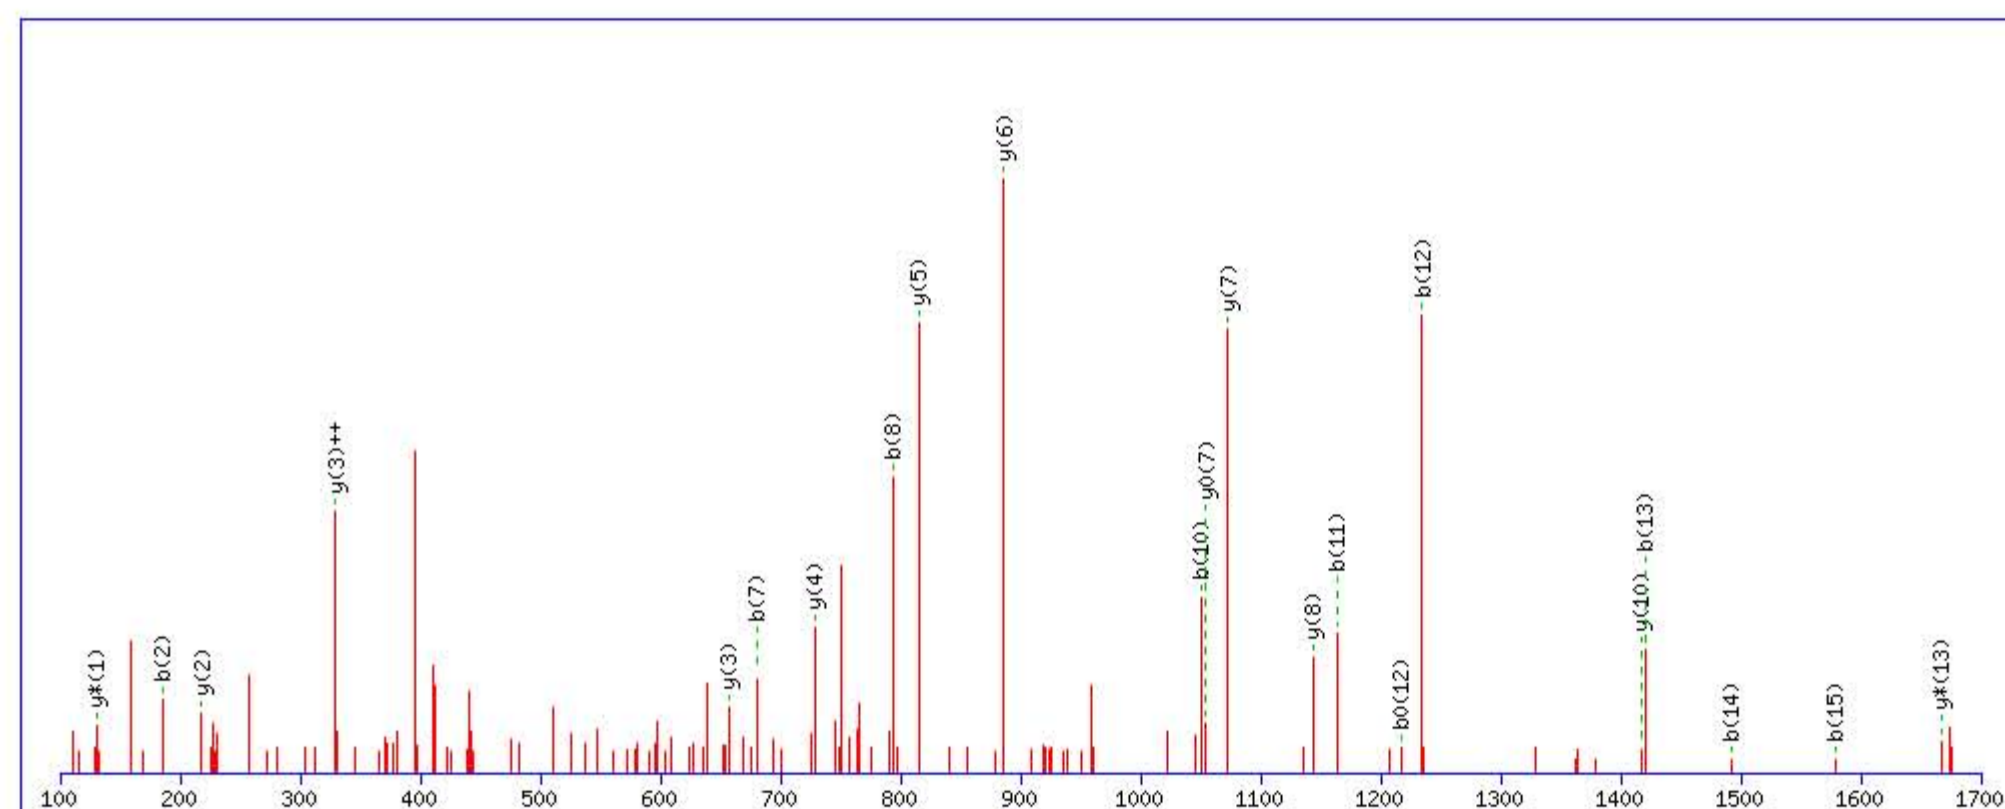

Monoisotopic mass of neutral peptide Mr(calc): 2305.207504

Fixed modifications: Carbamidomethyl (C) (apply to specified residues or termini only)

Variable modifications:

Q17 : Biotin:Thermo-21345 (Q)

Ions Score: 48 Expect: 3.3e-005

Matches : 22/170 fragment ions using 46 most intense peaks [\(help\)](#)

| #  | b                  | b <sup>++</sup> | b <sup>*</sup> | b <sup>+++</sup> | b <sup>0</sup>     | b <sup>0++</sup> | Seq. | y                  | y <sup>++</sup>   | y <sup>*</sup>     | y <sup>+++</sup> | y <sup>0</sup>     | y <sup>0++</sup> | #  |
|----|--------------------|-----------------|----------------|------------------|--------------------|------------------|------|--------------------|-------------------|--------------------|------------------|--------------------|------------------|----|
| 1  | 114.091340         | 57.549308       |                |                  |                    |                  | L    |                    |                   |                    |                  |                    |                  | 19 |
| 2  | <b>185.128454</b>  | 93.067865       |                |                  |                    |                  | A    | 2193.130730        | 1097.069003       | 2176.104181        | 1088.555728      | 2175.120165        | 1088.063720      | 18 |
| 3  | 284.196868         | 142.602072      |                |                  |                    |                  | V    | 2122.093616        | 1061.550446       | 2105.067067        | 1053.037171      | 2104.083051        | 1052.545163      | 17 |
| 4  | 385.244547         | 193.125912      |                |                  | 367.233982         | 184.120629       | T    | 2023.025202        | 1012.016239       | 2005.998653        | 1003.502965      | 2005.014637        | 1003.010957      | 16 |
| 5  | 486.292226         | 243.649751      |                |                  | 468.281661         | 234.644469       | T    | 1921.977523        | 961.492400        | 1904.950974        | 952.979125       | 1903.966958        | 952.487117       | 15 |
| 6  | 623.351138         | 312.179207      |                |                  | 605.340573         | 303.173925       | H    | 1820.929844        | 910.968560        | 1803.903295        | 902.455286       | 1802.919279        | 901.963278       | 14 |
| 7  | <b>680.372602</b>  | 340.689939      |                |                  | 662.362037         | 331.684657       | G    | 1683.870932        | 842.439104        | <b>1666.844383</b> | 833.925830       | 1665.860367        | 833.433822       | 13 |
| 8  | <b>793.456666</b>  | 397.231971      |                |                  | 775.446101         | 388.226689       | L    | 1626.849468        | 813.928372        | 1609.822919        | 805.415098       | 1608.838903        | 804.923090       | 12 |
| 9  | 890.509430         | 445.758353      |                |                  | 872.498865         | 436.753071       | P    | 1513.765404        | 757.386340        | 1496.738855        | 748.873066       | 1495.754839        | 748.381058       | 11 |
| 10 | <b>1050.540079</b> | 525.773678      |                |                  | 1032.529514        | 516.768395       | C    | <b>1416.712640</b> | 708.859958        | 1399.686091        | 700.346684       | 1398.702075        | 699.854675       | 10 |
| 11 | <b>1163.624143</b> | 582.315710      |                |                  | 1145.613578        | 573.310427       | L    | 1256.681991        | 628.844634        | 1239.655442        | 620.331359       | 1238.671426        | 619.839351       | 9  |
| 12 | <b>1234.661257</b> | 617.834267      |                |                  | <b>1216.650692</b> | 608.828984       | A    | <b>1143.597927</b> | 572.302602        | 1126.571378        | 563.789327       | 1125.587362        | 563.297319       | 8  |
| 13 | <b>1420.740570</b> | 710.873923      |                |                  | 1402.730005        | 701.868640       | W    | <b>1072.560813</b> | 536.784045        | 1055.534264        | 528.270770       | <b>1054.550248</b> | 527.778762       | 7  |
| 14 | <b>1491.777684</b> | 746.392480      |                |                  | 1473.767119        | 737.387197       | A    | <b>886.481500</b>  | 443.744388        | 869.454951         | 435.231114       | 868.470935         | 434.739106       | 6  |
| 15 | <b>1578.809712</b> | 789.908494      |                |                  | 1560.799147        | 780.903212       | S    | <b>815.444386</b>  | 408.225831        | 798.417837         | 399.712557       | 797.433821         | 399.220549       | 5  |
| 16 | 1649.846826        | 825.427051      |                |                  | 1631.836261        | 816.421768       | A    | <b>728.412358</b>  | 364.709817        | 711.385809         | 356.196543       |                    |                  | 4  |
| 17 | 2089.072152        | 1045.039714     | 2072.045603    | 1036.526439      | 2071.061587        | 1036.034431      | Q    | <b>657.375244</b>  | <b>329.191260</b> | 640.348695         | 320.677986       |                    |                  | 3  |
| 18 | 2160.109266        | 1080.558271     | 2143.082717    | 1072.044996      | 2142.098701        | 1071.552988      | A    | <b>218.149918</b>  | 109.578597        | 201.123369         | 101.065323       |                    |                  | 2  |
| 19 |                    |                 |                |                  |                    |                  | K    | 147.112804         | 74.060040         | <b>130.086255</b>  | 65.546765        |                    |                  | 1  |

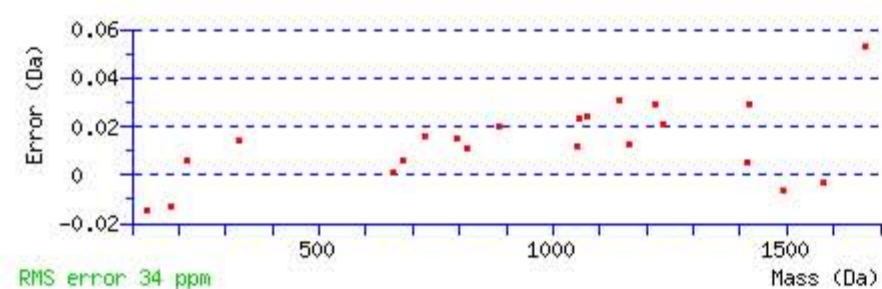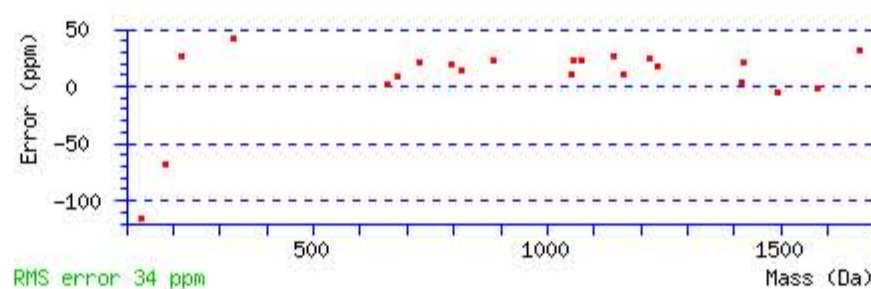

NCBI BLAST search of **LAVTTHGLPCLAWASAQAK**

(Parameters: blastp, nr protein database, expect=20000, no filter, PAM30)

Other BLAST [web gateways](#)

All matches to this query

| Score | Mr(calc):   | Delta    | Sequence                   |
|-------|-------------|----------|----------------------------|
| 48.0  | 2305.207504 | 0.032678 | <b>LAVTTHGLPCLAWASAQAK</b> |
| 0.2   | 2305.236481 | 0.003701 | <b>STLSQHLRIHTGEKPYK</b>   |



# MASCOT Search Results

## Peptide View

MS/MS Fragmentation of **SEGSSVNLSPPLEQCVDR**

Found in **THRB\_HUMAN**, Prothrombin OS=Homo sapiens GN=F2 PE=1 SV=2

Match to Query 62037: 2381.164662 from(794.728830,3+) rtinseconds(2138) index(61466)

Title: Locus:1.1.1.3049.21 File:"2013-07-02 CLN FXIII 60 min 1st F 4.wiff"

Data file C:\Program Files (x86)\Matrix Science\Mascot Daemon\mgf4 FXIII 60 min 1st\mascot\_daemon\_merge.mgf

Click mouse within plot area to zoom in by factor of two about that point

Or, Plot from  to  Da

Label all possible matches  Label matches used for scoring

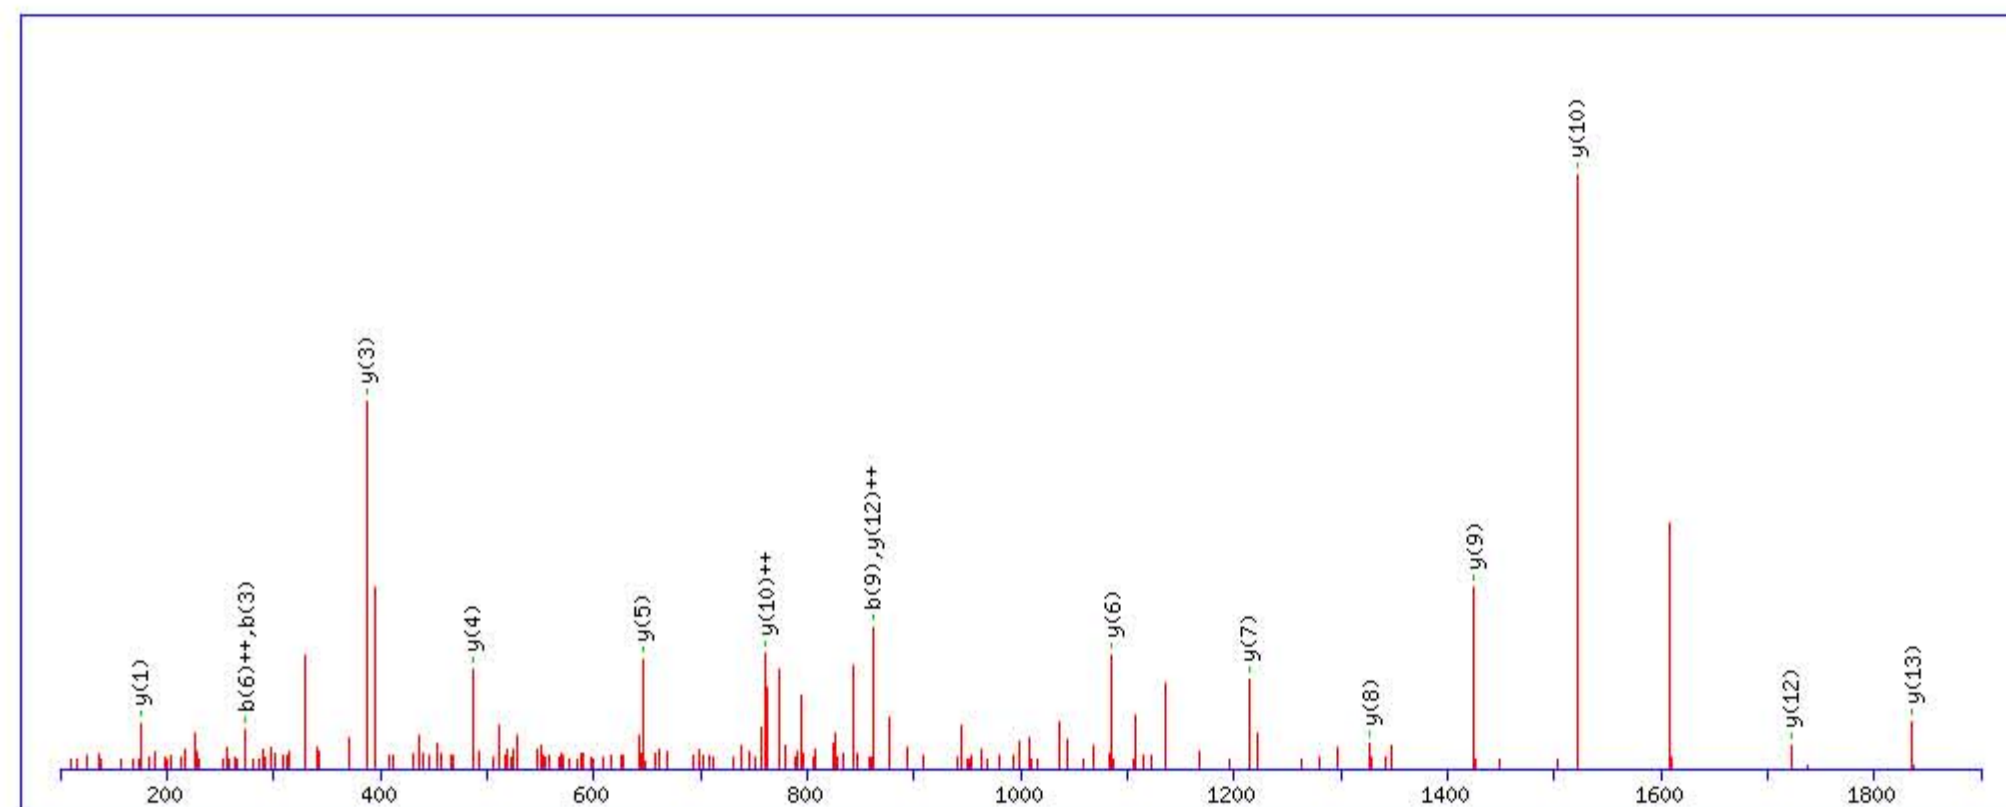

Monoisotopic mass of neutral peptide Mr(calc): 2381.135529

Fixed modifications: Carbamidomethyl (C) (apply to specified residues or termini only)

Variable modifications:

Q14 : Biotin:Thermo-21345 (Q)

Ions Score: 94 Expect: 8.6e-009

Matches : 16/202 fragment ions using 17 most intense peaks ([help](#))

| #  | b                 | b <sup>++</sup>   | b <sup>*</sup> | b <sup>*++</sup> | b <sup>0</sup> | b <sup>0++</sup> | Seq. | y                  | y <sup>++</sup>   | y <sup>*</sup> | y <sup>*++</sup> | y <sup>0</sup> | y <sup>0++</sup> | #  |
|----|-------------------|-------------------|----------------|------------------|----------------|------------------|------|--------------------|-------------------|----------------|------------------|----------------|------------------|----|
| 1  | 88.039304         | 44.523290         |                |                  | 70.028739      | 35.518008        | S    |                    |                   |                |                  |                |                  | 19 |
| 2  | 217.081897        | 109.044586        |                |                  | 199.071332     | 100.039304       | E    | 2295.110779        | 1148.059027       | 2278.084230    | 1139.545753      | 2277.100214    | 1139.053745      | 18 |
| 3  | <b>274.103361</b> | 137.555319        |                |                  | 256.092796     | 128.550036       | G    | 2166.068186        | 1083.537731       | 2149.041637    | 1075.024456      | 2148.057621    | 1074.532448      | 17 |
| 4  | 361.135389        | 181.071332        |                |                  | 343.124824     | 172.066050       | S    | 2109.046722        | 1055.026999       | 2092.020173    | 1046.513724      | 2091.036157    | 1046.021716      | 16 |
| 5  | 448.167417        | 224.587346        |                |                  | 430.156852     | 215.582064       | S    | 2022.014694        | 1011.510985       | 2004.988145    | 1002.997711      | 2004.004129    | 1002.505703      | 15 |
| 6  | 547.235831        | <b>274.121554</b> |                |                  | 529.225266     | 265.116271       | V    | 1934.982666        | 967.994971        | 1917.956117    | 959.481697       | 1916.972101    | 958.989689       | 14 |
| 7  | 661.278758        | 331.143017        | 644.252209     | 322.629742       | 643.268193     | 322.137734       | N    | <b>1835.914252</b> | 918.460764        | 1818.887703    | 909.947490       | 1817.903687    | 909.455482       | 13 |
| 8  | 774.362822        | 387.685049        | 757.336273     | 379.171774       | 756.352257     | 378.679766       | L    | <b>1721.871325</b> | <b>861.439301</b> | 1704.844776    | 852.926026       | 1703.860760    | 852.434018       | 12 |
| 9  | <b>861.394850</b> | 431.201063        | 844.368301     | 422.687788       | 843.384285     | 422.195780       | S    | 1608.787261        | 804.897269        | 1591.760712    | 796.383994       | 1590.776696    | 795.891986       | 11 |
| 10 | 958.447614        | 479.727445        | 941.421065     | 471.214170       | 940.437049     | 470.722162       | P    | <b>1521.755233</b> | <b>761.381255</b> | 1504.728684    | 752.867980       | 1503.744668    | 752.375972       | 10 |
| 11 | 1055.500378       | 528.253827        | 1038.473829    | 519.740553       | 1037.489813    | 519.248544       | P    | <b>1424.702469</b> | 712.854873        | 1407.675920    | 704.341598       | 1406.691904    | 703.849590       | 9  |
| 12 | 1168.584442       | 584.795859        | 1151.557893    | 576.282584       | 1150.573877    | 575.790576       | L    | <b>1327.649705</b> | 664.328491        | 1310.623156    | 655.815216       | 1309.639140    | 655.323208       | 8  |
| 13 | 1297.627035       | 649.317155        | 1280.600486    | 640.803881       | 1279.616470    | 640.311873       | E    | <b>1214.565641</b> | 607.786459        | 1197.539092    | 599.273184       | 1196.555076    | 598.781176       | 7  |
| 14 | 1736.852361       | 868.929819        | 1719.825812    | 860.416544       | 1718.841796    | 859.924536       | Q    | <b>1085.523048</b> | 543.265162        | 1068.496499    | 534.751888       | 1067.512483    | 534.259880       | 6  |
| 15 | 1896.883010       | 948.945143        | 1879.856461    | 940.431869       | 1878.872445    | 939.939861       | C    | <b>646.297722</b>  | 323.652499        | 629.271173     | 315.139225       | 628.287157     | 314.647217       | 5  |
| 16 | 1995.951424       | 998.479350        | 1978.924875    | 989.966076       | 1977.940859    | 989.474068       | V    | <b>486.267073</b>  | 243.637174        | 469.240524     | 235.123900       | 468.256508     | 234.631892       | 4  |
| 17 | 2093.004188       | 1047.005732       | 2075.977639    | 1038.492457      | 2074.993623    | 1038.000449      | P    | <b>387.198659</b>  | 194.102967        | 370.172110     | 185.589693       | 369.188094     | 185.097685       | 3  |
| 18 | 2208.031131       | 1104.519203       | 2191.004582    | 1096.005929      | 2190.020566    | 1095.513921      | D    | 290.145895         | 145.576585        | 273.119346     | 137.063311       | 272.135330     | 136.571303       | 2  |
| 19 |                   |                   |                |                  |                |                  | R    | <b>175.118952</b>  | 88.063114         | 158.092403     | 79.549839        |                |                  | 1  |

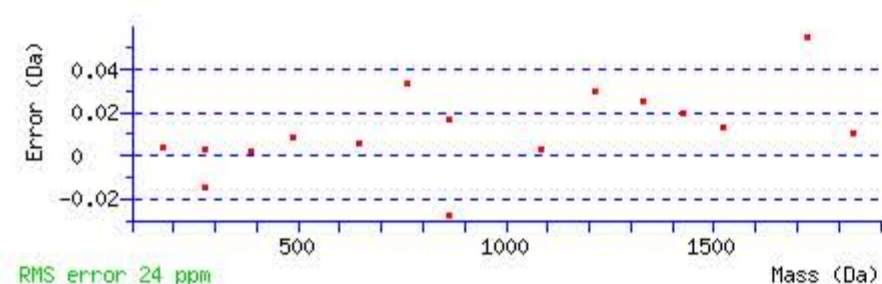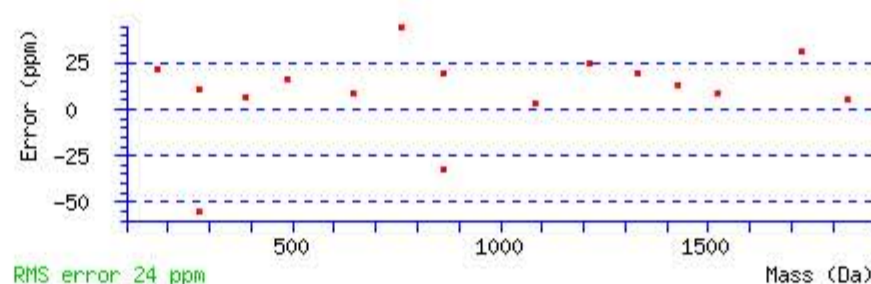

NCBI BLAST search of [SEGSSVNLSPPLEQCVDR](#)

(Parameters: blastp, nr protein database, expect=20000, no filter, PAM30)

Other BLAST [web gateways](#)

## All matches to this query

| Score | Mr(calc):   | Delta     | Sequence                               |
|-------|-------------|-----------|----------------------------------------|
| 94.2  | 2381.135529 | 0.029133  | <a href="#">SEGSSVNLSPPLEQCVDR</a>     |
| 7.9   | 2381.168564 | -0.003902 | <a href="#">GNAVVGYLQCFDLEGESGLVVR</a> |
| 3.6   | 2381.158005 | 0.006657  | <a href="#">HPKPSTVKDCPTLCKQTDNR</a>   |



# MASCOT Search Results

## Peptide View

MS/MS Fragmentation of **IVEGSDAEIGMSPWQVMLFR**

Found in **THRB\_HUMAN**, Prothrombin OS=Homo sapiens GN=F2 PE=1 SV=2

Match to Query 66681: 2607.269022 from(870.096950,3+) rtinseconds(2703) index(65321)

Title: Locus:1.1.1.3245.20 File:"2013-07-02 CLN FXIII 60 min 1st F 4.wiff"

Data file C:\Program Files (x86)\Matrix Science\Mascot Daemon\mgf4 FXIII 60 min 1st\mascot\_daemon\_merge.mgf

Click mouse within plot area to zoom in by factor of two about that point

Or, Plot from  to  Da

Label all possible matches  Label matches used for scoring

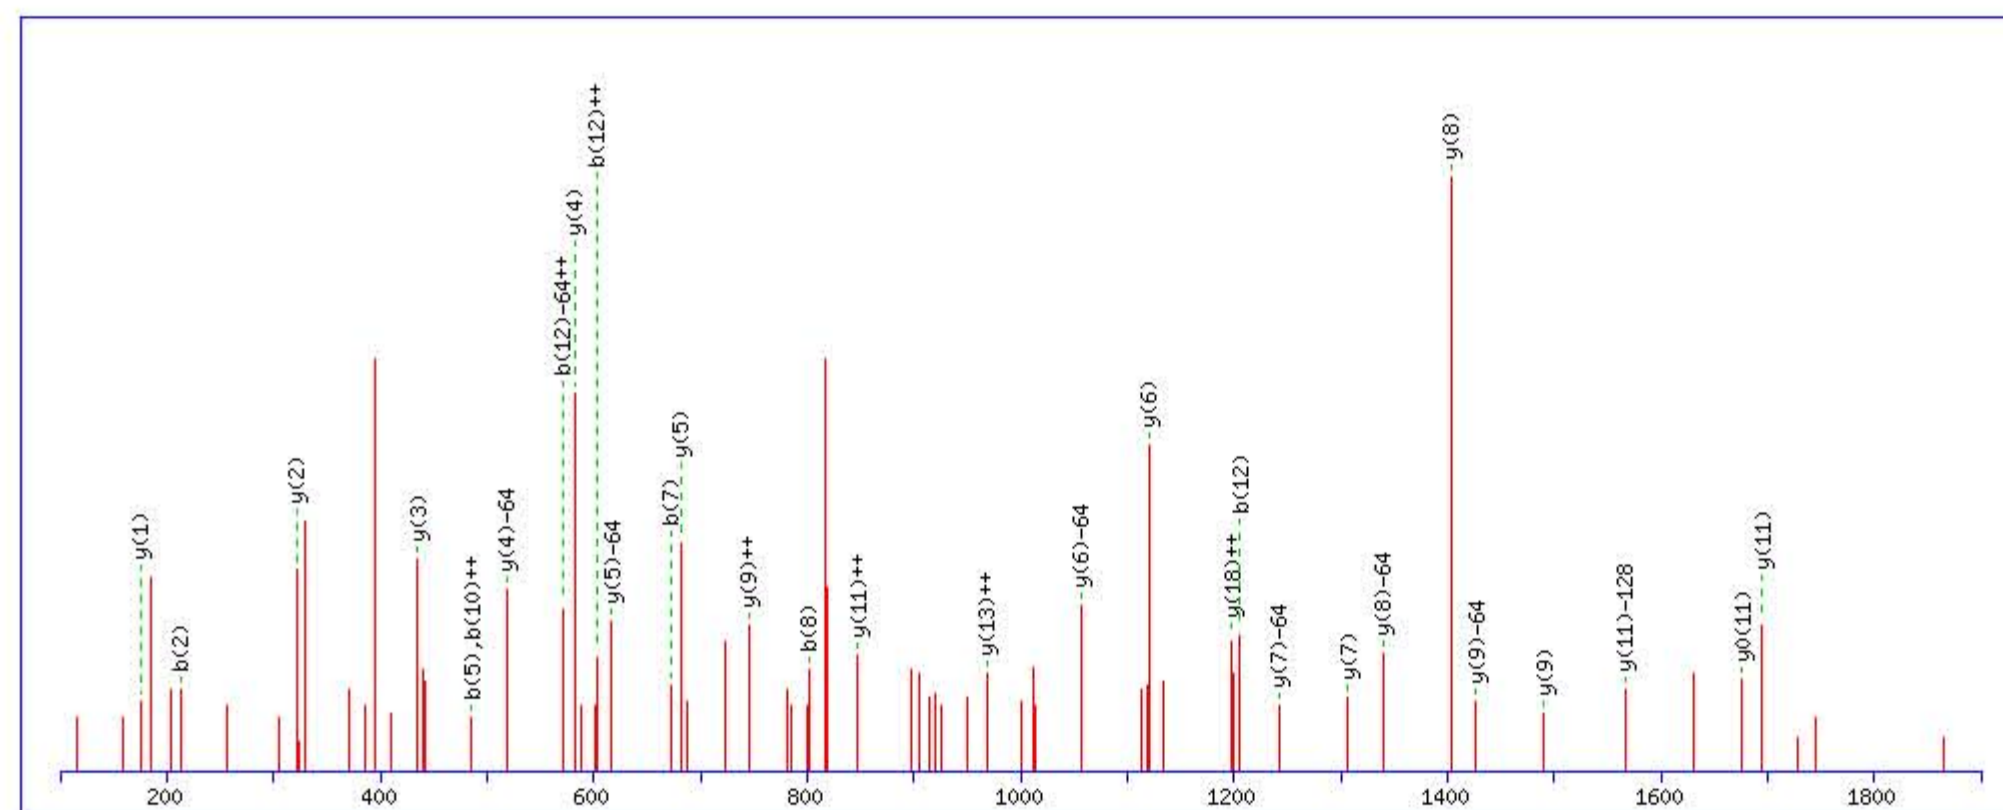

Monoisotopic mass of neutral peptide Mr(calc): 2607.253540

Fixed modifications: Carbamidomethyl (C) (apply to specified residues or termini only)

Variable modifications:

M11 : Oxidation (M), with neutral losses 0.000000 (shown in table), 63.998285

Q15 : Biotin:Thermo-21345 (Q)

M17 : Oxidation (M), with neutral losses 0.000000 (shown in table), 63.998285

Ions Score: 46 Expect: 0.00055

Matches : 30/312 fragment ions using 54 most intense peaks [\(help\)](#)

| #  | b                  | b <sup>++</sup>   | b <sup>*</sup> | b <sup>*++</sup> | b <sup>0</sup> | b <sup>0++</sup> | Seq. | y                  | y <sup>++</sup>    | y <sup>*</sup> | y <sup>*++</sup> | y <sup>0</sup>     | y <sup>0++</sup> | #  |
|----|--------------------|-------------------|----------------|------------------|----------------|------------------|------|--------------------|--------------------|----------------|------------------|--------------------|------------------|----|
| 1  | 114.091340         | 57.549308         |                |                  |                |                  | I    |                    |                    |                |                  |                    |                  | 20 |
| 2  | <b>213.159754</b>  | 107.083515        |                |                  |                |                  | V    | 2495.176752        | 1248.092014        | 2478.150203    | 1239.578739      | 2477.166187        | 1239.086731      | 19 |
| 3  | 342.202347         | 171.604811        |                |                  | 324.191782     | 162.599529       | E    | 2396.108338        | <b>1198.557807</b> | 2379.081789    | 1190.044532      | 2378.097773        | 1189.552524      | 18 |
| 4  | 399.223811         | 200.115543        |                |                  | 381.213246     | 191.110261       | G    | 2267.065745        | 1134.036510        | 2250.039196    | 1125.523236      | 2249.055180        | 1125.031228      | 17 |
| 5  | <b>486.255839</b>  | 243.631557        |                |                  | 468.245274     | 234.626275       | S    | 2210.044281        | 1105.525778        | 2193.017732    | 1097.012504      | 2192.033716        | 1096.520496      | 16 |
| 6  | 601.282782         | 301.145029        |                |                  | 583.272217     | 292.139747       | D    | 2123.012253        | 1062.009764        | 2105.985704    | 1053.496490      | 2105.001688        | 1053.004482      | 15 |
| 7  | <b>672.319896</b>  | 336.663586        |                |                  | 654.309331     | 327.658303       | A    | 2007.985310        | 1004.496293        | 1990.958761    | 995.983019       | 1989.974745        | 995.491011       | 14 |
| 8  | <b>801.362489</b>  | 401.184883        |                |                  | 783.351924     | 392.179600       | E    | 1936.948196        | <b>968.977736</b>  | 1919.921647    | 960.464462       | 1918.937631        | 959.972454       | 13 |
| 9  | 914.446553         | 457.726915        |                |                  | 896.435988     | 448.721632       | I    | 1807.905603        | 904.456440         | 1790.879054    | 895.943165       | 1789.895038        | 895.451157       | 12 |
| 10 | 971.468017         | <b>486.237647</b> |                |                  | 953.457452     | 477.232364       | G    | <b>1694.821539</b> | <b>847.914408</b>  | 1677.794990    | 839.401133       | <b>1676.810974</b> | 838.909125       | 11 |
| 11 | 1118.503417        | 559.755346        |                |                  | 1100.492852    | 550.750064       | M    | 1637.800075        | 819.403676         | 1620.773526    | 810.890401       | 1619.789510        | 810.398393       | 10 |
| 12 | <b>1205.535445</b> | <b>603.271361</b> |                |                  | 1187.524880    | 594.266078       | S    | <b>1490.764675</b> | <b>745.885976</b>  | 1473.738126    | 737.372701       | 1472.754110        | 736.880693       | 9  |
| 13 | 1302.588209        | 651.797743        |                |                  | 1284.577644    | 642.792460       | P    | <b>1403.732647</b> | 702.369962         | 1386.706098    | 693.856687       |                    |                  | 8  |
| 14 | 1488.667522        | 744.837399        |                |                  | 1470.656957    | 735.832116       | W    | <b>1306.679883</b> | 653.843580         | 1289.653334    | 645.330305       |                    |                  | 7  |
| 15 | 1927.892848        | 964.450062        | 1910.866299    | 955.936788       | 1909.882283    | 955.444780       | Q    | <b>1120.600570</b> | 560.803923         | 1103.574021    | 552.290649       |                    |                  | 6  |
| 16 | 2026.961262        | 1013.984269       | 2009.934713    | 1005.470995      | 2008.950697    | 1004.978987      | V    | <b>681.375244</b>  | 341.191260         | 664.348695     | 332.677986       |                    |                  | 5  |
| 17 | 2173.996662        | 1087.501969       | 2156.970113    | 1078.988694      | 2155.986097    | 1078.496686      | M    | <b>582.306830</b>  | 291.657053         | 565.280281     | 283.143779       |                    |                  | 4  |
| 18 | 2287.080726        | 1144.044001       | 2270.054177    | 1135.530726      | 2269.070161    | 1135.038719      | L    | <b>435.271430</b>  | 218.139353         | 418.244881     | 209.626078       |                    |                  | 3  |
| 19 | 2434.149140        | 1217.578208       | 2417.122591    | 1209.064933      | 2416.138575    | 1208.572925      | F    | <b>322.187366</b>  | 161.597321         | 305.160817     | 153.084046       |                    |                  | 2  |
| 20 |                    |                   |                |                  |                |                  | R    | <b>175.118952</b>  | 88.063114          | 158.092403     | 79.549839        |                    |                  | 1  |

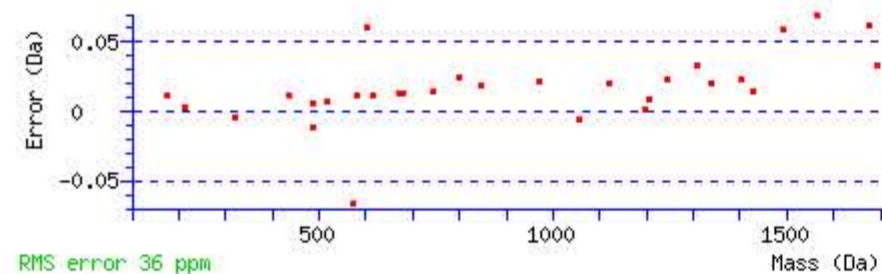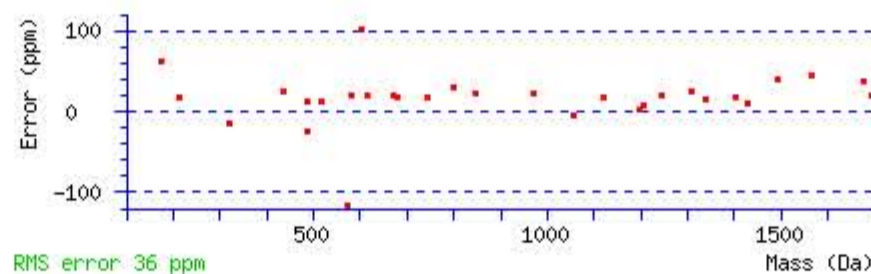

NCBI BLAST search of **IVEGSDAEIGMSPWQVMLFR**

(Parameters: blastp, nr protein database, expect=20000, no filter, PAM30)

Other BLAST [web gateways](#)

All matches to this query

| Score | Mr(calc):   | Delta    | Sequence                    |
|-------|-------------|----------|-----------------------------|
| 46.4  | 2607.253540 | 0.015482 | <b>IVEGSDAEIGMSPWQVMLFR</b> |



# MASCOT Search Results

## Peptide View

MS/MS Fragmentation of **RQEC SIPVCGQDQVT VAMTPR**

Found in **THRB\_HUMAN**, Prothrombin OS=Homo sapiens GN=F2 PE=1 SV=2

Match to Query 68027: 2742.330012 from(915.117280,3+) rtinseconds(2000) index(78518)

Title: Locus:1.1.1.2910.14 File:"2013-07-02 CLN FXIII 60 min 1st FT.wiff"

Data file C:\Program Files (x86)\Matrix Science\Mascot Daemon\mgf4 FXIII 60 min 1st\mascot\_daemon\_merge.mgf

Click mouse within plot area to zoom in by factor of two about that point

Or, Plot from  to  Da

Label all possible matches  Label matches used for scoring

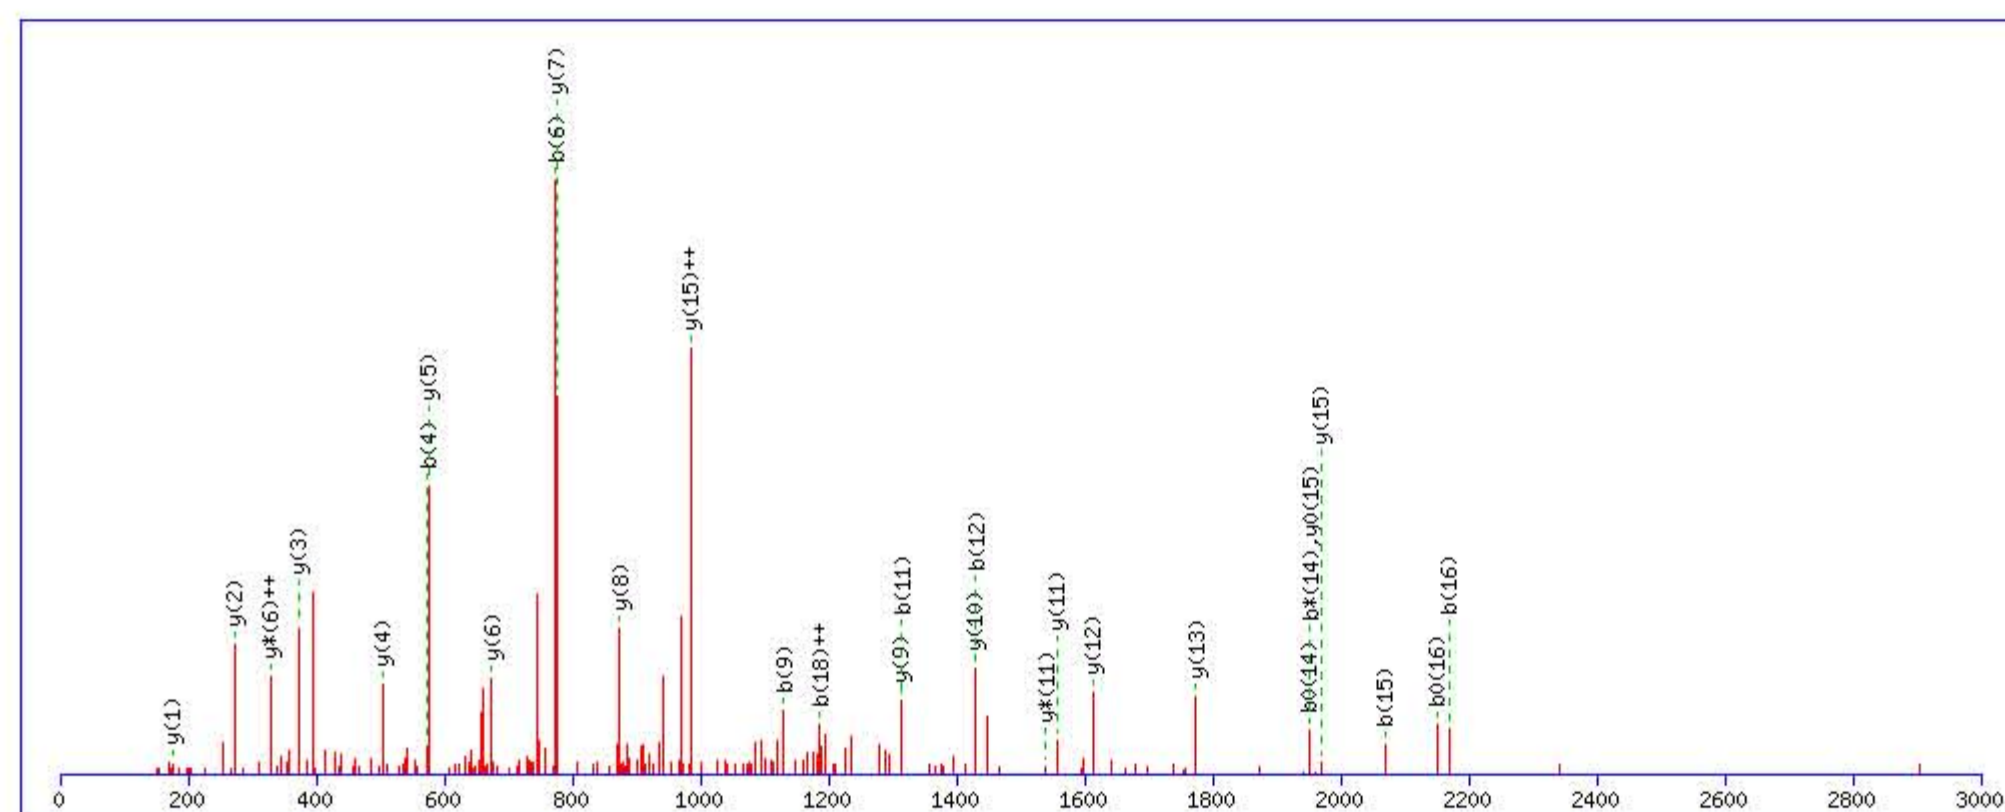

Monoisotopic mass of neutral peptide Mr(calc): 2742.307404

Fixed modifications: Carbamidomethyl (C) (apply to specified residues or termini only)

Variable modifications:

Q13 : Biotin:Thermo-21345 (Q)

Ions Score: 94 Expect: 9.6e-009

Matches : 29/232 fragment ions using 42 most intense peaks [\(help\)](#)

| #  | b                  | b <sup>++</sup>    | b <sup>*</sup>     | b <sup>*++</sup> | b <sup>0</sup>     | b <sup>0++</sup> | Seq. | y                  | y <sup>++</sup>   | y <sup>*</sup>     | y <sup>*++</sup>  | y <sup>0</sup>     | y <sup>0++</sup> | #  |
|----|--------------------|--------------------|--------------------|------------------|--------------------|------------------|------|--------------------|-------------------|--------------------|-------------------|--------------------|------------------|----|
| 1  | 157.108387         | 79.057831          | 140.081838         | 70.544557        |                    |                  | R    |                    |                   |                    |                   |                    |                  | 21 |
| 2  | 285.166965         | 143.087121         | 268.140416         | 134.573846       |                    |                  | Q    | 2587.213551        | 1294.110413       | 2570.187002        | 1285.597139       | 2569.202986        | 1285.105131      | 20 |
| 3  | 414.209558         | 207.608417         | 397.183009         | 199.095143       | 396.198993         | 198.603135       | E    | 2459.154973        | 1230.081124       | 2442.128424        | 1221.567850       | 2441.144408        | 1221.075842      | 19 |
| 4  | <b>574.240207</b>  | 287.623742         | 557.213658         | 279.110467       | 556.229642         | 278.618459       | C    | 2330.112380        | 1165.559828       | 2313.085831        | 1157.046553       | 2312.101815        | 1156.554545      | 18 |
| 5  | 661.272235         | 331.139756         | 644.245686         | 322.626481       | 643.261670         | 322.134473       | S    | 2170.081731        | 1085.544503       | 2153.055182        | 1077.031229       | 2152.071166        | 1076.539221      | 17 |
| 6  | <b>774.356299</b>  | 387.681788         | 757.329750         | 379.168513       | 756.345734         | 378.676505       | I    | 2083.049703        | 1042.028489       | 2066.023154        | 1033.515215       | 2065.039138        | 1033.023207      | 16 |
| 7  | 871.409063         | 436.208170         | 854.382514         | 427.694895       | 853.398498         | 427.202887       | P    | <b>1969.965639</b> | <b>985.486458</b> | 1952.939090        | 976.973183        | <b>1951.955074</b> | 976.481175       | 15 |
| 8  | 970.477477         | 485.742377         | 953.450928         | 477.229102       | 952.466912         | 476.737094       | V    | 1872.912875        | 936.960076        | 1855.886326        | 928.446801        | 1854.902310        | 927.954793       | 14 |
| 9  | <b>1130.508126</b> | 565.757701         | 1113.481577        | 557.244427       | 1112.497561        | 556.752418       | C    | <b>1773.844461</b> | 887.425868        | 1756.817912        | 878.912594        | 1755.833896        | 878.420586       | 13 |
| 10 | 1187.529590        | 594.268433         | 1170.503041        | 585.755158       | 1169.519025        | 585.263150       | G    | <b>1613.813812</b> | 807.410544        | 1596.787263        | 798.897270        | 1595.803247        | 798.405262       | 12 |
| 11 | <b>1315.588168</b> | 658.297722         | 1298.561619        | 649.784448       | 1297.577603        | 649.292440       | Q    | <b>1556.792348</b> | 778.899812        | <b>1539.765799</b> | 770.386538        | 1538.781783        | 769.894530       | 11 |
| 12 | <b>1430.615111</b> | 715.811194         | 1413.588562        | 707.297919       | 1412.604546        | 706.805911       | D    | <b>1428.733770</b> | 714.870523        | 1411.707221        | 706.357249        | 1410.723205        | 705.865241       | 10 |
| 13 | 1869.840437        | 935.423857         | 1852.813888        | 926.910582       | 1851.829872        | 926.418574       | Q    | <b>1313.706827</b> | 657.357052        | 1296.680278        | 648.843777        | 1295.696262        | 648.351769       | 9  |
| 14 | 1968.908851        | 984.958064         | <b>1951.882302</b> | 976.444789       | <b>1950.898286</b> | 975.952781       | V    | <b>874.481501</b>  | 437.744389        | 857.454952         | 429.231114        | 856.470936         | 428.739106       | 8  |
| 15 | <b>2069.956530</b> | 1035.481903        | 2052.929981        | 1026.968628      | 2051.945965        | 1026.476620      | T    | <b>775.413087</b>  | 388.210181        | 758.386538         | 379.696907        | 757.402522         | 379.204899       | 7  |
| 16 | <b>2169.024944</b> | 1085.016110        | 2151.998395        | 1076.502835      | <b>2151.014379</b> | 1076.010827      | V    | <b>674.365408</b>  | 337.686342        | 657.338859         | <b>329.173067</b> | 656.354843         | 328.681059       | 6  |
| 17 | 2240.062058        | 1120.534667        | 2223.035509        | 1112.021392      | 2222.051493        | 1111.529384      | A    | <b>575.296994</b>  | 288.152135        | 558.270445         | 279.638861        | 557.286429         | 279.146853       | 5  |
| 18 | 2371.102543        | <b>1186.054909</b> | 2354.075994        | 1177.541635      | 2353.091978        | 1177.049627      | M    | <b>504.259880</b>  | 252.633578        | 487.233331         | 244.120303        | 486.249315         | 243.628295       | 4  |
| 19 | 2472.150222        | 1236.578749        | 2455.123673        | 1228.065474      | 2454.139657        | 1227.573466      | T    | <b>373.219395</b>  | 187.113335        | 356.192846         | 178.600061        | 355.208830         | 178.108053       | 3  |
| 20 | 2569.202986        | 1285.105131        | 2552.176437        | 1276.591856      | 2551.192421        | 1276.099848      | P    | <b>272.171716</b>  | 136.589496        | 255.145167         | 128.076221        |                    |                  | 2  |
| 21 |                    |                    |                    |                  |                    |                  | R    | <b>175.118952</b>  | 88.063114         | 158.092403         | 79.549839         |                    |                  | 1  |

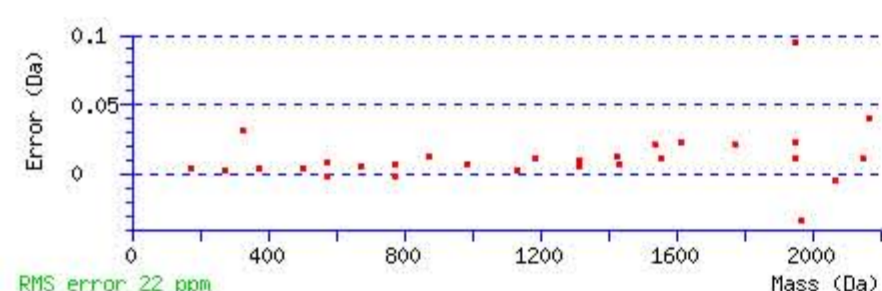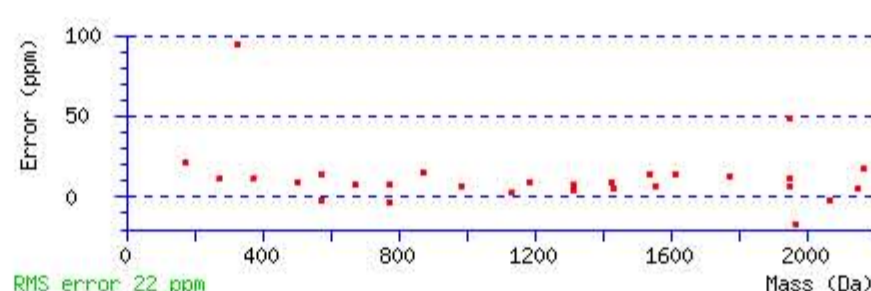

NCBI BLAST search of [RQEC SIPVCGQDQVT VAMTPR](#)

(Parameters: blastp, nr protein database, expect=20000, no filter, PAM30)

Other BLAST [web gateways](#)

All matches to this query

| Score | Mr(calc):   | Delta    | Sequence                                |
|-------|-------------|----------|-----------------------------------------|
| 94.4  | 2742.307404 | 0.022608 | <a href="#">RQEC SIPVCGQDQVT VAMTPR</a> |
| 68.3  | 2742.307404 | 0.022608 | <a href="#">RQEC SIPVCGQDQVT VAMTPR</a> |
| 22.9  | 2742.307404 | 0.022608 | <a href="#">RQEC SIPVCGQDQVT VAMTPR</a> |



# MASCOT Search Results

## Peptide View

MS/MS Fragmentation of **RQECSIPVCGQDQVTVAMTPR**

Found in **THRB\_HUMAN**, Prothrombin OS=Homo sapiens GN=F2 PE=1 SV=2

Match to Query 72078: 3053.509416 from(764.384630,4+) rtinseconds(2167) index(61713)

Title: Locus:1.1.1.3059.18 File:"2013-07-02 CLN FXIII 60 min 1st F 4.wiff"

Data file C:\Program Files (x86)\Matrix Science\Mascot Daemon\mgf4 FXIII 60 min 1st\mascot\_daemon\_merge.mgf

Click mouse within plot area to zoom in by factor of two about that point

Or, Plot from  to  Da

Label all possible matches  Label matches used for scoring

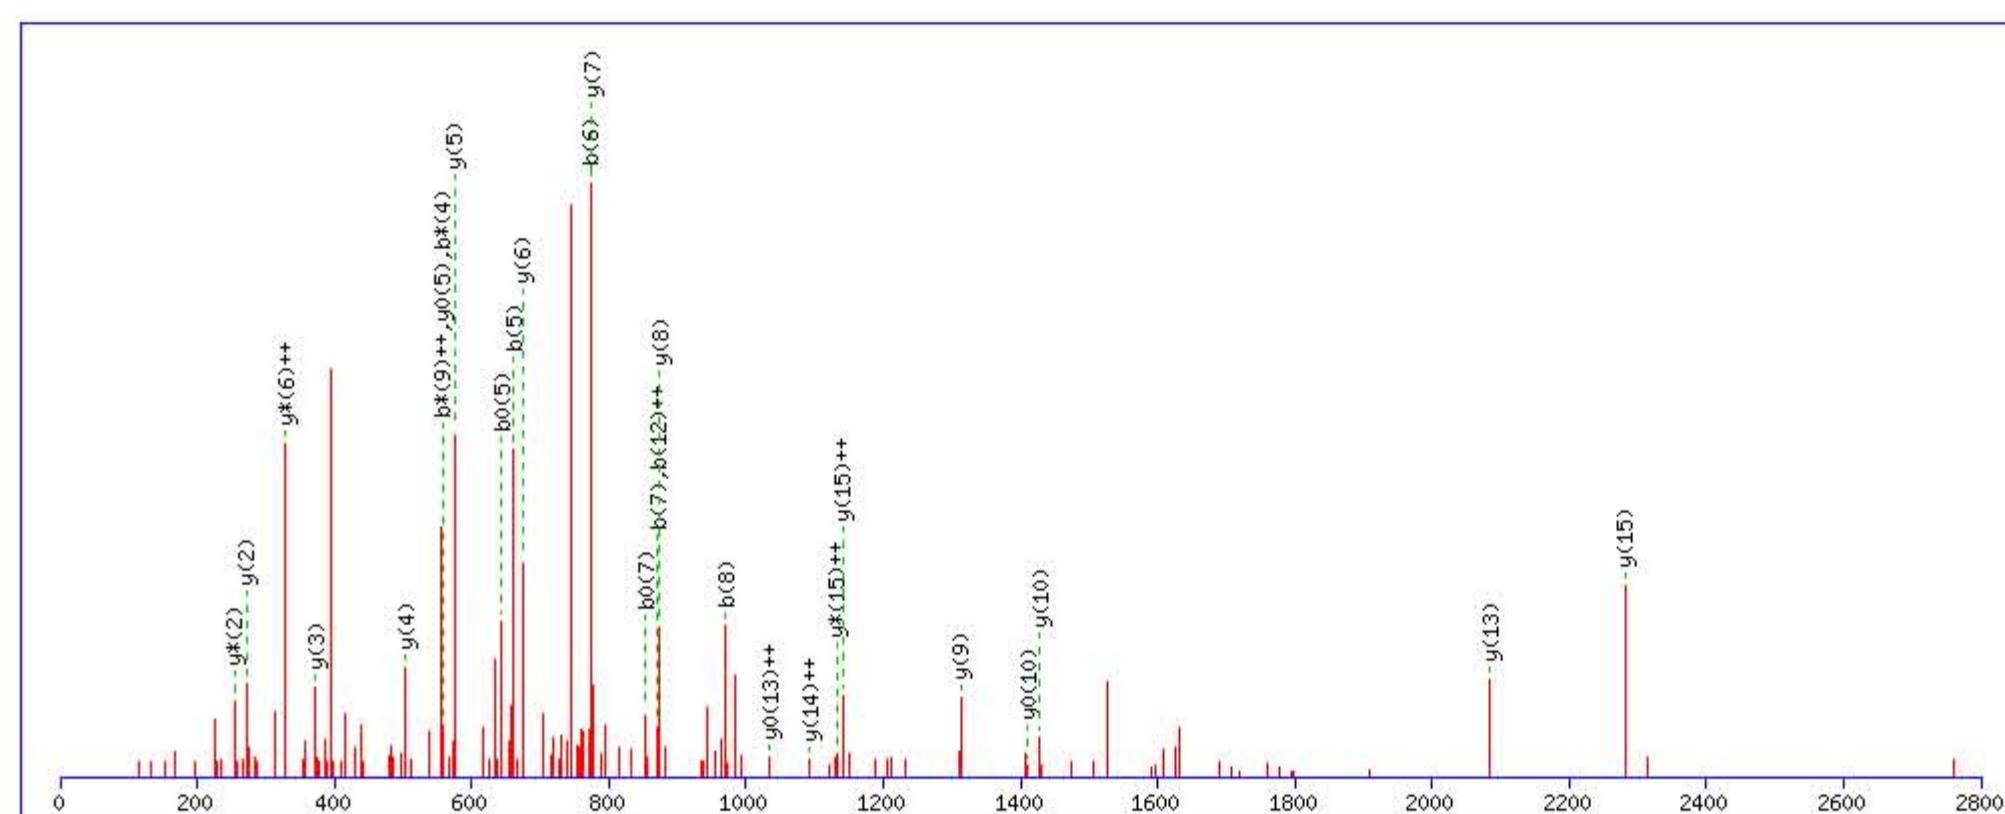

Monoisotopic mass of neutral peptide Mr(calc): 3053.474152

Fixed modifications: Carbamidomethyl (C) (apply to specified residues or termini only)

Variable modifications:

Q11 : Biotin:Thermo-21345 (Q)

Q13 : Biotin:Thermo-21345 (Q)

Ions Score: 46 Expect: 0.00077

Matches : 28/232 fragment ions using 55 most intense peaks [\(help\)](#)

| #  | b                 | b <sup>++</sup>   | b <sup>+</sup>    | b <sup>*++</sup>  | b <sup>0</sup>    | b <sup>0++</sup> | Seq. | y                  | y <sup>++</sup>    | y <sup>+</sup>    | y <sup>*++</sup>   | y <sup>0</sup>     | y <sup>0++</sup>   | #  |
|----|-------------------|-------------------|-------------------|-------------------|-------------------|------------------|------|--------------------|--------------------|-------------------|--------------------|--------------------|--------------------|----|
| 1  | 157.108387        | 79.057831         | 140.081838        | 70.544557         |                   |                  | R    |                    |                    |                   |                    |                    |                    | 21 |
| 2  | 285.166965        | 143.087121        | 268.140416        | 134.573846        |                   |                  | Q    | 2898.380299        | 1449.693787        | 2881.353750       | 1441.180513        | 2880.369734        | 1440.688505        | 20 |
| 3  | 414.209558        | 207.608417        | 397.183009        | 199.095143        | 396.198993        | 198.603135       | E    | 2770.321721        | 1385.664498        | 2753.295172       | 1377.151224        | 2752.311156        | 1376.659216        | 19 |
| 4  | 574.240207        | 287.623742        | <b>557.213658</b> | 279.110467        | 556.229642        | 278.618459       | C    | 2641.279128        | 1321.143202        | 2624.252579       | 1312.629927        | 2623.268563        | 1312.137919        | 18 |
| 5  | <b>661.272235</b> | 331.139756        | 644.245686        | 322.626481        | <b>643.261670</b> | 322.134473       | S    | 2481.248479        | 1241.127877        | 2464.221930       | 1232.614603        | 2463.237914        | 1232.122595        | 17 |
| 6  | <b>774.356299</b> | 387.681788        | 757.329750        | 379.168513        | 756.345734        | 378.676505       | I    | 2394.216451        | 1197.611863        | 2377.189902       | 1189.098589        | 2376.205886        | 1188.606581        | 16 |
| 7  | <b>871.409063</b> | 436.208170        | 854.382514        | 427.694895        | <b>853.398498</b> | 427.202887       | P    | <b>2281.132387</b> | <b>1141.069831</b> | 2264.105838       | <b>1132.556557</b> | 2263.121822        | 1132.064549        | 15 |
| 8  | <b>970.477477</b> | 485.742377        | 953.450928        | 477.229102        | 952.466912        | 476.737094       | V    | 2184.079623        | <b>1092.543449</b> | 2167.053074       | 1084.030175        | 2166.069058        | 1083.538167        | 14 |
| 9  | 1130.508126       | 565.757701        | 1113.481577       | <b>557.244427</b> | 1112.497561       | 556.752418       | C    | <b>2085.011209</b> | 1043.009242        | 2067.984660       | 1034.495968        | 2067.000644        | <b>1034.003960</b> | 13 |
| 10 | 1187.529590       | 594.268433        | 1170.503041       | 585.755158        | 1169.519025       | 585.263150       | G    | 1924.980560        | 962.993918         | 1907.954011       | 954.480643         | 1906.969995        | 953.988635         | 12 |
| 11 | 1626.754916       | 813.881096        | 1609.728367       | 805.367822        | 1608.744351       | 804.875814       | Q    | 1867.959096        | 934.483186         | 1850.932547       | 925.969911         | 1849.948531        | 925.477903         | 11 |
| 12 | 1741.781859       | <b>871.394568</b> | 1724.755310       | 862.881293        | 1723.771294       | 862.389285       | D    | <b>1428.733770</b> | 714.870523         | 1411.707221       | 706.357248         | <b>1410.723205</b> | 705.865240         | 10 |
| 13 | 2181.007185       | 1091.007230       | 2163.980636       | 1082.493956       | 2162.996620       | 1082.001948      | Q    | <b>1313.706827</b> | 657.357051         | 1296.680278       | 648.843777         | 1295.696262        | 648.351769         | 9  |
| 14 | 2280.075599       | 1140.541437       | 2263.049050       | 1132.028163       | 2262.065034       | 1131.536155      | V    | <b>874.481501</b>  | 437.744388         | 857.454952        | 429.231114         | 856.470936         | 428.739106         | 8  |
| 15 | 2381.123278       | 1191.065277       | 2364.096729       | 1182.552002       | 2363.112713       | 1182.059994      | T    | <b>775.413087</b>  | 388.210181         | 758.386538        | 379.696907         | 757.402522         | 379.204899         | 7  |
| 16 | 2480.191692       | 1240.599484       | 2463.165143       | 1232.086209       | 2462.181127       | 1231.594201      | V    | <b>674.365408</b>  | 337.686342         | 657.338859        | <b>329.173067</b>  | 656.354843         | 328.681059         | 6  |
| 17 | 2551.228806       | 1276.118041       | 2534.202257       | 1267.604766       | 2533.218241       | 1267.112758      | A    | <b>575.296994</b>  | 288.152135         | 558.270445        | 279.638861         | <b>557.286429</b>  | 279.146853         | 5  |
| 18 | 2682.269291       | 1341.638283       | 2665.242742       | 1333.125009       | 2664.258726       | 1332.633001      | M    | <b>504.259880</b>  | 252.633578         | 487.233331        | 244.120303         | 486.249315         | 243.628295         | 4  |
| 19 | 2783.316970       | 1392.162123       | 2766.290421       | 1383.648848       | 2765.306405       | 1383.156840      | T    | <b>373.219395</b>  | 187.113335         | 356.192846        | 178.600061         | 355.208830         | 178.108053         | 3  |
| 20 | 2880.369734       | 1440.688505       | 2863.343185       | 1432.175230       | 2862.359169       | 1431.683222      | P    | <b>272.171716</b>  | 136.589496         | <b>255.145167</b> | 128.076221         |                    |                    | 2  |
| 21 |                   |                   |                   |                   |                   |                  | R    | 175.118952         | 88.063114          | 158.092403        | 79.549839          |                    |                    | 1  |

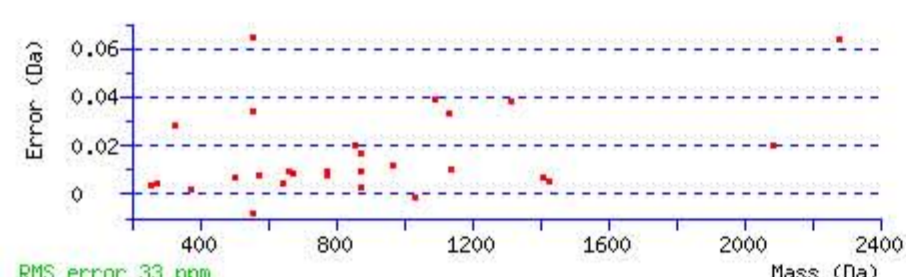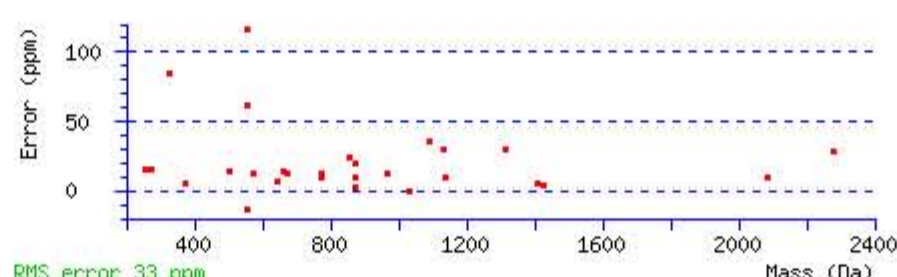

NCBI BLAST search of [RQECSIPVCGQDQVTVAMTPR](#)

(Parameters: blastp, nr protein database, expect=20000, no filter, PAM30)

Other BLAST [web gateways](#)

All matches to this query

| Score | Mr(calc):   | Delta    | Sequence                              |
|-------|-------------|----------|---------------------------------------|
| 45.9  | 3053.474152 | 0.035264 | <a href="#">RQECSIPVCGQDQVTVAMTPR</a> |
| 17.3  | 3053.474152 | 0.035264 | <a href="#">RQECSIPVCGQDQVTVAMTPR</a> |
| 4.5   | 3053.474152 | 0.035264 | <a href="#">RQECSIPVCGQDQVTVAMTPR</a> |



# **MASCOT** Mascot Search Results

## Peptide View

MS/MS Fragmentation of **CINQLLCK**

Found in **SEPP1\_HUMAN**, Selenoprotein P OS=Homo sapiens GN=SEPP1 PE=1 SV=3

Match to Query 32959: 1358.697608 from(680.356080,2+) rtinseconds(1979) index(78348)

Title: Locus:1.1.1.2903.17 File:"2013-07-02 CLN FXIII 60 min 1st FT.wiff"

Data file C:\Program Files (x86)\Matrix Science\Mascot Daemon\mgf4 FXIII 60 min 1st\mascot\_daemon\_merge.mgf

Click mouse within plot area to zoom in by factor of two about that point

Or, Plot from  to  Da

Label all possible matches  Label matches used for scoring

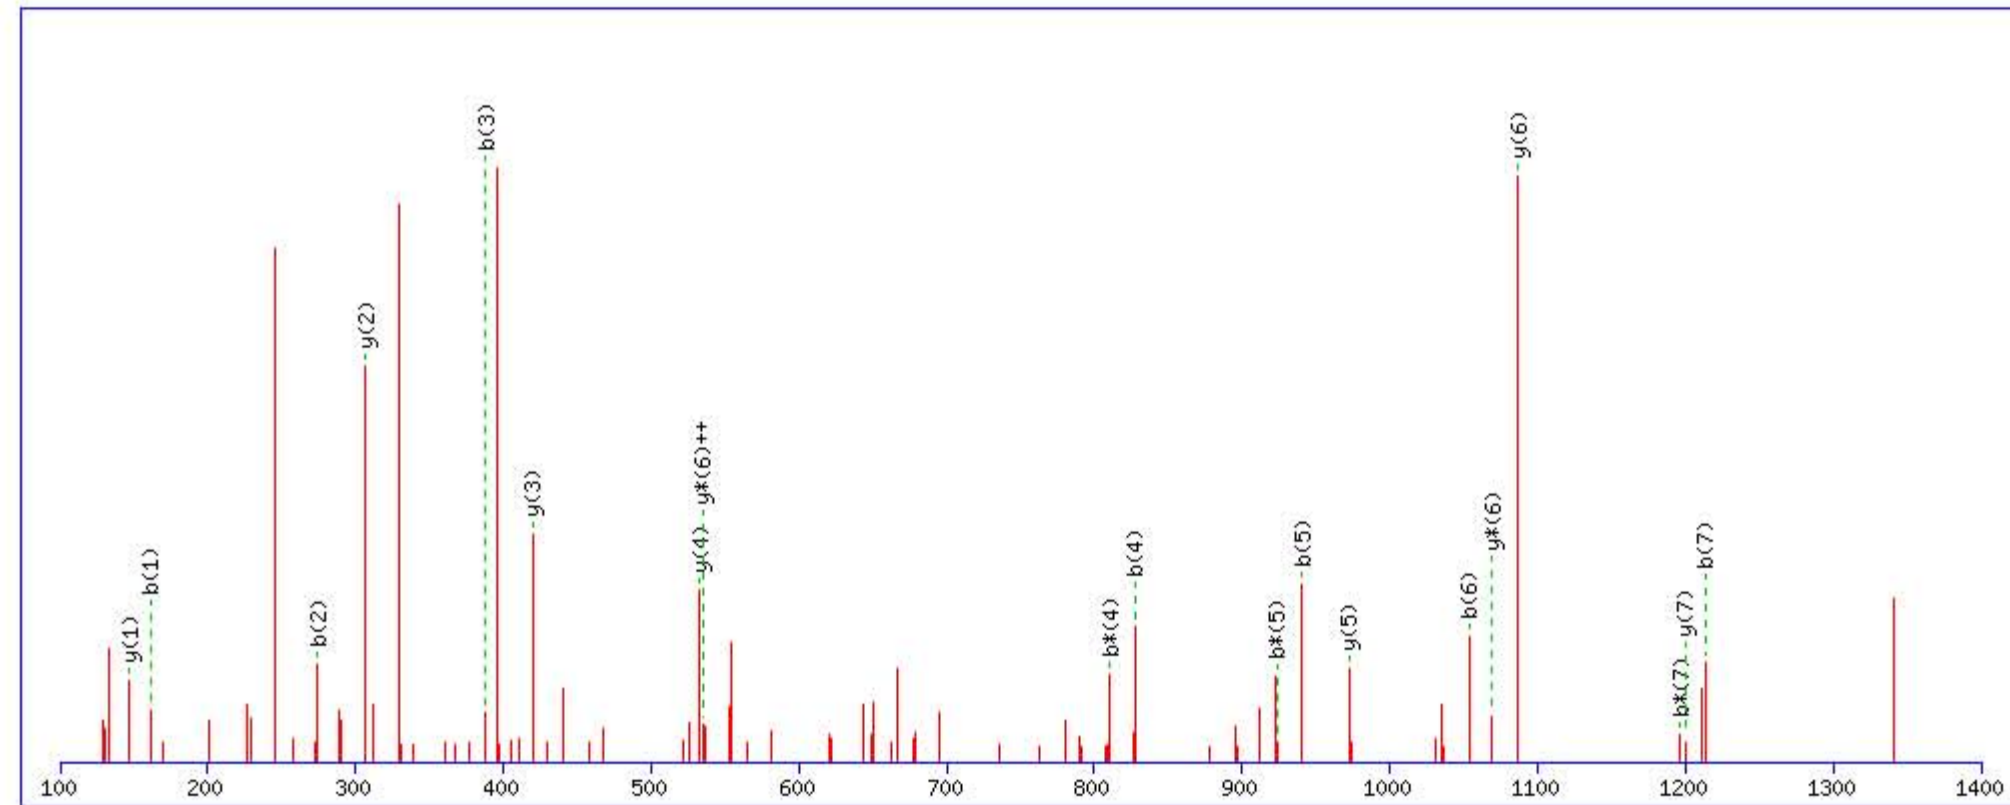

Monoisotopic mass of neutral peptide Mr(calc): 1358.687256

Fixed modifications: Carbamidomethyl (C) (apply to specified residues or termini only)

Variable modifications:

Q4 : Biotin:Thermo-21345 (Q)

Ions Score: 31 Expect: 0.0031

Matches : 19/52 fragment ions using 44 most intense peaks [\(help\)](#)

| # | b           | b <sup>++</sup> | b*          | b <sup>*++</sup> | Seq. | y           | y <sup>++</sup> | y*          | y <sup>*++</sup> | # |
|---|-------------|-----------------|-------------|------------------|------|-------------|-----------------|-------------|------------------|---|
| 1 | 161.037925  | 81.022600       |             |                  | C    |             |                 |             |                  | 8 |
| 2 | 274.121989  | 137.564632      |             |                  | I    | 1199.663898 | 600.335587      | 1182.637349 | 591.822313       | 7 |
| 3 | 388.164916  | 194.586096      | 371.138367  | 186.072822       | N    | 1086.579834 | 543.793555      | 1069.553285 | 535.280281       | 6 |
| 4 | 827.390242  | 414.198759      | 810.363693  | 405.685485       | Q    | 972.536907  | 486.772092      | 955.510358  | 478.258817       | 5 |
| 5 | 940.474306  | 470.740791      | 923.447757  | 462.227517       | L    | 533.311581  | 267.159429      | 516.285032  | 258.646154       | 4 |
| 6 | 1053.558370 | 527.282823      | 1036.531821 | 518.769549       | L    | 420.227517  | 210.617396      | 403.200968  | 202.104122       | 3 |
| 7 | 1213.589019 | 607.298148      | 1196.562470 | 598.784873       | C    | 307.143453  | 154.075365      | 290.116904  | 145.562090       | 2 |
| 8 |             |                 |             |                  | K    | 147.112804  | 74.060040       | 130.086255  | 65.546765        | 1 |

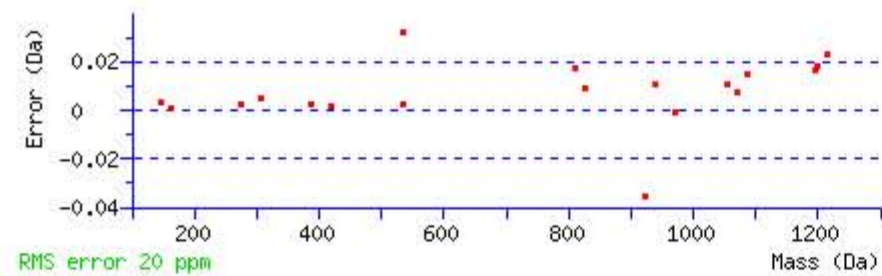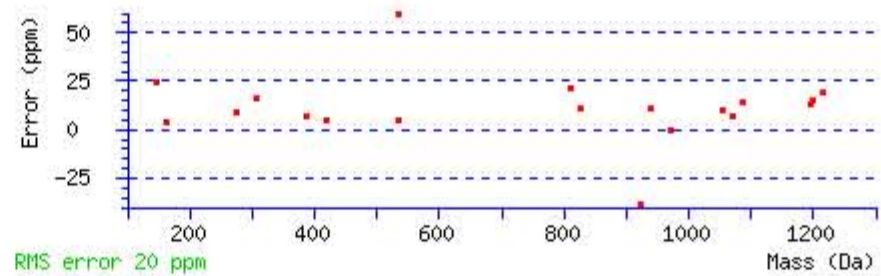

NCBI BLAST search of **CINQLLCK**

(Parameters: blastp, nr protein database, expect=20000, no filter, PAM30)

Other BLAST [web gateways](#)

## All matches to this query

| Score | Mr(calc):   | Delta     | Sequence                      |
|-------|-------------|-----------|-------------------------------|
| 31.0  | 1358.687256 | 0.010352  | <a href="#">CINQLLCK</a>      |
| 4.0   | 1358.701630 | -0.004022 | <a href="#">KKIYAMGGGSYGK</a> |
| 2.3   | 1358.705017 | -0.007409 | <a href="#">CLLNVQSSK</a>     |
| 0.2   | 1358.679855 | 0.017753  | <a href="#">AMAGQRVELPCK</a>  |

Mascot: <http://www.matrixscience.com/>



# MASCOT SEARCH RESULTS

## Peptide View

MS/MS Fragmentation of **DMPASEDLQDLQK**

Found in **SEPP1\_HUMAN**, Selenoprotein P OS=Homo sapiens GN=SEPP1 PE=1 SV=3

Match to Query 48409: 1799.854362 from(600.958730,3+) rtinseconds(2161) index(43162)

Title: Locus:1.1.1.3036.12 File:"2013-07-02 CLN FXIII 60 min 1st F 3.wiff"

Data file C:\Program Files (x86)\Matrix Science\Mascot Daemon\mgf4 FXIII 60 min 1st\mascot\_daemon\_merge.mgf

Click mouse within plot area to zoom in by factor of two about that point

Or, Plot from  to  Da

Label all possible matches  Label matches used for scoring

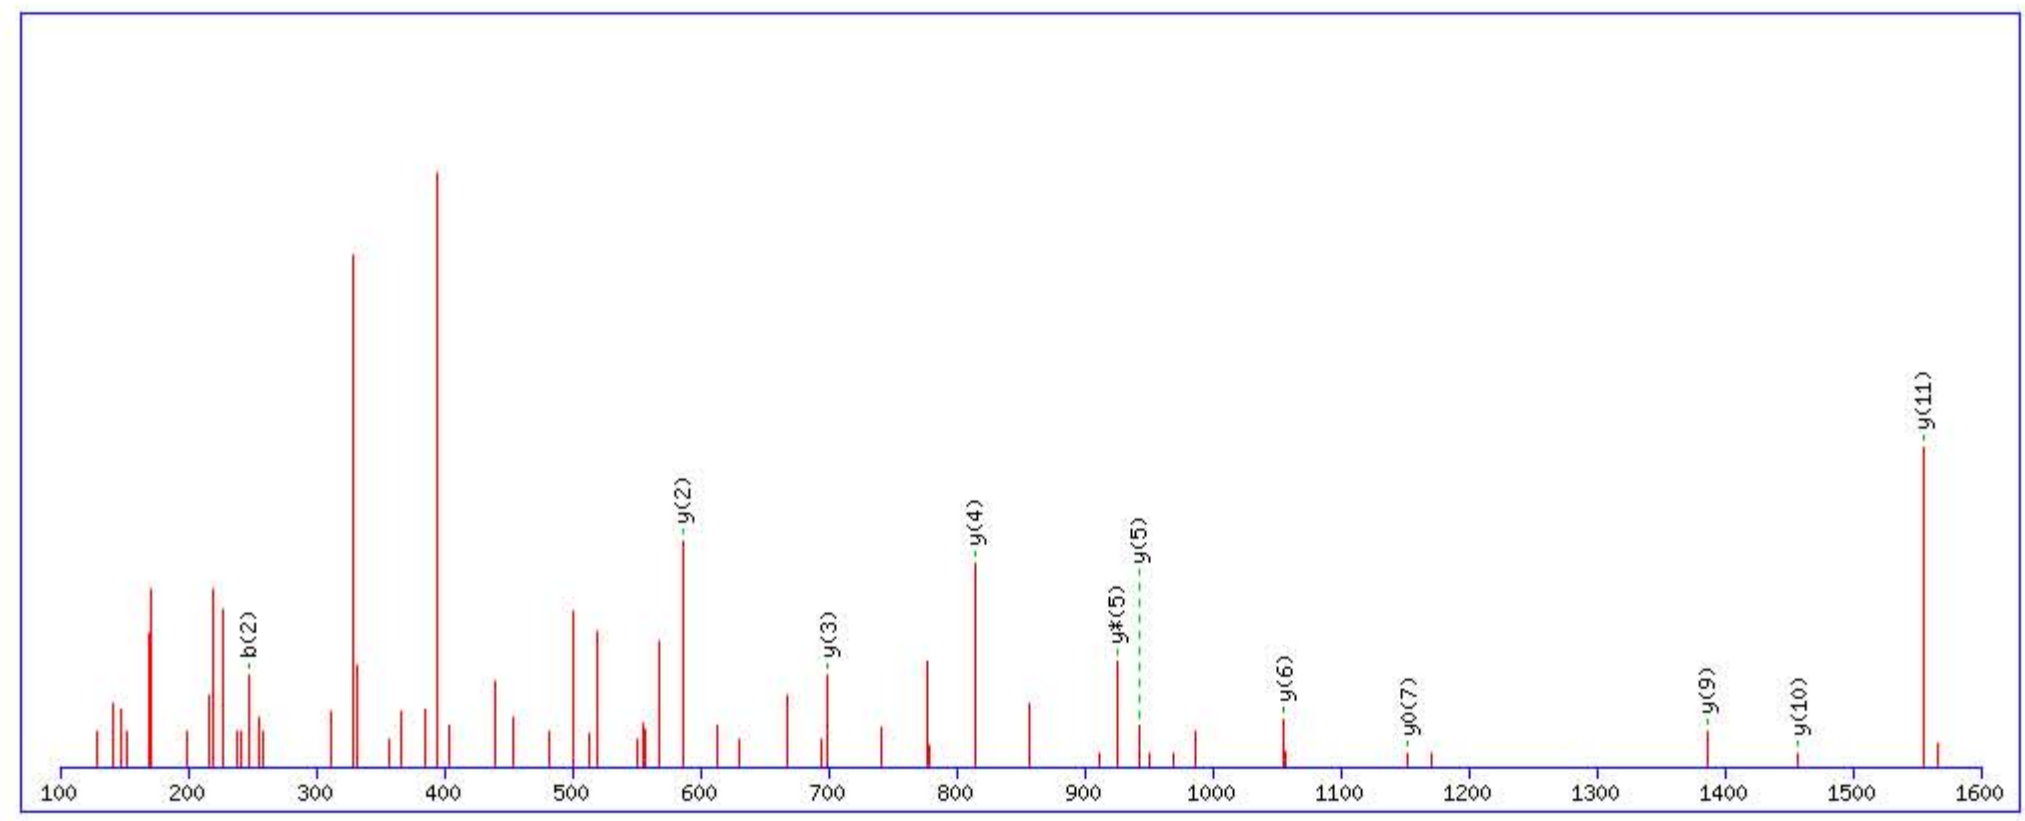

Monoisotopic mass of neutral peptide Mr(calc): 1799.843353

Fixed modifications: Carbamidomethyl (C) (apply to specified residues or termini only)

Variable modifications:

Q12 : Biotin:Thermo-21345 (Q)

Ions Score: 62 Expect: 1e-005

Matches : 11/122 fragment ions using 14 most intense peaks [\(help\)](#)

| #  | b                 | b <sup>++</sup> | b <sup>*</sup> | b <sup>*++</sup> | b <sup>0</sup> | b <sup>0++</sup> | Seq. | y                  | y <sup>++</sup> | y <sup>*</sup>    | y <sup>*++</sup> | y <sup>0</sup>     | y <sup>0++</sup> | #  |
|----|-------------------|-----------------|----------------|------------------|----------------|------------------|------|--------------------|-----------------|-------------------|------------------|--------------------|------------------|----|
| 1  | 116.034219        | 58.520748       |                |                  | 98.023654      | 49.515465        | D    |                    |                 |                   |                  |                    |                  | 13 |
| 2  | <b>247.074704</b> | 124.040990      |                |                  | 229.064139     | 115.035708       | M    | 1685.823706        | 843.415491      | 1668.797157       | 834.902217       | 1667.813141        | 834.410209       | 12 |
| 3  | 344.127468        | 172.567372      |                |                  | 326.116903     | 163.562089       | P    | <b>1554.783221</b> | 777.895249      | 1537.756672       | 769.381974       | 1536.772656        | 768.889966       | 11 |
| 4  | 415.164582        | 208.085929      |                |                  | 397.154017     | 199.080646       | A    | <b>1457.730457</b> | 729.368867      | 1440.703908       | 720.855592       | 1439.719892        | 720.363584       | 10 |
| 5  | 502.196610        | 251.601943      |                |                  | 484.186045     | 242.596660       | S    | <b>1386.693343</b> | 693.850310      | 1369.666794       | 685.337035       | 1368.682778        | 684.845027       | 9  |
| 6  | 631.239203        | 316.123240      |                |                  | 613.228638     | 307.117957       | E    | 1299.661315        | 650.334296      | 1282.634766       | 641.821021       | 1281.650750        | 641.329013       | 8  |
| 7  | 746.266146        | 373.636711      |                |                  | 728.255581     | 364.631428       | D    | 1170.618722        | 585.812999      | 1153.592173       | 577.299725       | <b>1152.608157</b> | 576.807717       | 7  |
| 8  | 859.350210        | 430.178743      |                |                  | 841.339645     | 421.173460       | L    | <b>1055.591779</b> | 528.299528      | 1038.565230       | 519.786253       | 1037.581214        | 519.294245       | 6  |
| 9  | 987.408788        | 494.208032      | 970.382239     | 485.694757       | 969.398223     | 485.202749       | Q    | <b>942.507715</b>  | 471.757496      | <b>925.481166</b> | 463.244221       | 924.497150         | 462.752213       | 5  |
| 10 | 1102.435731       | 551.721504      | 1085.409182    | 543.208229       | 1084.425166    | 542.716221       | D    | <b>814.449137</b>  | 407.728207      | 797.422588        | 399.214932       | 796.438572         | 398.722924       | 4  |
| 11 | 1215.519795       | 608.263535      | 1198.493246    | 599.750261       | 1197.509230    | 599.258253       | L    | <b>699.422194</b>  | 350.214735      | 682.395645        | 341.701461       |                    |                  | 3  |
| 12 | 1654.745121       | 827.876199      | 1637.718572    | 819.362924       | 1636.734556    | 818.870916       | Q    | <b>586.338130</b>  | 293.672703      | 569.311581        | 285.159429       |                    |                  | 2  |
| 13 |                   |                 |                |                  |                |                  | K    | 147.112804         | 74.060040       | 130.086255        | 65.546765        |                    |                  | 1  |

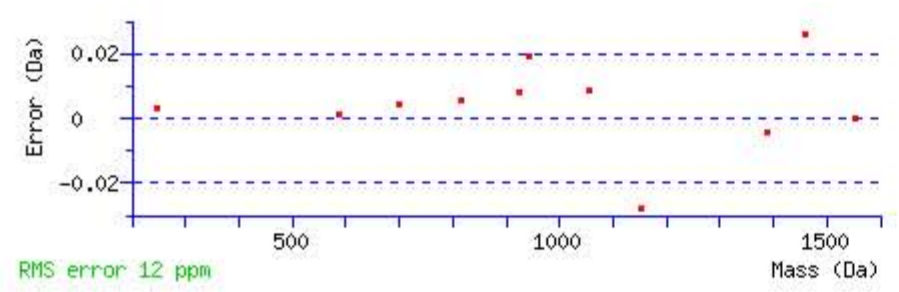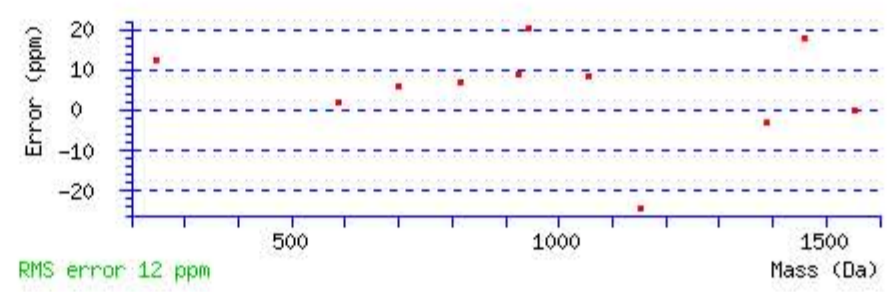

NCBI BLAST search of **DMPASEDLQDLQK**

(Parameters: blastp, nr protein database, expect=20000, no filter, PAM30)

Other BLAST [web gateways](#)

All matches to this query

| Score | Mr(calc):   | Delta    | Sequence                      |
|-------|-------------|----------|-------------------------------|
| 62.2  | 1799.843353 | 0.011009 | <a href="#">DMPASEDLQDLQK</a> |
| 20.9  | 1799.843353 | 0.011009 | <a href="#">DMPASEDLQDLQK</a> |



# MASCOT SCIENCE Mascot Search Results

## Peptide View

MS/MS Fragmentation of **HQTVPQNTGGK**

Found in **TRFE\_HUMAN**, Serotransferrin OS=Homo sapiens GN=TF PE=1 SV=3

Match to Query 37895: 1476.754602 from(493.258810,3+) rtinseconds(1186) index(73073)

Title: Locus:1.1.1.2627.15 File:"2013-07-02 CLN FXIII 60 min 1st FT.wiff"

Data file C:\Program Files (x86)\Matrix Science\Mascot Daemon\mgf4 FXIII 60 min 1st\mascot\_daemon\_merge.mgf

Click mouse within plot area to zoom in by factor of two about that point

Or, Plot from  to  Da

Label all possible matches  Label matches used for scoring

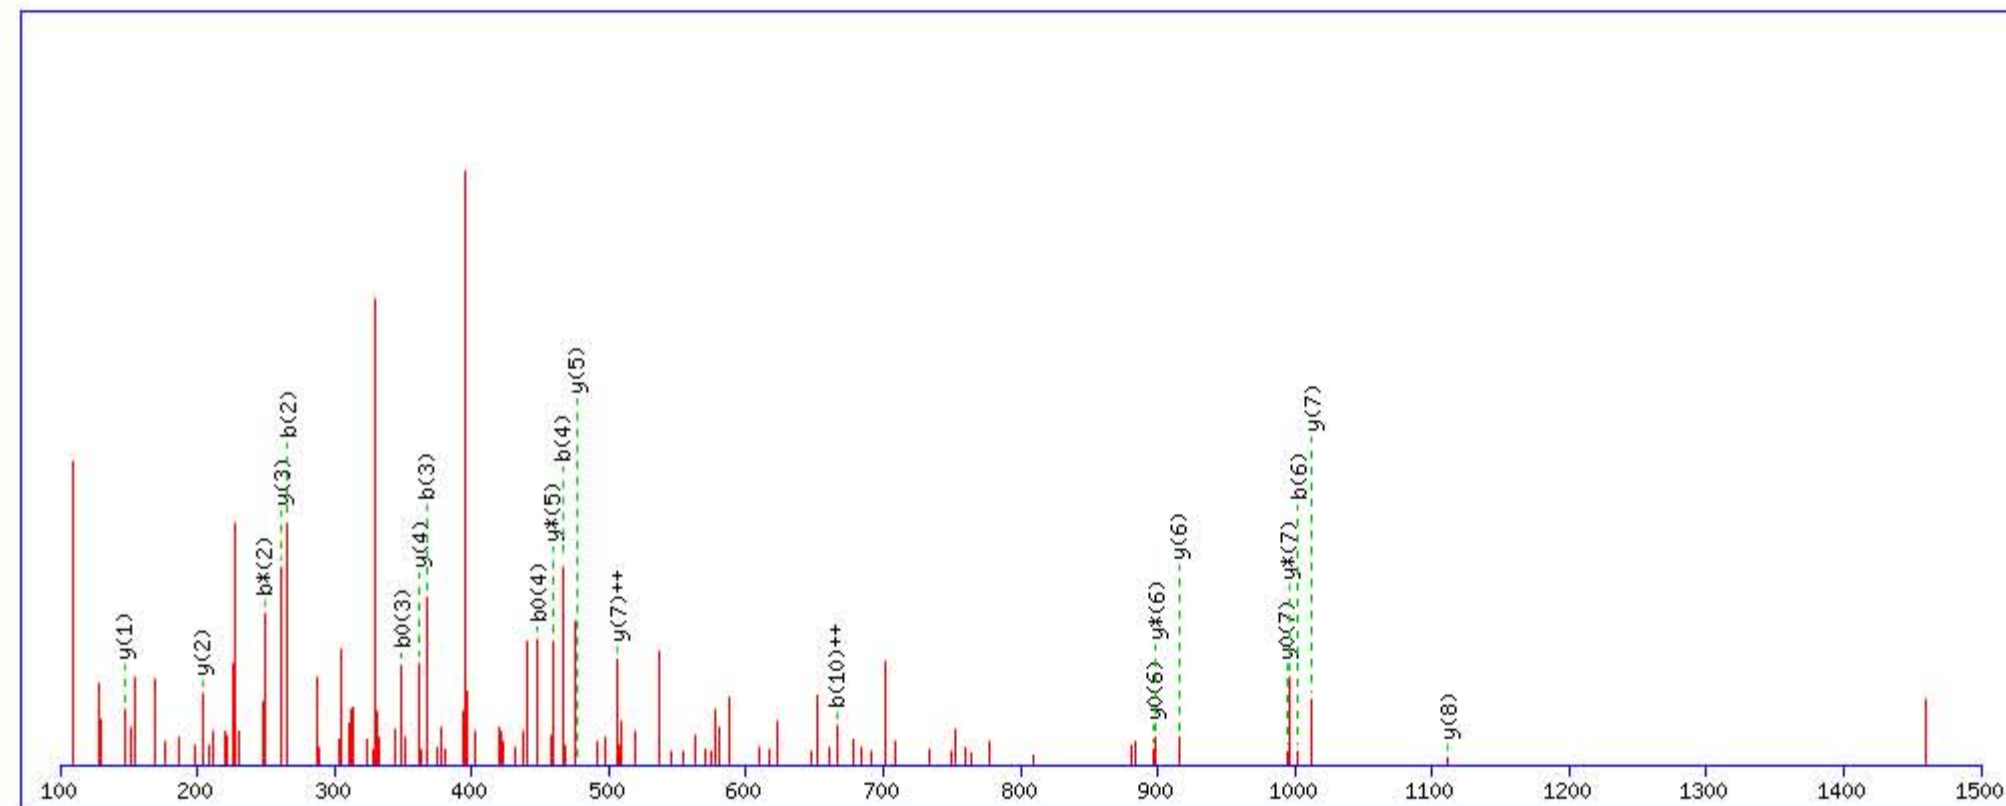

Monoisotopic mass of neutral peptide Mr(calc): 1476.750748

Fixed modifications: Carbamidomethyl (C) (apply to specified residues or termini only)

Variable modifications:

Q6 : Biotin:Thermo-21345 (Q)

Ions Score: 31 Expect: 0.019

Matches : 22/108 fragment ions using 54 most intense peaks [\(help\)](#)

| #  | b                  | b <sup>++</sup>   | b <sup>+</sup>    | b <sup>+++</sup> | b <sup>0</sup>    | b <sup>0++</sup> | Seq. | y                  | y <sup>++</sup>   | y <sup>+</sup>    | y <sup>+++</sup> | y <sup>0</sup>    | y <sup>0++</sup> | #  |
|----|--------------------|-------------------|-------------------|------------------|-------------------|------------------|------|--------------------|-------------------|-------------------|------------------|-------------------|------------------|----|
| 1  | 138.066188         | 69.536732         |                   |                  |                   |                  | H    |                    |                   |                   |                  |                   |                  | 11 |
| 2  | <b>266.124766</b>  | 133.566021        | <b>249.098217</b> | 125.052746       |                   |                  | Q    | 1340.699099        | 670.853187        | 1323.672550       | 662.339913       | 1322.688534       | 661.847905       | 10 |
| 3  | <b>367.172445</b>  | 184.089860        | 350.145896        | 175.576586       | <b>349.161880</b> | 175.084578       | T    | 1212.640521        | 606.823899        | 1195.613972       | 598.310624       | 1194.629956       | 597.818616       | 9  |
| 4  | <b>466.240859</b>  | 233.624068        | 449.214310        | 225.110793       | <b>448.230294</b> | 224.618785       | V    | <b>1111.592842</b> | 556.300059        | 1094.566293       | 547.786784       | 1093.582277       | 547.294776       | 8  |
| 5  | 563.293623         | 282.150450        | 546.267074        | 273.637175       | 545.283058        | 273.145167       | P    | <b>1012.524428</b> | <b>506.765852</b> | <b>995.497879</b> | 498.252577       | <b>994.513863</b> | 497.760569       | 7  |
| 6  | <b>1002.518949</b> | 501.763113        | 985.492400        | 493.249838       | 984.508384        | 492.757830       | Q    | <b>915.471664</b>  | 458.239470        | <b>898.445115</b> | 449.726195       | <b>897.461099</b> | 449.234187       | 6  |
| 7  | 1116.561876        | 558.784576        | 1099.535327       | 550.271302       | 1098.551311       | 549.779293       | N    | <b>476.246338</b>  | 238.626807        | <b>459.219789</b> | 230.113532       | 458.235773        | 229.621524       | 5  |
| 8  | 1217.609555        | 609.308416        | 1200.583006       | 600.795141       | 1199.598990       | 600.303133       | T    | <b>362.203411</b>  | 181.605343        | 345.176862        | 173.092069       | 344.192846        | 172.600061       | 4  |
| 9  | 1274.631019        | 637.819147        | 1257.604470       | 629.305873       | 1256.620454       | 628.813865       | G    | <b>261.155732</b>  | 131.081504        | 244.129183        | 122.568229       |                   |                  | 3  |
| 10 | 1331.652483        | <b>666.329879</b> | 1314.625934       | 657.816605       | 1313.641918       | 657.324597       | G    | <b>204.134268</b>  | 102.570772        | 187.107719        | 94.057497        |                   |                  | 2  |
| 11 |                    |                   |                   |                  |                   |                  | K    | <b>147.112804</b>  | 74.060040         | 130.086255        | 65.546765        |                   |                  | 1  |

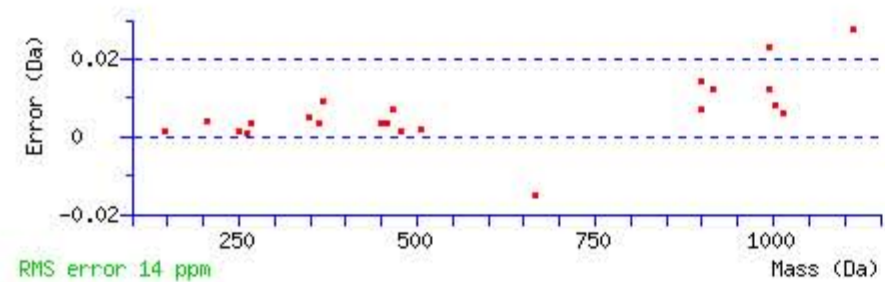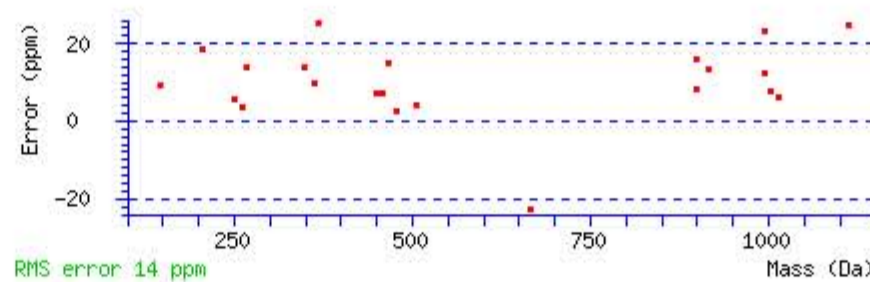

NCBI BLAST search of **HQTVPQNTGGK**

(Parameters: blastp, nr protein database, expect=20000, no filter, PAM30)

Other BLAST [web gateways](#)

All matches to this query

| Score | Mr(calc):   | Delta     | Sequence                       |
|-------|-------------|-----------|--------------------------------|
| 31.3  | 1476.750748 | 0.003854  | <a href="#">HQTVPQNTGGK</a>    |
| 17.5  | 1476.736115 | 0.018487  | <a href="#">HQEALIGQSIFYGK</a> |
| 11.8  | 1476.750748 | 0.003854  | <a href="#">HQTVPQNTGGK</a>    |
| 3.3   | 1476.739487 | 0.015115  | <a href="#">GPEVMAFIEQGKR</a>  |
| 2.2   | 1476.775864 | -0.021262 | <a href="#">AGPEPQALAGQK</a>   |



# MASCOT Search Results

## Peptide View

MS/MS Fragmentation of **DSGFQMNQLR**

Found in **TRFE\_HUMAN**, Serotransferrin OS=Homo sapiens GN=TF PE=1 SV=3

Match to Query 38767: 1505.722768 from(753.868660,2+) rtinseconds(2039) index(78778)

Title: Locus:1.1.1.2924.18 File:"2013-07-02 CLN FXIII 60 min 1st FT.wiff"

Data file C:\Program Files (x86)\Matrix Science\Mascot Daemon\mgf\4 FXIII 60 min 1st\mascot\_daemon\_merge.mgf

Click mouse within plot area to zoom in by factor of two about that point

Or, Plot from  to  Da

Label all possible matches  Label matches used for scoring

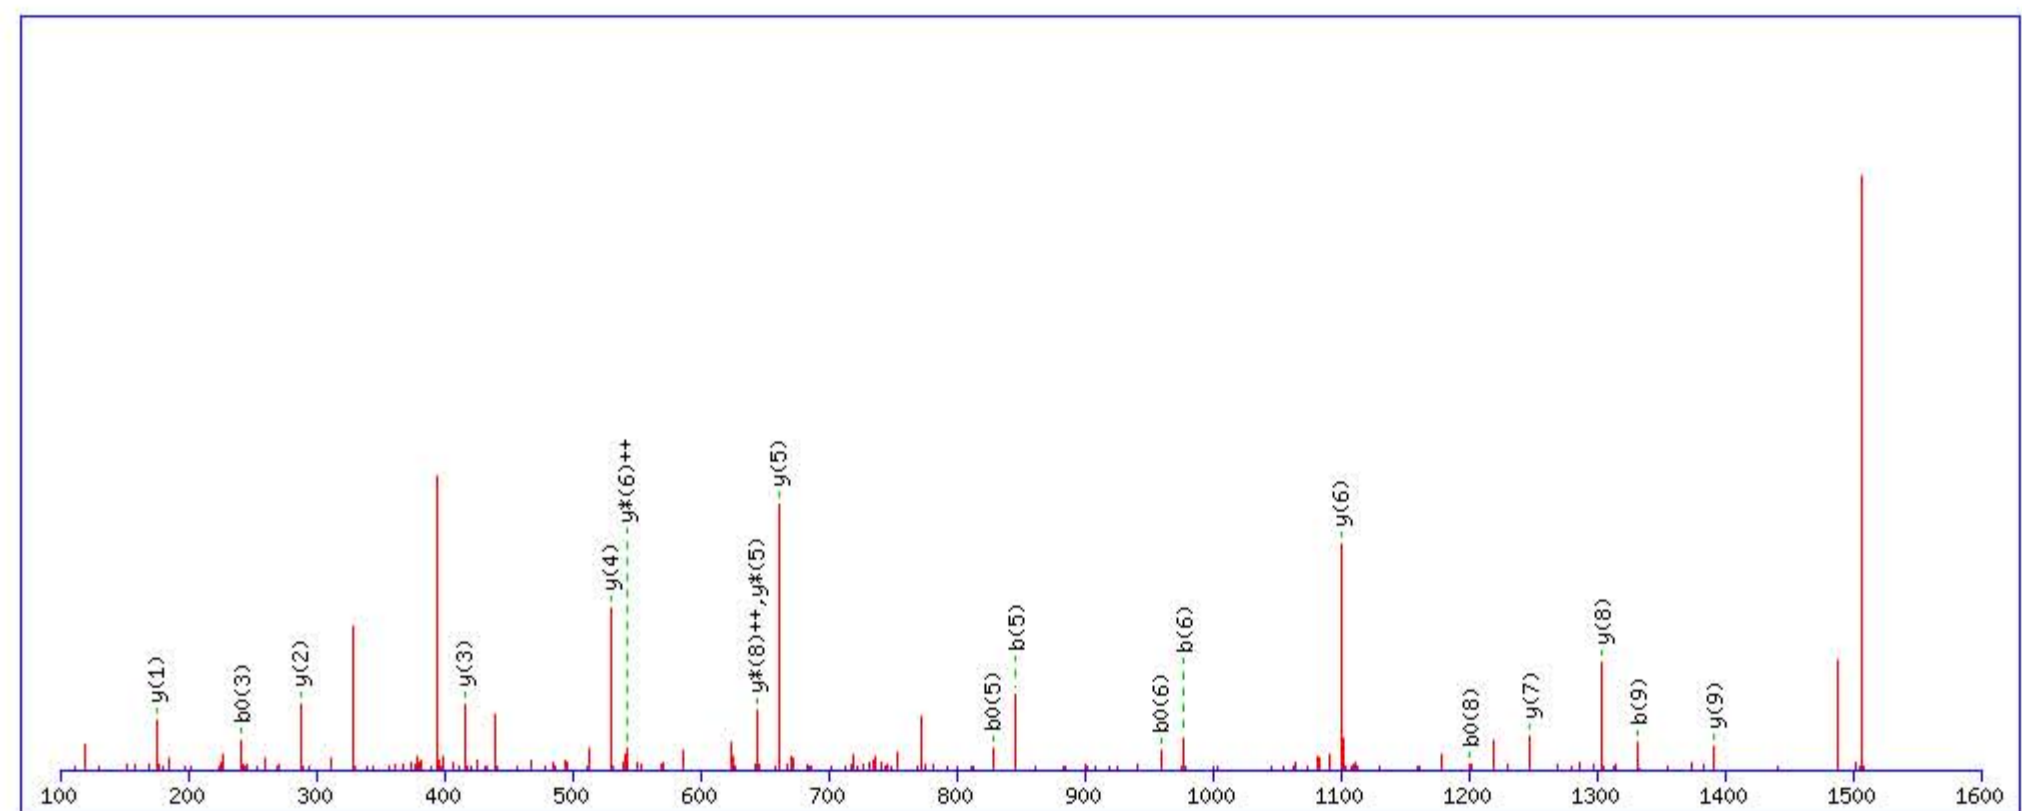

Monoisotopic mass of neutral peptide Mr(calc): 1505.711899

Fixed modifications: Carbamidomethyl (C) (apply to specified residues or termini only)

Variable modifications:

Q5 : Biotin:Thermo-21345 (Q)

Ions Score: 68 Expect: 2.7e-006

Matches : 19/84 fragment ions using 28 most intense peaks [\(help\)](#)

| #  | b           | b <sup>++</sup> | b <sup>+</sup> | b <sup>+++</sup> | b <sup>0</sup> | b <sup>0++</sup> | Seq. | y           | y <sup>++</sup> | y <sup>+</sup> | y <sup>+++</sup> | y <sup>0</sup> | y <sup>0++</sup> | #  |
|----|-------------|-----------------|----------------|------------------|----------------|------------------|------|-------------|-----------------|----------------|------------------|----------------|------------------|----|
| 1  | 116.034219  | 58.520748       |                |                  | 98.023654      | 49.515465        | D    |             |                 |                |                  |                |                  | 10 |
| 2  | 203.066247  | 102.036761      |                |                  | 185.055682     | 93.031479        | S    | 1391.692238 | 696.349757      | 1374.665689    | 687.836482       | 1373.681673    | 687.344474       | 9  |
| 3  | 260.087711  | 130.547493      |                |                  | 242.077146     | 121.542211       | G    | 1304.660210 | 652.833743      | 1287.633661    | 644.320469       |                |                  | 8  |
| 4  | 407.156125  | 204.081700      |                |                  | 389.145560     | 195.076418       | F    | 1247.638746 | 624.323011      | 1230.612197    | 615.809736       |                |                  | 7  |
| 5  | 846.381451  | 423.694364      | 829.354902     | 415.181089       | 828.370886     | 414.689081       | Q    | 1100.570332 | 550.788804      | 1083.543783    | 542.275530       |                |                  | 6  |
| 6  | 977.421936  | 489.214606      | 960.395387     | 480.701331       | 959.411371     | 480.209323       | M    | 661.345006  | 331.176141      | 644.318457     | 322.662867       |                |                  | 5  |
| 7  | 1091.464863 | 546.236069      | 1074.438314    | 537.722795       | 1073.454298    | 537.230787       | N    | 530.304521  | 265.655899      | 513.277972     | 257.142624       |                |                  | 4  |
| 8  | 1219.523441 | 610.265359      | 1202.496892    | 601.752084       | 1201.512876    | 601.260076       | Q    | 416.261594  | 208.634435      | 399.235045     | 200.121160       |                |                  | 3  |
| 9  | 1332.607505 | 666.807391      | 1315.580956    | 658.294116       | 1314.596940    | 657.802108       | L    | 288.203016  | 144.605146      | 271.176467     | 136.091871       |                |                  | 2  |
| 10 |             |                 |                |                  |                |                  | R    | 175.118952  | 88.063114       | 158.092403     | 79.549839        |                |                  | 1  |

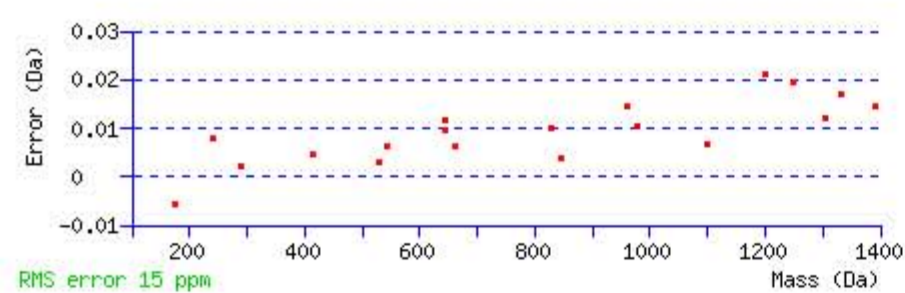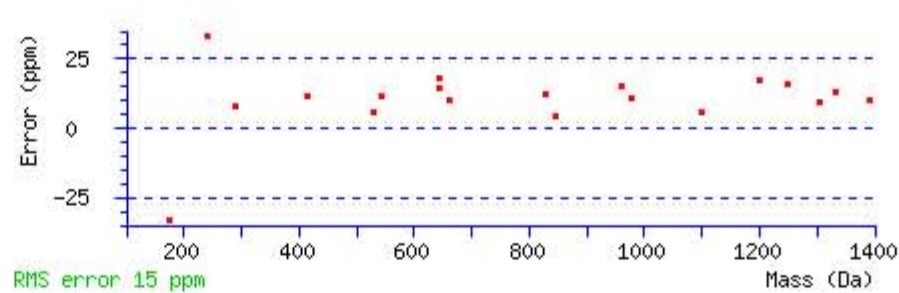

NCBI BLAST search of **DSGFQMNQLR**

(Parameters: blastp, nr protein database, expect=20000, no filter, PAM30)

Other BLAST [web gateways](#)

## All matches to this query

| Score | Mr(calc):   | Delta     | Sequence                        |
|-------|-------------|-----------|---------------------------------|
| 68.3  | 1505.711899 | 0.010869  | <a href="#">DSGFQMNQLR</a>      |
| 19.1  | 1505.703140 | 0.019628  | <a href="#">DETMEEQDIKLR</a>    |
| 19.0  | 1505.711899 | 0.010869  | <a href="#">DSGFQMNQLR</a>      |
| 17.7  | 1505.740891 | -0.018123 | <a href="#">VQTSNFPRECIR</a>    |
| 5.8   | 1505.704025 | 0.018743  | <a href="#">MQMEIDQLR</a>       |
| 5.5   | 1505.744232 | -0.021464 | <a href="#">QAKMAPSRMDSLRL</a>  |
| 4.3   | 1505.739548 | -0.016780 | <a href="#">TVQSLEIDLDSMR</a>   |
| 3.0   | 1505.736862 | -0.014094 | <a href="#">EVMSPGTGSARGRSR</a> |
| 3.0   | 1505.740875 | -0.018107 | <a href="#">ECGKAFSHSSKLR</a>   |
| 3.0   | 1505.700653 | 0.022115  | <a href="#">FMEDEQQLR</a>       |



# MASCOT SCIENCE Mascot Search Results

## Peptide View

MS/MS Fragmentation of **DSGFQMNQLR**

Found in **TRFE\_HUMAN**, Serotransferrin OS=Homo sapiens GN=TF PE=1 SV=3

Match to Query 39303: 1521.712348 from(761.863450,2+) rtinseconds(1798) index(77138)

Title: Locus:1.1.1.2840.16 File:"2013-07-02 CLN FXIII 60 min 1st FT.wiff"

Data file C:\Program Files (x86)\Matrix Science\Mascot Daemon\mgf4 FXIII 60 min 1st\mascot\_daemon\_merge.mgf

Click mouse within plot area to zoom in by factor of two about that point

Or, Plot from  to  Da

Label all possible matches  Label matches used for scoring

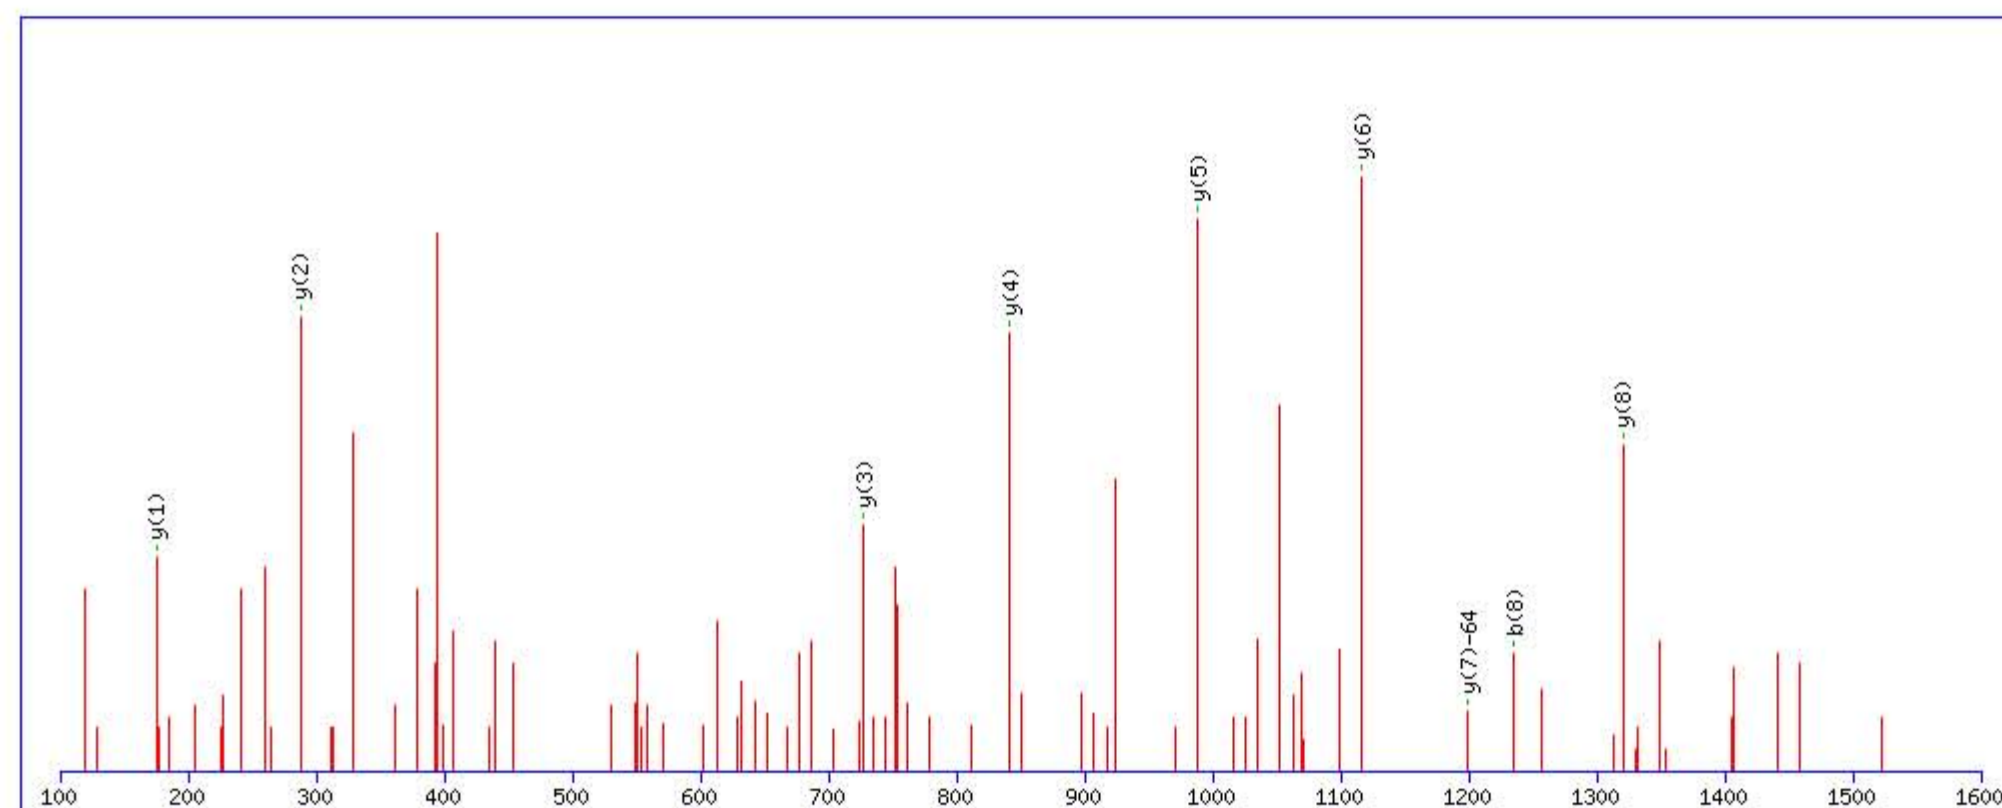

Monoisotopic mass of neutral peptide Mr(calc): 1521.706818

Fixed modifications: Carbamidomethyl (C) (apply to specified residues or termini only)

Variable modifications:

M6 : Oxidation (M), with neutral losses 0.000000 (shown in table), 63.998285

Q8 : Biotin:Thermo-21345 (Q)

Ions Score: 52 Expect: 2.5e-005

Matches : 9/130 fragment ions using 14 most intense peaks [\(help\)](#)

| #  | b                  | b <sup>++</sup> | b <sup>*</sup> | b <sup>*++</sup> | b <sup>0</sup> | b <sup>0++</sup> | Seq. | y                  | y <sup>++</sup> | y <sup>*</sup> | y <sup>*++</sup> | y <sup>0</sup> | y <sup>0++</sup> | #  |
|----|--------------------|-----------------|----------------|------------------|----------------|------------------|------|--------------------|-----------------|----------------|------------------|----------------|------------------|----|
| 1  | 116.034219         | 58.520748       |                |                  | 98.023654      | 49.515465        | D    |                    |                 |                |                  |                |                  | 10 |
| 2  | 203.066247         | 102.036761      |                |                  | 185.055682     | 93.031479        | S    | 1407.687153        | 704.347214      | 1390.660604    | 695.833940       | 1389.676588    | 695.341932       | 9  |
| 3  | 260.087711         | 130.547493      |                |                  | 242.077146     | 121.542211       | G    | <b>1320.655125</b> | 660.831200      | 1303.628576    | 652.317926       |                |                  | 8  |
| 4  | 407.156125         | 204.081700      |                |                  | 389.145560     | 195.076418       | F    | 1263.633661        | 632.320468      | 1246.607112    | 623.807194       |                |                  | 7  |
| 5  | 535.214703         | 268.110990      | 518.188154     | 259.597715       | 517.204138     | 259.105707       | Q    | <b>1116.565247</b> | 558.786261      | 1099.538698    | 550.272987       |                |                  | 6  |
| 6  | 682.250103         | 341.628690      | 665.223554     | 333.115415       | 664.239538     | 332.623407       | M    | <b>988.506669</b>  | 494.756972      | 971.480120     | 486.243698       |                |                  | 5  |
| 7  | 796.293030         | 398.650153      | 779.266481     | 390.136878       | 778.282465     | 389.644870       | N    | <b>841.471269</b>  | 421.239272      | 824.444720     | 412.725998       |                |                  | 4  |
| 8  | <b>1235.518356</b> | 618.262816      | 1218.491807    | 609.749541       | 1217.507791    | 609.257533       | Q    | <b>727.428342</b>  | 364.217809      | 710.401793     | 355.704534       |                |                  | 3  |
| 9  | 1348.602420        | 674.804848      | 1331.575871    | 666.291573       | 1330.591855    | 665.799565       | L    | <b>288.203016</b>  | 144.605146      | 271.176467     | 136.091871       |                |                  | 2  |
| 10 |                    |                 |                |                  |                |                  | R    | <b>175.118952</b>  | 88.063114       | 158.092403     | 79.549839        |                |                  | 1  |

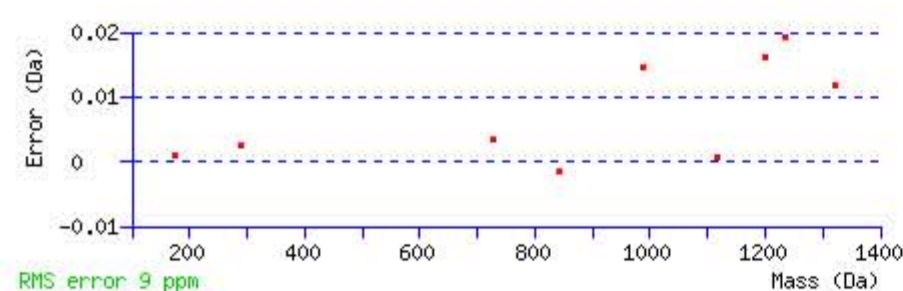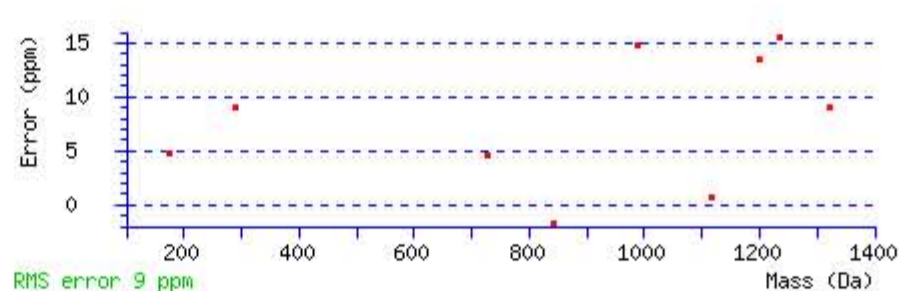

NCBI BLAST search of [DSGFQMNQLR](#)

(Parameters: blastp, nr protein database, expect=20000, no filter, PAM30)

Other BLAST [web gateways](#)

All matches to this query

| Score | Mr(calc):   | Delta    | Sequence                   |
|-------|-------------|----------|----------------------------|
| 52.1  | 1521.706818 | 0.005530 | <a href="#">DSGFQMNQLR</a> |
| 28.9  | 1521.706818 | 0.005530 | <a href="#">DSGFQMNQLR</a> |
| 3.0   | 1521.695572 | 0.016776 | <a href="#">FMEDEQQLR</a>  |



# MASCOT Search Results

## Peptide View

MS/MS Fragmentation of **SKEFQLFSSPHGK**

Found in **TRFE\_HUMAN**, Serotransferrin OS=Homo sapiens GN=TF PE=1 SV=3

Match to Query 48441: 1801.925712 from(601.649180,3+) rtinseconds(1757) index(76876)

Title: Locus:1.1.1.2826.15 File:"2013-07-02 CLN FXIII 60 min 1st FT.wiff"

Data file C:\Program Files (x86)\Matrix Science\Mascot Daemon\mgf4 FXIII 60 min 1st\mascot\_daemon\_merge.mgf

Click mouse within plot area to zoom in by factor of two about that point

Or, Plot from  to  Da

Label all possible matches  Label matches used for scoring

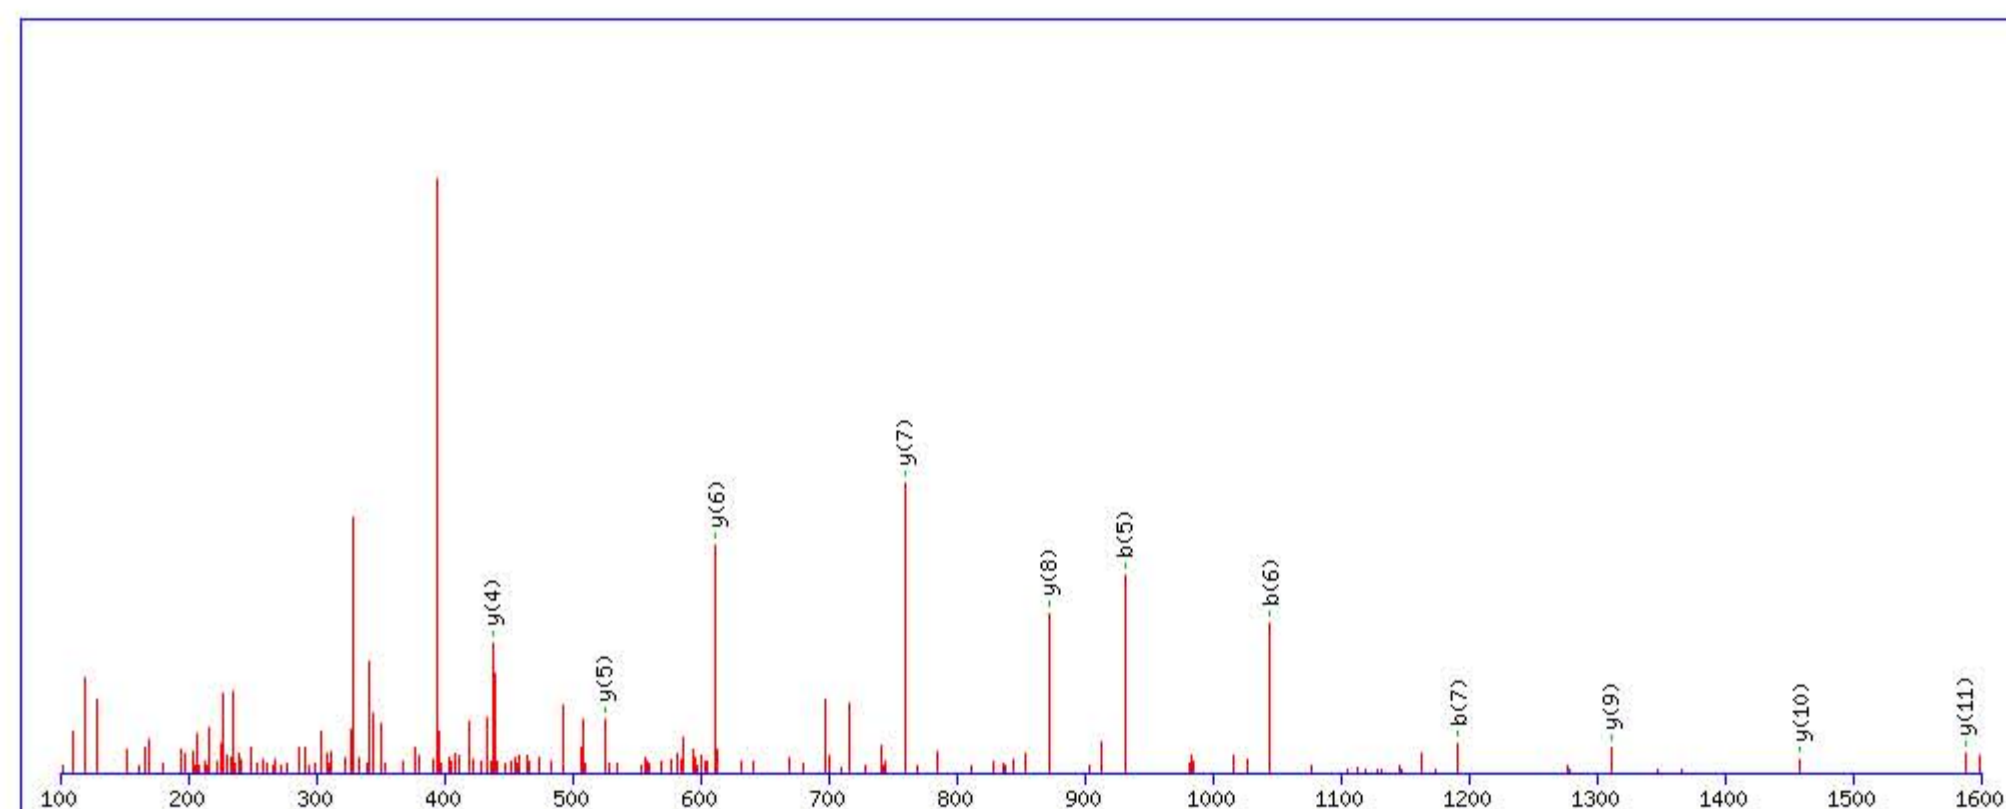

Monoisotopic mass of neutral peptide Mr(calc): 1801.918518

Fixed modifications: Carbamidomethyl (C) (apply to specified residues or termini only)

Variable modifications:

Q5 : Biotin:Thermo-21345 (Q)

Ions Score: 60 Expect: 4.3e-006

Matches : 11/134 fragment ions using 15 most intense peaks [\(help\)](#)

| #  | b                  | b <sup>++</sup> | b <sup>+</sup> | b <sup>+++</sup> | b <sup>0</sup> | b <sup>0++</sup> | Seq. | y                  | y <sup>++</sup> | y <sup>+</sup> | y <sup>+++</sup> | y <sup>0</sup> | y <sup>0++</sup> | #  |
|----|--------------------|-----------------|----------------|------------------|----------------|------------------|------|--------------------|-----------------|----------------|------------------|----------------|------------------|----|
| 1  | 88.039304          | 44.523290       |                |                  | 70.028739      | 35.518008        | S    |                    |                 |                |                  |                |                  | 13 |
| 2  | 216.134267         | 108.570771      | 199.107718     | 100.057497       | 198.123702     | 99.565489        | K    | 1715.893774        | 858.450525      | 1698.867225    | 849.937251       | 1697.883209    | 849.445243       | 12 |
| 3  | 345.176860         | 173.092068      | 328.150311     | 164.578793       | 327.166295     | 164.086785       | E    | <b>1587.798811</b> | 794.403044      | 1570.772262    | 785.889769       | 1569.788246    | 785.397761       | 11 |
| 4  | 492.245274         | 246.626275      | 475.218725     | 238.113000       | 474.234709     | 237.620992       | F    | <b>1458.756218</b> | 729.881747      | 1441.729669    | 721.368473       | 1440.745653    | 720.876465       | 10 |
| 5  | <b>931.470600</b>  | 466.238938      | 914.444051     | 457.725664       | 913.460035     | 457.233656       | Q    | <b>1311.687804</b> | 656.347540      | 1294.661255    | 647.834266       | 1293.677239    | 647.342258       | 9  |
| 6  | <b>1044.554664</b> | 522.780970      | 1027.528115    | 514.267696       | 1026.544099    | 513.775688       | L    | <b>872.462478</b>  | 436.734877      | 855.435929     | 428.221603       | 854.451913     | 427.729595       | 8  |
| 7  | <b>1191.623078</b> | 596.315177      | 1174.596529    | 587.801903       | 1173.612513    | 587.309895       | F    | <b>759.378414</b>  | 380.192845      | 742.351865     | 371.679571       | 741.367849     | 371.187563       | 7  |
| 8  | 1278.655106        | 639.831191      | 1261.628557    | 631.317917       | 1260.644541    | 630.825909       | S    | <b>612.310000</b>  | 306.658638      | 595.283451     | 298.145364       | 594.299435     | 297.653356       | 6  |
| 9  | 1365.687134        | 683.347205      | 1348.660585    | 674.833931       | 1347.676569    | 674.341923       | S    | <b>525.277972</b>  | 263.142624      | 508.251423     | 254.629350       | 507.267407     | 254.137342       | 5  |
| 10 | 1462.739898        | 731.873587      | 1445.713349    | 723.360313       | 1444.729333    | 722.868305       | P    | <b>438.245944</b>  | 219.626610      | 421.219395     | 211.113335       |                |                  | 4  |
| 11 | 1599.798810        | 800.403043      | 1582.772261    | 791.889769       | 1581.788245    | 791.397761       | H    | 341.193180         | 171.100228      | 324.166631     | 162.586953       |                |                  | 3  |
| 12 | 1656.820274        | 828.913775      | 1639.793725    | 820.400501       | 1638.809709    | 819.908493       | G    | 204.134268         | 102.570772      | 187.107719     | 94.057497        |                |                  | 2  |
| 13 |                    |                 |                |                  |                |                  | K    | 147.112804         | 74.060040       | 130.086255     | 65.546765        |                |                  | 1  |

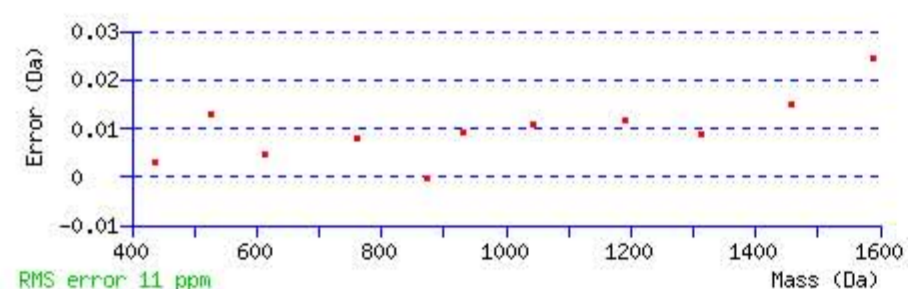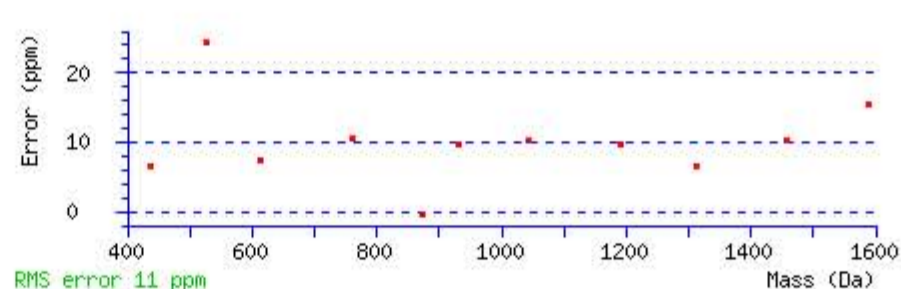

NCBI BLAST search of **SKEFQLFSSPHGK**

(Parameters: blastp, nr protein database, expect=20000, no filter, PAM30)

Other BLAST [web gateways](#)

All matches to this query

| Score | Mr(calc):   | Delta    | Sequence                         |
|-------|-------------|----------|----------------------------------|
| 59.6  | 1801.918518 | 0.007194 | <a href="#">SKEFQLFSSPHGK</a>    |
| 2.2   | 1801.914536 | 0.011176 | <a href="#">QIVMTVVYGVTRYGGR</a> |
| 0.3   | 1801.924332 | 0.001380 | <a href="#">MIQQEEIRKLEEEK</a>   |

Mascot: <http://www.matrixscience.com/>



# MASCOT Search Results

## Peptide View

MS/MS Fragmentation of **KDSGFQMNQLR**

Found in **TRFE\_HUMAN**, Serotransferrin OS=Homo sapiens GN=TF PE=1 SV=3

Match to Query 51630: 1944.988932 from(649.336920,3+) rtinseconds(2065) index(78963)

Title: Locus:1.1.1.2933.10 File:"2013-07-02 CLN FXIII 60 min 1st FT.wiff"

Data file C:\Program Files (x86)\Matrix Science\Mascot Daemon\mgf4 FXIII 60 min 1st\mascot\_daemon\_merge.mgf

Click mouse within plot area to zoom in by factor of two about that point

Or, Plot from 0 to 2200 Da Full range

Label all possible matches  Label matches used for scoring

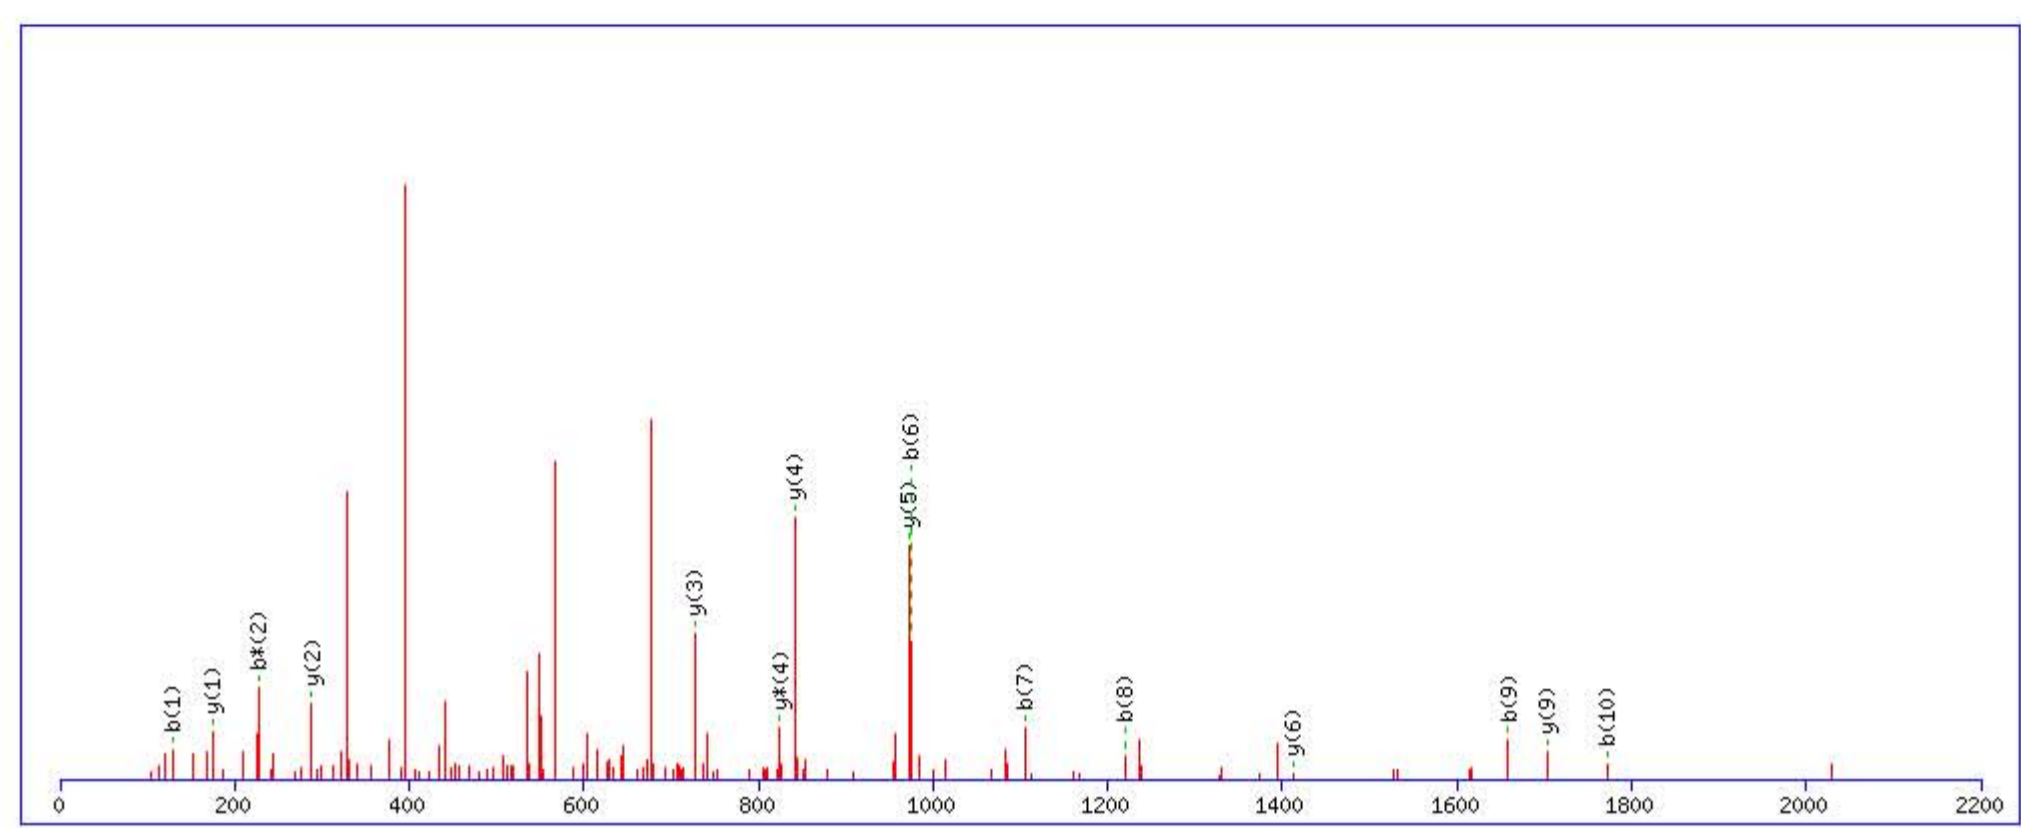

Monoisotopic mass of neutral peptide Mr(calc): 1944.973602

Fixed modifications: Carbamidomethyl (C) (apply to specified residues or termini only)

Variable modifications:

Q6 : Biotin:Thermo-21345 (Q)

Q9 : Biotin:Thermo-21345 (Q)

Ions Score: 30 Expect: 0.0073

Matches : 15/102 fragment ions using 32 most intense peaks [\(help\)](#)

| #  | b                  | b <sup>++</sup> | b <sup>*</sup>    | b <sup>*++</sup> | b <sup>0</sup> | b <sup>0++</sup> | Seq.     | y                  | y <sup>++</sup> | y <sup>*</sup>    | y <sup>*++</sup> | y <sup>0</sup> | y <sup>0++</sup> | #         |
|----|--------------------|-----------------|-------------------|------------------|----------------|------------------|----------|--------------------|-----------------|-------------------|------------------|----------------|------------------|-----------|
| 1  | <b>129.102239</b>  | 65.054757       | 112.075690        | 56.541483        |                |                  | <b>K</b> |                    |                 |                   |                  |                |                  | <b>11</b> |
| 2  | 244.129182         | 122.568229      | <b>227.102633</b> | 114.054955       | 226.118617     | 113.562947       | <b>D</b> | 1817.885929        | 909.446603      | 1800.859380       | 900.933328       | 1799.875364    | 900.441320       | <b>10</b> |
| 3  | 331.161210         | 166.084243      | 314.134661        | 157.570969       | 313.150645     | 157.078961       | <b>S</b> | <b>1702.858986</b> | 851.933131      | 1685.832437       | 843.419857       | 1684.848421    | 842.927848       | <b>9</b>  |
| 4  | 388.182674         | 194.594975      | 371.156125        | 186.081701       | 370.172109     | 185.589693       | <b>G</b> | 1615.826958        | 808.417117      | 1598.800409       | 799.903843       |                |                  | <b>8</b>  |
| 5  | 535.251088         | 268.129182      | 518.224539        | 259.615908       | 517.240523     | 259.123900       | <b>F</b> | 1558.805494        | 779.906385      | 1541.778945       | 771.393111       |                |                  | <b>7</b>  |
| 6  | <b>974.476414</b>  | 487.741845      | 957.449865        | 479.228571       | 956.465849     | 478.736563       | <b>Q</b> | <b>1411.737080</b> | 706.372178      | 1394.710531       | 697.858904       |                |                  | <b>6</b>  |
| 7  | <b>1105.516899</b> | 553.262088      | 1088.490350       | 544.748813       | 1087.506334    | 544.256805       | <b>M</b> | <b>972.511754</b>  | 486.759515      | 955.485205        | 478.246241       |                |                  | <b>5</b>  |
| 8  | <b>1219.559826</b> | 610.283551      | 1202.533277       | 601.770277       | 1201.549261    | 601.278268       | <b>N</b> | <b>841.471269</b>  | 421.239273      | <b>824.444720</b> | 412.725998       |                |                  | <b>4</b>  |
| 9  | <b>1658.785152</b> | 829.896214      | 1641.758603       | 821.382940       | 1640.774587    | 820.890932       | <b>Q</b> | <b>727.428342</b>  | 364.217809      | 710.401793        | 355.704535       |                |                  | <b>3</b>  |
| 10 | <b>1771.869216</b> | 886.438246      | 1754.842667       | 877.924972       | 1753.858651    | 877.432964       | <b>L</b> | <b>288.203016</b>  | 144.605146      | 271.176467        | 136.091871       |                |                  | <b>2</b>  |
| 11 |                    |                 |                   |                  |                |                  | <b>R</b> | <b>175.118952</b>  | 88.063114       | 158.092403        | 79.549839        |                |                  | <b>1</b>  |

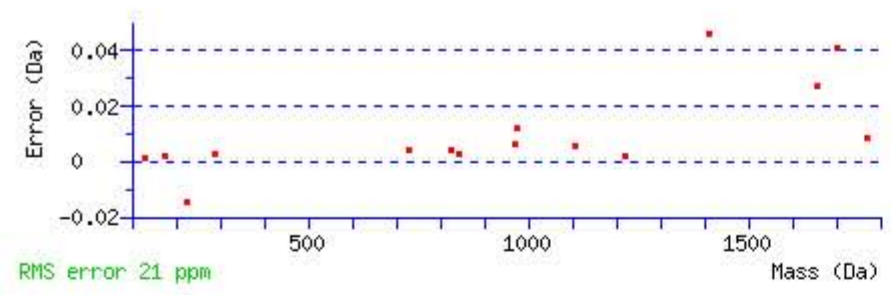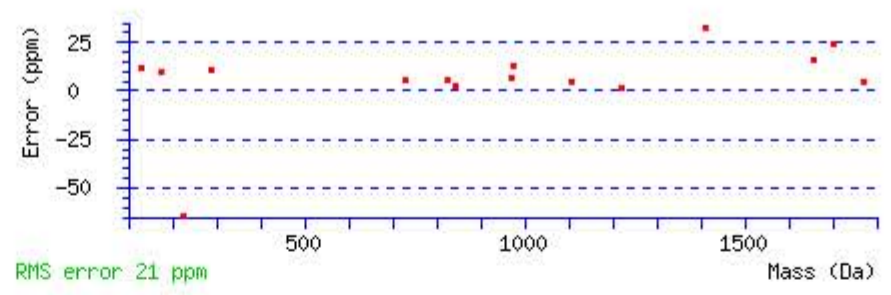

NCBI BLAST search of **KDSGFQMNQLR**

(Parameters: blastp, nr protein database, expect=20000, no filter, PAM30)

Other BLAST [web gateways](#)

### All matches to this query

| Score | Mr(calc):   | Delta     | Sequence                         |
|-------|-------------|-----------|----------------------------------|
| 29.9  | 1944.973602 | 0.015330  | <a href="#">KDSGFQMNQLR</a>      |
| 6.7   | 1945.012939 | -0.024007 | <a href="#">LEQHKDLLQNTDAHKR</a> |
| 3.3   | 1945.013123 | -0.024191 | <a href="#">DKPVPEQILNYR</a>     |
| 0.9   | 1944.969574 | 0.019358  | <a href="#">VDMLRDIMDAQRR</a>    |



# MASCOT Search Results

## Peptide View

MS/MS Fragmentation of **ADRDQYELLCLDNTR**

Found in **TRFE\_HUMAN**, Serotransferrin OS=Homo sapiens GN=TF PE=1 SV=3

Match to Query 58001: 2192.054592 from(731.692140,3+) rtinseconds(2200) index(79935)

Title: Locus:1.1.1.2980.11 File:"2013-07-02 CLN FXIII 60 min 1st FT.wiff"

Data file C:\Program Files (x86)\Matrix Science\Mascot Daemon\mgf\4 FXIII 60 min 1st\mascot\_daemon\_merge.mgf

Click mouse within plot area to zoom in by factor of two about that point

Or, Plot from  to  Da

Label all possible matches  Label matches used for scoring

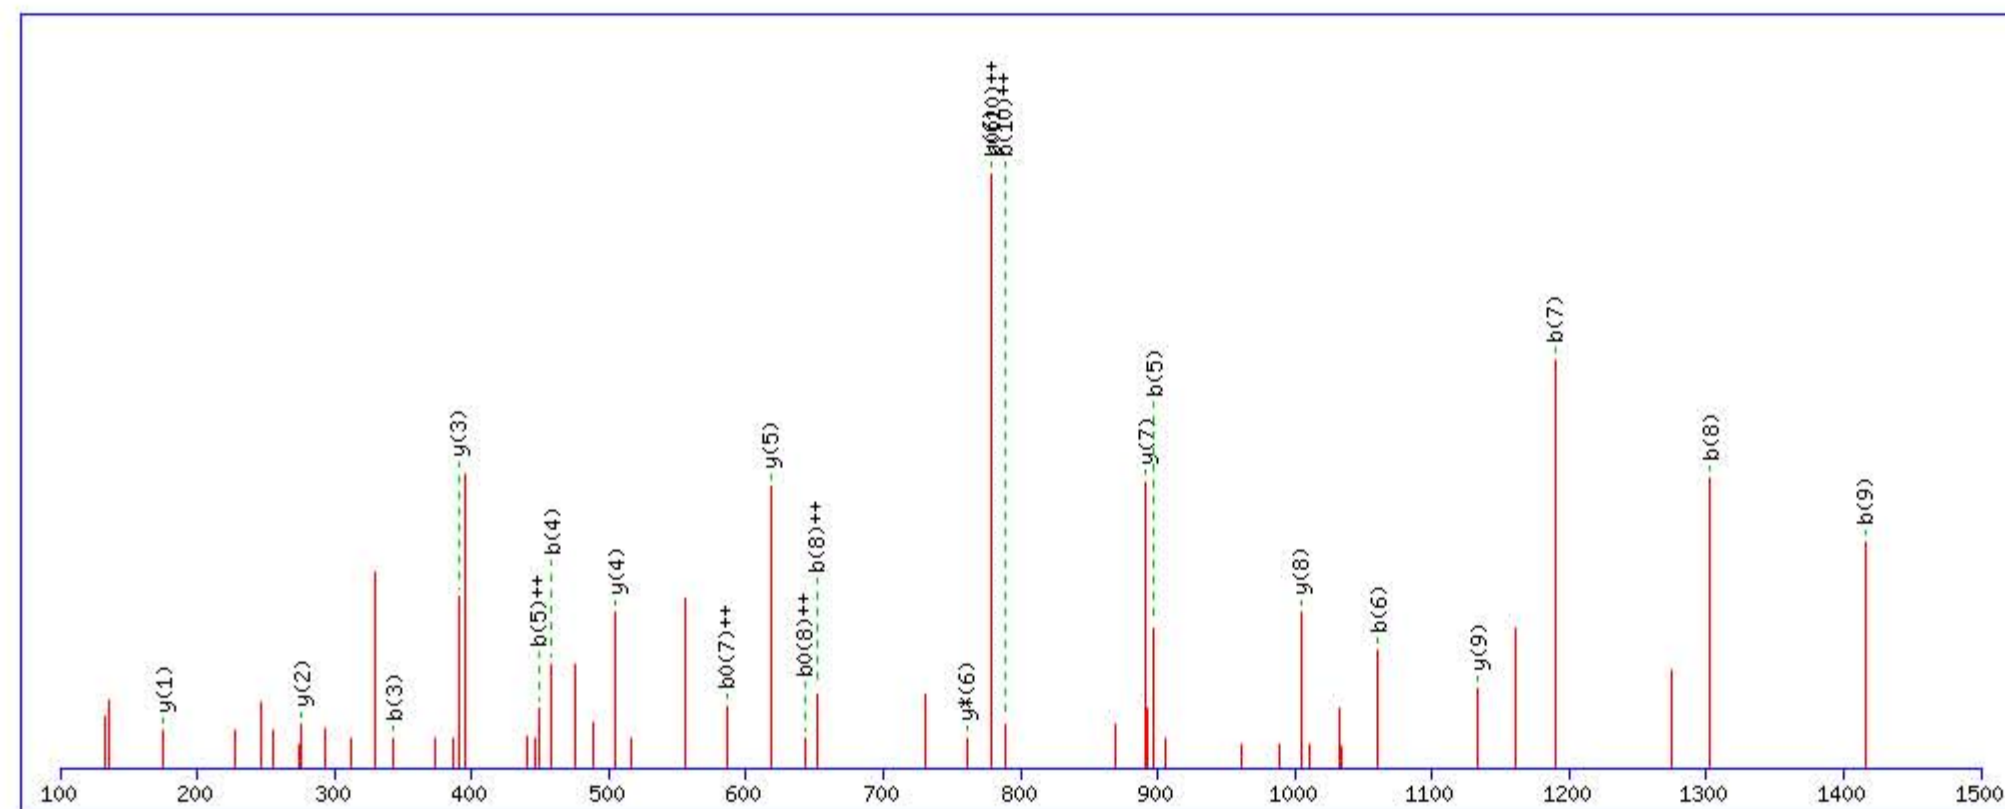

Monoisotopic mass of neutral peptide Mr(calc): 2192.035400

Fixed modifications: Carbamidomethyl (C) (apply to specified residues or termini only)

Variable modifications:

Q5 : Biotin:Thermo-21345 (Q)

Ions Score: 52 Expect: 1.4e-005

Matches : 23/160 fragment ions using 43 most intense peaks [\(help\)](#)

| #  | b                  | b <sup>++</sup>   | b <sup>+</sup> | b <sup>+++</sup> | b <sup>0</sup> | b <sup>0++</sup>  | Seq. | y                  | y <sup>++</sup> | y <sup>+</sup>    | y <sup>+++</sup> | y <sup>0</sup> | y <sup>0++</sup> | #  |
|----|--------------------|-------------------|----------------|------------------|----------------|-------------------|------|--------------------|-----------------|-------------------|------------------|----------------|------------------|----|
| 1  | 72.044390          | 36.525833         |                |                  |                |                   | A    |                    |                 |                   |                  |                |                  | 15 |
| 2  | 187.071333         | 94.039304         |                |                  | 169.060768     | 85.034022         | D    | 2122.005587        | 1061.506431     | 2104.979038       | 1052.993157      | 2103.995022    | 1052.501149      | 14 |
| 3  | <b>343.172444</b>  | 172.089860        | 326.145895     | 163.576585       | 325.161879     | 163.084577        | R    | 2006.978644        | 1003.992960     | 1989.952095       | 995.479685       | 1988.968079    | 994.987677       | 13 |
| 4  | <b>458.199387</b>  | 229.603332        | 441.172838     | 221.090057       | 440.188822     | 220.598049        | D    | 1850.877533        | 925.942404      | 1833.850984       | 917.429130       | 1832.866968    | 916.937122       | 12 |
| 5  | <b>897.424713</b>  | <b>449.215995</b> | 880.398164     | 440.702720       | 879.414148     | 440.210712        | Q    | 1735.850590        | 868.428933      | 1718.824041       | 859.915658       | 1717.840025    | 859.423650       | 11 |
| 6  | <b>1060.488042</b> | 530.747659        | 1043.461493    | 522.234385       | 1042.477477    | 521.742376        | Y    | 1296.625264        | 648.816270      | 1279.598715       | 640.302995       | 1278.614699    | 639.810987       | 10 |
| 7  | <b>1189.530635</b> | 595.268955        | 1172.504086    | 586.755681       | 1171.520070    | <b>586.263673</b> | E    | <b>1133.561935</b> | 567.284605      | 1116.535386       | 558.771331       | 1115.551370    | 558.279323       | 9  |
| 8  | <b>1302.614699</b> | <b>651.810987</b> | 1285.588150    | 643.297713       | 1284.604134    | <b>642.805705</b> | L    | <b>1004.519342</b> | 502.763309      | 987.492793        | 494.250034       | 986.508777     | 493.758026       | 8  |
| 9  | <b>1415.698763</b> | 708.353019        | 1398.672214    | 699.839745       | 1397.688198    | 699.347737        | L    | <b>891.435278</b>  | 446.221277      | 874.408729        | 437.708002       | 873.424713     | 437.215994       | 7  |
| 10 | 1575.729412        | <b>788.368344</b> | 1558.702863    | 779.855069       | 1557.718847    | <b>779.363061</b> | C    | <b>778.351214</b>  | 389.679245      | <b>761.324665</b> | 381.165971       | 760.340649     | 380.673963       | 6  |
| 11 | 1688.813476        | 844.910376        | 1671.786927    | 836.397101       | 1670.802911    | 835.905093        | L    | <b>618.320565</b>  | 309.663921      | 601.294016        | 301.150646       | 600.310000     | 300.658638       | 5  |
| 12 | 1803.840419        | 902.423847        | 1786.813870    | 893.910573       | 1785.829854    | 893.418565        | D    | <b>505.236501</b>  | 253.121888      | 488.209952        | 244.608614       | 487.225936     | 244.116606       | 4  |
| 13 | 1917.883346        | 959.445311        | 1900.856797    | 950.932036       | 1899.872781    | 950.440028        | N    | <b>390.209558</b>  | 195.608417      | 373.183009        | 187.095142       | 372.198993     | 186.603134       | 3  |
| 14 | 2018.931025        | 1009.969150       | 2001.904476    | 1001.455876      | 2000.920460    | 1000.963868       | T    | <b>276.166631</b>  | 138.586953      | 259.140082        | 130.073679       | 258.156066     | 129.581671       | 2  |
| 15 |                    |                   |                |                  |                |                   | R    | <b>175.118952</b>  | 88.063114       | 158.092403        | 79.549839        |                |                  | 1  |

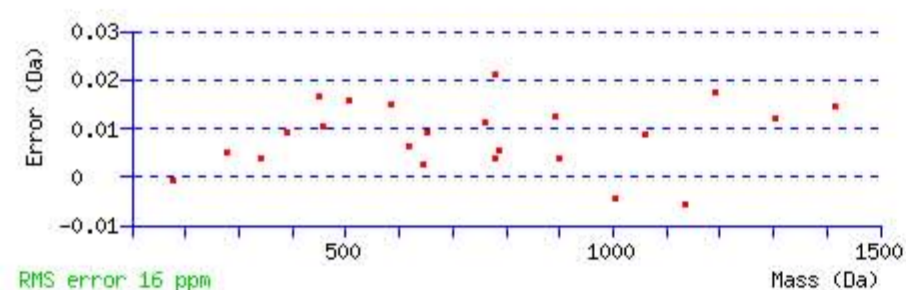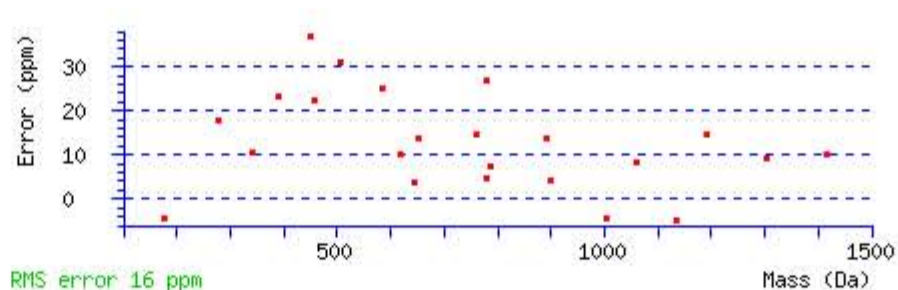

NCBI BLAST search of [ADRDQYELLCLDNTR](#)

(Parameters: blastp, nr protein database, expect=20000, no filter, PAM30)

Other BLAST [web gateways](#)

All matches to this query

| Score | Mr(calc):   | Delta    | Sequence                            |
|-------|-------------|----------|-------------------------------------|
| 52.4  | 2192.035400 | 0.019192 | <a href="#">ADRDQYELLCLDNTR</a>     |
| 0.6   | 2192.049133 | 0.005459 | <a href="#">GQETSMSPGRREQLSDASK</a> |



# MASCOT Search Results

## Peptide View

MS/MS Fragmentation of **EDLIWELLNQAQEHFGK**

Found in **TRFE\_HUMAN**, Serotransferrin OS=Homo sapiens GN=TF PE=1 SV=3

Match to Query 62025: 2380.215252 from(794.412360,3+) rtinseconds(3218) index(86894)

Title: Locus:1.1.1.3329.19 File:"2013-07-02 CLN FXIII 60 min 1st FT.wiff"

Data file C:\Program Files (x86)\Matrix Science\Mascot Daemon\mgf4 FXIII 60 min 1st\mascot\_daemon\_merge.mgf

Click mouse within plot area to zoom in by factor of two about that point

Or, Plot from  to  Da

Label all possible matches  Label matches used for scoring

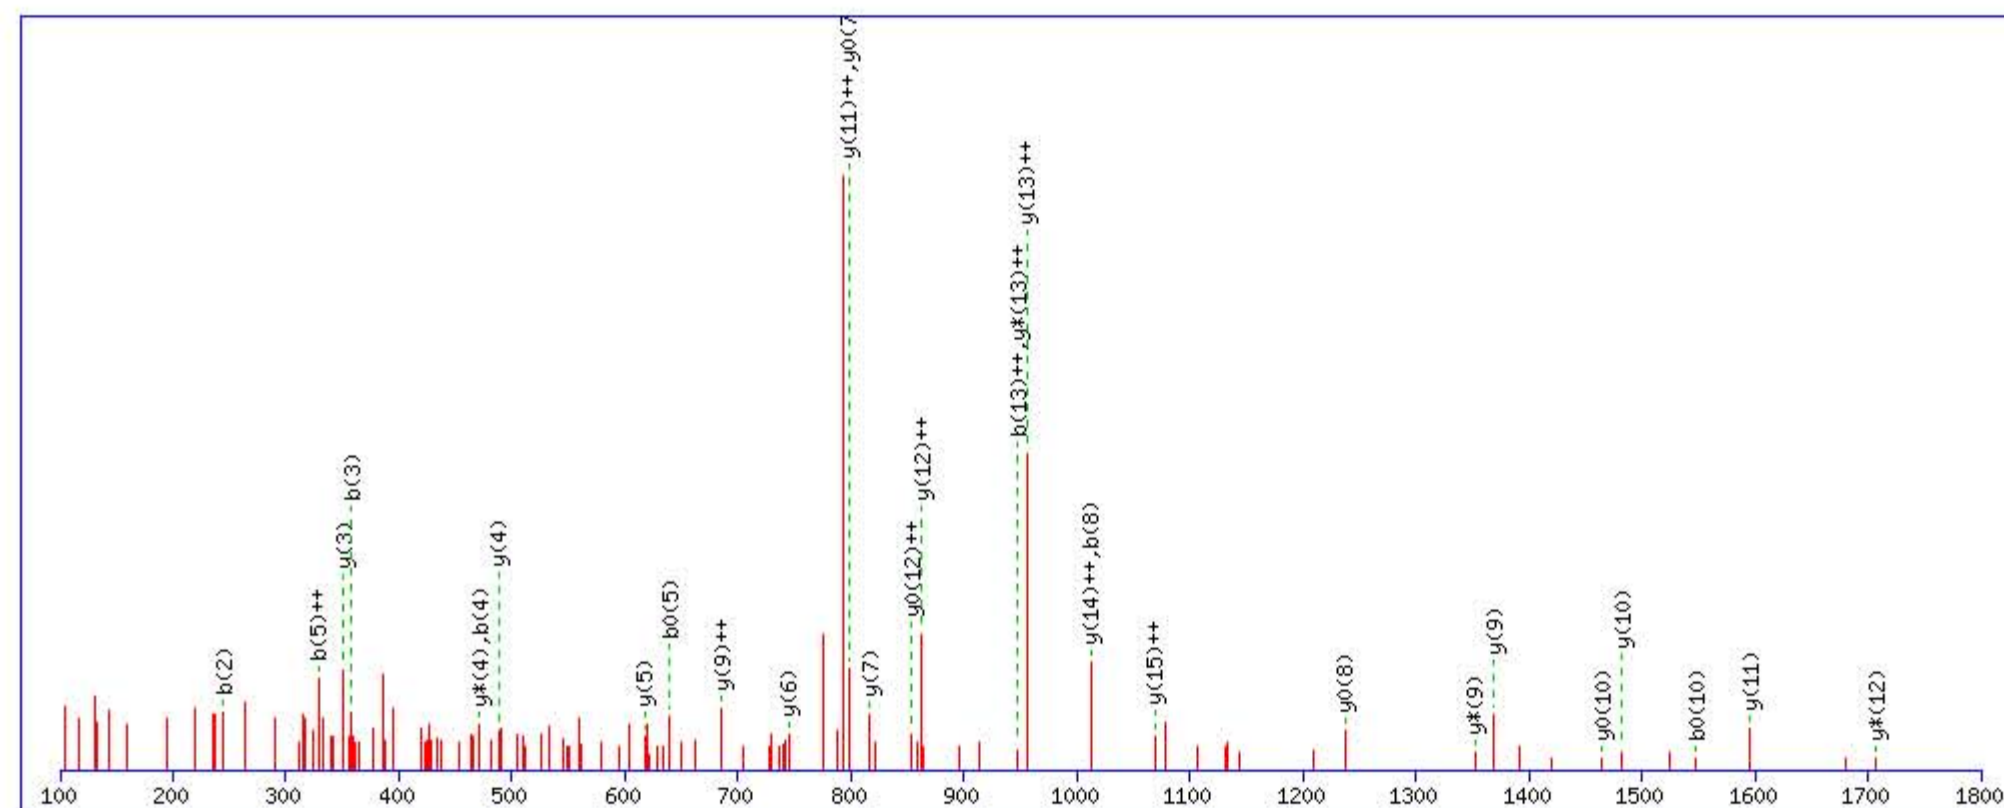

Monoisotopic mass of neutral peptide Mr(calc): 2380.188522

Fixed modifications: Carbamidomethyl (C) (apply to specified residues or termini only)

Variable modifications:

Q10 : Biotin:Thermo-21345 (Q)

Ions Score: 30 Expect: 0.033

Matches : 30/168 fragment ions using 64 most intense peaks [\(help\)](#)

| #  | b                  | b <sup>++</sup>   | b <sup>*</sup> | b <sup>***</sup> | b <sup>0</sup>     | b <sup>0++</sup> | Seq. | y                  | y <sup>++</sup>    | y <sup>*</sup>     | y <sup>***</sup>  | y <sup>0</sup>     | y <sup>0++</sup>  | #  |
|----|--------------------|-------------------|----------------|------------------|--------------------|------------------|------|--------------------|--------------------|--------------------|-------------------|--------------------|-------------------|----|
| 1  | 130.049869         | 65.528572         |                |                  | 112.039304         | 56.523290        | E    |                    |                    |                    |                   |                    |                   | 17 |
| 2  | <b>245.076812</b>  | 123.042044        |                |                  | 227.066247         | 114.036762       | D    | 2252.153237        | 1126.580256        | 2235.126688        | 1118.066982       | 2234.142672        | 1117.574974       | 16 |
| 3  | <b>358.160876</b>  | 179.584076        |                |                  | 340.150311         | 170.578794       | L    | 2137.126294        | <b>1069.066785</b> | 2120.099745        | 1060.553510       | 2119.115729        | 1060.061502       | 15 |
| 4  | <b>471.244940</b>  | 236.126108        |                |                  | 453.234375         | 227.120826       | I    | 2024.042230        | <b>1012.524753</b> | 2007.015681        | 1004.011479       | 2006.031665        | 1003.519470       | 14 |
| 5  | 657.324253         | <b>329.165765</b> |                |                  | <b>639.313688</b>  | 320.160482       | W    | 1910.958166        | <b>955.982721</b>  | 1893.931617        | <b>947.469447</b> | 1892.947601        | 946.977438        | 13 |
| 6  | 786.366846         | 393.687061        |                |                  | 768.356281         | 384.681779       | E    | 1724.878853        | <b>862.943064</b>  | <b>1707.852304</b> | 854.429790        | 1706.868288        | <b>853.937782</b> | 12 |
| 7  | 899.450910         | 450.229093        |                |                  | 881.440345         | 441.223811       | L    | <b>1595.836260</b> | <b>798.421768</b>  | 1578.809711        | 789.908493        | 1577.825695        | 789.416485        | 11 |
| 8  | <b>1012.534974</b> | 506.771125        |                |                  | 994.524409         | 497.765843       | L    | <b>1482.752196</b> | 741.879736         | 1465.725647        | 733.366461        | <b>1464.741631</b> | 732.874453        | 10 |
| 9  | 1126.577901        | 563.792589        | 1109.551352    | 555.279314       | 1108.567336        | 554.787306       | N    | <b>1369.668132</b> | <b>685.337704</b>  | <b>1352.641583</b> | 676.824429        | 1351.657567        | 676.332421        | 9  |
| 10 | 1565.803227        | 783.405252        | 1548.776678    | 774.891977       | <b>1547.792662</b> | 774.399969       | Q    | 1255.625205        | 628.316240         | 1238.598656        | 619.802966        | <b>1237.614640</b> | 619.310958        | 8  |
| 11 | 1636.840341        | 818.923809        | 1619.813792    | 810.410534       | 1618.829776        | 809.918526       | A    | <b>816.399879</b>  | 408.703577         | 799.373330         | 400.190303        | <b>798.389314</b>  | 399.698295        | 7  |
| 12 | 1764.898919        | 882.953098        | 1747.872370    | 874.439823       | 1746.888354        | 873.947815       | Q    | <b>745.362765</b>  | 373.185020         | 728.336216         | 364.671746        | 727.352200         | 364.179738        | 6  |
| 13 | 1893.941512        | <b>947.474394</b> | 1876.914963    | 938.961120       | 1875.930947        | 938.469112       | E    | <b>617.304187</b>  | 309.155732         | 600.277638         | 300.642457        | 599.293622         | 300.150449        | 5  |
| 14 | 2031.000424        | 1016.003850       | 2013.973875    | 1007.490576      | 2012.989859        | 1006.998568      | H    | <b>488.261594</b>  | 244.634435         | <b>471.235045</b>  | 236.121160        |                    |                   | 4  |
| 15 | 2178.068838        | 1089.538057       | 2161.042289    | 1081.024782      | 2160.058273        | 1080.532774      | F    | <b>351.202682</b>  | 176.104979         | 334.176133         | 167.591704        |                    |                   | 3  |
| 16 | 2235.090302        | 1118.048789       | 2218.063753    | 1109.535514      | 2217.079737        | 1109.043506      | G    | 204.134268         | 102.570772         | 187.107719         | 94.057497         |                    |                   | 2  |
| 17 |                    |                   |                |                  |                    |                  | K    | 147.112804         | 74.060040          | 130.086255         | 65.546765         |                    |                   | 1  |

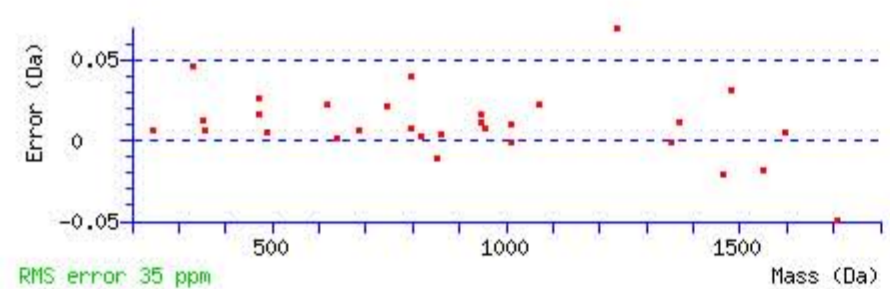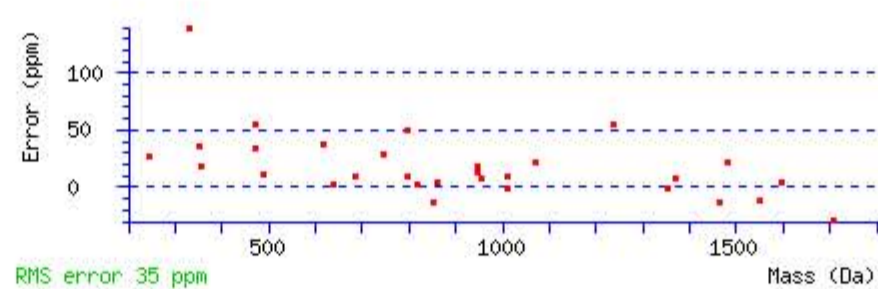

NCBI BLAST search of **EDLIWELLNQAQEHFGK**

(Parameters: blastp, nr protein database, expect=20000, no filter, PAM30)

Other BLAST [web gateways](#)

## All matches to this query

| Score | Mr(calc):   | Delta    | Sequence                          |
|-------|-------------|----------|-----------------------------------|
| 29.5  | 2380.188522 | 0.026730 | <a href="#">EDLIWELLNQAQEHFGK</a> |
| 21.1  | 2380.188522 | 0.026730 | <a href="#">EDLIWELLNQAQEHFGK</a> |



# MASCOT Search Results

## Peptide View

MS/MS Fragmentation of **KPVDEYKDCHLAQVPSHTVVAR**

Found in **TRFE\_HUMAN**, Serotransferrin OS=Homo sapiens GN=TF PE=1 SV=3

Match to Query 69961: 2859.469576 from(715.874670,4+) rtinseconds(1525) index(75422)

Title: Locus:1.1.1.2745.12 File:"2013-07-02 CLN FXIII 60 min 1st FT.wiff"

Data file C:\Program Files (x86)\Matrix Science\Mascot Daemon\mgf4 FXIII 60 min 1st\mascot\_daemon\_merge.mgf

Click mouse within plot area to zoom in by factor of two about that point

Or, Plot from  to  Da

Label all possible matches  Label matches used for scoring

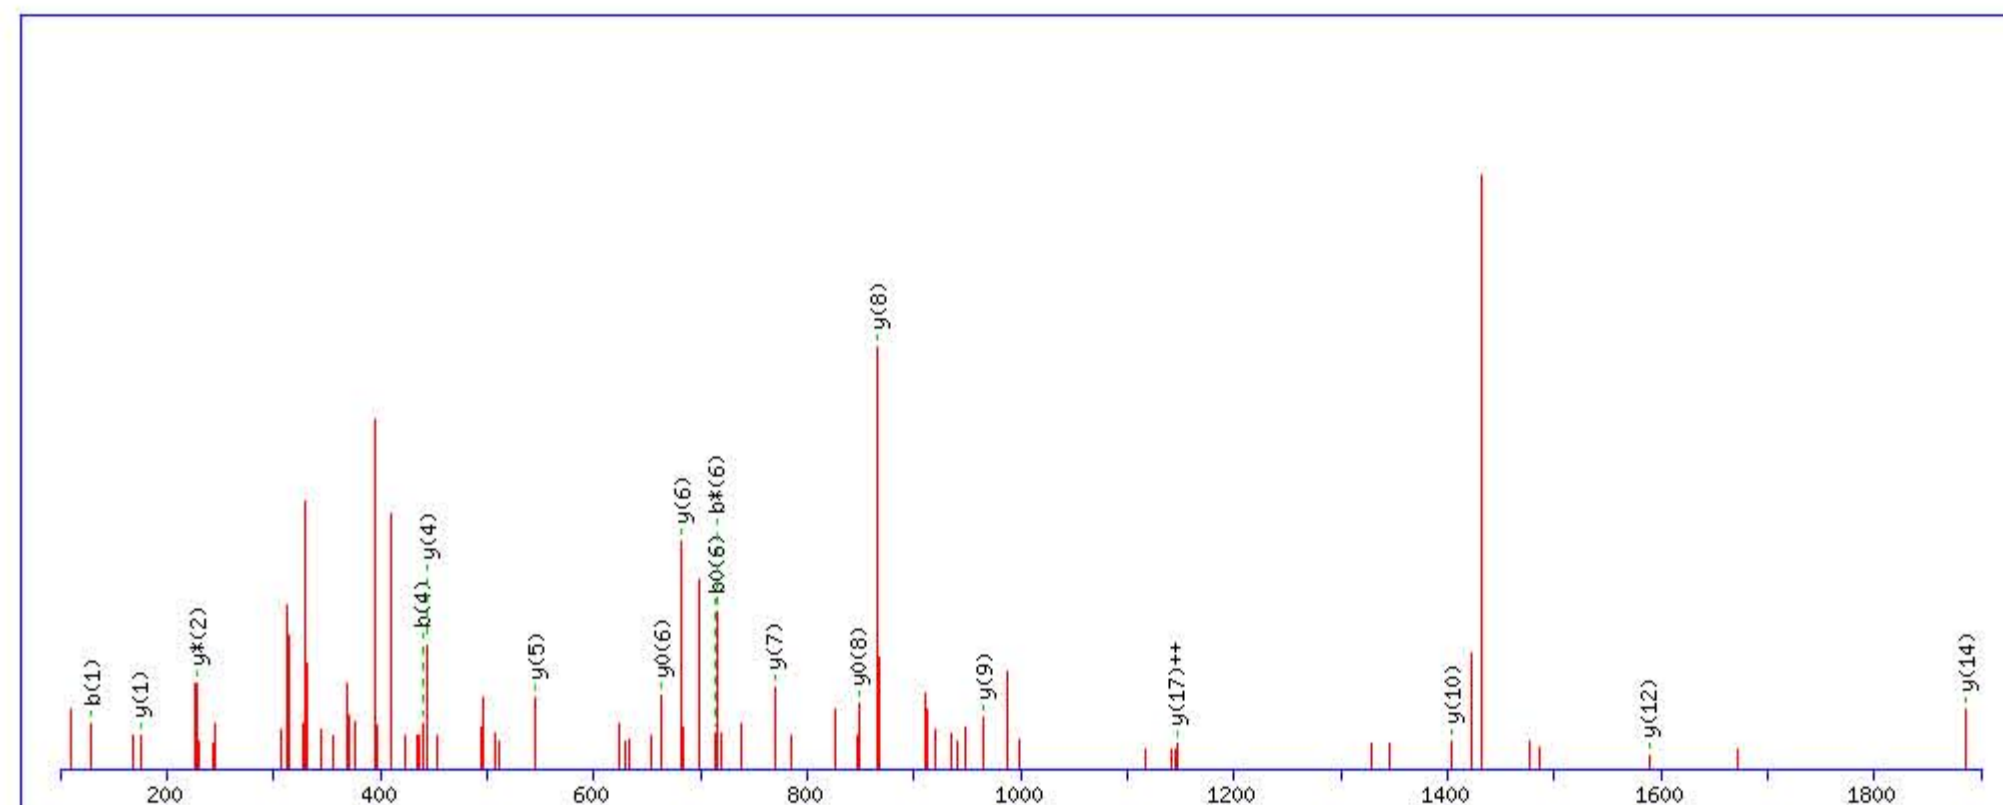

Monoisotopic mass of neutral peptide Mr(calc): 2859.452393

Fixed modifications: Carbamidomethyl (C) (apply to specified residues or termini only)

Variable modifications:

Q13 : Biotin:Thermo-21345 (Q)

Ions Score: 33 Expect: 0.013

Matches : 18/238 fragment ions using 48 most intense peaks [\(help\)](#)

| #  | b           | b <sup>++</sup> | b <sup>*</sup> | b <sup>*++</sup> | b <sup>0</sup> | b <sup>0++</sup> | Seq. | y           | y <sup>++</sup> | y <sup>*</sup> | y <sup>*++</sup> | y <sup>0</sup> | y <sup>0++</sup> | #  |
|----|-------------|-----------------|----------------|------------------|----------------|------------------|------|-------------|-----------------|----------------|------------------|----------------|------------------|----|
| 1  | 129.102239  | 65.054757       | 112.075690     | 56.541483        |                |                  | K    |             |                 |                |                  |                |                  | 22 |
| 2  | 226.155003  | 113.581139      | 209.128454     | 105.067865       |                |                  | P    | 2732.364705 | 1366.685990     | 2715.338156    | 1358.172716      | 2714.354140    | 1357.680708      | 21 |
| 3  | 325.223417  | 163.115346      | 308.196868     | 154.602072       |                |                  | V    | 2635.311941 | 1318.159608     | 2618.285392    | 1309.646334      | 2617.301376    | 1309.154326      | 20 |
| 4  | 440.250360  | 220.628818      | 423.223811     | 212.115544       | 422.239795     | 211.623536       | D    | 2536.243527 | 1268.625401     | 2519.216978    | 1260.112127      | 2518.232962    | 1259.620119      | 19 |
| 5  | 569.292953  | 285.150115      | 552.266404     | 276.636840       | 551.282388     | 276.144832       | E    | 2421.216584 | 1211.111930     | 2404.190035    | 1202.598655      | 2403.206019    | 1202.106647      | 18 |
| 6  | 732.356282  | 366.681779      | 715.329733     | 358.168505       | 714.345717     | 357.676497       | Y    | 2292.173991 | 1146.590633     | 2275.147442    | 1138.077359      | 2274.163426    | 1137.585351      | 17 |
| 7  | 860.451245  | 430.729261      | 843.424696     | 422.215986       | 842.440680     | 421.723978       | K    | 2129.110662 | 1065.058969     | 2112.084113    | 1056.545694      | 2111.100097    | 1056.053686      | 16 |
| 8  | 975.478188  | 488.242732      | 958.451639     | 479.729458       | 957.467623     | 479.237450       | D    | 2001.015699 | 1001.011487     | 1983.989150    | 992.498213       | 1983.005134    | 992.006205       | 15 |
| 9  | 1135.508837 | 568.258057      | 1118.482288    | 559.744782       | 1117.498272    | 559.252774       | C    | 1885.988756 | 943.498016      | 1868.962207    | 934.984741       | 1867.978191    | 934.492733       | 14 |
| 10 | 1272.567749 | 636.787513      | 1255.541200    | 628.274238       | 1254.557184    | 627.782230       | H    | 1725.958107 | 863.482691      | 1708.931558    | 854.969417       | 1707.947542    | 854.477409       | 13 |
| 11 | 1385.651813 | 693.329545      | 1368.625264    | 684.816270       | 1367.641248    | 684.324262       | L    | 1588.899195 | 794.953235      | 1571.872646    | 786.439961       | 1570.888630    | 785.947953       | 12 |
| 12 | 1456.688927 | 728.848101      | 1439.662378    | 720.334827       | 1438.678362    | 719.842819       | A    | 1475.815131 | 738.411203      | 1458.788582    | 729.897929       | 1457.804566    | 729.405921       | 11 |
| 13 | 1895.914253 | 948.460765      | 1878.887704    | 939.947490       | 1877.903688    | 939.455482       | Q    | 1404.778017 | 702.892646      | 1387.751468    | 694.379372       | 1386.767452    | 693.887364       | 10 |
| 14 | 1994.982667 | 997.994972      | 1977.956118    | 989.481697       | 1976.972102    | 988.989689       | V    | 965.552691  | 483.279983      | 948.526142     | 474.766709       | 947.542126     | 474.274701       | 9  |
| 15 | 2092.035431 | 1046.521353     | 2075.008882    | 1038.008079      | 2074.024866    | 1037.516071      | P    | 866.484277  | 433.745776      | 849.457728     | 425.232502       | 848.473712     | 424.740494       | 8  |
| 16 | 2179.067459 | 1090.037367     | 2162.040910    | 1081.524093      | 2161.056894    | 1081.032085      | S    | 769.431513  | 385.219394      | 752.404964     | 376.706120       | 751.420948     | 376.214112       | 7  |
| 17 | 2316.126371 | 1158.566823     | 2299.099822    | 1150.053549      | 2298.115806    | 1149.561541      | H    | 682.399485  | 341.703380      | 665.372936     | 333.190106       | 664.388920     | 332.698098       | 6  |
| 18 | 2417.174050 | 1209.090663     | 2400.147501    | 1200.577388      | 2399.163485    | 1200.085380      | T    | 545.340573  | 273.173924      | 528.314024     | 264.660650       | 527.330008     | 264.168642       | 5  |
| 19 | 2516.242464 | 1258.624870     | 2499.215915    | 1250.111595      | 2498.231899    | 1249.619587      | V    | 444.292894  | 222.650085      | 427.266345     | 214.136810       |                |                  | 4  |
| 20 | 2615.310878 | 1308.159077     | 2598.284329    | 1299.645802      | 2597.300313    | 1299.153794      | V    | 345.224480  | 173.115878      | 328.197931     | 164.602603       |                |                  | 3  |
| 21 | 2686.347992 | 1343.677634     | 2669.321443    | 1335.164359      | 2668.337427    | 1334.672351      | A    | 246.156066  | 123.581671      | 229.129517     | 115.068397       |                |                  | 2  |
| 22 |             |                 |                |                  |                |                  | R    | 175.118952  | 88.063114       | 158.092403     | 79.549839        |                |                  | 1  |

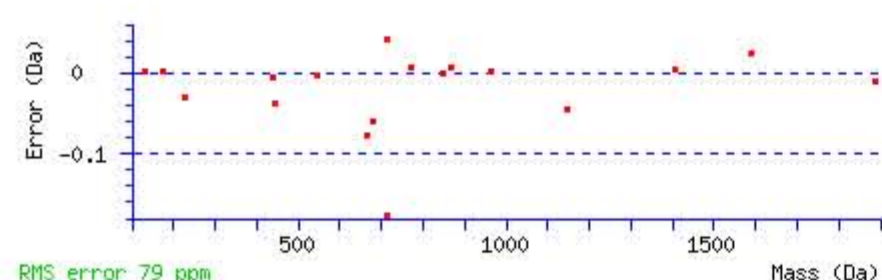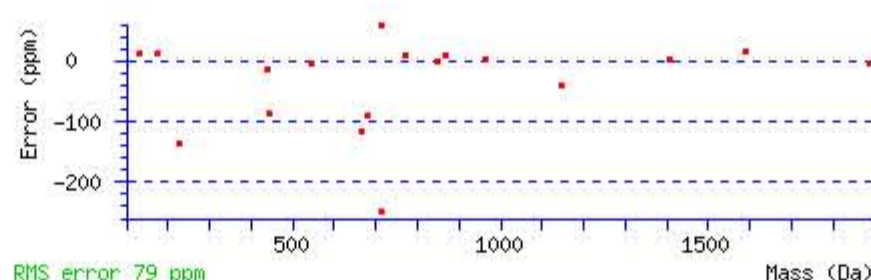

NCBI BLAST search of **KPVDEYKDCHLAQVPSHTVVAR**

(Parameters: blastp, nr protein database, expect=20000, no filter, PAM30)

Other BLAST [web gateways](#)

All matches to this query

| Score | Mr(calc):   | Delta    | Sequence                      |
|-------|-------------|----------|-------------------------------|
| 33.1  | 2859.452393 | 0.017183 | <b>KPVDEYKDCHLAQVPSHTVVAR</b> |



# **MASCOT** Mascot Search Results

## Peptide View

MS/MS Fragmentation of **FQNALLVR**

Found in **ALBU\_HUMAN**, Serum albumin OS=Homo sapiens GN=ALB PE=1 SV=2

Match to Query 29984: 1270.706208 from(636.360380,2+) rtinseconds(2091) index(42693)

Title: Locus:1.1.1.3012.7 File:"2013-07-02 CLN FXIII 60 min 1st F 3.wiff"

Data file C:\Program Files (x86)\Matrix Science\Mascot Daemon\mgf4 FXIII 60 min 1st\mascot\_daemon\_merge.mgf

Click mouse within plot area to zoom in by factor of two about that point

Or, Plot from  to  Da

Label all possible matches  Label matches used for scoring

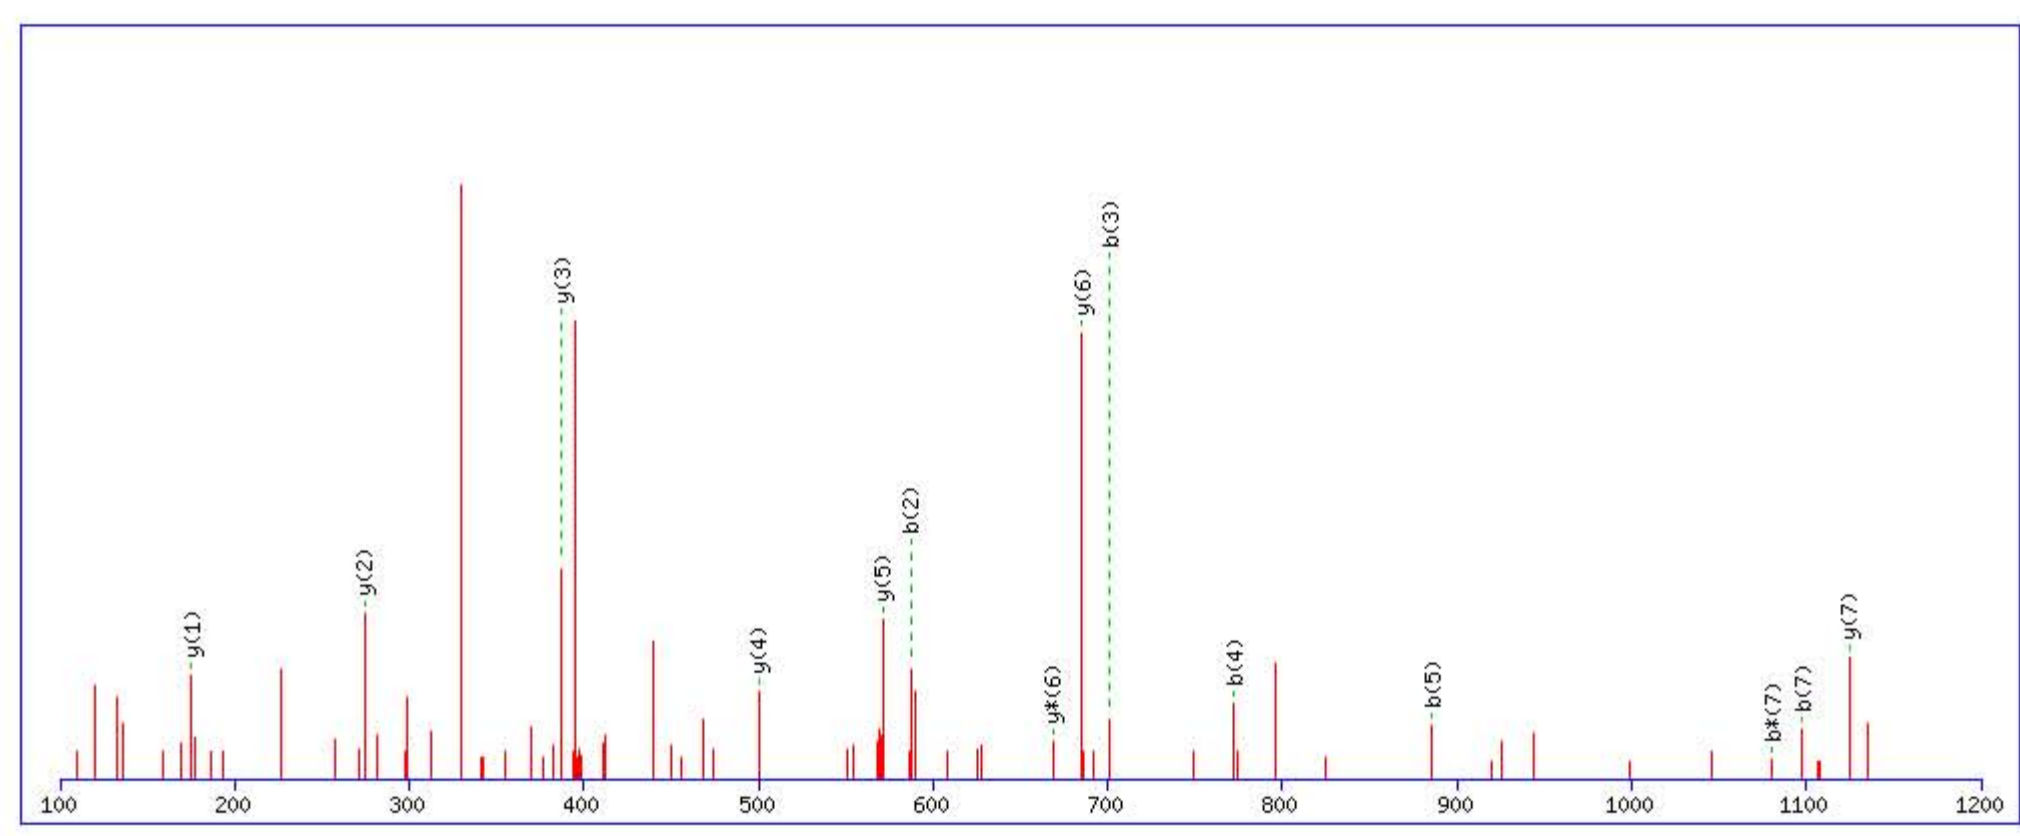

Monoisotopic mass of neutral peptide Mr(calc): 1270.721985

Fixed modifications: Carbamidomethyl (C) (apply to specified residues or termini only)

Variable modifications:

Q2 : Biotin:Thermo-21345 (Q)

Ions Score: 35 Expect: 0.0076

Matches : 14/54 fragment ions using 31 most intense peaks [\(help\)](#)

| # | b                  | b <sup>++</sup> | b <sup>*</sup>     | b <sup>+++</sup> | Seq. | y                  | y <sup>++</sup> | y <sup>*</sup>    | y <sup>+++</sup> | # |
|---|--------------------|-----------------|--------------------|------------------|------|--------------------|-----------------|-------------------|------------------|---|
| 1 | 148.075690         | 74.541483       |                    |                  | F    |                    |                 |                   |                  | 8 |
| 2 | <b>587.301016</b>  | 294.154146      | 570.274467         | 285.640872       | Q    | <b>1124.660861</b> | 562.834068      | 1107.634312       | 554.320794       | 7 |
| 3 | <b>701.343943</b>  | 351.175610      | 684.317394         | 342.662335       | N    | <b>685.435535</b>  | 343.221406      | <b>668.408986</b> | 334.708131       | 6 |
| 4 | <b>772.381057</b>  | 386.694166      | 755.354508         | 378.180892       | A    | <b>571.392608</b>  | 286.199942      | 554.366059        | 277.686668       | 5 |
| 5 | <b>885.465121</b>  | 443.236199      | 868.438572         | 434.722924       | L    | <b>500.355494</b>  | 250.681385      | 483.328945        | 242.168110       | 4 |
| 6 | 998.549185         | 499.778231      | 981.522636         | 491.264956       | L    | <b>387.271430</b>  | 194.139353      | 370.244881        | 185.626078       | 3 |
| 7 | <b>1097.617599</b> | 549.312437      | <b>1080.591050</b> | 540.799163       | V    | <b>274.187366</b>  | 137.597321      | 257.160817        | 129.084046       | 2 |
| 8 |                    |                 |                    |                  | R    | <b>175.118952</b>  | 88.063114       | 158.092403        | 79.549839        | 1 |

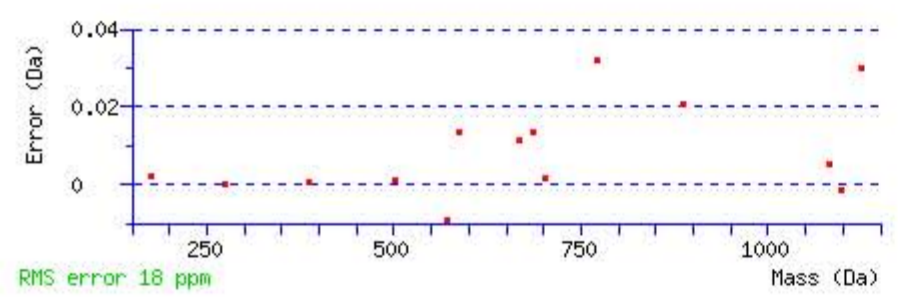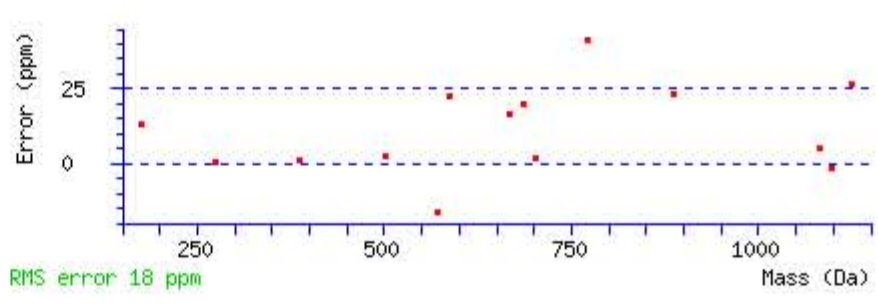

NCBI BLAST search of [FQNALLVR](#)

(Parameters: blastp, nr protein database, expect=20000, no filter, PAM30)

Other BLAST [web gateways](#)

### All matches to this query

| Score | Mr(calc):   | Delta     | Sequence                      |
|-------|-------------|-----------|-------------------------------|
| 35.2  | 1270.721985 | -0.015777 | <a href="#">FQNALLVR</a>      |
| 15.2  | 1270.722000 | -0.015792 | <a href="#">FQIAQVVR</a>      |
| 13.4  | 1270.699295 | 0.006913  | <a href="#">QEAEERKLLR</a>    |
| 8.9   | 1270.706696 | -0.000488 | <a href="#">LPALLEKNAMR</a>   |
| 8.4   | 1270.699341 | 0.006867  | <a href="#">AVTLRSGSEPVR</a>  |
| 8.3   | 1270.699295 | 0.006913  | <a href="#">AEKLERELQR</a>    |
| 7.1   | 1270.699326 | 0.006882  | <a href="#">ANGTPKSAASLVR</a> |
| 6.1   | 1270.689438 | 0.016770  | <a href="#">LIQRFNSTHR</a>    |
| 4.7   | 1270.700195 | 0.006013  | <a href="#">SQAMRIVR</a>      |
| 4.3   | 1270.688065 | 0.018143  | <a href="#">LLEESIANLNR</a>   |



# MASCOT SEARCH RESULTS

## Peptide View

MS/MS Fragmentation of **KVPQVSTPTLVEVSR**

Found in **ALBU\_HUMAN**, Serum albumin OS=Homo sapiens GN=ALB PE=1 SV=2

Match to Query 51751: 1950.106662 from(651.042830,3+) rtinseconds(1982) index(78370)

Title: Locus:1.1.1.2904.14 File:"2013-07-02 CLN FXIII 60 min 1st FT.wiff"

Data file C:\Program Files (x86)\Matrix Science\Mascot Daemon\mgf\4 FXIII 60 min 1st\mascot\_daemon\_merge.mgf

Click mouse within plot area to zoom in by factor of two about that point

Or, Plot from  to  Da

Label all possible matches  Label matches used for scoring

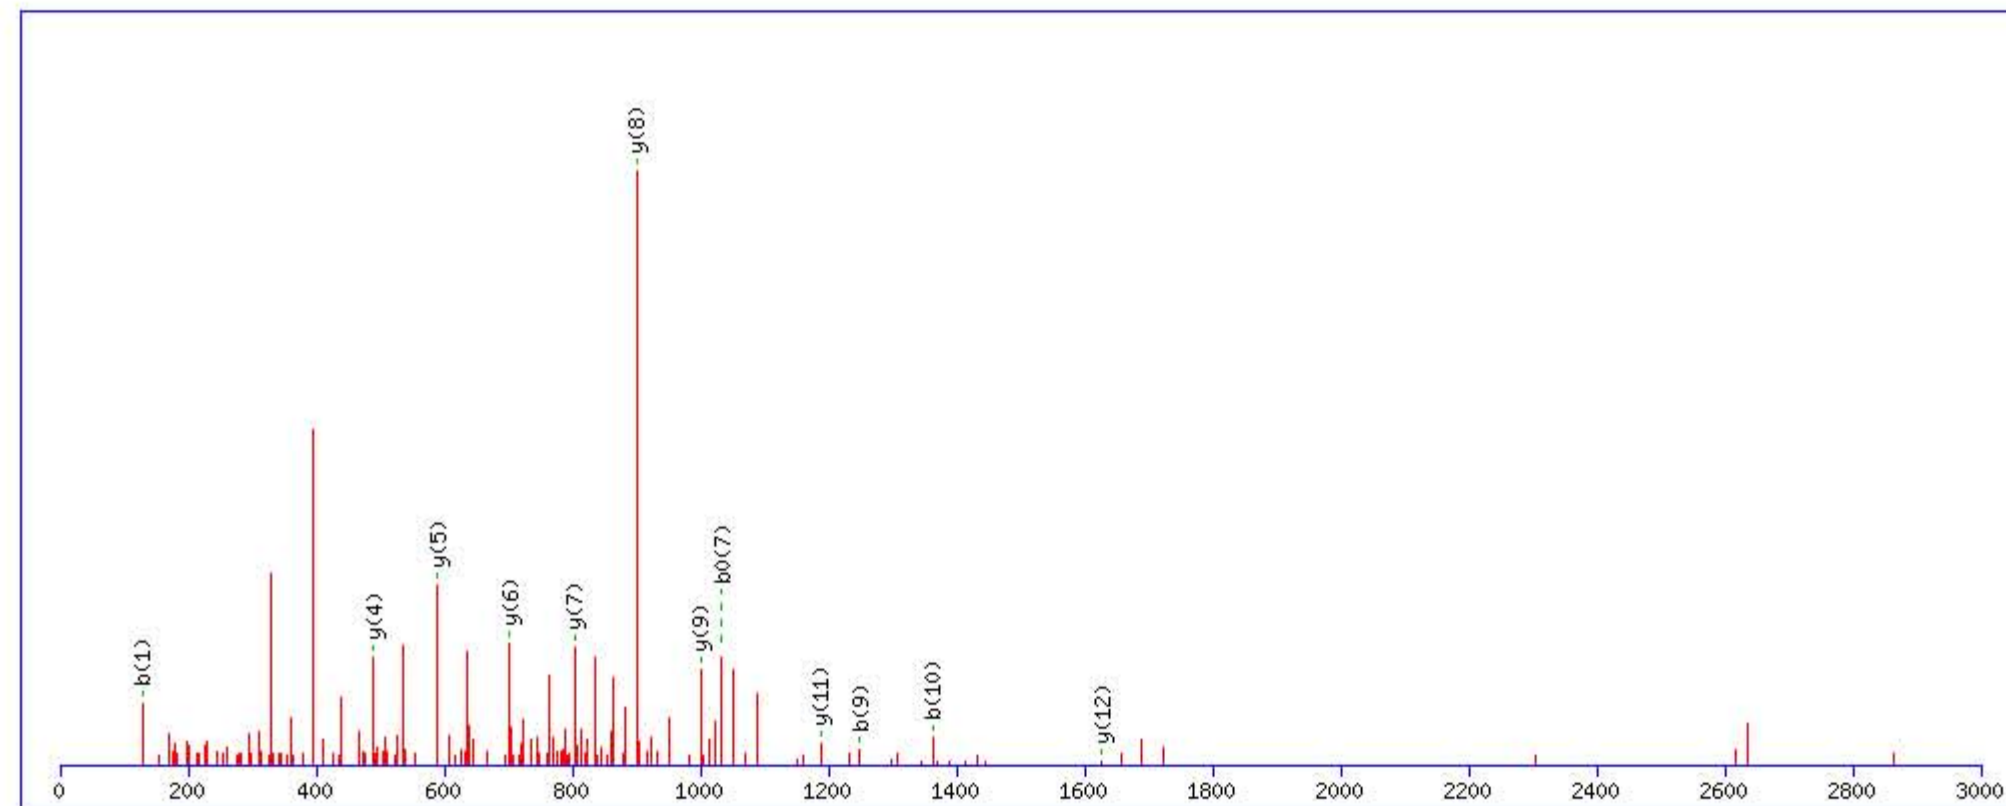

Monoisotopic mass of neutral peptide Mr(calc): 1950.097229

Fixed modifications: Carbamidomethyl (C) (apply to specified residues or termini only)

Variable modifications:

Q4 : Biotin:Thermo-21345 (Q)

Ions Score: 59 Expect: 1.1e-005

Matches : 12/156 fragment ions using 16 most intense peaks [\(help\)](#)

| #  | b                  | b <sup>++</sup> | b <sup>+</sup> | b <sup>+++</sup> | b <sup>0</sup>     | b <sup>0++</sup> | Seq.     | y                  | y <sup>++</sup> | y <sup>+</sup> | y <sup>+++</sup> | y <sup>0</sup> | y <sup>0++</sup> | #         |
|----|--------------------|-----------------|----------------|------------------|--------------------|------------------|----------|--------------------|-----------------|----------------|------------------|----------------|------------------|-----------|
| 1  | <b>129.102239</b>  | 65.054757       | 112.075690     | 56.541483        |                    |                  | <b>K</b> |                    |                 |                |                  |                |                  | <b>15</b> |
| 2  | 228.170653         | 114.588965      | 211.144104     | 106.075690       |                    |                  | <b>V</b> | 1823.009533        | 912.008404      | 1805.982984    | 903.495130       | 1804.998968    | 903.003122       | <b>14</b> |
| 3  | 325.223417         | 163.115346      | 308.196868     | 154.602072       |                    |                  | <b>P</b> | 1723.941119        | 862.474197      | 1706.914570    | 853.960923       | 1705.930554    | 853.468915       | <b>13</b> |
| 4  | 764.448743         | 382.728010      | 747.422194     | 374.214735       |                    |                  | <b>Q</b> | <b>1626.888355</b> | 813.947815      | 1609.861806    | 805.434541       | 1608.877790    | 804.942533       | <b>12</b> |
| 5  | 863.517157         | 432.262217      | 846.490608     | 423.748942       |                    |                  | <b>V</b> | <b>1187.663029</b> | 594.335153      | 1170.636480    | 585.821878       | 1169.652464    | 585.329870       | <b>11</b> |
| 6  | 950.549185         | 475.778231      | 933.522636     | 467.264956       | 932.538620         | 466.772948       | <b>S</b> | 1088.594615        | 544.800946      | 1071.568066    | 536.287671       | 1070.584050    | 535.795663       | <b>10</b> |
| 7  | 1051.596864        | 526.302070      | 1034.570315    | 517.788795       | <b>1033.586299</b> | 517.296787       | <b>T</b> | <b>1001.562587</b> | 501.284932      | 984.536038     | 492.771657       | 983.552022     | 492.279649       | <b>9</b>  |
| 8  | 1148.649628        | 574.828452      | 1131.623079    | 566.315178       | 1130.639063        | 565.823169       | <b>P</b> | <b>900.514908</b>  | 450.761092      | 883.488359     | 442.247818       | 882.504343     | 441.755810       | <b>8</b>  |
| 9  | <b>1249.697307</b> | 625.352291      | 1232.670758    | 616.839017       | 1231.686742        | 616.347009       | <b>T</b> | <b>803.462144</b>  | 402.234710      | 786.435595     | 393.721436       | 785.451579     | 393.229428       | <b>7</b>  |
| 10 | <b>1362.781371</b> | 681.894323      | 1345.754822    | 673.381049       | 1344.770806        | 672.889041       | <b>L</b> | <b>702.414465</b>  | 351.710871      | 685.387916     | 343.197596       | 684.403900     | 342.705588       | <b>6</b>  |
| 11 | 1461.849785        | 731.428530      | 1444.823236    | 722.915256       | 1443.839220        | 722.423248       | <b>V</b> | <b>589.330401</b>  | 295.168839      | 572.303852     | 286.655564       | 571.319836     | 286.163556       | <b>5</b>  |
| 12 | 1590.892378        | 795.949827      | 1573.865829    | 787.436552       | 1572.881813        | 786.944544       | <b>E</b> | <b>490.261987</b>  | 245.634631      | 473.235438     | 237.121357       | 472.251422     | 236.629349       | <b>4</b>  |
| 13 | 1689.960792        | 845.484034      | 1672.934243    | 836.970759       | 1671.950227        | 836.478751       | <b>V</b> | 361.219394         | 181.113335      | 344.192845     | 172.600061       | 343.208829     | 172.108053       | <b>3</b>  |
| 14 | 1776.992820        | 889.000048      | 1759.966271    | 880.486774       | 1758.982255        | 879.994765       | <b>S</b> | 262.150980         | 131.579128      | 245.124431     | 123.065854       | 244.140415     | 122.573846       | <b>2</b>  |
| 15 |                    |                 |                |                  |                    |                  | <b>R</b> | 175.118952         | 88.063114       | 158.092403     | 79.549839        |                |                  | <b>1</b>  |

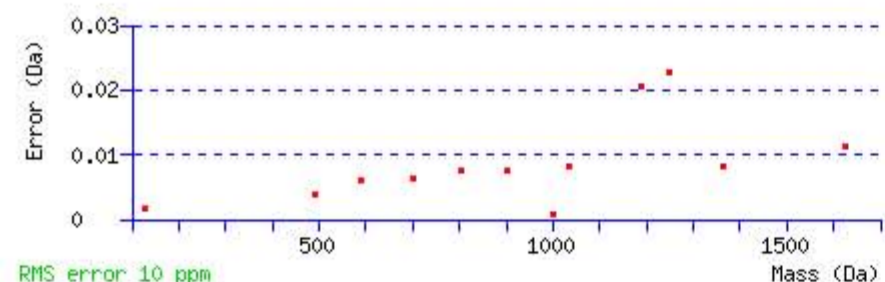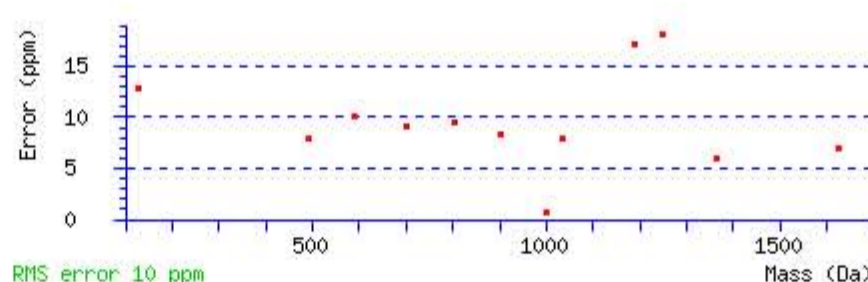

NCBI BLAST search of **KVPQVSTPTLVEVSR**

(Parameters: blastp, nr protein database, expect=20000, no filter, PAM30)

Other BLAST [web gateways](#)

All matches to this query

| Score | Mr(calc):   | Delta    | Sequence                        |
|-------|-------------|----------|---------------------------------|
| 59.4  | 1950.097229 | 0.009433 | <a href="#">KVPQVSTPTLVEVSR</a> |

Mascot: <http://www.matrixscience.com/>



# MASCOT SCIENCE Mascot Search Results

## Peptide View

MS/MS Fragmentation of **NHQSSYQTR**

Found in **PON1\_HUMAN**, Serum paraoxonase/arylesterase 1 OS=Homo sapiens GN=PON1 PE=1 SV=3

Match to Query 36345: 1430.672532 from(477.898120,3+) rtinseconds(1108) index(36230)

Title: Locus:1.1.1.2669.15 File:"2013-07-02 CLN FXIII 60 min 1st F 3.wiff"

Data file C:\Program Files (x86)\Matrix Science\Mascot Daemon\mgf\4 FXIII 60 min 1st\mascot\_daemon\_merge.mgf

Click mouse within plot area to zoom in by factor of two about that point

Or, Plot from  to  Da

Label all possible matches  Label matches used for scoring

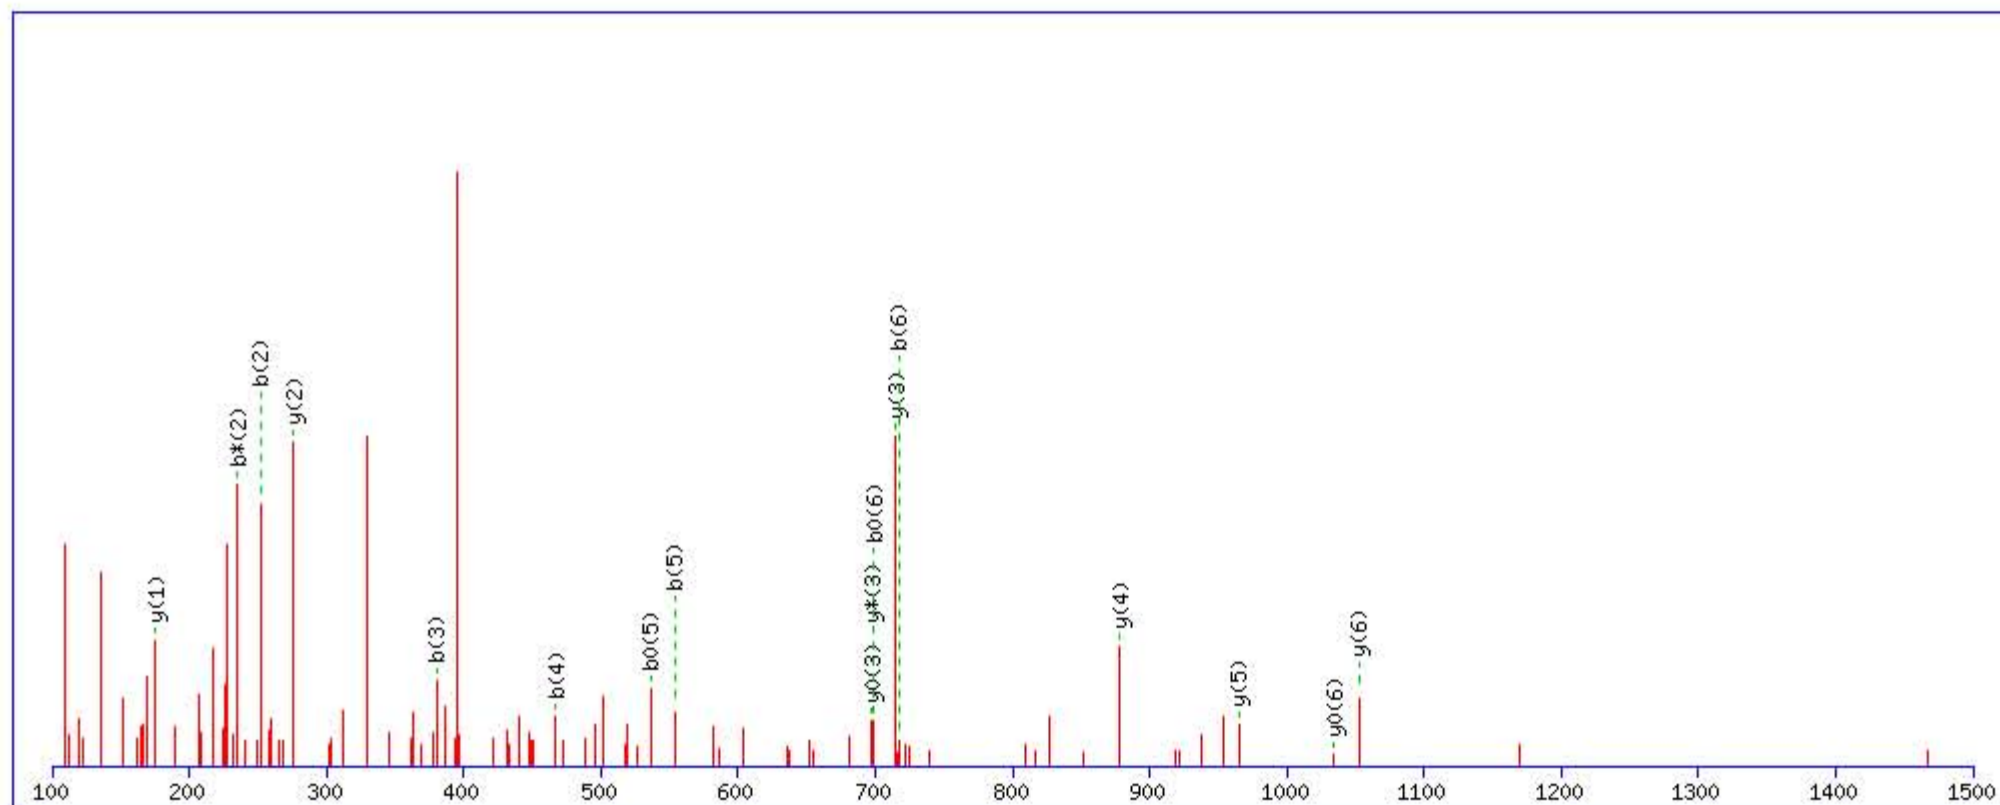

Monoisotopic mass of neutral peptide Mr(calc): 1430.672470

Fixed modifications: Carbamidomethyl (C) (apply to specified residues or termini only)

Variable modifications:

Q7 : Biotin:Thermo-21345 (Q)

Ions Score: 32 Expect: 0.0093

Matches : 17/88 fragment ions using 30 most intense peaks [\(help\)](#)

| # | b                 | b <sup>++</sup> | b <sup>*</sup>    | b <sup>*++</sup> | b <sup>0</sup>    | b <sup>0++</sup> | Seq. | y                  | y <sup>++</sup> | y <sup>*</sup>    | y <sup>*++</sup> | y <sup>0</sup>     | y <sup>0++</sup> | # |
|---|-------------------|-----------------|-------------------|------------------|-------------------|------------------|------|--------------------|-----------------|-------------------|------------------|--------------------|------------------|---|
| 1 | 115.050203        | 58.028740       | 98.023654         | 49.515465        |                   |                  | N    |                    |                 |                   |                  |                    |                  | 9 |
| 2 | <b>252.109115</b> | 126.558195      | <b>235.082566</b> | 118.044921       |                   |                  | H    | 1317.636832        | 659.322054      | 1300.610283       | 650.808780       | 1299.626267        | 650.316772       | 8 |
| 3 | <b>380.167693</b> | 190.587484      | 363.141144        | 182.074210       |                   |                  | Q    | 1180.577920        | 590.792598      | 1163.551371       | 582.279324       | 1162.567355        | 581.787316       | 7 |
| 4 | <b>467.199721</b> | 234.103499      | 450.173172        | 225.590224       | 449.189156        | 225.098216       | S    | <b>1052.519342</b> | 526.763309      | 1035.492793       | 518.250035       | <b>1034.508777</b> | 517.758027       | 6 |
| 5 | <b>554.231749</b> | 277.619513      | 537.205200        | 269.106238       | <b>536.221184</b> | 268.614230       | S    | <b>965.487314</b>  | 483.247295      | 948.460765        | 474.734021       | 947.476749         | 474.242013       | 5 |
| 6 | <b>717.295078</b> | 359.151177      | 700.268529        | 350.637903       | <b>699.284513</b> | 350.145895       | Y    | <b>878.455286</b>  | 439.731281      | 861.428737        | 431.218007       | 860.444721         | 430.725999       | 4 |
| 7 | 1156.520404       | 578.763840      | 1139.493855       | 570.250566       | 1138.509839       | 569.758558       | Q    | <b>715.391957</b>  | 358.199617      | <b>698.365408</b> | 349.686342       | <b>697.381392</b>  | 349.194334       | 3 |
| 8 | 1257.568083       | 629.287680      | 1240.541534       | 620.774405       | 1239.557518       | 620.282397       | T    | <b>276.166631</b>  | 138.586953      | 259.140082        | 130.073679       | 258.156066         | 129.581671       | 2 |
| 9 |                   |                 |                   |                  |                   |                  | R    | <b>175.118952</b>  | 88.063114       | 158.092403        | 79.549839        |                    |                  | 1 |

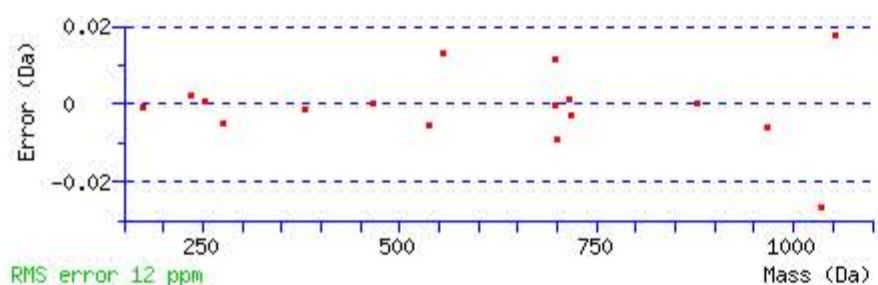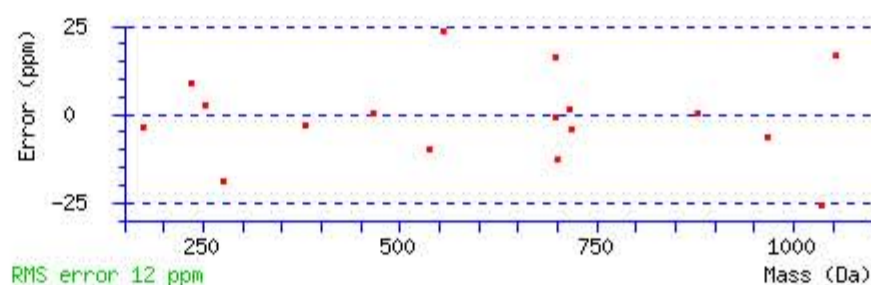

NCBI BLAST search of **NHQSSYQTR**

(Parameters: blastp, nr protein database, expect=20000, no filter, PAM30)

Other BLAST [web gateways](#)

All matches to this query

| Score | Mr(calc):   | Delta    | Sequence                  |
|-------|-------------|----------|---------------------------|
| 31.9  | 1430.672470 | 0.000062 | <a href="#">NHQSSYQTR</a> |

Mascot: <http://www.matrixscience.com/>



# MASCOT SCIENCE Mascot Search Results

## Peptide View

MS/MS Fragmentation of **NHQSSYQTR**

Found in **PON1\_HUMAN**, Serum paraoxonase/arylesterase 1 OS=Homo sapiens GN=PON1 PE=1 SV=3

Match to Query 36349: 1430.673792 from(477.898540,3+) rtinseconds(1111) index(54218)

Title: Locus:1.1.1.2693.13 File:"2013-07-02 CLN FXIII 60 min 1st F 4.wiff"

Data file C:\Program Files (x86)\Matrix Science\Mascot Daemon\mgf\4 FXIII 60 min 1st\mascot\_daemon\_merge.mgf

Click mouse within plot area to zoom in by factor of two about that point

Or, Plot from  to  Da

Label all possible matches  Label matches used for scoring

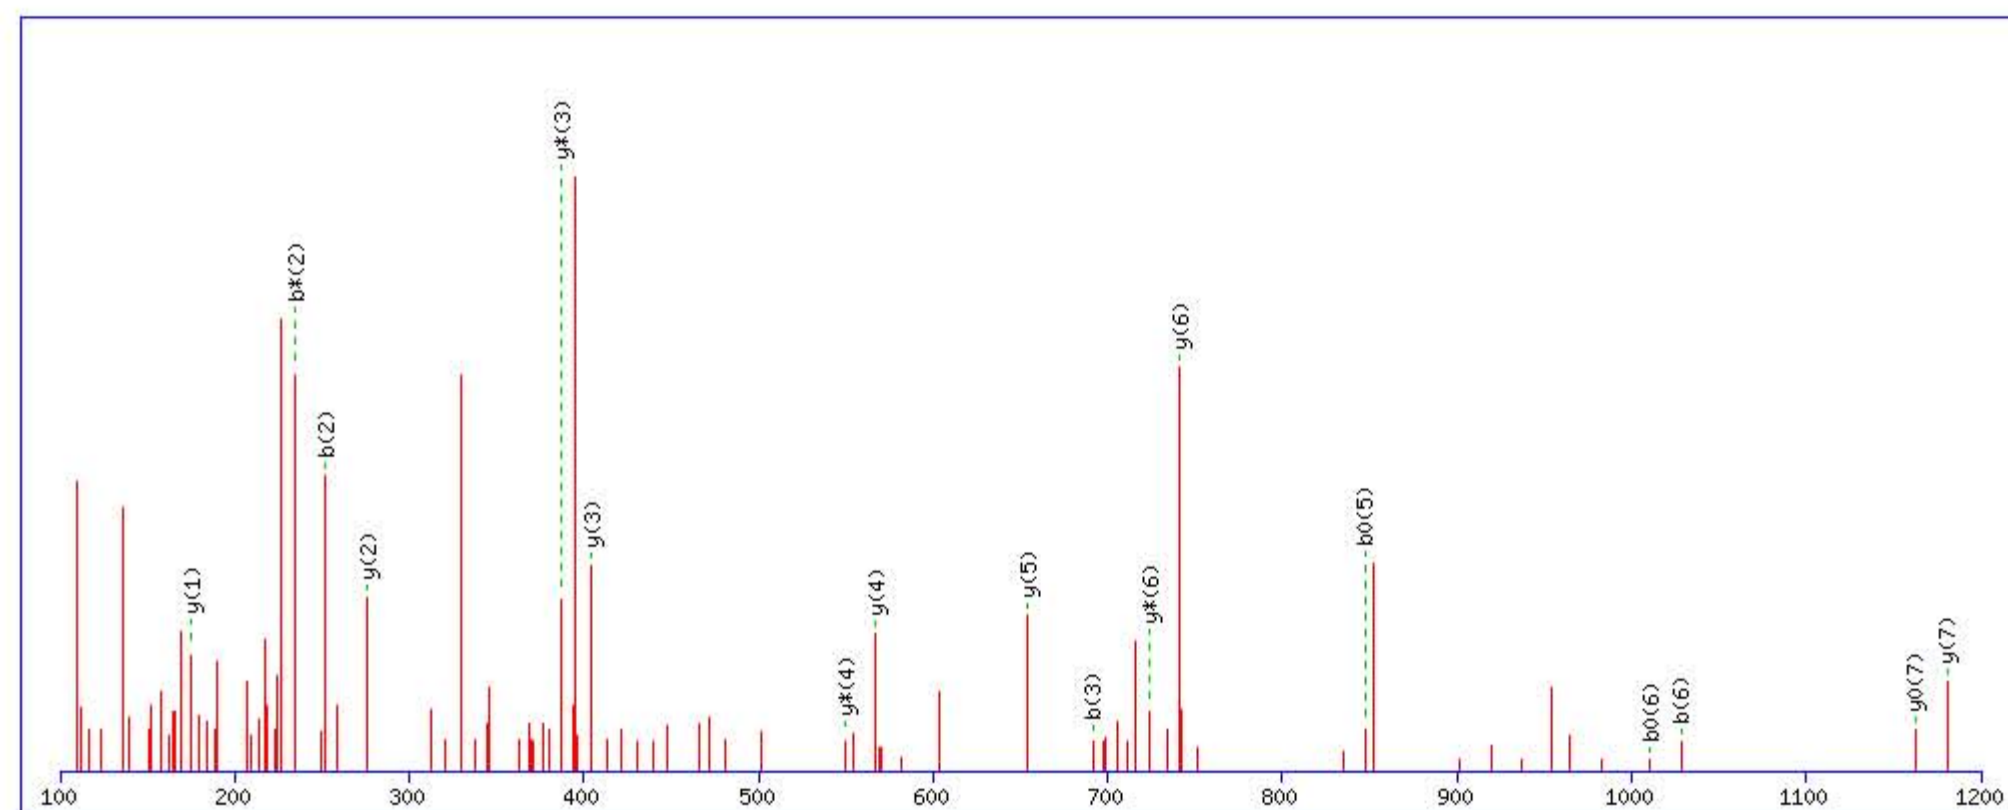

Monoisotopic mass of neutral peptide Mr(calc): 1430.672470

Fixed modifications: Carbamidomethyl (C) (apply to specified residues or termini only)

Variable modifications:

Q3 : Biotin:Thermo-21345 (Q)

Ions Score: 31 Expect: 0.012

Matches : 17/88 fragment ions using 40 most intense peaks ([help](#))

| # | b                  | b <sup>++</sup> | b <sup>*</sup>    | b <sup>***</sup> | b <sup>0</sup>     | b <sup>0++</sup> | Seq. | y                  | y <sup>++</sup> | y <sup>*</sup>    | y <sup>***</sup> | y <sup>0</sup>     | y <sup>0++</sup> | # |
|---|--------------------|-----------------|-------------------|------------------|--------------------|------------------|------|--------------------|-----------------|-------------------|------------------|--------------------|------------------|---|
| 1 | 115.050203         | 58.028740       | 98.023654         | 49.515465        |                    |                  | N    |                    |                 |                   |                  |                    |                  | 9 |
| 2 | <b>252.109115</b>  | 126.558195      | <b>235.082566</b> | 118.044921       |                    |                  | H    | 1317.636832        | 659.322054      | 1300.610283       | 650.808780       | 1299.626267        | 650.316772       | 8 |
| 3 | <b>691.334441</b>  | 346.170859      | 674.307892        | 337.657584       |                    |                  | Q    | <b>1180.577920</b> | 590.792598      | 1163.551371       | 582.279324       | <b>1162.567355</b> | 581.787316       | 7 |
| 4 | 778.366469         | 389.686872      | 761.339920        | 381.173598       | 760.355904         | 380.681590       | S    | <b>741.352594</b>  | 371.179935      | <b>724.326045</b> | 362.666661       | 723.342029         | 362.174653       | 6 |
| 5 | 865.398497         | 433.202886      | 848.371948        | 424.689612       | <b>847.387932</b>  | 424.197604       | S    | <b>654.320566</b>  | 327.663921      | 637.294017        | 319.150647       | 636.310001         | 318.658639       | 5 |
| 6 | <b>1028.461826</b> | 514.734551      | 1011.435277       | 506.221276       | <b>1010.451261</b> | 505.729268       | Y    | <b>567.288538</b>  | 284.147907      | <b>550.261989</b> | 275.634633       | 549.277973         | 275.142625       | 4 |
| 7 | 1156.520404        | 578.763840      | 1139.493855       | 570.250566       | 1138.509839        | 569.758558       | Q    | <b>404.225209</b>  | 202.616243      | <b>387.198660</b> | 194.102968       | 386.214644         | 193.610960       | 3 |
| 8 | 1257.568083        | 629.287680      | 1240.541534       | 620.774405       | 1239.557518        | 620.282397       | T    | <b>276.166631</b>  | 138.586953      | 259.140082        | 130.073679       | 258.156066         | 129.581671       | 2 |
| 9 |                    |                 |                   |                  |                    |                  | R    | <b>175.118952</b>  | 88.063114       | 158.092403        | 79.549839        |                    |                  | 1 |

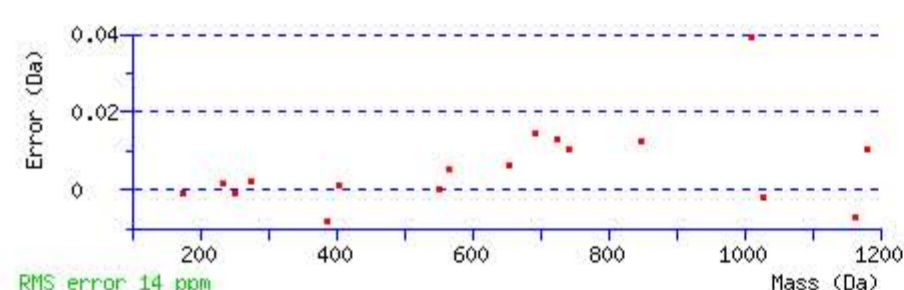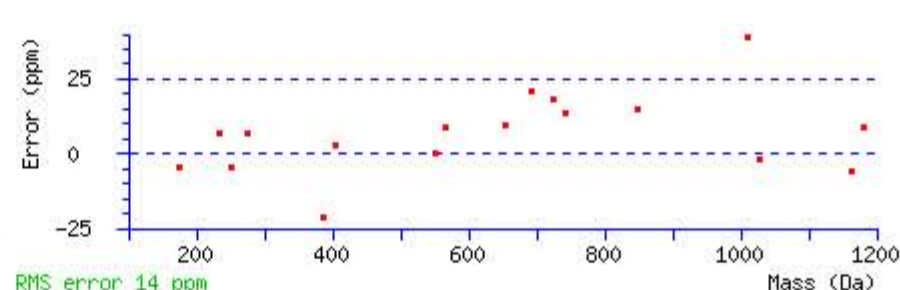

NCBI BLAST search of **NHQSSYQTR**

(Parameters: blastp, nr protein database, expect=20000, no filter, PAM30)

Other BLAST [web gateways](#)

All matches to this query

| Score | Mr(calc):   | Delta    | Sequence                  |
|-------|-------------|----------|---------------------------|
| 30.9  | 1430.672470 | 0.001322 | <a href="#">NHQSSYQTR</a> |
| 2.1   | 1430.672470 | 0.001322 | <a href="#">NHQSSYQTR</a> |

Mascot: <http://www.matrixscience.com/>



# MASCOT Search Results

## Peptide View

MS/MS Fragmentation of **IQNILTEEPK**

Found in **PON1\_HUMAN**, Serum paraoxonase/arylesterase 1 OS=Homo sapiens GN=PON1 PE=1 SV=3

Match to Query 38459: 1494.827648 from(748.421100,2+) rtinseconds(2003) index(60553)

Title: Locus:1.1.1.3002.18 File:"2013-07-02 CLN FXIII 60 min 1st F 4.wiff"

Data file C:\Program Files (x86)\Matrix Science\Mascot Daemon\mgf\4 FXIII 60 min 1st\mascot\_daemon\_merge.mgf

Click mouse within plot area to zoom in by factor of two about that point

Or, Plot from  to  Da

Label all possible matches  Label matches used for scoring

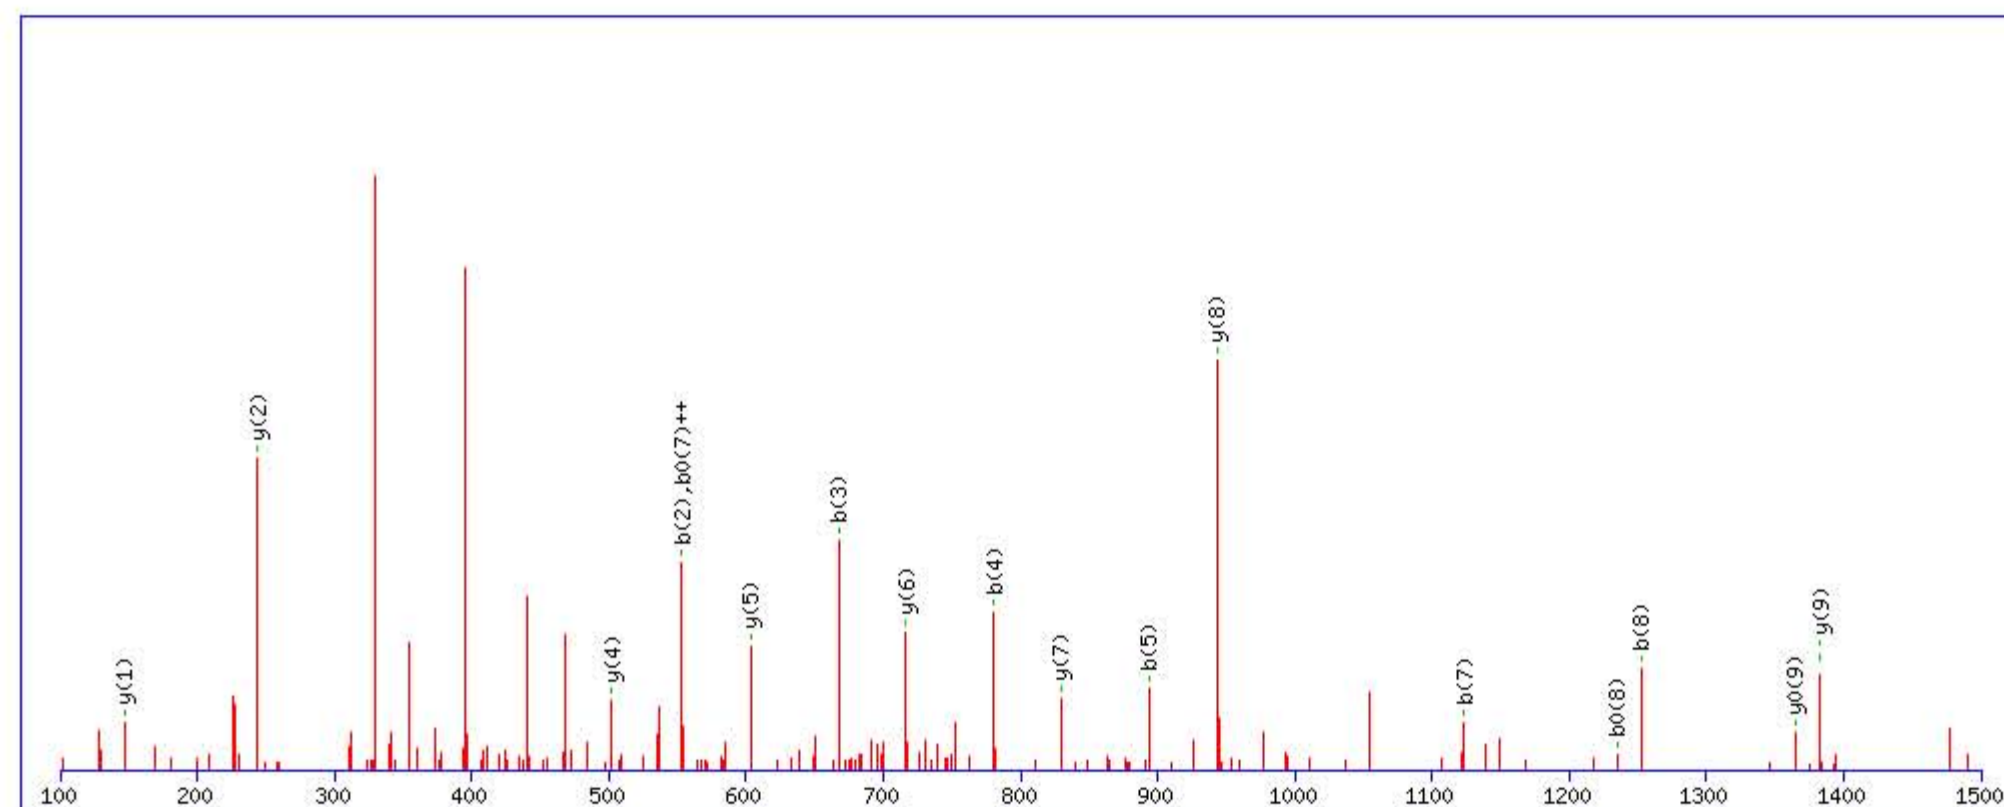

Monoisotopic mass of neutral peptide Mr(calc): 1494.811569

Fixed modifications: Carbamidomethyl (C) (apply to specified residues or termini only)

Variable modifications:

Q2 : Biotin:Thermo-21345 (Q)

Ions Score: 52 Expect: 8.2e-005

Matches : 17/92 fragment ions using 28 most intense peaks [\(help\)](#)

| #  | b                  | b <sup>++</sup> | b <sup>+</sup> | b <sup>+++</sup> | b <sup>0</sup>     | b <sup>0++</sup>  | Seq. | y                  | y <sup>++</sup> | y <sup>+</sup> | y <sup>+++</sup> | y <sup>0</sup>     | y <sup>0++</sup> | #  |
|----|--------------------|-----------------|----------------|------------------|--------------------|-------------------|------|--------------------|-----------------|----------------|------------------|--------------------|------------------|----|
| 1  | 114.091340         | 57.549308       |                |                  |                    |                   | I    |                    |                 |                |                  |                    |                  | 10 |
| 2  | <b>553.316666</b>  | 277.161971      | 536.290117     | 268.648697       |                    |                   | Q    | <b>1382.734814</b> | 691.871045      | 1365.708265    | 683.357771       | <b>1364.724249</b> | 682.865763       | 9  |
| 3  | <b>667.359593</b>  | 334.183435      | 650.333044     | 325.670160       |                    |                   | N    | <b>943.509488</b>  | 472.258382      | 926.482939     | 463.745108       | 925.498923         | 463.253100       | 8  |
| 4  | <b>780.443657</b>  | 390.725467      | 763.417108     | 382.212192       |                    |                   | I    | <b>829.466561</b>  | 415.236919      | 812.440012     | 406.723644       | 811.455996         | 406.231636       | 7  |
| 5  | <b>893.527721</b>  | 447.267499      | 876.501172     | 438.754224       |                    |                   | L    | <b>716.382497</b>  | 358.694887      | 699.355948     | 350.181612       | 698.371932         | 349.689604       | 6  |
| 6  | 994.575400         | 497.791338      | 977.548851     | 489.278064       | 976.564835         | 488.786056        | T    | <b>603.298433</b>  | 302.152855      | 586.271884     | 293.639580       | 585.287868         | 293.147572       | 5  |
| 7  | <b>1123.617993</b> | 562.312635      | 1106.591444    | 553.799360       | 1105.607428        | <b>553.307352</b> | E    | <b>502.250754</b>  | 251.629015      | 485.224205     | 243.115741       | 484.240189         | 242.623733       | 4  |
| 8  | <b>1252.660586</b> | 626.833931      | 1235.634037    | 618.320657       | <b>1234.650021</b> | 617.828649        | E    | 373.208161         | 187.107719      | 356.181612     | 178.594444       | 355.197596         | 178.102436       | 3  |
| 9  | 1349.713350        | 675.360313      | 1332.686801    | 666.847039       | 1331.702785        | 666.355031        | P    | <b>244.165568</b>  | 122.586422      | 227.139019     | 114.073148       |                    |                  | 2  |
| 10 |                    |                 |                |                  |                    |                   | K    | <b>147.112804</b>  | 74.060040       | 130.086255     | 65.546765        |                    |                  | 1  |

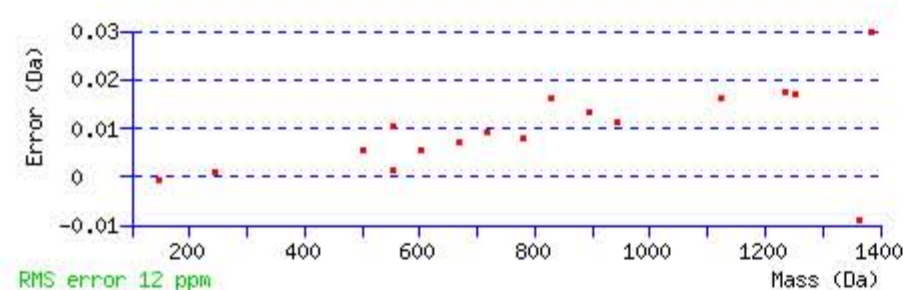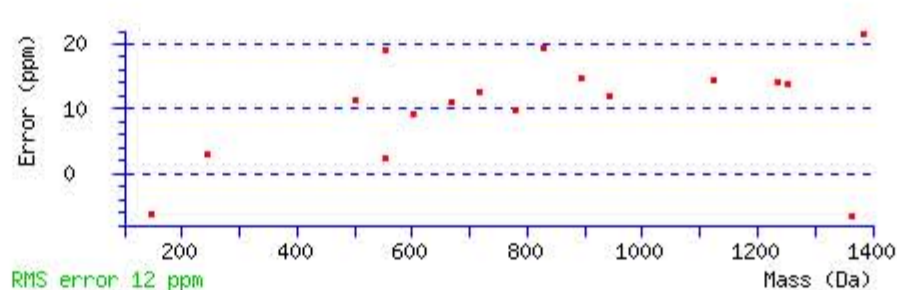

NCBI BLAST search of **IQNILTEEPK**

(Parameters: blastp, nr protein database, expect=20000, no filter, PAM30)

Other BLAST [web gateways](#)

## All matches to this query

| Score | Mr(calc):   | Delta     | Sequence                       |
|-------|-------------|-----------|--------------------------------|
| 51.8  | 1494.811569 | 0.016079  | <a href="#">IQNILTEEPK</a>     |
| 7.7   | 1494.834030 | -0.006382 | <a href="#">QLLRALLEGR</a>     |
| 7.1   | 1494.834030 | -0.006382 | <a href="#">QLNAIRDNIK</a>     |
| 6.6   | 1494.809097 | 0.018551  | <a href="#">LQLYVFVMR</a>      |
| 6.4   | 1494.822800 | 0.004848  | <a href="#">LQQIAAAVENK</a>    |
| 6.3   | 1494.815430 | 0.012218  | <a href="#">KGSTKDSGHLQIPK</a> |
| 4.3   | 1494.824142 | 0.003506  | <a href="#">QIRSYPHRK</a>      |
| 4.2   | 1494.820129 | 0.007519  | <a href="#">LQSLCRGHLQRK</a>   |
| 4.2   | 1494.822800 | 0.004848  | <a href="#">LSLKNDAPOAK</a>    |
| 3.9   | 1494.834030 | -0.006382 | <a href="#">LQAEAQQLRK</a>     |



# MASCOT SEARCH RESULTS

## Peptide View

MS/MS Fragmentation of **VHAVDSCMSFQCK**

Found in **SPRL1\_HUMAN**, SPARC-like protein 1 OS=Homo sapiens GN=SPARCL1 PE=1 SV=2

Match to Query 50262: 1878.842412 from(627.288080,3+) rtinseconds(1692) index(58251)

Title: Locus:1.1.1.2895.11 File:"2013-07-02 CLN FXIII 60 min 1st F 4.wiff"

Data file C:\Program Files (x86)\Matrix Science\Mascot Daemon\mgf4 FXIII 60 min 1st\mascot\_daemon\_merge.mgf

Click mouse within plot area to zoom in by factor of two about that point

Or, Plot from  to  Da

Label all possible matches  Label matches used for scoring

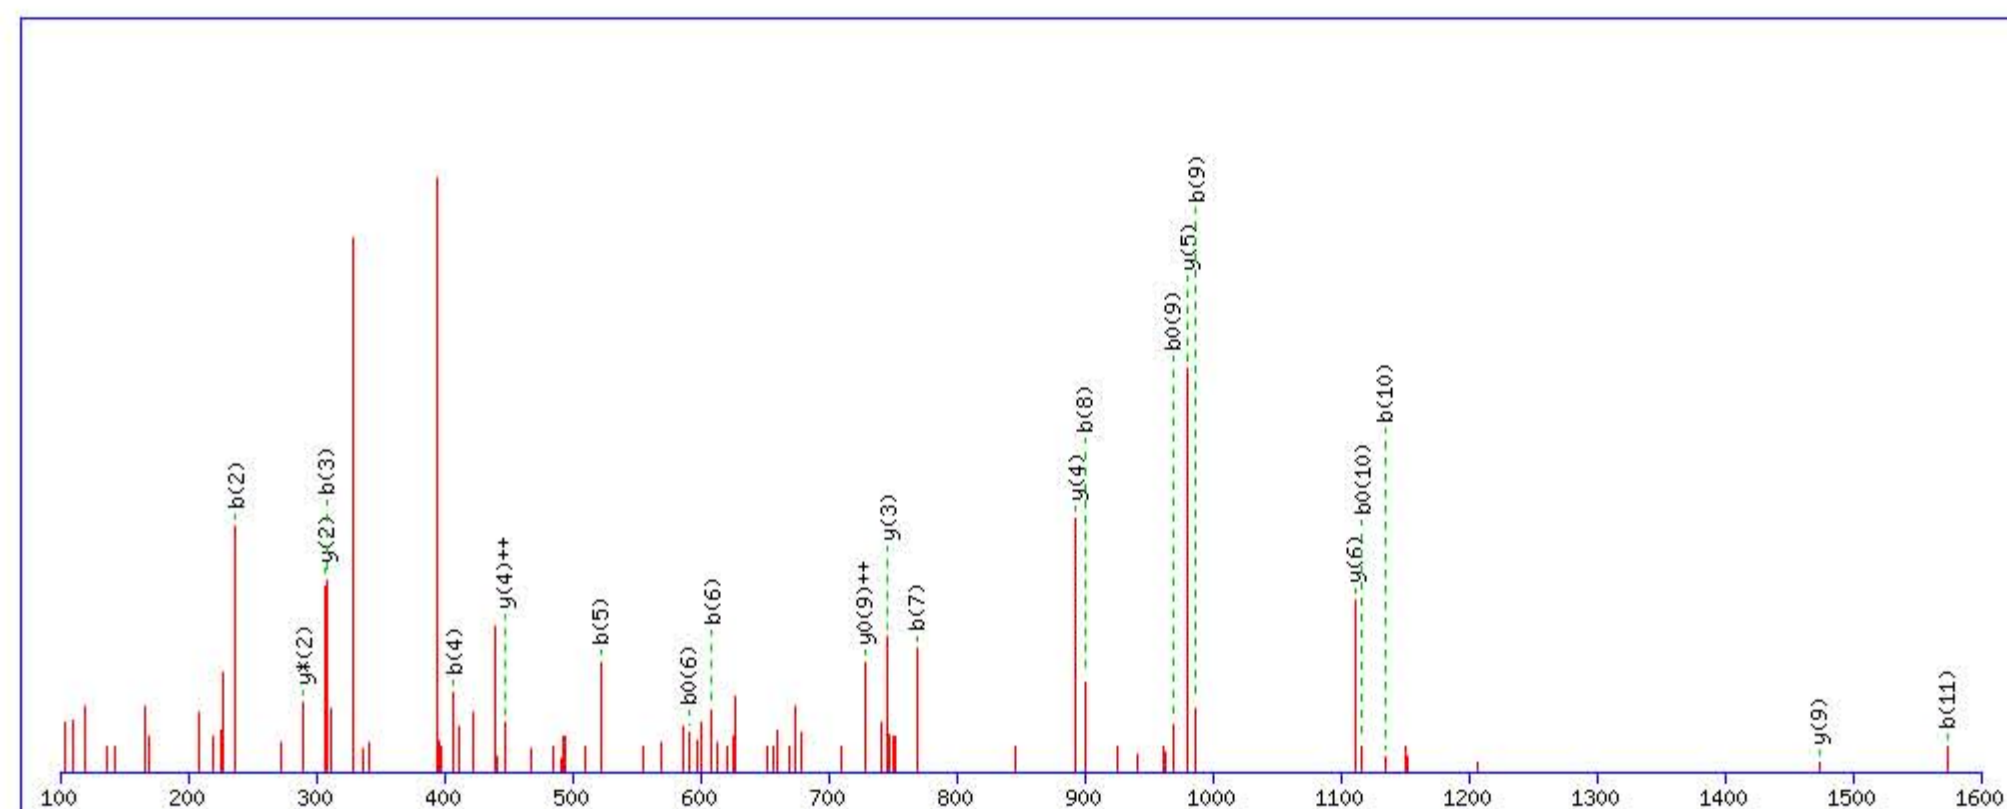

Monoisotopic mass of neutral peptide Mr(calc): 1878.824921

Fixed modifications: Carbamidomethyl (C) (apply to specified residues or termini only)

Variable modifications:

Q11 : Biotin:Thermo-21345 (Q)

Ions Score: 56 Expect: 2.5e-005

Matches : 22/108 fragment ions using 42 most intense peaks [\(help\)](#)

| #  | b                  | b <sup>++</sup> | b <sup>*</sup> | b <sup>*++</sup> | b <sup>0</sup>     | b <sup>0++</sup> | Seq. | y                  | y <sup>++</sup>   | y <sup>*</sup>    | y <sup>*++</sup> | y <sup>0</sup> | y <sup>0++</sup>  | #  |
|----|--------------------|-----------------|----------------|------------------|--------------------|------------------|------|--------------------|-------------------|-------------------|------------------|----------------|-------------------|----|
| 1  | 100.075690         | 50.541483       |                |                  |                    |                  | V    |                    |                   |                   |                  |                |                   | 13 |
| 2  | <b>237.134602</b>  | 119.070939      |                |                  |                    |                  | H    | 1780.763766        | 890.885521        | 1763.737217       | 882.372247       | 1762.753201    | 881.880239        | 12 |
| 3  | <b>308.171716</b>  | 154.589496      |                |                  |                    |                  | A    | 1643.704854        | 822.356065        | 1626.678305       | 813.842791       | 1625.694289    | 813.350783        | 11 |
| 4  | <b>407.240130</b>  | 204.123703      |                |                  |                    |                  | V    | 1572.667740        | 786.837508        | 1555.641191       | 778.324234       | 1554.657175    | 777.832226        | 10 |
| 5  | <b>522.267073</b>  | 261.637175      |                |                  | 504.256508         | 252.631892       | D    | <b>1473.599326</b> | 737.303301        | 1456.572777       | 728.790027       | 1455.588761    | <b>728.298019</b> | 9  |
| 6  | <b>609.299101</b>  | 305.153189      |                |                  | <b>591.288536</b>  | 296.147906       | S    | 1358.572383        | 679.789830        | 1341.545834       | 671.276555       | 1340.561818    | 670.784547        | 8  |
| 7  | <b>769.329750</b>  | 385.168513      |                |                  | 751.319185         | 376.163231       | C    | 1271.540355        | 636.273816        | 1254.513806       | 627.760541       | 1253.529790    | 627.268533        | 7  |
| 8  | <b>900.370235</b>  | 450.688756      |                |                  | 882.359670         | 441.683473       | M    | <b>1111.509706</b> | 556.258491        | 1094.483157       | 547.745217       | 1093.499141    | 547.253209        | 6  |
| 9  | <b>987.402263</b>  | 494.204770      |                |                  | <b>969.391698</b>  | 485.199487       | S    | <b>980.469221</b>  | 490.738249        | 963.442672        | 482.224974       | 962.458656     | 481.732966        | 5  |
| 10 | <b>1134.470677</b> | 567.738977      |                |                  | <b>1116.460112</b> | 558.733694       | F    | <b>893.437193</b>  | <b>447.222235</b> | 876.410644        | 438.708960       |                |                   | 4  |
| 11 | <b>1573.696003</b> | 787.351640      | 1556.669454    | 778.838365       | 1555.685438        | 778.346357       | Q    | <b>746.368779</b>  | 373.688028        | 729.342230        | 365.174753       |                |                   | 3  |
| 12 | 1733.726652        | 867.366964      | 1716.700103    | 858.853690       | 1715.716087        | 858.361682       | C    | <b>307.143453</b>  | 154.075365        | <b>290.116904</b> | 145.562090       |                |                   | 2  |
| 13 |                    |                 |                |                  |                    |                  | K    | 147.112804         | 74.060040         | 130.086255        | 65.546765        |                |                   | 1  |

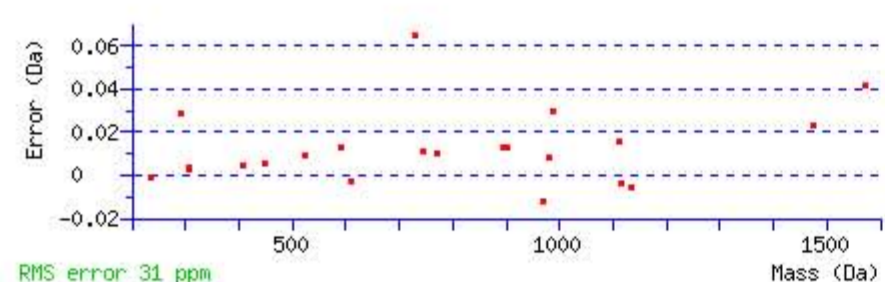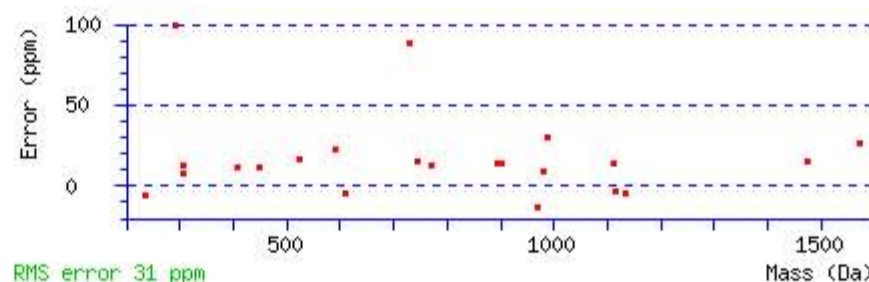

NCBI BLAST search of **VHAVDSCMSFQCK**

(Parameters: blastp, nr protein database, expect=20000, no filter, PAM30)

Other BLAST [web gateways](#)

All matches to this query

| Score | Mr(calc):   | Delta    | Sequence             |
|-------|-------------|----------|----------------------|
| 55.6  | 1878.824921 | 0.017491 | <b>VHAVDSCMSFQCK</b> |

Mascot: <http://www.matrixscience.com/>



# MASCOT SEARCH RESULTS

## Peptide View

MS/MS Fragmentation of **KGHQLQLDYFGACK**

Found in **SPRL1\_HUMAN**, SPARC-like protein 1 OS=Homo sapiens GN=SPARCL1 PE=1 SV=2

Match to Query 52362: 1974.997782 from(659.339870,3+) rtinseconds(1921) index(59942)

Title: Locus:1.1.1.2974.13 File:"2013-07-02 CLN FXIII 60 min 1st F 4.wiff"

Data file C:\Program Files (x86)\Matrix Science\Mascot Daemon\mgf4 FXIII 60 min 1st\mascot\_daemon\_merge.mgf

Click mouse within plot area to zoom in by factor of two about that point

Or, Plot from  to  Da

Label all possible matches  Label matches used for scoring

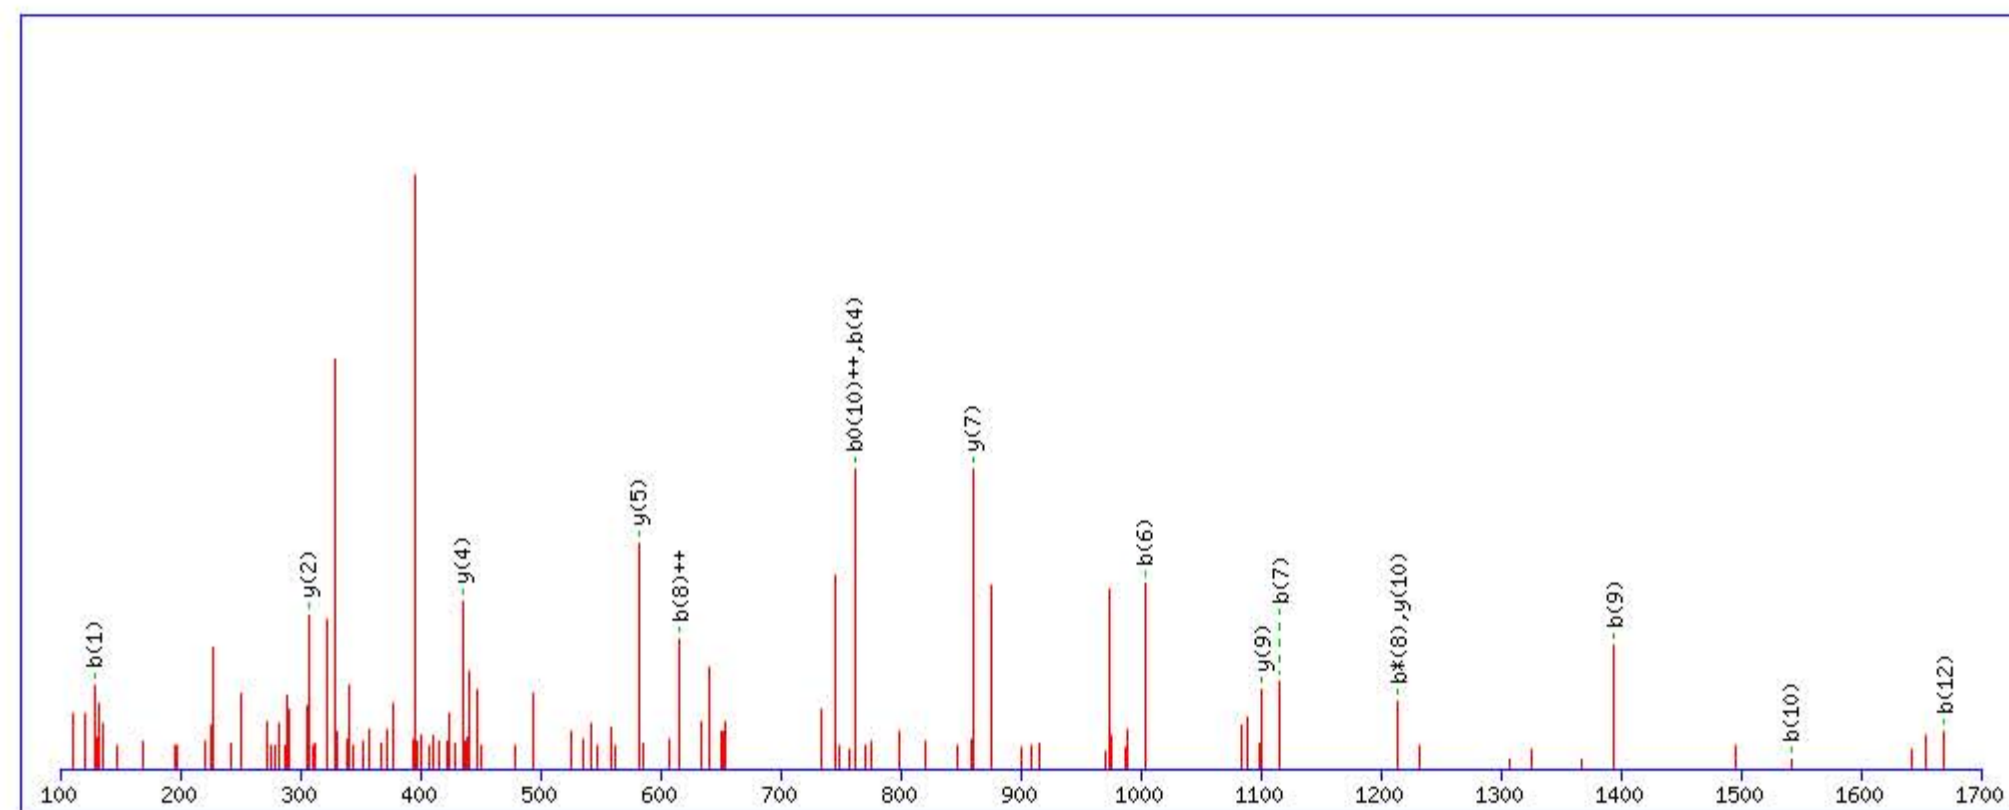

Monoisotopic mass of neutral peptide Mr(calc): 1974.980804

Fixed modifications: Carbamidomethyl (C) (apply to specified residues or termini only)

Variable modifications:

Q4 : Biotin:Thermo-21345 (Q)

Ions Score: 56 Expect: 7e-005

Matches : 16/130 fragment ions using 16 most intense peaks [\(help\)](#)

| #  | b                  | b <sup>++</sup>   | b <sup>+</sup>     | b <sup>+++</sup> | b <sup>0</sup> | b <sup>0++</sup>  | Seq.     | y                  | y <sup>++</sup> | y <sup>+</sup> | y <sup>+++</sup> | y <sup>0</sup> | y <sup>0++</sup> | #         |
|----|--------------------|-------------------|--------------------|------------------|----------------|-------------------|----------|--------------------|-----------------|----------------|------------------|----------------|------------------|-----------|
| 1  | <b>129.102239</b>  | 65.054757         | 112.075690         | 56.541483        |                |                   | <b>K</b> |                    |                 |                |                  |                |                  | <b>14</b> |
| 2  | 186.123703         | 93.565489         | 169.097154         | 85.052215        |                |                   | <b>G</b> | 1847.893125        | 924.450201      | 1830.866576    | 915.936926       | 1829.882560    | 915.444918       | <b>13</b> |
| 3  | 323.182615         | 162.094945        | 306.156066         | 153.581671       |                |                   | <b>H</b> | 1790.871661        | 895.939469      | 1773.845112    | 887.426194       | 1772.861096    | 886.934186       | <b>12</b> |
| 4  | <b>762.407941</b>  | 381.707609        | 745.381392         | 373.194334       |                |                   | <b>Q</b> | 1653.812749        | 827.410013      | 1636.786200    | 818.896738       | 1635.802184    | 818.404730       | <b>11</b> |
| 5  | 875.492005         | 438.249641        | 858.465456         | 429.736366       |                |                   | <b>L</b> | <b>1214.587423</b> | 607.797350      | 1197.560874    | 599.284075       | 1196.576858    | 598.792067       | <b>10</b> |
| 6  | <b>1003.550583</b> | 502.278930        | 986.524034         | 493.765655       |                |                   | <b>Q</b> | <b>1101.503359</b> | 551.255318      | 1084.476810    | 542.742043       | 1083.492794    | 542.250035       | <b>9</b>  |
| 7  | <b>1116.634647</b> | 558.820962        | 1099.608098        | 550.307687       |                |                   | <b>L</b> | 973.444781         | 487.226029      | 956.418232     | 478.712754       | 955.434216     | 478.220746       | <b>8</b>  |
| 8  | 1231.661590        | <b>616.334433</b> | <b>1214.635041</b> | 607.821159       | 1213.651025    | 607.329151        | <b>D</b> | <b>860.360717</b>  | 430.683997      | 843.334168     | 422.170722       | 842.350152     | 421.678714       | <b>7</b>  |
| 9  | <b>1394.724919</b> | 697.866098        | 1377.698370        | 689.352823       | 1376.714354    | 688.860815        | <b>Y</b> | 745.333774         | 373.170525      | 728.307225     | 364.657251       |                |                  | <b>6</b>  |
| 10 | <b>1541.793333</b> | 771.400305        | 1524.766784        | 762.887030       | 1523.782768    | <b>762.395022</b> | <b>F</b> | <b>582.270445</b>  | 291.638861      | 565.243896     | 283.125586       |                |                  | <b>5</b>  |
| 11 | 1598.814797        | 799.911037        | 1581.788248        | 791.397762       | 1580.804232    | 790.905754        | <b>G</b> | <b>435.202031</b>  | 218.104653      | 418.175482     | 209.591379       |                |                  | <b>4</b>  |
| 12 | <b>1669.851911</b> | 835.429594        | 1652.825362        | 826.916319       | 1651.841346    | 826.424311        | <b>A</b> | 378.180567         | 189.593921      | 361.154018     | 181.080647       |                |                  | <b>3</b>  |
| 13 | 1829.882560        | 915.444918        | 1812.856011        | 906.931644       | 1811.871995    | 906.439636        | <b>C</b> | <b>307.143453</b>  | 154.075365      | 290.116904     | 145.562090       |                |                  | <b>2</b>  |
| 14 |                    |                   |                    |                  |                |                   | <b>K</b> | 147.112804         | 74.060040       | 130.086255     | 65.546765        |                |                  | <b>1</b>  |

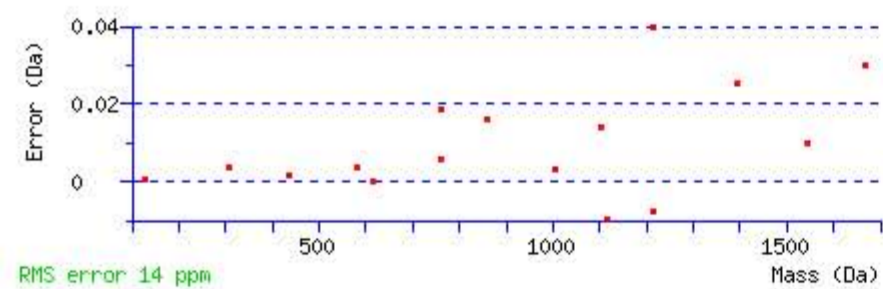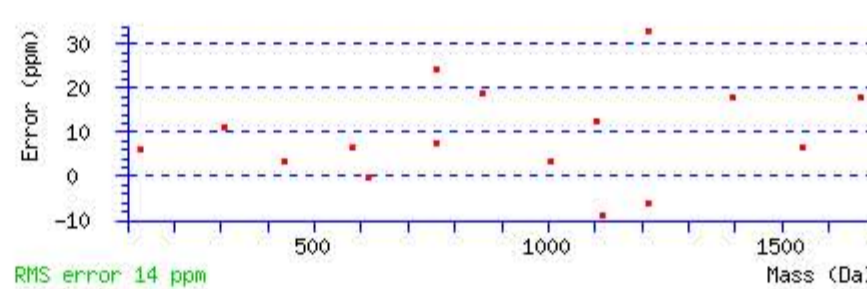

NCBI BLAST search of **KGHQLQLDYFGACK**

(Parameters: blastp, nr protein database, expect=20000, no filter, PAM30)

Other BLAST [web gateways](#)

All matches to this query

| Score | Mr(calc):   | Delta    | Sequence                       |
|-------|-------------|----------|--------------------------------|
| 55.8  | 1974.980804 | 0.016978 | <a href="#">KGHQLQLDYFGACK</a> |
| 38.0  | 1974.980804 | 0.016978 | <a href="#">KGHQLQLDYFGACK</a> |

Mascot: <http://www.matrixscience.com/>



# MASCOT Search Results

## Peptide View

MS/MS Fragmentation of **SIPTCTDFEVIQFPLR**

Found in **SPRL1\_HUMAN**, SPARC-like protein 1 OS=Homo sapiens GN=SPARCL1 PE=1 SV=2

Match to Query 58987: 2233.156812 from(745.392880,3+) rtinseconds(2795) index(66092)

Title: Locus:1.1.1.3276.17 File:"2013-07-02 CLN FXIII 60 min 1st F 4.wiff"

Data file C:\Program Files (x86)\Matrix Science\Mascot Daemon\mgf\4 FXIII 60 min 1st\mascot\_daemon\_merge.mgf

Click mouse within plot area to zoom in by factor of two about that point

Or, Plot from  to  Da

Label all possible matches  Label matches used for scoring

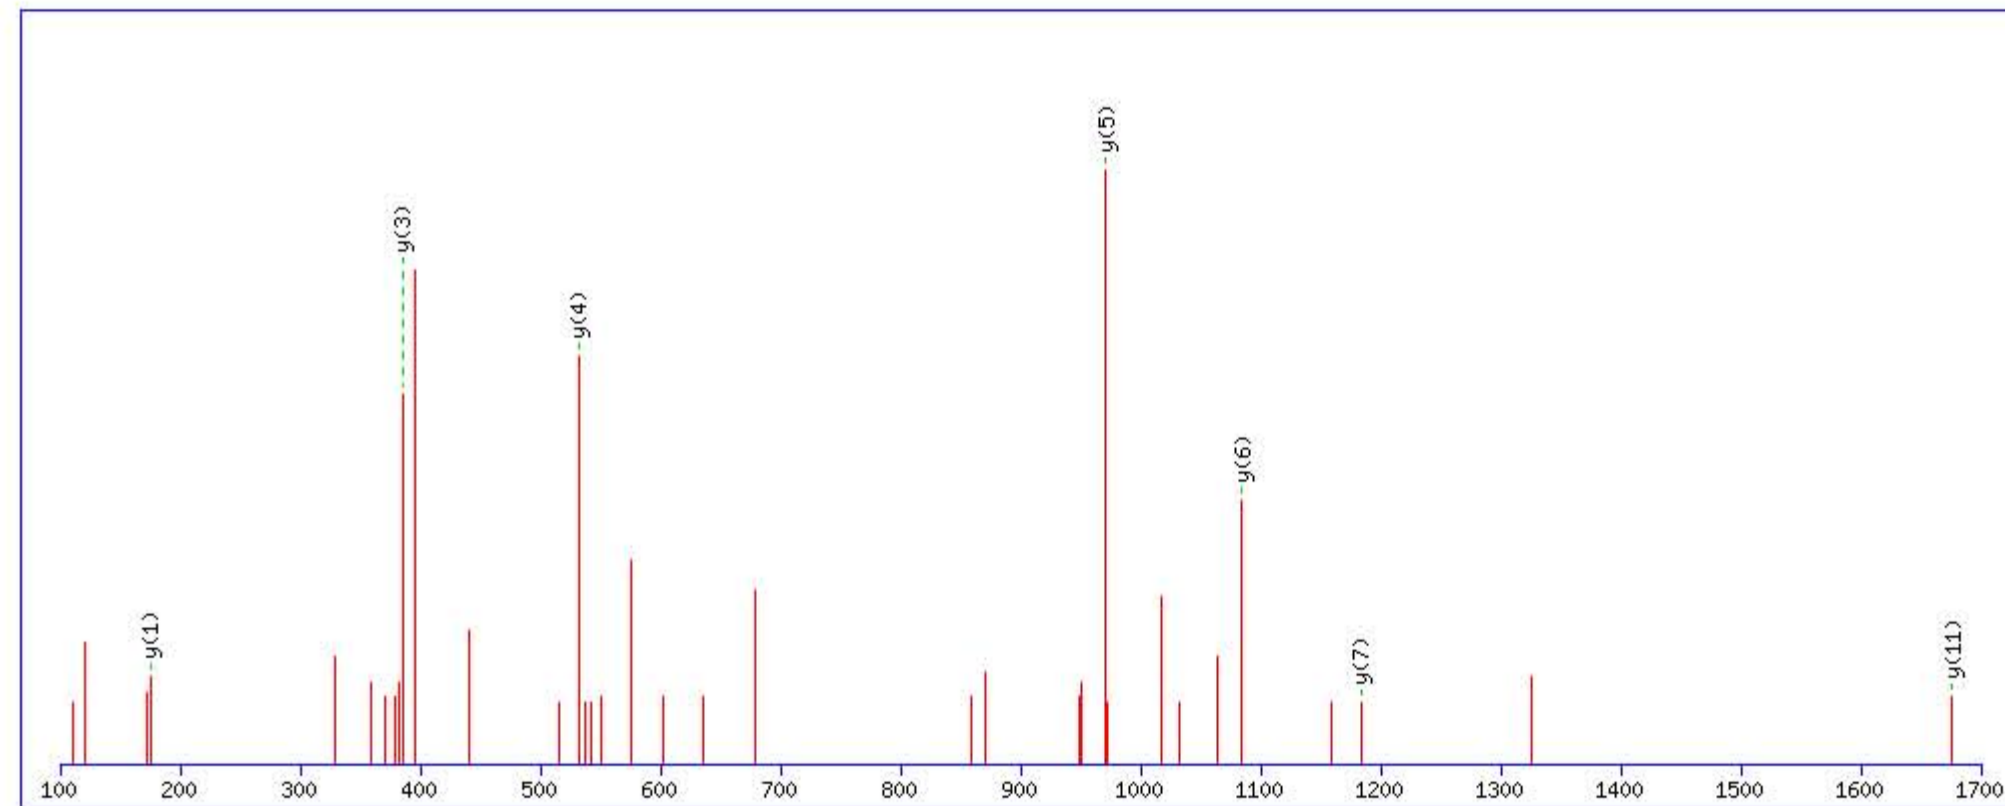

Monoisotopic mass of neutral peptide Mr(calc): 2233.127548

Fixed modifications: Carbamidomethyl (C) (apply to specified residues or termini only)

Variable modifications:

Q12 : Biotin:Thermo-21345 (Q)

Ions Score: 28 Expect: 0.041

Matches : 7/144 fragment ions using 19 most intense peaks [\(help\)](#)

| #  | b           | b <sup>++</sup> | b <sup>*</sup> | b <sup>+++</sup> | b <sup>0</sup> | b <sup>0++</sup> | Seq. | y                  | y <sup>++</sup> | y <sup>*</sup> | y <sup>+++</sup> | y <sup>0</sup> | y <sup>0++</sup> | #  |
|----|-------------|-----------------|----------------|------------------|----------------|------------------|------|--------------------|-----------------|----------------|------------------|----------------|------------------|----|
| 1  | 88.039304   | 44.523290       |                |                  | 70.028739      | 35.518008        | S    |                    |                 |                |                  |                |                  | 16 |
| 2  | 201.123368  | 101.065322      |                |                  | 183.112803     | 92.060039        | I    | 2147.102783        | 1074.055029     | 2130.076234    | 1065.541755      | 2129.092218    | 1065.049747      | 15 |
| 3  | 298.176132  | 149.591704      |                |                  | 280.165567     | 140.586422       | P    | 2034.018719        | 1017.512998     | 2016.992170    | 1008.999723      | 2016.008154    | 1008.507715      | 14 |
| 4  | 399.223811  | 200.115544      |                |                  | 381.213246     | 191.110261       | T    | 1936.965955        | 968.986616      | 1919.939406    | 960.473341       | 1918.955390    | 959.981333       | 13 |
| 5  | 559.254460  | 280.130868      |                |                  | 541.243895     | 271.125586       | C    | 1835.918276        | 918.462776      | 1818.891727    | 909.949502       | 1817.907711    | 909.457494       | 12 |
| 6  | 660.302139  | 330.654708      |                |                  | 642.291574     | 321.649425       | T    | <b>1675.887627</b> | 838.447452      | 1658.861078    | 829.934177       | 1657.877062    | 829.442169       | 11 |
| 7  | 775.329082  | 388.168179      |                |                  | 757.318517     | 379.162897       | D    | 1574.839948        | 787.923612      | 1557.813399    | 779.410338       | 1556.829383    | 778.918330       | 10 |
| 8  | 922.397496  | 461.702386      |                |                  | 904.386931     | 452.697104       | F    | 1459.813005        | 730.410141      | 1442.786456    | 721.896866       | 1441.802440    | 721.404858       | 9  |
| 9  | 1051.440089 | 526.223683      |                |                  | 1033.429524    | 517.218400       | E    | 1312.744591        | 656.875934      | 1295.718042    | 648.362659       | 1294.734026    | 647.870651       | 8  |
| 10 | 1150.508503 | 575.757890      |                |                  | 1132.497938    | 566.752607       | V    | <b>1183.701998</b> | 592.354637      | 1166.675449    | 583.841363       |                |                  | 7  |
| 11 | 1263.592567 | 632.299921      |                |                  | 1245.582002    | 623.294639       | I    | <b>1084.633584</b> | 542.820430      | 1067.607035    | 534.307156       |                |                  | 6  |
| 12 | 1702.817893 | 851.912585      | 1685.791344    | 843.399310       | 1684.807328    | 842.907302       | Q    | <b>971.549520</b>  | 486.278398      | 954.522971     | 477.765124       |                |                  | 5  |
| 13 | 1849.886307 | 925.446792      | 1832.859758    | 916.933517       | 1831.875742    | 916.441509       | F    | <b>532.324194</b>  | 266.665735      | 515.297645     | 258.152461       |                |                  | 4  |
| 14 | 1946.939071 | 973.973174      | 1929.912522    | 965.459899       | 1928.928506    | 964.967891       | P    | <b>385.255780</b>  | 193.131528      | 368.229231     | 184.618253       |                |                  | 3  |
| 15 | 2060.023135 | 1030.515205     | 2042.996586    | 1022.001931      | 2042.012570    | 1021.509923      | L    | 288.203016         | 144.605146      | 271.176467     | 136.091871       |                |                  | 2  |
| 16 |             |                 |                |                  |                |                  | R    | <b>175.118952</b>  | 88.063114       | 158.092403     | 79.549839        |                |                  | 1  |

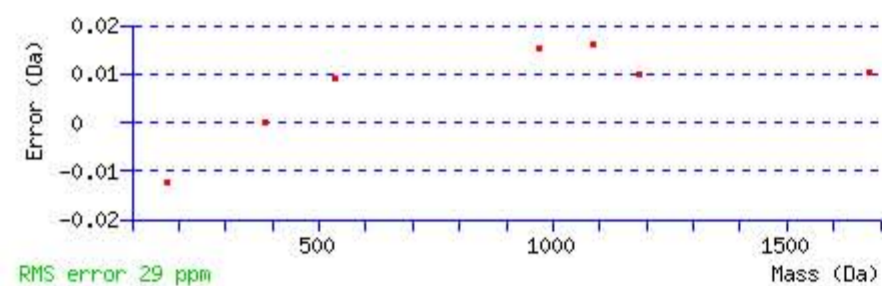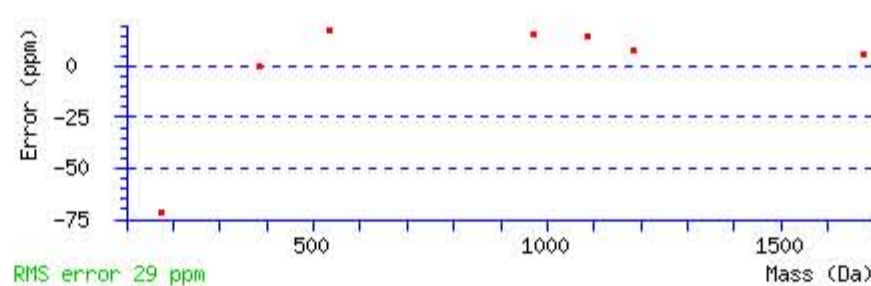

NCBI BLAST search of [SIPTCTDFEVIQFPLR](#)

(Parameters: blastp, nr protein database, expect=20000, no filter, PAM30)

Other BLAST [web gateways](#)

### All matches to this query

| Score | Mr(calc):   | Delta    | Sequence                         |
|-------|-------------|----------|----------------------------------|
| 28.4  | 2233.127548 | 0.029264 | <a href="#">SIPTCTDFEVIQFPLR</a> |

Mascot: <http://www.matrixscience.com/>



# Mascot Search Results

## Peptide View

MS/MS Fragmentation of **GAAAHPDSEEQQQR**

Found in **TLN1\_HUMAN**, Talin-1 OS=Homo sapiens GN=TLN1 PE=1 SV=3

Match to Query 49146: 1833.851262 from(612.291030,3+) rtinseconds(1107) index(54182)

Title: Locus:1.1.1.2691.15 File:"2013-07-02 CLN FXIII 60 min 1st F 4.wiff"

Data file C:\Program Files (x86)\Matrix Science\Mascot Daemon\mgf\4 FXIII 60 min 1st\mascot\_daemon\_merge.mgf

Click mouse within plot area to zoom in by factor of two about that point

Or, Plot from  to  Da

Label all possible matches  Label matches used for scoring

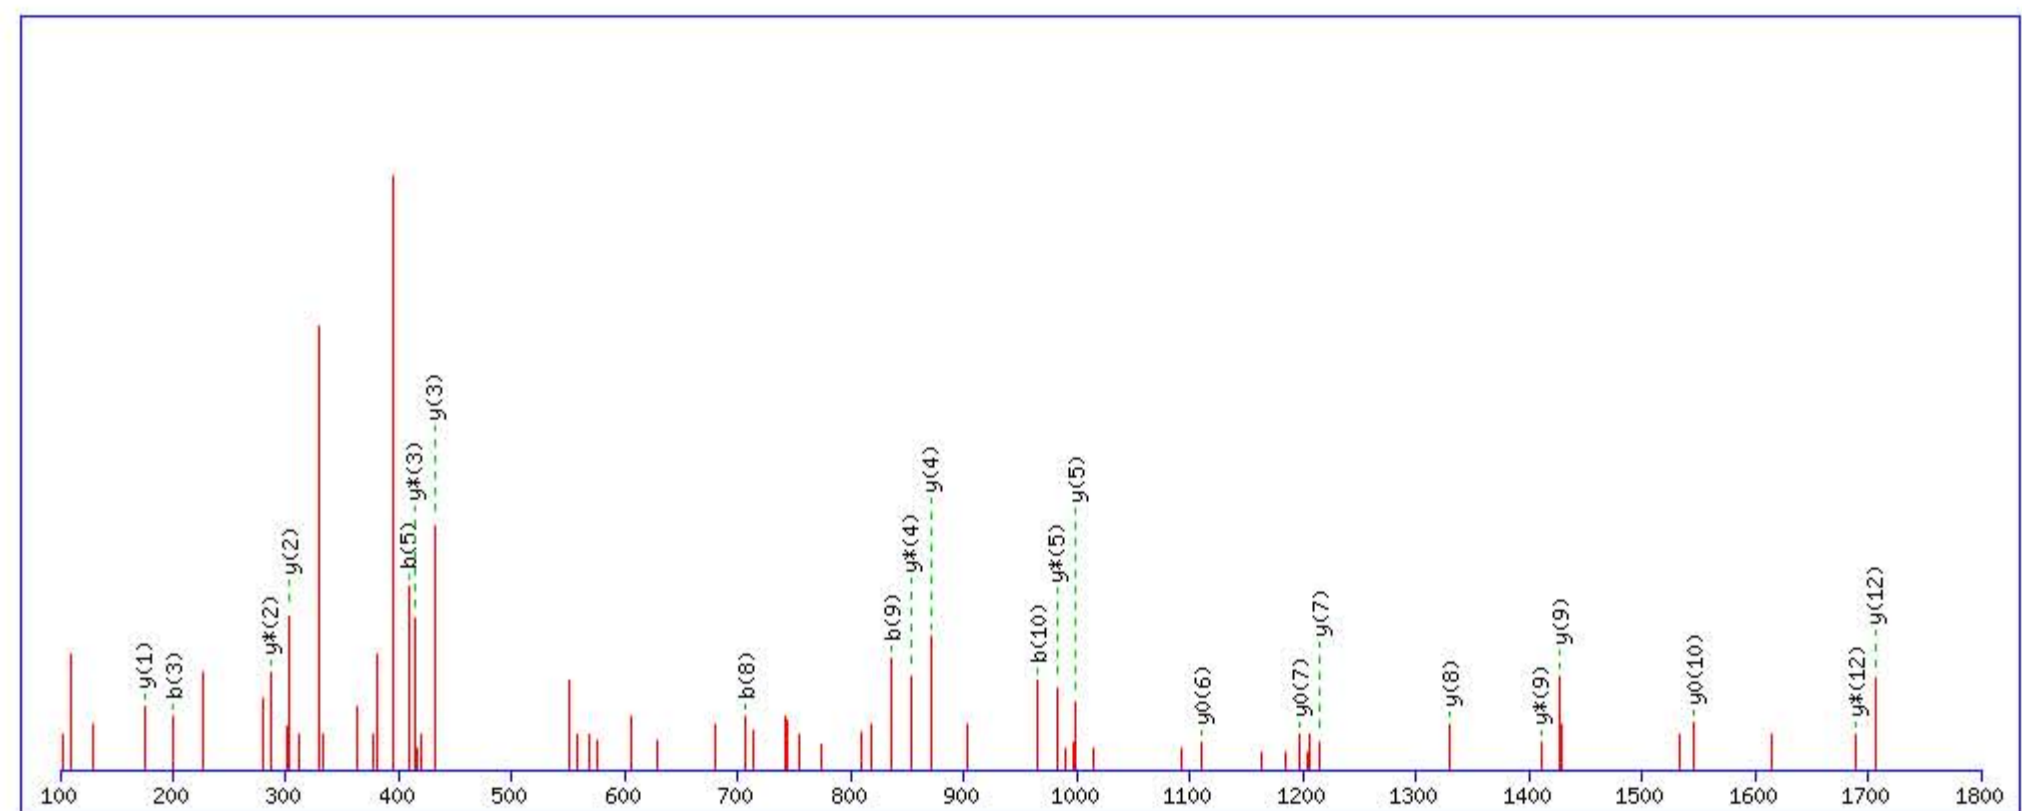

Monoisotopic mass of neutral peptide Mr(calc): 1833.842773

Fixed modifications: Carbamidomethyl (C) (apply to specified residues or termini only)

Variable modifications:

Q11 : Biotin:Thermo-21345 (Q)

Ions Score: 47 Expect: 0.00018

Matches : 23/116 fragment ions using 44 most intense peaks [\(help\)](#)

| #  | b                 | b <sup>++</sup> | b <sup>+</sup> | b <sup>+++</sup> | b <sup>0</sup> | b <sup>0++</sup> | Seq.     | y                  | y <sup>++</sup> | y <sup>+</sup>     | y <sup>+++</sup> | y <sup>0</sup>     | y <sup>0++</sup> | #  |
|----|-------------------|-----------------|----------------|------------------|----------------|------------------|----------|--------------------|-----------------|--------------------|------------------|--------------------|------------------|----|
| 1  | 58.028740         | 29.518008       |                |                  |                |                  | <b>G</b> |                    |                 |                    |                  |                    |                  | 14 |
| 2  | 129.065854        | 65.036565       |                |                  |                |                  | <b>A</b> | 1777.828609        | 889.417943      | 1760.802060        | 880.904668       | 1759.818044        | 880.412660       | 13 |
| 3  | <b>200.102968</b> | 100.555122      |                |                  |                |                  | <b>A</b> | <b>1706.791495</b> | 853.899386      | <b>1689.764946</b> | 845.386111       | 1688.780930        | 844.894103       | 12 |
| 4  | 271.140082        | 136.073679      |                |                  |                |                  | <b>A</b> | 1635.754381        | 818.380829      | 1618.727832        | 809.867554       | 1617.743816        | 809.375546       | 11 |
| 5  | <b>408.198994</b> | 204.603135      |                |                  |                |                  | <b>H</b> | 1564.717267        | 782.862272      | 1547.690718        | 774.348997       | <b>1546.706702</b> | 773.856989       | 10 |
| 6  | 505.251758        | 253.129517      |                |                  |                |                  | <b>P</b> | <b>1427.658355</b> | 714.332816      | <b>1410.631806</b> | 705.819541       | 1409.647790        | 705.327533       | 9  |
| 7  | 620.278701        | 310.642989      |                |                  | 602.268136     | 301.637706       | <b>D</b> | <b>1330.605591</b> | 665.806434      | 1313.579042        | 657.293159       | 1312.595026        | 656.801151       | 8  |
| 8  | <b>707.310729</b> | 354.159003      |                |                  | 689.300164     | 345.153720       | <b>S</b> | <b>1215.578648</b> | 608.292962      | 1198.552099        | 599.779688       | <b>1197.568083</b> | 599.287680       | 7  |
| 9  | <b>836.353322</b> | 418.680299      |                |                  | 818.342757     | 409.675017       | <b>E</b> | 1128.546620        | 564.776948      | 1111.520071        | 556.263674       | <b>1110.536055</b> | 555.771666       | 6  |
| 10 | <b>965.395915</b> | 483.201596      |                |                  | 947.385350     | 474.196313       | <b>E</b> | <b>999.504027</b>  | 500.255652      | <b>982.477478</b>  | 491.742377       | 981.493462         | 491.250369       | 5  |
| 11 | 1404.621241       | 702.814259      | 1387.594692    | 694.300984       | 1386.610676    | 693.808976       | <b>Q</b> | <b>870.461434</b>  | 435.734355      | <b>853.434885</b>  | 427.221081       |                    |                  | 4  |
| 12 | 1532.679819       | 766.843548      | 1515.653270    | 758.330273       | 1514.669254    | 757.838265       | <b>Q</b> | <b>431.236108</b>  | 216.121692      | <b>414.209559</b>  | 207.608418       |                    |                  | 3  |
| 13 | 1660.738397       | 830.872837      | 1643.711848    | 822.359562       | 1642.727832    | 821.867554       | <b>Q</b> | <b>303.177530</b>  | 152.092403      | <b>286.150981</b>  | 143.579129       |                    |                  | 2  |
| 14 |                   |                 |                |                  |                |                  | <b>R</b> | <b>175.118952</b>  | 88.063114       | 158.092403         | 79.549839        |                    |                  | 1  |

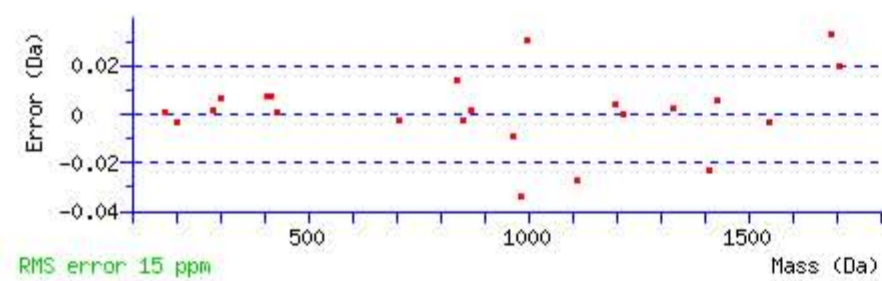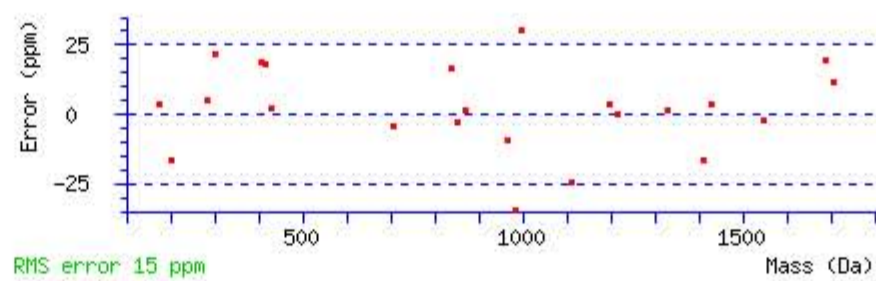

NCBI BLAST search of **GAAAHPDSEEQQQR**

(Parameters: blastp, nr protein database, expect=20000, no filter, PAM30)

Other BLAST [web gateways](#)

All matches to this query

| Score | Mr(calc):   | Delta     | Sequence                          |
|-------|-------------|-----------|-----------------------------------|
| 46.9  | 1833.842773 | 0.008489  | <a href="#">GAAAHPDSEEQQQR</a>    |
| 44.7  | 1833.842773 | 0.008489  | <a href="#">GAAAHPDSEEQQQR</a>    |
| 34.3  | 1833.842773 | 0.008489  | <a href="#">GAAAHPDSEEQQQR</a>    |
| 6.8   | 1833.864761 | -0.013499 | <a href="#">QREQMEQMKQR</a>       |
| 5.1   | 1833.864761 | -0.013499 | <a href="#">QREQMEQMKQR</a>       |
| 5.0   | 1833.867935 | -0.016673 | <a href="#">QPSFPANKGTEDSLMGR</a> |

Mascot: <http://www.matrixscience.com/>



# MASCOT Search Results

## Peptide View

MS/MS Fragmentation of **QELAVFCSPEPPAK**

Found in **TLN1\_HUMAN**, Talin-1 OS=Homo sapiens GN=TLN1 PE=1 SV=3

Match to Query 50310: 1882.955668 from(942.485110,2+) rtinseconds(2216) index(62102)

Title: Locus:1.1.1.3076.25 File:"2013-07-02 CLN FXIII 60 min 1st F 4.wiff"

Data file C:\Program Files (x86)\Matrix Science\Mascot Daemon\mgf\4 FXIII 60 min 1st\mascot\_daemon\_merge.mgf

Click mouse within plot area to zoom in by factor of two about that point

Or, Plot from  to  Da

Label all possible matches  Label matches used for scoring

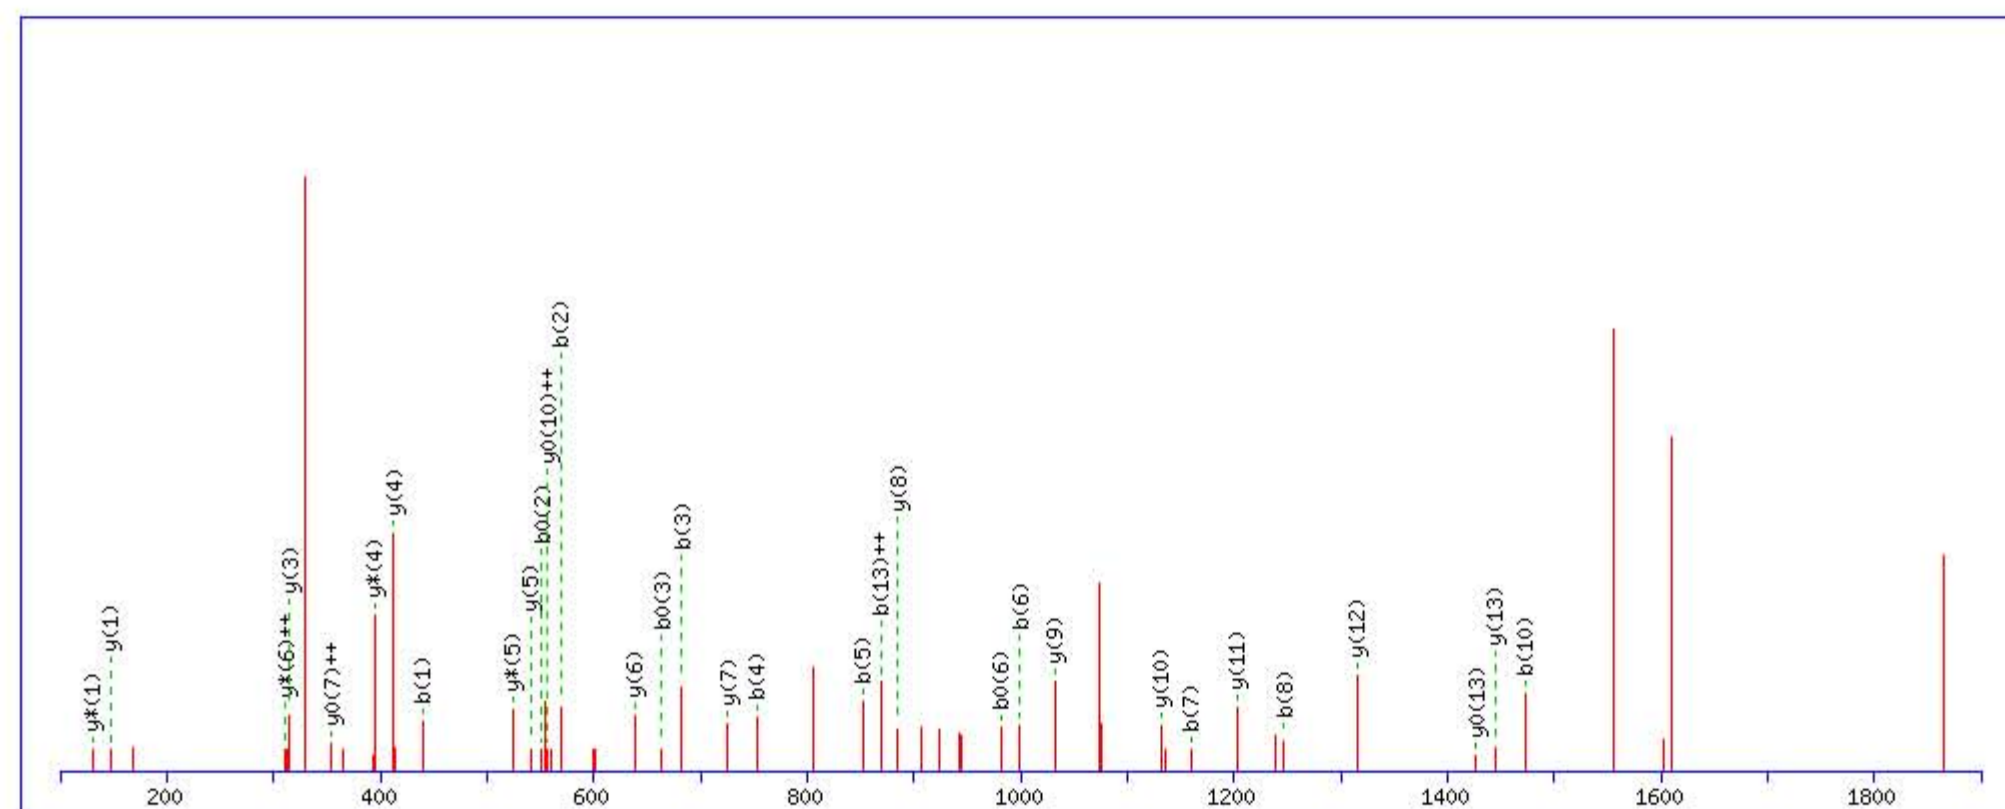

Monoisotopic mass of neutral peptide Mr(calc): 1882.932114

Fixed modifications: Carbamidomethyl (C) (apply to specified residues or termini only)

Variable modifications:

Q1 : Biotin:Thermo-21345 (Q)

Ions Score: 73 Expect: 5.1e-007

Matches : 32/146 fragment ions using 61 most intense peaks [\(help\)](#)

| #  | b           | b <sup>++</sup> | b <sup>*</sup> | b <sup>*++</sup> | b <sup>0</sup> | b <sup>0++</sup> | Seq. | y           | y <sup>++</sup> | y <sup>*</sup> | y <sup>*++</sup> | y <sup>0</sup> | y <sup>0++</sup> | #  |
|----|-------------|-----------------|----------------|------------------|----------------|------------------|------|-------------|-----------------|----------------|------------------|----------------|------------------|----|
| 1  | 440.232602  | 220.619939      | 423.206053     | 212.106664       |                |                  | Q    |             |                 |                |                  |                |                  | 14 |
| 2  | 569.275195  | 285.141236      | 552.248646     | 276.627961       | 551.264630     | 276.135953       | E    | 1444.714079 | 722.860678      | 1427.687530    | 714.347403       | 1426.703514    | 713.855395       | 13 |
| 3  | 682.359259  | 341.683268      | 665.332710     | 333.169993       | 664.348694     | 332.677985       | L    | 1315.671486 | 658.339381      | 1298.644937    | 649.826107       | 1297.660921    | 649.334098       | 12 |
| 4  | 753.396373  | 377.201825      | 736.369824     | 368.688550       | 735.385808     | 368.196542       | A    | 1202.587422 | 601.797349      | 1185.560873    | 593.284075       | 1184.576857    | 592.792067       | 11 |
| 5  | 852.464787  | 426.736032      | 835.438238     | 418.222757       | 834.454222     | 417.730749       | V    | 1131.550308 | 566.278792      | 1114.523759    | 557.765518       | 1113.539743    | 557.273510       | 10 |
| 6  | 999.533201  | 500.270239      | 982.506652     | 491.756964       | 981.522636     | 491.264956       | F    | 1032.481894 | 516.744585      | 1015.455345    | 508.231311       | 1014.471329    | 507.739303       | 9  |
| 7  | 1159.563850 | 580.285563      | 1142.537301    | 571.772289       | 1141.553285    | 571.280281       | C    | 885.413480  | 443.210378      | 868.386931     | 434.697104       | 867.402915     | 434.205096       | 8  |
| 8  | 1246.595878 | 623.801577      | 1229.569329    | 615.288303       | 1228.585313    | 614.796295       | S    | 725.382831  | 363.195054      | 708.356282     | 354.681779       | 707.372266     | 354.189771       | 7  |
| 9  | 1343.648642 | 672.327959      | 1326.622093    | 663.814685       | 1325.638077    | 663.322677       | P    | 638.350803  | 319.679040      | 621.324254     | 311.165765       | 620.340238     | 310.673757       | 6  |
| 10 | 1472.691235 | 736.849256      | 1455.664686    | 728.335981       | 1454.680670    | 727.843973       | E    | 541.298039  | 271.152658      | 524.271490     | 262.639383       | 523.287474     | 262.147375       | 5  |
| 11 | 1569.743999 | 785.375638      | 1552.717450    | 776.862363       | 1551.733434    | 776.370355       | P    | 412.255446  | 206.631361      | 395.228897     | 198.118087       |                |                  | 4  |
| 12 | 1666.796763 | 833.902020      | 1649.770214    | 825.388745       | 1648.786198    | 824.896737       | P    | 315.202682  | 158.104979      | 298.176133     | 149.591704       |                |                  | 3  |
| 13 | 1737.833877 | 869.420577      | 1720.807328    | 860.907302       | 1719.823312    | 860.415294       | A    | 218.149918  | 109.578597      | 201.123369     | 101.065322       |                |                  | 2  |
| 14 |             |                 |                |                  |                |                  | K    | 147.112804  | 74.060040       | 130.086255     | 65.546765        |                |                  | 1  |

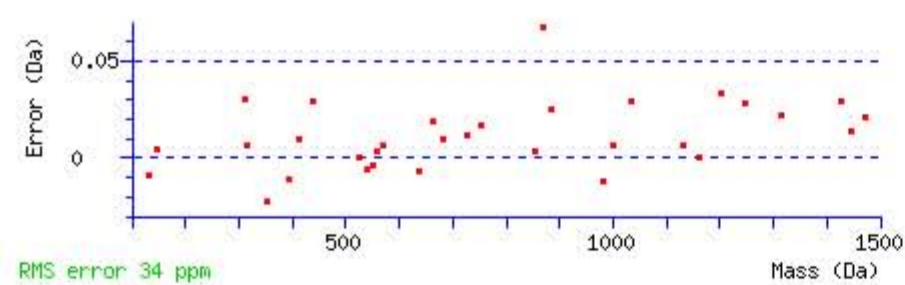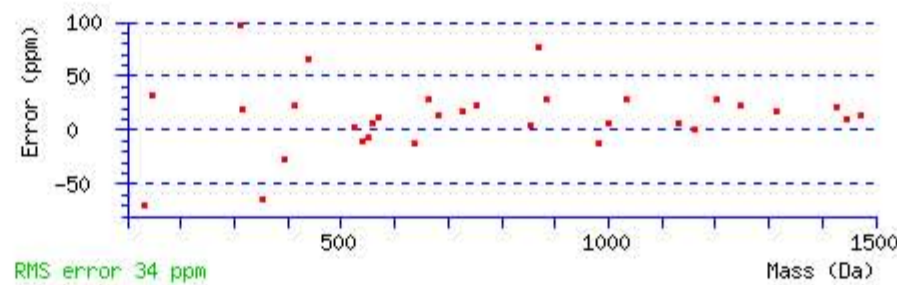

NCBI BLAST search of **QELAVFCSPEPPAK**

(Parameters: blastp, nr protein database, expect=20000, no filter, PAM30)

Other BLAST [web gateways](#)

All matches to this query

| Score | Mr(calc):   | Delta     | Sequence                          |
|-------|-------------|-----------|-----------------------------------|
| 72.5  | 1882.932114 | 0.023554  | <a href="#">QELAVFCSPEPPAK</a>    |
| 5.2   | 1882.975693 | -0.020025 | <a href="#">EQLQADLLRCQAK</a>     |
| 2.2   | 1882.949661 | 0.006007  | <a href="#">AAGEELEKQHLGSSSRK</a> |
| 1.2   | 1882.928070 | 0.027598  | <a href="#">QELSEAEQATR</a>       |
| 0.8   | 1882.932602 | 0.023066  | <a href="#">GSSPWDRFLVGGYLSSR</a> |



# MASCOT Search Results

## Peptide View

MS/MS Fragmentation of **EQQALQTVCLK**

Found in **TETN\_HUMAN**, Tetranectin OS=Homo sapiens GN=CLEC3B PE=1 SV=3

Match to Query 43913: 1627.860308 from(814.937430,2+) rtinseconds(1951) index(6732)

Title: Locus:1.1.1.2811.18 File:"2013-07-02 CLN FXIII 60 min 1st F 1.wiff"

Data file C:\Program Files (x86)\Matrix Science\Mascot Daemon\mgf\4 FXIII 60 min 1st\mascot\_daemon\_merge.mgf

Click mouse within plot area to zoom in by factor of two about that point

Or, Plot from  to  Da

Label all possible matches  Label matches used for scoring

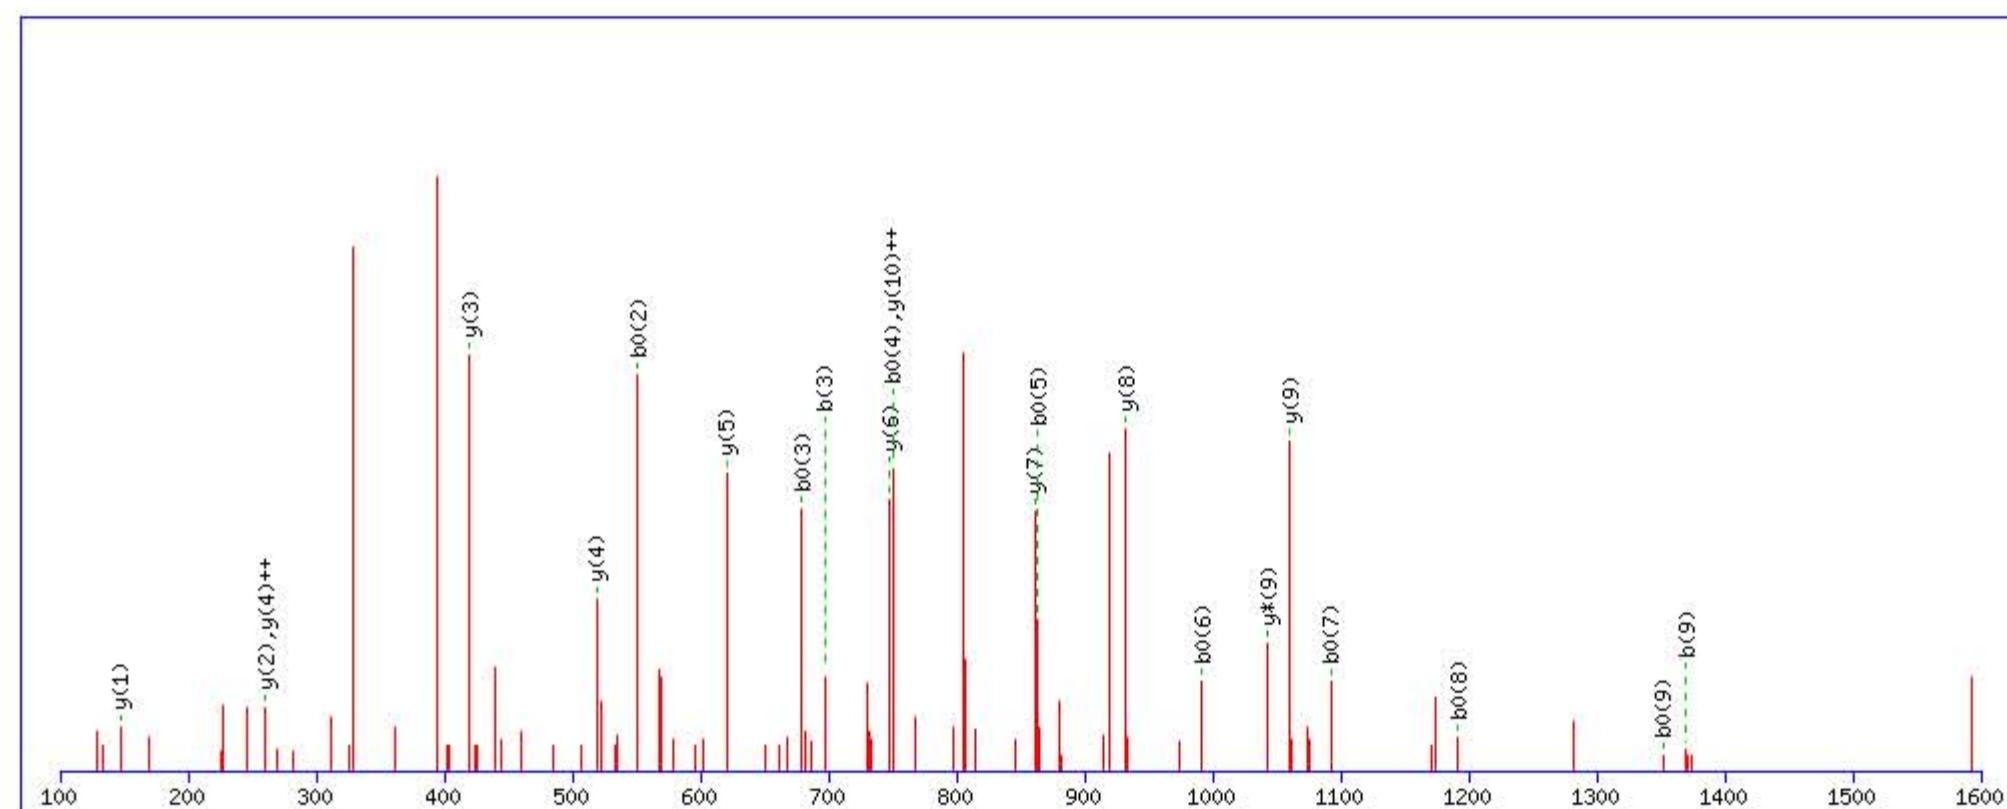

Monoisotopic mass of neutral peptide Mr(calc): 1627.842575

Fixed modifications: Carbamidomethyl (C) (apply to specified residues or termini only)

Variable modifications:

Q2 : Biotin:Thermo-21345 (Q)

Ions Score: 56 Expect: 3.5e-005

Matches : 22/110 fragment ions using 38 most intense peaks [\(help\)](#)

| #  | b           | b <sup>++</sup> | b <sup>*</sup> | b <sup>***</sup> | b <sup>0</sup> | b <sup>0++</sup> | Seq. | y           | y <sup>++</sup> | y <sup>*</sup> | y <sup>***</sup> | y <sup>0</sup> | y <sup>0++</sup> | #  |
|----|-------------|-----------------|----------------|------------------|----------------|------------------|------|-------------|-----------------|----------------|------------------|----------------|------------------|----|
| 1  | 130.049869  | 65.528572       |                |                  | 112.039304     | 56.523290        | E    |             |                 |                |                  |                |                  | 11 |
| 2  | 569.275195  | 285.141236      | 552.248646     | 276.627961       | 551.264630     | 276.135953       | Q    | 1499.807270 | 750.407273      | 1482.780721    | 741.893999       | 1481.796705    | 741.401991       | 10 |
| 3  | 697.333773  | 349.170525      | 680.307224     | 340.657250       | 679.323208     | 340.165242       | Q    | 1060.581944 | 530.794610      | 1043.555395    | 522.281336       | 1042.571379    | 521.789328       | 9  |
| 4  | 768.370887  | 384.689082      | 751.344338     | 376.175807       | 750.360322     | 375.683799       | A    | 932.523366  | 466.765321      | 915.496817     | 458.252047       | 914.512801     | 457.760039       | 8  |
| 5  | 881.454951  | 441.231114      | 864.428402     | 432.717839       | 863.444386     | 432.225831       | L    | 861.486252  | 431.246764      | 844.459703     | 422.733490       | 843.475687     | 422.241482       | 7  |
| 6  | 1009.513529 | 505.260403      | 992.486980     | 496.747128       | 991.502964     | 496.255120       | Q    | 748.402188  | 374.704732      | 731.375639     | 366.191458       | 730.391623     | 365.699450       | 6  |
| 7  | 1110.561208 | 555.784242      | 1093.534659    | 547.270968       | 1092.550643    | 546.778960       | T    | 620.343610  | 310.675443      | 603.317061     | 302.162169       | 602.333045     | 301.670161       | 5  |
| 8  | 1209.629622 | 605.318449      | 1192.603073    | 596.805175       | 1191.619057    | 596.313167       | V    | 519.295931  | 260.151604      | 502.269382     | 251.638329       |                |                  | 4  |
| 9  | 1369.660271 | 685.333774      | 1352.633722    | 676.820499       | 1351.649706    | 676.328491       | C    | 420.227517  | 210.617396      | 403.200968     | 202.104122       |                |                  | 3  |
| 10 | 1482.744335 | 741.875806      | 1465.717786    | 733.362531       | 1464.733770    | 732.870523       | L    | 260.196868  | 130.602072      | 243.170319     | 122.088797       |                |                  | 2  |
| 11 |             |                 |                |                  |                |                  | K    | 147.112804  | 74.060040       | 130.086255     | 65.546765        |                |                  | 1  |

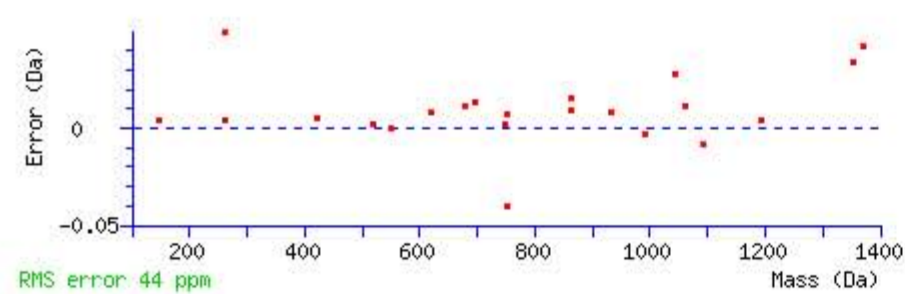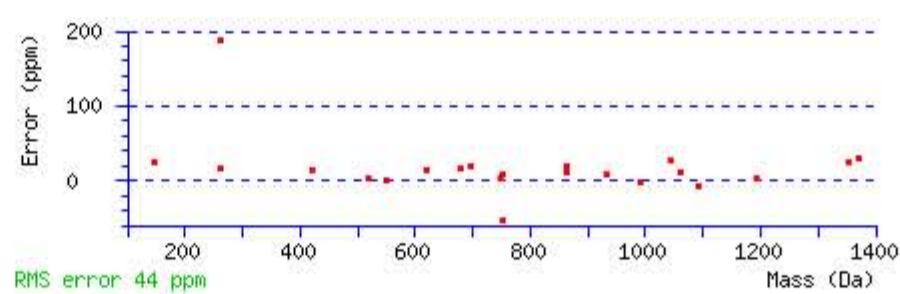

NCBI BLAST search of **EQQALQTVCLK**

(Parameters: blastp, nr protein database, expect=20000, no filter, PAM30)

Other BLAST [web gateways](#)

All matches to this query

| Score | Mr(calc):   | Delta     | Sequence                       |
|-------|-------------|-----------|--------------------------------|
| 56.5  | 1627.842575 | 0.017733  | <a href="#">EQQALQTVCLK</a>    |
| 52.2  | 1627.842575 | 0.017733  | <a href="#">EQQALQTVCLK</a>    |
| 10.7  | 1627.842575 | 0.017733  | <a href="#">EQQALQTVCLK</a>    |
| 8.5   | 1627.846390 | 0.013918  | <a href="#">GAQAARGSSNASLK</a> |
| 4.8   | 1627.853775 | 0.006533  | <a href="#">QEKMQQLREK</a>     |
| 2.6   | 1627.879395 | -0.019087 | <a href="#">VALWARAQAERTEK</a> |
| 2.6   | 1627.846588 | 0.013720  | <a href="#">QPTNPFLEMIK</a>    |



# MASCOT SEARCH RESULTS

## Peptide View

MS/MS Fragmentation of **SPYQLVLQHSR**

Found in **BGH3\_HUMAN**, Transforming growth factor-beta-induced protein ig-h3 OS=Homo sapiens GN=TGFBI PE=1 SV=1

Match to Query 44266: 1637.876142 from(546.965990,3+) rtinseconds(1879) index(41233)

Title: Locus:1.1.1.2938.17 File:"2013-07-02 CLN FXIII 60 min 1st F 3.wiff"

Data file C:\Program Files (x86)\Matrix Science\Mascot Daemon\mgf4 FXIII 60 min 1st\mascot\_daemon\_merge.mgf

Click mouse within plot area to zoom in by factor of two about that point

Or, Plot from  to  Da

Label all possible matches  Label matches used for scoring

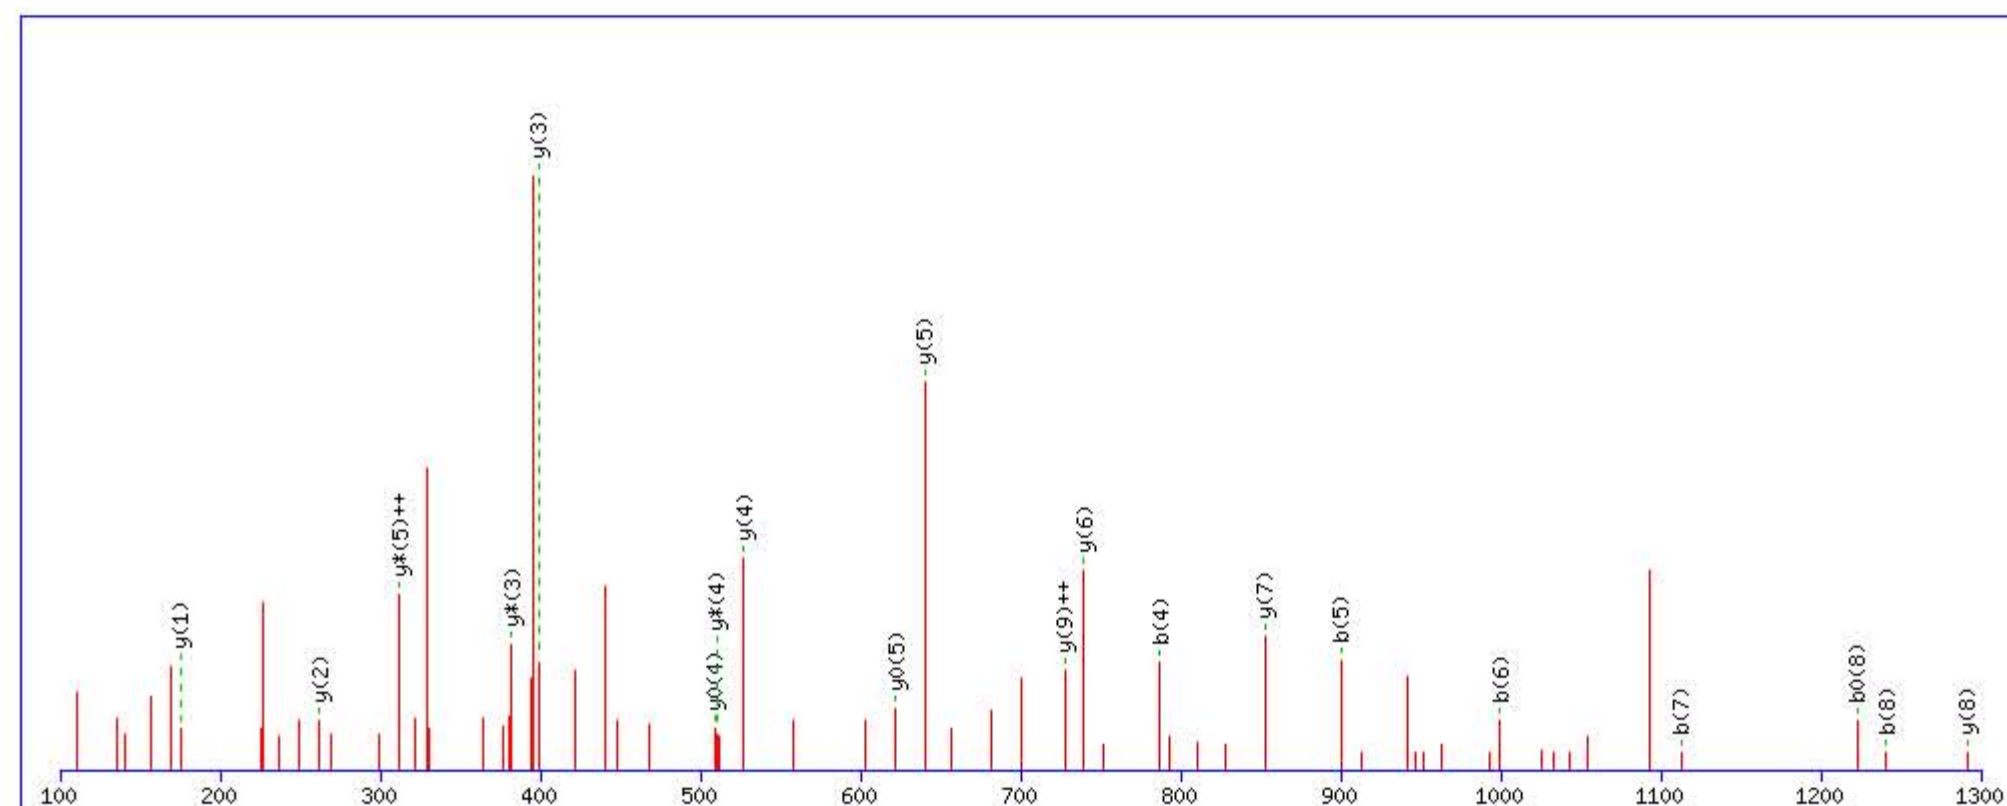

Monoisotopic mass of neutral peptide Mr(calc): 1637.871170

Fixed modifications: Carbamidomethyl (C) (apply to specified residues or termini only)

Variable modifications:

Q4 : Biotin:Thermo-21345 (Q)

Ions Score: 29 Expect: 0.0021

Matches : 20/112 fragment ions using 53 most intense peaks [\(help\)](#)

| #  | b           | b <sup>++</sup> | b <sup>+</sup> | b <sup>+++</sup> | b <sup>0</sup> | b <sup>0++</sup> | Seq. | y           | y <sup>++</sup> | y <sup>+</sup> | y <sup>+++</sup> | y <sup>0</sup> | y <sup>0++</sup> | #  |
|----|-------------|-----------------|----------------|------------------|----------------|------------------|------|-------------|-----------------|----------------|------------------|----------------|------------------|----|
| 1  | 88.039304   | 44.523290       |                |                  | 70.028739      | 35.518008        | S    |             |                 |                |                  |                |                  | 11 |
| 2  | 185.092068  | 93.049672       |                |                  | 167.081503     | 84.044389        | P    | 1551.846431 | 776.426853      | 1534.819882    | 767.913579       | 1533.835866    | 767.421571       | 10 |
| 3  | 348.155397  | 174.581336      |                |                  | 330.144832     | 165.576054       | Y    | 1454.793667 | 727.900471      | 1437.767118    | 719.387197       | 1436.783102    | 718.895189       | 9  |
| 4  | 787.380723  | 394.194000      | 770.354174     | 385.680725       | 769.370158     | 385.188717       | Q    | 1291.730338 | 646.368807      | 1274.703789    | 637.855532       | 1273.719773    | 637.363524       | 8  |
| 5  | 900.464787  | 450.736032      | 883.438238     | 442.222757       | 882.454222     | 441.730749       | L    | 852.505012  | 426.756144      | 835.478463     | 418.242869       | 834.494447     | 417.750861       | 7  |
| 6  | 999.533201  | 500.270239      | 982.506652     | 491.756964       | 981.522636     | 491.264956       | V    | 739.420948  | 370.214112      | 722.394399     | 361.700837       | 721.410383     | 361.208829       | 6  |
| 7  | 1112.617265 | 556.812270      | 1095.590716    | 548.298996       | 1094.606700    | 547.806988       | L    | 640.352534  | 320.679905      | 623.325985     | 312.166630       | 622.341969     | 311.674622       | 5  |
| 8  | 1240.675843 | 620.841559      | 1223.649294    | 612.328285       | 1222.665278    | 611.836277       | Q    | 527.268470  | 264.137873      | 510.241921     | 255.624598       | 509.257905     | 255.132590       | 4  |
| 9  | 1377.734755 | 689.371015      | 1360.708206    | 680.857741       | 1359.724190    | 680.365733       | H    | 399.209892  | 200.108584      | 382.183343     | 191.595309       | 381.199327     | 191.103301       | 3  |
| 10 | 1464.766783 | 732.887029      | 1447.740234    | 724.373755       | 1446.756218    | 723.881747       | S    | 262.150980  | 131.579128      | 245.124431     | 123.065854       | 244.140415     | 122.573846       | 2  |
| 11 |             |                 |                |                  |                |                  | R    | 175.118952  | 88.063114       | 158.092403     | 79.549839        |                |                  | 1  |

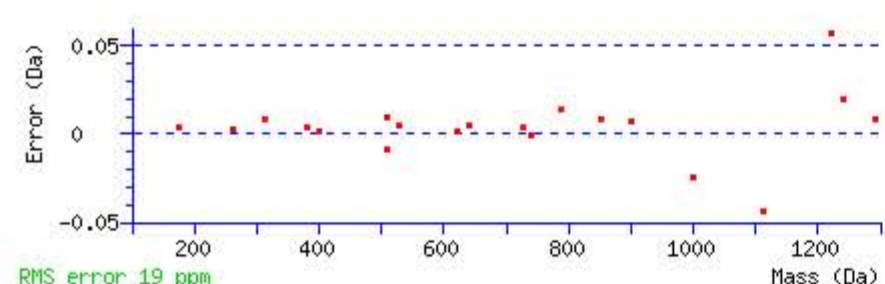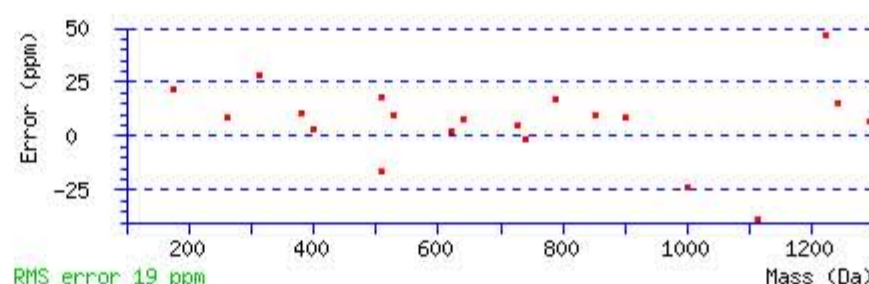

NCBI BLAST search of **SPYQLVLQHSR**

(Parameters: blastp, nr protein database, expect=20000, no filter, PAM30)

Other BLAST [web gateways](#)

## All matches to this query

| Score | Mr(calc):   | Delta     | Sequence                          |
|-------|-------------|-----------|-----------------------------------|
| 28.6  | 1637.871170 | 0.004972  | <a href="#">SPYQLVLQHSR</a>       |
| 0.0   | 1637.888916 | -0.012774 | <a href="#">APAPPPAGALLPEPGQR</a> |

Mascot: <http://www.matrixscience.com/>



# MASCOT SEARCH RESULTS

## Peptide View

MS/MS Fragmentation of **NLHDLVSDNQLER**

Found in **VASN\_HUMAN**, Vasorin OS=Homo sapiens GN=VASN PE=1 SV=1

Match to Query 52397: 1977.966402 from(660.329410,3+) rtinseconds(1920) index(41576)

Title: Locus:1.1.1.2952.18 File:"2013-07-02 CLN FXIII 60 min 1st F 3.wiff"

Data file C:\Program Files (x86)\Matrix Science\Mascot Daemon\mgf4 FXIII 60 min 1st\mascot\_daemon\_merge.mgf

Click mouse within plot area to zoom in by factor of two about that point

Or, Plot from  to  Da

Label all possible matches  Label matches used for scoring

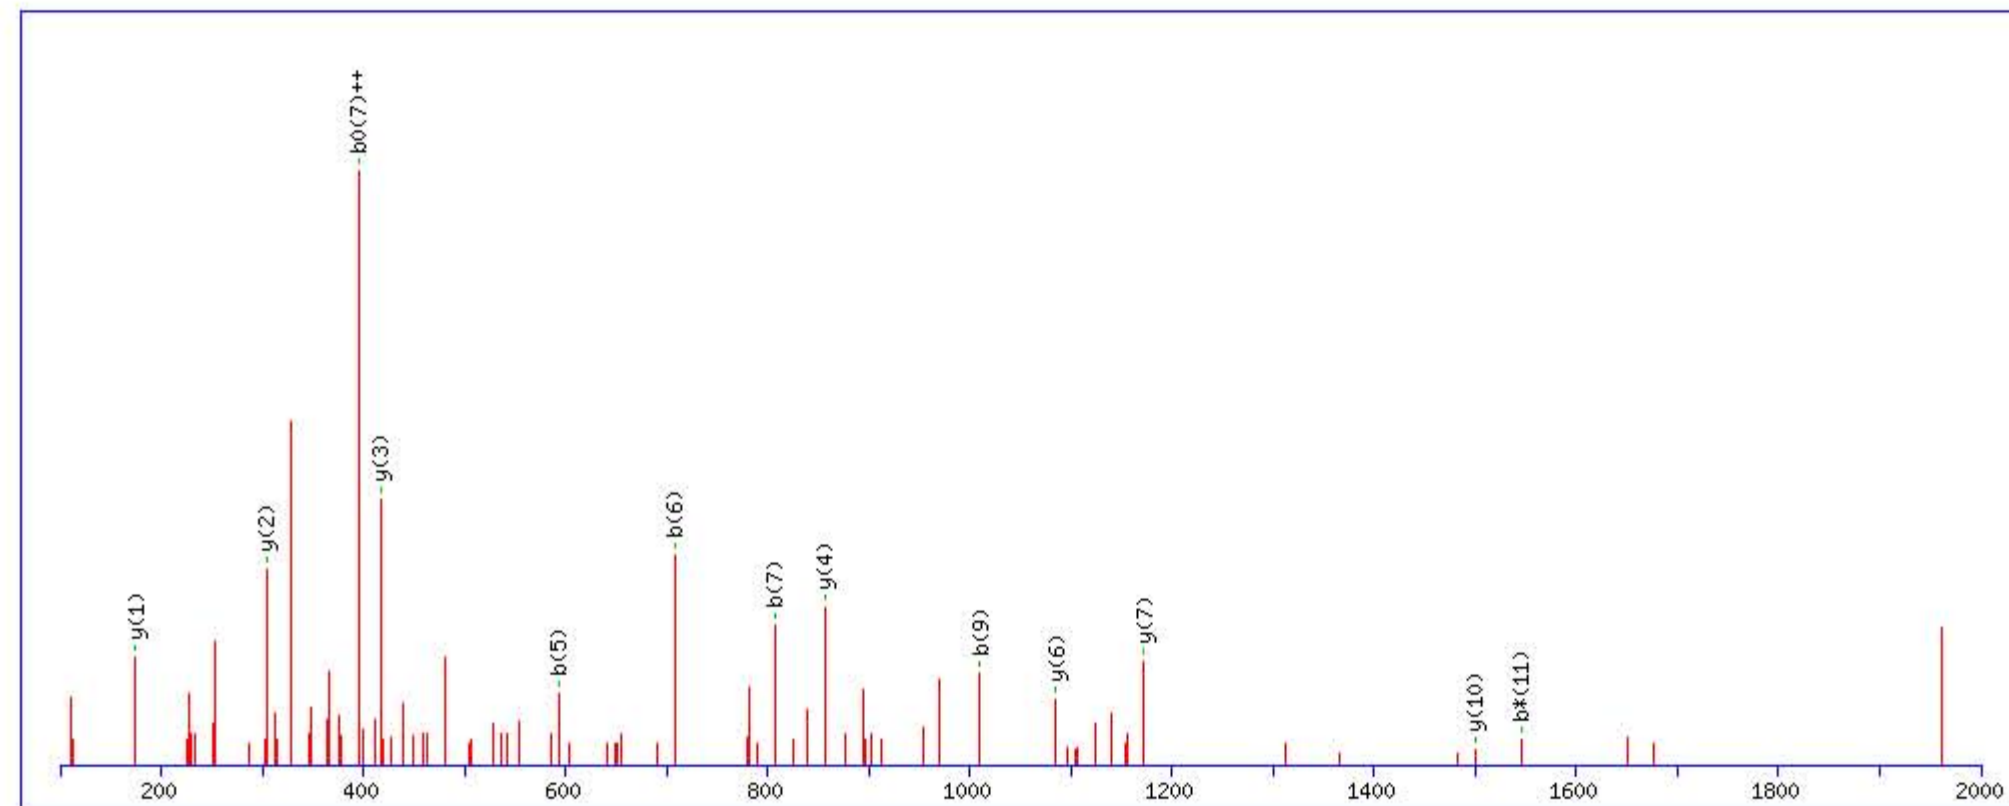

Monoisotopic mass of neutral peptide Mr(calc): 1977.957809

Fixed modifications: Carbamidomethyl (C) (apply to specified residues or termini only)

Variable modifications:

Q11 : Biotin:Thermo-21345 (Q)

Ions Score: 62 Expect: 4.3e-006

Matches : 13/148 fragment ions using 16 most intense peaks [\(help\)](#)

| #  | b                  | b <sup>++</sup> | b <sup>+</sup>     | b <sup>+++</sup> | b <sup>0</sup> | b <sup>0++</sup> | Seq. | y                  | y <sup>++</sup> | y <sup>+</sup> | y <sup>+++</sup> | y <sup>0</sup> | y <sup>0++</sup> | #  |
|----|--------------------|-----------------|--------------------|------------------|----------------|------------------|------|--------------------|-----------------|----------------|------------------|----------------|------------------|----|
| 1  | 115.050203         | 58.028740       | 98.023654          | 49.515465        |                |                  | N    |                    |                 |                |                  |                |                  | 14 |
| 2  | 228.134267         | 114.570771      | 211.107718         | 106.057497       |                |                  | L    | 1864.922173        | 932.964724      | 1847.895624    | 924.451450       | 1846.911608    | 923.959442       | 13 |
| 3  | 365.193179         | 183.100227      | 348.166630         | 174.586953       |                |                  | H    | 1751.838109        | 876.422692      | 1734.811560    | 867.909418       | 1733.827544    | 867.417410       | 12 |
| 4  | 480.220122         | 240.613699      | 463.193573         | 232.100425       | 462.209557     | 231.608417       | D    | 1614.779197        | 807.893236      | 1597.752648    | 799.379962       | 1596.768632    | 798.887954       | 11 |
| 5  | <b>593.304186</b>  | 297.155731      | 576.277637         | 288.642457       | 575.293621     | 288.150449       | L    | <b>1499.752254</b> | 750.379765      | 1482.725705    | 741.866490       | 1481.741689    | 741.374482       | 10 |
| 6  | <b>708.331129</b>  | 354.669203      | 691.304580         | 346.155928       | 690.320564     | 345.663920       | D    | 1386.668190        | 693.837733      | 1369.641641    | 685.324458       | 1368.657625    | 684.832450       | 9  |
| 7  | <b>807.399543</b>  | 404.203410      | 790.372994         | 395.690135       | 789.388978     | 395.198127       | V    | 1271.641247        | 636.324261      | 1254.614698    | 627.810987       | 1253.630682    | 627.318979       | 8  |
| 8  | 894.431571         | 447.719424      | 877.405022         | 439.206149       | 876.421006     | 438.714141       | S    | <b>1172.572833</b> | 586.790054      | 1155.546284    | 578.276780       | 1154.562268    | 577.784772       | 7  |
| 9  | <b>1009.458514</b> | 505.232895      | 992.431965         | 496.719620       | 991.447949     | 496.227612       | D    | <b>1085.540805</b> | 543.274040      | 1068.514256    | 534.760766       | 1067.530240    | 534.268758       | 6  |
| 10 | 1123.501441        | 562.254358      | 1106.474892        | 553.741084       | 1105.490876    | 553.249076       | N    | 970.513862         | 485.760569      | 953.487313     | 477.247294       | 952.503297     | 476.755286       | 5  |
| 11 | 1562.726767        | 781.867021      | <b>1545.700218</b> | 773.353747       | 1544.716202    | 772.861739       | Q    | <b>856.470935</b>  | 428.739105      | 839.444386     | 420.225831       | 838.460370     | 419.733823       | 4  |
| 12 | 1675.810831        | 838.409053      | 1658.784282        | 829.895779       | 1657.800266    | 829.403771       | L    | <b>417.245609</b>  | 209.126442      | 400.219060     | 200.613168       | 399.235044     | 200.121160       | 3  |
| 13 | 1804.853424        | 902.930350      | 1787.826875        | 894.417075       | 1786.842859    | 893.925067       | E    | <b>304.161545</b>  | 152.584410      | 287.134996     | 144.071136       | 286.150980     | 143.579128       | 2  |
| 14 |                    |                 |                    |                  |                |                  | R    | <b>175.118952</b>  | 88.063114       | 158.092403     | 79.549839        |                |                  | 1  |

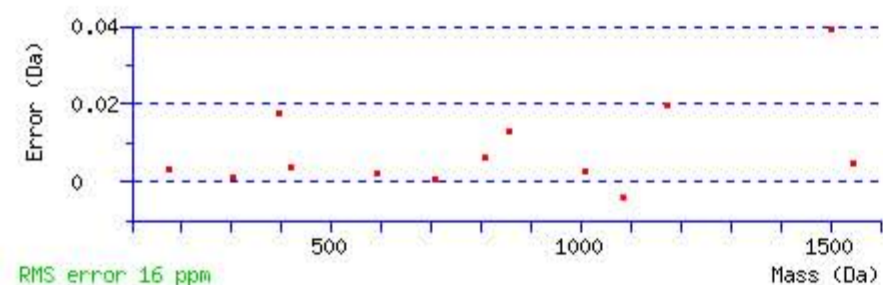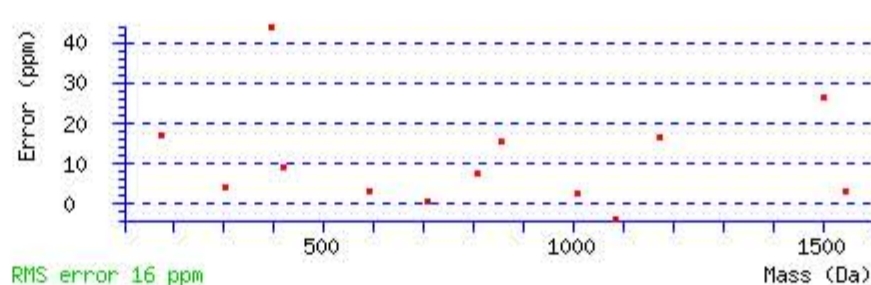

NCBI BLAST search of **NLHDLVSDNQLER**

(Parameters: blastp, nr protein database, expect=20000, no filter, PAM30)

Other BLAST [web gateways](#)

All matches to this query

| Score | Mr(calc):   | Delta     | Sequence                        |
|-------|-------------|-----------|---------------------------------|
| 61.8  | 1977.957809 | 0.008593  | <a href="#">NLHDLVSDNQLER</a>   |
| 4.5   | 1977.969009 | -0.002607 | <a href="#">HLDMEHERLQLEKER</a> |

Mascot: <http://www.matrixscience.com/>



# MASCOT Search Results

## Peptide View

MS/MS Fragmentation of **GQELCADYSENTFTEYK**  
 Found in **VTDB\_HUMAN**, Vitamin D-binding protein OS=Homo sapiens GN=GC PE=1 SV=1

Match to Query 61874: 2365.049292 from(789.357040,3+) rtinseconds(2140) index(79477)  
 Title: Locus:1.1.1.2959.24 File:"2013-07-02 CLN FXIII 60 min 1st FT.wiff"  
 Data file C:\Program Files (x86)\Matrix Science\Mascot Daemon\mgf\4 FXIII 60 min 1st\mascot\_daemon\_merge.mgf

Click mouse within plot area to zoom in by factor of two about that point  
 Or, Plot from  to  Da   
 Label all possible matches  Label matches used for scoring

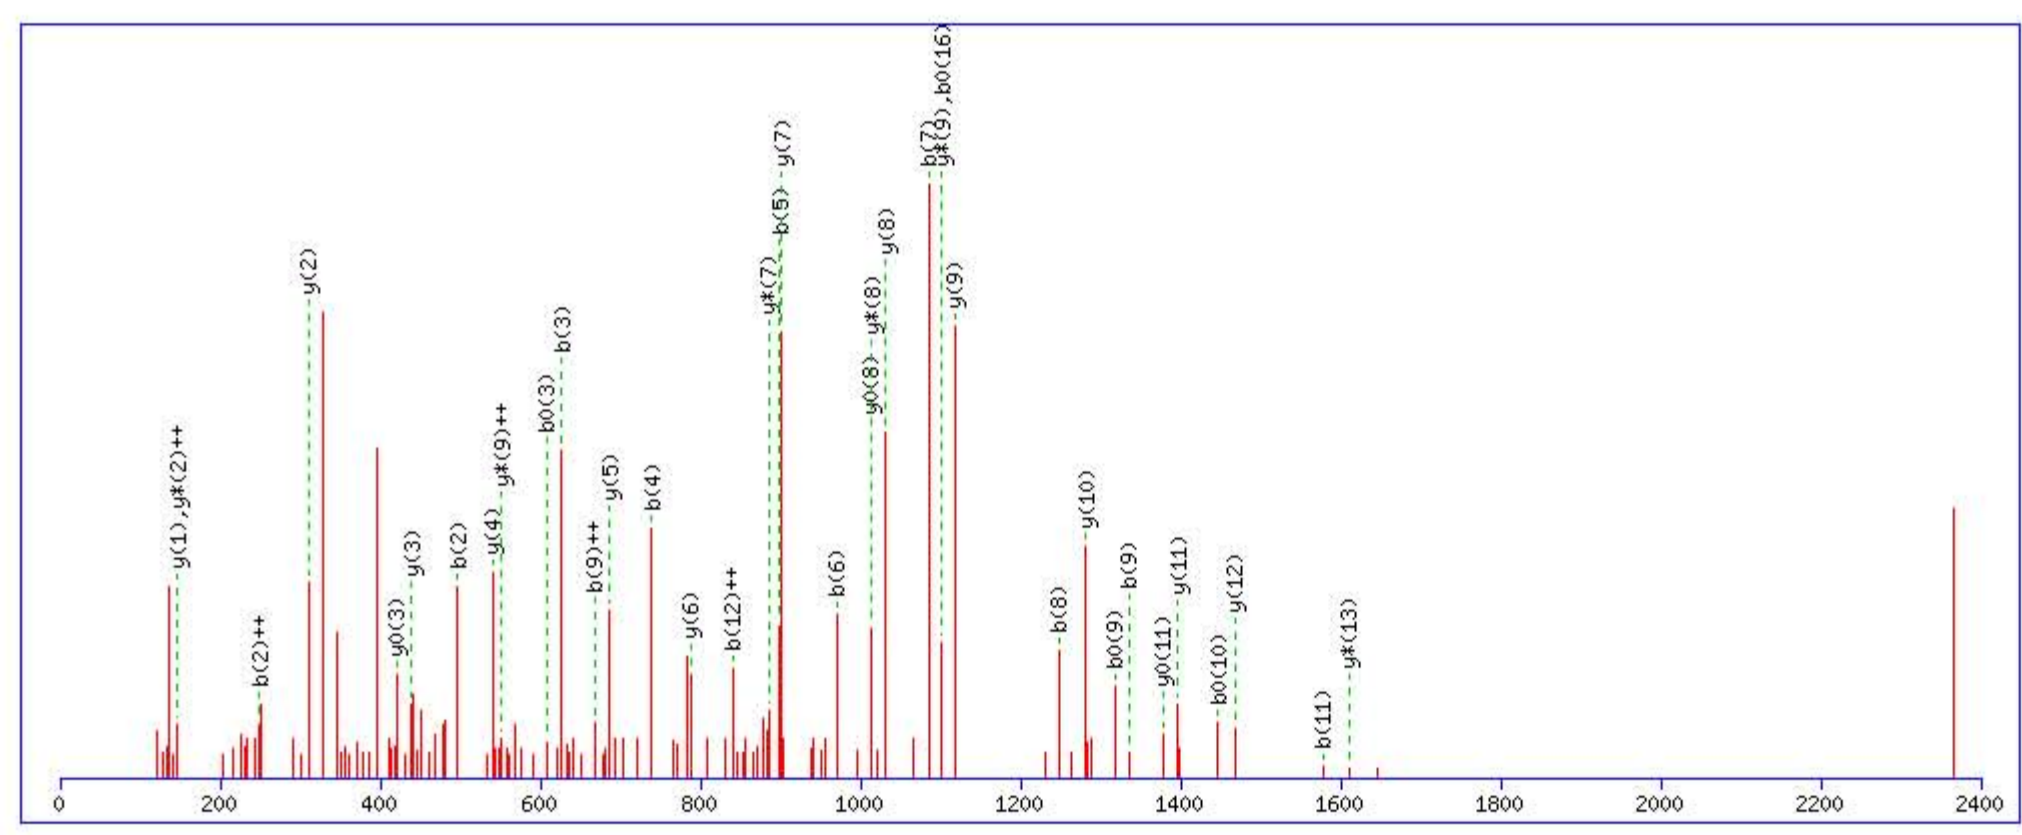

Monoisotopic mass of neutral peptide Mr(calc): 2365.024231  
 Fixed modifications: Carbamidomethyl (C) (apply to specified residues or termini only)  
 Variable modifications:  
 Q2 : Biotin:Thermo-21345 (Q)  
 Ions Score: 80 Expect: 5.8e-008  
 Matches : 37/182 fragment ions using 54 most intense peaks [\(help\)](#)

| #  | b                  | b <sup>++</sup>   | b <sup>*</sup> | b <sup>*++</sup> | b <sup>0</sup>     | b <sup>0++</sup>   | Seq. | y                  | y <sup>++</sup> | y <sup>*</sup>     | y <sup>*++</sup>  | y <sup>0</sup>     | y <sup>0++</sup> | #  |
|----|--------------------|-------------------|----------------|------------------|--------------------|--------------------|------|--------------------|-----------------|--------------------|-------------------|--------------------|------------------|----|
| 1  | 58.028740          | 29.518008         |                |                  |                    |                    | G    |                    |                 |                    |                   |                    |                  | 17 |
| 2  | <b>497.254066</b>  | <b>249.130671</b> | 480.227517     | 240.617397       |                    |                    | Q    | 2309.010064        | 1155.008670     | 2291.983515        | 1146.495395       | 2290.999499        | 1146.003387      | 16 |
| 3  | <b>626.296659</b>  | 313.651968        | 609.270110     | 305.138693       | <b>608.286094</b>  | 304.646685         | E    | 1869.784738        | 935.396007      | 1852.758189        | 926.882733        | 1851.774173        | 926.390725       | 15 |
| 4  | <b>739.380723</b>  | 370.194000        | 722.354174     | 361.680725       | 721.370158         | 361.188717         | L    | 1740.742145        | 870.874711      | 1723.715596        | 862.361436        | 1722.731580        | 861.869428       | 14 |
| 5  | <b>899.411372</b>  | 450.209324        | 882.384823     | 441.696050       | 881.400807         | 441.204042         | C    | 1627.658081        | 814.332679      | <b>1610.631532</b> | 805.819404        | 1609.647516        | 805.327396       | 13 |
| 6  | <b>970.448486</b>  | 485.727881        | 953.421937     | 477.214607       | 952.437921         | 476.722599         | A    | <b>1467.627432</b> | 734.317354      | 1450.600883        | 725.804080        | 1449.616867        | 725.312072       | 12 |
| 7  | <b>1085.475429</b> | 543.241353        | 1068.448880    | 534.728078       | 1067.464864        | 534.236070         | D    | <b>1396.590318</b> | 698.798797      | 1379.563769        | 690.285523        | <b>1378.579753</b> | 689.793515       | 11 |
| 8  | <b>1248.538758</b> | 624.773017        | 1231.512209    | 616.259743       | 1230.528193        | 615.767735         | Y    | <b>1281.563375</b> | 641.285326      | 1264.536826        | 632.772051        | 1263.552810        | 632.280043       | 10 |
| 9  | <b>1335.570786</b> | <b>668.289031</b> | 1318.544237    | 659.775757       | <b>1317.560221</b> | 659.283749         | S    | <b>1118.500046</b> | 559.753661      | <b>1101.473497</b> | <b>551.240387</b> | 1100.489481        | 550.748379       | 9  |
| 10 | 1464.613379        | 732.810328        | 1447.586830    | 724.297053       | <b>1446.602814</b> | 723.805045         | E    | <b>1031.468018</b> | 516.237647      | <b>1014.441469</b> | 507.724373        | <b>1013.457453</b> | 507.232365       | 8  |
| 11 | <b>1578.656306</b> | 789.831791        | 1561.629757    | 781.318517       | 1560.645741        | 780.826509         | N    | <b>902.425425</b>  | 451.716351      | <b>885.398876</b>  | 443.203076        | 884.414860         | 442.711068       | 7  |
| 12 | 1679.703985        | <b>840.355631</b> | 1662.677436    | 831.842356       | 1661.693420        | 831.350348         | T    | <b>788.382498</b>  | 394.694887      | 771.355949         | 386.181613        | 770.371933         | 385.689605       | 6  |
| 13 | 1826.772399        | 913.889838        | 1809.745850    | 905.376563       | 1808.761834        | 904.884555         | F    | <b>687.334819</b>  | 344.171048      | 670.308270         | 335.657773        | 669.324254         | 335.165765       | 5  |
| 14 | 1927.820078        | 964.413677        | 1910.793529    | 955.900403       | 1909.809513        | 955.408395         | T    | <b>540.266405</b>  | 270.636841      | 523.239856         | 262.123566        | 522.255840         | 261.631558       | 4  |
| 15 | 2056.862671        | 1028.934973       | 2039.836122    | 1020.421699      | 2038.852106        | 1019.929691        | E    | <b>439.218726</b>  | 220.113001      | 422.192177         | 211.599726        | <b>421.208161</b>  | 211.107718       | 3  |
| 16 | 2219.926000        | 1110.466638       | 2202.899451    | 1101.953363      | 2201.915435        | <b>1101.461355</b> | Y    | <b>310.176133</b>  | 155.591705      | 293.149584         | <b>147.078430</b> |                    |                  | 2  |
| 17 |                    |                   |                |                  |                    |                    | K    | <b>147.112804</b>  | 74.060040       | 130.086255         | 65.546765         |                    |                  | 1  |

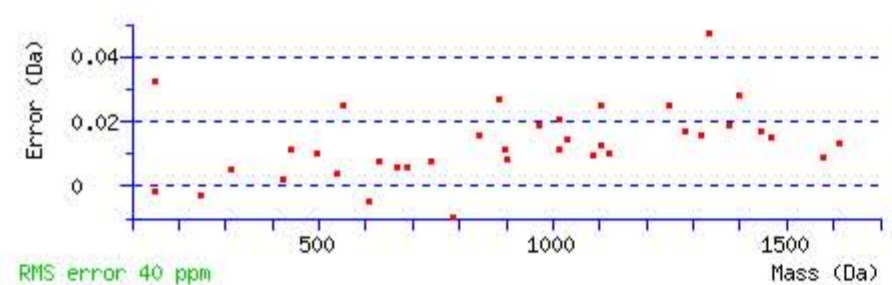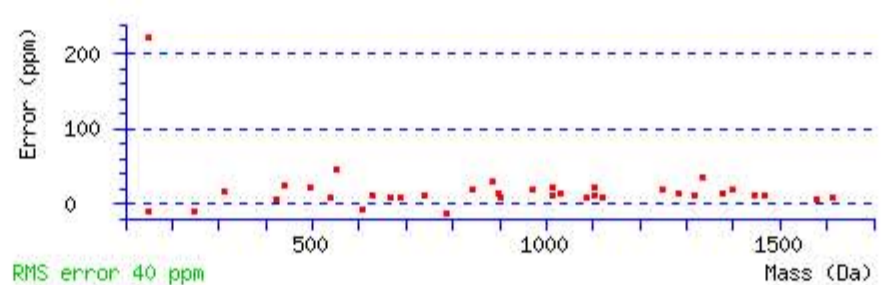

NCBI BLAST search of [GQELCADYSENTFTEYK](#)  
 (Parameters: blastp, nr protein database, expect=20000, no filter, PAM30)  
 Other BLAST [web gateways](#)

### All matches to this query

| Score | Mr(calc):   | Delta    | Sequence                          |
|-------|-------------|----------|-----------------------------------|
| 80.4  | 2365.024231 | 0.025061 | <a href="#">GQELCADYSENTFTEYK</a> |



# MASCOT SEARCH RESULTS

## Peptide View

MS/MS Fragmentation of **LGDDLLQCHPAVK**

Found in **PROC\_HUMAN**, Vitamin K-dependent protein C OS=Homo sapiens GN=PROC PE=1 SV=1

Match to Query 47910: 1775.918172 from(592.980000,3+) rtinseconds(1938) index(60089)

Title: Locus:1.1.1.2980.10 File:"2013-07-02 CLN FXIII 60 min 1st F 4.wiff"

Data file C:\Program Files (x86)\Matrix Science\Mascot Daemon\mgf4 FXIII 60 min 1st\mascot\_daemon\_merge.mgf

Click mouse within plot area to zoom in by factor of two about that point

Or, Plot from  to  Da

Label all possible matches  Label matches used for scoring

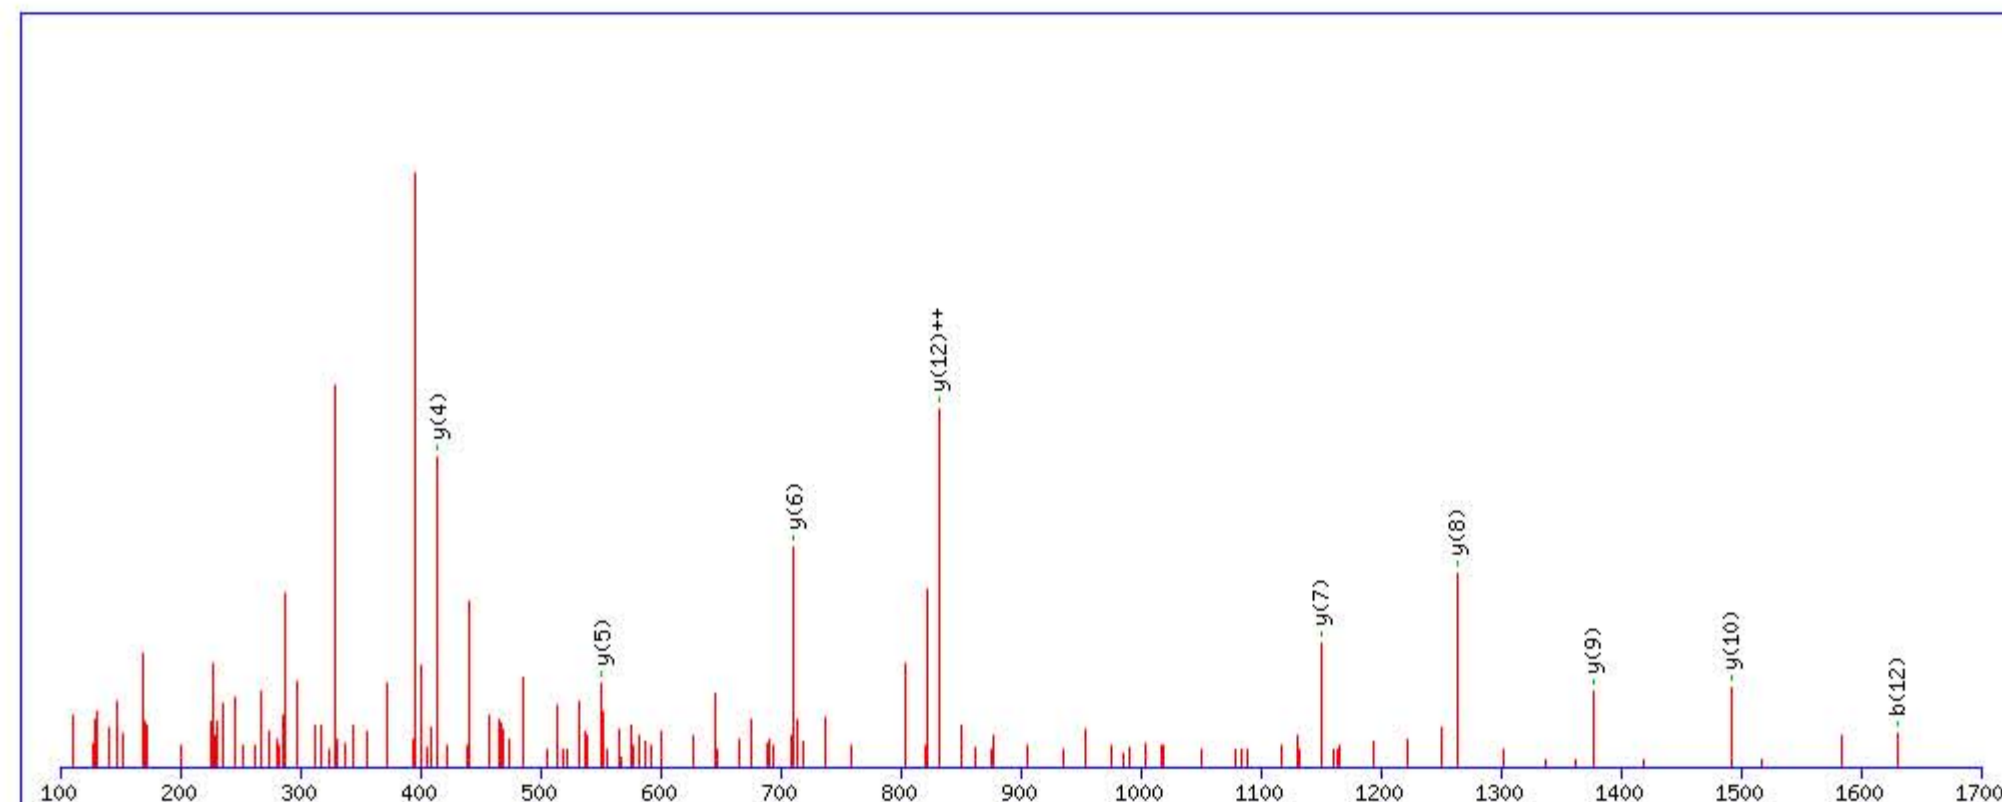

Monoisotopic mass of neutral peptide Mr(calc): 1775.906250

Fixed modifications: Carbamidomethyl (C) (apply to specified residues or termini only)

Variable modifications:

Q7 : Biotin:Thermo-21345 (Q)

Ions Score: 35 Expect: 0.00082

Matches : 9/110 fragment ions using 16 most intense peaks [\(help\)](#)

| #  | b           | b <sup>++</sup> | b <sup>*</sup> | b <sup>*++</sup> | b <sup>0</sup> | b <sup>0++</sup> | Seq. | y           | y <sup>++</sup> | y <sup>*</sup> | y <sup>*++</sup> | y <sup>0</sup> | y <sup>0++</sup> | #  |
|----|-------------|-----------------|----------------|------------------|----------------|------------------|------|-------------|-----------------|----------------|------------------|----------------|------------------|----|
| 1  | 114.091340  | 57.549308       |                |                  |                |                  | L    |             |                 |                |                  |                |                  | 13 |
| 2  | 171.112804  | 86.060040       |                |                  |                |                  | G    | 1663.829461 | 832.418369      | 1646.802912    | 823.905094       | 1645.818896    | 823.413086       | 12 |
| 3  | 286.139747  | 143.573512      |                |                  | 268.129182     | 134.568229       | D    | 1606.807997 | 803.907637      | 1589.781448    | 795.394362       | 1588.797432    | 794.902354       | 11 |
| 4  | 401.166690  | 201.086983      |                |                  | 383.156125     | 192.081701       | D    | 1491.781054 | 746.394165      | 1474.754505    | 737.880891       | 1473.770489    | 737.388883       | 10 |
| 5  | 514.250754  | 257.629015      |                |                  | 496.240189     | 248.623733       | L    | 1376.754111 | 688.880694      | 1359.727562    | 680.367419       |                |                  | 9  |
| 6  | 627.334818  | 314.171047      |                |                  | 609.324253     | 305.165765       | L    | 1263.670047 | 632.338662      | 1246.643498    | 623.825387       |                |                  | 8  |
| 7  | 1066.560144 | 533.783710      | 1049.533595    | 525.270436       | 1048.549579    | 524.778428       | Q    | 1150.585983 | 575.796630      | 1133.559434    | 567.283355       |                |                  | 7  |
| 8  | 1226.590793 | 613.799035      | 1209.564244    | 605.285760       | 1208.580228    | 604.793752       | C    | 711.360657  | 356.183967      | 694.334108     | 347.670692       |                |                  | 6  |
| 9  | 1363.649705 | 682.328491      | 1346.623156    | 673.815216       | 1345.639140    | 673.323208       | H    | 551.330008  | 276.168642      | 534.303459     | 267.655368       |                |                  | 5  |
| 10 | 1460.702469 | 730.854873      | 1443.675920    | 722.341598       | 1442.691904    | 721.849590       | P    | 414.271096  | 207.639186      | 397.244547     | 199.125912       |                |                  | 4  |
| 11 | 1531.739583 | 766.373430      | 1514.713034    | 757.860155       | 1513.729018    | 757.368147       | A    | 317.218332  | 159.112804      | 300.191783     | 150.599530       |                |                  | 3  |
| 12 | 1630.807997 | 815.907637      | 1613.781448    | 807.394362       | 1612.797432    | 806.902354       | V    | 246.181218  | 123.594247      | 229.154669     | 115.080973       |                |                  | 2  |
| 13 |             |                 |                |                  |                |                  | K    | 147.112804  | 74.060040       | 130.086255     | 65.546765        |                |                  | 1  |

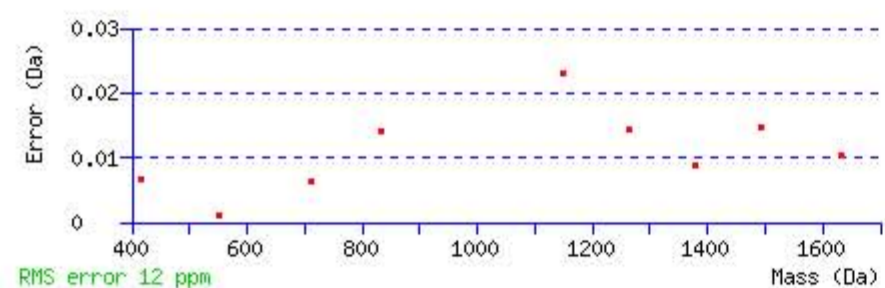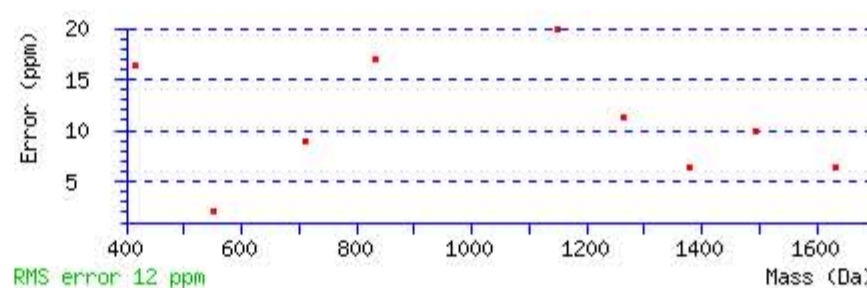

NCBI BLAST search of [LGDDLLQCHPAVK](#)

(Parameters: blastp, nr protein database, expect=20000, no filter, PAM30)

Other BLAST [web gateways](#)

All matches to this query

| Score | Mr(calc):   | Delta     | Sequence                         |
|-------|-------------|-----------|----------------------------------|
| 34.7  | 1775.906250 | 0.011922  | <a href="#">LGDDLLQCHPAVK</a>    |
| 1.8   | 1775.919952 | -0.001780 | <a href="#">NVDSSGNKSVLMERLK</a> |

Mascot: <http://www.matrixscience.com/>



# MASCOT Search Results

## Peptide View

MS/MS Fragmentation of **ELNQAGQETLVTGWGYHSSR**

Found in **PROC\_HUMAN**, Vitamin K-dependent protein C OS=Homo sapiens GN=PROC PE=1 SV=1

Match to Query 66019: 2543.257482 from(848.759770,3+) rtinseconds(2141) index(61494)

Title: Locus:1.1.1.3050.24 File:"2013-07-02 CLN FXIII 60 min 1st F 4.wiff"

Data file C:\Program Files (x86)\Matrix Science\Mascot Daemon\mgf4 FXIII 60 min 1st\mascot\_daemon\_merge.mgf

Click mouse within plot area to zoom in by factor of two about that point

Or, Plot from  to  Da

Label all possible matches  Label matches used for scoring

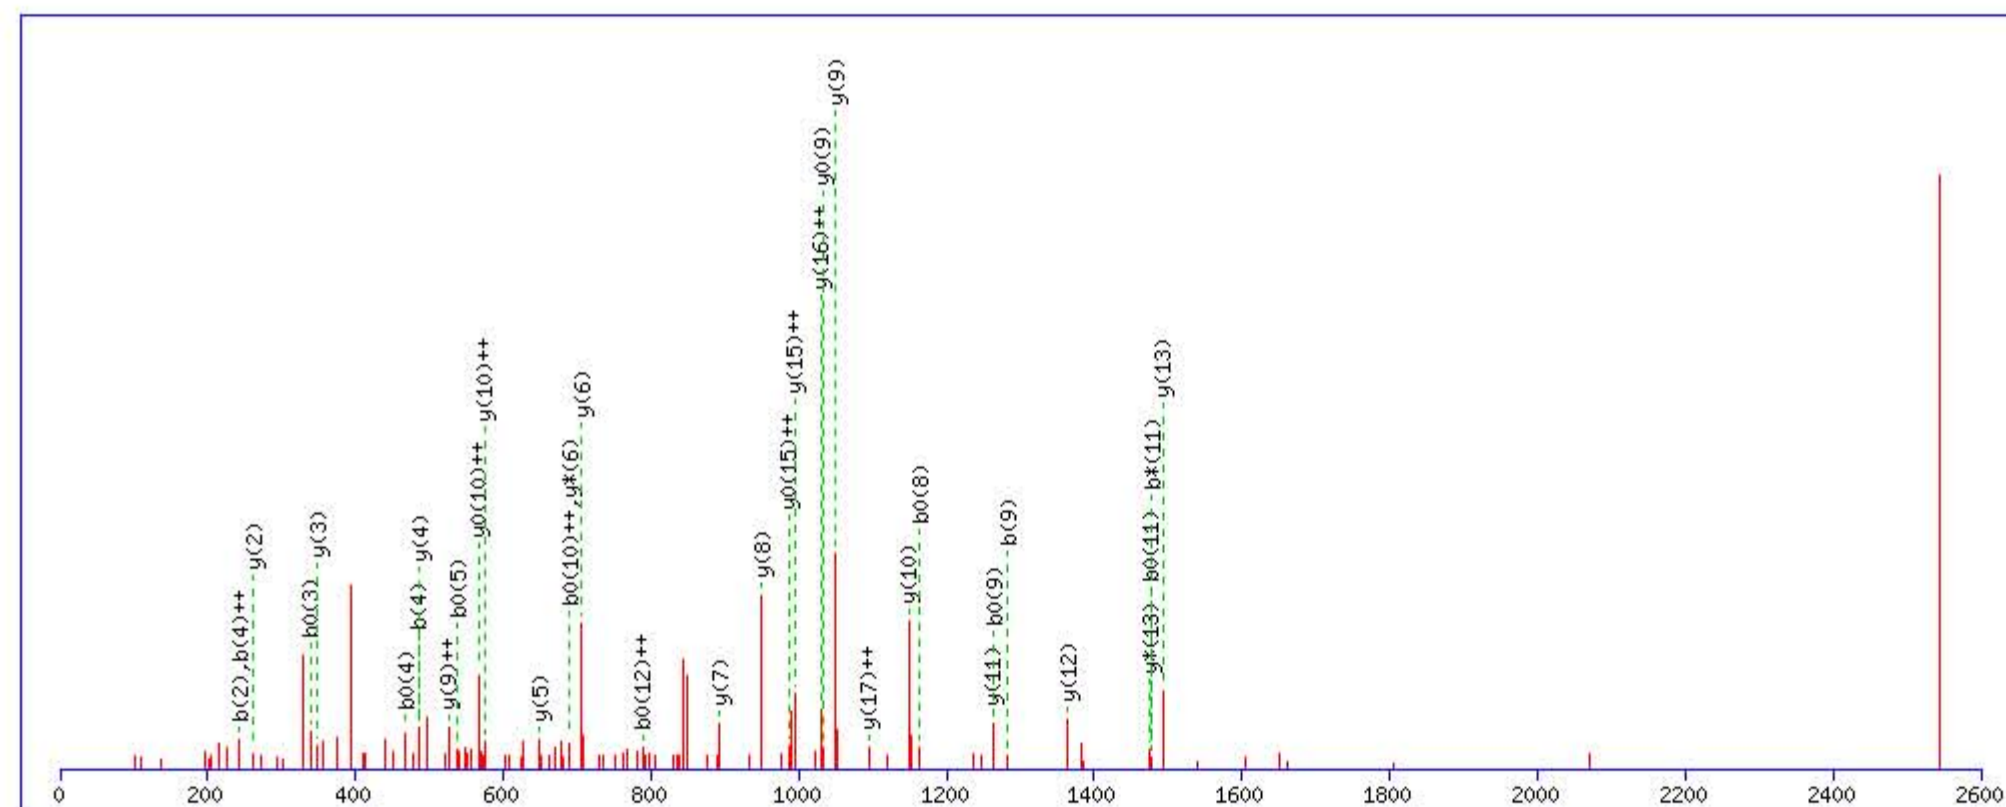

Monoisotopic mass of neutral peptide Mr(calc): 2543.222702

Fixed modifications: Carbamidomethyl (C) (apply to specified residues or termini only)

Variable modifications:

Q7 : Biotin:Thermo-21345 (Q)

Ions Score: 46 Expect: 0.00077

Matches : 35/222 fragment ions using 82 most intense peaks [\(help\)](#)

| #  | b                  | b <sup>++</sup>   | b <sup>*</sup>     | b <sup>*++</sup> | b <sup>0</sup>     | b <sup>0++</sup>  | Seq. | y                  | y <sup>++</sup>    | y <sup>*</sup>     | y <sup>*++</sup> | y <sup>0</sup>     | y <sup>0++</sup>  | #  |
|----|--------------------|-------------------|--------------------|------------------|--------------------|-------------------|------|--------------------|--------------------|--------------------|------------------|--------------------|-------------------|----|
| 1  | 130.049869         | 65.528572         |                    |                  | 112.039304         | 56.523290         | E    |                    |                    |                    |                  |                    |                   | 20 |
| 2  | <b>243.133933</b>  | 122.070605        |                    |                  | 225.123368         | 113.065322        | L    | 2415.187392        | 1208.097334        | 2398.160843        | 1199.584059      | 2397.176827        | 1199.092051       | 19 |
| 3  | 357.176860         | 179.092068        | 340.150311         | 170.578794       | <b>339.166295</b>  | 170.086786        | N    | 2302.103328        | 1151.555302        | 2285.076779        | 1143.042027      | 2284.092763        | 1142.550019       | 18 |
| 4  | <b>485.235438</b>  | <b>243.121357</b> | 468.208889         | 234.608083       | <b>467.224873</b>  | 234.116075        | Q    | 2188.060401        | <b>1094.533838</b> | 2171.033852        | 1086.020564      | 2170.049836        | 1085.528556       | 17 |
| 5  | 556.272552         | 278.639914        | 539.246003         | 270.126640       | <b>538.261987</b>  | 269.634632        | A    | 2060.001823        | <b>1030.504549</b> | 2042.975274        | 1021.991275      | 2041.991258        | 1021.499267       | 16 |
| 6  | 613.294016         | 307.150646        | 596.267467         | 298.637372       | 595.283451         | 298.145364        | G    | 1988.964709        | <b>994.985993</b>  | 1971.938160        | 986.472718       | 1970.954144        | <b>985.980710</b> | 15 |
| 7  | 1052.519342        | 526.763309        | 1035.492793        | 518.250035       | 1034.508777        | 517.758027        | Q    | 1931.943245        | 966.475261         | 1914.916696        | 957.961986       | 1913.932680        | 957.469978        | 14 |
| 8  | 1181.561935        | 591.284606        | 1164.535386        | 582.771331       | <b>1163.551370</b> | 582.279323        | E    | <b>1492.717919</b> | 746.862597         | <b>1475.691370</b> | 738.349323       | 1474.707354        | 737.857315        | 13 |
| 9  | <b>1282.609614</b> | 641.808445        | 1265.583065        | 633.295171       | <b>1264.599049</b> | 632.803163        | T    | <b>1363.675326</b> | 682.341301         | 1346.648777        | 673.828026       | 1345.664761        | 673.336018        | 12 |
| 10 | 1395.693678        | 698.350477        | 1378.667129        | 689.837203       | 1377.683113        | <b>689.345195</b> | L    | <b>1262.627647</b> | 631.817461         | 1245.601098        | 623.304187       | 1244.617082        | 622.812179        | 11 |
| 11 | 1494.762092        | 747.884684        | <b>1477.735543</b> | 739.371410       | <b>1476.751527</b> | 738.879402        | V    | <b>1149.543583</b> | <b>575.275429</b>  | 1132.517034        | 566.762155       | 1131.533018        | <b>566.270147</b> | 10 |
| 12 | 1595.809771        | 798.408524        | 1578.783222        | 789.895249       | 1577.799206        | <b>789.403241</b> | T    | <b>1050.475169</b> | <b>525.741222</b>  | 1033.448620        | 517.227948       | <b>1032.464604</b> | 516.735940        | 9  |
| 13 | 1652.831235        | 826.919256        | 1635.804686        | 818.405981       | 1634.820670        | 817.913973        | G    | <b>949.427490</b>  | 475.217383         | 932.400941         | 466.704108       | 931.416925         | 466.212100        | 8  |
| 14 | 1838.910548        | 919.958912        | 1821.883999        | 911.445638       | 1820.899983        | 910.953630        | W    | <b>892.406026</b>  | 446.706651         | 875.379477         | 438.193376       | 874.395461         | 437.701368        | 7  |
| 15 | 1895.932012        | 948.469644        | 1878.905463        | 939.956370       | 1877.921447        | 939.464362        | G    | <b>706.326713</b>  | 353.666994         | <b>689.300164</b>  | 345.153720       | 688.316148         | 344.661712        | 6  |
| 16 | 2058.995341        | 1030.001308       | 2041.968792        | 1021.488034      | 2040.984776        | 1020.996026       | Y    | <b>649.305249</b>  | 325.156263         | 632.278700         | 316.642988       | 631.294684         | 316.150980        | 5  |
| 17 | 2196.054253        | 1098.530764       | 2179.027704        | 1090.017490      | 2178.043688        | 1089.525482       | H    | <b>486.241920</b>  | 243.624598         | 469.215371         | 235.111324       | 468.231355         | 234.619316        | 4  |
| 18 | 2283.086281        | 1142.046778       | 2266.059732        | 1133.533504      | 2265.075716        | 1133.041496       | S    | <b>349.183008</b>  | 175.095142         | 332.156459         | 166.581868       | 331.172443         | 166.089860        | 3  |
| 19 | 2370.118309        | 1185.562792       | 2353.091760        | 1177.049518      | 2352.107744        | 1176.557510       | S    | <b>262.150980</b>  | 131.579128         | 245.124431         | 123.065854       | 244.140415         | 122.573846        | 2  |
| 20 |                    |                   |                    |                  |                    |                   | R    | 175.118952         | 88.063114          | 158.092403         | 79.549839        |                    |                   | 1  |

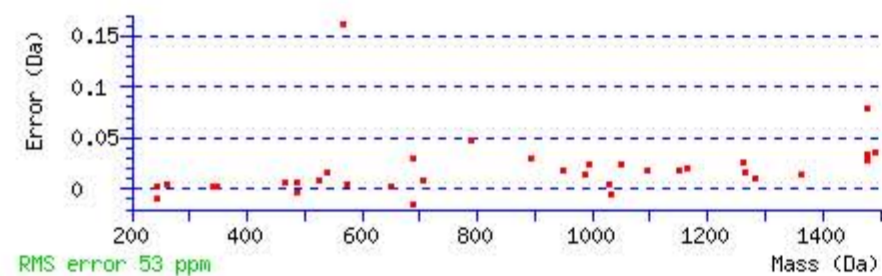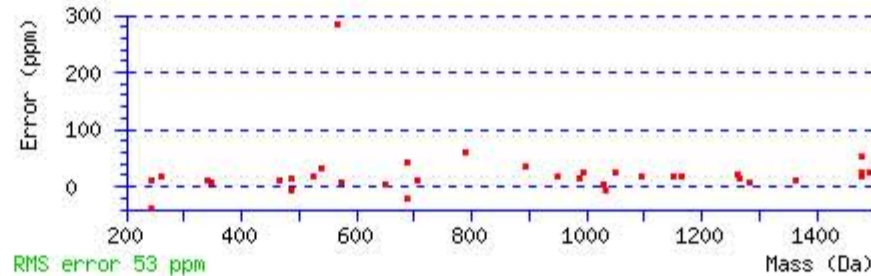

NCBI BLAST search of **ELNQAGQETLVTGWGYHSSR**

(Parameters: blastp, nr protein database, expect=20000, no filter, PAM30)

Other BLAST [web gateways](#)

All matches to this query

| Score | Mr(calc):   | Delta    | Sequence                             |
|-------|-------------|----------|--------------------------------------|
| 45.7  | 2543.222702 | 0.034780 | <a href="#">ELNQAGQETLVTGWGYHSSR</a> |
| 39.7  | 2543.222702 | 0.034780 | <a href="#">ELNQAGQETLVTGWGYHSSR</a> |



# **MASCOT** Mascot Search Results

## Peptide View

MS/MS Fragmentation of **QLAVLDK**

Found in **PROS\_HUMAN**, Vitamin K-dependent protein S OS=Homo sapiens GN=PROS1 PE=1 SV=1

Match to Query 22436: 1096.637388 from(549.325970,2+) rtinseconds(1941) index(60113)

Title: Locus:1.1.1.2981.9 File:"2013-07-02 CLN FXIII 60 min 1st F 4.wiff"

Data file C:\Program Files (x86)\Matrix Science\Mascot Daemon\mgf4 FXIII 60 min 1st\mascot\_daemon\_merge.mgf

Click mouse within plot area to zoom in by factor of two about that point

Or, Plot from  to  Da

Label all possible matches  Label matches used for scoring

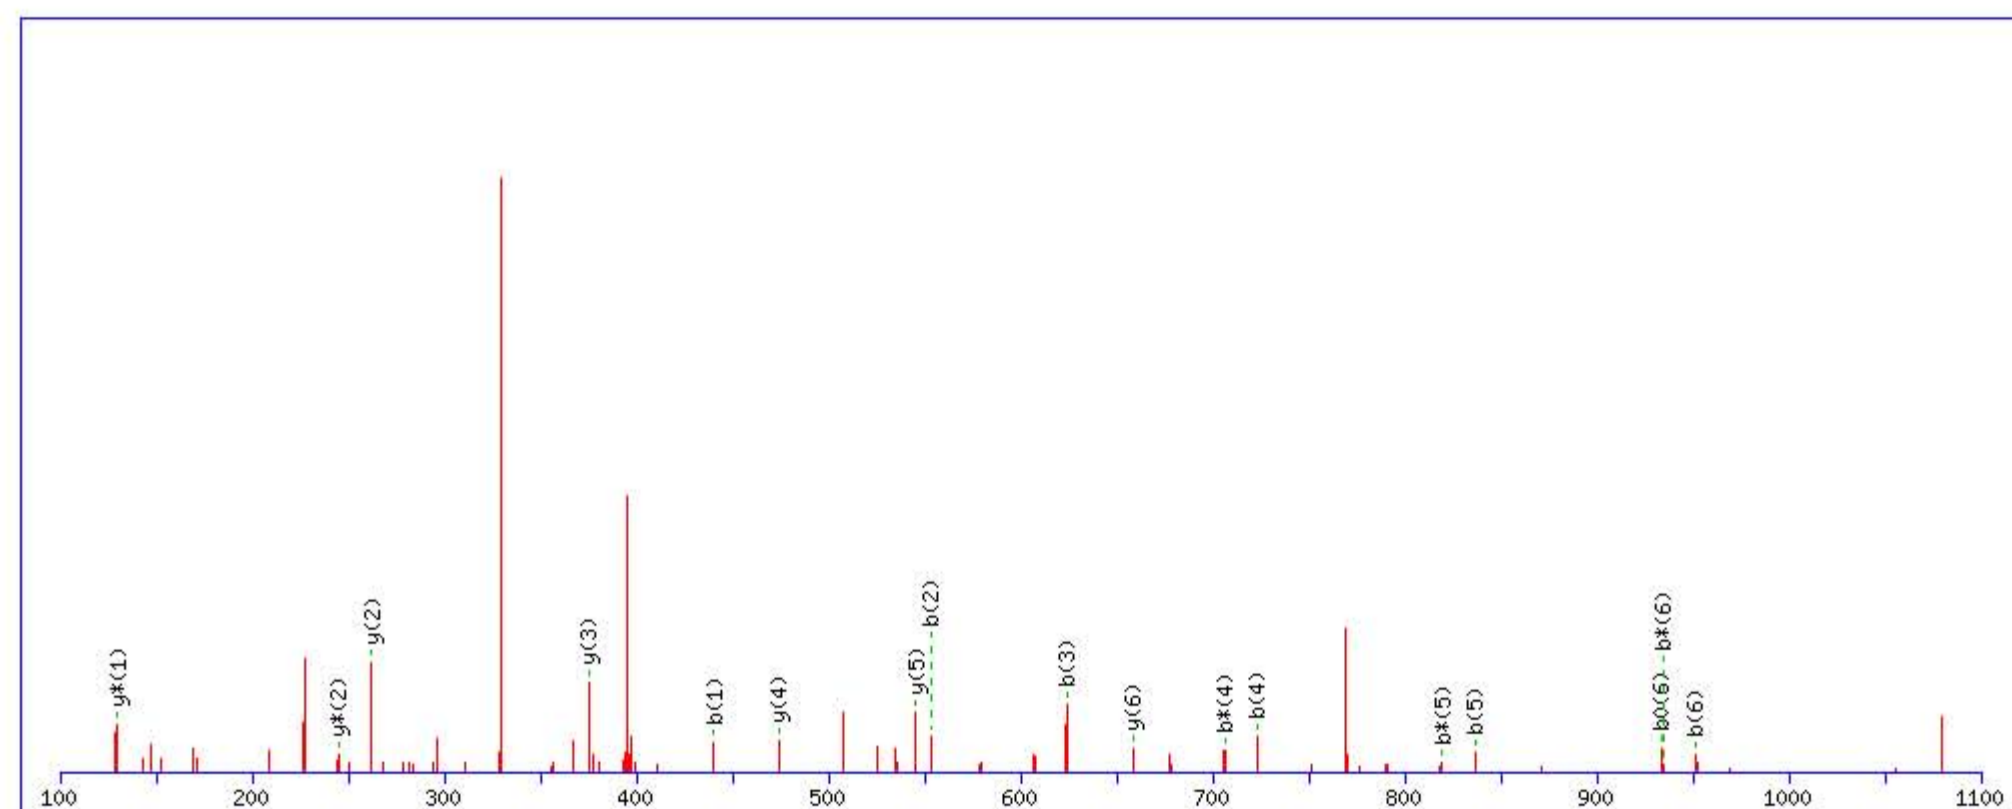

Monoisotopic mass of neutral peptide Mr(calc): 1096.631439

Fixed modifications: Carbamidomethyl (C) (apply to specified residues or termini only)

Variable modifications:

Q1 : Biotin:Thermo-21345 (Q)

Ions Score: 29 Expect: 0.019

Matches : 17/60 fragment ions using 36 most intense peaks [\(help\)](#)

| # | b                 | b <sup>++</sup> | b <sup>*</sup>    | b <sup>*++</sup> | b <sup>0</sup>    | b <sup>0++</sup> | Seq.     | y                 | y <sup>++</sup> | y <sup>*</sup>    | y <sup>*++</sup> | y <sup>0</sup> | y <sup>0++</sup> | # |
|---|-------------------|-----------------|-------------------|------------------|-------------------|------------------|----------|-------------------|-----------------|-------------------|------------------|----------------|------------------|---|
| 1 | <b>440.232602</b> | 220.619939      | 423.206053        | 212.106664       |                   |                  | <b>Q</b> |                   |                 |                   |                  |                |                  | 7 |
| 2 | <b>553.316666</b> | 277.161971      | 536.290117        | 268.648697       |                   |                  | <b>L</b> | <b>658.413403</b> | 329.710340      | 641.386854        | 321.197065       | 640.402838     | 320.705057       | 6 |
| 3 | <b>624.353780</b> | 312.680528      | 607.327231        | 304.167254       |                   |                  | <b>A</b> | <b>545.329339</b> | 273.168308      | 528.302790        | 264.655033       | 527.318774     | 264.163025       | 5 |
| 4 | <b>723.422194</b> | 362.214735      | <b>706.395645</b> | 353.701461       |                   |                  | <b>V</b> | <b>474.292225</b> | 237.649750      | 457.265676        | 229.136476       | 456.281660     | 228.644468       | 4 |
| 5 | <b>836.506258</b> | 418.756767      | <b>819.479709</b> | 410.243493       |                   |                  | <b>L</b> | <b>375.223811</b> | 188.115543      | 358.197262        | 179.602269       | 357.213246     | 179.110261       | 3 |
| 6 | <b>951.533201</b> | 476.270239      | <b>934.506652</b> | 467.756964       | <b>933.522636</b> | 467.264956       | <b>D</b> | <b>262.139747</b> | 131.573511      | <b>245.113198</b> | 123.060237       | 244.129182     | 122.568229       | 2 |
| 7 |                   |                 |                   |                  |                   |                  | <b>K</b> | 147.112804        | 74.060040       | <b>130.086255</b> | 65.546765        |                |                  | 1 |

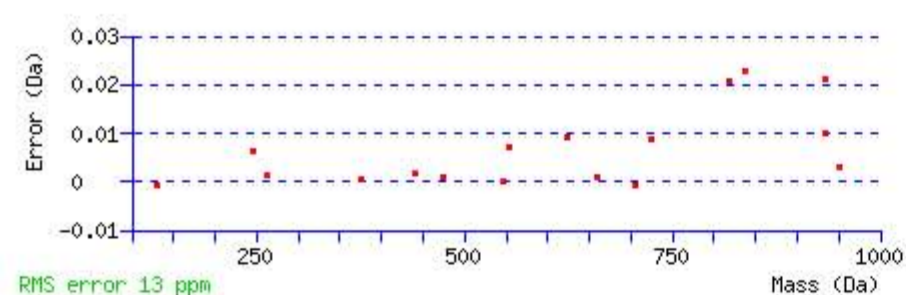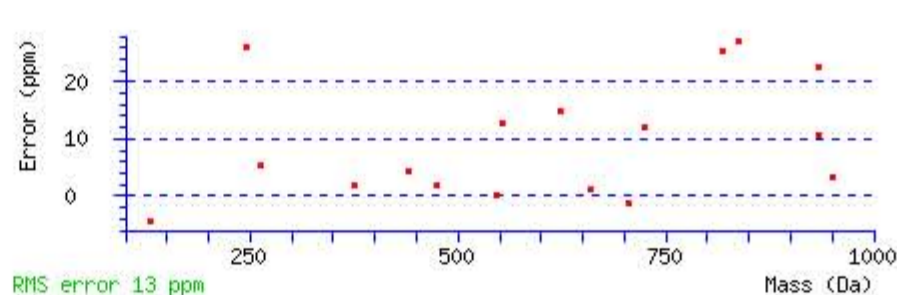

NCBI BLAST search of **QLAVLDK**

(Parameters: blastp, nr protein database, expect=20000, no filter, PAM30)

Other BLAST [web gateways](#)

All matches to this query

| Score | Mr(calc):   | Delta    | Sequence                   |
|-------|-------------|----------|----------------------------|
| 28.8  | 1096.631439 | 0.005949 | <a href="#">QLAVLDK</a>    |
| 17.5  | 1096.624054 | 0.013334 | <a href="#">KPVDSVPLSR</a> |
| 7.9   | 1096.635269 | 0.002119 | <a href="#">SSSLVIHKAR</a> |
| 7.0   | 1096.624023 | 0.013365 | <a href="#">IPRENLLDK</a>  |
| 2.7   | 1096.631439 | 0.005949 | <a href="#">GILQLDK</a>    |
| 1.9   | 1096.628067 | 0.009321 | <a href="#">YIFVSLLSR</a>  |
| 0.0   | 1096.631439 | 0.005949 | <a href="#">QIDVAIK</a>    |

Mascot: <http://www.matrixscience.com/>



# MASCOT Search Results

## Peptide View

MS/MS Fragmentation of **QSTNAYPDLR**

Found in **PROS\_HUMAN**, Vitamin K-dependent protein S OS=Homo sapiens GN=PROS1 PE=1 SV=1

Match to Query 37809: 1474.739688 from(738.377120,2+) rtinseconds(1739) index(58642)

Title: Locus:1.1.1.2911.19 File:"2013-07-02 CLN FXIII 60 min 1st F 4.wiff"

Data file C:\Program Files (x86)\Matrix Science\Mascot Daemon\mgf\4 FXIII 60 min 1st\mascot\_daemon\_merge.mgf

Click mouse within plot area to zoom in by factor of two about that point

Or, Plot from  to  Da

Label all possible matches  Label matches used for scoring

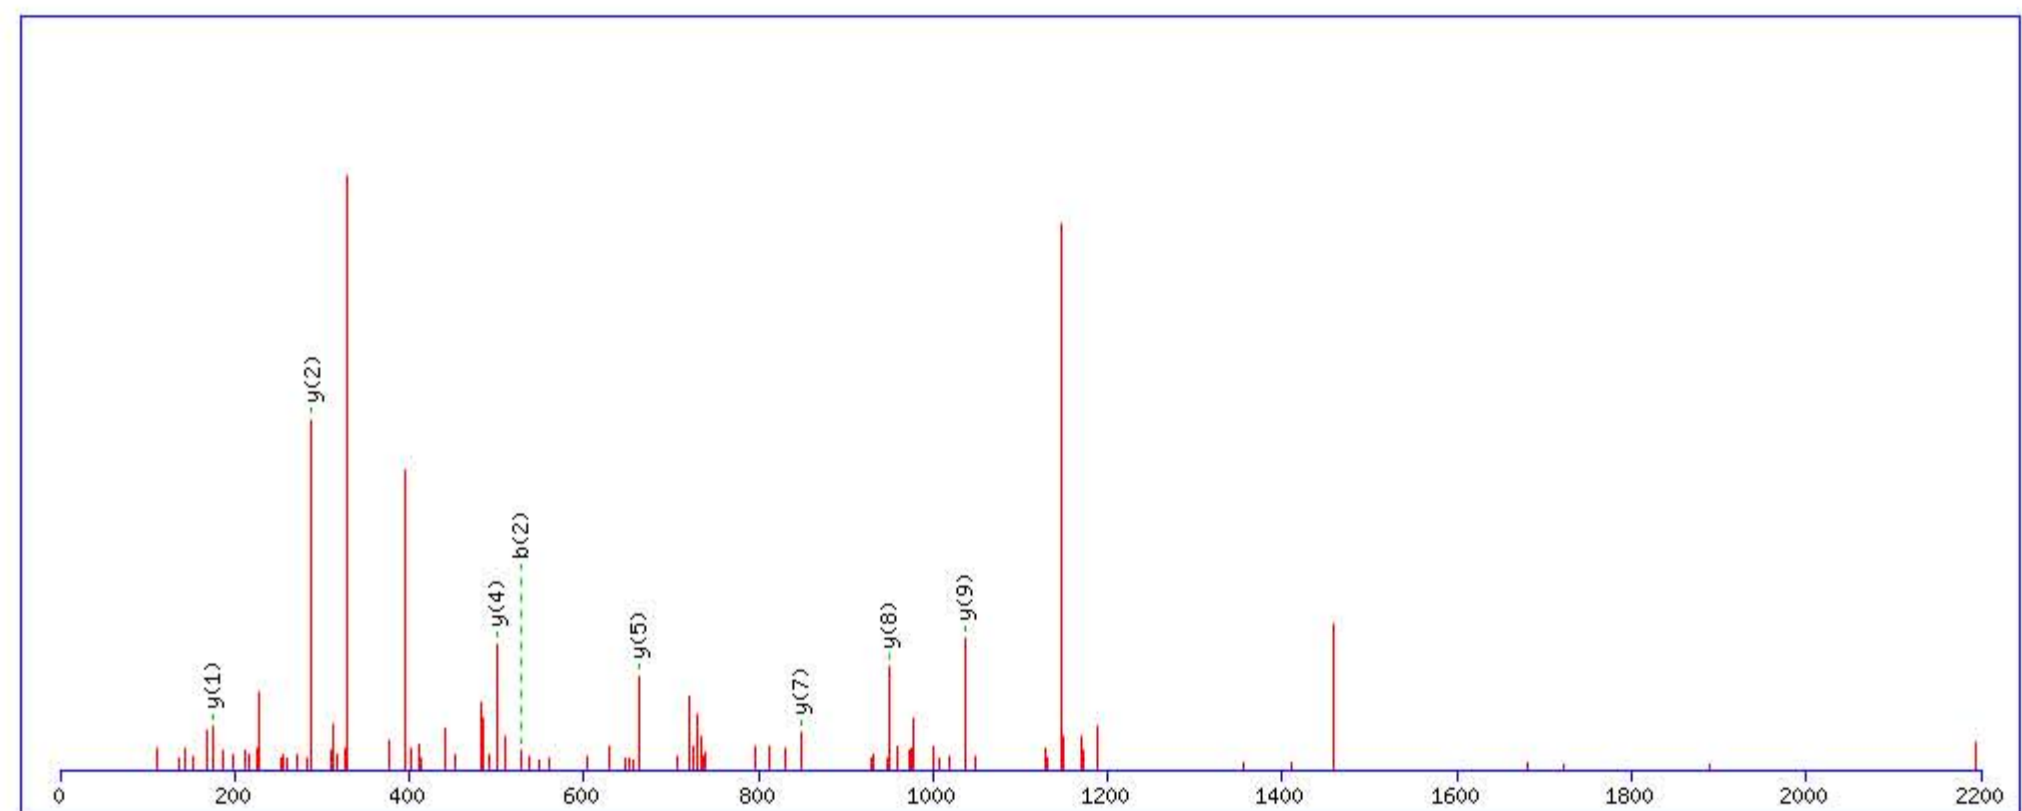

Monoisotopic mass of neutral peptide Mr(calc): 1474.723831

Fixed modifications: Carbamidomethyl (C) (apply to specified residues or termini only)

Variable modifications:

Q1 : Biotin:Thermo-21345 (Q)

Ions Score: 51 Expect: 0.00021

Matches : 8/102 fragment ions using 13 most intense peaks [\(help\)](#)

| #  | b                 | b <sup>++</sup> | b <sup>+</sup> | b <sup>+++</sup> | b <sup>0</sup> | b <sup>0++</sup> | Seq. | y                  | y <sup>++</sup> | y <sup>+</sup> | y <sup>+++</sup> | y <sup>0</sup> | y <sup>0++</sup> | #  |
|----|-------------------|-----------------|----------------|------------------|----------------|------------------|------|--------------------|-----------------|----------------|------------------|----------------|------------------|----|
| 1  | 440.232602        | 220.619939      | 423.206053     | 212.106664       |                |                  | Q    |                    |                 |                |                  |                |                  | 10 |
| 2  | <b>527.264630</b> | 264.135953      | 510.238081     | 255.622679       | 509.254065     | 255.130671       | S    | <b>1036.505800</b> | 518.756538      | 1019.479251    | 510.243263       | 1018.495235    | 509.751255       | 9  |
| 3  | 628.312309        | 314.659793      | 611.285760     | 306.146518       | 610.301744     | 305.654510       | T    | <b>949.473772</b>  | 475.240524      | 932.447223     | 466.727249       | 931.463207     | 466.235241       | 8  |
| 4  | 742.355236        | 371.681256      | 725.328687     | 363.167982       | 724.344671     | 362.675974       | N    | <b>848.426093</b>  | 424.716684      | 831.399544     | 416.203410       | 830.415528     | 415.711402       | 7  |
| 5  | 813.392350        | 407.199813      | 796.365801     | 398.686538       | 795.381785     | 398.194530       | A    | 734.383166         | 367.695221      | 717.356617     | 359.181946       | 716.372601     | 358.689938       | 6  |
| 6  | 976.455679        | 488.731477      | 959.429130     | 480.218203       | 958.445114     | 479.726195       | Y    | <b>663.346052</b>  | 332.176664      | 646.319503     | 323.663389       | 645.335487     | 323.171382       | 5  |
| 7  | 1073.508443       | 537.257860      | 1056.481894    | 528.744585       | 1055.497878    | 528.252577       | P    | <b>500.282723</b>  | 250.644999      | 483.256174     | 242.131725       | 482.272158     | 241.639717       | 4  |
| 8  | 1188.535386       | 594.771331      | 1171.508837    | 586.258057       | 1170.524821    | 585.766049       | D    | 403.229959         | 202.118617      | 386.203410     | 193.605343       | 385.219394     | 193.113335       | 3  |
| 9  | 1301.619450       | 651.313363      | 1284.592901    | 642.800089       | 1283.608885    | 642.308080       | L    | <b>288.203016</b>  | 144.605146      | 271.176467     | 136.091871       |                |                  | 2  |
| 10 |                   |                 |                |                  |                |                  | R    | <b>175.118952</b>  | 88.063114       | 158.092403     | 79.549839        |                |                  | 1  |

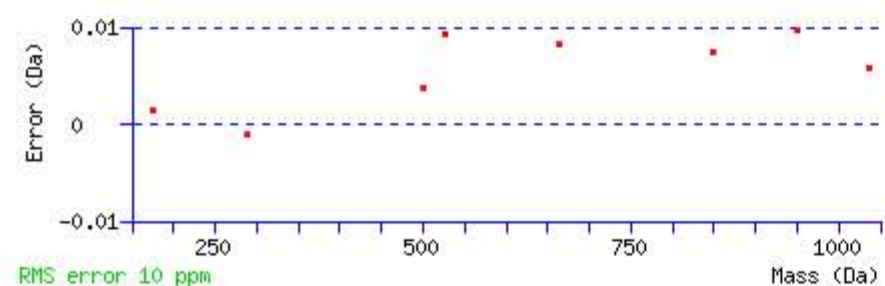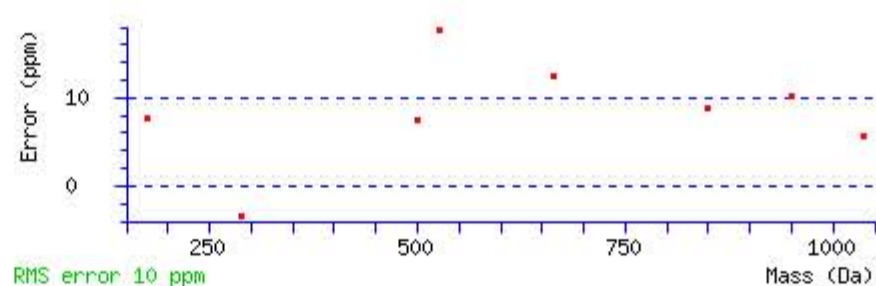

NCBI BLAST search of [QSTNAYPDLR](#)

(Parameters: blastp, nr protein database, expect=20000, no filter, PAM30)

Other BLAST [web gateways](#)

## All matches to this query

| Score | Mr(calc):   | Delta     | Sequence                      |
|-------|-------------|-----------|-------------------------------|
| 50.7  | 1474.723831 | 0.015857  | <a href="#">QSTNAYPDLR</a>    |
| 16.7  | 1474.721161 | 0.018527  | <a href="#">QSTHGERGHR</a>    |
| 8.9   | 1474.741592 | -0.001904 | <a href="#">SSLEHGSDVYLLR</a> |
| 8.4   | 1474.744934 | -0.005246 | <a href="#">LSKEELIQNMDR</a>  |
| 5.8   | 1474.760239 | -0.020551 | <a href="#">TWTKQPDLTMVR</a>  |
| 5.2   | 1474.757523 | -0.017835 | <a href="#">MGLQARRWASGSR</a> |
| 4.6   | 1474.719788 | 0.019900  | <a href="#">QQEELEQMRLR</a>   |
| 3.9   | 1474.748779 | -0.009091 | <a href="#">LQSESTNNGKNKR</a> |
| 0.8   | 1474.742462 | -0.002774 | <a href="#">QCKSEFPIR</a>     |
| 0.8   | 1474.753708 | -0.014020 | <a href="#">QRPSFTCLR</a>     |



# MASCOT Search Results

## Peptide View

MS/MS Fragmentation of **SFQTGLFTAAR**

Found in **PROS\_HUMAN**, Vitamin K-dependent protein S OS=Homo sapiens GN=PROS1 PE=1 SV=1

Match to Query 38959: 1508.795228 from(755.404890,2+) rtinseconds(2277) index(43923)

Title: Locus:1.1.1.3076.23 File:"2013-07-02 CLN FXIII 60 min 1st F 3.wiff"

Data file C:\Program Files (x86)\Matrix Science\Mascot Daemon\mgf4 FXIII 60 min 1st\mascot\_daemon\_merge.mgf

Click mouse within plot area to zoom in by factor of two about that point

Or, Plot from  to  Da

Label all possible matches  Label matches used for scoring

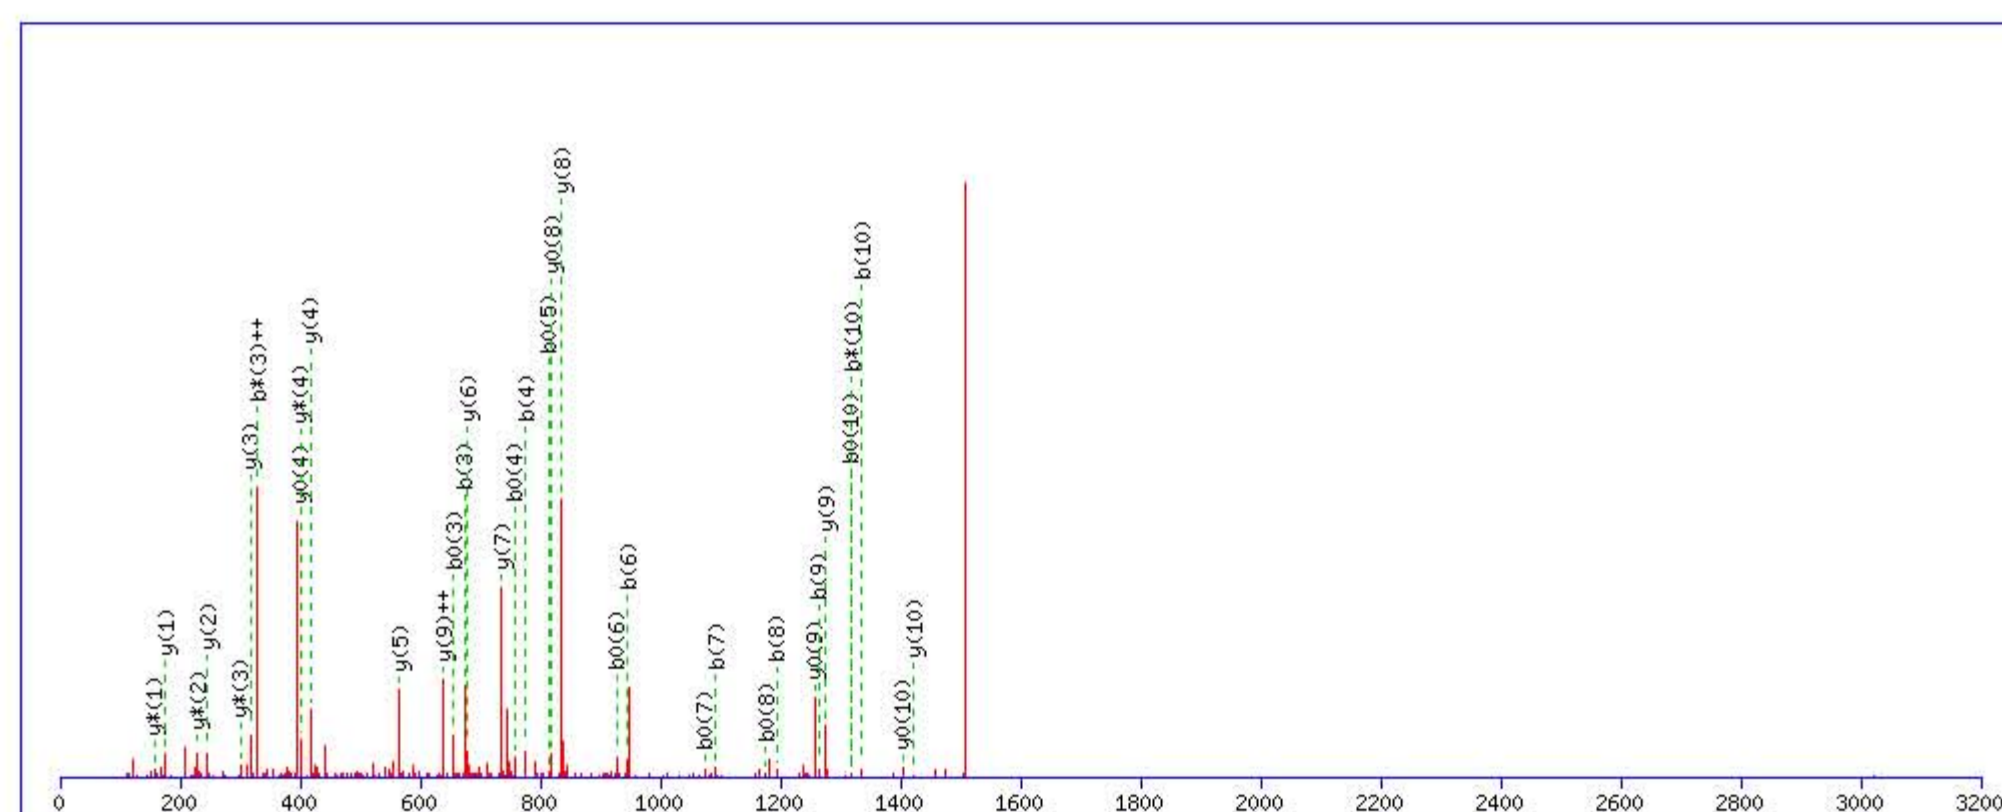

Monoisotopic mass of neutral peptide Mr(calc): 1508.780975

Fixed modifications: Carbamidomethyl (C) (apply to specified residues or termini only)

Variable modifications:

Q3 : Biotin:Thermo-21345 (Q)

Ions Score: 56 Expect: 2e-005

Matches : 35/110 fragment ions using 70 most intense peaks [\(help\)](#)

| #  | b           | b <sup>++</sup> | b <sup>*</sup> | b <sup>*++</sup> | b <sup>0</sup> | b <sup>0++</sup> | Seq. | y           | y <sup>++</sup> | y <sup>*</sup> | y <sup>*++</sup> | y <sup>0</sup> | y <sup>0++</sup> | #  |
|----|-------------|-----------------|----------------|------------------|----------------|------------------|------|-------------|-----------------|----------------|------------------|----------------|------------------|----|
| 1  | 88.039304   | 44.523290       |                |                  | 70.028739      | 35.518008        | S    |             |                 |                |                  |                |                  | 11 |
| 2  | 235.107718  | 118.057497      |                |                  | 217.097153     | 109.052214       | F    | 1422.756220 | 711.881748      | 1405.729671    | 703.368474       | 1404.745655    | 702.876465       | 10 |
| 3  | 674.333044  | 337.670160      | 657.306495     | 329.156885       | 656.322479     | 328.664877       | Q    | 1275.687806 | 638.347541      | 1258.661257    | 629.834267       | 1257.677241    | 629.342259       | 9  |
| 4  | 775.380723  | 388.194000      | 758.354174     | 379.680725       | 757.370158     | 379.188717       | T    | 836.462480  | 418.734878      | 819.435931     | 410.221604       | 818.451915     | 409.729596       | 8  |
| 5  | 832.402187  | 416.704732      | 815.375638     | 408.191457       | 814.391622     | 407.699449       | G    | 735.414801  | 368.211039      | 718.388252     | 359.697764       | 717.404236     | 359.205756       | 7  |
| 6  | 945.486251  | 473.246764      | 928.459702     | 464.733489       | 927.475686     | 464.241481       | L    | 678.393337  | 339.700307      | 661.366788     | 331.187032       | 660.382772     | 330.695024       | 6  |
| 7  | 1092.554665 | 546.780971      | 1075.528116    | 538.267696       | 1074.544100    | 537.775688       | F    | 565.309273  | 283.158275      | 548.282724     | 274.645000       | 547.298708     | 274.152992       | 5  |
| 8  | 1193.602344 | 597.304810      | 1176.575795    | 588.791536       | 1175.591779    | 588.299528       | T    | 418.240859  | 209.624067      | 401.214310     | 201.110793       | 400.230294     | 200.618785       | 4  |
| 9  | 1264.639458 | 632.823367      | 1247.612909    | 624.310093       | 1246.628893    | 623.818085       | A    | 317.193180  | 159.100228      | 300.166631     | 150.586953       |                |                  | 3  |
| 10 | 1335.676572 | 668.341924      | 1318.650023    | 659.828650       | 1317.666007    | 659.336642       | A    | 246.156066  | 123.581671      | 229.129517     | 115.068396       |                |                  | 2  |
| 11 |             |                 |                |                  |                |                  | R    | 175.118952  | 88.063114       | 158.092403     | 79.549839        |                |                  | 1  |

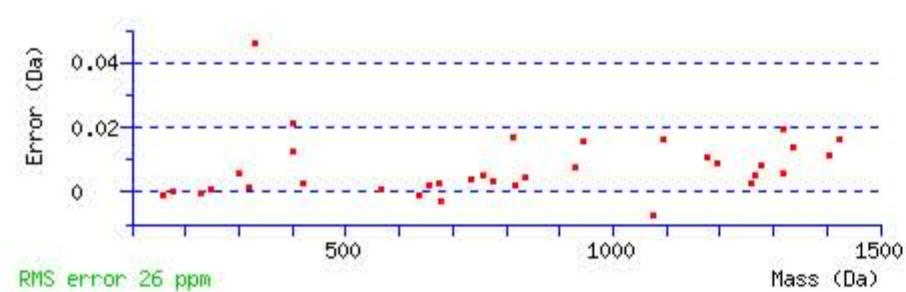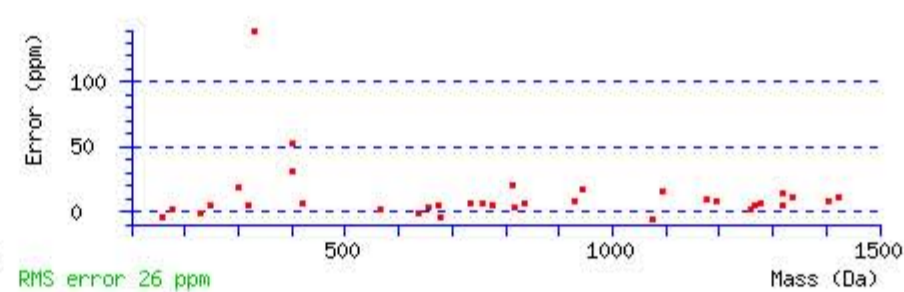

NCBI BLAST search of **SFQTGLFTAAR**

(Parameters: blastp, nr protein database, expect=20000, no filter, PAM30)

Other BLAST [web gateways](#)

All matches to this query

| Score | Mr(calc):   | Delta     | Sequence                       |
|-------|-------------|-----------|--------------------------------|
| 56.3  | 1508.780975 | 0.014253  | <a href="#">SFQTGLFTAAR</a>    |
| 5.9   | 1508.805893 | -0.010665 | <a href="#">RLELPRASDAEPR</a>  |
| 3.3   | 1508.798721 | -0.003493 | <a href="#">SSYGVAAPVDFLRK</a> |
| 3.0   | 1508.776932 | 0.018296  | <a href="#">LMGADSLQLFRSR</a>  |

Mascot: <http://www.matrixscience.com/>



# MASCOT SCIENCE Mascot Search Results

## Peptide View

MS/MS Fragmentation of **IETISHEDLQR**

Found in **PROS\_HUMAN**, Vitamin K-dependent protein S OS=Homo sapiens GN=PROS1 PE=1 SV=1

Match to Query 44635: 1650.837372 from(551.286400,3+) rtinseconds(1603) index(39521)

Title: Locus:1.1.1.2842.9 File:"2013-07-02 CLN FXIII 60 min 1st F 3.wiff"

Data file C:\Program Files (x86)\Matrix Science\Mascot Daemon\mgf4 FXIII 60 min 1st\mascot\_daemon\_merge.mgf

Click mouse within plot area to zoom in by factor of two about that point

Or, Plot from  to  Da

Label all possible matches  Label matches used for scoring

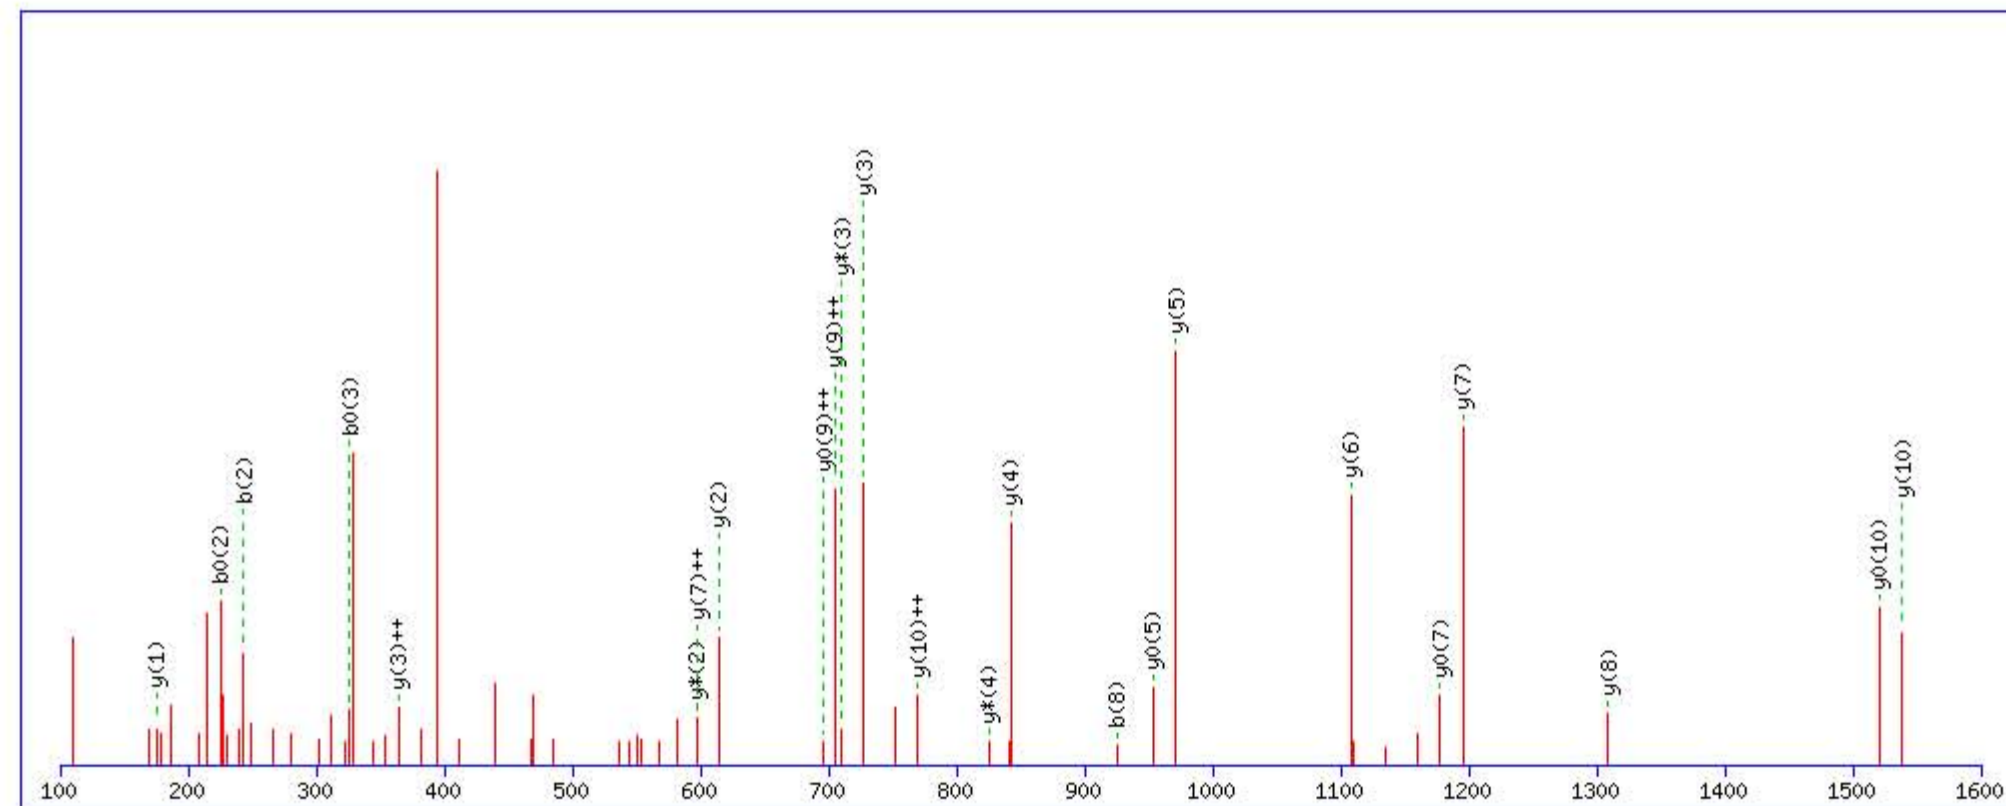

Monoisotopic mass of neutral peptide Mr(calc): 1650.839920

Fixed modifications: Carbamidomethyl (C) (apply to specified residues or termini only)

Variable modifications:

Q10 : Biotin:Thermo-21345 (Q)

Ions Score: 54 Expect: 9.7e-005

Matches : 24/94 fragment ions using 43 most intense peaks [\(help\)](#)

| #  | b                 | b <sup>++</sup> | b <sup>*</sup> | b <sup>*++</sup> | b <sup>0</sup>    | b <sup>0++</sup> | Seq. | y                  | y <sup>++</sup>   | y <sup>*</sup>    | y <sup>*++</sup> | y <sup>0</sup>     | y <sup>0++</sup>  | #  |
|----|-------------------|-----------------|----------------|------------------|-------------------|------------------|------|--------------------|-------------------|-------------------|------------------|--------------------|-------------------|----|
| 1  | 114.091340        | 57.549308       |                |                  |                   |                  | I    |                    |                   |                   |                  |                    |                   | 11 |
| 2  | <b>243.133933</b> | 122.070605      |                |                  | <b>225.123368</b> | 113.065322       | E    | <b>1538.763154</b> | <b>769.885215</b> | 1521.736605       | 761.371941       | <b>1520.752589</b> | 760.879933        | 10 |
| 3  | 344.181612        | 172.594444      |                |                  | <b>326.171047</b> | 163.589162       | T    | 1409.720561        | <b>705.363919</b> | 1392.694012       | 696.850644       | 1391.709996        | <b>696.358636</b> | 9  |
| 4  | 457.265676        | 229.136476      |                |                  | 439.255111        | 220.131194       | I    | <b>1308.672882</b> | 654.840079        | 1291.646333       | 646.326805       | 1290.662317        | 645.834797        | 8  |
| 5  | 544.297704        | 272.652490      |                |                  | 526.287139        | 263.647208       | S    | <b>1195.588818</b> | <b>598.298047</b> | 1178.562269       | 589.784773       | <b>1177.578253</b> | 589.292764        | 7  |
| 6  | 681.356616        | 341.181946      |                |                  | 663.346051        | 332.176664       | H    | <b>1108.556790</b> | 554.782033        | 1091.530241       | 546.268759       | 1090.546225        | 545.776751        | 6  |
| 7  | 810.399209        | 405.703243      |                |                  | 792.388644        | 396.697960       | E    | <b>971.497878</b>  | 486.252577        | 954.471329        | 477.739303       | <b>953.487313</b>  | 477.247295        | 5  |
| 8  | <b>925.426152</b> | 463.216714      |                |                  | 907.415587        | 454.211432       | D    | <b>842.455285</b>  | 421.731281        | <b>825.428736</b> | 413.218006       | 824.444720         | 412.725998        | 4  |
| 9  | 1038.510216       | 519.758746      |                |                  | 1020.499651       | 510.753463       | L    | <b>727.428342</b>  | <b>364.217809</b> | <b>710.401793</b> | 355.704535       |                    |                   | 3  |
| 10 | 1477.735542       | 739.371409      | 1460.708993    | 730.858135       | 1459.724977       | 730.366127       | Q    | <b>614.344278</b>  | 307.675777        | <b>597.317729</b> | 299.162503       |                    |                   | 2  |
| 11 |                   |                 |                |                  |                   |                  | R    | <b>175.118952</b>  | 88.063114         | 158.092403        | 79.549839        |                    |                   | 1  |

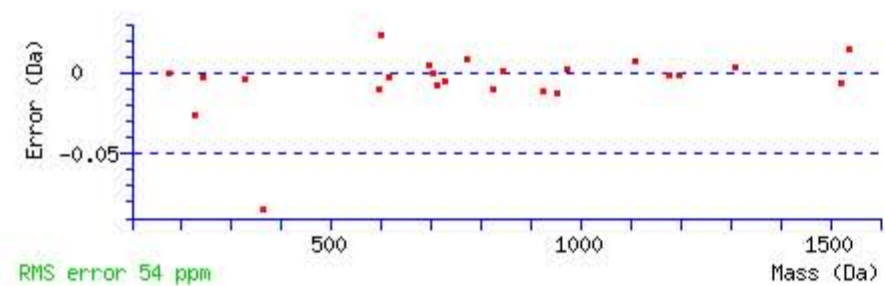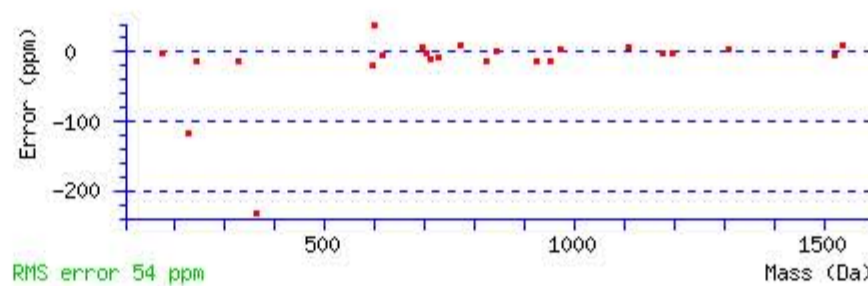

NCBI BLAST search of [IETISHEDLQR](#)

(Parameters: blastp, nr protein database, expect=20000, no filter, PAM30)

Other BLAST [web gateways](#)

All matches to this query

| Score | Mr(calc):   | Delta     | Sequence                      |
|-------|-------------|-----------|-------------------------------|
| 53.7  | 1650.839920 | -0.002548 | <a href="#">IETISHEDLQR</a>   |
| 13.6  | 1650.855881 | -0.018509 | <a href="#">MQRTGGGAPRPGR</a> |
| 8.0   | 1650.833389 | 0.003983  | <a href="#">QQLIHIMATNR</a>   |
| 0.6   | 1650.833389 | 0.003983  | <a href="#">QQLIHIMATNR</a>   |
| 0.3   | 1650.822144 | 0.015228  | <a href="#">QSALNTEKMYR</a>   |



# MASCOT Search Results

## Peptide View

MS/MS Fragmentation of **IQALSLCSDQQSHLEFR**

Found in **PROS\_HUMAN**, Vitamin K-dependent protein S OS=Homo sapiens GN=PROS1 PE=1 SV=1

Match to Query 61547: 2342.170932 from(781.730920,3+) rtinseconds(2175) index(79768)

Title: Locus:1.1.1.2971.22 File:"2013-07-02 CLN FXIII 60 min 1st FT.wiff"

Data file C:\Program Files (x86)\Matrix Science\Mascot Daemon\mgf4 FXIII 60 min 1st\mascot\_daemon\_merge.mgf

Click mouse within plot area to zoom in by factor of two about that point

Or, Plot from  to  Da

Label all possible matches  Label matches used for scoring

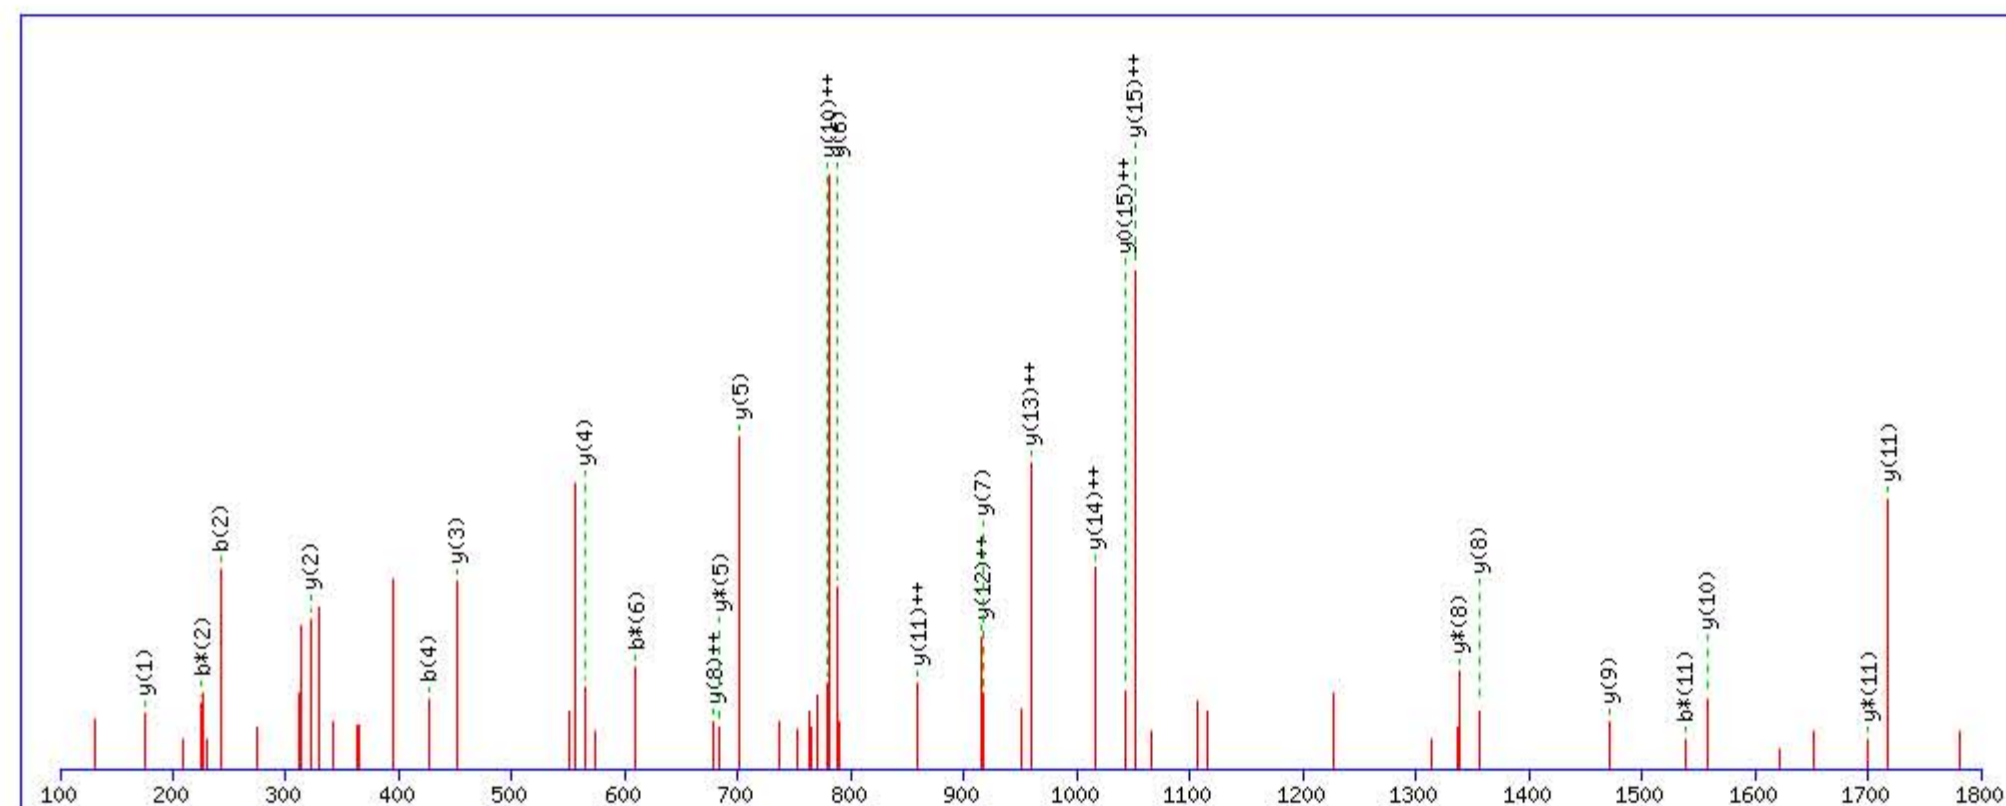

Monoisotopic mass of neutral peptide Mr(calc): 2342.151108

Fixed modifications: Carbamidomethyl (C) (apply to specified residues or termini only)

Variable modifications:

Q10 : Biotin:Thermo-21345 (Q)

Ions Score: 76 Expect: 8.6e-007

Matches : 27/178 fragment ions using 42 most intense peaks [\(help\)](#)

| #  | b                 | b <sup>++</sup> | b <sup>+</sup>     | b <sup>+++</sup> | b <sup>0</sup> | b <sup>0++</sup> | Seq. | y                  | y <sup>++</sup>    | y <sup>+</sup>     | y <sup>+++</sup> | y <sup>0</sup> | y <sup>0++</sup>   | #  |
|----|-------------------|-----------------|--------------------|------------------|----------------|------------------|------|--------------------|--------------------|--------------------|------------------|----------------|--------------------|----|
| 1  | 114.091340        | 57.549308       |                    |                  |                |                  | I    |                    |                    |                    |                  |                |                    | 17 |
| 2  | <b>242.149918</b> | 121.578597      | <b>225.123369</b>  | 113.065323       |                |                  | Q    | 2230.074335        | 1115.540805        | 2213.047786        | 1107.027531      | 2212.063770    | 1106.535523        | 16 |
| 3  | 313.187032        | 157.097154      | 296.160483         | 148.583879       |                |                  | A    | 2102.015757        | <b>1051.511516</b> | 2084.989208        | 1042.998242      | 2084.005192    | <b>1042.506234</b> | 15 |
| 4  | <b>426.271096</b> | 213.639186      | 409.244547         | 205.125912       |                |                  | L    | 2030.978643        | <b>1015.992959</b> | 2013.952094        | 1007.479685      | 2012.968078    | 1006.987677        | 14 |
| 5  | 513.303124        | 257.155200      | 496.276575         | 248.641926       | 495.292559     | 248.149918       | S    | 1917.894579        | <b>959.450927</b>  | 1900.868030        | 950.937653       | 1899.884014    | 950.445645         | 13 |
| 6  | 626.387188        | 313.697232      | <b>609.360639</b>  | 305.183958       | 608.376623     | 304.691950       | L    | 1830.862551        | <b>915.934913</b>  | 1813.836002        | 907.421639       | 1812.851986    | 906.929631         | 12 |
| 7  | 786.417837        | 393.712557      | 769.391288         | 385.199282       | 768.407272     | 384.707274       | C    | <b>1717.778487</b> | <b>859.392881</b>  | <b>1700.751938</b> | 850.879607       | 1699.767922    | 850.387599         | 11 |
| 8  | 873.449865        | 437.228571      | 856.423316         | 428.715296       | 855.439300     | 428.223288       | S    | <b>1557.747838</b> | <b>779.377557</b>  | 1540.721289        | 770.864282       | 1539.737273    | 770.372274         | 10 |
| 9  | 988.476808        | 494.742042      | 971.450259         | 486.228768       | 970.466243     | 485.736760       | D    | <b>1470.715810</b> | 735.861543         | 1453.689261        | 727.348268       | 1452.705245    | 726.856260         | 9  |
| 10 | 1427.702134       | 714.354705      | 1410.675585        | 705.841431       | 1409.691569    | 705.349422       | Q    | <b>1355.688867</b> | <b>678.348071</b>  | <b>1338.662318</b> | 669.834797       | 1337.678302    | 669.342789         | 8  |
| 11 | 1555.760712       | 778.383994      | <b>1538.734163</b> | 769.870720       | 1537.750147    | 769.378712       | Q    | <b>916.463541</b>  | 458.735408         | 899.436992         | 450.222134       | 898.452976     | 449.730126         | 7  |
| 12 | 1642.792740       | 821.900008      | 1625.766191        | 813.386734       | 1624.782175    | 812.894726       | S    | <b>788.404963</b>  | 394.706119         | 771.378414         | 386.192845       | 770.394398     | 385.700837         | 6  |
| 13 | 1779.851652       | 890.429464      | 1762.825103        | 881.916190       | 1761.841087    | 881.424182       | H    | <b>701.372935</b>  | 351.190105         | <b>684.346386</b>  | 342.676831       | 683.362370     | 342.184823         | 5  |
| 14 | 1892.935716       | 946.971496      | 1875.909167        | 938.458222       | 1874.925151    | 937.966213       | L    | <b>564.314023</b>  | 282.660649         | 547.287474         | 274.147375       | 546.303458     | 273.655367         | 4  |
| 15 | 2021.978309       | 1011.492793     | 2004.951760        | 1002.979518      | 2003.967744    | 1002.487510      | E    | <b>451.229959</b>  | 226.118617         | 434.203410         | 217.605343       | 433.219394     | 217.113335         | 3  |
| 16 | 2169.046723       | 1085.026999     | 2152.020174        | 1076.513725      | 2151.036158    | 1076.021717      | F    | <b>322.187366</b>  | 161.597321         | 305.160817         | 153.084046       |                |                    | 2  |
| 17 |                   |                 |                    |                  |                |                  | R    | <b>175.118952</b>  | 88.063114          | 158.092403         | 79.549839        |                |                    | 1  |

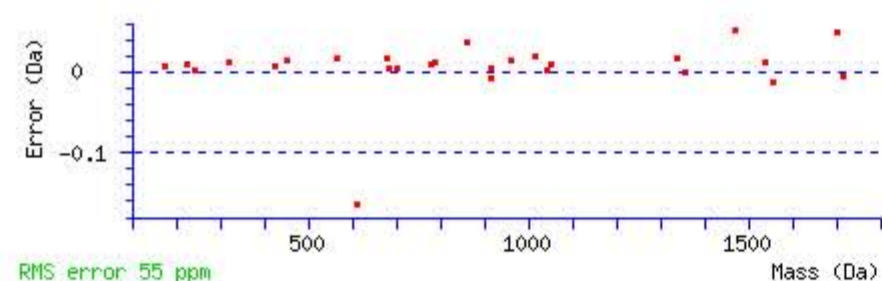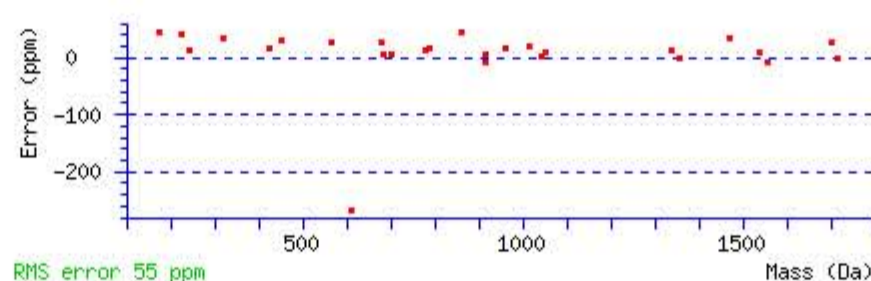

NCBI BLAST search of **IQALSLCSDQQSHLEFR**

(Parameters: blastp, nr protein database, expect=20000, no filter, PAM30)

Other BLAST [web gateways](#)

## All matches to this query

| Score | Mr(calc):   | Delta    | Sequence                          |
|-------|-------------|----------|-----------------------------------|
| 75.6  | 2342.151108 | 0.019824 | <a href="#">IQALSLCSDQQSHLEFR</a> |
| 75.6  | 2342.151108 | 0.019824 | <a href="#">IQALSLCSDQQSHLEFR</a> |
| 8.5   | 2342.151108 | 0.019824 | <a href="#">IQALSLCSDQQSHLEFR</a> |



# MASCOT Search Results

## Peptide View

MS/MS Fragmentation of **IQALSLCSDQQSHLEFR**

Found in **PROS\_HUMAN**, Vitamin K-dependent protein S OS=Homo sapiens GN=PROS1 PE=1 SV=1

Match to Query 61548: 2342.170932 from(781.730920,3+) rtinseconds(2166) index(79695)

Title: Locus:1.1.1.2968.24 File:"2013-07-02 CLN FXIII 60 min 1st FT.wiff"

Data file C:\Program Files (x86)\Matrix Science\Mascot Daemon\mgf4 FXIII 60 min 1st\mascot\_daemon\_merge.mgf

Click mouse within plot area to zoom in by factor of two about that point

Or, Plot from  to  Da

Label all possible matches  Label matches used for scoring

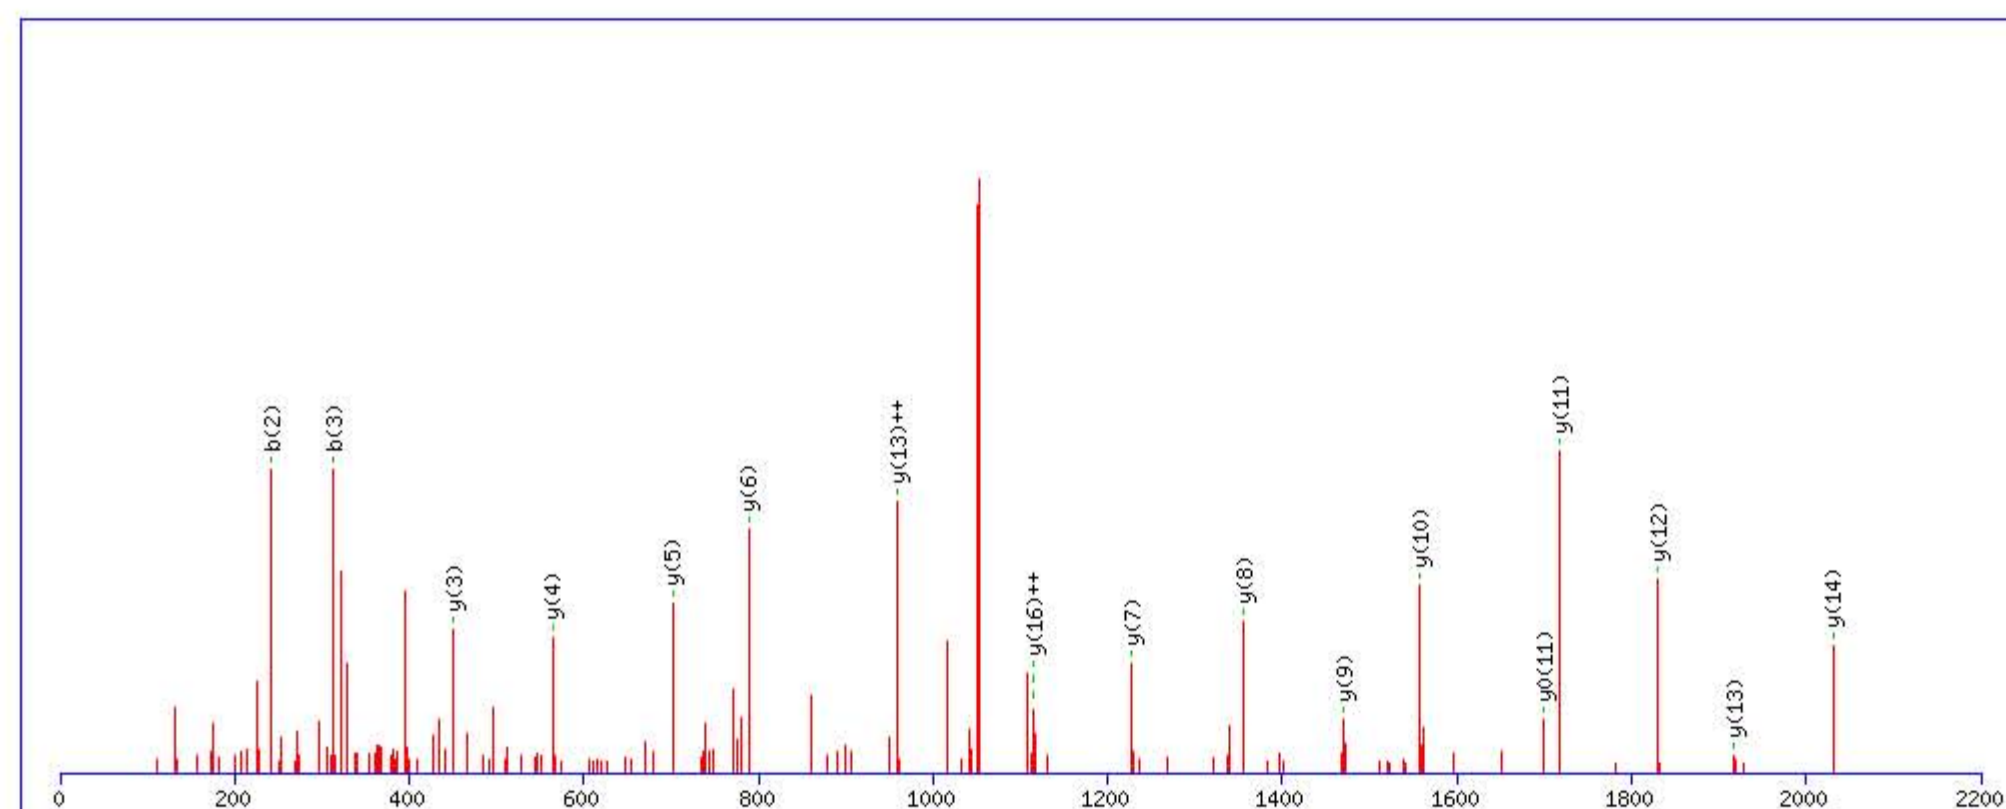

Monoisotopic mass of neutral peptide Mr(calc): 2342.151108

Fixed modifications: Carbamidomethyl (C) (apply to specified residues or termini only)

Variable modifications:

Q11 : Biotin:Thermo-21345 (Q)

Ions Score: 107 Expect: 1.8e-010

Matches : 17/178 fragment ions using 20 most intense peaks [\(help\)](#)

| #  | b                 | b <sup>++</sup> | b <sup>*</sup> | b <sup>*++</sup> | b <sup>0</sup> | b <sup>0++</sup> | Seq. | y                  | y <sup>++</sup>    | y <sup>*</sup> | y <sup>*++</sup> | y <sup>0</sup>     | y <sup>0++</sup> | #  |
|----|-------------------|-----------------|----------------|------------------|----------------|------------------|------|--------------------|--------------------|----------------|------------------|--------------------|------------------|----|
| 1  | 114.091340        | 57.549308       |                |                  |                |                  | I    |                    |                    |                |                  |                    |                  | 17 |
| 2  | <b>242.149918</b> | 121.578597      | 225.123369     | 113.065323       |                |                  | Q    | 2230.074335        | <b>1115.540805</b> | 2213.047786    | 1107.027531      | 2212.063770        | 1106.535523      | 16 |
| 3  | <b>313.187032</b> | 157.097154      | 296.160483     | 148.583879       |                |                  | A    | 2102.015757        | 1051.511516        | 2084.989208    | 1042.998242      | 2084.005192        | 1042.506234      | 15 |
| 4  | 426.271096        | 213.639186      | 409.244547     | 205.125912       |                |                  | L    | <b>2030.978643</b> | 1015.992959        | 2013.952094    | 1007.479685      | 2012.968078        | 1006.987677      | 14 |
| 5  | 513.303124        | 257.155200      | 496.276575     | 248.641926       | 495.292559     | 248.149918       | S    | <b>1917.894579</b> | <b>959.450927</b>  | 1900.868030    | 950.937653       | 1899.884014        | 950.445645       | 13 |
| 6  | 626.387188        | 313.697232      | 609.360639     | 305.183958       | 608.376623     | 304.691950       | L    | <b>1830.862551</b> | 915.934913         | 1813.836002    | 907.421639       | 1812.851986        | 906.929631       | 12 |
| 7  | 786.417837        | 393.712557      | 769.391288     | 385.199282       | 768.407272     | 384.707274       | C    | <b>1717.778487</b> | 859.392881         | 1700.751938    | 850.879607       | <b>1699.767922</b> | 850.387599       | 11 |
| 8  | 873.449865        | 437.228571      | 856.423316     | 428.715296       | 855.439300     | 428.223288       | S    | <b>1557.747838</b> | 779.377557         | 1540.721289    | 770.864282       | 1539.737273        | 770.372274       | 10 |
| 9  | 988.476808        | 494.742042      | 971.450259     | 486.228768       | 970.466243     | 485.736760       | D    | <b>1470.715810</b> | 735.861543         | 1453.689261    | 727.348268       | 1452.705245        | 726.856260       | 9  |
| 10 | 1116.535386       | 558.771331      | 1099.508837    | 550.258057       | 1098.524821    | 549.766049       | Q    | <b>1355.688867</b> | 678.348071         | 1338.662318    | 669.834797       | 1337.678302        | 669.342789       | 8  |
| 11 | 1555.760712       | 778.383994      | 1538.734163    | 769.870720       | 1537.750147    | 769.378712       | Q    | <b>1227.630289</b> | 614.318782         | 1210.603740    | 605.805508       | 1209.619724        | 605.313500       | 7  |
| 12 | 1642.792740       | 821.900008      | 1625.766191    | 813.386734       | 1624.782175    | 812.894726       | S    | <b>788.404963</b>  | 394.706119         | 771.378414     | 386.192845       | 770.394398         | 385.700837       | 6  |
| 13 | 1779.851652       | 890.429464      | 1762.825103    | 881.916190       | 1761.841087    | 881.424182       | H    | <b>701.372935</b>  | 351.190105         | 684.346386     | 342.676831       | 683.362370         | 342.184823       | 5  |
| 14 | 1892.935716       | 946.971496      | 1875.909167    | 938.458222       | 1874.925151    | 937.966213       | L    | <b>564.314023</b>  | 282.660649         | 547.287474     | 274.147375       | 546.303458         | 273.655367       | 4  |
| 15 | 2021.978309       | 1011.492793     | 2004.951760    | 1002.979518      | 2003.967744    | 1002.487510      | E    | <b>451.229959</b>  | 226.118617         | 434.203410     | 217.605343       | 433.219394         | 217.113335       | 3  |
| 16 | 2169.046723       | 1085.026999     | 2152.020174    | 1076.513725      | 2151.036158    | 1076.021717      | F    | 322.187366         | 161.597321         | 305.160817     | 153.084046       |                    |                  | 2  |
| 17 |                   |                 |                |                  |                |                  | R    | 175.118952         | 88.063114          | 158.092403     | 79.549839        |                    |                  | 1  |

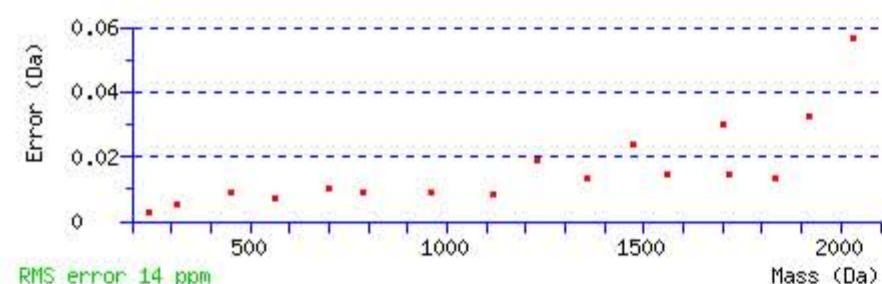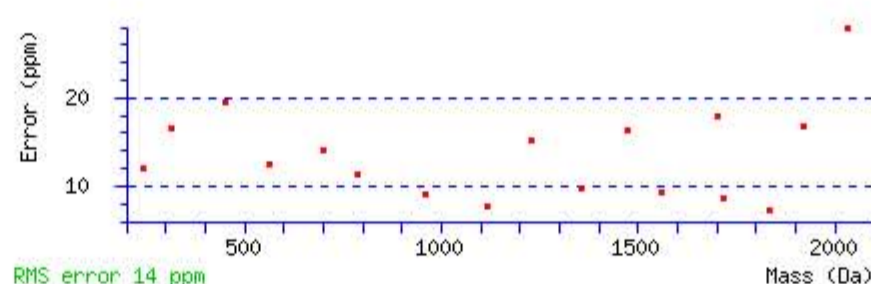

NCBI BLAST search of [IQALSLCSDQQSHLEFR](#)

(Parameters: blastp, nr protein database, expect=20000, no filter, PAM30)

Other BLAST [web gateways](#)

All matches to this query

| Score | Mr(calc):   | Delta     | Sequence                             |
|-------|-------------|-----------|--------------------------------------|
| 106.8 | 2342.151108 | 0.019824  | <a href="#">IQALSLCSDQQSHLEFR</a>    |
| 94.1  | 2342.151108 | 0.019824  | <a href="#">IQALSLCSDQQSHLEFR</a>    |
| 6.7   | 2342.151108 | 0.019824  | <a href="#">IQALSLCSDQQSHLEFR</a>    |
| 2.9   | 2342.197372 | -0.026440 | <a href="#">LVAAASPSAMLSQSLDLSDR</a> |



# MASCOT Search Results

## Peptide View

MS/MS Fragmentation of **QCVPHDQCACGVLTSK**

Found in **PROZ\_HUMAN**, Vitamin K-dependent protein Z OS=Homo sapiens GN=PROZ PE=1 SV=2

Match to Query 60653: 2299.039152 from(767.353660,3+) rtinseconds(1583) index(57512)

Title: Locus:1.1.1.2857.10 File:"2013-07-02 CLN FXIII 60 min 1st F 4.wiff"

Data file C:\Program Files (x86)\Matrix Science\Mascot Daemon\mgf4 FXIII 60 min 1st\mascot\_daemon\_merge.mgf

Click mouse within plot area to zoom in by factor of two about that point

Or, Plot from  to  Da

Label all possible matches  Label matches used for scoring

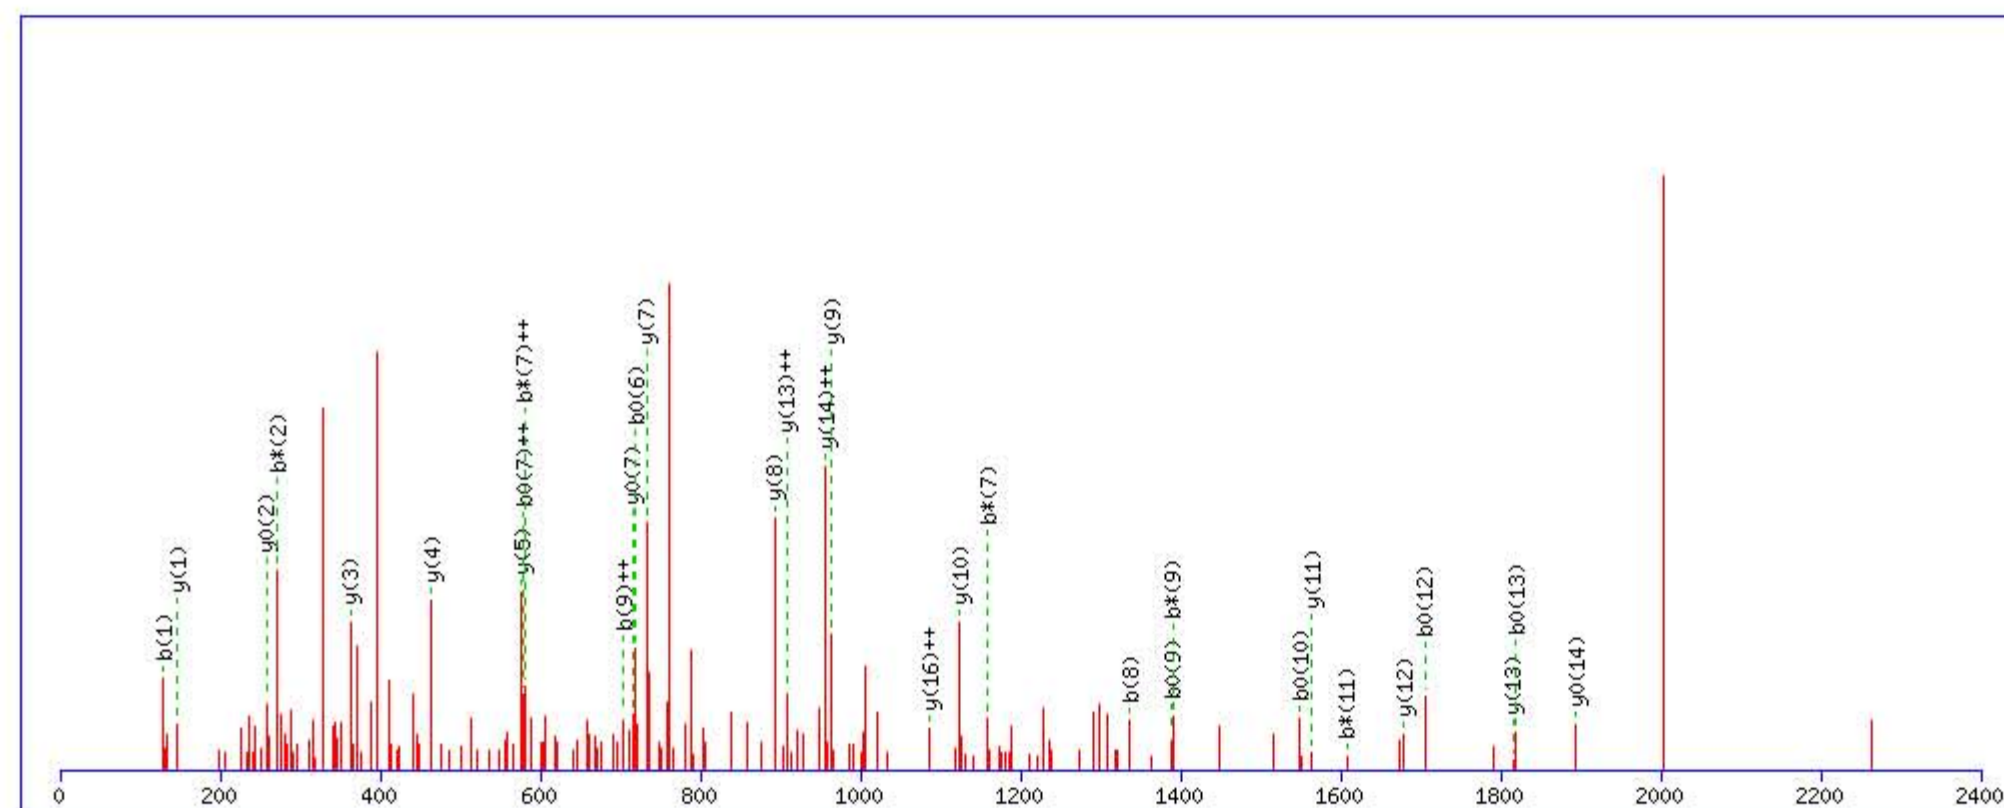

Monoisotopic mass of neutral peptide Mr(calc): 2299.021790

Fixed modifications: Carbamidomethyl (C) (apply to specified residues or termini only)

Variable modifications:

Q7 : Biotin:Thermo-21345 (Q)

Ions Score: 60 Expect: 1e-005

Matches : 31/180 fragment ions using 53 most intense peaks [\(help\)](#)

| #  | b                  | b <sup>++</sup>   | b <sup>*</sup>     | b <sup>*++</sup>  | b <sup>0</sup>     | b <sup>0++</sup>  | Seq. | y                  | y <sup>++</sup>    | y <sup>*</sup> | y <sup>*++</sup> | y <sup>0</sup>     | y <sup>0++</sup> | #  |
|----|--------------------|-------------------|--------------------|-------------------|--------------------|-------------------|------|--------------------|--------------------|----------------|------------------|--------------------|------------------|----|
| 1  | <b>129.065854</b>  | 65.036565         | 112.039305         | 56.523291         |                    |                   | Q    |                    |                    |                |                  |                    |                  | 17 |
| 2  | 289.096503         | 145.051890        | <b>272.069954</b>  | 136.538615        |                    |                   | C    | 2171.970466        | <b>1086.488871</b> | 2154.943917    | 1077.975596      | 2153.959901        | 1077.483588      | 16 |
| 3  | 388.164917         | 194.586097        | 371.138368         | 186.072822        |                    |                   | V    | 2011.939817        | 1006.473547        | 1994.913268    | 997.960272       | 1993.929252        | 997.468264       | 15 |
| 4  | 485.217681         | 243.112479        | 468.191132         | 234.599204        |                    |                   | P    | 1912.871403        | <b>956.939340</b>  | 1895.844854    | 948.426065       | <b>1894.860838</b> | 947.934057       | 14 |
| 5  | 622.276593         | 311.641935        | 605.250044         | 303.128660        |                    |                   | H    | <b>1815.818639</b> | <b>908.412958</b>  | 1798.792090    | 899.899683       | 1797.808074        | 899.407675       | 13 |
| 6  | 737.303536         | 369.155406        | 720.276987         | 360.642132        | <b>719.292971</b>  | 360.150124        | D    | <b>1678.759727</b> | 839.883502         | 1661.733178    | 831.370227       | 1660.749162        | 830.878219       | 12 |
| 7  | 1176.528862        | 588.768069        | <b>1159.502313</b> | <b>580.254795</b> | 1158.518297        | <b>579.762786</b> | Q    | <b>1563.732784</b> | 782.370030         | 1546.706235    | 773.856756       | 1545.722219        | 773.364748       | 11 |
| 8  | <b>1336.559511</b> | 668.783393        | 1319.532962        | 660.270119        | 1318.548946        | 659.778111        | C    | <b>1124.507458</b> | 562.757367         | 1107.480909    | 554.244093       | 1106.496893        | 553.752085       | 10 |
| 9  | 1407.596625        | <b>704.301950</b> | <b>1390.570076</b> | 695.788676        | <b>1389.586060</b> | 695.296668        | A    | <b>964.476809</b>  | 482.742043         | 947.450260     | 474.228768       | 946.466244         | 473.736760       | 9  |
| 10 | 1567.627274        | 784.317275        | 1550.600725        | 775.804001        | <b>1549.616709</b> | 775.311992        | C    | <b>893.439695</b>  | 447.223486         | 876.413146     | 438.710211       | 875.429130         | 438.218203       | 8  |
| 11 | 1624.648738        | 812.828007        | <b>1607.622189</b> | 804.314732        | 1606.638173        | 803.822724        | G    | <b>733.409046</b>  | 367.208161         | 716.382497     | 358.694887       | <b>715.398481</b>  | 358.202879       | 7  |
| 12 | 1723.717152        | 862.362214        | 1706.690603        | 853.848940        | <b>1705.706587</b> | 853.356931        | V    | 676.387582         | 338.697429         | 659.361033     | 330.184155       | 658.377017         | 329.692147       | 6  |
| 13 | 1836.801216        | 918.904246        | 1819.774667        | 910.390971        | <b>1818.790651</b> | 909.898963        | L    | <b>577.319168</b>  | 289.163222         | 560.292619     | 280.649948       | 559.308603         | 280.157940       | 5  |
| 14 | 1937.848895        | 969.428085        | 1920.822346        | 960.914811        | 1919.838330        | 960.422803        | T    | <b>464.235104</b>  | 232.621190         | 447.208555     | 224.107916       | 446.224539         | 223.615908       | 4  |
| 15 | 2024.880923        | 1012.944100       | 2007.854374        | 1004.430825       | 2006.870358        | 1003.938817       | S    | <b>363.187425</b>  | 182.097351         | 346.160876     | 173.584076       | 345.176860         | 173.092068       | 3  |
| 16 | 2153.923516        | 1077.465396       | 2136.896967        | 1068.952121       | 2135.912951        | 1068.460113       | E    | 276.155397         | 138.581337         | 259.128848     | 130.068062       | <b>258.144832</b>  | 129.576054       | 2  |
| 17 |                    |                   |                    |                   |                    |                   | K    | <b>147.112804</b>  | 74.060040          | 130.086255     | 65.546765        |                    |                  | 1  |

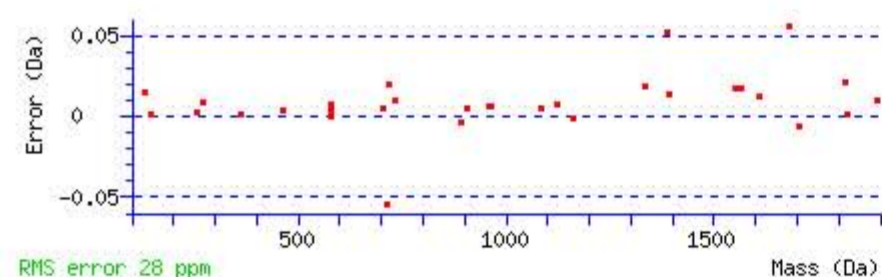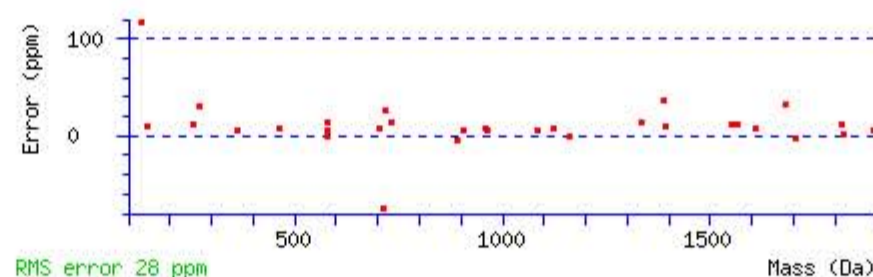

NCBI BLAST search of **QCVPHDQCACGVLTSK**

(Parameters: blastp, nr protein database, expect=20000, no filter, PAM30)

Other BLAST [web gateways](#)

## All matches to this query

| Score | Mr(calc):   | Delta    | Sequence                         |
|-------|-------------|----------|----------------------------------|
| 60.4  | 2299.021790 | 0.017362 | <a href="#">QCVPHDQCACGVLTSK</a> |
| 25.6  | 2299.021790 | 0.017362 | <a href="#">QCVPHDQCACGVLTSK</a> |



# MASCOT SCIENCE Mascot Search Results

## Peptide View

MS/MS Fragmentation of **GQYCYELDEK**

Found in **VTNC\_HUMAN**, Vitronectin OS=Homo sapiens GN=VTN PE=1 SV=1

Match to Query 42765: 1614.724568 from(808.369560,2+) rtinseconds(1857) index(59425)

Title: Locus:1.1.1.2952.21 File:"2013-07-02 CLN FXIII 60 min 1st F 4.wiff"

Data file C:\Program Files (x86)\Matrix Science\Mascot Daemon\mgf4 FXIII 60 min 1st\mascot\_daemon\_merge.mgf

Click mouse within plot area to zoom in by factor of two about that point

Or, Plot from  to  Da

Label all possible matches  Label matches used for scoring

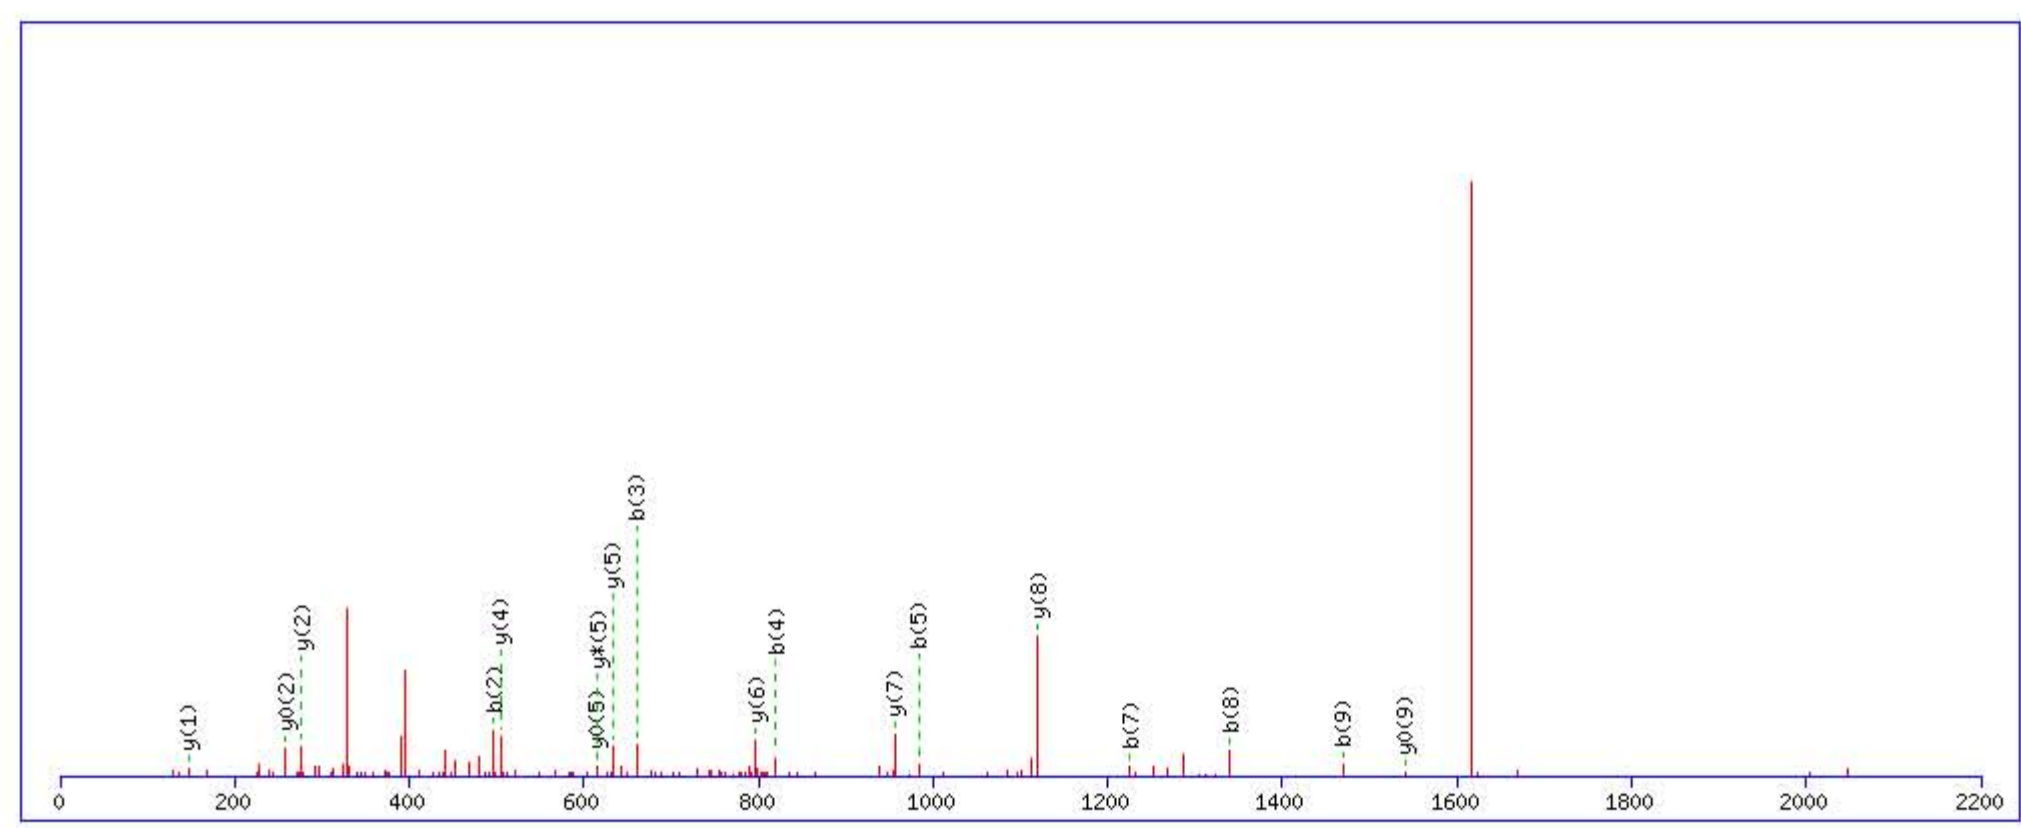

Monoisotopic mass of neutral peptide Mr(calc): 1614.705795

Fixed modifications: Carbamidomethyl (C) (apply to specified residues or termini only)

Variable modifications:

Q2 : Biotin:Thermo-21345 (Q)

Ions Score: 51 Expect: 4.6e-005

Matches : 18/94 fragment ions using 26 most intense peaks [\(help\)](#)

| #  | b                  | b <sup>++</sup> | b <sup>*</sup> | b <sup>*++</sup> | b <sup>0</sup> | b <sup>0++</sup> | Seq. | y                  | y <sup>++</sup> | y <sup>*</sup>    | y <sup>*++</sup> | y <sup>0</sup>     | y <sup>0++</sup> | #  |
|----|--------------------|-----------------|----------------|------------------|----------------|------------------|------|--------------------|-----------------|-------------------|------------------|--------------------|------------------|----|
| 1  | 58.028740          | 29.518008       |                |                  |                |                  | G    |                    |                 |                   |                  |                    |                  | 10 |
| 2  | <b>497.254066</b>  | 249.130671      | 480.227517     | 240.617397       |                |                  | Q    | 1558.691630        | 779.849453      | 1541.665081       | 771.336179       | <b>1540.681065</b> | 770.844171       | 9  |
| 3  | <b>660.317395</b>  | 330.662336      | 643.290846     | 322.149061       |                |                  | Y    | <b>1119.466304</b> | 560.236790      | 1102.439755       | 551.723516       | 1101.455739        | 551.231508       | 8  |
| 4  | <b>820.348044</b>  | 410.677660      | 803.321495     | 402.164386       |                |                  | C    | <b>956.402975</b>  | 478.705126      | 939.376426        | 470.191851       | 938.392410         | 469.699843       | 7  |
| 5  | <b>983.411373</b>  | 492.209325      | 966.384824     | 483.696050       |                |                  | Y    | <b>796.372326</b>  | 398.689801      | 779.345777        | 390.176527       | 778.361761         | 389.684519       | 6  |
| 6  | 1112.453966        | 556.730621      | 1095.427417    | 548.217347       | 1094.443401    | 547.725339       | E    | <b>633.308997</b>  | 317.158137      | <b>616.282448</b> | 308.644862       | <b>615.298432</b>  | 308.152854       | 5  |
| 7  | <b>1225.538030</b> | 613.272653      | 1208.511481    | 604.759379       | 1207.527465    | 604.267371       | L    | <b>504.266404</b>  | 252.636840      | 487.239855        | 244.123566       | 486.255839         | 243.631558       | 4  |
| 8  | <b>1340.564973</b> | 670.786125      | 1323.538424    | 662.272850       | 1322.554408    | 661.780842       | D    | 391.182340         | 196.094808      | 374.155791        | 187.581534       | 373.171775         | 187.089526       | 3  |
| 9  | <b>1469.607566</b> | 735.307421      | 1452.581017    | 726.794147       | 1451.597001    | 726.302139       | E    | <b>276.155397</b>  | 138.581337      | 259.128848        | 130.068062       | <b>258.144832</b>  | 129.576054       | 2  |
| 10 |                    |                 |                |                  |                |                  | K    | <b>147.112804</b>  | 74.060040       | 130.086255        | 65.546765        |                    |                  | 1  |

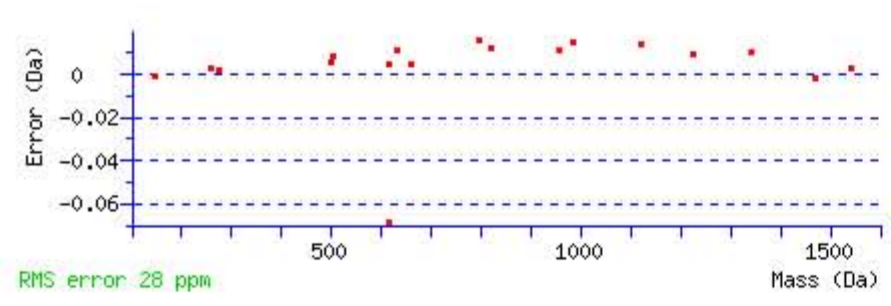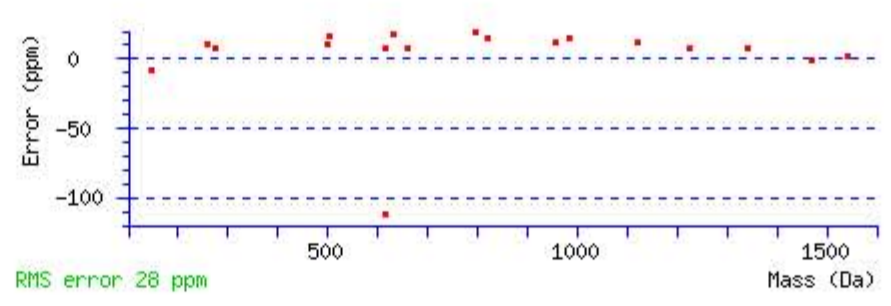

NCBI BLAST search of **GQYCYELDEK**

(Parameters: blastp, nr protein database, expect=20000, no filter, PAM30)

Other BLAST [web gateways](#)

### All matches to this query

| Score | Mr(calc):   | Delta     | Sequence                         |
|-------|-------------|-----------|----------------------------------|
| 51.0  | 1614.705795 | 0.018773  | <a href="#">GQYCYELDEK</a>       |
| 13.9  | 1614.748520 | -0.023952 | <a href="#">TRAPAEEGAEGPSDTK</a> |
| 5.3   | 1614.717010 | 0.007558  | <a href="#">EYFRMELMHAEK</a>     |
| 1.0   | 1614.748535 | -0.023967 | <a href="#">VDNSSLTGESEPQPR</a>  |



# MASCOT SEARCH RESULTS

## Peptide View

MS/MS Fragmentation of **DWHGVPGQVDAAMAGR**  
 Found in **VTNC\_HUMAN**, Vitronectin OS=Homo sapiens GN=VTN PE=1 SV=1

Match to Query 52383: 1976.948952 from(659.990260,3+) rtinseconds(2147) index(43046)  
 Title: Locus:1.1.1.3031.21 File:"2013-07-02 CLN FXIII 60 min 1st F 3.wiff"  
 Data file C:\Program Files (x86)\Matrix Science\Mascot Daemon\mgf4 FXIII 60 min 1st\mascot\_daemon\_merge.mgf

Click mouse within plot area to zoom in by factor of two about that point

Or, Plot from  to  Da   
 Label all possible matches  Label matches used for scoring

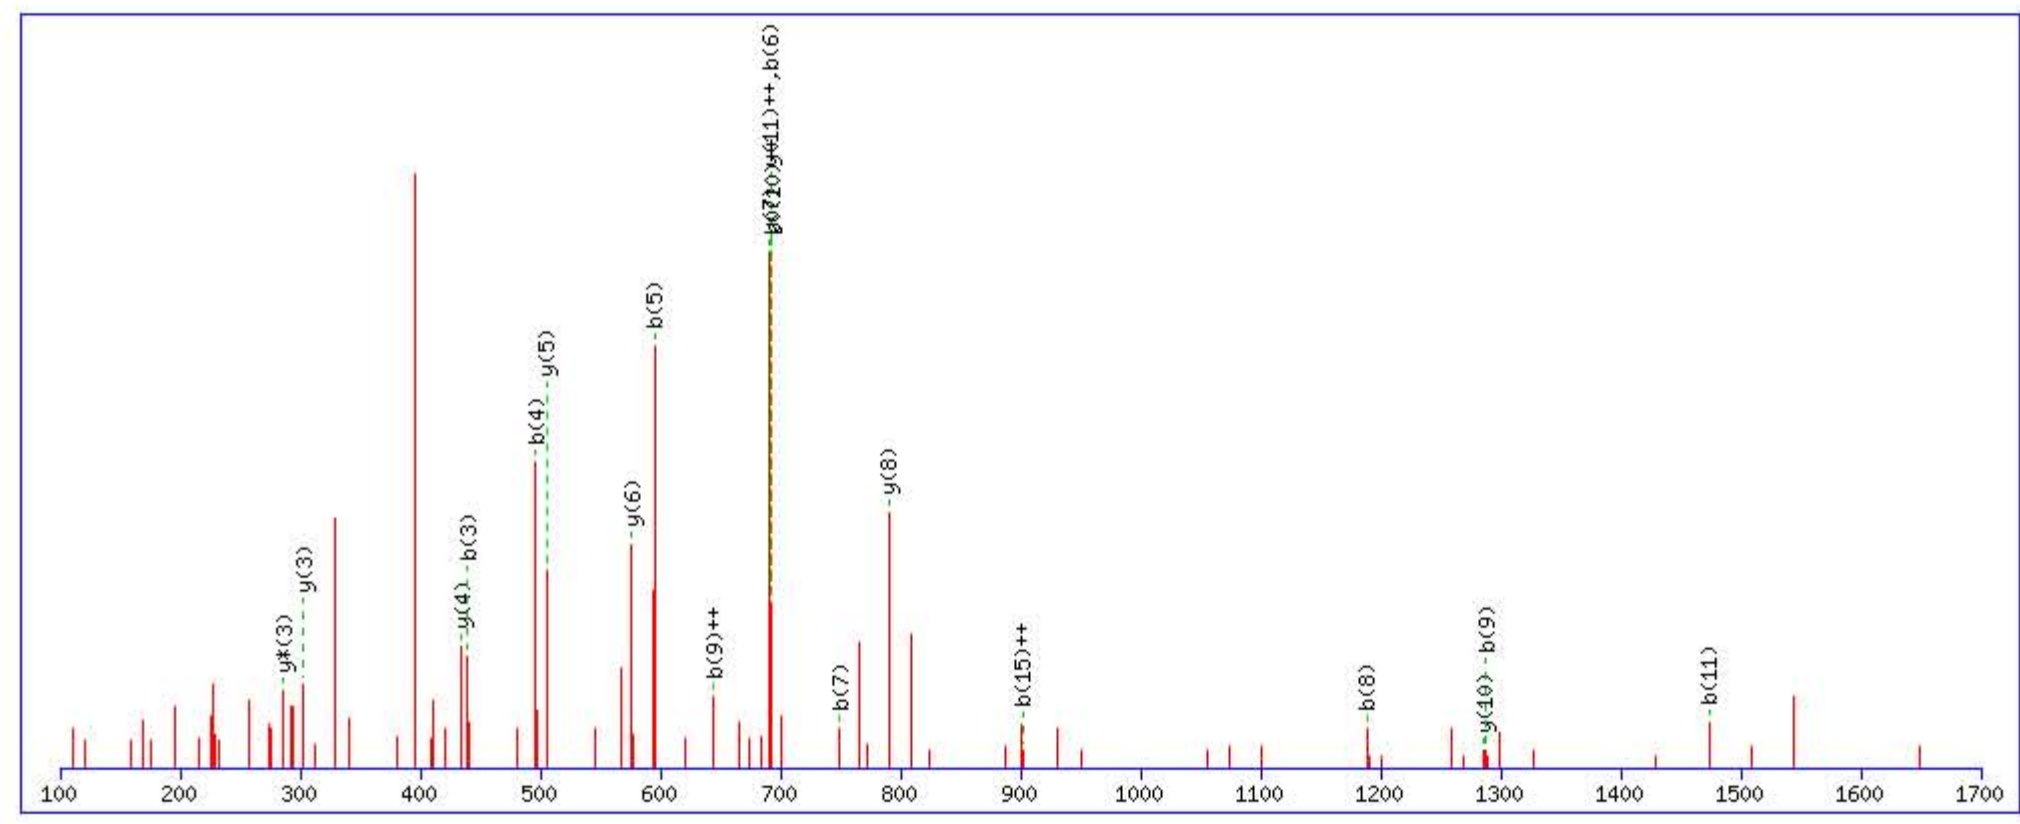

Monoisotopic mass of neutral peptide  $M_r(\text{calc})$ : 1976.934937  
 Fixed modifications: Carbamidomethyl (C) (apply to specified residues or termini only)  
 Variable modifications:  
 Q8 : Biotin:Thermo-21345 (Q)  
 Ions Score: 34 Expect: 0.0077  
 Matches : 20/154 fragment ions using 51 most intense peaks [\(help\)](#)

| #  | b                  | b <sup>++</sup>   | b <sup>*</sup> | b <sup>*++</sup> | b <sup>0</sup> | b <sup>0++</sup>  | Seq. | y                  | y <sup>++</sup>   | y <sup>*</sup>    | y <sup>*++</sup> | y <sup>0</sup> | y <sup>0++</sup> | #  |
|----|--------------------|-------------------|----------------|------------------|----------------|-------------------|------|--------------------|-------------------|-------------------|------------------|----------------|------------------|----|
| 1  | 116.034219         | 58.520748         |                |                  | 98.023654      | 49.515465         | D    |                    |                   |                   |                  |                |                  | 16 |
| 2  | 302.113532         | 151.560404        |                |                  | 284.102967     | 142.555122        | W    | 1862.915257        | 931.961266        | 1845.888708       | 923.447992       | 1844.904692    | 922.955984       | 15 |
| 3  | <b>439.172444</b>  | 220.089860        |                |                  | 421.161879     | 211.084577        | H    | 1676.835944        | 838.921610        | 1659.809395       | 830.408336       | 1658.825379    | 829.916327       | 14 |
| 4  | <b>496.193908</b>  | 248.600592        |                |                  | 478.183343     | 239.595309        | G    | 1539.777032        | 770.392154        | 1522.750483       | 761.878880       | 1521.766467    | 761.386871       | 13 |
| 5  | <b>595.262322</b>  | 298.134799        |                |                  | 577.251757     | 289.129517        | V    | 1482.755568        | 741.881422        | 1465.729019       | 733.368148       | 1464.745003    | 732.876140       | 12 |
| 6  | <b>692.315086</b>  | 346.661181        |                |                  | 674.304521     | 337.655899        | P    | 1383.687154        | <b>692.347215</b> | 1366.660605       | 683.833941       | 1365.676589    | 683.341932       | 11 |
| 7  | <b>749.336550</b>  | 375.171913        |                |                  | 731.325985     | 366.166631        | G    | <b>1286.634390</b> | 643.820833        | 1269.607841       | 635.307559       | 1268.623825    | 634.815550       | 10 |
| 8  | <b>1188.561876</b> | 594.784576        | 1171.535327    | 586.271302       | 1170.551311    | 585.779293        | Q    | 1229.612926        | 615.310101        | 1212.586377       | 606.796827       | 1211.602361    | 606.304819       | 9  |
| 9  | <b>1287.630290</b> | <b>644.318783</b> | 1270.603741    | 635.805509       | 1269.619725    | 635.313501        | V    | <b>790.387600</b>  | 395.697438        | 773.361051        | 387.184164       | 772.377035     | 386.692156       | 8  |
| 10 | 1402.657233        | 701.832255        | 1385.630684    | 693.318980       | 1384.646668    | <b>692.826972</b> | D    | <b>691.319186</b>  | 346.163231        | 674.292637        | 337.649956       | 673.308621     | 337.157948       | 7  |
| 11 | <b>1473.694347</b> | 737.350812        | 1456.667798    | 728.837537       | 1455.683782    | 728.345529        | A    | <b>576.292243</b>  | 288.649759        | 559.265694        | 280.136485       |                |                  | 6  |
| 12 | 1544.731461        | 772.869369        | 1527.704912    | 764.356094       | 1526.720896    | 763.864086        | A    | <b>505.255129</b>  | 253.131202        | 488.228580        | 244.617928       |                |                  | 5  |
| 13 | 1675.771946        | 838.389611        | 1658.745397    | 829.876337       | 1657.761381    | 829.384329        | M    | <b>434.218015</b>  | 217.612645        | 417.191466        | 209.099371       |                |                  | 4  |
| 14 | 1746.809060        | 873.908168        | 1729.782511    | 865.394894       | 1728.798495    | 864.902886        | A    | <b>303.177530</b>  | 152.092403        | <b>286.150981</b> | 143.579128       |                |                  | 3  |
| 15 | 1803.830524        | <b>902.418900</b> | 1786.803975    | 893.905626       | 1785.819959    | 893.413617        | G    | 232.140416         | 116.573846        | 215.113867        | 108.060571       |                |                  | 2  |
| 16 |                    |                   |                |                  |                |                   | R    | 175.118952         | 88.063114         | 158.092403        | 79.549839        |                |                  | 1  |

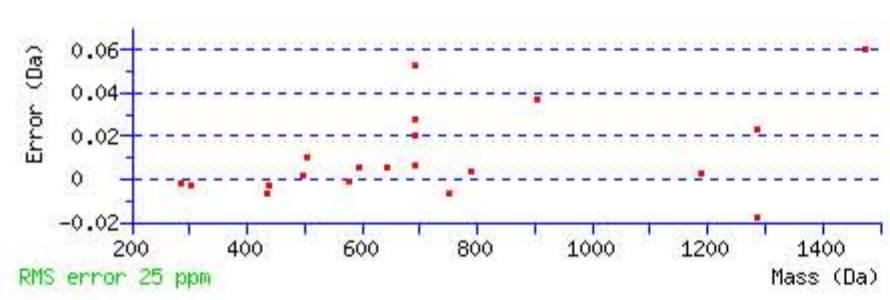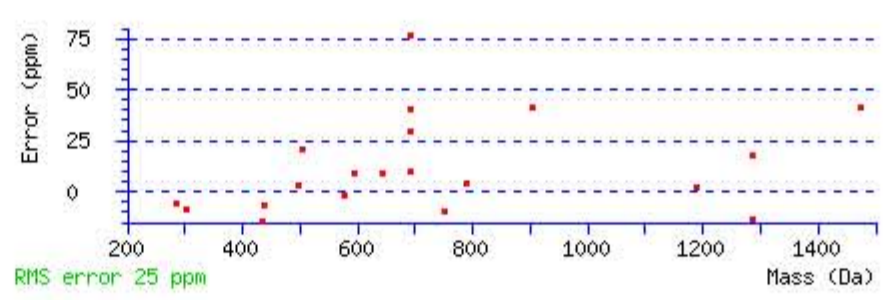

NCBI BLAST search of **DWHGVPGQVDAAMAGR**  
 (Parameters: blastp, nr protein database, expect=20000, no filter, PAM30)  
 Other BLAST [web gateways](#)

### All matches to this query

| Score | $M_r(\text{calc})$ : | Delta    | Sequence                         |
|-------|----------------------|----------|----------------------------------|
| 34.4  | 1976.934937          | 0.014015 | <a href="#">DWHGVPGQVDAAMAGR</a> |

Mascot: <http://www.matrixscience.com/>



Peptide View

MS/MS Fragmentation of GNPEQTPVLKPEEEAPAVEVGASKPEGIDSRPETLHPGRPQQPPAEELCSGKPFDAFTDLK
Found in VTNC\_HUMAN, Vitronectin OS=Homo sapiens GN=VTN PE=1 SV=1

Match to Query 89465: 6883.449392 from(861.438450,8+) rtinseconds(2078) index(42613)
Title: Locus:1.1.1.3007.10 File:"2013-07-02 CLN FXIII 60 min 1st F 3.wiff"
Data file C:\Program Files (x86)\Matrix Science\Mascot Daemon\mgf\4 FXIII 60 min 1st\mascot\_daemon\_merge.mgf

Click mouse within plot area to zoom in by factor of two about that point
Or, Plot from 0 to 7000 Da Full range
Label all possible matches Label matches used for scoring

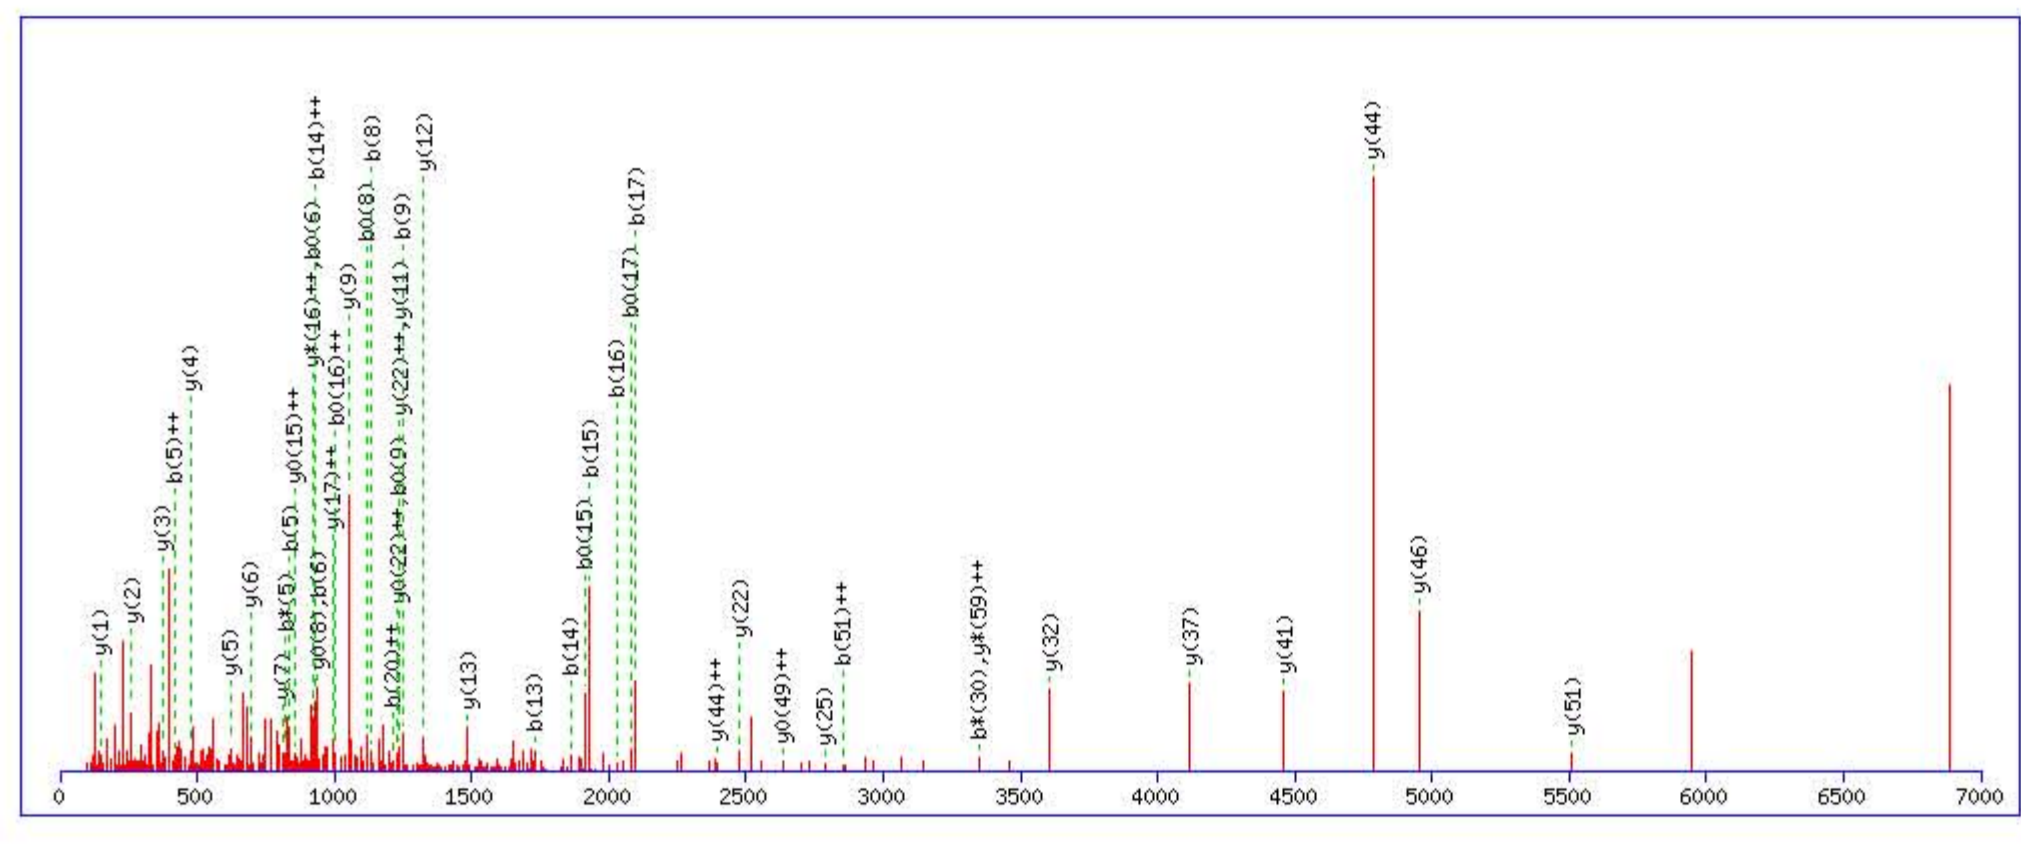

Monoisotopic mass of neutral peptide Mr(calc): 6883.374893
Fixed modifications: Carbamidomethyl (C) (apply to specified residues or termini only)
Variable modifications:
Q5 : Biotin:Thermo-21345 (Q)
Ions Score: 34 Expect: 0.0051
Matches : 49/708 fragment ions using 149 most intense peaks

Table with columns: #, b, b+, b\*, b\*+, b0, b0+, Seq., y, y+, y\*, y\*+, y0, y0+, #. Contains 61 rows of fragmentation data.

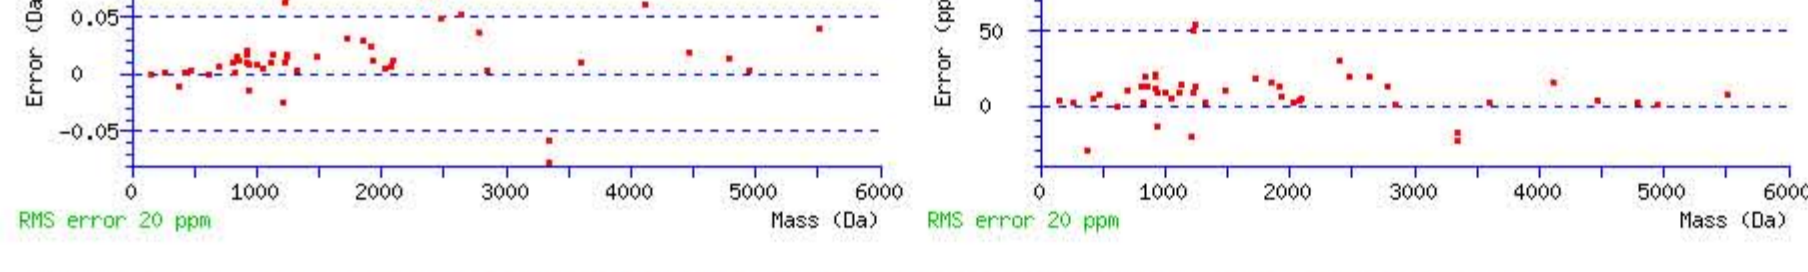

NCBI BLAST search of GNPEQTPVLKPEEEAPAVEVGASKPEGIDSRPETLHPGRPQQPPAEELCSGKPFDAFTDLK
(Parameters: blastp, nr protein database, expect=20000, no filter, PAM30)
Other BLAST web gateways

All matches to this query

Table with columns: Score, Mr(calc), Delta, Sequence. Shows a match with score 33.5 and sequence GNPEQTPVLKPEEEAPAVEVGASKPEGIDSRPETLHPGRPQQPPAEELCSGKPFDAFTDLK.



# MASCOT Search Results

## Peptide View

MS/MS Fragmentation of **GGQIMTLK**

Found in **VWF\_HUMAN**, von Willebrand factor OS=Homo sapiens GN=VWF PE=1 SV=4

Match to Query 25993: 1157.632688 from(579.823620,2+) rtinseconds(1888) index(41306)

Title: Locus:1.1.1.2941.15 File:"2013-07-02 CLN FXIII 60 min 1st F 3.wiff"

Data file C:\Program Files (x86)\Matrix Science\Mascot Daemon\mgf4 FXIII 60 min 1st\mascot\_daemon\_merge.mgf

Click mouse within plot area to zoom in by factor of two about that point

Or, Plot from  to  Da

Label all possible matches  Label matches used for scoring

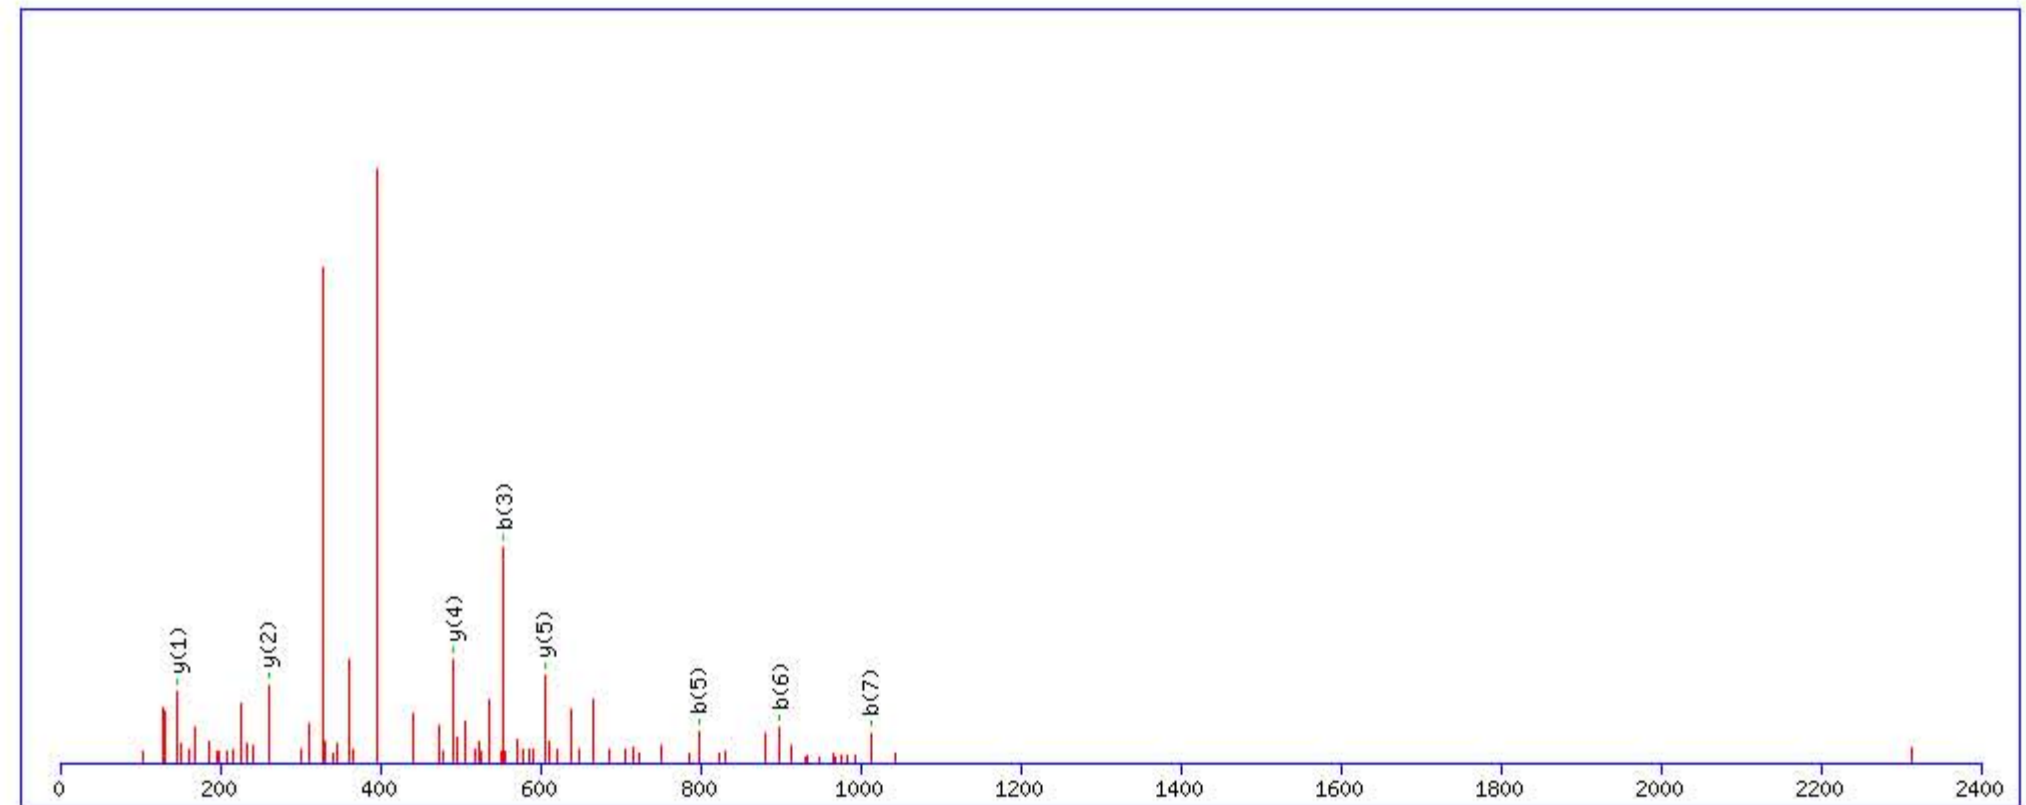

Monoisotopic mass of neutral peptide Mr(calc): 1157.630066

Fixed modifications: Carbamidomethyl (C) (apply to specified residues or termini only)

Variable modifications:

Q3 : Biotin:Thermo-21345 (Q)

Ions Score: 32 Expect: 0.015

Matches : 8/66 fragment ions using 10 most intense peaks [\(help\)](#)

| # | b                  | b <sup>++</sup> | b <sup>*</sup> | b <sup>+++</sup> | b <sup>0</sup> | b <sup>0++</sup> | Seq. | y                 | y <sup>++</sup> | y <sup>*</sup> | y <sup>+++</sup> | y <sup>0</sup> | y <sup>0++</sup> | # |
|---|--------------------|-----------------|----------------|------------------|----------------|------------------|------|-------------------|-----------------|----------------|------------------|----------------|------------------|---|
| 1 | 58.028740          | 29.518008       |                |                  |                |                  | G    |                   |                 |                |                  |                |                  | 8 |
| 2 | 115.050204         | 58.028740       |                |                  |                |                  | G    | 1101.615886       | 551.311581      | 1084.589337    | 542.798307       | 1083.605321    | 542.306299       | 7 |
| 3 | <b>554.275530</b>  | 277.641403      | 537.248981     | 269.128129       |                |                  | Q    | 1044.594422       | 522.800849      | 1027.567873    | 514.287575       | 1026.583857    | 513.795567       | 6 |
| 4 | 667.359594         | 334.183435      | 650.333045     | 325.670161       |                |                  | I    | <b>605.369096</b> | 303.188186      | 588.342547     | 294.674912       | 587.358531     | 294.182904       | 5 |
| 5 | <b>798.400079</b>  | 399.703678      | 781.373530     | 391.190403       |                |                  | M    | <b>492.285032</b> | 246.646154      | 475.258483     | 238.132880       | 474.274467     | 237.640872       | 4 |
| 6 | <b>899.447758</b>  | 450.227517      | 882.421209     | 441.714243       | 881.437193     | 441.222235       | T    | 361.244547        | 181.125912      | 344.217998     | 172.612637       | 343.233982     | 172.120629       | 3 |
| 7 | <b>1012.531822</b> | 506.769549      | 995.505273     | 498.256275       | 994.521257     | 497.764267       | L    | <b>260.196868</b> | 130.602072      | 243.170319     | 122.088798       |                |                  | 2 |
| 8 |                    |                 |                |                  |                |                  | K    | <b>147.112804</b> | 74.060040       | 130.086255     | 65.546765        |                |                  | 1 |

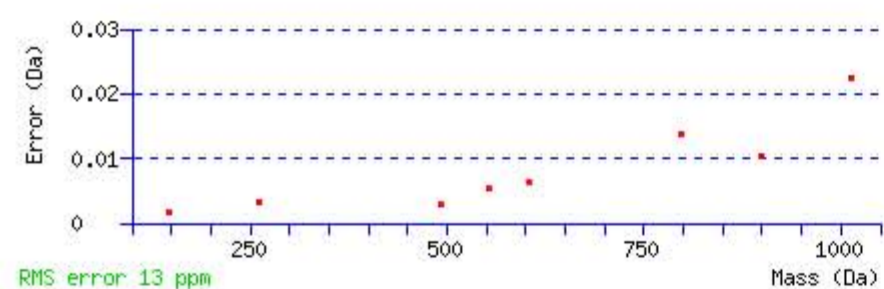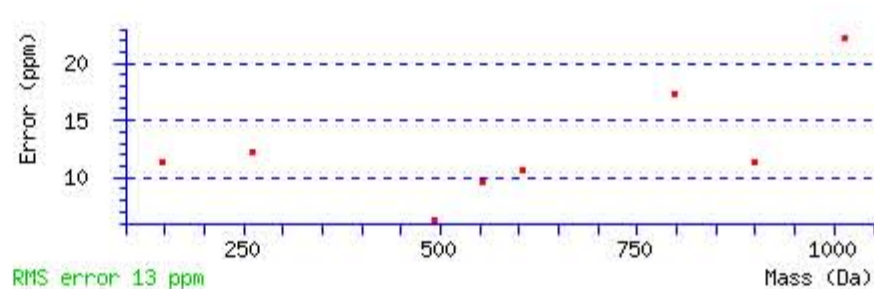

NCBI BLAST search of [GGQIMTLK](#)

(Parameters: blastp, nr protein database, expect=20000, no filter, PAM30)

Other BLAST [web gateways](#)

All matches to this query

| Score | Mr(calc):   | Delta     | Sequence                     |
|-------|-------------|-----------|------------------------------|
| 32.0  | 1157.630066 | 0.002622  | <a href="#">GGQIMTLK</a>     |
| 13.1  | 1157.647827 | -0.015139 | <a href="#">ALVGGTAPMTIK</a> |
| 12.8  | 1157.640411 | -0.007723 | <a href="#">AQQLSSGNLK</a>   |
| 12.6  | 1157.630051 | 0.002637  | <a href="#">QLSQMLK</a>      |
| 10.4  | 1157.647827 | -0.015139 | <a href="#">IMVPINGSVTK</a>  |
| 9.0   | 1157.640411 | -0.007723 | <a href="#">SPGKNSSIQLK</a>  |
| 7.0   | 1157.619293 | 0.013395  | <a href="#">INFEGPPRLK</a>   |
| 5.9   | 1157.630081 | 0.002607  | <a href="#">CVTLVQK</a>      |
| 5.9   | 1157.629196 | 0.003492  | <a href="#">VTGKPAETLK</a>   |
| 5.6   | 1157.630051 | 0.002637  | <a href="#">MLQTNLK</a>      |



# MASCOT SCIENCE Mascot Search Results

## Peptide View

MS/MS Fragmentation of **GDSQSSWK**

Found in **VWF\_HUMAN**, von Willebrand factor OS=Homo sapiens GN=VWF PE=1 SV=4

Match to Query 27798: 1204.556168 from(603.285360,2+) rtinseconds(1521) index(39013)

Title: Locus:1.1.1.2813.18 File:"2013-07-02 CLN FXIII 60 min 1st F 3.wiff"

Data file C:\Program Files (x86)\Matrix Science\Mascot Daemon\mgf\4 FXIII 60 min 1st\mascot\_daemon\_merge.mgf

Click mouse within plot area to zoom in by factor of two about that point

Or, Plot from  to  Da

Label all possible matches  Label matches used for scoring

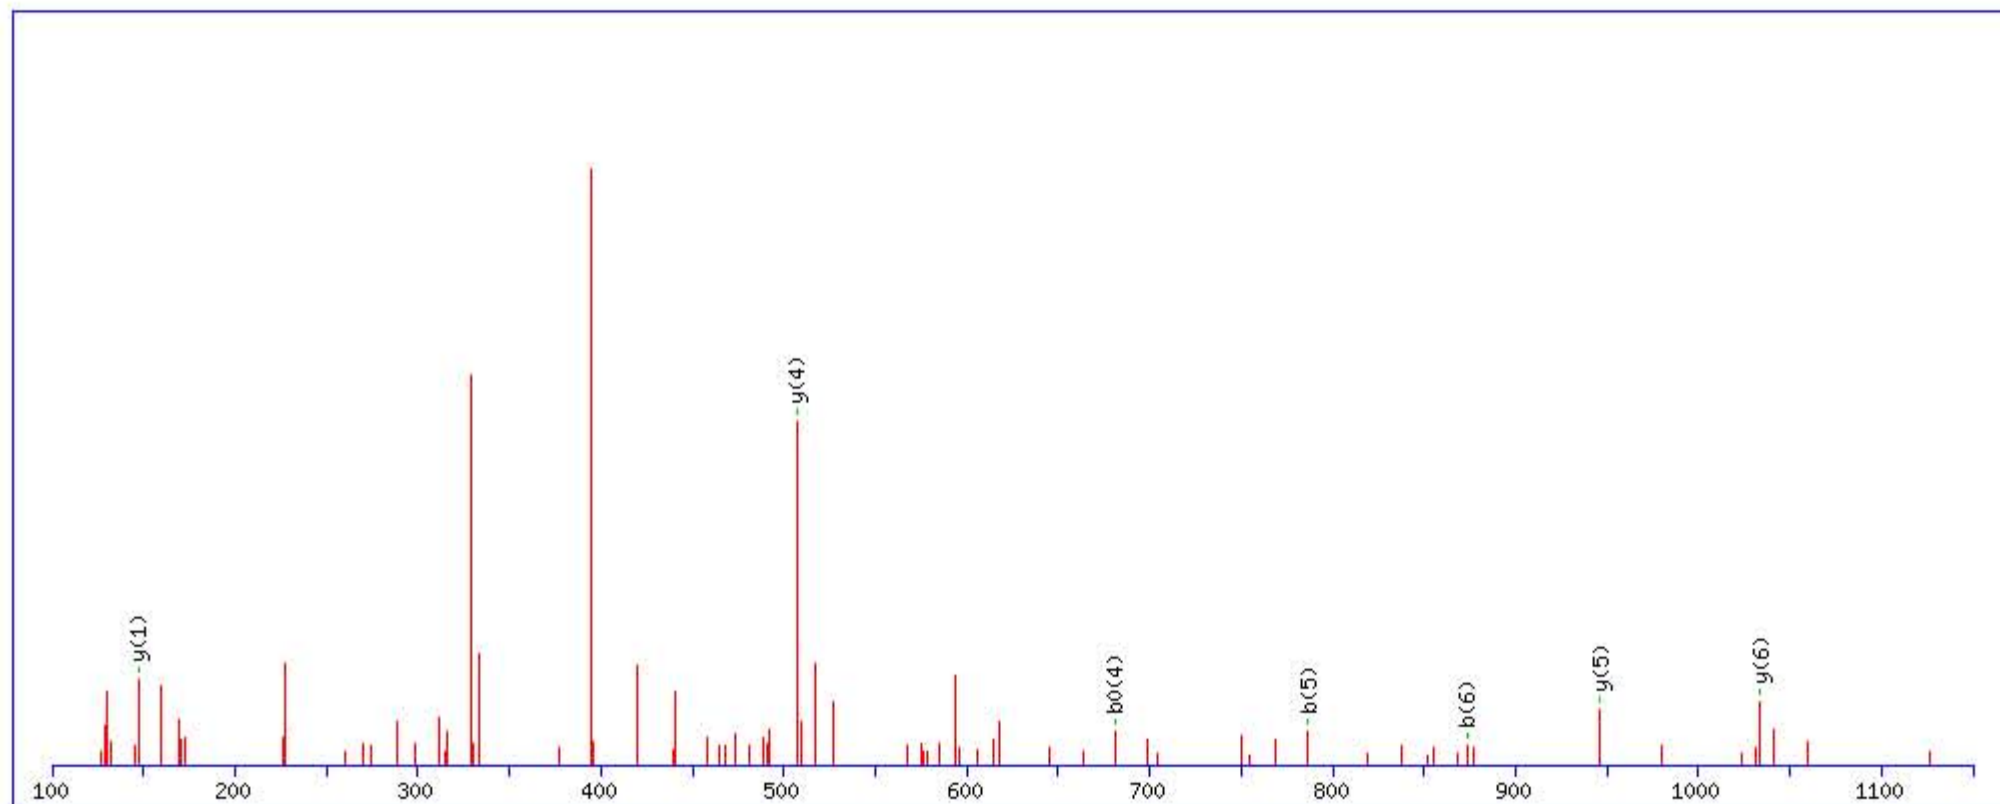

Monoisotopic mass of neutral peptide Mr(calc): 1204.554657

Fixed modifications: Carbamidomethyl (C) (apply to specified residues or termini only)

Variable modifications:

Q4 : Biotin:Thermo-21345 (Q)

Ions Score: 28 Expect: 0.011

Matches : 7/72 fragment ions using 10 most intense peaks ([help](#))

| # | b                 | b <sup>++</sup> | b <sup>*</sup> | b <sup>*++</sup> | b <sup>0</sup>    | b <sup>0++</sup> | Seq. | y                  | y <sup>++</sup> | y <sup>*</sup> | y <sup>*++</sup> | y <sup>0</sup> | y <sup>0++</sup> | # |
|---|-------------------|-----------------|----------------|------------------|-------------------|------------------|------|--------------------|-----------------|----------------|------------------|----------------|------------------|---|
| 1 | 58.028740         | 29.518008       |                |                  |                   |                  | G    |                    |                 |                |                  |                |                  | 8 |
| 2 | 173.055683        | 87.031479       |                |                  | 155.045118        | 78.026197        | D    | 1148.540470        | 574.773873      | 1131.513921    | 566.260599       | 1130.529905    | 565.768591       | 7 |
| 3 | 260.087711        | 130.547493      |                |                  | 242.077146        | 121.542211       | S    | <b>1033.513527</b> | 517.260402      | 1016.486978    | 508.747127       | 1015.502962    | 508.255119       | 6 |
| 4 | 699.313037        | 350.160157      | 682.286488     | 341.646882       | <b>681.302472</b> | 341.154874       | Q    | <b>946.481499</b>  | 473.744388      | 929.454950     | 465.231113       | 928.470934     | 464.739105       | 5 |
| 5 | <b>786.345065</b> | 393.676171      | 769.318516     | 385.162896       | 768.334500        | 384.670888       | S    | <b>507.256173</b>  | 254.131724      | 490.229624     | 245.618450       | 489.245608     | 245.126442       | 4 |
| 6 | <b>873.377093</b> | 437.192185      | 856.350544     | 428.678910       | 855.366528        | 428.186902       | S    | 420.224145         | 210.615711      | 403.197596     | 202.102436       | 402.213580     | 201.610428       | 3 |
| 7 | 1059.456406       | 530.231841      | 1042.429857    | 521.718567       | 1041.445841       | 521.226559       | W    | 333.192117         | 167.099697      | 316.165568     | 158.586422       |                |                  | 2 |
| 8 |                   |                 |                |                  |                   |                  | K    | <b>147.112804</b>  | 74.060040       | 130.086255     | 65.546765        |                |                  | 1 |

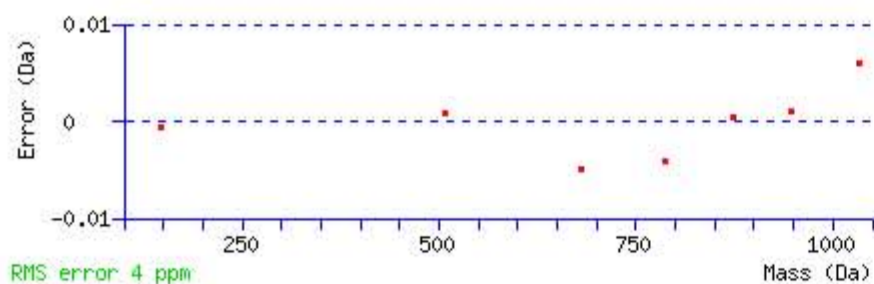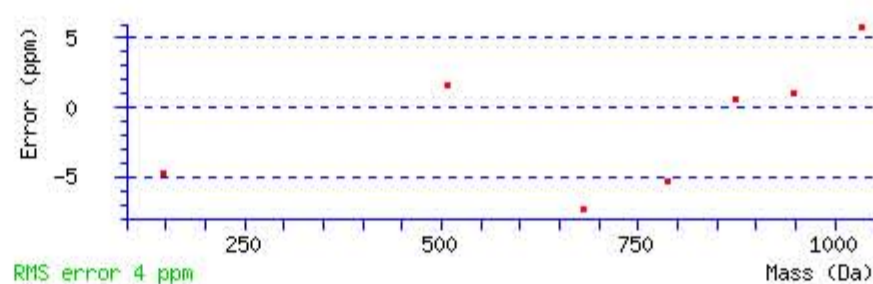

NCBI BLAST search of [GDSQSSWK](#)

(Parameters: blastp, nr protein database, expect=20000, no filter, PAM30)

Other BLAST [web gateways](#)

## All matches to this query

| Score | Mr(calc):   | Delta     | Sequence                   |
|-------|-------------|-----------|----------------------------|
| 28.4  | 1204.554657 | 0.001511  | <a href="#">GDSQSSWK</a>   |
| 7.3   | 1204.540253 | 0.015915  | <a href="#">QMQECAK</a>    |
| 3.6   | 1204.565872 | -0.009704 | <a href="#">QAKQACDAWK</a> |
| 2.4   | 1204.540253 | 0.015915  | <a href="#">QMQECAK</a>    |



# MASCOT Search Results

## Peptide View

MS/MS Fragmentation of **VSSQCADTR**

Found in **VWF\_HUMAN**, von Willebrand factor OS=Homo sapiens GN=VWF PE=1 SV=4

Match to Query 31611: 1333.616868 from(667.815710,2+) rtinseconds(1223) index(36953)

Title: Locus:1.1.1.2709.21 File:"2013-07-02 CLN FXIII 60 min 1st F 3.wiff"

Data file C:\Program Files (x86)\Matrix Science\Mascot Daemon\mgf4 FXIII 60 min 1st\mascot\_daemon\_merge.mgf

Click mouse within plot area to zoom in by factor of two about that point

Or, Plot from  to  Da

Label all possible matches  Label matches used for scoring

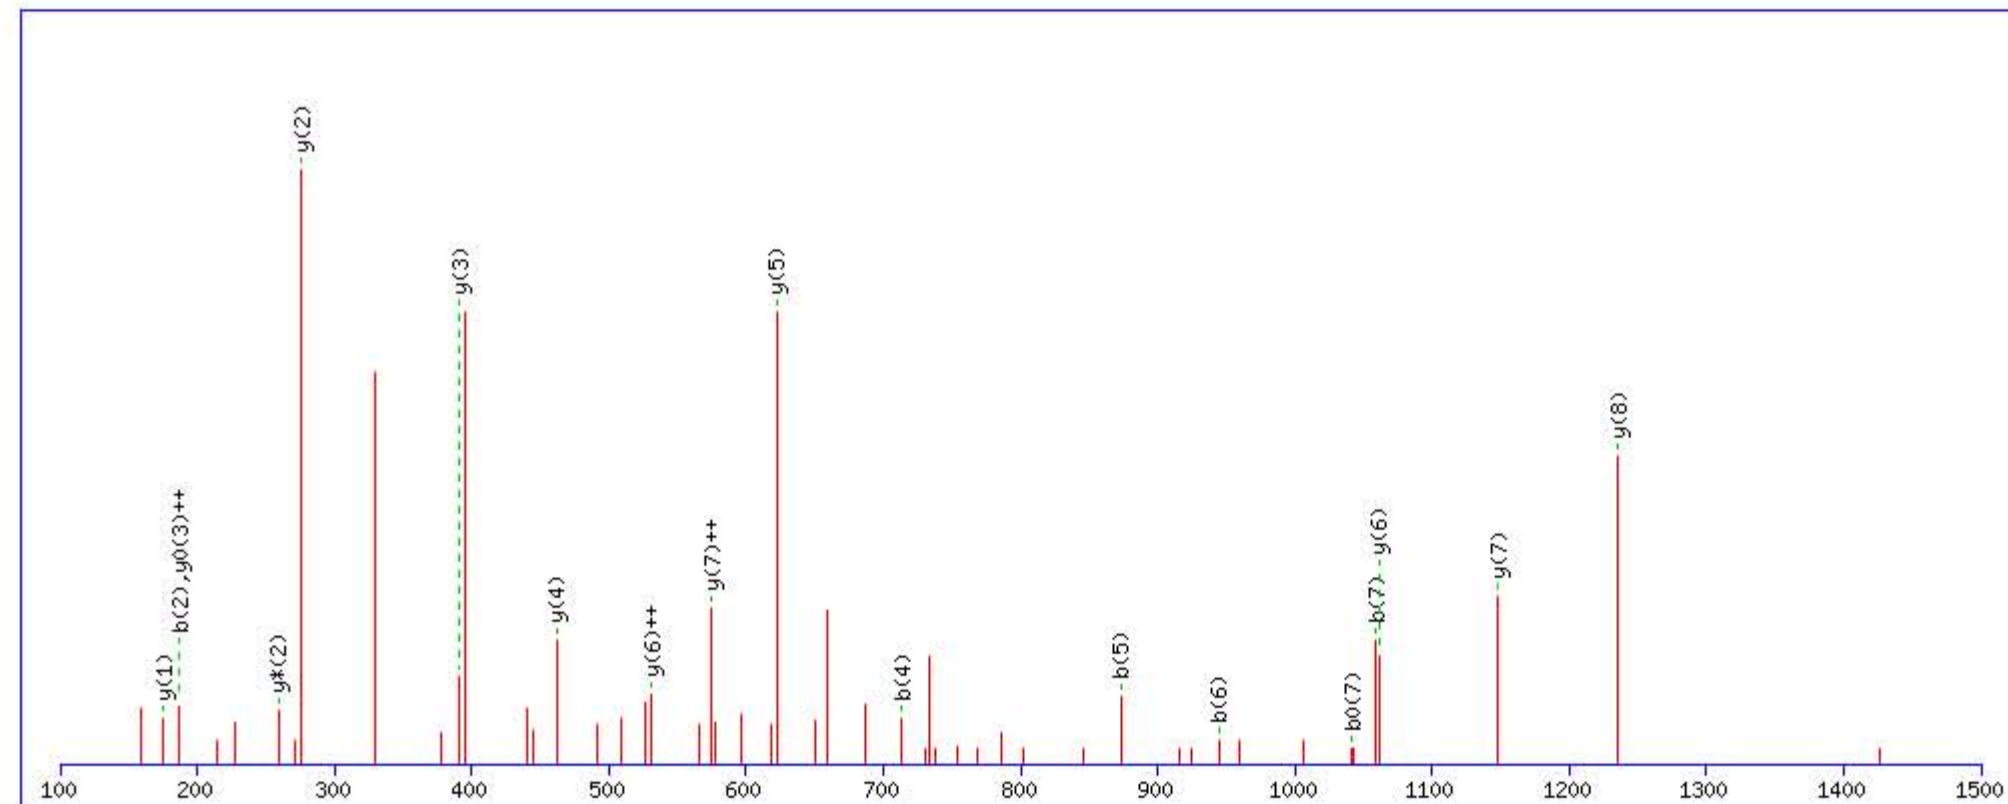

Monoisotopic mass of neutral peptide Mr(calc): 1333.611862

Fixed modifications: Carbamidomethyl (C) (apply to specified residues or termini only)

Variable modifications:

Q4 : Biotin:Thermo-21345 (Q)

Ions Score: 53 Expect: 6.5e-005

Matches : 18/86 fragment ions using 31 most intense peaks ([help](#))

| # | b                  | b <sup>++</sup> | b <sup>*</sup> | b <sup>*++</sup> | b <sup>0</sup>     | b <sup>0++</sup> | Seq. | y                  | y <sup>++</sup>   | y <sup>*</sup>    | y <sup>*++</sup> | y <sup>0</sup> | y <sup>0++</sup>  | # |
|---|--------------------|-----------------|----------------|------------------|--------------------|------------------|------|--------------------|-------------------|-------------------|------------------|----------------|-------------------|---|
| 1 | 100.075690         | 50.541483       |                |                  |                    |                  | V    |                    |                   |                   |                  |                |                   | 9 |
| 2 | <b>187.107718</b>  | 94.057497       |                |                  | 169.097153         | 85.052214        | S    | <b>1235.550719</b> | 618.278998        | 1218.524170       | 609.765723       | 1217.540154    | 609.273715        | 8 |
| 3 | 274.139746         | 137.573511      |                |                  | 256.129181         | 128.568229       | S    | <b>1148.518691</b> | <b>574.762984</b> | 1131.492142       | 566.249709       | 1130.508126    | 565.757701        | 7 |
| 4 | <b>713.365072</b>  | 357.186174      | 696.338523     | 348.672900       | 695.354507         | 348.180892       | Q    | <b>1061.486663</b> | <b>531.246970</b> | 1044.460114       | 522.733695       | 1043.476098    | 522.241687        | 6 |
| 5 | <b>873.395721</b>  | 437.201499      | 856.369172     | 428.688224       | 855.385156         | 428.196216       | C    | <b>622.261337</b>  | 311.634307        | 605.234788        | 303.121032       | 604.250772     | 302.629024        | 5 |
| 6 | <b>944.432835</b>  | 472.720056      | 927.406286     | 464.206781       | 926.422270         | 463.714773       | A    | <b>462.230688</b>  | 231.618982        | 445.204139        | 223.105707       | 444.220123     | 222.613700        | 4 |
| 7 | <b>1059.459778</b> | 530.233527      | 1042.433229    | 521.720253       | <b>1041.449213</b> | 521.228245       | D    | <b>391.193574</b>  | 196.100425        | 374.167025        | 187.587151       | 373.183009     | <b>187.095143</b> | 3 |
| 8 | 1160.507457        | 580.757367      | 1143.480908    | 572.244092       | 1142.496892        | 571.752084       | T    | <b>276.166631</b>  | 138.586953        | <b>259.140082</b> | 130.073679       | 258.156066     | 129.581671        | 2 |
| 9 |                    |                 |                |                  |                    |                  | R    | <b>175.118952</b>  | 88.063114         | 158.092403        | 79.549839        |                |                   | 1 |

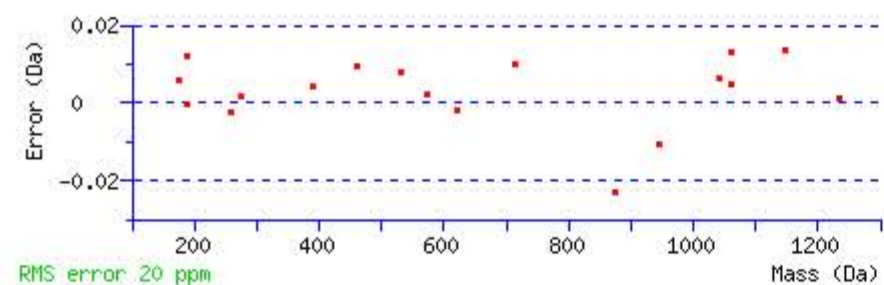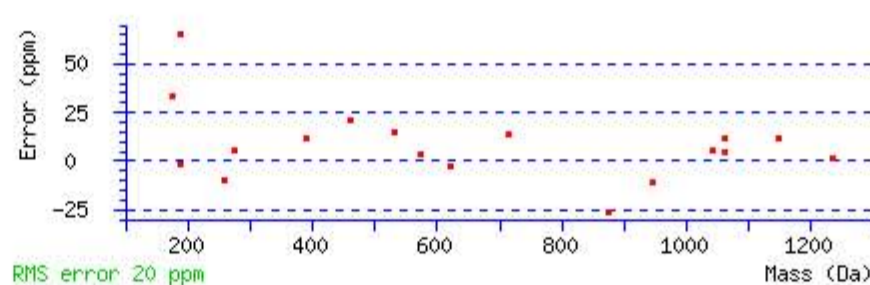

NCBI BLAST search of **VSSQCADTR**

(Parameters: blastp, nr protein database, expect=20000, no filter, PAM30)

Other BLAST [web gateways](#)

All matches to this query

| Score | Mr(calc):   | Delta     | Sequence                     |
|-------|-------------|-----------|------------------------------|
| 52.5  | 1333.611862 | 0.005006  | <a href="#">VSSQCADTR</a>    |
| 8.3   | 1333.633606 | -0.016738 | <a href="#">LIYNTHMADEK</a>  |
| 4.2   | 1333.607117 | 0.009751  | <a href="#">GEIEIESDAPMK</a> |
| 3.4   | 1333.615005 | 0.001863  | <a href="#">DVQNFPAATDEK</a> |
| 2.5   | 1333.601105 | 0.015763  | <a href="#">VDNRPDGFGDSR</a> |



# MASCOT SCIENCE Mascot Search Results

## Peptide View

MS/MS Fragmentation of **VKEEVFIQQR**

Found in **VWF\_HUMAN**, von Willebrand factor OS=Homo sapiens GN=VWF PE=1 SV=4

Match to Query 41492: 1585.874262 from(529.632030,3+) rtinseconds(1741) index(58656)

Title: Locus:1.1.1.2912.8 File:"2013-07-02 CLN FXIII 60 min 1st F 4.wiff"

Data file C:\Program Files (x86)\Matrix Science\Mascot Daemon\mgf4 FXIII 60 min 1st\mascot\_daemon\_merge.mgf

Click mouse within plot area to zoom in by factor of two about that point

Or, Plot from  to  Da

Label all possible matches  Label matches used for scoring

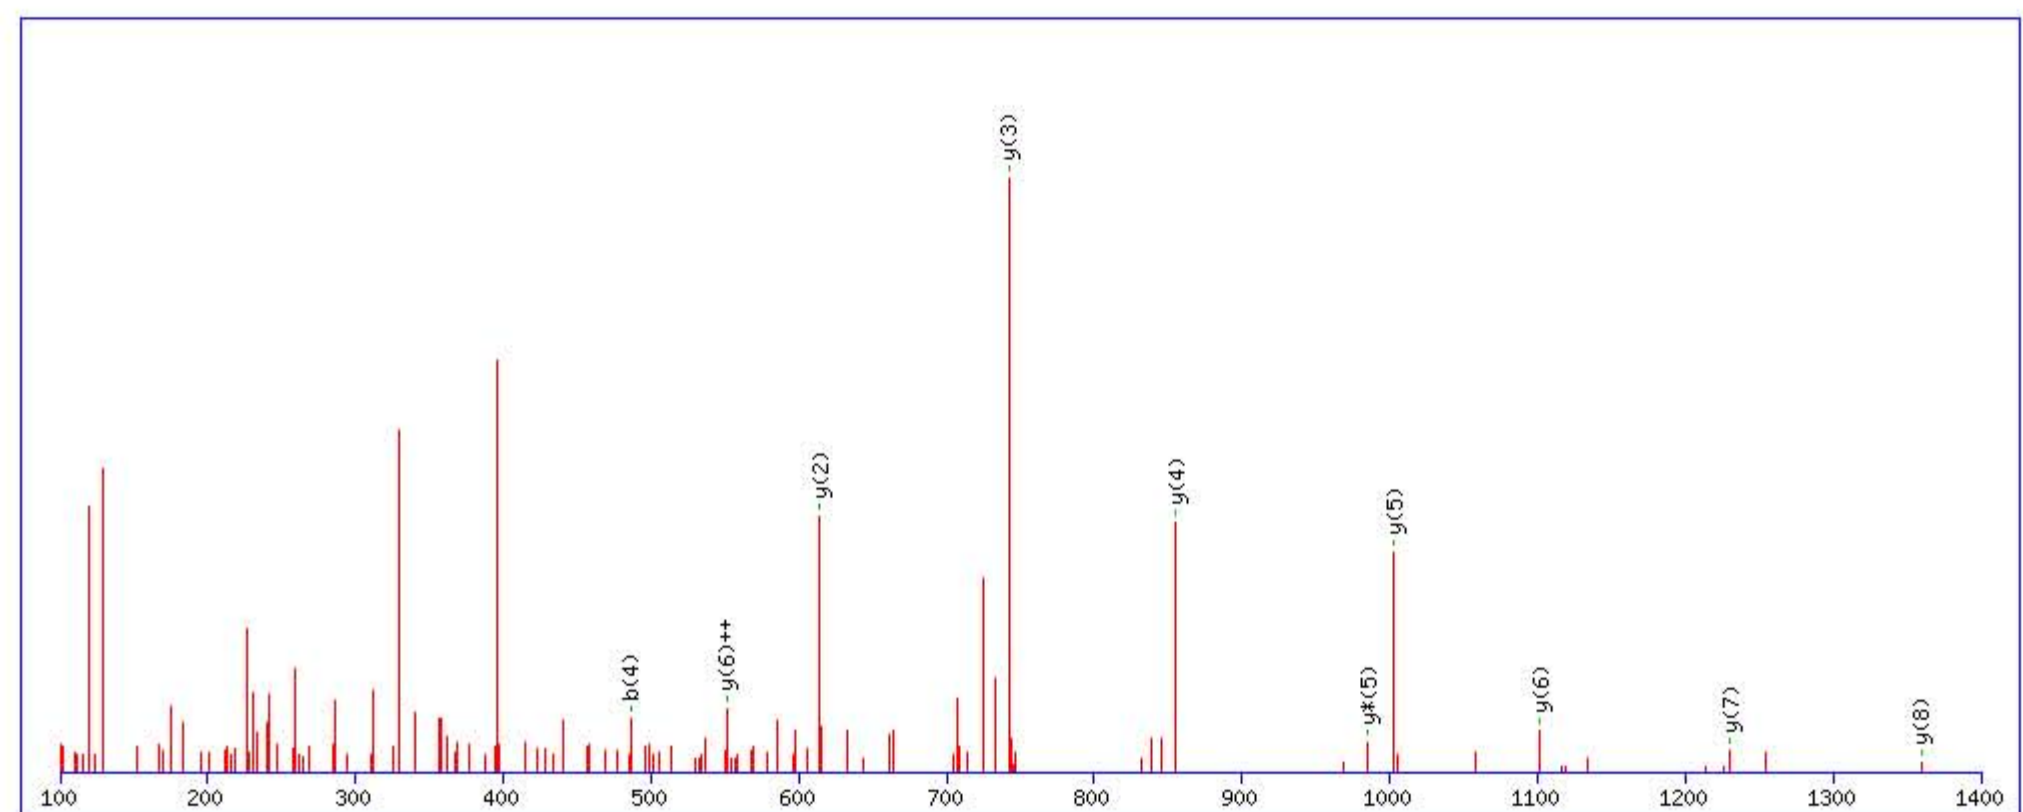

Monoisotopic mass of neutral peptide Mr(calc): 1585.865021

Fixed modifications: Carbamidomethyl (C) (apply to specified residues or termini only)

Variable modifications:

Q9 : Biotin:Thermo-21345 (Q)

Ions Score: 54 Expect: 2.4e-005

Matches : 10/90 fragment ions using 13 most intense peaks [\(help\)](#)

| #  | b                 | b <sup>++</sup> | b <sup>*</sup> | b <sup>*++</sup> | b <sup>0</sup> | b <sup>0++</sup> | Seq. | y                  | y <sup>++</sup>   | y <sup>*</sup>    | y <sup>*++</sup> | y <sup>0</sup> | y <sup>0++</sup> | #  |
|----|-------------------|-----------------|----------------|------------------|----------------|------------------|------|--------------------|-------------------|-------------------|------------------|----------------|------------------|----|
| 1  | 100.075690        | 50.541483       |                |                  |                |                  | V    |                    |                   |                   |                  |                |                  | 10 |
| 2  | 228.170653        | 114.588965      | 211.144104     | 106.075690       |                |                  | K    | 1487.803897        | 744.405587        | 1470.777348       | 735.892312       | 1469.793332    | 735.400304       | 9  |
| 3  | 357.213246        | 179.110261      | 340.186697     | 170.596987       | 339.202681     | 170.104979       | E    | <b>1359.708934</b> | 680.358105        | 1342.682385       | 671.844831       | 1341.698369    | 671.352823       | 8  |
| 4  | <b>486.255839</b> | 243.631558      | 469.229290     | 235.118283       | 468.245274     | 234.626275       | E    | <b>1230.666341</b> | 615.836809        | 1213.639792       | 607.323534       | 1212.655776    | 606.831526       | 7  |
| 5  | 585.324253        | 293.165765      | 568.297704     | 284.652490       | 567.313688     | 284.160482       | V    | <b>1101.623748</b> | <b>551.315512</b> | 1084.597199       | 542.802238       |                |                  | 6  |
| 6  | 732.392667        | 366.699972      | 715.366118     | 358.186697       | 714.382102     | 357.694689       | F    | <b>1002.555334</b> | 501.781305        | <b>985.528785</b> | 493.268031       |                |                  | 5  |
| 7  | 845.476731        | 423.242004      | 828.450182     | 414.728729       | 827.466166     | 414.236721       | I    | <b>855.486920</b>  | 428.247098        | 838.460371        | 419.733824       |                |                  | 4  |
| 8  | 973.535309        | 487.271293      | 956.508760     | 478.758018       | 955.524744     | 478.266010       | Q    | <b>742.402856</b>  | 371.705066        | 725.376307        | 363.191792       |                |                  | 3  |
| 9  | 1412.760635       | 706.883956      | 1395.734086    | 698.370681       | 1394.750070    | 697.878673       | Q    | <b>614.344278</b>  | 307.675777        | 597.317729        | 299.162503       |                |                  | 2  |
| 10 |                   |                 |                |                  |                |                  | R    | 175.118952         | 88.063114         | 158.092403        | 79.549839        |                |                  | 1  |

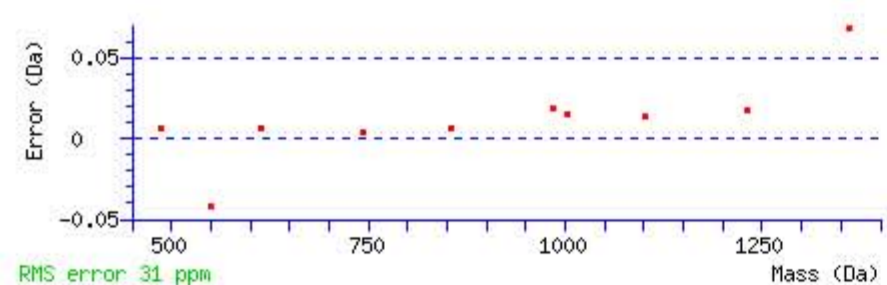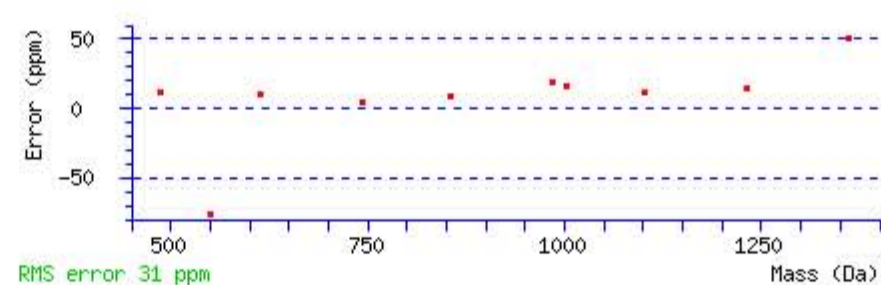

NCBI BLAST search of **VKEEVFIQQR**

(Parameters: blastp, nr protein database, expect=20000, no filter, PAM30)

Other BLAST [web gateways](#)

All matches to this query

| Score | Mr(calc):   | Delta     | Sequence                       |
|-------|-------------|-----------|--------------------------------|
| 53.5  | 1585.865021 | 0.009241  | <a href="#">VKEEVFIQQR</a>     |
| 38.6  | 1585.865021 | 0.009241  | <a href="#">VKEEVFIQQR</a>     |
| 4.0   | 1585.857605 | 0.016657  | <a href="#">QEEVAGIRAKFPNK</a> |
| 2.0   | 1585.893524 | -0.019262 | <a href="#">QDLIKSLAMLK</a>    |

Mascot: <http://www.matrixscience.com/>



# MASCOT Search Results

## Peptide View

MS/MS Fragmentation of **QHSDPCALNPR**

Found in **VWF\_HUMAN**, von Willebrand factor OS=Homo sapiens GN=VWF PE=1 SV=4

Match to Query 42313: 1604.754072 from(535.925300,3+) rtinseconds(1383) index(37970)

Title: Locus:1.1.1.2765.12 File:"2013-07-02 CLN FXIII 60 min 1st F 3.wiff"

Data file C:\Program Files (x86)\Matrix Science\Mascot Daemon\mgf\4 FXIII 60 min 1st\mascot\_daemon\_merge.mgf

Click mouse within plot area to zoom in by factor of two about that point

Or, Plot from  to  Da

Label all possible matches  Label matches used for scoring

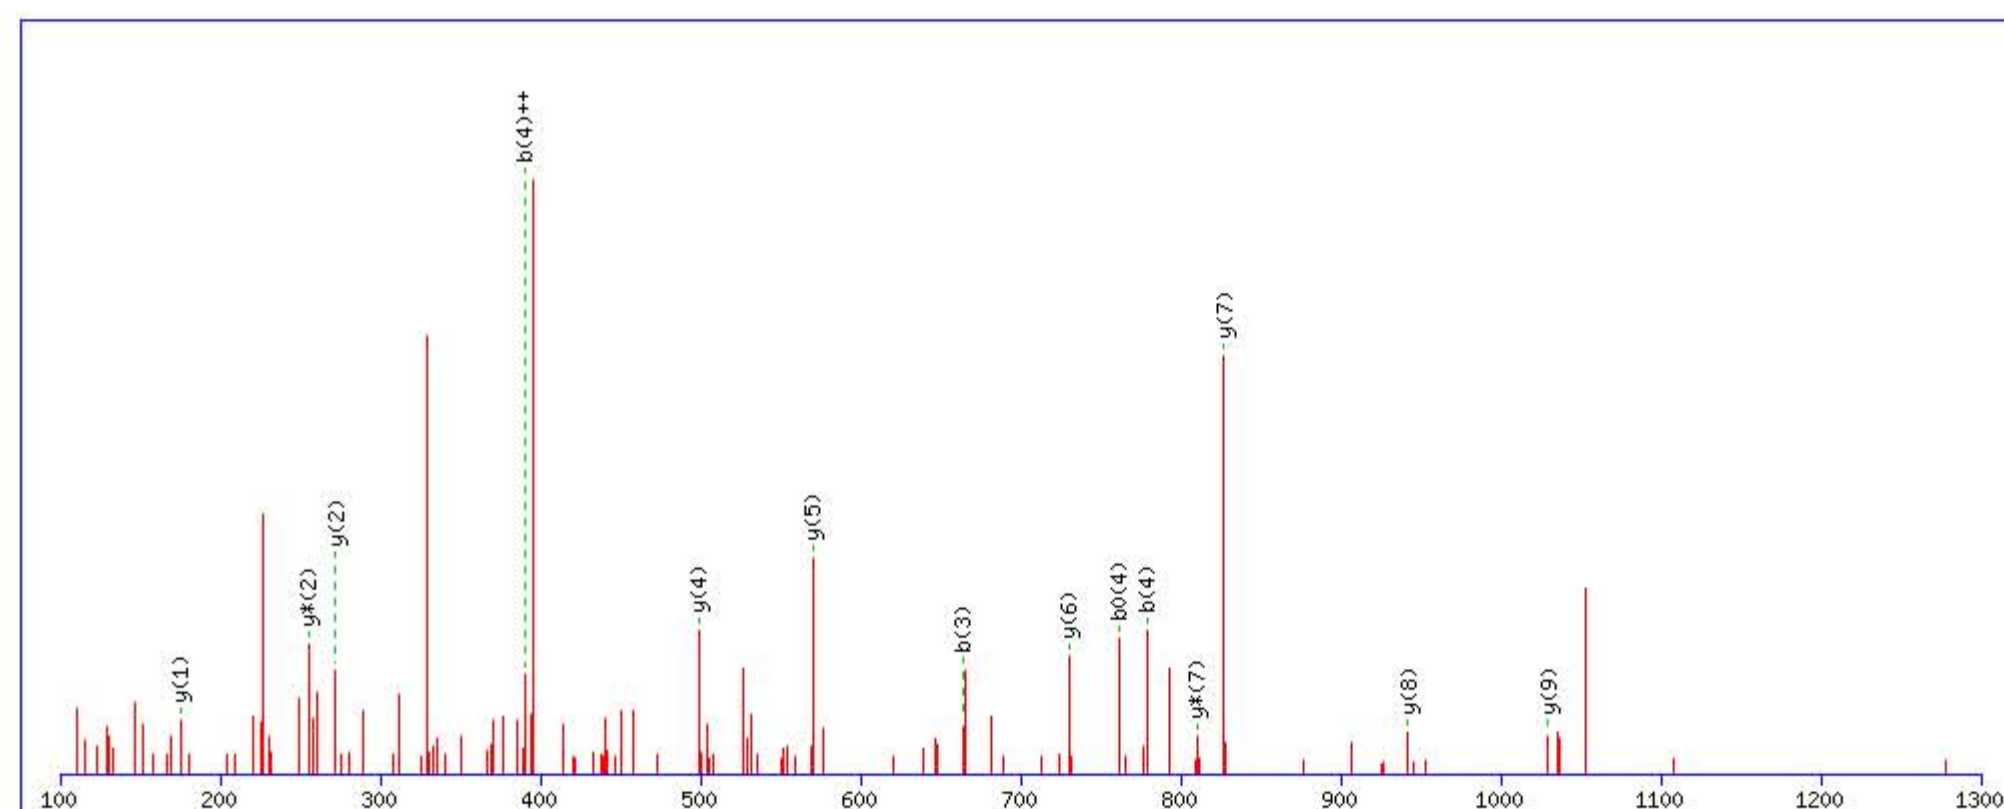

Monoisotopic mass of neutral peptide Mr(calc): 1604.755157

Fixed modifications: Carbamidomethyl (C) (apply to specified residues or termini only)

Variable modifications:

Q1 : Biotin:Thermo-21345 (Q)

Ions Score: 37 Expect: 0.0013

Matches : 14/102 fragment ions using 31 most intense peaks [\(help\)](#)

| #  | b                 | b <sup>++</sup>   | b <sup>*</sup> | b <sup>+++</sup> | b <sup>0</sup>    | b <sup>0++</sup> | Seq. | y                  | y <sup>++</sup> | y <sup>*</sup>    | y <sup>+++</sup> | y <sup>0</sup> | y <sup>0++</sup> | #  |
|----|-------------------|-------------------|----------------|------------------|-------------------|------------------|------|--------------------|-----------------|-------------------|------------------|----------------|------------------|----|
| 1  | 440.232602        | 220.619939        | 423.206053     | 212.106664       |                   |                  | Q    |                    |                 |                   |                  |                |                  | 11 |
| 2  | 577.291514        | 289.149395        | 560.264965     | 280.636121       |                   |                  | H    | 1166.537117        | 583.772196      | 1149.510568       | 575.258922       | 1148.526552    | 574.766914       | 10 |
| 3  | <b>664.323542</b> | 332.665409        | 647.296993     | 324.152134       | 646.312977        | 323.660126       | S    | <b>1029.478205</b> | 515.242740      | 1012.451656       | 506.729466       | 1011.467640    | 506.237458       | 9  |
| 4  | <b>779.350485</b> | <b>390.178880</b> | 762.323936     | 381.665606       | <b>761.339920</b> | 381.173598       | D    | <b>942.446177</b>  | 471.726726      | 925.419628        | 463.213452       | 924.435612     | 462.721444       | 8  |
| 5  | 876.403249        | 438.705263        | 859.376700     | 430.191988       | 858.392684        | 429.699980       | P    | <b>827.419234</b>  | 414.213255      | <b>810.392685</b> | 405.699980       |                |                  | 7  |
| 6  | 1036.433898       | 518.720587        | 1019.407349    | 510.207313       | 1018.423333       | 509.715305       | C    | <b>730.366470</b>  | 365.686873      | 713.339921        | 357.173598       |                |                  | 6  |
| 7  | 1107.471012       | 554.239144        | 1090.444463    | 545.725870       | 1089.460447       | 545.233861       | A    | <b>570.335821</b>  | 285.671548      | 553.309272        | 277.158274       |                |                  | 5  |
| 8  | 1220.555076       | 610.781176        | 1203.528527    | 602.267901       | 1202.544511       | 601.775893       | L    | <b>499.298707</b>  | 250.152991      | 482.272158        | 241.639717       |                |                  | 4  |
| 9  | 1334.598003       | 667.802639        | 1317.571454    | 659.289365       | 1316.587438       | 658.797357       | N    | 386.214643         | 193.610959      | 369.188094        | 185.097685       |                |                  | 3  |
| 10 | 1431.650767       | 716.329021        | 1414.624218    | 707.815747       | 1413.640202       | 707.323739       | P    | <b>272.171716</b>  | 136.589496      | <b>255.145167</b> | 128.076221       |                |                  | 2  |
| 11 |                   |                   |                |                  |                   |                  | R    | <b>175.118952</b>  | 88.063114       | 158.092403        | 79.549839        |                |                  | 1  |

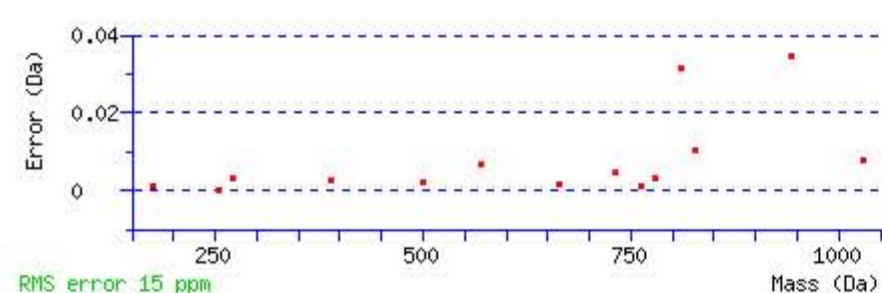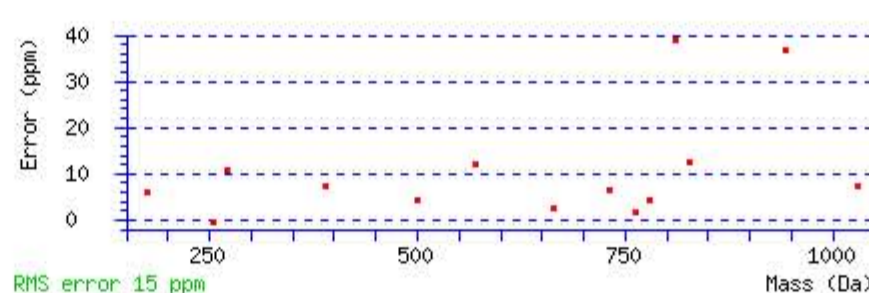

NCBI BLAST search of **QHSDPCALNPR**

(Parameters: blastp, nr protein database, expect=20000, no filter, PAM30)

Other BLAST [web gateways](#)

## All matches to this query

| Score | Mr(calc):   | Delta     | Sequence                        |
|-------|-------------|-----------|---------------------------------|
| 37.5  | 1604.755157 | -0.001085 | <a href="#">QHSDPCALNPR</a>     |
| 6.3   | 1604.743912 | 0.010160  | <a href="#">QMIMKDKNWHDK</a>    |
| 4.8   | 1604.736725 | 0.017347  | <a href="#">EGMGWSYLVFCLK</a>   |
| 4.7   | 1604.772247 | -0.018175 | <a href="#">TDDIPVWDQEFLK</a>   |
| 3.2   | 1604.771530 | -0.017458 | <a href="#">LTNELKEEQEMNK</a>   |
| 2.9   | 1604.747070 | 0.007002  | <a href="#">NGYAEFPPSPSNPTK</a> |
| 2.7   | 1604.765030 | -0.010958 | <a href="#">KEASPPSNKLCCK</a>   |
| 2.3   | 1604.757828 | -0.003756 | <a href="#">AEKTFVSYEIMCK</a>   |
| 1.6   | 1604.761200 | -0.007128 | <a href="#">QCDLEIMEIK</a>      |
| 0.9   | 1604.769043 | -0.014971 | <a href="#">KEIMYYQQALMR</a>    |



# MASCOT SCIENCE Mascot Search Results

## Peptide View

MS/MS Fragmentation of **VAQCSQKPCEDSCR**

Found in **VWF\_HUMAN**, von Willebrand factor OS=Homo sapiens GN=VWF PE=1 SV=4

Match to Query 54585: 2034.881172 from(679.301000,3+) rtinseconds(1140) index(36435)

Title: Locus:1.1.1.2680.23 File:"2013-07-02 CLN FXIII 60 min 1st F 3.wiff"

Data file C:\Program Files (x86)\Matrix Science\Mascot Daemon\mgf4 FXIII 60 min 1st\mascot\_daemon\_merge.mgf

Click mouse within plot area to zoom in by factor of two about that point

Or, Plot from  to  Da

Label all possible matches  Label matches used for scoring

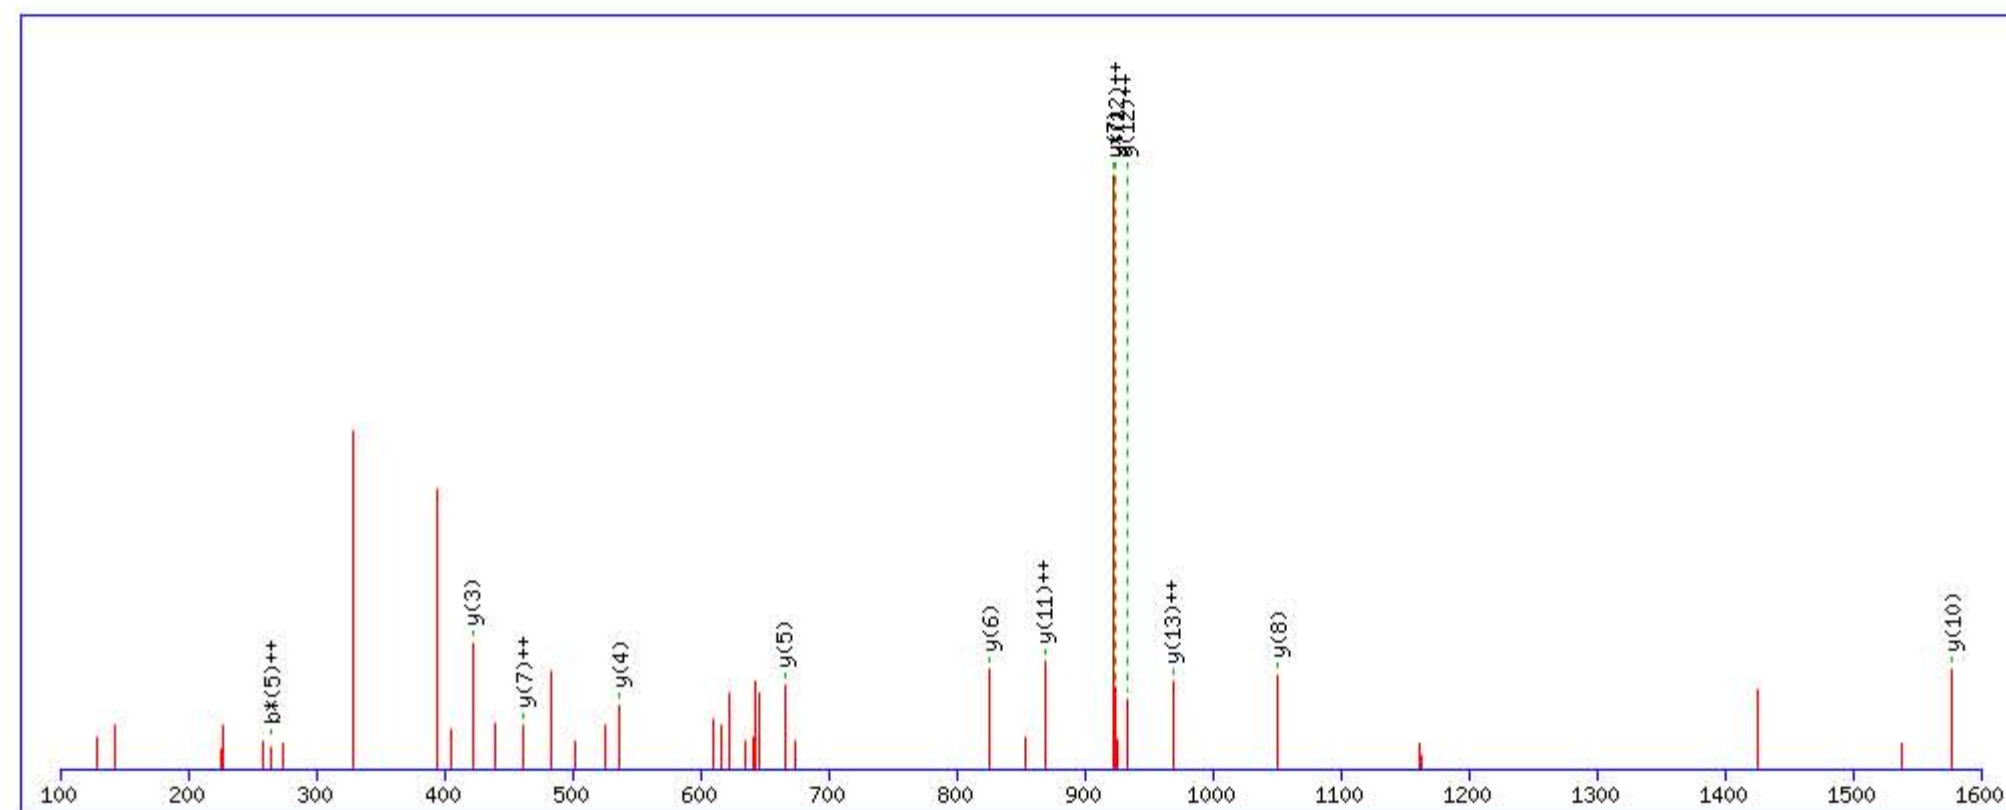

Monoisotopic mass of neutral peptide Mr(calc): 2034.874374

Fixed modifications: Carbamidomethyl (C) (apply to specified residues or termini only)

Variable modifications:

Q6 : Biotin:Thermo-21345 (Q)

Ions Score: 29 Expect: 0.0051

Matches : 13/140 fragment ions using 31 most intense peaks [\(help\)](#)

| #  | b           | b <sup>++</sup> | b <sup>+</sup> | b <sup>+++</sup> | b <sup>0</sup> | b <sup>0++</sup> | Seq. | y           | y <sup>++</sup> | y <sup>+</sup> | y <sup>+++</sup> | y <sup>0</sup> | y <sup>0++</sup> | #  |
|----|-------------|-----------------|----------------|------------------|----------------|------------------|------|-------------|-----------------|----------------|------------------|----------------|------------------|----|
| 1  | 100.075690  | 50.541483       |                |                  |                |                  | V    |             |                 |                |                  |                |                  | 14 |
| 2  | 171.112804  | 86.060040       |                |                  |                |                  | A    | 1936.813236 | 968.910256      | 1919.786687    | 960.396982       | 1918.802671    | 959.904973       | 13 |
| 3  | 299.171382  | 150.089329      | 282.144833     | 141.576055       |                |                  | Q    | 1865.776122 | 933.391699      | 1848.749573    | 924.878425       | 1847.765557    | 924.386417       | 12 |
| 4  | 459.202031  | 230.104653      | 442.175482     | 221.591379       |                |                  | C    | 1737.717544 | 869.362410      | 1720.690995    | 860.849136       | 1719.706979    | 860.357128       | 11 |
| 5  | 546.234059  | 273.620668      | 529.207510     | 265.107393       | 528.223494     | 264.615385       | S    | 1577.686895 | 789.347086      | 1560.660346    | 780.833811       | 1559.676330    | 780.341803       | 10 |
| 6  | 985.459385  | 493.233331      | 968.432836     | 484.720056       | 967.448820     | 484.228048       | Q    | 1490.654867 | 745.831072      | 1473.628318    | 737.317797       | 1472.644302    | 736.825789       | 9  |
| 7  | 1113.554348 | 557.280812      | 1096.527799    | 548.767538       | 1095.543783    | 548.275529       | K    | 1051.429541 | 526.218409      | 1034.402992    | 517.705134       | 1033.418976    | 517.213126       | 8  |
| 8  | 1210.607112 | 605.807194      | 1193.580563    | 597.293920       | 1192.596547    | 596.801911       | P    | 923.334578  | 462.170927      | 906.308029     | 453.657653       | 905.324013     | 453.165645       | 7  |
| 9  | 1370.637761 | 685.822519      | 1353.611212    | 677.309244       | 1352.627196    | 676.817236       | C    | 826.281814  | 413.644545      | 809.255265     | 405.131271       | 808.271249     | 404.639263       | 6  |
| 10 | 1499.680354 | 750.343815      | 1482.653805    | 741.830540       | 1481.669789    | 741.338532       | E    | 666.251165  | 333.629221      | 649.224616     | 325.115946       | 648.240600     | 324.623938       | 5  |
| 11 | 1614.707297 | 807.857286      | 1597.680748    | 799.344012       | 1596.696732    | 798.852004       | D    | 537.208572  | 269.107924      | 520.182023     | 260.594650       | 519.198007     | 260.102642       | 4  |
| 12 | 1701.739325 | 851.373301      | 1684.712776    | 842.860026       | 1683.728760    | 842.368018       | S    | 422.181629  | 211.594453      | 405.155080     | 203.081178       | 404.171064     | 202.589170       | 3  |
| 13 | 1861.769974 | 931.388625      | 1844.743425    | 922.875351       | 1843.759409    | 922.383343       | C    | 335.149601  | 168.078438      | 318.123052     | 159.565164       |                |                  | 2  |
| 14 |             |                 |                |                  |                |                  | R    | 175.118952  | 88.063114       | 158.092403     | 79.549839        |                |                  | 1  |

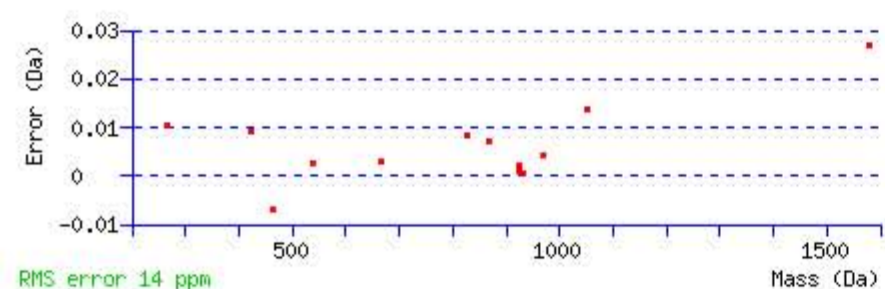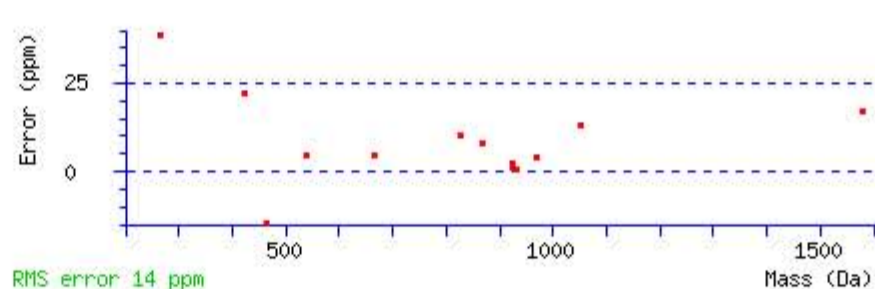

NCBI BLAST search of **VAQCSQKPCEDSCR**

(Parameters: blastp, nr protein database, expect=20000, no filter, PAM30)

Other BLAST [web gateways](#)

All matches to this query

| Score | Mr(calc):   | Delta    | Sequence                       |
|-------|-------------|----------|--------------------------------|
| 29.4  | 2034.874374 | 0.006798 | <a href="#">VAQCSQKPCEDSCR</a> |
| 26.1  | 2034.874374 | 0.006798 | <a href="#">VAQCSQKPCEDSCR</a> |

Mascot: <http://www.matrixscience.com/>



**MASCOT** Mascot Search Results

**Peptide View**

MS/MS Fragmentation of **LGHPEALSAGTGSPQPPSFTYAQQR**  
 Found in **ZYX\_HUMAN**, Zyxin OS=Homo sapiens GN=ZYX PE=1 SV=1

Match to Query 70642: 2907.473352 from(970.165060,3+) rtinseconds(1983) index(6907)  
 Title: Locus:1.1.1.2822.14 File:"2013-07-02 CLN FXIII 60 min 1st F 1.wiff"  
 Data file C:\Program Files (x86)\Matrix Science\Mascot Daemon\mgf4 FXIII 60 min 1st\mascot\_daemon\_merge.mgf

Click mouse within plot area to zoom in by factor of two about that point  
 Or, Plot from  to  Da   
 Label all possible matches  Label matches used for scoring

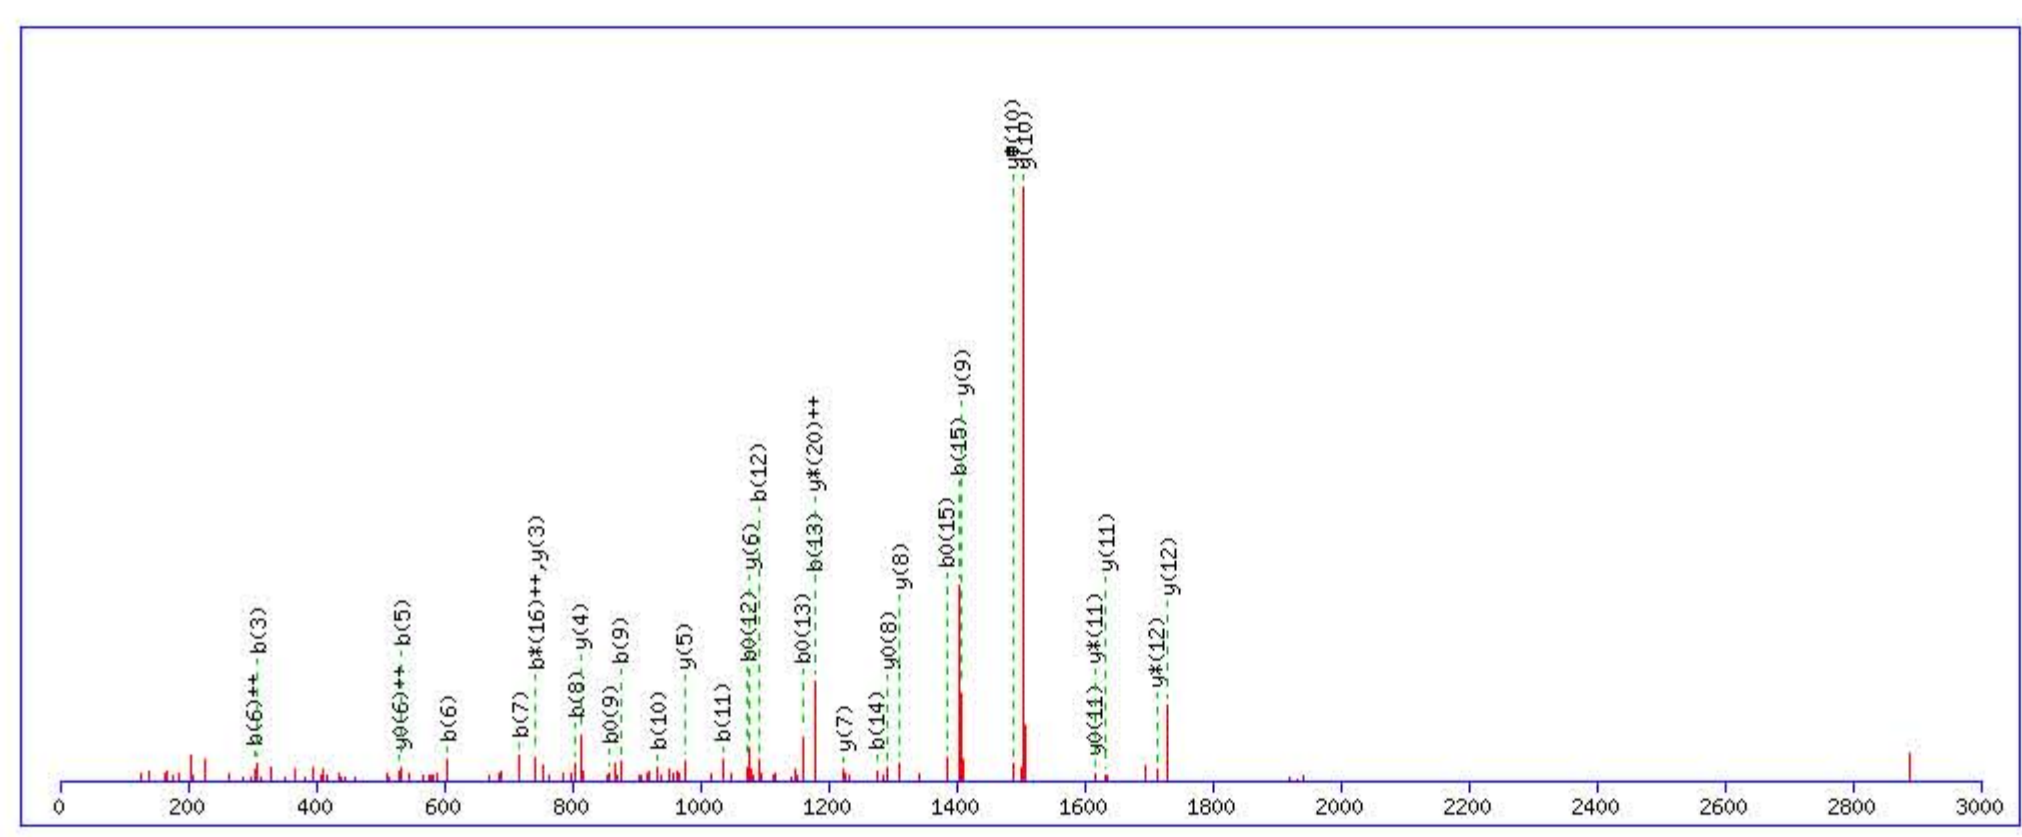

Monoisotopic mass of neutral peptide Mr(calc): 2907.433762  
 Fixed modifications: Carbamidomethyl (C) (apply to specified residues or termini only)  
 Variable modifications:  
 Q24 : Biotin:Thermo-21345 (Q)  
 Ions Score: 78 Expect: 4.7e-007  
 Matches : 36/242 fragment ions using 67 most intense peaks [\(help\)](#)

| #  | b                  | b <sup>++</sup>   | b <sup>*</sup> | b <sup>+++</sup>  | b <sup>0</sup>     | b <sup>0++</sup> | Seq. | y                  | y <sup>++</sup> | y <sup>*</sup>     | y <sup>+++</sup>   | y <sup>0</sup>     | y <sup>0++</sup>  | #  |
|----|--------------------|-------------------|----------------|-------------------|--------------------|------------------|------|--------------------|-----------------|--------------------|--------------------|--------------------|-------------------|----|
| 1  | 114.091340         | 57.549308         |                |                   |                    |                  | L    |                    |                 |                    |                    |                    |                   | 25 |
| 2  | 171.112804         | 86.060040         |                |                   |                    |                  | G    | 2795.356978        | 1398.182127     | 2778.330429        | 1389.668853        | 2777.346413        | 1389.176845       | 24 |
| 3  | <b>308.171716</b>  | 154.589496        |                |                   |                    |                  | H    | 2738.335514        | 1369.671395     | 2721.308965        | 1361.158121        | 2720.324949        | 1360.666113       | 23 |
| 4  | 405.224480         | 203.115878        |                |                   |                    |                  | P    | 2601.276602        | 1301.141939     | 2584.250053        | 1292.628665        | 2583.266037        | 1292.136657       | 22 |
| 5  | <b>534.267073</b>  | 267.637175        |                |                   | 516.256508         | 258.631892       | E    | 2504.223838        | 1252.615557     | 2487.197289        | 1244.102283        | 2486.213273        | 1243.610275       | 21 |
| 6  | <b>605.304187</b>  | <b>303.155732</b> |                |                   | 587.293622         | 294.150449       | A    | 2375.181245        | 1188.094261     | 2358.154696        | <b>1179.580986</b> | 2357.170680        | 1179.088978       | 20 |
| 7  | <b>718.388251</b>  | 359.697764        |                |                   | 700.377686         | 350.692481       | L    | 2304.144131        | 1152.575704     | 2287.117582        | 1144.062429        | 2286.133566        | 1143.570421       | 19 |
| 8  | <b>805.420279</b>  | 403.213778        |                |                   | 787.409714         | 394.208495       | S    | 2191.060067        | 1096.033672     | 2174.033518        | 1087.520397        | 2173.049502        | 1087.028389       | 18 |
| 9  | <b>876.457393</b>  | 438.732335        |                |                   | <b>858.446828</b>  | 429.727052       | A    | 2104.028039        | 1052.517658     | 2087.001490        | 1044.004383        | 2086.017474        | 1043.512375       | 17 |
| 10 | <b>933.478857</b>  | 467.243067        |                |                   | 915.468292         | 458.237784       | G    | 2032.990925        | 1016.999101     | 2015.964376        | 1008.485826        | 2014.980360        | 1007.993818       | 16 |
| 11 | <b>1034.526536</b> | 517.766906        |                |                   | 1016.515971        | 508.761624       | T    | 1975.969461        | 988.488369      | 1958.942912        | 979.975094         | 1957.958896        | 979.483086        | 15 |
| 12 | <b>1091.548000</b> | 546.277638        |                |                   | <b>1073.537435</b> | 537.272356       | G    | 1874.921782        | 937.964529      | 1857.895233        | 929.451255         | 1856.911217        | 928.959247        | 14 |
| 13 | <b>1178.580028</b> | 589.793652        |                |                   | <b>1160.569463</b> | 580.788370       | S    | 1817.900318        | 909.453797      | 1800.873769        | 900.940523         | 1799.889753        | 900.448515        | 13 |
| 14 | <b>1275.632792</b> | 638.320034        |                |                   | 1257.622227        | 629.314752       | P    | <b>1730.868290</b> | 865.937783      | <b>1713.841741</b> | 857.424509         | 1712.857725        | 856.932501        | 12 |
| 15 | <b>1403.691370</b> | 702.349323        | 1386.664821    | 693.836049        | <b>1385.680805</b> | 693.344041       | Q    | <b>1633.815526</b> | 817.411401      | <b>1616.788977</b> | 808.898127         | <b>1615.804961</b> | 808.406119        | 11 |
| 16 | 1500.744134        | 750.875705        | 1483.717585    | <b>742.362431</b> | 1482.733569        | 741.870423       | P    | <b>1505.756948</b> | 753.382112      | <b>1488.730399</b> | 744.868838         | <b>1487.746383</b> | 744.376830        | 10 |
| 17 | 1597.796898        | 799.402087        | 1580.770349    | 790.888813        | 1579.786333        | 790.396805       | P    | <b>1408.704184</b> | 704.855730      | 1391.677635        | 696.342456         | 1390.693619        | 695.850448        | 9  |
| 18 | 1684.828926        | 842.918101        | 1667.802377    | 834.404827        | 1666.818361        | 833.912819       | S    | <b>1311.651420</b> | 656.329348      | 1294.624871        | 647.816074         | <b>1293.640855</b> | 647.324066        | 8  |
| 19 | 1831.897340        | 916.452308        | 1814.870791    | 907.939034        | 1813.886775        | 907.447026       | F    | <b>1224.619392</b> | 612.813334      | 1207.592843        | 604.300060         | 1206.608827        | 603.808052        | 7  |
| 20 | 1932.945019        | 966.976148        | 1915.918470    | 958.462873        | 1914.934454        | 957.970865       | T    | <b>1077.550978</b> | 539.279127      | 1060.524429        | 530.765853         | 1059.540413        | <b>530.273845</b> | 6  |
| 21 | 2096.008348        | 1048.507812       | 2078.981799    | 1039.994538       | 2077.997783        | 1039.502530      | Y    | <b>976.503299</b>  | 488.755288      | 959.476750         | 480.242013         |                    |                   | 5  |
| 22 | 2167.045462        | 1084.026369       | 2150.018913    | 1075.513095       | 2149.034897        | 1075.021087      | A    | <b>813.439970</b>  | 407.223623      | 796.413421         | 398.710349         |                    |                   | 4  |
| 23 | 2295.104040        | 1148.055658       | 2278.077491    | 1139.542384       | 2277.093475        | 1139.050376      | Q    | <b>742.402856</b>  | 371.705066      | 725.376307         | 363.191792         |                    |                   | 3  |
| 24 | 2734.329366        | 1367.668321       | 2717.302817    | 1359.155047       | 2716.318801        | 1358.663039      | Q    | 614.344278         | 307.675777      | 597.317729         | 299.162503         |                    |                   | 2  |
| 25 |                    |                   |                |                   |                    |                  | R    | 175.118952         | 88.063114       | 158.092403         | 79.549839          |                    |                   | 1  |

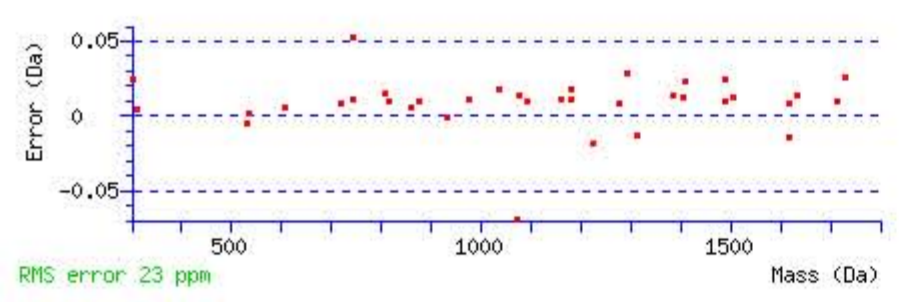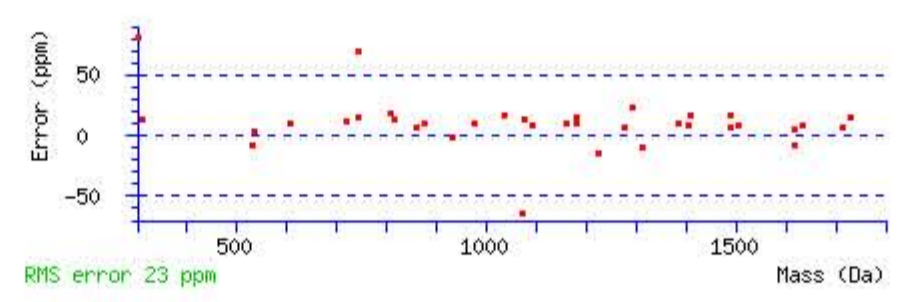

NCBI BLAST search of **LGHPEALSAGTGSPQPPSFTYAQQR**  
 (Parameters: blastp, nr protein database, expect=20000, no filter, PAM30)  
 Other BLAST [web gateways](#)

**All matches to this query**

| Score | Mr(calc):   | Delta    | Sequence                                  |
|-------|-------------|----------|-------------------------------------------|
| 78.0  | 2907.433762 | 0.039590 | <a href="#">LGHPEALSAGTGSPQPPSFTYAQQR</a> |
| 77.5  | 2907.433762 | 0.039590 | <a href="#">LGHPEALSAGTGSPQPPSFTYAQQR</a> |
| 36.0  | 2907.433762 | 0.039590 | <a href="#">LGHPEALSAGTGSPQPPSFTYAQQR</a> |
