# Supplementary material
Source: PubMed Central journal article supplement (PMC3945317)
Supplement: supp_M113.517904_jbc.M113.517904-8.pdf [file supp_M113.517904_jbc.M113.517904-8.pdf]

# MASCOT Search Results

## Peptide View

MS/MS Fragmentation of **DSTLIMQLLR**

Found in **1433B\_HUMAN**, 14-3-3 protein beta/alpha OS=Homo sapiens GN=YWHAB PE=1 SV=3

Match to Query 33792: 1499.832708 from(750.923630,2+) rtinseconds(2966) index(59252)

Title: Locus:1.1.1.1645.7 File:"2013-07-02 CLN FXIII 60 min 2nd F 4.wiff"

Data file C:\Program Files (x86)\Matrix Science\Mascot Daemon\mgf\5 FXIII 60 min 2nd\mascot\_daemon\_merge.mgf

Click mouse within plot area to zoom in by factor of two about that point

Or, Plot from  to  Da

Label all possible matches  Label matches used for scoring

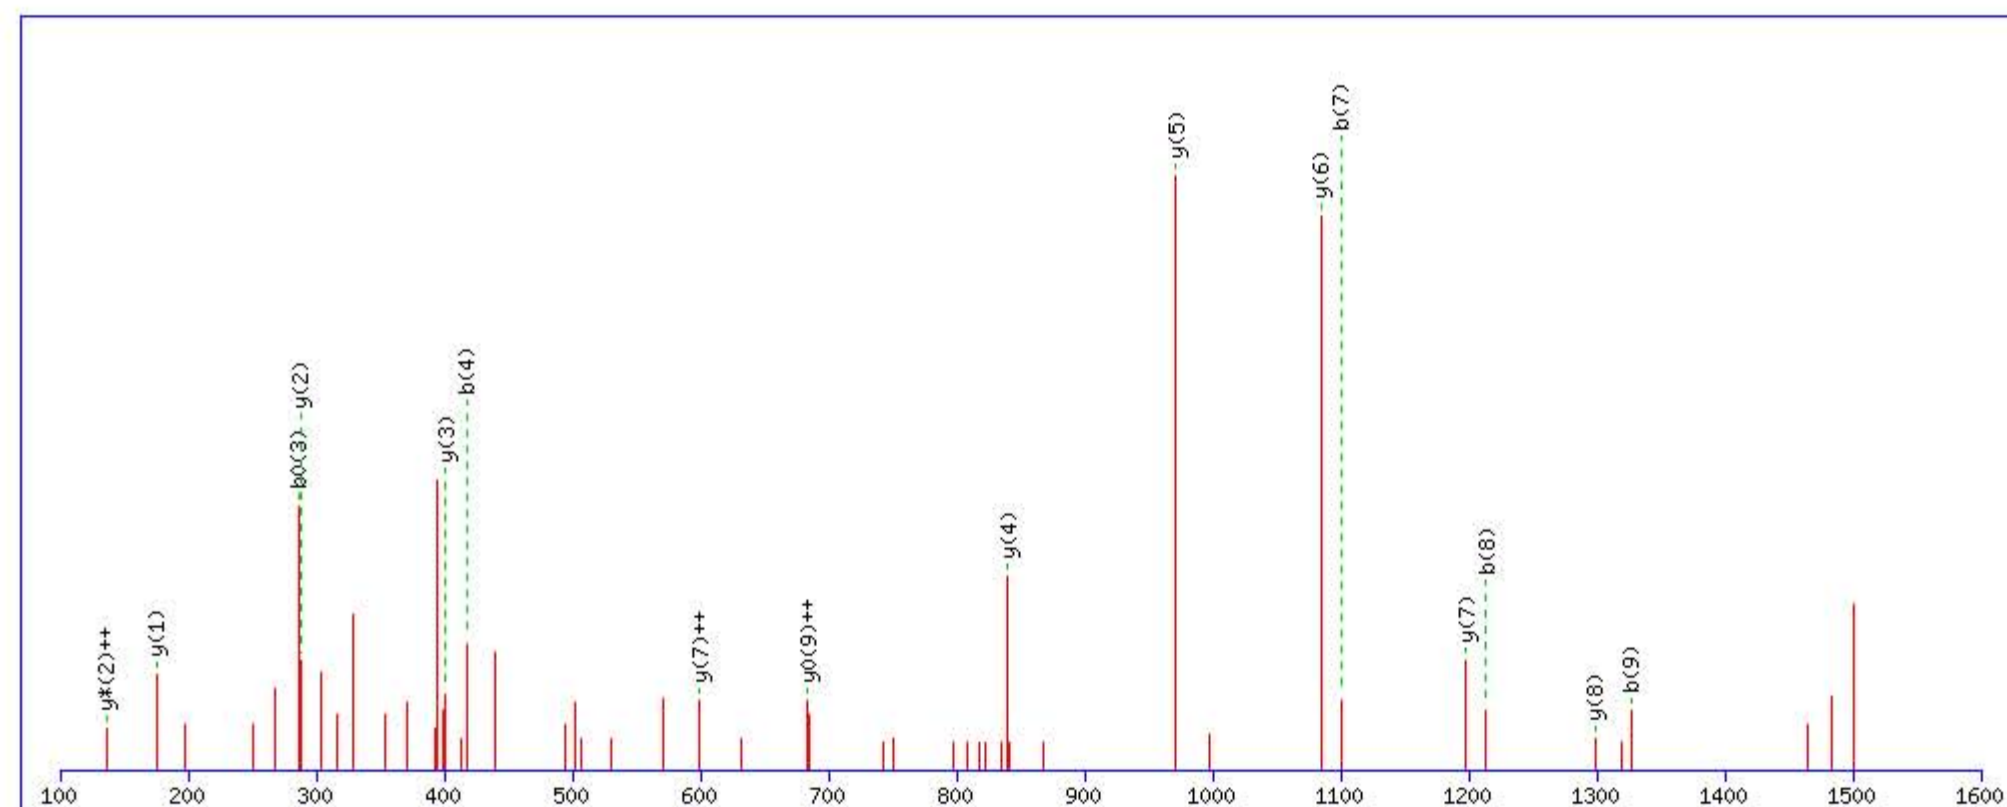

Monoisotopic mass of neutral peptide Mr(calc): 1499.820374

Fixed modifications: Carbamidomethyl (C) (apply to specified residues or termini only)

Variable modifications:

Q7 : Biotin:Thermo-21345 (Q)

Ions Score: 47 Expect: 0.00033

Matches : 16/82 fragment ions using 34 most intense peaks [\(help\)](#)

| #  | b           | b <sup>++</sup> | b <sup>+</sup> | b <sup>+++</sup> | b <sup>0</sup> | b <sup>0++</sup> | Seq. | y           | y <sup>++</sup> | y <sup>+</sup> | y <sup>+++</sup> | y <sup>0</sup> | y <sup>0++</sup> | #  |
|----|-------------|-----------------|----------------|------------------|----------------|------------------|------|-------------|-----------------|----------------|------------------|----------------|------------------|----|
| 1  | 116.034219  | 58.520748       |                |                  | 98.023654      | 49.515465        | D    |             |                 |                |                  |                |                  | 10 |
| 2  | 203.066247  | 102.036761      |                |                  | 185.055682     | 93.031479        | S    | 1385.800726 | 693.404001      | 1368.774177    | 684.890726       | 1367.790161    | 684.398718       | 9  |
| 3  | 304.113926  | 152.560601      |                |                  | 286.103361     | 143.555319       | T    | 1298.768698 | 649.887987      | 1281.742149    | 641.374712       | 1280.758133    | 640.882704       | 8  |
| 4  | 417.197990  | 209.102633      |                |                  | 399.187425     | 200.097351       | L    | 1197.721019 | 599.364147      | 1180.694470    | 590.850873       |                |                  | 7  |
| 5  | 530.282054  | 265.644665      |                |                  | 512.271489     | 256.639383       | I    | 1084.636955 | 542.822115      | 1067.610406    | 534.308841       |                |                  | 6  |
| 6  | 661.322539  | 331.164908      |                |                  | 643.311974     | 322.159625       | M    | 971.552891  | 486.280083      | 954.526342     | 477.766809       |                |                  | 5  |
| 7  | 1100.547865 | 550.777571      | 1083.521316    | 542.264296       | 1082.537300    | 541.772288       | Q    | 840.512406  | 420.759841      | 823.485857     | 412.246566       |                |                  | 4  |
| 8  | 1213.631929 | 607.319602      | 1196.605380    | 598.806328       | 1195.621364    | 598.314320       | L    | 401.287080  | 201.147178      | 384.260531     | 192.633903       |                |                  | 3  |
| 9  | 1326.715993 | 663.861634      | 1309.689444    | 655.348360       | 1308.705428    | 654.856352       | L    | 288.203016  | 144.605146      | 271.176467     | 136.091871       |                |                  | 2  |
| 10 |             |                 |                |                  |                |                  | R    | 175.118952  | 88.063114       | 158.092403     | 79.549839        |                |                  | 1  |

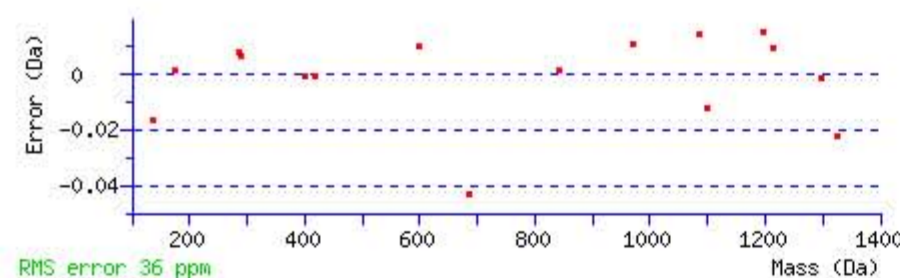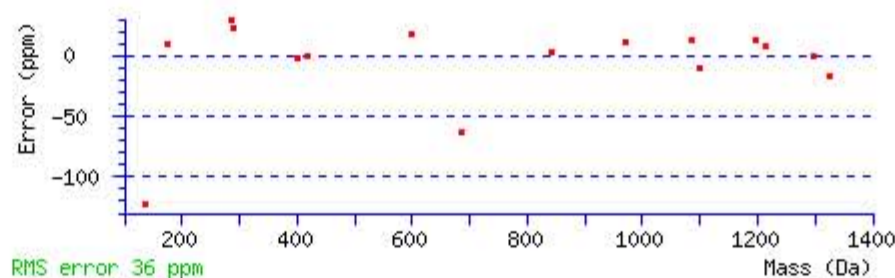

NCBI BLAST search of **DSTLIMQLLR**

(Parameters: blastp, nr protein database, expect=20000, no filter, PAM30)

Other BLAST [web gateways](#)

## All matches to this query

| Score | Mr(calc):   | Delta    | Sequence                      |
|-------|-------------|----------|-------------------------------|
| 47.1  | 1499.820374 | 0.012334 | <a href="#">DSTLIMQLLR</a>    |
| 22.0  | 1499.819489 | 0.013219 | <a href="#">SLSLVDNEIELLR</a> |
| 18.8  | 1499.830719 | 0.001989 | <a href="#">EEIVDKTRLIER</a>  |
| 17.9  | 1499.824203 | 0.008505 | <a href="#">MNKLGTRLVPAER</a> |
| 8.5   | 1499.830719 | 0.001989 | <a href="#">IEALSSKVQQLER</a> |
| 7.8   | 1499.819504 | 0.013204 | <a href="#">KTLLVEDILGDER</a> |
| 6.9   | 1499.820847 | 0.011861 | <a href="#">AFIKNSSLTVHQR</a> |
| 6.9   | 1499.832062 | 0.000646 | <a href="#">AFSQRASLSIHKR</a> |
| 6.7   | 1499.820374 | 0.012334 | <a href="#">MVQALTELLR</a>    |
| 6.4   | 1499.814316 | 0.018392 | <a href="#">QQGKAFQRAR</a>    |



**MASCOT** **SCIENCE** Mascot Search Results

Peptide View

MS/MS Fragmentation of **HQGVMVGMGQK**

Found in **ACTA\_HUMAN**, Actin, aortic smooth muscle OS=Homo sapiens GN=ACTA2 PE=1 SV=1

Match to Query 33746: 1497.724332 from(500.248720,3+) rtinseconds(1438) index(49079)

Title: Locus:1.1.1.1116.15 File:"2013-07-02 CLN FXIII 60 min 2nd F 4.wiff"

Data file C:\Program Files (x86)\Matrix Science\Mascot Daemon\mgf5 FXIII 60 min 2nd\mascot\_daemon\_merge.mgf

Click mouse within plot area to zoom in by factor of two about that point

Or, Plot from  to  Da

Label all possible matches  Label matches used for scoring

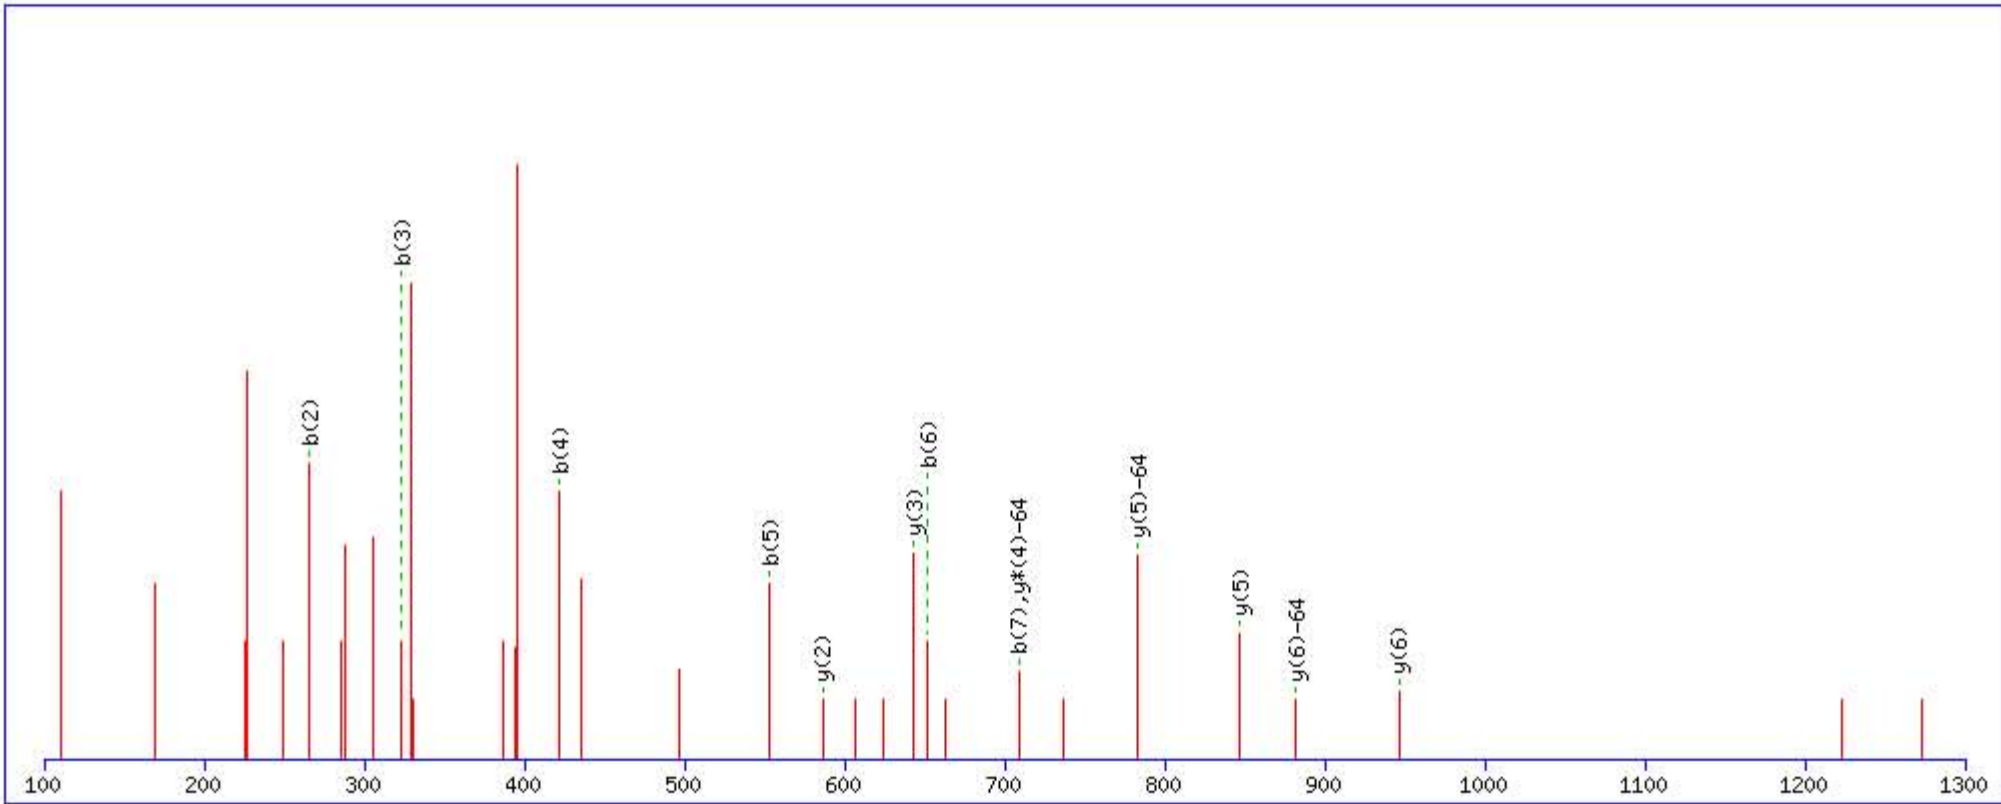

Monoisotopic mass of neutral peptide Mr(calc): 1497.725464

Fixed modifications: Carbamidomethyl (C) (apply to specified residues or termini only)

Variable modifications:

M8 : Oxidation (M), with neutral losses 0.000000 (shown in table), 63.998285

Q10 : Biotin:Thermo-21345 (Q)

Ions Score: 31 Expect: 0.011

Matches : 13/118 fragment ions using 24 most intense peaks [\(help\)](#)

| #  | b                 | b <sup>++</sup> | b <sup>*</sup> | b <sup>*++</sup> | Seq. | y                 | y <sup>++</sup> | y <sup>*</sup> | y <sup>*++</sup> | #  |
|----|-------------------|-----------------|----------------|------------------|------|-------------------|-----------------|----------------|------------------|----|
| 1  | 138.066188        | 69.536732       |                |                  | H    |                   |                 |                |                  | 11 |
| 2  | <b>266.124766</b> | 133.566021      | 249.098217     | 125.052746       | Q    | 1361.673813       | 681.340545      | 1344.647264    | 672.827270       | 10 |
| 3  | <b>323.146230</b> | 162.076753      | 306.119681     | 153.563478       | G    | 1233.615235       | 617.311256      | 1216.588686    | 608.797981       | 9  |
| 4  | <b>422.214644</b> | 211.610960      | 405.188095     | 203.097685       | V    | 1176.593771       | 588.800524      | 1159.567222    | 580.287249       | 8  |
| 5  | <b>553.255129</b> | 277.131203      | 536.228580     | 268.617928       | M    | 1077.525357       | 539.266317      | 1060.498808    | 530.753042       | 7  |
| 6  | <b>652.323543</b> | 326.665410      | 635.296994     | 318.152135       | V    | <b>946.484872</b> | 473.746074      | 929.458323     | 465.232800       | 6  |
| 7  | <b>709.345007</b> | 355.176142      | 692.318458     | 346.662867       | G    | <b>847.416458</b> | 424.211867      | 830.389909     | 415.698593       | 5  |
| 8  | 856.380407        | 428.693842      | 839.353858     | 420.180567       | M    | 790.394994        | 395.701135      | 773.368445     | 387.187861       | 4  |
| 9  | 913.401871        | 457.204574      | 896.375322     | 448.691299       | G    | <b>643.359594</b> | 322.183435      | 626.333045     | 313.670161       | 3  |
| 10 | 1352.627197       | 676.817237      | 1335.600648    | 668.303962       | Q    | <b>586.338130</b> | 293.672703      | 569.311581     | 285.159429       | 2  |
| 11 |                   |                 |                |                  | K    | 147.112804        | 74.060040       | 130.086255     | 65.546765        | 1  |

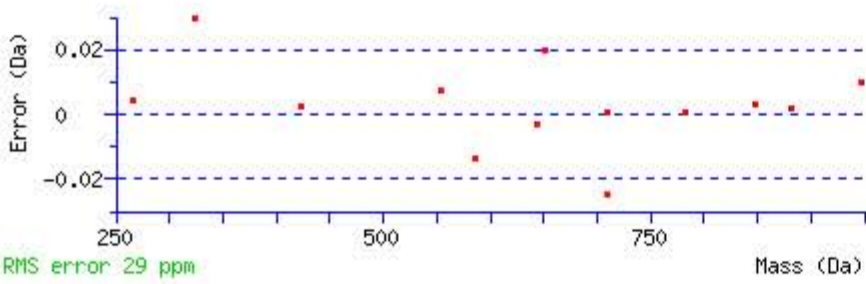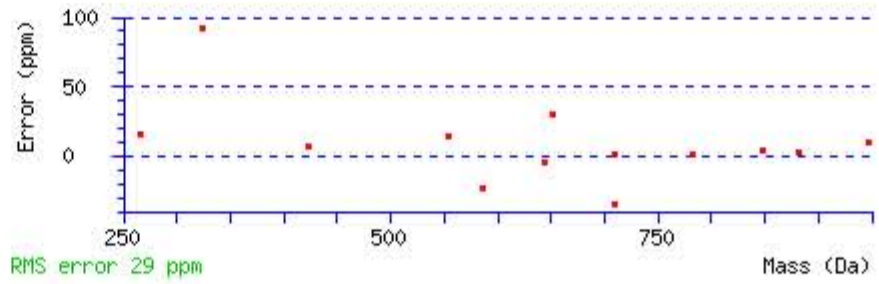

NCBI BLAST search of **HQGVMVGMGQK**

(Parameters: blastp, nr protein database, expect=20000, no filter, PAM30)

Other BLAST [web gateways](#)

All matches to this query

| Score | Mr(calc):   | Delta     | Sequence                    |
|-------|-------------|-----------|-----------------------------|
| 31.2  | 1497.725464 | -0.001132 | <a href="#">HQGVMVGMGQK</a> |

Mascot: <http://www.matrixscience.com/>



# MASCOT Search Results

## Peptide View

MS/MS Fragmentation of **DSYVGDEAQS**K

Found in **ACTA\_HUMAN**, Actin, aortic smooth muscle OS=Homo sapiens GN=ACTA2 PE=1 SV=1

Match to Query 34165: 1508.680588 from(755.347570,2+) rtinseconds(1545) index(33589)

Title: Locus:1.1.1.2957.20 File:"2013-07-02 CLN FXIII 60 min 2nd F 3.wiff"

Data file C:\Program Files (x86)\Matrix Science\Mascot Daemon\mgf5 FXIII 60 min 2nd\mascot\_daemon\_merge.mgf

Click mouse within plot area to zoom in by factor of two about that point

Or, Plot from  to  Da

Label all possible matches  Label matches used for scoring

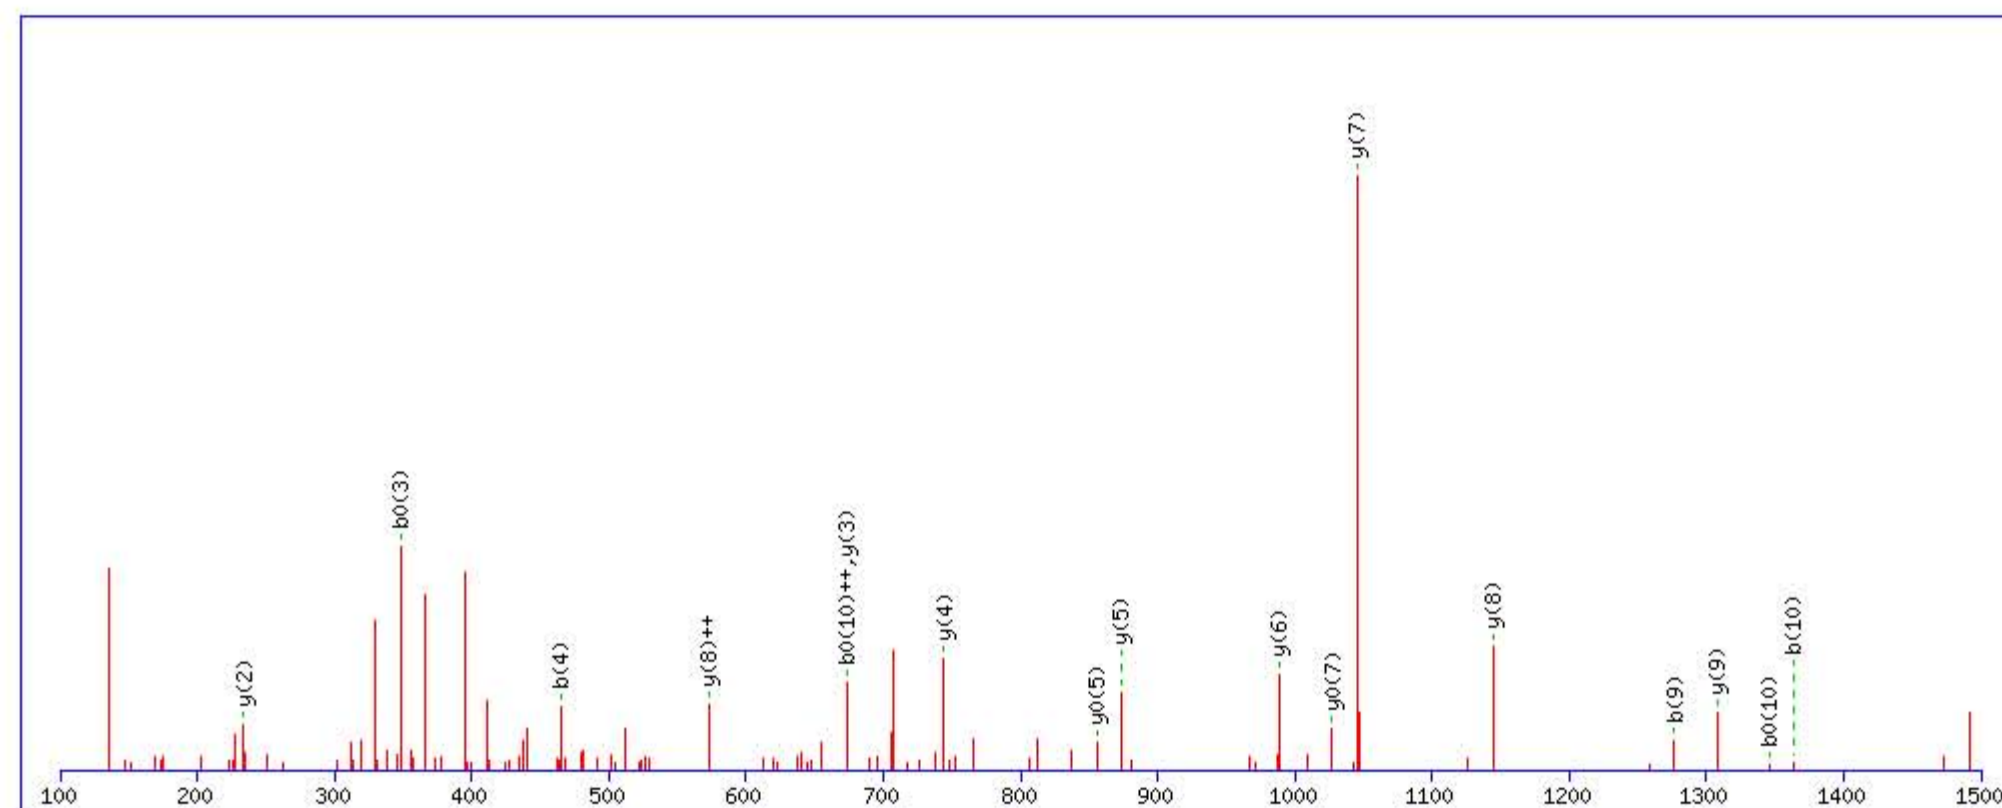

Monoisotopic mass of neutral peptide Mr(calc): 1508.681702

Fixed modifications: Carbamidomethyl (C) (apply to specified residues or termini only)

Variable modifications:

Q9 : Biotin:Thermo-21345 (Q)

Ions Score: 53 Expect: 5.6e-005

Matches : 17/102 fragment ions using 28 most intense peaks [\(help\)](#)

| #  | b           | b <sup>++</sup> | b <sup>+</sup> | b <sup>*++</sup> | b <sup>0</sup> | b <sup>0++</sup> | Seq. | y           | y <sup>++</sup> | y <sup>+</sup> | y <sup>*++</sup> | y <sup>0</sup> | y <sup>0++</sup> | #  |
|----|-------------|-----------------|----------------|------------------|----------------|------------------|------|-------------|-----------------|----------------|------------------|----------------|------------------|----|
| 1  | 116.034219  | 58.520748       |                |                  | 98.023654      | 49.515465        | D    |             |                 |                |                  |                |                  | 11 |
| 2  | 203.066247  | 102.036761      |                |                  | 185.055682     | 93.031479        | S    | 1394.662043 | 697.834660      | 1377.635494    | 689.321385       | 1376.651478    | 688.829377       | 10 |
| 3  | 366.129576  | 183.568426      |                |                  | 348.119011     | 174.563144       | Y    | 1307.630015 | 654.318646      | 1290.603466    | 645.805371       | 1289.619450    | 645.313363       | 9  |
| 4  | 465.197990  | 233.102633      |                |                  | 447.187425     | 224.097351       | V    | 1144.566686 | 572.786981      | 1127.540137    | 564.273707       | 1126.556121    | 563.781699       | 8  |
| 5  | 522.219454  | 261.613365      |                |                  | 504.208889     | 252.608083       | G    | 1045.498272 | 523.252774      | 1028.471723    | 514.739500       | 1027.487707    | 514.247492       | 7  |
| 6  | 637.246397  | 319.126837      |                |                  | 619.235832     | 310.121554       | D    | 988.476808  | 494.742042      | 971.450259     | 486.228768       | 970.466243     | 485.736760       | 6  |
| 7  | 766.288990  | 383.648133      |                |                  | 748.278425     | 374.642851       | E    | 873.449865  | 437.228571      | 856.423316     | 428.715296       | 855.439300     | 428.223288       | 5  |
| 8  | 837.326104  | 419.166690      |                |                  | 819.315539     | 410.161408       | A    | 744.407272  | 372.707274      | 727.380723     | 364.194000       | 726.396707     | 363.701992       | 4  |
| 9  | 1276.551430 | 638.779353      | 1259.524881    | 630.266079       | 1258.540865    | 629.774070       | Q    | 673.370158  | 337.188717      | 656.343609     | 328.675443       | 655.359593     | 328.183435       | 3  |
| 10 | 1363.583458 | 682.295367      | 1346.556909    | 673.782093       | 1345.572893    | 673.290085       | S    | 234.144832  | 117.576054      | 217.118283     | 109.062780       | 216.134267     | 108.570772       | 2  |
| 11 |             |                 |                |                  |                |                  | K    | 147.112804  | 74.060040       | 130.086255     | 65.546765        |                |                  | 1  |

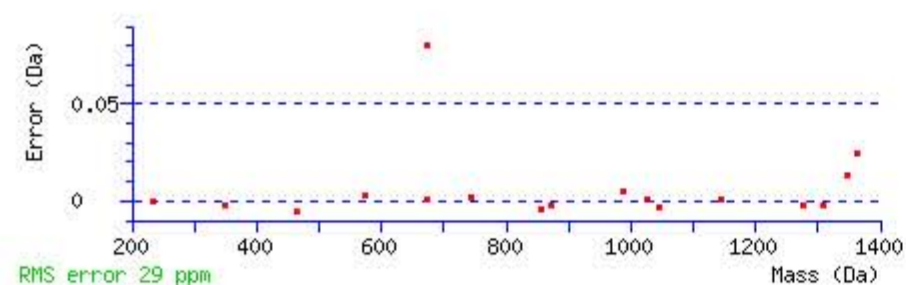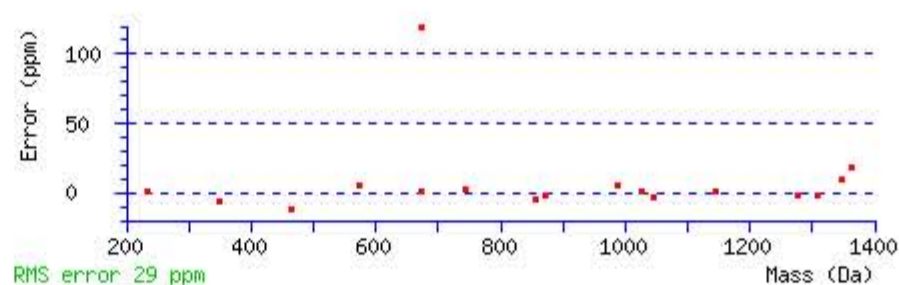

NCBI BLAST search of **DSYVGDEAQS**K

(Parameters: blastp, nr protein database, expect=20000, no filter, PAM30)

Other BLAST [web gateways](#)

All matches to this query

| Score | Mr(calc):   | Delta     | Sequence                          |
|-------|-------------|-----------|-----------------------------------|
| 52.7  | 1508.681702 | -0.001114 | <a href="#">DSYVGDEAQS</a> K      |
| 7.5   | 1508.690277 | -0.009689 | <a href="#">GGRGGMGGSDRGGF</a> NK |

Mascot: <http://www.matrixscience.com/>



# MASCOT Search Results

## Peptide View

MS/MS Fragmentation of **SYELPDGQVITIGNER**

Found in **ACTA\_HUMAN**, Actin, aortic smooth muscle OS=Homo sapiens GN=ACTA2 PE=1 SV=1

Match to Query 49230: 2101.062372 from(701.361400,3+) rtinseconds(2611) index(40232)

Title: Locus:1.1.1.3328.10 File:"2013-07-02 CLN FXIII 60 min 2nd F 3.wiff"

Data file C:\Program Files (x86)\Matrix Science\Mascot Daemon\mgf5 FXIII 60 min 2nd\mascot\_daemon\_merge.mgf

Click mouse within plot area to zoom in by factor of two about that point

Or, Plot from  to  Da

Label all possible matches  Label matches used for scoring

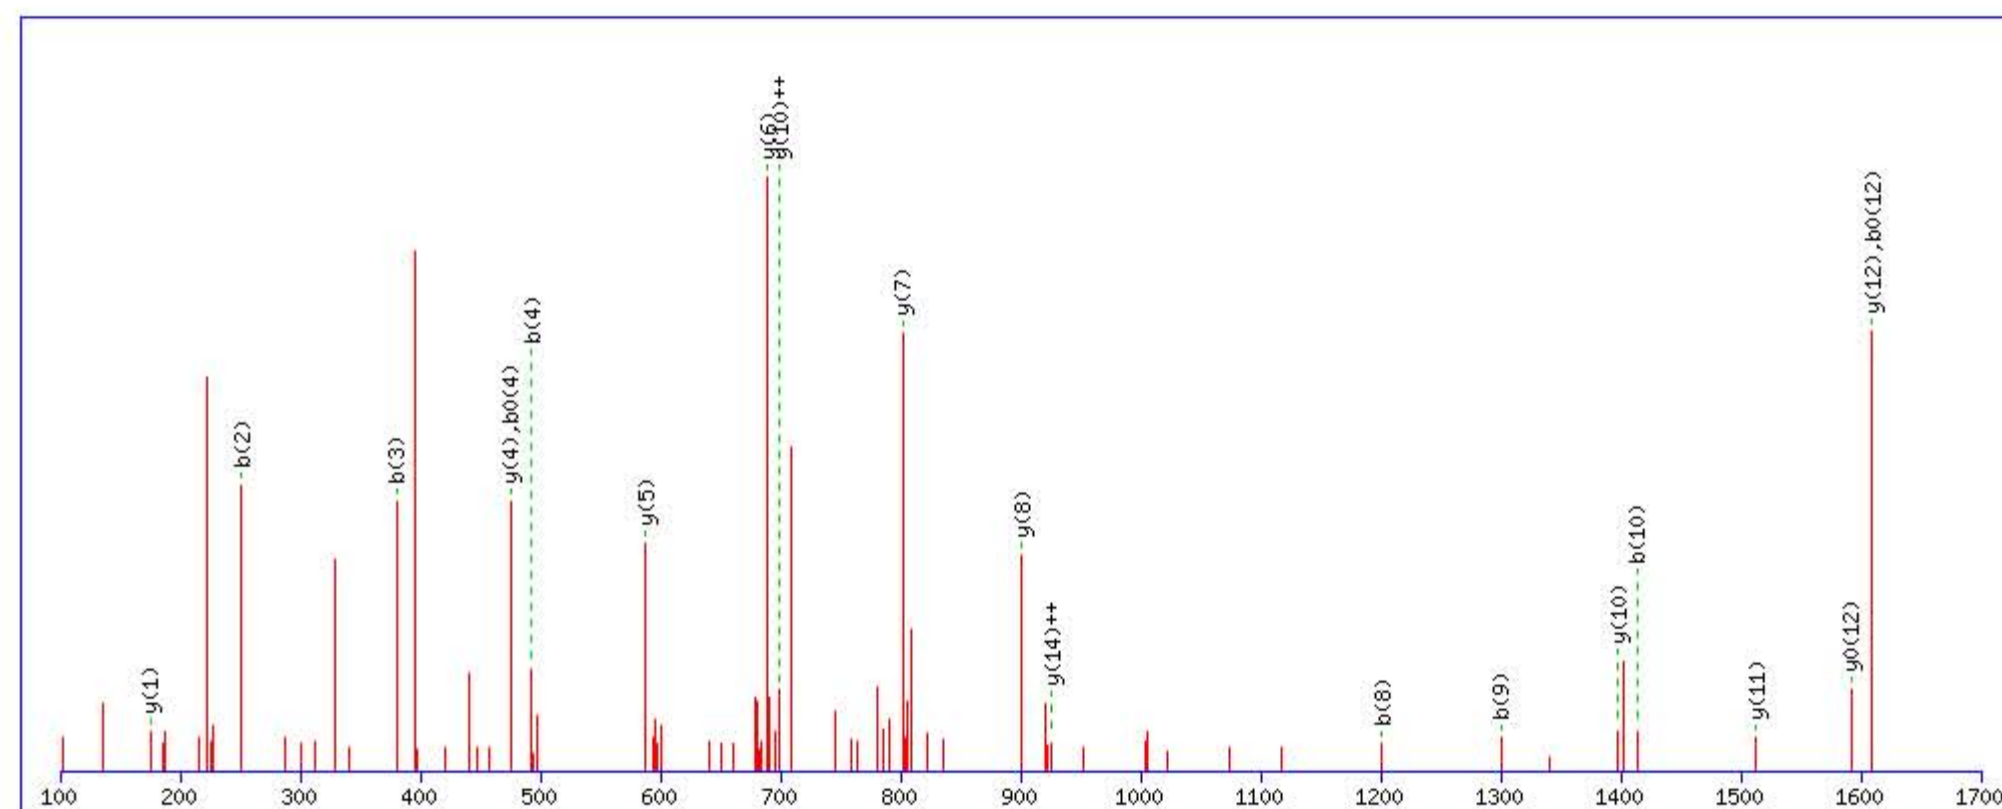

Monoisotopic mass of neutral peptide Mr(calc): 2101.051376

Fixed modifications: Carbamidomethyl (C) (apply to specified residues or termini only)

Variable modifications:

Q8 : Biotin:Thermo-21345 (Q)

Ions Score: 55 Expect: 3.1e-005

Matches : 20/164 fragment ions using 30 most intense peaks [\(help\)](#)

| #  | b                  | b <sup>++</sup> | b <sup>*</sup> | b <sup>*++</sup> | b <sup>0</sup>     | b <sup>0++</sup> | Seq. | y                  | y <sup>++</sup>   | y <sup>*</sup> | y <sup>*++</sup> | y <sup>0</sup>     | y <sup>0++</sup> | #  |
|----|--------------------|-----------------|----------------|------------------|--------------------|------------------|------|--------------------|-------------------|----------------|------------------|--------------------|------------------|----|
| 1  | 88.039304          | 44.523290       |                |                  | 70.028739          | 35.518008        | S    |                    |                   |                |                  |                    |                  | 16 |
| 2  | <b>251.102633</b>  | 126.054954      |                |                  | 233.092068         | 117.049672       | Y    | 2015.026640        | 1008.016958       | 1998.000091    | 999.503683       | 1997.016075        | 999.011675       | 15 |
| 3  | <b>380.145226</b>  | 190.576251      |                |                  | 362.134661         | 181.570969       | E    | 1851.963311        | <b>926.485294</b> | 1834.936762    | 917.972019       | 1833.952746        | 917.480011       | 14 |
| 4  | <b>493.229290</b>  | 247.118283      |                |                  | <b>475.218725</b>  | 238.113001       | L    | 1722.920718        | 861.963997        | 1705.894169    | 853.450722       | 1704.910153        | 852.958714       | 13 |
| 5  | 590.282054         | 295.644665      |                |                  | 572.271489         | 286.639383       | P    | <b>1609.836654</b> | 805.421965        | 1592.810105    | 796.908691       | <b>1591.826089</b> | 796.416682       | 12 |
| 6  | 705.308997         | 353.158137      |                |                  | 687.298432         | 344.152854       | D    | <b>1512.783890</b> | 756.895583        | 1495.757341    | 748.382309       | 1494.773325        | 747.890300       | 11 |
| 7  | 762.330461         | 381.668869      |                |                  | 744.319896         | 372.663586       | G    | <b>1397.756947</b> | <b>699.382111</b> | 1380.730398    | 690.868837       | 1379.746382        | 690.376829       | 10 |
| 8  | <b>1201.555787</b> | 601.281532      | 1184.529238    | 592.768257       | 1183.545222        | 592.276249       | Q    | 1340.735483        | 670.871379        | 1323.708934    | 662.358105       | 1322.724918        | 661.866097       | 9  |
| 9  | <b>1300.624201</b> | 650.815739      | 1283.597652    | 642.302464       | 1282.613636        | 641.810456       | V    | <b>901.510157</b>  | 451.258716        | 884.483608     | 442.745442       | 883.499592         | 442.253434       | 8  |
| 10 | <b>1413.708265</b> | 707.357771      | 1396.681716    | 698.844496       | 1395.697700        | 698.352488       | I    | <b>802.441743</b>  | 401.724509        | 785.415194     | 393.211235       | 784.431178         | 392.719227       | 7  |
| 11 | 1514.755944        | 757.881610      | 1497.729395    | 749.368336       | 1496.745379        | 748.876328       | T    | <b>689.357679</b>  | 345.182478        | 672.331130     | 336.669203       | 671.347114         | 336.177195       | 6  |
| 12 | 1627.840008        | 814.423642      | 1610.813459    | 805.910368       | <b>1609.829443</b> | 805.418359       | I    | <b>588.310000</b>  | 294.658638        | 571.283451     | 286.145363       | 570.299435         | 285.653355       | 5  |
| 13 | 1684.861472        | 842.934374      | 1667.834923    | 834.421099       | 1666.850907        | 833.929091       | G    | <b>475.225936</b>  | 238.116606        | 458.199387     | 229.603331       | 457.215371         | 229.111323       | 4  |
| 14 | 1798.904399        | 899.955837      | 1781.877850    | 891.442563       | 1780.893834        | 890.950555       | N    | 418.204472         | 209.605874        | 401.177923     | 201.092600       | 400.193907         | 200.600592       | 3  |
| 15 | 1927.946992        | 964.477134      | 1910.920443    | 955.963860       | 1909.936427        | 955.471851       | E    | 304.161545         | 152.584411        | 287.134996     | 144.071136       | 286.150980         | 143.579128       | 2  |
| 16 |                    |                 |                |                  |                    |                  | R    | <b>175.118952</b>  | 88.063114         | 158.092403     | 79.549839        |                    |                  | 1  |

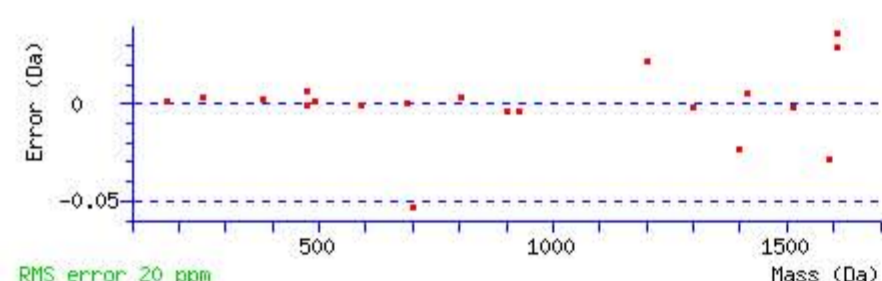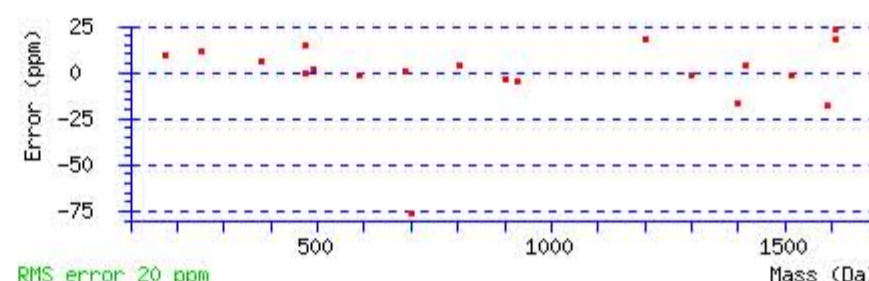

NCBI BLAST search of [SYELPDGQVITIGNER](#)

(Parameters: blastp, nr protein database, expect=20000, no filter, PAM30)

Other BLAST [web gateways](#)

### All matches to this query

| Score | Mr(calc):   | Delta    | Sequence                              |
|-------|-------------|----------|---------------------------------------|
| 55.3  | 2101.051376 | 0.010996 | <a href="#">SYELPDGQVITIGNER</a>      |
| 7.2   | 2101.047363 | 0.015009 | <a href="#">IMGGNSILHSAADSVTSAVQK</a> |

Mascot: <http://www.matrixscience.com/>



# MASCOT SEARCH RESULTS

## Peptide View

MS/MS Fragmentation of **VNCLQTR**

Found in **AFAM\_HUMAN**, Afamin OS=Homo sapiens GN=AFM PE=1 SV=1

Match to Query 23313: 1200.592788 from(601.303670,2+) rtinseconds(1485) index(33178)

Title: Locus:1.1.1.2936.8 File:"2013-07-02 CLN FXIII 60 min 2nd F 3.wiff"

Data file C:\Program Files (x86)\Matrix Science\Mascot Daemon\mgf\5 FXIII 60 min 2nd\mascot\_daemon\_merge.mgf

Click mouse within plot area to zoom in by factor of two about that point

Or, Plot from  to  Da

Label all possible matches  Label matches used for scoring

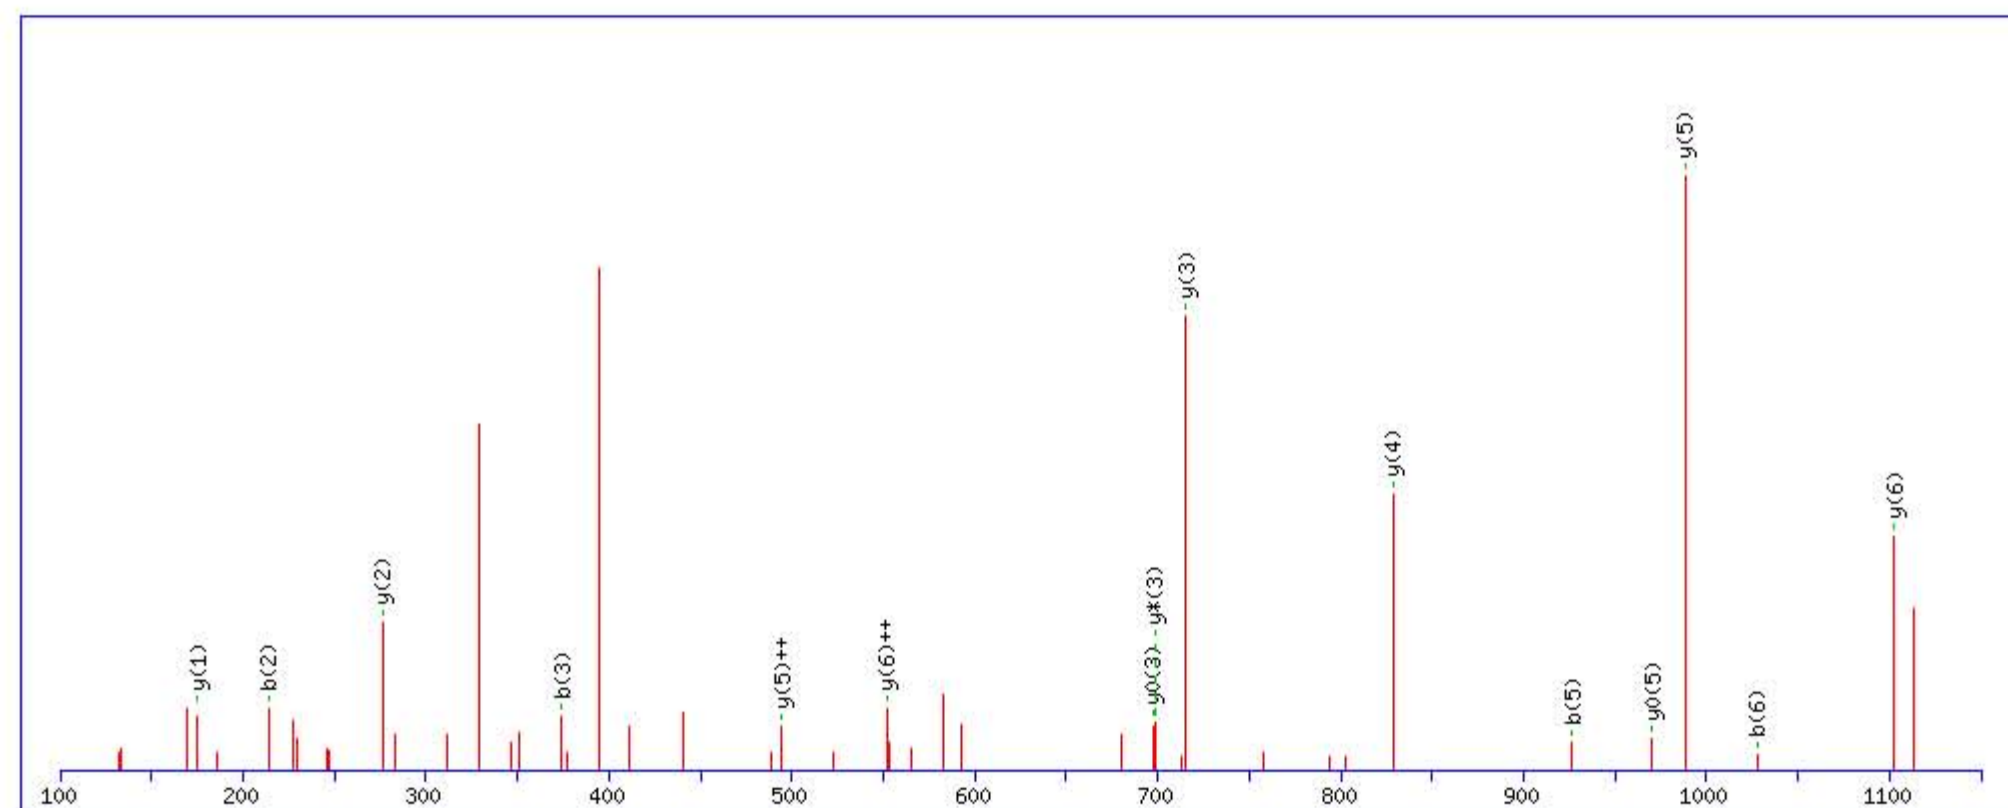

Monoisotopic mass of neutral peptide Mr(calc): 1200.610733

Fixed modifications: Carbamidomethyl (C) (apply to specified residues or termini only)

Variable modifications:

Q5 : Biotin:Thermo-21345 (Q)

Ions Score: 39 Expect: 0.00065

Matches : 15/58 fragment ions using 27 most intense peaks [\(help\)](#)

| # | b                  | b <sup>++</sup> | b <sup>+</sup> | b <sup>*++</sup> | b <sup>0</sup> | b <sup>0++</sup> | Seq. | y                  | y <sup>++</sup>   | y <sup>+</sup>    | y <sup>*++</sup> | y <sup>0</sup>    | y <sup>0++</sup> | # |
|---|--------------------|-----------------|----------------|------------------|----------------|------------------|------|--------------------|-------------------|-------------------|------------------|-------------------|------------------|---|
| 1 | 100.075690         | 50.541483       |                |                  |                |                  | V    |                    |                   |                   |                  |                   |                  | 7 |
| 2 | <b>214.118617</b>  | 107.562947      | 197.092068     | 99.049672        |                |                  | N    | <b>1102.549597</b> | <b>551.778437</b> | 1085.523048       | 543.265162       | 1084.539032       | 542.773154       | 6 |
| 3 | <b>374.149266</b>  | 187.578271      | 357.122717     | 179.064997       |                |                  | C    | <b>988.506670</b>  | <b>494.756973</b> | 971.480121        | 486.243698       | <b>970.496105</b> | 485.751691       | 5 |
| 4 | 487.233330         | 244.120303      | 470.206781     | 235.607029       |                |                  | L    | <b>828.476021</b>  | 414.741649        | 811.449472        | 406.228374       | 810.465456        | 405.736366       | 4 |
| 5 | <b>926.458656</b>  | 463.732966      | 909.432107     | 455.219692       |                |                  | Q    | <b>715.391957</b>  | 358.199617        | <b>698.365408</b> | 349.686342       | <b>697.381392</b> | 349.194334       | 3 |
| 6 | <b>1027.506335</b> | 514.256806      | 1010.479786    | 505.743531       | 1009.495770    | 505.251523       | T    | <b>276.166631</b>  | 138.586953        | 259.140082        | 130.073679       | 258.156066        | 129.581671       | 2 |
| 7 |                    |                 |                |                  |                |                  | R    | <b>175.118952</b>  | 88.063114         | 158.092403        | 79.549839        |                   |                  | 1 |

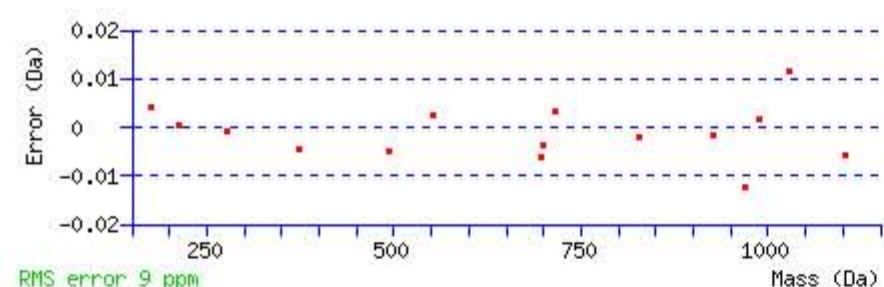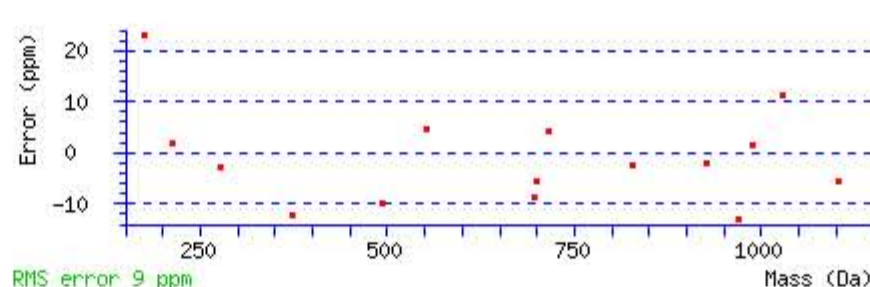

NCBI BLAST search of **VNCLQTR**

(Parameters: blastp, nr protein database, expect=20000, no filter, PAM30)

Other BLAST [web gateways](#)

All matches to this query

| Score | Mr(calc):   | Delta     | Sequence                    |
|-------|-------------|-----------|-----------------------------|
| 38.7  | 1200.610733 | -0.017945 | <a href="#">VNCLQTR</a>     |
| 4.4   | 1200.603333 | -0.010545 | <a href="#">GRIAEPSVCGR</a> |
| 3.0   | 1200.592087 | 0.000701  | <a href="#">QEATNATR</a>    |
| 2.9   | 1200.592102 | 0.000686  | <a href="#">QSVGENTR</a>    |
| 2.0   | 1200.603333 | -0.010545 | <a href="#">SQEGRGTR</a>    |
| 0.1   | 1200.610733 | -0.017945 | <a href="#">QCNVITR</a>     |

Mascot: <http://www.matrixscience.com/>



# MASCOT Search Results

## Peptide View

MS/MS Fragmentation of **LPNNVLQEK**

Found in **AFAM\_HUMAN**, Afamin OS=Homo sapiens GN=AFM PE=1 SV=1

Match to Query 29030: 1364.745432 from(455.922420,3+) rtinseconds(1846) index(4828)

Title: Locus:1.1.1.1452.7 File:"2013-07-02 CLN FXIII 60 min 2nd F 1.wiff"

Data file C:\Program Files (x86)\Matrix Science\Mascot Daemon\mgf\5 FXIII 60 min 2nd\mascot\_daemon\_merge.mgf

Click mouse within plot area to zoom in by factor of two about that point

Or, Plot from  to  Da

Label all possible matches  Label matches used for scoring

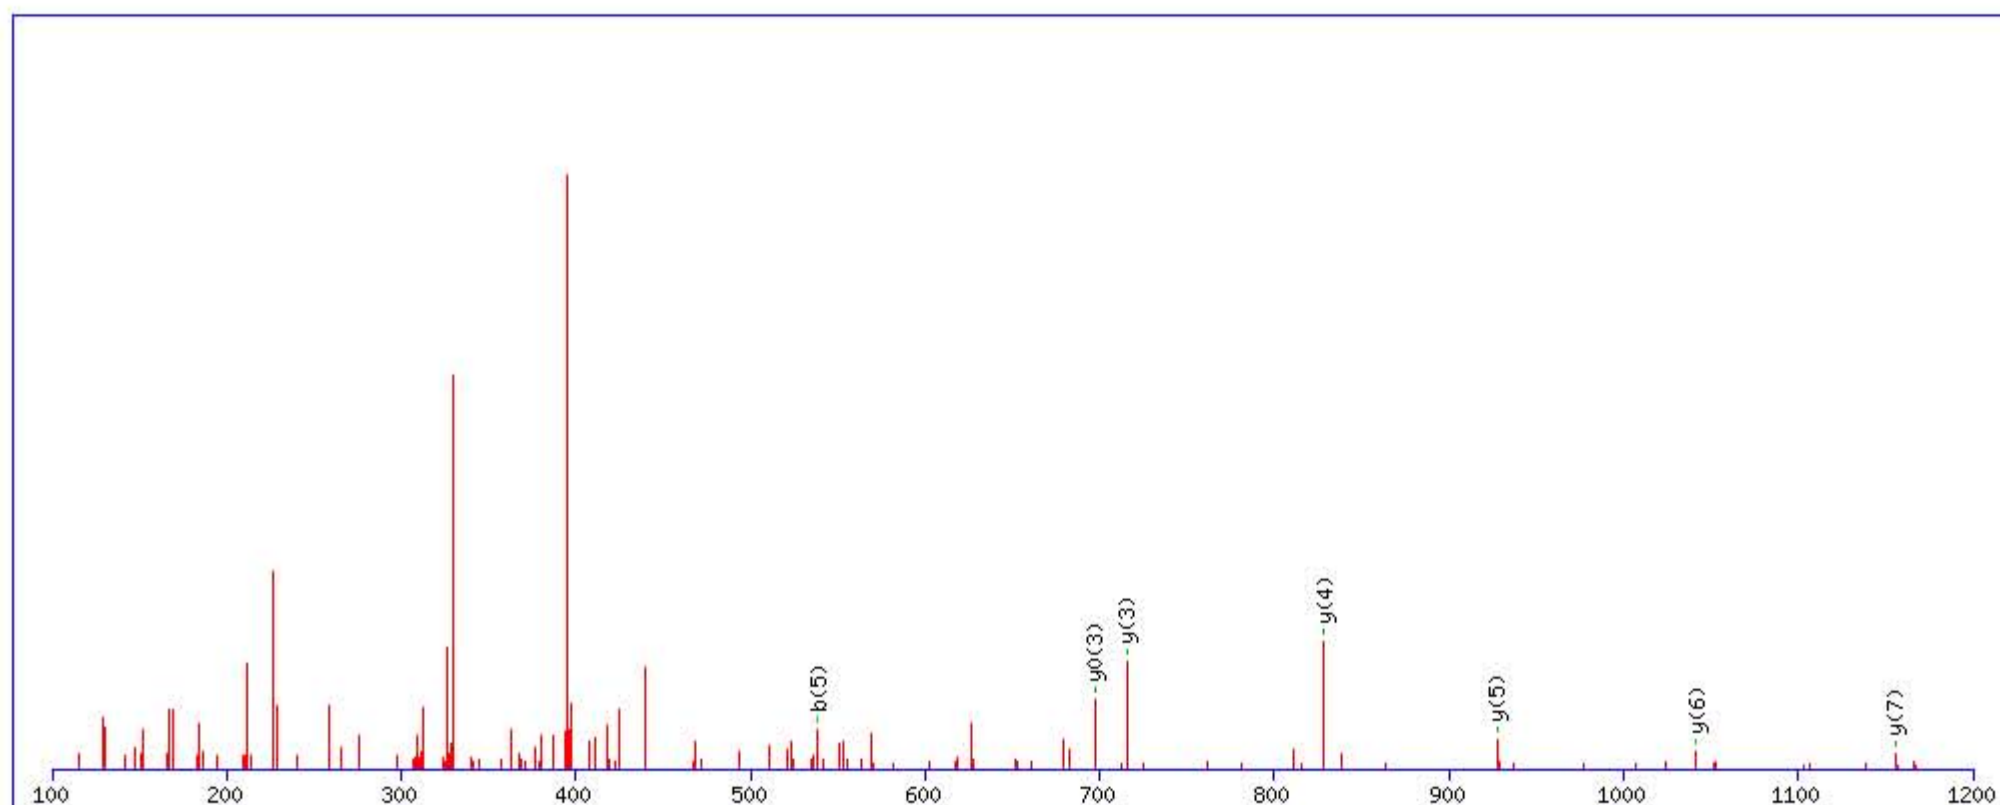

Monoisotopic mass of neutral peptide Mr(calc): 1364.748581

Fixed modifications: Carbamidomethyl (C) (apply to specified residues or termini only)

Variable modifications:

Q7 : Biotin:Thermo-21345 (Q)

Ions Score: 26 Expect: 0.024

Matches : 7/76 fragment ions using 11 most intense peaks [\(help\)](#)

| # | b                 | b <sup>++</sup> | b <sup>*</sup> | b <sup>*++</sup> | b <sup>0</sup> | b <sup>0++</sup> | Seq. | y                  | y <sup>++</sup> | y <sup>*</sup> | y <sup>*++</sup> | y <sup>0</sup>    | y <sup>0++</sup> | # |
|---|-------------------|-----------------|----------------|------------------|----------------|------------------|------|--------------------|-----------------|----------------|------------------|-------------------|------------------|---|
| 1 | 114.091340        | 57.549308       |                |                  |                |                  | L    |                    |                 |                |                  |                   |                  | 9 |
| 2 | 211.144104        | 106.075690      |                |                  |                |                  | P    | 1252.671819        | 626.839548      | 1235.645270    | 618.326273       | 1234.661254       | 617.834265       | 8 |
| 3 | 325.187031        | 163.097153      | 308.160482     | 154.583879       |                |                  | N    | <b>1155.619055</b> | 578.313166      | 1138.592506    | 569.799891       | 1137.608490       | 569.307883       | 7 |
| 4 | 439.229958        | 220.118617      | 422.203409     | 211.605343       |                |                  | N    | <b>1041.576128</b> | 521.291702      | 1024.549579    | 512.778428       | 1023.565563       | 512.286420       | 6 |
| 5 | <b>538.298372</b> | 269.652824      | 521.271823     | 261.139550       |                |                  | V    | <b>927.533201</b>  | 464.270239      | 910.506652     | 455.756964       | 909.522636        | 455.264956       | 5 |
| 6 | 651.382436        | 326.194856      | 634.355887     | 317.681582       |                |                  | L    | <b>828.464787</b>  | 414.736032      | 811.438238     | 406.222757       | 810.454222        | 405.730749       | 4 |
| 7 | 1090.607762       | 545.807519      | 1073.581213    | 537.294245       |                |                  | Q    | <b>715.380723</b>  | 358.194000      | 698.354174     | 349.680725       | <b>697.370158</b> | 349.188717       | 3 |
| 8 | 1219.650355       | 610.328816      | 1202.623806    | 601.815541       | 1201.639790    | 601.323533       | E    | 276.155397         | 138.581336      | 259.128848     | 130.068062       | 258.144832        | 129.576054       | 2 |
| 9 |                   |                 |                |                  |                |                  | K    | 147.112804         | 74.060040       | 130.086255     | 65.546765        |                   |                  | 1 |

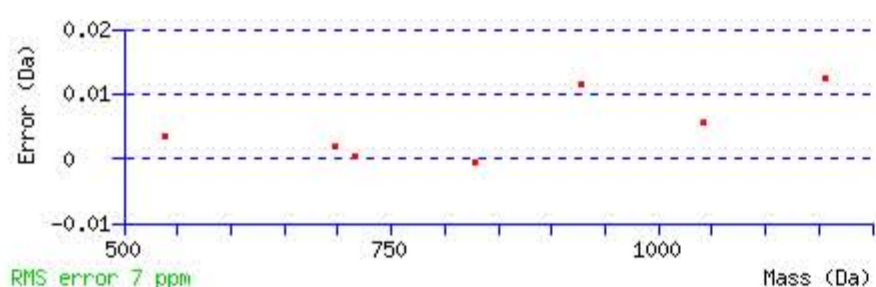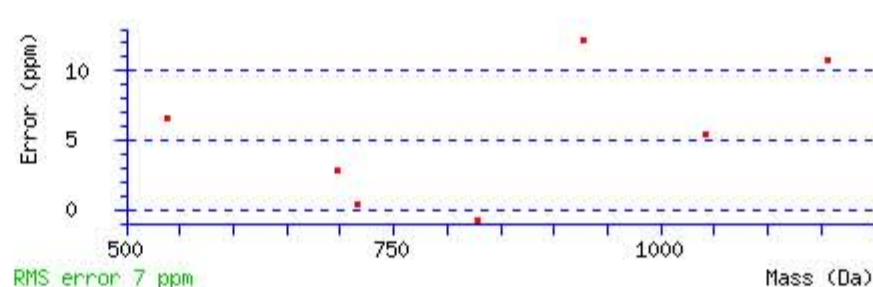

NCBI BLAST search of **LPNNVLQEK**

(Parameters: blastp, nr protein database, expect=20000, no filter, PAM30)

Other BLAST [web gateways](#)

All matches to this query

| Score | Mr(calc):   | Delta     | Sequence                    |
|-------|-------------|-----------|-----------------------------|
| 26.4  | 1364.748581 | -0.003149 | <a href="#">LPNNVLQEK</a>   |
| 8.5   | 1364.759827 | -0.014395 | <a href="#">QTSSLIHR</a>    |
| 0.2   | 1364.745239 | 0.000193  | <a href="#">KVVSWIDVYTR</a> |



# MASCOT Search Results

## Peptide View

MS/MS Fragmentation of **ICAMEGLPQK**

Found in **AFAM\_HUMAN**, Afamin OS=Homo sapiens GN=AFM PE=1 SV=1

Match to Query 32669: 1456.720928 from(729.367740,2+) rtinseconds(1934) index(5503)

Title: Locus:1.1.1.1482.24 File:"2013-07-02 CLN FXIII 60 min 2nd F 1.wiff"

Data file C:\Program Files (x86)\Matrix Science\Mascot Daemon\mgf\5 FXIII 60 min 2nd\mascot\_daemon\_merge.mgf

Click mouse within plot area to zoom in by factor of two about that point

Or, Plot from  to  Da

Label all possible matches  Label matches used for scoring

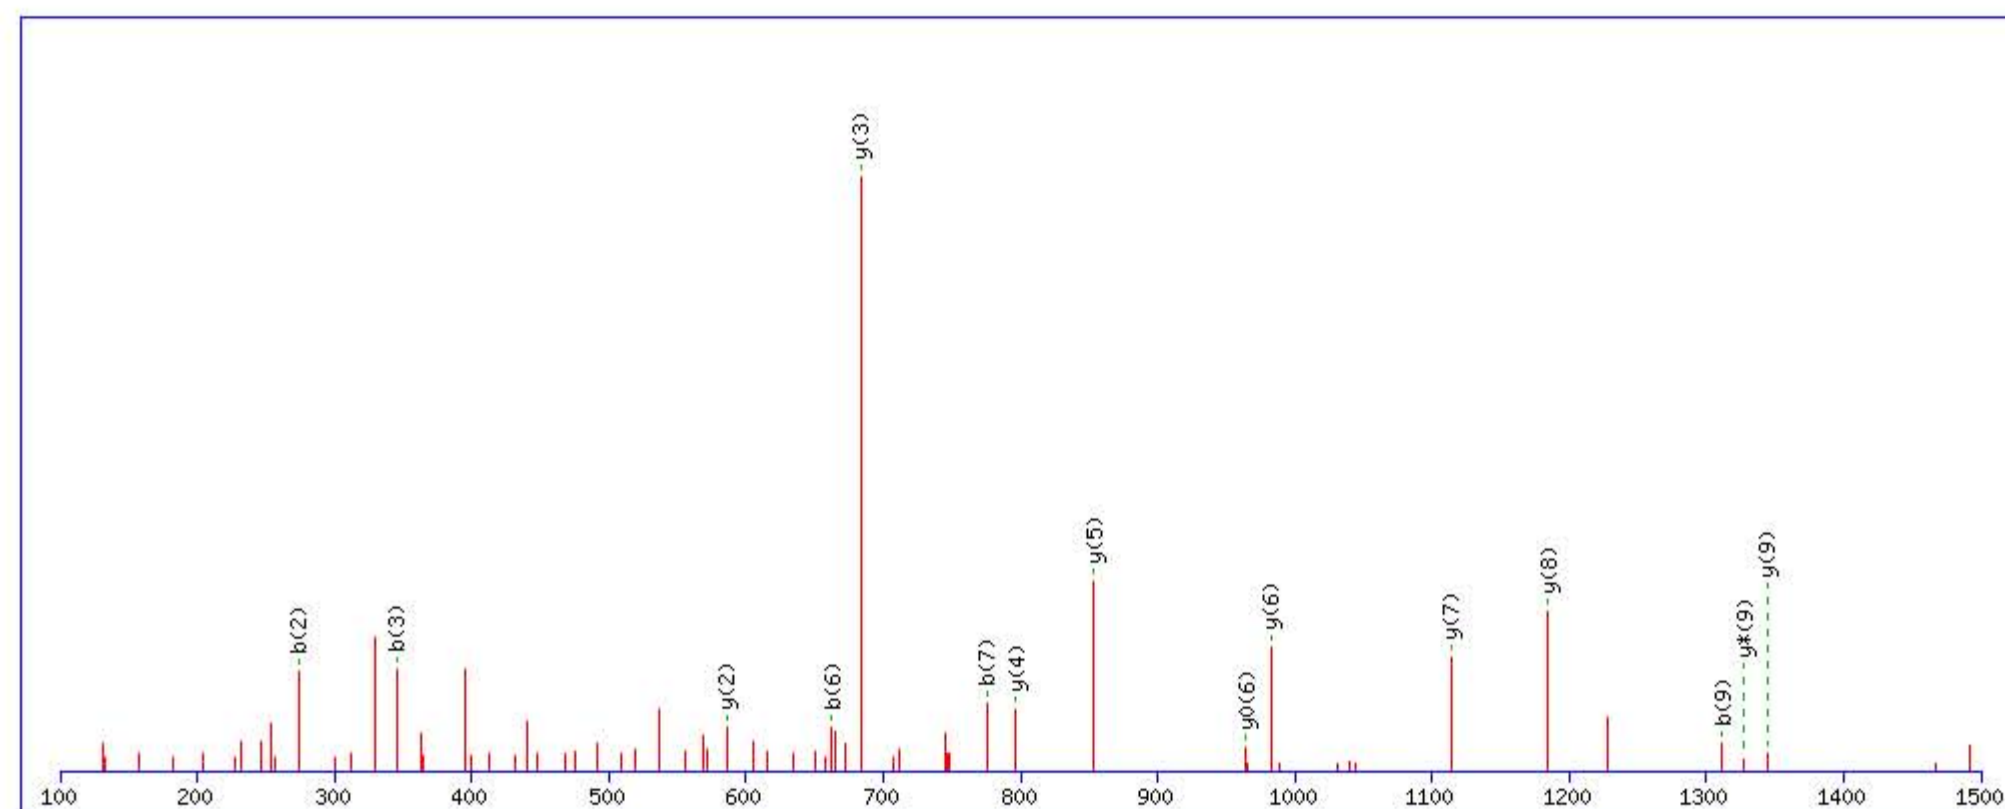

Monoisotopic mass of neutral peptide Mr(calc): 1456.724030

Fixed modifications: Carbamidomethyl (C) (apply to specified residues or termini only)

Variable modifications:

Q9 : Biotin:Thermo-21345 (Q)

Ions Score: 56 Expect: 5.2e-005

Matches : 15/74 fragment ions using 24 most intense peaks [\(help\)](#)

| #  | b                  | b <sup>++</sup> | b <sup>*</sup> | b <sup>*++</sup> | b <sup>0</sup> | b <sup>0++</sup> | Seq. | y                  | y <sup>++</sup> | y <sup>*</sup>     | y <sup>*++</sup> | y <sup>0</sup>    | y <sup>0++</sup> | #  |
|----|--------------------|-----------------|----------------|------------------|----------------|------------------|------|--------------------|-----------------|--------------------|------------------|-------------------|------------------|----|
| 1  | 114.091340         | 57.549308       |                |                  |                |                  | I    |                    |                 |                    |                  |                   |                  | 10 |
| 2  | <b>274.121989</b>  | 137.564632      |                |                  |                |                  | C    | <b>1344.647263</b> | 672.827270      | <b>1327.620714</b> | 664.313995       | 1326.636698       | 663.821987       | 9  |
| 3  | <b>345.159103</b>  | 173.083190      |                |                  |                |                  | A    | <b>1184.616614</b> | 592.811945      | 1167.590065        | 584.298671       | 1166.606049       | 583.806663       | 8  |
| 4  | 476.199588         | 238.603432      |                |                  |                |                  | M    | <b>1113.579500</b> | 557.293388      | 1096.552951        | 548.780114       | 1095.568935       | 548.288106       | 7  |
| 5  | 605.242181         | 303.124729      |                |                  | 587.231616     | 294.119446       | E    | <b>982.539015</b>  | 491.773146      | 965.512466         | 483.259871       | <b>964.528450</b> | 482.767863       | 6  |
| 6  | <b>662.263645</b>  | 331.635461      |                |                  | 644.253080     | 322.630178       | G    | <b>853.496422</b>  | 427.251849      | 836.469873         | 418.738575       |                   |                  | 5  |
| 7  | <b>775.347709</b>  | 388.177493      |                |                  | 757.337144     | 379.172210       | L    | <b>796.474958</b>  | 398.741117      | 779.448409         | 390.227843       |                   |                  | 4  |
| 8  | 872.400473         | 436.703875      |                |                  | 854.389908     | 427.698592       | P    | <b>683.390894</b>  | 342.199085      | 666.364345         | 333.685811       |                   |                  | 3  |
| 9  | <b>1311.625799</b> | 656.316538      | 1294.599250    | 647.803263       | 1293.615234    | 647.311255       | Q    | <b>586.338130</b>  | 293.672703      | 569.311581         | 285.159429       |                   |                  | 2  |
| 10 |                    |                 |                |                  |                |                  | K    | 147.112804         | 74.060040       | 130.086255         | 65.546765        |                   |                  | 1  |

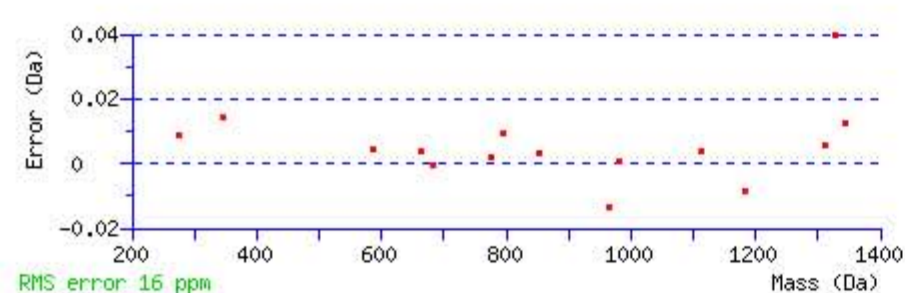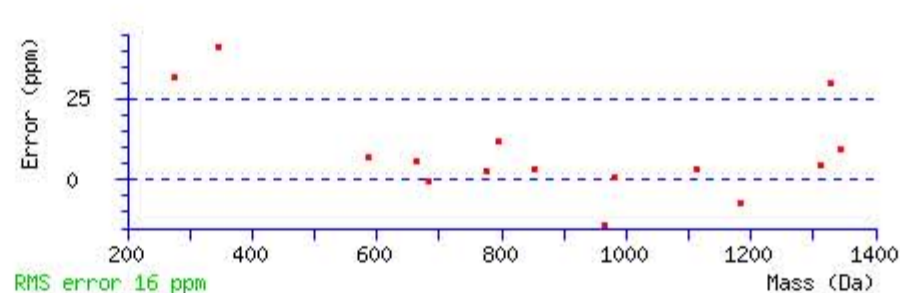

NCBI BLAST search of **ICAMEGLPQK**

(Parameters: blastp, nr protein database, expect=20000, no filter, PAM30)

Other BLAST [web gateways](#)

All matches to this query

| Score | Mr(calc):   | Delta     | Sequence                        |
|-------|-------------|-----------|---------------------------------|
| 56.1  | 1456.724030 | -0.003102 | <a href="#">ICAMEGLPQK</a>      |
| 15.8  | 1456.740921 | -0.019993 | <a href="#">ATVPAGEGVSLEEAK</a> |
| 6.7   | 1456.742279 | -0.021351 | <a href="#">LSGSHSQGVAYPVR</a>  |
| 4.5   | 1456.742279 | -0.021351 | <a href="#">RDGAGGWTPLVSNK</a>  |
| 4.0   | 1456.738434 | -0.017506 | <a href="#">LFPNTSDPQK</a>      |
| 2.0   | 1456.723145 | -0.002217 | <a href="#">QQTLEAEEAK</a>      |
| 0.6   | 1456.734390 | -0.013462 | <a href="#">QDQISASELR</a>      |
| 0.5   | 1456.723160 | -0.002232 | <a href="#">NQEILDDTAK</a>      |



# MASCOT Search Results

## Peptide View

MS/MS Fragmentation of **FTDSENVQER**

Found in **AFAM\_HUMAN**, Afamin OS=Homo sapiens GN=AFM PE=1 SV=1

Match to Query 40311: 1694.744068 from(848.379310,2+) rtinseconds(1574) index(3370)

Title: Locus:1.1.1.1357.15 File:"2013-07-02 CLN FXIII 60 min 2nd F 1.wiff"

Data file C:\Program Files (x86)\Matrix Science\Mascot Daemon\mgf5 FXIII 60 min 2nd\mascot\_daemon\_merge.mgf

Click mouse within plot area to zoom in by factor of two about that point

Or, Plot from  to  Da

Label all possible matches  Label matches used for scoring

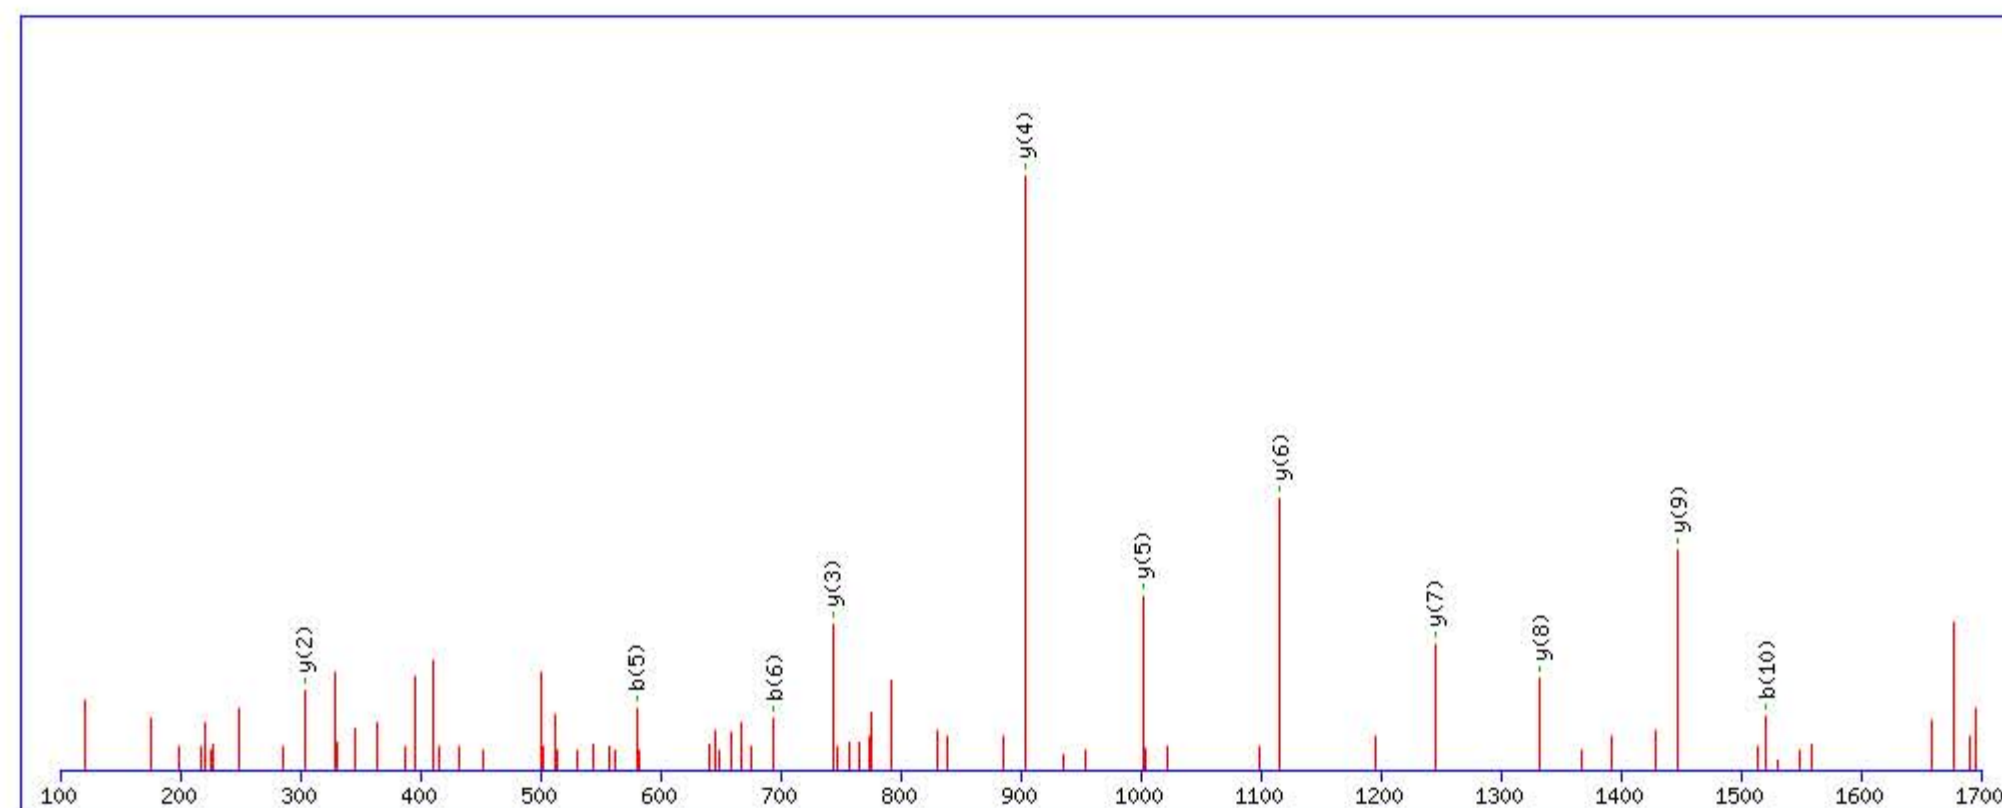

Monoisotopic mass of neutral peptide  $M_r(\text{calc})$ : 1694.739243

Fixed modifications: Carbamidomethyl (C) (apply to specified residues or termini only)

Variable modifications:

Q9 : Biotin:Thermo-21345 (Q)

Ions Score: 63 Expect: 7.2e-006

Matches : 11/106 fragment ions using 16 most intense peaks [\(help\)](#)

| #  | b                  | b <sup>++</sup> | b <sup>+</sup> | b <sup>*++</sup> | b <sup>0</sup> | b <sup>0++</sup> | Seq. | y                  | y <sup>++</sup> | y <sup>+</sup> | y <sup>*++</sup> | y <sup>0</sup> | y <sup>0++</sup> | #  |
|----|--------------------|-----------------|----------------|------------------|----------------|------------------|------|--------------------|-----------------|----------------|------------------|----------------|------------------|----|
| 1  | 148.075690         | 74.541483       |                |                  |                |                  | F    |                    |                 |                |                  |                |                  | 11 |
| 2  | 249.123369         | 125.065322      |                |                  | 231.112804     | 116.060040       | T    | 1548.678104        | 774.842690      | 1531.651555    | 766.329416       | 1530.667539    | 765.837408       | 10 |
| 3  | 364.150312         | 182.578794      |                |                  | 346.139747     | 173.573512       | D    | <b>1447.630425</b> | 724.318851      | 1430.603876    | 715.805576       | 1429.619860    | 715.313568       | 9  |
| 4  | 451.182340         | 226.094808      |                |                  | 433.171775     | 217.089526       | S    | <b>1332.603482</b> | 666.805379      | 1315.576933    | 658.292105       | 1314.592917    | 657.800097       | 8  |
| 5  | <b>580.224933</b>  | 290.616105      |                |                  | 562.214368     | 281.610822       | E    | <b>1245.571454</b> | 623.289365      | 1228.544905    | 614.776091       | 1227.560889    | 614.284083       | 7  |
| 6  | <b>694.267860</b>  | 347.637568      | 677.241311     | 339.124294       | 676.257295     | 338.632286       | N    | <b>1116.528861</b> | 558.768069      | 1099.502312    | 550.254794       | 1098.518296    | 549.762786       | 6  |
| 7  | 793.336274         | 397.171775      | 776.309725     | 388.658501       | 775.325709     | 388.166493       | V    | <b>1002.485934</b> | 501.746605      | 985.459385     | 493.233331       | 984.475369     | 492.741323       | 5  |
| 8  | 953.366923         | 477.187100      | 936.340374     | 468.673825       | 935.356358     | 468.181817       | C    | <b>903.417520</b>  | 452.212398      | 886.390971     | 443.699124       | 885.406955     | 443.207116       | 4  |
| 9  | 1392.592249        | 696.799763      | 1375.565700    | 688.286488       | 1374.581684    | 687.794480       | Q    | <b>743.386871</b>  | 372.197074      | 726.360322     | 363.683799       | 725.376306     | 363.191791       | 3  |
| 10 | <b>1521.634842</b> | 761.321059      | 1504.608293    | 752.807785       | 1503.624277    | 752.315777       | E    | <b>304.161545</b>  | 152.584411      | 287.134996     | 144.071136       | 286.150980     | 143.579128       | 2  |
| 11 |                    |                 |                |                  |                |                  | R    | 175.118952         | 88.063114       | 158.092403     | 79.549839        |                |                  | 1  |

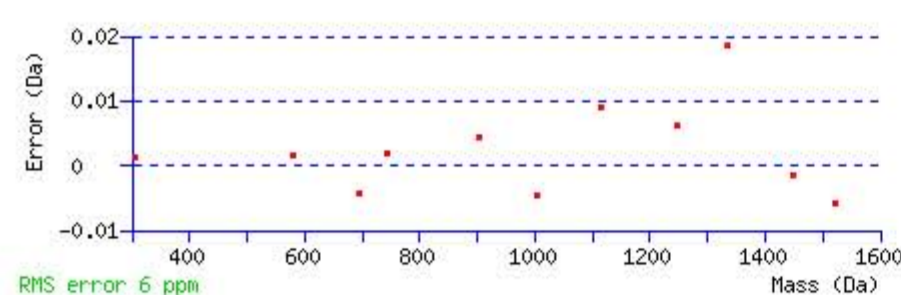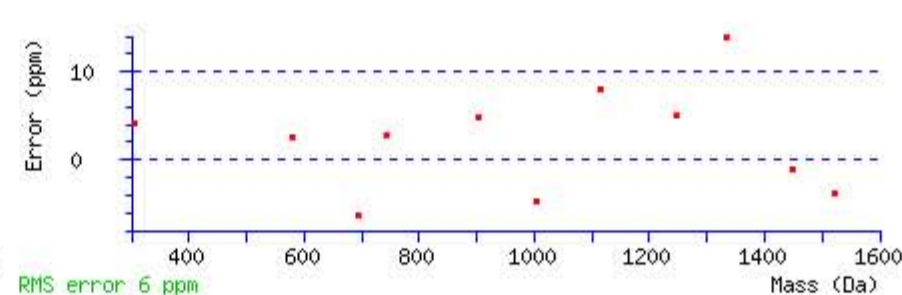

NCBI BLAST search of **FTDSENVQER**

(Parameters: blastp, nr protein database, expect=20000, no filter, PAM30)

Other BLAST [web gateways](#)

All matches to this query

| Score | $M_r(\text{calc})$ : | Delta     | Sequence                       |
|-------|----------------------|-----------|--------------------------------|
| 63.4  | 1694.739243          | 0.004825  | <a href="#">FTDSENVQER</a>     |
| 12.3  | 1694.768219          | -0.024151 | <a href="#">EQSVDCRAGLEFER</a> |

Mascot: <http://www.matrixscience.com/>



# MASCOT Search Results

## Peptide View

MS/MS Fragmentation of **GQCIINSNKDDRPK**

Found in **AFAM\_HUMAN**, Afamin OS=Homo sapiens GN=AFM PE=1 SV=1

Match to Query 45629: 1954.968096 from(489.749300,4+) rtinseconds(1350) index(1871)

Title: Locus:1.1.1.1279.10 File:"2013-07-02 CLN FXIII 60 min 2nd F 1.wiff"

Data file C:\Program Files (x86)\Matrix Science\Mascot Daemon\mgf\5 FXIII 60 min 2nd\mascot\_daemon\_merge.mgf

Click mouse within plot area to zoom in by factor of two about that point

Or, Plot from  to  Da

Label all possible matches  Label matches used for scoring

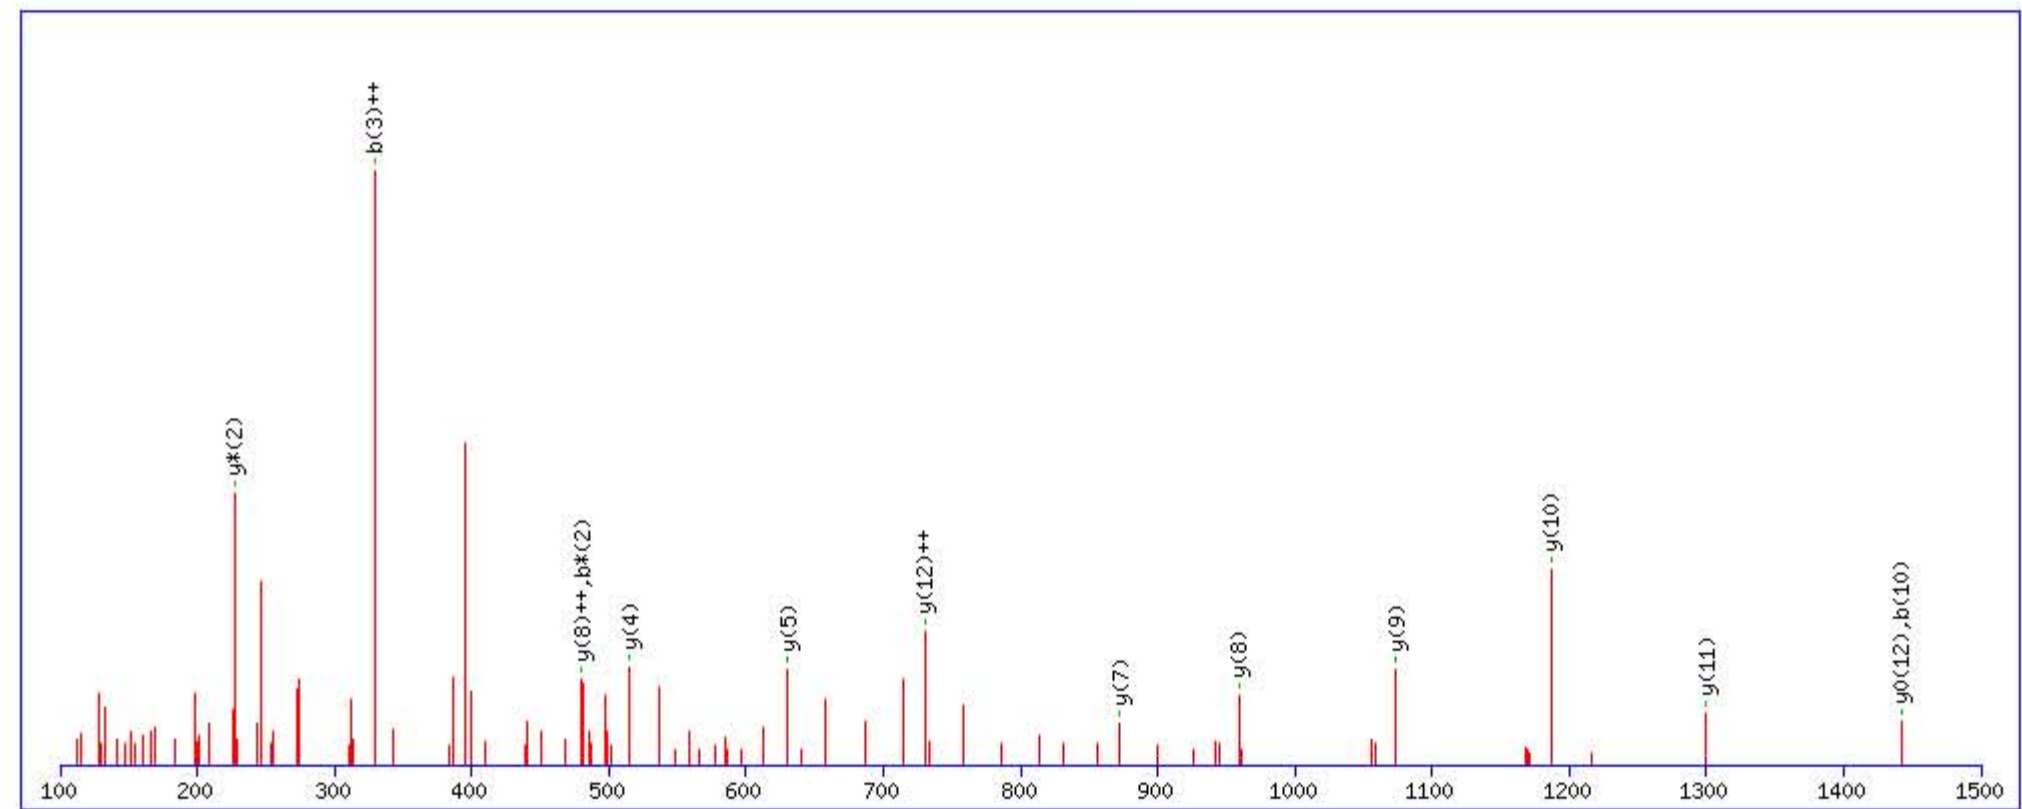

Monoisotopic mass of neutral peptide Mr(calc): 1954.971680

Fixed modifications: Carbamidomethyl (C) (apply to specified residues or termini only)

Variable modifications:

Q2 : Biotin:Thermo-21345 (Q)

Ions Score: 60 Expect: 4.1e-006

Matches : 14/136 fragment ions using 13 most intense peaks [\(help\)](#)

| #  | b                  | b <sup>++</sup>   | b <sup>+</sup>    | b <sup>+++</sup> | b <sup>0</sup> | b <sup>0++</sup> | Seq.     | y                  | y <sup>++</sup>   | y <sup>+</sup>    | y <sup>+++</sup> | y <sup>0</sup>     | y <sup>0++</sup> | #  |
|----|--------------------|-------------------|-------------------|------------------|----------------|------------------|----------|--------------------|-------------------|-------------------|------------------|--------------------|------------------|----|
| 1  | 58.028740          | 29.518008         |                   |                  |                |                  | <b>G</b> |                    |                   |                   |                  |                    |                  | 14 |
| 2  | 497.254066         | 249.130671        | <b>480.227517</b> | 240.617397       |                |                  | <b>Q</b> | 1898.957513        | 949.982395        | 1881.930964       | 941.469120       | 1880.946948        | 940.977112       | 13 |
| 3  | 657.284715         | <b>329.145996</b> | 640.258166        | 320.632721       |                |                  | <b>C</b> | 1459.732187        | <b>730.369732</b> | 1442.705638       | 721.856457       | <b>1441.721622</b> | 721.364449       | 12 |
| 4  | 770.368779         | 385.688028        | 753.342230        | 377.174753       |                |                  | <b>I</b> | <b>1299.701538</b> | 650.354407        | 1282.674989       | 641.841133       | 1281.690973        | 641.349125       | 11 |
| 5  | 883.452843         | 442.230060        | 866.426294        | 433.716785       |                |                  | <b>I</b> | <b>1186.617474</b> | 593.812375        | 1169.590925       | 585.299101       | 1168.606909        | 584.807093       | 10 |
| 6  | 997.495770         | 499.251523        | 980.469221        | 490.738249       |                |                  | <b>N</b> | <b>1073.533410</b> | 537.270343        | 1056.506861       | 528.757069       | 1055.522845        | 528.265061       | 9  |
| 7  | 1084.527798        | 542.767537        | 1067.501249       | 534.254263       | 1066.517233    | 533.762255       | <b>S</b> | <b>959.490483</b>  | <b>480.248880</b> | 942.463934        | 471.735605       | 941.479918         | 471.243597       | 8  |
| 8  | 1198.570725        | 599.789001        | 1181.544176       | 591.275726       | 1180.560160    | 590.783718       | <b>N</b> | <b>872.458455</b>  | 436.732866        | 855.431906        | 428.219591       | 854.447890         | 427.727583       | 7  |
| 9  | 1326.665688        | 663.836482        | 1309.639139       | 655.323208       | 1308.655123    | 654.831200       | <b>K</b> | 758.415528         | 379.711402        | 741.388979        | 371.198128       | 740.404963         | 370.706120       | 6  |
| 10 | <b>1441.692631</b> | 721.349954        | 1424.666082       | 712.836679       | 1423.682066    | 712.344671       | <b>D</b> | <b>630.320565</b>  | 315.663921        | 613.294016        | 307.150646       | 612.310000         | 306.658638       | 5  |
| 11 | 1556.719574        | 778.863425        | 1539.693025       | 770.350151       | 1538.709009    | 769.858143       | <b>D</b> | <b>515.293622</b>  | 258.150449        | 498.267073        | 249.637175       | 497.283057         | 249.145167       | 4  |
| 12 | 1712.820685        | 856.913981        | 1695.794136       | 848.400706       | 1694.810120    | 847.908698       | <b>R</b> | 400.266679         | 200.636977        | 383.240130        | 192.123703       |                    |                  | 3  |
| 13 | 1809.873449        | 905.440363        | 1792.846900       | 896.927088       | 1791.862884    | 896.435080       | <b>P</b> | 244.165568         | 122.586422        | <b>227.139019</b> | 114.073148       |                    |                  | 2  |
| 14 |                    |                   |                   |                  |                |                  | <b>K</b> | 147.112804         | 74.060040         | 130.086255        | 65.546765        |                    |                  | 1  |

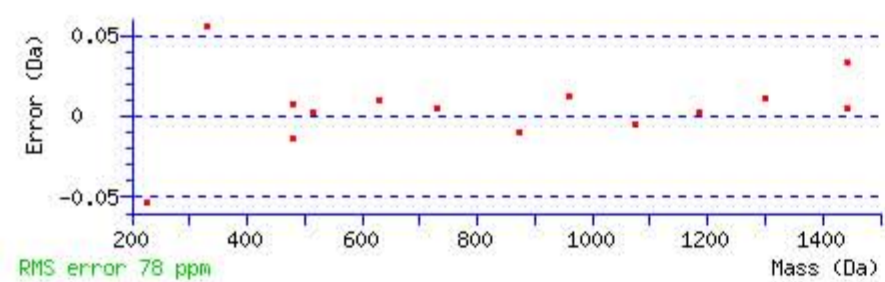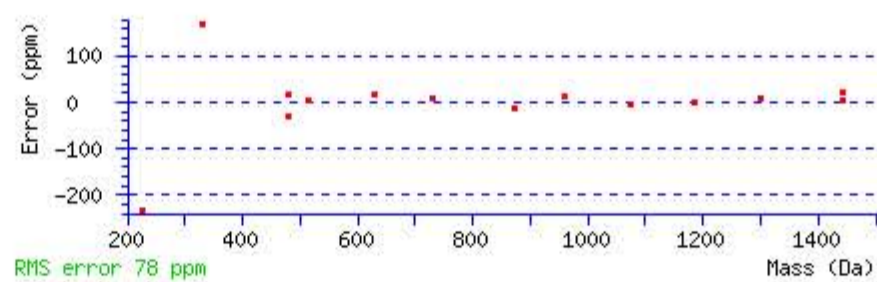

NCBI BLAST search of **GQCIINSNKDDRPK**

(Parameters: blastp, nr protein database, expect=20000, no filter, PAM30)

Other BLAST [web gateways](#)

All matches to this query

| Score | Mr(calc):   | Delta     | Sequence                           |
|-------|-------------|-----------|------------------------------------|
| 60.0  | 1954.971680 | -0.003584 | <a href="#">GQCIINSNKDDRPK</a>     |
| 2.5   | 1954.953094 | 0.015002  | <a href="#">KDDRTGTGILSVFGMQAR</a> |

Mascot: <http://www.matrixscience.com/>



# MASCOT SEARCH RESULTS

## Peptide View

MS/MS Fragmentation of **SCCEEQNKVNCLQTR**

Found in **AFAM\_HUMAN**, Afamin OS=Homo sapiens GN=AFM PE=1 SV=1

Match to Query 51769: 2235.979722 from(746.333850,3+) rtinseconds(1443) index(2476)

Title: Locus:1.1.1.1311.24 File:"2013-07-02 CLN FXIII 60 min 2nd F 1.wiff"

Data file C:\Program Files (x86)\Matrix Science\Mascot Daemon\mgf5 FXIII 60 min 2nd\mascot\_daemon\_merge.mgf

Click mouse within plot area to zoom in by factor of two about that point

Or, Plot from  to  Da

Label all possible matches  Label matches used for scoring

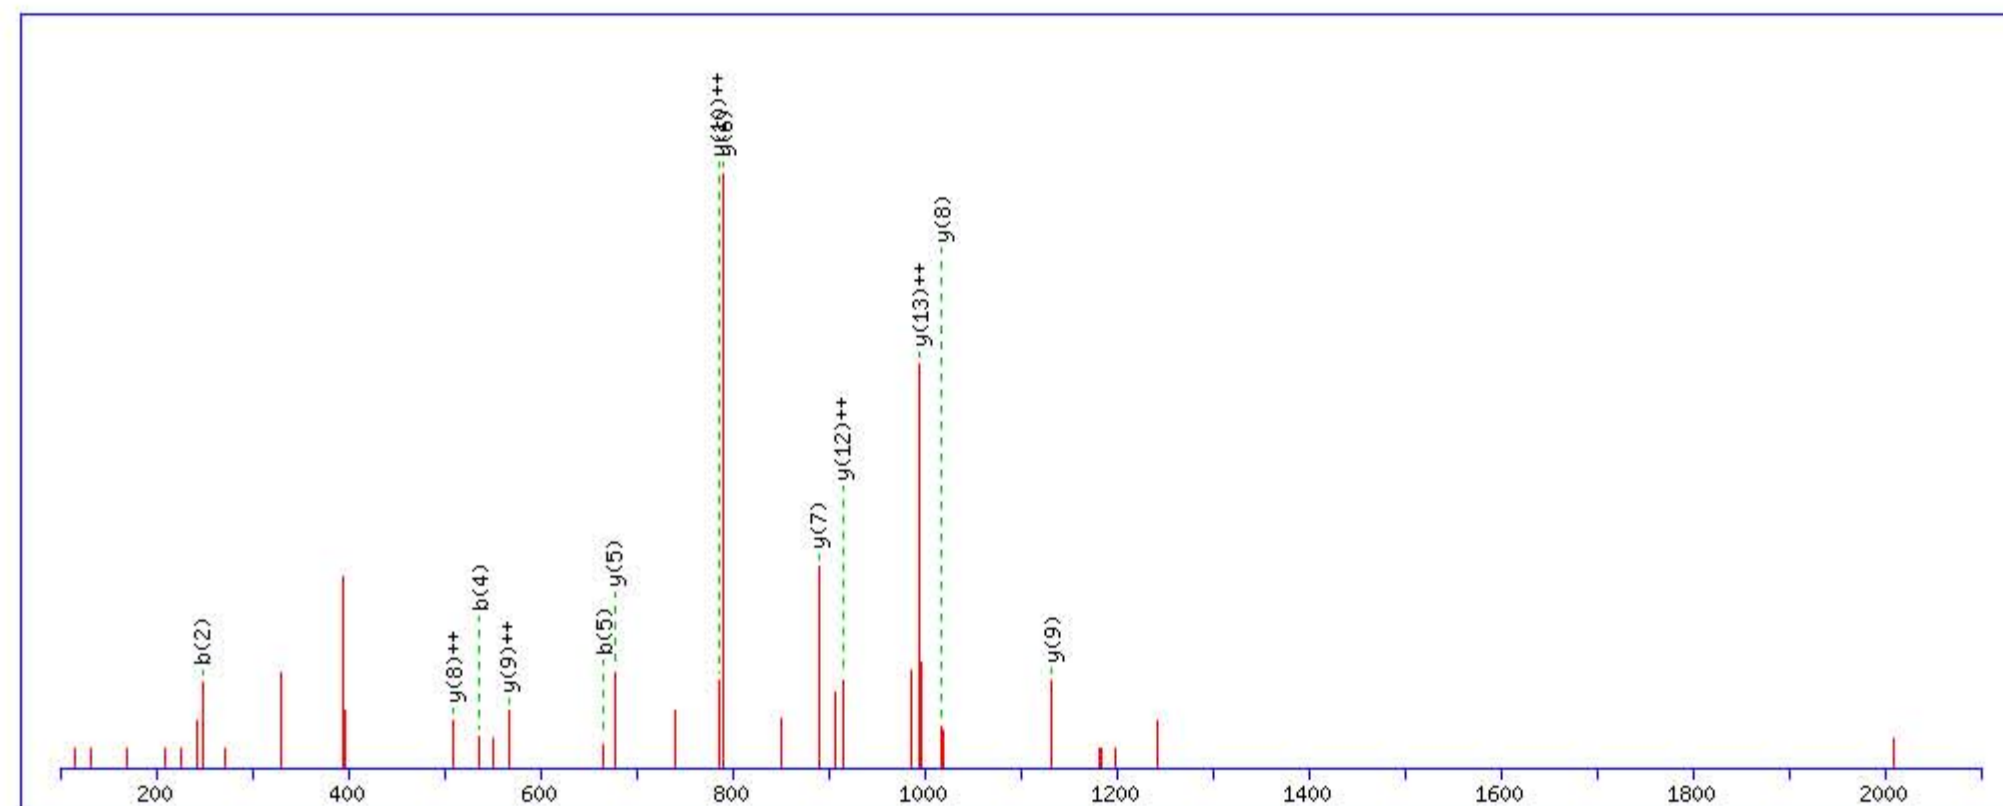

Monoisotopic mass of neutral peptide Mr(calc): 2235.985703

Fixed modifications: Carbamidomethyl (C) (apply to specified residues or termini only)

Variable modifications:

Q6 : Biotin:Thermo-21345 (Q)

Ions Score: 32 Expect: 0.0033

Matches : 13/156 fragment ions using 23 most intense peaks [\(help\)](#)

| #  | b                 | b <sup>++</sup> | b <sup>*</sup> | b <sup>+++</sup> | b <sup>0</sup> | b <sup>0++</sup> | Seq. | y                  | y <sup>++</sup>   | y <sup>*</sup> | y <sup>+++</sup> | y <sup>0</sup> | y <sup>0++</sup> | #  |
|----|-------------------|-----------------|----------------|------------------|----------------|------------------|------|--------------------|-------------------|----------------|------------------|----------------|------------------|----|
| 1  | 88.039304         | 44.523290       |                |                  | 70.028739      | 35.518008        | S    |                    |                   |                |                  |                |                  | 15 |
| 2  | <b>248.069953</b> | 124.538614      |                |                  | 230.059388     | 115.533332       | C    | 2149.960963        | 1075.484119       | 2132.934414    | 1066.970845      | 2131.950398    | 1066.478837      | 14 |
| 3  | 408.100602        | 204.553939      |                |                  | 390.090037     | 195.548657       | C    | 1989.930314        | <b>995.468795</b> | 1972.903765    | 986.955521       | 1971.919749    | 986.463512       | 13 |
| 4  | <b>537.143195</b> | 269.075236      |                |                  | 519.132630     | 260.069953       | E    | 1829.899665        | <b>915.453470</b> | 1812.873116    | 906.940196       | 1811.889100    | 906.448188       | 12 |
| 5  | <b>666.185788</b> | 333.596532      |                |                  | 648.175223     | 324.591250       | E    | 1700.857072        | 850.932174        | 1683.830523    | 842.418899       | 1682.846507    | 841.926891       | 11 |
| 6  | 1105.411114       | 553.209195      | 1088.384565    | 544.695921       | 1087.400549    | 544.203913       | Q    | 1571.814479        | <b>786.410877</b> | 1554.787930    | 777.897603       | 1553.803914    | 777.405595       | 10 |
| 7  | 1219.454041       | 610.230659      | 1202.427492    | 601.717384       | 1201.443476    | 601.225376       | N    | <b>1132.589153</b> | <b>566.798214</b> | 1115.562604    | 558.284940       | 1114.578588    | 557.792932       | 9  |
| 8  | 1347.549004       | 674.278140      | 1330.522455    | 665.764866       | 1329.538439    | 665.272858       | K    | <b>1018.546226</b> | <b>509.776751</b> | 1001.519677    | 501.263476       | 1000.535661    | 500.771468       | 8  |
| 9  | 1446.617418       | 723.812347      | 1429.590869    | 715.299073       | 1428.606853    | 714.807065       | V    | <b>890.451263</b>  | 445.729269        | 873.424714     | 437.215995       | 872.440698     | 436.723987       | 7  |
| 10 | 1560.660345       | 780.833811      | 1543.633796    | 772.320536       | 1542.649780    | 771.828528       | N    | <b>791.382849</b>  | 396.195062        | 774.356300     | 387.681788       | 773.372284     | 387.189780       | 6  |
| 11 | 1720.690994       | 860.849135      | 1703.664445    | 852.335861       | 1702.680429    | 851.843853       | C    | <b>677.339922</b>  | 339.173599        | 660.313373     | 330.660324       | 659.329357     | 330.168316       | 5  |
| 12 | 1833.775058       | 917.391167      | 1816.748509    | 908.877893       | 1815.764493    | 908.385885       | L    | 517.309273         | 259.158274        | 500.282724     | 250.645000       | 499.298708     | 250.152992       | 4  |
| 13 | 1961.833636       | 981.420456      | 1944.807087    | 972.907182       | 1943.823071    | 972.415174       | Q    | 404.225209         | 202.616242        | 387.198660     | 194.102968       | 386.214644     | 193.610960       | 3  |
| 14 | 2062.881315       | 1031.944295     | 2045.854766    | 1023.431021      | 2044.870750    | 1022.939013      | T    | 276.166631         | 138.586953        | 259.140082     | 130.073679       | 258.156066     | 129.581671       | 2  |
| 15 |                   |                 |                |                  |                |                  | R    | 175.118952         | 88.063114         | 158.092403     | 79.549839        |                |                  | 1  |

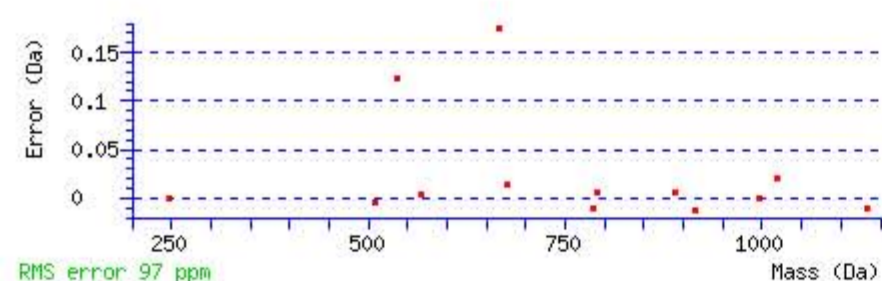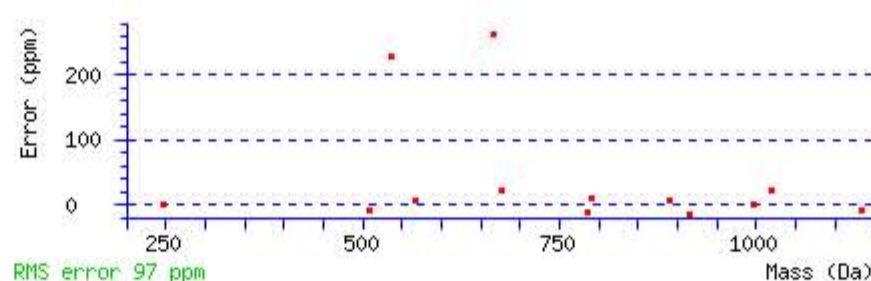

NCBI BLAST search of **SCCEEQNKVNCLQTR**

(Parameters: blastp, nr protein database, expect=20000, no filter, PAM30)

Other BLAST [web gateways](#)

All matches to this query

| Score | Mr(calc):   | Delta     | Sequence                        |
|-------|-------------|-----------|---------------------------------|
| 31.7  | 2235.985703 | -0.005981 | <a href="#">SCCEEQNKVNCLQTR</a> |
| 8.1   | 2235.985703 | -0.005981 | <a href="#">SCCEEQNKVNCLQTR</a> |



# MASCOT Search Results

## Peptide View

MS/MS Fragmentation of **EQQDSPGNK**

Found in **A2AP\_HUMAN**, Alpha-2-antiplasmin OS=Homo sapiens GN=SERPINF2 PE=1 SV=3

Match to Query 26443: 1312.609468 from(657.312010,2+) rtinseconds(1174) index(1044)

Title: Locus:1.1.1.1217.17 File:"2013-07-02 CLN FXIII 60 min 2nd F 1.wiff"

Data file C:\Program Files (x86)\Matrix Science\Mascot Daemon\mgf5 FXIII 60 min 2nd\mascot\_daemon\_merge.mgf

Click mouse within plot area to zoom in by factor of two about that point

Or, Plot from  to  Da

Label all possible matches  Label matches used for scoring

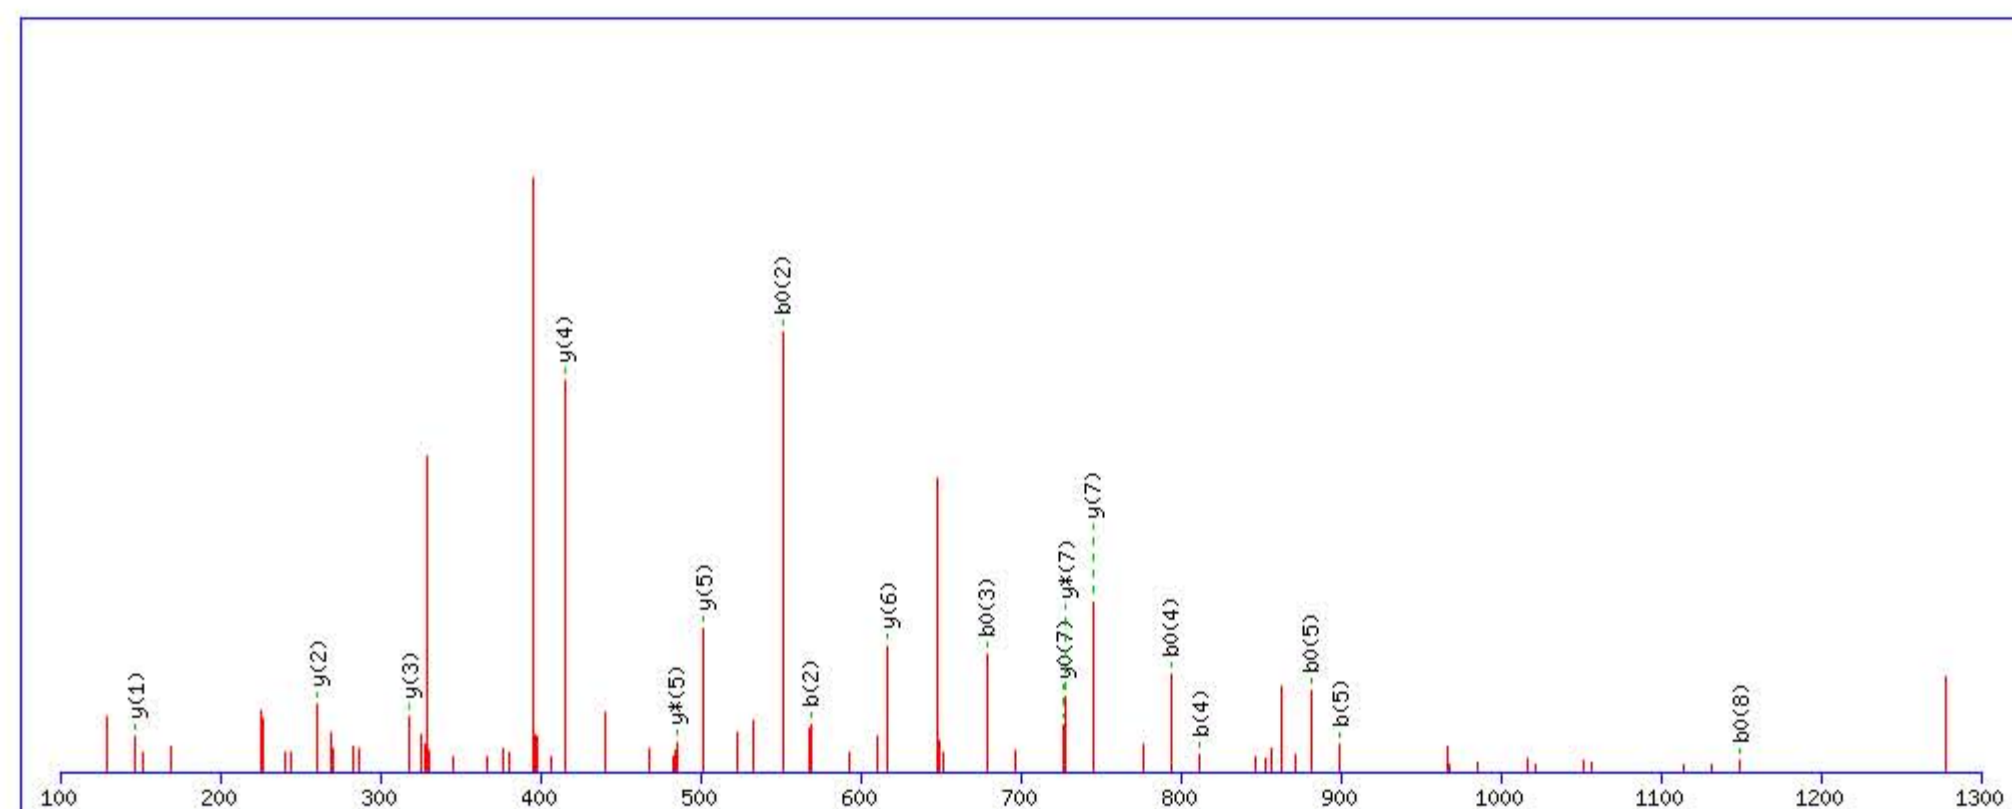

Monoisotopic mass of neutral peptide Mr(calc): 1312.608139

Fixed modifications: Carbamidomethyl (C) (apply to specified residues or termini only)

Variable modifications:

Q2 : Biotin:Thermo-21345 (Q)

Ions Score: 35 Expect: 0.0032

Matches : 18/86 fragment ions using 42 most intense peaks [\(help\)](#)

| # | b                 | b <sup>++</sup> | b <sup>*</sup> | b <sup>*++</sup> | b <sup>0</sup>     | b <sup>0++</sup> | Seq. | y                 | y <sup>++</sup> | y <sup>*</sup>    | y <sup>*++</sup> | y <sup>0</sup>    | y <sup>0++</sup> | # |
|---|-------------------|-----------------|----------------|------------------|--------------------|------------------|------|-------------------|-----------------|-------------------|------------------|-------------------|------------------|---|
| 1 | 130.049869        | 65.528572       |                |                  | 112.039304         | 56.523290        | E    |                   |                 |                   |                  |                   |                  | 9 |
| 2 | <b>569.275195</b> | 285.141236      | 552.248646     | 276.627961       | <b>551.264630</b>  | 276.135953       | Q    | 1184.572834       | 592.790055      | 1167.546285       | 584.276780       | 1166.562269       | 583.784772       | 8 |
| 3 | 697.333773        | 349.170525      | 680.307224     | 340.657250       | <b>679.323208</b>  | 340.165242       | Q    | <b>745.347508</b> | 373.177392      | <b>728.320959</b> | 364.664117       | <b>727.336943</b> | 364.172109       | 7 |
| 4 | <b>812.360716</b> | 406.683996      | 795.334167     | 398.170722       | <b>794.350151</b>  | 397.678714       | D    | <b>617.288930</b> | 309.148103      | 600.262381        | 300.634828       | 599.278365        | 300.142820       | 6 |
| 5 | <b>899.392744</b> | 450.200010      | 882.366195     | 441.686736       | <b>881.382179</b>  | 441.194728       | S    | <b>502.261987</b> | 251.634631      | <b>485.235438</b> | 243.121357       | 484.251422        | 242.629349       | 5 |
| 6 | 996.445508        | 498.726392      | 979.418959     | 490.213118       | 978.434943         | 489.721110       | P    | <b>415.229959</b> | 208.118617      | 398.203410        | 199.605343       |                   |                  | 4 |
| 7 | 1053.466972       | 527.237124      | 1036.440423    | 518.723850       | 1035.456407        | 518.231841       | G    | <b>318.177195</b> | 159.592235      | 301.150646        | 151.078961       |                   |                  | 3 |
| 8 | 1167.509899       | 584.258587      | 1150.483350    | 575.745313       | <b>1149.499334</b> | 575.253305       | N    | <b>261.155731</b> | 131.081503      | 244.129182        | 122.568229       |                   |                  | 2 |
| 9 |                   |                 |                |                  |                    |                  | K    | <b>147.112804</b> | 74.060040       | 130.086255        | 65.546765        |                   |                  | 1 |

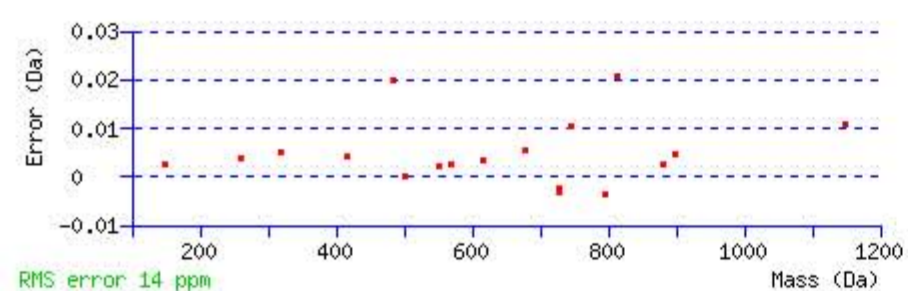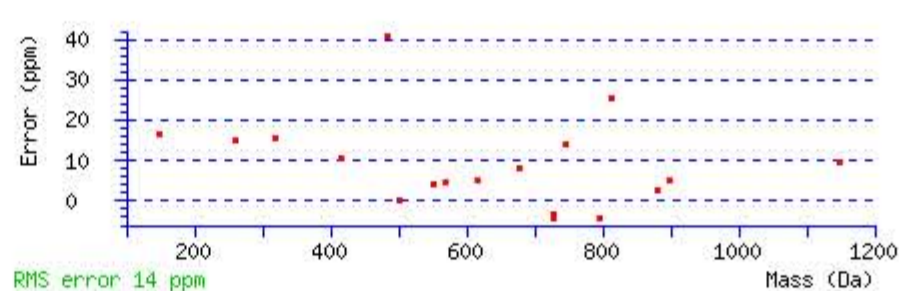

NCBI BLAST search of **EQQDSPGNK**

(Parameters: blastp, nr protein database, expect=20000, no filter, PAM30)

Other BLAST [web gateways](#)

All matches to this query

| Score | Mr(calc):   | Delta     | Sequence                     |
|-------|-------------|-----------|------------------------------|
| 35.1  | 1312.608139 | 0.001329  | <a href="#">EQQDSPGNK</a>    |
| 28.6  | 1312.608139 | 0.001329  | <a href="#">EQQDSPGNK</a>    |
| 8.8   | 1312.625900 | -0.016432 | <a href="#">QEAVHTDSLEGK</a> |
| 3.0   | 1312.596863 | 0.012605  | <a href="#">SKLEEMYEER</a>   |
| 0.3   | 1312.601624 | 0.007844  | <a href="#">CGECGKAFTRK</a>  |

Mascot: <http://www.matrixscience.com/>



# MASCOT Search Results

## Peptide View

MS/MS Fragmentation of **LGNQEPGGQTALK**

Found in **A2AP\_HUMAN**, Alpha-2-antiplasmin OS=Homo sapiens GN=SERPINF2 PE=1 SV=3

Match to Query 38122: 1622.831528 from(812.423040,2+) rtinseconds(1606) index(66496)

Title: Locus:1.1.1.1496.14 File:"2013-07-02 CLN FXIII 60 min 2nd FT.wiff"

Data file C:\Program Files (x86)\Matrix Science\Mascot Daemon\mgf\5 FXIII 60 min 2nd\mascot\_daemon\_merge.mgf

Click mouse within plot area to zoom in by factor of two about that point

Or, Plot from  to  Da

Label all possible matches  Label matches used for scoring

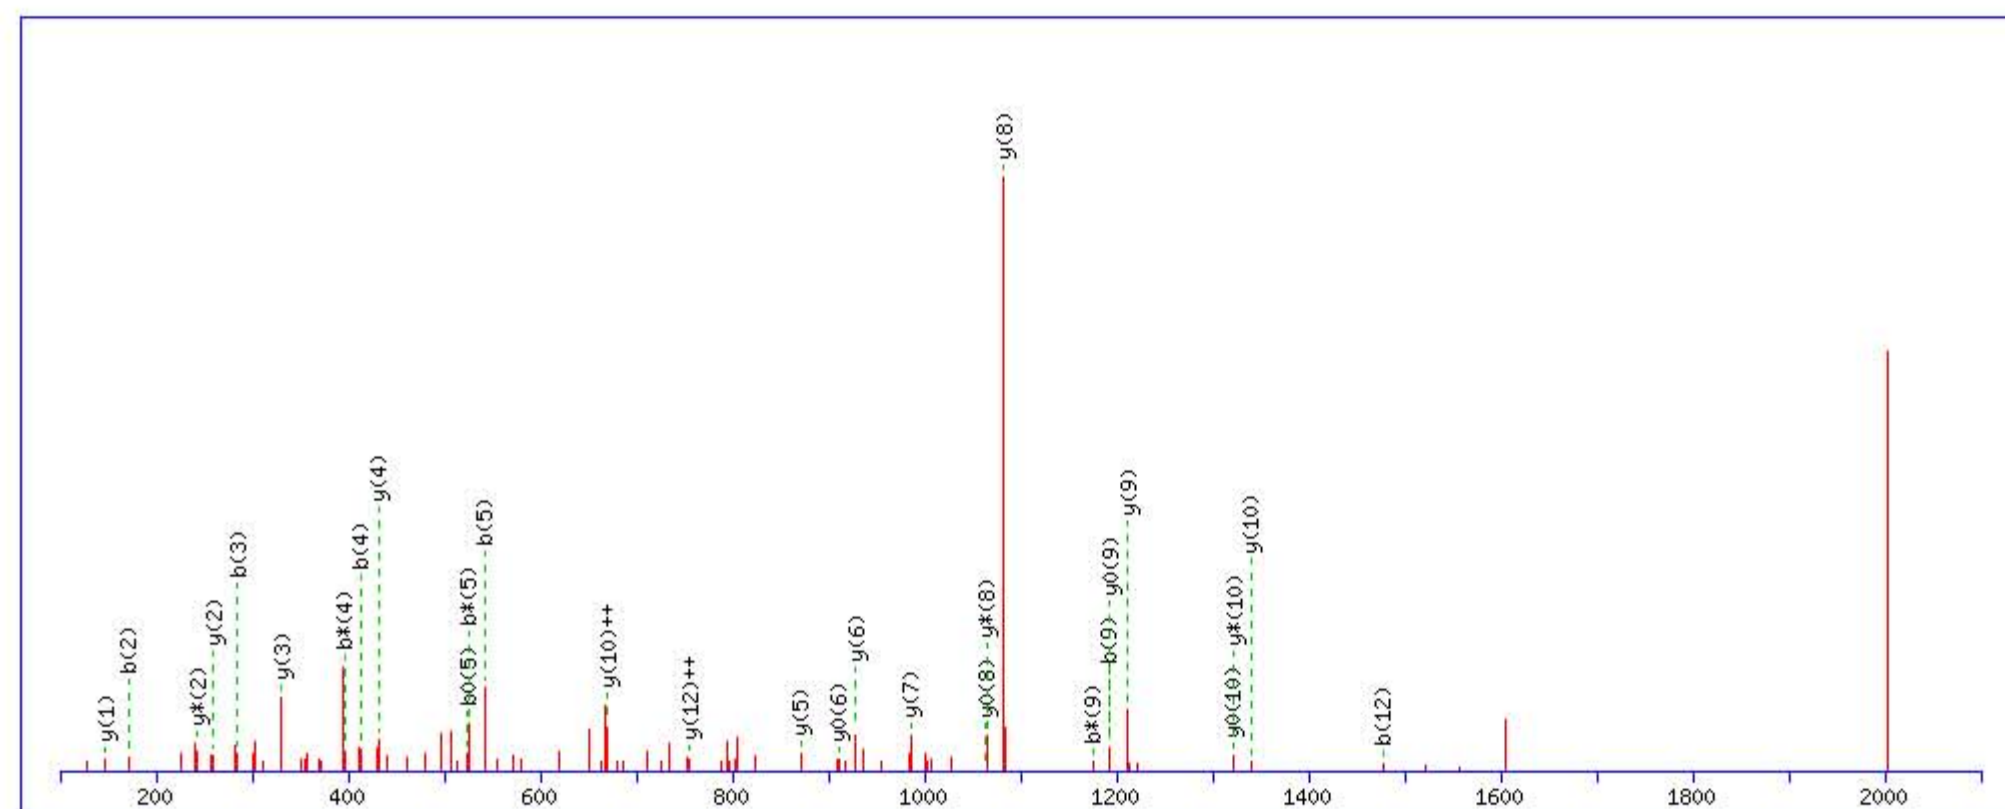

Monoisotopic mass of neutral peptide Mr(calc): 1622.845016

Fixed modifications: Carbamidomethyl (C) (apply to specified residues or termini only)

Variable modifications:

Q9 : Biotin:Thermo-21345 (Q)

Ions Score: 43 Expect: 0.00038

Matches : 29/126 fragment ions using 81 most intense peaks [\(help\)](#)

| #  | b                  | b <sup>++</sup> | b <sup>*</sup>     | b <sup>*++</sup> | b <sup>0</sup>    | b <sup>0++</sup> | Seq. | y                  | y <sup>++</sup>   | y <sup>*</sup>     | y <sup>*++</sup> | y <sup>0</sup>     | y <sup>0++</sup> | #  |
|----|--------------------|-----------------|--------------------|------------------|-------------------|------------------|------|--------------------|-------------------|--------------------|------------------|--------------------|------------------|----|
| 1  | 114.091340         | 57.549308       |                    |                  |                   |                  | L    |                    |                   |                    |                  |                    |                  | 13 |
| 2  | <b>171.112804</b>  | 86.060040       |                    |                  |                   |                  | G    | 1510.768241        | <b>755.887759</b> | 1493.741692        | 747.374484       | 1492.757676        | 746.882476       | 12 |
| 3  | <b>285.155731</b>  | 143.081504      | 268.129182         | 134.568229       |                   |                  | N    | 1453.746777        | 727.377027        | 1436.720228        | 718.863752       | 1435.736212        | 718.371744       | 11 |
| 4  | <b>413.214309</b>  | 207.110793      | <b>396.187760</b>  | 198.597518       |                   |                  | Q    | <b>1339.703850</b> | <b>670.355563</b> | <b>1322.677301</b> | 661.842289       | <b>1321.693285</b> | 661.350281       | 10 |
| 5  | <b>542.256902</b>  | 271.632089      | <b>525.230353</b>  | 263.118815       | <b>524.246337</b> | 262.626807       | E    | <b>1211.645272</b> | 606.326274        | 1194.618723        | 597.813000       | <b>1193.634707</b> | 597.320991       | 9  |
| 6  | 639.309666         | 320.158471      | 622.283117         | 311.645197       | 621.299101        | 311.153189       | P    | <b>1082.602679</b> | 541.804978        | <b>1065.576130</b> | 533.291703       | <b>1064.592114</b> | 532.799695       | 8  |
| 7  | 696.331130         | 348.669203      | 679.304581         | 340.155929       | 678.320565        | 339.663921       | G    | <b>985.549915</b>  | 493.278596        | 968.523366         | 484.765321       | 967.539350         | 484.273313       | 7  |
| 8  | 753.352594         | 377.179935      | 736.326045         | 368.666661       | 735.342029        | 368.174653       | G    | <b>928.528451</b>  | 464.767864        | 911.501902         | 456.254589       | <b>910.517886</b>  | 455.762581       | 6  |
| 9  | <b>1192.577920</b> | 596.792598      | <b>1175.551371</b> | 588.279324       | 1174.567355       | 587.787316       | Q    | <b>871.506987</b>  | 436.257132        | 854.480438         | 427.743857       | 853.496422         | 427.251849       | 5  |
| 10 | 1293.625599        | 647.316438      | 1276.599050        | 638.803163       | 1275.615034       | 638.311155       | T    | <b>432.281661</b>  | 216.644468        | 415.255112         | 208.131194       | 414.271096         | 207.639186       | 4  |
| 11 | 1364.662713        | 682.834995      | 1347.636164        | 674.321720       | 1346.652148       | 673.829712       | A    | <b>331.233982</b>  | 166.120629        | 314.207433         | 157.607354       |                    |                  | 3  |
| 12 | <b>1477.746777</b> | 739.377027      | 1460.720228        | 730.863752       | 1459.736212       | 730.371744       | L    | <b>260.196868</b>  | 130.602072        | <b>243.170319</b>  | 122.088797       |                    |                  | 2  |
| 13 |                    |                 |                    |                  |                   |                  | K    | <b>147.112804</b>  | 74.060040         | 130.086255         | 65.546765        |                    |                  | 1  |

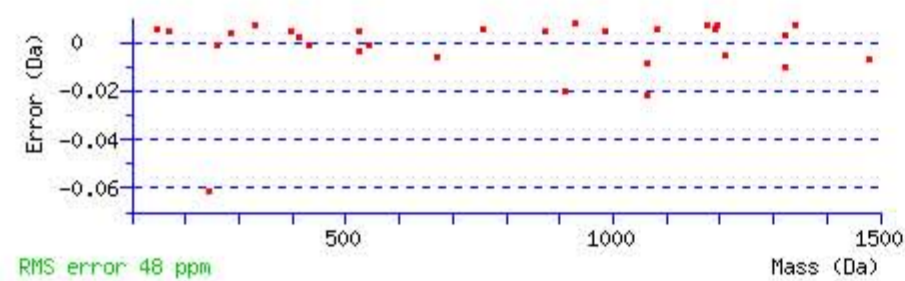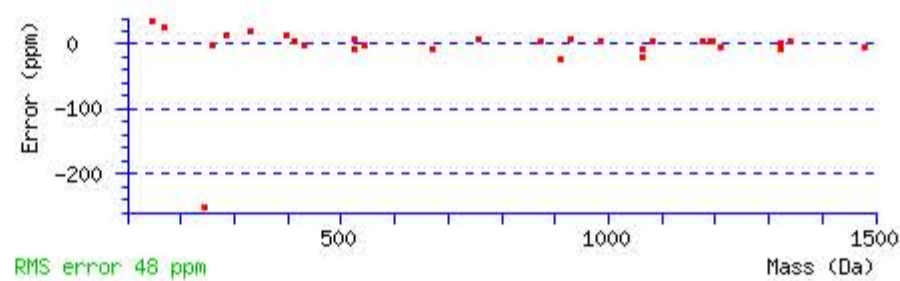

NCBI BLAST search of **LGNQEPGGQTALK**

(Parameters: blastp, nr protein database, expect=20000, no filter, PAM30)

Other BLAST [web gateways](#)

All matches to this query

| Score | Mr(calc):   | Delta     | Sequence                        |
|-------|-------------|-----------|---------------------------------|
| 42.7  | 1622.845016 | -0.013488 | <a href="#">LGNQEPGGQTALK</a>   |
| 6.8   | 1622.845016 | -0.013488 | <a href="#">LGNQEPGGQTALK</a>   |
| 5.8   | 1622.831085 | 0.000443  | <a href="#">GLNPNPSHQMTKRK</a>  |
| 5.4   | 1622.813324 | 0.018204  | <a href="#">NGLAQRMSHGK</a>     |
| 5.1   | 1622.820511 | 0.011017  | <a href="#">FPPEASGYLHIGHAK</a> |
| 2.3   | 1622.837601 | -0.006073 | <a href="#">SQSEKQTYLEVRR</a>   |



# MASCOT Search Results

## Peptide View

MS/MS Fragmentation of **LGNQEPGGQTALK**

Found in **A2AP\_HUMAN**, Alpha-2-antiplasmin OS=Homo sapiens GN=SERPINF2 PE=1 SV=3

Match to Query 45252: 1934.017128 from(968.015840,2+) rtinseconds(1971) index(5715)

Title: Locus:1.1.1.1495.18 File:"2013-07-02 CLN FXIII 60 min 2nd F 1.wiff"

Data file C:\Program Files (x86)\Matrix Science\Mascot Daemon\mgf\5 FXIII 60 min 2nd\mascot\_daemon\_merge.mgf

Click mouse within plot area to zoom in by factor of two about that point

Or, Plot from  to  Da

Label all possible matches  Label matches used for scoring

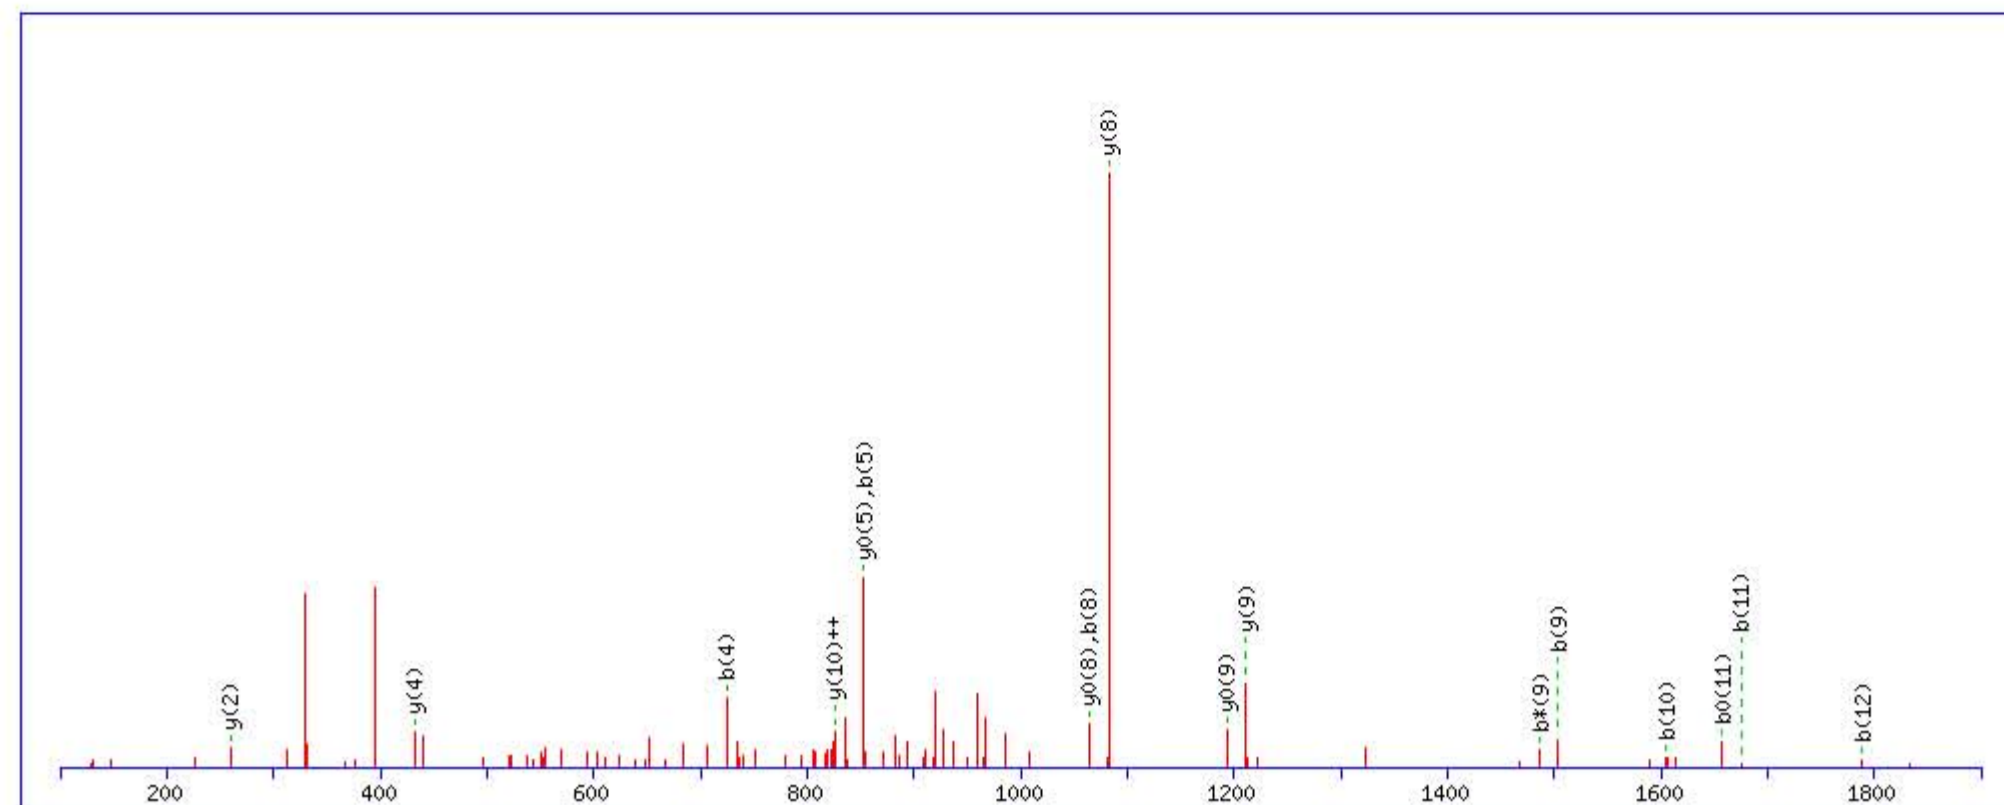

Monoisotopic mass of neutral peptide Mr(calc): 1934.011765

Fixed modifications: Carbamidomethyl (C) (apply to specified residues or termini only)

Variable modifications:

Q4 : Biotin:Thermo-21345 (Q)

Q9 : Biotin:Thermo-21345 (Q)

Ions Score: 33 Expect: 0.019

Matches : 17/126 fragment ions using 31 most intense peaks [\(help\)](#)

| #  | b                  | b <sup>++</sup> | b <sup>*</sup>     | b <sup>+++</sup> | b <sup>0</sup>     | b <sup>0++</sup> | Seq. | y                  | y <sup>++</sup>   | y <sup>*</sup> | y <sup>+++</sup> | y <sup>0</sup>     | y <sup>0++</sup> | #  |
|----|--------------------|-----------------|--------------------|------------------|--------------------|------------------|------|--------------------|-------------------|----------------|------------------|--------------------|------------------|----|
| 1  | 114.091340         | 57.549308       |                    |                  |                    |                  | L    |                    |                   |                |                  |                    |                  | 13 |
| 2  | 171.112804         | 86.060040       |                    |                  |                    |                  | G    | 1821.934989        | 911.471133        | 1804.908440    | 902.957858       | 1803.924424        | 902.465850       | 12 |
| 3  | 285.155731         | 143.081504      | 268.129182         | 134.568229       |                    |                  | N    | 1764.913525        | 882.960400        | 1747.886976    | 874.447126       | 1746.902960        | 873.955118       | 11 |
| 4  | <b>724.381057</b>  | 362.694167      | 707.354508         | 354.180892       |                    |                  | Q    | 1650.870598        | <b>825.938937</b> | 1633.844049    | 817.425663       | 1632.860033        | 816.933654       | 10 |
| 5  | <b>853.423650</b>  | 427.215463      | 836.397101         | 418.702189       | 835.413085         | 418.210181       | E    | <b>1211.645272</b> | 606.326274        | 1194.618723    | 597.813000       | <b>1193.634707</b> | 597.320991       | 9  |
| 6  | 950.476414         | 475.741845      | 933.449865         | 467.228571       | 932.465849         | 466.736563       | P    | <b>1082.602679</b> | 541.804977        | 1065.576130    | 533.291703       | <b>1064.592114</b> | 532.799695       | 8  |
| 7  | 1007.497878        | 504.252577      | 990.471329         | 495.739303       | 989.487313         | 495.247295       | G    | 985.549915         | 493.278595        | 968.523366     | 484.765321       | 967.539350         | 484.273313       | 7  |
| 8  | <b>1064.519342</b> | 532.763309      | 1047.492793        | 524.250035       | 1046.508777        | 523.758027       | G    | 928.528451         | 464.767863        | 911.501902     | 456.254589       | 910.517886         | 455.762581       | 6  |
| 9  | <b>1503.744668</b> | 752.375972      | <b>1486.718119</b> | 743.862698       | 1485.734103        | 743.370690       | Q    | 871.506987         | 436.257132        | 854.480438     | 427.743857       | <b>853.496422</b>  | 427.251849       | 5  |
| 10 | <b>1604.792347</b> | 802.899812      | 1587.765798        | 794.386537       | 1586.781782        | 793.894529       | T    | <b>432.281661</b>  | 216.644468        | 415.255112     | 208.131194       | 414.271096         | 207.639186       | 4  |
| 11 | <b>1675.829461</b> | 838.418369      | 1658.802912        | 829.905094       | <b>1657.818896</b> | 829.413086       | A    | 331.233982         | 166.120629        | 314.207433     | 157.607354       |                    |                  | 3  |
| 12 | <b>1788.913525</b> | 894.960400      | 1771.886976        | 886.447126       | 1770.902960        | 885.955118       | L    | <b>260.196868</b>  | 130.602072        | 243.170319     | 122.088797       |                    |                  | 2  |
| 13 |                    |                 |                    |                  |                    |                  | K    | 147.112804         | 74.060040         | 130.086255     | 65.546765        |                    |                  | 1  |

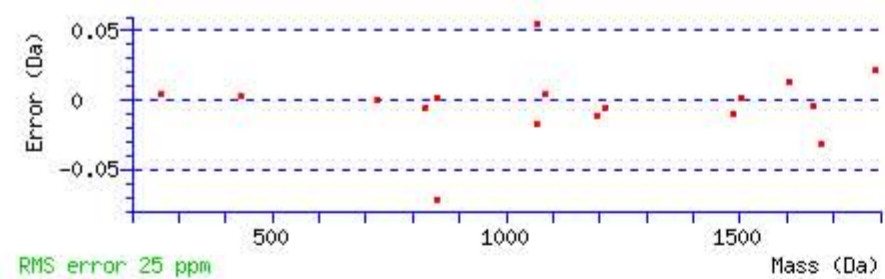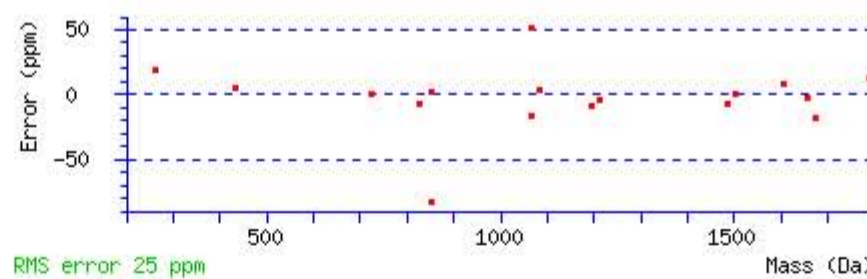

NCBI BLAST search of **LGNQEPGGQTALK**

(Parameters: blastp, nr protein database, expect=20000, no filter, PAM30)

Other BLAST [web gateways](#)

## All matches to this query

| Score | Mr(calc):   | Delta     | Sequence                          |
|-------|-------------|-----------|-----------------------------------|
| 33.2  | 1934.011765 | 0.005363  | <a href="#">LGNQEPGGQTALK</a>     |
| 10.2  | 1934.032867 | -0.015739 | <a href="#">KSRPLTGLMDLAKEMTK</a> |
| 5.1   | 1934.032867 | -0.015739 | <a href="#">KSRPLTGLMDLAKEMTK</a> |
| 3.8   | 1934.037369 | -0.020241 | <a href="#">NYLEGIYNVPVAAVTR</a>  |
| 1.7   | 1934.003647 | 0.013481  | <a href="#">SSSLGYISKAEEYFLK</a>  |
| 0.9   | 1934.026154 | -0.009026 | <a href="#">QPLRK YVTPSDFDQLK</a> |
| 0.8   | 1934.027008 | -0.009880 | <a href="#">VSFRLHITEPKMMFAK</a>  |



# MASCOT Search Results

## Peptide View

MS/MS Fragmentation of **QLTSGPNQEQVSPLTLK**  
 Found in **A2AP\_HUMAN**, Alpha-2-antiplasmin OS=Homo sapiens GN=SERPINF2 PE=1 SV=3

Match to Query 52312: 2263.243468 from(1132.629010,2+) rtinseconds(2502) index(8663)  
 Title: Locus:1.1.1.1680.11 File:"2013-07-02 CLN FXIII 60 min 2nd F 1.wiff"  
 Data file C:\Program Files (x86)\Matrix Science\Mascot Daemon\mgf5 FXIII 60 min 2nd\mascot\_daemon\_merge.mgf

Click mouse within plot area to zoom in by factor of two about that point  
 Or, Plot from  to  Da   
 Label all possible matches  Label matches used for scoring

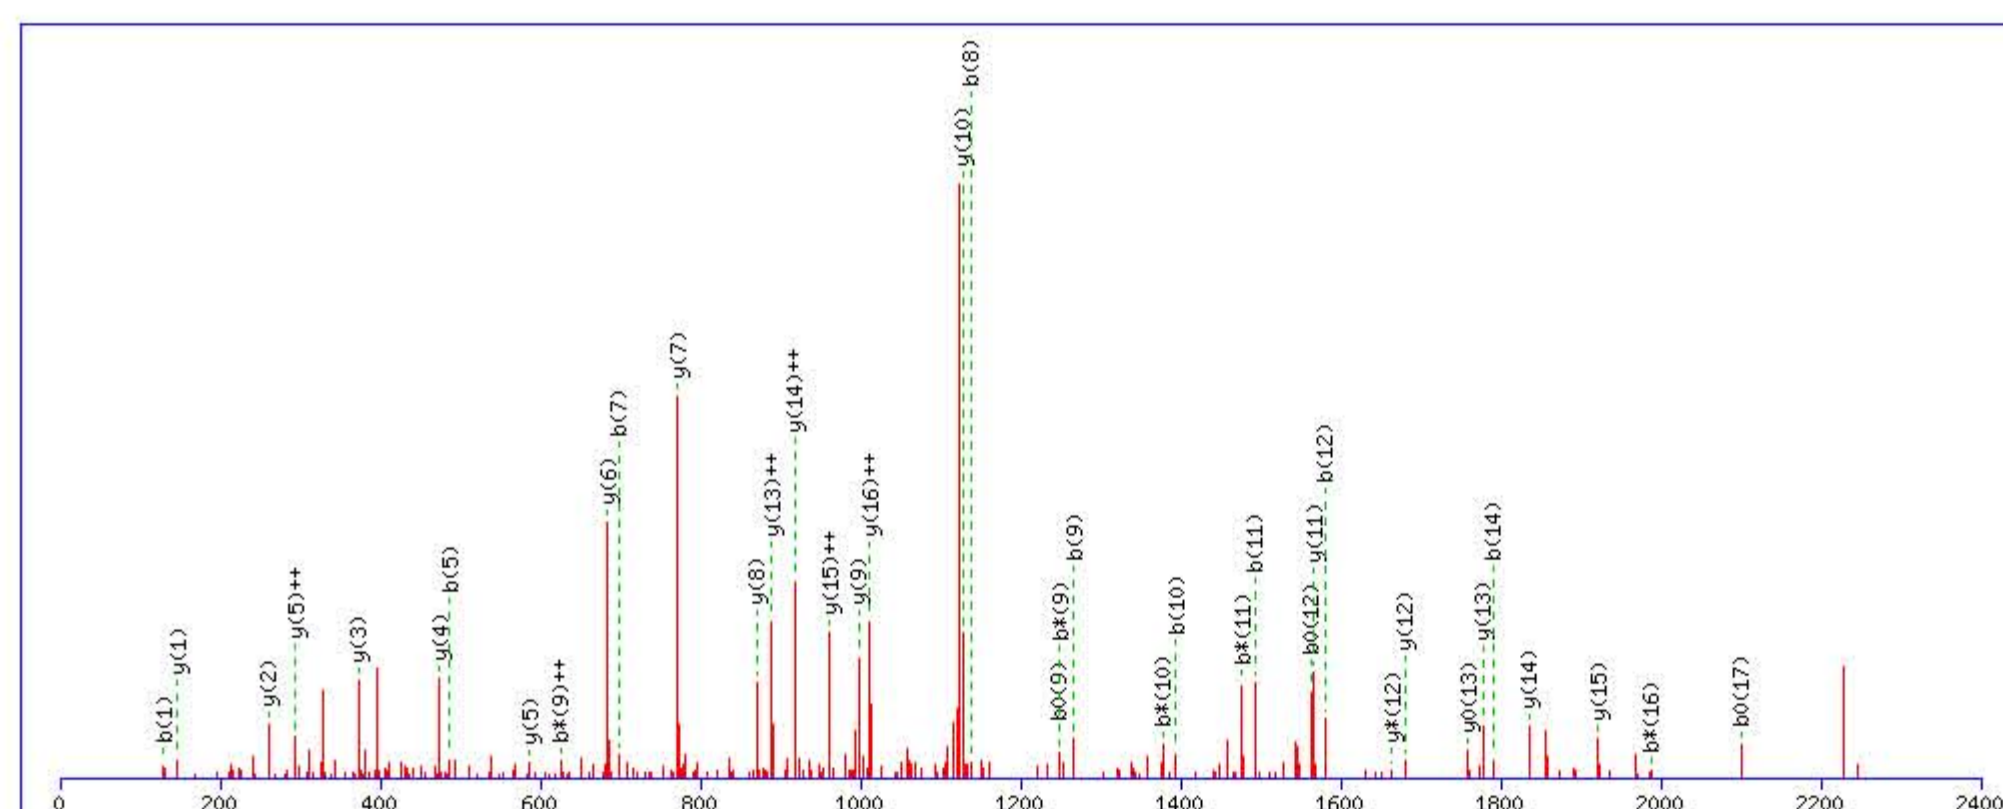

Monoisotopic mass of neutral peptide Mr(calc): 2263.224594  
 Fixed modifications: Carbamidomethyl (C) (apply to specified residues or termini only)  
 Variable modifications:  
 Q8 : Biotin:Thermo-21345 (Q)  
 Ions Score: 116 Expect: 6.6e-011  
 Matches : 39/194 fragment ions using 60 most intense peaks [\(help\)](#)

| #  | b           | b <sup>++</sup> | b <sup>*</sup> | b <sup>*++</sup> | b <sup>0</sup> | b <sup>0++</sup> | Seq. | y           | y <sup>++</sup> | y <sup>*</sup> | y <sup>*++</sup> | y <sup>0</sup> | y <sup>0++</sup> | #  |
|----|-------------|-----------------|----------------|------------------|----------------|------------------|------|-------------|-----------------|----------------|------------------|----------------|------------------|----|
| 1  | 129.065854  | 65.036565       | 112.039305     | 56.523291        |                |                  | Q    |             |                 |                |                  |                |                  | 18 |
| 2  | 242.149918  | 121.578597      | 225.123369     | 113.065323       |                |                  | L    | 2136.173304 | 1068.590290     | 2119.146755    | 1060.077015      | 2118.162739    | 1059.585007      | 17 |
| 3  | 343.197597  | 172.102437      | 326.171048     | 163.589162       | 325.187032     | 163.097154       | T    | 2023.089240 | 1012.048258     | 2006.062691    | 1003.534984      | 2005.078675    | 1003.042976      | 16 |
| 4  | 430.229625  | 215.618450      | 413.203076     | 207.105176       | 412.219060     | 206.613168       | S    | 1922.041561 | 961.524419      | 1905.015012    | 953.011144       | 1904.030996    | 952.519136       | 15 |
| 5  | 487.251089  | 244.129182      | 470.224540     | 235.615908       | 469.240524     | 235.123900       | G    | 1835.009533 | 918.008405      | 1817.982984    | 909.495130       | 1816.998968    | 909.003122       | 14 |
| 6  | 584.303853  | 292.655565      | 567.277304     | 284.142290       | 566.293288     | 283.650282       | P    | 1777.988069 | 889.497673      | 1760.961520    | 880.984398       | 1759.977504    | 880.492390       | 13 |
| 7  | 698.346780  | 349.677028      | 681.320231     | 341.163753       | 680.336215     | 340.671745       | N    | 1680.935305 | 840.971291      | 1663.908756    | 832.458016       | 1662.924740    | 831.966008       | 12 |
| 8  | 1137.572106 | 569.289691      | 1120.545557    | 560.776416       | 1119.561541    | 560.284408       | Q    | 1566.892378 | 783.949827      | 1549.865829    | 775.436553       | 1548.881813    | 774.944545       | 11 |
| 9  | 1266.614699 | 633.810988      | 1249.588150    | 625.297713       | 1248.604134    | 624.805705       | E    | 1127.667052 | 564.337164      | 1110.640503    | 555.823890       | 1109.656487    | 555.331882       | 10 |
| 10 | 1394.673277 | 697.840277      | 1377.646728    | 689.327002       | 1376.662712    | 688.834994       | Q    | 998.624459  | 499.815868      | 981.597910     | 491.302593       | 980.613894     | 490.810585       | 9  |
| 11 | 1493.741691 | 747.374484      | 1476.715142    | 738.861209       | 1475.731126    | 738.369201       | V    | 870.565881  | 435.786579      | 853.539332     | 427.273304       | 852.555316     | 426.781296       | 8  |
| 12 | 1580.773719 | 790.890498      | 1563.747170    | 782.377223       | 1562.763154    | 781.885215       | S    | 771.497467  | 386.252372      | 754.470918     | 377.739097       | 753.486902     | 377.247089       | 7  |
| 13 | 1677.826483 | 839.416880      | 1660.799934    | 830.903605       | 1659.815918    | 830.411597       | P    | 684.465439  | 342.736358      | 667.438890     | 334.223083       | 666.454874     | 333.731075       | 6  |
| 14 | 1790.910547 | 895.958912      | 1773.883998    | 887.445637       | 1772.899982    | 886.953629       | L    | 587.412675  | 294.209976      | 570.386126     | 285.696701       | 569.402110     | 285.204693       | 5  |
| 15 | 1891.958226 | 946.482751      | 1874.931677    | 937.969477       | 1873.947661    | 937.477469       | T    | 474.328611  | 237.667944      | 457.302062     | 229.154669       | 456.318046     | 228.662661       | 4  |
| 16 | 2005.042290 | 1003.024783     | 1988.015741    | 994.511509       | 1987.031725    | 994.019501       | L    | 373.280932  | 187.144104      | 356.254383     | 178.630830       |                |                  | 3  |
| 17 | 2118.126354 | 1059.566815     | 2101.099805    | 1051.053540      | 2100.115789    | 1050.561532      | L    | 260.196868  | 130.602072      | 243.170319     | 122.088798       |                |                  | 2  |
| 18 |             |                 |                |                  |                |                  | K    | 147.112804  | 74.060040       | 130.086255     | 65.546765        |                |                  | 1  |

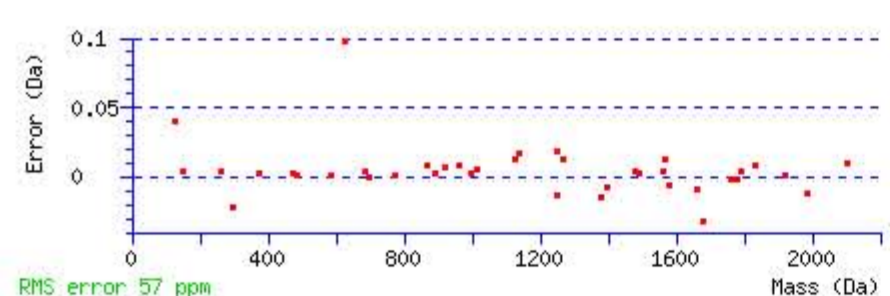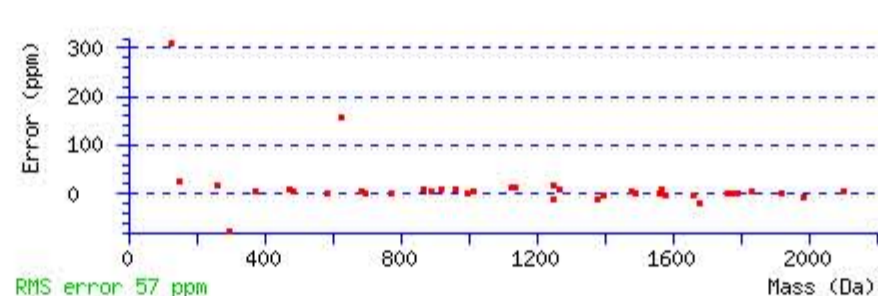

NCBI BLAST search of **QLTSGPNQEQVSPLTLK**  
 (Parameters: blastp, nr protein database, expect=20000, no filter, PAM30)  
 Other BLAST [web gateways](#)

### All matches to this query

| Score | Mr(calc):   | Delta    | Sequence                             |
|-------|-------------|----------|--------------------------------------|
| 115.6 | 2263.224594 | 0.018874 | <a href="#">QLTSGPNQEQVSPLTLK</a>    |
| 80.5  | 2263.224594 | 0.018874 | <a href="#">QLTSGPNQEQVSPLTLK</a>    |
| 45.3  | 2263.224594 | 0.018874 | <a href="#">QLTSGPNQEQVSPLTLK</a>    |
| 7.0   | 2263.231979 | 0.011489 | <a href="#">LGKKIETIVMIFDCEGLGLK</a> |
| 6.4   | 2263.224594 | 0.018874 | <a href="#">GLALSSNKVKSVMVVFENEK</a> |



# Mascot Search Results

## Peptide View

MS/MS Fragmentation of **LQQVLHAGSGPCLPHLLSR**

Found in **A2AP\_HUMAN**, Alpha-2-antiplasmin OS=Homo sapiens GN=SERPINF2 PE=1 SV=3

Match to Query 54203: 2393.285896 from(599.328750,4+) rtinseconds(2111) index(6515)

Title: Locus:1.1.1.1544.21 File:"2013-07-02 CLN FXIII 60 min 2nd F 1.wiff"

Data file C:\Program Files (x86)\Matrix Science\Mascot Daemon\mgf5 FXIII 60 min 2nd\mascot\_daemon\_merge.mgf

Click mouse within plot area to zoom in by factor of two about that point

Or, Plot from  to  Da

Label all possible matches  Label matches used for scoring

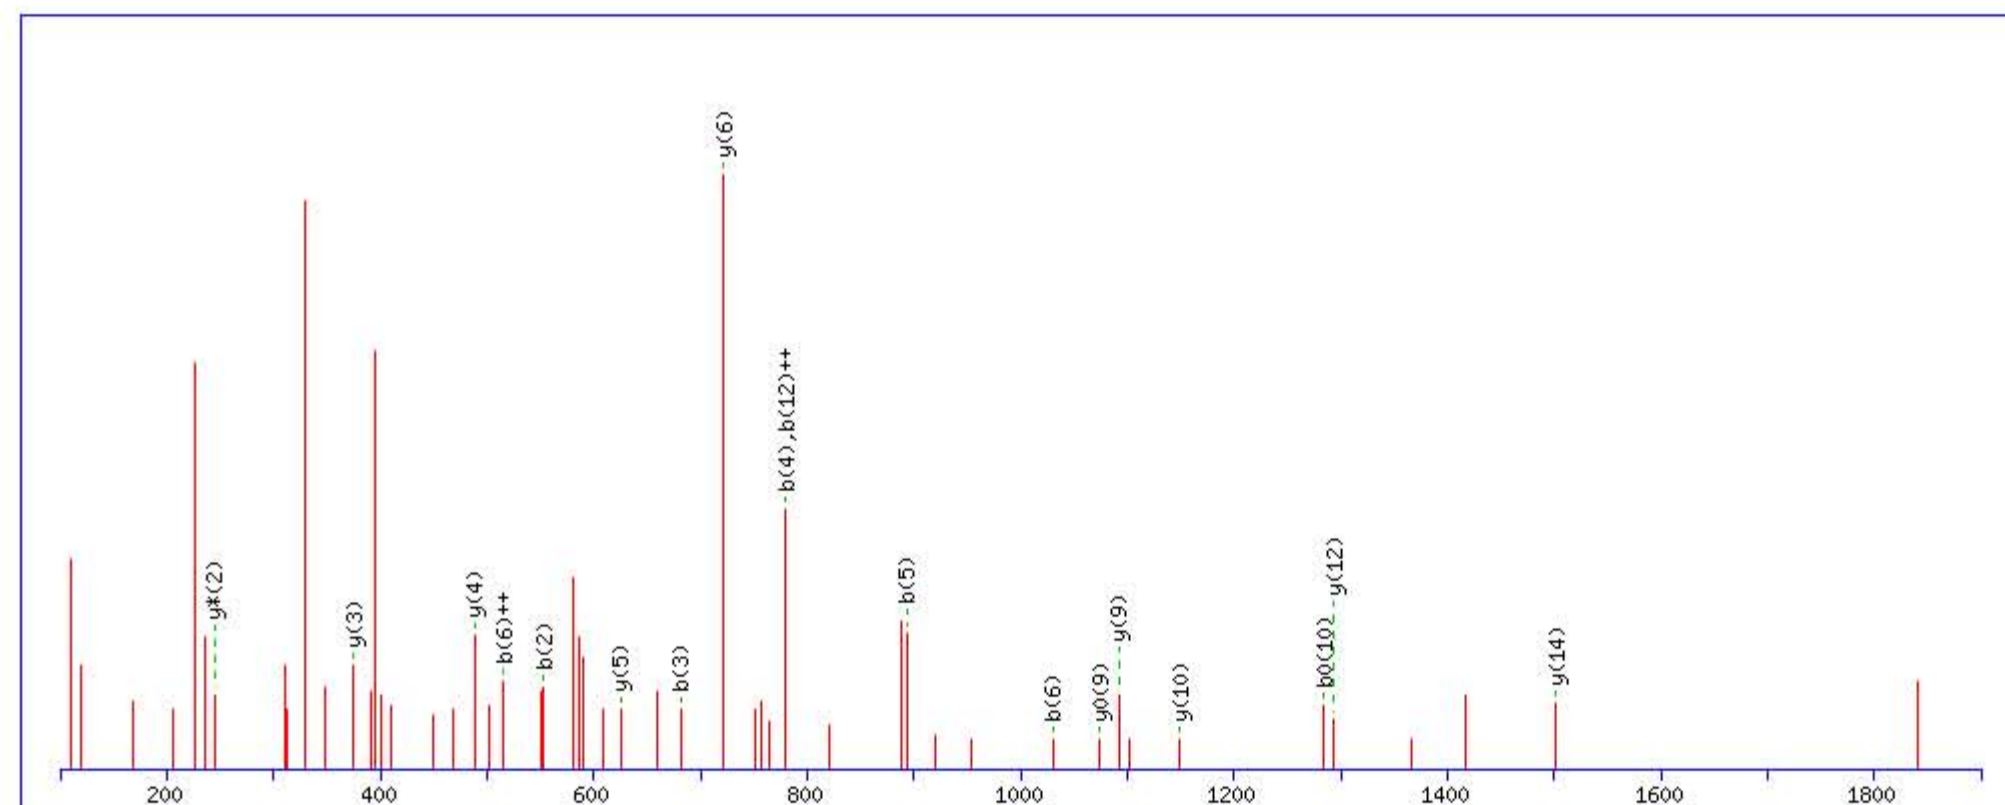

Monoisotopic mass of neutral peptide Mr(calc): 2393.282410

Fixed modifications: Carbamidomethyl (C) (apply to specified residues or termini only)

Variable modifications:

Q2 : Biotin:Thermo-21345 (Q)

Ions Score: 27 Expect: 0.042

Matches : 18/196 fragment ions using 46 most intense peaks [\(help\)](#)

| #  | b                  | b <sup>++</sup>   | b <sup>+</sup> | b <sup>+++</sup> | b <sup>0</sup>     | b <sup>0++</sup> | Seq. | y                  | y <sup>++</sup> | y <sup>+</sup>    | y <sup>+++</sup> | y <sup>0</sup>     | y <sup>0++</sup> | #  |
|----|--------------------|-------------------|----------------|------------------|--------------------|------------------|------|--------------------|-----------------|-------------------|------------------|--------------------|------------------|----|
| 1  | 114.091340         | 57.549308         |                |                  |                    |                  | L    |                    |                 |                   |                  |                    |                  | 19 |
| 2  | <b>553.316666</b>  | 277.161971        | 536.290117     | 268.648697       |                    |                  | Q    | 2281.205625        | 1141.106450     | 2264.179076       | 1132.593176      | 2263.195060        | 1132.101168      | 18 |
| 3  | <b>681.375244</b>  | 341.191260        | 664.348695     | 332.677986       |                    |                  | Q    | 1841.980299        | 921.493788      | 1824.953750       | 912.980513       | 1823.969734        | 912.488505       | 17 |
| 4  | <b>780.443658</b>  | 390.725467        | 763.417109     | 382.212193       |                    |                  | V    | 1713.921721        | 857.464498      | 1696.895172       | 848.951224       | 1695.911156        | 848.459216       | 16 |
| 5  | <b>893.527722</b>  | 447.267499        | 876.501173     | 438.754225       |                    |                  | L    | 1614.853307        | 807.930292      | 1597.826758       | 799.417017       | 1596.842742        | 798.925009       | 15 |
| 6  | <b>1030.586634</b> | <b>515.796955</b> | 1013.560085    | 507.283681       |                    |                  | H    | <b>1501.769243</b> | 751.388260      | 1484.742694       | 742.874985       | 1483.758678        | 742.382977       | 14 |
| 7  | 1101.623748        | 551.315512        | 1084.597199    | 542.802238       |                    |                  | A    | 1364.710331        | 682.858804      | 1347.683782       | 674.345529       | 1346.699766        | 673.853521       | 13 |
| 8  | 1158.645212        | 579.826244        | 1141.618663    | 571.312970       |                    |                  | G    | <b>1293.673217</b> | 647.340247      | 1276.646668       | 638.826972       | 1275.662652        | 638.334964       | 12 |
| 9  | 1245.677240        | 623.342258        | 1228.650691    | 614.828984       | 1227.666675        | 614.336975       | S    | 1236.651753        | 618.829515      | 1219.625204       | 610.316240       | 1218.641188        | 609.824232       | 11 |
| 10 | 1302.698704        | 651.852990        | 1285.672155    | 643.339716       | <b>1284.688139</b> | 642.847707       | G    | <b>1149.619725</b> | 575.313501      | 1132.593176       | 566.800226       | 1131.609160        | 566.308218       | 10 |
| 11 | 1399.751468        | 700.379372        | 1382.724919    | 691.866098       | 1381.740903        | 691.374089       | P    | <b>1092.598261</b> | 546.802769      | 1075.571712       | 538.289494       | <b>1074.587696</b> | 537.797486       | 9  |
| 12 | 1559.782117        | <b>780.394697</b> | 1542.755568    | 771.881422       | 1541.771552        | 771.389414       | C    | 995.545497         | 498.276387      | 978.518948        | 489.763112       | 977.534932         | 489.271104       | 8  |
| 13 | 1672.866181        | 836.936728        | 1655.839632    | 828.423454       | 1654.855616        | 827.931446       | L    | 835.514848         | 418.261062      | 818.488299        | 409.747788       | 817.504283         | 409.255780       | 7  |
| 14 | 1769.918945        | 885.463110        | 1752.892396    | 876.949836       | 1751.908380        | 876.457828       | P    | <b>722.430784</b>  | 361.719030      | 705.404235        | 353.205756       | 704.420219         | 352.713748       | 6  |
| 15 | 1906.977857        | 953.992566        | 1889.951308    | 945.479292       | 1888.967292        | 944.987284       | H    | <b>625.378020</b>  | 313.192648      | 608.351471        | 304.679374       | 607.367455         | 304.187366       | 5  |
| 16 | 2020.061921        | 1010.534598       | 2003.035372    | 1002.021324      | 2002.051356        | 1001.529316      | L    | <b>488.319108</b>  | 244.663192      | 471.292559        | 236.149918       | 470.308543         | 235.657910       | 4  |
| 17 | 2133.145985        | 1067.076630       | 2116.119436    | 1058.563356      | 2115.135420        | 1058.071348      | L    | <b>375.235044</b>  | 188.121160      | 358.208495        | 179.607886       | 357.224479         | 179.115878       | 3  |
| 18 | 2220.178013        | 1110.592644       | 2203.151464    | 1102.079370      | 2202.167448        | 1101.587362      | S    | 262.150980         | 131.579128      | <b>245.124431</b> | 123.065854       | 244.140415         | 122.573846       | 2  |
| 19 |                    |                   |                |                  |                    |                  | R    | 175.118952         | 88.063114       | 158.092403        | 79.549839        |                    |                  | 1  |

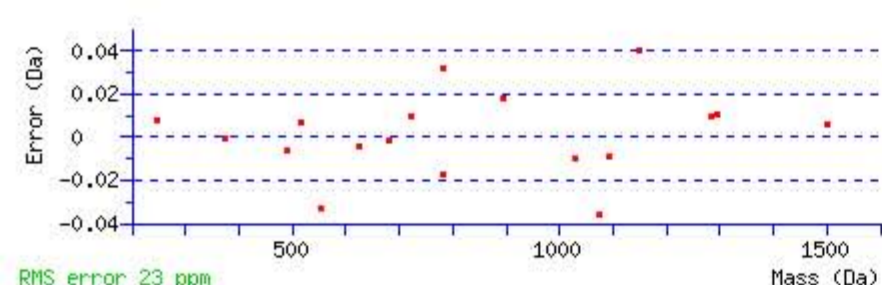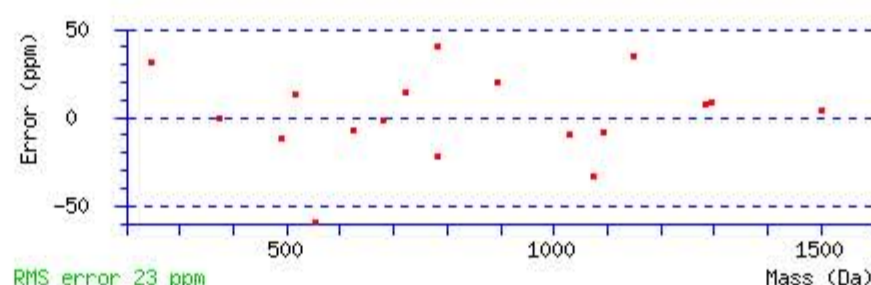

NCBI BLAST search of [LQQVLHAGSGPCLPHLLSR](#)

(Parameters: blastp, nr protein database, expect=20000, no filter, PAM30)

Other BLAST [web gateways](#)

All matches to this query

| Score | Mr(calc):   | Delta    | Sequence                            |
|-------|-------------|----------|-------------------------------------|
| 27.1  | 2393.282410 | 0.003486 | <a href="#">LQQVLHAGSGPCLPHLLSR</a> |
| 25.6  | 2393.282410 | 0.003486 | <a href="#">LQQVLHAGSGPCLPHLLSR</a> |



# MASCOT Search Results

## Peptide View

MS/MS Fragmentation of **ELKEQQDSPGNKDFLQSLK**

Found in **A2AP\_HUMAN**, Alpha-2-antiplasmin OS=Homo sapiens GN=SERPINF2 PE=1 SV=3

Match to Query 56923: 2514.277136 from(629.576560,4+) rtinseconds(1896) index(5176)

Title: Locus:1.1.1.1469.22 File:"2013-07-02 CLN FXIII 60 min 2nd F 1.wiff"

Data file C:\Program Files (x86)\Matrix Science\Mascot Daemon\mgf5 FXIII 60 min 2nd\mascot\_daemon\_merge.mgf

Click mouse within plot area to zoom in by factor of two about that point

Or, Plot from  to  Da

Label all possible matches  Label matches used for scoring

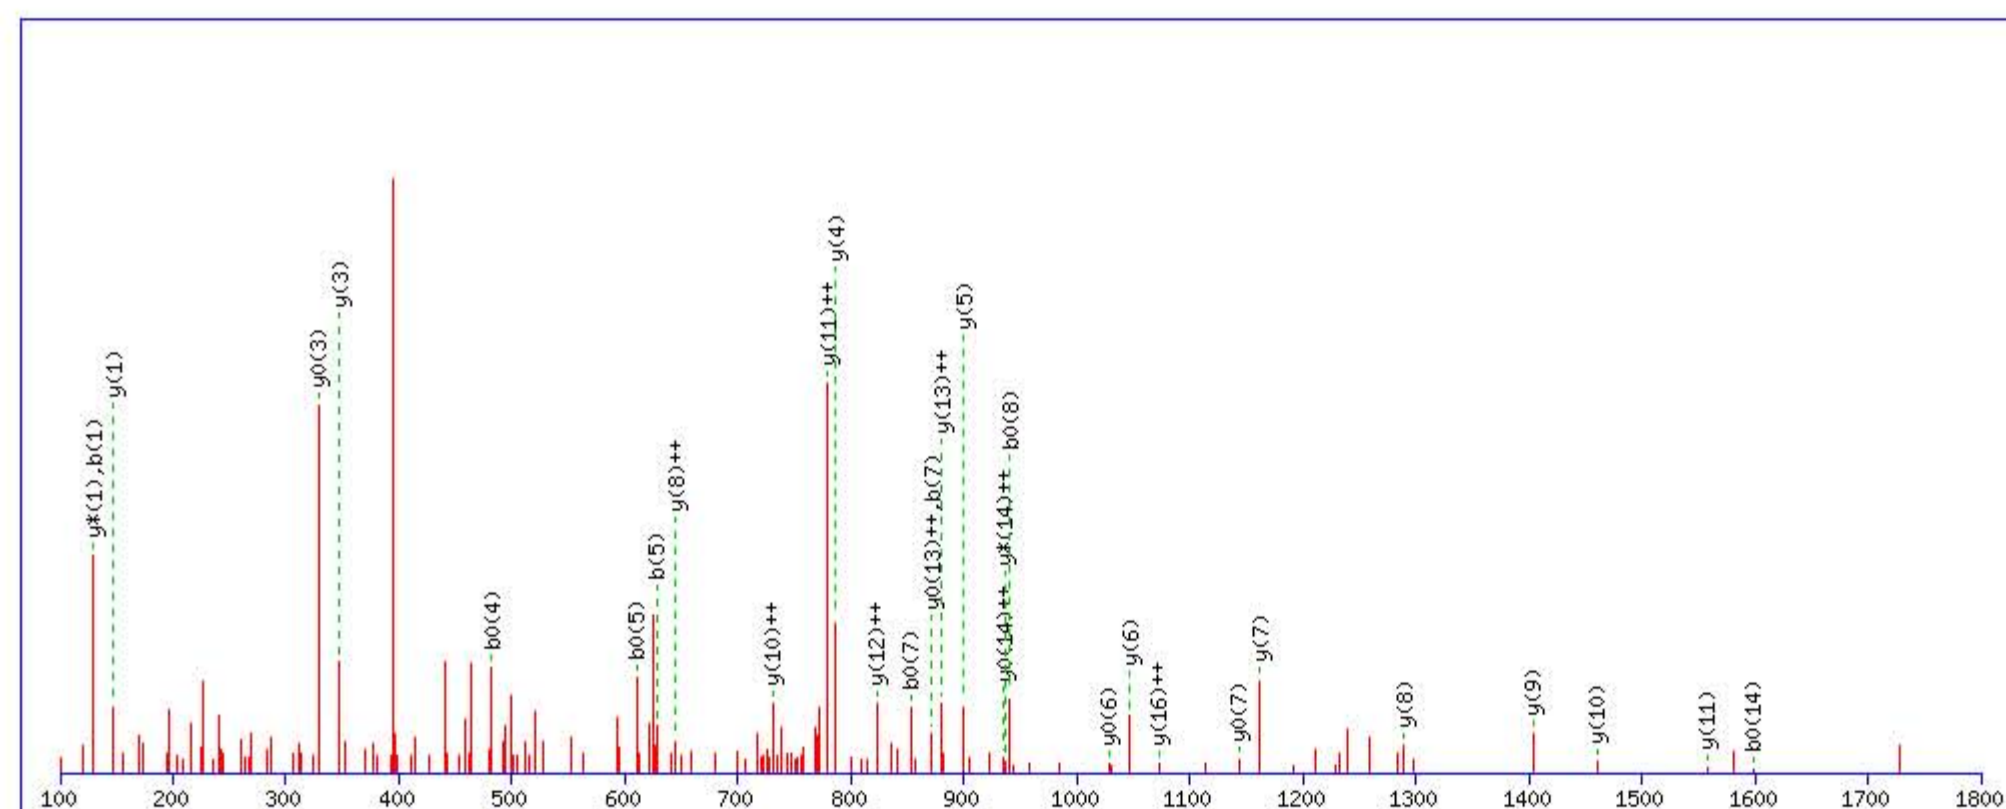

Monoisotopic mass of neutral peptide Mr(calc): 2514.278793

Fixed modifications: Carbamidomethyl (C) (apply to specified residues or termini only)

Variable modifications:

Q16 : Biotin:Thermo-21345 (Q)

Ions Score: 40 Expect: 0.00085

Matches : 31/208 fragment ions using 65 most intense peaks [\(help\)](#)

| #  | b                 | b <sup>++</sup> | b <sup>*</sup> | b <sup>*++</sup> | b <sup>0</sup>     | b <sup>0++</sup> | Seq. | y                  | y <sup>++</sup>    | y <sup>*</sup>    | y <sup>*++</sup>  | y <sup>0</sup>     | y <sup>0++</sup>  | #  |
|----|-------------------|-----------------|----------------|------------------|--------------------|------------------|------|--------------------|--------------------|-------------------|-------------------|--------------------|-------------------|----|
| 1  | <b>130.049869</b> | 65.528572       |                |                  | 112.039304         | 56.523290        | E    |                    |                    |                   |                   |                    |                   | 19 |
| 2  | 243.133933        | 122.070605      |                |                  | 225.123368         | 113.065322       | L    | 2386.243508        | 1193.625392        | 2369.216959       | 1185.112117       | 2368.232943        | 1184.620109       | 18 |
| 3  | 371.228896        | 186.118086      | 354.202347     | 177.604812       | 353.218331         | 177.112804       | K    | 2273.159444        | 1137.083360        | 2256.132895       | 1128.570085       | 2255.148879        | 1128.078077       | 17 |
| 4  | 500.271489        | 250.639383      | 483.244940     | 242.126108       | <b>482.260924</b>  | 241.634100       | E    | 2145.064481        | <b>1073.035878</b> | 2128.037932       | 1064.522604       | 2127.053916        | 1064.030596       | 16 |
| 5  | <b>628.330067</b> | 314.668672      | 611.303518     | 306.155397       | <b>610.319502</b>  | 305.663389       | Q    | 2016.021888        | 1008.514582        | 1998.995339       | 1000.001308       | 1998.011323        | 999.509300        | 15 |
| 6  | 756.388645        | 378.697961      | 739.362096     | 370.184686       | 738.378080         | 369.692678       | Q    | 1887.963310        | 944.485293         | 1870.936761       | <b>935.972019</b> | 1869.952745        | <b>935.480011</b> | 14 |
| 7  | <b>871.415588</b> | 436.211432      | 854.389039     | 427.698158       | <b>853.405023</b>  | 427.206150       | D    | 1759.904732        | <b>880.456004</b>  | 1742.878183       | 871.942730        | 1741.894167        | <b>871.450722</b> | 13 |
| 8  | 958.447616        | 479.727446      | 941.421067     | 471.214172       | <b>940.437051</b>  | 470.722164       | S    | 1644.877789        | <b>822.942533</b>  | 1627.851240       | 814.429258        | 1626.867224        | 813.937250        | 12 |
| 9  | 1055.500380       | 528.253828      | 1038.473831    | 519.740554       | 1037.489815        | 519.248545       | P    | <b>1557.845761</b> | <b>779.426519</b>  | 1540.819212       | 770.913244        | 1539.835196        | 770.421236        | 11 |
| 10 | 1112.521844       | 556.764560      | 1095.495295    | 548.251285       | 1094.511279        | 547.759277       | G    | <b>1460.792997</b> | <b>730.900137</b>  | 1443.766448       | 722.386862        | 1442.782432        | 721.894854        | 10 |
| 11 | 1226.564771       | 613.786023      | 1209.538222    | 605.272749       | 1208.554206        | 604.780741       | N    | <b>1403.771533</b> | 702.389405         | 1386.744984       | 693.876130        | 1385.760968        | 693.384122        | 9  |
| 12 | 1354.659734       | 677.833505      | 1337.633185    | 669.320230       | 1336.649169        | 668.828222       | K    | <b>1289.728606</b> | <b>645.367941</b>  | 1272.702057       | 636.854667        | 1271.718041        | 636.362659        | 8  |
| 13 | 1469.686677       | 735.346976      | 1452.660128    | 726.833702       | 1451.676112        | 726.341694       | D    | <b>1161.633643</b> | 581.320460         | 1144.607094       | 572.807185        | <b>1143.623078</b> | 572.315177        | 7  |
| 14 | 1616.755091       | 808.881184      | 1599.728542    | 800.367909       | <b>1598.744526</b> | 799.875901       | F    | <b>1046.606700</b> | 523.806988         | 1029.580151       | 515.293714        | <b>1028.596135</b> | 514.801706        | 6  |
| 15 | 1729.839155       | 865.423215      | 1712.812606    | 856.909941       | 1711.828590        | 856.417933       | L    | <b>899.538286</b>  | 450.272781         | 882.511737        | 441.759507        | 881.527721         | 441.267499        | 5  |
| 16 | 2169.064481       | 1085.035878     | 2152.037932    | 1076.522604      | 2151.053916        | 1076.030596      | Q    | <b>786.454222</b>  | 393.730749         | 769.427673        | 385.217475        | 768.443657         | 384.725467        | 4  |
| 17 | 2256.096509       | 1128.551892     | 2239.069960    | 1120.038618      | 2238.085944        | 1119.546610      | S    | <b>347.228896</b>  | 174.118086         | 330.202347        | 165.604812        | <b>329.218331</b>  | 165.112804        | 3  |
| 18 | 2369.180573       | 1185.093925     | 2352.154024    | 1176.580650      | 2351.170008        | 1176.088642      | L    | 260.196868         | 130.602072         | 243.170319        | 122.088798        |                    |                   | 2  |
| 19 |                   |                 |                |                  |                    |                  | K    | <b>147.112804</b>  | 74.060040          | <b>130.086255</b> | 65.546765         |                    |                   | 1  |

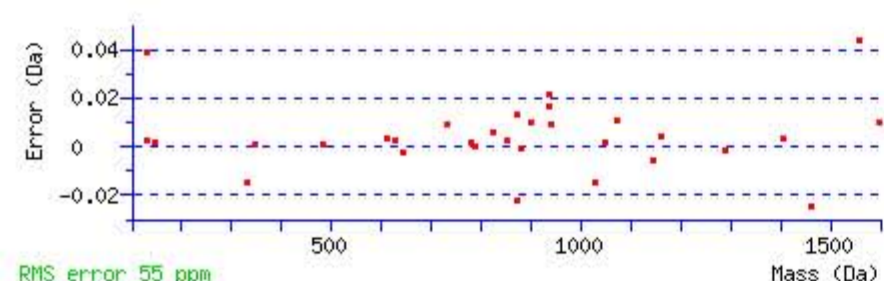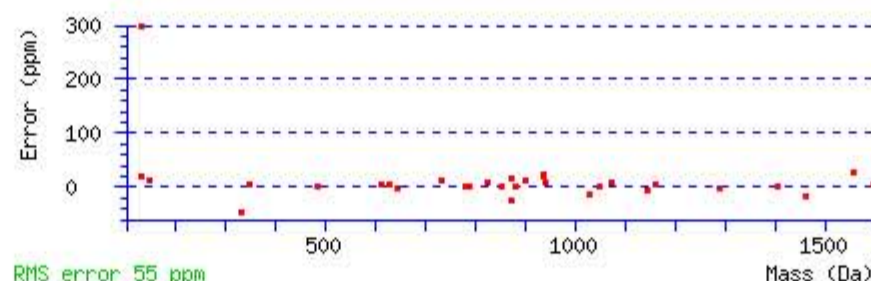

NCBI BLAST search of [ELKEQQDSPGNKDFLQSLK](#)

(Parameters: blastp, nr protein database, expect=20000, no filter, PAM30)

Other BLAST [web gateways](#)

All matches to this query

| Score | Mr(calc):   | Delta     | Sequence                                 |
|-------|-------------|-----------|------------------------------------------|
| 39.7  | 2514.278793 | -0.001657 | <a href="#">ELKEQQDSPGNKDFLQSLK</a>      |
| 7.0   | 2514.268951 | 0.008185  | <a href="#">GNSGPPGIVGQKGDPGYPGAPGPK</a> |

Mascot: <http://www.matrixscience.com/>



# Mascot Search Results

## Peptide View

MS/MS Fragmentation of **QLTSGPNQEQVSPLTLK**

Found in **A2AP\_HUMAN**, Alpha-2-antiplasmin OS=Homo sapiens GN=SERPINF2 PE=1 SV=3

Match to Query 57391: 2574.407772 from(859.143200,3+) rtinseconds(2698) index(9758)

Title: Locus:1.1.1.1748.19 File:"2013-07-02 CLN FXIII 60 min 2nd F 1.wiff"

Data file C:\Program Files (x86)\Matrix Science\Mascot Daemon\mgf5 FXIII 60 min 2nd\mascot\_daemon\_merge.mgf

Click mouse within plot area to zoom in by factor of two about that point

Or, Plot from  to  Da

Label all possible matches  Label matches used for scoring

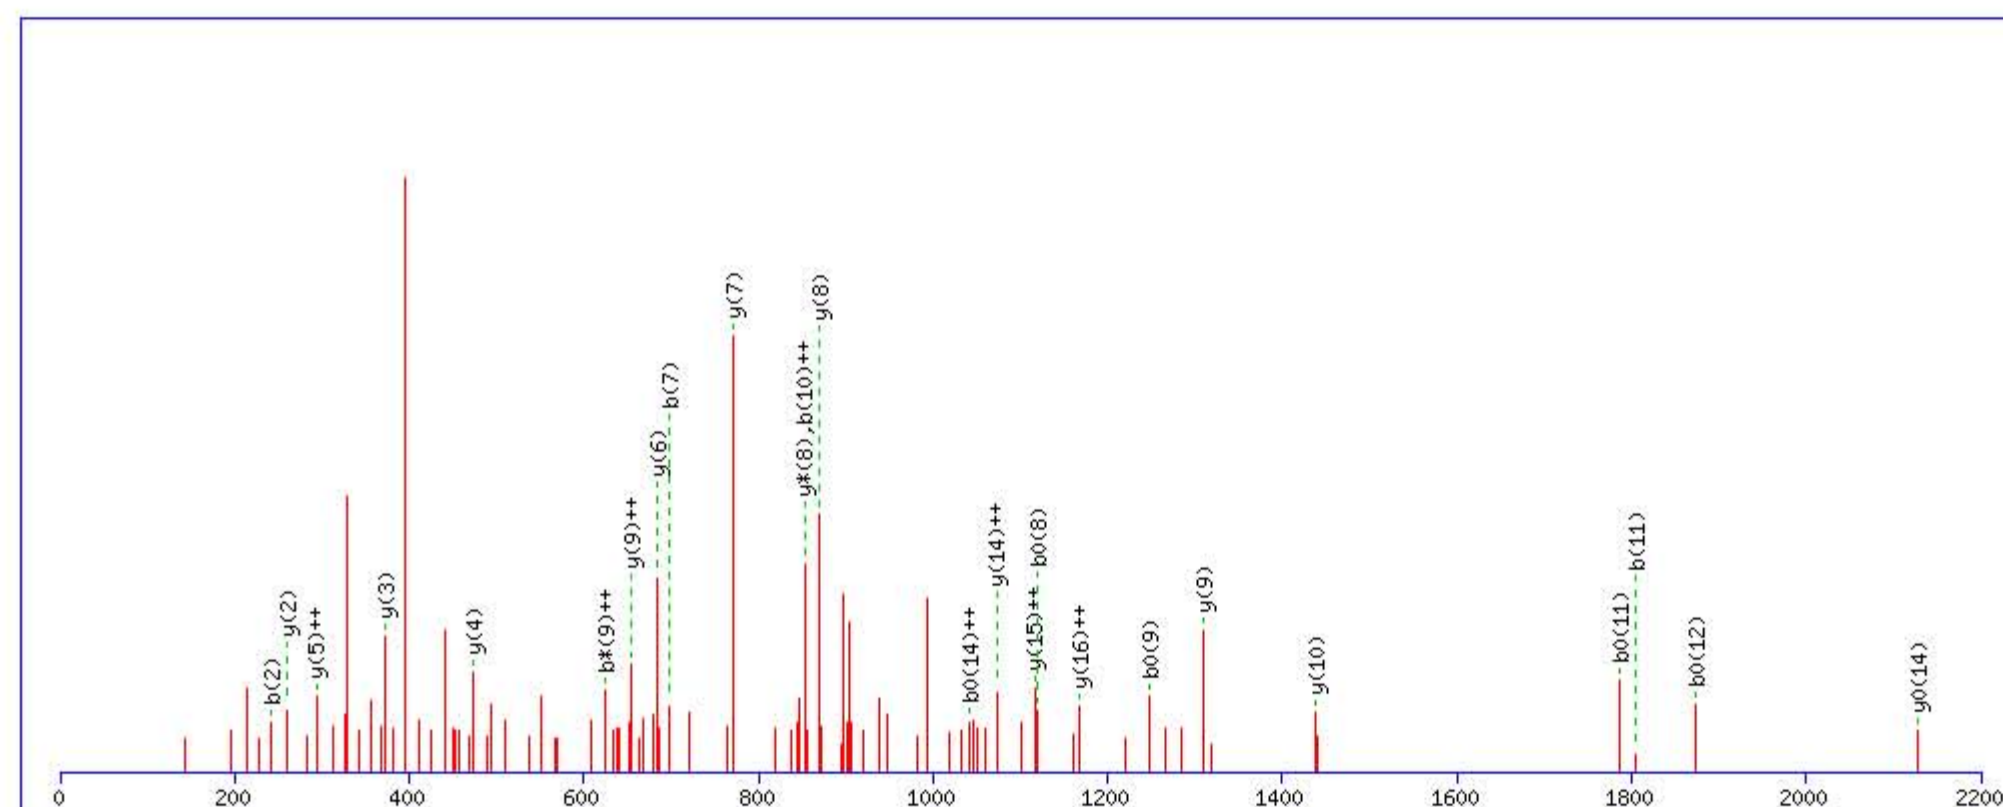

Monoisotopic mass of neutral peptide Mr(calc): 2574.391342

Fixed modifications: Carbamidomethyl (C) (apply to specified residues or termini only)

Variable modifications:

Q8 : Biotin:Thermo-21345 (Q)

Q10 : Biotin:Thermo-21345 (Q)

Ions Score: 41 Expect: 0.001

Matches : 25/194 fragment ions using 42 most intense peaks [\(help\)](#)

| #  | b                  | b <sup>++</sup>   | b <sup>*</sup> | b <sup>+++</sup>  | b <sup>0</sup>     | b <sup>0++</sup>   | Seq. | y                  | y <sup>++</sup>    | y <sup>*</sup>    | y <sup>+++</sup> | y <sup>0</sup>     | y <sup>0++</sup> | #  |
|----|--------------------|-------------------|----------------|-------------------|--------------------|--------------------|------|--------------------|--------------------|-------------------|------------------|--------------------|------------------|----|
| 1  | 129.065854         | 65.036565         | 112.039305     | 56.523291         |                    |                    | Q    |                    |                    |                   |                  |                    |                  | 18 |
| 2  | <b>242.149918</b>  | 121.578597        | 225.123369     | 113.065323        |                    |                    | L    | 2447.340052        | 1224.173664        | 2430.313503       | 1215.660389      | 2429.329487        | 1215.168381      | 17 |
| 3  | 343.197597         | 172.102437        | 326.171048     | 163.589162        | 325.187032         | 163.097154         | T    | 2334.255988        | <b>1167.631632</b> | 2317.229439       | 1159.118357      | 2316.245423        | 1158.626349      | 16 |
| 4  | 430.229625         | 215.618450        | 413.203076     | 207.105176        | 412.219060         | 206.613168         | S    | 2233.208309        | <b>1117.107792</b> | 2216.181760       | 1108.594518      | 2215.197744        | 1108.102510      | 15 |
| 5  | 487.251089         | 244.129182        | 470.224540     | 235.615908        | 469.240524         | 235.123900         | G    | 2146.176281        | <b>1073.591778</b> | 2129.149732       | 1065.078504      | <b>2128.165716</b> | 1064.586496      | 14 |
| 6  | 584.303853         | 292.655565        | 567.277304     | 284.142290        | 566.293288         | 283.650282         | P    | 2089.154817        | 1045.081046        | 2072.128268       | 1036.567772      | 2071.144252        | 1036.075764      | 13 |
| 7  | <b>698.346780</b>  | 349.677028        | 681.320231     | 341.163753        | 680.336215         | 340.671745         | N    | 1992.102053        | 996.554665         | 1975.075504       | 988.041390       | 1974.091488        | 987.549382       | 12 |
| 8  | 1137.572106        | 569.289691        | 1120.545557    | 560.776416        | <b>1119.561541</b> | 560.284408         | Q    | 1878.059126        | 939.533201         | 1861.032577       | 931.019927       | 1860.048561        | 930.527919       | 11 |
| 9  | 1266.614699        | 633.810988        | 1249.588150    | <b>625.297713</b> | <b>1248.604134</b> | 624.805705         | E    | <b>1438.833800</b> | 719.920538         | 1421.807251       | 711.407264       | 1420.823235        | 710.915256       | 10 |
| 10 | 1705.840025        | <b>853.423651</b> | 1688.813476    | 844.910376        | 1687.829460        | 844.418368         | Q    | <b>1309.791207</b> | <b>655.399242</b>  | 1292.764658       | 646.885967       | 1291.780642        | 646.393959       | 9  |
| 11 | <b>1804.908439</b> | 902.957858        | 1787.881890    | 894.444583        | <b>1786.897874</b> | 893.952575         | V    | <b>870.565881</b>  | 435.786579         | <b>853.539332</b> | 427.273304       | 852.555316         | 426.781296       | 8  |
| 12 | 1891.940467        | 946.473872        | 1874.913918    | 937.960597        | <b>1873.929902</b> | 937.468589         | S    | <b>771.497467</b>  | 386.252372         | 754.470918        | 377.739097       | 753.486902         | 377.247089       | 7  |
| 13 | 1988.993231        | 995.000254        | 1971.966682    | 986.486979        | 1970.982666        | 985.994971         | P    | <b>684.465439</b>  | 342.736358         | 667.438890        | 334.223083       | 666.454874         | 333.731075       | 6  |
| 14 | 2102.077295        | 1051.542285       | 2085.050746    | 1043.029011       | 2084.066730        | <b>1042.537003</b> | L    | 587.412675         | <b>294.209976</b>  | 570.386126        | 285.696701       | 569.402110         | 285.204693       | 5  |
| 15 | 2203.124974        | 1102.066125       | 2186.098425    | 1093.552850       | 2185.114409        | 1093.060842        | T    | <b>474.328611</b>  | 237.667944         | 457.302062        | 229.154669       | 456.318046         | 228.662661       | 4  |
| 16 | 2316.209038        | 1158.608157       | 2299.182489    | 1150.094882       | 2298.198473        | 1149.602874        | L    | <b>373.280932</b>  | 187.144104         | 356.254383        | 178.630830       |                    |                  | 3  |
| 17 | 2429.293102        | 1215.150189       | 2412.266553    | 1206.636914       | 2411.282537        | 1206.144906        | L    | <b>260.196868</b>  | 130.602072         | 243.170319        | 122.088798       |                    |                  | 2  |
| 18 |                    |                   |                |                   |                    |                    | K    | 147.112804         | 74.060040          | 130.086255        | 65.546765        |                    |                  | 1  |

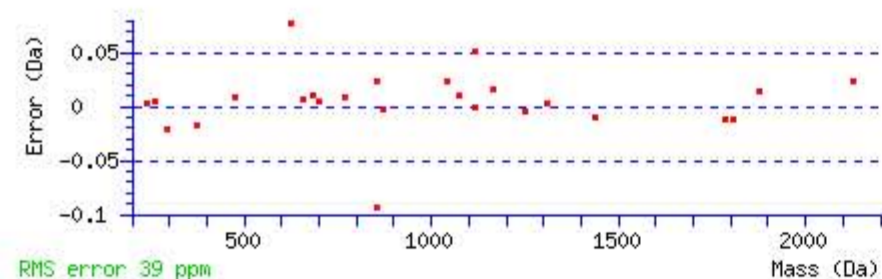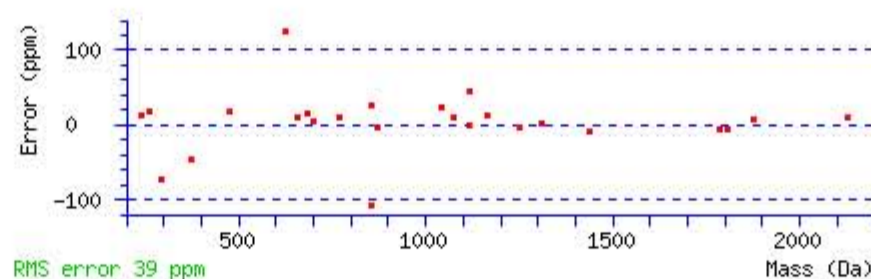

NCBI BLAST search of [QLTSGPNQEQVSPLTLK](#)

(Parameters: blastp, nr protein database, expect=20000, no filter, PAM30)

Other BLAST [web gateways](#)

All matches to this query

| Score | Mr(calc):   | Delta    | Sequence                          |
|-------|-------------|----------|-----------------------------------|
| 41.4  | 2574.391342 | 0.016430 | <a href="#">QLTSGPNQEQVSPLTLK</a> |
| 28.3  | 2574.391342 | 0.016430 | <a href="#">QLTSGPNQEQVSPLTLK</a> |
| 9.6   | 2574.391342 | 0.016430 | <a href="#">QLTSGPNQEQVSPLTLK</a> |

Mascot: <http://www.matrixscience.com/>



# MASCOT Search Results

## Peptide View

MS/MS Fragmentation of **GFPIKEDFLEQSEQLFGAKPVSLTGK**

Found in **A2AP\_HUMAN**, Alpha-2-antiplasmin OS=Homo sapiens GN=SERPINF2 PE=1 SV=3

Match to Query 62986: 3175.678376 from(794.926870,4+) rtinseconds(2762) index(10173)

Title: Locus:1.1.1.1770.9 File:"2013-07-02 CLN FXIII 60 min 2nd F 1.wiff"

Data file C:\Program Files (x86)\Matrix Science\Mascot Daemon\mgf5 FXIII 60 min 2nd\mascot\_daemon\_merge.mgf

Click mouse within plot area to zoom in by factor of two about that point

Or, Plot from  to  Da

Label all possible matches  Label matches used for scoring

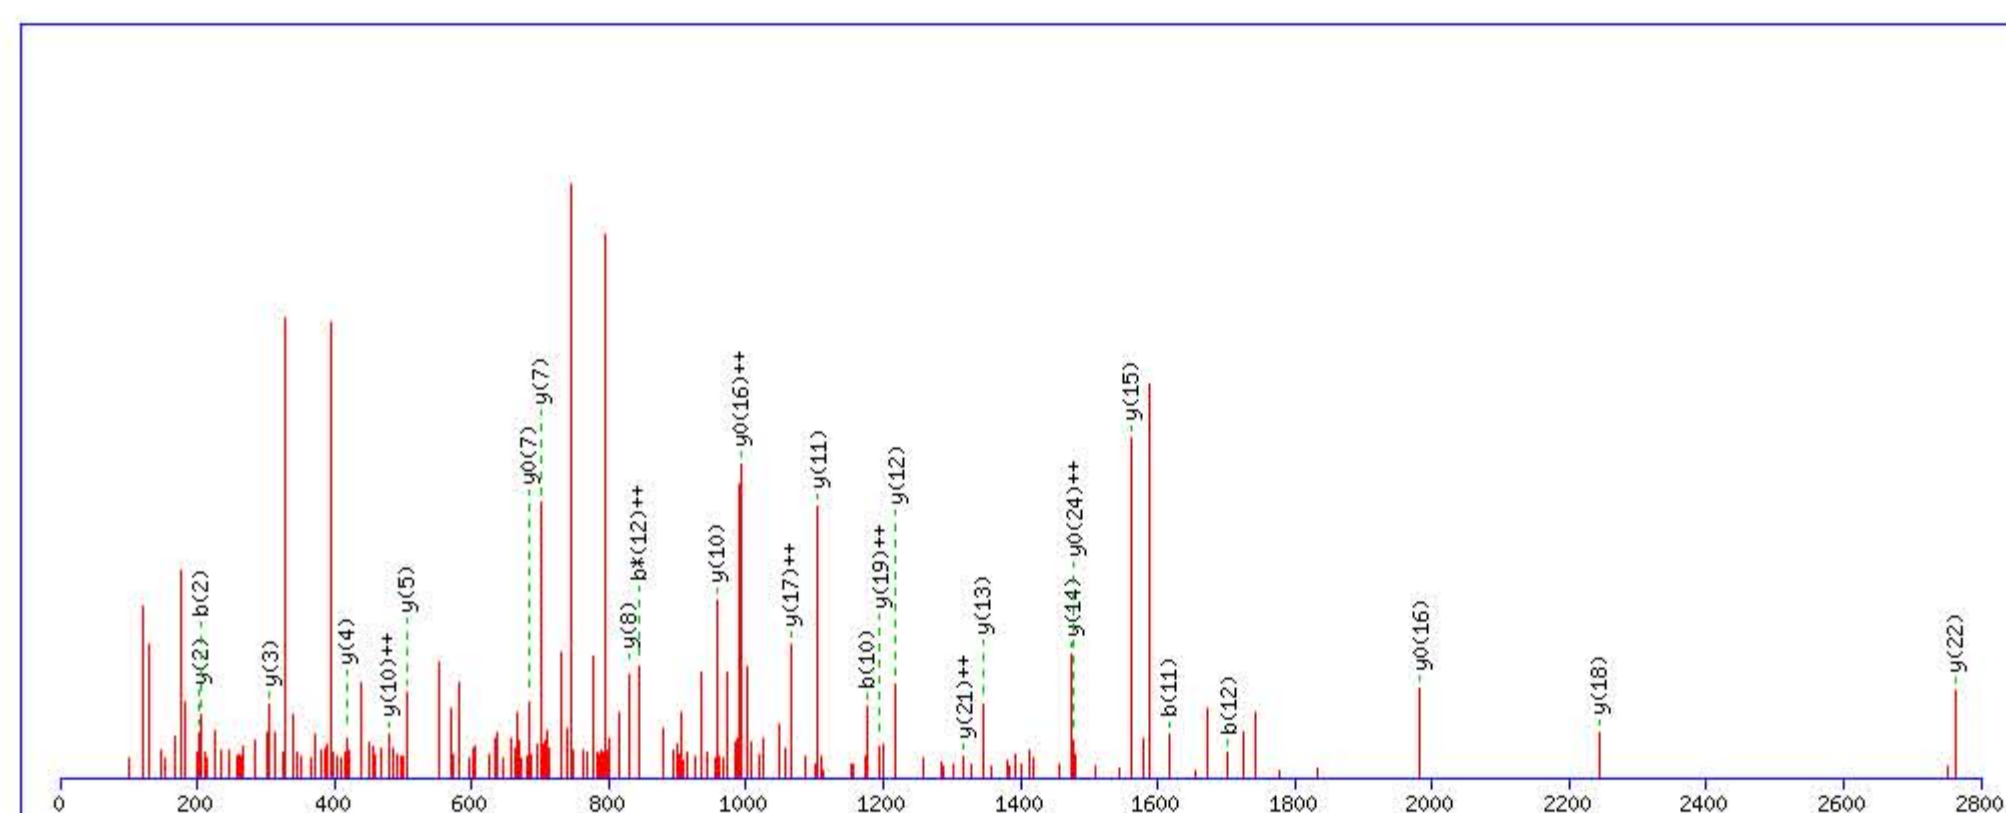

Monoisotopic mass of neutral peptide Mr(calc): 3175.662750

Fixed modifications: Carbamidomethyl (C) (apply to specified residues or termini only)

Variable modifications:

Q11 : Biotin:Thermo-21345 (Q)

Ions Score: 71 Expect: 1.6e-006

Matches : 27/278 fragment ions using 56 most intense peaks [\(help\)](#)

| #  | b                  | b <sup>++</sup> | b <sup>*</sup> | b <sup>++</sup>   | b <sup>0</sup> | b <sup>0++</sup> | Seq. | y                  | y <sup>++</sup>    | y <sup>*</sup> | y <sup>++</sup> | y <sup>0</sup>     | y <sup>0++</sup>   | #  |
|----|--------------------|-----------------|----------------|-------------------|----------------|------------------|------|--------------------|--------------------|----------------|-----------------|--------------------|--------------------|----|
| 1  | 58.028740          | 29.518008       |                |                   |                |                  | G    |                    |                    |                |                 |                    |                    | 26 |
| 2  | <b>205.097154</b>  | 103.052215      |                |                   |                |                  | F    | 3119.648573        | 1560.327924        | 3102.622024    | 1551.814650     | 3101.638008        | 1551.322642        | 25 |
| 3  | 302.149918         | 151.578597      |                |                   |                |                  | P    | 2972.580159        | 1486.793717        | 2955.553610    | 1478.280443     | 2954.569594        | <b>1477.788435</b> | 24 |
| 4  | 415.233982         | 208.120629      |                |                   |                |                  | I    | 2875.527395        | 1438.267335        | 2858.500846    | 1429.754061     | 2857.516830        | 1429.262053        | 23 |
| 5  | 543.328945         | 272.168111      | 526.302396     | 263.654836        |                |                  | K    | <b>2762.443331</b> | 1381.725303        | 2745.416782    | 1373.212029     | 2744.432766        | 1372.720021        | 22 |
| 6  | 672.371538         | 336.689407      | 655.344989     | 328.176133        | 654.360973     | 327.684125       | E    | 2634.348368        | <b>1317.677822</b> | 2617.321819    | 1309.164547     | 2616.337803        | 1308.672539        | 21 |
| 7  | 787.398481         | 394.202879      | 770.371932     | 385.689604        | 769.387916     | 385.197596       | D    | 2505.305775        | 1253.156525        | 2488.279226    | 1244.643251     | 2487.295210        | 1244.151243        | 20 |
| 8  | 934.466895         | 467.737086      | 917.440346     | 459.223811        | 916.456330     | 458.731803       | F    | 2390.278832        | <b>1195.643054</b> | 2373.252283    | 1187.129779     | 2372.268267        | 1186.637771        | 19 |
| 9  | 1047.550959        | 524.279117      | 1030.524410    | 515.765843        | 1029.540394    | 515.273835       | L    | <b>2243.210418</b> | 1122.108847        | 2226.183869    | 1113.595572     | 2225.199853        | 1113.103564        | 18 |
| 10 | <b>1176.593552</b> | 588.800414      | 1159.567003    | 580.287140        | 1158.582987    | 579.795132       | E    | 2130.126354        | <b>1065.566815</b> | 2113.099805    | 1057.053540     | 2112.115789        | 1056.561532        | 17 |
| 11 | <b>1615.818878</b> | 808.413077      | 1598.792329    | 799.899803        | 1597.808313    | 799.407795       | Q    | 2001.083761        | 1001.045519        | 1984.057212    | 992.532244      | <b>1983.073196</b> | <b>992.040236</b>  | 16 |
| 12 | <b>1702.850906</b> | 851.929091      | 1685.824357    | <b>843.415817</b> | 1684.840341    | 842.923809       | S    | <b>1561.858435</b> | 781.432856         | 1544.831886    | 772.919581      | 1543.847870        | 772.427573         | 15 |
| 13 | 1831.893499        | 916.450388      | 1814.866950    | 907.937113        | 1813.882934    | 907.445105       | E    | <b>1474.826407</b> | 737.916842         | 1457.799858    | 729.403567      | 1456.815842        | 728.911559         | 14 |
| 14 | 1959.952077        | 980.479677      | 1942.925528    | 971.966402        | 1941.941512    | 971.474394       | Q    | <b>1345.783814</b> | 673.395545         | 1328.757265    | 664.882271      | 1327.773249        | 664.390263         | 13 |
| 15 | 2073.036141        | 1037.021709     | 2056.009592    | 1028.508434       | 2055.025576    | 1028.016426      | L    | <b>1217.725236</b> | 609.366256         | 1200.698687    | 600.852982      | 1199.714671        | 600.360974         | 12 |
| 16 | 2220.104555        | 1110.555916     | 2203.078006    | 1102.042641       | 2202.093990    | 1101.550633      | F    | <b>1104.641172</b> | 552.824224         | 1087.614623    | 544.310949      | 1086.630607        | 543.818941         | 11 |
| 17 | 2277.126019        | 1139.066648     | 2260.099470    | 1130.553373       | 2259.115454    | 1130.061365      | G    | <b>957.572758</b>  | <b>479.290017</b>  | 940.546209     | 470.776743      | 939.562193         | 470.284735         | 10 |
| 18 | 2348.163133        | 1174.585205     | 2331.136584    | 1166.071930       | 2330.152568    | 1165.579922      | A    | 900.551294         | 450.779285         | 883.524745     | 442.266011      | 882.540729         | 441.774003         | 9  |
| 19 | 2476.258096        | 1238.632686     | 2459.231547    | 1230.119412       | 2458.247531    | 1229.627404      | K    | <b>829.514180</b>  | 415.260728         | 812.487631     | 406.747453      | 811.503615         | 406.255445         | 8  |
| 20 | 2573.310860        | 1287.159068     | 2556.284311    | 1278.645794       | 2555.300295    | 1278.153786      | P    | <b>701.419217</b>  | 351.213246         | 684.392668     | 342.699972      | <b>683.408652</b>  | 342.207964         | 7  |
| 21 | 2672.379274        | 1336.693275     | 2655.352725    | 1328.180001       | 2654.368709    | 1327.687993      | V    | 604.366453         | 302.686864         | 587.339904     | 294.173590      | 586.355888         | 293.681582         | 6  |
| 22 | 2759.411302        | 1380.209289     | 2742.384753    | 1371.696015       | 2741.400737    | 1371.204007      | S    | <b>505.298039</b>  | 253.152657         | 488.271490     | 244.639383      | 487.287474         | 244.147375         | 5  |
| 23 | 2872.495366        | 1436.751321     | 2855.468817    | 1428.238047       | 2854.484801    | 1427.746039      | L    | <b>418.266011</b>  | 209.636643         | 401.239462     | 201.123369      | 400.255446         | 200.631361         | 4  |
| 24 | 2973.543045        | 1487.275161     | 2956.516496    | 1478.761886       | 2955.532480    | 1478.269878      | T    | <b>305.181947</b>  | 153.094611         | 288.155398     | 144.581337      | 287.171382         | 144.089329         | 3  |
| 25 | 3030.564509        | 1515.785893     | 3013.537960    | 1507.272618       | 3012.553944    | 1506.780610      | G    | <b>204.134268</b>  | 102.570772         | 187.107719     | 94.057497       |                    |                    | 2  |
| 26 |                    |                 |                |                   |                |                  | K    | 147.112804         | 74.060040          | 130.086255     | 65.546765       |                    |                    | 1  |

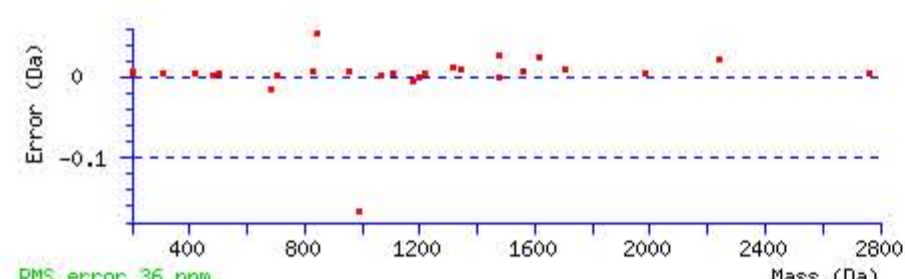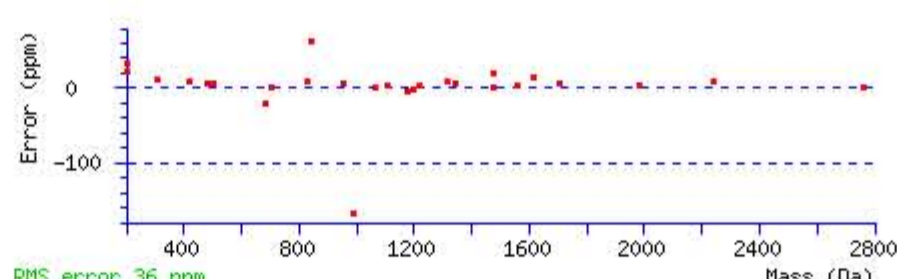

NCBI BLAST search of **GFPIKEDFLEQSEQLFGAKPVSLTGK**

(Parameters: blastp, nr protein database, expect=20000, no filter, PAM30)

Other BLAST [web gateways](#)

All matches to this query

| Score | Mr(calc):   | Delta    | Sequence                                   |
|-------|-------------|----------|--------------------------------------------|
| 71.2  | 3175.662750 | 0.015626 | <a href="#">GFPIKEDFLEQSEQLFGAKPVSLTGK</a> |
| 37.4  | 3175.662750 | 0.015626 | <a href="#">GFPIKEDFLEQSEQLFGAKPVSLTGK</a> |



# MASCOT Search Results

## Peptide View

MS/MS Fragmentation of **HTLNQIDEVK**

Found in **FETUA\_HUMAN**, Alpha-2-HS-glycoprotein OS=Homo sapiens GN=AHSG PE=1 SV=1

Match to Query 34068: 1506.778888 from(754.396720,2+) rtinseconds(1576) index(18994)

Title: Locus:1.1.1.551.13 File:"2013-07-02 CLN FXIII 60 min 2nd F 2.wiff"

Data file C:\Program Files (x86)\Matrix Science\Mascot Daemon\mgf5 FXIII 60 min 2nd\mascot\_daemon\_merge.mgf

Click mouse within plot area to zoom in by factor of two about that point

Or, Plot from  to  Da

Label all possible matches  Label matches used for scoring

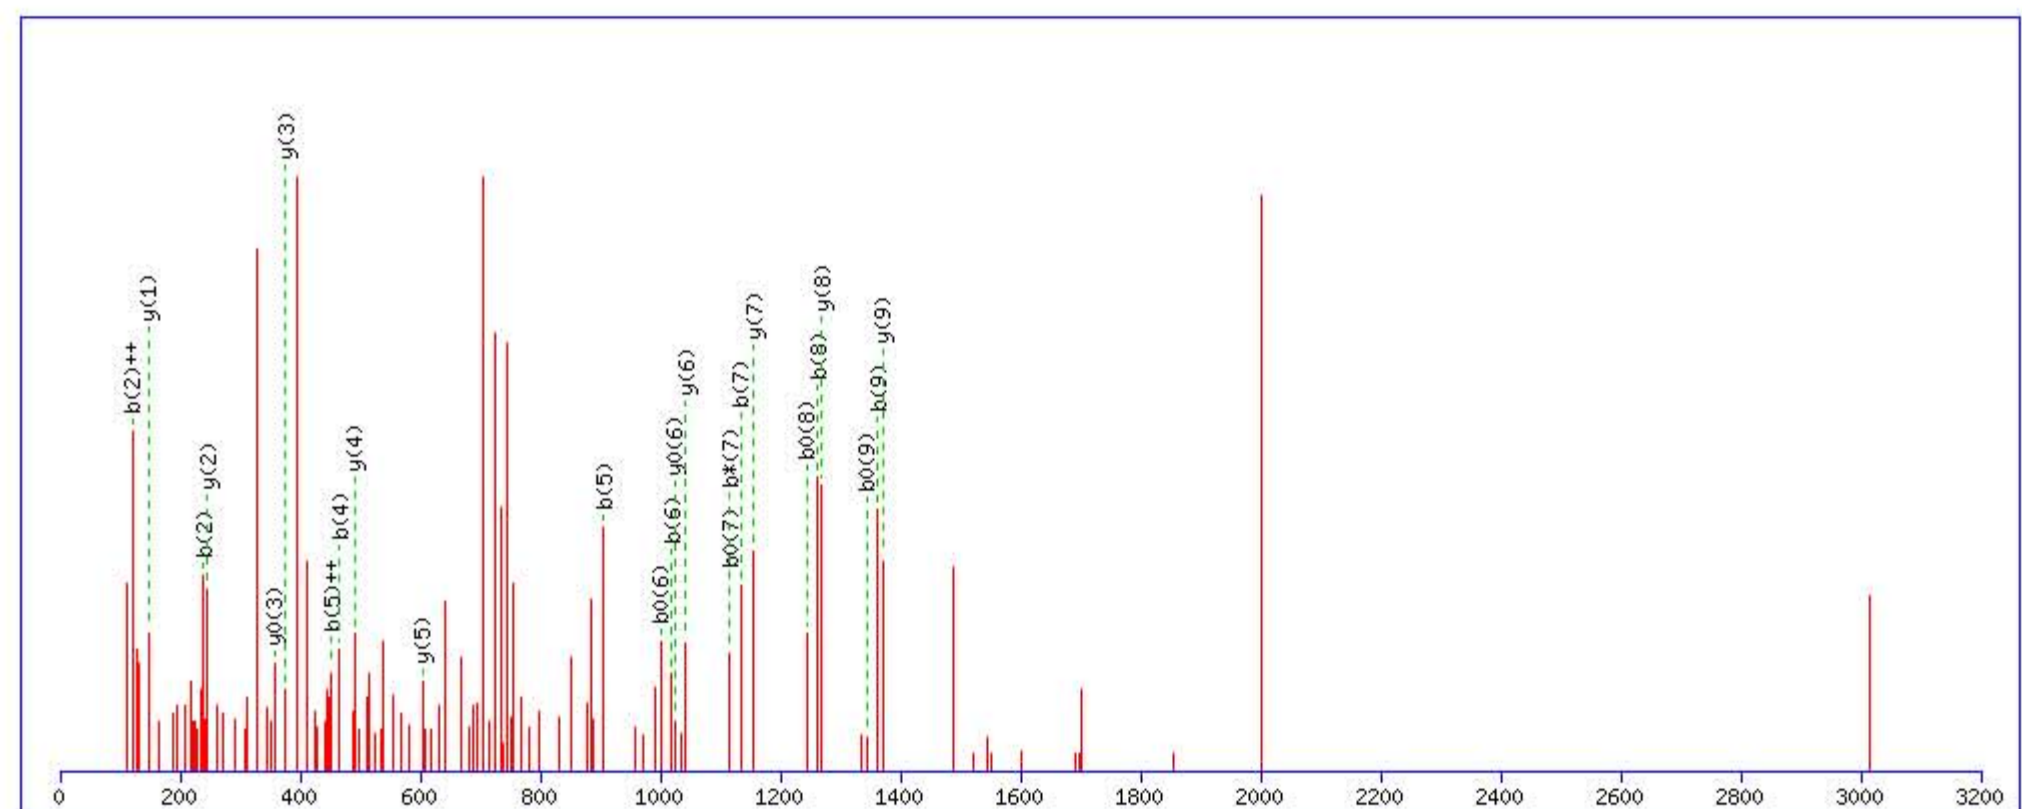

Monoisotopic mass of neutral peptide  $M_r(\text{calc})$ : 1506.786438

Fixed modifications: Carbamidomethyl (C) (apply to specified residues or termini only)

Variable modifications:

Q5 : Biotin:Thermo-21345 (Q)

Ions Score: 50 Expect: 6.6e-005

Matches : 25/96 fragment ions using 52 most intense peaks [\(help\)](#)

| #  | b                  | b <sup>++</sup>   | b <sup>*</sup>     | b <sup>*++</sup> | b <sup>0</sup>     | b <sup>0++</sup> | Seq. | y                  | y <sup>++</sup> | y <sup>*</sup> | y <sup>*++</sup> | y <sup>0</sup>     | y <sup>0++</sup> | #  |
|----|--------------------|-------------------|--------------------|------------------|--------------------|------------------|------|--------------------|-----------------|----------------|------------------|--------------------|------------------|----|
| 1  | 138.066188         | 69.536732         |                    |                  |                    |                  | H    |                    |                 |                |                  |                    |                  | 10 |
| 2  | <b>239.113867</b>  | <b>120.060571</b> |                    |                  | 221.103302         | 111.055289       | T    | <b>1370.734814</b> | 685.871045      | 1353.708265    | 677.357771       | 1352.724249        | 676.865763       | 9  |
| 3  | 352.197931         | 176.602603        |                    |                  | 334.187366         | 167.597321       | L    | <b>1269.687135</b> | 635.347206      | 1252.660586    | 626.833931       | 1251.676570        | 626.341923       | 8  |
| 4  | <b>466.240858</b>  | 233.624067        | 449.214309         | 225.110793       | 448.230293         | 224.618785       | N    | <b>1156.603071</b> | 578.805174      | 1139.576522    | 570.291899       | 1138.592506        | 569.799891       | 7  |
| 5  | <b>905.466184</b>  | <b>453.236730</b> | 888.439635         | 444.723456       | 887.455619         | 444.231448       | Q    | <b>1042.560144</b> | 521.783710      | 1025.533595    | 513.270436       | <b>1024.549579</b> | 512.778428       | 6  |
| 6  | <b>1018.550248</b> | 509.778762        | 1001.523699        | 501.265488       | <b>1000.539683</b> | 500.773480       | I    | <b>603.334818</b>  | 302.171047      | 586.308269     | 293.657773       | 585.324253         | 293.165765       | 5  |
| 7  | <b>1133.577191</b> | 567.292234        | <b>1116.550642</b> | 558.778959       | <b>1115.566626</b> | 558.286951       | D    | <b>490.250754</b>  | 245.629015      | 473.224205     | 237.115741       | 472.240189         | 236.623733       | 4  |
| 8  | <b>1262.619784</b> | 631.813530        | 1245.593235        | 623.300256       | <b>1244.609219</b> | 622.808248       | E    | <b>375.223811</b>  | 188.115544      | 358.197262     | 179.602269       | <b>357.213246</b>  | 179.110261       | 3  |
| 9  | <b>1361.688198</b> | 681.347737        | 1344.661649        | 672.834463       | <b>1343.677633</b> | 672.342455       | V    | <b>246.181218</b>  | 123.594247      | 229.154669     | 115.080973       |                    |                  | 2  |
| 10 |                    |                   |                    |                  |                    |                  | K    | <b>147.112804</b>  | 74.060040       | 130.086255     | 65.546765        |                    |                  | 1  |

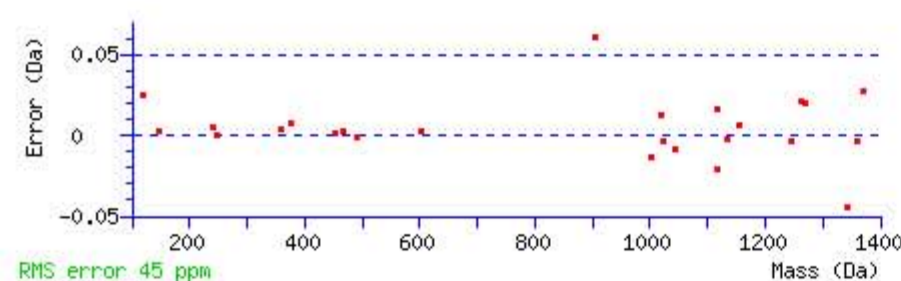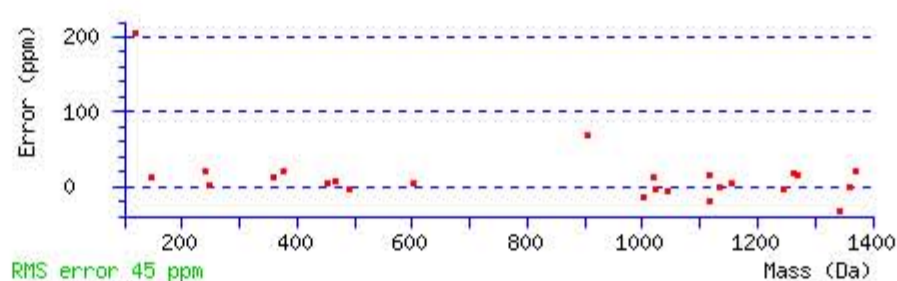

NCBI BLAST search of **HTLNQIDEVK**

(Parameters: blastp, nr protein database, expect=20000, no filter, PAM30)

Other BLAST [web gateways](#)

## All matches to this query

| Score | $M_r(\text{calc})$ : | Delta     | Sequence                      |
|-------|----------------------|-----------|-------------------------------|
| 50.2  | 1506.786438          | -0.007550 | <a href="#">HTLNQIDEVK</a>    |
| 5.3   | 1506.779037          | -0.000149 | <a href="#">EHQALQDLVDLAR</a> |
| 3.8   | 1506.790253          | -0.011365 | <a href="#">SSRFLKEGNNLSR</a> |
| 2.5   | 1506.771149          | 0.007739  | <a href="#">GEKSSMERLLTEK</a> |
| 2.1   | 1506.767792          | 0.011096  | <a href="#">SGTEYPENLRILK</a> |
| 1.8   | 1506.765320          | 0.013568  | <a href="#">KPPWHLQVDVEK</a>  |
| 1.3   | 1506.772507          | 0.006381  | <a href="#">QHISRNAQDK</a>    |
| 1.1   | 1506.759964          | 0.018924  | <a href="#">QQVTMVSDEILK</a>  |
| 0.5   | 1506.756577          | 0.022311  | <a href="#">ITFDSEQLQEAVK</a> |



# MASCOT SCIENCE Mascot Search Results

## Peptide View

MS/MS Fragmentation of **EHAVEGDCDFQLLK**

Found in **FETUA\_HUMAN**, Alpha-2-HS-glycoprotein OS=Homo sapiens GN=AHSG PE=1 SV=1

Match to Query 45981: 1970.925192 from(657.982340,3+) rtinseconds(2071) index(6273)

Title: Locus:1.1.1.1530.16 File:"2013-07-02 CLN FXIII 60 min 2nd F 1.wiff"

Data file C:\Program Files (x86)\Matrix Science\Mascot Daemon\mgf\5 FXIII 60 min 2nd\mascot\_daemon\_merge.mgf

Click mouse within plot area to zoom in by factor of two about that point

Or, Plot from  to  Da

Label all possible matches  Label matches used for scoring

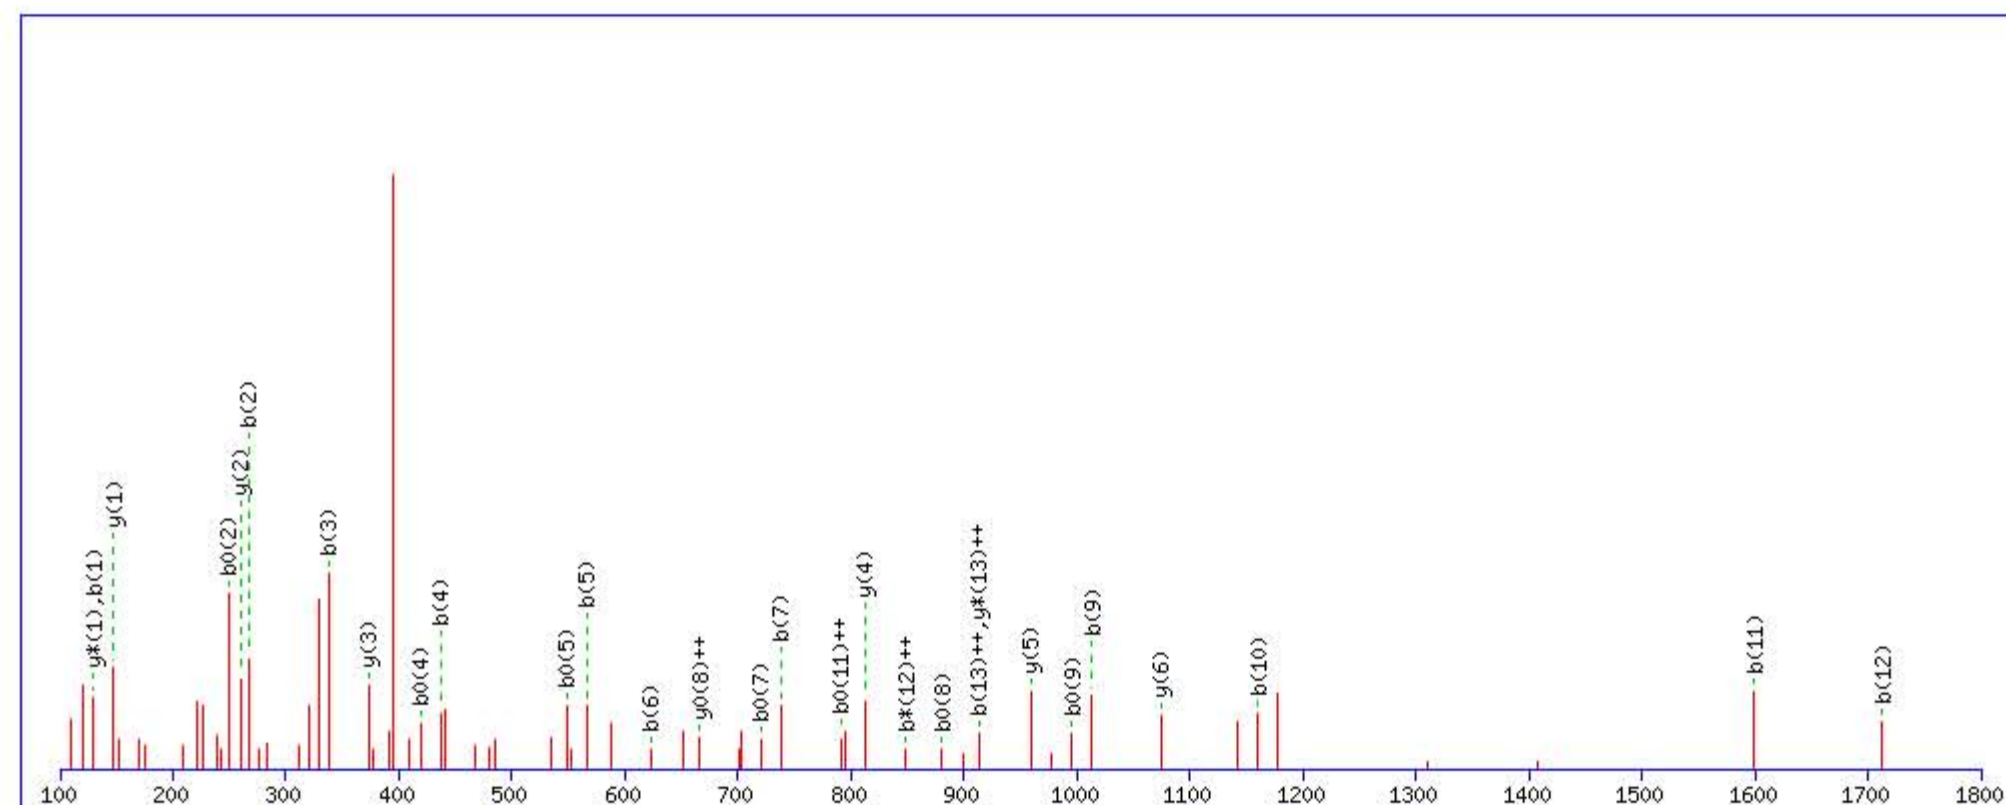

Monoisotopic mass of neutral peptide Mr(calc): 1970.923019

Fixed modifications: Carbamidomethyl (C) (apply to specified residues or termini only)

Variable modifications:

Q11 : Biotin:Thermo-21345 (Q)

Ions Score: 69 Expect: 4.3e-007

Matches : 29/126 fragment ions using 46 most intense peaks [\(help\)](#)

| #  | b           | b <sup>++</sup> | b <sup>+</sup> | b <sup>+++</sup> | b <sup>0</sup> | b <sup>0++</sup> | Seq. | y           | y <sup>++</sup> | y <sup>+</sup> | y <sup>+++</sup> | y <sup>0</sup> | y <sup>0++</sup> | #  |
|----|-------------|-----------------|----------------|------------------|----------------|------------------|------|-------------|-----------------|----------------|------------------|----------------|------------------|----|
| 1  | 130.049869  | 65.528572       |                |                  | 112.039304     | 56.523290        | E    |             |                 |                |                  |                |                  | 14 |
| 2  | 267.108781  | 134.058028      |                |                  | 249.098216     | 125.052746       | H    | 1842.887704 | 921.947490      | 1825.861155    | 913.434216       | 1824.877139    | 912.942207       | 13 |
| 3  | 338.145895  | 169.576585      |                |                  | 320.135330     | 160.571303       | A    | 1705.828792 | 853.418034      | 1688.802243    | 844.904760       | 1687.818227    | 844.412752       | 12 |
| 4  | 437.214309  | 219.110792      |                |                  | 419.203744     | 210.105510       | V    | 1634.791678 | 817.899477      | 1617.765129    | 809.386203       | 1616.781113    | 808.894195       | 11 |
| 5  | 566.256902  | 283.632089      |                |                  | 548.246337     | 274.626807       | E    | 1535.723264 | 768.365270      | 1518.696715    | 759.851996       | 1517.712699    | 759.359988       | 10 |
| 6  | 623.278366  | 312.142821      |                |                  | 605.267801     | 303.137539       | G    | 1406.680671 | 703.843974      | 1389.654122    | 695.330699       | 1388.670106    | 694.838691       | 9  |
| 7  | 738.305309  | 369.656293      |                |                  | 720.294744     | 360.651010       | D    | 1349.659207 | 675.333241      | 1332.632658    | 666.819967       | 1331.648642    | 666.327959       | 8  |
| 8  | 898.335958  | 449.671617      |                |                  | 880.325393     | 440.666335       | C    | 1234.632264 | 617.819770      | 1217.605715    | 609.306496       | 1216.621699    | 608.814488       | 7  |
| 9  | 1013.362901 | 507.185089      |                |                  | 995.352336     | 498.179806       | D    | 1074.601615 | 537.804446      | 1057.575066    | 529.291171       | 1056.591050    | 528.799163       | 6  |
| 10 | 1160.431315 | 580.719296      |                |                  | 1142.420750    | 571.714013       | F    | 959.574672  | 480.290974      | 942.548123     | 471.777700       |                |                  | 5  |
| 11 | 1599.656641 | 800.331959      | 1582.630092    | 791.818684       | 1581.646076    | 791.326676       | Q    | 812.506258  | 406.756767      | 795.479709     | 398.243493       |                |                  | 4  |
| 12 | 1712.740705 | 856.873991      | 1695.714156    | 848.360716       | 1694.730140    | 847.868708       | L    | 373.280932  | 187.144104      | 356.254383     | 178.630829       |                |                  | 3  |
| 13 | 1825.824769 | 913.416023      | 1808.798220    | 904.902748       | 1807.814204    | 904.410740       | L    | 260.196868  | 130.602072      | 243.170319     | 122.088797       |                |                  | 2  |
| 14 |             |                 |                |                  |                |                  | K    | 147.112804  | 74.060040       | 130.086255     | 65.546765        |                |                  | 1  |

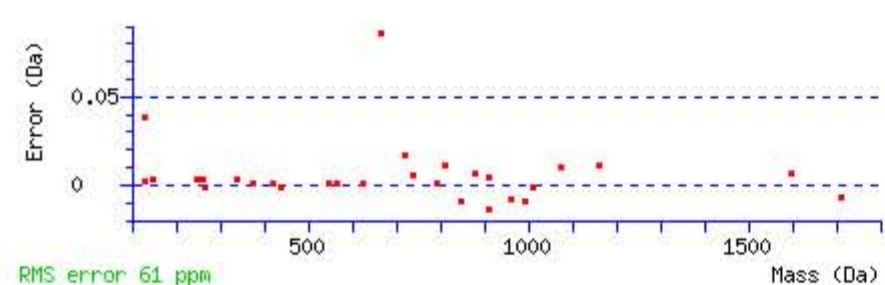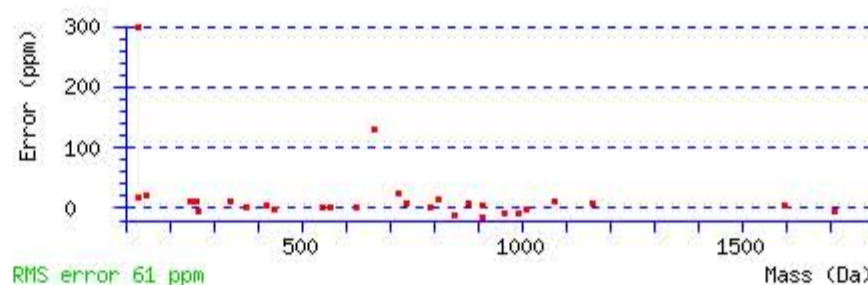

NCBI BLAST search of **EHAVEGDCDFQLLK**

(Parameters: blastp, nr protein database, expect=20000, no filter, PAM30)

Other BLAST [web gateways](#)

All matches to this query

| Score | Mr(calc):   | Delta    | Sequence                         |
|-------|-------------|----------|----------------------------------|
| 69.2  | 1970.923019 | 0.002173 | <a href="#">EHAVEGDCDFQLLK</a>   |
| 1.3   | 1970.905258 | 0.019934 | <a href="#">LDFNMTTNHSFMCLIK</a> |

Mascot: <http://www.matrixscience.com/>



# MASCOT SEARCH RESULTS

## Peptide View

MS/MS Fragmentation of **VTAAPQSVCALR**

Found in **A2MG\_HUMAN**, Alpha-2-macroglobulin OS=Homo sapiens GN=A2M PE=1 SV=3

Match to Query 36296: 1582.833728 from(792.424140,2+) rtinseconds(1806) index(20396)

Title: Locus:1.1.1.631.12 File:"2013-07-02 CLN FXIII 60 min 2nd F 2.wiff"

Data file C:\Program Files (x86)\Matrix Science\Mascot Daemon\mgf5 FXIII 60 min 2nd\mascot\_daemon\_merge.mgf

Click mouse within plot area to zoom in by factor of two about that point

Or, Plot from  to  Da

Label all possible matches  Label matches used for scoring

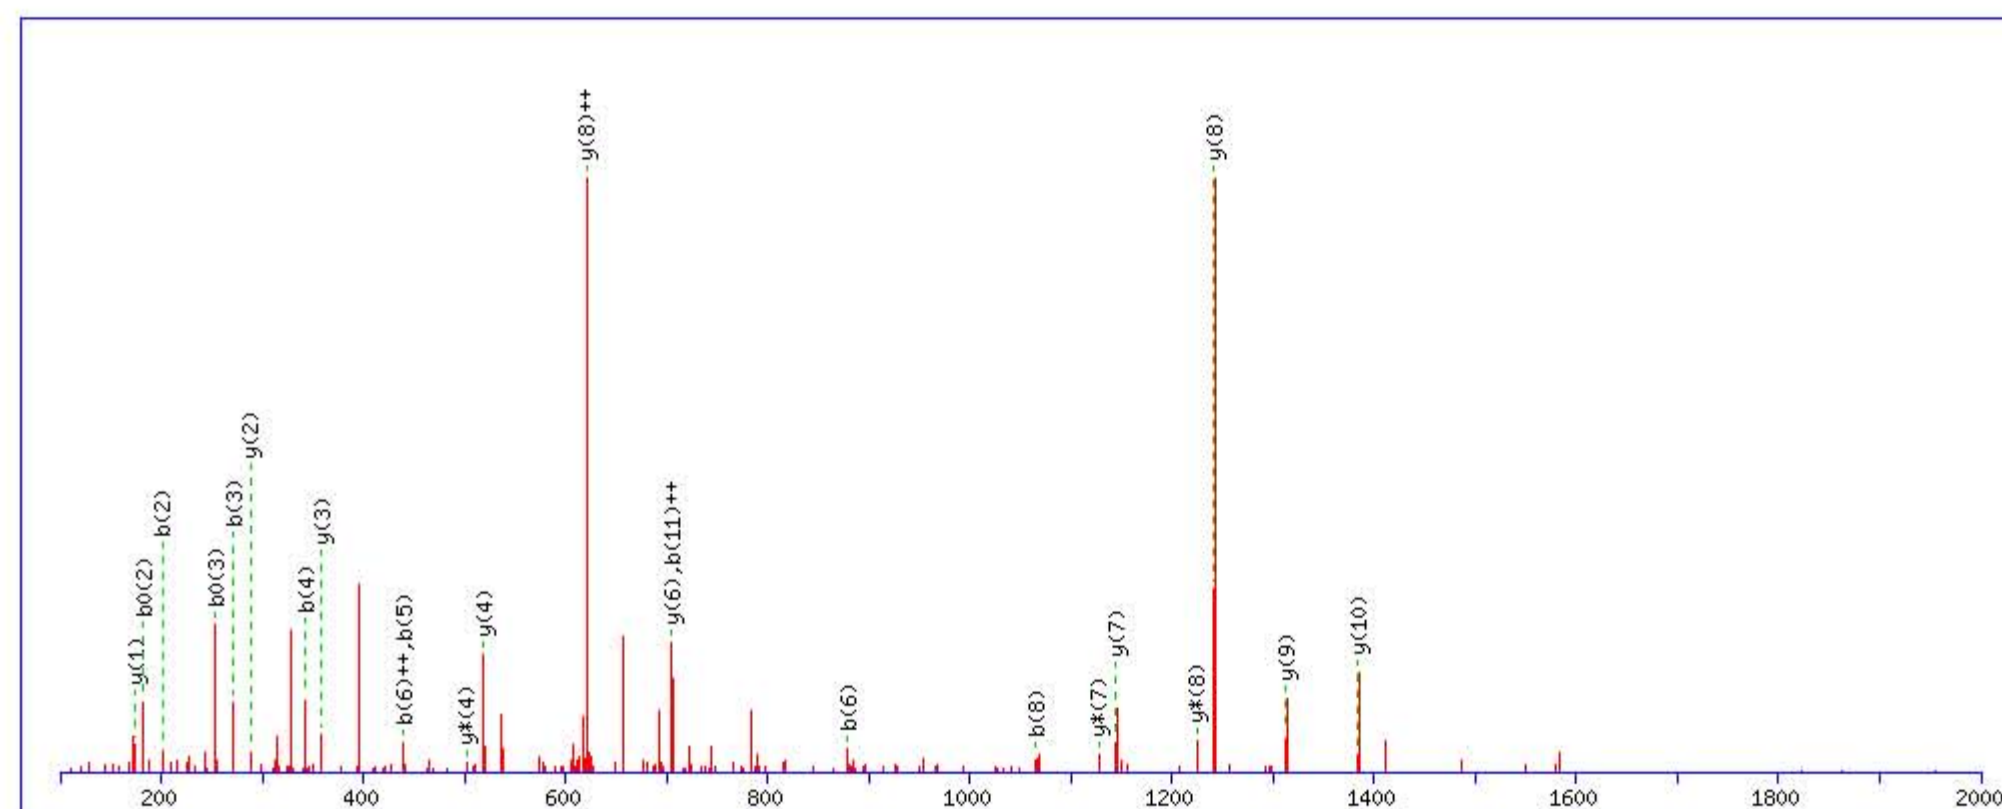

Monoisotopic mass of neutral peptide Mr(calc): 1582.832352

Fixed modifications: Carbamidomethyl (C) (apply to specified residues or termini only)

Variable modifications:

Q6 : Biotin:Thermo-21345 (Q)

Ions Score: 37 Expect: 0.00044

Matches : 23/110 fragment ions using 56 most intense peaks [\(help\)](#)

| #  | b                  | b <sup>++</sup>   | b <sup>*</sup> | b <sup>*++</sup> | b <sup>0</sup>    | b <sup>0++</sup> | Seq. | y                  | y <sup>++</sup>   | y <sup>*</sup>     | y <sup>*++</sup> | y <sup>0</sup> | y <sup>0++</sup> | #  |
|----|--------------------|-------------------|----------------|------------------|-------------------|------------------|------|--------------------|-------------------|--------------------|------------------|----------------|------------------|----|
| 1  | 100.075690         | 50.541483         |                |                  |                   |                  | V    |                    |                   |                    |                  |                |                  | 12 |
| 2  | <b>201.123369</b>  | 101.065322        |                |                  | <b>183.112804</b> | 92.060040        | T    | 1484.771218        | 742.889247        | 1467.744669        | 734.375972       | 1466.760653    | 733.883964       | 11 |
| 3  | <b>272.160483</b>  | 136.583879        |                |                  | <b>254.149918</b> | 127.578597       | A    | <b>1383.723539</b> | 692.365407        | 1366.696990        | 683.852133       | 1365.712974    | 683.360125       | 10 |
| 4  | <b>343.197597</b>  | 172.102437        |                |                  | 325.187032        | 163.097154       | A    | <b>1312.686425</b> | 656.846850        | 1295.659876        | 648.333576       | 1294.675860    | 647.841568       | 9  |
| 5  | <b>440.250361</b>  | 220.628819        |                |                  | 422.239796        | 211.623536       | P    | <b>1241.649311</b> | <b>621.328293</b> | <b>1224.622762</b> | 612.815019       | 1223.638746    | 612.323011       | 8  |
| 6  | <b>879.475687</b>  | <b>440.241482</b> | 862.449138     | 431.728207       | 861.465122        | 431.236199       | Q    | <b>1144.596547</b> | 572.801911        | <b>1127.569998</b> | 564.288637       | 1126.585982    | 563.796629       | 7  |
| 7  | 966.507715         | 483.757496        | 949.481166     | 475.244221       | 948.497150        | 474.752213       | S    | <b>705.371221</b>  | 353.189248        | 688.344672         | 344.675974       | 687.360656     | 344.183966       | 6  |
| 8  | <b>1065.576129</b> | 533.291703        | 1048.549580    | 524.778428       | 1047.565564       | 524.286420       | V    | 618.339193         | 309.673234        | 601.312644         | 301.159960       |                |                  | 5  |
| 9  | 1225.606778        | 613.307027        | 1208.580229    | 604.793753       | 1207.596213       | 604.301745       | C    | <b>519.270779</b>  | 260.139028        | <b>502.244230</b>  | 251.625753       |                |                  | 4  |
| 10 | 1296.643892        | 648.825584        | 1279.617343    | 640.312310       | 1278.633327       | 639.820302       | A    | <b>359.240130</b>  | 180.123703        | 342.213581         | 171.610428       |                |                  | 3  |
| 11 | 1409.727956        | <b>705.367616</b> | 1392.701407    | 696.854342       | 1391.717391       | 696.362333       | L    | <b>288.203016</b>  | 144.605146        | 271.176467         | 136.091871       |                |                  | 2  |
| 12 |                    |                   |                |                  |                   |                  | R    | <b>175.118952</b>  | 88.063114         | 158.092403         | 79.549839        |                |                  | 1  |

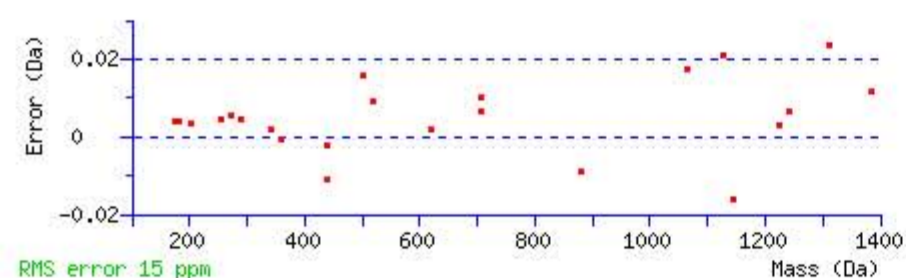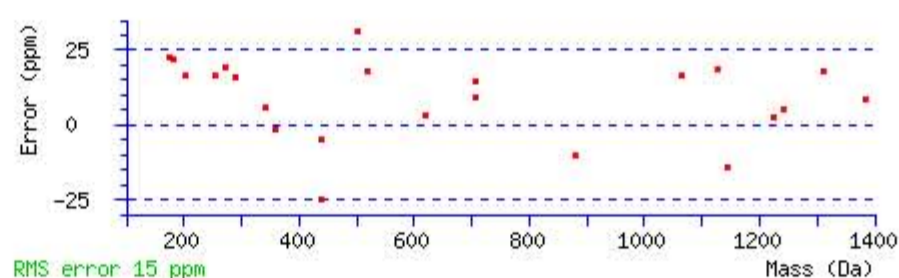

NCBI BLAST search of **VTAAPQSVCALR**

(Parameters: blastp, nr protein database, expect=20000, no filter, PAM30)

Other BLAST [web gateways](#)

All matches to this query

| Score | Mr(calc):   | Delta     | Sequence                      |
|-------|-------------|-----------|-------------------------------|
| 37.0  | 1582.832352 | 0.001376  | <a href="#">VTAAPQSVCALR</a>  |
| 1.2   | 1582.846710 | -0.012982 | <a href="#">LVEHLLDPSRYNK</a> |

Mascot: <http://www.matrixscience.com/>



# MASCOT Search Results

## Peptide View

MS/MS Fragmentation of **MCPQLQQYEMHGPEGLR**

Found in **A2MG\_HUMAN**, Alpha-2-macroglobulin OS=Homo sapiens GN=A2M PE=1 SV=3

Match to Query 47425: 3006.443742 from(1003.155190,3+) rtinseconds(2332) index(38404)

Title: Locus:1.1.1.3231.19 File:"2013-07-02 CLN FXIII 60 min 2nd F 3.wiff"

Data file C:\Program Files (x86)\Matrix Science\Mascot Daemon\mgf5 FXIII 60 min 2nd\mascot\_daemon\_merge.mgf

Click mouse within plot area to zoom in by factor of two about that point

Or, Plot from  to  Da

Label all possible matches  Label matches used for scoring

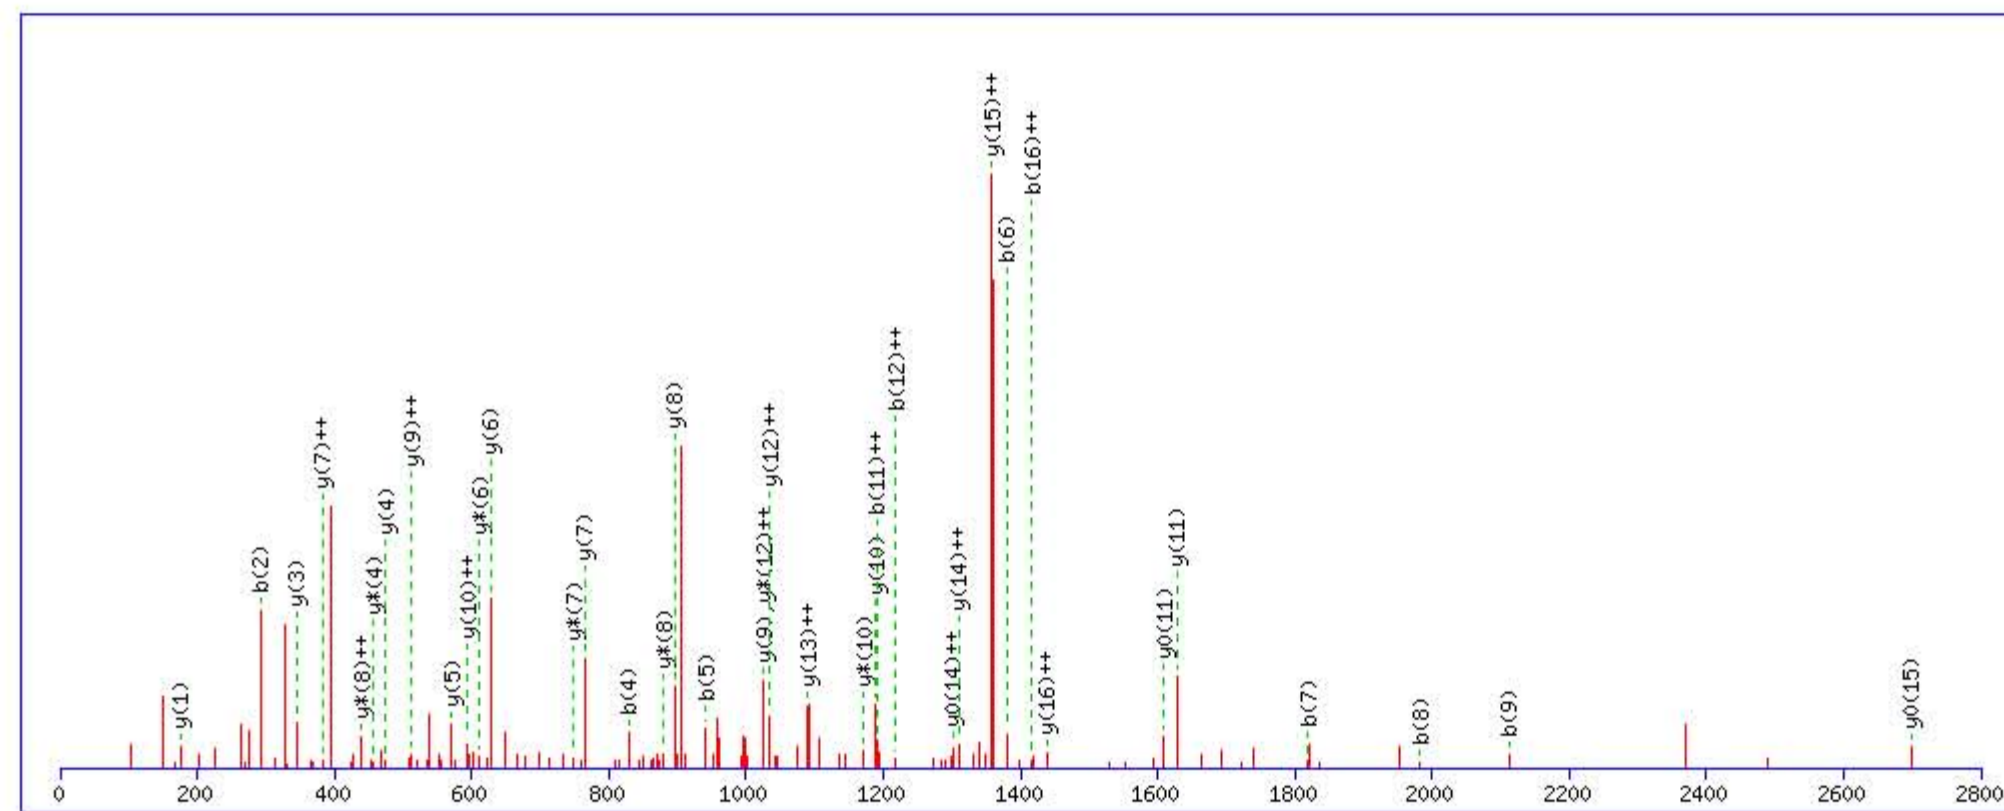

Monoisotopic mass of neutral peptide Mr(calc): 3006.423264

Fixed modifications: Carbamidomethyl (C) (apply to specified residues or termini only)

Variable modifications:

Q4 : Biotin:Thermo-21345 (Q)

Q6 : Biotin:Thermo-21345 (Q)

Q7 : Biotin:Thermo-21345 (Q)

Ions Score: 31 Expect: 0.021

Matches : 38/164 fragment ions using 102 most intense peaks [\(help\)](#)

| #  | b                  | b <sup>++</sup>    | b <sup>*</sup> | b <sup>+++</sup> | b <sup>0</sup> | b <sup>0++</sup> | Seq. | y                  | y <sup>++</sup>    | y <sup>*</sup>     | y <sup>+++</sup>   | y <sup>0</sup>     | y <sup>0++</sup>   | #  |
|----|--------------------|--------------------|----------------|------------------|----------------|------------------|------|--------------------|--------------------|--------------------|--------------------|--------------------|--------------------|----|
| 1  | 132.047761         | 66.527518          |                |                  |                |                  | M    |                    |                    |                    |                    |                    |                    | 17 |
| 2  | <b>292.078410</b>  | 146.542843         |                |                  |                |                  | C    | 2876.390075        | <b>1438.698675</b> | 2859.363526        | 1430.185401        | 2858.379510        | 1429.693393        | 16 |
| 3  | 389.131174         | 195.069225         |                |                  |                |                  | P    | 2716.359426        | <b>1358.683351</b> | 2699.332877        | 1350.170076        | <b>2698.348861</b> | 1349.678068        | 15 |
| 4  | <b>828.356500</b>  | 414.681888         | 811.329951     | 406.168614       |                |                  | Q    | 2619.306662        | <b>1310.156969</b> | 2602.280113        | 1301.643694        | 2601.296097        | <b>1301.151686</b> | 14 |
| 5  | <b>941.440564</b>  | 471.223920         | 924.414015     | 462.710646       |                |                  | L    | 2180.081336        | <b>1090.544306</b> | 2163.054787        | 1082.031031        | 2162.070771        | 1081.539023        | 13 |
| 6  | <b>1380.665890</b> | 690.836583         | 1363.639341    | 682.323309       |                |                  | Q    | 2066.997272        | <b>1034.002274</b> | 2049.970723        | <b>1025.488999</b> | 2048.986707        | 1024.996991        | 12 |
| 7  | <b>1819.891216</b> | 910.449246         | 1802.864667    | 901.935972       |                |                  | Q    | <b>1627.771946</b> | 814.389611         | 1610.745397        | 805.876337         | <b>1609.761381</b> | 805.384329         | 11 |
| 8  | <b>1982.954545</b> | 991.980911         | 1965.927996    | 983.467636       |                |                  | Y    | <b>1188.546620</b> | <b>594.776948</b>  | <b>1171.520071</b> | 586.263674         | 1170.536055        | 585.771666         | 10 |
| 9  | <b>2111.997138</b> | 1056.502207        | 2094.970589    | 1047.988932      | 2093.986573    | 1047.496925      | E    | <b>1025.483291</b> | <b>513.245284</b>  | 1008.456742        | 504.732009         | 1007.472726        | 504.240001         | 9  |
| 10 | 2243.037623        | 1122.022450        | 2226.011074    | 1113.509175      | 2225.027058    | 1113.017167      | M    | <b>896.440698</b>  | 448.723987         | <b>879.414149</b>  | <b>440.210713</b>  | 878.430133         | 439.718705         | 8  |
| 11 | 2380.096535        | <b>1190.551906</b> | 2363.069986    | 1182.038631      | 2362.085970    | 1181.546623      | H    | <b>765.400213</b>  | <b>383.203745</b>  | <b>748.373664</b>  | 374.690470         | 747.389648         | 374.198462         | 7  |
| 12 | 2437.117999        | <b>1219.062637</b> | 2420.091450    | 1210.549363      | 2419.107434    | 1210.057355      | G    | <b>628.341301</b>  | 314.674289         | <b>611.314752</b>  | 306.161014         | 610.330736         | 305.669006         | 6  |
| 13 | 2534.170763        | 1267.589019        | 2517.144214    | 1259.075745      | 2516.160198    | 1258.583737      | P    | <b>571.319837</b>  | 286.163557         | 554.293288         | 277.650282         | 553.309272         | 277.158274         | 5  |
| 14 | 2663.213356        | 1332.110316        | 2646.186807    | 1323.597041      | 2645.202791    | 1323.105034      | E    | <b>474.267073</b>  | 237.637175         | <b>457.240524</b>  | 229.123900         | 456.256508         | 228.631892         | 4  |
| 15 | 2720.234820        | 1360.621048        | 2703.208271    | 1352.107773      | 2702.224255    | 1351.615766      | G    | <b>345.224480</b>  | 173.115878         | 328.197931         | 164.602603         |                    |                    | 3  |
| 16 | 2833.318884        | <b>1417.163080</b> | 2816.292335    | 1408.649806      | 2815.308319    | 1408.157798      | L    | 288.203016         | 144.605146         | 271.176467         | 136.091872         |                    |                    | 2  |
| 17 |                    |                    |                |                  |                |                  | R    | <b>175.118952</b>  | 88.063114          | 158.092403         | 79.549839          |                    |                    | 1  |

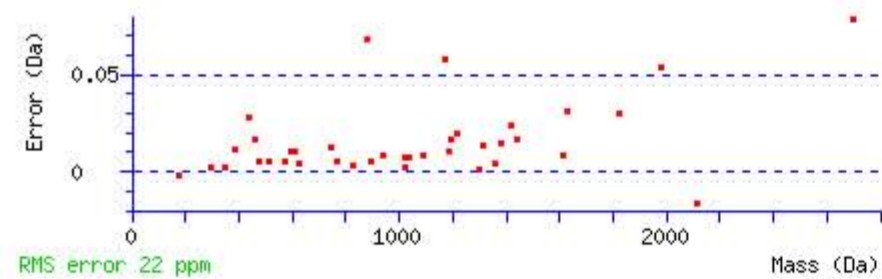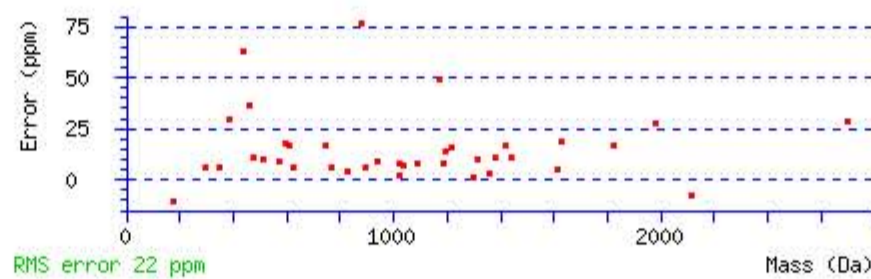

NCBI BLAST search of [MCPQLQQYEMHGPEGLR](#)

(Parameters: blastp, nr protein database, expect=20000, no filter, PAM30)

Other BLAST [web gateways](#)

All matches to this query

| Score | Mr(calc):   | Delta    | Sequence                          |
|-------|-------------|----------|-----------------------------------|
| 30.7  | 3006.423264 | 0.020478 | <a href="#">MCPQLQQYEMHGPEGLR</a> |

Mascot: <http://www.matrixscience.com/>



# MASCOT Search Results

## Peptide View

MS/MS Fragmentation of **FSGQLNSHGCFYQQVK**

Found in **A2MG\_HUMAN**, Alpha-2-macroglobulin OS=Homo sapiens GN=A2M PE=1 SV=3

Match to Query 51197: 2210.043942 from(737.688590,3+) rtinseconds(1863) index(35359)

Title: Locus:1.1.1.3068.18 File:"2013-07-02 CLN FXIII 60 min 2nd F 3.wiff"

Data file C:\Program Files (x86)\Matrix Science\Mascot Daemon\mgf5 FXIII 60 min 2nd\mascot\_daemon\_merge.mgf

Click mouse within plot area to zoom in by factor of two about that point

Or, Plot from  to  Da

Label all possible matches  Label matches used for scoring

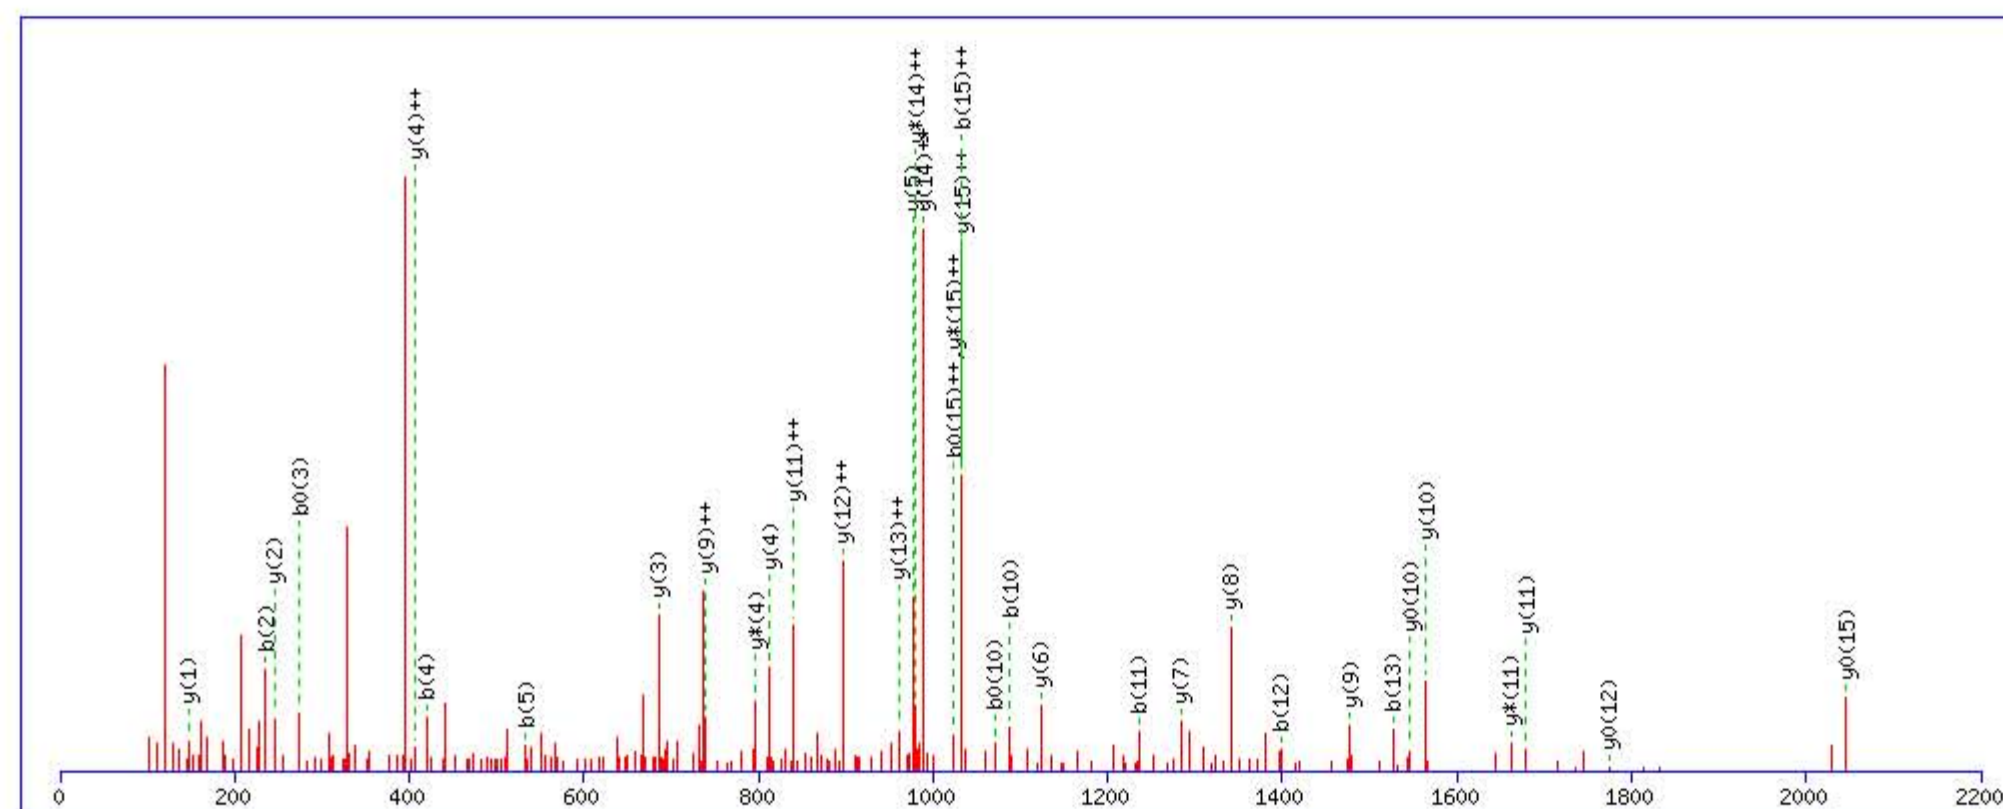

Monoisotopic mass of neutral peptide Mr(calc): 2210.040131

Fixed modifications: Carbamidomethyl (C) (apply to specified residues or termini only)

Variable modifications:

Q14 : Biotin:Thermo-21345 (Q)

Ions Score: 46 Expect: 0.00045

Matches : 36/154 fragment ions using 87 most intense peaks [\(help\)](#)

| #  | b                  | b <sup>++</sup>    | b <sup>*</sup> | b <sup>*++</sup> | b <sup>0</sup>     | b <sup>0++</sup>   | Seq. | y                  | y <sup>++</sup>    | y <sup>*</sup>     | y <sup>*++</sup>   | y <sup>0</sup>     | y <sup>0++</sup> | #  |
|----|--------------------|--------------------|----------------|------------------|--------------------|--------------------|------|--------------------|--------------------|--------------------|--------------------|--------------------|------------------|----|
| 1  | 148.075690         | 74.541483          |                |                  |                    |                    | F    |                    |                    |                    |                    |                    |                  | 16 |
| 2  | <b>235.107718</b>  | 118.057497         |                |                  | 217.097153         | 109.052214         | S    | 2063.978979        | <b>1032.493127</b> | 2046.952430        | <b>1023.979853</b> | <b>2045.968414</b> | 1023.487845      | 15 |
| 3  | 292.129182         | 146.568229         |                |                  | <b>274.118617</b>  | 137.562946         | G    | 1976.946951        | <b>988.977114</b>  | 1959.920402        | <b>980.463839</b>  | 1958.936386        | 979.971831       | 14 |
| 4  | <b>420.187760</b>  | 210.597518         | 403.161211     | 202.084243       | 402.177195         | 201.592235         | Q    | 1919.925487        | <b>960.466382</b>  | 1902.898938        | 951.953107         | 1901.914922        | 951.461099       | 13 |
| 5  | <b>533.271824</b>  | 267.139550         | 516.245275     | 258.626276       | 515.261259         | 258.134268         | L    | 1791.866909        | <b>896.437093</b>  | 1774.840360        | 887.923818         | <b>1773.856344</b> | 887.431810       | 12 |
| 6  | 647.314751         | 324.161014         | 630.288202     | 315.647739       | 629.304186         | 315.155731         | N    | <b>1678.782845</b> | <b>839.895061</b>  | <b>1661.756296</b> | 831.381786         | 1660.772280        | 830.889778       | 11 |
| 7  | 734.346779         | 367.677028         | 717.320230     | 359.163753       | 716.336214         | 358.671745         | S    | <b>1564.739918</b> | 782.873597         | 1547.713369        | 774.360323         | <b>1546.729353</b> | 773.868315       | 10 |
| 8  | 871.405691         | 436.206483         | 854.379142     | 427.693209       | 853.395126         | 427.201201         | H    | <b>1477.707890</b> | <b>739.357583</b>  | 1460.681341        | 730.844309         |                    |                  | 9  |
| 9  | 928.427155         | 464.717216         | 911.400606     | 456.203941       | 910.416590         | 455.711933         | G    | <b>1340.648978</b> | 670.828127         | 1323.622429        | 662.314853         |                    |                  | 8  |
| 10 | <b>1088.457804</b> | 544.732540         | 1071.431255    | 536.219266       | <b>1070.447239</b> | 535.727257         | C    | <b>1283.627514</b> | 642.317395         | 1266.600965        | 633.804121         |                    |                  | 7  |
| 11 | <b>1235.526218</b> | 618.266747         | 1218.499669    | 609.753473       | 1217.515653        | 609.261464         | F    | <b>1123.596865</b> | 562.302071         | 1106.570316        | 553.788796         |                    |                  | 6  |
| 12 | <b>1398.589547</b> | 699.798412         | 1381.562998    | 691.285137       | 1380.578982        | 690.793129         | Y    | <b>976.528451</b>  | 488.767864         | 959.501902         | 480.254589         |                    |                  | 5  |
| 13 | <b>1526.648125</b> | 763.827700         | 1509.621576    | 755.314426       | 1508.637560        | 754.822418         | Q    | <b>813.465122</b>  | <b>407.236199</b>  | <b>796.438573</b>  | 398.722925         |                    |                  | 4  |
| 14 | 1965.873451        | 983.440364         | 1948.846902    | 974.927089       | 1947.862886        | 974.435081         | Q    | <b>685.406544</b>  | 343.206910         | 668.379995         | 334.693636         |                    |                  | 3  |
| 15 | 2064.941865        | <b>1032.974570</b> | 2047.915316    | 1024.461296      | 2046.931300        | <b>1023.969288</b> | V    | <b>246.181218</b>  | 123.594247         | 229.154669         | 115.080972         |                    |                  | 2  |
| 16 |                    |                    |                |                  |                    |                    | K    | <b>147.112804</b>  | 74.060040          | 130.086255         | 65.546765          |                    |                  | 1  |

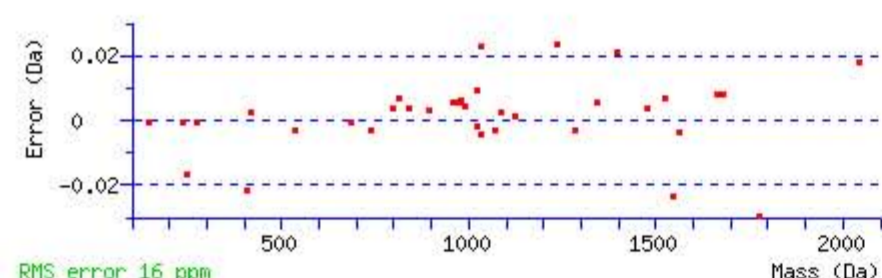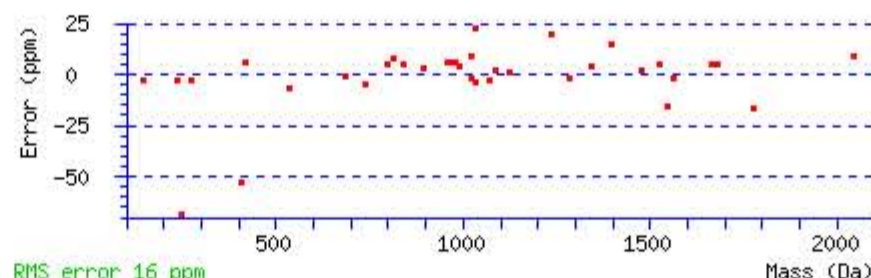

NCBI BLAST search of **FSGQLNSHGCFYQQVK**

(Parameters: blastp, nr protein database, expect=20000, no filter, PAM30)

Other BLAST [web gateways](#)

## All matches to this query

| Score | Mr(calc):   | Delta    | Sequence                         |
|-------|-------------|----------|----------------------------------|
| 45.6  | 2210.040131 | 0.003811 | <a href="#">FSGQLNSHGCFYQQVK</a> |
| 37.7  | 2210.040131 | 0.003811 | <a href="#">FSGQLNSHGCFYQQVK</a> |



# Mascot Search Results

## Peptide View

MS/MS Fragmentation of **LLLQQVSLPELPGEYSMK**  
 Found in **A2MG\_HUMAN**, Alpha-2-macroglobulin OS=Homo sapiens GN=A2M PE=1 SV=3

Match to Query 53813: 2355.271572 from(786.097800,3+) rtinseconds(2841) index(26709)  
 Title: Locus:1.1.1.990.12 File:"2013-07-02 CLN FXIII 60 min 2nd F 2.wiff"  
 Data file C:\Program Files (x86)\Matrix Science\Mascot Daemon\mgf5 FXIII 60 min 2nd\mascot\_daemon\_merge.mgf

Click mouse within plot area to zoom in by factor of two about that point  
 Or, Plot from  to  Da   
 Label all possible matches  Label matches used for scoring

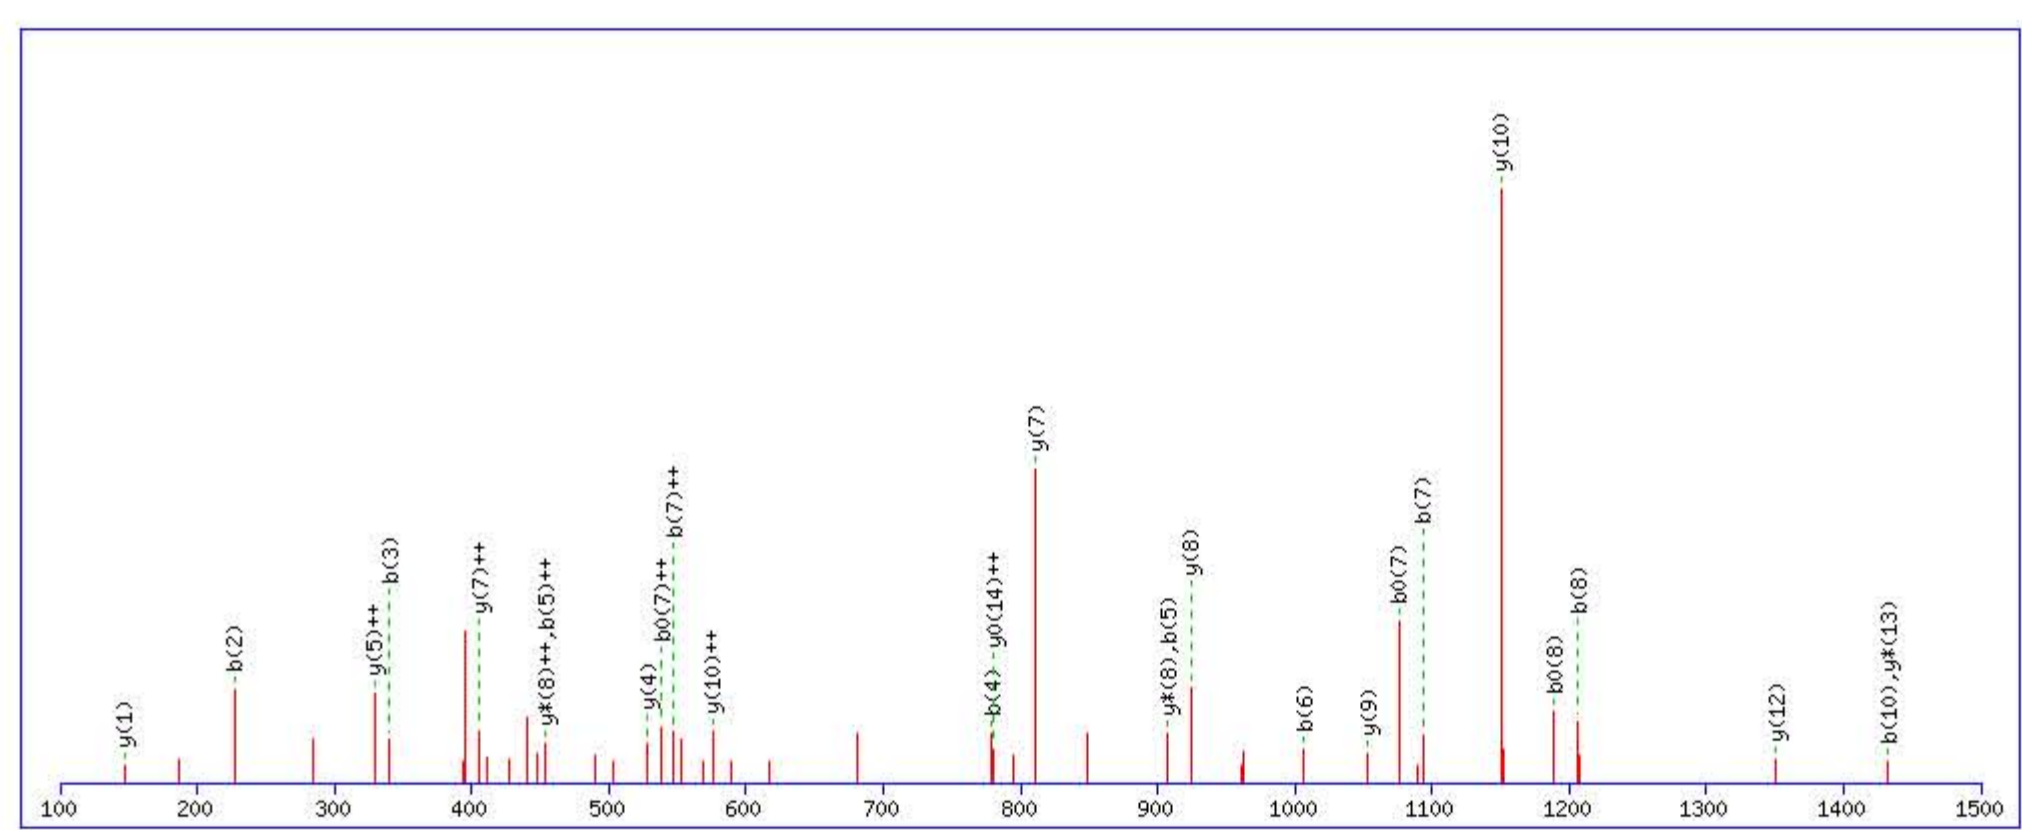

Monoisotopic mass of neutral peptide  $M_r(\text{calc})$ : 2355.258179  
 Fixed modifications: Carbamidomethyl (C) (apply to specified residues or termini only)  
 Variable modifications:  
 Q4 : Biotin:Thermo-21345 (Q)  
 Ions Score: 65 Expect: 1.3e-006  
 Matches : 27/182 fragment ions using 33 most intense peaks [\(help\)](#)

| #  | b                  | b <sup>++</sup>   | b <sup>*</sup> | b <sup>*++</sup> | b <sup>0</sup>     | b <sup>0++</sup>  | Seq. | y                  | y <sup>++</sup>   | y <sup>*</sup>     | y <sup>*++</sup>  | y <sup>0</sup> | y <sup>0++</sup>  | #  |
|----|--------------------|-------------------|----------------|------------------|--------------------|-------------------|------|--------------------|-------------------|--------------------|-------------------|----------------|-------------------|----|
| 1  | 114.091340         | 57.549308         |                |                  |                    |                   | L    |                    |                   |                    |                   |                |                   | 18 |
| 2  | <b>227.175404</b>  | 114.091340        |                |                  |                    |                   | L    | 2243.181426        | 1122.094351       | 2226.154877        | 1113.581076       | 2225.170861    | 1113.089068       | 17 |
| 3  | <b>340.259468</b>  | 170.633372        |                |                  |                    |                   | L    | 2130.097362        | 1065.552319       | 2113.070813        | 1057.039044       | 2112.086797    | 1056.547036       | 16 |
| 4  | <b>779.484794</b>  | 390.246035        | 762.458245     | 381.732760       |                    |                   | Q    | 2017.013298        | 1009.010287       | 1999.986749        | 1000.497013       | 1999.002733    | 1000.005005       | 15 |
| 5  | <b>907.543372</b>  | <b>454.275324</b> | 890.516823     | 445.762049       |                    |                   | Q    | 1577.787972        | 789.397624        | 1560.761423        | 780.884350        | 1559.777407    | <b>780.392342</b> | 14 |
| 6  | <b>1006.611786</b> | 503.809531        | 989.585237     | 495.296256       |                    |                   | V    | 1449.729394        | 725.368335        | <b>1432.702845</b> | 716.855061        | 1431.718829    | 716.363053        | 13 |
| 7  | <b>1093.643814</b> | <b>547.325545</b> | 1076.617265    | 538.812271       | <b>1075.633249</b> | <b>538.320263</b> | S    | <b>1350.660980</b> | 675.834128        | 1333.634431        | 667.320854        | 1332.650415    | 666.828846        | 12 |
| 8  | <b>1206.727878</b> | 603.867577        | 1189.701329    | 595.354303       | <b>1188.717313</b> | 594.862294        | L    | 1263.628952        | 632.318114        | 1246.602403        | 623.804840        | 1245.618387    | 623.312832        | 11 |
| 9  | 1303.780642        | 652.393959        | 1286.754093    | 643.880685       | 1285.770077        | 643.388676        | P    | <b>1150.544888</b> | <b>575.776082</b> | 1133.518339        | 567.262808        | 1132.534323    | 566.770800        | 10 |
| 10 | <b>1432.823235</b> | 716.915256        | 1415.796686    | 708.401981       | 1414.812670        | 707.909973        | E    | <b>1053.492124</b> | 527.249700        | 1036.465575        | 518.736426        | 1035.481559    | 518.244418        | 9  |
| 11 | 1545.907299        | 773.457288        | 1528.880750    | 764.944013       | 1527.896734        | 764.452005        | L    | <b>924.449531</b>  | 462.728404        | <b>907.422982</b>  | <b>454.215129</b> | 906.438966     | 453.723121        | 8  |
| 12 | 1642.960063        | 821.983670        | 1625.933514    | 813.470395       | 1624.949498        | 812.978387        | P    | <b>811.365467</b>  | <b>406.186372</b> | 794.338918         | 397.673097        | 793.354902     | 397.181089        | 7  |
| 13 | 1699.981527        | 850.494401        | 1682.954978    | 841.981127       | 1681.970962        | 841.489119        | G    | 714.312703         | 357.659990        | 697.286154         | 349.146715        | 696.302138     | 348.654707        | 6  |
| 14 | 1829.024120        | 915.015698        | 1811.997571    | 906.502423       | 1811.013555        | 906.010415        | E    | 657.291239         | <b>329.149258</b> | 640.264690         | 320.635983        | 639.280674     | 320.143975        | 5  |
| 15 | 1992.087449        | 996.547362        | 1975.060900    | 988.034088       | 1974.076884        | 987.542080        | Y    | <b>528.248646</b>  | 264.627961        | 511.222097         | 256.114687        | 510.238081     | 255.622679        | 4  |
| 16 | 2079.119477        | 1040.063376       | 2062.092928    | 1031.550102      | 2061.108912        | 1031.058094       | S    | 365.185317         | 183.096297        | 348.158768         | 174.583022        | 347.174752     | 174.091014        | 3  |
| 17 | 2210.159962        | 1105.583619       | 2193.133413    | 1097.070344      | 2192.149397        | 1096.578336       | M    | 278.153289         | 139.580282        | 261.126740         | 131.067008        |                |                   | 2  |
| 18 |                    |                   |                |                  |                    |                   | K    | <b>147.112804</b>  | 74.060040         | 130.086255         | 65.546765         |                |                   | 1  |

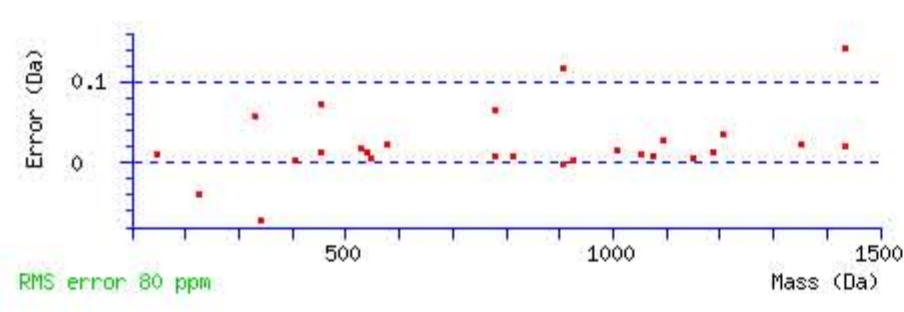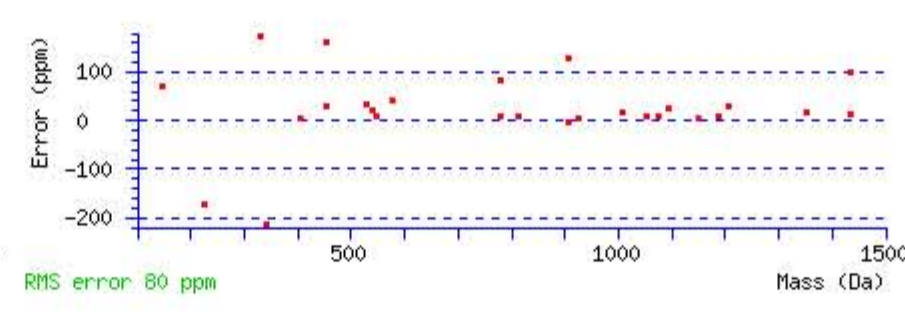

NCBI BLAST search of [LLLQQVSLPELPGEYSMK](#)  
 (Parameters: blastp, nr protein database, expect=20000, no filter, PAM30)  
 Other BLAST [web gateways](#)

### All matches to this query

| Score | $M_r(\text{calc})$ : | Delta     | Sequence                             |
|-------|----------------------|-----------|--------------------------------------|
| 64.9  | 2355.258179          | 0.013393  | <a href="#">LLLQQVSLPELPGEYSMK</a>   |
| 53.6  | 2355.258179          | 0.013393  | <a href="#">LLLQQVSLPELPGEYSMK</a>   |
| 2.0   | 2355.259354          | 0.012218  | <a href="#">SQPRASGPPRSIQPVSPR</a>   |
| 1.8   | 2355.273926          | -0.002354 | <a href="#">LGLYTFVNLANFVKSWTNLR</a> |
| 0.6   | 2355.288498          | -0.016926 | <a href="#">LIQKERALLNFTWKR</a>      |
| 0.6   | 2355.288498          | -0.016926 | <a href="#">LIQKERALLNFTWKR</a>      |
| 0.5   | 2355.240891          | 0.030681  | <a href="#">IQQIRSLSEDVRFYYK</a>     |



# MASCOT Search Results

## Peptide View

MS/MS Fragmentation of **MCPQLQQYEMHGPEGLR**

Found in **A2MG\_HUMAN**, Alpha-2-macroglobulin OS=Homo sapiens GN=A2M PE=1 SV=3

Match to Query 54075: 2384.095212 from(795.705680,3+) rtinseconds(1985) index(21610)

Title: Locus:1.1.1.693.12 File:"2013-07-02 CLN FXIII 60 min 2nd F 2.wiff"

Data file C:\Program Files (x86)\Matrix Science\Mascot Daemon\mgf5 FXIII 60 min 2nd\mascot\_daemon\_merge.mgf

Click mouse within plot area to zoom in by factor of two about that point

Or, Plot from  to  Da

Label all possible matches  Label matches used for scoring

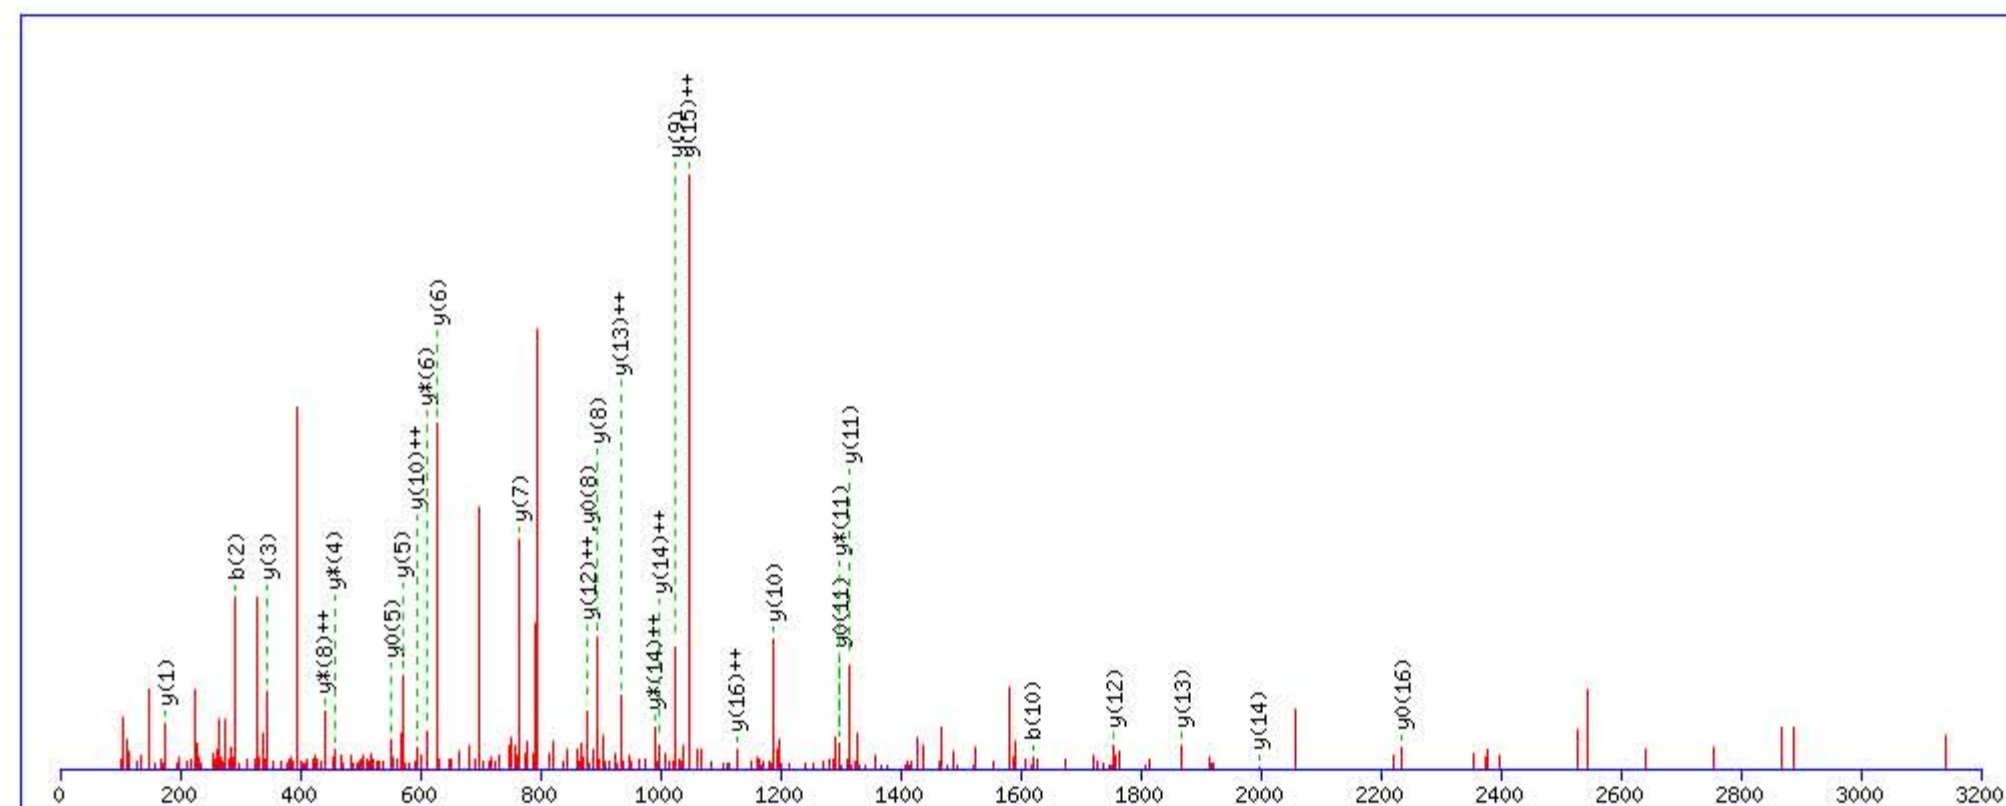

Monoisotopic mass of neutral peptide Mr(calc): 2384.089767

Fixed modifications: Carbamidomethyl (C) (apply to specified residues or termini only)

Variable modifications:

Q6 : Biotin:Thermo-21345 (Q)

Ions Score: 41 Expect: 0.001

Matches : 29/164 fragment ions using 82 most intense peaks [\(help\)](#)

| #  | b                  | b <sup>++</sup> | b <sup>+</sup> | b <sup>+++</sup> | b <sup>0</sup> | b <sup>0++</sup> | Seq. | y                  | y <sup>++</sup>    | y <sup>+</sup>     | y <sup>+++</sup>  | y <sup>0</sup>     | y <sup>0++</sup> | #  |
|----|--------------------|-----------------|----------------|------------------|----------------|------------------|------|--------------------|--------------------|--------------------|-------------------|--------------------|------------------|----|
| 1  | 132.047761         | 66.527518       |                |                  |                |                  | M    |                    |                    |                    |                   |                    |                  | 17 |
| 2  | <b>292.078410</b>  | 146.542843      |                |                  |                |                  | C    | 2254.056579        | <b>1127.531927</b> | 2237.030030        | 1119.018653       | <b>2236.046014</b> | 1118.526645      | 16 |
| 3  | 389.131174         | 195.069225      |                |                  |                |                  | P    | 2094.025930        | <b>1047.516603</b> | 2076.999381        | 1039.003328       | 2076.015365        | 1038.511320      | 15 |
| 4  | 517.189752         | 259.098514      | 500.163203     | 250.585240       |                |                  | Q    | <b>1996.973166</b> | <b>998.990221</b>  | 1979.946617        | <b>990.476947</b> | 1978.962601        | 989.984939       | 14 |
| 5  | 630.273816         | 315.640546      | 613.247267     | 307.127272       |                |                  | L    | <b>1868.914588</b> | <b>934.960932</b>  | 1851.888039        | 926.447658        | 1850.904023        | 925.955650       | 13 |
| 6  | 1069.499142        | 535.253209      | 1052.472593    | 526.739935       |                |                  | Q    | <b>1755.830524</b> | <b>878.418900</b>  | 1738.803975        | 869.905626        | 1737.819959        | 869.413618       | 12 |
| 7  | 1197.557720        | 599.282498      | 1180.531171    | 590.769224       |                |                  | Q    | <b>1316.605198</b> | 658.806237         | <b>1299.578649</b> | 650.292963        | <b>1298.594633</b> | 649.800955       | 11 |
| 8  | 1360.621049        | 680.814163      | 1343.594500    | 672.300888       |                |                  | Y    | <b>1188.546620</b> | <b>594.776948</b>  | 1171.520071        | 586.263674        | 1170.536055        | 585.771666       | 10 |
| 9  | 1489.663642        | 745.335459      | 1472.637093    | 736.822185       | 1471.653077    | 736.330177       | E    | <b>1025.483291</b> | 513.245284         | 1008.456742        | 504.732009        | 1007.472726        | 504.240001       | 9  |
| 10 | <b>1620.704127</b> | 810.855702      | 1603.677578    | 802.342427       | 1602.693562    | 801.850419       | M    | <b>896.440698</b>  | 448.723987         | 879.414149         | <b>440.210713</b> | <b>878.430133</b>  | 439.718705       | 8  |
| 11 | 1757.763039        | 879.385158      | 1740.736490    | 870.871883       | 1739.752474    | 870.379875       | H    | <b>765.400213</b>  | 383.203745         | 748.373664         | 374.690470        | 747.389648         | 374.198462       | 7  |
| 12 | 1814.784503        | 907.895890      | 1797.757954    | 899.382615       | 1796.773938    | 898.890607       | G    | <b>628.341301</b>  | 314.674289         | <b>611.314752</b>  | 306.161014        | 610.330736         | 305.669006       | 6  |
| 13 | 1911.837267        | 956.422272      | 1894.810718    | 947.908997       | 1893.826702    | 947.416989       | P    | <b>571.319837</b>  | 286.163557         | 554.293288         | 277.650282        | <b>553.309272</b>  | 277.158274       | 5  |
| 14 | 2040.879860        | 1020.943568     | 2023.853311    | 1012.430294      | 2022.869295    | 1011.938286      | E    | 474.267073         | 237.637175         | <b>457.240524</b>  | 229.123900        | 456.256508         | 228.631892       | 4  |
| 15 | 2097.901324        | 1049.454300     | 2080.874775    | 1040.941025      | 2079.890759    | 1040.449017      | G    | <b>345.224480</b>  | 173.115878         | 328.197931         | 164.602603        |                    |                  | 3  |
| 16 | 2210.985388        | 1105.996332     | 2193.958839    | 1097.483057      | 2192.974823    | 1096.991049      | L    | 288.203016         | 144.605146         | 271.176467         | 136.091872        |                    |                  | 2  |
| 17 |                    |                 |                |                  |                |                  | R    | <b>175.118952</b>  | 88.063114          | 158.092403         | 79.549839         |                    |                  | 1  |

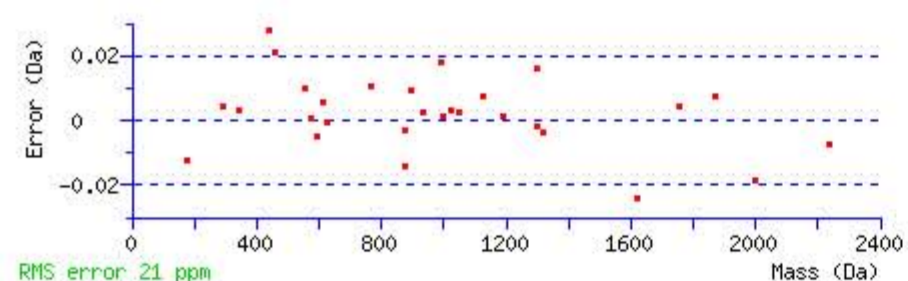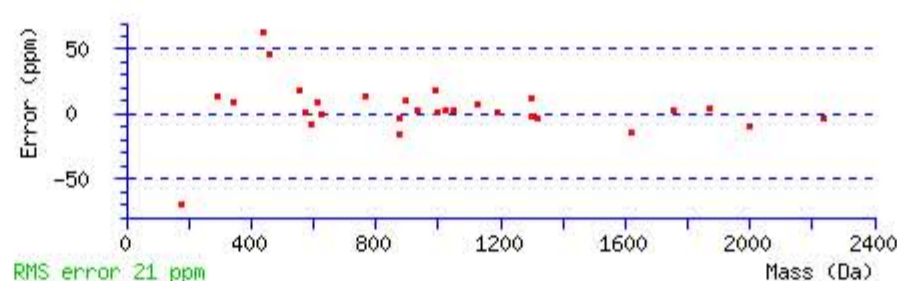

NCBI BLAST search of [MCPQLQQYEMHGPEGLR](#)

(Parameters: blastp, nr protein database, expect=20000, no filter, PAM30)

Other BLAST [web gateways](#)

## All matches to this query

| Score | Mr(calc):   | Delta    | Sequence                          |
|-------|-------------|----------|-----------------------------------|
| 40.7  | 2384.089767 | 0.005445 | <a href="#">MCPQLQQYEMHGPEGLR</a> |
| 39.4  | 2384.089767 | 0.005445 | <a href="#">MCPQLQQYEMHGPEGLR</a> |
| 25.7  | 2384.089767 | 0.005445 | <a href="#">MCPQLQQYEMHGPEGLR</a> |



# MASCOT SCIENCE Mascot Search Results

## Peptide View

MS/MS Fragmentation of **MCPQLQQYEMHGPEGLR**

Found in **A2MG\_HUMAN**, Alpha-2-macroglobulin OS=Homo sapiens GN=A2M PE=1 SV=3

Match to Query 54085: 2384.108908 from(1193.061730,2+) rtinseconds(2028) index(36558)

Title: Locus:1.1.1.3125.20 File:"2013-07-02 CLN FXIII 60 min 2nd F 3.wiff"

Data file C:\Program Files (x86)\Matrix Science\Mascot Daemon\mgf\5 FXIII 60 min 2nd\mascot\_daemon\_merge.mgf

Click mouse within plot area to zoom in by factor of two about that point

Or, Plot from  to  Da

Label all possible matches  Label matches used for scoring

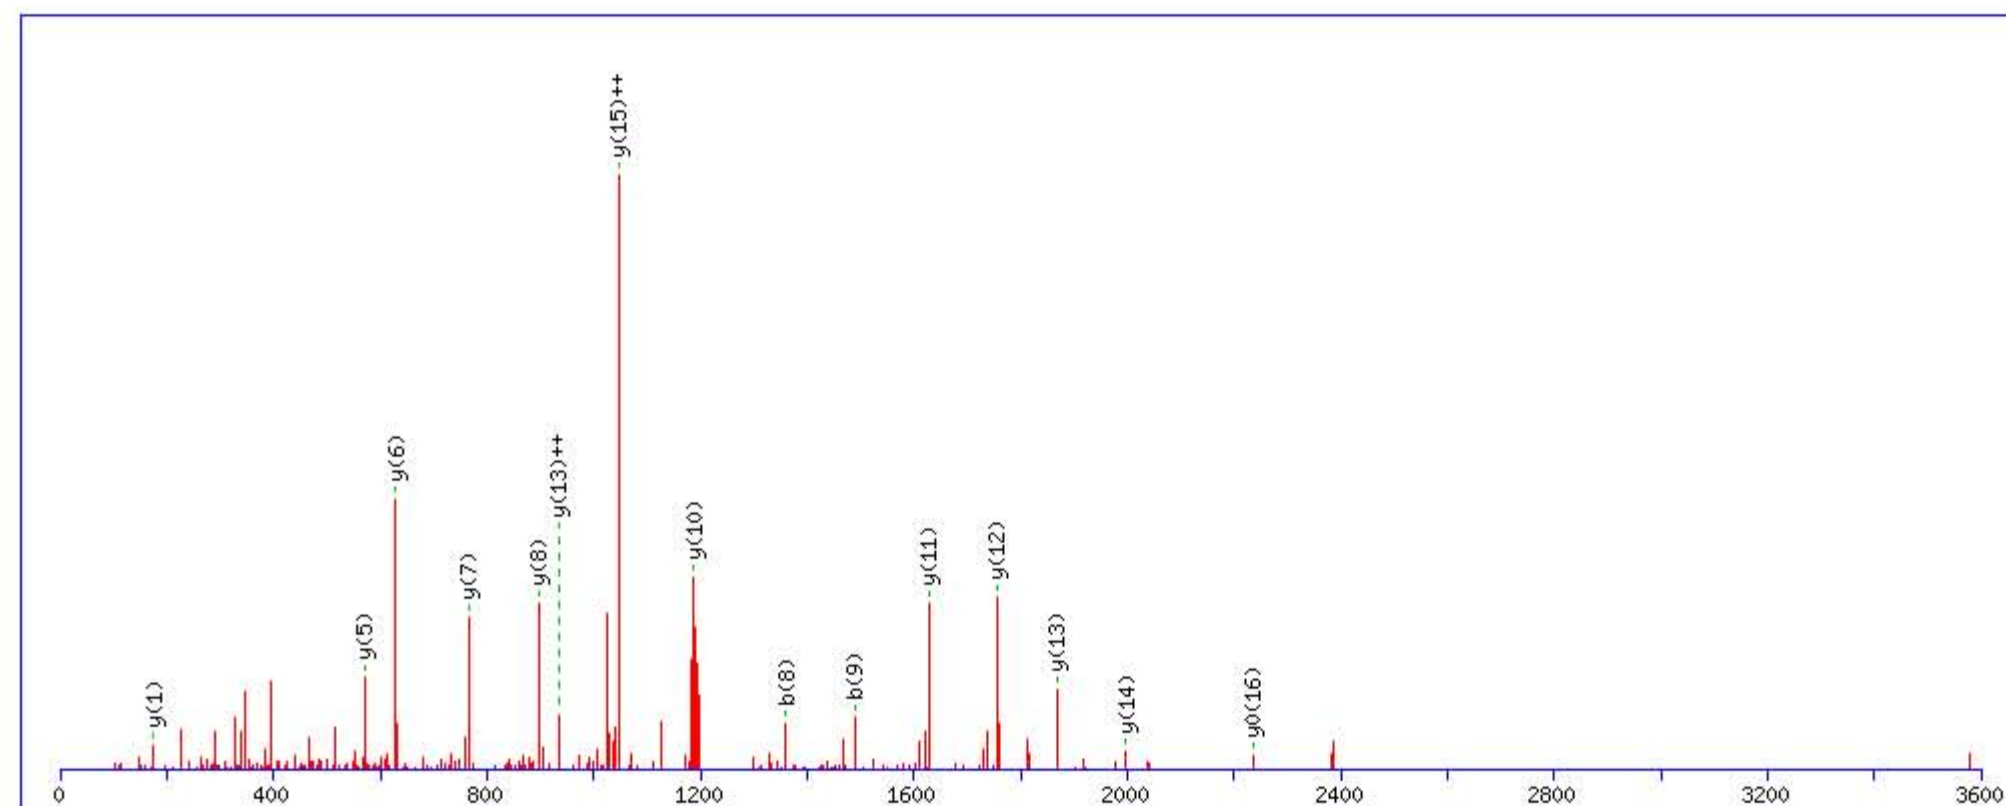

Monoisotopic mass of neutral peptide Mr(calc): 2384.089767

Fixed modifications: Carbamidomethyl (C) (apply to specified residues or termini only)

Variable modifications:

Q7 : Biotin:Thermo-21345 (Q)

Ions Score: 70 Expect: 1.5e-006

Matches : 15/164 fragment ions using 22 most intense peaks [\(help\)](#)

| #  | b           | b <sup>++</sup> | b <sup>+</sup> | b <sup>+++</sup> | b <sup>0</sup> | b <sup>0++</sup> | Seq. | y           | y <sup>++</sup> | y <sup>+</sup> | y <sup>+++</sup> | y <sup>0</sup> | y <sup>0++</sup> | #  |
|----|-------------|-----------------|----------------|------------------|----------------|------------------|------|-------------|-----------------|----------------|------------------|----------------|------------------|----|
| 1  | 132.047761  | 66.527518       |                |                  |                |                  | M    |             |                 |                |                  |                |                  | 17 |
| 2  | 292.078410  | 146.542843      |                |                  |                |                  | C    | 2254.056579 | 1127.531927     | 2237.030030    | 1119.018653      | 2236.046014    | 1118.526645      | 16 |
| 3  | 389.131174  | 195.069225      |                |                  |                |                  | P    | 2094.025930 | 1047.516603     | 2076.999381    | 1039.003328      | 2076.015365    | 1038.511320      | 15 |
| 4  | 517.189752  | 259.098514      | 500.163203     | 250.585240       |                |                  | Q    | 1996.973166 | 998.990221      | 1979.946617    | 990.476947       | 1978.962601    | 989.984939       | 14 |
| 5  | 630.273816  | 315.640546      | 613.247267     | 307.127272       |                |                  | L    | 1868.914588 | 934.960932      | 1851.888039    | 926.447658       | 1850.904023    | 925.955650       | 13 |
| 6  | 758.332394  | 379.669835      | 741.305845     | 371.156561       |                |                  | Q    | 1755.830524 | 878.418900      | 1738.803975    | 869.905626       | 1737.819959    | 869.413618       | 12 |
| 7  | 1197.557720 | 599.282498      | 1180.531171    | 590.769224       |                |                  | Q    | 1627.771946 | 814.389611      | 1610.745397    | 805.876337       | 1609.761381    | 805.384329       | 11 |
| 8  | 1360.621049 | 680.814163      | 1343.594500    | 672.300888       |                |                  | Y    | 1188.546620 | 594.776948      | 1171.520071    | 586.263674       | 1170.536055    | 585.771666       | 10 |
| 9  | 1489.663642 | 745.335459      | 1472.637093    | 736.822185       | 1471.653077    | 736.330177       | E    | 1025.483291 | 513.245284      | 1008.456742    | 504.732009       | 1007.472726    | 504.240001       | 9  |
| 10 | 1620.704127 | 810.855702      | 1603.677578    | 802.342427       | 1602.693562    | 801.850419       | M    | 896.440698  | 448.723987      | 879.414149     | 440.210713       | 878.430133     | 439.718705       | 8  |
| 11 | 1757.763039 | 879.385158      | 1740.736490    | 870.871883       | 1739.752474    | 870.379875       | H    | 765.400213  | 383.203745      | 748.373664     | 374.690470       | 747.389648     | 374.198462       | 7  |
| 12 | 1814.784503 | 907.895890      | 1797.757954    | 899.382615       | 1796.773938    | 898.890607       | G    | 628.341301  | 314.674289      | 611.314752     | 306.161014       | 610.330736     | 305.669006       | 6  |
| 13 | 1911.837267 | 956.422272      | 1894.810718    | 947.908997       | 1893.826702    | 947.416989       | P    | 571.319837  | 286.163557      | 554.293288     | 277.650282       | 553.309272     | 277.158274       | 5  |
| 14 | 2040.879860 | 1020.943568     | 2023.853311    | 1012.430294      | 2022.869295    | 1011.938286      | E    | 474.267073  | 237.637175      | 457.240524     | 229.123900       | 456.256508     | 228.631892       | 4  |
| 15 | 2097.901324 | 1049.454300     | 2080.874775    | 1040.941025      | 2079.890759    | 1040.449017      | G    | 345.224480  | 173.115878      | 328.197931     | 164.602603       |                |                  | 3  |
| 16 | 2210.985388 | 1105.996332     | 2193.958839    | 1097.483057      | 2192.974823    | 1096.991049      | L    | 288.203016  | 144.605146      | 271.176467     | 136.091872       |                |                  | 2  |
| 17 |             |                 |                |                  |                |                  | R    | 175.118952  | 88.063114       | 158.092403     | 79.549839        |                |                  | 1  |

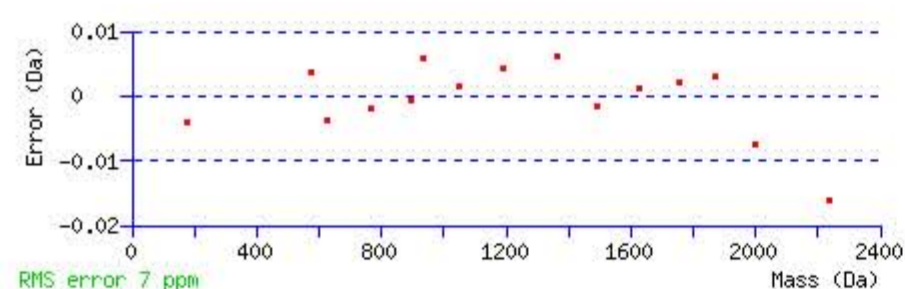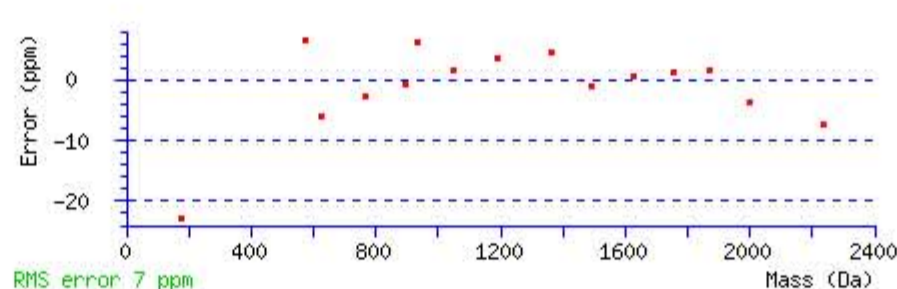

NCBI BLAST search of [MCPQLQQYEMHGPEGLR](#)

(Parameters: blastp, nr protein database, expect=20000, no filter, PAM30)

Other BLAST [web gateways](#)

## All matches to this query

| Score | Mr(calc):   | Delta    | Sequence                          |
|-------|-------------|----------|-----------------------------------|
| 70.0  | 2384.089767 | 0.019141 | <a href="#">MCPQLQQYEMHGPEGLR</a> |
| 59.4  | 2384.089767 | 0.019141 | <a href="#">MCPQLQQYEMHGPEGLR</a> |
| 31.4  | 2384.089767 | 0.019141 | <a href="#">MCPQLQQYEMHGPEGLR</a> |



# MASCOT Search Results

## Peptide View

MS/MS Fragmentation of **YSDASDCHGEDSQAFCEK**

Found in **A2MG\_HUMAN**, Alpha-2-macroglobulin OS=Homo sapiens GN=A2M PE=1 SV=3

Match to Query 54704: 2415.935772 from(806.319200,3+) rtinseconds(1528) index(18656)

Title: Locus:1.1.1.534.18 File:"2013-07-02 CLN FXIII 60 min 2nd F 2.wiff"

Data file C:\Program Files (x86)\Matrix Science\Mascot Daemon\mgf5 FXIII 60 min 2nd\mascot\_daemon\_merge.mgf

Click mouse within plot area to zoom in by factor of two about that point

Or, Plot from  to  Da

Label all possible matches  Label matches used for scoring

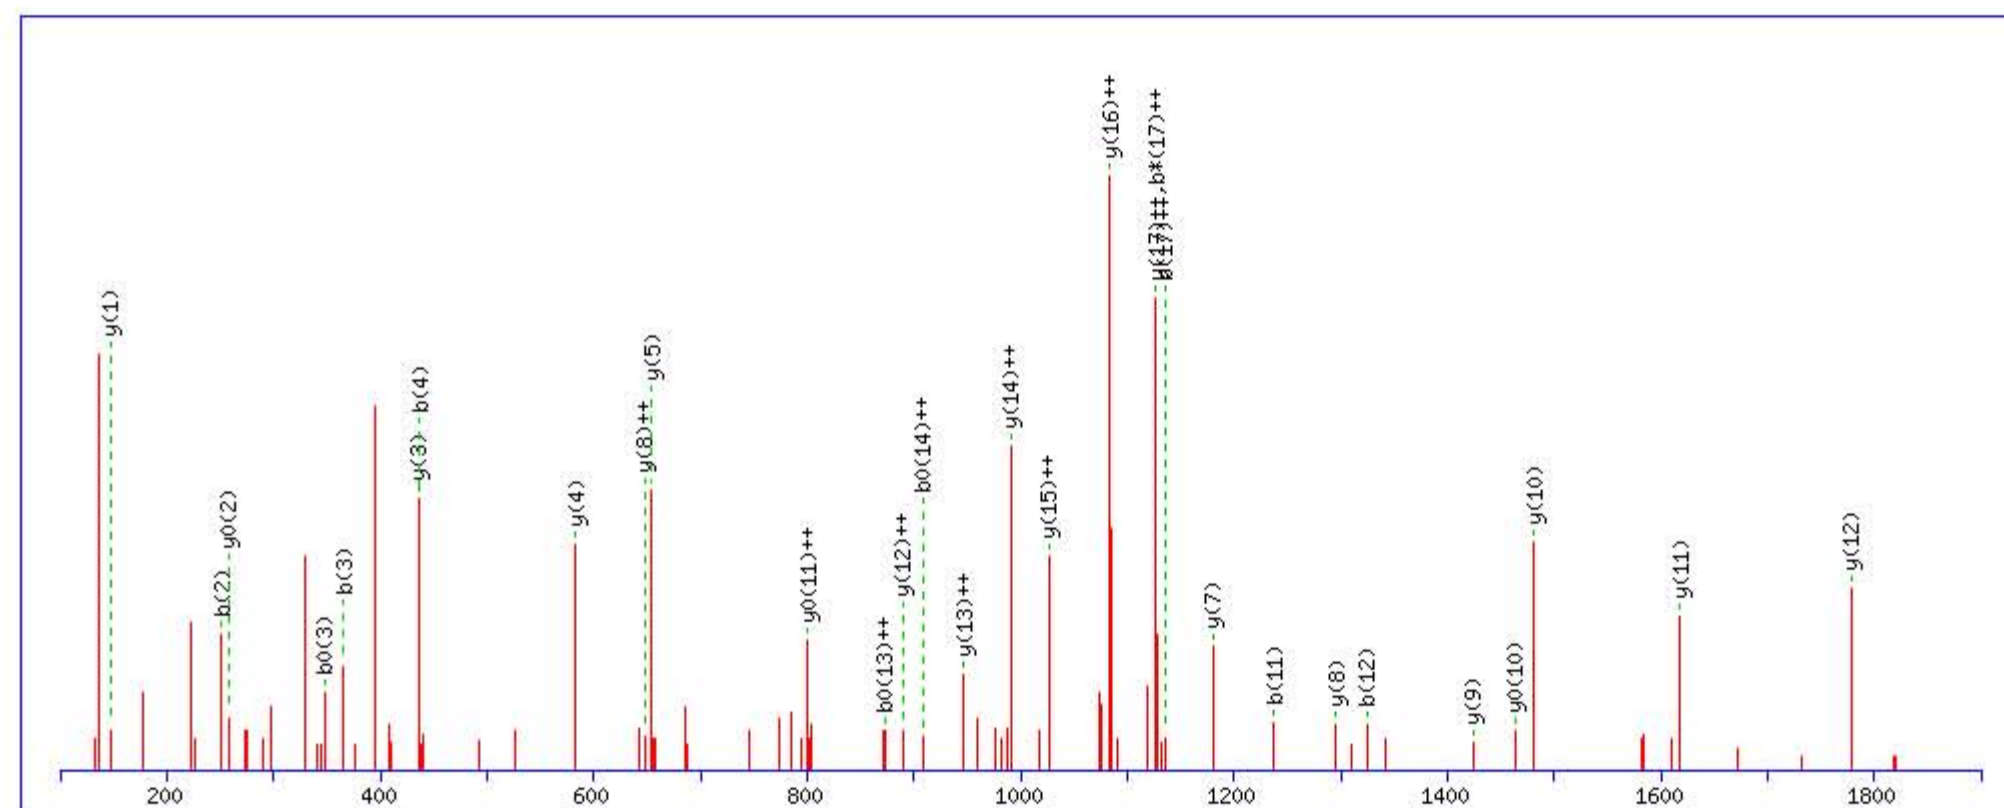

Monoisotopic mass of neutral peptide Mr(calc): 2415.940598

Fixed modifications: Carbamidomethyl (C) (apply to specified residues or termini only)

Variable modifications:

Q13 : Biotin:Thermo-21345 (Q)

Ions Score: 57 Expect: 2e-006

Matches : 30/176 fragment ions using 56 most intense peaks [\(help\)](#)

| #  | b                  | b <sup>++</sup>    | b <sup>*</sup> | b <sup>*++</sup>   | b <sup>0</sup>    | b <sup>0++</sup>  | Seq. | y                  | y <sup>++</sup>    | y <sup>*</sup> | y <sup>*++</sup> | y <sup>0</sup>     | y <sup>0++</sup>  | #  |
|----|--------------------|--------------------|----------------|--------------------|-------------------|-------------------|------|--------------------|--------------------|----------------|------------------|--------------------|-------------------|----|
| 1  | 164.070605         | 82.538940          |                |                    |                   |                   | Y    |                    |                    |                |                  |                    |                   | 18 |
| 2  | <b>251.102633</b>  | 126.054954         |                |                    | 233.092068        | 117.049672        | S    | 2253.884545        | <b>1127.445910</b> | 2236.857996    | 1118.932636      | 2235.873980        | 1118.440628       | 17 |
| 3  | <b>366.129576</b>  | 183.568426         |                |                    | <b>348.119011</b> | 174.563144        | D    | 2166.852517        | <b>1083.929896</b> | 2149.825968    | 1075.416622      | 2148.841952        | 1074.924614       | 16 |
| 4  | <b>437.166690</b>  | 219.086983         |                |                    | 419.156125        | 210.081700        | A    | 2051.825574        | <b>1026.416425</b> | 2034.799025    | 1017.903150      | 2033.815009        | 1017.411142       | 15 |
| 5  | 524.198718         | 262.602997         |                |                    | 506.188153        | 253.597715        | S    | 1980.788460        | <b>990.897868</b>  | 1963.761911    | 982.384594       | 1962.777895        | 981.892586        | 14 |
| 6  | 639.225661         | 320.116469         |                |                    | 621.215096        | 311.111186        | D    | 1893.756432        | <b>947.381854</b>  | 1876.729883    | 938.868580       | 1875.745867        | 938.376572        | 13 |
| 7  | 799.256310         | 400.131793         |                |                    | 781.245745        | 391.126510        | C    | <b>1778.729489</b> | <b>889.868383</b>  | 1761.702940    | 881.355108       | 1760.718924        | 880.863100        | 12 |
| 8  | 936.315222         | 468.661249         |                |                    | 918.304657        | 459.655966        | H    | <b>1618.698840</b> | 809.853058         | 1601.672291    | 801.339784       | 1600.688275        | <b>800.847776</b> | 11 |
| 9  | 993.336686         | 497.171981         |                |                    | 975.326121        | 488.166699        | G    | <b>1481.639928</b> | 741.323602         | 1464.613379    | 732.810328       | <b>1463.629363</b> | 732.318320        | 10 |
| 10 | 1122.379279        | 561.693278         |                |                    | 1104.368714       | 552.687995        | E    | <b>1424.618464</b> | 712.812870         | 1407.591915    | 704.299596       | 1406.607899        | 703.807588        | 9  |
| 11 | <b>1237.406222</b> | 619.206749         |                |                    | 1219.395657       | 610.201467        | D    | <b>1295.575871</b> | <b>648.291574</b>  | 1278.549322    | 639.778299       | 1277.565306        | 639.286291        | 8  |
| 12 | <b>1324.438250</b> | 662.722763         |                |                    | 1306.427685       | 653.717481        | S    | <b>1180.548928</b> | 590.778102         | 1163.522379    | 582.264828       | 1162.538363        | 581.772820        | 7  |
| 13 | 1763.663576        | 882.335426         | 1746.637027    | 873.822152         | 1745.653011       | <b>873.330144</b> | Q    | 1093.516900        | 547.262088         | 1076.490351    | 538.748814       | 1075.506335        | 538.256806        | 6  |
| 14 | 1834.700690        | 917.853983         | 1817.674141    | 909.340709         | 1816.690125       | <b>908.848701</b> | A    | <b>654.291574</b>  | 327.649425         | 637.265025     | 319.136151       | 636.281009         | 318.644143        | 5  |
| 15 | 1981.769104        | 991.388190         | 1964.742555    | 982.874916         | 1963.758539       | 982.382908        | F    | <b>583.254460</b>  | 292.130868         | 566.227911     | 283.617594       | 565.243895         | 283.125586        | 4  |
| 16 | 2141.799753        | 1071.403514        | 2124.773204    | 1062.890240        | 2123.789188       | 1062.398232       | C    | <b>436.186046</b>  | 218.596661         | 419.159497     | 210.083386       | 418.175481         | 209.591378        | 3  |
| 17 | 2270.842346        | <b>1135.924811</b> | 2253.815797    | <b>1127.411536</b> | 2252.831781       | 1126.919528       | E    | 276.155397         | 138.581337         | 259.128848     | 130.068062       | <b>258.144832</b>  | 129.576054        | 2  |
| 18 |                    |                    |                |                    |                   |                   | K    | <b>147.112804</b>  | 74.060040          | 130.086255     | 65.546765        |                    |                   | 1  |

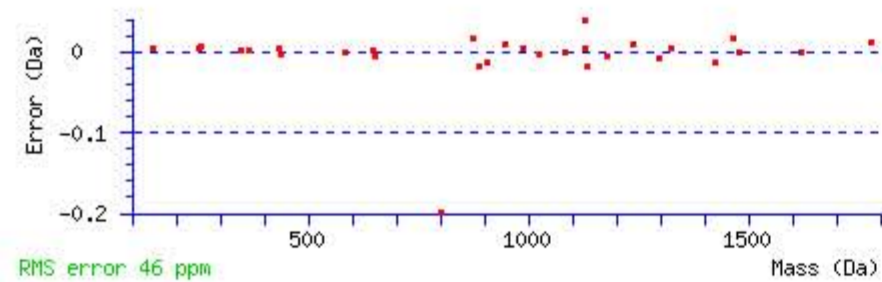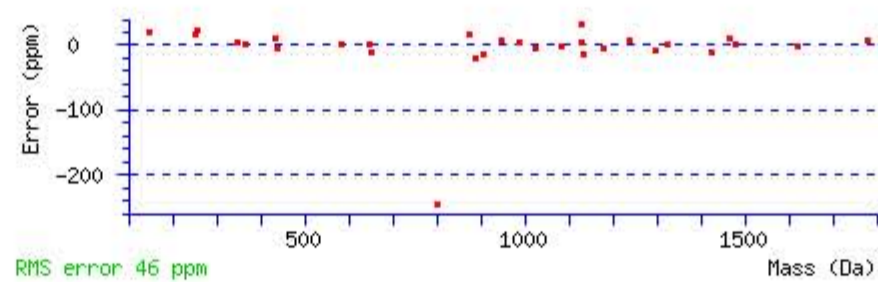

NCBI BLAST search of [YSDASDCHGEDSQAFCEK](#)

(Parameters: blastp, nr protein database, expect=20000, no filter, PAM30)

Other BLAST [web gateways](#)

### All matches to this query

| Score | Mr(calc):   | Delta     | Sequence                           |
|-------|-------------|-----------|------------------------------------|
| 57.0  | 2415.940598 | -0.004826 | <a href="#">YSDASDCHGEDSQAFCEK</a> |

Mascot: <http://www.matrixscience.com/>



# MASCOT Search Results

## Peptide View

MS/MS Fragmentation of **MCPQLQQYEMHGPEGLR**

Found in **A2MG\_HUMAN**, Alpha-2-macroglobulin OS=Homo sapiens GN=A2M PE=1 SV=3

Match to Query 58296: 2695.265892 from(899.429240,3+) rtinseconds(2212) index(22970)

Title: Locus:1.1.1.772.23 File:"2013-07-02 CLN FXIII 60 min 2nd F 2.wiff"

Data file C:\Program Files (x86)\Matrix Science\Mascot Daemon\mgf5 FXIII 60 min 2nd\mascot\_daemon\_merge.mgf

Click mouse within plot area to zoom in by factor of two about that point

Or, Plot from  to  Da

Label all possible matches  Label matches used for scoring

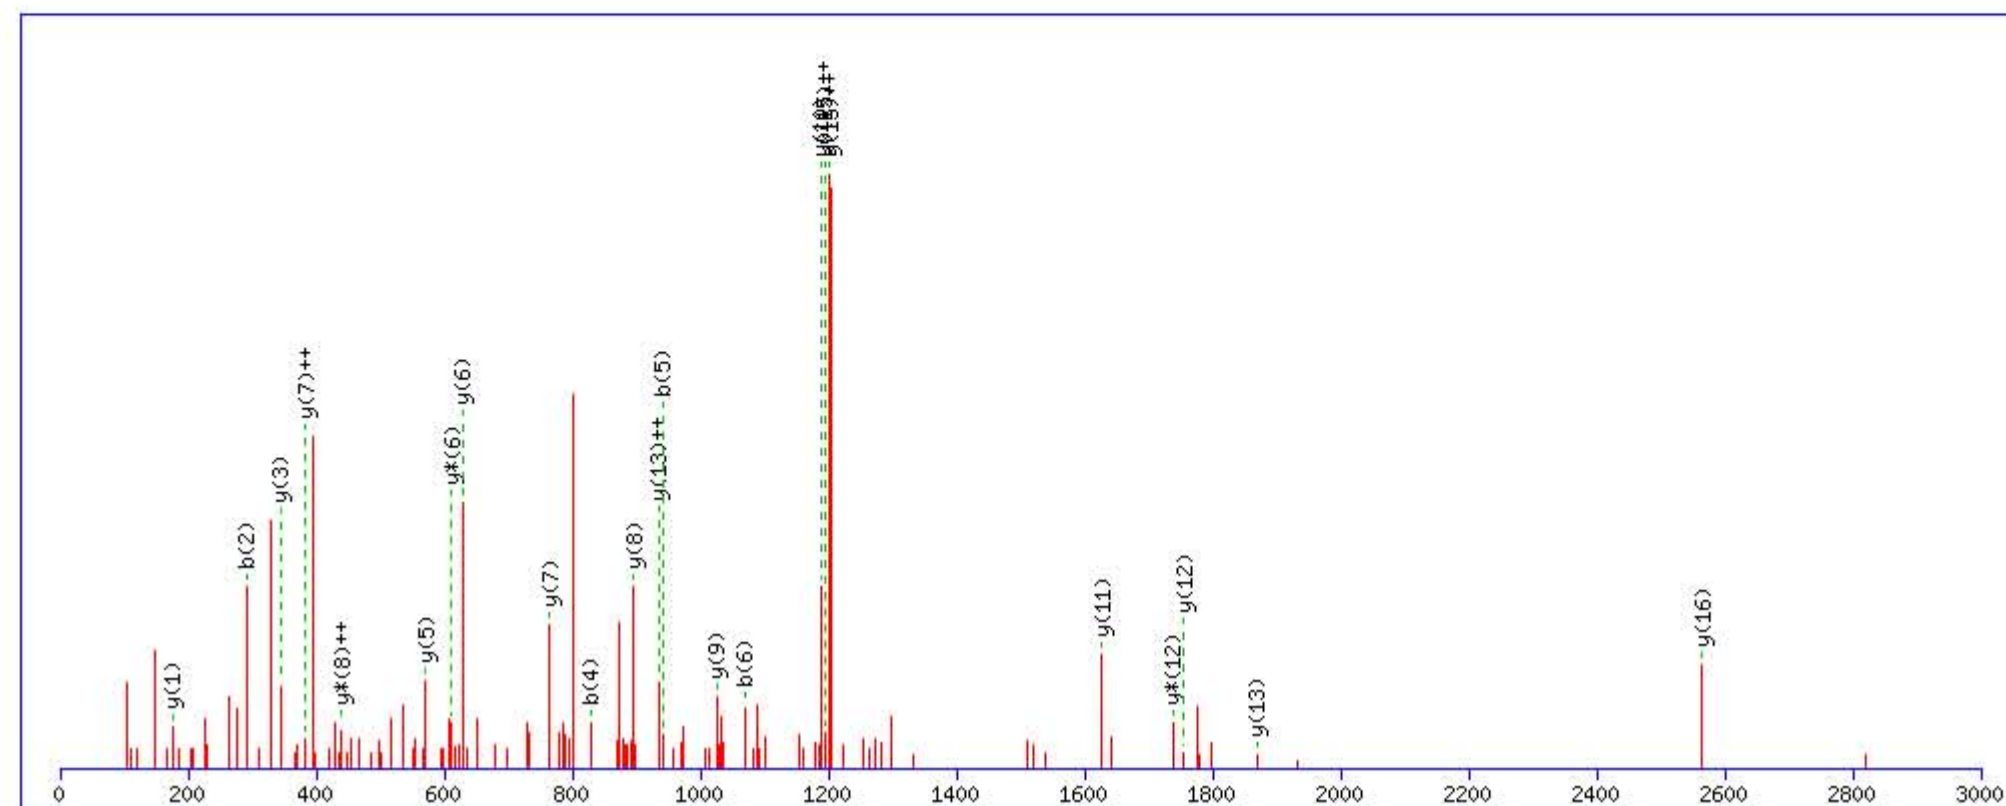

Monoisotopic mass of neutral peptide Mr(calc): 2695.256516

Fixed modifications: Carbamidomethyl (C) (apply to specified residues or termini only)

Variable modifications:

Q4 : Biotin:Thermo-21345 (Q)

Q7 : Biotin:Thermo-21345 (Q)

Ions Score: 44 Expect: 0.00064

Matches : 23/164 fragment ions using 62 most intense peaks [\(help\)](#)

| #  | b                  | b <sup>++</sup> | b <sup>*</sup> | b <sup>*++</sup> | b <sup>0</sup> | b <sup>0++</sup> | Seq. | y                  | y <sup>++</sup>    | y <sup>*</sup>     | y <sup>*++</sup>  | y <sup>0</sup> | y <sup>0++</sup>   | #  |
|----|--------------------|-----------------|----------------|------------------|----------------|------------------|------|--------------------|--------------------|--------------------|-------------------|----------------|--------------------|----|
| 1  | 132.047761         | 66.527518       |                |                  |                |                  | M    |                    |                    |                    |                   |                |                    | 17 |
| 2  | <b>292.078410</b>  | 146.542843      |                |                  |                |                  | C    | <b>2565.223327</b> | 1283.115301        | 2548.196778        | 1274.602027       | 2547.212762    | 1274.110019        | 16 |
| 3  | 389.131174         | 195.069225      |                |                  |                |                  | P    | 2405.192678        | <b>1203.099977</b> | 2388.166129        | 1194.586702       | 2387.182113    | <b>1194.094694</b> | 15 |
| 4  | <b>828.356500</b>  | 414.681888      | 811.329951     | 406.168614       |                |                  | Q    | 2308.139914        | 1154.573595        | 2291.113365        | 1146.060320       | 2290.129349    | 1145.568312        | 14 |
| 5  | <b>941.440564</b>  | 471.223920      | 924.414015     | 462.710646       |                |                  | L    | <b>1868.914588</b> | <b>934.960932</b>  | 1851.888039        | 926.447658        | 1850.904023    | 925.955650         | 13 |
| 6  | <b>1069.499142</b> | 535.253209      | 1052.472593    | 526.739935       |                |                  | Q    | <b>1755.830524</b> | 878.418900         | <b>1738.803975</b> | 869.905626        | 1737.819959    | 869.413618         | 12 |
| 7  | 1508.724468        | 754.865872      | 1491.697919    | 746.352598       |                |                  | Q    | <b>1627.771946</b> | 814.389611         | 1610.745397        | 805.876337        | 1609.761381    | 805.384329         | 11 |
| 8  | 1671.787797        | 836.397537      | 1654.761248    | 827.884262       |                |                  | Y    | <b>1188.546620</b> | 594.776948         | 1171.520071        | 586.263674        | 1170.536055    | 585.771666         | 10 |
| 9  | 1800.830390        | 900.918833      | 1783.803841    | 892.405559       | 1782.819825    | 891.913551       | E    | <b>1025.483291</b> | 513.245284         | 1008.456742        | 504.732009        | 1007.472726    | 504.240001         | 9  |
| 10 | 1931.870875        | 966.439076      | 1914.844326    | 957.925801       | 1913.860310    | 957.433793       | M    | <b>896.440698</b>  | 448.723987         | 879.414149         | <b>440.210713</b> | 878.430133     | 439.718705         | 8  |
| 11 | 2068.929787        | 1034.968531     | 2051.903238    | 1026.455257      | 2050.919222    | 1025.963249      | H    | <b>765.400213</b>  | <b>383.203745</b>  | 748.373664         | 374.690470        | 747.389648     | 374.198462         | 7  |
| 12 | 2125.951251        | 1063.479263     | 2108.924702    | 1054.965989      | 2107.940686    | 1054.473981      | G    | <b>628.341301</b>  | 314.674289         | <b>611.314752</b>  | 306.161014        | 610.330736     | 305.669006         | 6  |
| 13 | 2223.004015        | 1112.005645     | 2205.977466    | 1103.492371      | 2204.993450    | 1103.000363      | P    | <b>571.319837</b>  | 286.163557         | 554.293288         | 277.650282        | 553.309272     | 277.158274         | 5  |
| 14 | 2352.046608        | 1176.526942     | 2335.020059    | 1168.013667      | 2334.036043    | 1167.521659      | E    | 474.267073         | 237.637175         | 457.240524         | 229.123900        | 456.256508     | 228.631892         | 4  |
| 15 | 2409.068072        | 1205.037674     | 2392.041523    | 1196.524399      | 2391.057507    | 1196.032391      | G    | <b>345.224480</b>  | 173.115878         | 328.197931         | 164.602603        |                |                    | 3  |
| 16 | 2522.152136        | 1261.579706     | 2505.125587    | 1253.066431      | 2504.141571    | 1252.574424      | L    | 288.203016         | 144.605146         | 271.176467         | 136.091872        |                |                    | 2  |
| 17 |                    |                 |                |                  |                |                  | R    | <b>175.118952</b>  | 88.063114          | 158.092403         | 79.549839         |                |                    | 1  |

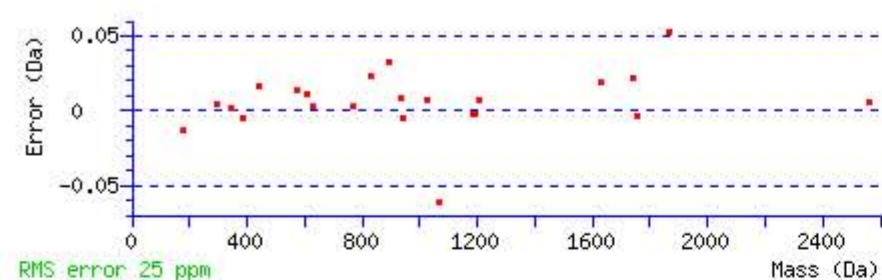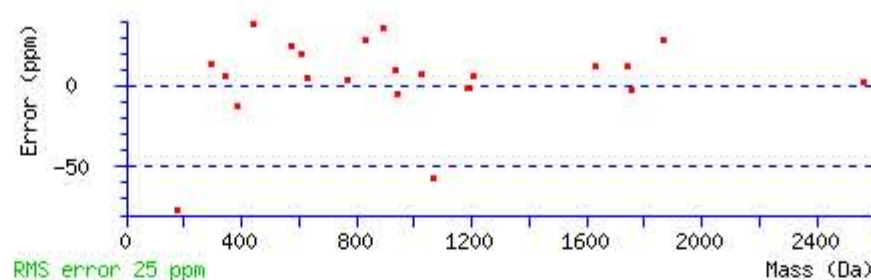

NCBI BLAST search of [MCPQLQQYEMHGPEGLR](#)

(Parameters: blastp, nr protein database, expect=20000, no filter, PAM30)

Other BLAST [web gateways](#)

All matches to this query

| Score | Mr(calc):   | Delta    | Sequence                          |
|-------|-------------|----------|-----------------------------------|
| 44.4  | 2695.256516 | 0.009376 | <a href="#">MCPQLQQYEMHGPEGLR</a> |
| 37.2  | 2695.256516 | 0.009376 | <a href="#">MCPQLQQYEMHGPEGLR</a> |
| 30.7  | 2695.256516 | 0.009376 | <a href="#">MCPQLQQYEMHGPEGLR</a> |



# Mascot Search Results

## Peptide View

MS/MS Fragmentation of **MCPQLQQYEMHGPEGLR**

Found in **A2MG\_HUMAN**, Alpha-2-macroglobulin OS=Homo sapiens GN=A2M PE=1 SV=3

Match to Query 58427: 2711.253016 from(678.820530,4+) rtinseconds(2053) index(6150)

Title: Locus:1.1.1.1524.16 File:"2013-07-02 CLN FXIII 60 min 2nd F 1.wiff"

Data file C:\Program Files (x86)\Matrix Science\Mascot Daemon\mgf5 FXIII 60 min 2nd\mascot\_daemon\_merge.mgf

Click mouse within plot area to zoom in by factor of two about that point

Or, Plot from  to  Da

Label all possible matches  Label matches used for scoring

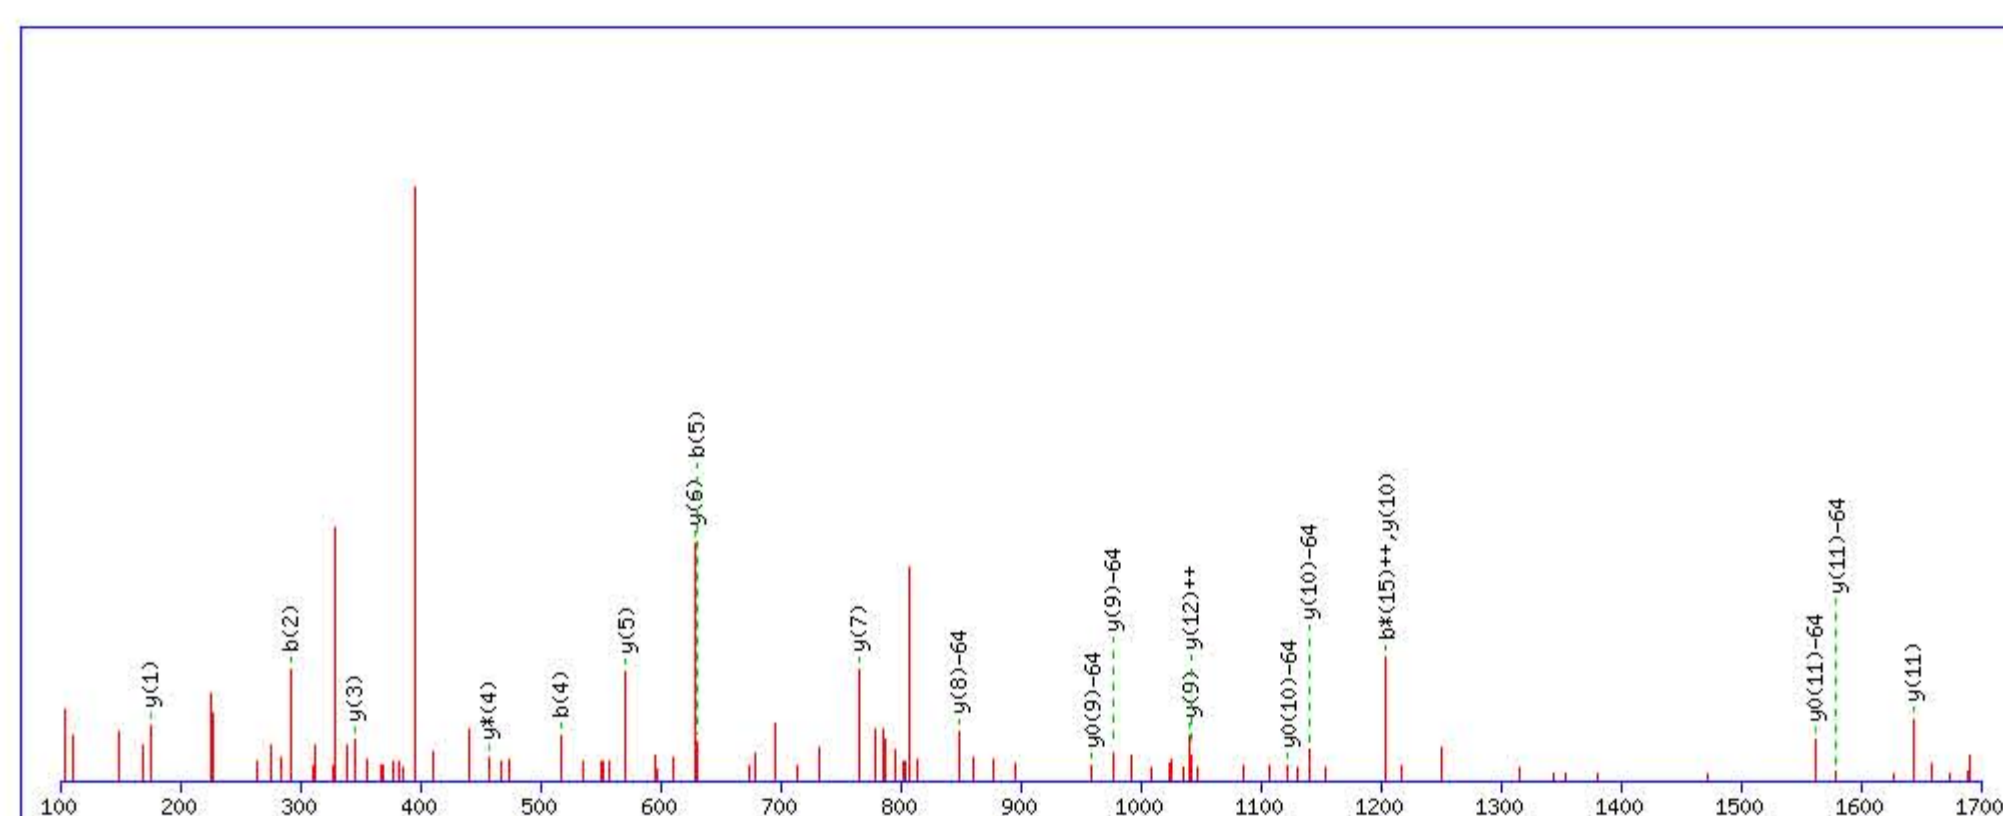

Monoisotopic mass of neutral peptide Mr(calc): 2711.251434

Fixed modifications: Carbamidomethyl (C) (apply to specified residues or termini only)

Variable modifications:

Q6 : Biotin:Thermo-21345 (Q)

Q7 : Biotin:Thermo-21345 (Q)

M10 : Oxidation (M), with neutral losses 63.998285 (shown in table), 0.000000

Ions Score: 28 Expect: 0.0027

Matches : 21/260 fragment ions using 45 most intense peaks [\(help\)](#)

| #  | b                 | b <sup>++</sup> | b <sup>+</sup> | b <sup>*++</sup> | b <sup>0</sup> | b <sup>0++</sup> | Seq. | y                  | y <sup>++</sup> | y <sup>+</sup>    | y <sup>*++</sup> | y <sup>0</sup>     | y <sup>0++</sup> | #  |
|----|-------------------|-----------------|----------------|------------------|----------------|------------------|------|--------------------|-----------------|-------------------|------------------|--------------------|------------------|----|
| 1  | 132.047761        | 66.527518       |                |                  |                |                  | M    |                    |                 |                   |                  |                    |                  | 17 |
| 2  | <b>292.078410</b> | 146.542843      |                |                  |                |                  | C    | 2517.219957        | 1259.113616     | 2500.193408       | 1250.600342      | 2499.209392        | 1250.108334      | 16 |
| 3  | 389.131174        | 195.069225      |                |                  |                |                  | P    | 2357.189308        | 1179.098292     | 2340.162759       | 1170.585017      | 2339.178743        | 1170.093009      | 15 |
| 4  | <b>517.189752</b> | 259.098514      | 500.163203     | 250.585240       |                |                  | Q    | 2260.136544        | 1130.571910     | 2243.109995       | 1122.058635      | 2242.125979        | 1121.566627      | 14 |
| 5  | <b>630.273816</b> | 315.640546      | 613.247267     | 307.127272       |                |                  | L    | 2132.077966        | 1066.542621     | 2115.051417       | 1058.029346      | 2114.067401        | 1057.537338      | 13 |
| 6  | 1069.499142       | 535.253209      | 1052.472593    | 526.739935       |                |                  | Q    | 2018.993902        | 1010.000589     | 2001.967353       | 1001.487315      | 2000.983337        | 1000.995307      | 12 |
| 7  | 1508.724468       | 754.865872      | 1491.697919    | 746.352598       |                |                  | Q    | <b>1579.768576</b> | 790.387926      | 1562.742027       | 781.874652       | <b>1561.758011</b> | 781.382644       | 11 |
| 8  | 1671.787797       | 836.397537      | 1654.761248    | 827.884262       |                |                  | Y    | <b>1140.543250</b> | 570.775263      | 1123.516701       | 562.261989       | <b>1122.532685</b> | 561.769981       | 10 |
| 9  | 1800.830390       | 900.918833      | 1783.803841    | 892.405559       | 1782.819825    | 891.913551       | E    | <b>977.479921</b>  | 489.243599      | 960.453372        | 480.730324       | <b>959.469356</b>  | 480.238316       | 9  |
| 10 | 1883.867505       | 942.437391      | 1866.840956    | 933.924116       | 1865.856940    | 933.432108       | M    | <b>848.437328</b>  | 424.722302      | 831.410779        | 416.209028       | 830.426763         | 415.717020       | 8  |
| 11 | 2020.926417       | 1010.966847     | 2003.899868    | 1002.453572      | 2002.915852    | 1001.961564      | H    | <b>765.400213</b>  | 383.203745      | 748.373664        | 374.690470       | 747.389648         | 374.198462       | 7  |
| 12 | 2077.947881       | 1039.477578     | 2060.921332    | 1030.964304      | 2059.937316    | 1030.472296      | G    | <b>628.341301</b>  | 314.674289      | 611.314752        | 306.161014       | 610.330736         | 305.669006       | 6  |
| 13 | 2175.000645       | 1088.003960     | 2157.974096    | 1079.490686      | 2156.990080    | 1078.998678      | P    | <b>571.319837</b>  | 286.163557      | 554.293288        | 277.650282       | 553.309272         | 277.158274       | 5  |
| 14 | 2304.043238       | 1152.525257     | 2287.016689    | 1144.011982      | 2286.032673    | 1143.519975      | E    | 474.267073         | 237.637175      | <b>457.240524</b> | 229.123900       | 456.256508         | 228.631892       | 4  |
| 15 | 2361.064702       | 1181.035989     | 2344.038153    | 1172.522714      | 2343.054137    | 1172.030707      | G    | <b>345.224480</b>  | 173.115878      | 328.197931        | 164.602603       |                    |                  | 3  |
| 16 | 2474.148766       | 1237.578021     | 2457.122217    | 1229.064747      | 2456.138201    | 1228.572739      | L    | 288.203016         | 144.605146      | 271.176467        | 136.091872       |                    |                  | 2  |
| 17 |                   |                 |                |                  |                |                  | R    | <b>175.118952</b>  | 88.063114       | 158.092403        | 79.549839        |                    |                  | 1  |

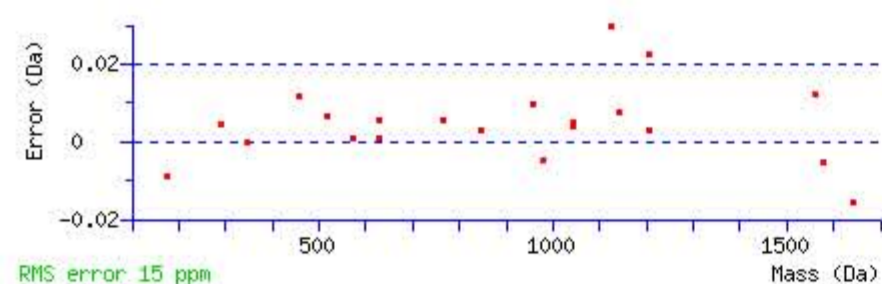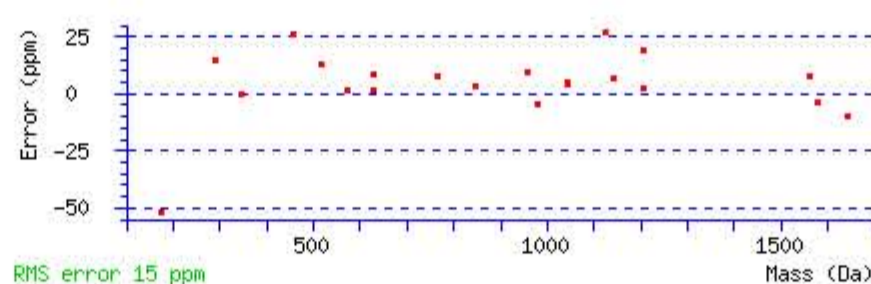

NCBI BLAST search of **MCPQLQQYEMHGPEGLR**

(Parameters: blastp, nr protein database, expect=20000, no filter, PAM30)

Other BLAST [web gateways](#)

All matches to this query

| Score | Mr(calc):   | Delta    | Sequence                                |
|-------|-------------|----------|-----------------------------------------|
| 27.8  | 2711.251434 | 0.001582 | <a href="#">MCPQLQQYEMHGPEGLR</a>       |
| 24.8  | 2711.251434 | 0.001582 | <a href="#">MCPQLQQYEMHGPEGLR</a>       |
| 18.3  | 2711.251434 | 0.001582 | <a href="#">MCPQLQQYEMHGPEGLR</a>       |
| 9.0   | 2711.251434 | 0.001582 | <a href="#">MCPQLQQYEMHGPEGLR</a>       |
| 9.0   | 2711.251434 | 0.001582 | <a href="#">MCPQLQQYEMHGPEGLR</a>       |
| 5.1   | 2711.251434 | 0.001582 | <a href="#">MCPQLQQYEMHGPEGLR</a>       |
| 0.4   | 2711.226059 | 0.026957 | <a href="#">FHYGEKPYECKECKGKAFSVYGR</a> |



**Peptide View**

MS/MS Fragmentation of **MCPQLQQYEMHGPEGLR**

Found in **A2MG\_HUMAN**, Alpha-2-macroglobulin OS=Homo sapiens GN=A2M PE=1 SV=3

Match to Query 58448: 2711.264862 from(904.762230,3+) rtinseconds(2087) index(36932)

Title: Locus:1.1.1.3146.12 File:"2013-07-02 CLN FXIII 60 min 2nd F 3.wiff"

Data file C:\Program Files (x86)\Matrix Science\Mascot Daemon\mgf5 FXIII 60 min 2nd\mascot\_daemon\_merge.mgf

Click mouse within plot area to zoom in by factor of two about that point

Or, Plot from  to  Da

Label all possible matches  Label matches used for scoring

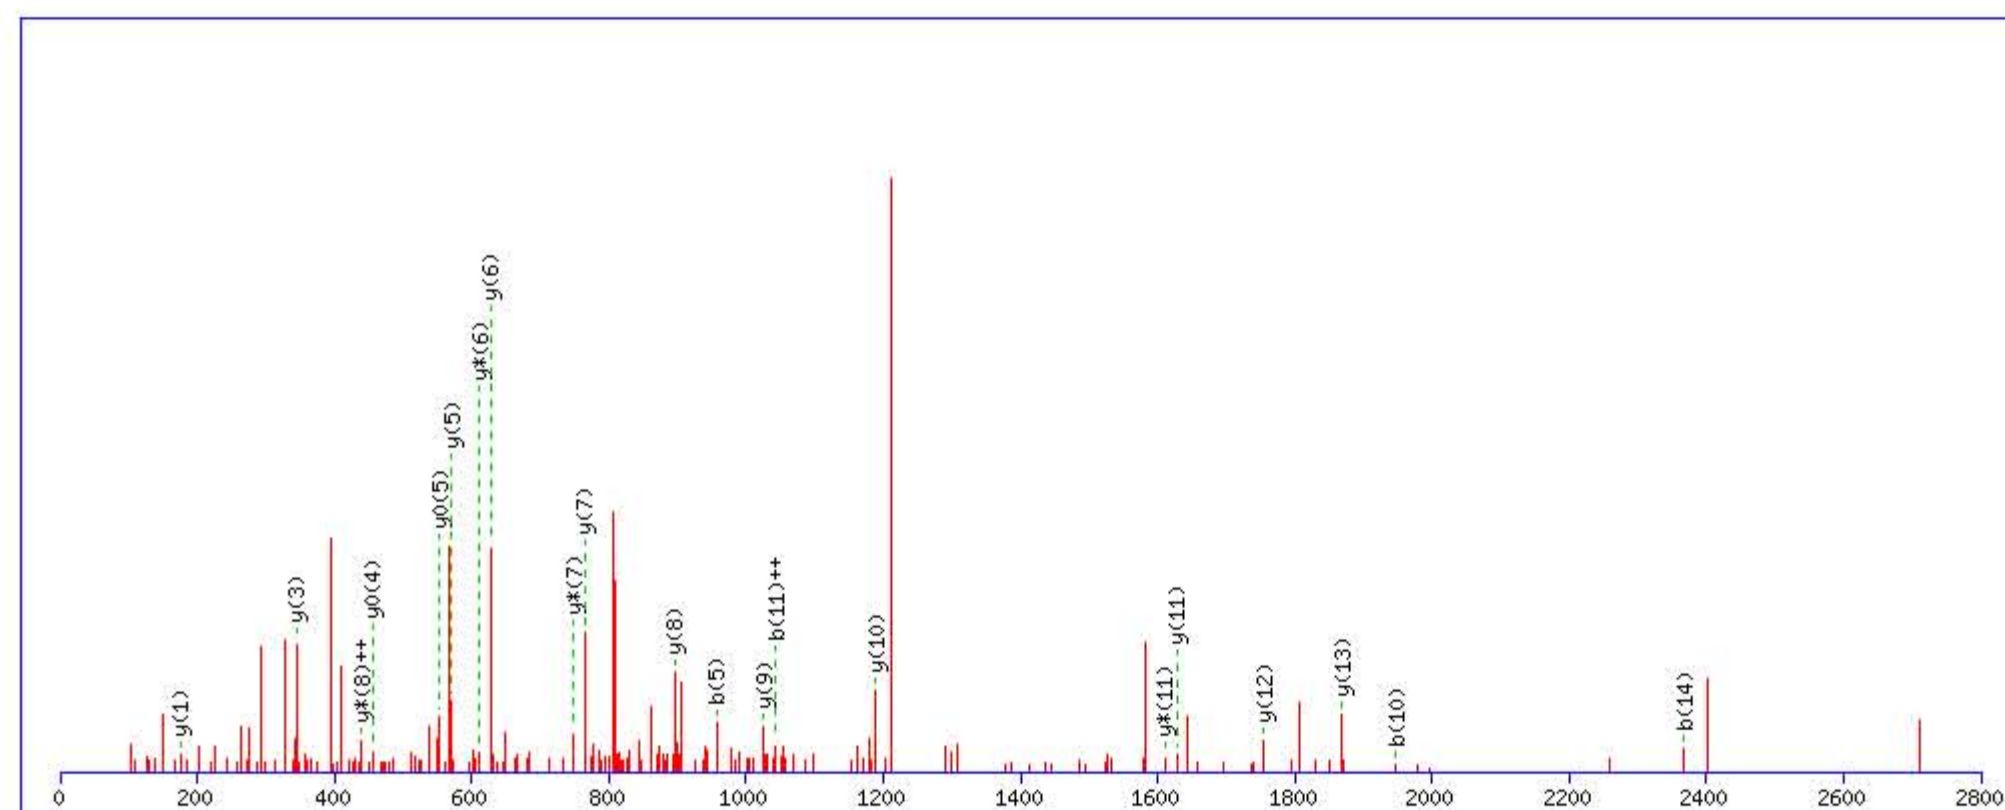

Monoisotopic mass of neutral peptide Mr(calc): 2711.251434

Fixed modifications: Carbamidomethyl (C) (apply to specified residues or termini only)

Variable modifications:

M1 : Oxidation (M), with neutral losses 0.000000 (shown in table), 63.998285

Q4 : Biotin:Thermo-21345 (Q)

Q7 : Biotin:Thermo-21345 (Q)

Ions Score: 32 Expect: 0.0094

Matches : 21/238 fragment ions using 60 most intense peaks [\(help\)](#)

| #  | b                  | b <sup>++</sup>    | b <sup>*</sup> | b <sup>*++</sup> | b <sup>0</sup> | b <sup>0++</sup> | Seq. | y                  | y <sup>++</sup> | y <sup>*</sup>     | y <sup>*++</sup>  | y <sup>0</sup>    | y <sup>0++</sup> | #  |
|----|--------------------|--------------------|----------------|------------------|----------------|------------------|------|--------------------|-----------------|--------------------|-------------------|-------------------|------------------|----|
| 1  | 148.042676         | 74.524976          |                |                  |                |                  | M    |                    |                 |                    |                   |                   |                  | 17 |
| 2  | 308.073325         | 154.540301         |                |                  |                |                  | C    | 2565.223327        | 1283.115302     | 2548.196778        | 1274.602027       | 2547.212762       | 1274.110019      | 16 |
| 3  | 405.126089         | 203.066683         |                |                  |                |                  | P    | 2405.192678        | 1203.099977     | 2388.166129        | 1194.586702       | 2387.182113       | 1194.094694      | 15 |
| 4  | 844.351415         | 422.679346         | 827.324866     | 414.166071       |                |                  | Q    | 2308.139914        | 1154.573595     | 2291.113365        | 1146.060320       | 2290.129349       | 1145.568312      | 14 |
| 5  | <b>957.435479</b>  | 479.221378         | 940.408930     | 470.708103       |                |                  | L    | <b>1868.914588</b> | 934.960932      | 1851.888039        | 926.447658        | 1850.904023       | 925.955650       | 13 |
| 6  | 1085.494057        | 543.250667         | 1068.467508    | 534.737392       |                |                  | Q    | <b>1755.830524</b> | 878.418900      | 1738.803975        | 869.905626        | 1737.819959       | 869.413618       | 12 |
| 7  | 1524.719383        | 762.863330         | 1507.692834    | 754.350055       |                |                  | Q    | <b>1627.771946</b> | 814.389611      | <b>1610.745397</b> | 805.876337        | 1609.761381       | 805.384329       | 11 |
| 8  | 1687.782712        | 844.394994         | 1670.756163    | 835.881720       |                |                  | Y    | <b>1188.546620</b> | 594.776948      | 1171.520071        | 586.263674        | 1170.536055       | 585.771666       | 10 |
| 9  | 1816.825305        | 908.916291         | 1799.798756    | 900.403016       | 1798.814740    | 899.911008       | E    | <b>1025.483291</b> | 513.245284      | 1008.456742        | 504.732009        | 1007.472726       | 504.240001       | 9  |
| 10 | <b>1947.865790</b> | 974.436533         | 1930.839241    | 965.923259       | 1929.855225    | 965.431251       | M    | <b>896.440698</b>  | 448.723987      | 879.414149         | <b>440.210713</b> | 878.430133        | 439.718705       | 8  |
| 11 | 2084.924702        | <b>1042.965989</b> | 2067.898153    | 1034.452715      | 2066.914137    | 1033.960707      | H    | <b>765.400213</b>  | 383.203745      | <b>748.373664</b>  | 374.690470        | 747.389648        | 374.198462       | 7  |
| 12 | 2141.946166        | 1071.476721        | 2124.919617    | 1062.963446      | 2123.935601    | 1062.471439      | G    | <b>628.341301</b>  | 314.674289      | <b>611.314752</b>  | 306.161014        | 610.330736        | 305.669006       | 6  |
| 13 | 2238.998930        | 1120.003103        | 2221.972381    | 1111.489828      | 2220.988365    | 1110.997821      | P    | <b>571.319837</b>  | 286.163557      | 554.293288         | 277.650282        | <b>553.309272</b> | 277.158274       | 5  |
| 14 | <b>2368.041523</b> | 1184.524400        | 2351.014974    | 1176.011125      | 2350.030958    | 1175.519117      | E    | 474.267073         | 237.637175      | 457.240524         | 229.123900        | <b>456.256508</b> | 228.631892       | 4  |
| 15 | 2425.062987        | 1213.035132        | 2408.036438    | 1204.521857      | 2407.052422    | 1204.029849      | G    | <b>345.224480</b>  | 173.115878      | 328.197931         | 164.602603        |                   |                  | 3  |
| 16 | 2538.147051        | 1269.577164        | 2521.120502    | 1261.063889      | 2520.136486    | 1260.571881      | L    | 288.203016         | 144.605146      | 271.176467         | 136.091872        |                   |                  | 2  |
| 17 |                    |                    |                |                  |                |                  | R    | <b>175.118952</b>  | 88.063114       | 158.092403         | 79.549839         |                   |                  | 1  |

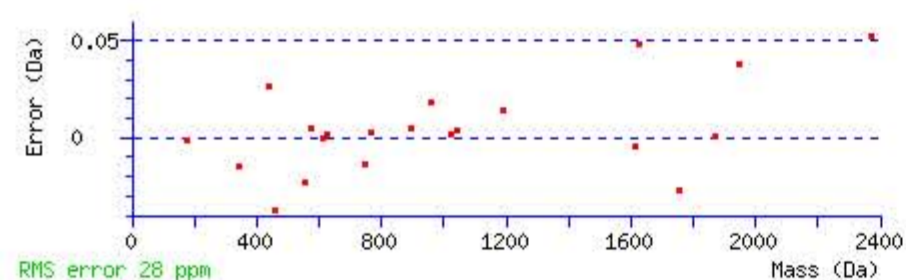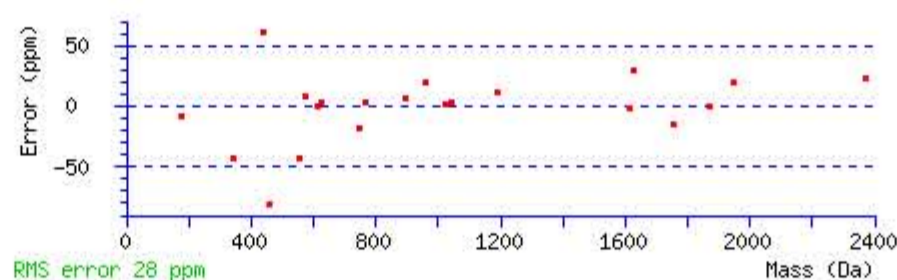

NCBI BLAST search of [MCPQLQQYEMHGPEGLR](#)

(Parameters: blastp, nr protein database, expect=20000, no filter, PAM30)

Other BLAST [web gateways](#)

**All matches to this query**

| Score | Mr(calc):   | Delta    | Sequence                          |
|-------|-------------|----------|-----------------------------------|
| 32.4  | 2711.251434 | 0.013428 | <a href="#">MCPQLQQYEMHGPEGLR</a> |
| 25.0  | 2711.251434 | 0.013428 | <a href="#">MCPQLQQYEMHGPEGLR</a> |
| 16.9  | 2711.251434 | 0.013428 | <a href="#">MCPQLQQYEMHGPEGLR</a> |
| 9.4   | 2711.251434 | 0.013428 | <a href="#">MCPQLQQYEMHGPEGLR</a> |
| 7.4   | 2711.251434 | 0.013428 | <a href="#">MCPQLQQYEMHGPEGLR</a> |
| 6.2   | 2711.251434 | 0.013428 | <a href="#">MCPQLQQYEMHGPEGLR</a> |



# MASCOT Search Results

## Peptide View

MS/MS Fragmentation of **AVDQSVLLMKPDAELSASSVYNLLPEK**  
 Found in **A2MG\_HUMAN**, Alpha-2-macroglobulin OS=Homo sapiens GN=A2M PE=1 SV=3

Match to Query 64174: 3227.705652 from(1076.909160,3+) rtinseconds(2761) index(26239)  
 Title: Locus:1.1.1.962.25 File:"2013-07-02 CLN FXIII 60 min 2nd F 2.wiff"  
 Data file C:\Program Files (x86)\Matrix Science\Mascot Daemon\mgf5 FXIII 60 min 2nd\mascot\_daemon\_merge.mgf

Click mouse within plot area to zoom in by factor of two about that point  
 Or, Plot from  to  Da   
 Label all possible matches  Label matches used for scoring

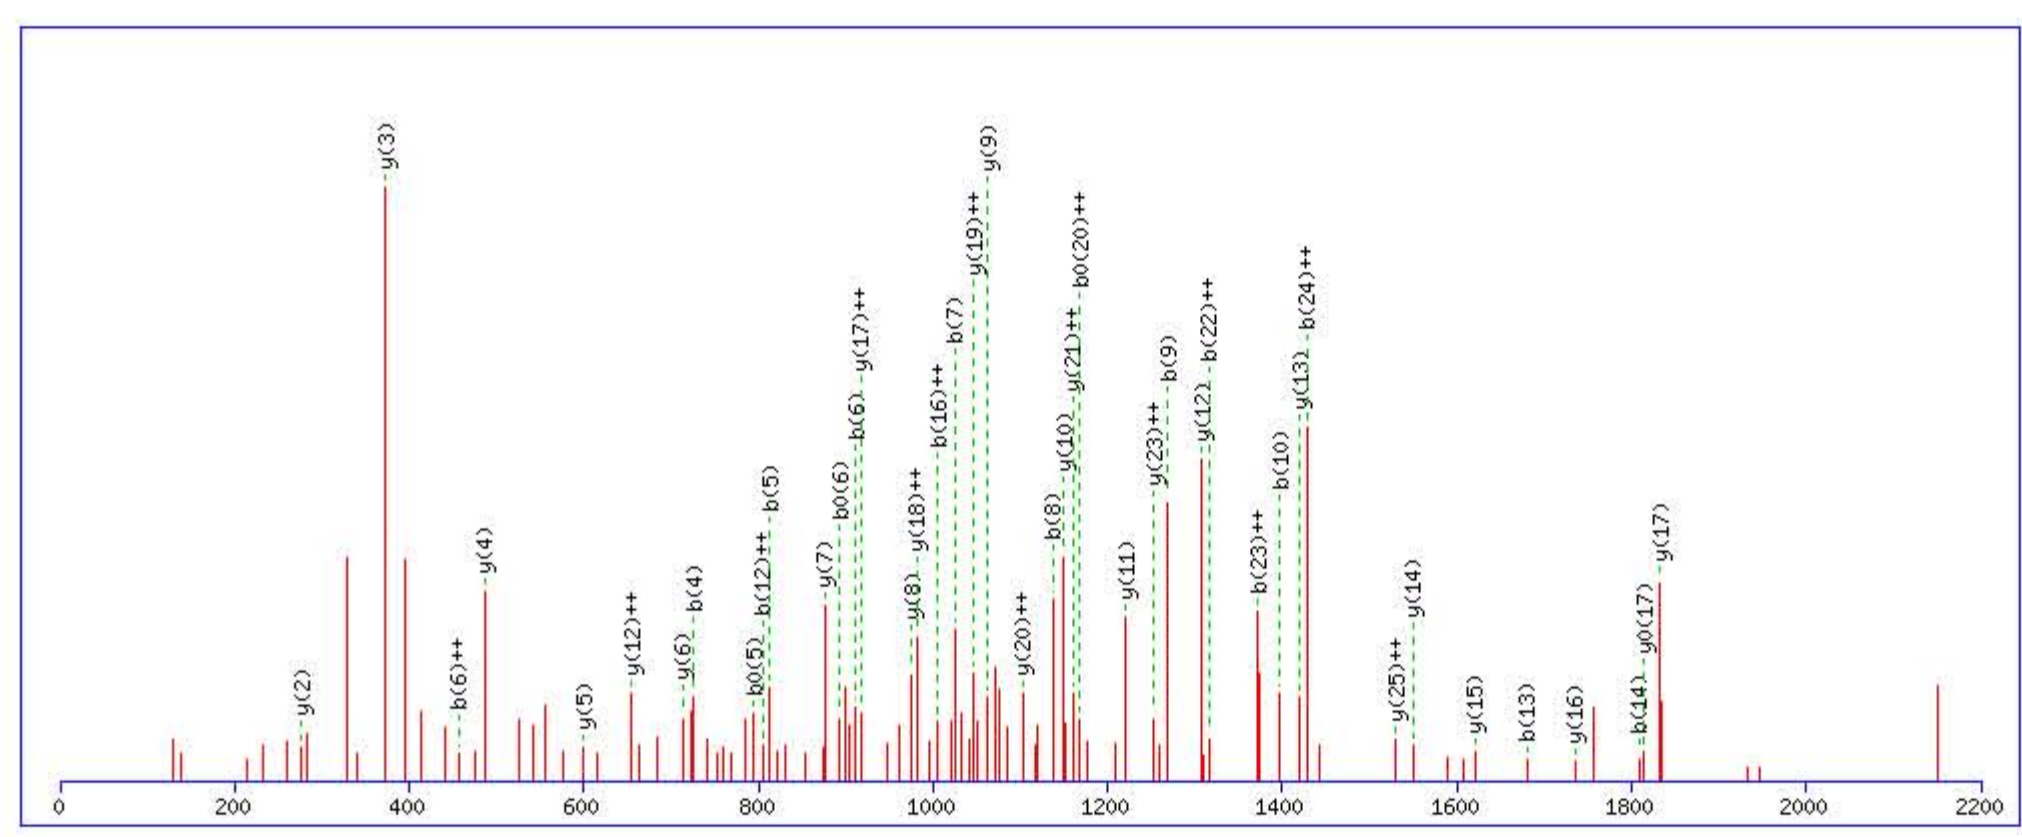

Monoisotopic mass of neutral peptide Mr(calc): 3227.682129  
 Fixed modifications: Carbamidomethyl (C) (apply to specified residues or termini only)  
 Variable modifications:  
 Q4 : Biotin:Thermo-21345 (Q)  
 Ions Score: 91 Expect: 1.4e-008  
 Matches : 43/300 fragment ions using 80 most intense peaks [\(help\)](#)

| #  | b           | b <sup>++</sup> | b <sup>*</sup> | b <sup>+++</sup> | b <sup>0</sup> | b <sup>0++</sup> | Seq. | y           | y <sup>++</sup> | y <sup>*</sup> | y <sup>+++</sup> | y <sup>0</sup> | y <sup>0++</sup> | #  |
|----|-------------|-----------------|----------------|------------------|----------------|------------------|------|-------------|-----------------|----------------|------------------|----------------|------------------|----|
| 1  | 72.044390   | 36.525833       |                |                  |                |                  | A    |             |                 |                |                  |                |                  | 27 |
| 2  | 171.112804  | 86.060040       |                |                  |                |                  | V    | 3157.652336 | 1579.329806     | 3140.625787    | 1570.816531      | 3139.641771    | 1570.324523      | 26 |
| 3  | 286.139747  | 143.573512      |                |                  | 268.129182     | 134.568229       | D    | 3058.583922 | 1529.795599     | 3041.557373    | 1521.282324      | 3040.573357    | 1520.790316      | 25 |
| 4  | 725.365073  | 363.186175      | 708.338524     | 354.672900       | 707.354508     | 354.180892       | Q    | 2943.556979 | 1472.282127     | 2926.530430    | 1463.768853      | 2925.546414    | 1463.276845      | 24 |
| 5  | 812.397101  | 406.702189      | 795.370552     | 398.188914       | 794.386536     | 397.696906       | S    | 2504.331653 | 1252.669464     | 2487.305104    | 1244.156190      | 2486.321088    | 1243.664182      | 23 |
| 6  | 911.465515  | 456.236396      | 894.438966     | 447.723121       | 893.454950     | 447.231113       | V    | 2417.299625 | 1209.153451     | 2400.273076    | 1200.640176      | 2399.289060    | 1200.148168      | 22 |
| 7  | 1024.549579 | 512.778427      | 1007.523030    | 504.265153       | 1006.539014    | 503.773145       | L    | 2318.231211 | 1159.619243     | 2301.204662    | 1151.105969      | 2300.220646    | 1150.613961      | 21 |
| 8  | 1137.633643 | 569.320459      | 1120.607094    | 560.807185       | 1119.623078    | 560.315177       | L    | 2205.147147 | 1103.077212     | 2188.120598    | 1094.563937      | 2187.136582    | 1094.071929      | 20 |
| 9  | 1268.674128 | 634.840702      | 1251.647579    | 626.327428       | 1250.663563    | 625.835419       | M    | 2092.063083 | 1046.535179     | 2075.036534    | 1038.021905      | 2074.052518    | 1037.529897      | 19 |
| 10 | 1396.769091 | 698.888183      | 1379.742542    | 690.374909       | 1378.758526    | 689.882901       | K    | 1961.022598 | 981.014937      | 1943.996049    | 972.501663       | 1943.012033    | 972.009655       | 18 |
| 11 | 1493.821855 | 747.414565      | 1476.795306    | 738.901291       | 1475.811290    | 738.409283       | P    | 1832.927635 | 916.967456      | 1815.901086    | 908.454181       | 1814.917070    | 907.962173       | 17 |
| 12 | 1608.848798 | 804.928037      | 1591.822249    | 796.414763       | 1590.838233    | 795.922755       | D    | 1735.874871 | 868.441074      | 1718.848322    | 859.927799       | 1717.864306    | 859.435791       | 16 |
| 13 | 1679.885912 | 840.446594      | 1662.859363    | 831.933320       | 1661.875347    | 831.441311       | A    | 1620.847928 | 810.927602      | 1603.821379    | 802.414328       | 1602.837363    | 801.922320       | 15 |
| 14 | 1808.928505 | 904.967891      | 1791.901956    | 896.454616       | 1790.917940    | 895.962608       | E    | 1549.810814 | 775.409045      | 1532.784265    | 766.895771       | 1531.800249    | 766.403763       | 14 |
| 15 | 1922.012569 | 961.509923      | 1904.986020    | 952.996648       | 1904.002004    | 952.504640       | L    | 1420.768221 | 710.887749      | 1403.741672    | 702.374474       | 1402.757656    | 701.882466       | 13 |
| 16 | 2009.044597 | 1005.025937     | 1992.018048    | 996.512662       | 1991.034032    | 996.020654       | S    | 1307.684157 | 654.345717      | 1290.657608    | 645.832442       | 1289.673592    | 645.340434       | 12 |
| 17 | 2080.081711 | 1040.544493     | 2063.055162    | 1032.031219      | 2062.071146    | 1031.539211      | A    | 1220.652129 | 610.829703      | 1203.625580    | 602.316428       | 1202.641564    | 601.824420       | 11 |
| 18 | 2167.113739 | 1084.060507     | 2150.087190    | 1075.547233      | 2149.103174    | 1075.055225      | S    | 1149.615015 | 575.311146      | 1132.588466    | 566.797871       | 1131.604450    | 566.305863       | 10 |
| 19 | 2254.145767 | 1127.576521     | 2237.119218    | 1119.063247      | 2236.135202    | 1118.571239      | S    | 1062.582987 | 531.795132      | 1045.556438    | 523.281857       | 1044.572422    | 522.789849       | 9  |
| 20 | 2353.214181 | 1177.110728     | 2336.187632    | 1168.597454      | 2335.203616    | 1168.105446      | V    | 975.550959  | 488.279118      | 958.524410     | 479.765843       | 957.540394     | 479.273835       | 8  |
| 21 | 2516.277510 | 1258.642393     | 2499.250961    | 1250.129118      | 2498.266945    | 1249.637110      | Y    | 876.482545  | 438.744911      | 859.455996     | 430.231636       | 858.471980     | 429.739628       | 7  |
| 22 | 2630.320437 | 1315.663856     | 2613.293888    | 1307.150582      | 2612.309872    | 1306.658574      | N    | 713.419216  | 357.213246      | 696.392667     | 348.699972       | 695.408651     | 348.207964       | 6  |
| 23 | 2743.404501 | 1372.205888     | 2726.377952    | 1363.692614      | 2725.393936    | 1363.200606      | L    | 599.376289  | 300.191783      | 582.349740     | 291.678508       | 581.365724     | 291.186500       | 5  |
| 24 | 2856.488565 | 1428.747921     | 2839.462016    | 1420.234646      | 2838.478000    | 1419.742638      | L    | 486.292225  | 243.649751      | 469.265676     | 235.136476       | 468.281660     | 234.644468       | 4  |
| 25 | 2953.541329 | 1477.274303     | 2936.514780    | 1468.761028      | 2935.530764    | 1468.269020      | P    | 373.208161  | 187.107719      | 356.181612     | 178.594444       | 355.197596     | 178.102436       | 3  |
| 26 | 3082.583922 | 1541.795599     | 3065.557373    | 1533.282325      | 3064.573357    | 1532.790317      | E    | 276.155397  | 138.581337      | 259.128848     | 130.068062       | 258.144832     | 129.576054       | 2  |
| 27 |             |                 |                |                  |                |                  | K    | 147.112804  | 74.060040       | 130.086255     | 65.546765        |                |                  | 1  |

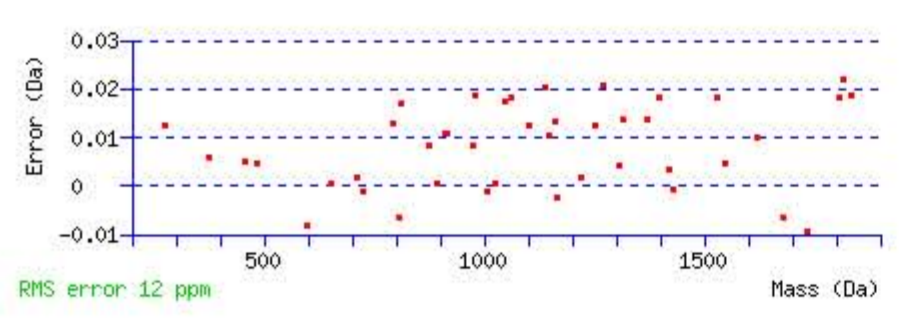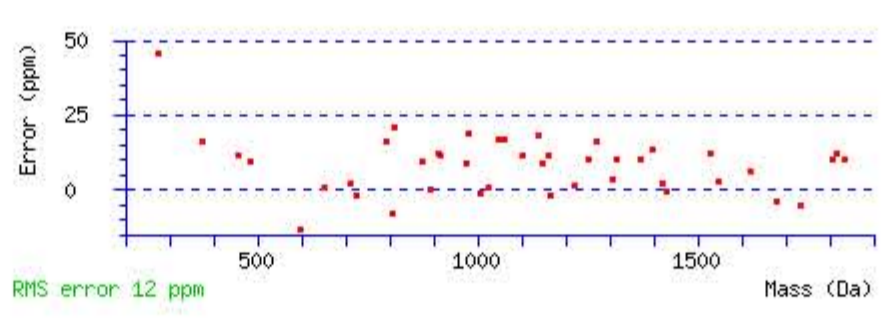

NCBI BLAST search of **AVDQSVLLMKPDAELSASSVYNLLPEK**  
 (Parameters: blastp, nr protein database, expect=20000, no filter, PAM30)  
 Other BLAST [web gateways](#)

### All matches to this query

| Score | Mr(calc):   | Delta    | Sequence                                    |
|-------|-------------|----------|---------------------------------------------|
| 91.4  | 3227.682129 | 0.023523 | <a href="#">AVDQSVLLMKPDAELSASSVYNLLPEK</a> |



**MASCOT** SCIENCE } Mascot Search Results

**Peptide View**

MS/MS Fragmentation of **ENAEQSR**

Found in **ANT3\_HUMAN**, Antithrombin-III OS=Homo sapiens GN=SERPINC1 PE=1 SV=1

Match to Query 21427: 1143.530328 from(572.772440,2+) rtinseconds(1132) index(31086)

Title: Locus:1.1.1.2813.13 File:"2013-07-02 CLN FXIII 60 min 2nd F 3.wiff"

Data file C:\Program Files (x86)\Matrix Science\Mascot Daemon\mgf\5 FXIII 60 min 2nd\mascot\_daemon\_merge.mgf

Click mouse within plot area to zoom in by factor of two about that point

Or, Plot from  to  Da

Label all possible matches  Label matches used for scoring

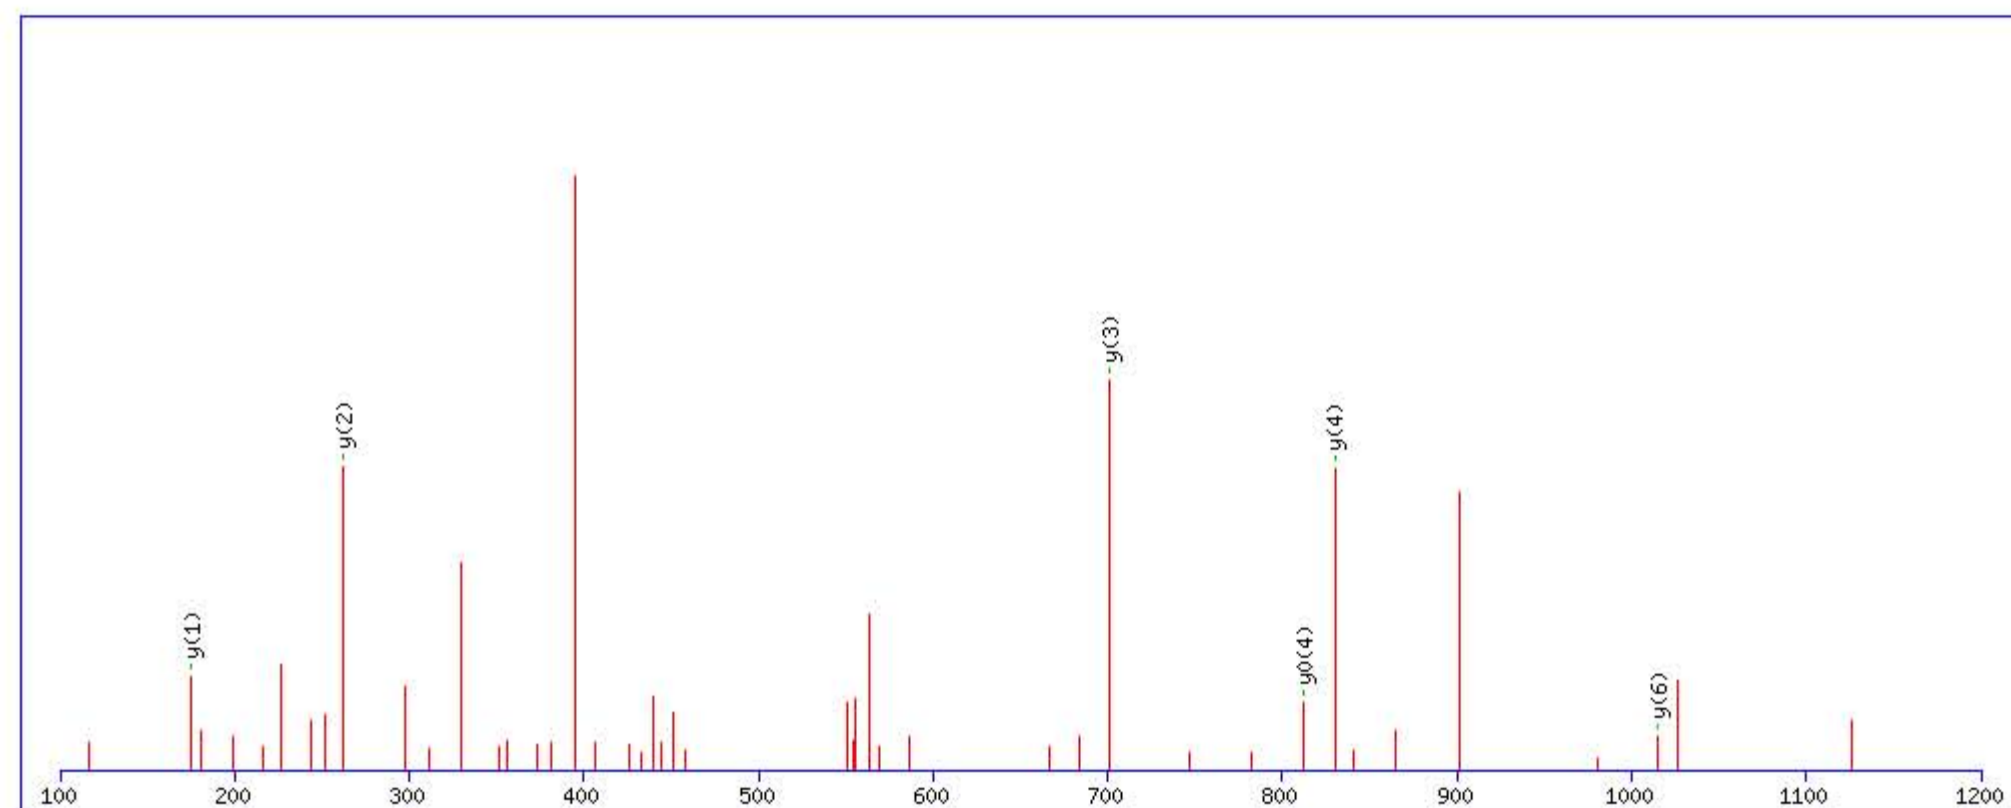

Monoisotopic mass of neutral peptide Mr(calc): 1143.534225

Fixed modifications: Carbamidomethyl (C) (apply to specified residues or termini only)

Variable modifications:

Q5 : Biotin:Thermo-21345 (Q)

Ions Score: 36 Expect: 0.0021

Matches : 6/68 fragment ions using 11 most intense peaks [\(help\)](#)

| # | b          | b <sup>++</sup> | b <sup>*</sup> | b <sup>*++</sup> | b <sup>0</sup> | b <sup>0++</sup> | Seq. | y                  | y <sup>++</sup> | y <sup>*</sup> | y <sup>*++</sup> | y <sup>0</sup>    | y <sup>0++</sup> | # |
|---|------------|-----------------|----------------|------------------|----------------|------------------|------|--------------------|-----------------|----------------|------------------|-------------------|------------------|---|
| 1 | 130.049869 | 65.528572       |                |                  | 112.039304     | 56.523290        | E    |                    |                 |                |                  |                   |                  | 7 |
| 2 | 244.092796 | 122.550036      | 227.066247     | 114.036762       | 226.082231     | 113.544754       | N    | <b>1015.498940</b> | 508.253108      | 998.472391     | 499.739834       | 997.488375        | 499.247826       | 6 |
| 3 | 315.129910 | 158.068593      | 298.103361     | 149.555319       | 297.119345     | 149.063311       | A    | 901.456013         | 451.231645      | 884.429464     | 442.718370       | 883.445448        | 442.226362       | 5 |
| 4 | 444.172503 | 222.589890      | 427.145954     | 214.076615       | 426.161938     | 213.584607       | E    | <b>830.418899</b>  | 415.713088      | 813.392350     | 407.199813       | <b>812.408334</b> | 406.707805       | 4 |
| 5 | 883.397829 | 442.202553      | 866.371280     | 433.689278       | 865.387264     | 433.197270       | Q    | <b>701.376306</b>  | 351.191791      | 684.349757     | 342.678517       | 683.365741        | 342.186509       | 3 |
| 6 | 970.429857 | 485.718567      | 953.403308     | 477.205292       | 952.419292     | 476.713284       | S    | <b>262.150980</b>  | 131.579128      | 245.124431     | 123.065853       | 244.140415        | 122.573845       | 2 |
| 7 |            |                 |                |                  |                |                  | R    | <b>175.118952</b>  | 88.063114       | 158.092403     | 79.549839        |                   |                  | 1 |

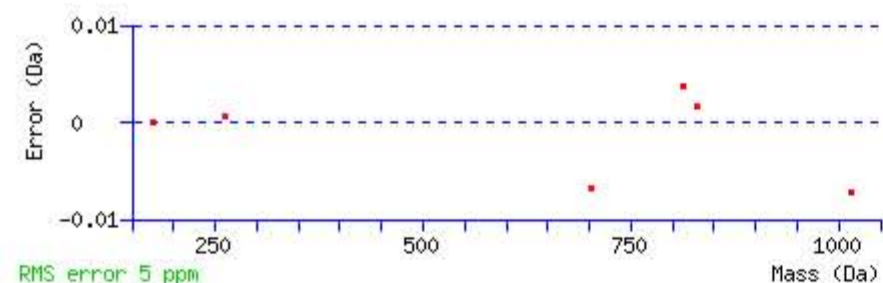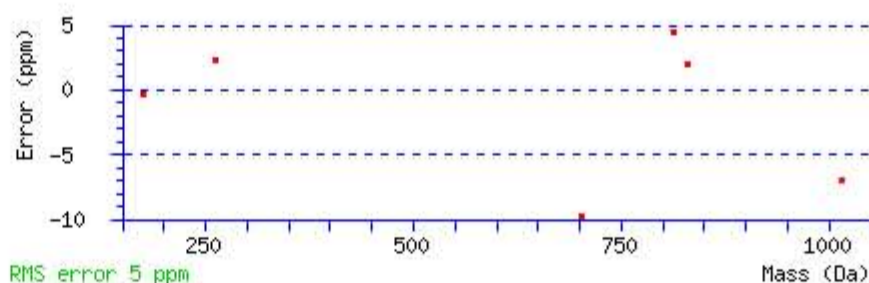

NCBI BLAST search of [ENAEQSR](#)

(Parameters: blastp, nr protein database, expect=20000, no filter, PAM30)

Other BLAST [web gateways](#)

All matches to this query

| Score | Mr(calc):   | Delta     | Sequence                     |
|-------|-------------|-----------|------------------------------|
| 36.4  | 1143.534225 | -0.003897 | <a href="#">ENAEQSR</a>      |
| 10.6  | 1143.526840 | 0.003488  | <a href="#">EGEGASAPRDR</a>  |
| 1.4   | 1143.515625 | 0.014703  | <a href="#">SYSVGASGSSSR</a> |



# MASCOT Search Results

## Peptide View

MS/MS Fragmentation of **KATEDEGSEQK**

Found in **ANT3\_HUMAN**, Antithrombin-III OS=Homo sapiens GN=SERPINC1 PE=1 SV=1

Match to Query 34703: 1531.713552 from(511.578460,3+) rtinseconds(1023) index(16161)

Title: Locus:1.1.1.358.6 File:"2013-07-02 CLN FXIII 60 min 2nd F 2.wiff"

Data file C:\Program Files (x86)\Matrix Science\Mascot Daemon\mgf\5 FXIII 60 min 2nd\mascot\_daemon\_merge.mgf

Click mouse within plot area to zoom in by factor of two about that point

Or, Plot from  to  Da

Label all possible matches  Label matches used for scoring

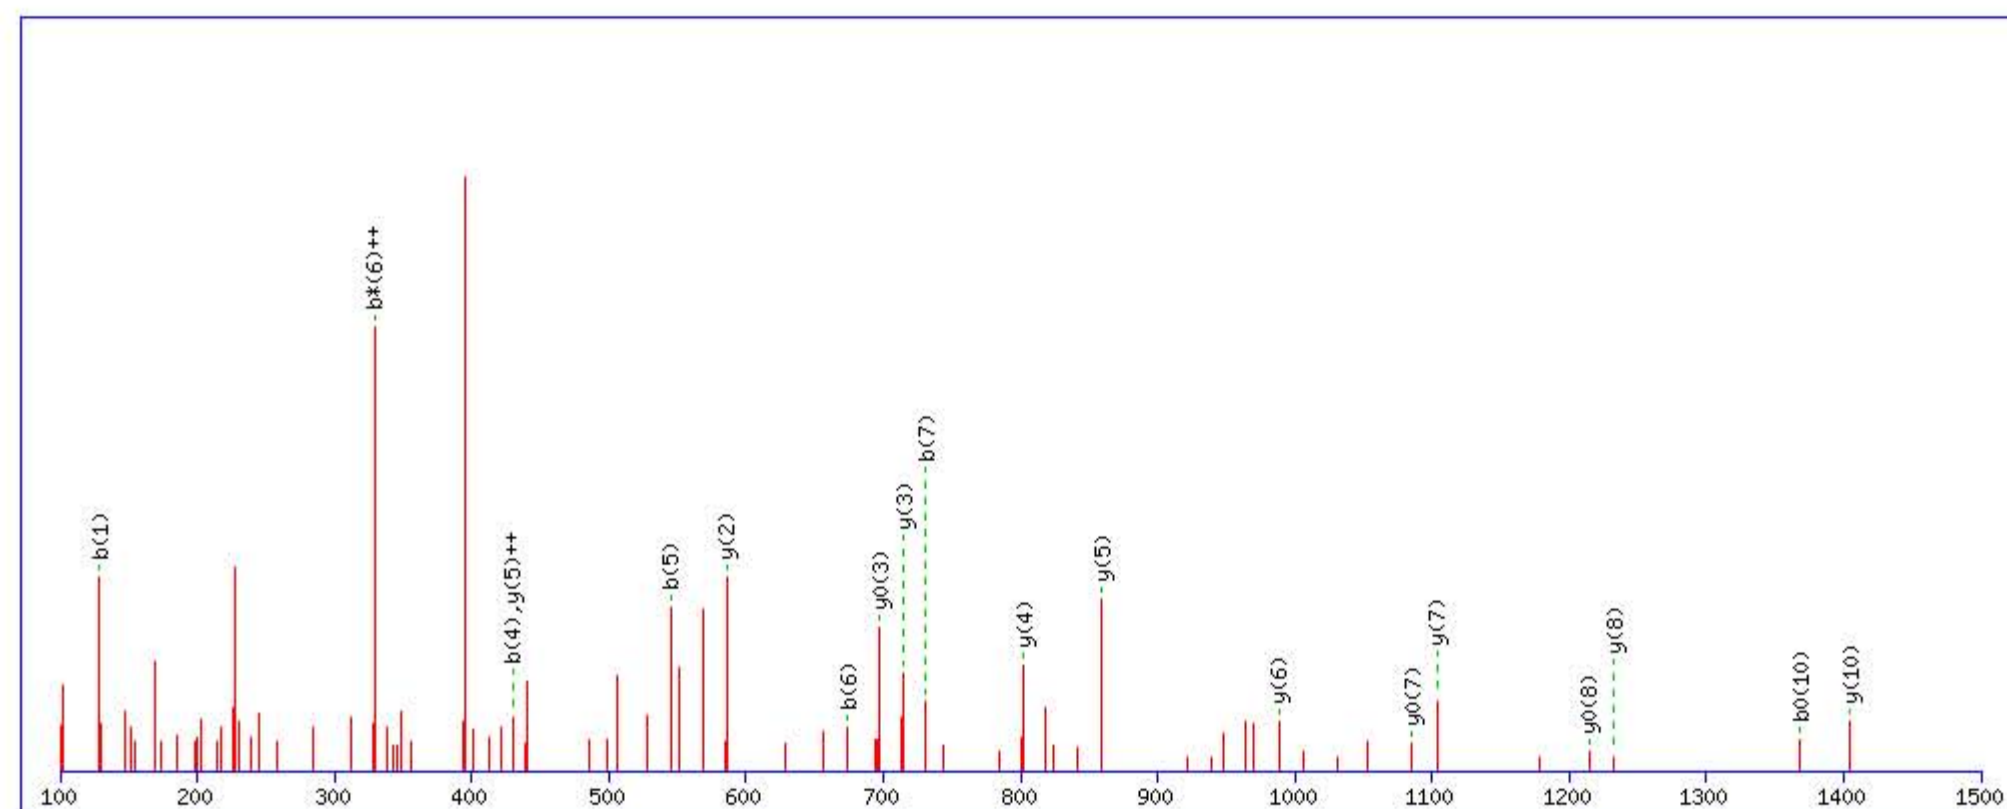

Monoisotopic mass of neutral peptide Mr(calc): 1531.718796

Fixed modifications: Carbamidomethyl (C) (apply to specified residues or termini only)

Variable modifications:

Q10 : Biotin:Thermo-21345 (Q)

Ions Score: 57 Expect: 2.8e-005

Matches : 19/112 fragment ions using 26 most intense peaks [\(help\)](#)

| #  | b                 | b <sup>++</sup> | b <sup>*</sup> | b <sup>*++</sup>  | b <sup>0</sup>     | b <sup>0++</sup> | Seq.     | y                  | y <sup>++</sup>   | y <sup>*</sup> | y <sup>*++</sup> | y <sup>0</sup>     | y <sup>0++</sup> | #         |
|----|-------------------|-----------------|----------------|-------------------|--------------------|------------------|----------|--------------------|-------------------|----------------|------------------|--------------------|------------------|-----------|
| 1  | <b>129.102239</b> | 65.054757       | 112.075690     | 56.541483         |                    |                  | <b>K</b> |                    |                   |                |                  |                    |                  | <b>11</b> |
| 2  | 200.139353        | 100.573315      | 183.112804     | 92.060040         |                    |                  | <b>A</b> | <b>1404.631137</b> | 702.819207        | 1387.604588    | 694.305932       | 1386.620572        | 693.813924       | <b>10</b> |
| 3  | 301.187032        | 151.097154      | 284.160483     | 142.583879        | 283.176467         | 142.091872       | <b>T</b> | 1333.594023        | 667.300650        | 1316.567474    | 658.787375       | 1315.583458        | 658.295367       | <b>9</b>  |
| 4  | <b>430.229625</b> | 215.618450      | 413.203076     | 207.105176        | 412.219060         | 206.613168       | <b>E</b> | <b>1232.546344</b> | 616.776810        | 1215.519795    | 608.263536       | <b>1214.535779</b> | 607.771528       | <b>8</b>  |
| 5  | <b>545.256568</b> | 273.131922      | 528.230019     | 264.618648        | 527.246003         | 264.126640       | <b>D</b> | <b>1103.503751</b> | 552.255514        | 1086.477202    | 543.742239       | <b>1085.493186</b> | 543.250231       | <b>7</b>  |
| 6  | <b>674.299161</b> | 337.653219      | 657.272612     | <b>329.139944</b> | 656.288596         | 328.647936       | <b>E</b> | <b>988.476808</b>  | 494.742042        | 971.450259     | 486.228768       | 970.466243         | 485.736760       | <b>6</b>  |
| 7  | <b>731.320625</b> | 366.163951      | 714.294076     | 357.650676        | 713.310060         | 357.158668       | <b>G</b> | <b>859.434215</b>  | <b>430.220746</b> | 842.407666     | 421.707471       | 841.423650         | 421.215463       | <b>5</b>  |
| 8  | 818.352653        | 409.679965      | 801.326104     | 401.166690        | 800.342088         | 400.674682       | <b>S</b> | <b>802.412751</b>  | 401.710014        | 785.386202     | 393.196739       | 784.402186         | 392.704731       | <b>4</b>  |
| 9  | 947.395246        | 474.201261      | 930.368697     | 465.687987        | 929.384681         | 465.195979       | <b>E</b> | <b>715.380723</b>  | 358.194000        | 698.354174     | 349.680725       | <b>697.370158</b>  | 349.188717       | <b>3</b>  |
| 10 | 1386.620572       | 693.813924      | 1369.594023    | 685.300650        | <b>1368.610007</b> | 684.808642       | <b>Q</b> | <b>586.338130</b>  | 293.672703        | 569.311581     | 285.159429       |                    |                  | <b>2</b>  |
| 11 |                   |                 |                |                   |                    |                  | <b>K</b> | 147.112804         | 74.060040         | 130.086255     | 65.546765        |                    |                  | <b>1</b>  |

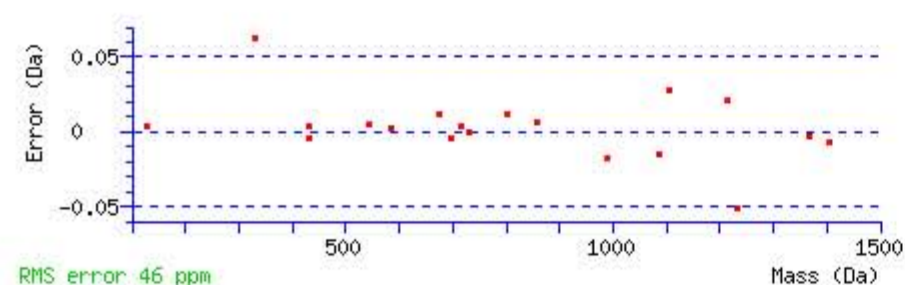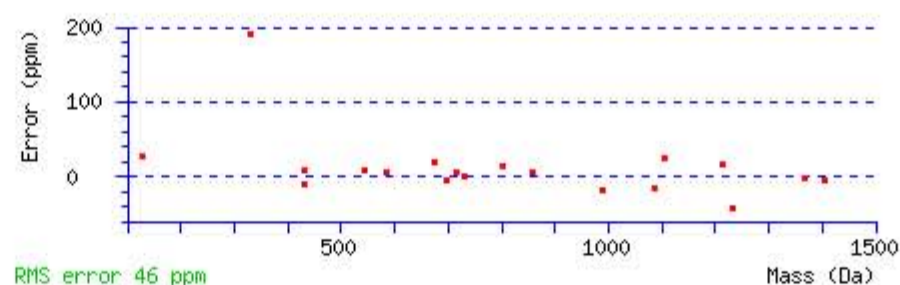

NCBI BLAST search of **KATEDEGSEQK**

(Parameters: blastp, nr protein database, expect=20000, no filter, PAM30)

Other BLAST [web gateways](#)

All matches to this query

| Score | Mr(calc):   | Delta     | Sequence                       |
|-------|-------------|-----------|--------------------------------|
| 57.2  | 1531.718796 | -0.005244 | <a href="#">KATEDEGSEQK</a>    |
| 13.1  | 1531.716309 | -0.002757 | <a href="#">QVDSMWAEQK</a>     |
| 7.2   | 1531.734055 | -0.020503 | <a href="#">VNPQEESYQK</a>     |
| 7.0   | 1531.715454 | -0.001902 | <a href="#">EWNGVVSESDSPVK</a> |
| 2.9   | 1531.701523 | 0.012029  | <a href="#">EGFDPQGASQLNNR</a> |
| 2.3   | 1531.730072 | -0.016520 | <a href="#">DGQQSGTVSSQK</a>   |
| 1.9   | 1531.722626 | -0.009074 | <a href="#">EAQQATETQRNEK</a>  |



# MASCOT SEARCH RESULTS

## Peptide View

MS/MS Fragmentation of **VAEGTQVLELPPFK**

Found in **ANT3\_HUMAN**, Antithrombin-III OS=Homo sapiens GN=SERPINC1 PE=1 SV=1

Match to Query 41310: 1740.957428 from(871.485990,2+) rtinseconds(2545) index(24773)

Title: Locus:1.1.1.888.9 File:"2013-07-02 CLN FXIII 60 min 2nd F 2.wiff"

Data file C:\Program Files (x86)\Matrix Science\Mascot Daemon\mgf5 FXIII 60 min 2nd\mascot\_daemon\_merge.mgf

Click mouse within plot area to zoom in by factor of two about that point

Or, Plot from  to  Da

Label all possible matches  Label matches used for scoring

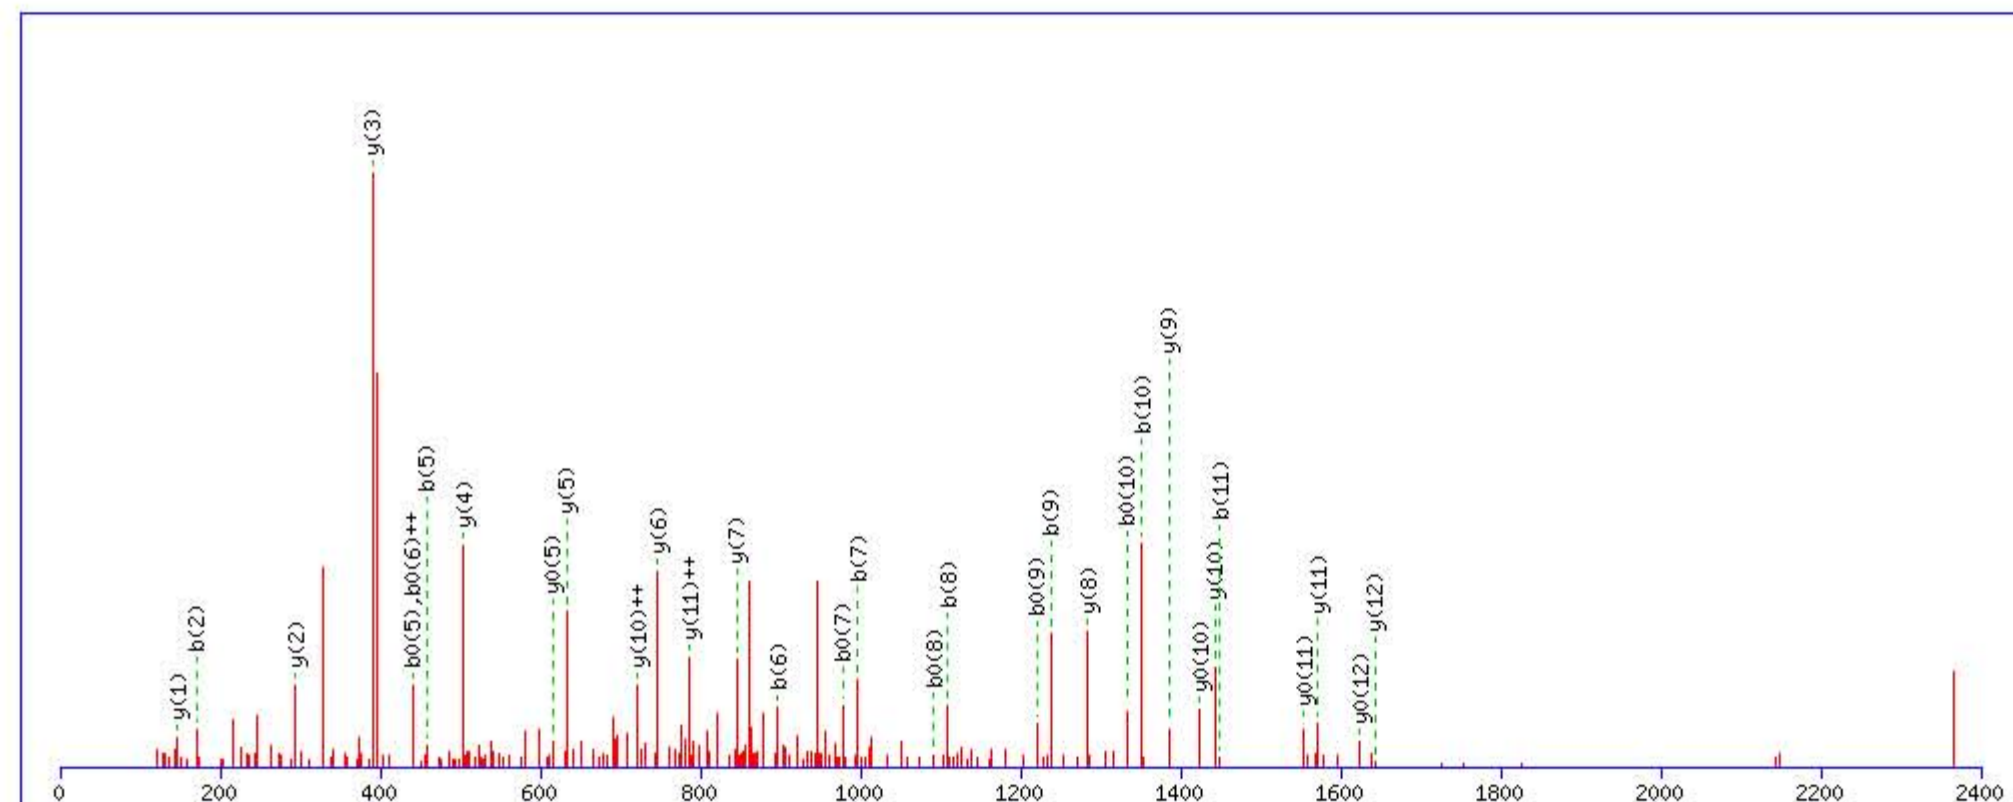

Monoisotopic mass of neutral peptide Mr(calc): 1740.948425

Fixed modifications: Carbamidomethyl (C) (apply to specified residues or termini only)

Variable modifications:

Q6 : Biotin:Thermo-21345 (Q)

Ions Score: 90 Expect: 1.7e-008

Matches : 32/122 fragment ions using 49 most intense peaks [\(help\)](#)

| #  | b                  | b <sup>++</sup> | b <sup>*</sup> | b <sup>*++</sup> | b <sup>0</sup>     | b <sup>0++</sup>  | Seq. | y                  | y <sup>++</sup>   | y <sup>*</sup> | y <sup>*++</sup> | y <sup>0</sup>     | y <sup>0++</sup> | #  |
|----|--------------------|-----------------|----------------|------------------|--------------------|-------------------|------|--------------------|-------------------|----------------|------------------|--------------------|------------------|----|
| 1  | 100.075690         | 50.541483       |                |                  |                    |                   | V    |                    |                   |                |                  |                    |                  | 13 |
| 2  | <b>171.112804</b>  | 86.060040       |                |                  |                    |                   | A    | <b>1642.887293</b> | 821.947284        | 1625.860744    | 813.434010       | <b>1624.876728</b> | 812.942002       | 12 |
| 3  | 300.155397         | 150.581336      |                |                  | 282.144832         | 141.576054        | E    | <b>1571.850179</b> | <b>786.428727</b> | 1554.823630    | 777.915453       | <b>1553.839614</b> | 777.423445       | 11 |
| 4  | 357.176861         | 179.092068      |                |                  | 339.166296         | 170.086786        | G    | <b>1442.807586</b> | <b>721.907431</b> | 1425.781037    | 713.394157       | <b>1424.797021</b> | 712.902148       | 10 |
| 5  | <b>458.224540</b>  | 229.615908      |                |                  | <b>440.213975</b>  | 220.610626        | T    | <b>1385.786122</b> | 693.396699        | 1368.759573    | 684.883424       | 1367.775557        | 684.391416       | 9  |
| 6  | <b>897.449866</b>  | 449.228571      | 880.423317     | 440.715297       | 879.439301         | <b>440.223289</b> | Q    | <b>1284.738443</b> | 642.872860        | 1267.711894    | 634.359585       | 1266.727878        | 633.867577       | 8  |
| 7  | <b>996.518280</b>  | 498.762778      | 979.491731     | 490.249504       | <b>978.507715</b>  | 489.757496        | V    | <b>845.513117</b>  | 423.260196        | 828.486568     | 414.746922       | 827.502552         | 414.254914       | 7  |
| 8  | <b>1109.602344</b> | 555.304810      | 1092.575795    | 546.791536       | <b>1091.591779</b> | 546.299527        | L    | <b>746.444703</b>  | 373.725989        | 729.418154     | 365.212715       | 728.434138         | 364.720707       | 6  |
| 9  | <b>1238.644937</b> | 619.826106      | 1221.618388    | 611.312832       | <b>1220.634372</b> | 610.820824        | E    | <b>633.360639</b>  | 317.183958        | 616.334090     | 308.670683       | <b>615.350074</b>  | 308.178675       | 5  |
| 10 | <b>1351.729001</b> | 676.368138      | 1334.702452    | 667.854864       | <b>1333.718436</b> | 667.362856        | L    | <b>504.318046</b>  | 252.662661        | 487.291497     | 244.149386       |                    |                  | 4  |
| 11 | <b>1448.781765</b> | 724.894520      | 1431.755216    | 716.381246       | 1430.771200        | 715.889238        | P    | <b>391.233982</b>  | 196.120629        | 374.207433     | 187.607355       |                    |                  | 3  |
| 12 | 1595.850179        | 798.428727      | 1578.823630    | 789.915453       | 1577.839614        | 789.423445        | F    | <b>294.181218</b>  | 147.594247        | 277.154669     | 139.080973       |                    |                  | 2  |
| 13 |                    |                 |                |                  |                    |                   | K    | <b>147.112804</b>  | 74.060040         | 130.086255     | 65.546765        |                    |                  | 1  |

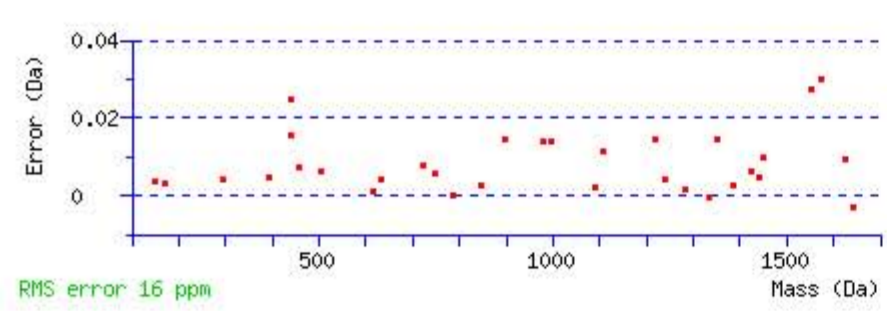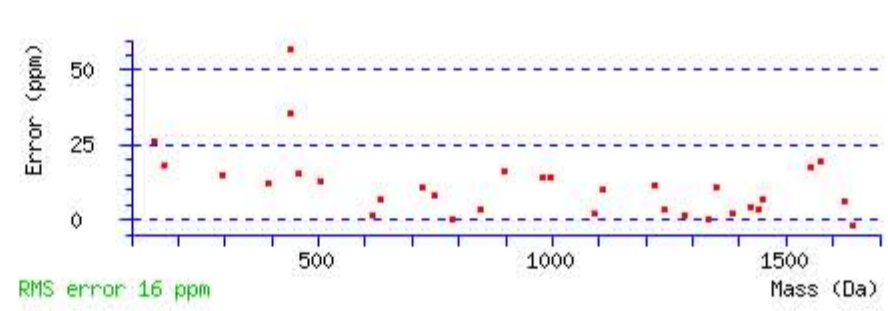

NCBI BLAST search of **VAEGTQVLELPPFK**

(Parameters: blastp, nr protein database, expect=20000, no filter, PAM30)

Other BLAST [web gateways](#)

All matches to this query

| Score | Mr(calc):   | Delta     | Sequence                       |
|-------|-------------|-----------|--------------------------------|
| 89.9  | 1740.948425 | 0.009003  | <a href="#">VAEGTQVLELPPFK</a> |
| 6.9   | 1740.962982 | -0.005554 | <a href="#">ISRQLAEEILMK</a>   |



# MASCOT SEARCH RESULTS

## Peptide View

MS/MS Fragmentation of **AELQEGAR**

Found in **APOA1\_HUMAN**, Apolipoprotein A-I OS=Homo sapiens GN=APOA1 PE=1 SV=1

Match to Query 22870: 1183.598148 from(592.806350,2+) rtinseconds(1454) index(32954)

Title: Locus:1.1.1.2925.20 File:"2013-07-02 CLN FXIII 60 min 2nd F 3.wiff"

Data file C:\Program Files (x86)\Matrix Science\Mascot Daemon\mgf5 FXIII 60 min 2nd\mascot\_daemon\_merge.mgf

Click mouse within plot area to zoom in by factor of two about that point

Or, Plot from  to  Da

Label all possible matches  Label matches used for scoring

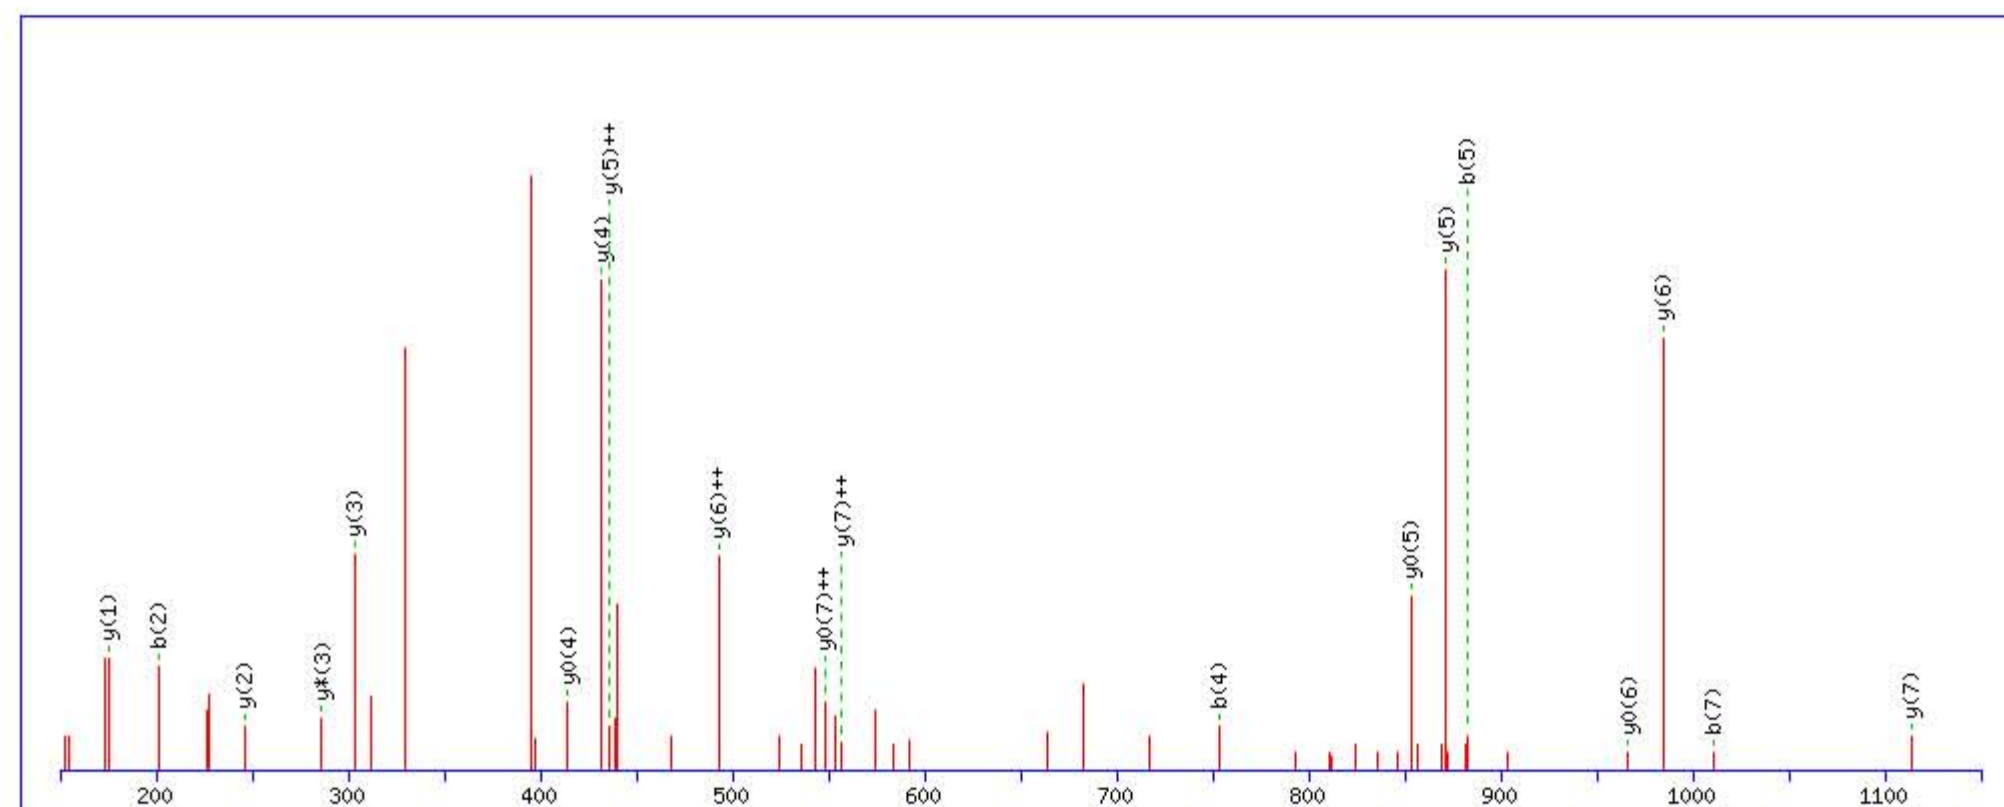

Monoisotopic mass of neutral peptide Mr(calc): 1183.601913

Fixed modifications: Carbamidomethyl (C) (apply to specified residues or termini only)

Variable modifications:

Q4 : Biotin:Thermo-21345 (Q)

Ions Score: 35 Expect: 0.0054

Matches : 19/70 fragment ions using 46 most intense peaks [\(help\)](#)

| # | b                  | b <sup>++</sup> | b <sup>*</sup> | b <sup>*++</sup> | b <sup>0</sup> | b <sup>0++</sup> | Seq. | y                  | y <sup>++</sup>   | y <sup>*</sup>    | y <sup>*++</sup> | y <sup>0</sup>    | y <sup>0++</sup>  | # |
|---|--------------------|-----------------|----------------|------------------|----------------|------------------|------|--------------------|-------------------|-------------------|------------------|-------------------|-------------------|---|
| 1 | 72.044390          | 36.525833       |                |                  |                |                  | A    |                    |                   |                   |                  |                   |                   | 8 |
| 2 | <b>201.086983</b>  | 101.047130      |                |                  | 183.076418     | 92.041847        | E    | <b>1113.572106</b> | <b>557.289691</b> | 1096.545557       | 548.776417       | 1095.561541       | <b>548.284409</b> | 7 |
| 3 | 314.171047         | 157.589161      |                |                  | 296.160482     | 148.583879       | L    | <b>984.529513</b>  | <b>492.768395</b> | 967.502964        | 484.255120       | <b>966.518948</b> | 483.763112        | 6 |
| 4 | <b>753.396373</b>  | 377.201825      | 736.369824     | 368.688550       | 735.385808     | 368.196542       | Q    | <b>871.445449</b>  | <b>436.226363</b> | 854.418900        | 427.713088       | <b>853.434884</b> | 427.221080        | 5 |
| 5 | <b>882.438966</b>  | 441.723121      | 865.412417     | 433.209847       | 864.428401     | 432.717839       | E    | <b>432.220123</b>  | 216.613699        | 415.193574        | 208.100425       | <b>414.209558</b> | 207.608417        | 4 |
| 6 | 939.460430         | 470.233853      | 922.433881     | 461.720579       | 921.449865     | 461.228571       | G    | <b>303.177530</b>  | 152.092403        | <b>286.150981</b> | 143.579128       |                   |                   | 3 |
| 7 | <b>1010.497544</b> | 505.752410      | 993.470995     | 497.239136       | 992.486979     | 496.747128       | A    | <b>246.156066</b>  | 123.581671        | 229.129517        | 115.068396       |                   |                   | 2 |
| 8 |                    |                 |                |                  |                |                  | R    | <b>175.118952</b>  | 88.063114         | 158.092403        | 79.549839        |                   |                   | 1 |

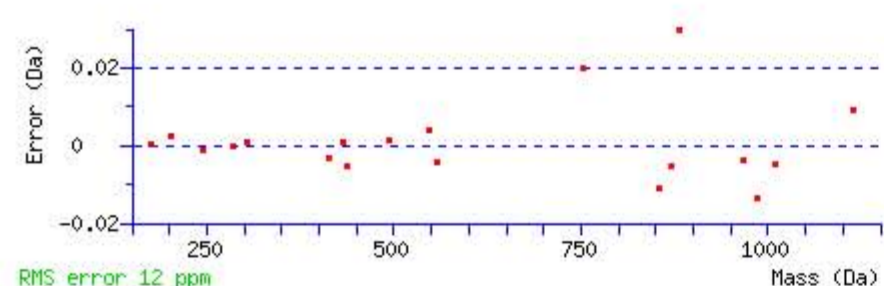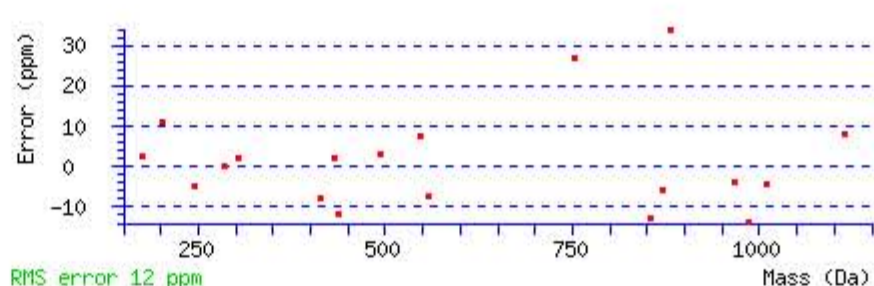

NCBI BLAST search of **AELQEGAR**

(Parameters: blastp, nr protein database, expect=20000, no filter, PAM30)

Other BLAST [web gateways](#)

All matches to this query

| Score | Mr(calc):   | Delta     | Sequence                     |
|-------|-------------|-----------|------------------------------|
| 35.0  | 1183.601913 | -0.003765 | <a href="#">AELQEGAR</a>     |
| 11.9  | 1183.601913 | -0.003765 | <a href="#">EALEQQR</a>      |
| 10.6  | 1183.601913 | -0.003765 | <a href="#">QLAEQER</a>      |
| 10.0  | 1183.601913 | -0.003765 | <a href="#">LQEAQER</a>      |
| 9.5   | 1183.601913 | -0.003765 | <a href="#">EALEQQR</a>      |
| 9.4   | 1183.613815 | -0.015667 | <a href="#">FHFEALPPAR</a>   |
| 7.8   | 1183.601913 | -0.003765 | <a href="#">ELQAEAGR</a>     |
| 7.1   | 1183.587997 | 0.010151  | <a href="#">EAKLDHCRR</a>    |
| 5.6   | 1183.609802 | -0.011654 | <a href="#">ATPHFSGLAAGR</a> |
| 3.7   | 1183.601913 | -0.003765 | <a href="#">LEQEAGAR</a>     |



# MASCOT Search Results

## Peptide View

MS/MS Fragmentation of **QGLLPVLESFK**

Found in **APOA1\_HUMAN**, Apolipoprotein A-I OS=Homo sapiens GN=APOA1 PE=1 SV=1

Match to Query 34898: 1540.870848 from(771.442700,2+) rtinseconds(2823) index(73793)

Title: Locus:1.1.1.1919.8 File:"2013-07-02 CLN FXIII 60 min 2nd FT.wiff"

Data file C:\Program Files (x86)\Matrix Science\Mascot Daemon\mgf5 FXIII 60 min 2nd\mascot\_daemon\_merge.mgf

Click mouse within plot area to zoom in by factor of two about that point

Or, Plot from  to  Da

Label all possible matches  Label matches used for scoring

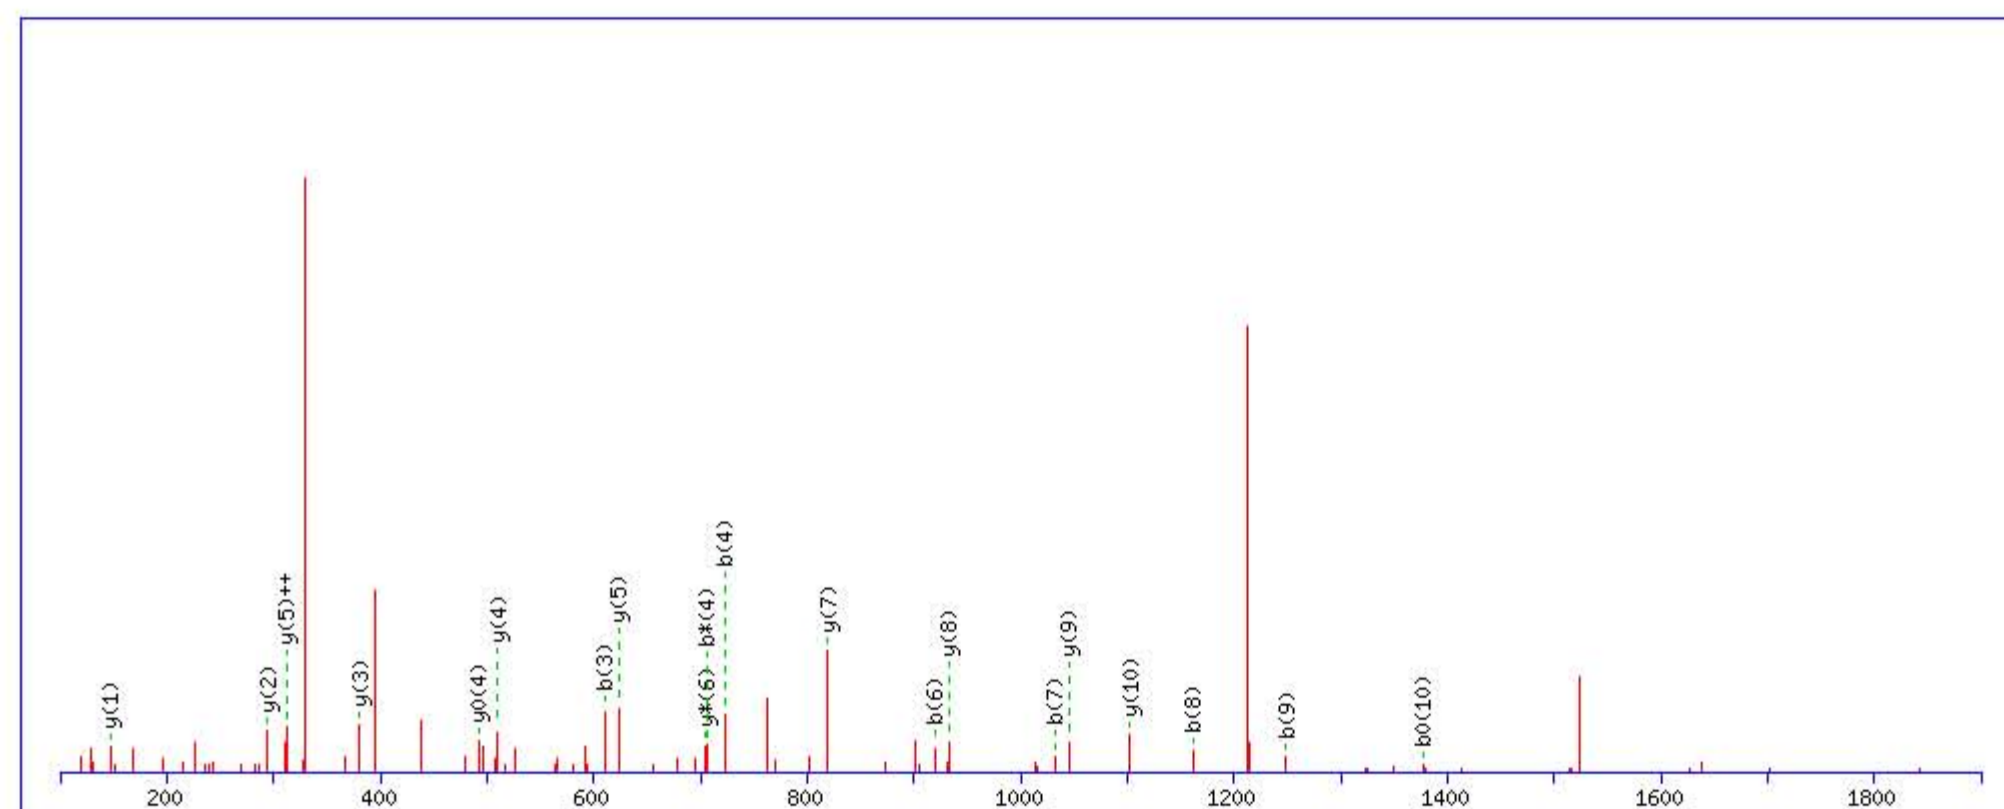

Monoisotopic mass of neutral peptide Mr(calc): 1540.868713

Fixed modifications: Carbamidomethyl (C) (apply to specified residues or termini only)

Variable modifications:

Q1 : Biotin:Thermo-21345 (Q)

Ions Score: 51 Expect: 3.1e-005

Matches : 20/102 fragment ions using 41 most intense peaks [\(help\)](#)

| #  | b           | b <sup>++</sup> | b <sup>*</sup> | b <sup>*++</sup> | b <sup>0</sup> | b <sup>0++</sup> | Seq. | y           | y <sup>++</sup> | y <sup>*</sup> | y <sup>*++</sup> | y <sup>0</sup> | y <sup>0++</sup> | #  |
|----|-------------|-----------------|----------------|------------------|----------------|------------------|------|-------------|-----------------|----------------|------------------|----------------|------------------|----|
| 1  | 440.232602  | 220.619939      | 423.206053     | 212.106664       |                |                  | Q    |             |                 |                |                  |                |                  | 11 |
| 2  | 497.254066  | 249.130671      | 480.227517     | 240.617396       |                |                  | G    | 1102.650673 | 551.828975      | 1085.624124    | 543.315700       | 1084.640108    | 542.823692       | 10 |
| 3  | 610.338130  | 305.672703      | 593.311581     | 297.159428       |                |                  | L    | 1045.629209 | 523.318243      | 1028.602660    | 514.804968       | 1027.618644    | 514.312960       | 9  |
| 4  | 723.422194  | 362.214735      | 706.395645     | 353.701461       |                |                  | L    | 932.545145  | 466.776211      | 915.518596     | 458.262936       | 914.534580     | 457.770928       | 8  |
| 5  | 820.474958  | 410.741117      | 803.448409     | 402.227843       |                |                  | P    | 819.461081  | 410.234179      | 802.434532     | 401.720904       | 801.450516     | 401.228896       | 7  |
| 6  | 919.543372  | 460.275324      | 902.516823     | 451.762049       |                |                  | V    | 722.408317  | 361.707797      | 705.381768     | 353.194522       | 704.397752     | 352.702514       | 6  |
| 7  | 1032.627436 | 516.817356      | 1015.600887    | 508.304082       |                |                  | L    | 623.339903  | 312.173590      | 606.313354     | 303.660315       | 605.329338     | 303.168307       | 5  |
| 8  | 1161.670029 | 581.338653      | 1144.643480    | 572.825378       | 1143.659464    | 572.333370       | E    | 510.255839  | 255.631558      | 493.229290     | 247.118283       | 492.245274     | 246.626275       | 4  |
| 9  | 1248.702057 | 624.854667      | 1231.675508    | 616.341392       | 1230.691492    | 615.849384       | S    | 381.213246  | 191.110261      | 364.186697     | 182.596987       | 363.202681     | 182.104979       | 3  |
| 10 | 1395.770471 | 698.388874      | 1378.743922    | 689.875599       | 1377.759906    | 689.383591       | F    | 294.181218  | 147.594247      | 277.154669     | 139.080973       |                |                  | 2  |
| 11 |             |                 |                |                  |                |                  | K    | 147.112804  | 74.060040       | 130.086255     | 65.546765        |                |                  | 1  |

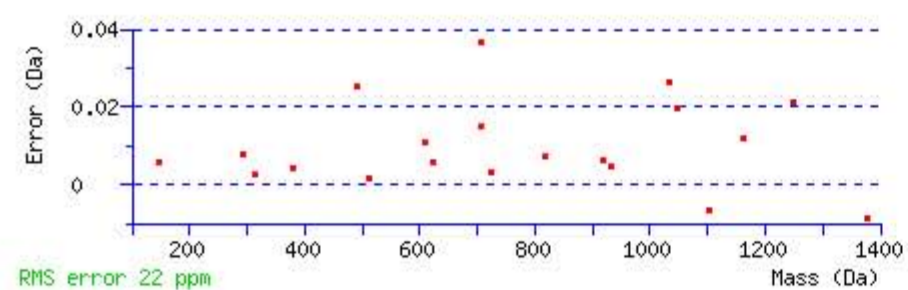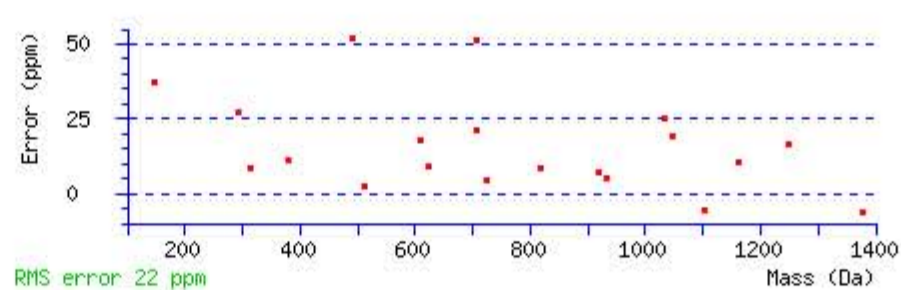

NCBI BLAST search of **QGLLPVLESFK**

(Parameters: blastp, nr protein database, expect=20000, no filter, PAM30)

Other BLAST [web gateways](#)

All matches to this query

| Score | Mr(calc):   | Delta     | Sequence                       |
|-------|-------------|-----------|--------------------------------|
| 50.8  | 1540.868713 | 0.002135  | <a href="#">QGLLPVLESFK</a>    |
| 2.6   | 1540.872559 | -0.001711 | <a href="#">GALHKTVQNLVFSK</a> |
| 1.2   | 1540.887146 | -0.016298 | <a href="#">KTVRVGLNAPSMLR</a> |
| 0.8   | 1540.864700 | 0.006148  | <a href="#">KVTVGKDDIQK</a>    |
| 0.6   | 1540.893677 | -0.022829 | <a href="#">LKSVDVGLQGLREK</a> |
| 0.6   | 1540.858139 | 0.012709  | <a href="#">LTNLRQLQNMK</a>    |

Mascot: <http://www.matrixscience.com/>



# MASCOT Search Results

## Peptide View

MS/MS Fragmentation of **VQPYLDDDFQK**

Found in **APOA1\_HUMAN**, Apolipoprotein A-I OS=Homo sapiens GN=APOA1 PE=1 SV=1

Match to Query 35478: 1562.791308 from(782.402930,2+) rtinseconds(2184) index(37540)

Title: Locus:1.1.1.3180.7 File:"2013-07-02 CLN FXIII 60 min 2nd F 3.wiff"

Data file C:\Program Files (x86)\Matrix Science\Mascot Daemon\mgf\5 FXIII 60 min 2nd\mascot\_daemon\_merge.mgf

Click mouse within plot area to zoom in by factor of two about that point

Or, Plot from  to  Da

Label all possible matches  Label matches used for scoring

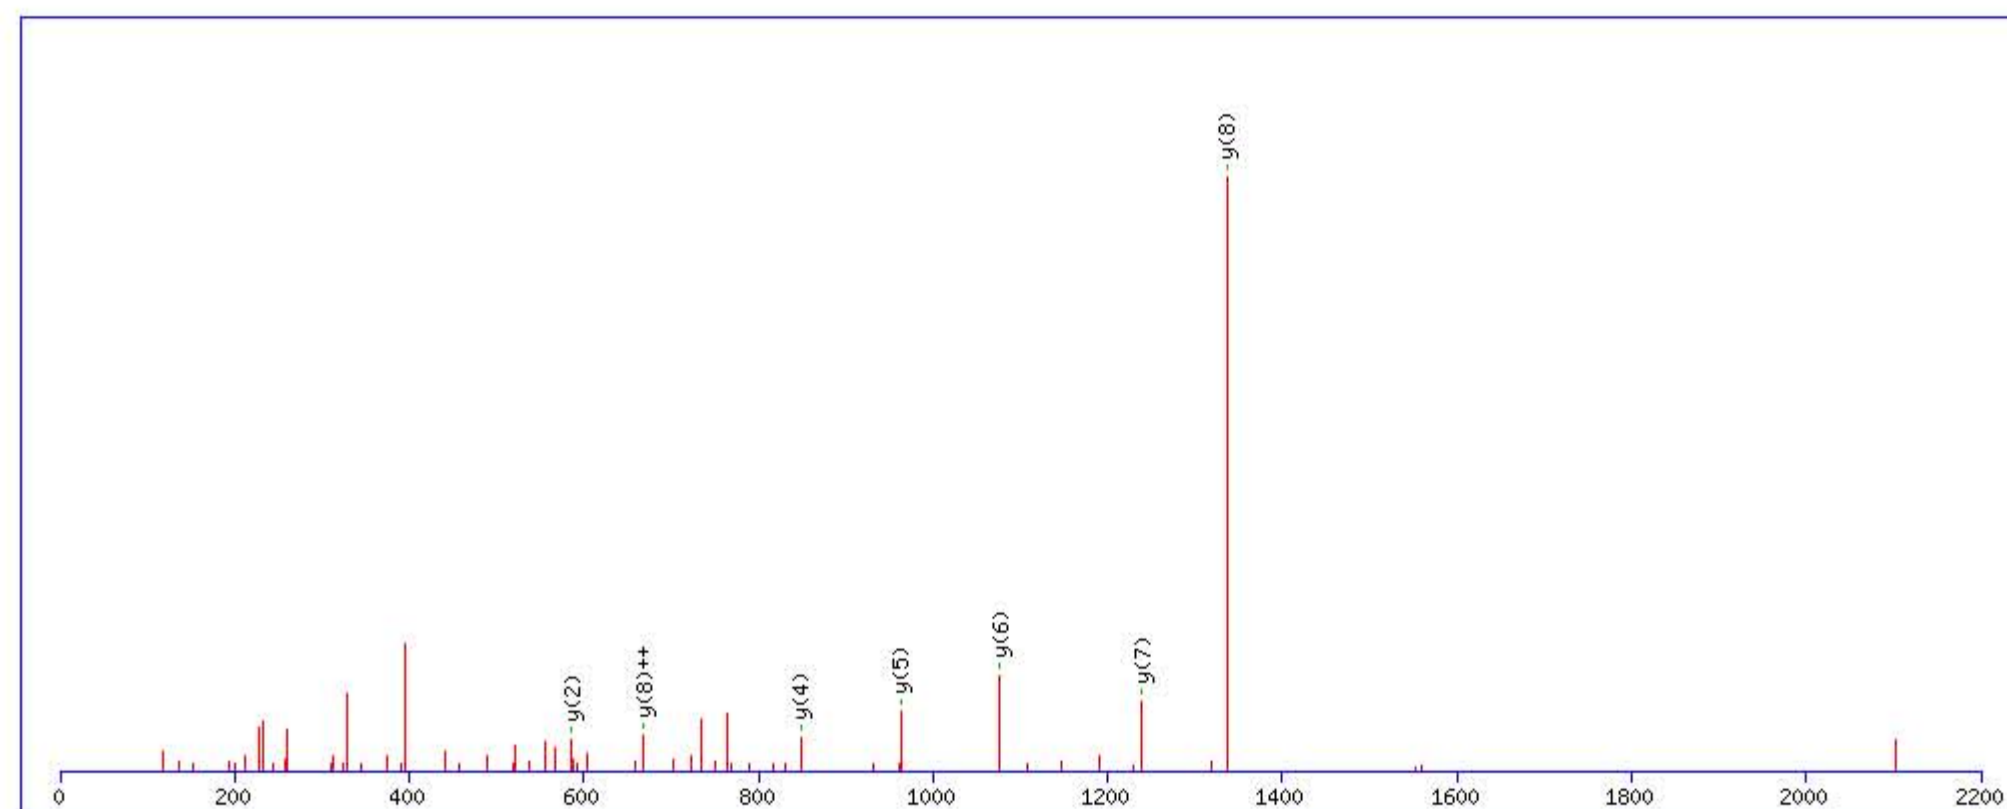

Monoisotopic mass of neutral peptide Mr(calc): 1562.780304

Fixed modifications: Carbamidomethyl (C) (apply to specified residues or termini only)

Variable modifications:

Q9 : Biotin:Thermo-21345 (Q)

Ions Score: 34 Expect: 0.0031

Matches : 7/90 fragment ions using 14 most intense peaks [\(help\)](#)

| #  | b           | b <sup>++</sup> | b <sup>*</sup> | b <sup>*++</sup> | b <sup>0</sup> | b <sup>0++</sup> | Seq. | y                  | y <sup>++</sup>   | y <sup>*</sup> | y <sup>*++</sup> | y <sup>0</sup> | y <sup>0++</sup> | #  |
|----|-------------|-----------------|----------------|------------------|----------------|------------------|------|--------------------|-------------------|----------------|------------------|----------------|------------------|----|
| 1  | 100.075690  | 50.541483       |                |                  |                |                  | V    |                    |                   |                |                  |                |                  | 10 |
| 2  | 228.134268  | 114.570772      | 211.107719     | 106.057498       |                |                  | Q    | 1464.719165        | 732.863221        | 1447.692616    | 724.349946       | 1446.708600    | 723.857938       | 9  |
| 3  | 325.187032  | 163.097154      | 308.160483     | 154.583879       |                |                  | P    | <b>1336.660587</b> | <b>668.833932</b> | 1319.634038    | 660.320657       | 1318.650022    | 659.828649       | 8  |
| 4  | 488.250361  | 244.628818      | 471.223812     | 236.115544       |                |                  | Y    | <b>1239.607823</b> | 620.307550        | 1222.581274    | 611.794275       | 1221.597258    | 611.302267       | 7  |
| 5  | 601.334425  | 301.170851      | 584.307876     | 292.657576       |                |                  | L    | <b>1076.544494</b> | 538.775885        | 1059.517945    | 530.262611       | 1058.533929    | 529.770603       | 6  |
| 6  | 716.361368  | 358.684322      | 699.334819     | 350.171047       | 698.350803     | 349.679039       | D    | <b>963.460430</b>  | 482.233853        | 946.433881     | 473.720579       | 945.449865     | 473.228571       | 5  |
| 7  | 831.388311  | 416.197793      | 814.361762     | 407.684519       | 813.377746     | 407.192511       | D    | <b>848.433487</b>  | 424.720382        | 831.406938     | 416.207107       | 830.422922     | 415.715099       | 4  |
| 8  | 978.456725  | 489.732000      | 961.430176     | 481.218726       | 960.446160     | 480.726718       | F    | 733.406544         | 367.206910        | 716.379995     | 358.693636       |                |                  | 3  |
| 9  | 1417.682051 | 709.344664      | 1400.655502    | 700.831389       | 1399.671486    | 700.339381       | Q    | <b>586.338130</b>  | 293.672703        | 569.311581     | 285.159429       |                |                  | 2  |
| 10 |             |                 |                |                  |                |                  | K    | 147.112804         | 74.060040         | 130.086255     | 65.546765        |                |                  | 1  |

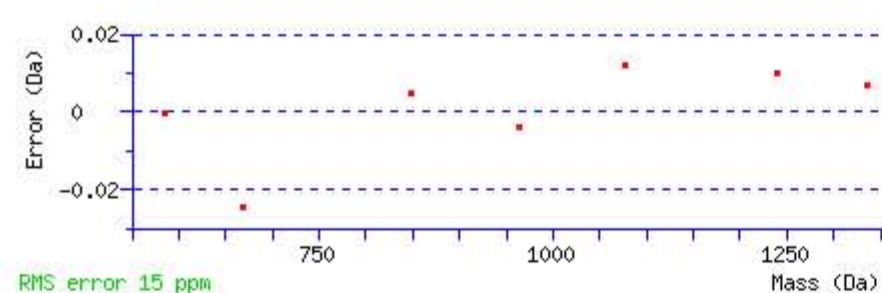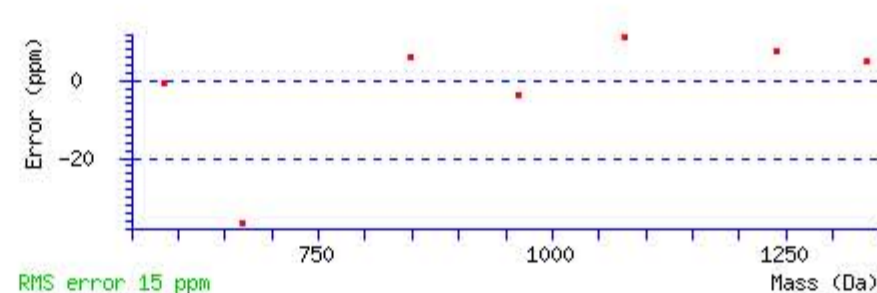

NCBI BLAST search of **VQPYLDDDFQK**

(Parameters: blastp, nr protein database, expect=20000, no filter, PAM30)

Other BLAST [web gateways](#)

## All matches to this query

| Score | Mr(calc):   | Delta     | Sequence                       |
|-------|-------------|-----------|--------------------------------|
| 34.3  | 1562.780304 | 0.011004  | <a href="#">VQPYLDDDFQK</a>    |
| 7.1   | 1562.808624 | -0.017316 | <a href="#">LNSPTTTSQIMARK</a> |
| 5.6   | 1562.804764 | -0.013456 | <a href="#">QVEELLMAMEKVK</a>  |
| 1.6   | 1562.768875 | 0.022433  | <a href="#">VQQGERDFEQISK</a>  |
| 1.4   | 1562.780960 | 0.010348  | <a href="#">MERHMVRGQLYK</a>   |
| 1.2   | 1562.787521 | 0.003787  | <a href="#">VQLVDNVYCIGQR</a>  |
| 1.1   | 1562.804764 | -0.013456 | <a href="#">QVEELLMAMEKVK</a>  |
| 0.7   | 1562.769714 | 0.021594  | <a href="#">YAVMRAAEMHQLK</a>  |



# MASCOT Search Results

## Peptide View

MS/MS Fragmentation of **DYVSQFEGSALGK**

Found in **APOA1\_HUMAN**, Apolipoprotein A-I OS=Homo sapiens GN=APOA1 PE=1 SV=1

Match to Query 40698: 1710.849728 from(856.432140,2+) rtinseconds(2432) index(55595)

Title: Locus:1.1.1.1461.13 File:"2013-07-02 CLN FXIII 60 min 2nd F 4.wiff"

Data file C:\Program Files (x86)\Matrix Science\Mascot Daemon\mgf5 FXIII 60 min 2nd\mascot\_daemon\_merge.mgf

Click mouse within plot area to zoom in by factor of two about that point

Or, Plot from  to  Da

Label all possible matches  Label matches used for scoring

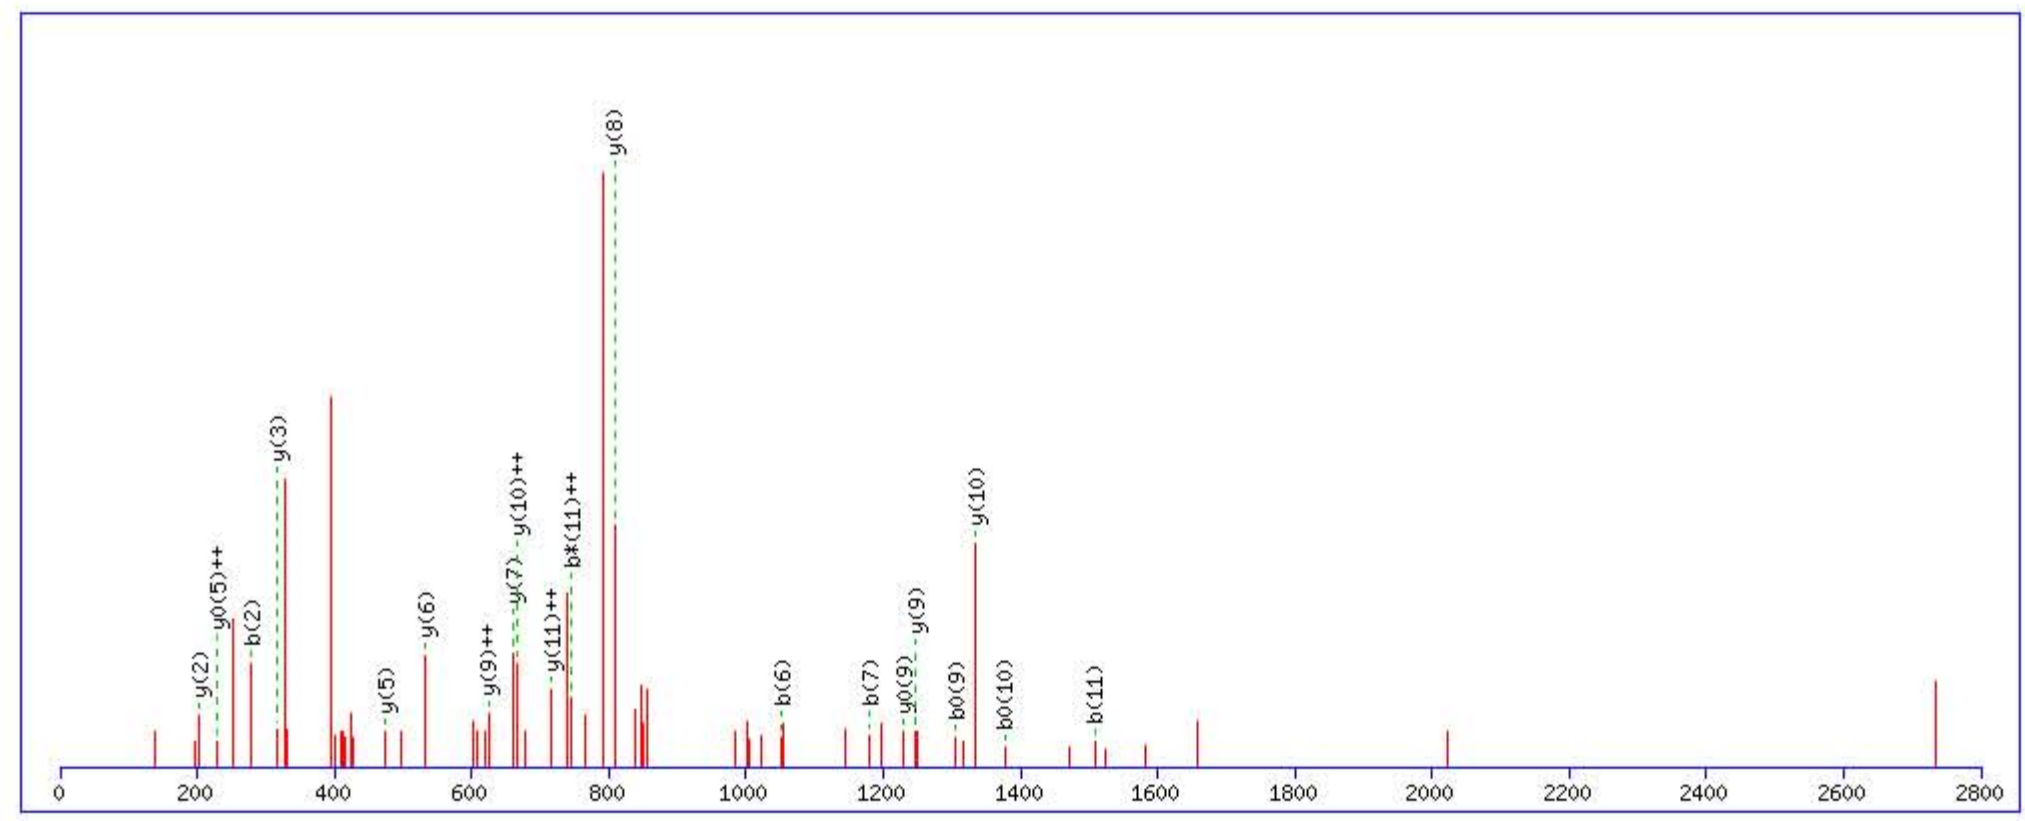

Monoisotopic mass of neutral peptide Mr(calc): 1710.828705

Fixed modifications: Carbamidomethyl (C) (apply to specified residues or termini only)

Variable modifications:

Q5 : Biotin:Thermo-21345 (Q)

Ions Score: 32 Expect: 0.0015

Matches : 20/128 fragment ions using 51 most intense peaks [\(help\)](#)

| #  | b                  | b <sup>++</sup> | b <sup>*</sup> | b <sup>*++</sup>  | b <sup>0</sup>     | b <sup>0++</sup> | Seq. | y                  | y <sup>++</sup>   | y <sup>*</sup> | y <sup>*++</sup> | y <sup>0</sup>     | y <sup>0++</sup>  | #  |
|----|--------------------|-----------------|----------------|-------------------|--------------------|------------------|------|--------------------|-------------------|----------------|------------------|--------------------|-------------------|----|
| 1  | 116.034219         | 58.520748       |                |                   | 98.023654          | 49.515465        | D    |                    |                   |                |                  |                    |                   | 13 |
| 2  | <b>279.097548</b>  | 140.052412      |                |                   | 261.086983         | 131.047130       | Y    | 1596.809042        | 798.908159        | 1579.782493    | 790.394884       | 1578.798477        | 789.902876        | 12 |
| 3  | 378.165962         | 189.586619      |                |                   | 360.155397         | 180.581337       | V    | 1433.745713        | <b>717.376495</b> | 1416.719164    | 708.863220       | 1415.735148        | 708.371212        | 11 |
| 4  | 465.197990         | 233.102633      |                |                   | 447.187425         | 224.097351       | S    | <b>1334.677299</b> | <b>667.842288</b> | 1317.650750    | 659.329013       | 1316.666734        | 658.837005        | 10 |
| 5  | 904.423316         | 452.715296      | 887.396767     | 444.202022        | 886.412751         | 443.710014       | Q    | <b>1247.645271</b> | <b>624.326273</b> | 1230.618722    | 615.812999       | <b>1229.634706</b> | 615.320991        | 9  |
| 6  | <b>1051.491730</b> | 526.249503      | 1034.465181    | 517.736229        | 1033.481165        | 517.244221       | F    | <b>808.419945</b>  | 404.713610        | 791.393396     | 396.200336       | 790.409380         | 395.708328        | 8  |
| 7  | <b>1180.534323</b> | 590.770800      | 1163.507774    | 582.257525        | 1162.523758        | 581.765517       | E    | <b>661.351531</b>  | 331.179403        | 644.324982     | 322.666129       | 643.340966         | 322.174121        | 7  |
| 8  | 1237.555787        | 619.281532      | 1220.529238    | 610.768257        | 1219.545222        | 610.276249       | G    | <b>532.308938</b>  | 266.658107        | 515.282389     | 258.144832       | 514.298373         | 257.652824        | 6  |
| 9  | 1324.587815        | 662.797546      | 1307.561266    | 654.284271        | <b>1306.577250</b> | 653.792263       | S    | <b>475.287474</b>  | 238.147375        | 458.260925     | 229.634100       | 457.276909         | <b>229.142092</b> | 5  |
| 10 | 1395.624929        | 698.316103      | 1378.598380    | 689.802828        | <b>1377.614364</b> | 689.310820       | A    | 388.255446         | 194.631361        | 371.228897     | 186.118086       |                    |                   | 4  |
| 11 | <b>1508.708993</b> | 754.858135      | 1491.682444    | <b>746.344860</b> | 1490.698428        | 745.852852       | L    | <b>317.218332</b>  | 159.112804        | 300.191783     | 150.599529       |                    |                   | 3  |
| 12 | 1565.730457        | 783.368866      | 1548.703908    | 774.855592        | 1547.719892        | 774.363584       | G    | <b>204.134268</b>  | 102.570772        | 187.107719     | 94.057497        |                    |                   | 2  |
| 13 |                    |                 |                |                   |                    |                  | K    | 147.112804         | 74.060040         | 130.086255     | 65.546765        |                    |                   | 1  |

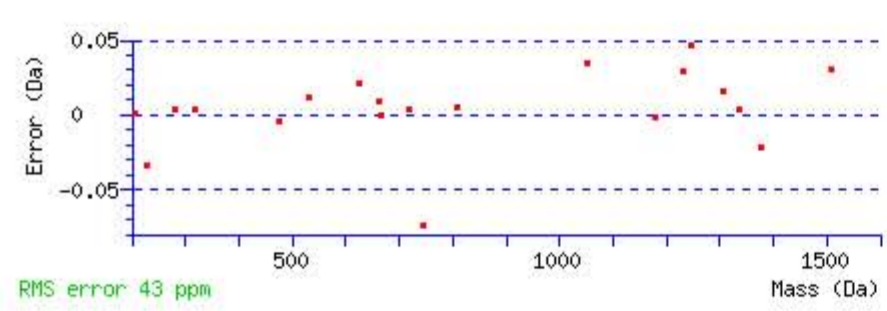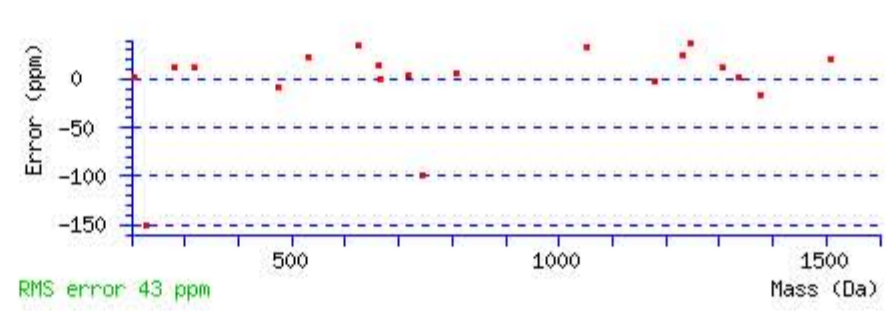

NCBI BLAST search of **DYVSQFEGSALGK**

(Parameters: blastp, nr protein database, expect=20000, no filter, PAM30)

Other BLAST [web gateways](#)

All matches to this query

| Score | Mr(calc):   | Delta    | Sequence                      |
|-------|-------------|----------|-------------------------------|
| 32.0  | 1710.828705 | 0.021023 | <a href="#">DYVSQFEGSALGK</a> |
| 1.7   | 1710.833420 | 0.016308 | <a href="#">YDPVWMTVTRKCR</a> |

Mascot: <http://www.matrixscience.com/>



# MASCOT Search Results

## Peptide View

MS/MS Fragmentation of **SPELQAEAK**

Found in **APOA2\_HUMAN**, Apolipoprotein A-II OS=Homo sapiens GN=APOA2 PE=1 SV=1

Match to Query 25787: 1282.654828 from(642.334690,2+) rtinseconds(1531) index(33483)

Title: Locus:1.1.1.2952.12 File:"2013-07-02 CLN FXIII 60 min 2nd F 3.wiff"

Data file C:\Program Files (x86)\Matrix Science\Mascot Daemon\mgf5 FXIII 60 min 2nd\mascot\_daemon\_merge.mgf

Click mouse within plot area to zoom in by factor of two about that point

Or, Plot from  to  Da

Label all possible matches  Label matches used for scoring

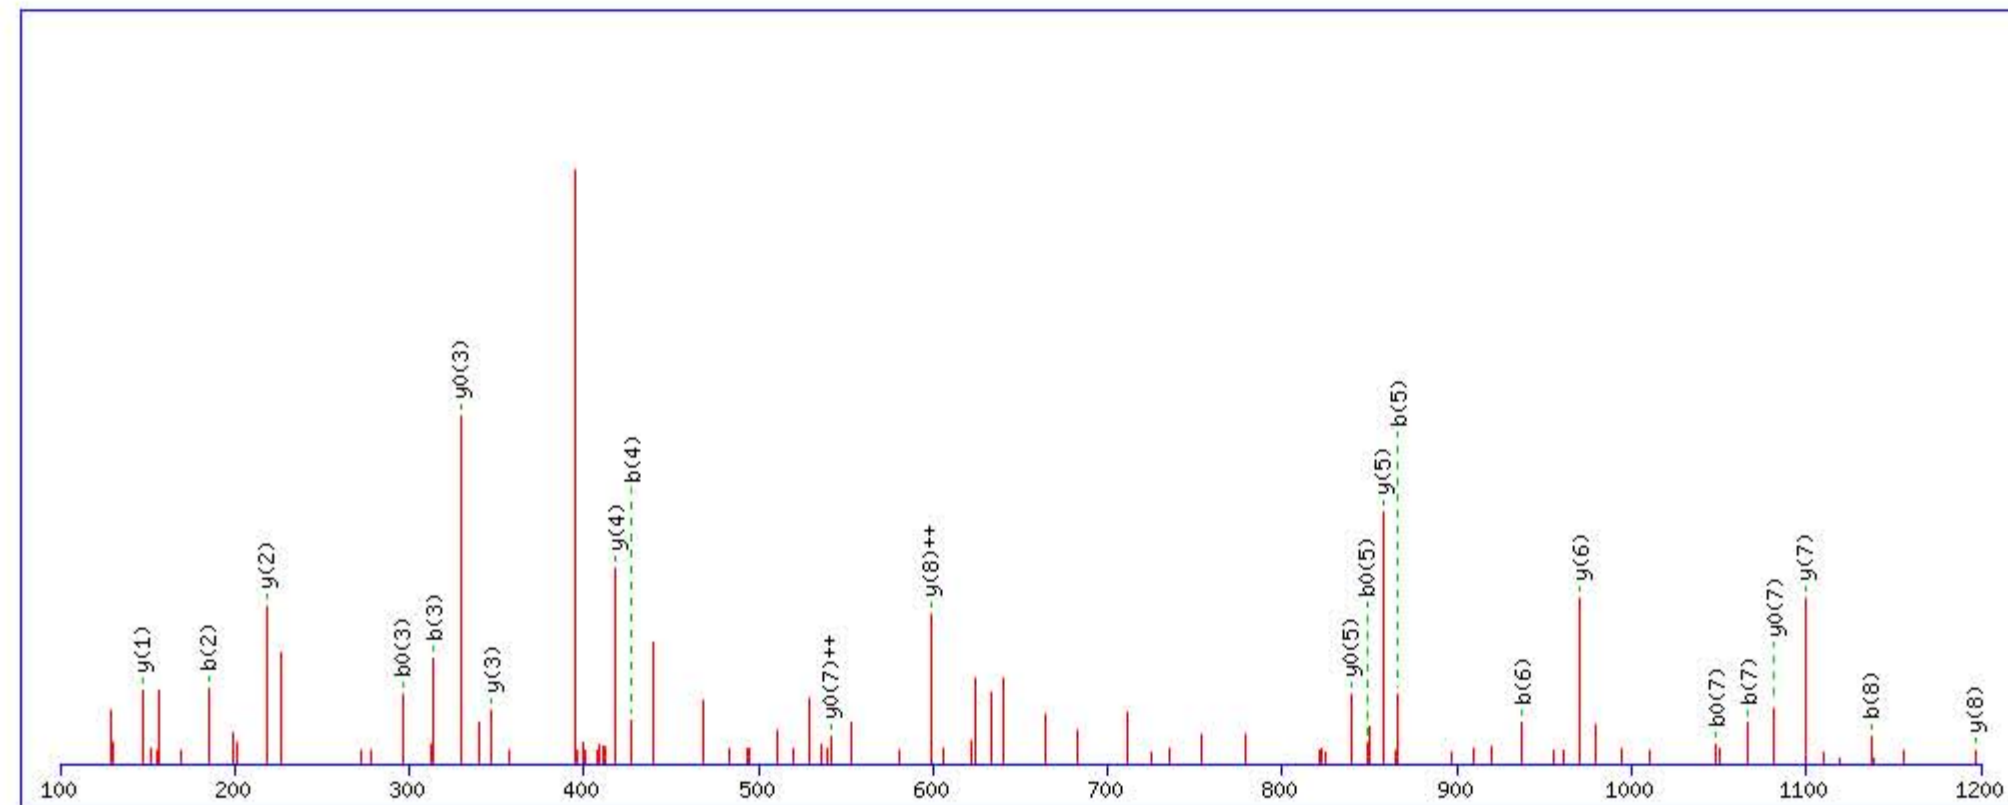

Monoisotopic mass of neutral peptide Mr(calc): 1282.659088

Fixed modifications: Carbamidomethyl (C) (apply to specified residues or termini only)

Variable modifications:

Q5 : Biotin:Thermo-21345 (Q)

Ions Score: 40 Expect: 0.0022

Matches : 23/84 fragment ions using 54 most intense peaks [\(help\)](#)

| # | b           | b <sup>++</sup> | b <sup>*</sup> | b <sup>+++</sup> | b <sup>0</sup> | b <sup>0++</sup> | Seq. | y           | y <sup>++</sup> | y <sup>*</sup> | y <sup>+++</sup> | y <sup>0</sup> | y <sup>0++</sup> | # |
|---|-------------|-----------------|----------------|------------------|----------------|------------------|------|-------------|-----------------|----------------|------------------|----------------|------------------|---|
| 1 | 88.039304   | 44.523290       |                |                  | 70.028739      | 35.518008        | S    |             |                 |                |                  |                |                  | 9 |
| 2 | 185.092068  | 93.049672       |                |                  | 167.081503     | 84.044389        | P    | 1196.634372 | 598.820824      | 1179.607823    | 590.307550       | 1178.623807    | 589.815541       | 8 |
| 3 | 314.134661  | 157.570968      |                |                  | 296.124096     | 148.565686       | E    | 1099.581608 | 550.294442      | 1082.555059    | 541.781168       | 1081.571043    | 541.289160       | 7 |
| 4 | 427.218725  | 214.113001      |                |                  | 409.208160     | 205.107718       | L    | 970.539015  | 485.773146      | 953.512466     | 477.259871       | 952.528450     | 476.767863       | 6 |
| 5 | 866.444051  | 433.725664      | 849.417502     | 425.212389       | 848.433486     | 424.720381       | Q    | 857.454951  | 429.231114      | 840.428402     | 420.717839       | 839.444386     | 420.225831       | 5 |
| 6 | 937.481165  | 469.244221      | 920.454616     | 460.730946       | 919.470600     | 460.238938       | A    | 418.229625  | 209.618450      | 401.203076     | 201.105176       | 400.219060     | 200.613168       | 4 |
| 7 | 1066.523758 | 533.765517      | 1049.497209    | 525.252243       | 1048.513193    | 524.760235       | E    | 347.192511  | 174.099893      | 330.165962     | 165.586619       | 329.181946     | 165.094611       | 3 |
| 8 | 1137.560872 | 569.284074      | 1120.534323    | 560.770800       | 1119.550307    | 560.278792       | A    | 218.149918  | 109.578597      | 201.123369     | 101.065322       |                |                  | 2 |
| 9 |             |                 |                |                  |                |                  | K    | 147.112804  | 74.060040       | 130.086255     | 65.546765        |                |                  | 1 |

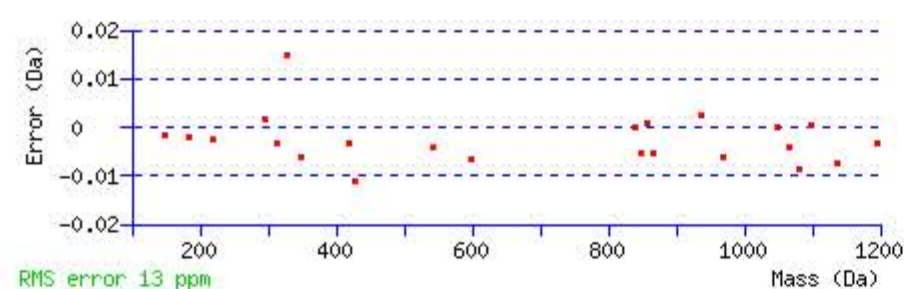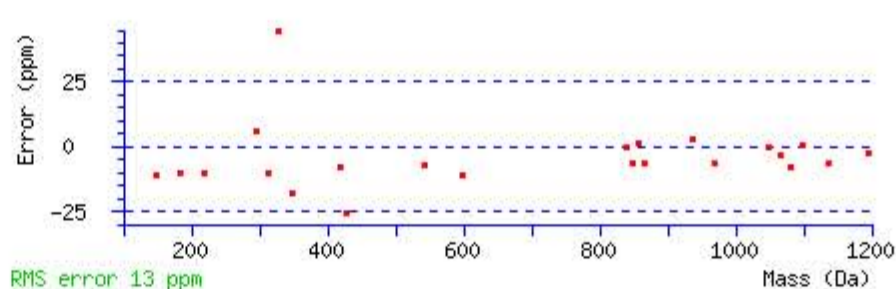

NCBI BLAST search of [SPELQAEAK](#)

(Parameters: blastp, nr protein database, expect=20000, no filter, PAM30)

Other BLAST [web gateways](#)

## All matches to this query

| Score | Mr(calc):   | Delta     | Sequence                       |
|-------|-------------|-----------|--------------------------------|
| 39.6  | 1282.659088 | -0.004260 | <a href="#">SPELQAEAK</a>      |
| 12.5  | 1282.637802 | 0.017026  | <a href="#">KGHETLRDGD</a>     |
| 3.1   | 1282.670334 | -0.015506 | <a href="#">EPIQASTAR</a>      |
| 1.3   | 1282.655716 | -0.000888 | <a href="#">ALEAEKYGFQK</a>    |
| 1.1   | 1282.662949 | -0.008121 | <a href="#">DLSDTQRHLAK</a>    |
| 0.8   | 1282.645203 | 0.009625  | <a href="#">AAGPGLGNVAMGPR</a> |
| 0.7   | 1282.645187 | 0.009641  | <a href="#">KCGHENLQLGK</a>    |
| 0.6   | 1282.641830 | 0.012998  | <a href="#">SYPGHVQPATAR</a>   |



# MASCOT Search Results

## Peptide View

MS/MS Fragmentation of **EPCVESLVSQYFQTVTDYGK**

Found in **APOA2\_HUMAN**, Apolipoprotein A-II OS=Homo sapiens GN=APOA2 PE=1 SV=1

Match to Query 58048: 2660.263062 from(887.761630,3+) rtinseconds(3114) index(28264)

Title: Locus:1.1.1.1083.16 File:"2013-07-02 CLN FXIII 60 min 2nd F 2.wiff"

Data file C:\Program Files (x86)\Matrix Science\Mascot Daemon\mgf5 FXIII 60 min 2nd\mascot\_daemon\_merge.mgf

Click mouse within plot area to zoom in by factor of two about that point

Or, Plot from  to  Da

Label all possible matches  Label matches used for scoring

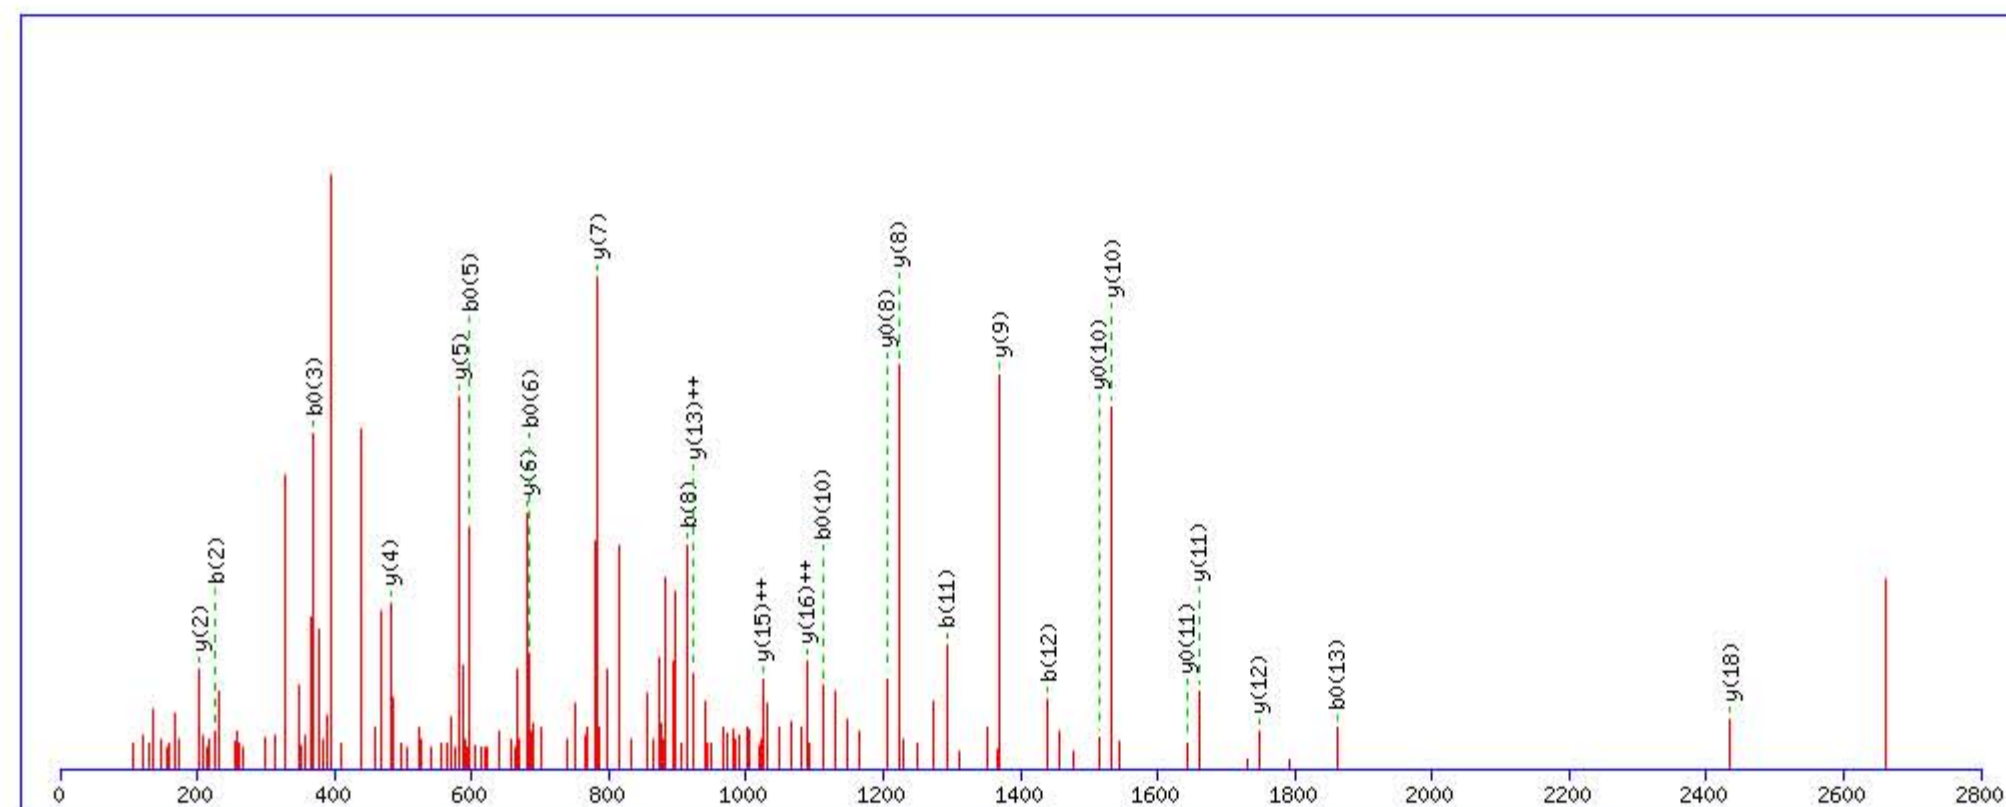

Monoisotopic mass of neutral peptide Mr(calc): 2660.250244

Fixed modifications: Carbamidomethyl (C) (apply to specified residues or termini only)

Variable modifications:

Q13 : Biotin:Thermo-21345 (Q)

Ions Score: 75 Expect: 7.3e-007

Matches : 26/204 fragment ions using 36 most intense peaks [\(help\)](#)

| #  | b                  | b <sup>++</sup> | b <sup>*</sup> | b <sup>*++</sup> | b <sup>0</sup>     | b <sup>0++</sup> | Seq. | y                  | y <sup>++</sup>    | y <sup>*</sup> | y <sup>*++</sup> | y <sup>0</sup>     | y <sup>0++</sup> | #  |
|----|--------------------|-----------------|----------------|------------------|--------------------|------------------|------|--------------------|--------------------|----------------|------------------|--------------------|------------------|----|
| 1  | 130.049869         | 65.528572       |                |                  | 112.039304         | 56.523290        | E    |                    |                    |                |                  |                    |                  | 20 |
| 2  | <b>227.102633</b>  | 114.054954      |                |                  | 209.092068         | 105.049672       | P    | 2532.214913        | 1266.611094        | 2515.188364    | 1258.097820      | 2514.204348        | 1257.605812      | 19 |
| 3  | 387.133282         | 194.070279      |                |                  | <b>369.122717</b>  | 185.064997       | C    | <b>2435.162149</b> | 1218.084712        | 2418.135600    | 1209.571438      | 2417.151584        | 1209.079430      | 18 |
| 4  | 486.201696         | 243.604486      |                |                  | 468.191131         | 234.599204       | V    | 2275.131500        | 1138.069388        | 2258.104951    | 1129.556113      | 2257.120935        | 1129.064105      | 17 |
| 5  | 615.244289         | 308.125783      |                |                  | <b>597.233724</b>  | 299.120500       | E    | 2176.063086        | <b>1088.535181</b> | 2159.036537    | 1080.021906      | 2158.052521        | 1079.529898      | 16 |
| 6  | 702.276317         | 351.641797      |                |                  | <b>684.265752</b>  | 342.636514       | S    | 2047.020493        | <b>1024.013885</b> | 2029.993944    | 1015.500610      | 2029.009928        | 1015.008602      | 15 |
| 7  | 815.360381         | 408.183829      |                |                  | 797.349816         | 399.178546       | L    | 1959.988465        | 980.497871         | 1942.961916    | 971.984596       | 1941.977900        | 971.492588       | 14 |
| 8  | <b>914.428795</b>  | 457.718036      |                |                  | 896.418230         | 448.712753       | V    | 1846.904401        | <b>923.955839</b>  | 1829.877852    | 915.442564       | 1828.893836        | 914.950556       | 13 |
| 9  | 1001.460823        | 501.234050      |                |                  | 983.450258         | 492.228767       | S    | <b>1747.835987</b> | 874.421632         | 1730.809438    | 865.908357       | 1729.825422        | 865.416349       | 12 |
| 10 | 1129.519401        | 565.263339      | 1112.492852    | 556.750064       | <b>1111.508836</b> | 556.258056       | Q    | <b>1660.803959</b> | 830.905618         | 1643.777410    | 822.392343       | <b>1642.793394</b> | 821.900335       | 11 |
| 11 | <b>1292.582730</b> | 646.795003      | 1275.556181    | 638.281729       | 1274.572165        | 637.789721       | Y    | <b>1532.745381</b> | 766.876329         | 1515.718832    | 758.363054       | <b>1514.734816</b> | 757.871046       | 10 |
| 12 | <b>1439.651144</b> | 720.329210      | 1422.624595    | 711.815936       | 1421.640579        | 711.323928       | F    | <b>1369.682052</b> | 685.344664         | 1352.655503    | 676.831390       | 1351.671487        | 676.339382       | 9  |
| 13 | 1878.876470        | 939.941873      | 1861.849921    | 931.428599       | <b>1860.865905</b> | 930.936591       | Q    | <b>1222.613638</b> | 611.810457         | 1205.587089    | 603.297183       | <b>1204.603073</b> | 602.805175       | 8  |
| 14 | 1979.924149        | 990.465713      | 1962.897600    | 981.952438       | 1961.913584        | 981.460430       | T    | <b>783.388312</b>  | 392.197794         | 766.361763     | 383.684519       | 765.377747         | 383.192511       | 7  |
| 15 | 2078.992563        | 1039.999920     | 2061.966014    | 1031.486645      | 2060.981998        | 1030.994637      | V    | <b>682.340633</b>  | 341.673954         | 665.314084     | 333.160680       | 664.330068         | 332.668672       | 6  |
| 16 | 2180.040242        | 1090.523759     | 2163.013693    | 1082.010484      | 2162.029677        | 1081.518476      | T    | <b>583.272219</b>  | 292.139747         | 566.245670     | 283.626473       | 565.261654         | 283.134465       | 5  |
| 17 | 2295.067185        | 1148.037230     | 2278.040636    | 1139.523956      | 2277.056620        | 1139.031948      | D    | <b>482.224540</b>  | 241.615908         | 465.197991     | 233.102633       | 464.213975         | 232.610625       | 4  |
| 18 | 2458.130514        | 1229.568895     | 2441.103965    | 1221.055620      | 2440.119949        | 1220.563612      | Y    | 367.197597         | 184.102436         | 350.171048     | 175.589162       |                    |                  | 3  |
| 19 | 2515.151978        | 1258.079627     | 2498.125429    | 1249.566352      | 2497.141413        | 1249.074344      | G    | <b>204.134268</b>  | 102.570772         | 187.107719     | 94.057497        |                    |                  | 2  |
| 20 |                    |                 |                |                  |                    |                  | K    | 147.112804         | 74.060040          | 130.086255     | 65.546765        |                    |                  | 1  |

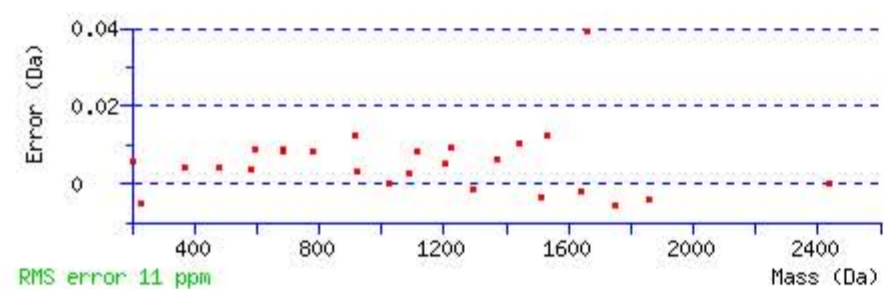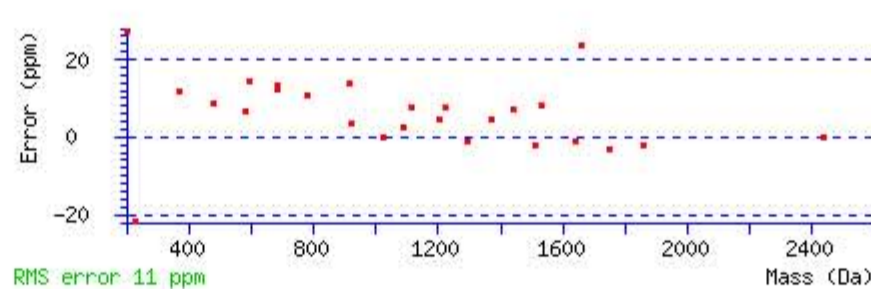

NCBI BLAST search of **EPCVESLVSQYFQTVTDYGK**

(Parameters: blastp, nr protein database, expect=20000, no filter, PAM30)

Other BLAST [web gateways](#)

All matches to this query

| Score | Mr(calc):   | Delta    | Sequence                             |
|-------|-------------|----------|--------------------------------------|
| 74.8  | 2660.250244 | 0.012818 | <a href="#">EPCVESLVSQYFQTVTDYGK</a> |
| 33.1  | 2660.250244 | 0.012818 | <a href="#">EPCVESLVSQYFQTVTDYGK</a> |

Mascot: <http://www.matrixscience.com/>



# MASCOT Search Results

## Peptide View

MS/MS Fragmentation of **EPCVESLVSQYFQTVTDYGK**

Found in **APOA2\_HUMAN**, Apolipoprotein A-II OS=Homo sapiens GN=APOA2 PE=1 SV=1

Match to Query 58051: 2660.265912 from(887.762580,3+) rtinseconds(3178) index(28557)

Title: Locus:1.1.1.1105.9 File:"2013-07-02 CLN FXIII 60 min 2nd F 2.wiff"

Data file C:\Program Files (x86)\Matrix Science\Mascot Daemon\mgf5 FXIII 60 min 2nd\mascot\_daemon\_merge.mgf

Click mouse within plot area to zoom in by factor of two about that point

Or, Plot from  to  Da

Label all possible matches  Label matches used for scoring

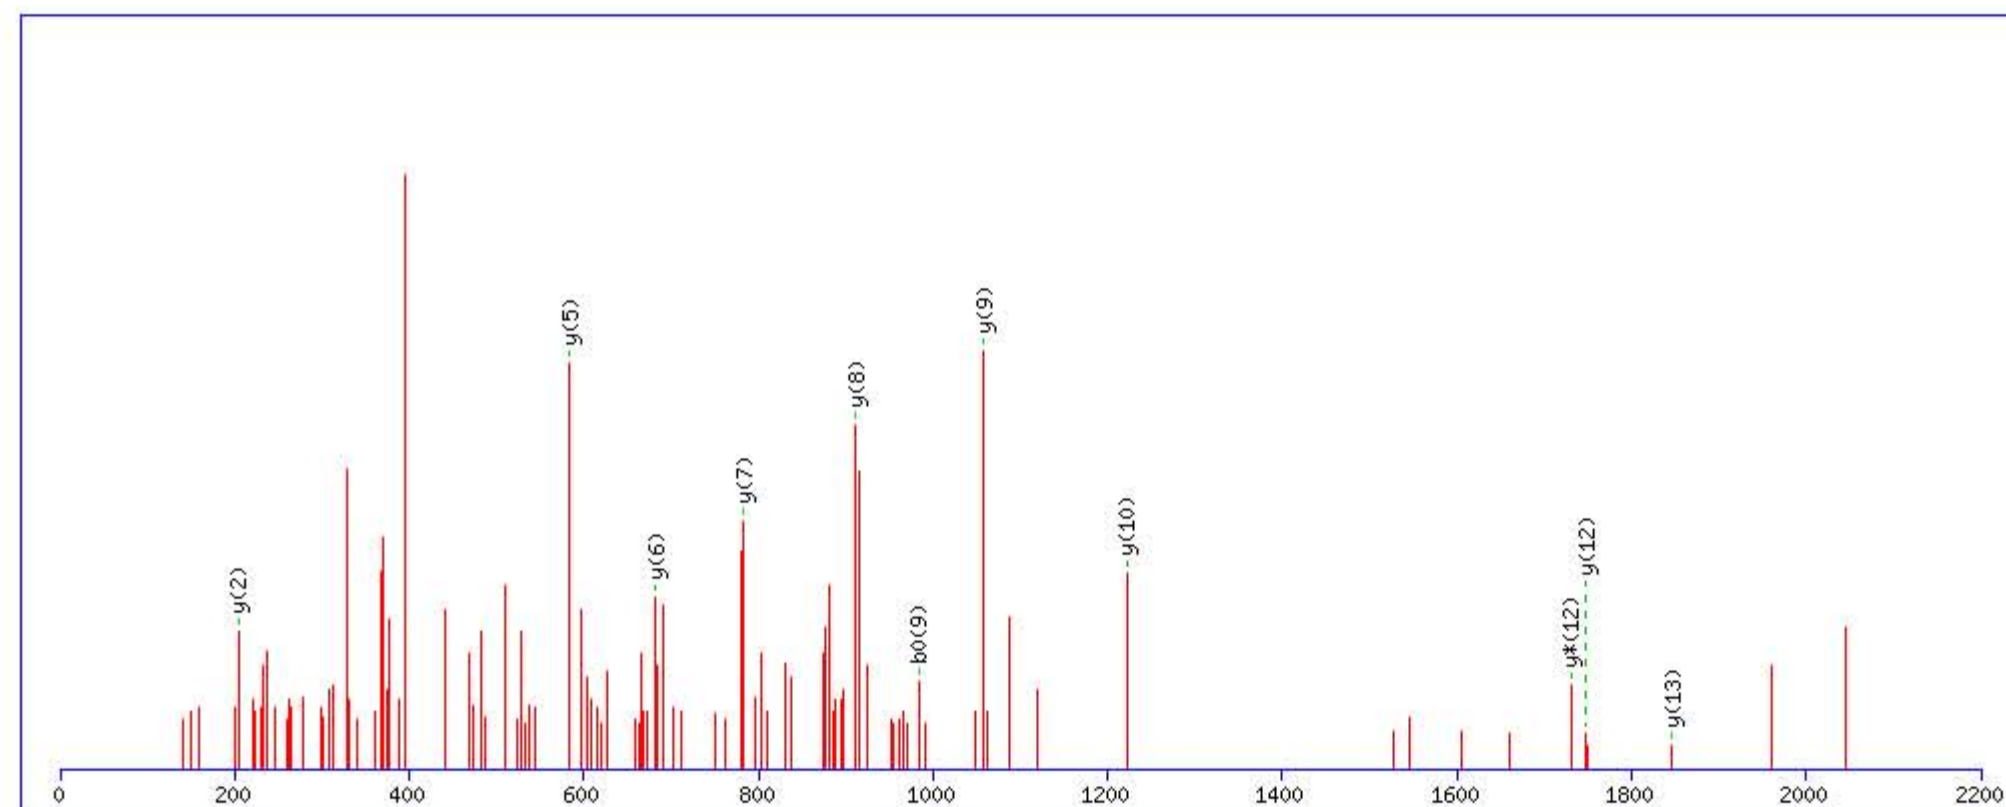

Monoisotopic mass of neutral peptide Mr(calc): 2660.250244

Fixed modifications: Carbamidomethyl (C) (apply to specified residues or termini only)

Variable modifications:

Q10 : Biotin:Thermo-21345 (Q)

Ions Score: 50 Expect: 0.00023

Matches : 11/204 fragment ions using 18 most intense peaks [\(help\)](#)

| #  | b           | b <sup>++</sup> | b <sup>*</sup> | b <sup>*++</sup> | b <sup>0</sup>    | b <sup>0++</sup> | Seq. | y                  | y <sup>++</sup> | y <sup>*</sup>     | y <sup>*++</sup> | y <sup>0</sup> | y <sup>0++</sup> | #  |
|----|-------------|-----------------|----------------|------------------|-------------------|------------------|------|--------------------|-----------------|--------------------|------------------|----------------|------------------|----|
| 1  | 130.049869  | 65.528572       |                |                  | 112.039304        | 56.523290        | E    |                    |                 |                    |                  |                |                  | 20 |
| 2  | 227.102633  | 114.054954      |                |                  | 209.092068        | 105.049672       | P    | 2532.214913        | 1266.611094     | 2515.188364        | 1258.097820      | 2514.204348    | 1257.605812      | 19 |
| 3  | 387.133282  | 194.070279      |                |                  | 369.122717        | 185.064997       | C    | 2435.162149        | 1218.084712     | 2418.135600        | 1209.571438      | 2417.151584    | 1209.079430      | 18 |
| 4  | 486.201696  | 243.604486      |                |                  | 468.191131        | 234.599204       | V    | 2275.131500        | 1138.069388     | 2258.104951        | 1129.556113      | 2257.120935    | 1129.064105      | 17 |
| 5  | 615.244289  | 308.125783      |                |                  | 597.233724        | 299.120500       | E    | 2176.063086        | 1088.535181     | 2159.036537        | 1080.021906      | 2158.052521    | 1079.529898      | 16 |
| 6  | 702.276317  | 351.641797      |                |                  | 684.265752        | 342.636514       | S    | 2047.020493        | 1024.013884     | 2029.993944        | 1015.500610      | 2029.009928    | 1015.008602      | 15 |
| 7  | 815.360381  | 408.183829      |                |                  | 797.349816        | 399.178546       | L    | 1959.988465        | 980.497870      | 1942.961916        | 971.984596       | 1941.977900    | 971.492588       | 14 |
| 8  | 914.428795  | 457.718036      |                |                  | 896.418230        | 448.712753       | V    | <b>1846.904401</b> | 923.955838      | 1829.877852        | 915.442564       | 1828.893836    | 914.950556       | 13 |
| 9  | 1001.460823 | 501.234050      |                |                  | <b>983.450258</b> | 492.228767       | S    | <b>1747.835987</b> | 874.421631      | <b>1730.809438</b> | 865.908357       | 1729.825422    | 865.416349       | 12 |
| 10 | 1440.686149 | 720.846712      | 1423.659600    | 712.333438       | 1422.675584       | 711.841430       | Q    | 1660.803959        | 830.905617      | 1643.777410        | 822.392343       | 1642.793394    | 821.900335       | 11 |
| 11 | 1603.749478 | 802.378377      | 1586.722929    | 793.865103       | 1585.738913       | 793.373094       | Y    | <b>1221.578633</b> | 611.292954      | 1204.552084        | 602.779680       | 1203.568068    | 602.287672       | 10 |
| 12 | 1750.817892 | 875.912584      | 1733.791343    | 867.399310       | 1732.807327       | 866.907302       | F    | <b>1058.515304</b> | 529.761290      | 1041.488755        | 521.248015       | 1040.504739    | 520.756007       | 9  |
| 13 | 1878.876470 | 939.941873      | 1861.849921    | 931.428599       | 1860.865905       | 930.936590       | Q    | <b>911.446890</b>  | 456.227083      | 894.420341         | 447.713808       | 893.436325     | 447.221800       | 8  |
| 14 | 1979.924149 | 990.465713      | 1962.897600    | 981.952438       | 1961.913584       | 981.460430       | T    | <b>783.388312</b>  | 392.197794      | 766.361763         | 383.684519       | 765.377747     | 383.192511       | 7  |
| 15 | 2078.992563 | 1039.999919     | 2061.966014    | 1031.486645      | 2060.981998       | 1030.994637      | V    | <b>682.340633</b>  | 341.673954      | 665.314084         | 333.160680       | 664.330068     | 332.668672       | 6  |
| 16 | 2180.040242 | 1090.523759     | 2163.013693    | 1082.010484      | 2162.029677       | 1081.518476      | T    | <b>583.272219</b>  | 292.139747      | 566.245670         | 283.626473       | 565.261654     | 283.134465       | 5  |
| 17 | 2295.067185 | 1148.037230     | 2278.040636    | 1139.523956      | 2277.056620       | 1139.031948      | D    | 482.224540         | 241.615908      | 465.197991         | 233.102633       | 464.213975     | 232.610625       | 4  |
| 18 | 2458.130514 | 1229.568895     | 2441.103965    | 1221.055620      | 2440.119949       | 1220.563612      | Y    | 367.197597         | 184.102436      | 350.171048         | 175.589162       |                |                  | 3  |
| 19 | 2515.151978 | 1258.079627     | 2498.125429    | 1249.566352      | 2497.141413       | 1249.074344      | G    | <b>204.134268</b>  | 102.570772      | 187.107719         | 94.057497        |                |                  | 2  |
| 20 |             |                 |                |                  |                   |                  | K    | 147.112804         | 74.060040       | 130.086255         | 65.546765        |                |                  | 1  |

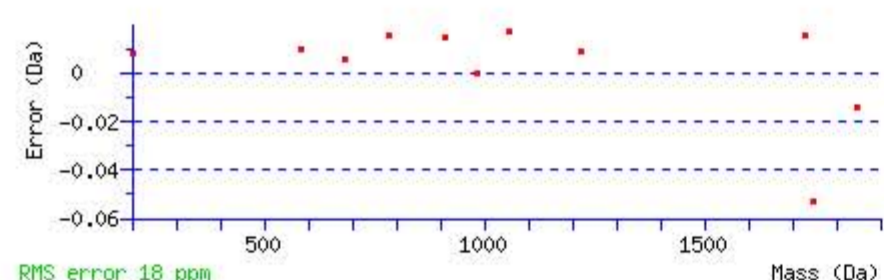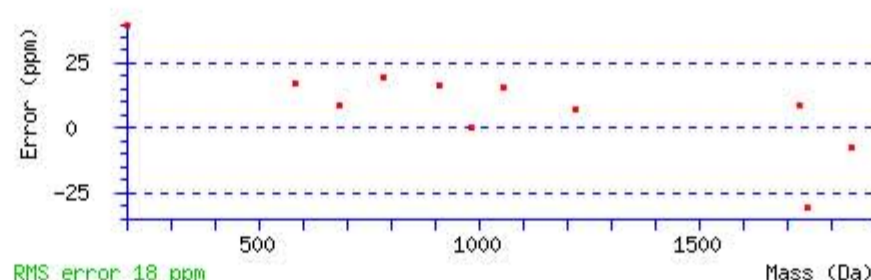

NCBI BLAST search of **EPCVESLVSQYFQTVTDYGK**

(Parameters: blastp, nr protein database, expect=20000, no filter, PAM30)

Other BLAST [web gateways](#)

All matches to this query

| Score | Mr(calc):   | Delta    | Sequence                             |
|-------|-------------|----------|--------------------------------------|
| 50.0  | 2660.250244 | 0.015668 | <a href="#">EPCVESLVSQYFQTVTDYGK</a> |
| 28.6  | 2660.250244 | 0.015668 | <a href="#">EPCVESLVSQYFQTVTDYGK</a> |

Mascot: <http://www.matrixscience.com/>



# MASCOT SEARCH RESULTS

## Peptide View

MS/MS Fragmentation of **GNTEGLQK**

Found in **APOA4\_HUMAN**, Apolipoprotein A-IV OS=Homo sapiens GN=APOA4 PE=1 SV=3

Match to Query 21820: 1156.585268 from(579.299910,2+) rtinseconds(1399) index(32517)

Title: Locus:1.1.1.2906.15 File:"2013-07-02 CLN FXIII 60 min 2nd F 3.wiff"

Data file C:\Program Files (x86)\Matrix Science\Mascot Daemon\mgf5 FXIII 60 min 2nd\mascot\_daemon\_merge.mgf

Click mouse within plot area to zoom in by factor of two about that point

Or, Plot from  to  Da

Label all possible matches  Label matches used for scoring

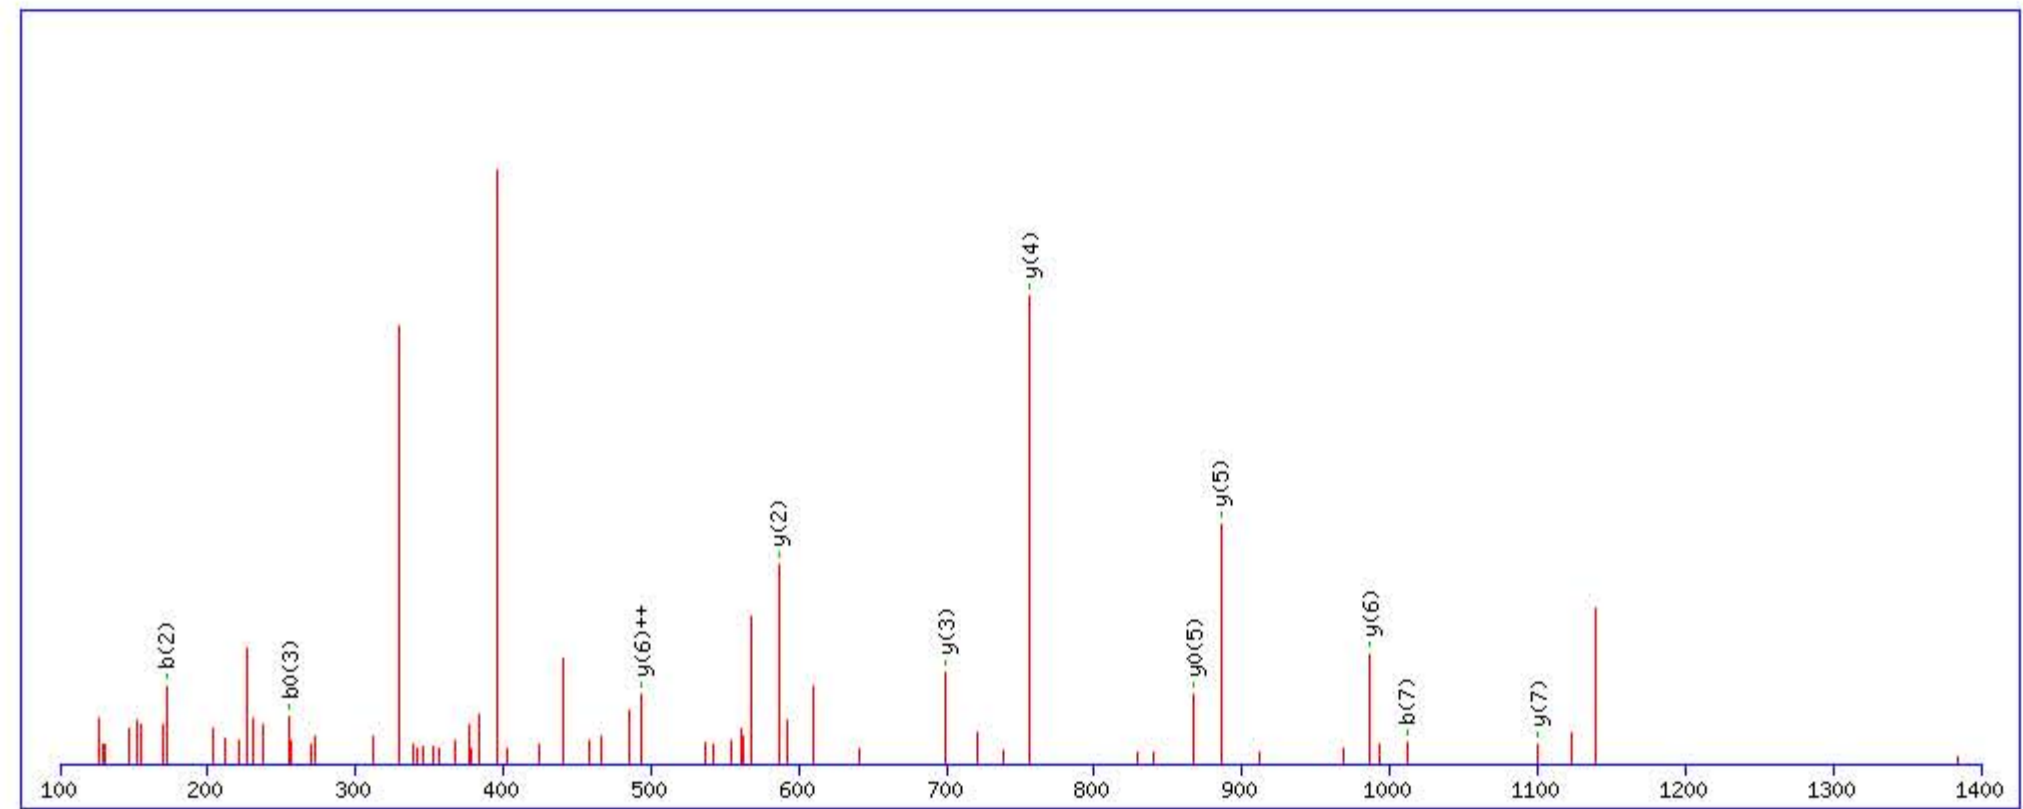

Monoisotopic mass of neutral peptide Mr(calc): 1156.591034

Fixed modifications: Carbamidomethyl (C) (apply to specified residues or termini only)

Variable modifications:

Q7 : Biotin:Thermo-21345 (Q)

Ions Score: 37 Expect: 0.004

Matches : 11/70 fragment ions using 21 most intense peaks [\(help\)](#)

| # | b                  | b <sup>++</sup> | b <sup>*</sup> | b <sup>*++</sup> | b <sup>0</sup>    | b <sup>0++</sup> | Seq. | y                  | y <sup>++</sup>   | y <sup>*</sup> | y <sup>*++</sup> | y <sup>0</sup>    | y <sup>0++</sup> | # |
|---|--------------------|-----------------|----------------|------------------|-------------------|------------------|------|--------------------|-------------------|----------------|------------------|-------------------|------------------|---|
| 1 | 58.028740          | 29.518008       |                |                  |                   |                  | G    |                    |                   |                |                  |                   |                  | 8 |
| 2 | <b>172.071667</b>  | 86.539471       | 155.045118     | 78.026197        |                   |                  | N    | <b>1100.576857</b> | 550.792067        | 1083.550308    | 542.278792       | 1082.566292       | 541.786784       | 7 |
| 3 | 273.119346         | 137.063311      | 256.092797     | 128.550037       | <b>255.108781</b> | 128.058029       | T    | <b>986.533930</b>  | <b>493.770603</b> | 969.507381     | 485.257329       | 968.523365        | 484.765321       | 6 |
| 4 | 402.161939         | 201.584608      | 385.135390     | 193.071333       | 384.151374        | 192.579325       | E    | <b>885.486251</b>  | 443.246764        | 868.459702     | 434.733489       | <b>867.475686</b> | 434.241481       | 5 |
| 5 | 459.183403         | 230.095339      | 442.156854     | 221.582065       | 441.172838        | 221.090057       | G    | <b>756.443658</b>  | 378.725467        | 739.417109     | 370.212193       |                   |                  | 4 |
| 6 | 572.267467         | 286.637372      | 555.240918     | 278.124097       | 554.256902        | 277.632089       | L    | <b>699.422194</b>  | 350.214735        | 682.395645     | 341.701461       |                   |                  | 3 |
| 7 | <b>1011.492793</b> | 506.250035      | 994.466244     | 497.736760       | 993.482228        | 497.244752       | Q    | <b>586.338130</b>  | 293.672703        | 569.311581     | 285.159429       |                   |                  | 2 |
| 8 |                    |                 |                |                  |                   |                  | K    | 147.112804         | 74.060040         | 130.086255     | 65.546766        |                   |                  | 1 |

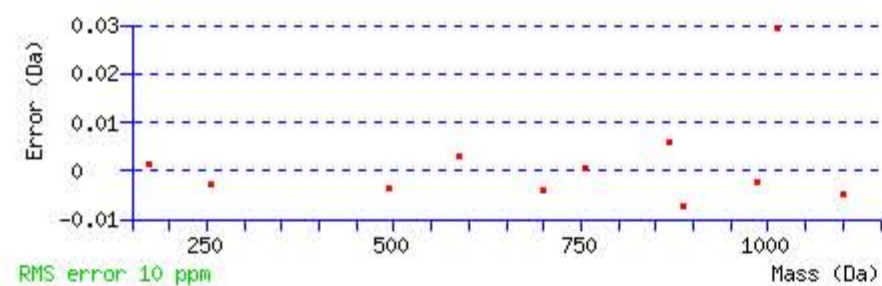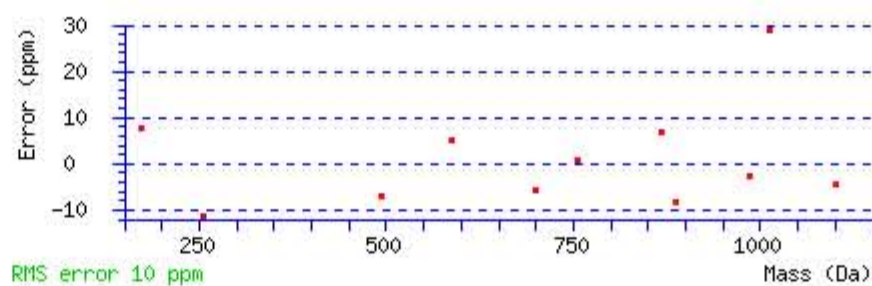

NCBI BLAST search of **GNTEGLQK**

(Parameters: blastp, nr protein database, expect=20000, no filter, PAM30)

Other BLAST [web gateways](#)

All matches to this query

| Score | Mr(calc):   | Delta     | Sequence                     |
|-------|-------------|-----------|------------------------------|
| 36.7  | 1156.591034 | -0.005766 | <a href="#">GNTEGLQK</a>     |
| 12.7  | 1156.572418 | 0.012850  | <a href="#">GPQTSTSPASPK</a> |
| 7.2   | 1156.598923 | -0.013655 | <a href="#">GDRGGPGIPGFK</a> |
| 6.0   | 1156.577118 | 0.008150  | <a href="#">QLSTRCHQK</a>    |
| 3.1   | 1156.591019 | -0.005751 | <a href="#">SQLENQK</a>      |
| 2.3   | 1156.576416 | 0.008852  | <a href="#">IKSQDFYEK</a>    |
| 2.1   | 1156.595047 | -0.009779 | <a href="#">CDYFLAKIK</a>    |
| 1.3   | 1156.602249 | -0.016981 | <a href="#">MVHKEKGANK</a>   |
| 1.0   | 1156.591034 | -0.005766 | <a href="#">IQVEQNK</a>      |



# MASCOT Search Results

## Peptide View

MS/MS Fragmentation of **IDQNVEELK**

Found in **APOA4\_HUMAN**, Apolipoprotein A-IV OS=Homo sapiens GN=APOA4 PE=1 SV=3

Match to Query 30079: 1397.714368 from(699.864460,2+) rtinseconds(1817) index(35136)

Title: Locus:1.1.1.3052.14 File:"2013-07-02 CLN FXIII 60 min 2nd F 3.wiff"

Data file C:\Program Files (x86)\Matrix Science\Mascot Daemon\mgf5 FXIII 60 min 2nd\mascot\_daemon\_merge.mgf

Click mouse within plot area to zoom in by factor of two about that point

Or, Plot from  to  Da

Label all possible matches  Label matches used for scoring

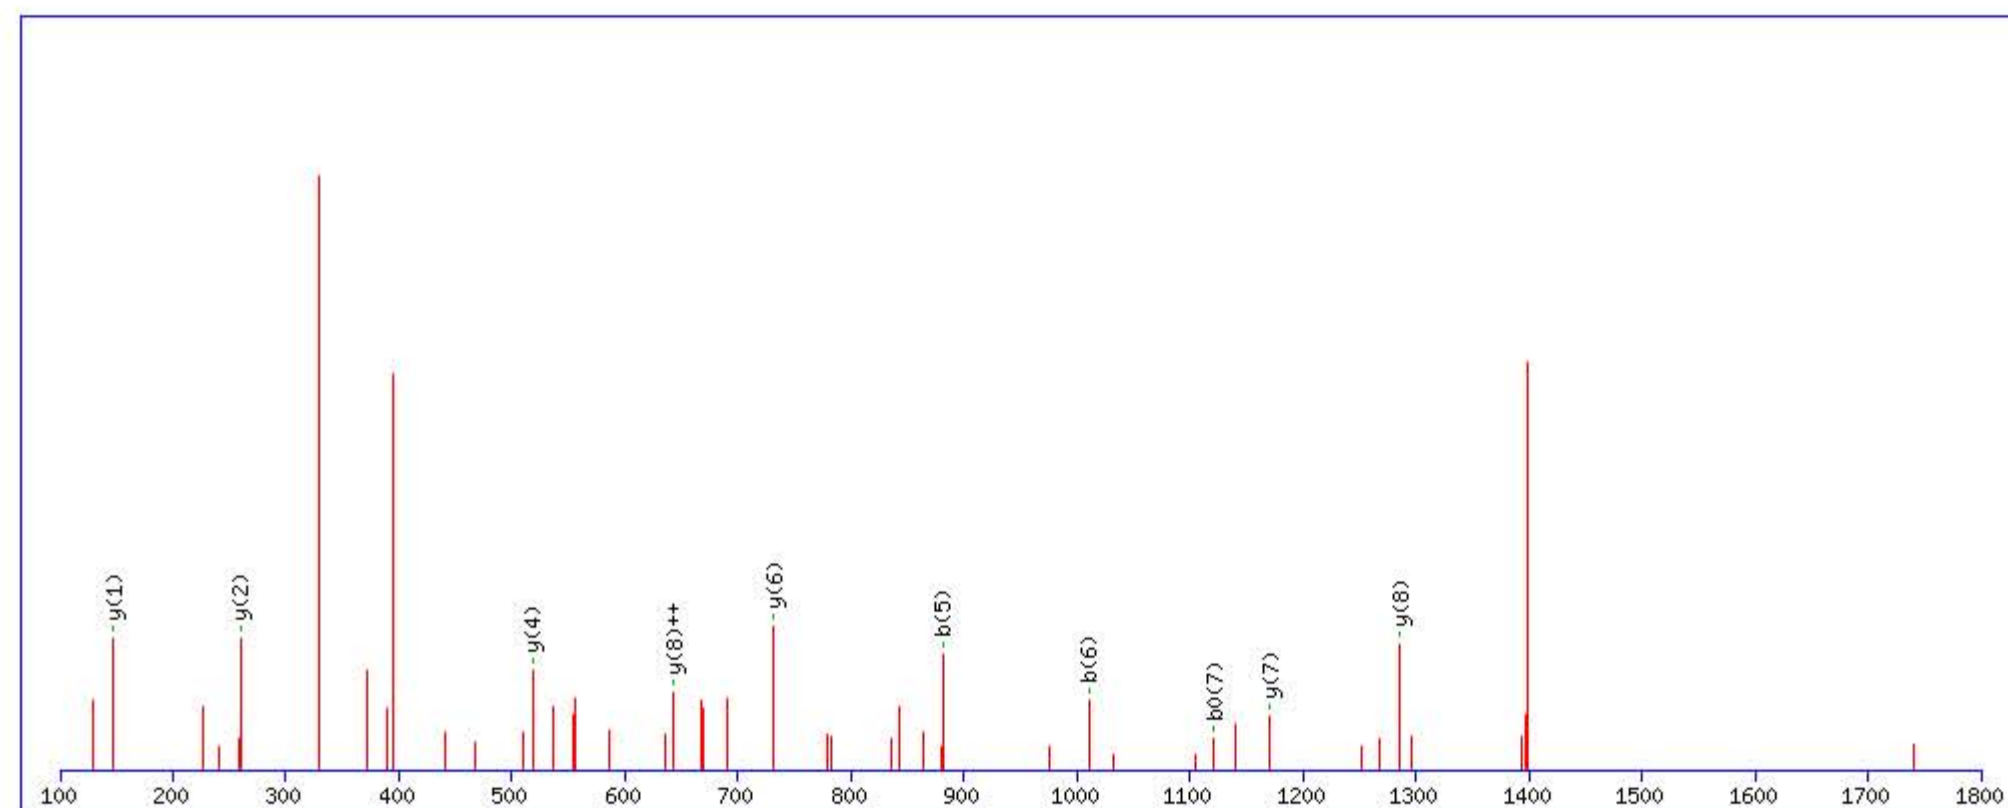

Monoisotopic mass of neutral peptide  $M_r(\text{calc})$ : 1397.722427

Fixed modifications: Carbamidomethyl (C) (apply to specified residues or termini only)

Variable modifications:

Q3 : Biotin:Thermo-21345 (Q)

Ions Score: 45 Expect: 0.00086

Matches : 10/86 fragment ions using 13 most intense peaks [\(help\)](#)

| # | b                  | b <sup>++</sup> | b <sup>*</sup> | b <sup>*++</sup> | b <sup>0</sup>     | b <sup>0++</sup> | Seq. | y                  | y <sup>++</sup>   | y <sup>*</sup> | y <sup>*++</sup> | y <sup>0</sup> | y <sup>0++</sup> | # |
|---|--------------------|-----------------|----------------|------------------|--------------------|------------------|------|--------------------|-------------------|----------------|------------------|----------------|------------------|---|
| 1 | 114.091340         | 57.549308       |                |                  |                    |                  | I    |                    |                   |                |                  |                |                  | 9 |
| 2 | 229.118283         | 115.062779      |                |                  | 211.107718         | 106.057497       | D    | <b>1285.645664</b> | <b>643.326470</b> | 1268.619115    | 634.813196       | 1267.635099    | 634.321187       | 8 |
| 3 | 668.343609         | 334.675443      | 651.317060     | 326.162168       | 650.333044         | 325.670160       | Q    | <b>1170.618721</b> | 585.812998        | 1153.592172    | 577.299724       | 1152.608156    | 576.807716       | 7 |
| 4 | 782.386536         | 391.696906      | 765.359987     | 383.183631       | 764.375971         | 382.691623       | N    | <b>731.393395</b>  | 366.200335        | 714.366846     | 357.687061       | 713.382830     | 357.195053       | 6 |
| 5 | <b>881.454950</b>  | 441.231113      | 864.428401     | 432.717838       | 863.444385         | 432.225830       | V    | 617.350468         | 309.178872        | 600.323919     | 300.665597       | 599.339903     | 300.173589       | 5 |
| 6 | <b>1010.497543</b> | 505.752410      | 993.470994     | 497.239135       | 992.486978         | 496.747127       | E    | <b>518.282054</b>  | 259.644665        | 501.255505     | 251.131390       | 500.271489     | 250.639382       | 4 |
| 7 | 1139.540136        | 570.273706      | 1122.513587    | 561.760431       | <b>1121.529571</b> | 561.268423       | E    | 389.239461         | 195.123368        | 372.212912     | 186.610094       | 371.228896     | 186.118086       | 3 |
| 8 | 1252.624200        | 626.815738      | 1235.597651    | 618.302463       | 1234.613635        | 617.810455       | L    | <b>260.196868</b>  | 130.602072        | 243.170319     | 122.088797       |                |                  | 2 |
| 9 |                    |                 |                |                  |                    |                  | K    | <b>147.112804</b>  | 74.060040         | 130.086255     | 65.546765        |                |                  | 1 |

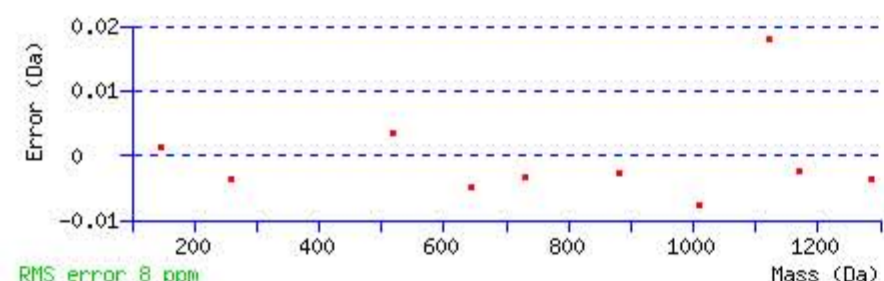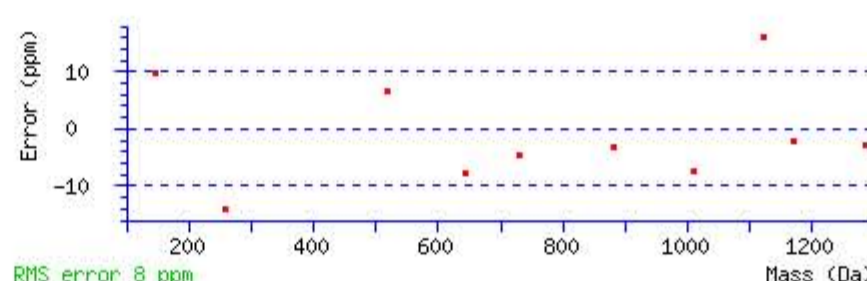

NCBI BLAST search of **IDQNVEELK**

(Parameters: blastp, nr protein database, expect=20000, no filter, PAM30)

Other BLAST [web gateways](#)

## All matches to this query

| Score | $M_r(\text{calc})$ : | Delta     | Sequence                     |
|-------|----------------------|-----------|------------------------------|
| 44.5  | 1397.722427          | -0.008059 | <a href="#">IDQNVEELK</a>    |
| 13.5  | 1397.704681          | 0.009687  | <a href="#">EQVDPLQMK</a>    |
| 8.9   | 1397.733658          | -0.019290 | <a href="#">QNITNQLEK</a>    |
| 8.8   | 1397.722427          | -0.008059 | <a href="#">EQKDTYVMKIK</a>  |
| 8.4   | 1397.722412          | -0.008044 | <a href="#">EELEQAQIK</a>    |
| 7.4   | 1397.697296          | 0.017072  | <a href="#">LPNTESHQVVMK</a> |
| 4.8   | 1397.722412          | -0.008044 | <a href="#">QLEAQLQEK</a>    |
| 4.7   | 1397.712540          | 0.001828  | <a href="#">LMFDAFNQRLK</a>  |
| 4.3   | 1397.719070          | -0.004702 | <a href="#">EFATSQLSFLQK</a> |
| 3.7   | 1397.723785          | -0.009417 | <a href="#">LFVSHMIDKHR</a>  |



# MASCOT Search Results

## Peptide View

MS/MS Fragmentation of **IDQTVEELR**

Found in **APOA4\_HUMAN**, Apolipoprotein A-IV OS=Homo sapiens GN=APOA4 PE=1 SV=3

Match to Query 31041: 1412.731008 from(707.372780,2+) rtinseconds(1889) index(35570)

Title: Locus:1.1.1.3077.22 File:"2013-07-02 CLN FXIII 60 min 2nd F 3.wiff"

Data file C:\Program Files (x86)\Matrix Science\Mascot Daemon\mgf5 FXIII 60 min 2nd\mascot\_daemon\_merge.mgf

Click mouse within plot area to zoom in by factor of two about that point

Or, Plot from  to  Da

Label all possible matches  Label matches used for scoring

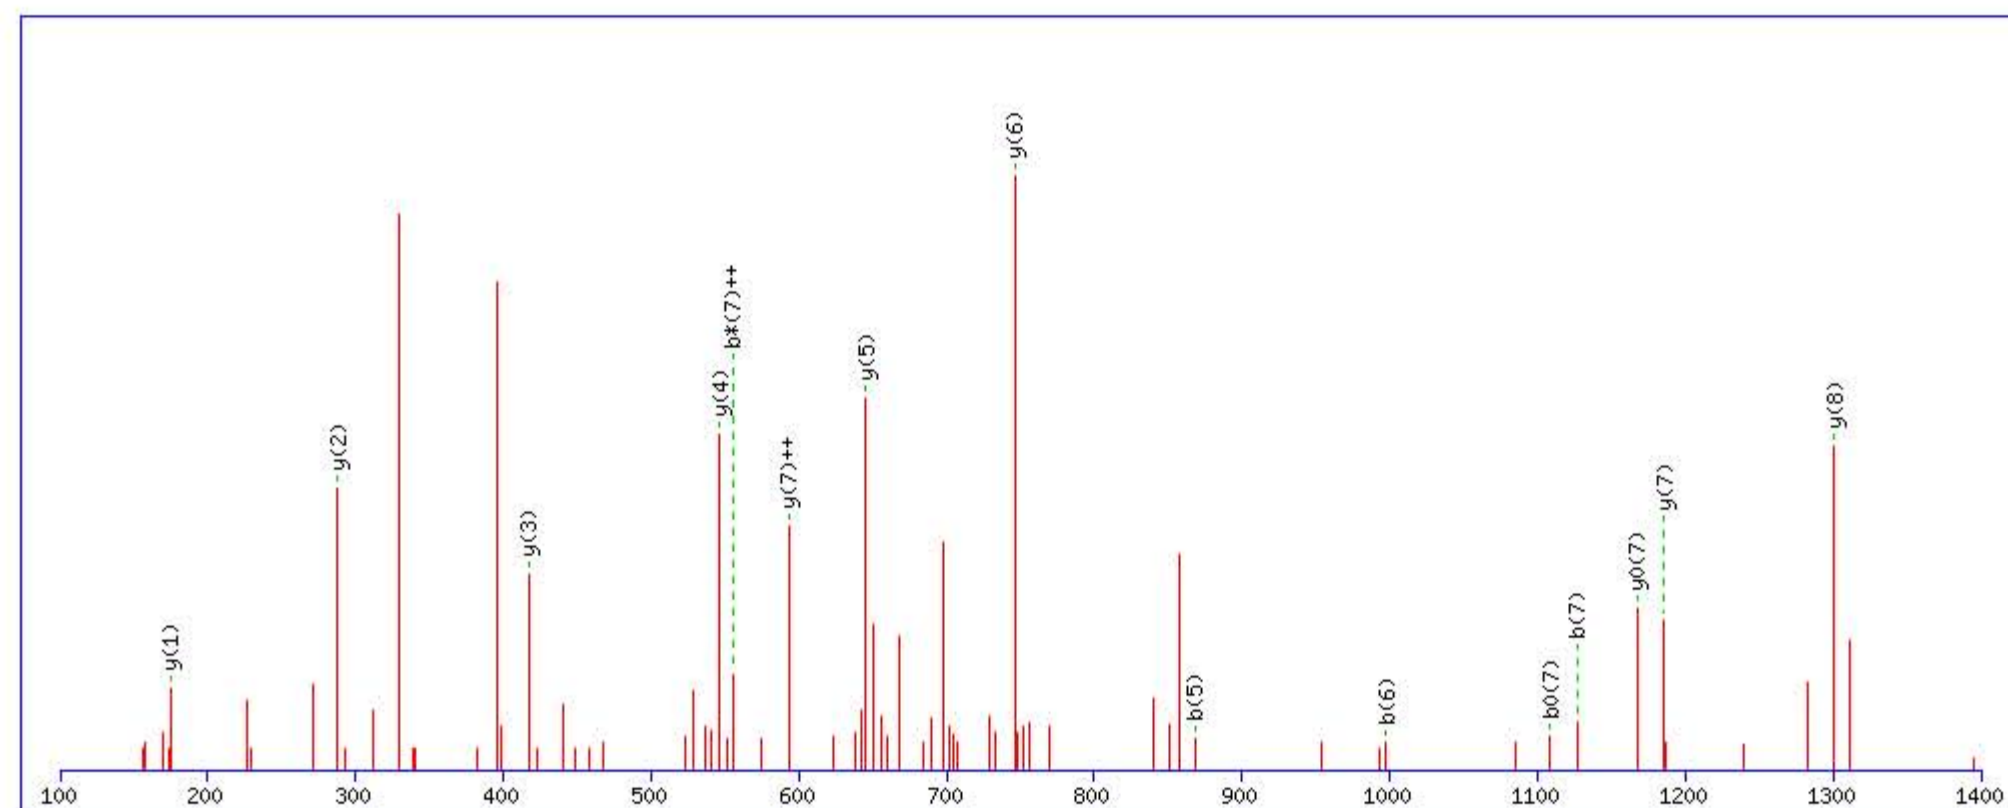

Monoisotopic mass of neutral peptide  $M_r(\text{calc})$ : 1412.733337

Fixed modifications: Carbamidomethyl (C) (apply to specified residues or termini only)

Variable modifications:

Q3 : Biotin:Thermo-21345 (Q)

Ions Score: 57 Expect: 4e-005

Matches : 15/86 fragment ions using 25 most intense peaks [\(help\)](#)

| # | b           | b <sup>++</sup> | b <sup>*</sup> | b <sup>*++</sup> | b <sup>0</sup> | b <sup>0++</sup> | Seq. | y           | y <sup>++</sup> | y <sup>*</sup> | y <sup>*++</sup> | y <sup>0</sup> | y <sup>0++</sup> | # |
|---|-------------|-----------------|----------------|------------------|----------------|------------------|------|-------------|-----------------|----------------|------------------|----------------|------------------|---|
| 1 | 114.091340  | 57.549308       |                |                  |                |                  | I    |             |                 |                |                  |                |                  | 9 |
| 2 | 229.118283  | 115.062779      |                |                  | 211.107718     | 106.057497       | D    | 1300.656564 | 650.831920      | 1283.630015    | 642.318646       | 1282.645999    | 641.826638       | 8 |
| 3 | 668.343609  | 334.675443      | 651.317060     | 326.162168       | 650.333044     | 325.670160       | Q    | 1185.629621 | 593.318449      | 1168.603072    | 584.805174       | 1167.619056    | 584.313166       | 7 |
| 4 | 769.391288  | 385.199282      | 752.364739     | 376.686008       | 751.380723     | 376.194000       | T    | 746.404295  | 373.705786      | 729.377746     | 365.192511       | 728.393730     | 364.700503       | 6 |
| 5 | 868.459702  | 434.733489      | 851.433153     | 426.220215       | 850.449137     | 425.728207       | V    | 645.356616  | 323.181946      | 628.330067     | 314.668672       | 627.346051     | 314.176664       | 5 |
| 6 | 997.502295  | 499.254786      | 980.475746     | 490.741511       | 979.491730     | 490.249503       | E    | 546.288202  | 273.647739      | 529.261653     | 265.134465       | 528.277637     | 264.642457       | 4 |
| 7 | 1126.544888 | 563.776082      | 1109.518339    | 555.262808       | 1108.534323    | 554.770800       | E    | 417.245609  | 209.126442      | 400.219060     | 200.613168       | 399.235044     | 200.121160       | 3 |
| 8 | 1239.628952 | 620.318114      | 1222.602403    | 611.804840       | 1221.618387    | 611.312832       | L    | 288.203016  | 144.605146      | 271.176467     | 136.091871       |                |                  | 2 |
| 9 |             |                 |                |                  |                |                  | R    | 175.118952  | 88.063114       | 158.092403     | 79.549839        |                |                  | 1 |

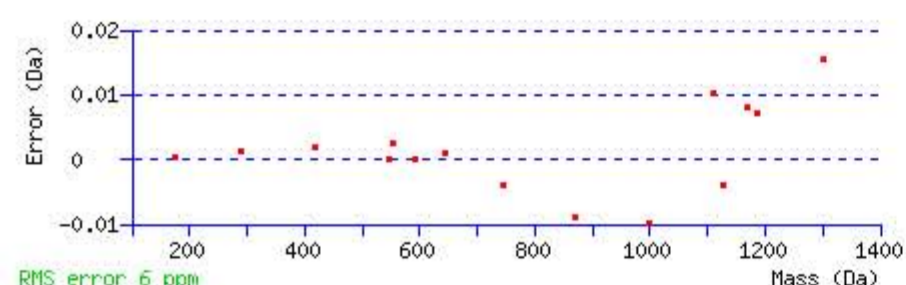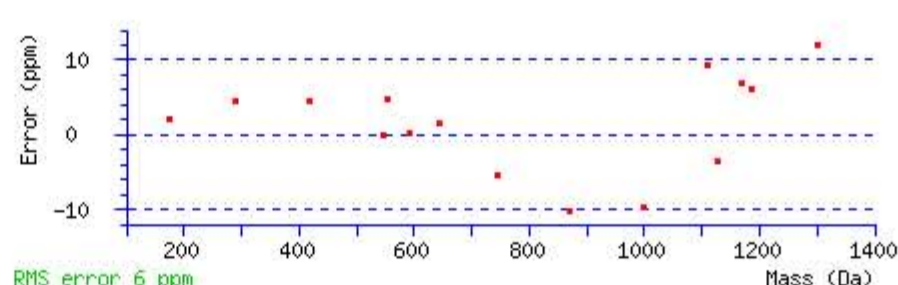

NCBI BLAST search of **IDQTVEELR**

(Parameters: blastp, nr protein database, expect=20000, no filter, PAM30)

Other BLAST [web gateways](#)

All matches to this query

| Score | $M_r(\text{calc})$ : | Delta     | Sequence                      |
|-------|----------------------|-----------|-------------------------------|
| 57.4  | 1412.733337          | -0.002329 | <a href="#">IDQTVEELR</a>     |
| 9.9   | 1412.744537          | -0.013529 | <a href="#">IPPEKMLELER</a>   |
| 7.2   | 1412.734665          | -0.003657 | <a href="#">MPADWRQQLR</a>    |
| 6.3   | 1412.741211          | -0.010203 | <a href="#">KVTIYSFTGNQR</a>  |
| 5.8   | 1412.737167          | -0.006159 | <a href="#">ARPEDVISEGRGK</a> |
| 4.9   | 1412.741196          | -0.010188 | <a href="#">SSLHYKTPDLR</a>   |
| 2.5   | 1412.730621          | 0.000387  | <a href="#">ARMEHSRELLR</a>   |
| 1.9   | 1412.719421          | 0.011587  | <a href="#">VSTLHCKADNIR</a>  |
| 1.9   | 1412.716034          | 0.014974  | <a href="#">SWRESHLTEIR</a>   |
| 1.9   | 1412.741180          | -0.010172 | <a href="#">WQQQELIAELR</a>   |



# MASCOT Search Results

## Peptide View

MS/MS Fragmentation of **LEPYADQLR**

Found in **APOA4\_HUMAN**, Apolipoprotein A-IV OS=Homo sapiens GN=APOA4 PE=1 SV=3

Match to Query 31067: 1414.726348 from(708.370450,2+) rtinseconds(1990) index(68722)

Title: Locus:1.1.1.1630.12 File:"2013-07-02 CLN FXIII 60 min 2nd FT.wiff"

Data file C:\Program Files (x86)\Matrix Science\Mascot Daemon\mgf5 FXIII 60 min 2nd\mascot\_daemon\_merge.mgf

Click mouse within plot area to zoom in by factor of two about that point

Or, Plot from  to  Da

Label all possible matches  Label matches used for scoring

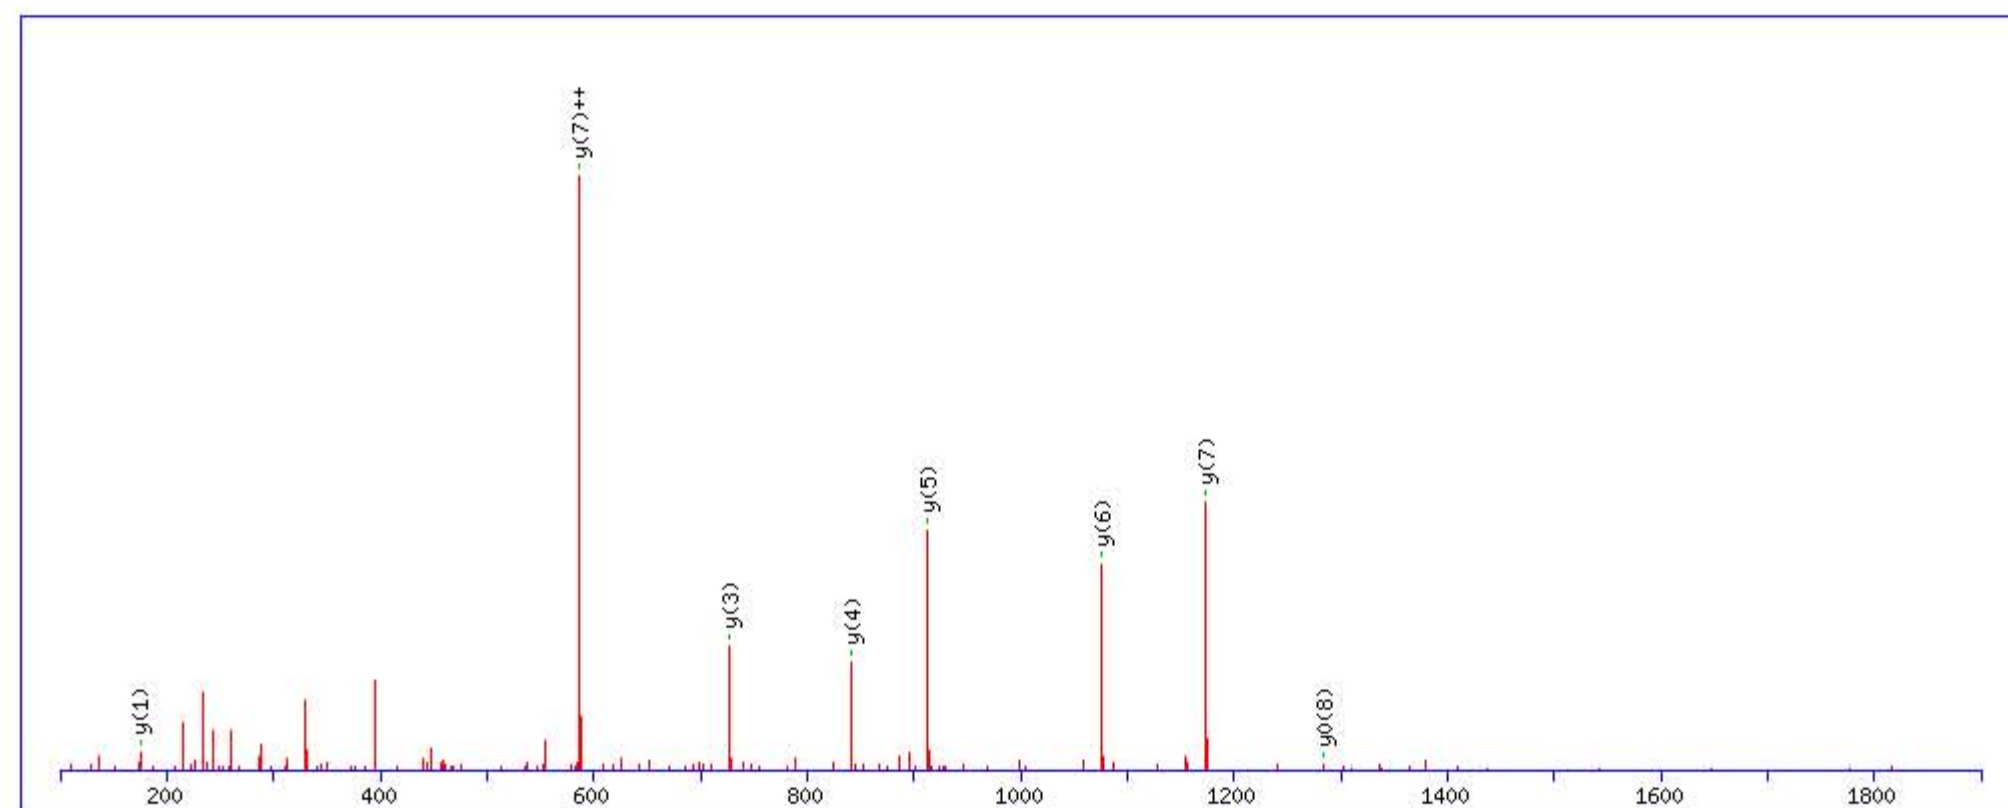

Monoisotopic mass of neutral peptide Mr(calc): 1414.727844

Fixed modifications: Carbamidomethyl (C) (apply to specified residues or termini only)

Variable modifications:

Q7 : Biotin:Thermo-21345 (Q)

Ions Score: 40 Expect: 0.001

Matches : 8/76 fragment ions using 14 most intense peaks [\(help\)](#)

| # | b           | b <sup>++</sup> | b <sup>*</sup> | b <sup>*++</sup> | b <sup>0</sup> | b <sup>0++</sup> | Seq. | y           | y <sup>++</sup> | y <sup>*</sup> | y <sup>*++</sup> | y <sup>0</sup> | y <sup>0++</sup> | # |
|---|-------------|-----------------|----------------|------------------|----------------|------------------|------|-------------|-----------------|----------------|------------------|----------------|------------------|---|
| 1 | 114.091340  | 57.549308       |                |                  |                |                  | L    |             |                 |                |                  |                |                  | 9 |
| 2 | 243.133933  | 122.070605      |                |                  | 225.123368     | 113.065322       | E    | 1302.651085 | 651.829181      | 1285.624536    | 643.315906       | 1284.640520    | 642.823898       | 8 |
| 3 | 340.186697  | 170.596987      |                |                  | 322.176132     | 161.591704       | P    | 1173.608492 | 587.307884      | 1156.581943    | 578.794610       | 1155.597927    | 578.302602       | 7 |
| 4 | 503.250026  | 252.128651      |                |                  | 485.239461     | 243.123369       | Y    | 1076.555728 | 538.781502      | 1059.529179    | 530.268228       | 1058.545163    | 529.776220       | 6 |
| 5 | 574.287140  | 287.647208      |                |                  | 556.276575     | 278.641926       | A    | 913.492399  | 457.249838      | 896.465850     | 448.736563       | 895.481834     | 448.244555       | 5 |
| 6 | 689.314083  | 345.160680      |                |                  | 671.303518     | 336.155397       | D    | 842.455285  | 421.731281      | 825.428736     | 413.218006       | 824.444720     | 412.725998       | 4 |
| 7 | 1128.539409 | 564.773343      | 1111.512860    | 556.260068       | 1110.528844    | 555.768060       | Q    | 727.428342  | 364.217809      | 710.401793     | 355.704535       |                |                  | 3 |
| 8 | 1241.623473 | 621.315375      | 1224.596924    | 612.802100       | 1223.612908    | 612.310092       | L    | 288.203016  | 144.605146      | 271.176467     | 136.091871       |                |                  | 2 |
| 9 |             |                 |                |                  |                |                  | R    | 175.118952  | 88.063114       | 158.092403     | 79.549839        |                |                  | 1 |

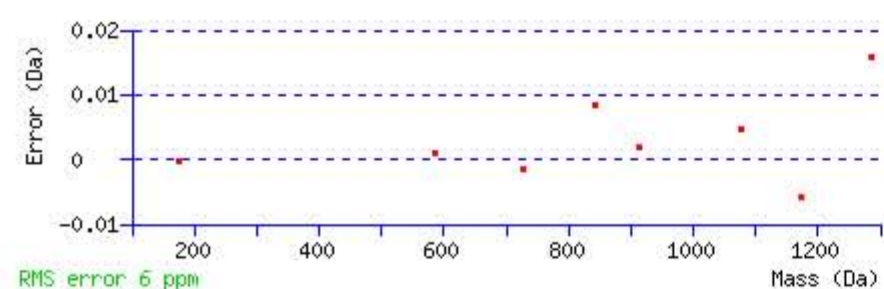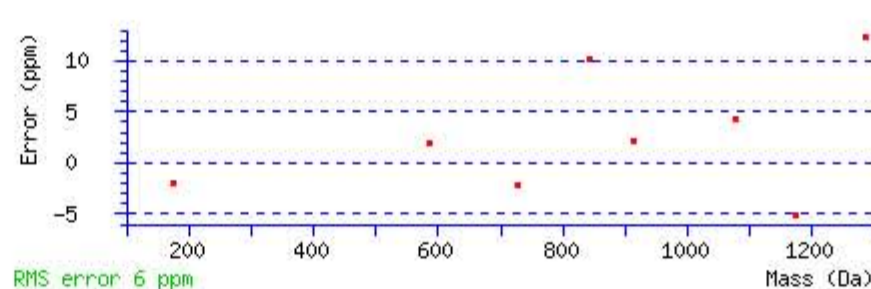

NCBI BLAST search of [LEPYADQLR](#)

(Parameters: blastp, nr protein database, expect=20000, no filter, PAM30)

Other BLAST [web gateways](#)

## All matches to this query

| Score | Mr(calc):   | Delta     | Sequence                       |
|-------|-------------|-----------|--------------------------------|
| 39.5  | 1414.727844 | -0.001496 | <a href="#">LEPYADQLR</a>      |
| 7.3   | 1414.712585 | 0.013763  | <a href="#">EISTEEQLR</a>      |
| 6.5   | 1414.713943 | 0.012405  | <a href="#">KLQCIADQFHR</a>    |
| 5.0   | 1414.735931 | -0.009583 | <a href="#">LMRGLLHCMIR</a>    |
| 1.8   | 1414.731216 | -0.004868 | <a href="#">LMELQEAVR</a>      |
| 1.5   | 1414.731689 | -0.005341 | <a href="#">NKAEFHQSVISR</a>   |
| 0.8   | 1414.735077 | -0.008729 | <a href="#">SSMSGLHLVKQGR</a>  |
| 0.4   | 1414.741577 | -0.015229 | <a href="#">ELDVEVSRLEAR</a>   |
| 0.3   | 1414.716400 | 0.009948  | <a href="#">LEEDARLEERR</a>    |
| 0.1   | 1414.717789 | 0.008559  | <a href="#">GKGAAGGSWQQRGR</a> |



# MASCOT Search Results

## Peptide View

MS/MS Fragmentation of **ALVQQMEQLR**

Found in **APOA4\_HUMAN**, Apolipoprotein A-IV OS=Homo sapiens GN=APOA4 PE=1 SV=3

Match to Query 34589: 1525.813928 from(763.914240,2+) rtinseconds(2097) index(6396)

Title: Locus:1.1.1.1539.12 File:"2013-07-02 CLN FXIII 60 min 2nd F 1.wiff"

Data file C:\Program Files (x86)\Matrix Science\Mascot Daemon\mgf5 FXIII 60 min 2nd\mascot\_daemon\_merge.mgf

Click mouse within plot area to zoom in by factor of two about that point

Or, Plot from  to  Da

Label all possible matches  Label matches used for scoring

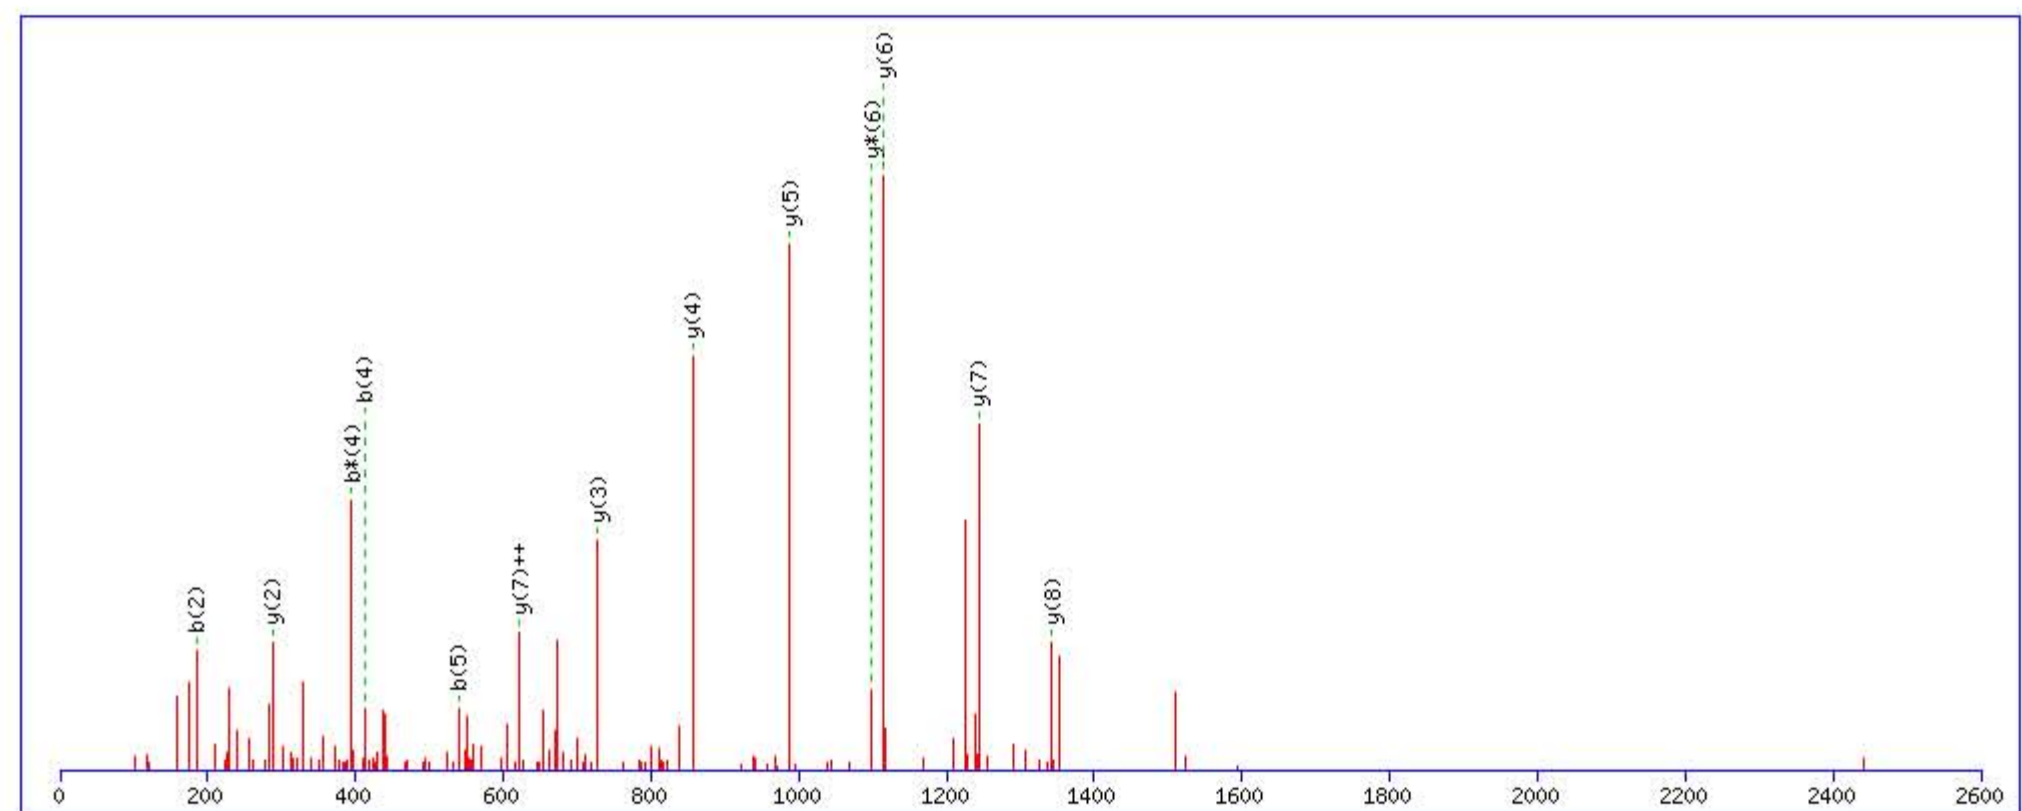

Monoisotopic mass of neutral peptide Mr(calc): 1525.810867

Fixed modifications: Carbamidomethyl (C) (apply to specified residues or termini only)

Variable modifications:

Q8 : Biotin:Thermo-21345 (Q)

Ions Score: 71 Expect: 2.1e-006

Matches : 13/84 fragment ions using 14 most intense peaks [\(help\)](#)

| #  | b                 | b <sup>++</sup> | b <sup>+</sup>    | b <sup>+++</sup> | b <sup>0</sup> | b <sup>0++</sup> | Seq. | y                  | y <sup>++</sup>   | y <sup>+</sup>     | y <sup>+++</sup> | y <sup>0</sup> | y <sup>0++</sup> | #  |
|----|-------------------|-----------------|-------------------|------------------|----------------|------------------|------|--------------------|-------------------|--------------------|------------------|----------------|------------------|----|
| 1  | 72.044390         | 36.525833       |                   |                  |                |                  | A    |                    |                   |                    |                  |                |                  | 10 |
| 2  | <b>185.128454</b> | 93.067865       |                   |                  |                |                  | L    | 1455.781054        | 728.394165        | 1438.754505        | 719.880890       | 1437.770489    | 719.388882       | 9  |
| 3  | 284.196868        | 142.602072      |                   |                  |                |                  | V    | <b>1342.696990</b> | 671.852133        | 1325.670441        | 663.338858       | 1324.686425    | 662.846850       | 8  |
| 4  | <b>412.255446</b> | 206.631361      | <b>395.228897</b> | 198.118087       |                |                  | Q    | <b>1243.628576</b> | <b>622.317926</b> | 1226.602027        | 613.804651       | 1225.618011    | 613.312643       | 7  |
| 5  | <b>540.314024</b> | 270.660650      | 523.287475        | 262.147376       |                |                  | Q    | <b>1115.569998</b> | 558.288637        | <b>1098.543449</b> | 549.775362       | 1097.559433    | 549.283354       | 6  |
| 6  | 671.354509        | 336.180893      | 654.327960        | 327.667618       |                |                  | M    | <b>987.511420</b>  | 494.259348        | 970.484871         | 485.746073       | 969.500855     | 485.254065       | 5  |
| 7  | 800.397102        | 400.702189      | 783.370553        | 392.188915       | 782.386537     | 391.696907       | E    | <b>856.470935</b>  | 428.739105        | 839.444386         | 420.225831       | 838.460370     | 419.733823       | 4  |
| 8  | 1239.622428       | 620.314852      | 1222.595879       | 611.801578       | 1221.611863    | 611.309569       | Q    | <b>727.428342</b>  | 364.217809        | 710.401793         | 355.704534       |                |                  | 3  |
| 9  | 1352.706492       | 676.856884      | 1335.679943       | 668.343609       | 1334.695927    | 667.851601       | L    | <b>288.203016</b>  | 144.605146        | 271.176467         | 136.091871       |                |                  | 2  |
| 10 |                   |                 |                   |                  |                |                  | R    | 175.118952         | 88.063114         | 158.092403         | 79.549839        |                |                  | 1  |

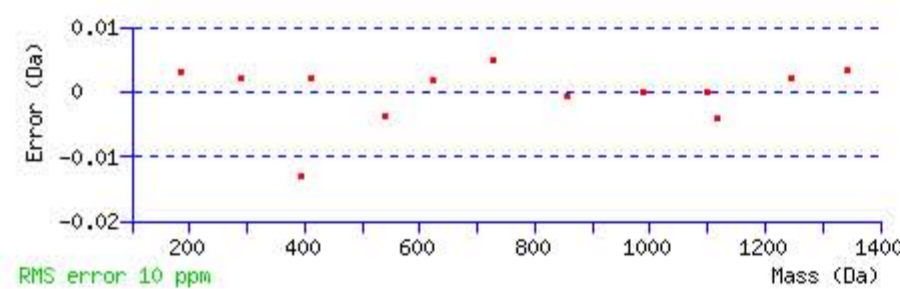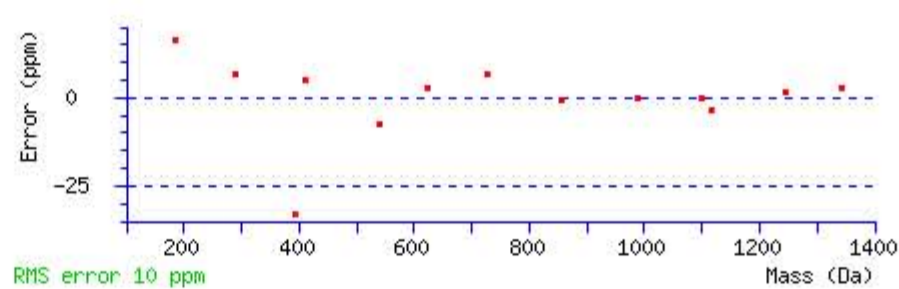

NCBI BLAST search of **ALVQQMEQLR**

(Parameters: blastp, nr protein database, expect=20000, no filter, PAM30)

Other BLAST [web gateways](#)

## All matches to this query

| Score | Mr(calc):   | Delta     | Sequence                        |
|-------|-------------|-----------|---------------------------------|
| 71.4  | 1525.810867 | 0.003061  | <a href="#">ALVQQMEQLR</a>      |
| 23.1  | 1525.810867 | 0.003061  | <a href="#">ALVQQMEQLR</a>      |
| 16.7  | 1525.798752 | 0.015176  | <a href="#">SPVKEEEEKPOEVK</a>  |
| 14.9  | 1525.792236 | 0.021692  | <a href="#">ALTEQQEQLR</a>      |
| 10.3  | 1525.800064 | 0.013864  | <a href="#">ARALQSYEAKAR</a>    |
| 9.9   | 1525.810867 | 0.003061  | <a href="#">ALVQQMEQLR</a>      |
| 7.7   | 1525.803467 | 0.010461  | <a href="#">SPPSPRSSMAAVALR</a> |
| 5.5   | 1525.803482 | 0.010446  | <a href="#">VNTFAGSSQKAR</a>    |
| 5.2   | 1525.807495 | 0.006433  | <a href="#">WPPQQLMLSAALR</a>   |
| 4.9   | 1525.814682 | -0.000754 | <a href="#">LARASEQERR</a>      |



# MASCOT SEARCH RESULTS

## Peptide View

MS/MS Fragmentation of **LLPHANEVSQK**

Found in **APOA4\_HUMAN**, Apolipoprotein A-IV OS=Homo sapiens GN=APOA4 PE=1 SV=3

Match to Query 35002: 1545.829928 from(773.922240,2+) rtinseconds(1531) index(66052)

Title: Locus:1.1.1.1470.18 File:"2013-07-02 CLN FXIII 60 min 2nd FT.wiff"

Data file C:\Program Files (x86)\Matrix Science\Mascot Daemon\mgf5 FXIII 60 min 2nd\mascot\_daemon\_merge.mgf

Click mouse within plot area to zoom in by factor of two about that point

Or, Plot from  to  Da

Label all possible matches  Label matches used for scoring

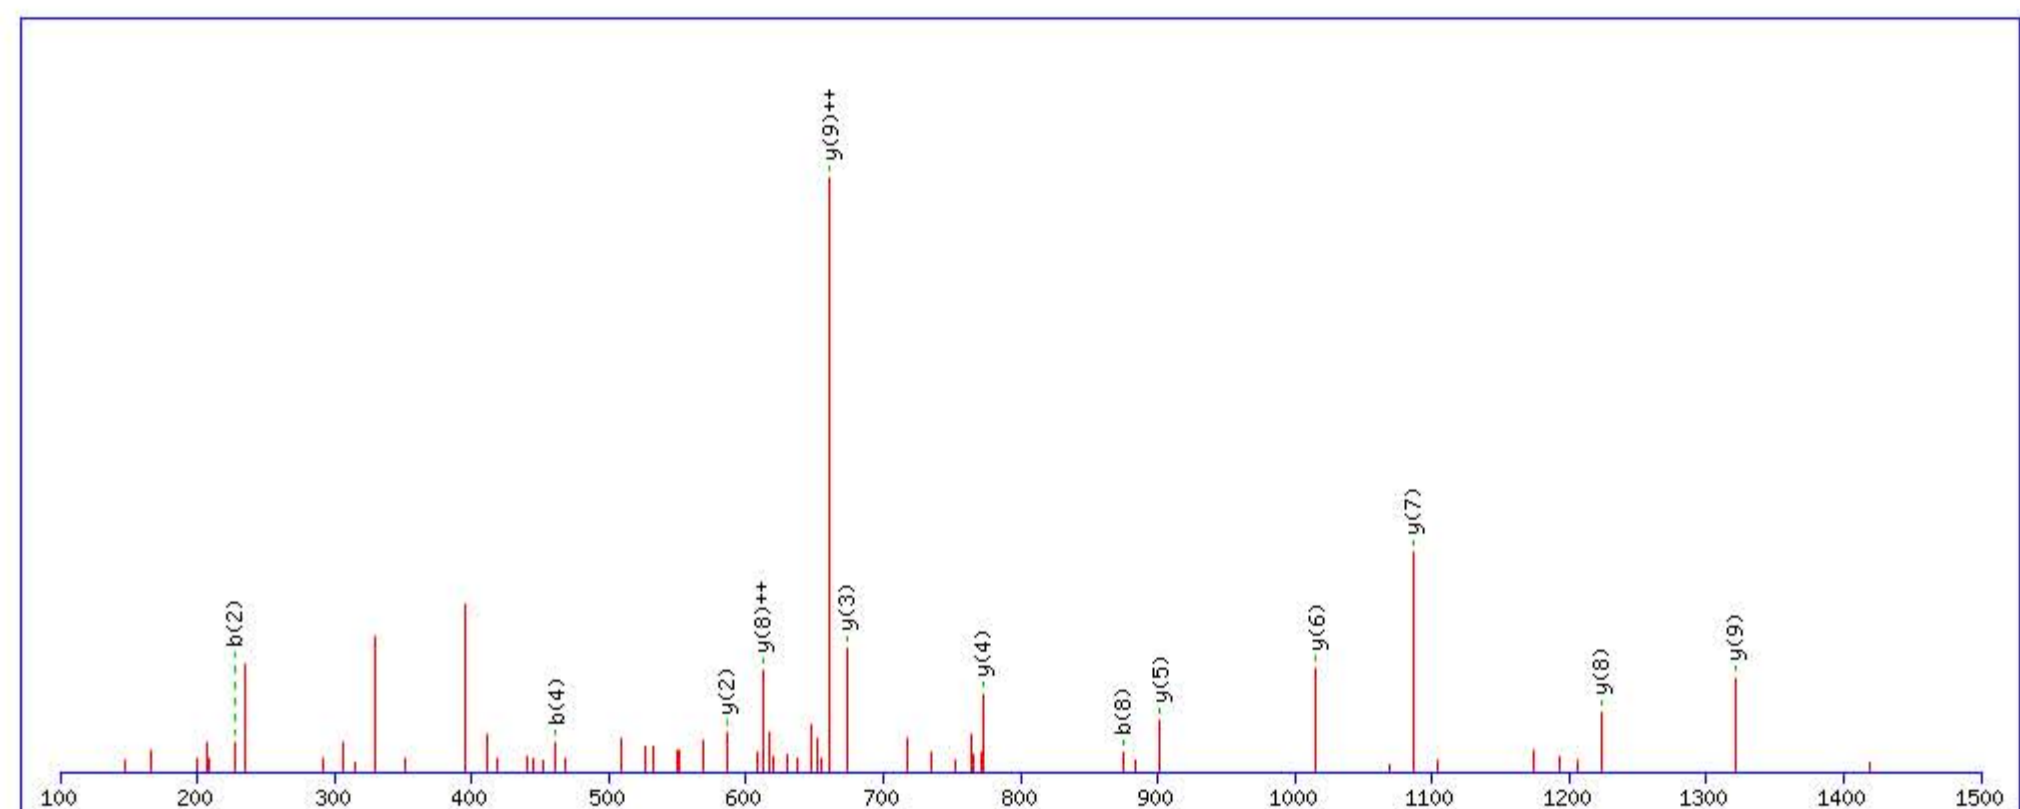

Monoisotopic mass of neutral peptide Mr(calc): 1545.833710

Fixed modifications: Carbamidomethyl (C) (apply to specified residues or termini only)

Variable modifications:

Q10 : Biotin:Thermo-21345 (Q)

Ions Score: 56 Expect: 9.2e-006

Matches : 13/94 fragment ions using 23 most intense peaks [\(help\)](#)

| #  | b                 | b <sup>++</sup> | b <sup>*</sup> | b <sup>*++</sup> | b <sup>0</sup> | b <sup>0++</sup> | Seq. | y                  | y <sup>++</sup>   | y <sup>*</sup> | y <sup>*++</sup> | y <sup>0</sup> | y <sup>0++</sup> | #  |
|----|-------------------|-----------------|----------------|------------------|----------------|------------------|------|--------------------|-------------------|----------------|------------------|----------------|------------------|----|
| 1  | 114.091340        | 57.549308       |                |                  |                |                  | L    |                    |                   |                |                  |                |                  | 11 |
| 2  | <b>227.175404</b> | 114.091340      |                |                  |                |                  | L    | 1433.756946        | 717.382111        | 1416.730397    | 708.868837       | 1415.746381    | 708.376828       | 10 |
| 3  | 324.228168        | 162.617722      |                |                  |                |                  | P    | <b>1320.672882</b> | <b>660.840079</b> | 1303.646333    | 652.326804       | 1302.662317    | 651.834796       | 9  |
| 4  | <b>461.287080</b> | 231.147178      |                |                  |                |                  | H    | <b>1223.620118</b> | <b>612.313697</b> | 1206.593569    | 603.800422       | 1205.609553    | 603.308414       | 8  |
| 5  | 532.324194        | 266.665735      |                |                  |                |                  | A    | <b>1086.561206</b> | 543.784241        | 1069.534657    | 535.270966       | 1068.550641    | 534.778958       | 7  |
| 6  | 646.367121        | 323.687199      | 629.340572     | 315.173924       |                |                  | N    | <b>1015.524092</b> | 508.265684        | 998.497543     | 499.752409       | 997.513527     | 499.260401       | 6  |
| 7  | 775.409714        | 388.208495      | 758.383165     | 379.695221       | 757.399149     | 379.203213       | E    | <b>901.481165</b>  | 451.244220        | 884.454616     | 442.730946       | 883.470600     | 442.238938       | 5  |
| 8  | <b>874.478128</b> | 437.742702      | 857.451579     | 429.229427       | 856.467563     | 428.737419       | V    | <b>772.438572</b>  | 386.722924        | 755.412023     | 378.209649       | 754.428007     | 377.717641       | 4  |
| 9  | 961.510156        | 481.258716      | 944.483607     | 472.745441       | 943.499591     | 472.253433       | S    | <b>673.370158</b>  | 337.188717        | 656.343609     | 328.675442       | 655.359593     | 328.183434       | 3  |
| 10 | 1400.735482       | 700.871379      | 1383.708933    | 692.358104       | 1382.724917    | 691.866096       | Q    | <b>586.338130</b>  | 293.672703        | 569.311581     | 285.159428       |                |                  | 2  |
| 11 |                   |                 |                |                  |                |                  | K    | 147.112804         | 74.060040         | 130.086255     | 65.546765        |                |                  | 1  |

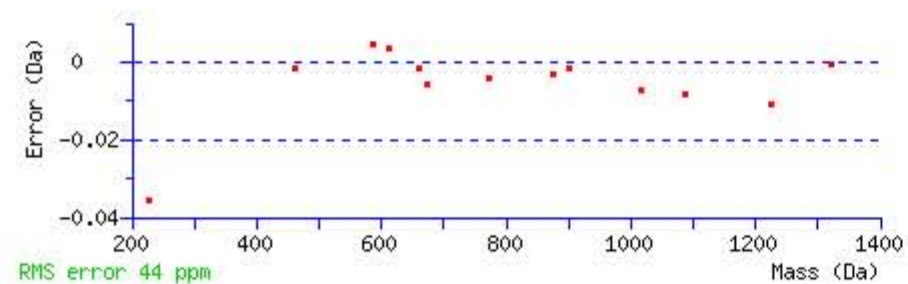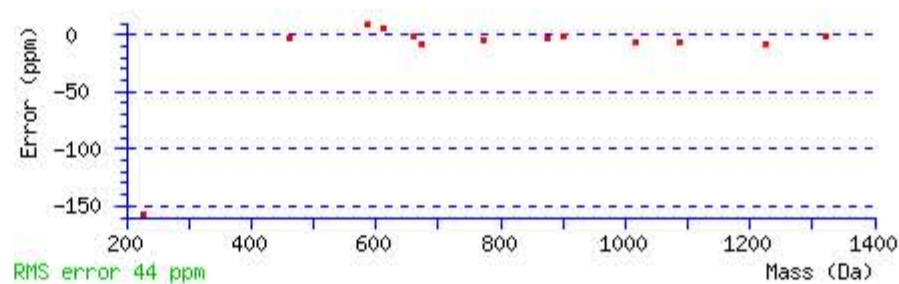

NCBI BLAST search of **LLPHANEVSQK**

(Parameters: blastp, nr protein database, expect=20000, no filter, PAM30)

Other BLAST [web gateways](#)

All matches to this query

| Score | Mr(calc):   | Delta     | Sequence                      |
|-------|-------------|-----------|-------------------------------|
| 55.6  | 1545.833710 | -0.003782 | <a href="#">LLPHANEVSQK</a>   |
| 1.8   | 1545.837738 | -0.007810 | <a href="#">LIPGQEYIFR</a>    |
| 0.9   | 1545.832352 | -0.002424 | <a href="#">LLSEVMEELEKVK</a> |

Mascot: <http://www.matrixscience.com/>



# MASCOT Search Results

## Peptide View

MS/MS Fragmentation of **TQVNTQAEQLR**

Found in **APOA4\_HUMAN**, Apolipoprotein A-IV OS=Homo sapiens GN=APOA4 PE=1 SV=3

Match to Query 37125: 1597.818132 from(533.613320,3+) rtinseconds(1582) index(66370)

Title: Locus:1.1.1.1488.10 File:"2013-07-02 CLN FXIII 60 min 2nd FT.wiff"

Data file C:\Program Files (x86)\Matrix Science\Mascot Daemon\mgf\5 FXIII 60 min 2nd\mascot\_daemon\_merge.mgf

Click mouse within plot area to zoom in by factor of two about that point

Or, Plot from  to  Da

Label all possible matches  Label matches used for scoring

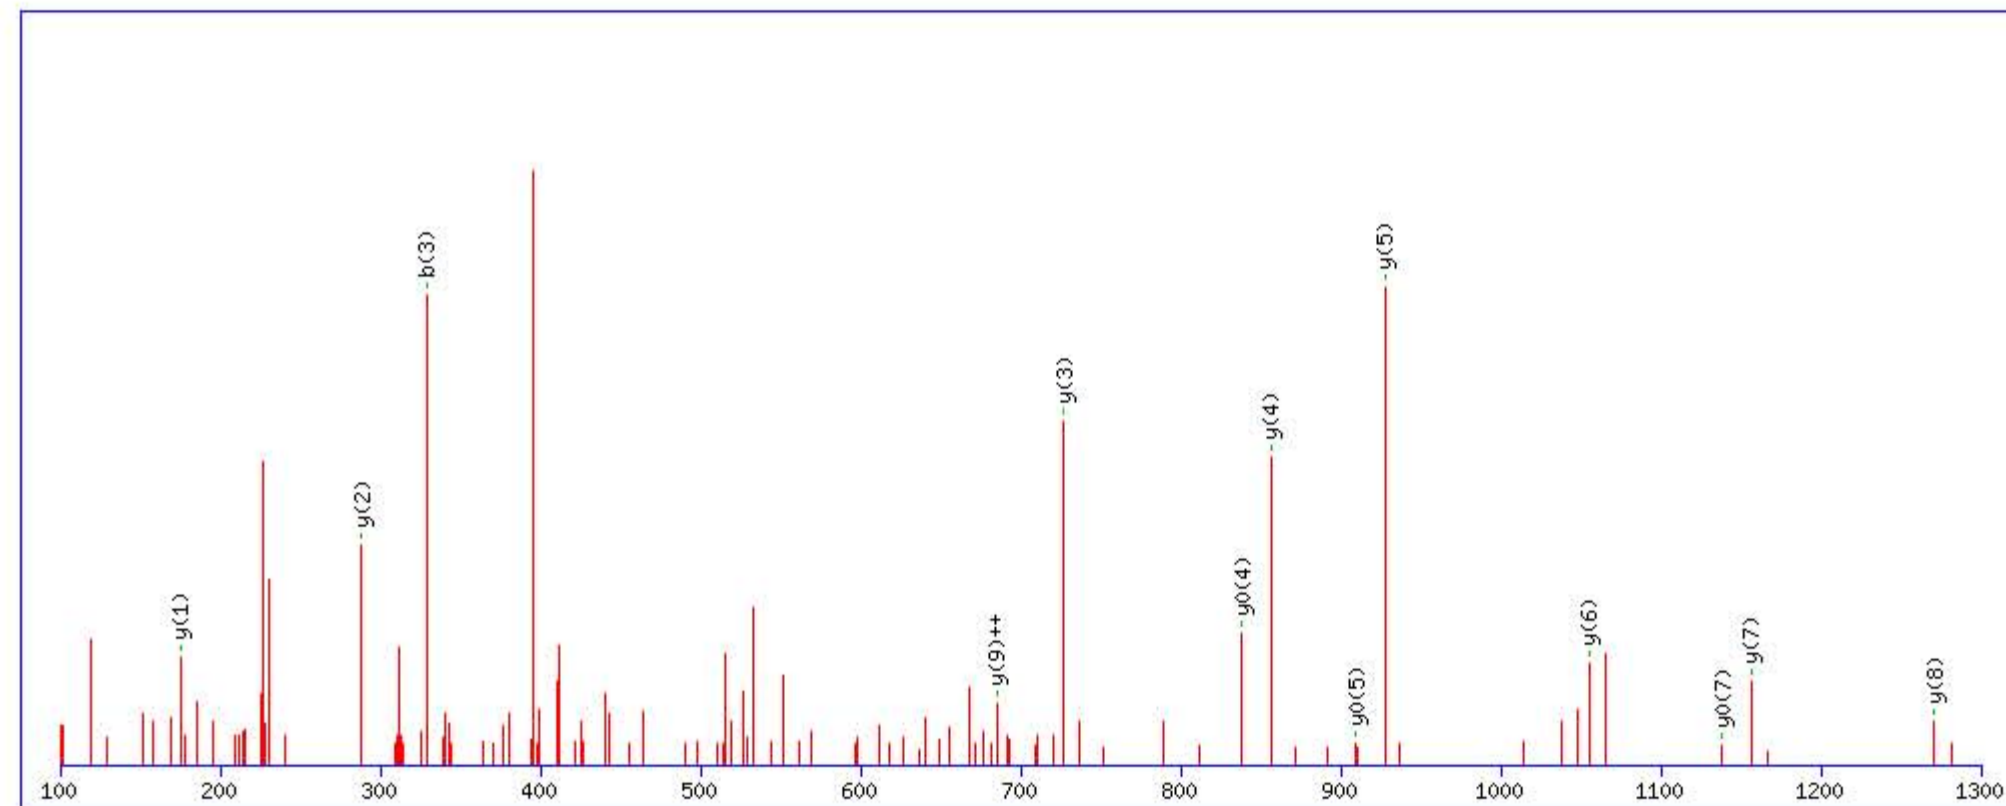

Monoisotopic mass of neutral peptide Mr(calc): 1597.824615

Fixed modifications: Carbamidomethyl (C) (apply to specified residues or termini only)

Variable modifications:

Q9 : Biotin:Thermo-21345 (Q)

Ions Score: 44 Expect: 0.00015

Matches : 13/112 fragment ions using 24 most intense peaks [\(help\)](#)

| #  | b                 | b <sup>++</sup> | b <sup>+</sup> | b <sup>+++</sup> | b <sup>0</sup> | b <sup>0++</sup> | Seq. | y                  | y <sup>++</sup>   | y <sup>+</sup> | y <sup>+++</sup> | y <sup>0</sup>     | y <sup>0++</sup> | #  |
|----|-------------------|-----------------|----------------|------------------|----------------|------------------|------|--------------------|-------------------|----------------|------------------|--------------------|------------------|----|
| 1  | 102.054955        | 51.531116       |                |                  | 84.044390      | 42.525833        | T    |                    |                   |                |                  |                    |                  | 11 |
| 2  | 230.113533        | 115.560405      | 213.086984     | 107.047130       | 212.102968     | 106.555122       | Q    | 1497.784225        | 749.395751        | 1480.757676    | 740.882476       | 1479.773660        | 740.390468       | 10 |
| 3  | <b>329.181947</b> | 165.094612      | 312.155398     | 156.581337       | 311.171382     | 156.089329       | V    | 1369.725647        | <b>685.366462</b> | 1352.699098    | 676.853187       | 1351.715082        | 676.361179       | 9  |
| 4  | 443.224874        | 222.116075      | 426.198325     | 213.602801       | 425.214309     | 213.110793       | N    | <b>1270.657233</b> | 635.832255        | 1253.630684    | 627.318980       | 1252.646668        | 626.826972       | 8  |
| 5  | 544.272553        | 272.639915      | 527.246004     | 264.126640       | 526.261988     | 263.634632       | T    | <b>1156.614306</b> | 578.810791        | 1139.587757    | 570.297517       | <b>1138.603741</b> | 569.805509       | 7  |
| 6  | 672.331131        | 336.669204      | 655.304582     | 328.155929       | 654.320566     | 327.663921       | Q    | <b>1055.566627</b> | 528.286951        | 1038.540078    | 519.773677       | 1037.556062        | 519.281669       | 6  |
| 7  | 743.368245        | 372.187761      | 726.341696     | 363.674486       | 725.357680     | 363.182478       | A    | <b>927.508049</b>  | 464.257663        | 910.481500     | 455.744388       | <b>909.497484</b>  | 455.252380       | 5  |
| 8  | 872.410838        | 436.709057      | 855.384289     | 428.195783       | 854.400273     | 427.703775       | E    | <b>856.470935</b>  | 428.739106        | 839.444386     | 420.225831       | <b>838.460370</b>  | 419.733823       | 4  |
| 9  | 1311.636164       | 656.321720      | 1294.609615    | 647.808446       | 1293.625599    | 647.316438       | Q    | <b>727.428342</b>  | 364.217809        | 710.401793     | 355.704535       |                    |                  | 3  |
| 10 | 1424.720228       | 712.863752      | 1407.693679    | 704.350478       | 1406.709663    | 703.858470       | L    | <b>288.203016</b>  | 144.605146        | 271.176467     | 136.091871       |                    |                  | 2  |
| 11 |                   |                 |                |                  |                |                  | R    | <b>175.118952</b>  | 88.063114         | 158.092403     | 79.549839        |                    |                  | 1  |

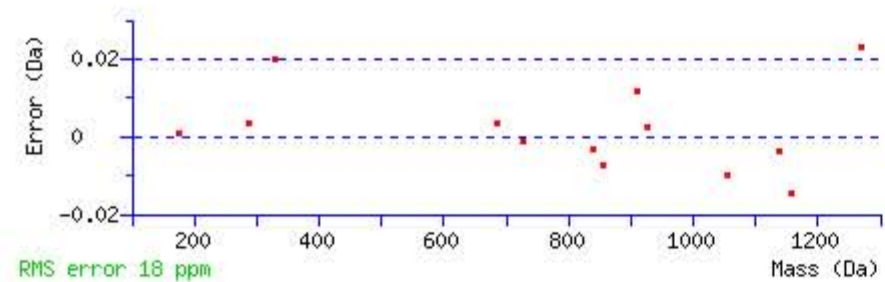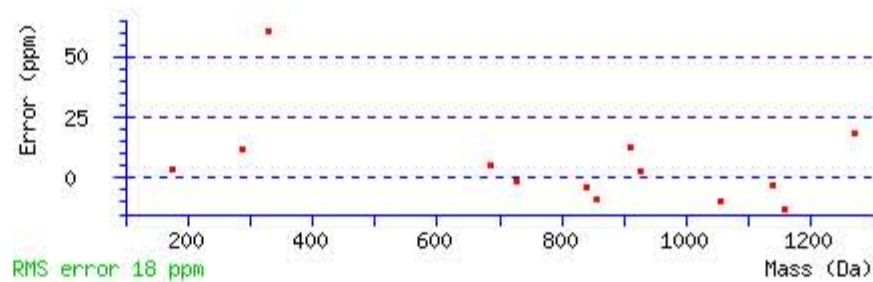

NCBI BLAST search of **TQVNTQAEQLR**

(Parameters: blastp, nr protein database, expect=20000, no filter, PAM30)

Other BLAST [web gateways](#)

All matches to this query

| Score | Mr(calc):   | Delta     | Sequence                       |
|-------|-------------|-----------|--------------------------------|
| 43.6  | 1597.824615 | -0.006483 | <a href="#">TQVNTQAEQLR</a>    |
| 9.0   | 1597.824615 | -0.006483 | <a href="#">TQVNTQAEQLR</a>    |
| 2.8   | 1597.828400 | -0.010268 | <a href="#">RALQEEERAAAQAR</a> |
| 2.5   | 1597.835846 | -0.017714 | <a href="#">TKAAATAGGQGAAR</a> |
| 0.6   | 1597.828629 | -0.010497 | <a href="#">AWDILSGEQLR</a>    |

Mascot: <http://www.matrixscience.com/>



# MASCOT Search Results

## Peptide View

MS/MS Fragmentation of **SLAPYAQDTQEK**

Found in **APOA4\_HUMAN**, Apolipoprotein A-IV OS=Homo sapiens GN=APOA4 PE=1 SV=3

Match to Query 39610: 1660.812208 from(831.413380,2+) rtinseconds(1720) index(4209)

Title: Locus:1.1.1.1408.12 File:"2013-07-02 CLN FXIII 60 min 2nd F 1.wiff"

Data file C:\Program Files (x86)\Matrix Science\Mascot Daemon\mgf\5 FXIII 60 min 2nd\mascot\_daemon\_merge.mgf

Click mouse within plot area to zoom in by factor of two about that point

Or, Plot from  to  Da

Label all possible matches  Label matches used for scoring

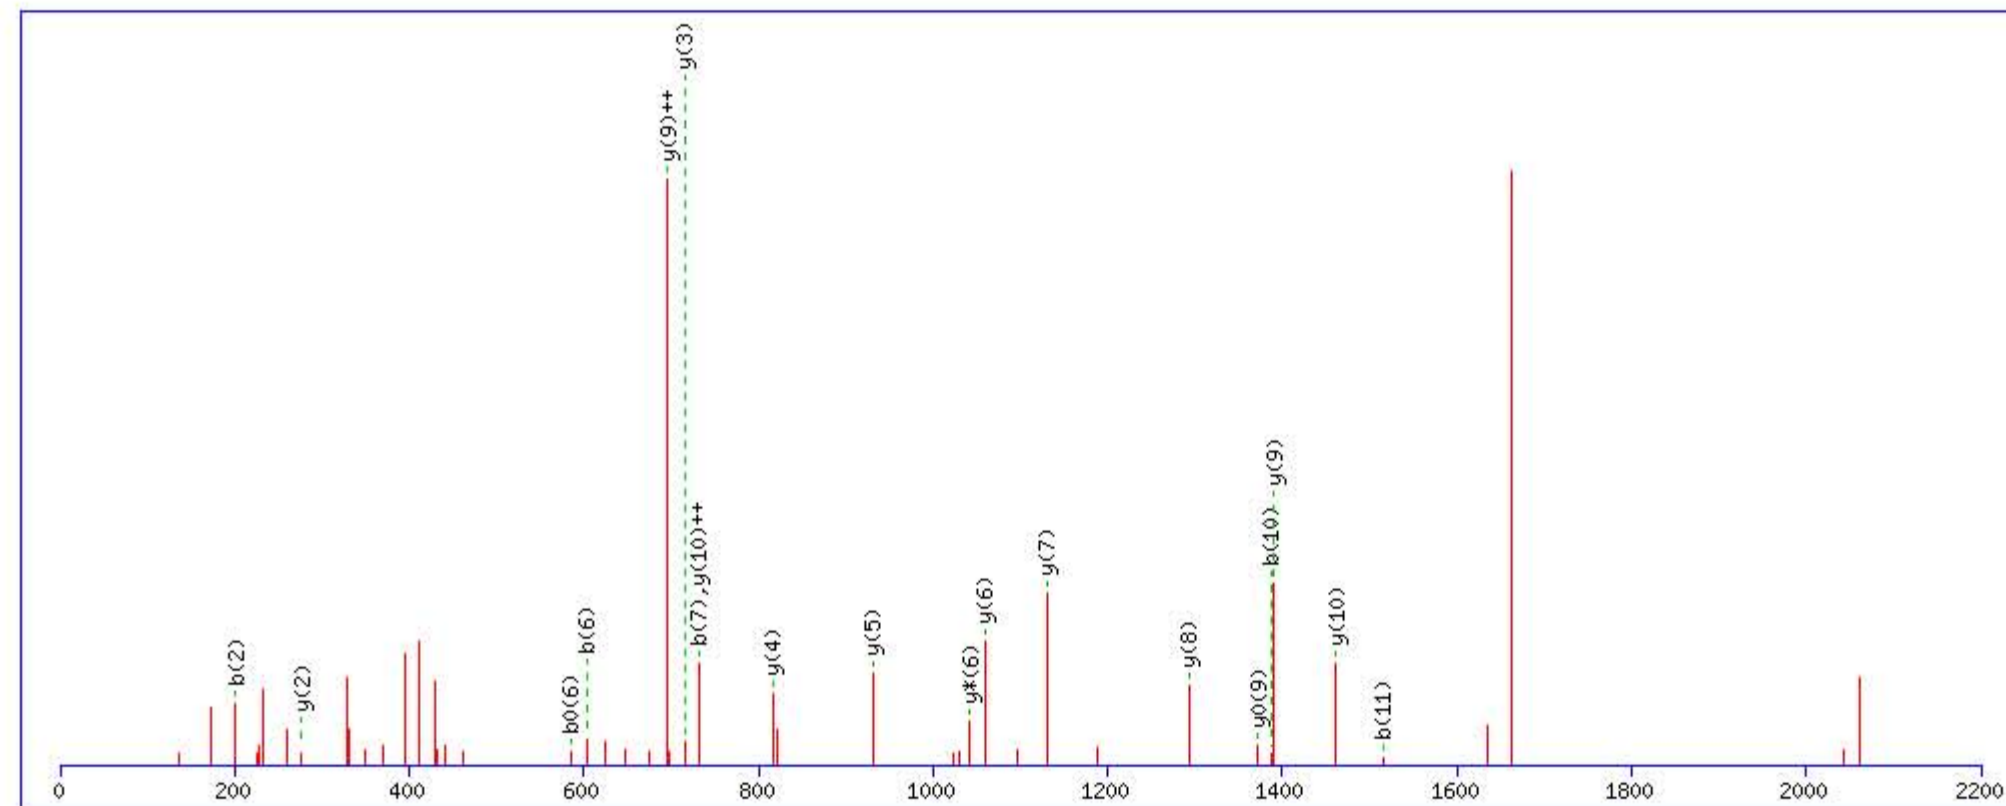

Monoisotopic mass of neutral peptide Mr(calc): 1660.813034

Fixed modifications: Carbamidomethyl (C) (apply to specified residues or termini only)

Variable modifications:

Q10 : Biotin:Thermo-21345 (Q)

Ions Score: 52 Expect: 6.7e-005

Matches : 19/118 fragment ions using 38 most intense peaks [\(help\)](#)

| #  | b                  | b <sup>++</sup> | b <sup>+</sup> | b <sup>+++</sup> | b <sup>0</sup>    | b <sup>0++</sup> | Seq. | y                  | y <sup>++</sup>   | y <sup>+</sup>     | y <sup>+++</sup> | y <sup>0</sup>     | y <sup>0++</sup> | #  |
|----|--------------------|-----------------|----------------|------------------|-------------------|------------------|------|--------------------|-------------------|--------------------|------------------|--------------------|------------------|----|
| 1  | 88.039304          | 44.523290       |                |                  | 70.028739         | 35.518008        | S    |                    |                   |                    |                  |                    |                  | 12 |
| 2  | <b>201.123368</b>  | 101.065322      |                |                  | 183.112803        | 92.060039        | L    | 1574.788308        | 787.897792        | 1557.761759        | 779.384518       | 1556.777743        | 778.892510       | 11 |
| 3  | 272.160482         | 136.583879      |                |                  | 254.149917        | 127.578596       | A    | <b>1461.704244</b> | <b>731.355760</b> | 1444.677695        | 722.842486       | 1443.693679        | 722.350478       | 10 |
| 4  | 369.213246         | 185.110261      |                |                  | 351.202681        | 176.104978       | P    | <b>1390.667130</b> | <b>695.837203</b> | 1373.640581        | 687.323929       | <b>1372.656565</b> | 686.831921       | 9  |
| 5  | 532.276575         | 266.641926      |                |                  | 514.266010        | 257.636643       | Y    | <b>1293.614366</b> | 647.310821        | 1276.587817        | 638.797547       | 1275.603801        | 638.305539       | 8  |
| 6  | <b>603.313689</b>  | 302.160483      |                |                  | <b>585.303124</b> | 293.155200       | A    | <b>1130.551037</b> | 565.779157        | 1113.524488        | 557.265882       | 1112.540472        | 556.773874       | 7  |
| 7  | <b>731.372267</b>  | 366.189772      | 714.345718     | 357.676497       | 713.361702        | 357.184489       | Q    | <b>1059.513923</b> | 530.260600        | <b>1042.487374</b> | 521.747325       | 1041.503358        | 521.255317       | 6  |
| 8  | 846.399210         | 423.703243      | 829.372661     | 415.189969       | 828.388645        | 414.697961       | D    | <b>931.455345</b>  | 466.231311        | 914.428796         | 457.718036       | 913.444780         | 457.226028       | 5  |
| 9  | 947.446889         | 474.227083      | 930.420340     | 465.713808       | 929.436324        | 465.221800       | T    | <b>816.428402</b>  | 408.717839        | 799.401853         | 400.204565       | 798.417837         | 399.712557       | 4  |
| 10 | <b>1386.672215</b> | 693.839746      | 1369.645666    | 685.326471       | 1368.661650       | 684.834463       | Q    | <b>715.380723</b>  | 358.194000        | 698.354174         | 349.680725       | 697.370158         | 349.188717       | 3  |
| 11 | <b>1515.714808</b> | 758.361042      | 1498.688259    | 749.847768       | 1497.704243       | 749.355760       | E    | <b>276.155397</b>  | 138.581337        | 259.128848         | 130.068062       | 258.144832         | 129.576054       | 2  |
| 12 |                    |                 |                |                  |                   |                  | K    | 147.112804         | 74.060040         | 130.086255         | 65.546765        |                    |                  | 1  |

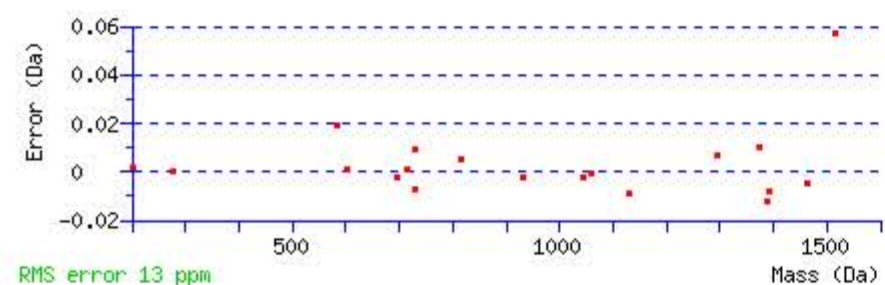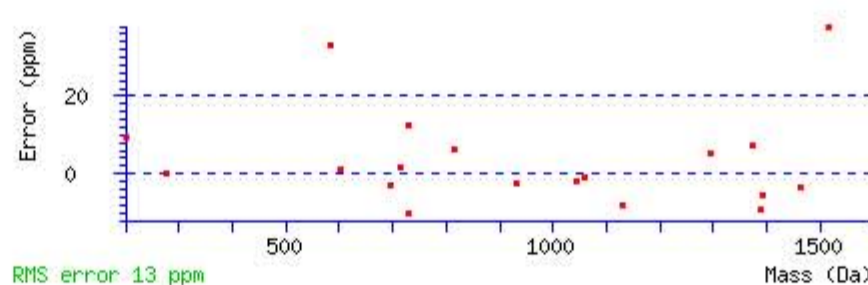

NCBI BLAST search of **SLAPYAQDTQEK**

(Parameters: blastp, nr protein database, expect=20000, no filter, PAM30)

Other BLAST [web gateways](#)

All matches to this query

| Score | Mr(calc):   | Delta     | Sequence                         |
|-------|-------------|-----------|----------------------------------|
| 52.3  | 1660.813034 | -0.000826 | <a href="#">SLAPYAQDTQEK</a>     |
| 28.1  | 1660.813034 | -0.000826 | <a href="#">SLAPYAQDTQEK</a>     |
| 7.4   | 1660.820908 | -0.008700 | <a href="#">SLARAGFYITGVNDK</a>  |
| 2.1   | 1660.826782 | -0.014574 | <a href="#">EAATQAQQTLGSTIDK</a> |

Mascot: <http://www.matrixscience.com/>



# MASCOT SCIENCE Mascot Search Results

## Peptide View

MS/MS Fragmentation of **LGEVNTYAGDLQK**

Found in **APOA4\_HUMAN**, Apolipoprotein A-IV OS=Homo sapiens GN=APOA4 PE=1 SV=3

Match to Query 40840: 1717.866492 from(573.629440,3+) rtinseconds(1999) index(68793)

Title: Locus:1.1.1.1633.20 File:"2013-07-02 CLN FXIII 60 min 2nd FT.wiff"

Data file C:\Program Files (x86)\Matrix Science\Mascot Daemon\mgf5 FXIII 60 min 2nd\mascot\_daemon\_merge.mgf

Click mouse within plot area to zoom in by factor of two about that point

Or, Plot from  to  Da

Label all possible matches  Label matches used for scoring

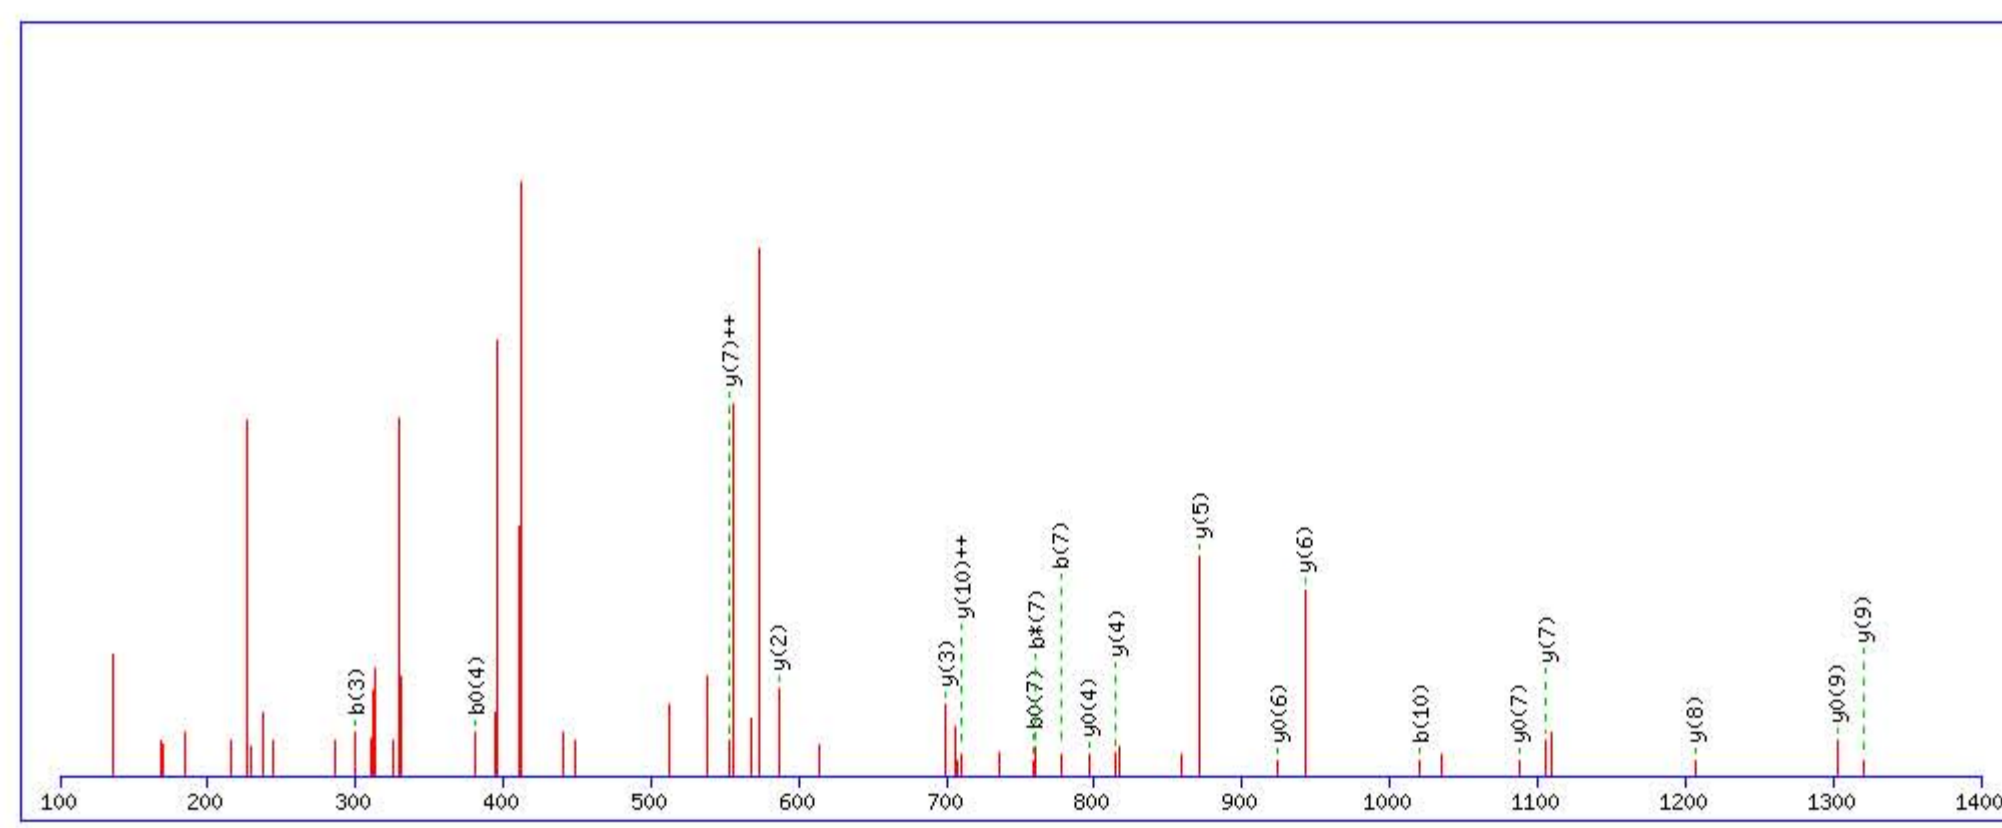

Monoisotopic mass of neutral peptide Mr(calc): 1717.870895

Fixed modifications: Carbamidomethyl (C) (apply to specified residues or termini only)

Variable modifications:

Q12 : Biotin:Thermo-21345 (Q)

Ions Score: 28 Expect: 0.041

Matches : 20/126 fragment ions using 49 most intense peaks [\(help\)](#)

| #  | b                  | b <sup>++</sup> | b <sup>*</sup>    | b <sup>*++</sup> | b <sup>0</sup>    | b <sup>0++</sup> | Seq. | y                  | y <sup>++</sup>   | y <sup>*</sup> | y <sup>*++</sup> | y <sup>0</sup>     | y <sup>0++</sup> | #  |
|----|--------------------|-----------------|-------------------|------------------|-------------------|------------------|------|--------------------|-------------------|----------------|------------------|--------------------|------------------|----|
| 1  | 114.091340         | 57.549308       |                   |                  |                   |                  | L    |                    |                   |                |                  |                    |                  | 13 |
| 2  | 171.112804         | 86.060040       |                   |                  |                   |                  | G    | 1605.794121        | 803.400699        | 1588.767572    | 794.887424       | 1587.783556        | 794.395416       | 12 |
| 3  | <b>300.155397</b>  | 150.581336      |                   |                  | 282.144832        | 141.576054       | E    | 1548.772657        | 774.889967        | 1531.746108    | 766.376692       | 1530.762092        | 765.884684       | 11 |
| 4  | 399.223811         | 200.115544      |                   |                  | <b>381.213246</b> | 191.110261       | V    | 1419.730064        | <b>710.368670</b> | 1402.703515    | 701.855396       | 1401.719499        | 701.363388       | 10 |
| 5  | 513.266738         | 257.137007      | 496.240189        | 248.623733       | 495.256173        | 248.131725       | N    | <b>1320.661650</b> | 660.834463        | 1303.635101    | 652.321189       | <b>1302.651085</b> | 651.829181       | 9  |
| 6  | 614.314417         | 307.660847      | 597.287868        | 299.147572       | 596.303852        | 298.655564       | T    | <b>1206.618723</b> | 603.813000        | 1189.592174    | 595.299725       | 1188.608158        | 594.807717       | 8  |
| 7  | <b>777.377746</b>  | 389.192511      | <b>760.351197</b> | 380.679237       | <b>759.367181</b> | 380.187229       | Y    | <b>1105.571044</b> | <b>553.289160</b> | 1088.544495    | 544.775886       | <b>1087.560479</b> | 544.283878       | 7  |
| 8  | 848.414860         | 424.711068      | 831.388311        | 416.197794       | 830.404295        | 415.705786       | A    | <b>942.507715</b>  | 471.757496        | 925.481166     | 463.244221       | <b>924.497150</b>  | 462.752213       | 6  |
| 9  | 905.436324         | 453.221800      | 888.409775        | 444.708526       | 887.425759        | 444.216518       | G    | <b>871.470601</b>  | 436.238939        | 854.444052     | 427.725664       | 853.460036         | 427.233656       | 5  |
| 10 | <b>1020.463267</b> | 510.735272      | 1003.436718       | 502.221997       | 1002.452702       | 501.729989       | D    | <b>814.449137</b>  | 407.728207        | 797.422588     | 399.214932       | <b>796.438572</b>  | 398.722924       | 4  |
| 11 | 1133.547331        | 567.277304      | 1116.520782       | 558.764029       | 1115.536766       | 558.272021       | L    | <b>699.422194</b>  | 350.214735        | 682.395645     | 341.701461       |                    |                  | 3  |
| 12 | 1572.772657        | 786.889967      | 1555.746108       | 778.376692       | 1554.762092       | 777.884684       | Q    | <b>586.338130</b>  | 293.672703        | 569.311581     | 285.159429       |                    |                  | 2  |
| 13 |                    |                 |                   |                  |                   |                  | K    | 147.112804         | 74.060040         | 130.086255     | 65.546765        |                    |                  | 1  |

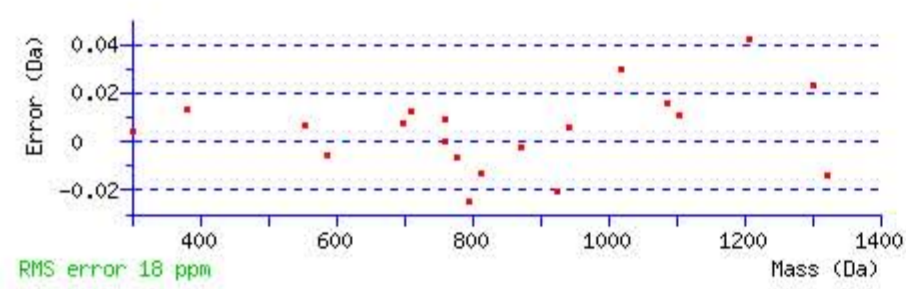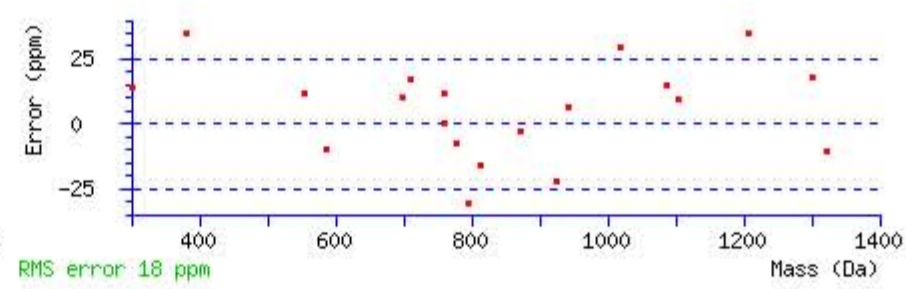

NCBI BLAST search of **LGEVNTYAGDLQK**

(Parameters: blastp, nr protein database, expect=20000, no filter, PAM30)

Other BLAST [web gateways](#)

All matches to this query

| Score | Mr(calc):   | Delta     | Sequence                      |
|-------|-------------|-----------|-------------------------------|
| 28.0  | 1717.870895 | -0.004403 | <a href="#">LGEVNTYAGDLQK</a> |



# MASCOT SCIENCE Mascot Search Results

## Peptide View

MS/MS Fragmentation of **ALVQQMEQLR**

Found in **APOA4\_HUMAN**, Apolipoprotein A-IV OS=Homo sapiens GN=APOA4 PE=1 SV=3

Match to Query 43403: 1836.982512 from(613.334780,3+) rtinseconds(2342) index(70733)

Title: Locus:1.1.1.1753.6 File:"2013-07-02 CLN FXIII 60 min 2nd FT.wiff"

Data file C:\Program Files (x86)\Matrix Science\Mascot Daemon\mgf5 FXIII 60 min 2nd\mascot\_daemon\_merge.mgf

Click mouse within plot area to zoom in by factor of two about that point

Or, Plot from  to  Da

Label all possible matches  Label matches used for scoring

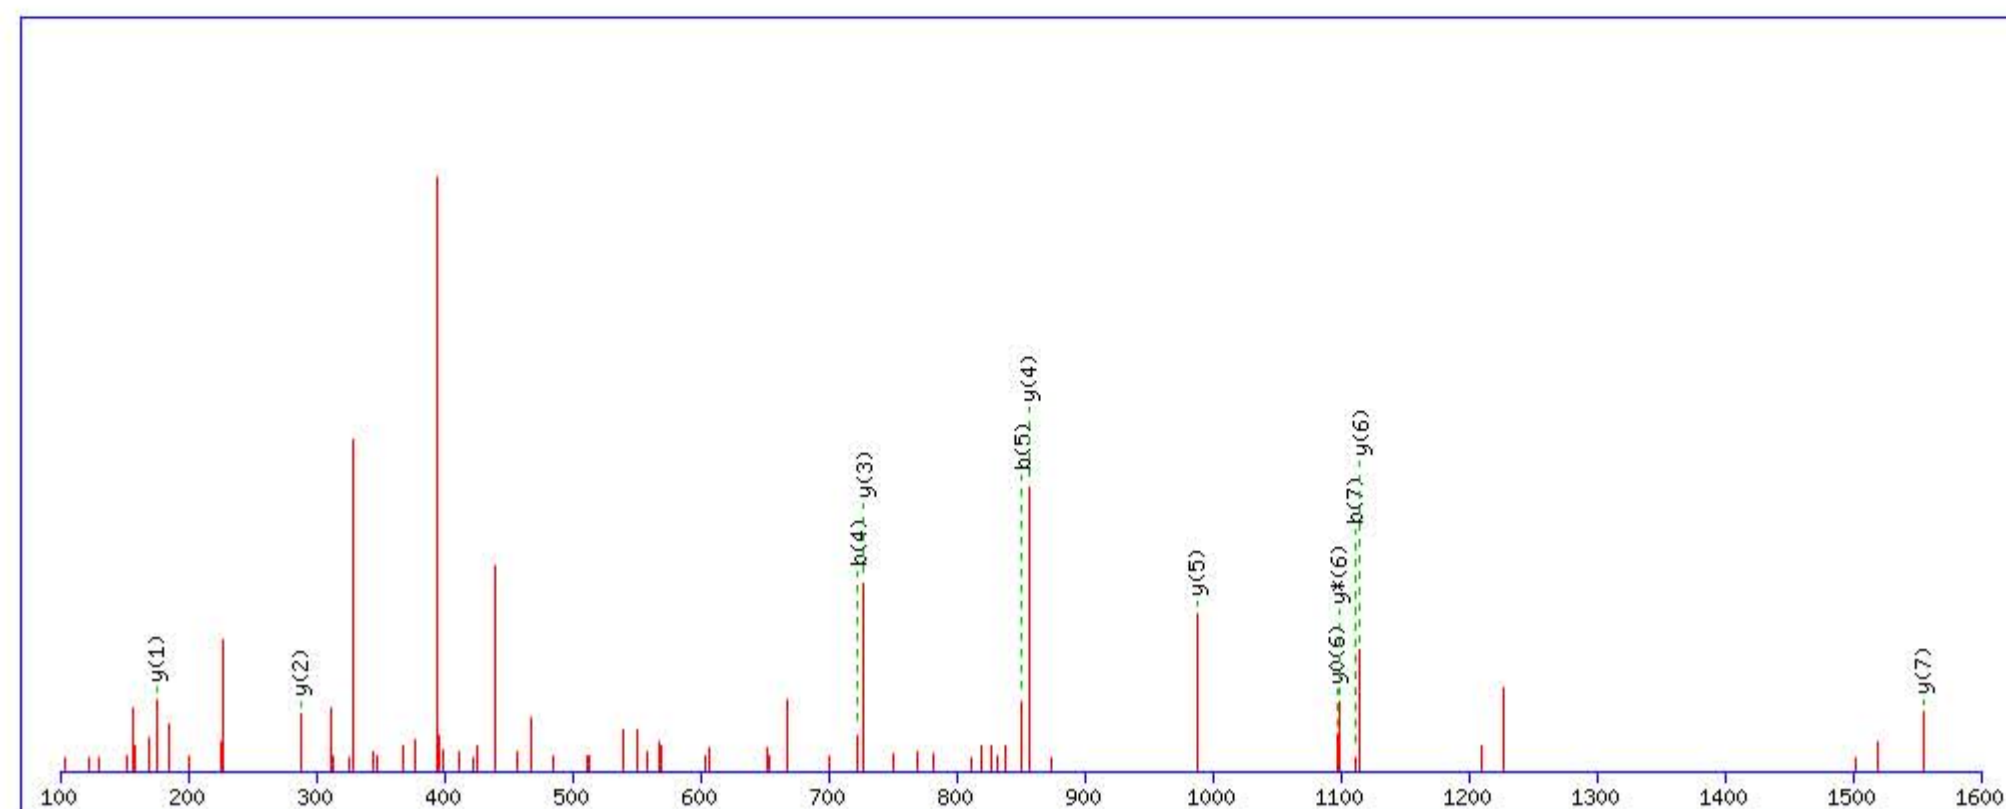

Monoisotopic mass of neutral peptide Mr(calc): 1836.977615

Fixed modifications: Carbamidomethyl (C) (apply to specified residues or termini only)

Variable modifications:

Q4 : Biotin:Thermo-21345 (Q)

Q8 : Biotin:Thermo-21345 (Q)

Ions Score: 31 Expect: 0.0042

Matches : 12/84 fragment ions using 26 most intense peaks [\(help\)](#)

| #  | b                  | b <sup>++</sup> | b <sup>*</sup> | b <sup>+++</sup> | b <sup>0</sup> | b <sup>0++</sup> | Seq. | y                  | y <sup>++</sup> | y <sup>*</sup>     | y <sup>+++</sup> | y <sup>0</sup>     | y <sup>0++</sup> | #  |
|----|--------------------|-----------------|----------------|------------------|----------------|------------------|------|--------------------|-----------------|--------------------|------------------|--------------------|------------------|----|
| 1  | 72.044390          | 36.525833       |                |                  |                |                  | A    |                    |                 |                    |                  |                    |                  | 10 |
| 2  | 185.128454         | 93.067865       |                |                  |                |                  | L    | 1766.947802        | 883.977539      | 1749.921253        | 875.464265       | 1748.937237        | 874.972256       | 9  |
| 3  | 284.196868         | 142.602072      |                |                  |                |                  | V    | 1653.863738        | 827.435507      | 1636.837189        | 818.922232       | 1635.853173        | 818.430224       | 8  |
| 4  | <b>723.422194</b>  | 362.214735      | 706.395645     | 353.701461       |                |                  | Q    | <b>1554.795324</b> | 777.901300      | 1537.768775        | 769.388026       | 1536.784759        | 768.896017       | 7  |
| 5  | <b>851.480772</b>  | 426.244024      | 834.454223     | 417.730750       |                |                  | Q    | <b>1115.569998</b> | 558.288637      | <b>1098.543449</b> | 549.775363       | <b>1097.559433</b> | 549.283354       | 6  |
| 6  | 982.521257         | 491.764267      | 965.494708     | 483.250992       |                |                  | M    | <b>987.511420</b>  | 494.259348      | 970.484871         | 485.746073       | 969.500855         | 485.254065       | 5  |
| 7  | <b>1111.563850</b> | 556.285563      | 1094.537301    | 547.772289       | 1093.553285    | 547.280281       | E    | <b>856.470935</b>  | 428.739105      | 839.444386         | 420.225831       | 838.460370         | 419.733823       | 4  |
| 8  | 1550.789176        | 775.898226      | 1533.762627    | 767.384952       | 1532.778611    | 766.892944       | Q    | <b>727.428342</b>  | 364.217809      | 710.401793         | 355.704534       |                    |                  | 3  |
| 9  | 1663.873240        | 832.440258      | 1646.846691    | 823.926984       | 1645.862675    | 823.434975       | L    | <b>288.203016</b>  | 144.605146      | 271.176467         | 136.091871       |                    |                  | 2  |
| 10 |                    |                 |                |                  |                |                  | R    | <b>175.118952</b>  | 88.063114       | 158.092403         | 79.549839        |                    |                  | 1  |

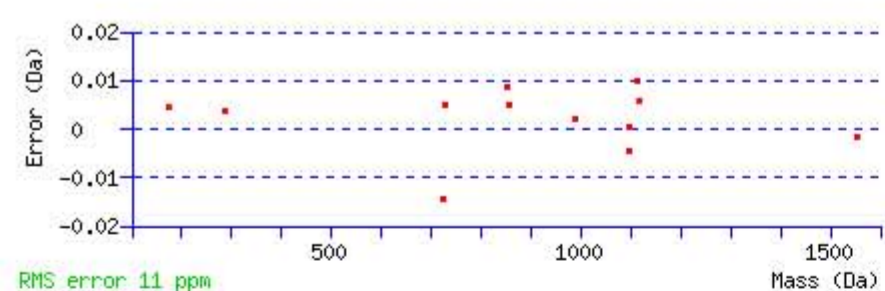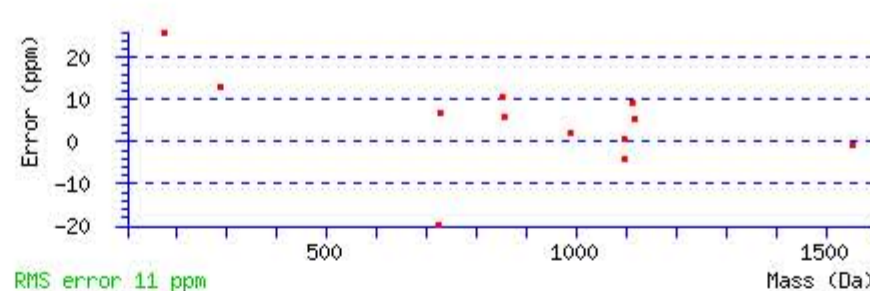

NCBI BLAST search of [ALVQQMEQLR](#)

(Parameters: blastp, nr protein database, expect=20000, no filter, PAM30)

Other BLAST [web gateways](#)

All matches to this query

| Score | Mr(calc):   | Delta     | Sequence                         |
|-------|-------------|-----------|----------------------------------|
| 31.3  | 1836.977615 | 0.004897  | <a href="#">ALVQQMEQLR</a>       |
| 20.2  | 1836.977615 | 0.004897  | <a href="#">ALVQQMEQLR</a>       |
| 5.8   | 1836.999207 | -0.016695 | <a href="#">QQLRQLEQLR</a>       |
| 5.5   | 1837.004578 | -0.022066 | <a href="#">RHSWRQQIFLR</a>      |
| 2.3   | 1836.969360 | 0.013152  | <a href="#">EPSAAGGLETTLVSPR</a> |

Mascot: <http://www.matrixscience.com/>



# MASCOT SEARCH RESULTS

## Peptide View

MS/MS Fragmentation of **LNHQLEGLTFQMK**  
 Found in **APOA4\_HUMAN**, Apolipoprotein A-IV OS=Homo sapiens GN=APOA4 PE=1 SV=3

Match to Query 44101: 1868.962812 from(623.994880,3+) rtinseconds(2153) index(69686)  
 Title: Locus:1.1.1.1687.14 File:"2013-07-02 CLN FXIII 60 min 2nd FT.wiff"  
 Data file C:\Program Files (x86)\Matrix Science\Mascot Daemon\mgf\5 FXIII 60 min 2nd\mascot\_daemon\_merge.mgf

Click mouse within plot area to zoom in by factor of two about that point  
 Or, Plot from  to  Da   
 Label all possible matches  Label matches used for scoring

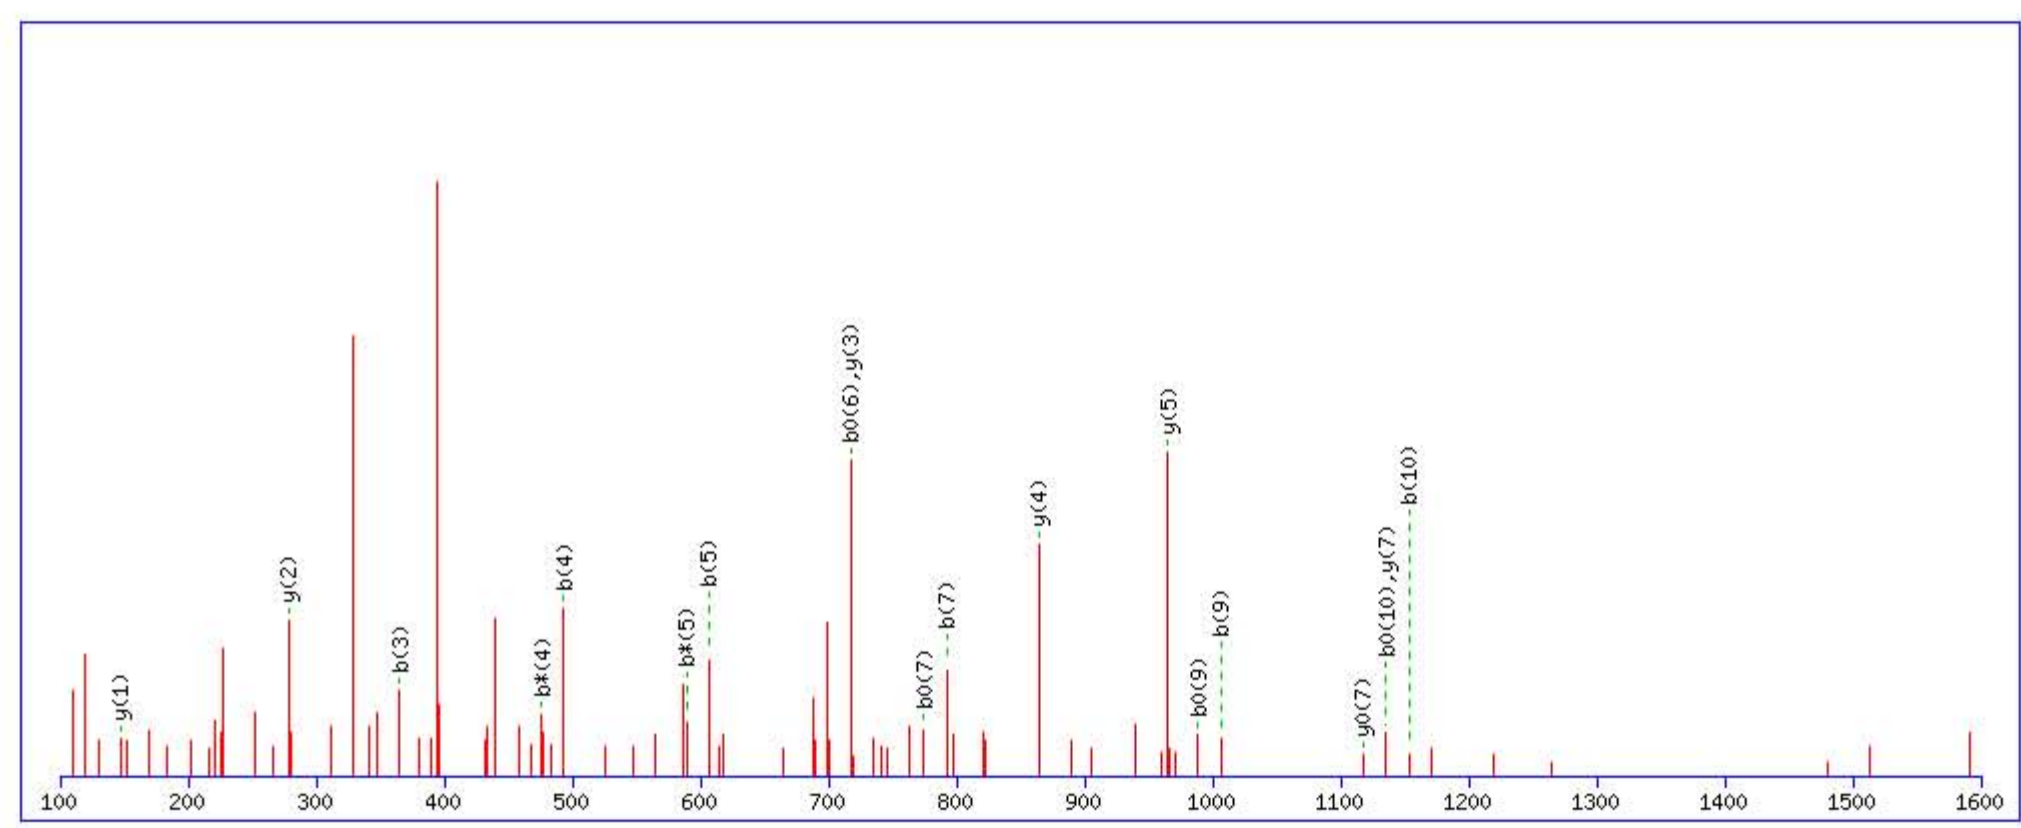

Monoisotopic mass of neutral peptide Mr(calc): 1868.964081  
 Fixed modifications: Carbamidomethyl (C) (apply to specified residues or termini only)  
 Variable modifications:  
 Q11 : Biotin:Thermo-21345 (Q)  
 Ions Score: 27 Expect: 0.057  
 Matches : 19/124 fragment ions using 45 most intense peaks [\(help\)](#)

| #  | b                  | b <sup>++</sup> | b <sup>*</sup>    | b <sup>*++</sup> | b <sup>0</sup>     | b <sup>0++</sup> | Seq. | y                  | y <sup>++</sup> | y <sup>*</sup> | y <sup>*++</sup> | y <sup>0</sup>     | y <sup>0++</sup> | #  |
|----|--------------------|-----------------|-------------------|------------------|--------------------|------------------|------|--------------------|-----------------|----------------|------------------|--------------------|------------------|----|
| 1  | 114.091340         | 57.549308       |                   |                  |                    |                  | L    |                    |                 |                |                  |                    |                  | 13 |
| 2  | 228.134267         | 114.570771      | 211.107718        | 106.057497       |                    |                  | N    | 1756.887310        | 878.947293      | 1739.860761    | 870.434019       | 1738.876745        | 869.942011       | 12 |
| 3  | <b>365.193179</b>  | 183.100227      | 348.166630        | 174.586953       |                    |                  | H    | 1642.844383        | 821.925830      | 1625.817834    | 813.412555       | 1624.833818        | 812.920547       | 11 |
| 4  | <b>493.251757</b>  | 247.129516      | <b>476.225208</b> | 238.616242       |                    |                  | Q    | 1505.785471        | 753.396374      | 1488.758922    | 744.883099       | 1487.774906        | 744.391091       | 10 |
| 5  | <b>606.335821</b>  | 303.671549      | <b>589.309272</b> | 295.158274       |                    |                  | L    | 1377.726893        | 689.367085      | 1360.700344    | 680.853810       | 1359.716328        | 680.361802       | 9  |
| 6  | 735.378414         | 368.192845      | 718.351865        | 359.679571       | <b>717.367849</b>  | 359.187563       | E    | 1264.642829        | 632.825053      | 1247.616280    | 624.311778       | 1246.632264        | 623.819770       | 8  |
| 7  | <b>792.399878</b>  | 396.703577      | 775.373329        | 388.190303       | <b>774.389313</b>  | 387.698295       | G    | <b>1135.600236</b> | 568.303756      | 1118.573687    | 559.790482       | <b>1117.589671</b> | 559.298474       | 7  |
| 8  | 905.483942         | 453.245609      | 888.457393        | 444.732335       | 887.473377         | 444.240327       | L    | 1078.578772        | 539.793024      | 1061.552223    | 531.279750       | 1060.568207        | 530.787742       | 6  |
| 9  | <b>1006.531621</b> | 503.769449      | 989.505072        | 495.256174       | <b>988.521056</b>  | 494.764166       | T    | <b>965.494708</b>  | 483.250992      | 948.468159     | 474.737718       | 947.484143         | 474.245710       | 5  |
| 10 | <b>1153.600035</b> | 577.303656      | 1136.573486       | 568.790381       | <b>1135.589470</b> | 568.298373       | F    | <b>864.447029</b>  | 432.727153      | 847.420480     | 424.213878       |                    |                  | 4  |
| 11 | 1592.825361        | 796.916319      | 1575.798812       | 788.403044       | 1574.814796        | 787.911036       | Q    | <b>717.378615</b>  | 359.192946      | 700.352066     | 350.679671       |                    |                  | 3  |
| 12 | 1723.865846        | 862.436561      | 1706.839297       | 853.923287       | 1705.855281        | 853.431279       | M    | <b>278.153289</b>  | 139.580282      | 261.126740     | 131.067008       |                    |                  | 2  |
| 13 |                    |                 |                   |                  |                    |                  | K    | <b>147.112804</b>  | 74.060040       | 130.086255     | 65.546765        |                    |                  | 1  |

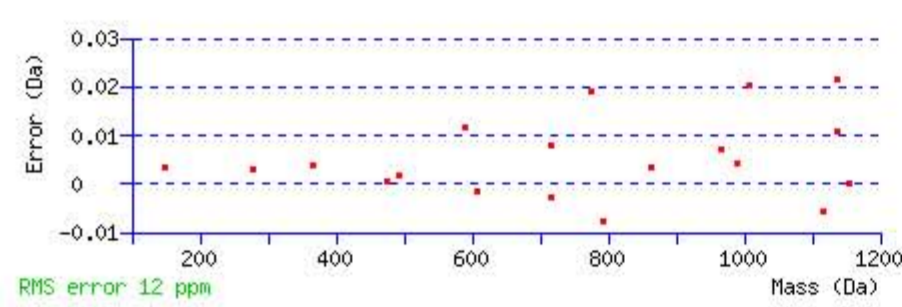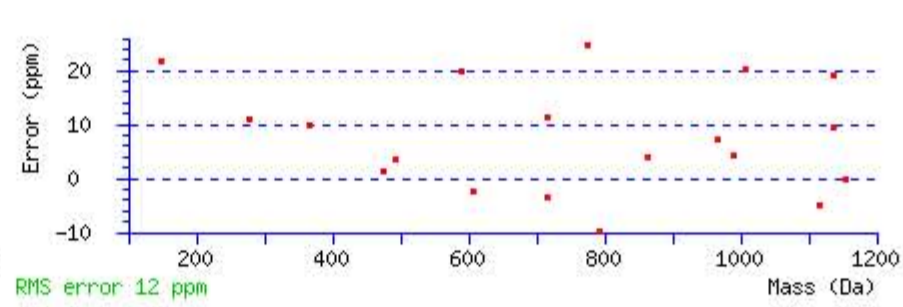

NCBI BLAST search of **LNHQLEGLTFQMK**  
 (Parameters: blastp, nr protein database, expect=20000, no filter, PAM30)  
 Other BLAST [web gateways](#)

### All matches to this query

| Score | Mr(calc):   | Delta     | Sequence                      |
|-------|-------------|-----------|-------------------------------|
| 26.8  | 1868.964081 | -0.001269 | <a href="#">LNHQLEGLTFQMK</a> |



# MASCOT SCIENCE Mascot Search Results

## Peptide View

MS/MS Fragmentation of **TQVNTQAEQLR**

Found in **APOA4\_HUMAN**, Apolipoprotein A-IV OS=Homo sapiens GN=APOA4 PE=1 SV=3

Match to Query 44739: 1908.989982 from(637.337270,3+) rtinseconds(1935) index(68265)

Title: Locus:1.1.1.1611.21 File:"2013-07-02 CLN FXIII 60 min 2nd FT.wiff"

Data file C:\Program Files (x86)\Matrix Science\Mascot Daemon\mgf5 FXIII 60 min 2nd\mascot\_daemon\_merge.mgf

Click mouse within plot area to zoom in by factor of two about that point

Or, Plot from  to  Da

Label all possible matches  Label matches used for scoring

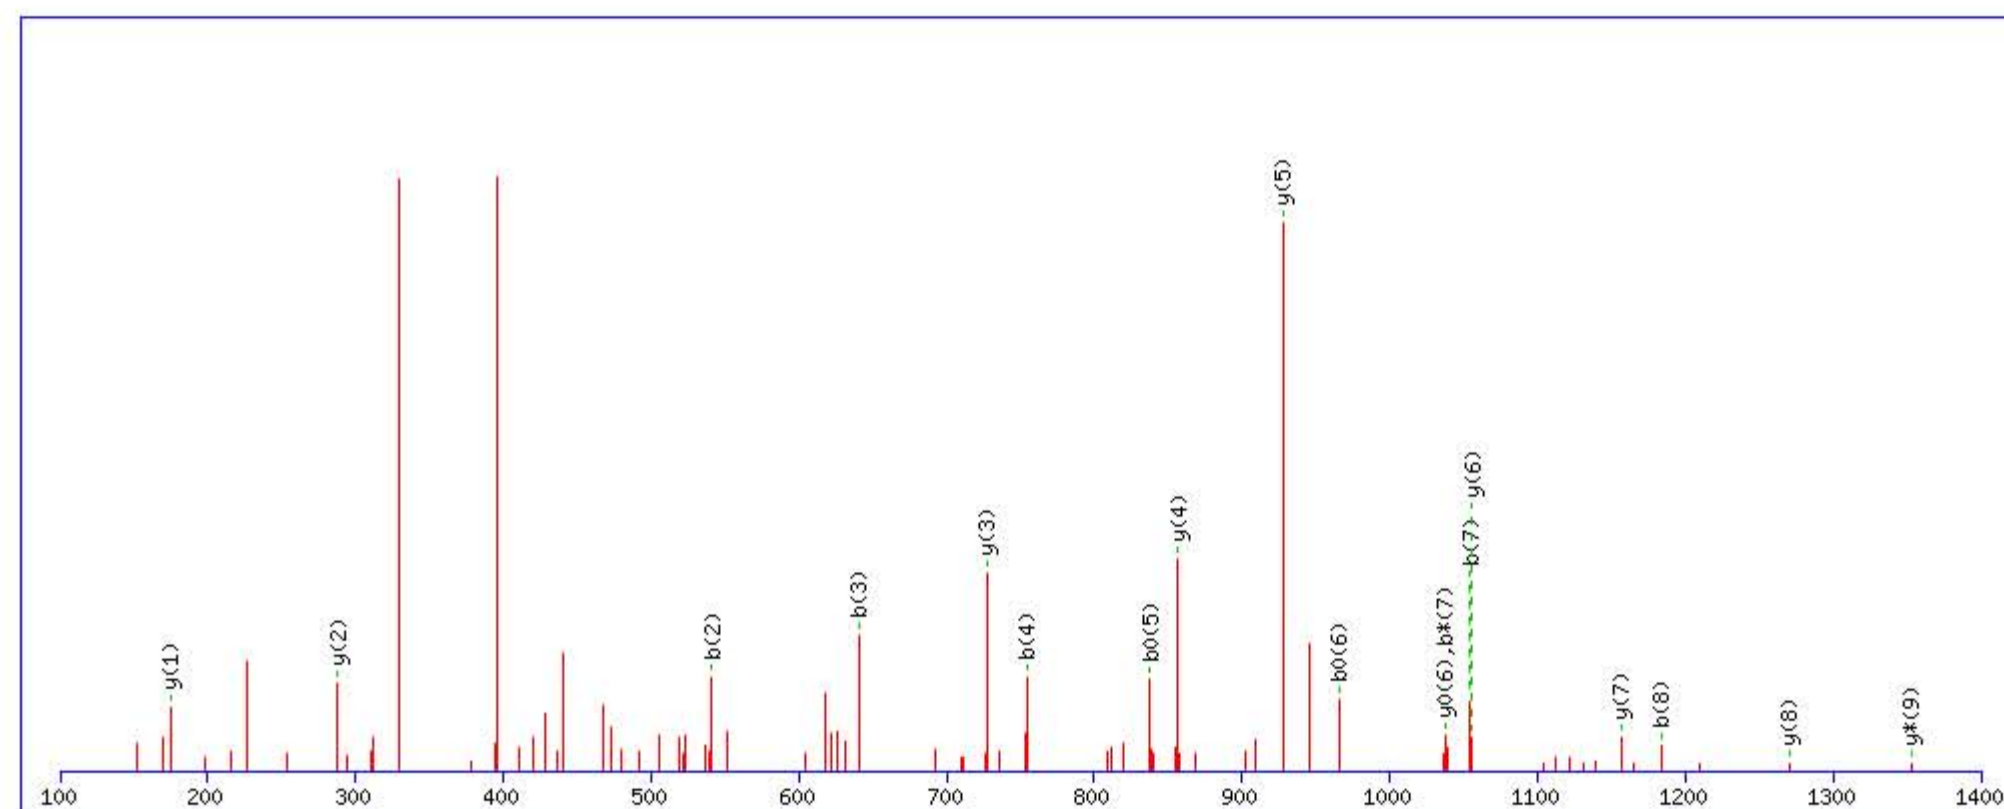

Monoisotopic mass of neutral peptide Mr(calc): 1908.991364

Fixed modifications: Carbamidomethyl (C) (apply to specified residues or termini only)

Variable modifications:

Q2 : Biotin:Thermo-21345 (Q)

Q9 : Biotin:Thermo-21345 (Q)

Ions Score: 54 Expect: 1.4e-005

Matches : 18/112 fragment ions using 24 most intense peaks [\(help\)](#)

| #  | b                  | b <sup>++</sup> | b <sup>+</sup>     | b <sup>+++</sup> | b <sup>0</sup>    | b <sup>0++</sup> | Seq. | y                  | y <sup>++</sup> | y <sup>+</sup>     | y <sup>+++</sup> | y <sup>0</sup>     | y <sup>0++</sup> | #  |
|----|--------------------|-----------------|--------------------|------------------|-------------------|------------------|------|--------------------|-----------------|--------------------|------------------|--------------------|------------------|----|
| 1  | 102.054955         | 51.531116       |                    |                  | 84.044390         | 42.525833        | T    |                    |                 |                    |                  |                    |                  | 11 |
| 2  | <b>541.280281</b>  | 271.143779      | 524.253732         | 262.630504       | 523.269716        | 262.138496       | Q    | 1808.950973        | 904.979125      | 1791.924424        | 896.465850       | 1790.940408        | 895.973842       | 10 |
| 3  | <b>640.348695</b>  | 320.677986      | 623.322146         | 312.164711       | 622.338130        | 311.672703       | V    | 1369.725647        | 685.366462      | <b>1352.699098</b> | 676.853187       | 1351.715082        | 676.361179       | 9  |
| 4  | <b>754.391622</b>  | 377.699449      | 737.365073         | 369.186174       | 736.381057        | 368.694166       | N    | <b>1270.657233</b> | 635.832255      | 1253.630684        | 627.318980       | 1252.646668        | 626.826972       | 8  |
| 5  | 855.439301         | 428.223289      | 838.412752         | 419.710014       | <b>837.428736</b> | 419.218006       | T    | <b>1156.614306</b> | 578.810791      | 1139.587757        | 570.297517       | 1138.603741        | 569.805509       | 7  |
| 6  | 983.497879         | 492.252578      | 966.471330         | 483.739303       | <b>965.487314</b> | 483.247295       | Q    | <b>1055.566627</b> | 528.286952      | 1038.540078        | 519.773677       | <b>1037.556062</b> | 519.281669       | 6  |
| 7  | <b>1054.534993</b> | 527.771135      | <b>1037.508444</b> | 519.257860       | 1036.524428       | 518.765852       | A    | <b>927.508049</b>  | 464.257663      | 910.481500         | 455.744388       | 909.497484         | 455.252380       | 5  |
| 8  | <b>1183.577586</b> | 592.292431      | 1166.551037        | 583.779157       | 1165.567021       | 583.287149       | E    | <b>856.470935</b>  | 428.739106      | 839.444386         | 420.225831       | 838.460370         | 419.733823       | 4  |
| 9  | 1622.802912        | 811.905094      | 1605.776363        | 803.391820       | 1604.792347       | 802.899812       | Q    | <b>727.428342</b>  | 364.217809      | 710.401793         | 355.704535       |                    |                  | 3  |
| 10 | 1735.886976        | 868.447126      | 1718.860427        | 859.933852       | 1717.876411       | 859.441844       | L    | <b>288.203016</b>  | 144.605146      | 271.176467         | 136.091871       |                    |                  | 2  |
| 11 |                    |                 |                    |                  |                   |                  | R    | <b>175.118952</b>  | 88.063114       | 158.092403         | 79.549839        |                    |                  | 1  |

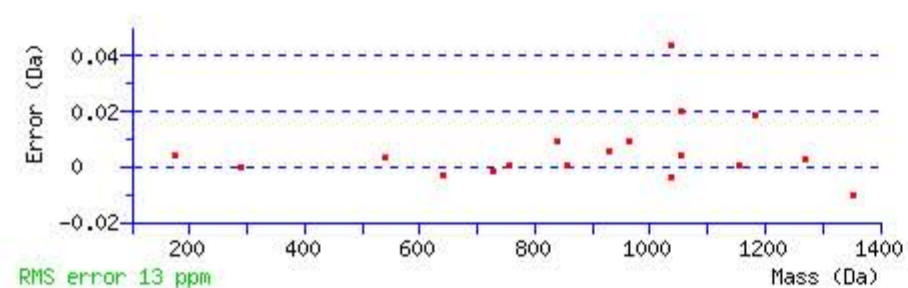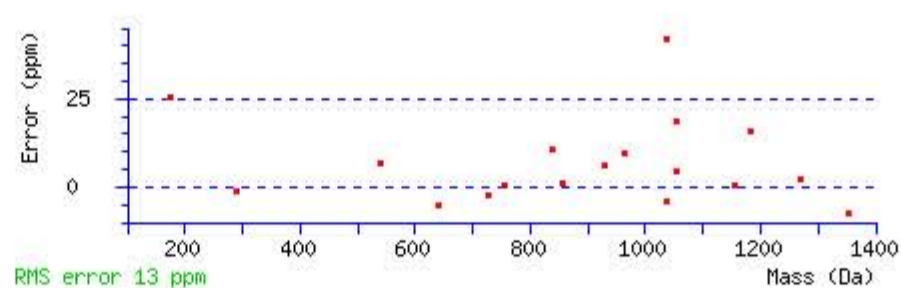

NCBI BLAST search of [TQVNTQAEQLR](#)

(Parameters: blastp, nr protein database, expect=20000, no filter, PAM30)

Other BLAST [web gateways](#)

All matches to this query

| Score | Mr(calc):   | Delta     | Sequence                            |
|-------|-------------|-----------|-------------------------------------|
| 53.9  | 1908.991364 | -0.001382 | <a href="#">TQVNTQAEQLR</a>         |
| 16.6  | 1908.991364 | -0.001382 | <a href="#">TQVNTQAEQLR</a>         |
| 13.4  | 1908.991364 | -0.001382 | <a href="#">TQVNTQAEQLR</a>         |
| 2.0   | 1909.015610 | -0.025628 | <a href="#">SSIALTAPDAAADPKEKPK</a> |
| 0.9   | 1908.974045 | 0.015937  | <a href="#">SAQWAINRVAMEIQHR</a>    |

Mascot: <http://www.matrixscience.com/>



# MASCOT SEARCH RESULTS

## Peptide View

MS/MS Fragmentation of **SELTQQLNALFQDK**

Found in **APOA4\_HUMAN**, Apolipoprotein A-IV OS=Homo sapiens GN=APOA4 PE=1 SV=3

Match to Query 45445: 1944.999408 from(973.506980,2+) rtinseconds(2880) index(74176)

Title: Locus:1.1.1.1938.19 File:"2013-07-02 CLN FXIII 60 min 2nd FT.wiff"

Data file C:\Program Files (x86)\Matrix Science\Mascot Daemon\mgf\5 FXIII 60 min 2nd\mascot\_daemon\_merge.mgf

Click mouse within plot area to zoom in by factor of two about that point

Or, Plot from  to  Da

Label all possible matches  Label matches used for scoring

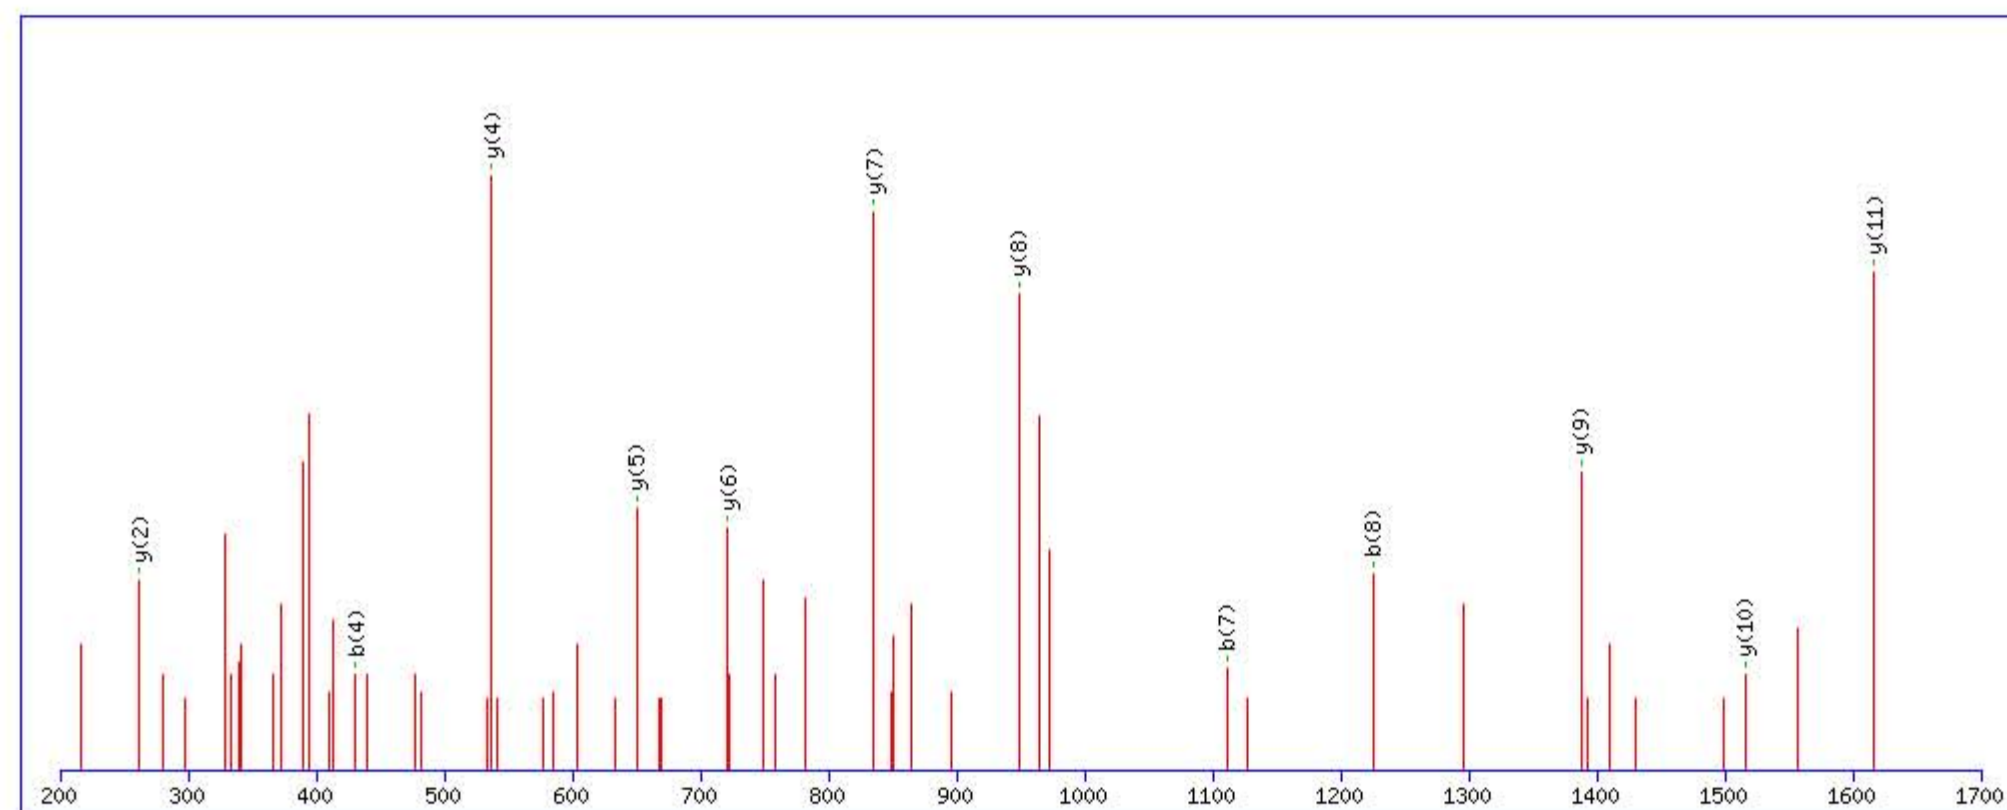

Monoisotopic mass of neutral peptide Mr(calc): 1944.997879

Fixed modifications: Carbamidomethyl (C) (apply to specified residues or termini only)

Variable modifications:

Q6 : Biotin:Thermo-21345 (Q)

Ions Score: 79 Expect: 1.3e-007

Matches : 12/146 fragment ions using 14 most intense peaks [\(help\)](#)

| #  | b                  | b <sup>++</sup> | b <sup>*</sup> | b <sup>+++</sup> | b <sup>0</sup> | b <sup>0++</sup> | Seq. | y                  | y <sup>++</sup> | y <sup>*</sup> | y <sup>+++</sup> | y <sup>0</sup> | y <sup>0++</sup> | #  |
|----|--------------------|-----------------|----------------|------------------|----------------|------------------|------|--------------------|-----------------|----------------|------------------|----------------|------------------|----|
| 1  | 88.039304          | 44.523290       |                |                  | 70.028739      | 35.518008        | S    |                    |                 |                |                  |                |                  | 14 |
| 2  | 217.081897         | 109.044586      |                |                  | 199.071332     | 100.039304       | E    | 1858.973148        | 929.990212      | 1841.946599    | 921.476938       | 1840.962583    | 920.984930       | 13 |
| 3  | 330.165961         | 165.586618      |                |                  | 312.155396     | 156.581336       | L    | 1729.930555        | 865.468916      | 1712.904006    | 856.955641       | 1711.919990    | 856.463633       | 12 |
| 4  | <b>431.213640</b>  | 216.110458      |                |                  | 413.203075     | 207.105176       | T    | <b>1616.846491</b> | 808.926884      | 1599.819942    | 800.413609       | 1598.835926    | 799.921601       | 11 |
| 5  | 559.272218         | 280.139747      | 542.245669     | 271.626473       | 541.261653     | 271.134465       | Q    | <b>1515.798812</b> | 758.403044      | 1498.772263    | 749.889770       | 1497.788247    | 749.397762       | 10 |
| 6  | 998.497544         | 499.752410      | 981.470995     | 491.239136       | 980.486979     | 490.747128       | Q    | <b>1387.740234</b> | 694.373755      | 1370.713685    | 685.860481       | 1369.729669    | 685.368473       | 9  |
| 7  | <b>1111.581608</b> | 556.294442      | 1094.555059    | 547.781168       | 1093.571043    | 547.289159       | L    | <b>948.514908</b>  | 474.761092      | 931.488359     | 466.247818       | 930.504343     | 465.755810       | 8  |
| 8  | <b>1225.624535</b> | 613.315905      | 1208.597986    | 604.802631       | 1207.613970    | 604.310623       | N    | <b>835.430844</b>  | 418.219060      | 818.404295     | 409.705786       | 817.420279     | 409.213778       | 7  |
| 9  | 1296.661649        | 648.834462      | 1279.635100    | 640.321188       | 1278.651084    | 639.829180       | A    | <b>721.387917</b>  | 361.197597      | 704.361368     | 352.684322       | 703.377352     | 352.192314       | 6  |
| 10 | 1409.745713        | 705.376494      | 1392.719164    | 696.863220       | 1391.735148    | 696.371212       | L    | <b>650.350803</b>  | 325.679040      | 633.324254     | 317.165765       | 632.340238     | 316.673757       | 5  |
| 11 | 1556.814127        | 778.910701      | 1539.787578    | 770.397427       | 1538.803562    | 769.905419       | F    | <b>537.266739</b>  | 269.137008      | 520.240190     | 260.623733       | 519.256174     | 260.131725       | 4  |
| 12 | 1684.872705        | 842.939991      | 1667.846156    | 834.426716       | 1666.862140    | 833.934708       | Q    | 390.198325         | 195.602801      | 373.171776     | 187.089526       | 372.187760     | 186.597518       | 3  |
| 13 | 1799.899648        | 900.453462      | 1782.873099    | 891.940188       | 1781.889083    | 891.448180       | D    | <b>262.139747</b>  | 131.573512      | 245.113198     | 123.060237       | 244.129182     | 122.568229       | 2  |
| 14 |                    |                 |                |                  |                |                  | K    | 147.112804         | 74.060040       | 130.086255     | 65.546765        |                |                  | 1  |

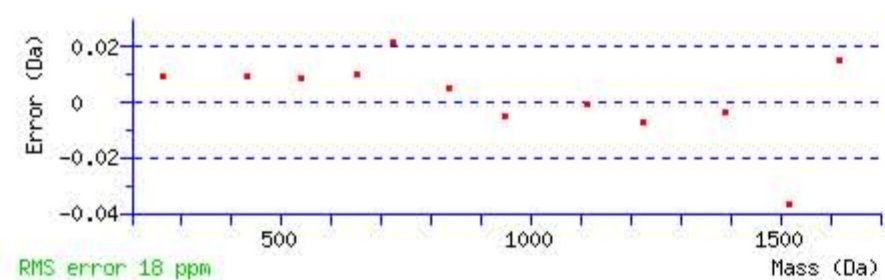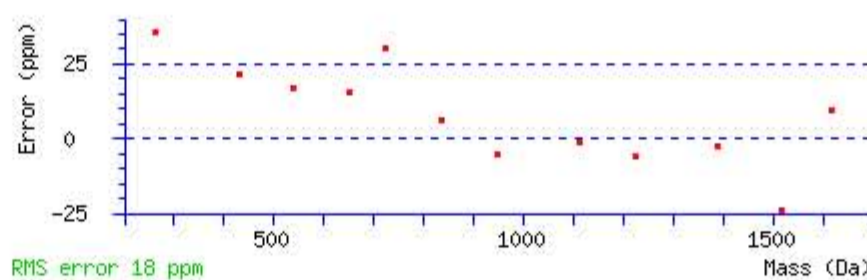

NCBI BLAST search of **SELTQQLNALFQDK**

(Parameters: blastp, nr protein database, expect=20000, no filter, PAM30)

Other BLAST [web gateways](#)

## All matches to this query

| Score | Mr(calc):   | Delta     | Sequence                         |
|-------|-------------|-----------|----------------------------------|
| 79.3  | 1944.997879 | 0.001529  | <a href="#">SELTQQLNALFQDK</a>   |
| 64.2  | 1944.997879 | 0.001529  | <a href="#">SELTQQLNALFQDK</a>   |
| 8.2   | 1944.997879 | 0.001529  | <a href="#">SELTQQLNALFQDK</a>   |
| 5.4   | 1945.005280 | -0.005872 | <a href="#">QPPSDAALTMLSFIK</a>  |
| 2.1   | 1945.024384 | -0.024976 | <a href="#">QASLWVQGDIKFRSK</a>  |
| 1.5   | 1945.024384 | -0.024976 | <a href="#">QASLWVQGDIKFRSK</a>  |
| 0.3   | 1945.027740 | -0.028332 | <a href="#">GGFGSMLRALGAQIEK</a> |



# MASCOT Search Results

## Peptide View

MS/MS Fragmentation of **SLAELGGHLDQQVEEFR**  
 Found in **APOA4\_HUMAN**, Apolipoprotein A-IV OS=Homo sapiens GN=APOA4 PE=1 SV=3

Match to Query 51791: 2238.110412 from(747.044080,3+) rtinseconds(2262) index(70361)  
 Title: Locus:1.1.1.1725.9 File:"2013-07-02 CLN FXIII 60 min 2nd FT.wiff"  
 Data file C:\Program Files (x86)\Matrix Science\Mascot Daemon\mgf5 FXIII 60 min 2nd\mascot\_daemon\_merge.mgf

Click mouse within plot area to zoom in by factor of two about that point

Or, Plot from  to  Da

Label all possible matches  Label matches used for scoring

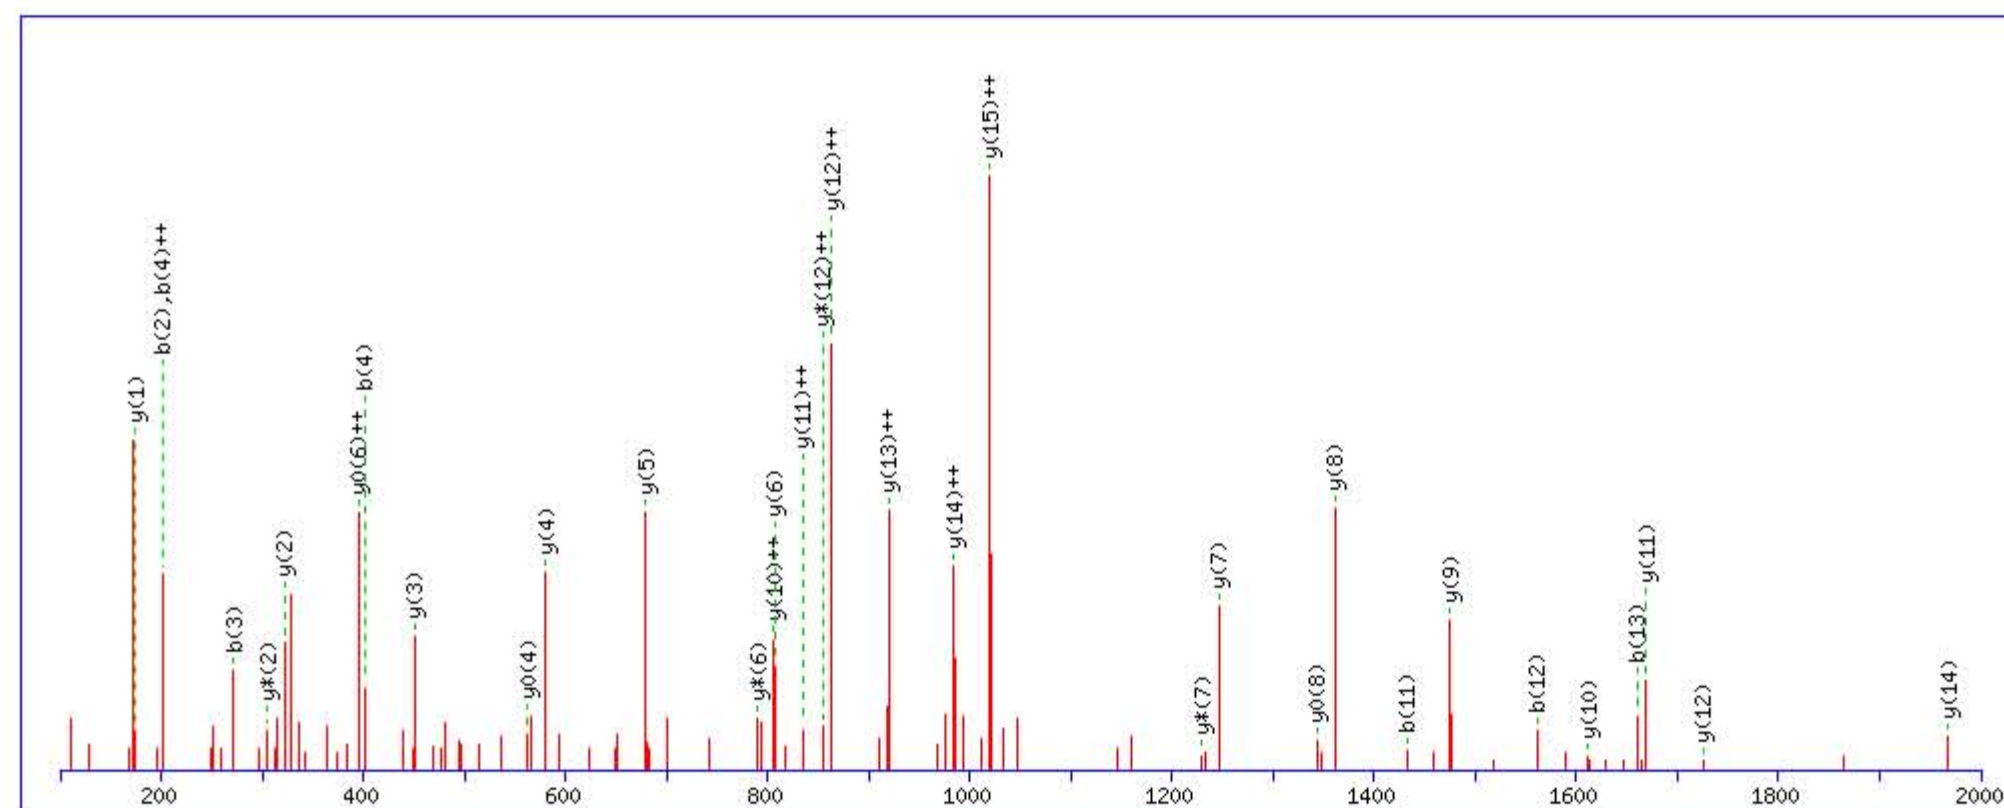

Monoisotopic mass of neutral peptide Mr(calc): 2238.110291  
 Fixed modifications: Carbamidomethyl (C) (apply to specified residues or termini only)  
 Variable modifications:  
 Q11 : Biotin:Thermo-21345 (Q)  
 Ions Score: 74 Expect: 1.1e-006  
 Matches : 33/168 fragment ions using 62 most intense peaks [\(help\)](#)

| #  | b                  | b <sup>++</sup>   | b <sup>*</sup> | b <sup>***</sup> | b <sup>0</sup> | b <sup>0++</sup> | Seq. | y                  | y <sup>++</sup>    | y <sup>*</sup>     | y <sup>***</sup>  | y <sup>0</sup>     | y <sup>0++</sup>  | #  |
|----|--------------------|-------------------|----------------|------------------|----------------|------------------|------|--------------------|--------------------|--------------------|-------------------|--------------------|-------------------|----|
| 1  | 88.039304          | 44.523290         |                |                  | 70.028739      | 35.518008        | S    |                    |                    |                    |                   |                    |                   | 17 |
| 2  | <b>201.123368</b>  | 101.065322        |                |                  | 183.112803     | 92.060039        | L    | 2152.085552        | 1076.546414        | 2135.059003        | 1068.033139       | 2134.074987        | 1067.541131       | 16 |
| 3  | <b>272.160482</b>  | 136.583879        |                |                  | 254.149917     | 127.578596       | A    | 2039.001488        | <b>1020.004382</b> | 2021.974939        | 1011.491108       | 2020.990923        | 1010.999100       | 15 |
| 4  | <b>401.203075</b>  | <b>201.105175</b> |                |                  | 383.192510     | 192.099893       | E    | <b>1967.964374</b> | <b>984.485825</b>  | 1950.937825        | 975.972551        | 1949.953809        | 975.480543        | 14 |
| 5  | 514.287139         | 257.647208        |                |                  | 496.276574     | 248.641925       | L    | 1838.921781        | <b>919.964529</b>  | 1821.895232        | 911.451254        | 1820.911216        | 910.959246        | 13 |
| 6  | 571.308603         | 286.157940        |                |                  | 553.298038     | 277.152657       | G    | <b>1725.837717</b> | <b>863.422497</b>  | 1708.811168        | <b>854.909222</b> | 1707.827152        | 854.417214        | 12 |
| 7  | 628.330067         | 314.668672        |                |                  | 610.319502     | 305.663389       | G    | <b>1668.816253</b> | <b>834.911765</b>  | 1651.789704        | 826.398490        | 1650.805688        | 825.906482        | 11 |
| 8  | 765.388979         | 383.198128        |                |                  | 747.378414     | 374.192845       | H    | <b>1611.794789</b> | <b>806.401033</b>  | 1594.768240        | 797.887758        | 1593.784224        | 797.395750        | 10 |
| 9  | 878.473043         | 439.740160        |                |                  | 860.462478     | 430.734877       | L    | <b>1474.735877</b> | 737.871577         | 1457.709328        | 729.358302        | 1456.725312        | 728.866294        | 9  |
| 10 | 993.499986         | 497.253631        |                |                  | 975.489421     | 488.248349       | D    | <b>1361.651813</b> | 681.329545         | 1344.625264        | 672.816270        | <b>1343.641248</b> | 672.324262        | 8  |
| 11 | <b>1432.725312</b> | 716.866294        | 1415.698763    | 708.353020       | 1414.714747    | 707.861012       | Q    | <b>1246.624870</b> | 623.816073         | <b>1229.598321</b> | 615.302799        | 1228.614305        | 614.810791        | 7  |
| 12 | <b>1560.783890</b> | 780.895583        | 1543.757341    | 772.382309       | 1542.773325    | 771.890301       | Q    | <b>807.399544</b>  | 404.203410         | <b>790.372995</b>  | 395.690136        | 789.388979         | <b>395.198128</b> | 6  |
| 13 | <b>1659.852304</b> | 830.429790        | 1642.825755    | 821.916516       | 1641.841739    | 821.424508       | V    | <b>679.340966</b>  | 340.174121         | 662.314417         | 331.660846        | 661.330401         | 331.168838        | 5  |
| 14 | 1788.894897        | 894.951087        | 1771.868348    | 886.437812       | 1770.884332    | 885.945804       | E    | <b>580.272552</b>  | 290.639914         | 563.246003         | 282.126639        | <b>562.261987</b>  | 281.634631        | 4  |
| 15 | 1917.937490        | 959.472383        | 1900.910941    | 950.959109       | 1899.926925    | 950.467101       | E    | <b>451.229959</b>  | 226.118617         | 434.203410         | 217.605343        | 433.219394         | 217.113335        | 3  |
| 16 | 2065.005904        | 1033.006590       | 2047.979355    | 1024.493316      | 2046.995339    | 1024.001307      | F    | <b>322.187366</b>  | 161.597321         | <b>305.160817</b>  | 153.084046        |                    |                   | 2  |
| 17 |                    |                   |                |                  |                |                  | R    | <b>175.118952</b>  | 88.063114          | 158.092403         | 79.549839         |                    |                   | 1  |

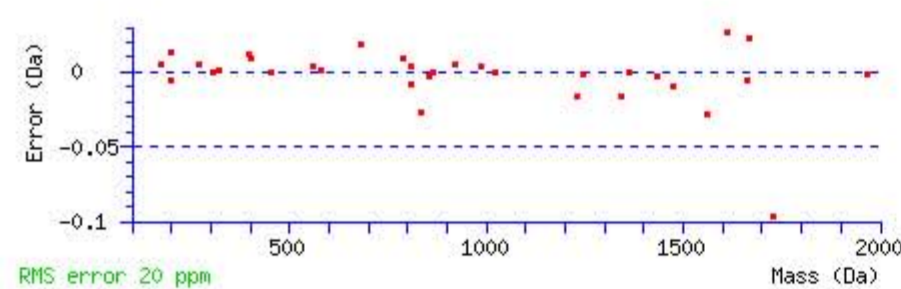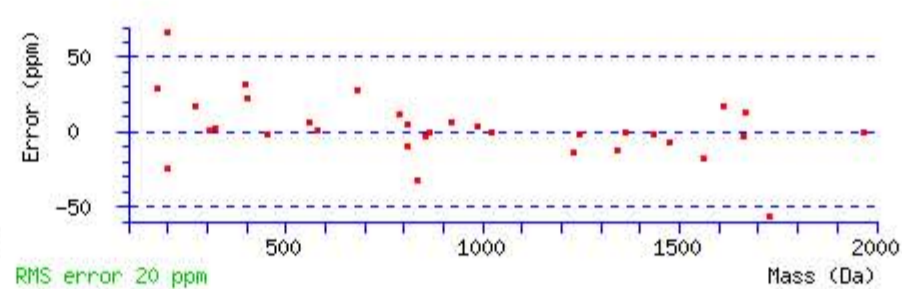

NCBI BLAST search of **SLAELGGHLDQQVEEFR**  
 (Parameters: blastp, nr protein database, expect=20000, no filter, PAM30)  
 Other BLAST [web gateways](#)

### All matches to this query

| Score | Mr(calc):   | Delta    | Sequence                          |
|-------|-------------|----------|-----------------------------------|
| 73.8  | 2238.110291 | 0.000121 | <a href="#">SLAELGGHLDQQVEEFR</a> |
| 69.0  | 2238.110291 | 0.000121 | <a href="#">SLAELGGHLDQQVEEFR</a> |



# Mascot Search Results

## Peptide View

MS/MS Fragmentation of **ENADSLQASLRPHADELK**

Found in **APOA4\_HUMAN**, Apolipoprotein A-IV OS=Homo sapiens GN=APOA4 PE=1 SV=3

Match to Query 53077: 2304.154176 from(577.045820,4+) rtinseconds(1900) index(67967)

Title: Locus:1.1.1.1599.13 File:"2013-07-02 CLN FXIII 60 min 2nd FT.wiff"

Data file C:\Program Files (x86)\Matrix Science\Mascot Daemon\mgf5 FXIII 60 min 2nd\mascot\_daemon\_merge.mgf

Click mouse within plot area to zoom in by factor of two about that point

Or, Plot from  to  Da

Label all possible matches  Label matches used for scoring

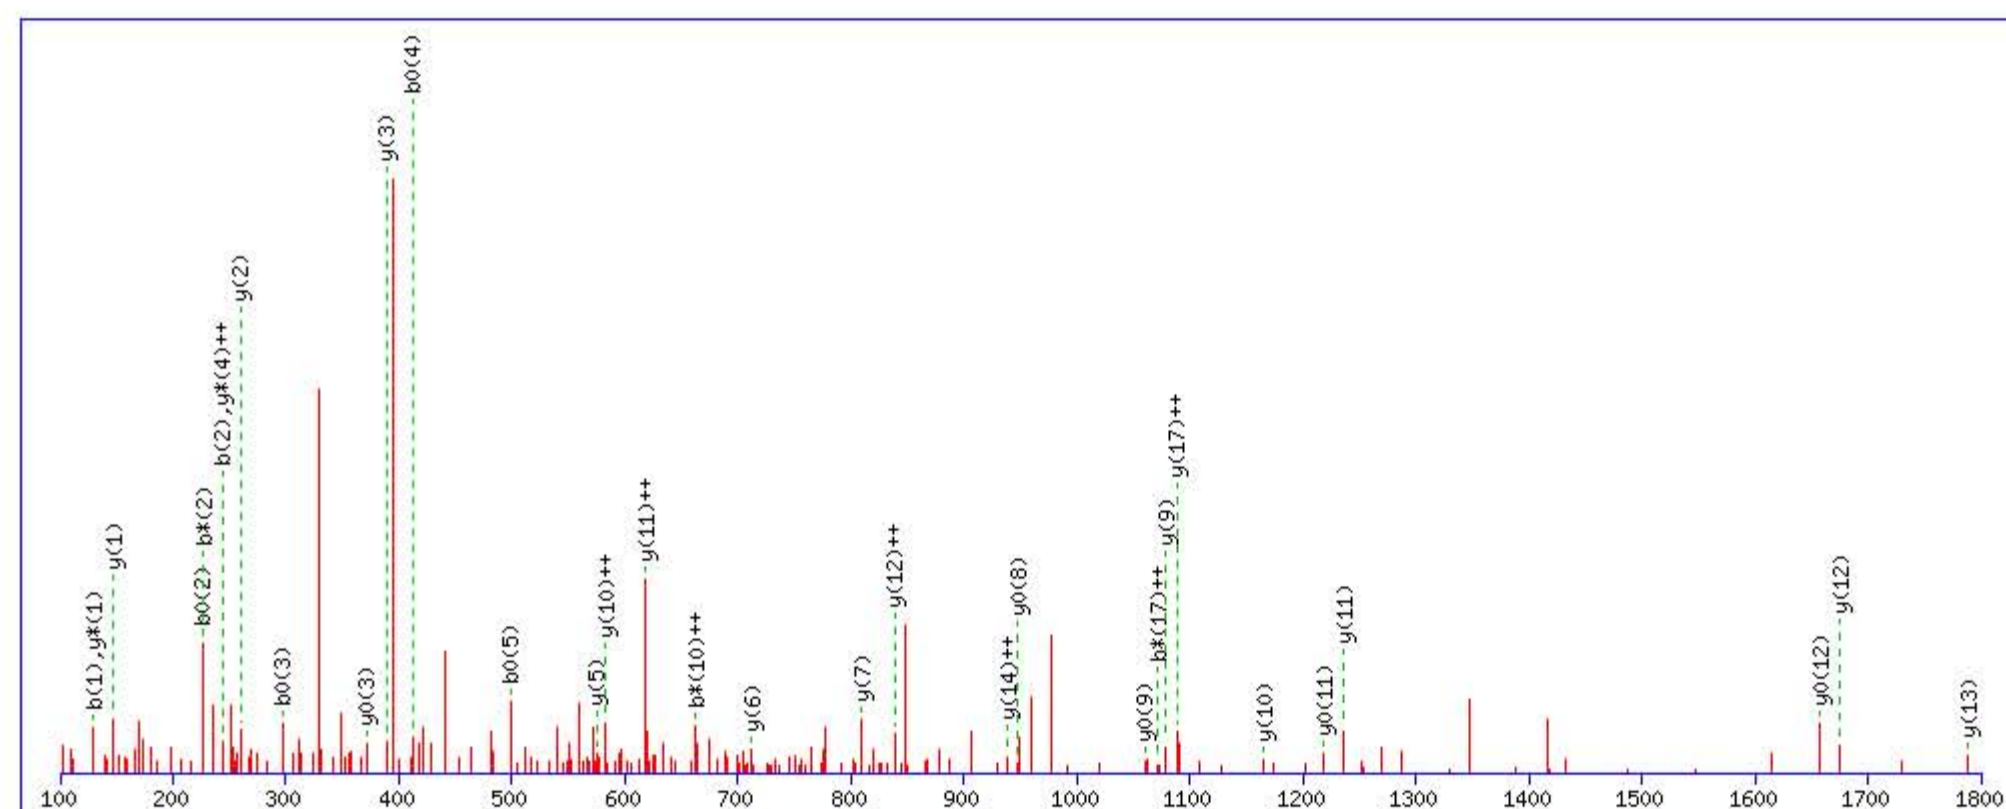

Monoisotopic mass of neutral peptide Mr(calc): 2304.153183

Fixed modifications: Carbamidomethyl (C) (apply to specified residues or termini only)

Variable modifications:

Q7 : Biotin:Thermo-21345 (Q)

Ions Score: 26 Expect: 0.0065

Matches : 32/198 fragment ions using 104 most intense peaks [\(help\)](#)

| #  | b           | b <sup>++</sup> | b <sup>*</sup> | b <sup>*++</sup> | b <sup>0</sup> | b <sup>0++</sup> | Seq. | y           | y <sup>++</sup> | y <sup>*</sup> | y <sup>*++</sup> | y <sup>0</sup> | y <sup>0++</sup> | #  |
|----|-------------|-----------------|----------------|------------------|----------------|------------------|------|-------------|-----------------|----------------|------------------|----------------|------------------|----|
| 1  | 130.049869  | 65.528572       |                |                  | 112.039304     | 56.523290        | E    |             |                 |                |                  |                |                  | 18 |
| 2  | 244.092796  | 122.550036      | 227.066247     | 114.036762       | 226.082231     | 113.544754       | N    | 2176.117913 | 1088.562594     | 2159.091364    | 1080.049320      | 2158.107348    | 1079.557312      | 17 |
| 3  | 315.129910  | 158.068593      | 298.103361     | 149.555319       | 297.119345     | 149.063311       | A    | 2062.074986 | 1031.541131     | 2045.048437    | 1023.027856      | 2044.064421    | 1022.535848      | 16 |
| 4  | 430.156853  | 215.582065      | 413.130304     | 207.068790       | 412.146288     | 206.576782       | D    | 1991.037872 | 996.022574      | 1974.011323    | 987.509300       | 1973.027307    | 987.017292       | 15 |
| 5  | 517.188881  | 259.098079      | 500.162332     | 250.584804       | 499.178316     | 250.092796       | S    | 1876.010929 | 938.509103      | 1858.984380    | 929.995828       | 1858.000364    | 929.503820       | 14 |
| 6  | 630.272945  | 315.640111      | 613.246396     | 307.126836       | 612.262380     | 306.634828       | L    | 1788.978901 | 894.993089      | 1771.952352    | 886.479814       | 1770.968336    | 885.987806       | 13 |
| 7  | 1069.498271 | 535.252774      | 1052.471722    | 526.739499       | 1051.487706    | 526.247491       | Q    | 1675.894837 | 838.451057      | 1658.868288    | 829.937782       | 1657.884272    | 829.445774       | 12 |
| 8  | 1140.535385 | 570.771331      | 1123.508836    | 562.258056       | 1122.524820    | 561.766048       | A    | 1236.669511 | 618.838394      | 1219.642962    | 610.325119       | 1218.658946    | 609.833111       | 11 |
| 9  | 1227.567413 | 614.287345      | 1210.540864    | 605.774070       | 1209.556848    | 605.282062       | S    | 1165.632397 | 583.319837      | 1148.605848    | 574.806562       | 1147.621832    | 574.314554       | 10 |
| 10 | 1340.651477 | 670.829377      | 1323.624928    | 662.316102       | 1322.640912    | 661.824094       | L    | 1078.600369 | 539.803823      | 1061.573820    | 531.290548       | 1060.589804    | 530.798540       | 9  |
| 11 | 1496.752588 | 748.879932      | 1479.726039    | 740.366658       | 1478.742023    | 739.874650       | R    | 965.516305  | 483.261791      | 948.489756     | 474.748516       | 947.505740     | 474.256508       | 8  |
| 12 | 1593.805352 | 797.406314      | 1576.778803    | 788.893040       | 1575.794787    | 788.401032       | P    | 809.415194  | 405.211235      | 792.388645     | 396.697961       | 791.404629     | 396.205953       | 7  |
| 13 | 1730.864264 | 865.935770      | 1713.837715    | 857.422496       | 1712.853699    | 856.930488       | H    | 712.362430  | 356.684853      | 695.335881     | 348.171579       | 694.351865     | 347.679571       | 6  |
| 14 | 1801.901378 | 901.454327      | 1784.874829    | 892.941053       | 1783.890813    | 892.449045       | A    | 575.303518  | 288.155397      | 558.276969     | 279.642123       | 557.292953     | 279.150115       | 5  |
| 15 | 1916.928321 | 958.967799      | 1899.901772    | 950.454524       | 1898.917756    | 949.962516       | D    | 504.266404  | 252.636840      | 487.239855     | 244.123566       | 486.255839     | 243.631558       | 4  |
| 16 | 2045.970914 | 1023.489095     | 2028.944365    | 1014.975821      | 2027.960349    | 1014.483813      | E    | 389.239461  | 195.123369      | 372.212912     | 186.610094       | 371.228896     | 186.118086       | 3  |
| 17 | 2159.054978 | 1080.031127     | 2142.028429    | 1071.517852      | 2141.044413    | 1071.025844      | L    | 260.196868  | 130.602072      | 243.170319     | 122.088798       |                |                  | 2  |
| 18 |             |                 |                |                  |                |                  | K    | 147.112804  | 74.060040       | 130.086255     | 65.546765        |                |                  | 1  |

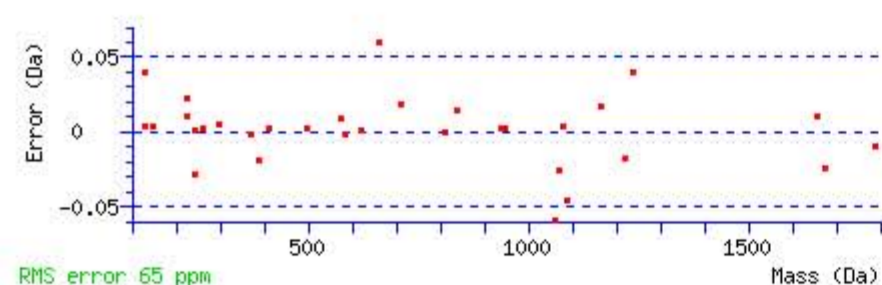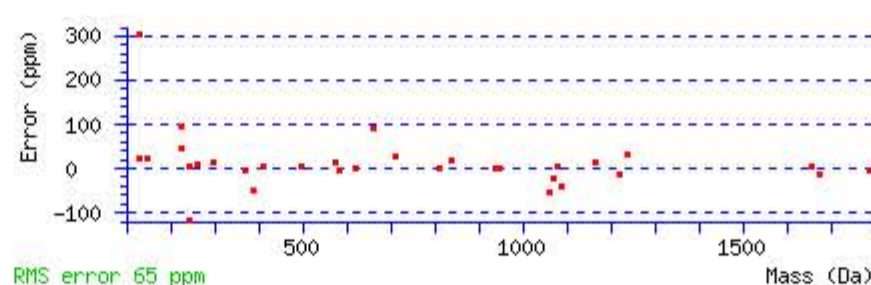

NCBI BLAST search of **ENADSLQASLRPHADELK**

(Parameters: blastp, nr protein database, expect=20000, no filter, PAM30)

Other BLAST [web gateways](#)

All matches to this query

| Score | Mr(calc):   | Delta    | Sequence                              |
|-------|-------------|----------|---------------------------------------|
| 25.7  | 2304.153183 | 0.000993 | <a href="#">ENADSLQASLRPHADELK</a>    |
| 2.3   | 2304.149384 | 0.004792 | <a href="#">LNCMETFEVKVDSPVKPAPK</a>  |
| 0.8   | 2304.124191 | 0.029985 | <a href="#">TAAMLSSAESFSKHAHEIMLK</a> |

Mascot: <http://www.matrixscience.com/>



# Mascot Search Results

## Peptide View

MS/MS Fragmentation of **STAAMSTYTGIFTDQVLSVLK**

Found in **APOC2\_HUMAN**, Apolipoprotein C-II OS=Homo sapiens GN=APOC2 PE=1 SV=1

Match to Query 57186: 2543.312562 from(848.778130,3+) rtinseconds(3224) index(44528)

Title: Locus:1.1.1.3537.19 File:"2013-07-02 CLN FXIII 60 min 2nd F 3.wiff"

Data file C:\Program Files (x86)\Matrix Science\Mascot Daemon\mgf5 FXIII 60 min 2nd\mascot\_daemon\_merge.mgf

Click mouse within plot area to zoom in by factor of two about that point

Or, Plot from  to  Da

Label all possible matches  Label matches used for scoring

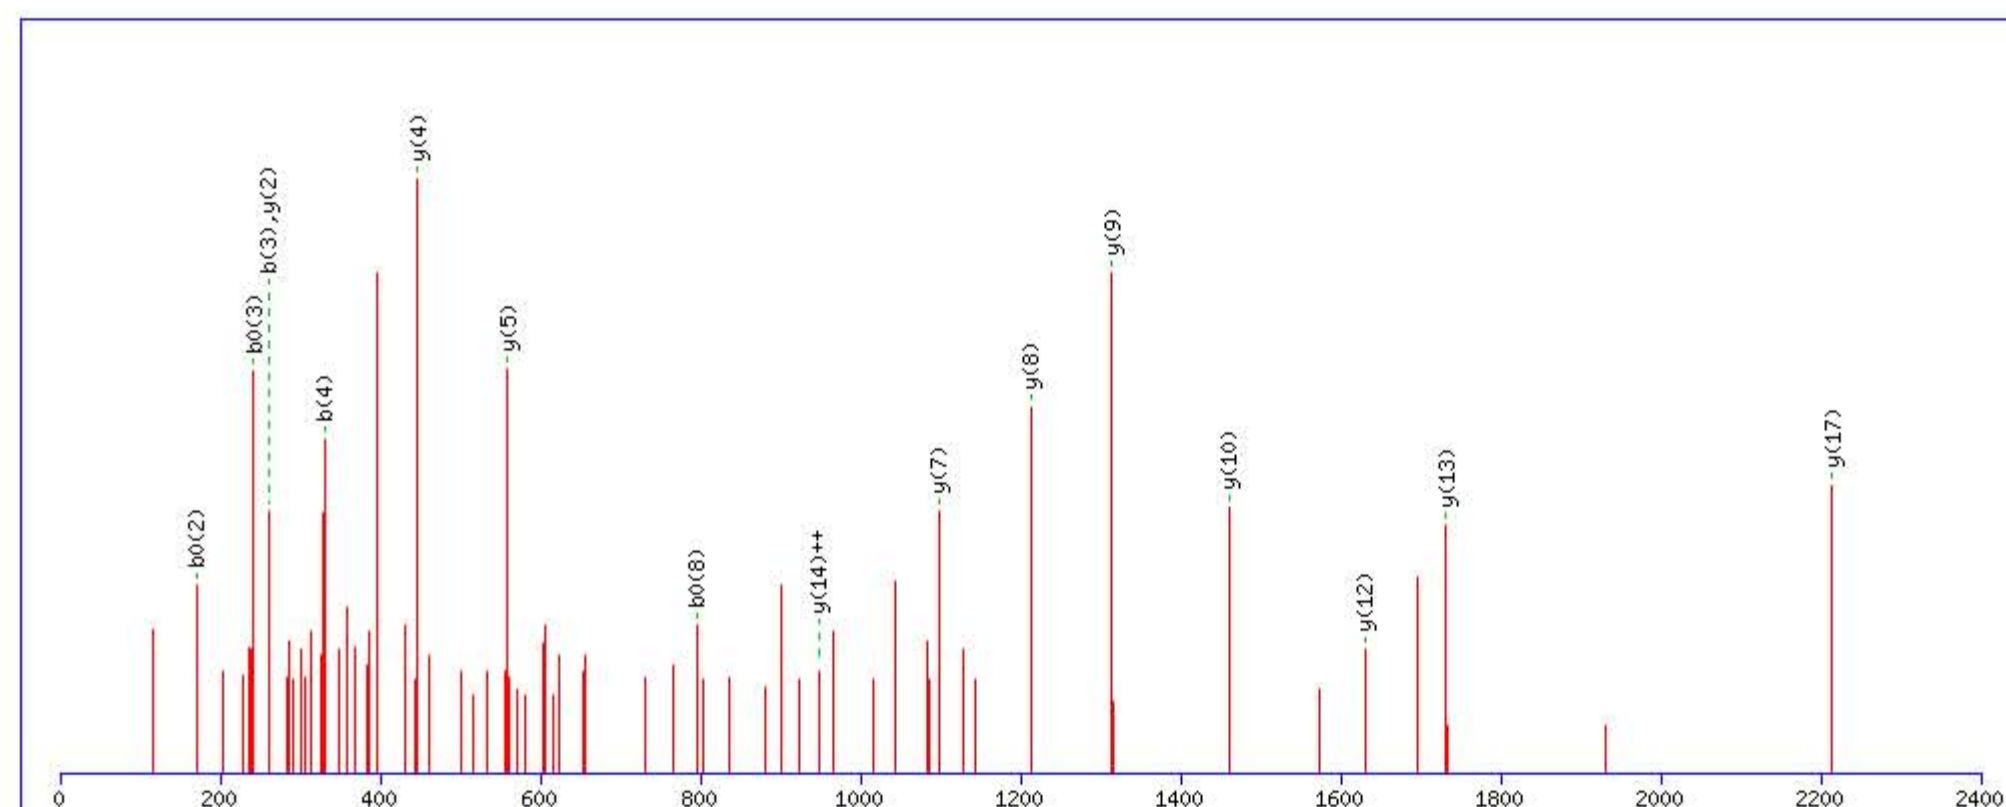

Monoisotopic mass of neutral peptide Mr(calc): 2543.301544

Fixed modifications: Carbamidomethyl (C) (apply to specified residues or termini only)

Variable modifications:

Q15 : Biotin:Thermo-21345 (Q)

Ions Score: 46 Expect: 0.00069

Matches : 16/206 fragment ions using 33 most intense peaks [\(help\)](#)

| #  | b           | b <sup>++</sup> | b <sup>*</sup> | b <sup>*++</sup> | b <sup>0</sup> | b <sup>0++</sup> | Seq. | y           | y <sup>++</sup> | y <sup>*</sup> | y <sup>*++</sup> | y <sup>0</sup> | y <sup>0++</sup> | #  |
|----|-------------|-----------------|----------------|------------------|----------------|------------------|------|-------------|-----------------|----------------|------------------|----------------|------------------|----|
| 1  | 88.039304   | 44.523290       |                |                  | 70.028739      | 35.518008        | S    |             |                 |                |                  |                |                  | 21 |
| 2  | 189.086983  | 95.047129       |                |                  | 171.076418     | 86.041847        | T    | 2457.276785 | 1229.142030     | 2440.250236    | 1220.628756      | 2439.266220    | 1220.136748      | 20 |
| 3  | 260.124097  | 130.565686      |                |                  | 242.113532     | 121.560404       | A    | 2356.229106 | 1178.618191     | 2339.202557    | 1170.104916      | 2338.218541    | 1169.612908      | 19 |
| 4  | 331.161211  | 166.084243      |                |                  | 313.150646     | 157.078961       | A    | 2285.191992 | 1143.099634     | 2268.165443    | 1134.586359      | 2267.181427    | 1134.094351      | 18 |
| 5  | 462.201696  | 231.604486      |                |                  | 444.191131     | 222.599203       | M    | 2214.154878 | 1107.581077     | 2197.128329    | 1099.067802      | 2196.144313    | 1098.575794      | 17 |
| 6  | 549.233724  | 275.120500      |                |                  | 531.223159     | 266.115217       | S    | 2083.114393 | 1042.060834     | 2066.087844    | 1033.547560      | 2065.103828    | 1033.055552      | 16 |
| 7  | 650.281403  | 325.644340      |                |                  | 632.270838     | 316.639057       | T    | 1996.082365 | 998.544821      | 1979.055816    | 990.031546       | 1978.071800    | 989.539538       | 15 |
| 8  | 813.344732  | 407.176004      |                |                  | 795.334167     | 398.170722       | Y    | 1895.034686 | 948.020981      | 1878.008137    | 939.507707       | 1877.024121    | 939.015699       | 14 |
| 9  | 914.392411  | 457.699844      |                |                  | 896.381846     | 448.694561       | T    | 1731.971357 | 866.489317      | 1714.944808    | 857.976042       | 1713.960792    | 857.484034       | 13 |
| 10 | 971.413875  | 486.210576      |                |                  | 953.403310     | 477.205293       | G    | 1630.923678 | 815.965477      | 1613.897129    | 807.452203       | 1612.913113    | 806.960195       | 12 |
| 11 | 1084.497939 | 542.752608      |                |                  | 1066.487374    | 533.747325       | I    | 1573.902214 | 787.454745      | 1556.875665    | 778.941471       | 1555.891649    | 778.449463       | 11 |
| 12 | 1231.566353 | 616.286815      |                |                  | 1213.555788    | 607.281532       | F    | 1460.818150 | 730.912713      | 1443.791601    | 722.399439       | 1442.807585    | 721.907431       | 10 |
| 13 | 1332.614032 | 666.810654      |                |                  | 1314.603467    | 657.805372       | T    | 1313.749736 | 657.378506      | 1296.723187    | 648.865232       | 1295.739171    | 648.373224       | 9  |
| 14 | 1447.640975 | 724.324126      |                |                  | 1429.630410    | 715.318843       | D    | 1212.702057 | 606.854667      | 1195.675508    | 598.341392       | 1194.691492    | 597.849384       | 8  |
| 15 | 1886.866301 | 943.936789      | 1869.839752    | 935.423514       | 1868.855736    | 934.931506       | Q    | 1097.675114 | 549.341195      | 1080.648565    | 540.827921       | 1079.664549    | 540.335913       | 7  |
| 16 | 1985.934715 | 993.470996      | 1968.908166    | 984.957721       | 1967.924150    | 984.465713       | V    | 658.449788  | 329.728532      | 641.423239     | 321.215258       | 640.439223     | 320.723250       | 6  |
| 17 | 2099.018779 | 1050.013027     | 2081.992230    | 1041.499753      | 2081.008214    | 1041.007745      | L    | 559.381374  | 280.194325      | 542.354825     | 271.681051       | 541.370809     | 271.189043       | 5  |
| 18 | 2186.050807 | 1093.529041     | 2169.024258    | 1085.015767      | 2168.040242    | 1084.523759      | S    | 446.297310  | 223.652293      | 429.270761     | 215.139019       | 428.286745     | 214.647011       | 4  |
| 19 | 2285.119221 | 1143.063248     | 2268.092672    | 1134.549974      | 2267.108656    | 1134.057966      | V    | 359.265282  | 180.136279      | 342.238733     | 171.623004       |                |                  | 3  |
| 20 | 2398.203285 | 1199.605280     | 2381.176736    | 1191.092006      | 2380.192720    | 1190.599998      | L    | 260.196868  | 130.602072      | 243.170319     | 122.088798       |                |                  | 2  |
| 21 |             |                 |                |                  |                |                  | K    | 147.112804  | 74.060040       | 130.086255     | 65.546765        |                |                  | 1  |

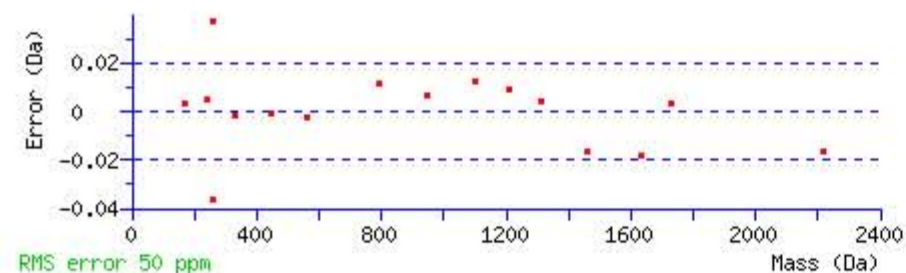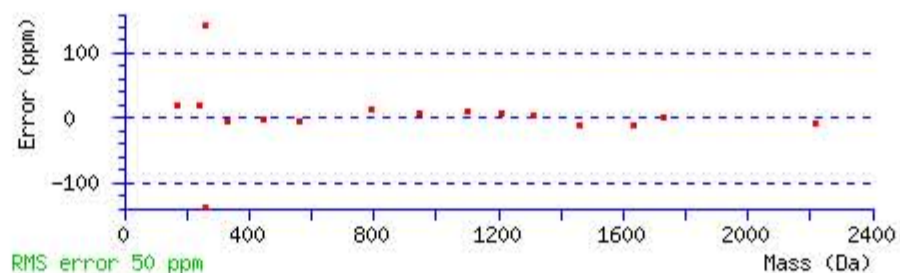

NCBI BLAST search of [STAAMSTYTGIFTDQVLSVLK](#)

(Parameters: blastp, nr protein database, expect=20000, no filter, PAM30)

Other BLAST [web gateways](#)

All matches to this query

| Score | Mr(calc):   | Delta    | Sequence                              |
|-------|-------------|----------|---------------------------------------|
| 46.1  | 2543.301544 | 0.011018 | <a href="#">STAAMSTYTGIFTDQVLSVLK</a> |

Mascot: <http://www.matrixscience.com/>



# MASCOT Search Results

## Peptide View

MS/MS Fragmentation of **DALSSVQESQVAQQAR**

Found in **APOC3\_HUMAN**, Apolipoprotein C-III OS=Homo sapiens GN=APOC3 PE=1 SV=1

Match to Query 47816: 2027.010522 from(676.677450,3+) rtinseconds(1944) index(36032)

Title: Locus:1.1.1.3096.18 File:"2013-07-02 CLN FXIII 60 min 2nd F 3.wiff"

Data file C:\Program Files (x86)\Matrix Science\Mascot Daemon\mgf\5 FXIII 60 min 2nd\mascot\_daemon\_merge.mgf

Click mouse within plot area to zoom in by factor of two about that point

Or, Plot from  to  Da

Label all possible matches  Label matches used for scoring

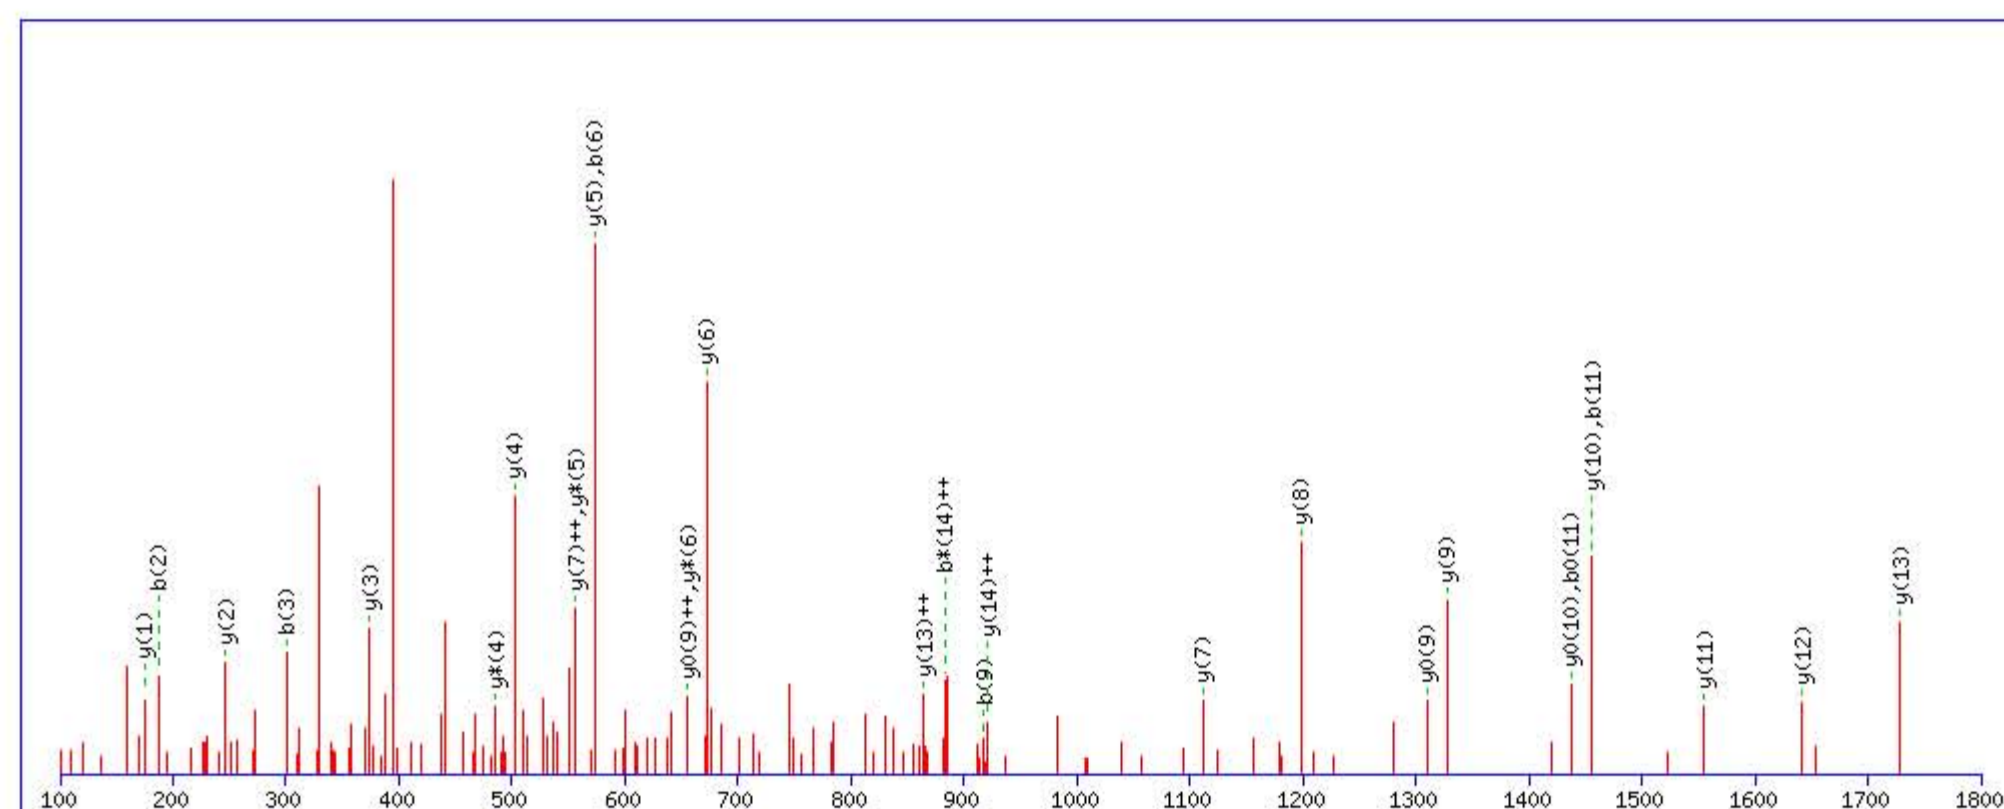

Monoisotopic mass of neutral peptide Mr(calc): 2027.010574

Fixed modifications: Carbamidomethyl (C) (apply to specified residues or termini only)

Variable modifications:

Q10 : Biotin:Thermo-21345 (Q)

Ions Score: 81 Expect: 2.7e-008

Matches : 29/154 fragment ions using 47 most intense peaks [\(help\)](#)

| #  | b                  | b <sup>++</sup> | b <sup>*</sup> | b <sup>+++</sup>  | b <sup>0</sup>     | b <sup>0++</sup> | Seq. | y                  | y <sup>++</sup>   | y <sup>*</sup>    | y <sup>+++</sup> | y <sup>0</sup>     | y <sup>0++</sup>  | #  |
|----|--------------------|-----------------|----------------|-------------------|--------------------|------------------|------|--------------------|-------------------|-------------------|------------------|--------------------|-------------------|----|
| 1  | 116.034219         | 58.520748       |                |                   | 98.023654          | 49.515465        | D    |                    |                   |                   |                  |                    |                   | 16 |
| 2  | <b>187.071333</b>  | 94.039304       |                |                   | 169.060768         | 85.034022        | A    | 1912.990923        | 956.999100        | 1895.964374       | 948.485825       | 1894.980358        | 947.993817        | 15 |
| 3  | <b>300.155397</b>  | 150.581336      |                |                   | 282.144832         | 141.576054       | L    | 1841.953809        | <b>921.480543</b> | 1824.927260       | 912.967268       | 1823.943244        | 912.475260        | 14 |
| 4  | 387.187425         | 194.097351      |                |                   | 369.176860         | 185.092068       | S    | <b>1728.869745</b> | <b>864.938511</b> | 1711.843196       | 856.425236       | 1710.859180        | 855.933228        | 13 |
| 5  | 474.219453         | 237.613364      |                |                   | 456.208888         | 228.608082       | S    | <b>1641.837717</b> | 821.422497        | 1624.811168       | 812.909222       | 1623.827152        | 812.417214        | 12 |
| 6  | <b>573.287867</b>  | 287.147572      |                |                   | 555.277302         | 278.142289       | V    | <b>1554.805689</b> | 777.906483        | 1537.779140       | 769.393208       | 1536.795124        | 768.901200        | 11 |
| 7  | 701.346445         | 351.176861      | 684.319896     | 342.663586        | 683.335880         | 342.171578       | Q    | <b>1455.737275</b> | 728.372276        | 1438.710726       | 719.859001       | <b>1437.726710</b> | 719.366993        | 10 |
| 8  | 830.389038         | 415.698157      | 813.362489     | 407.184883        | 812.378473         | 406.692875       | E    | <b>1327.678697</b> | 664.342987        | 1310.652148       | 655.829712       | <b>1309.668132</b> | <b>655.337704</b> | 9  |
| 9  | <b>917.421066</b>  | 459.214171      | 900.394517     | 450.700897        | 899.410501         | 450.208889       | S    | <b>1198.636104</b> | 599.821690        | 1181.609555       | 591.308416       | 1180.625539        | 590.816408        | 8  |
| 10 | 1356.646392        | 678.826834      | 1339.619843    | 670.313560        | 1338.635827        | 669.821551       | Q    | <b>1111.604076</b> | <b>556.305676</b> | 1094.577527       | 547.792402       |                    |                   | 7  |
| 11 | <b>1455.714806</b> | 728.361041      | 1438.688257    | 719.847767        | <b>1437.704241</b> | 719.355758       | V    | <b>672.378750</b>  | 336.693013        | <b>655.352201</b> | 328.179739       |                    |                   | 6  |
| 12 | 1526.751920        | 763.879598      | 1509.725371    | 755.366324        | 1508.741355        | 754.874315       | A    | <b>573.310336</b>  | 287.158806        | <b>556.283787</b> | 278.645532       |                    |                   | 5  |
| 13 | 1654.810498        | 827.908887      | 1637.783949    | 819.395613        | 1636.799933        | 818.903605       | Q    | <b>502.273222</b>  | 251.640249        | <b>485.246673</b> | 243.126975       |                    |                   | 4  |
| 14 | 1782.869076        | 891.938176      | 1765.842527    | <b>883.424902</b> | 1764.858511        | 882.932894       | Q    | <b>374.214644</b>  | 187.610960        | 357.188095        | 179.097686       |                    |                   | 3  |
| 15 | 1853.906190        | 927.456733      | 1836.879641    | 918.943459        | 1835.895625        | 918.451451       | A    | <b>246.156066</b>  | 123.581671        | 229.129517        | 115.068396       |                    |                   | 2  |
| 16 |                    |                 |                |                   |                    |                  | R    | <b>175.118952</b>  | 88.063114         | 158.092403        | 79.549839        |                    |                   | 1  |

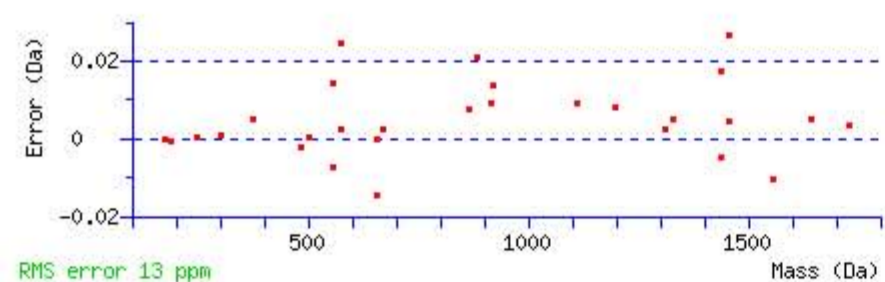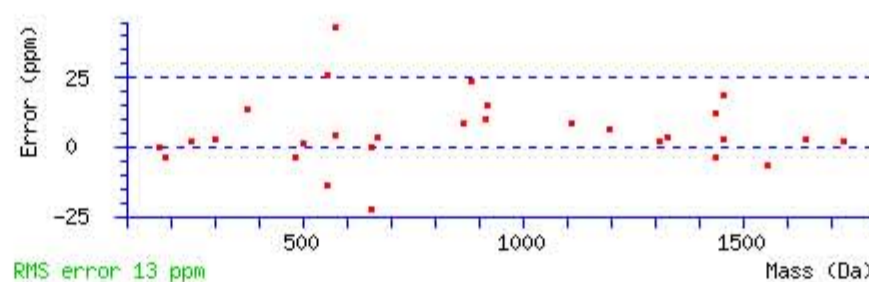

NCBI BLAST search of **DALSSVQESQVAQQAR**

(Parameters: blastp, nr protein database, expect=20000, no filter, PAM30)

Other BLAST [web gateways](#)

### All matches to this query

| Score | Mr(calc):   | Delta     | Sequence                          |
|-------|-------------|-----------|-----------------------------------|
| 81.4  | 2027.010574 | -0.000052 | <a href="#">DALSSVQESQVAQQAR</a>  |
| 74.7  | 2027.010574 | -0.000052 | <a href="#">DALSSVQESQVAQQAR</a>  |
| 68.6  | 2027.010574 | -0.000052 | <a href="#">DALSSVQESQVAQQAR</a>  |
| 43.5  | 2027.010574 | -0.000052 | <a href="#">DALSSVQESQVAQQAR</a>  |
| 0.6   | 2027.027161 | -0.016639 | <a href="#">IHSGKKPYQCGKAFNHR</a> |



# MASCOT Search Results

## Peptide View

MS/MS Fragmentation of **DALSSVQESQVAQQAR**

Found in **APOC3\_HUMAN**, Apolipoprotein C-III OS=Homo sapiens GN=APOC3 PE=1 SV=1

Match to Query 47817: 2027.010522 from(676.677450,3+) rtinseconds(1927) index(35894)

Title: Locus:1.1.1.3090.21 File:"2013-07-02 CLN FXIII 60 min 2nd F 3.wiff"

Data file C:\Program Files (x86)\Matrix Science\Mascot Daemon\mgf5 FXIII 60 min 2nd\mascot\_daemon\_merge.mgf

Click mouse within plot area to zoom in by factor of two about that point

Or, Plot from  to  Da

Label all possible matches  Label matches used for scoring

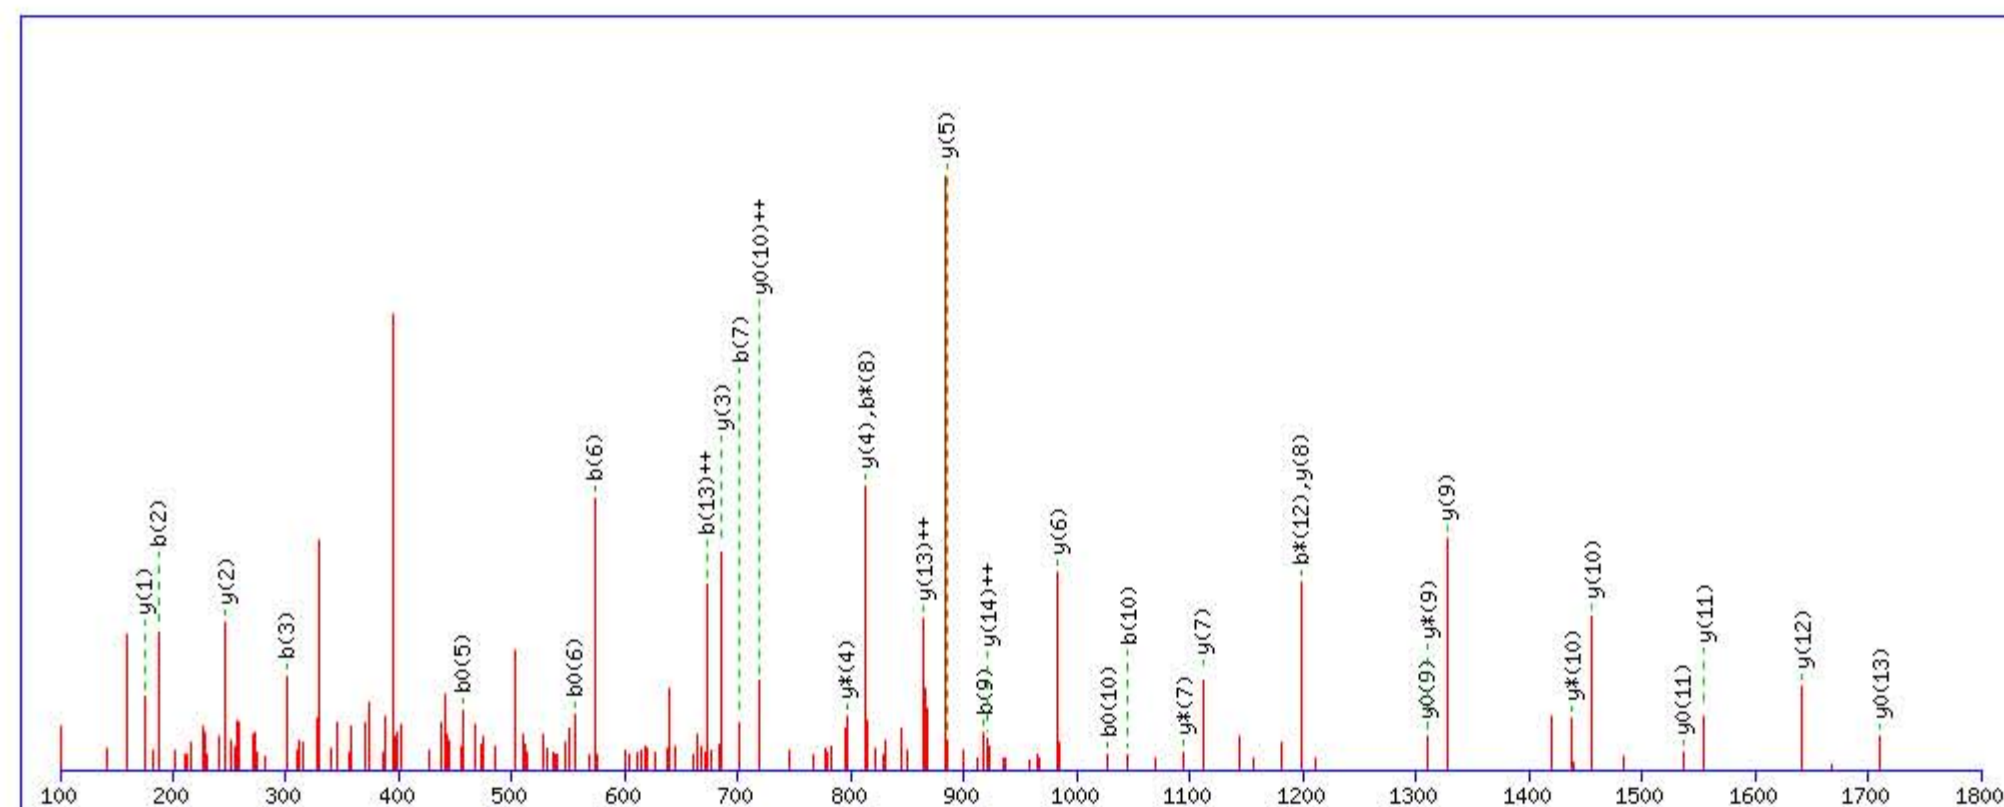

Monoisotopic mass of neutral peptide Mr(calc): 2027.010574

Fixed modifications: Carbamidomethyl (C) (apply to specified residues or termini only)

Variable modifications:

Q14 : Biotin:Thermo-21345 (Q)

Ions Score: 88 Expect: 4.3e-008

Matches : 34/154 fragment ions using 45 most intense peaks [\(help\)](#)

| #  | b                  | b <sup>++</sup>   | b <sup>+</sup>     | b <sup>+++</sup> | b <sup>0</sup>     | b <sup>0++</sup> | Seq. | y                  | y <sup>++</sup>   | y <sup>+</sup>     | y <sup>+++</sup> | y <sup>0</sup>     | y <sup>0++</sup>  | #  |
|----|--------------------|-------------------|--------------------|------------------|--------------------|------------------|------|--------------------|-------------------|--------------------|------------------|--------------------|-------------------|----|
| 1  | 116.034219         | 58.520748         |                    |                  | 98.023654          | 49.515465        | D    |                    |                   |                    |                  |                    |                   | 16 |
| 2  | <b>187.071333</b>  | 94.039304         |                    |                  | 169.060768         | 85.034022        | A    | 1912.990923        | 956.999100        | 1895.964374        | 948.485825       | 1894.980358        | 947.993817        | 15 |
| 3  | <b>300.155397</b>  | 150.581336        |                    |                  | 282.144832         | 141.576054       | L    | 1841.953809        | <b>921.480543</b> | 1824.927260        | 912.967268       | 1823.943244        | 912.475260        | 14 |
| 4  | 387.187425         | 194.097351        |                    |                  | 369.176860         | 185.092068       | S    | 1728.869745        | <b>864.938511</b> | 1711.843196        | 856.425236       | <b>1710.859180</b> | 855.933228        | 13 |
| 5  | 474.219453         | 237.613364        |                    |                  | <b>456.208888</b>  | 228.608082       | S    | <b>1641.837717</b> | 821.422497        | 1624.811168        | 812.909222       | 1623.827152        | 812.417214        | 12 |
| 6  | <b>573.287867</b>  | 287.147572        |                    |                  | <b>555.277302</b>  | 278.142289       | V    | <b>1554.805689</b> | 777.906483        | 1537.779140        | 769.393208       | <b>1536.795124</b> | 768.901200        | 11 |
| 7  | <b>701.346445</b>  | 351.176861        | 684.319896         | 342.663586       | 683.335880         | 342.171578       | Q    | <b>1455.737275</b> | 728.372276        | <b>1438.710726</b> | 719.859001       | 1437.726710        | <b>719.366993</b> | 10 |
| 8  | 830.389038         | 415.698157        | <b>813.362489</b>  | 407.184883       | 812.378473         | 406.692875       | E    | <b>1327.678697</b> | 664.342987        | <b>1310.652148</b> | 655.829712       | <b>1309.668132</b> | 655.337704        | 9  |
| 9  | <b>917.421066</b>  | 459.214171        | 900.394517         | 450.700897       | 899.410501         | 450.208889       | S    | <b>1198.636104</b> | 599.821690        | 1181.609555        | 591.308416       | 1180.625539        | 590.816408        | 8  |
| 10 | <b>1045.479644</b> | 523.243460        | 1028.453095        | 514.730186       | <b>1027.469079</b> | 514.238178       | Q    | <b>1111.604076</b> | 556.305676        | <b>1094.577527</b> | 547.792402       |                    |                   | 7  |
| 11 | 1144.548058        | 572.777667        | 1127.521509        | 564.264393       | 1126.537493        | 563.772385       | V    | <b>983.545498</b>  | 492.276387        | 966.518949         | 483.763113       |                    |                   | 6  |
| 12 | 1215.585172        | 608.296224        | <b>1198.558623</b> | 599.782950       | 1197.574607        | 599.290942       | A    | <b>884.477084</b>  | 442.742180        | 867.450535         | 434.228906       |                    |                   | 5  |
| 13 | 1343.643750        | <b>672.325513</b> | 1326.617201        | 663.812239       | 1325.633185        | 663.320230       | Q    | <b>813.439970</b>  | 407.223623        | <b>796.413421</b>  | 398.710349       |                    |                   | 4  |
| 14 | 1782.869076        | 891.938176        | 1765.842527        | 883.424902       | 1764.858511        | 882.932894       | Q    | <b>685.381392</b>  | 343.194334        | 668.354843         | 334.681060       |                    |                   | 3  |
| 15 | 1853.906190        | 927.456733        | 1836.879641        | 918.943459       | 1835.895625        | 918.451451       | A    | <b>246.156066</b>  | 123.581671        | 229.129517         | 115.068396       |                    |                   | 2  |
| 16 |                    |                   |                    |                  |                    |                  | R    | <b>175.118952</b>  | 88.063114         | 158.092403         | 79.549839        |                    |                   | 1  |

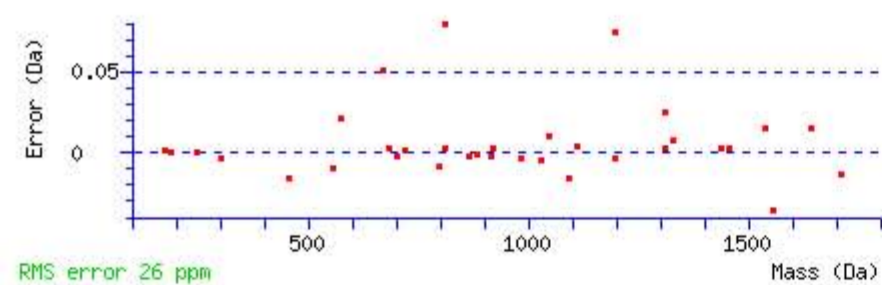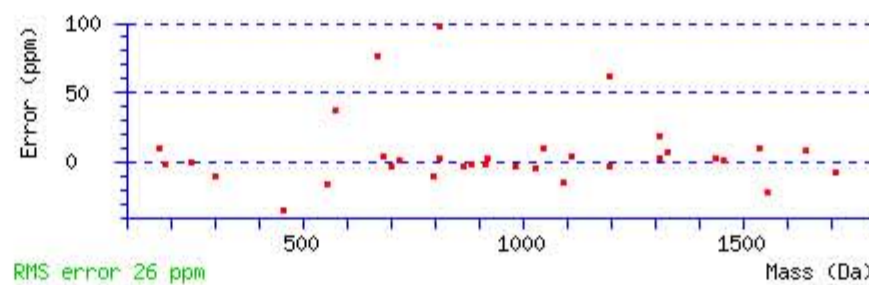

NCBI BLAST search of **DALSSVQESQVAQQAR**

(Parameters: blastp, nr protein database, expect=20000, no filter, PAM30)

Other BLAST [web gateways](#)

### All matches to this query

| Score | Mr(calc):   | Delta     | Sequence                         |
|-------|-------------|-----------|----------------------------------|
| 87.7  | 2027.010574 | -0.000052 | <a href="#">DALSSVQESQVAQQAR</a> |
| 87.3  | 2027.010574 | -0.000052 | <a href="#">DALSSVQESQVAQQAR</a> |
| 80.7  | 2027.010574 | -0.000052 | <a href="#">DALSSVQESQVAQQAR</a> |
| 37.3  | 2027.010574 | -0.000052 | <a href="#">DALSSVQESQVAQQAR</a> |



# MASCOT SEARCH RESULTS

## Peptide View

MS/MS Fragmentation of **DALSSVQESQVAQQAR**

Found in **APOC3\_HUMAN**, Apolipoprotein C-III OS=Homo sapiens GN=APOC3 PE=1 SV=1

Match to Query 47819: 2027.012172 from(676.678000,3+) rtinseconds(1962) index(36184)

Title: Locus:1.1.1.3102.22 File:"2013-07-02 CLN FXIII 60 min 2nd F 3.wiff"

Data file C:\Program Files (x86)\Matrix Science\Mascot Daemon\mgf\5 FXIII 60 min 2nd\mascot\_daemon\_merge.mgf

Click mouse within plot area to zoom in by factor of two about that point

Or, Plot from 100 to 2100 Da Full range

Label all possible matches  Label matches used for scoring

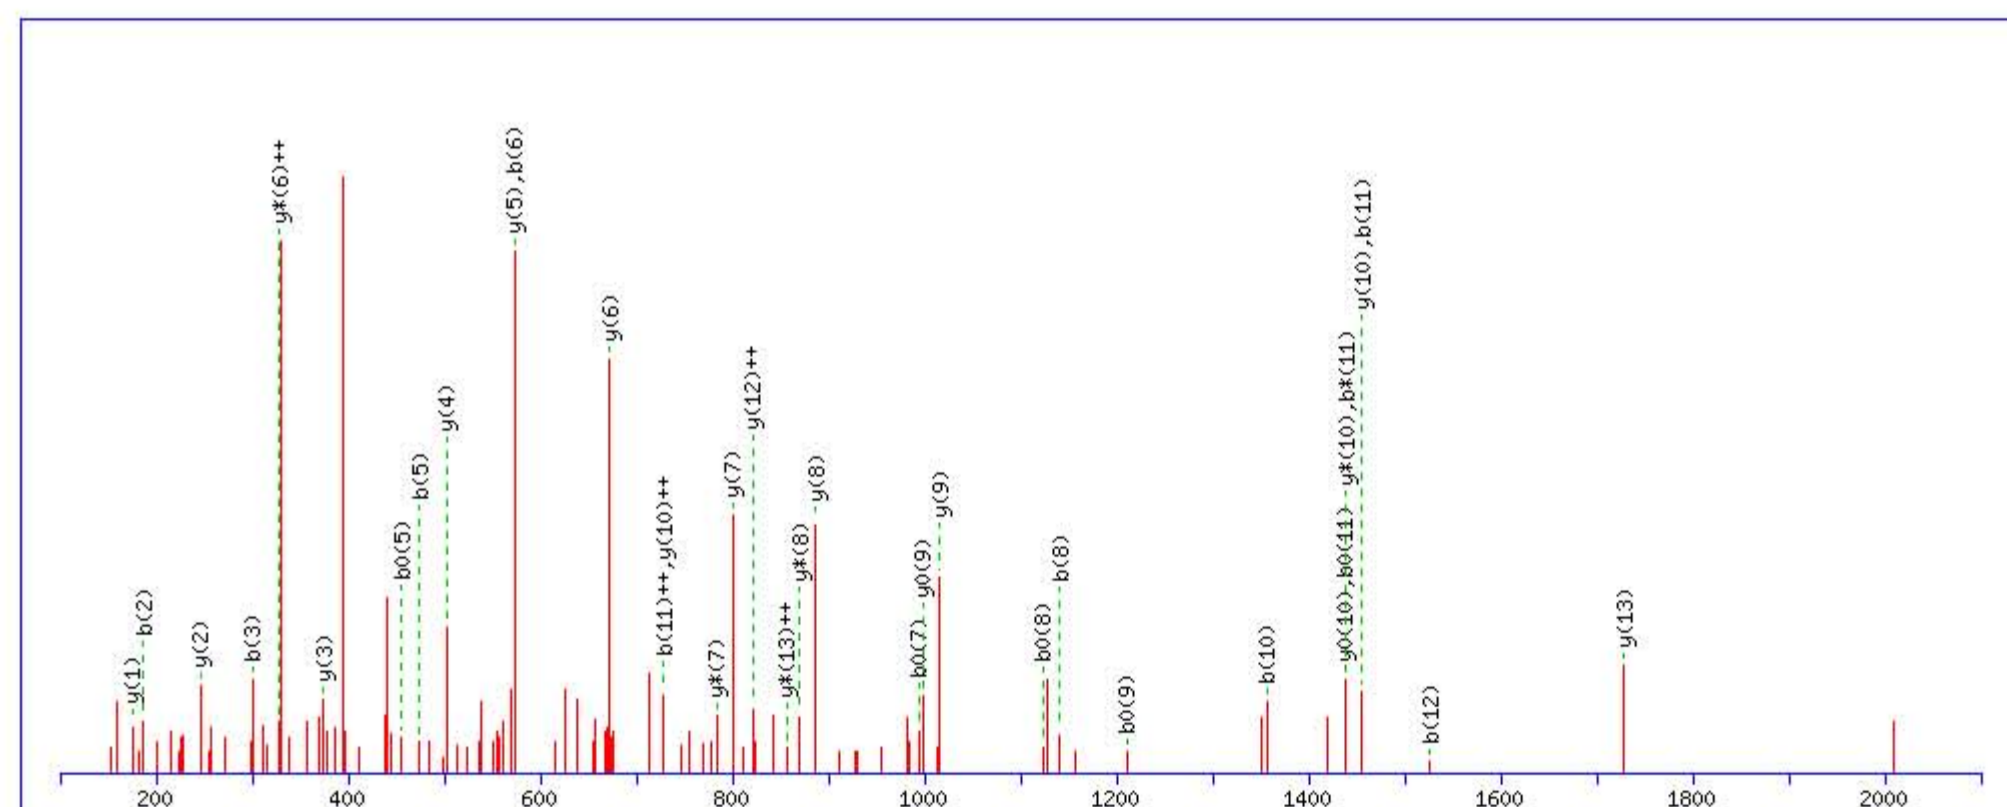

Monoisotopic mass of neutral peptide Mr(calc): 2027.010574

Fixed modifications: Carbamidomethyl (C) (apply to specified residues or termini only)

Variable modifications:

Q7 : Biotin:Thermo-21345 (Q)

Ions Score: 69 Expect: 5.8e-007

Matches : 35/154 fragment ions using 50 most intense peaks [\(help\)](#)

| #  | b                  | b <sup>++</sup>   | b <sup>*</sup>     | b <sup>+++</sup> | b <sup>0</sup>     | b <sup>0++</sup> | Seq. | y                  | y <sup>++</sup>   | y <sup>*</sup>     | y <sup>+++</sup>  | y <sup>0</sup>     | y <sup>0++</sup> | #  |
|----|--------------------|-------------------|--------------------|------------------|--------------------|------------------|------|--------------------|-------------------|--------------------|-------------------|--------------------|------------------|----|
| 1  | 116.034219         | 58.520748         |                    |                  | 98.023654          | 49.515465        | D    |                    |                   |                    |                   |                    |                  | 16 |
| 2  | <b>187.071333</b>  | 94.039304         |                    |                  | 169.060768         | 85.034022        | A    | 1912.990923        | 956.999100        | 1895.964374        | 948.485825        | 1894.980358        | 947.993817       | 15 |
| 3  | <b>300.155397</b>  | 150.581336        |                    |                  | 282.144832         | 141.576054       | L    | 1841.953809        | 921.480543        | 1824.927260        | 912.967268        | 1823.943244        | 912.475260       | 14 |
| 4  | 387.187425         | 194.097351        |                    |                  | 369.176860         | 185.092068       | S    | <b>1728.869745</b> | 864.938511        | 1711.843196        | <b>856.425236</b> | 1710.859180        | 855.933228       | 13 |
| 5  | <b>474.219453</b>  | 237.613364        |                    |                  | <b>456.208888</b>  | 228.608082       | S    | 1641.837717        | <b>821.422497</b> | 1624.811168        | 812.909222        | 1623.827152        | 812.417214       | 12 |
| 6  | <b>573.287867</b>  | 287.147572        |                    |                  | 555.277302         | 278.142289       | V    | 1554.805689        | 777.906483        | 1537.779140        | 769.393208        | 1536.795124        | 768.901200       | 11 |
| 7  | 1012.513193        | 506.760235        | 995.486644         | 498.246960       | <b>994.502628</b>  | 497.754952       | Q    | <b>1455.737275</b> | <b>728.372276</b> | <b>1438.710726</b> | 719.859001        | <b>1437.726710</b> | 719.366993       | 10 |
| 8  | <b>1141.555786</b> | 571.281531        | 1124.529237        | 562.768257       | <b>1123.545221</b> | 562.276249       | E    | <b>1016.511949</b> | 508.759613        | 999.485400         | 500.246338        | <b>998.501384</b>  | 499.754330       | 9  |
| 9  | 1228.587814        | 614.797545        | 1211.561265        | 606.284271       | <b>1210.577249</b> | 605.792263       | S    | <b>887.469356</b>  | 444.238316        | <b>870.442807</b>  | 435.725042        | 869.458791         | 435.233034       | 8  |
| 10 | <b>1356.646392</b> | 678.826834        | 1339.619843        | 670.313560       | 1338.635827        | 669.821552       | Q    | <b>800.437328</b>  | 400.722302        | <b>783.410779</b>  | 392.209028        |                    |                  | 7  |
| 11 | <b>1455.714806</b> | <b>728.361041</b> | <b>1438.688257</b> | 719.847767       | <b>1437.704241</b> | 719.355759       | V    | <b>672.378750</b>  | 336.693013        | 655.352201         | <b>328.179739</b> |                    |                  | 6  |
| 12 | <b>1526.751920</b> | 763.879598        | 1509.725371        | 755.366324       | 1508.741355        | 754.874316       | A    | <b>573.310336</b>  | 287.158806        | 556.283787         | 278.645532        |                    |                  | 5  |
| 13 | 1654.810498        | 827.908887        | 1637.783949        | 819.395613       | 1636.799933        | 818.903605       | Q    | <b>502.273222</b>  | 251.640249        | 485.246673         | 243.126975        |                    |                  | 4  |
| 14 | 1782.869076        | 891.938176        | 1765.842527        | 883.424902       | 1764.858511        | 882.932894       | Q    | <b>374.214644</b>  | 187.610960        | 357.188095         | 179.097686        |                    |                  | 3  |
| 15 | 1853.906190        | 927.456733        | 1836.879641        | 918.943459       | 1835.895625        | 918.451451       | A    | <b>246.156066</b>  | 123.581671        | 229.129517         | 115.068396        |                    |                  | 2  |
| 16 |                    |                   |                    |                  |                    |                  | R    | <b>175.118952</b>  | 88.063114         | 158.092403         | 79.549839         |                    |                  | 1  |

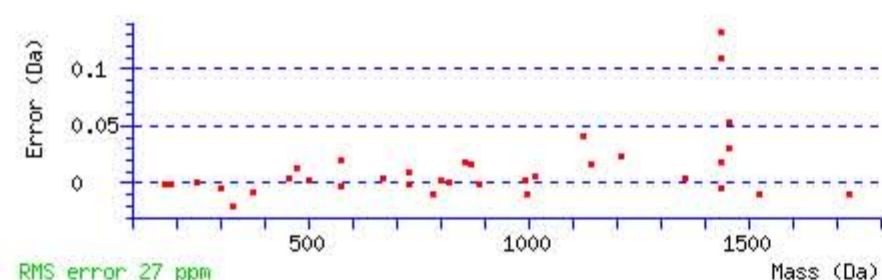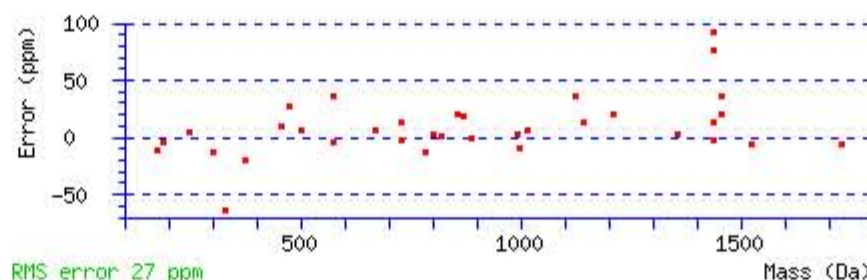

NCBI BLAST search of **DALSSVQESQVAQQAR**

(Parameters: blastp, nr protein database, expect=20000, no filter, PAM30)

Other BLAST [web gateways](#)

## All matches to this query

| Score | Mr(calc):   | Delta    | Sequence                          |
|-------|-------------|----------|-----------------------------------|
| 68.6  | 2027.010574 | 0.001598 | <a href="#">DALSSVQESQVAQQAR</a>  |
| 31.7  | 2027.010574 | 0.001598 | <a href="#">DALSSVQESQVAQQAR</a>  |
| 12.1  | 2027.010574 | 0.001598 | <a href="#">DALSSVQESQVAQQAR</a>  |
| 10.1  | 2027.010574 | 0.001598 | <a href="#">DALSSVQESQVAQQAR</a>  |
| 2.0   | 2027.010559 | 0.001613 | <a href="#">LTGRGAEDSLADQAANK</a> |
| 0.5   | 2027.000870 | 0.011302 | <a href="#">QMSEPNIPFPQGFK</a>    |



# MASCOT Search Results

## Peptide View

MS/MS Fragmentation of **DALSSVQESQVAQQAR**

Found in **APOC3\_HUMAN**, Apolipoprotein C-III OS=Homo sapiens GN=APOC3 PE=1 SV=1

Match to Query 47821: 2027.012772 from(676.678200,3+) rtinseconds(1883) index(35519)

Title: Locus:1.1.1.3075.21 File:"2013-07-02 CLN FXIII 60 min 2nd F 3.wiff"

Data file C:\Program Files (x86)\Matrix Science\Mascot Daemon\mgf5 FXIII 60 min 2nd\mascot\_daemon\_merge.mgf

Click mouse within plot area to zoom in by factor of two about that point

Or, Plot from  to  Da

Label all possible matches  Label matches used for scoring

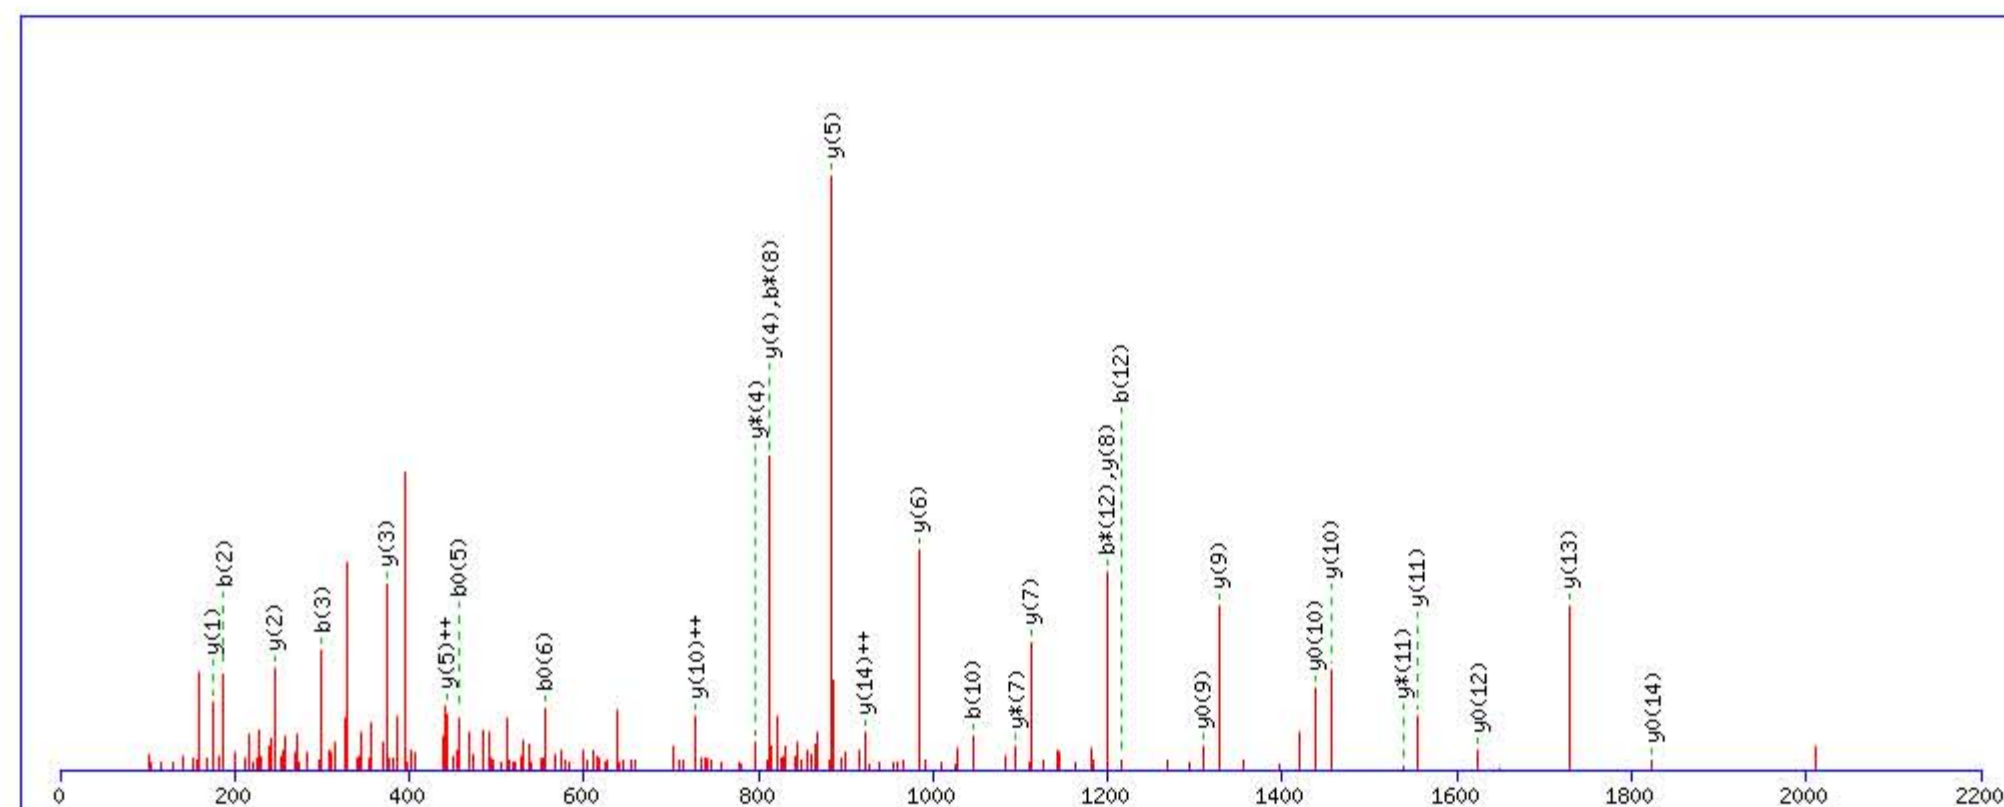

Monoisotopic mass of neutral peptide Mr(calc): 2027.010574

Fixed modifications: Carbamidomethyl (C) (apply to specified residues or termini only)

Variable modifications:

Q13 : Biotin:Thermo-21345 (Q)

Ions Score: 76 Expect: 5.5e-007

Matches : 30/154 fragment ions using 50 most intense peaks [\(help\)](#)

| #  | b                  | b <sup>++</sup> | b <sup>+</sup>     | b <sup>+++</sup> | b <sup>0</sup>    | b <sup>0++</sup> | Seq. | y                  | y <sup>++</sup>   | y <sup>+</sup>     | y <sup>+++</sup> | y <sup>0</sup>     | y <sup>0++</sup> | #  |
|----|--------------------|-----------------|--------------------|------------------|-------------------|------------------|------|--------------------|-------------------|--------------------|------------------|--------------------|------------------|----|
| 1  | 116.034219         | 58.520748       |                    |                  | 98.023654         | 49.515465        | D    |                    |                   |                    |                  |                    |                  | 16 |
| 2  | <b>187.071333</b>  | 94.039304       |                    |                  | 169.060768        | 85.034022        | A    | 1912.990923        | 956.999100        | 1895.964374        | 948.485825       | 1894.980358        | 947.993817       | 15 |
| 3  | <b>300.155397</b>  | 150.581336      |                    |                  | 282.144832        | 141.576054       | L    | 1841.953809        | <b>921.480543</b> | 1824.927260        | 912.967268       | <b>1823.943244</b> | 912.475260       | 14 |
| 4  | 387.187425         | 194.097351      |                    |                  | 369.176860        | 185.092068       | S    | <b>1728.869745</b> | 864.938511        | 1711.843196        | 856.425236       | 1710.859180        | 855.933228       | 13 |
| 5  | 474.219453         | 237.613364      |                    |                  | <b>456.208888</b> | 228.608082       | S    | 1641.837717        | 821.422497        | 1624.811168        | 812.909222       | <b>1623.827152</b> | 812.417214       | 12 |
| 6  | 573.287867         | 287.147572      |                    |                  | <b>555.277302</b> | 278.142289       | V    | <b>1554.805689</b> | 777.906483        | <b>1537.779140</b> | 769.393208       | 1536.795124        | 768.901200       | 11 |
| 7  | 701.346445         | 351.176861      | 684.319896         | 342.663586       | 683.335880        | 342.171578       | Q    | <b>1455.737275</b> | <b>728.372276</b> | 1438.710726        | 719.859001       | <b>1437.726710</b> | 719.366993       | 10 |
| 8  | 830.389038         | 415.698157      | <b>813.362489</b>  | 407.184883       | 812.378473        | 406.692875       | E    | <b>1327.678697</b> | 664.342987        | 1310.652148        | 655.829712       | <b>1309.668132</b> | 655.337704       | 9  |
| 9  | 917.421066         | 459.214171      | 900.394517         | 450.700897       | 899.410501        | 450.208889       | S    | <b>1198.636104</b> | 599.821690        | 1181.609555        | 591.308416       | 1180.625539        | 590.816408       | 8  |
| 10 | <b>1045.479644</b> | 523.243460      | 1028.453095        | 514.730186       | 1027.469079       | 514.238178       | Q    | <b>1111.604076</b> | 556.305676        | <b>1094.577527</b> | 547.792402       |                    |                  | 7  |
| 11 | 1144.548058        | 572.777667      | 1127.521509        | 564.264393       | 1126.537493       | 563.772385       | V    | <b>983.545498</b>  | 492.276387        | 966.518949         | 483.763113       |                    |                  | 6  |
| 12 | <b>1215.585172</b> | 608.296224      | <b>1198.558623</b> | 599.782950       | 1197.574607       | 599.290942       | A    | <b>884.477084</b>  | <b>442.742180</b> | 867.450535         | 434.228906       |                    |                  | 5  |
| 13 | 1654.810498        | 827.908887      | 1637.783949        | 819.395613       | 1636.799933       | 818.903605       | Q    | <b>813.439970</b>  | 407.223623        | <b>796.413421</b>  | 398.710349       |                    |                  | 4  |
| 14 | 1782.869076        | 891.938176      | 1765.842527        | 883.424902       | 1764.858511       | 882.932894       | Q    | <b>374.214644</b>  | 187.610960        | 357.188095         | 179.097686       |                    |                  | 3  |
| 15 | 1853.906190        | 927.456733      | 1836.879641        | 918.943459       | 1835.895625       | 918.451451       | A    | <b>246.156066</b>  | 123.581671        | 229.129517         | 115.068396       |                    |                  | 2  |
| 16 |                    |                 |                    |                  |                   |                  | R    | <b>175.118952</b>  | 88.063114         | 158.092403         | 79.549839        |                    |                  | 1  |

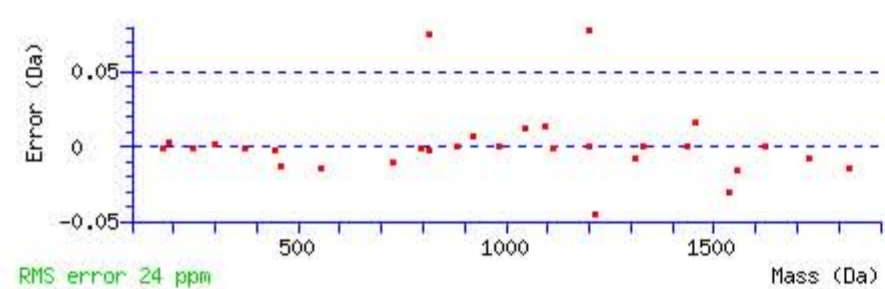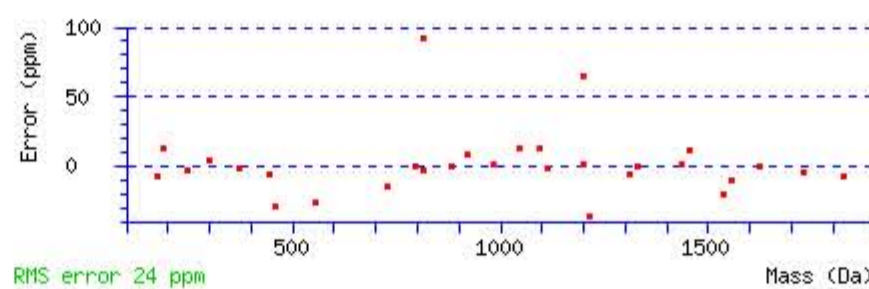

NCBI BLAST search of **DALSSVQESQVAQQAR**

(Parameters: blastp, nr protein database, expect=20000, no filter, PAM30)

Other BLAST [web gateways](#)

## All matches to this query

| Score | Mr(calc):   | Delta    | Sequence                         |
|-------|-------------|----------|----------------------------------|
| 76.5  | 2027.010574 | 0.002198 | <a href="#">DALSSVQESQVAQQAR</a> |
| 66.5  | 2027.010574 | 0.002198 | <a href="#">DALSSVQESQVAQQAR</a> |
| 38.2  | 2027.010574 | 0.002198 | <a href="#">DALSSVQESQVAQQAR</a> |
| 11.5  | 2027.010574 | 0.002198 | <a href="#">DALSSVQESQVAQQAR</a> |



# **MASCOT** Mascot Search Results

## Peptide View

MS/MS Fragmentation of **ELQAAQAR**

Found in **APOE\_HUMAN**, Apolipoprotein E OS=Homo sapiens GN=APOE PE=1 SV=1

Match to Query 23251: 1196.634708 from(599.324630,2+) rtinseconds(1508) index(49626)

Title: Locus:1.1.1.1140.19 File:"2013-07-02 CLN FXIII 60 min 2nd F 4.wiff"

Data file C:\Program Files (x86)\Matrix Science\Mascot Daemon\mgf5 FXIII 60 min 2nd\mascot\_daemon\_merge.mgf

Click mouse within plot area to zoom in by factor of two about that point

Or, Plot from  to  Da

Label all possible matches  Label matches used for scoring

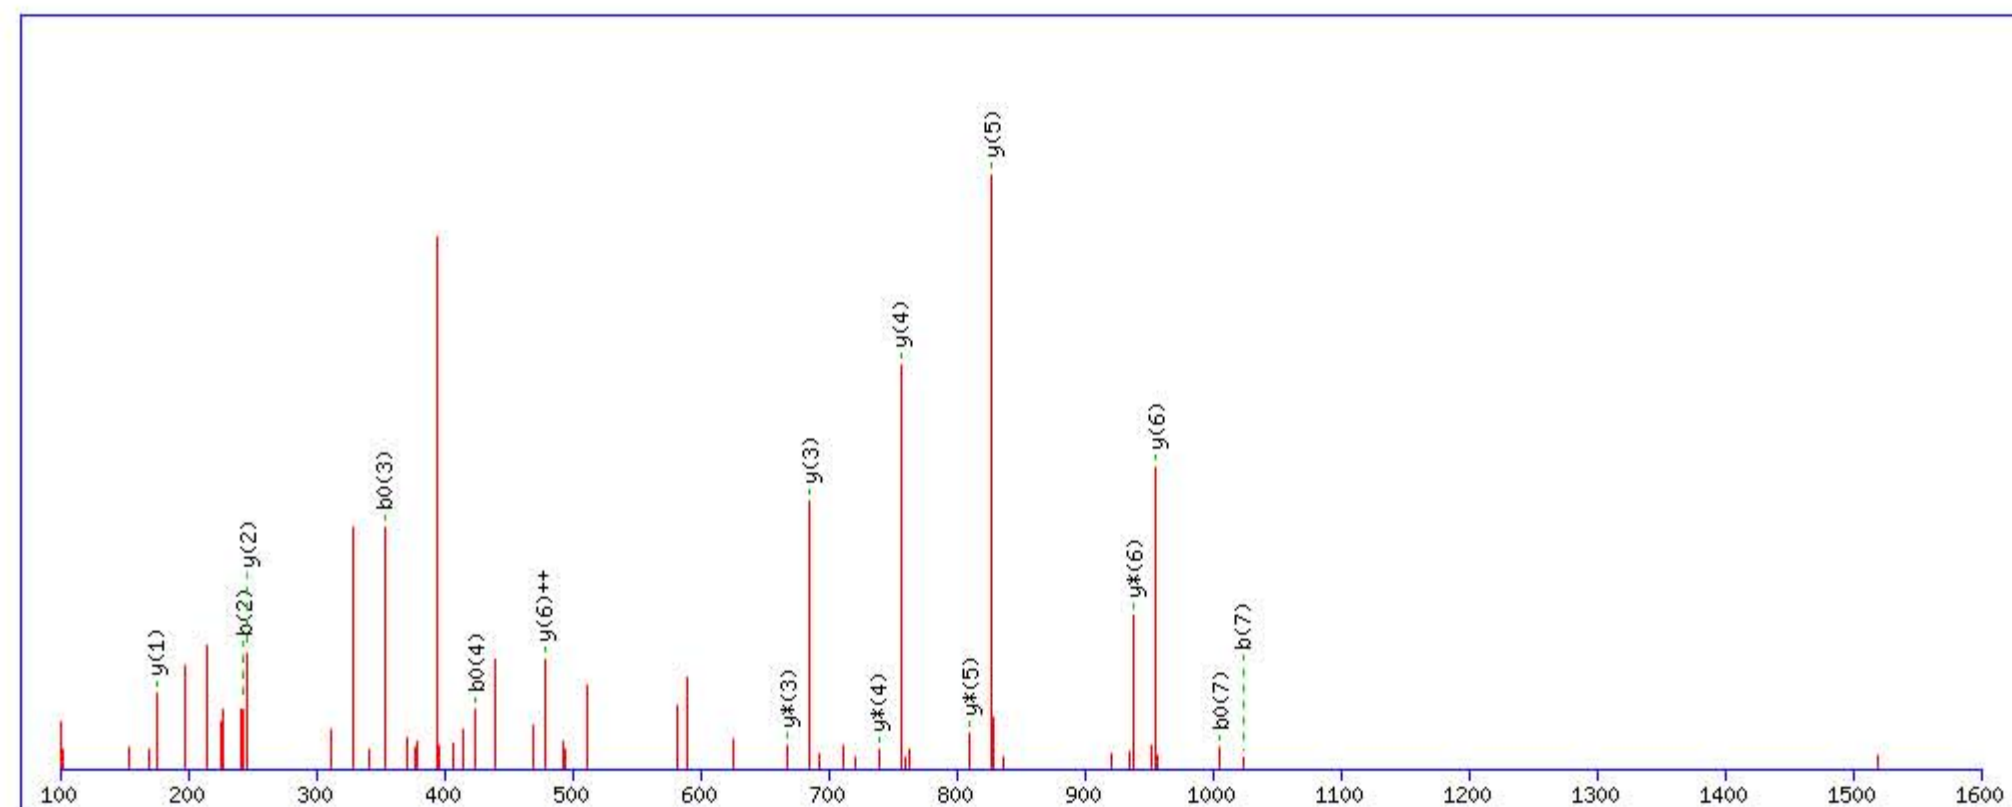

Monoisotopic mass of neutral peptide **Mr(calc)**: 1196.633545

Fixed modifications: Carbamidomethyl (C) (apply to specified residues or termini only)

Variable modifications:

Q6 : Biotin:Thermo-21345 (Q)

Ions Score: 34 Expect: 0.0034

Matches : 16/66 fragment ions using 29 most intense peaks [\(help\)](#)

| # | b                  | b <sup>++</sup> | b <sup>*</sup> | b <sup>+++</sup> | b <sup>0</sup>     | b <sup>0++</sup> | Seq. | y                 | y <sup>++</sup>   | y <sup>*</sup>    | y <sup>+++</sup> | # |
|---|--------------------|-----------------|----------------|------------------|--------------------|------------------|------|-------------------|-------------------|-------------------|------------------|---|
| 1 | 130.049869         | 65.528572       |                |                  | 112.039304         | 56.523290        | E    |                   |                   |                   |                  | 8 |
| 2 | <b>243.133933</b>  | 122.070605      |                |                  | 225.123368         | 113.065322       | L    | 1068.598262       | 534.802769        | 1051.571713       | 526.289495       | 7 |
| 3 | 371.192511         | 186.099894      | 354.165962     | 177.586619       | <b>353.181946</b>  | 177.094611       | Q    | <b>955.514198</b> | <b>478.260737</b> | <b>938.487649</b> | 469.747463       | 6 |
| 4 | 442.229625         | 221.618450      | 425.203076     | 213.105176       | <b>424.219060</b>  | 212.613168       | A    | <b>827.455620</b> | 414.231448        | <b>810.429071</b> | 405.718174       | 5 |
| 5 | 513.266739         | 257.137008      | 496.240190     | 248.623733       | 495.256174         | 248.131725       | A    | <b>756.418506</b> | 378.712891        | <b>739.391957</b> | 370.199617       | 4 |
| 6 | 952.492065         | 476.749671      | 935.465516     | 468.236396       | 934.481500         | 467.744388       | Q    | <b>685.381392</b> | 343.194334        | <b>668.354843</b> | 334.681060       | 3 |
| 7 | <b>1023.529179</b> | 512.268227      | 1006.502630    | 503.754953       | <b>1005.518614</b> | 503.262945       | A    | <b>246.156066</b> | 123.581671        | 229.129517        | 115.068397       | 2 |
| 8 |                    |                 |                |                  |                    |                  | R    | <b>175.118952</b> | 88.063114         | 158.092403        | 79.549840        | 1 |

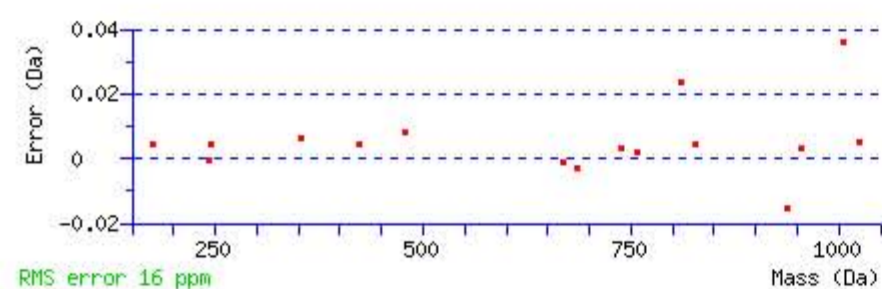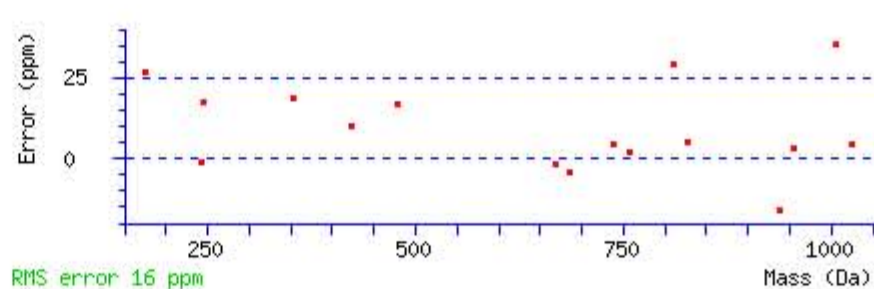

NCBI BLAST search of **ELQAAQAR**

(Parameters: blastp, nr protein database, expect=20000, no filter, PAM30)

Other BLAST [web gateways](#)

## All matches to this query

| Score | Mr(calc):   | Delta     | Sequence                    |
|-------|-------------|-----------|-----------------------------|
| 34.4  | 1196.633545 | 0.001163  | <a href="#">ELQAAQAR</a>    |
| 7.6   | 1196.633575 | 0.001133  | <a href="#">QASTQVPR</a>    |
| 4.6   | 1196.637390 | -0.002682 | <a href="#">TLRQAGAPNNR</a> |
| 2.0   | 1196.641434 | -0.006726 | <a href="#">STRPQAWVPR</a>  |
| 1.3   | 1196.633545 | 0.001163  | <a href="#">ELQAAQAR</a>    |
| 1.2   | 1196.627029 | 0.007679  | <a href="#">AGMPRQAR</a>    |

Mascot: <http://www.matrixscience.com/>



# MASCOT Search Results

## Peptide View

MS/MS Fragmentation of **LGPLVEQGR**

Found in **APOE\_HUMAN**, Apolipoprotein E OS=Homo sapiens GN=APOE PE=1 SV=1

Match to Query 25534: 1278.711268 from(640.362910,2+) rtinseconds(1962) index(36182)

Title: Locus:1.1.1.3102.20 File:"2013-07-02 CLN FXIII 60 min 2nd F 3.wiff"

Data file C:\Program Files (x86)\Matrix Science\Mascot Daemon\mgf5 FXIII 60 min 2nd\mascot\_daemon\_merge.mgf

Click mouse within plot area to zoom in by factor of two about that point

Or, Plot from  to  Da

Label all possible matches  Label matches used for scoring

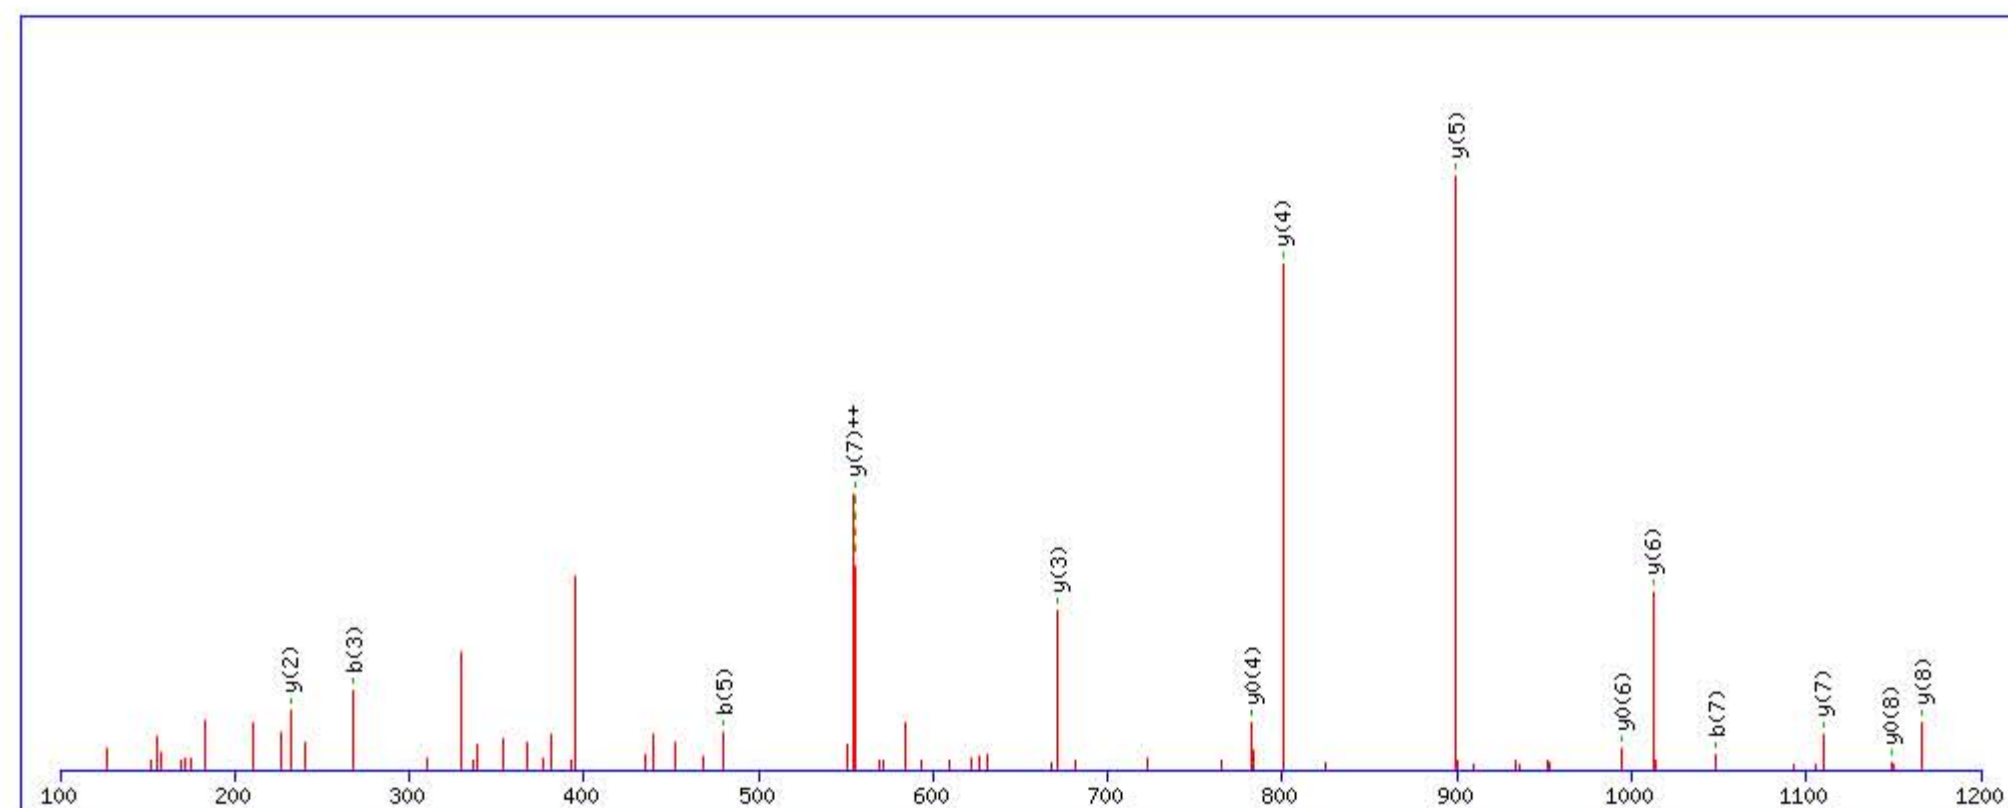

Monoisotopic mass of neutral peptide Mr(calc): 1278.711823

Fixed modifications: Carbamidomethyl (C) (apply to specified residues or termini only)

Variable modifications:

Q7 : Biotin:Thermo-21345 (Q)

Ions Score: 50 Expect: 6.3e-005

Matches : 14/68 fragment ions using 22 most intense peaks [\(help\)](#)

| # | b                  | b <sup>++</sup> | b <sup>+</sup> | b <sup>*++</sup> | b <sup>0</sup> | b <sup>0++</sup> | Seq. | y                  | y <sup>++</sup>   | y <sup>+</sup> | y <sup>*++</sup> | y <sup>0</sup>     | y <sup>0++</sup> | # |
|---|--------------------|-----------------|----------------|------------------|----------------|------------------|------|--------------------|-------------------|----------------|------------------|--------------------|------------------|---|
| 1 | 114.091340         | 57.549308       |                |                  |                |                  | L    |                    |                   |                |                  |                    |                  | 9 |
| 2 | 171.112804         | 86.060040       |                |                  |                |                  | G    | <b>1166.635041</b> | 583.821159        | 1149.608492    | 575.307884       | <b>1148.624476</b> | 574.815876       | 8 |
| 3 | <b>268.165568</b>  | 134.586422      |                |                  |                |                  | P    | <b>1109.613577</b> | <b>555.310426</b> | 1092.587028    | 546.797152       | 1091.603012        | 546.305144       | 7 |
| 4 | 381.249632         | 191.128454      |                |                  |                |                  | L    | <b>1012.560813</b> | 506.784044        | 995.534264     | 498.270770       | <b>994.550248</b>  | 497.778762       | 6 |
| 5 | <b>480.318046</b>  | 240.662661      |                |                  |                |                  | V    | <b>899.476749</b>  | 450.242012        | 882.450200     | 441.728738       | 881.466184         | 441.236730       | 5 |
| 6 | 609.360639         | 305.183958      |                |                  | 591.350074     | 296.178675       | E    | <b>800.408335</b>  | 400.707805        | 783.381786     | 392.194531       | <b>782.397770</b>  | 391.702523       | 4 |
| 7 | <b>1048.585965</b> | 524.796621      | 1031.559416    | 516.283346       | 1030.575400    | 515.791338       | Q    | <b>671.365742</b>  | 336.186509        | 654.339193     | 327.673234       |                    |                  | 3 |
| 8 | 1105.607429        | 553.307352      | 1088.580880    | 544.794078       | 1087.596864    | 544.302070       | G    | <b>232.140416</b>  | 116.573846        | 215.113867     | 108.060571       |                    |                  | 2 |
| 9 |                    |                 |                |                  |                |                  | R    | 175.118952         | 88.063114         | 158.092403     | 79.549839        |                    |                  | 1 |

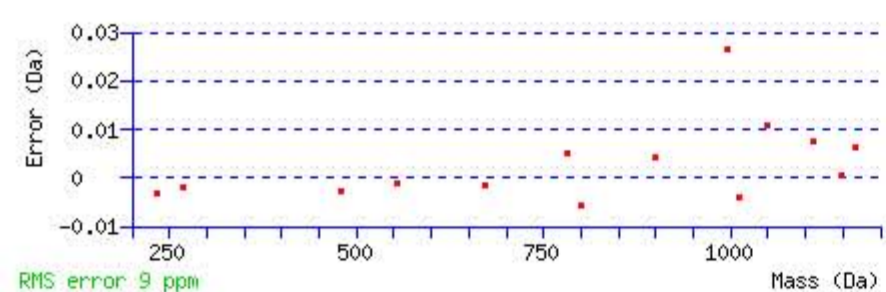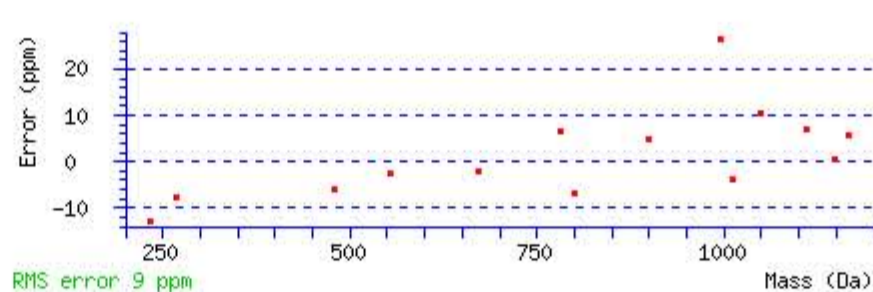

NCBI BLAST search of **LGPLVEQGR**

(Parameters: blastp, nr protein database, expect=20000, no filter, PAM30)

Other BLAST [web gateways](#)

All matches to this query

| Score | Mr(calc):   | Delta     | Sequence                      |
|-------|-------------|-----------|-------------------------------|
| 50.1  | 1278.711823 | -0.000555 | <a href="#">LGPLVEQGR</a>     |
| 5.0   | 1278.729584 | -0.018316 | <a href="#">IVIVPSLNPDGR</a>  |
| 0.3   | 1278.704422 | 0.006846  | <a href="#">ERGGLPVIEGPR</a>  |
| 0.3   | 1278.693192 | 0.018076  | <a href="#">LGDL DVALHQAK</a> |

Mascot: <http://www.matrixscience.com/>



# MASCOT Search Results

## Peptide View

MS/MS Fragmentation of **LEEQAQQIR**

Found in **APOE\_HUMAN**, Apolipoprotein E OS=Homo sapiens GN=APOE PE=1 SV=1

Match to Query 31712: 1424.740448 from(713.377500,2+) rtinseconds(1547) index(18797)

Title: Locus:1.1.1.541.11 File:"2013-07-02 CLN FXIII 60 min 2nd F 2.wiff"

Data file C:\Program Files (x86)\Matrix Science\Mascot Daemon\mgf5 FXIII 60 min 2nd\mascot\_daemon\_merge.mgf

Click mouse within plot area to zoom in by factor of two about that point

Or, Plot from  to  Da

Label all possible matches  Label matches used for scoring

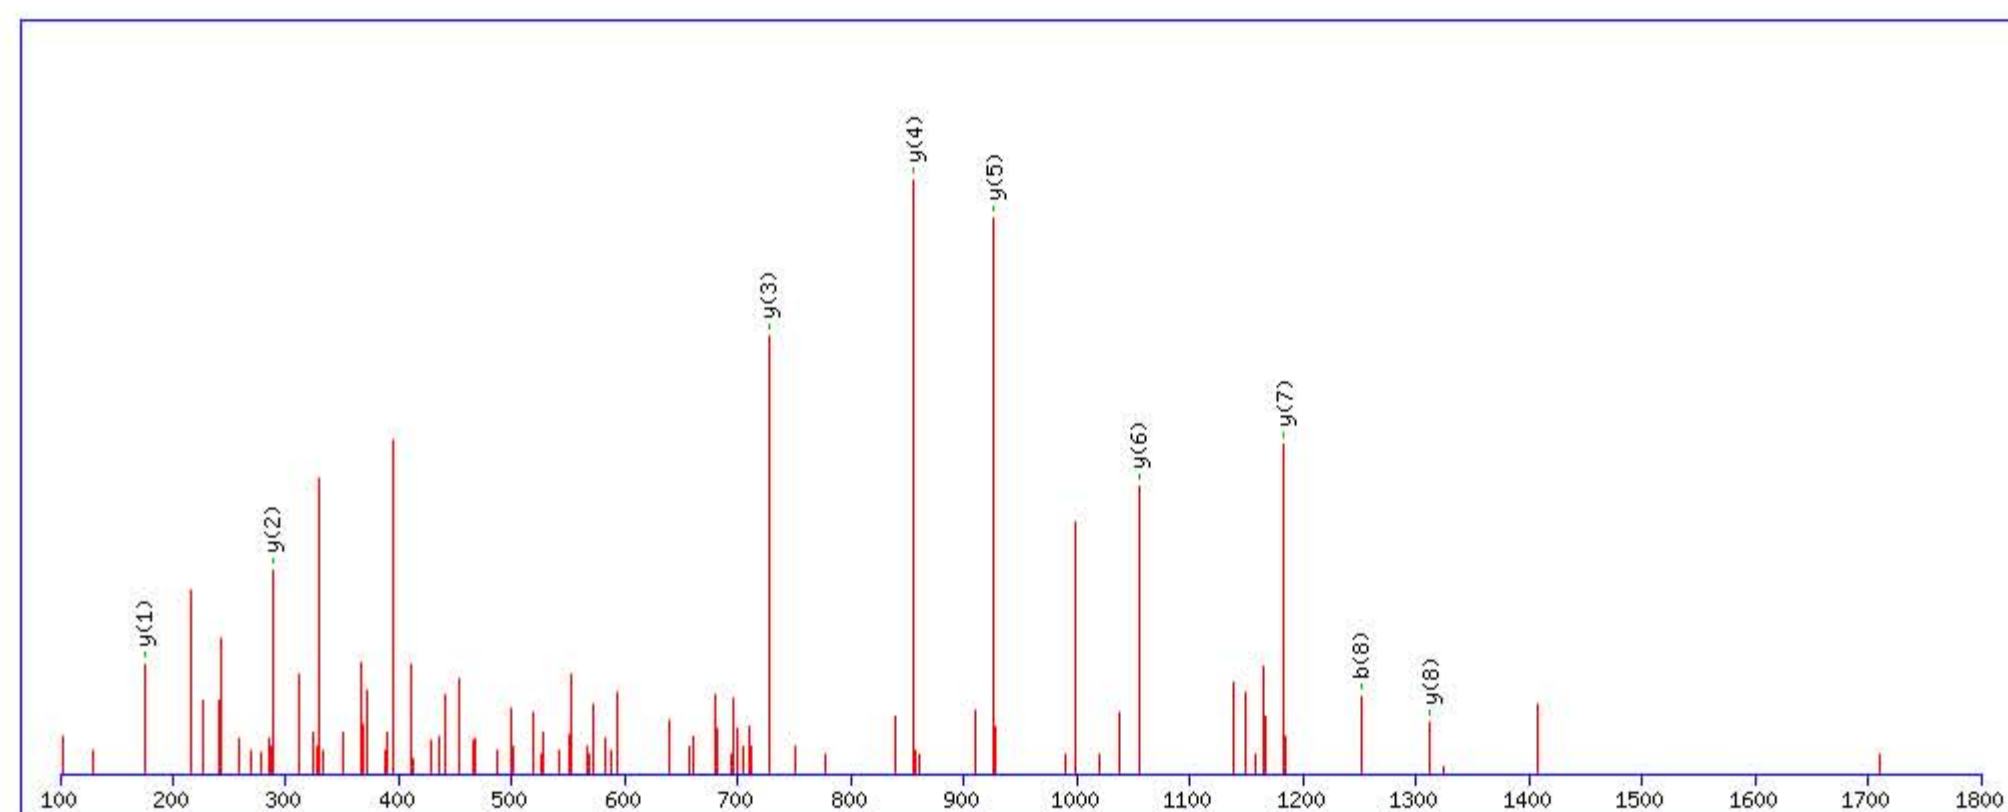

Monoisotopic mass of neutral peptide Mr(calc): 1424.744553

Fixed modifications: Carbamidomethyl (C) (apply to specified residues or termini only)

Variable modifications:

Q7 : Biotin:Thermo-21345 (Q)

Ions Score: 66 Expect: 1.7e-005

Matches : 9/76 fragment ions using 14 most intense peaks [\(help\)](#)

| # | b                  | b <sup>++</sup> | b <sup>*</sup> | b <sup>*++</sup> | b <sup>0</sup> | b <sup>0++</sup> | Seq. | y                  | y <sup>++</sup> | y <sup>*</sup> | y <sup>*++</sup> | y <sup>0</sup> | y <sup>0++</sup> | # |
|---|--------------------|-----------------|----------------|------------------|----------------|------------------|------|--------------------|-----------------|----------------|------------------|----------------|------------------|---|
| 1 | 114.091340         | 57.549308       |                |                  |                |                  | L    |                    |                 |                |                  |                |                  | 9 |
| 2 | 243.133933         | 122.070605      |                |                  | 225.123368     | 113.065322       | E    | <b>1312.667798</b> | 656.837537      | 1295.641249    | 648.324263       | 1294.657233    | 647.832255       | 8 |
| 3 | 372.176526         | 186.591901      |                |                  | 354.165961     | 177.586619       | E    | <b>1183.625205</b> | 592.316241      | 1166.598656    | 583.802966       | 1165.614640    | 583.310958       | 7 |
| 4 | 500.235104         | 250.621190      | 483.208555     | 242.107916       | 482.224539     | 241.615908       | Q    | <b>1054.582612</b> | 527.794944      | 1037.556063    | 519.281670       |                |                  | 6 |
| 5 | 571.272218         | 286.139747      | 554.245669     | 277.626473       | 553.261653     | 277.134465       | A    | <b>926.524034</b>  | 463.765655      | 909.497485     | 455.252381       |                |                  | 5 |
| 6 | 699.330796         | 350.169036      | 682.304247     | 341.655762       | 681.320231     | 341.163754       | Q    | <b>855.486920</b>  | 428.247098      | 838.460371     | 419.733824       |                |                  | 4 |
| 7 | 1138.556122        | 569.781699      | 1121.529573    | 561.268425       | 1120.545557    | 560.776417       | Q    | <b>727.428342</b>  | 364.217809      | 710.401793     | 355.704535       |                |                  | 3 |
| 8 | <b>1251.640186</b> | 626.323731      | 1234.613637    | 617.810457       | 1233.629621    | 617.318449       | I    | <b>288.203016</b>  | 144.605146      | 271.176467     | 136.091871       |                |                  | 2 |
| 9 |                    |                 |                |                  |                |                  | R    | <b>175.118952</b>  | 88.063114       | 158.092403     | 79.549839        |                |                  | 1 |

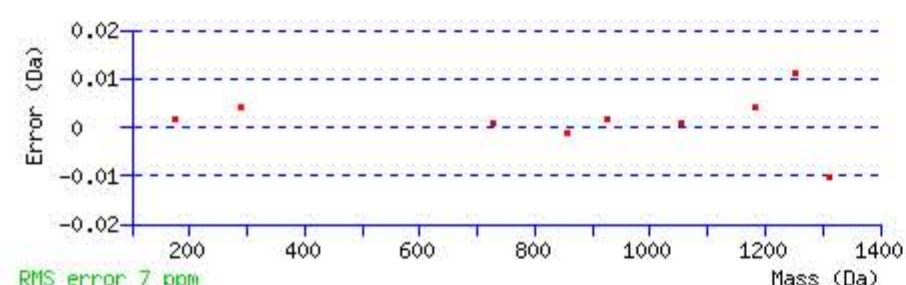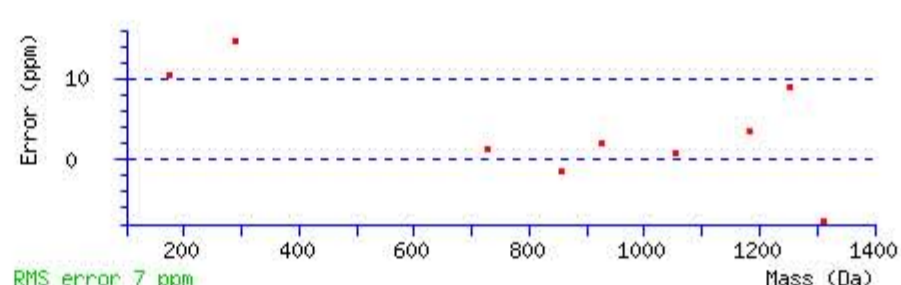

NCBI BLAST search of **LEEQAQQIR**

(Parameters: blastp, nr protein database, expect=20000, no filter, PAM30)

Other BLAST [web gateways](#)

All matches to this query

| Score | Mr(calc):   | Delta     | Sequence                      |
|-------|-------------|-----------|-------------------------------|
| 66.1  | 1424.744553 | -0.004105 | <a href="#">LEEQAQQIR</a>     |
| 50.2  | 1424.744553 | -0.004105 | <a href="#">LEEQAQQIR</a>     |
| 22.0  | 1424.744553 | -0.004105 | <a href="#">LEEQAQQIR</a>     |
| 14.4  | 1424.733322 | 0.007126  | <a href="#">LEQETEPLR</a>     |
| 13.4  | 1424.745438 | -0.004990 | <a href="#">QMQQIR</a>        |
| 10.3  | 1424.730667 | 0.009781  | <a href="#">QPGCAVPQSGRLR</a> |
| 8.9   | 1424.723465 | 0.016983  | <a href="#">TWTVLPPMSTHR</a>  |
| 5.5   | 1424.734680 | 0.005768  | <a href="#">WVLTAHCLAQR</a>   |
| 5.4   | 1424.744583 | -0.004135 | <a href="#">QLSGDQPTIR</a>    |
| 4.3   | 1424.744583 | -0.004135 | <a href="#">QLSGDQPTIR</a>    |



# MASCOT Search Results

## Peptide View

MS/MS Fragmentation of **QQTEWQSGQR**

Found in **APOE\_HUMAN**, Apolipoprotein E OS=Homo sapiens GN=APOE PE=1 SV=1

Match to Query 35208: 1557.731388 from(779.872970,2+) rtinseconds(1534) index(33507)

Title: Locus:1.1.1.2953.22 File:"2013-07-02 CLN FXIII 60 min 2nd F 3.wiff"

Data file C:\Program Files (x86)\Matrix Science\Mascot Daemon\mgf\5 FXIII 60 min 2nd\mascot\_daemon\_merge.mgf

Click mouse within plot area to zoom in by factor of two about that point

Or, Plot from  to  Da

Label all possible matches  Label matches used for scoring

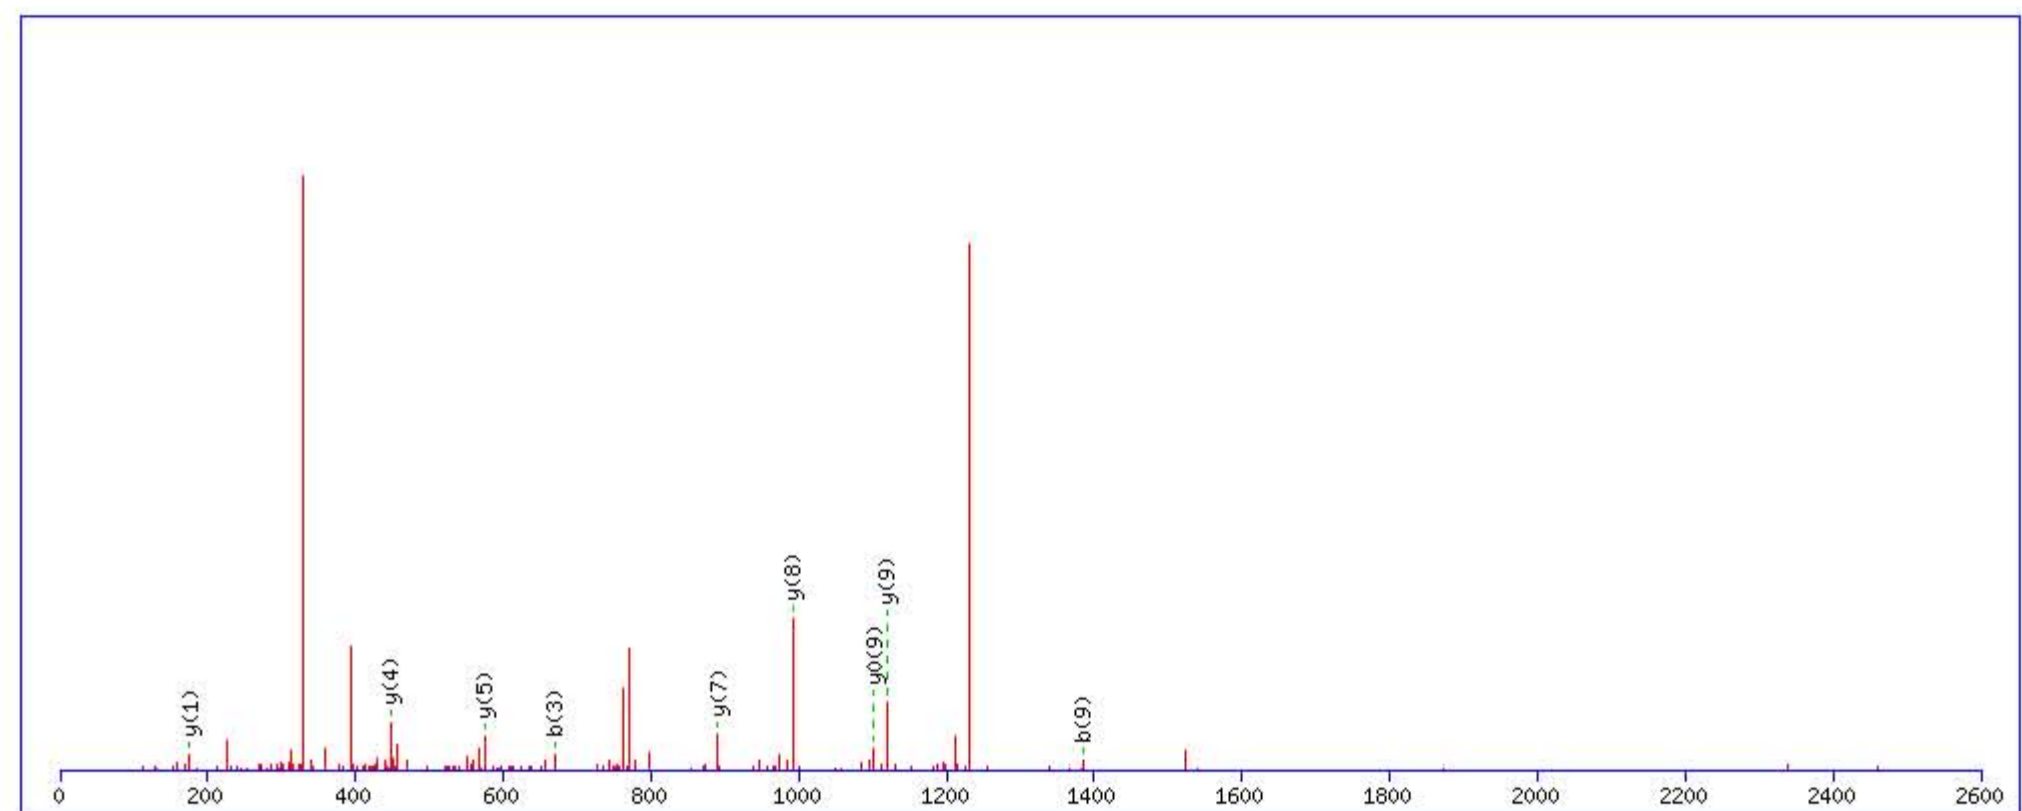

Monoisotopic mass of neutral peptide Mr(calc): 1557.735809

Fixed modifications: Carbamidomethyl (C) (apply to specified residues or termini only)

Variable modifications:

Q1 : Biotin:Thermo-21345 (Q)

Ions Score: 41 Expect: 0.00098

Matches : 9/98 fragment ions using 14 most intense peaks [\(help\)](#)

| #  | b           | b <sup>++</sup> | b <sup>+</sup> | b <sup>+++</sup> | b <sup>0</sup> | b <sup>0++</sup> | Seq. | y           | y <sup>++</sup> | y <sup>+</sup> | y <sup>+++</sup> | y <sup>0</sup> | y <sup>0++</sup> | #  |
|----|-------------|-----------------|----------------|------------------|----------------|------------------|------|-------------|-----------------|----------------|------------------|----------------|------------------|----|
| 1  | 440.232602  | 220.619939      | 423.206053     | 212.106664       |                |                  | Q    |             |                 |                |                  |                |                  | 10 |
| 2  | 568.291180  | 284.649228      | 551.264631     | 276.135954       |                |                  | Q    | 1119.517763 | 560.262520      | 1102.491214    | 551.749245       | 1101.507198    | 551.257237       | 9  |
| 3  | 669.338859  | 335.173068      | 652.312310     | 326.659793       | 651.328294     | 326.167785       | T    | 991.459185  | 496.233231      | 974.432636     | 487.719956       | 973.448620     | 487.227948       | 8  |
| 4  | 798.381452  | 399.694364      | 781.354903     | 391.181090       | 780.370887     | 390.689082       | E    | 890.411506  | 445.709391      | 873.384957     | 437.196117       | 872.400941     | 436.704109       | 7  |
| 5  | 984.460765  | 492.734021      | 967.434216     | 484.220746       | 966.450200     | 483.728738       | W    | 761.368913  | 381.188095      | 744.342364     | 372.674820       | 743.358348     | 372.182812       | 6  |
| 6  | 1112.519343 | 556.763310      | 1095.492794    | 548.250035       | 1094.508778    | 547.758027       | Q    | 575.289600  | 288.148438      | 558.263051     | 279.635164       | 557.279035     | 279.143156       | 5  |
| 7  | 1199.551371 | 600.279324      | 1182.524822    | 591.766049       | 1181.540806    | 591.274041       | S    | 447.231022  | 224.119149      | 430.204473     | 215.605875       | 429.220457     | 215.113867       | 4  |
| 8  | 1256.572835 | 628.790056      | 1239.546286    | 620.276781       | 1238.562270    | 619.784773       | G    | 360.198994  | 180.603135      | 343.172445     | 172.089860       |                |                  | 3  |
| 9  | 1384.631413 | 692.819345      | 1367.604864    | 684.306070       | 1366.620848    | 683.814062       | Q    | 303.177530  | 152.092403      | 286.150981     | 143.579129       |                |                  | 2  |
| 10 |             |                 |                |                  |                |                  | R    | 175.118952  | 88.063114       | 158.092403     | 79.549839        |                |                  | 1  |

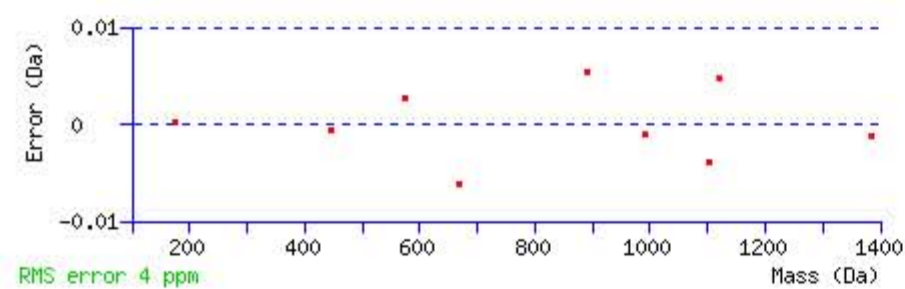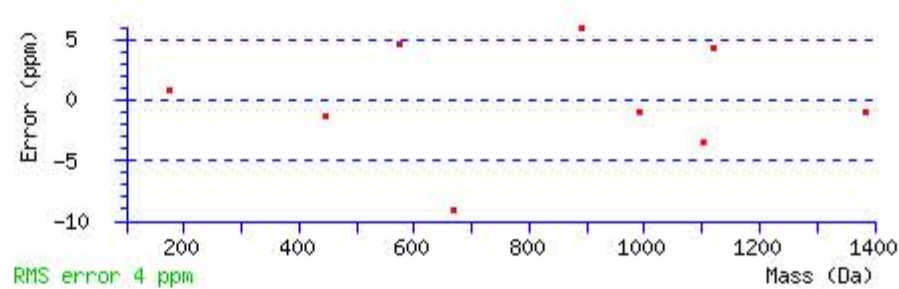

NCBI BLAST search of **QQTEWQSGQR**

(Parameters: blastp, nr protein database, expect=20000, no filter, PAM30)

Other BLAST [web gateways](#)

## All matches to this query

| Score | Mr(calc):   | Delta     | Sequence                        |
|-------|-------------|-----------|---------------------------------|
| 41.5  | 1557.735809 | -0.004421 | <a href="#">QQTEWQSGQR</a>      |
| 28.7  | 1557.735809 | -0.004421 | <a href="#">QQTEWQSGQR</a>      |
| 16.9  | 1557.747040 | -0.015652 | <a href="#">AFSHCSSLTKHQR</a>   |
| 6.8   | 1557.745697 | -0.014309 | <a href="#">GSSLFMDTEKSGKR</a>  |
| 5.8   | 1557.742340 | -0.010952 | <a href="#">TQSFEIPQPDSPGR</a>  |
| 5.1   | 1557.739182 | -0.007794 | <a href="#">GPMIDQRGLPMDGR</a>  |
| 5.0   | 1557.720566 | 0.010822  | <a href="#">QEAAATGVDTICTHR</a> |
| 4.4   | 1557.720551 | 0.010837  | <a href="#">LSQVSPEDDRPCR</a>   |
| 4.4   | 1557.749496 | -0.018108 | <a href="#">QAEATRQAAAQEER</a>  |
| 4.4   | 1557.709305 | 0.022083  | <a href="#">QLSDQQDEER</a>      |



# MASCOT Search Results

## Peptide View

MS/MS Fragmentation of **AATVGS LAGQPLQER**

Found in **APOE\_HUMAN**, Apolipoprotein E OS=Homo sapiens GN=APOE PE=1 SV=1

Match to Query 42837: 1807.960542 from(603.660790,3+) rtinseconds(1953) index(36106)

Title: Locus:1.1.1.3099.19 File:"2013-07-02 CLN FXIII 60 min 2nd F 3.wiff"

Data file C:\Program Files (x86)\Matrix Science\Mascot Daemon\mgf5 FXIII 60 min 2nd\mascot\_daemon\_merge.mgf

Click mouse within plot area to zoom in by factor of two about that point

Or, Plot from  to  Da

Label all possible matches  Label matches used for scoring

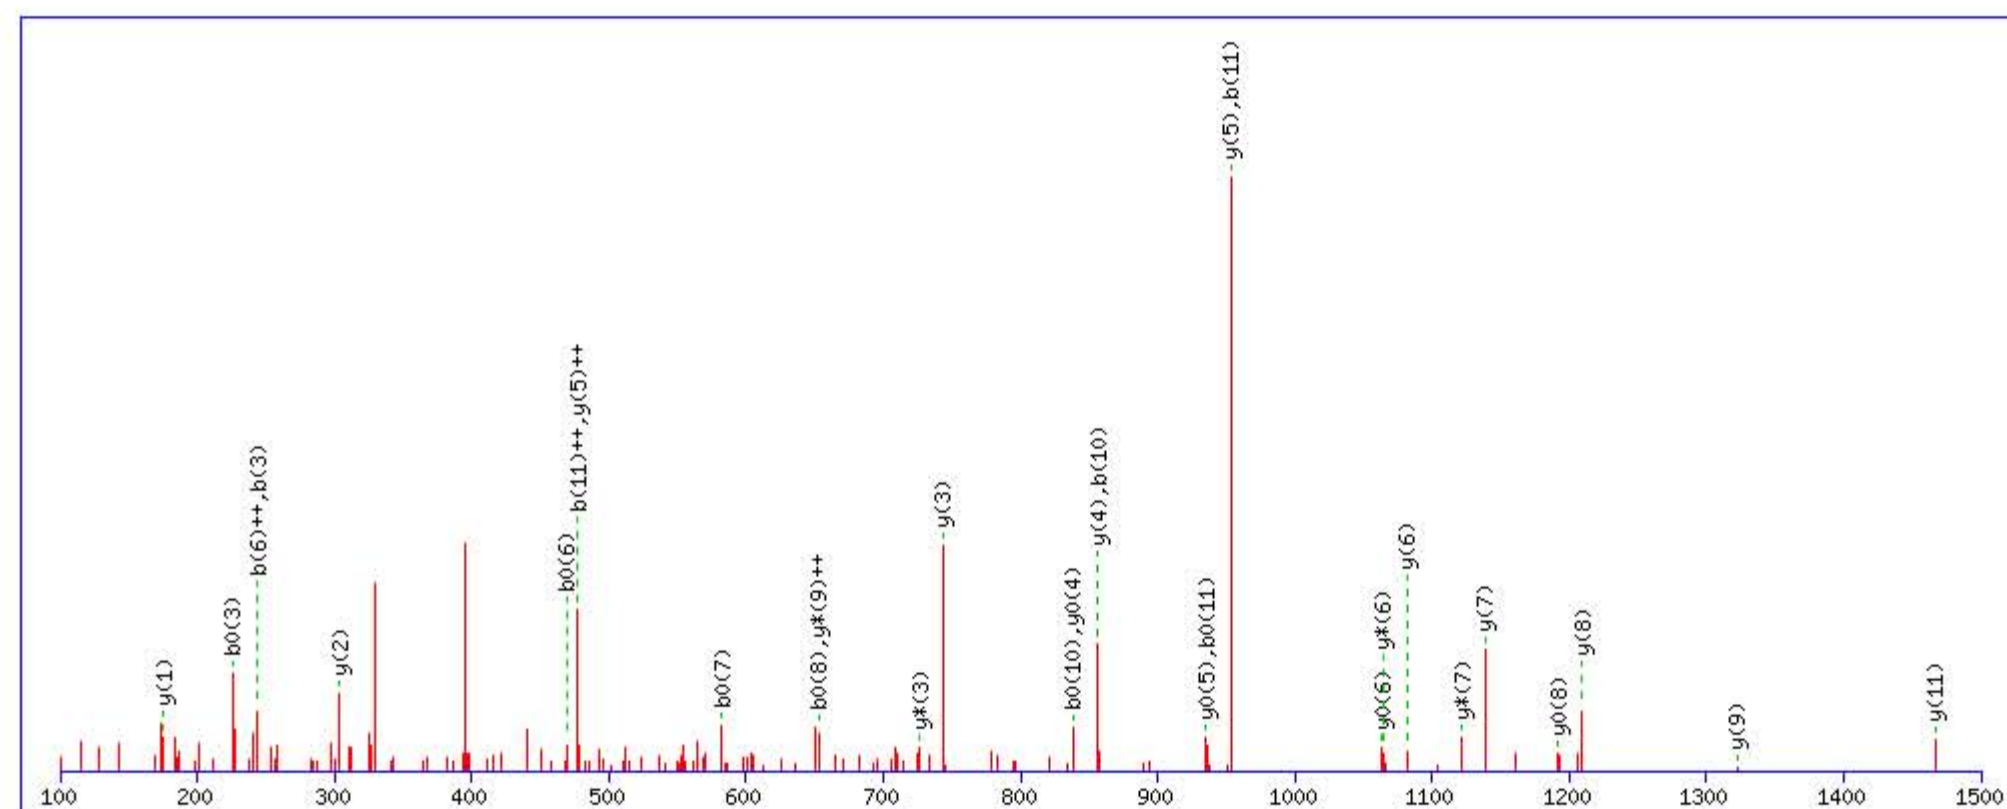

Monoisotopic mass of neutral peptide Mr(calc): 1807.961441

Fixed modifications: Carbamidomethyl (C) (apply to specified residues or termini only)

Variable modifications:

Q13 : Biotin:Thermo-21345 (Q)

Ions Score: 65 Expect: 3.9e-006

Matches : 30/144 fragment ions using 38 most intense peaks [\(help\)](#)

| #  | b                 | b <sup>++</sup>   | b <sup>*</sup> | b <sup>*++</sup> | b <sup>0</sup>    | b <sup>0++</sup> | Seq. | y                  | y <sup>++</sup>   | y <sup>*</sup>     | y <sup>*++</sup>  | y <sup>0</sup>     | y <sup>0++</sup> | #  |
|----|-------------------|-------------------|----------------|------------------|-------------------|------------------|------|--------------------|-------------------|--------------------|-------------------|--------------------|------------------|----|
| 1  | 72.044390         | 36.525833         |                |                  |                   |                  | A    |                    |                   |                    |                   |                    |                  | 15 |
| 2  | 143.081504        | 72.044390         |                |                  |                   |                  | A    | 1737.931618        | 869.469447        | 1720.905069        | 860.956173        | 1719.921053        | 860.464165       | 14 |
| 3  | <b>244.129183</b> | 122.568230        |                |                  | <b>226.118618</b> | 113.562947       | T    | 1666.894504        | 833.950890        | 1649.867955        | 825.437616        | 1648.883939        | 824.945608       | 13 |
| 4  | 343.197597        | 172.102437        |                |                  | 325.187032        | 163.097154       | V    | 1565.846825        | 783.427051        | 1548.820276        | 774.913776        | 1547.836260        | 774.421768       | 12 |
| 5  | 400.219061        | 200.613169        |                |                  | 382.208496        | 191.607886       | G    | <b>1466.778411</b> | 733.892844        | 1449.751862        | 725.379569        | 1448.767846        | 724.887561       | 11 |
| 6  | 487.251089        | <b>244.129183</b> |                |                  | <b>469.240524</b> | 235.123900       | S    | 1409.756947        | 705.382112        | 1392.730398        | 696.868837        | 1391.746382        | 696.376829       | 10 |
| 7  | 600.335153        | 300.671215        |                |                  | <b>582.324588</b> | 291.665932       | L    | <b>1322.724919</b> | 661.866098        | 1305.698370        | <b>653.352823</b> | 1304.714354        | 652.860815       | 9  |
| 8  | 671.372267        | 336.189772        |                |                  | <b>653.361702</b> | 327.184489       | A    | <b>1209.640855</b> | 605.324066        | 1192.614306        | 596.810791        | <b>1191.630290</b> | 596.318783       | 8  |
| 9  | 728.393731        | 364.700504        |                |                  | 710.383166        | 355.695221       | G    | <b>1138.603741</b> | 569.805509        | <b>1121.577192</b> | 561.292234        | 1120.593176        | 560.800226       | 7  |
| 10 | <b>856.452309</b> | 428.729793        | 839.425760     | 420.216518       | <b>838.441744</b> | 419.724510       | Q    | <b>1081.582277</b> | 541.294777        | <b>1064.555728</b> | 532.781502        | <b>1063.571712</b> | 532.289494       | 6  |
| 11 | <b>953.505073</b> | <b>477.256175</b> | 936.478524     | 468.742900       | <b>935.494508</b> | 468.250892       | P    | <b>953.523699</b>  | <b>477.265488</b> | 936.497150         | 468.752213        | <b>935.513134</b>  | 468.260205       | 5  |
| 12 | 1066.589137       | 533.798207        | 1049.562588    | 525.284932       | 1048.578572       | 524.792924       | L    | <b>856.470935</b>  | 428.739106        | 839.444386         | 420.225831        | <b>838.460370</b>  | 419.733823       | 4  |
| 13 | 1505.814463       | 753.410870        | 1488.787914    | 744.897595       | 1487.803898       | 744.405587       | Q    | <b>743.386871</b>  | 372.197074        | <b>726.360322</b>  | 363.683799        | 725.376306         | 363.191791       | 3  |
| 14 | 1634.857056       | 817.932166        | 1617.830507    | 809.418892       | 1616.846491       | 808.926884       | E    | <b>304.161545</b>  | 152.584411        | 287.134996         | 144.071136        | 286.150980         | 143.579128       | 2  |
| 15 |                   |                   |                |                  |                   |                  | R    | <b>175.118952</b>  | 88.063114         | 158.092403         | 79.549839         |                    |                  | 1  |

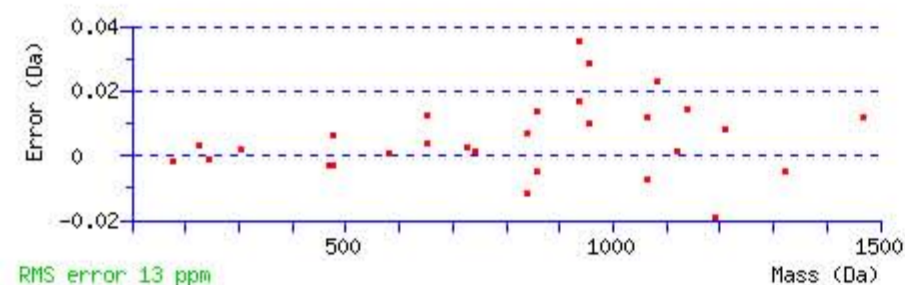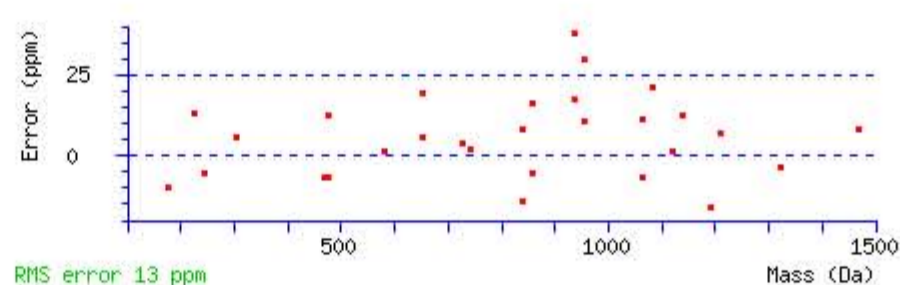

NCBI BLAST search of **AATVGS LAGQPLQER**

(Parameters: blastp, nr protein database, expect=20000, no filter, PAM30)

Other BLAST [web gateways](#)

All matches to this query

| Score | Mr(calc):   | Delta     | Sequence                          |
|-------|-------------|-----------|-----------------------------------|
| 65.1  | 1807.961441 | -0.000899 | <a href="#">AATVGS LAGQPLQER</a>  |
| 18.2  | 1807.961441 | -0.000899 | <a href="#">AATVGS LAGQPLQER</a>  |
| 7.1   | 1807.947510 | 0.013032  | <a href="#">VGLAQIAAMDISRGNHR</a> |
| 2.6   | 1807.942795 | 0.017747  | <a href="#">ENKDQLESVLEVLHR</a>   |



# MASCOT SEARCH RESULTS

## Peptide View

MS/MS Fragmentation of **SWFEPLVEDMQR**

Found in **APOE\_HUMAN**, Apolipoprotein E OS=Homo sapiens GN=APOE PE=1 SV=1

Match to Query 43580: 1846.875492 from(616.632440,3+) rtinseconds(2818) index(41692)

Title: Locus:1.1.1.3399.3 File:"2013-07-02 CLN FXIII 60 min 2nd F 3.wiff"

Data file C:\Program Files (x86)\Matrix Science\Mascot Daemon\mgf5 FXIII 60 min 2nd\mascot\_daemon\_merge.mgf

Click mouse within plot area to zoom in by factor of two about that point

Or, Plot from  to  Da

Label all possible matches  Label matches used for scoring

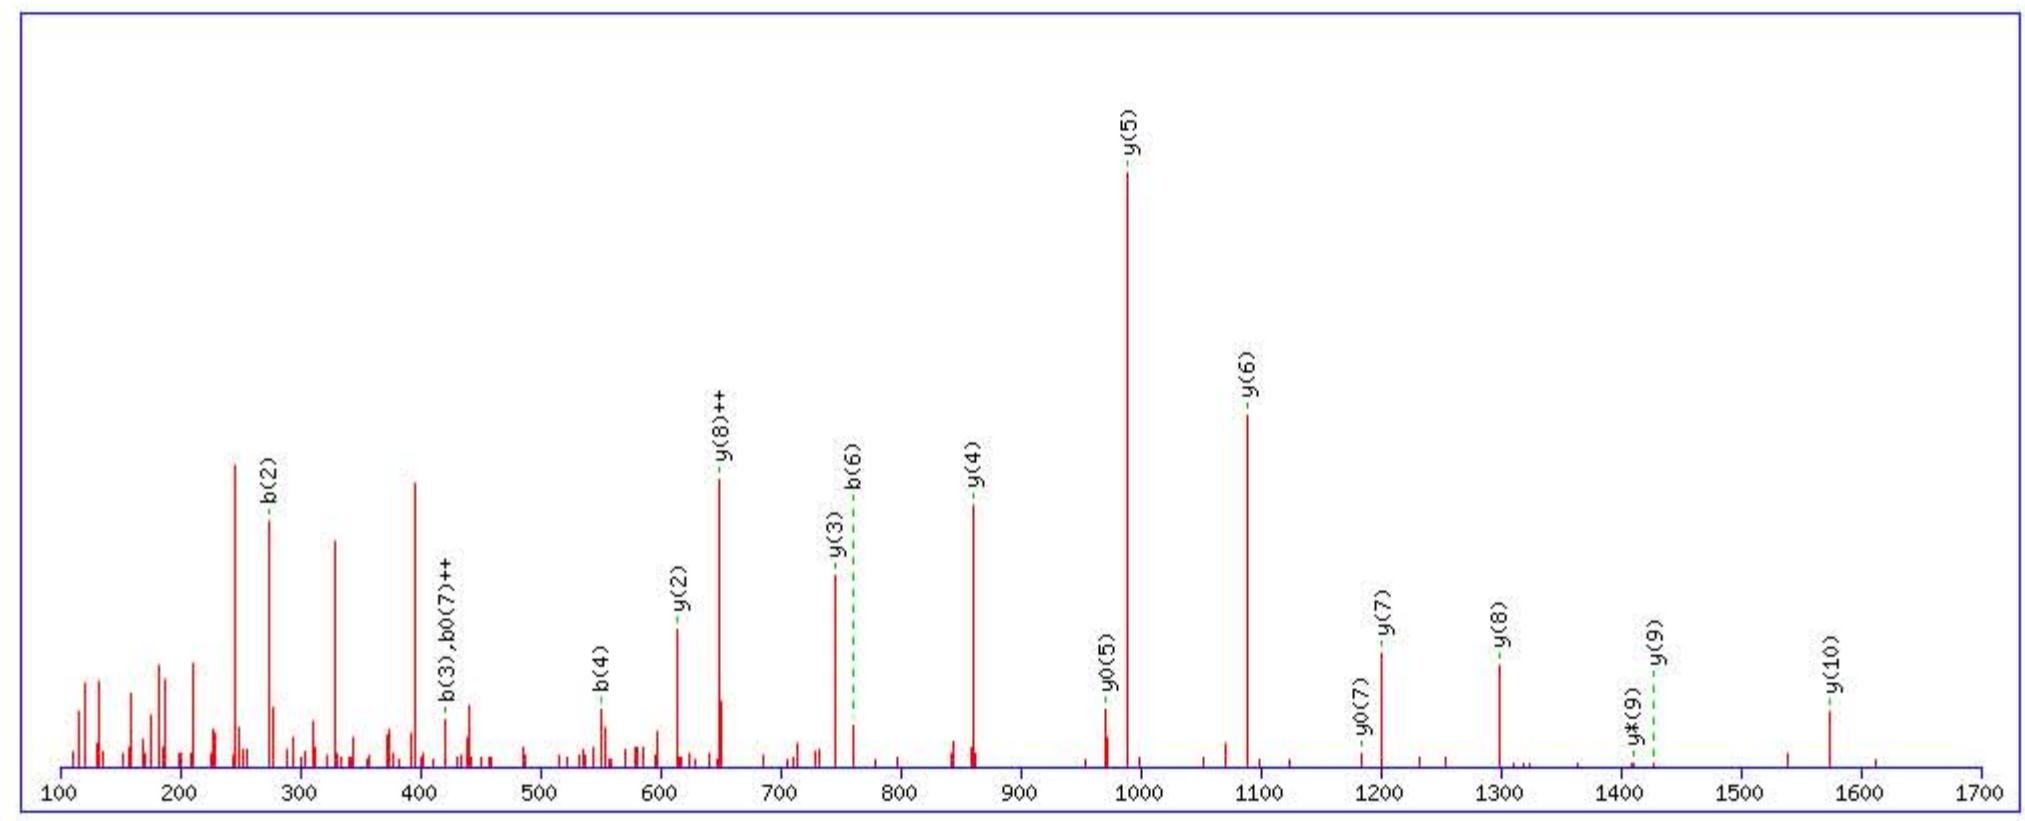

Monoisotopic mass of neutral peptide Mr(calc): 1846.874603

Fixed modifications: Carbamidomethyl (C) (apply to specified residues or termini only)

Variable modifications:

Q11 : Biotin:Thermo-21345 (Q)

Ions Score: 52 Expect: 2.8e-005

Matches : 18/106 fragment ions using 31 most intense peaks [\(help\)](#)

| #  | b                 | b <sup>++</sup> | b <sup>*</sup> | b <sup>*++</sup> | b <sup>0</sup> | b <sup>0++</sup>  | Seq. | y                  | y <sup>++</sup>   | y <sup>*</sup>     | y <sup>*++</sup> | y <sup>0</sup>     | y <sup>0++</sup> | #  |
|----|-------------------|-----------------|----------------|------------------|----------------|-------------------|------|--------------------|-------------------|--------------------|------------------|--------------------|------------------|----|
| 1  | 88.039304         | 44.523290       |                |                  | 70.028739      | 35.518008         | S    |                    |                   |                    |                  |                    |                  | 12 |
| 2  | <b>274.118617</b> | 137.562947      |                |                  | 256.108052     | 128.557664        | W    | 1760.849861        | 880.928568        | 1743.823312        | 872.415294       | 1742.839296        | 871.923286       | 11 |
| 3  | <b>421.187031</b> | 211.097153      |                |                  | 403.176466     | 202.091871        | F    | <b>1574.770548</b> | 787.888912        | 1557.743999        | 779.375638       | 1556.759983        | 778.883629       | 10 |
| 4  | <b>550.229624</b> | 275.618450      |                |                  | 532.219059     | 266.613168        | E    | <b>1427.702134</b> | 714.354705        | <b>1410.675585</b> | 705.841431       | 1409.691569        | 705.349422       | 9  |
| 5  | 647.282388        | 324.144832      |                |                  | 629.271823     | 315.139550        | P    | <b>1298.659541</b> | <b>649.833409</b> | 1281.632992        | 641.320134       | 1280.648976        | 640.828126       | 8  |
| 6  | <b>760.366452</b> | 380.686864      |                |                  | 742.355887     | 371.681582        | L    | <b>1201.606777</b> | 601.307027        | 1184.580228        | 592.793752       | <b>1183.596212</b> | 592.301744       | 7  |
| 7  | 859.434866        | 430.221071      |                |                  | 841.424301     | <b>421.215789</b> | V    | <b>1088.522713</b> | 544.764995        | 1071.496164        | 536.251720       | 1070.512148        | 535.759712       | 6  |
| 8  | 988.477459        | 494.742368      |                |                  | 970.466894     | 485.737085        | E    | <b>989.454299</b>  | 495.230788        | 972.427750         | 486.717513       | <b>971.443734</b>  | 486.225505       | 5  |
| 9  | 1103.504402       | 552.255839      |                |                  | 1085.493837    | 543.250557        | D    | <b>860.411706</b>  | 430.709491        | 843.385157         | 422.196216       | 842.401141         | 421.704208       | 4  |
| 10 | 1234.544887       | 617.776082      |                |                  | 1216.534322    | 608.770799        | M    | <b>745.384763</b>  | 373.196020        | 728.358214         | 364.682745       |                    |                  | 3  |
| 11 | 1673.770213       | 837.388745      | 1656.743664    | 828.875470       | 1655.759648    | 828.383462        | Q    | <b>614.344278</b>  | 307.675777        | 597.317729         | 299.162503       |                    |                  | 2  |
| 12 |                   |                 |                |                  |                |                   | R    | 175.118952         | 88.063114         | 158.092403         | 79.549839        |                    |                  | 1  |

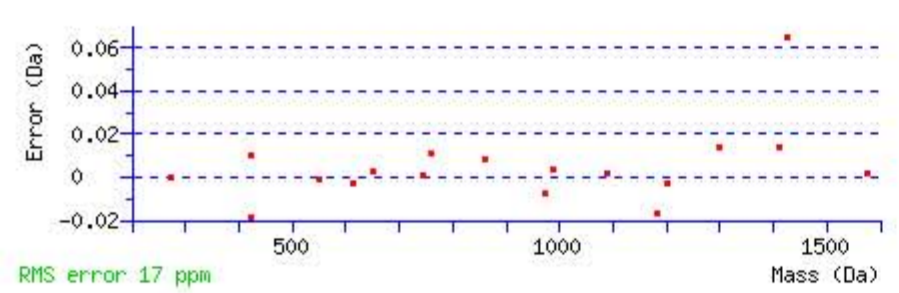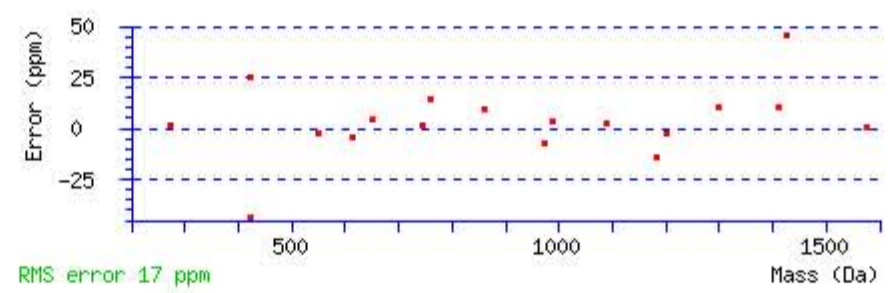

NCBI BLAST search of **SWFEPLVEDMQR**

(Parameters: blastp, nr protein database, expect=20000, no filter, PAM30)

Other BLAST [web gateways](#)

All matches to this query

| Score | Mr(calc):   | Delta     | Sequence                       |
|-------|-------------|-----------|--------------------------------|
| 51.7  | 1846.874603 | 0.000889  | <a href="#">SWFEPLVEDMQR</a>   |
| 3.0   | 1846.849426 | 0.026066  | <a href="#">SFWENNCKMIYLAR</a> |
| 0.4   | 1846.895721 | -0.020229 | <a href="#">LQLEETMPSPYGR</a>  |



# MASCOT Search Results

## Peptide View

MS/MS Fragmentation of **SGVQQLIQYYQDQK**

Found in **APOF\_HUMAN**, Apolipoprotein F OS=Homo sapiens GN=APOF PE=1 SV=2

Match to Query 47485: 2008.016472 from(670.346100,3+) rtinseconds(2469) index(39224)

Title: Locus:1.1.1.3279.14 File:"2013-07-02 CLN FXIII 60 min 2nd F 3.wiff"

Data file C:\Program Files (x86)\Matrix Science\Mascot Daemon\mgf5 FXIII 60 min 2nd\mascot\_daemon\_merge.mgf

Click mouse within plot area to zoom in by factor of two about that point

Or, Plot from  to  Da

Label all possible matches  Label matches used for scoring

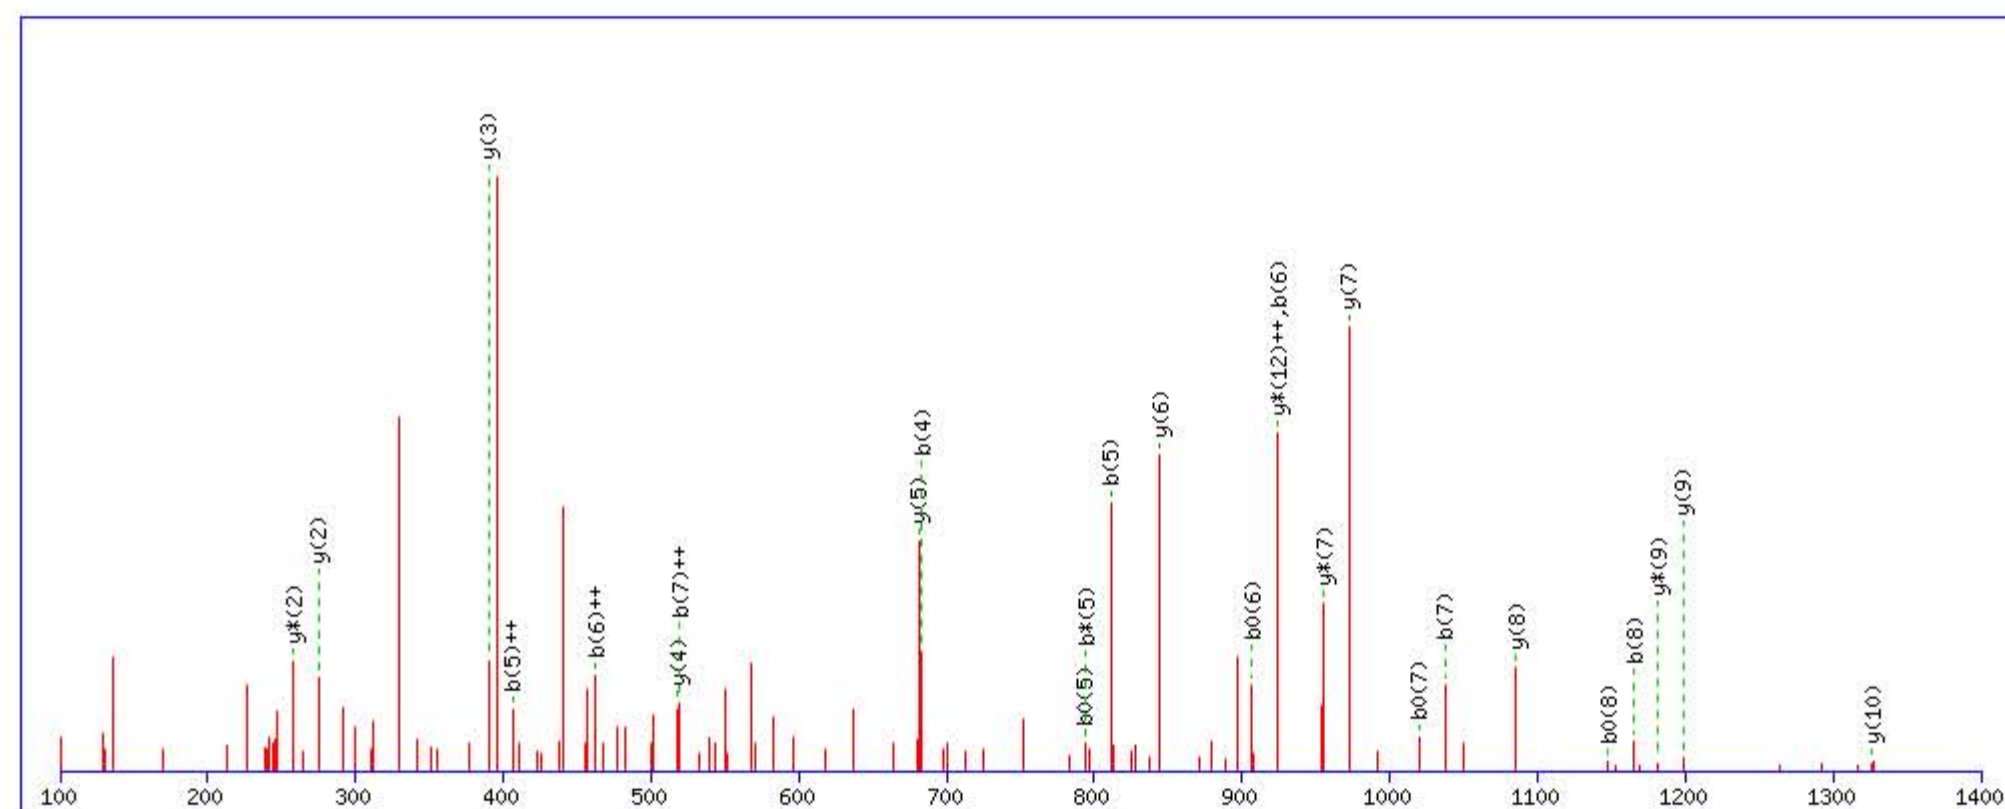

Monoisotopic mass of neutral peptide Mr(calc): 2008.008789

Fixed modifications: Carbamidomethyl (C) (apply to specified residues or termini only)

Variable modifications:

Q4 : Biotin:Thermo-21345 (Q)

Ions Score: 43 Expect: 0.00088

Matches : 26/146 fragment ions using 49 most intense peaks [\(help\)](#)

| #  | b                  | b <sup>++</sup>   | b <sup>*</sup>    | b <sup>*++</sup> | b <sup>0</sup>     | b <sup>0++</sup> | Seq. | y                  | y <sup>++</sup> | y <sup>*</sup>     | y <sup>*++</sup> | y <sup>0</sup> | y <sup>0++</sup> | #  |
|----|--------------------|-------------------|-------------------|------------------|--------------------|------------------|------|--------------------|-----------------|--------------------|------------------|----------------|------------------|----|
| 1  | 88.039304          | 44.523290         |                   |                  | 70.028739          | 35.518008        | S    |                    |                 |                    |                  |                |                  | 14 |
| 2  | 145.060768         | 73.034022         |                   |                  | 127.050203         | 64.028740        | G    | 1921.984049        | 961.495663      | 1904.957500        | 952.982388       | 1903.973484    | 952.490380       | 13 |
| 3  | 244.129182         | 122.568229        |                   |                  | 226.118617         | 113.562947       | V    | 1864.962585        | 932.984931      | 1847.936036        | 924.471656       | 1846.952020    | 923.979648       | 12 |
| 4  | <b>683.354508</b>  | 342.180892        | 666.327959        | 333.667618       | 665.343943         | 333.175610       | Q    | 1765.894171        | 883.450724      | 1748.867622        | 874.937449       | 1747.883606    | 874.445441       | 11 |
| 5  | <b>811.413086</b>  | <b>406.210181</b> | <b>794.386537</b> | 397.696907       | <b>793.402521</b>  | 397.204899       | Q    | <b>1326.668845</b> | 663.838061      | 1309.642296        | 655.324786       | 1308.658280    | 654.832778       | 10 |
| 6  | <b>924.497150</b>  | <b>462.752213</b> | 907.470601        | 454.238939       | <b>906.486585</b>  | 453.746931       | L    | <b>1198.610267</b> | 599.808772      | <b>1181.583718</b> | 591.295497       | 1180.599702    | 590.803489       | 9  |
| 7  | <b>1037.581214</b> | <b>519.294245</b> | 1020.554665       | 510.780971       | <b>1019.570649</b> | 510.288963       | I    | <b>1085.526203</b> | 543.266740      | 1068.499654        | 534.753465       | 1067.515638    | 534.261457       | 8  |
| 8  | <b>1165.639792</b> | 583.323534        | 1148.613243       | 574.810260       | <b>1147.629227</b> | 574.318252       | Q    | <b>972.442139</b>  | 486.724708      | <b>955.415590</b>  | 478.211433       | 954.431574     | 477.719425       | 7  |
| 9  | 1328.703121        | 664.855199        | 1311.676572       | 656.341924       | 1310.692556        | 655.849916       | Y    | <b>844.383561</b>  | 422.695419      | 827.357012         | 414.182144       | 826.372996     | 413.690136       | 6  |
| 10 | 1491.766450        | 746.386863        | 1474.739901       | 737.873589       | 1473.755885        | 737.381581       | Y    | <b>681.320232</b>  | 341.163754      | 664.293683         | 332.650480       | 663.309667     | 332.158472       | 5  |
| 11 | 1619.825028        | 810.416152        | 1602.798479       | 801.902878       | 1601.814463        | 801.410870       | Q    | <b>518.256903</b>  | 259.632090      | 501.230354         | 251.118815       | 500.246338     | 250.626807       | 4  |
| 12 | 1734.851971        | 867.929624        | 1717.825422       | 859.416349       | 1716.841406        | 858.924341       | D    | <b>390.198325</b>  | 195.602800      | 373.171776         | 187.089526       | 372.187760     | 186.597518       | 3  |
| 13 | 1862.910549        | 931.958913        | 1845.884000       | 923.445638       | 1844.899984        | 922.953630       | Q    | <b>275.171382</b>  | 138.089329      | <b>258.144833</b>  | 129.576054       |                |                  | 2  |
| 14 |                    |                   |                   |                  |                    |                  | K    | 147.112804         | 74.060040       | 130.086255         | 65.546765        |                |                  | 1  |

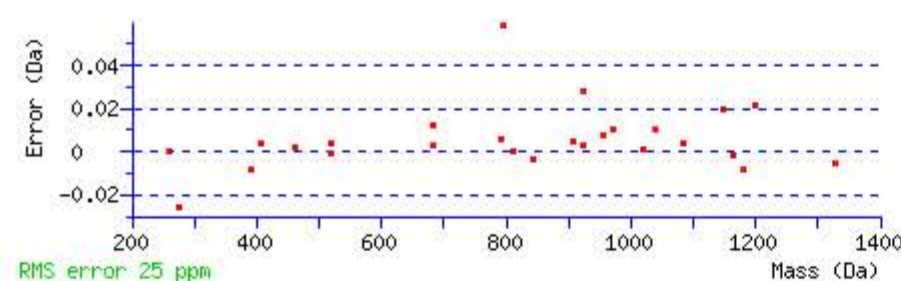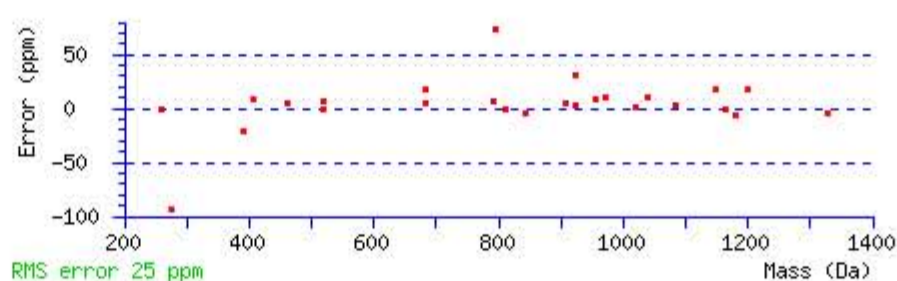

NCBI BLAST search of **SGVQQLIQYYQDQK**

(Parameters: blastp, nr protein database, expect=20000, no filter, PAM30)

Other BLAST [web gateways](#)

All matches to this query

| Score | Mr(calc):   | Delta     | Sequence                           |
|-------|-------------|-----------|------------------------------------|
| 42.6  | 2008.008789 | 0.007683  | <a href="#">SGVQQLIQYYQDQK</a>     |
| 32.2  | 2008.008789 | 0.007683  | <a href="#">SGVQQLIQYYQDQK</a>     |
| 9.4   | 2007.998215 | 0.018257  | <a href="#">QQLNLRTHMADENK</a>     |
| 7.6   | 2008.037308 | -0.020836 | <a href="#">VVPVLSLSLYLLQCNMK</a>  |
| 0.6   | 2008.026535 | -0.010063 | <a href="#">HYSNTLKALGISDEFVSK</a> |



# MASCOT Search Results

## Peptide View

MS/MS Fragmentation of **VTEPISAESGEQVER**

Found in **APOLI\_HUMAN**, Apolipoprotein L1 OS=Homo sapiens GN=APOL1 PE=1 SV=5

Match to Query 45380: 1940.949702 from(647.990510,3+) rtinseconds(1702) index(19696)

Title: Locus:1.1.1.595.8 File:"2013-07-02 CLN FXIII 60 min 2nd F 2.wiff"

Data file C:\Program Files (x86)\Matrix Science\Mascot Daemon\mgf\5 FXIII 60 min 2nd\mascot\_daemon\_merge.mgf

Click mouse within plot area to zoom in by factor of two about that point

Or, Plot from  to  Da

Label all possible matches  Label matches used for scoring

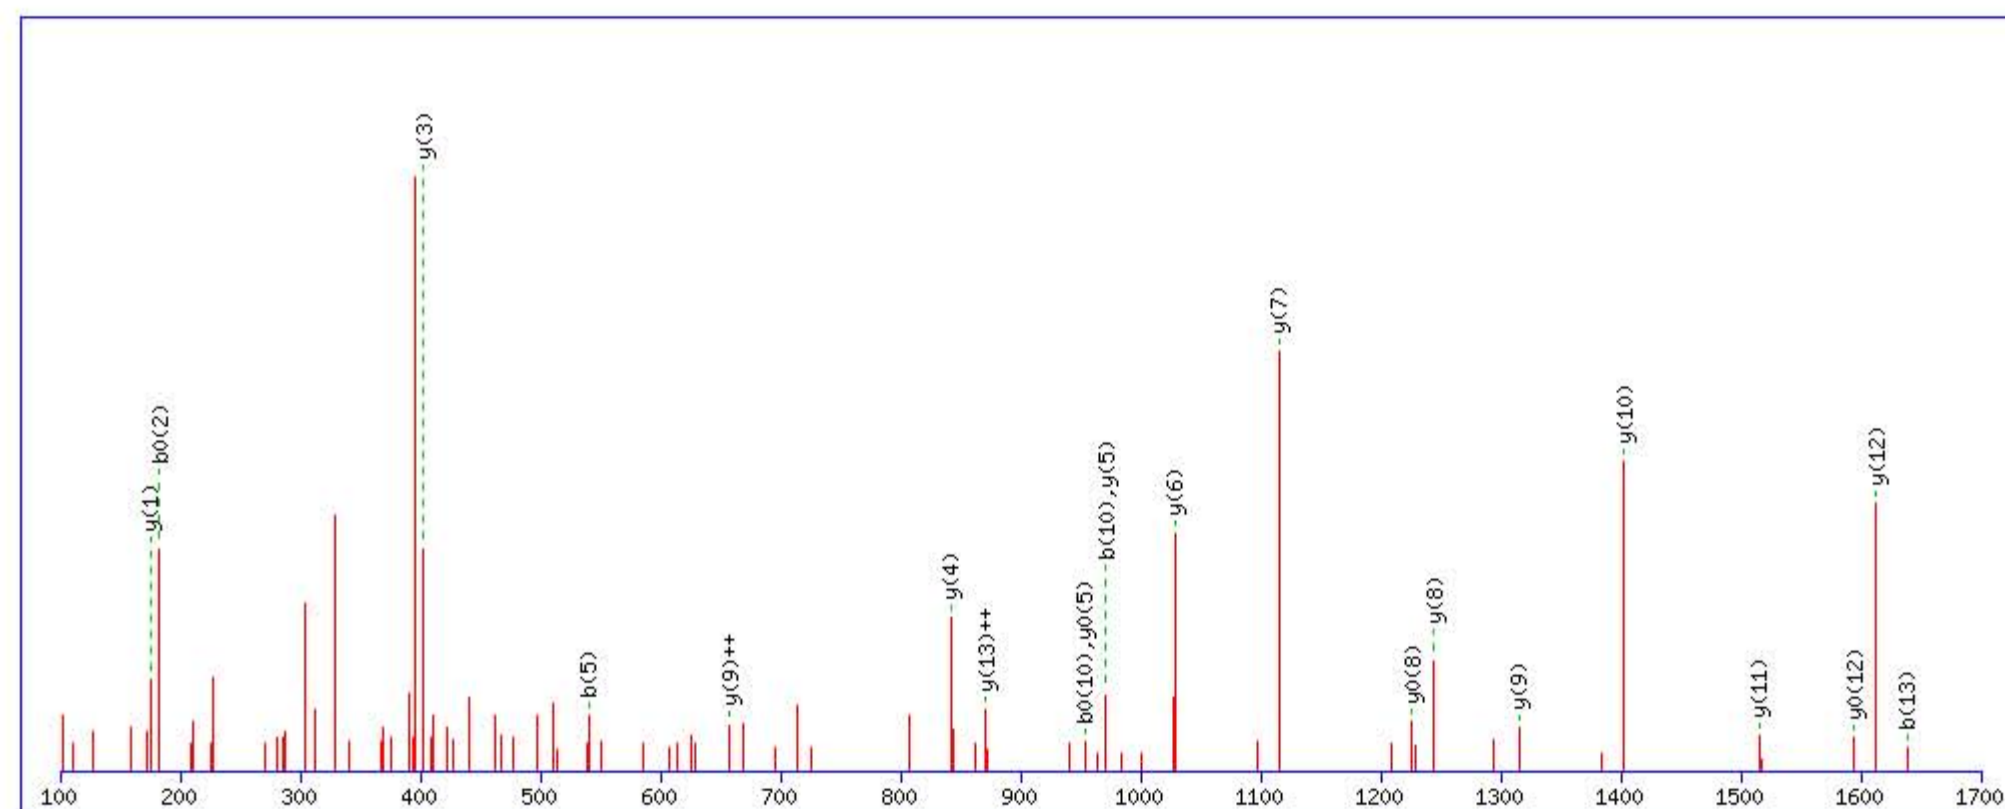

Monoisotopic mass of neutral peptide Mr(calc): 1940.951324

Fixed modifications: Carbamidomethyl (C) (apply to specified residues or termini only)

Variable modifications:

Q12 : Biotin:Thermo-21345 (Q)

Ions Score: 79 Expect: 2.8e-007

Matches : 21/142 fragment ions using 30 most intense peaks [\(help\)](#)

| #  | b           | b <sup>++</sup> | b <sup>*</sup> | b <sup>*++</sup> | b <sup>0</sup> | b <sup>0++</sup> | Seq. | y           | y <sup>++</sup> | y <sup>*</sup> | y <sup>*++</sup> | y <sup>0</sup> | y <sup>0++</sup> | #  |
|----|-------------|-----------------|----------------|------------------|----------------|------------------|------|-------------|-----------------|----------------|------------------|----------------|------------------|----|
| 1  | 100.075690  | 50.541483       |                |                  |                |                  | V    |             |                 |                |                  |                |                  | 15 |
| 2  | 201.123369  | 101.065322      |                |                  | 183.112804     | 92.060040        | T    | 1842.890205 | 921.948741      | 1825.863656    | 913.435466       | 1824.879640    | 912.943458       | 14 |
| 3  | 330.165962  | 165.586619      |                |                  | 312.155397     | 156.581336       | E    | 1741.842526 | 871.424901      | 1724.815977    | 862.911627       | 1723.831961    | 862.419619       | 13 |
| 4  | 427.218726  | 214.113001      |                |                  | 409.208161     | 205.107719       | P    | 1612.799933 | 806.903605      | 1595.773384    | 798.390330       | 1594.789368    | 797.898322       | 12 |
| 5  | 540.302790  | 270.655033      |                |                  | 522.292225     | 261.649751       | I    | 1515.747169 | 758.377223      | 1498.720620    | 749.863948       | 1497.736604    | 749.371940       | 11 |
| 6  | 627.334818  | 314.171047      |                |                  | 609.324253     | 305.165765       | S    | 1402.663105 | 701.835191      | 1385.636556    | 693.321916       | 1384.652540    | 692.829908       | 10 |
| 7  | 698.371932  | 349.689604      |                |                  | 680.361367     | 340.684322       | A    | 1315.631077 | 658.319177      | 1298.604528    | 649.805902       | 1297.620512    | 649.313894       | 9  |
| 8  | 827.414525  | 414.210901      |                |                  | 809.403960     | 405.205618       | E    | 1244.593963 | 622.800620      | 1227.567414    | 614.287345       | 1226.583398    | 613.795337       | 8  |
| 9  | 914.446553  | 457.726915      |                |                  | 896.435988     | 448.721632       | S    | 1115.551370 | 558.279323      | 1098.524821    | 549.766049       | 1097.540805    | 549.274041       | 7  |
| 10 | 971.468017  | 486.237647      |                |                  | 953.457452     | 477.232364       | G    | 1028.519342 | 514.763309      | 1011.492793    | 506.250035       | 1010.508777    | 505.758027       | 6  |
| 11 | 1100.510610 | 550.758943      |                |                  | 1082.500045    | 541.753661       | E    | 971.497878  | 486.252577      | 954.471329     | 477.739303       | 953.487313     | 477.247295       | 5  |
| 12 | 1539.735936 | 770.371606      | 1522.709387    | 761.858332       | 1521.725371    | 761.366324       | Q    | 842.455285  | 421.731281      | 825.428736     | 413.218006       | 824.444720     | 412.725998       | 4  |
| 13 | 1638.804350 | 819.905813      | 1621.777801    | 811.392539       | 1620.793785    | 810.900531       | V    | 403.229959  | 202.118617      | 386.203410     | 193.605343       | 385.219394     | 193.113335       | 3  |
| 14 | 1767.846943 | 884.427110      | 1750.820394    | 875.913835       | 1749.836378    | 875.421827       | E    | 304.161545  | 152.584410      | 287.134996     | 144.071136       | 286.150980     | 143.579128       | 2  |
| 15 |             |                 |                |                  |                |                  | R    | 175.118952  | 88.063114       | 158.092403     | 79.549839        |                |                  | 1  |

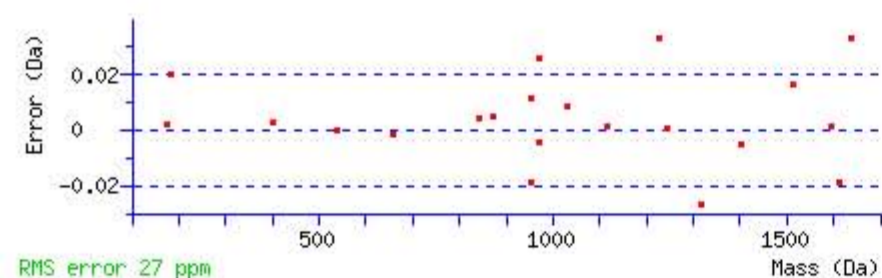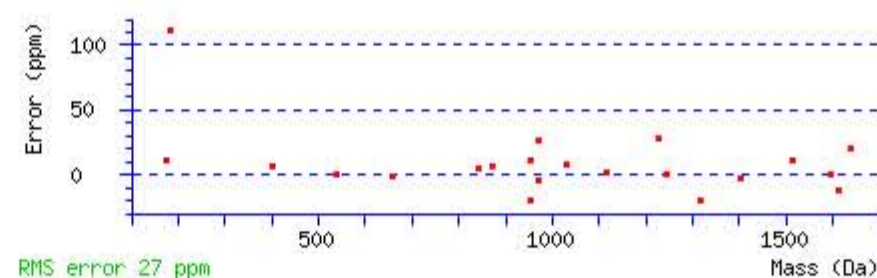

NCBI BLAST search of **VTEPISAESGEQVER**

(Parameters: blastp, nr protein database, expect=20000, no filter, PAM30)

Other BLAST [web gateways](#)

All matches to this query

| Score | Mr(calc):   | Delta     | Sequence                        |
|-------|-------------|-----------|---------------------------------|
| 79.2  | 1940.951324 | -0.001622 | <a href="#">VTEPISAESGEQVER</a> |
| 11.1  | 1940.962540 | -0.012838 | <a href="#">LLNDQEEEGTQRAK</a>  |
| 2.5   | 1940.937378 | 0.012324  | <a href="#">SNNLEREQEQLDR</a>   |

Mascot: <http://www.matrixscience.com/>



# MASCOT Search Results

## Peptide View

MS/MS Fragmentation of **NQEACELSNN**

Found in **APOM\_HUMAN**, Apolipoprotein M OS=Homo sapiens GN=APOM PE=1 SV=2

Match to Query 33528: 1488.631988 from(745.323270,2+) rtinseconds(1637) index(34042)

Title: Locus:1.1.1.2989.17 File:"2013-07-02 CLN FXIII 60 min 2nd F 3.wiff"

Data file C:\Program Files (x86)\Matrix Science\Mascot Daemon\mgf5 FXIII 60 min 2nd\mascot\_daemon\_merge.mgf

Click mouse within plot area to zoom in by factor of two about that point

Or, Plot from  to  Da

Label all possible matches  Label matches used for scoring

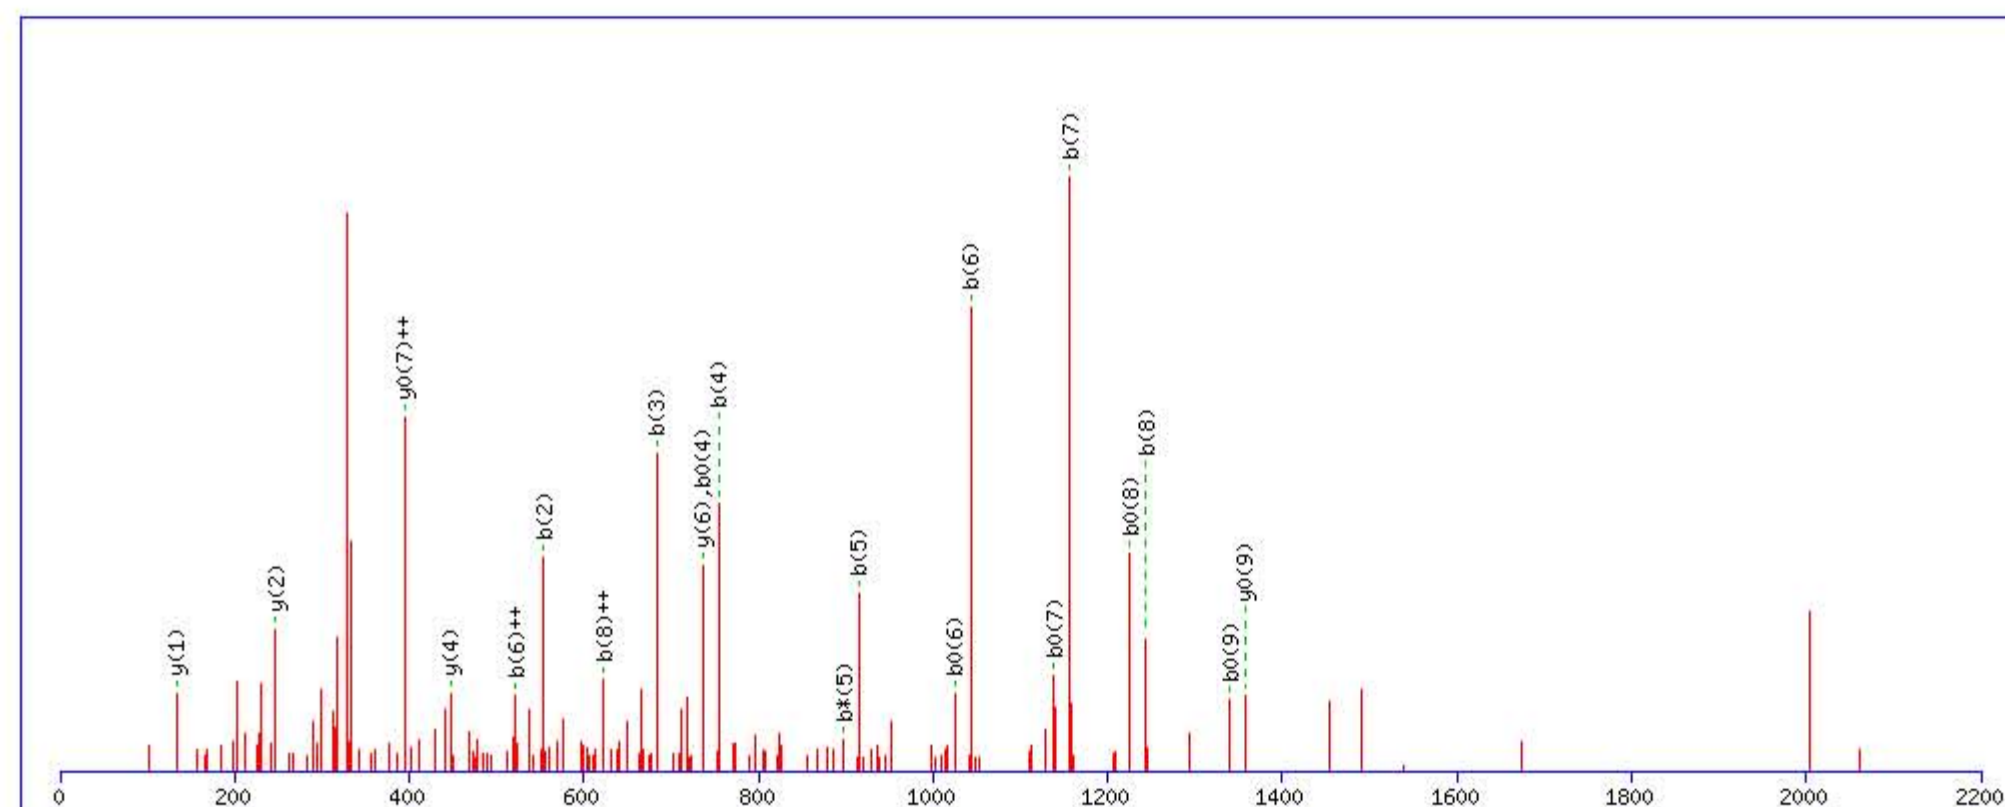

Monoisotopic mass of neutral peptide Mr(calc): 1488.633682

Fixed modifications: Carbamidomethyl (C) (apply to specified residues or termini only)

Variable modifications:

Q2 : Biotin:Thermo-21345 (Q)

Ions Score: 63 Expect: 1.5e-006

Matches : 22/100 fragment ions using 28 most intense peaks [\(help\)](#)

| #  | b                  | b <sup>++</sup>   | b <sup>*</sup>    | b <sup>*++</sup> | b <sup>0</sup>     | b <sup>0++</sup> | Seq. | y                 | y <sup>++</sup> | y <sup>*</sup> | y <sup>*++</sup> | y <sup>0</sup>     | y <sup>0++</sup>  | #  |
|----|--------------------|-------------------|-------------------|------------------|--------------------|------------------|------|-------------------|-----------------|----------------|------------------|--------------------|-------------------|----|
| 1  | 115.050203         | 58.028740         | 98.023654         | 49.515465        |                    |                  | N    |                   |                 |                |                  |                    |                   | 10 |
| 2  | <b>554.275529</b>  | 277.641403        | 537.248980        | 269.128128       |                    |                  | Q    | 1375.598062       | 688.302669      | 1358.571513    | 679.789395       | <b>1357.587497</b> | 679.297387        | 9  |
| 3  | <b>683.318122</b>  | 342.162699        | 666.291573        | 333.649425       | 665.307557         | 333.157417       | E    | 936.372736        | 468.690006      | 919.346187     | 460.176732       | 918.362171         | 459.684724        | 8  |
| 4  | <b>754.355236</b>  | 377.681256        | 737.328687        | 369.167982       | <b>736.344671</b>  | 368.675974       | A    | 807.330143        | 404.168710      | 790.303594     | 395.655435       | 789.319578         | <b>395.163427</b> | 7  |
| 5  | <b>914.385885</b>  | 457.696581        | <b>897.359336</b> | 449.183306       | 896.375320         | 448.691298       | C    | <b>736.293029</b> | 368.650153      | 719.266480     | 360.136878       | 718.282464         | 359.644870        | 6  |
| 6  | <b>1043.428478</b> | <b>522.217877</b> | 1026.401929       | 513.704603       | <b>1025.417913</b> | 513.212595       | E    | 576.262380        | 288.634828      | 559.235831     | 280.121554       | 558.251815         | 279.629546        | 5  |
| 7  | <b>1156.512542</b> | 578.759909        | 1139.485993       | 570.246635       | <b>1138.501977</b> | 569.754626       | L    | <b>447.219787</b> | 224.113531      | 430.193238     | 215.600257       | 429.209222         | 215.108249        | 4  |
| 8  | <b>1243.544570</b> | <b>622.275923</b> | 1226.518021       | 613.762649       | <b>1225.534005</b> | 613.270641       | S    | 334.135723        | 167.571499      | 317.109174     | 159.058225       | 316.125158         | 158.566217        | 3  |
| 9  | <b>1357.587497</b> | 679.297387        | 1340.560948       | 670.784112       | <b>1339.576932</b> | 670.292104       | N    | <b>247.103695</b> | 124.055485      | 230.077146     | 115.542211       |                    |                   | 2  |
| 10 |                    |                   |                   |                  |                    |                  | N    | <b>133.060768</b> | 67.034022       | 116.034219     | 58.520747        |                    |                   | 1  |

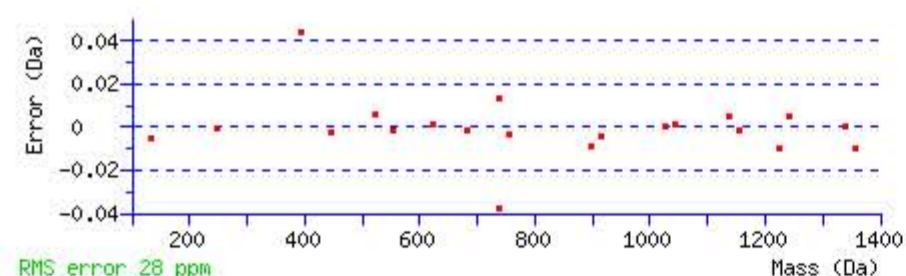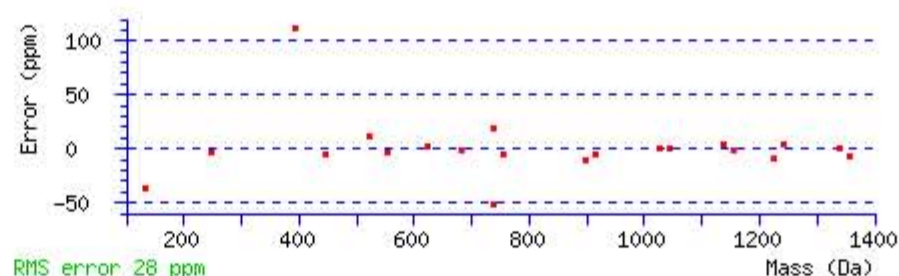

NCBI BLAST search of **NQEACELSNN**

(Parameters: blastp, nr protein database, expect=20000, no filter, PAM30)

Other BLAST [web gateways](#)

All matches to this query

| Score | Mr(calc):   | Delta     | Sequence                   |
|-------|-------------|-----------|----------------------------|
| 63.5  | 1488.633682 | -0.001694 | <a href="#">NQEACELSNN</a> |

Mascot: <http://www.matrixscience.com/>



**MASCOT** Mascot Search Results

**Peptide View**

MS/MS Fragmentation of **EELATFDPVDNIVFNMAAGSAPMQLHLR**  
 Found in **APOM\_HUMAN**, Apolipoprotein M OS=Homo sapiens GN=APOM PE=1 SV=2

Match to Query 66282: 3396.690376 from(850.179870,4+) rtinseconds(3152) index(44024)  
 Title: Locus:1.1.1.3513.13 File:"2013-07-02 CLN FXIII 60 min 2nd F 3.wiff"  
 Data file C:\Program Files (x86)\Matrix Science\Mascot Daemon\mgf5 FXIII 60 min 2nd\mascot\_daemon\_merge.mgf

Click mouse within plot area to zoom in by factor of two about that point  
 Or, Plot from  to  Da   
 Label all possible matches  Label matches used for scoring

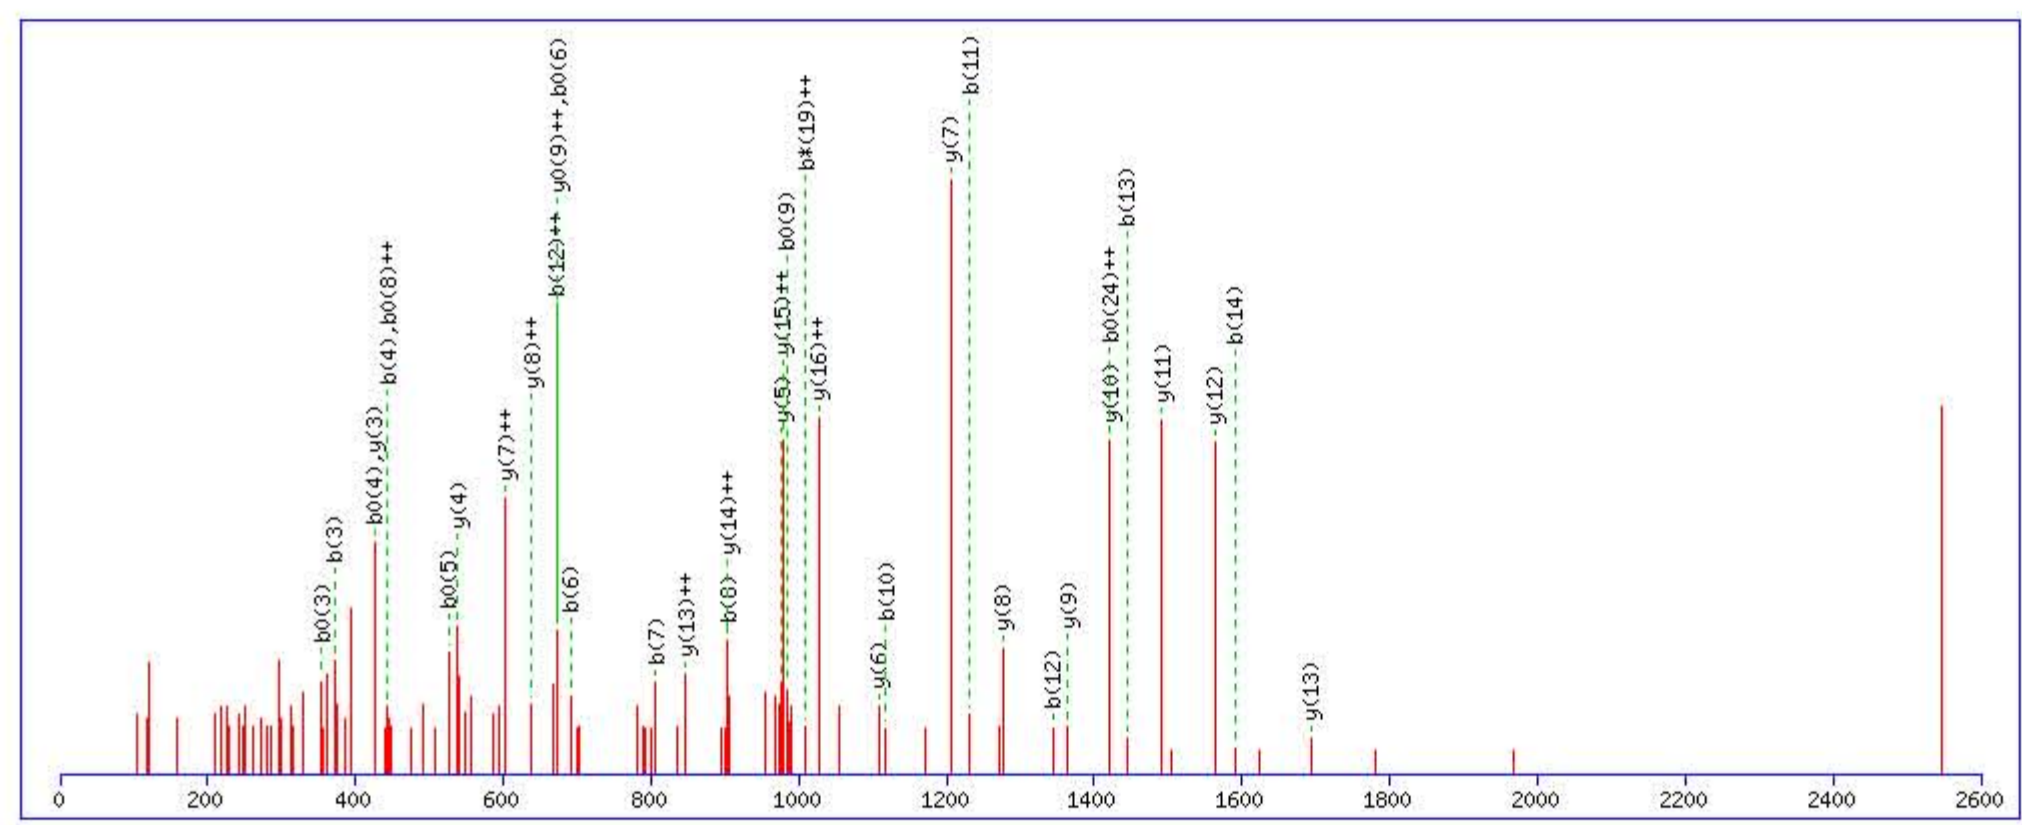

Monoisotopic mass of neutral peptide Mr(calc): 3396.666855  
 Fixed modifications: Carbamidomethyl (C) (apply to specified residues or termini only)  
 Variable modifications:  
 Q24 : Biotin:Thermo-21345 (Q)  
 Ions Score: 72 Expect: 1.7e-006  
 Matches : 37/288 fragment ions using 69 most intense peaks [\(help\)](#)

| #  | b                  | b <sup>++</sup>   | b <sup>*</sup> | b <sup>+++</sup>   | b <sup>0</sup>    | b <sup>0++</sup>   | Seq. | y                  | y <sup>++</sup>    | y <sup>*</sup> | y <sup>+++</sup> | y <sup>0</sup> | y <sup>0++</sup>  | #  |
|----|--------------------|-------------------|----------------|--------------------|-------------------|--------------------|------|--------------------|--------------------|----------------|------------------|----------------|-------------------|----|
| 1  | 130.049869         | 65.528572         |                |                    | 112.039304        | 56.523290          | E    |                    |                    |                |                  |                |                   | 28 |
| 2  | 259.092462         | 130.049869        |                |                    | 241.081897        | 121.044587         | E    | 3268.631560        | 1634.819418        | 3251.605011    | 1626.306143      | 3250.620995    | 1625.814135       | 27 |
| 3  | <b>372.176526</b>  | 186.591901        |                |                    | <b>354.165961</b> | 177.586619         | L    | 3139.588967        | 1570.298122        | 3122.562418    | 1561.784847      | 3121.578402    | 1561.292839       | 26 |
| 4  | <b>443.213640</b>  | 222.110458        |                |                    | <b>425.203075</b> | 213.105176         | A    | 3026.504903        | 1513.756089        | 3009.478354    | 1505.242815      | 3008.494338    | 1504.750807       | 25 |
| 5  | 544.261319         | 272.634298        |                |                    | <b>526.250754</b> | 263.629015         | T    | 2955.467789        | 1478.237532        | 2938.441240    | 1469.724258      | 2937.457224    | 1469.232250       | 24 |
| 6  | <b>691.329733</b>  | 346.168505        |                |                    | <b>673.319168</b> | 337.163222         | F    | 2854.420110        | 1427.713693        | 2837.393561    | 1419.200418      | 2836.409545    | 1418.708410       | 23 |
| 7  | <b>806.356676</b>  | 403.681976        |                |                    | 788.346111        | 394.676694         | D    | 2707.351696        | 1354.179486        | 2690.325147    | 1345.666211      | 2689.341131    | 1345.174204       | 22 |
| 8  | <b>903.409440</b>  | 452.208358        |                |                    | 885.398875        | <b>443.203076</b>  | P    | 2592.324753        | 1296.666014        | 2575.298204    | 1288.152740      | 2574.314188    | 1287.660732       | 21 |
| 9  | 1002.477854        | 501.742565        |                |                    | <b>984.467289</b> | 492.737282         | V    | 2495.271989        | 1248.139632        | 2478.245440    | 1239.626358      | 2477.261424    | 1239.134350       | 20 |
| 10 | <b>1117.504797</b> | 559.256037        |                |                    | 1099.494232       | 550.250754         | D    | 2396.203575        | 1198.605425        | 2379.177026    | 1190.092151      | 2378.193010    | 1189.600143       | 19 |
| 11 | <b>1231.547724</b> | 616.277500        | 1214.521175    | 607.764226         | 1213.537159       | 607.272218         | N    | 2281.176632        | 1141.091954        | 2264.150083    | 1132.578679      | 2263.166067    | 1132.086672       | 18 |
| 12 | <b>1344.631788</b> | <b>672.819532</b> | 1327.605239    | 664.306258         | 1326.621223       | 663.814249         | I    | 2167.133705        | 1084.070490        | 2150.107156    | 1075.557216      | 2149.123140    | 1075.065208       | 17 |
| 13 | <b>1443.700202</b> | 722.353739        | 1426.673653    | 713.840465         | 1425.689637       | 713.348457         | V    | 2054.049641        | <b>1027.528458</b> | 2037.023092    | 1019.015184      | 2036.039076    | 1018.523176       | 16 |
| 14 | <b>1590.768616</b> | 795.887946        | 1573.742067    | 787.374672         | 1572.758051       | 786.882664         | F    | 1954.981227        | <b>977.994252</b>  | 1937.954678    | 969.480977       | 1936.970662    | 968.988969        | 15 |
| 15 | 1704.811543        | 852.909410        | 1687.784994    | 844.396135         | 1686.800978       | 843.904127         | N    | 1807.912813        | <b>904.460045</b>  | 1790.886264    | 895.946770       | 1789.902248    | 895.454762        | 14 |
| 16 | 1835.852028        | 918.429652        | 1818.825479    | 909.916378         | 1817.841463       | 909.424370         | M    | <b>1693.869886</b> | <b>847.438581</b>  | 1676.843337    | 838.925307       | 1675.859321    | 838.433299        | 13 |
| 17 | 1906.889142        | 953.948209        | 1889.862593    | 945.434935         | 1888.878577       | 944.942927         | A    | <b>1562.829401</b> | 781.918339         | 1545.802852    | 773.405064       | 1544.818836    | 772.913056        | 12 |
| 18 | 1977.926256        | 989.466766        | 1960.899707    | 980.953492         | 1959.915691       | 980.461483         | A    | <b>1491.792287</b> | 746.399782         | 1474.765738    | 737.886507       | 1473.781722    | 737.394499        | 11 |
| 19 | 2034.947720        | 1017.977498       | 2017.921171    | <b>1009.464224</b> | 2016.937155       | 1008.972215        | G    | <b>1420.755173</b> | 710.881225         | 1403.728624    | 702.367950       | 1402.744608    | 701.875942        | 10 |
| 20 | 2121.979748        | 1061.493512       | 2104.953199    | 1052.980237        | 2103.969183       | 1052.488229        | S    | <b>1363.733709</b> | 682.370493         | 1346.707160    | 673.857218       | 1345.723144    | <b>673.365210</b> | 9  |
| 21 | 2193.016862        | 1097.012069       | 2175.990313    | 1088.498794        | 2175.006297       | 1088.006786        | A    | <b>1276.701681</b> | <b>638.854479</b>  | 1259.675132    | 630.341204       |                |                   | 8  |
| 22 | 2290.069626        | 1145.538451       | 2273.043077    | 1137.025176        | 2272.059061       | 1136.533168        | P    | <b>1205.664567</b> | <b>603.335922</b>  | 1188.638018    | 594.822647       |                |                   | 7  |
| 23 | 2421.110111        | 1211.058693       | 2404.083562    | 1202.545419        | 2403.099546       | 1202.053411        | M    | <b>1108.611803</b> | 554.809540         | 1091.585254    | 546.296265       |                |                   | 6  |
| 24 | 2860.335437        | 1430.671357       | 2843.308888    | 1422.158082        | 2842.324872       | <b>1421.666074</b> | Q    | <b>977.571318</b>  | 489.289297         | 960.544769     | 480.776023       |                |                   | 5  |
| 25 | 2973.419501        | 1487.213389       | 2956.392952    | 1478.700114        | 2955.408936       | 1478.208106        | L    | <b>538.345992</b>  | 269.676634         | 521.319443     | 261.163360       |                |                   | 4  |
| 26 | 3110.478413        | 1555.742845       | 3093.451864    | 1547.229570        | 3092.467848       | 1546.737562        | H    | <b>425.261928</b>  | 213.134602         | 408.235379     | 204.621328       |                |                   | 3  |
| 27 | 3223.562477        | 1612.284877       | 3206.535928    | 1603.771602        | 3205.551912       | 1603.279594        | L    | 288.203016         | 144.605146         | 271.176467     | 136.091872       |                |                   | 2  |
| 28 |                    |                   |                |                    |                   |                    | R    | 175.118952         | 88.063114          | 158.092403     | 79.549839        |                |                   | 1  |

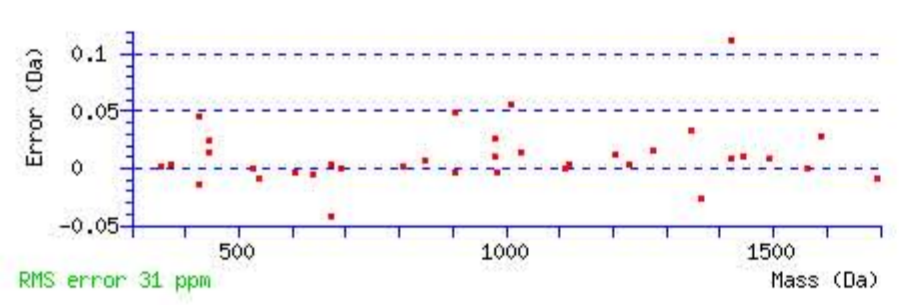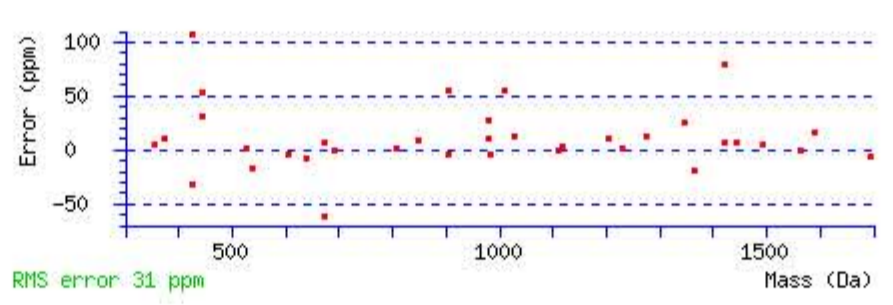

NCBI BLAST search of [EELATFDPVDNIVFNMAAGSAPMQLHLR](#)  
 (Parameters: blastp, nr protein database, expect=20000, no filter, PAM30)  
 Other BLAST [web gateways](#)

**All matches to this query**

| Score | Mr(calc):   | Delta    | Sequence                                     |
|-------|-------------|----------|----------------------------------------------|
| 72.0  | 3396.666855 | 0.023521 | <a href="#">EELATFDPVDNIVFNMAAGSAPMQLHLR</a> |



# MASCOT Search Results

## Peptide View

MS/MS Fragmentation of **SCALDQNCQWEPR**

Found in **ATRN\_HUMAN**, Attractin OS=Homo sapiens GN=ATRN PE=1 SV=2

Match to Query 46012: 1973.853792 from(658.958540,3+) rtinseconds(1990) index(5796)

Title: Locus:1.1.1.1502.9 File:"2013-07-02 CLN FXIII 60 min 2nd F 1.wiff"

Data file C:\Program Files (x86)\Matrix Science\Mascot Daemon\mgf5 FXIII 60 min 2nd\mascot\_daemon\_merge.mgf

Click mouse within plot area to zoom in by factor of two about that point

Or, Plot from  to  Da

Label all possible matches  Label matches used for scoring

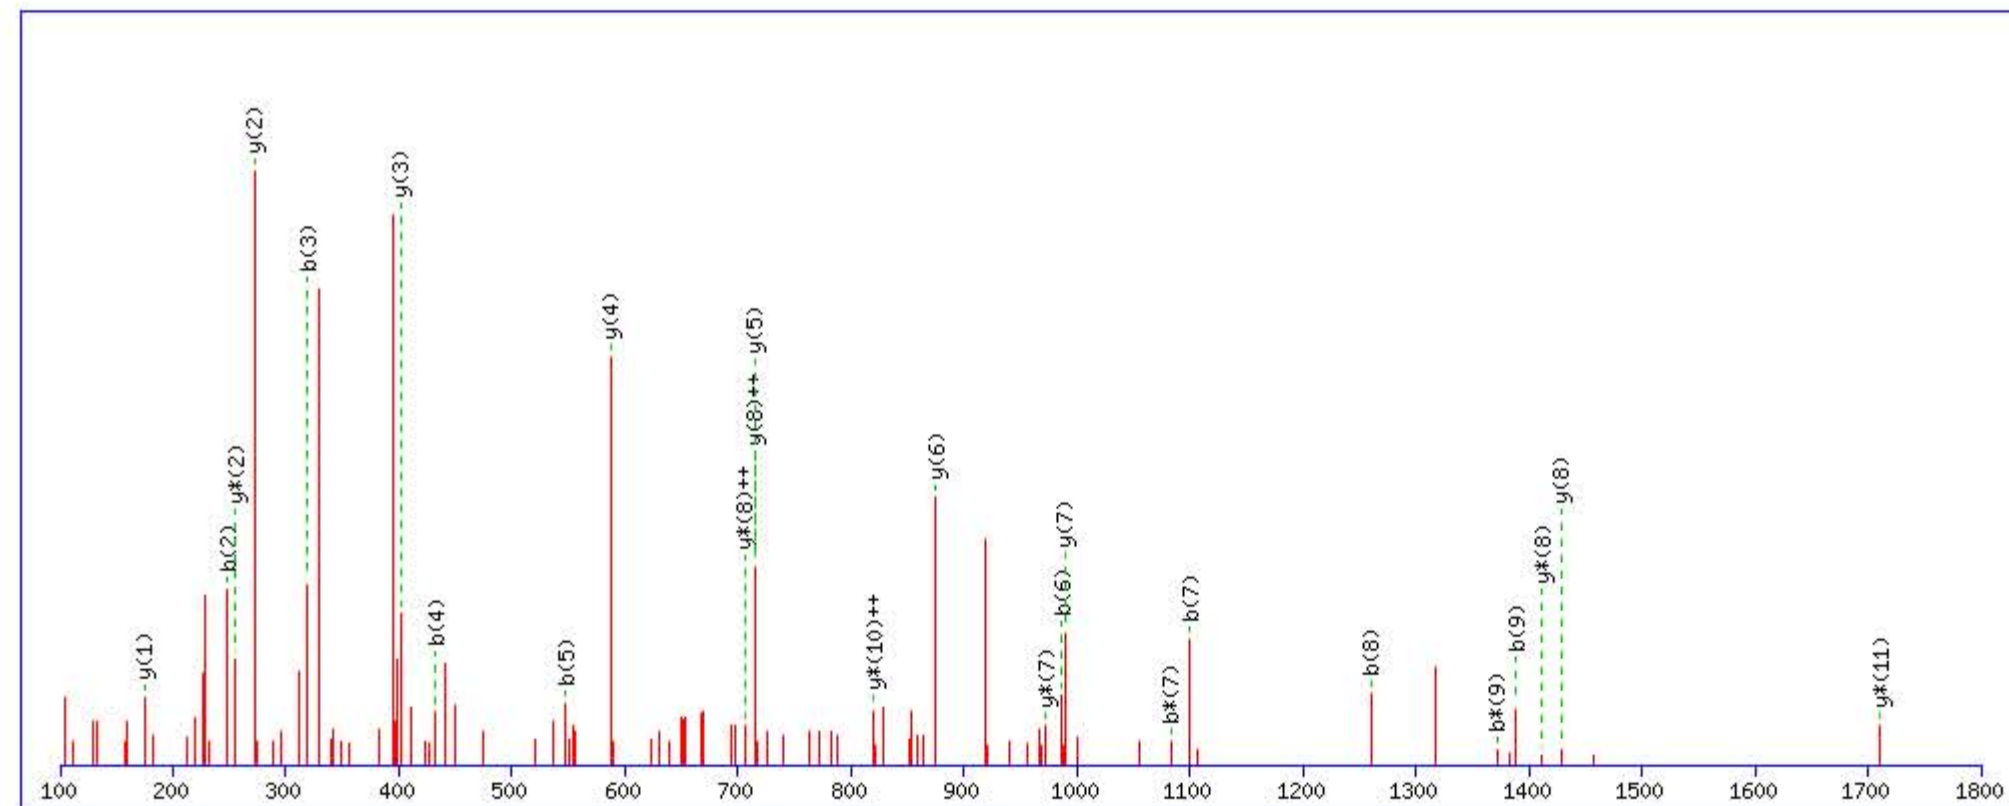

Monoisotopic mass of neutral peptide Mr(calc): 1973.854614

Fixed modifications: Carbamidomethyl (C) (apply to specified residues or termini only)

Variable modifications:

Q6 : Biotin:Thermo-21345 (Q)

Ions Score: 44 Expect: 0.00016

Matches : 25/130 fragment ions using 49 most intense peaks [\(help\)](#)

| #  | b                  | b <sup>++</sup> | b <sup>*</sup>     | b <sup>*++</sup> | b <sup>0</sup> | b <sup>0++</sup> | Seq. | y                  | y <sup>++</sup>   | y <sup>*</sup>     | y <sup>*++</sup>  | y <sup>0</sup> | y <sup>0++</sup> | #  |
|----|--------------------|-----------------|--------------------|------------------|----------------|------------------|------|--------------------|-------------------|--------------------|-------------------|----------------|------------------|----|
| 1  | 88.039304          | 44.523290       |                    |                  | 70.028739      | 35.518008        | S    |                    |                   |                    |                   |                |                  | 13 |
| 2  | <b>248.069953</b>  | 124.538614      |                    |                  | 230.059388     | 115.533332       | C    | 1887.829872        | 944.418574        | 1870.803323        | 935.905300        | 1869.819307    | 935.413292       | 12 |
| 3  | <b>319.107067</b>  | 160.057171      |                    |                  | 301.096502     | 151.051889       | A    | 1727.799223        | 864.403250        | <b>1710.772674</b> | 855.889975        | 1709.788658    | 855.397967       | 11 |
| 4  | <b>432.191131</b>  | 216.599203      |                    |                  | 414.180566     | 207.593921       | L    | 1656.762109        | 828.884693        | 1639.735560        | <b>820.371418</b> | 1638.751544    | 819.879410       | 10 |
| 5  | <b>547.218074</b>  | 274.112675      |                    |                  | 529.207509     | 265.107393       | D    | 1543.678045        | 772.342661        | 1526.651496        | 763.829386        | 1525.667480    | 763.337378       | 9  |
| 6  | <b>986.443400</b>  | 493.725338      | 969.416851         | 485.212064       | 968.432835     | 484.720056       | Q    | <b>1428.651102</b> | <b>714.829189</b> | <b>1411.624553</b> | <b>706.315915</b> | 1410.640537    | 705.823907       | 8  |
| 7  | <b>1100.486327</b> | 550.746802      | <b>1083.459778</b> | 542.233527       | 1082.475762    | 541.741519       | N    | <b>989.425776</b>  | 495.216526        | <b>972.399227</b>  | 486.703252        | 971.415211     | 486.211244       | 7  |
| 8  | <b>1260.516976</b> | 630.762126      | 1243.490427        | 622.248852       | 1242.506411    | 621.756844       | C    | <b>875.382849</b>  | 438.195063        | 858.356300         | 429.681788        | 857.372284     | 429.189780       | 6  |
| 9  | <b>1388.575554</b> | 694.791415      | <b>1371.549005</b> | 686.278141       | 1370.564989    | 685.786133       | Q    | <b>715.352200</b>  | 358.179738        | 698.325651         | 349.666464        | 697.341635     | 349.174456       | 5  |
| 10 | 1574.654867        | 787.831072      | 1557.628318        | 779.317797       | 1556.644302    | 778.825789       | W    | <b>587.293622</b>  | 294.150449        | 570.267073         | 285.637174        | 569.283057     | 285.145166       | 4  |
| 11 | 1703.697460        | 852.352368      | 1686.670911        | 843.839094       | 1685.686895    | 843.347086       | E    | <b>401.214309</b>  | 201.110792        | 384.187760         | 192.597518        | 383.203744     | 192.105510       | 3  |
| 12 | 1800.750224        | 900.878750      | 1783.723675        | 892.365476       | 1782.739659    | 891.873468       | P    | <b>272.171716</b>  | 136.589496        | <b>255.145167</b>  | 128.076221        |                |                  | 2  |
| 13 |                    |                 |                    |                  |                |                  | R    | <b>175.118952</b>  | 88.063114         | 158.092403         | 79.549839         |                |                  | 1  |

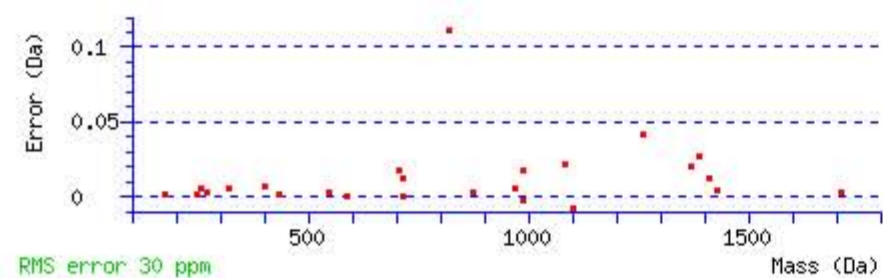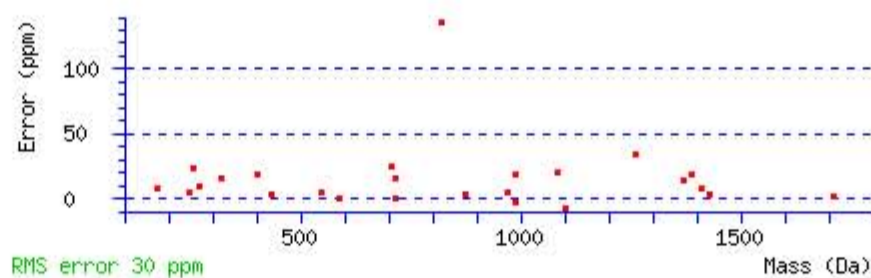

NCBI BLAST search of **SCALDQNCQWEPR**

(Parameters: blastp, nr protein database, expect=20000, no filter, PAM30)

Other BLAST [web gateways](#)

All matches to this query

| Score | Mr(calc):   | Delta     | Sequence                           |
|-------|-------------|-----------|------------------------------------|
| 44.2  | 1973.854614 | -0.000822 | <a href="#">SCALDQNCQWEPR</a>      |
| 16.2  | 1973.854614 | -0.000822 | <a href="#">SCALDQNCQWEPR</a>      |
| 1.7   | 1973.853729 | 0.000063  | <a href="#">DSPETGEEMGRAEGAWPR</a> |

Mascot: <http://www.matrixscience.com/>



# MASCOT Search Results

## Peptide View

MS/MS Fragmentation of **CSYTEDAQCIDGTIEVPK**  
 Found in **APOH\_HUMAN**, Beta-2-glycoprotein 1 OS=Homo sapiens GN=APOH PE=1 SV=3

Match to Query 54239: 2396.073612 from(799.698480,3+) rtinseconds(2156) index(69708)  
 Title: Locus:1.1.1.1688.17 File:"2013-07-02 CLN FXIII 60 min 2nd FT.wiff"  
 Data file C:\Program Files (x86)\Matrix Science\Mascot Daemon\mgf\5 FXIII 60 min 2nd\mascot\_daemon\_merge.mgf

Click mouse within plot area to zoom in by factor of two about that point  
 Or, Plot from  to  Da   
 Label all possible matches  Label matches used for scoring

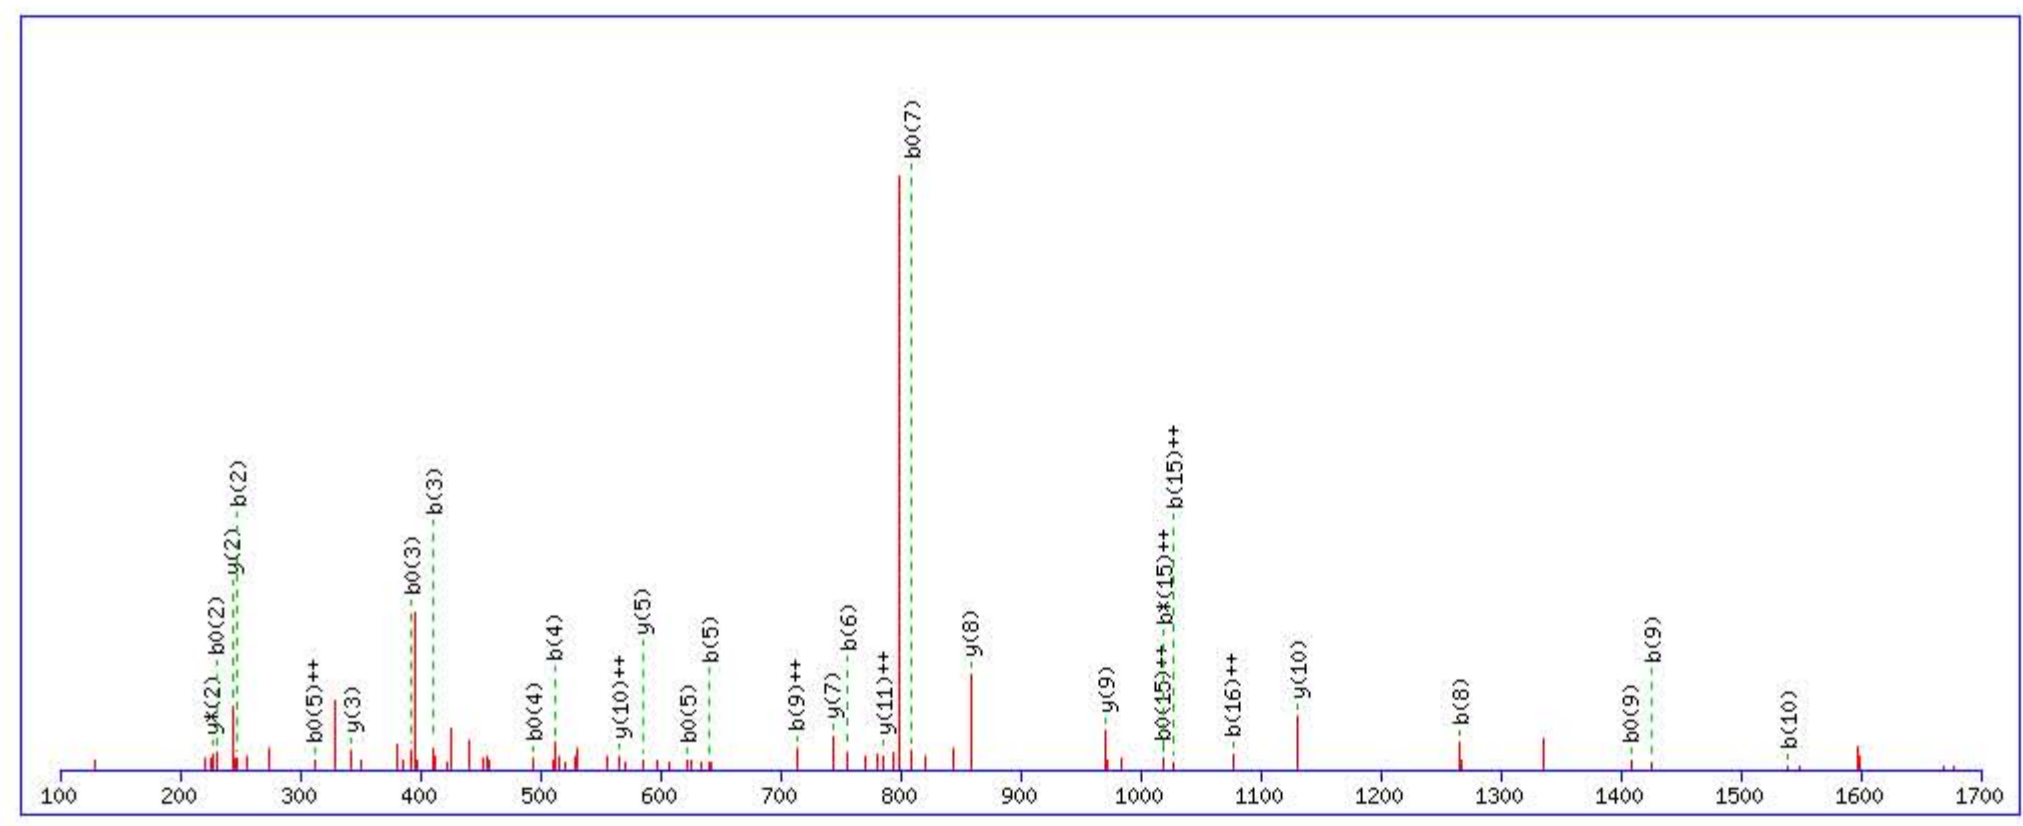

Monoisotopic mass of neutral peptide Mr(calc): 2396.069824  
 Fixed modifications: Carbamidomethyl (C) (apply to specified residues or termini only)  
 Variable modifications:  
 Q8 : Biotin:Thermo-21345 (Q)  
 Ions Score: 33 Expect: 0.0042  
 Matches : 30/182 fragment ions using 67 most intense peaks [\(help\)](#)

| #  | b                  | b <sup>++</sup>    | b <sup>*</sup> | b <sup>*++</sup>   | b <sup>0</sup>     | b <sup>0++</sup>   | Seq. | y                  | y <sup>++</sup>   | y <sup>*</sup>    | y <sup>*++</sup> | y <sup>0</sup> | y <sup>0++</sup> | #  |
|----|--------------------|--------------------|----------------|--------------------|--------------------|--------------------|------|--------------------|-------------------|-------------------|------------------|----------------|------------------|----|
| 1  | 161.037925         | 81.022600          |                |                    |                    |                    | C    |                    |                   |                   |                  |                |                  | 18 |
| 2  | <b>248.069953</b>  | 124.538614         |                |                    | <b>230.059388</b>  | 115.533332         | S    | 2237.046450        | 1119.026863       | 2220.019901       | 1110.513588      | 2219.035885    | 1110.021580      | 17 |
| 3  | <b>411.133282</b>  | 206.070279         |                |                    | <b>393.122717</b>  | 197.064997         | Y    | 2150.014422        | 1075.510849       | 2132.987873       | 1066.997574      | 2132.003857    | 1066.505566      | 16 |
| 4  | <b>512.180961</b>  | 256.594119         |                |                    | <b>494.170396</b>  | 247.588836         | T    | 1986.951093        | 993.979184        | 1969.924544       | 985.465910       | 1968.940528    | 984.973902       | 15 |
| 5  | <b>641.223554</b>  | 321.115415         |                |                    | <b>623.212989</b>  | <b>312.110133</b>  | E    | 1885.903414        | 943.455345        | 1868.876865       | 934.942071       | 1867.892849    | 934.450062       | 14 |
| 6  | <b>756.250497</b>  | 378.628887         |                |                    | <b>738.239932</b>  | 369.623604         | D    | 1756.860821        | 878.934048        | 1739.834272       | 870.420774       | 1738.850256    | 869.928766       | 13 |
| 7  | 827.287611         | 414.147444         |                |                    | <b>809.277046</b>  | 405.142161         | A    | 1641.833878        | 821.420577        | 1624.807329       | 812.907302       | 1623.823313    | 812.415294       | 12 |
| 8  | <b>1266.512937</b> | 633.760107         | 1249.486388    | 625.246832         | 1248.502372        | 624.754824         | Q    | 1570.796764        | <b>785.902020</b> | 1553.770215       | 777.388746       | 1552.786199    | 776.896737       | 11 |
| 9  | <b>1426.543586</b> | <b>713.775431</b>  | 1409.517037    | 705.262157         | <b>1408.533021</b> | 704.770149         | C    | <b>1131.571438</b> | <b>566.289357</b> | 1114.544889       | 557.776082       | 1113.560873    | 557.284074       | 10 |
| 10 | <b>1539.627650</b> | 770.317463         | 1522.601101    | 761.804189         | 1521.617085        | 761.312181         | I    | <b>971.540789</b>  | 486.274032        | 954.514240        | 477.760758       | 953.530224     | 477.268750       | 9  |
| 11 | 1654.654593        | 827.830935         | 1637.628044    | 819.317660         | 1636.644028        | 818.825652         | D    | <b>858.456725</b>  | 429.732000        | 841.430176        | 421.218726       | 840.446160     | 420.726718       | 8  |
| 12 | 1711.676057        | 856.341667         | 1694.649508    | 847.828392         | 1693.665492        | 847.336384         | G    | <b>743.429782</b>  | 372.218529        | 726.403233        | 363.705254       | 725.419217     | 363.213246       | 7  |
| 13 | 1812.723736        | 906.865506         | 1795.697187    | 898.352232         | 1794.713171        | 897.860224         | T    | 686.408318         | 343.707797        | 669.381769        | 335.194522       | 668.397753     | 334.702514       | 6  |
| 14 | 1925.807800        | 963.407538         | 1908.781251    | 954.894264         | 1907.797235        | 954.402256         | I    | <b>585.360639</b>  | 293.183957        | 568.334090        | 284.670683       | 567.350074     | 284.178675       | 5  |
| 15 | 2054.850393        | <b>1027.928834</b> | 2037.823844    | <b>1019.415560</b> | 2036.839828        | <b>1018.923552</b> | E    | 472.276575         | 236.641925        | 455.250026        | 228.128651       | 454.266010     | 227.636643       | 4  |
| 16 | 2153.918807        | <b>1077.463041</b> | 2136.892258    | 1068.949767        | 2135.908242        | 1068.457759        | V    | <b>343.233982</b>  | 172.120629        | 326.207433        | 163.607354       |                |                  | 3  |
| 17 | 2250.971571        | 1125.989423        | 2233.945022    | 1117.476149        | 2232.961006        | 1116.984141        | P    | <b>244.165568</b>  | 122.586422        | <b>227.139019</b> | 114.073148       |                |                  | 2  |
| 18 |                    |                    |                |                    |                    |                    | K    | 147.112804         | 74.060040         | 130.086255        | 65.546765        |                |                  | 1  |

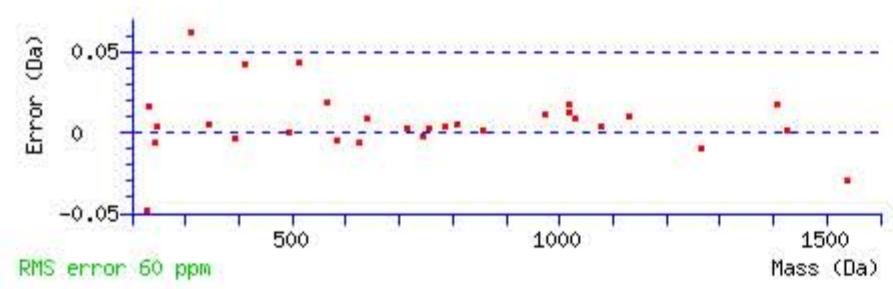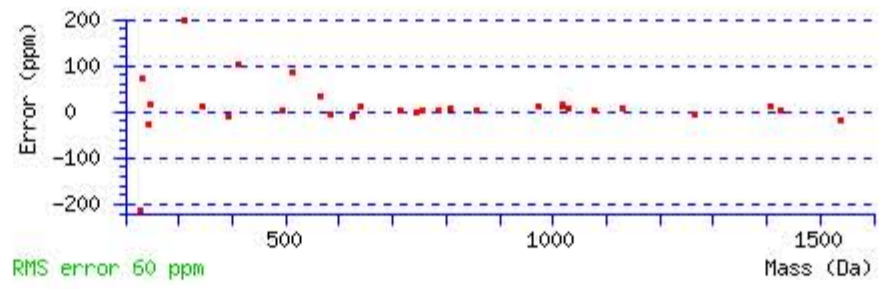

NCBI BLAST search of **CSYTEDAQCIDGTIEVPK**  
 (Parameters: blastp, nr protein database, expect=20000, no filter, PAM30)  
 Other BLAST [web gateways](#)

### All matches to this query

| Score | Mr(calc):   | Delta    | Sequence                           |
|-------|-------------|----------|------------------------------------|
| 32.8  | 2396.069824 | 0.003788 | <a href="#">CSYTEDAQCIDGTIEVPK</a> |



# MASCOT SCIENCE Mascot Search Results

## Peptide View

MS/MS Fragmentation of **GYILVGQAK**

Found in **C4BPA\_HUMAN**, C4b-binding protein alpha chain OS=Homo sapiens GN=C4BPA PE=1 SV=2

Match to Query 24918: 1258.713068 from(630.363810,2+) rtinseconds(2050) index(36718)

Title: Locus:1.1.1.3133.16 File:"2013-07-02 CLN FXIII 60 min 2nd F 3.wiff"

Data file C:\Program Files (x86)\Matrix Science\Mascot Daemon\mgf5 FXIII 60 min 2nd\mascot\_daemon\_merge.mgf

Click mouse within plot area to zoom in by factor of two about that point

Or, Plot from  to  Da

Label all possible matches  Label matches used for scoring

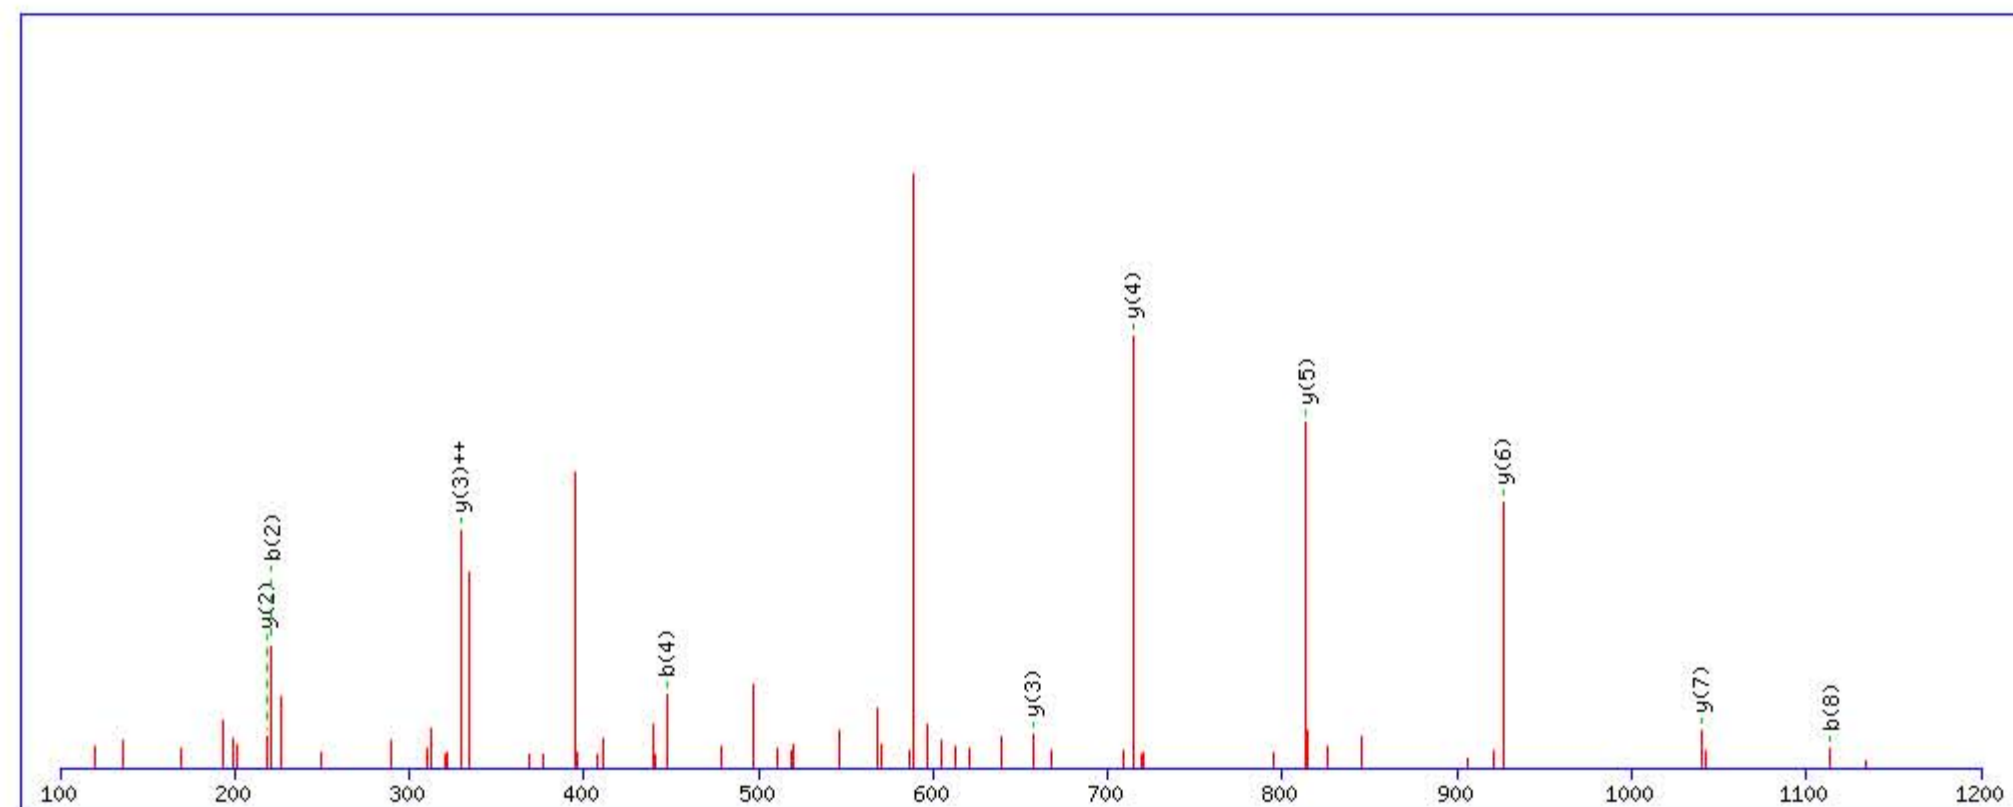

Monoisotopic mass of neutral peptide Mr(calc): 1258.710754

Fixed modifications: Carbamidomethyl (C) (apply to specified residues or termini only)

Variable modifications:

Q7 : Biotin:Thermo-21345 (Q)

Ions Score: 30 Expect: 0.0071

Matches : 10/52 fragment ions using 21 most intense peaks [\(help\)](#)

| # | b                  | b <sup>++</sup> | b <sup>*</sup> | b <sup>*++</sup> | Seq.     | y                  | y <sup>++</sup>   | y <sup>*</sup> | y <sup>*++</sup> | #        |
|---|--------------------|-----------------|----------------|------------------|----------|--------------------|-------------------|----------------|------------------|----------|
| 1 | 58.028740          | 29.518008       |                |                  | <b>G</b> |                    |                   |                |                  | <b>9</b> |
| 2 | <b>221.092069</b>  | 111.049673      |                |                  | <b>Y</b> | 1202.696579        | 601.851928        | 1185.670030    | 593.338653       | <b>8</b> |
| 3 | 334.176133         | 167.591704      |                |                  | <b>I</b> | <b>1039.633250</b> | 520.320263        | 1022.606701    | 511.806989       | <b>7</b> |
| 4 | <b>447.260197</b>  | 224.133737      |                |                  | <b>L</b> | <b>926.549186</b>  | 463.778231        | 909.522637     | 455.264957       | <b>6</b> |
| 5 | 546.328611         | 273.667944      |                |                  | <b>V</b> | <b>813.465122</b>  | 407.236199        | 796.438573     | 398.722925       | <b>5</b> |
| 6 | 603.350075         | 302.178676      |                |                  | <b>G</b> | <b>714.396708</b>  | 357.701992        | 697.370159     | 349.188718       | <b>4</b> |
| 7 | 1042.575401        | 521.791339      | 1025.548852    | 513.278064       | <b>Q</b> | <b>657.375244</b>  | <b>329.191260</b> | 640.348695     | 320.677986       | <b>3</b> |
| 8 | <b>1113.612515</b> | 557.309896      | 1096.585966    | 548.796621       | <b>A</b> | <b>218.149918</b>  | 109.578597        | 201.123369     | 101.065322       | <b>2</b> |
| 9 |                    |                 |                |                  | <b>K</b> | 147.112804         | 74.060040         | 130.086255     | 65.546765        | <b>1</b> |

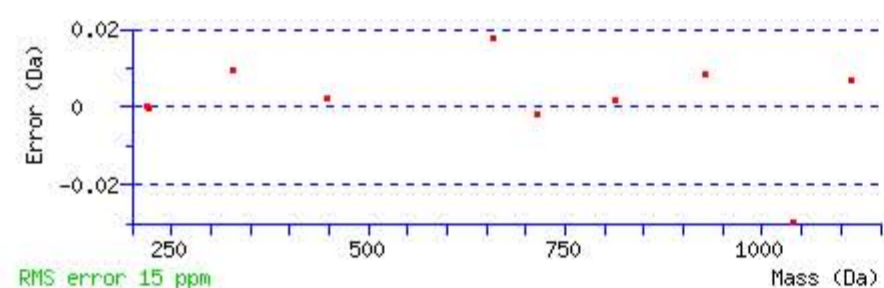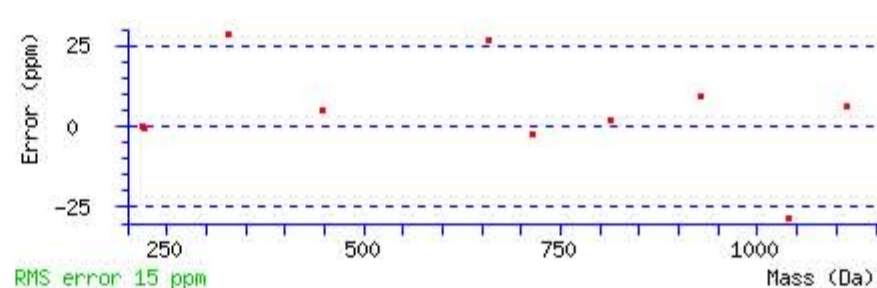

NCBI BLAST search of [GYILVGQAK](#)

(Parameters: blastp, nr protein database, expect=20000, no filter, PAM30)

Other BLAST [web gateways](#)

All matches to this query

| Score | Mr(calc):   | Delta     | Sequence                   |
|-------|-------------|-----------|----------------------------|
| 29.9  | 1258.710754 | 0.002314  | <a href="#">GYILVGQAK</a>  |
| 6.9   | 1258.721970 | -0.008902 | <a href="#">GYILQAKR</a>   |
| 6.7   | 1258.717941 | -0.004873 | <a href="#">RILAKVQEMR</a> |

Mascot: <http://www.matrixscience.com/>



# MASCOT SEARCH RESULTS

## Peptide View

MS/MS Fragmentation of **QSSSYSFFK**

Found in **C4BPA\_HUMAN**, C4b-binding protein alpha chain OS=Homo sapiens GN=C4BPA PE=1 SV=2

Match to Query 29789: 1390.665948 from(696.340250,2+) rtinseconds(2139) index(37248)

Title: Locus:1.1.1.3164.13 File:"2013-07-02 CLN FXIII 60 min 2nd F 3.wiff"

Data file C:\Program Files (x86)\Matrix Science\Mascot Daemon\mgf5 FXIII 60 min 2nd\mascot\_daemon\_merge.mgf

Click mouse within plot area to zoom in by factor of two about that point

Or, Plot from  to  Da

Label all possible matches  Label matches used for scoring

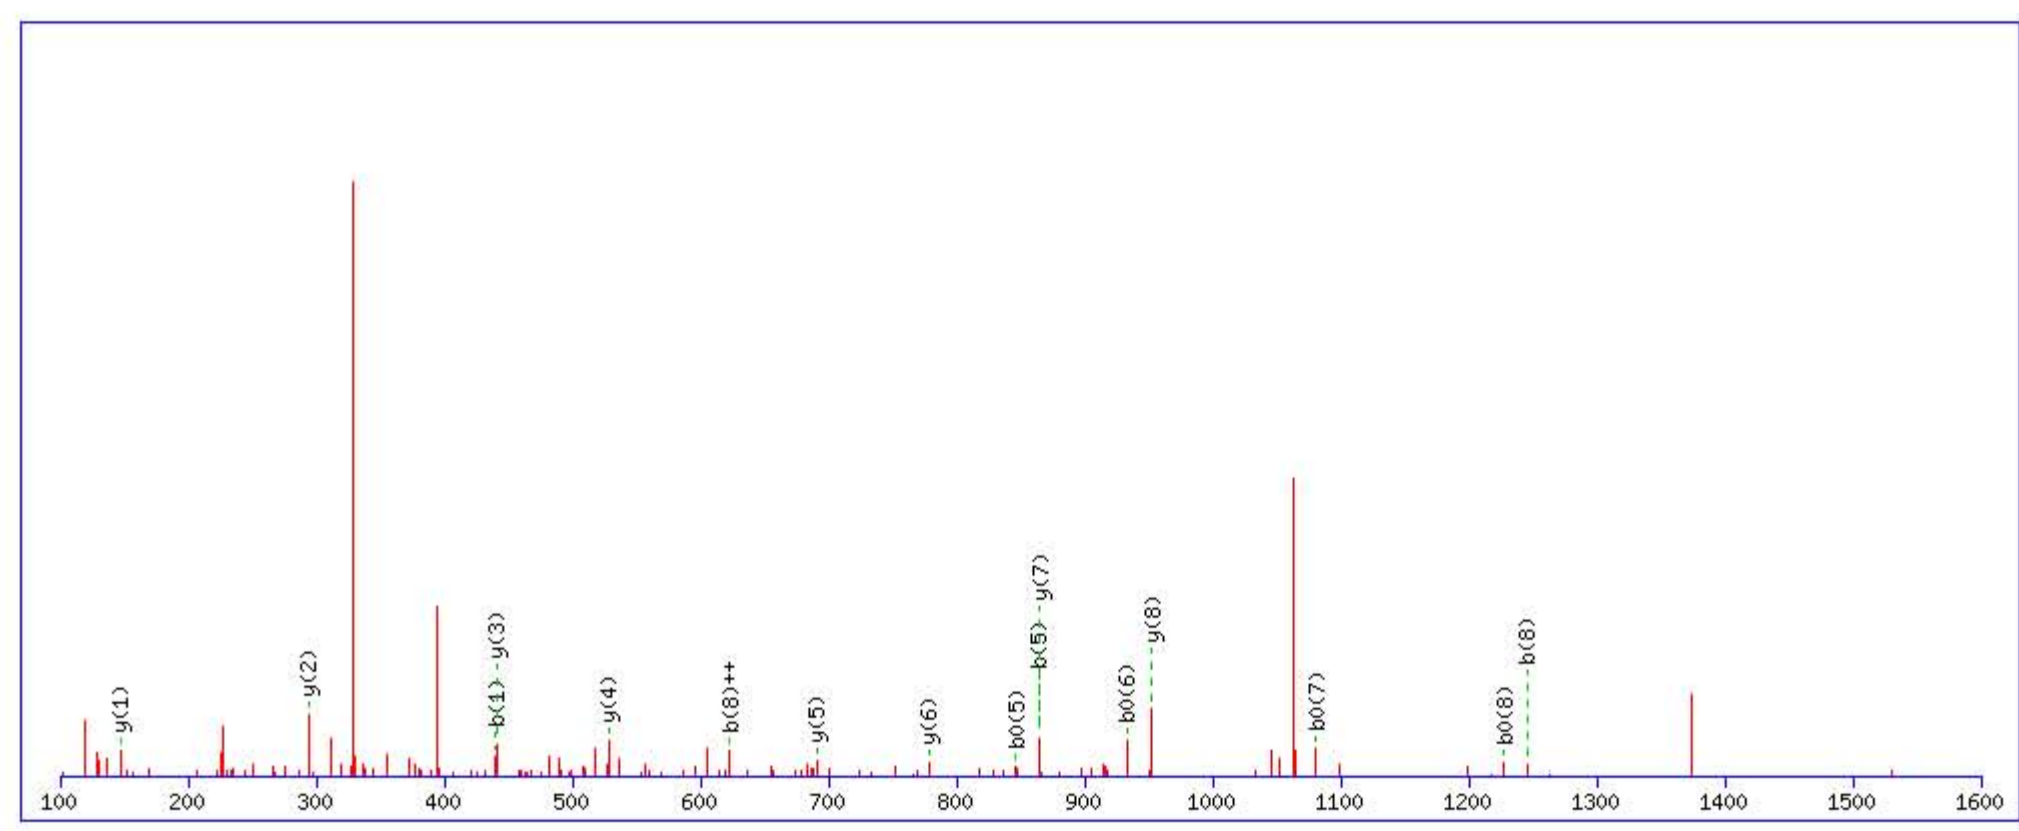

Monoisotopic mass of neutral peptide Mr(calc): 1390.659119

Fixed modifications: Carbamidomethyl (C) (apply to specified residues or termini only)

Variable modifications:

Q1 : Biotin:Thermo-21345 (Q)

Ions Score: 40 Expect: 0.00036

Matches : 16/88 fragment ions using 36 most intense peaks [\(help\)](#)

| # | b           | b <sup>++</sup> | b <sup>*</sup> | b <sup>+++</sup> | b <sup>0</sup> | b <sup>0++</sup> | Seq. | y          | y <sup>++</sup> | y <sup>*</sup> | y <sup>+++</sup> | y <sup>0</sup> | y <sup>0++</sup> | # |
|---|-------------|-----------------|----------------|------------------|----------------|------------------|------|------------|-----------------|----------------|------------------|----------------|------------------|---|
| 1 | 440.232602  | 220.619939      | 423.206053     | 212.106664       |                |                  | Q    |            |                 |                |                  |                |                  | 9 |
| 2 | 527.264630  | 264.135953      | 510.238081     | 255.622679       | 509.254065     | 255.130671       | S    | 952.441073 | 476.724175      | 935.414524     | 468.210900       | 934.430508     | 467.718892       | 8 |
| 3 | 614.296658  | 307.651967      | 597.270109     | 299.138692       | 596.286093     | 298.646684       | S    | 865.409045 | 433.208161      | 848.382496     | 424.694886       | 847.398480     | 424.202878       | 7 |
| 4 | 701.328686  | 351.167981      | 684.302137     | 342.654706       | 683.318121     | 342.162698       | S    | 778.377017 | 389.692147      | 761.350468     | 381.178872       | 760.366452     | 380.686864       | 6 |
| 5 | 864.392015  | 432.699645      | 847.365466     | 424.186371       | 846.381450     | 423.694363       | Y    | 691.344989 | 346.176133      | 674.318440     | 337.662858       | 673.334424     | 337.170850       | 5 |
| 6 | 951.424043  | 476.215659      | 934.397494     | 467.702385       | 933.413478     | 467.210377       | S    | 528.281660 | 264.644468      | 511.255111     | 256.131194       | 510.271095     | 255.639186       | 4 |
| 7 | 1098.492457 | 549.749866      | 1081.465908    | 541.236592       | 1080.481892    | 540.744584       | F    | 441.249632 | 221.128454      | 424.223083     | 212.615180       |                |                  | 3 |
| 8 | 1245.560871 | 623.284073      | 1228.534322    | 614.770799       | 1227.550306    | 614.278791       | F    | 294.181218 | 147.594247      | 277.154669     | 139.080973       |                |                  | 2 |
| 9 |             |                 |                |                  |                |                  | K    | 147.112804 | 74.060040       | 130.086255     | 65.546765        |                |                  | 1 |

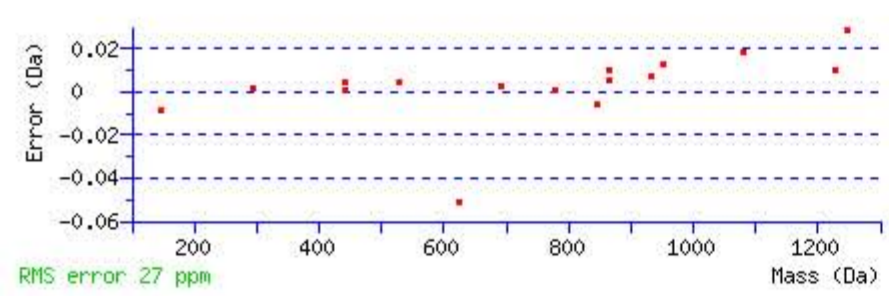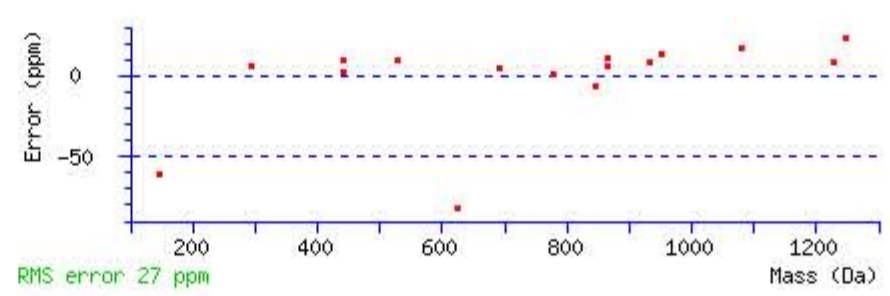

NCBI BLAST search of **QSSSYSFFK**

(Parameters: blastp, nr protein database, expect=20000, no filter, PAM30)

Other BLAST [web gateways](#)

### All matches to this query

| Score | Mr(calc):   | Delta     | Sequence                     |
|-------|-------------|-----------|------------------------------|
| 40.4  | 1390.659119 | 0.006829  | <a href="#">QSSSYSFFK</a>    |
| 3.5   | 1390.670135 | -0.004187 | <a href="#">YRNQESKSSHR</a>  |
| 3.2   | 1390.669678 | -0.003730 | <a href="#">QEMAIQQLGMR</a>  |
| 2.3   | 1390.655075 | 0.010873  | <a href="#">IHEQDQLYSMK</a>  |
| 2.0   | 1390.676208 | -0.010260 | <a href="#">AEKSSSTDQK</a>   |
| 1.7   | 1390.669678 | -0.003730 | <a href="#">CAPASIRLMDNK</a> |
| 1.4   | 1390.672821 | -0.006873 | <a href="#">QQLENNLEEFK</a>  |



# MASCOT Search Results

## Peptide View

MS/MS Fragmentation of **FSAICQGDGTWSPR**

Found in **C4BPA\_HUMAN**, C4b-binding protein alpha chain OS=Homo sapiens GN=C4BPA PE=1 SV=2

Match to Query 44409: 1891.878882 from(631.633570,3+) rtinseconds(2138) index(37246)

Title: Locus:1.1.1.3164.11 File:"2013-07-02 CLN FXIII 60 min 2nd F 3.wiff"

Data file C:\Program Files (x86)\Matrix Science\Mascot Daemon\mgf5 FXIII 60 min 2nd\mascot\_daemon\_merge.mgf

Click mouse within plot area to zoom in by factor of two about that point

Or, Plot from  to  Da

Label all possible matches  Label matches used for scoring

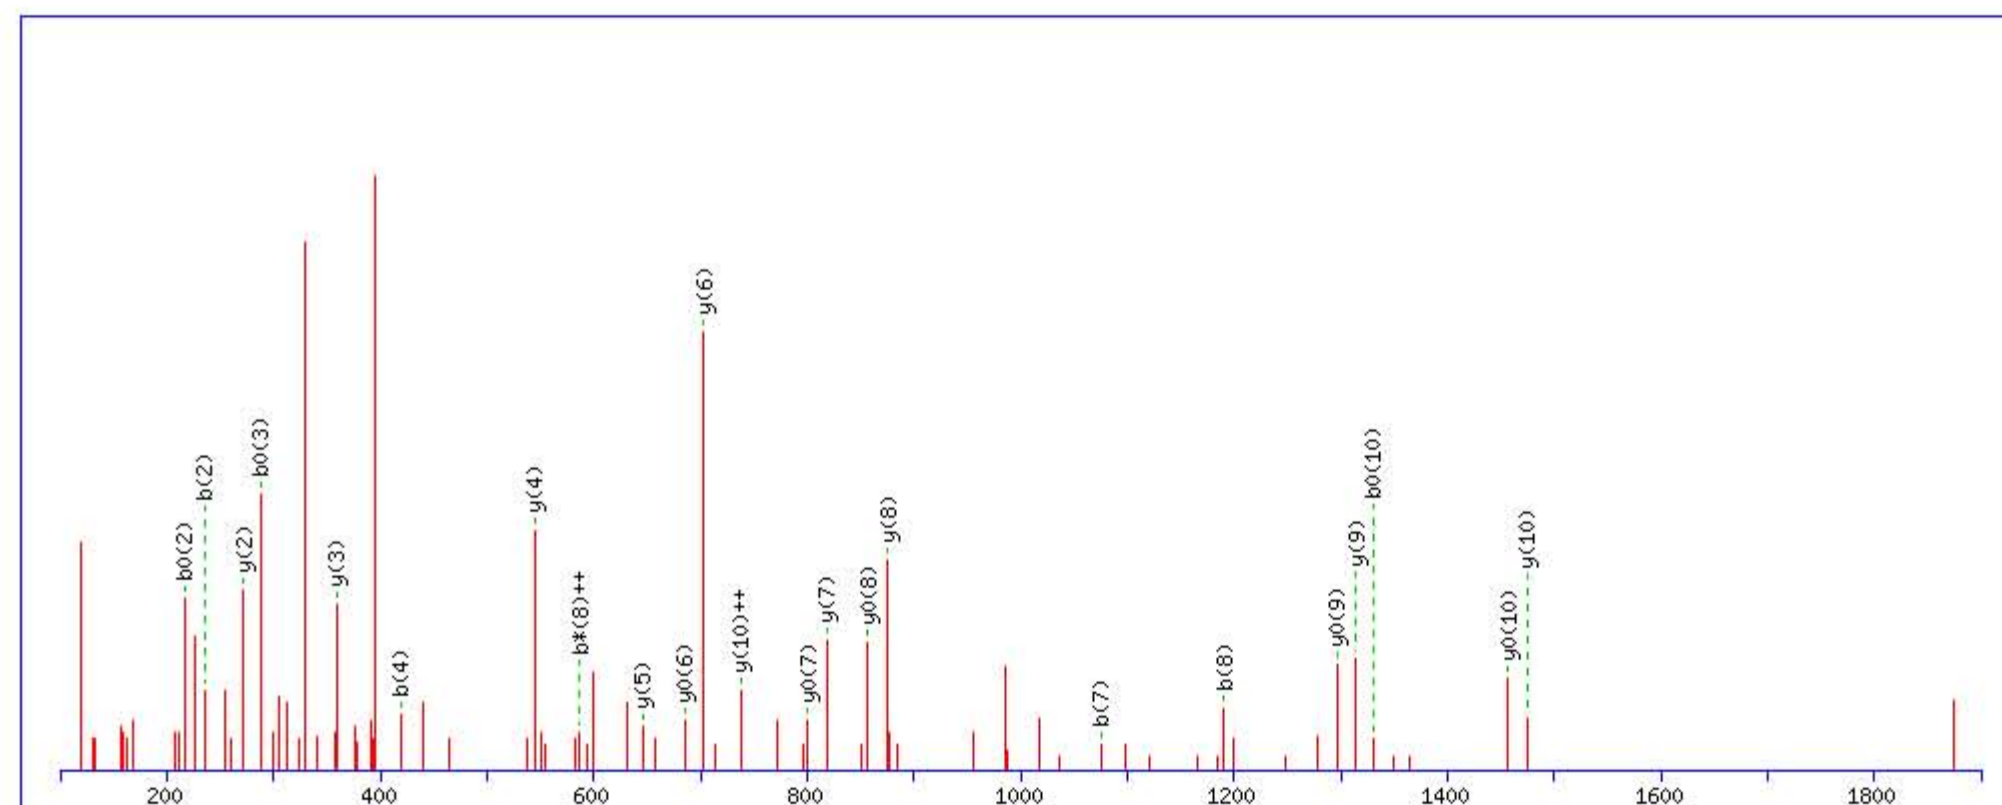

Monoisotopic mass of neutral peptide Mr(calc): 1891.870941

Fixed modifications: Carbamidomethyl (C) (apply to specified residues or termini only)

Variable modifications:

Q6 : Biotin:Thermo-21345 (Q)

Ions Score: 39 Expect: 0.0019

Matches : 23/140 fragment ions using 52 most intense peaks [\(help\)](#)

| #  | b                  | b <sup>++</sup> | b <sup>*</sup> | b <sup>*++</sup>  | b <sup>0</sup>     | b <sup>0++</sup> | Seq. | y                  | y <sup>++</sup>   | y <sup>*</sup> | y <sup>*++</sup> | y <sup>0</sup>     | y <sup>0++</sup> | #  |
|----|--------------------|-----------------|----------------|-------------------|--------------------|------------------|------|--------------------|-------------------|----------------|------------------|--------------------|------------------|----|
| 1  | 148.075690         | 74.541483       |                |                   |                    |                  | F    |                    |                   |                |                  |                    |                  | 14 |
| 2  | <b>235.107718</b>  | 118.057497      |                |                   | <b>217.097153</b>  | 109.052214       | S    | 1745.809788        | 873.408532        | 1728.783239    | 864.895258       | 1727.799223        | 864.403250       | 13 |
| 3  | 306.144832         | 153.576054      |                |                   | <b>288.134267</b>  | 144.570772       | A    | 1658.777760        | 829.892518        | 1641.751211    | 821.379244       | 1640.767195        | 820.887236       | 12 |
| 4  | <b>419.228896</b>  | 210.118086      |                |                   | 401.218331         | 201.112804       | I    | 1587.740646        | 794.373961        | 1570.714097    | 785.860687       | 1569.730081        | 785.368678       | 11 |
| 5  | 579.259545         | 290.133411      |                |                   | 561.248980         | 281.128128       | C    | <b>1474.656582</b> | <b>737.831929</b> | 1457.630033    | 729.318655       | <b>1456.646017</b> | 728.826647       | 10 |
| 6  | 1018.484871        | 509.746074      | 1001.458322    | 501.232799        | 1000.474306        | 500.740791       | Q    | <b>1314.625933</b> | 657.816605        | 1297.599384    | 649.303330       | <b>1296.615368</b> | 648.811322       | 9  |
| 7  | <b>1075.506335</b> | 538.256806      | 1058.479786    | 529.743531        | 1057.495770        | 529.251523       | G    | <b>875.400607</b>  | 438.203942        | 858.374058     | 429.690667       | <b>857.390042</b>  | 429.198659       | 8  |
| 8  | <b>1190.533278</b> | 595.770277      | 1173.506729    | <b>587.257003</b> | 1172.522713        | 586.764995       | D    | <b>818.379143</b>  | 409.693210        | 801.352594     | 401.179935       | <b>800.368578</b>  | 400.687927       | 7  |
| 9  | 1247.554742        | 624.281009      | 1230.528193    | 615.767735        | 1229.544177        | 615.275727       | G    | <b>703.352200</b>  | 352.179738        | 686.325651     | 343.666464       | <b>685.341635</b>  | 343.174456       | 6  |
| 10 | 1348.602421        | 674.804849      | 1331.575872    | 666.291574        | <b>1330.591856</b> | 665.799566       | T    | <b>646.330736</b>  | 323.669006        | 629.304187     | 315.155732       | 628.320171         | 314.663724       | 5  |
| 11 | 1534.681734        | 767.844505      | 1517.655185    | 759.331231        | 1516.671169        | 758.839223       | W    | <b>545.283057</b>  | 273.145167        | 528.256508     | 264.631892       | 527.272492         | 264.139884       | 4  |
| 12 | 1621.713762        | 811.360519      | 1604.687213    | 802.847245        | 1603.703197        | 802.355237       | S    | <b>359.203744</b>  | 180.105510        | 342.177195     | 171.592236       | 341.193179         | 171.100228       | 3  |
| 13 | 1718.766526        | 859.886901      | 1701.739977    | 851.373627        | 1700.755961        | 850.881619       | P    | <b>272.171716</b>  | 136.589496        | 255.145167     | 128.076221       |                    |                  | 2  |
| 14 |                    |                 |                |                   |                    |                  | R    | 175.118952         | 88.063114         | 158.092403     | 79.549839        |                    |                  | 1  |

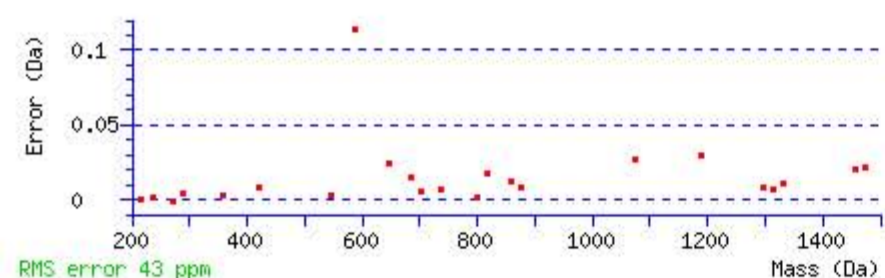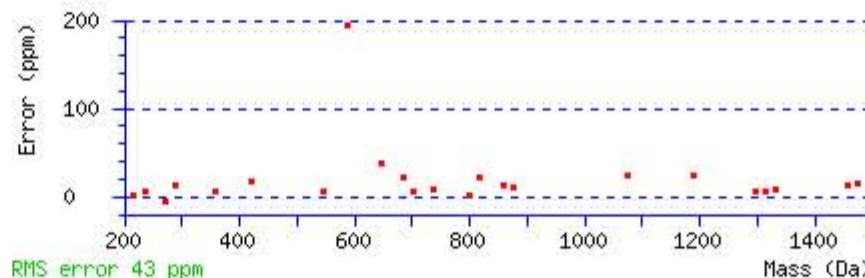

NCBI BLAST search of **FSAICQGDGTWSPR**

(Parameters: blastp, nr protein database, expect=20000, no filter, PAM30)

Other BLAST [web gateways](#)

All matches to this query

| Score | Mr(calc):   | Delta    | Sequence                       |
|-------|-------------|----------|--------------------------------|
| 38.7  | 1891.870941 | 0.007941 | <a href="#">FSAICQGDGTWSPR</a> |

Mascot: <http://www.matrixscience.com/>



# MASCOT Search Results

## Peptide View

MS/MS Fragmentation of **GVGWSHPLPQCEIVK**

Found in **C4BPA\_HUMAN**, C4b-binding protein alpha chain OS=Homo sapiens GN=C4BPA PE=1 SV=2

Match to Query 47664: 2017.031712 from(673.351180,3+) rtinseconds(2070) index(36836)

Title: Locus:1.1.1.3140.9 File:"2013-07-02 CLN FXIII 60 min 2nd F 3.wiff"

Data file C:\Program Files (x86)\Matrix Science\Mascot Daemon\mgf\5 FXIII 60 min 2nd\mascot\_daemon\_merge.mgf

Click mouse within plot area to zoom in by factor of two about that point

Or, Plot from  to  Da

Label all possible matches  Label matches used for scoring

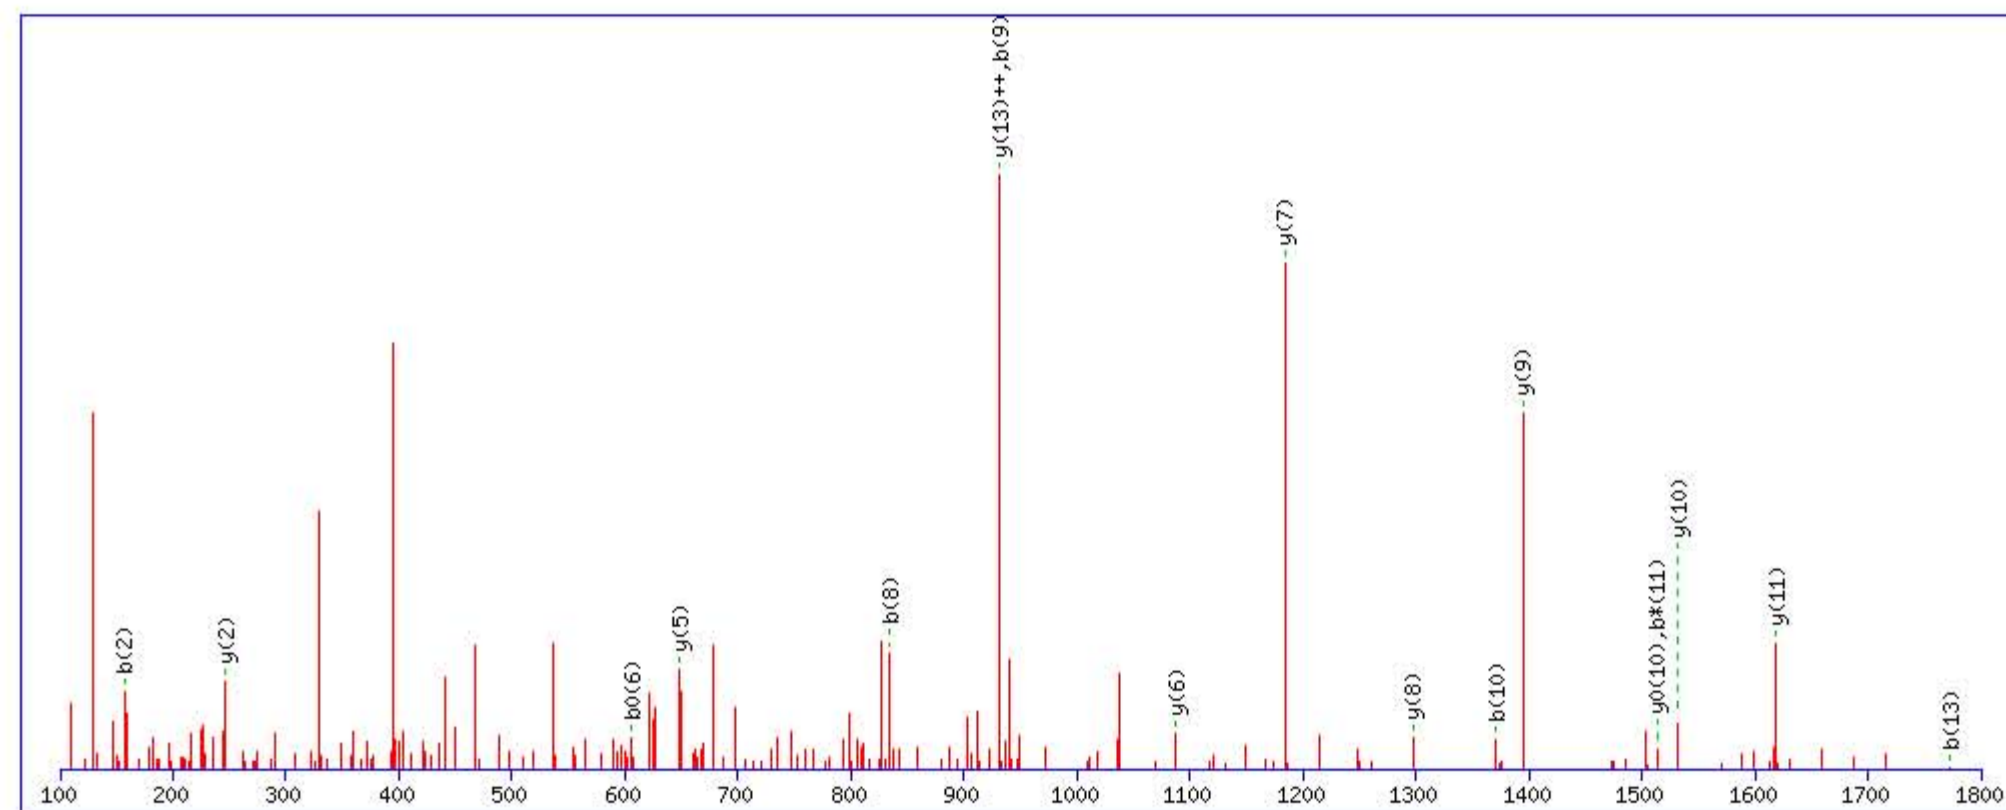

Monoisotopic mass of neutral peptide Mr(calc): 2017.027771

Fixed modifications: Carbamidomethyl (C) (apply to specified residues or termini only)

Variable modifications:

Q10 : Biotin:Thermo-21345 (Q)

Ions Score: 34 Expect: 0.013

Matches : 17/136 fragment ions using 34 most intense peaks [\(help\)](#)

| #  | b                  | b <sup>++</sup> | b <sup>+</sup>     | b <sup>+++</sup> | b <sup>0</sup>    | b <sup>0++</sup> | Seq. | y                  | y <sup>++</sup>   | y <sup>+</sup> | y <sup>+++</sup> | y <sup>0</sup>     | y <sup>0++</sup> | #  |
|----|--------------------|-----------------|--------------------|------------------|-------------------|------------------|------|--------------------|-------------------|----------------|------------------|--------------------|------------------|----|
| 1  | 58.028740          | 29.518008       |                    |                  |                   |                  | G    |                    |                   |                |                  |                    |                  | 15 |
| 2  | <b>157.097154</b>  | 79.052215       |                    |                  |                   |                  | V    | 1961.013573        | 981.010425        | 1943.987024    | 972.497150       | 1943.003008        | 972.005142       | 14 |
| 3  | 214.118618         | 107.562947      |                    |                  |                   |                  | G    | 1861.945159        | <b>931.476217</b> | 1844.918610    | 922.962943       | 1843.934594        | 922.470935       | 13 |
| 4  | 400.197931         | 200.602603      |                    |                  |                   |                  | W    | 1804.923695        | 902.965486        | 1787.897146    | 894.452211       | 1786.913130        | 893.960203       | 12 |
| 5  | 487.229959         | 244.118617      |                    |                  | 469.219394        | 235.113335       | S    | <b>1618.844382</b> | 809.925829        | 1601.817833    | 801.412555       | 1600.833817        | 800.920547       | 11 |
| 6  | 624.288871         | 312.648074      |                    |                  | <b>606.278306</b> | 303.642791       | H    | <b>1531.812354</b> | 766.409815        | 1514.785805    | 757.896541       | <b>1513.801789</b> | 757.404532       | 10 |
| 7  | 721.341635         | 361.174456      |                    |                  | 703.331070        | 352.169173       | P    | <b>1394.753442</b> | 697.880359        | 1377.726893    | 689.367085       | 1376.742877        | 688.875076       | 9  |
| 8  | <b>834.425699</b>  | 417.716488      |                    |                  | 816.415134        | 408.711205       | L    | <b>1297.700678</b> | 649.353977        | 1280.674129    | 640.840703       | 1279.690113        | 640.348694       | 8  |
| 9  | <b>931.478463</b>  | 466.242870      |                    |                  | 913.467898        | 457.237587       | P    | <b>1184.616614</b> | 592.811945        | 1167.590065    | 584.298670       | 1166.606049        | 583.806662       | 7  |
| 10 | <b>1370.703789</b> | 685.855532      | 1353.677240        | 677.342258       | 1352.693224       | 676.850250       | Q    | <b>1087.563850</b> | 544.285563        | 1070.537301    | 535.772288       | 1069.553285        | 535.280280       | 6  |
| 11 | 1530.734438        | 765.870857      | <b>1513.707889</b> | 757.357583       | 1512.723873       | 756.865574       | C    | <b>648.338524</b>  | 324.672900        | 631.311975     | 316.159626       | 630.327959         | 315.667618       | 5  |
| 12 | 1659.777031        | 830.392153      | 1642.750482        | 821.878879       | 1641.766466       | 821.386871       | E    | 488.307875         | 244.657575        | 471.281326     | 236.144301       | 470.297310         | 235.652293       | 4  |
| 13 | <b>1772.861095</b> | 886.934185      | 1755.834546        | 878.420911       | 1754.850530       | 877.928903       | I    | 359.265282         | 180.136279        | 342.238733     | 171.623004       |                    |                  | 3  |
| 14 | 1871.929509        | 936.468392      | 1854.902960        | 927.955118       | 1853.918944       | 927.463110       | V    | <b>246.181218</b>  | 123.594247        | 229.154669     | 115.080973       |                    |                  | 2  |
| 15 |                    |                 |                    |                  |                   |                  | K    | 147.112804         | 74.060040         | 130.086255     | 65.546765        |                    |                  | 1  |

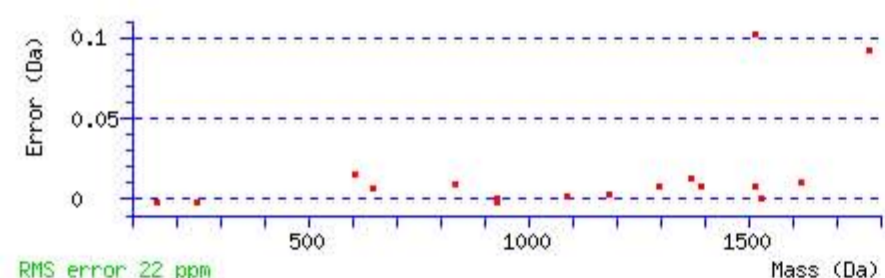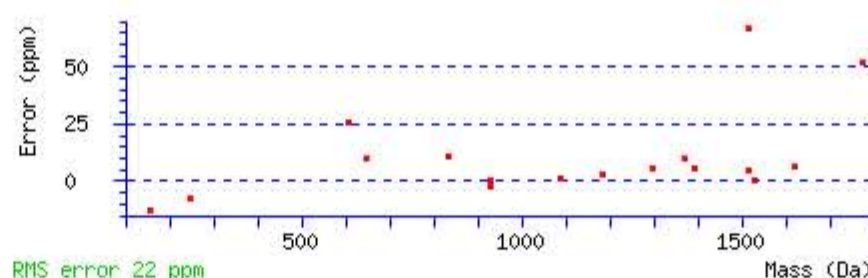

NCBI BLAST search of **GVGWSHPLPQCEIVK**

(Parameters: blastp, nr protein database, expect=20000, no filter, PAM30)

Other BLAST [web gateways](#)

All matches to this query

| Score | Mr(calc):   | Delta    | Sequence                        |
|-------|-------------|----------|---------------------------------|
| 33.5  | 2017.027771 | 0.003941 | <a href="#">GVGWSHPLPQCEIVK</a> |

Mascot: <http://www.matrixscience.com/>



# MASCOT Search Results

## Peptide View

MS/MS Fragmentation of **LSCSYSHWSAPAPQCK**

Found in **C4BPA\_HUMAN**, C4b-binding protein alpha chain OS=Homo sapiens GN=C4BPA PE=1 SV=2

Match to Query 50865: 2188.986132 from(730.669320,3+) rtinseconds(1769) index(34880)

Title: Locus:1.1.1.3035.17 File:"2013-07-02 CLN FXIII 60 min 2nd F 3.wiff"

Data file C:\Program Files (x86)\Matrix Science\Mascot Daemon\mgf5 FXIII 60 min 2nd\mascot\_daemon\_merge.mgf

Click mouse within plot area to zoom in by factor of two about that point

Or, Plot from  to  Da

Label all possible matches  Label matches used for scoring

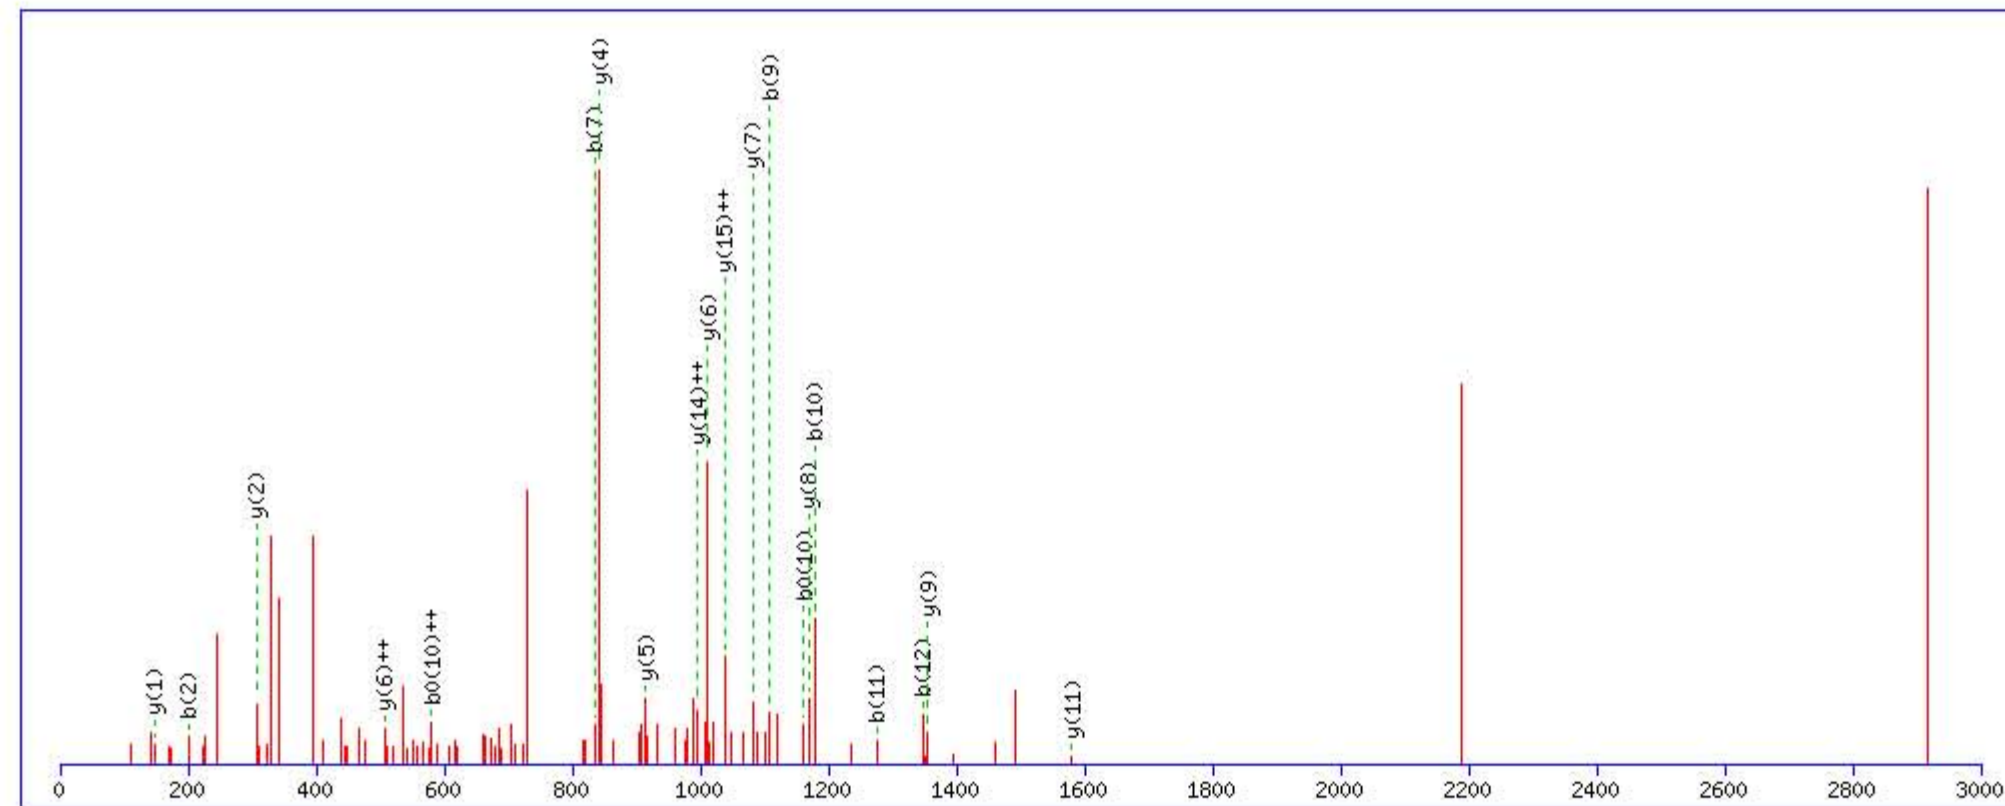

Monoisotopic mass of neutral peptide Mr(calc): 2188.985626

Fixed modifications: Carbamidomethyl (C) (apply to specified residues or termini only)

Variable modifications:

Q14 : Biotin:Thermo-21345 (Q)

Ions Score: 31 Expect: 0.008

Matches : 20/138 fragment ions using 54 most intense peaks [\(help\)](#)

| #  | b                  | b <sup>++</sup> | b <sup>*</sup> | b <sup>+++</sup> | b <sup>0</sup>     | b <sup>0++</sup>  | Seq. | y                  | y <sup>++</sup>    | y <sup>*</sup> | y <sup>+++</sup> | y <sup>0</sup> | y <sup>0++</sup> | #  |
|----|--------------------|-----------------|----------------|------------------|--------------------|-------------------|------|--------------------|--------------------|----------------|------------------|----------------|------------------|----|
| 1  | 114.091340         | 57.549308       |                |                  |                    |                   | L    |                    |                    |                |                  |                |                  | 16 |
| 2  | <b>201.123368</b>  | 101.065322      |                |                  | 183.112803         | 92.060039         | S    | 2076.908850        | <b>1038.958063</b> | 2059.882301    | 1030.444788      | 2058.898285    | 1029.952780      | 15 |
| 3  | 361.154017         | 181.080647      |                |                  | 343.143452         | 172.075364        | C    | 1989.876822        | <b>995.442049</b>  | 1972.850273    | 986.928775       | 1971.866257    | 986.436767       | 14 |
| 4  | 448.186045         | 224.596660      |                |                  | 430.175480         | 215.591378        | S    | 1829.846173        | 915.426725         | 1812.819624    | 906.913450       | 1811.835608    | 906.421442       | 13 |
| 5  | 611.249374         | 306.128325      |                |                  | 593.238809         | 297.123043        | Y    | 1742.814145        | 871.910711         | 1725.787596    | 863.397436       | 1724.803580    | 862.905428       | 12 |
| 6  | 698.281402         | 349.644339      |                |                  | 680.270837         | 340.639056        | S    | <b>1579.750816</b> | 790.379046         | 1562.724267    | 781.865772       | 1561.740251    | 781.373764       | 11 |
| 7  | <b>835.340314</b>  | 418.173795      |                |                  | 817.329749         | 409.168512        | H    | 1492.718788        | 746.863032         | 1475.692239    | 738.349758       | 1474.708223    | 737.857750       | 10 |
| 8  | 1021.419627        | 511.213452      |                |                  | 1003.409062        | 502.208169        | W    | <b>1355.659876</b> | 678.333576         | 1338.633327    | 669.820302       | 1337.649311    | 669.328294       | 9  |
| 9  | <b>1108.451655</b> | 554.729466      |                |                  | 1090.441090        | 545.724183        | S    | <b>1169.580563</b> | 585.293920         | 1152.554014    | 576.780645       | 1151.569998    | 576.288637       | 8  |
| 10 | <b>1179.488769</b> | 590.248023      |                |                  | <b>1161.478204</b> | <b>581.242740</b> | A    | <b>1082.548535</b> | 541.777906         | 1065.521986    | 533.264631       |                |                  | 7  |
| 11 | <b>1276.541533</b> | 638.774405      |                |                  | 1258.530968        | 629.769122        | P    | <b>1011.511421</b> | <b>506.259349</b>  | 994.484872     | 497.746074       |                |                  | 6  |
| 12 | <b>1347.578647</b> | 674.292962      |                |                  | 1329.568082        | 665.287679        | A    | <b>914.458657</b>  | 457.732967         | 897.432108     | 449.219692       |                |                  | 5  |
| 13 | 1444.631411        | 722.819344      |                |                  | 1426.620846        | 713.814061        | P    | <b>843.421543</b>  | 422.214410         | 826.394994     | 413.701135       |                |                  | 4  |
| 14 | 1883.856737        | 942.432007      | 1866.830188    | 933.918732       | 1865.846172        | 933.426724        | Q    | 746.368779         | 373.688028         | 729.342230     | 365.174753       |                |                  | 3  |
| 15 | 2043.887386        | 1022.447331     | 2026.860837    | 1013.934057      | 2025.876821        | 1013.442049       | C    | <b>307.143453</b>  | 154.075365         | 290.116904     | 145.562090       |                |                  | 2  |
| 16 |                    |                 |                |                  |                    |                   | K    | <b>147.112804</b>  | 74.060040          | 130.086255     | 65.546766        |                |                  | 1  |

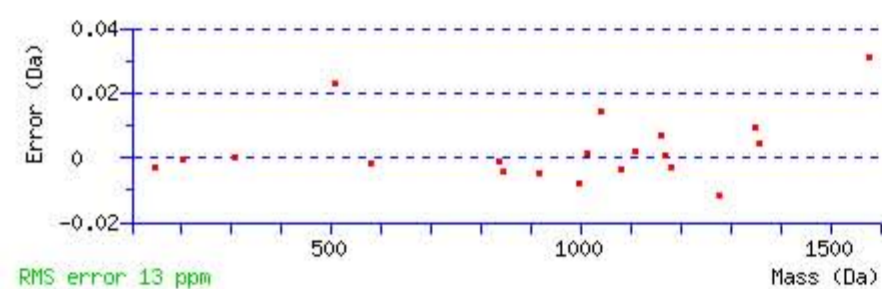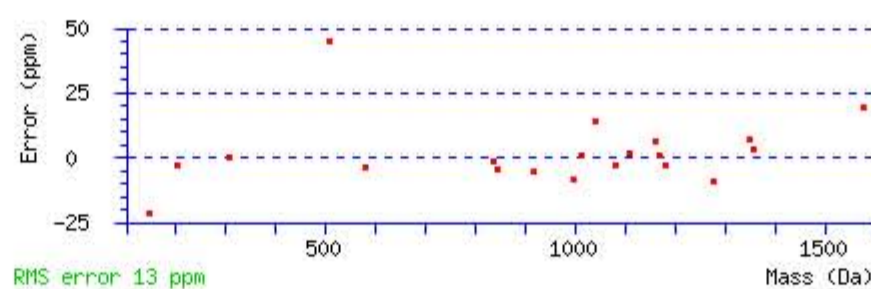

NCBI BLAST search of **LSCSYSHWSAPAPQCK**

(Parameters: blastp, nr protein database, expect=20000, no filter, PAM30)

Other BLAST [web gateways](#)

## All matches to this query

| Score | Mr(calc):   | Delta    | Sequence                         |
|-------|-------------|----------|----------------------------------|
| 30.9  | 2188.985626 | 0.000506 | <a href="#">LSCSYSHWSAPAPQCK</a> |

Mascot: <http://www.matrixscience.com/>



# MASCOT Search Results

## Peptide View

MS/MS Fragmentation of **WTPYQGCEALCCPEPK**

Found in **C4BPA\_HUMAN**, C4b-binding protein alpha chain OS=Homo sapiens GN=C4BPA PE=1 SV=2

Match to Query 53115: 2306.018952 from(769.680260,3+) rtinseconds(2114) index(37103)

Title: Locus:1.1.1.3155.20 File:"2013-07-02 CLN FXIII 60 min 2nd F 3.wiff"

Data file C:\Program Files (x86)\Matrix Science\Mascot Daemon\mgf5 FXIII 60 min 2nd\mascot\_daemon\_merge.mgf

Click mouse within plot area to zoom in by factor of two about that point

Or, Plot from  to  Da

Label all possible matches  Label matches used for scoring

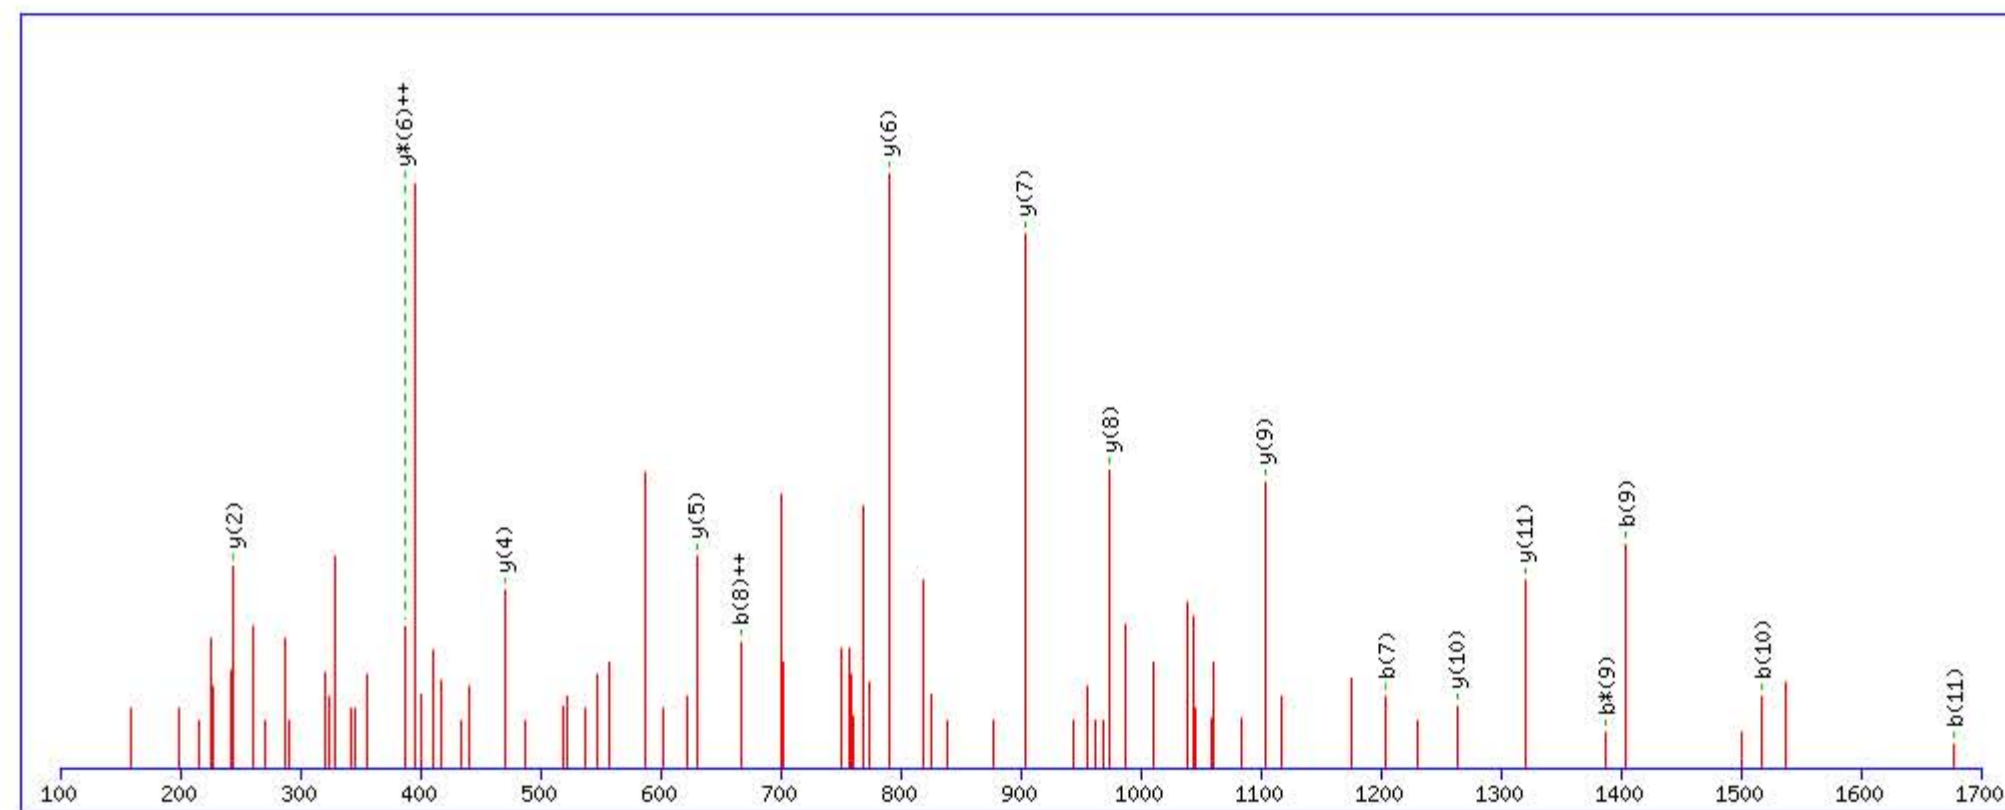

Monoisotopic mass of neutral peptide  $M_r(\text{calc})$ : 2305.999237

Fixed modifications: Carbamidomethyl (C) (apply to specified residues or termini only)

Variable modifications:

Q5 : Biotin:Thermo-21345 (Q)

Ions Score: 47 Expect: 0.00015

Matches : 16/166 fragment ions using 29 most intense peaks [\(help\)](#)

| #  | b                  | b <sup>++</sup>   | b <sup>*</sup>     | b <sup>+++</sup> | b <sup>0</sup> | b <sup>0++</sup> | Seq. | y                  | y <sup>++</sup> | y <sup>*</sup> | y <sup>+++</sup>  | y <sup>0</sup> | y <sup>0++</sup> | #  |
|----|--------------------|-------------------|--------------------|------------------|----------------|------------------|------|--------------------|-----------------|----------------|-------------------|----------------|------------------|----|
| 1  | 187.086589         | 94.046932         |                    |                  |                |                  | W    |                    |                 |                |                   |                |                  | 16 |
| 2  | 288.134268         | 144.570772        |                    |                  | 270.123703     | 135.565490       | T    | 2120.927205        | 1060.967240     | 2103.900656    | 1052.453966       | 2102.916640    | 1051.961958      | 15 |
| 3  | 385.187032         | 193.097154        |                    |                  | 367.176467     | 184.091872       | P    | 2019.879526        | 1010.443401     | 2002.852977    | 1001.930127       | 2001.868961    | 1001.438119      | 14 |
| 4  | 548.250361         | 274.628819        |                    |                  | 530.239796     | 265.623536       | Y    | 1922.826762        | 961.917019      | 1905.800213    | 953.403745        | 1904.816197    | 952.911737       | 13 |
| 5  | 987.475687         | 494.241482        | 970.449138         | 485.728207       | 969.465122     | 485.236199       | Q    | 1759.763433        | 880.385355      | 1742.736884    | 871.872080        | 1741.752868    | 871.380072       | 12 |
| 6  | 1044.497151        | 522.752214        | 1027.470602        | 514.238939       | 1026.486586    | 513.746931       | G    | <b>1320.538107</b> | 660.772692      | 1303.511558    | 652.259417        | 1302.527542    | 651.767409       | 11 |
| 7  | <b>1204.527800</b> | 602.767538        | 1187.501251        | 594.254264       | 1186.517235    | 593.762256       | C    | <b>1263.516643</b> | 632.261960      | 1246.490094    | 623.748685        | 1245.506078    | 623.256677       | 10 |
| 8  | 1333.570393        | <b>667.288835</b> | 1316.543844        | 658.775560       | 1315.559828    | 658.283552       | E    | <b>1103.485994</b> | 552.246635      | 1086.459445    | 543.733361        | 1085.475429    | 543.241353       | 9  |
| 9  | <b>1404.607507</b> | 702.807392        | <b>1387.580958</b> | 694.294117       | 1386.596942    | 693.802109       | A    | <b>974.443401</b>  | 487.725339      | 957.416852     | 479.212064        | 956.432836     | 478.720056       | 8  |
| 10 | <b>1517.691571</b> | 759.349424        | 1500.665022        | 750.836149       | 1499.681006    | 750.344141       | L    | <b>903.406287</b>  | 452.206782      | 886.379738     | 443.693507        | 885.395722     | 443.201499       | 7  |
| 11 | <b>1677.722220</b> | 839.364748        | 1660.695671        | 830.851474       | 1659.711655    | 830.359466       | C    | <b>790.322223</b>  | 395.664750      | 773.295674     | <b>387.151475</b> | 772.311658     | 386.659467       | 6  |
| 12 | 1837.752869        | 919.380073        | 1820.726320        | 910.866798       | 1819.742304    | 910.374790       | C    | <b>630.291574</b>  | 315.649425      | 613.265025     | 307.136151        | 612.281009     | 306.644143       | 5  |
| 13 | 1934.805633        | 967.906455        | 1917.779084        | 959.393180       | 1916.795068    | 958.901172       | P    | <b>470.260925</b>  | 235.634101      | 453.234376     | 227.120826        | 452.250360     | 226.628818       | 4  |
| 14 | 2063.848226        | 1032.427751       | 2046.821677        | 1023.914477      | 2045.837661    | 1023.422469      | E    | 373.208161         | 187.107719      | 356.181612     | 178.594444        | 355.197596     | 178.102436       | 3  |
| 15 | 2160.900990        | 1080.954133       | 2143.874441        | 1072.440858      | 2142.890425    | 1071.948850      | P    | <b>244.165568</b>  | 122.586422      | 227.139019     | 114.073148        |                |                  | 2  |
| 16 |                    |                   |                    |                  |                |                  | K    | 147.112804         | 74.060040       | 130.086255     | 65.546765         |                |                  | 1  |

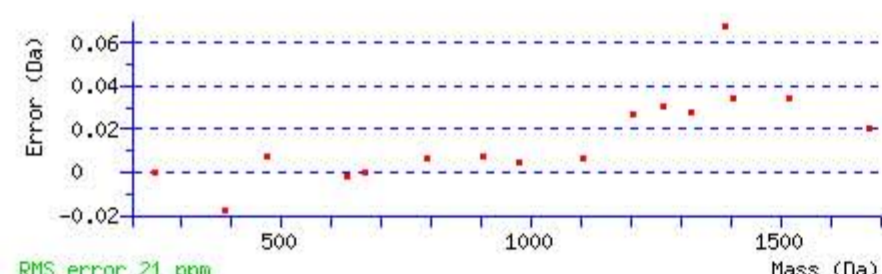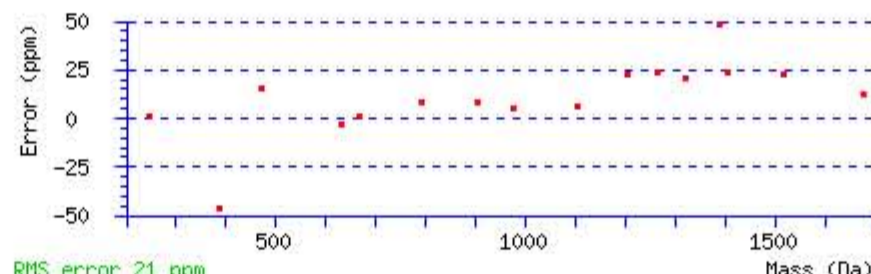

NCBI BLAST search of **WTPYQGCEALCCPEPK**

(Parameters: blastp, nr protein database, expect=20000, no filter, PAM30)

Other BLAST [web gateways](#)

All matches to this query

| Score | $M_r(\text{calc})$ | Delta    | Sequence                         |
|-------|--------------------|----------|----------------------------------|
| 46.7  | 2305.999237        | 0.019715 | <a href="#">WTPYQGCEALCCPEPK</a> |

Mascot: <http://www.matrixscience.com/>



# MASCOT Search Results

## Peptide View

MS/MS Fragmentation of **EVEGQILGTYVCIK**

Found in **C4BPB\_HUMAN**, C4b-binding protein beta chain OS=Homo sapiens GN=C4BPB PE=1 SV=1

Match to Query 44915: 1919.003468 from(960.509010,2+) rtinseconds(2470) index(39236)

Title: Locus:1.1.1.3279.26 File:"2013-07-02 CLN FXIII 60 min 2nd F 3.wiff"

Data file C:\Program Files (x86)\Matrix Science\Mascot Daemon\mgf5 FXIII 60 min 2nd\mascot\_daemon\_merge.mgf

Click mouse within plot area to zoom in by factor of two about that point

Or, Plot from  to  Da

Label all possible matches  Label matches used for scoring

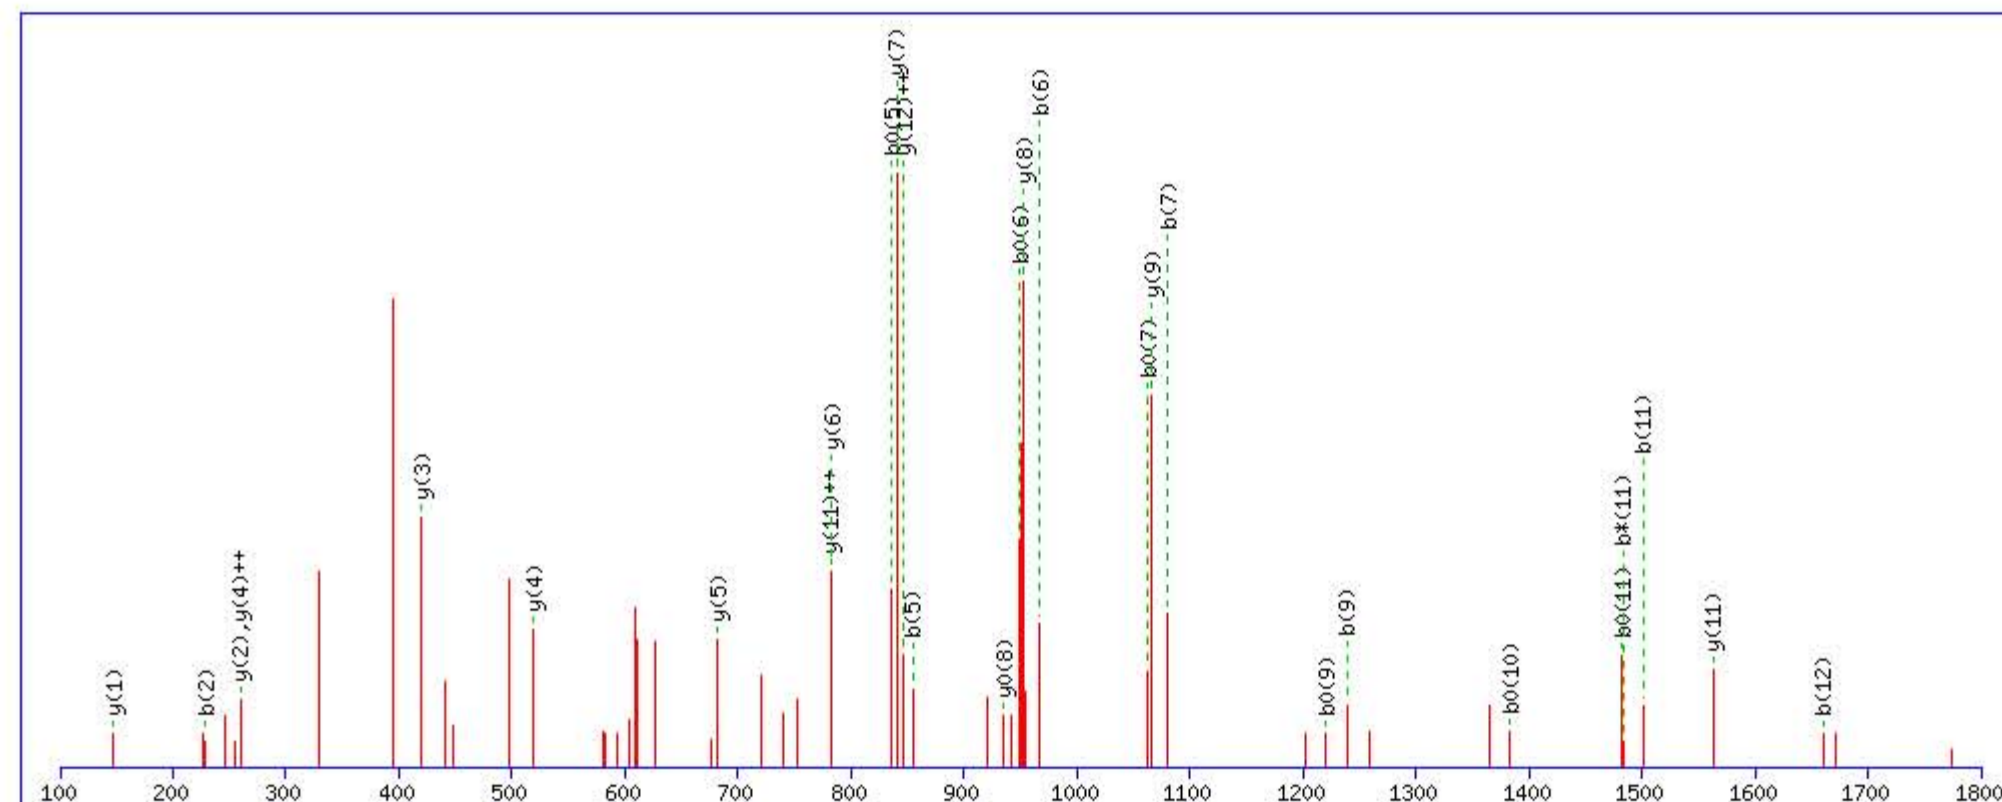

Monoisotopic mass of neutral peptide Mr(calc): 1918.989639

Fixed modifications: Carbamidomethyl (C) (apply to specified residues or termini only)

Variable modifications:

Q5 : Biotin:Thermo-21345 (Q)

Ions Score: 56 Expect: 7.2e-005

Matches : 28/138 fragment ions using 53 most intense peaks [\(help\)](#)

| #  | b                  | b <sup>++</sup> | b <sup>*</sup>     | b <sup>*++</sup> | b <sup>0</sup>     | b <sup>0++</sup> | Seq. | y                  | y <sup>++</sup>   | y <sup>*</sup> | y <sup>*++</sup> | y <sup>0</sup>    | y <sup>0++</sup> | #  |
|----|--------------------|-----------------|--------------------|------------------|--------------------|------------------|------|--------------------|-------------------|----------------|------------------|-------------------|------------------|----|
| 1  | 130.049869         | 65.528572       |                    |                  | 112.039304         | 56.523290        | E    |                    |                   |                |                  |                   |                  | 14 |
| 2  | <b>229.118283</b>  | 115.062780      |                    |                  | 211.107718         | 106.057497       | V    | 1790.954328        | 895.980802        | 1773.927779    | 887.467528       | 1772.943763       | 886.975520       | 13 |
| 3  | 358.160876         | 179.584076      |                    |                  | 340.150311         | 170.578794       | E    | 1691.885914        | <b>846.446595</b> | 1674.859365    | 837.933321       | 1673.875349       | 837.441313       | 12 |
| 4  | 415.182340         | 208.094808      |                    |                  | 397.171775         | 199.089526       | G    | <b>1562.843321</b> | <b>781.925299</b> | 1545.816772    | 773.412024       | 1544.832756       | 772.920016       | 11 |
| 5  | <b>854.407666</b>  | 427.707471      | 837.381117         | 419.194197       | <b>836.397101</b>  | 418.702189       | Q    | 1505.821857        | 753.414567        | 1488.795308    | 744.901292       | 1487.811292       | 744.409284       | 10 |
| 6  | <b>967.491730</b>  | 484.249503      | 950.465181         | 475.736229       | <b>949.481165</b>  | 475.244221       | I    | <b>1066.596531</b> | 533.801904        | 1049.569982    | 525.288629       | 1048.585966       | 524.796621       | 9  |
| 7  | <b>1080.575794</b> | 540.791535      | 1063.549245        | 532.278261       | <b>1062.565229</b> | 531.786253       | L    | <b>953.512467</b>  | 477.259872        | 936.485918     | 468.746597       | <b>935.501902</b> | 468.254589       | 8  |
| 8  | 1137.597258        | 569.302267      | 1120.570709        | 560.788993       | 1119.586693        | 560.296985       | G    | <b>840.428403</b>  | 420.717840        | 823.401854     | 412.204565       | 822.417838        | 411.712557       | 7  |
| 9  | <b>1238.644937</b> | 619.826107      | 1221.618388        | 611.312832       | <b>1220.634372</b> | 610.820824       | T    | <b>783.406939</b>  | 392.207108        | 766.380390     | 383.693833       | 765.396374        | 383.201825       | 6  |
| 10 | 1401.708266        | 701.357771      | 1384.681717        | 692.844497       | <b>1383.697701</b> | 692.352489       | Y    | <b>682.359260</b>  | 341.683268        | 665.332711     | 333.169994       |                   |                  | 5  |
| 11 | <b>1500.776680</b> | 750.891978      | <b>1483.750131</b> | 742.378704       | <b>1482.766115</b> | 741.886696       | V    | <b>519.295931</b>  | <b>260.151604</b> | 502.269382     | 251.638329       |                   |                  | 4  |
| 12 | <b>1660.807329</b> | 830.907303      | 1643.780780        | 822.394028       | 1642.796764        | 821.902020       | C    | <b>420.227517</b>  | 210.617396        | 403.200968     | 202.104122       |                   |                  | 3  |
| 13 | 1773.891393        | 887.449335      | 1756.864844        | 878.936060       | 1755.880828        | 878.444052       | I    | <b>260.196868</b>  | 130.602072        | 243.170319     | 122.088797       |                   |                  | 2  |
| 14 |                    |                 |                    |                  |                    |                  | K    | <b>147.112804</b>  | 74.060040         | 130.086255     | 65.546765        |                   |                  | 1  |

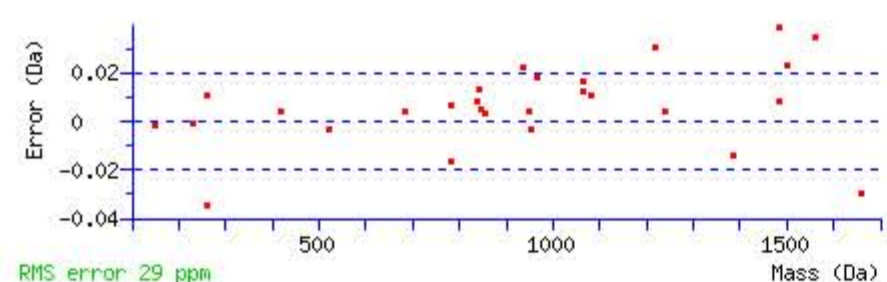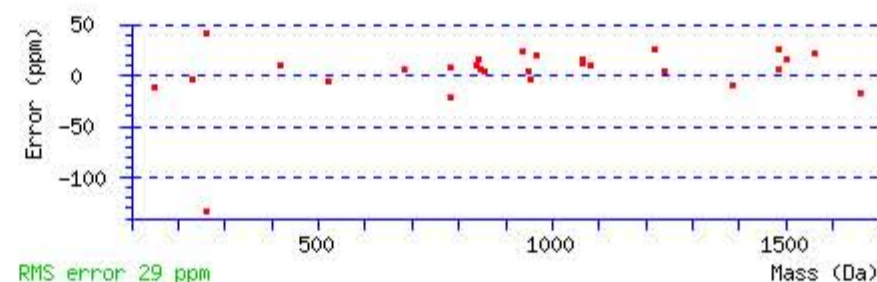

NCBI BLAST search of **EVEGQILGTYVCIK**

(Parameters: blastp, nr protein database, expect=20000, no filter, PAM30)

Other BLAST [web gateways](#)

All matches to this query

| Score | Mr(calc):   | Delta    | Sequence                       |
|-------|-------------|----------|--------------------------------|
| 55.5  | 1918.989639 | 0.013829 | <a href="#">EVEGQILGTYVCIK</a> |

Mascot: <http://www.matrixscience.com/>



# MASCOT SCIENCE Mascot Search Results

## Peptide View

MS/MS Fragmentation of **NLCEAMENFMQQLK**

Found in **C4BPB\_HUMAN**, C4b-binding protein beta chain OS=Homo sapiens GN=C4BPB PE=1 SV=1

Match to Query 48688: 2065.953492 from(689.658440,3+) rtinseconds(3093) index(43559)

Title: Locus:1.1.1.3493.6 File:"2013-07-02 CLN FXIII 60 min 2nd F 3.wiff"

Data file C:\Program Files (x86)\Matrix Science\Mascot Daemon\mgf\5 FXIII 60 min 2nd\mascot\_daemon\_merge.mgf

Click mouse within plot area to zoom in by factor of two about that point

Or, Plot from  to  Da

Label all possible matches  Label matches used for scoring

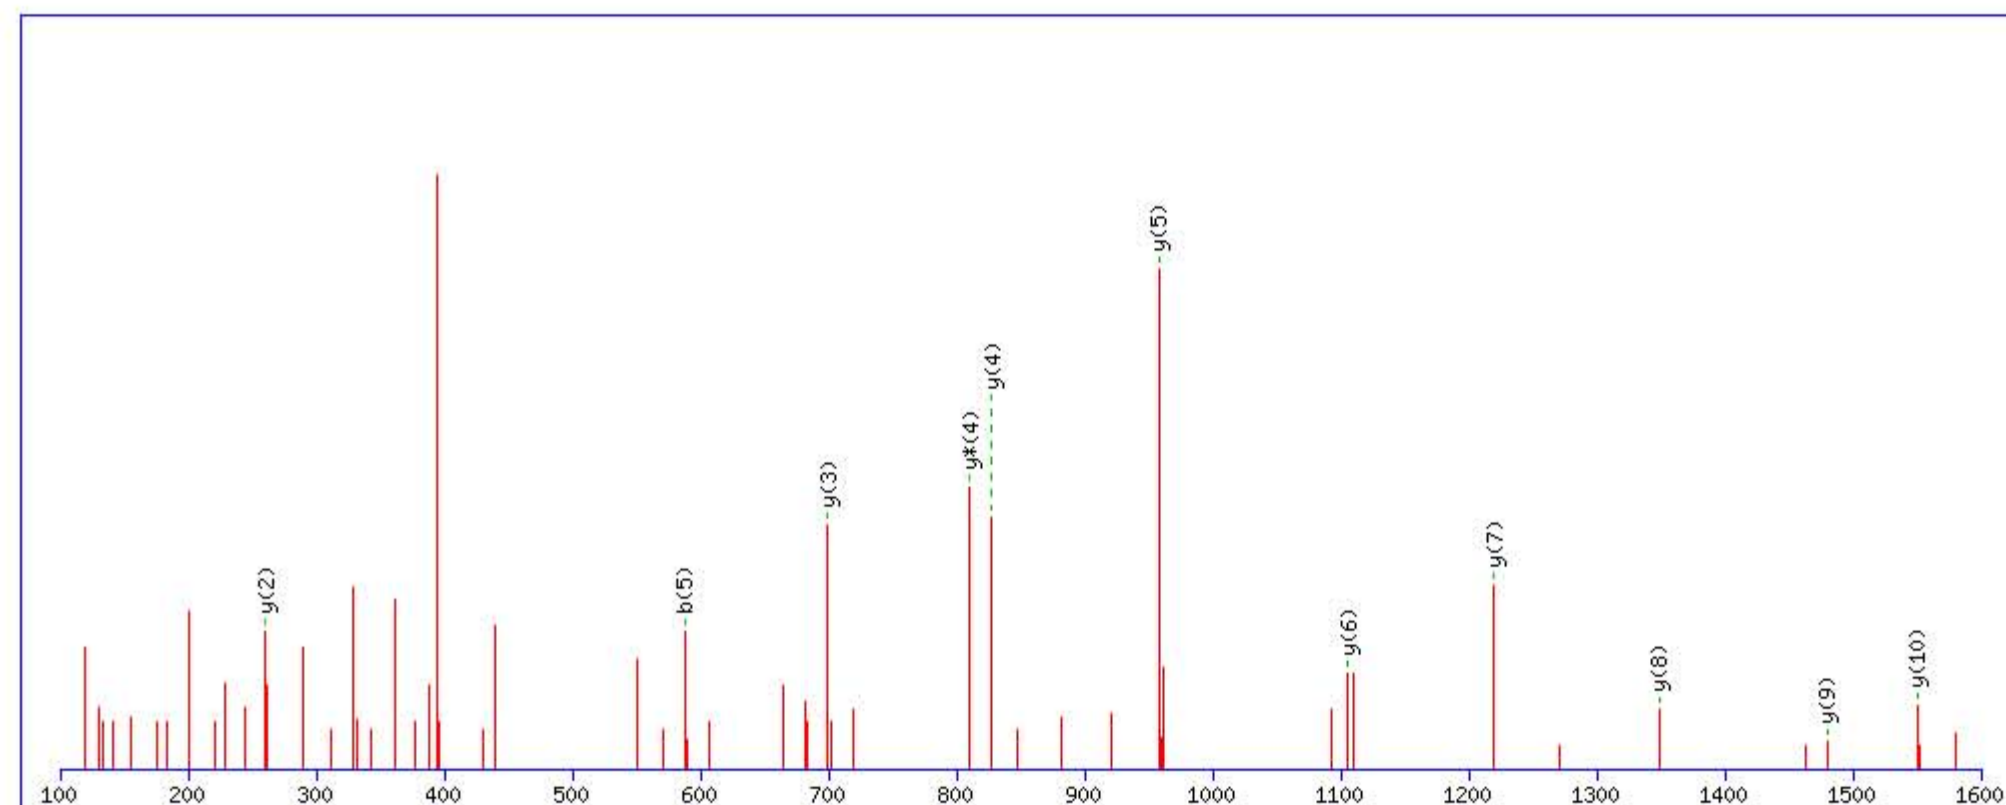

Monoisotopic mass of neutral peptide Mr(calc): 2065.945709

Fixed modifications: Carbamidomethyl (C) (apply to specified residues or termini only)

Variable modifications:

Q12 : Biotin:Thermo-21345 (Q)

Ions Score: 65 Expect: 4e-006

Matches : 11/136 fragment ions using 15 most intense peaks [\(help\)](#)

| #  | b                 | b <sup>++</sup> | b <sup>+</sup> | b <sup>+++</sup> | b <sup>0</sup> | b <sup>0++</sup> | Seq. | y                  | y <sup>++</sup> | y <sup>+</sup>    | y <sup>+++</sup> | y <sup>0</sup> | y <sup>0++</sup> | #  |
|----|-------------------|-----------------|----------------|------------------|----------------|------------------|------|--------------------|-----------------|-------------------|------------------|----------------|------------------|----|
| 1  | 115.050203        | 58.028740       | 98.023654      | 49.515465        |                |                  | N    |                    |                 |                   |                  |                |                  | 14 |
| 2  | 228.134267        | 114.570771      | 211.107718     | 106.057497       |                |                  | L    | 1952.910096        | 976.958686      | 1935.883547       | 968.445412       | 1934.899531    | 967.953404       | 13 |
| 3  | 388.164916        | 194.586096      | 371.138367     | 186.072822       |                |                  | C    | 1839.826032        | 920.416654      | 1822.799483       | 911.903380       | 1821.815467    | 911.411371       | 12 |
| 4  | 517.207509        | 259.107393      | 500.180960     | 250.594118       | 499.196944     | 250.102110       | E    | 1679.795383        | 840.401329      | 1662.768834       | 831.888055       | 1661.784818    | 831.396047       | 11 |
| 5  | <b>588.244623</b> | 294.625950      | 571.218074     | 286.112675       | 570.234058     | 285.620667       | A    | <b>1550.752790</b> | 775.880033      | 1533.726241       | 767.366759       | 1532.742225    | 766.874751       | 10 |
| 6  | 719.285108        | 360.146192      | 702.258559     | 351.632918       | 701.274543     | 351.140910       | M    | <b>1479.715676</b> | 740.361476      | 1462.689127       | 731.848202       | 1461.705111    | 731.356194       | 9  |
| 7  | 848.327701        | 424.667489      | 831.301152     | 416.154214       | 830.317136     | 415.662206       | E    | <b>1348.675191</b> | 674.841234      | 1331.648642       | 666.327959       | 1330.664626    | 665.835951       | 8  |
| 8  | 962.370628        | 481.688952      | 945.344079     | 473.175678       | 944.360063     | 472.683670       | N    | <b>1219.632598</b> | 610.319937      | 1202.606049       | 601.806663       |                |                  | 7  |
| 9  | 1109.439042       | 555.223159      | 1092.412493    | 546.709885       | 1091.428477    | 546.217876       | F    | <b>1105.589671</b> | 553.298474      | 1088.563122       | 544.785199       |                |                  | 6  |
| 10 | 1240.479527       | 620.743402      | 1223.452978    | 612.230127       | 1222.468962    | 611.738119       | M    | <b>958.521257</b>  | 479.764267      | 941.494708        | 471.250992       |                |                  | 5  |
| 11 | 1368.538105       | 684.772690      | 1351.511556    | 676.259416       | 1350.527540    | 675.767408       | Q    | <b>827.480772</b>  | 414.244024      | <b>810.454223</b> | 405.730750       |                |                  | 4  |
| 12 | 1807.763431       | 904.385354      | 1790.736882    | 895.872079       | 1789.752866    | 895.380071       | Q    | <b>699.422194</b>  | 350.214735      | 682.395645        | 341.701461       |                |                  | 3  |
| 13 | 1920.847495       | 960.927386      | 1903.820946    | 952.414111       | 1902.836930    | 951.922103       | L    | <b>260.196868</b>  | 130.602072      | 243.170319        | 122.088797       |                |                  | 2  |
| 14 |                   |                 |                |                  |                |                  | K    | 147.112804         | 74.060040       | 130.086255        | 65.546765        |                |                  | 1  |

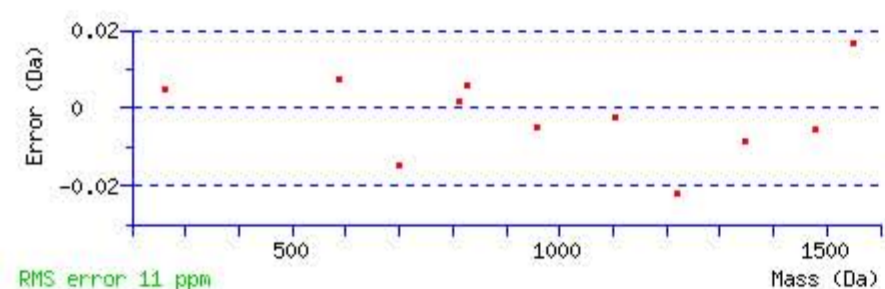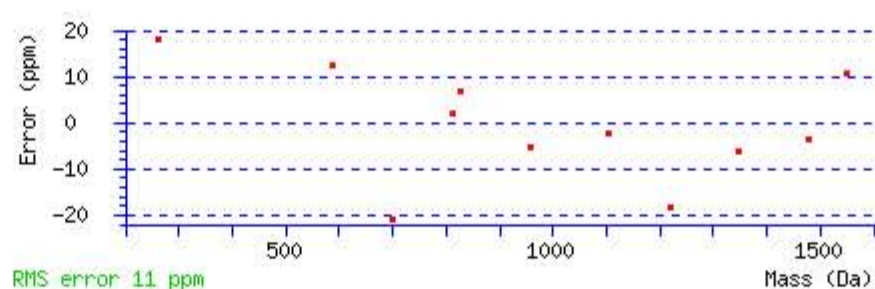

NCBI BLAST search of **NLCEAMENFMQQLK**

(Parameters: blastp, nr protein database, expect=20000, no filter, PAM30)

Other BLAST [web gateways](#)

All matches to this query

| Score | Mr(calc):   | Delta    | Sequence                       |
|-------|-------------|----------|--------------------------------|
| 65.3  | 2065.945709 | 0.007783 | <a href="#">NLCEAMENFMQQLK</a> |
| 50.9  | 2065.945709 | 0.007783 | <a href="#">NLCEAMENFMQQLK</a> |

Mascot: <http://www.matrixscience.com/>



# MASCOT Search Results

## Peptide View

MS/MS Fragmentation of **SQCLEDHTWAPFPICK**  
 Found in **C4BPB\_HUMAN**, C4b-binding protein beta chain OS=Homo sapiens GN=C4BPB PE=1 SV=1

Match to Query 54240: 2396.131002 from(799.717610,3+) rtinseconds(2326) index(38370)  
 Title: Locus:1.1.1.3229.18 File:"2013-07-02 CLN FXIII 60 min 2nd F 3.wiff"  
 Data file C:\Program Files (x86)\Matrix Science\Mascot Daemon\mgf5 FXIII 60 min 2nd\mascot\_daemon\_merge.mgf

Click mouse within plot area to zoom in by factor of two about that point  
 Or, Plot from  to  Da   
 Label all possible matches  Label matches used for scoring

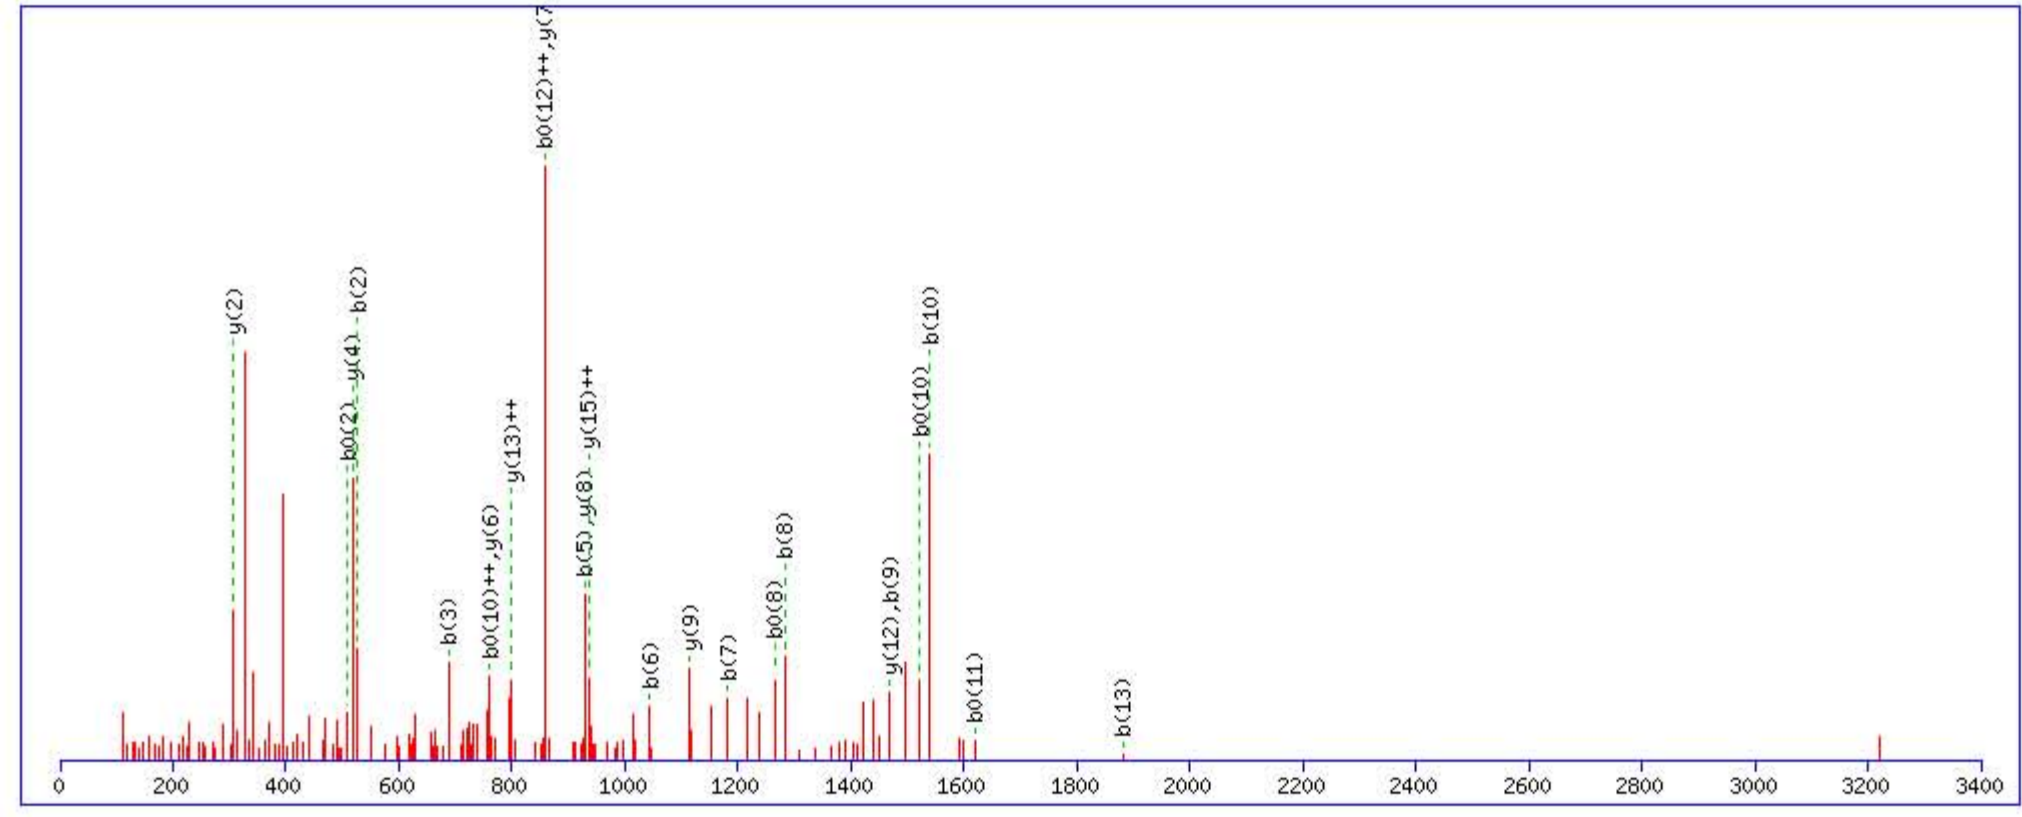

Monoisotopic mass of neutral peptide Mr(calc): 2396.111572  
 Fixed modifications: Carbamidomethyl (C) (apply to specified residues or termini only)  
 Variable modifications:  
 Q2 : Biotin:Thermo-21345 (Q)  
 Ions Score: 56 Expect: 5.5e-005  
 Matches : 24/172 fragment ions using 32 most intense peaks [\(help\)](#)

| #  | b                  | b <sup>++</sup> | b <sup>*</sup> | b <sup>*++</sup> | b <sup>0</sup>     | b <sup>0++</sup>  | Seq. | y                  | y <sup>++</sup>   | y <sup>*</sup> | y <sup>*++</sup> | y <sup>0</sup> | y <sup>0++</sup> | #  |
|----|--------------------|-----------------|----------------|------------------|--------------------|-------------------|------|--------------------|-------------------|----------------|------------------|----------------|------------------|----|
| 1  | 88.039304          | 44.523290       |                |                  | 70.028739          | 35.518008         | S    |                    |                   |                |                  |                |                  | 17 |
| 2  | <b>527.264630</b>  | 264.135953      | 510.238081     | 255.622679       | <b>509.254065</b>  | 255.130671        | Q    | 2310.086816        | 1155.547046       | 2293.060267    | 1147.033771      | 2292.076251    | 1146.541763      | 16 |
| 3  | <b>687.295279</b>  | 344.151278      | 670.268730     | 335.638003       | 669.284714         | 335.145995        | C    | 1870.861490        | <b>935.934383</b> | 1853.834941    | 927.421109       | 1852.850925    | 926.929101       | 15 |
| 4  | 800.379343         | 400.693310      | 783.352794     | 392.180035       | 782.368778         | 391.688027        | L    | 1710.830841        | 855.919058        | 1693.804292    | 847.405784       | 1692.820276    | 846.913776       | 14 |
| 5  | <b>929.421936</b>  | 465.214606      | 912.395387     | 456.701332       | 911.411371         | 456.209324        | E    | 1597.746777        | <b>799.377026</b> | 1580.720228    | 790.863752       | 1579.736212    | 790.371744       | 13 |
| 6  | <b>1044.448879</b> | 522.728078      | 1027.422330    | 514.214803       | 1026.438314        | 513.722795        | D    | <b>1468.704184</b> | 734.855730        | 1451.677635    | 726.342456       | 1450.693619    | 725.850447       | 12 |
| 7  | <b>1181.507791</b> | 591.257534      | 1164.481242    | 582.744259       | 1163.497226        | 582.252251        | H    | 1353.677241        | 677.342258        | 1336.650692    | 668.828984       | 1335.666676    | 668.336976       | 11 |
| 8  | <b>1282.555470</b> | 641.781373      | 1265.528921    | 633.268099       | <b>1264.544905</b> | 632.776091        | T    | 1216.618329        | 608.812802        | 1199.591780    | 600.299528       | 1198.607764    | 599.807520       | 10 |
| 9  | <b>1468.634783</b> | 734.821030      | 1451.608234    | 726.307755       | 1450.624218        | 725.815747        | W    | <b>1115.570650</b> | 558.288963        | 1098.544101    | 549.775689       |                |                  | 9  |
| 10 | <b>1539.671897</b> | 770.339587      | 1522.645348    | 761.826312       | <b>1521.661332</b> | <b>761.334304</b> | A    | <b>929.491337</b>  | 465.249306        | 912.464788     | 456.736032       |                |                  | 8  |
| 11 | 1636.724661        | 818.865969      | 1619.698112    | 810.352694       | <b>1618.714096</b> | 809.860686        | P    | <b>858.454223</b>  | 429.730750        | 841.427674     | 421.217475       |                |                  | 7  |
| 12 | 1733.777425        | 867.392351      | 1716.750876    | 858.879076       | 1715.766860        | <b>858.387068</b> | P    | <b>761.401459</b>  | 381.204367        | 744.374910     | 372.691093       |                |                  | 6  |
| 13 | <b>1880.845839</b> | 940.926558      | 1863.819290    | 932.413283       | 1862.835274        | 931.921275        | F    | 664.348695         | 332.677985        | 647.322146     | 324.164711       |                |                  | 5  |
| 14 | 1977.898603        | 989.452940      | 1960.872054    | 980.939665       | 1959.888038        | 980.447657        | P    | <b>517.280281</b>  | 259.143778        | 500.253732     | 250.630504       |                |                  | 4  |
| 15 | 2090.982667        | 1045.994971     | 2073.956118    | 1037.481697      | 2072.972102        | 1036.989689       | I    | 420.227517         | 210.617396        | 403.200968     | 202.104122       |                |                  | 3  |
| 16 | 2251.013316        | 1126.010296     | 2233.986767    | 1117.497021      | 2233.002751        | 1117.005013       | C    | <b>307.143453</b>  | 154.075364        | 290.116904     | 145.562090       |                |                  | 2  |
| 17 |                    |                 |                |                  |                    |                   | K    | 147.112804         | 74.060040         | 130.086255     | 65.546765        |                |                  | 1  |

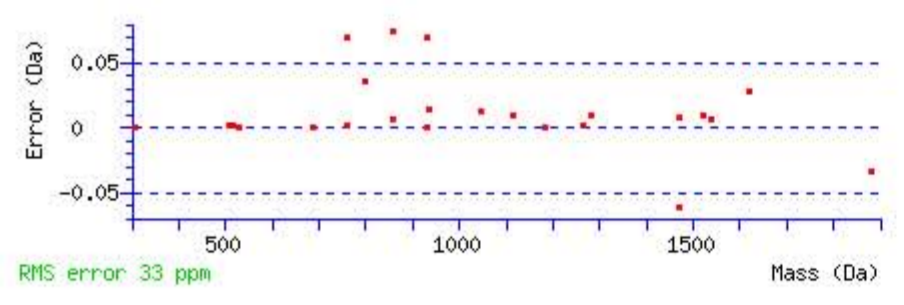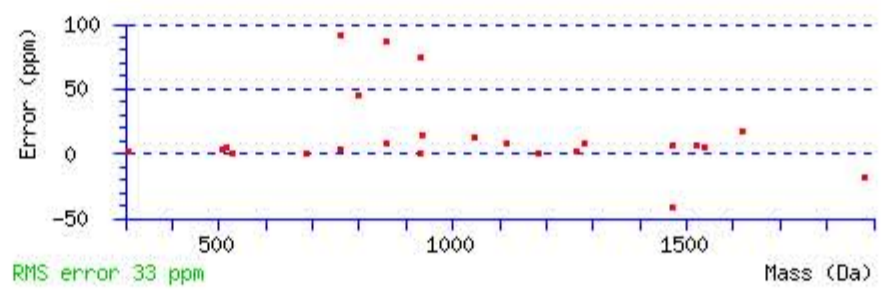

NCBI BLAST search of **SQCLEDHTWAPFPICK**  
 (Parameters: blastp, nr protein database, expect=20000, no filter, PAM30)  
 Other BLAST [web gateways](#)

### All matches to this query

| Score | Mr(calc):   | Delta    | Sequence                         |
|-------|-------------|----------|----------------------------------|
| 55.6  | 2396.111572 | 0.019430 | <a href="#">SQCLEDHTWAPFPICK</a> |



# MASCOT Search Results

## Peptide View

MS/MS Fragmentation of **DHLGFQVTWPDESK**

Found in **CPN2\_HUMAN**, Carboxypeptidase N subunit 2 OS=Homo sapiens GN=CPN2 PE=1 SV=3

Match to Query 26446: 1968.958872 from(657.326900,3+) rtinseconds(2305) index(38268)

Title: Locus:1.1.1.3222.10 File:"2013-07-02 CLN FXIII 60 min 2nd F 3.wiff"

Data file C:\Program Files (x86)\Matrix Science\Mascot Daemon\mgf\5 FXIII 60 min 2nd\mascot\_daemon\_merge.mgf

Click mouse within plot area to zoom in by factor of two about that point

Or, Plot from  to  Da

Label all possible matches  Label matches used for scoring

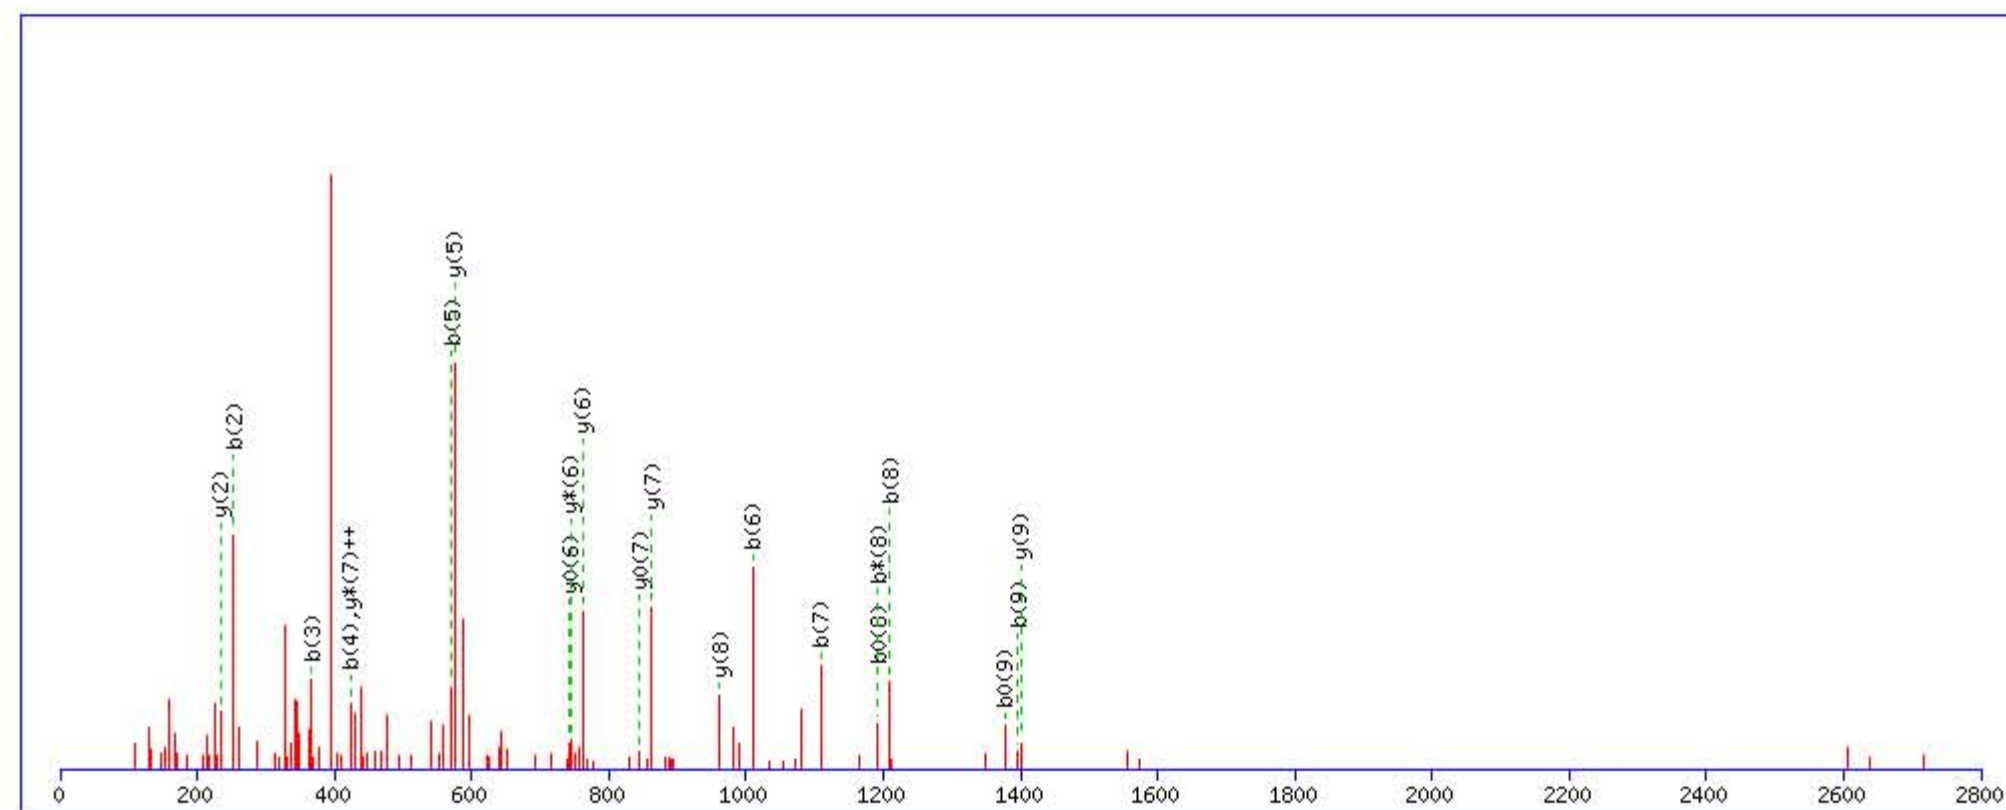

Monoisotopic mass of neutral peptide Mr(calc): 1968.940399

Fixed modifications: Carbamidomethyl (C) (apply to specified residues or termini only)

Variable modifications:

Q6 : Biotin:Thermo-21345 (Q)

Ions Score: 38 Expect: 0.0011

Matches : 21/144 fragment ions using 39 most intense peaks [\(help\)](#)

| #  | b                  | b <sup>++</sup> | b <sup>+</sup>     | b <sup>+++</sup> | b <sup>0</sup>     | b <sup>0++</sup> | Seq. | y                  | y <sup>++</sup> | y <sup>+</sup>    | y <sup>+++</sup>  | y <sup>0</sup>    | y <sup>0++</sup> | #  |
|----|--------------------|-----------------|--------------------|------------------|--------------------|------------------|------|--------------------|-----------------|-------------------|-------------------|-------------------|------------------|----|
| 1  | 116.034219         | 58.520748       |                    |                  | 98.023654          | 49.515465        | D    |                    |                 |                   |                   |                   |                  | 14 |
| 2  | <b>253.093131</b>  | 127.050203      |                    |                  | 235.082566         | 118.044921       | H    | 1854.920718        | 927.963997      | 1837.894169       | 919.450723        | 1836.910153       | 918.958715       | 13 |
| 3  | <b>366.177195</b>  | 183.592235      |                    |                  | 348.166630         | 174.586953       | L    | 1717.861806        | 859.434541      | 1700.835257       | 850.921267        | 1699.851241       | 850.429259       | 12 |
| 4  | <b>423.198659</b>  | 212.102967      |                    |                  | 405.188094         | 203.097685       | G    | 1604.777742        | 802.892509      | 1587.751193       | 794.379235        | 1586.767177       | 793.887227       | 11 |
| 5  | <b>570.267073</b>  | 285.637175      |                    |                  | 552.256508         | 276.631892       | F    | 1547.756278        | 774.381777      | 1530.729729       | 765.868503        | 1529.745713       | 765.376495       | 10 |
| 6  | <b>1009.492399</b> | 505.249838      | 992.465850         | 496.736563       | 991.481834         | 496.244555       | Q    | <b>1400.687864</b> | 700.847570      | 1383.661315       | 692.334296        | 1382.677299       | 691.842288       | 9  |
| 7  | <b>1108.560813</b> | 554.784045      | 1091.534264        | 546.270770       | 1090.550248        | 545.778762       | V    | <b>961.462538</b>  | 481.234907      | 944.435989        | 472.721633        | 943.451973        | 472.229625       | 8  |
| 8  | <b>1209.608492</b> | 605.307884      | <b>1192.581943</b> | 596.794610       | <b>1191.597927</b> | 596.302602       | T    | <b>862.394124</b>  | 431.700700      | 845.367575        | <b>423.187426</b> | <b>844.383559</b> | 422.695418       | 7  |
| 9  | <b>1395.687805</b> | 698.347541      | 1378.661256        | 689.834266       | <b>1377.677240</b> | 689.342258       | W    | <b>761.346445</b>  | 381.176861      | <b>744.319896</b> | 372.663586        | <b>743.335880</b> | 372.171578       | 6  |
| 10 | 1492.740569        | 746.873923      | 1475.714020        | 738.360648       | 1474.730004        | 737.868640       | P    | <b>575.267132</b>  | 288.137204      | 558.240583        | 279.623930        | 557.256567        | 279.131922       | 5  |
| 11 | 1607.767512        | 804.387394      | 1590.740963        | 795.874120       | 1589.756947        | 795.382112       | D    | 478.214368         | 239.610822      | 461.187819        | 231.097548        | 460.203803        | 230.605540       | 4  |
| 12 | 1736.810105        | 868.908691      | 1719.783556        | 860.395416       | 1718.799540        | 859.903408       | E    | 363.187425         | 182.097351      | 346.160876        | 173.584076        | 345.176860        | 173.092068       | 3  |
| 13 | 1823.842133        | 912.424705      | 1806.815584        | 903.911430       | 1805.831568        | 903.419422       | S    | <b>234.144832</b>  | 117.576054      | 217.118283        | 109.062780        | 216.134267        | 108.570772       | 2  |
| 14 |                    |                 |                    |                  |                    |                  | K    | 147.112804         | 74.060040       | 130.086255        | 65.546765         |                   |                  | 1  |

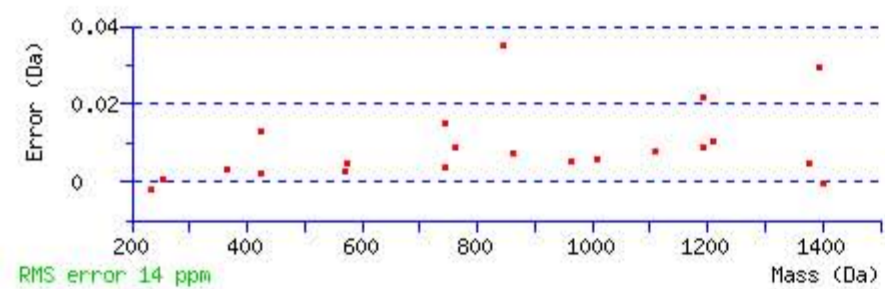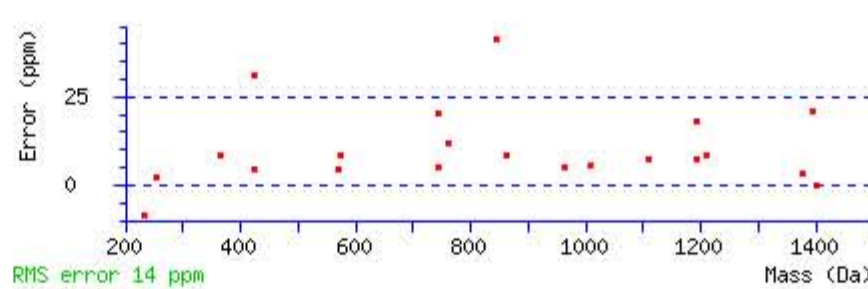

NCBI BLAST search of **DHLGFQVTWPDESK**

(Parameters: blastp, nr protein database, expect=20000, no filter, PAM30)

Other BLAST [web gateways](#)

All matches to this query

| Score | Mr(calc):   | Delta    | Sequence                           |
|-------|-------------|----------|------------------------------------|
| 37.9  | 1968.940399 | 0.018473 | <a href="#">DHLGFQVTWPDESK</a>     |
| 6.5   | 1968.949585 | 0.009287 | <a href="#">EGQMESVEAAMSSKTLKK</a> |

Mascot: <http://www.matrixscience.com/>



# MASCOT Search Results

## Peptide View

MS/MS Fragmentation of **SQCTYSNPEGTVVLACDQAQCR**

Found in **CPN2\_HUMAN**, Carboxypeptidase N subunit 2 OS=Homo sapiens GN=CPN2 PE=1 SV=3

Match to Query 60277: 2854.270512 from(952.430780,3+) rtinseconds(2039) index(36632)

Title: Locus:1.1.1.3129.20 File:"2013-07-02 CLN FXIII 60 min 2nd F 3.wiff"

Data file C:\Program Files (x86)\Matrix Science\Mascot Daemon\mgf5 FXIII 60 min 2nd\mascot\_daemon\_merge.mgf

Click mouse within plot area to zoom in by factor of two about that point

Or, Plot from  to  Da

Label all possible matches  Label matches used for scoring

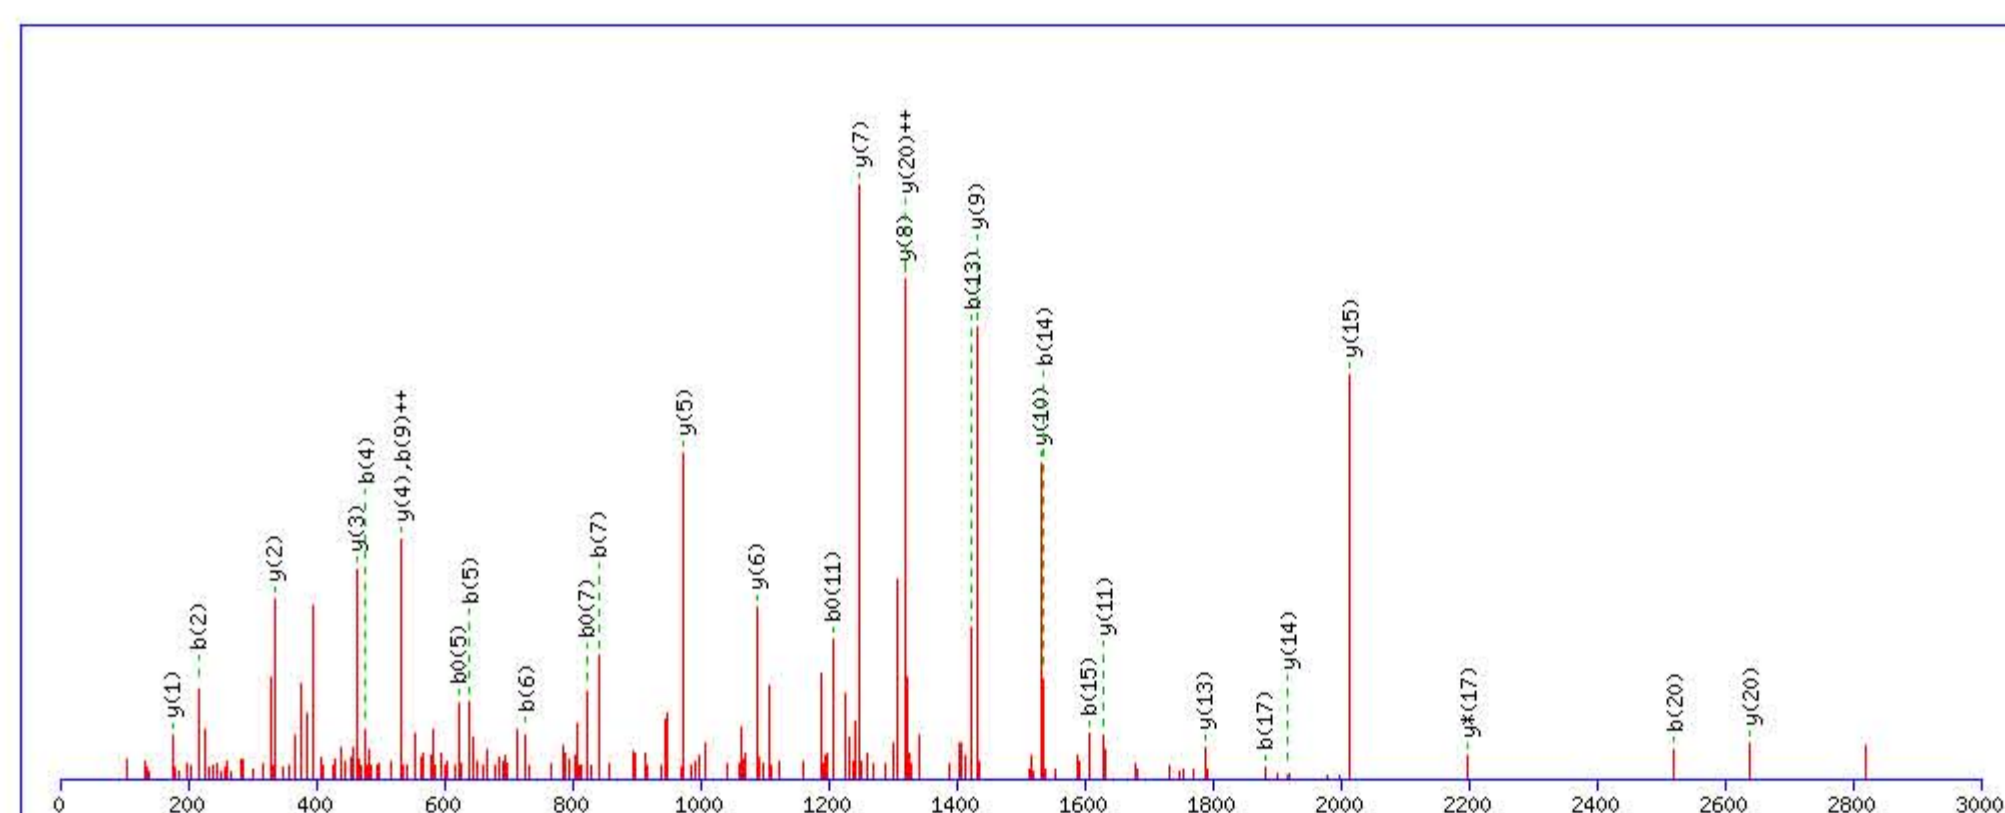

Monoisotopic mass of neutral peptide Mr(calc): 2854.250671

Fixed modifications: Carbamidomethyl (C) (apply to specified residues or termini only)

Variable modifications:

Q18 : Biotin:Thermo-21345 (Q)

Ions Score: 111 Expect: 5.1e-011

Matches : 31/240 fragment ions using 43 most intense peaks [\(help\)](#)

| #  | b                  | b <sup>++</sup>   | b <sup>*</sup> | b <sup>*++</sup> | b <sup>0</sup>     | b <sup>0++</sup> | Seq. | y                  | y <sup>++</sup>    | y <sup>*</sup>     | y <sup>*++</sup> | y <sup>0</sup> | y <sup>0++</sup> | #  |
|----|--------------------|-------------------|----------------|------------------|--------------------|------------------|------|--------------------|--------------------|--------------------|------------------|----------------|------------------|----|
| 1  | 88.039304          | 44.523290         |                |                  | 70.028739          | 35.518008        | S    |                    |                    |                    |                  |                |                  | 22 |
| 2  | <b>216.097882</b>  | 108.552579        | 199.071333     | 100.039305       | 198.087317         | 99.547296        | Q    | 2768.225907        | 1384.616591        | 2751.199358        | 1376.103317      | 2750.215342    | 1375.611309      | 21 |
| 3  | 376.128531         | 188.567904        | 359.101982     | 180.054629       | 358.117966         | 179.562621       | C    | <b>2640.167329</b> | <b>1320.587302</b> | 2623.140780        | 1312.074028      | 2622.156764    | 1311.582020      | 20 |
| 4  | <b>477.176210</b>  | 239.091743        | 460.149661     | 230.578469       | 459.165645         | 230.086461       | T    | 2480.136680        | 1240.571978        | 2463.110131        | 1232.058703      | 2462.126115    | 1231.566695      | 19 |
| 5  | <b>640.239539</b>  | 320.623408        | 623.212990     | 312.110133       | <b>622.228974</b>  | 311.618125       | Y    | 2379.089001        | 1190.048138        | 2362.062452        | 1181.534864      | 2361.078436    | 1181.042856      | 18 |
| 6  | <b>727.271567</b>  | 364.139422        | 710.245018     | 355.626147       | 709.261002         | 355.134139       | S    | 2216.025672        | 1108.516474        | <b>2198.999123</b> | 1100.003199      | 2198.015107    | 1099.511191      | 17 |
| 7  | <b>841.314494</b>  | 421.160885        | 824.287945     | 412.647611       | <b>823.303929</b>  | 412.155603       | N    | 2128.993644        | 1065.000460        | 2111.967095        | 1056.487185      | 2110.983079    | 1055.995177      | 16 |
| 8  | 938.367258         | 469.687267        | 921.340709     | 461.173993       | 920.356693         | 460.681985       | P    | <b>2014.950717</b> | 1007.978997        | 1997.924168        | 999.465722       | 1996.940152    | 998.973714       | 15 |
| 9  | 1067.409851        | <b>534.208564</b> | 1050.383302    | 525.695289       | 1049.399286        | 525.203281       | E    | <b>1917.897953</b> | 959.452615         | 1900.871404        | 950.939340       | 1899.887388    | 950.447332       | 14 |
| 10 | 1124.431315        | 562.719296        | 1107.404766    | 554.206021       | 1106.420750        | 553.714013       | G    | <b>1788.855360</b> | 894.931318         | 1771.828811        | 886.418044       | 1770.844795    | 885.926036       | 13 |
| 11 | 1225.478994        | 613.243135        | 1208.452445    | 604.729861       | <b>1207.468429</b> | 604.237853       | T    | 1731.833896        | 866.420586         | 1714.807347        | 857.907312       | 1713.823331    | 857.415304       | 12 |
| 12 | 1324.547408        | 662.777342        | 1307.520859    | 654.264068       | 1306.536843        | 653.772060       | V    | <b>1630.786217</b> | 815.896747         | 1613.759668        | 807.383472       | 1612.775652    | 806.891464       | 11 |
| 13 | <b>1423.615822</b> | 712.311549        | 1406.589273    | 703.798275       | 1405.605257        | 703.306267       | V    | <b>1531.717803</b> | 766.362540         | 1514.691254        | 757.849265       | 1513.707238    | 757.357257       | 10 |
| 14 | <b>1536.699886</b> | 768.853581        | 1519.673337    | 760.340307       | 1518.689321        | 759.848299       | L    | <b>1432.649389</b> | 716.828333         | 1415.622840        | 708.315058       | 1414.638824    | 707.823050       | 9  |
| 15 | <b>1607.737000</b> | 804.372138        | 1590.710451    | 795.858864       | 1589.726435        | 795.366856       | A    | <b>1319.565325</b> | 660.286301         | 1302.538776        | 651.773026       | 1301.554760    | 651.281018       | 8  |
| 16 | 1767.767649        | 884.387463        | 1750.741100    | 875.874188       | 1749.757084        | 875.382180       | C    | <b>1248.528211</b> | 624.767744         | 1231.501662        | 616.254469       | 1230.517646    | 615.762461       | 7  |
| 17 | <b>1882.794592</b> | 941.900934        | 1865.768043    | 933.387660       | 1864.784027        | 932.895652       | D    | <b>1088.497562</b> | 544.752419         | 1071.471013        | 536.239145       | 1070.486997    | 535.747137       | 6  |
| 18 | 2322.019918        | 1161.513597       | 2304.993369    | 1153.000322      | 2304.009353        | 1152.508314      | Q    | <b>973.470619</b>  | 487.238948         | 956.444070         | 478.725673       |                |                  | 5  |
| 19 | 2393.057032        | 1197.032154       | 2376.030483    | 1188.518879      | 2375.046467        | 1188.026872      | A    | <b>534.245293</b>  | 267.626285         | 517.218744         | 259.113010       |                |                  | 4  |
| 20 | <b>2521.115610</b> | 1261.061443       | 2504.089061    | 1252.548169      | 2503.105045        | 1252.056161      | Q    | <b>463.208179</b>  | 232.107727         | 446.181630         | 223.594453       |                |                  | 3  |
| 21 | 2681.146259        | 1341.076768       | 2664.119710    | 1332.563493      | 2663.135694        | 1332.071485      | C    | <b>335.149601</b>  | 168.078438         | 318.123052         | 159.565164       |                |                  | 2  |
| 22 |                    |                   |                |                  |                    |                  | R    | <b>175.118952</b>  | 88.063114          | 158.092403         | 79.549839        |                |                  | 1  |

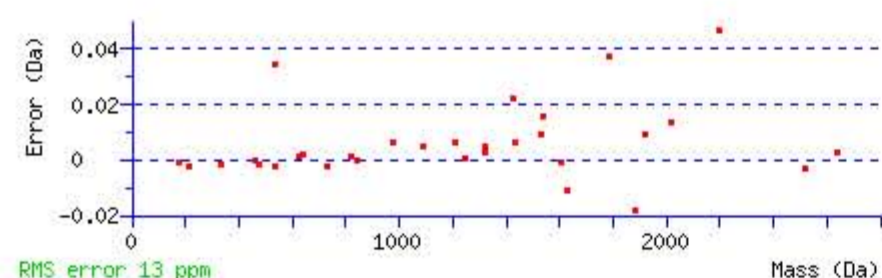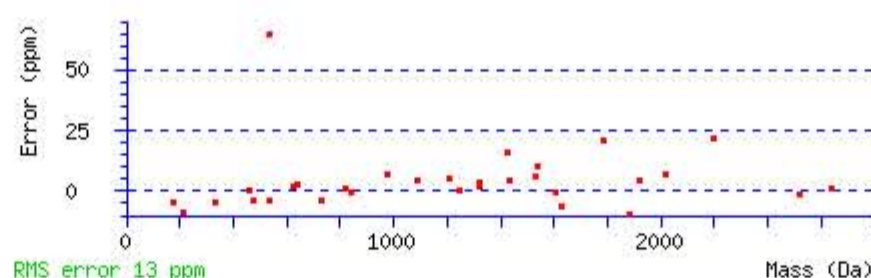

NCBI BLAST search of **SQCTYSNPEGTVVLACDQAQCR**

(Parameters: blastp, nr protein database, expect=20000, no filter, PAM30)

Other BLAST [web gateways](#)

All matches to this query

| Score | Mr(calc):   | Delta    | Sequence                               |
|-------|-------------|----------|----------------------------------------|
| 111.4 | 2854.250671 | 0.019841 | <a href="#">SQCTYSNPEGTVVLACDQAQCR</a> |
| 90.1  | 2854.250671 | 0.019841 | <a href="#">SQCTYSNPEGTVVLACDQAQCR</a> |
| 9.3   | 2854.250671 | 0.019841 | <a href="#">SQCTYSNPEGTVVLACDQAQCR</a> |

Mascot: <http://www.matrixscience.com/>



# MASCOT Search Results

## Peptide View

MS/MS Fragmentation of **SSTGPGEQLR**

Found in **COMP\_HUMAN**, Cartilage oligomeric matrix protein OS=Homo sapiens GN=COMP PE=1 SV=2

Match to Query 27036: 1341.673848 from(671.844200,2+) rtinseconds(1599) index(50236)

Title: Locus:1.1.1.1172.14 File:"2013-07-02 CLN FXIII 60 min 2nd F 4.wiff"

Data file C:\Program Files (x86)\Matrix Science\Mascot Daemon\mgf5 FXIII 60 min 2nd\mascot\_daemon\_merge.mgf

Click mouse within plot area to zoom in by factor of two about that point

Or, Plot from  to  Da

Label all possible matches  Label matches used for scoring

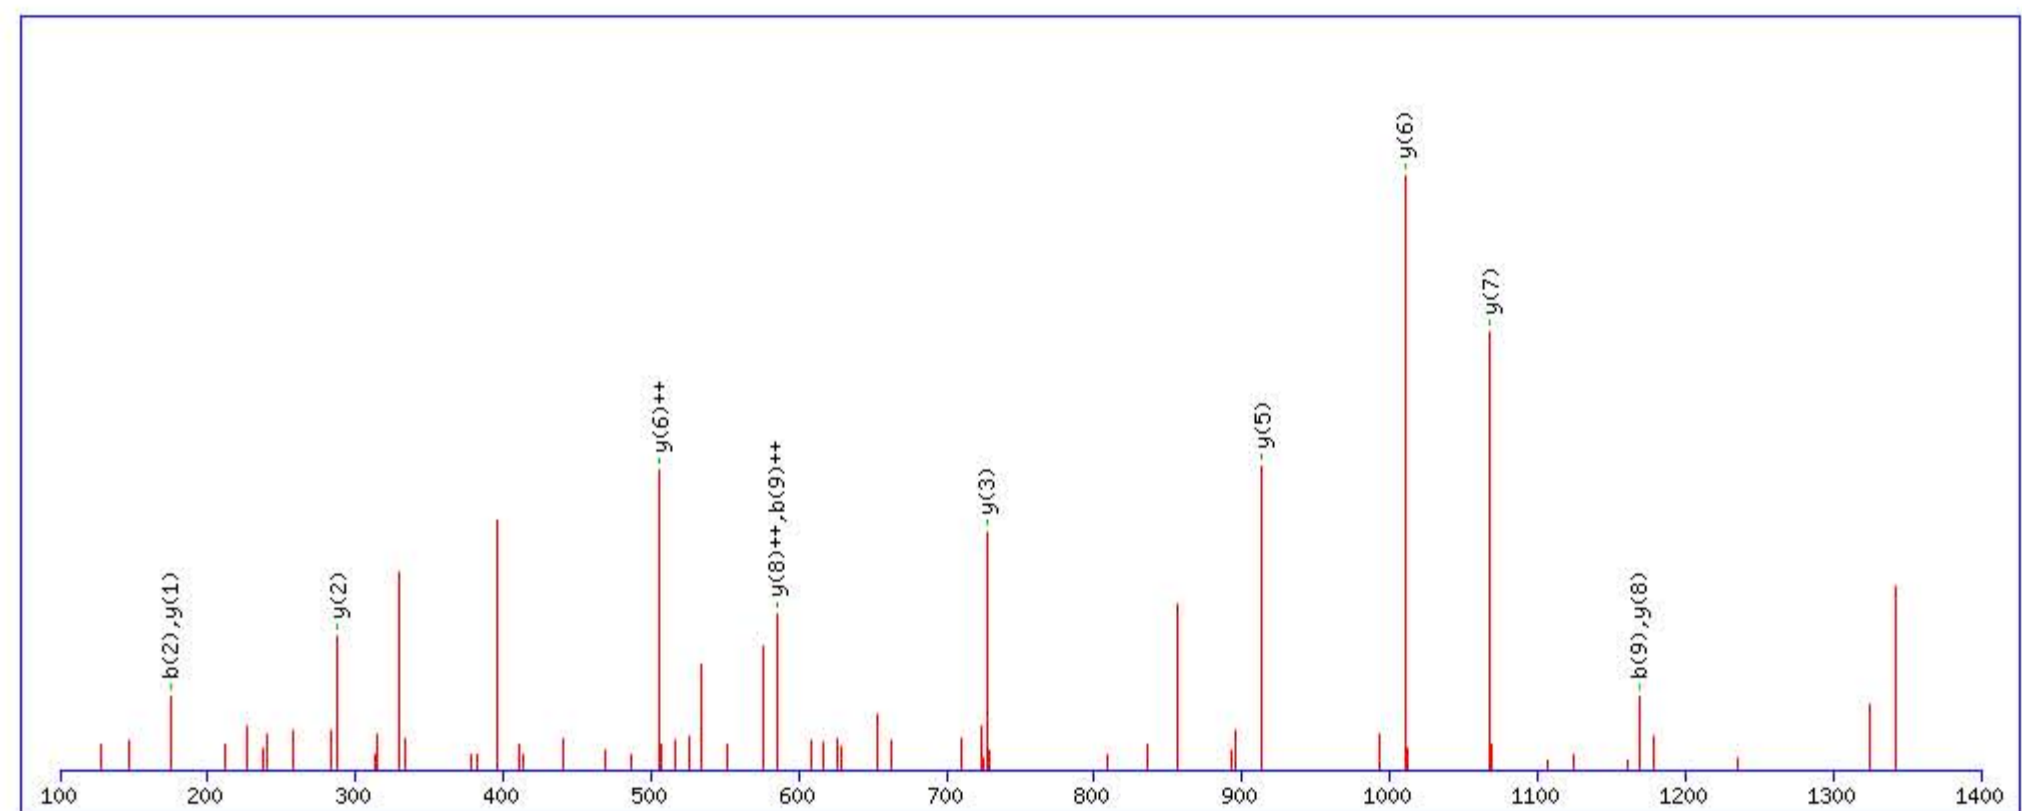

Monoisotopic mass of neutral peptide Mr(calc): 1341.671082

Fixed modifications: Carbamidomethyl (C) (apply to specified residues or termini only)

Variable modifications:

Q8 : Biotin:Thermo-21345 (Q)

Ions Score: 67 Expect: 3.7e-006

Matches : 12/88 fragment ions using 12 most intense peaks [\(help\)](#)

| #  | b                  | b <sup>++</sup>   | b <sup>*</sup> | b <sup>+++</sup> | b <sup>0</sup> | b <sup>0++</sup> | Seq. | y                  | y <sup>++</sup>   | y <sup>*</sup> | y <sup>+++</sup> | y <sup>0</sup> | y <sup>0++</sup> | #  |
|----|--------------------|-------------------|----------------|------------------|----------------|------------------|------|--------------------|-------------------|----------------|------------------|----------------|------------------|----|
| 1  | 88.039304          | 44.523290         |                |                  | 70.028739      | 35.518008        | S    |                    |                   |                |                  |                |                  | 10 |
| 2  | <b>175.071332</b>  | 88.039304         |                |                  | 157.060767     | 79.034021        | S    | 1255.646334        | 628.326805        | 1238.619785    | 619.813530       | 1237.635769    | 619.321522       | 9  |
| 3  | 276.119011         | 138.563144        |                |                  | 258.108446     | 129.557861       | T    | <b>1168.614306</b> | <b>584.810791</b> | 1151.587757    | 576.297517       | 1150.603741    | 575.805508       | 8  |
| 4  | 333.140475         | 167.073875        |                |                  | 315.129910     | 158.068593       | G    | <b>1067.566627</b> | 534.286951        | 1050.540078    | 525.773677       | 1049.556062    | 525.281669       | 7  |
| 5  | 430.193239         | 215.600258        |                |                  | 412.182674     | 206.594975       | P    | <b>1010.545163</b> | <b>505.776219</b> | 993.518614     | 497.262945       | 992.534598     | 496.770937       | 6  |
| 6  | 487.214703         | 244.110989        |                |                  | 469.204138     | 235.105707       | G    | <b>913.492399</b>  | 457.249837        | 896.465850     | 448.736563       | 895.481834     | 448.244555       | 5  |
| 7  | 616.257296         | 308.632286        |                |                  | 598.246731     | 299.627004       | E    | 856.470935         | 428.739105        | 839.444386     | 420.225831       | 838.460370     | 419.733823       | 4  |
| 8  | 1055.482622        | 528.244949        | 1038.456073    | 519.731675       | 1037.472057    | 519.239667       | Q    | <b>727.428342</b>  | 364.217809        | 710.401793     | 355.704534       |                |                  | 3  |
| 9  | <b>1168.566686</b> | <b>584.786981</b> | 1151.540137    | 576.273707       | 1150.556121    | 575.781698       | L    | <b>288.203016</b>  | 144.605146        | 271.176467     | 136.091871       |                |                  | 2  |
| 10 |                    |                   |                |                  |                |                  | R    | <b>175.118952</b>  | 88.063114         | 158.092403     | 79.549839        |                |                  | 1  |

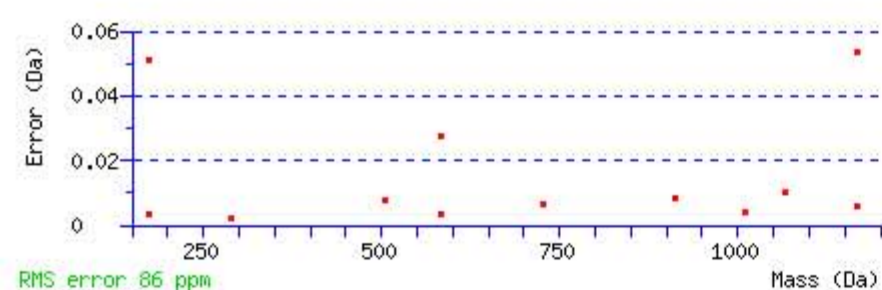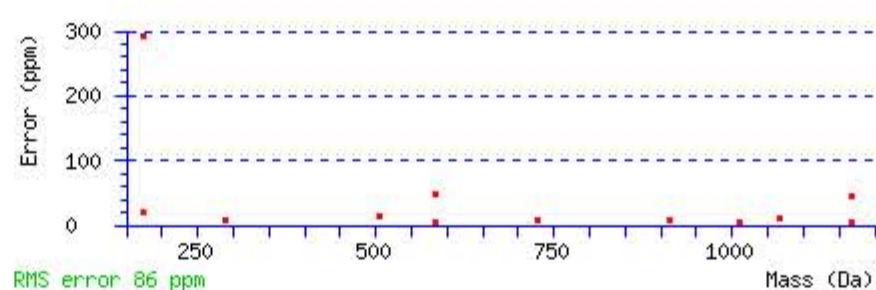

NCBI BLAST search of **SSTGPGEQLR**

(Parameters: blastp, nr protein database, expect=20000, no filter, PAM30)

Other BLAST [web gateways](#)

## All matches to this query

| Score | Mr(calc):   | Delta     | Sequence                      |
|-------|-------------|-----------|-------------------------------|
| 67.2  | 1341.671082 | 0.002766  | <a href="#">SSTGPGEQLR</a>    |
| 14.0  | 1341.674911 | -0.001063 | <a href="#">TSPERREPGTGR</a>  |
| 13.7  | 1341.663651 | 0.010197  | <a href="#">ESARDPKPEASR</a>  |
| 10.0  | 1341.663681 | 0.010167  | <a href="#">SSHKDSPRDVSK</a>  |
| 9.9   | 1341.688828 | -0.014980 | <a href="#">DDAQLSGLPSALR</a> |
| 9.5   | 1341.682297 | -0.008449 | <a href="#">ASEQDVRAR</a>     |
| 9.5   | 1341.693512 | -0.019664 | <a href="#">ASEQERRR</a>      |
| 8.6   | 1341.686325 | -0.012477 | <a href="#">SMKQLTSHPWK</a>   |
| 7.0   | 1341.653793 | 0.020055  | <a href="#">GFAEHGKQQQGR</a>  |
| 6.4   | 1341.686340 | -0.012492 | <a href="#">GSGIQWDLR</a>     |

Mascot: <http://www.matrixscience.com/>



# MASCOT SEARCH RESULTS

## Peptide View

MS/MS Fragmentation of **NALWHTGDTESQVR**

Found in **COMP\_HUMAN**, Cartilage oligomeric matrix protein OS=Homo sapiens GN=COMP PE=1 SV=2

Match to Query 45032: 1923.932982 from(642.318270,3+) rtinseconds(1791) index(51457)

Title: Locus:1.1.1.1239.9 File:"2013-07-02 CLN FXIII 60 min 2nd F 4.wiff"

Data file C:\Program Files (x86)\Matrix Science\Mascot Daemon\mgf5 FXIII 60 min 2nd\mascot\_daemon\_merge.mgf

Click mouse within plot area to zoom in by factor of two about that point

Or, Plot from  to  Da

Label all possible matches  Label matches used for scoring

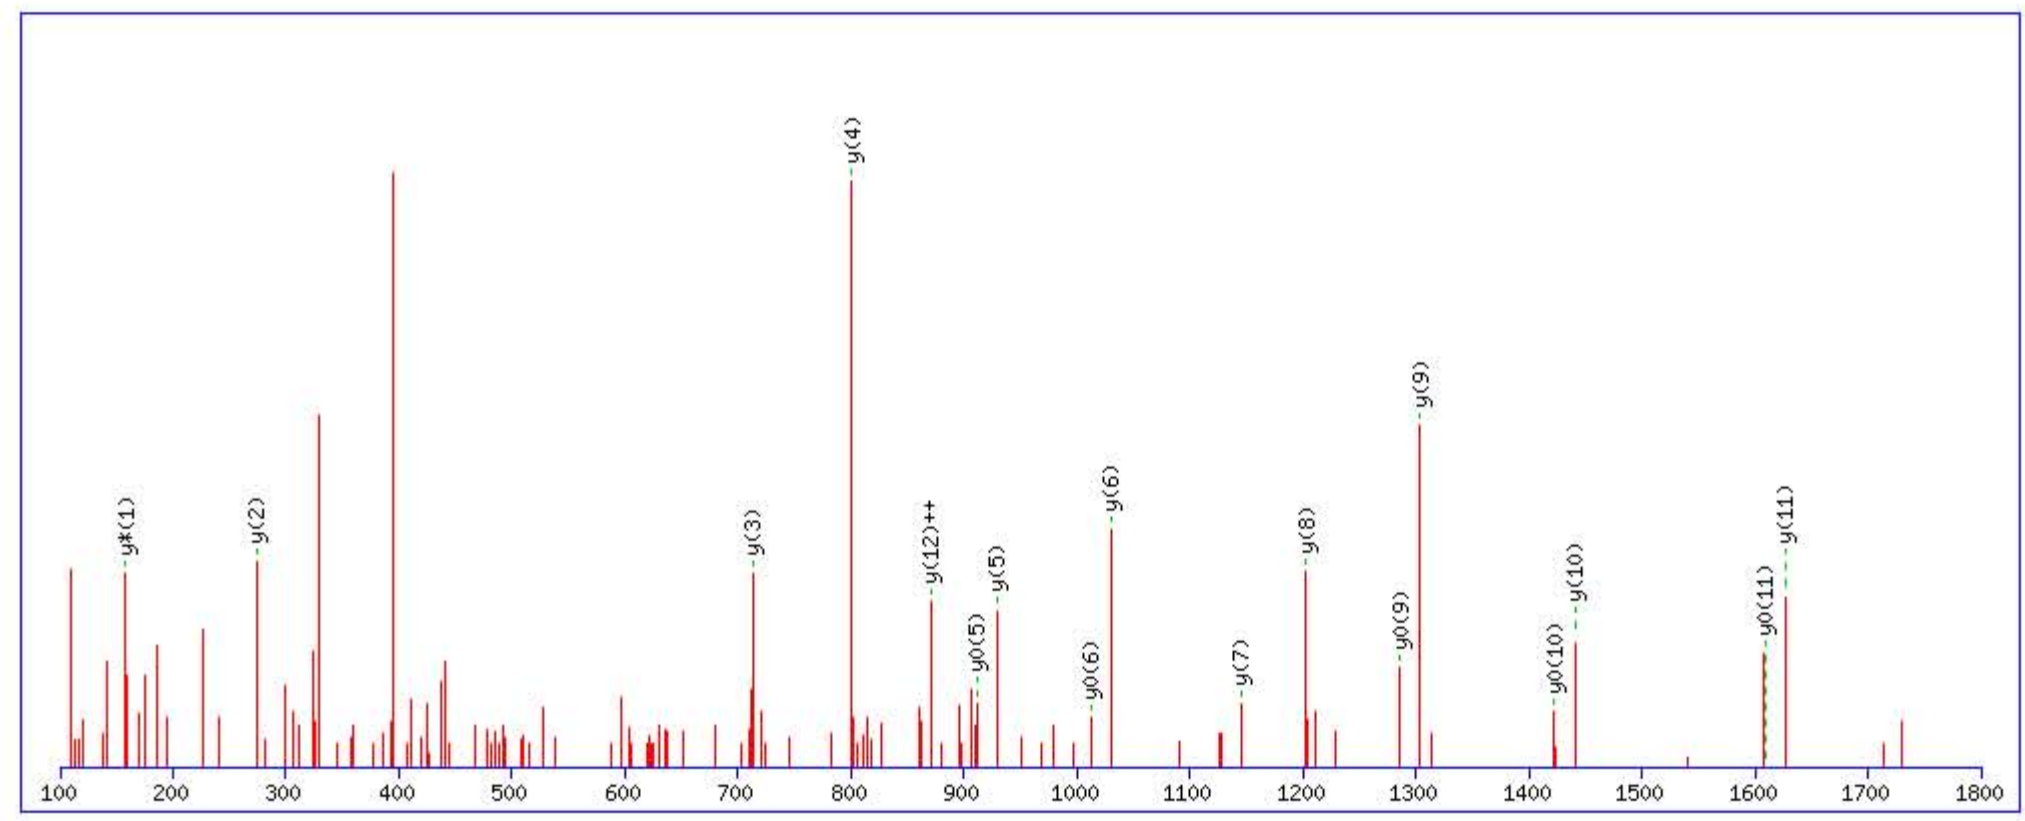

Monoisotopic mass of neutral peptide Mr(calc): 1923.926132

Fixed modifications: Carbamidomethyl (C) (apply to specified residues or termini only)

Variable modifications:

Q12 : Biotin:Thermo-21345 (Q)

Ions Score: 58 Expect: 3.7e-005

Matches : 17/140 fragment ions using 32 most intense peaks [\(help\)](#)

| #  | b           | b <sup>++</sup> | b <sup>*</sup> | b <sup>*++</sup> | b <sup>0</sup> | b <sup>0++</sup> | Seq. | y           | y <sup>++</sup> | y <sup>*</sup> | y <sup>*++</sup> | y <sup>0</sup> | y <sup>0++</sup> | #  |
|----|-------------|-----------------|----------------|------------------|----------------|------------------|------|-------------|-----------------|----------------|------------------|----------------|------------------|----|
| 1  | 115.050203  | 58.028740       | 98.023654      | 49.515465        |                |                  | N    |             |                 |                |                  |                |                  | 14 |
| 2  | 186.087317  | 93.547296       | 169.060768     | 85.034022        |                |                  | A    | 1810.890481 | 905.948879      | 1793.863932    | 897.435604       | 1792.879916    | 896.943596       | 13 |
| 3  | 299.171381  | 150.089328      | 282.144832     | 141.576054       |                |                  | L    | 1739.853367 | 870.430322      | 1722.826818    | 861.917047       | 1721.842802    | 861.425039       | 12 |
| 4  | 485.250694  | 243.128985      | 468.224145     | 234.615711       |                |                  | W    | 1626.769303 | 813.888290      | 1609.742754    | 805.375015       | 1608.758738    | 804.883007       | 11 |
| 5  | 622.309606  | 311.658441      | 605.283057     | 303.145167       |                |                  | H    | 1440.689990 | 720.848633      | 1423.663441    | 712.335359       | 1422.679425    | 711.843351       | 10 |
| 6  | 723.357285  | 362.182281      | 706.330736     | 353.669006       | 705.346720     | 353.176998       | T    | 1303.631078 | 652.319177      | 1286.604529    | 643.805903       | 1285.620513    | 643.313895       | 9  |
| 7  | 780.378749  | 390.693013      | 763.352200     | 382.179738       | 762.368184     | 381.687730       | G    | 1202.583399 | 601.795338      | 1185.556850    | 593.282063       | 1184.572834    | 592.790055       | 8  |
| 8  | 895.405692  | 448.206484      | 878.379143     | 439.693210       | 877.395127     | 439.201202       | D    | 1145.561935 | 573.284606      | 1128.535386    | 564.771331       | 1127.551370    | 564.279323       | 7  |
| 9  | 996.453371  | 498.730324      | 979.426822     | 490.217049       | 978.442806     | 489.725041       | T    | 1030.534992 | 515.771134      | 1013.508443    | 507.257860       | 1012.524427    | 506.765852       | 6  |
| 10 | 1125.495964 | 563.251620      | 1108.469415    | 554.738346       | 1107.485399    | 554.246337       | E    | 929.487313  | 465.247295      | 912.460764     | 456.734020       | 911.476748     | 456.242012       | 5  |
| 11 | 1212.527992 | 606.767634      | 1195.501443    | 598.254360       | 1194.517427    | 597.762352       | S    | 800.444720  | 400.725998      | 783.418171     | 392.212724       | 782.434155     | 391.720716       | 4  |
| 12 | 1651.753318 | 826.380297      | 1634.726769    | 817.867023       | 1633.742753    | 817.375015       | Q    | 713.412692  | 357.209984      | 696.386143     | 348.696710       |                |                  | 3  |
| 13 | 1750.821732 | 875.914504      | 1733.795183    | 867.401230       | 1732.811167    | 866.909222       | V    | 274.187366  | 137.597321      | 257.160817     | 129.084047       |                |                  | 2  |
| 14 |             |                 |                |                  |                |                  | R    | 175.118952  | 88.063114       | 158.092403     | 79.549839        |                |                  | 1  |

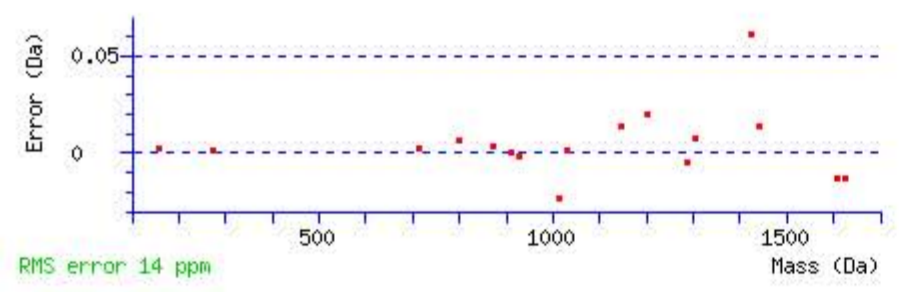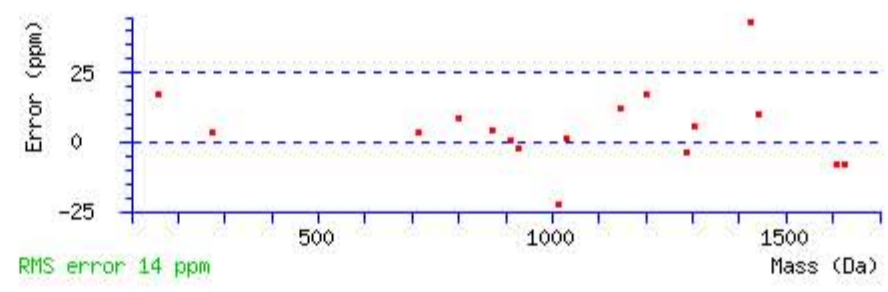

NCBI BLAST search of [NALWHTGDTESQVR](#)

(Parameters: blastp, nr protein database, expect=20000, no filter, PAM30)

Other BLAST [web gateways](#)

### All matches to this query

| Score | Mr(calc):   | Delta    | Sequence                       |
|-------|-------------|----------|--------------------------------|
| 57.5  | 1923.926132 | 0.006850 | <a href="#">NALWHTGDTESQVR</a> |



# MASCOT Search Results

## Peptide View

MS/MS Fragmentation of **GVWGSVCDDNWGEKEDQVVCK**

Found in **CD5L\_HUMAN**, CD5 antigen-like OS=Homo sapiens GN=CD5L PE=1 SV=1

Match to Query 43647: 2777.256822 from(926.759550,3+) rtinseconds(2122) index(37166)

Title: Locus:1.1.1.3158.16 File:"2013-07-02 CLN FXIII 60 min 2nd F 3.wiff"

Data file C:\Program Files (x86)\Matrix Science\Mascot Daemon\mgf5 FXIII 60 min 2nd\mascot\_daemon\_merge.mgf

Click mouse within plot area to zoom in by factor of two about that point

Or, Plot from  to  Da

Label all possible matches  Label matches used for scoring

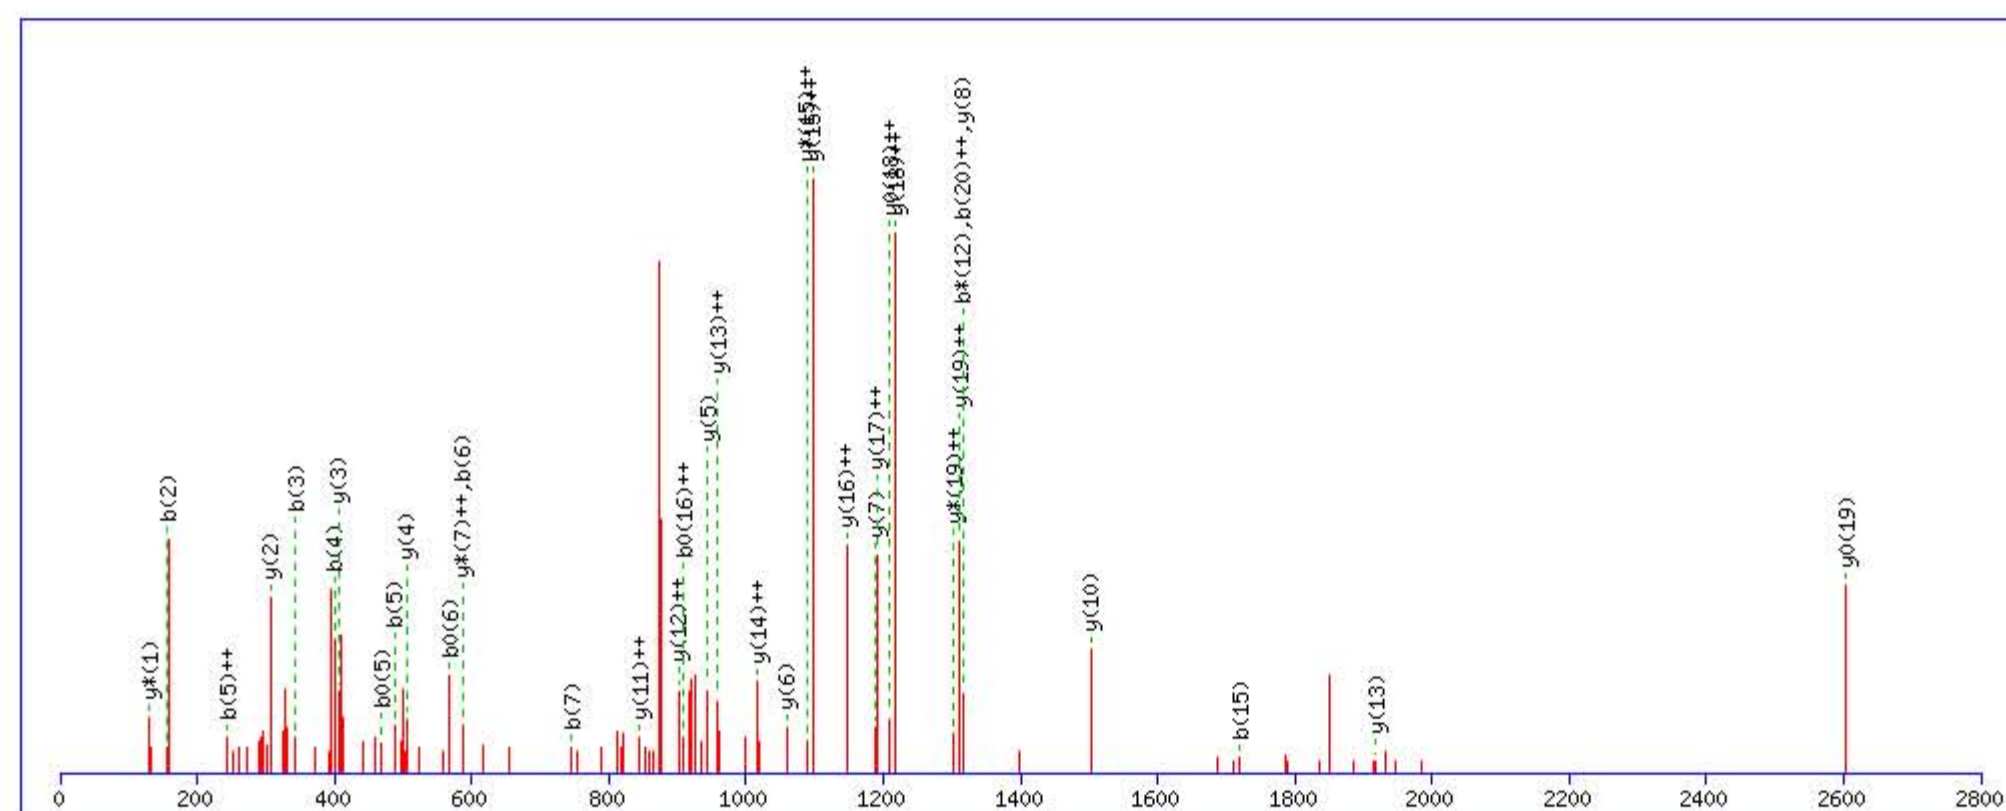

Monoisotopic mass of neutral peptide Mr(calc): 2777.224792

Fixed modifications: Carbamidomethyl (C) (apply to specified residues or termini only)

Variable modifications:

Q17 : Biotin:Thermo-21345 (Q)

Ions Score: 35 Expect: 0.0056

Matches : 37/204 fragment ions using 100 most intense peaks [\(help\)](#)

| #  | b           | b <sup>++</sup> | b <sup>*</sup> | b <sup>*++</sup> | b <sup>0</sup> | b <sup>0++</sup> | Seq. | y           | y <sup>++</sup> | y <sup>*</sup> | y <sup>*++</sup> | y <sup>0</sup> | y <sup>0++</sup> | #  |
|----|-------------|-----------------|----------------|------------------|----------------|------------------|------|-------------|-----------------|----------------|------------------|----------------|------------------|----|
| 1  | 58.028740   | 29.518008       |                |                  |                |                  | G    |             |                 |                |                  |                |                  | 21 |
| 2  | 157.097154  | 79.052215       |                |                  |                |                  | V    | 2721.210571 | 1361.108923     | 2704.184022    | 1352.595649      | 2703.200006    | 1352.103641      | 20 |
| 3  | 343.176467  | 172.091872      |                |                  |                |                  | W    | 2622.142157 | 1311.574716     | 2605.115608    | 1303.061442      | 2604.131592    | 1302.569434      | 19 |
| 4  | 400.197931  | 200.602603      |                |                  |                |                  | G    | 2436.062844 | 1218.535060     | 2419.036295    | 1210.021785      | 2418.052279    | 1209.529777      | 18 |
| 5  | 487.229959  | 244.118617      |                |                  | 469.219394     | 235.113335       | S    | 2379.041380 | 1190.024328     | 2362.014831    | 1181.511053      | 2361.030815    | 1181.019045      | 17 |
| 6  | 586.298373  | 293.652825      |                |                  | 568.287808     | 284.647542       | V    | 2292.009352 | 1146.508314     | 2274.982803    | 1137.995039      | 2273.998787    | 1137.503031      | 16 |
| 7  | 746.329022  | 373.668149      |                |                  | 728.318457     | 364.662867       | C    | 2192.940938 | 1096.974107     | 2175.914389    | 1088.460832      | 2174.930373    | 1087.968824      | 15 |
| 8  | 861.355965  | 431.181621      |                |                  | 843.345400     | 422.176338       | D    | 2032.910289 | 1016.958782     | 2015.883740    | 1008.445508      | 2014.899724    | 1007.953500      | 14 |
| 9  | 976.382908  | 488.695092      |                |                  | 958.372343     | 479.689809       | D    | 1917.883346 | 959.445311      | 1900.856797    | 950.932036       | 1899.872781    | 950.440028       | 13 |
| 10 | 1090.425835 | 545.716556      | 1073.399286    | 537.203281       | 1072.415270    | 536.711273       | N    | 1802.856403 | 901.931840      | 1785.829854    | 893.418565       | 1784.845838    | 892.926557       | 12 |
| 11 | 1276.505148 | 638.756212      | 1259.478599    | 630.242938       | 1258.494583    | 629.750929       | W    | 1688.813476 | 844.910376      | 1671.786927    | 836.397101       | 1670.802911    | 835.905093       | 11 |
| 12 | 1333.526612 | 667.266944      | 1316.500063    | 658.753670       | 1315.516047    | 658.261661       | G    | 1502.734163 | 751.870719      | 1485.707614    | 743.357445       | 1484.723598    | 742.865437       | 10 |
| 13 | 1462.569205 | 731.788241      | 1445.542656    | 723.274966       | 1444.558640    | 722.782958       | E    | 1445.712699 | 723.359987      | 1428.686150    | 714.846713       | 1427.702134    | 714.354705       | 9  |
| 14 | 1590.664168 | 795.835722      | 1573.637619    | 787.322448       | 1572.653603    | 786.830440       | K    | 1316.670106 | 658.838691      | 1299.643557    | 650.325416       | 1298.659541    | 649.833408       | 8  |
| 15 | 1719.706761 | 860.357019      | 1702.680212    | 851.843744       | 1701.696196    | 851.351736       | E    | 1188.575143 | 594.791209      | 1171.548594    | 586.277935       | 1170.564578    | 585.785927       | 7  |
| 16 | 1834.733704 | 917.870490      | 1817.707155    | 909.357216       | 1816.723139    | 908.865208       | D    | 1059.532550 | 530.269913      | 1042.506001    | 521.756638       | 1041.521985    | 521.264630       | 6  |
| 17 | 2273.959030 | 1137.483153     | 2256.932481    | 1128.969878      | 2255.948465    | 1128.477870      | Q    | 944.505607  | 472.756441      | 927.479058     | 464.243167       |                |                  | 5  |
| 18 | 2373.027444 | 1187.017360     | 2356.000895    | 1178.504085      | 2355.016879    | 1178.012077      | V    | 505.280281  | 253.143778      | 488.253732     | 244.630504       |                |                  | 4  |
| 19 | 2472.095858 | 1236.551567     | 2455.069309    | 1228.038292      | 2454.085293    | 1227.546284      | V    | 406.211867  | 203.609571      | 389.185318     | 195.096297       |                |                  | 3  |
| 20 | 2632.126507 | 1316.566891     | 2615.099958    | 1308.053617      | 2614.115942    | 1307.561609      | C    | 307.143453  | 154.075364      | 290.116904     | 145.562090       |                |                  | 2  |
| 21 |             |                 |                |                  |                |                  | K    | 147.112804  | 74.060040       | 130.086255     | 65.546765        |                |                  | 1  |

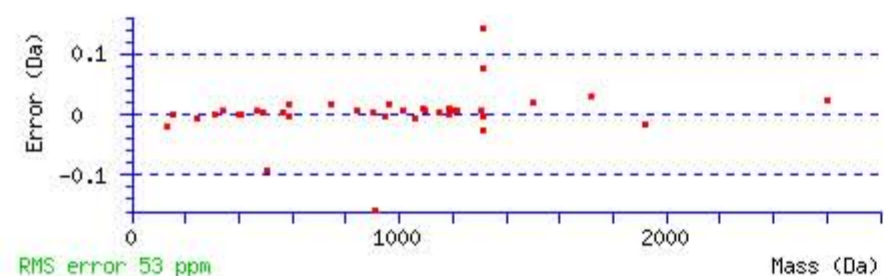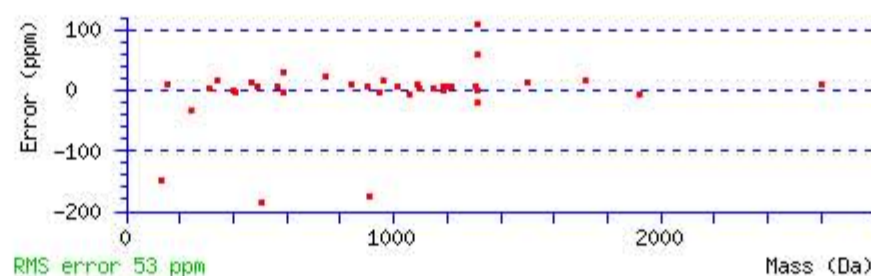

NCBI BLAST search of [GVWGSVCDDNWGEKEDQVVCK](#)

(Parameters: blastp, nr protein database, expect=20000, no filter, PAM30)

Other BLAST [web gateways](#)

All matches to this query

| Score | Mr(calc):   | Delta    | Sequence                              |
|-------|-------------|----------|---------------------------------------|
| 34.9  | 2777.224792 | 0.032030 | <a href="#">GVWGSVCDDNWGEKEDQVVCK</a> |

Mascot: <http://www.matrixscience.com/>



# MASCOT Search Results

## Peptide View

MS/MS Fragmentation of **KAEEEHLGILGPQLHADVGDK**

Found in **CERU\_HUMAN**, Ceruloplasmin OS=Homo sapiens GN=CP PE=1 SV=1

Match to Query 57310: 2566.331816 from(642.590230,4+) rtinseconds(1979) index(52716)

Title: Locus:1.1.1.1304.16 File:"2013-07-02 CLN FXIII 60 min 2nd F 4.wiff"

Data file C:\Program Files (x86)\Matrix Science\Mascot Daemon\mgf5 FXIII 60 min 2nd\mascot\_daemon\_merge.mgf

Click mouse within plot area to zoom in by factor of two about that point

Or, Plot from  to  Da

Label all possible matches  Label matches used for scoring

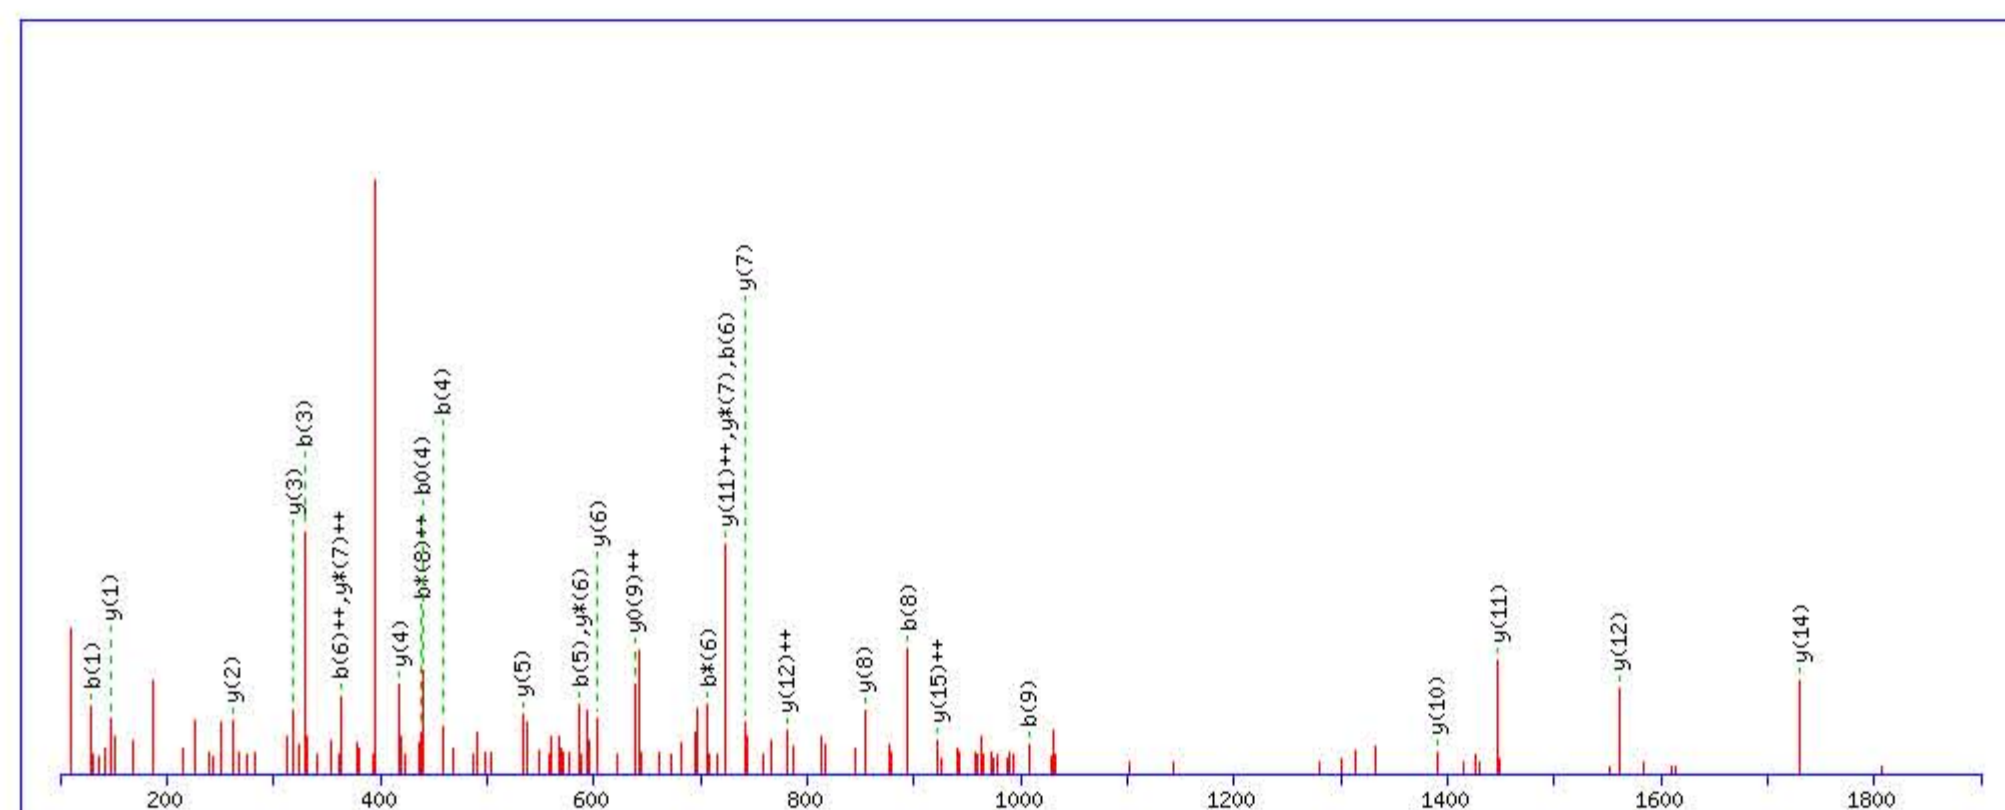

Monoisotopic mass of neutral peptide Mr(calc): 2566.321335

Fixed modifications: Carbamidomethyl (C) (apply to specified residues or termini only)

Variable modifications:

Q13 : Biotin:Thermo-21345 (Q)

Ions Score: 66 Expect: 7.9e-007

Matches : 30/234 fragment ions using 58 most intense peaks [\(help\)](#)

| #  | b                  | b <sup>++</sup>   | b <sup>*</sup>    | b <sup>*++</sup>  | b <sup>0</sup>    | b <sup>0++</sup> | Seq.     | y                  | y <sup>++</sup>   | y <sup>*</sup>    | y <sup>*++</sup>  | y <sup>0</sup> | y <sup>0++</sup>  | #         |
|----|--------------------|-------------------|-------------------|-------------------|-------------------|------------------|----------|--------------------|-------------------|-------------------|-------------------|----------------|-------------------|-----------|
| 1  | <b>129.102239</b>  | 65.054757         | 112.075690        | 56.541483         |                   |                  | <b>K</b> |                    |                   |                   |                   |                |                   | <b>21</b> |
| 2  | 200.139353         | 100.573315        | 183.112804        | 92.060040         |                   |                  | <b>A</b> | 2439.233673        | 1220.120474       | 2422.207124       | 1211.607200       | 2421.223108    | 1211.115192       | <b>20</b> |
| 3  | <b>329.181946</b>  | 165.094611        | 312.155397        | 156.581336        | 311.171381        | 156.089328       | <b>E</b> | 2368.196559        | 1184.601917       | 2351.170010       | 1176.088643       | 2350.185994    | 1175.596635       | <b>19</b> |
| 4  | <b>458.224539</b>  | 229.615907        | 441.197990        | 221.102633        | <b>440.213974</b> | 220.610625       | <b>E</b> | 2239.153966        | 1120.080621       | 2222.127417       | 1111.567346       | 2221.143401    | 1111.075338       | <b>18</b> |
| 5  | <b>587.267132</b>  | 294.137204        | 570.240583        | 285.623930        | 569.256567        | 285.131922       | <b>E</b> | 2110.111373        | 1055.559324       | 2093.084824       | 1047.046050       | 2092.100808    | 1046.554042       | <b>17</b> |
| 6  | <b>724.326044</b>  | <b>362.666660</b> | <b>707.299495</b> | 354.153386        | 706.315479        | 353.661378       | <b>H</b> | 1981.068780        | 991.038028        | 1964.042231       | 982.524753        | 1963.058215    | 982.032745        | <b>16</b> |
| 7  | 837.410108         | 419.208692        | 820.383559        | 410.695418        | 819.399543        | 410.203410       | <b>L</b> | 1844.009868        | <b>922.508572</b> | 1826.983319       | 913.995297        | 1825.999303    | 913.503289        | <b>15</b> |
| 8  | <b>894.431572</b>  | 447.719424        | 877.405023        | <b>439.206150</b> | 876.421007        | 438.714142       | <b>G</b> | <b>1730.925804</b> | 865.966540        | 1713.899255       | 857.453265        | 1712.915239    | 856.961257        | <b>14</b> |
| 9  | <b>1007.515636</b> | 504.261456        | 990.489087        | 495.748182        | 989.505071        | 495.256174       | <b>I</b> | 1673.904340        | 837.455808        | 1656.877791       | 828.942533        | 1655.893775    | 828.450525        | <b>13</b> |
| 10 | 1120.599700        | 560.803488        | 1103.573151       | 552.290214        | 1102.589135       | 551.798205       | <b>L</b> | <b>1560.820276</b> | <b>780.913776</b> | 1543.793727       | 772.400501        | 1542.809711    | 771.908493        | <b>12</b> |
| 11 | 1177.621164        | 589.314220        | 1160.594615       | 580.800946        | 1159.610599       | 580.308937       | <b>G</b> | <b>1447.736212</b> | <b>724.371744</b> | 1430.709663       | 715.858469        | 1429.725647    | 715.366461        | <b>11</b> |
| 12 | 1274.673928        | 637.840602        | 1257.647379       | 629.327328        | 1256.663363       | 628.835319       | <b>P</b> | <b>1390.714748</b> | 695.861012        | 1373.688199       | 687.347737        | 1372.704183    | 686.855729        | <b>10</b> |
| 13 | 1713.899254        | 857.453265        | 1696.872705       | 848.939991        | 1695.888689       | 848.447983       | <b>Q</b> | 1293.661984        | 647.334630        | 1276.635435       | 638.821355        | 1275.651419    | <b>638.329347</b> | <b>9</b>  |
| 14 | 1826.983318        | 913.995297        | 1809.956769       | 905.482023        | 1808.972753       | 904.990015       | <b>L</b> | <b>854.436658</b>  | 427.721967        | 837.410109        | 419.208692        | 836.426093     | 418.716684        | <b>8</b>  |
| 15 | 1964.042230        | 982.524753        | 1947.015681       | 974.011479        | 1946.031665       | 973.519471       | <b>H</b> | <b>741.352594</b>  | 371.179935        | <b>724.326045</b> | <b>362.666660</b> | 723.342029     | 362.174652        | <b>7</b>  |
| 16 | 2035.079344        | 1018.043310       | 2018.052795       | 1009.530036       | 2017.068779       | 1009.038028      | <b>A</b> | <b>604.293682</b>  | 302.650479        | <b>587.267133</b> | 294.137204        | 586.283117     | 293.645196        | <b>6</b>  |
| 17 | 2150.106287        | 1075.556781       | 2133.079738       | 1067.043507       | 2132.095722       | 1066.551499      | <b>D</b> | <b>533.256568</b>  | 267.131922        | 516.230019        | 258.618647        | 515.246003     | 258.126639        | <b>5</b>  |
| 18 | 2249.174701        | 1125.090988       | 2232.148152       | 1116.577714       | 2231.164136       | 1116.085706      | <b>V</b> | <b>418.229625</b>  | 209.618450        | 401.203076        | 201.105176        | 400.219060     | 200.613168        | <b>4</b>  |
| 19 | 2306.196165        | 1153.601720       | 2289.169616       | 1145.088446       | 2288.185600       | 1144.596438      | <b>G</b> | <b>319.161211</b>  | 160.084243        | 302.134662        | 151.570969        | 301.150646     | 151.078961        | <b>3</b>  |
| 20 | 2421.223108        | 1211.115192       | 2404.196559       | 1202.601917       | 2403.212543       | 1202.109909      | <b>D</b> | <b>262.139747</b>  | 131.573511        | 245.113198        | 123.060237        | 244.129182     | 122.568229        | <b>2</b>  |
| 21 |                    |                   |                   |                   |                   |                  | <b>K</b> | <b>147.112804</b>  | 74.060040         | 130.086255        | 65.546765         |                |                   | <b>1</b>  |

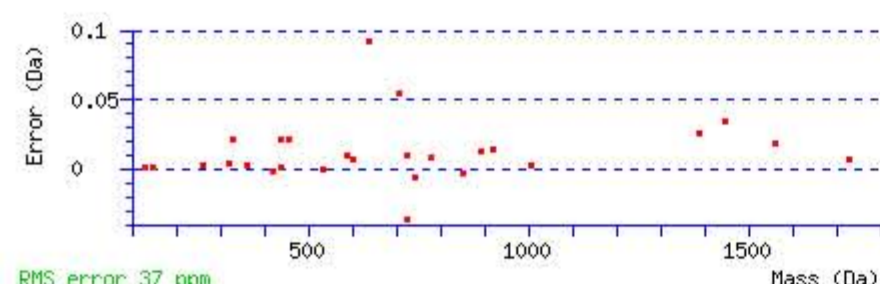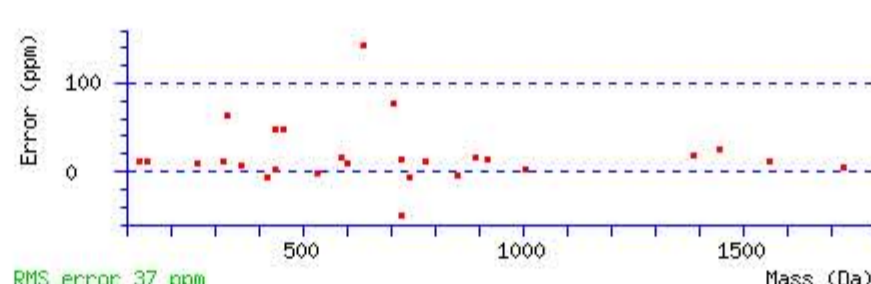

NCBI BLAST search of **KAEEEHLGILGPQLHADVGDK**

(Parameters: blastp, nr protein database, expect=20000, no filter, PAM30)

Other BLAST [web gateways](#)

All matches to this query

| Score | Mr(calc):   | Delta    | Sequence                              |
|-------|-------------|----------|---------------------------------------|
| 65.8  | 2566.321335 | 0.010481 | <a href="#">KAEEEHLGILGPQLHADVGDK</a> |
| 0.7   | 2566.329437 | 0.002379 | <a href="#">QMHGLRTLNIQCVRITDK</a>    |



# MASCOT SEARCH RESULTS

## Peptide View

MS/MS Fragmentation of **ASSIDELFQDR**

Found in **CLUS\_HUMAN**, Clusterin OS=Homo sapiens GN=CLU PE=1 SV=1

Match to Query 40552: 1703.862508 from(852.938530,2+) rtinseconds(2841) index(26710)

Title: Locus:1.1.1.990.13 File:"2013-07-02 CLN FXIII 60 min 2nd F 2.wiff"

Data file C:\Program Files (x86)\Matrix Science\Mascot Daemon\mgf5 FXIII 60 min 2nd\mascot\_daemon\_merge.mgf

Click mouse within plot area to zoom in by factor of two about that point

Or, Plot from  to  Da

Label all possible matches  Label matches used for scoring

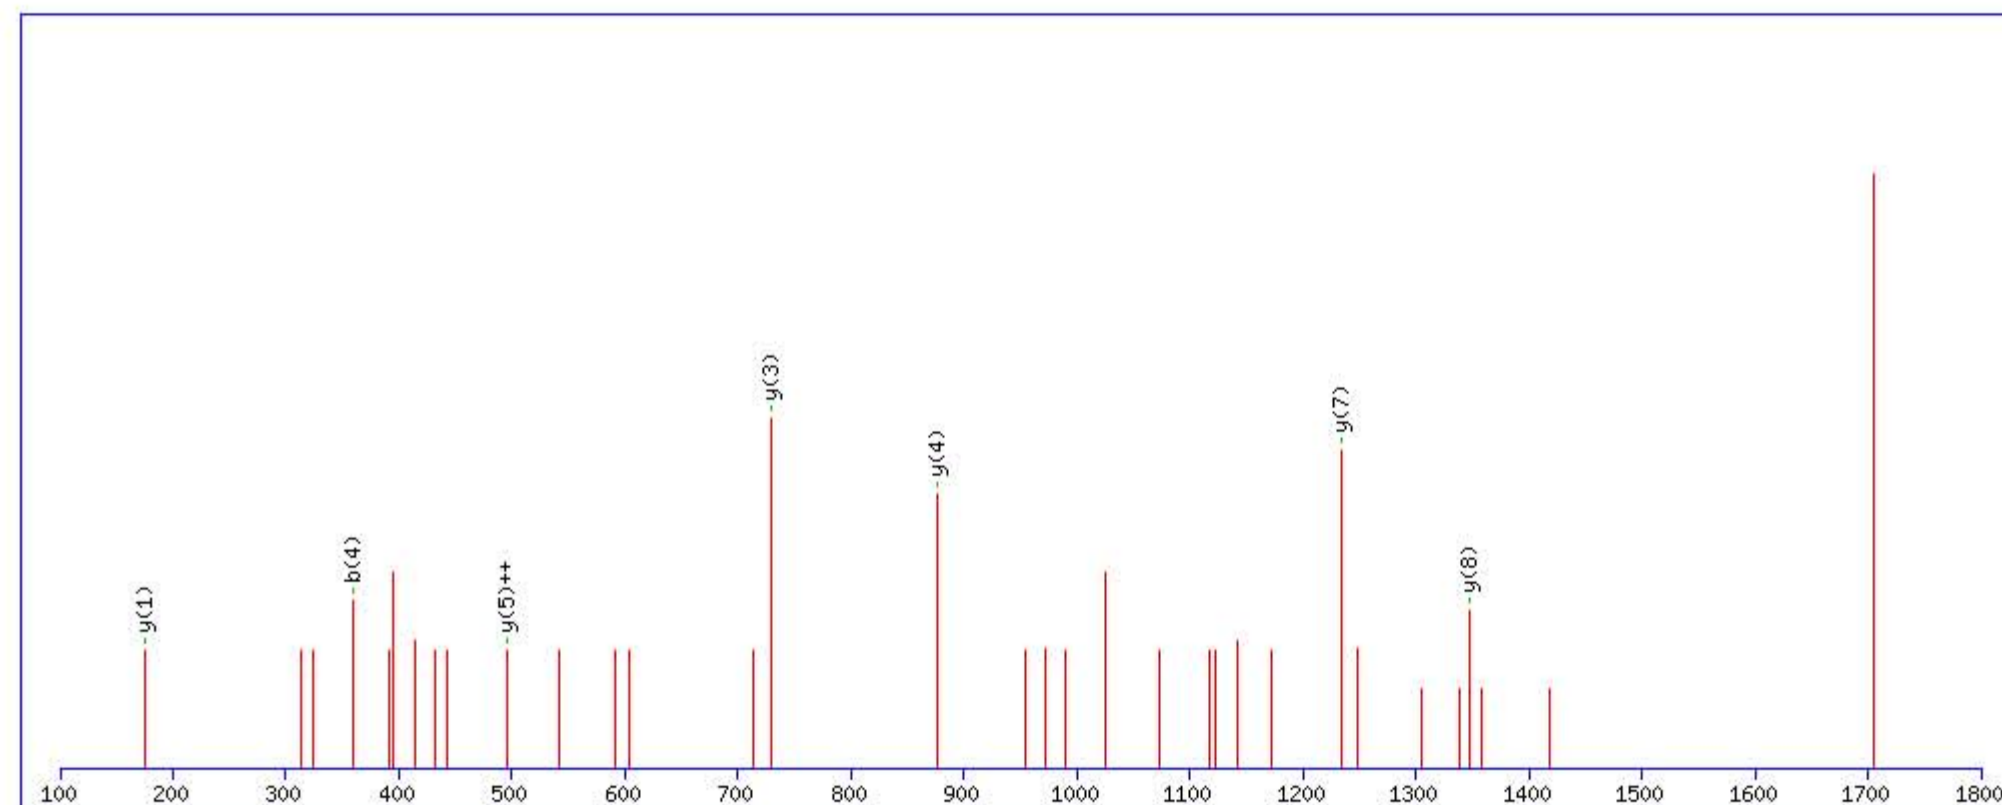

Monoisotopic mass of neutral peptide Mr(calc): 1703.855240

Fixed modifications: Carbamidomethyl (C) (apply to specified residues or termini only)

Variable modifications:

Q10 : Biotin:Thermo-21345 (Q)

Ions Score: 27 Expect: 0.0032

Matches : 7/110 fragment ions using 12 most intense peaks [\(help\)](#)

| #  | b                 | b <sup>++</sup> | b <sup>*</sup> | b <sup>+++</sup> | b <sup>0</sup> | b <sup>0++</sup> | Seq. | y                  | y <sup>++</sup>   | y <sup>*</sup> | y <sup>+++</sup> | y <sup>0</sup> | y <sup>0++</sup> | #  |
|----|-------------------|-----------------|----------------|------------------|----------------|------------------|------|--------------------|-------------------|----------------|------------------|----------------|------------------|----|
| 1  | 72.044390         | 36.525833       |                |                  |                |                  | A    |                    |                   |                |                  |                |                  | 12 |
| 2  | 159.076418        | 80.041847       |                |                  | 141.065853     | 71.036564        | S    | 1633.825419        | 817.416348        | 1616.798870    | 808.903073       | 1615.814854    | 808.411065       | 11 |
| 3  | 246.108446        | 123.557861      |                |                  | 228.097881     | 114.552578       | S    | 1546.793391        | 773.900333        | 1529.766842    | 765.387059       | 1528.782826    | 764.895051       | 10 |
| 4  | <b>359.192510</b> | 180.099893      |                |                  | 341.181945     | 171.094610       | I    | 1459.761363        | 730.384320        | 1442.734814    | 721.871045       | 1441.750798    | 721.379037       | 9  |
| 5  | 472.276574        | 236.641925      |                |                  | 454.266009     | 227.636642       | I    | <b>1346.677299</b> | 673.842288        | 1329.650750    | 665.329013       | 1328.666734    | 664.837005       | 8  |
| 6  | 587.303517        | 294.155397      |                |                  | 569.292952     | 285.150114       | D    | <b>1233.593235</b> | 617.300256        | 1216.566686    | 608.786981       | 1215.582670    | 608.294973       | 7  |
| 7  | 716.346110        | 358.676693      |                |                  | 698.335545     | 349.671411       | E    | 1118.566292        | 559.786784        | 1101.539743    | 551.273510       | 1100.555727    | 550.781501       | 6  |
| 8  | 829.430174        | 415.218725      |                |                  | 811.419609     | 406.213443       | L    | 989.523699         | <b>495.265488</b> | 972.497150     | 486.752213       | 971.513134     | 486.260205       | 5  |
| 9  | 976.498588        | 488.752932      |                |                  | 958.488023     | 479.747650       | F    | <b>876.439635</b>  | 438.723456        | 859.413086     | 430.210181       | 858.429070     | 429.718173       | 4  |
| 10 | 1415.723914       | 708.365595      | 1398.697365    | 699.852321       | 1397.713349    | 699.360312       | Q    | <b>729.371221</b>  | 365.189249        | 712.344672     | 356.675974       | 711.360656     | 356.183966       | 3  |
| 11 | 1530.750857       | 765.879067      | 1513.724308    | 757.365792       | 1512.740292    | 756.873784       | D    | 290.145895         | 145.576585        | 273.119346     | 137.063311       | 272.135330     | 136.571303       | 2  |
| 12 |                   |                 |                |                  |                |                  | R    | <b>175.118952</b>  | 88.063114         | 158.092403     | 79.549839        |                |                  | 1  |

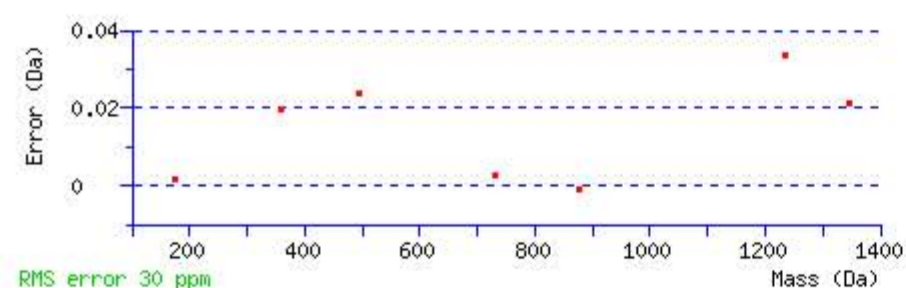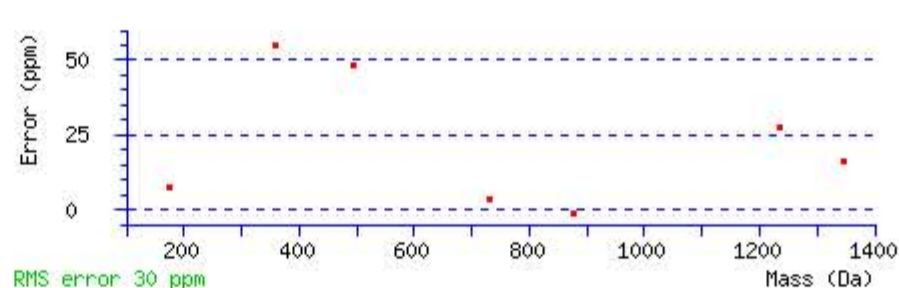

NCBI BLAST search of [ASSIDELFQDR](#)

(Parameters: blastp, nr protein database, expect=20000, no filter, PAM30)

Other BLAST [web gateways](#)

All matches to this query

| Score | Mr(calc):   | Delta     | Sequence                           |
|-------|-------------|-----------|------------------------------------|
| 26.9  | 1703.855240 | 0.007268  | <a href="#">ASSIDELFQDR</a>        |
| 0.3   | 1703.877731 | -0.015223 | <a href="#">AVGMASDIPGLHLPGGGR</a> |

Mascot: <http://www.matrixscience.com/>



**Peptide View**

MS/MS Fragmentation of **RELDES LQVAER**

Found in **CLUS\_HUMAN**, Clusterin OS=Homo sapiens GN=CLU PE=1 SV=1

Match to Query 41759: 1754.894262 from(585.972030,3+) rtinseconds(1753) index(34789)

Title: Locus:1.1.1.3030.10 File:"2013-07-02 CLN FXIII 60 min 2nd F 3.wiff"

Data file C:\Program Files (x86)\Matrix Science\Mascot Daemon\mgf\5 FXIII 60 min 2nd\mascot\_daemon\_merge.mgf

Click mouse within plot area to zoom in by factor of two about that point

Or, Plot from 100 to 1400 Da Full range

Label all possible matches  Label matches used for scoring

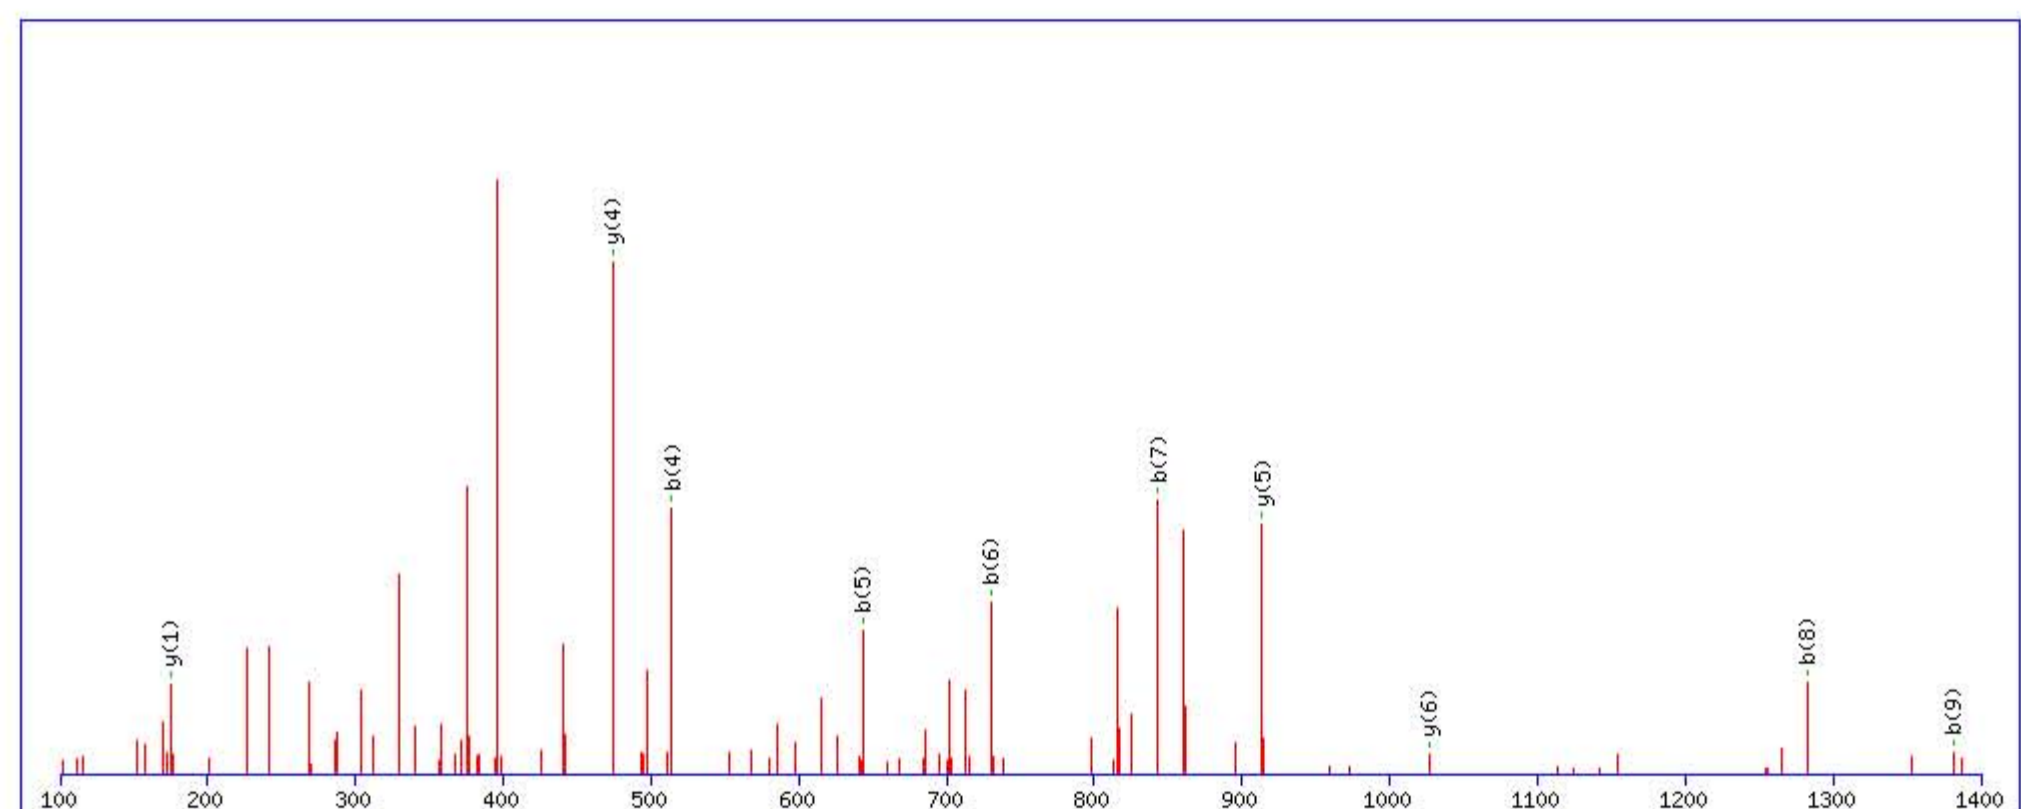

Monoisotopic mass of neutral peptide Mr(calc): 1754.898483

Fixed modifications: Carbamidomethyl (C) (apply to specified residues or termini only)

Variable modifications:

Q8 : Biotin:Thermo-21345 (Q)

Ions Score: 42 Expect: 0.00052

Matches : 10/128 fragment ions using 13 most intense peaks (help)

| #  | b                  | b <sup>++</sup> | b <sup>*</sup> | b <sup>*++</sup> | b <sup>0</sup> | b <sup>0++</sup> | Seq. | y                  | y <sup>++</sup> | y <sup>*</sup> | y <sup>*++</sup> | y <sup>0</sup> | y <sup>0++</sup> | #  |
|----|--------------------|-----------------|----------------|------------------|----------------|------------------|------|--------------------|-----------------|----------------|------------------|----------------|------------------|----|
| 1  | 157.108387         | 79.057831       | 140.081838     | 70.544557        |                |                  | R    |                    |                 |                |                  |                |                  | 12 |
| 2  | 286.150980         | 143.579128      | 269.124431     | 135.065854       | 268.140415     | 134.573846       | E    | 1599.804684        | 800.405980      | 1582.778135    | 791.892706       | 1581.794119    | 791.400698       | 11 |
| 3  | 399.235044         | 200.121160      | 382.208495     | 191.607886       | 381.224479     | 191.115878       | L    | 1470.762091        | 735.884684      | 1453.735542    | 727.371409       | 1452.751526    | 726.879401       | 10 |
| 4  | <b>514.261987</b>  | 257.634632      | 497.235438     | 249.121357       | 496.251422     | 248.629349       | D    | 1357.678027        | 679.342652      | 1340.651478    | 670.829377       | 1339.667462    | 670.337369       | 9  |
| 5  | <b>643.304580</b>  | 322.155928      | 626.278031     | 313.642654       | 625.294015     | 313.150646       | E    | 1242.651084        | 621.829180      | 1225.624535    | 613.315906       | 1224.640519    | 612.823898       | 8  |
| 6  | <b>730.336608</b>  | 365.671942      | 713.310059     | 357.158668       | 712.326043     | 356.666660       | S    | 1113.608491        | 557.307884      | 1096.581942    | 548.794609       | 1095.597926    | 548.302601       | 7  |
| 7  | <b>843.420672</b>  | 422.213974      | 826.394123     | 413.700700       | 825.410107     | 413.208692       | L    | <b>1026.576463</b> | 513.791870      | 1009.549914    | 505.278595       | 1008.565898    | 504.786587       | 6  |
| 8  | <b>1282.645998</b> | 641.826637      | 1265.619449    | 633.313363       | 1264.635433    | 632.821355       | Q    | <b>913.492399</b>  | 457.249838      | 896.465850     | 448.736563       | 895.481834     | 448.244555       | 5  |
| 9  | <b>1381.714412</b> | 691.360844      | 1364.687863    | 682.847570       | 1363.703847    | 682.355562       | V    | <b>474.267073</b>  | 237.637175      | 457.240524     | 229.123900       | 456.256508     | 228.631892       | 4  |
| 10 | 1452.751526        | 726.879401      | 1435.724977    | 718.366127       | 1434.740961    | 717.874119       | A    | 375.198659         | 188.102968      | 358.172110     | 179.589693       | 357.188094     | 179.097685       | 3  |
| 11 | 1581.794119        | 791.400698      | 1564.767570    | 782.887423       | 1563.783554    | 782.395415       | E    | 304.161545         | 152.584411      | 287.134996     | 144.071136       | 286.150980     | 143.579128       | 2  |
| 12 |                    |                 |                |                  |                |                  | R    | <b>175.118952</b>  | 88.063114       | 158.092403     | 79.549839        |                |                  | 1  |

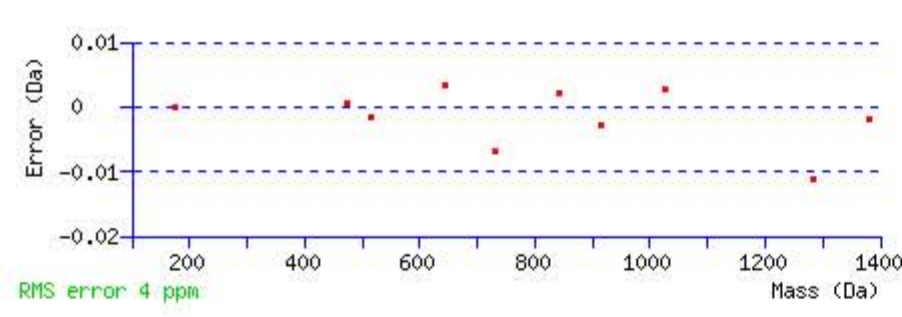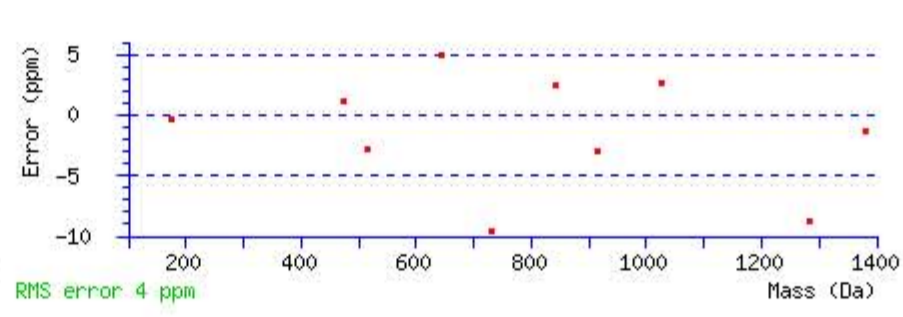

NCBI BLAST search of **RELDES LQVAER**

(Parameters: blastp, nr protein database, expect=20000, no filter, PAM30)

Other BLAST [web gateways](#)

**All matches to this query**

| Score | Mr(calc):   | Delta     | Sequence                       |
|-------|-------------|-----------|--------------------------------|
| 42.2  | 1754.898483 | -0.004221 | <a href="#">RELDES LQVAER</a>  |
| 6.8   | 1754.873306 | 0.020956  | <a href="#">EREQKEIEAMHSLR</a> |
| 4.1   | 1754.880737 | 0.013525  | <a href="#">QQLLACAGVEAER</a>  |
| 3.7   | 1754.898483 | -0.004221 | <a href="#">AEAQGKQEVESLR</a>  |
| 2.3   | 1754.898483 | -0.004221 | <a href="#">RLEESDVLQEAR</a>   |
| 1.8   | 1754.917130 | -0.022868 | <a href="#">LCVTIQEANQLR</a>   |
| 1.4   | 1754.898483 | -0.004221 | <a href="#">AEAQGKQEVESLR</a>  |
| 0.7   | 1754.896011 | -0.001749 | <a href="#">FCSPHQSLLSIR</a>   |
| 0.4   | 1754.898514 | -0.004252 | <a href="#">DQGSPTLSANVSLR</a> |



# MASCOT Search Results

## Peptide View

MS/MS Fragmentation of **EILSVDCSTNNPSQAK**

Found in **CLUS\_HUMAN**, Clusterin OS=Homo sapiens GN=CLU PE=1 SV=1

Match to Query 48789: 2073.006368 from(1037.510460,2+) rtinseconds(1835) index(51777)

Title: Locus:1.1.1.1254.26 File:"2013-07-02 CLN FXIII 60 min 2nd F 4.wiff"

Data file C:\Program Files (x86)\Matrix Science\Mascot Daemon\mgf\5 FXIII 60 min 2nd\mascot\_daemon\_merge.mgf

Click mouse within plot area to zoom in by factor of two about that point

Or, Plot from  to  Da

Label all possible matches  Label matches used for scoring

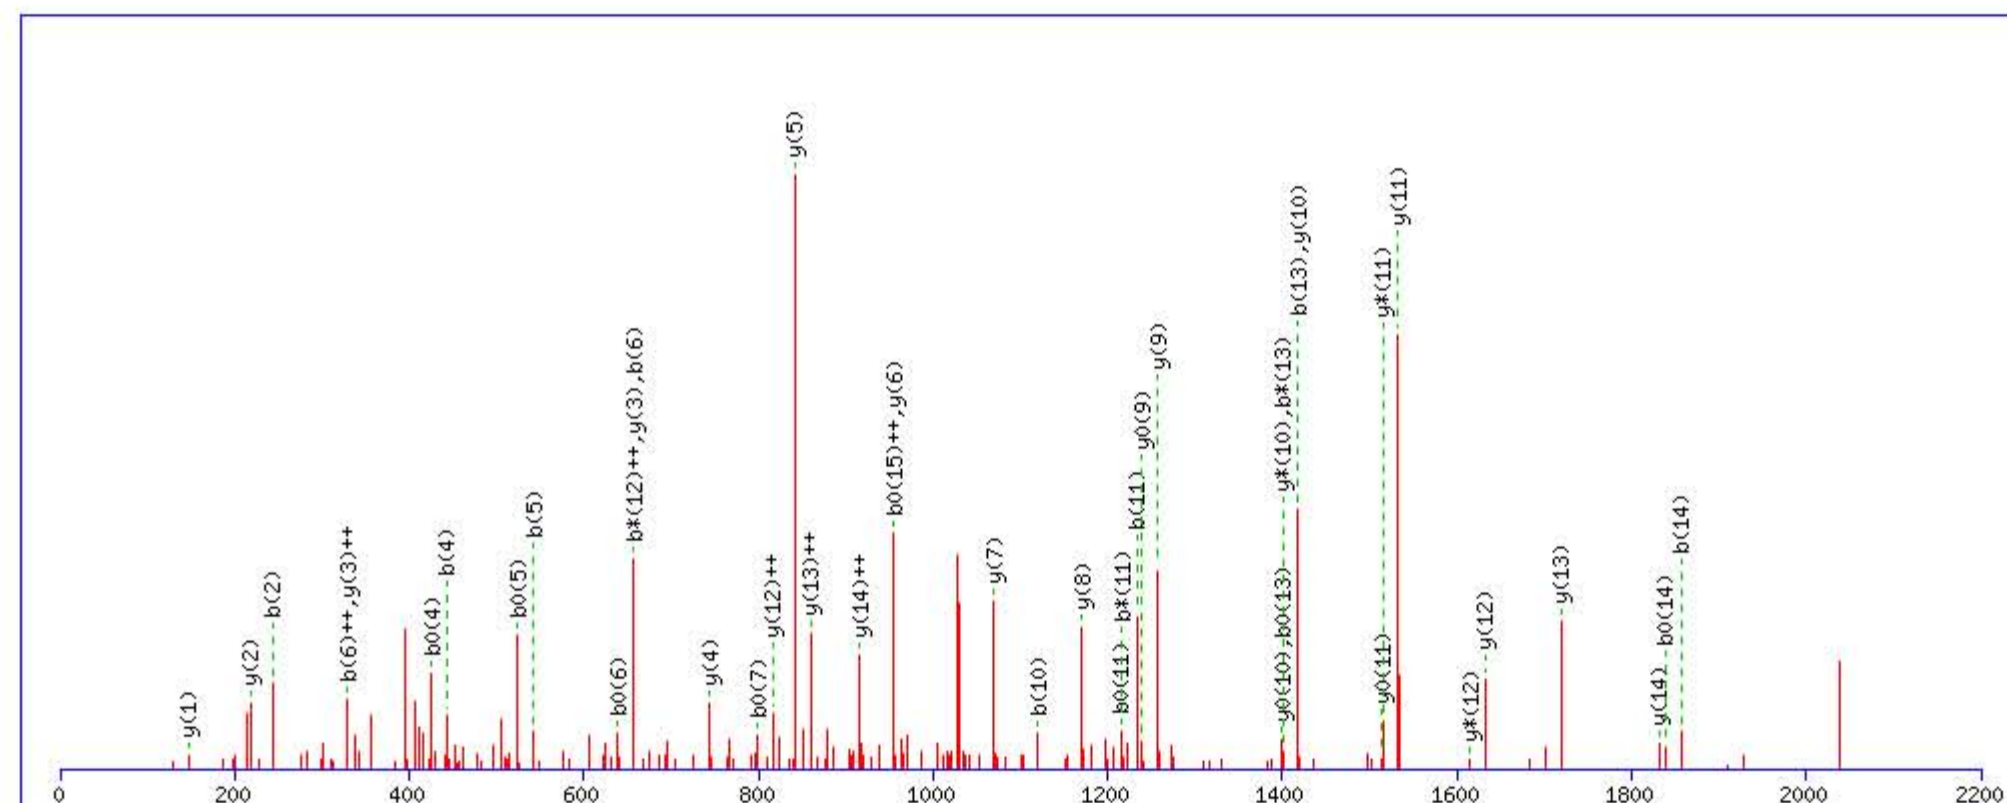

Monoisotopic mass of neutral peptide Mr(calc): 2072.987061

Fixed modifications: Carbamidomethyl (C) (apply to specified residues or termini only)

Variable modifications:

Q14 : Biotin:Thermo-21345 (Q)

Ions Score: 119 Expect: 2.5e-011

Matches : 44/156 fragment ions using 52 most intense peaks [\(help\)](#)

| #  | b                  | b <sup>++</sup>   | b <sup>*</sup>     | b <sup>***</sup>  | b <sup>0</sup>     | b <sup>0++</sup>  | Seq. | y                  | y <sup>++</sup>   | y <sup>*</sup>     | y <sup>***</sup> | y <sup>0</sup>     | y <sup>0++</sup> | #  |
|----|--------------------|-------------------|--------------------|-------------------|--------------------|-------------------|------|--------------------|-------------------|--------------------|------------------|--------------------|------------------|----|
| 1  | 130.049869         | 65.528572         |                    |                   | 112.039304         | 56.523290         | E    |                    |                   |                    |                  |                    |                  | 16 |
| 2  | <b>243.133933</b>  | 122.070605        |                    |                   | 225.123368         | 113.065322        | I    | 1944.951759        | 972.979517        | 1927.925210        | 964.466243       | 1926.941194        | 963.974235       | 15 |
| 3  | 356.217997         | 178.612637        |                    |                   | 338.207432         | 169.607354        | L    | <b>1831.867695</b> | <b>916.437485</b> | 1814.841146        | 907.924211       | 1813.857130        | 907.432203       | 14 |
| 4  | <b>443.250025</b>  | 222.128650        |                    |                   | <b>425.239460</b>  | 213.123368        | S    | <b>1718.783631</b> | <b>859.895454</b> | 1701.757082        | 851.382179       | 1700.773066        | 850.890171       | 13 |
| 5  | <b>542.318439</b>  | 271.662858        |                    |                   | <b>524.307874</b>  | 262.657575        | V    | <b>1631.751603</b> | <b>816.379439</b> | <b>1614.725054</b> | 807.866165       | 1613.741038        | 807.374157       | 12 |
| 6  | <b>657.345382</b>  | <b>329.176329</b> |                    |                   | <b>639.334817</b>  | 320.171046        | D    | <b>1532.683189</b> | 766.845233        | <b>1515.656640</b> | 758.331958       | <b>1514.672624</b> | 757.839950       | 11 |
| 7  | 817.376031         | 409.191654        |                    |                   | <b>799.365466</b>  | 400.186371        | C    | <b>1417.656246</b> | 709.331761        | <b>1400.629697</b> | 700.818487       | <b>1399.645681</b> | 700.326479       | 10 |
| 8  | 904.408059         | 452.707668        |                    |                   | 886.397494         | 443.702385        | S    | <b>1257.625597</b> | 629.316437        | 1240.599048        | 620.803162       | <b>1239.615032</b> | 620.311154       | 9  |
| 9  | 1005.455738        | 503.231507        |                    |                   | 987.445173         | 494.226225        | T    | <b>1170.593569</b> | 585.800422        | 1153.567020        | 577.287148       | 1152.583004        | 576.795140       | 8  |
| 10 | <b>1119.498665</b> | 560.252971        | 1102.472116        | 551.739696        | 1101.488100        | 551.247688        | N    | <b>1069.545890</b> | 535.276583        | 1052.519341        | 526.763309       | 1051.535325        | 526.271301       | 7  |
| 11 | <b>1233.541592</b> | 617.274434        | <b>1216.515043</b> | 608.761160        | <b>1215.531027</b> | 608.269152        | N    | <b>955.502963</b>  | 478.255119        | 938.476414         | 469.741845       | 937.492398         | 469.249837       | 6  |
| 12 | 1330.594356        | 665.800816        | 1313.567807        | <b>657.287542</b> | 1312.583791        | 656.795534        | P    | <b>841.460036</b>  | 421.233656        | 824.433487         | 412.720381       | 823.449471         | 412.228373       | 5  |
| 13 | <b>1417.626384</b> | 709.316830        | <b>1400.599835</b> | 700.803556        | <b>1399.615819</b> | 700.311548        | S    | <b>744.407272</b>  | 372.707274        | 727.380723         | 364.193999       | 726.396707         | 363.701991       | 4  |
| 14 | <b>1856.851710</b> | 928.929493        | 1839.825161        | 920.416219        | <b>1838.841145</b> | 919.924211        | Q    | <b>657.375244</b>  | <b>329.191260</b> | 640.348695         | 320.677985       |                    |                  | 3  |
| 15 | 1927.888824        | 964.448050        | 1910.862275        | 955.934776        | 1909.878259        | <b>955.442768</b> | A    | <b>218.149918</b>  | 109.578597        | 201.123369         | 101.065322       |                    |                  | 2  |
| 16 |                    |                   |                    |                   |                    |                   | K    | <b>147.112804</b>  | 74.060040         | 130.086255         | 65.546765        |                    |                  | 1  |

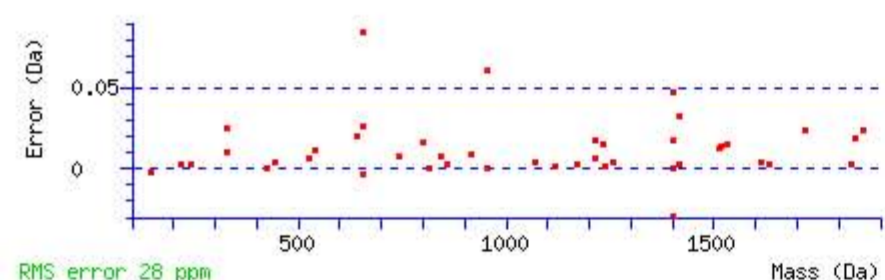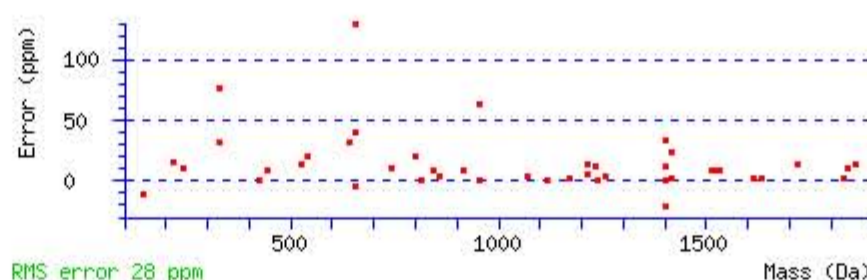

NCBI BLAST search of [EILSVDCSTNNPSQAK](#)

(Parameters: blastp, nr protein database, expect=20000, no filter, PAM30)

Other BLAST [web gateways](#)

## All matches to this query

| Score | Mr(calc):   | Delta     | Sequence                            |
|-------|-------------|-----------|-------------------------------------|
| 119.1 | 2072.987061 | 0.019307  | <a href="#">EILSVDCSTNNPSQAK</a>    |
| 5.7   | 2073.031265 | -0.024897 | <a href="#">YMEHEERPKALNDLGKK</a>   |
| 5.0   | 2073.029984 | -0.023616 | <a href="#">LQDDSVETVTSIEQAK</a>    |
| 2.5   | 2072.994492 | 0.011876  | <a href="#">ELVKSGLGADGVCMTFMK</a>  |
| 1.0   | 2073.016708 | -0.010340 | <a href="#">EGQIIKVVYGDKDADGFYR</a> |
| 0.3   | 2072.994904 | 0.011464  | <a href="#">MQDPNADTEWNDILRKK</a>   |



# MASCOT Search Results

## Peptide View

MS/MS Fragmentation of **QQTHMLDVMQDHF**SR

Found in **CLUS\_HUMAN**, Clusterin OS=Homo sapiens GN=CLU PE=1 SV=1

Match to Query 50711: 2183.004096 from(546.758300,4+) rtinseconds(2009) index(36443)

Title: Locus:1.1.1.3119.4 File:"2013-07-02 CLN FXIII 60 min 2nd F 3.wiff"

Data file C:\Program Files (x86)\Matrix Science\Mascot Daemon\mgf5 FXIII 60 min 2nd\mascot\_daemon\_merge.mgf

Click mouse within plot area to zoom in by factor of two about that point

Or, Plot from  to  Da

Label all possible matches  Label matches used for scoring

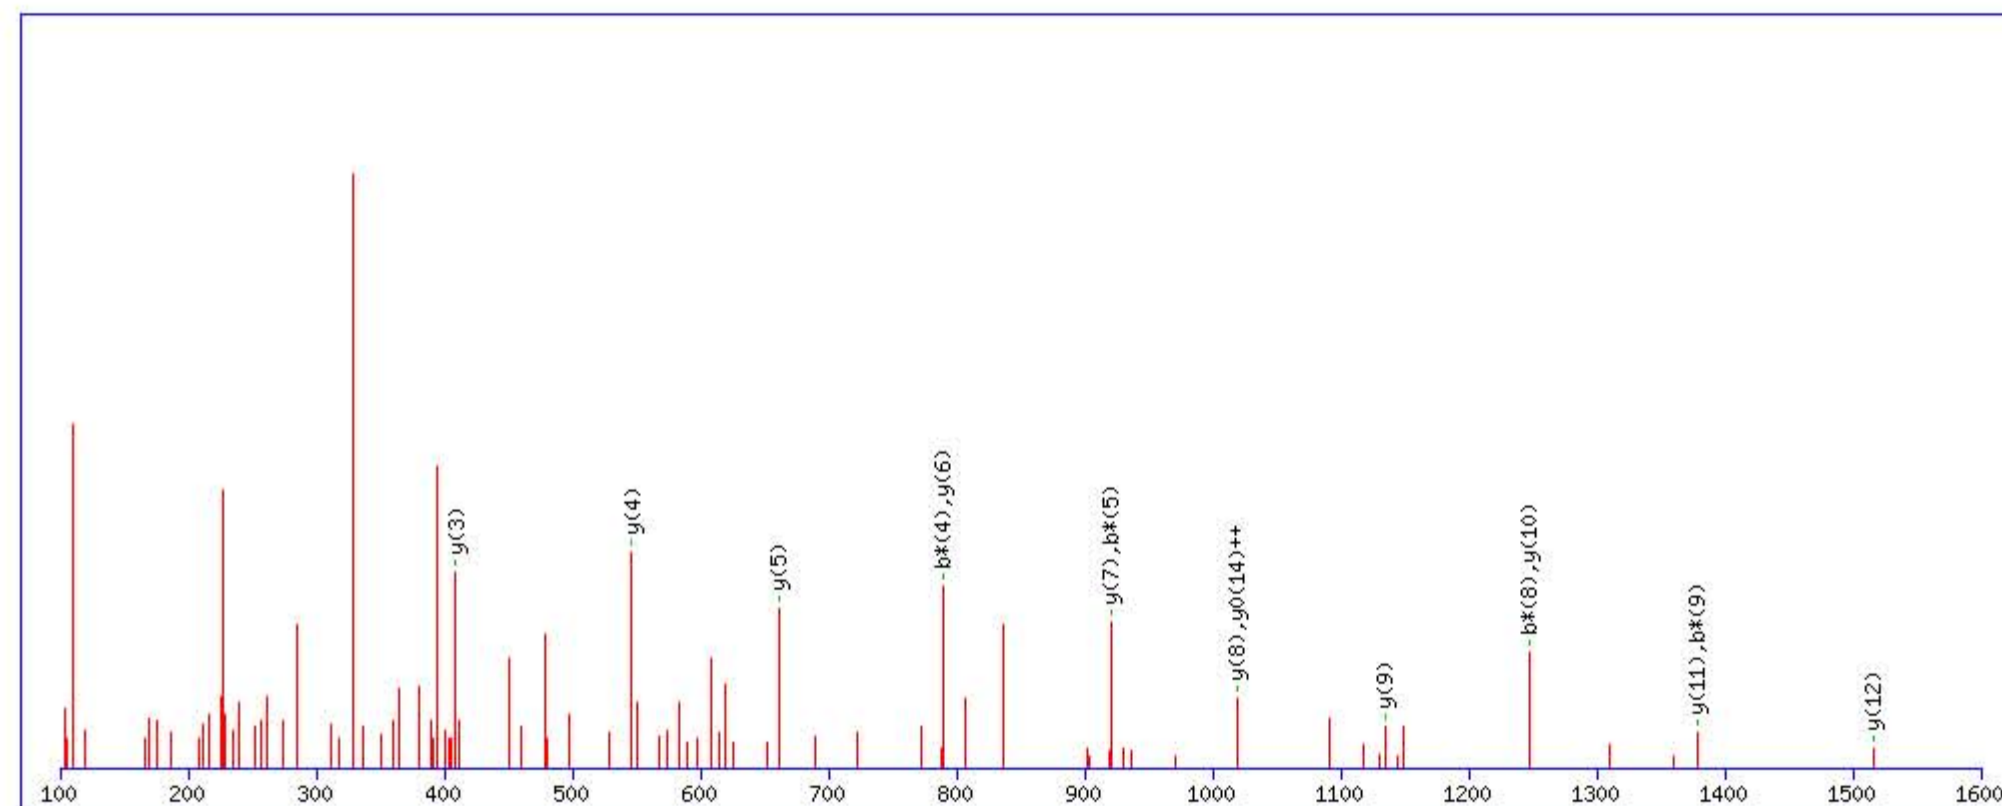

Monoisotopic mass of neutral peptide Mr(calc): 2183.007446

Fixed modifications: Carbamidomethyl (C) (apply to specified residues or termini only)

Variable modifications:

Q2 : Biotin:Thermo-21345 (Q)

Ions Score: 77 Expect: 2.7e-007

Matches : 15/162 fragment ions using 14 most intense peaks [\(help\)](#)

| #  | b           | b <sup>++</sup> | b <sup>+</sup> | b <sup>+++</sup> | b <sup>0</sup> | b <sup>0++</sup> | Seq. | y           | y <sup>++</sup> | y <sup>+</sup> | y <sup>+++</sup> | y <sup>0</sup> | y <sup>0++</sup> | #  |
|----|-------------|-----------------|----------------|------------------|----------------|------------------|------|-------------|-----------------|----------------|------------------|----------------|------------------|----|
| 1  | 129.065854  | 65.036565       | 112.039305     | 56.523291        |                |                  | Q    |             |                 |                |                  |                |                  | 15 |
| 2  | 568.291180  | 284.649228      | 551.264631     | 276.135954       |                |                  | Q    | 2055.956135 | 1028.481705     | 2038.929586    | 1019.968431      | 2037.945570    | 1019.476423      | 14 |
| 3  | 669.338859  | 335.173068      | 652.312310     | 326.659793       | 651.328294     | 326.167785       | T    | 1616.730809 | 808.869043      | 1599.704260    | 800.355768       | 1598.720244    | 799.863760       | 13 |
| 4  | 806.397771  | 403.702524      | 789.371222     | 395.189249       | 788.387206     | 394.697241       | H    | 1515.683130 | 758.345203      | 1498.656581    | 749.831929       | 1497.672565    | 749.339921       | 12 |
| 5  | 937.438256  | 469.222766      | 920.411707     | 460.709492       | 919.427691     | 460.217484       | M    | 1378.624218 | 689.815747      | 1361.597669    | 681.302473       | 1360.613653    | 680.810465       | 11 |
| 6  | 1050.522320 | 525.764798      | 1033.495771    | 517.251524       | 1032.511755    | 516.759516       | L    | 1247.583733 | 624.295505      | 1230.557184    | 615.782230       | 1229.573168    | 615.290222       | 10 |
| 7  | 1165.549263 | 583.278270      | 1148.522714    | 574.764995       | 1147.538698    | 574.272987       | D    | 1134.499669 | 567.753473      | 1117.473120    | 559.240198       | 1116.489104    | 558.748190       | 9  |
| 8  | 1264.617677 | 632.812477      | 1247.591128    | 624.299202       | 1246.607112    | 623.807194       | V    | 1019.472726 | 510.240001      | 1002.446177    | 501.726727       | 1001.462161    | 501.234719       | 8  |
| 9  | 1395.658162 | 698.332719      | 1378.631613    | 689.819445       | 1377.647597    | 689.327437       | M    | 920.404312  | 460.705794      | 903.377763     | 452.192520       | 902.393747     | 451.700512       | 7  |
| 10 | 1523.716740 | 762.362008      | 1506.690191    | 753.848734       | 1505.706175    | 753.356726       | Q    | 789.363827  | 395.185552      | 772.337278     | 386.672277       | 771.353262     | 386.180269       | 6  |
| 11 | 1638.743683 | 819.875480      | 1621.717134    | 811.362205       | 1620.733118    | 810.870197       | D    | 661.305249  | 331.156263      | 644.278700     | 322.642988       | 643.294684     | 322.150980       | 5  |
| 12 | 1775.802595 | 888.404936      | 1758.776046    | 879.891661       | 1757.792030    | 879.399653       | H    | 546.278306  | 273.642791      | 529.251757     | 265.129517       | 528.267741     | 264.637509       | 4  |
| 13 | 1922.871009 | 961.939143      | 1905.844460    | 953.425868       | 1904.860444    | 952.933860       | F    | 409.219394  | 205.113335      | 392.192845     | 196.600061       | 391.208829     | 196.108053       | 3  |
| 14 | 2009.903037 | 1005.455157     | 1992.876488    | 996.941882       | 1991.892472    | 996.449874       | S    | 262.150980  | 131.579128      | 245.124431     | 123.065854       | 244.140415     | 122.573846       | 2  |
| 15 |             |                 |                |                  |                |                  | R    | 175.118952  | 88.063114       | 158.092403     | 79.549839        |                |                  | 1  |

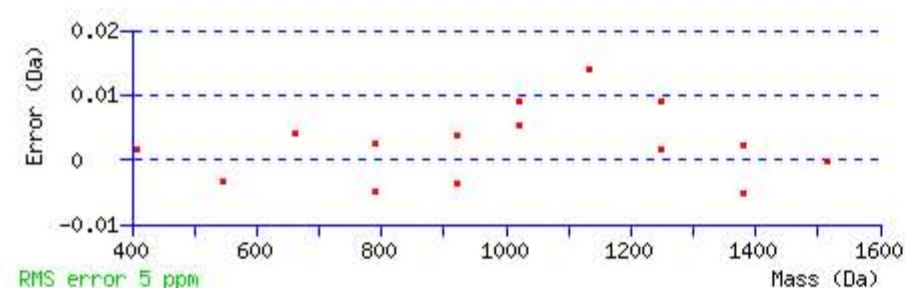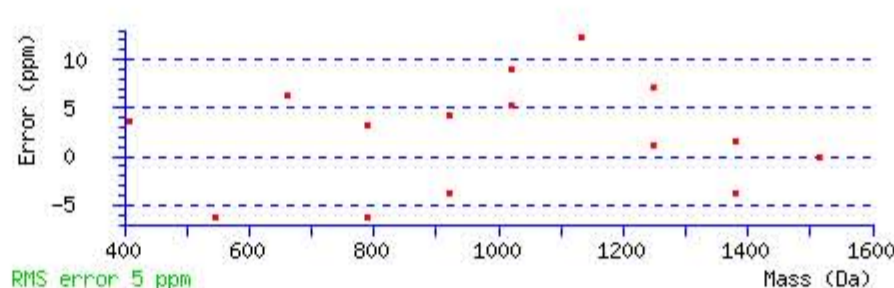

NCBI BLAST search of **QQTHMLDVMQDHF**SR

(Parameters: blastp, nr protein database, expect=20000, no filter, PAM30)

Other BLAST [web gateways](#)

All matches to this query

| Score | Mr(calc):   | Delta     | Sequence                         |
|-------|-------------|-----------|----------------------------------|
| 76.5  | 2183.007446 | -0.003350 | <a href="#">QQTHMLDVMQDHF</a> SR |
| 76.5  | 2183.007446 | -0.003350 | <a href="#">QQTHMLDVMQDHF</a> SR |



# MASCOT Search Results

## Peptide View

MS/MS Fragmentation of **QQTHMLDVMQDHF<sup>SR</sup>**

Found in **CLUS\_HUMAN**, Clusterin OS=Homo sapiens GN=CLU PE=1 SV=1

Match to Query 50713: 2183.012176 from(546.760320,4+) rtinseconds(1981) index(21586)

Title: Locus:1.1.1.692.3 File:"2013-07-02 CLN FXIII 60 min 2nd F 2.wiff"

Data file C:\Program Files (x86)\Matrix Science\Mascot Daemon\mgf5 FXIII 60 min 2nd\mascot\_daemon\_merge.mgf

Click mouse within plot area to zoom in by factor of two about that point

Or, Plot from  to  Da

Label all possible matches  Label matches used for scoring

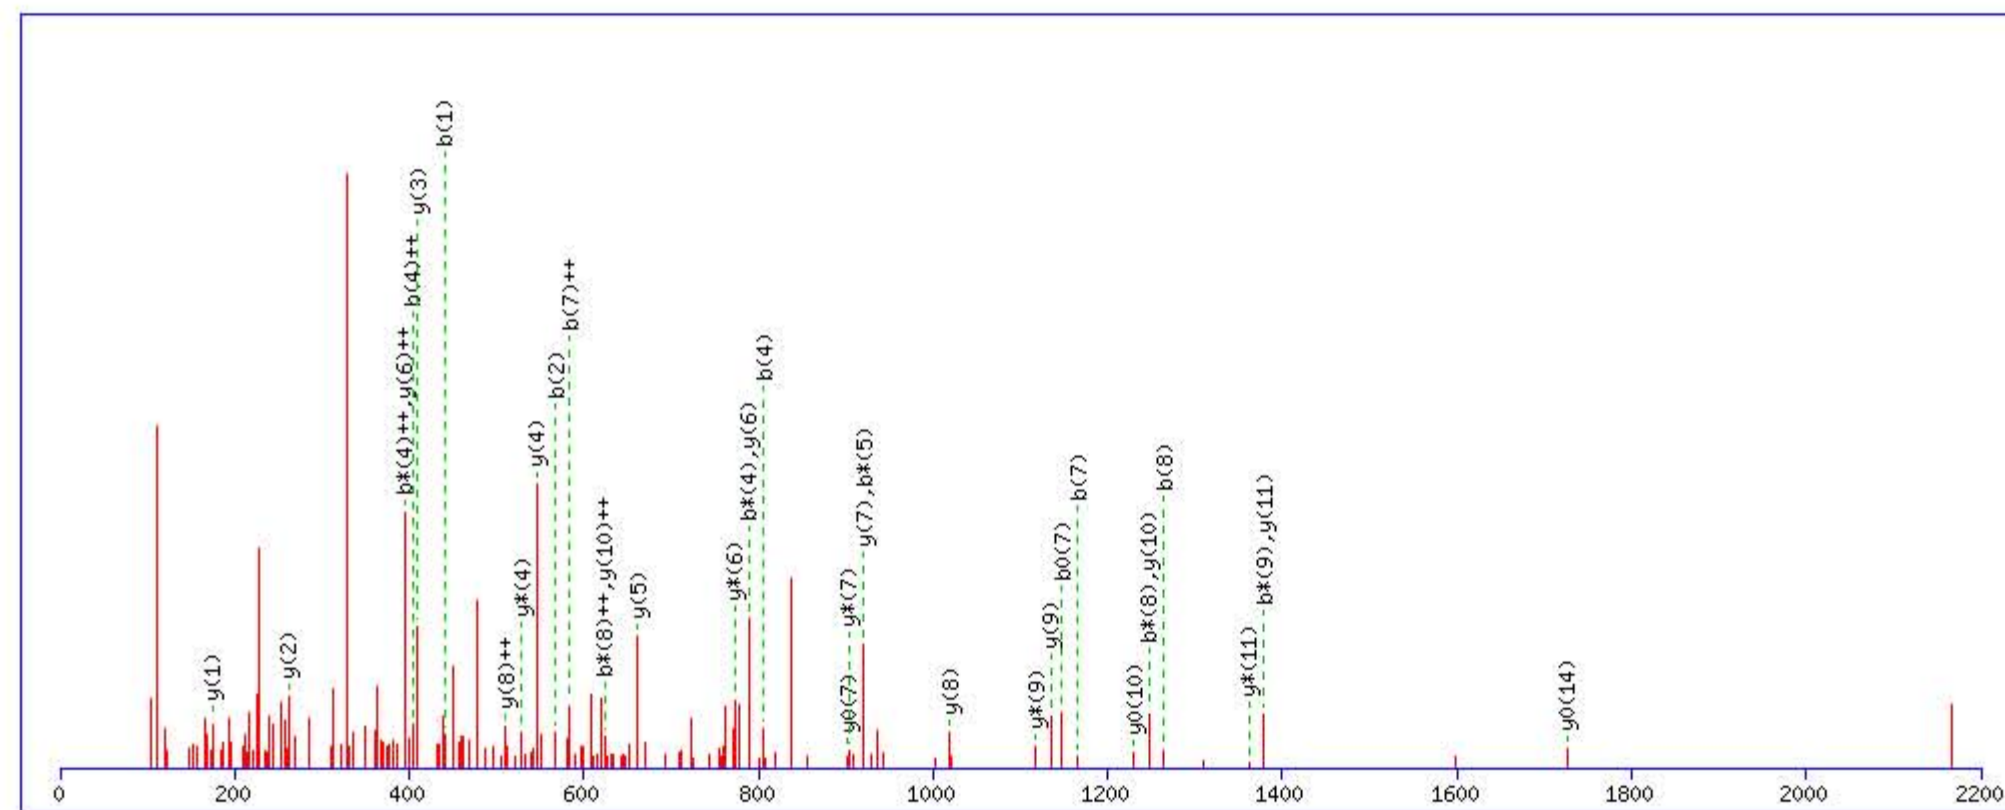

Monoisotopic mass of neutral peptide Mr(calc): 2183.007446

Fixed modifications: Carbamidomethyl (C) (apply to specified residues or termini only)

Variable modifications:

Q1 : Biotin:Thermo-21345 (Q)

Ions Score: 53 Expect: 6.7e-005

Matches : 36/162 fragment ions using 62 most intense peaks [\(help\)](#)

| #  | b                  | b <sup>++</sup>   | b <sup>+</sup>     | b <sup>+++</sup>  | b <sup>0</sup>     | b <sup>0++</sup> | Seq. | y                  | y <sup>++</sup>   | y <sup>+</sup>     | y <sup>+++</sup> | y <sup>0</sup>     | y <sup>0++</sup> | #  |
|----|--------------------|-------------------|--------------------|-------------------|--------------------|------------------|------|--------------------|-------------------|--------------------|------------------|--------------------|------------------|----|
| 1  | <b>440.232602</b>  | 220.619939        | 423.206053         | 212.106664        |                    |                  | Q    |                    |                   |                    |                  |                    |                  | 15 |
| 2  | <b>568.291180</b>  | 284.649228        | 551.264631         | 276.135954        |                    |                  | Q    | 1744.789387        | 872.898332        | 1727.762838        | 864.385057       | <b>1726.778822</b> | 863.893049       | 14 |
| 3  | 669.338859         | 335.173068        | 652.312310         | 326.659793        | 651.328294         | 326.167785       | T    | 1616.730809        | 808.869043        | 1599.704260        | 800.355768       | 1598.720244        | 799.863760       | 13 |
| 4  | <b>806.397771</b>  | <b>403.702524</b> | <b>789.371222</b>  | <b>395.189249</b> | 788.387206         | 394.697241       | H    | 1515.683130        | 758.345203        | 1498.656581        | 749.831929       | 1497.672565        | 749.339921       | 12 |
| 5  | 937.438256         | 469.222766        | <b>920.411707</b>  | 460.709492        | 919.427691         | 460.217484       | M    | <b>1378.624218</b> | 689.815747        | <b>1361.597669</b> | 681.302473       | 1360.613653        | 680.810465       | 11 |
| 6  | 1050.522320        | 525.764798        | 1033.495771        | 517.251524        | 1032.511755        | 516.759516       | L    | <b>1247.583733</b> | <b>624.295505</b> | 1230.557184        | 615.782230       | <b>1229.573168</b> | 615.290222       | 10 |
| 7  | <b>1165.549263</b> | <b>583.278270</b> | 1148.522714        | 574.764995        | <b>1147.538698</b> | 574.272987       | D    | <b>1134.499669</b> | 567.753473        | <b>1117.473120</b> | 559.240198       | 1116.489104        | 558.748190       | 9  |
| 8  | <b>1264.617677</b> | 632.812477        | <b>1247.591128</b> | <b>624.299202</b> | 1246.607112        | 623.807194       | V    | <b>1019.472726</b> | <b>510.240001</b> | 1002.446177        | 501.726727       | 1001.462161        | 501.234719       | 8  |
| 9  | 1395.658162        | 698.332719        | <b>1378.631613</b> | 689.819445        | 1377.647597        | 689.327437       | M    | <b>920.404312</b>  | 460.705794        | <b>903.377763</b>  | 452.192520       | <b>902.393747</b>  | 451.700512       | 7  |
| 10 | 1523.716740        | 762.362008        | 1506.690191        | 753.848734        | 1505.706175        | 753.356726       | Q    | <b>789.363827</b>  | <b>395.185552</b> | <b>772.337278</b>  | 386.672277       | 771.353262         | 386.180269       | 6  |
| 11 | 1638.743683        | 819.875480        | 1621.717134        | 811.362205        | 1620.733118        | 810.870197       | D    | <b>661.305249</b>  | 331.156263        | 644.278700         | 322.642988       | 643.294684         | 322.150980       | 5  |
| 12 | 1775.802595        | 888.404936        | 1758.776046        | 879.891661        | 1757.792030        | 879.399653       | H    | <b>546.278306</b>  | 273.642791        | <b>529.251757</b>  | 265.129517       | 528.267741         | 264.637509       | 4  |
| 13 | 1922.871009        | 961.939143        | 1905.844460        | 953.425868        | 1904.860444        | 952.933860       | F    | <b>409.219394</b>  | 205.113335        | 392.192845         | 196.600061       | 391.208829         | 196.108053       | 3  |
| 14 | 2009.903037        | 1005.455157       | 1992.876488        | 996.941882        | 1991.892472        | 996.449874       | S    | <b>262.150980</b>  | 131.579128        | 245.124431         | 123.065854       | 244.140415         | 122.573846       | 2  |
| 15 |                    |                   |                    |                   |                    |                  | R    | <b>175.118952</b>  | 88.063114         | 158.092403         | 79.549839        |                    |                  | 1  |

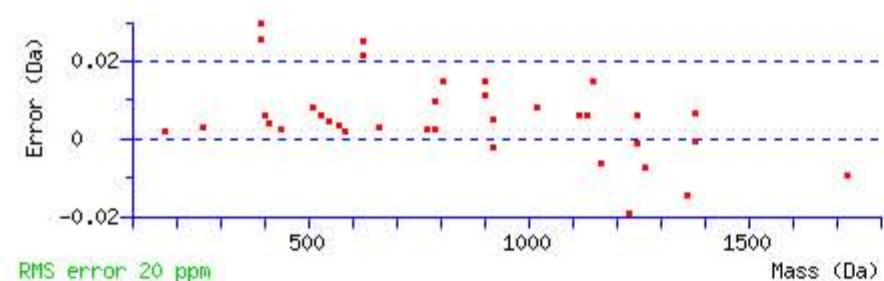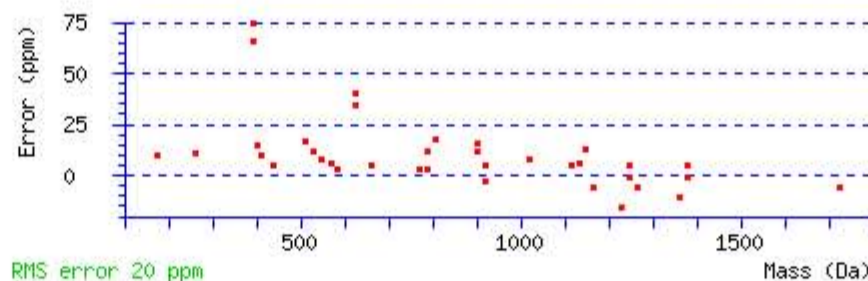

NCBI BLAST search of **QQTHMLDVMQDHF<sup>SR</sup>**

(Parameters: blastp, nr protein database, expect=20000, no filter, PAM30)

Other BLAST [web gateways](#)

All matches to this query

| Score | Mr(calc):   | Delta    | Sequence                                   |
|-------|-------------|----------|--------------------------------------------|
| 53.1  | 2183.007446 | 0.004730 | <a href="#">QQTHMLDVMQDHF<sup>SR</sup></a> |
| 50.5  | 2183.007446 | 0.004730 | <a href="#">QQTHMLDVMQDHF<sup>SR</sup></a> |

Mascot: <http://www.matrixscience.com/>



# MASCOT Search Results

## Peptide View

MS/MS Fragmentation of **VSVSQTSK**

Found in **FA9\_HUMAN**, Coagulation factor IX OS=Homo sapiens GN=F9 PE=1 SV=2

Match to Query 21478: 1145.612008 from(573.813280,2+) rtinseconds(1448) index(49162)

Title: Locus:1.1.1.1119.24 File:"2013-07-02 CLN FXIII 60 min 2nd F 4.wiff"

Data file C:\Program Files (x86)\Matrix Science\Mascot Daemon\mgf5 FXIII 60 min 2nd\mascot\_daemon\_merge.mgf

Click mouse within plot area to zoom in by factor of two about that point

Or, Plot from  to  Da

Label all possible matches  Label matches used for scoring

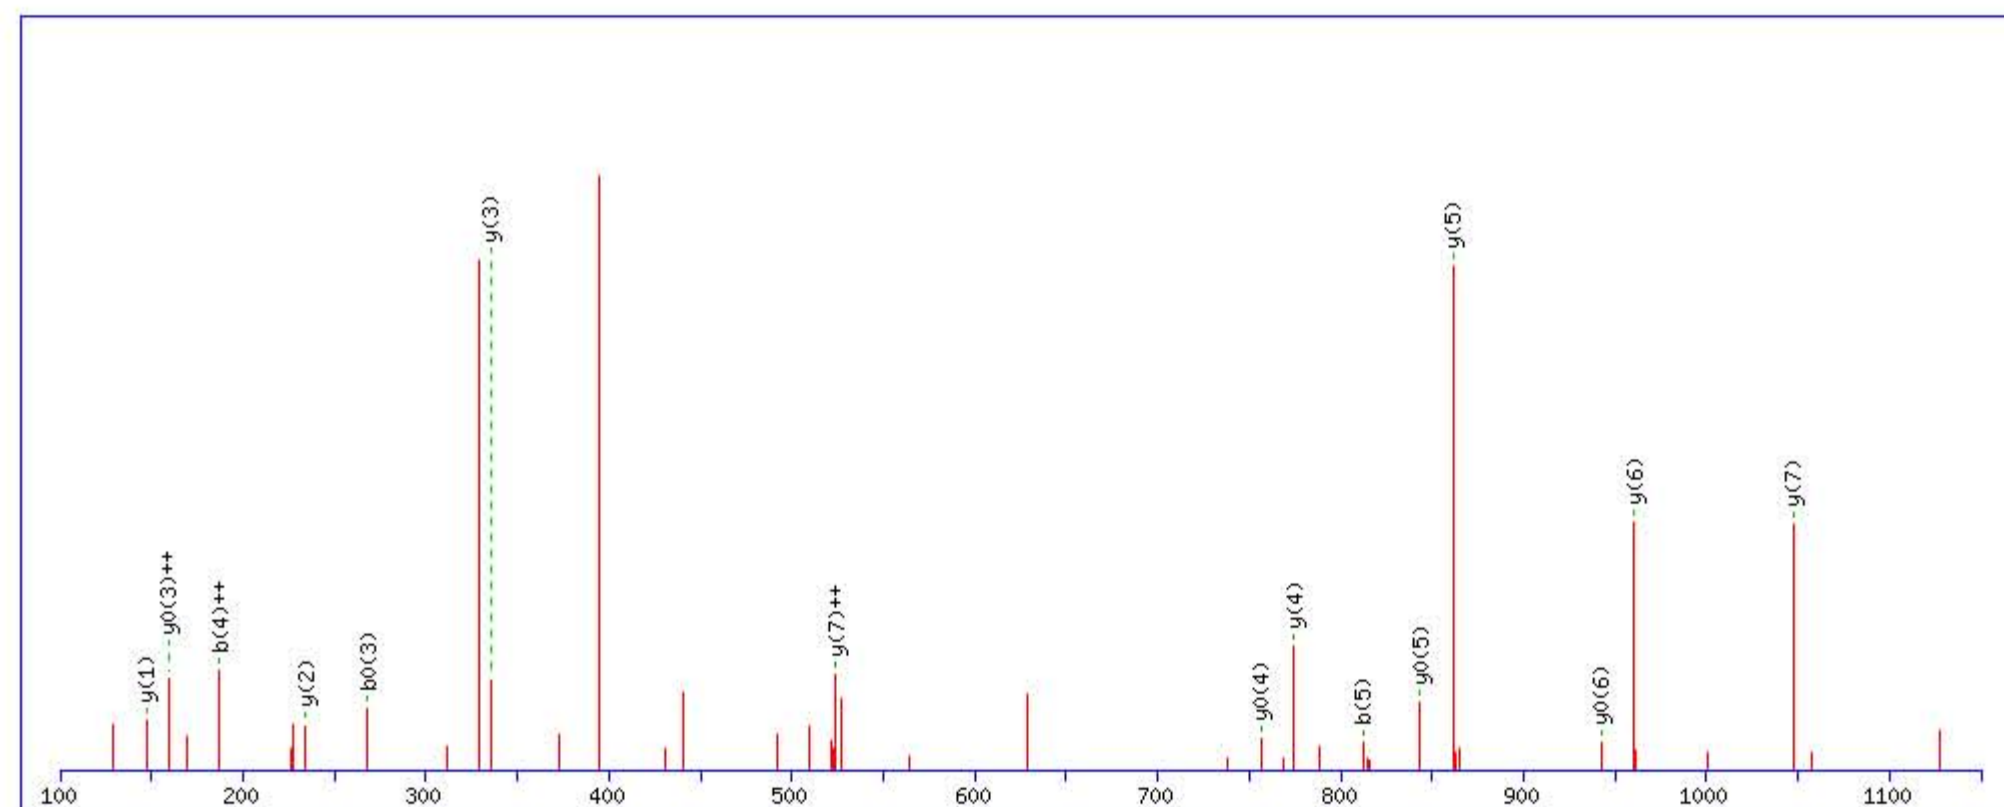

Monoisotopic mass of neutral peptide Mr(calc): 1145.611450

Fixed modifications: Carbamidomethyl (C) (apply to specified residues or termini only)

Variable modifications:

Q5 : Biotin:Thermo-21345 (Q)

Ions Score: 46 Expect: 0.00027

Matches : 16/72 fragment ions using 26 most intense peaks [\(help\)](#)

| # | b                 | b <sup>++</sup>   | b <sup>*</sup> | b <sup>*++</sup> | b <sup>0</sup>    | b <sup>0++</sup> | Seq. | y                  | y <sup>++</sup>   | y <sup>*</sup> | y <sup>*++</sup> | y <sup>0</sup>    | y <sup>0++</sup>  | # |
|---|-------------------|-------------------|----------------|------------------|-------------------|------------------|------|--------------------|-------------------|----------------|------------------|-------------------|-------------------|---|
| 1 | 100.075690        | 50.541483         |                |                  |                   |                  | V    |                    |                   |                |                  |                   |                   | 8 |
| 2 | <b>187.107718</b> | 94.057497         |                |                  | 169.097153        | 85.052214        | S    | <b>1047.550307</b> | <b>524.278792</b> | 1030.523758    | 515.765517       | 1029.539742       | 515.273509        | 7 |
| 3 | 286.176132        | 143.591704        |                |                  | <b>268.165567</b> | 134.586422       | V    | <b>960.518279</b>  | 480.762778        | 943.491730     | 472.249503       | <b>942.507714</b> | 471.757495        | 6 |
| 4 | 373.208160        | <b>187.107718</b> |                |                  | 355.197595        | 178.102435       | S    | <b>861.449865</b>  | 431.228571        | 844.423316     | 422.715296       | <b>843.439300</b> | 422.223288        | 5 |
| 5 | <b>812.433486</b> | 406.720381        | 795.406937     | 398.207107       | 794.422921        | 397.715099       | Q    | <b>774.417837</b>  | 387.712557        | 757.391288     | 379.199282       | <b>756.407272</b> | 378.707274        | 4 |
| 6 | 913.481165        | 457.244221        | 896.454616     | 448.730946       | 895.470600        | 448.238938       | T    | <b>335.192511</b>  | 168.099893        | 318.165962     | 159.586619       | 317.181946        | <b>159.094611</b> | 3 |
| 7 | 1000.513193       | 500.760235        | 983.486644     | 492.246960       | 982.502628        | 491.754952       | S    | <b>234.144832</b>  | 117.576054        | 217.118283     | 109.062779       | 216.134267        | 108.570771        | 2 |
| 8 |                   |                   |                |                  |                   |                  | K    | <b>147.112804</b>  | 74.060040         | 130.086255     | 65.546765        |                   |                   | 1 |

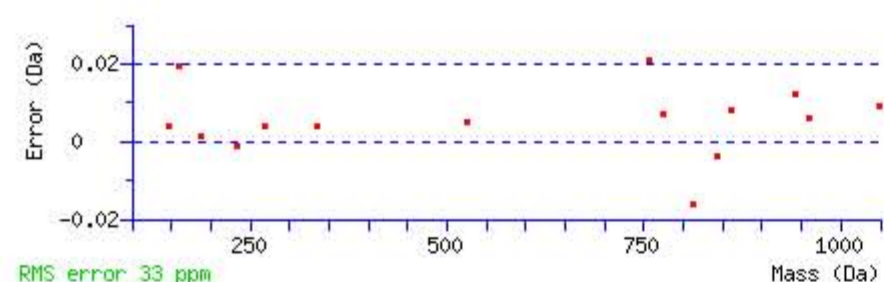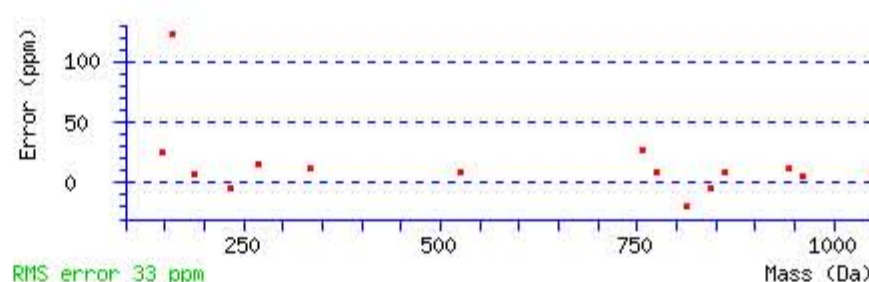

NCBI BLAST search of **VSVSQTSK**

(Parameters: blastp, nr protein database, expect=20000, no filter, PAM30)

Other BLAST [web gateways](#)

All matches to this query

| Score | Mr(calc):   | Delta     | Sequence                     |
|-------|-------------|-----------|------------------------------|
| 46.5  | 1145.611450 | 0.000558  | <a href="#">VSVSQTSK</a>     |
| 8.0   | 1145.611420 | 0.000588  | <a href="#">KSIMVQSPEK</a>   |
| 6.7   | 1145.622650 | -0.010642 | <a href="#">VDNAMSRLK</a>    |
| 3.9   | 1145.629196 | -0.017188 | <a href="#">GEVLGLSSSLGK</a> |
| 3.9   | 1145.629181 | -0.017173 | <a href="#">VAKEVVEASSK</a>  |
| 3.7   | 1145.604034 | 0.007974  | <a href="#">STPSSPSLRK</a>   |
| 3.3   | 1145.623337 | -0.011329 | <a href="#">WVDGGKPLFK</a>   |
| 2.8   | 1145.608047 | 0.003961  | <a href="#">WTKEKTEPK</a>    |
| 2.2   | 1145.622650 | -0.010642 | <a href="#">VSMDLRANLK</a>   |
| 1.1   | 1145.629166 | -0.017158 | <a href="#">EDKLEAVKSK</a>   |



# **MASCOT** Mascot Search Results

## Peptide View

MS/MS Fragmentation of **SALVLQYLR**

Found in **FA9\_HUMAN**, Coagulation factor IX OS=Homo sapiens GN=F9 PE=1 SV=2

Match to Query 29293: 1372.803028 from(687.408790,2+) rtinseconds(2436) index(55616)

Title: Locus:1.1.1.1463.10 File:"2013-07-02 CLN FXIII 60 min 2nd F 4.wiff"

Data file C:\Program Files (x86)\Matrix Science\Mascot Daemon\mgf5 FXIII 60 min 2nd\mascot\_daemon\_merge.mgf

Click mouse within plot area to zoom in by factor of two about that point

Or, Plot from  to  Da

Label all possible matches  Label matches used for scoring

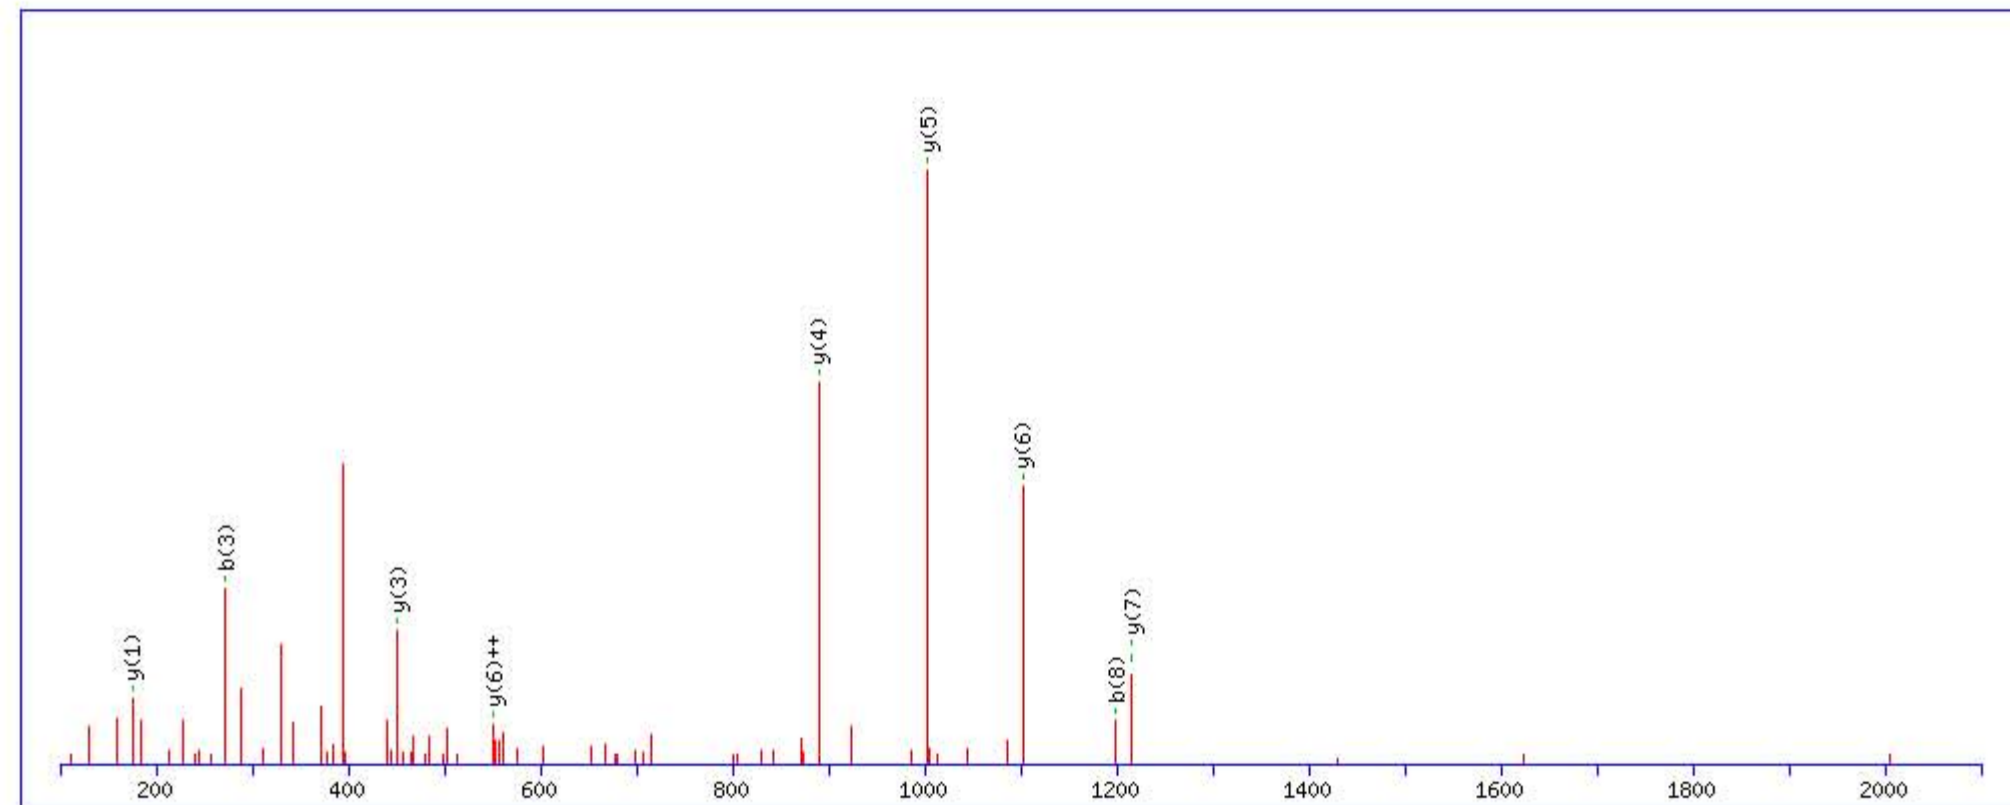

Monoisotopic mass of neutral peptide  $M_r(\text{calc})$ : 1372.790054

Fixed modifications: Carbamidomethyl (C) (apply to specified residues or termini only)

Variable modifications:

Q6 : Biotin:Thermo-21345 (Q)

Ions Score: 47 Expect: 0.00015

Matches : 9/70 fragment ions using 12 most intense peaks [\(help\)](#)

| # | b                  | b <sup>++</sup> | b <sup>*</sup> | b <sup>*++</sup> | b <sup>0</sup> | b <sup>0++</sup> | Seq. | y                  | y <sup>++</sup>   | y <sup>*</sup> | y <sup>*++</sup> | # |
|---|--------------------|-----------------|----------------|------------------|----------------|------------------|------|--------------------|-------------------|----------------|------------------|---|
| 1 | 88.039304          | 44.523290       |                |                  | 70.028739      | 35.518008        | S    |                    |                   |                |                  | 9 |
| 2 | 159.076418         | 80.041847       |                |                  | 141.065853     | 71.036564        | A    | 1286.765327        | 643.886301        | 1269.738778    | 635.373027       | 8 |
| 3 | <b>272.160482</b>  | 136.583879      |                |                  | 254.149917     | 127.578597       | L    | <b>1215.728213</b> | 608.367744        | 1198.701664    | 599.854470       | 7 |
| 4 | 371.228896         | 186.118086      |                |                  | 353.218331     | 177.112804       | V    | <b>1102.644149</b> | <b>551.825713</b> | 1085.617600    | 543.312438       | 6 |
| 5 | 484.312960         | 242.660118      |                |                  | 466.302395     | 233.654836       | L    | <b>1003.575735</b> | 502.291505        | 986.549186     | 493.778231       | 5 |
| 6 | 923.538286         | 462.272781      | 906.511737     | 453.759507       | 905.527721     | 453.267499       | Q    | <b>890.491671</b>  | 445.749473        | 873.465122     | 437.236199       | 4 |
| 7 | 1086.601615        | 543.804446      | 1069.575066    | 535.291171       | 1068.591050    | 534.799163       | Y    | <b>451.266345</b>  | 226.136810        | 434.239796     | 217.623536       | 3 |
| 8 | <b>1199.685679</b> | 600.346477      | 1182.659130    | 591.833203       | 1181.675114    | 591.341195       | L    | 288.203016         | 144.605146        | 271.176467     | 136.091871       | 2 |
| 9 |                    |                 |                |                  |                |                  | R    | <b>175.118952</b>  | 88.063114         | 158.092403     | 79.549839        | 1 |

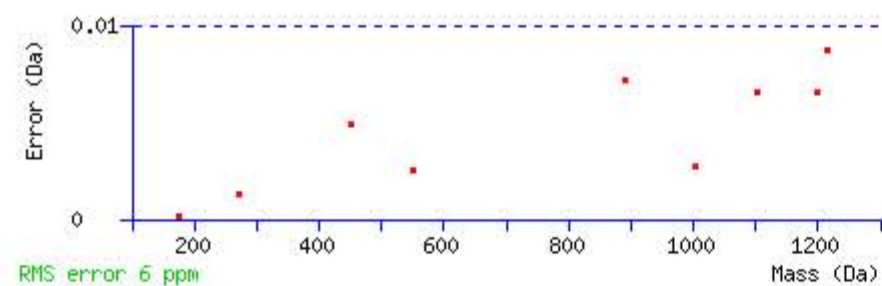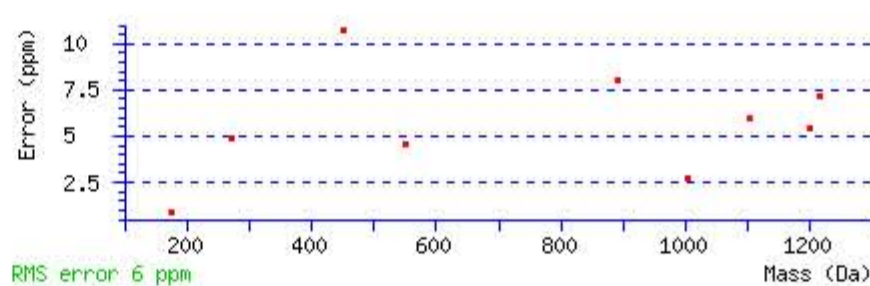

NCBI BLAST search of **SALVLQYLR**

(Parameters: blastp, nr protein database, expect=20000, no filter, PAM30)

Other BLAST [web gateways](#)

All matches to this query

| Score | $M_r(\text{calc})$ : | Delta    | Sequence                     |
|-------|----------------------|----------|------------------------------|
| 47.2  | 1372.790054          | 0.012974 | <a href="#">SALVLQYLR</a>    |
| 8.1   | 1372.782669          | 0.020359 | <a href="#">LSNKFNSVIPVR</a> |
| 7.0   | 1372.790039          | 0.012989 | <a href="#">KELQILYR</a>     |
| 1.1   | 1372.801270          | 0.001758 | <a href="#">ALKMPYRILPR</a>  |
| 0.6   | 1372.797913          | 0.005115 | <a href="#">LRLLSGYLWPR</a>  |

Mascot: <http://www.matrixscience.com/>



# MASCOT Search Results

## Peptide View

MS/MS Fragmentation of **ITVVAGEHNIEETEHTEQK**

Found in **FA9\_HUMAN**, Coagulation factor IX OS=Homo sapiens GN=F9 PE=1 SV=2

Match to Query 55964: 2474.215896 from(619.561250,4+) rtinseconds(1653) index(50592)

Title: Locus:1.1.1.1191.8 File:"2013-07-02 CLN FXIII 60 min 2nd F 4.wiff"

Data file C:\Program Files (x86)\Matrix Science\Mascot Daemon\mgf\5 FXIII 60 min 2nd\mascot\_daemon\_merge.mgf

Click mouse within plot area to zoom in by factor of two about that point

Or, Plot from  to  Da

Label all possible matches  Label matches used for scoring

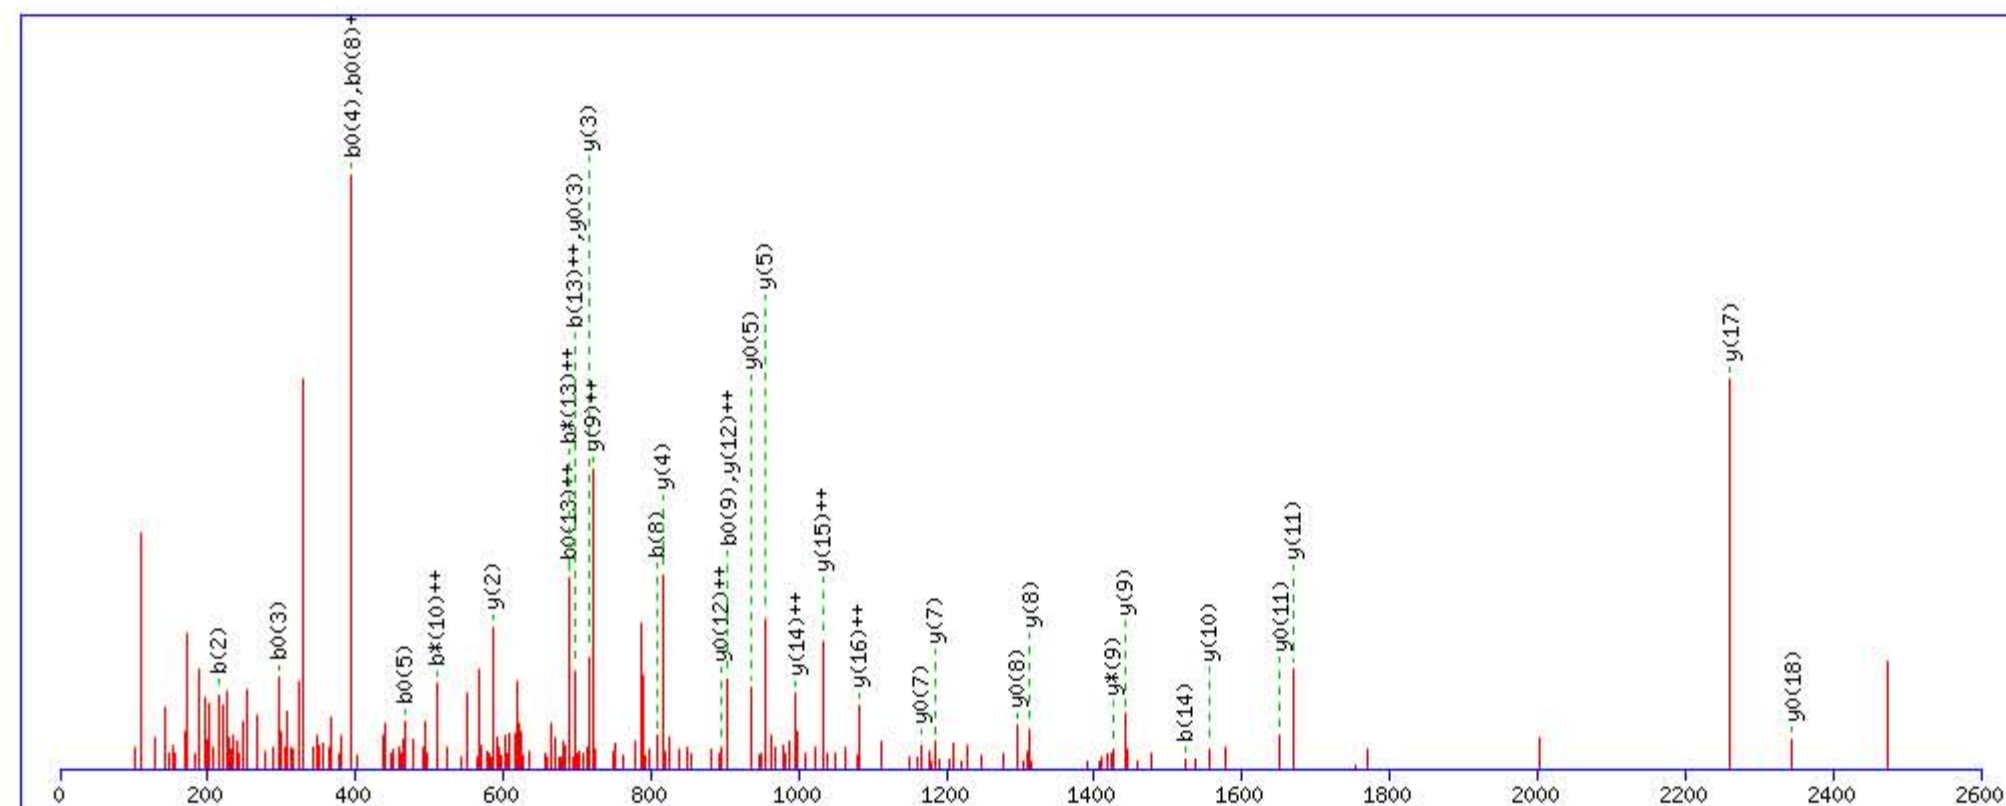

Monoisotopic mass of neutral peptide Mr(calc): 2474.211121

Fixed modifications: Carbamidomethyl (C) (apply to specified residues or termini only)

Variable modifications:

Q18 : Biotin:Thermo-21345 (Q)

Ions Score: 43 Expect: 0.0012

Matches : 35/194 fragment ions using 68 most intense peaks [\(help\)](#)

| #  | b                  | b <sup>++</sup>   | b <sup>+</sup> | b <sup>+++</sup>  | b <sup>0</sup>    | b <sup>0++</sup>  | Seq. | y                  | y <sup>++</sup>    | y <sup>+</sup>     | y <sup>+++</sup> | y <sup>0</sup>     | y <sup>0++</sup>  | #  |
|----|--------------------|-------------------|----------------|-------------------|-------------------|-------------------|------|--------------------|--------------------|--------------------|------------------|--------------------|-------------------|----|
| 1  | 114.091340         | 57.549308         |                |                   |                   |                   | I    |                    |                    |                    |                  |                    |                   | 19 |
| 2  | <b>215.139019</b>  | 108.073147        |                |                   | 197.128454        | 99.067865         | T    | 2362.134353        | 1181.570814        | 2345.107804        | 1173.057540      | <b>2344.123788</b> | 1172.565532       | 18 |
| 3  | 314.207433         | 157.607354        |                |                   | <b>296.196868</b> | 148.602072        | V    | <b>2261.086674</b> | 1131.046975        | 2244.060125        | 1122.533700      | 2243.076109        | 1122.041692       | 17 |
| 4  | 413.275847         | 207.141561        |                |                   | <b>395.265282</b> | 198.136279        | V    | 2162.018260        | <b>1081.512768</b> | 2144.991711        | 1072.999493      | 2144.007695        | 1072.507485       | 16 |
| 5  | 484.312961         | 242.660119        |                |                   | <b>466.302396</b> | 233.654836        | A    | 2062.949846        | <b>1031.978561</b> | 2045.923297        | 1023.465286      | 2044.939281        | 1022.973278       | 15 |
| 6  | 541.334425         | 271.170851        |                |                   | 523.323860        | 262.165568        | G    | 1991.912732        | <b>996.460004</b>  | 1974.886183        | 987.946730       | 1973.902167        | 987.454722        | 14 |
| 7  | 670.377018         | 335.692147        |                |                   | 652.366453        | 326.686865        | E    | 1934.891268        | 967.949272         | 1917.864719        | 959.435998       | 1916.880703        | 958.943990        | 13 |
| 8  | <b>807.435930</b>  | 404.221603        |                |                   | 789.425365        | <b>395.216321</b> | H    | 1805.848675        | <b>903.427976</b>  | 1788.822126        | 894.914701       | 1787.838110        | <b>894.422693</b> | 12 |
| 9  | 921.478857         | 461.243067        | 904.452308     | 452.729792        | <b>903.468292</b> | 452.237784        | N    | <b>1668.789763</b> | 834.898520         | 1651.763214        | 826.385245       | <b>1650.779198</b> | 825.893237        | 11 |
| 10 | 1034.562921        | 517.785099        | 1017.536372    | <b>509.271824</b> | 1016.552356       | 508.779816        | I    | <b>1554.746836</b> | 777.877056         | 1537.720287        | 769.363782       | 1536.736271        | 768.871774        | 10 |
| 11 | 1163.605514        | 582.306395        | 1146.578965    | 573.793121        | 1145.594949       | 573.301113        | E    | <b>1441.662772</b> | <b>721.335024</b>  | <b>1424.636223</b> | 712.821750       | 1423.652207        | 712.329742        | 9  |
| 12 | 1292.648107        | 646.827692        | 1275.621558    | 638.314417        | 1274.637542       | 637.822409        | E    | <b>1312.620179</b> | 656.813728         | 1295.593630        | 648.300453       | <b>1294.609614</b> | 647.808445        | 8  |
| 13 | 1393.695786        | <b>697.351531</b> | 1376.669237    | <b>688.838257</b> | 1375.685221       | <b>688.346249</b> | T    | <b>1183.577586</b> | 592.292431         | 1166.551037        | 583.779157       | <b>1165.567021</b> | 583.287149        | 7  |
| 14 | <b>1522.738379</b> | 761.872828        | 1505.711830    | 753.359553        | 1504.727814       | 752.867545        | E    | 1082.529907        | 541.768592         | 1065.503358        | 533.255317       | 1064.519342        | 532.763309        | 6  |
| 15 | 1659.797291        | 830.402284        | 1642.770742    | 821.889009        | 1641.786726       | 821.397001        | H    | <b>953.487314</b>  | 477.247295         | 936.460765         | 468.734021       | <b>935.476749</b>  | 468.242013        | 5  |
| 16 | 1760.844970        | 880.926123        | 1743.818421    | 872.412849        | 1742.834405       | 871.920841        | T    | <b>816.428402</b>  | 408.717839         | 799.401853         | 400.204565       | 798.417837         | 399.712557        | 4  |
| 17 | 1889.887563        | 945.447420        | 1872.861014    | 936.934145        | 1871.876998       | 936.442137        | E    | <b>715.380723</b>  | 358.194000         | 698.354174         | 349.680725       | <b>697.370158</b>  | 349.188717        | 3  |
| 18 | 2329.112889        | 1165.060082       | 2312.086340    | 1156.546808       | 2311.102324       | 1156.054800       | Q    | <b>586.338130</b>  | 293.672703         | 569.311581         | 285.159429       |                    |                   | 2  |
| 19 |                    |                   |                |                   |                   |                   | K    | 147.112804         | 74.060040          | 130.086255         | 65.546765        |                    |                   | 1  |

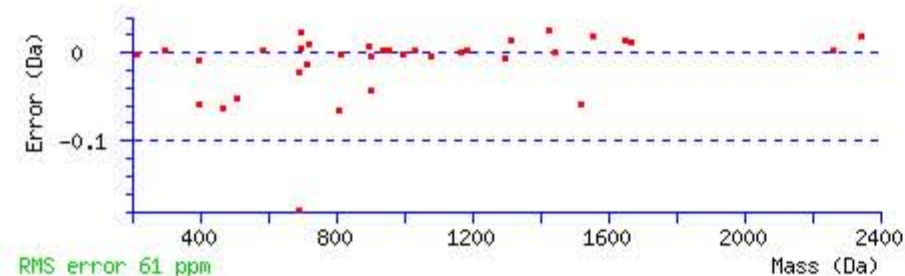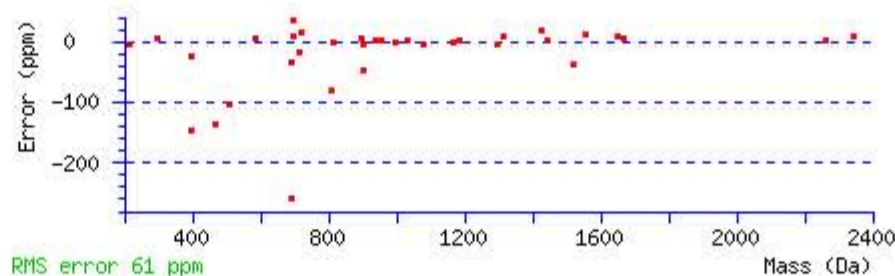

NCBI BLAST search of [ITVVAGEHNIEETEHTEQK](#)

(Parameters: blastp, nr protein database, expect=20000, no filter, PAM30)

Other BLAST [web gateways](#)

All matches to this query

| Score | Mr(calc):   | Delta    | Sequence                            |
|-------|-------------|----------|-------------------------------------|
| 43.3  | 2474.211121 | 0.004775 | <a href="#">ITVVAGEHNIEETEHTEQK</a> |

Mascot: <http://www.matrixscience.com/>



# MASCOT SEARCH RESULTS

## Peptide View

MS/MS Fragmentation of **SQHLDNFSNQIGK**

Found in **FA5\_HUMAN**, Coagulation factor V OS=Homo sapiens GN=F5 PE=1 SV=4

Match to Query 42681: 1797.889002 from(600.303610,3+) rtinseconds(1796) index(51491)

Title: Locus:1.1.1.1241.4 File:"2013-07-02 CLN FXIII 60 min 2nd F 4.wiff"

Data file C:\Program Files (x86)\Matrix Science\Mascot Daemon\mgf5 FXIII 60 min 2nd\mascot\_daemon\_merge.mgf

Click mouse within plot area to zoom in by factor of two about that point

Or, Plot from  to  Da

Label all possible matches  Label matches used for scoring

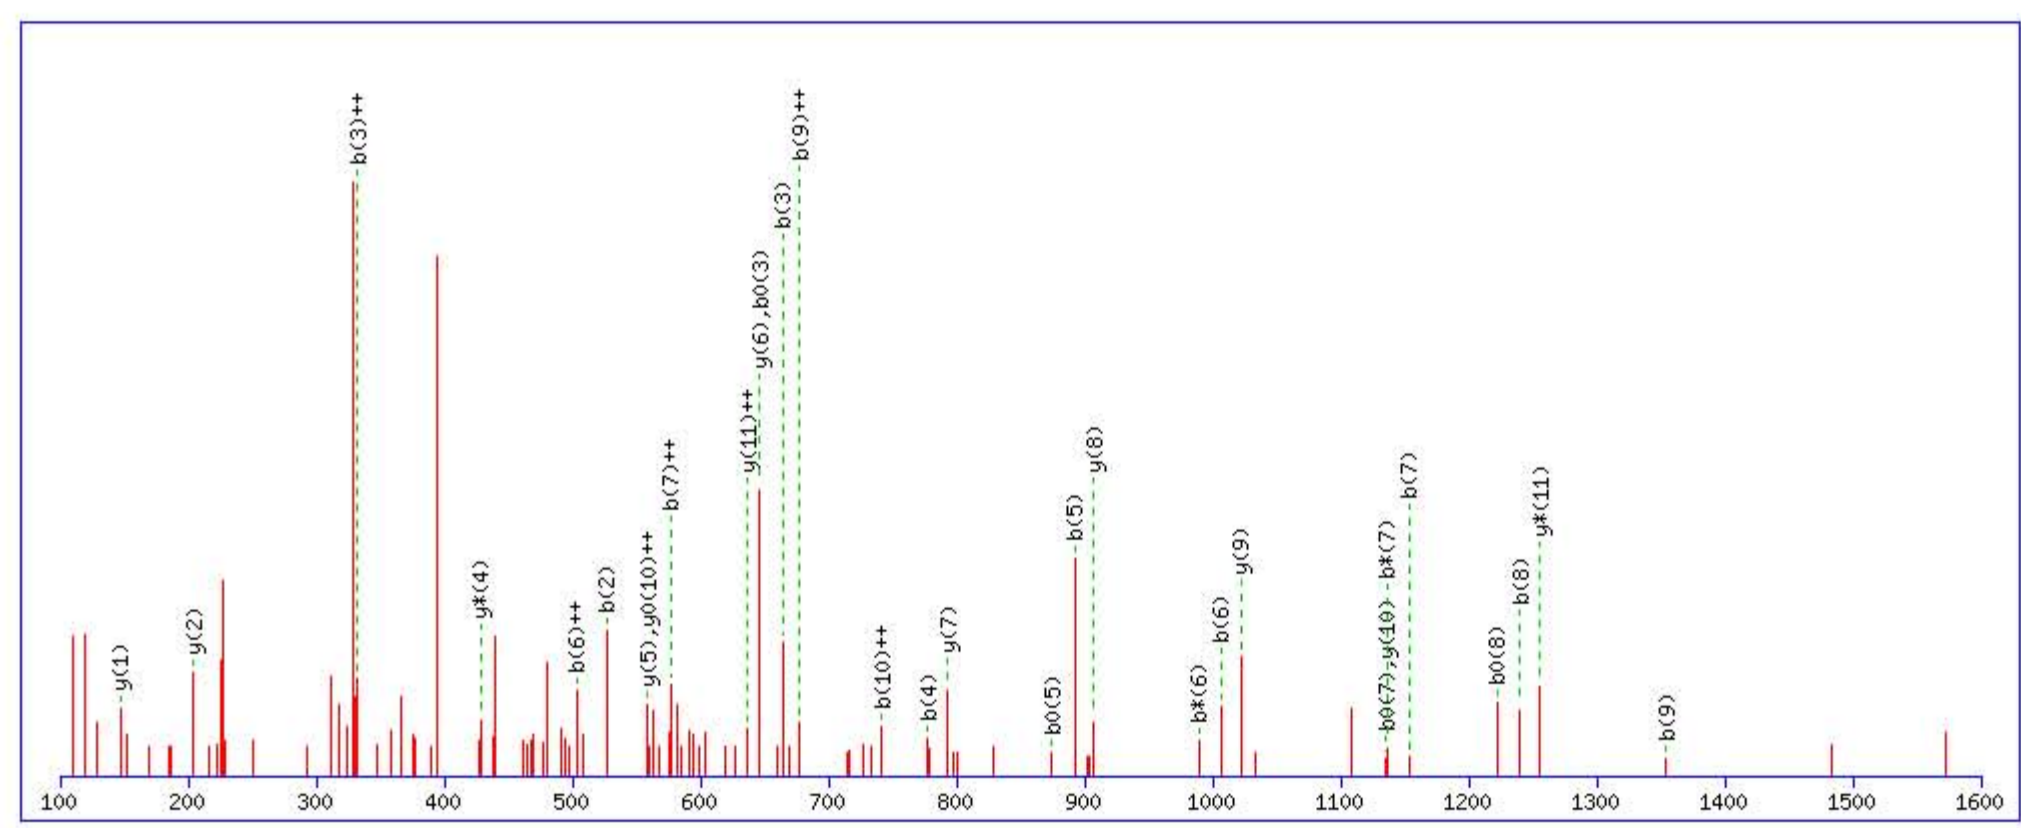

Monoisotopic mass of neutral peptide Mr(calc): 1797.883194

Fixed modifications: Carbamidomethyl (C) (apply to specified residues or termini only)

Variable modifications:

Q2 : Biotin:Thermo-21345 (Q)

Ions Score: 48 Expect: 0.00041

Matches : 31/132 fragment ions using 46 most intense peaks [\(help\)](#)

| #  | b                  | b <sup>++</sup>   | b <sup>*</sup>     | b <sup>*++</sup> | b <sup>0</sup>     | b <sup>0++</sup> | Seq. | y                  | y <sup>++</sup>   | y <sup>*</sup>     | y <sup>*++</sup> | y <sup>0</sup> | y <sup>0++</sup>  | #  |
|----|--------------------|-------------------|--------------------|------------------|--------------------|------------------|------|--------------------|-------------------|--------------------|------------------|----------------|-------------------|----|
| 1  | 88.039304          | 44.523290         |                    |                  | 70.028739          | 35.518008        | S    |                    |                   |                    |                  |                |                   | 13 |
| 2  | <b>527.264630</b>  | 264.135953        | 510.238081         | 255.622679       | 509.254065         | 255.130671       | Q    | 1711.858451        | 856.432863        | 1694.831902        | 847.919589       | 1693.847886    | 847.427581        | 12 |
| 3  | <b>664.323542</b>  | <b>332.665409</b> | 647.296993         | 324.152134       | <b>646.312977</b>  | 323.660126       | H    | 1272.633125        | <b>636.820200</b> | <b>1255.606576</b> | 628.306926       | 1254.622560    | 627.814918        | 11 |
| 4  | <b>777.407606</b>  | 389.207441        | 760.381057         | 380.694166       | 759.397041         | 380.202159       | L    | <b>1135.574213</b> | 568.290744        | 1118.547664        | 559.777470       | 1117.563648    | <b>559.285462</b> | 10 |
| 5  | <b>892.434549</b>  | 446.720913        | 875.408000         | 438.207638       | <b>874.423984</b>  | 437.715630       | D    | <b>1022.490149</b> | 511.748712        | 1005.463600        | 503.235438       | 1004.479584    | 502.743430        | 9  |
| 6  | <b>1006.477476</b> | <b>503.742376</b> | <b>989.450927</b>  | 495.229101       | 988.466911         | 494.737093       | N    | <b>907.463206</b>  | 454.235241        | 890.436657         | 445.721966       | 889.452641     | 445.229958        | 8  |
| 7  | <b>1153.545890</b> | <b>577.276583</b> | <b>1136.519341</b> | 568.763308       | <b>1135.535325</b> | 568.271300       | F    | <b>793.420279</b>  | 397.213777        | 776.393730         | 388.700503       | 775.409714     | 388.208495        | 7  |
| 8  | <b>1240.577918</b> | 620.792597        | 1223.551369        | 612.279323       | <b>1222.567353</b> | 611.787314       | S    | <b>646.351865</b>  | 323.679570        | 629.325316         | 315.166296       | 628.341300     | 314.674288        | 6  |
| 9  | <b>1354.620845</b> | <b>677.814060</b> | 1337.594296        | 669.300786       | 1336.610280        | 668.808778       | N    | <b>559.319837</b>  | 280.163556        | 542.293288         | 271.650282       |                |                   | 5  |
| 10 | 1482.679423        | <b>741.843349</b> | 1465.652874        | 733.330075       | 1464.668858        | 732.838067       | Q    | 445.276910         | 223.142093        | <b>428.250361</b>  | 214.628818       |                |                   | 4  |
| 11 | 1595.763487        | 798.385381        | 1578.736938        | 789.872107       | 1577.752922        | 789.380099       | I    | 317.218332         | 159.112804        | 300.191783         | 150.599529       |                |                   | 3  |
| 12 | 1652.784951        | 826.896113        | 1635.758402        | 818.382839       | 1634.774386        | 817.890831       | G    | <b>204.134268</b>  | 102.570772        | 187.107719         | 94.057497        |                |                   | 2  |
| 13 |                    |                   |                    |                  |                    |                  | K    | <b>147.112804</b>  | 74.060040         | 130.086255         | 65.546765        |                |                   | 1  |

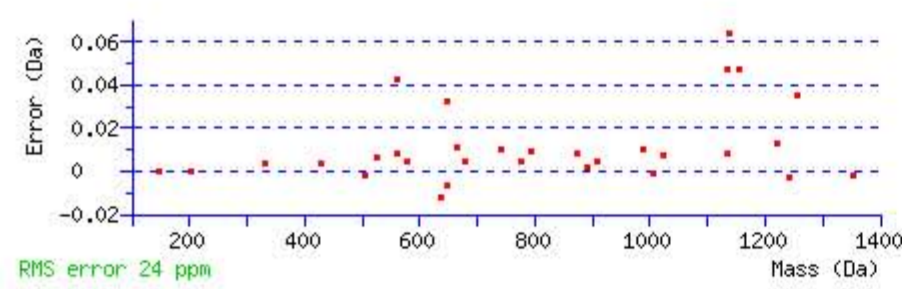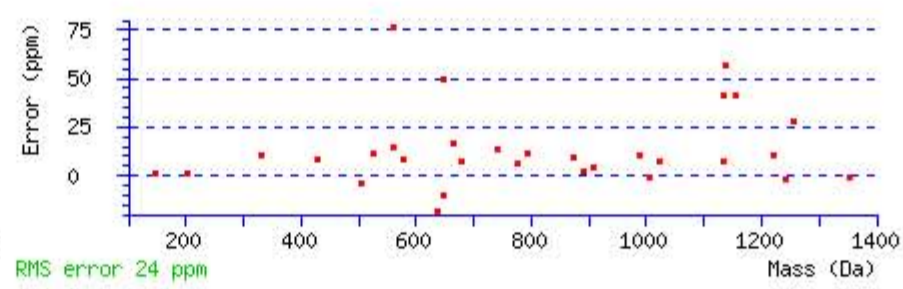

NCBI BLAST search of **SQHLDNFSNQIGK**

(Parameters: blastp, nr protein database, expect=20000, no filter, PAM30)

Other BLAST [web gateways](#)

### All matches to this query

| Score | Mr(calc):   | Delta    | Sequence                      |
|-------|-------------|----------|-------------------------------|
| 47.6  | 1797.883194 | 0.005808 | <a href="#">SQHLDNFSNQIGK</a> |



# MASCOT Search Results

## Peptide View

MS/MS Fragmentation of **MPMGLSTGIISDSQIK**

Found in **FA5\_HUMAN**, Coagulation factor V OS=Homo sapiens GN=F5 PE=1 SV=4

Match to Query 46222: 1988.032482 from(663.684770,3+) rtinseconds(2496) index(55899)

Title: Locus:1.1.1.1484.4 File:"2013-07-02 CLN FXIII 60 min 2nd F 4.wiff"

Data file C:\Program Files (x86)\Matrix Science\Mascot Daemon\mgf\5 FXIII 60 min 2nd\mascot\_daemon\_merge.mgf

Click mouse within plot area to zoom in by factor of two about that point

Or, Plot from  to  Da

Label all possible matches  Label matches used for scoring

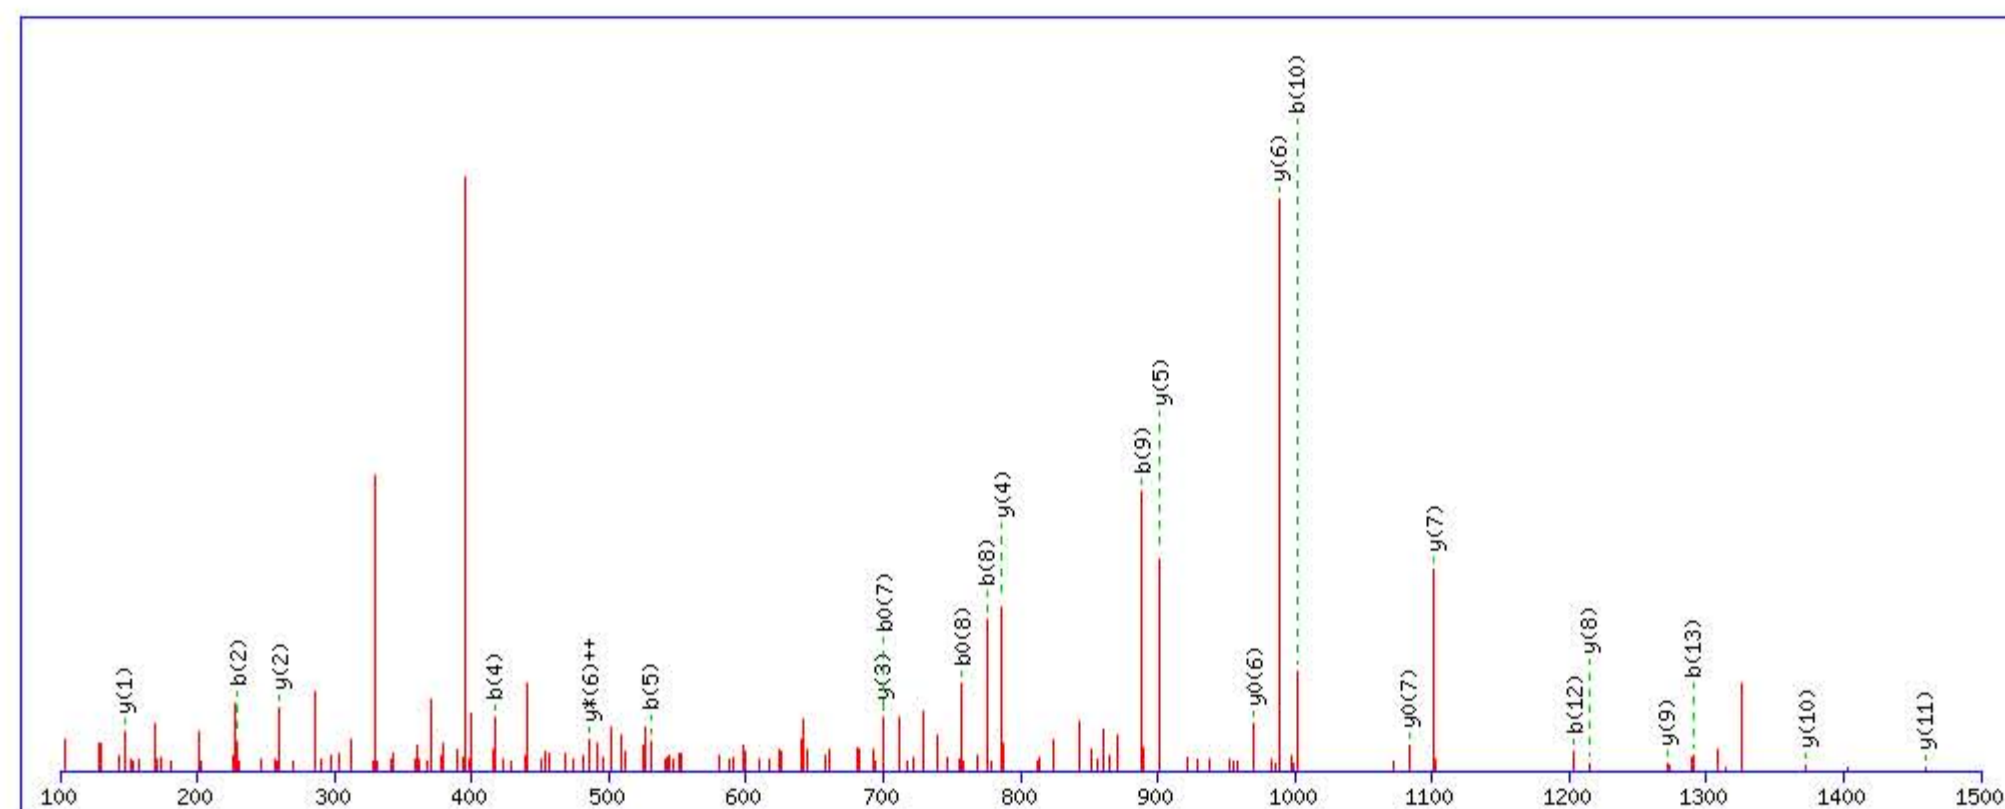

Monoisotopic mass of neutral peptide Mr(calc): 1988.014465

Fixed modifications: Carbamidomethyl (C) (apply to specified residues or termini only)

Variable modifications:

Q14 : Biotin:Thermo-21345 (Q)

Ions Score: 59 Expect: 5.8e-006

Matches : 24/138 fragment ions using 50 most intense peaks [\(help\)](#)

| #  | b                  | b <sup>++</sup> | b <sup>*</sup> | b <sup>*++</sup> | b <sup>0</sup>    | b <sup>0++</sup> | Seq. | y                  | y <sup>++</sup> | y <sup>*</sup> | y <sup>*++</sup>  | y <sup>0</sup>     | y <sup>0++</sup> | #  |
|----|--------------------|-----------------|----------------|------------------|-------------------|------------------|------|--------------------|-----------------|----------------|-------------------|--------------------|------------------|----|
| 1  | 132.047761         | 66.527518       |                |                  |                   |                  | M    |                    |                 |                |                   |                    |                  | 16 |
| 2  | <b>229.100525</b>  | 115.053900      |                |                  |                   |                  | P    | 1857.981269        | 929.494273      | 1840.954720    | 920.980998        | 1839.970704        | 920.488990       | 15 |
| 3  | 360.141010         | 180.574143      |                |                  |                   |                  | M    | 1760.928505        | 880.967891      | 1743.901956    | 872.454616        | 1742.917940        | 871.962608       | 14 |
| 4  | <b>417.162474</b>  | 209.084875      |                |                  |                   |                  | G    | 1629.888020        | 815.447648      | 1612.861471    | 806.934374        | 1611.877455        | 806.442366       | 13 |
| 5  | <b>530.246538</b>  | 265.626907      |                |                  |                   |                  | L    | 1572.866556        | 786.936916      | 1555.840007    | 778.423642        | 1554.855991        | 777.931634       | 12 |
| 6  | 617.278566         | 309.142921      |                |                  | 599.268001        | 300.137638       | S    | <b>1459.782492</b> | 730.394884      | 1442.755943    | 721.881610        | 1441.771927        | 721.389602       | 11 |
| 7  | 718.326245         | 359.666761      |                |                  | <b>700.315680</b> | 350.661478       | T    | <b>1372.750464</b> | 686.878870      | 1355.723915    | 678.365596        | 1354.739899        | 677.873588       | 10 |
| 8  | <b>775.347709</b>  | 388.177493      |                |                  | <b>757.337144</b> | 379.172210       | G    | <b>1271.702785</b> | 636.355031      | 1254.676236    | 627.841756        | 1253.692220        | 627.349748       | 9  |
| 9  | <b>888.431773</b>  | 444.719525      |                |                  | 870.421208        | 435.714242       | I    | <b>1214.681321</b> | 607.844299      | 1197.654772    | 599.331024        | 1196.670756        | 598.839016       | 8  |
| 10 | <b>1001.515837</b> | 501.261557      |                |                  | 983.505272        | 492.256274       | I    | <b>1101.597257</b> | 551.302267      | 1084.570708    | 542.788992        | <b>1083.586692</b> | 542.296984       | 7  |
| 11 | 1088.547865        | 544.777571      |                |                  | 1070.537300       | 535.772288       | S    | <b>988.513193</b>  | 494.760235      | 971.486644     | <b>486.246960</b> | <b>970.502628</b>  | 485.754952       | 6  |
| 12 | <b>1203.574808</b> | 602.291042      |                |                  | 1185.564243       | 593.285760       | D    | <b>901.481165</b>  | 451.244221      | 884.454616     | 442.730946        | 883.470600         | 442.238938       | 5  |
| 13 | <b>1290.606836</b> | 645.807056      |                |                  | 1272.596271       | 636.801774       | S    | <b>786.454222</b>  | 393.730749      | 769.427673     | 385.217475        | 768.443657         | 384.725467       | 4  |
| 14 | 1729.832162        | 865.419719      | 1712.805613    | 856.906445       | 1711.821597       | 856.414437       | Q    | <b>699.422194</b>  | 350.214735      | 682.395645     | 341.701461        |                    |                  | 3  |
| 15 | 1842.916226        | 921.961751      | 1825.889677    | 913.448477       | 1824.905661       | 912.956469       | I    | <b>260.196868</b>  | 130.602072      | 243.170319     | 122.088797        |                    |                  | 2  |
| 16 |                    |                 |                |                  |                   |                  | K    | <b>147.112804</b>  | 74.060040       | 130.086255     | 65.546765         |                    |                  | 1  |

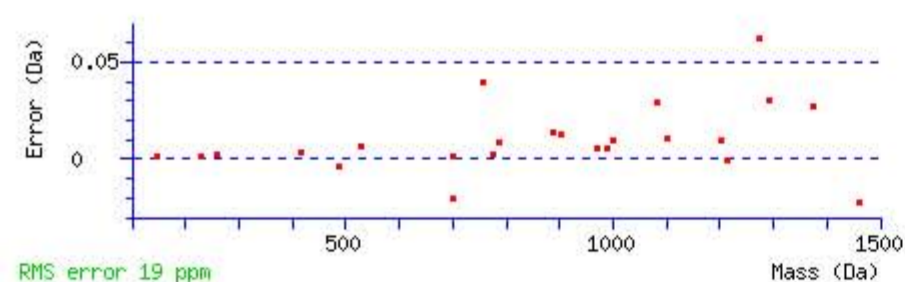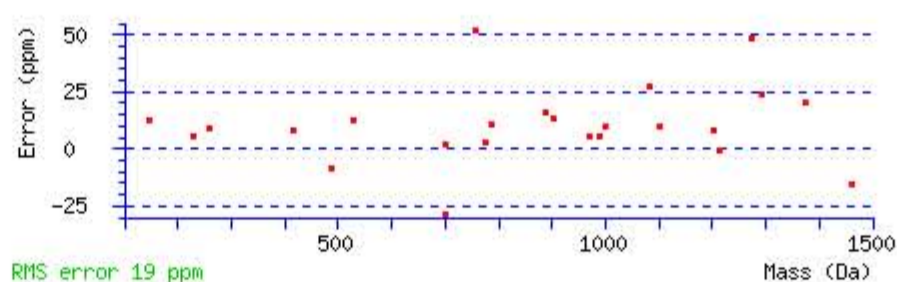

NCBI BLAST search of **MPMGLSTGIISDSQIK**

(Parameters: blastp, nr protein database, expect=20000, no filter, PAM30)

Other BLAST [web gateways](#)

All matches to this query

| Score | Mr(calc):   | Delta     | Sequence                          |
|-------|-------------|-----------|-----------------------------------|
| 59.1  | 1988.014465 | 0.018017  | <a href="#">MPMGLSTGIISDSQIK</a>  |
| 3.3   | 1988.051331 | -0.018849 | <a href="#">MTHKLVFLEDGTSQVRK</a> |

Mascot: <http://www.matrixscience.com/>



**Peptide View**

MS/MS Fragmentation of **AADIEQQAVFAVFDENK**

Found in **FA5\_HUMAN**, Coagulation factor V OS=Homo sapiens GN=F5 PE=1 SV=4

Match to Query 51132: 2205.098172 from(736.040000,3+) rtinseconds(2786) index(57735)

Title: Locus:1.1.1.1584.15 File:"2013-07-02 CLN FXIII 60 min 2nd F 4.wiff"

Data file C:\Program Files (x86)\Matrix Science\Mascot Daemon\mgf5 FXIII 60 min 2nd\mascot\_daemon\_merge.mgf

Click mouse within plot area to zoom in by factor of two about that point

Or, Plot from  to  Da

Label all possible matches  Label matches used for scoring

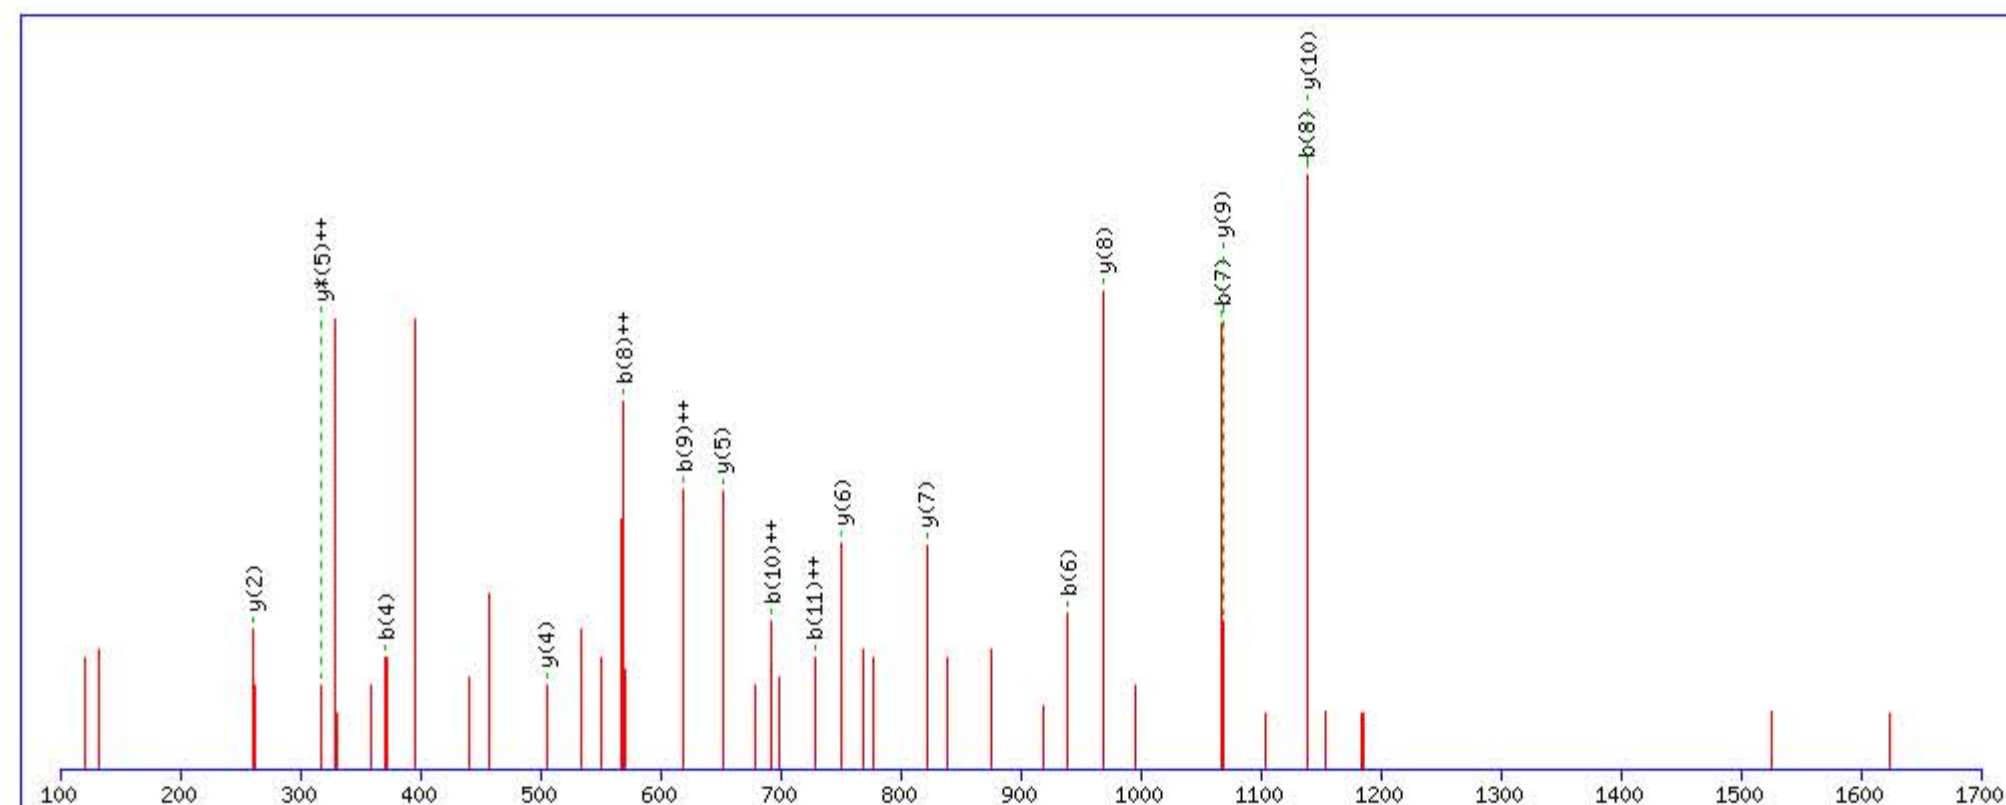

Monoisotopic mass of neutral peptide Mr(calc): 2205.077591

Fixed modifications: Carbamidomethyl (C) (apply to specified residues or termini only)

Variable modifications:

Q6 : Biotin:Thermo-21345 (Q)

Ions Score: 38 Expect: 0.00039

Matches : 17/174 fragment ions using 34 most intense peaks [\(help\)](#)

| #  | b                  | b <sup>++</sup>   | b <sup>*</sup> | b <sup>*++</sup> | b <sup>0</sup> | b <sup>0++</sup> | Seq. | y                  | y <sup>++</sup> | y <sup>*</sup> | y <sup>*++</sup>  | y <sup>0</sup> | y <sup>0++</sup> | #  |
|----|--------------------|-------------------|----------------|------------------|----------------|------------------|------|--------------------|-----------------|----------------|-------------------|----------------|------------------|----|
| 1  | 72.044390          | 36.525833         |                |                  |                |                  | A    |                    |                 |                |                   |                |                  | 17 |
| 2  | 143.081504         | 72.044390         |                |                  |                |                  | A    | 2135.047769        | 1068.027522     | 2118.021220    | 1059.514248       | 2117.037204    | 1059.022240      | 16 |
| 3  | 258.108447         | 129.557862        |                |                  | 240.097882     | 120.552579       | D    | 2064.010655        | 1032.508965     | 2046.984106    | 1023.995691       | 2046.000090    | 1023.503683      | 15 |
| 4  | <b>371.192511</b>  | 186.099894        |                |                  | 353.181946     | 177.094611       | I    | 1948.983712        | 974.995494      | 1931.957163    | 966.482220        | 1930.973147    | 965.990212       | 14 |
| 5  | 500.235104         | 250.621190        |                |                  | 482.224539     | 241.615908       | E    | 1835.899648        | 918.453462      | 1818.873099    | 909.940188        | 1817.889083    | 909.448180       | 13 |
| 6  | <b>939.460430</b>  | 470.233853        | 922.433881     | 461.720579       | 921.449865     | 461.228571       | Q    | 1706.857055        | 853.932166      | 1689.830506    | 845.418891        | 1688.846490    | 844.926883       | 12 |
| 7  | <b>1067.519008</b> | 534.263142        | 1050.492459    | 525.749868       | 1049.508443    | 525.257860       | Q    | 1267.631729        | 634.319503      | 1250.605180    | 625.806228        | 1249.621164    | 625.314220       | 11 |
| 8  | <b>1138.556122</b> | <b>569.781699</b> | 1121.529573    | 561.268425       | 1120.545557    | 560.776416       | A    | <b>1139.573151</b> | 570.290214      | 1122.546602    | 561.776939        | 1121.562586    | 561.284931       | 10 |
| 9  | 1237.624536        | <b>619.315906</b> | 1220.597987    | 610.802632       | 1219.613971    | 610.310624       | V    | <b>1068.536037</b> | 534.771657      | 1051.509488    | 526.258382        | 1050.525472    | 525.766374       | 9  |
| 10 | 1384.692950        | <b>692.850113</b> | 1367.666401    | 684.336839       | 1366.682385    | 683.844831       | F    | <b>969.467623</b>  | 485.237450      | 952.441074     | 476.724175        | 951.457058     | 476.232167       | 8  |
| 11 | 1455.730064        | <b>728.368670</b> | 1438.703515    | 719.855396       | 1437.719499    | 719.363388       | A    | <b>822.399209</b>  | 411.703243      | 805.372660     | 403.189968        | 804.388644     | 402.697960       | 7  |
| 12 | 1554.798478        | 777.902877        | 1537.771929    | 769.389603       | 1536.787913    | 768.897595       | V    | <b>751.362095</b>  | 376.184686      | 734.335546     | 367.671411        | 733.351530     | 367.179403       | 6  |
| 13 | 1701.866892        | 851.437084        | 1684.840343    | 842.923810       | 1683.856327    | 842.431802       | F    | <b>652.293681</b>  | 326.650479      | 635.267132     | <b>318.137204</b> | 634.283116     | 317.645196       | 5  |
| 14 | 1816.893835        | 908.950556        | 1799.867286    | 900.437281       | 1798.883270    | 899.945273       | D    | <b>505.225267</b>  | 253.116271      | 488.198718     | 244.602997        | 487.214702     | 244.110989       | 4  |
| 15 | 1945.936428        | 973.471852        | 1928.909879    | 964.958578       | 1927.925863    | 964.466570       | E    | 390.198324         | 195.602800      | 373.171775     | 187.089525        | 372.187759     | 186.597517       | 3  |
| 16 | 2059.979355        | 1030.493315       | 2042.952806    | 1021.980041      | 2041.968790    | 1021.488033      | N    | <b>261.155731</b>  | 131.081503      | 244.129182     | 122.568229        |                |                  | 2  |
| 17 |                    |                   |                |                  |                |                  | K    | 147.112804         | 74.060040       | 130.086255     | 65.546765         |                |                  | 1  |

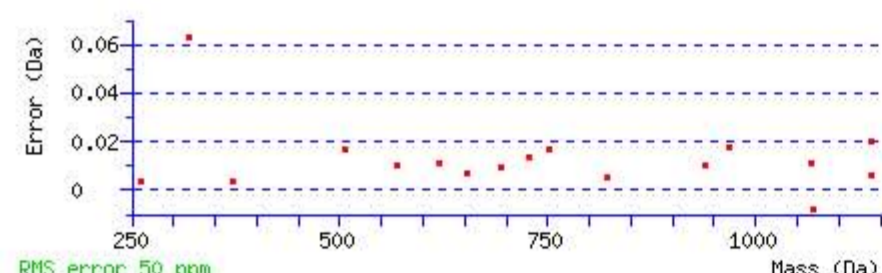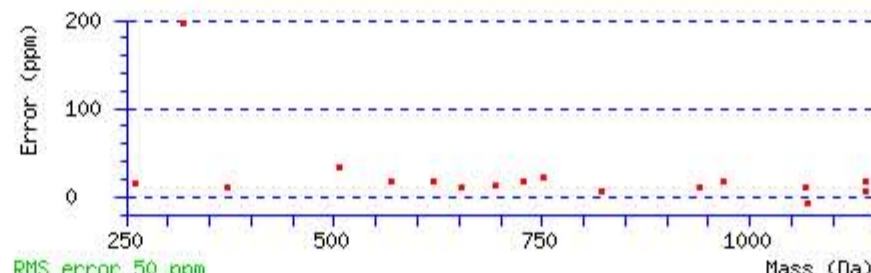

NCBI BLAST search of **AADIEQQAVFAVFDENK**

(Parameters: blastp, nr protein database, expect=20000, no filter, PAM30)

Other BLAST [web gateways](#)

**All matches to this query**

| Score | Mr(calc):   | Delta     | Sequence                            |
|-------|-------------|-----------|-------------------------------------|
| 38.3  | 2205.077591 | 0.020581  | <a href="#">AADIEQQAVFAVFDENK</a>   |
| 36.6  | 2205.077591 | 0.020581  | <a href="#">AADIEQQAVFAVFDENK</a>   |
| 1.9   | 2205.129929 | -0.031757 | <a href="#">YPGRNGAQMMVHIVFKVAR</a> |
| 0.8   | 2205.107452 | -0.009280 | <a href="#">TNLQFMGQAFKSIHEK</a>    |



# MASCOT Search Results

## Peptide View

MS/MS Fragmentation of **IVGGQECK**

Found in **FA10\_HUMAN**, Coagulation factor X OS=Homo sapiens GN=F10 PE=1 SV=2

Match to Query 23316: 1200.600788 from(601.307670,2+) rtinseconds(1450) index(49182)

Title: Locus:1.1.1.1120.19 File:"2013-07-02 CLN FXIII 60 min 2nd F 4.wiff"

Data file C:\Program Files (x86)\Matrix Science\Mascot Daemon\mgf\5 FXIII 60 min 2nd\mascot\_daemon\_merge.mgf

Click mouse within plot area to zoom in by factor of two about that point

Or, Plot from  to  Da

Label all possible matches  Label matches used for scoring

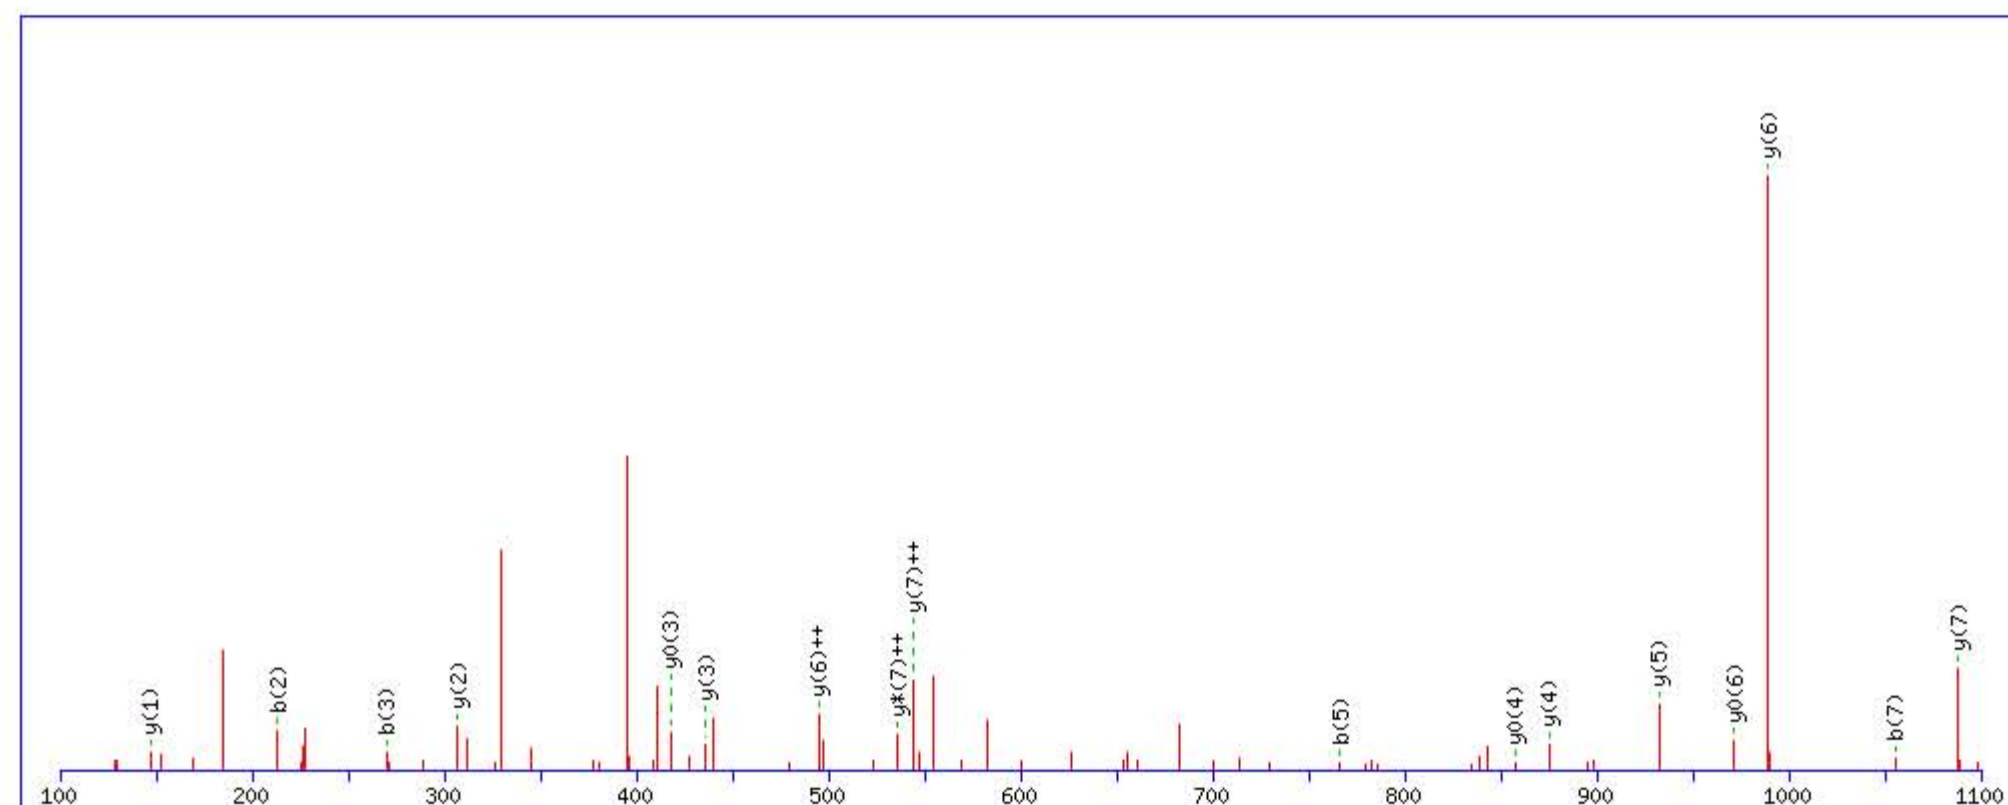

Monoisotopic mass of neutral peptide Mr(calc): 1200.599503

Fixed modifications: Carbamidomethyl (C) (apply to specified residues or termini only)

Variable modifications:

Q5 : Biotin:Thermo-21345 (Q)

Ions Score: 30 Expect: 0.0039

Matches : 17/62 fragment ions using 48 most intense peaks [\(help\)](#)

| # | b                  | b <sup>++</sup> | b <sup>+</sup> | b <sup>*++</sup> | b <sup>0</sup> | b <sup>0++</sup> | Seq. | y                  | y <sup>++</sup>   | y <sup>+</sup> | y <sup>*++</sup>  | y <sup>0</sup>    | y <sup>0++</sup> | # |
|---|--------------------|-----------------|----------------|------------------|----------------|------------------|------|--------------------|-------------------|----------------|-------------------|-------------------|------------------|---|
| 1 | 114.091340         | 57.549308       |                |                  |                |                  | I    |                    |                   |                |                   |                   |                  | 8 |
| 2 | <b>213.159754</b>  | 107.083515      |                |                  |                |                  | V    | <b>1088.522714</b> | <b>544.764995</b> | 1071.496165    | <b>536.251721</b> | 1070.512149       | 535.759713       | 7 |
| 3 | <b>270.181218</b>  | 135.594247      |                |                  |                |                  | G    | <b>989.454300</b>  | <b>495.230788</b> | 972.427751     | 486.717514        | <b>971.443735</b> | 486.225506       | 6 |
| 4 | 327.202682         | 164.104979      |                |                  |                |                  | G    | <b>932.432836</b>  | 466.720056        | 915.406287     | 458.206782        | 914.422271        | 457.714774       | 5 |
| 5 | <b>766.428008</b>  | 383.717642      | 749.401459     | 375.204368       |                |                  | Q    | <b>875.411372</b>  | 438.209324        | 858.384823     | 429.696050        | <b>857.400807</b> | 429.204042       | 4 |
| 6 | 895.470601         | 448.238939      | 878.444052     | 439.725664       | 877.460036     | 439.233656       | E    | <b>436.186046</b>  | 218.596661        | 419.159497     | 210.083386        | <b>418.175481</b> | 209.591378       | 3 |
| 7 | <b>1055.501250</b> | 528.254263      | 1038.474701    | 519.740989       | 1037.490685    | 519.248981       | C    | <b>307.143453</b>  | 154.075364        | 290.116904     | 145.562090        |                   |                  | 2 |
| 8 |                    |                 |                |                  |                |                  | K    | <b>147.112804</b>  | 74.060040         | 130.086255     | 65.546765         |                   |                  | 1 |

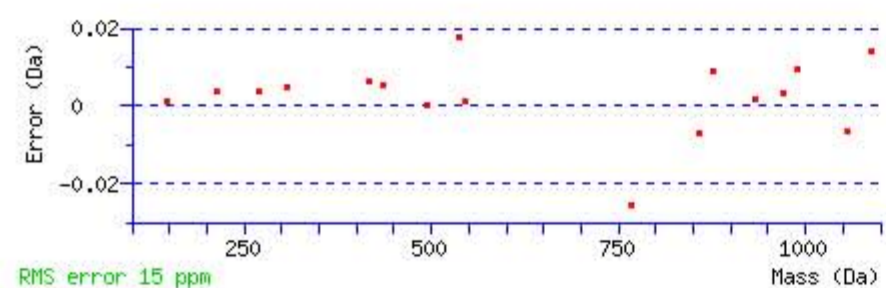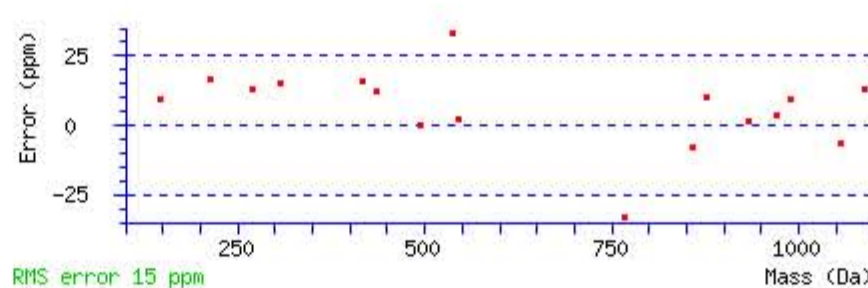

NCBI BLAST search of **IVGGQECK**

(Parameters: blastp, nr protein database, expect=20000, no filter, PAM30)

Other BLAST [web gateways](#)

All matches to this query

| Score | Mr(calc):   | Delta    | Sequence                  |
|-------|-------------|----------|---------------------------|
| 29.7  | 1200.599503 | 0.001285 | <a href="#">IVGGQECK</a>  |
| 3.7   | 1200.598587 | 0.002201 | <a href="#">ILADLEENR</a> |
| 3.3   | 1200.599503 | 0.001285 | <a href="#">LIQGDGCK</a>  |
| 0.5   | 1200.596100 | 0.004688 | <a href="#">LVKMYDNR</a>  |
| 0.1   | 1200.599487 | 0.001301 | <a href="#">LLNDQCK</a>   |

Mascot: <http://www.matrixscience.com/>



# MASCOT Search Results

## Peptide View

MS/MS Fragmentation of **DWAESTLMTQK**

Found in **FA10\_HUMAN**, Coagulation factor X OS=Homo sapiens GN=F10 PE=1 SV=2

Match to Query 37931: 1619.779988 from(810.897270,2+) rtinseconds(2304) index(54875)

Title: Locus:1.1.1.1417.10 File:"2013-07-02 CLN FXIII 60 min 2nd F 4.wiff"

Data file C:\Program Files (x86)\Matrix Science\Mascot Daemon\mgf5 FXIII 60 min 2nd\mascot\_daemon\_merge.mgf

Click mouse within plot area to zoom in by factor of two about that point

Or, Plot from  to  Da

Label all possible matches  Label matches used for scoring

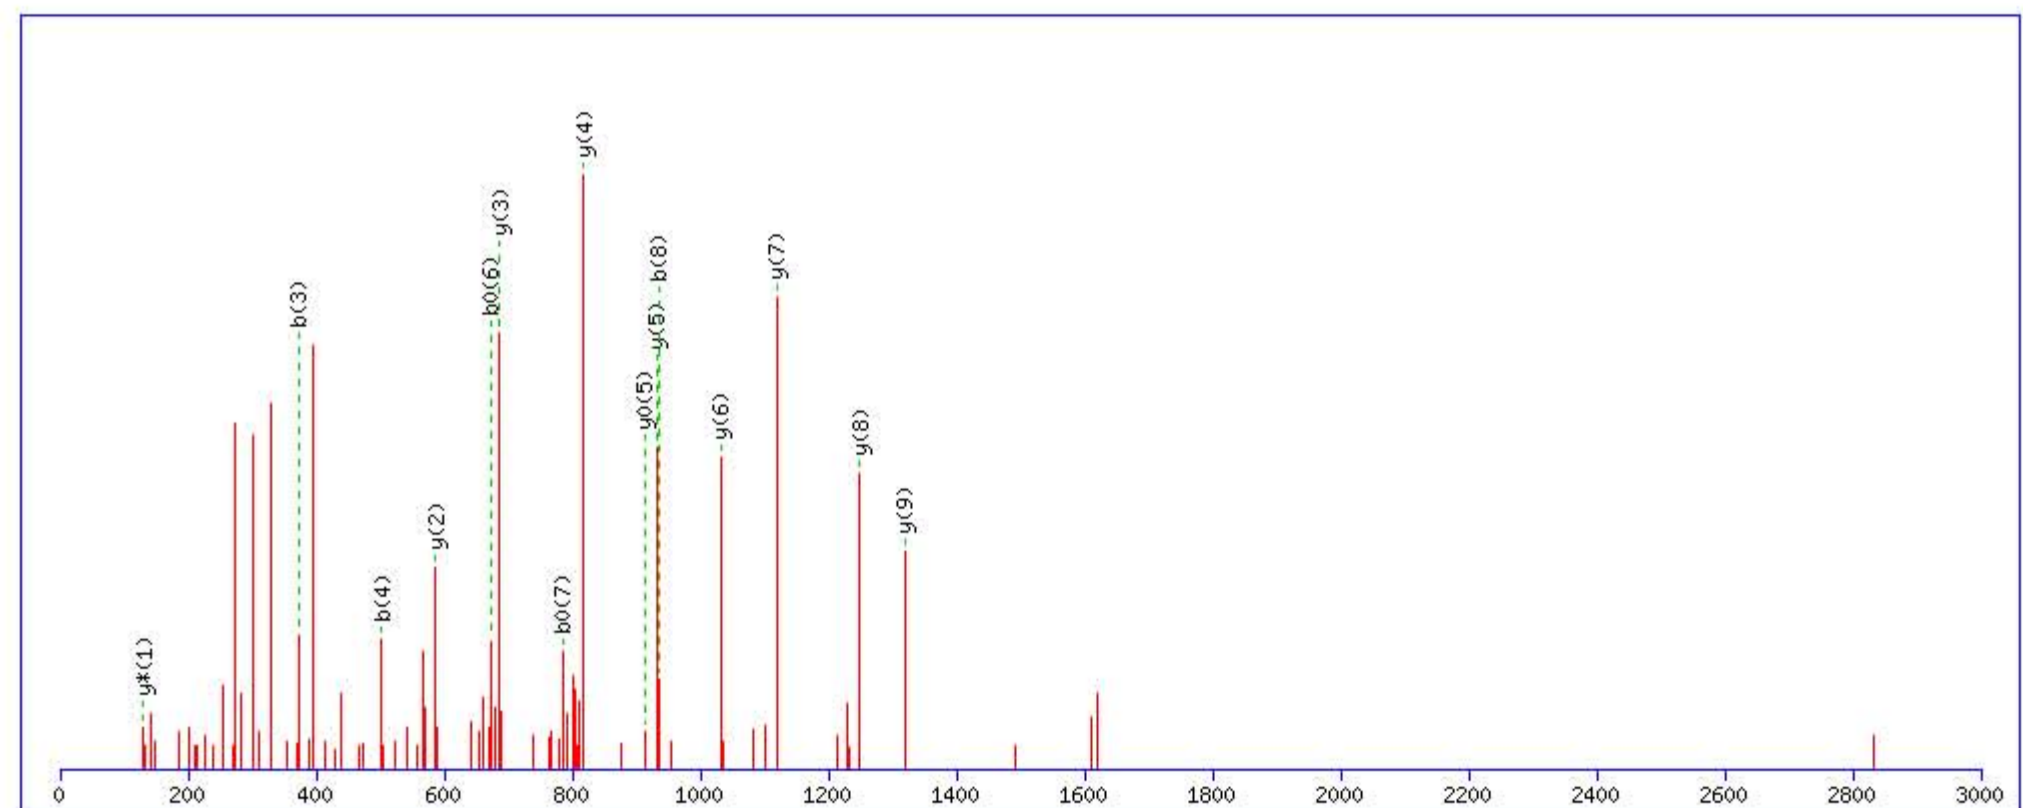

Monoisotopic mass of neutral peptide Mr(calc): 1619.768738

Fixed modifications: Carbamidomethyl (C) (apply to specified residues or termini only)

Variable modifications:

Q10 : Biotin:Thermo-21345 (Q)

Ions Score: 52 Expect: 0.00012

Matches : 15/98 fragment ions using 25 most intense peaks [\(help\)](#)

| #  | b                 | b <sup>++</sup> | b <sup>*</sup> | b <sup>*++</sup> | b <sup>0</sup>    | b <sup>0++</sup> | Seq. | y                  | y <sup>++</sup> | y <sup>*</sup>    | y <sup>*++</sup> | y <sup>0</sup>    | y <sup>0++</sup> | #  |
|----|-------------------|-----------------|----------------|------------------|-------------------|------------------|------|--------------------|-----------------|-------------------|------------------|-------------------|------------------|----|
| 1  | 116.034219        | 58.520748       |                |                  | 98.023654         | 49.515465        | D    |                    |                 |                   |                  |                   |                  | 11 |
| 2  | 302.113532        | 151.560404      |                |                  | 284.102967        | 142.555122       | W    | 1505.749085        | 753.378180      | 1488.722536       | 744.864906       | 1487.738520       | 744.372898       | 10 |
| 3  | <b>373.150646</b> | 187.078961      |                |                  | 355.140081        | 178.073679       | A    | <b>1319.669772</b> | 660.338524      | 1302.643223       | 651.825250       | 1301.659207       | 651.333241       | 9  |
| 4  | <b>502.193239</b> | 251.600258      |                |                  | 484.182674        | 242.594975       | E    | <b>1248.632658</b> | 624.819967      | 1231.606109       | 616.306693       | 1230.622093       | 615.814685       | 8  |
| 5  | 589.225267        | 295.116272      |                |                  | 571.214702        | 286.110989       | S    | <b>1119.590065</b> | 560.298671      | 1102.563516       | 551.785396       | 1101.579500       | 551.293388       | 7  |
| 6  | 690.272946        | 345.640111      |                |                  | <b>672.262381</b> | 336.634829       | T    | <b>1032.558037</b> | 516.782657      | 1015.531488       | 508.269382       | 1014.547472       | 507.777374       | 6  |
| 7  | 803.357010        | 402.182143      |                |                  | <b>785.346445</b> | 393.176861       | L    | <b>931.510358</b>  | 466.258817      | 914.483809        | 457.745543       | <b>913.499793</b> | 457.253535       | 5  |
| 8  | <b>934.397495</b> | 467.702386      |                |                  | 916.386930        | 458.697103       | M    | <b>818.426294</b>  | 409.716785      | 801.399745        | 401.203510       | 800.415729        | 400.711502       | 4  |
| 9  | 1035.445174       | 518.226225      |                |                  | 1017.434609       | 509.220942       | T    | <b>687.385809</b>  | 344.196543      | 670.359260        | 335.683268       | 669.375244        | 335.191260       | 3  |
| 10 | 1474.670500       | 737.838888      | 1457.643951    | 729.325614       | 1456.659935       | 728.833605       | Q    | <b>586.338130</b>  | 293.672703      | 569.311581        | 285.159429       |                   |                  | 2  |
| 11 |                   |                 |                |                  |                   |                  | K    | 147.112804         | 74.060040       | <b>130.086255</b> | 65.546765        |                   |                  | 1  |

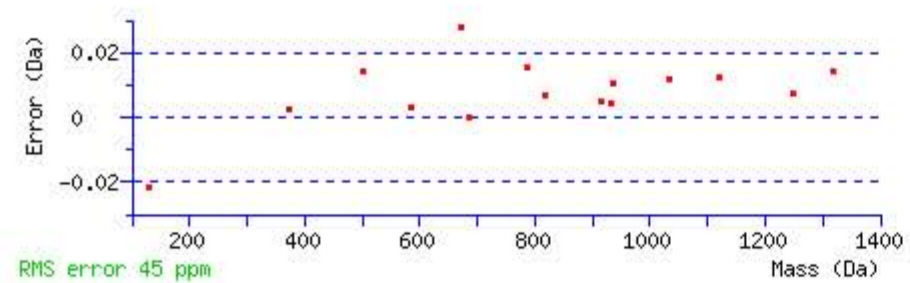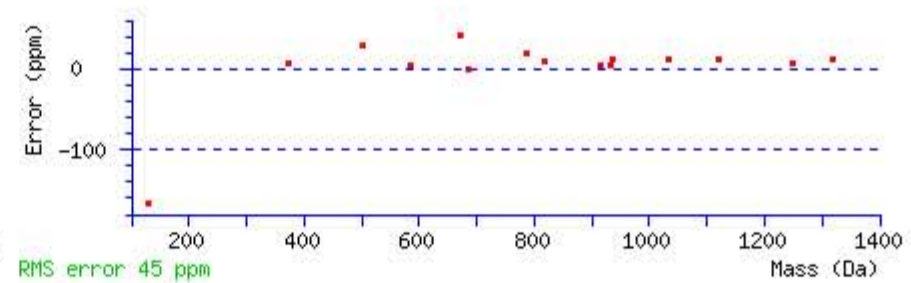

NCBI BLAST search of [DWAESTLMTQK](#)

(Parameters: blastp, nr protein database, expect=20000, no filter, PAM30)

Other BLAST [web gateways](#)

All matches to this query

| Score | Mr(calc):   | Delta    | Sequence                    |
|-------|-------------|----------|-----------------------------|
| 52.0  | 1619.768738 | 0.011250 | <a href="#">DWAESTLMTQK</a> |

Mascot: <http://www.matrixscience.com/>



# MASCOT Search Results

## Peptide View

MS/MS Fragmentation of **QEDACQGDSSGGPHVTR**

Found in **FA10\_HUMAN**, Coagulation factor X OS=Homo sapiens GN=F10 PE=1 SV=2

Match to Query 47758: 2023.888212 from(675.636680,3+) rtinseconds(1339) index(48484)

Title: Locus:1.1.1.1081.24 File:"2013-07-02 CLN FXIII 60 min 2nd F 4.wiff"

Data file C:\Program Files (x86)\Matrix Science\Mascot Daemon\mgf\5 FXIII 60 min 2nd\mascot\_daemon\_merge.mgf

Click mouse within plot area to zoom in by factor of two about that point

Or, Plot from  to  Da

Label all possible matches  Label matches used for scoring

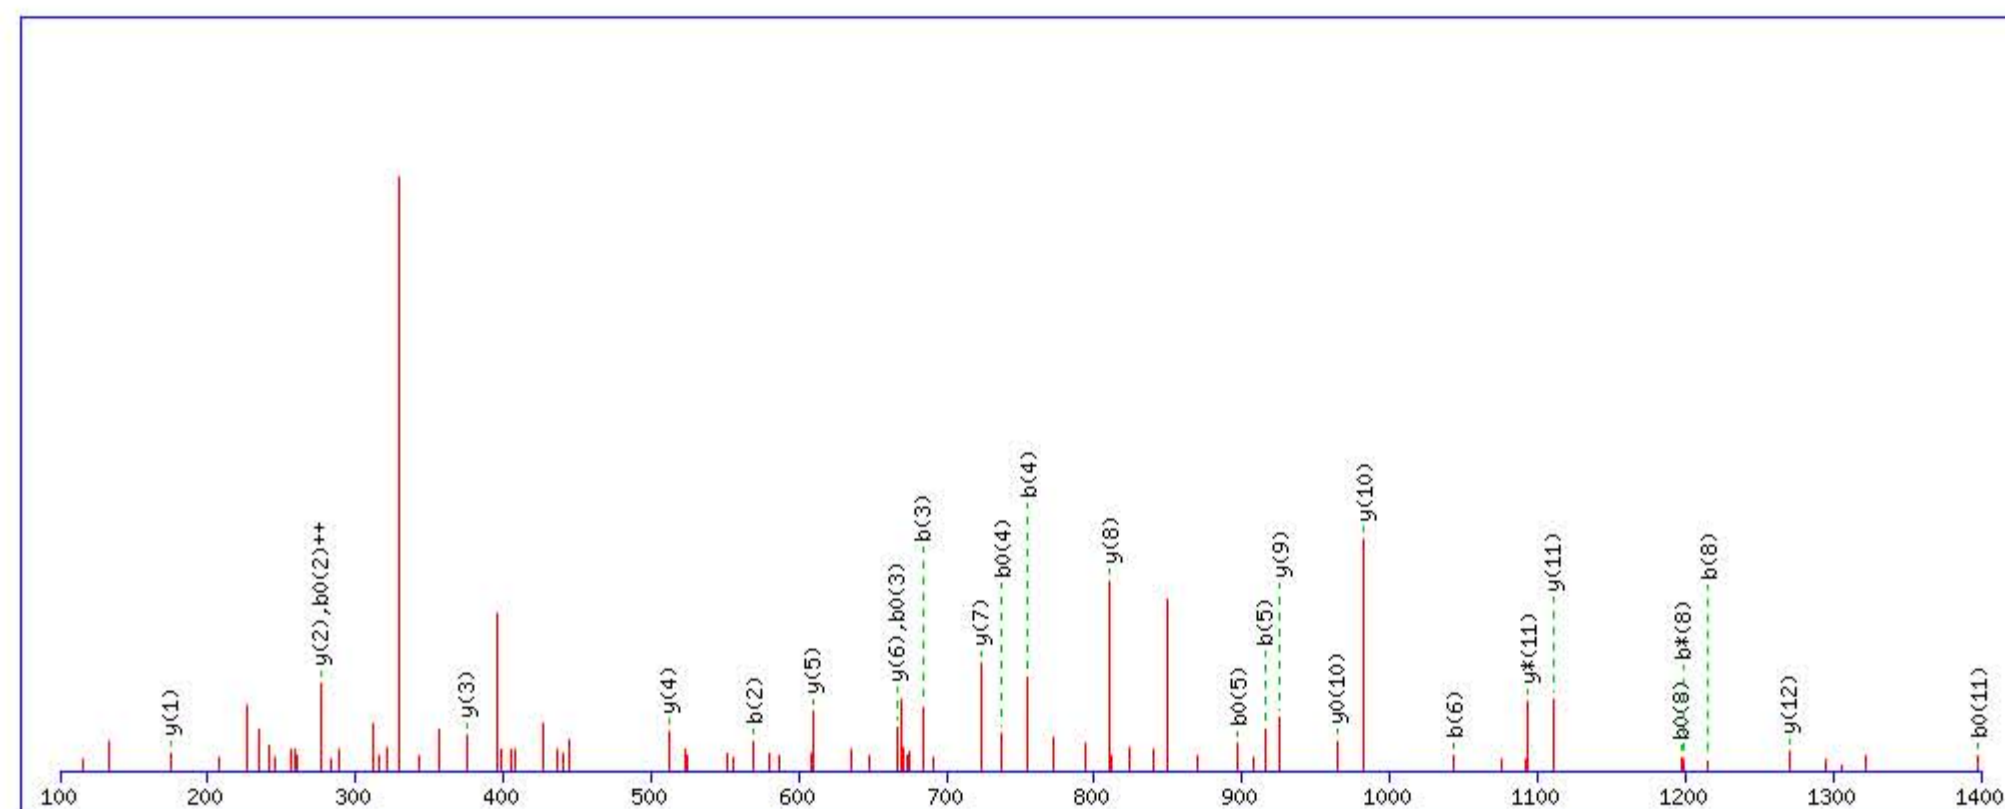

Monoisotopic mass of neutral peptide Mr(calc): 2023.884033

Fixed modifications: Carbamidomethyl (C) (apply to specified residues or termini only)

Variable modifications:

Q1 : Biotin:Thermo-21345 (Q)

Ions Score: 71 Expect: 4.4e-007

Matches : 27/176 fragment ions using 48 most intense peaks [\(help\)](#)

| #  | b                  | b <sup>++</sup> | b <sup>*</sup>     | b <sup>*++</sup> | b <sup>0</sup>     | b <sup>0++</sup>  | Seq. | y                  | y <sup>++</sup> | y <sup>*</sup>     | y <sup>*++</sup> | y <sup>0</sup>    | y <sup>0++</sup> | #  |
|----|--------------------|-----------------|--------------------|------------------|--------------------|-------------------|------|--------------------|-----------------|--------------------|------------------|-------------------|------------------|----|
| 1  | 440.232602         | 220.619939      | 423.206053         | 212.106664       |                    |                   | Q    |                    |                 |                    |                  |                   |                  | 16 |
| 2  | <b>569.275195</b>  | 285.141236      | 552.248646         | 276.627961       | 551.264630         | <b>276.135953</b> | E    | 1585.665961        | 793.336618      | 1568.639412        | 784.823344       | 1567.655396       | 784.331336       | 15 |
| 3  | <b>684.302138</b>  | 342.654707      | 667.275589         | 334.141433       | <b>666.291573</b>  | 333.649425        | D    | 1456.623368        | 728.815322      | 1439.596819        | 720.302047       | 1438.612803       | 719.810039       | 14 |
| 4  | <b>755.339252</b>  | 378.173264      | 738.312703         | 369.659989       | <b>737.328687</b>  | 369.167982        | A    | 1341.596425        | 671.301851      | 1324.569876        | 662.788576       | 1323.585860       | 662.296568       | 13 |
| 5  | <b>915.369901</b>  | 458.188589      | 898.343352         | 449.675314       | <b>897.359336</b>  | 449.183306        | C    | <b>1270.559311</b> | 635.783294      | 1253.532762        | 627.270019       | 1252.548746       | 626.778011       | 12 |
| 6  | <b>1043.428479</b> | 522.217877      | 1026.401930        | 513.704603       | 1025.417914        | 513.212595        | Q    | <b>1110.528662</b> | 555.767969      | <b>1093.502113</b> | 547.254695       | 1092.518097       | 546.762686       | 11 |
| 7  | 1100.449943        | 550.728609      | 1083.423394        | 542.215335       | 1082.439378        | 541.723327        | G    | <b>982.470084</b>  | 491.738680      | 965.443535         | 483.225406       | <b>964.459519</b> | 482.733398       | 10 |
| 8  | <b>1215.476886</b> | 608.242081      | <b>1198.450337</b> | 599.728807       | <b>1197.466321</b> | 599.236798        | D    | <b>925.448620</b>  | 463.227948      | 908.422071         | 454.714674       | 907.438055        | 454.222666       | 9  |
| 9  | 1302.508914        | 651.758095      | 1285.482365        | 643.244821       | 1284.498349        | 642.752813        | S    | <b>810.421677</b>  | 405.714477      | 793.395128         | 397.201202       | 792.411112        | 396.709194       | 8  |
| 10 | 1359.530378        | 680.268827      | 1342.503829        | 671.755553       | 1341.519813        | 671.263544        | G    | <b>723.389649</b>  | 362.198463      | 706.363100         | 353.685188       | 705.379084        | 353.193180       | 7  |
| 11 | 1416.551842        | 708.779559      | 1399.525293        | 700.266284       | <b>1398.541277</b> | 699.774276        | G    | <b>666.368185</b>  | 333.687731      | 649.341636         | 325.174456       | 648.357620        | 324.682448       | 6  |
| 12 | 1513.604606        | 757.305941      | 1496.578057        | 748.792667       | 1495.594041        | 748.300658        | P    | <b>609.346721</b>  | 305.176999      | 592.320172         | 296.663724       | 591.336156        | 296.171716       | 5  |
| 13 | 1650.663518        | 825.835397      | 1633.636969        | 817.322122       | 1632.652953        | 816.830114        | H    | <b>512.293957</b>  | 256.650617      | 495.267408         | 248.137342       | 494.283392        | 247.645334       | 4  |
| 14 | 1749.731932        | 875.369604      | 1732.705383        | 866.856330       | 1731.721367        | 866.364321        | V    | <b>375.235045</b>  | 188.121161      | 358.208496         | 179.607886       | 357.224480        | 179.115878       | 3  |
| 15 | 1850.779611        | 925.893443      | 1833.753062        | 917.380169       | 1832.769046        | 916.888161        | T    | <b>276.166631</b>  | 138.586953      | 259.140082         | 130.073679       | 258.156066        | 129.581671       | 2  |
| 16 |                    |                 |                    |                  |                    |                   | R    | <b>175.118952</b>  | 88.063114       | 158.092403         | 79.549839        |                   |                  | 1  |

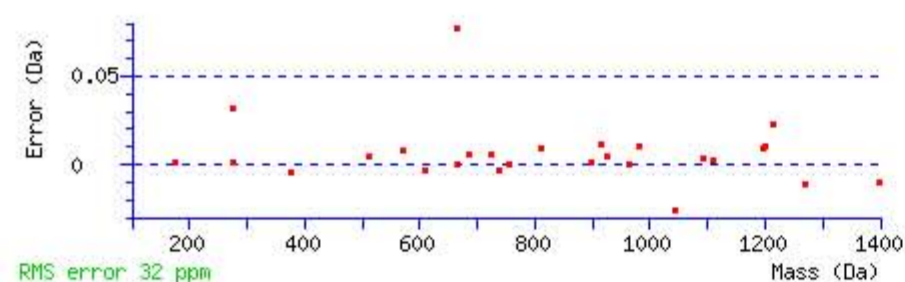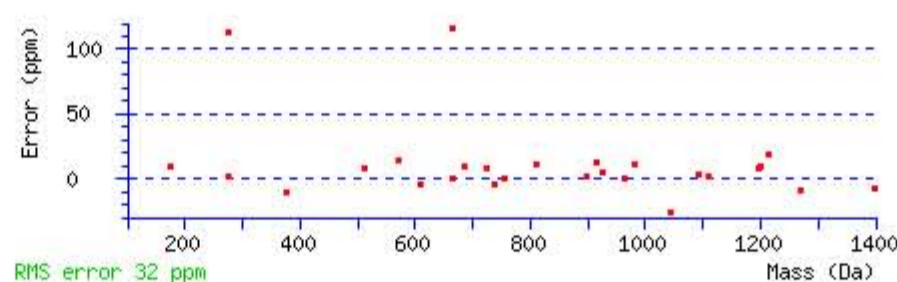

NCBI BLAST search of **QEDACQGDSSGGPHVTR**

(Parameters: blastp, nr protein database, expect=20000, no filter, PAM30)

Other BLAST [web gateways](#)

All matches to this query

| Score | Mr(calc):   | Delta    | Sequence                          |
|-------|-------------|----------|-----------------------------------|
| 71.0  | 2023.884033 | 0.004179 | <a href="#">QEDACQGDSSGGPHVTR</a> |
| 41.7  | 2023.884033 | 0.004179 | <a href="#">QEDACQGDSSGGPHVTR</a> |



# MASCOT Search Results

## Peptide View

MS/MS Fragmentation of **YKDGDCETSPCQNQGK**

Found in **FA10\_HUMAN**, Coagulation factor X OS=Homo sapiens GN=F10 PE=1 SV=2

Match to Query 53442: 2324.989452 from(776.003760,3+) rtinseconds(1308) index(48295)  
 Title: Locus:1.1.1.1070.17 File:"2013-07-02 CLN FXIII 60 min 2nd F 4.wiff"  
 Data file C:\Program Files (x86)\Matrix Science\Mascot Daemon\mgf\5 FXIII 60 min 2nd\mascot\_daemon\_merge.mgf

Click mouse within plot area to zoom in by factor of two about that point

Or, Plot from  to  Da

Label all possible matches  Label matches used for scoring

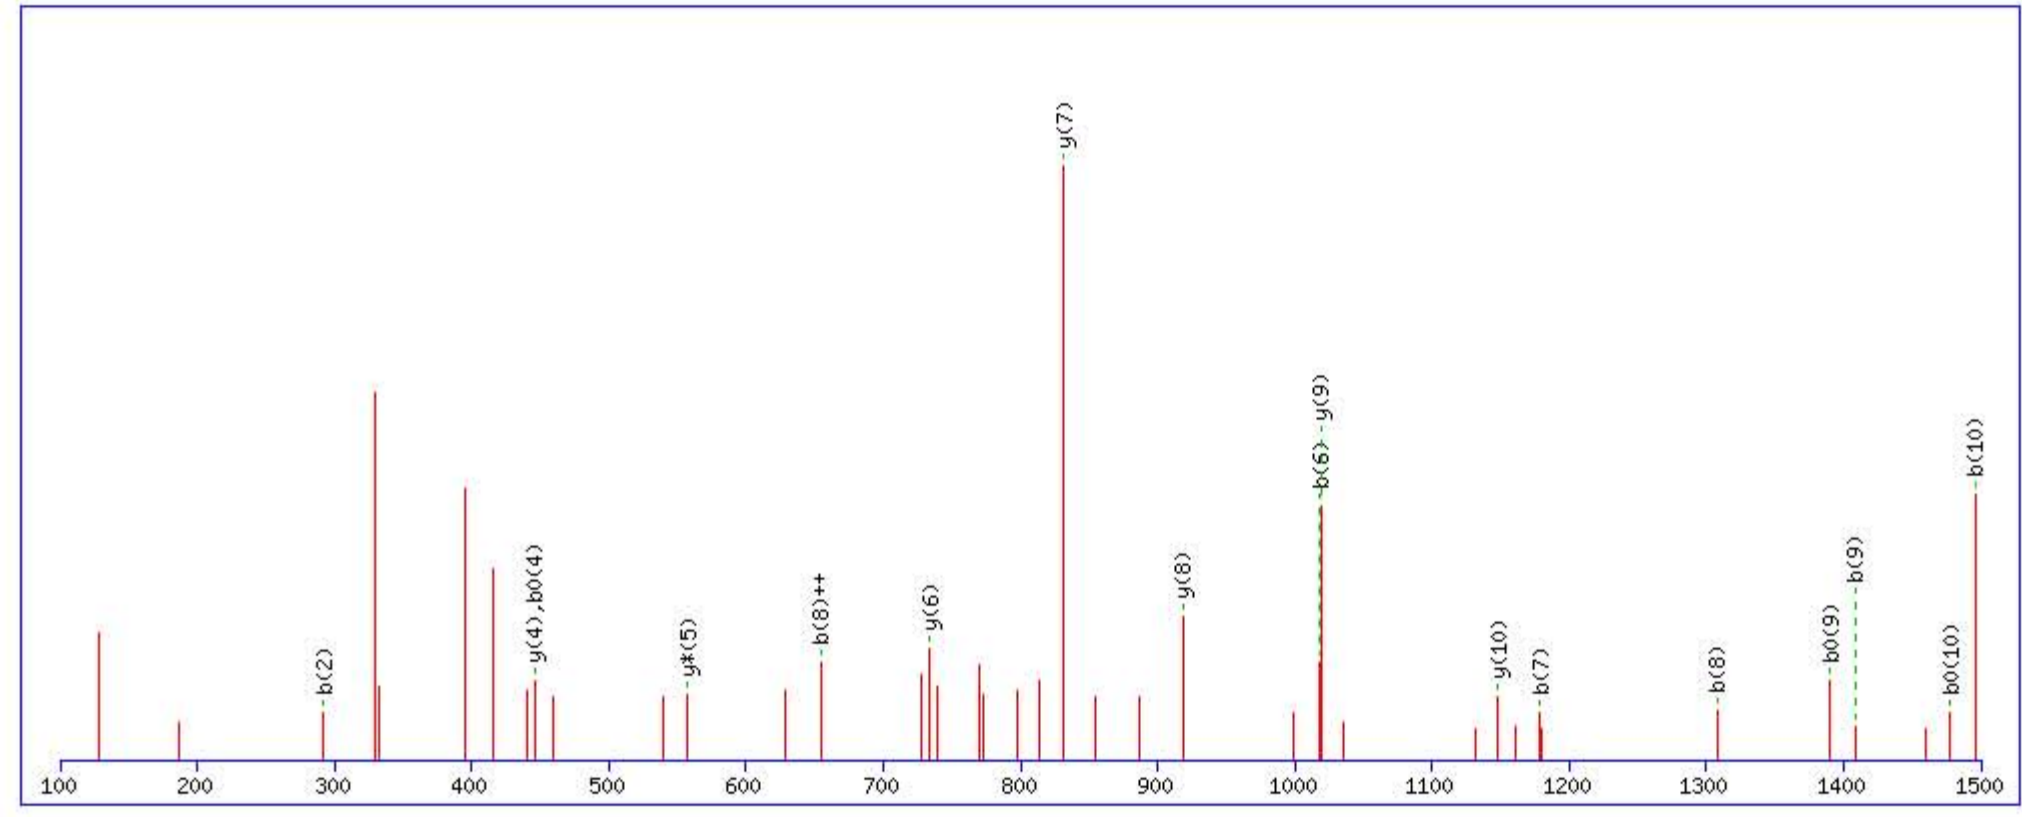

Monoisotopic mass of neutral peptide  $M_r(\text{calc})$ : 2324.982407  
 Fixed modifications: Carbamidomethyl (C) (apply to specified residues or termini only)  
 Variable modifications:  
 Q6 : Biotin:Thermo-21345 (Q)  
 Ions Score: 37 Expect: 0.00055  
 Matches : 17/172 fragment ions using 25 most intense peaks [\(help\)](#)

| #  | b                  | b <sup>++</sup>   | b <sup>*</sup> | b <sup>*++</sup> | b <sup>0</sup>     | b <sup>0++</sup> | Seq. | y                  | y <sup>++</sup> | y <sup>*</sup>    | y <sup>*++</sup> | y <sup>0</sup> | y <sup>0++</sup> | #  |
|----|--------------------|-------------------|----------------|------------------|--------------------|------------------|------|--------------------|-----------------|-------------------|------------------|----------------|------------------|----|
| 1  | 164.070605         | 82.538940         |                |                  |                    |                  | Y    |                    |                 |                   |                  |                |                  | 17 |
| 2  | <b>292.165568</b>  | 146.586422        | 275.139019     | 138.073148       |                    |                  | K    | 2162.926352        | 1081.966814     | 2145.899803       | 1073.453539      | 2144.915787    | 1072.961531      | 16 |
| 3  | 407.192511         | 204.099894        | 390.165962     | 195.586619       | 389.181946         | 195.094611       | D    | 2034.831389        | 1017.919333     | 2017.804840       | 1009.406058      | 2016.820824    | 1008.914050      | 15 |
| 4  | 464.213975         | 232.610626        | 447.187426     | 224.097351       | <b>446.203410</b>  | 223.605343       | G    | 1919.804446        | 960.405861      | 1902.777897       | 951.892587       | 1901.793881    | 951.400579       | 14 |
| 5  | 579.240918         | 290.124097        | 562.214369     | 281.610823       | 561.230353         | 281.118815       | D    | 1862.782982        | 931.895129      | 1845.756433       | 923.381855       | 1844.772417    | 922.889847       | 13 |
| 6  | <b>1018.466244</b> | 509.736760        | 1001.439695    | 501.223486       | 1000.455679        | 500.731478       | Q    | 1747.756039        | 874.381658      | 1730.729490       | 865.868383       | 1729.745474    | 865.376375       | 12 |
| 7  | <b>1178.496893</b> | 589.752085        | 1161.470344    | 581.238810       | 1160.486328        | 580.746802       | C    | 1308.530713        | 654.768995      | 1291.504164       | 646.255720       | 1290.520148    | 645.763712       | 11 |
| 8  | <b>1307.539486</b> | <b>654.273381</b> | 1290.512937    | 645.760107       | 1289.528921        | 645.268098       | E    | <b>1148.500064</b> | 574.753670      | 1131.473515       | 566.240396       | 1130.489499    | 565.748388       | 10 |
| 9  | <b>1408.587165</b> | 704.797220        | 1391.560616    | 696.283946       | <b>1390.576600</b> | 695.791938       | T    | <b>1019.457471</b> | 510.232374      | 1002.430922       | 501.719099       | 1001.446906    | 501.227091       | 9  |
| 10 | <b>1495.619193</b> | 748.313235        | 1478.592644    | 739.799960       | <b>1477.608628</b> | 739.307952       | S    | <b>918.409792</b>  | 459.708534      | 901.383243        | 451.195260       | 900.399227     | 450.703252       | 8  |
| 11 | 1592.671957        | 796.839617        | 1575.645408    | 788.326342       | 1574.661392        | 787.834334       | P    | <b>831.377764</b>  | 416.192520      | 814.351215        | 407.679246       |                |                  | 7  |
| 12 | 1752.702606        | 876.854941        | 1735.676057    | 868.341667       | 1734.692041        | 867.849659       | C    | <b>734.325000</b>  | 367.666138      | 717.298451        | 359.152864       |                |                  | 6  |
| 13 | 1880.761184        | 940.884230        | 1863.734635    | 932.370956       | 1862.750619        | 931.878948       | Q    | 574.294351         | 287.650814      | <b>557.267802</b> | 279.137539       |                |                  | 5  |
| 14 | 1994.804111        | 997.905694        | 1977.777562    | 989.392419       | 1976.793546        | 988.900411       | N    | <b>446.235773</b>  | 223.621524      | 429.209224        | 215.108250       |                |                  | 4  |
| 15 | 2122.862689        | 1061.934982       | 2105.836140    | 1053.421708      | 2104.852124        | 1052.929700      | Q    | 332.192846         | 166.600061      | 315.166297        | 158.086787       |                |                  | 3  |
| 16 | 2179.884153        | 1090.445714       | 2162.857604    | 1081.932440      | 2161.873588        | 1081.440432      | G    | 204.134268         | 102.570772      | 187.107719        | 94.057497        |                |                  | 2  |
| 17 |                    |                   |                |                  |                    |                  | K    | 147.112804         | 74.060040       | 130.086255        | 65.546765        |                |                  | 1  |

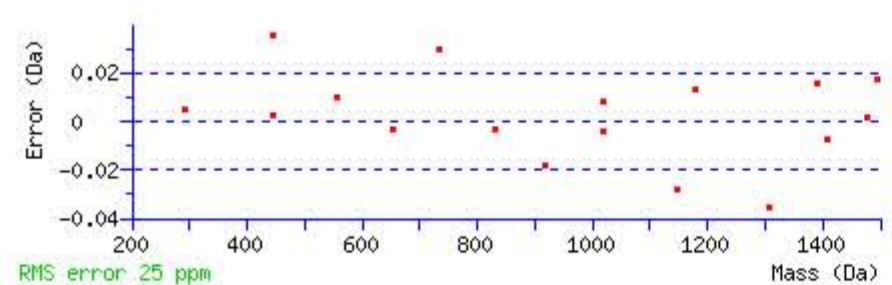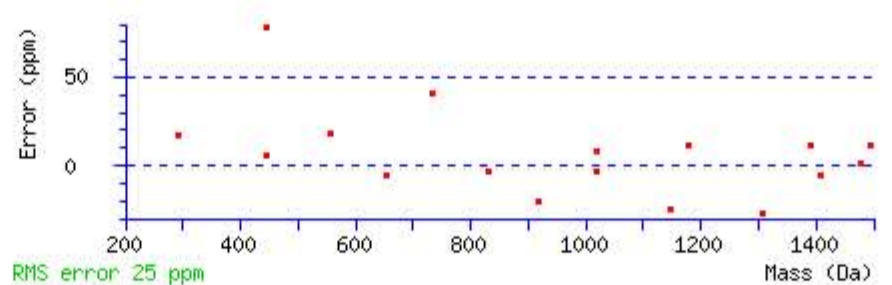

NCBI BLAST search of **YKDGDCETSPCQNQGK**  
 (Parameters: blastp, nr protein database, expect=20000, no filter, PAM30)  
 Other BLAST [web gateways](#)

### All matches to this query

| Score | $M_r(\text{calc})$ : | Delta    | Sequence                         |
|-------|----------------------|----------|----------------------------------|
| 37.0  | 2324.982407          | 0.007045 | <a href="#">YKDGDCETSPCQNQGK</a> |



# MASCOT Search Results

## Peptide View

MS/MS Fragmentation of **LASQACR**

Found in **FA12\_HUMAN**, Coagulation factor XII OS=Homo sapiens GN=F12 PE=1 SV=3

Match to Query 19749: 1115.555988 from(558.785270,2+) rtinseconds(1362) index(64812)

Title: Locus:1.1.1.1411.21 File:"2013-07-02 CLN FXIII 60 min 2nd FT.wiff"

Data file C:\Program Files (x86)\Matrix Science\Mascot Daemon\mgf\5 FXIII 60 min 2nd\mascot\_daemon\_merge.mgf

Click mouse within plot area to zoom in by factor of two about that point

Or, Plot from  to  Da

Label all possible matches  Label matches used for scoring

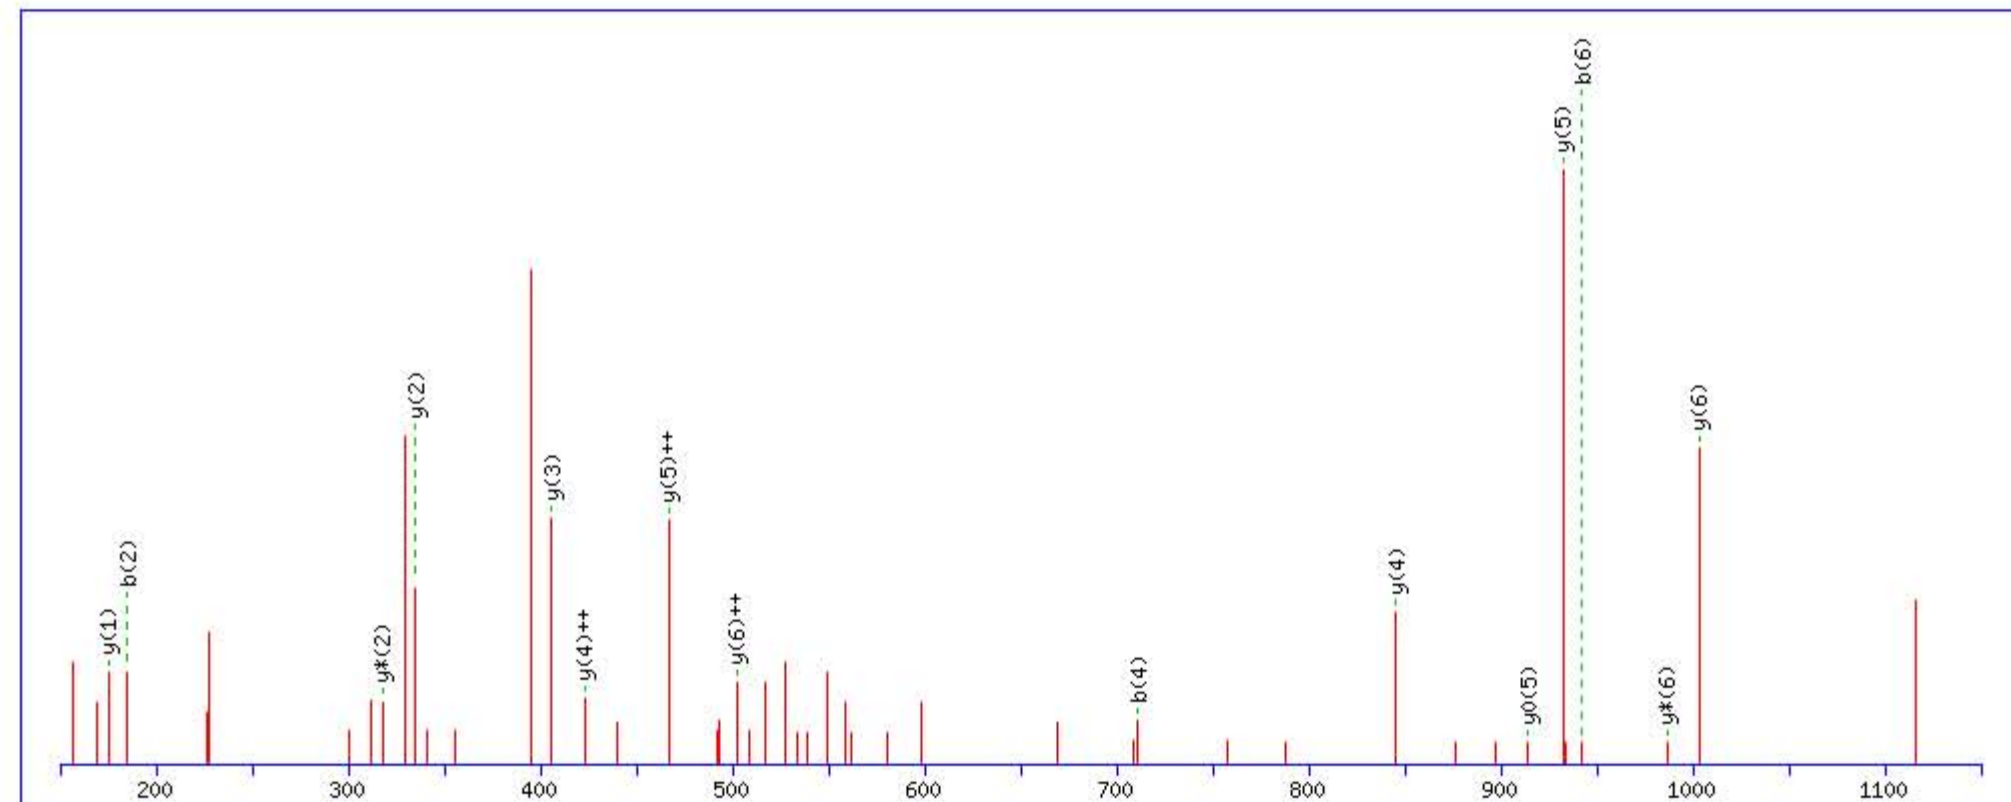

Monoisotopic mass of neutral peptide Mr(calc): 1115.557953

Fixed modifications: Carbamidomethyl (C) (apply to specified residues or termini only)

Variable modifications:

Q4 : Biotin:Thermo-21345 (Q)

Ions Score: 31 Expect: 0.0083

Matches : 15/54 fragment ions using 32 most intense peaks [\(help\)](#)

| # | b                 | b <sup>++</sup> | b*         | b <sup>+++</sup> | b <sup>0</sup> | b <sup>0++</sup> | Seq. | y                  | y <sup>++</sup>   | y*                | y <sup>+++</sup> | y <sup>0</sup>    | y <sup>0++</sup> | # |
|---|-------------------|-----------------|------------|------------------|----------------|------------------|------|--------------------|-------------------|-------------------|------------------|-------------------|------------------|---|
| 1 | 114.091340        | 57.549308       |            |                  |                |                  | L    |                    |                   |                   |                  |                   |                  | 7 |
| 2 | <b>185.128454</b> | 93.067865       |            |                  |                |                  | A    | <b>1003.481183</b> | <b>502.244230</b> | <b>986.454634</b> | 493.730955       | 985.470618        | 493.238947       | 6 |
| 3 | 272.160482        | 136.583879      |            |                  | 254.149917     | 127.578596       | S    | <b>932.444069</b>  | <b>466.725673</b> | 915.417520        | 458.212398       | <b>914.433504</b> | 457.720390       | 5 |
| 4 | <b>711.385808</b> | 356.196542      | 694.359259 | 347.683268       | 693.375243     | 347.191260       | Q    | <b>845.412041</b>  | <b>423.209659</b> | 828.385492        | 414.696384       |                   |                  | 4 |
| 5 | 782.422922        | 391.715099      | 765.396373 | 383.201824       | 764.412357     | 382.709816       | A    | <b>406.186715</b>  | 203.596995        | 389.160166        | 195.083721       |                   |                  | 3 |
| 6 | <b>942.453571</b> | 471.730424      | 925.427022 | 463.217149       | 924.443006     | 462.725141       | C    | <b>335.149601</b>  | 168.078438        | <b>318.123052</b> | 159.565164       |                   |                  | 2 |
| 7 |                   |                 |            |                  |                |                  | R    | <b>175.118952</b>  | 88.063114         | 158.092403        | 79.549839        |                   |                  | 1 |

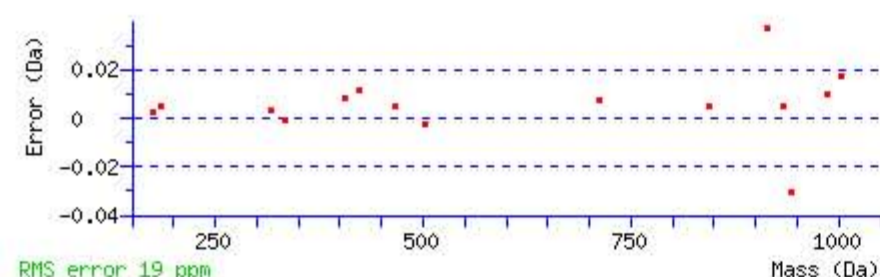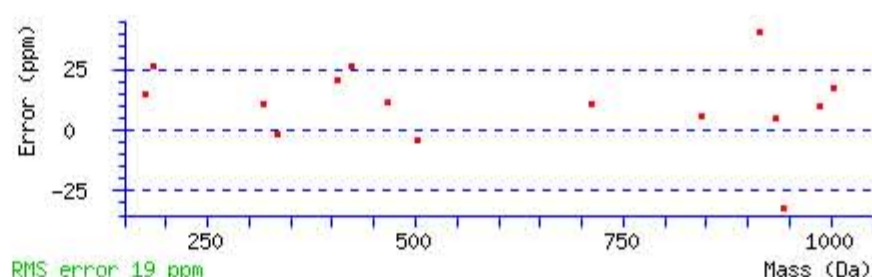

NCBI BLAST search of [LASQACR](#)

(Parameters: blastp, nr protein database, expect=20000, no filter, PAM30)

Other BLAST [web gateways](#)

All matches to this query

| Score | Mr(calc):   | Delta     | Sequence                    |
|-------|-------------|-----------|-----------------------------|
| 31.4  | 1115.557953 | -0.001965 | <a href="#">LASQACR</a>     |
| 8.7   | 1115.543350 | 0.012638  | <a href="#">SFCYISALR</a>   |
| 5.1   | 1115.539352 | 0.016636  | <a href="#">ACLTSGTPGPR</a> |
| 4.8   | 1115.550552 | 0.005436  | <a href="#">LAAGSRCPER</a>  |
| 2.0   | 1115.543350 | 0.012638  | <a href="#">LEYKFCTR</a>    |
| 1.9   | 1115.539322 | 0.016666  | <a href="#">QSAQESR</a>     |
| 0.6   | 1115.546722 | 0.009266  | <a href="#">LAQDACK</a>     |

Mascot: <http://www.matrixscience.com/>



# MASCOT Search Results

## Peptide View

MS/MS Fragmentation of **TEQAAVAR**

Found in **FA12\_HUMAN**, Coagulation factor XII OS=Homo sapiens GN=F12 PE=1 SV=3

Match to Query 21799: 1155.602148 from(578.808350,2+) rtinseconds(1376) index(17578)

Title: Locus:1.1.1.481.18 File:"2013-07-02 CLN FXIII 60 min 2nd F 2.wiff"

Data file C:\Program Files (x86)\Matrix Science\Mascot Daemon\mgf5 FXIII 60 min 2nd\mascot\_daemon\_merge.mgf

Click mouse within plot area to zoom in by factor of two about that point

Or, Plot from  to  Da

Label all possible matches  Label matches used for scoring

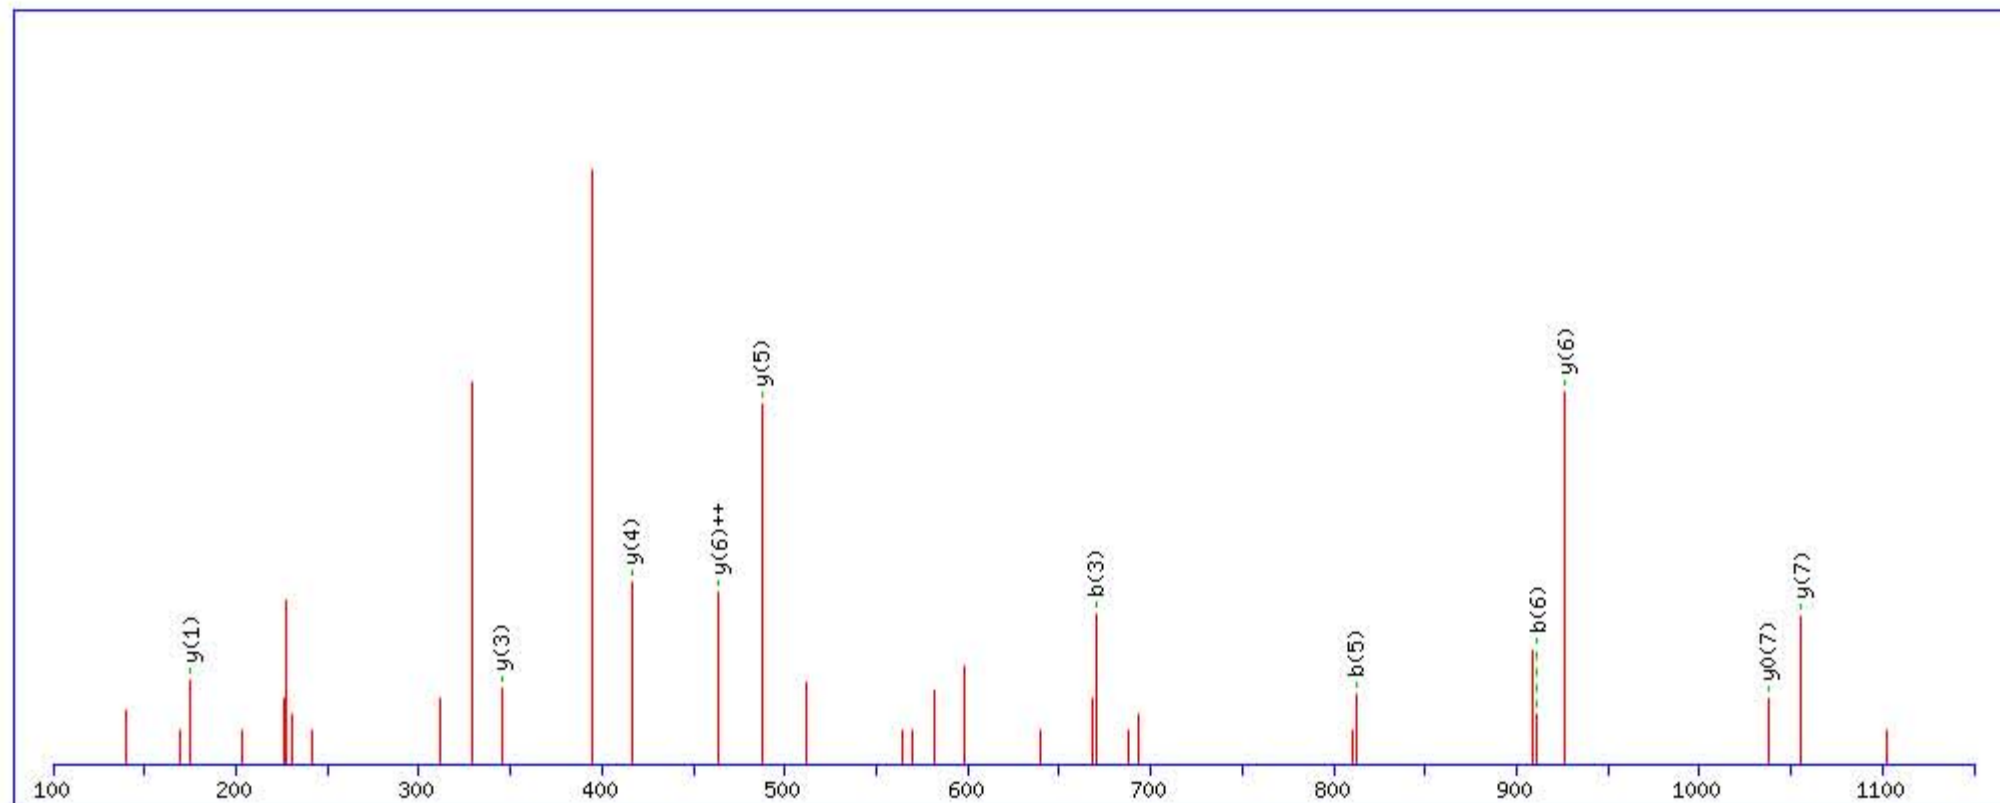

Monoisotopic mass of neutral peptide Mr(calc): 1155.607010

Fixed modifications: Carbamidomethyl (C) (apply to specified residues or termini only)

Variable modifications:

Q3 : Biotin:Thermo-21345 (Q)

Ions Score: 28 Expect: 0.016

Matches : 11/68 fragment ions using 26 most intense peaks [\(help\)](#)

| # | b                 | b <sup>++</sup> | b <sup>*</sup> | b <sup>*++</sup> | b <sup>0</sup> | b <sup>0++</sup> | Seq. | y                  | y <sup>++</sup>   | y <sup>*</sup> | y <sup>*++</sup> | y <sup>0</sup>     | y <sup>0++</sup> | # |
|---|-------------------|-----------------|----------------|------------------|----------------|------------------|------|--------------------|-------------------|----------------|------------------|--------------------|------------------|---|
| 1 | 102.054955        | 51.531116       |                |                  | 84.044390      | 42.525833        | T    |                    |                   |                |                  |                    |                  | 8 |
| 2 | 231.097548        | 116.052412      |                |                  | 213.086983     | 107.047130       | E    | <b>1055.566627</b> | 528.286951        | 1038.540078    | 519.773677       | <b>1037.556062</b> | 519.281669       | 7 |
| 3 | <b>670.322874</b> | 335.665075      | 653.296325     | 327.151801       | 652.312309     | 326.659793       | Q    | <b>926.524034</b>  | <b>463.765655</b> | 909.497485     | 455.252380       |                    |                  | 6 |
| 4 | 741.359988        | 371.183632      | 724.333439     | 362.670358       | 723.349423     | 362.178350       | A    | <b>487.298708</b>  | 244.152992        | 470.272159     | 235.639717       |                    |                  | 5 |
| 5 | <b>812.397102</b> | 406.702189      | 795.370553     | 398.188915       | 794.386537     | 397.696907       | A    | <b>416.261594</b>  | 208.634435        | 399.235045     | 200.121160       |                    |                  | 4 |
| 6 | <b>911.465516</b> | 456.236396      | 894.438967     | 447.723121       | 893.454951     | 447.231113       | V    | <b>345.224480</b>  | 173.115878        | 328.197931     | 164.602603       |                    |                  | 3 |
| 7 | 982.502630        | 491.754953      | 965.476081     | 483.241678       | 964.492065     | 482.749670       | A    | 246.156066         | 123.581671        | 229.129517     | 115.068396       |                    |                  | 2 |
| 8 |                   |                 |                |                  |                |                  | R    | <b>175.118952</b>  | 88.063114         | 158.092403     | 79.549839        |                    |                  | 1 |

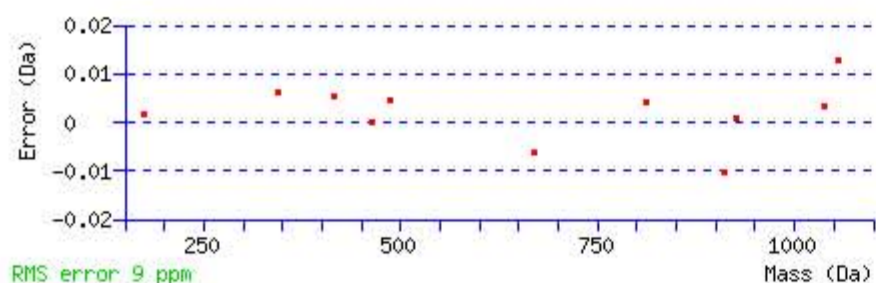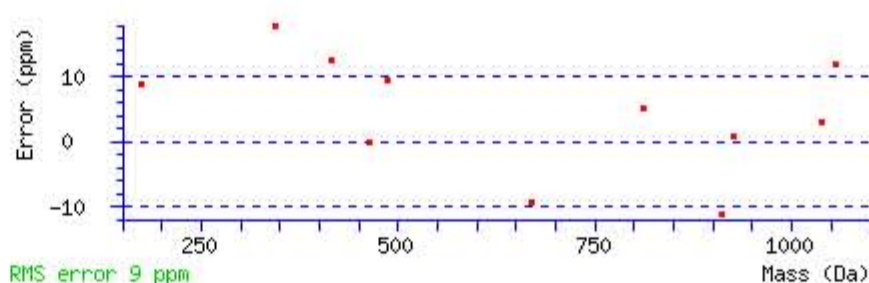

NCBI BLAST search of [TEQAAVAR](#)

(Parameters: blastp, nr protein database, expect=20000, no filter, PAM30)

Other BLAST [web gateways](#)

All matches to this query

| Score | Mr(calc):   | Delta     | Sequence                    |
|-------|-------------|-----------|-----------------------------|
| 27.6  | 1155.607010 | -0.004862 | <a href="#">TEQAAVAR</a>    |
| 8.3   | 1155.588394 | 0.013754  | <a href="#">VEQIEAGTPGR</a> |
| 5.2   | 1155.588379 | 0.013769  | <a href="#">TEVPLAENQR</a>  |



# MASCOT SCIENCE Mascot Search Results

## Peptide View

MS/MS Fragmentation of **CFEPQLLR**

Found in **FA12\_HUMAN**, Coagulation factor XII OS=Homo sapiens GN=F12 PE=1 SV=3

Match to Query 29275: 1372.699228 from(687.356890,2+) rtinseconds(2199) index(69965)

Title: Locus:1.1.1.1703.13 File:"2013-07-02 CLN FXIII 60 min 2nd FT.wiff"

Data file C:\Program Files (x86)\Matrix Science\Mascot Daemon\mgf\5 FXIII 60 min 2nd\mascot\_daemon\_merge.mgf

Click mouse within plot area to zoom in by factor of two about that point

Or, Plot from  to  Da

Label all possible matches  Label matches used for scoring

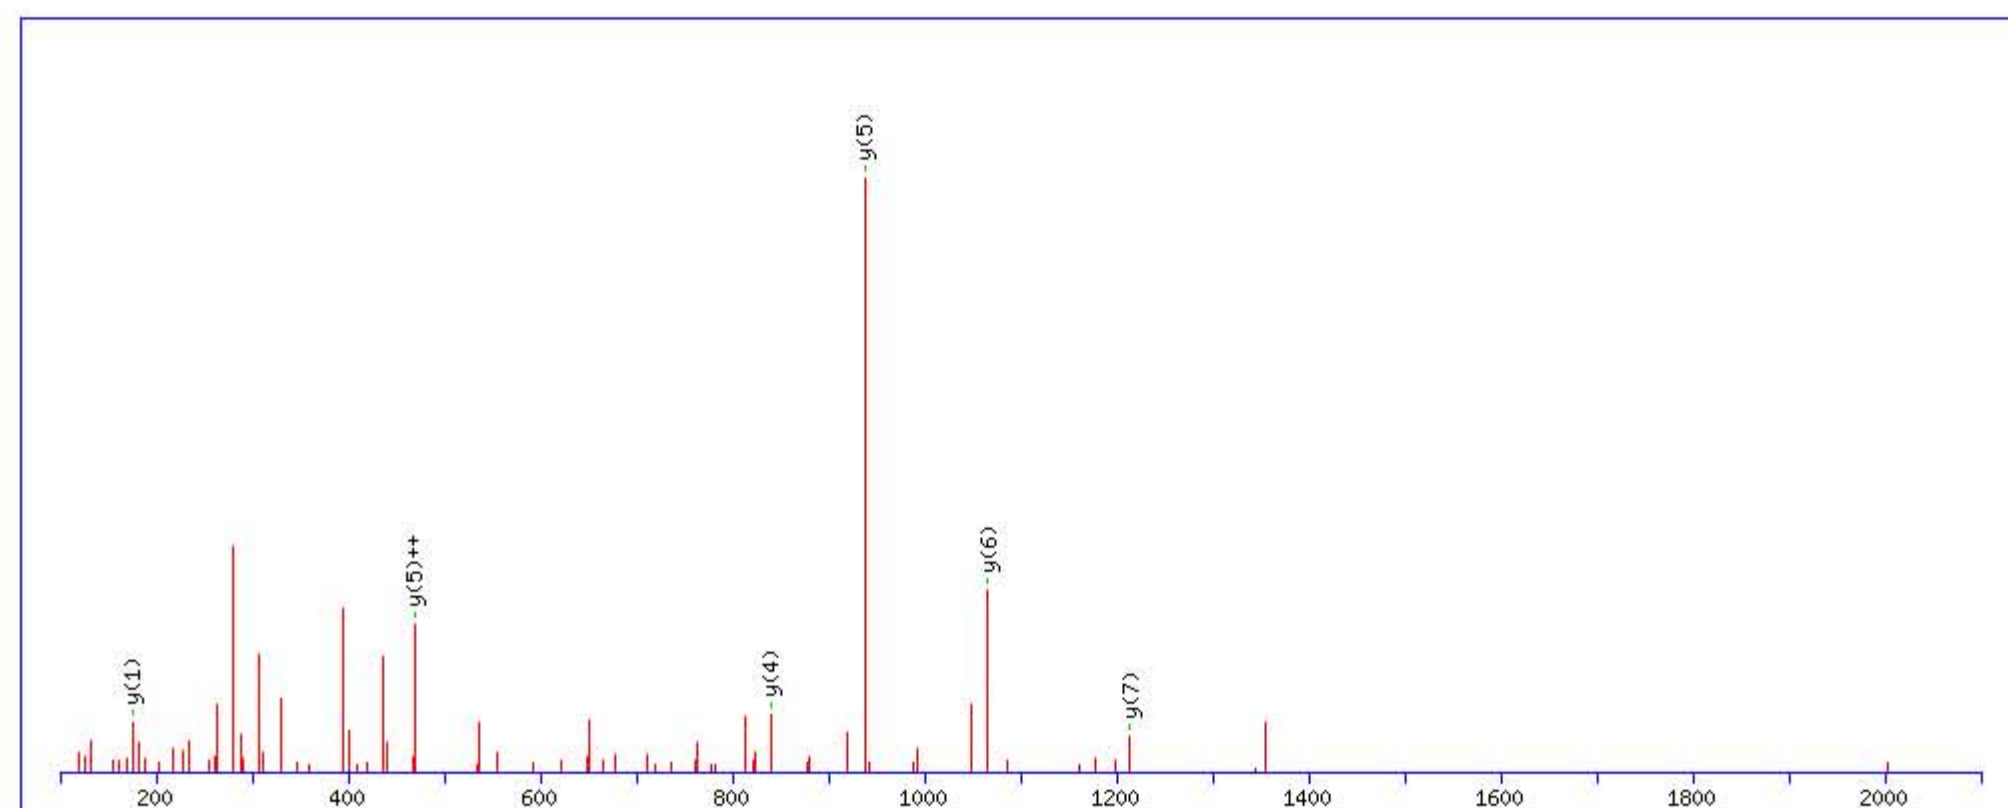

Monoisotopic mass of neutral peptide Mr(calc): 1372.699539

Fixed modifications: Carbamidomethyl (C) (apply to specified residues or termini only)

Variable modifications:

Q5 : Biotin:Thermo-21345 (Q)

Ions Score: 29 Expect: 0.0079

Matches : 6/62 fragment ions using 12 most intense peaks [\(help\)](#)

| # | b           | b <sup>++</sup> | b <sup>*</sup> | b <sup>*++</sup> | b <sup>0</sup> | b <sup>0++</sup> | Seq. | y           | y <sup>++</sup> | y <sup>*</sup> | y <sup>*++</sup> | y <sup>0</sup> | y <sup>0++</sup> | # |
|---|-------------|-----------------|----------------|------------------|----------------|------------------|------|-------------|-----------------|----------------|------------------|----------------|------------------|---|
| 1 | 161.037925  | 81.022600       |                |                  |                |                  | C    |             |                 |                |                  |                |                  | 8 |
| 2 | 308.106339  | 154.556807      |                |                  |                |                  | F    | 1213.676177 | 607.341726      | 1196.649628    | 598.828452       | 1195.665612    | 598.336444       | 7 |
| 3 | 437.148932  | 219.078104      |                |                  | 419.138367     | 210.072822       | E    | 1066.607763 | 533.807519      | 1049.581214    | 525.294245       | 1048.597198    | 524.802237       | 6 |
| 4 | 534.201696  | 267.604486      |                |                  | 516.191131     | 258.599204       | P    | 937.565170  | 469.286223      | 920.538621     | 460.772948       |                |                  | 5 |
| 5 | 973.427022  | 487.217149      | 956.400473     | 478.703875       | 955.416457     | 478.211867       | Q    | 840.512406  | 420.759841      | 823.485857     | 412.246566       |                |                  | 4 |
| 6 | 1086.511086 | 543.759181      | 1069.484537    | 535.245907       | 1068.500521    | 534.753898       | L    | 401.287080  | 201.147178      | 384.260531     | 192.633903       |                |                  | 3 |
| 7 | 1199.595150 | 600.301213      | 1182.568601    | 591.787939       | 1181.584585    | 591.295930       | L    | 288.203016  | 144.605146      | 271.176467     | 136.091871       |                |                  | 2 |
| 8 |             |                 |                |                  |                |                  | R    | 175.118952  | 88.063114       | 158.092403     | 79.549839        |                |                  | 1 |

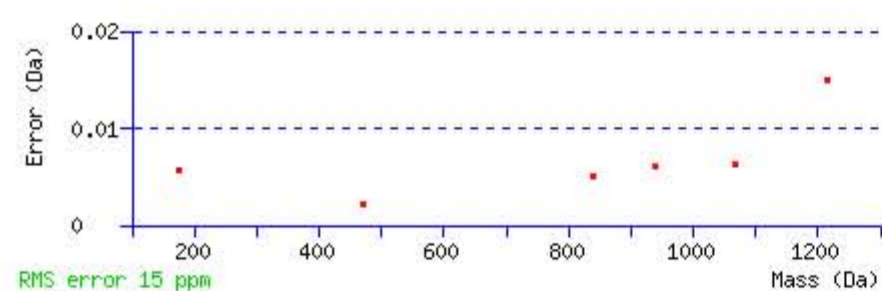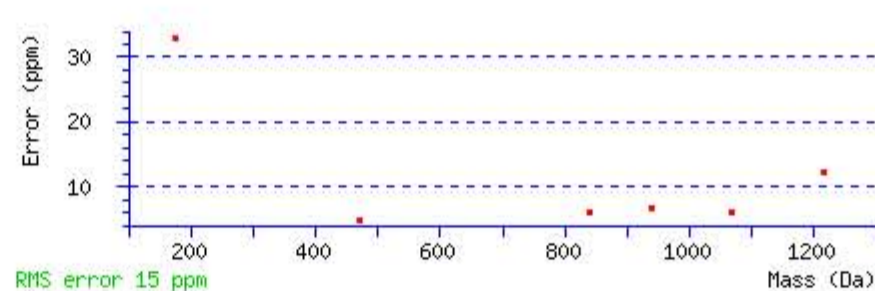

NCBI BLAST search of **CFEPQLLR**

(Parameters: blastp, nr protein database, expect=20000, no filter, PAM30)

Other BLAST [web gateways](#)

## All matches to this query

| Score | Mr(calc):   | Delta     | Sequence                     |
|-------|-------------|-----------|------------------------------|
| 29.4  | 1372.699539 | -0.000311 | <a href="#">CFEPQLLR</a>     |
| 6.6   | 1372.710770 | -0.011542 | <a href="#">QPRMLDFR</a>     |
| 0.8   | 1372.717331 | -0.018103 | <a href="#">QGLPVVMPVFDR</a> |
| 0.1   | 1372.703369 | -0.004141 | <a href="#">NPPKQEGHR</a>    |

Mascot: <http://www.matrixscience.com/>



**MASCOT** Mascot Search Results

**Peptide View**

MS/MS Fragmentation of **AEHTVVLTVTGEPCHFPPQYHR**  
 Found in **FA12\_HUMAN**, Coagulation factor XII OS=Homo sapiens GN=F12 PE=1 SV=3

Match to Query 62135: 3064.482096 from(767.127800,4+) rtinseconds(2143) index(69615)  
 Title: Locus:1.1.1.1683.17 File:"2013-07-02 CLN FXIII 60 min 2nd FT.wiff"  
 Data file C:\Program Files (x86)\Matrix Science\Mascot Daemon\mgf5 FXIII 60 min 2nd\mascot\_daemon\_merge.mgf

Click mouse within plot area to zoom in by factor of two about that point  
 Or, Plot from  to  Da   
 Label all possible matches  Label matches used for scoring

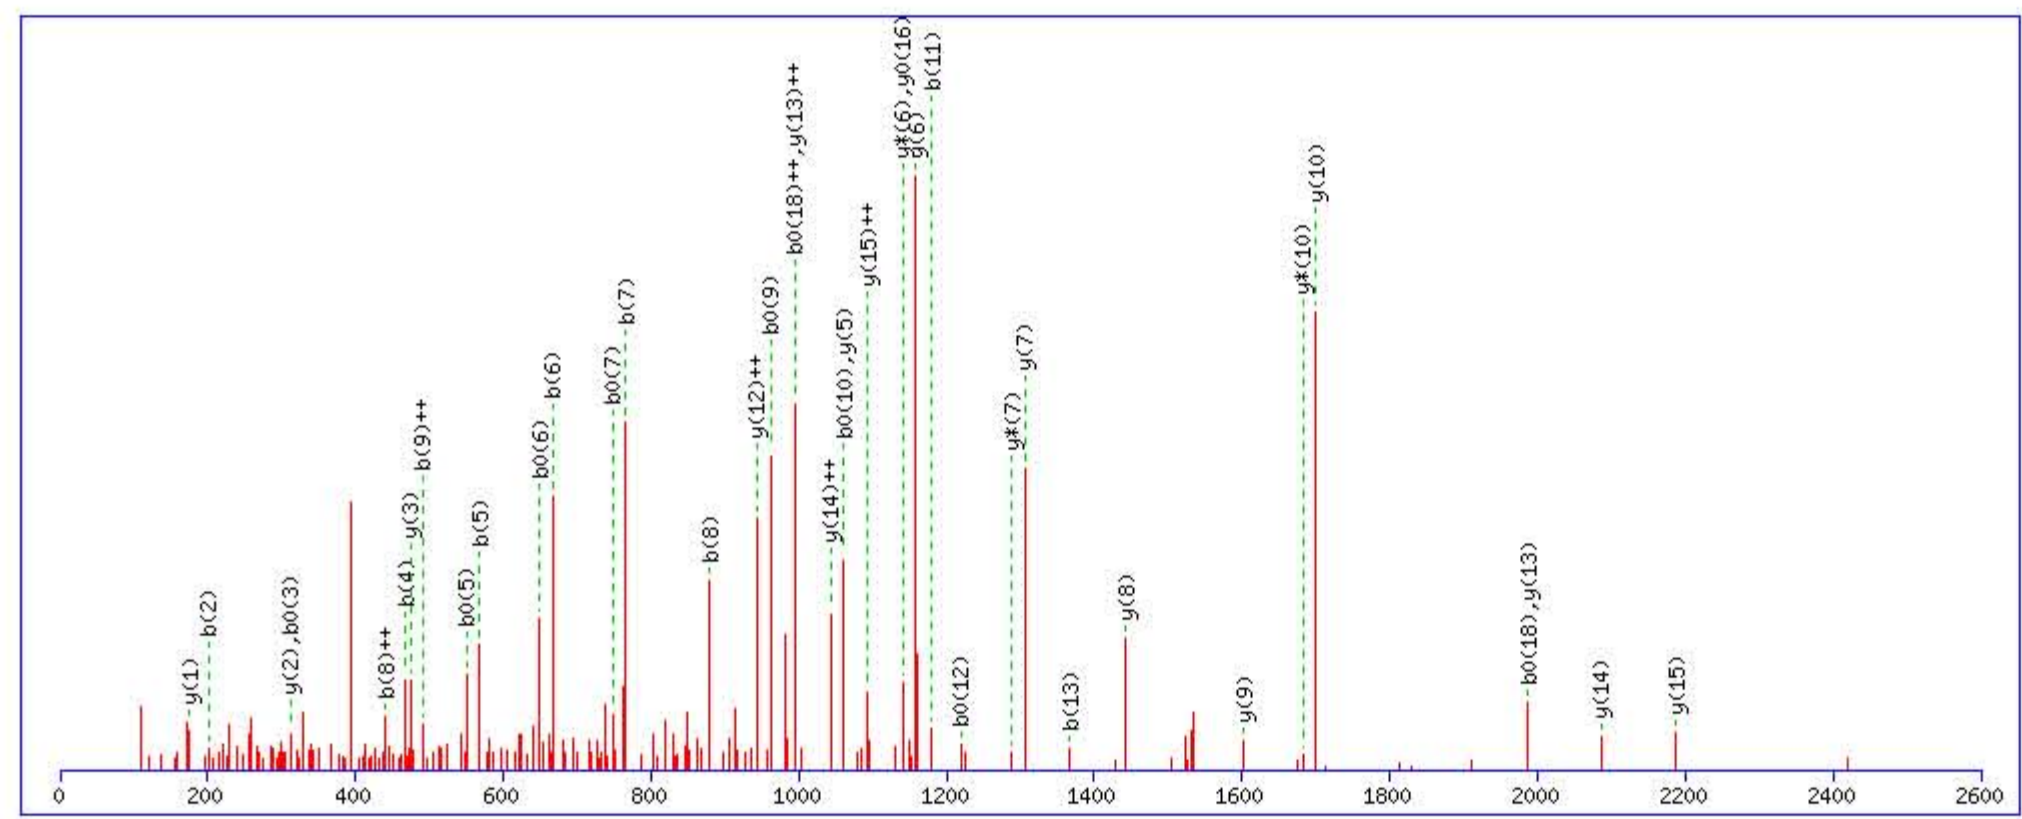

Monoisotopic mass of neutral peptide Mr(calc): 3064.468796  
 Fixed modifications: Carbamidomethyl (C) (apply to specified residues or termini only)  
 Variable modifications:  
 Q20 : Biotin:Thermo-21345 (Q)  
 Ions Score: 66 Expect: 6.7e-006  
 Matches : 39/204 fragment ions using 70 most intense peaks [\(help\)](#)

| #  | b                  | b <sup>++</sup>   | b <sup>*</sup> | b <sup>+++</sup> | b <sup>0</sup>     | b <sup>0++</sup>  | Seq. | y                  | y <sup>++</sup>    | y <sup>*</sup>     | y <sup>+++</sup> | y <sup>0</sup> | y <sup>0++</sup>   | #  |
|----|--------------------|-------------------|----------------|------------------|--------------------|-------------------|------|--------------------|--------------------|--------------------|------------------|----------------|--------------------|----|
| 1  | 72.044390          | 36.525833         |                |                  |                    |                   | A    |                    |                    |                    |                  |                |                    | 23 |
| 2  | <b>201.086983</b>  | 101.047130        |                |                  | 183.076418         | 92.041847         | E    | 2994.438934        | 1497.723105        | 2977.412385        | 1489.209830      | 2976.428369    | 1488.717822        | 22 |
| 3  | 330.129576         | 165.568426        |                |                  | <b>312.119011</b>  | 156.563144        | E    | 2865.396341        | 1433.201808        | 2848.369792        | 1424.688534      | 2847.385776    | 1424.196526        | 21 |
| 4  | <b>467.188488</b>  | 234.097882        |                |                  | 449.177923         | 225.092599        | H    | 2736.353748        | 1368.680512        | 2719.327199        | 1360.167237      | 2718.343183    | 1359.675229        | 20 |
| 5  | <b>568.236167</b>  | 284.621722        |                |                  | <b>550.225602</b>  | 275.616439        | T    | 2599.294836        | 1300.151056        | 2582.268287        | 1291.637781      | 2581.284271    | 1291.145773        | 19 |
| 6  | <b>667.304581</b>  | 334.155929        |                |                  | <b>649.294016</b>  | 325.150646        | V    | 2498.247157        | 1249.627216        | 2481.220608        | 1241.113942      | 2480.236592    | 1240.621934        | 18 |
| 7  | <b>766.372995</b>  | 383.690136        |                |                  | <b>748.362430</b>  | 374.684853        | V    | 2399.178743        | 1200.093009        | 2382.152194        | 1191.579735      | 2381.168178    | 1191.087727        | 17 |
| 8  | <b>879.457059</b>  | <b>440.232168</b> |                |                  | 861.446494         | 431.226885        | L    | 2300.110329        | 1150.558802        | 2283.083780        | 1142.045528      | 2282.099764    | <b>1141.553520</b> | 16 |
| 9  | 980.504738         | <b>490.756007</b> |                |                  | <b>962.494173</b>  | 481.750724        | T    | <b>2187.026265</b> | <b>1094.016770</b> | 2169.999716        | 1085.503496      | 2169.015700    | 1085.011488        | 15 |
| 10 | 1079.573152        | 540.290214        |                |                  | <b>1061.562587</b> | 531.284931        | V    | <b>2085.978586</b> | <b>1043.492931</b> | 2068.952037        | 1034.979656      | 2067.968021    | 1034.487648        | 14 |
| 11 | <b>1180.620831</b> | 590.814054        |                |                  | 1162.610266        | 581.808771        | T    | <b>1986.910172</b> | <b>993.958724</b>  | 1969.883623        | 985.445450       | 1968.899607    | 984.953442         | 13 |
| 12 | 1237.642295        | 619.324785        |                |                  | <b>1219.631730</b> | 610.319503        | G    | 1885.862493        | <b>943.434885</b>  | 1868.835944        | 934.921610       | 1867.851928    | 934.429602         | 12 |
| 13 | <b>1366.684888</b> | 683.846082        |                |                  | 1348.674323        | 674.840800        | E    | 1828.841029        | 914.924153         | 1811.814480        | 906.410878       | 1810.830464    | 905.918870         | 11 |
| 14 | 1463.737652        | 732.372464        |                |                  | 1445.727087        | 723.367182        | P    | <b>1699.798436</b> | 850.402856         | <b>1682.771887</b> | 841.889582       |                |                    | 10 |
| 15 | 1623.768301        | 812.387789        |                |                  | 1605.757736        | 803.382506        | C    | <b>1602.745672</b> | 801.876474         | 1585.719123        | 793.363200       |                |                    | 9  |
| 16 | 1760.827213        | 880.917245        |                |                  | 1742.816648        | 871.911962        | H    | <b>1442.715023</b> | 721.861150         | 1425.688474        | 713.347875       |                |                    | 8  |
| 17 | 1907.895627        | 954.451452        |                |                  | 1889.885062        | 945.446169        | F    | <b>1305.656111</b> | 653.331694         | <b>1288.629562</b> | 644.818419       |                |                    | 7  |
| 18 | 2004.948391        | 1002.977834       |                |                  | <b>1986.937826</b> | <b>993.972551</b> | P    | <b>1158.587697</b> | 579.797487         | <b>1141.561148</b> | 571.284212       |                |                    | 6  |
| 19 | 2152.016805        | 1076.512040       |                |                  | 2134.006240        | 1067.506758       | F    | <b>1061.534933</b> | 531.271105         | 1044.508384        | 522.757830       |                |                    | 5  |
| 20 | 2591.242131        | 1296.124703       | 2574.215582    | 1287.611429      | 2573.231566        | 1287.119421       | Q    | 914.466519         | 457.736898         | 897.439970         | 449.223623       |                |                    | 4  |
| 21 | 2754.305460        | 1377.656368       | 2737.278911    | 1369.143093      | 2736.294895        | 1368.651085       | Y    | <b>475.241193</b>  | 238.124234         | 458.214644         | 229.610960       |                |                    | 3  |
| 22 | 2891.364372        | 1446.185824       | 2874.337823    | 1437.672549      | 2873.353807        | 1437.180541       | H    | <b>312.177864</b>  | 156.592570         | 295.151315         | 148.079295       |                |                    | 2  |
| 23 |                    |                   |                |                  |                    |                   | R    | <b>175.118952</b>  | 88.063114          | 158.092403         | 79.549839        |                |                    | 1  |

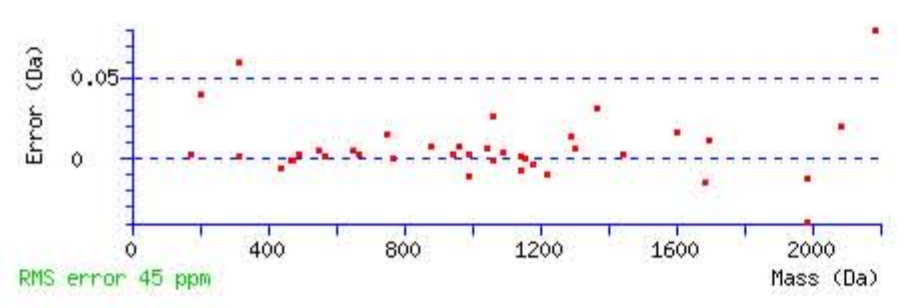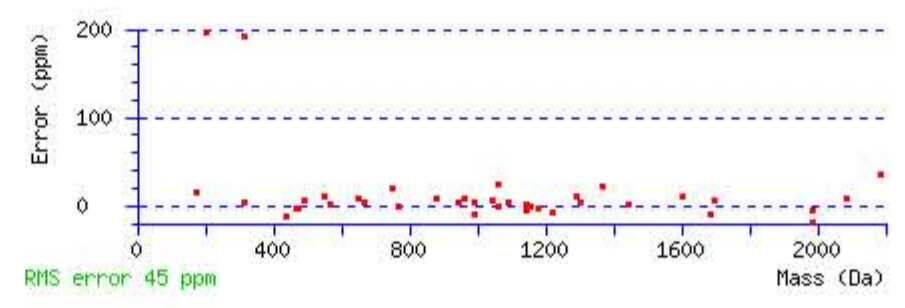

NCBI BLAST search of [AEHTVVLTVTGEPCHFPPQYHR](#)  
 (Parameters: blastp, nr protein database, expect=20000, no filter, PAM30)  
 Other BLAST [web gateways](#)

**All matches to this query**

| Score | Mr(calc):   | Delta    | Sequence                               |
|-------|-------------|----------|----------------------------------------|
| 65.6  | 3064.468796 | 0.013300 | <a href="#">AEHTVVLTVTGEPCHFPPQYHR</a> |



# MASCOT SCIENCE Mascot Search Results

## Peptide View

MS/MS Fragmentation of **AQMDLSGR**

Found in **F13A\_HUMAN**, Coagulation factor XIII A chain OS=Homo sapiens GN=F13A1 PE=1 SV=4

Match to Query 23368: 1203.569848 from(602.792200,2+) rtinseconds(1465) index(65613)

Title: Locus:1.1.1.1447.21 File:"2013-07-02 CLN FXIII 60 min 2nd FT.wiff"

Data file C:\Program Files (x86)\Matrix Science\Mascot Daemon\mgf5 FXIII 60 min 2nd\mascot\_daemon\_merge.mgf

Click mouse within plot area to zoom in by factor of two about that point

Or, Plot from  to  Da

Label all possible matches  Label matches used for scoring

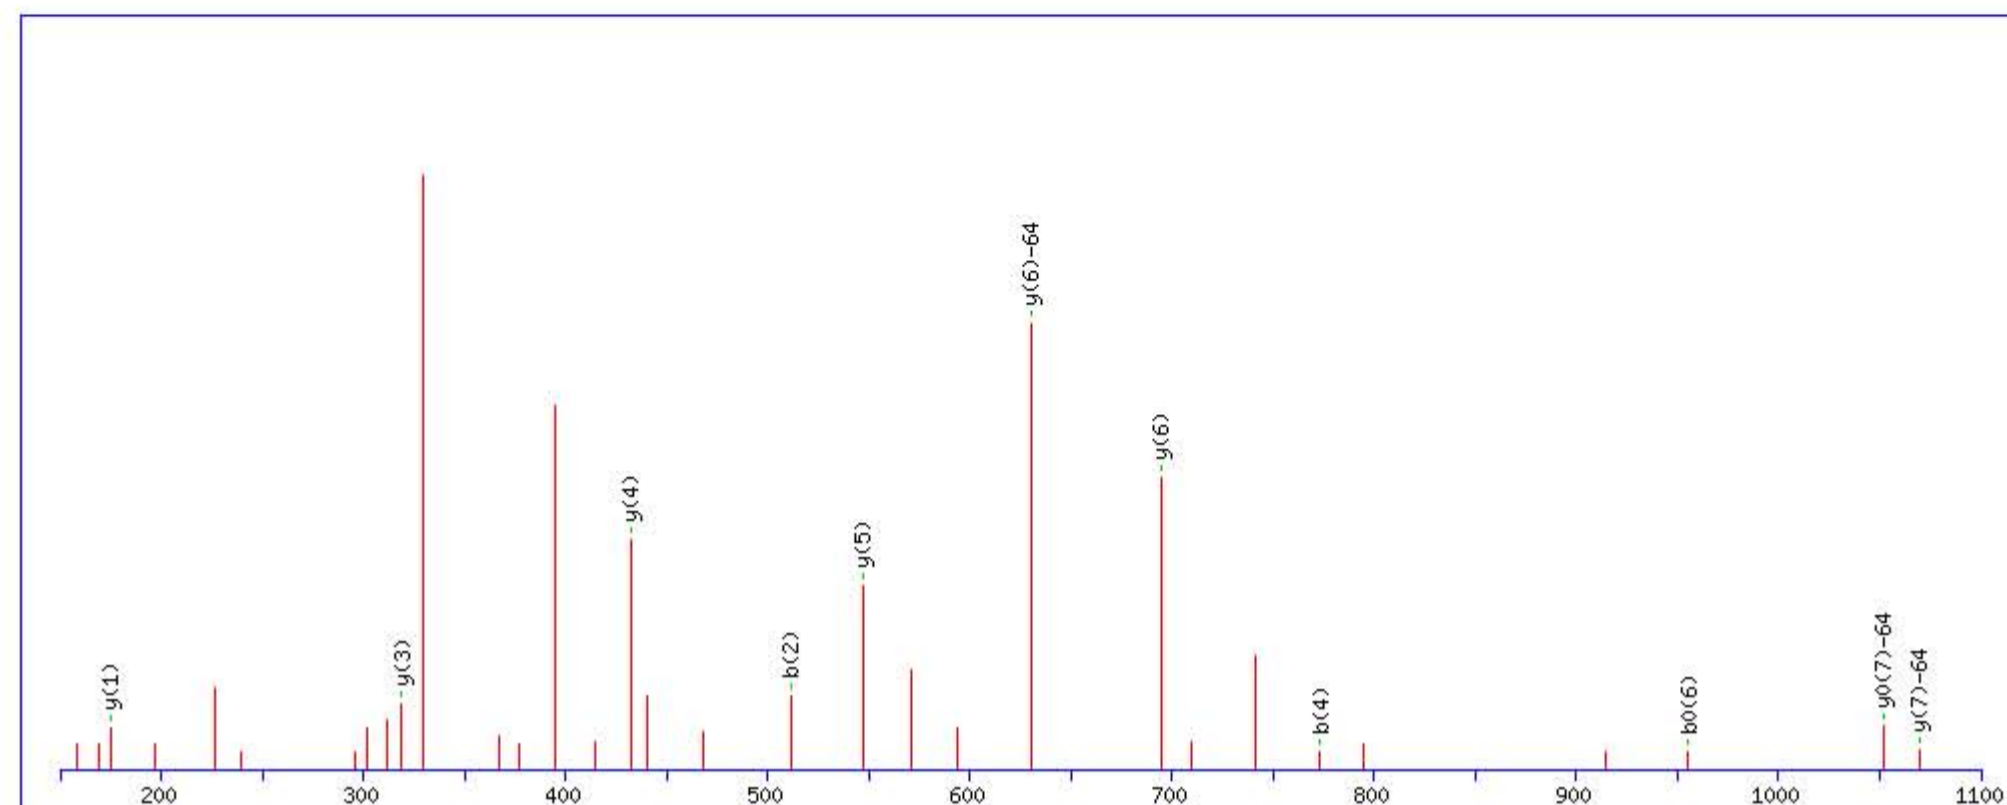

Monoisotopic mass of neutral peptide Mr(calc): 1203.574005

Fixed modifications: Carbamidomethyl (C) (apply to specified residues or termini only)

Variable modifications:

Q2 : Biotin:Thermo-21345 (Q)

M3 : Oxidation (M), with neutral losses 63.998285 (shown in table), 0.000000

Ions Score: 33 Expect: 0.0018

Matches : 11/112 fragment ions using 18 most intense peaks [\(help\)](#)

| # | b                 | b <sup>++</sup> | b <sup>*</sup> | b <sup>*++</sup> | b <sup>0</sup> | b <sup>0++</sup> | Seq. | y                  | y <sup>++</sup> | y <sup>*</sup> | y <sup>*++</sup> | y <sup>0</sup>     | y <sup>0++</sup> | # |
|---|-------------------|-----------------|----------------|------------------|----------------|------------------|------|--------------------|-----------------|----------------|------------------|--------------------|------------------|---|
| 1 | 72.044390         | 36.525833       |                |                  |                |                  | A    |                    |                 |                |                  |                    |                  | 8 |
| 2 | <b>511.269716</b> | 256.138496      | 494.243167     | 247.625221       |                |                  | Q    | <b>1069.545892</b> | 535.276584      | 1052.519343    | 526.763310       | <b>1051.535327</b> | 526.271302       | 7 |
| 3 | 594.306831        | 297.657054      | 577.280282     | 289.143779       |                |                  | M    | <b>630.320566</b>  | 315.663921      | 613.294017     | 307.150646       | 612.310001         | 306.658639       | 6 |
| 4 | 709.333774        | 355.170525      | 692.307225     | 346.657250       | 691.323209     | 346.165242       | D    | <b>547.283451</b>  | 274.145364      | 530.256902     | 265.632089       | 529.272886         | 265.140081       | 5 |
| 5 | 822.417838        | 411.712557      | 805.391289     | 403.199282       | 804.407273     | 402.707274       | L    | <b>432.256508</b>  | 216.631892      | 415.229959     | 208.118617       | 414.245943         | 207.626609       | 4 |
| 6 | 909.449866        | 455.228571      | 892.423317     | 446.715296       | 891.439301     | 446.223288       | S    | <b>319.172444</b>  | 160.089860      | 302.145895     | 151.576585       | 301.161879         | 151.084577       | 3 |
| 7 | 966.471330        | 483.739303      | 949.444781     | 475.226028       | 948.460765     | 474.734020       | G    | 232.140416         | 116.573846      | 215.113867     | 108.060571       |                    |                  | 2 |
| 8 |                   |                 |                |                  |                |                  | R    | <b>175.118952</b>  | 88.063114       | 158.092403     | 79.549839        |                    |                  | 1 |

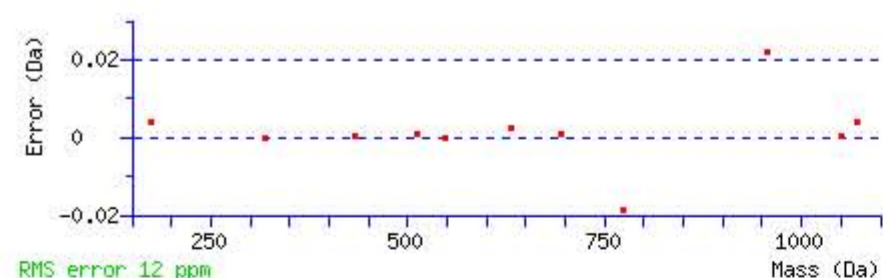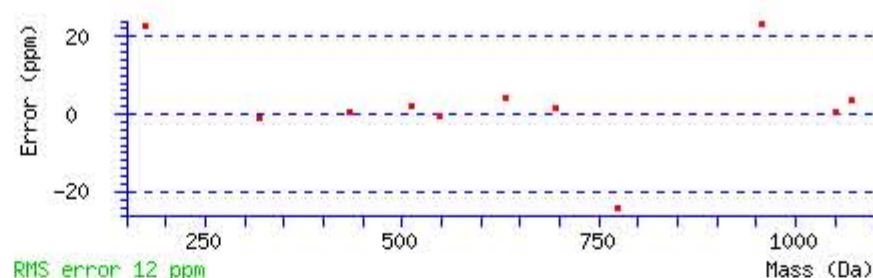

NCBI BLAST search of [AQMDLSGR](#)

(Parameters: blastp, nr protein database, expect=20000, no filter, PAM30)

Other BLAST [web gateways](#)

All matches to this query

| Score | Mr(calc):   | Delta     | Sequence                   |
|-------|-------------|-----------|----------------------------|
| 32.8  | 1203.574005 | -0.004157 | <a href="#">AQMDLSGR</a>   |
| 3.5   | 1203.577820 | -0.007972 | <a href="#">EAQQRQAAMR</a> |

Mascot: <http://www.matrixscience.com/>



# MASCOT SCIENCE Mascot Search Results

## Peptide View

MS/MS Fragmentation of **FQEGQEEER**

Found in **F13A\_HUMAN**, Coagulation factor XIII A chain OS=Homo sapiens GN=F13A1 PE=1 SV=4

Match to Query 32782: 1461.654748 from(731.834650,2+) rtinseconds(1458) index(2602)

Title: Locus:1.1.1.1316.26 File:"2013-07-02 CLN FXIII 60 min 2nd F 1.wiff"

Data file C:\Program Files (x86)\Matrix Science\Mascot Daemon\mgf5 FXIII 60 min 2nd\mascot\_daemon\_merge.mgf

Click mouse within plot area to zoom in by factor of two about that point

Or, Plot from  to  Da

Label all possible matches  Label matches used for scoring

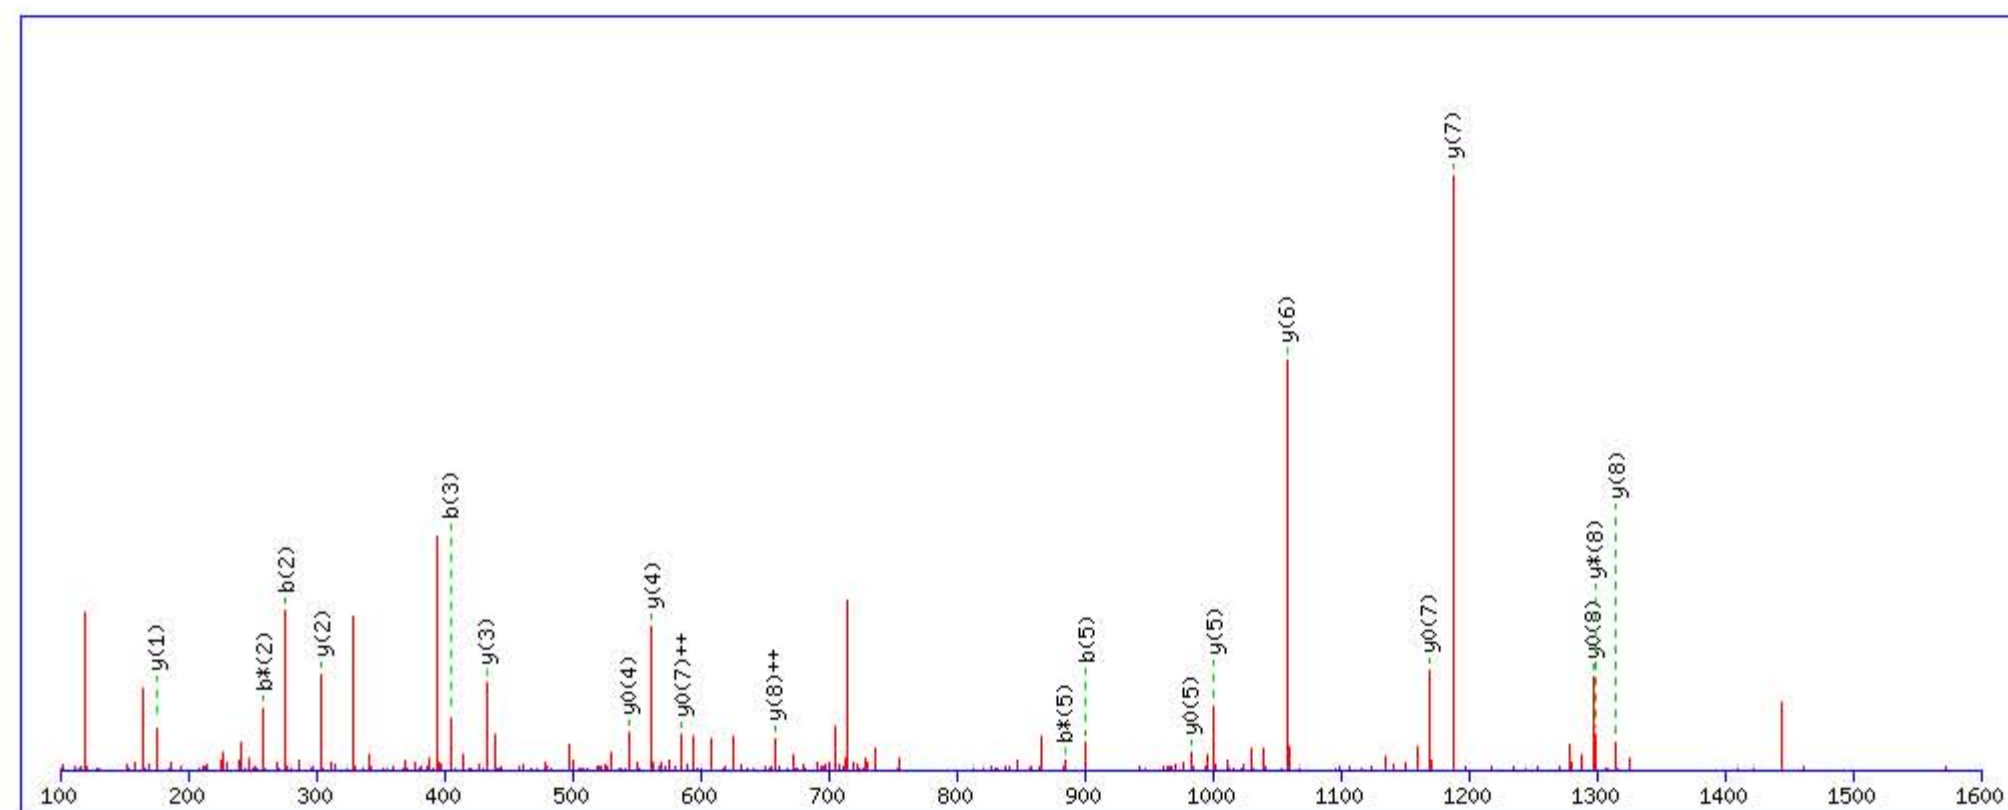

Monoisotopic mass of neutral peptide Mr(calc): 1461.655807

Fixed modifications: Carbamidomethyl (C) (apply to specified residues or termini only)

Variable modifications:

Q5 : Biotin:Thermo-21345 (Q)

Ions Score: 43 Expect: 0.00037

Matches : 20/88 fragment ions using 42 most intense peaks [\(help\)](#)

| # | b                 | b <sup>++</sup> | b <sup>*</sup>    | b <sup>*++</sup> | b <sup>0</sup> | b <sup>0++</sup> | Seq. | y                  | y <sup>++</sup>   | y <sup>*</sup>     | y <sup>*++</sup> | y <sup>0</sup>     | y <sup>0++</sup>  | # |
|---|-------------------|-----------------|-------------------|------------------|----------------|------------------|------|--------------------|-------------------|--------------------|------------------|--------------------|-------------------|---|
| 1 | 148.075690        | 74.541483       |                   |                  |                |                  | F    |                    |                   |                    |                  |                    |                   | 9 |
| 2 | <b>276.134268</b> | 138.570772      | <b>259.107719</b> | 130.057497       |                |                  | Q    | <b>1315.594692</b> | <b>658.300984</b> | <b>1298.568143</b> | 649.787710       | <b>1297.584127</b> | 649.295702        | 8 |
| 3 | <b>405.176861</b> | 203.092068      | 388.150312        | 194.578794       | 387.166296     | 194.086786       | E    | <b>1187.536114</b> | 594.271695        | 1170.509565        | 585.758421       | <b>1169.525549</b> | <b>585.266413</b> | 7 |
| 4 | 462.198325        | 231.602800      | 445.171776        | 223.089526       | 444.187760     | 222.597518       | G    | <b>1058.493521</b> | 529.750399        | 1041.466972        | 521.237124       | 1040.482956        | 520.745116        | 6 |
| 5 | <b>901.423651</b> | 451.215464      | <b>884.397102</b> | 442.702189       | 883.413086     | 442.210181       | Q    | <b>1001.472057</b> | 501.239667        | 984.445508         | 492.726392       | <b>983.461492</b>  | 492.234384        | 5 |
| 6 | 1030.466244       | 515.736760      | 1013.439695       | 507.223485       | 1012.455679    | 506.731477       | E    | <b>562.246731</b>  | 281.627004        | 545.220182         | 273.113729       | <b>544.236166</b>  | 272.621721        | 4 |
| 7 | 1159.508837       | 580.258057      | 1142.482288       | 571.744782       | 1141.498272    | 571.252774       | E    | <b>433.204138</b>  | 217.105707        | 416.177589         | 208.592433       | 415.193573         | 208.100425        | 3 |
| 8 | 1288.551430       | 644.779353      | 1271.524881       | 636.266079       | 1270.540865    | 635.774071       | E    | <b>304.161545</b>  | 152.584411        | 287.134996         | 144.071136       | 286.150980         | 143.579128        | 2 |
| 9 |                   |                 |                   |                  |                |                  | R    | <b>175.118952</b>  | 88.063114         | 158.092403         | 79.549839        |                    |                   | 1 |

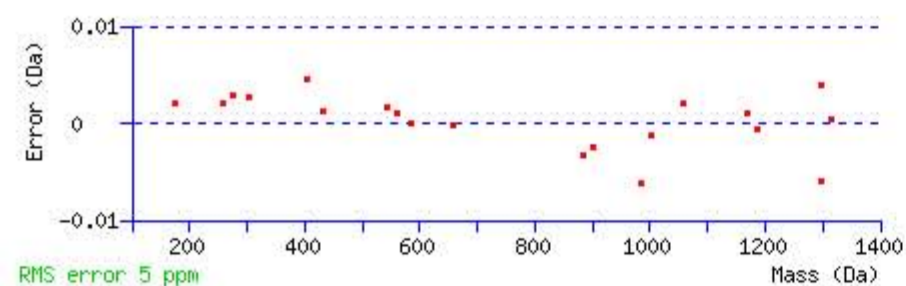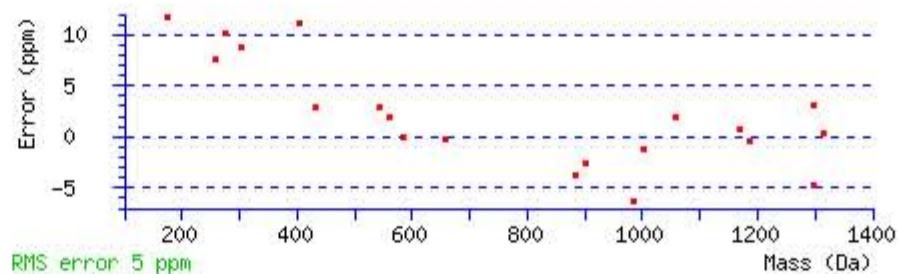

NCBI BLAST search of **FQEGQEEER**

(Parameters: blastp, nr protein database, expect=20000, no filter, PAM30)

Other BLAST [web gateways](#)

## All matches to this query

| Score | Mr(calc):   | Delta     | Sequence                      |
|-------|-------------|-----------|-------------------------------|
| 42.8  | 1461.655807 | -0.001059 | <a href="#">FQEGQEEER</a>     |
| 11.2  | 1461.640564 | 0.014184  | <a href="#">NSGTQSDGEEK</a>   |
| 7.8   | 1461.648392 | 0.006356  | <a href="#">HREELSDYEER</a>   |
| 7.2   | 1461.655807 | -0.001059 | <a href="#">FQEGQEEER</a>     |
| 6.3   | 1461.640564 | 0.014184  | <a href="#">VMTDVAGNPEEER</a> |
| 2.3   | 1461.637161 | 0.017587  | <a href="#">ESELQWQEEER</a>   |



# MASCOT Search Results

## Peptide View

MS/MS Fragmentation of **HVYGELDVQIQR**

Found in **F13A\_HUMAN**, Coagulation factor XIII A chain OS=Homo sapiens GN=F13A1 PE=1 SV=4

Match to Query 42023: 1766.908528 from(884.461540,2+) rtinseconds(1962) index(68494)

Title: Locus:1.1.1.1620.25 File:"2013-07-02 CLN FXIII 60 min 2nd FT.wiff"

Data file C:\Program Files (x86)\Matrix Science\Mascot Daemon\mgf\5 FXIII 60 min 2nd\mascot\_daemon\_merge.mgf

Click mouse within plot area to zoom in by factor of two about that point

Or, Plot from  to  Da

Label all possible matches  Label matches used for scoring

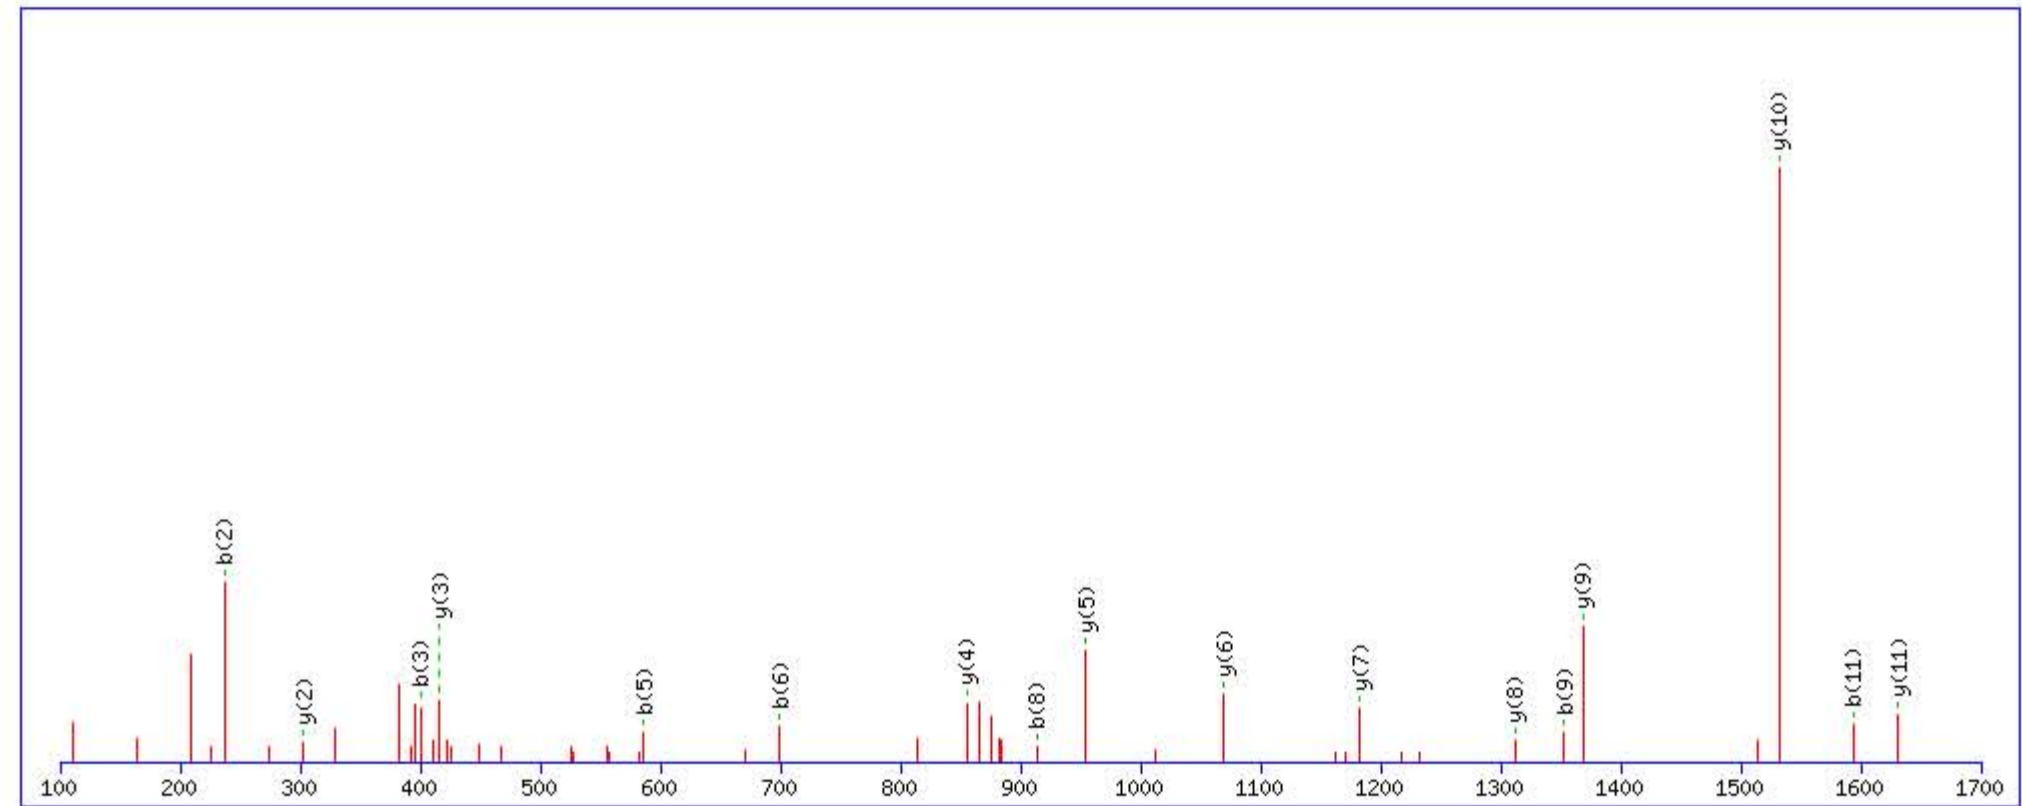

Monoisotopic mass of neutral peptide Mr(calc): 1766.913773

Fixed modifications: Carbamidomethyl (C) (apply to specified residues or termini only)

Variable modifications:

Q9 : Biotin:Thermo-21345 (Q)

Ions Score: 64 Expect: 4.3e-006

Matches : 17/98 fragment ions using 36 most intense peaks [\(help\)](#)

| #  | b                  | b <sup>++</sup> | b <sup>+</sup> | b <sup>+++</sup> | b <sup>0</sup> | b <sup>0++</sup> | Seq. | y                  | y <sup>++</sup> | y <sup>+</sup> | y <sup>+++</sup> | y <sup>0</sup> | y <sup>0++</sup> | #  |
|----|--------------------|-----------------|----------------|------------------|----------------|------------------|------|--------------------|-----------------|----------------|------------------|----------------|------------------|----|
| 1  | 138.066188         | 69.536732       |                |                  |                |                  | H    |                    |                 |                |                  |                |                  | 12 |
| 2  | <b>237.134602</b>  | 119.070939      |                |                  |                |                  | V    | <b>1630.862141</b> | 815.934708      | 1613.835592    | 807.421434       | 1612.851576    | 806.929426       | 11 |
| 3  | <b>400.197931</b>  | 200.602603      |                |                  |                |                  | Y    | <b>1531.793727</b> | 766.400501      | 1514.767178    | 757.887227       | 1513.783162    | 757.395219       | 10 |
| 4  | 457.219395         | 229.113335      |                |                  |                |                  | G    | <b>1368.730398</b> | 684.868837      | 1351.703849    | 676.355563       | 1350.719833    | 675.863554       | 9  |
| 5  | <b>586.261988</b>  | 293.634632      |                |                  | 568.251423     | 284.629349       | E    | <b>1311.708934</b> | 656.358105      | 1294.682385    | 647.844830       | 1293.698369    | 647.352822       | 8  |
| 6  | <b>699.346052</b>  | 350.176664      |                |                  | 681.335487     | 341.171382       | L    | <b>1182.666341</b> | 591.836808      | 1165.639792    | 583.323534       | 1164.655776    | 582.831526       | 7  |
| 7  | 814.372995         | 407.690136      |                |                  | 796.362430     | 398.684853       | D    | <b>1069.582277</b> | 535.294776      | 1052.555728    | 526.781502       | 1051.571712    | 526.289494       | 6  |
| 8  | <b>913.441409</b>  | 457.224342      |                |                  | 895.430844     | 448.219060       | V    | <b>954.555334</b>  | 477.781305      | 937.528785     | 469.268030       |                |                  | 5  |
| 9  | <b>1352.666735</b> | 676.837006      | 1335.640186    | 668.323731       | 1334.656170    | 667.831723       | Q    | <b>855.486920</b>  | 428.247098      | 838.460371     | 419.733823       |                |                  | 4  |
| 10 | 1465.750799        | 733.379037      | 1448.724250    | 724.865763       | 1447.740234    | 724.373755       | I    | <b>416.261594</b>  | 208.634435      | 399.235045     | 200.121160       |                |                  | 3  |
| 11 | <b>1593.809377</b> | 797.408326      | 1576.782828    | 788.895052       | 1575.798812    | 788.403044       | Q    | <b>303.177530</b>  | 152.092403      | 286.150981     | 143.579128       |                |                  | 2  |
| 12 |                    |                 |                |                  |                |                  | R    | 175.118952         | 88.063114       | 158.092403     | 79.549839        |                |                  | 1  |

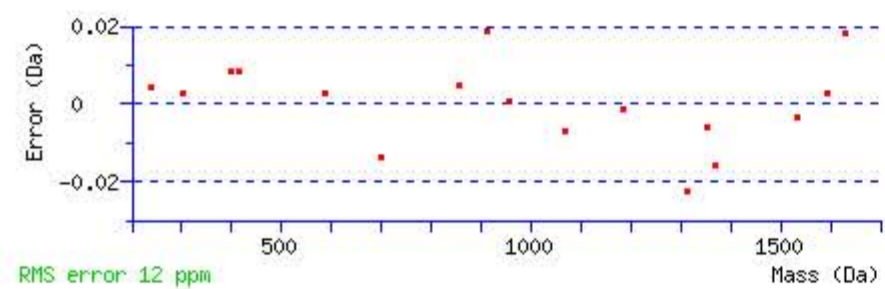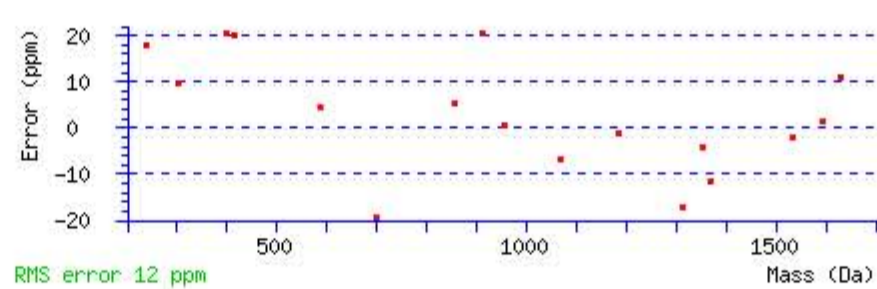

NCBI BLAST search of [HVYGELDVQIQR](#)

(Parameters: blastp, nr protein database, expect=20000, no filter, PAM30)

Other BLAST [web gateways](#)

All matches to this query

| Score | Mr(calc):   | Delta     | Sequence                     |
|-------|-------------|-----------|------------------------------|
| 63.6  | 1766.913773 | -0.005245 | <a href="#">HVYGELDVQIQR</a> |
| 42.0  | 1766.913773 | -0.005245 | <a href="#">HVYGELDVQIQR</a> |
| 5.1   | 1766.888596 | 0.019932  | <a href="#">NQDDRELWPRK</a>  |
| 4.8   | 1766.888138 | 0.020390  | <a href="#">IMQNGTILYTMR</a> |



# MASCOT Search Results

## Peptide View

MS/MS Fragmentation of **FQEGQEEER**

Found in **F13A\_HUMAN**, Coagulation factor XIII A chain OS=Homo sapiens GN=F13A1 PE=1 SV=4

Match to Query 42205: 1772.818908 from(887.416730,2+) rtinseconds(1835) index(20548)

Title: Locus:1.1.1.641.15 File:"2013-07-02 CLN FXIII 60 min 2nd F 2.wiff"

Data file C:\Program Files (x86)\Matrix Science\Mascot Daemon\mgf5 FXIII 60 min 2nd\mascot\_daemon\_merge.mgf

Click mouse within plot area to zoom in by factor of two about that point

Or, Plot from  to  Da

Label all possible matches  Label matches used for scoring

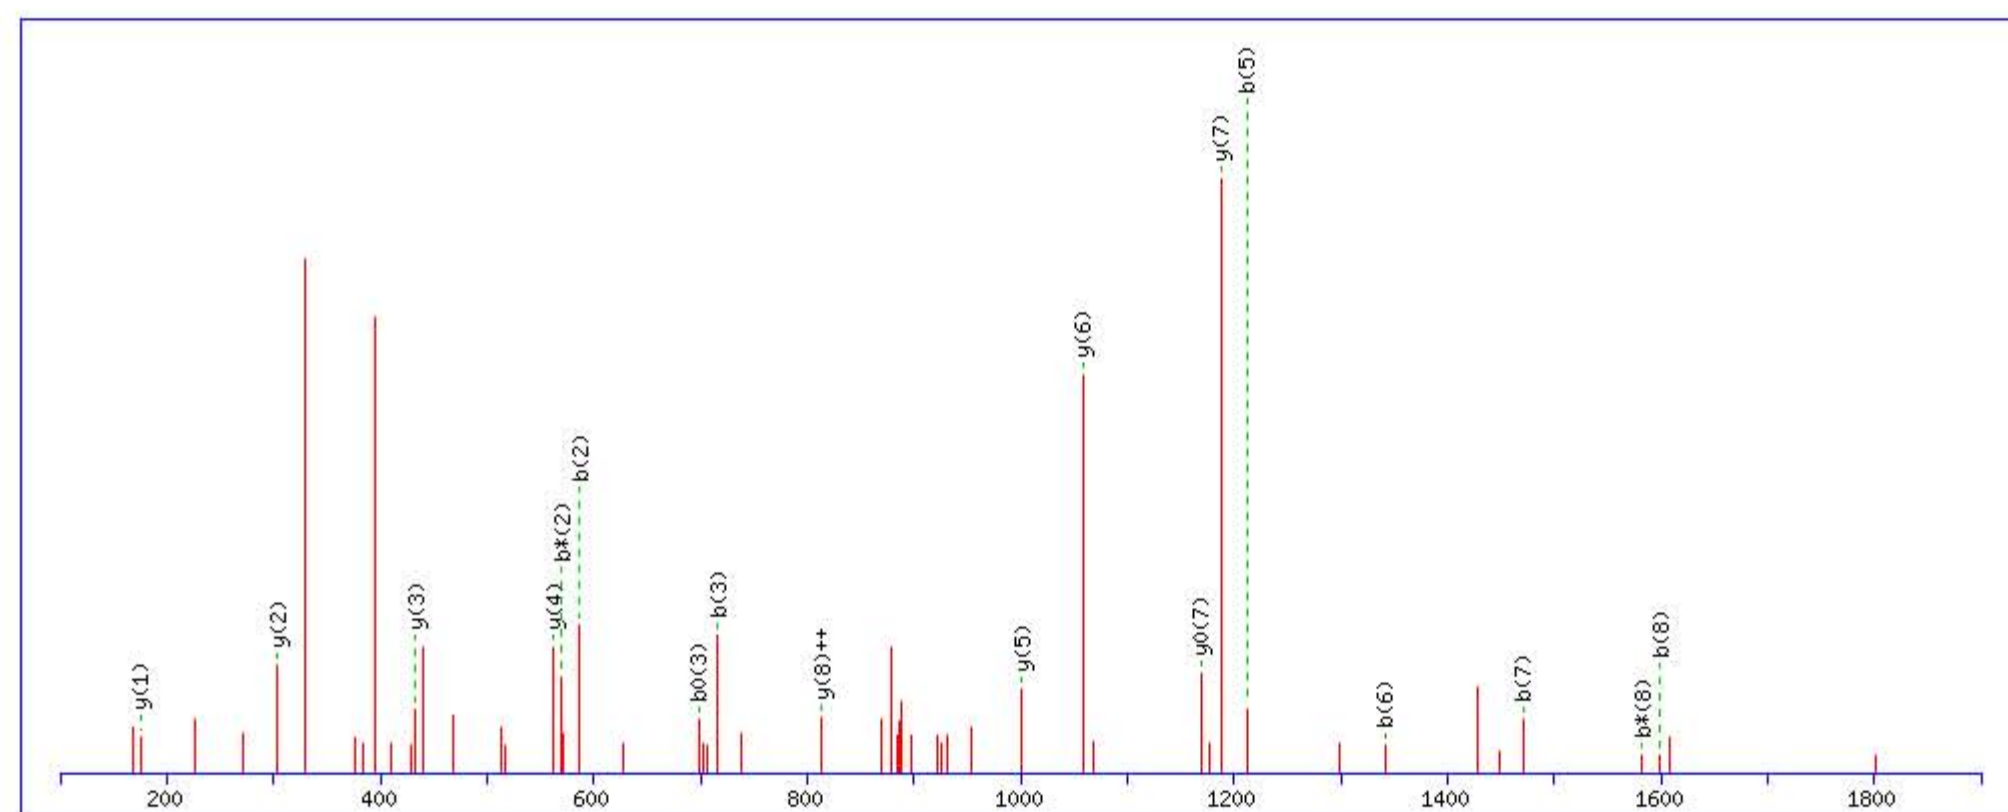

Monoisotopic mass of neutral peptide Mr(calc): 1772.822556

Fixed modifications: Carbamidomethyl (C) (apply to specified residues or termini only)

Variable modifications:

Q2 : Biotin:Thermo-21345 (Q)

Q5 : Biotin:Thermo-21345 (Q)

Ions Score: 33 Expect: 0.01

Matches : 18/88 fragment ions using 37 most intense peaks [\(help\)](#)

| # | b                  | b <sup>++</sup> | b <sup>*</sup>     | b <sup>*++</sup> | b <sup>0</sup>    | b <sup>0++</sup> | Seq. | y                  | y <sup>++</sup>   | y <sup>*</sup> | y <sup>*++</sup> | y <sup>0</sup>     | y <sup>0++</sup> | # |
|---|--------------------|-----------------|--------------------|------------------|-------------------|------------------|------|--------------------|-------------------|----------------|------------------|--------------------|------------------|---|
| 1 | 148.075690         | 74.541483       |                    |                  |                   |                  | F    |                    |                   |                |                  |                    |                  | 9 |
| 2 | <b>587.301016</b>  | 294.154146      | <b>570.274467</b>  | 285.640872       |                   |                  | Q    | 1626.761440        | <b>813.884358</b> | 1609.734891    | 805.371084       | 1608.750875        | 804.879076       | 8 |
| 3 | <b>716.343609</b>  | 358.675443      | 699.317060         | 350.162168       | <b>698.333044</b> | 349.670160       | E    | <b>1187.536114</b> | 594.271695        | 1170.509565    | 585.758421       | <b>1169.525549</b> | 585.266413       | 7 |
| 4 | 773.365073         | 387.186175      | 756.338524         | 378.672900       | 755.354508        | 378.180892       | G    | <b>1058.493521</b> | 529.750399        | 1041.466972    | 521.237124       | 1040.482956        | 520.745116       | 6 |
| 5 | <b>1212.590399</b> | 606.798837      | 1195.563850        | 598.285563       | 1194.579834       | 597.793555       | Q    | <b>1001.472057</b> | 501.239667        | 984.445508     | 492.726392       | 983.461492         | 492.234384       | 5 |
| 6 | <b>1341.632992</b> | 671.320134      | 1324.606443        | 662.806860       | 1323.622427       | 662.314852       | E    | <b>562.246731</b>  | 281.627004        | 545.220182     | 273.113729       | 544.236166         | 272.621721       | 4 |
| 7 | <b>1470.675585</b> | 735.841431      | 1453.649036        | 727.328156       | 1452.665020       | 726.836148       | E    | <b>433.204138</b>  | 217.105707        | 416.177589     | 208.592433       | 415.193573         | 208.100425       | 3 |
| 8 | <b>1599.718178</b> | 800.362727      | <b>1582.691629</b> | 791.849453       | 1581.707613       | 791.357445       | E    | <b>304.161545</b>  | 152.584411        | 287.134996     | 144.071136       | 286.150980         | 143.579128       | 2 |
| 9 |                    |                 |                    |                  |                   |                  | R    | <b>175.118952</b>  | 88.063114         | 158.092403     | 79.549839        |                    |                  | 1 |

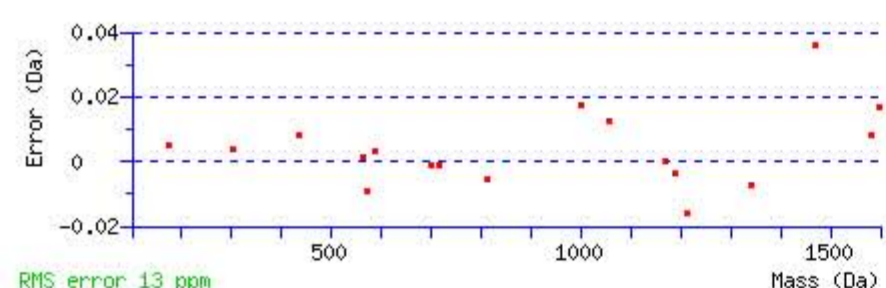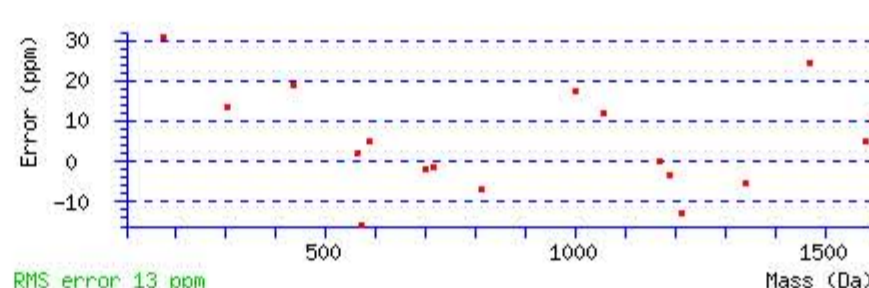

NCBI BLAST search of **FQEGQEEER**

(Parameters: blastp, nr protein database, expect=20000, no filter, PAM30)

Other BLAST [web gateways](#)

## All matches to this query

| Score | Mr(calc):   | Delta     | Sequence                            |
|-------|-------------|-----------|-------------------------------------|
| 33.4  | 1772.803909 | 0.014999  | <a href="#">ESELQWQEEER</a>         |
| 33.1  | 1772.822556 | -0.003648 | <a href="#">FQEGQEEER</a>           |
| 11.1  | 1772.829727 | -0.010819 | <a href="#">QEEEEAMRRER</a>         |
| 9.5   | 1772.803909 | 0.014999  | <a href="#">ESELQWQEEER</a>         |
| 5.3   | 1772.798752 | 0.020156  | <a href="#">HISSCMRWPGHYSR</a>      |
| 3.7   | 1772.811798 | 0.007110  | <a href="#">YQTTPPHQNFEDLER</a>     |
| 3.3   | 1772.803909 | 0.014999  | <a href="#">DMASPNWSILPEEER</a>     |
| 3.1   | 1772.828873 | -0.009965 | <a href="#">QAEQEATVAREEQER</a>     |
| 3.0   | 1772.819901 | -0.000993 | <a href="#">CGKSFSQSCHLVAHR</a>     |
| 1.3   | 1772.836288 | -0.017380 | <a href="#">ADGSLTGGGLEAAAMAPER</a> |



# MASCOT Search Results

## Peptide View

MS/MS Fragmentation of **GTYPVPIVSELQSGK**

Found in **F13A\_HUMAN**, Coagulation factor XIII A chain OS=Homo sapiens GN=F13A1 PE=1 SV=4

Match to Query 46450: 1998.091152 from(667.037660,3+) rtinseconds(2770) index(73343)

Title: Locus:1.1.1.1901.8 File:"2013-07-02 CLN FXIII 60 min 2nd FT.wiff"

Data file C:\Program Files (x86)\Matrix Science\Mascot Daemon\mgf5 FXIII 60 min 2nd\mascot\_daemon\_merge.mgf

Click mouse within plot area to zoom in by factor of two about that point

Or, Plot from  to  Da

Label all possible matches  Label matches used for scoring

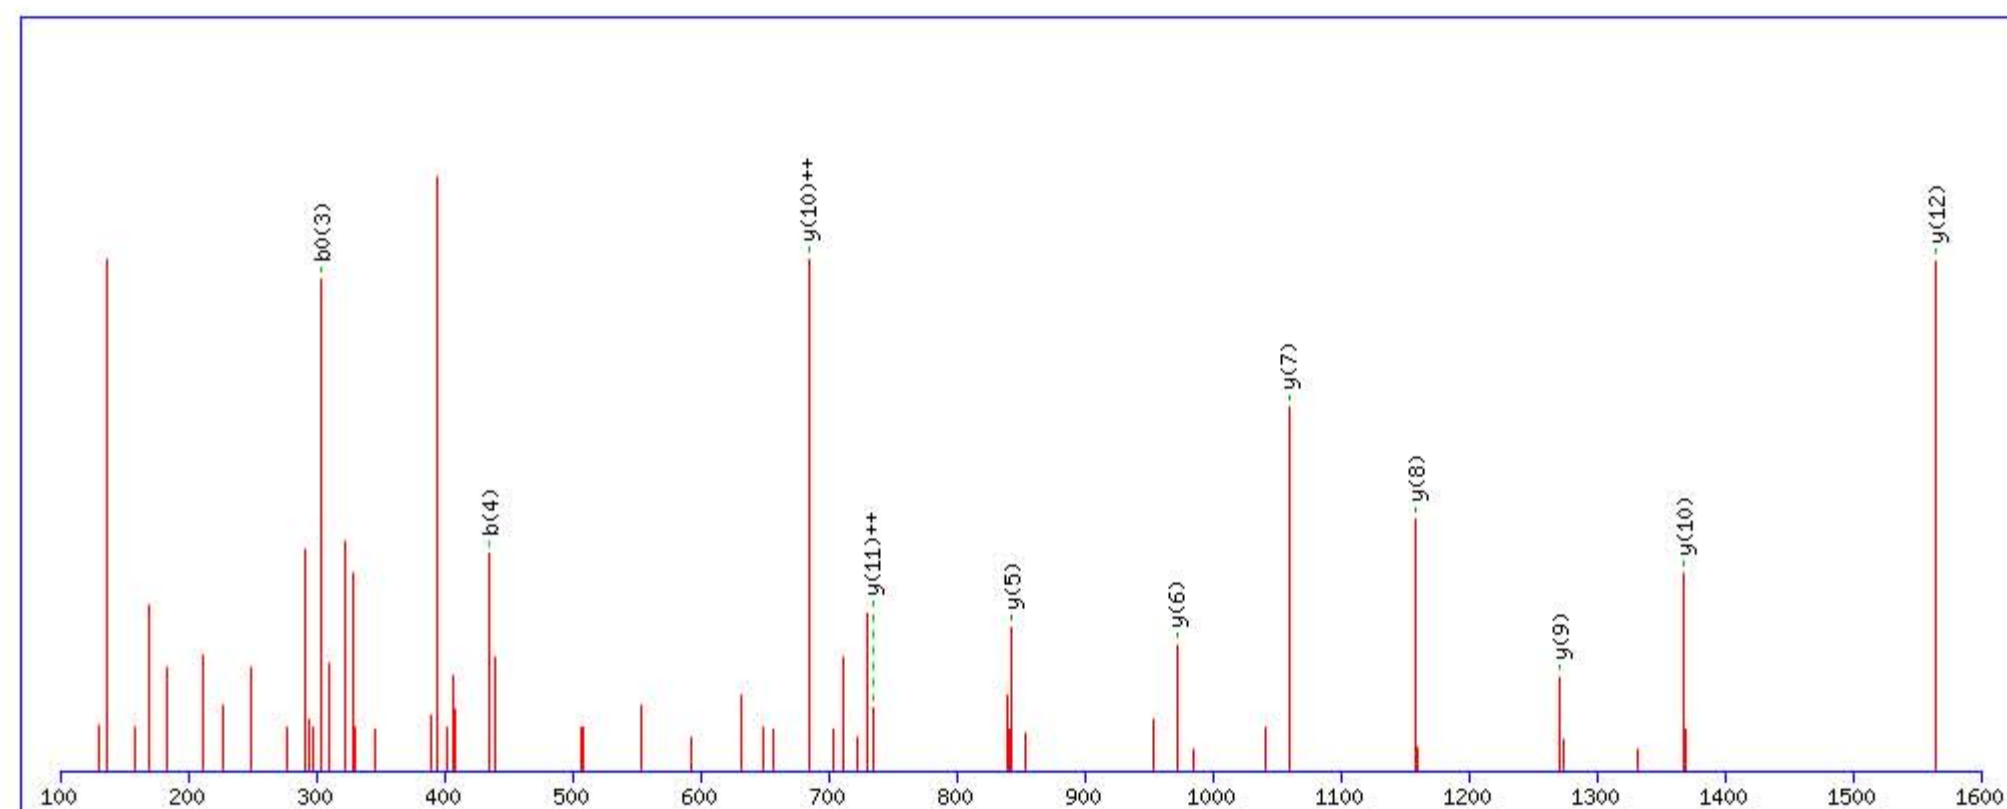

Monoisotopic mass of neutral peptide Mr(calc): 1998.085983

Fixed modifications: Carbamidomethyl (C) (apply to specified residues or termini only)

Variable modifications:

Q13 : Biotin:Thermo-21345 (Q)

Ions Score: 52 Expect: 2.1e-005

Matches : 11/150 fragment ions using 14 most intense peaks [\(help\)](#)

| #  | b                 | b <sup>++</sup> | b <sup>*</sup> | b <sup>*++</sup> | b <sup>0</sup> | b <sup>0++</sup> | Seq.     | y                  | y <sup>++</sup>   | y <sup>*</sup> | y <sup>*++</sup> | y <sup>0</sup> | y <sup>0++</sup> | #  |
|----|-------------------|-----------------|----------------|------------------|----------------|------------------|----------|--------------------|-------------------|----------------|------------------|----------------|------------------|----|
| 1  | 58.028740         | 29.518008       |                |                  |                |                  | <b>G</b> |                    |                   |                |                  |                |                  | 16 |
| 2  | 159.076419        | 80.041847       |                |                  | 141.065854     | 71.036565        | <b>T</b> | 1942.071799        | 971.539538        | 1925.045250    | 963.026263       | 1924.061234    | 962.534255       | 15 |
| 3  | 322.139748        | 161.573512      |                |                  | 304.129183     | 152.568230       | <b>Y</b> | 1841.024120        | 921.015698        | 1823.997571    | 912.502424       | 1823.013555    | 912.010416       | 14 |
| 4  | <b>435.223812</b> | 218.115544      |                |                  | 417.213247     | 209.110262       | <b>I</b> | 1677.960791        | 839.484034        | 1660.934242    | 830.970759       | 1659.950226    | 830.478751       | 13 |
| 5  | 532.276576        | 266.641926      |                |                  | 514.266011     | 257.636644       | <b>P</b> | <b>1564.876727</b> | 782.942002        | 1547.850178    | 774.428727       | 1546.866162    | 773.936719       | 12 |
| 6  | 631.344990        | 316.176133      |                |                  | 613.334425     | 307.170851       | <b>V</b> | 1467.823963        | <b>734.415620</b> | 1450.797414    | 725.902345       | 1449.813398    | 725.410337       | 11 |
| 7  | 728.397754        | 364.702515      |                |                  | 710.387189     | 355.697233       | <b>P</b> | <b>1368.755549</b> | <b>684.881413</b> | 1351.729000    | 676.368138       | 1350.744984    | 675.876130       | 10 |
| 8  | 841.481818        | 421.244547      |                |                  | 823.471253     | 412.239265       | <b>I</b> | <b>1271.702785</b> | 636.355031        | 1254.676236    | 627.841756       | 1253.692220    | 627.349748       | 9  |
| 9  | 940.550232        | 470.778754      |                |                  | 922.539667     | 461.773472       | <b>V</b> | <b>1158.618721</b> | 579.812999        | 1141.592172    | 571.299724       | 1140.608156    | 570.807716       | 8  |
| 10 | 1027.582260       | 514.294768      |                |                  | 1009.571695    | 505.289486       | <b>S</b> | <b>1059.550307</b> | 530.278792        | 1042.523758    | 521.765517       | 1041.539742    | 521.273509       | 7  |
| 11 | 1156.624853       | 578.816065      |                |                  | 1138.614288    | 569.810782       | <b>E</b> | <b>972.518279</b>  | 486.762777        | 955.491730     | 478.249503       | 954.507714     | 477.757495       | 6  |
| 12 | 1269.708917       | 635.358096      |                |                  | 1251.698352    | 626.352814       | <b>L</b> | <b>843.475686</b>  | 422.241481        | 826.449137     | 413.728207       | 825.465121     | 413.236199       | 5  |
| 13 | 1708.934243       | 854.970759      | 1691.907694    | 846.457485       | 1690.923678    | 845.965477       | <b>Q</b> | 730.391622         | 365.699449        | 713.365073     | 357.186175       | 712.381057     | 356.694167       | 4  |
| 14 | 1795.966271       | 898.486774      | 1778.939722    | 889.973499       | 1777.955706    | 889.481491       | <b>S</b> | 291.166296         | 146.086786        | 274.139747     | 137.573512       | 273.155731     | 137.081504       | 3  |
| 15 | 1852.987735       | 926.997505      | 1835.961186    | 918.484231       | 1834.977170    | 917.992223       | <b>G</b> | 204.134268         | 102.570772        | 187.107719     | 94.057497        |                |                  | 2  |
| 16 |                   |                 |                |                  |                |                  | <b>K</b> | 147.112804         | 74.060040         | 130.086255     | 65.546765        |                |                  | 1  |

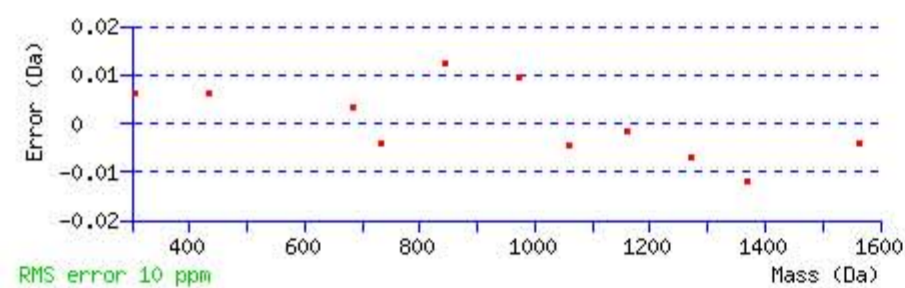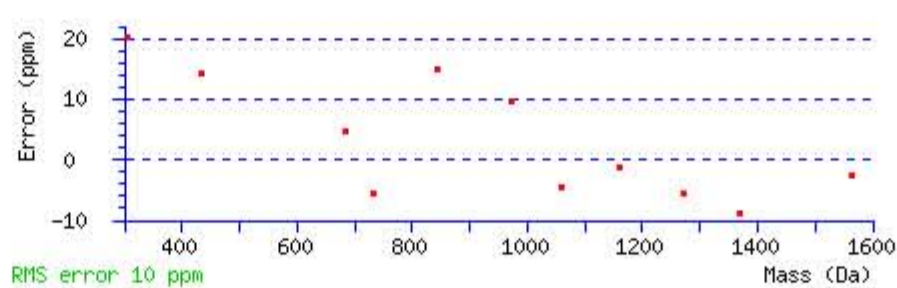

NCBI BLAST search of **GTYPVPIVSELQSGK**

(Parameters: blastp, nr protein database, expect=20000, no filter, PAM30)

Other BLAST [web gateways](#)

All matches to this query

| Score | Mr(calc):   | Delta     | Sequence                            |
|-------|-------------|-----------|-------------------------------------|
| 51.6  | 1998.085983 | 0.005169  | <a href="#">GTYPVPIVSELQSGK</a>     |
| 1.7   | 1998.099731 | -0.008579 | <a href="#">GDEVVVELVENGKKVTVGK</a> |
| 0.5   | 1998.076065 | 0.015087  | <a href="#">LQKYSTKPGSYIFR</a>      |



# MASCOT Search Results

## Peptide View

MS/MS Fragmentation of **GVNLQEFLNVTSVHLFK**  
 Found in **F13A\_HUMAN**, Coagulation factor XIII A chain OS=Homo sapiens GN=F13A1 PE=1 SV=4

Match to Query 52075: 2255.224988 from(1128.619770,2+) rtinseconds(3004) index(27831)  
 Title: Locus:1.1.1.1045.22 File:"2013-07-02 CLN FXIII 60 min 2nd F 2.wiff"  
 Data file C:\Program Files (x86)\Matrix Science\Mascot Daemon\mgf5 FXIII 60 min 2nd\mascot\_daemon\_merge.mgf

Click mouse within plot area to zoom in by factor of two about that point

Or, Plot from  to  Da

Label all possible matches  Label matches used for scoring

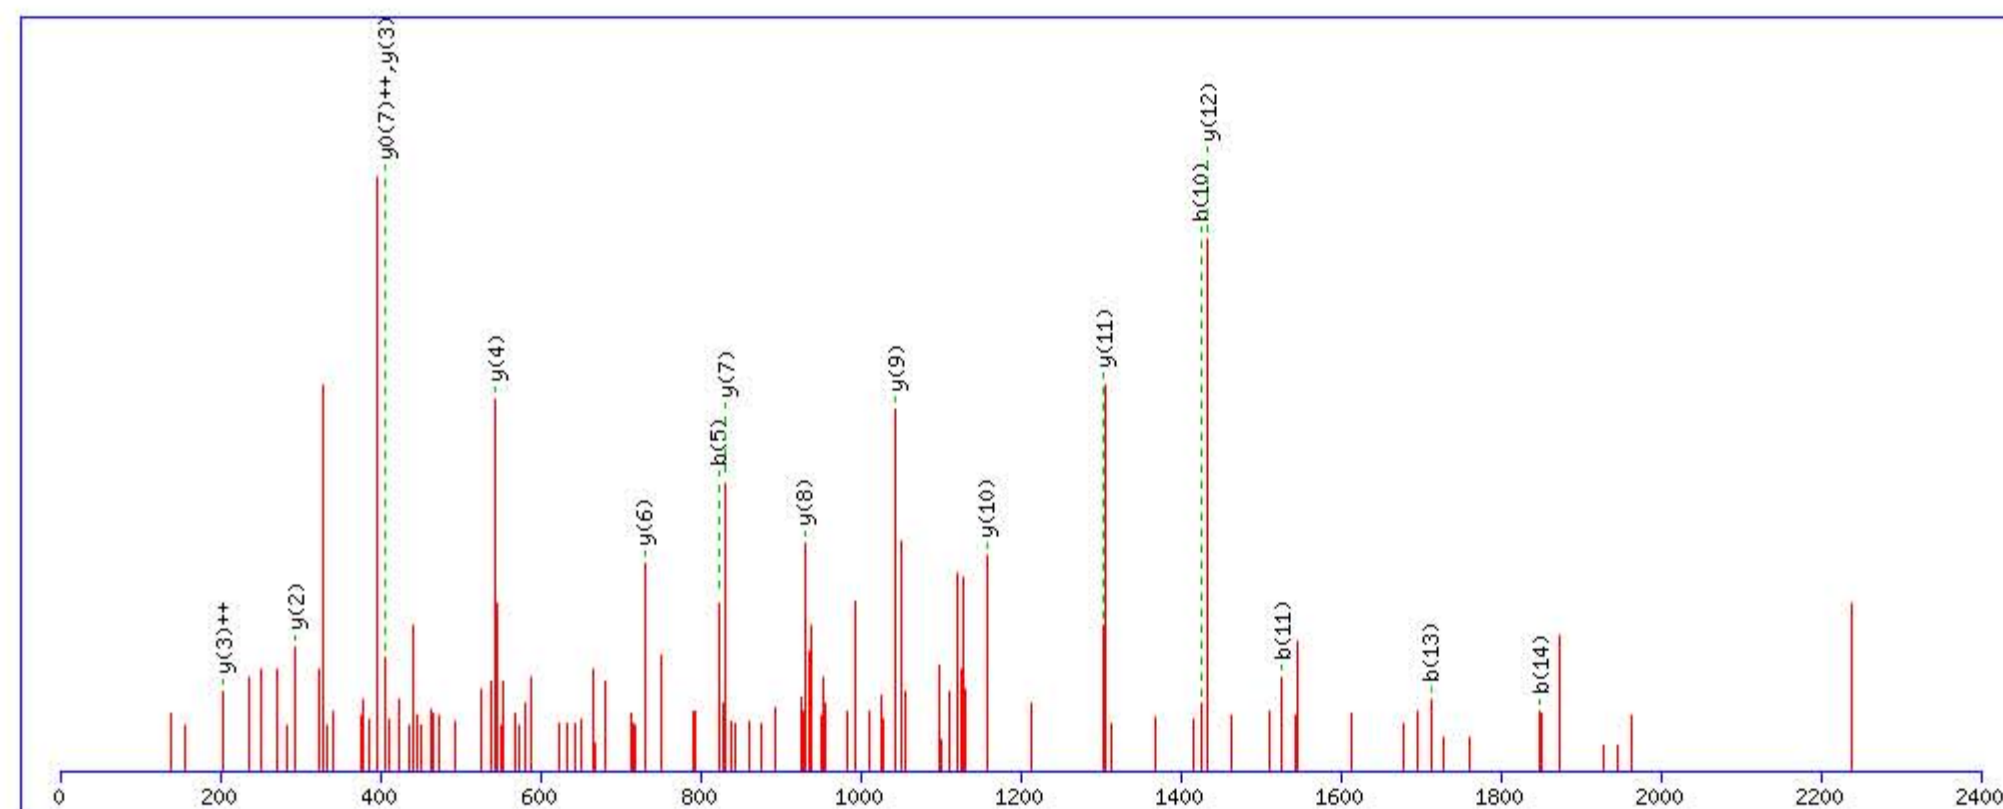

Monoisotopic mass of neutral peptide  $M_r(\text{calc})$ : 2255.213654  
 Fixed modifications: Carbamidomethyl (C) (apply to specified residues or termini only)  
 Variable modifications:  
 Q5 : Biotin:Thermo-21345 (Q)  
 Ions Score: 44 Expect: 0.00073  
 Matches : 17/168 fragment ions using 38 most intense peaks ([help](#))

| #  | b                  | b <sup>++</sup> | b <sup>*</sup> | b <sup>+++</sup> | b <sup>0</sup> | b <sup>0++</sup> | Seq. | y                  | y <sup>++</sup>   | y <sup>*</sup> | y <sup>+++</sup> | y <sup>0</sup> | y <sup>0++</sup>  | #  |
|----|--------------------|-----------------|----------------|------------------|----------------|------------------|------|--------------------|-------------------|----------------|------------------|----------------|-------------------|----|
| 1  | 58.028740          | 29.518008       |                |                  |                |                  | G    |                    |                   |                |                  |                |                   | 17 |
| 2  | 157.097154         | 79.052215       |                |                  |                |                  | V    | 2199.199458        | 1100.103367       | 2182.172909    | 1091.590092      | 2181.188893    | 1091.098084       | 16 |
| 3  | 271.140081         | 136.073679      | 254.113532     | 127.560404       |                |                  | N    | 2100.131044        | 1050.569160       | 2083.104495    | 1042.055885      | 2082.120479    | 1041.563877       | 15 |
| 4  | 384.224145         | 192.615711      | 367.197596     | 184.102436       |                |                  | L    | 1986.088117        | 993.547697        | 1969.061568    | 985.034422       | 1968.077552    | 984.542414        | 14 |
| 5  | <b>823.449471</b>  | 412.228374      | 806.422922     | 403.715099       |                |                  | Q    | 1873.004053        | 937.005665        | 1855.977504    | 928.492390       | 1854.993488    | 928.000382        | 13 |
| 6  | 952.492064         | 476.749670      | 935.465515     | 468.236396       | 934.481499     | 467.744388       | E    | <b>1433.778727</b> | 717.393002        | 1416.752178    | 708.879727       | 1415.768162    | 708.387719        | 12 |
| 7  | 1099.560478        | 550.283877      | 1082.533929    | 541.770603       | 1081.549913    | 541.278595       | F    | <b>1304.736134</b> | 652.871705        | 1287.709585    | 644.358431       | 1286.725569    | 643.866423        | 11 |
| 8  | 1212.644542        | 606.825909      | 1195.617993    | 598.312635       | 1194.633977    | 597.820627       | L    | <b>1157.667720</b> | 579.337498        | 1140.641171    | 570.824224       | 1139.657155    | 570.332216        | 10 |
| 9  | 1326.687469        | 663.847373      | 1309.660920    | 655.334098       | 1308.676904    | 654.842090       | N    | <b>1044.583656</b> | 522.795466        | 1027.557107    | 514.282192       | 1026.573091    | 513.790184        | 9  |
| 10 | <b>1425.755883</b> | 713.381580      | 1408.729334    | 704.868305       | 1407.745318    | 704.376297       | V    | <b>930.540729</b>  | 465.774003        | 913.514180     | 457.260728       | 912.530164     | 456.768720        | 8  |
| 11 | <b>1526.803562</b> | 763.905419      | 1509.777013    | 755.392145       | 1508.792997    | 754.900137       | T    | <b>831.472315</b>  | 416.239796        | 814.445766     | 407.726521       | 813.461750     | <b>407.234513</b> | 7  |
| 12 | 1613.835590        | 807.421433      | 1596.809041    | 798.908159       | 1595.825025    | 798.416151       | S    | <b>730.424636</b>  | 365.715956        | 713.398087     | 357.202682       | 712.414071     | 356.710674        | 6  |
| 13 | <b>1712.904004</b> | 856.955640      | 1695.877455    | 848.442366       | 1694.893439    | 847.950358       | V    | 643.392608         | 322.199942        | 626.366059     | 313.686668       |                |                   | 5  |
| 14 | <b>1849.962916</b> | 925.485096      | 1832.936367    | 916.971822       | 1831.952351    | 916.479814       | H    | <b>544.324194</b>  | 272.665735        | 527.297645     | 264.152461       |                |                   | 4  |
| 15 | 1963.046980        | 982.027128      | 1946.020431    | 973.513854       | 1945.036415    | 973.021846       | L    | <b>407.265282</b>  | <b>204.136279</b> | 390.238733     | 195.623004       |                |                   | 3  |
| 16 | 2110.115394        | 1055.561335     | 2093.088845    | 1047.048060      | 2092.104829    | 1046.556052      | F    | <b>294.181218</b>  | 147.594247        | 277.154669     | 139.080973       |                |                   | 2  |
| 17 |                    |                 |                |                  |                |                  | K    | 147.112804         | 74.060040         | 130.086255     | 65.546765        |                |                   | 1  |

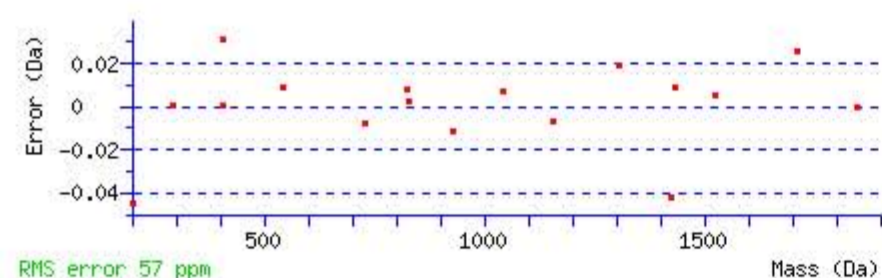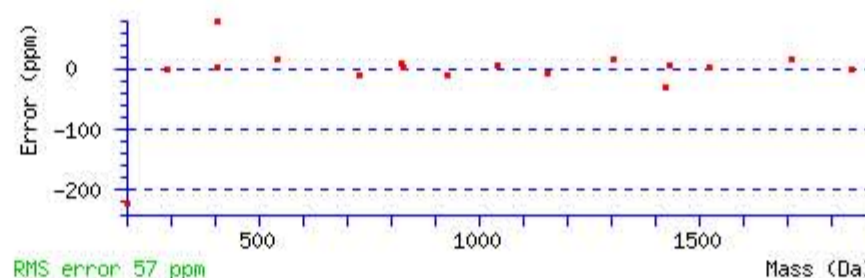

NCBI BLAST search of [GVNLQEFLNVTSVHLFK](#)  
 (Parameters: blastp, nr protein database, expect=20000, no filter, PAM30)  
 Other BLAST [web gateways](#)

## All matches to this query

| Score | $M_r(\text{calc})$ : | Delta    | Sequence                          |
|-------|----------------------|----------|-----------------------------------|
| 44.1  | 2255.213654          | 0.011334 | <a href="#">GVNLQEFLNVTSVHLFK</a> |



# Mascot Search Results

## Peptide View

MS/MS Fragmentation of **AVPPNNSNAEEDDLPTVELQGVVPR**

Found in **F13A\_HUMAN**, Coagulation factor XIII A chain OS=Homo sapiens GN=F13A1 PE=1 SV=4

Match to Query 60940: 2912.478912 from(971.833580,3+) rtinseconds(2568) index(24846)

Title: Locus:1.1.1.896.16 File:"2013-07-02 CLN FXIII 60 min 2nd F 2.wiff"

Data file C:\Program Files (x86)\Matrix Science\Mascot Daemon\mgf5 FXIII 60 min 2nd\mascot\_daemon\_merge.mgf

Click mouse within plot area to zoom in by factor of two about that point

Or, Plot from  to  Da

Label all possible matches  Label matches used for scoring

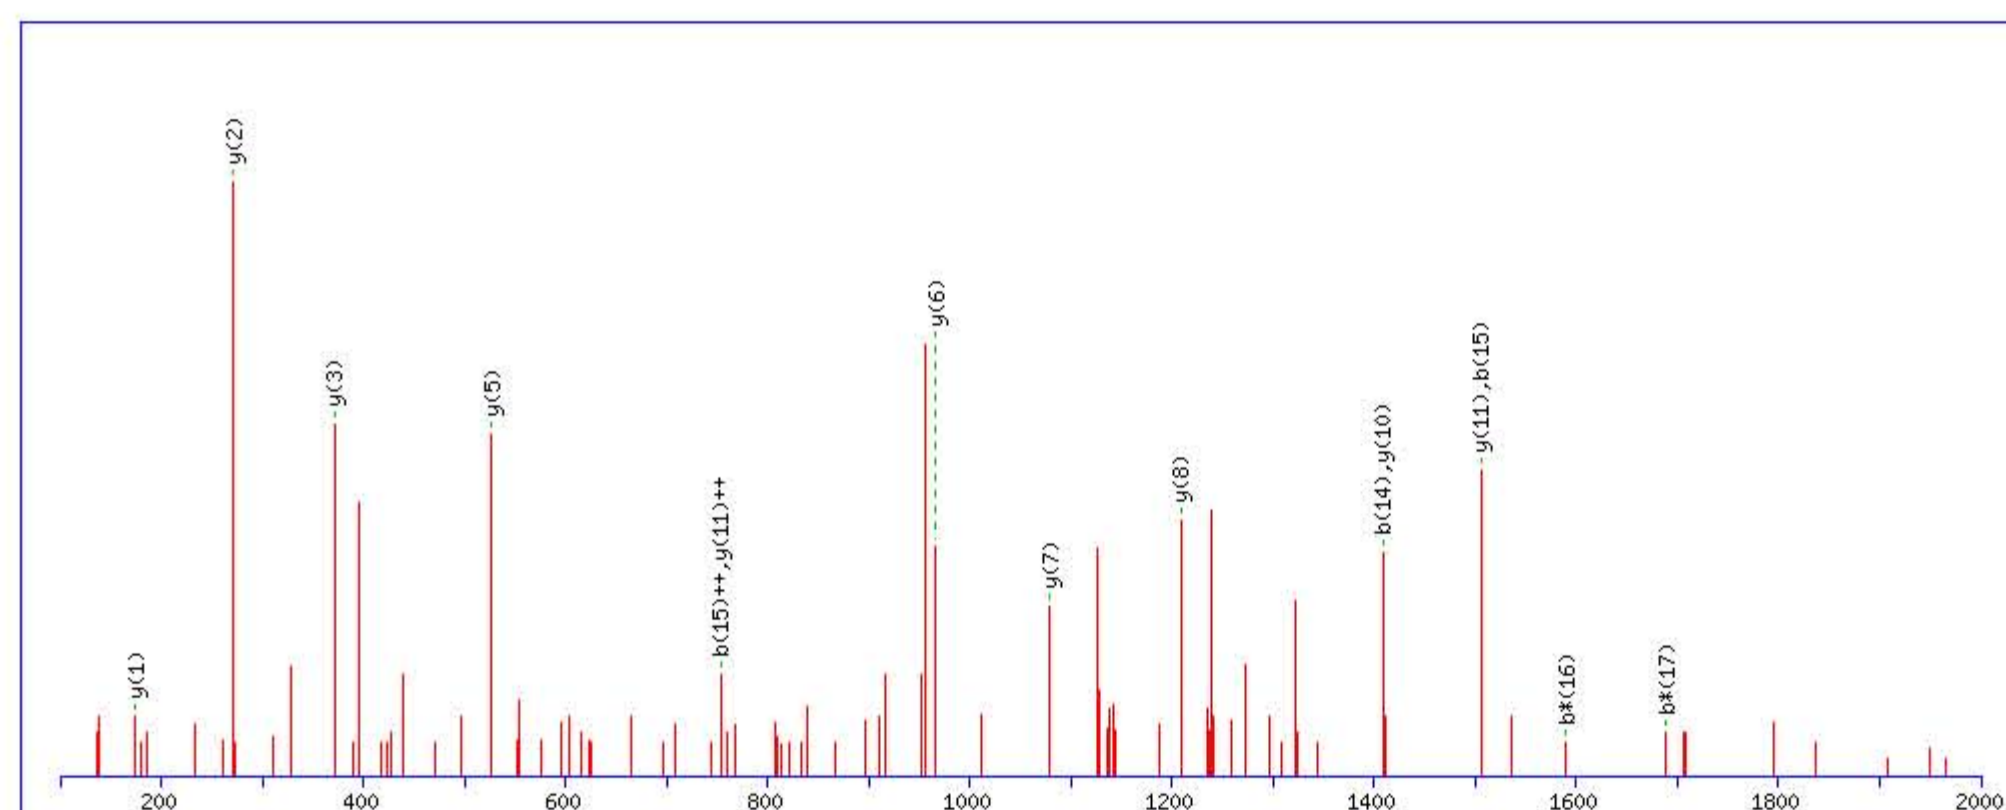

Monoisotopic mass of neutral peptide  $M_r(\text{calc})$ : 2912.470200

Fixed modifications: Carbamidomethyl (C) (apply to specified residues or termini only)

Variable modifications:

Q20 : Biotin:Thermo-21345 (Q)

Ions Score: 26 Expect: 0.081

Matches : 15/254 fragment ions using 37 most intense peaks [\(help\)](#)

| #  | b                  | b <sup>++</sup>   | b <sup>+</sup>     | b <sup>*++</sup> | b <sup>0</sup> | b <sup>0++</sup> | Seq. | y                  | y <sup>++</sup>   | y <sup>+</sup> | y <sup>*++</sup> | y <sup>0</sup> | y <sup>0++</sup> | #  |
|----|--------------------|-------------------|--------------------|------------------|----------------|------------------|------|--------------------|-------------------|----------------|------------------|----------------|------------------|----|
| 1  | 72.044390          | 36.525833         |                    |                  |                |                  | A    |                    |                   |                |                  |                |                  | 25 |
| 2  | 171.112804         | 86.060040         |                    |                  |                |                  | V    | 2842.440370        | 1421.723823       | 2825.413821    | 1413.210548      | 2824.429805    | 1412.718540      | 24 |
| 3  | 268.165568         | 134.586422        |                    |                  |                |                  | P    | 2743.371956        | 1372.189616       | 2726.345407    | 1363.676341      | 2725.361391    | 1363.184333      | 23 |
| 4  | 365.218332         | 183.112804        |                    |                  |                |                  | P    | 2646.319192        | 1323.663234       | 2629.292643    | 1315.149959      | 2628.308627    | 1314.657951      | 22 |
| 5  | 479.261259         | 240.134267        | 462.234710         | 231.620993       |                |                  | N    | 2549.266428        | 1275.136852       | 2532.239879    | 1266.623577      | 2531.255863    | 1266.131569      | 21 |
| 6  | 593.304186         | 297.155731        | 576.277637         | 288.642457       |                |                  | N    | 2435.223501        | 1218.115388       | 2418.196952    | 1209.602114      | 2417.212936    | 1209.110106      | 20 |
| 7  | 680.336214         | 340.671745        | 663.309665         | 332.158471       | 662.325649     | 331.666463       | S    | 2321.180574        | 1161.093925       | 2304.154025    | 1152.580650      | 2303.170009    | 1152.088642      | 19 |
| 8  | 794.379141         | 397.693209        | 777.352592         | 389.179934       | 776.368576     | 388.687926       | N    | 2234.148546        | 1117.577911       | 2217.121997    | 1109.064636      | 2216.137981    | 1108.572628      | 18 |
| 9  | 865.416255         | 433.211766        | 848.389706         | 424.698491       | 847.405690     | 424.206483       | A    | 2120.105619        | 1060.556447       | 2103.079070    | 1052.043173      | 2102.095054    | 1051.551165      | 17 |
| 10 | 936.453369         | 468.730323        | 919.426820         | 460.217048       | 918.442804     | 459.725040       | A    | 2049.068505        | 1025.037890       | 2032.041956    | 1016.524616      | 2031.057940    | 1016.032608      | 16 |
| 11 | 1065.495962        | 533.251619        | 1048.469413        | 524.738345       | 1047.485397    | 524.246336       | E    | 1978.031391        | 989.519333        | 1961.004842    | 981.006059       | 1960.020826    | 980.514051       | 15 |
| 12 | 1180.522905        | 590.765091        | 1163.496356        | 582.251816       | 1162.512340    | 581.759808       | D    | 1848.988798        | 924.998037        | 1831.962249    | 916.484762       | 1830.978233    | 915.992754       | 14 |
| 13 | 1295.549848        | 648.278562        | 1278.523299        | 639.765288       | 1277.539283    | 639.273280       | D    | 1733.961855        | 867.484565        | 1716.935306    | 858.971291       | 1715.951290    | 858.479283       | 13 |
| 14 | <b>1408.633912</b> | 704.820594        | 1391.607363        | 696.307320       | 1390.623347    | 695.815312       | L    | 1618.934912        | 809.971094        | 1601.908363    | 801.457819       | 1600.924347    | 800.965811       | 12 |
| 15 | <b>1505.686676</b> | <b>753.346976</b> | 1488.660127        | 744.833702       | 1487.676111    | 744.341694       | P    | <b>1505.850848</b> | <b>753.429062</b> | 1488.824299    | 744.915787       | 1487.840283    | 744.423779       | 11 |
| 16 | 1606.734355        | 803.870816        | <b>1589.707806</b> | 795.357541       | 1588.723790    | 794.865533       | T    | <b>1408.798084</b> | 704.902680        | 1391.771535    | 696.389405       | 1390.787519    | 695.897397       | 10 |
| 17 | 1705.802769        | 853.405023        | <b>1688.776220</b> | 844.891748       | 1687.792204    | 844.399740       | V    | 1307.750405        | 654.378840        | 1290.723856    | 645.865566       | 1289.739840    | 645.373558       | 9  |
| 18 | 1834.845362        | 917.926319        | 1817.818813        | 909.413045       | 1816.834797    | 908.921037       | E    | <b>1208.681991</b> | 604.844633        | 1191.655442    | 596.331359       | 1190.671426    | 595.839351       | 8  |
| 19 | 1947.929426        | 974.468351        | 1930.902877        | 965.955077       | 1929.918861    | 965.463069       | L    | <b>1079.639398</b> | 540.323337        | 1062.612849    | 531.810062       |                |                  | 7  |
| 20 | 2387.154752        | 1194.081014       | 2370.128203        | 1185.567739      | 2369.144187    | 1185.075731      | Q    | <b>966.555334</b>  | 483.781305        | 949.528785     | 475.268030       |                |                  | 6  |
| 21 | 2444.176216        | 1222.591746       | 2427.149667        | 1214.078471      | 2426.165651    | 1213.586463      | G    | <b>527.330008</b>  | 264.168642        | 510.303459     | 255.655367       |                |                  | 5  |
| 22 | 2543.244630        | 1272.125953       | 2526.218081        | 1263.612678      | 2525.234065    | 1263.120670      | V    | 470.308544         | 235.657910        | 453.281995     | 227.144635       |                |                  | 4  |
| 23 | 2642.313044        | 1321.660160       | 2625.286495        | 1313.146885      | 2624.302479    | 1312.654877      | V    | <b>371.240130</b>  | 186.123703        | 354.213581     | 177.610428       |                |                  | 3  |
| 24 | 2739.365808        | 1370.186542       | 2722.339259        | 1361.673267      | 2721.355243    | 1361.181259      | P    | <b>272.171716</b>  | 136.589496        | 255.145167     | 128.076221       |                |                  | 2  |
| 25 |                    |                   |                    |                  |                |                  | R    | <b>175.118952</b>  | 88.063114         | 158.092403     | 79.549839        |                |                  | 1  |

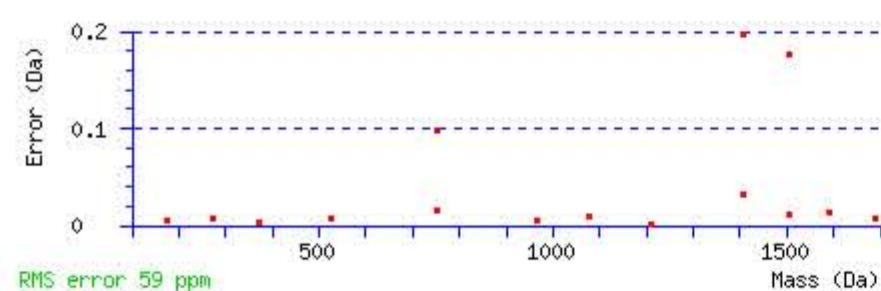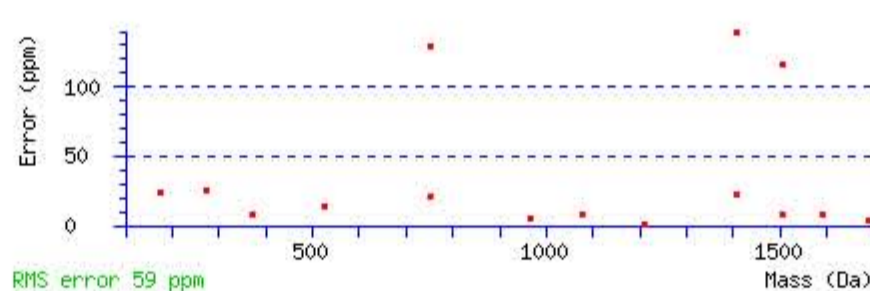

NCBI BLAST search of [AVPPNNSNAEEDDLPTVELQGVVPR](#)  
 (Parameters: blastp, nr protein database, expect=20000, no filter, PAM30)  
 Other BLAST [web gateways](#)

## All matches to this query

| Score | $M_r(\text{calc})$ : | Delta    | Sequence                                  |
|-------|----------------------|----------|-------------------------------------------|
| 25.8  | 2912.470200          | 0.008712 | <a href="#">AVPPNNSNAEEDDLPTVELQGVVPR</a> |



# MASCOT Search Results

## Peptide View

MS/MS Fragmentation of **AIGEMDNQVSQLTSELK**

Found in **COL11\_HUMAN**, Collectin-11 OS=Homo sapiens GN=COLEC11 PE=1 SV=1

Match to Query 50526: 2173.094622 from(725.372150,3+) rtinseconds(2436) index(55618)  
 Title: Locus:1.1.1.1463.12 File:"2013-07-02 CLN FXIII 60 min 2nd F 4.wiff"  
 Data file C:\Program Files (x86)\Matrix Science\Mascot Daemon\mgf\5 FXIII 60 min 2nd\mascot\_daemon\_merge.mgf

Click mouse within plot area to zoom in by factor of two about that point

Or, Plot from  to  Da

Label all possible matches  Label matches used for scoring

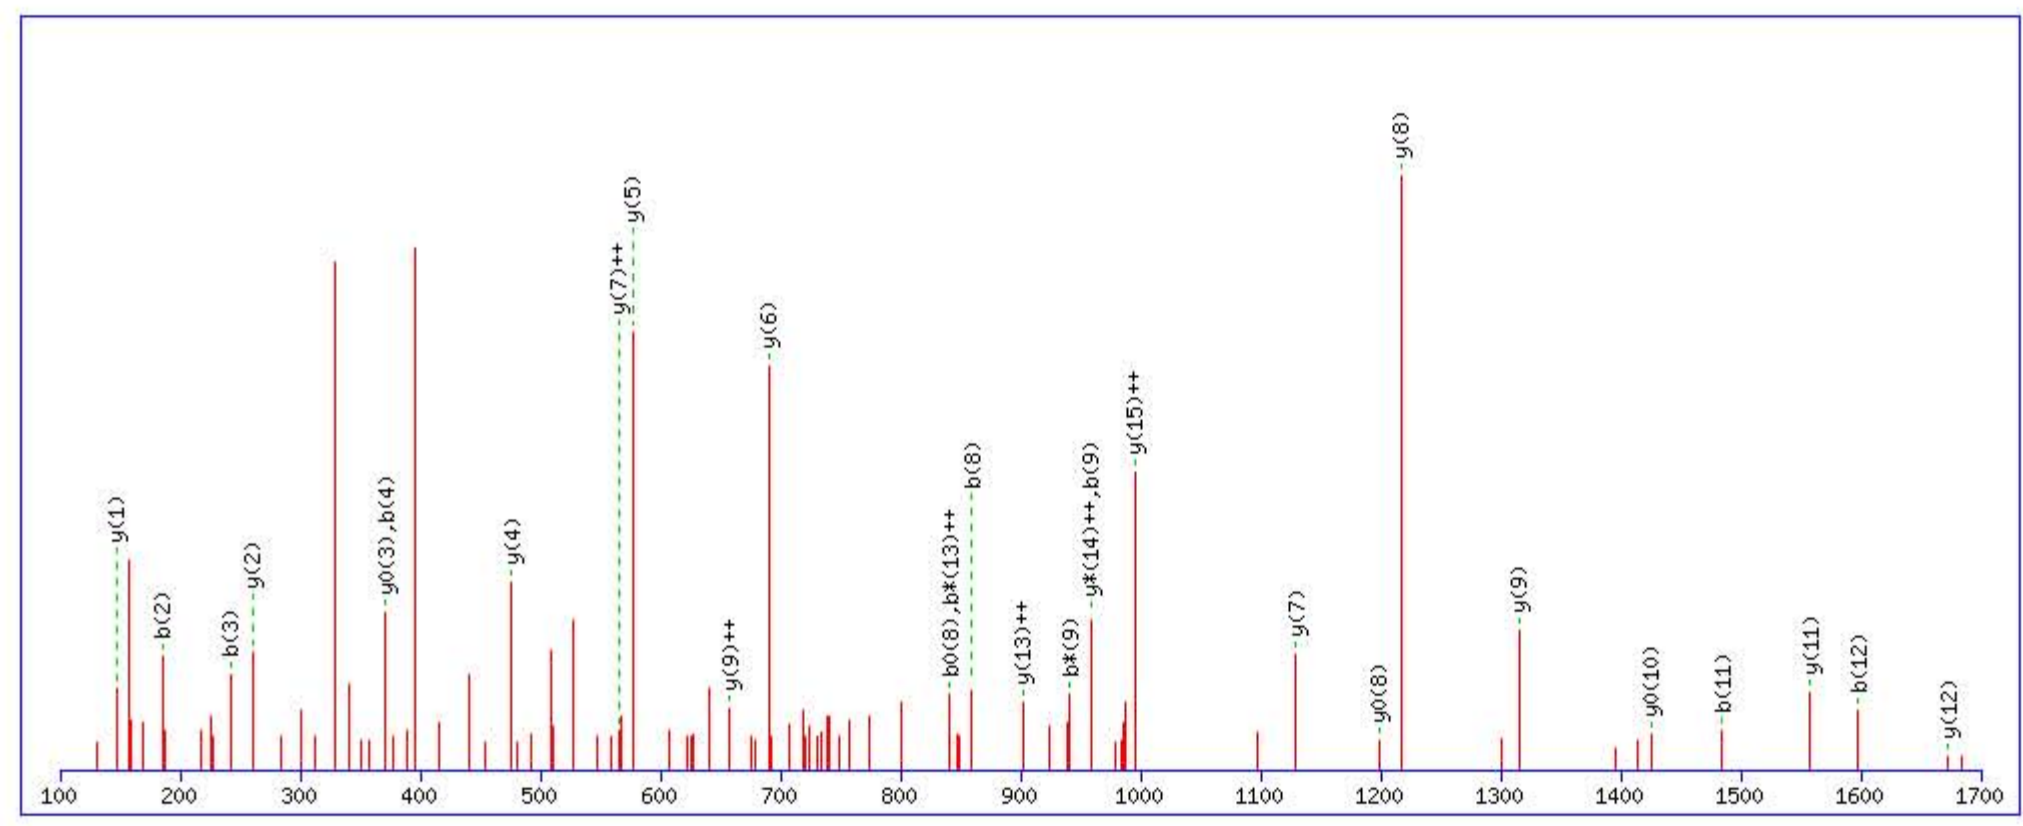

Monoisotopic mass of neutral peptide Mr(calc): 2173.075867  
 Fixed modifications: Carbamidomethyl (C) (apply to specified residues or termini only)  
 Variable modifications:  
 Q11 : Biotin:Thermo-21345 (Q)  
 Ions Score: 64 Expect: 1.2e-005  
 Matches : 28/170 fragment ions using 41 most intense peaks [\(help\)](#)

| #  | b                  | b <sup>++</sup> | b <sup>*</sup>    | b <sup>+++</sup>  | b <sup>0</sup>    | b <sup>0++</sup> | Seq. | y                  | y <sup>++</sup>   | y <sup>*</sup> | y <sup>+++</sup>  | y <sup>0</sup>     | y <sup>0++</sup> | #  |
|----|--------------------|-----------------|-------------------|-------------------|-------------------|------------------|------|--------------------|-------------------|----------------|-------------------|--------------------|------------------|----|
| 1  | 72.044390          | 36.525833       |                   |                   |                   |                  | A    |                    |                   |                |                   |                    |                  | 17 |
| 2  | <b>185.128454</b>  | 93.067865       |                   |                   |                   |                  | I    | 2103.046054        | 1052.026665       | 2086.019505    | 1043.513390       | 2085.035489        | 1043.021382      | 16 |
| 3  | <b>242.149918</b>  | 121.578597      |                   |                   |                   |                  | G    | 1989.961990        | <b>995.484633</b> | 1972.935441    | 986.971359        | 1971.951425        | 986.479351       | 15 |
| 4  | <b>371.192511</b>  | 186.099894      |                   |                   | 353.181946        | 177.094611       | E    | 1932.940526        | 966.973901        | 1915.913977    | <b>958.460627</b> | 1914.929961        | 957.968619       | 14 |
| 5  | 502.232996         | 251.620136      |                   |                   | 484.222431        | 242.614854       | M    | 1803.897933        | <b>902.452605</b> | 1786.871384    | 893.939330        | 1785.887368        | 893.447322       | 13 |
| 6  | 617.259939         | 309.133608      |                   |                   | 599.249374        | 300.128325       | D    | <b>1672.857448</b> | 836.932362        | 1655.830899    | 828.419088        | 1654.846883        | 827.927080       | 12 |
| 7  | 731.302866         | 366.155071      | 714.276317        | 357.641797        | 713.292301        | 357.149789       | N    | <b>1557.830505</b> | 779.418891        | 1540.803956    | 770.905616        | 1539.819940        | 770.413608       | 11 |
| 8  | <b>859.361444</b>  | 430.184360      | 842.334895        | 421.671086        | <b>841.350879</b> | 421.179078       | Q    | 1443.787578        | 722.397427        | 1426.761029    | 713.884153        | <b>1425.777013</b> | 713.392145       | 10 |
| 9  | <b>958.429858</b>  | 479.718567      | <b>941.403309</b> | 471.205292        | 940.419293        | 470.713284       | V    | <b>1315.729000</b> | <b>658.368138</b> | 1298.702451    | 649.854864        | 1297.718435        | 649.362856       | 9  |
| 10 | 1045.461886        | 523.234581      | 1028.435337       | 514.721307        | 1027.451321       | 514.229299       | S    | <b>1216.660586</b> | 608.833931        | 1199.634037    | 600.320657        | <b>1198.650021</b> | 599.828649       | 8  |
| 11 | <b>1484.687212</b> | 742.847244      | 1467.660663       | 734.333970        | 1466.676647       | 733.841962       | Q    | <b>1129.628558</b> | <b>565.317917</b> | 1112.602009    | 556.804643        | 1111.617993        | 556.312635       | 7  |
| 12 | <b>1597.771276</b> | 799.389276      | 1580.744727       | 790.876002        | 1579.760711       | 790.383993       | L    | <b>690.403232</b>  | 345.705254        | 673.376683     | 337.191980        | 672.392667         | 336.699972       | 6  |
| 13 | 1698.818955        | 849.913116      | 1681.792406       | <b>841.399841</b> | 1680.808390       | 840.907833       | T    | <b>577.319168</b>  | 289.163222        | 560.292619     | 280.649948        | 559.308603         | 280.157940       | 5  |
| 14 | 1785.850983        | 893.429130      | 1768.824434       | 884.915855        | 1767.840418       | 884.423847       | S    | <b>476.271489</b>  | 238.639383        | 459.244940     | 230.126108        | 458.260924         | 229.634100       | 4  |
| 15 | 1914.893576        | 957.950426      | 1897.867027       | 949.437152        | 1896.883011       | 948.945144       | E    | 389.239461         | 195.123369        | 372.212912     | 186.610094        | <b>371.228896</b>  | 186.118086       | 3  |
| 16 | 2027.977640        | 1014.492458     | 2010.951091       | 1005.979184       | 2009.967075       | 1005.487176      | L    | <b>260.196868</b>  | 130.602072        | 243.170319     | 122.088798        |                    |                  | 2  |
| 17 |                    |                 |                   |                   |                   |                  | K    | <b>147.112804</b>  | 74.060040         | 130.086255     | 65.546766         |                    |                  | 1  |

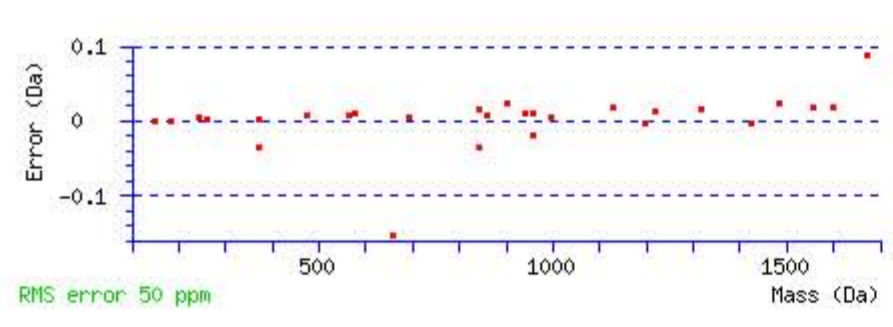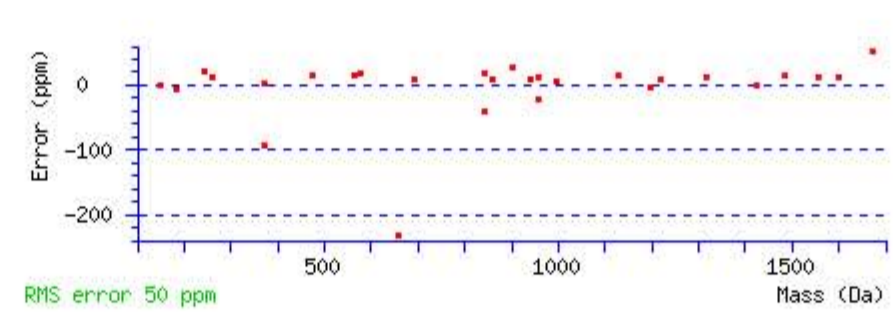

NCBI BLAST search of **AIGEMDNQVSQLTSELK**  
 (Parameters: blastp, nr protein database, expect=20000, no filter, PAM30)  
 Other BLAST [web gateways](#)

### All matches to this query

| Score | Mr(calc):   | Delta    | Sequence                          |
|-------|-------------|----------|-----------------------------------|
| 64.0  | 2173.075867 | 0.018755 | <a href="#">AIGEMDNQVSQLTSELK</a> |
| 28.5  | 2173.075867 | 0.018755 | <a href="#">AIGEMDNQVSQLTSELK</a> |



# MASCOT Search Results

## Peptide View

MS/MS Fragmentation of **QDACQGDSGGVFAVR**

Found in **C1R\_HUMAN**, Complement C1r subcomponent OS=Homo sapiens GN=C1R PE=1 SV=2

Match to Query 44249: 1876.851852 from(626.624560,3+) rtinseconds(1938) index(35986)

Title: Locus:1.1.1.3094.13 File:"2013-07-02 CLN FXIII 60 min 2nd F 3.wiff"

Data file C:\Program Files (x86)\Matrix Science\Mascot Daemon\mgf\5 FXIII 60 min 2nd\mascot\_daemon\_merge.mgf

Click mouse within plot area to zoom in by factor of two about that point

Or, Plot from  to  Da

Label all possible matches  Label matches used for scoring

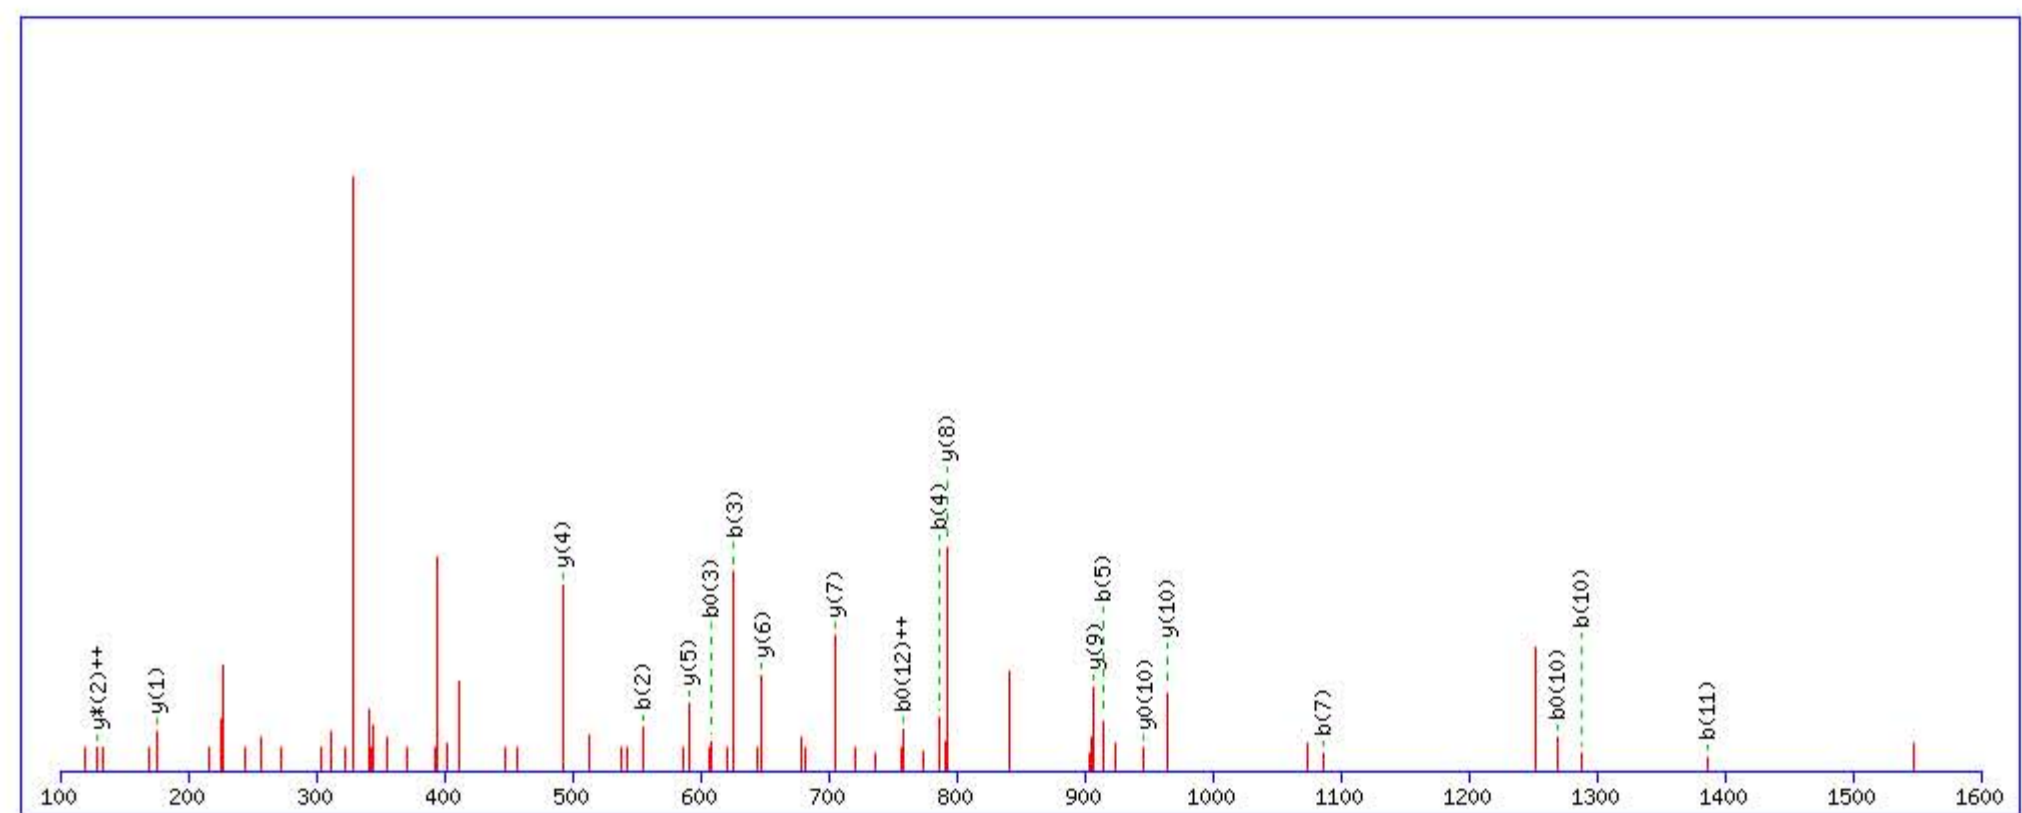

Monoisotopic mass of neutral peptide Mr(calc): 1876.856033

Fixed modifications: Carbamidomethyl (C) (apply to specified residues or termini only)

Variable modifications:

Q1 : Biotin:Thermo-21345 (Q)

Ions Score: 54 Expect: 8.7e-006

Matches : 20/152 fragment ions using 34 most intense peaks [\(help\)](#)

| #  | b                  | b <sup>++</sup> | b <sup>*</sup> | b <sup>+++</sup> | b <sup>0</sup>     | b <sup>0++</sup>  | Seq. | y                 | y <sup>++</sup> | y <sup>*</sup> | y <sup>+++</sup>  | y <sup>0</sup>    | y <sup>0++</sup> | #  |
|----|--------------------|-----------------|----------------|------------------|--------------------|-------------------|------|-------------------|-----------------|----------------|-------------------|-------------------|------------------|----|
| 1  | 440.232602         | 220.619939      | 423.206053     | 212.106664       |                    |                   | Q    |                   |                 |                |                   |                   |                  | 15 |
| 2  | <b>555.259545</b>  | 278.133411      | 538.232996     | 269.620136       | 537.248980         | 269.128128        | D    | 1438.637955       | 719.822616      | 1421.611406    | 711.309341        | 1420.627390       | 710.817333       | 14 |
| 3  | <b>626.296659</b>  | 313.651968      | 609.270110     | 305.138693       | <b>608.286094</b>  | 304.646685        | A    | 1323.611012       | 662.309144      | 1306.584463    | 653.795870        | 1305.600447       | 653.303862       | 13 |
| 4  | <b>786.327308</b>  | 393.667292      | 769.300759     | 385.154018       | 768.316743         | 384.662010        | C    | 1252.573898       | 626.790587      | 1235.547349    | 618.277313        | 1234.563333       | 617.785305       | 12 |
| 5  | <b>914.385886</b>  | 457.696581      | 897.359337     | 449.183307       | 896.375321         | 448.691299        | Q    | 1092.543249       | 546.775263      | 1075.516700    | 538.261988        | 1074.532684       | 537.769980       | 11 |
| 6  | 971.407350         | 486.207313      | 954.380801     | 477.694039       | 953.396785         | 477.202031        | G    | <b>964.484671</b> | 482.745974      | 947.458122     | 474.232699        | <b>946.474106</b> | 473.740691       | 10 |
| 7  | <b>1086.434293</b> | 543.720785      | 1069.407744    | 535.207510       | 1068.423728        | 534.715502        | D    | <b>907.463207</b> | 454.235242      | 890.436658     | 445.721967        | 889.452642        | 445.229959       | 9  |
| 8  | 1173.466321        | 587.236799      | 1156.439772    | 578.723524       | 1155.455756        | 578.231516        | S    | <b>792.436264</b> | 396.721770      | 775.409715     | 388.208496        | 774.425699        | 387.716488       | 8  |
| 9  | 1230.487785        | 615.747531      | 1213.461236    | 607.234256       | 1212.477220        | 606.742248        | G    | <b>705.404236</b> | 353.205756      | 688.377687     | 344.692482        |                   |                  | 7  |
| 10 | <b>1287.509249</b> | 644.258263      | 1270.482700    | 635.744988       | <b>1269.498684</b> | 635.252980        | G    | <b>648.382772</b> | 324.695024      | 631.356223     | 316.181750        |                   |                  | 6  |
| 11 | <b>1386.577663</b> | 693.792470      | 1369.551114    | 685.279195       | 1368.567098        | 684.787187        | V    | <b>591.361308</b> | 296.184292      | 574.334759     | 287.671018        |                   |                  | 5  |
| 12 | 1533.646077        | 767.326677      | 1516.619528    | 758.813402       | 1515.635512        | <b>758.321394</b> | F    | <b>492.292894</b> | 246.650085      | 475.266345     | 238.136811        |                   |                  | 4  |
| 13 | 1604.683191        | 802.845234      | 1587.656642    | 794.331959       | 1586.672626        | 793.839951        | A    | 345.224480        | 173.115878      | 328.197931     | 164.602603        |                   |                  | 3  |
| 14 | 1703.751605        | 852.379441      | 1686.725056    | 843.866166       | 1685.741040        | 843.374158        | V    | 274.187366        | 137.597321      | 257.160817     | <b>129.084047</b> |                   |                  | 2  |
| 15 |                    |                 |                |                  |                    |                   | R    | <b>175.118952</b> | 88.063114       | 158.092403     | 79.549839         |                   |                  | 1  |

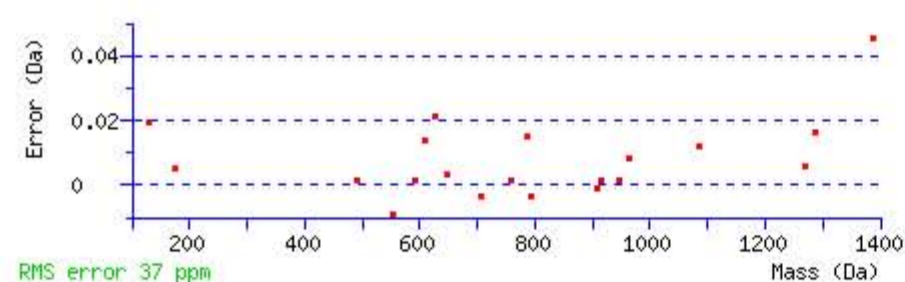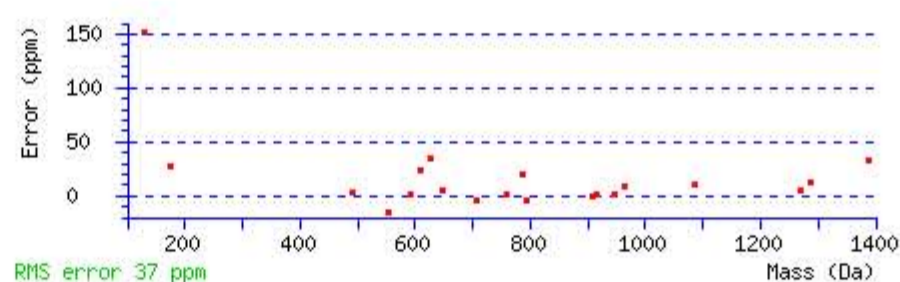

NCBI BLAST search of **QDACQGDSGGVFAVR**

(Parameters: blastp, nr protein database, expect=20000, no filter, PAM30)

Other BLAST [web gateways](#)

All matches to this query

| Score | Mr(calc):   | Delta     | Sequence                            |
|-------|-------------|-----------|-------------------------------------|
| 54.1  | 1876.856033 | -0.004181 | <a href="#">QDACQGDSGGVFAVR</a>     |
| 43.1  | 1876.856033 | -0.004181 | <a href="#">QDACQGDSGGVFAVR</a>     |
| 0.1   | 1876.855820 | -0.003968 | <a href="#">QRAGSSGGRGECDISGAGR</a> |

Mascot: <http://www.matrixscience.com/>



# MASCOT Search Results

## Peptide View

MS/MS Fragmentation of **ESEQGVYTCTAQGIWK**

Found in **C1R\_HUMAN**, Complement C1r subcomponent OS=Homo sapiens GN=C1R PE=1 SV=2

Match to Query 50315: 2167.026388 from(1084.520470,2+) rtinseconds(2163) index(37411)

Title: Locus:1.1.1.3172.26 File:"2013-07-02 CLN FXIII 60 min 2nd F 3.wiff"

Data file C:\Program Files (x86)\Matrix Science\Mascot Daemon\mgf5 FXIII 60 min 2nd\mascot\_daemon\_merge.mgf

Click mouse within plot area to zoom in by factor of two about that point

Or, Plot from  to  Da

Label all possible matches  Label matches used for scoring

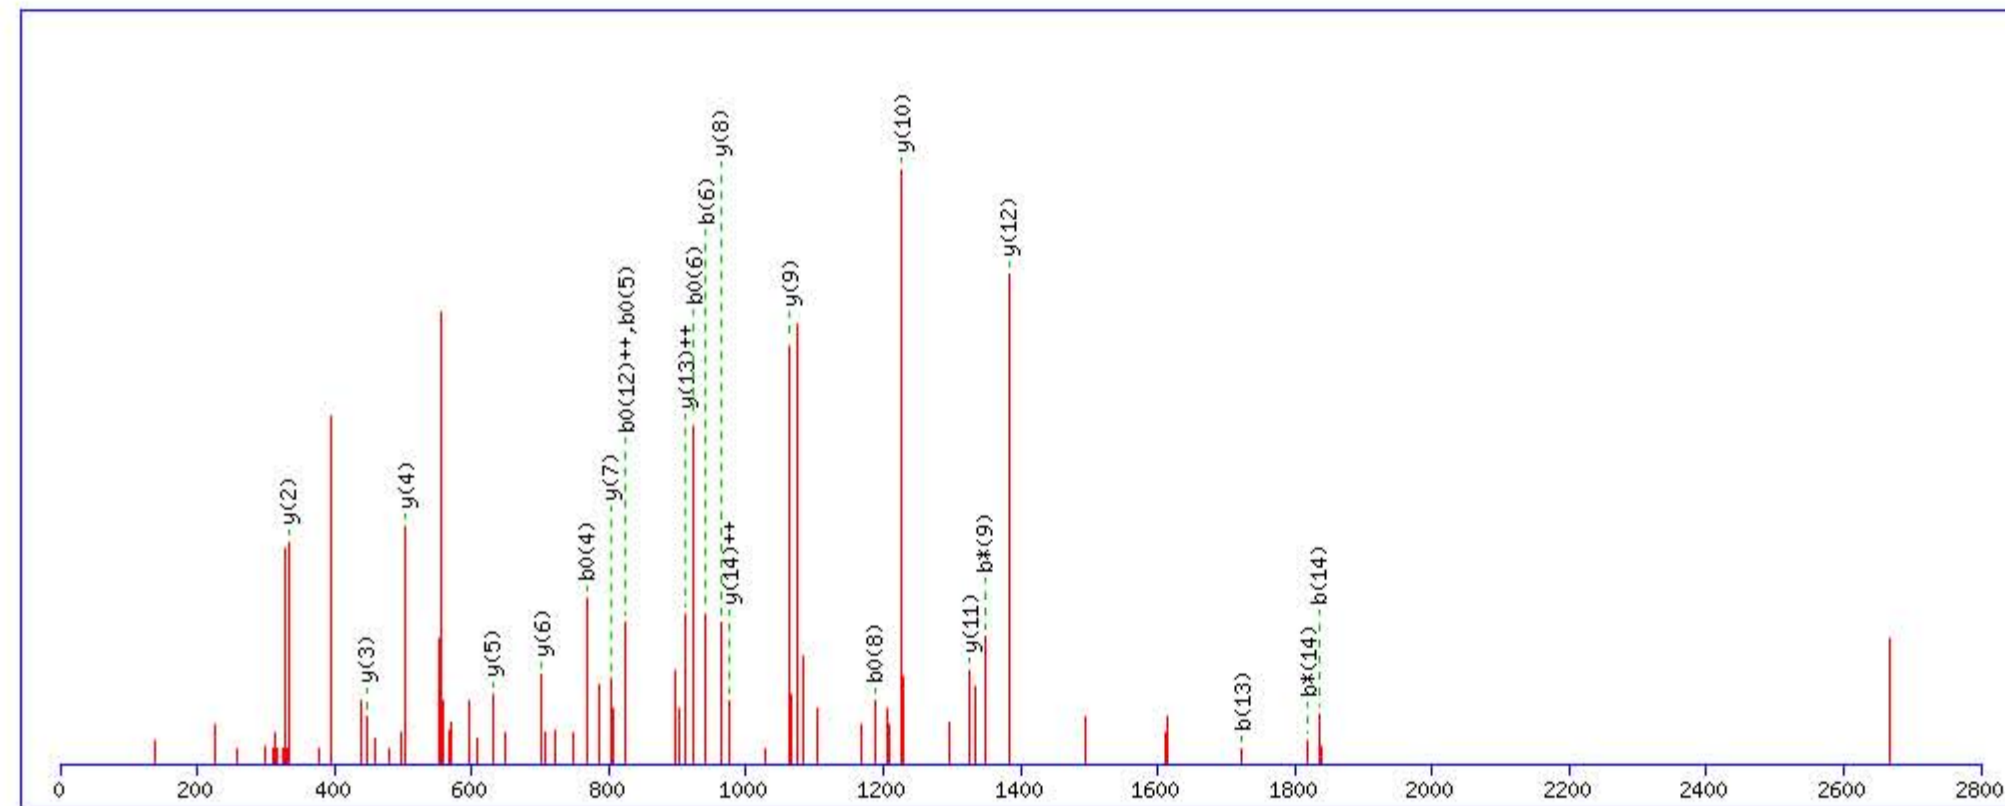

Monoisotopic mass of neutral peptide  $M_r(\text{calc})$ : 2167.007813

Fixed modifications: Carbamidomethyl (C) (apply to specified residues or termini only)

Variable modifications:

Q4 : Biotin:Thermo-21345 (Q)

Ions Score: 62 Expect: 1.2e-005

Matches : 23/162 fragment ions using 46 most intense peaks [\(help\)](#)

| #  | b           | b <sup>++</sup> | b <sup>*</sup> | b <sup>+++</sup> | b <sup>0</sup> | b <sup>0++</sup> | Seq. | y           | y <sup>++</sup> | y <sup>*</sup> | y <sup>+++</sup> | y <sup>0</sup> | y <sup>0++</sup> | #  |
|----|-------------|-----------------|----------------|------------------|----------------|------------------|------|-------------|-----------------|----------------|------------------|----------------|------------------|----|
| 1  | 130.049869  | 65.528572       |                |                  | 112.039304     | 56.523290        | E    |             |                 |                |                  |                |                  | 16 |
| 2  | 217.081897  | 109.044586      |                |                  | 199.071332     | 100.039304       | S    | 2038.972498 | 1019.989887     | 2021.945949    | 1011.476613      | 2020.961933    | 1010.984604      | 15 |
| 3  | 346.124490  | 173.565883      |                |                  | 328.113925     | 164.560600       | E    | 1951.940470 | 976.473873      | 1934.913921    | 967.960599       | 1933.929905    | 967.468591       | 14 |
| 4  | 785.349816  | 393.178546      | 768.323267     | 384.665272       | 767.339251     | 384.173264       | Q    | 1822.897877 | 911.952577      | 1805.871328    | 903.439302       | 1804.887312    | 902.947294       | 13 |
| 5  | 842.371280  | 421.689278      | 825.344731     | 413.176004       | 824.360715     | 412.683996       | G    | 1383.672551 | 692.339913      | 1366.646002    | 683.826639       | 1365.661986    | 683.334631       | 12 |
| 6  | 941.439694  | 471.223485      | 924.413145     | 462.710211       | 923.429129     | 462.218203       | V    | 1326.651087 | 663.829182      | 1309.624538    | 655.315907       | 1308.640522    | 654.823899       | 11 |
| 7  | 1104.503023 | 552.755150      | 1087.476474    | 544.241875       | 1086.492458    | 543.749867       | Y    | 1227.582673 | 614.294975      | 1210.556124    | 605.781700       | 1209.572108    | 605.289692       | 10 |
| 8  | 1205.550702 | 603.278989      | 1188.524153    | 594.765715       | 1187.540137    | 594.273707       | T    | 1064.519344 | 532.763310      | 1047.492795    | 524.250036       | 1046.508779    | 523.758028       | 9  |
| 9  | 1365.581351 | 683.294314      | 1348.554802    | 674.781039       | 1347.570786    | 674.289031       | C    | 963.471665  | 482.239471      | 946.445116     | 473.726196       | 945.461100     | 473.234188       | 8  |
| 10 | 1466.629030 | 733.818153      | 1449.602481    | 725.304879       | 1448.618465    | 724.812871       | T    | 803.441016  | 402.224146      | 786.414467     | 393.710872       | 785.430451     | 393.218864       | 7  |
| 11 | 1537.666144 | 769.336710      | 1520.639595    | 760.823436       | 1519.655579    | 760.331428       | A    | 702.393337  | 351.700307      | 685.366788     | 343.187032       |                |                  | 6  |
| 12 | 1665.724722 | 833.365999      | 1648.698173    | 824.852725       | 1647.714157    | 824.360717       | Q    | 631.356223  | 316.181750      | 614.329674     | 307.668475       |                |                  | 5  |
| 13 | 1722.746186 | 861.876731      | 1705.719637    | 853.363457       | 1704.735621    | 852.871449       | G    | 503.297645  | 252.152460      | 486.271096     | 243.639186       |                |                  | 4  |
| 14 | 1835.830250 | 918.418763      | 1818.803701    | 909.905489       | 1817.819685    | 909.413480       | I    | 446.276181  | 223.641728      | 429.249632     | 215.128454       |                |                  | 3  |
| 15 | 2021.909563 | 1011.458420     | 2004.883014    | 1002.945145      | 2003.898998    | 1002.453137      | W    | 333.192117  | 167.099696      | 316.165568     | 158.586422       |                |                  | 2  |
| 16 |             |                 |                |                  |                |                  | K    | 147.112804  | 74.060040       | 130.086255     | 65.546765        |                |                  | 1  |

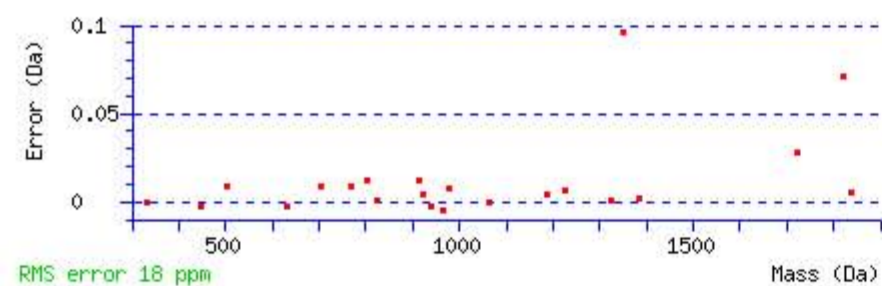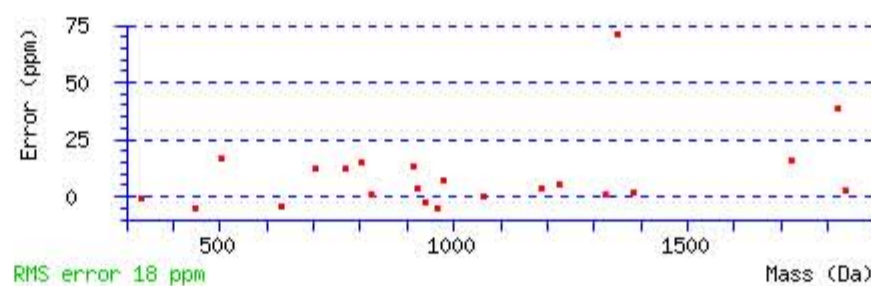

NCBI BLAST search of **ESEQGVYTCTAQGIWK**

(Parameters: blastp, nr protein database, expect=20000, no filter, PAM30)

Other BLAST [web gateways](#)

## All matches to this query

| Score | $M_r(\text{calc})$ | Delta    | Sequence                         |
|-------|--------------------|----------|----------------------------------|
| 62.0  | 2167.007813        | 0.018576 | <a href="#">ESEQGVYTCTAQGIWK</a> |

Mascot: <http://www.matrixscience.com/>



# MASCOT Search Results

## Peptide View

MS/MS Fragmentation of **SNALDIIFQTDLTGQK**

Found in **C1S\_HUMAN**, Complement C1s subcomponent OS=Homo sapiens GN=C1S PE=1 SV=1

Match to Query 48811: 2074.100688 from(1038.057620,2+) rtinseconds(2891) index(58620)

Title: Locus:1.1.1.1619.25 File:"2013-07-02 CLN FXIII 60 min 2nd F 4.wiff"

Data file C:\Program Files (x86)\Matrix Science\Mascot Daemon\mgf\5 FXIII 60 min 2nd\mascot\_daemon\_merge.mgf

Click mouse within plot area to zoom in by factor of two about that point

Or, Plot from  to  Da

Label all possible matches  Label matches used for scoring

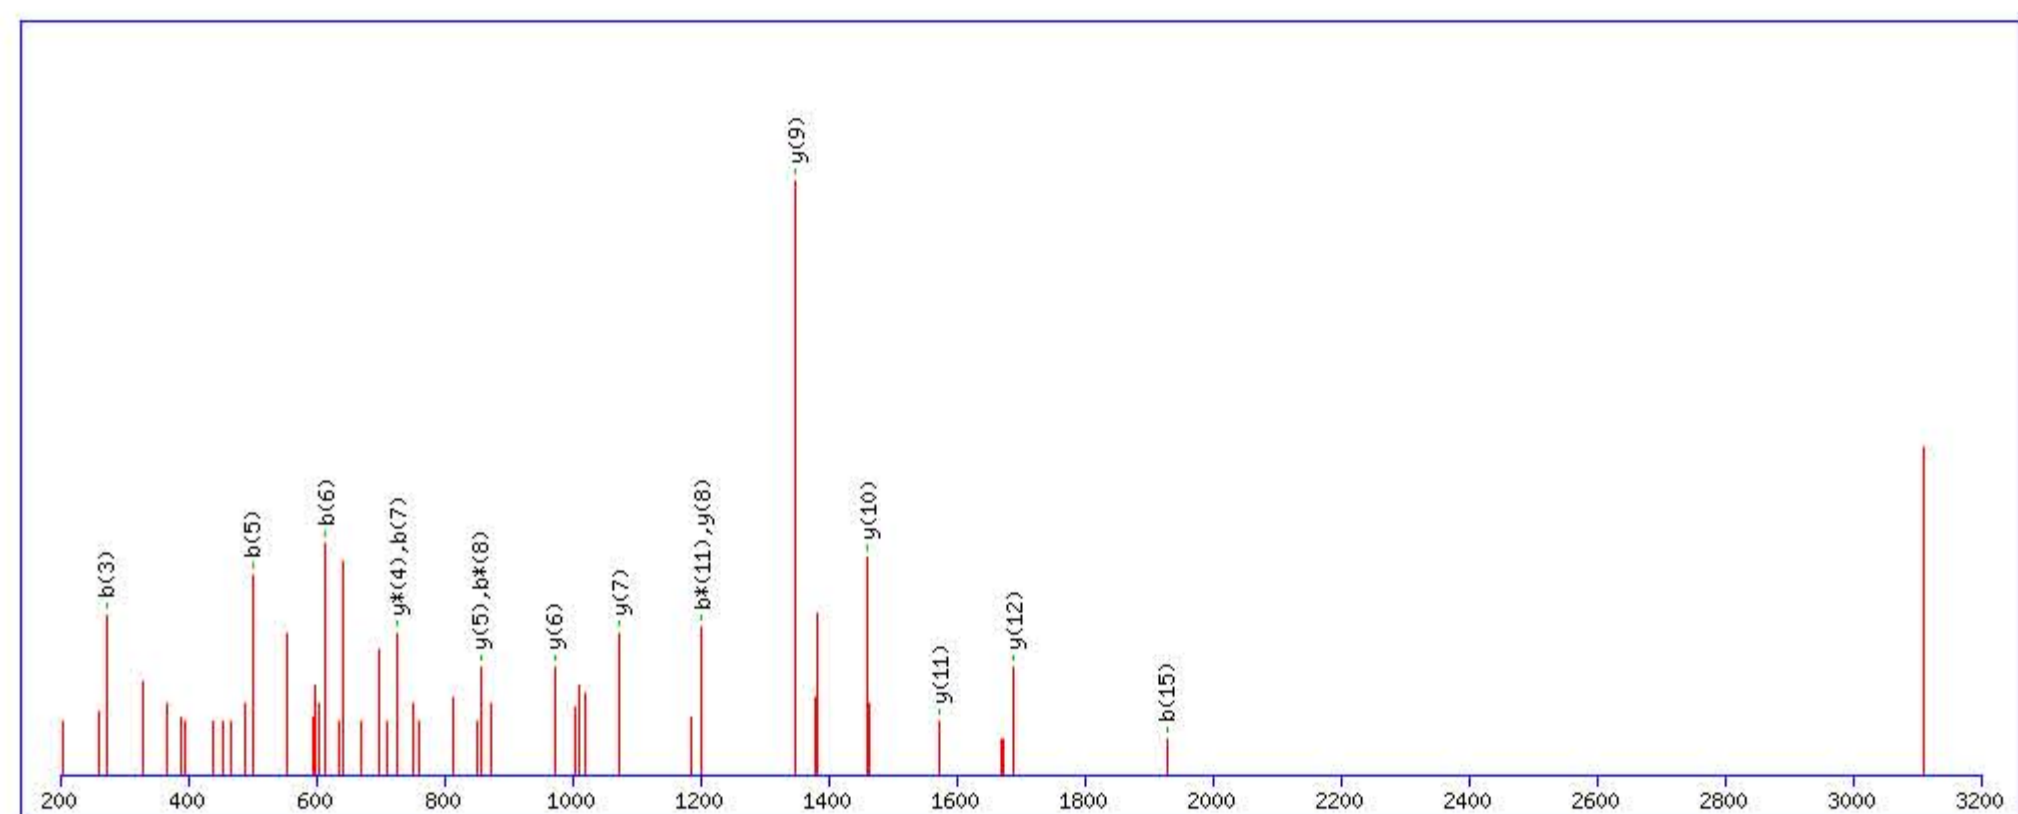

Monoisotopic mass of neutral peptide Mr(calc): 2074.076874

Fixed modifications: Carbamidomethyl (C) (apply to specified residues or termini only)

Variable modifications:

Q15 : Biotin:Thermo-21345 (Q)

Ions Score: 69 Expect: 2.5e-006

Matches : 16/172 fragment ions using 15 most intense peaks [\(help\)](#)

| #  | b                  | b <sup>++</sup> | b <sup>*</sup>     | b <sup>*++</sup> | b <sup>0</sup> | b <sup>0++</sup> | Seq. | y                  | y <sup>++</sup> | y <sup>*</sup>    | y <sup>*++</sup> | y <sup>0</sup> | y <sup>0++</sup> | #  |
|----|--------------------|-----------------|--------------------|------------------|----------------|------------------|------|--------------------|-----------------|-------------------|------------------|----------------|------------------|----|
| 1  | 88.039304          | 44.523290       |                    |                  | 70.028739      | 35.518008        | S    |                    |                 |                   |                  |                |                  | 16 |
| 2  | 202.082231         | 101.544753      | 185.055682         | 93.031479        | 184.071666     | 92.539471        | N    | 1988.052127        | 994.529702      | 1971.025578       | 986.016427       | 1970.041562    | 985.524419       | 15 |
| 3  | <b>273.119345</b>  | 137.063311      | 256.092796         | 128.550036       | 255.108780     | 128.058028       | A    | 1874.009200        | 937.508238      | 1856.982651       | 928.994964       | 1855.998635    | 928.502956       | 14 |
| 4  | 386.203409         | 193.605343      | 369.176860         | 185.092068       | 368.192844     | 184.600060       | L    | 1802.972086        | 901.989681      | 1785.945537       | 893.476407       | 1784.961521    | 892.984399       | 13 |
| 5  | <b>501.230352</b>  | 251.118814      | 484.203803         | 242.605540       | 483.219787     | 242.113532       | D    | <b>1689.888022</b> | 845.447649      | 1672.861473       | 836.934375       | 1671.877457    | 836.442367       | 12 |
| 6  | <b>614.314416</b>  | 307.660846      | 597.287867         | 299.147572       | 596.303851     | 298.655564       | I    | <b>1574.861079</b> | 787.934178      | 1557.834530       | 779.420903       | 1556.850514    | 778.928895       | 11 |
| 7  | <b>727.398480</b>  | 364.202878      | 710.371931         | 355.689604       | 709.387915     | 355.197596       | I    | <b>1461.777015</b> | 731.392146      | 1444.750466       | 722.878871       | 1443.766450    | 722.386863       | 10 |
| 8  | 874.466894         | 437.737085      | <b>857.440345</b>  | 429.223811       | 856.456329     | 428.731803       | F    | <b>1348.692951</b> | 674.850114      | 1331.666402       | 666.336839       | 1330.682386    | 665.844831       | 9  |
| 9  | 1002.525472        | 501.766374      | 985.498923         | 493.253100       | 984.514907     | 492.761092       | Q    | <b>1201.624537</b> | 601.315907      | 1184.597988       | 592.802632       | 1183.613972    | 592.310624       | 8  |
| 10 | 1103.573151        | 552.290214      | 1086.546602        | 543.776939       | 1085.562586    | 543.284931       | T    | <b>1073.565959</b> | 537.286618      | 1056.539410       | 528.773343       | 1055.555394    | 528.281335       | 7  |
| 11 | 1218.600094        | 609.803685      | <b>1201.573545</b> | 601.290411       | 1200.589529    | 600.798403       | D    | <b>972.518280</b>  | 486.762778      | 955.491731        | 478.249504       | 954.507715     | 477.757496       | 6  |
| 12 | 1331.684158        | 666.345717      | 1314.657609        | 657.832443       | 1313.673593    | 657.340435       | L    | <b>857.491337</b>  | 429.249307      | 840.464788        | 420.736032       | 839.480772     | 420.244024       | 5  |
| 13 | 1432.731837        | 716.869557      | 1415.705288        | 708.356282       | 1414.721272    | 707.864274       | T    | 744.407273         | 372.707275      | <b>727.380724</b> | 364.194000       | 726.396708     | 363.701992       | 4  |
| 14 | 1489.753301        | 745.380289      | 1472.726752        | 736.867014       | 1471.742736    | 736.375006       | G    | 643.359594         | 322.183435      | 626.333045        | 313.670161       |                |                  | 3  |
| 15 | <b>1928.978627</b> | 964.992952      | 1911.952078        | 956.479677       | 1910.968062    | 955.987669       | Q    | 586.338130         | 293.672703      | 569.311581        | 285.159429       |                |                  | 2  |
| 16 |                    |                 |                    |                  |                |                  | K    | 147.112804         | 74.060040       | 130.086255        | 65.546765        |                |                  | 1  |

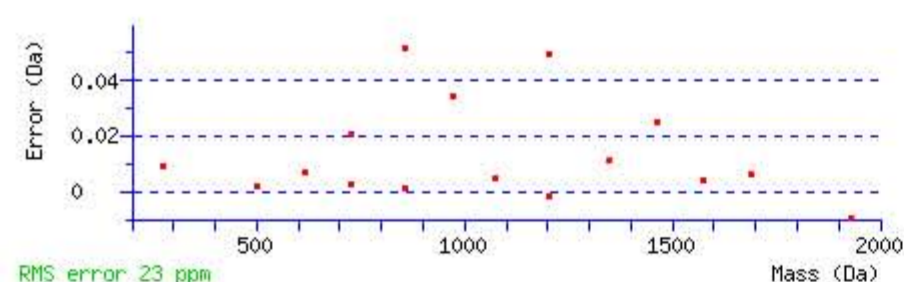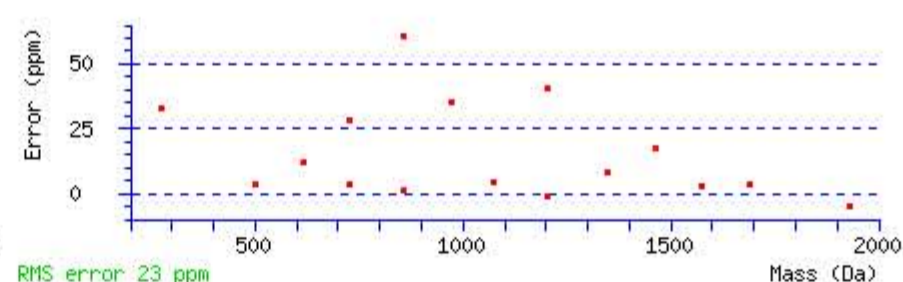

NCBI BLAST search of **SNALDIIFQTDLTGQK**

(Parameters: blastp, nr protein database, expect=20000, no filter, PAM30)

Other BLAST [web gateways](#)

## All matches to this query

| Score | Mr(calc):   | Delta     | Sequence                             |
|-------|-------------|-----------|--------------------------------------|
| 68.8  | 2074.076874 | 0.023814  | <a href="#">SNALDIIFQTDLTGQK</a>     |
| 38.8  | 2074.076874 | 0.023814  | <a href="#">SNALDIIFQTDLTGQK</a>     |
| 8.5   | 2074.088104 | 0.012584  | <a href="#">SKGLVQNIDQLYSGGGK</a>    |
| 1.8   | 2074.076813 | 0.023875  | <a href="#">LEEELREKQAYVEK</a>       |
| 1.6   | 2074.110535 | -0.009847 | <a href="#">QNPSLPAARGLNELQR</a>     |
| 0.5   | 2074.111420 | -0.010732 | <a href="#">VFVGFLLFPWALMLLSYR</a>   |
| 0.3   | 2074.126923 | -0.026235 | <a href="#">IEALKATAASLSSRIESEAK</a> |
| 0.2   | 2074.100662 | 0.000026  | <a href="#">DYKIQNHGHRVLQR</a>       |
| 0.2   | 2074.081589 | 0.019099  | <a href="#">GTMGNHLLTNPVLQPR</a>     |
| 0.2   | 2074.118423 | -0.017735 | <a href="#">VRETRHLWVGNLPEVNR</a>    |



# MASCOT SCIENCE Mascot Search Results

## Peptide View

MS/MS Fragmentation of **SVQLTEK**

Found in **CO3\_HUMAN**, Complement C3 OS=Homo sapiens GN=C3 PE=1 SV=2

Match to Query 19739: 1114.600588 from(558.307570,2+) rtinseconds(1507) index(33332)

Title: Locus:1.1.1.2944.11 File:"2013-07-02 CLN FXIII 60 min 2nd F 3.wiff"

Data file C:\Program Files (x86)\Matrix Science\Mascot Daemon\mgf5 FXIII 60 min 2nd\mascot\_daemon\_merge.mgf

Click mouse within plot area to zoom in by factor of two about that point

Or, Plot from  to  Da

Label all possible matches  Label matches used for scoring

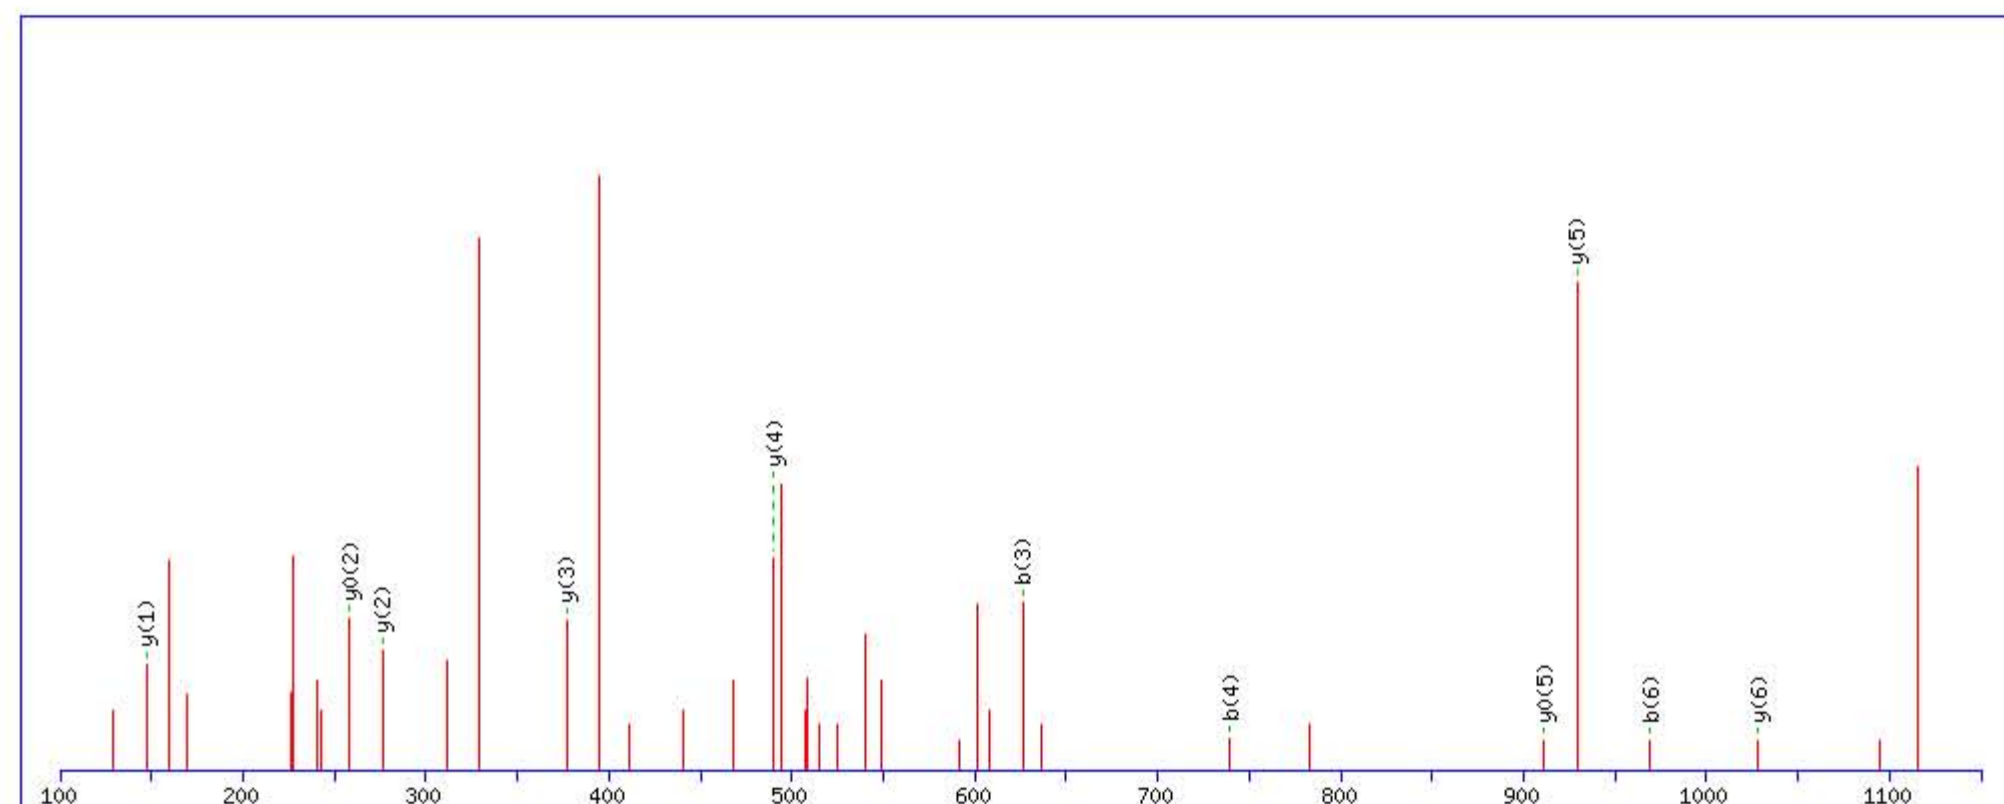

Monoisotopic mass of neutral peptide Mr(calc): 1114.605621

Fixed modifications: Carbamidomethyl (C) (apply to specified residues or termini only)

Variable modifications:

Q3 : Biotin:Thermo-21345 (Q)

Ions Score: 33 Expect: 0.0051

Matches : 11/66 fragment ions using 23 most intense peaks [\(help\)](#)

| # | b          | b <sup>++</sup> | b <sup>+</sup> | b <sup>+++</sup> | b <sup>0</sup> | b <sup>0++</sup> | Seq. | y           | y <sup>++</sup> | y <sup>+</sup> | y <sup>+++</sup> | y <sup>0</sup> | y <sup>0++</sup> | # |
|---|------------|-----------------|----------------|------------------|----------------|------------------|------|-------------|-----------------|----------------|------------------|----------------|------------------|---|
| 1 | 88.039304  | 44.523290       |                |                  | 70.028739      | 35.518008        | S    |             |                 |                |                  |                |                  | 7 |
| 2 | 187.107718 | 94.057497       |                |                  | 169.097153     | 85.052214        | V    | 1028.580880 | 514.794078      | 1011.554331    | 506.280804       | 1010.570315    | 505.788796       | 6 |
| 3 | 626.333044 | 313.670160      | 609.306495     | 305.156885       | 608.322479     | 304.664877       | Q    | 929.512466  | 465.259871      | 912.485917     | 456.746597       | 911.501901     | 456.254589       | 5 |
| 4 | 739.417108 | 370.212192      | 722.390559     | 361.698917       | 721.406543     | 361.206909       | L    | 490.287140  | 245.647208      | 473.260591     | 237.133934       | 472.276575     | 236.641926       | 4 |
| 5 | 840.464787 | 420.736032      | 823.438238     | 412.222757       | 822.454222     | 411.730749       | T    | 377.203076  | 189.105176      | 360.176527     | 180.591902       | 359.192511     | 180.099894       | 3 |
| 6 | 969.507380 | 485.257328      | 952.480831     | 476.744054       | 951.496815     | 476.252046       | E    | 276.155397  | 138.581336      | 259.128848     | 130.068062       | 258.144832     | 129.576054       | 2 |
| 7 |            |                 |                |                  |                |                  | K    | 147.112804  | 74.060040       | 130.086255     | 65.546765        |                |                  | 1 |

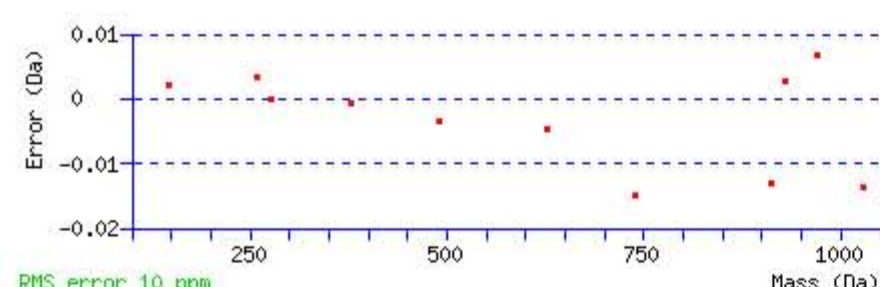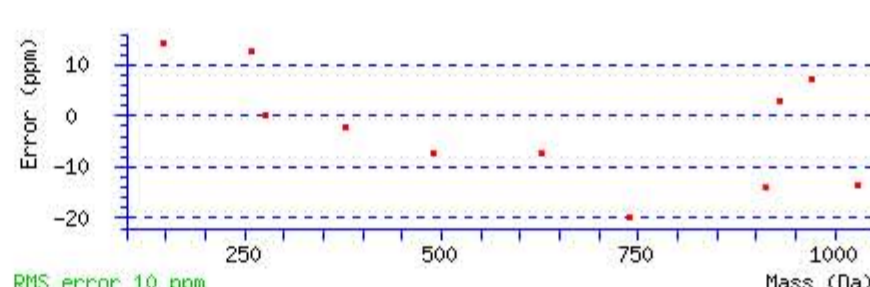

NCBI BLAST search of [SVQLTEK](#)

(Parameters: blastp, nr protein database, expect=20000, no filter, PAM30)

Other BLAST [web gateways](#)

## All matches to this query

| Score | Mr(calc):   | Delta     | Sequence                    |
|-------|-------------|-----------|-----------------------------|
| 33.4  | 1114.605621 | -0.005033 | <a href="#">SVQLTEK</a>     |
| 8.5   | 1114.591690 | 0.008898  | <a href="#">ASVHSMISRK</a>  |
| 6.9   | 1114.613480 | -0.012892 | <a href="#">SVFAKHGLEK</a>  |
| 4.6   | 1114.584503 | 0.016085  | <a href="#">DAQVFPK</a>     |
| 3.4   | 1114.598236 | 0.002352  | <a href="#">SAVITSLDPGR</a> |
| 2.7   | 1114.598190 | 0.002398  | <a href="#">QEQAALKLAK</a>  |

Mascot: <http://www.matrixscience.com/>



# MASCOT SEARCH RESULTS

## Peptide View

MS/MS Fragmentation of **NEQVEIR**

Found in **CO3\_HUMAN**, Complement C3 OS=Homo sapiens GN=C3 PE=1 SV=2

Match to Query 23267: 1197.613508 from(599.814030,2+) rtinseconds(1591) index(33866)

Title: Locus:1.1.1.2973.11 File:"2013-07-02 CLN FXIII 60 min 2nd F 3.wiff"

Data file C:\Program Files (x86)\Matrix Science\Mascot Daemon\mgf\5 FXIII 60 min 2nd\mascot\_daemon\_merge.mgf

Click mouse within plot area to zoom in by factor of two about that point

Or, Plot from  to  Da

Label all possible matches  Label matches used for scoring

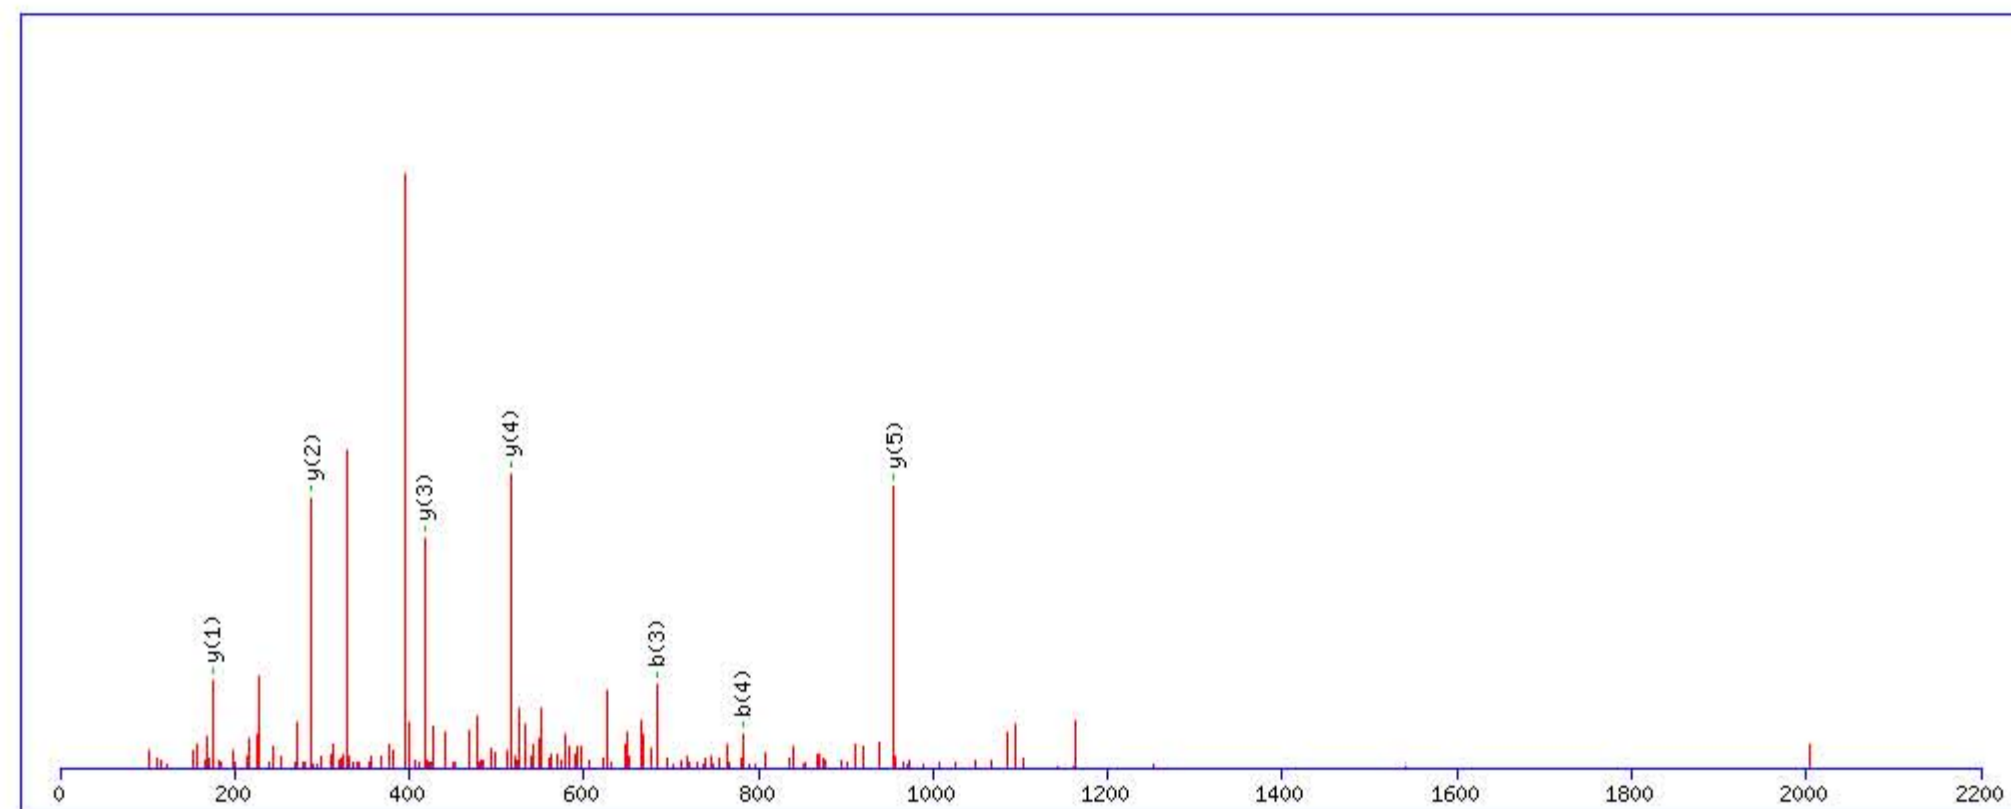

Monoisotopic mass of neutral peptide Mr(calc): 1197.617569

Fixed modifications: Carbamidomethyl (C) (apply to specified residues or termini only)

Variable modifications:

Q3 : Biotin:Thermo-21345 (Q)

Ions Score: 36 Expect: 0.0032

Matches : 7/66 fragment ions using 11 most intense peaks [\(help\)](#)

| # | b                 | b <sup>++</sup> | b <sup>*</sup> | b <sup>*++</sup> | b <sup>0</sup> | b <sup>0++</sup> | Seq. | y                 | y <sup>++</sup> | y <sup>*</sup> | y <sup>*++</sup> | y <sup>0</sup> | y <sup>0++</sup> | # |
|---|-------------------|-----------------|----------------|------------------|----------------|------------------|------|-------------------|-----------------|----------------|------------------|----------------|------------------|---|
| 1 | 115.050203        | 58.028740       | 98.023654      | 49.515465        |                |                  | N    |                   |                 |                |                  |                |                  | 7 |
| 2 | 244.092796        | 122.550036      | 227.066247     | 114.036762       | 226.082231     | 113.544754       | E    | 1084.581942       | 542.794609      | 1067.555393    | 534.281335       | 1066.571377    | 533.789327       | 6 |
| 3 | <b>683.318122</b> | 342.162699      | 666.291573     | 333.649425       | 665.307557     | 333.157417       | Q    | <b>955.539349</b> | 478.273313      | 938.512800     | 469.760038       | 937.528784     | 469.268030       | 5 |
| 4 | <b>782.386536</b> | 391.696906      | 765.359987     | 383.183632       | 764.375971     | 382.691624       | V    | <b>516.314023</b> | 258.660650      | 499.287474     | 250.147375       | 498.303458     | 249.655367       | 4 |
| 5 | 911.429129        | 456.218203      | 894.402580     | 447.704928       | 893.418564     | 447.212920       | E    | <b>417.245609</b> | 209.126443      | 400.219060     | 200.613168       | 399.235044     | 200.121160       | 3 |
| 6 | 1024.513193       | 512.760235      | 1007.486644    | 504.246960       | 1006.502628    | 503.754952       | I    | <b>288.203016</b> | 144.605146      | 271.176467     | 136.091872       |                |                  | 2 |
| 7 |                   |                 |                |                  |                |                  | R    | <b>175.118952</b> | 88.063114       | 158.092403     | 79.549840        |                |                  | 1 |

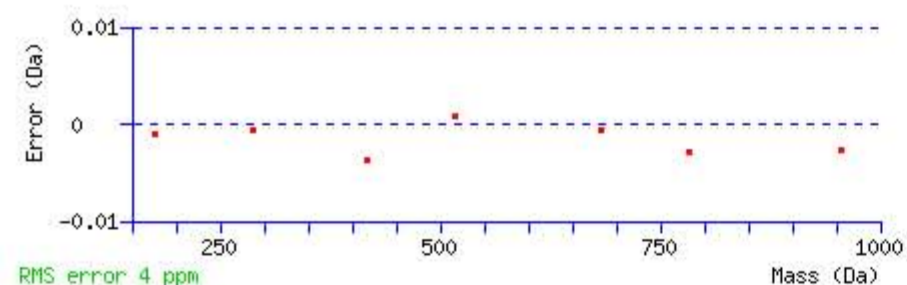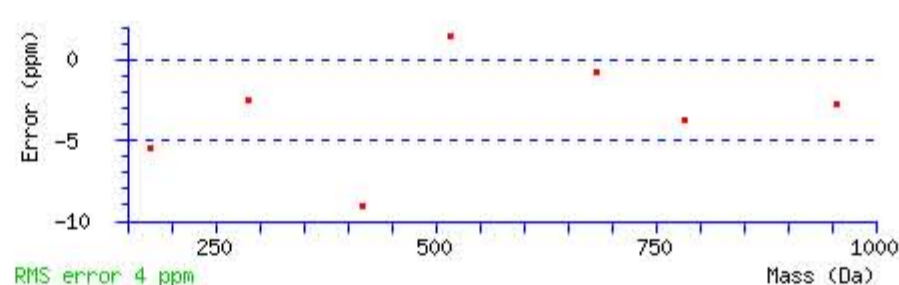

NCBI BLAST search of [NEQVEIR](#)

(Parameters: blastp, nr protein database, expect=20000, no filter, PAM30)

Other BLAST [web gateways](#)

All matches to this query

| Score | Mr(calc):   | Delta     | Sequence                     |
|-------|-------------|-----------|------------------------------|
| 35.9  | 1197.617569 | -0.004061 | <a href="#">NEQVEIR</a>      |
| 8.8   | 1197.617569 | -0.004061 | <a href="#">NQEDLLR</a>      |
| 8.8   | 1197.598953 | 0.014555  | <a href="#">QDNLPDIEVR</a>   |
| 8.4   | 1197.617569 | -0.004061 | <a href="#">QEVNELR</a>      |
| 8.2   | 1197.598938 | 0.014570  | <a href="#">AAQEGDLPCLR</a>  |
| 8.0   | 1197.617569 | -0.004061 | <a href="#">LQDNELR</a>      |
| 7.6   | 1197.598953 | 0.014555  | <a href="#">EISPGSGPGEIR</a> |
| 6.0   | 1197.621399 | -0.007891 | <a href="#">EKHSTQAKNR</a>   |
| 3.9   | 1197.628815 | -0.015307 | <a href="#">QLSMQVHALR</a>   |
| 2.8   | 1197.598953 | 0.014555  | <a href="#">VDNQPEELVR</a>   |

Mascot: <http://www.matrixscience.com/>



# MASCOT SEARCH RESULTS

## Peptide View

MS/MS Fragmentation of **TGLQEVEVK**

Found in **CO3\_HUMAN**, Complement C3 OS=Homo sapiens GN=C3 PE=1 SV=2

Match to Query 26450: 1312.705908 from(657.360230,2+) rtinseconds(1814) index(35116)

Title: Locus:1.1.1.3051.13 File:"2013-07-02 CLN FXIII 60 min 2nd F 3.wiff"

Data file C:\Program Files (x86)\Matrix Science\Mascot Daemon\mgf5 FXIII 60 min 2nd\mascot\_daemon\_merge.mgf

Click mouse within plot area to zoom in by factor of two about that point

Or, Plot from  to  Da

Label all possible matches  Label matches used for scoring

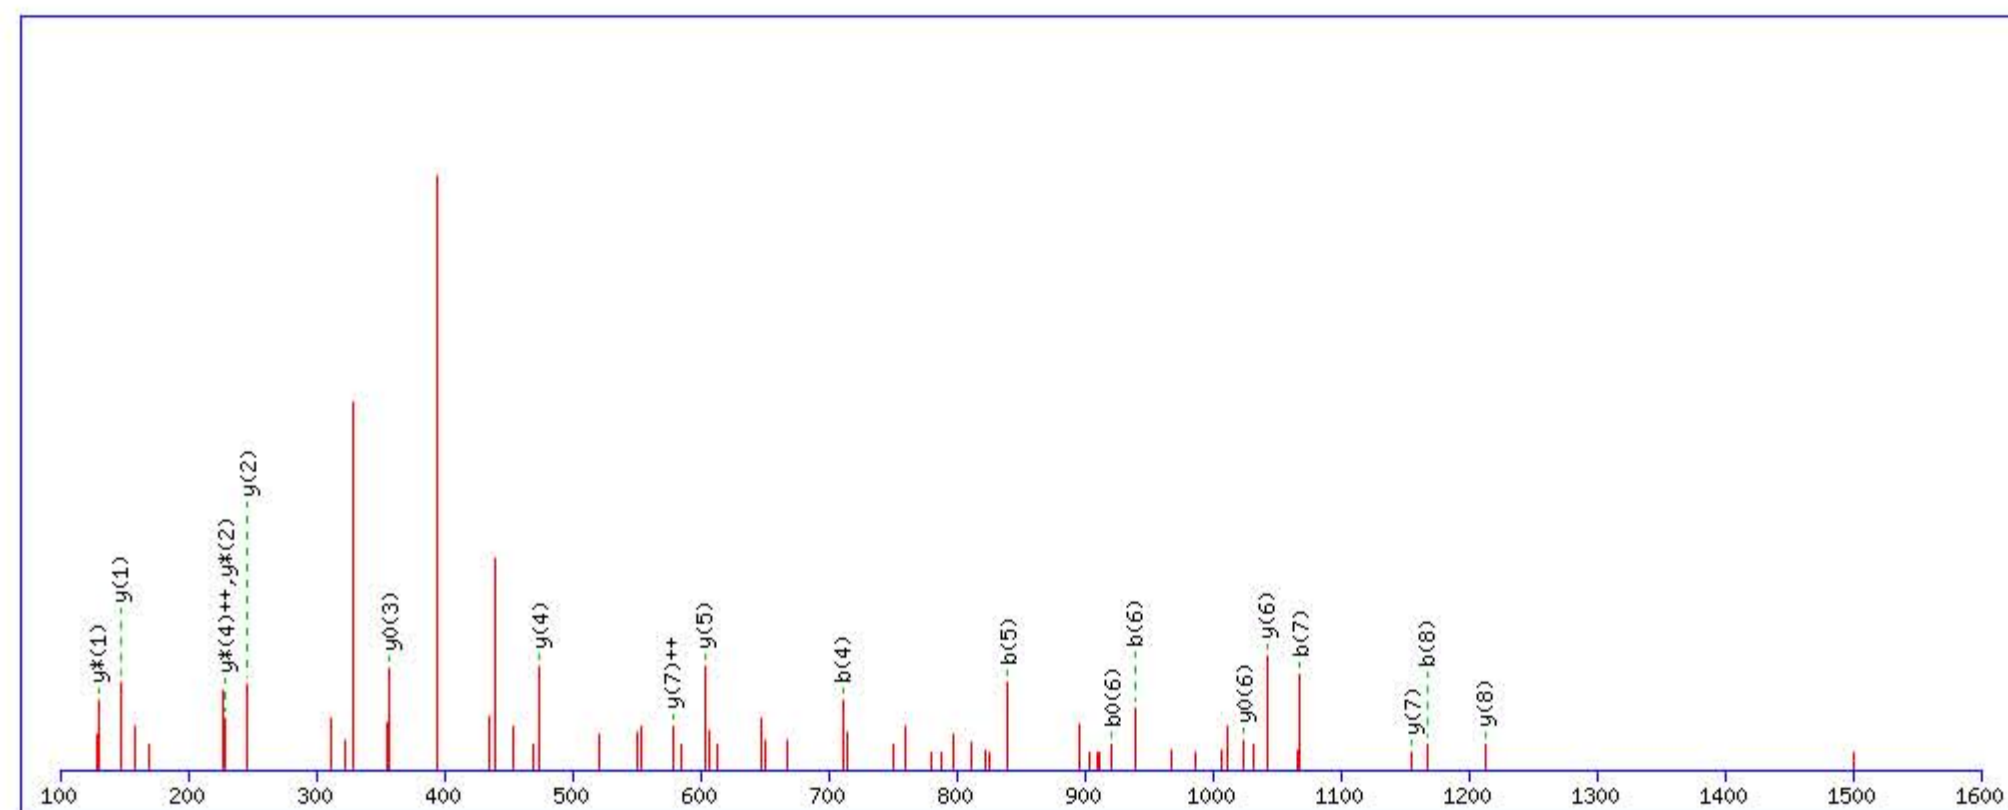

Monoisotopic mass of neutral peptide Mr(calc): 1312.706070

Fixed modifications: Carbamidomethyl (C) (apply to specified residues or termini only)

Variable modifications:

Q4 : Biotin:Thermo-21345 (Q)

Ions Score: 39 Expect: 0.002

Matches : 19/86 fragment ions using 33 most intense peaks [\(help\)](#)

| # | b                  | b <sup>++</sup> | b <sup>*</sup> | b <sup>*++</sup> | b <sup>0</sup>    | b <sup>0++</sup> | Seq. | y                  | y <sup>++</sup>   | y <sup>*</sup>    | y <sup>*++</sup>  | y <sup>0</sup>     | y <sup>0++</sup> | # |
|---|--------------------|-----------------|----------------|------------------|-------------------|------------------|------|--------------------|-------------------|-------------------|-------------------|--------------------|------------------|---|
| 1 | 102.054955         | 51.531116       |                |                  | 84.044390         | 42.525833        | T    |                    |                   |                   |                   |                    |                  | 9 |
| 2 | 159.076419         | 80.041847       |                |                  | 141.065854        | 71.036565        | G    | <b>1212.665672</b> | 606.836474        | 1195.639123       | 598.323200        | 1194.655107        | 597.831192       | 8 |
| 3 | 272.160483         | 136.583879      |                |                  | 254.149918        | 127.578597       | L    | <b>1155.644208</b> | <b>578.325742</b> | 1138.617659       | 569.812468        | 1137.633643        | 569.320460       | 7 |
| 4 | <b>711.385809</b>  | 356.196543      | 694.359260     | 347.683268       | 693.375244        | 347.191260       | Q    | <b>1042.560144</b> | 521.783710        | 1025.533595       | 513.270436        | <b>1024.549579</b> | 512.778428       | 6 |
| 5 | <b>840.428402</b>  | 420.717839      | 823.401853     | 412.204565       | 822.417837        | 411.712557       | E    | <b>603.334818</b>  | 302.171047        | 586.308269        | 293.657773        | 585.324253         | 293.165765       | 5 |
| 6 | <b>939.496816</b>  | 470.252046      | 922.470267     | 461.738772       | <b>921.486251</b> | 461.246764       | V    | <b>474.292225</b>  | 237.649751        | 457.265676        | <b>229.136476</b> | 456.281660         | 228.644468       | 4 |
| 7 | <b>1068.539409</b> | 534.773343      | 1051.512860    | 526.260068       | 1050.528844       | 525.768060       | E    | 375.223811         | 188.115544        | 358.197262        | 179.602269        | <b>357.213246</b>  | 179.110261       | 3 |
| 8 | <b>1167.607823</b> | 584.307550      | 1150.581274    | 575.794275       | 1149.597258       | 575.302267       | V    | <b>246.181218</b>  | 123.594247        | <b>229.154669</b> | 115.080973        |                    |                  | 2 |
| 9 |                    |                 |                |                  |                   |                  | K    | <b>147.112804</b>  | 74.060040         | <b>130.086255</b> | 65.546765         |                    |                  | 1 |

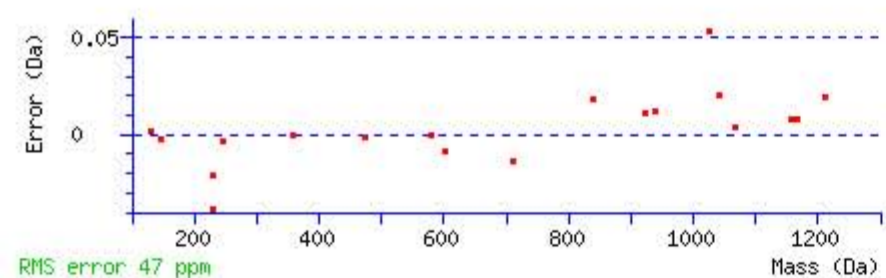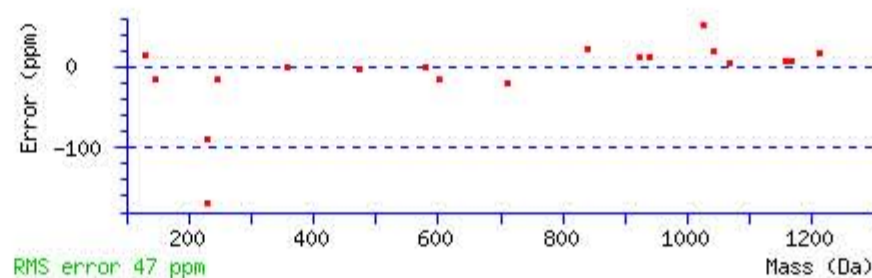

NCBI BLAST search of **TGLQEVEVK**

(Parameters: blastp, nr protein database, expect=20000, no filter, PAM30)

Other BLAST [web gateways](#)

## All matches to this query

| Score | Mr(calc):   | Delta     | Sequence                    |
|-------|-------------|-----------|-----------------------------|
| 39.2  | 1312.706070 | -0.000162 | <a href="#">TGLQEVEVK</a>   |
| 9.8   | 1312.699524 | 0.006384  | <a href="#">TIMHLMINNVK</a> |
| 5.9   | 1312.692139 | 0.013769  | <a href="#">DRQSQIQK</a>    |
| 2.4   | 1312.688766 | 0.017142  | <a href="#">HKVHTGEKSYK</a> |
| 1.3   | 1312.706055 | -0.000147 | <a href="#">QSAEEVIVK</a>   |
| 1.1   | 1312.691422 | 0.014486  | <a href="#">YKELYLEEVK</a>  |



# MASCOT Search Results

## Peptide View

MS/MS Fragmentation of **VLLDGVQNPR**

Found in **CO3\_HUMAN**, Complement C3 OS=Homo sapiens GN=C3 PE=1 SV=2

Match to Query 31271: 1420.793088 from(711.403820,2+) rtinseconds(1980) index(36296)

Title: Locus:1.1.1.3109.6 File:"2013-07-02 CLN FXIII 60 min 2nd F 3.wiff"

Data file C:\Program Files (x86)\Matrix Science\Mascot Daemon\mgf5 FXIII 60 min 2nd\mascot\_daemon\_merge.mgf

Click mouse within plot area to zoom in by factor of two about that point

Or, Plot from  to  Da

Label all possible matches  Label matches used for scoring

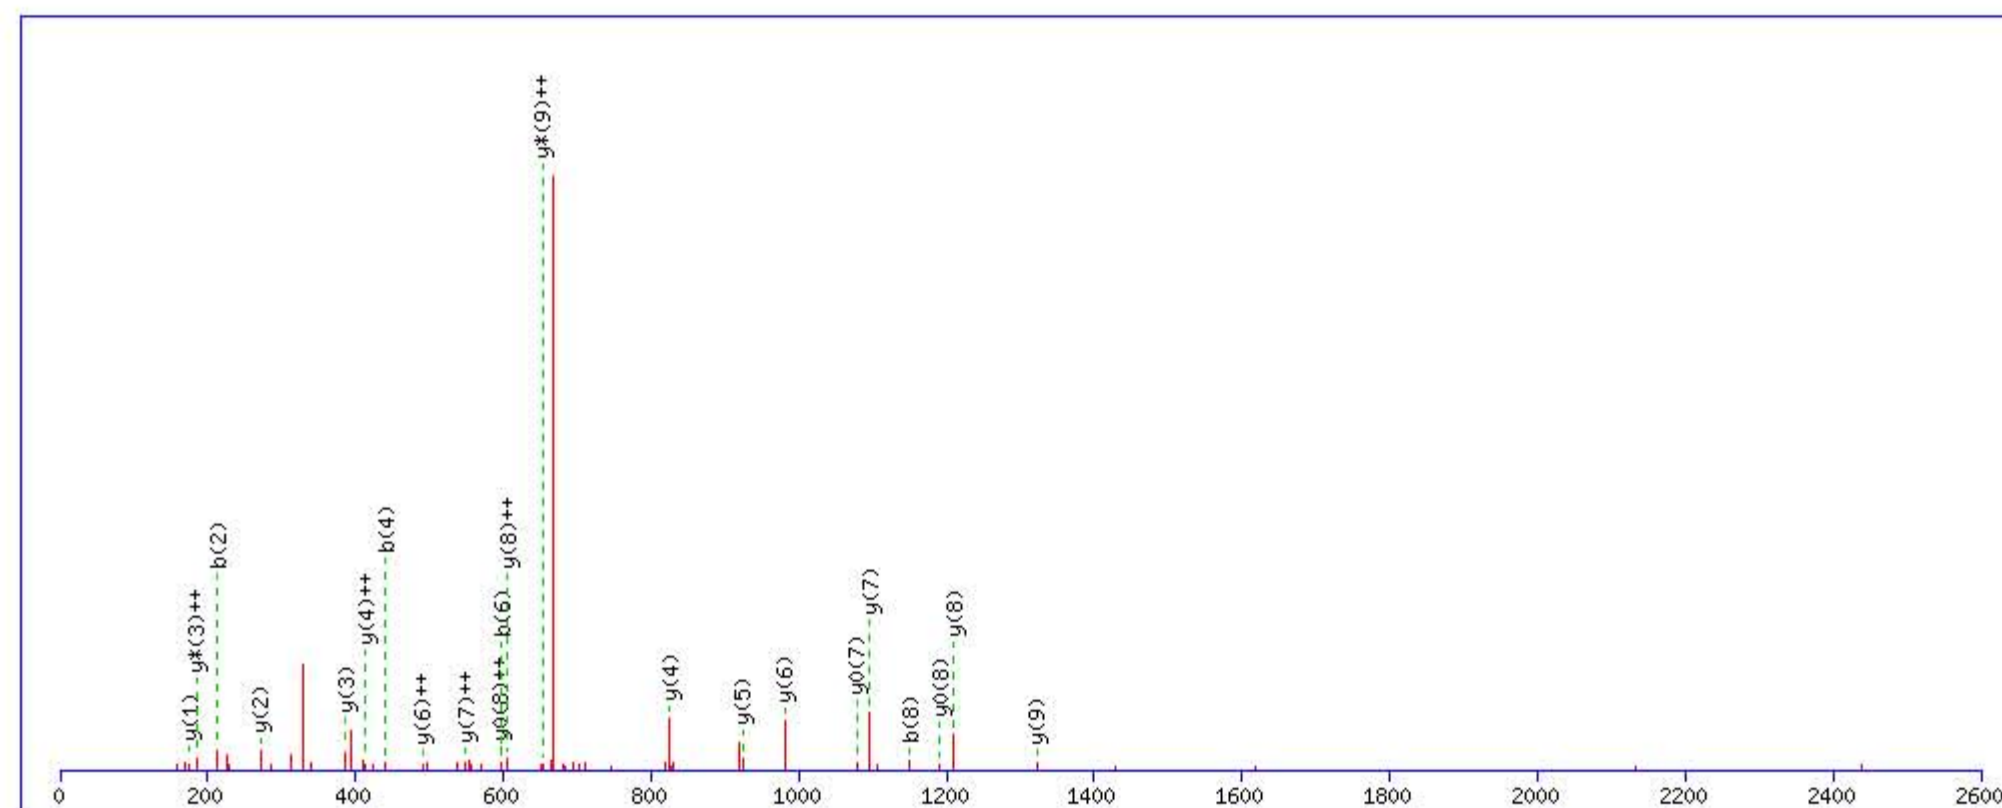

Monoisotopic mass of neutral peptide Mr(calc): 1420.786057

Fixed modifications: Carbamidomethyl (C) (apply to specified residues or termini only)

Variable modifications:

Q7 : Biotin:Thermo-21345 (Q)

Ions Score: 46 Expect: 8.7e-005

Matches : 22/78 fragment ions using 52 most intense peaks [\(help\)](#)

| #  | b                  | b <sup>++</sup> | b <sup>+</sup> | b <sup>*++</sup> | b <sup>0</sup> | b <sup>0++</sup> | Seq. | y                  | y <sup>++</sup>   | y <sup>+</sup> | y <sup>*++</sup>  | y <sup>0</sup>     | y <sup>0++</sup>  | #  |
|----|--------------------|-----------------|----------------|------------------|----------------|------------------|------|--------------------|-------------------|----------------|-------------------|--------------------|-------------------|----|
| 1  | 100.075690         | 50.541483       |                |                  |                |                  | V    |                    |                   |                |                   |                    |                   | 10 |
| 2  | <b>213.159754</b>  | 107.083515      |                |                  |                |                  | L    | <b>1322.724918</b> | 661.866097        | 1305.698369    | <b>653.352823</b> | 1304.714353        | 652.860814        | 9  |
| 3  | 326.243818         | 163.625547      |                |                  |                |                  | L    | <b>1209.640854</b> | <b>605.324065</b> | 1192.614305    | 596.810791        | <b>1191.630289</b> | <b>596.318783</b> | 8  |
| 4  | <b>441.270761</b>  | 221.139018      |                |                  | 423.260196     | 212.133736       | D    | <b>1096.556790</b> | <b>548.782033</b> | 1079.530241    | 540.268758        | <b>1078.546225</b> | <b>539.776750</b> | 7  |
| 5  | 498.292225         | 249.649750      |                |                  | 480.281660     | 240.644468       | G    | <b>981.529847</b>  | <b>491.268562</b> | 964.503298     | 482.755287        |                    |                   | 6  |
| 6  | <b>597.360639</b>  | 299.183958      |                |                  | 579.350074     | 290.178675       | V    | <b>924.508383</b>  | 462.757830        | 907.481834     | 454.244555        |                    |                   | 5  |
| 7  | 1036.585965        | 518.796621      | 1019.559416    | 510.283346       | 1018.575400    | 509.791338       | Q    | <b>825.439969</b>  | <b>413.223623</b> | 808.413420     | 404.710348        |                    |                   | 4  |
| 8  | <b>1150.628892</b> | 575.818084      | 1133.602343    | 567.304810       | 1132.618327    | 566.812801       | N    | <b>386.214643</b>  | 193.610959        | 369.188094     | <b>185.097685</b> |                    |                   | 3  |
| 9  | 1247.681656        | 624.344466      | 1230.655107    | 615.831192       | 1229.671091    | 615.339183       | P    | <b>272.171716</b>  | 136.589496        | 255.145167     | 128.076221        |                    |                   | 2  |
| 10 |                    |                 |                |                  |                |                  | R    | <b>175.118952</b>  | 88.063114         | 158.092403     | 79.549839         |                    |                   | 1  |

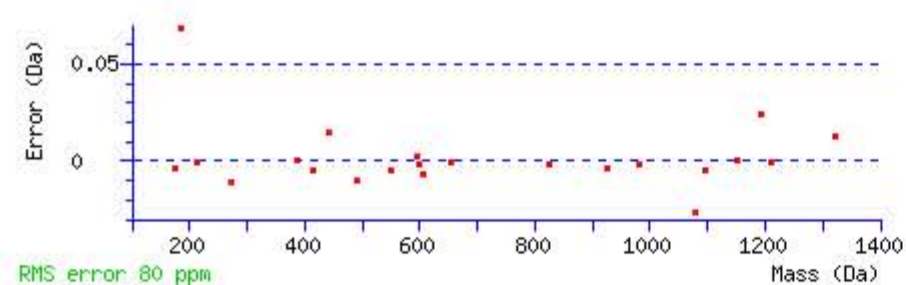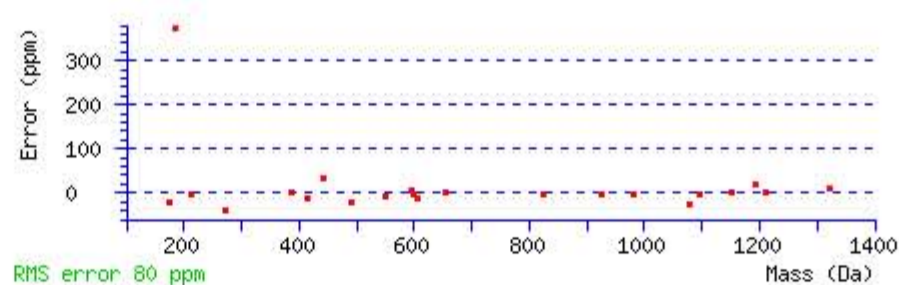

NCBI BLAST search of **VLLDGVQNPR**

(Parameters: blastp, nr protein database, expect=20000, no filter, PAM30)

Other BLAST [web gateways](#)

All matches to this query

| Score | Mr(calc):   | Delta     | Sequence                    |
|-------|-------------|-----------|-----------------------------|
| 45.6  | 1420.786057 | 0.007031  | <a href="#">VLLDGVQNPR</a>  |
| 2.3   | 1420.811172 | -0.018084 | <a href="#">KQKQLEILFMK</a> |
| 1.7   | 1420.801315 | -0.008227 | <a href="#">VLQPFLTHR</a>   |

Mascot: <http://www.matrixscience.com/>



# MASCOT Search Results

## Peptide View

MS/MS Fragmentation of **HQQTVTIPPK**

Found in **CO3\_HUMAN**, Complement C3 OS=Homo sapiens GN=C3 PE=1 SV=2

Match to Query 32710: 1458.791502 from(487.271110,3+) rtinseconds(1614) index(33955)

Title: Locus:1.1.1.2981.11 File:"2013-07-02 CLN FXIII 60 min 2nd F 3.wiff"

Data file C:\Program Files (x86)\Matrix Science\Mascot Daemon\mgf5 FXIII 60 min 2nd\mascot\_daemon\_merge.mgf

Click mouse within plot area to zoom in by factor of two about that point

Or, Plot from  to  Da

Label all possible matches  Label matches used for scoring

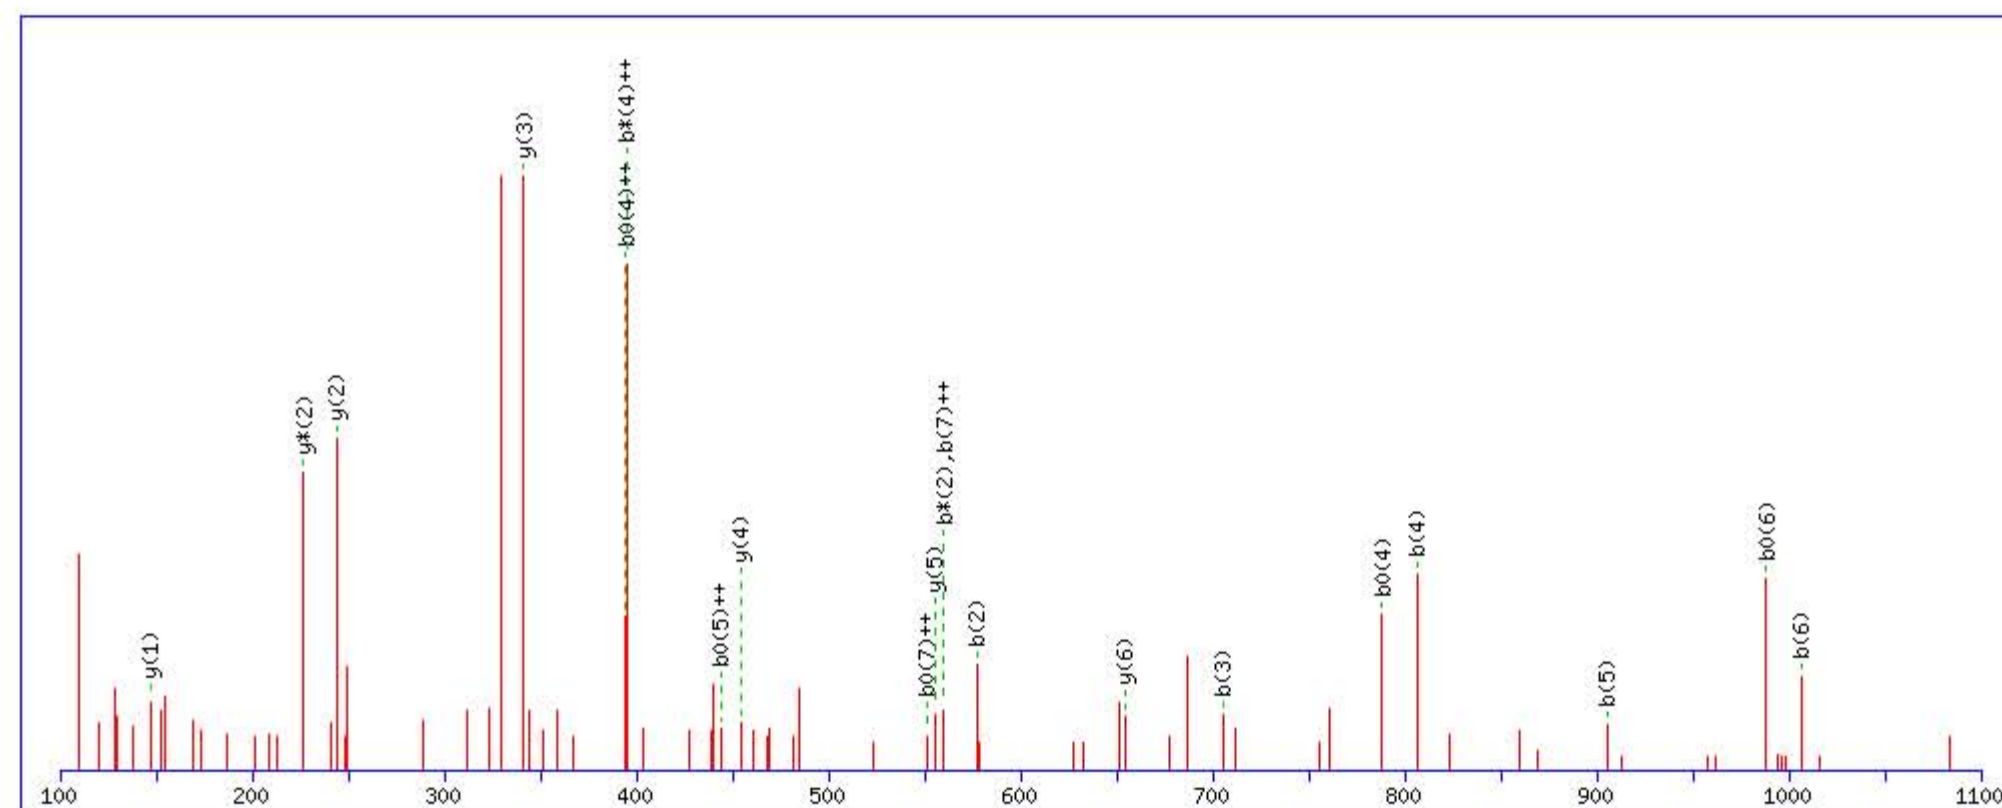

Monoisotopic mass of neutral peptide Mr(calc): 1458.801712

Fixed modifications: Carbamidomethyl (C) (apply to specified residues or termini only)

Variable modifications:

Q2 : Biotin:Thermo-21345 (Q)

Ions Score: 32 Expect: 0.0019

Matches : 20/92 fragment ions using 38 most intense peaks [\(help\)](#)

| #  | b                  | b <sup>++</sup>   | b <sup>+</sup>    | b <sup>+++</sup>  | b <sup>0</sup>    | b <sup>0++</sup>  | Seq. | y                 | y <sup>++</sup> | y <sup>+</sup>    | y <sup>+++</sup> | y <sup>0</sup> | y <sup>0++</sup> | #  |
|----|--------------------|-------------------|-------------------|-------------------|-------------------|-------------------|------|-------------------|-----------------|-------------------|------------------|----------------|------------------|----|
| 1  | 138.066188         | 69.536732         |                   |                   |                   |                   | H    |                   |                 |                   |                  |                |                  | 10 |
| 2  | <b>577.291514</b>  | 289.149395        | <b>560.264965</b> | 280.636121        |                   |                   | Q    | 1322.750072       | 661.878674      | 1305.723523       | 653.365400       | 1304.739507    | 652.873392       | 9  |
| 3  | <b>705.350092</b>  | 353.178684        | 688.323543        | 344.665410        |                   |                   | Q    | 883.524746        | 442.266011      | 866.498197        | 433.752737       | 865.514181     | 433.260729       | 8  |
| 4  | <b>806.397771</b>  | 403.702524        | 789.371222        | <b>395.189249</b> | <b>788.387206</b> | <b>394.697241</b> | T    | 755.466168        | 378.236722      | 738.439619        | 369.723448       | 737.455603     | 369.231440       | 7  |
| 5  | <b>905.466185</b>  | 453.236731        | 888.439636        | 444.723456        | 887.455620        | <b>444.231448</b> | V    | <b>654.418489</b> | 327.712883      | 637.391940        | 319.199608       | 636.407924     | 318.707600       | 6  |
| 6  | <b>1006.513864</b> | 503.760570        | 989.487315        | 495.247296        | <b>988.503299</b> | 494.755288        | T    | <b>555.350075</b> | 278.178676      | 538.323526        | 269.665401       | 537.339510     | 269.173393       | 5  |
| 7  | 1119.597928        | <b>560.302602</b> | 1102.571379       | 551.789328        | 1101.587363       | <b>551.297319</b> | I    | <b>454.302396</b> | 227.654836      | 437.275847        | 219.141561       |                |                  | 4  |
| 8  | 1216.650692        | 608.828984        | 1199.624143       | 600.315710        | 1198.640127       | 599.823701        | P    | <b>341.218332</b> | 171.112804      | 324.191783        | 162.599530       |                |                  | 3  |
| 9  | 1313.703456        | 657.355366        | 1296.676907       | 648.842092        | 1295.692891       | 648.350083        | P    | <b>244.165568</b> | 122.586422      | <b>227.139019</b> | 114.073148       |                |                  | 2  |
| 10 |                    |                   |                   |                   |                   |                   | K    | <b>147.112804</b> | 74.060040       | 130.086255        | 65.546765        |                |                  | 1  |

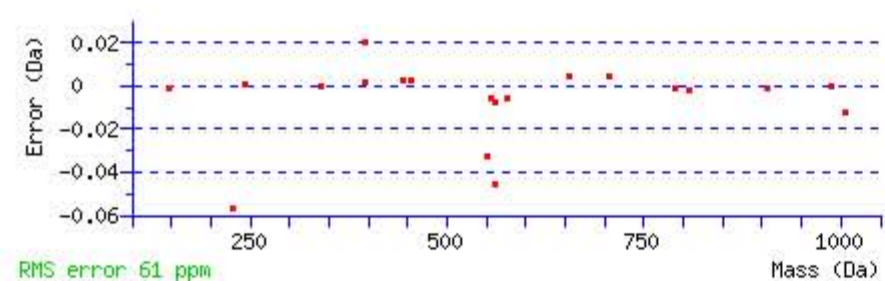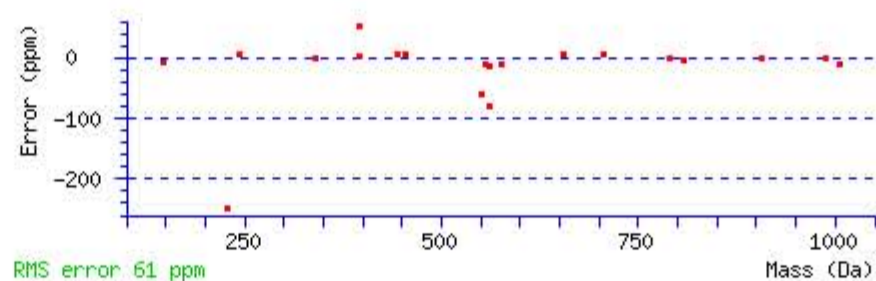

NCBI BLAST search of [HQQTVTIPPK](#)

(Parameters: blastp, nr protein database, expect=20000, no filter, PAM30)

Other BLAST [web gateways](#)

All matches to this query

| Score | Mr(calc):   | Delta     | Sequence                   |
|-------|-------------|-----------|----------------------------|
| 31.7  | 1458.801712 | -0.010210 | <a href="#">HQQTVTIPPK</a> |
| 29.4  | 1458.801712 | -0.010210 | <a href="#">HQQTVTIPPK</a> |
| 2.8   | 1458.776535 | 0.014967  | <a href="#">QHPADKLPSR</a> |

Mascot: <http://www.matrixscience.com/>



# MASCOT Search Results

## Peptide View

MS/MS Fragmentation of **HQQTVTIPPK**

Found in **CO3\_HUMAN**, Complement C3 OS=Homo sapiens GN=C3 PE=1 SV=2

Match to Query 32728: 1458.795732 from(487.272520,3+) rtinseconds(1545) index(33581)

Title: Locus:1.1.1.2957.12 File:"2013-07-02 CLN FXIII 60 min 2nd F 3.wiff"

Data file C:\Program Files (x86)\Matrix Science\Mascot Daemon\mgf.5 FXIII 60 min 2nd\mascot\_daemon\_merge.mgf

Click mouse within plot area to zoom in by factor of two about that point

Or, Plot from  to  Da

Label all possible matches  Label matches used for scoring

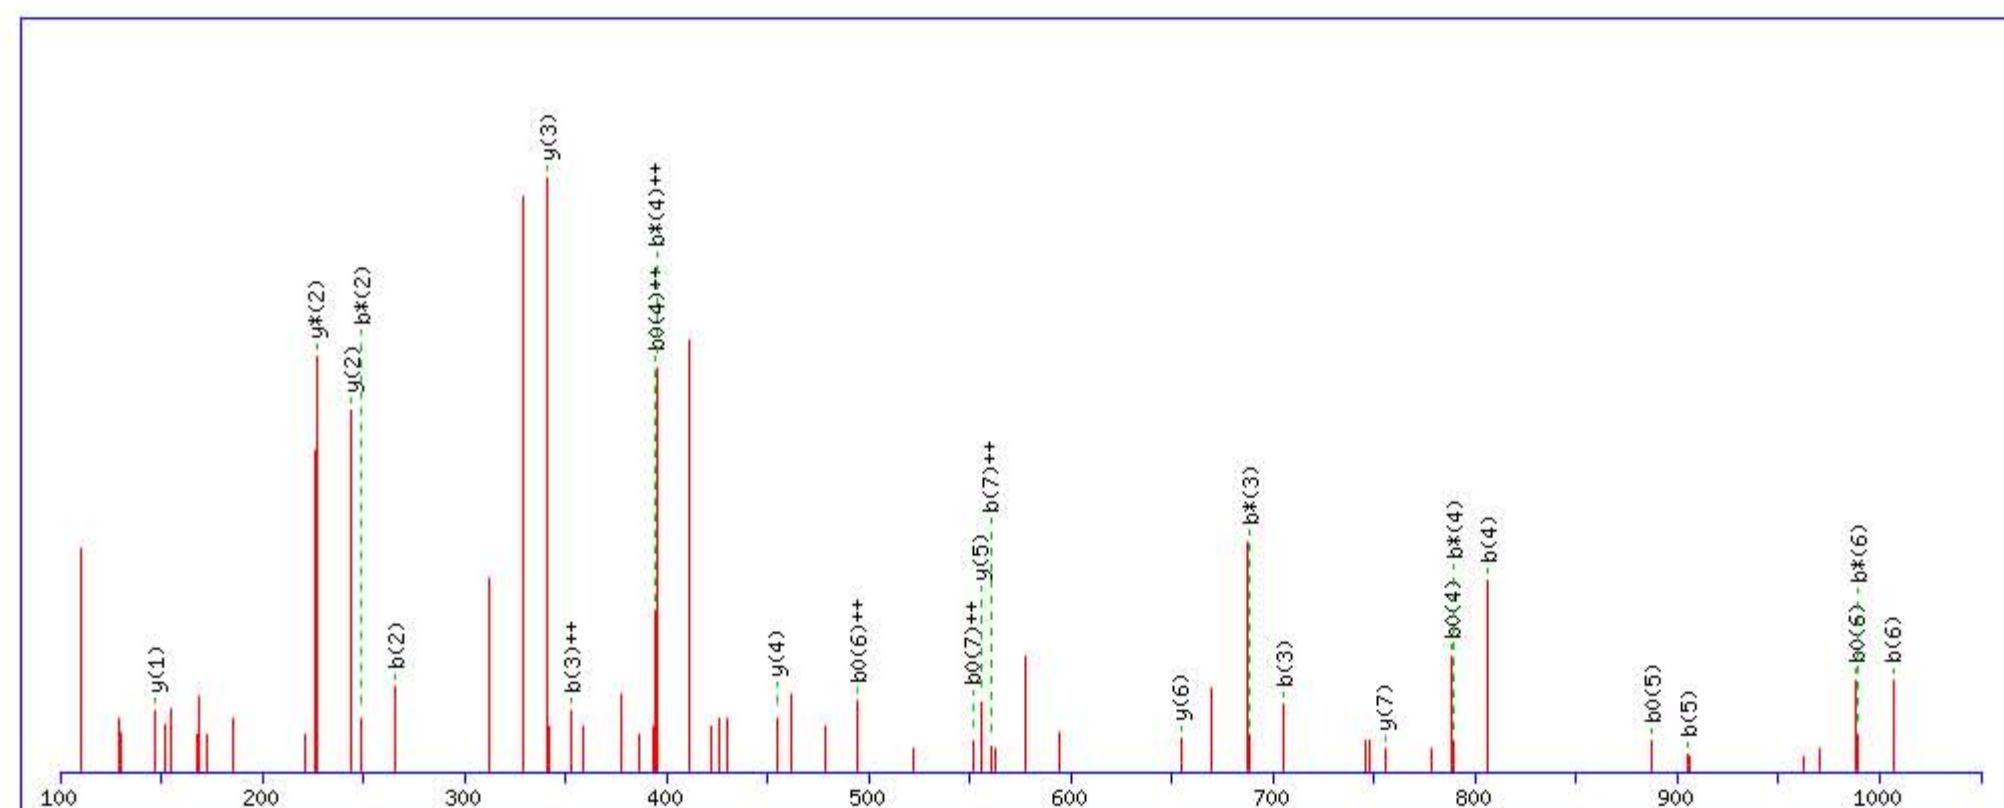

Monoisotopic mass of neutral peptide  $M_r(\text{calc})$ : 1458.801712

Fixed modifications: Carbamidomethyl (C) (apply to specified residues or termini only)

Variable modifications:

Q3 : Biotin:Thermo-21345 (Q)

Ions Score: 30 Expect: 0.023

Matches : 26/92 fragment ions using 54 most intense peaks [\(help\)](#)

| #  | b                  | b <sup>++</sup>   | b <sup>*</sup>    | b <sup>*++</sup>  | b <sup>0</sup>    | b <sup>0++</sup>  | Seq. | y                 | y <sup>++</sup> | y <sup>*</sup>    | y <sup>*++</sup> | y <sup>0</sup> | y <sup>0++</sup> | #  |
|----|--------------------|-------------------|-------------------|-------------------|-------------------|-------------------|------|-------------------|-----------------|-------------------|------------------|----------------|------------------|----|
| 1  | 138.066188         | 69.536732         |                   |                   |                   |                   | H    |                   |                 |                   |                  |                |                  | 10 |
| 2  | <b>266.124766</b>  | 133.566021        | <b>249.098217</b> | 125.052746        |                   |                   | Q    | 1322.750072       | 661.878674      | 1305.723523       | 653.365400       | 1304.739507    | 652.873392       | 9  |
| 3  | <b>705.350092</b>  | <b>353.178684</b> | <b>688.323543</b> | 344.665410        |                   |                   | Q    | 1194.691494       | 597.849385      | 1177.664945       | 589.336111       | 1176.680929    | 588.844102       | 8  |
| 4  | <b>806.397771</b>  | 403.702524        | <b>789.371222</b> | <b>395.189249</b> | <b>788.387206</b> | <b>394.697241</b> | T    | <b>755.466168</b> | 378.236722      | 738.439619        | 369.723448       | 737.455603     | 369.231440       | 7  |
| 5  | <b>905.466185</b>  | 453.236731        | 888.439636        | 444.723456        | <b>887.455620</b> | 444.231448        | V    | <b>654.418489</b> | 327.712883      | 637.391940        | 319.199608       | 636.407924     | 318.707600       | 6  |
| 6  | <b>1006.513864</b> | 503.760570        | <b>989.487315</b> | 495.247296        | <b>988.503299</b> | <b>494.755288</b> | T    | <b>555.350075</b> | 278.178676      | 538.323526        | 269.665401       | 537.339510     | 269.173393       | 5  |
| 7  | 1119.597928        | <b>560.302602</b> | 1102.571379       | 551.789328        | 1101.587363       | <b>551.297319</b> | I    | <b>454.302396</b> | 227.654836      | 437.275847        | 219.141561       |                |                  | 4  |
| 8  | 1216.650692        | 608.828984        | 1199.624143       | 600.315710        | 1198.640127       | 599.823701        | P    | <b>341.218332</b> | 171.112804      | 324.191783        | 162.599530       |                |                  | 3  |
| 9  | 1313.703456        | 657.355366        | 1296.676907       | 648.842092        | 1295.692891       | 648.350083        | P    | <b>244.165568</b> | 122.586422      | <b>227.139019</b> | 114.073148       |                |                  | 2  |
| 10 |                    |                   |                   |                   |                   |                   | K    | <b>147.112804</b> | 74.060040       | 130.086255        | 65.546765        |                |                  | 1  |

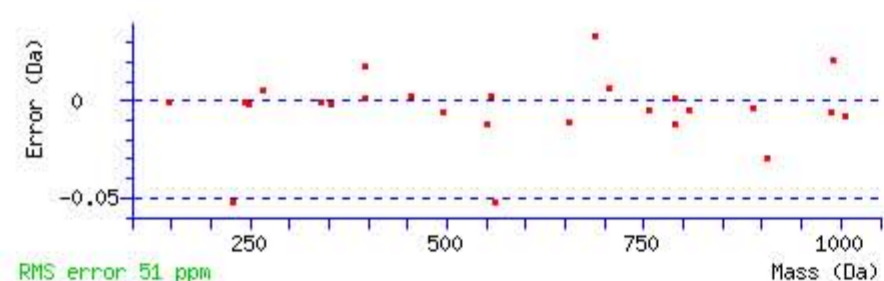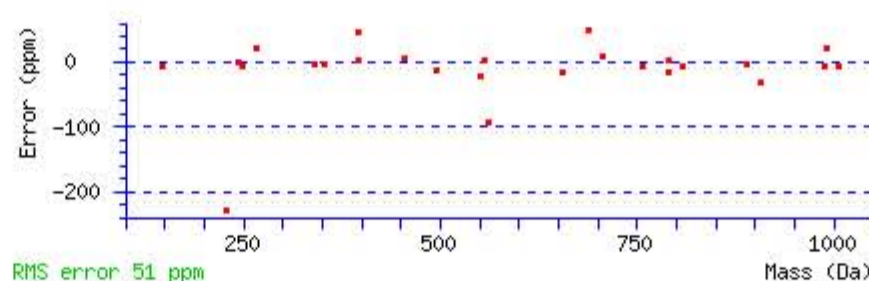

NCBI BLAST search of **HQQTVTIPPK**

(Parameters: blastp, nr protein database, expect=20000, no filter, PAM30)

Other BLAST [web gateways](#)

## All matches to this query

| Score | $M_r(\text{calc})$ : | Delta     | Sequence                   |
|-------|----------------------|-----------|----------------------------|
| 29.8  | 1458.801712          | -0.005980 | <a href="#">HQQTVTIPPK</a> |
| 28.9  | 1458.801712          | -0.005980 | <a href="#">HQQTVTIPPK</a> |



# MASCOT SEARCH RESULTS

## Peptide View

MS/MS Fragmentation of **SGSDEVQVGQQR**

Found in **CO3\_HUMAN**, Complement C3 OS=Homo sapiens GN=C3 PE=1 SV=2

Match to Query 37178: 1599.760392 from(534.260740,3+) rtinseconds(1516) index(33398)

Title: Locus:1.1.1.2947.13 File:"2013-07-02 CLN FXIII 60 min 2nd F 3.wiff"

Data file C:\Program Files (x86)\Matrix Science\Mascot Daemon\mgf5 FXIII 60 min 2nd\mascot\_daemon\_merge.mgf

Click mouse within plot area to zoom in by factor of two about that point

Or, Plot from  to  Da

Label all possible matches  Label matches used for scoring

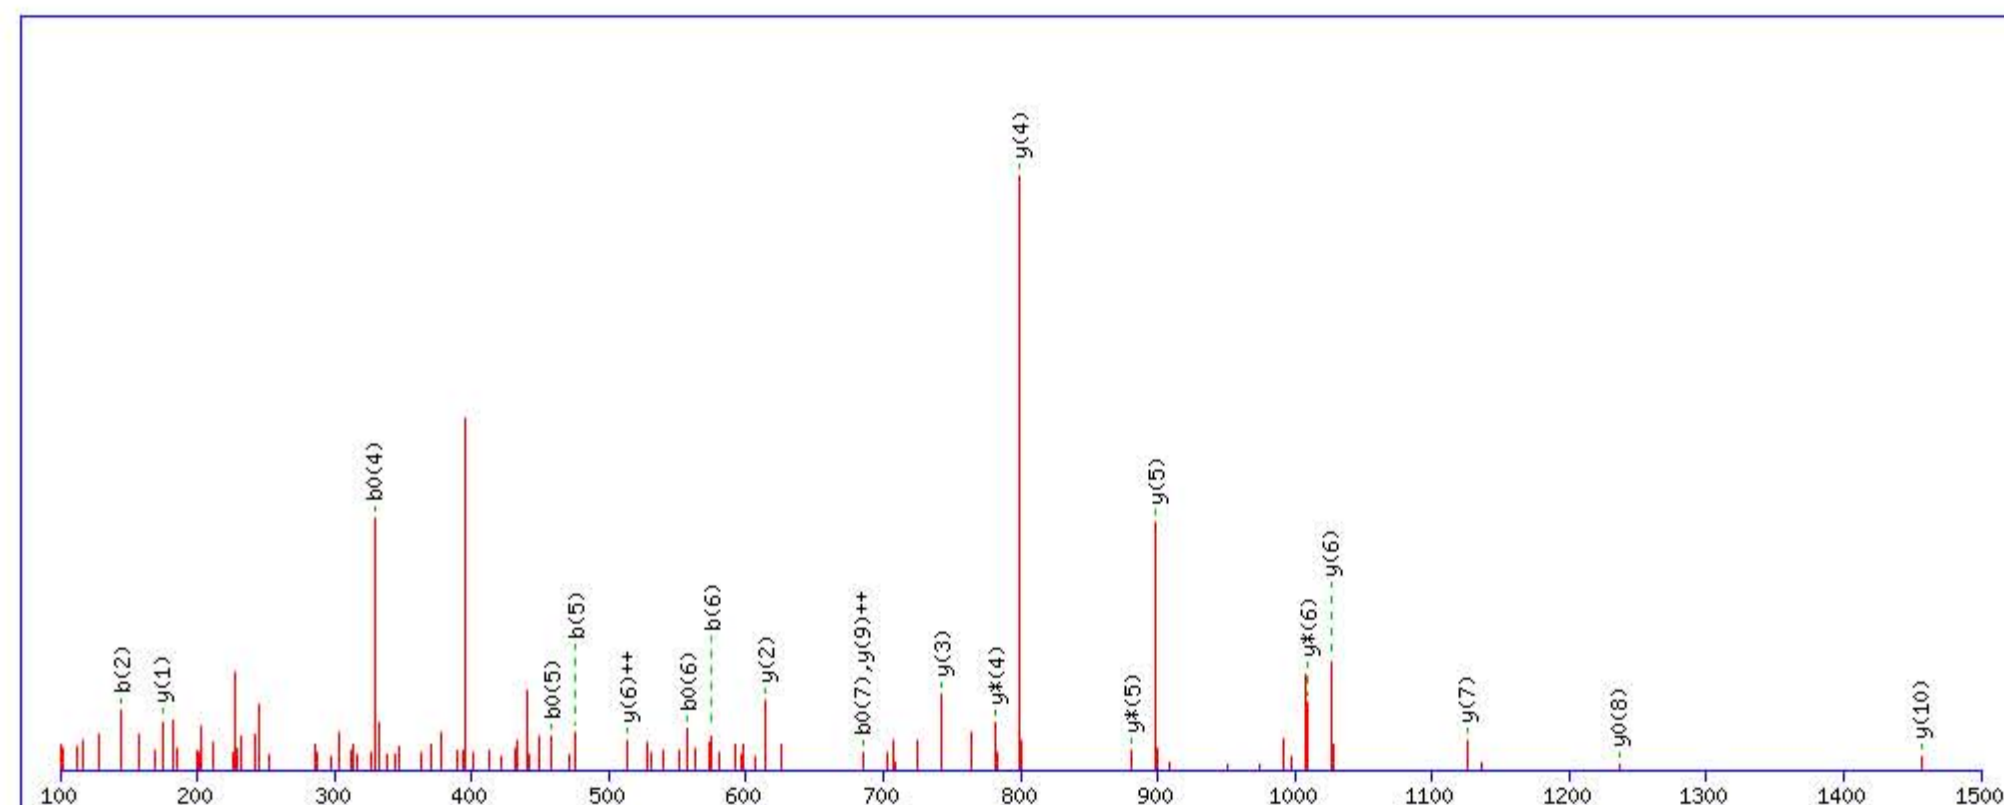

Monoisotopic mass of neutral peptide Mr(calc): 1599.767517

Fixed modifications: Carbamidomethyl (C) (apply to specified residues or termini only)

Variable modifications:

Q11 : Biotin:Thermo-21345 (Q)

Ions Score: 48 Expect: 0.00023

Matches : 21/106 fragment ions using 34 most intense peaks [\(help\)](#)

| #  | b                 | b <sup>++</sup> | b <sup>*</sup> | b <sup>*++</sup> | b <sup>0</sup>    | b <sup>0++</sup> | Seq. | y                  | y <sup>++</sup>   | y <sup>*</sup>     | y <sup>*++</sup> | y <sup>0</sup>     | y <sup>0++</sup> | #  |
|----|-------------------|-----------------|----------------|------------------|-------------------|------------------|------|--------------------|-------------------|--------------------|------------------|--------------------|------------------|----|
| 1  | 88.039304         | 44.523290       |                |                  | 70.028739         | 35.518008        | S    |                    |                   |                    |                  |                    |                  | 12 |
| 2  | <b>145.060768</b> | 73.034022       |                |                  | 127.050203        | 64.028740        | G    | 1513.742754        | 757.375015        | 1496.716205        | 748.861741       | 1495.732189        | 748.369733       | 11 |
| 3  | 232.092796        | 116.550036      |                |                  | 214.082231        | 107.544753       | S    | <b>1456.721290</b> | 728.864283        | 1439.694741        | 720.351009       | 1438.710725        | 719.859001       | 10 |
| 4  | 347.119739        | 174.063507      |                |                  | <b>329.109174</b> | 165.058225       | D    | 1369.689262        | <b>685.348269</b> | 1352.662713        | 676.834995       | 1351.678697        | 676.342987       | 9  |
| 5  | <b>476.162332</b> | 238.584804      |                |                  | <b>458.151767</b> | 229.579522       | E    | 1254.662319        | 627.834798        | 1237.635770        | 619.321523       | <b>1236.651754</b> | 618.829515       | 8  |
| 6  | <b>575.230746</b> | 288.119011      |                |                  | <b>557.220181</b> | 279.113729       | V    | <b>1125.619726</b> | 563.313501        | 1108.593177        | 554.800227       |                    |                  | 7  |
| 7  | 703.289324        | 352.148300      | 686.262775     | 343.635026       | <b>685.278759</b> | 343.143018       | Q    | <b>1026.551312</b> | <b>513.779294</b> | <b>1009.524763</b> | 505.266020       |                    |                  | 6  |
| 8  | 802.357738        | 401.682507      | 785.331189     | 393.169233       | 784.347173        | 392.677225       | V    | <b>898.492734</b>  | 449.750005        | <b>881.466185</b>  | 441.236731       |                    |                  | 5  |
| 9  | 859.379202        | 430.193239      | 842.352653     | 421.679965       | 841.368637        | 421.187957       | G    | <b>799.424320</b>  | 400.215798        | <b>782.397771</b>  | 391.702524       |                    |                  | 4  |
| 10 | 987.437780        | 494.222528      | 970.411231     | 485.709254       | 969.427215        | 485.217246       | Q    | <b>742.402856</b>  | 371.705066        | 725.376307         | 363.191792       |                    |                  | 3  |
| 11 | 1426.663106       | 713.835191      | 1409.636557    | 705.321917       | 1408.652541       | 704.829909       | Q    | <b>614.344278</b>  | 307.675777        | 597.317729         | 299.162503       |                    |                  | 2  |
| 12 |                   |                 |                |                  |                   |                  | R    | <b>175.118952</b>  | 88.063114         | 158.092403         | 79.549839        |                    |                  | 1  |

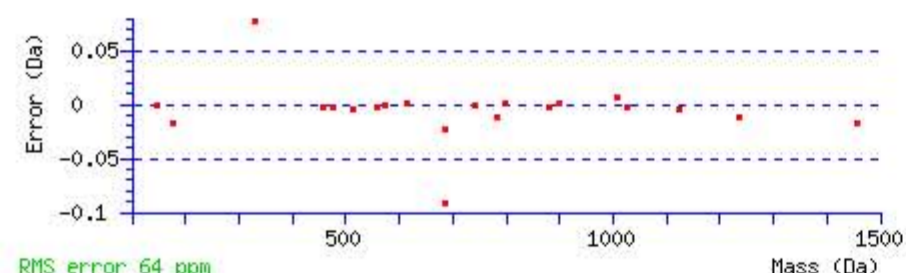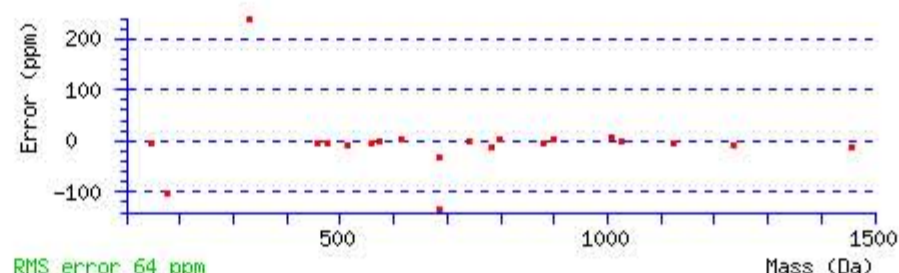

NCBI BLAST search of **SGSDEVQVGQQR**

(Parameters: blastp, nr protein database, expect=20000, no filter, PAM30)

Other BLAST [web gateways](#)

All matches to this query

| Score | Mr(calc):   | Delta     | Sequence                     |
|-------|-------------|-----------|------------------------------|
| 47.9  | 1599.767517 | -0.007125 | <a href="#">SGSDEVQVGQQR</a> |
| 36.8  | 1599.767517 | -0.007125 | <a href="#">SGSDEVQVGQQR</a> |
| 12.5  | 1599.767517 | -0.007125 | <a href="#">SGSDEVQVGQQR</a> |

Mascot: <http://www.matrixscience.com/>



# MASCOT Search Results

## Peptide View

MS/MS Fragmentation of **SGSDEVQVGQQR**

Found in **CO3\_HUMAN**, Complement C3 OS=Homo sapiens GN=C3 PE=1 SV=2

Match to Query 37179: 1599.767148 from(800.890850,2+) rtinseconds(1500) index(33277)

Title: Locus:1.1.1.2941.18 File:"2013-07-02 CLN FXIII 60 min 2nd F 3.wiff"

Data file C:\Program Files (x86)\Matrix Science\Mascot Daemon\mgf\5 FXIII 60 min 2nd\mascot\_daemon\_merge.mgf

Click mouse within plot area to zoom in by factor of two about that point

Or, Plot from  to  Da

Label all possible matches  Label matches used for scoring

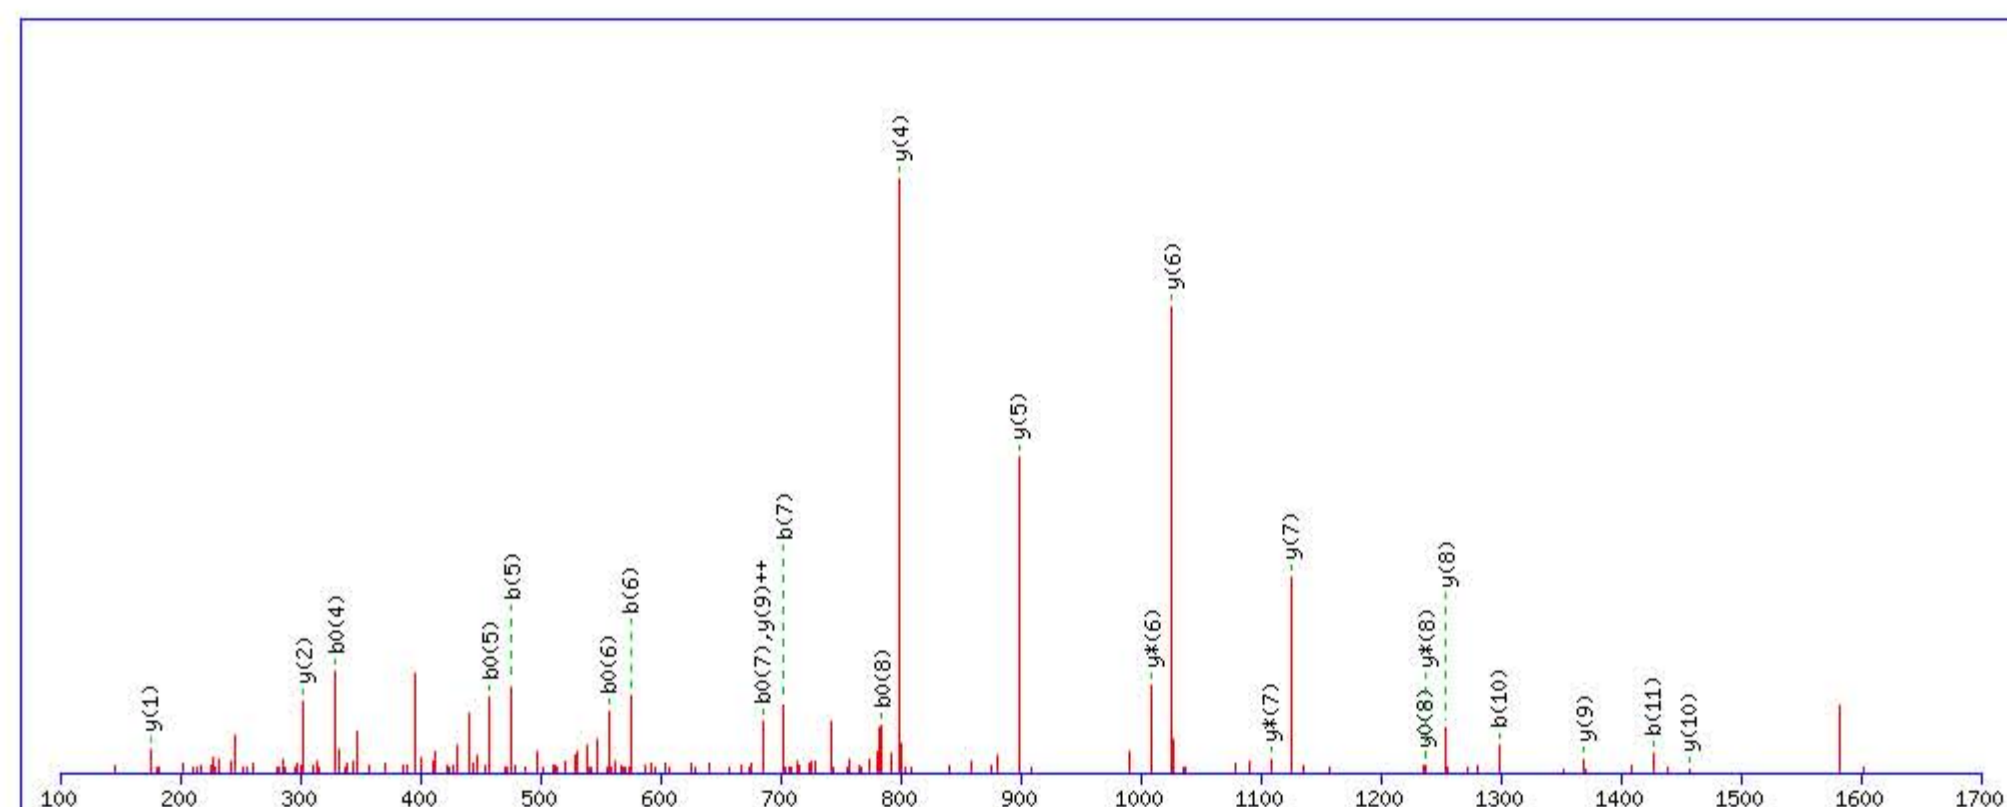

Monoisotopic mass of neutral peptide Mr(calc): 1599.767517

Fixed modifications: Carbamidomethyl (C) (apply to specified residues or termini only)

Variable modifications:

Q10 : Biotin:Thermo-21345 (Q)

Ions Score: 81 Expect: 1.3e-007

Matches : 24/106 fragment ions using 28 most intense peaks [\(help\)](#)

| #  | b           | b <sup>++</sup> | b <sup>*</sup> | b <sup>+++</sup> | b <sup>0</sup> | b <sup>0++</sup> | Seq. | y           | y <sup>++</sup> | y <sup>*</sup> | y <sup>+++</sup> | y <sup>0</sup> | y <sup>0++</sup> | #  |
|----|-------------|-----------------|----------------|------------------|----------------|------------------|------|-------------|-----------------|----------------|------------------|----------------|------------------|----|
| 1  | 88.039304   | 44.523290       |                |                  | 70.028739      | 35.518008        | S    |             |                 |                |                  |                |                  | 12 |
| 2  | 145.060768  | 73.034022       |                |                  | 127.050203     | 64.028740        | G    | 1513.742754 | 757.375015      | 1496.716205    | 748.861741       | 1495.732189    | 748.369733       | 11 |
| 3  | 232.092796  | 116.550036      |                |                  | 214.082231     | 107.544753       | S    | 1456.721290 | 728.864283      | 1439.694741    | 720.351009       | 1438.710725    | 719.859001       | 10 |
| 4  | 347.119739  | 174.063507      |                |                  | 329.109174     | 165.058225       | D    | 1369.689262 | 685.348269      | 1352.662713    | 676.834995       | 1351.678697    | 676.342987       | 9  |
| 5  | 476.162332  | 238.584804      |                |                  | 458.151767     | 229.579522       | E    | 1254.662319 | 627.834798      | 1237.635770    | 619.321523       | 1236.651754    | 618.829515       | 8  |
| 6  | 575.230746  | 288.119011      |                |                  | 557.220181     | 279.113729       | V    | 1125.619726 | 563.313501      | 1108.593177    | 554.800227       |                |                  | 7  |
| 7  | 703.289324  | 352.148300      | 686.262775     | 343.635026       | 685.278759     | 343.143018       | Q    | 1026.551312 | 513.779294      | 1009.524763    | 505.266020       |                |                  | 6  |
| 8  | 802.357738  | 401.682507      | 785.331189     | 393.169233       | 784.347173     | 392.677225       | V    | 898.492734  | 449.750005      | 881.466185     | 441.236731       |                |                  | 5  |
| 9  | 859.379202  | 430.193239      | 842.352653     | 421.679965       | 841.368637     | 421.187957       | G    | 799.424320  | 400.215798      | 782.397771     | 391.702524       |                |                  | 4  |
| 10 | 1298.604528 | 649.805902      | 1281.577979    | 641.292628       | 1280.593963    | 640.800620       | Q    | 742.402856  | 371.705066      | 725.376307     | 363.191792       |                |                  | 3  |
| 11 | 1426.663106 | 713.835191      | 1409.636557    | 705.321917       | 1408.652541    | 704.829909       | Q    | 303.177530  | 152.092403      | 286.150981     | 143.579129       |                |                  | 2  |
| 12 |             |                 |                |                  |                |                  | R    | 175.118952  | 88.063114       | 158.092403     | 79.549839        |                |                  | 1  |

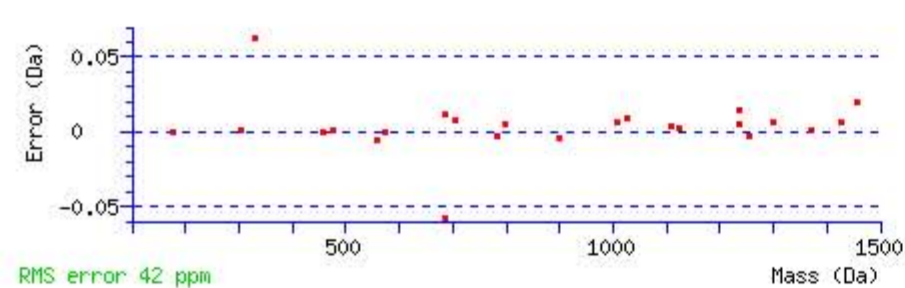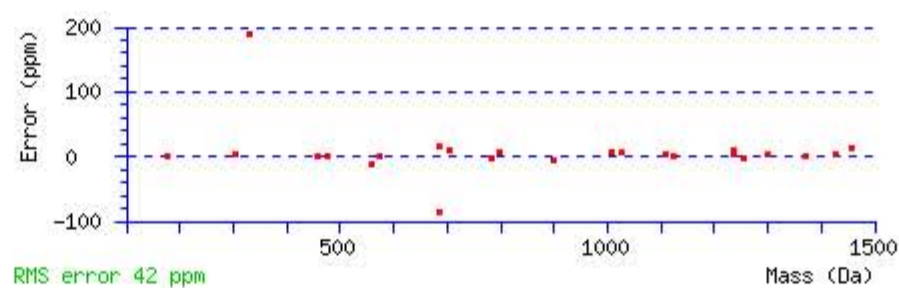

NCBI BLAST search of **SGSDEVQVGQQR**

(Parameters: blastp, nr protein database, expect=20000, no filter, PAM30)

Other BLAST [web gateways](#)

## All matches to this query

| Score | Mr(calc):   | Delta     | Sequence                        |
|-------|-------------|-----------|---------------------------------|
| 80.7  | 1599.767517 | -0.000369 | <a href="#">SGSDEVQVGQQR</a>    |
| 64.9  | 1599.767517 | -0.000369 | <a href="#">SGSDEVQVGQQR</a>    |
| 44.1  | 1599.767517 | -0.000369 | <a href="#">SGSDEVQVGQQR</a>    |
| 8.1   | 1599.767471 | -0.000323 | <a href="#">AMNAANLNIPPSDTR</a> |
| 7.8   | 1599.767502 | -0.000354 | <a href="#">LHMLSSVDLNGQDR</a>  |
| 5.5   | 1599.779388 | -0.012240 | <a href="#">RFPDFSYITQNGR</a>   |
| 4.4   | 1599.774872 | -0.007724 | <a href="#">MAKEAIFQDTMRK</a>   |
| 3.3   | 1599.789291 | -0.022143 | <a href="#">DPVFEITGAPGNVER</a> |
| 1.6   | 1599.753769 | 0.013379  | <a href="#">ASTFSCIMQKWGGK</a>  |
| 1.1   | 1599.771515 | -0.004367 | <a href="#">YVTSAPMPEPQAPGR</a> |



# MASCOT SEARCH RESULTS

## Peptide View

MS/MS Fragmentation of **KQELSEAEQATR**

Found in **CO3\_HUMAN**, Complement C3 OS=Homo sapiens GN=C3 PE=1 SV=2

Match to Query 40430: 1699.850652 from(567.624160,3+) rtinseconds(1373) index(32379)

Title: Locus:1.1.1.2897.11 File:"2013-07-02 CLN FXIII 60 min 2nd F 3.wiff"

Data file C:\Program Files (x86)\Matrix Science\Mascot Daemon\mgf\5 FXIII 60 min 2nd\mascot\_daemon\_merge.mgf

Click mouse within plot area to zoom in by factor of two about that point

Or, Plot from  to  Da

Label all possible matches  Label matches used for scoring

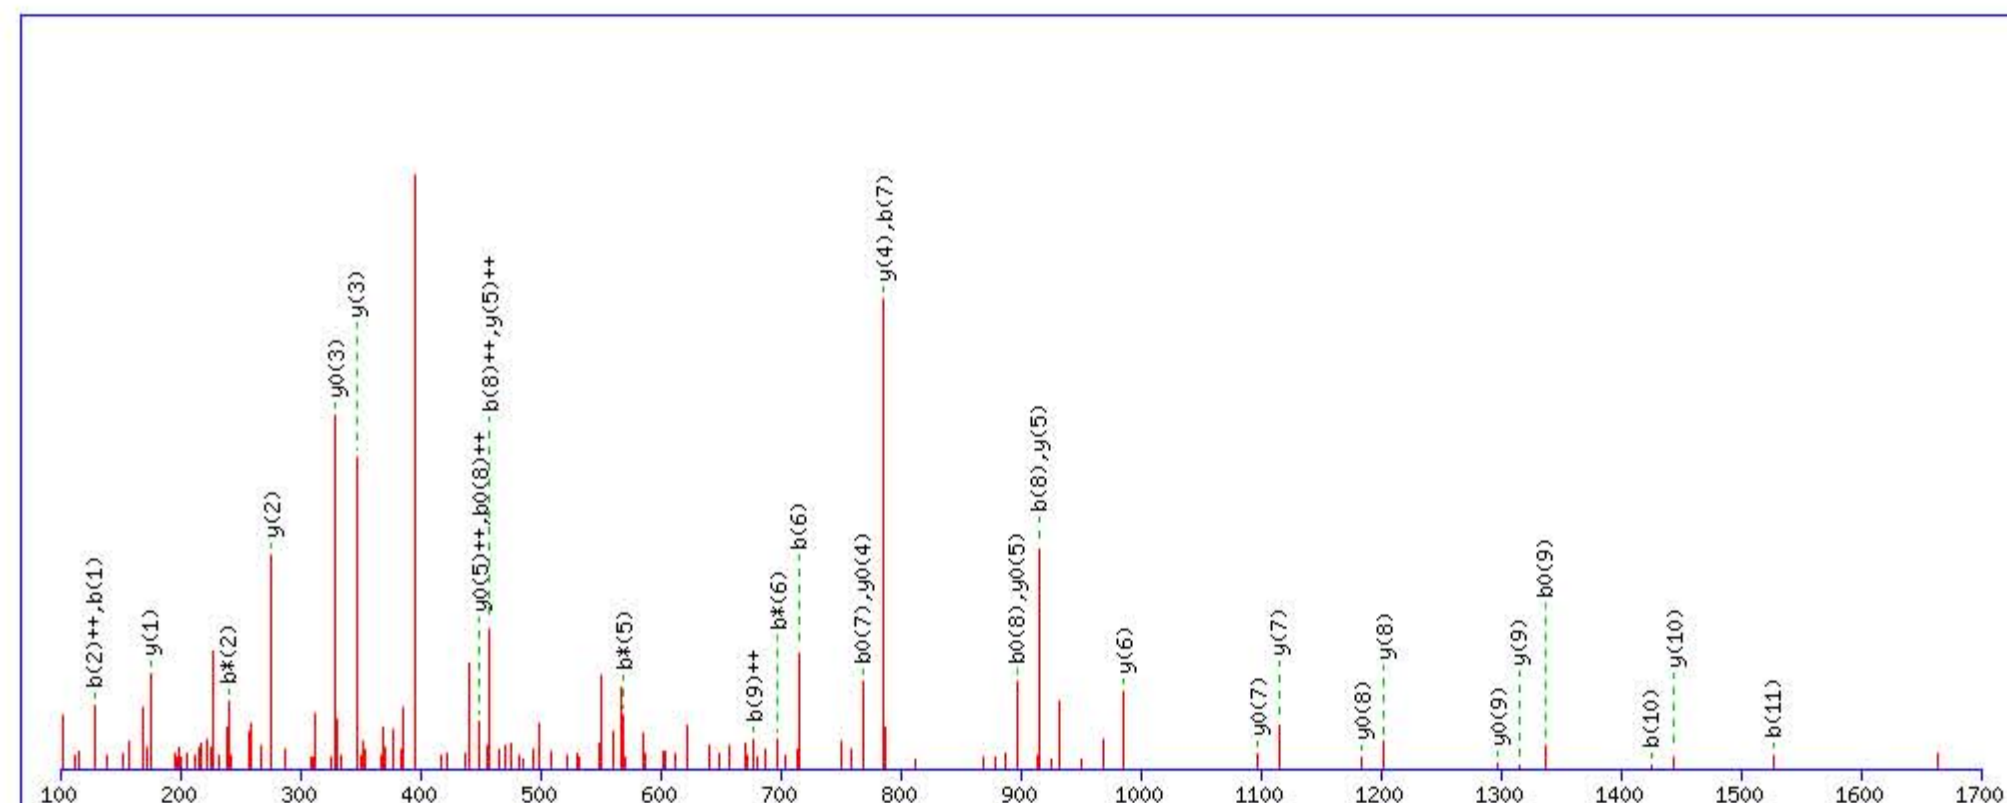

Monoisotopic mass of neutral peptide Mr(calc): 1699.856277

Fixed modifications: Carbamidomethyl (C) (apply to specified residues or termini only)

Variable modifications:

Q9 : Biotin:Thermo-21345 (Q)

Ions Score: 75 Expect: 9.2e-007

Matches : 34/126 fragment ions using 39 most intense peaks [\(help\)](#)

| #  | b           | b <sup>++</sup> | b <sup>*</sup> | b <sup>+++</sup> | b <sup>0</sup> | b <sup>0++</sup> | Seq. | y           | y <sup>++</sup> | y <sup>*</sup> | y <sup>+++</sup> | y <sup>0</sup> | y <sup>0++</sup> | #  |
|----|-------------|-----------------|----------------|------------------|----------------|------------------|------|-------------|-----------------|----------------|------------------|----------------|------------------|----|
| 1  | 129.102239  | 65.054757       | 112.075690     | 56.541483        |                |                  | K    |             |                 |                |                  |                |                  | 12 |
| 2  | 257.160817  | 129.084047      | 240.134268     | 120.570772       |                |                  | Q    | 1572.768634 | 786.887955      | 1555.742085    | 778.374681       | 1554.758069    | 777.882673       | 11 |
| 3  | 386.203410  | 193.605343      | 369.176861     | 185.092069       | 368.192845     | 184.600061       | E    | 1444.710056 | 722.858666      | 1427.683507    | 714.345392       | 1426.699491    | 713.853384       | 10 |
| 4  | 499.287474  | 250.147375      | 482.260925     | 241.634101       | 481.276909     | 241.142093       | L    | 1315.667463 | 658.337370      | 1298.640914    | 649.824095       | 1297.656898    | 649.332087       | 9  |
| 5  | 586.319502  | 293.663389      | 569.292953     | 285.150115       | 568.308937     | 284.658107       | S    | 1202.583399 | 601.795338      | 1185.556850    | 593.282063       | 1184.572834    | 592.790055       | 8  |
| 6  | 715.362095  | 358.184686      | 698.335546     | 349.671411       | 697.351530     | 349.179403       | E    | 1115.551371 | 558.279324      | 1098.524822    | 549.766049       | 1097.540806    | 549.274041       | 7  |
| 7  | 786.399209  | 393.703243      | 769.372660     | 385.189968       | 768.388644     | 384.697960       | A    | 986.508778  | 493.758027      | 969.482229     | 485.244753       | 968.498213     | 484.752745       | 6  |
| 8  | 915.441802  | 458.224539      | 898.415253     | 449.711265       | 897.431237     | 449.219257       | E    | 915.471664  | 458.239470      | 898.445115     | 449.726196       | 897.461099     | 449.234188       | 5  |
| 9  | 1354.667128 | 677.837202      | 1337.640579    | 669.323928       | 1336.656563    | 668.831920       | Q    | 786.429071  | 393.718174      | 769.402522     | 385.204899       | 768.418506     | 384.712891       | 4  |
| 10 | 1425.704242 | 713.355759      | 1408.677693    | 704.842485       | 1407.693677    | 704.350477       | A    | 347.203745  | 174.105510      | 330.177196     | 165.592236       | 329.193180     | 165.100228       | 3  |
| 11 | 1526.751921 | 763.879599      | 1509.725372    | 755.366324       | 1508.741356    | 754.874316       | T    | 276.166631  | 138.586953      | 259.140082     | 130.073679       | 258.156066     | 129.581671       | 2  |
| 12 |             |                 |                |                  |                |                  | R    | 175.118952  | 88.063114       | 158.092403     | 79.549839        |                |                  | 1  |

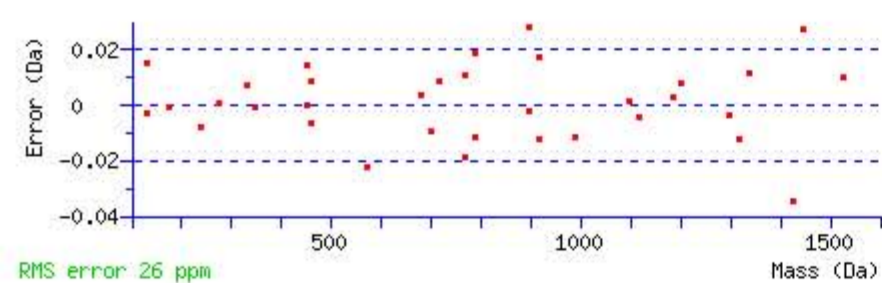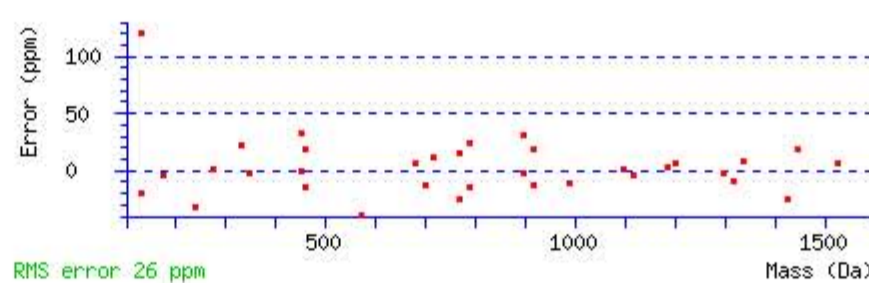

NCBI BLAST search of **KQELSEAEQATR**

(Parameters: blastp, nr protein database, expect=20000, no filter, PAM30)

Other BLAST [web gateways](#)

## All matches to this query

| Score | Mr(calc):   | Delta     | Sequence                        |
|-------|-------------|-----------|---------------------------------|
| 74.7  | 1699.856277 | -0.005625 | <a href="#">KQELSEAEQATR</a>    |
| 20.0  | 1699.856277 | -0.005625 | <a href="#">KQELSEAEQATR</a>    |
| 11.2  | 1699.849792 | 0.000860  | <a href="#">QEMRTTQLGPGR</a>    |
| 10.6  | 1699.843735 | 0.006917  | <a href="#">QFNRQRGVSHAMGGR</a> |
| 10.3  | 1699.874039 | -0.023387 | <a href="#">KEISVNDLNESSIPR</a> |
| 7.3   | 1699.843063 | 0.007589  | <a href="#">GKVSEGIDFVHHYGR</a> |
| 7.2   | 1699.874924 | -0.024272 | <a href="#">SQGMLALSISPNR</a>   |
| 6.1   | 1699.845932 | 0.004720  | <a href="#">QAMQEQLSK</a>       |
| 5.3   | 1699.848907 | 0.001745  | <a href="#">TQATERVNSQPVNEK</a> |
| 4.7   | 1699.845932 | 0.004720  | <a href="#">QAMQEQLSK</a>       |



# MASCOT SCIENCE Mascot Search Results

## Peptide View

MS/MS Fragmentation of **HQQTVTIPPK**

Found in **CO3\_HUMAN**, Complement C3 OS=Homo sapiens GN=C3 PE=1 SV=2

Match to Query 42140: 1769.958912 from(590.993580,3+) rtinseconds(1927) index(35891)

Title: Locus:1.1.1.3090.18 File:"2013-07-02 CLN FXIII 60 min 2nd F 3.wiff"

Data file C:\Program Files (x86)\Matrix Science\Mascot Daemon\mgf5 FXIII 60 min 2nd\mascot\_daemon\_merge.mgf

Click mouse within plot area to zoom in by factor of two about that point

Or, Plot from  to  Da

Label all possible matches  Label matches used for scoring

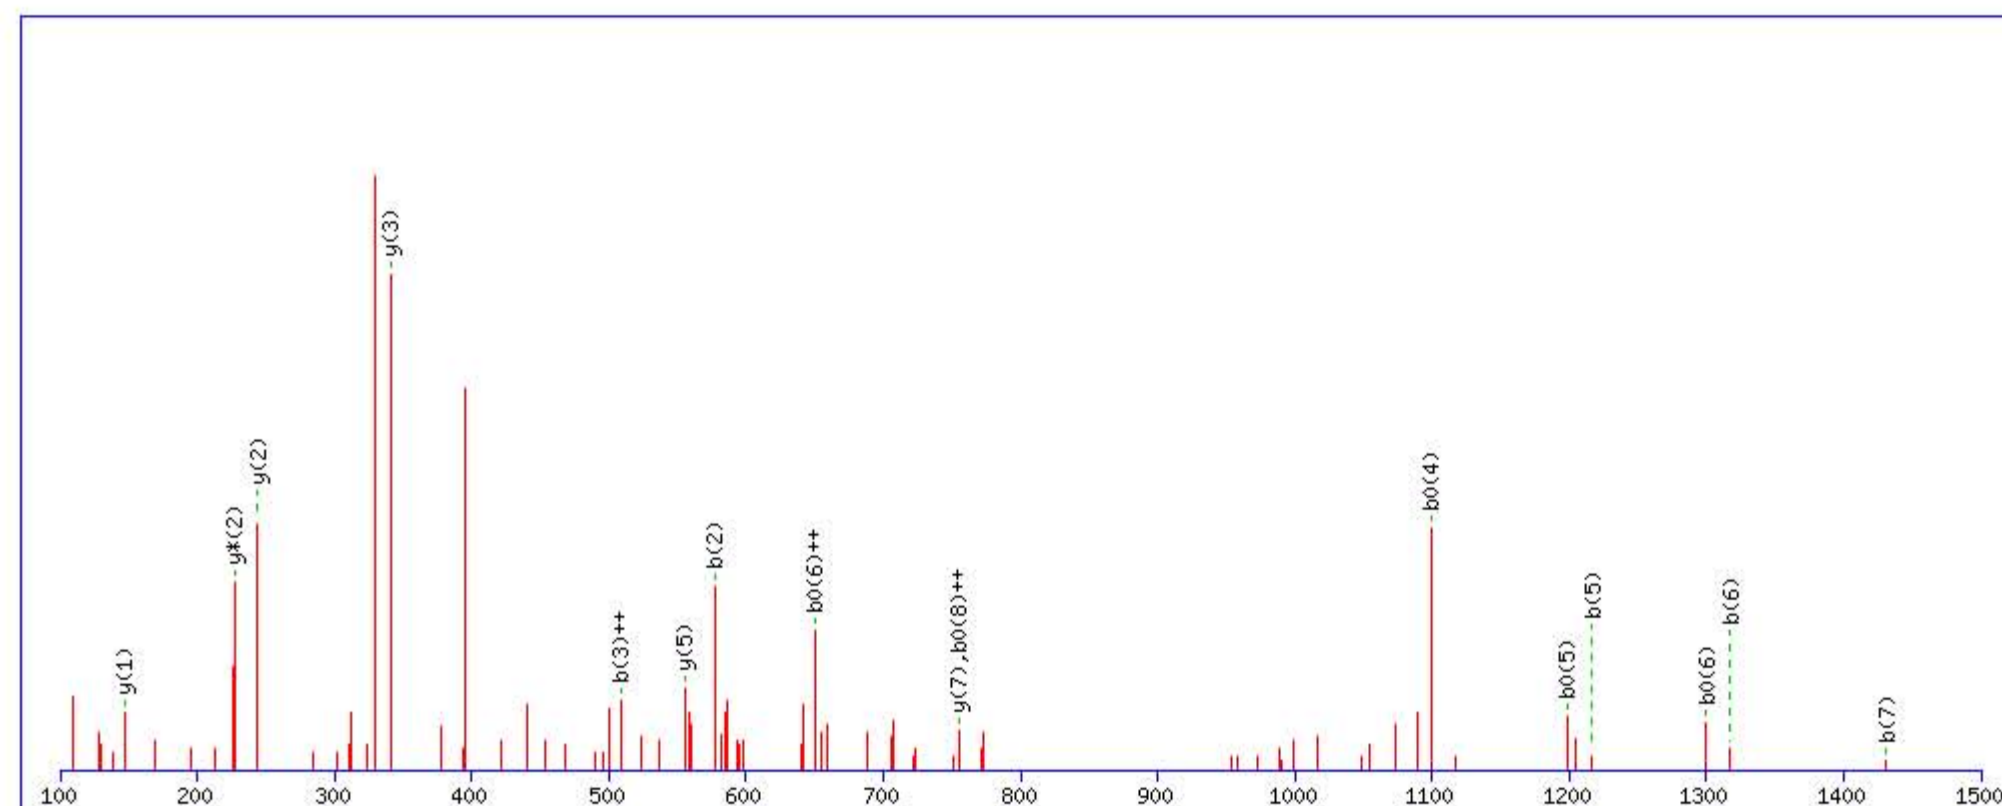

Monoisotopic mass of neutral peptide Mr(calc): 1769.968460

Fixed modifications: Carbamidomethyl (C) (apply to specified residues or termini only)

Variable modifications:

Q2 : Biotin:Thermo-21345 (Q)

Q3 : Biotin:Thermo-21345 (Q)

Ions Score: 27 Expect: 0.018

Matches : 16/92 fragment ions using 24 most intense peaks [\(help\)](#)

| #  | b                  | b <sup>++</sup>   | b <sup>*</sup> | b <sup>*++</sup> | b <sup>0</sup>     | b <sup>0++</sup>  | Seq. | y                 | y <sup>++</sup> | y <sup>*</sup>    | y <sup>*++</sup> | y <sup>0</sup> | y <sup>0++</sup> | #  |
|----|--------------------|-------------------|----------------|------------------|--------------------|-------------------|------|-------------------|-----------------|-------------------|------------------|----------------|------------------|----|
| 1  | 138.066188         | 69.536732         |                |                  |                    |                   | H    |                   |                 |                   |                  |                |                  | 10 |
| 2  | <b>577.291514</b>  | 289.149395        | 560.264965     | 280.636121       |                    |                   | Q    | 1633.916820       | 817.462048      | 1616.890271       | 808.948774       | 1615.906255    | 808.456766       | 9  |
| 3  | 1016.516840        | <b>508.762058</b> | 999.490291     | 500.248784       |                    |                   | Q    | 1194.691494       | 597.849385      | 1177.664945       | 589.336111       | 1176.680929    | 588.844103       | 8  |
| 4  | 1117.564519        | 559.285898        | 1100.537970    | 550.772623       | <b>1099.553954</b> | 550.280615        | T    | <b>755.466168</b> | 378.236722      | 738.439619        | 369.723448       | 737.455603     | 369.231440       | 7  |
| 5  | <b>1216.632933</b> | 608.820105        | 1199.606384    | 600.306830       | <b>1198.622368</b> | 599.814822        | V    | 654.418489        | 327.712883      | 637.391940        | 319.199608       | 636.407924     | 318.707600       | 6  |
| 6  | <b>1317.680612</b> | 659.343944        | 1300.654063    | 650.830670       | <b>1299.670047</b> | <b>650.338662</b> | T    | <b>555.350075</b> | 278.178676      | 538.323526        | 269.665401       | 537.339510     | 269.173393       | 5  |
| 7  | <b>1430.764676</b> | 715.885976        | 1413.738127    | 707.372702       | 1412.754111        | 706.880694        | I    | 454.302396        | 227.654836      | 437.275847        | 219.141561       |                |                  | 4  |
| 8  | 1527.817440        | 764.412358        | 1510.790891    | 755.899084       | 1509.806875        | <b>755.407076</b> | P    | <b>341.218332</b> | 171.112804      | 324.191783        | 162.599530       |                |                  | 3  |
| 9  | 1624.870204        | 812.938740        | 1607.843655    | 804.425466       | 1606.859639        | 803.933458        | P    | <b>244.165568</b> | 122.586422      | <b>227.139019</b> | 114.073148       |                |                  | 2  |
| 10 |                    |                   |                |                  |                    |                   | K    | <b>147.112804</b> | 74.060040       | 130.086255        | 65.546765        |                |                  | 1  |

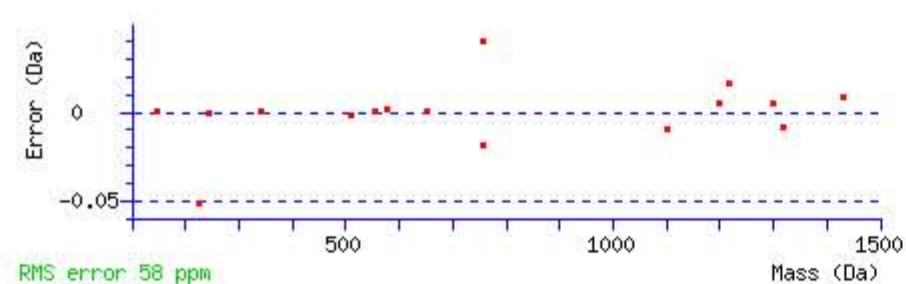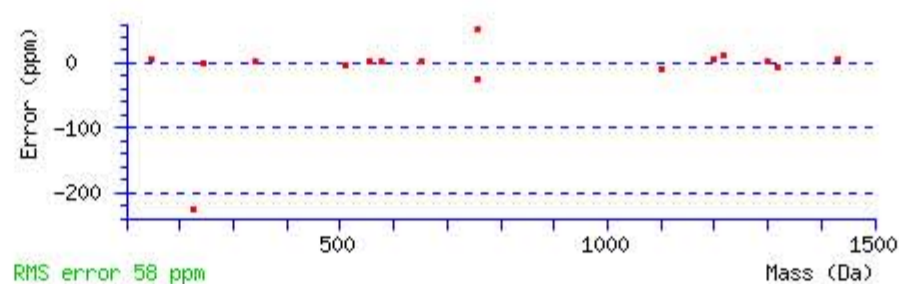

NCBI BLAST search of **HQQTVTIPPK**

(Parameters: blastp, nr protein database, expect=20000, no filter, PAM30)

Other BLAST [web gateways](#)

All matches to this query

| Score | Mr(calc):   | Delta     | Sequence                        |
|-------|-------------|-----------|---------------------------------|
| 27.3  | 1769.968460 | -0.009548 | <a href="#">HQQTVTIPPK</a>      |
| 8.4   | 1769.961029 | -0.002117 | <a href="#">WMLSRDRASTLPLPK</a> |
| 1.8   | 1769.976303 | -0.017391 | <a href="#">VIQVWFQNARAK</a>    |
| 1.8   | 1769.976303 | -0.017391 | <a href="#">VLQVWFQNARAK</a>    |

Mascot: <http://www.matrixscience.com/>



# MASCOT Search Results

## Peptide View

MS/MS Fragmentation of **QGGLSVVTMYHAK**

Found in **CO3\_HUMAN**, Complement C3 OS=Homo sapiens GN=C3 PE=1 SV=2

Match to Query 43143: 1817.912832 from(606.978220,3+) rtinseconds(1823) index(35167)

Title: Locus:1.1.1.3054.9 File:"2013-07-02 CLN FXIII 60 min 2nd F 3.wiff"

Data file C:\Program Files (x86)\Matrix Science\Mascot Daemon\mgf5 FXIII 60 min 2nd\mascot\_daemon\_merge.mgf

Click mouse within plot area to zoom in by factor of two about that point

Or, Plot from  to  Da

Label all possible matches  Label matches used for scoring

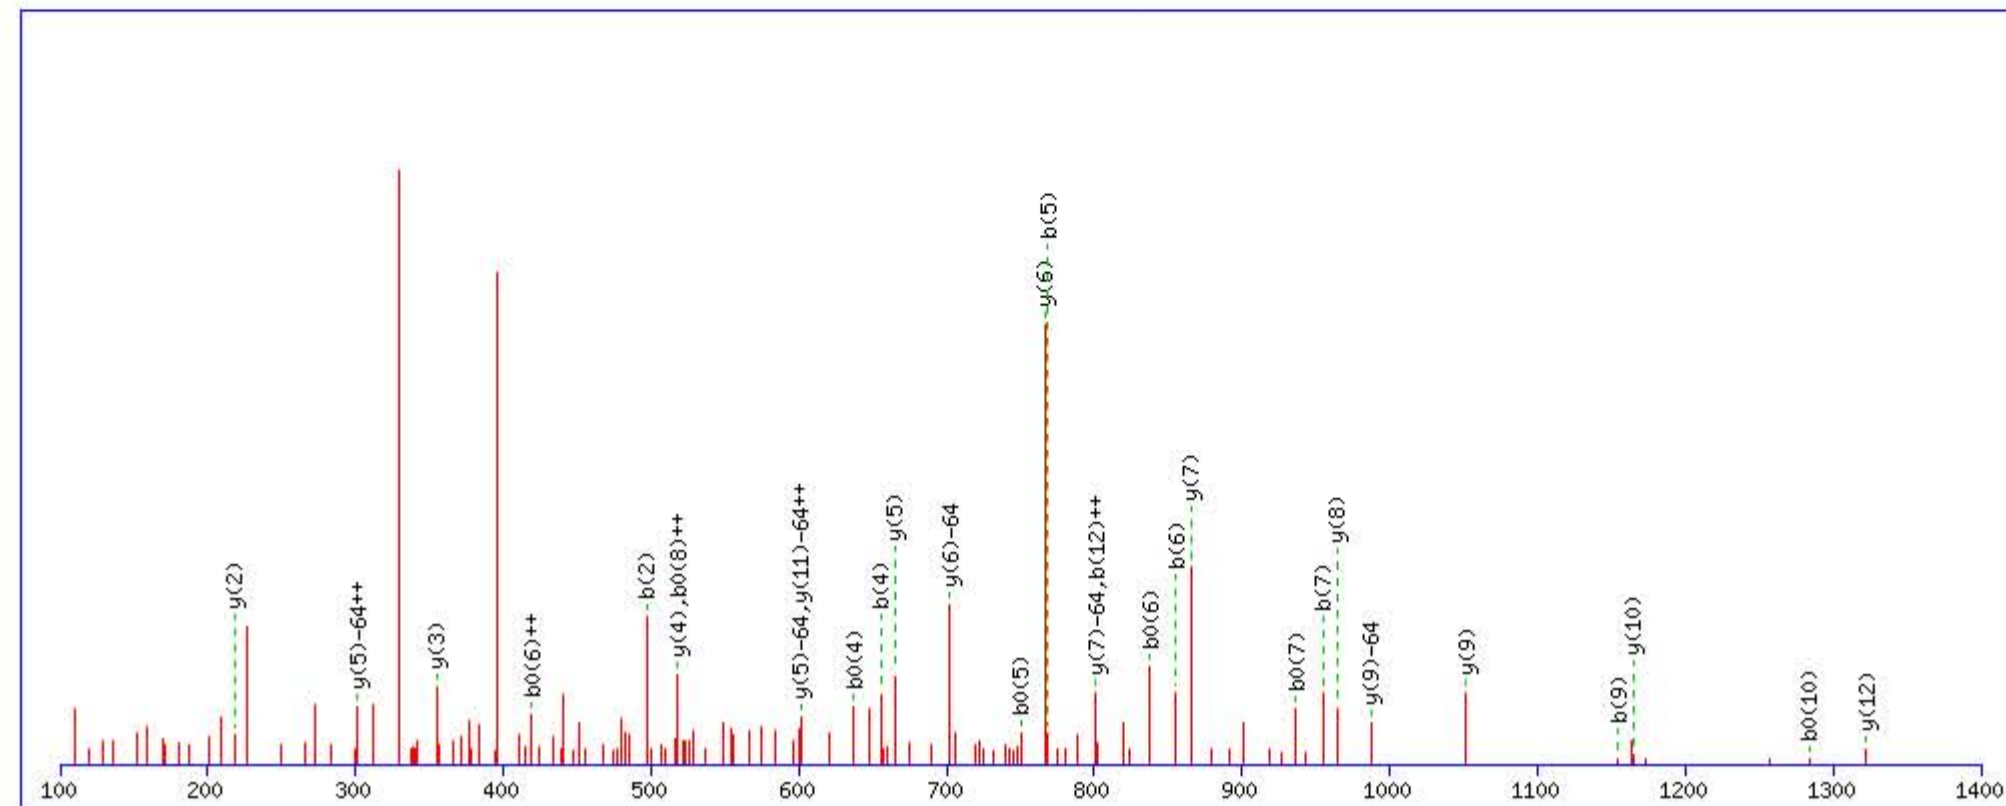

Monoisotopic mass of neutral peptide Mr(calc): 1817.916824

Fixed modifications: Carbamidomethyl (C) (apply to specified residues or termini only)

Variable modifications:

Q2 : Biotin:Thermo-21345 (Q)

M10 : Oxidation (M), with neutral losses 0.000000 (shown in table), 63.998285

Ions Score: 63 Expect: 1.5e-005

Matches : 30/214 fragment ions using 44 most intense peaks [\(help\)](#)

| #  | b                  | b <sup>++</sup>   | b <sup>*</sup> | b <sup>+++</sup> | b <sup>0</sup>     | b <sup>0++</sup>  | Seq. | y                  | y <sup>++</sup> | y <sup>*</sup> | y <sup>+++</sup> | y <sup>0</sup> | y <sup>0++</sup> | #  |
|----|--------------------|-------------------|----------------|------------------|--------------------|-------------------|------|--------------------|-----------------|----------------|------------------|----------------|------------------|----|
| 1  | 58.028740          | 29.518008         |                |                  |                    |                   | G    |                    |                 |                |                  |                |                  | 14 |
| 2  | <b>497.254066</b>  | 249.130671        | 480.227517     | 240.617397       |                    |                   | Q    | 1761.902627        | 881.454952      | 1744.876078    | 872.941677       | 1743.892062    | 872.449669       | 13 |
| 3  | 554.275530         | 277.641403        | 537.248981     | 269.128129       |                    |                   | G    | <b>1322.677301</b> | 661.842289      | 1305.650752    | 653.329014       | 1304.666736    | 652.837006       | 12 |
| 4  | <b>655.323209</b>  | 328.165243        | 638.296660     | 319.651968       | <b>637.312644</b>  | 319.159960        | T    | 1265.655837        | 633.331557      | 1248.629288    | 624.818282       | 1247.645272    | 624.326274       | 11 |
| 5  | <b>768.407273</b>  | 384.707275        | 751.380724     | 376.194000       | <b>750.396708</b>  | 375.701992        | L    | <b>1164.608158</b> | 582.807717      | 1147.581609    | 574.294443       | 1146.597593    | 573.802435       | 10 |
| 6  | <b>855.439301</b>  | 428.223289        | 838.412752     | 419.710014       | <b>837.428736</b>  | 419.218006        | S    | <b>1051.524094</b> | 526.265685      | 1034.497545    | 517.752411       | 1033.513529    | 517.260403       | 9  |
| 7  | <b>954.507715</b>  | 477.757496        | 937.481166     | 469.244221       | <b>936.497150</b>  | 468.752213        | V    | <b>964.492066</b>  | 482.749671      | 947.465517     | 474.236397       | 946.481501     | 473.744389       | 8  |
| 8  | 1053.576129        | 527.291703        | 1036.549580    | 518.778428       | 1035.565564        | <b>518.286420</b> | V    | <b>865.423652</b>  | 433.215464      | 848.397103     | 424.702190       | 847.413087     | 424.210182       | 7  |
| 9  | <b>1154.623808</b> | 577.815542        | 1137.597259    | 569.302268       | 1136.613243        | 568.810260        | T    | <b>766.355238</b>  | 383.681257      | 749.328689     | 375.167983       | 748.344673     | 374.675975       | 6  |
| 10 | 1301.659208        | 651.333242        | 1284.632659    | 642.819968       | <b>1283.648643</b> | 642.327960        | M    | <b>665.307559</b>  | 333.157418      | 648.281010     | 324.644143       |                |                  | 5  |
| 11 | 1464.722537        | 732.864907        | 1447.695988    | 724.351632       | 1446.711972        | 723.859624        | Y    | <b>518.272159</b>  | 259.639718      | 501.245610     | 251.126443       |                |                  | 4  |
| 12 | 1601.781449        | <b>801.394363</b> | 1584.754900    | 792.881088       | 1583.770884        | 792.389080        | H    | <b>355.208830</b>  | 178.108053      | 338.182281     | 169.594778       |                |                  | 3  |
| 13 | 1672.818563        | 836.912920        | 1655.792014    | 828.399645       | 1654.807998        | 827.907637        | A    | <b>218.149918</b>  | 109.578597      | 201.123369     | 101.065322       |                |                  | 2  |
| 14 |                    |                   |                |                  |                    |                   | K    | 147.112804         | 74.060040       | 130.086255     | 65.546765        |                |                  | 1  |

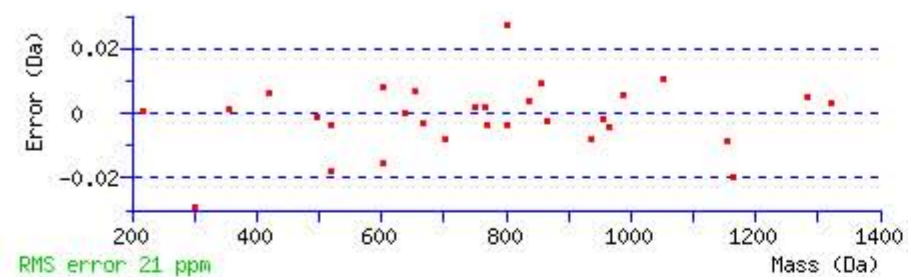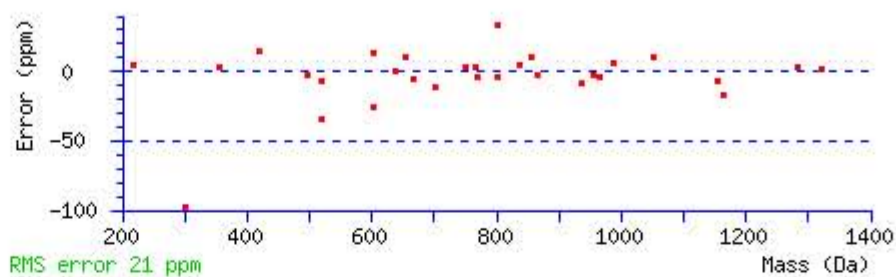

NCBI BLAST search of [QGGLSVVTMYHAK](#)

(Parameters: blastp, nr protein database, expect=20000, no filter, PAM30)

Other BLAST [web gateways](#)

All matches to this query

| Score | Mr(calc):   | Delta     | Sequence                      |
|-------|-------------|-----------|-------------------------------|
| 62.7  | 1817.916824 | -0.003992 | <a href="#">QGGLSVVTMYHAK</a> |

Mascot: <http://www.matrixscience.com/>



# MASCOT Search Results

## Peptide View

MS/MS Fragmentation of **SGSDEVQVGQQR**

Found in **CO3\_HUMAN**, Complement C3 OS=Homo sapiens GN=C3 PE=1 SV=2

Match to Query 44786: 1910.934492 from(637.985440,3+) rtinseconds(1903) index(35690)

Title: Locus:1.1.1.3082.17 File:"2013-07-02 CLN FXIII 60 min 2nd F 3.wiff"

Data file C:\Program Files (x86)\Matrix Science\Mascot Daemon\mgf\5 FXIII 60 min 2nd\mascot\_daemon\_merge.mgf

Click mouse within plot area to zoom in by factor of two about that point

Or, Plot from  to  Da

Label all possible matches  Label matches used for scoring

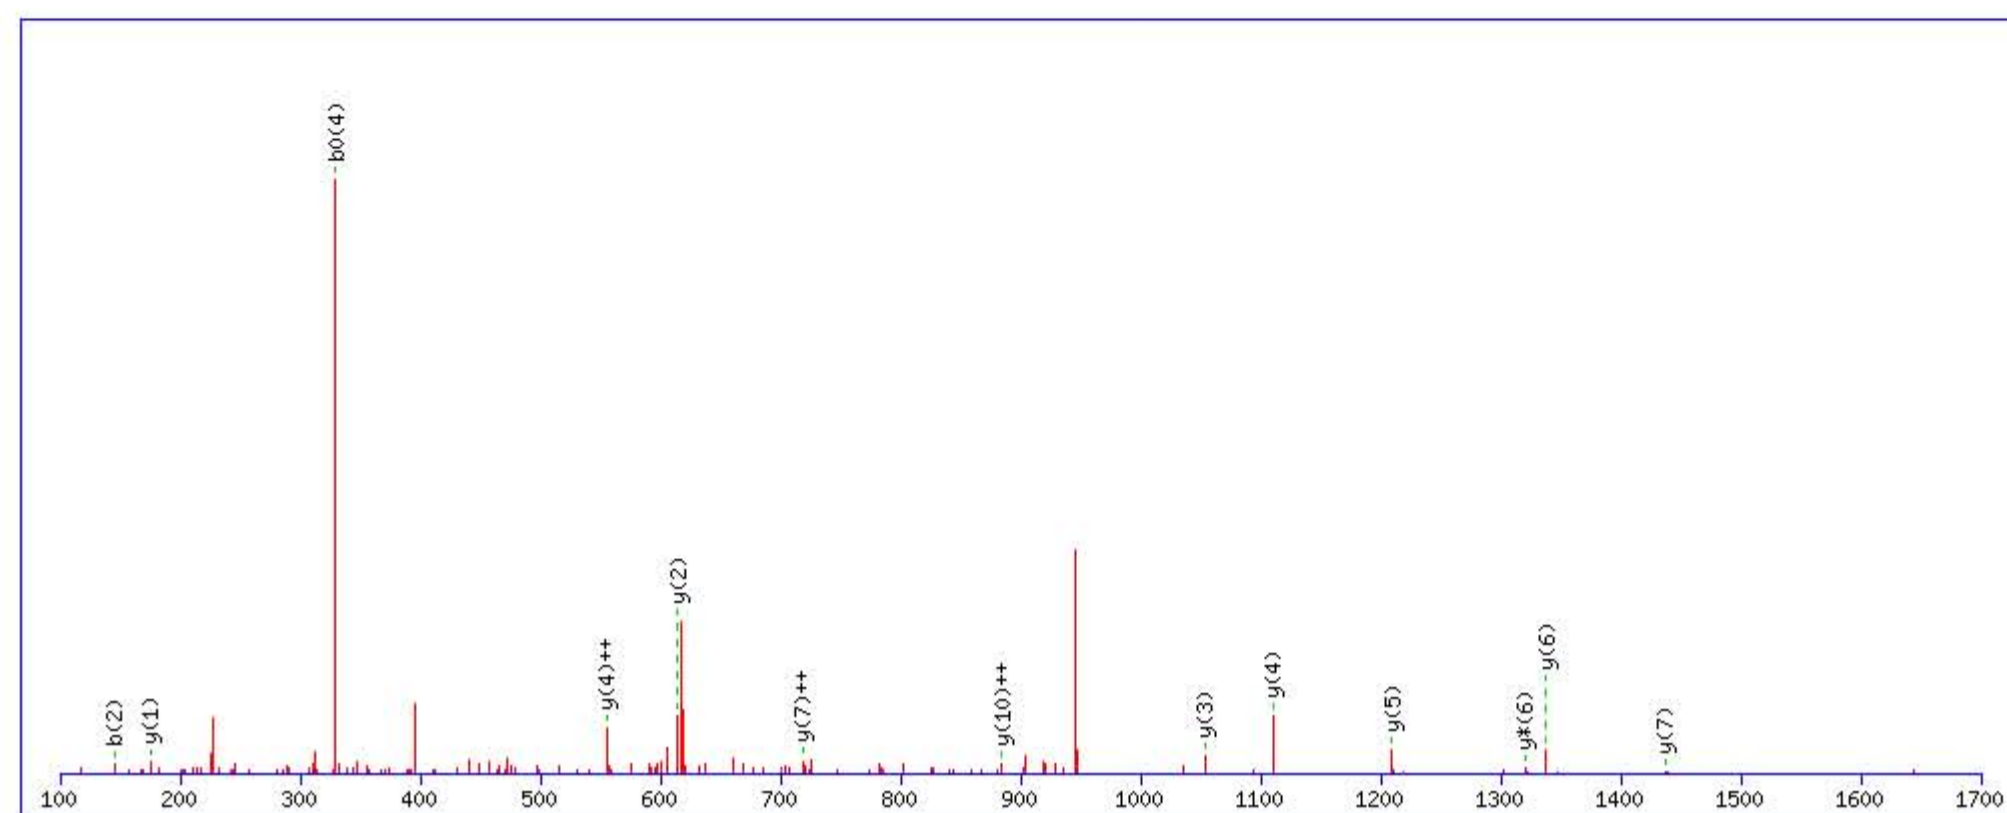

Monoisotopic mass of neutral peptide Mr(calc): 1910.934265

Fixed modifications: Carbamidomethyl (C) (apply to specified residues or termini only)

Variable modifications:

Q10 : Biotin:Thermo-21345 (Q)

Q11 : Biotin:Thermo-21345 (Q)

Ions Score: 27 Expect: 0.0054

Matches : 13/106 fragment ions using 29 most intense peaks [\(help\)](#)

| #  | b                 | b <sup>++</sup> | b <sup>*</sup> | b <sup>+++</sup> | b <sup>0</sup>    | b <sup>0++</sup> | Seq. | y                  | y <sup>++</sup>   | y <sup>*</sup>     | y <sup>+++</sup> | y <sup>0</sup> | y <sup>0++</sup> | #  |
|----|-------------------|-----------------|----------------|------------------|-------------------|------------------|------|--------------------|-------------------|--------------------|------------------|----------------|------------------|----|
| 1  | 88.039304         | 44.523290       |                |                  | 70.028739         | 35.518008        | S    |                    |                   |                    |                  |                |                  | 12 |
| 2  | <b>145.060768</b> | 73.034022       |                |                  | 127.050203        | 64.028740        | G    | 1824.909502        | 912.958389        | 1807.882953        | 904.445115       | 1806.898937    | 903.953107       | 11 |
| 3  | 232.092796        | 116.550036      |                |                  | 214.082231        | 107.544753       | S    | 1767.888038        | <b>884.447657</b> | 1750.861489        | 875.934383       | 1749.877473    | 875.442375       | 10 |
| 4  | 347.119739        | 174.063507      |                |                  | <b>329.109174</b> | 165.058225       | D    | 1680.856010        | 840.931643        | 1663.829461        | 832.418369       | 1662.845445    | 831.926361       | 9  |
| 5  | 476.162332        | 238.584804      |                |                  | 458.151767        | 229.579522       | E    | 1565.829067        | 783.418172        | 1548.802518        | 774.904897       | 1547.818502    | 774.412889       | 8  |
| 6  | 575.230746        | 288.119011      |                |                  | 557.220181        | 279.113729       | V    | <b>1436.786474</b> | <b>718.896875</b> | 1419.759925        | 710.383601       |                |                  | 7  |
| 7  | 703.289324        | 352.148300      | 686.262775     | 343.635026       | 685.278759        | 343.143018       | Q    | <b>1337.718060</b> | 669.362668        | <b>1320.691511</b> | 660.849394       |                |                  | 6  |
| 8  | 802.357738        | 401.682507      | 785.331189     | 393.169233       | 784.347173        | 392.677225       | V    | <b>1209.659482</b> | 605.333379        | 1192.632933        | 596.820105       |                |                  | 5  |
| 9  | 859.379202        | 430.193239      | 842.352653     | 421.679965       | 841.368637        | 421.187957       | G    | <b>1110.591068</b> | <b>555.799172</b> | 1093.564519        | 547.285898       |                |                  | 4  |
| 10 | 1298.604528       | 649.805902      | 1281.577979    | 641.292628       | 1280.593963       | 640.800620       | Q    | <b>1053.569604</b> | 527.288440        | 1036.543055        | 518.775166       |                |                  | 3  |
| 11 | 1737.829854       | 869.418565      | 1720.803305    | 860.905291       | 1719.819289       | 860.413283       | Q    | <b>614.344278</b>  | 307.675777        | 597.317729         | 299.162503       |                |                  | 2  |
| 12 |                   |                 |                |                  |                   |                  | R    | <b>175.118952</b>  | 88.063114         | 158.092403         | 79.549839        |                |                  | 1  |

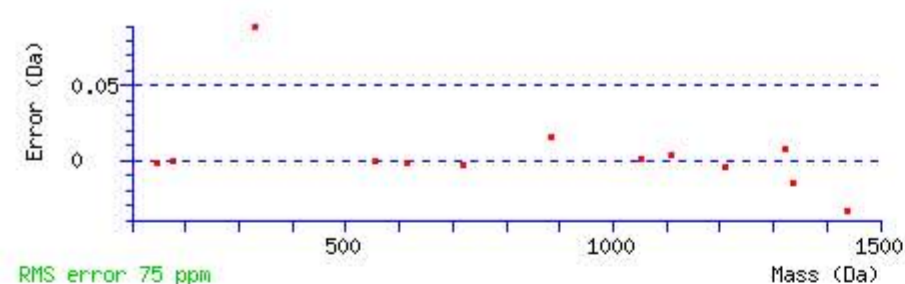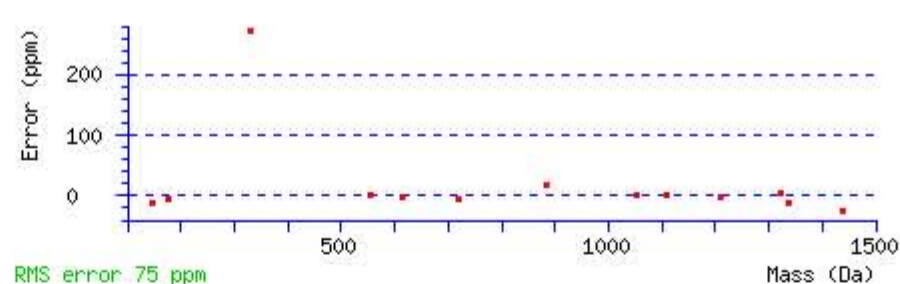

NCBI BLAST search of [SGSDEVQVGQQR](#)

(Parameters: blastp, nr protein database, expect=20000, no filter, PAM30)

Other BLAST [web gateways](#)

All matches to this query

| Score | Mr(calc):   | Delta     | Sequence                          |
|-------|-------------|-----------|-----------------------------------|
| 26.8  | 1910.934265 | 0.000227  | <a href="#">SGSDEVQVGQQR</a>      |
| 11.3  | 1910.934265 | 0.000227  | <a href="#">SGSDEVQVGQQR</a>      |
| 4.2   | 1910.934265 | 0.000227  | <a href="#">SGSDEVQVGQQR</a>      |
| 2.5   | 1910.960709 | -0.026217 | <a href="#">VGAPAWREAAQAMAR</a>   |
| 0.5   | 1910.958542 | -0.024050 | <a href="#">TDDYGRDLSSVQILLTK</a> |

Mascot: <http://www.matrixscience.com/>



# MASCOT Search Results

## Peptide View

MS/MS Fragmentation of **SGSDEVQVGQQR**

Found in **CO3\_HUMAN**, Complement C3 OS=Homo sapiens GN=C3 PE=1 SV=2

Match to Query 44788: 1910.954128 from(956.484340,2+) rtinseconds(1867) index(35386)

Title: Locus:1.1.1.3069.26 File:"2013-07-02 CLN FXIII 60 min 2nd F 3.wiff"

Data file C:\Program Files (x86)\Matrix Science\Mascot Daemon\mgf\5 FXIII 60 min 2nd\mascot\_daemon\_merge.mgf

Click mouse within plot area to zoom in by factor of two about that point

Or, Plot from  to  Da

Label all possible matches  Label matches used for scoring

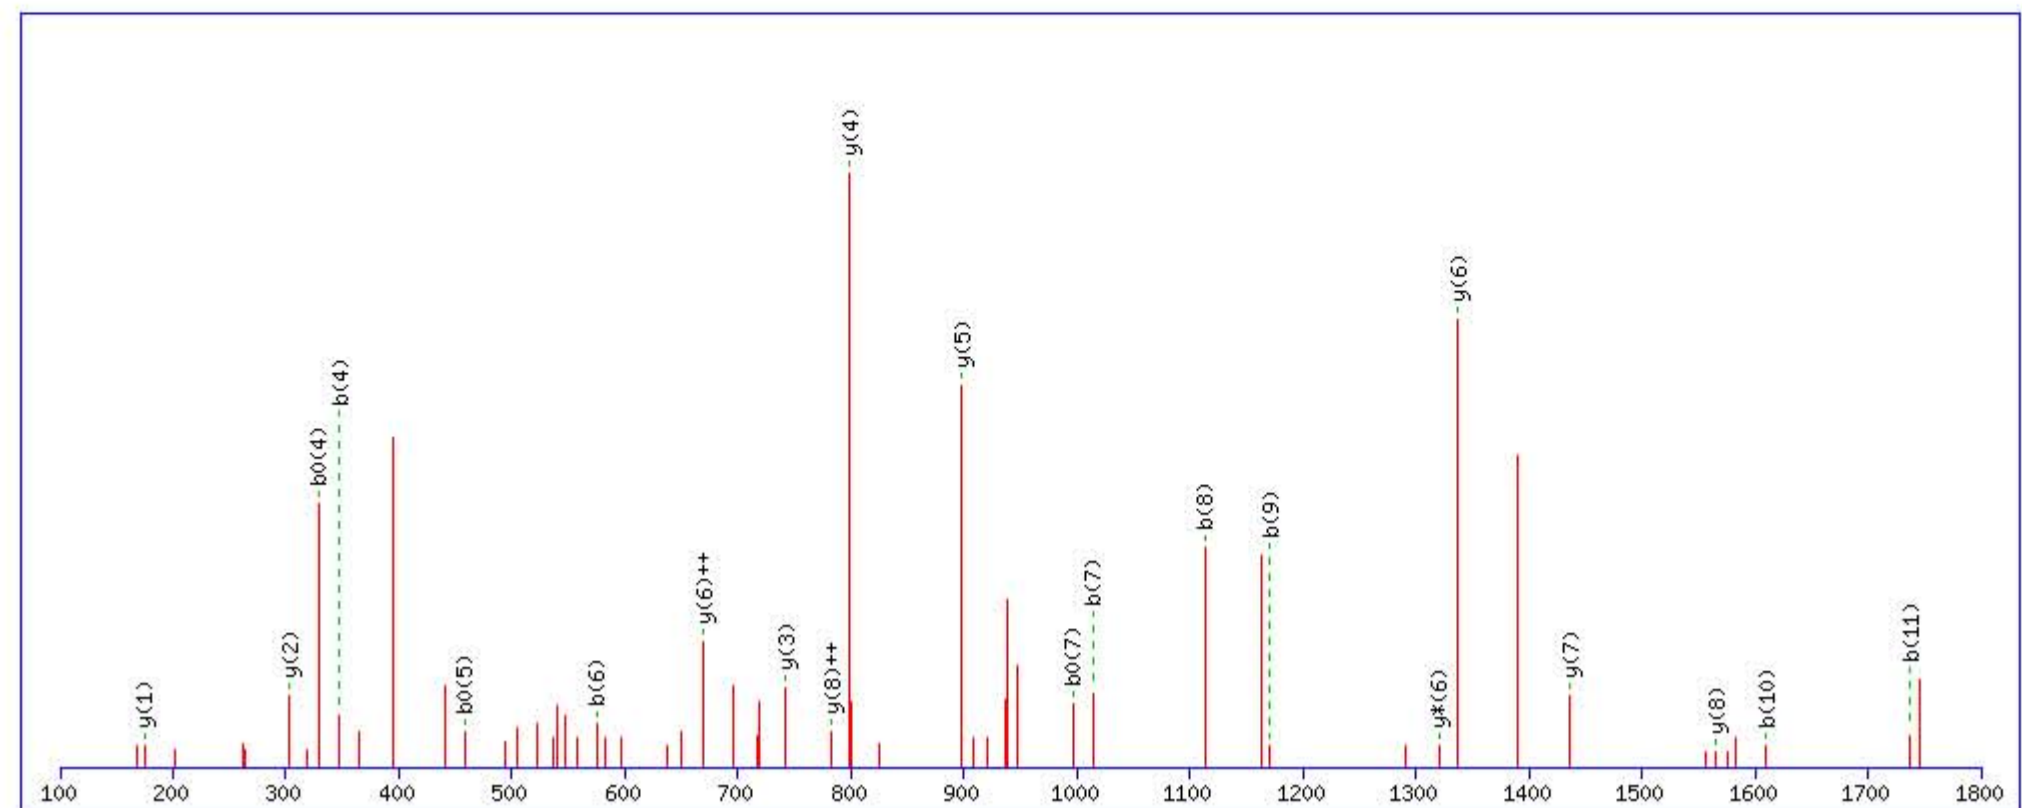

Monoisotopic mass of neutral peptide Mr(calc): 1910.934265

Fixed modifications: Carbamidomethyl (C) (apply to specified residues or termini only)

Variable modifications:

Q7 : Biotin:Thermo-21345 (Q)

Q10 : Biotin:Thermo-21345 (Q)

Ions Score: 42 Expect: 0.0029

Matches : 21/106 fragment ions using 41 most intense peaks [\(help\)](#)

| #  | b                  | b <sup>++</sup> | b <sup>*</sup> | b <sup>+++</sup> | b <sup>0</sup>    | b <sup>0++</sup> | Seq. | y                  | y <sup>++</sup>   | y <sup>*</sup>     | y <sup>+++</sup> | y <sup>0</sup> | y <sup>0++</sup> | #  |
|----|--------------------|-----------------|----------------|------------------|-------------------|------------------|------|--------------------|-------------------|--------------------|------------------|----------------|------------------|----|
| 1  | 88.039304          | 44.523290       |                |                  | 70.028739         | 35.518008        | S    |                    |                   |                    |                  |                |                  | 12 |
| 2  | 145.060768         | 73.034022       |                |                  | 127.050203        | 64.028740        | G    | 1824.909502        | 912.958389        | 1807.882953        | 904.445115       | 1806.898937    | 903.953107       | 11 |
| 3  | 232.092796         | 116.550036      |                |                  | 214.082231        | 107.544753       | S    | 1767.888038        | 884.447657        | 1750.861489        | 875.934383       | 1749.877473    | 875.442375       | 10 |
| 4  | <b>347.119739</b>  | 174.063507      |                |                  | <b>329.109174</b> | 165.058225       | D    | 1680.856010        | 840.931643        | 1663.829461        | 832.418369       | 1662.845445    | 831.926361       | 9  |
| 5  | 476.162332         | 238.584804      |                |                  | <b>458.151767</b> | 229.579522       | E    | <b>1565.829067</b> | <b>783.418172</b> | 1548.802518        | 774.904897       | 1547.818502    | 774.412889       | 8  |
| 6  | <b>575.230746</b>  | 288.119011      |                |                  | 557.220181        | 279.113729       | V    | <b>1436.786474</b> | 718.896875        | 1419.759925        | 710.383601       |                |                  | 7  |
| 7  | <b>1014.456072</b> | 507.731674      | 997.429523     | 499.218400       | <b>996.445507</b> | 498.726392       | Q    | <b>1337.718060</b> | <b>669.362668</b> | <b>1320.691511</b> | 660.849394       |                |                  | 6  |
| 8  | <b>1113.524486</b> | 557.265881      | 1096.497937    | 548.752607       | 1095.513921       | 548.260599       | V    | <b>898.492734</b>  | 449.750005        | 881.466185         | 441.236731       |                |                  | 5  |
| 9  | <b>1170.545950</b> | 585.776613      | 1153.519401    | 577.263339       | 1152.535385       | 576.771330       | G    | <b>799.424320</b>  | 400.215798        | 782.397771         | 391.702524       |                |                  | 4  |
| 10 | <b>1609.771276</b> | 805.389276      | 1592.744727    | 796.876002       | 1591.760711       | 796.383994       | Q    | <b>742.402856</b>  | 371.705066        | 725.376307         | 363.191792       |                |                  | 3  |
| 11 | <b>1737.829854</b> | 869.418565      | 1720.803305    | 860.905291       | 1719.819289       | 860.413283       | Q    | <b>303.177530</b>  | 152.092403        | 286.150981         | 143.579129       |                |                  | 2  |
| 12 |                    |                 |                |                  |                   |                  | R    | <b>175.118952</b>  | 88.063114         | 158.092403         | 79.549839        |                |                  | 1  |

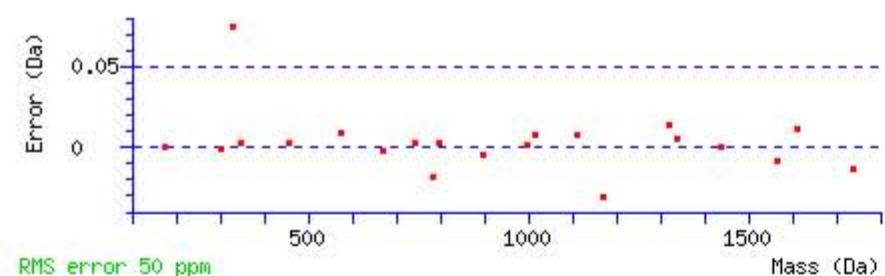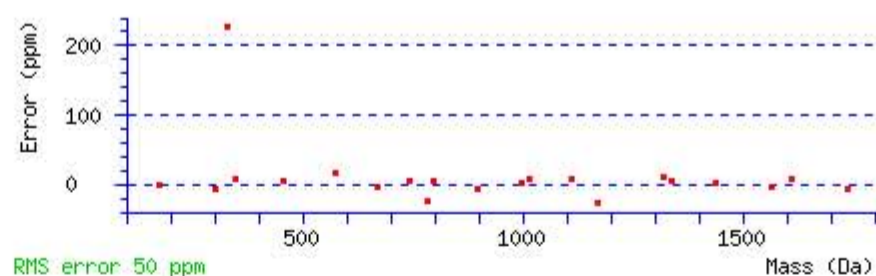

NCBI BLAST search of **SGSDEVQVGQQR**

(Parameters: blastp, nr protein database, expect=20000, no filter, PAM30)

Other BLAST [web gateways](#)

All matches to this query

| Score | Mr(calc):   | Delta     | Sequence                                  |
|-------|-------------|-----------|-------------------------------------------|
| 41.5  | 1910.934265 | 0.019863  | <a href="#">SGSDEVQVGQQR</a>              |
| 30.8  | 1910.934265 | 0.019863  | <a href="#">SGSDEVQVGQQR</a>              |
| 13.5  | 1910.938263 | 0.015865  | <a href="#">YVTSAPMPEPQAPGR</a>           |
| 5.7   | 1910.934265 | 0.019863  | <a href="#">SGSDEVQVGQQR</a>              |
| 5.5   | 1910.938721 | 0.015407  | <a href="#">QEA EGLALDSPWHRFR</a>         |
| 1.5   | 1910.930725 | 0.023403  | <a href="#">AGSGGLGGGAGGGQGAGAGQGAALR</a> |
| 0.1   | 1910.956024 | -0.001896 | <a href="#">DFQPVREQIPEDK</a>             |
| 0.0   | 1910.971970 | -0.017842 | <a href="#">KAPMGTARFGHHMAVLR</a>         |



# MASCOT Search Results

## Peptide View

MS/MS Fragmentation of **SGIPIVTSPYQIHFTK**

Found in **CO3\_HUMAN**, Complement C3 OS=Homo sapiens GN=C3 PE=1 SV=2

Match to Query 49190: 2098.140102 from(700.387310,3+) rtinseconds(2328) index(38382)

Title: Locus:1.1.1.3230.12 File:"2013-07-02 CLN FXIII 60 min 2nd F 3.wiff"

Data file C:\Program Files (x86)\Matrix Science\Mascot Daemon\mgf5 FXIII 60 min 2nd\mascot\_daemon\_merge.mgf

Click mouse within plot area to zoom in by factor of two about that point

Or, Plot from  to  Da

Label all possible matches  Label matches used for scoring

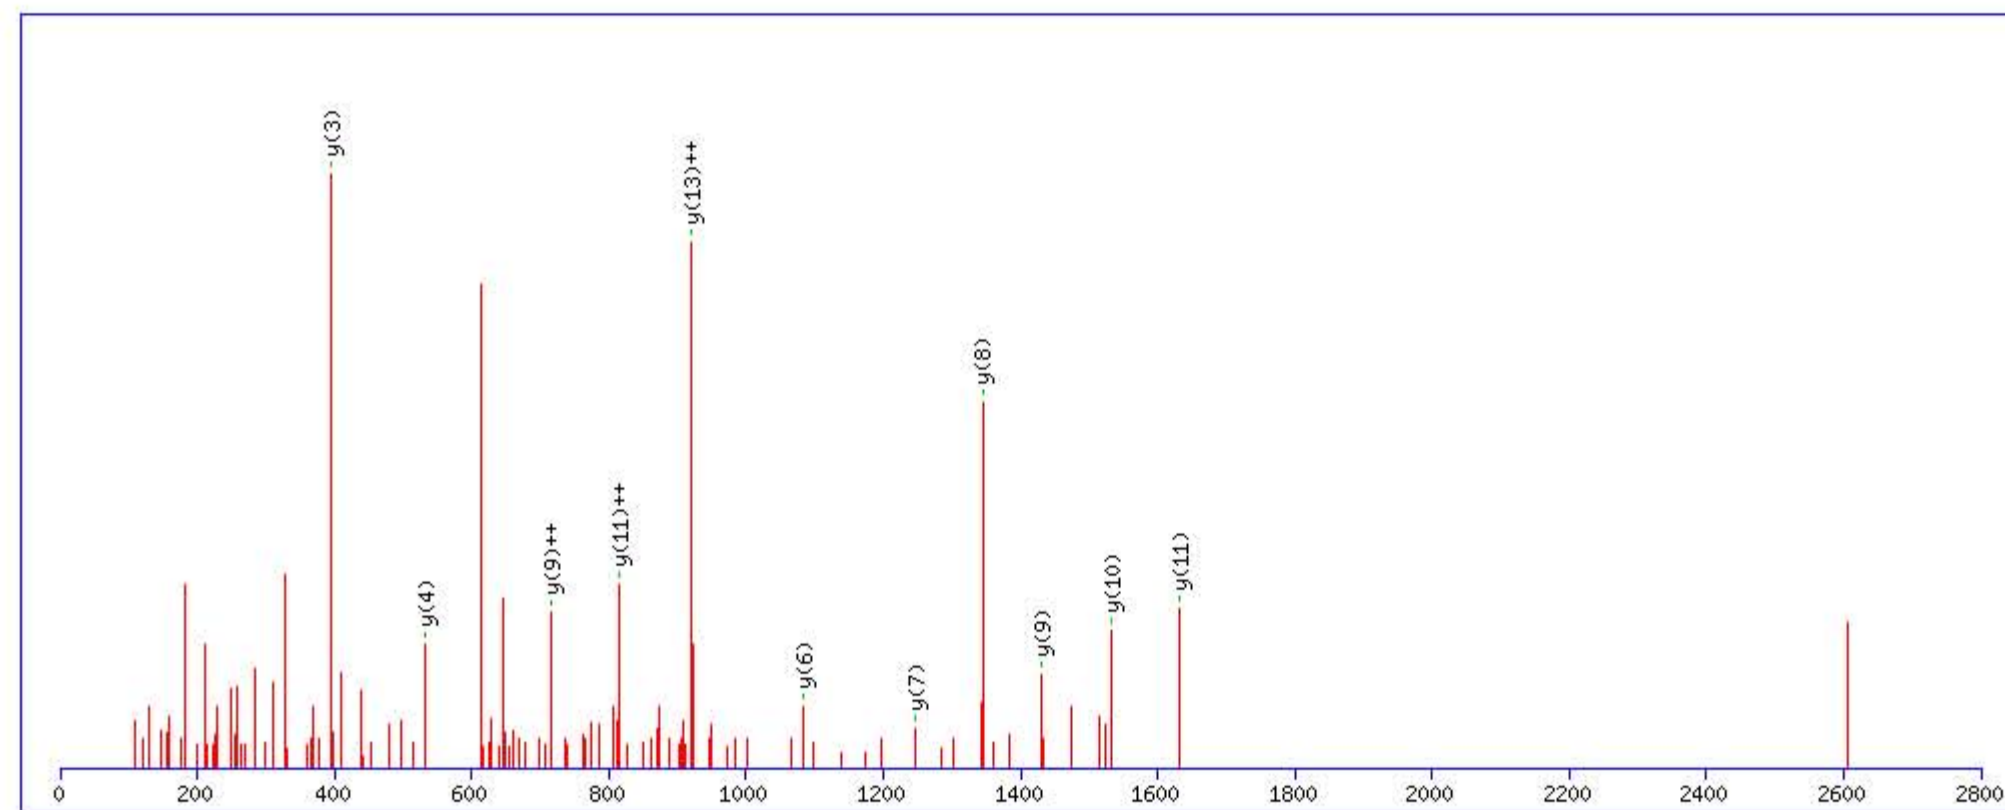

Monoisotopic mass of neutral peptide Mr(calc): 2098.128525

Fixed modifications: Carbamidomethyl (C) (apply to specified residues or termini only)

Variable modifications:

Q11 : Biotin:Thermo-21345 (Q)

Ions Score: 55 Expect: 5.5e-005

Matches : 11/158 fragment ions using 16 most intense peaks [\(help\)](#)

| #  | b           | b <sup>++</sup> | b <sup>+</sup> | b <sup>+++</sup> | b <sup>0</sup> | b <sup>0++</sup> | Seq. | y           | y <sup>++</sup> | y <sup>+</sup> | y <sup>+++</sup> | y <sup>0</sup> | y <sup>0++</sup> | #  |
|----|-------------|-----------------|----------------|------------------|----------------|------------------|------|-------------|-----------------|----------------|------------------|----------------|------------------|----|
| 1  | 88.039304   | 44.523290       |                |                  | 70.028739      | 35.518008        | S    |             |                 |                |                  |                |                  | 16 |
| 2  | 145.060768  | 73.034022       |                |                  | 127.050203     | 64.028740        | G    | 2012.103769 | 1006.555523     | 1995.077220    | 998.042248       | 1994.093204    | 997.550240       | 15 |
| 3  | 258.144832  | 129.576054      |                |                  | 240.134267     | 120.570772       | I    | 1955.082305 | 978.044791      | 1938.055756    | 969.531516       | 1937.071740    | 969.039508       | 14 |
| 4  | 355.197596  | 178.102436      |                |                  | 337.187031     | 169.097154       | P    | 1841.998241 | 921.502759      | 1824.971692    | 912.989484       | 1823.987676    | 912.497476       | 13 |
| 5  | 468.281660  | 234.644468      |                |                  | 450.271095     | 225.639186       | I    | 1744.945477 | 872.976377      | 1727.918928    | 864.463102       | 1726.934912    | 863.971094       | 12 |
| 6  | 567.350074  | 284.178675      |                |                  | 549.339509     | 275.173393       | V    | 1631.861413 | 816.434345      | 1614.834864    | 807.921070       | 1613.850848    | 807.429062       | 11 |
| 7  | 668.397753  | 334.702515      |                |                  | 650.387188     | 325.697232       | T    | 1532.792999 | 766.900138      | 1515.766450    | 758.386863       | 1514.782434    | 757.894855       | 10 |
| 8  | 755.429781  | 378.218529      |                |                  | 737.419216     | 369.213246       | S    | 1431.745320 | 716.376298      | 1414.718771    | 707.863024       | 1413.734755    | 707.371016       | 9  |
| 9  | 852.482545  | 426.744911      |                |                  | 834.471980     | 417.739628       | P    | 1344.713292 | 672.860284      | 1327.686743    | 664.347010       | 1326.702727    | 663.855002       | 8  |
| 10 | 1015.545874 | 508.276575      |                |                  | 997.535309     | 499.271293       | Y    | 1247.660528 | 624.333902      | 1230.633979    | 615.820628       | 1229.649963    | 615.328620       | 7  |
| 11 | 1454.771200 | 727.889238      | 1437.744651    | 719.375964       | 1436.760635    | 718.883956       | Q    | 1084.597199 | 542.802238      | 1067.570650    | 534.288963       | 1066.586634    | 533.796955       | 6  |
| 12 | 1567.855264 | 784.431270      | 1550.828715    | 775.917996       | 1549.844699    | 775.425988       | I    | 645.371873  | 323.189574      | 628.345324     | 314.676300       | 627.361308     | 314.184292       | 5  |
| 13 | 1704.914176 | 852.960726      | 1687.887627    | 844.447452       | 1686.903611    | 843.955444       | H    | 532.287809  | 266.647542      | 515.261260     | 258.134268       | 514.277244     | 257.642260       | 4  |
| 14 | 1851.982590 | 926.494933      | 1834.956041    | 917.981659       | 1833.972025    | 917.489651       | F    | 395.228897  | 198.118086      | 378.202348     | 189.604812       | 377.218332     | 189.112804       | 3  |
| 15 | 1953.030269 | 977.018773      | 1936.003720    | 968.505498       | 1935.019704    | 968.013490       | T    | 248.160483  | 124.583879      | 231.133934     | 116.070605       | 230.149918     | 115.578597       | 2  |
| 16 |             |                 |                |                  |                |                  | K    | 147.112804  | 74.060040       | 130.086255     | 65.546765        |                |                  | 1  |

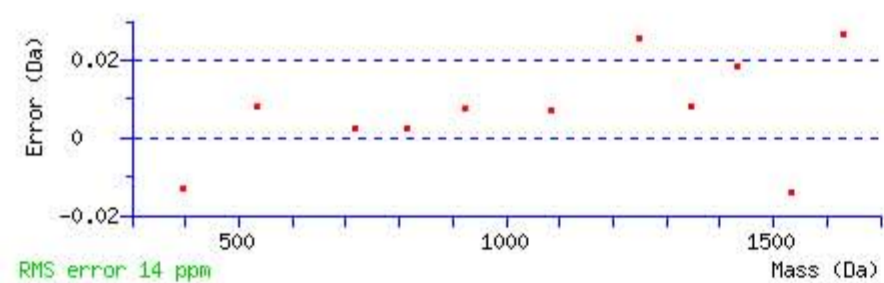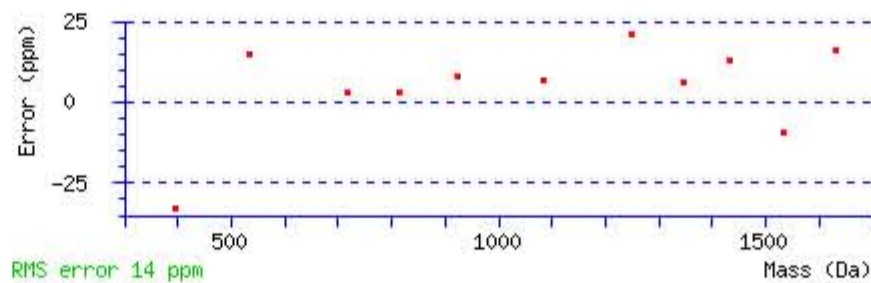

NCBI BLAST search of [SGIPIVTSPYQIHFTK](#)

(Parameters: blastp, nr protein database, expect=20000, no filter, PAM30)

Other BLAST [web gateways](#)

All matches to this query

| Score | Mr(calc):   | Delta    | Sequence                         |
|-------|-------------|----------|----------------------------------|
| 55.3  | 2098.128525 | 0.011577 | <a href="#">SGIPIVTSPYQIHFTK</a> |

Mascot: <http://www.matrixscience.com/>



# MASCOT Search Results

## Peptide View

MS/MS Fragmentation of **LSINTHPSQKPLSITVR**

Found in **CO3\_HUMAN**, Complement C3 OS=Homo sapiens GN=C3 PE=1 SV=2

Match to Query 51086: 2201.231736 from(551.315210,4+) rtinseconds(1880) index(35492)

Title: Locus:1.1.1.3074.19 File:"2013-07-02 CLN FXIII 60 min 2nd F 3.wiff"

Data file C:\Program Files (x86)\Matrix Science\Mascot Daemon\mgf5 FXIII 60 min 2nd\mascot\_daemon\_merge.mgf

Click mouse within plot area to zoom in by factor of two about that point

Or, Plot from  to  Da

Label all possible matches  Label matches used for scoring

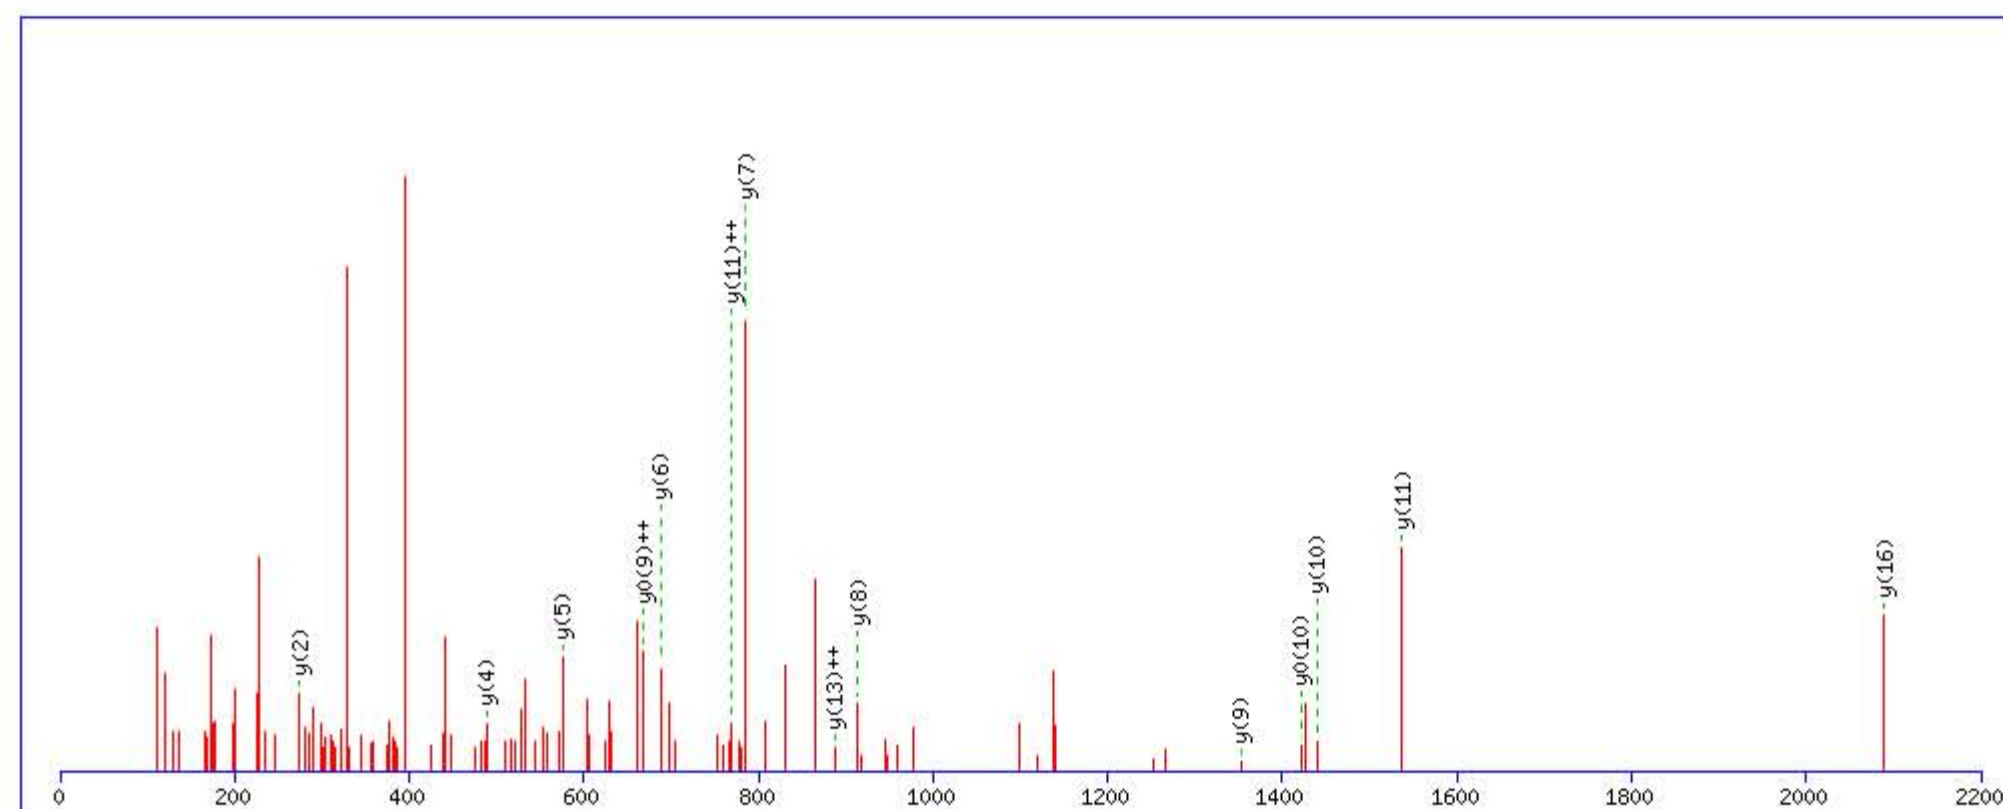

Monoisotopic mass of neutral peptide Mr(calc): 2201.235428

Fixed modifications: Carbamidomethyl (C) (apply to specified residues or termini only)

Variable modifications:

Q9 : Biotin:Thermo-21345 (Q)

Ions Score: 39 Expect: 0.0012

Matches : 14/180 fragment ions using 40 most intense peaks [\(help\)](#)

| #  | b           | b <sup>++</sup> | b <sup>*</sup> | b <sup>+++</sup> | b <sup>0</sup> | b <sup>0++</sup> | Seq. | y                  | y <sup>++</sup>   | y <sup>*</sup> | y <sup>+++</sup> | y <sup>0</sup>     | y <sup>0++</sup>  | #  |
|----|-------------|-----------------|----------------|------------------|----------------|------------------|------|--------------------|-------------------|----------------|------------------|--------------------|-------------------|----|
| 1  | 114.091340  | 57.549308       |                |                  |                |                  | L    |                    |                   |                |                  |                    |                   | 17 |
| 2  | 201.123368  | 101.065322      |                |                  | 183.112803     | 92.060039        | S    | <b>2089.158656</b> | 1045.082966       | 2072.132107    | 1036.569691      | 2071.148091        | 1036.077683       | 16 |
| 3  | 314.207432  | 157.607354      |                |                  | 296.196867     | 148.602071       | I    | 2002.126628        | 1001.566952       | 1985.100079    | 993.053678       | 1984.116063        | 992.561669        | 15 |
| 4  | 428.250359  | 214.628818      | 411.223810     | 206.115543       | 410.239794     | 205.623535       | N    | 1889.042564        | 945.024920        | 1872.016015    | 936.511646       | 1871.031999        | 936.019638        | 14 |
| 5  | 529.298038  | 265.152657      | 512.271489     | 256.639383       | 511.287473     | 256.147375       | T    | 1774.999637        | <b>888.003456</b> | 1757.973088    | 879.490182       | 1756.989072        | 878.998174        | 13 |
| 6  | 666.356950  | 333.682113      | 649.330401     | 325.168838       | 648.346385     | 324.676830       | H    | 1673.951958        | 837.479617        | 1656.925409    | 828.966343       | 1655.941393        | 828.474334        | 12 |
| 7  | 763.409714  | 382.208495      | 746.383165     | 373.695221       | 745.399149     | 373.203213       | P    | <b>1536.893046</b> | <b>768.950161</b> | 1519.866497    | 760.436887       | 1518.882481        | 759.944878        | 11 |
| 8  | 850.441742  | 425.724509      | 833.415193     | 417.211234       | 832.431177     | 416.719226       | S    | <b>1439.840282</b> | 720.423779        | 1422.813733    | 711.910505       | <b>1421.829717</b> | 711.418496        | 10 |
| 9  | 1289.667068 | 645.337172      | 1272.640519    | 636.823898       | 1271.656503    | 636.331889       | Q    | <b>1352.808254</b> | 676.907765        | 1335.781705    | 668.394491       | 1334.797689        | <b>667.902483</b> | 9  |
| 10 | 1417.762031 | 709.384654      | 1400.735482    | 700.871379       | 1399.751466    | 700.379371       | K    | <b>913.582928</b>  | 457.295102        | 896.556379     | 448.781828       | 895.572363         | 448.289820        | 8  |
| 11 | 1514.814795 | 757.911036      | 1497.788246    | 749.397761       | 1496.804230    | 748.905753       | P    | <b>785.487965</b>  | 393.247621        | 768.461416     | 384.734346       | 767.477400         | 384.242338        | 7  |
| 12 | 1627.898859 | 814.453067      | 1610.872310    | 805.939793       | 1609.888294    | 805.447785       | L    | <b>688.435201</b>  | 344.721239        | 671.408652     | 336.207964       | 670.424636         | 335.715956        | 6  |
| 13 | 1714.930887 | 857.969082      | 1697.904338    | 849.455807       | 1696.920322    | 848.963799       | S    | <b>575.351137</b>  | 288.179207        | 558.324588     | 279.665932       | 557.340572         | 279.173924        | 5  |
| 14 | 1828.014951 | 914.511113      | 1810.988402    | 905.997839       | 1810.004386    | 905.505831       | I    | <b>488.319109</b>  | 244.663192        | 471.292560     | 236.149918       | 470.308544         | 235.657910        | 4  |
| 15 | 1929.062630 | 965.034953      | 1912.036081    | 956.521679       | 1911.052065    | 956.029670       | T    | 375.235045         | 188.121161        | 358.208496     | 179.607886       | 357.224480         | 179.115878        | 3  |
| 16 | 2028.131044 | 1014.569160     | 2011.104495    | 1006.055886      | 2010.120479    | 1005.563878      | V    | <b>274.187366</b>  | 137.597321        | 257.160817     | 129.084047       |                    |                   | 2  |
| 17 |             |                 |                |                  |                |                  | R    | 175.118952         | 88.063114         | 158.092403     | 79.549839        |                    |                   | 1  |

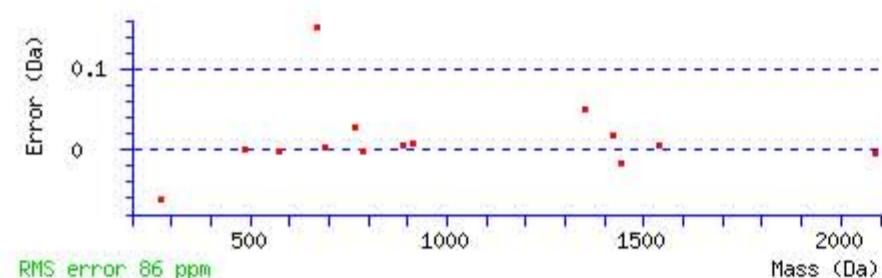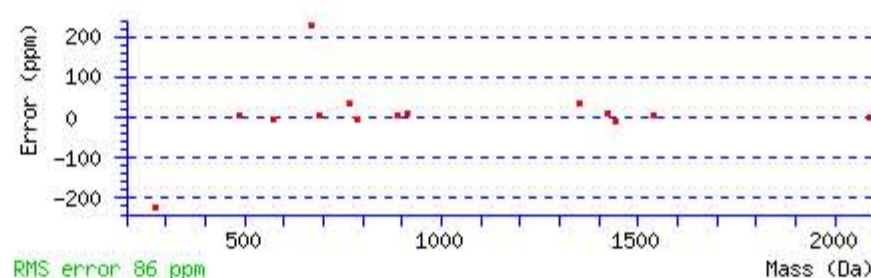

NCBI BLAST search of [LSINTHPSQKPLSITVR](#)

(Parameters: blastp, nr protein database, expect=20000, no filter, PAM30)

Other BLAST [web gateways](#)

All matches to this query

| Score | Mr(calc):   | Delta     | Sequence                          |
|-------|-------------|-----------|-----------------------------------|
| 38.7  | 2201.235428 | -0.003692 | <a href="#">LSINTHPSQKPLSITVR</a> |

Mascot: <http://www.matrixscience.com/>



# MASCOT Search Results

## Peptide View

MS/MS Fragmentation of **KVEGTAFVIFGIQDGEQR**

Found in **CO3\_HUMAN**, Complement C3 OS=Homo sapiens GN=C3 PE=1 SV=2

Match to Query 53078: 2304.216672 from(769.079500,3+) rtinseconds(2464) index(39183)  
 Title: Locus:1.1.1.3277.14 File:"2013-07-02 CLN FXIII 60 min 2nd F 3.wiff"  
 Data file C:\Program Files (x86)\Matrix Science\Mascot Daemon\mgf5 FXIII 60 min 2nd\mascot\_daemon\_merge.mgf

Click mouse within plot area to zoom in by factor of two about that point  
 Or, Plot from  to  Da   
 Label all possible matches  Label matches used for scoring

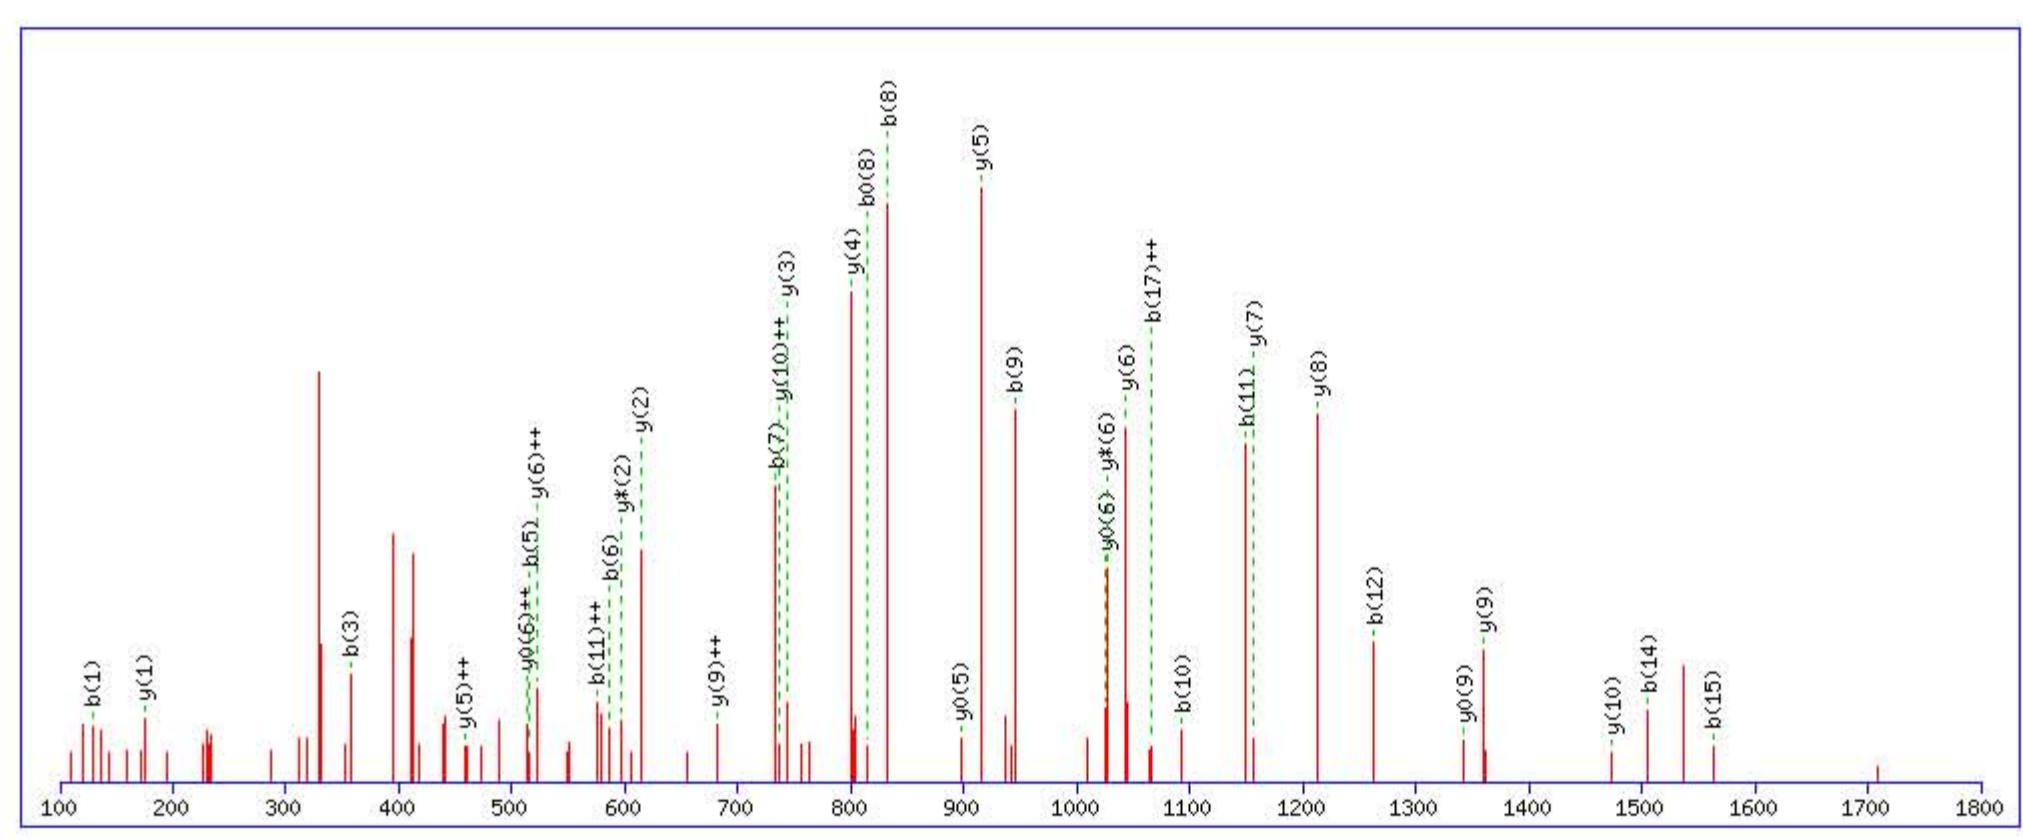

Monoisotopic mass of neutral peptide Mr(calc): 2304.193649  
 Fixed modifications: Carbamidomethyl (C) (apply to specified residues or termini only)  
 Variable modifications:  
 Q17 : Biotin:Thermo-21345 (Q)  
 Ions Score: 61 Expect: 1.9e-005  
 Matches : 35/196 fragment ions using 76 most intense peaks [\(help\)](#)

| #  | b                  | b <sup>++</sup>    | b <sup>*</sup> | b <sup>*++</sup> | b <sup>0</sup>    | b <sup>0++</sup> | Seq.     | y                  | y <sup>++</sup>   | y <sup>*</sup>     | y <sup>*++</sup> | y <sup>0</sup>     | y <sup>0++</sup>  | #         |
|----|--------------------|--------------------|----------------|------------------|-------------------|------------------|----------|--------------------|-------------------|--------------------|------------------|--------------------|-------------------|-----------|
| 1  | <b>129.102239</b>  | 65.054757          | 112.075690     | 56.541483        |                   |                  | <b>K</b> |                    |                   |                    |                  |                    |                   | <b>18</b> |
| 2  | 228.170653         | 114.588965         | 211.144104     | 106.075690       |                   |                  | <b>V</b> | 2177.105954        | 1089.056615       | 2160.079405        | 1080.543340      | 2159.095389        | 1080.051332       | <b>17</b> |
| 3  | <b>357.213246</b>  | 179.110261         | 340.186697     | 170.596987       | 339.202681        | 170.104979       | <b>E</b> | 2078.037540        | 1039.522408       | 2061.010991        | 1031.009133      | 2060.026975        | 1030.517125       | <b>16</b> |
| 4  | 414.234710         | 207.620993         | 397.208161     | 199.107719       | 396.224145        | 198.615711       | <b>G</b> | 1948.994947        | 975.001111        | 1931.968398        | 966.487837       | 1930.984382        | 965.995829        | <b>15</b> |
| 5  | <b>515.282389</b>  | 258.144833         | 498.255840     | 249.631558       | 497.271824        | 249.139550       | <b>T</b> | 1891.973483        | 946.490380        | 1874.946934        | 937.977105       | 1873.962918        | 937.485097        | <b>14</b> |
| 6  | <b>586.319503</b>  | 293.663390         | 569.292954     | 285.150115       | 568.308938        | 284.658107       | <b>A</b> | 1790.925804        | 895.966540        | 1773.899255        | 887.453265       | 1772.915239        | 886.961257        | <b>13</b> |
| 7  | <b>733.387917</b>  | 367.197597         | 716.361368     | 358.684322       | 715.377352        | 358.192314       | <b>F</b> | 1719.888690        | 860.447983        | 1702.862141        | 851.934709       | 1701.878125        | 851.442701        | <b>12</b> |
| 8  | <b>832.456331</b>  | 416.731804         | 815.429782     | 408.218529       | <b>814.445766</b> | 407.726521       | <b>V</b> | 1572.820276        | 786.913776        | 1555.793727        | 778.400502       | 1554.809711        | 777.908493        | <b>11</b> |
| 9  | <b>945.540395</b>  | 473.273836         | 928.513846     | 464.760561       | 927.529830        | 464.268553       | <b>I</b> | <b>1473.751862</b> | <b>737.379569</b> | 1456.725313        | 728.866294       | 1455.741297        | 728.374286        | <b>10</b> |
| 10 | <b>1092.608809</b> | 546.808043         | 1075.582260    | 538.294768       | 1074.598244       | 537.802760       | <b>F</b> | <b>1360.667798</b> | <b>680.837537</b> | 1343.641249        | 672.324263       | <b>1342.657233</b> | 671.832254        | <b>9</b>  |
| 11 | <b>1149.630273</b> | <b>575.318775</b>  | 1132.603724    | 566.805500       | 1131.619708       | 566.313492       | <b>G</b> | <b>1213.599384</b> | 607.303330        | 1196.572835        | 598.790055       | 1195.588819        | 598.298047        | <b>8</b>  |
| 12 | <b>1262.714337</b> | 631.860806         | 1245.687788    | 623.347532       | 1244.703772       | 622.855524       | <b>I</b> | <b>1156.577920</b> | 578.792598        | 1139.551371        | 570.279324       | 1138.567355        | 569.787315        | <b>7</b>  |
| 13 | 1390.772915        | 695.890095         | 1373.746366    | 687.376821       | 1372.762350       | 686.884813       | <b>Q</b> | <b>1043.493856</b> | <b>522.250566</b> | <b>1026.467307</b> | 513.737292       | <b>1025.483291</b> | <b>513.245284</b> | <b>6</b>  |
| 14 | <b>1505.799858</b> | 753.403567         | 1488.773309    | 744.890292       | 1487.789293       | 744.398284       | <b>D</b> | <b>915.435278</b>  | <b>458.221277</b> | 898.408729         | 449.708003       | <b>897.424713</b>  | 449.215995        | <b>5</b>  |
| 15 | <b>1562.821322</b> | 781.914299         | 1545.794773    | 773.401024       | 1544.810757       | 772.909016       | <b>G</b> | <b>800.408335</b>  | 400.707806        | 783.381786         | 392.194531       | 782.397770         | 391.702523        | <b>4</b>  |
| 16 | 1691.863915        | 846.435595         | 1674.837366    | 837.922321       | 1673.853350       | 837.430313       | <b>E</b> | <b>743.386871</b>  | 372.197074        | 726.360322         | 363.683799       | 725.376306         | 363.191791        | <b>3</b>  |
| 17 | 2131.089241        | <b>1066.048258</b> | 2114.062692    | 1057.534984      | 2113.078676       | 1057.042976      | <b>Q</b> | <b>614.344278</b>  | 307.675777        | <b>597.317729</b>  | 299.162503       |                    |                   | <b>2</b>  |
| 18 |                    |                    |                |                  |                   |                  | <b>R</b> | <b>175.118952</b>  | 88.063114         | 158.092403         | 79.549839        |                    |                   | <b>1</b>  |

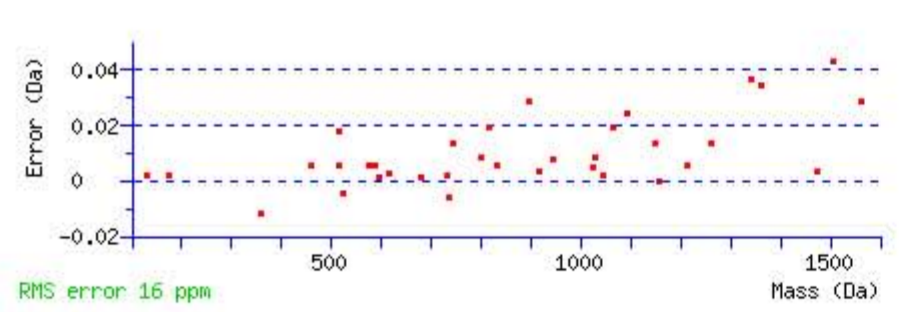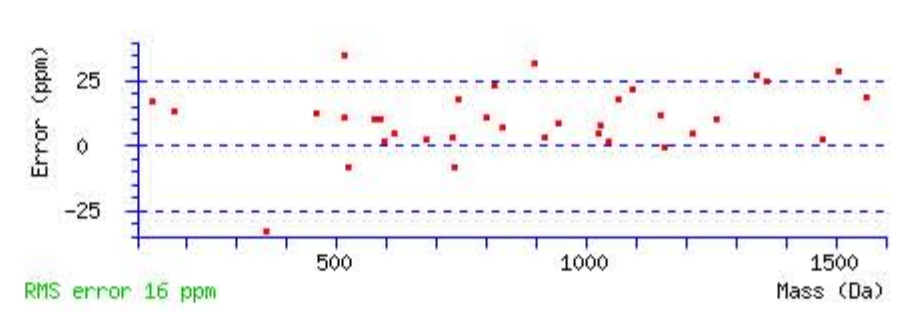

NCBI BLAST search of [KVEGTAFVIFGIQDGEQR](#)  
 (Parameters: blastp, nr protein database, expect=20000, no filter, PAM30)  
 Other BLAST [web gateways](#)

### All matches to this query

| Score | Mr(calc):   | Delta    | Sequence                           |
|-------|-------------|----------|------------------------------------|
| 61.1  | 2304.193649 | 0.023023 | <a href="#">KVEGTAFVIFGIQDGEQR</a> |
| 31.4  | 2304.193649 | 0.023023 | <a href="#">KVEGTAFVIFGIQDGEQR</a> |



# MASCOT Search Results

## Peptide View

MS/MS Fragmentation of **DAPDHQELNLDVSLQLPSR**

Found in **CO3\_HUMAN**, Complement C3 OS=Homo sapiens GN=C3 PE=1 SV=2

Match to Query 55503: 2457.243072 from(820.088300,3+) rtinseconds(2571) index(39898)

Title: Locus:1.1.1.3314.21 File:"2013-07-02 CLN FXIII 60 min 2nd F 3.wiff"

Data file C:\Program Files (x86)\Matrix Science\Mascot Daemon\mgf5 FXIII 60 min 2nd\mascot\_daemon\_merge.mgf

Click mouse within plot area to zoom in by factor of two about that point

Or, Plot from  to  Da

Label all possible matches  Label matches used for scoring

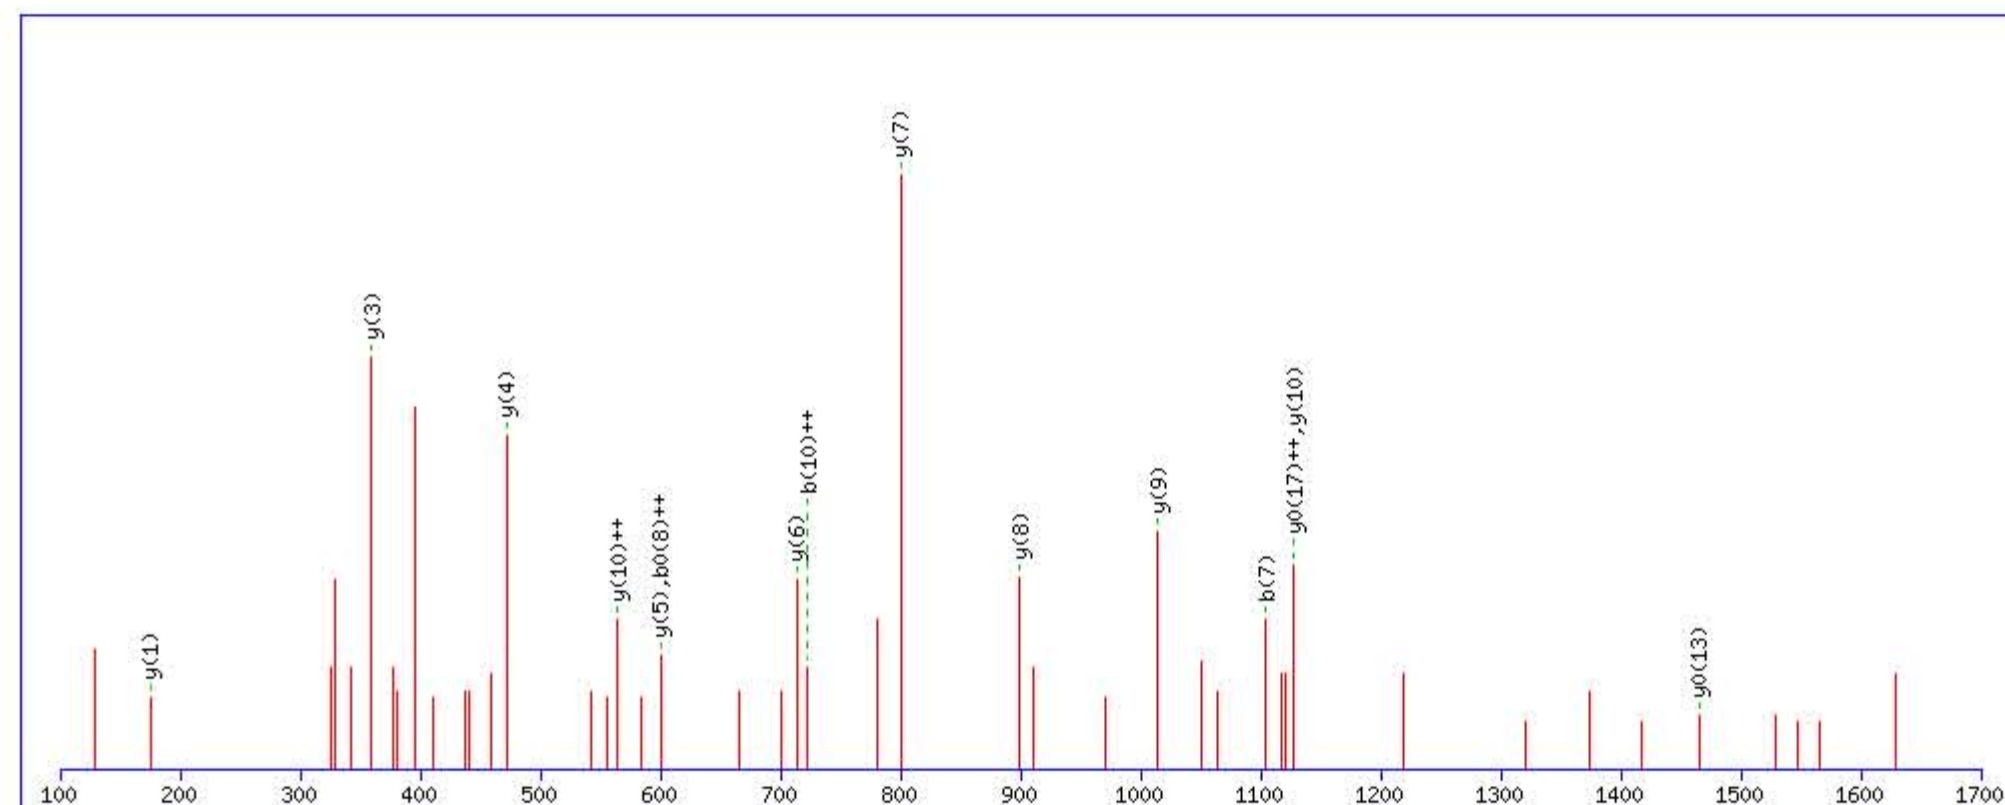

Monoisotopic mass of neutral peptide Mr(calc): 2457.232193

Fixed modifications: Carbamidomethyl (C) (apply to specified residues or termini only)

Variable modifications:

Q6 : Biotin:Thermo-21345 (Q)

Ions Score: 38 Expect: 0.0013

Matches : 15/204 fragment ions using 27 most intense peaks [\(help\)](#)

| #  | b                  | b <sup>++</sup>   | b <sup>*</sup> | b <sup>*++</sup> | b <sup>0</sup> | b <sup>0++</sup>  | Seq. | y                  | y <sup>++</sup>   | y <sup>*</sup> | y <sup>*++</sup> | y <sup>0</sup>     | y <sup>0++</sup> | #  |
|----|--------------------|-------------------|----------------|------------------|----------------|-------------------|------|--------------------|-------------------|----------------|------------------|--------------------|------------------|----|
| 1  | 116.034219         | 58.520748         |                |                  | 98.023654      | 49.515465         | D    |                    |                   |                |                  |                    |                  | 19 |
| 2  | 187.071333         | 94.039304         |                |                  | 169.060768     | 85.034022         | A    | 2343.212542        | 1172.109909       | 2326.185993    | 1163.596634      | 2325.201977        | 1163.104626      | 18 |
| 3  | 284.124097         | 142.565686        |                |                  | 266.113532     | 133.560404        | P    | 2272.175428        | 1136.591352       | 2255.148879    | 1128.078077      | 2254.164863        | 1127.586069      | 17 |
| 4  | 399.151040         | 200.079158        |                |                  | 381.140475     | 191.073875        | D    | 2175.122664        | 1088.064970       | 2158.096115    | 1079.551695      | 2157.112099        | 1079.059687      | 16 |
| 5  | 536.209952         | 268.608614        |                |                  | 518.199387     | 259.603332        | H    | 2060.095721        | 1030.551498       | 2043.069172    | 1022.038224      | 2042.085156        | 1021.546216      | 15 |
| 6  | 975.435278         | 488.221277        | 958.408729     | 479.708003       | 957.424713     | 479.215995        | Q    | 1923.036809        | 962.022043        | 1906.010260    | 953.508768       | 1905.026244        | 953.016760       | 14 |
| 7  | <b>1104.477871</b> | 552.742574        | 1087.451322    | 544.229299       | 1086.467306    | 543.737291        | E    | 1483.811483        | 742.409380        | 1466.784934    | 733.896105       | <b>1465.800918</b> | 733.404097       | 13 |
| 8  | 1217.561935        | 609.284606        | 1200.535386    | 600.771331       | 1199.551370    | <b>600.279323</b> | L    | 1354.768890        | 677.888083        | 1337.742341    | 669.374809       | 1336.758325        | 668.882801       | 12 |
| 9  | 1331.604862        | 666.306069        | 1314.578313    | 657.792795       | 1313.594297    | 657.300786        | N    | 1241.684826        | 621.346051        | 1224.658277    | 612.832777       | 1223.674261        | 612.340769       | 11 |
| 10 | 1444.688926        | <b>722.848101</b> | 1427.662377    | 714.334826       | 1426.678361    | 713.842818        | L    | <b>1127.641899</b> | <b>564.324588</b> | 1110.615350    | 555.811313       | 1109.631334        | 555.319305       | 10 |
| 11 | 1559.715869        | 780.361572        | 1542.689320    | 771.848298       | 1541.705304    | 771.356290        | D    | <b>1014.557835</b> | 507.782556        | 997.531286     | 499.269281       | 996.547270         | 498.777273       | 9  |
| 12 | 1658.784283        | 829.895780        | 1641.757734    | 821.382505       | 1640.773718    | 820.890497        | V    | <b>899.530892</b>  | 450.269084        | 882.504343     | 441.755810       | 881.520327         | 441.263802       | 8  |
| 13 | 1745.816311        | 873.411794        | 1728.789762    | 864.898519       | 1727.805746    | 864.406511        | S    | <b>800.462478</b>  | 400.734877        | 783.435929     | 392.221603       | 782.451913         | 391.729595       | 7  |
| 14 | 1858.900375        | 929.953825        | 1841.873826    | 921.440551       | 1840.889810    | 920.948543        | L    | <b>713.430450</b>  | 357.218863        | 696.403901     | 348.705589       | 695.419885         | 348.213581       | 6  |
| 15 | 1986.958953        | 993.983115        | 1969.932404    | 985.469840       | 1968.948388    | 984.977832        | Q    | <b>600.346386</b>  | 300.676831        | 583.319837     | 292.163557       | 582.335821         | 291.671549       | 5  |
| 16 | 2100.043017        | 1050.525146       | 2083.016468    | 1042.011872      | 2082.032452    | 1041.519864       | L    | <b>472.287808</b>  | 236.647542        | 455.261259     | 228.134268       | 454.277243         | 227.642260       | 4  |
| 17 | 2197.095781        | 1099.051528       | 2180.069232    | 1090.538254      | 2179.085216    | 1090.046246       | P    | <b>359.203744</b>  | 180.105510        | 342.177195     | 171.592236       | 341.193179         | 171.100228       | 3  |
| 18 | 2284.127809        | 1142.567542       | 2267.101260    | 1134.054268      | 2266.117244    | 1133.562260       | S    | 262.150980         | 131.579128        | 245.124431     | 123.065854       | 244.140415         | 122.573846       | 2  |
| 19 |                    |                   |                |                  |                |                   | R    | <b>175.118952</b>  | 88.063114         | 158.092403     | 79.549839        |                    |                  | 1  |

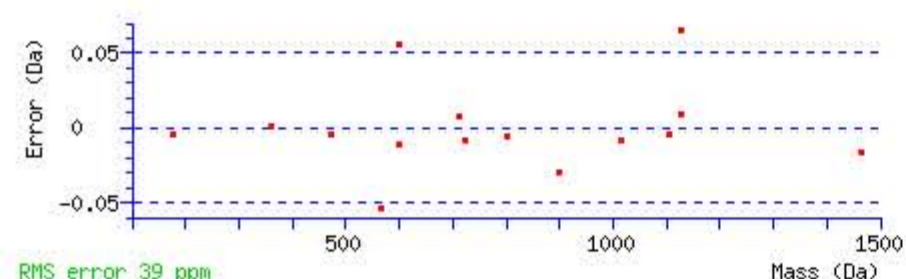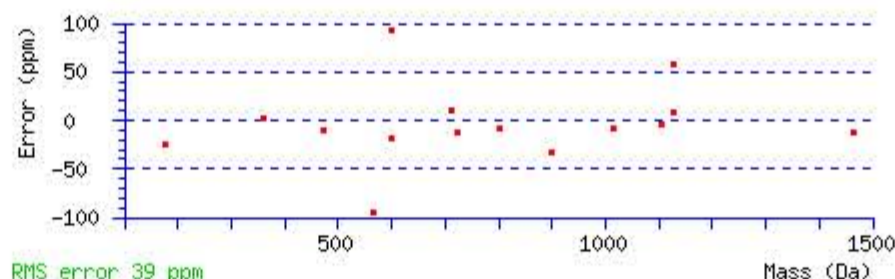

NCBI BLAST search of [DAPDHQELNLDVSLQLPSR](#)

(Parameters: blastp, nr protein database, expect=20000, no filter, PAM30)

Other BLAST [web gateways](#)

## All matches to this query

| Score | Mr(calc):   | Delta     | Sequence                               |
|-------|-------------|-----------|----------------------------------------|
| 38.5  | 2457.232193 | 0.010879  | <a href="#">DAPDHQELNLDVSLQLPSR</a>    |
| 7.1   | 2457.278442 | -0.035370 | <a href="#">EPVSNVTAEGMEALTKILAEIR</a> |
| 1.5   | 2457.243423 | -0.000351 | <a href="#">TGLSDAFMILNPSDPVPESTR</a>  |
| 0.4   | 2457.232193 | 0.010879  | <a href="#">DAPDHQELNLDVSLQLPSR</a>    |



# MASCOT Search Results

## Peptide View

MS/MS Fragmentation of **ILLQGPVAQMTEDAVDAER**

Found in **CO3\_HUMAN**, Complement C3 OS=Homo sapiens GN=C3 PE=1 SV=2

Match to Query 55784: 2467.260642 from(823.427490,3+) rtinseconds(2676) index(40595)

Title: Locus:1.1.1.3350.22 File:"2013-07-02 CLN FXIII 60 min 2nd F 3.wiff"

Data file C:\Program Files (x86)\Matrix Science\Mascot Daemon\mgf5 FXIII 60 min 2nd\mascot\_daemon\_merge.mgf

Click mouse within plot area to zoom in by factor of two about that point

Or, Plot from  to  Da

Label all possible matches  Label matches used for scoring

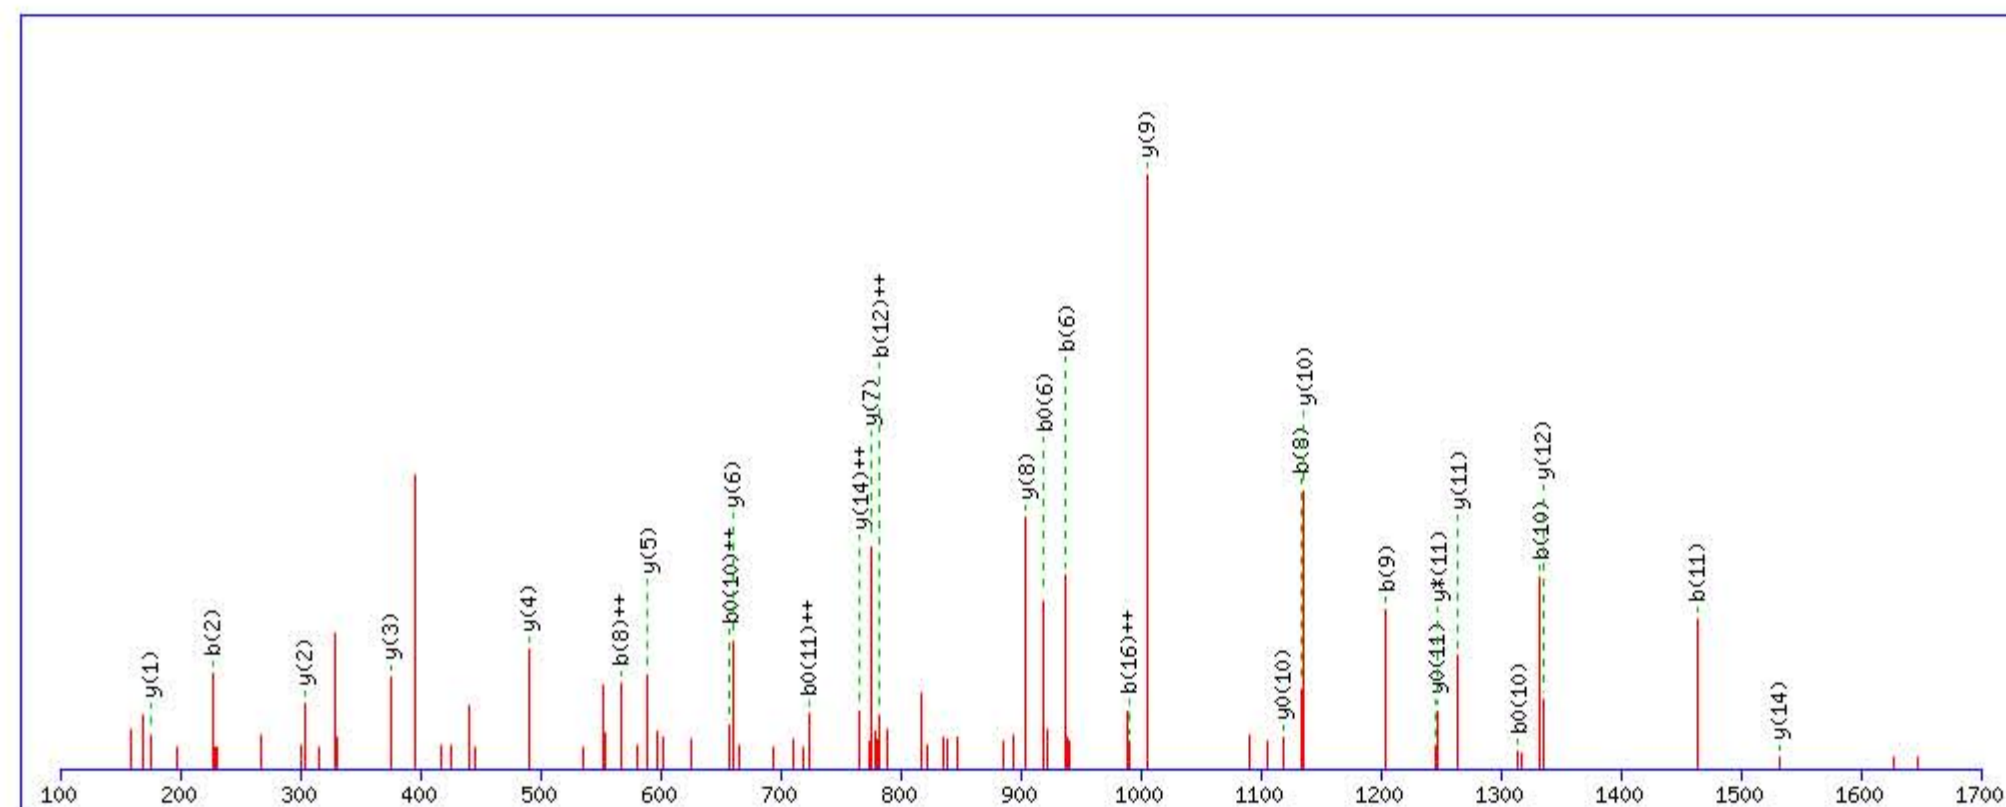

Monoisotopic mass of neutral peptide Mr(calc): 2467.245071

Fixed modifications: Carbamidomethyl (C) (apply to specified residues or termini only)

Variable modifications:

Q4 : Biotin:Thermo-21345 (Q)

Ions Score: 80 Expect: 3.3e-007

Matches : 30/210 fragment ions using 51 most intense peaks [\(help\)](#)

| #  | b                  | b <sup>++</sup>   | b <sup>*</sup> | b <sup>*++</sup> | b <sup>0</sup>     | b <sup>0++</sup>  | Seq. | y                  | y <sup>++</sup>   | y <sup>*</sup>     | y <sup>*++</sup> | y <sup>0</sup>     | y <sup>0++</sup> | #  |
|----|--------------------|-------------------|----------------|------------------|--------------------|-------------------|------|--------------------|-------------------|--------------------|------------------|--------------------|------------------|----|
| 1  | 114.091340         | 57.549308         |                |                  |                    |                   | I    |                    |                   |                    |                  |                    |                  | 20 |
| 2  | <b>227.175404</b>  | 114.091340        |                |                  |                    |                   | L    | 2355.168297        | 1178.087786       | 2338.141748        | 1169.574512      | 2337.157732        | 1169.082504      | 19 |
| 3  | 340.259468         | 170.633372        |                |                  |                    |                   | L    | 2242.084233        | 1121.545754       | 2225.057684        | 1113.032480      | 2224.073668        | 1112.540472      | 18 |
| 4  | 779.484794         | 390.246035        | 762.458245     | 381.732760       |                    |                   | Q    | 2129.000169        | 1065.003722       | 2111.973620        | 1056.490448      | 2110.989604        | 1055.998440      | 17 |
| 5  | 836.506258         | 418.756767        | 819.479709     | 410.243493       |                    |                   | G    | 1689.774843        | 845.391060        | 1672.748294        | 836.877785       | 1671.764278        | 836.385777       | 16 |
| 6  | <b>937.553937</b>  | 469.280607        | 920.527388     | 460.767332       | <b>919.543372</b>  | 460.275324        | T    | 1632.753379        | 816.880328        | 1615.726830        | 808.367053       | 1614.742814        | 807.875045       | 15 |
| 7  | 1034.606701        | 517.806988        | 1017.580152    | 509.293714       | 1016.596136        | 508.801706        | P    | <b>1531.705700</b> | <b>766.356488</b> | 1514.679151        | 757.843214       | 1513.695135        | 757.351206       | 14 |
| 8  | <b>1133.675115</b> | <b>567.341196</b> | 1116.648566    | 558.827921       | 1115.664550        | 558.335913        | V    | 1434.652936        | 717.830106        | 1417.626387        | 709.316832       | 1416.642371        | 708.824824       | 13 |
| 9  | <b>1204.712229</b> | 602.859753        | 1187.685680    | 594.346478       | 1186.701664        | 593.854470        | A    | <b>1335.584522</b> | 668.295899        | 1318.557973        | 659.782625       | 1317.573957        | 659.290617       | 12 |
| 10 | <b>1332.770807</b> | 666.889042        | 1315.744258    | 658.375767       | <b>1314.760242</b> | <b>657.883759</b> | Q    | <b>1264.547408</b> | 632.777342        | <b>1247.520859</b> | 624.264068       | <b>1246.536843</b> | 623.772060       | 11 |
| 11 | <b>1463.811292</b> | 732.409284        | 1446.784743    | 723.896010       | 1445.800727        | <b>723.404002</b> | M    | <b>1136.488830</b> | 568.748053        | 1119.462281        | 560.234779       | <b>1118.478265</b> | 559.742771       | 10 |
| 12 | 1564.858971        | <b>782.933124</b> | 1547.832422    | 774.419849       | 1546.848406        | 773.927841        | T    | <b>1005.448345</b> | 503.227811        | 988.421796         | 494.714536       | 987.437780         | 494.222528       | 9  |
| 13 | 1693.901564        | 847.454420        | 1676.875015    | 838.941146       | 1675.890999        | 838.449138        | E    | <b>904.400666</b>  | 452.703971        | 887.374117         | 444.190697       | 886.390101         | 443.698689       | 8  |
| 14 | 1808.928507        | 904.967892        | 1791.901958    | 896.454617       | 1790.917942        | 895.962609        | D    | <b>775.358073</b>  | 388.182675        | 758.331524         | 379.669400       | 757.347508         | 379.177392       | 7  |
| 15 | 1879.965621        | 940.486449        | 1862.939072    | 931.973174       | 1861.955056        | 931.481166        | A    | <b>660.331130</b>  | 330.669203        | 643.304581         | 322.155929       | 642.320565         | 321.663921       | 6  |
| 16 | 1979.034035        | <b>990.020656</b> | 1962.007486    | 981.507381       | 1961.023470        | 981.015373        | V    | <b>589.294016</b>  | 295.150646        | 572.267467         | 286.637372       | 571.283451         | 286.145364       | 5  |
| 17 | 2094.060978        | 1047.534127       | 2077.034429    | 1039.020852      | 2076.050413        | 1038.528844       | D    | <b>490.225602</b>  | 245.616439        | 473.199053         | 237.103165       | 472.215037         | 236.611157       | 4  |
| 18 | 2165.098092        | 1083.052684       | 2148.071543    | 1074.539409      | 2147.087527        | 1074.047402       | A    | <b>375.198659</b>  | 188.102968        | 358.172110         | 179.589693       | 357.188094         | 179.097685       | 3  |
| 19 | 2294.140685        | 1147.573981       | 2277.114136    | 1139.060706      | 2276.130120        | 1138.568698       | E    | <b>304.161545</b>  | 152.584411        | 287.134996         | 144.071136       | 286.150980         | 143.579128       | 2  |
| 20 |                    |                   |                |                  |                    |                   | R    | <b>175.118952</b>  | 88.063114         | 158.092403         | 79.549839        |                    |                  | 1  |

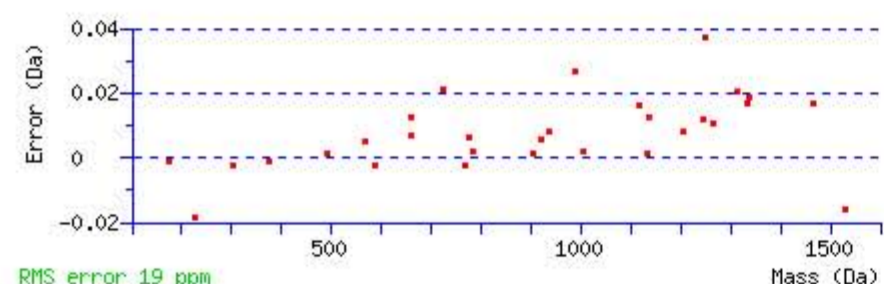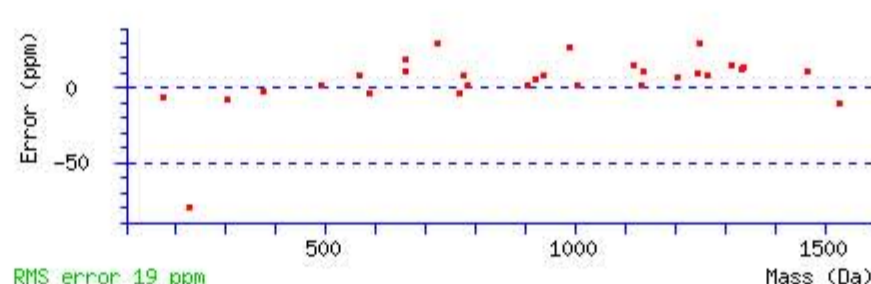

NCBI BLAST search of [ILLQGPVAQMTEDAVDAER](#)

(Parameters: blastp, nr protein database, expect=20000, no filter, PAM30)

Other BLAST [web gateways](#)

All matches to this query

| Score | Mr(calc):   | Delta    | Sequence                            |
|-------|-------------|----------|-------------------------------------|
| 79.6  | 2467.245071 | 0.015571 | <a href="#">ILLQGPVAQMTEDAVDAER</a> |
| 54.1  | 2467.245071 | 0.015571 | <a href="#">ILLQGPVAQMTEDAVDAER</a> |



# MASCOT Search Results

## Peptide View

MS/MS Fragmentation of **ILLQGTPVAQMTEDAVER**  
 Found in **CO3\_HUMAN**, Complement C3 OS=Homo sapiens GN=C3 PE=1 SV=2

Match to Query 56191: 2483.252112 from(828.757980,3+) rtinseconds(2234) index(37885)  
 Title: Locus:1.1.1.3197.22 File:"2013-07-02 CLN FXIII 60 min 2nd F 3.wiff"  
 Data file C:\Program Files (x86)\Matrix Science\Mascot Daemon\mgf5 FXIII 60 min 2nd\mascot\_daemon\_merge.mgf

Click mouse within plot area to zoom in by factor of two about that point  
 Or, Plot from  to  Da   
 Label all possible matches  Label matches used for scoring

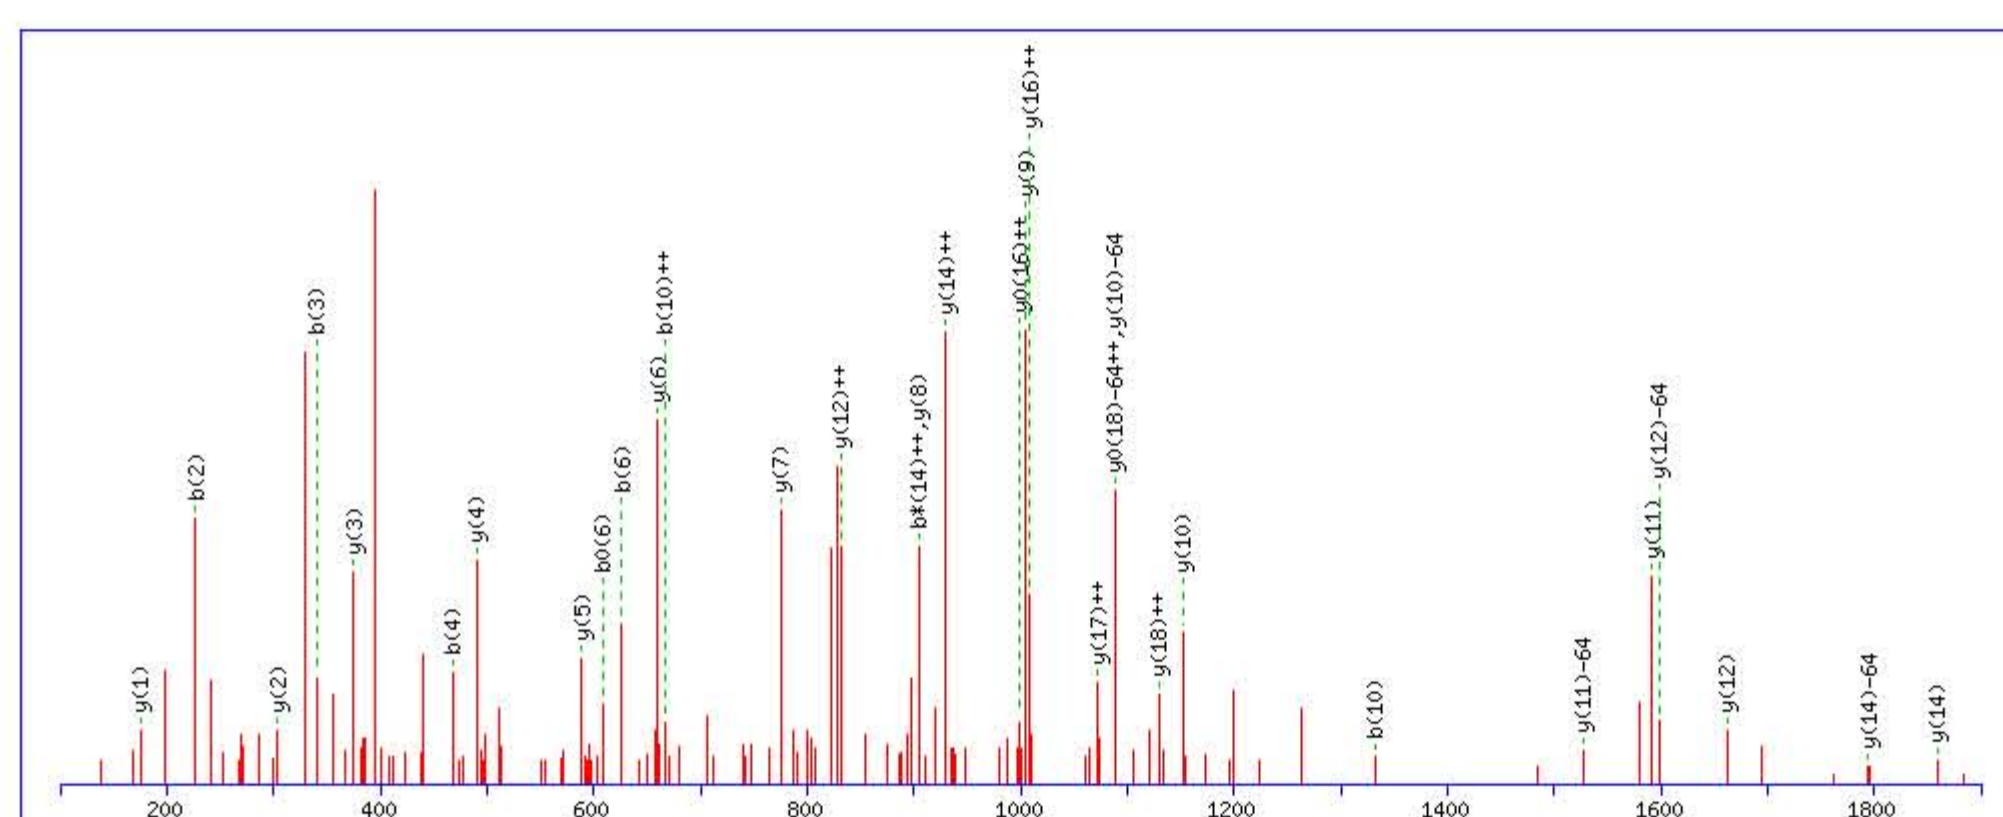

Monoisotopic mass of neutral peptide Mr(calc): 2483.239990  
 Fixed modifications: Carbamidomethyl (C) (apply to specified residues or termini only)  
 Variable modifications:  
 Q10 : Biotin:Thermo-21345 (Q)  
 M11 : Oxidation (M), with neutral losses 0.000000 (shown in table), 63.998285  
 Ions Score: 81 Expect: 2.4e-007  
 Matches : 32/324 fragment ions using 49 most intense peaks [\(help\)](#)

| #  | b                  | b <sup>++</sup>   | b <sup>*</sup> | b <sup>*++</sup>  | b <sup>0</sup>    | b <sup>0++</sup> | Seq. | y                  | y <sup>++</sup>    | y <sup>*</sup> | y <sup>*++</sup> | y <sup>0</sup> | y <sup>0++</sup>  | #  |
|----|--------------------|-------------------|----------------|-------------------|-------------------|------------------|------|--------------------|--------------------|----------------|------------------|----------------|-------------------|----|
| 1  | 114.091340         | 57.549308         |                |                   |                   |                  | I    |                    |                    |                |                  |                |                   | 20 |
| 2  | <b>227.175404</b>  | 114.091340        |                |                   |                   |                  | L    | 2371.163212        | 1186.085244        | 2354.136663    | 1177.571969      | 2353.152647    | 1177.079961       | 19 |
| 3  | <b>340.259468</b>  | 170.633372        |                |                   |                   |                  | L    | 2258.079148        | <b>1129.543212</b> | 2241.052599    | 1121.029938      | 2240.068583    | 1120.537930       | 18 |
| 4  | <b>468.318046</b>  | 234.662661        | 451.291497     | 226.149386        |                   |                  | Q    | 2144.995084        | <b>1073.001180</b> | 2127.968535    | 1064.487905      | 2126.984519    | 1063.995898       | 17 |
| 5  | 525.339510         | 263.173393        | 508.312961     | 254.660119        |                   |                  | G    | 2016.936506        | <b>1008.971891</b> | 1999.909957    | 1000.458617      | 1998.925941    | <b>999.966609</b> | 16 |
| 6  | <b>626.387189</b>  | 313.697233        | 609.360640     | 305.183958        | <b>608.376624</b> | 304.691950       | T    | 1959.915042        | 980.461159         | 1942.888493    | 971.947885       | 1941.904477    | 971.455877        | 15 |
| 7  | 723.439953         | 362.223615        | 706.413404     | 353.710340        | 705.429388        | 353.218332       | P    | <b>1858.867363</b> | <b>929.937320</b>  | 1841.840814    | 921.424045       | 1840.856798    | 920.932037        | 14 |
| 8  | 822.508367         | 411.757822        | 805.481818     | 403.244547        | 804.497802        | 402.752539       | V    | 1761.814599        | 881.410938         | 1744.788050    | 872.897663       | 1743.804034    | 872.405655        | 13 |
| 9  | 893.545481         | 447.276379        | 876.518932     | 438.763104        | 875.534916        | 438.271096       | A    | <b>1662.746185</b> | <b>831.876731</b>  | 1645.719636    | 823.363456       | 1644.735620    | 822.871448        | 12 |
| 10 | <b>1332.770807</b> | <b>666.889042</b> | 1315.744258    | 658.375767        | 1314.760242       | 657.883759       | Q    | <b>1591.709071</b> | 796.358174         | 1574.682522    | 787.844899       | 1573.698506    | 787.352891        | 11 |
| 11 | 1479.806207        | 740.406742        | 1462.779658    | 731.893467        | 1461.795642       | 731.401459       | M    | <b>1152.483745</b> | 576.745511         | 1135.457196    | 568.232236       | 1134.473180    | 567.740228        | 10 |
| 12 | 1580.853886        | 790.930581        | 1563.827337    | 782.417307        | 1562.843321       | 781.925299       | T    | <b>1005.448345</b> | 503.227811         | 988.421796     | 494.714536       | 987.437780     | 494.222528        | 9  |
| 13 | 1709.896479        | 855.451878        | 1692.869930    | 846.938603        | 1691.885914       | 846.446595       | E    | <b>904.400666</b>  | 452.703971         | 887.374117     | 444.190697       | 886.390101     | 443.698689        | 8  |
| 14 | 1824.923422        | 912.965349        | 1807.896873    | <b>904.452075</b> | 1806.912857       | 903.960067       | D    | <b>775.358073</b>  | 388.182675         | 758.331524     | 379.669400       | 757.347508     | 379.177392        | 7  |
| 15 | 1895.960536        | 948.483906        | 1878.933987    | 939.970632        | 1877.949971       | 939.478624       | A    | <b>660.331130</b>  | 330.669203         | 643.304581     | 322.155929       | 642.320565     | 321.663921        | 6  |
| 16 | 1995.028950        | 998.018113        | 1978.002401    | 989.504839        | 1977.018385       | 989.012831       | V    | <b>589.294016</b>  | 295.150646         | 572.267467     | 286.637372       | 571.283451     | 286.145364        | 5  |
| 17 | 2110.055893        | 1055.531585       | 2093.029344    | 1047.018310       | 2092.045328       | 1046.526302      | D    | <b>490.225602</b>  | 245.616439         | 473.199053     | 237.103165       | 472.215037     | 236.611157        | 4  |
| 18 | 2181.093007        | 1091.050142       | 2164.066458    | 1082.536867       | 2163.082442       | 1082.044859      | A    | <b>375.198659</b>  | 188.102968         | 358.172110     | 179.589693       | 357.188094     | 179.097685        | 3  |
| 19 | 2310.135600        | 1155.571438       | 2293.109051    | 1147.058164       | 2292.125035       | 1146.566156      | E    | <b>304.161545</b>  | 152.584411         | 287.134996     | 144.071136       | 286.150980     | 143.579128        | 2  |
| 20 |                    |                   |                |                   |                   |                  | R    | <b>175.118952</b>  | 88.063114          | 158.092403     | 79.549839        |                |                   | 1  |

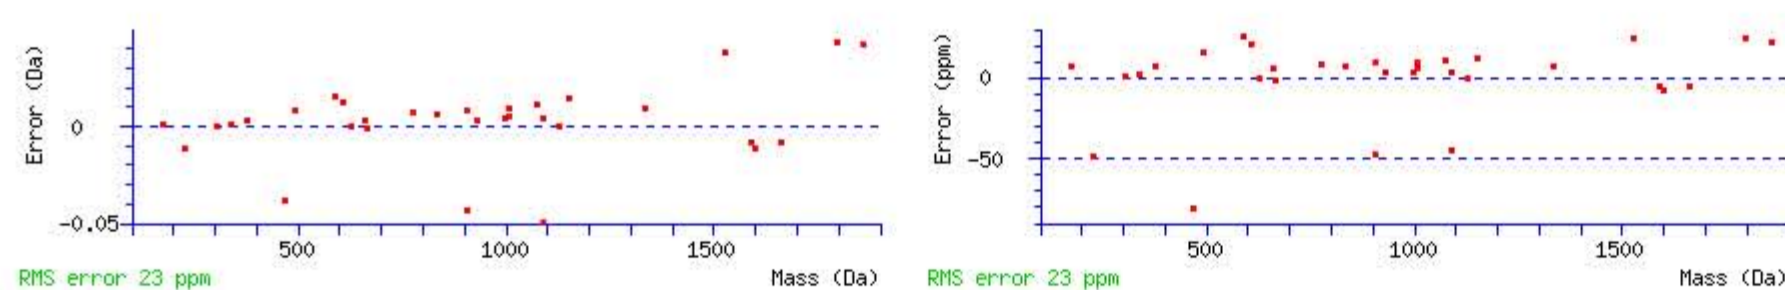

NCBI BLAST search of [ILLQGTPVAQMTEDAVER](#)  
 (Parameters: blastp, nr protein database, expect=20000, no filter, PAM30)  
 Other BLAST [web gateways](#)

### All matches to this query

| Score | Mr(calc):   | Delta    | Sequence                           |
|-------|-------------|----------|------------------------------------|
| 81.0  | 2483.239990 | 0.012122 | <a href="#">ILLQGTPVAQMTEDAVER</a> |
| 33.8  | 2483.239990 | 0.012122 | <a href="#">ILLQGTPVAQMTEDAVER</a> |



**MASCOT** Mascot Search Results

**Peptide View**

MS/MS Fragmentation of **VPVAVQGEDTVQSLTQGDGVAK**  
 Found in **CO3\_HUMAN**, Complement C3 OS=Homo sapiens GN=C3 PE=1 SV=2

Match to Query 56831: 2508.305142 from(837.108990,3+) rtinseconds(2220) index(37789)  
 Title: Locus:1.1.1.3192.24 File:"2013-07-02 CLN FXIII 60 min 2nd F 3.wiff"  
 Data file C:\Program Files (x86)\Matrix Science\Mascot Daemon\mgf5 FXIII 60 min 2nd\mascot\_daemon\_merge.mgf

Click mouse within plot area to zoom in by factor of two about that point  
 Or, Plot from  to  Da   
 Label all possible matches  Label matches used for scoring

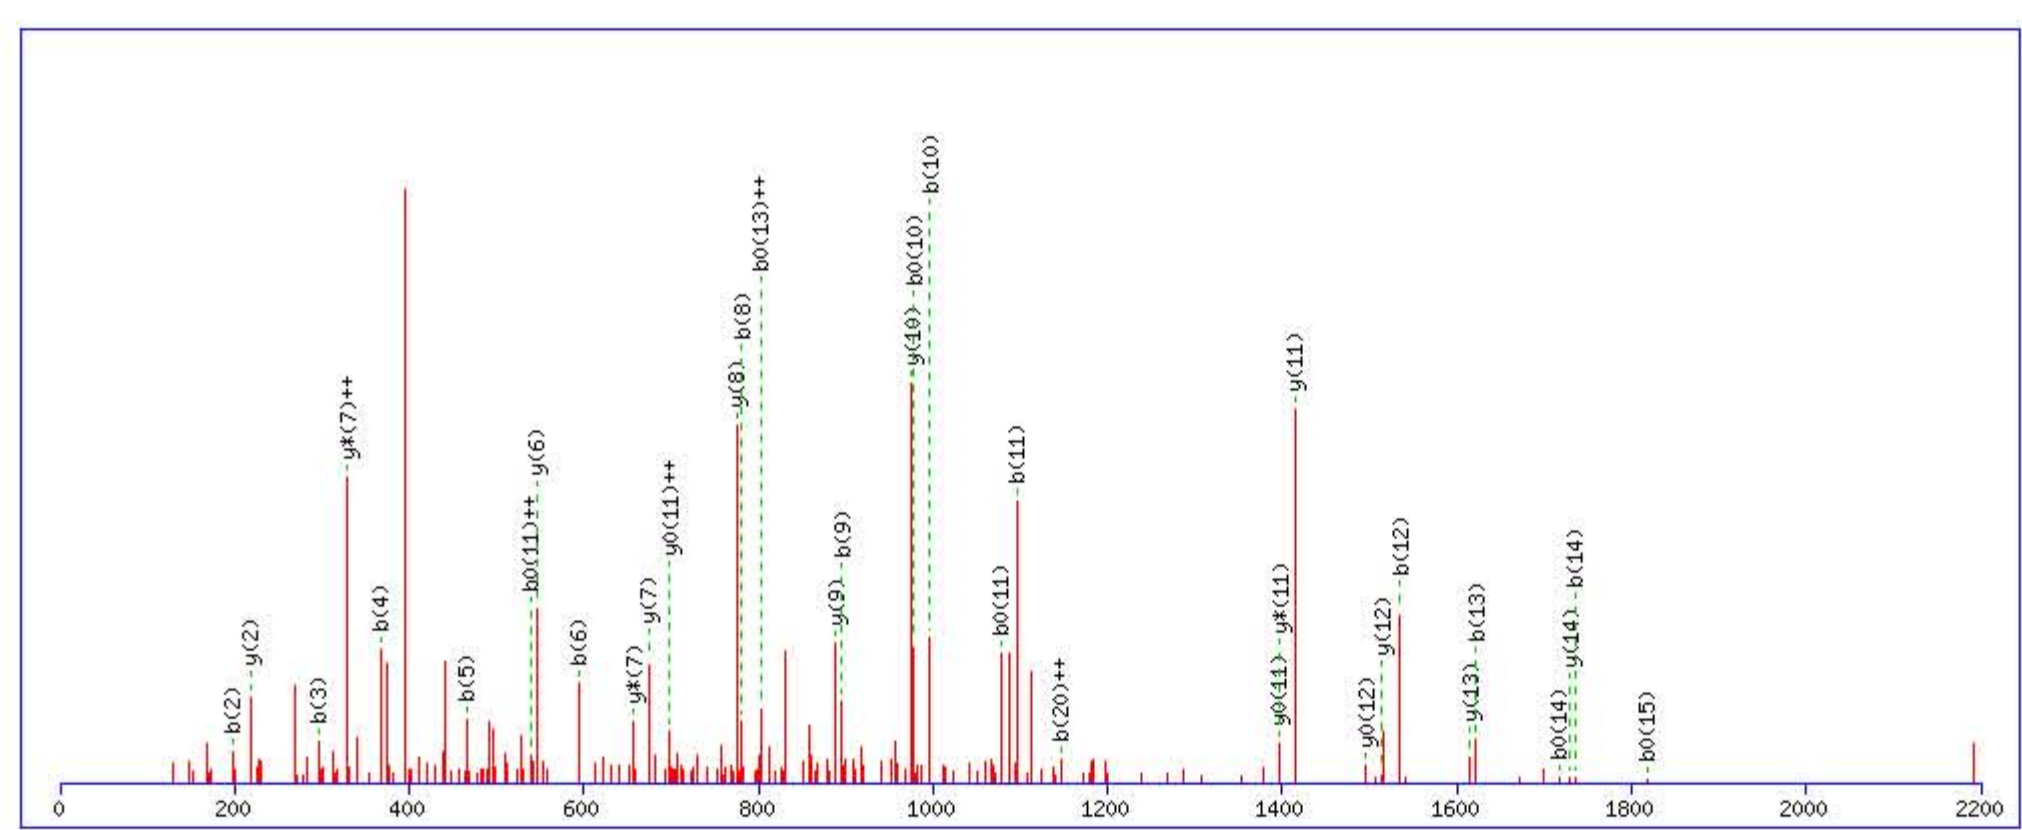

Monoisotopic mass of neutral peptide  $M_r(\text{calc})$ : 2508.289429  
 Fixed modifications: Carbamidomethyl (C) (apply to specified residues or termini only)  
 Variable modifications:  
 Q12 : Biotin:Thermo-21345 (Q)  
 Ions Score: 83 Expect: 1.4e-007  
 Matches : 35/220 fragment ions using 52 most intense peaks [\(help\)](#)

| #  | b                  | b <sup>++</sup>    | b <sup>*</sup> | b <sup>*++</sup> | b <sup>0</sup>     | b <sup>0++</sup>  | Seq. | y                  | y <sup>++</sup> | y <sup>*</sup>     | y <sup>*++</sup>  | y <sup>0</sup>     | y <sup>0++</sup>  | #  |
|----|--------------------|--------------------|----------------|------------------|--------------------|-------------------|------|--------------------|-----------------|--------------------|-------------------|--------------------|-------------------|----|
| 1  | 100.075690         | 50.541483          |                |                  |                    |                   | V    |                    |                 |                    |                   |                    |                   | 22 |
| 2  | <b>197.128454</b>  | 99.067865          |                |                  |                    |                   | P    | 2410.228255        | 1205.617765     | 2393.201706        | 1197.104491       | 2392.217690        | 1196.612483       | 21 |
| 3  | <b>296.196868</b>  | 148.602072         |                |                  |                    |                   | V    | 2313.175491        | 1157.091383     | 2296.148942        | 1148.578109       | 2295.164926        | 1148.086101       | 20 |
| 4  | <b>367.233982</b>  | 184.120629         |                |                  |                    |                   | A    | 2214.107077        | 1107.557176     | 2197.080528        | 1099.043902       | 2196.096512        | 1098.551894       | 19 |
| 5  | <b>466.302396</b>  | 233.654836         |                |                  |                    |                   | V    | 2143.069963        | 1072.038619     | 2126.043414        | 1063.525345       | 2125.059398        | 1063.033337       | 18 |
| 6  | <b>594.360974</b>  | 297.684125         | 577.334425     | 289.170851       |                    |                   | Q    | 2044.001549        | 1022.504413     | 2026.975000        | 1013.991138       | 2025.990984        | 1013.499130       | 17 |
| 7  | 651.382438         | 326.194857         | 634.355889     | 317.681583       |                    |                   | G    | 1915.942971        | 958.475124      | 1898.916422        | 949.961849        | 1897.932406        | 949.469841        | 16 |
| 8  | <b>780.425031</b>  | 390.716154         | 763.398482     | 382.202879       | 762.414466         | 381.710871        | E    | 1858.921507        | 929.964391      | 1841.894958        | 921.451117        | 1840.910942        | 920.959109        | 15 |
| 9  | <b>895.451974</b>  | 448.229625         | 878.425425     | 439.716351       | 877.441409         | 439.224343        | D    | <b>1729.878914</b> | 865.443095      | 1712.852365        | 856.929821        | 1711.868349        | 856.437812        | 14 |
| 10 | <b>996.499653</b>  | 498.753465         | 979.473104     | 490.240190       | <b>978.489088</b>  | 489.748182        | T    | <b>1614.851971</b> | 807.929623      | 1597.825422        | 799.416349        | 1596.841406        | 798.924341        | 13 |
| 11 | <b>1095.568067</b> | 548.287672         | 1078.541518    | 539.774397       | <b>1077.557502</b> | <b>539.282389</b> | V    | <b>1513.804292</b> | 757.405784      | 1496.777743        | 748.892510        | <b>1495.793727</b> | 748.400502        | 12 |
| 12 | <b>1534.793393</b> | 767.900335         | 1517.766844    | 759.387060       | 1516.782828        | 758.895052        | Q    | <b>1414.735878</b> | 707.871577      | <b>1397.709329</b> | 699.358303        | <b>1396.725313</b> | <b>698.866294</b> | 11 |
| 13 | <b>1621.825421</b> | 811.416349         | 1604.798872    | 802.903074       | 1603.814856        | <b>802.411066</b> | S    | <b>975.510552</b>  | 488.258914      | 958.484003         | 479.745639        | 957.499987         | 479.253631        | 10 |
| 14 | <b>1734.909485</b> | 867.958381         | 1717.882936    | 859.445106       | <b>1716.898920</b> | 858.953098        | L    | <b>888.478524</b>  | 444.742900      | 871.451975         | 436.229625        | 870.467959         | 435.737617        | 9  |
| 15 | 1835.957164        | 918.482220         | 1818.930615    | 909.968946       | <b>1817.946599</b> | 909.476938        | T    | <b>775.394460</b>  | 388.200868      | 758.367911         | 379.687593        | 757.383895         | 379.195585        | 8  |
| 16 | 1964.015742        | 982.511509         | 1946.989193    | 973.998235       | 1946.005177        | 973.506227        | Q    | <b>674.346781</b>  | 337.677029      | <b>657.320232</b>  | <b>329.163754</b> | 656.336216         | 328.671746        | 7  |
| 17 | 2021.037206        | 1011.022241        | 2004.010657    | 1002.508967      | 2003.026641        | 1002.016959       | G    | <b>546.288203</b>  | 273.647739      | 529.261654         | 265.134465        | 528.277638         | 264.642457        | 6  |
| 18 | 2136.064149        | 1068.535712        | 2119.037600    | 1060.022438      | 2118.053584        | 1059.530430       | D    | 489.266739         | 245.137007      | 472.240190         | 236.623733        | 471.256174         | 236.131725        | 5  |
| 19 | 2193.085613        | 1097.046444        | 2176.059064    | 1088.533170      | 2175.075048        | 1088.041162       | G    | 374.239796         | 187.623536      | 357.213247         | 179.110261        |                    |                   | 4  |
| 20 | 2292.154027        | <b>1146.580651</b> | 2275.127478    | 1138.067377      | 2274.143462        | 1137.575369       | V    | 317.218332         | 159.112804      | 300.191783         | 150.599530        |                    |                   | 3  |
| 21 | 2363.191141        | 1182.099208        | 2346.164592    | 1173.585934      | 2345.180576        | 1173.093926       | A    | <b>218.149918</b>  | 109.578597      | 201.123369         | 101.065323        |                    |                   | 2  |
| 22 |                    |                    |                |                  |                    |                   | K    | 147.112804         | 74.060040       | 130.086255         | 65.546765         |                    |                   | 1  |

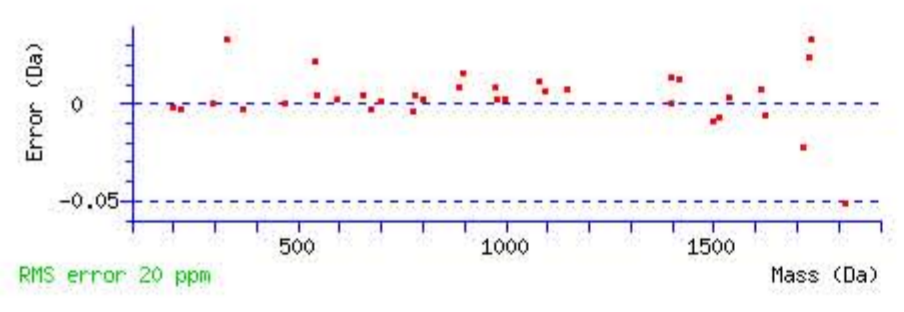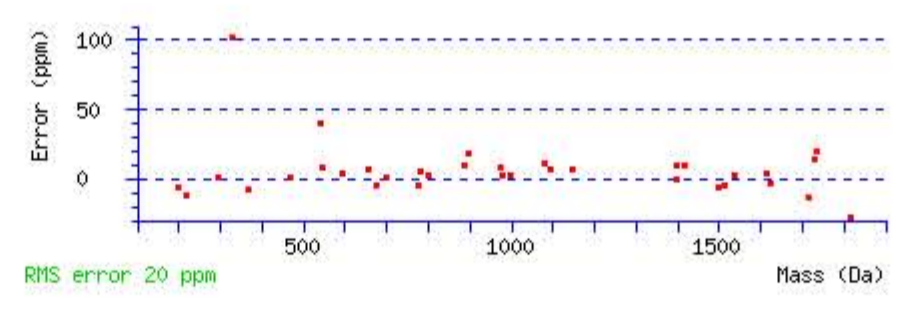

NCBI BLAST search of **VPVAVQGEDTVQSLTQGDGVAK**  
 (Parameters: blastp, nr protein database, expect=20000, no filter, PAM30)  
 Other BLAST [web gateways](#)

**All matches to this query**

| Score | $M_r(\text{calc})$ : | Delta    | Sequence                               |
|-------|----------------------|----------|----------------------------------------|
| 82.8  | 2508.289429          | 0.015713 | <a href="#">VPVAVQGEDTVQSLTQGDGVAK</a> |
| 48.5  | 2508.289429          | 0.015713 | <a href="#">VPVAVQGEDTVQSLTQGDGVAK</a> |
| 31.3  | 2508.289429          | 0.015713 | <a href="#">VPVAVQGEDTVQSLTQGDGVAK</a> |



**Peptide View**

MS/MS Fragmentation of **EDIPPADLSDQVPDTESETR**  
 Found in **CO3\_HUMAN**, Complement C3 OS=Homo sapiens GN=C3 PE=1 SV=2

Match to Query 57007: 2524.176792 from(842.399540,3+) rtinseconds(2096) index(37001)  
 Title: Locus:1.1.1.3149.16 File:"2013-07-02 CLN FXIII 60 min 2nd F 3.wiff"  
 Data file C:\Program Files (x86)\Matrix Science\Mascot Daemon\mgf5 FXIII 60 min 2nd\mascot\_daemon\_merge.mgf

Click mouse within plot area to zoom in by factor of two about that point  
 Or, Plot from  to  Da   
 Label all possible matches  Label matches used for scoring

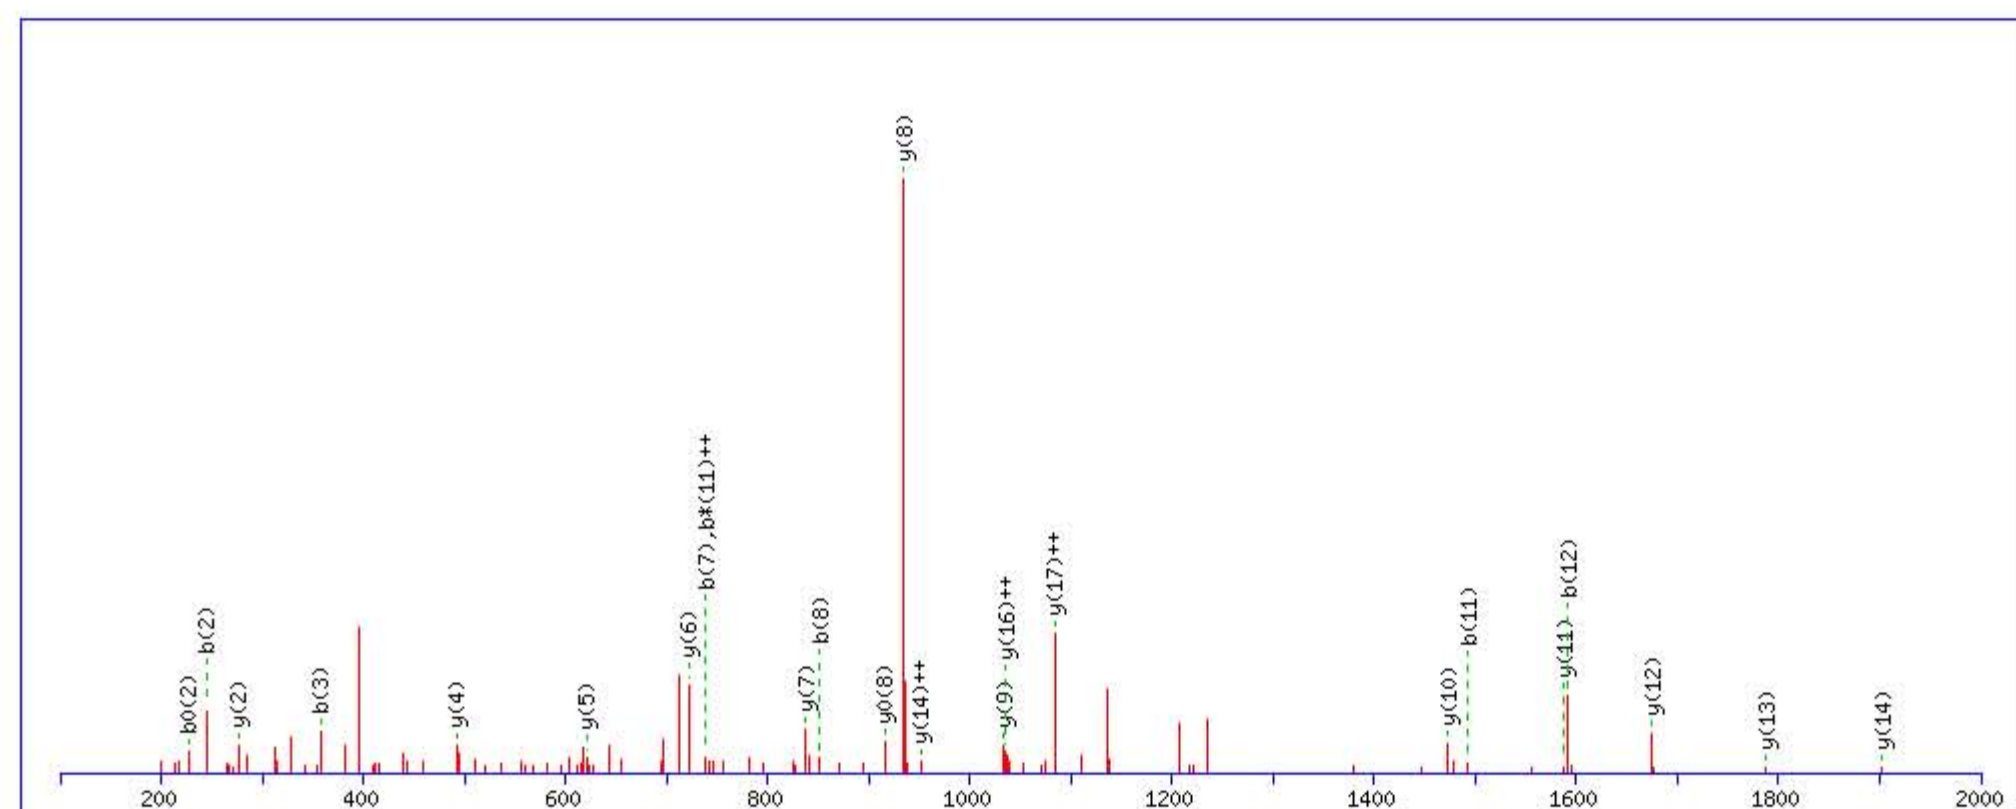

Monoisotopic mass of neutral peptide Mr(calc): 2524.163910  
 Fixed modifications: Carbamidomethyl (C) (apply to specified residues or termini only)  
 Variable modifications:  
 Q11 : Biotin:Thermo-21345 (Q)  
 Ions Score: 54 Expect: 6.4e-005  
 Matches : 24/206 fragment ions using 56 most intense peaks [\(help\)](#)

| #  | b                  | b <sup>++</sup> | b <sup>*</sup> | b <sup>*++</sup>  | b <sup>0</sup>    | b <sup>0++</sup> | Seq. | y                  | y <sup>++</sup>    | y <sup>*</sup> | y <sup>*++</sup> | y <sup>0</sup>    | y <sup>0++</sup> | #  |
|----|--------------------|-----------------|----------------|-------------------|-------------------|------------------|------|--------------------|--------------------|----------------|------------------|-------------------|------------------|----|
| 1  | 130.049869         | 65.528572       |                |                   | 112.039304        | 56.523290        | E    |                    |                    |                |                  |                   |                  | 20 |
| 2  | <b>245.076812</b>  | 123.042044      |                |                   | <b>227.066247</b> | 114.036762       | D    | 2396.128598        | 1198.567937        | 2379.102049    | 1190.054662      | 2378.118033       | 1189.562654      | 19 |
| 3  | <b>358.160876</b>  | 179.584076      |                |                   | 340.150311        | 170.578794       | I    | 2281.101655        | 1141.054465        | 2264.075106    | 1132.541191      | 2263.091090       | 1132.049183      | 18 |
| 4  | 455.213640         | 228.110458      |                |                   | 437.203075        | 219.105176       | P    | 2168.017591        | <b>1084.512433</b> | 2150.991042    | 1075.999159      | 2150.007026       | 1075.507151      | 17 |
| 5  | 552.266404         | 276.636840      |                |                   | 534.255839        | 267.631558       | P    | 2070.964827        | <b>1035.986051</b> | 2053.938278    | 1027.472777      | 2052.954262       | 1026.980769      | 16 |
| 6  | 623.303518         | 312.155397      |                |                   | 605.292953        | 303.150115       | A    | 1973.912063        | 987.459670         | 1956.885514    | 978.946395       | 1955.901498       | 978.454387       | 15 |
| 7  | <b>738.330461</b>  | 369.668869      |                |                   | 720.319896        | 360.663586       | D    | <b>1902.874949</b> | <b>951.941113</b>  | 1885.848400    | 943.427838       | 1884.864384       | 942.935830       | 14 |
| 8  | <b>851.414525</b>  | 426.210901      |                |                   | 833.403960        | 417.205618       | L    | <b>1787.848006</b> | 894.427641         | 1770.821457    | 885.914367       | 1769.837441       | 885.422359       | 13 |
| 9  | 938.446553         | 469.726915      |                |                   | 920.435988        | 460.721632       | S    | <b>1674.763942</b> | 837.885609         | 1657.737393    | 829.372335       | 1656.753377       | 828.880327       | 12 |
| 10 | 1053.473496        | 527.240386      |                |                   | 1035.462931       | 518.235104       | D    | <b>1587.731914</b> | 794.369595         | 1570.705365    | 785.856321       | 1569.721349       | 785.364313       | 11 |
| 11 | <b>1492.698822</b> | 746.853049      | 1475.672273    | <b>738.339775</b> | 1474.688257       | 737.847767       | Q    | <b>1472.704971</b> | 736.856124         | 1455.678422    | 728.342849       | 1454.694406       | 727.850841       | 10 |
| 12 | <b>1591.767236</b> | 796.387256      | 1574.740687    | 787.873982        | 1573.756671       | 787.381974       | V    | <b>1033.479645</b> | 517.243461         | 1016.453096    | 508.730186       | 1015.469080       | 508.238178       | 9  |
| 13 | 1688.820000        | 844.913638      | 1671.793451    | 836.400364        | 1670.809435       | 835.908356       | P    | <b>934.411231</b>  | 467.709254         | 917.384682     | 459.195979       | <b>916.400666</b> | 458.703971       | 8  |
| 14 | 1803.846943        | 902.427110      | 1786.820394    | 893.913835        | 1785.836378       | 893.421827       | D    | <b>837.358467</b>  | 419.182872         | 820.331918     | 410.669597       | 819.347902        | 410.177589       | 7  |
| 15 | 1904.894622        | 952.950949      | 1887.868073    | 944.437675        | 1886.884057       | 943.945667       | T    | <b>722.331524</b>  | 361.669400         | 705.304975     | 353.156125       | 704.320959        | 352.664117       | 6  |
| 16 | 2033.937215        | 1017.472246     | 2016.910666    | 1008.958971       | 2015.926650       | 1008.466963      | E    | <b>621.283845</b>  | 311.145560         | 604.257296     | 302.632286       | 603.273280        | 302.140278       | 5  |
| 17 | 2120.969243        | 1060.988259     | 2103.942694    | 1052.474985       | 2102.958678       | 1051.982977      | S    | <b>492.241252</b>  | 246.624264         | 475.214703     | 238.110989       | 474.230687        | 237.618981       | 4  |
| 18 | 2250.011836        | 1125.509556     | 2232.985287    | 1116.996281       | 2232.001271       | 1116.504274      | E    | 405.209224         | 203.108250         | 388.182675     | 194.594975       | 387.198659        | 194.102967       | 3  |
| 19 | 2351.059515        | 1176.033395     | 2334.032966    | 1167.520121       | 2333.048950       | 1167.028113      | T    | <b>276.166631</b>  | 138.586953         | 259.140082     | 130.073679       | 258.156066        | 129.581671       | 2  |
| 20 |                    |                 |                |                   |                   |                  | R    | 175.118952         | 88.063114          | 158.092403     | 79.549839        |                   |                  | 1  |

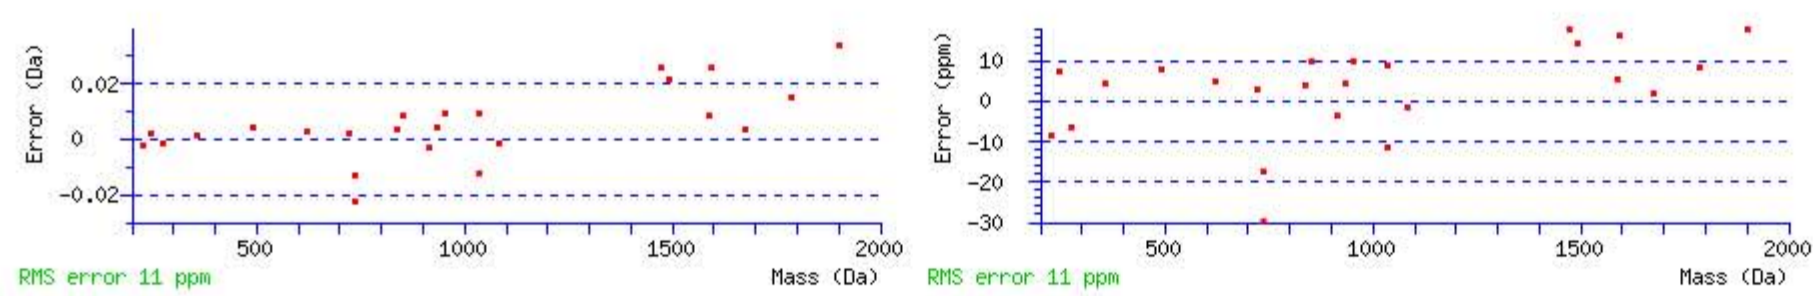

NCBI BLAST search of [EDIPPADLSDQVPDTESETR](#)  
 (Parameters: blastp, nr protein database, expect=20000, no filter, PAM30)  
 Other BLAST [web gateways](#)

**All matches to this query**

| Score | Mr(calc):   | Delta    | Sequence                             |
|-------|-------------|----------|--------------------------------------|
| 53.6  | 2524.163910 | 0.012882 | <a href="#">EDIPPADLSDQVPDTESETR</a> |



# MASCOT Search Results

## Peptide View

MS/MS Fragmentation of **VQLSNDFDEYIMAIEQTIK**  
 Found in **CO3\_HUMAN**, Complement C3 OS=Homo sapiens GN=C3 PE=1 SV=2

Match to Query 57316: 2567.276352 from(856.766060,3+) rtinseconds(3246) index(44662)  
 Title: Locus:1.1.1.3544.21 File:"2013-07-02 CLN FXIII 60 min 2nd F 3.wiff"  
 Data file C:\Program Files (x86)\Matrix Science\Mascot Daemon\mgf\5 FXIII 60 min 2nd\mascot\_daemon\_merge.mgf

Click mouse within plot area to zoom in by factor of two about that point

Or, Plot from  to  Da

Label all possible matches  Label matches used for scoring

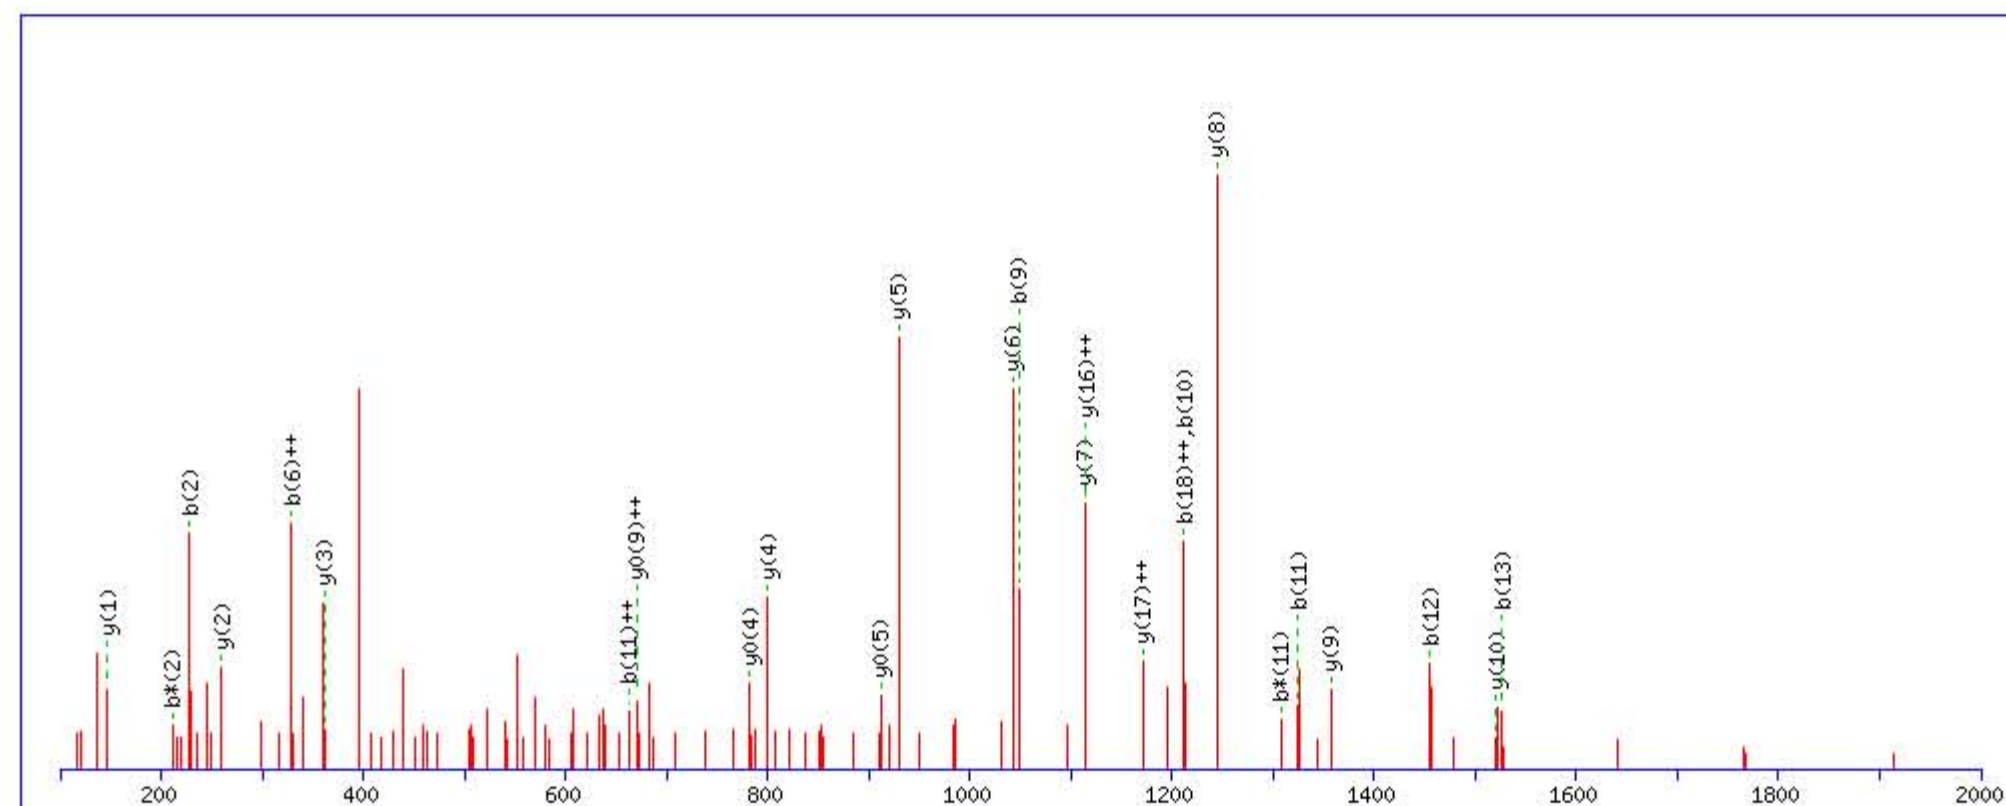

Monoisotopic mass of neutral peptide Mr(calc): 2567.265121  
 Fixed modifications: Carbamidomethyl (C) (apply to specified residues or termini only)  
 Variable modifications:  
 Q16 : Biotin:Thermo-21345 (Q)  
 Ions Score: 35 Expect: 0.0098  
 Matches : 26/204 fragment ions using 63 most intense peaks [\(help\)](#)

| #  | b                  | b <sup>++</sup>    | b <sup>+</sup>     | b <sup>+++</sup> | b <sup>0</sup> | b <sup>0++</sup> | Seq. | y                  | y <sup>++</sup>    | y <sup>+</sup> | y <sup>+++</sup> | y <sup>0</sup>    | y <sup>0++</sup>  | #  |
|----|--------------------|--------------------|--------------------|------------------|----------------|------------------|------|--------------------|--------------------|----------------|------------------|-------------------|-------------------|----|
| 1  | 100.075690         | 50.541483          |                    |                  |                |                  | V    |                    |                    |                |                  |                   |                   | 19 |
| 2  | <b>228.134268</b>  | 114.570772         | <b>211.107719</b>  | 106.057498       |                |                  | Q    | 2469.204012        | 1235.105644        | 2452.177463    | 1226.592369      | 2451.193447       | 1226.100361       | 18 |
| 3  | 341.218332         | 171.112804         | 324.191783         | 162.599530       |                |                  | L    | 2341.145434        | <b>1171.076355</b> | 2324.118885    | 1162.563080      | 2323.134869       | 1162.071072       | 17 |
| 4  | 428.250360         | 214.628818         | 411.223811         | 206.115544       | 410.239795     | 205.623536       | S    | 2228.061370        | <b>1114.534323</b> | 2211.034821    | 1106.021048      | 2210.050805       | 1105.529040       | 16 |
| 5  | 542.293287         | 271.650282         | 525.266738         | 263.137007       | 524.282722     | 262.644999       | N    | 2141.029342        | 1071.018309        | 2124.002793    | 1062.505034      | 2123.018777       | 1062.013026       | 15 |
| 6  | 657.320230         | <b>329.163753</b>  | 640.293681         | 320.650479       | 639.309665     | 320.158471       | D    | 2026.986415        | 1013.996845        | 2009.959866    | 1005.483571      | 2008.975850       | 1004.991563       | 14 |
| 7  | 804.388644         | 402.697960         | 787.362095         | 394.184686       | 786.378079     | 393.692678       | F    | 1911.959472        | 956.483374         | 1894.932923    | 947.970099       | 1893.948907       | 947.478091        | 13 |
| 8  | 919.415587         | 460.211432         | 902.389038         | 451.698157       | 901.405022     | 451.206149       | D    | 1764.891058        | 882.949167         | 1747.864509    | 874.435893       | 1746.880493       | 873.943884        | 12 |
| 9  | <b>1048.458180</b> | 524.732728         | 1031.431631        | 516.219453       | 1030.447615    | 515.727445       | E    | 1649.864115        | 825.435695         | 1632.837566    | 816.922421       | 1631.853550       | 816.430413        | 11 |
| 10 | <b>1211.521509</b> | 606.264392         | 1194.494960        | 597.751118       | 1193.510944    | 597.259110       | Y    | <b>1520.821522</b> | 760.914399         | 1503.794973    | 752.401125       | 1502.810957       | 751.909116        | 10 |
| 11 | <b>1324.605573</b> | <b>662.806424</b>  | <b>1307.579024</b> | 654.293150       | 1306.595008    | 653.801142       | I    | <b>1357.758193</b> | 679.382734         | 1340.731644    | 670.869460       | 1339.747628       | <b>670.377452</b> | 9  |
| 12 | <b>1455.646058</b> | 728.326667         | 1438.619509        | 719.813392       | 1437.635493    | 719.321384       | M    | <b>1244.674129</b> | 622.840703         | 1227.647580    | 614.327428       | 1226.663564       | 613.835420        | 8  |
| 13 | <b>1526.683172</b> | 763.845224         | 1509.656623        | 755.331949       | 1508.672607    | 754.839941       | A    | <b>1113.633644</b> | 557.320460         | 1096.607095    | 548.807186       | 1095.623079       | 548.315178        | 7  |
| 14 | 1639.767236        | 820.387256         | 1622.740687        | 811.873981       | 1621.756671    | 811.381973       | I    | <b>1042.596530</b> | 521.801903         | 1025.569981    | 513.288629       | 1024.585965       | 512.796621        | 6  |
| 15 | 1768.809829        | 884.908552         | 1751.783280        | 876.395278       | 1750.799264    | 875.903270       | E    | <b>929.512466</b>  | 465.259871         | 912.485917     | 456.746597       | <b>911.501901</b> | 456.254589        | 5  |
| 16 | 2208.035155        | 1104.521215        | 2191.008606        | 1096.007941      | 2190.024590    | 1095.515933      | Q    | <b>800.469873</b>  | 400.738575         | 783.443324     | 392.225300       | <b>782.459308</b> | 391.733292        | 4  |
| 17 | 2309.082834        | 1155.045055        | 2292.056285        | 1146.531780      | 2291.072269    | 1146.039772      | T    | <b>361.244547</b>  | 181.125911         | 344.217998     | 172.612637       | 343.233982        | 172.120629        | 3  |
| 18 | 2422.166898        | <b>1211.587087</b> | 2405.140349        | 1203.073812      | 2404.156333    | 1202.581804      | I    | <b>260.196868</b>  | 130.602072         | 243.170319     | 122.088798       |                   |                   | 2  |
| 19 |                    |                    |                    |                  |                |                  | K    | <b>147.112804</b>  | 74.060040          | 130.086255     | 65.546765        |                   |                   | 1  |

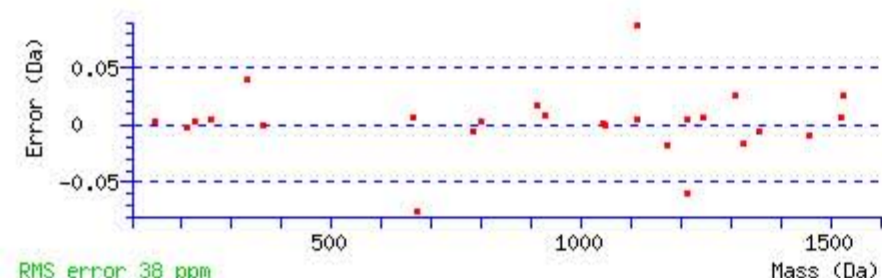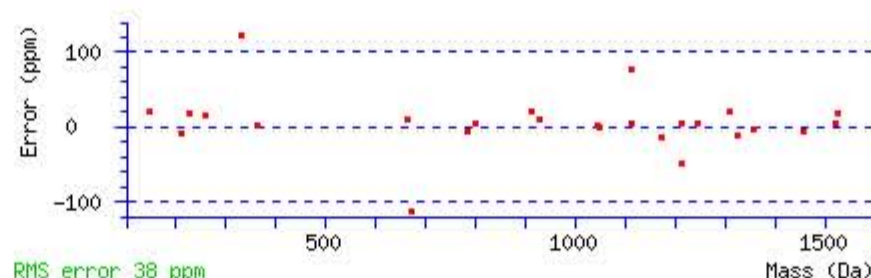

NCBI BLAST search of **VQLSNDFDEYIMAIEQTIK**  
 (Parameters: blastp, nr protein database, expect=20000, no filter, PAM30)  
 Other BLAST [web gateways](#)

## All matches to this query

| Score | Mr(calc):   | Delta    | Sequence                            |
|-------|-------------|----------|-------------------------------------|
| 34.5  | 2567.265121 | 0.011231 | <a href="#">VQLSNDFDEYIMAIEQTIK</a> |



# Mascot Search Results

## Peptide View

MS/MS Fragmentation of **QKPDGVFQEDAPVIHQEMIGGLR**

Found in **CO3\_HUMAN**, Complement C3 OS=Homo sapiens GN=C3 PE=1 SV=2

Match to Query 60616: 2874.463176 from(719.623070,4+) rtinseconds(2217) index(37760)

Title: Locus:1.1.1.3191.20 File:"2013-07-02 CLN FXIII 60 min 2nd F 3.wiff"

Data file C:\Program Files (x86)\Matrix Science\Mascot Daemon\mgf5 FXIII 60 min 2nd\mascot\_daemon\_merge.mgf

Click mouse within plot area to zoom in by factor of two about that point

Or, Plot from  to  Da

Label all possible matches  Label matches used for scoring

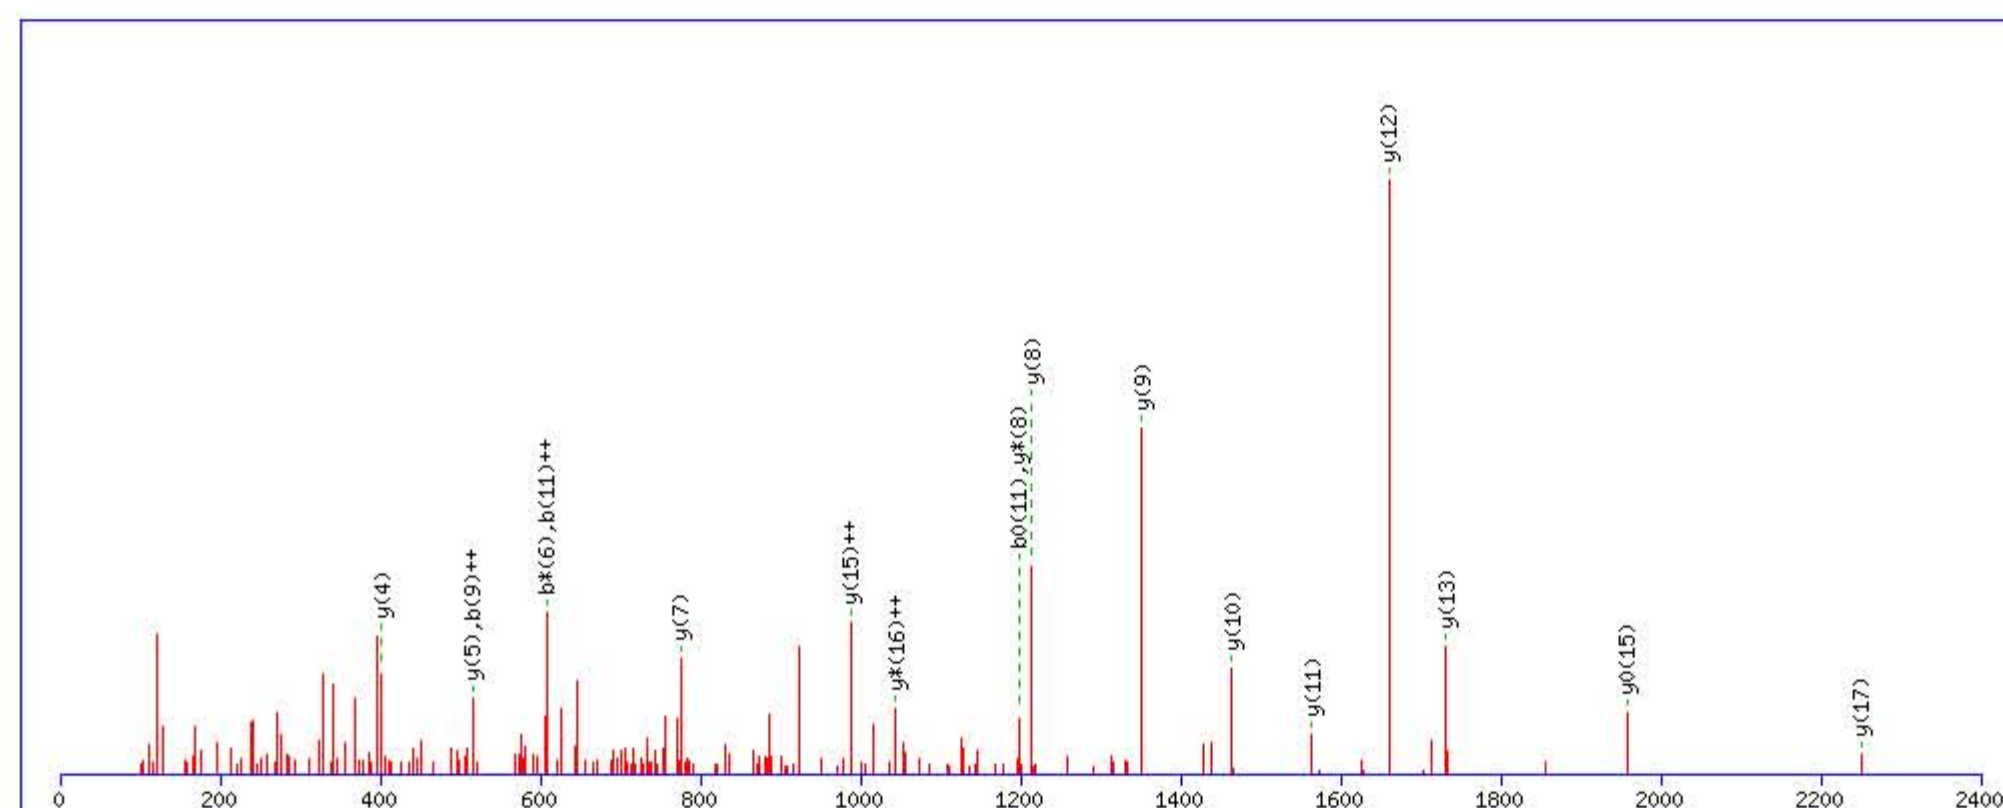

Monoisotopic mass of neutral peptide Mr(calc): 2874.452057

Fixed modifications: Carbamidomethyl (C) (apply to specified residues or termini only)

Variable modifications:

Q16 : Biotin:Thermo-21345 (Q)

Ions Score: 68 Expect: 4.3e-006

Matches : 18/246 fragment ions using 20 most intense peaks [\(help\)](#)

| #  | b           | b <sup>++</sup>   | b <sup>*</sup>    | b <sup>*++</sup> | b <sup>0</sup>     | b <sup>0++</sup> | Seq. | y                  | y <sup>++</sup>   | y <sup>*</sup>     | y <sup>*++</sup>   | y <sup>0</sup>     | y <sup>0++</sup> | #  |
|----|-------------|-------------------|-------------------|------------------|--------------------|------------------|------|--------------------|-------------------|--------------------|--------------------|--------------------|------------------|----|
| 1  | 129.065854  | 65.036565         | 112.039305        | 56.523291        |                    |                  | Q    |                    |                   |                    |                    |                    |                  | 23 |
| 2  | 257.160817  | 129.084047        | 240.134268        | 120.570772       |                    |                  | K    | 2747.400756        | 1374.204016       | 2730.374207        | 1365.690741        | 2729.390191        | 1365.198733      | 22 |
| 3  | 354.213581  | 177.610429        | 337.187032        | 169.097154       |                    |                  | P    | 2619.305793        | 1310.156534       | 2602.279244        | 1301.643260        | 2601.295228        | 1301.151252      | 21 |
| 4  | 469.240524  | 235.123900        | 452.213975        | 226.610626       | 451.229959         | 226.118618       | D    | 2522.253029        | 1261.630152       | 2505.226480        | 1253.116878        | 2504.242464        | 1252.624870      | 20 |
| 5  | 526.261988  | 263.634632        | 509.235439        | 255.121358       | 508.251423         | 254.629350       | G    | 2407.226086        | 1204.116681       | 2390.199537        | 1195.603406        | 2389.215521        | 1195.111398      | 19 |
| 6  | 625.330402  | 313.168839        | <b>608.303853</b> | 304.655565       | 607.319837         | 304.163557       | V    | 2350.204622        | 1175.605949       | 2333.178073        | 1167.092674        | 2332.194057        | 1166.600666      | 18 |
| 7  | 772.398816  | 386.703046        | 755.372267        | 378.189772       | 754.388251         | 377.697764       | F    | <b>2251.136208</b> | 1126.071742       | 2234.109659        | 1117.558467        | 2233.125643        | 1117.066459      | 17 |
| 8  | 900.457394  | 450.732335        | 883.430845        | 442.219061       | 882.446829         | 441.727053       | Q    | 2104.067794        | 1052.537535       | 2087.041245        | <b>1044.024260</b> | 2086.057229        | 1043.532252      | 16 |
| 9  | 1029.499987 | <b>515.253631</b> | 1012.473438       | 506.740357       | 1011.489422        | 506.248349       | E    | 1976.009216        | <b>988.508246</b> | 1958.982667        | 979.994972         | <b>1957.998651</b> | 979.502964       | 15 |
| 10 | 1144.526930 | 572.767103        | 1127.500381       | 564.253829       | 1126.516365        | 563.761821       | D    | 1846.966623        | 923.986950        | 1829.940074        | 915.473675         | 1828.956058        | 914.981667       | 14 |
| 11 | 1215.564044 | <b>608.285660</b> | 1198.537495       | 599.772386       | <b>1197.553479</b> | 599.280377       | A    | <b>1731.939680</b> | 866.473478        | 1714.913131        | 857.960204         | 1713.929115        | 857.468196       | 13 |
| 12 | 1312.616808 | 656.812042        | 1295.590259       | 648.298768       | 1294.606243        | 647.806760       | P    | <b>1660.902566</b> | 830.954921        | 1643.876017        | 822.441647         | 1642.892001        | 821.949639       | 12 |
| 13 | 1411.685222 | 706.346249        | 1394.658673       | 697.832975       | 1393.674657        | 697.340967       | V    | <b>1563.849802</b> | 782.428539        | 1546.823253        | 773.915265         | 1545.839237        | 773.423257       | 11 |
| 14 | 1524.769286 | 762.888281        | 1507.742737       | 754.375007       | 1506.758721        | 753.882998       | I    | <b>1464.781388</b> | 732.894332        | 1447.754839        | 724.381058         | 1446.770823        | 723.889050       | 10 |
| 15 | 1661.828198 | 831.417737        | 1644.801649       | 822.904463       | 1643.817633        | 822.412454       | H    | <b>1351.697324</b> | 676.352300        | 1334.670775        | 667.839026         | 1333.686759        | 667.347018       | 9  |
| 16 | 2101.053524 | 1051.030400       | 2084.026975       | 1042.517125      | 2083.042959        | 1042.025117      | Q    | <b>1214.638412</b> | 607.822844        | <b>1197.611863</b> | 599.309570         | 1196.627847        | 598.817562       | 8  |
| 17 | 2230.096117 | 1115.551696       | 2213.069568       | 1107.038422      | 2212.085552        | 1106.546414      | E    | <b>775.413086</b>  | 388.210181        | 758.386537         | 379.696907         | <b>757.402521</b>  | 379.204899       | 7  |
| 18 | 2361.136602 | 1181.071939       | 2344.110053       | 1172.558664      | 2343.126037        | 1172.066656      | M    | 646.370493         | 323.688885        | 629.343944         | 315.175610         |                    |                  | 6  |
| 19 | 2474.220666 | 1237.613971       | 2457.194117       | 1229.100696      | 2456.210101        | 1228.608689      | I    | <b>515.330008</b>  | 258.168642        | 498.303459         | 249.655368         |                    |                  | 5  |
| 20 | 2531.242130 | 1266.124703       | 2514.215581       | 1257.611428      | 2513.231565        | 1257.119420      | G    | <b>402.245944</b>  | 201.626610        | 385.219395         | 193.113335         |                    |                  | 4  |
| 21 | 2588.263594 | 1294.635435       | 2571.237045       | 1286.122160      | 2570.253029        | 1285.630152      | G    | 345.224480         | 173.115878        | 328.197931         | 164.602603         |                    |                  | 3  |
| 22 | 2701.347658 | 1351.177467       | 2684.321109       | 1342.664192      | 2683.337093        | 1342.172185      | L    | 288.203016         | 144.605146        | 271.176467         | 136.091872         |                    |                  | 2  |
| 23 |             |                   |                   |                  |                    |                  | R    | 175.118952         | 88.063114         | 158.092403         | 79.549839          |                    |                  | 1  |

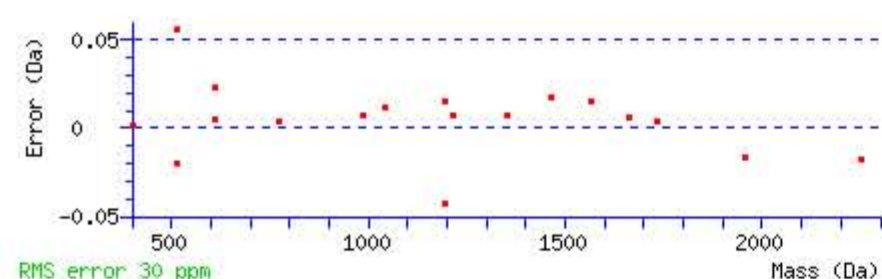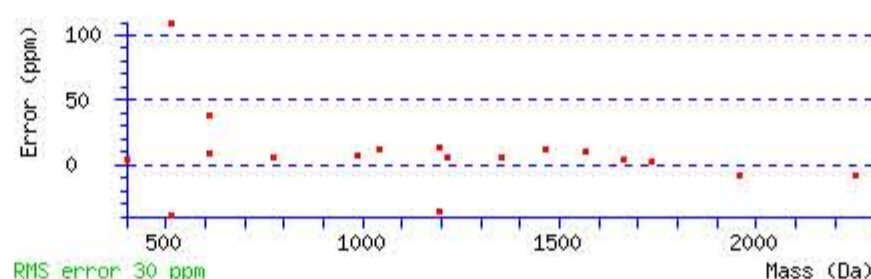

NCBI BLAST search of **QKPDGVFQEDAPVIHQEMIGGLR**

(Parameters: blastp, nr protein database, expect=20000, no filter, PAM30)

Other BLAST [web gateways](#)

All matches to this query

| Score | Mr(calc):   | Delta    | Sequence                                |
|-------|-------------|----------|-----------------------------------------|
| 68.3  | 2874.452057 | 0.011119 | <a href="#">QKPDGVFQEDAPVIHQEMIGGLR</a> |
| 6.5   | 2874.452057 | 0.011119 | <a href="#">QKPDGVFQEDAPVIHQEMIGGLR</a> |

Mascot: <http://www.matrixscience.com/>



# MASCOT Search Results

## Peptide View

MS/MS Fragmentation of **DTWVEHWPEEDECQDEENQK**  
 Found in **CO3\_HUMAN**, Complement C3 OS=Homo sapiens GN=C3 PE=1 SV=2

Match to Query 60968: 2913.206682 from(972.076170,3+) rtinseconds(2114) index(37109)  
 Title: Locus:1.1.1.3155.26 File:"2013-07-02 CLN FXIII 60 min 2nd F 3.wiff"  
 Data file C:\Program Files (x86)\Matrix Science\Mascot Daemon\mgf5 FXIII 60 min 2nd\mascot\_daemon\_merge.mgf

Click mouse within plot area to zoom in by factor of two about that point  
 Or, Plot from  to  Da   
 Label all possible matches  Label matches used for scoring

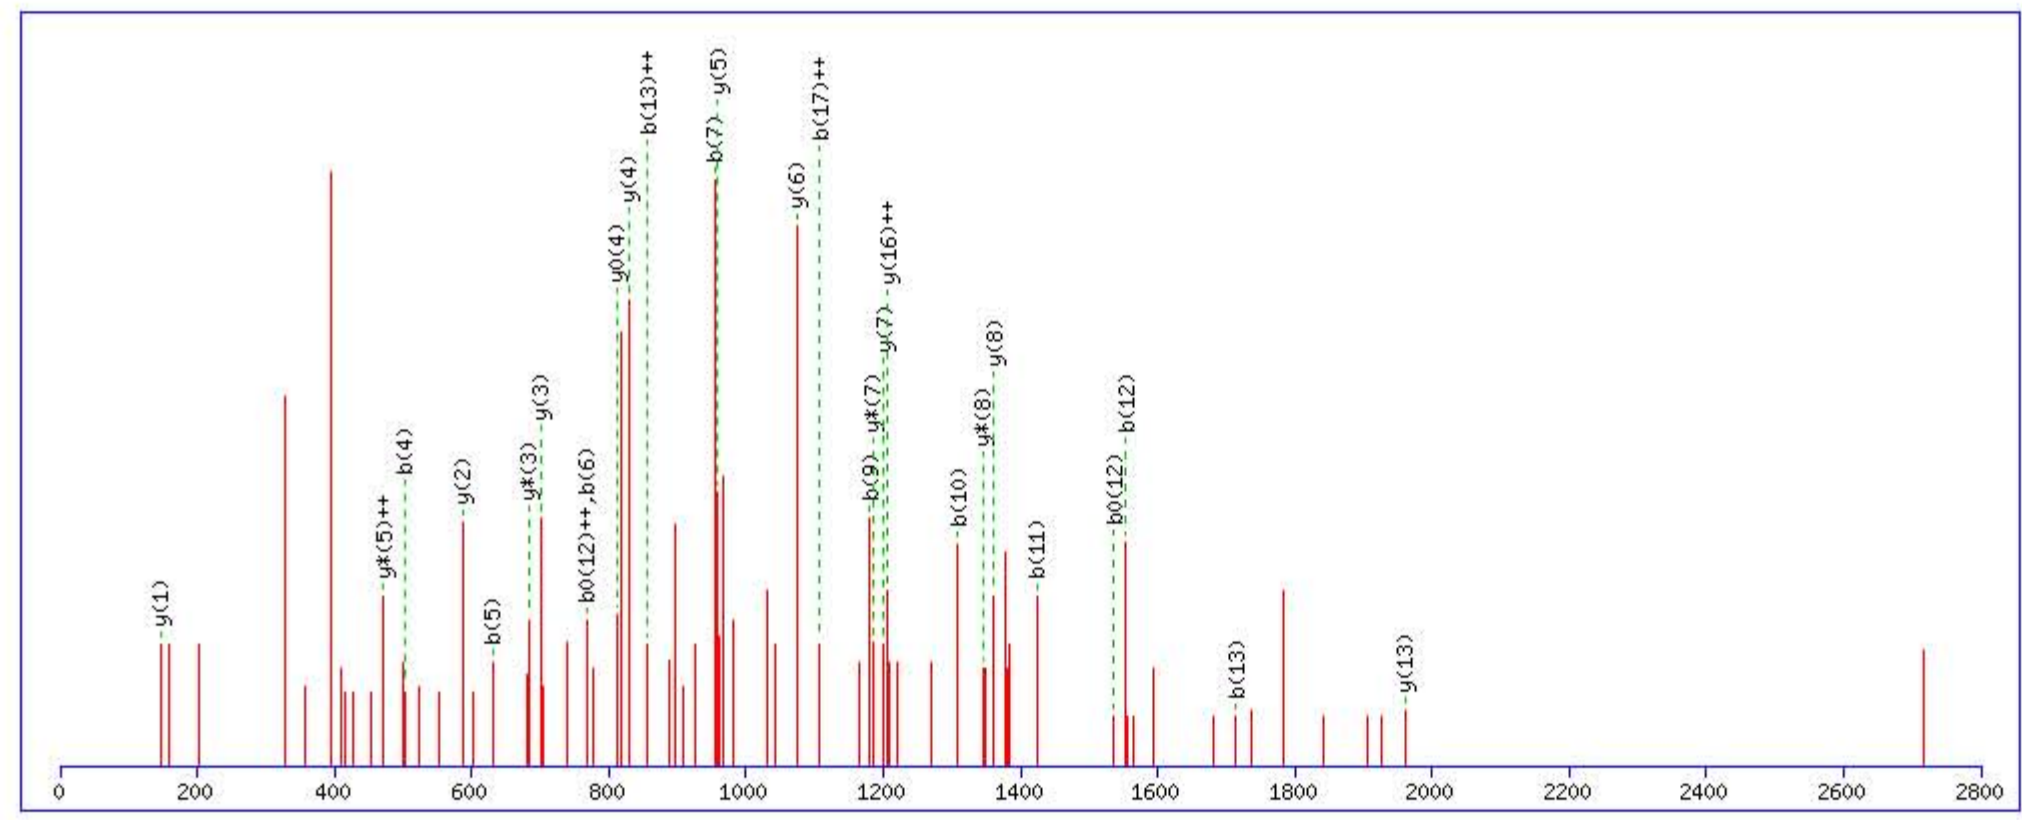

Monoisotopic mass of neutral peptide  $M_r(\text{calc})$ : 2913.185776  
 Fixed modifications: Carbamidomethyl (C) (apply to specified residues or termini only)  
 Variable modifications:  
 Q19 : Biotin:Thermo-21345 (Q)  
 Ions Score: 47 Expect: 3.4e-005  
 Matches : 28/196 fragment ions using 59 most intense peaks [\(help\)](#)

| #  | b                  | b <sup>++</sup>    | b <sup>*</sup> | b <sup>+++</sup> | b <sup>0</sup>     | b <sup>0++</sup>  | Seq. | y                  | y <sup>++</sup>    | y <sup>*</sup>     | y <sup>+++</sup>  | y <sup>0</sup>    | y <sup>0++</sup> | #  |
|----|--------------------|--------------------|----------------|------------------|--------------------|-------------------|------|--------------------|--------------------|--------------------|-------------------|-------------------|------------------|----|
| 1  | 116.034219         | 58.520748          |                |                  | 98.023654          | 49.515465         | D    |                    |                    |                    |                   |                   |                  | 20 |
| 2  | 217.081898         | 109.044587         |                |                  | 199.071333         | 100.039304        | T    | 2799.166123        | 1400.086699        | 2782.139574        | 1391.573425       | 2781.155558       | 1391.081417      | 19 |
| 3  | 403.161211         | 202.084244         |                |                  | 385.150646         | 193.078961        | W    | 2698.118444        | 1349.562860        | 2681.091895        | 1341.049585       | 2680.107879       | 1340.557577      | 18 |
| 4  | <b>502.229625</b>  | 251.618451         |                |                  | 484.219060         | 242.613168        | V    | 2512.039131        | 1256.523203        | 2495.012582        | 1248.009929       | 2494.028566       | 1247.517921      | 17 |
| 5  | <b>631.272218</b>  | 316.139747         |                |                  | 613.261653         | 307.134465        | E    | 2412.970717        | <b>1206.988996</b> | 2395.944168        | 1198.475722       | 2394.960152       | 1197.983714      | 16 |
| 6  | <b>768.331130</b>  | 384.669203         |                |                  | 750.320565         | 375.663921        | H    | 2283.928124        | 1142.467700        | 2266.901575        | 1133.954425       | 2265.917559       | 1133.462417      | 15 |
| 7  | <b>954.410443</b>  | 477.708860         |                |                  | 936.399878         | 468.703577        | W    | 2146.869212        | 1073.938244        | 2129.842663        | 1065.424969       | 2128.858647       | 1064.932961      | 14 |
| 8  | 1051.463207        | 526.235242         |                |                  | 1033.452642        | 517.229959        | P    | <b>1960.789899</b> | 980.898588         | 1943.763350        | 972.385313        | 1942.779334       | 971.893305       | 13 |
| 9  | <b>1180.505800</b> | 590.756538         |                |                  | 1162.495235        | 581.751256        | E    | 1863.737135        | 932.372206         | 1846.710586        | 923.858931        | 1845.726570       | 923.366923       | 12 |
| 10 | <b>1309.548393</b> | 655.277835         |                |                  | 1291.537828        | 646.272552        | E    | 1734.694542        | 867.850909         | 1717.667993        | 859.337635        | 1716.683977       | 858.845627       | 11 |
| 11 | <b>1424.575336</b> | 712.791306         |                |                  | 1406.564771        | 703.786024        | D    | 1605.651949        | 803.329613         | 1588.625400        | 794.816338        | 1587.641384       | 794.324330       | 10 |
| 12 | <b>1553.617929</b> | 777.312603         |                |                  | <b>1535.607364</b> | <b>768.307320</b> | E    | 1490.625006        | 745.816141         | 1473.598457        | 737.302867        | 1472.614441       | 736.810859       | 9  |
| 13 | <b>1713.648578</b> | <b>857.327927</b>  |                |                  | 1695.638013        | 848.322645        | C    | <b>1361.582413</b> | 681.294845         | <b>1344.555864</b> | 672.781570        | 1343.571848       | 672.289562       | 8  |
| 14 | 1841.707156        | 921.357216         | 1824.680607    | 912.843942       | 1823.696591        | 912.351934        | Q    | <b>1201.551764</b> | 601.279520         | <b>1184.525215</b> | 592.766246        | 1183.541199       | 592.274238       | 7  |
| 15 | 1956.734099        | 978.870688         | 1939.707550    | 970.357413       | 1938.723534        | 969.865405        | D    | <b>1073.493186</b> | 537.250231         | 1056.466637        | 528.736957        | 1055.482621       | 528.244949       | 6  |
| 16 | 2085.776692        | 1043.391984        | 2068.750143    | 1034.878709      | 2067.766127        | 1034.386701       | E    | <b>958.466243</b>  | 479.736760         | 941.439694         | <b>471.223485</b> | 940.455678        | 470.731477       | 5  |
| 17 | 2214.819285        | <b>1107.913280</b> | 2197.792736    | 1099.400006      | 2196.808720        | 1098.907998       | E    | <b>829.423650</b>  | 415.215463         | 812.397101         | 406.702189        | <b>811.413085</b> | 406.210181       | 4  |
| 18 | 2328.862212        | 1164.934744        | 2311.835663    | 1156.421469      | 2310.851647        | 1155.929461       | N    | <b>700.381057</b>  | 350.694167         | <b>683.354508</b>  | 342.180892        |                   |                  | 3  |
| 19 | 2768.087538        | 1384.547407        | 2751.060989    | 1376.034132      | 2750.076973        | 1375.542125       | Q    | <b>586.338130</b>  | 293.672703         | 569.311581         | 285.159429        |                   |                  | 2  |
| 20 |                    |                    |                |                  |                    |                   | K    | <b>147.112804</b>  | 74.060040          | 130.086255         | 65.546765         |                   |                  | 1  |

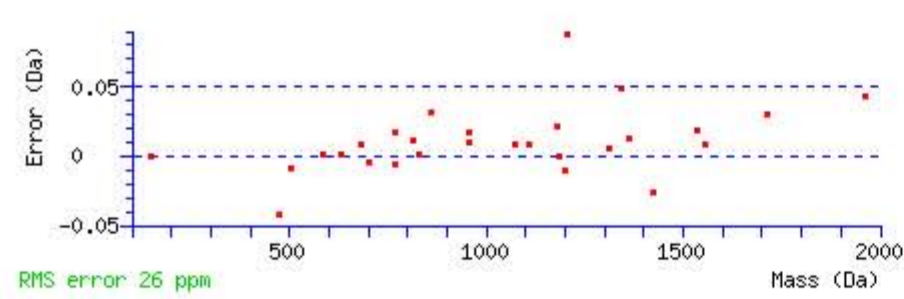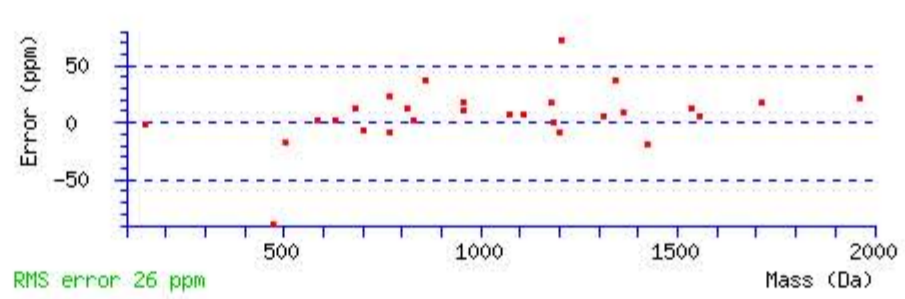

NCBI BLAST search of **DTWVEHWPEEDECQDEENQK**  
 (Parameters: blastp, nr protein database, expect=20000, no filter, PAM30)  
 Other BLAST [web gateways](#)

### All matches to this query

| Score | $M_r(\text{calc})$ : | Delta    | Sequence                             |
|-------|----------------------|----------|--------------------------------------|
| 46.8  | 2913.185776          | 0.020906 | <a href="#">DTWVEHWPEEDECQDEENQK</a> |
| 17.9  | 2913.185776          | 0.020906 | <a href="#">DTWVEHWPEEDECQDEENQK</a> |



# *MATRIX* SCIENCE Mascot Search Results

## Peptide View

MS/MS Fragmentation of **GQAGLQR**

Found in **CO4A\_HUMAN**, Complement C4-A OS=Homo sapiens GN=C4A PE=1 SV=2

Match to Query 17300: 1039.555588 from(520.785070,2+) rtinseconds(1467) index(49286)

Title: Locus:1.1.1.1126.9 File:"2013-07-02 CLN FXIII 60 min 2nd F 4.wiff"

Data file C:\Program Files (x86)\Matrix Science\Mascot Daemon\mgf5 FXIII 60 min 2nd\mascot\_daemon\_merge.mgf

Click mouse within plot area to zoom in by factor of two about that point

Or, Plot from  to  Da

Label all possible matches  Label matches used for scoring

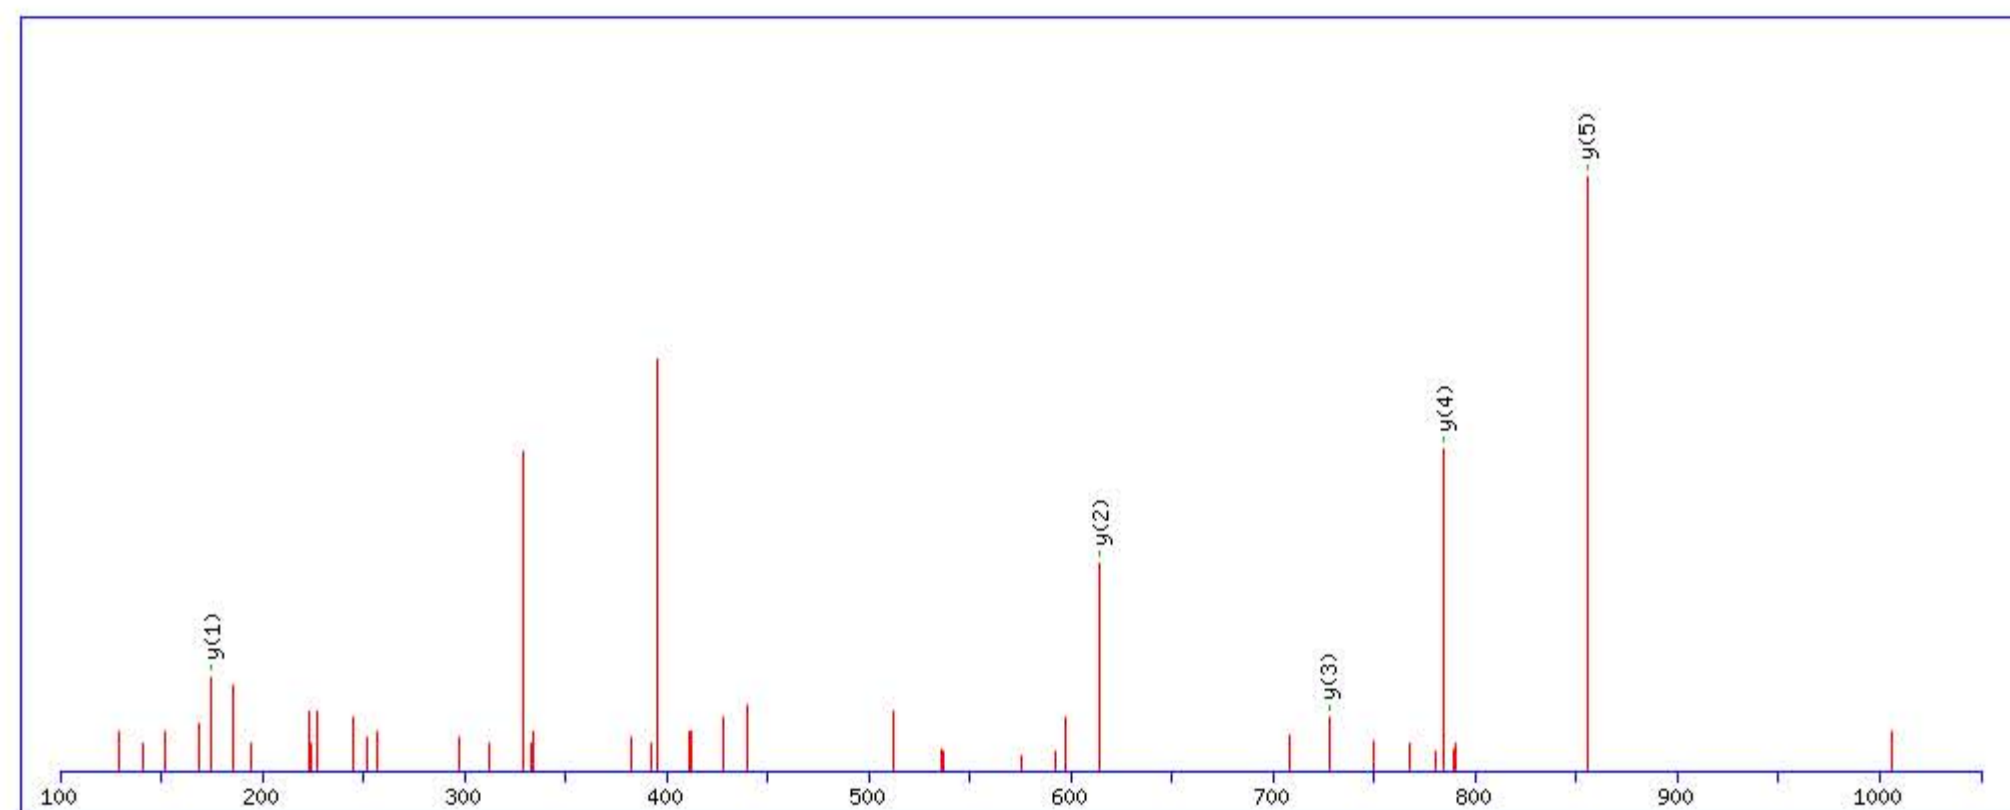

Monoisotopic mass of neutral peptide Mr(calc): 1039.559677

Fixed modifications: Carbamidomethyl (C) (apply to specified residues or termini only)

Variable modifications:

Q6 : Biotin:Thermo-21345 (Q)

Ions Score: 34 Expect: 0.0068

Matches : 5/46 fragment ions using 9 most intense peaks [\(help\)](#)

| # | b          | b <sup>++</sup> | b <sup>+</sup> | b <sup>*++</sup> | Seq. | y                 | y <sup>++</sup> | y <sup>+</sup> | y <sup>*++</sup> | # |
|---|------------|-----------------|----------------|------------------|------|-------------------|-----------------|----------------|------------------|---|
| 1 | 58.028740  | 29.518008       |                |                  | G    |                   |                 |                |                  | 7 |
| 2 | 186.087318 | 93.547297       | 169.060769     | 85.034023        | Q    | 983.545498        | 492.276387      | 966.518949     | 483.763113       | 6 |
| 3 | 257.124432 | 129.065854      | 240.097883     | 120.552580       | A    | <b>855.486920</b> | 428.247098      | 838.460371     | 419.733824       | 5 |
| 4 | 314.145896 | 157.576586      | 297.119347     | 149.063312       | G    | <b>784.449806</b> | 392.728541      | 767.423257     | 384.215267       | 4 |
| 5 | 427.229960 | 214.118618      | 410.203411     | 205.605344       | L    | <b>727.428342</b> | 364.217809      | 710.401793     | 355.704535       | 3 |
| 6 | 866.455286 | 433.731281      | 849.428737     | 425.218007       | Q    | <b>614.344278</b> | 307.675777      | 597.317729     | 299.162503       | 2 |
| 7 |            |                 |                |                  | R    | <b>175.118952</b> | 88.063114       | 158.092403     | 79.549840        | 1 |

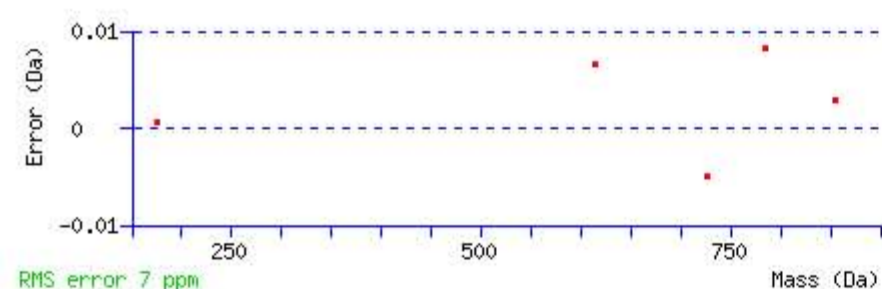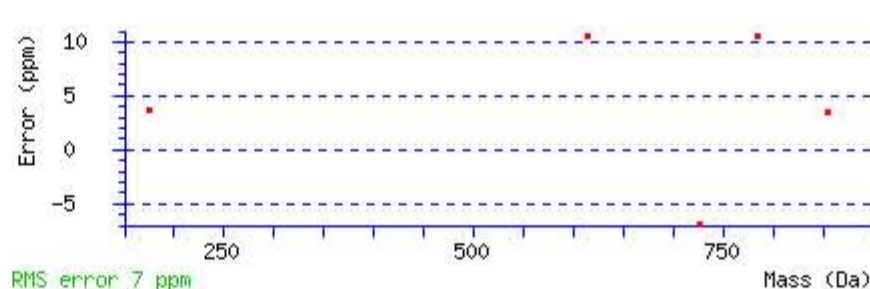

NCBI BLAST search of [GQAGLQR](#)

(Parameters: blastp, nr protein database, expect=20000, no filter, PAM30)

Other BLAST [web gateways](#)

## All matches to this query

| Score | Mr(calc):   | Delta     | Sequence                   |
|-------|-------------|-----------|----------------------------|
| 33.5  | 1039.559677 | -0.004089 | <a href="#">GQAGLQR</a>    |
| 19.5  | 1039.559677 | -0.004089 | <a href="#">GQQIQR</a>     |
| 9.5   | 1039.559677 | -0.004089 | <a href="#">KGGPSQR</a>    |
| 7.8   | 1039.541061 | 0.014527  | <a href="#">GQGDLLQPGR</a> |
| 5.5   | 1039.552277 | 0.003311  | <a href="#">QRAALDGGPR</a> |
| 5.2   | 1039.548431 | 0.007157  | <a href="#">SPEIQR</a>     |
| 3.2   | 1039.541046 | 0.014542  | <a href="#">NATTAPNPVR</a> |
| 1.8   | 1039.563522 | -0.007934 | <a href="#">ARRGGDGVPR</a> |

Mascot: <http://www.matrixscience.com/>



# MASCOT Search Results

## Peptide View

MS/MS Fragmentation of **GLESQTK**

Found in **CO4A\_HUMAN**, Complement C4-A OS=Homo sapiens GN=C4A PE=1 SV=2

Match to Query 18125: 1072.558368 from(537.286460,2+) rtinseconds(1491) index(49479)

Title: Locus:1.1.1.1134.19 File:"2013-07-02 CLN FXIII 60 min 2nd F 4.wiff"

Data file C:\Program Files (x86)\Matrix Science\Mascot Daemon\mgf5 FXIII 60 min 2nd\mascot\_daemon\_merge.mgf

Click mouse within plot area to zoom in by factor of two about that point

Or, Plot from  to  Da

Label all possible matches  Label matches used for scoring

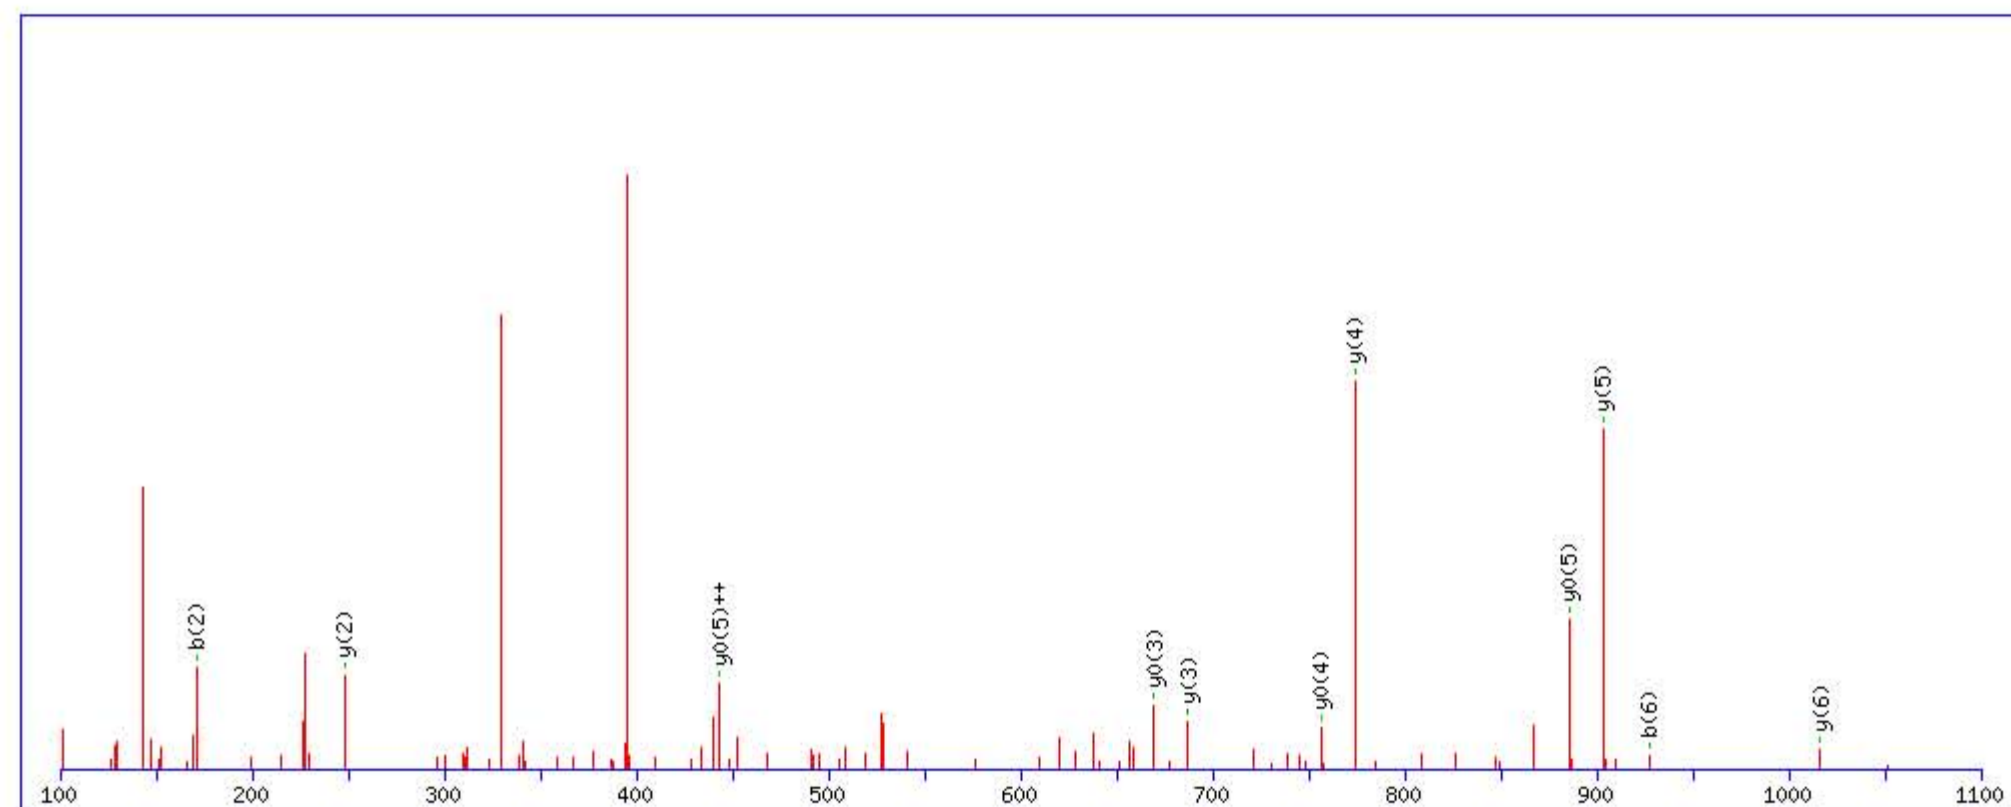

Monoisotopic mass of neutral peptide  $M_r(\text{calc})$ : 1072.558670

Fixed modifications: Carbamidomethyl (C) (apply to specified residues or termini only)

Variable modifications:

Q5 : Biotin:Thermo-21345 (Q)

Ions Score: 29 Expect: 0.011

Matches : 11/58 fragment ions using 20 most intense peaks [\(help\)](#)

| # | b                 | b <sup>++</sup> | b*         | b <sup>+++</sup> | b <sup>0</sup> | b <sup>0++</sup> | Seq. | y                  | y <sup>++</sup> | y*         | y <sup>+++</sup> | y <sup>0</sup>    | y <sup>0++</sup>  | # |
|---|-------------------|-----------------|------------|------------------|----------------|------------------|------|--------------------|-----------------|------------|------------------|-------------------|-------------------|---|
| 1 | 58.028740         | 29.518008       |            |                  |                |                  | G    |                    |                 |            |                  |                   |                   | 7 |
| 2 | <b>171.112804</b> | 86.060040       |            |                  |                |                  | L    | <b>1016.544494</b> | 508.775885      | 999.517945 | 500.262611       | 998.533929        | 499.770603        | 6 |
| 3 | 300.155397        | 150.581336      |            |                  | 282.144832     | 141.576054       | E    | <b>903.460430</b>  | 452.233853      | 886.433881 | 443.720579       | <b>885.449865</b> | <b>443.228571</b> | 5 |
| 4 | 387.187425        | 194.097351      |            |                  | 369.176860     | 185.092068       | S    | <b>774.417837</b>  | 387.712557      | 757.391288 | 379.199282       | <b>756.407272</b> | 378.707274        | 4 |
| 5 | 826.412751        | 413.710014      | 809.386202 | 405.196739       | 808.402186     | 404.704731       | Q    | <b>687.385809</b>  | 344.196543      | 670.359260 | 335.683268       | <b>669.375244</b> | 335.191260        | 3 |
| 6 | <b>927.460430</b> | 464.233853      | 910.433881 | 455.720579       | 909.449865     | 455.228571       | T    | <b>248.160483</b>  | 124.583879      | 231.133934 | 116.070605       | 230.149918        | 115.578597        | 2 |
| 7 |                   |                 |            |                  |                |                  | K    | 147.112804         | 74.060040       | 130.086255 | 65.546765        |                   |                   | 1 |

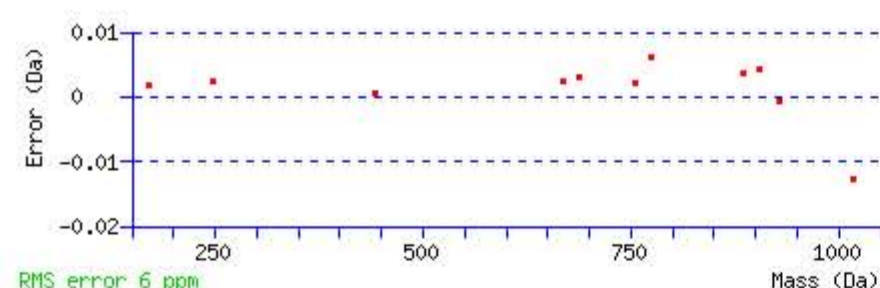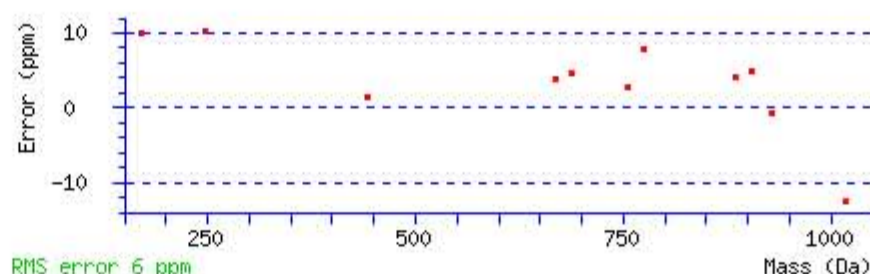

NCBI BLAST search of **GLESQTK**

(Parameters: blastp, nr protein database, expect=20000, no filter, PAM30)

Other BLAST [web gateways](#)

All matches to this query

| Score | $M_r(\text{calc})$ : | Delta     | Sequence                   |
|-------|----------------------|-----------|----------------------------|
| 29.2  | 1072.558670          | -0.000302 | <a href="#">GLESQTK</a>    |
| 7.9   | 1072.558670          | -0.000302 | <a href="#">QSEGLTK</a>    |
| 7.2   | 1072.558670          | -0.000302 | <a href="#">LGECPAVLSK</a> |
| 7.0   | 1072.551254          | 0.007114  | <a href="#">KEAPRDETK</a>  |
| 3.8   | 1072.551285          | 0.007083  | <a href="#">GPRTTEPSTK</a> |
| 0.4   | 1072.566559          | -0.008191 | <a href="#">VQIHFGGSTK</a> |
| 0.3   | 1072.544739          | 0.013629  | <a href="#">LGEPQARMR</a>  |



# Mascot Search Results

## Peptide View

### MS/MS Fragmentation of VQQPDCR

Found in **CO4A\_HUMAN**, Complement C4-A OS=Homo sapiens GN=C4A PE=1 SV=2

Match to Query 23594: 1212.574068 from(607.294310,2+) rtinseconds(1319) index(48351)

Title: Locus:1.1.1.1074.7 File:"2013-07-02 CLN FXIII 60 min 2nd F 4.wiff"

Data file C:\Program Files (x86)\Matrix Science\Mascot Daemon\mgf\5 FXIII 60 min 2nd\mascot\_daemon\_merge.mgf

Click mouse within plot area to zoom in by factor of two about that point

Or, Plot from  to  Da

Label all possible matches  Label matches used for scoring

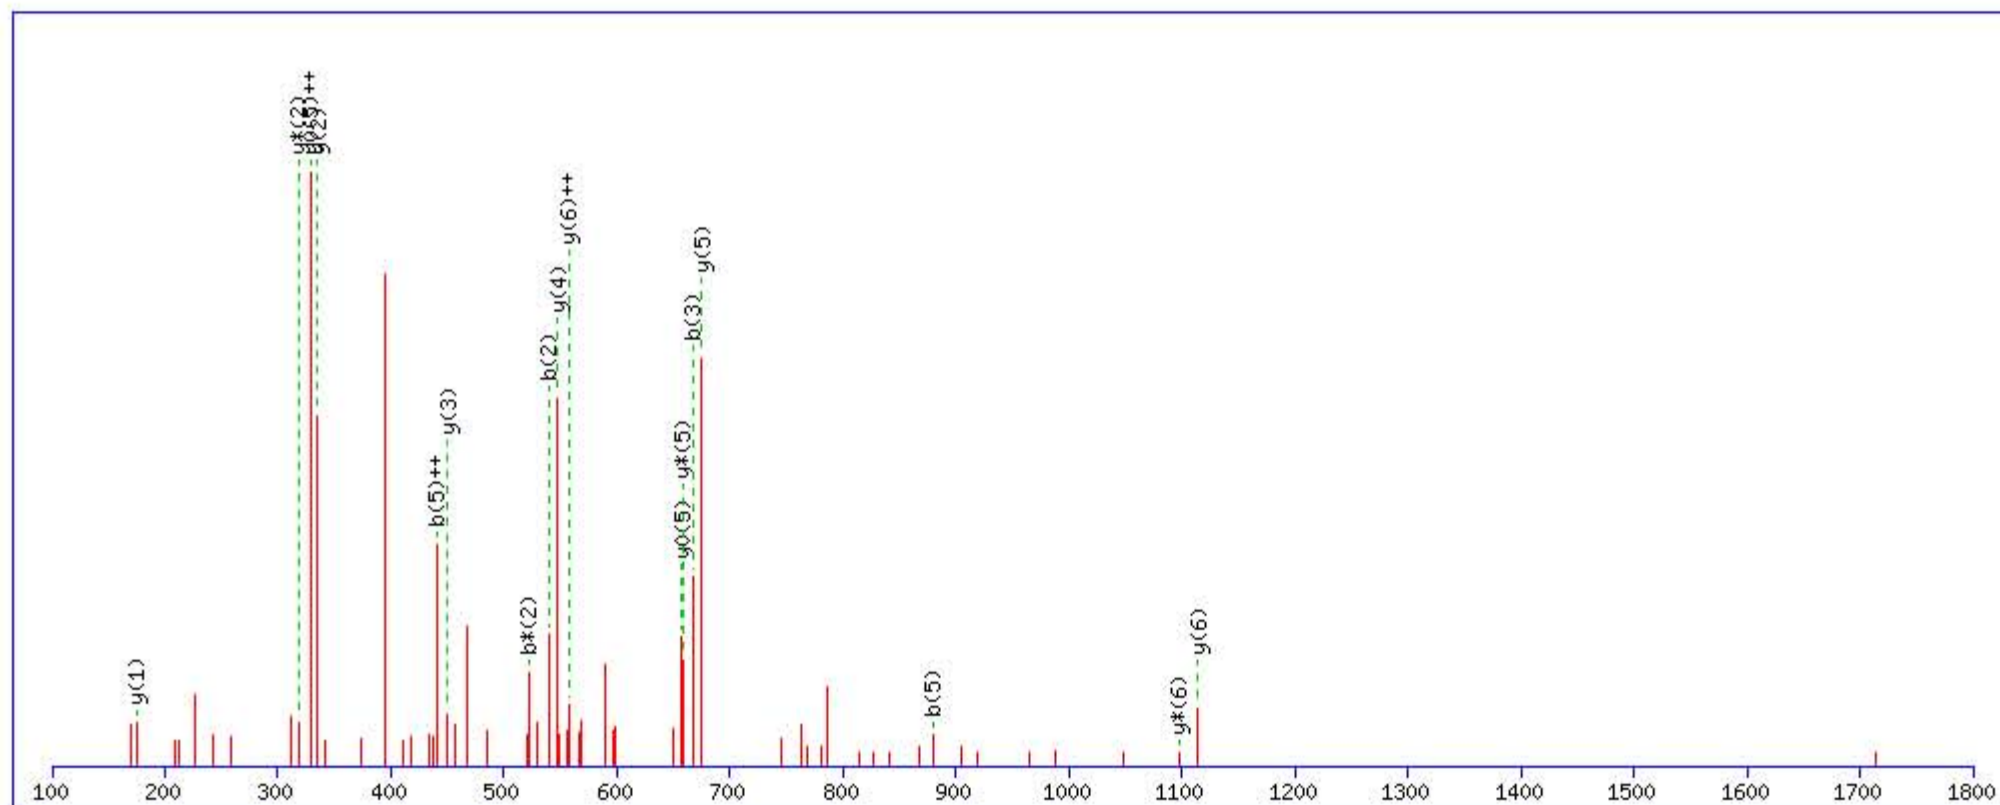

Monoisotopic mass of neutral peptide Mr(calc): 1212.574356

Fixed modifications: Carbamidomethyl (C) (apply to specified residues or termini only)

Variable modifications:

Q2 : Biotin:Thermo-21345 (Q)

Ions Score: 30 Expect: 0.0052

Matches : 17/58 fragment ions using 35 most intense peaks [\(help\)](#)

| # | b                 | b <sup>++</sup>   | b <sup>*</sup>    | b <sup>*++</sup> | b <sup>0</sup> | b <sup>0++</sup> | Seq. | y                  | y <sup>++</sup>   | y <sup>*</sup>     | y <sup>*++</sup> | y <sup>0</sup>    | y <sup>0++</sup>  | # |
|---|-------------------|-------------------|-------------------|------------------|----------------|------------------|------|--------------------|-------------------|--------------------|------------------|-------------------|-------------------|---|
| 1 | 100.075690        | 50.541483         |                   |                  |                |                  | V    |                    |                   |                    |                  |                   |                   | 7 |
| 2 | <b>539.301016</b> | 270.154146        | <b>522.274467</b> | 261.640872       |                |                  | Q    | <b>1114.513212</b> | <b>557.760244</b> | <b>1097.486663</b> | 549.246970       | 1096.502647       | 548.754962        | 6 |
| 3 | <b>667.359594</b> | 334.183435        | 650.333045        | 325.670161       |                |                  | Q    | <b>675.287886</b>  | 338.147581        | <b>658.261337</b>  | 329.634307       | <b>657.277321</b> | <b>329.142299</b> | 5 |
| 4 | 764.412358        | 382.709817        | 747.385809        | 374.196543       |                |                  | P    | <b>547.229308</b>  | 274.118292        | 530.202759         | 265.605018       | 529.218743        | 265.113010        | 4 |
| 5 | <b>879.439301</b> | <b>440.223289</b> | 862.412752        | 431.710014       | 861.428736     | 431.218006       | D    | <b>450.176544</b>  | 225.591910        | 433.149995         | 217.078635       | 432.165979        | 216.586627        | 3 |
| 6 | 1039.469950       | 520.238613        | 1022.443401       | 511.725339       | 1021.459385    | 511.233331       | C    | <b>335.149601</b>  | 168.078438        | <b>318.123052</b>  | 159.565164       |                   |                   | 2 |
| 7 |                   |                   |                   |                  |                |                  | R    | <b>175.118952</b>  | 88.063114         | 158.092403         | 79.549839        |                   |                   | 1 |

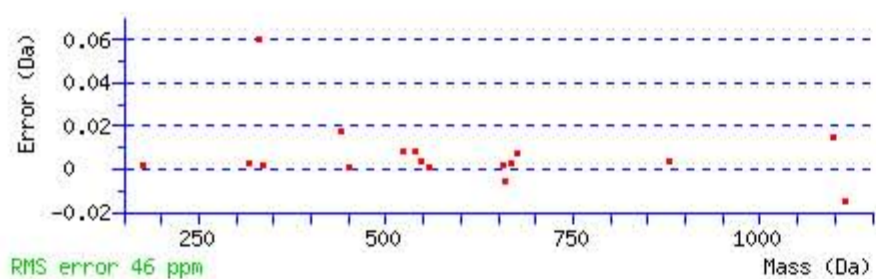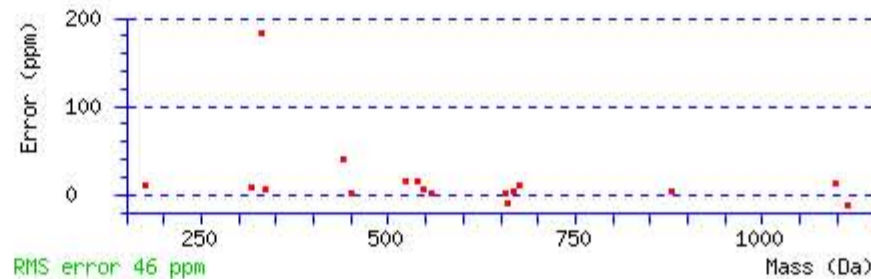

### NCBI BLAST search of VQQPDCR

(Parameters: blastp, nr protein database, expect=20000, no filter, PAM30)

Other BLAST [web gateways](#)

### All matches to this query

| Score | Mr(calc):   | Delta     | Sequence                |
|-------|-------------|-----------|-------------------------|
| 29.6  | 1212.574356 | -0.000288 | <a href="#">VQQPDCR</a> |
| 12.6  | 1212.574356 | -0.000288 | <a href="#">VQQPDCR</a> |
| 5.2   | 1212.592102 | -0.018034 | <a href="#">VQEDQQR</a> |



# MASCOT Search Results

## Peptide View

MS/MS Fragmentation of **VEYGFQVK**

Found in **CO4A\_HUMAN**, Complement C4-A OS=Homo sapiens GN=C4A PE=1 SV=2

Match to Query 25584: 1279.667348 from(640.840950,2+) rtinseconds(2022) index(53086)

Title: Locus:1.1.1.1319.11 File:"2013-07-02 CLN FXIII 60 min 2nd F 4.wiff"

Data file C:\Program Files (x86)\Matrix Science\Mascot Daemon\mgf5 FXIII 60 min 2nd\mascot\_daemon\_merge.mgf

Click mouse within plot area to zoom in by factor of two about that point

Or, Plot from  to  Da

Label all possible matches  Label matches used for scoring

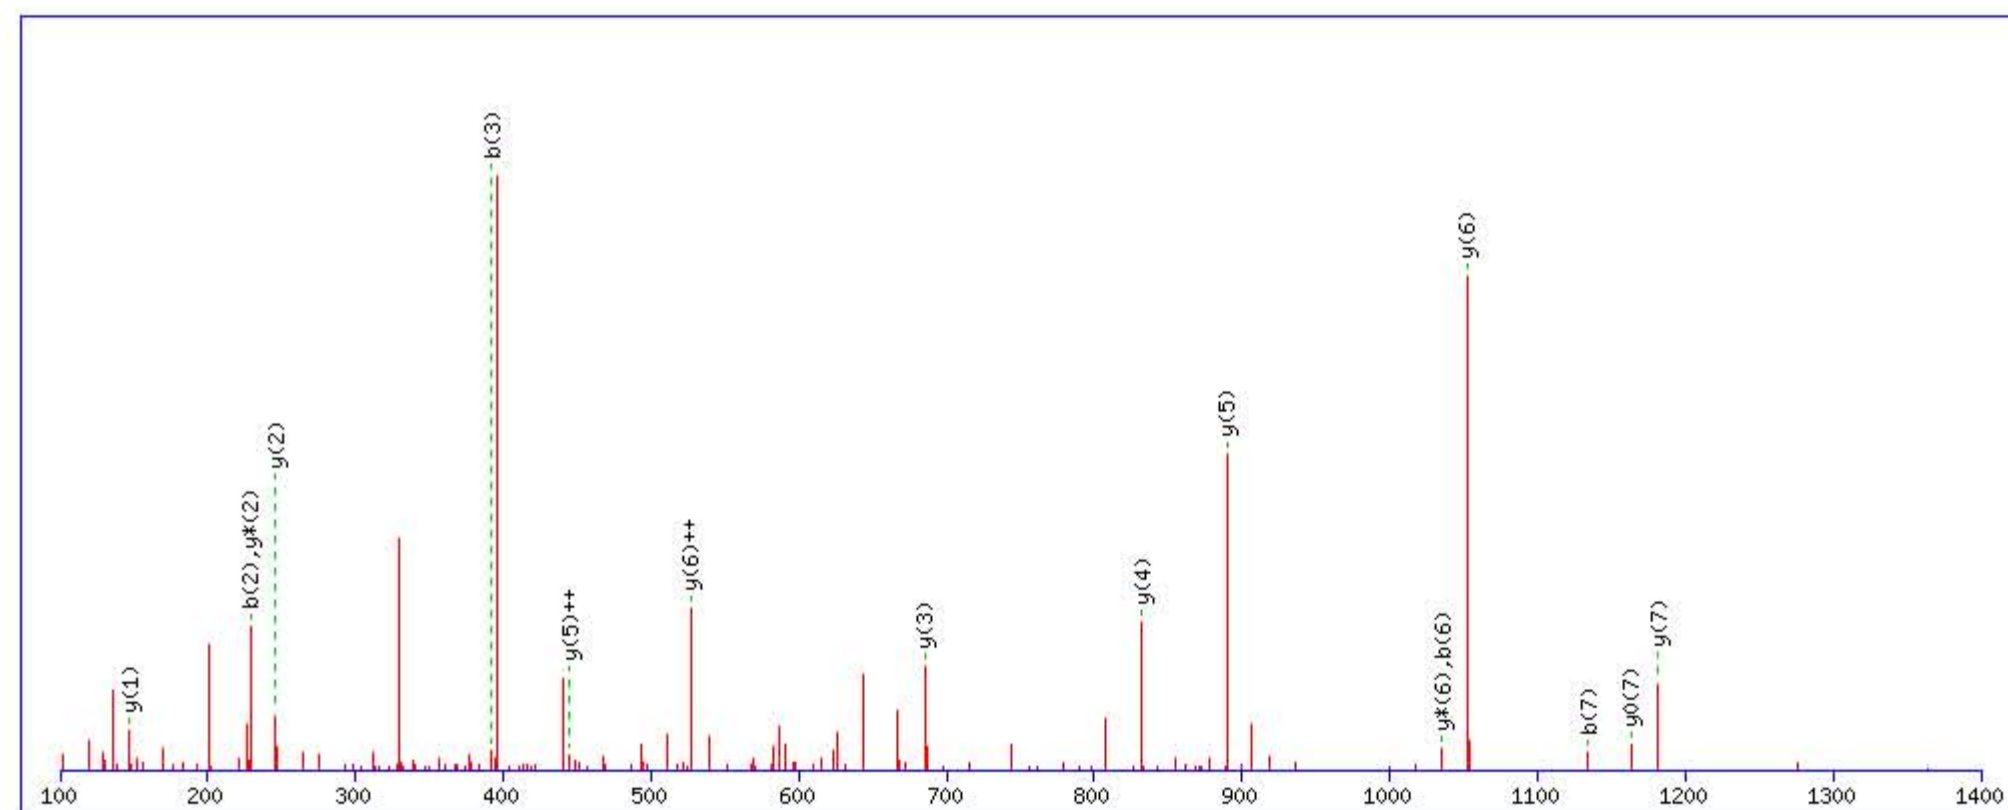

Monoisotopic mass of neutral peptide Mr(calc): 1279.663483

Fixed modifications: Carbamidomethyl (C) (apply to specified residues or termini only)

Variable modifications:

Q6 : Biotin:Thermo-21345 (Q)

Ions Score: 33 Expect: 0.0029

Matches : 16/60 fragment ions using 34 most intense peaks [\(help\)](#)

| # | b                  | b <sup>++</sup> | b <sup>*</sup> | b <sup>*++</sup> | b <sup>0</sup> | b <sup>0++</sup> | Seq. | y                  | y <sup>++</sup>   | y <sup>*</sup>     | y <sup>*++</sup> | y <sup>0</sup>     | y <sup>0++</sup> | # |
|---|--------------------|-----------------|----------------|------------------|----------------|------------------|------|--------------------|-------------------|--------------------|------------------|--------------------|------------------|---|
| 1 | 100.075690         | 50.541483       |                |                  |                |                  | V    |                    |                   |                    |                  |                    |                  | 8 |
| 2 | <b>229.118283</b>  | 115.062780      |                |                  | 211.107718     | 106.057497       | E    | <b>1181.602344</b> | 591.304810        | 1164.575795        | 582.791536       | <b>1163.591779</b> | 582.299528       | 7 |
| 3 | <b>392.181612</b>  | 196.594444      |                |                  | 374.171047     | 187.589162       | Y    | <b>1052.559751</b> | <b>526.783514</b> | <b>1035.533202</b> | 518.270239       |                    |                  | 6 |
| 4 | 449.203076         | 225.105176      |                |                  | 431.192511     | 216.099894       | G    | <b>889.496422</b>  | <b>445.251849</b> | 872.469873         | 436.738575       |                    |                  | 5 |
| 5 | 596.271490         | 298.639383      |                |                  | 578.260925     | 289.634101       | F    | <b>832.474958</b>  | 416.741117        | 815.448409         | 408.227843       |                    |                  | 4 |
| 6 | <b>1035.496816</b> | 518.252046      | 1018.470267    | 509.738772       | 1017.486251    | 509.246764       | Q    | <b>685.406544</b>  | 343.206910        | 668.379995         | 334.693636       |                    |                  | 3 |
| 7 | <b>1134.565230</b> | 567.786253      | 1117.538681    | 559.272979       | 1116.554665    | 558.780971       | V    | <b>246.181218</b>  | 123.594247        | <b>229.154669</b>  | 115.080973       |                    |                  | 2 |
| 8 |                    |                 |                |                  |                |                  | K    | <b>147.112804</b>  | 74.060040         | 130.086255         | 65.546765        |                    |                  | 1 |

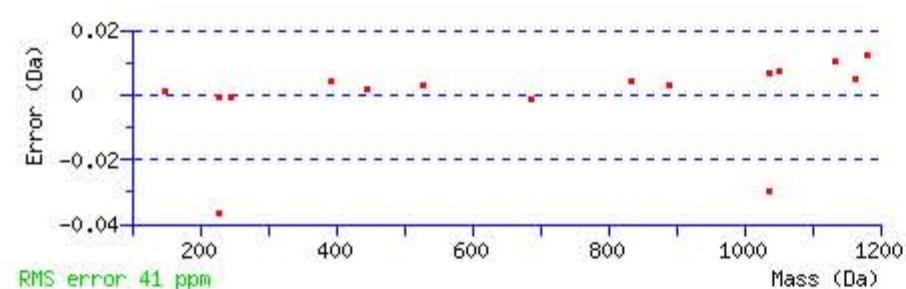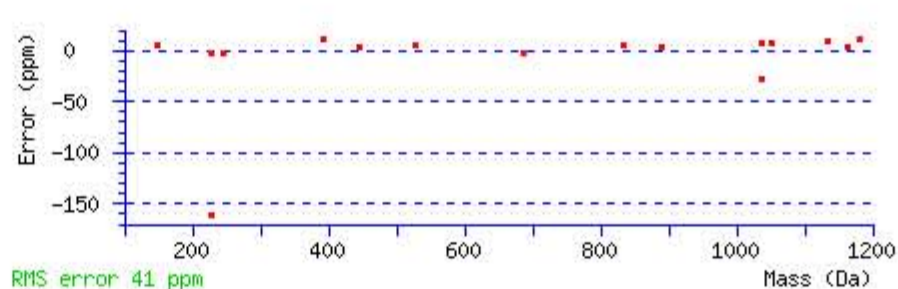

NCBI BLAST search of **VEYGFQVK**

(Parameters: blastp, nr protein database, expect=20000, no filter, PAM30)

Other BLAST [web gateways](#)

All matches to this query

| Score | Mr(calc):   | Delta     | Sequence                     |
|-------|-------------|-----------|------------------------------|
| 33.1  | 1279.663483 | 0.003865  | <a href="#">VEYGFQVK</a>     |
| 5.9   | 1279.681229 | -0.013881 | <a href="#">EVTVKEWYVK</a>   |
| 5.9   | 1279.663483 | 0.003865  | <a href="#">QFVGYLDK</a>     |
| 5.7   | 1279.659470 | 0.007878  | <a href="#">VCSFGKQVVEK</a>  |
| 4.0   | 1279.677216 | -0.009868 | <a href="#">VFKTEDTQGKK</a>  |
| 3.8   | 1279.684601 | -0.017253 | <a href="#">MSASAVFILDVK</a> |
| 2.0   | 1279.666824 | 0.000524  | <a href="#">VKEWSLMIMK</a>   |



# MASCOT SCIENCE Mascot Search Results

## Peptide View

MS/MS Fragmentation of **VVEEQESR**

Found in **CO4A\_HUMAN**, Complement C4-A OS=Homo sapiens GN=C4A PE=1 SV=2

Match to Query 25907: 1285.634328 from(643.824440,2+) rtinseconds(1393) index(48807)

Title: Locus:1.1.1.1100.20 File:"2013-07-02 CLN FXIII 60 min 2nd F 4.wiff"

Data file C:\Program Files (x86)\Matrix Science\Mascot Daemon\mgf\5 FXIII 60 min 2nd\mascot\_daemon\_merge.mgf

Click mouse within plot area to zoom in by factor of two about that point

Or, Plot from  to  Da

Label all possible matches  Label matches used for scoring

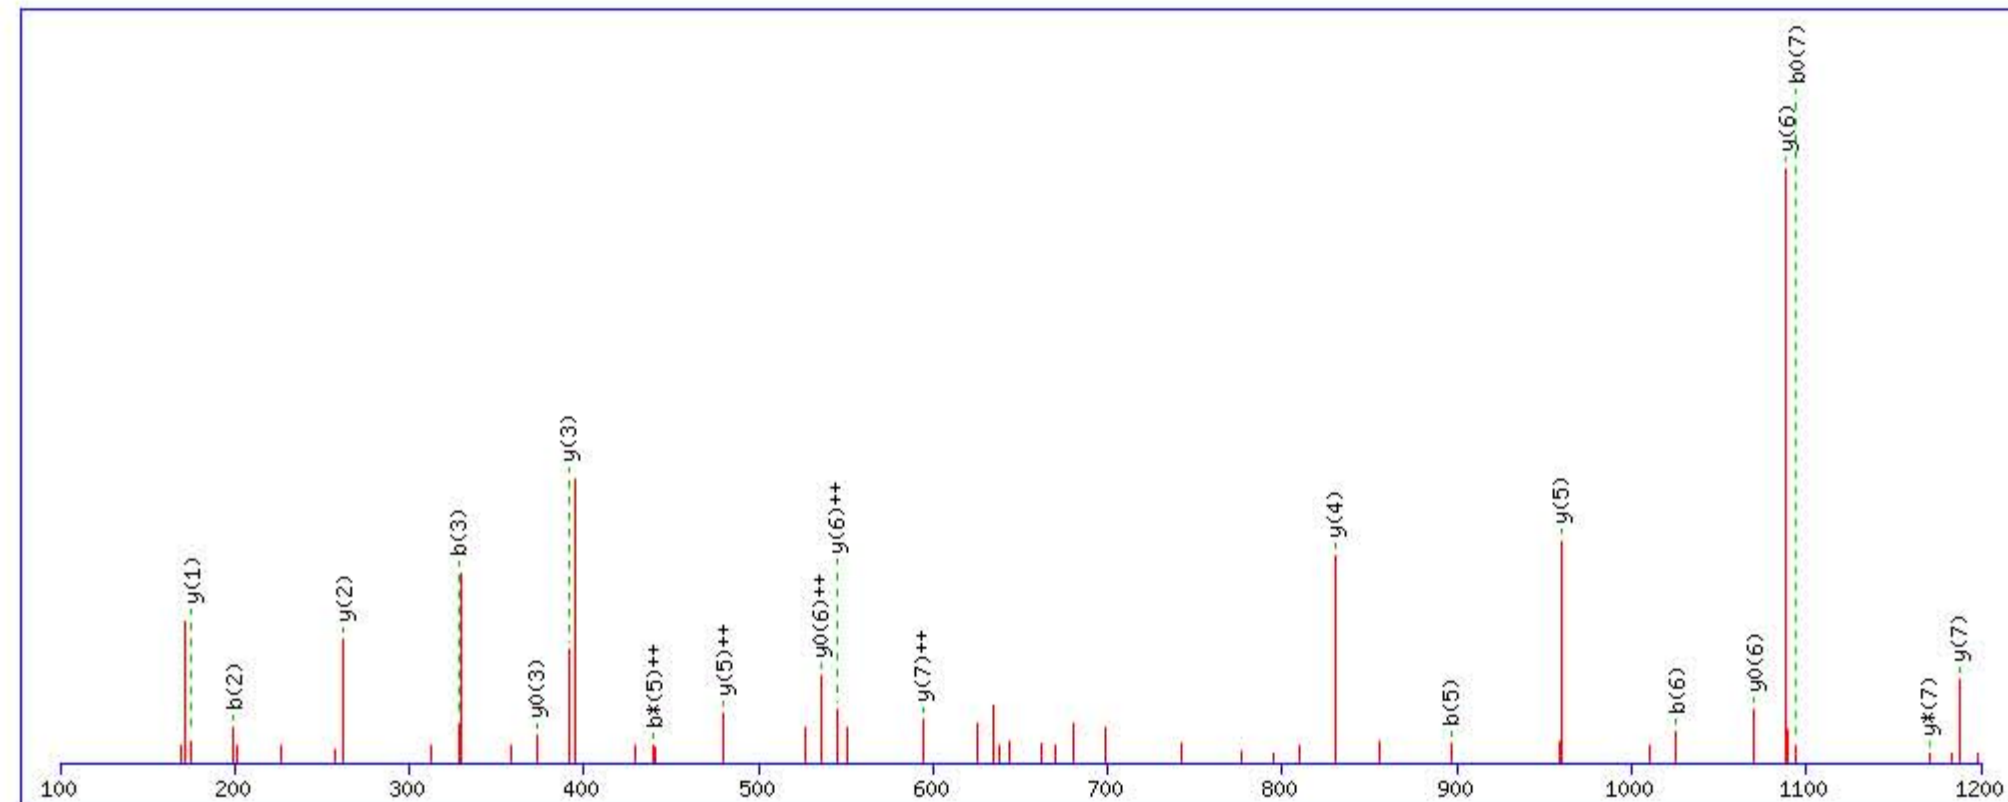

Monoisotopic mass of neutral peptide Mr(calc): 1285.633621

Fixed modifications: Carbamidomethyl (C) (apply to specified residues or termini only)

Variable modifications:

Q5 : Biotin:Thermo-21345 (Q)

Ions Score: 38 Expect: 0.00057

Matches : 20/70 fragment ions using 41 most intense peaks ([help](#))

| # | b                  | b <sup>++</sup> | b <sup>*</sup> | b <sup>+++</sup>  | b <sup>0</sup>     | b <sup>0++</sup> | Seq. | y                  | y <sup>++</sup>   | y <sup>*</sup>     | y <sup>+++</sup> | y <sup>0</sup>     | y <sup>0++</sup>  | # |
|---|--------------------|-----------------|----------------|-------------------|--------------------|------------------|------|--------------------|-------------------|--------------------|------------------|--------------------|-------------------|---|
| 1 | 100.075690         | 50.541483       |                |                   |                    |                  | V    |                    |                   |                    |                  |                    |                   | 8 |
| 2 | <b>199.144104</b>  | 100.075690      |                |                   |                    |                  | V    | <b>1187.572499</b> | 594.289888        | <b>1170.545950</b> | 585.776613       | 1169.561934        | 585.284605        | 7 |
| 3 | <b>328.186697</b>  | 164.596987      |                |                   | 310.176132         | 155.591704       | E    | <b>1088.504085</b> | <b>544.755681</b> | 1071.477536        | 536.242406       | <b>1070.493520</b> | <b>535.750398</b> | 6 |
| 4 | 457.229290         | 229.118283      |                |                   | 439.218725         | 220.113001       | E    | <b>959.461492</b>  | <b>480.234384</b> | 942.434943         | 471.721110       | 941.450927         | 471.229102        | 5 |
| 5 | <b>896.454616</b>  | 448.730946      | 879.428067     | <b>440.217672</b> | 878.444051         | 439.725664       | Q    | <b>830.418899</b>  | 415.713088        | 813.392350         | 407.199813       | 812.408334         | 406.707805        | 4 |
| 6 | <b>1025.497209</b> | 513.252243      | 1008.470660    | 504.738968        | 1007.486644        | 504.246960       | E    | <b>391.193573</b>  | 196.100425        | 374.167024         | 187.587150       | <b>373.183008</b>  | 187.095142        | 3 |
| 7 | 1112.529237        | 556.768257      | 1095.502688    | 548.254982        | <b>1094.518672</b> | 547.762974       | S    | <b>262.150980</b>  | 131.579128        | 245.124431         | 123.065854       | 244.140415         | 122.573846        | 2 |
| 8 |                    |                 |                |                   |                    |                  | R    | <b>175.118952</b>  | 88.063114         | 158.092403         | 79.549839        |                    |                   | 1 |

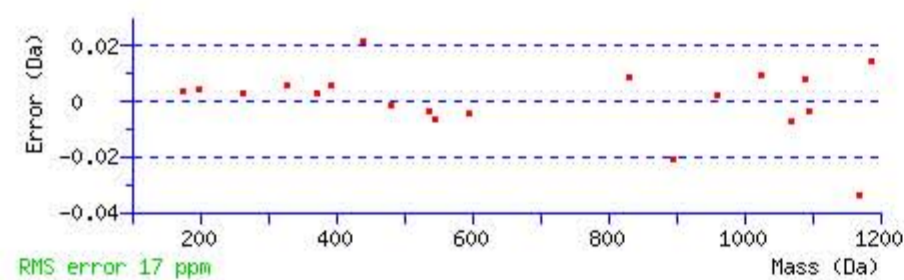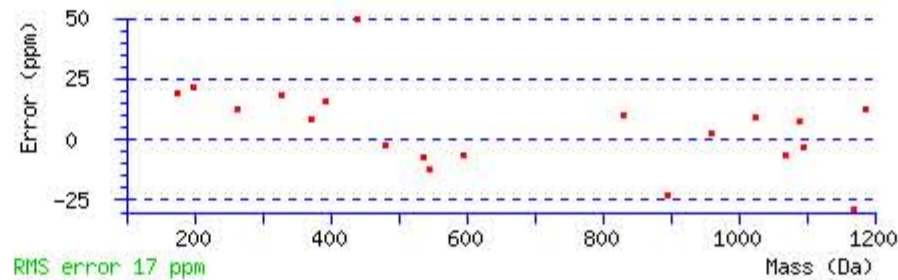

NCBI BLAST search of **VVEEQESR**

(Parameters: blastp, nr protein database, expect=20000, no filter, PAM30)

Other BLAST [web gateways](#)

All matches to this query

| Score | Mr(calc):   | Delta     | Sequence                      |
|-------|-------------|-----------|-------------------------------|
| 37.8  | 1285.633621 | 0.000707  | <a href="#">VVEEQESR</a>      |
| 3.2   | 1285.644867 | -0.010539 | <a href="#">DTLHSAMAVVSR</a>  |
| 2.3   | 1285.637451 | -0.003123 | <a href="#">TAPASGSAPRESR</a> |

Mascot: <http://www.matrixscience.com/>



# MASCOT SCIENCE Mascot Search Results

## Peptide View

MS/MS Fragmentation of **CCQDGVTR**

Found in **CO4A\_HUMAN**, Complement C4-A OS=Homo sapiens GN=C4A PE=1 SV=2

Match to Query 26305: 1305.566628 from(653.790590,2+) rtinseconds(1405) index(48858)

Title: Locus:1.1.1.1104.13 File:"2013-07-02 CLN FXIII 60 min 2nd F 4.wiff"

Data file C:\Program Files (x86)\Matrix Science\Mascot Daemon\mgf\5 FXIII 60 min 2nd\mascot\_daemon\_merge.mgf

Click mouse within plot area to zoom in by factor of two about that point

Or, Plot from  to  Da

Label all possible matches  Label matches used for scoring

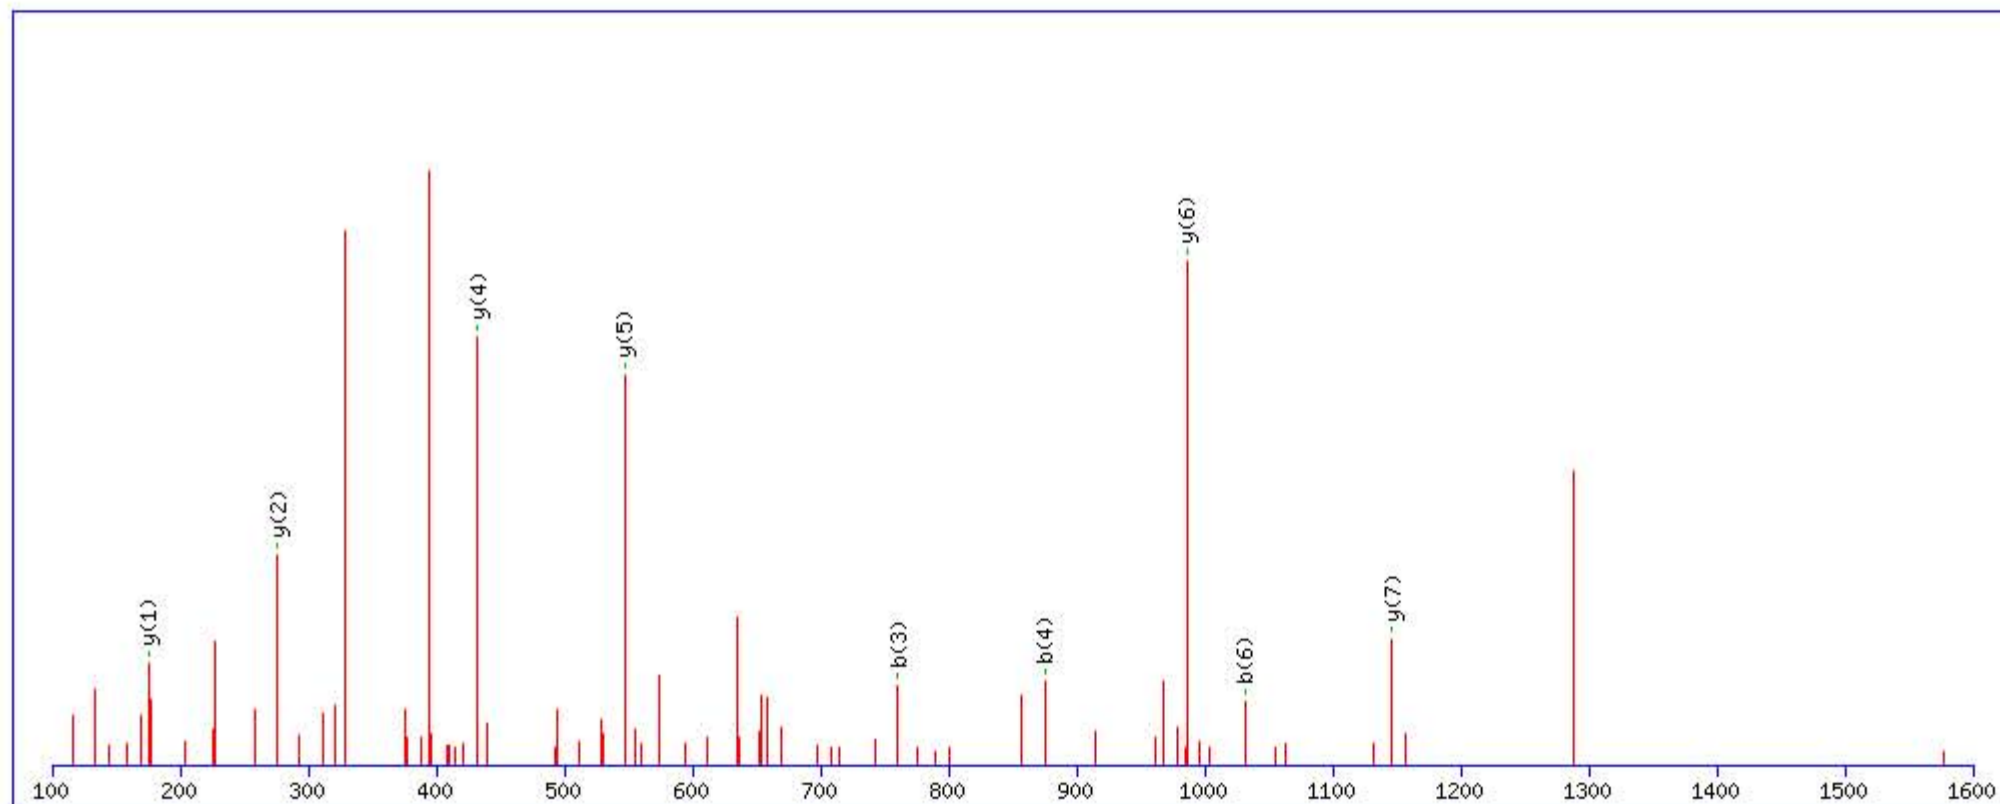

Monoisotopic mass of neutral peptide Mr(calc): 1305.562820

Fixed modifications: Carbamidomethyl (C) (apply to specified residues or termini only)

Variable modifications:

Q3 : Biotin:Thermo-21345 (Q)

Ions Score: 51 Expect: 7e-005

Matches : 9/72 fragment ions using 12 most intense peaks [\(help\)](#)

| # | b           | b <sup>++</sup> | b <sup>*</sup> | b <sup>*++</sup> | b <sup>0</sup> | b <sup>0++</sup> | Seq. | y           | y <sup>++</sup> | y <sup>*</sup> | y <sup>*++</sup> | y <sup>0</sup> | y <sup>0++</sup> | # |
|---|-------------|-----------------|----------------|------------------|----------------|------------------|------|-------------|-----------------|----------------|------------------|----------------|------------------|---|
| 1 | 161.037925  | 81.022600       |                |                  |                |                  | C    |             |                 |                |                  |                |                  | 8 |
| 2 | 321.068574  | 161.037925      |                |                  |                |                  | C    | 1146.539427 | 573.773352      | 1129.512878    | 565.260077       | 1128.528862    | 564.768069       | 7 |
| 3 | 760.293900  | 380.650588      | 743.267351     | 372.137314       |                |                  | Q    | 986.508778  | 493.758027      | 969.482229     | 485.244753       | 968.498213     | 484.752745       | 6 |
| 4 | 875.320843  | 438.164060      | 858.294294     | 429.650785       | 857.310278     | 429.158777       | D    | 547.283452  | 274.145364      | 530.256903     | 265.632090       | 529.272887     | 265.140082       | 5 |
| 5 | 932.342307  | 466.674792      | 915.315758     | 458.161517       | 914.331742     | 457.669509       | G    | 432.256509  | 216.631893      | 415.229960     | 208.118618       | 414.245944     | 207.626610       | 4 |
| 6 | 1031.410721 | 516.208999      | 1014.384172    | 507.695724       | 1013.400156    | 507.203716       | V    | 375.235045  | 188.121161      | 358.208496     | 179.607886       | 357.224480     | 179.115878       | 3 |
| 7 | 1132.458400 | 566.732838      | 1115.431851    | 558.219564       | 1114.447835    | 557.727556       | T    | 276.166631  | 138.586953      | 259.140082     | 130.073679       | 258.156066     | 129.581671       | 2 |
| 8 |             |                 |                |                  |                |                  | R    | 175.118952  | 88.063114       | 158.092403     | 79.549839        |                |                  | 1 |

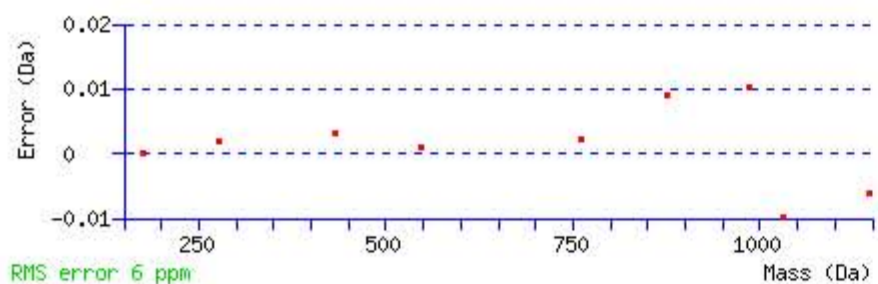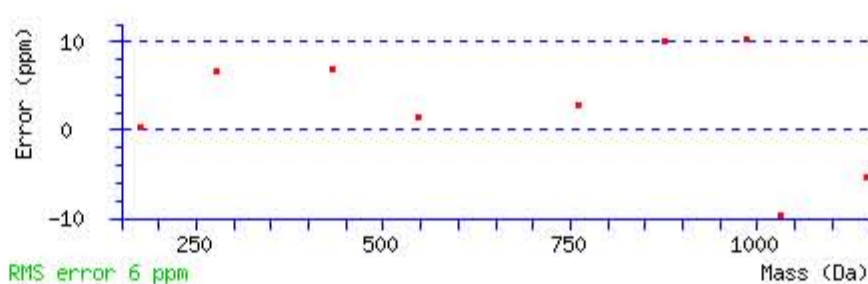

NCBI BLAST search of [CCQDGVTR](#)

(Parameters: blastp, nr protein database, expect=20000, no filter, PAM30)

Other BLAST [web gateways](#)

## All matches to this query

| Score | Mr(calc):   | Delta     | Sequence                     |
|-------|-------------|-----------|------------------------------|
| 50.7  | 1305.562820 | 0.003808  | <a href="#">CCQDGVTR</a>     |
| 6.0   | 1305.577194 | -0.010566 | <a href="#">CDAGWLADGSVR</a> |
| 5.7   | 1305.562805 | 0.003823  | <a href="#">CCTSPSQR</a>     |
| 0.6   | 1305.583679 | -0.017051 | <a href="#">EQEPDFEEKR</a>   |



# MASCOT Search Results

## Peptide View

MS/MS Fragmentation of **LGQYASPTAK**

Found in **CO4A\_HUMAN**, Complement C4-A OS=Homo sapiens GN=C4A PE=1 SV=2

Match to Query 27133: 1345.709368 from(673.861960,2+) rtinseconds(1630) index(50468)

Title: Locus:1.1.1.1183.10 File:"2013-07-02 CLN FXIII 60 min 2nd F 4.wiff"

Data file C:\Program Files (x86)\Matrix Science\Mascot Daemon\mgf5 FXIII 60 min 2nd\mascot\_daemon\_merge.mgf

Click mouse within plot area to zoom in by factor of two about that point

Or, Plot from  to  Da

Label all possible matches  Label matches used for scoring

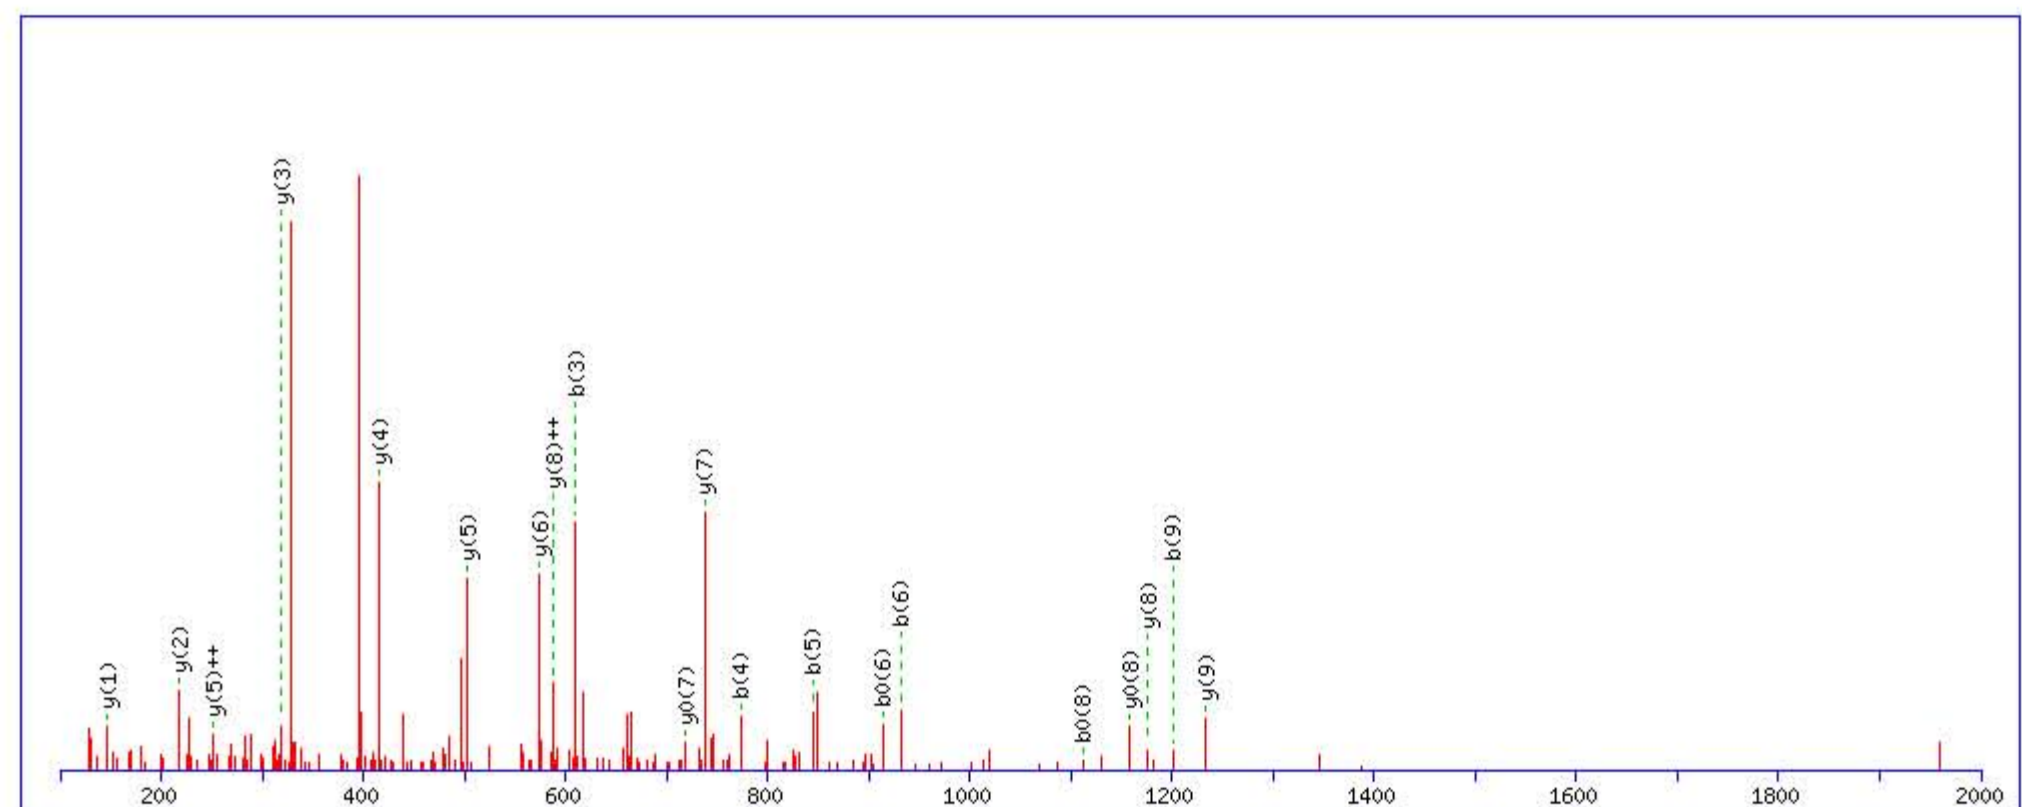

Monoisotopic mass of neutral peptide Mr(calc): 1345.706390

Fixed modifications: Carbamidomethyl (C) (apply to specified residues or termini only)

Variable modifications:

Q3 : Biotin:Thermo-21345 (Q)

Ions Score: 63 Expect: 1.4e-005

Matches : 20/90 fragment ions using 34 most intense peaks [\(help\)](#)

| #  | b           | b <sup>++</sup> | b <sup>+</sup> | b <sup>+++</sup> | b <sup>0</sup> | b <sup>0++</sup> | Seq. | y           | y <sup>++</sup> | y <sup>+</sup> | y <sup>+++</sup> | y <sup>0</sup> | y <sup>0++</sup> | #  |
|----|-------------|-----------------|----------------|------------------|----------------|------------------|------|-------------|-----------------|----------------|------------------|----------------|------------------|----|
| 1  | 114.091340  | 57.549308       |                |                  |                |                  | L    |             |                 |                |                  |                |                  | 10 |
| 2  | 171.112804  | 86.060040       |                |                  |                |                  | G    | 1233.629622 | 617.318449      | 1216.603073    | 608.805175       | 1215.619057    | 608.313167       | 9  |
| 3  | 610.338130  | 305.672703      | 593.311581     | 297.159429       |                |                  | Q    | 1176.608158 | 588.807717      | 1159.581609    | 580.294443       | 1158.597593    | 579.802435       | 8  |
| 4  | 773.401459  | 387.204368      | 756.374910     | 378.691093       |                |                  | Y    | 737.382832  | 369.195054      | 720.356283     | 360.681780       | 719.372267     | 360.189772       | 7  |
| 5  | 844.438573  | 422.722925      | 827.412024     | 414.209650       |                |                  | A    | 574.319503  | 287.663389      | 557.292954     | 279.150115       | 556.308938     | 278.658107       | 6  |
| 6  | 931.470601  | 466.238939      | 914.444052     | 457.725664       | 913.460036     | 457.233656       | S    | 503.282389  | 252.144832      | 486.255840     | 243.631558       | 485.271824     | 243.139550       | 5  |
| 7  | 1028.523365 | 514.765321      | 1011.496816    | 506.252046       | 1010.512800    | 505.760038       | P    | 416.250361  | 208.628818      | 399.223812     | 200.115544       | 398.239796     | 199.623536       | 4  |
| 8  | 1129.571044 | 565.289160      | 1112.544495    | 556.775886       | 1111.560479    | 556.283878       | T    | 319.197597  | 160.102436      | 302.171048     | 151.589162       | 301.187032     | 151.097154       | 3  |
| 9  | 1200.608158 | 600.807717      | 1183.581609    | 592.294443       | 1182.597593    | 591.802435       | A    | 218.149918  | 109.578597      | 201.123369     | 101.065322       |                |                  | 2  |
| 10 |             |                 |                |                  |                |                  | K    | 147.112804  | 74.060040       | 130.086255     | 65.546765        |                |                  | 1  |

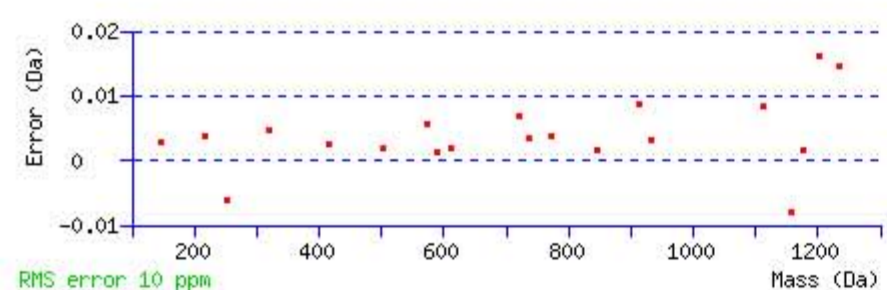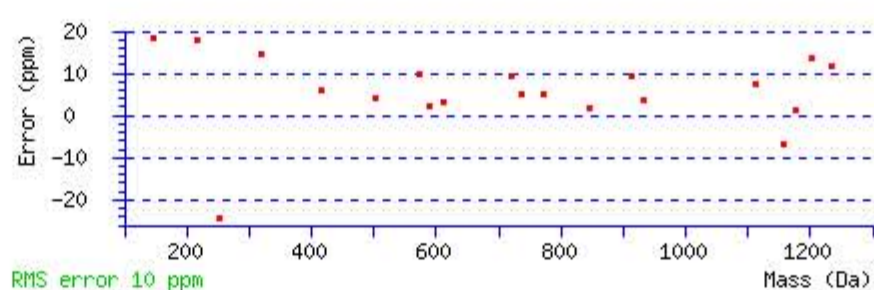

NCBI BLAST search of **LGQYASPTAK**

(Parameters: blastp, nr protein database, expect=20000, no filter, PAM30)

Other BLAST [web gateways](#)

All matches to this query

| Score | Mr(calc):   | Delta     | Sequence                       |
|-------|-------------|-----------|--------------------------------|
| 63.1  | 1345.706390 | 0.002978  | <a href="#">LGQYASPTAK</a>     |
| 14.4  | 1345.706390 | 0.002978  | <a href="#">LGQYDQALK</a>      |
| 13.1  | 1345.724182 | -0.014814 | <a href="#">LGAVPATSGPTTFK</a> |
| 10.9  | 1345.706406 | 0.002962  | <a href="#">QGLYTPQTK</a>      |
| 7.0   | 1345.692474 | 0.016894  | <a href="#">VASCRYPALGPR</a>   |
| 6.7   | 1345.717636 | -0.008268 | <a href="#">QMPQPTFTLRK</a>    |
| 5.8   | 1345.727509 | -0.018141 | <a href="#">LGLMDNEIKVAK</a>   |
| 5.5   | 1345.727509 | -0.018141 | <a href="#">DKLKMEVDQLK</a>    |
| 5.4   | 1345.720108 | -0.010740 | <a href="#">KQEEVSTLRK</a>     |
| 3.0   | 1345.706390 | 0.002978  | <a href="#">HEMTLKFPSIK</a>    |



# MASCOT SCIENCE Mascot Search Results

## Peptide View

MS/MS Fragmentation of **GLQDEDGYR**

Found in **CO4A\_HUMAN**, Complement C4-A OS=Homo sapiens GN=C4A PE=1 SV=2

Match to Query 28904: 1362.626348 from(682.320450,2+) rtinseconds(1742) index(51102)

Title: Locus:1.1.1.1222.12 File:"2013-07-02 CLN FXIII 60 min 2nd F 4.wiff"

Data file C:\Program Files (x86)\Matrix Science\Mascot Daemon\mgf\5 FXIII 60 min 2nd\mascot\_daemon\_merge.mgf

Click mouse within plot area to zoom in by factor of two about that point

Or, Plot from  to  Da

Label all possible matches  Label matches used for scoring

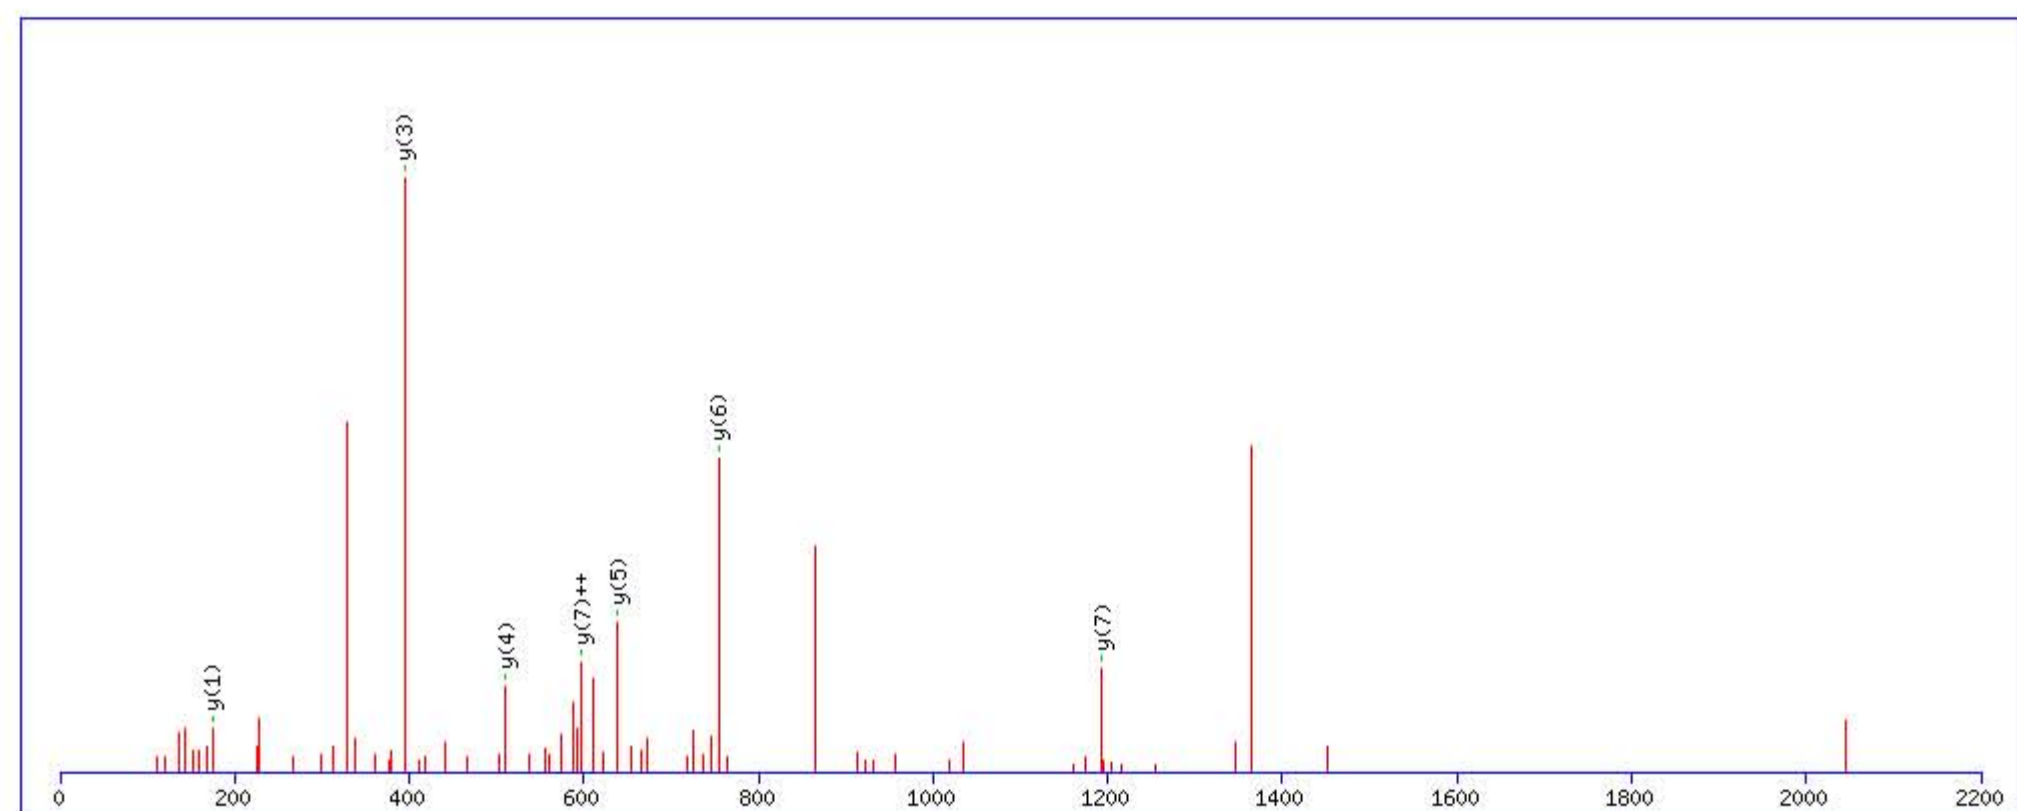

Monoisotopic mass of neutral peptide Mr(calc): 1362.623795

Fixed modifications: Carbamidomethyl (C) (apply to specified residues or termini only)

Variable modifications:

Q3 : Biotin:Thermo-21345 (Q)

Ions Score: 40 Expect: 0.00027

Matches : 7/80 fragment ions using 13 most intense peaks [\(help\)](#)

| # | b           | b <sup>++</sup> | b <sup>*</sup> | b <sup>*++</sup> | b <sup>0</sup> | b <sup>0++</sup> | Seq.     | y                  | y <sup>++</sup>   | y <sup>*</sup> | y <sup>*++</sup> | y <sup>0</sup> | y <sup>0++</sup> | # |
|---|-------------|-----------------|----------------|------------------|----------------|------------------|----------|--------------------|-------------------|----------------|------------------|----------------|------------------|---|
| 1 | 58.028740   | 29.518008       |                |                  |                |                  | <b>G</b> |                    |                   |                |                  |                |                  | 9 |
| 2 | 171.112804  | 86.060040       |                |                  |                |                  | <b>L</b> | 1306.609614        | 653.808445        | 1289.583065    | 645.295171       | 1288.599049    | 644.803163       | 8 |
| 3 | 610.338130  | 305.672703      | 593.311581     | 297.159429       |                |                  | <b>Q</b> | <b>1193.525550</b> | <b>597.266413</b> | 1176.499001    | 588.753139       | 1175.514985    | 588.261131       | 7 |
| 4 | 725.365073  | 363.186175      | 708.338524     | 354.672900       | 707.354508     | 354.180892       | <b>D</b> | <b>754.300224</b>  | 377.653750        | 737.273675     | 369.140476       | 736.289659     | 368.648468       | 6 |
| 5 | 854.407666  | 427.707471      | 837.381117     | 419.194197       | 836.397101     | 418.702189       | <b>E</b> | <b>639.273281</b>  | 320.140279        | 622.246732     | 311.627004       | 621.262716     | 311.134996       | 5 |
| 6 | 969.434609  | 485.220943      | 952.408060     | 476.707668       | 951.424044     | 476.215660       | <b>D</b> | <b>510.230688</b>  | 255.618982        | 493.204139     | 247.105707       | 492.220123     | 246.613700       | 4 |
| 7 | 1026.456073 | 513.731675      | 1009.429524    | 505.218400       | 1008.445508    | 504.726392       | <b>G</b> | <b>395.203745</b>  | 198.105511        | 378.177196     | 189.592236       |                |                  | 3 |
| 8 | 1189.519402 | 595.263339      | 1172.492853    | 586.750065       | 1171.508837    | 586.258057       | <b>Y</b> | 338.182281         | 169.594778        | 321.155732     | 161.081504       |                |                  | 2 |
| 9 |             |                 |                |                  |                |                  | <b>R</b> | <b>175.118952</b>  | 88.063114         | 158.092403     | 79.549839        |                |                  | 1 |

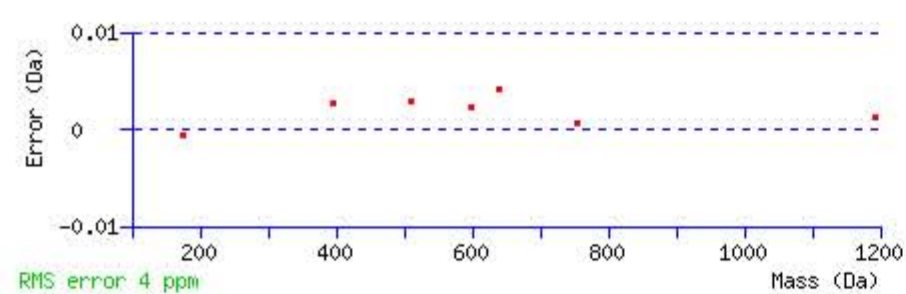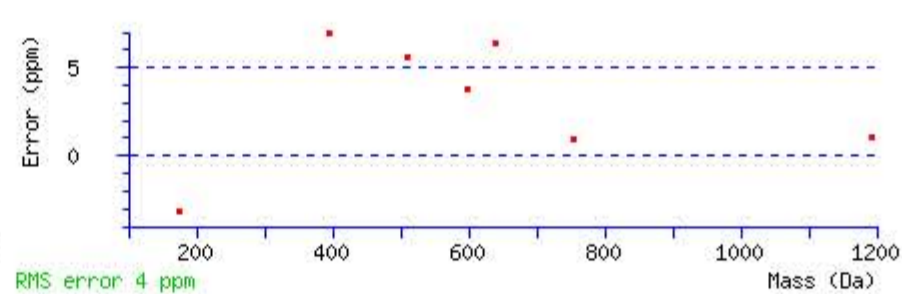

NCBI BLAST search of **GLQDEDGYR**

(Parameters: blastp, nr protein database, expect=20000, no filter, PAM30)

Other BLAST [web gateways](#)

All matches to this query

| Score | Mr(calc):   | Delta    | Sequence                       |
|-------|-------------|----------|--------------------------------|
| 40.4  | 1362.623795 | 0.002553 | <a href="#">GLQDEDGYR</a>      |
| 2.4   | 1362.613251 | 0.013097 | <a href="#">MGAGATGRAMDGPR</a> |
| 2.2   | 1362.623795 | 0.002553 | <a href="#">TGFLEIDEHMR</a>    |

Mascot: <http://www.matrixscience.com/>



# MASCOT Search Results

## Peptide View

MS/MS Fragmentation of **TEQWSTLPPETK**

Found in **CO4A\_HUMAN**, Complement C4-A OS=Homo sapiens GN=C4A PE=1 SV=2

Match to Query 41020: 1726.871328 from(864.442940,2+) rtinseconds(2031) index(53160)

Title: Locus:1.1.1.1322.10 File:"2013-07-02 CLN FXIII 60 min 2nd F 4.wiff"

Data file C:\Program Files (x86)\Matrix Science\Mascot Daemon\mgf\5 FXIII 60 min 2nd\mascot\_daemon\_merge.mgf

Click mouse within plot area to zoom in by factor of two about that point

Or, Plot from  to  Da

Label all possible matches  Label matches used for scoring

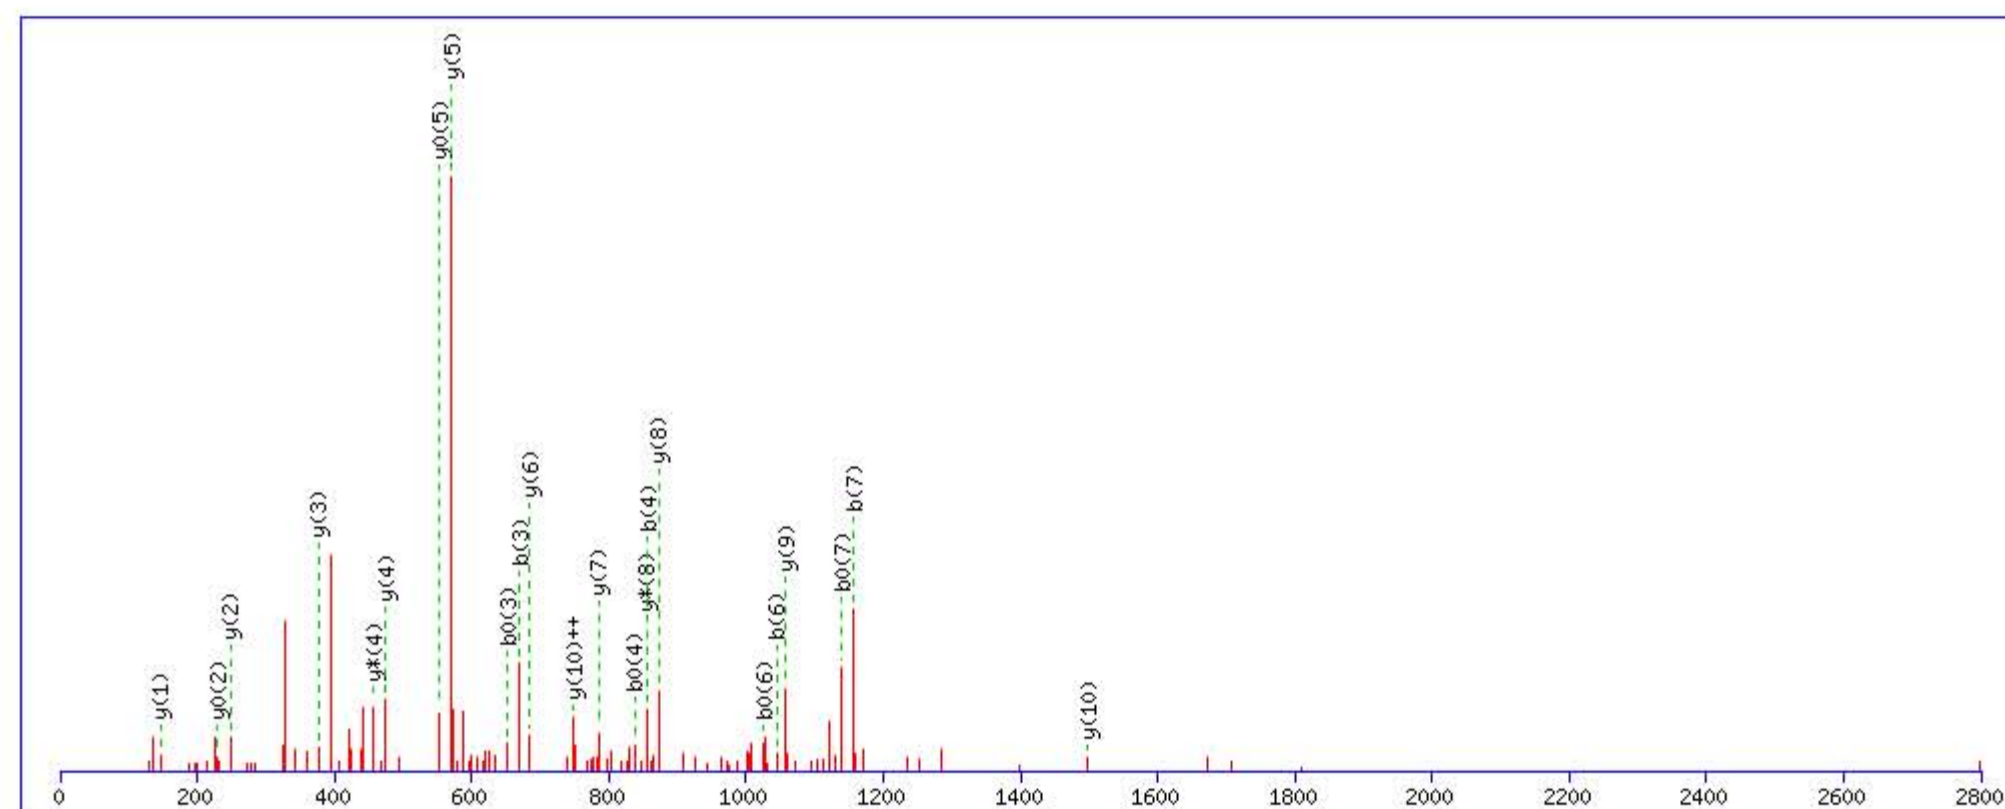

Monoisotopic mass of neutral peptide Mr(calc): 1726.860001

Fixed modifications: Carbamidomethyl (C) (apply to specified residues or termini only)

Variable modifications:

Q3 : Biotin:Thermo-21345 (Q)

Ions Score: 50 Expect: 0.00018

Matches : 23/126 fragment ions using 51 most intense peaks [\(help\)](#)

| #  | b                  | b <sup>++</sup> | b <sup>*</sup> | b <sup>*++</sup> | b <sup>0</sup>     | b <sup>0++</sup> | Seq. | y                  | y <sup>++</sup>   | y <sup>*</sup>    | y <sup>*++</sup> | y <sup>0</sup>    | y <sup>0++</sup> | #  |
|----|--------------------|-----------------|----------------|------------------|--------------------|------------------|------|--------------------|-------------------|-------------------|------------------|-------------------|------------------|----|
| 1  | 102.054955         | 51.531116       |                |                  | 84.044390          | 42.525833        | T    |                    |                   |                   |                  |                   |                  | 12 |
| 2  | 231.097548         | 116.052412      |                |                  | 213.086983         | 107.047130       | E    | 1626.819607        | 813.913442        | 1609.793058       | 805.400167       | 1608.809042       | 804.908159       | 11 |
| 3  | <b>670.322874</b>  | 335.665075      | 653.296325     | 327.151801       | <b>652.312309</b>  | 326.659793       | Q    | <b>1497.777014</b> | <b>749.392145</b> | 1480.750465       | 740.878871       | 1479.766449       | 740.386863       | 10 |
| 4  | <b>856.402187</b>  | 428.704732      | 839.375638     | 420.191457       | <b>838.391622</b>  | 419.699449       | W    | <b>1058.551688</b> | 529.779482        | 1041.525139       | 521.266208       | 1040.541123       | 520.774200       | 9  |
| 5  | 943.434215         | 472.220746      | 926.407666     | 463.707471       | 925.423650         | 463.215463       | S    | <b>872.472375</b>  | 436.739826        | <b>855.445826</b> | 428.226551       | 854.461810        | 427.734543       | 8  |
| 6  | <b>1044.481894</b> | 522.744585      | 1027.455345    | 514.231311       | <b>1026.471329</b> | 513.739303       | T    | <b>785.440347</b>  | 393.223812        | 768.413798        | 384.710537       | 767.429782        | 384.218529       | 7  |
| 7  | <b>1157.565958</b> | 579.286617      | 1140.539409    | 570.773343       | <b>1139.555393</b> | 570.281334       | L    | <b>684.392668</b>  | 342.699972        | 667.366119        | 334.186698       | 666.382103        | 333.694690       | 6  |
| 8  | 1254.618722        | 627.812999      | 1237.592173    | 619.299725       | 1236.608157        | 618.807716       | P    | <b>571.308604</b>  | 286.157940        | 554.282055        | 277.644666       | <b>553.298039</b> | 277.152658       | 5  |
| 9  | 1351.671486        | 676.339381      | 1334.644937    | 667.826107       | 1333.660921        | 667.334098       | P    | <b>474.255840</b>  | 237.631558        | <b>457.229291</b> | 229.118284       | 456.245275        | 228.626276       | 4  |
| 10 | 1480.714079        | 740.860678      | 1463.687530    | 732.347403       | 1462.703514        | 731.855395       | E    | <b>377.203076</b>  | 189.105176        | 360.176527        | 180.591902       | 359.192511        | 180.099894       | 3  |
| 11 | 1581.761758        | 791.384517      | 1564.735209    | 782.871243       | 1563.751193        | 782.379235       | T    | <b>248.160483</b>  | 124.583879        | 231.133934        | 116.070605       | <b>230.149918</b> | 115.578597       | 2  |
| 12 |                    |                 |                |                  |                    |                  | K    | <b>147.112804</b>  | 74.060040         | 130.086255        | 65.546765        |                   |                  | 1  |

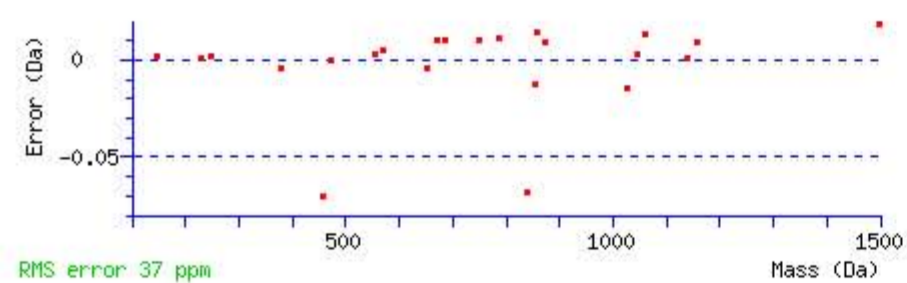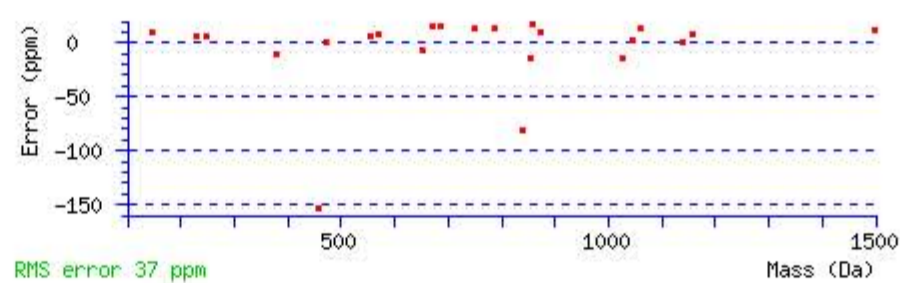

NCBI BLAST search of **TEQWSTLPPETK**

(Parameters: blastp, nr protein database, expect=20000, no filter, PAM30)

Other BLAST [web gateways](#)

All matches to this query

| Score | Mr(calc):   | Delta     | Sequence                           |
|-------|-------------|-----------|------------------------------------|
| 50.1  | 1726.860001 | 0.011327  | <a href="#">TEQWSTLPPETK</a>       |
| 9.6   | 1726.849960 | 0.021368  | <a href="#">TERFGQGGAGPVGGQGPR</a> |
| 6.2   | 1726.867188 | 0.004140  | <a href="#">KDHAEMQAVIDAKQK</a>    |
| 3.5   | 1726.871216 | 0.000112  | <a href="#">NLNTKLQMYFQSPK</a>     |
| 1.9   | 1726.853485 | 0.017843  | <a href="#">MASGHAFQPDLVK</a>      |
| 1.1   | 1726.874573 | -0.003245 | <a href="#">VTKNQEMMSQIKYK</a>     |



# MASCOT Search Results

## Peptide View

MS/MS Fragmentation of **GLEEELQFSLGSK**

Found in **CO4A\_HUMAN**, Complement C4-A OS=Homo sapiens GN=C4A PE=1 SV=2

Match to Query 41586: 1746.900028 from(874.457290,2+) rtinseconds(2580) index(56406)

Title: Locus:1.1.1.1513.10 File:"2013-07-02 CLN FXIII 60 min 2nd F 4.wiff"

Data file C:\Program Files (x86)\Matrix Science\Mascot Daemon\mgf\5 FXIII 60 min 2nd\mascot\_daemon\_merge.mgf

Click mouse within plot area to zoom in by factor of two about that point

Or, Plot from  to  Da

Label all possible matches  Label matches used for scoring

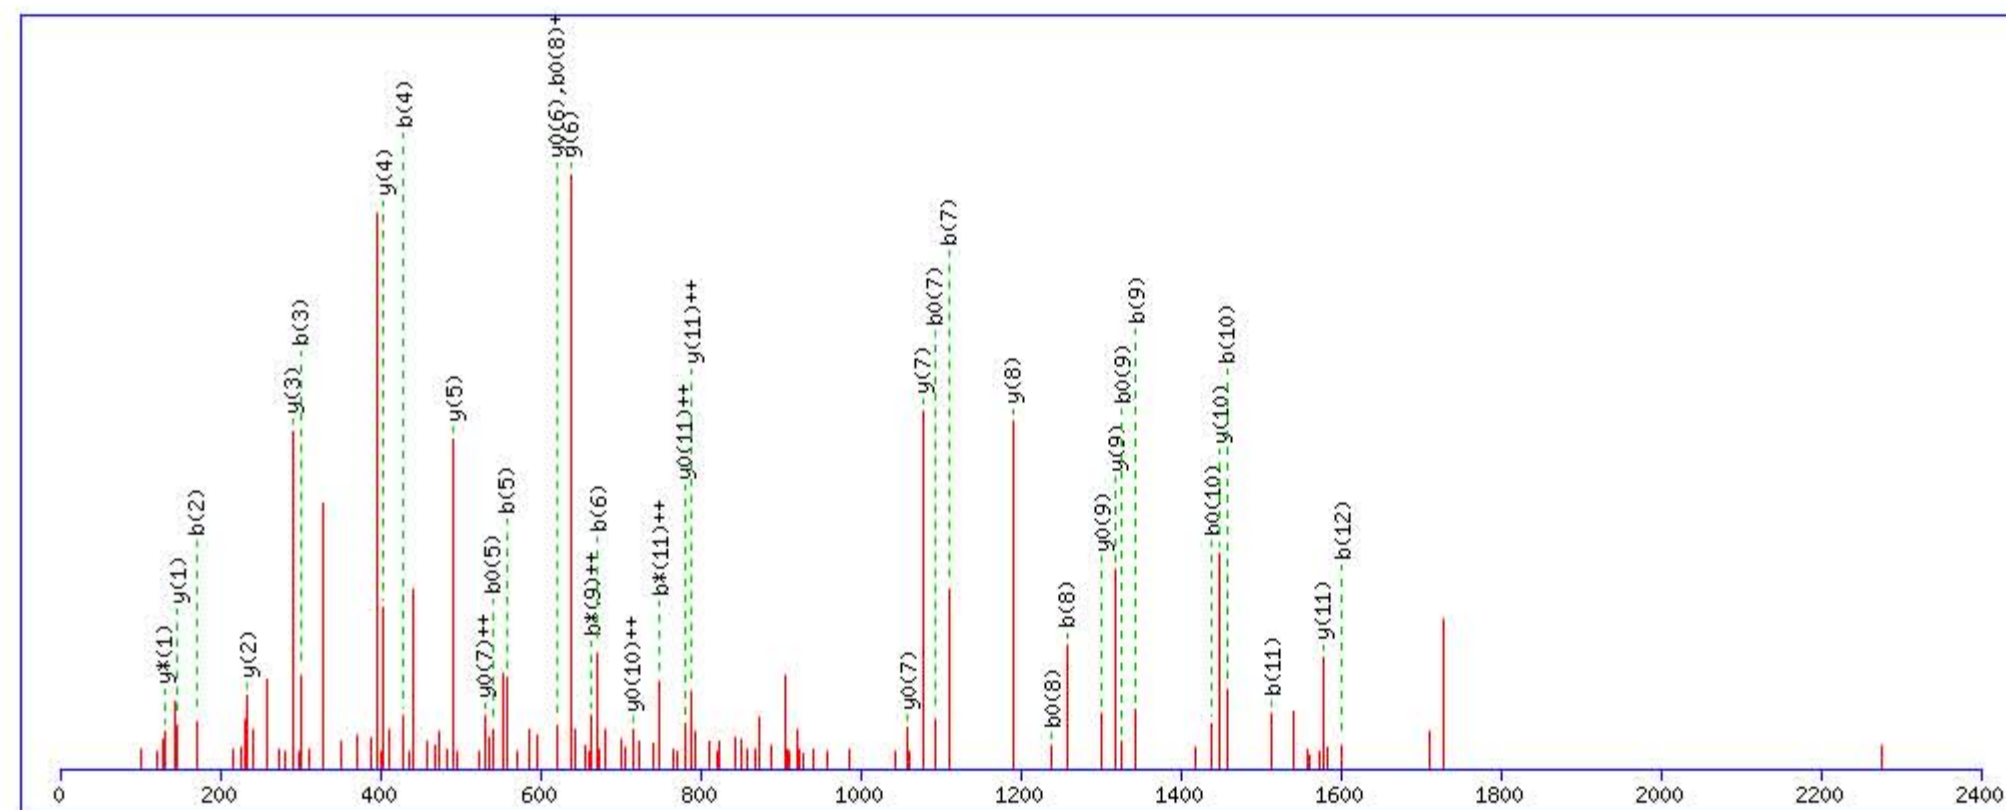

Monoisotopic mass of neutral peptide Mr(calc): 1746.886200

Fixed modifications: Carbamidomethyl (C) (apply to specified residues or termini only)

Variable modifications:

Q7 : Biotin:Thermo-21345 (Q)

Ions Score: 75 Expect: 1.9e-007

Matches : 38/126 fragment ions using 59 most intense peaks [\(help\)](#)

| #  | b                  | b <sup>++</sup> | b <sup>+</sup> | b <sup>+++</sup>  | b <sup>0</sup>     | b <sup>0++</sup> | Seq. | y                  | y <sup>++</sup>   | y <sup>+</sup>    | y <sup>+++</sup> | y <sup>0</sup>     | y <sup>0++</sup>  | #  |
|----|--------------------|-----------------|----------------|-------------------|--------------------|------------------|------|--------------------|-------------------|-------------------|------------------|--------------------|-------------------|----|
| 1  | 58.028740          | 29.518008       |                |                   |                    |                  | G    |                    |                   |                   |                  |                    |                   | 13 |
| 2  | <b>171.112804</b>  | 86.060040       |                |                   |                    |                  | L    | 1690.872035        | 845.939656        | 1673.845486       | 837.426381       | 1672.861470        | 836.934373        | 12 |
| 3  | <b>300.155397</b>  | 150.581336      |                |                   | 282.144832         | 141.576054       | E    | <b>1577.787971</b> | <b>789.397624</b> | 1560.761422       | 780.884349       | 1559.777406        | <b>780.392341</b> | 11 |
| 4  | <b>429.197990</b>  | 215.102633      |                |                   | 411.187425         | 206.097351       | E    | <b>1448.745378</b> | 724.876327        | 1431.718829       | 716.363053       | 1430.734813        | <b>715.871045</b> | 10 |
| 5  | <b>558.240583</b>  | 279.623930      |                |                   | <b>540.230018</b>  | 270.618647       | E    | <b>1319.702785</b> | 660.355031        | 1302.676236       | 651.841756       | <b>1301.692220</b> | 651.349748        | 9  |
| 6  | <b>671.324647</b>  | 336.165962      |                |                   | 653.314082         | 327.160679       | L    | <b>1190.660192</b> | 595.833734        | 1173.633643       | 587.320460       | 1172.649627        | 586.828452        | 8  |
| 7  | <b>1110.549973</b> | 555.778624      | 1093.523424    | 547.265350        | <b>1092.539408</b> | 546.773342       | Q    | <b>1077.576128</b> | 539.291702        | 1060.549579       | 530.778428       | <b>1059.565563</b> | <b>530.286419</b> | 7  |
| 8  | <b>1257.618387</b> | 629.312832      | 1240.591838    | 620.799557        | <b>1239.607822</b> | 620.307549       | F    | <b>638.350802</b>  | 319.679039        | 621.324253        | 311.165765       | <b>620.340237</b>  | 310.673757        | 6  |
| 9  | <b>1344.650415</b> | 672.828846      | 1327.623866    | <b>664.315571</b> | <b>1326.639850</b> | 663.823563       | S    | <b>491.282388</b>  | 246.144832        | 474.255839        | 237.631557       | 473.271823         | 237.139549        | 5  |
| 10 | <b>1457.734479</b> | 729.370878      | 1440.707930    | 720.857603        | <b>1439.723914</b> | 720.365595       | L    | <b>404.250360</b>  | 202.628818        | 387.223811        | 194.115543       | 386.239795         | 193.623535        | 4  |
| 11 | <b>1514.755943</b> | 757.881609      | 1497.729394    | <b>749.368335</b> | 1496.745378        | 748.876327       | G    | <b>291.166296</b>  | 146.086786        | 274.139747        | 137.573512       | 273.155731         | 137.081504        | 3  |
| 12 | <b>1601.787971</b> | 801.397624      | 1584.761422    | 792.884349        | 1583.777406        | 792.392341       | S    | <b>234.144832</b>  | 117.576054        | 217.118283        | 109.062780       | 216.134267         | 108.570772        | 2  |
| 13 |                    |                 |                |                   |                    |                  | K    | <b>147.112804</b>  | 74.060040         | <b>130.086255</b> | 65.546765        |                    |                   | 1  |

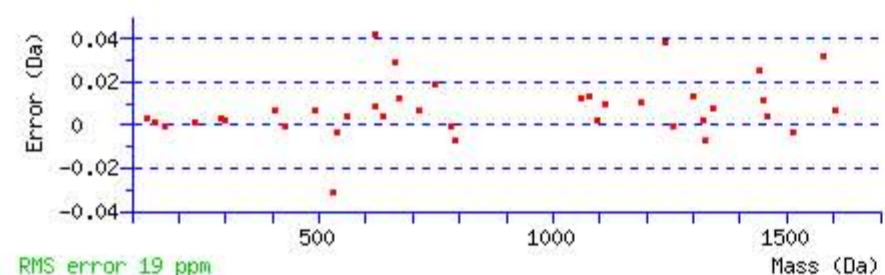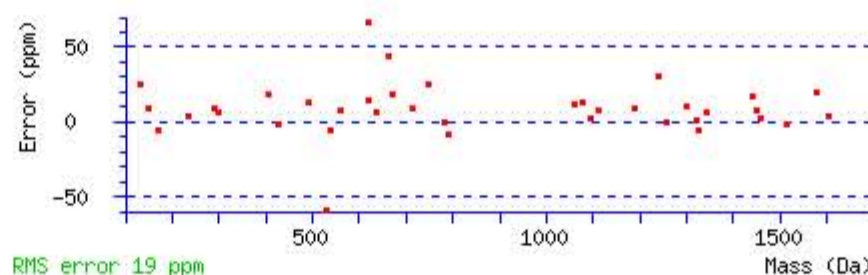

NCBI BLAST search of [GLEEELQFSLGSK](#)

(Parameters: blastp, nr protein database, expect=20000, no filter, PAM30)

Other BLAST [web gateways](#)

All matches to this query

| Score | Mr(calc):   | Delta     | Sequence                          |
|-------|-------------|-----------|-----------------------------------|
| 74.7  | 1746.886200 | 0.013828  | <a href="#">GLEEELQFSLGSK</a>     |
| 2.9   | 1746.887558 | 0.012470  | <a href="#">AVQSKAFCAGGLAPGWK</a> |
| 1.3   | 1746.918533 | -0.018505 | <a href="#">AKLQMTEAALALSEQK</a>  |

Mascot: <http://www.matrixscience.com/>



# MASCOT Search Results

## Peptide View

MS/MS Fragmentation of **VLSLAQEQVGGSP**EK

Found in **CO4A\_HUMAN**, Complement C4-A OS=Homo sapiens GN=C4A PE=1 SV=2

Match to Query 43649: 1851.979932 from(618.333920,3+) rtinseconds(2022) index(53085)

Title: Locus:1.1.1.1319.10 File:"2013-07-02 CLN FXIII 60 min 2nd F 4.wiff"

Data file C:\Program Files (x86)\Matrix Science\Mascot Daemon\mgf5 FXIII 60 min 2nd\mascot\_daemon\_merge.mgf

Click mouse within plot area to zoom in by factor of two about that point

Or, Plot from  to  Da

Label all possible matches  Label matches used for scoring

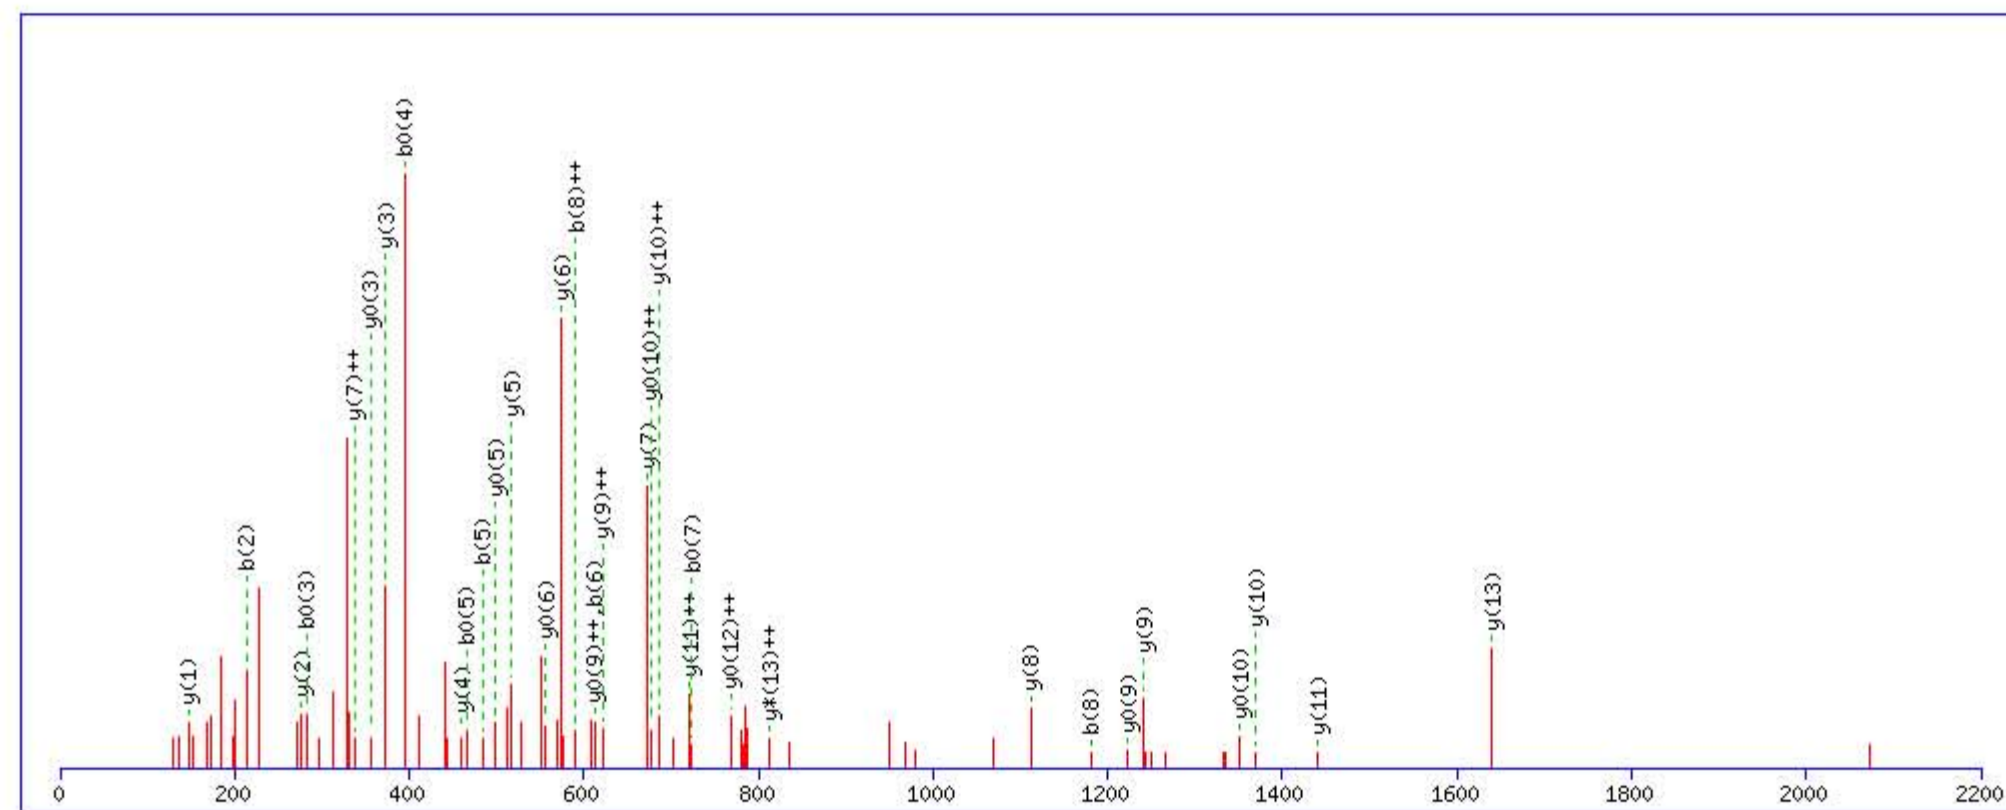

Monoisotopic mass of neutral peptide Mr(calc): 1851.976425

Fixed modifications: Carbamidomethyl (C) (apply to specified residues or termini only)

Variable modifications:

Q8 : Biotin:Thermo-21345 (Q)

Ions Score: 66 Expect: 6.2e-006

Matches : 34/152 fragment ions using 68 most intense peaks [\(help\)](#)

| #  | b                  | b <sup>++</sup>   | b <sup>*</sup> | b <sup>*++</sup> | b <sup>0</sup>    | b <sup>0++</sup> | Seq. | y                  | y <sup>++</sup>   | y <sup>*</sup> | y <sup>*++</sup>  | y <sup>0</sup>     | y <sup>0++</sup>  | #  |
|----|--------------------|-------------------|----------------|------------------|-------------------|------------------|------|--------------------|-------------------|----------------|-------------------|--------------------|-------------------|----|
| 1  | 100.075690         | 50.541483         |                |                  |                   |                  | V    |                    |                   |                |                   |                    |                   | 15 |
| 2  | <b>213.159754</b>  | 107.083515        |                |                  |                   |                  | L    | 1753.915298        | 877.461287        | 1736.888749    | 868.948013        | 1735.904733        | 868.456004        | 14 |
| 3  | 300.191782         | 150.599529        |                |                  | <b>282.181217</b> | 141.594247       | S    | <b>1640.831234</b> | 820.919255        | 1623.804685    | <b>812.405981</b> | 1622.820669        | 811.913973        | 13 |
| 4  | 413.275846         | 207.141561        |                |                  | <b>395.265281</b> | 198.136279       | L    | 1553.799206        | 777.403241        | 1536.772657    | 768.889967        | 1535.788641        | <b>768.397958</b> | 12 |
| 5  | <b>484.312960</b>  | 242.660118        |                |                  | <b>466.302395</b> | 233.654836       | A    | <b>1440.715142</b> | <b>720.861209</b> | 1423.688593    | 712.347935        | 1422.704577        | 711.855927        | 11 |
| 6  | <b>612.371538</b>  | 306.689407        | 595.344989     | 298.176133       | 594.360973        | 297.684125       | Q    | <b>1369.678028</b> | <b>685.342652</b> | 1352.651479    | 676.829378        | <b>1351.667463</b> | <b>676.337370</b> | 10 |
| 7  | 741.414131         | 371.210704        | 724.387582     | 362.697429       | <b>723.403566</b> | 362.205421       | E    | <b>1241.619450</b> | <b>621.313363</b> | 1224.592901    | 612.800089        | <b>1223.608885</b> | <b>612.308080</b> | 9  |
| 8  | <b>1180.639457</b> | <b>590.823367</b> | 1163.612908    | 582.310092       | 1162.628892       | 581.818084       | Q    | <b>1112.576857</b> | 556.792066        | 1095.550308    | 548.278792        | 1094.566292        | 547.786784        | 8  |
| 9  | 1279.707871        | 640.357574        | 1262.681322    | 631.844299       | 1261.697306       | 631.352291       | V    | <b>673.351531</b>  | <b>337.179404</b> | 656.324982     | 328.666129        | 655.340966         | 328.174121        | 7  |
| 10 | 1336.729335        | 668.868306        | 1319.702786    | 660.355031       | 1318.718770       | 659.863023       | G    | <b>574.283117</b>  | 287.645197        | 557.256568     | 279.131922        | <b>556.272552</b>  | 278.639914        | 6  |
| 11 | 1393.750799        | 697.379037        | 1376.724250    | 688.865763       | 1375.740234       | 688.373755       | G    | <b>517.261653</b>  | 259.134465        | 500.235104     | 250.621190        | <b>499.251088</b>  | 250.129182        | 5  |
| 12 | 1480.782827        | 740.895052        | 1463.756278    | 732.381777       | 1462.772262       | 731.889769       | S    | <b>460.240189</b>  | 230.623732        | 443.213640     | 222.110458        | 442.229624         | 221.618450        | 4  |
| 13 | 1577.835591        | 789.421434        | 1560.809042    | 780.908159       | 1559.825026       | 780.416151       | P    | <b>373.208161</b>  | 187.107718        | 356.181612     | 178.594444        | <b>355.197596</b>  | 178.102436        | 3  |
| 14 | 1706.878184        | 853.942730        | 1689.851635    | 845.429456       | 1688.867619       | 844.937447       | E    | <b>276.155397</b>  | 138.581336        | 259.128848     | 130.068062        | 258.144832         | 129.576054        | 2  |
| 15 |                    |                   |                |                  |                   |                  | K    | <b>147.112804</b>  | 74.060040         | 130.086255     | 65.546765         |                    |                   | 1  |

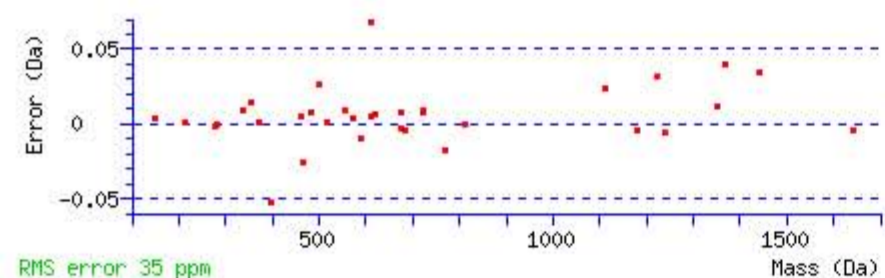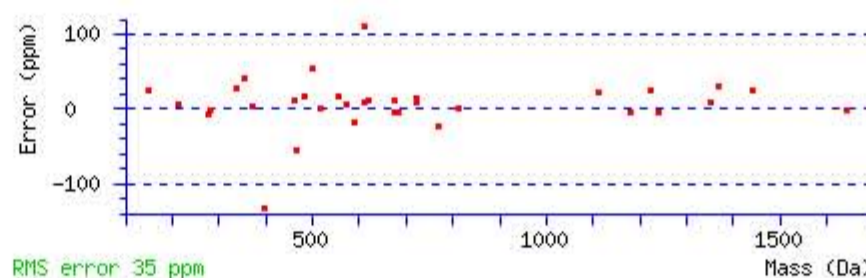

NCBI BLAST search of **VLSLAQEQVGGSP**EK

(Parameters: blastp, nr protein database, expect=20000, no filter, PAM30)

Other BLAST [web gateways](#)

All matches to this query

| Score | Mr(calc):   | Delta    | Sequence                         |
|-------|-------------|----------|----------------------------------|
| 66.0  | 1851.976425 | 0.003507 | <a href="#">VLSLAQEQVGGSP</a> EK |
| 41.9  | 1851.976425 | 0.003507 | <a href="#">VLSLAQEQVGGSP</a> EK |

Mascot: <http://www.matrixscience.com/>



# MASCOT SCIENCE Mascot Search Results

## Peptide View

MS/MS Fragmentation of **GPEVQLVAHSPWLK**

Found in **CO4A\_HUMAN**, Complement C4-A OS=Homo sapiens GN=C4A PE=1 SV=2

Match to Query 44158: 1871.022582 from(624.681470,3+) rtinseconds(2255) index(54583)

Title: Locus:1.1.1.1400.6 File:"2013-07-02 CLN FXIII 60 min 2nd F 4.wiff"

Data file C:\Program Files (x86)\Matrix Science\Mascot Daemon\mgf5 FXIII 60 min 2nd\mascot\_daemon\_merge.mgf

Click mouse within plot area to zoom in by factor of two about that point

Or, Plot from  to  Da

Label all possible matches  Label matches used for scoring

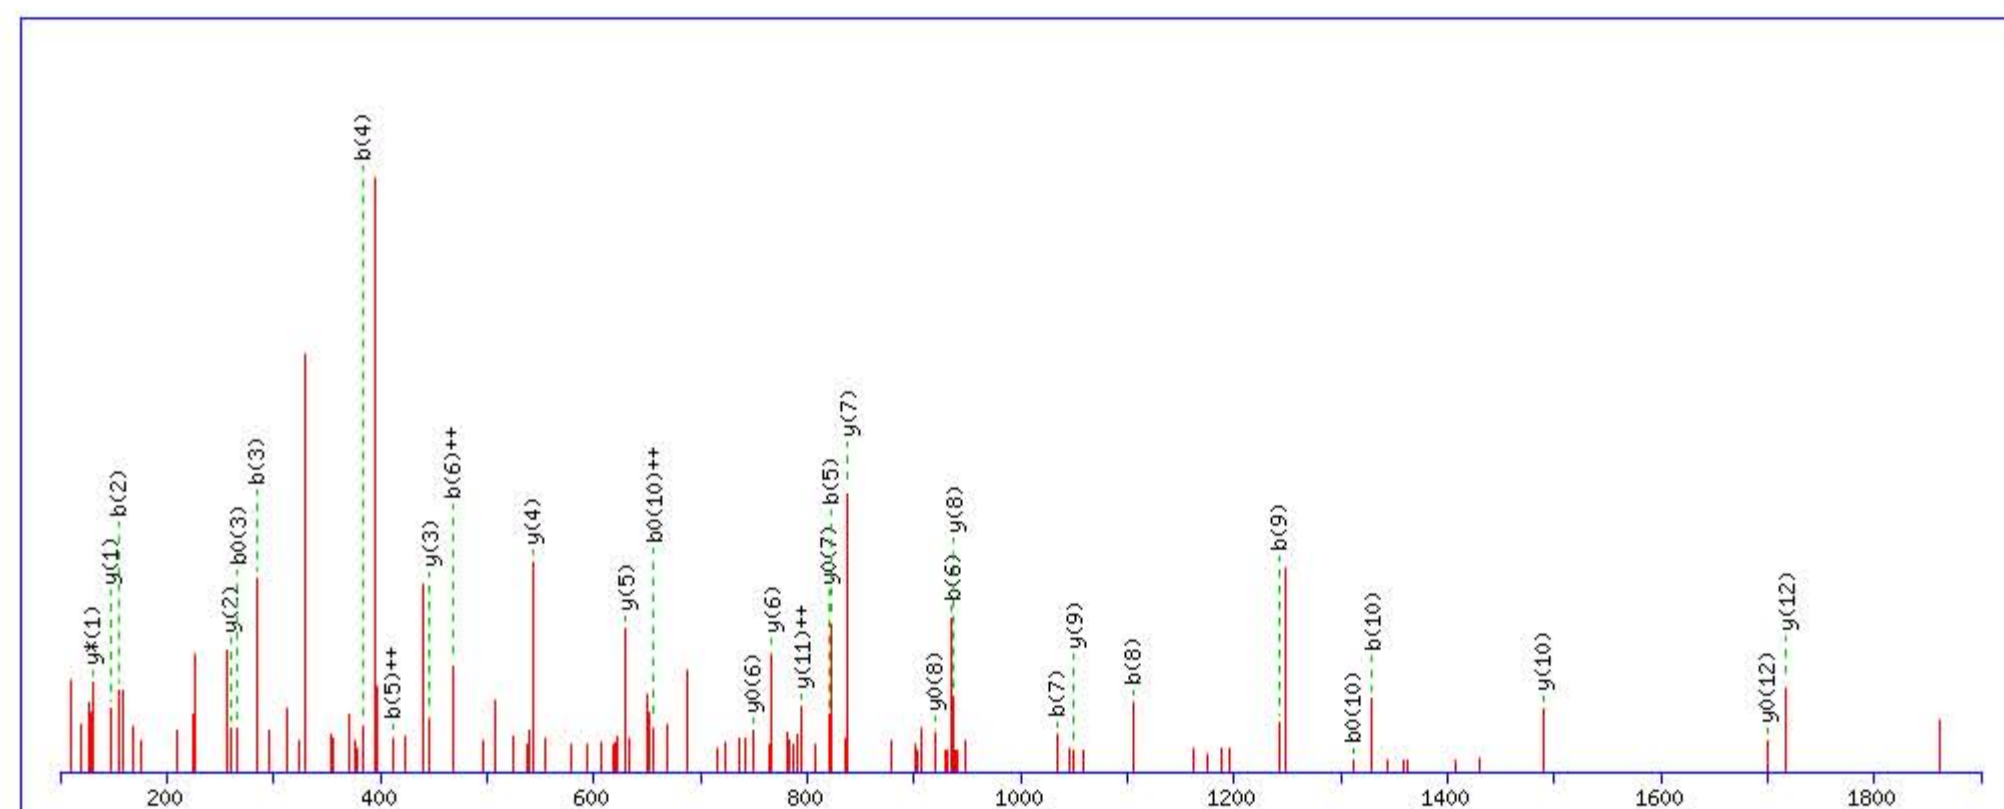

Monoisotopic mass of neutral peptide Mr(calc): 1871.012756

Fixed modifications: Carbamidomethyl (C) (apply to specified residues or termini only)

Variable modifications:

Q5 : Biotin:Thermo-21345 (Q)

Ions Score: 46 Expect: 7.1e-005

Matches : 31/136 fragment ions using 77 most intense peaks [\(help\)](#)

| #  | b           | b <sup>++</sup> | b <sup>*</sup> | b <sup>++</sup> | b <sup>0</sup> | b <sup>0++</sup> | Seq. | y           | y <sup>++</sup> | y <sup>*</sup> | y <sup>++</sup> | y <sup>0</sup> | y <sup>0++</sup> | #  |
|----|-------------|-----------------|----------------|-----------------|----------------|------------------|------|-------------|-----------------|----------------|-----------------|----------------|------------------|----|
| 1  | 58.028740   | 29.518008       |                |                 |                |                  | G    |             |                 |                |                 |                |                  | 14 |
| 2  | 155.081504  | 78.044390       |                |                 |                |                  | P    | 1814.998574 | 908.002925      | 1797.972025    | 899.489651      | 1796.988009    | 898.997643       | 13 |
| 3  | 284.124097  | 142.565687      |                |                 | 266.113532     | 133.560404       | E    | 1717.945810 | 859.476543      | 1700.919261    | 850.963269      | 1699.935245    | 850.471261       | 12 |
| 4  | 383.192511  | 192.099894      |                |                 | 365.181946     | 183.094611       | V    | 1588.903217 | 794.955247      | 1571.876668    | 786.441972      | 1570.892652    | 785.949964       | 11 |
| 5  | 822.417837  | 411.712557      | 805.391288     | 403.199282      | 804.407272     | 402.707274       | Q    | 1489.834803 | 745.421040      | 1472.808254    | 736.907765      | 1471.824238    | 736.415757       | 10 |
| 6  | 935.501901  | 468.254589      | 918.475352     | 459.741314      | 917.491336     | 459.249306       | L    | 1050.609477 | 525.808377      | 1033.582928    | 517.295102      | 1032.598912    | 516.803094       | 9  |
| 7  | 1034.570315 | 517.788796      | 1017.543766    | 509.275521      | 1016.559750    | 508.783513       | V    | 937.525413  | 469.266345      | 920.498864     | 460.753070      | 919.514848     | 460.261062       | 8  |
| 8  | 1105.607429 | 553.307353      | 1088.580880    | 544.794078      | 1087.596864    | 544.302070       | A    | 838.456999  | 419.732138      | 821.430450     | 411.218863      | 820.446434     | 410.726855       | 7  |
| 9  | 1242.666341 | 621.836809      | 1225.639792    | 613.323534      | 1224.655776    | 612.831526       | H    | 767.419885  | 384.213581      | 750.393336     | 375.700306      | 749.409320     | 375.208298       | 6  |
| 10 | 1329.698369 | 665.352823      | 1312.671820    | 656.839548      | 1311.687804    | 656.347540       | S    | 630.360973  | 315.684125      | 613.334424     | 307.170850      | 612.350408     | 306.678842       | 5  |
| 11 | 1426.751133 | 713.879205      | 1409.724584    | 705.365930      | 1408.740568    | 704.873922       | P    | 543.328945  | 272.168111      | 526.302396     | 263.654836      |                |                  | 4  |
| 12 | 1612.830446 | 806.918861      | 1595.803897    | 798.405587      | 1594.819881    | 797.913579       | W    | 446.276181  | 223.641728      | 429.249632     | 215.128454      |                |                  | 3  |
| 13 | 1725.914510 | 863.460893      | 1708.887961    | 854.947619      | 1707.903945    | 854.455611       | L    | 260.196868  | 130.602072      | 243.170319     | 122.088797      |                |                  | 2  |
| 14 |             |                 |                |                 |                |                  | K    | 147.112804  | 74.060040       | 130.086255     | 65.546765       |                |                  | 1  |

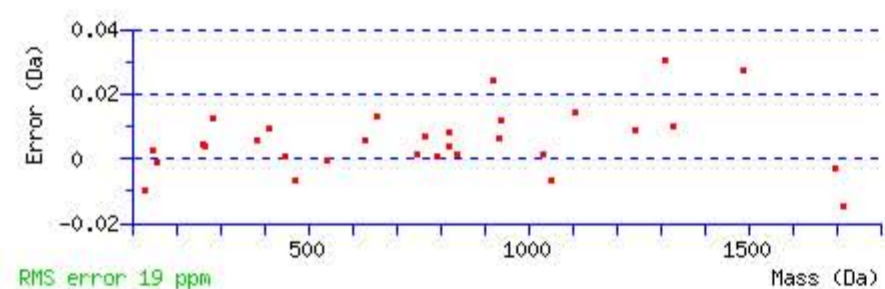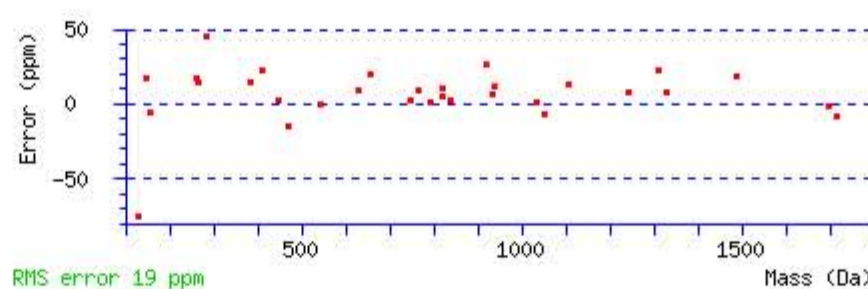

NCBI BLAST search of **GPEVQLVAHSPWLK**

(Parameters: blastp, nr protein database, expect=20000, no filter, PAM30)

Other BLAST [web gateways](#)

All matches to this query

| Score | Mr(calc):   | Delta    | Sequence                          |
|-------|-------------|----------|-----------------------------------|
| 46.0  | 1871.012756 | 0.009826 | <a href="#">GPEVQLVAHSPWLK</a>    |
| 1.8   | 1871.002686 | 0.019896 | <a href="#">QRVLHWDLRGPGGGPAR</a> |
| 1.6   | 1870.994781 | 0.027801 | <a href="#">NVNQAKLSEHRHK</a>     |

Mascot: <http://www.matrixscience.com/>



# **MASCOT** Mascot Search Results

## Peptide View

MS/MS Fragmentation of **HLVPGAPFLLQALVR**

Found in **CO4A\_HUMAN**, Complement C4-A OS=Homo sapiens GN=C4A PE=1 SV=2

Match to Query 45393: 1941.152712 from(648.058180,3+) rtinseconds(2868) index(58426)

Title: Locus:1.1.1.1612.6 File:"2013-07-02 CLN FXIII 60 min 2nd F 4.wiff"

Data file C:\Program Files (x86)\Matrix Science\Mascot Daemon\mgf5 FXIII 60 min 2nd\mascot\_daemon\_merge.mgf

Click mouse within plot area to zoom in by factor of two about that point

Or, Plot from  to  Da

Label all possible matches  Label matches used for scoring

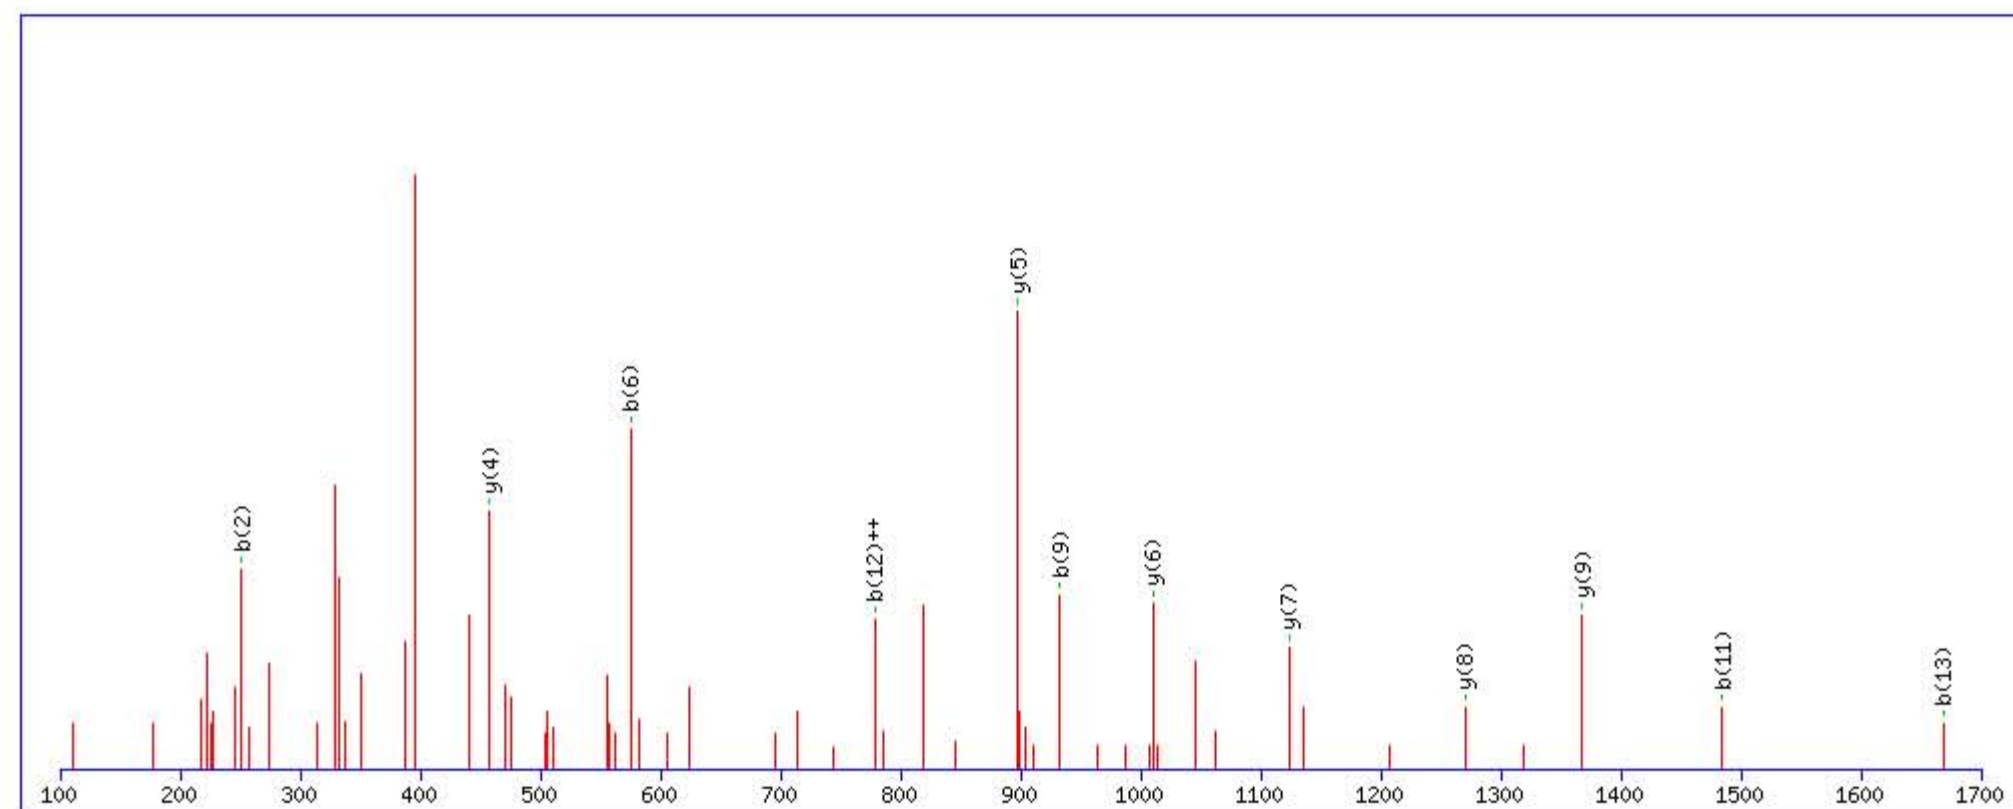

Monoisotopic mass of neutral peptide Mr(calc): 1941.138626

Fixed modifications: Carbamidomethyl (C) (apply to specified residues or termini only)

Variable modifications:

Q11 : Biotin:Thermo-21345 (Q)

Ions Score: 46 Expect: 4.6e-005

Matches : 12/92 fragment ions using 15 most intense peaks [\(help\)](#)

| #  | b                  | b <sup>++</sup>   | b <sup>*</sup> | b <sup>*++</sup> | Seq.     | y                  | y <sup>++</sup> | y <sup>*</sup> | y <sup>*++</sup> | #         |
|----|--------------------|-------------------|----------------|------------------|----------|--------------------|-----------------|----------------|------------------|-----------|
| 1  | 138.066188         | 69.536732         |                |                  | <b>H</b> |                    |                 |                |                  | <b>15</b> |
| 2  | <b>251.150252</b>  | 126.078764        |                |                  | <b>L</b> | 1805.086996        | 903.047136      | 1788.060447    | 894.533862       | <b>14</b> |
| 3  | 350.218666         | 175.612971        |                |                  | <b>V</b> | 1692.002932        | 846.505104      | 1674.976383    | 837.991830       | <b>13</b> |
| 4  | 447.271430         | 224.139353        |                |                  | <b>P</b> | 1592.934518        | 796.970897      | 1575.907969    | 788.457623       | <b>12</b> |
| 5  | 504.292894         | 252.650085        |                |                  | <b>G</b> | 1495.881754        | 748.444515      | 1478.855205    | 739.931241       | <b>11</b> |
| 6  | <b>575.330008</b>  | 288.168642        |                |                  | <b>A</b> | 1438.860290        | 719.933783      | 1421.833741    | 711.420509       | <b>10</b> |
| 7  | 672.382772         | 336.695024        |                |                  | <b>P</b> | <b>1367.823176</b> | 684.415226      | 1350.796627    | 675.901952       | <b>9</b>  |
| 8  | 819.451186         | 410.229231        |                |                  | <b>F</b> | <b>1270.770412</b> | 635.888844      | 1253.743863    | 627.375570       | <b>8</b>  |
| 9  | <b>932.535250</b>  | 466.771263        |                |                  | <b>L</b> | <b>1123.701998</b> | 562.354637      | 1106.675449    | 553.841363       | <b>7</b>  |
| 10 | 1045.619314        | 523.313295        |                |                  | <b>L</b> | <b>1010.617934</b> | 505.812605      | 993.591385     | 497.299331       | <b>6</b>  |
| 11 | <b>1484.844640</b> | 742.925958        | 1467.818091    | 734.412684       | <b>Q</b> | <b>897.533870</b>  | 449.270573      | 880.507321     | 440.757298       | <b>5</b>  |
| 12 | 1555.881754        | <b>778.444515</b> | 1538.855205    | 769.931241       | <b>A</b> | <b>458.308544</b>  | 229.657910      | 441.281995     | 221.144635       | <b>4</b>  |
| 13 | <b>1668.965818</b> | 834.986547        | 1651.939269    | 826.473273       | <b>L</b> | 387.271430         | 194.139353      | 370.244881     | 185.626078       | <b>3</b>  |
| 14 | 1768.034232        | 884.520754        | 1751.007683    | 876.007480       | <b>V</b> | 274.187366         | 137.597321      | 257.160817     | 129.084047       | <b>2</b>  |
| 15 |                    |                   |                |                  | <b>R</b> | 175.118952         | 88.063114       | 158.092403     | 79.549839        | <b>1</b>  |

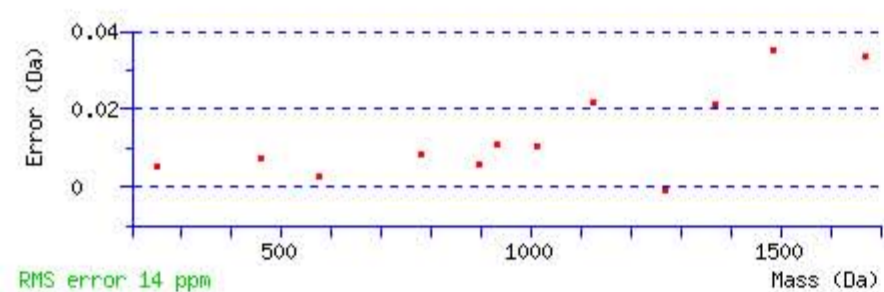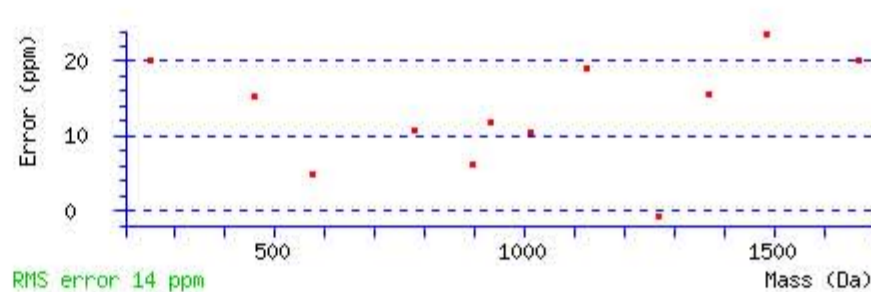

NCBI BLAST search of [HLVPGAPFLLQALVR](#)

(Parameters: blastp, nr protein database, expect=20000, no filter, PAM30)

Other BLAST [web gateways](#)

All matches to this query

| Score | Mr(calc):   | Delta    | Sequence                        |
|-------|-------------|----------|---------------------------------|
| 45.9  | 1941.138626 | 0.014086 | <a href="#">HLVPGAPFLLQALVR</a> |

Mascot: <http://www.matrixscience.com/>



# MASCOT Search Results

## Peptide View

MS/MS Fragmentation of **EPFLSCCQFAESLR**

Found in **CO4A\_HUMAN**, Complement C4-A OS=Homo sapiens GN=C4A PE=1 SV=2

Match to Query 48472: 2053.960542 from(685.660790,3+) rtinseconds(2519) index(56008)

Title: Locus:1.1.1.1492.12 File:"2013-07-02 CLN FXIII 60 min 2nd F 4.wiff"

Data file C:\Program Files (x86)\Matrix Science\Mascot Daemon\mgf5 FXIII 60 min 2nd\mascot\_daemon\_merge.mgf

Click mouse within plot area to zoom in by factor of two about that point

Or, Plot from  to  Da

Label all possible matches  Label matches used for scoring

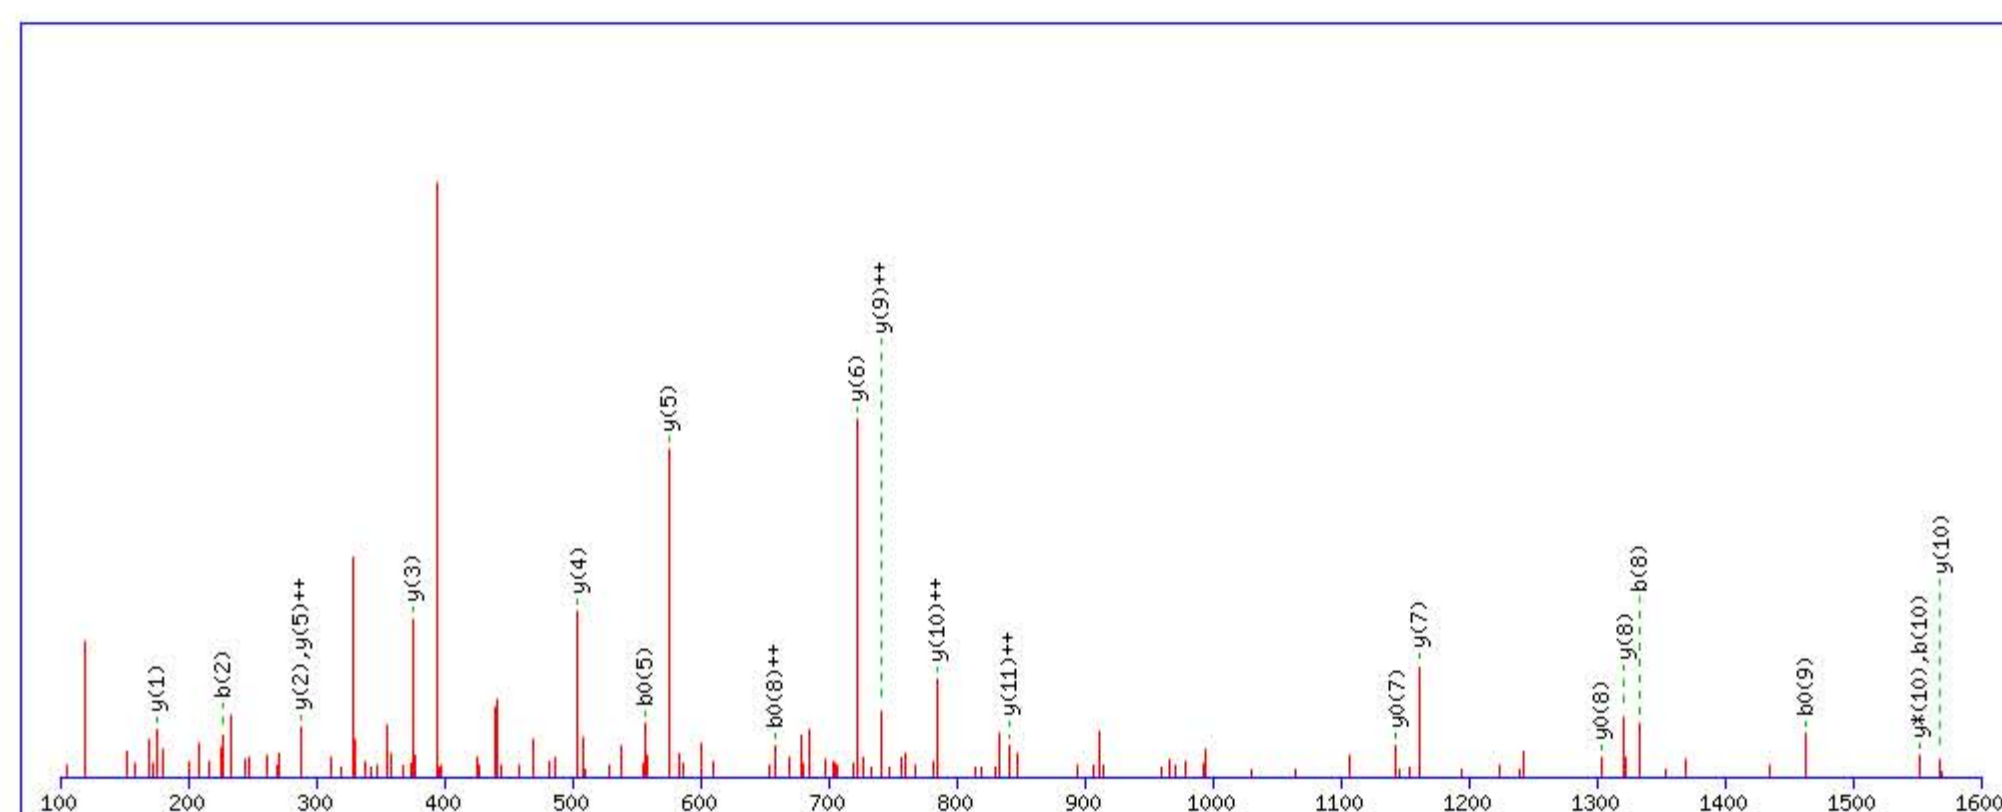

Monoisotopic mass of neutral peptide Mr(calc): 2053.942368

Fixed modifications: Carbamidomethyl (C) (apply to specified residues or termini only)

Variable modifications:

Q8 : Biotin:Thermo-21345 (Q)

Ions Score: 41 Expect: 0.0012

Matches : 22/138 fragment ions using 43 most intense peaks [\(help\)](#)

| #  | b                  | b <sup>++</sup> | b <sup>*</sup> | b <sup>*++</sup> | b <sup>0</sup>     | b <sup>0++</sup>  | Seq. | y                  | y <sup>++</sup>   | y <sup>*</sup>     | y <sup>*++</sup> | y <sup>0</sup>     | y <sup>0++</sup> | #  |
|----|--------------------|-----------------|----------------|------------------|--------------------|-------------------|------|--------------------|-------------------|--------------------|------------------|--------------------|------------------|----|
| 1  | 130.049869         | 65.528572       |                |                  | 112.039304         | 56.523290         | E    |                    |                   |                    |                  |                    |                  | 14 |
| 2  | <b>227.102633</b>  | 114.054954      |                |                  | 209.092068         | 105.049672        | P    | 1925.907059        | 963.457168        | 1908.880510        | 954.943893       | 1907.896494        | 954.451885       | 13 |
| 3  | 374.171047         | 187.589161      |                |                  | 356.160482         | 178.583879        | F    | 1828.854295        | 914.930786        | 1811.827746        | 906.417511       | 1810.843730        | 905.925503       | 12 |
| 4  | 487.255111         | 244.131193      |                |                  | 469.244546         | 235.125911        | L    | 1681.785881        | <b>841.396579</b> | 1664.759332        | 832.883304       | 1663.775316        | 832.391296       | 11 |
| 5  | 574.287139         | 287.647208      |                |                  | <b>556.276574</b>  | 278.641925        | S    | <b>1568.701817</b> | <b>784.854547</b> | <b>1551.675268</b> | 776.341272       | 1550.691252        | 775.849264       | 10 |
| 6  | 734.317788         | 367.662532      |                |                  | 716.307223         | 358.657250        | C    | 1481.669789        | <b>741.338533</b> | 1464.643240        | 732.825258       | 1463.659224        | 732.333250       | 9  |
| 7  | 894.348437         | 447.677857      |                |                  | 876.337872         | 438.672574        | C    | <b>1321.639140</b> | 661.323208        | 1304.612591        | 652.809934       | <b>1303.628575</b> | 652.317926       | 8  |
| 8  | <b>1333.573763</b> | 667.290520      | 1316.547214    | 658.777245       | 1315.563198        | <b>658.285237</b> | Q    | <b>1161.608491</b> | 581.307884        | 1144.581942        | 572.794609       | <b>1143.597926</b> | 572.302601       | 7  |
| 9  | 1480.642177        | 740.824727      | 1463.615628    | 732.311452       | <b>1462.631612</b> | 731.819444        | F    | <b>722.383165</b>  | 361.695221        | 705.356616         | 353.181946       | 704.372600         | 352.689938       | 6  |
| 10 | <b>1551.679291</b> | 776.343284      | 1534.652742    | 767.830009       | 1533.668726        | 767.338001        | A    | <b>575.314751</b>  | <b>288.161014</b> | 558.288202         | 279.647739       | 557.304186         | 279.155731       | 5  |
| 11 | 1680.721884        | 840.864580      | 1663.695335    | 832.351306       | 1662.711319        | 831.859298        | E    | <b>504.277637</b>  | 252.642457        | 487.251088         | 244.129182       | 486.267072         | 243.637174       | 4  |
| 12 | 1767.753912        | 884.380594      | 1750.727363    | 875.867320       | 1749.743347        | 875.375312        | S    | <b>375.235044</b>  | 188.121160        | 358.208495         | 179.607885       | 357.224479         | 179.115877       | 3  |
| 13 | 1880.837976        | 940.922626      | 1863.811427    | 932.409352       | 1862.827411        | 931.917344        | L    | <b>288.203016</b>  | 144.605146        | 271.176467         | 136.091871       |                    |                  | 2  |
| 14 |                    |                 |                |                  |                    |                   | R    | <b>175.118952</b>  | 88.063114         | 158.092403         | 79.549839        |                    |                  | 1  |

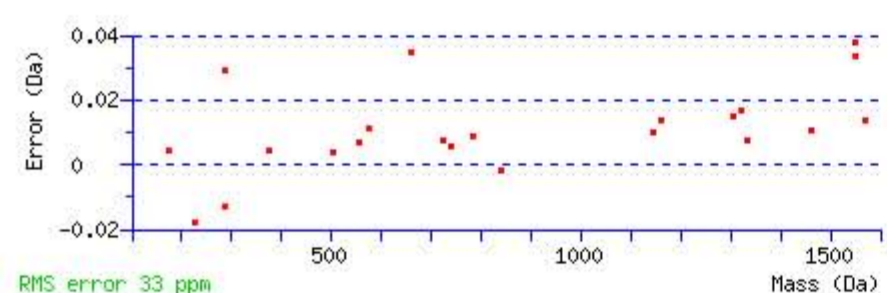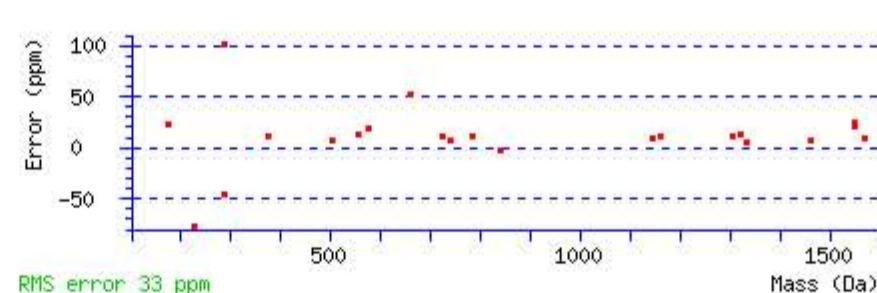

NCBI BLAST search of **EPFLSCCQFAESLR**

(Parameters: blastp, nr protein database, expect=20000, no filter, PAM30)

Other BLAST [web gateways](#)

All matches to this query

| Score | Mr(calc):   | Delta    | Sequence                       |
|-------|-------------|----------|--------------------------------|
| 40.8  | 2053.942368 | 0.018174 | <a href="#">EPFLSCCQFAESLR</a> |

Mascot: <http://www.matrixscience.com/>



# MASCOT Search Results

## Peptide View

MS/MS Fragmentation of **LLATLCSAEVCQCAEGK**

Found in **CO4A\_HUMAN**, Complement C4-A OS=Homo sapiens GN=C4A PE=1 SV=2

Match to Query 51483: 2220.042522 from(741.021450,3+) rtinseconds(2119) index(69497)

Title: Locus:1.1.1.1675.13 File:"2013-07-02 CLN FXIII 60 min 2nd FT.wiff"

Data file C:\Program Files (x86)\Matrix Science\Mascot Daemon\mgf5 FXIII 60 min 2nd\mascot\_daemon\_merge.mgf

Click mouse within plot area to zoom in by factor of two about that point

Or, Plot from  to  Da

Label all possible matches  Label matches used for scoring

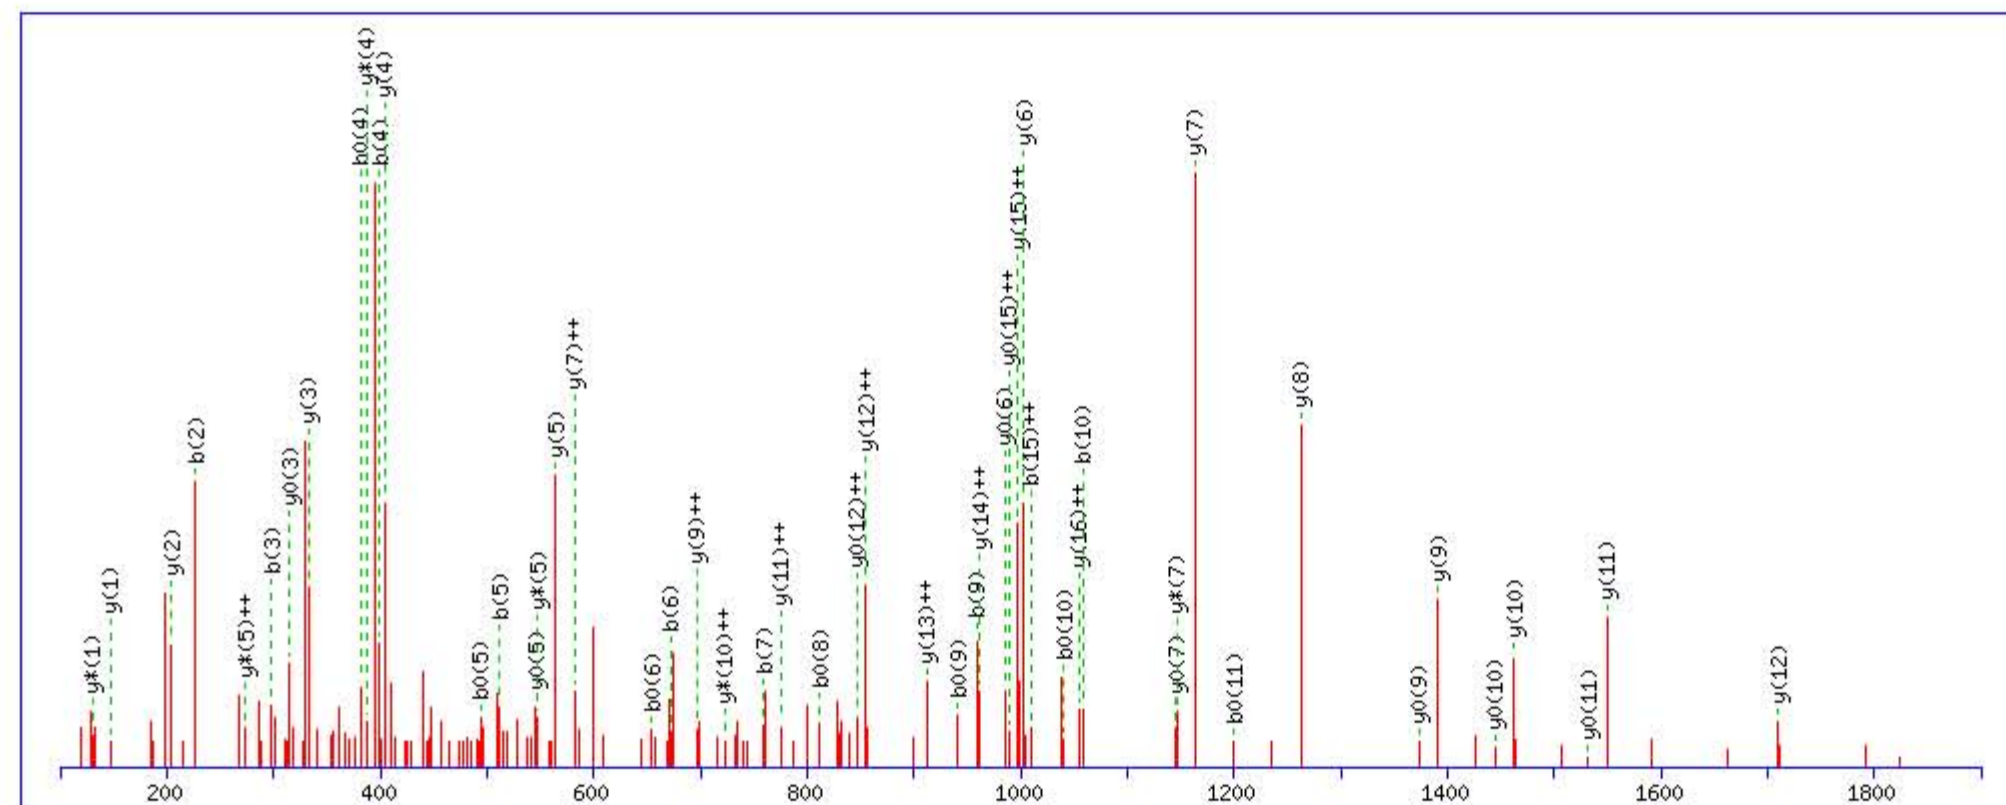

Monoisotopic mass of neutral peptide Mr(calc): 2220.041092

Fixed modifications: Carbamidomethyl (C) (apply to specified residues or termini only)

Variable modifications:

Q12 : Biotin:Thermo-21345 (Q)

Ions Score: 54 Expect: 1e-005

Matches : 51/160 fragment ions using 110 most intense peaks [\(help\)](#)

| #  | b                  | b <sup>++</sup>    | b <sup>*</sup> | b <sup>***</sup> | b <sup>0</sup> | b <sup>0++</sup> | Seq. | y                  | y <sup>++</sup>    | y <sup>*</sup>    | y <sup>***</sup>  | y <sup>0</sup>     | y <sup>0++</sup>  | #  |
|----|--------------------|--------------------|----------------|------------------|----------------|------------------|------|--------------------|--------------------|-------------------|-------------------|--------------------|-------------------|----|
| 1  | 114.091340         | 57.549308          |                |                  |                |                  | L    |                    |                    |                   |                   |                    |                   | 17 |
| 2  | <b>227.175404</b>  | 114.091340         |                |                  |                |                  | L    | 2107.964318        | <b>1054.485797</b> | 2090.937769       | 1045.972522       | 2089.953753        | 1045.480514       | 16 |
| 3  | <b>298.212518</b>  | 149.609897         |                |                  |                |                  | A    | 1994.880254        | <b>997.943765</b>  | 1977.853705       | 989.430491        | 1976.869689        | <b>988.938483</b> | 15 |
| 4  | <b>399.260197</b>  | 200.133737         |                |                  | 381.249632     | 191.128454       | T    | 1923.843140        | <b>962.425208</b>  | 1906.816591       | 953.911934        | 1905.832575        | 953.419926        | 14 |
| 5  | <b>512.344261</b>  | 256.675769         |                |                  | 494.333696     | 247.670486       | L    | 1822.795461        | <b>911.901369</b>  | 1805.768912       | 903.388094        | 1804.784896        | 902.896086        | 13 |
| 6  | <b>672.374910</b>  | 336.691093         |                |                  | 654.364345     | 327.685811       | C    | <b>1709.711397</b> | <b>855.359337</b>  | 1692.684848       | 846.846062        | 1691.700832        | <b>846.354054</b> | 12 |
| 7  | <b>759.406938</b>  | 380.207107         |                |                  | 741.396373     | 371.201825       | S    | <b>1549.680748</b> | <b>775.344012</b>  | 1532.654199       | 766.830738        | <b>1531.670183</b> | 766.338730        | 11 |
| 8  | 830.444052         | 415.725664         |                |                  | 812.433487     | 406.720382       | A    | <b>1462.648720</b> | 731.827998         | 1445.622171       | <b>723.314724</b> | <b>1444.638155</b> | 722.822716        | 10 |
| 9  | <b>959.486645</b>  | 480.246961         |                |                  | 941.476080     | 471.241678       | E    | <b>1391.611606</b> | <b>696.309441</b>  | 1374.585057       | 687.796167        | <b>1373.601041</b> | 687.304159        | 9  |
| 10 | <b>1058.555059</b> | 529.781168         |                |                  | 1040.544494    | 520.775885       | V    | <b>1262.569013</b> | 631.788145         | 1245.542464       | 623.274870        | 1244.558448        | 622.782862        | 8  |
| 11 | 1218.585708        | 609.796492         |                |                  | 1200.575143    | 600.791210       | C    | <b>1163.500599</b> | <b>582.253938</b>  | 1146.474050       | 573.740663        | <b>1145.490034</b> | 573.248655        | 7  |
| 12 | 1657.811034        | 829.409155         | 1640.784485    | 820.895881       | 1639.800469    | 820.403873       | Q    | <b>1003.469950</b> | 502.238613         | 986.443401        | 493.725339        | <b>985.459385</b>  | 493.233331        | 6  |
| 13 | 1817.841683        | 909.424480         | 1800.815134    | 900.911205       | 1799.831118    | 900.419197       | C    | <b>564.244624</b>  | 282.625950         | <b>547.218075</b> | <b>274.112676</b> | <b>546.234059</b>  | 273.620668        | 5  |
| 14 | 1888.878797        | 944.943037         | 1871.852248    | 936.429762       | 1870.868232    | 935.937754       | A    | <b>404.213975</b>  | 202.610626         | <b>387.187426</b> | 194.097351        | 386.203410         | 193.605343        | 4  |
| 15 | 2017.921390        | <b>1009.464333</b> | 2000.894841    | 1000.951059      | 1999.910825    | 1000.459051      | E    | <b>333.176861</b>  | 167.092069         | 316.150312        | 158.578794        | <b>315.166296</b>  | 158.086786        | 3  |
| 16 | 2074.942854        | 1037.975065        | 2057.916305    | 1029.461790      | 2056.932289    | 1028.969782      | G    | <b>204.134268</b>  | 102.570772         | 187.107719        | 94.057497         |                    |                   | 2  |
| 17 |                    |                    |                |                  |                |                  | K    | <b>147.112804</b>  | 74.060040          | <b>130.086255</b> | 65.546765         |                    |                   | 1  |

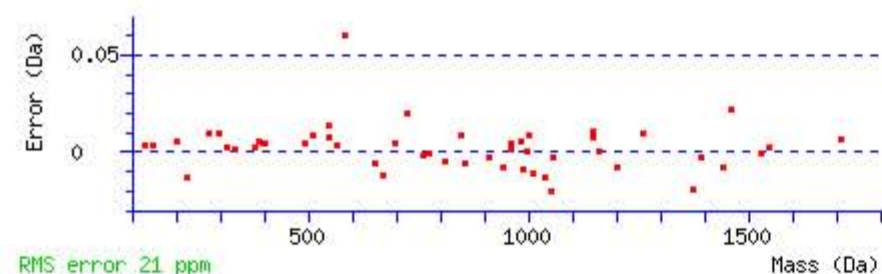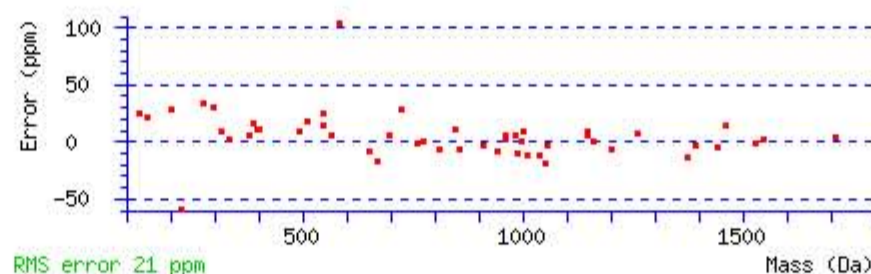

NCBI BLAST search of [LLATLCSAEVCQCAEGK](#)

(Parameters: blastp, nr protein database, expect=20000, no filter, PAM30)

Other BLAST [web gateways](#)

## All matches to this query

| Score | Mr(calc):   | Delta     | Sequence                           |
|-------|-------------|-----------|------------------------------------|
| 53.8  | 2220.041092 | 0.001430  | <a href="#">LLATLCSAEVCQCAEGK</a>  |
| 0.5   | 2220.048080 | -0.005558 | <a href="#">EPQEGAELPEATGTTSHR</a> |



# Mascot Search Results

## Peptide View

MS/MS Fragmentation of **GCGEQTMIIYLAPTLAASR**

Found in **CO4A\_HUMAN**, Complement C4-A OS=Homo sapiens GN=C4A PE=1 SV=2

Match to Query 51975: 2249.122692 from(750.714840,3+) rtinseconds(2546) index(56228)

Title: Locus:1.1.1.1501.18 File:"2013-07-02 CLN FXIII 60 min 2nd F 4.wiff"

Data file C:\Program Files (x86)\Matrix Science\Mascot Daemon\mgf5 FXIII 60 min 2nd\mascot\_daemon\_merge.mgf

Click mouse within plot area to zoom in by factor of two about that point

Or, Plot from  to  Da

Label all possible matches  Label matches used for scoring

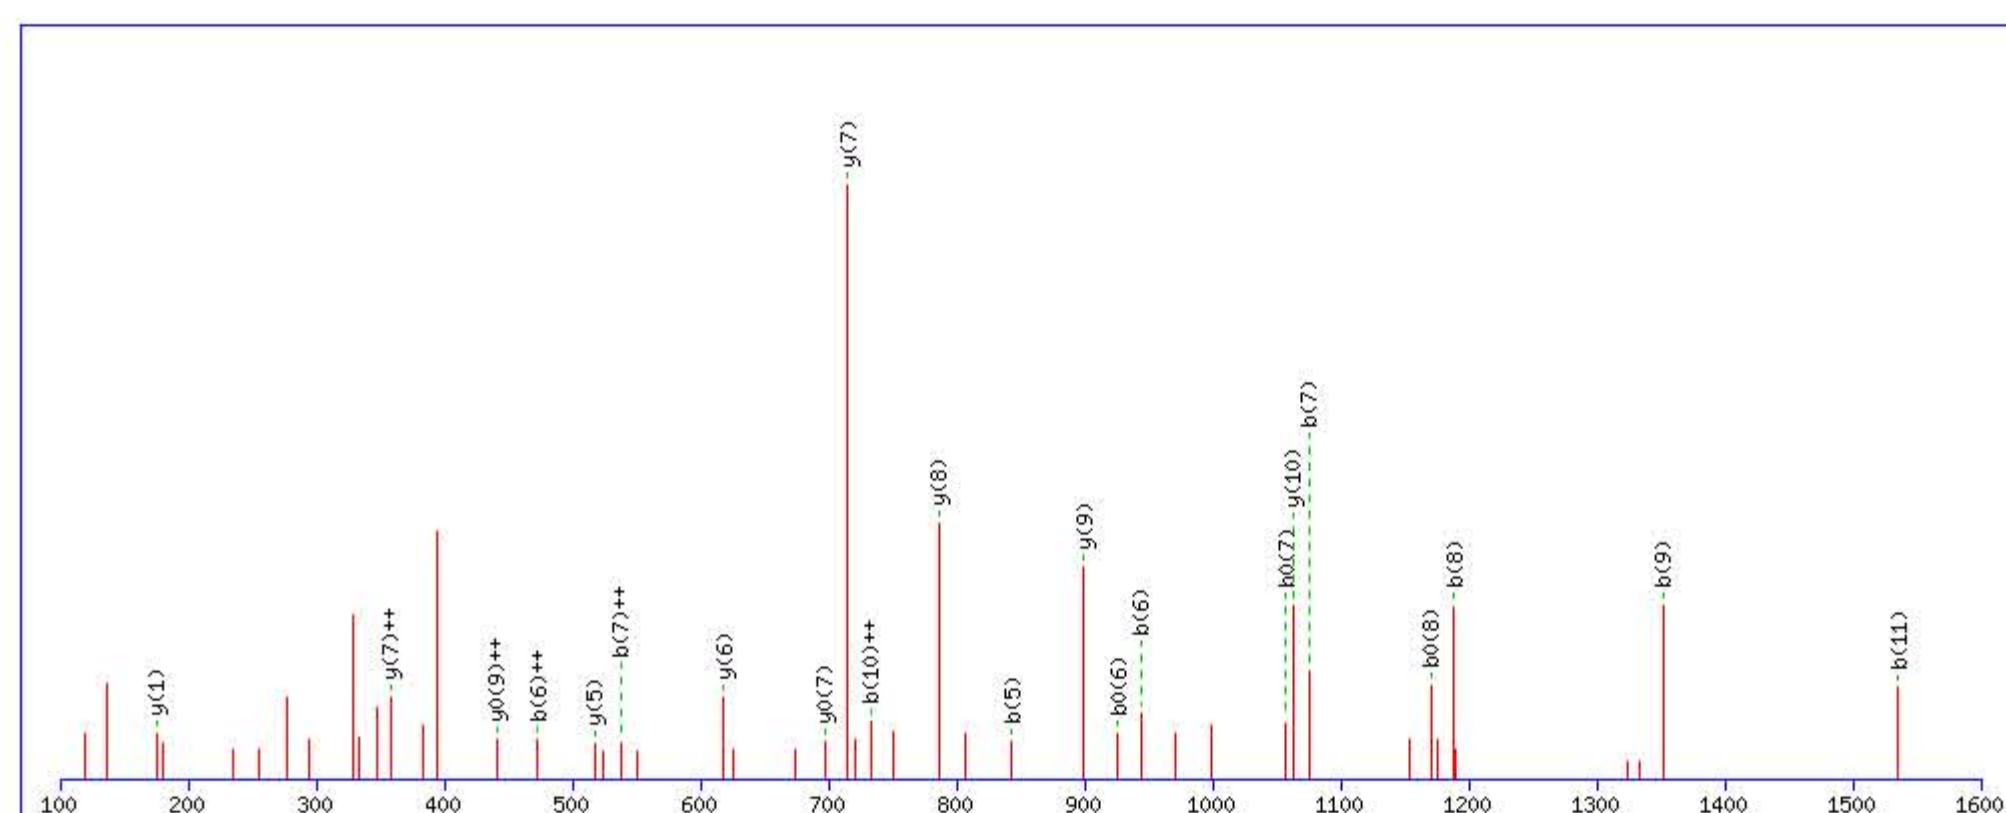

Monoisotopic mass of neutral peptide Mr(calc): 2249.100647

Fixed modifications: Carbamidomethyl (C) (apply to specified residues or termini only)

Variable modifications:

Q5 : Biotin:Thermo-21345 (Q)

Ions Score: 42 Expect: 0.00086

Matches : 22/188 fragment ions using 36 most intense peaks [\(help\)](#)

| #  | b                  | b <sup>++</sup>   | b <sup>*</sup> | b <sup>*++</sup> | b <sup>0</sup>     | b <sup>0++</sup> | Seq. | y                  | y <sup>++</sup>   | y <sup>*</sup> | y <sup>*++</sup> | y <sup>0</sup>    | y <sup>0++</sup>  | #  |
|----|--------------------|-------------------|----------------|------------------|--------------------|------------------|------|--------------------|-------------------|----------------|------------------|-------------------|-------------------|----|
| 1  | 58.028740          | 29.518008         |                |                  |                    |                  | G    |                    |                   |                |                  |                   |                   | 18 |
| 2  | 218.059389         | 109.533333        |                |                  |                    |                  | C    | 2193.086482        | 1097.046879       | 2176.059933    | 1088.533604      | 2175.075917       | 1088.041596       | 17 |
| 3  | 275.080853         | 138.044064        |                |                  |                    |                  | G    | 2033.055833        | 1017.031555       | 2016.029284    | 1008.518280      | 2015.045268       | 1008.026272       | 16 |
| 4  | 404.123446         | 202.565361        |                |                  | 386.112881         | 193.560079       | E    | 1976.034369        | 988.520822        | 1959.007820    | 980.007548       | 1958.023804       | 979.515540        | 15 |
| 5  | <b>843.348772</b>  | 422.178024        | 826.322223     | 413.664750       | 825.338207         | 413.172742       | Q    | 1846.991776        | 923.999526        | 1829.965227    | 915.486251       | 1828.981211       | 914.994243        | 14 |
| 6  | <b>944.396451</b>  | <b>472.701864</b> | 927.369902     | 464.188589       | <b>926.385886</b>  | 463.696581       | T    | 1407.766450        | 704.386863        | 1390.739901    | 695.873588       | 1389.755885       | 695.381580        | 13 |
| 7  | <b>1075.436936</b> | <b>538.222106</b> | 1058.410387    | 529.708832       | <b>1057.426371</b> | 529.216824       | M    | 1306.718771        | 653.863023        | 1289.692222    | 645.349749       | 1288.708206       | 644.857741        | 12 |
| 8  | <b>1188.521000</b> | 594.764138        | 1171.494451    | 586.250864       | <b>1170.510435</b> | 585.758855       | I    | 1175.678286        | 588.342781        | 1158.651737    | 579.829506       | 1157.667721       | 579.337498        | 11 |
| 9  | <b>1351.584329</b> | 676.295803        | 1334.557780    | 667.782528       | 1333.573764        | 667.290520       | Y    | <b>1062.594222</b> | 531.800749        | 1045.567673    | 523.287475       | 1044.583657       | 522.795466        | 10 |
| 10 | 1464.668393        | <b>732.837834</b> | 1447.641844    | 724.324560       | 1446.657828        | 723.832552       | L    | <b>899.530893</b>  | 450.269084        | 882.504344     | 441.755810       | 881.520328        | <b>441.263802</b> | 9  |
| 11 | <b>1535.705507</b> | 768.356391        | 1518.678958    | 759.843117       | 1517.694942        | 759.351109       | A    | <b>786.446829</b>  | 393.727053        | 769.420280     | 385.213778       | 768.436264        | 384.721770        | 8  |
| 12 | 1632.758271        | 816.882773        | 1615.731722    | 808.369499       | 1614.747706        | 807.877491       | P    | <b>715.409715</b>  | <b>358.208496</b> | 698.383166     | 349.695221       | <b>697.399150</b> | 349.203213        | 7  |
| 13 | 1733.805950        | 867.406613        | 1716.779401    | 858.893339       | 1715.795385        | 858.401330       | T    | <b>618.356951</b>  | 309.682114        | 601.330402     | 301.168839       | 600.346386        | 300.676831        | 6  |
| 14 | 1846.890014        | 923.948645        | 1829.863465    | 915.435370       | 1828.879449        | 914.943362       | L    | <b>517.309272</b>  | 259.158274        | 500.282723     | 250.644999       | 499.298707        | 250.152991        | 5  |
| 15 | 1917.927128        | 959.467202        | 1900.900579    | 950.953927       | 1899.916563        | 950.461919       | A    | 404.225208         | 202.616242        | 387.198659     | 194.102967       | 386.214643        | 193.610959        | 4  |
| 16 | 1988.964242        | 994.985759        | 1971.937693    | 986.472484       | 1970.953677        | 985.980476       | A    | 333.188094         | 167.097685        | 316.161545     | 158.584410       | 315.177529        | 158.092402        | 3  |
| 17 | 2075.996270        | 1038.501773       | 2058.969721    | 1029.988498      | 2057.985705        | 1029.496490      | S    | 262.150980         | 131.579128        | 245.124431     | 123.065854       | 244.140415        | 122.573846        | 2  |
| 18 |                    |                   |                |                  |                    |                  | R    | <b>175.118952</b>  | 88.063114         | 158.092403     | 79.549839        |                   |                   | 1  |

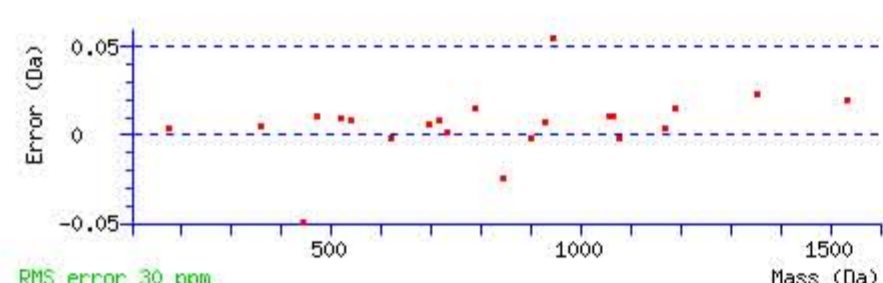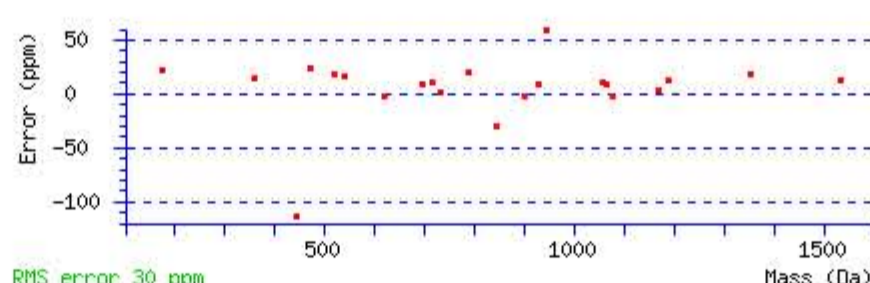

NCBI BLAST search of **GCGEQTMIIYLAPTLAASR**

(Parameters: blastp, nr protein database, expect=20000, no filter, PAM30)

Other BLAST [web gateways](#)

All matches to this query

| Score | Mr(calc):   | Delta     | Sequence                              |
|-------|-------------|-----------|---------------------------------------|
| 41.7  | 2249.100647 | 0.022045  | <a href="#">GCGEQTMIIYLAPTLAASR</a>   |
| 8.5   | 2249.115051 | 0.007641  | <a href="#">YSTSLYASPSMVHEGVAVVPR</a> |
| 4.1   | 2249.104492 | 0.018200  | <a href="#">AQLQQHNLEMVGEGRQ</a>      |
| 1.0   | 2249.143570 | -0.020878 | <a href="#">TPPPQPPLISSMDSISQK</a>    |
| 0.8   | 2249.089874 | 0.032818  | <a href="#">EMIDIYSTREPQLAFHQ</a>     |
| 0.6   | 2249.150742 | -0.028050 | <a href="#">LRSIMMSQDLENVTSKEIR</a>   |
| 0.5   | 2249.137527 | -0.014835 | <a href="#">QKFERPICVSWSTDVKGGR</a>   |



# MASCOT Search Results

## Peptide View

MS/MS Fragmentation of **DDPDAPLQPVTPLQLFEGR**

Found in **CO4A\_HUMAN**, Complement C4-A OS=Homo sapiens GN=C4A PE=1 SV=2

Match to Query 54809: 2418.243612 from(807.088480,3+) rtinseconds(3020) index(59691)

Title: Locus:1.1.1.1663.10 File:"2013-07-02 CLN FXIII 60 min 2nd F 4.wiff"

Data file C:\Program Files (x86)\Matrix Science\Mascot Daemon\mgf\5 FXIII 60 min 2nd\mascot\_daemon\_merge.mgf

Click mouse within plot area to zoom in by factor of two about that point

Or, Plot from  to  Da

Label all possible matches  Label matches used for scoring

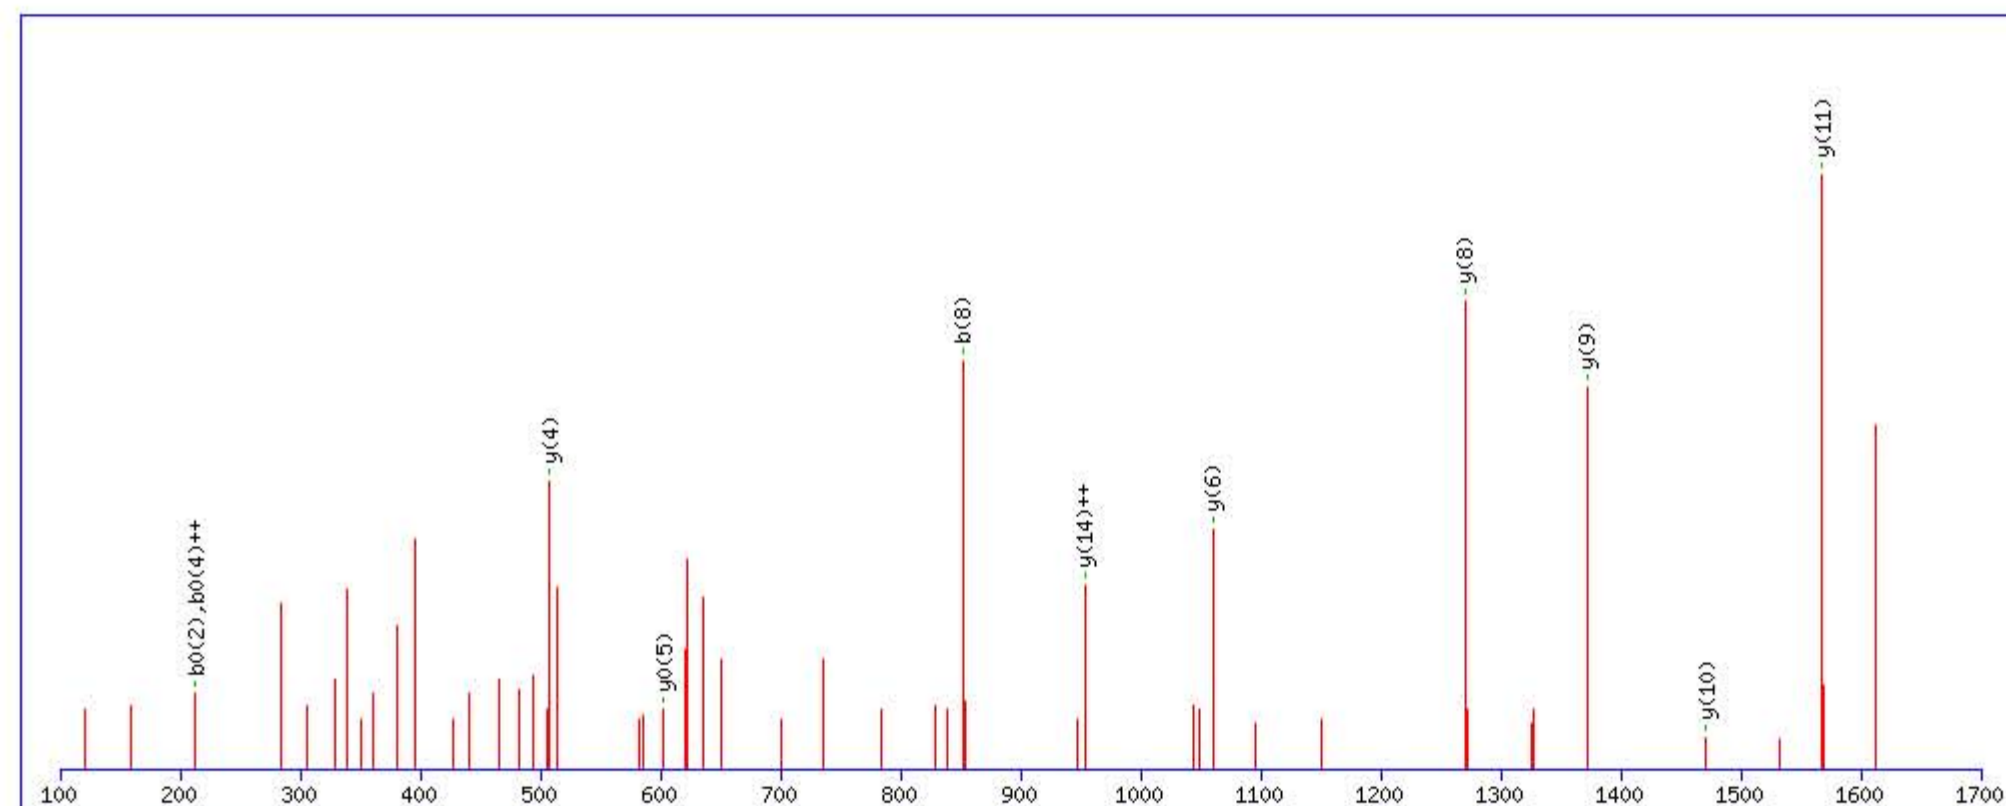

Monoisotopic mass of neutral peptide Mr(calc): 2418.225342

Fixed modifications: Carbamidomethyl (C) (apply to specified residues or termini only)

Variable modifications:

Q14 : Biotin:Thermo-21345 (Q)

Ions Score: 27 Expect: 0.051

Matches : 11/198 fragment ions using 15 most intense peaks [\(help\)](#)

| #  | b           | b <sup>++</sup> | b <sup>+</sup> | b <sup>+++</sup> | b <sup>0</sup> | b <sup>0++</sup> | Seq. | y           | y <sup>++</sup> | y <sup>+</sup> | y <sup>+++</sup> | y <sup>0</sup> | y <sup>0++</sup> | #  |
|----|-------------|-----------------|----------------|------------------|----------------|------------------|------|-------------|-----------------|----------------|------------------|----------------|------------------|----|
| 1  | 116.034219  | 58.520748       |                |                  | 98.023654      | 49.515465        | D    |             |                 |                |                  |                |                  | 19 |
| 2  | 231.061162  | 116.034219      |                |                  | 213.050597     | 107.028936       | D    | 2304.205668 | 1152.606472     | 2287.179119    | 1144.093197      | 2286.195103    | 1143.601189      | 18 |
| 3  | 328.113926  | 164.560601      |                |                  | 310.103361     | 155.555319       | P    | 2189.178725 | 1095.093000     | 2172.152176    | 1086.579726      | 2171.168160    | 1086.087718      | 17 |
| 4  | 443.140869  | 222.074073      |                |                  | 425.130304     | 213.068790       | D    | 2092.125961 | 1046.566618     | 2075.099412    | 1038.053344      | 2074.115396    | 1037.561336      | 16 |
| 5  | 514.177983  | 257.592630      |                |                  | 496.167418     | 248.587347       | A    | 1977.099018 | 989.053147      | 1960.072469    | 980.539873       | 1959.088453    | 980.047865       | 15 |
| 6  | 611.230747  | 306.119012      |                |                  | 593.220182     | 297.113729       | P    | 1906.061904 | 953.534590      | 1889.035355    | 945.021316       | 1888.051339    | 944.529308       | 14 |
| 7  | 724.314811  | 362.661044      |                |                  | 706.304246     | 353.655761       | L    | 1809.009140 | 905.008208      | 1791.982591    | 896.494934       | 1790.998575    | 896.002926       | 13 |
| 8  | 852.373389  | 426.690333      | 835.346840     | 418.177058       | 834.362824     | 417.685050       | Q    | 1695.925076 | 848.466176      | 1678.898527    | 839.952902       | 1677.914511    | 839.460894       | 12 |
| 9  | 949.426153  | 475.216715      | 932.399604     | 466.703440       | 931.415588     | 466.211432       | P    | 1567.866498 | 784.436887      | 1550.839949    | 775.923613       | 1549.855933    | 775.431605       | 11 |
| 10 | 1048.494567 | 524.750922      | 1031.468018    | 516.237647       | 1030.484002    | 515.745639       | V    | 1470.813734 | 735.910505      | 1453.787185    | 727.397231       | 1452.803169    | 726.905223       | 10 |
| 11 | 1149.542246 | 575.274761      | 1132.515697    | 566.761487       | 1131.531681    | 566.269479       | T    | 1371.745320 | 686.376298      | 1354.718771    | 677.863024       | 1353.734755    | 677.371016       | 9  |
| 12 | 1246.595010 | 623.801143      | 1229.568461    | 615.287869       | 1228.584445    | 614.795861       | P    | 1270.697641 | 635.852459      | 1253.671092    | 627.339184       | 1252.687076    | 626.847176       | 8  |
| 13 | 1359.679074 | 680.343175      | 1342.652525    | 671.829901       | 1341.668509    | 671.337893       | L    | 1173.644877 | 587.326077      | 1156.618328    | 578.812802       | 1155.634312    | 578.320794       | 7  |
| 14 | 1798.904400 | 899.955838      | 1781.877851    | 891.442564       | 1780.893835    | 890.950556       | Q    | 1060.560813 | 530.784045      | 1043.534264    | 522.270770       | 1042.550248    | 521.778762       | 6  |
| 15 | 1911.988464 | 956.497870      | 1894.961915    | 947.984596       | 1893.977899    | 947.492588       | L    | 621.335487  | 311.171382      | 604.308938     | 302.658107       | 603.324922     | 302.166099       | 5  |
| 16 | 2059.056878 | 1030.032077     | 2042.030329    | 1021.518803      | 2041.046313    | 1021.026794      | F    | 508.251423  | 254.629350      | 491.224874     | 246.116075       | 490.240858     | 245.624067       | 4  |
| 17 | 2188.099471 | 1094.553373     | 2171.072922    | 1086.040099      | 2170.088906    | 1085.548091      | E    | 361.183009  | 181.095142      | 344.156460     | 172.581868       | 343.172444     | 172.089860       | 3  |
| 18 | 2245.120935 | 1123.064105     | 2228.094386    | 1114.550831      | 2227.110370    | 1114.058823      | G    | 232.140416  | 116.573846      | 215.113867     | 108.060571       |                |                  | 2  |
| 19 |             |                 |                |                  |                |                  | R    | 175.118952  | 88.063114       | 158.092403     | 79.549839        |                |                  | 1  |

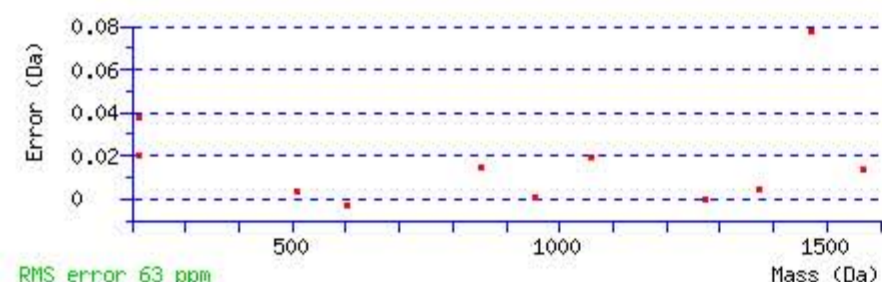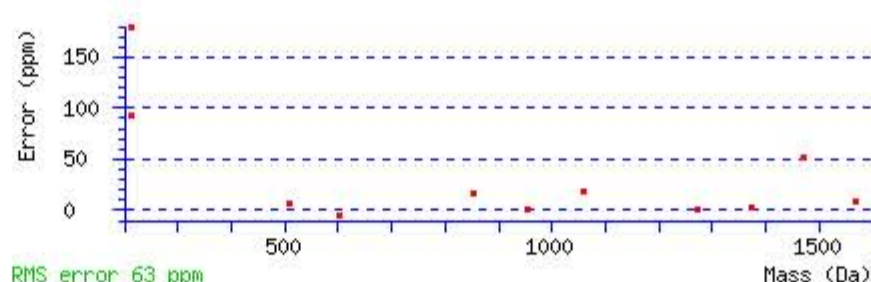

NCBI BLAST search of [DDPDAPLQPVTPLQLFEGR](#)

(Parameters: blastp, nr protein database, expect=20000, no filter, PAM30)

Other BLAST [web gateways](#)

All matches to this query

| Score | Mr(calc):   | Delta    | Sequence                            |
|-------|-------------|----------|-------------------------------------|
| 27.1  | 2418.225342 | 0.018270 | <a href="#">DDPDAPLQPVTPLQLFEGR</a> |

Mascot: <http://www.matrixscience.com/>



# MASCOT Search Results

## Peptide View

MS/MS Fragmentation of **AACAQLNDFLQEYGTQGCQV**

Found in **CO4A\_HUMAN**, Complement C4-A OS=Homo sapiens GN=C4A PE=1 SV=2

Match to Query 57447: 2583.179442 from(862.067090,3+) rtinseconds(2758) index(57495)

Title: Locus:1.1.1.1574.25 File:"2013-07-02 CLN FXIII 60 min 2nd F 4.wiff"

Data file C:\Program Files (x86)\Matrix Science\Mascot Daemon\mgf5 FXIII 60 min 2nd\mascot\_daemon\_merge.mgf

Click mouse within plot area to zoom in by factor of two about that point

Or, Plot from  to  Da

Label all possible matches  Label matches used for scoring

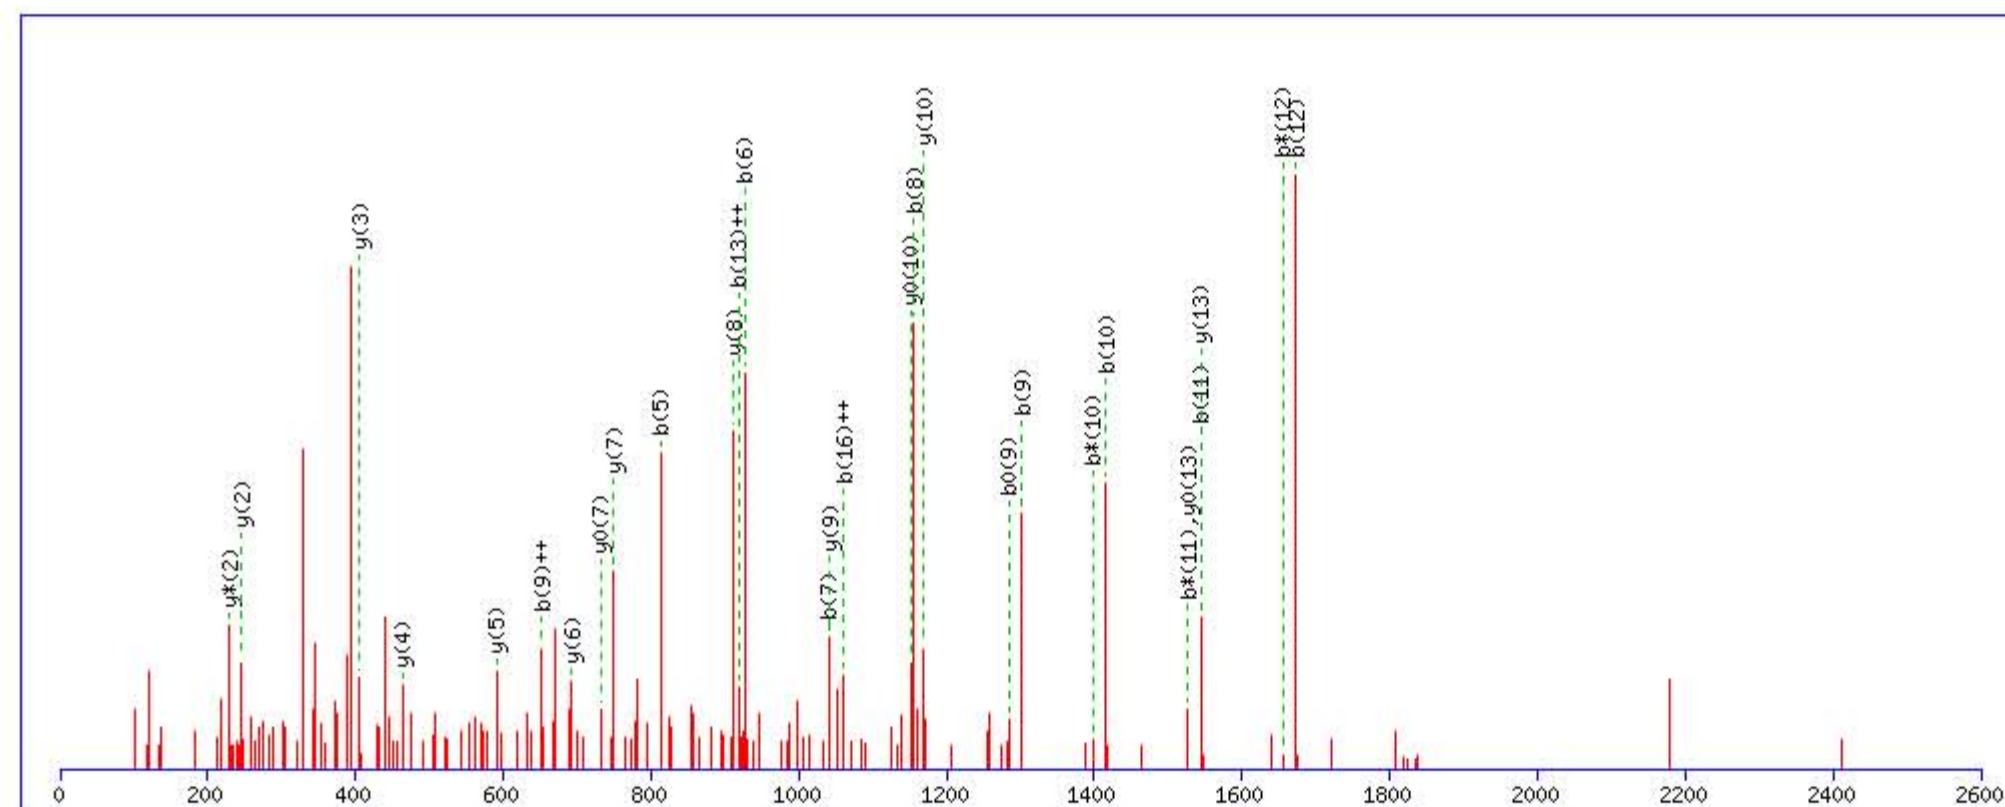

Monoisotopic mass of neutral peptide Mr(calc): 2583.155624

Fixed modifications: Carbamidomethyl (C) (apply to specified residues or termini only)

Variable modifications:

Q5 : Biotin:Thermo-21345 (Q)

Ions Score: 54 Expect: 4.4e-005

Matches : 29/194 fragment ions using 54 most intense peaks [\(help\)](#)

| #  | b                  | b <sup>++</sup>    | b <sup>*</sup>     | b <sup>+++</sup> | b <sup>0</sup>     | b <sup>0++</sup> | Seq. | y                  | y <sup>++</sup> | y <sup>*</sup>    | y <sup>+++</sup> | y <sup>0</sup>     | y <sup>0++</sup> | #  |
|----|--------------------|--------------------|--------------------|------------------|--------------------|------------------|------|--------------------|-----------------|-------------------|------------------|--------------------|------------------|----|
| 1  | 72.044390          | 36.525833          |                    |                  |                    |                  | A    |                    |                 |                   |                  |                    |                  | 20 |
| 2  | 143.081504         | 72.044390          |                    |                  |                    |                  | A    | 2513.125782        | 1257.066529     | 2496.099233       | 1248.553254      | 2495.115217        | 1248.061246      | 19 |
| 3  | 303.112153         | 152.059714         |                    |                  |                    |                  | C    | 2442.088668        | 1221.547972     | 2425.062119       | 1213.034697      | 2424.078103        | 1212.542689      | 18 |
| 4  | 374.149267         | 187.578271         |                    |                  |                    |                  | A    | 2282.058019        | 1141.532647     | 2265.031470       | 1133.019373      | 2264.047454        | 1132.527365      | 17 |
| 5  | <b>813.374593</b>  | 407.190935         | 796.348044         | 398.677660       |                    |                  | Q    | 2211.020905        | 1106.014090     | 2193.994356       | 1097.500816      | 2193.010340        | 1097.008808      | 16 |
| 6  | <b>926.458657</b>  | 463.732967         | 909.432108         | 455.219692       |                    |                  | L    | 1771.795579        | 886.401428      | 1754.769030       | 877.888153       | 1753.785014        | 877.396145       | 15 |
| 7  | <b>1040.501584</b> | 520.754430         | 1023.475035        | 512.241155       |                    |                  | N    | 1658.711515        | 829.859396      | 1641.684966       | 821.346121       | 1640.700950        | 820.854113       | 14 |
| 8  | <b>1155.528527</b> | 578.267902         | 1138.501978        | 569.754627       | 1137.517962        | 569.262619       | D    | <b>1544.668588</b> | 772.837932      | 1527.642039       | 764.324658       | <b>1526.658023</b> | 763.832650       | 13 |
| 9  | <b>1302.596941</b> | <b>651.802109</b>  | 1285.570392        | 643.288834       | <b>1284.586376</b> | 642.796826       | F    | 1429.641645        | 715.324460      | 1412.615096       | 706.811186       | 1411.631080        | 706.319178       | 12 |
| 10 | <b>1415.681005</b> | 708.344141         | <b>1398.654456</b> | 699.830866       | 1397.670440        | 699.338858       | L    | 1282.573231        | 641.790253      | 1265.546682       | 633.276979       | 1264.562666        | 632.784971       | 11 |
| 11 | <b>1543.739583</b> | 772.373430         | <b>1526.713034</b> | 763.860155       | 1525.729018        | 763.368147       | Q    | <b>1169.489167</b> | 585.248222      | 1152.462618       | 576.734947       | <b>1151.478602</b> | 576.242939       | 10 |
| 12 | <b>1672.782176</b> | 836.894726         | <b>1655.755627</b> | 828.381452       | 1654.771611        | 827.889444       | E    | <b>1041.430589</b> | 521.218932      | 1024.404040       | 512.705658       | 1023.420024        | 512.213650       | 9  |
| 13 | 1835.845505        | <b>918.426391</b>  | 1818.818956        | 909.913116       | 1817.834940        | 909.421108       | Y    | <b>912.387996</b>  | 456.697636      | 895.361447        | 448.184361       | 894.377431         | 447.692353       | 8  |
| 14 | 1892.866969        | 946.937123         | 1875.840420        | 938.423848       | 1874.856404        | 937.931840       | G    | <b>749.324667</b>  | 375.165971      | 732.298118        | 366.652697       | <b>731.314102</b>  | 366.160689       | 7  |
| 15 | 1993.914648        | 997.460962         | 1976.888099        | 988.947688       | 1975.904083        | 988.455680       | T    | <b>692.303203</b>  | 346.655239      | 675.276654        | 338.141965       | 674.292638         | 337.649957       | 6  |
| 16 | 2121.973226        | <b>1061.490251</b> | 2104.946677        | 1052.976976      | 2103.962661        | 1052.484968      | Q    | <b>591.255524</b>  | 296.131400      | 574.228975        | 287.618125       |                    |                  | 5  |
| 17 | 2178.994690        | 1090.000983        | 2161.968141        | 1081.487708      | 2160.984125        | 1080.995700      | G    | <b>463.196946</b>  | 232.102111      | 446.170397        | 223.588836       |                    |                  | 4  |
| 18 | 2339.025339        | 1170.016307        | 2321.998790        | 1161.503033      | 2321.014774        | 1161.011025      | C    | <b>406.175482</b>  | 203.591379      | 389.148933        | 195.078104       |                    |                  | 3  |
| 19 | 2467.083917        | 1234.045596        | 2450.057368        | 1225.532322      | 2449.073352        | 1225.040314      | Q    | <b>246.144833</b>  | 123.576054      | <b>229.118284</b> | 115.062780       |                    |                  | 2  |
| 20 |                    |                    |                    |                  |                    |                  | V    | 118.086255         | 59.546765       |                   |                  |                    |                  | 1  |

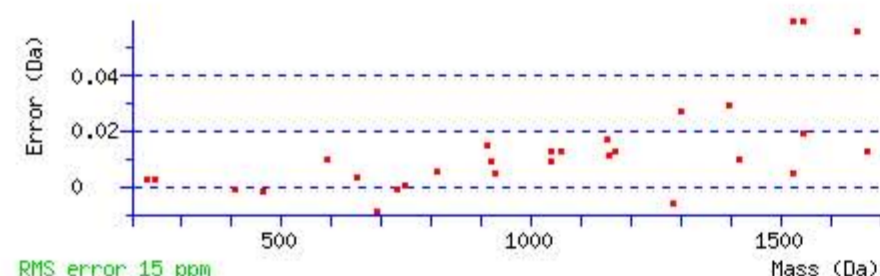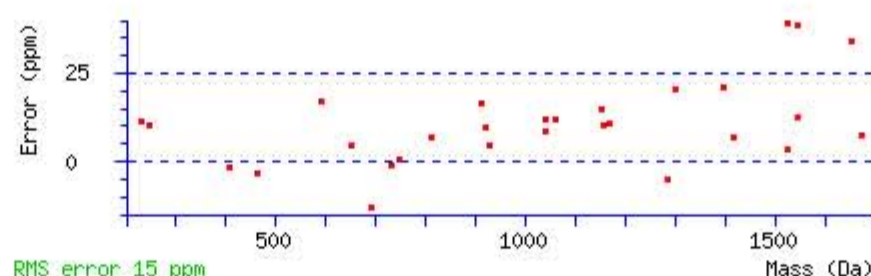

NCBI BLAST search of [AACAQLNDFLQEYGTQGCQV](#)

(Parameters: blastp, nr protein database, expect=20000, no filter, PAM30)

Other BLAST [web gateways](#)

All matches to this query

| Score | Mr(calc):   | Delta    | Sequence                             |
|-------|-------------|----------|--------------------------------------|
| 54.1  | 2583.155624 | 0.023818 | <a href="#">AACAQLNDFLQEYGTQGCQV</a> |
| 16.9  | 2583.155624 | 0.023818 | <a href="#">AACAQLNDFLQEYGTQGCQV</a> |



# *MATRIX* SCIENCE Mascot Search Results

## Peptide View

MS/MS Fragmentation of **GQAGLQR**

Found in **CO4A\_HUMAN**, Complement C4-A OS=Homo sapiens GN=C4A PE=1 SV=2

Match to Query 17300: 1039.555588 from(520.785070,2+) rtinseconds(1467) index(49286)

Title: Locus:1.1.1.1126.9 File:"2013-07-02 CLN FXIII 60 min 2nd F 4.wiff"

Data file C:\Program Files (x86)\Matrix Science\Mascot Daemon\mgf5 FXIII 60 min 2nd\mascot\_daemon\_merge.mgf

Click mouse within plot area to zoom in by factor of two about that point

Or, Plot from  to  Da

Label all possible matches  Label matches used for scoring



Monoisotopic mass of neutral peptide Mr(calc): 1039.559677

Fixed modifications: Carbamidomethyl (C) (apply to specified residues or termini only)

Variable modifications:

Q6 : Biotin:Thermo-21345 (Q)

Ions Score: 34 Expect: 0.0068

Matches : 5/46 fragment ions using 9 most intense peaks [\(help\)](#)

| # | b          | b <sup>++</sup> | b <sup>*</sup> | b <sup>*++</sup> | Seq. | y                 | y <sup>++</sup> | y <sup>*</sup> | y <sup>*++</sup> | # |
|---|------------|-----------------|----------------|------------------|------|-------------------|-----------------|----------------|------------------|---|
| 1 | 58.028740  | 29.518008       |                |                  | G    |                   |                 |                |                  | 7 |
| 2 | 186.087318 | 93.547297       | 169.060769     | 85.034023        | Q    | 983.545498        | 492.276387      | 966.518949     | 483.763113       | 6 |
| 3 | 257.124432 | 129.065854      | 240.097883     | 120.552580       | A    | <b>855.486920</b> | 428.247098      | 838.460371     | 419.733824       | 5 |
| 4 | 314.145896 | 157.576586      | 297.119347     | 149.063312       | G    | <b>784.449806</b> | 392.728541      | 767.423257     | 384.215267       | 4 |
| 5 | 427.229960 | 214.118618      | 410.203411     | 205.605344       | L    | <b>727.428342</b> | 364.217809      | 710.401793     | 355.704535       | 3 |
| 6 | 866.455286 | 433.731281      | 849.428737     | 425.218007       | Q    | <b>614.344278</b> | 307.675777      | 597.317729     | 299.162503       | 2 |
| 7 |            |                 |                |                  | R    | <b>175.118952</b> | 88.063114       | 158.092403     | 79.549840        | 1 |

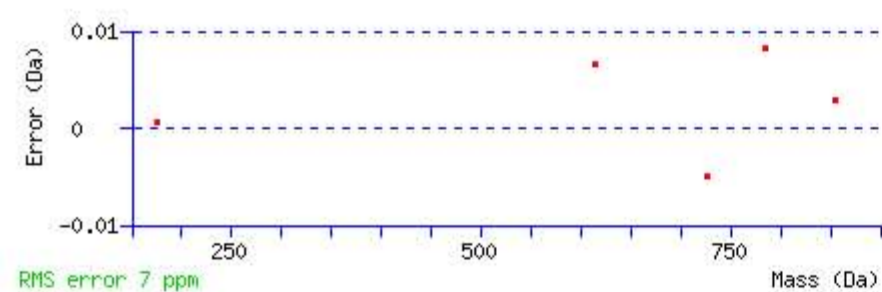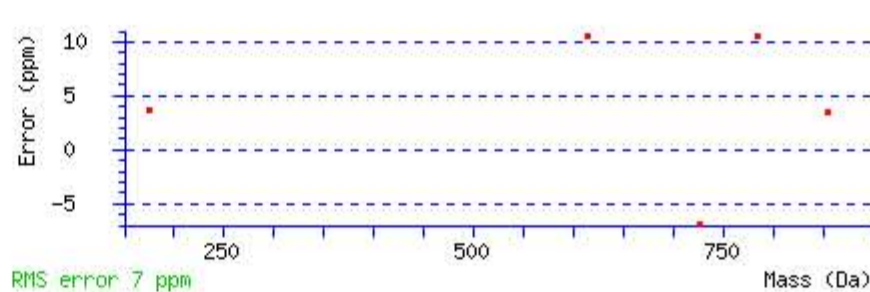

NCBI BLAST search of [GQAGLQR](#)

(Parameters: blastp, nr protein database, expect=20000, no filter, PAM30)

Other BLAST [web gateways](#)

## All matches to this query

| Score | Mr(calc):   | Delta     | Sequence                   |
|-------|-------------|-----------|----------------------------|
| 33.5  | 1039.559677 | -0.004089 | <a href="#">GQAGLQR</a>    |
| 19.5  | 1039.559677 | -0.004089 | <a href="#">GQQIQR</a>     |
| 9.5   | 1039.559677 | -0.004089 | <a href="#">KGGPSQR</a>    |
| 7.8   | 1039.541061 | 0.014527  | <a href="#">GQGDLLQPGR</a> |
| 5.5   | 1039.552277 | 0.003311  | <a href="#">QRAALDGGPR</a> |
| 5.2   | 1039.548431 | 0.007157  | <a href="#">SPEIQR</a>     |
| 3.2   | 1039.541046 | 0.014542  | <a href="#">NATTAPNPVR</a> |
| 1.8   | 1039.563522 | -0.007934 | <a href="#">ARRGGDGVPR</a> |

Mascot: <http://www.matrixscience.com/>



# MASCOT Search Results

## Peptide View

MS/MS Fragmentation of **GLESQTK**

Found in **CO4A\_HUMAN**, Complement C4-A OS=Homo sapiens GN=C4A PE=1 SV=2

Match to Query 18125: 1072.558368 from(537.286460,2+) rtinseconds(1491) index(49479)

Title: Locus:1.1.1.1134.19 File:"2013-07-02 CLN FXIII 60 min 2nd F 4.wiff"

Data file C:\Program Files (x86)\Matrix Science\Mascot Daemon\mgf5 FXIII 60 min 2nd\mascot\_daemon\_merge.mgf

Click mouse within plot area to zoom in by factor of two about that point

Or, Plot from  to  Da

Label all possible matches  Label matches used for scoring



Monoisotopic mass of neutral peptide  $M_r(\text{calc})$ : 1072.558670

Fixed modifications: Carbamidomethyl (C) (apply to specified residues or termini only)

Variable modifications:

Q5 : Biotin:Thermo-21345 (Q)

Ions Score: 29 Expect: 0.011

Matches : 11/58 fragment ions using 20 most intense peaks [\(help\)](#)

| # | b                 | b <sup>++</sup> | b*         | b <sup>*++</sup> | b <sup>0</sup> | b <sup>0++</sup> | Seq. | y                  | y <sup>++</sup> | y*         | y <sup>*++</sup> | y <sup>0</sup>    | y <sup>0++</sup>  | # |
|---|-------------------|-----------------|------------|------------------|----------------|------------------|------|--------------------|-----------------|------------|------------------|-------------------|-------------------|---|
| 1 | 58.028740         | 29.518008       |            |                  |                |                  | G    |                    |                 |            |                  |                   |                   | 7 |
| 2 | <b>171.112804</b> | 86.060040       |            |                  |                |                  | L    | <b>1016.544494</b> | 508.775885      | 999.517945 | 500.262611       | 998.533929        | 499.770603        | 6 |
| 3 | 300.155397        | 150.581336      |            |                  | 282.144832     | 141.576054       | E    | <b>903.460430</b>  | 452.233853      | 886.433881 | 443.720579       | <b>885.449865</b> | <b>443.228571</b> | 5 |
| 4 | 387.187425        | 194.097351      |            |                  | 369.176860     | 185.092068       | S    | <b>774.417837</b>  | 387.712557      | 757.391288 | 379.199282       | <b>756.407272</b> | 378.707274        | 4 |
| 5 | 826.412751        | 413.710014      | 809.386202 | 405.196739       | 808.402186     | 404.704731       | Q    | <b>687.385809</b>  | 344.196543      | 670.359260 | 335.683268       | <b>669.375244</b> | 335.191260        | 3 |
| 6 | <b>927.460430</b> | 464.233853      | 910.433881 | 455.720579       | 909.449865     | 455.228571       | T    | <b>248.160483</b>  | 124.583879      | 231.133934 | 116.070605       | 230.149918        | 115.578597        | 2 |
| 7 |                   |                 |            |                  |                |                  | K    | 147.112804         | 74.060040       | 130.086255 | 65.546765        |                   |                   | 1 |

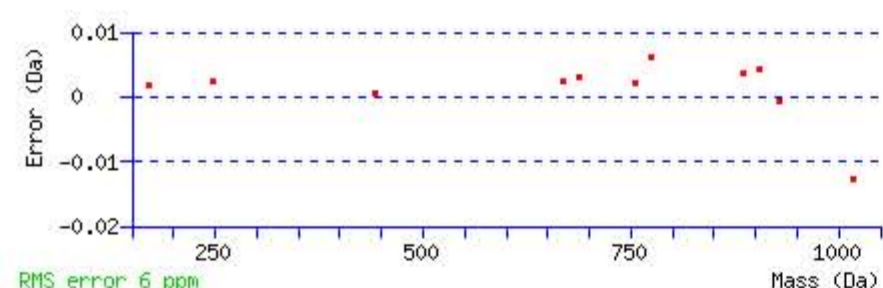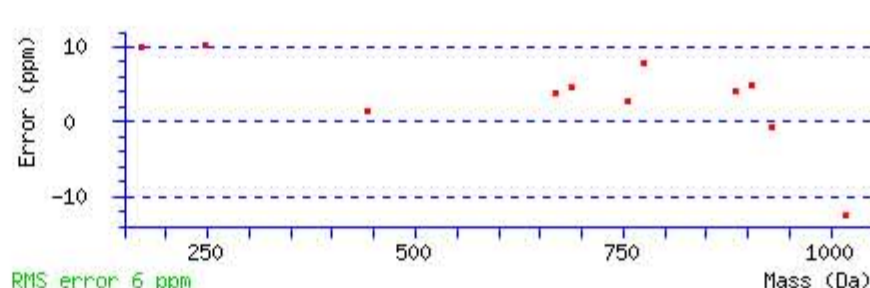

NCBI BLAST search of **GLESQTK**

(Parameters: blastp, nr protein database, expect=20000, no filter, PAM30)

Other BLAST [web gateways](#)

All matches to this query

| Score | $M_r(\text{calc})$ : | Delta     | Sequence                   |
|-------|----------------------|-----------|----------------------------|
| 29.2  | 1072.558670          | -0.000302 | <a href="#">GLESQTK</a>    |
| 7.9   | 1072.558670          | -0.000302 | <a href="#">QSEGLTK</a>    |
| 7.2   | 1072.558670          | -0.000302 | <a href="#">LGECPAVLSK</a> |
| 7.0   | 1072.551254          | 0.007114  | <a href="#">KEAPRDETK</a>  |
| 3.8   | 1072.551285          | 0.007083  | <a href="#">GPRTTEPSTK</a> |
| 0.4   | 1072.566559          | -0.008191 | <a href="#">VQIHFGGSTK</a> |
| 0.3   | 1072.544739          | 0.013629  | <a href="#">LGEPQARMR</a>  |

Mascot: <http://www.matrixscience.com/>



# Mascot Search Results

## Peptide View

### MS/MS Fragmentation of VQQPDCR

Found in **CO4A\_HUMAN**, Complement C4-A OS=Homo sapiens GN=C4A PE=1 SV=2

Match to Query 23594: 1212.574068 from(607.294310,2+) rtinseconds(1319) index(48351)

Title: Locus:1.1.1.1074.7 File:"2013-07-02 CLN FXIII 60 min 2nd F 4.wiff"

Data file C:\Program Files (x86)\Matrix Science\Mascot Daemon\mgf\5 FXIII 60 min 2nd\mascot\_daemon\_merge.mgf

Click mouse within plot area to zoom in by factor of two about that point

Or, Plot from  to  Da

Label all possible matches  Label matches used for scoring



Monoisotopic mass of neutral peptide Mr(calc): 1212.574356

Fixed modifications: Carbamidomethyl (C) (apply to specified residues or termini only)

Variable modifications:

Q2 : Biotin:Thermo-21345 (Q)

Ions Score: 30 Expect: 0.0052

Matches : 17/58 fragment ions using 35 most intense peaks [\(help\)](#)

| # | b                 | b <sup>++</sup>   | b <sup>*</sup>    | b <sup>*++</sup> | b <sup>0</sup> | b <sup>0++</sup> | Seq. | y                  | y <sup>++</sup>   | y <sup>*</sup>     | y <sup>*++</sup> | y <sup>0</sup>    | y <sup>0++</sup>  | # |
|---|-------------------|-------------------|-------------------|------------------|----------------|------------------|------|--------------------|-------------------|--------------------|------------------|-------------------|-------------------|---|
| 1 | 100.075690        | 50.541483         |                   |                  |                |                  | V    |                    |                   |                    |                  |                   |                   | 7 |
| 2 | <b>539.301016</b> | 270.154146        | <b>522.274467</b> | 261.640872       |                |                  | Q    | <b>1114.513212</b> | <b>557.760244</b> | <b>1097.486663</b> | 549.246970       | 1096.502647       | 548.754962        | 6 |
| 3 | <b>667.359594</b> | 334.183435        | 650.333045        | 325.670161       |                |                  | Q    | <b>675.287886</b>  | 338.147581        | <b>658.261337</b>  | 329.634307       | <b>657.277321</b> | <b>329.142299</b> | 5 |
| 4 | 764.412358        | 382.709817        | 747.385809        | 374.196543       |                |                  | P    | <b>547.229308</b>  | 274.118292        | 530.202759         | 265.605018       | 529.218743        | 265.113010        | 4 |
| 5 | <b>879.439301</b> | <b>440.223289</b> | 862.412752        | 431.710014       | 861.428736     | 431.218006       | D    | <b>450.176544</b>  | 225.591910        | 433.149995         | 217.078635       | 432.165979        | 216.586627        | 3 |
| 6 | 1039.469950       | 520.238613        | 1022.443401       | 511.725339       | 1021.459385    | 511.233331       | C    | <b>335.149601</b>  | 168.078438        | <b>318.123052</b>  | 159.565164       |                   |                   | 2 |
| 7 |                   |                   |                   |                  |                |                  | R    | <b>175.118952</b>  | 88.063114         | 158.092403         | 79.549839        |                   |                   | 1 |



### NCBI BLAST search of VQQPDCR

(Parameters: blastp, nr protein database, expect=20000, no filter, PAM30)

Other BLAST [web gateways](#)

### All matches to this query

| Score | Mr(calc):   | Delta     | Sequence                |
|-------|-------------|-----------|-------------------------|
| 29.6  | 1212.574356 | -0.000288 | <a href="#">VQQPDCR</a> |
| 12.6  | 1212.574356 | -0.000288 | <a href="#">VQQPDCR</a> |
| 5.2   | 1212.592102 | -0.018034 | <a href="#">VQEDQQR</a> |



# MASCOT Search Results

## Peptide View

MS/MS Fragmentation of **VEYGFQVK**

Found in **CO4A\_HUMAN**, Complement C4-A OS=Homo sapiens GN=C4A PE=1 SV=2

Match to Query 25584: 1279.667348 from(640.840950,2+) rtinseconds(2022) index(53086)

Title: Locus:1.1.1.1319.11 File:"2013-07-02 CLN FXIII 60 min 2nd F 4.wiff"

Data file C:\Program Files (x86)\Matrix Science\Mascot Daemon\mgf5 FXIII 60 min 2nd\mascot\_daemon\_merge.mgf

Click mouse within plot area to zoom in by factor of two about that point

Or, Plot from  to  Da

Label all possible matches  Label matches used for scoring



Monoisotopic mass of neutral peptide Mr(calc): 1279.663483

Fixed modifications: Carbamidomethyl (C) (apply to specified residues or termini only)

Variable modifications:

Q6 : Biotin:Thermo-21345 (Q)

Ions Score: 33 Expect: 0.0029

Matches : 16/60 fragment ions using 34 most intense peaks [\(help\)](#)

| # | b                  | b <sup>++</sup> | b <sup>*</sup> | b <sup>*++</sup> | b <sup>0</sup> | b <sup>0++</sup> | Seq. | y                  | y <sup>++</sup>   | y <sup>*</sup>     | y <sup>*++</sup> | y <sup>0</sup>     | y <sup>0++</sup> | # |
|---|--------------------|-----------------|----------------|------------------|----------------|------------------|------|--------------------|-------------------|--------------------|------------------|--------------------|------------------|---|
| 1 | 100.075690         | 50.541483       |                |                  |                |                  | V    |                    |                   |                    |                  |                    |                  | 8 |
| 2 | <b>229.118283</b>  | 115.062780      |                |                  | 211.107718     | 106.057497       | E    | <b>1181.602344</b> | 591.304810        | 1164.575795        | 582.791536       | <b>1163.591779</b> | 582.299528       | 7 |
| 3 | <b>392.181612</b>  | 196.594444      |                |                  | 374.171047     | 187.589162       | Y    | <b>1052.559751</b> | <b>526.783514</b> | <b>1035.533202</b> | 518.270239       |                    |                  | 6 |
| 4 | 449.203076         | 225.105176      |                |                  | 431.192511     | 216.099894       | G    | <b>889.496422</b>  | <b>445.251849</b> | 872.469873         | 436.738575       |                    |                  | 5 |
| 5 | 596.271490         | 298.639383      |                |                  | 578.260925     | 289.634101       | F    | <b>832.474958</b>  | 416.741117        | 815.448409         | 408.227843       |                    |                  | 4 |
| 6 | <b>1035.496816</b> | 518.252046      | 1018.470267    | 509.738772       | 1017.486251    | 509.246764       | Q    | <b>685.406544</b>  | 343.206910        | 668.379995         | 334.693636       |                    |                  | 3 |
| 7 | <b>1134.565230</b> | 567.786253      | 1117.538681    | 559.272979       | 1116.554665    | 558.780971       | V    | <b>246.181218</b>  | 123.594247        | <b>229.154669</b>  | 115.080973       |                    |                  | 2 |
| 8 |                    |                 |                |                  |                |                  | K    | <b>147.112804</b>  | 74.060040         | 130.086255         | 65.546765        |                    |                  | 1 |



NCBI BLAST search of **VEYGFQVK**

(Parameters: blastp, nr protein database, expect=20000, no filter, PAM30)

Other BLAST [web gateways](#)

All matches to this query

| Score | Mr(calc):   | Delta     | Sequence                     |
|-------|-------------|-----------|------------------------------|
| 33.1  | 1279.663483 | 0.003865  | <a href="#">VEYGFQVK</a>     |
| 5.9   | 1279.681229 | -0.013881 | <a href="#">EVTVKEWYVK</a>   |
| 5.9   | 1279.663483 | 0.003865  | <a href="#">QFVGYLDK</a>     |
| 5.7   | 1279.659470 | 0.007878  | <a href="#">VCSFGKQVVEK</a>  |
| 4.0   | 1279.677216 | -0.009868 | <a href="#">VFKTEDTQGKK</a>  |
| 3.8   | 1279.684601 | -0.017253 | <a href="#">MSASAVFILDVK</a> |
| 2.0   | 1279.666824 | 0.000524  | <a href="#">VKEWSLMIMK</a>   |



# MASCOT SCIENCE Mascot Search Results

## Peptide View

MS/MS Fragmentation of **VVEEQESR**

Found in **CO4A\_HUMAN**, Complement C4-A OS=Homo sapiens GN=C4A PE=1 SV=2

Match to Query 25907: 1285.634328 from(643.824440,2+) rtinseconds(1393) index(48807)

Title: Locus:1.1.1.1100.20 File:"2013-07-02 CLN FXIII 60 min 2nd F 4.wiff"

Data file C:\Program Files (x86)\Matrix Science\Mascot Daemon\mgf\5 FXIII 60 min 2nd\mascot\_daemon\_merge.mgf

Click mouse within plot area to zoom in by factor of two about that point

Or, Plot from  to  Da

Label all possible matches  Label matches used for scoring

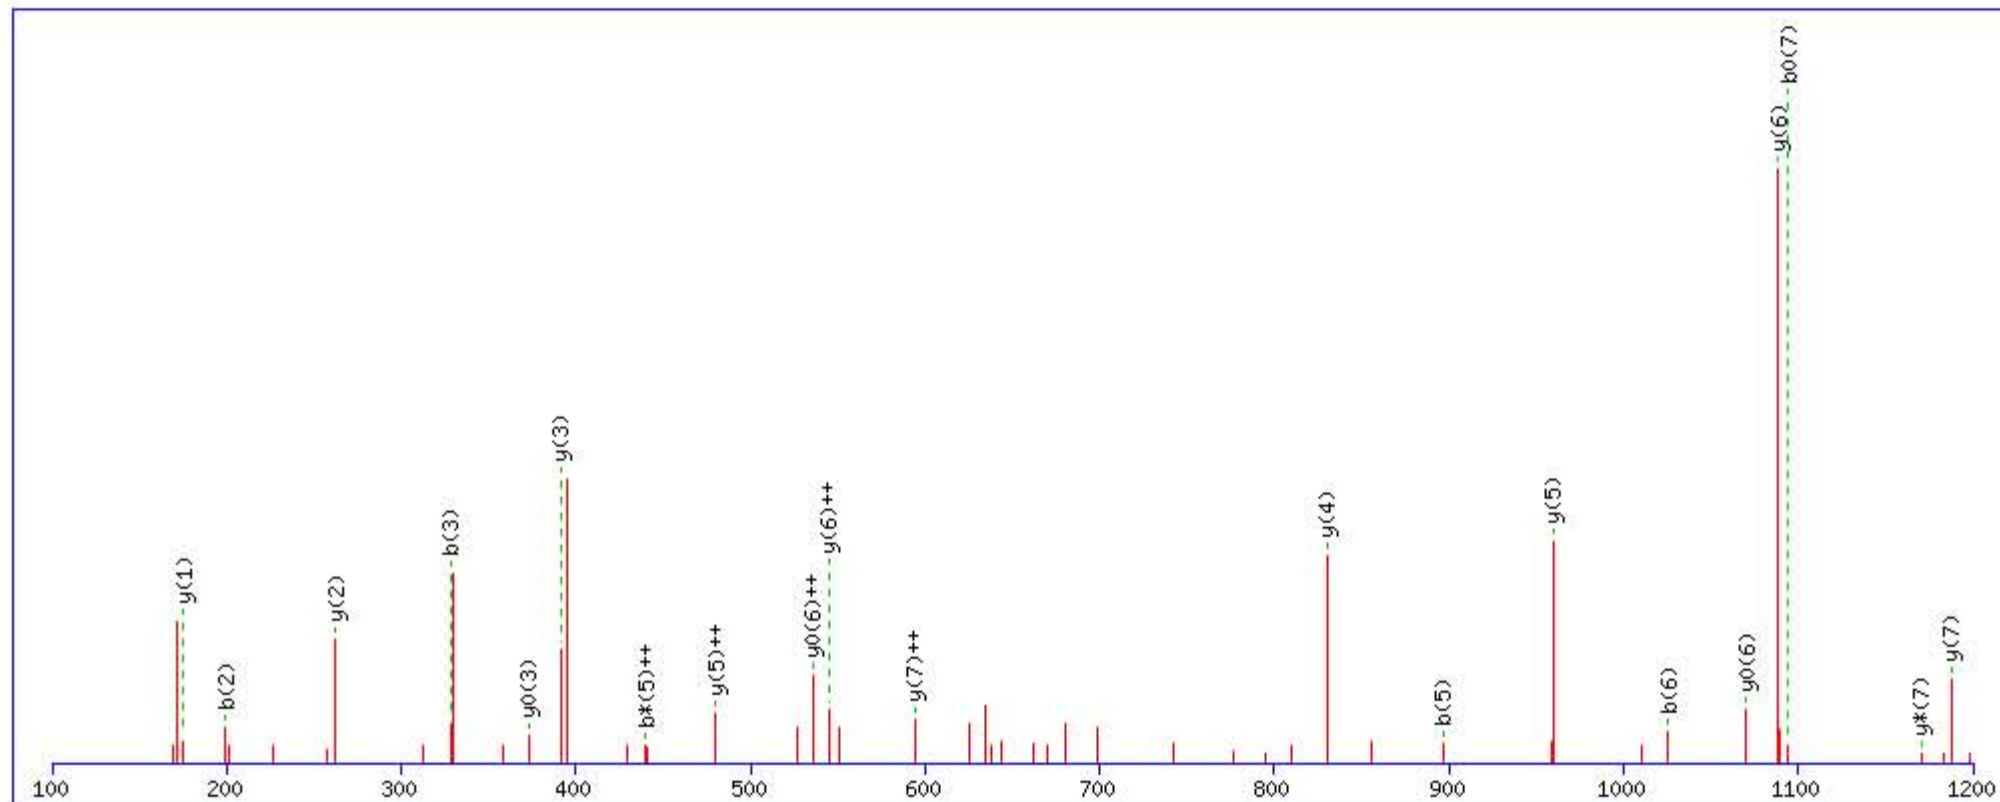

Monoisotopic mass of neutral peptide Mr(calc): 1285.633621

Fixed modifications: Carbamidomethyl (C) (apply to specified residues or termini only)

Variable modifications:

Q5 : Biotin:Thermo-21345 (Q)

Ions Score: 38 Expect: 0.00057

Matches : 20/70 fragment ions using 41 most intense peaks ([help](#))

| # | b                  | b <sup>++</sup> | b <sup>*</sup> | b <sup>+++</sup>  | b <sup>0</sup>     | b <sup>0++</sup> | Seq. | y                  | y <sup>++</sup>   | y <sup>*</sup>     | y <sup>+++</sup> | y <sup>0</sup>     | y <sup>0++</sup>  | # |
|---|--------------------|-----------------|----------------|-------------------|--------------------|------------------|------|--------------------|-------------------|--------------------|------------------|--------------------|-------------------|---|
| 1 | 100.075690         | 50.541483       |                |                   |                    |                  | V    |                    |                   |                    |                  |                    |                   | 8 |
| 2 | <b>199.144104</b>  | 100.075690      |                |                   |                    |                  | V    | <b>1187.572499</b> | 594.289888        | <b>1170.545950</b> | 585.776613       | 1169.561934        | 585.284605        | 7 |
| 3 | <b>328.186697</b>  | 164.596987      |                |                   | 310.176132         | 155.591704       | E    | <b>1088.504085</b> | <b>544.755681</b> | 1071.477536        | 536.242406       | <b>1070.493520</b> | <b>535.750398</b> | 6 |
| 4 | 457.229290         | 229.118283      |                |                   | 439.218725         | 220.113001       | E    | <b>959.461492</b>  | <b>480.234384</b> | 942.434943         | 471.721110       | 941.450927         | 471.229102        | 5 |
| 5 | <b>896.454616</b>  | 448.730946      | 879.428067     | <b>440.217672</b> | 878.444051         | 439.725664       | Q    | <b>830.418899</b>  | 415.713088        | 813.392350         | 407.199813       | 812.408334         | 406.707805        | 4 |
| 6 | <b>1025.497209</b> | 513.252243      | 1008.470660    | 504.738968        | 1007.486644        | 504.246960       | E    | <b>391.193573</b>  | 196.100425        | 374.167024         | 187.587150       | <b>373.183008</b>  | 187.095142        | 3 |
| 7 | 1112.529237        | 556.768257      | 1095.502688    | 548.254982        | <b>1094.518672</b> | 547.762974       | S    | <b>262.150980</b>  | 131.579128        | 245.124431         | 123.065854       | 244.140415         | 122.573846        | 2 |
| 8 |                    |                 |                |                   |                    |                  | R    | <b>175.118952</b>  | 88.063114         | 158.092403         | 79.549839        |                    |                   | 1 |

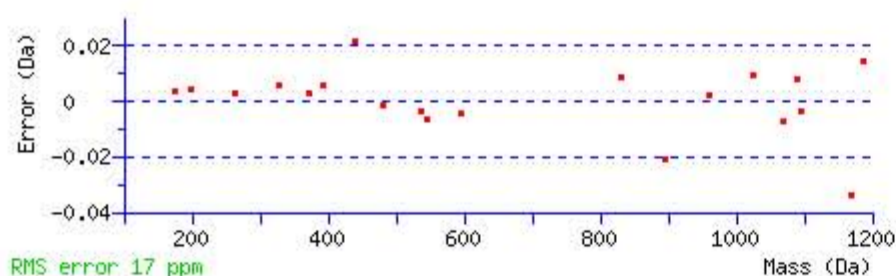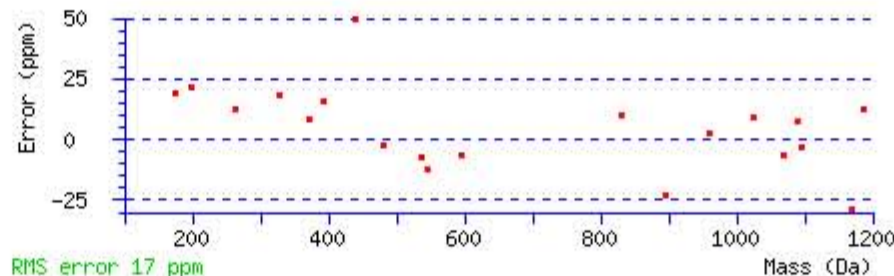

NCBI BLAST search of **VVEEQESR**

(Parameters: blastp, nr protein database, expect=20000, no filter, PAM30)

Other BLAST [web gateways](#)

All matches to this query

| Score | Mr(calc):   | Delta     | Sequence                      |
|-------|-------------|-----------|-------------------------------|
| 37.8  | 1285.633621 | 0.000707  | <a href="#">VVEEQESR</a>      |
| 3.2   | 1285.644867 | -0.010539 | <a href="#">DTLHSAMAVVSR</a>  |
| 2.3   | 1285.637451 | -0.003123 | <a href="#">TAPASGSAPRESR</a> |



# MASCOT SCIENCE Mascot Search Results

## Peptide View

MS/MS Fragmentation of **CCQDGVTR**

Found in **CO4A\_HUMAN**, Complement C4-A OS=Homo sapiens GN=C4A PE=1 SV=2

Match to Query 26305: 1305.566628 from(653.790590,2+) rtinseconds(1405) index(48858)

Title: Locus:1.1.1.1104.13 File:"2013-07-02 CLN FXIII 60 min 2nd F 4.wiff"

Data file C:\Program Files (x86)\Matrix Science\Mascot Daemon\mgf\5 FXIII 60 min 2nd\mascot\_daemon\_merge.mgf

Click mouse within plot area to zoom in by factor of two about that point

Or, Plot from  to  Da

Label all possible matches  Label matches used for scoring

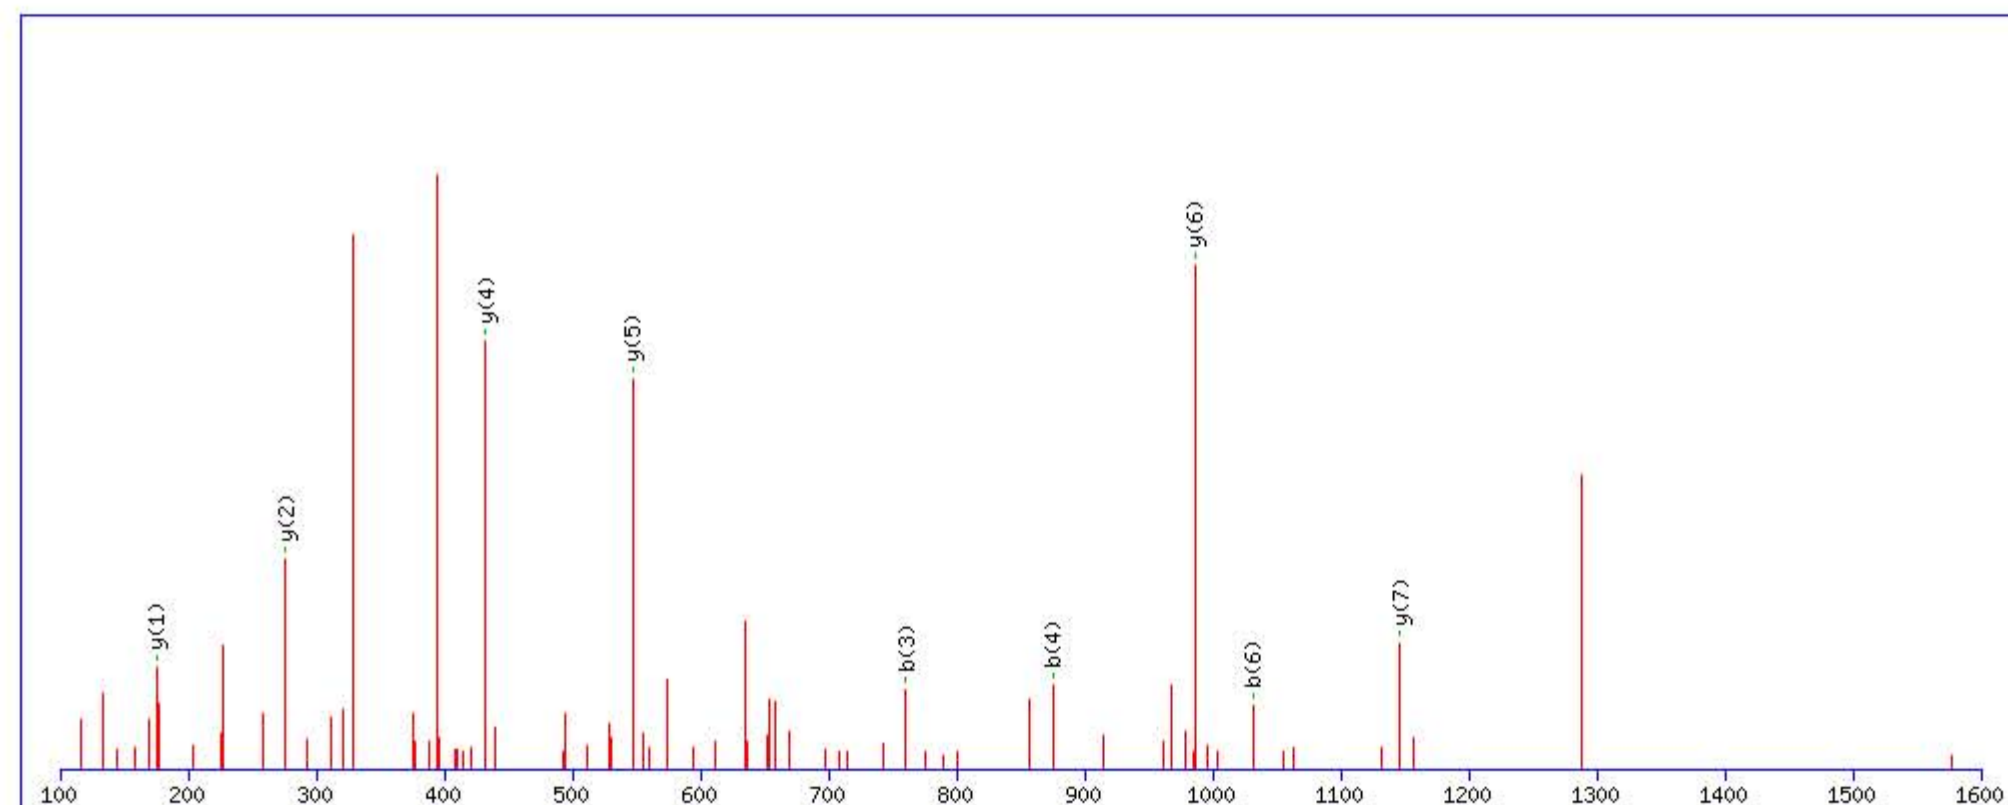

Monoisotopic mass of neutral peptide Mr(calc): 1305.562820

Fixed modifications: Carbamidomethyl (C) (apply to specified residues or termini only)

Variable modifications:

Q3 : Biotin:Thermo-21345 (Q)

Ions Score: 51 Expect: 7e-005

Matches : 9/72 fragment ions using 12 most intense peaks [\(help\)](#)

| # | b           | b <sup>++</sup> | b <sup>*</sup> | b <sup>*++</sup> | b <sup>0</sup> | b <sup>0++</sup> | Seq. | y           | y <sup>++</sup> | y <sup>*</sup> | y <sup>*++</sup> | y <sup>0</sup> | y <sup>0++</sup> | # |
|---|-------------|-----------------|----------------|------------------|----------------|------------------|------|-------------|-----------------|----------------|------------------|----------------|------------------|---|
| 1 | 161.037925  | 81.022600       |                |                  |                |                  | C    |             |                 |                |                  |                |                  | 8 |
| 2 | 321.068574  | 161.037925      |                |                  |                |                  | C    | 1146.539427 | 573.773352      | 1129.512878    | 565.260077       | 1128.528862    | 564.768069       | 7 |
| 3 | 760.293900  | 380.650588      | 743.267351     | 372.137314       |                |                  | Q    | 986.508778  | 493.758027      | 969.482229     | 485.244753       | 968.498213     | 484.752745       | 6 |
| 4 | 875.320843  | 438.164060      | 858.294294     | 429.650785       | 857.310278     | 429.158777       | D    | 547.283452  | 274.145364      | 530.256903     | 265.632090       | 529.272887     | 265.140082       | 5 |
| 5 | 932.342307  | 466.674792      | 915.315758     | 458.161517       | 914.331742     | 457.669509       | G    | 432.256509  | 216.631893      | 415.229960     | 208.118618       | 414.245944     | 207.626610       | 4 |
| 6 | 1031.410721 | 516.208999      | 1014.384172    | 507.695724       | 1013.400156    | 507.203716       | V    | 375.235045  | 188.121161      | 358.208496     | 179.607886       | 357.224480     | 179.115878       | 3 |
| 7 | 1132.458400 | 566.732838      | 1115.431851    | 558.219564       | 1114.447835    | 557.727556       | T    | 276.166631  | 138.586953      | 259.140082     | 130.073679       | 258.156066     | 129.581671       | 2 |
| 8 |             |                 |                |                  |                |                  | R    | 175.118952  | 88.063114       | 158.092403     | 79.549839        |                |                  | 1 |

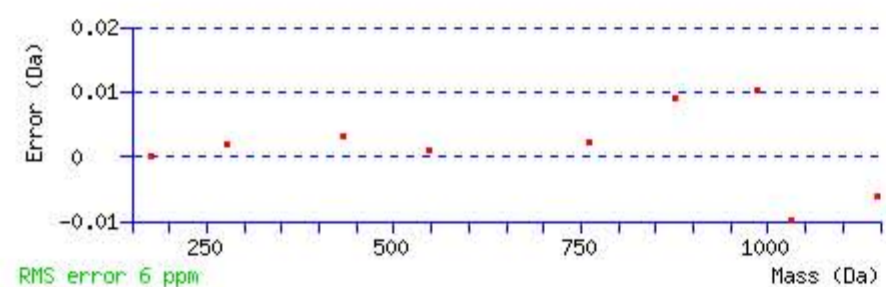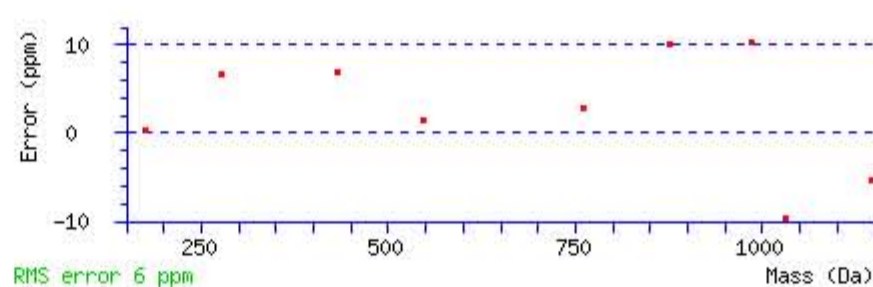

NCBI BLAST search of **CCQDGVTR**

(Parameters: blastp, nr protein database, expect=20000, no filter, PAM30)

Other BLAST [web gateways](#)

## All matches to this query

| Score | Mr(calc):   | Delta     | Sequence                     |
|-------|-------------|-----------|------------------------------|
| 50.7  | 1305.562820 | 0.003808  | <a href="#">CCQDGVTR</a>     |
| 6.0   | 1305.577194 | -0.010566 | <a href="#">CDAGWLADGSVR</a> |
| 5.7   | 1305.562805 | 0.003823  | <a href="#">CCTSPSQR</a>     |
| 0.6   | 1305.583679 | -0.017051 | <a href="#">EQEPDFEEKR</a>   |



# MASCOT Search Results

## Peptide View

MS/MS Fragmentation of **LGQYASPTAK**

Found in **CO4A\_HUMAN**, Complement C4-A OS=Homo sapiens GN=C4A PE=1 SV=2

Match to Query 27133: 1345.709368 from(673.861960,2+) rtinseconds(1630) index(50468)

Title: Locus:1.1.1.1183.10 File:"2013-07-02 CLN FXIII 60 min 2nd F 4.wiff"

Data file C:\Program Files (x86)\Matrix Science\Mascot Daemon\mgf5 FXIII 60 min 2nd\mascot\_daemon\_merge.mgf

Click mouse within plot area to zoom in by factor of two about that point

Or, Plot from  to  Da

Label all possible matches  Label matches used for scoring

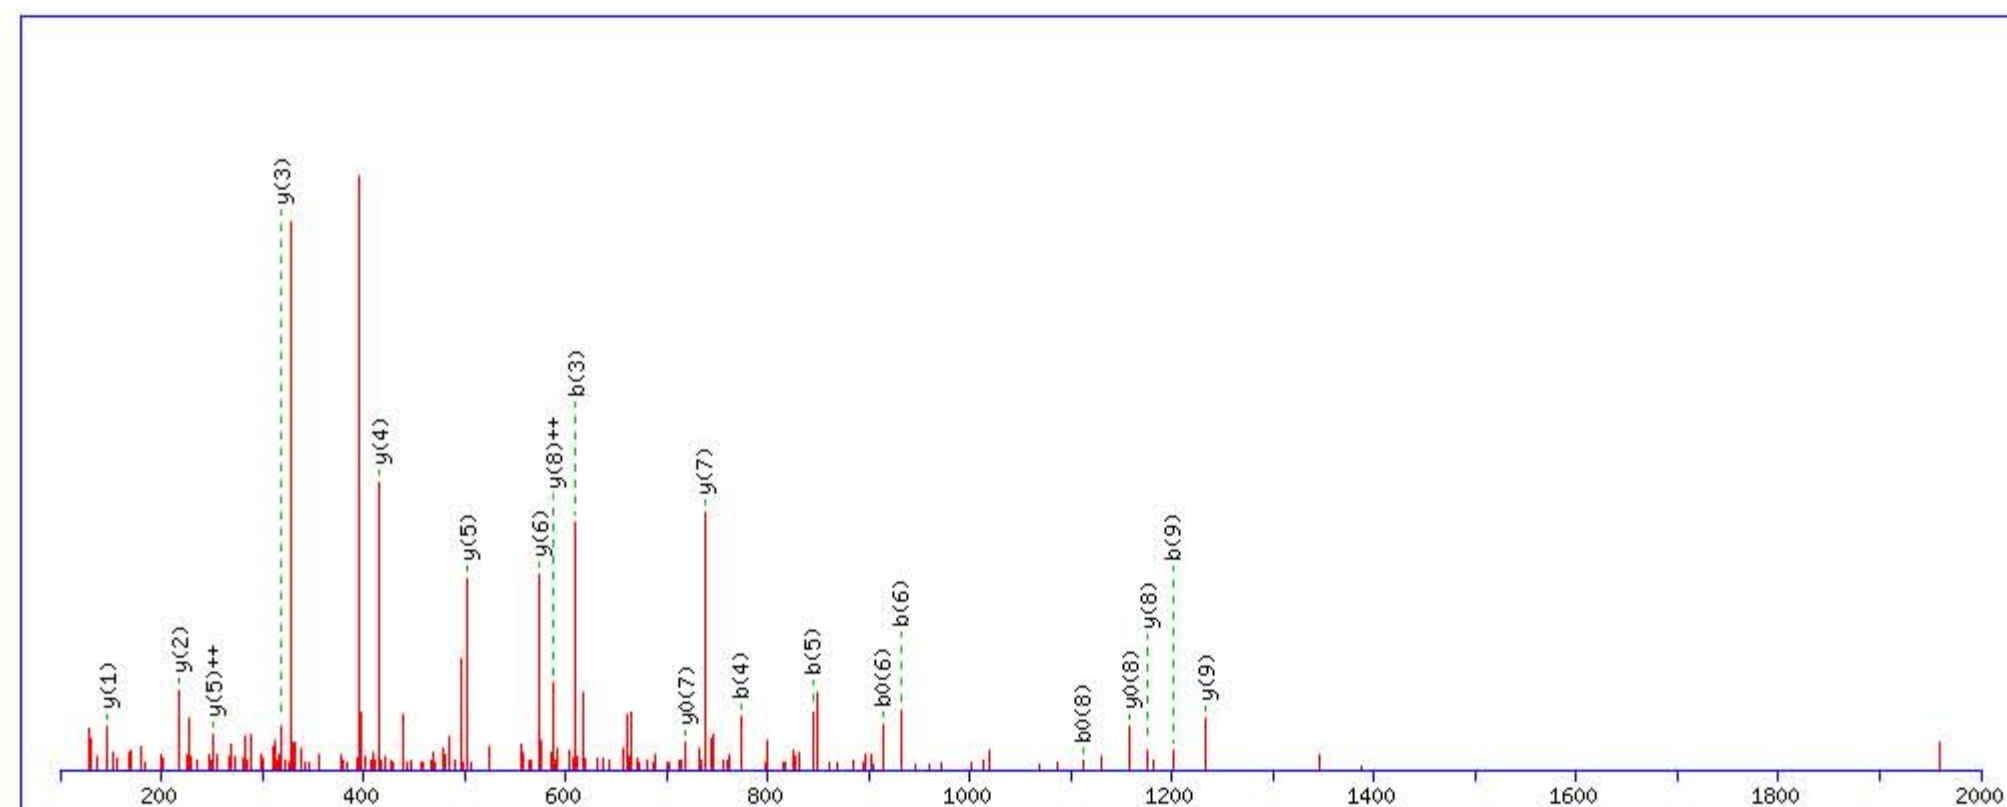

Monoisotopic mass of neutral peptide Mr(calc): 1345.706390

Fixed modifications: Carbamidomethyl (C) (apply to specified residues or termini only)

Variable modifications:

Q3 : Biotin:Thermo-21345 (Q)

Ions Score: 63 Expect: 1.4e-005

Matches : 20/90 fragment ions using 34 most intense peaks [\(help\)](#)

| #  | b           | b <sup>++</sup> | b <sup>+</sup> | b <sup>+++</sup> | b <sup>0</sup> | b <sup>0++</sup> | Seq. | y           | y <sup>++</sup> | y <sup>+</sup> | y <sup>+++</sup> | y <sup>0</sup> | y <sup>0++</sup> | #  |
|----|-------------|-----------------|----------------|------------------|----------------|------------------|------|-------------|-----------------|----------------|------------------|----------------|------------------|----|
| 1  | 114.091340  | 57.549308       |                |                  |                |                  | L    |             |                 |                |                  |                |                  | 10 |
| 2  | 171.112804  | 86.060040       |                |                  |                |                  | G    | 1233.629622 | 617.318449      | 1216.603073    | 608.805175       | 1215.619057    | 608.313167       | 9  |
| 3  | 610.338130  | 305.672703      | 593.311581     | 297.159429       |                |                  | Q    | 1176.608158 | 588.807717      | 1159.581609    | 580.294443       | 1158.597593    | 579.802435       | 8  |
| 4  | 773.401459  | 387.204368      | 756.374910     | 378.691093       |                |                  | Y    | 737.382832  | 369.195054      | 720.356283     | 360.681780       | 719.372267     | 360.189772       | 7  |
| 5  | 844.438573  | 422.722925      | 827.412024     | 414.209650       |                |                  | A    | 574.319503  | 287.663389      | 557.292954     | 279.150115       | 556.308938     | 278.658107       | 6  |
| 6  | 931.470601  | 466.238939      | 914.444052     | 457.725664       | 913.460036     | 457.233656       | S    | 503.282389  | 252.144832      | 486.255840     | 243.631558       | 485.271824     | 243.139550       | 5  |
| 7  | 1028.523365 | 514.765321      | 1011.496816    | 506.252046       | 1010.512800    | 505.760038       | P    | 416.250361  | 208.628818      | 399.223812     | 200.115544       | 398.239796     | 199.623536       | 4  |
| 8  | 1129.571044 | 565.289160      | 1112.544495    | 556.775886       | 1111.560479    | 556.283878       | T    | 319.197597  | 160.102436      | 302.171048     | 151.589162       | 301.187032     | 151.097154       | 3  |
| 9  | 1200.608158 | 600.807717      | 1183.581609    | 592.294443       | 1182.597593    | 591.802435       | A    | 218.149918  | 109.578597      | 201.123369     | 101.065322       |                |                  | 2  |
| 10 |             |                 |                |                  |                |                  | K    | 147.112804  | 74.060040       | 130.086255     | 65.546765        |                |                  | 1  |

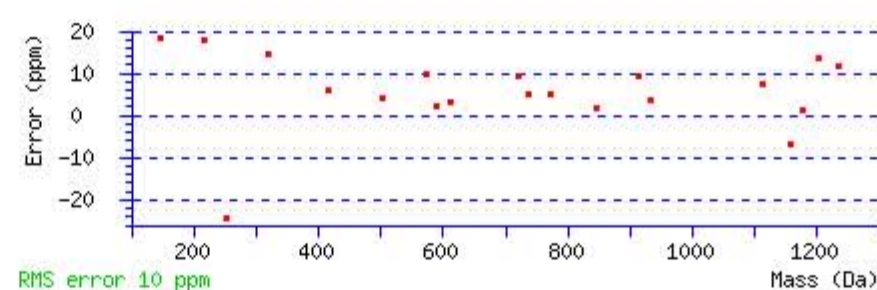

NCBI BLAST search of **LGQYASPTAK**

(Parameters: blastp, nr protein database, expect=20000, no filter, PAM30)

Other BLAST [web gateways](#)

## All matches to this query

| Score | Mr(calc):   | Delta     | Sequence                       |
|-------|-------------|-----------|--------------------------------|
| 63.1  | 1345.706390 | 0.002978  | <a href="#">LGQYASPTAK</a>     |
| 14.4  | 1345.706390 | 0.002978  | <a href="#">LGQYDQALK</a>      |
| 13.1  | 1345.724182 | -0.014814 | <a href="#">LGAVPATSGPTTFK</a> |
| 10.9  | 1345.706406 | 0.002962  | <a href="#">QGLYTPQTK</a>      |
| 7.0   | 1345.692474 | 0.016894  | <a href="#">VASCRYPALGPR</a>   |
| 6.7   | 1345.717636 | -0.008268 | <a href="#">QMPQPTFTRLK</a>    |
| 5.8   | 1345.727509 | -0.018141 | <a href="#">LGLMDNEIKVAK</a>   |
| 5.5   | 1345.727509 | -0.018141 | <a href="#">DKLKMEVDQLK</a>    |
| 5.4   | 1345.720108 | -0.010740 | <a href="#">KQEEEVSTLRK</a>    |
| 3.0   | 1345.706390 | 0.002978  | <a href="#">HEMTLKFPSIK</a>    |



# MASCOT SCIENCE Mascot Search Results

## Peptide View

MS/MS Fragmentation of **GLQDEDGYR**

Found in **CO4A\_HUMAN**, Complement C4-A OS=Homo sapiens GN=C4A PE=1 SV=2

Match to Query 28904: 1362.626348 from(682.320450,2+) rtinseconds(1742) index(51102)

Title: Locus:1.1.1.1222.12 File:"2013-07-02 CLN FXIII 60 min 2nd F 4.wiff"

Data file C:\Program Files (x86)\Matrix Science\Mascot Daemon\mgf\5 FXIII 60 min 2nd\mascot\_daemon\_merge.mgf

Click mouse within plot area to zoom in by factor of two about that point

Or, Plot from  to  Da

Label all possible matches  Label matches used for scoring



Monoisotopic mass of neutral peptide Mr(calc): 1362.623795

Fixed modifications: Carbamidomethyl (C) (apply to specified residues or termini only)

Variable modifications:

Q3 : Biotin:Thermo-21345 (Q)

Ions Score: 40 Expect: 0.00027

Matches : 7/80 fragment ions using 13 most intense peaks [\(help\)](#)

| # | b           | b <sup>++</sup> | b <sup>*</sup> | b <sup>*++</sup> | b <sup>0</sup> | b <sup>0++</sup> | Seq.     | y                  | y <sup>++</sup>   | y <sup>*</sup> | y <sup>*++</sup> | y <sup>0</sup> | y <sup>0++</sup> | #        |
|---|-------------|-----------------|----------------|------------------|----------------|------------------|----------|--------------------|-------------------|----------------|------------------|----------------|------------------|----------|
| 1 | 58.028740   | 29.518008       |                |                  |                |                  | <b>G</b> |                    |                   |                |                  |                |                  | <b>9</b> |
| 2 | 171.112804  | 86.060040       |                |                  |                |                  | <b>L</b> | 1306.609614        | 653.808445        | 1289.583065    | 645.295171       | 1288.599049    | 644.803163       | <b>8</b> |
| 3 | 610.338130  | 305.672703      | 593.311581     | 297.159429       |                |                  | <b>Q</b> | <b>1193.525550</b> | <b>597.266413</b> | 1176.499001    | 588.753139       | 1175.514985    | 588.261131       | <b>7</b> |
| 4 | 725.365073  | 363.186175      | 708.338524     | 354.672900       | 707.354508     | 354.180892       | <b>D</b> | <b>754.300224</b>  | 377.653750        | 737.273675     | 369.140476       | 736.289659     | 368.648468       | <b>6</b> |
| 5 | 854.407666  | 427.707471      | 837.381117     | 419.194197       | 836.397101     | 418.702189       | <b>E</b> | <b>639.273281</b>  | 320.140279        | 622.246732     | 311.627004       | 621.262716     | 311.134996       | <b>5</b> |
| 6 | 969.434609  | 485.220943      | 952.408060     | 476.707668       | 951.424044     | 476.215660       | <b>D</b> | <b>510.230688</b>  | 255.618982        | 493.204139     | 247.105707       | 492.220123     | 246.613700       | <b>4</b> |
| 7 | 1026.456073 | 513.731675      | 1009.429524    | 505.218400       | 1008.445508    | 504.726392       | <b>G</b> | <b>395.203745</b>  | 198.105511        | 378.177196     | 189.592236       |                |                  | <b>3</b> |
| 8 | 1189.519402 | 595.263339      | 1172.492853    | 586.750065       | 1171.508837    | 586.258057       | <b>Y</b> | 338.182281         | 169.594778        | 321.155732     | 161.081504       |                |                  | <b>2</b> |
| 9 |             |                 |                |                  |                |                  | <b>R</b> | <b>175.118952</b>  | 88.063114         | 158.092403     | 79.549839        |                |                  | <b>1</b> |



NCBI BLAST search of **GLQDEDGYR**

(Parameters: blastp, nr protein database, expect=20000, no filter, PAM30)

Other BLAST [web gateways](#)

All matches to this query

| Score | Mr(calc):   | Delta    | Sequence                       |
|-------|-------------|----------|--------------------------------|
| 40.4  | 1362.623795 | 0.002553 | <a href="#">GLQDEDGYR</a>      |
| 2.4   | 1362.613251 | 0.013097 | <a href="#">MGAGATGRAMDGPR</a> |
| 2.2   | 1362.623795 | 0.002553 | <a href="#">TGFLEIDEHMR</a>    |

Mascot: <http://www.matrixscience.com/>



# MASCOT Search Results

## Peptide View

MS/MS Fragmentation of **TEQWSTLPPETK**

Found in **CO4A\_HUMAN**, Complement C4-A OS=Homo sapiens GN=C4A PE=1 SV=2

Match to Query 41020: 1726.871328 from(864.442940,2+) rtinseconds(2031) index(53160)

Title: Locus:1.1.1.1322.10 File:"2013-07-02 CLN FXIII 60 min 2nd F 4.wiff"

Data file C:\Program Files (x86)\Matrix Science\Mascot Daemon\mgf\5 FXIII 60 min 2nd\mascot\_daemon\_merge.mgf

Click mouse within plot area to zoom in by factor of two about that point

Or, Plot from  to  Da

Label all possible matches  Label matches used for scoring

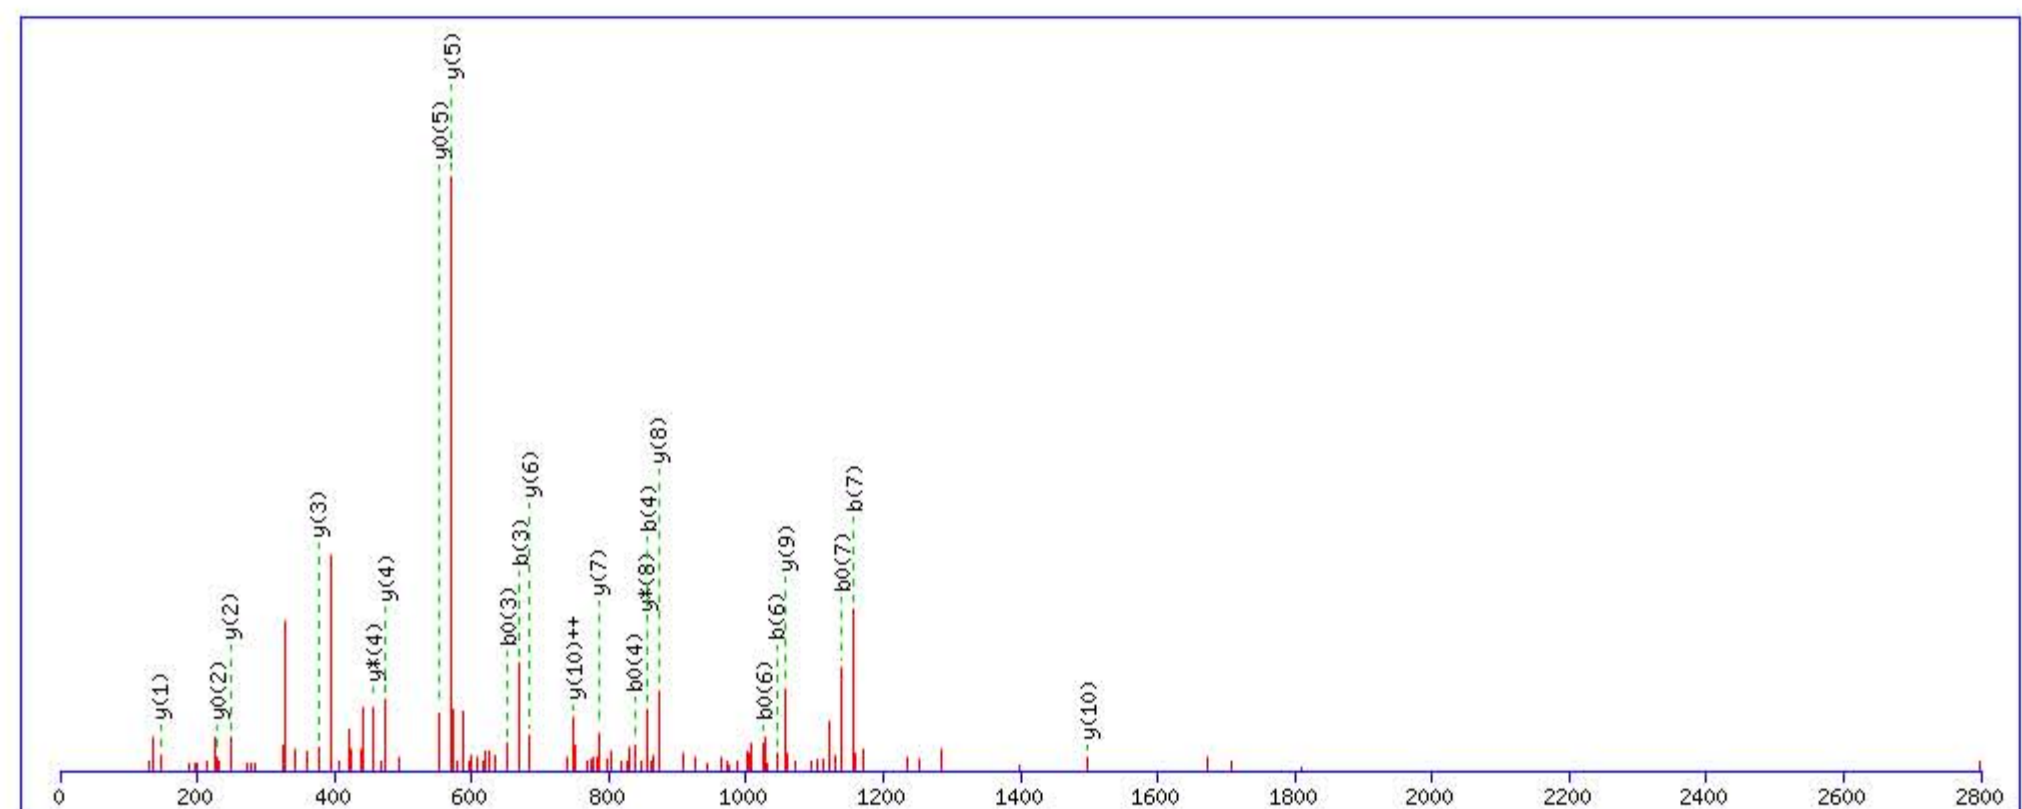

Monoisotopic mass of neutral peptide Mr(calc): 1726.860001

Fixed modifications: Carbamidomethyl (C) (apply to specified residues or termini only)

Variable modifications:

Q3 : Biotin:Thermo-21345 (Q)

Ions Score: 50 Expect: 0.00018

Matches : 23/126 fragment ions using 51 most intense peaks [\(help\)](#)

| #  | b                  | b <sup>++</sup> | b <sup>*</sup> | b <sup>*++</sup> | b <sup>0</sup>     | b <sup>0++</sup> | Seq. | y                  | y <sup>++</sup>   | y <sup>*</sup>    | y <sup>*++</sup> | y <sup>0</sup>    | y <sup>0++</sup> | #  |
|----|--------------------|-----------------|----------------|------------------|--------------------|------------------|------|--------------------|-------------------|-------------------|------------------|-------------------|------------------|----|
| 1  | 102.054955         | 51.531116       |                |                  | 84.044390          | 42.525833        | T    |                    |                   |                   |                  |                   |                  | 12 |
| 2  | 231.097548         | 116.052412      |                |                  | 213.086983         | 107.047130       | E    | 1626.819607        | 813.913442        | 1609.793058       | 805.400167       | 1608.809042       | 804.908159       | 11 |
| 3  | <b>670.322874</b>  | 335.665075      | 653.296325     | 327.151801       | <b>652.312309</b>  | 326.659793       | Q    | <b>1497.777014</b> | <b>749.392145</b> | 1480.750465       | 740.878871       | 1479.766449       | 740.386863       | 10 |
| 4  | <b>856.402187</b>  | 428.704732      | 839.375638     | 420.191457       | <b>838.391622</b>  | 419.699449       | W    | <b>1058.551688</b> | 529.779482        | 1041.525139       | 521.266208       | 1040.541123       | 520.774200       | 9  |
| 5  | 943.434215         | 472.220746      | 926.407666     | 463.707471       | 925.423650         | 463.215463       | S    | <b>872.472375</b>  | 436.739826        | <b>855.445826</b> | 428.226551       | 854.461810        | 427.734543       | 8  |
| 6  | <b>1044.481894</b> | 522.744585      | 1027.455345    | 514.231311       | <b>1026.471329</b> | 513.739303       | T    | <b>785.440347</b>  | 393.223812        | 768.413798        | 384.710537       | 767.429782        | 384.218529       | 7  |
| 7  | <b>1157.565958</b> | 579.286617      | 1140.539409    | 570.773343       | <b>1139.555393</b> | 570.281334       | L    | <b>684.392668</b>  | 342.699972        | 667.366119        | 334.186698       | 666.382103        | 333.694690       | 6  |
| 8  | 1254.618722        | 627.812999      | 1237.592173    | 619.299725       | 1236.608157        | 618.807716       | P    | <b>571.308604</b>  | 286.157940        | 554.282055        | 277.644666       | <b>553.298039</b> | 277.152658       | 5  |
| 9  | 1351.671486        | 676.339381      | 1334.644937    | 667.826107       | 1333.660921        | 667.334098       | P    | <b>474.255840</b>  | 237.631558        | <b>457.229291</b> | 229.118284       | 456.245275        | 228.626276       | 4  |
| 10 | 1480.714079        | 740.860678      | 1463.687530    | 732.347403       | 1462.703514        | 731.855395       | E    | <b>377.203076</b>  | 189.105176        | 360.176527        | 180.591902       | 359.192511        | 180.099894       | 3  |
| 11 | 1581.761758        | 791.384517      | 1564.735209    | 782.871243       | 1563.751193        | 782.379235       | T    | <b>248.160483</b>  | 124.583879        | 231.133934        | 116.070605       | <b>230.149918</b> | 115.578597       | 2  |
| 12 |                    |                 |                |                  |                    |                  | K    | <b>147.112804</b>  | 74.060040         | 130.086255        | 65.546765        |                   |                  | 1  |

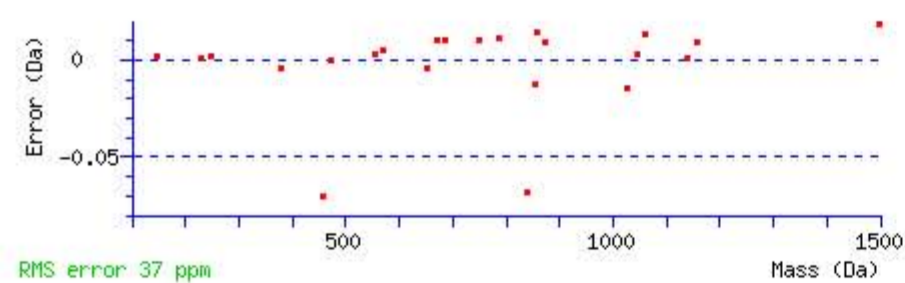

NCBI BLAST search of **TEQWSTLPPETK**

(Parameters: blastp, nr protein database, expect=20000, no filter, PAM30)

Other BLAST [web gateways](#)

All matches to this query

| Score | Mr(calc):   | Delta     | Sequence                           |
|-------|-------------|-----------|------------------------------------|
| 50.1  | 1726.860001 | 0.011327  | <a href="#">TEQWSTLPPETK</a>       |
| 9.6   | 1726.849960 | 0.021368  | <a href="#">TERFGQGGAGPVGGQGPR</a> |
| 6.2   | 1726.867188 | 0.004140  | <a href="#">KDHAEMQAVIDAKQK</a>    |
| 3.5   | 1726.871216 | 0.000112  | <a href="#">NLNTKLQMYFQSPK</a>     |
| 1.9   | 1726.853485 | 0.017843  | <a href="#">MASGHAFQPDLVK</a>      |
| 1.1   | 1726.874573 | -0.003245 | <a href="#">VTKNQEMMSQIKYK</a>     |



# MASCOT Search Results

## Peptide View

MS/MS Fragmentation of **GLEEELQFSLGSK**

Found in **CO4A\_HUMAN**, Complement C4-A OS=Homo sapiens GN=C4A PE=1 SV=2

Match to Query 41586: 1746.900028 from(874.457290,2+) rtinseconds(2580) index(56406)

Title: Locus:1.1.1.1513.10 File:"2013-07-02 CLN FXIII 60 min 2nd F 4.wiff"

Data file C:\Program Files (x86)\Matrix Science\Mascot Daemon\mgf\5 FXIII 60 min 2nd\mascot\_daemon\_merge.mgf

Click mouse within plot area to zoom in by factor of two about that point

Or, Plot from  to  Da

Label all possible matches  Label matches used for scoring



Monoisotopic mass of neutral peptide Mr(calc): 1746.886200

Fixed modifications: Carbamidomethyl (C) (apply to specified residues or termini only)

Variable modifications:

Q7 : Biotin:Thermo-21345 (Q)

Ions Score: 75 Expect: 1.9e-007

Matches : 38/126 fragment ions using 59 most intense peaks [\(help\)](#)

| #  | b                  | b <sup>++</sup> | b <sup>+</sup> | b <sup>+++</sup>  | b <sup>0</sup>     | b <sup>0++</sup> | Seq. | y                  | y <sup>++</sup>   | y <sup>+</sup>    | y <sup>+++</sup> | y <sup>0</sup>     | y <sup>0++</sup>  | #  |
|----|--------------------|-----------------|----------------|-------------------|--------------------|------------------|------|--------------------|-------------------|-------------------|------------------|--------------------|-------------------|----|
| 1  | 58.028740          | 29.518008       |                |                   |                    |                  | G    |                    |                   |                   |                  |                    |                   | 13 |
| 2  | <b>171.112804</b>  | 86.060040       |                |                   |                    |                  | L    | 1690.872035        | 845.939656        | 1673.845486       | 837.426381       | 1672.861470        | 836.934373        | 12 |
| 3  | <b>300.155397</b>  | 150.581336      |                |                   | 282.144832         | 141.576054       | E    | <b>1577.787971</b> | <b>789.397624</b> | 1560.761422       | 780.884349       | 1559.777406        | <b>780.392341</b> | 11 |
| 4  | <b>429.197990</b>  | 215.102633      |                |                   | 411.187425         | 206.097351       | E    | <b>1448.745378</b> | 724.876327        | 1431.718829       | 716.363053       | 1430.734813        | <b>715.871045</b> | 10 |
| 5  | <b>558.240583</b>  | 279.623930      |                |                   | <b>540.230018</b>  | 270.618647       | E    | <b>1319.702785</b> | 660.355031        | 1302.676236       | 651.841756       | <b>1301.692220</b> | 651.349748        | 9  |
| 6  | <b>671.324647</b>  | 336.165962      |                |                   | 653.314082         | 327.160679       | L    | <b>1190.660192</b> | 595.833734        | 1173.633643       | 587.320460       | 1172.649627        | 586.828452        | 8  |
| 7  | <b>1110.549973</b> | 555.778624      | 1093.523424    | 547.265350        | <b>1092.539408</b> | 546.773342       | Q    | <b>1077.576128</b> | 539.291702        | 1060.549579       | 530.778428       | <b>1059.565563</b> | <b>530.286419</b> | 7  |
| 8  | <b>1257.618387</b> | 629.312832      | 1240.591838    | 620.799557        | <b>1239.607822</b> | 620.307549       | F    | <b>638.350802</b>  | 319.679039        | 621.324253        | 311.165765       | <b>620.340237</b>  | 310.673757        | 6  |
| 9  | <b>1344.650415</b> | 672.828846      | 1327.623866    | <b>664.315571</b> | <b>1326.639850</b> | 663.823563       | S    | <b>491.282388</b>  | 246.144832        | 474.255839        | 237.631557       | 473.271823         | 237.139549        | 5  |
| 10 | <b>1457.734479</b> | 729.370878      | 1440.707930    | 720.857603        | <b>1439.723914</b> | 720.365595       | L    | <b>404.250360</b>  | 202.628818        | 387.223811        | 194.115543       | 386.239795         | 193.623535        | 4  |
| 11 | <b>1514.755943</b> | 757.881609      | 1497.729394    | <b>749.368335</b> | 1496.745378        | 748.876327       | G    | <b>291.166296</b>  | 146.086786        | 274.139747        | 137.573512       | 273.155731         | 137.081504        | 3  |
| 12 | <b>1601.787971</b> | 801.397624      | 1584.761422    | 792.884349        | 1583.777406        | 792.392341       | S    | <b>234.144832</b>  | 117.576054        | 217.118283        | 109.062780       | 216.134267         | 108.570772        | 2  |
| 13 |                    |                 |                |                   |                    |                  | K    | <b>147.112804</b>  | 74.060040         | <b>130.086255</b> | 65.546765        |                    |                   | 1  |



NCBI BLAST search of [GLEEELQFSLGSK](#)

(Parameters: blastp, nr protein database, expect=20000, no filter, PAM30)

Other BLAST [web gateways](#)

All matches to this query

| Score | Mr(calc):   | Delta     | Sequence                          |
|-------|-------------|-----------|-----------------------------------|
| 74.7  | 1746.886200 | 0.013828  | <a href="#">GLEEELQFSLGSK</a>     |
| 2.9   | 1746.887558 | 0.012470  | <a href="#">AVQSKAFCAGGLAPGWK</a> |
| 1.3   | 1746.918533 | -0.018505 | <a href="#">AKLQMTEAALALSEQK</a>  |

Mascot: <http://www.matrixscience.com/>



# MASCOT Search Results

## Peptide View

MS/MS Fragmentation of **VLSLAQEQVGGSP**EK

Found in **CO4A\_HUMAN**, Complement C4-A OS=Homo sapiens GN=C4A PE=1 SV=2

Match to Query 43649: 1851.979932 from(618.333920,3+) rtinseconds(2022) index(53085)

Title: Locus:1.1.1.1319.10 File:"2013-07-02 CLN FXIII 60 min 2nd F 4.wiff"

Data file C:\Program Files (x86)\Matrix Science\Mascot Daemon\mgf5 FXIII 60 min 2nd\mascot\_daemon\_merge.mgf

Click mouse within plot area to zoom in by factor of two about that point

Or, Plot from  to  Da

Label all possible matches  Label matches used for scoring



Monoisotopic mass of neutral peptide Mr(calc): 1851.976425

Fixed modifications: Carbamidomethyl (C) (apply to specified residues or termini only)

Variable modifications:

Q8 : Biotin:Thermo-21345 (Q)

Ions Score: 66 Expect: 6.2e-006

Matches : 34/152 fragment ions using 68 most intense peaks [\(help\)](#)

| #  | b                  | b <sup>++</sup>   | b <sup>*</sup> | b <sup>*++</sup> | b <sup>0</sup>    | b <sup>0++</sup> | Seq. | y                  | y <sup>++</sup>   | y <sup>*</sup> | y <sup>*++</sup>  | y <sup>0</sup>     | y <sup>0++</sup>  | #  |
|----|--------------------|-------------------|----------------|------------------|-------------------|------------------|------|--------------------|-------------------|----------------|-------------------|--------------------|-------------------|----|
| 1  | 100.075690         | 50.541483         |                |                  |                   |                  | V    |                    |                   |                |                   |                    |                   | 15 |
| 2  | <b>213.159754</b>  | 107.083515        |                |                  |                   |                  | L    | 1753.915298        | 877.461287        | 1736.888749    | 868.948013        | 1735.904733        | 868.456004        | 14 |
| 3  | 300.191782         | 150.599529        |                |                  | <b>282.181217</b> | 141.594247       | S    | <b>1640.831234</b> | 820.919255        | 1623.804685    | <b>812.405981</b> | 1622.820669        | 811.913973        | 13 |
| 4  | 413.275846         | 207.141561        |                |                  | <b>395.265281</b> | 198.136279       | L    | 1553.799206        | 777.403241        | 1536.772657    | 768.889967        | 1535.788641        | <b>768.397958</b> | 12 |
| 5  | <b>484.312960</b>  | 242.660118        |                |                  | <b>466.302395</b> | 233.654836       | A    | <b>1440.715142</b> | <b>720.861209</b> | 1423.688593    | 712.347935        | 1422.704577        | 711.855927        | 11 |
| 6  | <b>612.371538</b>  | 306.689407        | 595.344989     | 298.176133       | 594.360973        | 297.684125       | Q    | <b>1369.678028</b> | <b>685.342652</b> | 1352.651479    | 676.829378        | <b>1351.667463</b> | <b>676.337370</b> | 10 |
| 7  | 741.414131         | 371.210704        | 724.387582     | 362.697429       | <b>723.403566</b> | 362.205421       | E    | <b>1241.619450</b> | <b>621.313363</b> | 1224.592901    | 612.800089        | <b>1223.608885</b> | <b>612.308080</b> | 9  |
| 8  | <b>1180.639457</b> | <b>590.823367</b> | 1163.612908    | 582.310092       | 1162.628892       | 581.818084       | Q    | <b>1112.576857</b> | 556.792066        | 1095.550308    | 548.278792        | 1094.566292        | 547.786784        | 8  |
| 9  | 1279.707871        | 640.357574        | 1262.681322    | 631.844299       | 1261.697306       | 631.352291       | V    | <b>673.351531</b>  | <b>337.179404</b> | 656.324982     | 328.666129        | 655.340966         | 328.174121        | 7  |
| 10 | 1336.729335        | 668.868306        | 1319.702786    | 660.355031       | 1318.718770       | 659.863023       | G    | <b>574.283117</b>  | 287.645197        | 557.256568     | 279.131922        | <b>556.272552</b>  | 278.639914        | 6  |
| 11 | 1393.750799        | 697.379037        | 1376.724250    | 688.865763       | 1375.740234       | 688.373755       | G    | <b>517.261653</b>  | 259.134465        | 500.235104     | 250.621190        | <b>499.251088</b>  | 250.129182        | 5  |
| 12 | 1480.782827        | 740.895052        | 1463.756278    | 732.381777       | 1462.772262       | 731.889769       | S    | <b>460.240189</b>  | 230.623732        | 443.213640     | 222.110458        | 442.229624         | 221.618450        | 4  |
| 13 | 1577.835591        | 789.421434        | 1560.809042    | 780.908159       | 1559.825026       | 780.416151       | P    | <b>373.208161</b>  | 187.107718        | 356.181612     | 178.594444        | <b>355.197596</b>  | 178.102436        | 3  |
| 14 | 1706.878184        | 853.942730        | 1689.851635    | 845.429456       | 1688.867619       | 844.937447       | E    | <b>276.155397</b>  | 138.581336        | 259.128848     | 130.068062        | 258.144832         | 129.576054        | 2  |
| 15 |                    |                   |                |                  |                   |                  | K    | <b>147.112804</b>  | 74.060040         | 130.086255     | 65.546765         |                    |                   | 1  |



NCBI BLAST search of **VLSLAQEQVGGSP**EK

(Parameters: blastp, nr protein database, expect=20000, no filter, PAM30)

Other BLAST [web gateways](#)

All matches to this query

| Score | Mr(calc):   | Delta    | Sequence                         |
|-------|-------------|----------|----------------------------------|
| 66.0  | 1851.976425 | 0.003507 | <a href="#">VLSLAQEQVGGSP</a> EK |
| 41.9  | 1851.976425 | 0.003507 | <a href="#">VLSLAQEQVGGSP</a> EK |

Mascot: <http://www.matrixscience.com/>



# MASCOT SCIENCE Mascot Search Results

## Peptide View

MS/MS Fragmentation of **GPEVQLVAHSPWLK**

Found in **CO4A\_HUMAN**, Complement C4-A OS=Homo sapiens GN=C4A PE=1 SV=2

Match to Query 44158: 1871.022582 from(624.681470,3+) rtinseconds(2255) index(54583)

Title: Locus:1.1.1.1400.6 File:"2013-07-02 CLN FXIII 60 min 2nd F 4.wiff"

Data file C:\Program Files (x86)\Matrix Science\Mascot Daemon\mgf5 FXIII 60 min 2nd\mascot\_daemon\_merge.mgf

Click mouse within plot area to zoom in by factor of two about that point

Or, Plot from  to  Da

Label all possible matches  Label matches used for scoring



Monoisotopic mass of neutral peptide Mr(calc): 1871.012756

Fixed modifications: Carbamidomethyl (C) (apply to specified residues or termini only)

Variable modifications:

Q5 : Biotin:Thermo-21345 (Q)

Ions Score: 46 Expect: 7.1e-005

Matches : 31/136 fragment ions using 77 most intense peaks [\(help\)](#)

| #  | b           | b <sup>++</sup> | b <sup>*</sup> | b <sup>++</sup> | b <sup>0</sup> | b <sup>0++</sup> | Seq. | y           | y <sup>++</sup> | y <sup>*</sup> | y <sup>++</sup> | y <sup>0</sup> | y <sup>0++</sup> | #  |
|----|-------------|-----------------|----------------|-----------------|----------------|------------------|------|-------------|-----------------|----------------|-----------------|----------------|------------------|----|
| 1  | 58.028740   | 29.518008       |                |                 |                |                  | G    |             |                 |                |                 |                |                  | 14 |
| 2  | 155.081504  | 78.044390       |                |                 |                |                  | P    | 1814.998574 | 908.002925      | 1797.972025    | 899.489651      | 1796.988009    | 898.997643       | 13 |
| 3  | 284.124097  | 142.565687      |                |                 | 266.113532     | 133.560404       | E    | 1717.945810 | 859.476543      | 1700.919261    | 850.963269      | 1699.935245    | 850.471261       | 12 |
| 4  | 383.192511  | 192.099894      |                |                 | 365.181946     | 183.094611       | V    | 1588.903217 | 794.955247      | 1571.876668    | 786.441972      | 1570.892652    | 785.949964       | 11 |
| 5  | 822.417837  | 411.712557      | 805.391288     | 403.199282      | 804.407272     | 402.707274       | Q    | 1489.834803 | 745.421040      | 1472.808254    | 736.907765      | 1471.824238    | 736.415757       | 10 |
| 6  | 935.501901  | 468.254589      | 918.475352     | 459.741314      | 917.491336     | 459.249306       | L    | 1050.609477 | 525.808377      | 1033.582928    | 517.295102      | 1032.598912    | 516.803094       | 9  |
| 7  | 1034.570315 | 517.788796      | 1017.543766    | 509.275521      | 1016.559750    | 508.783513       | V    | 937.525413  | 469.266345      | 920.498864     | 460.753070      | 919.514848     | 460.261062       | 8  |
| 8  | 1105.607429 | 553.307353      | 1088.580880    | 544.794078      | 1087.596864    | 544.302070       | A    | 838.456999  | 419.732138      | 821.430450     | 411.218863      | 820.446434     | 410.726855       | 7  |
| 9  | 1242.666341 | 621.836809      | 1225.639792    | 613.323534      | 1224.655776    | 612.831526       | H    | 767.419885  | 384.213581      | 750.393336     | 375.700306      | 749.409320     | 375.208298       | 6  |
| 10 | 1329.698369 | 665.352823      | 1312.671820    | 656.839548      | 1311.687804    | 656.347540       | S    | 630.360973  | 315.684125      | 613.334424     | 307.170850      | 612.350408     | 306.678842       | 5  |
| 11 | 1426.751133 | 713.879205      | 1409.724584    | 705.365930      | 1408.740568    | 704.873922       | P    | 543.328945  | 272.168111      | 526.302396     | 263.654836      |                |                  | 4  |
| 12 | 1612.830446 | 806.918861      | 1595.803897    | 798.405587      | 1594.819881    | 797.913579       | W    | 446.276181  | 223.641728      | 429.249632     | 215.128454      |                |                  | 3  |
| 13 | 1725.914510 | 863.460893      | 1708.887961    | 854.947619      | 1707.903945    | 854.455611       | L    | 260.196868  | 130.602072      | 243.170319     | 122.088797      |                |                  | 2  |
| 14 |             |                 |                |                 |                |                  | K    | 147.112804  | 74.060040       | 130.086255     | 65.546765       |                |                  | 1  |

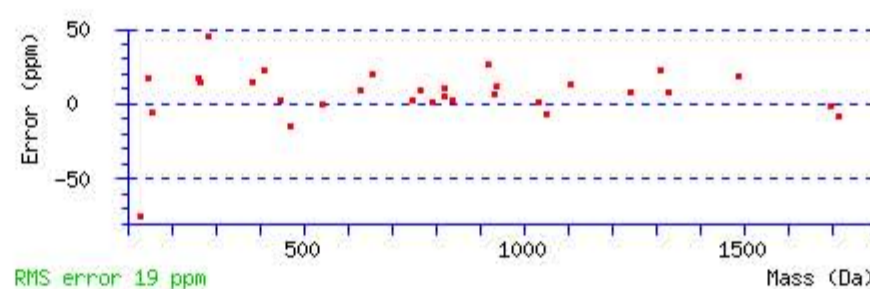

NCBI BLAST search of **GPEVQLVAHSPWLK**

(Parameters: blastp, nr protein database, expect=20000, no filter, PAM30)

Other BLAST [web gateways](#)

All matches to this query

| Score | Mr(calc):   | Delta    | Sequence                          |
|-------|-------------|----------|-----------------------------------|
| 46.0  | 1871.012756 | 0.009826 | <a href="#">GPEVQLVAHSPWLK</a>    |
| 1.8   | 1871.002686 | 0.019896 | <a href="#">QRVLHWDLRGPGGGPAR</a> |
| 1.6   | 1870.994781 | 0.027801 | <a href="#">NVNQAKLSEHRHK</a>     |

Mascot: <http://www.matrixscience.com/>



# **MASCOT** Mascot Search Results

## Peptide View

MS/MS Fragmentation of **HLVPGAPFLLQALVR**

Found in **CO4A\_HUMAN**, Complement C4-A OS=Homo sapiens GN=C4A PE=1 SV=2

Match to Query 45393: 1941.152712 from(648.058180,3+) rtinseconds(2868) index(58426)

Title: Locus:1.1.1.1612.6 File:"2013-07-02 CLN FXIII 60 min 2nd F 4.wiff"

Data file C:\Program Files (x86)\Matrix Science\Mascot Daemon\mgf5 FXIII 60 min 2nd\mascot\_daemon\_merge.mgf

Click mouse within plot area to zoom in by factor of two about that point

Or, Plot from  to  Da

Label all possible matches  Label matches used for scoring



Monoisotopic mass of neutral peptide Mr(calc): 1941.138626

Fixed modifications: Carbamidomethyl (C) (apply to specified residues or termini only)

Variable modifications:

Q11 : Biotin:Thermo-21345 (Q)

Ions Score: 46 Expect: 4.6e-005

Matches : 12/92 fragment ions using 15 most intense peaks [\(help\)](#)

| #  | b                  | b <sup>++</sup>   | b <sup>*</sup> | b <sup>*++</sup> | Seq.     | y                  | y <sup>++</sup> | y <sup>*</sup> | y <sup>*++</sup> | #         |
|----|--------------------|-------------------|----------------|------------------|----------|--------------------|-----------------|----------------|------------------|-----------|
| 1  | 138.066188         | 69.536732         |                |                  | <b>H</b> |                    |                 |                |                  | <b>15</b> |
| 2  | <b>251.150252</b>  | 126.078764        |                |                  | <b>L</b> | 1805.086996        | 903.047136      | 1788.060447    | 894.533862       | <b>14</b> |
| 3  | 350.218666         | 175.612971        |                |                  | <b>V</b> | 1692.002932        | 846.505104      | 1674.976383    | 837.991830       | <b>13</b> |
| 4  | 447.271430         | 224.139353        |                |                  | <b>P</b> | 1592.934518        | 796.970897      | 1575.907969    | 788.457623       | <b>12</b> |
| 5  | 504.292894         | 252.650085        |                |                  | <b>G</b> | 1495.881754        | 748.444515      | 1478.855205    | 739.931241       | <b>11</b> |
| 6  | <b>575.330008</b>  | 288.168642        |                |                  | <b>A</b> | 1438.860290        | 719.933783      | 1421.833741    | 711.420509       | <b>10</b> |
| 7  | 672.382772         | 336.695024        |                |                  | <b>P</b> | <b>1367.823176</b> | 684.415226      | 1350.796627    | 675.901952       | <b>9</b>  |
| 8  | 819.451186         | 410.229231        |                |                  | <b>F</b> | <b>1270.770412</b> | 635.888844      | 1253.743863    | 627.375570       | <b>8</b>  |
| 9  | <b>932.535250</b>  | 466.771263        |                |                  | <b>L</b> | <b>1123.701998</b> | 562.354637      | 1106.675449    | 553.841363       | <b>7</b>  |
| 10 | 1045.619314        | 523.313295        |                |                  | <b>L</b> | <b>1010.617934</b> | 505.812605      | 993.591385     | 497.299331       | <b>6</b>  |
| 11 | <b>1484.844640</b> | 742.925958        | 1467.818091    | 734.412684       | <b>Q</b> | <b>897.533870</b>  | 449.270573      | 880.507321     | 440.757298       | <b>5</b>  |
| 12 | 1555.881754        | <b>778.444515</b> | 1538.855205    | 769.931241       | <b>A</b> | <b>458.308544</b>  | 229.657910      | 441.281995     | 221.144635       | <b>4</b>  |
| 13 | <b>1668.965818</b> | 834.986547        | 1651.939269    | 826.473273       | <b>L</b> | 387.271430         | 194.139353      | 370.244881     | 185.626078       | <b>3</b>  |
| 14 | 1768.034232        | 884.520754        | 1751.007683    | 876.007480       | <b>V</b> | 274.187366         | 137.597321      | 257.160817     | 129.084047       | <b>2</b>  |
| 15 |                    |                   |                |                  | <b>R</b> | 175.118952         | 88.063114       | 158.092403     | 79.549839        | <b>1</b>  |



NCBI BLAST search of [HLVPGAPFLLQALVR](#)

(Parameters: blastp, nr protein database, expect=20000, no filter, PAM30)

Other BLAST [web gateways](#)

All matches to this query

| Score | Mr(calc):   | Delta    | Sequence                        |
|-------|-------------|----------|---------------------------------|
| 45.9  | 1941.138626 | 0.014086 | <a href="#">HLVPGAPFLLQALVR</a> |

Mascot: <http://www.matrixscience.com/>



# MASCOT Search Results

## Peptide View

MS/MS Fragmentation of **EPFLSCCQFAESLR**

Found in **CO4A\_HUMAN**, Complement C4-A OS=Homo sapiens GN=C4A PE=1 SV=2

Match to Query 48472: 2053.960542 from(685.660790,3+) rtinseconds(2519) index(56008)

Title: Locus:1.1.1.1492.12 File:"2013-07-02 CLN FXIII 60 min 2nd F 4.wiff"

Data file C:\Program Files (x86)\Matrix Science\Mascot Daemon\mgf5 FXIII 60 min 2nd\mascot\_daemon\_merge.mgf

Click mouse within plot area to zoom in by factor of two about that point

Or, Plot from  to  Da

Label all possible matches  Label matches used for scoring

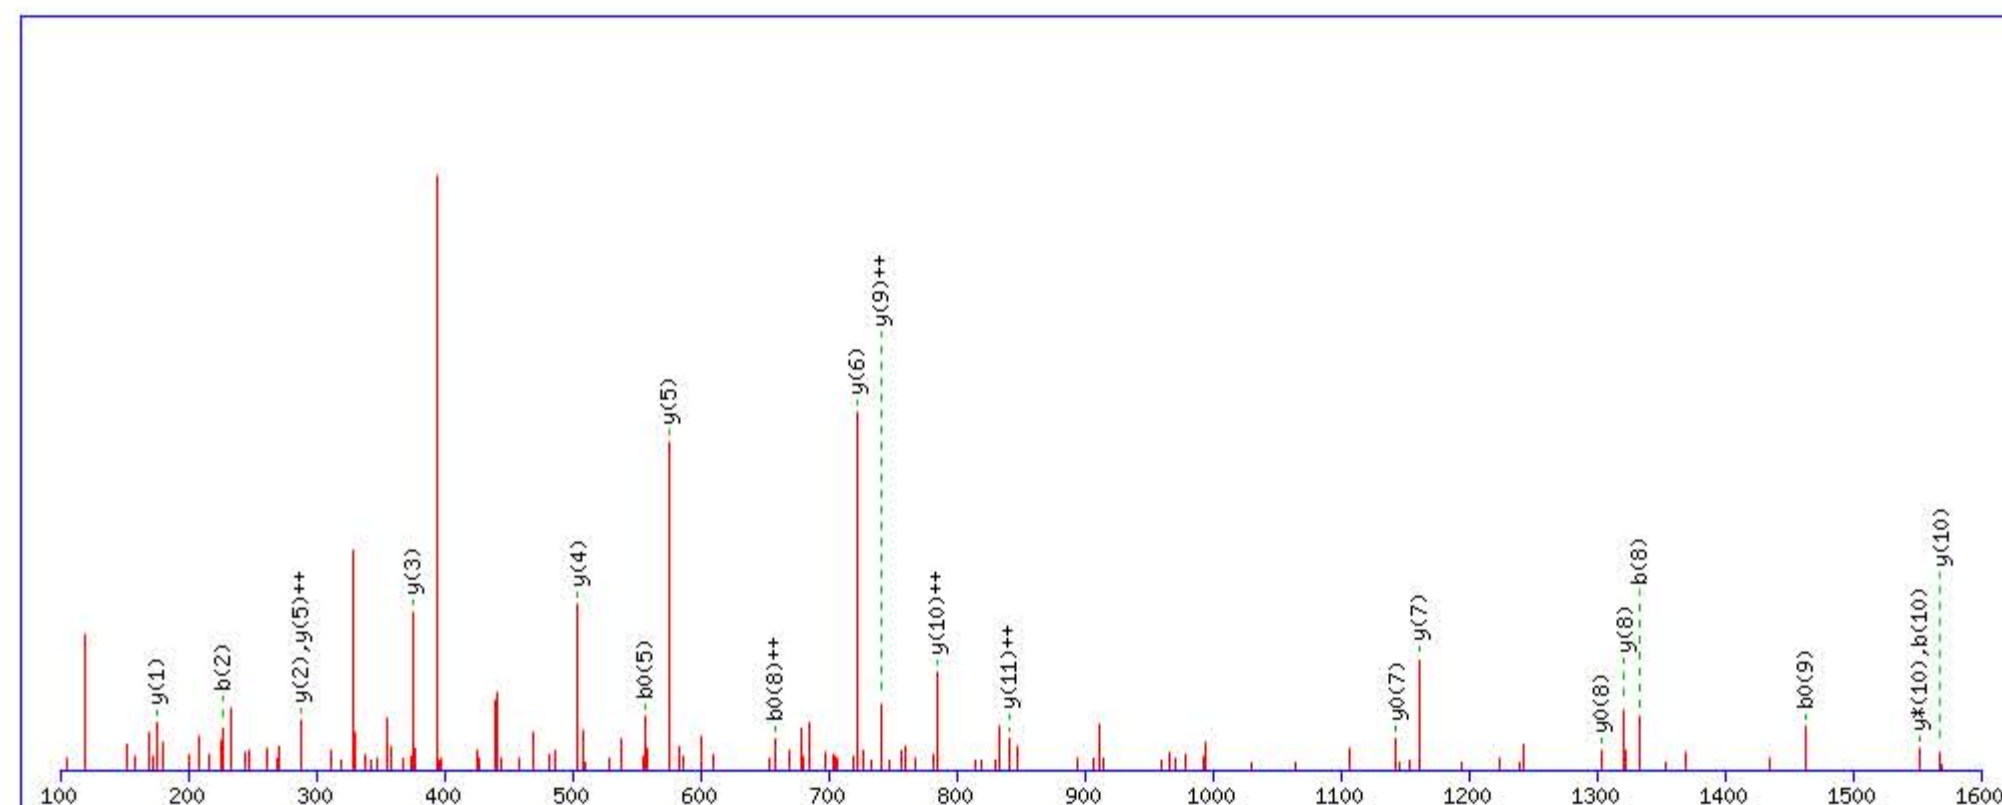

Monoisotopic mass of neutral peptide Mr(calc): 2053.942368

Fixed modifications: Carbamidomethyl (C) (apply to specified residues or termini only)

Variable modifications:

Q8 : Biotin:Thermo-21345 (Q)

Ions Score: 41 Expect: 0.0012

Matches : 22/138 fragment ions using 43 most intense peaks [\(help\)](#)

| #  | b                  | b <sup>++</sup> | b <sup>*</sup> | b <sup>*++</sup> | b <sup>0</sup>     | b <sup>0++</sup>  | Seq. | y                  | y <sup>++</sup>   | y <sup>*</sup>     | y <sup>*++</sup> | y <sup>0</sup>     | y <sup>0++</sup> | #  |
|----|--------------------|-----------------|----------------|------------------|--------------------|-------------------|------|--------------------|-------------------|--------------------|------------------|--------------------|------------------|----|
| 1  | 130.049869         | 65.528572       |                |                  | 112.039304         | 56.523290         | E    |                    |                   |                    |                  |                    |                  | 14 |
| 2  | <b>227.102633</b>  | 114.054954      |                |                  | 209.092068         | 105.049672        | P    | 1925.907059        | 963.457168        | 1908.880510        | 954.943893       | 1907.896494        | 954.451885       | 13 |
| 3  | 374.171047         | 187.589161      |                |                  | 356.160482         | 178.583879        | F    | 1828.854295        | 914.930786        | 1811.827746        | 906.417511       | 1810.843730        | 905.925503       | 12 |
| 4  | 487.255111         | 244.131193      |                |                  | 469.244546         | 235.125911        | L    | 1681.785881        | <b>841.396579</b> | 1664.759332        | 832.883304       | 1663.775316        | 832.391296       | 11 |
| 5  | 574.287139         | 287.647208      |                |                  | <b>556.276574</b>  | 278.641925        | S    | <b>1568.701817</b> | <b>784.854547</b> | <b>1551.675268</b> | 776.341272       | 1550.691252        | 775.849264       | 10 |
| 6  | 734.317788         | 367.662532      |                |                  | 716.307223         | 358.657250        | C    | 1481.669789        | <b>741.338533</b> | 1464.643240        | 732.825258       | 1463.659224        | 732.333250       | 9  |
| 7  | 894.348437         | 447.677857      |                |                  | 876.337872         | 438.672574        | C    | <b>1321.639140</b> | 661.323208        | 1304.612591        | 652.809934       | <b>1303.628575</b> | 652.317926       | 8  |
| 8  | <b>1333.573763</b> | 667.290520      | 1316.547214    | 658.777245       | 1315.563198        | <b>658.285237</b> | Q    | <b>1161.608491</b> | 581.307884        | 1144.581942        | 572.794609       | <b>1143.597926</b> | 572.302601       | 7  |
| 9  | 1480.642177        | 740.824727      | 1463.615628    | 732.311452       | <b>1462.631612</b> | 731.819444        | F    | <b>722.383165</b>  | 361.695221        | 705.356616         | 353.181946       | 704.372600         | 352.689938       | 6  |
| 10 | <b>1551.679291</b> | 776.343284      | 1534.652742    | 767.830009       | 1533.668726        | 767.338001        | A    | <b>575.314751</b>  | <b>288.161014</b> | 558.288202         | 279.647739       | 557.304186         | 279.155731       | 5  |
| 11 | 1680.721884        | 840.864580      | 1663.695335    | 832.351306       | 1662.711319        | 831.859298        | E    | <b>504.277637</b>  | 252.642457        | 487.251088         | 244.129182       | 486.267072         | 243.637174       | 4  |
| 12 | 1767.753912        | 884.380594      | 1750.727363    | 875.867320       | 1749.743347        | 875.375312        | S    | <b>375.235044</b>  | 188.121160        | 358.208495         | 179.607885       | 357.224479         | 179.115877       | 3  |
| 13 | 1880.837976        | 940.922626      | 1863.811427    | 932.409352       | 1862.827411        | 931.917344        | L    | <b>288.203016</b>  | 144.605146        | 271.176467         | 136.091871       |                    |                  | 2  |
| 14 |                    |                 |                |                  |                    |                   | R    | <b>175.118952</b>  | 88.063114         | 158.092403         | 79.549839        |                    |                  | 1  |

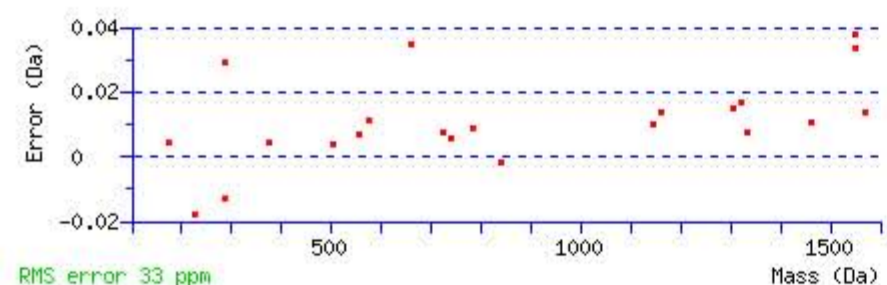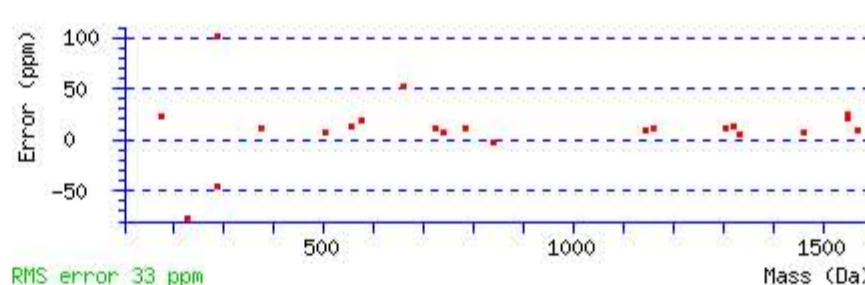

NCBI BLAST search of **EPFLSCCQFAESLR**

(Parameters: blastp, nr protein database, expect=20000, no filter, PAM30)

Other BLAST [web gateways](#)

All matches to this query

| Score | Mr(calc):   | Delta    | Sequence                       |
|-------|-------------|----------|--------------------------------|
| 40.8  | 2053.942368 | 0.018174 | <a href="#">EPFLSCCQFAESLR</a> |

Mascot: <http://www.matrixscience.com/>



# MASCOT Search Results

## Peptide View

MS/MS Fragmentation of **LLATLCSAEVCQCAEGK**

Found in **CO4A\_HUMAN**, Complement C4-A OS=Homo sapiens GN=C4A PE=1 SV=2

Match to Query 51483: 2220.042522 from(741.021450,3+) rtinseconds(2119) index(69497)

Title: Locus:1.1.1.1675.13 File:"2013-07-02 CLN FXIII 60 min 2nd FT.wiff"

Data file C:\Program Files (x86)\Matrix Science\Mascot Daemon\mgf5 FXIII 60 min 2nd\mascot\_daemon\_merge.mgf

Click mouse within plot area to zoom in by factor of two about that point

Or, Plot from  to  Da

Label all possible matches  Label matches used for scoring

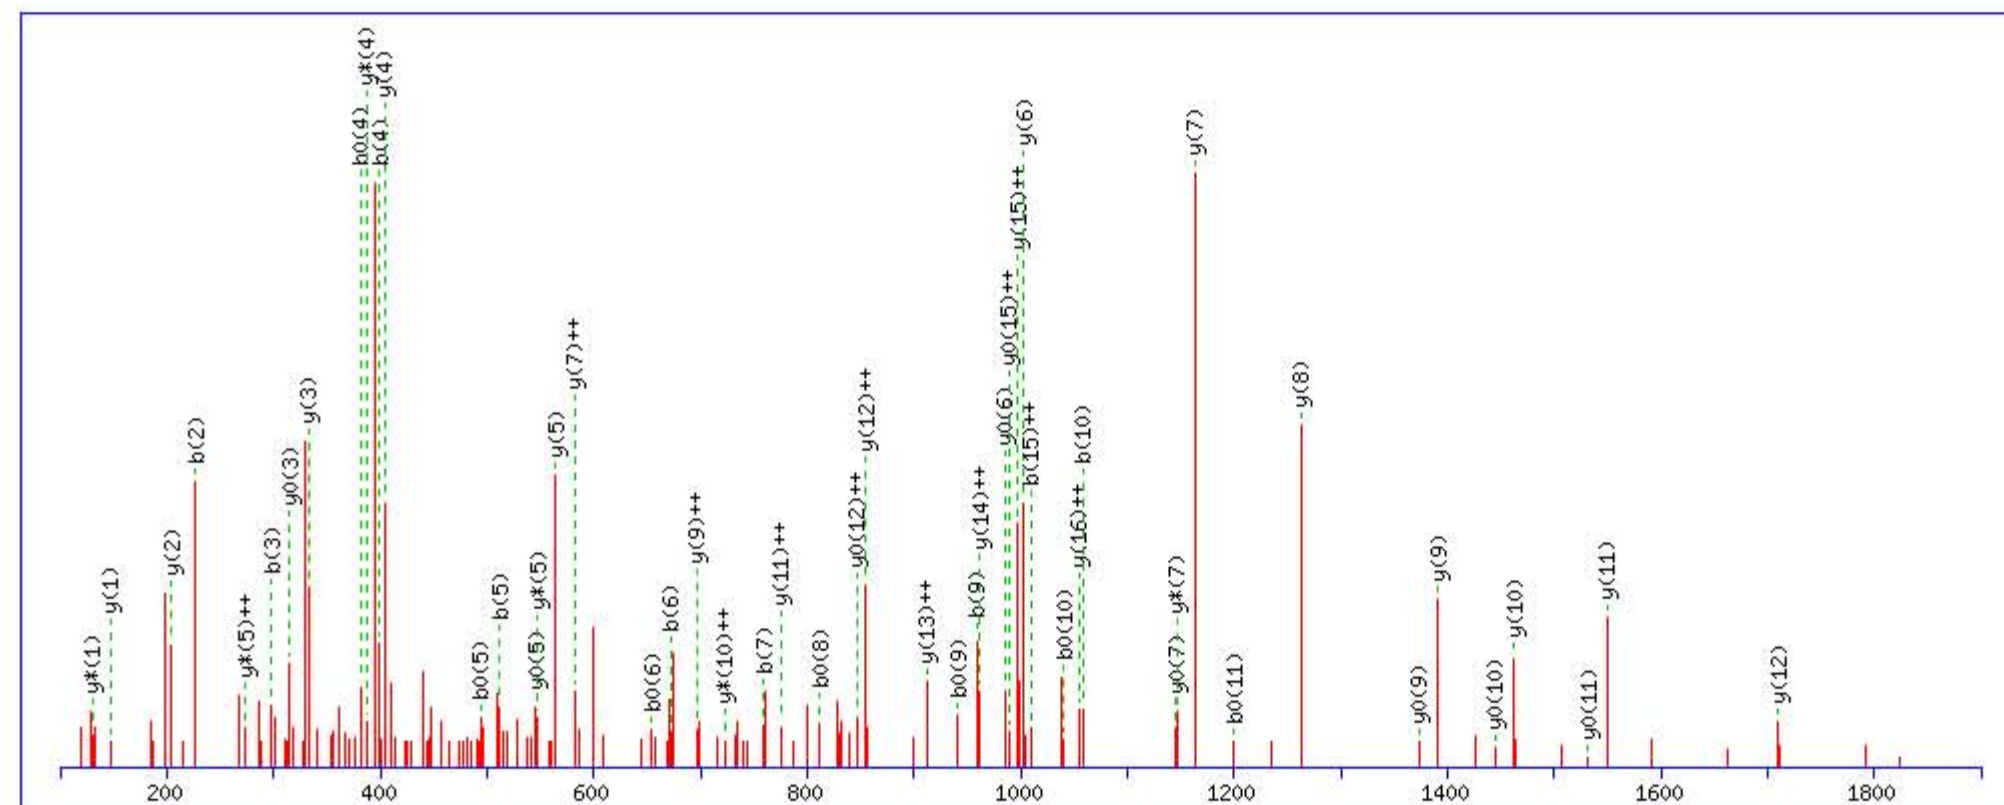

Monoisotopic mass of neutral peptide Mr(calc): 2220.041092

Fixed modifications: Carbamidomethyl (C) (apply to specified residues or termini only)

Variable modifications:

Q12 : Biotin:Thermo-21345 (Q)

Ions Score: 54 Expect: 1e-005

Matches : 51/160 fragment ions using 110 most intense peaks [\(help\)](#)

| #  | b                  | b <sup>++</sup>    | b <sup>*</sup> | b <sup>***</sup> | b <sup>0</sup>     | b <sup>0++</sup> | Seq. | y                  | y <sup>++</sup>    | y <sup>*</sup>     | y <sup>***</sup>  | y <sup>0</sup>     | y <sup>0++</sup>  | #  |
|----|--------------------|--------------------|----------------|------------------|--------------------|------------------|------|--------------------|--------------------|--------------------|-------------------|--------------------|-------------------|----|
| 1  | 114.091340         | 57.549308          |                |                  |                    |                  | L    |                    |                    |                    |                   |                    |                   | 17 |
| 2  | <b>227.175404</b>  | 114.091340         |                |                  |                    |                  | L    | 2107.964318        | <b>1054.485797</b> | 2090.937769        | 1045.972522       | 2089.953753        | 1045.480514       | 16 |
| 3  | <b>298.212518</b>  | 149.609897         |                |                  |                    |                  | A    | 1994.880254        | <b>997.943765</b>  | 1977.853705        | 989.430491        | 1976.869689        | <b>988.938483</b> | 15 |
| 4  | <b>399.260197</b>  | 200.133737         |                |                  | <b>381.249632</b>  | 191.128454       | T    | 1923.843140        | <b>962.425208</b>  | 1906.816591        | 953.911934        | 1905.832575        | 953.419926        | 14 |
| 5  | <b>512.344261</b>  | 256.675769         |                |                  | <b>494.333696</b>  | 247.670486       | L    | 1822.795461        | <b>911.901369</b>  | 1805.768912        | 903.388094        | 1804.784896        | 902.896086        | 13 |
| 6  | <b>672.374910</b>  | 336.691093         |                |                  | <b>654.364345</b>  | 327.685811       | C    | <b>1709.711397</b> | <b>855.359337</b>  | 1692.684848        | 846.846062        | 1691.700832        | <b>846.354054</b> | 12 |
| 7  | <b>759.406938</b>  | 380.207107         |                |                  | 741.396373         | 371.201825       | S    | <b>1549.680748</b> | <b>775.344012</b>  | 1532.654199        | 766.830738        | <b>1531.670183</b> | 766.338730        | 11 |
| 8  | 830.444052         | 415.725664         |                |                  | <b>812.433487</b>  | 406.720382       | A    | <b>1462.648720</b> | 731.827998         | 1445.622171        | <b>723.314724</b> | <b>1444.638155</b> | 722.822716        | 10 |
| 9  | <b>959.486645</b>  | 480.246961         |                |                  | <b>941.476080</b>  | 471.241678       | E    | <b>1391.611606</b> | <b>696.309441</b>  | 1374.585057        | 687.796167        | <b>1373.601041</b> | 687.304159        | 9  |
| 10 | <b>1058.555059</b> | 529.781168         |                |                  | <b>1040.544494</b> | 520.775885       | V    | <b>1262.569013</b> | 631.788145         | 1245.542464        | 623.274870        | 1244.558448        | 622.782862        | 8  |
| 11 | 1218.585708        | 609.796492         |                |                  | <b>1200.575143</b> | 600.791210       | C    | <b>1163.500599</b> | <b>582.253938</b>  | <b>1146.474050</b> | 573.740663        | <b>1145.490034</b> | 573.248655        | 7  |
| 12 | 1657.811034        | 829.409155         | 1640.784485    | 820.895881       | 1639.800469        | 820.403873       | Q    | <b>1003.469950</b> | 502.238613         | 986.443401         | 493.725339        | <b>985.459385</b>  | 493.233331        | 6  |
| 13 | 1817.841683        | 909.424480         | 1800.815134    | 900.911205       | 1799.831118        | 900.419197       | C    | <b>564.244624</b>  | 282.625950         | <b>547.218075</b>  | <b>274.112676</b> | <b>546.234059</b>  | 273.620668        | 5  |
| 14 | 1888.878797        | 944.943037         | 1871.852248    | 936.429762       | 1870.868232        | 935.937754       | A    | <b>404.213975</b>  | 202.610626         | <b>387.187426</b>  | 194.097351        | 386.203410         | 193.605343        | 4  |
| 15 | 2017.921390        | <b>1009.464333</b> | 2000.894841    | 1000.951059      | 1999.910825        | 1000.459051      | E    | <b>333.176861</b>  | 167.092069         | 316.150312         | 158.578794        | <b>315.166296</b>  | 158.086786        | 3  |
| 16 | 2074.942854        | 1037.975065        | 2057.916305    | 1029.461790      | 2056.932289        | 1028.969782      | G    | <b>204.134268</b>  | 102.570772         | 187.107719         | 94.057497         |                    |                   | 2  |
| 17 |                    |                    |                |                  |                    |                  | K    | <b>147.112804</b>  | 74.060040          | <b>130.086255</b>  | 65.546765         |                    |                   | 1  |



NCBI BLAST search of [LLATLCSAEVCQCAEGK](#)

(Parameters: blastp, nr protein database, expect=20000, no filter, PAM30)

Other BLAST [web gateways](#)

## All matches to this query

| Score | Mr(calc):   | Delta     | Sequence                           |
|-------|-------------|-----------|------------------------------------|
| 53.8  | 2220.041092 | 0.001430  | <a href="#">LLATLCSAEVCQCAEGK</a>  |
| 0.5   | 2220.048080 | -0.005558 | <a href="#">EPQEGAELPEATGTTSHR</a> |



# Mascot Search Results

## Peptide View

MS/MS Fragmentation of **GCGEQTMIIYLAPTLAASR**

Found in **CO4A\_HUMAN**, Complement C4-A OS=Homo sapiens GN=C4A PE=1 SV=2

Match to Query 51975: 2249.122692 from(750.714840,3+) rtinseconds(2546) index(56228)

Title: Locus:1.1.1.1501.18 File:"2013-07-02 CLN FXIII 60 min 2nd F 4.wiff"

Data file C:\Program Files (x86)\Matrix Science\Mascot Daemon\mgf5 FXIII 60 min 2nd\mascot\_daemon\_merge.mgf

Click mouse within plot area to zoom in by factor of two about that point

Or, Plot from  to  Da

Label all possible matches  Label matches used for scoring



Monoisotopic mass of neutral peptide Mr(calc): 2249.100647

Fixed modifications: Carbamidomethyl (C) (apply to specified residues or termini only)

Variable modifications:

Q5 : Biotin:Thermo-21345 (Q)

Ions Score: 42 Expect: 0.00086

Matches : 22/188 fragment ions using 36 most intense peaks [\(help\)](#)

| #  | b                  | b <sup>++</sup>   | b <sup>*</sup> | b <sup>*++</sup> | b <sup>0</sup>     | b <sup>0++</sup> | Seq. | y                  | y <sup>++</sup>   | y <sup>*</sup> | y <sup>*++</sup> | y <sup>0</sup>    | y <sup>0++</sup>  | #  |
|----|--------------------|-------------------|----------------|------------------|--------------------|------------------|------|--------------------|-------------------|----------------|------------------|-------------------|-------------------|----|
| 1  | 58.028740          | 29.518008         |                |                  |                    |                  | G    |                    |                   |                |                  |                   |                   | 18 |
| 2  | 218.059389         | 109.533333        |                |                  |                    |                  | C    | 2193.086482        | 1097.046879       | 2176.059933    | 1088.533604      | 2175.075917       | 1088.041596       | 17 |
| 3  | 275.080853         | 138.044064        |                |                  |                    |                  | G    | 2033.055833        | 1017.031555       | 2016.029284    | 1008.518280      | 2015.045268       | 1008.026272       | 16 |
| 4  | 404.123446         | 202.565361        |                |                  | 386.112881         | 193.560079       | E    | 1976.034369        | 988.520822        | 1959.007820    | 980.007548       | 1958.023804       | 979.515540        | 15 |
| 5  | <b>843.348772</b>  | 422.178024        | 826.322223     | 413.664750       | 825.338207         | 413.172742       | Q    | 1846.991776        | 923.999526        | 1829.965227    | 915.486251       | 1828.981211       | 914.994243        | 14 |
| 6  | <b>944.396451</b>  | <b>472.701864</b> | 927.369902     | 464.188589       | <b>926.385886</b>  | 463.696581       | T    | 1407.766450        | 704.386863        | 1390.739901    | 695.873588       | 1389.755885       | 695.381580        | 13 |
| 7  | <b>1075.436936</b> | <b>538.222106</b> | 1058.410387    | 529.708832       | <b>1057.426371</b> | 529.216824       | M    | 1306.718771        | 653.863023        | 1289.692222    | 645.349749       | 1288.708206       | 644.857741        | 12 |
| 8  | <b>1188.521000</b> | 594.764138        | 1171.494451    | 586.250864       | <b>1170.510435</b> | 585.758855       | I    | 1175.678286        | 588.342781        | 1158.651737    | 579.829506       | 1157.667721       | 579.337498        | 11 |
| 9  | <b>1351.584329</b> | 676.295803        | 1334.557780    | 667.782528       | 1333.573764        | 667.290520       | Y    | <b>1062.594222</b> | 531.800749        | 1045.567673    | 523.287475       | 1044.583657       | 522.795466        | 10 |
| 10 | 1464.668393        | <b>732.837834</b> | 1447.641844    | 724.324560       | 1446.657828        | 723.832552       | L    | <b>899.530893</b>  | 450.269084        | 882.504344     | 441.755810       | 881.520328        | <b>441.263802</b> | 9  |
| 11 | <b>1535.705507</b> | 768.356391        | 1518.678958    | 759.843117       | 1517.694942        | 759.351109       | A    | <b>786.446829</b>  | 393.727053        | 769.420280     | 385.213778       | 768.436264        | 384.721770        | 8  |
| 12 | 1632.758271        | 816.882773        | 1615.731722    | 808.369499       | 1614.747706        | 807.877491       | P    | <b>715.409715</b>  | <b>358.208496</b> | 698.383166     | 349.695221       | <b>697.399150</b> | 349.203213        | 7  |
| 13 | 1733.805950        | 867.406613        | 1716.779401    | 858.893339       | 1715.795385        | 858.401330       | T    | <b>618.356951</b>  | 309.682114        | 601.330402     | 301.168839       | 600.346386        | 300.676831        | 6  |
| 14 | 1846.890014        | 923.948645        | 1829.863465    | 915.435370       | 1828.879449        | 914.943362       | L    | <b>517.309272</b>  | 259.158274        | 500.282723     | 250.644999       | 499.298707        | 250.152991        | 5  |
| 15 | 1917.927128        | 959.467202        | 1900.900579    | 950.953927       | 1899.916563        | 950.461919       | A    | 404.225208         | 202.616242        | 387.198659     | 194.102967       | 386.214643        | 193.610959        | 4  |
| 16 | 1988.964242        | 994.985759        | 1971.937693    | 986.472484       | 1970.953677        | 985.980476       | A    | 333.188094         | 167.097685        | 316.161545     | 158.584410       | 315.177529        | 158.092402        | 3  |
| 17 | 2075.996270        | 1038.501773       | 2058.969721    | 1029.988498      | 2057.985705        | 1029.496490      | S    | 262.150980         | 131.579128        | 245.124431     | 123.065854       | 244.140415        | 122.573846        | 2  |
| 18 |                    |                   |                |                  |                    |                  | R    | <b>175.118952</b>  | 88.063114         | 158.092403     | 79.549839        |                   |                   | 1  |



NCBI BLAST search of **GCGEQTMIIYLAPTLAASR**

(Parameters: blastp, nr protein database, expect=20000, no filter, PAM30)

Other BLAST [web gateways](#)

All matches to this query

| Score | Mr(calc):   | Delta     | Sequence                              |
|-------|-------------|-----------|---------------------------------------|
| 41.7  | 2249.100647 | 0.022045  | <a href="#">GCGEQTMIIYLAPTLAASR</a>   |
| 8.5   | 2249.115051 | 0.007641  | <a href="#">YSTSLYASPSMVHEGVAVVPR</a> |
| 4.1   | 2249.104492 | 0.018200  | <a href="#">AQLQQHNLEMVGEGRQ</a>      |
| 1.0   | 2249.143570 | -0.020878 | <a href="#">TPPPQPPLISSMDSISQK</a>    |
| 0.8   | 2249.089874 | 0.032818  | <a href="#">EMIDIYSTREPQLAFHQ</a>     |
| 0.6   | 2249.150742 | -0.028050 | <a href="#">LRSIMMSQDLENVTSKEIR</a>   |
| 0.5   | 2249.137527 | -0.014835 | <a href="#">QKFERPICVSWSTDVKGGR</a>   |

Mascot: <http://www.matrixscience.com/>



# MASCOT Search Results

## Peptide View

MS/MS Fragmentation of **DDPDAPLQPVTPLQLFEGR**

Found in **CO4A\_HUMAN**, Complement C4-A OS=Homo sapiens GN=C4A PE=1 SV=2

Match to Query 54809: 2418.243612 from(807.088480,3+) rtinseconds(3020) index(59691)

Title: Locus:1.1.1.1663.10 File:"2013-07-02 CLN FXIII 60 min 2nd F 4.wiff"

Data file C:\Program Files (x86)\Matrix Science\Mascot Daemon\mgf\5 FXIII 60 min 2nd\mascot\_daemon\_merge.mgf

Click mouse within plot area to zoom in by factor of two about that point

Or, Plot from  to  Da

Label all possible matches  Label matches used for scoring



Monoisotopic mass of neutral peptide Mr(calc): 2418.225342

Fixed modifications: Carbamidomethyl (C) (apply to specified residues or termini only)

Variable modifications:

Q14 : Biotin:Thermo-21345 (Q)

Ions Score: 27 Expect: 0.051

Matches : 11/198 fragment ions using 15 most intense peaks [\(help\)](#)

| #  | b           | b <sup>++</sup> | b <sup>+</sup> | b <sup>+++</sup> | b <sup>0</sup> | b <sup>0++</sup> | Seq. | y           | y <sup>++</sup> | y <sup>+</sup> | y <sup>+++</sup> | y <sup>0</sup> | y <sup>0++</sup> | #  |
|----|-------------|-----------------|----------------|------------------|----------------|------------------|------|-------------|-----------------|----------------|------------------|----------------|------------------|----|
| 1  | 116.034219  | 58.520748       |                |                  | 98.023654      | 49.515465        | D    |             |                 |                |                  |                |                  | 19 |
| 2  | 231.061162  | 116.034219      |                |                  | 213.050597     | 107.028936       | D    | 2304.205668 | 1152.606472     | 2287.179119    | 1144.093197      | 2286.195103    | 1143.601189      | 18 |
| 3  | 328.113926  | 164.560601      |                |                  | 310.103361     | 155.555319       | P    | 2189.178725 | 1095.093000     | 2172.152176    | 1086.579726      | 2171.168160    | 1086.087718      | 17 |
| 4  | 443.140869  | 222.074073      |                |                  | 425.130304     | 213.068790       | D    | 2092.125961 | 1046.566618     | 2075.099412    | 1038.053344      | 2074.115396    | 1037.561336      | 16 |
| 5  | 514.177983  | 257.592630      |                |                  | 496.167418     | 248.587347       | A    | 1977.099018 | 989.053147      | 1960.072469    | 980.539873       | 1959.088453    | 980.047865       | 15 |
| 6  | 611.230747  | 306.119012      |                |                  | 593.220182     | 297.113729       | P    | 1906.061904 | 953.534590      | 1889.035355    | 945.021316       | 1888.051339    | 944.529308       | 14 |
| 7  | 724.314811  | 362.661044      |                |                  | 706.304246     | 353.655761       | L    | 1809.009140 | 905.008208      | 1791.982591    | 896.494934       | 1790.998575    | 896.002926       | 13 |
| 8  | 852.373389  | 426.690333      | 835.346840     | 418.177058       | 834.362824     | 417.685050       | Q    | 1695.925076 | 848.466176      | 1678.898527    | 839.952902       | 1677.914511    | 839.460894       | 12 |
| 9  | 949.426153  | 475.216715      | 932.399604     | 466.703440       | 931.415588     | 466.211432       | P    | 1567.866498 | 784.436887      | 1550.839949    | 775.923613       | 1549.855933    | 775.431605       | 11 |
| 10 | 1048.494567 | 524.750922      | 1031.468018    | 516.237647       | 1030.484002    | 515.745639       | V    | 1470.813734 | 735.910505      | 1453.787185    | 727.397231       | 1452.803169    | 726.905223       | 10 |
| 11 | 1149.542246 | 575.274761      | 1132.515697    | 566.761487       | 1131.531681    | 566.269479       | T    | 1371.745320 | 686.376298      | 1354.718771    | 677.863024       | 1353.734755    | 677.371016       | 9  |
| 12 | 1246.595010 | 623.801143      | 1229.568461    | 615.287869       | 1228.584445    | 614.795861       | P    | 1270.697641 | 635.852459      | 1253.671092    | 627.339184       | 1252.687076    | 626.847176       | 8  |
| 13 | 1359.679074 | 680.343175      | 1342.652525    | 671.829901       | 1341.668509    | 671.337893       | L    | 1173.644877 | 587.326077      | 1156.618328    | 578.812802       | 1155.634312    | 578.320794       | 7  |
| 14 | 1798.904400 | 899.955838      | 1781.877851    | 891.442564       | 1780.893835    | 890.950556       | Q    | 1060.560813 | 530.784045      | 1043.534264    | 522.270770       | 1042.550248    | 521.778762       | 6  |
| 15 | 1911.988464 | 956.497870      | 1894.961915    | 947.984596       | 1893.977899    | 947.492588       | L    | 621.335487  | 311.171382      | 604.308938     | 302.658107       | 603.324922     | 302.166099       | 5  |
| 16 | 2059.056878 | 1030.032077     | 2042.030329    | 1021.518803      | 2041.046313    | 1021.026794      | F    | 508.251423  | 254.629350      | 491.224874     | 246.116075       | 490.240858     | 245.624067       | 4  |
| 17 | 2188.099471 | 1094.553373     | 2171.072922    | 1086.040099      | 2170.088906    | 1085.548091      | E    | 361.183009  | 181.095142      | 344.156460     | 172.581868       | 343.172444     | 172.089860       | 3  |
| 18 | 2245.120935 | 1123.064105     | 2228.094386    | 1114.550831      | 2227.110370    | 1114.058823      | G    | 232.140416  | 116.573846      | 215.113867     | 108.060571       |                |                  | 2  |
| 19 |             |                 |                |                  |                |                  | R    | 175.118952  | 88.063114       | 158.092403     | 79.549839        |                |                  | 1  |

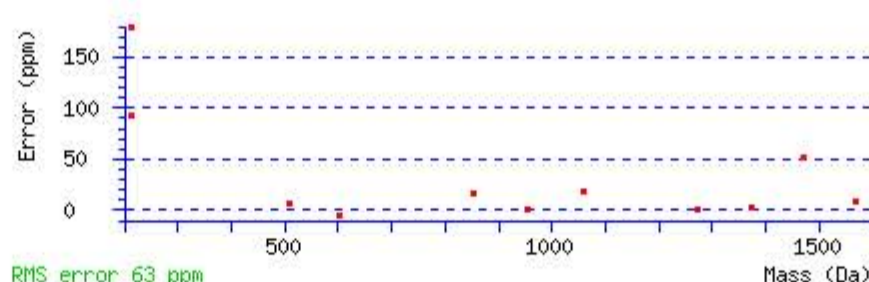

NCBI BLAST search of **DDPDAPLQPVTPLQLFEGR**

(Parameters: blastp, nr protein database, expect=20000, no filter, PAM30)

Other BLAST [web gateways](#)

All matches to this query

| Score | Mr(calc):   | Delta    | Sequence                            |
|-------|-------------|----------|-------------------------------------|
| 27.1  | 2418.225342 | 0.018270 | <a href="#">DDPDAPLQPVTPLQLFEGR</a> |

Mascot: <http://www.matrixscience.com/>



# MASCOT Search Results

## Peptide View

MS/MS Fragmentation of **AACAQLNDFLQEYGTQGCQV**

Found in **CO4A\_HUMAN**, Complement C4-A OS=Homo sapiens GN=C4A PE=1 SV=2

Match to Query 57447: 2583.179442 from(862.067090,3+) rtinseconds(2758) index(57495)

Title: Locus:1.1.1.1574.25 File:"2013-07-02 CLN FXIII 60 min 2nd F 4.wiff"

Data file C:\Program Files (x86)\Matrix Science\Mascot Daemon\mgf5 FXIII 60 min 2nd\mascot\_daemon\_merge.mgf

Click mouse within plot area to zoom in by factor of two about that point

Or, Plot from  to  Da

Label all possible matches  Label matches used for scoring



Monoisotopic mass of neutral peptide Mr(calc): 2583.155624

Fixed modifications: Carbamidomethyl (C) (apply to specified residues or termini only)

Variable modifications:

Q5 : Biotin:Thermo-21345 (Q)

Ions Score: 54 Expect: 4.4e-005

Matches : 29/194 fragment ions using 54 most intense peaks [\(help\)](#)

| #  | b                  | b <sup>++</sup>    | b <sup>*</sup>     | b <sup>+++</sup> | b <sup>0</sup>     | b <sup>0++</sup> | Seq. | y                  | y <sup>++</sup> | y <sup>*</sup>    | y <sup>+++</sup> | y <sup>0</sup>     | y <sup>0++</sup> | #  |
|----|--------------------|--------------------|--------------------|------------------|--------------------|------------------|------|--------------------|-----------------|-------------------|------------------|--------------------|------------------|----|
| 1  | 72.044390          | 36.525833          |                    |                  |                    |                  | A    |                    |                 |                   |                  |                    |                  | 20 |
| 2  | 143.081504         | 72.044390          |                    |                  |                    |                  | A    | 2513.125782        | 1257.066529     | 2496.099233       | 1248.553254      | 2495.115217        | 1248.061246      | 19 |
| 3  | 303.112153         | 152.059714         |                    |                  |                    |                  | C    | 2442.088668        | 1221.547972     | 2425.062119       | 1213.034697      | 2424.078103        | 1212.542689      | 18 |
| 4  | 374.149267         | 187.578271         |                    |                  |                    |                  | A    | 2282.058019        | 1141.532647     | 2265.031470       | 1133.019373      | 2264.047454        | 1132.527365      | 17 |
| 5  | <b>813.374593</b>  | 407.190935         | 796.348044         | 398.677660       |                    |                  | Q    | 2211.020905        | 1106.014090     | 2193.994356       | 1097.500816      | 2193.010340        | 1097.008808      | 16 |
| 6  | <b>926.458657</b>  | 463.732967         | 909.432108         | 455.219692       |                    |                  | L    | 1771.795579        | 886.401428      | 1754.769030       | 877.888153       | 1753.785014        | 877.396145       | 15 |
| 7  | <b>1040.501584</b> | 520.754430         | 1023.475035        | 512.241155       |                    |                  | N    | 1658.711515        | 829.859396      | 1641.684966       | 821.346121       | 1640.700950        | 820.854113       | 14 |
| 8  | <b>1155.528527</b> | 578.267902         | 1138.501978        | 569.754627       | 1137.517962        | 569.262619       | D    | <b>1544.668588</b> | 772.837932      | 1527.642039       | 764.324658       | <b>1526.658023</b> | 763.832650       | 13 |
| 9  | <b>1302.596941</b> | <b>651.802109</b>  | 1285.570392        | 643.288834       | <b>1284.586376</b> | 642.796826       | F    | 1429.641645        | 715.324460      | 1412.615096       | 706.811186       | 1411.631080        | 706.319178       | 12 |
| 10 | <b>1415.681005</b> | 708.344141         | <b>1398.654456</b> | 699.830866       | 1397.670440        | 699.338858       | L    | 1282.573231        | 641.790253      | 1265.546682       | 633.276979       | 1264.562666        | 632.784971       | 11 |
| 11 | <b>1543.739583</b> | 772.373430         | <b>1526.713034</b> | 763.860155       | 1525.729018        | 763.368147       | Q    | <b>1169.489167</b> | 585.248222      | 1152.462618       | 576.734947       | <b>1151.478602</b> | 576.242939       | 10 |
| 12 | <b>1672.782176</b> | 836.894726         | <b>1655.755627</b> | 828.381452       | 1654.771611        | 827.889444       | E    | <b>1041.430589</b> | 521.218932      | 1024.404040       | 512.705658       | 1023.420024        | 512.213650       | 9  |
| 13 | 1835.845505        | <b>918.426391</b>  | 1818.818956        | 909.913116       | 1817.834940        | 909.421108       | Y    | <b>912.387996</b>  | 456.697636      | 895.361447        | 448.184361       | 894.377431         | 447.692353       | 8  |
| 14 | 1892.866969        | 946.937123         | 1875.840420        | 938.423848       | 1874.856404        | 937.931840       | G    | <b>749.324667</b>  | 375.165971      | 732.298118        | 366.652697       | <b>731.314102</b>  | 366.160689       | 7  |
| 15 | 1993.914648        | 997.460962         | 1976.888099        | 988.947688       | 1975.904083        | 988.455680       | T    | <b>692.303203</b>  | 346.655239      | 675.276654        | 338.141965       | 674.292638         | 337.649957       | 6  |
| 16 | 2121.973226        | <b>1061.490251</b> | 2104.946677        | 1052.976976      | 2103.962661        | 1052.484968      | Q    | <b>591.255524</b>  | 296.131400      | 574.228975        | 287.618125       |                    |                  | 5  |
| 17 | 2178.994690        | 1090.000983        | 2161.968141        | 1081.487708      | 2160.984125        | 1080.995700      | G    | <b>463.196946</b>  | 232.102111      | 446.170397        | 223.588836       |                    |                  | 4  |
| 18 | 2339.025339        | 1170.016307        | 2321.998790        | 1161.503033      | 2321.014774        | 1161.011025      | C    | <b>406.175482</b>  | 203.591379      | 389.148933        | 195.078104       |                    |                  | 3  |
| 19 | 2467.083917        | 1234.045596        | 2450.057368        | 1225.532322      | 2449.073352        | 1225.040314      | Q    | <b>246.144833</b>  | 123.576054      | <b>229.118284</b> | 115.062780       |                    |                  | 2  |
| 20 |                    |                    |                    |                  |                    |                  | V    | 118.086255         | 59.546765       |                   |                  |                    |                  | 1  |



NCBI BLAST search of [AACAQLNDFLQEYGTQGCQV](#)

(Parameters: blastp, nr protein database, expect=20000, no filter, PAM30)

Other BLAST [web gateways](#)

All matches to this query

| Score | Mr(calc):   | Delta    | Sequence                             |
|-------|-------------|----------|--------------------------------------|
| 54.1  | 2583.155624 | 0.023818 | <a href="#">AACAQLNDFLQEYGTQGCQV</a> |
| 16.9  | 2583.155624 | 0.023818 | <a href="#">AACAQLNDFLQEYGTQGCQV</a> |



# MASCOT SCIENCE Mascot Search Results

## Peptide View

MS/MS Fragmentation of **GEQIQLK**

Found in **COS\_HUMAN**, Complement C5 OS=Homo sapiens GN=C5 PE=1 SV=4

Match to Query 20103: 1125.617288 from(563.815920,2+) rtinseconds(1728) index(34604)

Title: Locus:1.1.1.3021.12 File:"2013-07-02 CLN FXIII 60 min 2nd F 3.wiff"

Data file C:\Program Files (x86)\Matrix Science\Mascot Daemon\mgf5 FXIII 60 min 2nd\mascot\_daemon\_merge.mgf

Click mouse within plot area to zoom in by factor of two about that point

Or, Plot from  to  Da

Label all possible matches  Label matches used for scoring

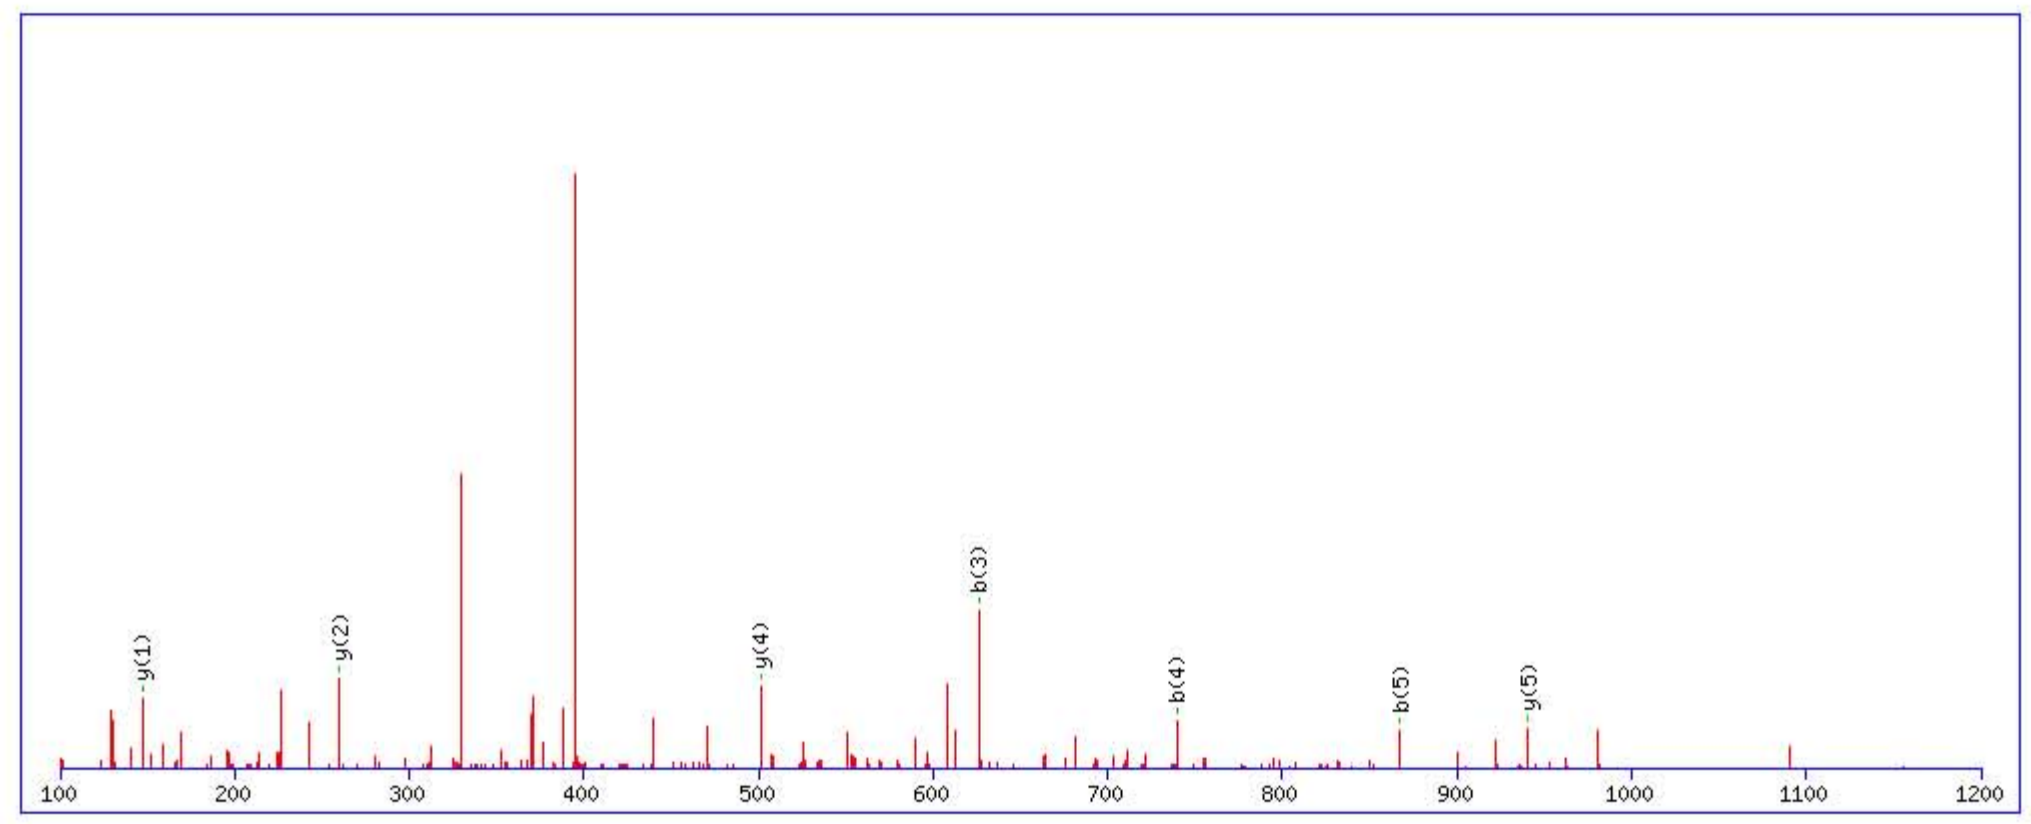

Monoisotopic mass of neutral peptide Mr(calc): 1125.621597

Fixed modifications: Carbamidomethyl (C) (apply to specified residues or termini only)

Variable modifications:

Q3 : Biotin:Thermo-21345 (Q)

Ions Score: 28 Expect: 0.036

Matches : 7/56 fragment ions using 10 most intense peaks [\(help\)](#)

| # | b                 | b <sup>++</sup> | b <sup>*</sup> | b <sup>*++</sup> | b <sup>0</sup> | b <sup>0++</sup> | Seq. | y                 | y <sup>++</sup> | y <sup>*</sup> | y <sup>*++</sup> | y <sup>0</sup> | y <sup>0++</sup> | # |
|---|-------------------|-----------------|----------------|------------------|----------------|------------------|------|-------------------|-----------------|----------------|------------------|----------------|------------------|---|
| 1 | 58.028740         | 29.518008       |                |                  |                |                  | G    |                   |                 |                |                  |                |                  | 7 |
| 2 | 187.071333        | 94.039305       |                |                  | 169.060768     | 85.034022        | E    | 1069.607429       | 535.307353      | 1052.580880    | 526.794078       | 1051.596864    | 526.302070       | 6 |
| 3 | <b>626.296659</b> | 313.651968      | 609.270110     | 305.138693       | 608.286094     | 304.646685       | Q    | <b>940.564836</b> | 470.786056      | 923.538287     | 462.272782       |                |                  | 5 |
| 4 | <b>739.380723</b> | 370.194000      | 722.354174     | 361.680725       | 721.370158     | 361.188717       | I    | <b>501.339510</b> | 251.173393      | 484.312961     | 242.660119       |                |                  | 4 |
| 5 | <b>867.439301</b> | 434.223289      | 850.412752     | 425.710014       | 849.428736     | 425.218006       | Q    | 388.255446        | 194.631361      | 371.228897     | 186.118087       |                |                  | 3 |
| 6 | 980.523365        | 490.765321      | 963.496816     | 482.252046       | 962.512800     | 481.760038       | L    | <b>260.196868</b> | 130.602072      | 243.170319     | 122.088798       |                |                  | 2 |
| 7 |                   |                 |                |                  |                |                  | K    | <b>147.112804</b> | 74.060040       | 130.086255     | 65.546766        |                |                  | 1 |

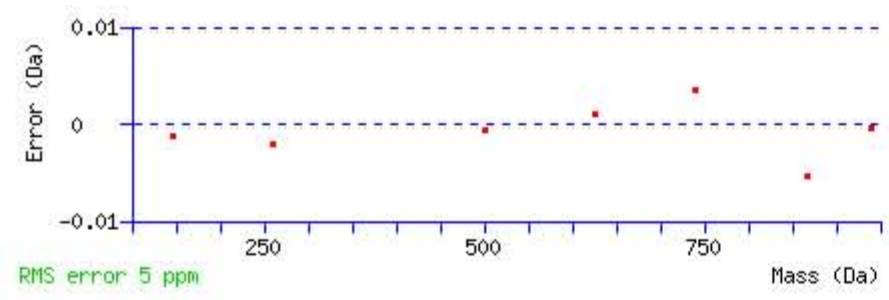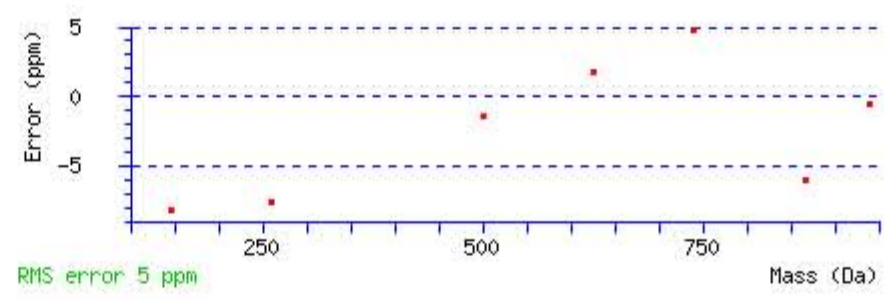

NCBI BLAST search of [GEQIQLK](#)

(Parameters: blastp, nr protein database, expect=20000, no filter, PAM30)

Other BLAST [web gateways](#)

### All matches to this query

| Score | Mr(calc):   | Delta     | Sequence                  |
|-------|-------------|-----------|---------------------------|
| 27.9  | 1125.621597 | -0.004309 | <a href="#">GEQIQLK</a>   |
| 16.1  | 1125.607666 | 0.009622  | <a href="#">QMDRHAKIK</a> |
| 12.5  | 1125.632828 | -0.015540 | <a href="#">KLCLSHLQK</a> |
| 7.6   | 1125.621597 | -0.004309 | <a href="#">EQVAQLK</a>   |
| 6.6   | 1125.606979 | 0.010309  | <a href="#">LKEAFDYIK</a> |
| 6.5   | 1125.621597 | -0.004309 | <a href="#">GEQIQLK</a>   |
| 6.5   | 1125.633499 | -0.016211 | <a href="#">VSHFLPWIK</a> |
| 6.3   | 1125.629486 | -0.012198 | <a href="#">RVDGWVGLK</a> |
| 4.6   | 1125.602966 | 0.014322  | <a href="#">VSISKSTYK</a> |
| 4.5   | 1125.632813 | -0.015525 | <a href="#">EQAARK</a>    |



# MASCOT SCIENCE Mascot Search Results

## Peptide View

MS/MS Fragmentation of **TSGMQFCVK**

Found in **CO5\_HUMAN**, Complement C5 OS=Homo sapiens GN=C5 PE=1 SV=4

Match to Query 29128: 1367.639588 from(684.827070,2+) rtinseconds(1921) index(35844)

Title: Locus:1.1.1.3088.21 File:"2013-07-02 CLN FXIII 60 min 2nd F 3.wiff"

Data file C:\Program Files (x86)\Matrix Science\Mascot Daemon\mgf\5 FXIII 60 min 2nd\mascot\_daemon\_merge.mgf

Click mouse within plot area to zoom in by factor of two about that point

Or, Plot from  to  Da

Label all possible matches  Label matches used for scoring

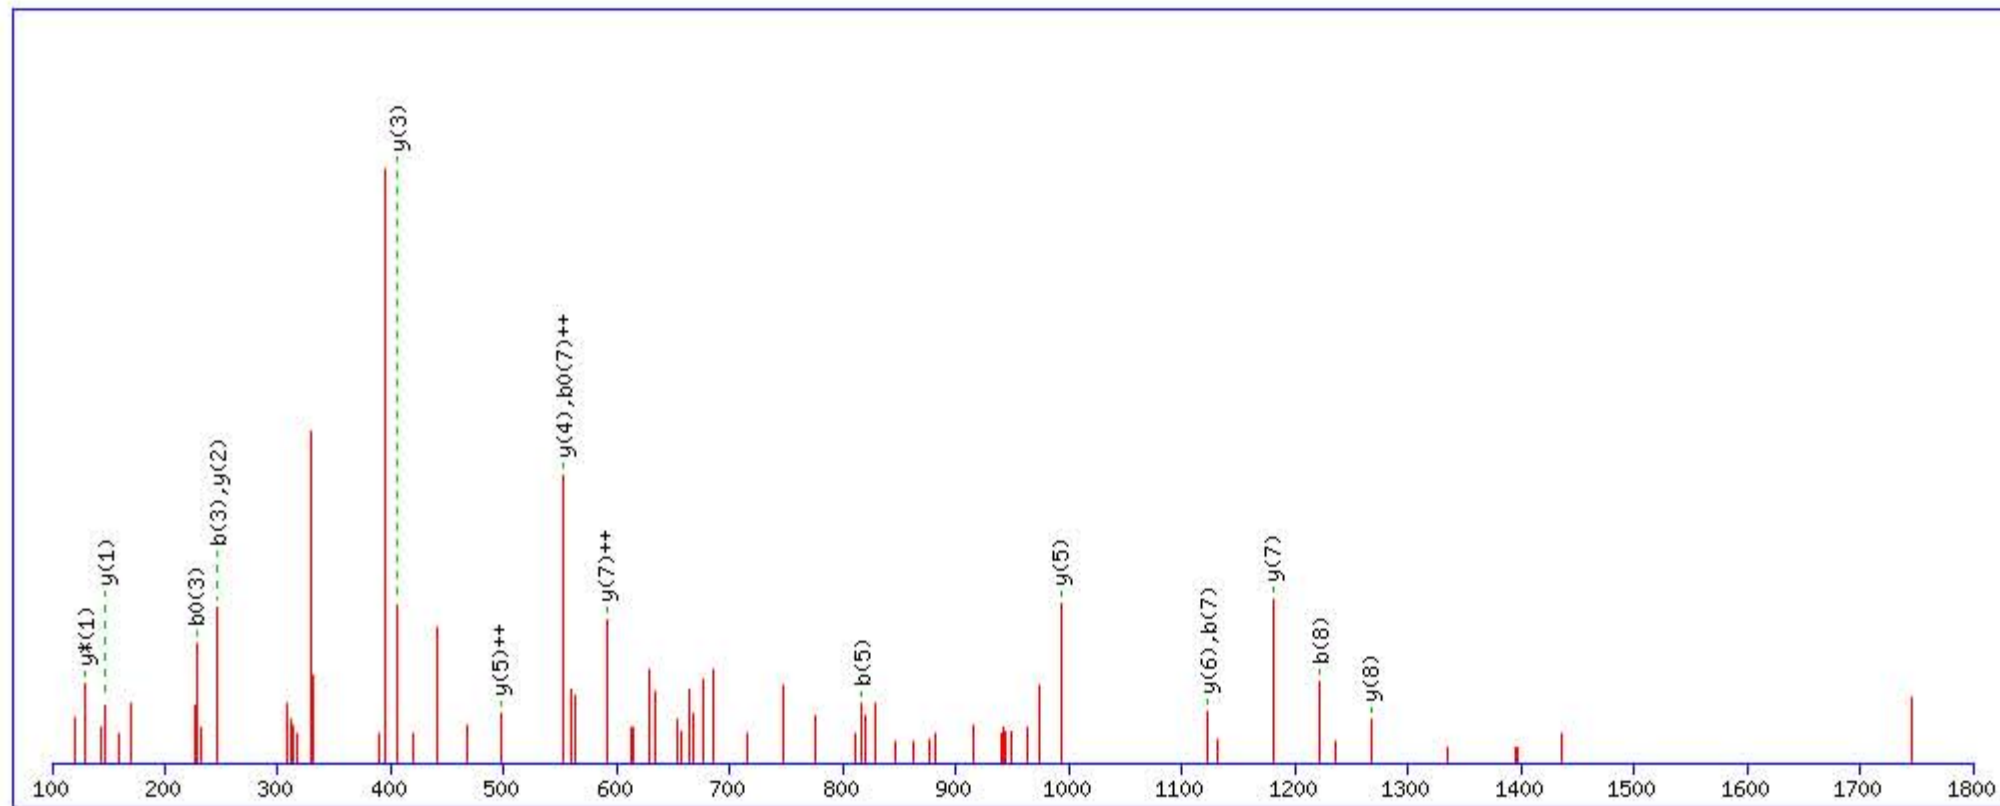

Monoisotopic mass of neutral peptide Mr(calc): 1367.639999

Fixed modifications: Carbamidomethyl (C) (apply to specified residues or termini only)

Variable modifications:

Q5 : Biotin:Thermo-21345 (Q)

Ions Score: 41 Expect: 0.00023

Matches : 17/74 fragment ions using 34 most intense peaks ([help](#))

| # | b           | b <sup>++</sup> | b <sup>*</sup> | b <sup>+++</sup> | b <sup>0</sup> | b <sup>0++</sup> | Seq. | y           | y <sup>++</sup> | y <sup>*</sup> | y <sup>+++</sup> | y <sup>0</sup> | y <sup>0++</sup> | # |
|---|-------------|-----------------|----------------|------------------|----------------|------------------|------|-------------|-----------------|----------------|------------------|----------------|------------------|---|
| 1 | 102.054955  | 51.531116       |                |                  | 84.044390      | 42.525833        | T    |             |                 |                |                  |                |                  | 9 |
| 2 | 189.086983  | 95.047129       |                |                  | 171.076418     | 86.041847        | S    | 1267.599584 | 634.303430      | 1250.573035    | 625.790156       | 1249.589019    | 625.298148       | 8 |
| 3 | 246.108447  | 123.557861      |                |                  | 228.097882     | 114.552579       | G    | 1180.567556 | 590.787416      | 1163.541007    | 582.274142       |                |                  | 7 |
| 4 | 377.148932  | 189.078104      |                |                  | 359.138367     | 180.072822       | M    | 1123.546092 | 562.276684      | 1106.519543    | 553.763410       |                |                  | 6 |
| 5 | 816.374258  | 408.690767      | 799.347709     | 400.177493       | 798.363693     | 399.685485       | Q    | 992.505607  | 496.756442      | 975.479058     | 488.243167       |                |                  | 5 |
| 6 | 963.442672  | 482.224974      | 946.416123     | 473.711700       | 945.432107     | 473.219692       | F    | 553.280281  | 277.143779      | 536.253732     | 268.630504       |                |                  | 4 |
| 7 | 1123.473321 | 562.240298      | 1106.446772    | 553.727024       | 1105.462756    | 553.235016       | C    | 406.211867  | 203.609571      | 389.185318     | 195.096297       |                |                  | 3 |
| 8 | 1222.541735 | 611.774506      | 1205.515186    | 603.261231       | 1204.531170    | 602.769223       | V    | 246.181218  | 123.594247      | 229.154669     | 115.080973       |                |                  | 2 |
| 9 |             |                 |                |                  |                |                  | K    | 147.112804  | 74.060040       | 130.086255     | 65.546765        |                |                  | 1 |

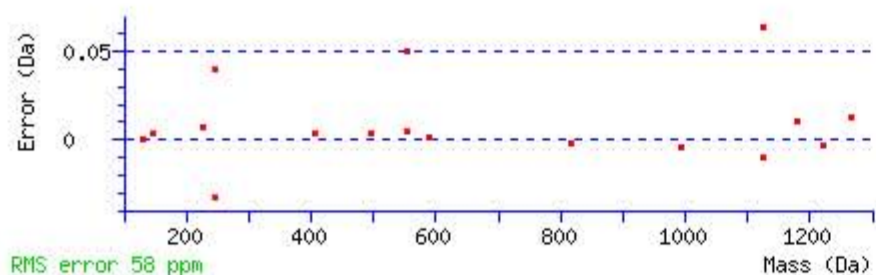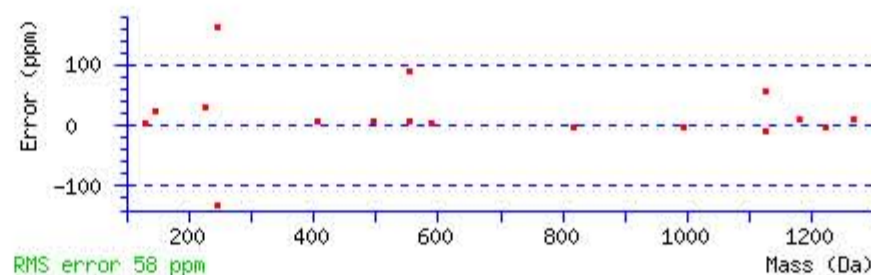

NCBI BLAST search of [TSGMQFCVK](#)

(Parameters: blastp, nr protein database, expect=20000, no filter, PAM30)

Other BLAST [web gateways](#)

## All matches to this query

| Score | Mr(calc):   | Delta     | Sequence                    |
|-------|-------------|-----------|-----------------------------|
| 41.4  | 1367.639999 | -0.000411 | <a href="#">TSGMQFCVK</a>   |
| 2.6   | 1367.650314 | -0.010726 | <a href="#">TLQGERMENYK</a> |



# MASCOT Search Results

## Peptide View

MS/MS Fragmentation of **MSAVEGICTSESPVIDHQGTK**

Found in **CO5\_HUMAN**, Complement C5 OS=Homo sapiens GN=C5 PE=1 SV=4

Match to Query 57242: 2556.205902 from(853.075910,3+) rtinseconds(1939) index(35998)

Title: Locus:1.1.1.3094.25 File:"2013-07-02 CLN FXIII 60 min 2nd F 3.wiff"

Data file C:\Program Files (x86)\Matrix Science\Mascot Daemon\mgf5 FXIII 60 min 2nd\mascot\_daemon\_merge.mgf

Click mouse within plot area to zoom in by factor of two about that point

Or, Plot from  to  Da

Label all possible matches  Label matches used for scoring

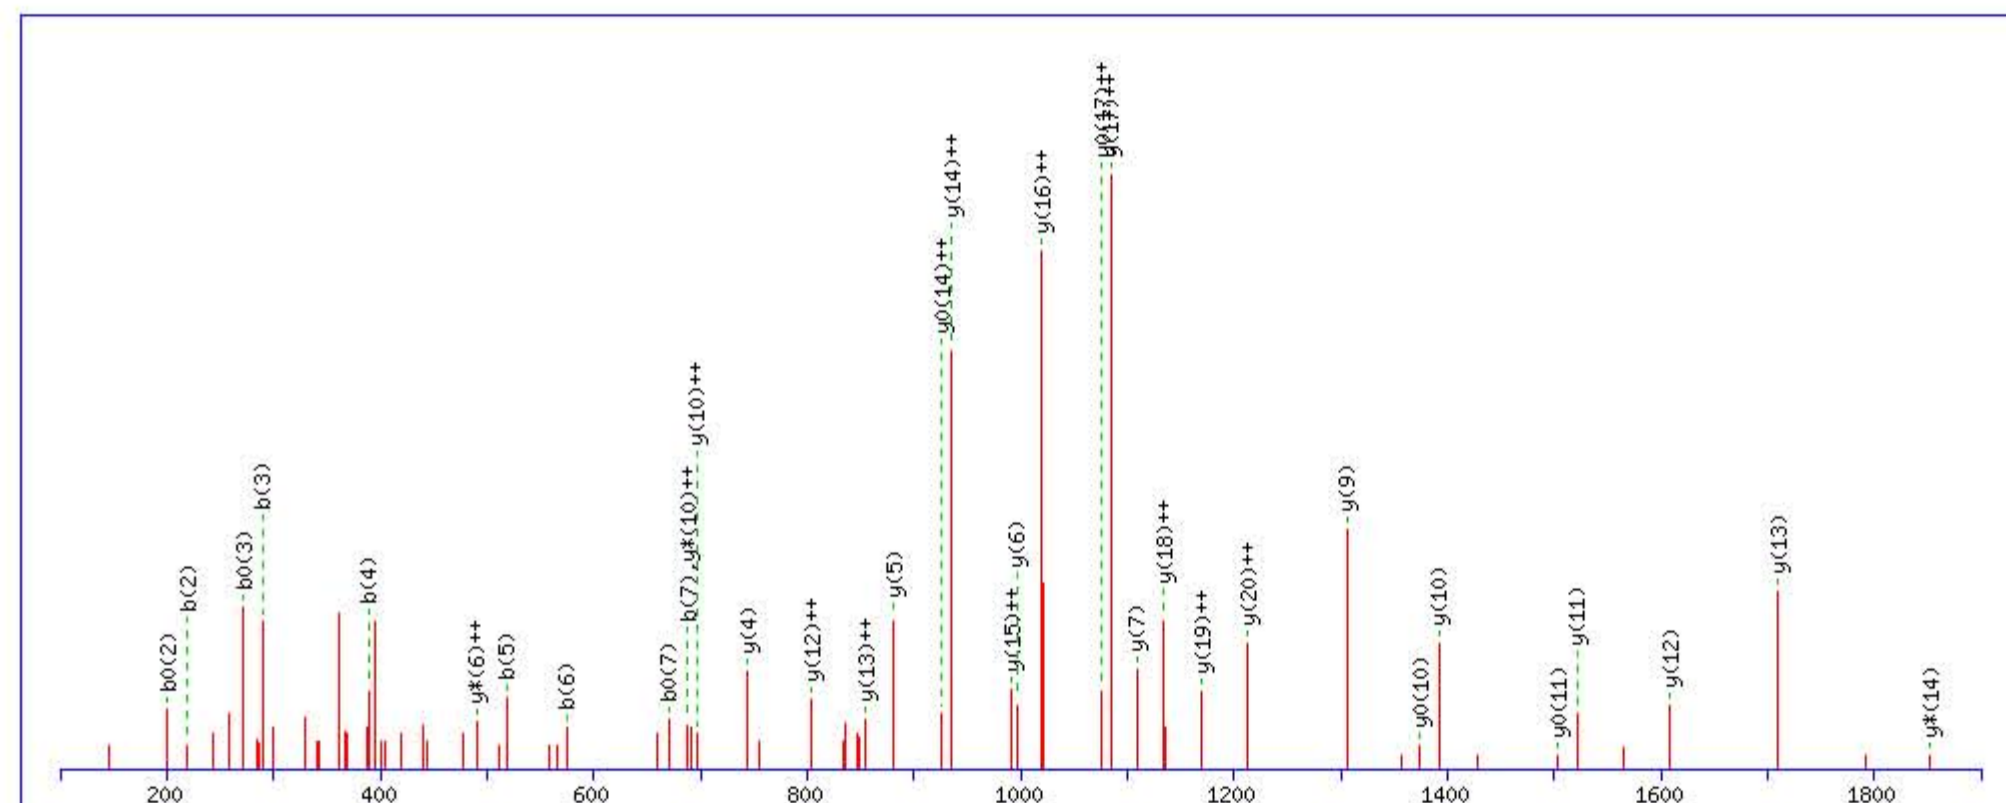

Monoisotopic mass of neutral peptide Mr(calc): 2556.202240

Fixed modifications: Carbamidomethyl (C) (apply to specified residues or termini only)

Variable modifications:

Q18 : Biotin:Thermo-21345 (Q)

Ions Score: 68 Expect: 3.1e-006

Matches : 35/202 fragment ions using 60 most intense peaks [\(help\)](#)

| #  | b                 | b <sup>++</sup> | b <sup>*</sup> | b <sup>*++</sup> | b <sup>0</sup>    | b <sup>0++</sup> | Seq. | y                  | y <sup>++</sup>    | y <sup>*</sup>     | y <sup>*++</sup>  | y <sup>0</sup>     | y <sup>0++</sup>   | #  |
|----|-------------------|-----------------|----------------|------------------|-------------------|------------------|------|--------------------|--------------------|--------------------|-------------------|--------------------|--------------------|----|
| 1  | 132.047761        | 66.527518       |                |                  |                   |                  | M    |                    |                    |                    |                   |                    |                    | 21 |
| 2  | <b>219.079789</b> | 110.043532      |                |                  | 201.069224        | 101.038250       | S    | 2426.169024        | <b>1213.588150</b> | 2409.142475        | 1205.074875       | 2408.158459        | 1204.582867        | 20 |
| 3  | <b>290.116903</b> | 145.562089      |                |                  | <b>272.106338</b> | 136.556807       | A    | 2339.136996        | <b>1170.072136</b> | 2322.110447        | 1161.558861       | 2321.126431        | 1161.066853        | 19 |
| 4  | <b>389.185317</b> | 195.096296      |                |                  | 371.174752        | 186.091014       | V    | 2268.099882        | <b>1134.553579</b> | 2251.073333        | 1126.040304       | 2250.089317        | 1125.548296        | 18 |
| 5  | <b>518.227910</b> | 259.617593      |                |                  | 500.217345        | 250.612311       | E    | 2169.031468        | <b>1085.019372</b> | 2152.004919        | 1076.506097       | 2151.020903        | <b>1076.014089</b> | 17 |
| 6  | <b>575.249374</b> | 288.128325      |                |                  | 557.238809        | 279.123043       | G    | 2039.988875        | <b>1020.498076</b> | 2022.962326        | 1011.984801       | 2021.978310        | 1011.492793        | 16 |
| 7  | <b>688.333438</b> | 344.670357      |                |                  | <b>670.322873</b> | 335.665075       | I    | 1982.967411        | <b>991.987343</b>  | 1965.940862        | 983.474069        | 1964.956846        | 982.982061         | 15 |
| 8  | 848.364087        | 424.685682      |                |                  | 830.353522        | 415.680399       | C    | 1869.883347        | <b>935.445312</b>  | <b>1852.856798</b> | 926.932037        | 1851.872782        | <b>926.440029</b>  | 14 |
| 9  | 949.411766        | 475.209521      |                |                  | 931.401201        | 466.204239       | T    | <b>1709.852698</b> | <b>855.429987</b>  | 1692.826149        | 846.916713        | 1691.842133        | 846.424704         | 13 |
| 10 | 1036.443794       | 518.725535      |                |                  | 1018.433229       | 509.720253       | S    | <b>1608.805019</b> | <b>804.906147</b>  | 1591.778470        | 796.392873        | 1590.794454        | 795.900865         | 12 |
| 11 | 1165.486387       | 583.246832      |                |                  | 1147.475822       | 574.241549       | E    | <b>1521.772991</b> | 761.390133         | 1504.746442        | 752.876859        | <b>1503.762426</b> | 752.384851         | 11 |
| 12 | 1252.518415       | 626.762846      |                |                  | 1234.507850       | 617.757563       | S    | <b>1392.730398</b> | <b>696.868837</b>  | 1375.703849        | <b>688.355563</b> | <b>1374.719833</b> | 687.863554         | 10 |
| 13 | 1349.571179       | 675.289228      |                |                  | 1331.560614       | 666.283945       | P    | <b>1305.698370</b> | 653.352823         | 1288.671821        | 644.839548        | 1287.687805        | 644.347540         | 9  |
| 14 | 1448.639593       | 724.823435      |                |                  | 1430.629028       | 715.818152       | V    | 1208.645606        | 604.826441         | 1191.619057        | 596.313166        | 1190.635041        | 595.821158         | 8  |
| 15 | 1561.723657       | 781.365467      |                |                  | 1543.713092       | 772.360184       | I    | <b>1109.577192</b> | 555.292234         | 1092.550643        | 546.778959        | 1091.566627        | 546.286951         | 7  |
| 16 | 1676.750600       | 838.878938      |                |                  | 1658.740035       | 829.873656       | D    | <b>996.493128</b>  | 498.750202         | 979.466579         | <b>490.236927</b> | 978.482563         | 489.744919         | 6  |
| 17 | 1813.809512       | 907.408394      |                |                  | 1795.798947       | 898.403112       | H    | <b>881.466185</b>  | 441.236730         | 864.439636         | 432.723456        | 863.455620         | 432.231448         | 5  |
| 18 | 2253.034838       | 1127.021057     | 2236.008289    | 1118.507782      | 2235.024273       | 1118.015774      | Q    | <b>744.407273</b>  | 372.707274         | 727.380724         | 364.194000        | 726.396708         | 363.701992         | 4  |
| 19 | 2310.056302       | 1155.531789     | 2293.029753    | 1147.018514      | 2292.045737       | 1146.526506      | G    | 305.181947         | 153.094611         | 288.155398         | 144.581337        | 287.171382         | 144.089329         | 3  |
| 20 | 2411.103981       | 1206.055628     | 2394.077432    | 1197.542354      | 2393.093416       | 1197.050346      | T    | 248.160483         | 124.583879         | 231.133934         | 116.070605        | 230.149918         | 115.578597         | 2  |
| 21 |                   |                 |                |                  |                   |                  | K    | 147.112804         | 74.060040          | 130.086255         | 65.546765         |                    |                    | 1  |

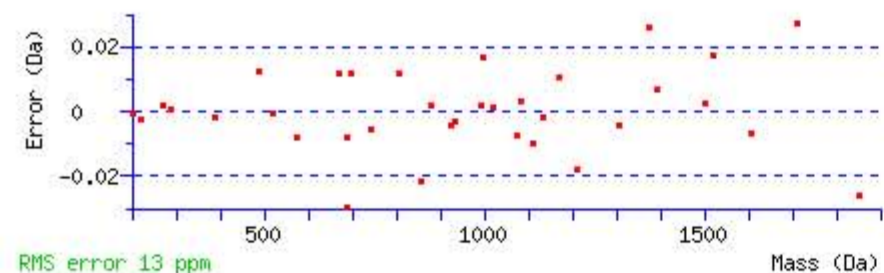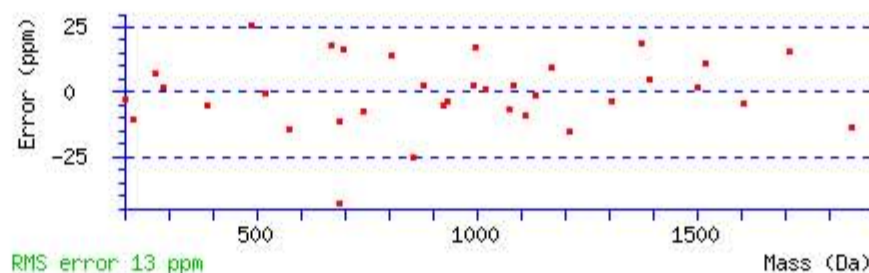

NCBI BLAST search of **MSAVEGICTSESPVIDHQGTK**

(Parameters: blastp, nr protein database, expect=20000, no filter, PAM30)

Other BLAST [web gateways](#)

All matches to this query

| Score | Mr(calc):   | Delta    | Sequence                              |
|-------|-------------|----------|---------------------------------------|
| 68.0  | 2556.202240 | 0.003662 | <a href="#">MSAVEGICTSESPVIDHQGTK</a> |

Mascot: <http://www.matrixscience.com/>



# MASCOT SCIENCE Mascot Search Results

## Peptide View

MS/MS Fragmentation of **QGDVECQR**

Found in **CO6\_HUMAN**, Complement component C6 OS=Homo sapiens GN=C6 PE=1 SV=3

Match to Query 26249: 1301.584428 from(651.799490,2+) rtinseconds(1341) index(17305)

Title: Locus:1.1.1.469.21 File:"2013-07-02 CLN FXIII 60 min 2nd F 2.wiff"

Data file C:\Program Files (x86)\Matrix Science\Mascot Daemon\mgf\5 FXIII 60 min 2nd\mascot\_daemon\_merge.mgf

Click mouse within plot area to zoom in by factor of two about that point

Or, Plot from  to  Da

Label all possible matches  Label matches used for scoring

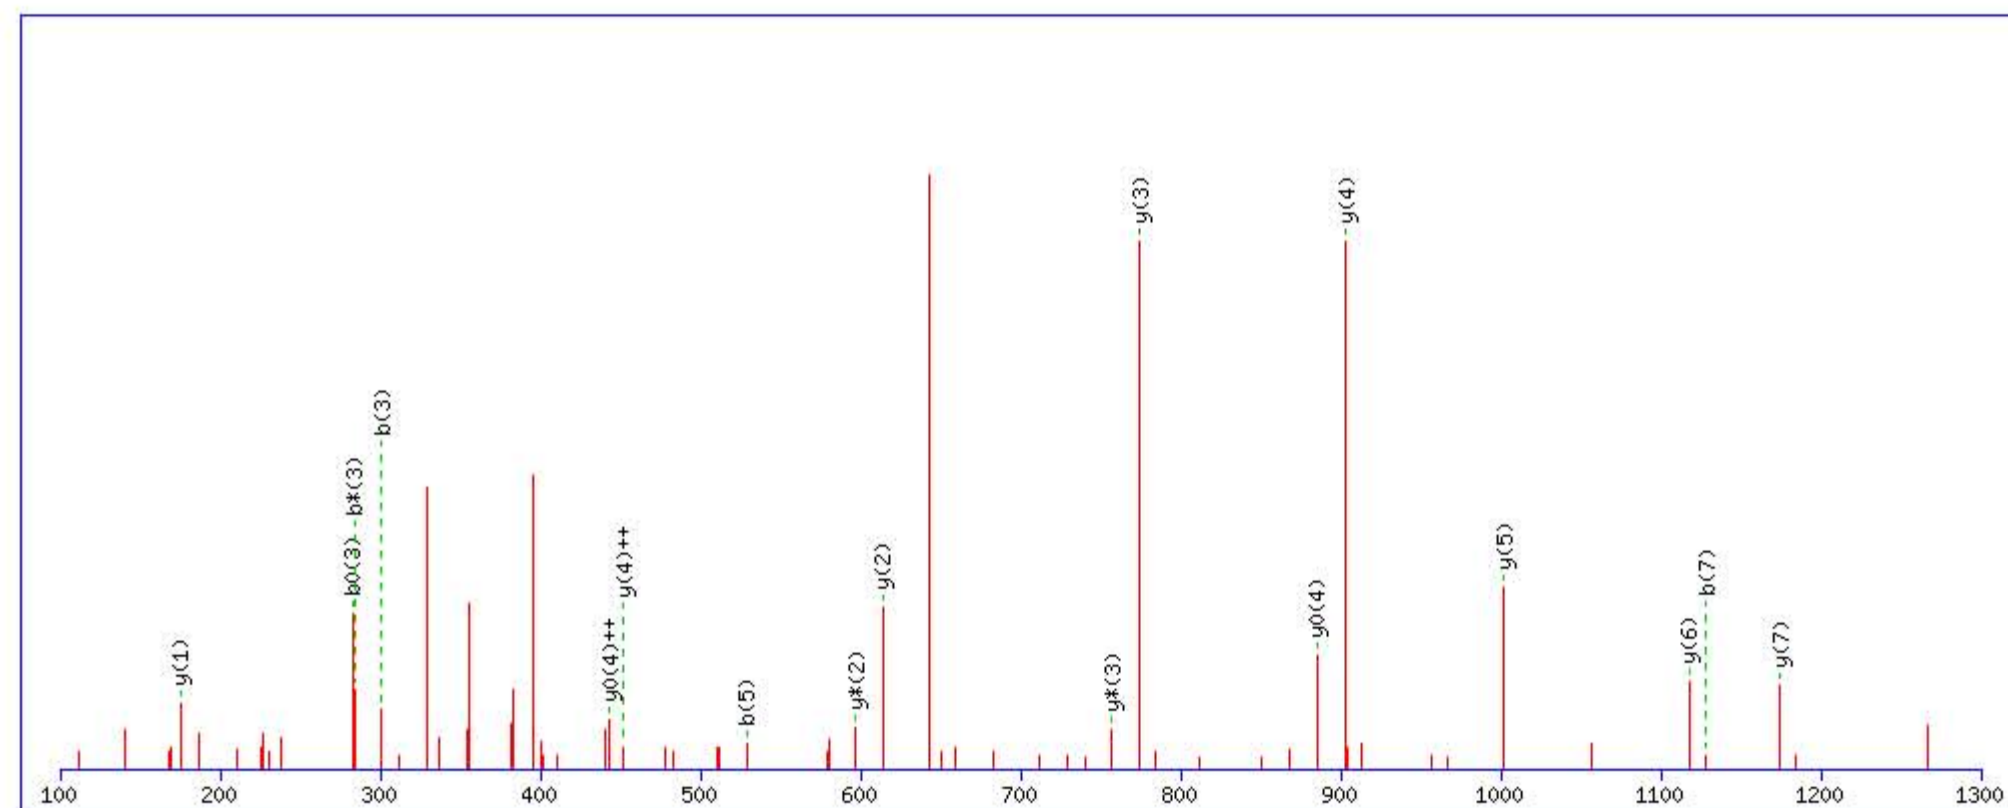

Monoisotopic mass of neutral peptide Mr(calc): 1301.585648

Fixed modifications: Carbamidomethyl (C) (apply to specified residues or termini only)

Variable modifications:

Q7 : Biotin:Thermo-21345 (Q)

Ions Score: 45 Expect: 0.00017

Matches : 17/74 fragment ions using 32 most intense peaks [\(help\)](#)

| # | b                  | b <sup>++</sup> | b <sup>*</sup>    | b <sup>*++</sup> | b <sup>0</sup>    | b <sup>0++</sup> | Seq. | y                  | y <sup>++</sup>   | y <sup>*</sup>    | y <sup>*++</sup> | y <sup>0</sup>    | y <sup>0++</sup>  | # |
|---|--------------------|-----------------|-------------------|------------------|-------------------|------------------|------|--------------------|-------------------|-------------------|------------------|-------------------|-------------------|---|
| 1 | 129.065854         | 65.036565       | 112.039305        | 56.523291        |                   |                  | Q    |                    |                   |                   |                  |                   |                   | 8 |
| 2 | 186.087318         | 93.547297       | 169.060769        | 85.034023        |                   |                  | G    | <b>1174.534341</b> | 587.770809        | 1157.507792       | 579.257534       | 1156.523776       | 578.765526        | 7 |
| 3 | <b>301.114261</b>  | 151.060768      | <b>284.087712</b> | 142.547494       | <b>283.103696</b> | 142.055486       | D    | <b>1117.512877</b> | 559.260077        | 1100.486328       | 550.746802       | 1099.502312       | 550.254794        | 6 |
| 4 | 400.182675         | 200.594976      | 383.156126        | 192.081701       | 382.172110        | 191.589693       | V    | <b>1002.485934</b> | 501.746605        | 985.459385        | 493.233331       | 984.475369        | 492.741323        | 5 |
| 5 | <b>529.225268</b>  | 265.116272      | 512.198719        | 256.602998       | 511.214703        | 256.110990       | E    | <b>903.417520</b>  | <b>452.212398</b> | 886.390971        | 443.699124       | <b>885.406955</b> | <b>443.207116</b> | 4 |
| 6 | 689.255917         | 345.131597      | 672.229368        | 336.618322       | 671.245352        | 336.126314       | C    | <b>774.374927</b>  | 387.691102        | <b>757.348378</b> | 379.177827       |                   |                   | 3 |
| 7 | <b>1128.481243</b> | 564.744260      | 1111.454694       | 556.230985       | 1110.470678       | 555.738977       | Q    | <b>614.344278</b>  | 307.675777        | <b>597.317729</b> | 299.162503       |                   |                   | 2 |
| 8 |                    |                 |                   |                  |                   |                  | R    | <b>175.118952</b>  | 88.063114         | 158.092403        | 79.549839        |                   |                   | 1 |

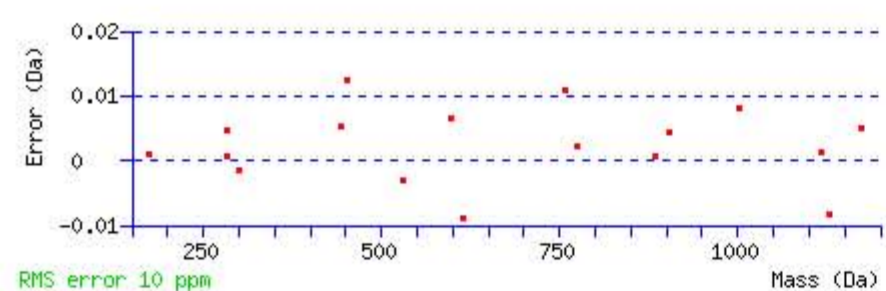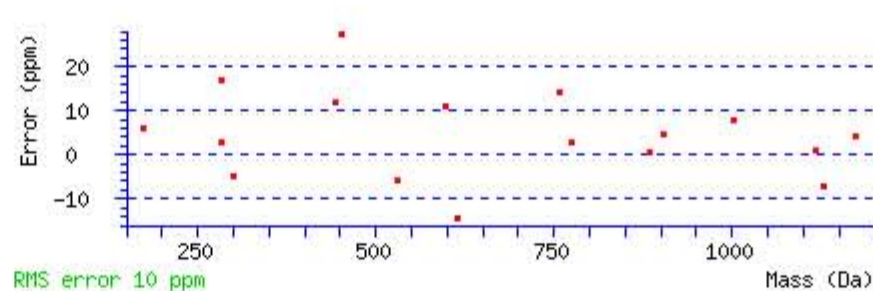

NCBI BLAST search of **QGDVECQR**

(Parameters: blastp, nr protein database, expect=20000, no filter, PAM30)

Other BLAST [web gateways](#)

## All matches to this query

| Score | Mr(calc):   | Delta     | Sequence                      |
|-------|-------------|-----------|-------------------------------|
| 44.6  | 1301.585648 | -0.001220 | <a href="#">QGDVECQR</a>      |
| 10.6  | 1301.584763 | -0.000335 | <a href="#">KATEDAEGGDGPR</a> |
| 3.6   | 1301.584747 | -0.000319 | <a href="#">ESENLASGDQPR</a>  |
| 2.2   | 1301.584747 | -0.000319 | <a href="#">QESPSQENIDR</a>   |



# MASCOT SEARCH RESULTS

## Peptide View

MS/MS Fragmentation of **YYQENFCEQICK**

Found in **CO6\_HUMAN**, Complement component C6 OS=Homo sapiens GN=C6 PE=1 SV=3

Match to Query 48853: 2078.896032 from(693.972620,3+) rtinseconds(2021) index(21814)

Title: Locus:1.1.1.706.6 File:"2013-07-02 CLN FXIII 60 min 2nd F 2.wiff"

Data file C:\Program Files (x86)\Matrix Science\Mascot Daemon\mgf5 FXIII 60 min 2nd\mascot\_daemon\_merge.mgf

Click mouse within plot area to zoom in by factor of two about that point

Or, Plot from  to  Da

Label all possible matches  Label matches used for scoring

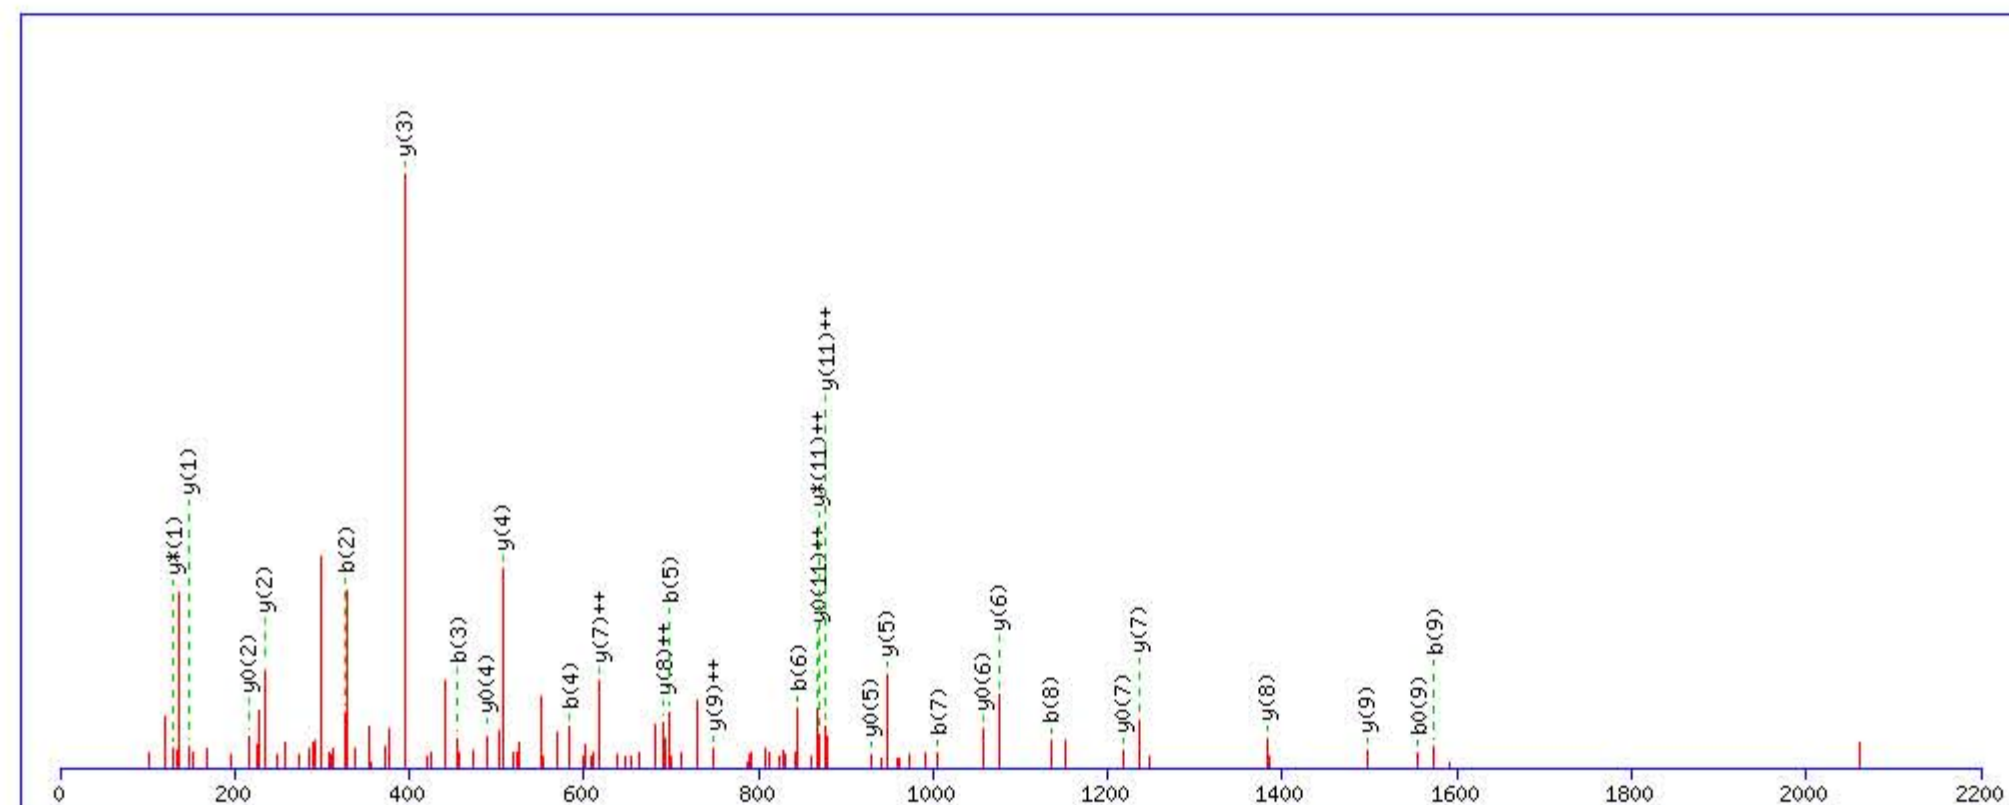

Monoisotopic mass of neutral peptide Mr(calc): 2078.889984

Fixed modifications: Carbamidomethyl (C) (apply to specified residues or termini only)

Variable modifications:

Q9 : Biotin:Thermo-21345 (Q)

Ions Score: 51 Expect: 3.1e-005

Matches : 30/132 fragment ions using 52 most intense peaks [\(help\)](#)

| #  | b                  | b <sup>++</sup> | b <sup>*</sup> | b <sup>*++</sup> | b <sup>0</sup>     | b <sup>0++</sup> | Seq. | y                  | y <sup>++</sup>   | y <sup>*</sup>    | y <sup>*++</sup>  | y <sup>0</sup>     | y <sup>0++</sup>  | #  |
|----|--------------------|-----------------|----------------|------------------|--------------------|------------------|------|--------------------|-------------------|-------------------|-------------------|--------------------|-------------------|----|
| 1  | 164.070605         | 82.538940       |                |                  |                    |                  | Y    |                    |                   |                   |                   |                    |                   | 13 |
| 2  | <b>327.133934</b>  | 164.070605      |                |                  |                    |                  | Y    | 1916.833954        | 958.920615        | 1899.807405       | 950.407341        | 1898.823389        | 949.915333        | 12 |
| 3  | <b>455.192512</b>  | 228.099894      | 438.165963     | 219.586620       |                    |                  | Q    | 1753.770625        | <b>877.388951</b> | 1736.744076       | <b>868.875676</b> | 1735.760060        | <b>868.383668</b> | 11 |
| 4  | <b>584.235105</b>  | 292.621191      | 567.208556     | 284.107916       | 566.224540         | 283.615908       | E    | 1625.712047        | 813.359662        | 1608.685498       | 804.846387        | 1607.701482        | 804.354379        | 10 |
| 5  | <b>698.278032</b>  | 349.642654      | 681.251483     | 341.129380       | 680.267467         | 340.637372       | N    | <b>1496.669454</b> | <b>748.838365</b> | 1479.642905       | 740.325091        | 1478.658889        | 739.833083        | 9  |
| 6  | <b>845.346446</b>  | 423.176861      | 828.319897     | 414.663587       | 827.335881         | 414.171579       | F    | <b>1382.626527</b> | <b>691.816902</b> | 1365.599978       | 683.303627        | 1364.615962        | 682.811619        | 8  |
| 7  | <b>1005.377095</b> | 503.192186      | 988.350546     | 494.678911       | 987.366530         | 494.186903       | C    | <b>1235.558113</b> | <b>618.282695</b> | 1218.531564       | 609.769420        | <b>1217.547548</b> | 609.277412        | 7  |
| 8  | <b>1134.419688</b> | 567.713482      | 1117.393139    | 559.200208       | 1116.409123        | 558.708200       | E    | <b>1075.527464</b> | 538.267370        | 1058.500915       | 529.754096        | <b>1057.516899</b> | 529.262088        | 6  |
| 9  | <b>1573.645014</b> | 787.326145      | 1556.618465    | 778.812871       | <b>1555.634449</b> | 778.320863       | Q    | <b>946.484871</b>  | 473.746074        | 929.458322        | 465.232799        | <b>928.474306</b>  | 464.740791        | 5  |
| 10 | 1686.729078        | 843.868177      | 1669.702529    | 835.354903       | 1668.718513        | 834.862895       | I    | <b>507.259545</b>  | 254.133411        | 490.232996        | 245.620136        | <b>489.248980</b>  | 245.128128        | 4  |
| 11 | 1846.759727        | 923.883502      | 1829.733178    | 915.370227       | 1828.749162        | 914.878219       | C    | <b>394.175481</b>  | 197.591379        | 377.148932        | 189.078104        | 376.164916         | 188.586096        | 3  |
| 12 | 1933.791755        | 967.399516      | 1916.765206    | 958.886241       | 1915.781190        | 958.394233       | S    | <b>234.144832</b>  | 117.576054        | 217.118283        | 109.062780        | <b>216.134267</b>  | 108.570772        | 2  |
| 13 |                    |                 |                |                  |                    |                  | K    | <b>147.112804</b>  | 74.060040         | <b>130.086255</b> | 65.546765         |                    |                   | 1  |

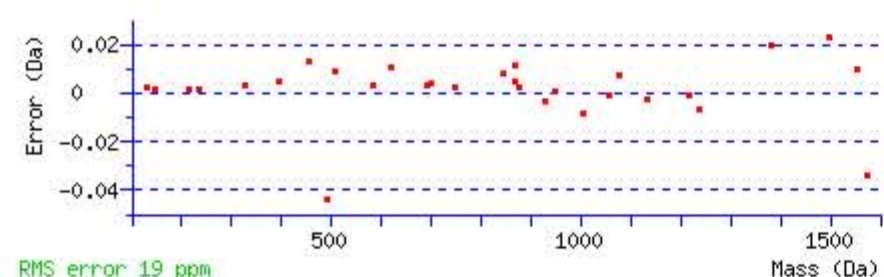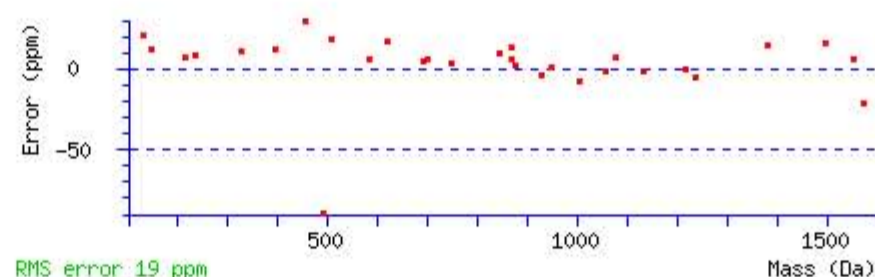

NCBI BLAST search of **YYQENFCEQICK**

(Parameters: blastp, nr protein database, expect=20000, no filter, PAM30)

Other BLAST [web gateways](#)

All matches to this query

| Score | Mr(calc):   | Delta    | Sequence                     |
|-------|-------------|----------|------------------------------|
| 50.9  | 2078.889984 | 0.006048 | <a href="#">YYQENFCEQICK</a> |

Mascot: <http://www.matrixscience.com/>



# MASCOT Search Results

## Peptide View

MS/MS Fragmentation of **VPANLENVGFVQTAEDDLK**  
 Found in **CO6\_HUMAN**, Complement component C6 OS=Homo sapiens GN=C6 PE=1 SV=3

Match to Query 56675: 2498.245212 from(833.755680,3+) rtinseconds(2635) index(25329)  
 Title: Locus:1.1.1.919.7 File:"2013-07-02 CLN FXIII 60 min 2nd F 2.wiff"  
 Data file C:\Program Files (x86)\Matrix Science\Mascot Daemon\mgf5 FXIII 60 min 2nd\mascot\_daemon\_merge.mgf

Click mouse within plot area to zoom in by factor of two about that point  
 Or, Plot from  to  Da   
 Label all possible matches  Label matches used for scoring

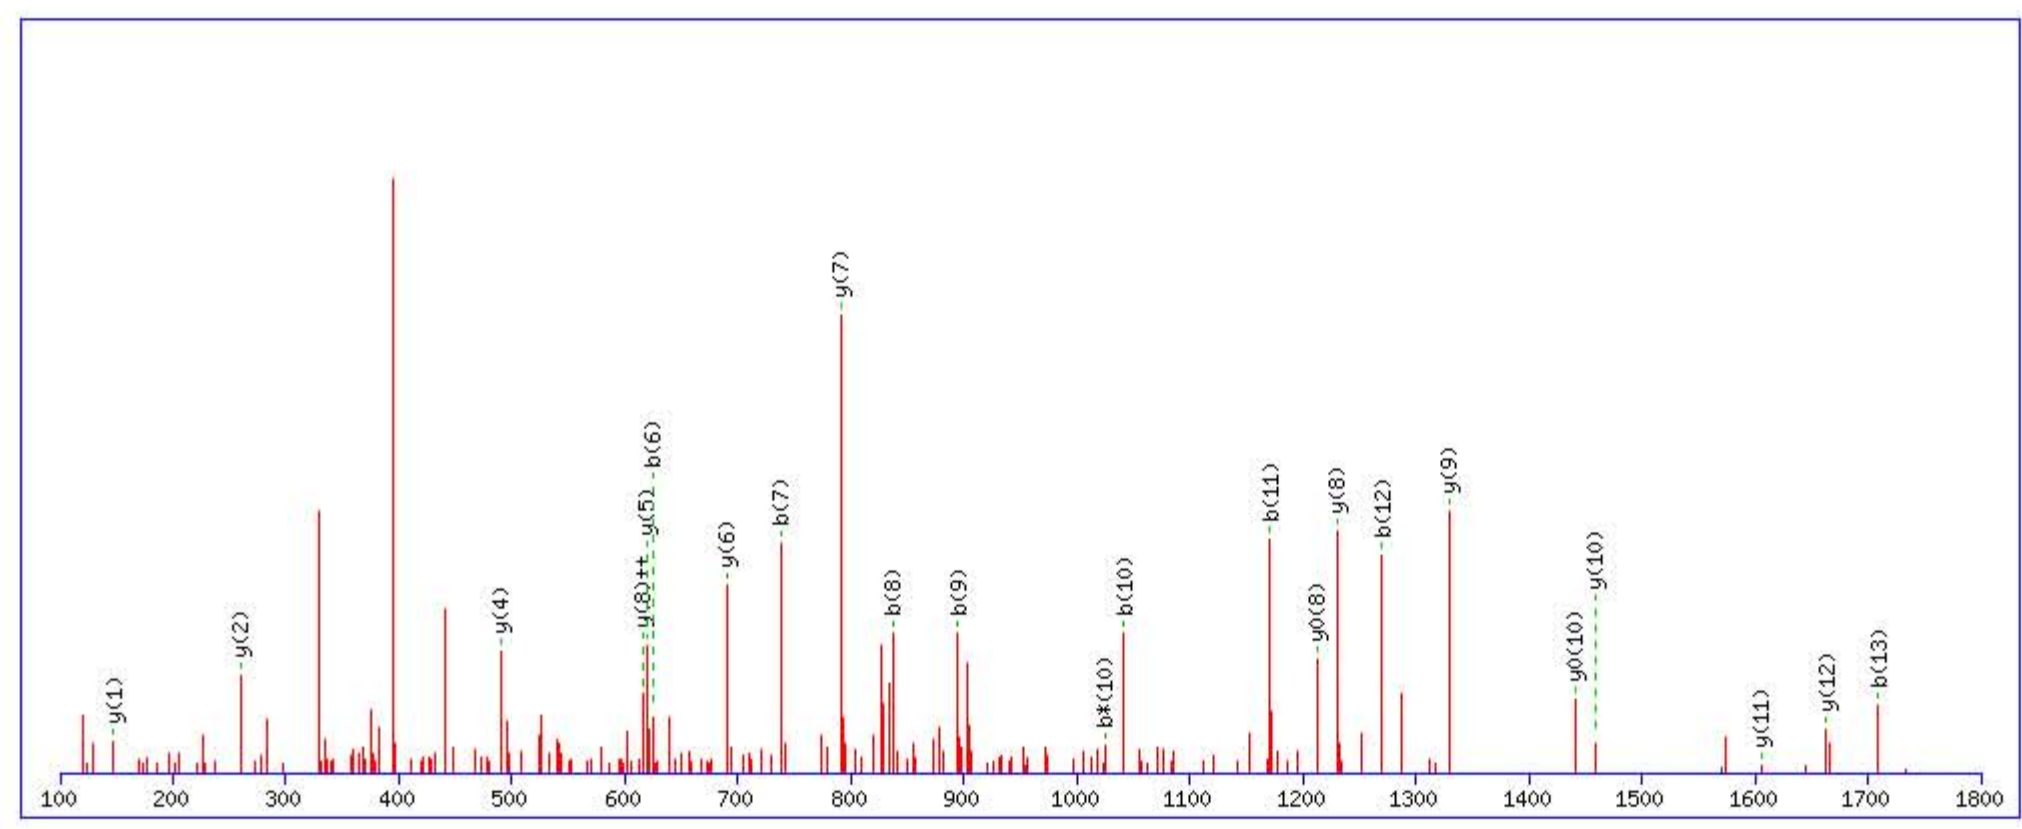

Monoisotopic mass of neutral peptide Mr(calc): 2498.236282  
 Fixed modifications: Carbamidomethyl (C) (apply to specified residues or termini only)  
 Variable modifications:  
 Q13 : Biotin:Thermo-21345 (Q)  
 Ions Score: 76 Expect: 6.7e-007  
 Matches : 23/208 fragment ions using 32 most intense peaks [\(help\)](#)

| #  | b                  | b <sup>++</sup> | b <sup>+</sup>     | b <sup>+++</sup> | b <sup>0</sup> | b <sup>0++</sup> | Seq. | y                  | y <sup>++</sup>   | y <sup>+</sup> | y <sup>+++</sup> | y <sup>0</sup>     | y <sup>0++</sup> | #  |
|----|--------------------|-----------------|--------------------|------------------|----------------|------------------|------|--------------------|-------------------|----------------|------------------|--------------------|------------------|----|
| 1  | 100.075690         | 50.541483       |                    |                  |                |                  | V    |                    |                   |                |                  |                    |                  | 20 |
| 2  | 197.128454         | 99.067865       |                    |                  |                |                  | P    | 2400.175154        | 1200.591215       | 2383.148605    | 1192.077940      | 2382.164589        | 1191.585932      | 19 |
| 3  | 268.165568         | 134.586422      |                    |                  |                |                  | A    | 2303.122390        | 1152.064833       | 2286.095841    | 1143.551558      | 2285.111825        | 1143.059550      | 18 |
| 4  | 382.208495         | 191.607885      | 365.181946         | 183.094611       |                |                  | N    | 2232.085276        | 1116.546276       | 2215.058727    | 1108.033001      | 2214.074711        | 1107.540993      | 17 |
| 5  | 495.292559         | 248.149917      | 478.266010         | 239.636643       |                |                  | L    | 2118.042349        | 1059.524812       | 2101.015800    | 1051.011538      | 2100.031784        | 1050.519530      | 16 |
| 6  | <b>624.335152</b>  | 312.671214      | 607.308603         | 304.157940       | 606.324587     | 303.665932       | E    | 2004.958285        | 1002.982781       | 1987.931736    | 994.469506       | 1986.947720        | 993.977498       | 15 |
| 7  | <b>738.378079</b>  | 369.692678      | 721.351530         | 361.179403       | 720.367514     | 360.687395       | N    | 1875.915692        | 938.461484        | 1858.889143    | 929.948210       | 1857.905127        | 929.456202       | 14 |
| 8  | <b>837.446493</b>  | 419.226885      | 820.419944         | 410.713610       | 819.435928     | 410.221602       | V    | 1761.872765        | 881.440021        | 1744.846216    | 872.926746       | 1743.862200        | 872.434738       | 13 |
| 9  | <b>894.467957</b>  | 447.737617      | 877.441408         | 439.224342       | 876.457392     | 438.732334       | G    | <b>1662.804351</b> | 831.905814        | 1645.777802    | 823.392539       | 1644.793786        | 822.900531       | 12 |
| 10 | <b>1041.536371</b> | 521.271824      | <b>1024.509822</b> | 512.758549       | 1023.525806    | 512.266541       | F    | <b>1605.782887</b> | 803.395082        | 1588.756338    | 794.881807       | 1587.772322        | 794.389799       | 11 |
| 11 | <b>1170.578964</b> | 585.793120      | 1153.552415        | 577.279846       | 1152.568399    | 576.787838       | E    | <b>1458.714473</b> | 729.860875        | 1441.687924    | 721.347600       | <b>1440.703908</b> | 720.855592       | 10 |
| 12 | <b>1269.647378</b> | 635.327327      | 1252.620829        | 626.814053       | 1251.636813    | 626.322045       | V    | <b>1329.671880</b> | 665.339578        | 1312.645331    | 656.826304       | 1311.661315        | 656.334296       | 9  |
| 13 | <b>1708.872704</b> | 854.939990      | 1691.846155        | 846.426716       | 1690.862139    | 845.934708       | Q    | <b>1230.603466</b> | <b>615.805371</b> | 1213.576917    | 607.292097       | <b>1212.592901</b> | 606.800089       | 8  |
| 14 | 1809.920383        | 905.463830      | 1792.893834        | 896.950555       | 1791.909818    | 896.458547       | T    | <b>791.378140</b>  | 396.192708        | 774.351591     | 387.679434       | 773.367575         | 387.187426       | 7  |
| 15 | 1880.957497        | 940.982387      | 1863.930948        | 932.469112       | 1862.946932    | 931.977104       | A    | <b>690.330461</b>  | 345.668869        | 673.303912     | 337.155594       | 672.319896         | 336.663586       | 6  |
| 16 | 2010.000090        | 1005.503683     | 1992.973541        | 996.990409       | 1991.989525    | 996.498401       | E    | <b>619.293347</b>  | 310.150312        | 602.266798     | 301.637037       | 601.282782         | 301.145029       | 5  |
| 17 | 2125.027033        | 1063.017154     | 2108.000484        | 1054.503880      | 2107.016468    | 1054.011872      | D    | <b>490.250754</b>  | 245.629015        | 473.224205     | 237.115740       | 472.240189         | 236.623732       | 4  |
| 18 | 2240.053976        | 1120.530626     | 2223.027427        | 1112.017351      | 2222.043411    | 1111.525343      | D    | 375.223811         | 188.115543        | 358.197262     | 179.602269       | 357.213246         | 179.110261       | 3  |
| 19 | 2353.138040        | 1177.072658     | 2336.111491        | 1168.559383      | 2335.127475    | 1168.067375      | L    | <b>260.196868</b>  | 130.602072        | 243.170319     | 122.088798       |                    |                  | 2  |
| 20 |                    |                 |                    |                  |                |                  | K    | <b>147.112804</b>  | 74.060040         | 130.086255     | 65.546765        |                    |                  | 1  |

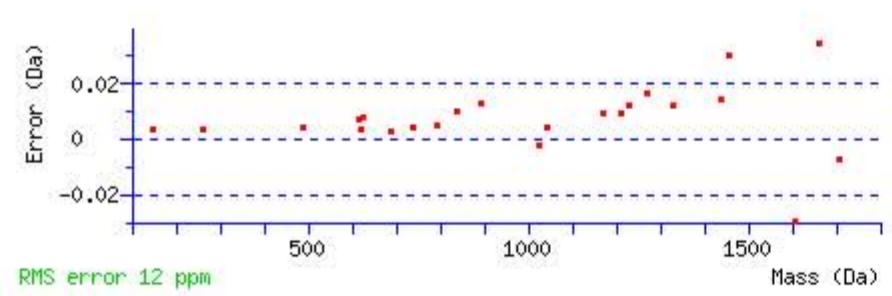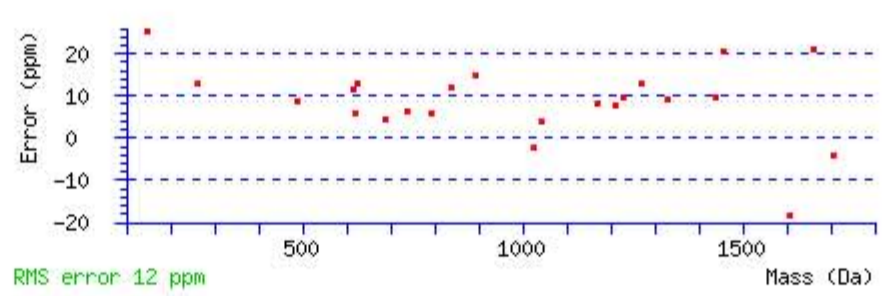

NCBI BLAST search of [VPANLENVGFVQTAEDDLK](#)  
 (Parameters: blastp, nr protein database, expect=20000, no filter, PAM30)  
 Other BLAST [web gateways](#)

### All matches to this query

| Score | Mr(calc):   | Delta    | Sequence                            |
|-------|-------------|----------|-------------------------------------|
| 76.5  | 2498.236282 | 0.008930 | <a href="#">VPANLENVGFVQTAEDDLK</a> |



# MASCOT SCIENCE Mascot Search Results

## Peptide View

MS/MS Fragmentation of **SFGGQCR**

Found in **CO7\_HUMAN**, Complement component C7 OS=Homo sapiens GN=C7 PE=1 SV=2

Match to Query 20008: 1121.506508 from(561.760530,2+) rtinseconds(1531) index(3100)

Title: Locus:1.1.1.1342.10 File:"2013-07-02 CLN FXIII 60 min 2nd F 1.wiff"

Data file C:\Program Files (x86)\Matrix Science\Mascot Daemon\mgf5 FXIII 60 min 2nd\mascot\_daemon\_merge.mgf

Click mouse within plot area to zoom in by factor of two about that point

Or, Plot from  to  Da

Label all possible matches  Label matches used for scoring

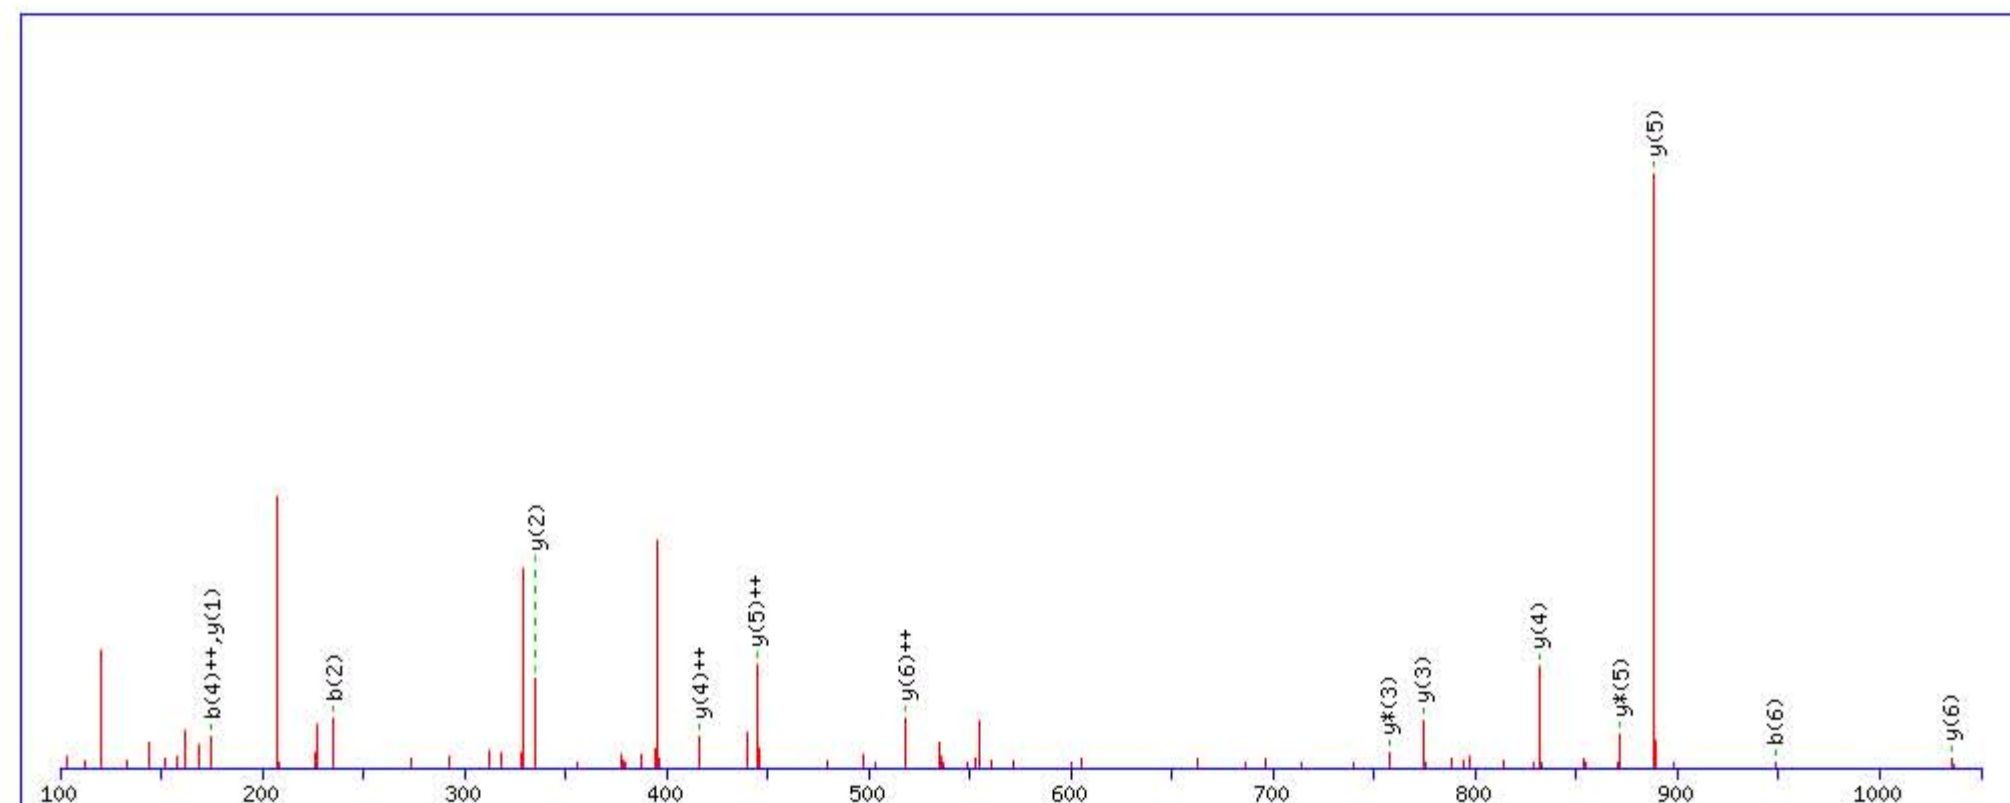

Monoisotopic mass of neutral peptide Mr(calc): 1121.511032

Fixed modifications: Carbamidomethyl (C) (apply to specified residues or termini only)

Variable modifications:

Q5 : Biotin:Thermo-21345 (Q)

Ions Score: 31 Expect: 0.0035

Matches : 14/52 fragment ions using 27 most intense peaks [\(help\)](#)

| # | b                 | b <sup>++</sup>   | b <sup>*</sup> | b <sup>*++</sup> | b <sup>0</sup> | b <sup>0++</sup> | Seq. | y                  | y <sup>++</sup>   | y <sup>*</sup>    | y <sup>*++</sup> | # |
|---|-------------------|-------------------|----------------|------------------|----------------|------------------|------|--------------------|-------------------|-------------------|------------------|---|
| 1 | 88.039304         | 44.523290         |                |                  | 70.028739      | 35.518008        | S    |                    |                   |                   |                  | 7 |
| 2 | <b>235.107718</b> | 118.057497        |                |                  | 217.097153     | 109.052214       | F    | <b>1035.486269</b> | <b>518.246773</b> | 1018.459720       | 509.733498       | 6 |
| 3 | 292.129182        | 146.568229        |                |                  | 274.118617     | 137.562946       | G    | <b>888.417855</b>  | <b>444.712566</b> | <b>871.391306</b> | 436.199291       | 5 |
| 4 | 349.150646        | <b>175.078961</b> |                |                  | 331.140081     | 166.073678       | G    | <b>831.396391</b>  | <b>416.201834</b> | 814.369842        | 407.688559       | 4 |
| 5 | 788.375972        | 394.691624        | 771.349423     | 386.178350       | 770.365407     | 385.686342       | Q    | <b>774.374927</b>  | 387.691102        | <b>757.348378</b> | 379.177827       | 3 |
| 6 | <b>948.406621</b> | 474.706949        | 931.380072     | 466.193674       | 930.396056     | 465.701666       | C    | <b>335.149601</b>  | 168.078438        | 318.123052        | 159.565164       | 2 |
| 7 |                   |                   |                |                  |                |                  | R    | <b>175.118952</b>  | 88.063114         | 158.092403        | 79.549839        | 1 |

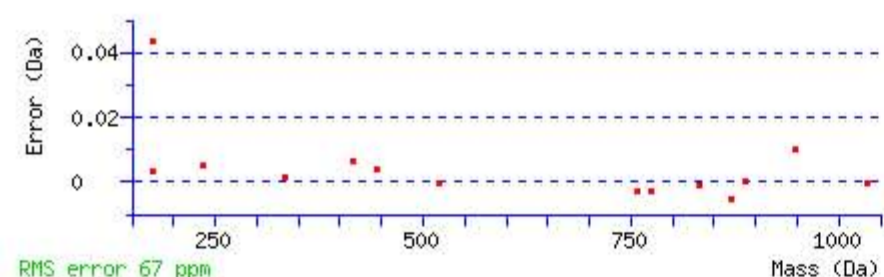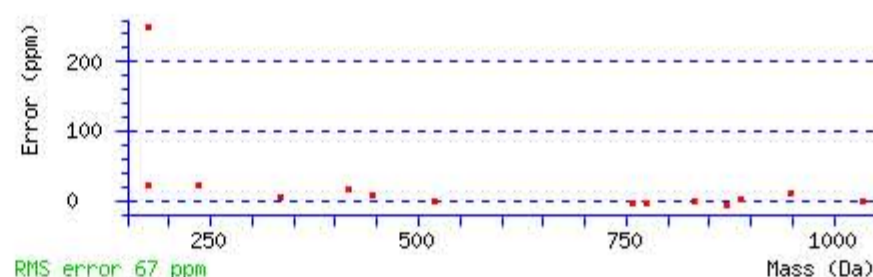

NCBI BLAST search of **SFGGQCR**

(Parameters: blastp, nr protein database, expect=20000, no filter, PAM30)

Other BLAST [web gateways](#)

All matches to this query

| Score | Mr(calc):   | Delta     | Sequence                     |
|-------|-------------|-----------|------------------------------|
| 31.4  | 1121.511032 | -0.004524 | <a href="#">SFGGQCR</a>      |
| 5.0   | 1121.500259 | 0.006249  | <a href="#">HPGFHQEDR</a>    |
| 1.9   | 1121.502274 | 0.004234  | <a href="#">MSVEEQIDR</a>    |
| 1.9   | 1121.494873 | 0.011635  | <a href="#">SANTSPSSSR</a>   |
| 0.9   | 1121.513535 | -0.007027 | <a href="#">MGSGGDSLLGGR</a> |

Mascot: <http://www.matrixscience.com/>



# MASCOT SCIENCE Mascot Search Results

## Peptide View

MS/MS Fragmentation of **CFSGQCISK**

Found in **CO7\_HUMAN**, Complement component C7 OS=Homo sapiens GN=C7 PE=1 SV=2

Match to Query 30058: 1396.624348 from(699.319450,2+) rtinseconds(1635) index(3725)

Title: Locus:1.1.1.1378.5 File:"2013-07-02 CLN FXIII 60 min 2nd F 1.wiff"

Data file C:\Program Files (x86)\Matrix Science\Mascot Daemon\mgf\5 FXIII 60 min 2nd\mascot\_daemon\_merge.mgf

Click mouse within plot area to zoom in by factor of two about that point

Or, Plot from  to  Da

Label all possible matches  Label matches used for scoring

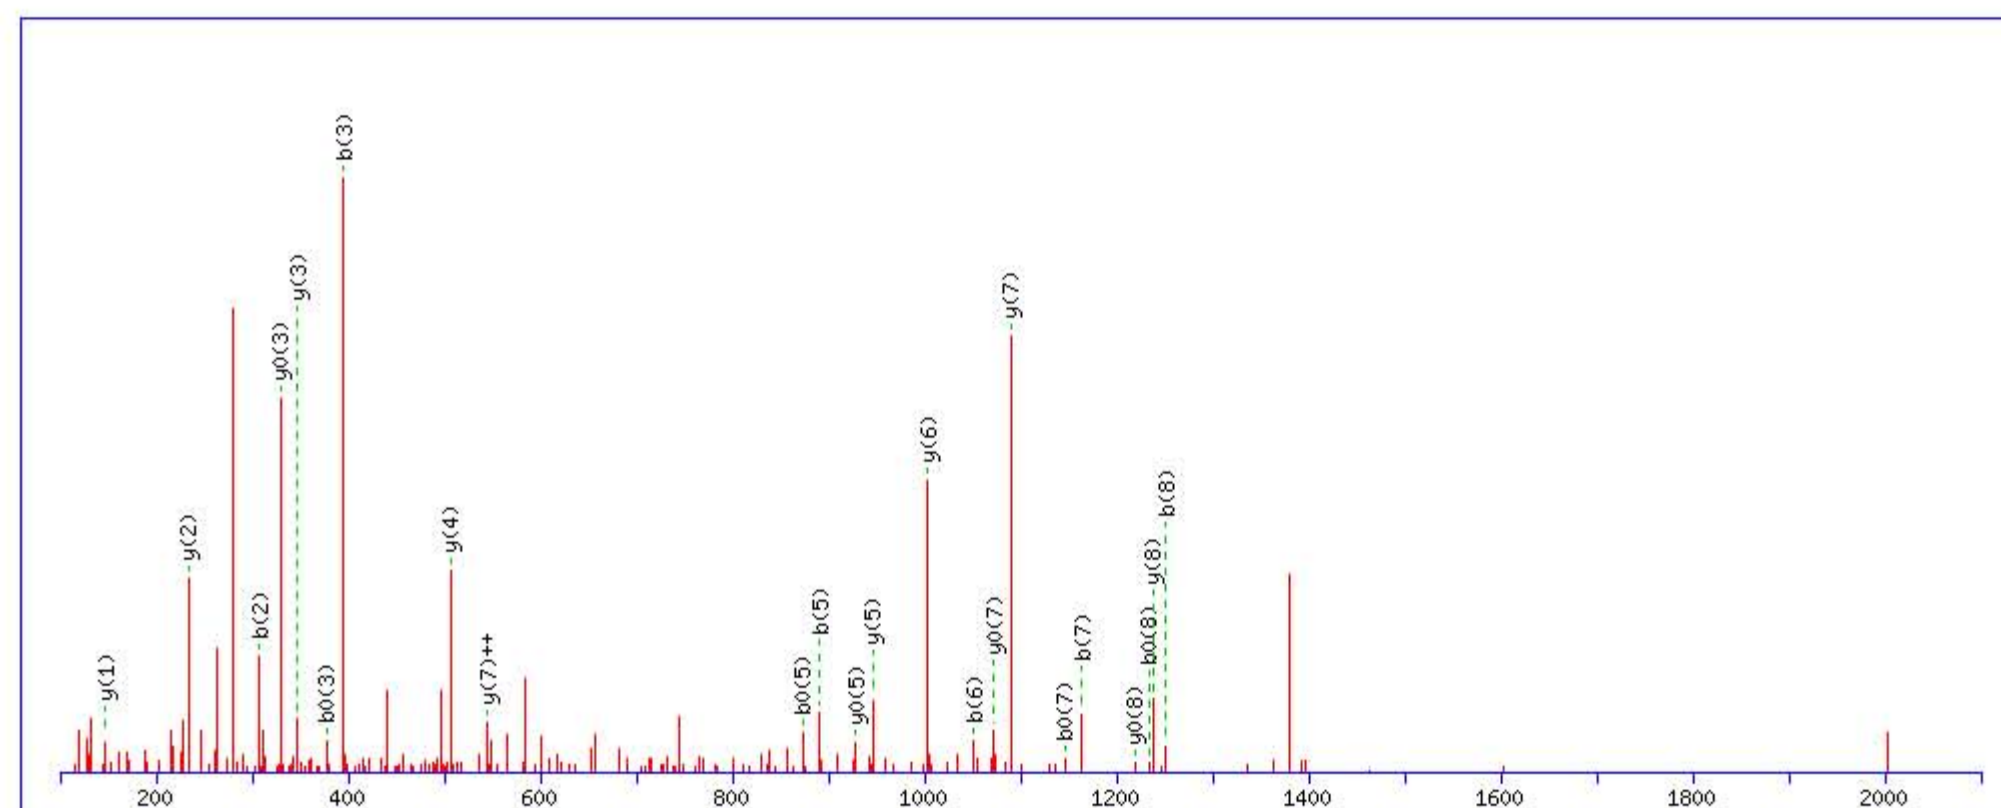

Monoisotopic mass of neutral peptide Mr(calc): 1396.630157

Fixed modifications: Carbamidomethyl (C) (apply to specified residues or termini only)

Variable modifications:

Q5 : Biotin:Thermo-21345 (Q)

Ions Score: 42 Expect: 0.0016

Matches : 23/82 fragment ions using 52 most intense peaks [\(help\)](#)

| # | b                  | b <sup>++</sup> | b <sup>*</sup> | b <sup>*++</sup> | b <sup>0</sup>     | b <sup>0++</sup> | Seq. | y                  | y <sup>++</sup>   | y <sup>*</sup> | y <sup>*++</sup> | y <sup>0</sup>     | y <sup>0++</sup> | # |
|---|--------------------|-----------------|----------------|------------------|--------------------|------------------|------|--------------------|-------------------|----------------|------------------|--------------------|------------------|---|
| 1 | 161.037925         | 81.022600       |                |                  |                    |                  | C    |                    |                   |                |                  |                    |                  | 9 |
| 2 | <b>308.106339</b>  | 154.556807      |                |                  |                    |                  | F    | <b>1237.606777</b> | 619.307027        | 1220.580228    | 610.793752       | <b>1219.596212</b> | 610.301744       | 8 |
| 3 | <b>395.138367</b>  | 198.072821      |                |                  | <b>377.127802</b>  | 189.067539       | S    | <b>1090.538363</b> | <b>545.772819</b> | 1073.511814    | 537.259545       | <b>1072.527798</b> | 536.767537       | 7 |
| 4 | 452.159831         | 226.583553      |                |                  | 434.149266         | 217.578271       | G    | <b>1003.506335</b> | 502.256806        | 986.479786     | 493.743531       | 985.495770         | 493.251523       | 6 |
| 5 | <b>891.385157</b>  | 446.196217      | 874.358608     | 437.682942       | <b>873.374592</b>  | 437.190934       | Q    | <b>946.484871</b>  | 473.746074        | 929.458322     | 465.232799       | <b>928.474306</b>  | 464.740791       | 5 |
| 6 | <b>1051.415806</b> | 526.211541      | 1034.389257    | 517.698267       | 1033.405241        | 517.206258       | C    | <b>507.259545</b>  | 254.133410        | 490.232996     | 245.620136       | 489.248980         | 245.128128       | 4 |
| 7 | <b>1164.499870</b> | 582.753573      | 1147.473321    | 574.240298       | <b>1146.489305</b> | 573.748290       | I    | <b>347.228896</b>  | 174.118086        | 330.202347     | 165.604811       | <b>329.218331</b>  | 165.112803       | 3 |
| 8 | <b>1251.531898</b> | 626.269587      | 1234.505349    | 617.756313       | <b>1233.521333</b> | 617.264304       | S    | <b>234.144832</b>  | 117.576054        | 217.118283     | 109.062780       | 216.134267         | 108.570772       | 2 |
| 9 |                    |                 |                |                  |                    |                  | K    | <b>147.112804</b>  | 74.060040         | 130.086255     | 65.546765        |                    |                  | 1 |

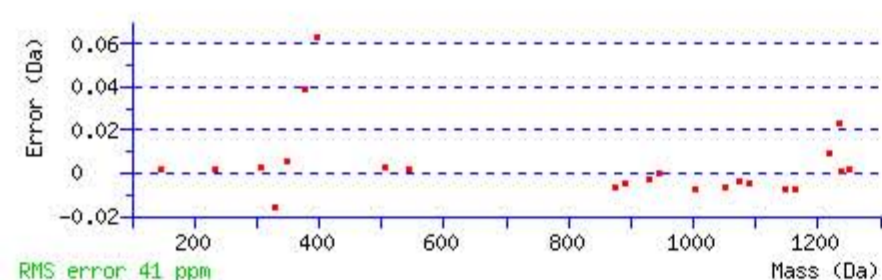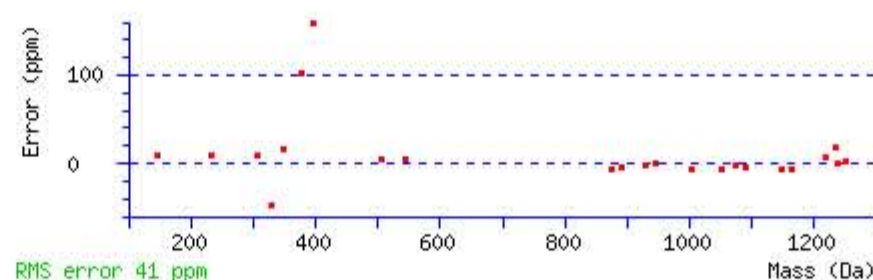

NCBI BLAST search of **CFSGQCISK**

(Parameters: blastp, nr protein database, expect=20000, no filter, PAM30)

Other BLAST [web gateways](#)

All matches to this query

| Score | Mr(calc):   | Delta     | Sequence                    |
|-------|-------------|-----------|-----------------------------|
| 41.7  | 1396.630157 | -0.005809 | <a href="#">CFSGQCISK</a>   |
| 11.2  | 1396.629272 | -0.004924 | <a href="#">QLSQAETDFCK</a> |
| 1.2   | 1396.629257 | -0.004909 | <a href="#">FDNLMNQKEDK</a> |

Mascot: <http://www.matrixscience.com/>



# MASCOT Search Results

## Peptide View

MS/MS Fragmentation of **AASGTQNNVLR**

Found in **CO7\_HUMAN**, Complement component C7 OS=Homo sapiens GN=C7 PE=1 SV=2

Match to Query 32220: 1440.747668 from(721.381110,2+) rtinseconds(1571) index(3347)

Title: Locus:1.1.1.1356.12 File:"2013-07-02 CLN FXIII 60 min 2nd F 1.wiff"

Data file C:\Program Files (x86)\Matrix Science\Mascot Daemon\mgf\5 FXIII 60 min 2nd\mascot\_daemon\_merge.mgf

Click mouse within plot area to zoom in by factor of two about that point

Or, Plot from  to  Da

Label all possible matches  Label matches used for scoring

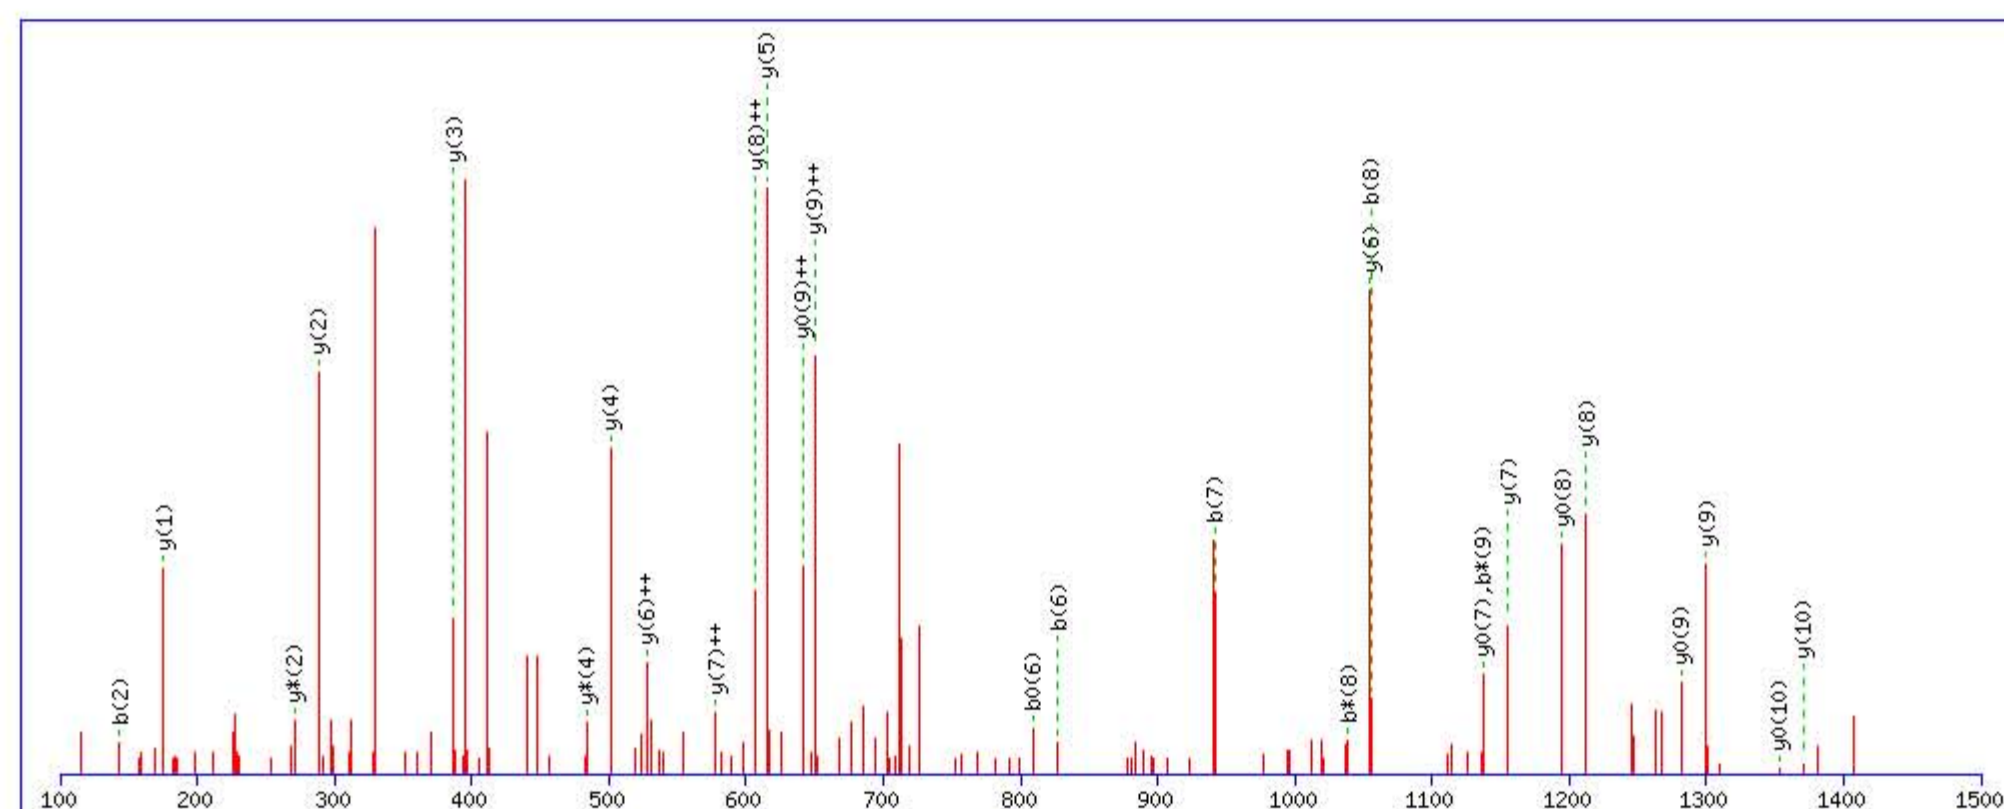

Monoisotopic mass of neutral peptide Mr(calc): 1440.750717

Fixed modifications: Carbamidomethyl (C) (apply to specified residues or termini only)

Variable modifications:

Q6 : Biotin:Thermo-21345 (Q)

Ions Score: 66 Expect: 1.9e-006

Matches : 28/94 fragment ions using 52 most intense peaks [\(help\)](#)

| #  | b                  | b <sup>++</sup> | b <sup>*</sup>     | b <sup>+++</sup> | b <sup>0</sup>    | b <sup>0++</sup> | Seq. | y                  | y <sup>++</sup>   | y <sup>*</sup>    | y <sup>+++</sup> | y <sup>0</sup>     | y <sup>0++</sup>  | #  |
|----|--------------------|-----------------|--------------------|------------------|-------------------|------------------|------|--------------------|-------------------|-------------------|------------------|--------------------|-------------------|----|
| 1  | 72.044390          | 36.525833       |                    |                  |                   |                  | A    |                    |                   |                   |                  |                    |                   | 11 |
| 2  | <b>143.081504</b>  | 72.044390       |                    |                  |                   |                  | A    | <b>1370.720895</b> | 685.864086        | 1353.694346       | 677.350811       | <b>1352.710330</b> | 676.858803        | 10 |
| 3  | 230.113532         | 115.560404      |                    |                  | 212.102967        | 106.555121       | S    | <b>1299.683781</b> | <b>650.345529</b> | 1282.657232       | 641.832254       | <b>1281.673216</b> | <b>641.340246</b> | 9  |
| 4  | 287.134996         | 144.071136      |                    |                  | 269.124431        | 135.065854       | G    | <b>1212.651753</b> | <b>606.829515</b> | 1195.625204       | 598.316240       | <b>1194.641188</b> | 597.824232        | 8  |
| 5  | 388.182675         | 194.594976      |                    |                  | 370.172110        | 185.589693       | T    | <b>1155.630289</b> | <b>578.318783</b> | 1138.603740       | 569.805508       | <b>1137.619724</b> | 569.313500        | 7  |
| 6  | <b>827.408001</b>  | 414.207639      | 810.381452         | 405.694364       | <b>809.397436</b> | 405.202356       | Q    | <b>1054.582610</b> | <b>527.794943</b> | 1037.556061       | 519.281669       |                    |                   | 6  |
| 7  | <b>941.450928</b>  | 471.229102      | 924.424379         | 462.715828       | 923.440363        | 462.223820       | N    | <b>615.357284</b>  | 308.182280        | 598.330735        | 299.669006       |                    |                   | 5  |
| 8  | <b>1055.493855</b> | 528.250566      | <b>1038.467306</b> | 519.737291       | 1037.483290       | 519.245283       | N    | <b>501.314357</b>  | 251.160816        | <b>484.287808</b> | 242.647542       |                    |                   | 4  |
| 9  | 1154.562269        | 577.784773      | <b>1137.535720</b> | 569.271498       | 1136.551704       | 568.779490       | V    | <b>387.271430</b>  | 194.139353        | 370.244881        | 185.626078       |                    |                   | 3  |
| 10 | 1267.646333        | 634.326805      | 1250.619784        | 625.813530       | 1249.635768       | 625.321522       | L    | <b>288.203016</b>  | 144.605146        | <b>271.176467</b> | 136.091871       |                    |                   | 2  |
| 11 |                    |                 |                    |                  |                   |                  | R    | <b>175.118952</b>  | 88.063114         | 158.092403        | 79.549839        |                    |                   | 1  |

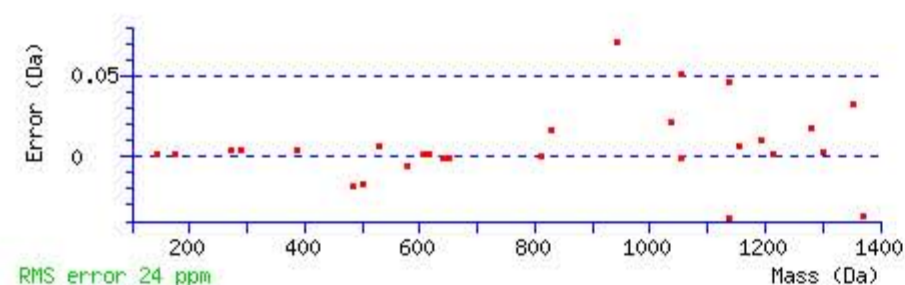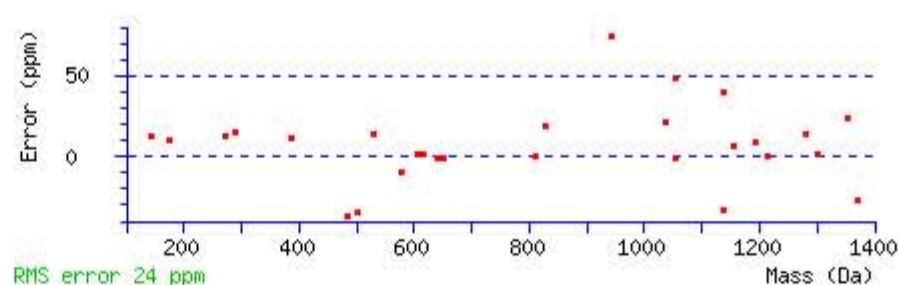

NCBI BLAST search of **AASGTQNNVLR**

(Parameters: blastp, nr protein database, expect=20000, no filter, PAM30)

Other BLAST [web gateways](#)

All matches to this query

| Score | Mr(calc):   | Delta     | Sequence                        |
|-------|-------------|-----------|---------------------------------|
| 65.7  | 1440.750717 | -0.003049 | <a href="#">AASGTQNNVLR</a>     |
| 4.5   | 1440.743515 | 0.004153  | <a href="#">FIQLLTEFQMR</a>     |
| 3.0   | 1440.736099 | 0.011569  | <a href="#">AAGSLAAAEFSPPR</a>  |
| 2.8   | 1440.739487 | 0.008181  | <a href="#">AAVTGQDEAIR</a>     |
| 2.6   | 1440.732086 | 0.015582  | <a href="#">GEENDVPSLRGLR</a>   |
| 2.3   | 1440.736115 | 0.011553  | <a href="#">ETFEGPKHEVLR</a>    |
| 2.2   | 1440.756073 | -0.008405 | <a href="#">WKHYLRVHMR</a>      |
| 1.6   | 1440.732071 | 0.015597  | <a href="#">ASEASKVHNEITR</a>   |
| 1.4   | 1440.750748 | -0.003080 | <a href="#">MDVLP TGGGRPGLR</a> |
| 1.3   | 1440.739471 | 0.008197  | <a href="#">EEKCPLGTAPALR</a>   |



# MASCOT Search Results

## Peptide View

MS/MS Fragmentation of **LSGNVLSYTFQVK**

Found in **CO7\_HUMAN**, Complement component C7 OS=Homo sapiens GN=C7 PE=1 SV=2

Match to Query 41989: 1765.952862 from(589.658230,3+) rtinseconds(2466) index(8422)

Title: Locus:1.1.1.1668.10 File:"2013-07-02 CLN FXIII 60 min 2nd F 1.wiff"

Data file C:\Program Files (x86)\Matrix Science\Mascot Daemon\mgf5 FXIII 60 min 2nd\mascot\_daemon\_merge.mgf

Click mouse within plot area to zoom in by factor of two about that point

Or, Plot from  to  Da

Label all possible matches  Label matches used for scoring

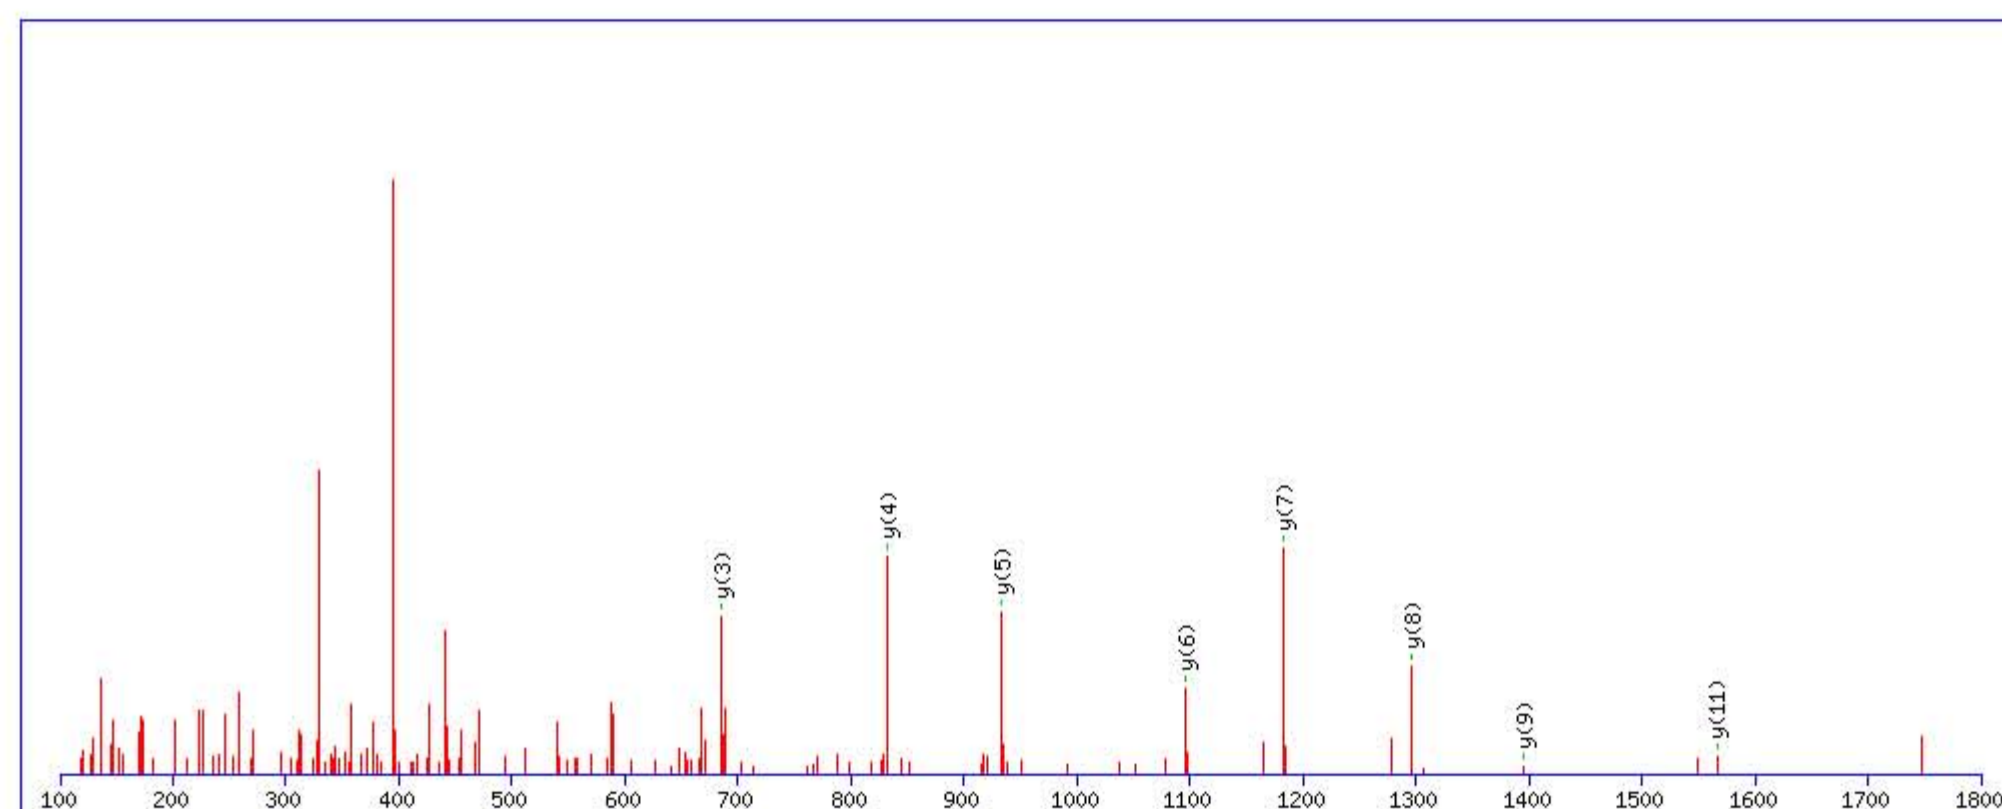

Monoisotopic mass of neutral peptide Mr(calc): 1765.943680

Fixed modifications: Carbamidomethyl (C) (apply to specified residues or termini only)

Variable modifications:

Q11 : Biotin:Thermo-21345 (Q)

Ions Score: 49 Expect: 4.3e-005

Matches : 8/128 fragment ions using 15 most intense peaks [\(help\)](#)

| #  | b           | b <sup>++</sup> | b <sup>*</sup> | b <sup>*++</sup> | b <sup>0</sup> | b <sup>0++</sup> | Seq. | y                  | y <sup>++</sup> | y <sup>*</sup> | y <sup>*++</sup> | y <sup>0</sup> | y <sup>0++</sup> | #  |
|----|-------------|-----------------|----------------|------------------|----------------|------------------|------|--------------------|-----------------|----------------|------------------|----------------|------------------|----|
| 1  | 114.091340  | 57.549308       |                |                  |                |                  | L    |                    |                 |                |                  |                |                  | 13 |
| 2  | 201.123368  | 101.065322      |                |                  | 183.112803     | 92.060039        | S    | 1653.866891        | 827.437084      | 1636.840342    | 818.923809       | 1635.856326    | 818.431801       | 12 |
| 3  | 258.144832  | 129.576054      |                |                  | 240.134267     | 120.570771       | G    | <b>1566.834863</b> | 783.921070      | 1549.808314    | 775.407795       | 1548.824298    | 774.915787       | 11 |
| 4  | 372.187759  | 186.597517      | 355.161210     | 178.084243       | 354.177194     | 177.592235       | N    | 1509.813399        | 755.410338      | 1492.786850    | 746.897063       | 1491.802834    | 746.405055       | 10 |
| 5  | 471.256173  | 236.131724      | 454.229624     | 227.618450       | 453.245608     | 227.126442       | V    | <b>1395.770472</b> | 698.388874      | 1378.743923    | 689.875600       | 1377.759907    | 689.383592       | 9  |
| 6  | 584.340237  | 292.673757      | 567.313688     | 284.160482       | 566.329672     | 283.668474       | L    | <b>1296.702058</b> | 648.854667      | 1279.675509    | 640.341393       | 1278.691493    | 639.849385       | 8  |
| 7  | 671.372265  | 336.189771      | 654.345716     | 327.676496       | 653.361700     | 327.184488       | S    | <b>1183.617994</b> | 592.312635      | 1166.591445    | 583.799361       | 1165.607429    | 583.307353       | 7  |
| 8  | 834.435594  | 417.721435      | 817.409045     | 409.208161       | 816.425029     | 408.716153       | Y    | <b>1096.585966</b> | 548.796621      | 1079.559417    | 540.283347       | 1078.575401    | 539.791339       | 6  |
| 9  | 935.483273  | 468.245275      | 918.456724     | 459.732000       | 917.472708     | 459.239992       | T    | <b>933.522637</b>  | 467.264957      | 916.496088     | 458.751682       | 915.512072     | 458.259674       | 5  |
| 10 | 1082.551687 | 541.779482      | 1065.525138    | 533.266207       | 1064.541122    | 532.774199       | F    | <b>832.474958</b>  | 416.741117      | 815.448409     | 408.227843       |                |                  | 4  |
| 11 | 1521.777013 | 761.392145      | 1504.750464    | 752.878870       | 1503.766448    | 752.386862       | Q    | <b>685.406544</b>  | 343.206910      | 668.379995     | 334.693636       |                |                  | 3  |
| 12 | 1620.845427 | 810.926352      | 1603.818878    | 802.413077       | 1602.834862    | 801.921069       | V    | 246.181218         | 123.594247      | 229.154669     | 115.080973       |                |                  | 2  |
| 13 |             |                 |                |                  |                |                  | K    | 147.112804         | 74.060040       | 130.086255     | 65.546765        |                |                  | 1  |

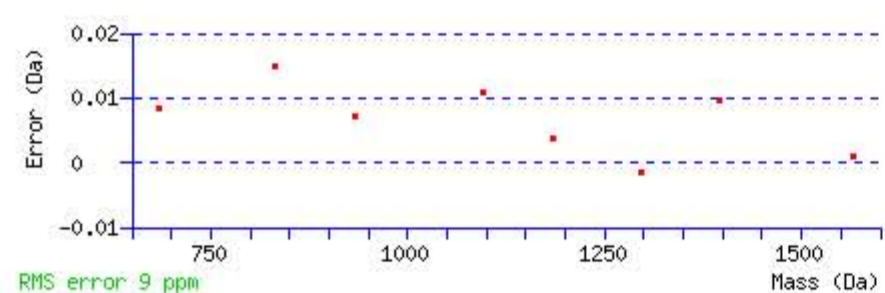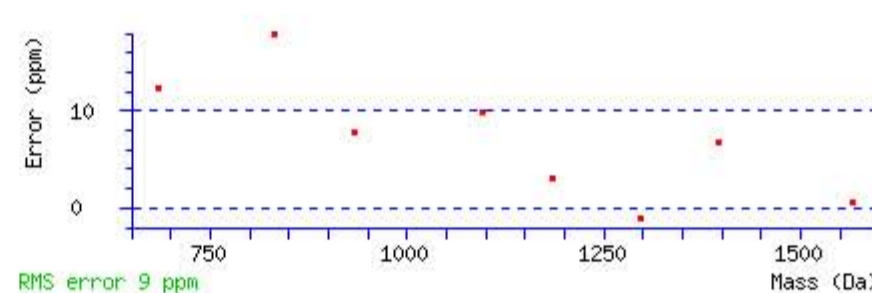

NCBI BLAST search of **LSGNVLSYTFQVK**

(Parameters: blastp, nr protein database, expect=20000, no filter, PAM30)

Other BLAST [web gateways](#)

All matches to this query

| Score | Mr(calc):   | Delta    | Sequence                         |
|-------|-------------|----------|----------------------------------|
| 49.2  | 1765.943680 | 0.009182 | <a href="#">LSGNVLSYTFQVK</a>    |
| 2.7   | 1765.950882 | 0.001980 | <a href="#">VTGNVSKKINYLVMGR</a> |

Mascot: <http://www.matrixscience.com/>



# MASCOT SEARCH RESULTS

## Peptide View

MS/MS Fragmentation of **EQTMSECEAGALR**

Found in **CO7\_HUMAN**, Complement component C7 OS=Homo sapiens GN=C7 PE=1 SV=2

Match to Query 42575: 1791.808588 from(896.911570,2+) rtinseconds(1744) index(4356)

Title: Locus:1.1.1.1416.23 File:"2013-07-02 CLN FXIII 60 min 2nd F 1.wiff"

Data file C:\Program Files (x86)\Matrix Science\Mascot Daemon\mgf5 FXIII 60 min 2nd\mascot\_daemon\_merge.mgf

Click mouse within plot area to zoom in by factor of two about that point

Or, Plot from  to  Da

Label all possible matches  Label matches used for scoring

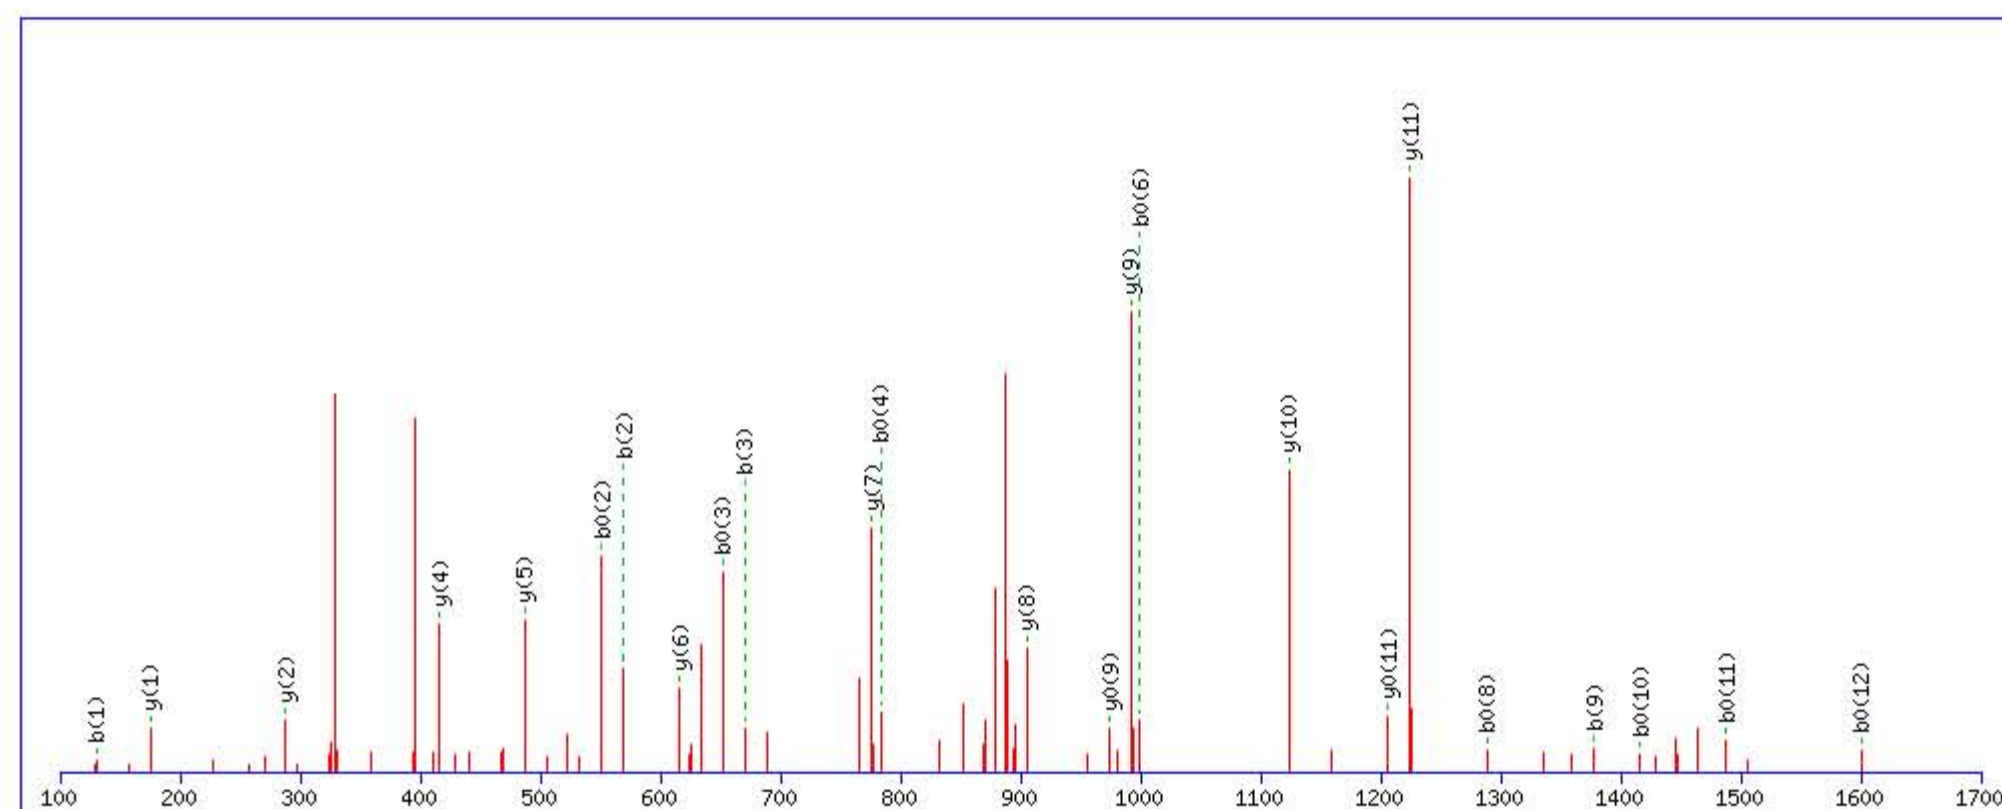

Monoisotopic mass of neutral peptide Mr(calc): 1791.795349

Fixed modifications: Carbamidomethyl (C) (apply to specified residues or termini only)

Variable modifications:

Q2 : Biotin:Thermo-21345 (Q)

Ions Score: 70 Expect: 9.9e-007

Matches : 24/132 fragment ions using 39 most intense peaks [\(help\)](#)

| #  | b           | b <sup>++</sup> | b <sup>*</sup> | b <sup>+++</sup> | b <sup>0</sup> | b <sup>0++</sup> | Seq. | y           | y <sup>++</sup> | y <sup>*</sup> | y <sup>+++</sup> | y <sup>0</sup> | y <sup>0++</sup> | #  |
|----|-------------|-----------------|----------------|------------------|----------------|------------------|------|-------------|-----------------|----------------|------------------|----------------|------------------|----|
| 1  | 130.049869  | 65.528572       |                |                  | 112.039304     | 56.523290        | E    |             |                 |                |                  |                |                  | 13 |
| 2  | 569.275195  | 285.141236      | 552.248646     | 276.627961       | 551.264630     | 276.135953       | Q    | 1663.760061 | 832.383668      | 1646.733512    | 823.870394       | 1645.749496    | 823.378386       | 12 |
| 3  | 670.322874  | 335.665075      | 653.296325     | 327.151801       | 652.312309     | 326.659793       | T    | 1224.534735 | 612.771005      | 1207.508186    | 604.257731       | 1206.524170    | 603.765723       | 11 |
| 4  | 801.363359  | 401.185318      | 784.336810     | 392.672043       | 783.352794     | 392.180035       | M    | 1123.487056 | 562.247166      | 1106.460507    | 553.733891       | 1105.476491    | 553.241883       | 10 |
| 5  | 888.395387  | 444.701332      | 871.368838     | 436.188057       | 870.384822     | 435.696049       | S    | 992.446571  | 496.726923      | 975.420022     | 488.213649       | 974.436006     | 487.721641       | 9  |
| 6  | 1017.437980 | 509.222628      | 1000.411431    | 500.709354       | 999.427415     | 500.217346       | E    | 905.414543  | 453.210909      | 888.387994     | 444.697635       | 887.403978     | 444.205627       | 8  |
| 7  | 1177.468629 | 589.237953      | 1160.442080    | 580.724678       | 1159.458064    | 580.232670       | C    | 776.371950  | 388.689613      | 759.345401     | 380.176338       | 758.361385     | 379.684330       | 7  |
| 8  | 1306.511222 | 653.759249      | 1289.484673    | 645.245974       | 1288.500657    | 644.753966       | E    | 616.341301  | 308.674288      | 599.314752     | 300.161014       | 598.330736     | 299.669006       | 6  |
| 9  | 1377.548336 | 689.277806      | 1360.521787    | 680.764531       | 1359.537771    | 680.272523       | A    | 487.298708  | 244.152992      | 470.272159     | 235.639717       |                |                  | 5  |
| 10 | 1434.569800 | 717.788538      | 1417.543251    | 709.275263       | 1416.559235    | 708.783255       | G    | 416.261594  | 208.634435      | 399.235045     | 200.121160       |                |                  | 4  |
| 11 | 1505.606914 | 753.307095      | 1488.580365    | 744.793820       | 1487.596349    | 744.301812       | A    | 359.240130  | 180.123703      | 342.213581     | 171.610428       |                |                  | 3  |
| 12 | 1618.690978 | 809.849127      | 1601.664429    | 801.335852       | 1600.680413    | 800.843844       | L    | 288.203016  | 144.605146      | 271.176467     | 136.091871       |                |                  | 2  |
| 13 |             |                 |                |                  |                |                  | R    | 175.118952  | 88.063114       | 158.092403     | 79.549839        |                |                  | 1  |

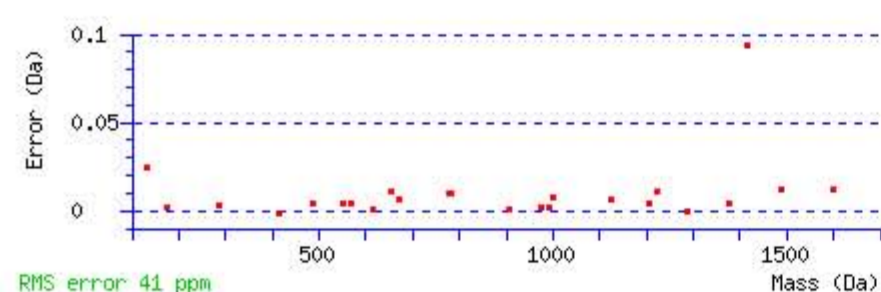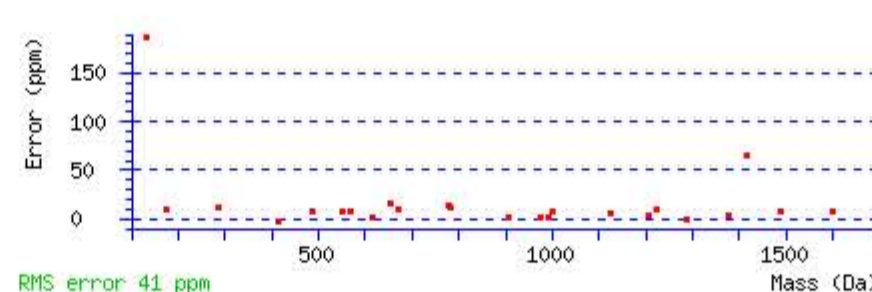

NCBI BLAST search of [EQTMSECEAGALR](#)

(Parameters: blastp, nr protein database, expect=20000, no filter, PAM30)

Other BLAST [web gateways](#)

## All matches to this query

| Score | Mr(calc):   | Delta    | Sequence                      |
|-------|-------------|----------|-------------------------------|
| 70.1  | 1791.795349 | 0.013239 | <a href="#">EQTMSECEAGALR</a> |

Mascot: <http://www.matrixscience.com/>



# MASCOT Search Results

## Peptide View

MS/MS Fragmentation of **MPYECGPSLDVCAQDER**

Found in **CO7\_HUMAN**, Complement component C7 OS=Homo sapiens GN=C7 PE=1 SV=2

Match to Query 53638: 2336.992182 from(780.004670,3+) rtinseconds(2109) index(6493)

Title: Locus:1.1.1.1543.24 File:"2013-07-02 CLN FXIII 60 min 2nd F 1.wiff"

Data file C:\Program Files (x86)\Matrix Science\Mascot Daemon\mgf5 FXIII 60 min 2nd\mascot\_daemon\_merge.mgf

Click mouse within plot area to zoom in by factor of two about that point

Or, Plot from  to  Da

Label all possible matches  Label matches used for scoring

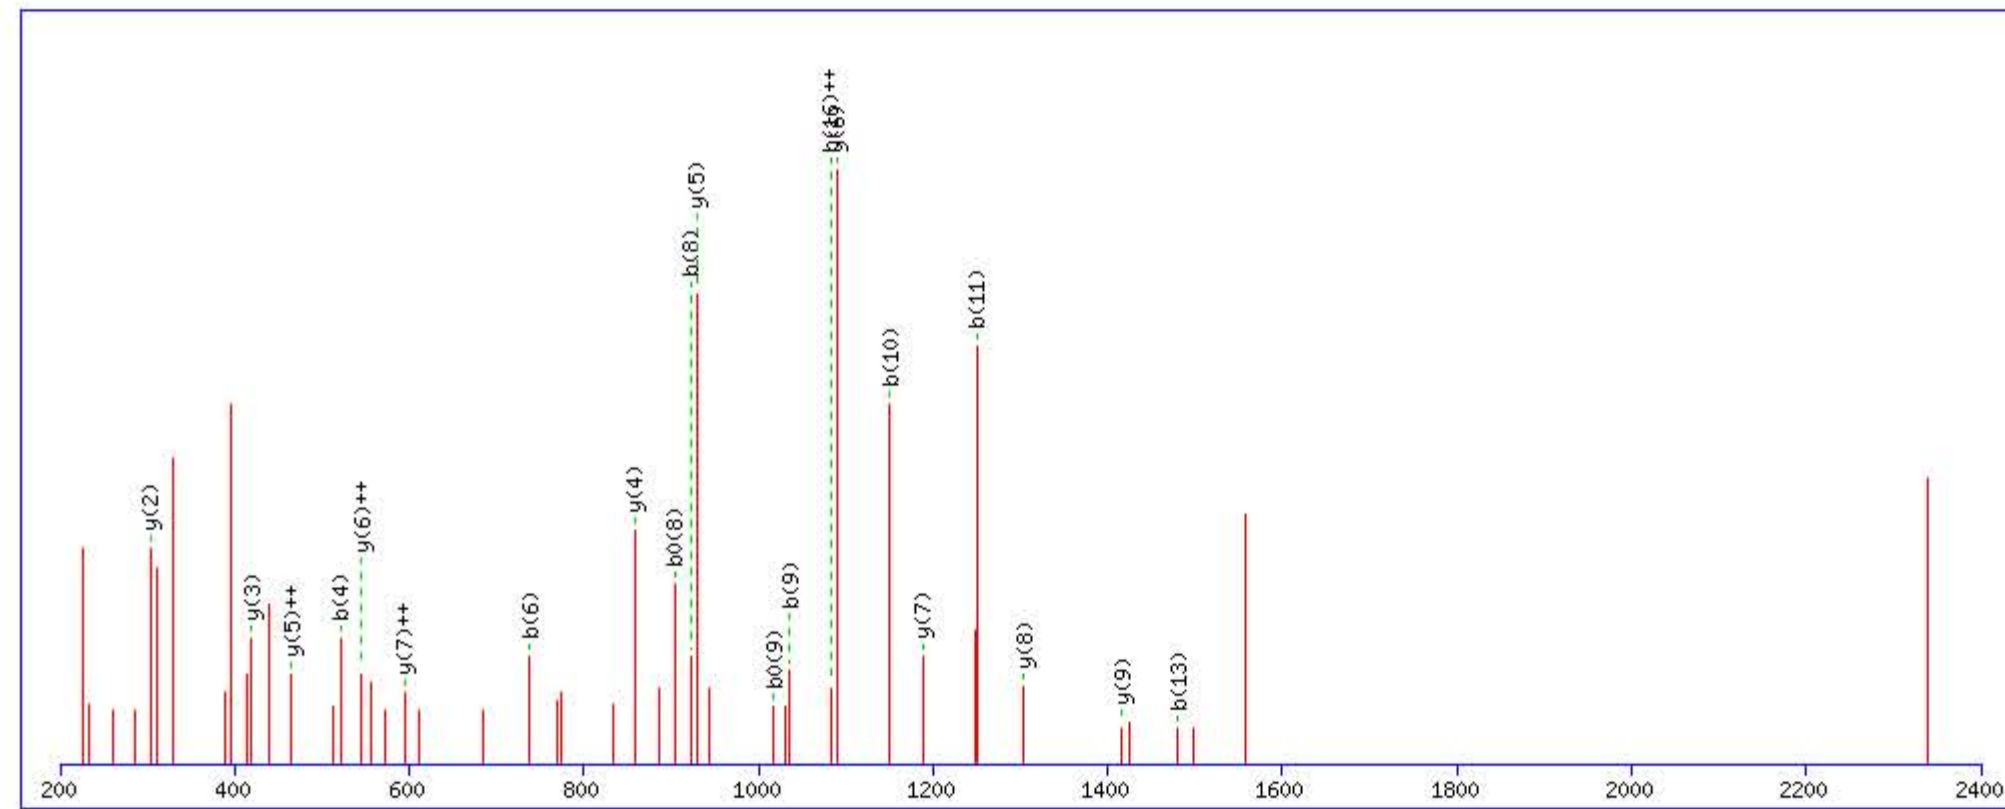

Monoisotopic mass of neutral peptide Mr(calc): 2336.989792

Fixed modifications: Carbamidomethyl (C) (apply to specified residues or termini only)

Variable modifications:

Q14 : Biotin:Thermo-21345 (Q)

Ions Score: 46 Expect: 7.5e-005

Matches : 21/158 fragment ions using 35 most intense peaks [\(help\)](#)

| #  | b                  | b <sup>++</sup>    | b <sup>*</sup> | b <sup>*++</sup> | b <sup>0</sup>     | b <sup>0++</sup> | Seq. | y                  | y <sup>++</sup>   | y <sup>*</sup> | y <sup>*++</sup> | y <sup>0</sup> | y <sup>0++</sup> | #  |
|----|--------------------|--------------------|----------------|------------------|--------------------|------------------|------|--------------------|-------------------|----------------|------------------|----------------|------------------|----|
| 1  | 132.047761         | 66.527518          |                |                  |                    |                  | M    |                    |                   |                |                  |                |                  | 17 |
| 2  | 229.100525         | 115.053900         |                |                  |                    |                  | P    | 2206.956589        | 1103.981932       | 2189.930040    | 1095.468658      | 2188.946024    | 1094.976650      | 16 |
| 3  | 392.163854         | 196.585565         |                |                  |                    |                  | Y    | 2109.903825        | 1055.455550       | 2092.877276    | 1046.942276      | 2091.893260    | 1046.450268      | 15 |
| 4  | <b>521.206447</b>  | 261.106862         |                |                  | 503.195882         | 252.101579       | E    | 1946.840496        | 973.923886        | 1929.813947    | 965.410612       | 1928.829931    | 964.918604       | 14 |
| 5  | 681.237096         | 341.122186         |                |                  | 663.226531         | 332.116904       | C    | 1817.797903        | 909.402590        | 1800.771354    | 900.889315       | 1799.787338    | 900.397307       | 13 |
| 6  | <b>738.258560</b>  | 369.632918         |                |                  | 720.247995         | 360.627636       | G    | 1657.767254        | 829.387265        | 1640.740705    | 820.873991       | 1639.756689    | 820.381983       | 12 |
| 7  | 835.311324         | 418.159300         |                |                  | 817.300759         | 409.154018       | P    | 1600.745790        | 800.876533        | 1583.719241    | 792.363259       | 1582.735225    | 791.871251       | 11 |
| 8  | <b>922.343352</b>  | 461.675314         |                |                  | <b>904.332787</b>  | 452.670032       | S    | 1503.693026        | 752.350151        | 1486.666477    | 743.836877       | 1485.682461    | 743.344869       | 10 |
| 9  | <b>1035.427416</b> | 518.217346         |                |                  | <b>1017.416851</b> | 509.212064       | L    | <b>1416.660998</b> | 708.834137        | 1399.634449    | 700.320863       | 1398.650433    | 699.828855       | 9  |
| 10 | <b>1150.454359</b> | 575.730818         |                |                  | 1132.443794        | 566.725535       | D    | <b>1303.576934</b> | 652.292105        | 1286.550385    | 643.778831       | 1285.566369    | 643.286823       | 8  |
| 11 | <b>1249.522773</b> | 625.265025         |                |                  | 1231.512208        | 616.259742       | V    | <b>1188.549991</b> | <b>594.778634</b> | 1171.523442    | 586.265359       | 1170.539426    | 585.773351       | 7  |
| 12 | 1409.553422        | 705.280349         |                |                  | 1391.542857        | 696.275067       | C    | <b>1089.481577</b> | <b>545.244427</b> | 1072.455028    | 536.731152       | 1071.471012    | 536.239144       | 6  |
| 13 | <b>1480.590536</b> | 740.798906         |                |                  | 1462.579971        | 731.793624       | A    | <b>929.450928</b>  | <b>465.229102</b> | 912.424379     | 456.715827       | 911.440363     | 456.223819       | 5  |
| 14 | 1919.815862        | 960.411569         | 1902.789313    | 951.898295       | 1901.805297        | 951.406287       | Q    | <b>858.413814</b>  | 429.710545        | 841.387265     | 421.197271       | 840.403249     | 420.705263       | 4  |
| 15 | 2034.842805        | 1017.925041        | 2017.816256    | 1009.411766      | 2016.832240        | 1008.919758      | D    | <b>419.188488</b>  | 210.097882        | 402.161939     | 201.584607       | 401.177923     | 201.092599       | 3  |
| 16 | 2163.885398        | <b>1082.446337</b> | 2146.858849    | 1073.933062      | 2145.874833        | 1073.441054      | E    | <b>304.161545</b>  | 152.584410        | 287.134996     | 144.071136       | 286.150980     | 143.579128       | 2  |
| 17 |                    |                    |                |                  |                    |                  | R    | 175.118952         | 88.063114         | 158.092403     | 79.549839        |                |                  | 1  |

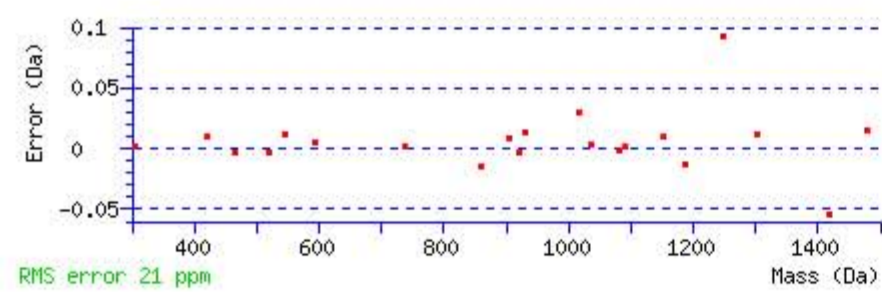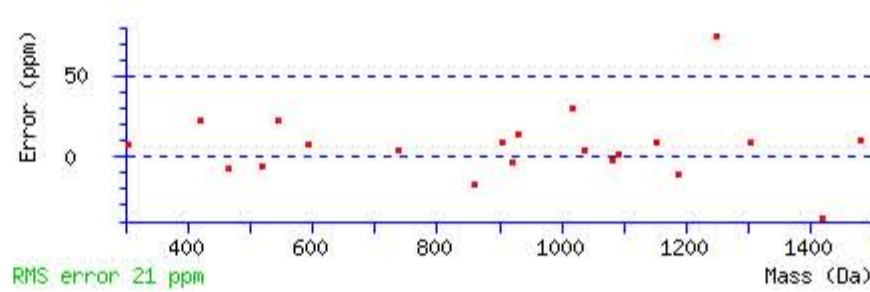

NCBI BLAST search of [MPYECGPSLDVCAQDER](#)

(Parameters: blastp, nr protein database, expect=20000, no filter, PAM30)

Other BLAST [web gateways](#)

All matches to this query

| Score | Mr(calc):   | Delta    | Sequence                          |
|-------|-------------|----------|-----------------------------------|
| 45.6  | 2336.989792 | 0.002390 | <a href="#">MPYECGPSLDVCAQDER</a> |

Mascot: <http://www.matrixscience.com/>



# MASCOT Search Results

## Peptide View

MS/MS Fragmentation of **IACVLPVLM DGIQSH P QKPFYTVGEK**

Found in **CO7\_HUMAN**, Complement component C7 OS=Homo sapiens GN=C7 PE=1 SV=2

Match to Query 64467: 3237.697020 from(648.546680,5+) rtinseconds(2566) index(8899)

Title: Locus:1.1.1.1703.5 File:"2013-07-02 CLN FXIII 60 min 2nd F 1.wiff"

Data file C:\Program Files (x86)\Matrix Science\Mascot Daemon\mgf5 FXIII 60 min 2nd\mascot\_daemon\_merge.mgf

Click mouse within plot area to zoom in by factor of two about that point

Or, Plot from  to  Da

Label all possible matches  Label matches used for scoring

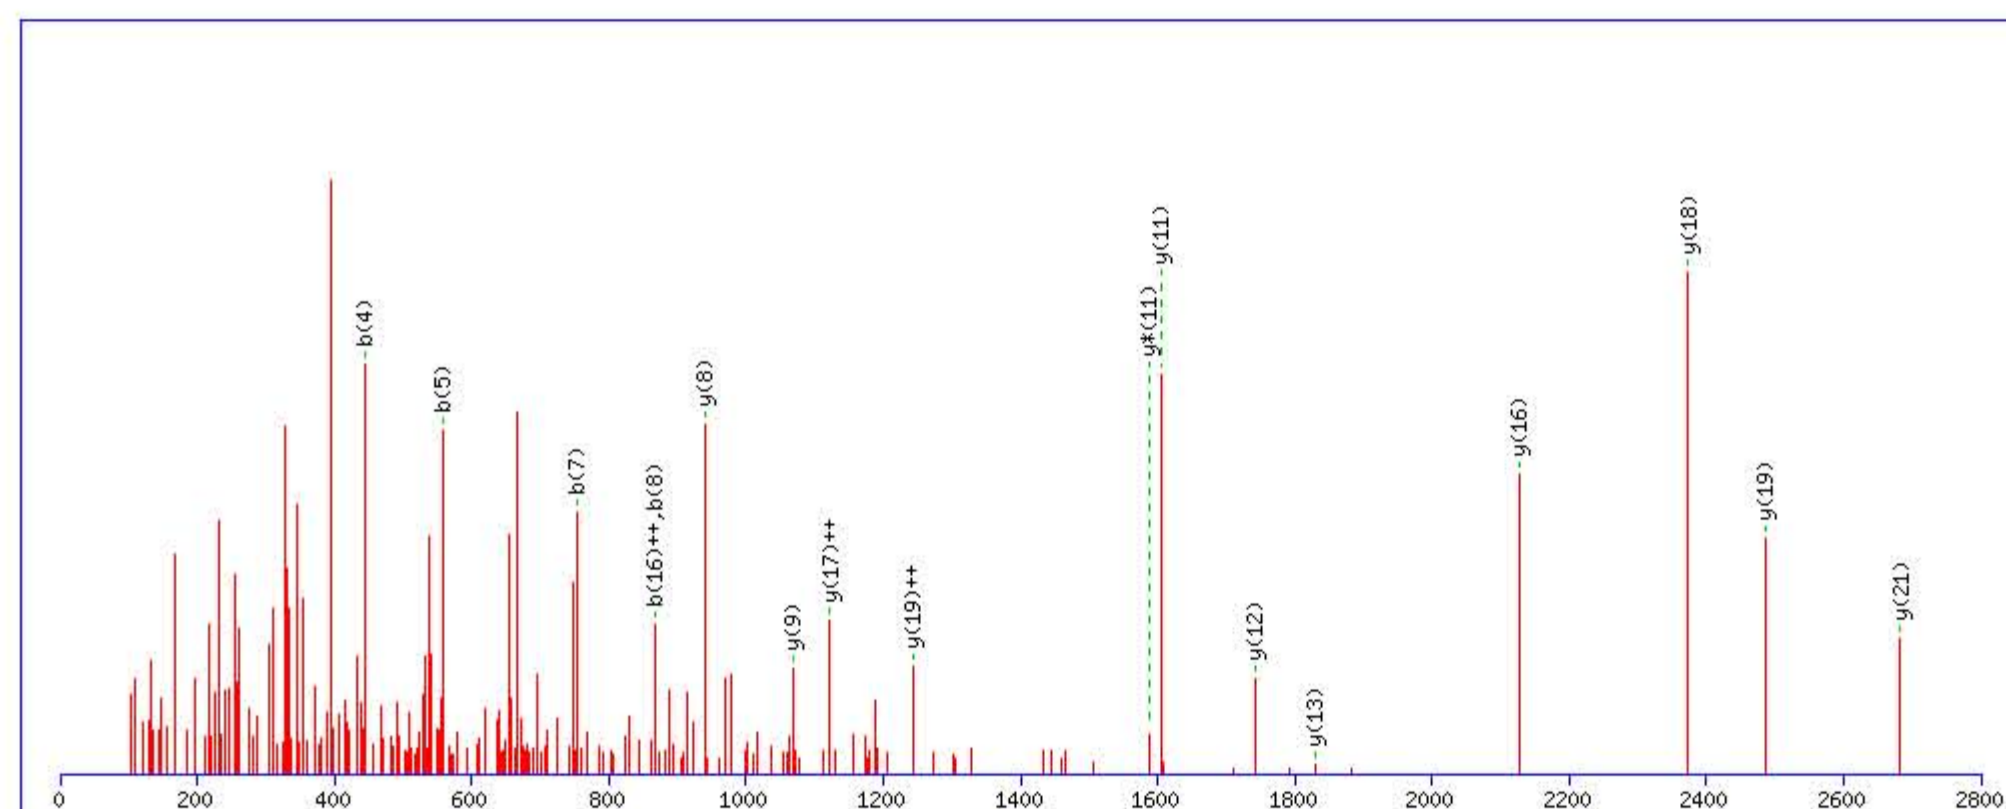

Monoisotopic mass of neutral peptide Mr(calc): 3237.675262

Fixed modifications: Carbamidomethyl (C) (apply to specified residues or termini only)

Variable modifications:

Q17 : Biotin:Thermo-21345 (Q)

Ions Score: 55 Expect: 7.3e-005

Matches : 17/256 fragment ions using 22 most intense peaks [\(help\)](#)

| #  | b                 | b <sup>++</sup>   | b <sup>*</sup> | b <sup>+++</sup> | b <sup>0</sup> | b <sup>0++</sup> | Seq. | y                  | y <sup>++</sup>    | y <sup>*</sup>     | y <sup>+++</sup> | y <sup>0</sup> | y <sup>0++</sup> | #  |
|----|-------------------|-------------------|----------------|------------------|----------------|------------------|------|--------------------|--------------------|--------------------|------------------|----------------|------------------|----|
| 1  | 114.091340        | 57.549308         |                |                  |                |                  | I    |                    |                    |                    |                  |                |                  | 26 |
| 2  | 185.128454        | 93.067865         |                |                  |                |                  | A    | 3125.598471        | 1563.302873        | 3108.571922        | 1554.789599      | 3107.587906    | 1554.297591      | 25 |
| 3  | 345.159103        | 173.083190        |                |                  |                |                  | C    | 3054.561357        | 1527.784316        | 3037.534808        | 1519.271042      | 3036.550792    | 1518.779034      | 24 |
| 4  | <b>444.227517</b> | 222.617397        |                |                  |                |                  | V    | 2894.530708        | 1447.768992        | 2877.504159        | 1439.255717      | 2876.520143    | 1438.763709      | 23 |
| 5  | <b>557.311581</b> | 279.159429        |                |                  |                |                  | L    | 2795.462294        | 1398.234785        | 2778.435745        | 1389.721510      | 2777.451729    | 1389.229502      | 22 |
| 6  | 654.364345        | 327.685811        |                |                  |                |                  | P    | <b>2682.378230</b> | 1341.692753        | 2665.351681        | 1333.179478      | 2664.367665    | 1332.687470      | 21 |
| 7  | <b>753.432759</b> | 377.220018        |                |                  |                |                  | V    | 2585.325466        | 1293.166371        | 2568.298917        | 1284.653096      | 2567.314901    | 1284.161088      | 20 |
| 8  | <b>866.516823</b> | 433.762050        |                |                  |                |                  | L    | <b>2486.257052</b> | <b>1243.632164</b> | 2469.230503        | 1235.118889      | 2468.246487    | 1234.626881      | 19 |
| 9  | 997.557308        | 499.282292        |                |                  |                |                  | M    | <b>2373.172988</b> | 1187.090132        | 2356.146439        | 1178.576857      | 2355.162423    | 1178.084849      | 18 |
| 10 | 1112.584251       | 556.795764        |                |                  | 1094.573686    | 547.790481       | D    | 2242.132503        | <b>1121.569889</b> | 2225.105954        | 1113.056615      | 2224.121938    | 1112.564607      | 17 |
| 11 | 1169.605715       | 585.306495        |                |                  | 1151.595150    | 576.301213       | G    | <b>2127.105560</b> | 1064.056418        | 2110.079011        | 1055.543143      | 2109.094995    | 1055.051135      | 16 |
| 12 | 1282.689779       | 641.848527        |                |                  | 1264.679214    | 632.843245       | I    | 2070.084096        | 1035.545686        | 2053.057547        | 1027.032411      | 2052.073531    | 1026.540403      | 15 |
| 13 | 1410.748357       | 705.877816        | 1393.721808    | 697.364542       | 1392.737792    | 696.872534       | Q    | 1957.000032        | 979.003654         | 1939.973483        | 970.490380       | 1938.989467    | 969.998371       | 14 |
| 14 | 1497.780385       | 749.393830        | 1480.753836    | 740.880556       | 1479.769820    | 740.388548       | S    | <b>1828.941454</b> | 914.974365         | 1811.914905        | 906.461091       | 1810.930889    | 905.969083       | 13 |
| 15 | 1634.839297       | 817.923286        | 1617.812748    | 809.410012       | 1616.828732    | 808.918004       | H    | <b>1741.909426</b> | 871.458351         | 1724.882877        | 862.945077       | 1723.898861    | 862.453068       | 12 |
| 16 | 1731.892061       | <b>866.449668</b> | 1714.865512    | 857.936394       | 1713.881496    | 857.444386       | P    | <b>1604.850514</b> | 802.928895         | <b>1587.823965</b> | 794.415621       | 1586.839949    | 793.923612       | 11 |
| 17 | 2171.117387       | 1086.062331       | 2154.090838    | 1077.549057      | 2153.106822    | 1077.057049      | Q    | 1507.797750        | 754.402513         | 1490.771201        | 745.889239       | 1489.787185    | 745.397230       | 10 |
| 18 | 2299.212350       | 1150.109813       | 2282.185801    | 1141.596538      | 2281.201785    | 1141.104530      | K    | <b>1068.572424</b> | 534.789850         | 1051.545875        | 526.276575       | 1050.561859    | 525.784567       | 9  |
| 19 | 2396.265114       | 1198.636195       | 2379.238565    | 1190.122920      | 2378.254549    | 1189.630912      | P    | <b>940.477461</b>  | 470.742368         | 923.450912         | 462.229094       | 922.466896     | 461.737086       | 8  |
| 20 | 2543.333528       | 1272.170402       | 2526.306979    | 1263.657127      | 2525.322963    | 1263.165119      | F    | 843.424697         | 422.215986         | 826.398148         | 413.702712       | 825.414132     | 413.210704       | 7  |
| 21 | 2706.396857       | 1353.702066       | 2689.370308    | 1345.188792      | 2688.386292    | 1344.696784      | Y    | 696.356283         | 348.681779         | 679.329734         | 340.168505       | 678.345718     | 339.676497       | 6  |
| 22 | 2807.444536       | 1404.225906       | 2790.417987    | 1395.712631      | 2789.433971    | 1395.220623      | T    | 533.292954         | 267.150115         | 516.266405         | 258.636840       | 515.282389     | 258.144832       | 5  |
| 23 | 2906.512950       | 1453.760113       | 2889.486401    | 1445.246838      | 2888.502385    | 1444.754830      | V    | 432.245275         | 216.626275         | 415.218726         | 208.113001       | 414.234710     | 207.620993       | 4  |
| 24 | 2963.534414       | 1482.270845       | 2946.507865    | 1473.757570      | 2945.523849    | 1473.265562      | G    | 333.176861         | 167.092069         | 316.150312         | 158.578794       | 315.166296     | 158.086786       | 3  |
| 25 | 3092.577007       | 1546.792141       | 3075.550458    | 1538.278867      | 3074.566442    | 1537.786859      | E    | 276.155397         | 138.581337         | 259.128848         | 130.068062       | 258.144832     | 129.576054       | 2  |
| 26 |                   |                   |                |                  |                |                  | K    | 147.112804         | 74.060040          | 130.086255         | 65.546765        |                |                  | 1  |

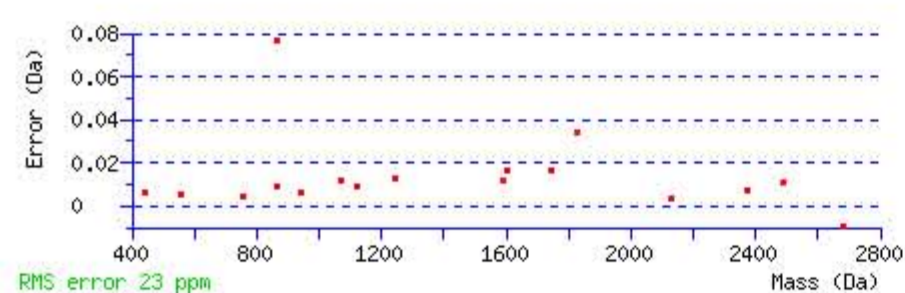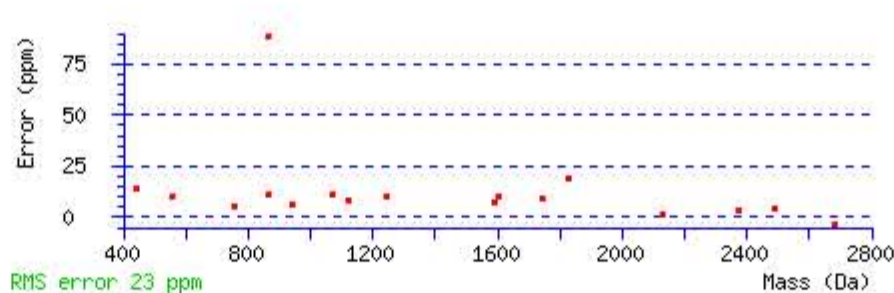

NCBI BLAST search of **IACVLPVLM DGIQSH P QKPFYTVGEK**

(Parameters: blastp, nr protein database, expect=20000, no filter, PAM30)

Other BLAST [web gateways](#)

All matches to this query

| Score | Mr(calc):   | Delta    | Sequence                                      |
|-------|-------------|----------|-----------------------------------------------|
| 54.8  | 3237.675262 | 0.021758 | <a href="#">IACVLPVLM DGIQSH P QKPFYTVGEK</a> |
| 23.1  | 3237.675262 | 0.021758 | <a href="#">IACVLPVLM DGIQSH P QKPFYTVGEK</a> |



**MASCOT** Mascot Search Results

**Peptide View**

MS/MS Fragmentation of **SVAVYGQYGGQPCVGNAFETQSCEPTR**  
 Found in **CO7\_HUMAN**, Complement component C7 OS=Homo sapiens GN=C7 PE=1 SV=2

Match to Query 65401: 3272.482782 from(1091.834870,3+) rtinseconds(2163) index(6833)  
 Title: Locus:1.1.1.1562.18 File:"2013-07-02 CLN FXIII 60 min 2nd F 1.wiff"  
 Data file C:\Program Files (x86)\Matrix Science\Mascot Daemon\mgf5 FXIII 60 min 2nd\mascot\_daemon\_merge.mgf

Click mouse within plot area to zoom in by factor of two about that point  
 Or, Plot from  to  Da   
 Label all possible matches  Label matches used for scoring

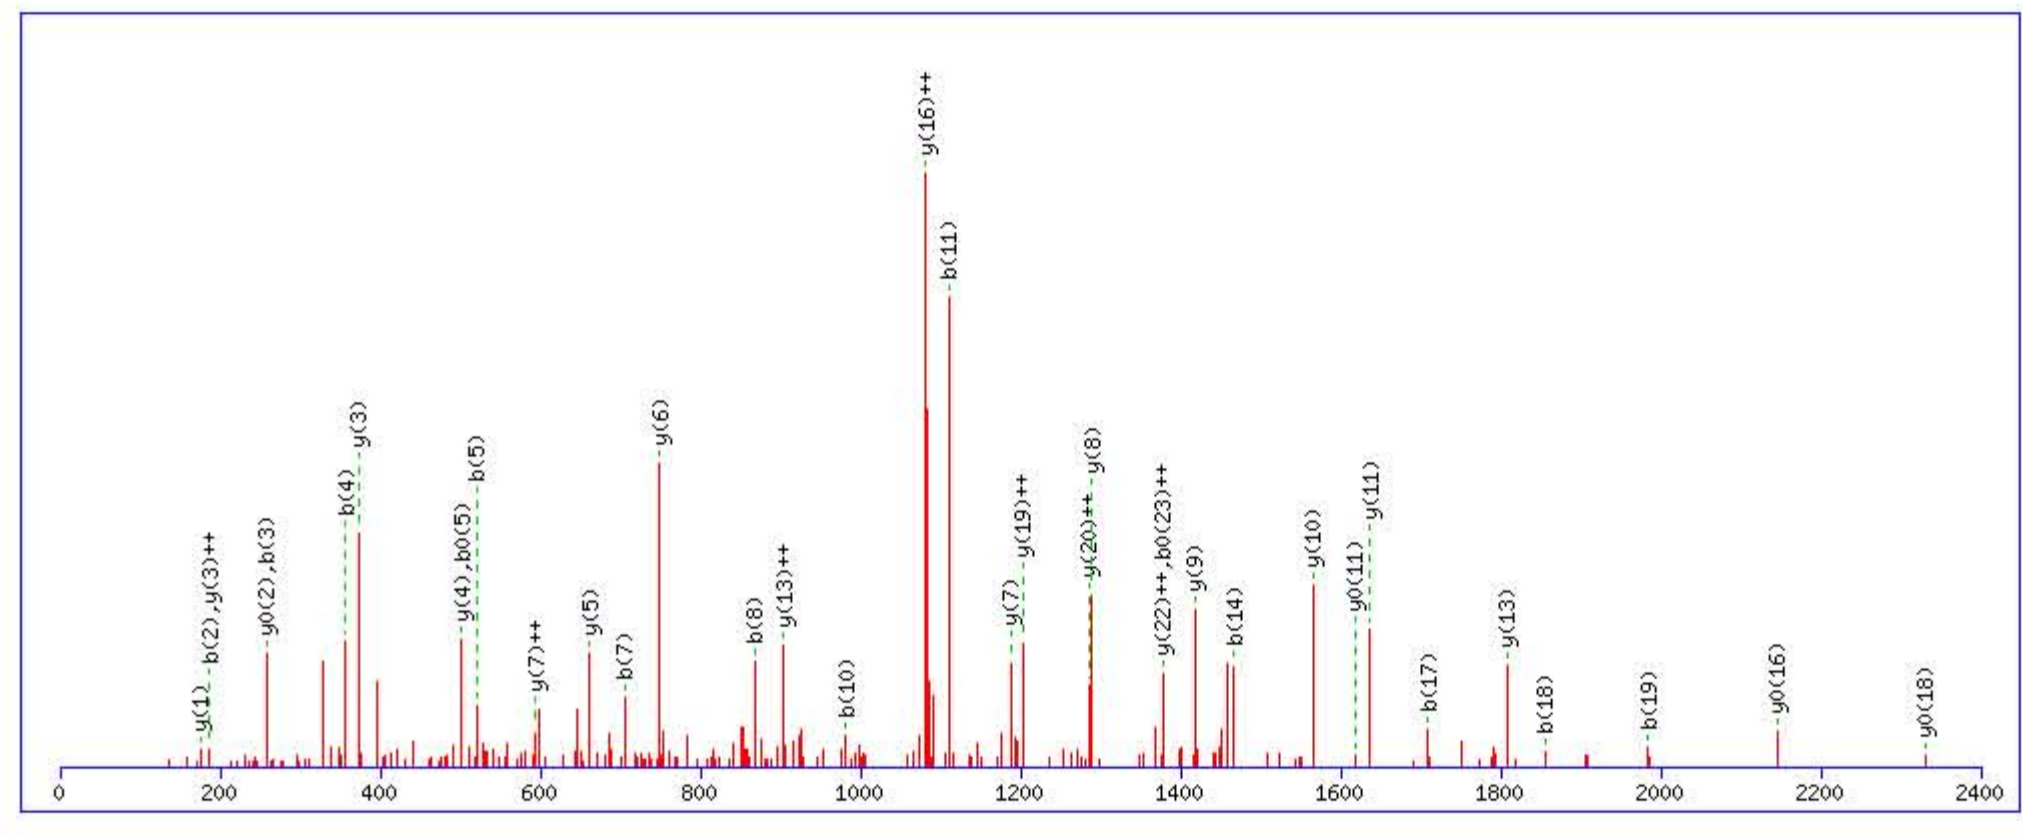

Monoisotopic mass of neutral peptide Mr(calc): 3272.468933  
 Fixed modifications: Carbamidomethyl (C) (apply to specified residues or termini only)  
 Variable modifications:  
 Q21 : Biotin:Thermo-21345 (Q)  
 Ions Score: 116 Expect: 2.1e-011  
 Matches : 36/298 fragment ions using 40 most intense peaks [\(help\)](#)

| #  | b                  | b <sup>++</sup> | b <sup>*</sup> | b <sup>+++</sup> | b <sup>0</sup>    | b <sup>0++</sup>   | Seq. | y                  | y <sup>++</sup>    | y <sup>*</sup> | y <sup>+++</sup> | y <sup>0</sup>     | y <sup>0++</sup> | #  |
|----|--------------------|-----------------|----------------|------------------|-------------------|--------------------|------|--------------------|--------------------|----------------|------------------|--------------------|------------------|----|
| 1  | 88.039304          | 44.523290       |                |                  | 70.028739         | 35.518008          | S    |                    |                    |                |                  |                    |                  | 27 |
| 2  | <b>187.107718</b>  | 94.057497       |                |                  | 169.097153        | 85.052214          | V    | 3186.444157        | 1593.725716        | 3169.417608    | 1585.212442      | 3168.433592        | 1584.720434      | 26 |
| 3  | <b>258.144832</b>  | 129.576054      |                |                  | 240.134267        | 120.570772         | A    | 3087.375743        | 1544.191509        | 3070.349194    | 1535.678235      | 3069.365178        | 1535.186227      | 25 |
| 4  | <b>357.213246</b>  | 179.110261      |                |                  | 339.202681        | 170.104979         | V    | 3016.338629        | 1508.672952        | 2999.312080    | 1500.159678      | 2998.328064        | 1499.667670      | 24 |
| 5  | <b>520.276575</b>  | 260.641926      |                |                  | <b>502.266010</b> | 251.636643         | Y    | 2917.270215        | 1459.138745        | 2900.243666    | 1450.625471      | 2899.259650        | 1450.133463      | 23 |
| 6  | 577.298039         | 289.152658      |                |                  | 559.287474        | 280.147375         | G    | 2754.206886        | <b>1377.607081</b> | 2737.180337    | 1369.093806      | 2736.196321        | 1368.601798      | 22 |
| 7  | <b>705.356617</b>  | 353.181947      | 688.330068     | 344.668672       | 687.346052        | 344.176664         | Q    | 2697.185422        | 1349.096349        | 2680.158873    | 1340.583074      | 2679.174857        | 1340.091066      | 21 |
| 8  | <b>868.419946</b>  | 434.713611      | 851.393397     | 426.200337       | 850.409381        | 425.708329         | Y    | 2569.126844        | <b>1285.067060</b> | 2552.100295    | 1276.553785      | 2551.116279        | 1276.061777      | 20 |
| 9  | 925.441410         | 463.224343      | 908.414861     | 454.711069       | 907.430845        | 454.219061         | G    | 2406.063515        | <b>1203.535395</b> | 2389.036966    | 1195.022121      | 2388.052950        | 1194.530113      | 19 |
| 10 | <b>982.462874</b>  | 491.735075      | 965.436325     | 483.221801       | 964.452309        | 482.729793         | G    | 2349.042051        | 1175.024663        | 2332.015502    | 1166.511389      | <b>2331.031486</b> | 1166.019381      | 18 |
| 11 | <b>1110.521452</b> | 555.764364      | 1093.494903    | 547.251090       | 1092.510887       | 546.759082         | Q    | 2292.020587        | 1146.513931        | 2274.994038    | 1138.000657      | 2274.010022        | 1137.508649      | 17 |
| 12 | 1207.574216        | 604.290746      | 1190.547667    | 595.777472       | 1189.563651       | 595.285464         | P    | 2163.962009        | <b>1082.484642</b> | 2146.935460    | 1073.971368      | <b>2145.951444</b> | 1073.479360      | 16 |
| 13 | 1367.604865        | 684.306071      | 1350.578316    | 675.792796       | 1349.594300       | 675.300788         | C    | 2066.909245        | 1033.958260        | 2049.882696    | 1025.444986      | 2048.898680        | 1024.952978      | 15 |
| 14 | <b>1466.673279</b> | 733.840278      | 1449.646730    | 725.327003       | 1448.662714       | 724.834995         | V    | 1906.878596        | 953.942936         | 1889.852047    | 945.429662       | 1888.868031        | 944.937654       | 14 |
| 15 | 1523.694743        | 762.351010      | 1506.668194    | 753.837735       | 1505.684178       | 753.345727         | G    | <b>1807.810182</b> | <b>904.408729</b>  | 1790.783633    | 895.895455       | 1789.799617        | 895.403446       | 13 |
| 16 | 1637.737670        | 819.372473      | 1620.711121    | 810.859199       | 1619.727105       | 810.367191         | N    | 1750.788718        | 875.897997         | 1733.762169    | 867.384723       | 1732.778153        | 866.892715       | 12 |
| 17 | <b>1708.774784</b> | 854.891030      | 1691.748235    | 846.377756       | 1690.764219       | 845.885748         | A    | <b>1636.745791</b> | 818.876534         | 1619.719242    | 810.363259       | <b>1618.735226</b> | 809.871251       | 11 |
| 18 | <b>1855.843198</b> | 928.425237      | 1838.816649    | 919.911963       | 1837.832633       | 919.419955         | F    | <b>1565.708677</b> | 783.357977         | 1548.682128    | 774.844702       | 1547.698112        | 774.352694       | 10 |
| 19 | <b>1984.885791</b> | 992.946534      | 1967.859242    | 984.433259       | 1966.875226       | 983.941251         | E    | <b>1418.640263</b> | 709.823770         | 1401.613714    | 701.310495       | 1400.629698        | 700.818487       | 9  |
| 20 | 2085.933470        | 1043.470373     | 2068.906921    | 1034.957098      | 2067.922905       | 1034.465090        | T    | <b>1289.597670</b> | 645.302473         | 1272.571121    | 636.789199       | 1271.587105        | 636.297190       | 8  |
| 21 | 2525.158796        | 1263.083036     | 2508.132247    | 1254.569761      | 2507.148231       | 1254.077754        | Q    | <b>1188.549991</b> | <b>594.778634</b>  | 1171.523442    | 586.265359       | 1170.539426        | 585.773351       | 7  |
| 22 | 2612.190824        | 1306.599050     | 2595.164275    | 1298.085776      | 2594.180259       | 1297.593768        | S    | <b>749.324665</b>  | 375.165970         | 732.298116     | 366.652696       | 731.314100         | 366.160688       | 6  |
| 23 | 2772.221473        | 1386.614374     | 2755.194924    | 1378.101100      | 2754.210908       | <b>1377.609092</b> | C    | <b>662.292637</b>  | 331.649956         | 645.266088     | 323.136682       | 644.282072         | 322.644674       | 5  |
| 24 | 2901.264066        | 1451.135671     | 2884.237517    | 1442.622396      | 2883.253501       | 1442.130389        | E    | <b>502.261988</b>  | 251.634632         | 485.235439     | 243.121357       | 484.251423         | 242.629349       | 4  |
| 25 | 2998.316830        | 1499.662053     | 2981.290281    | 1491.148778      | 2980.306265       | 1490.656771        | P    | <b>373.219395</b>  | <b>187.113335</b>  | 356.192846     | 178.600061       | 355.208830         | 178.108053       | 3  |
| 26 | 3099.364509        | 1550.185892     | 3082.337960    | 1541.672618      | 3081.353944       | 1541.180610        | T    | 276.166631         | 138.586953         | 259.140082     | 130.073679       | <b>258.156066</b>  | 129.581671       | 2  |
| 27 |                    |                 |                |                  |                   |                    | R    | <b>175.118952</b>  | 88.063114          | 158.092403     | 79.549839        |                    |                  | 1  |

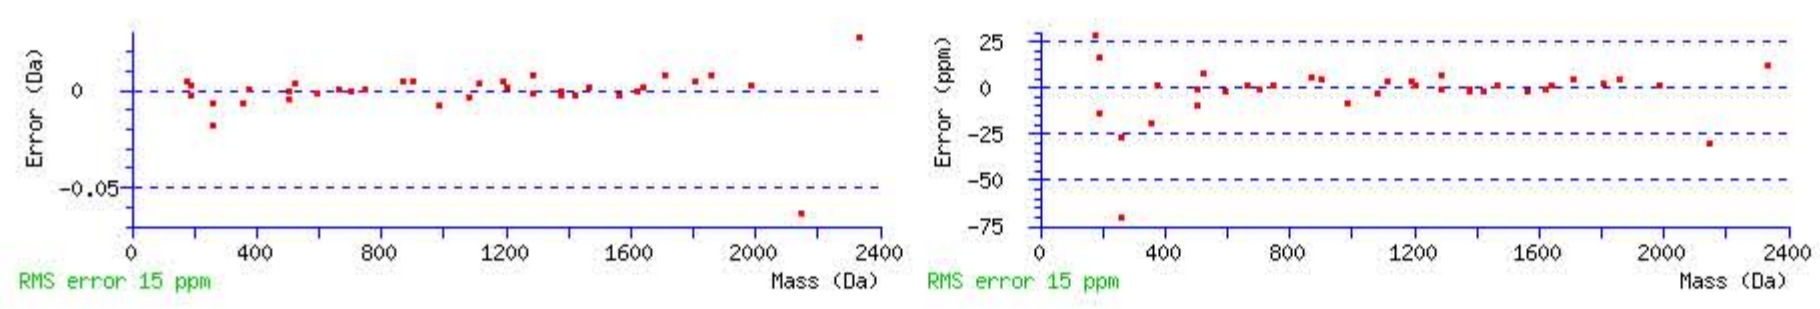

NCBI BLAST search of **SVAVYGQYGGQPCVGNAFETQSCEPTR**  
 (Parameters: blastp, nr protein database, expect=20000, no filter, PAM30)  
 Other BLAST [web gateways](#)

**All matches to this query**

| Score | Mr(calc):   | Delta    | Sequence                                    |
|-------|-------------|----------|---------------------------------------------|
| 116.4 | 3272.468933 | 0.013849 | <a href="#">SVAVYGQYGGQPCVGNAFETQSCEPTR</a> |
| 23.9  | 3272.468933 | 0.013849 | <a href="#">SVAVYGQYGGQPCVGNAFETQSCEPTR</a> |
| 7.5   | 3272.468933 | 0.013849 | <a href="#">SVAVYGQYGGQPCVGNAFETQSCEPTR</a> |



# MASCOT Search Results

## Peptide View

MS/MS Fragmentation of **AGIQER**

Found in **CO8A\_HUMAN**, Complement component C8 alpha chain OS=Homo sapiens GN=C8A PE=1 SV=2

Match to Query 15468: 983.519868 from(492.767210,2+) rtinseconds(1404) index(17786)

Title: Locus:1.1.1.491.12 File:"2013-07-02 CLN FXIII 60 min 2nd F 2.wiff"

Data file C:\Program Files (x86)\Matrix Science\Mascot Daemon\mgf\5 FXIII 60 min 2nd\mascot\_daemon\_merge.mgf

Click mouse within plot area to zoom in by factor of two about that point

Or, Plot from  to  Da

Label all possible matches  Label matches used for scoring

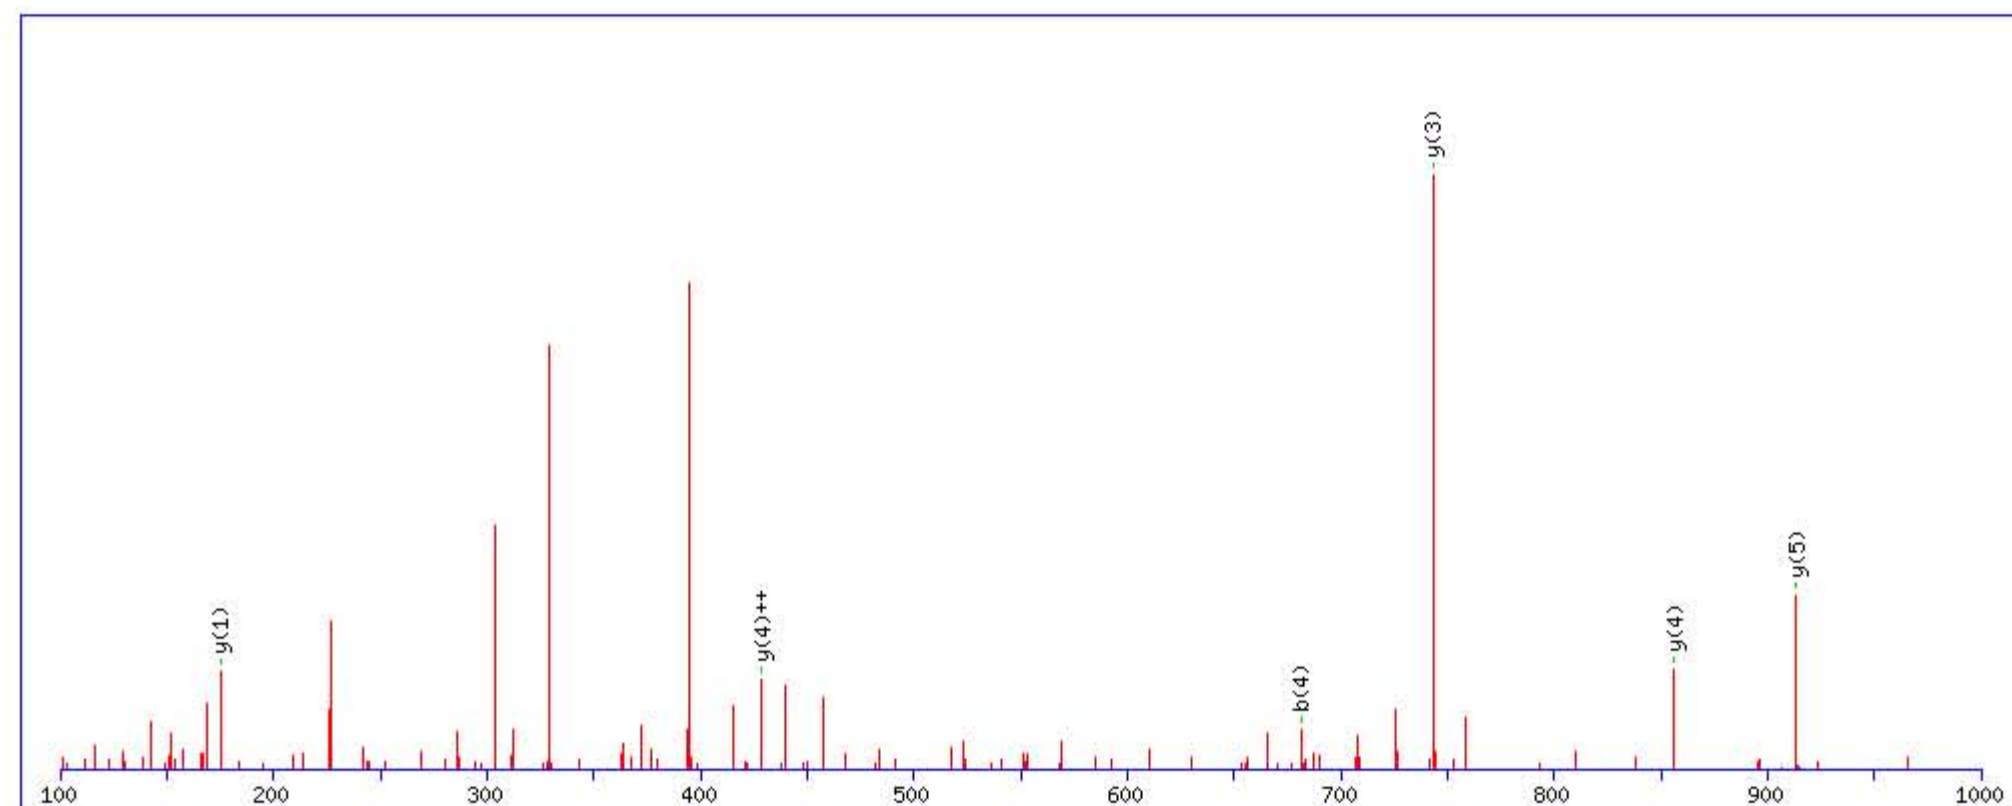

Monoisotopic mass of neutral peptide Mr(calc): 983.522217

Fixed modifications: Carbamidomethyl (C) (apply to specified residues or termini only)

Variable modifications:

Q4 : Biotin:Thermo-21345 (Q)

Ions Score: 26 Expect: 0.051

Matches : 6/44 fragment ions using 9 most intense peaks ([help](#))

| # | b                 | b <sup>++</sup> | b <sup>*</sup> | b <sup>+++</sup> | b <sup>0</sup> | b <sup>0++</sup> | Seq. | y                 | y <sup>++</sup>   | y <sup>*</sup> | y <sup>+++</sup> | y <sup>0</sup> | y <sup>0++</sup> | # |
|---|-------------------|-----------------|----------------|------------------|----------------|------------------|------|-------------------|-------------------|----------------|------------------|----------------|------------------|---|
| 1 | 72.044390         | 36.525833       |                |                  |                |                  | A    |                   |                   |                |                  |                |                  | 6 |
| 2 | 129.065854        | 65.036565       |                |                  |                |                  | G    | <b>913.492399</b> | 457.249838        | 896.465850     | 448.736563       | 895.481834     | 448.244555       | 5 |
| 3 | 242.149918        | 121.578597      |                |                  |                |                  | I    | <b>856.470935</b> | <b>428.739106</b> | 839.444386     | 420.225831       | 838.460370     | 419.733823       | 4 |
| 4 | <b>681.375244</b> | 341.191260      | 664.348695     | 332.677986       |                |                  | Q    | <b>743.386871</b> | 372.197074        | 726.360322     | 363.683799       | 725.376306     | 363.191791       | 3 |
| 5 | 810.417837        | 405.712557      | 793.391288     | 397.199282       | 792.407272     | 396.707274       | E    | 304.161545        | 152.584411        | 287.134996     | 144.071136       | 286.150980     | 143.579128       | 2 |
| 6 |                   |                 |                |                  |                |                  | R    | <b>175.118952</b> | 88.063114         | 158.092403     | 79.549840        |                |                  | 1 |

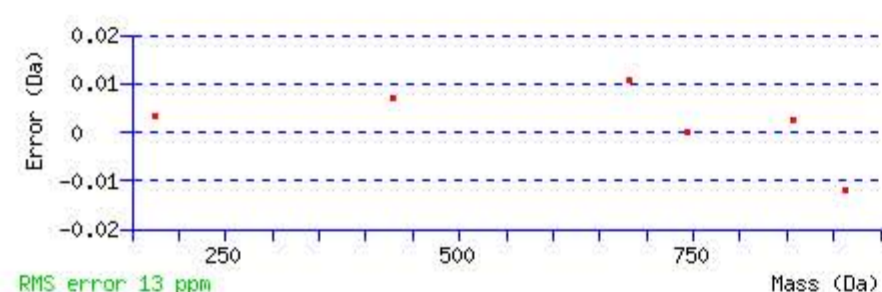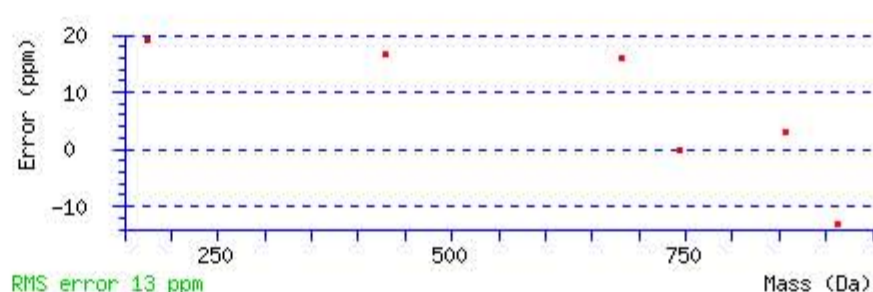

NCBI BLAST search of **AGIQER**

(Parameters: blastp, nr protein database, expect=20000, no filter, PAM30)

Other BLAST [web gateways](#)

All matches to this query

| Score | Mr(calc):  | Delta     | Sequence                 |
|-------|------------|-----------|--------------------------|
| 26.0  | 983.522217 | -0.002349 | <a href="#">AGIQER</a>   |
| 23.0  | 983.522217 | -0.002349 | <a href="#">AGLEQR</a>   |
| 13.3  | 983.522217 | -0.002349 | <a href="#">QIQER</a>    |
| 13.3  | 983.522217 | -0.002349 | <a href="#">QLQER</a>    |
| 11.1  | 983.522202 | -0.002334 | <a href="#">KLMENPPR</a> |
| 11.1  | 983.522217 | -0.002349 | <a href="#">QLEQR</a>    |
| 11.1  | 983.530090 | -0.010222 | <a href="#">QLLNHFGR</a> |
| 10.0  | 983.514816 | 0.005052  | <a href="#">QPVREAER</a> |
| 8.2   | 983.522217 | -0.002349 | <a href="#">AGQELR</a>   |
| 4.1   | 983.522217 | -0.002349 | <a href="#">AAQVER</a>   |

Mascot: <http://www.matrixscience.com/>



# MASCOT Search Results

## Peptide View

MS/MS Fragmentation of **QAQCGQDFQCK**

Found in **CO8A\_HUMAN**, Complement component C8 alpha chain OS=Homo sapiens GN=C8A PE=1 SV=2

Match to Query 40040: 1679.723448 from(840.869000,2+) rtinseconds(1510) index(18554)

Title: Locus:1.1.1.528.13 File:"2013-07-02 CLN FXIII 60 min 2nd F 2.wiff"

Data file C:\Program Files (x86)\Matrix Science\Mascot Daemon\mgf5 FXIII 60 min 2nd\mascot\_daemon\_merge.mgf

Click mouse within plot area to zoom in by factor of two about that point

Or, Plot from  to  Da

Label all possible matches  Label matches used for scoring

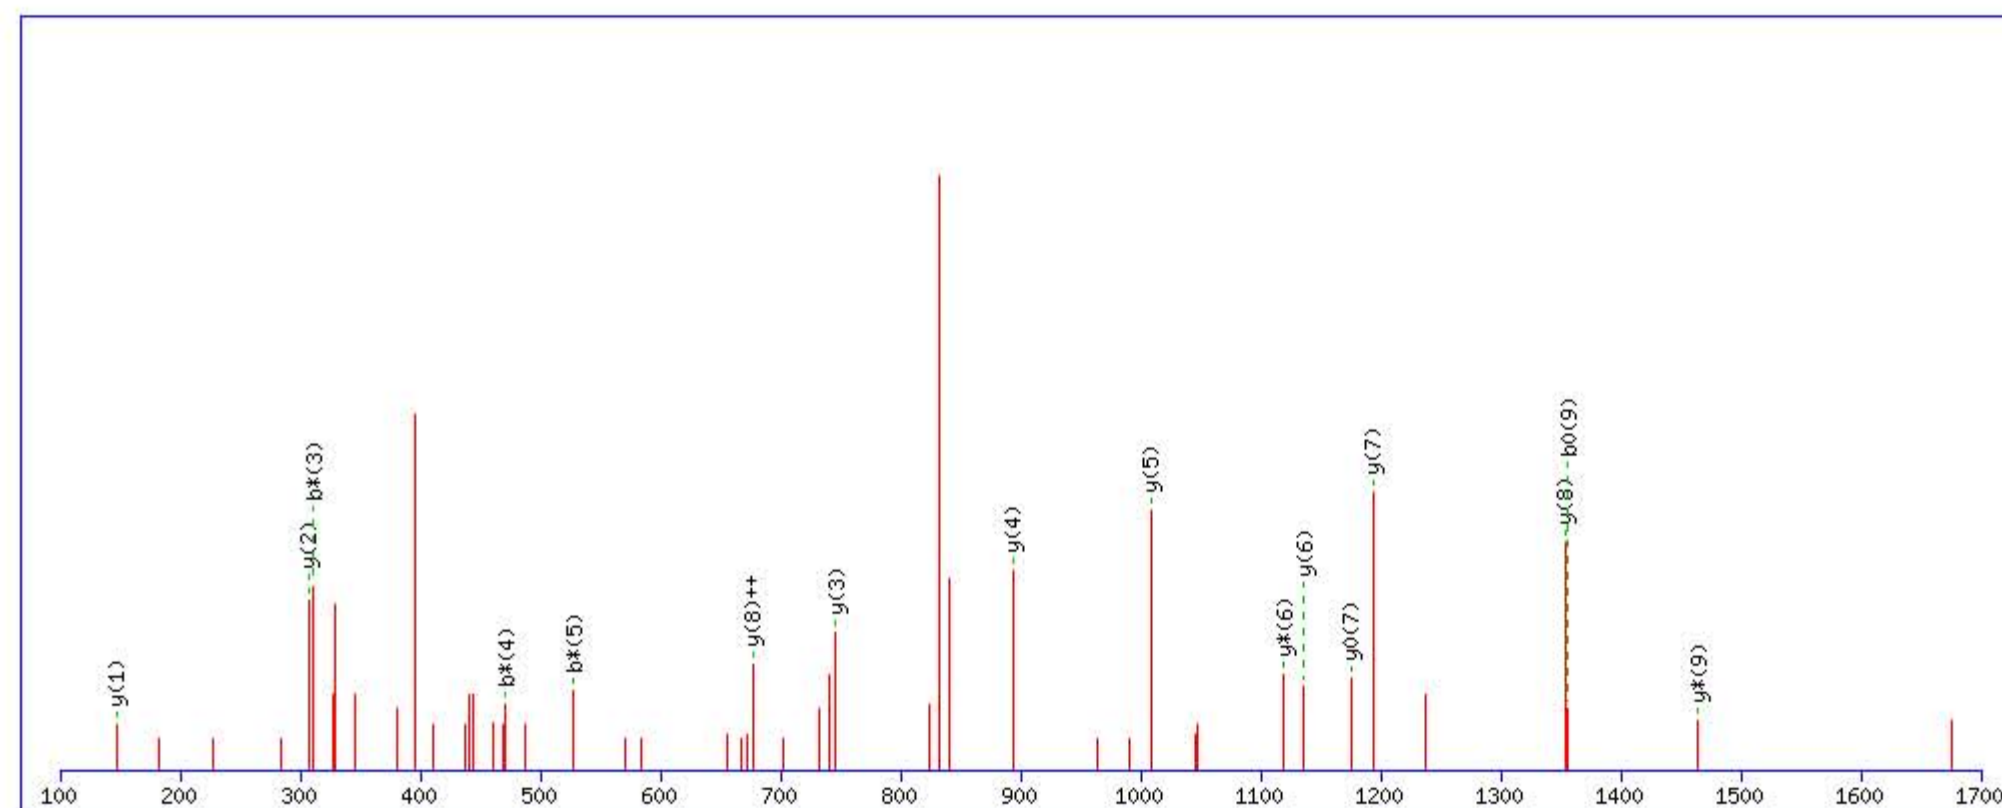

Monoisotopic mass of neutral peptide  $M_r(\text{calc})$ : 1679.721832

Fixed modifications: Carbamidomethyl (C) (apply to specified residues or termini only)

Variable modifications:

Q9 : Biotin:Thermo-21345 (Q)

Ions Score: 47 Expect: 8e-005

Matches : 16/100 fragment ions using 25 most intense peaks [\(help\)](#)

| #  | b           | b <sup>++</sup> | b <sup>+</sup> | b <sup>*++</sup> | b <sup>0</sup> | b <sup>0++</sup> | Seq. | y           | y <sup>++</sup> | y <sup>+</sup> | y <sup>*++</sup> | y <sup>0</sup> | y <sup>0++</sup> | #  |
|----|-------------|-----------------|----------------|------------------|----------------|------------------|------|-------------|-----------------|----------------|------------------|----------------|------------------|----|
| 1  | 129.065854  | 65.036565       | 112.039305     | 56.523291        |                |                  | Q    |             |                 |                |                  |                |                  | 11 |
| 2  | 200.102968  | 100.555122      | 183.076419     | 92.041848        |                |                  | A    | 1552.670519 | 776.838898      | 1535.643970    | 768.325623       | 1534.659954    | 767.833615       | 10 |
| 3  | 328.161546  | 164.584411      | 311.134997     | 156.071136       |                |                  | Q    | 1481.633405 | 741.320341      | 1464.606856    | 732.807066       | 1463.622840    | 732.315058       | 9  |
| 4  | 488.192195  | 244.599736      | 471.165646     | 236.086461       |                |                  | C    | 1353.574827 | 677.291052      | 1336.548278    | 668.777777       | 1335.564262    | 668.285769       | 8  |
| 5  | 545.213659  | 273.110468      | 528.187110     | 264.597193       |                |                  | G    | 1193.544178 | 597.275727      | 1176.517629    | 588.762453       | 1175.533613    | 588.270445       | 7  |
| 6  | 673.272237  | 337.139757      | 656.245688     | 328.626482       |                |                  | Q    | 1136.522714 | 568.764995      | 1119.496165    | 560.251721       | 1118.512149    | 559.759713       | 6  |
| 7  | 788.299180  | 394.653228      | 771.272631     | 386.139954       | 770.288615     | 385.647946       | D    | 1008.464136 | 504.735706      | 991.437587     | 496.222432       | 990.453571     | 495.730424       | 5  |
| 8  | 935.367594  | 468.187435      | 918.341045     | 459.674161       | 917.357029     | 459.182153       | F    | 893.437193  | 447.222235      | 876.410644     | 438.708960       |                |                  | 4  |
| 9  | 1374.592920 | 687.800098      | 1357.566371    | 679.286824       | 1356.582355    | 678.794816       | Q    | 746.368779  | 373.688028      | 729.342230     | 365.174753       |                |                  | 3  |
| 10 | 1534.623569 | 767.815423      | 1517.597020    | 759.302148       | 1516.613004    | 758.810140       | C    | 307.143453  | 154.075365      | 290.116904     | 145.562090       |                |                  | 2  |
| 11 |             |                 |                |                  |                |                  | K    | 147.112804  | 74.060040       | 130.086255     | 65.546765        |                |                  | 1  |

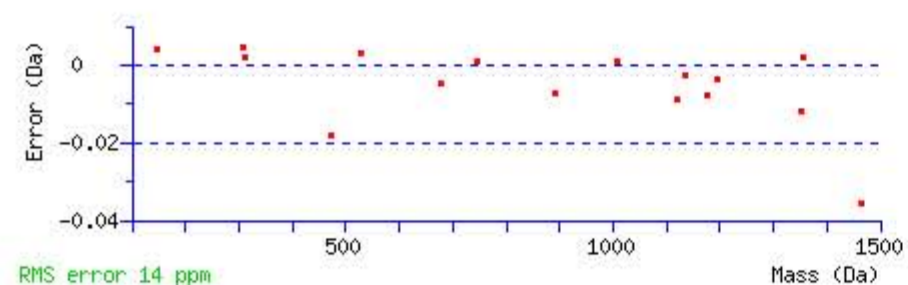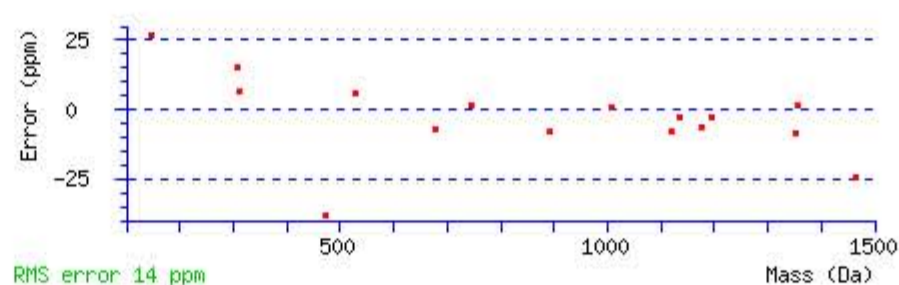

NCBI BLAST search of **QAQCGQDFQCK**

(Parameters: blastp, nr protein database, expect=20000, no filter, PAM30)

Other BLAST [web gateways](#)

All matches to this query

| Score | $M_r(\text{calc})$ : | Delta    | Sequence                    |
|-------|----------------------|----------|-----------------------------|
| 47.2  | 1679.721832          | 0.001616 | <a href="#">QAQCGQDFQCK</a> |
| 17.3  | 1679.721832          | 0.001616 | <a href="#">QAQCGQDFQCK</a> |

Mascot: <http://www.matrixscience.com/>



# MASCOT SEARCH RESULTS

## Peptide View

MS/MS Fragmentation of **ALDQYLMEFNACR**

Found in **CO8A\_HUMAN**, Complement component C8 alpha chain OS=Homo sapiens GN=C8A PE=1 SV=2

Match to Query 45377: 1940.896808 from(971.455680,2+) rtinseconds(2560) index(39843)

Title: Locus:1.1.1.3310.9 File:"2013-07-02 CLN FXIII 60 min 2nd F 3.wiff"

Data file C:\Program Files (x86)\Matrix Science\Mascot Daemon\mgf5 FXIII 60 min 2nd\mascot\_daemon\_merge.mgf

Click mouse within plot area to zoom in by factor of two about that point

Or, Plot from  to  Da

Label all possible matches  Label matches used for scoring

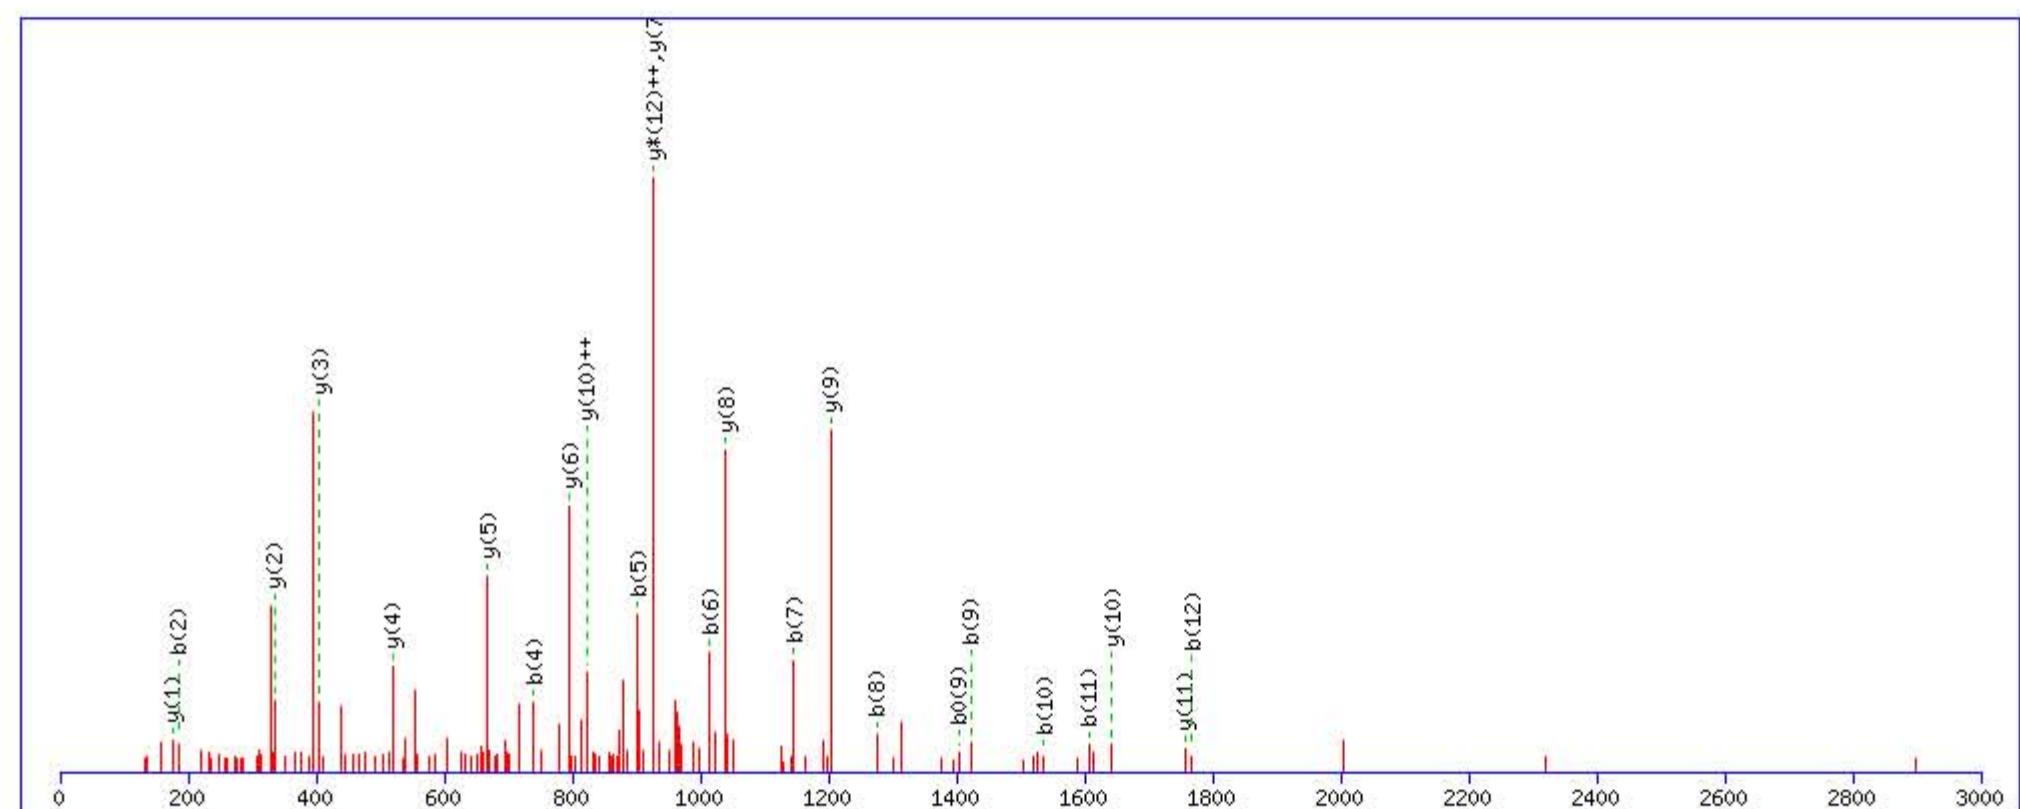

Monoisotopic mass of neutral peptide Mr(calc): 1940.894669

Fixed modifications: Carbamidomethyl (C) (apply to specified residues or termini only)

Variable modifications:

Q4 : Biotin:Thermo-21345 (Q)

Ions Score: 61 Expect: 8.3e-006

Matches : 24/124 fragment ions using 48 most intense peaks [\(help\)](#)

| #  | b                  | b <sup>++</sup> | b <sup>*</sup> | b <sup>*++</sup> | b <sup>0</sup>     | b <sup>0++</sup> | Seq. | y                  | y <sup>++</sup>   | y <sup>*</sup> | y <sup>*++</sup>  | y <sup>0</sup> | y <sup>0++</sup> | #  |
|----|--------------------|-----------------|----------------|------------------|--------------------|------------------|------|--------------------|-------------------|----------------|-------------------|----------------|------------------|----|
| 1  | 72.044390          | 36.525833       |                |                  |                    |                  | A    |                    |                   |                |                   |                |                  | 13 |
| 2  | <b>185.128454</b>  | 93.067865       |                |                  |                    |                  | L    | 1870.864860        | 935.936068        | 1853.838311    | <b>927.422794</b> | 1852.854295    | 926.930786       | 12 |
| 3  | 300.155397         | 150.581336      |                |                  | 282.144832         | 141.576054       | D    | <b>1757.780796</b> | 879.394036        | 1740.754247    | 870.880762        | 1739.770231    | 870.388754       | 11 |
| 4  | <b>739.380723</b>  | 370.194000      | 722.354174     | 361.680725       | 721.370158         | 361.188717       | Q    | <b>1642.753853</b> | <b>821.880565</b> | 1625.727304    | 813.367290        | 1624.743288    | 812.875282       | 10 |
| 5  | <b>902.444052</b>  | 451.725664      | 885.417503     | 443.212390       | 884.433487         | 442.720382       | Y    | <b>1203.528527</b> | 602.267902        | 1186.501978    | 593.754627        | 1185.517962    | 593.262619       | 9  |
| 6  | <b>1015.528116</b> | 508.267696      | 998.501567     | 499.754422       | 997.517551         | 499.262414       | L    | <b>1040.465198</b> | 520.736237        | 1023.438649    | 512.222963        | 1022.454633    | 511.730955       | 8  |
| 7  | <b>1146.568601</b> | 573.787939      | 1129.542052    | 565.274664       | 1128.558036        | 564.782656       | M    | <b>927.381134</b>  | 464.194205        | 910.354585     | 455.680931        | 909.370569     | 455.188923       | 7  |
| 8  | <b>1275.611194</b> | 638.309235      | 1258.584645    | 629.795961       | 1257.600629        | 629.303953       | E    | <b>796.340649</b>  | 398.673963        | 779.314100     | 390.160688        | 778.330084     | 389.668680       | 6  |
| 9  | <b>1422.679608</b> | 711.843442      | 1405.653059    | 703.330168       | <b>1404.669043</b> | 702.838160       | F    | <b>667.298056</b>  | 334.152666        | 650.271507     | 325.639392        |                |                  | 5  |
| 10 | <b>1536.722535</b> | 768.864906      | 1519.695986    | 760.351631       | 1518.711970        | 759.859623       | N    | <b>520.229642</b>  | 260.618459        | 503.203093     | 252.105185        |                |                  | 4  |
| 11 | <b>1607.759649</b> | 804.383463      | 1590.733100    | 795.870188       | 1589.749084        | 795.378180       | A    | <b>406.186715</b>  | 203.596995        | 389.160166     | 195.083721        |                |                  | 3  |
| 12 | <b>1767.790298</b> | 884.398787      | 1750.763749    | 875.885513       | 1749.779733        | 875.393505       | C    | <b>335.149601</b>  | 168.078438        | 318.123052     | 159.565164        |                |                  | 2  |
| 13 |                    |                 |                |                  |                    |                  | R    | <b>175.118952</b>  | 88.063114         | 158.092403     | 79.549839         |                |                  | 1  |

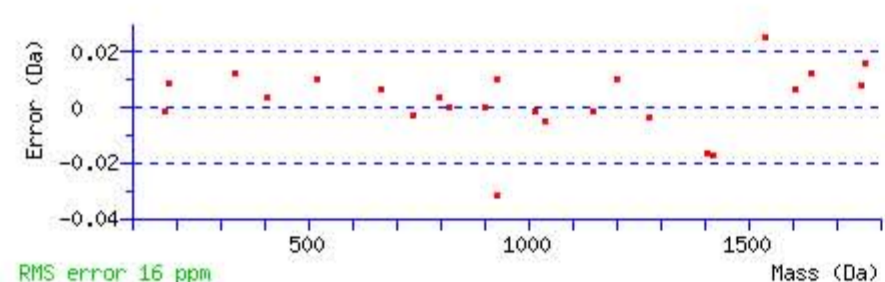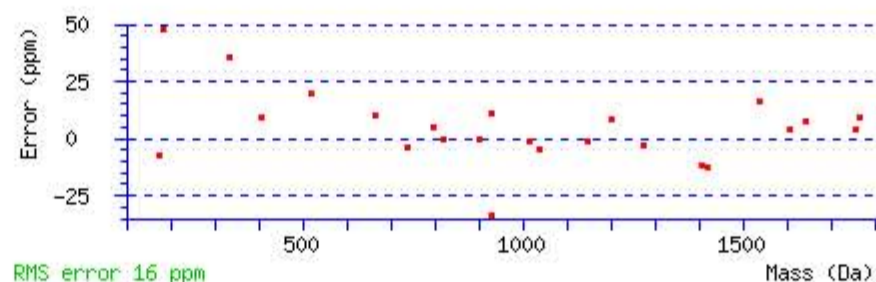

NCBI BLAST search of [ALDQYLMEFNACR](#)

(Parameters: blastp, nr protein database, expect=20000, no filter, PAM30)

Other BLAST [web gateways](#)

## All matches to this query

| Score | Mr(calc):   | Delta    | Sequence                      |
|-------|-------------|----------|-------------------------------|
| 61.5  | 1940.894669 | 0.002139 | <a href="#">ALDQYLMEFNACR</a> |

Mascot: <http://www.matrixscience.com/>



# MASCOT SCIENCE Mascot Search Results

## Peptide View

MS/MS Fragmentation of **QAQCGQDFQCK**

Found in **CO8A\_HUMAN**, Complement component C8 alpha chain OS=Homo sapiens GN=C8A PE=1 SV=2

Match to Query 46251: 1990.900122 from(664.640650,3+) rtinseconds(1837) index(35232)

Title: Locus:1.1.1.3059.6 File:"2013-07-02 CLN FXIII 60 min 2nd F 3.wiff"

Data file C:\Program Files (x86)\Matrix Science\Mascot Daemon\mgf5 FXIII 60 min 2nd\mascot\_daemon\_merge.mgf

Click mouse within plot area to zoom in by factor of two about that point

Or, Plot from  to  Da

Label all possible matches  Label matches used for scoring

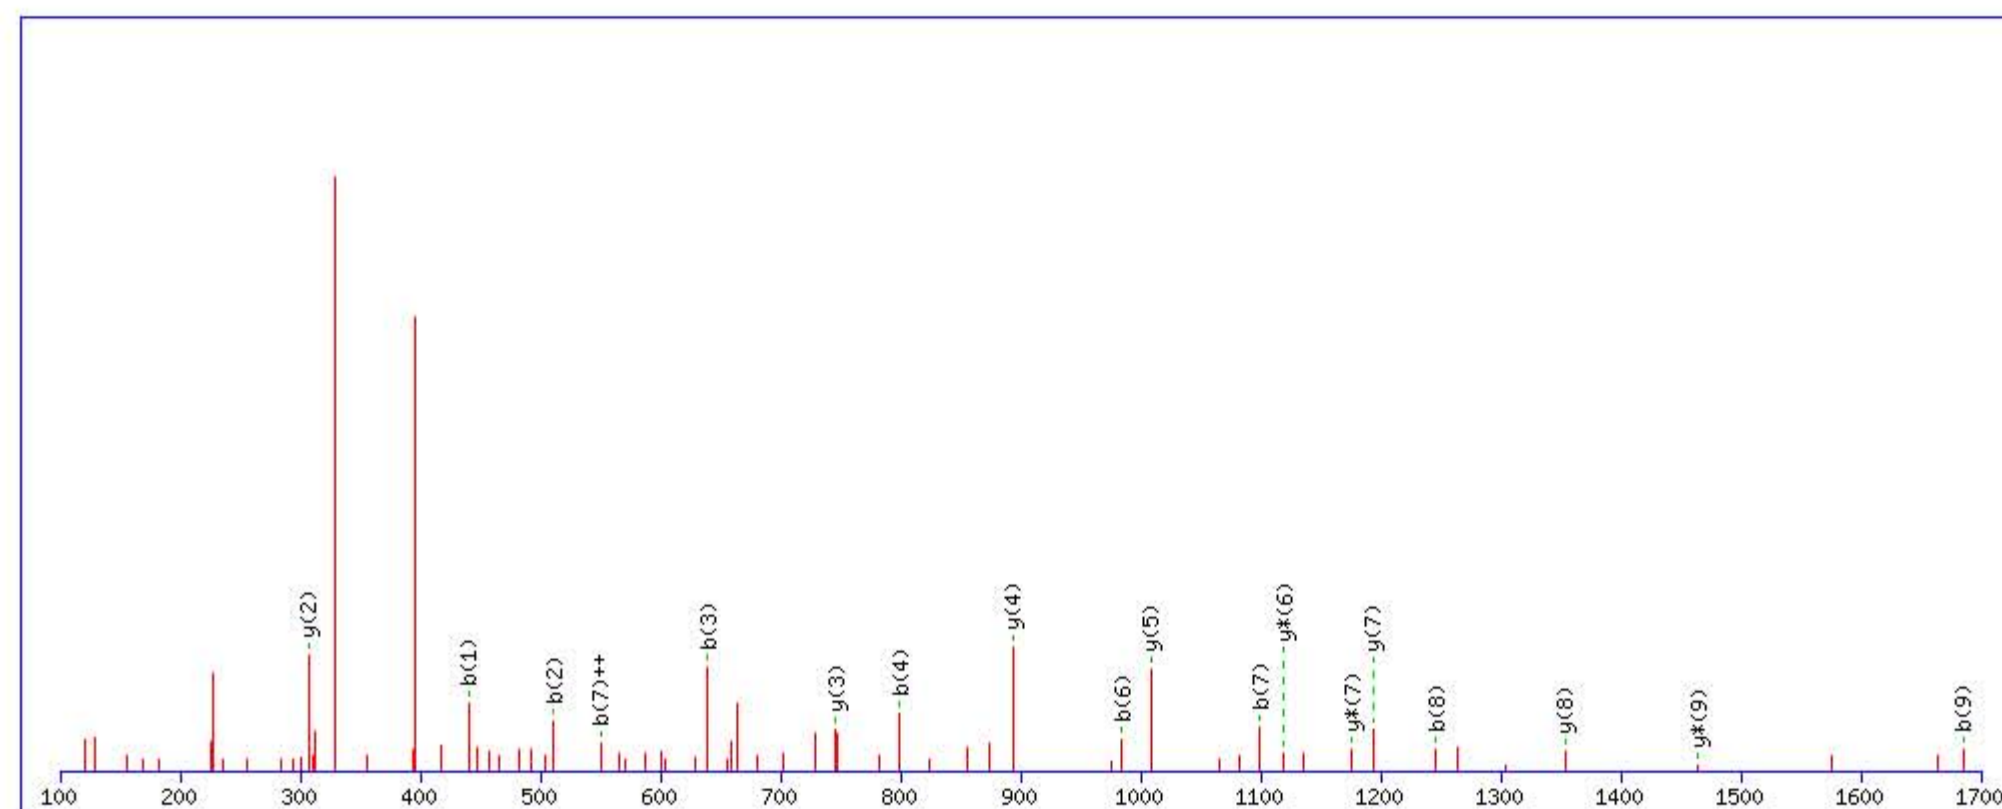

Monoisotopic mass of neutral peptide Mr(calc): 1990.888580

Fixed modifications: Carbamidomethyl (C) (apply to specified residues or termini only)

Variable modifications:

Q1 : Biotin:Thermo-21345 (Q)

Q9 : Biotin:Thermo-21345 (Q)

Ions Score: 43 Expect: 0.00048

Matches : 18/100 fragment ions using 30 most intense peaks [\(help\)](#)

| #  | b                  | b <sup>++</sup>   | b <sup>+</sup> | b <sup>+++</sup> | b <sup>0</sup> | b <sup>0++</sup> | Seq. | y                  | y <sup>++</sup> | y <sup>+</sup>     | y <sup>+++</sup> | y <sup>0</sup> | y <sup>0++</sup> | #  |
|----|--------------------|-------------------|----------------|------------------|----------------|------------------|------|--------------------|-----------------|--------------------|------------------|----------------|------------------|----|
| 1  | <b>440.232602</b>  | 220.619939        | 423.206053     | 212.106664       |                |                  | Q    |                    |                 |                    |                  |                |                  | 11 |
| 2  | <b>511.269716</b>  | 256.138496        | 494.243167     | 247.625221       |                |                  | A    | 1552.670519        | 776.838898      | 1535.643970        | 768.325623       | 1534.659954    | 767.833615       | 10 |
| 3  | <b>639.328294</b>  | 320.167785        | 622.301745     | 311.654511       |                |                  | Q    | 1481.633405        | 741.320341      | <b>1464.606856</b> | 732.807066       | 1463.622840    | 732.315058       | 9  |
| 4  | <b>799.358943</b>  | 400.183110        | 782.332394     | 391.669835       |                |                  | C    | <b>1353.574827</b> | 677.291052      | 1336.548278        | 668.777777       | 1335.564262    | 668.285769       | 8  |
| 5  | 856.380407         | 428.693842        | 839.353858     | 420.180567       |                |                  | G    | <b>1193.544178</b> | 597.275727      | <b>1176.517629</b> | 588.762453       | 1175.533613    | 588.270445       | 7  |
| 6  | <b>984.438985</b>  | 492.723131        | 967.412436     | 484.209856       |                |                  | Q    | 1136.522714        | 568.764995      | <b>1119.496165</b> | 560.251721       | 1118.512149    | 559.759713       | 6  |
| 7  | <b>1099.465928</b> | <b>550.236602</b> | 1082.439379    | 541.723328       | 1081.455363    | 541.231320       | D    | <b>1008.464136</b> | 504.735706      | 991.437587         | 496.222432       | 990.453571     | 495.730424       | 5  |
| 8  | <b>1246.534342</b> | 623.770809        | 1229.507793    | 615.257535       | 1228.523777    | 614.765527       | F    | <b>893.437193</b>  | 447.222235      | 876.410644         | 438.708960       |                |                  | 4  |
| 9  | <b>1685.759668</b> | 843.383472        | 1668.733119    | 834.870198       | 1667.749103    | 834.378190       | Q    | <b>746.368779</b>  | 373.688028      | 729.342230         | 365.174753       |                |                  | 3  |
| 10 | 1845.790317        | 923.398797        | 1828.763768    | 914.885522       | 1827.779752    | 914.393514       | C    | <b>307.143453</b>  | 154.075365      | 290.116904         | 145.562090       |                |                  | 2  |
| 11 |                    |                   |                |                  |                |                  | K    | 147.112804         | 74.060040       | 130.086255         | 65.546765        |                |                  | 1  |

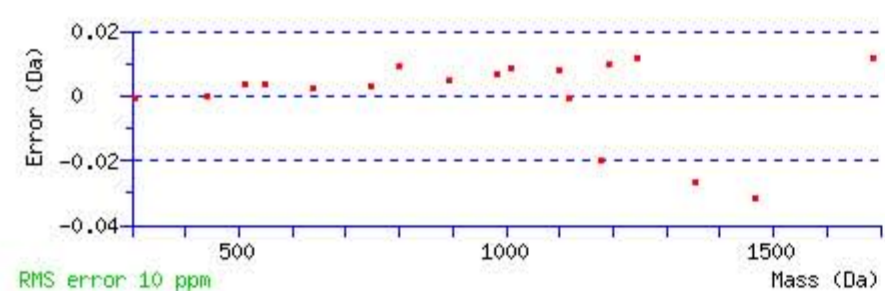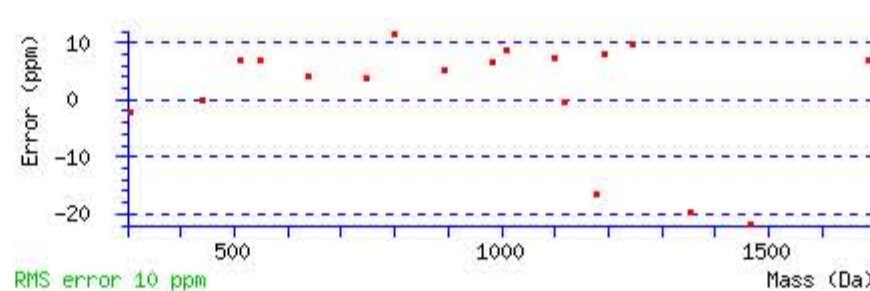

NCBI BLAST search of **QAQCGQDFQCK**

(Parameters: blastp, nr protein database, expect=20000, no filter, PAM30)

Other BLAST [web gateways](#)

All matches to this query

| Score | Mr(calc):   | Delta    | Sequence                    |
|-------|-------------|----------|-----------------------------|
| 42.6  | 1990.888580 | 0.011542 | <a href="#">QAQCGQDFQCK</a> |
| 31.0  | 1990.888580 | 0.011542 | <a href="#">QAQCGQDFQCK</a> |
| 12.9  | 1990.888580 | 0.011542 | <a href="#">QAQCGQDFQCK</a> |
| 8.3   | 1990.888580 | 0.011542 | <a href="#">QAQCGQDFQCK</a> |
| 7.4   | 1990.888580 | 0.011542 | <a href="#">QAQCGQDFQCK</a> |

Mascot: <http://www.matrixscience.com/>



# MASCOT Search Results

## Peptide View

MS/MS Fragmentation of **LGSLGAACEQTQTEGAK**

Found in **CO8A\_HUMAN**, Complement component C8 alpha chain OS=Homo sapiens GN=C8A PE=1 SV=2

Match to Query 47909: 2030.973372 from(677.998400,3+) rtinseconds(1704) index(34443)

Title: Locus:1.1.1.3013.7 File:"2013-07-02 CLN FXIII 60 min 2nd F 3.wiff"

Data file C:\Program Files (x86)\Matrix Science\Mascot Daemon\mgf\5 FXIII 60 min 2nd\mascot\_daemon\_merge.mgf

Click mouse within plot area to zoom in by factor of two about that point

Or, Plot from  to  Da

Label all possible matches  Label matches used for scoring

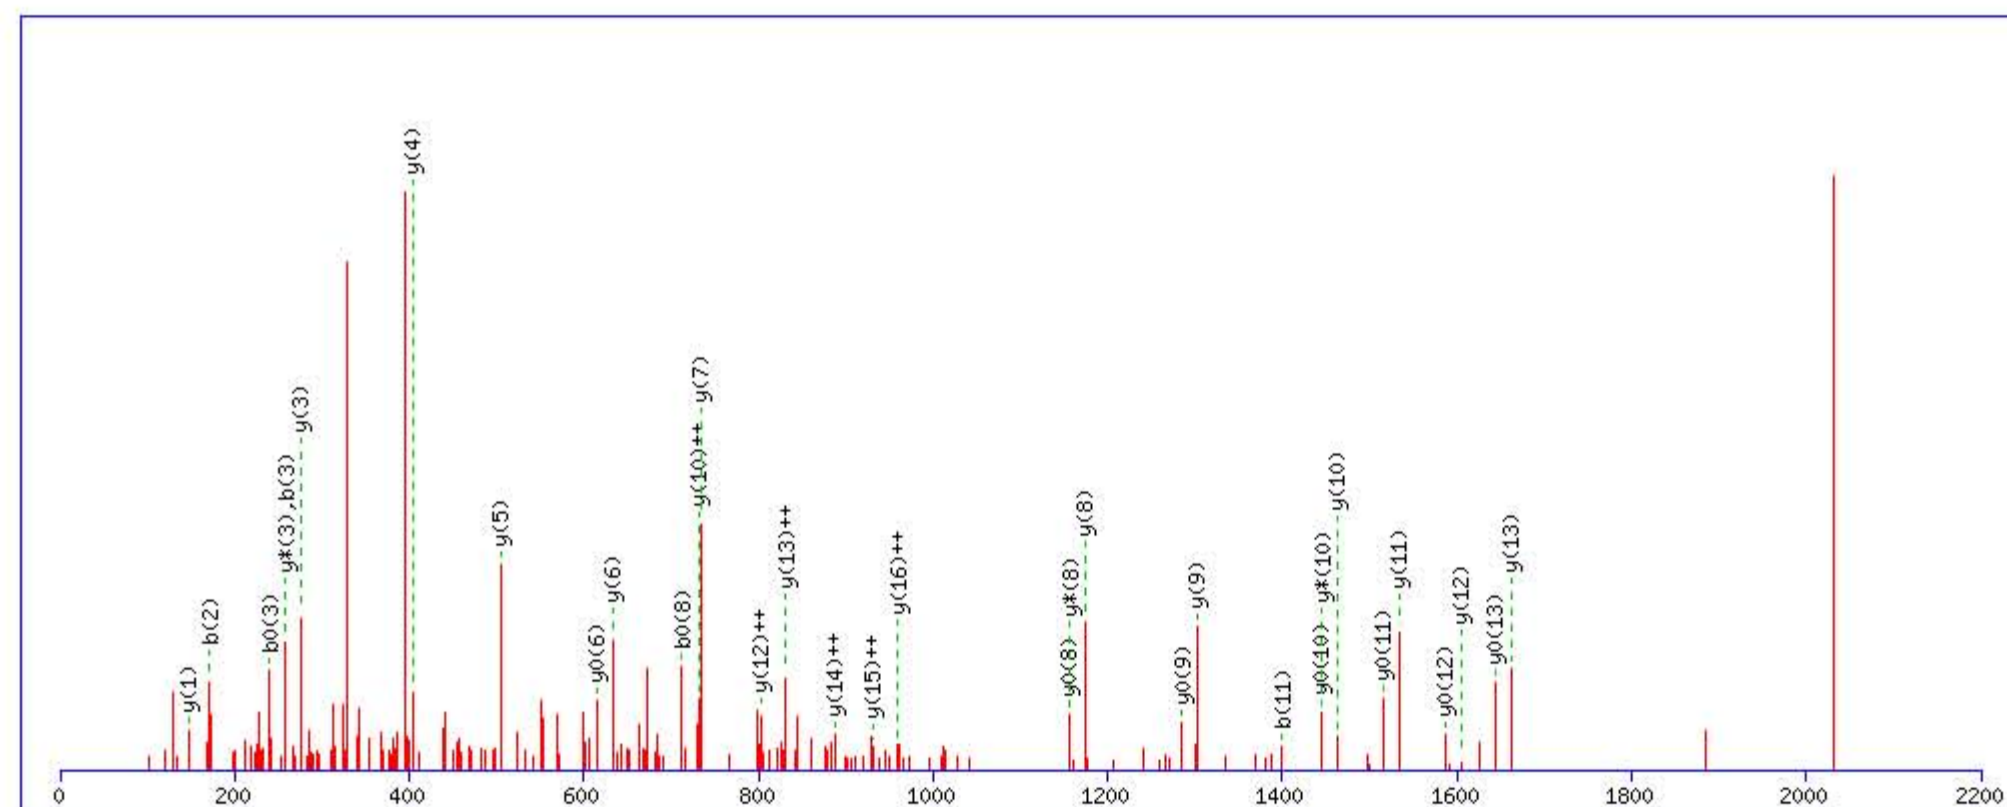

Monoisotopic mass of neutral peptide Mr(calc): 2030.976501

Fixed modifications: Carbamidomethyl (C) (apply to specified residues or termini only)

Variable modifications:

Q10 : Biotin:Thermo-21345 (Q)

Ions Score: 63 Expect: 1.6e-006

Matches : 33/164 fragment ions using 65 most intense peaks [\(help\)](#)

| #  | b                  | b <sup>++</sup> | b <sup>+</sup> | b <sup>+++</sup> | b <sup>0</sup>    | b <sup>0++</sup> | Seq. | y                  | y <sup>++</sup>   | y <sup>+</sup>     | y <sup>+++</sup> | y <sup>0</sup>     | y <sup>0++</sup> | #  |
|----|--------------------|-----------------|----------------|------------------|-------------------|------------------|------|--------------------|-------------------|--------------------|------------------|--------------------|------------------|----|
| 1  | 114.091340         | 57.549308       |                |                  |                   |                  | L    |                    |                   |                    |                  |                    |                  | 17 |
| 2  | <b>171.112804</b>  | 86.060040       |                |                  |                   |                  | G    | 1918.899727        | <b>959.953502</b> | 1901.873178        | 951.440227       | 1900.889162        | 950.948219       | 16 |
| 3  | <b>258.144832</b>  | 129.576054      |                |                  | <b>240.134267</b> | 120.570772       | S    | 1861.878263        | <b>931.442770</b> | 1844.851714        | 922.929495       | 1843.867698        | 922.437487       | 15 |
| 4  | 371.228896         | 186.118086      |                |                  | 353.218331        | 177.112804       | L    | 1774.846235        | <b>887.926756</b> | 1757.819686        | 879.413481       | 1756.835670        | 878.921473       | 14 |
| 5  | 428.250360         | 214.628818      |                |                  | 410.239795        | 205.623536       | G    | <b>1661.762171</b> | <b>831.384724</b> | 1644.735622        | 822.871449       | <b>1643.751606</b> | 822.379441       | 13 |
| 6  | 499.287474         | 250.147375      |                |                  | 481.276909        | 241.142093       | A    | <b>1604.740707</b> | <b>802.873992</b> | 1587.714158        | 794.360717       | <b>1586.730142</b> | 793.868709       | 12 |
| 7  | 570.324588         | 285.665932      |                |                  | 552.314023        | 276.660650       | A    | <b>1533.703593</b> | 767.355435        | 1516.677044        | 758.842160       | <b>1515.693028</b> | 758.350152       | 11 |
| 8  | 730.355237         | 365.681257      |                |                  | <b>712.344672</b> | 356.675974       | C    | <b>1462.666479</b> | <b>731.836878</b> | <b>1445.639930</b> | 723.323603       | <b>1444.655914</b> | 722.831595       | 10 |
| 9  | 859.397830         | 430.202553      |                |                  | 841.387265        | 421.197271       | E    | <b>1302.635830</b> | 651.821553        | 1285.609281        | 643.308279       | <b>1284.625265</b> | 642.816270       | 9  |
| 10 | 1298.623156        | 649.815216      | 1281.596607    | 641.301942       | 1280.612591       | 640.809934       | Q    | <b>1173.593237</b> | 587.300257        | <b>1156.566688</b> | 578.786982       | <b>1155.582672</b> | 578.294974       | 8  |
| 11 | <b>1399.670835</b> | 700.339056      | 1382.644286    | 691.825781       | 1381.660270       | 691.333773       | T    | <b>734.367911</b>  | 367.687594        | 717.341362         | 359.174319       | 716.357346         | 358.682311       | 7  |
| 12 | 1527.729413        | 764.368345      | 1510.702864    | 755.855070       | 1509.718848       | 755.363062       | Q    | <b>633.320232</b>  | 317.163754        | 616.293683         | 308.650480       | <b>615.309667</b>  | 308.158472       | 6  |
| 13 | 1628.777092        | 814.892184      | 1611.750543    | 806.378910       | 1610.766527       | 805.886902       | T    | <b>505.261654</b>  | 253.134465        | 488.235105         | 244.621190       | 487.251089         | 244.129182       | 5  |
| 14 | 1757.819685        | 879.413481      | 1740.793136    | 870.900206       | 1739.809120       | 870.408198       | E    | <b>404.213975</b>  | 202.610625        | 387.187426         | 194.097351       | 386.203410         | 193.605343       | 4  |
| 15 | 1814.841149        | 907.924213      | 1797.814600    | 899.410938       | 1796.830584       | 898.918930       | G    | <b>275.171382</b>  | 138.089329        | <b>258.144833</b>  | 129.576054       |                    |                  | 3  |
| 16 | 1885.878263        | 943.442770      | 1868.851714    | 934.929495       | 1867.867698       | 934.437487       | A    | 218.149918         | 109.578597        | 201.123369         | 101.065322       |                    |                  | 2  |
| 17 |                    |                 |                |                  |                   |                  | K    | <b>147.112804</b>  | 74.060040         | 130.086255         | 65.546765        |                    |                  | 1  |

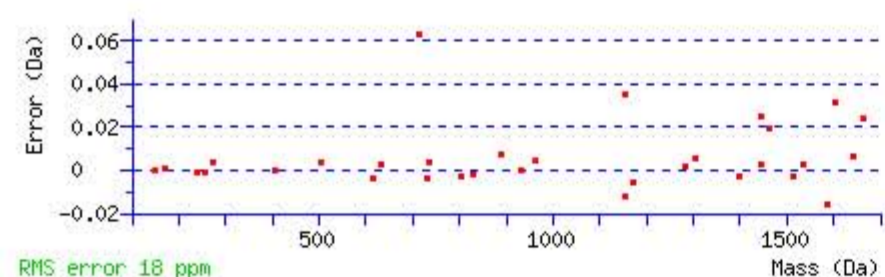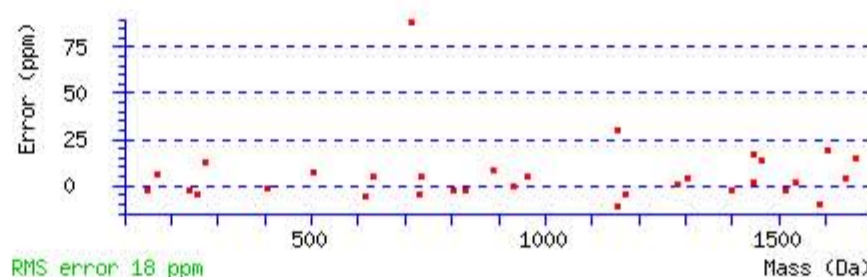

NCBI BLAST search of **LGSLGAACEQTQTEGAK**

(Parameters: blastp, nr protein database, expect=20000, no filter, PAM30)

Other BLAST [web gateways](#)

All matches to this query

| Score | Mr(calc):   | Delta     | Sequence                          |
|-------|-------------|-----------|-----------------------------------|
| 63.1  | 2030.976501 | -0.003129 | <a href="#">LGSLGAACEQTQTEGAK</a> |
| 47.2  | 2030.976501 | -0.003129 | <a href="#">LGSLGAACEQTQTEGAK</a> |
| 1.4   | 2031.000748 | -0.027376 | <a href="#">LEQQVEDLESSLEQEKK</a> |

Mascot: <http://www.matrixscience.com/>



# MASCOT Search Results

## Peptide View

MS/MS Fragmentation of **AIDEDCSQYEPIPGSQK**  
 Found in **CO8A\_HUMAN**, Complement component C8 alpha chain OS=Homo sapiens GN=C8A PE=1 SV=2

Match to Query 51945: 2247.023082 from(750.014970,3+) rtinseconds(1892) index(35596)  
 Title: Locus:1.1.1.3078.23 File:"2013-07-02 CLN FXIII 60 min 2nd F 3.wiff"  
 Data file C:\Program Files (x86)\Matrix Science\Mascot Daemon\mgf5 FXIII 60 min 2nd\mascot\_daemon\_merge.mgf

Click mouse within plot area to zoom in by factor of two about that point  
 Or, Plot from  to  Da   
 Label all possible matches  Label matches used for scoring

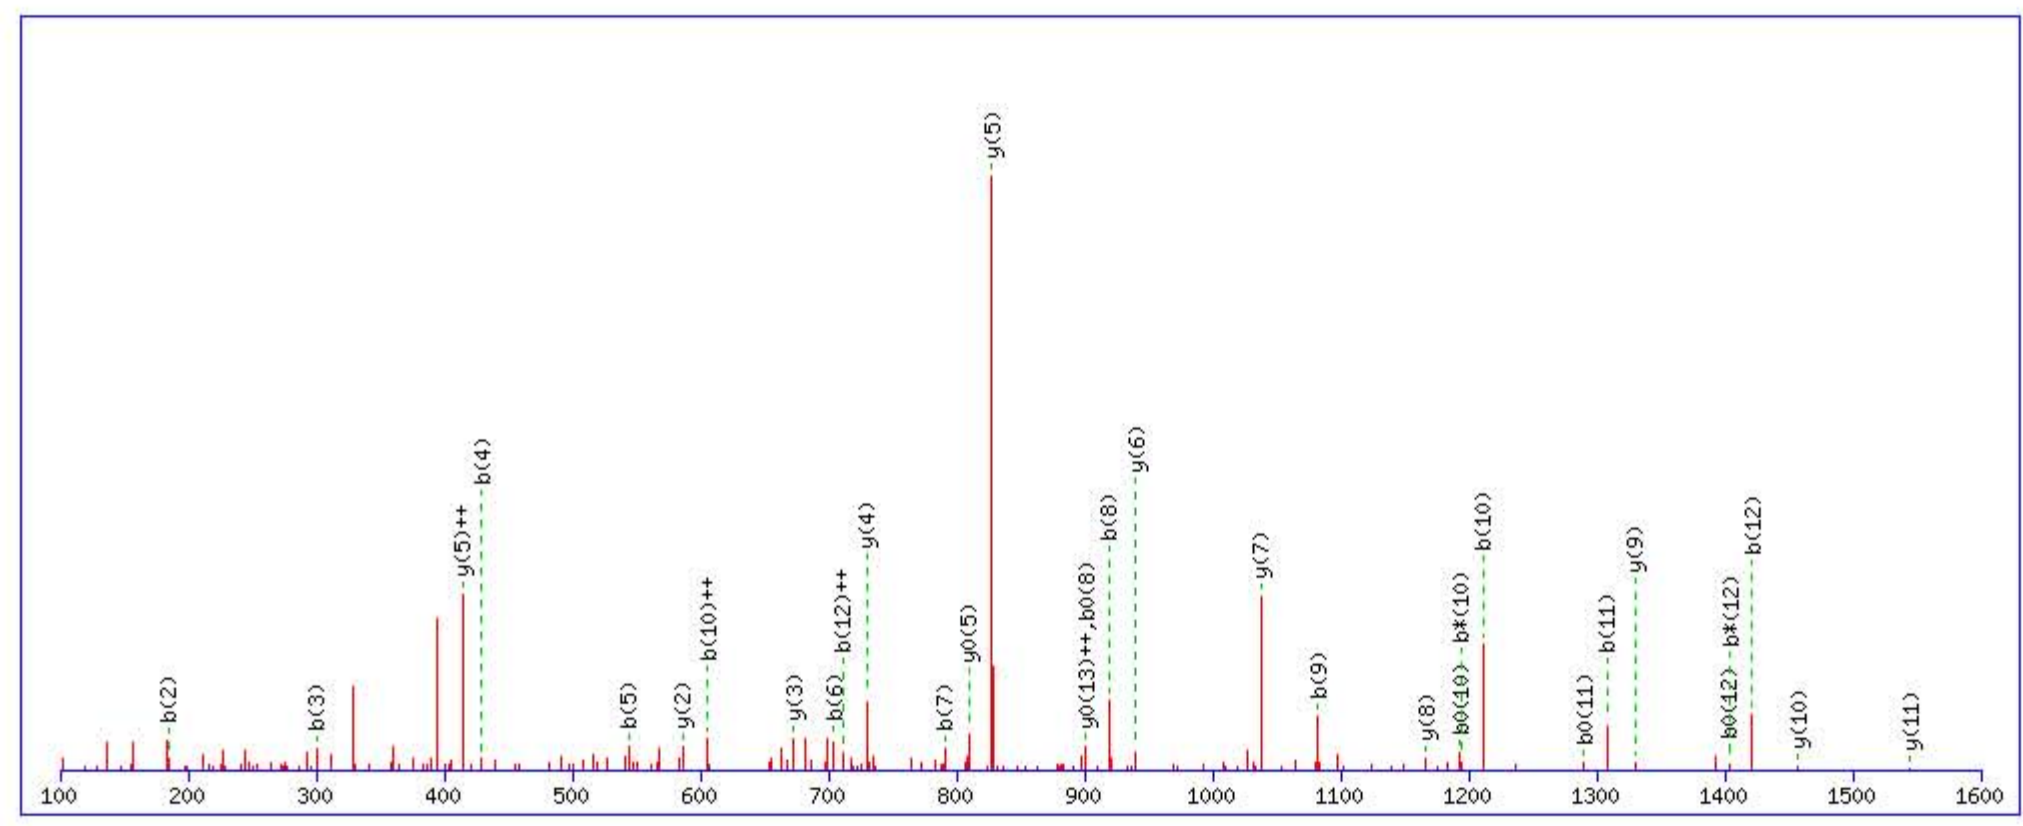

Monoisotopic mass of neutral peptide Mr(calc): 2247.018753  
 Fixed modifications: Carbamidomethyl (C) (apply to specified residues or termini only)  
 Variable modifications:  
 Q16 : Biotin:Thermo-21345 (Q)  
 Ions Score: 66 Expect: 3.2e-006  
 Matches : 32/170 fragment ions using 57 most intense peaks [\(help\)](#)

| #  | b                  | b <sup>++</sup>   | b <sup>*</sup>     | b <sup>+++</sup> | b <sup>0</sup>     | b <sup>0++</sup> | Seq. | y                  | y <sup>++</sup>   | y <sup>*</sup> | y <sup>+++</sup> | y <sup>0</sup>    | y <sup>0++</sup>  | #  |
|----|--------------------|-------------------|--------------------|------------------|--------------------|------------------|------|--------------------|-------------------|----------------|------------------|-------------------|-------------------|----|
| 1  | 72.044390          | 36.525833         |                    |                  |                    |                  | A    |                    |                   |                |                  |                   |                   | 17 |
| 2  | <b>185.128454</b>  | 93.067865         |                    |                  |                    |                  | I    | 2176.988934        | 1088.998105       | 2159.962385    | 1080.484830      | 2158.978369       | 1079.992822       | 16 |
| 3  | <b>300.155397</b>  | 150.581336        |                    |                  | 282.144832         | 141.576054       | D    | 2063.904870        | 1032.456073       | 2046.878321    | 1023.942798      | 2045.894305       | 1023.450790       | 15 |
| 4  | <b>429.197990</b>  | 215.102633        |                    |                  | 411.187425         | 206.097351       | E    | 1948.877927        | 974.942602        | 1931.851378    | 966.429327       | 1930.867362       | 965.937319        | 14 |
| 5  | <b>544.224933</b>  | 272.616105        |                    |                  | 526.214368         | 263.610822       | D    | 1819.835334        | 910.421305        | 1802.808785    | 901.908031       | 1801.824769       | <b>901.416022</b> | 13 |
| 6  | <b>704.255582</b>  | 352.631429        |                    |                  | 686.245017         | 343.626147       | C    | 1704.808391        | 852.907833        | 1687.781842    | 844.394559       | 1686.797826       | 843.902551        | 12 |
| 7  | <b>791.287610</b>  | 396.147443        |                    |                  | 773.277045         | 387.142161       | S    | <b>1544.777742</b> | 772.892509        | 1527.751193    | 764.379235       | 1526.767177       | 763.887227        | 11 |
| 8  | <b>919.346188</b>  | 460.176732        | 902.319639         | 451.663458       | <b>901.335623</b>  | 451.171450       | Q    | <b>1457.745714</b> | 729.376495        | 1440.719165    | 720.863221       | 1439.735149       | 720.371212        | 10 |
| 9  | <b>1082.409517</b> | 541.708397        | 1065.382968        | 533.195122       | 1064.398952        | 532.703114       | Y    | <b>1329.687136</b> | 665.347206        | 1312.660587    | 656.833931       | 1311.676571       | 656.341923        | 9  |
| 10 | <b>1211.452110</b> | <b>606.229693</b> | <b>1194.425561</b> | 597.716419       | <b>1193.441545</b> | 597.224410       | E    | <b>1166.623807</b> | 583.815541        | 1149.597258    | 575.302267       | 1148.613242       | 574.810259        | 8  |
| 11 | <b>1308.504874</b> | 654.756075        | 1291.478325        | 646.242801       | <b>1290.494309</b> | 645.750792       | P    | <b>1037.581214</b> | 519.294245        | 1020.554665    | 510.780971       | 1019.570649       | 510.288963        | 7  |
| 12 | <b>1421.588938</b> | <b>711.298107</b> | <b>1404.562389</b> | 702.784832       | <b>1403.578373</b> | 702.292824       | I    | <b>940.528450</b>  | 470.767863        | 923.501901     | 462.254589       | 922.517885        | 461.762581        | 6  |
| 13 | 1518.641702        | 759.824489        | 1501.615153        | 751.311215       | 1500.631137        | 750.819206       | P    | <b>827.444386</b>  | <b>414.225831</b> | 810.417837     | 405.712557       | <b>809.433821</b> | 405.220549        | 5  |
| 14 | 1575.663166        | 788.335221        | 1558.636617        | 779.821946       | 1557.652601        | 779.329938       | G    | <b>730.391622</b>  | 365.699449        | 713.365073     | 357.186175       | 712.381057        | 356.694167        | 4  |
| 15 | 1662.695194        | 831.851235        | 1645.668645        | 823.337961       | 1644.684629        | 822.845952       | S    | <b>673.370158</b>  | 337.188717        | 656.343609     | 328.675443       | 655.359593        | 328.183435        | 3  |
| 16 | 2101.920520        | 1051.463898       | 2084.893971        | 1042.950623      | 2083.909955        | 1042.458615      | Q    | <b>586.338130</b>  | 293.672703        | 569.311581     | 285.159429       |                   |                   | 2  |
| 17 |                    |                   |                    |                  |                    |                  | K    | 147.112804         | 74.060040         | 130.086255     | 65.546765        |                   |                   | 1  |

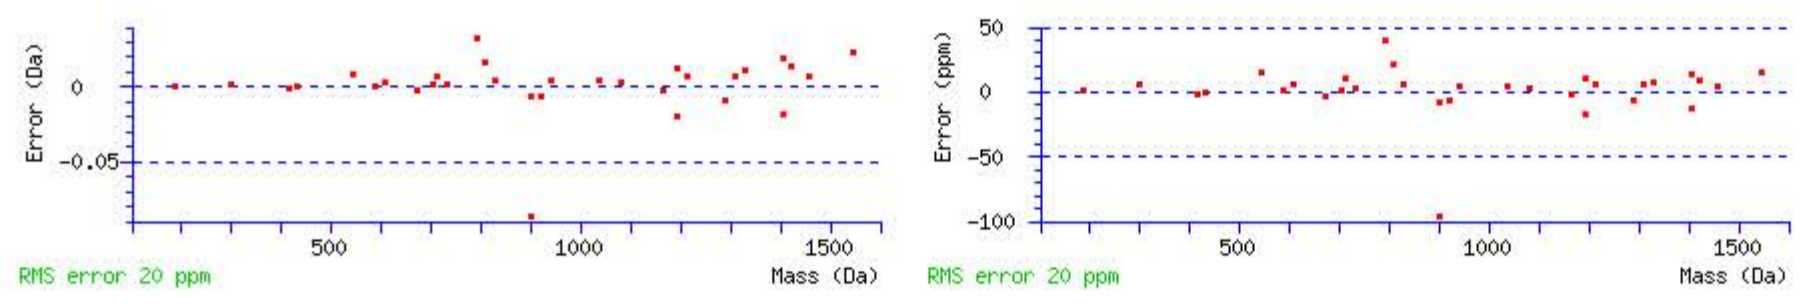

NCBI BLAST search of **AIDEDCSQYEPIPGSQK**  
 (Parameters: blastp, nr protein database, expect=20000, no filter, PAM30)  
 Other BLAST [web gateways](#)

### All matches to this query

| Score | Mr(calc):   | Delta    | Sequence                          |
|-------|-------------|----------|-----------------------------------|
| 65.7  | 2247.018753 | 0.004329 | <a href="#">AIDEDCSQYEPIPGSQK</a> |
| 2.8   | 2247.018753 | 0.004329 | <a href="#">AIDEDCSQYEPIPGSQK</a> |



# MASCOT Search Results

## Peptide View

MS/MS Fragmentation of **AIDEDCSQYEPIPGSQK**  
 Found in **CO8A\_HUMAN**, Complement component C8 alpha chain OS=Homo sapiens GN=C8A PE=1 SV=2

Match to Query 57259: 2558.212182 from(853.744670,3+) rtinseconds(2148) index(37306)  
 Title: Locus:1.1.1.3167.23 File:"2013-07-02 CLN FXIII 60 min 2nd F 3.wiff"  
 Data file C:\Program Files (x86)\Matrix Science\Mascot Daemon\mgf5 FXIII 60 min 2nd\mascot\_daemon\_merge.mgf

Click mouse within plot area to zoom in by factor of two about that point  
 Or, Plot from  to  Da   
 Label all possible matches  Label matches used for scoring

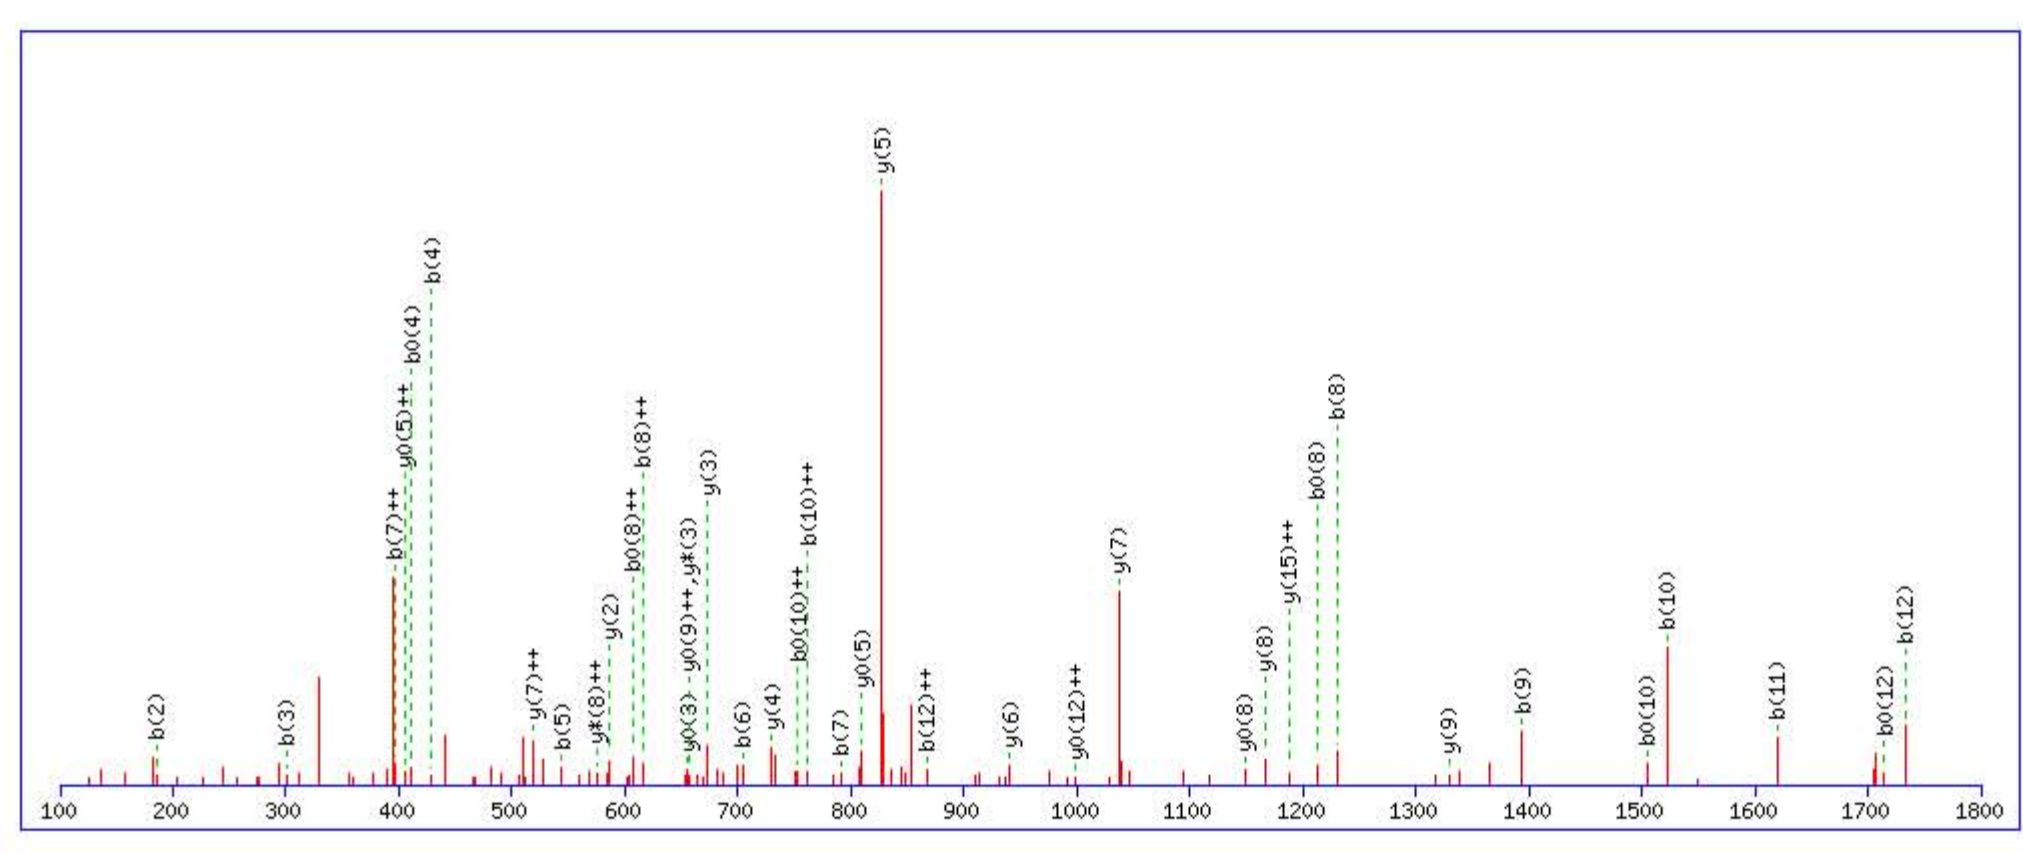

Monoisotopic mass of neutral peptide Mr(calc): 2558.185501  
 Fixed modifications: Carbamidomethyl (C) (apply to specified residues or termini only)  
 Variable modifications:  
 Q8 : Biotin:Thermo-21345 (Q)  
 Q16 : Biotin:Thermo-21345 (Q)  
 Ions Score: 38 Expect: 0.00086  
 Matches : 39/170 fragment ions using 95 most intense peaks [\(help\)](#)

| #  | b                  | b <sup>++</sup>   | b <sup>*</sup> | b <sup>*++</sup> | b <sup>0</sup>     | b <sup>0++</sup>  | Seq. | y                  | y <sup>++</sup>    | y <sup>*</sup>    | y <sup>*++</sup>  | y <sup>0</sup>     | y <sup>0++</sup>  | #  |
|----|--------------------|-------------------|----------------|------------------|--------------------|-------------------|------|--------------------|--------------------|-------------------|-------------------|--------------------|-------------------|----|
| 1  | 72.044390          | 36.525833         |                |                  |                    |                   | A    |                    |                    |                   |                   |                    |                   | 17 |
| 2  | <b>185.128454</b>  | 93.067865         |                |                  |                    |                   | I    | 2488.155682        | 1244.581479        | 2471.129133       | 1236.068204       | 2470.145117        | 1235.576196       | 16 |
| 3  | <b>300.155397</b>  | 150.581336        |                |                  | 282.144832         | 141.576054        | D    | 2375.071618        | <b>1188.039447</b> | 2358.045069       | 1179.526172       | 2357.061053        | 1179.034164       | 15 |
| 4  | <b>429.197990</b>  | 215.102633        |                |                  | <b>411.187425</b>  | 206.097351        | E    | 2260.044675        | 1130.525975        | 2243.018126       | 1122.012701       | 2242.034110        | 1121.520693       | 14 |
| 5  | <b>544.224933</b>  | 272.616105        |                |                  | 526.214368         | 263.610822        | D    | 2131.002082        | 1066.004679        | 2113.975533       | 1057.491404       | 2112.991517        | 1056.999396       | 13 |
| 6  | <b>704.255582</b>  | 352.631429        |                |                  | 686.245017         | 343.626147        | C    | 2015.975139        | 1008.491208        | 1998.948590       | 999.977933        | 1997.964574        | <b>999.485925</b> | 12 |
| 7  | <b>791.287610</b>  | <b>396.147443</b> |                |                  | 773.277045         | 387.142161        | S    | 1855.944490        | 928.475883         | 1838.917941       | 919.962609        | 1837.933925        | 919.470601        | 11 |
| 8  | <b>1230.512936</b> | <b>615.760106</b> | 1213.486387    | 607.246832       | <b>1212.502371</b> | <b>606.754824</b> | Q    | 1768.912462        | 884.959869         | 1751.885913       | 876.446595        | 1750.901897        | 875.954587        | 10 |
| 9  | <b>1393.576265</b> | 697.291771        | 1376.549716    | 688.778496       | 1375.565700        | 688.286488        | Y    | <b>1329.687136</b> | 665.347206         | 1312.660587       | 656.833932        | 1311.676571        | <b>656.341924</b> | 9  |
| 10 | <b>1522.618858</b> | <b>761.813067</b> | 1505.592309    | 753.299793       | <b>1504.608293</b> | <b>752.807785</b> | E    | <b>1166.623807</b> | 583.815541         | 1149.597258       | <b>575.302267</b> | <b>1148.613242</b> | 574.810259        | 8  |
| 11 | <b>1619.671622</b> | 810.339449        | 1602.645073    | 801.826175       | 1601.661057        | 801.334167        | P    | <b>1037.581214</b> | <b>519.294245</b>  | 1020.554665       | 510.780971        | 1019.570649        | 510.288963        | 7  |
| 12 | <b>1732.755686</b> | <b>866.881481</b> | 1715.729137    | 858.368207       | <b>1714.745121</b> | 857.876198        | I    | <b>940.528450</b>  | 470.767863         | 923.501901        | 462.254589        | 922.517885         | 461.762581        | 6  |
| 13 | 1829.808450        | 915.407863        | 1812.781901    | 906.894589       | 1811.797885        | 906.402581        | P    | <b>827.444386</b>  | 414.225831         | 810.417837        | 405.712557        | <b>809.433821</b>  | <b>405.220549</b> | 5  |
| 14 | 1886.829914        | 943.918595        | 1869.803365    | 935.405321       | 1868.819349        | 934.913312        | G    | <b>730.391622</b>  | 365.699449         | 713.365073        | 357.186175        | 712.381057         | 356.694167        | 4  |
| 15 | 1973.861942        | 987.434609        | 1956.835393    | 978.921335       | 1955.851377        | 978.429327        | S    | <b>673.370158</b>  | 337.188717         | <b>656.343609</b> | 328.675443        | <b>655.359593</b>  | 328.183435        | 3  |
| 16 | 2413.087268        | 1207.047272       | 2396.060719    | 1198.533997      | 2395.076703        | 1198.041989       | Q    | <b>586.338130</b>  | 293.672703         | 569.311581        | 285.159429        |                    |                   | 2  |
| 17 |                    |                   |                |                  |                    |                   | K    | 147.112804         | 74.060040          | 130.086255        | 65.546765         |                    |                   | 1  |

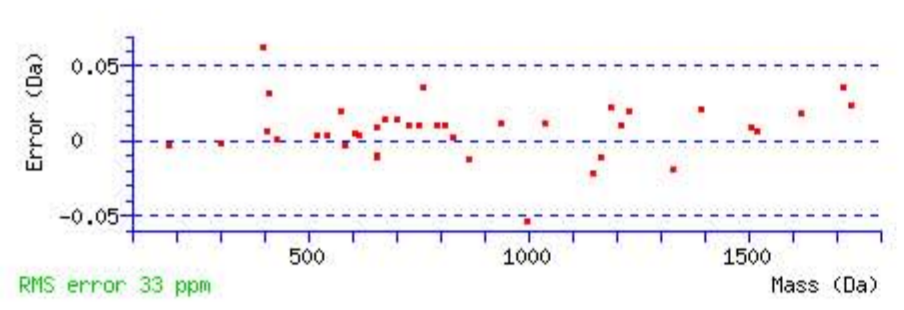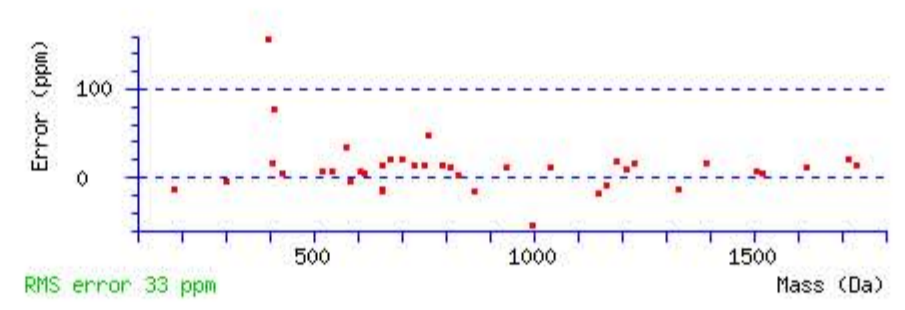

NCBI BLAST search of [AIDEDCSQYEPIPGSQK](#)  
 (Parameters: blastp, nr protein database, expect=20000, no filter, PAM30)  
 Other BLAST [web gateways](#)

### All matches to this query

| Score | Mr(calc):   | Delta     | Sequence                                 |
|-------|-------------|-----------|------------------------------------------|
| 38.4  | 2558.185501 | 0.026681  | <a href="#">AIDEDCSQYEPIPGSQK</a>        |
| 5.7   | 2558.214981 | -0.002799 | <a href="#">TSPQSAPPSSPLSPNWVSPSDHQR</a> |



# Mascot Search Results

## Peptide View

MS/MS Fragmentation of **FGGTICSGDIWDQASCSSTTCVR**

Found in **CO8A\_HUMAN**, Complement component C8 alpha chain OS=Homo sapiens GN=C8A PE=1 SV=2

Match to Query 61435: 2962.301742 from(988.441190,3+) rtinseconds(2367) index(23815)

Title: Locus:1.1.1.826.25 File:"2013-07-02 CLN FXIII 60 min 2nd F 2.wiff"

Data file C:\Program Files (x86)\Matrix Science\Mascot Daemon\mgf5 FXIII 60 min 2nd\mascot\_daemon\_merge.mgf

Click mouse within plot area to zoom in by factor of two about that point

Or, Plot from  to  Da

Label all possible matches  Label matches used for scoring

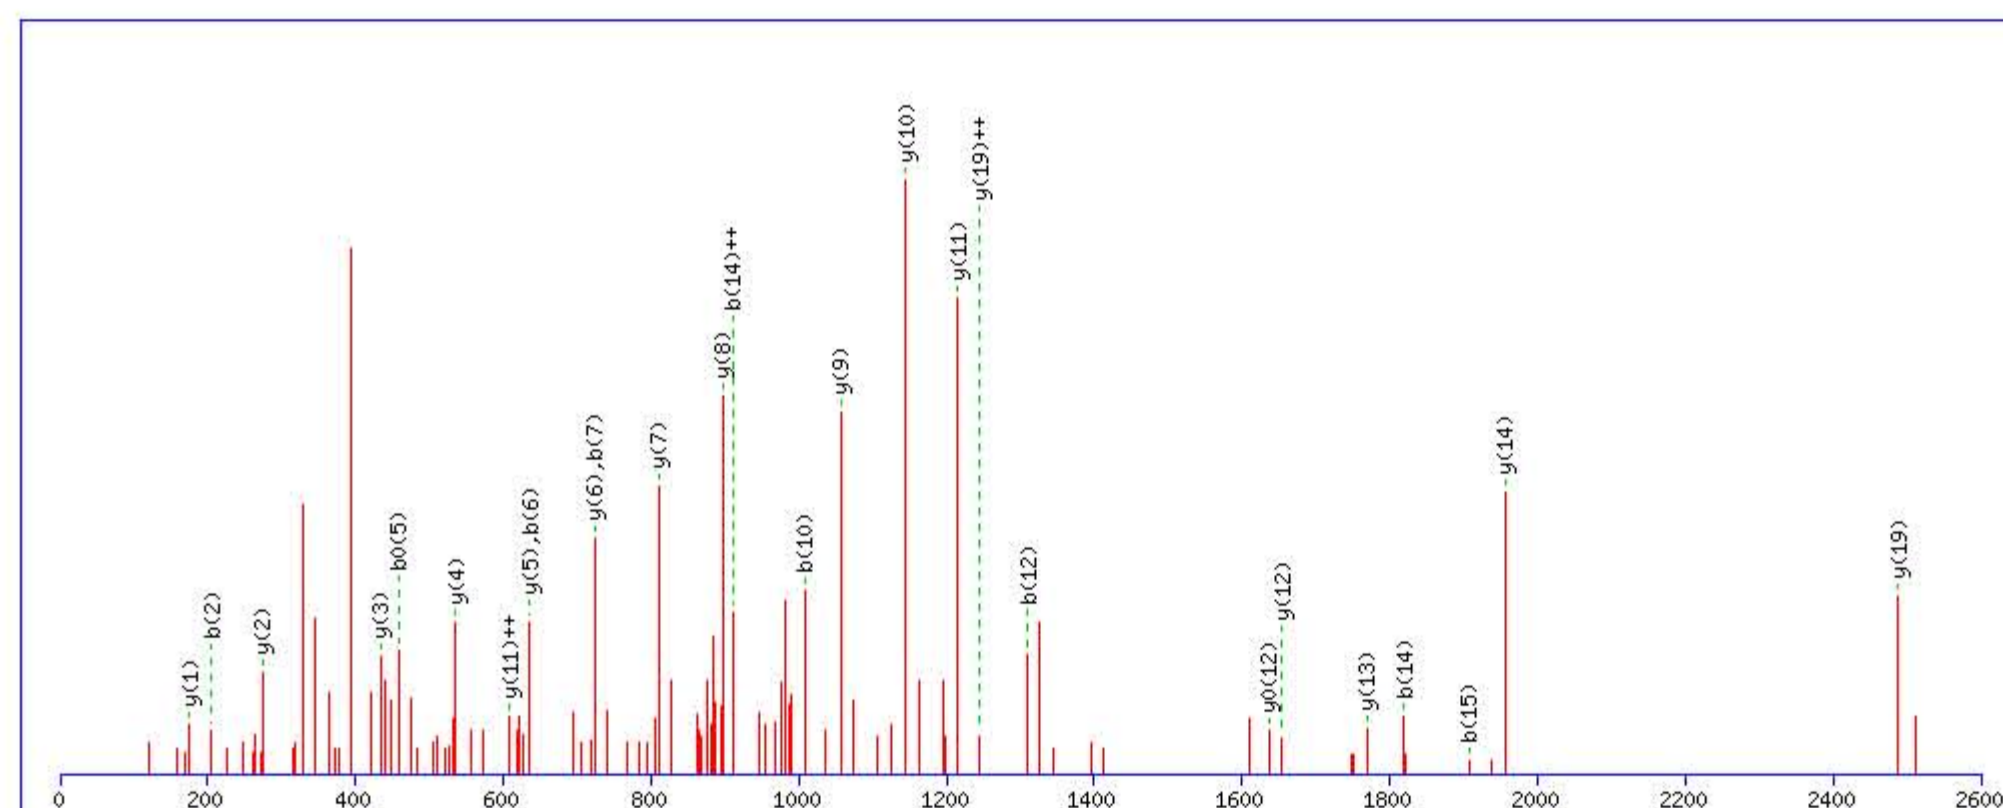

Monoisotopic mass of neutral peptide Mr(calc): 2962.271835

Fixed modifications: Carbamidomethyl (C) (apply to specified residues or termini only)

Variable modifications:

Q13 : Biotin:Thermo-21345 (Q)

Ions Score: 107 Expect: 1.3e-010

Matches : 27/240 fragment ions using 37 most intense peaks [\(help\)](#)

| #  | b                  | b <sup>++</sup>   | b <sup>*</sup> | b <sup>*++</sup> | b <sup>0</sup>    | b <sup>0++</sup> | Seq. | y                  | y <sup>++</sup>    | y <sup>*</sup> | y <sup>*++</sup> | y <sup>0</sup>     | y <sup>0++</sup> | #  |
|----|--------------------|-------------------|----------------|------------------|-------------------|------------------|------|--------------------|--------------------|----------------|------------------|--------------------|------------------|----|
| 1  | 148.075690         | 74.541483         |                |                  |                   |                  | F    |                    |                    |                |                  |                    |                  | 24 |
| 2  | <b>205.097154</b>  | 103.052215        |                |                  |                   |                  | G    | 2816.210649        | 1408.608962        | 2799.184100    | 1400.095688      | 2798.200084        | 1399.603680      | 23 |
| 3  | 262.118618         | 131.562947        |                |                  |                   |                  | G    | 2759.189185        | 1380.098230        | 2742.162636    | 1371.584956      | 2741.178620        | 1371.092948      | 22 |
| 4  | 363.166297         | 182.086786        |                |                  | 345.155732        | 173.081504       | T    | 2702.167721        | 1351.587498        | 2685.141172    | 1343.074224      | 2684.157156        | 1342.582216      | 21 |
| 5  | 476.250361         | 238.628818        |                |                  | <b>458.239796</b> | 229.623536       | I    | 2601.120042        | 1301.063659        | 2584.093493    | 1292.550384      | 2583.109477        | 1292.058376      | 20 |
| 6  | <b>636.281010</b>  | 318.644143        |                |                  | 618.270445        | 309.638861       | C    | <b>2488.035978</b> | <b>1244.521627</b> | 2471.009429    | 1236.008352      | 2470.025413        | 1235.516344      | 19 |
| 7  | <b>723.313038</b>  | 362.160157        |                |                  | 705.302473        | 353.154875       | S    | 2328.005329        | 1164.506302        | 2310.978780    | 1155.993028      | 2309.994764        | 1155.501020      | 18 |
| 8  | 780.334502         | 390.670889        |                |                  | 762.323937        | 381.665607       | G    | 2240.973301        | 1120.990288        | 2223.946752    | 1112.477014      | 2222.962736        | 1111.985006      | 17 |
| 9  | 895.361445         | 448.184361        |                |                  | 877.350880        | 439.179078       | D    | 2183.951837        | 1092.479556        | 2166.925288    | 1083.966282      | 2165.941272        | 1083.474274      | 16 |
| 10 | <b>1008.445509</b> | 504.726393        |                |                  | 990.434944        | 495.721110       | I    | 2068.924894        | 1034.966085        | 2051.898345    | 1026.452810      | 2050.914329        | 1025.968082      | 15 |
| 11 | 1194.524822        | 597.766049        |                |                  | 1176.514257       | 588.760767       | W    | <b>1955.840830</b> | 978.424053         | 1938.814281    | 969.910778       | 1937.830265        | 969.418770       | 14 |
| 12 | <b>1309.551765</b> | 655.279521        |                |                  | 1291.541200       | 646.274238       | D    | <b>1769.761517</b> | 885.384396         | 1752.734968    | 876.871122       | 1751.750952        | 876.379114       | 13 |
| 13 | 1748.777091        | 874.892184        | 1731.750542    | 866.378909       | 1730.766526       | 865.886901       | Q    | <b>1654.734574</b> | 827.870925         | 1637.708025    | 819.357650       | <b>1636.724009</b> | 818.865642       | 12 |
| 14 | <b>1819.814205</b> | <b>910.410741</b> | 1802.787656    | 901.897466       | 1801.803640       | 901.405458       | A    | <b>1215.509248</b> | <b>608.258262</b>  | 1198.482699    | 599.744987       | 1197.498683        | 599.252979       | 11 |
| 15 | <b>1906.846233</b> | 953.926755        | 1889.819684    | 945.413480       | 1888.835668       | 944.921472       | S    | <b>1144.472134</b> | 572.739705         | 1127.445585    | 564.226430       | 1126.461569        | 563.734422       | 10 |
| 16 | 2066.876882        | 1033.942079       | 2049.850333    | 1025.428804      | 2048.866317       | 1024.936796      | C    | <b>1057.440106</b> | 529.223691         | 1040.413557    | 520.710416       | 1039.429541        | 520.218408       | 9  |
| 17 | 2153.908910        | 1077.458093       | 2136.882361    | 1068.944818      | 2135.898345       | 1068.452810      | S    | <b>897.409457</b>  | 449.208366         | 880.382908     | 440.695092       | 879.398892         | 440.203084       | 8  |
| 18 | 2240.940938        | 1120.974107       | 2223.914389    | 1112.460832      | 2222.930373       | 1111.968825      | S    | <b>810.377429</b>  | 405.692352         | 793.350880     | 397.179078       | 792.366864         | 396.687070       | 7  |
| 19 | 2327.972966        | 1164.490121       | 2310.946417    | 1155.976847      | 2309.962401       | 1155.484839      | S    | <b>723.345401</b>  | 362.176338         | 706.318852     | 353.663064       | 705.334836         | 353.171056       | 6  |
| 20 | 2429.020645        | 1215.013960       | 2411.994096    | 1206.500686      | 2411.010080       | 1206.008678      | T    | <b>636.313373</b>  | 318.660324         | 619.286824     | 310.147050       | 618.302808         | 309.655042       | 5  |
| 21 | 2530.068324        | 1265.537800       | 2513.041775    | 1257.024525      | 2512.057759       | 1256.532517      | T    | <b>535.265694</b>  | 268.136485         | 518.239145     | 259.623210       | 517.255129         | 259.131202       | 4  |
| 22 | 2690.098973        | 1345.553124       | 2673.072424    | 1337.039850      | 2672.088408       | 1336.547842      | C    | <b>434.218015</b>  | 217.612645         | 417.191466     | 209.099371       |                    |                  | 3  |
| 23 | 2789.167387        | 1395.087331       | 2772.140838    | 1386.574057      | 2771.156822       | 1386.082049      | V    | <b>274.187366</b>  | 137.597321         | 257.160817     | 129.084046       |                    |                  | 2  |
| 24 |                    |                   |                |                  |                   |                  | R    | <b>175.118952</b>  | 88.063114          | 158.092403     | 79.549839        |                    |                  | 1  |

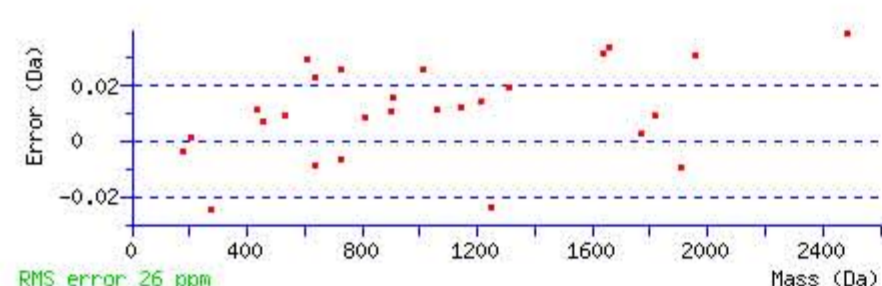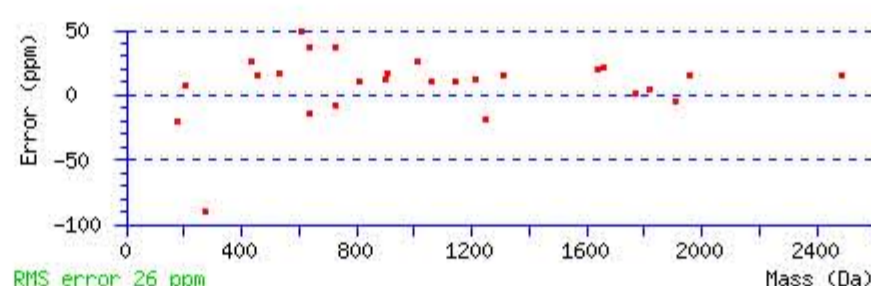

NCBI BLAST search of [FGGTICSGDIWDQASCSSTTCVR](#)

(Parameters: blastp, nr protein database, expect=20000, no filter, PAM30)

Other BLAST [web gateways](#)

All matches to this query

| Score | Mr(calc):   | Delta    | Sequence                                |
|-------|-------------|----------|-----------------------------------------|
| 106.9 | 2962.271835 | 0.029907 | <a href="#">FGGTICSGDIWDQASCSSTTCVR</a> |

Mascot: <http://www.matrixscience.com/>



# MASCOT Search Results

## Peptide View

MS/MS Fragmentation of **CEGFVCAQTGR**

Found in **CO8B\_HUMAN**, Complement component C8 beta chain OS=Homo sapiens GN=C8B PE=1 SV=3

Match to Query 36888: 1594.703388 from(798.358970,2+) rtinseconds(1772) index(20168)

Title: Locus:1.1.1.619.13 File:"2013-07-02 CLN FXIII 60 min 2nd F 2.wiff"

Data file C:\Program Files (x86)\Matrix Science\Mascot Daemon\mgf5 FXIII 60 min 2nd\mascot\_daemon\_merge.mgf

Click mouse within plot area to zoom in by factor of two about that point

Or, Plot from  to  Da

Label all possible matches  Label matches used for scoring

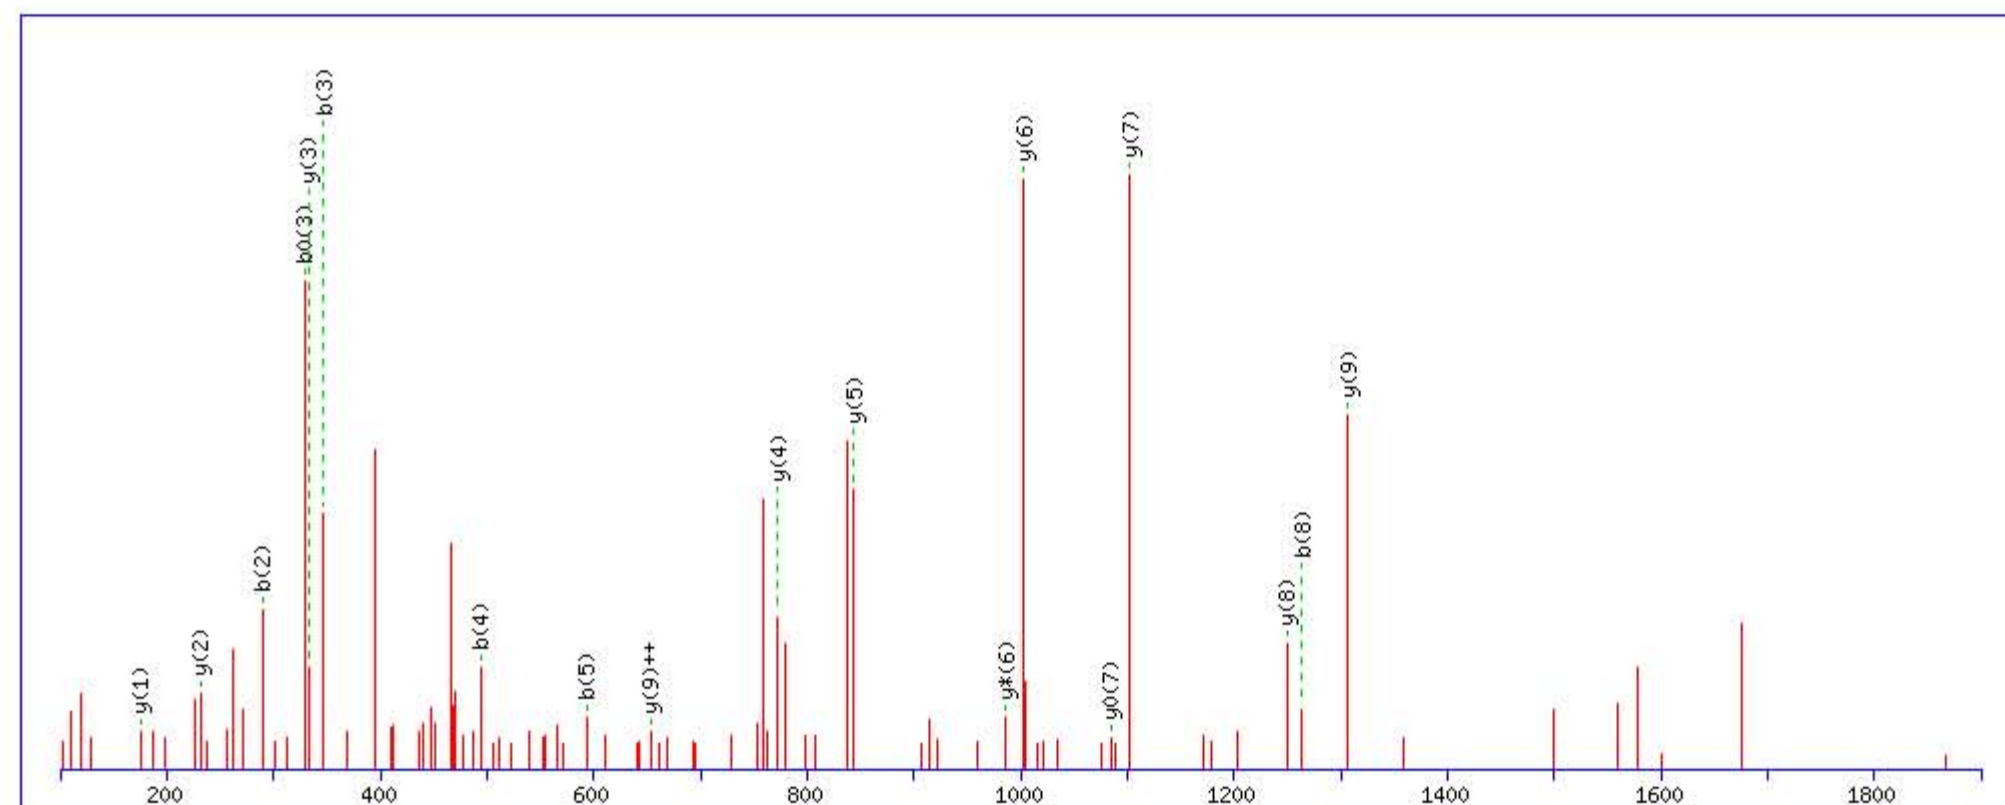

Monoisotopic mass of neutral peptide  $M_r(\text{calc})$ : 1594.705460

Fixed modifications: Carbamidomethyl (C) (apply to specified residues or termini only)

Variable modifications:

Q8 : Biotin:Thermo-21345 (Q)

Ions Score: 40 Expect: 0.00056

Matches : 18/100 fragment ions using 51 most intense peaks [\(help\)](#)

| #  | b                  | b <sup>++</sup> | b <sup>*</sup> | b <sup>*++</sup> | b <sup>0</sup>    | b <sup>0++</sup> | Seq. | y                  | y <sup>++</sup>   | y <sup>*</sup>    | y <sup>*++</sup> | y <sup>0</sup>     | y <sup>0++</sup> | #  |
|----|--------------------|-----------------|----------------|------------------|-------------------|------------------|------|--------------------|-------------------|-------------------|------------------|--------------------|------------------|----|
| 1  | 161.037925         | 81.022600       |                |                  |                   |                  | C    |                    |                   |                   |                  |                    |                  | 11 |
| 2  | <b>290.080518</b>  | 145.543897      |                |                  | 272.069953        | 136.538615       | E    | 1435.682069        | 718.344673        | 1418.655520       | 709.831398       | 1417.671504        | 709.339390       | 10 |
| 3  | <b>347.101982</b>  | 174.054629      |                |                  | <b>329.091417</b> | 165.049347       | G    | <b>1306.639476</b> | <b>653.823376</b> | 1289.612927       | 645.310102       | 1288.628911        | 644.818094       | 9  |
| 4  | <b>494.170396</b>  | 247.588836      |                |                  | 476.159831        | 238.583554       | F    | <b>1249.618012</b> | 625.312644        | 1232.591463       | 616.799370       | 1231.607447        | 616.307361       | 8  |
| 5  | <b>593.238810</b>  | 297.123043      |                |                  | 575.228245        | 288.117761       | V    | <b>1102.549598</b> | 551.778437        | 1085.523049       | 543.265162       | <b>1084.539033</b> | 542.773154       | 7  |
| 6  | 753.269459         | 377.138368      |                |                  | 735.258894        | 368.133085       | C    | <b>1003.481184</b> | 502.244230        | <b>986.454635</b> | 493.730955       | 985.470619         | 493.238947       | 6  |
| 7  | 824.306573         | 412.656925      |                |                  | 806.296008        | 403.651642       | A    | <b>843.450535</b>  | 422.228906        | 826.423986        | 413.715631       | 825.439970         | 413.223623       | 5  |
| 8  | <b>1263.531899</b> | 632.269588      | 1246.505350    | 623.756313       | 1245.521334       | 623.264305       | Q    | <b>772.413421</b>  | 386.710349        | 755.386872        | 378.197074       | 754.402856         | 377.705066       | 4  |
| 9  | 1364.579578        | 682.793427      | 1347.553029    | 674.280153       | 1346.569013       | 673.788145       | T    | <b>333.188095</b>  | 167.097685        | 316.161546        | 158.584411       | 315.177530         | 158.092403       | 3  |
| 10 | 1421.601042        | 711.304159      | 1404.574493    | 702.790885       | 1403.590477       | 702.298877       | G    | <b>232.140416</b>  | 116.573846        | 215.113867        | 108.060571       |                    |                  | 2  |
| 11 |                    |                 |                |                  |                   |                  | R    | <b>175.118952</b>  | 88.063114         | 158.092403        | 79.549839        |                    |                  | 1  |

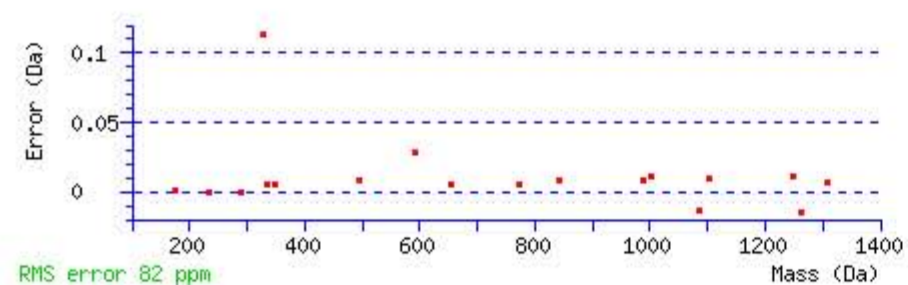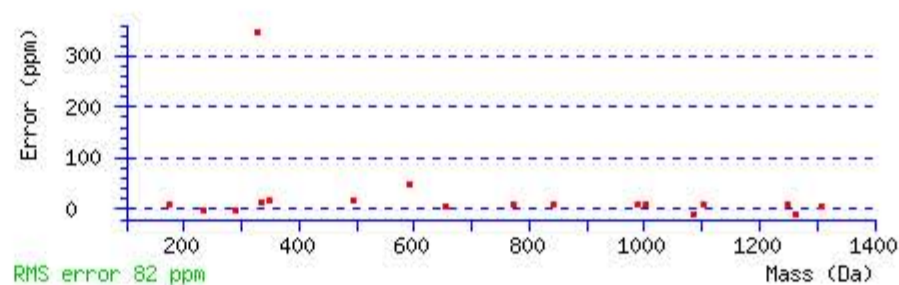

NCBI BLAST search of [CEGFVCAQTGR](#)

(Parameters: blastp, nr protein database, expect=20000, no filter, PAM30)

Other BLAST [web gateways](#)

All matches to this query

| Score | $M_r(\text{calc})$ : | Delta     | Sequence                    |
|-------|----------------------|-----------|-----------------------------|
| 40.4  | 1594.705460          | -0.002072 | <a href="#">CEGFVCAQTGR</a> |

Mascot: <http://www.matrixscience.com/>



# MASCOT SEARCH RESULTS

## Peptide View

MS/MS Fragmentation of **KPYNVESYTPQTQ GK**

Found in **CO8B\_HUMAN**, Complement component C8 beta chain OS=Homo sapiens GN=C8B PE=1 SV=3

Match to Query 48400: 2050.012212 from(684.344680,3+) rtinseconds(1582) index(19018)

Title: Locus:1.1.1.553.9 File:"2013-07-02 CLN FXIII 60 min 2nd F 2.wiff"

Data file C:\Program Files (x86)\Matrix Science\Mascot Daemon\mgf5 FXIII 60 min 2nd\mascot\_daemon\_merge.mgf

Click mouse within plot area to zoom in by factor of two about that point

Or, Plot from  to  Da

Label all possible matches  Label matches used for scoring

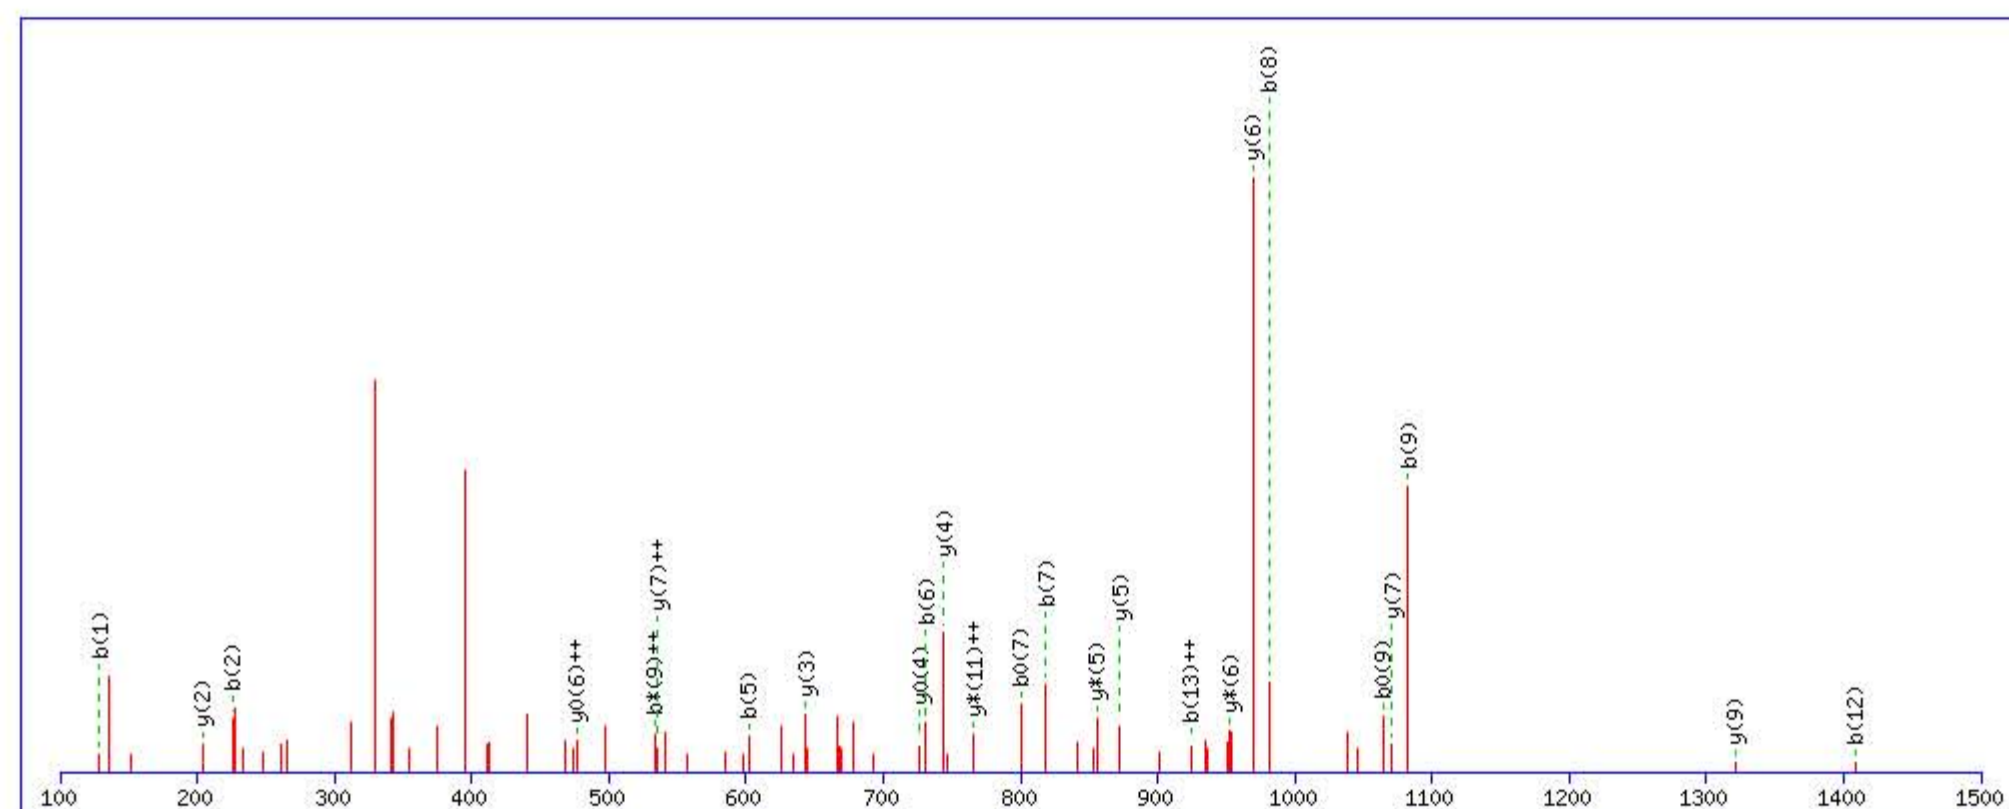

Monoisotopic mass of neutral peptide Mr(calc): 2050.019348

Fixed modifications: Carbamidomethyl (C) (apply to specified residues or termini only)

Variable modifications:

Q13 : Biotin:Thermo-21345 (Q)

Ions Score: 37 Expect: 0.0045

Matches : 25/152 fragment ions using 52 most intense peaks [\(help\)](#)

| #  | b                  | b <sup>++</sup>   | b <sup>*</sup> | b <sup>+++</sup>  | b <sup>0</sup>     | b <sup>0++</sup> | Seq.     | y                  | y <sup>++</sup>   | y <sup>*</sup>    | y <sup>+++</sup>  | y <sup>0</sup>    | y <sup>0++</sup>  | #         |
|----|--------------------|-------------------|----------------|-------------------|--------------------|------------------|----------|--------------------|-------------------|-------------------|-------------------|-------------------|-------------------|-----------|
| 1  | <b>129.102239</b>  | 65.054757         | 112.075690     | 56.541483         |                    |                  | <b>K</b> |                    |                   |                   |                   |                   |                   | <b>15</b> |
| 2  | <b>226.155003</b>  | 113.581139        | 209.128454     | 105.067865        |                    |                  | <b>P</b> | 1922.931678        | 961.969477        | 1905.905129       | 953.456203        | 1904.921113       | 952.964195        | <b>14</b> |
| 3  | 389.218332         | 195.112804        | 372.191783     | 186.599529        |                    |                  | <b>Y</b> | 1825.878914        | 913.443095        | 1808.852365       | 904.929821        | 1807.868349       | 904.437813        | <b>13</b> |
| 4  | 503.261259         | 252.134267        | 486.234710     | 243.620993        |                    |                  | <b>N</b> | 1662.815585        | 831.911431        | 1645.789036       | 823.398156        | 1644.805020       | 822.906148        | <b>12</b> |
| 5  | <b>602.329673</b>  | 301.668475        | 585.303124     | 293.155200        |                    |                  | <b>V</b> | 1548.772658        | 774.889967        | 1531.746109       | <b>766.376693</b> | 1530.762093       | 765.884685        | <b>11</b> |
| 6  | <b>731.372266</b>  | 366.189771        | 714.345717     | 357.676497        | 713.361701         | 357.184489       | <b>E</b> | 1449.704244        | 725.355760        | 1432.677695       | 716.842486        | 1431.693679       | 716.350478        | <b>10</b> |
| 7  | <b>818.404294</b>  | 409.705785        | 801.377745     | 401.192511        | <b>800.393729</b>  | 400.700503       | <b>S</b> | <b>1320.661651</b> | 660.834464        | 1303.635102       | 652.321189        | 1302.651086       | 651.829181        | <b>9</b>  |
| 8  | <b>981.467623</b>  | 491.237450        | 964.441074     | 482.724175        | 963.457058         | 482.232167       | <b>Y</b> | 1233.629623        | 617.318450        | 1216.603074       | 608.805175        | 1215.619058       | 608.313167        | <b>8</b>  |
| 9  | <b>1082.515302</b> | 541.761289        | 1065.488753    | <b>533.248015</b> | <b>1064.504737</b> | 532.756007       | <b>T</b> | <b>1070.566294</b> | <b>535.786785</b> | 1053.539745       | 527.273511        | 1052.555729       | 526.781503        | <b>7</b>  |
| 10 | 1179.568066        | 590.287671        | 1162.541517    | 581.774397        | 1161.557501        | 581.282389       | <b>P</b> | <b>969.518615</b>  | 485.262946        | <b>952.492066</b> | 476.749671        | 951.508050        | <b>476.257663</b> | <b>6</b>  |
| 11 | 1307.626644        | 654.316960        | 1290.600095    | 645.803686        | 1289.616079        | 645.311678       | <b>Q</b> | <b>872.465851</b>  | 436.736564        | <b>855.439302</b> | 428.223289        | 854.455286        | 427.731281        | <b>5</b>  |
| 12 | <b>1408.674323</b> | 704.840800        | 1391.647774    | 696.327525        | 1390.663758        | 695.835517       | <b>T</b> | <b>744.407273</b>  | 372.707275        | 727.380724        | 364.194000        | <b>726.396708</b> | 363.701992        | <b>4</b>  |
| 13 | 1847.899649        | <b>924.453463</b> | 1830.873100    | 915.940188        | 1829.889084        | 915.448180       | <b>Q</b> | <b>643.359594</b>  | 322.183435        | 626.333045        | 313.670161        |                   |                   | <b>3</b>  |
| 14 | 1904.921113        | 952.964195        | 1887.894564    | 944.450920        | 1886.910548        | 943.958912       | <b>G</b> | <b>204.134268</b>  | 102.570772        | 187.107719        | 94.057497         |                   |                   | <b>2</b>  |
| 15 |                    |                   |                |                   |                    |                  | <b>K</b> | 147.112804         | 74.060040         | 130.086255        | 65.546765         |                   |                   | <b>1</b>  |

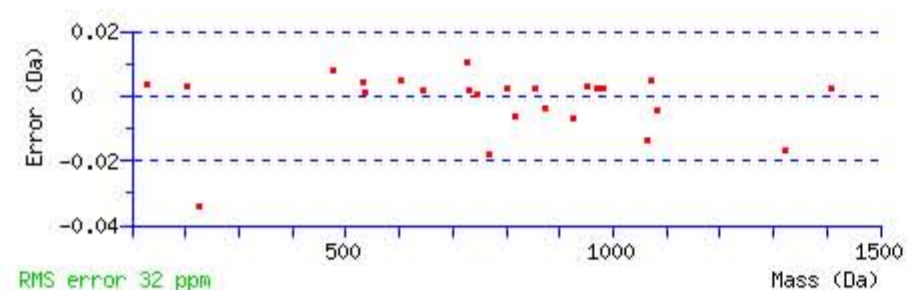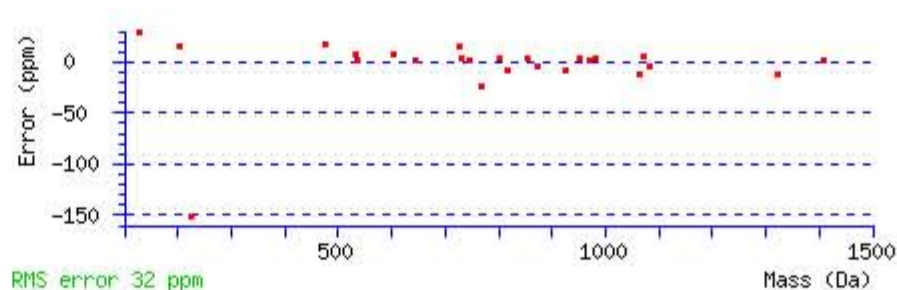

NCBI BLAST search of **KPYNVESYTPQTQ GK**

(Parameters: blastp, nr protein database, expect=20000, no filter, PAM30)

Other BLAST [web gateways](#)

All matches to this query

| Score | Mr(calc):   | Delta     | Sequence                         |
|-------|-------------|-----------|----------------------------------|
| 37.4  | 2050.019348 | -0.007136 | <a href="#">KPYNVESYTPQTQ GK</a> |
| 21.3  | 2050.019348 | -0.007136 | <a href="#">KPYNVESYTPQTQ GK</a> |

Mascot: <http://www.matrixscience.com/>



# MASCOT SCIENCE Mascot Search Results

## Peptide View

MS/MS Fragmentation of **CDCICPVGSQGLACEVSYR**  
 Found in **CO8B\_HUMAN**, Complement component C8 beta chain OS=Homo sapiens GN=C8B PE=1 SV=3

Match to Query 57167: 2541.100812 from(848.040880,3+) rtinseconds(2149) index(22589)  
 Title: Locus:1.1.1.750.24 File:"2013-07-02 CLN FXIII 60 min 2nd F 2.wiff"  
 Data file C:\Program Files (x86)\Matrix Science\Mascot Daemon\mgf5 FXIII 60 min 2nd\mascot\_daemon\_merge.mgf

Click mouse within plot area to zoom in by factor of two about that point  
 Or, Plot from  to  Da   
 Label all possible matches  Label matches used for scoring

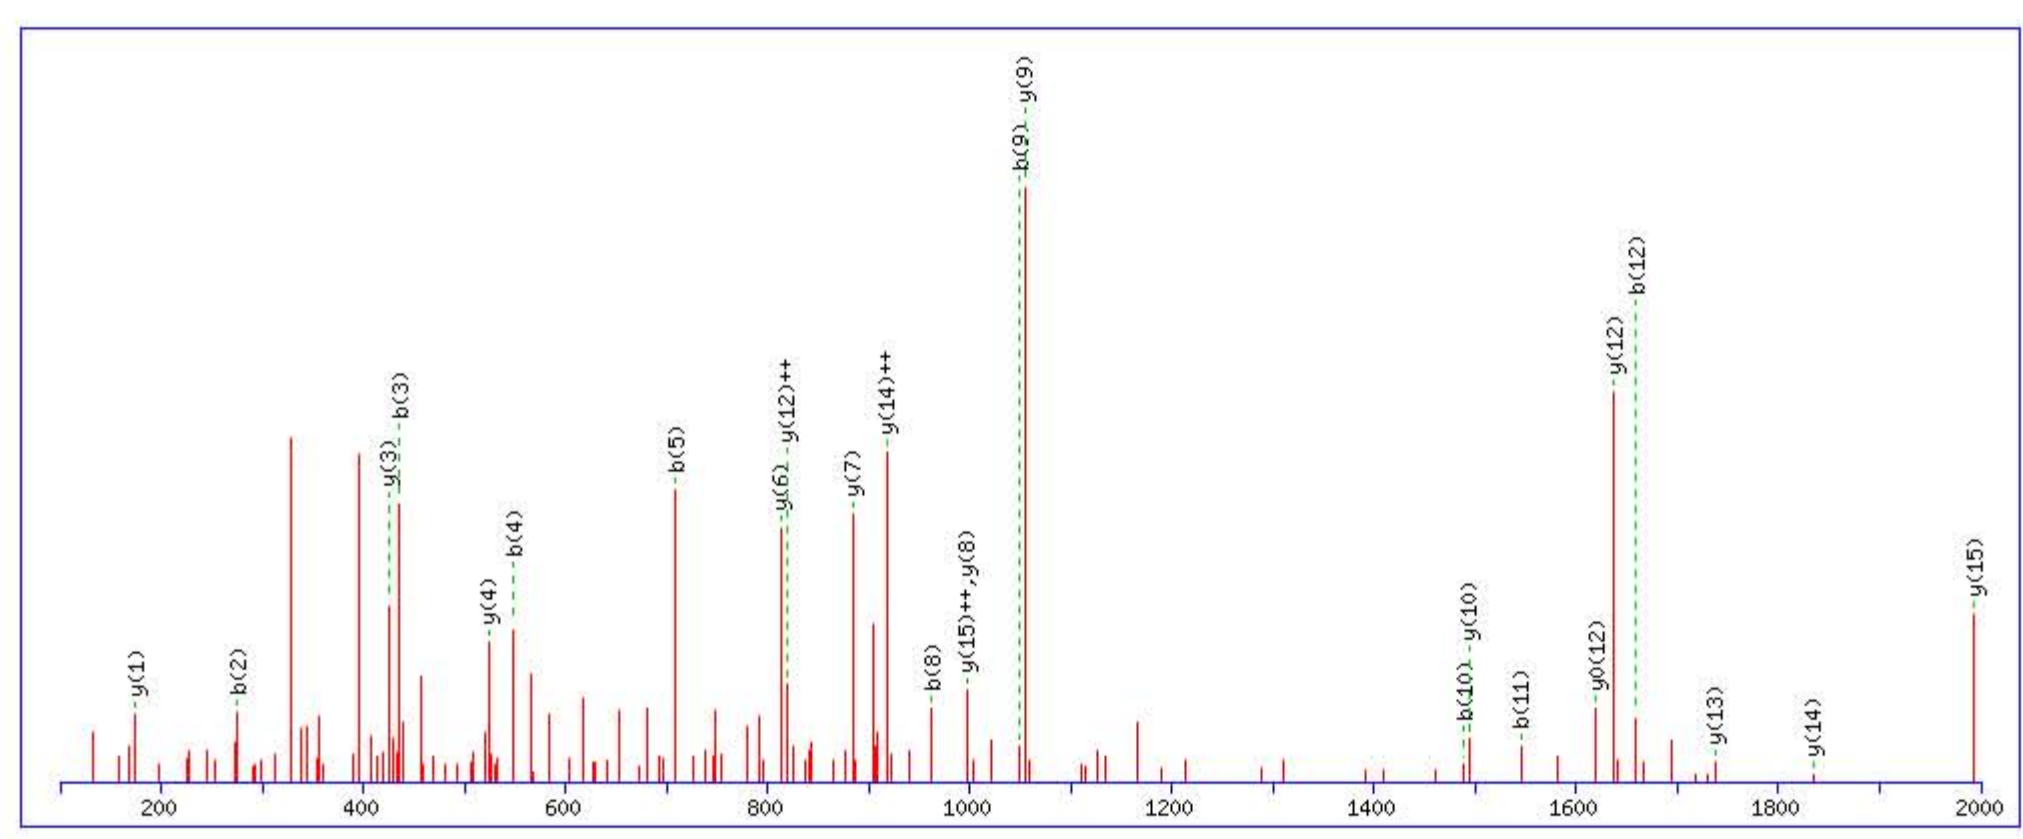

Monoisotopic mass of neutral peptide Mr(calc): 2541.094299  
 Fixed modifications: Carbamidomethyl (C) (apply to specified residues or termini only)  
 Variable modifications:  
 Q10 : Biotin:Thermo-21345 (Q)  
 Ions Score: 90 Expect: 3.9e-009  
 Matches : 25/192 fragment ions using 35 most intense peaks [\(help\)](#)

| #  | b                  | b <sup>++</sup> | b <sup>*</sup> | b <sup>*++</sup> | b <sup>0</sup> | b <sup>0++</sup> | Seq. | y                  | y <sup>++</sup>   | y <sup>*</sup> | y <sup>*++</sup> | y <sup>0</sup>     | y <sup>0++</sup> | #  |
|----|--------------------|-----------------|----------------|------------------|----------------|------------------|------|--------------------|-------------------|----------------|------------------|--------------------|------------------|----|
| 1  | 161.037925         | 81.022600       |                |                  |                |                  | C    |                    |                   |                |                  |                    |                  | 19 |
| 2  | <b>276.064868</b>  | 138.536072      |                |                  | 258.054303     | 129.530790       | D    | 2382.070908        | 1191.539092       | 2365.044359    | 1183.025817      | 2364.060343        | 1182.533809      | 18 |
| 3  | <b>436.095517</b>  | 218.551397      |                |                  | 418.084952     | 209.546114       | C    | 2267.043965        | 1134.025620       | 2250.017416    | 1125.512346      | 2249.033400        | 1125.020338      | 17 |
| 4  | <b>549.179581</b>  | 275.093429      |                |                  | 531.169016     | 266.088146       | I    | 2107.013316        | 1054.010296       | 2089.986767    | 1045.497021      | 2089.002751        | 1045.005013      | 16 |
| 5  | <b>709.210230</b>  | 355.108753      |                |                  | 691.199665     | 346.103471       | C    | <b>1993.929252</b> | <b>997.468264</b> | 1976.902703    | 988.954990       | 1975.918687        | 988.462982       | 15 |
| 6  | 806.262994         | 403.635135      |                |                  | 788.252429     | 394.629853       | P    | <b>1833.898603</b> | <b>917.452940</b> | 1816.872054    | 908.939665       | 1815.888038        | 908.447657       | 14 |
| 7  | 905.331408         | 453.169342      |                |                  | 887.320843     | 444.164060       | V    | <b>1736.845839</b> | 868.926558        | 1719.819290    | 860.413283       | 1718.835274        | 859.921275       | 13 |
| 8  | <b>962.352872</b>  | 481.680074      |                |                  | 944.342307     | 472.674792       | G    | <b>1637.777425</b> | <b>819.392351</b> | 1620.750876    | 810.879076       | <b>1619.766860</b> | 810.387068       | 12 |
| 9  | <b>1049.384900</b> | 525.196088      |                |                  | 1031.374335    | 516.190806       | S    | 1580.755961        | 790.881619        | 1563.729412    | 782.368344       | 1562.745396        | 781.876336       | 11 |
| 10 | <b>1488.610226</b> | 744.808751      | 1471.583677    | 736.295477       | 1470.599661    | 735.803469       | Q    | <b>1493.723933</b> | 747.365605        | 1476.697384    | 738.852330       | 1475.713368        | 738.360322       | 10 |
| 11 | <b>1545.631690</b> | 773.319483      | 1528.605141    | 764.806209       | 1527.621125    | 764.314201       | G    | <b>1054.498607</b> | 527.752941        | 1037.472058    | 519.239667       | 1036.488042        | 518.747659       | 9  |
| 12 | <b>1658.715754</b> | 829.861515      | 1641.689205    | 821.348241       | 1640.705189    | 820.856233       | L    | <b>997.477143</b>  | 499.242209        | 980.450594     | 490.728935       | 979.466578         | 490.236927       | 8  |
| 13 | 1729.752868        | 865.380072      | 1712.726319    | 856.866798       | 1711.742303    | 856.374790       | A    | <b>884.393079</b>  | 442.700178        | 867.366530     | 434.186903       | 866.382514         | 433.694895       | 7  |
| 14 | 1889.783517        | 945.395397      | 1872.756968    | 936.882122       | 1871.772952    | 936.390114       | C    | <b>813.355965</b>  | 407.181621        | 796.329416     | 398.668346       | 795.345400         | 398.176338       | 6  |
| 15 | 2018.826110        | 1009.916693     | 2001.799561    | 1001.403419      | 2000.815545    | 1000.911411      | E    | 653.325316         | 327.166296        | 636.298767     | 318.653021       | 635.314751         | 318.161013       | 5  |
| 16 | 2117.894524        | 1059.450900     | 2100.867975    | 1050.937625      | 2099.883959    | 1050.445617      | V    | <b>524.282723</b>  | 262.645000        | 507.256174     | 254.131725       | 506.272158         | 253.639717       | 4  |
| 17 | 2204.926552        | 1102.966914     | 2187.900003    | 1094.453639      | 2186.915987    | 1093.961631      | S    | <b>425.214309</b>  | 213.110793        | 408.187760     | 204.597518       | 407.203744         | 204.105510       | 3  |
| 18 | 2367.989881        | 1184.498578     | 2350.963332    | 1175.985304      | 2349.979316    | 1175.493296      | Y    | 338.182281         | 169.594778        | 321.155732     | 161.081504       |                    |                  | 2  |
| 19 |                    |                 |                |                  |                |                  | R    | <b>175.118952</b>  | 88.063114         | 158.092403     | 79.549839        |                    |                  | 1  |

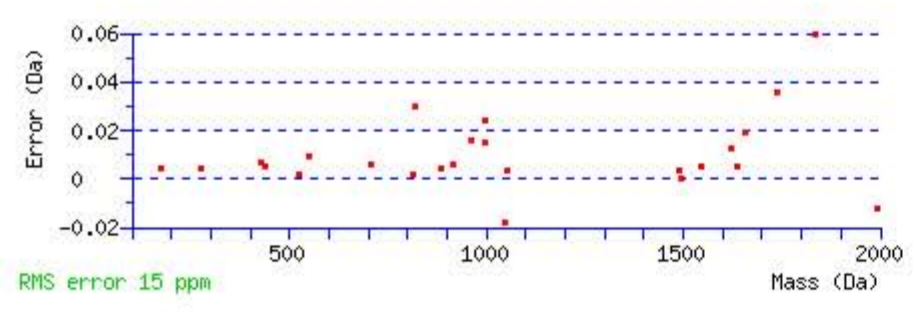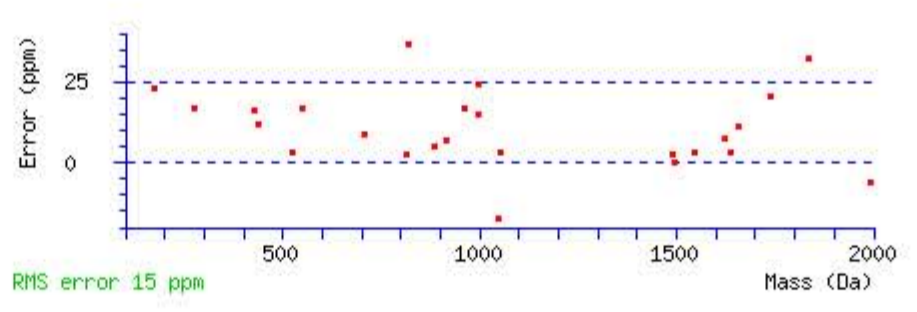

NCBI BLAST search of [CDCICPVGSQGLACEVSYR](#)  
 (Parameters: blastp, nr protein database, expect=20000, no filter, PAM30)  
 Other BLAST [web gateways](#)

### All matches to this query

| Score | Mr(calc):   | Delta    | Sequence                            |
|-------|-------------|----------|-------------------------------------|
| 90.5  | 2541.094299 | 0.006513 | <a href="#">CDCICPVGSQGLACEVSYR</a> |



# MASCOT SCIENCE Mascot Search Results

## Peptide View

MS/MS Fragmentation of **AGQLSVK**

Found in **CO8G\_HUMAN**, Complement component C8 gamma chain OS=Homo sapiens GN=C8G PE=1 SV=3

Match to Query 16066: 1012.569648 from(507.292100,2+) rtinseconds(1562) index(18906)

Title: Locus:1.1.1.546.10 File:"2013-07-02 CLN FXIII 60 min 2nd F 2.wiff"

Data file C:\Program Files (x86)\Matrix Science\Mascot Daemon\mgf\5 FXIII 60 min 2nd\mascot\_daemon\_merge.mgf

Click mouse within plot area to zoom in by factor of two about that point

Or, Plot from  to  Da

Label all possible matches  Label matches used for scoring

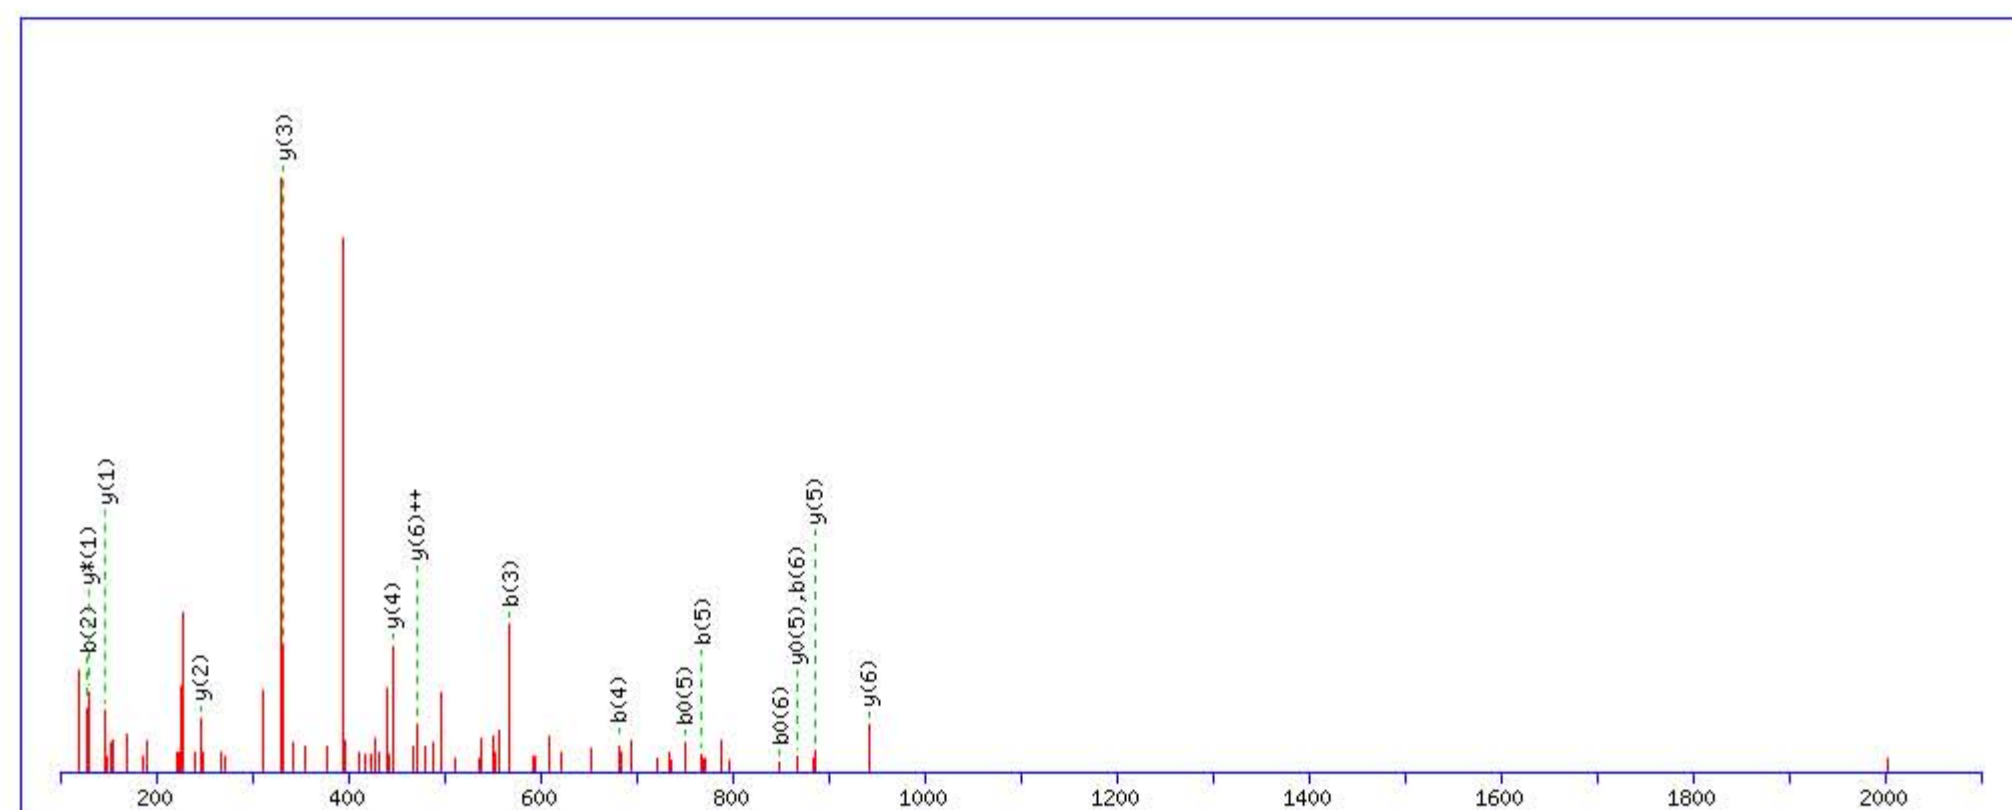

Monoisotopic mass of neutral peptide Mr(calc): 1012.573929

Fixed modifications: Carbamidomethyl (C) (apply to specified residues or termini only)

Variable modifications:

Q3 : Biotin:Thermo-21345 (Q)

Ions Score: 26 Expect: 0.037

Matches : 16/56 fragment ions using 33 most intense peaks [\(help\)](#)

| # | b                 | b <sup>++</sup> | b <sup>*</sup> | b <sup>+++</sup> | b <sup>0</sup>    | b <sup>0++</sup> | Seq. | y                 | y <sup>++</sup>   | y <sup>*</sup>    | y <sup>+++</sup> | y <sup>0</sup>    | y <sup>0++</sup> | # |
|---|-------------------|-----------------|----------------|------------------|-------------------|------------------|------|-------------------|-------------------|-------------------|------------------|-------------------|------------------|---|
| 1 | 72.044390         | 36.525833       |                |                  |                   |                  | A    |                   |                   |                   |                  |                   |                  | 7 |
| 2 | <b>129.065854</b> | 65.036565       |                |                  |                   |                  | G    | <b>942.544100</b> | <b>471.775688</b> | 925.517551        | 463.262414       | 924.533535        | 462.770406       | 6 |
| 3 | <b>568.291180</b> | 284.649228      | 551.264631     | 276.135954       |                   |                  | Q    | <b>885.522636</b> | 443.264956        | 868.496087        | 434.751682       | <b>867.512071</b> | 434.259674       | 5 |
| 4 | <b>681.375244</b> | 341.191260      | 664.348695     | 332.677986       |                   |                  | L    | <b>446.297310</b> | 223.652293        | 429.270761        | 215.139018       | 428.286745        | 214.647010       | 4 |
| 5 | <b>768.407272</b> | 384.707274      | 751.380723     | 376.194000       | <b>750.396707</b> | 375.701992       | S    | <b>333.213246</b> | 167.110261        | 316.186697        | 158.596986       | 315.202681        | 158.104978       | 3 |
| 6 | <b>867.475686</b> | 434.241481      | 850.449137     | 425.728207       | <b>849.465121</b> | 425.236199       | V    | <b>246.181218</b> | 123.594247        | 229.154669        | 115.080972       |                   |                  | 2 |
| 7 |                   |                 |                |                  |                   |                  | K    | <b>147.112804</b> | 74.060040         | <b>130.086255</b> | 65.546765        |                   |                  | 1 |

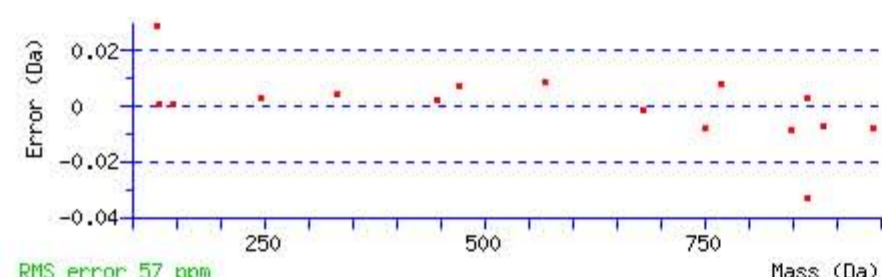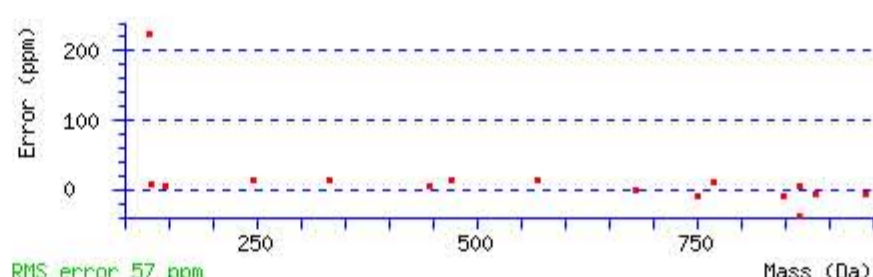

NCBI BLAST search of **AGQLSVK**

(Parameters: blastp, nr protein database, expect=20000, no filter, PAM30)

Other BLAST [web gateways](#)

All matches to this query

| Score | Mr(calc):   | Delta     | Sequence                   |
|-------|-------------|-----------|----------------------------|
| 26.0  | 1012.573929 | -0.004281 | <a href="#">AGQLSVK</a>    |
| 10.1  | 1012.573914 | -0.004266 | <a href="#">KEAQVK</a>     |
| 8.2   | 1012.573929 | -0.004281 | <a href="#">QAGLVSK</a>    |
| 8.2   | 1012.573914 | -0.004266 | <a href="#">QKLEGK</a>     |
| 7.4   | 1012.555267 | 0.014381  | <a href="#">EPSKPAEKK</a>  |
| 6.2   | 1012.570557 | -0.000909 | <a href="#">IIDFGLAHK</a>  |
| 6.2   | 1012.570557 | -0.000909 | <a href="#">LIDFGIAHK</a>  |
| 5.8   | 1012.555267 | 0.014381  | <a href="#">EPSKPKAEK</a>  |
| 4.2   | 1012.555313 | 0.014335  | <a href="#">GGEIQPVSVK</a> |
| 3.4   | 1012.573929 | -0.004281 | <a href="#">QNLTVK</a>     |

Mascot: <http://www.matrixscience.com/>



# MASCOT SEARCH RESULTS

## Peptide View

MS/MS Fragmentation of **KLDGICWQVR**

Found in **CO8G\_HUMAN**, Complement component C8 gamma chain OS=Homo sapiens GN=C8G PE=1 SV=3

Match to Query 36473: 1584.828072 from(529.283300,3+) rtinseconds(2075) index(36864)

Title: Locus:1.1.1.3142.9 File:"2013-07-02 CLN FXIII 60 min 2nd F 3.wiff"

Data file C:\Program Files (x86)\Matrix Science\Mascot Daemon\mgf5 FXIII 60 min 2nd\mascot\_daemon\_merge.mgf

Click mouse within plot area to zoom in by factor of two about that point

Or, Plot from  to  Da

Label all possible matches  Label matches used for scoring

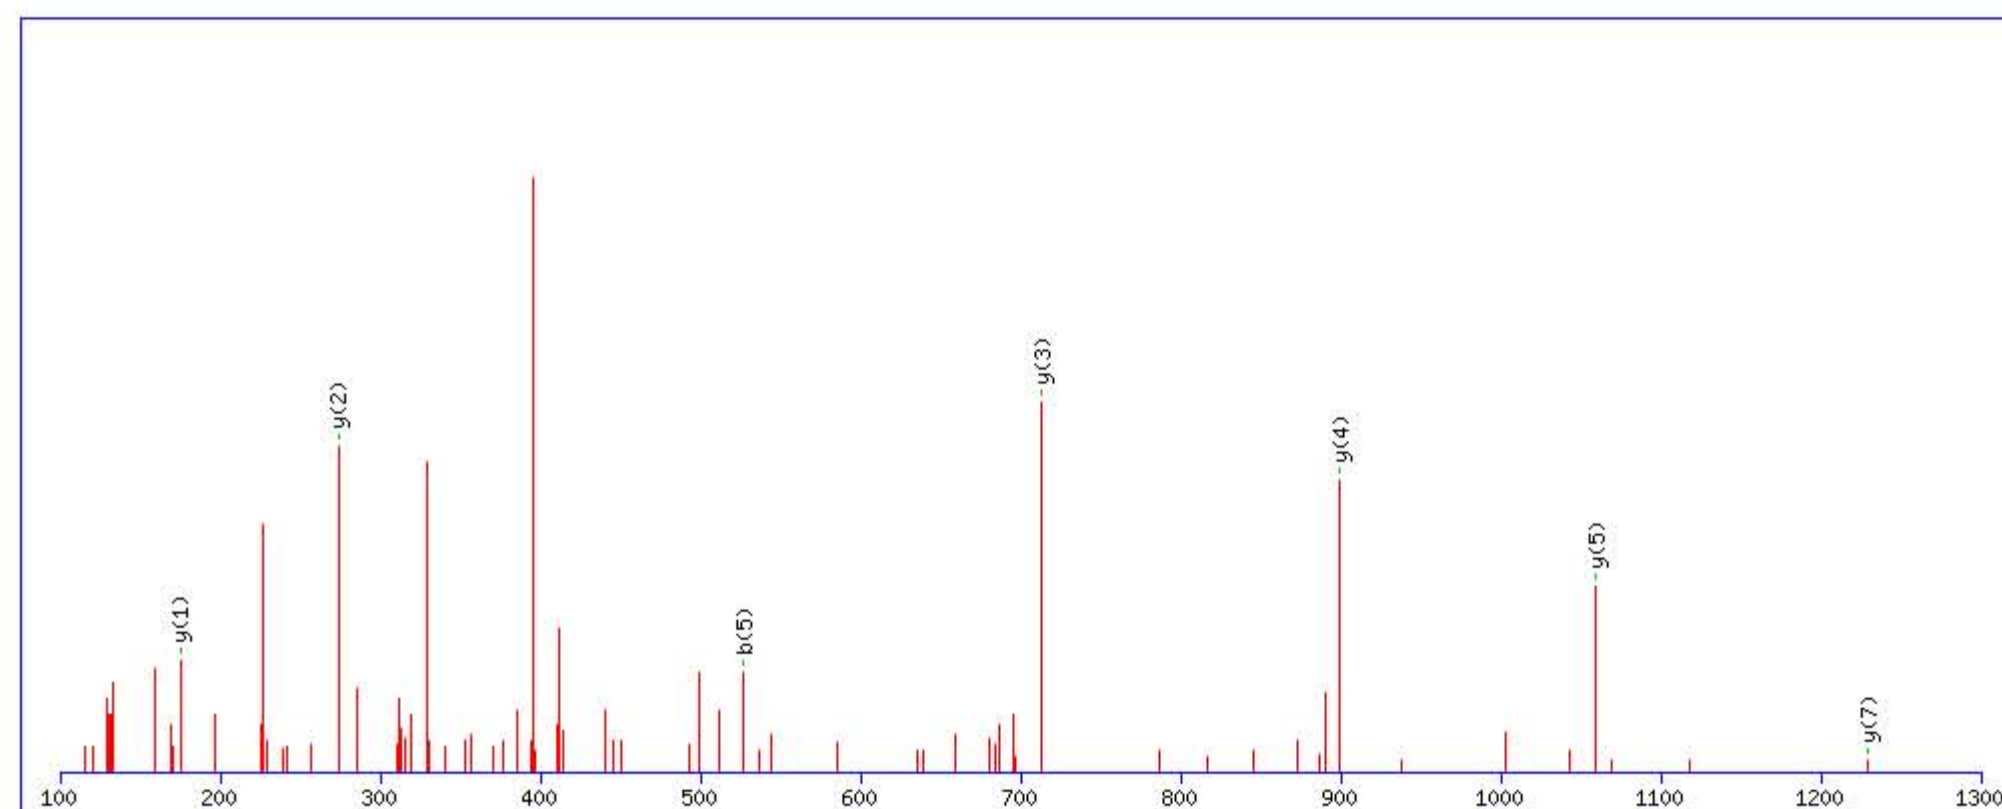

Monoisotopic mass of neutral peptide Mr(calc): 1584.826874

Fixed modifications: Carbamidomethyl (C) (apply to specified residues or termini only)

Variable modifications:

Q8 : Biotin:Thermo-21345 (Q)

Ions Score: 36 Expect: 0.0017

Matches : 7/90 fragment ions using 12 most intense peaks [\(help\)](#)

| #  | b                 | b <sup>++</sup> | b <sup>*</sup> | b <sup>*++</sup> | b <sup>0</sup> | b <sup>0++</sup> | Seq.     | y                  | y <sup>++</sup> | y <sup>*</sup> | y <sup>*++</sup> | y <sup>0</sup> | y <sup>0++</sup> | #  |
|----|-------------------|-----------------|----------------|------------------|----------------|------------------|----------|--------------------|-----------------|----------------|------------------|----------------|------------------|----|
| 1  | 129.102239        | 65.054757       | 112.075690     | 56.541483        |                |                  | <b>K</b> |                    |                 |                |                  |                |                  | 10 |
| 2  | 242.186303        | 121.596790      | 225.159754     | 113.083515       |                |                  | <b>L</b> | 1457.739189        | 729.373233      | 1440.712640    | 720.859958       | 1439.728624    | 720.367950       | 9  |
| 3  | 357.213246        | 179.110261      | 340.186697     | 170.596987       | 339.202681     | 170.104979       | <b>D</b> | 1344.655125        | 672.831201      | 1327.628576    | 664.317926       | 1326.644560    | 663.825918       | 8  |
| 4  | 414.234710        | 207.620993      | 397.208161     | 199.107719       | 396.224145     | 198.615711       | <b>G</b> | <b>1229.628182</b> | 615.317729      | 1212.601633    | 606.804455       |                |                  | 7  |
| 5  | <b>527.318774</b> | 264.163025      | 510.292225     | 255.649751       | 509.308209     | 255.157743       | <b>I</b> | 1172.606718        | 586.806997      | 1155.580169    | 578.293723       |                |                  | 6  |
| 6  | 687.349423        | 344.178350      | 670.322874     | 335.665075       | 669.338858     | 335.173067       | <b>C</b> | <b>1059.522654</b> | 530.264965      | 1042.496105    | 521.751691       |                |                  | 5  |
| 7  | 873.428736        | 437.218006      | 856.402187     | 428.704732       | 855.418171     | 428.212724       | <b>W</b> | <b>899.492005</b>  | 450.249641      | 882.465456     | 441.736366       |                |                  | 4  |
| 8  | 1312.654062       | 656.830669      | 1295.627513    | 648.317395       | 1294.643497    | 647.825387       | <b>Q</b> | <b>713.412692</b>  | 357.209984      | 696.386143     | 348.696710       |                |                  | 3  |
| 9  | 1411.722476       | 706.364876      | 1394.695927    | 697.851602       | 1393.711911    | 697.359594       | <b>V</b> | <b>274.187366</b>  | 137.597321      | 257.160817     | 129.084047       |                |                  | 2  |
| 10 |                   |                 |                |                  |                |                  | <b>R</b> | <b>175.118952</b>  | 88.063114       | 158.092403     | 79.549839        |                |                  | 1  |

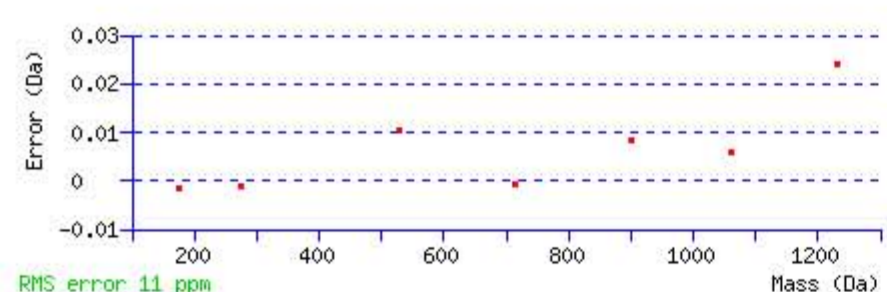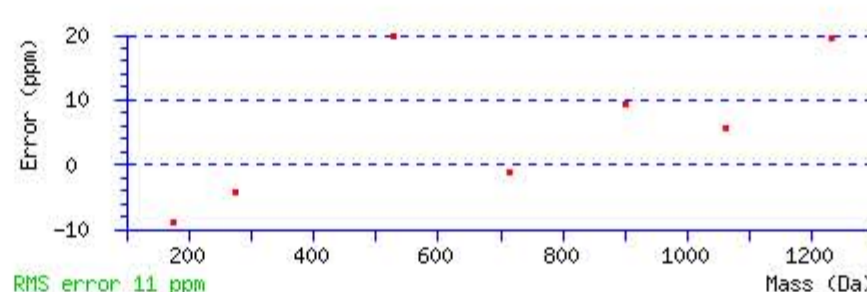

NCBI BLAST search of **KLDGICWQVR**

(Parameters: blastp, nr protein database, expect=20000, no filter, PAM30)

Other BLAST [web gateways](#)

All matches to this query

| Score | Mr(calc):   | Delta     | Sequence                    |
|-------|-------------|-----------|-----------------------------|
| 36.0  | 1584.826874 | 0.001198  | <a href="#">KLDGICWQVR</a>  |
| 6.1   | 1584.805099 | 0.022973  | <a href="#">SQCVPICRR</a>   |
| 4.5   | 1584.829346 | -0.001274 | <a href="#">QAESQINKQTK</a> |
| 1.0   | 1584.822845 | 0.005227  | <a href="#">SQMSPQGLRVR</a> |

Mascot: <http://www.matrixscience.com/>



# MASCOT Search Results

## Peptide View

MS/MS Fragmentation of **SLPVSDSVLSGFQQR**

Found in **CO8G\_HUMAN**, Complement component C8 gamma chain OS=Homo sapiens GN=C8G PE=1 SV=3

Match to Query 45137: 1930.989312 from(644.670380,3+) rtinseconds(2510) index(39574)

Title: Locus:1.1.1.3293.14 File:"2013-07-02 CLN FXIII 60 min 2nd F 3.wiff"

Data file C:\Program Files (x86)\Matrix Science\Mascot Daemon\mgf5 FXIII 60 min 2nd\mascot\_daemon\_merge.mgf

Click mouse within plot area to zoom in by factor of two about that point

Or, Plot from  to  Da

Label all possible matches  Label matches used for scoring

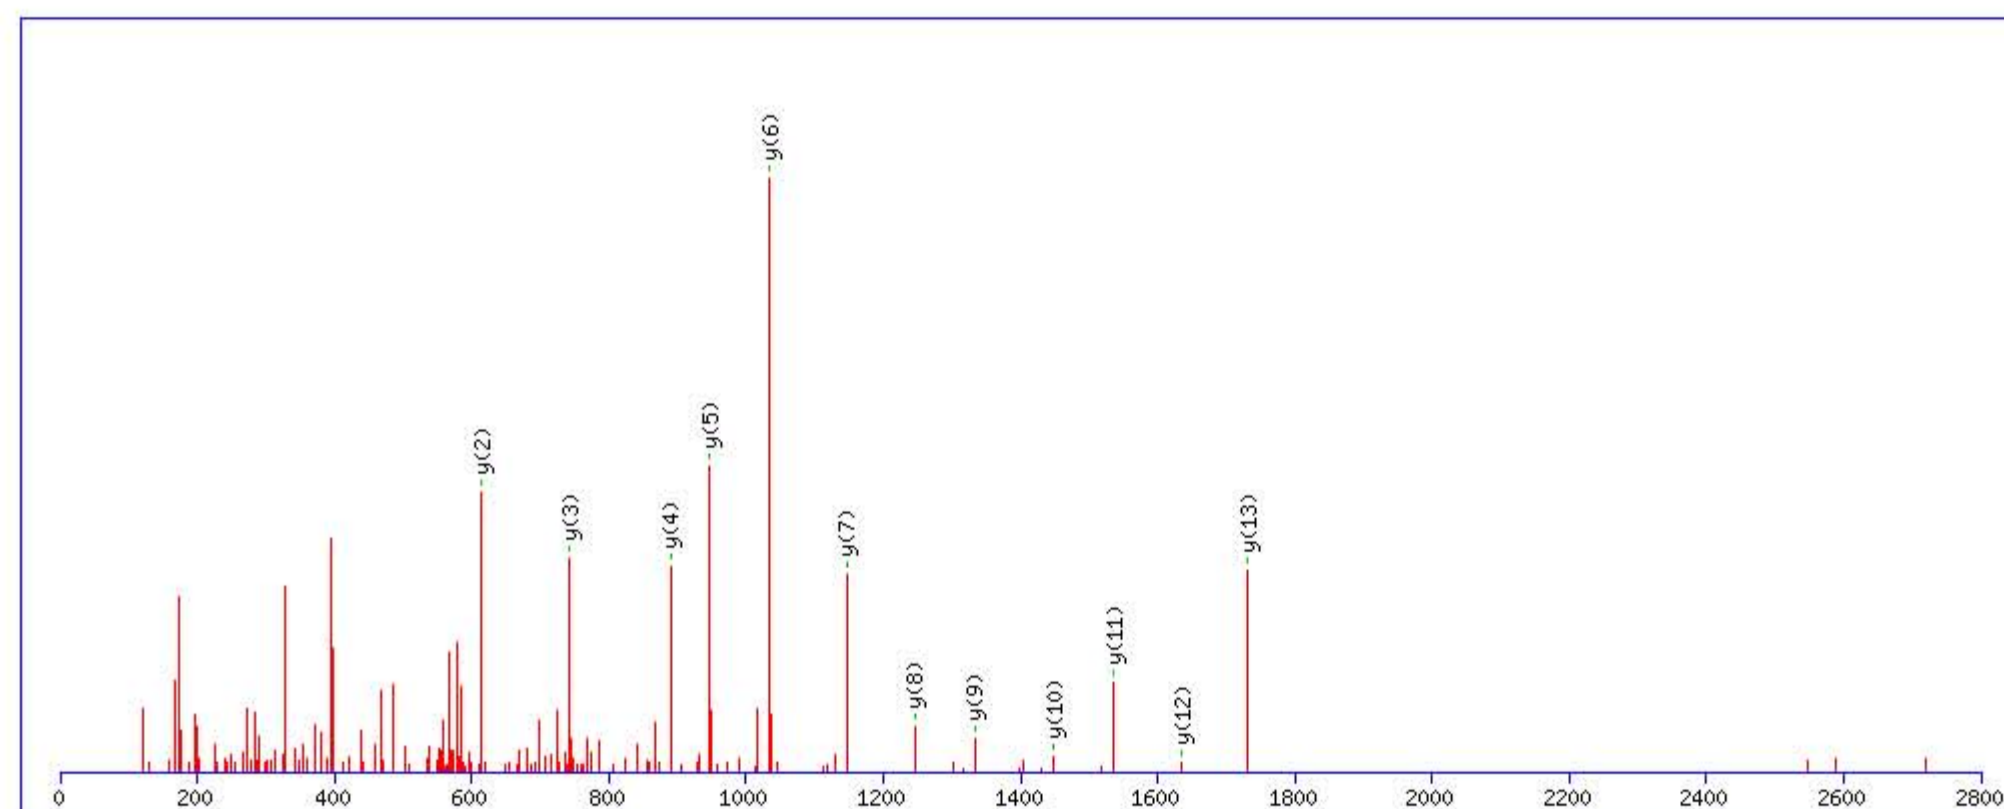

Monoisotopic mass of neutral peptide Mr(calc): 1930.982254

Fixed modifications: Carbamidomethyl (C) (apply to specified residues or termini only)

Variable modifications:

Q14 : Biotin:Thermo-21345 (Q)

Ions Score: 104 Expect: 2.1e-010

Matches : 12/138 fragment ions using 17 most intense peaks [\(help\)](#)

| #  | b           | b <sup>++</sup> | b <sup>*</sup> | b <sup>*++</sup> | b <sup>0</sup> | b <sup>0++</sup> | Seq. | y                  | y <sup>++</sup> | y <sup>*</sup> | y <sup>*++</sup> | y <sup>0</sup> | y <sup>0++</sup> | #  |
|----|-------------|-----------------|----------------|------------------|----------------|------------------|------|--------------------|-----------------|----------------|------------------|----------------|------------------|----|
| 1  | 88.039304   | 44.523290       |                |                  | 70.028739      | 35.518008        | S    |                    |                 |                |                  |                |                  | 15 |
| 2  | 201.123368  | 101.065322      |                |                  | 183.112803     | 92.060039        | L    | 1844.957496        | 922.982386      | 1827.930947    | 914.469112       | 1826.946931    | 913.977104       | 14 |
| 3  | 298.176132  | 149.591704      |                |                  | 280.165567     | 140.586422       | P    | <b>1731.873432</b> | 866.440354      | 1714.846883    | 857.927080       | 1713.862867    | 857.435072       | 13 |
| 4  | 397.244546  | 199.125911      |                |                  | 379.233981     | 190.120629       | V    | <b>1634.820668</b> | 817.913972      | 1617.794119    | 809.400698       | 1616.810103    | 808.908690       | 12 |
| 5  | 484.276574  | 242.641925      |                |                  | 466.266009     | 233.636643       | S    | <b>1535.752254</b> | 768.379765      | 1518.725705    | 759.866491       | 1517.741689    | 759.374483       | 11 |
| 6  | 599.303517  | 300.155397      |                |                  | 581.292952     | 291.150114       | D    | <b>1448.720226</b> | 724.863751      | 1431.693677    | 716.350477       | 1430.709661    | 715.858469       | 10 |
| 7  | 686.335545  | 343.671411      |                |                  | 668.324980     | 334.666128       | S    | <b>1333.693283</b> | 667.350280      | 1316.666734    | 658.837005       | 1315.682718    | 658.344997       | 9  |
| 8  | 785.403959  | 393.205618      |                |                  | 767.393394     | 384.200335       | V    | <b>1246.661255</b> | 623.834266      | 1229.634706    | 615.320991       | 1228.650690    | 614.828983       | 8  |
| 9  | 898.488023  | 449.747650      |                |                  | 880.477458     | 440.742367       | L    | <b>1147.592841</b> | 574.300059      | 1130.566292    | 565.786784       | 1129.582276    | 565.294776       | 7  |
| 10 | 985.520051  | 493.263664      |                |                  | 967.509486     | 484.258381       | S    | <b>1034.508777</b> | 517.758027      | 1017.482228    | 509.244752       | 1016.498212    | 508.752744       | 6  |
| 11 | 1042.541515 | 521.774395      |                |                  | 1024.530950    | 512.769113       | G    | <b>947.476749</b>  | 474.242013      | 930.450200     | 465.728738       | 929.466184     | 465.236730       | 5  |
| 12 | 1189.609929 | 595.308603      |                |                  | 1171.599364    | 586.303320       | F    | <b>890.455285</b>  | 445.731281      | 873.428736     | 437.218006       | 872.444720     | 436.725998       | 4  |
| 13 | 1318.652522 | 659.829899      |                |                  | 1300.641957    | 650.824617       | E    | <b>743.386871</b>  | 372.197074      | 726.360322     | 363.683799       | 725.376306     | 363.191791       | 3  |
| 14 | 1757.877848 | 879.442562      | 1740.851299    | 870.929288       | 1739.867283    | 870.437280       | Q    | <b>614.344278</b>  | 307.675777      | 597.317729     | 299.162503       |                |                  | 2  |
| 15 |             |                 |                |                  |                |                  | R    | 175.118952         | 88.063114       | 158.092403     | 79.549839        |                |                  | 1  |

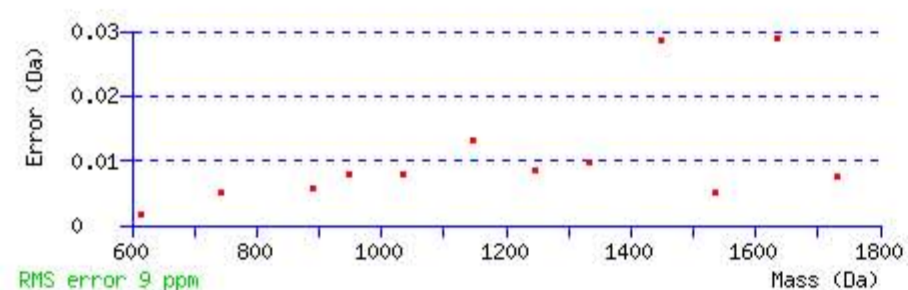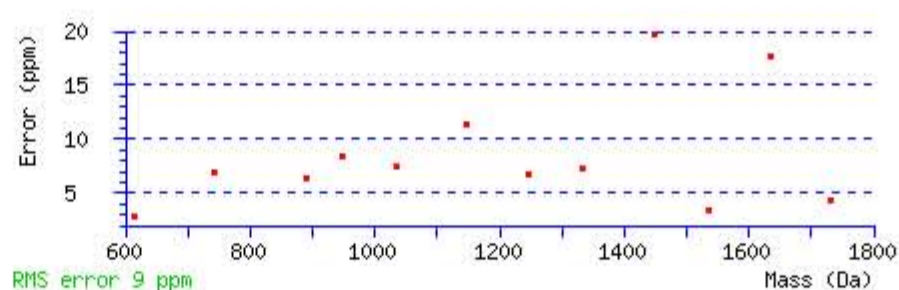

NCBI BLAST search of [SLPVSDSVLSGFQQR](#)

(Parameters: blastp, nr protein database, expect=20000, no filter, PAM30)

Other BLAST [web gateways](#)

All matches to this query

| Score | Mr(calc):   | Delta     | Sequence                        |
|-------|-------------|-----------|---------------------------------|
| 104.2 | 1930.982254 | 0.007058  | <a href="#">SLPVSDSVLSGFQQR</a> |
| 1.0   | 1931.000885 | -0.011573 | <a href="#">LSPVTACAGQTLQFK</a> |

Mascot: <http://www.matrixscience.com/>



# MASCOT Search Results

## Peptide View

MS/MS Fragmentation of **VQEAHLTEDQIFYFPK**

Found in **CO8G\_HUMAN**, Complement component C8 gamma chain OS=Homo sapiens GN=C8G PE=1 SV=3

Match to Query 52614: 2275.148982 from(759.390270,3+) rtinseconds(2364) index(23784)

Title: Locus:1.1.1.825.19 File:"2013-07-02 CLN FXIII 60 min 2nd F 2.wiff"

Data file C:\Program Files (x86)\Matrix Science\Mascot Daemon\mgf5 FXIII 60 min 2nd\mascot\_daemon\_merge.mgf

Click mouse within plot area to zoom in by factor of two about that point

Or, Plot from  to  Da

Label all possible matches  Label matches used for scoring

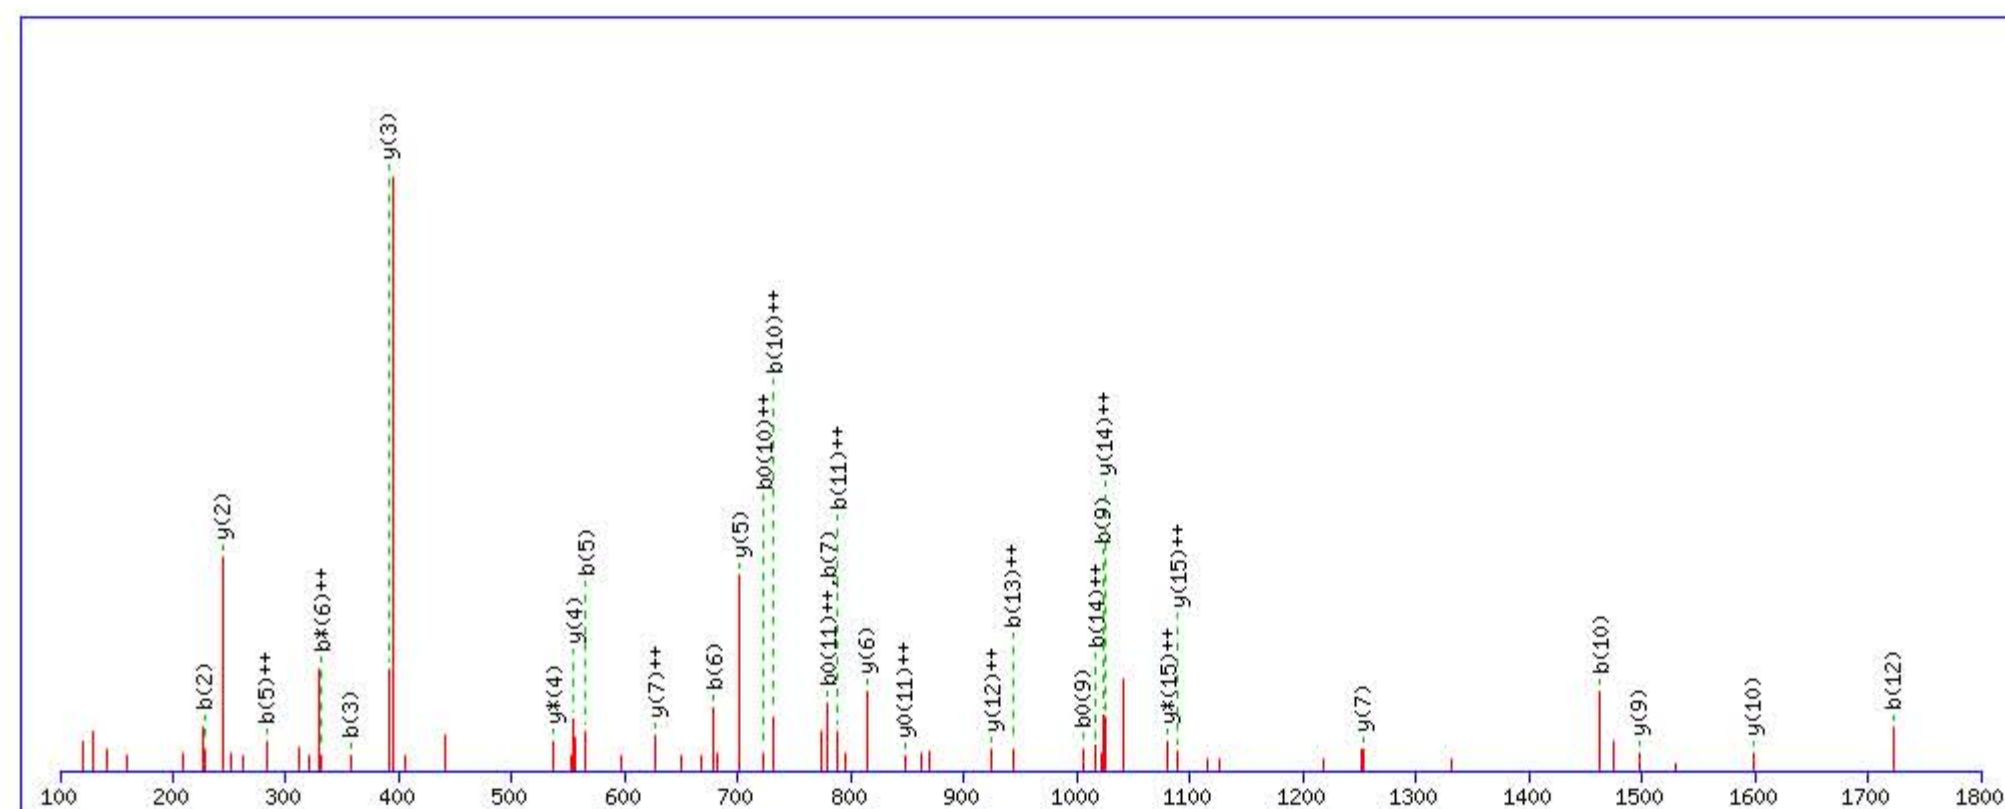

Monoisotopic mass of neutral peptide  $M_r(\text{calc})$ : 2275.134720

Fixed modifications: Carbamidomethyl (C) (apply to specified residues or termini only)

Variable modifications:

Q10 : Biotin:Thermo-21345 (Q)

Ions Score: 39 Expect: 0.0036

Matches : 32/160 fragment ions using 61 most intense peaks [\(help\)](#)

| #  | b                  | b <sup>++</sup>    | b <sup>*</sup> | b <sup>*++</sup>  | b <sup>0</sup>     | b <sup>0++</sup>  | Seq. | y                  | y <sup>++</sup>    | y <sup>*</sup>    | y <sup>*++</sup>   | y <sup>0</sup> | y <sup>0++</sup>  | #  |
|----|--------------------|--------------------|----------------|-------------------|--------------------|-------------------|------|--------------------|--------------------|-------------------|--------------------|----------------|-------------------|----|
| 1  | 100.075690         | 50.541483          |                |                   |                    |                   | V    |                    |                    |                   |                    |                |                   | 16 |
| 2  | <b>228.134268</b>  | 114.570772         | 211.107719     | 106.057498        |                    |                   | Q    | 2177.073591        | <b>1089.040433</b> | 2160.047042       | <b>1080.527159</b> | 2159.063026    | 1080.035151       | 15 |
| 3  | <b>357.176861</b>  | 179.092069         | 340.150312     | 170.578794        | 339.166296         | 170.086786        | E    | 2049.015013        | <b>1025.011144</b> | 2031.988464       | 1016.497870        | 2031.004448    | 1016.005862       | 14 |
| 4  | 428.213975         | 214.610626         | 411.187426     | 206.097351        | 410.203410         | 205.605343        | A    | 1919.972420        | 960.489848         | 1902.945871       | 951.976573         | 1901.961855    | 951.484565        | 13 |
| 5  | <b>565.272887</b>  | <b>283.140082</b>  | 548.246338     | 274.626807        | 547.262322         | 274.134799        | H    | 1848.935306        | <b>924.971291</b>  | 1831.908757       | 916.458016         | 1830.924741    | 915.966008        | 12 |
| 6  | <b>678.356951</b>  | 339.682114         | 661.330402     | <b>331.168839</b> | 660.346386         | 330.676831        | L    | 1711.876394        | 856.441835         | 1694.849845       | 847.928561         | 1693.865829    | <b>847.436552</b> | 11 |
| 7  | <b>779.404630</b>  | 390.205953         | 762.378081     | 381.692679        | 761.394065         | 381.200671        | T    | <b>1598.792330</b> | 799.899803         | 1581.765781       | 791.386529         | 1580.781765    | 790.894521        | 10 |
| 8  | 908.447223         | 454.727250         | 891.420674     | 446.213975        | 890.436658         | 445.721967        | E    | <b>1497.744651</b> | 749.375963         | 1480.718102       | 740.862689         | 1479.734086    | 740.370681        | 9  |
| 9  | <b>1023.474166</b> | 512.240721         | 1006.447617    | 503.727447        | <b>1005.463601</b> | 503.235439        | D    | 1368.702058        | 684.854667         | 1351.675509       | 676.341392         | 1350.691493    | 675.849384        | 8  |
| 10 | <b>1462.699492</b> | <b>731.853384</b>  | 1445.672943    | 723.340110        | 1444.688927        | <b>722.848101</b> | Q    | <b>1253.675115</b> | <b>627.341195</b>  | 1236.648566       | 618.827921         |                |                   | 7  |
| 11 | 1575.783556        | <b>788.395416</b>  | 1558.757007    | 779.882141        | 1557.772991        | <b>779.390133</b> | I    | <b>814.449789</b>  | 407.728533         | 797.423240        | 399.215258         |                |                   | 6  |
| 12 | <b>1722.851970</b> | 861.929623         | 1705.825421    | 853.416349        | 1704.841405        | 852.924340        | F    | <b>701.365725</b>  | 351.186501         | 684.339176        | 342.673226         |                |                   | 5  |
| 13 | 1885.915299        | <b>943.461288</b>  | 1868.888750    | 934.948013        | 1867.904734        | 934.456005        | Y    | <b>554.297311</b>  | 277.652294         | <b>537.270762</b> | 269.139019         |                |                   | 4  |
| 14 | 2032.983713        | <b>1016.995495</b> | 2015.957164    | 1008.482220       | 2014.973148        | 1007.990212       | F    | <b>391.233982</b>  | 196.120629         | 374.207433        | 187.607354         |                |                   | 3  |
| 15 | 2130.036477        | 1065.521876        | 2113.009928    | 1057.008602       | 2112.025912        | 1056.516594       | P    | <b>244.165568</b>  | 122.586422         | 227.139019        | 114.073147         |                |                   | 2  |
| 16 |                    |                    |                |                   |                    |                   | K    | 147.112804         | 74.060040          | 130.086255        | 65.546765          |                |                   | 1  |

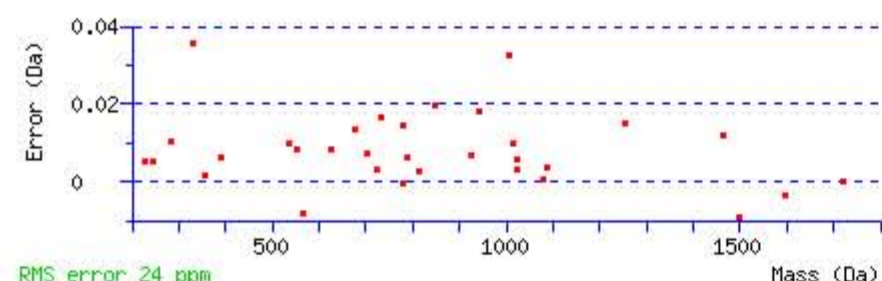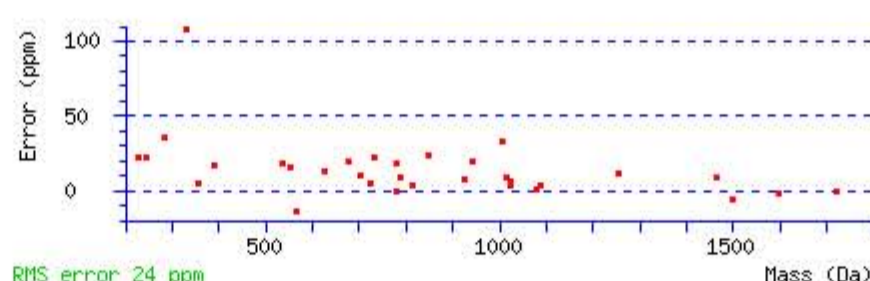

NCBI BLAST search of **VQEAHLTEDQIFYFPK**

(Parameters: blastp, nr protein database, expect=20000, no filter, PAM30)

Other BLAST [web gateways](#)

All matches to this query

| Score | $M_r(\text{calc})$ | Delta    | Sequence                         |
|-------|--------------------|----------|----------------------------------|
| 39.5  | 2275.134720        | 0.014262 | <a href="#">VQEAHLTEDQIFYFPK</a> |
| 12.4  | 2275.134720        | 0.014262 | <a href="#">VQEAHLTEDQIFYFPK</a> |

Mascot: <http://www.matrixscience.com/>



# MASCOT Search Results

## Peptide View

MS/MS Fragmentation of **YGFCEAADQFHVLDEVR**

Found in **CO8G\_HUMAN**, Complement component C8 gamma chain OS=Homo sapiens GN=C8G PE=1 SV=3

Match to Query 53929: 2366.094732 from(789.705520,3+) rtinseconds(2567) index(39873)

Title: Locus:1.1.1.3313.7 File:"2013-07-02 CLN FXIII 60 min 2nd F 3.wiff"

Data file C:\Program Files (x86)\Matrix Science\Mascot Daemon\mgf5 FXIII 60 min 2nd\mascot\_daemon\_merge.mgf

Click mouse within plot area to zoom in by factor of two about that point

Or, Plot from  to  Da

Label all possible matches  Label matches used for scoring

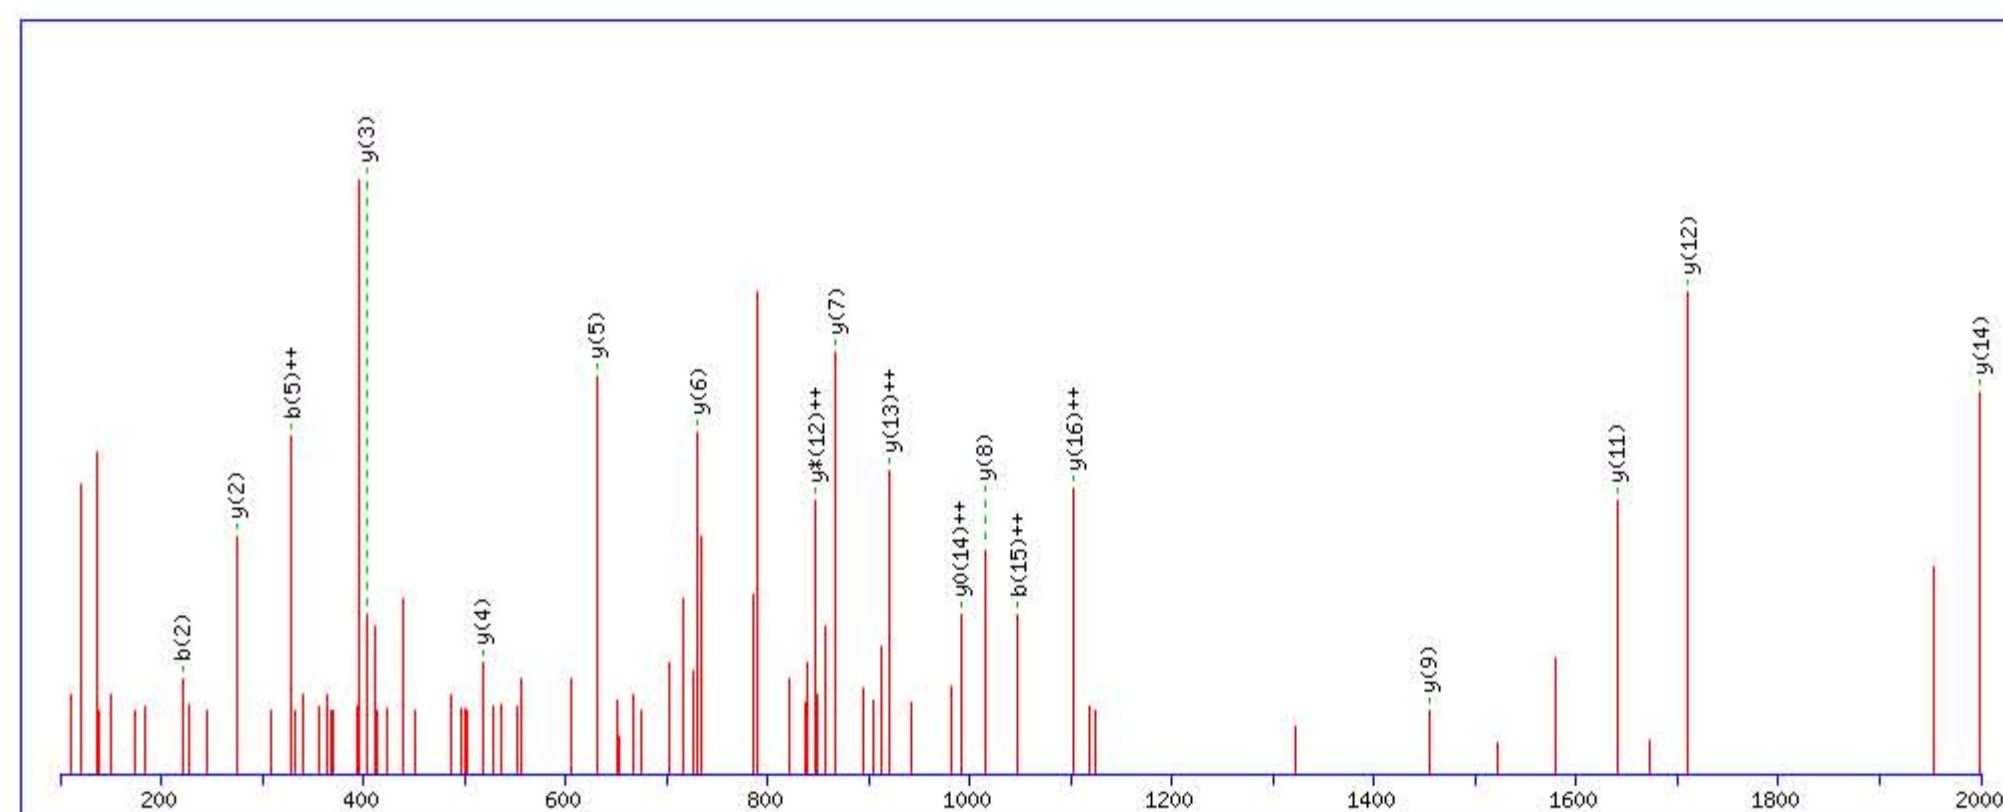

Monoisotopic mass of neutral peptide Mr(calc): 2366.082382

Fixed modifications: Carbamidomethyl (C) (apply to specified residues or termini only)

Variable modifications:

Q9 : Biotin:Thermo-21345 (Q)

Ions Score: 51 Expect: 0.00011

Matches : 18/164 fragment ions using 41 most intense peaks [\(help\)](#)

| #  | b                 | b <sup>++</sup>    | b <sup>*</sup> | b <sup>*++</sup> | b <sup>0</sup> | b <sup>0++</sup> | Seq. | y                  | y <sup>++</sup>    | y <sup>*</sup> | y <sup>*++</sup>  | y <sup>0</sup> | y <sup>0++</sup>  | #  |
|----|-------------------|--------------------|----------------|------------------|----------------|------------------|------|--------------------|--------------------|----------------|-------------------|----------------|-------------------|----|
| 1  | 164.070605        | 82.538940          |                |                  |                |                  | Y    |                    |                    |                |                   |                |                   | 17 |
| 2  | <b>221.092069</b> | 111.049673         |                |                  |                |                  | G    | 2204.026323        | <b>1102.516799</b> | 2186.999774    | 1094.003525       | 2186.015758    | 1093.511517       | 16 |
| 3  | 368.160483        | 184.583879         |                |                  |                |                  | F    | 2147.004859        | 1074.006067        | 2129.978310    | 1065.492793       | 2128.994294    | 1065.000785       | 15 |
| 4  | 528.191132        | 264.599204         |                |                  |                |                  | C    | <b>1999.936445</b> | 1000.471860        | 1982.909896    | 991.958586        | 1981.925880    | <b>991.466578</b> | 14 |
| 5  | 657.233725        | <b>329.120501</b>  |                |                  | 639.223160     | 320.115218       | E    | 1839.905796        | <b>920.456536</b>  | 1822.879247    | 911.943261        | 1821.895231    | 911.451253        | 13 |
| 6  | 728.270839        | 364.639058         |                |                  | 710.260274     | 355.633775       | A    | <b>1710.863203</b> | 855.935239         | 1693.836654    | <b>847.421965</b> | 1692.852638    | 846.929957        | 12 |
| 7  | 799.307953        | 400.157615         |                |                  | 781.297388     | 391.152332       | A    | <b>1639.826089</b> | 820.416682         | 1622.799540    | 811.903408        | 1621.815524    | 811.411400        | 11 |
| 8  | 914.334896        | 457.671086         |                |                  | 896.324331     | 448.665803       | D    | 1568.788975        | 784.898125         | 1551.762426    | 776.384851        | 1550.778410    | 775.892843        | 10 |
| 9  | 1353.560222       | 677.283749         | 1336.533673    | 668.770474       | 1335.549657    | 668.278466       | Q    | <b>1453.762032</b> | 727.384654         | 1436.735483    | 718.871379        | 1435.751467    | 718.379371        | 9  |
| 10 | 1500.628636       | 750.817956         | 1483.602087    | 742.304682       | 1482.618071    | 741.812673       | F    | <b>1014.536706</b> | 507.771991         | 997.510157     | 499.258717        | 996.526141     | 498.766709        | 8  |
| 11 | 1637.687548       | 819.347412         | 1620.660999    | 810.834138       | 1619.676983    | 810.342129       | H    | <b>867.468292</b>  | 434.237784         | 850.441743     | 425.724510        | 849.457727     | 425.232502        | 7  |
| 12 | 1736.755962       | 868.881619         | 1719.729413    | 860.368345       | 1718.745397    | 859.876336       | V    | <b>730.409380</b>  | 365.708328         | 713.382831     | 357.195054        | 712.398815     | 356.703046        | 6  |
| 13 | 1849.840026       | 925.423651         | 1832.813477    | 916.910376       | 1831.829461    | 916.418368       | L    | <b>631.340966</b>  | 316.174121         | 614.314417     | 307.660846        | 613.330401     | 307.168838        | 5  |
| 14 | 1964.866969       | 982.937122         | 1947.840420    | 974.423848       | 1946.856404    | 973.931840       | D    | <b>518.256902</b>  | 259.632089         | 501.230353     | 251.118815        | 500.246337     | 250.626807        | 4  |
| 15 | 2093.909562       | <b>1047.458419</b> | 2076.883013    | 1038.945144      | 2075.898997    | 1038.453136      | E    | <b>403.229959</b>  | 202.118617         | 386.203410     | 193.605343        | 385.219394     | 193.113335        | 3  |
| 16 | 2192.977976       | 1096.992626        | 2175.951427    | 1088.479351      | 2174.967411    | 1087.987343      | V    | <b>274.187366</b>  | 137.597321         | 257.160817     | 129.084046        |                |                   | 2  |
| 17 |                   |                    |                |                  |                |                  | R    | 175.118952         | 88.063114          | 158.092403     | 79.549839         |                |                   | 1  |

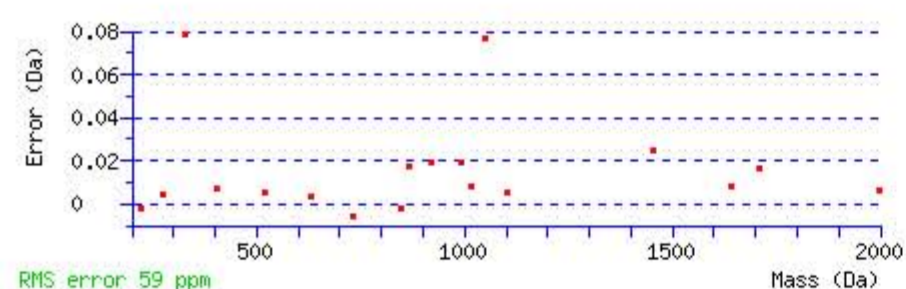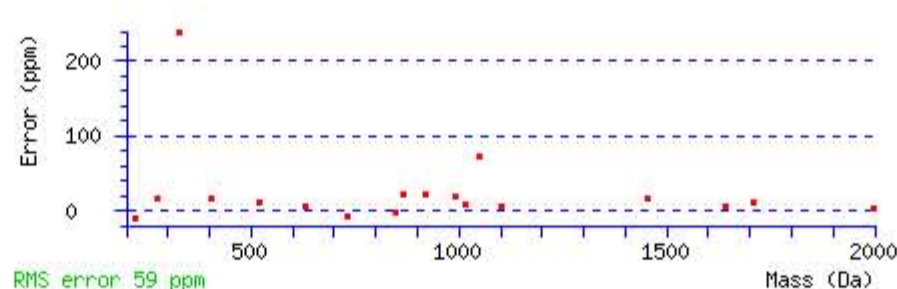

NCBI BLAST search of [YGFCEAADQFHVLDEVR](#)

(Parameters: blastp, nr protein database, expect=20000, no filter, PAM30)

Other BLAST [web gateways](#)

All matches to this query

| Score | Mr(calc):   | Delta    | Sequence                          |
|-------|-------------|----------|-----------------------------------|
| 51.3  | 2366.082382 | 0.012350 | <a href="#">YGFCEAADQFHVLDEVR</a> |

Mascot: <http://www.matrixscience.com/>



# MASCOT Search Results

## Peptide View

MS/MS Fragmentation of **TEHYEEQIEAFK**

Found in **CO9\_HUMAN**, Complement component C9 OS=Homo sapiens GN=C9 PE=1 SV=2

Match to Query 43357: 1833.861522 from(612.294450,3+) rtinseconds(1972) index(36258)

Title: Locus:1.1.1.3106.7 File:"2013-07-02 CLN FXIII 60 min 2nd F 3.wiff"

Data file C:\Program Files (x86)\Matrix Science\Mascot Daemon\mgf5 FXIII 60 min 2nd\mascot\_daemon\_merge.mgf

Click mouse within plot area to zoom in by factor of two about that point

Or, Plot from  to  Da

Label all possible matches  Label matches used for scoring

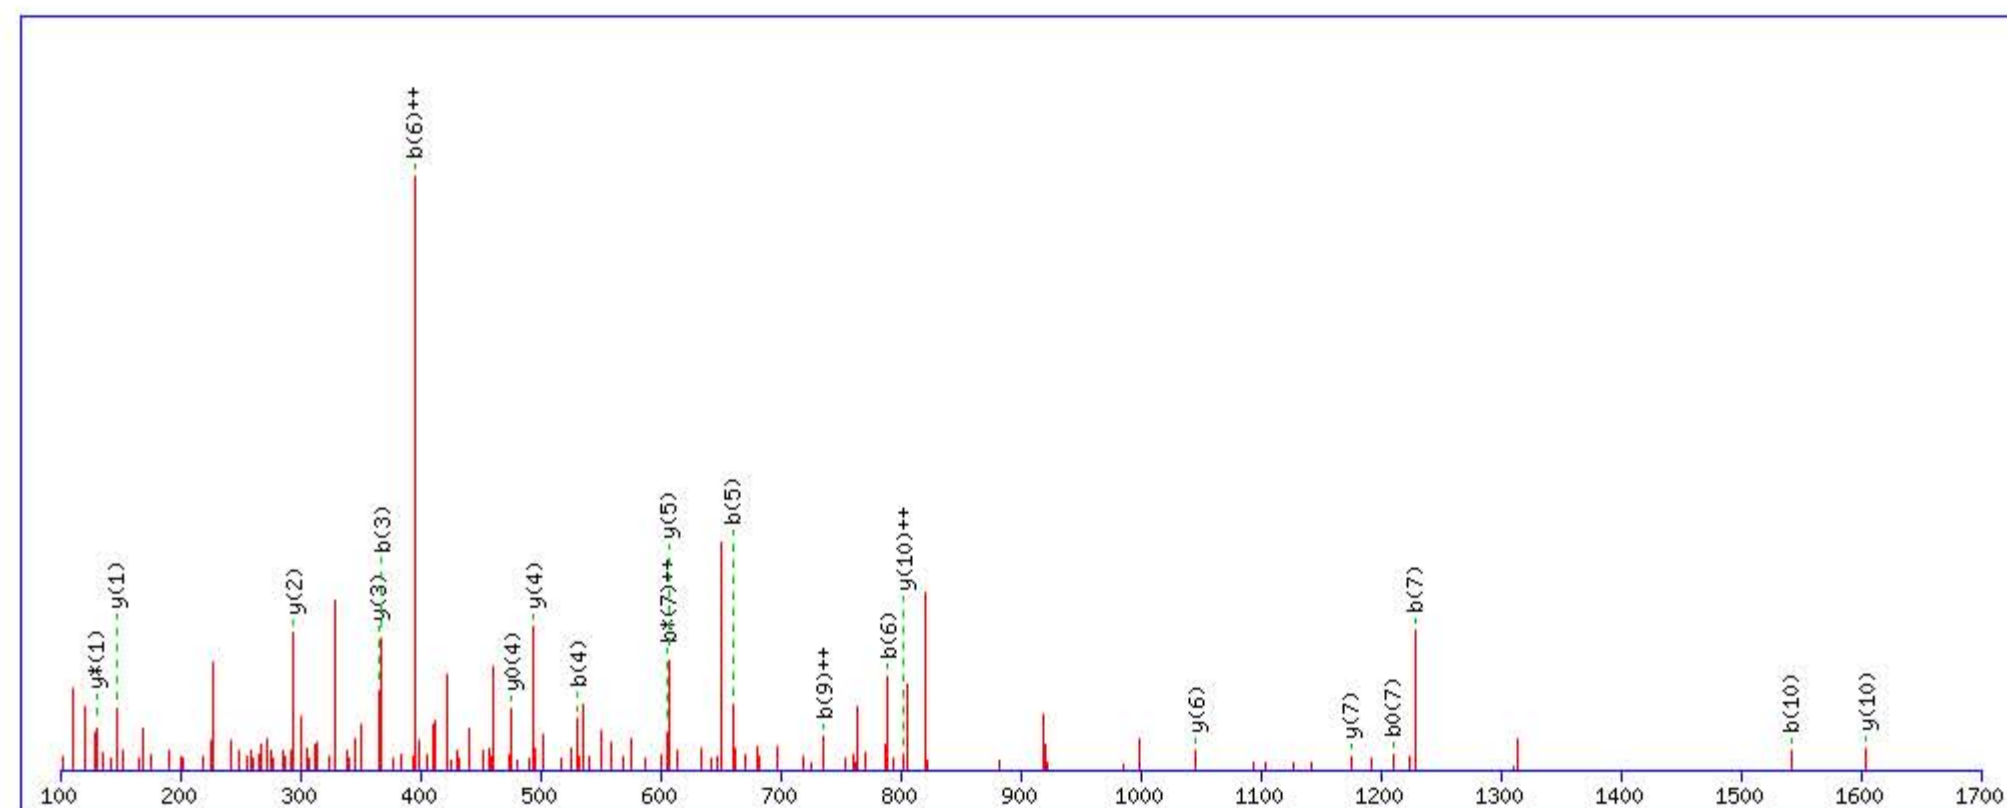

Monoisotopic mass of neutral peptide Mr(calc): 1833.860703

Fixed modifications: Carbamidomethyl (C) (apply to specified residues or termini only)

Variable modifications:

Q7 : Biotin:Thermo-21345 (Q)

Ions Score: 33 Expect: 0.011

Matches : 21/114 fragment ions using 49 most intense peaks [\(help\)](#)

| #  | b                  | b <sup>++</sup>   | b <sup>+</sup> | b <sup>*++</sup>  | b <sup>0</sup>     | b <sup>0++</sup> | Seq. | y                  | y <sup>++</sup>   | y <sup>+</sup>    | y <sup>*++</sup> | y <sup>0</sup>    | y <sup>0++</sup> | #  |
|----|--------------------|-------------------|----------------|-------------------|--------------------|------------------|------|--------------------|-------------------|-------------------|------------------|-------------------|------------------|----|
| 1  | 102.054955         | 51.531116         |                |                   | 84.044390          | 42.525833        | T    |                    |                   |                   |                  |                   |                  | 12 |
| 2  | 231.097548         | 116.052412        |                |                   | 213.086983         | 107.047130       | E    | 1733.820335        | 867.413805        | 1716.793786       | 858.900531       | 1715.809770       | 858.408523       | 11 |
| 3  | <b>368.156460</b>  | 184.581868        |                |                   | 350.145895         | 175.576585       | H    | <b>1604.777742</b> | <b>802.892509</b> | 1587.751193       | 794.379235       | 1586.767177       | 793.887227       | 10 |
| 4  | <b>531.219789</b>  | 266.113533        |                |                   | 513.209224         | 257.108250       | Y    | 1467.718830        | 734.363053        | 1450.692281       | 725.849779       | 1449.708265       | 725.357771       | 9  |
| 5  | <b>660.262382</b>  | 330.634829        |                |                   | 642.251817         | 321.629547       | E    | 1304.655501        | 652.831389        | 1287.628952       | 644.318114       | 1286.644936       | 643.826106       | 8  |
| 6  | <b>789.304975</b>  | <b>395.156126</b> |                |                   | 771.294410         | 386.150843       | E    | <b>1175.612908</b> | 588.310092        | 1158.586359       | 579.796817       | 1157.602343       | 579.304809       | 7  |
| 7  | <b>1228.530301</b> | 614.768789        | 1211.503752    | <b>606.255514</b> | <b>1210.519736</b> | 605.763506       | Q    | <b>1046.570315</b> | 523.788795        | 1029.543766       | 515.275521       | 1028.559750       | 514.783513       | 6  |
| 8  | 1341.614365        | 671.310820        | 1324.587816    | 662.797546        | 1323.603800        | 662.305538       | I    | <b>607.344989</b>  | 304.176132        | 590.318440        | 295.662858       | 589.334424        | 295.170850       | 5  |
| 9  | 1470.656958        | <b>735.832117</b> | 1453.630409    | 727.318842        | 1452.646393        | 726.826834       | E    | <b>494.260925</b>  | 247.634100        | 477.234376        | 239.120826       | <b>476.250360</b> | 238.628818       | 4  |
| 10 | <b>1541.694072</b> | 771.350674        | 1524.667523    | 762.837399        | 1523.683507        | 762.345391       | A    | <b>365.218332</b>  | 183.112804        | 348.191783        | 174.599530       |                   |                  | 3  |
| 11 | 1688.762486        | 844.884881        | 1671.735937    | 836.371606        | 1670.751921        | 835.879598       | F    | <b>294.181218</b>  | 147.594247        | 277.154669        | 139.080973       |                   |                  | 2  |
| 12 |                    |                   |                |                   |                    |                  | K    | <b>147.112804</b>  | 74.060040         | <b>130.086255</b> | 65.546765        |                   |                  | 1  |

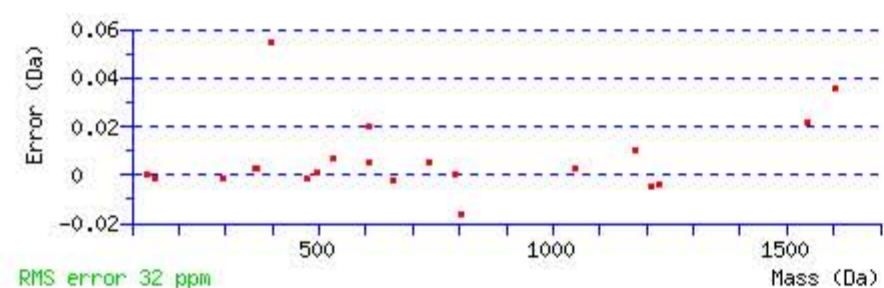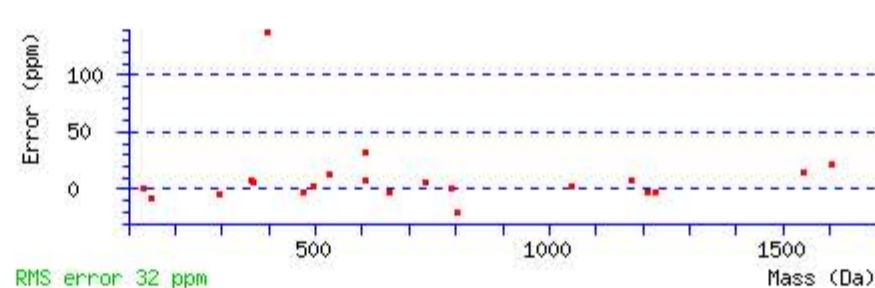

NCBI BLAST search of **TEHYEEQIEAFK**

(Parameters: blastp, nr protein database, expect=20000, no filter, PAM30)

Other BLAST [web gateways](#)

All matches to this query

| Score | Mr(calc):   | Delta    | Sequence                     |
|-------|-------------|----------|------------------------------|
| 32.5  | 1833.860703 | 0.000819 | <a href="#">TEHYEEQIEAFK</a> |

Mascot: <http://www.matrixscience.com/>



# MASCOT Search Results

## Peptide View

MS/MS Fragmentation of **AEQCCEETASSISLHGK**

Found in **CO9\_HUMAN**, Complement component C9 OS=Homo sapiens GN=C9 PE=1 SV=2

Match to Query 51399: 2216.981232 from(740.001020,3+) rtinseconds(1542) index(33562)

Title: Locus:1.1.1.2956.12 File:"2013-07-02 CLN FXIII 60 min 2nd F 3.wiff"

Data file C:\Program Files (x86)\Matrix Science\Mascot Daemon\mgf\5 FXIII 60 min 2nd\mascot\_daemon\_merge.mgf

Click mouse within plot area to zoom in by factor of two about that point

Or, Plot from  to  Da

Label all possible matches  Label matches used for scoring

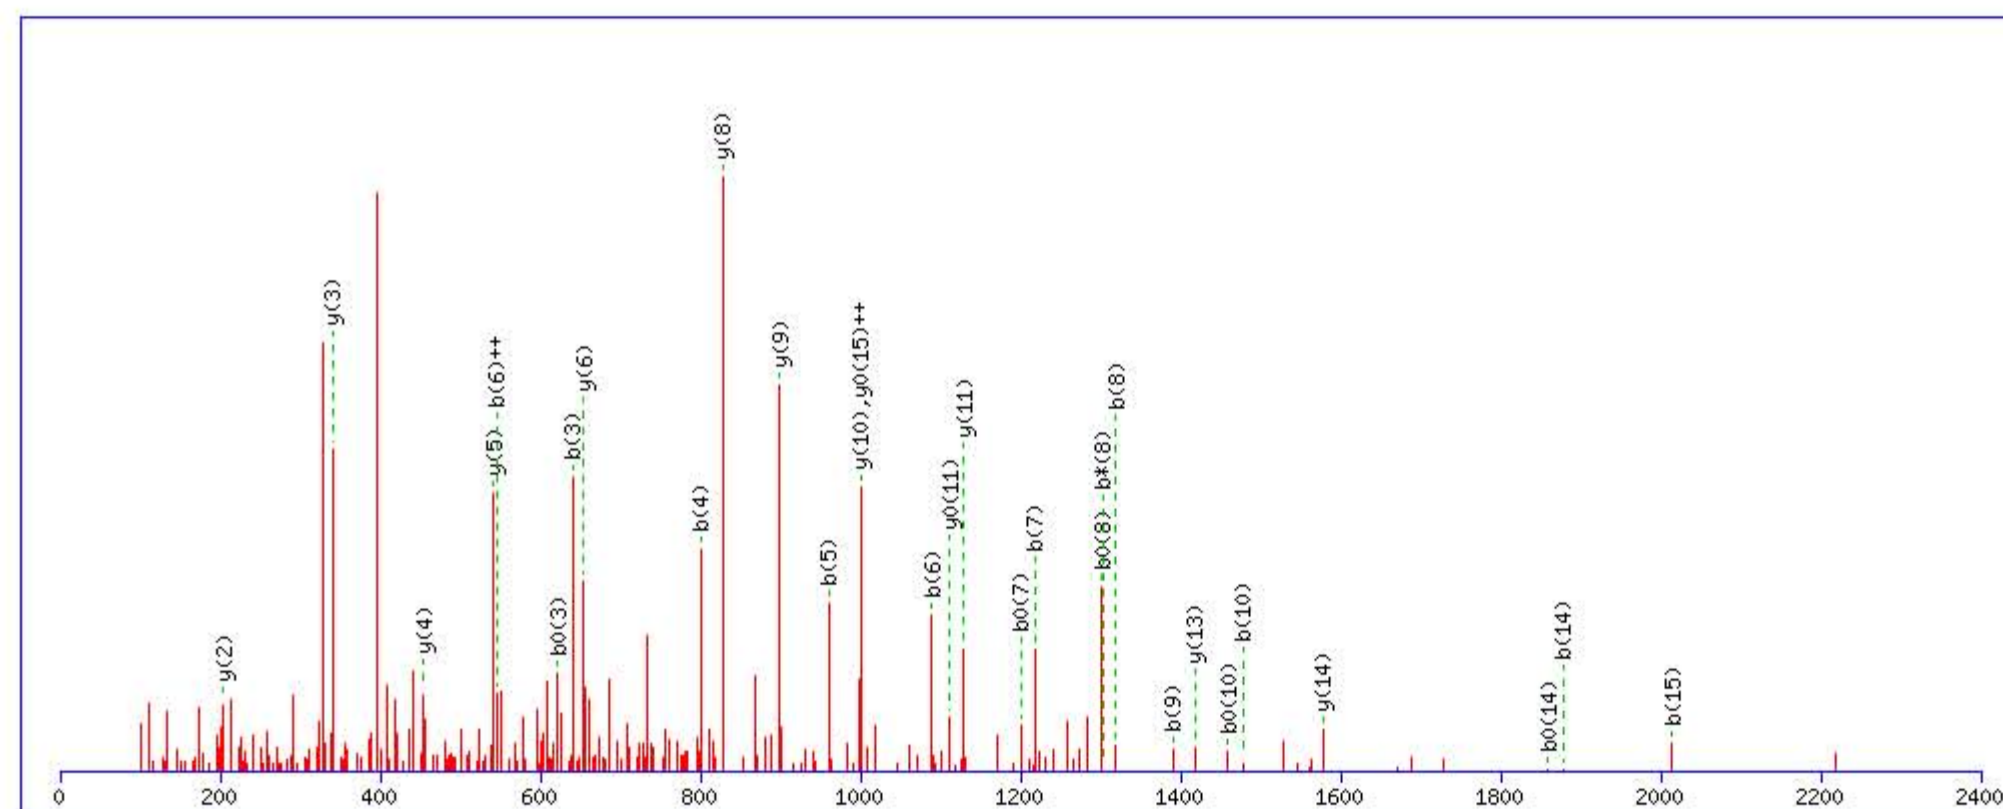

Monoisotopic mass of neutral peptide Mr(calc): 2216.986404

Fixed modifications: Carbamidomethyl (C) (apply to specified residues or termini only)

Variable modifications:

Q3 : Biotin:Thermo-21345 (Q)

Ions Score: 66 Expect: 1.9e-006

Matches : 30/178 fragment ions using 51 most intense peaks [\(help\)](#)

| #  | b                  | b <sup>++</sup>   | b <sup>*</sup>     | b <sup>*++</sup> | b <sup>0</sup>     | b <sup>0++</sup> | Seq. | y                  | y <sup>++</sup> | y <sup>*</sup> | y <sup>*++</sup> | y <sup>0</sup>     | y <sup>0++</sup>   | #  |
|----|--------------------|-------------------|--------------------|------------------|--------------------|------------------|------|--------------------|-----------------|----------------|------------------|--------------------|--------------------|----|
| 1  | 72.044390          | 36.525833         |                    |                  |                    |                  | A    |                    |                 |                |                  |                    |                    | 17 |
| 2  | 201.086983         | 101.047130        |                    |                  | 183.076418         | 92.041847        | E    | 2146.956588        | 1073.981932     | 2129.930039    | 1065.468657      | 2128.946023        | 1064.976649        | 16 |
| 3  | <b>640.312309</b>  | 320.659793        | 623.285760         | 312.146518       | <b>622.301744</b>  | 311.654510       | Q    | 2017.913995        | 1009.460636     | 2000.887446    | 1000.947361      | 1999.903430        | <b>1000.455353</b> | 15 |
| 4  | <b>800.342958</b>  | 400.675117        | 783.316409         | 392.161843       | 782.332393         | 391.669835       | C    | <b>1578.688669</b> | 789.847972      | 1561.662120    | 781.334698       | 1560.678104        | 780.842690         | 14 |
| 5  | <b>960.373607</b>  | 480.690442        | 943.347058         | 472.177167       | 942.363042         | 471.685159       | C    | <b>1418.658020</b> | 709.832648      | 1401.631471    | 701.319374       | 1400.647455        | 700.827366         | 13 |
| 6  | <b>1089.416200</b> | <b>545.211738</b> | 1072.389651        | 536.698464       | 1071.405635        | 536.206456       | E    | 1258.627371        | 629.817323      | 1241.600822    | 621.304049       | 1240.616806        | 620.812041         | 12 |
| 7  | <b>1218.458793</b> | 609.733035        | 1201.432244        | 601.219760       | <b>1200.448228</b> | 600.727752       | E    | <b>1129.584778</b> | 565.296027      | 1112.558229    | 556.782753       | <b>1111.574213</b> | 556.290744         | 11 |
| 8  | <b>1319.506472</b> | 660.256874        | <b>1302.479923</b> | 651.743600       | <b>1301.495907</b> | 651.251592       | T    | <b>1000.542185</b> | 500.774731      | 983.515636     | 492.261456       | 982.531620         | 491.769448         | 10 |
| 9  | <b>1390.543586</b> | 695.775431        | 1373.517037        | 687.262157       | 1372.533021        | 686.770149       | A    | <b>899.494506</b>  | 450.250891      | 882.467957     | 441.737617       | 881.483941         | 441.245609         | 9  |
| 10 | <b>1477.575614</b> | 739.291445        | 1460.549065        | 730.778171       | <b>1459.565049</b> | 730.286163       | S    | <b>828.457392</b>  | 414.732334      | 811.430843     | 406.219060       | 810.446827         | 405.727052         | 8  |
| 11 | 1564.607642        | 782.807459        | 1547.581093        | 774.294185       | 1546.597077        | 773.802177       | S    | 741.425364         | 371.216320      | 724.398815     | 362.703045       | 723.414799         | 362.211037         | 7  |
| 12 | 1677.691706        | 839.349491        | 1660.665157        | 830.836217       | 1659.681141        | 830.344209       | I    | <b>654.393336</b>  | 327.700306      | 637.366787     | 319.187031       | 636.382771         | 318.695023         | 6  |
| 13 | 1764.723734        | 882.865505        | 1747.697185        | 874.352231       | 1746.713169        | 873.860223       | S    | <b>541.309272</b>  | 271.158274      | 524.282723     | 262.644999       | 523.298707         | 262.152991         | 5  |
| 14 | <b>1877.807798</b> | 939.407537        | 1860.781249        | 930.894263       | <b>1859.797233</b> | 930.402255       | L    | <b>454.277244</b>  | 227.642260      | 437.250695     | 219.128985       |                    |                    | 4  |
| 15 | <b>2014.866710</b> | 1007.936993       | 1997.840161        | 999.423719       | 1996.856145        | 998.931711       | H    | <b>341.193180</b>  | 171.100228      | 324.166631     | 162.586953       |                    |                    | 3  |
| 16 | 2071.888174        | 1036.447725       | 2054.861625        | 1027.934450      | 2053.877609        | 1027.442442      | G    | <b>204.134268</b>  | 102.570772      | 187.107719     | 94.057497        |                    |                    | 2  |
| 17 |                    |                   |                    |                  |                    |                  | K    | 147.112804         | 74.060040       | 130.086255     | 65.546765        |                    |                    | 1  |

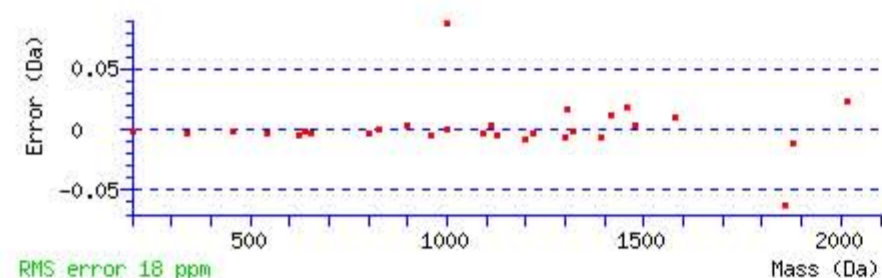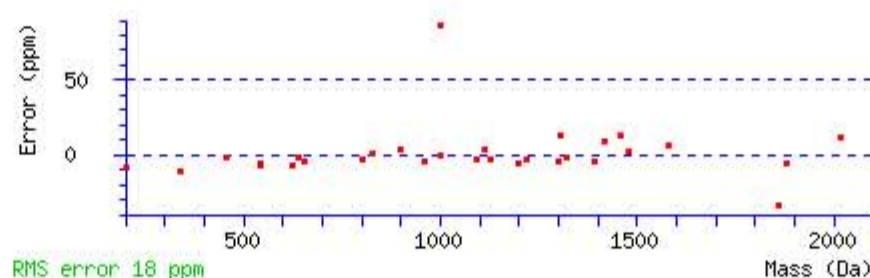

NCBI BLAST search of **AEQCCEETASSISLHGK**

(Parameters: blastp, nr protein database, expect=20000, no filter, PAM30)

Other BLAST [web gateways](#)

All matches to this query

| Score | Mr(calc):   | Delta     | Sequence                          |
|-------|-------------|-----------|-----------------------------------|
| 65.9  | 2216.986404 | -0.005172 | <a href="#">AEQCCEETASSISLHGK</a> |

Mascot: <http://www.matrixscience.com/>



# **MATRIX** SCIENCE Mascot Search Results

## Peptide View

MS/MS Fragmentation of **VGSQYR**

Found in **CFAB\_HUMAN**, Complement factor B OS=Homo sapiens GN=CFB PE=1 SV=2

Match to Query 16615: 1019.519788 from(510.767170,2+) rtinseconds(1399) index(65104)

Title: Locus:1.1.1.1424.15 File:"2013-07-02 CLN FXIII 60 min 2nd FT.wiff"

Data file C:\Program Files (x86)\Matrix Science\Mascot Daemon\mgf\5 FXIII 60 min 2nd\mascot\_daemon\_merge.mgf

Click mouse within plot area to zoom in by factor of two about that point

Or, Plot from  to  Da

Label all possible matches  Label matches used for scoring

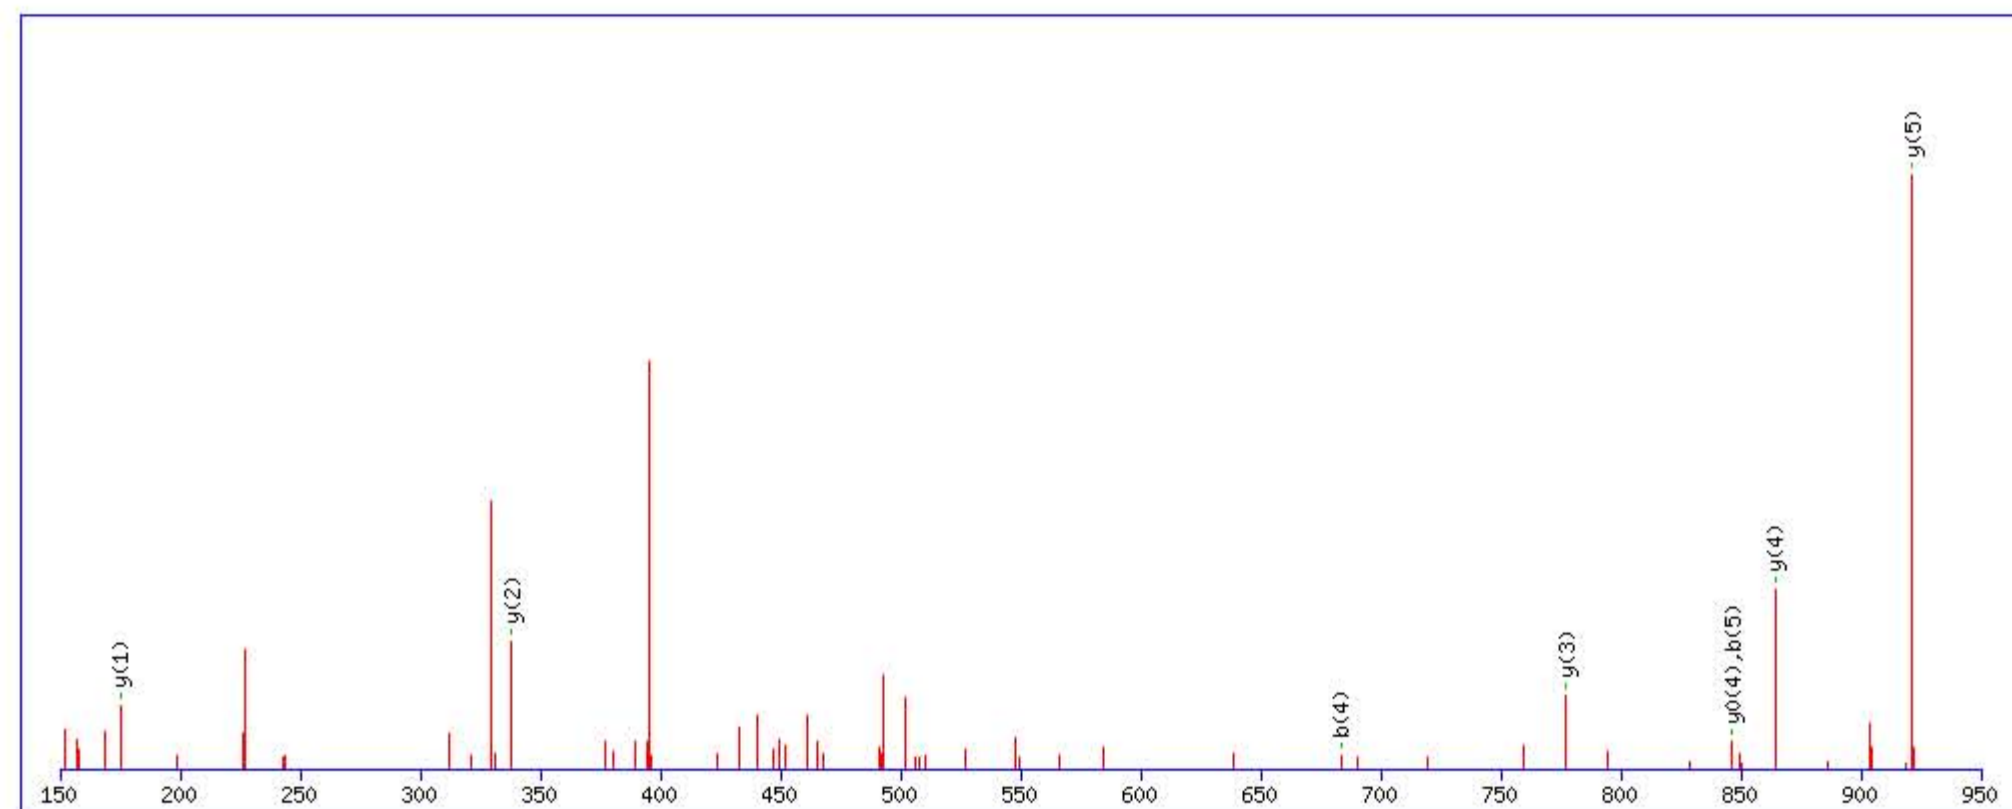

Monoisotopic mass of neutral peptide Mr(calc): 1019.522232

Fixed modifications: Carbamidomethyl (C) (apply to specified residues or termini only)

Variable modifications:

Q4 : Biotin:Thermo-21345 (Q)

Ions Score: 30 Expect: 0.021

Matches : 8/44 fragment ions using 16 most intense peaks [\(help\)](#)

| # | b                 | b <sup>++</sup> | b <sup>*</sup> | b <sup>+++</sup> | b <sup>0</sup> | b <sup>0++</sup> | Seq. | y                 | y <sup>++</sup> | y <sup>*</sup> | y <sup>+++</sup> | y <sup>0</sup>    | y <sup>0++</sup> | # |
|---|-------------------|-----------------|----------------|------------------|----------------|------------------|------|-------------------|-----------------|----------------|------------------|-------------------|------------------|---|
| 1 | 100.075690        | 50.541483       |                |                  |                |                  | V    |                   |                 |                |                  |                   |                  | 6 |
| 2 | 157.097154        | 79.052215       |                |                  |                |                  | G    | <b>921.461099</b> | 461.234188      | 904.434550     | 452.720913       | 903.450534        | 452.228905       | 5 |
| 3 | 244.129182        | 122.568229      |                |                  | 226.118617     | 113.562946       | S    | <b>864.439635</b> | 432.723456      | 847.413086     | 424.210181       | <b>846.429070</b> | 423.718173       | 4 |
| 4 | <b>683.354508</b> | 342.180892      | 666.327959     | 333.667618       | 665.343943     | 333.175610       | Q    | <b>777.407607</b> | 389.207442      | 760.381058     | 380.694167       |                   |                  | 3 |
| 5 | <b>846.417837</b> | 423.712557      | 829.391288     | 415.199282       | 828.407272     | 414.707274       | Y    | <b>338.182281</b> | 169.594778      | 321.155732     | 161.081504       |                   |                  | 2 |
| 6 |                   |                 |                |                  |                |                  | R    | <b>175.118952</b> | 88.063114       | 158.092403     | 79.549839        |                   |                  | 1 |

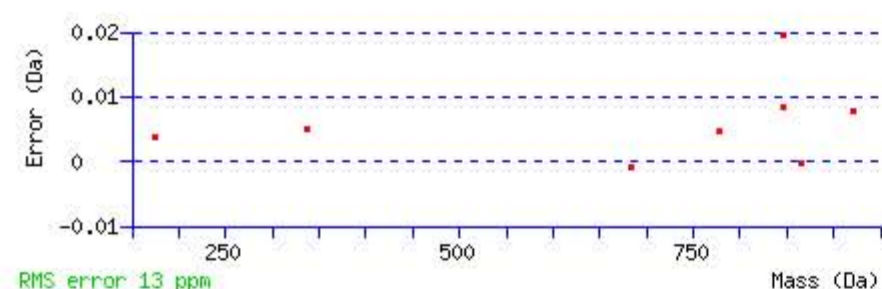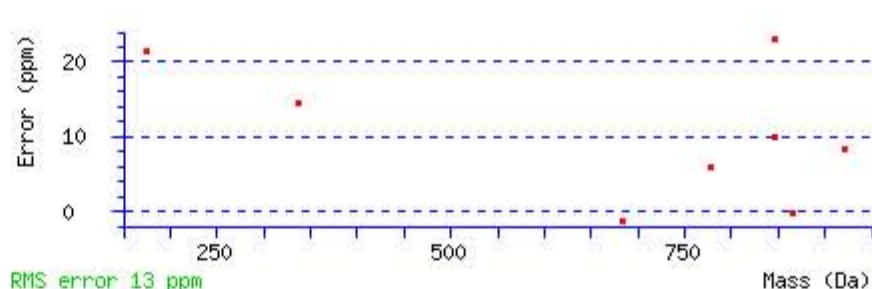

NCBI BLAST search of **VGSQYR**

(Parameters: blastp, nr protein database, expect=20000, no filter, PAM30)

Other BLAST [web gateways](#)

## All matches to this query

| Score | Mr(calc):   | Delta     | Sequence                    |
|-------|-------------|-----------|-----------------------------|
| 30.2  | 1019.522232 | -0.002444 | <a href="#">VGSQYR</a>      |
| 18.9  | 1019.533447 | -0.013659 | <a href="#">RSQYR</a>       |
| 15.1  | 1019.510818 | 0.008970  | <a href="#">RSSVSSGGAGR</a> |
| 8.4   | 1019.526047 | -0.006259 | <a href="#">SRERGPYR</a>    |
| 7.2   | 1019.533447 | -0.013659 | <a href="#">RQSYR</a>       |
| 7.1   | 1019.522217 | -0.002429 | <a href="#">QKDYR</a>       |
| 6.1   | 1019.533447 | -0.013659 | <a href="#">QSRYR</a>       |
| 6.1   | 1019.504944 | 0.014844  | <a href="#">SHLWGHQR</a>    |
| 5.7   | 1019.512146 | 0.007642  | <a href="#">RSRGHHDR</a>    |
| 4.6   | 1019.530090 | -0.010302 | <a href="#">SPLPWQHR</a>    |

Mascot: <http://www.matrixscience.com/>



# MASCOT Search Results

## Peptide View

MS/MS Fragmentation of **LPPTTTCQQQK**

Found in **CFAB\_HUMAN**, Complement factor B OS=Homo sapiens GN=CFB PE=1 SV=2

Match to Query 37672: 1611.800922 from(538.274250,3+) rtinseconds(1425) index(2386)

Title: Locus:1.1.1.1305.11 File:"2013-07-02 CLN FXIII 60 min 2nd F 1.wiff"

Data file C:\Program Files (x86)\Matrix Science\Mascot Daemon\mgf\5 FXIII 60 min 2nd\mascot\_daemon\_merge.mgf

Click mouse within plot area to zoom in by factor of two about that point

Or, Plot from  to  Da

Label all possible matches  Label matches used for scoring

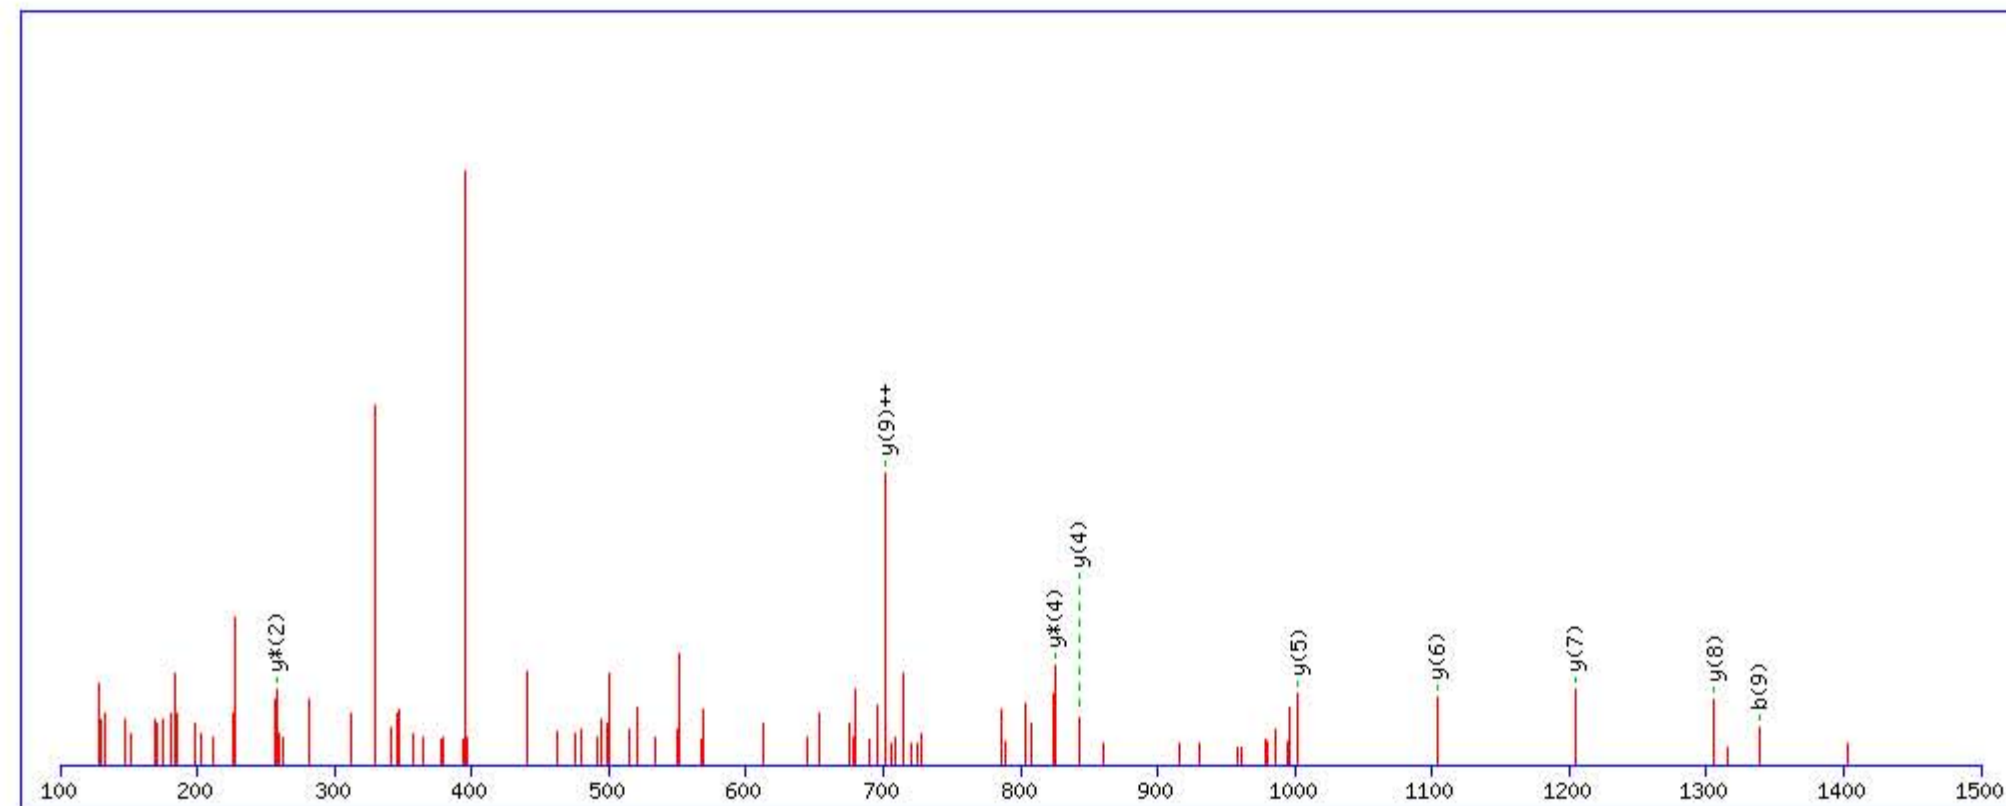

Monoisotopic mass of neutral peptide Mr(calc): 1611.811295

Fixed modifications: Carbamidomethyl (C) (apply to specified residues or termini only)

Variable modifications:

Q9 : Biotin:Thermo-21345 (Q)

Ions Score: 28 Expect: 0.0049

Matches : 9/90 fragment ions using 13 most intense peaks [\(help\)](#)

| #  | b           | b <sup>++</sup> | b <sup>+</sup> | b <sup>+++</sup> | b <sup>0</sup> | b <sup>0++</sup> | Seq. | y           | y <sup>++</sup> | y <sup>+</sup> | y <sup>+++</sup> | y <sup>0</sup> | y <sup>0++</sup> | #  |
|----|-------------|-----------------|----------------|------------------|----------------|------------------|------|-------------|-----------------|----------------|------------------|----------------|------------------|----|
| 1  | 114.091340  | 57.549308       |                |                  |                |                  | L    |             |                 |                |                  |                |                  | 11 |
| 2  | 211.144104  | 106.075690      |                |                  |                |                  | P    | 1499.734500 | 750.370888      | 1482.707951    | 741.857614       | 1481.723935    | 741.365606       | 10 |
| 3  | 308.196868  | 154.602072      |                |                  |                |                  | P    | 1402.681736 | 701.844506      | 1385.655187    | 693.331232       | 1384.671171    | 692.839224       | 9  |
| 4  | 409.244547  | 205.125911      |                |                  | 391.233982     | 196.120629       | T    | 1305.628972 | 653.318124      | 1288.602423    | 644.804850       | 1287.618407    | 644.312842       | 8  |
| 5  | 510.292226  | 255.649751      |                |                  | 492.281661     | 246.644468       | T    | 1204.581293 | 602.794285      | 1187.554744    | 594.281010       | 1186.570728    | 593.789002       | 7  |
| 6  | 611.339905  | 306.173591      |                |                  | 593.329340     | 297.168308       | T    | 1103.533614 | 552.270445      | 1086.507065    | 543.757171       | 1085.523049    | 543.265163       | 6  |
| 7  | 771.370554  | 386.188915      |                |                  | 753.359989     | 377.183633       | C    | 1002.485935 | 501.746606      | 985.459386     | 493.233331       |                |                  | 5  |
| 8  | 899.429132  | 450.218204      | 882.402583     | 441.704930       | 881.418567     | 441.212922       | Q    | 842.455286  | 421.731281      | 825.428737     | 413.218007       |                |                  | 4  |
| 9  | 1338.654458 | 669.830867      | 1321.627909    | 661.317593       | 1320.643893    | 660.825585       | Q    | 714.396708  | 357.701992      | 697.370159     | 349.188718       |                |                  | 3  |
| 10 | 1466.713036 | 733.860156      | 1449.686487    | 725.346882       | 1448.702471    | 724.854874       | Q    | 275.171382  | 138.089329      | 258.144833     | 129.576055       |                |                  | 2  |
| 11 |             |                 |                |                  |                |                  | K    | 147.112804  | 74.060040       | 130.086255     | 65.546765        |                |                  | 1  |

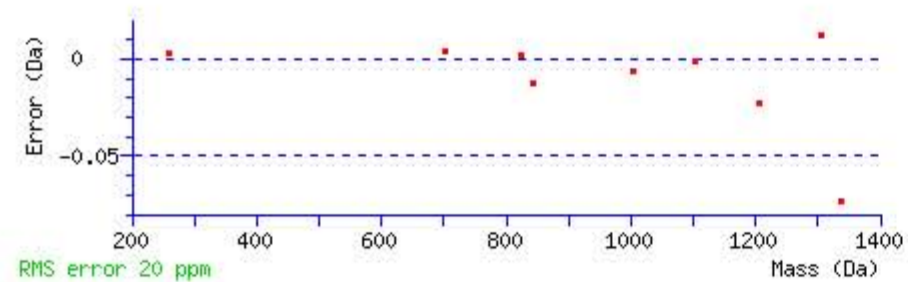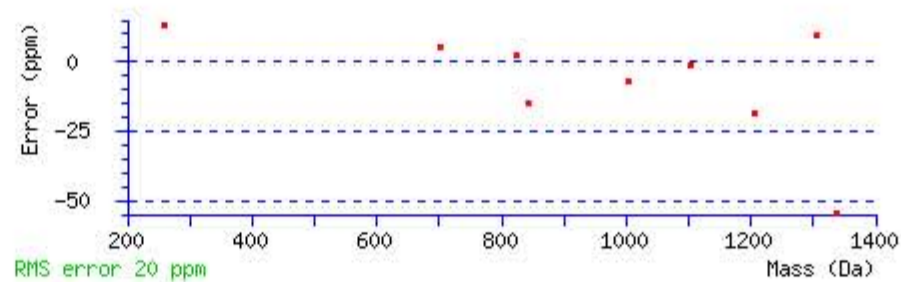

NCBI BLAST search of **LPPTTTCQQQK**

(Parameters: blastp, nr protein database, expect=20000, no filter, PAM30)

Other BLAST [web gateways](#)

All matches to this query

| Score | Mr(calc):   | Delta     | Sequence                        |
|-------|-------------|-----------|---------------------------------|
| 27.6  | 1611.811295 | -0.010373 | <a href="#">LPPTTTCQQQK</a>     |
| 27.6  | 1611.811295 | -0.010373 | <a href="#">LPPTTTCQQQK</a>     |
| 22.2  | 1611.811295 | -0.010373 | <a href="#">LPPTTTCQQQK</a>     |
| 3.0   | 1611.803879 | -0.002957 | <a href="#">RVQMEQPDAVPAQK</a>  |
| 2.3   | 1611.803406 | -0.002484 | <a href="#">TPIKMGISASTMTMK</a> |

Mascot: <http://www.matrixscience.com/>



# MASCOT Search Results

## Peptide View

MS/MS Fragmentation of **YGQTIKIPICLPCTEGTTR**

Found in **CFAB\_HUMAN**, Complement factor B OS=Homo sapiens GN=CFB PE=1 SV=2

Match to Query 55089: 2433.196872 from(812.072900,3+) rtinseconds(2065) index(6244)

Title: Locus:1.1.1.1528.10 File:"2013-07-02 CLN FXIII 60 min 2nd F 1.wiff"

Data file C:\Program Files (x86)\Matrix Science\Mascot Daemon\mgf5 FXIII 60 min 2nd\mascot\_daemon\_merge.mgf

Click mouse within plot area to zoom in by factor of two about that point

Or, Plot from  to  Da

Label all possible matches  Label matches used for scoring

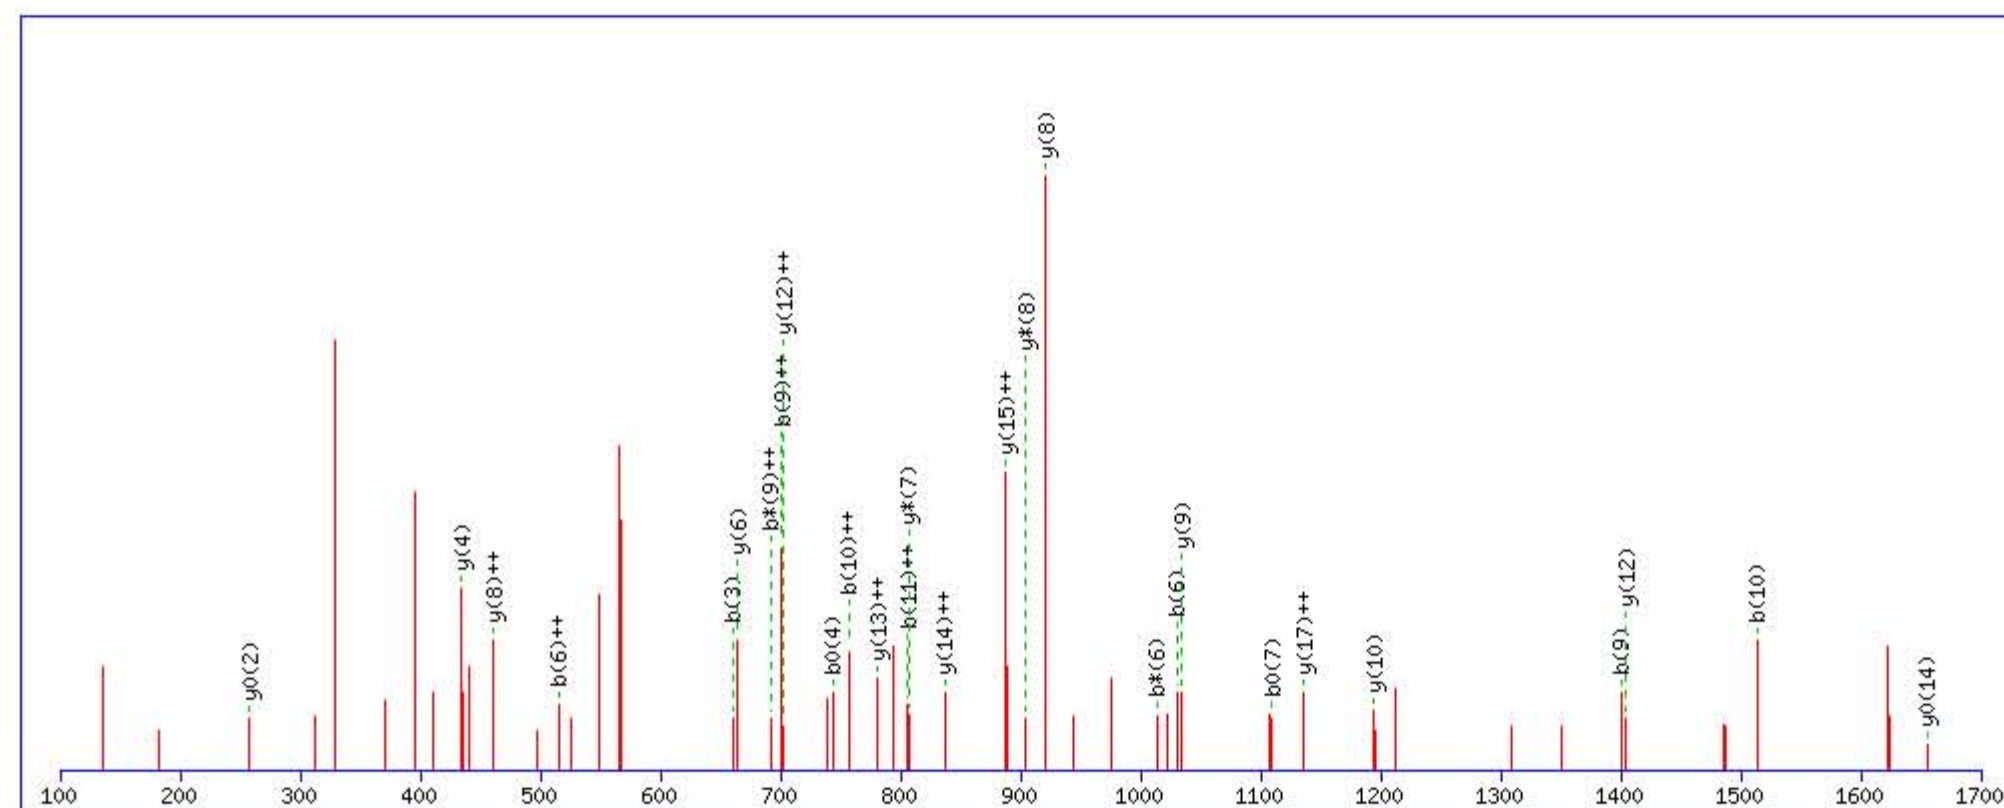

Monoisotopic mass of neutral peptide Mr(calc): 2433.196701

Fixed modifications: Carbamidomethyl (C) (apply to specified residues or termini only)

Variable modifications:

Q3 : Biotin:Thermo-21345 (Q)

Ions Score: 27 Expect: 0.054

Matches : 28/192 fragment ions using 58 most intense peaks [\(help\)](#)

| #  | b                  | b <sup>++</sup>   | b <sup>*</sup>     | b <sup>*++</sup>  | b <sup>0</sup>     | b <sup>0++</sup> | Seq. | y                  | y <sup>++</sup>   | y <sup>*</sup>    | y <sup>*++</sup> | y <sup>0</sup>     | y <sup>0++</sup> | #  |
|----|--------------------|-------------------|--------------------|-------------------|--------------------|------------------|------|--------------------|-------------------|-------------------|------------------|--------------------|------------------|----|
| 1  | 164.070605         | 82.538940         |                    |                   |                    |                  | Y    |                    |                   |                   |                  |                    |                  | 18 |
| 2  | 221.092069         | 111.049673        |                    |                   |                    |                  | G    | 2271.140644        | 1136.073960       | 2254.114095       | 1127.560685      | 2253.130079        | 1127.068677      | 17 |
| 3  | <b>660.317395</b>  | 330.662336        | 643.290846         | 322.149061        |                    |                  | Q    | 2214.119180        | 1107.563228       | 2197.092631       | 1099.049953      | 2196.108615        | 1098.557945      | 16 |
| 4  | 761.365074         | 381.186175        | 744.338525         | 372.672901        | <b>743.354509</b>  | 372.180893       | T    | 1774.893854        | <b>887.950565</b> | 1757.867305       | 879.437290       | 1756.883289        | 878.945282       | 15 |
| 5  | 874.449138         | 437.728207        | 857.422589         | 429.214933        | 856.438573         | 428.722925       | I    | 1673.846175        | <b>837.426725</b> | 1656.819626       | 828.913451       | <b>1655.835610</b> | 828.421443       | 14 |
| 6  | <b>1030.550249</b> | <b>515.778763</b> | <b>1013.523700</b> | 507.265488        | 1012.539684        | 506.773480       | R    | 1560.762111        | <b>780.884693</b> | 1543.735562       | 772.371419       | 1542.751546        | 771.879411       | 13 |
| 7  | 1127.603013        | 564.305145        | 1110.576464        | 555.791870        | <b>1109.592448</b> | 555.299862       | P    | <b>1404.661000</b> | <b>702.834138</b> | 1387.634451       | 694.320863       | 1386.650435        | 693.828855       | 12 |
| 8  | 1240.687077        | 620.847177        | 1223.660528        | 612.333902        | 1222.676512        | 611.841894       | I    | 1307.608236        | 654.307756        | 1290.581687       | 645.794481       | 1289.597671        | 645.302473       | 11 |
| 9  | <b>1400.717726</b> | <b>700.862501</b> | 1383.691177        | <b>692.349227</b> | 1382.707161        | 691.857219       | C    | <b>1194.524172</b> | 597.765724        | 1177.497623       | 589.252449       | 1176.513607        | 588.760441       | 10 |
| 10 | <b>1513.801790</b> | <b>757.404533</b> | 1496.775241        | 748.891259        | 1495.791225        | 748.399250       | L    | <b>1034.493523</b> | 517.750399        | 1017.466974       | 509.237125       | 1016.482958        | 508.745117       | 9  |
| 11 | 1610.854554        | <b>805.930915</b> | 1593.828005        | 797.417641        | 1592.843989        | 796.925633       | P    | <b>921.409459</b>  | <b>461.208367</b> | <b>904.382910</b> | 452.695093       | 903.398894         | 452.203085       | 8  |
| 12 | 1770.885203        | 885.946240        | 1753.858654        | 877.432965        | 1752.874638        | 876.940957       | C    | 824.356695         | 412.681985        | <b>807.330146</b> | 404.168711       | 806.346130         | 403.676703       | 7  |
| 13 | 1871.932882        | 936.470079        | 1854.906333        | 927.956805        | 1853.922317        | 927.464797       | T    | <b>664.326046</b>  | 332.666661        | 647.299497        | 324.153386       | 646.315481         | 323.661378       | 6  |
| 14 | 2000.975475        | 1000.991376       | 1983.948926        | 992.478101        | 1982.964910        | 991.986093       | E    | 563.278367         | 282.142821        | 546.251818        | 273.629547       | 545.267802         | 273.137539       | 5  |
| 15 | 2057.996939        | 1029.502107       | 2040.970390        | 1020.988833       | 2039.986374        | 1020.496825      | G    | <b>434.235774</b>  | 217.621525        | 417.209225        | 209.108250       | 416.225209         | 208.616242       | 4  |
| 16 | 2159.044618        | 1080.025947       | 2142.018069        | 1071.512672       | 2141.034053        | 1071.020664      | T    | 377.214310         | 189.110793        | 360.187761        | 180.597518       | 359.203745         | 180.105510       | 3  |
| 17 | 2260.092297        | 1130.549786       | 2243.065748        | 1122.036512       | 2242.081732        | 1121.544504      | T    | 276.166631         | 138.586953        | 259.140082        | 130.073679       | <b>258.156066</b>  | 129.581671       | 2  |
| 18 |                    |                   |                    |                   |                    |                  | R    | 175.118952         | 88.063114         | 158.092403        | 79.549839        |                    |                  | 1  |

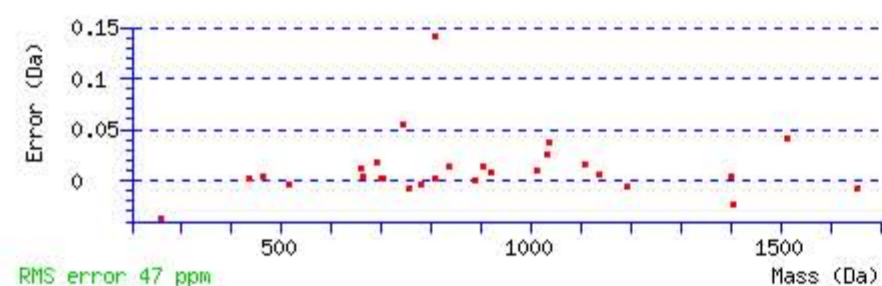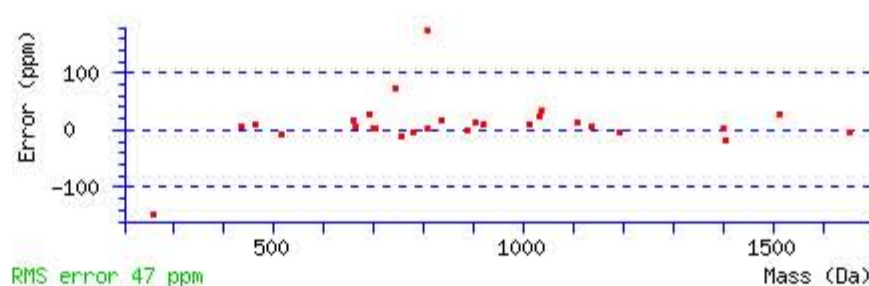

NCBI BLAST search of **YGQTIKIPICLPCTEGTTR**

(Parameters: blastp, nr protein database, expect=20000, no filter, PAM30)

Other BLAST [web gateways](#)

All matches to this query

| Score | Mr(calc):   | Delta    | Sequence                            |
|-------|-------------|----------|-------------------------------------|
| 26.8  | 2433.196701 | 0.000171 | <a href="#">YGQTIKIPICLPCTEGTTR</a> |

Mascot: <http://www.matrixscience.com/>



# MATRIX SCIENCE Mascot Search Results

## Peptide View

MS/MS Fragmentation of **WSSPPQCEGLPCK**

Found in **CFAH\_HUMAN**, Complement factor H OS=Homo sapiens GN=CFH PE=1 SV=4

Match to Query 43906: 1855.843512 from(619.621780,3+) rtinseconds(1898) index(21034)

Title: Locus:1.1.1.663.11 File:"2013-07-02 CLN FXIII 60 min 2nd F 2.wiff"

Data file C:\Program Files (x86)\Matrix Science\Mascot Daemon\mgf5 FXIII 60 min 2nd\mascot\_daemon\_merge.mgf

Click mouse within plot area to zoom in by factor of two about that point

Or, Plot from  to  Da

Label all possible matches  Label matches used for scoring

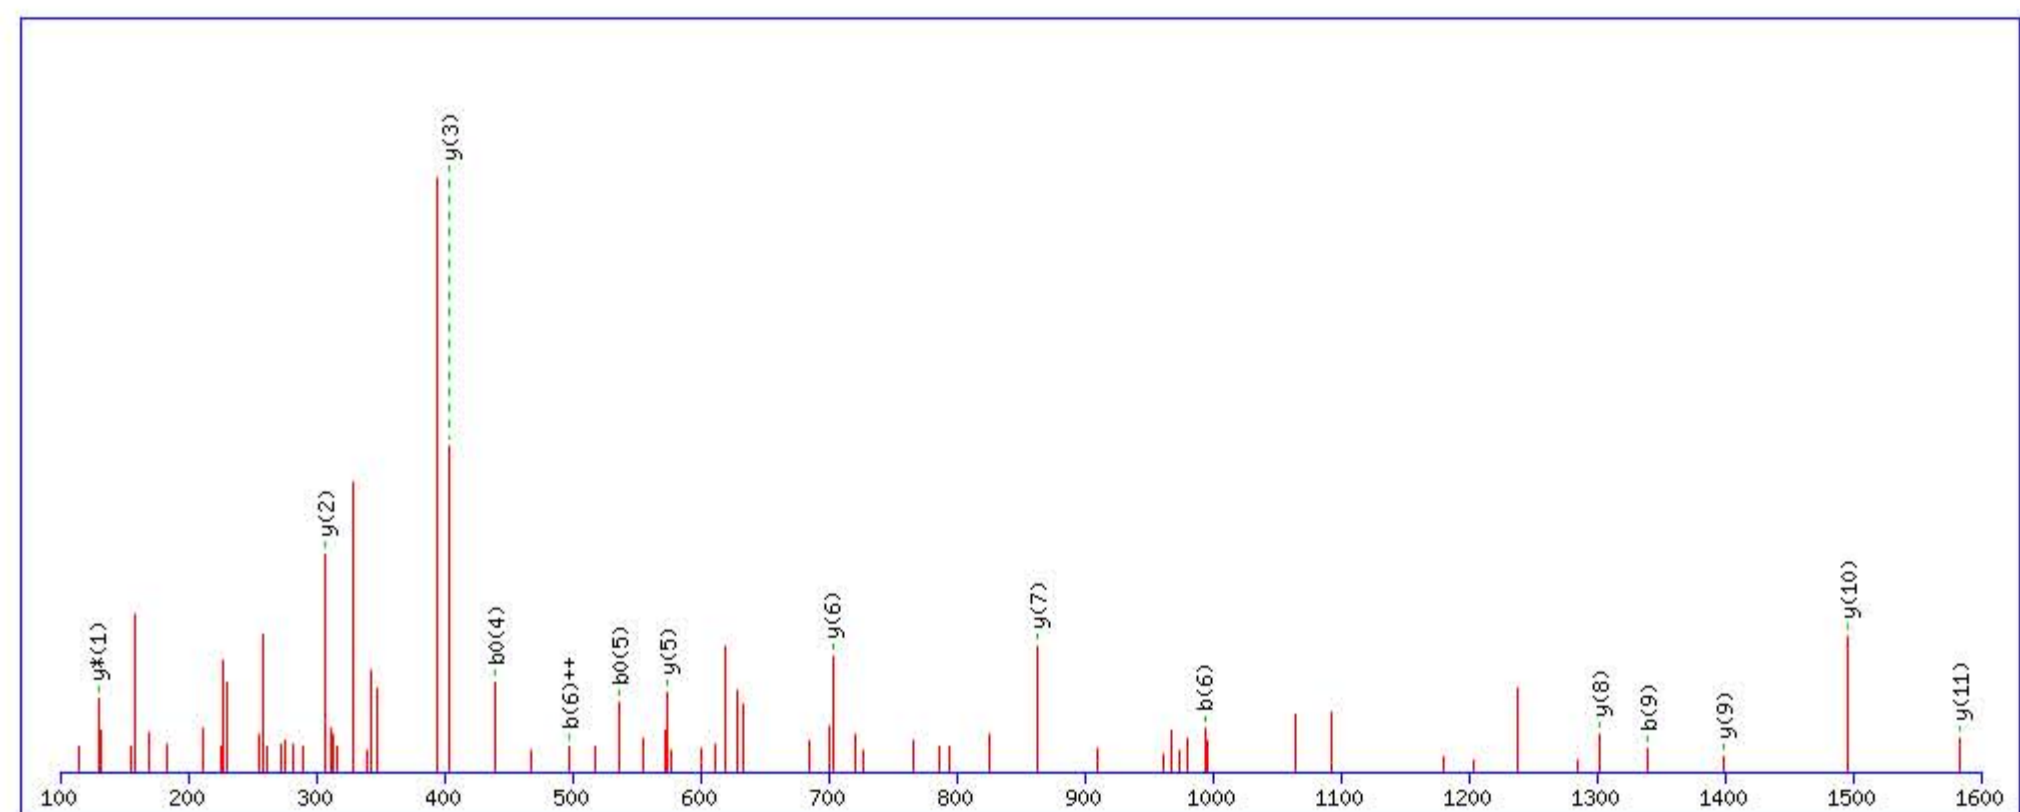

Monoisotopic mass of neutral peptide Mr(calc): 1855.841934

Fixed modifications: Carbamidomethyl (C) (apply to specified residues or termini only)

Variable modifications:

Q6 : Biotin:Thermo-21345 (Q)

Ions Score: 50 Expect: 9.5e-005

Matches : 15/122 fragment ions using 28 most intense peaks [\(help\)](#)

| #  | b                  | b <sup>++</sup>   | b <sup>*</sup> | b <sup>*++</sup> | b <sup>0</sup>    | b <sup>0++</sup> | Seq. | y                  | y <sup>++</sup> | y <sup>*</sup>    | y <sup>*++</sup> | y <sup>0</sup> | y <sup>0++</sup> | #  |
|----|--------------------|-------------------|----------------|------------------|-------------------|------------------|------|--------------------|-----------------|-------------------|------------------|----------------|------------------|----|
| 1  | 187.086589         | 94.046932         |                |                  |                   |                  | W    |                    |                 |                   |                  |                |                  | 13 |
| 2  | 274.118617         | 137.562947        |                |                  | 256.108052        | 128.557664       | S    | 1670.769897        | 835.888587      | 1653.743348       | 827.375312       | 1652.759332    | 826.883304       | 12 |
| 3  | 361.150645         | 181.078960        |                |                  | 343.140080        | 172.073678       | S    | <b>1583.737869</b> | 792.372573      | 1566.711320       | 783.859298       | 1565.727304    | 783.367290       | 11 |
| 4  | 458.203409         | 229.605343        |                |                  | <b>440.192844</b> | 220.600060       | P    | <b>1496.705841</b> | 748.856559      | 1479.679292       | 740.343284       | 1478.695276    | 739.851276       | 10 |
| 5  | 555.256173         | 278.131725        |                |                  | <b>537.245608</b> | 269.126442       | P    | <b>1399.653077</b> | 700.330177      | 1382.626528       | 691.816902       | 1381.642512    | 691.324894       | 9  |
| 6  | <b>994.481499</b>  | <b>497.744388</b> | 977.454950     | 489.231113       | 976.470934        | 488.739105       | Q    | <b>1302.600313</b> | 651.803795      | 1285.573764       | 643.290520       | 1284.589748    | 642.798512       | 8  |
| 7  | 1154.512148        | 577.759712        | 1137.485599    | 569.246438       | 1136.501583       | 568.754430       | C    | <b>863.374987</b>  | 432.191132      | 846.348438        | 423.677857       | 845.364422     | 423.185849       | 7  |
| 8  | 1283.554741        | 642.281009        | 1266.528192    | 633.767734       | 1265.544176       | 633.275726       | E    | <b>703.344338</b>  | 352.175807      | 686.317789        | 343.662533       | 685.333773     | 343.170525       | 6  |
| 9  | <b>1340.576205</b> | 670.791741        | 1323.549656    | 662.278466       | 1322.565640       | 661.786458       | G    | <b>574.301745</b>  | 287.654511      | 557.275196        | 279.141236       |                |                  | 5  |
| 10 | 1453.660269        | 727.333773        | 1436.633720    | 718.820498       | 1435.649704       | 718.328490       | L    | 517.280281         | 259.143779      | 500.253732        | 250.630504       |                |                  | 4  |
| 11 | 1550.713033        | 775.860155        | 1533.686484    | 767.346880       | 1532.702468       | 766.854872       | P    | <b>404.196217</b>  | 202.601747      | 387.169668        | 194.088472       |                |                  | 3  |
| 12 | 1710.743682        | 855.875479        | 1693.717133    | 847.362205       | 1692.733117       | 846.870197       | C    | <b>307.143453</b>  | 154.075365      | 290.116904        | 145.562090       |                |                  | 2  |
| 13 |                    |                   |                |                  |                   |                  | K    | 147.112804         | 74.060040       | <b>130.086255</b> | 65.546765        |                |                  | 1  |

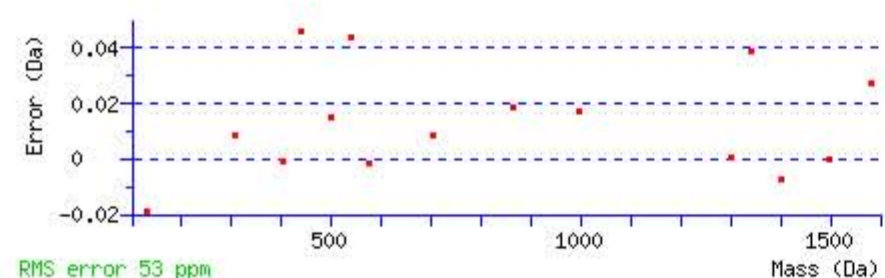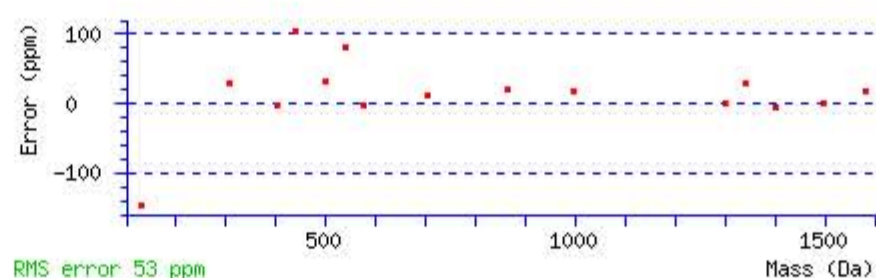

NCBI BLAST search of [WSSPPQCEGLPCK](#)

(Parameters: blastp, nr protein database, expect=20000, no filter, PAM30)

Other BLAST [web gateways](#)

All matches to this query

| Score | Mr(calc):   | Delta    | Sequence                      |
|-------|-------------|----------|-------------------------------|
| 50.2  | 1855.841934 | 0.001578 | <a href="#">WSSPPQCEGLPCK</a> |

Mascot: <http://www.matrixscience.com/>



# MASCOT Search Results

## Peptide View

MS/MS Fragmentation of **AGEQVITYTCATYYK**

Found in **CFAH\_HUMAN**, Complement factor H OS=Homo sapiens GN=CFH PE=1 SV=4

Match to Query 45865: 1964.900352 from(655.974060,3+) rtinseconds(1868) index(35393)  
 Title: Locus:1.1.1.3070.8 File:"2013-07-02 CLN FXIII 60 min 2nd F 3.wiff"

Data file C:\Program Files (x86)\Matrix Science\Mascot Daemon\mgf\5 FXIII 60 min 2nd\mascot\_daemon\_merge.mgf

Click mouse within plot area to zoom in by factor of two about that point

Or, Plot from  to  Da

Label all possible matches  Label matches used for scoring

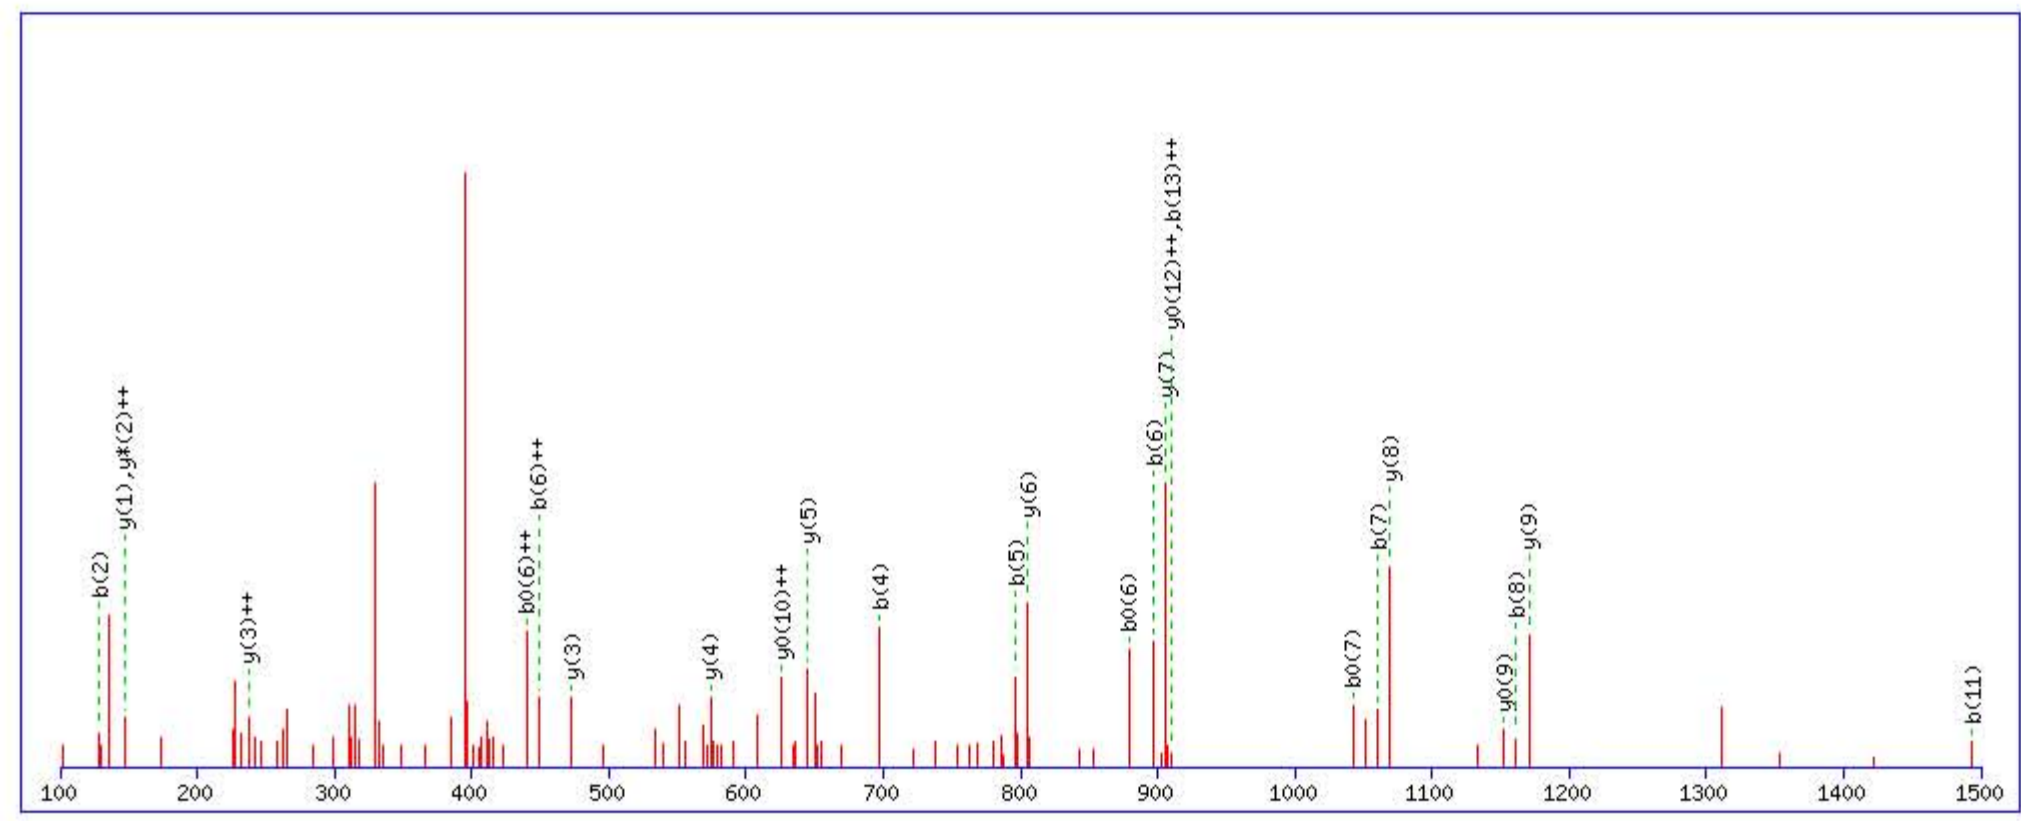

Monoisotopic mass of neutral peptide Mr(calc): 1964.901215

Fixed modifications: Carbamidomethyl (C) (apply to specified residues or termini only)

Variable modifications:

Q4 : Biotin:Thermo-21345 (Q)

Ions Score: 48 Expect: 0.00017

Matches : 25/140 fragment ions using 37 most intense peaks [\(help\)](#)

| #  | b                  | b <sup>++</sup>   | b <sup>*</sup> | b <sup>***</sup> | b <sup>0</sup>     | b <sup>0++</sup>  | Seq. | y                  | y <sup>++</sup>   | y <sup>*</sup> | y <sup>***</sup>  | y <sup>0</sup>     | y <sup>0++</sup>  | #  |
|----|--------------------|-------------------|----------------|------------------|--------------------|-------------------|------|--------------------|-------------------|----------------|-------------------|--------------------|-------------------|----|
| 1  | 72.044390          | 36.525833         |                |                  |                    |                   | A    |                    |                   |                |                   |                    |                   | 14 |
| 2  | <b>129.065854</b>  | 65.036565         |                |                  |                    |                   | G    | 1894.871388        | 947.939332        | 1877.844839    | 939.426058        | 1876.860823        | 938.934050        | 13 |
| 3  | 258.108447         | 129.557862        |                |                  | 240.097882         | 120.552579        | E    | 1837.849924        | 919.428600        | 1820.823375    | 910.915326        | 1819.839359        | <b>910.423318</b> | 12 |
| 4  | <b>697.333773</b>  | 349.170525        | 680.307224     | 340.657250       | 679.323208         | 340.165242        | Q    | 1708.807331        | 854.907304        | 1691.780782    | 846.394029        | 1690.796766        | 845.902021        | 11 |
| 5  | <b>796.402187</b>  | 398.704732        | 779.375638     | 390.191457       | 778.391622         | 389.699449        | V    | 1269.582005        | 635.294641        | 1252.555456    | 626.781366        | 1251.571440        | <b>626.289358</b> | 10 |
| 6  | <b>897.449866</b>  | <b>449.228571</b> | 880.423317     | 440.715297       | <b>879.439301</b>  | <b>440.223289</b> | T    | <b>1170.513591</b> | 585.760434        | 1153.487042    | 577.247159        | <b>1152.503026</b> | 576.755151        | 9  |
| 7  | <b>1060.513195</b> | 530.760236        | 1043.486646    | 522.246961       | <b>1042.502630</b> | 521.754953        | Y    | <b>1069.465912</b> | 535.236594        | 1052.439363    | 526.723320        | 1051.455347        | 526.231312        | 8  |
| 8  | <b>1161.560874</b> | 581.284075        | 1144.534325    | 572.770801       | 1143.550309        | 572.278793        | T    | <b>906.402583</b>  | 453.704930        | 889.376034     | 445.191655        | 888.392018         | 444.699647        | 7  |
| 9  | 1321.591523        | 661.299400        | 1304.564974    | 652.786125       | 1303.580958        | 652.294117        | C    | <b>805.354904</b>  | 403.181090        | 788.328355     | 394.667816        | 787.344339         | 394.175808        | 6  |
| 10 | 1392.628637        | 696.817957        | 1375.602088    | 688.304682       | 1374.618072        | 687.812674        | A    | <b>645.324255</b>  | 323.165766        | 628.297706     | 314.652491        | 627.313690         | 314.160483        | 5  |
| 11 | <b>1493.676316</b> | 747.341796        | 1476.649767    | 738.828522       | 1475.665751        | 738.336514        | T    | <b>574.287141</b>  | 287.647209        | 557.260592     | 279.133934        | 556.276576         | 278.641926        | 4  |
| 12 | 1656.739645        | 828.873461        | 1639.713096    | 820.360186       | 1638.729080        | 819.868178        | Y    | <b>473.239462</b>  | <b>237.123369</b> | 456.212913     | 228.610095        |                    |                   | 3  |
| 13 | 1819.802974        | <b>910.405125</b> | 1802.776425    | 901.891851       | 1801.792409        | 901.399843        | Y    | 310.176133         | 155.591705        | 293.149584     | <b>147.078430</b> |                    |                   | 2  |
| 14 |                    |                   |                |                  |                    |                   | K    | <b>147.112804</b>  | 74.060040         | 130.086255     | 65.546765         |                    |                   | 1  |

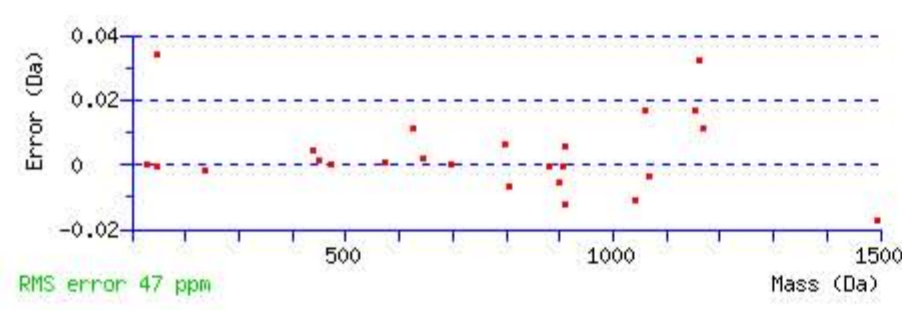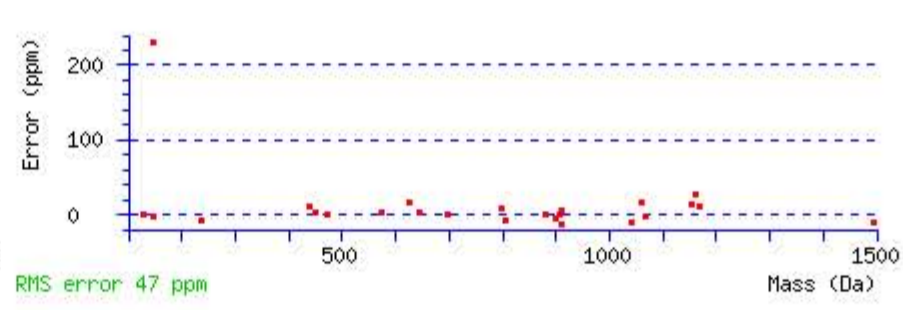

NCBI BLAST search of **AGEQVITYTCATYYK**  
 (Parameters: blastp, nr protein database, expect=20000, no filter, PAM30)  
 Other BLAST [web gateways](#)

### All matches to this query

| Score | Mr(calc):   | Delta     | Sequence                        |
|-------|-------------|-----------|---------------------------------|
| 48.3  | 1964.901215 | -0.000863 | <a href="#">AGEQVITYTCATYYK</a> |



# MASCOT Search Results

## Peptide View

MS/MS Fragmentation of **AVYTCNEGYQLLGEINYR**

Found in **CFAH\_HUMAN**, Complement factor H OS=Homo sapiens GN=CFH PE=1 SV=4

Match to Query 55930: 2473.192812 from(825.404880,3+) rtinseconds(2519) index(24667)

Title: Locus:1.1.1.879.20 File:"2013-07-02 CLN FXIII 60 min 2nd F 2.wiff"

Data file C:\Program Files (x86)\Matrix Science\Mascot Daemon\mgf5 FXIII 60 min 2nd\mascot\_daemon\_merge.mgf

Click mouse within plot area to zoom in by factor of two about that point

Or, Plot from  to  Da

Label all possible matches  Label matches used for scoring

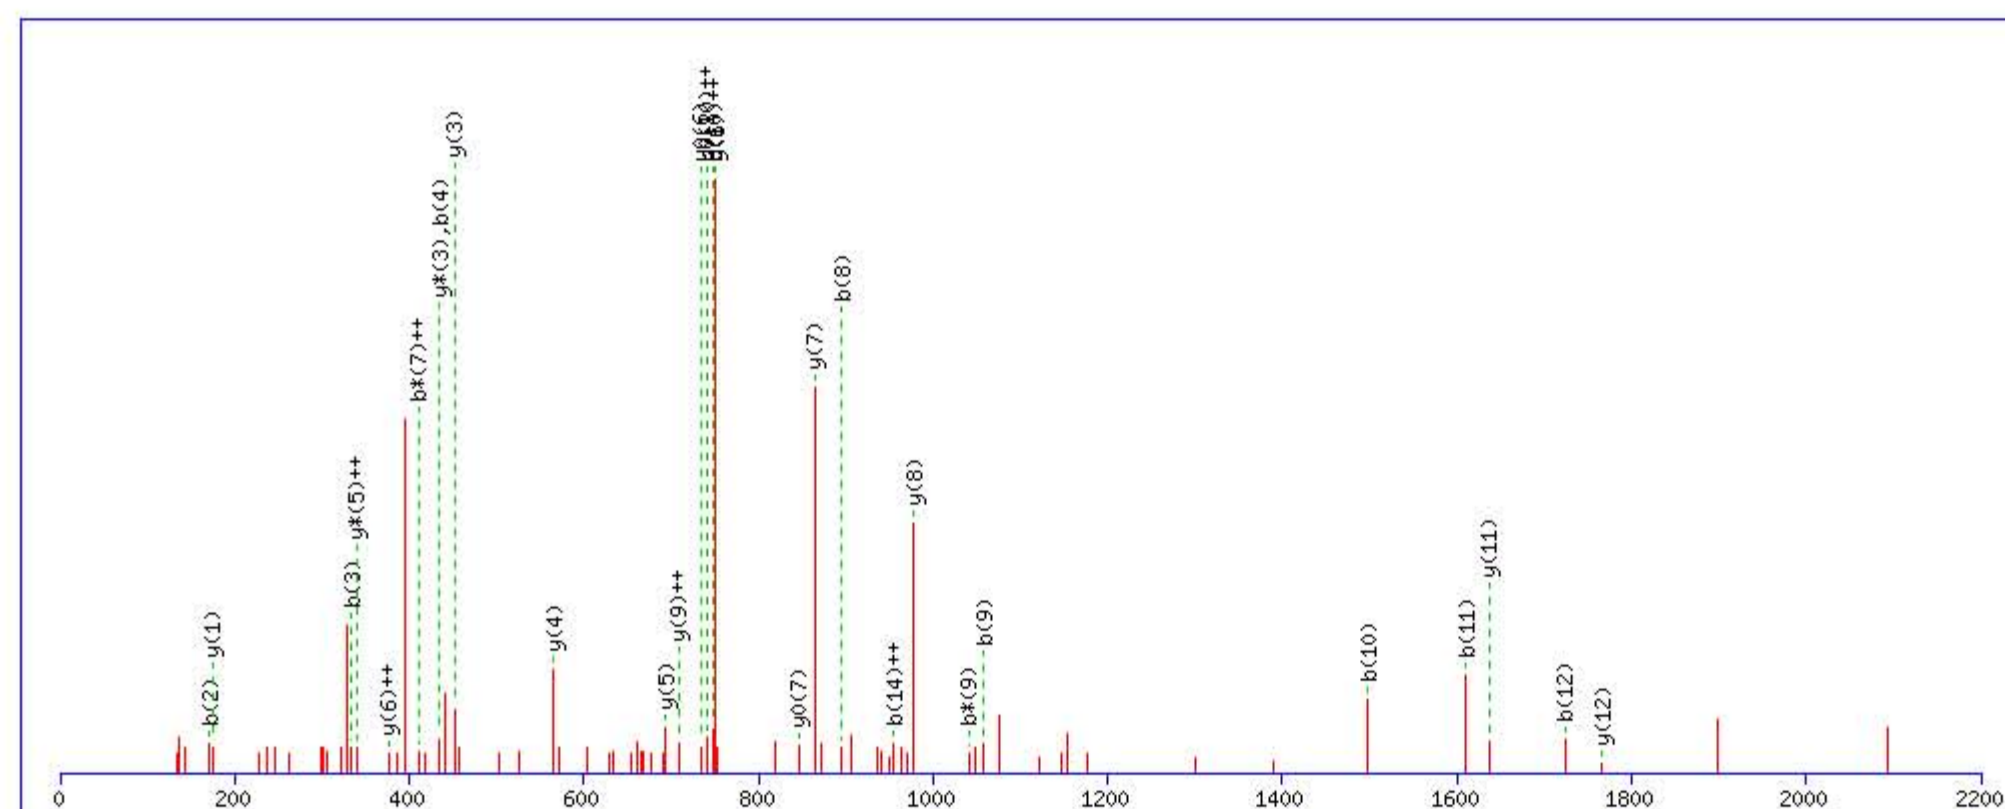

Monoisotopic mass of neutral peptide Mr(calc): 2473.176971

Fixed modifications: Carbamidomethyl (C) (apply to specified residues or termini only)

Variable modifications:

Q10 : Biotin:Thermo-21345 (Q)

Ions Score: 45 Expect: 0.00057

Matches : 28/180 fragment ions using 62 most intense peaks [\(help\)](#)

| #  | b                  | b <sup>++</sup>   | b <sup>*</sup>     | b <sup>+++</sup>  | b <sup>0</sup> | b <sup>0++</sup>  | Seq. | y                  | y <sup>++</sup>   | y <sup>*</sup>    | y <sup>+++</sup>  | y <sup>0</sup>    | y <sup>0++</sup> | #  |
|----|--------------------|-------------------|--------------------|-------------------|----------------|-------------------|------|--------------------|-------------------|-------------------|-------------------|-------------------|------------------|----|
| 1  | 72.044390          | 36.525833         |                    |                   |                |                   | A    |                    |                   |                   |                   |                   |                  | 18 |
| 2  | <b>171.112804</b>  | 86.060040         |                    |                   |                |                   | V    | 2403.147167        | 1202.077221       | 2386.120618       | 1193.563947       | 2385.136602       | 1193.071939      | 17 |
| 3  | <b>334.176133</b>  | 167.591704        |                    |                   |                |                   | Y    | 2304.078753        | 1152.543014       | 2287.052204       | 1144.029740       | 2286.068188       | 1143.537732      | 16 |
| 4  | <b>435.223812</b>  | 218.115544        |                    |                   | 417.213247     | 209.110262        | T    | 2141.015424        | 1071.011350       | 2123.988875       | 1062.498075       | 2123.004859       | 1062.006067      | 15 |
| 5  | 595.254461         | 298.130869        |                    |                   | 577.243896     | 289.125586        | C    | 2039.967745        | 1020.487511       | 2022.941196       | 1011.974236       | 2021.957180       | 1011.482228      | 14 |
| 6  | 709.297388         | 355.152332        | 692.270839         | 346.639058        | 691.286823     | 346.147050        | N    | 1879.937096        | 940.472186        | 1862.910547       | 931.958912        | 1861.926531       | 931.466903       | 13 |
| 7  | 838.339981         | 419.673629        | 821.313432         | <b>411.160354</b> | 820.329416     | 410.668346        | E    | <b>1765.894169</b> | 883.450722        | 1748.867620       | 874.937448        | 1747.883604       | 874.445440       | 12 |
| 8  | <b>895.361445</b>  | 448.184361        | 878.334896         | 439.671086        | 877.350880     | 439.179078        | G    | <b>1636.851576</b> | 818.929426        | 1619.825027       | 810.416152        | 1618.841011       | 809.924144       | 11 |
| 9  | <b>1058.424774</b> | 529.716025        | <b>1041.398225</b> | 521.202751        | 1040.414209    | 520.710743        | Y    | 1579.830112        | 790.418694        | 1562.803563       | 781.905419        | 1561.819547       | 781.413411       | 10 |
| 10 | <b>1497.650100</b> | <b>749.328688</b> | 1480.623551        | 740.815414        | 1479.639535    | <b>740.323406</b> | Q    | 1416.766783        | <b>708.887030</b> | 1399.740234       | 700.373755        | 1398.756218       | 699.881747       | 9  |
| 11 | <b>1610.734164</b> | 805.870720        | 1593.707615        | 797.357446        | 1592.723599    | 796.865437        | L    | <b>977.541457</b>  | 489.274367        | 960.514908        | 480.761092        | 959.530892        | 480.269084       | 8  |
| 12 | <b>1723.818228</b> | 862.412752        | 1706.791679        | 853.899477        | 1705.807663    | 853.407469        | L    | <b>864.457393</b>  | 432.732335        | 847.430844        | 424.219060        | <b>846.446828</b> | 423.727052       | 7  |
| 13 | 1780.839692        | 890.923484        | 1763.813143        | 882.410209        | 1762.829127    | 881.918201        | G    | <b>751.373329</b>  | <b>376.190303</b> | 734.346780        | 367.677028        | <b>733.362764</b> | 367.185020       | 6  |
| 14 | 1909.882285        | <b>955.444780</b> | 1892.855736        | 946.931506        | 1891.871720    | 946.439498        | E    | <b>694.351865</b>  | 347.679571        | 677.325316        | <b>339.166296</b> | 676.341300        | 338.674288       | 5  |
| 15 | 2022.966349        | 1011.986812       | 2005.939800        | 1003.473538       | 2004.955784    | 1002.981530       | I    | <b>565.309272</b>  | 283.158274        | 548.282723        | 274.645000        |                   |                  | 4  |
| 16 | 2137.009276        | 1069.008276       | 2119.982727        | 1060.495001       | 2118.998711    | 1060.002993       | N    | <b>452.225208</b>  | 226.616242        | <b>435.198659</b> | 218.102968        |                   |                  | 3  |
| 17 | 2300.072605        | 1150.539940       | 2283.046056        | 1142.026666       | 2282.062040    | 1141.534658       | Y    | 338.182281         | 169.594778        | 321.155732        | 161.081504        |                   |                  | 2  |
| 18 |                    |                   |                    |                   |                |                   | R    | <b>175.118952</b>  | 88.063114         | 158.092403        | 79.549839         |                   |                  | 1  |

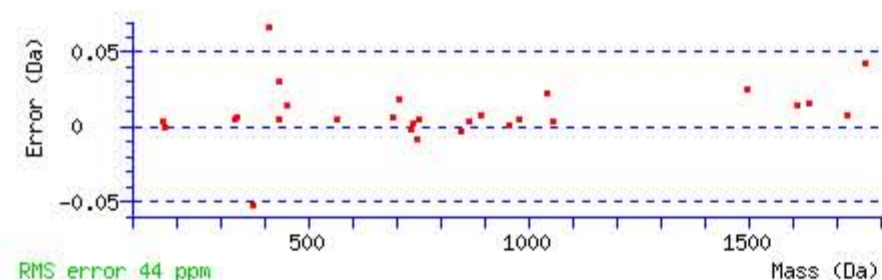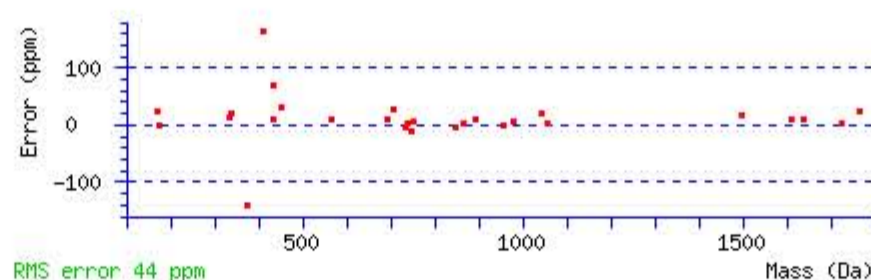

NCBI BLAST search of **AVYTCNEGYQLLGEINYR**

(Parameters: blastp, nr protein database, expect=20000, no filter, PAM30)

Other BLAST [web gateways](#)

All matches to this query

| Score | Mr(calc):   | Delta    | Sequence                                  |
|-------|-------------|----------|-------------------------------------------|
| 45.2  | 2473.176971 | 0.015841 | <a href="#">AVYTCNEGYQLLGEINYR</a>        |
| 10.2  | 2473.192047 | 0.000765 | <a href="#">ECDKAFIYGSQSEHQRHR</a>        |
| 4.5   | 2473.188065 | 0.004747 | <a href="#">GEAGAQQPMGSPGAPARGIQGPQGR</a> |



# MASCOT Search Results

## Peptide View

MS/MS Fragmentation of **IVSSAMEPDREYHFGQAVR**

Found in **CFAH\_HUMAN**, Complement factor H OS=Homo sapiens GN=CFH PE=1 SV=4

Match to Query 56705: 2502.216456 from(626.561390,4+) rtinseconds(1837) index(20560)

Title: Locus:1.1.1.642.10 File:"2013-07-02 CLN FXIII 60 min 2nd F 2.wiff"

Data file C:\Program Files (x86)\Matrix Science\Mascot Daemon\mgf5 FXIII 60 min 2nd\mascot\_daemon\_merge.mgf

Click mouse within plot area to zoom in by factor of two about that point

Or, Plot from  to  Da

Label all possible matches  Label matches used for scoring

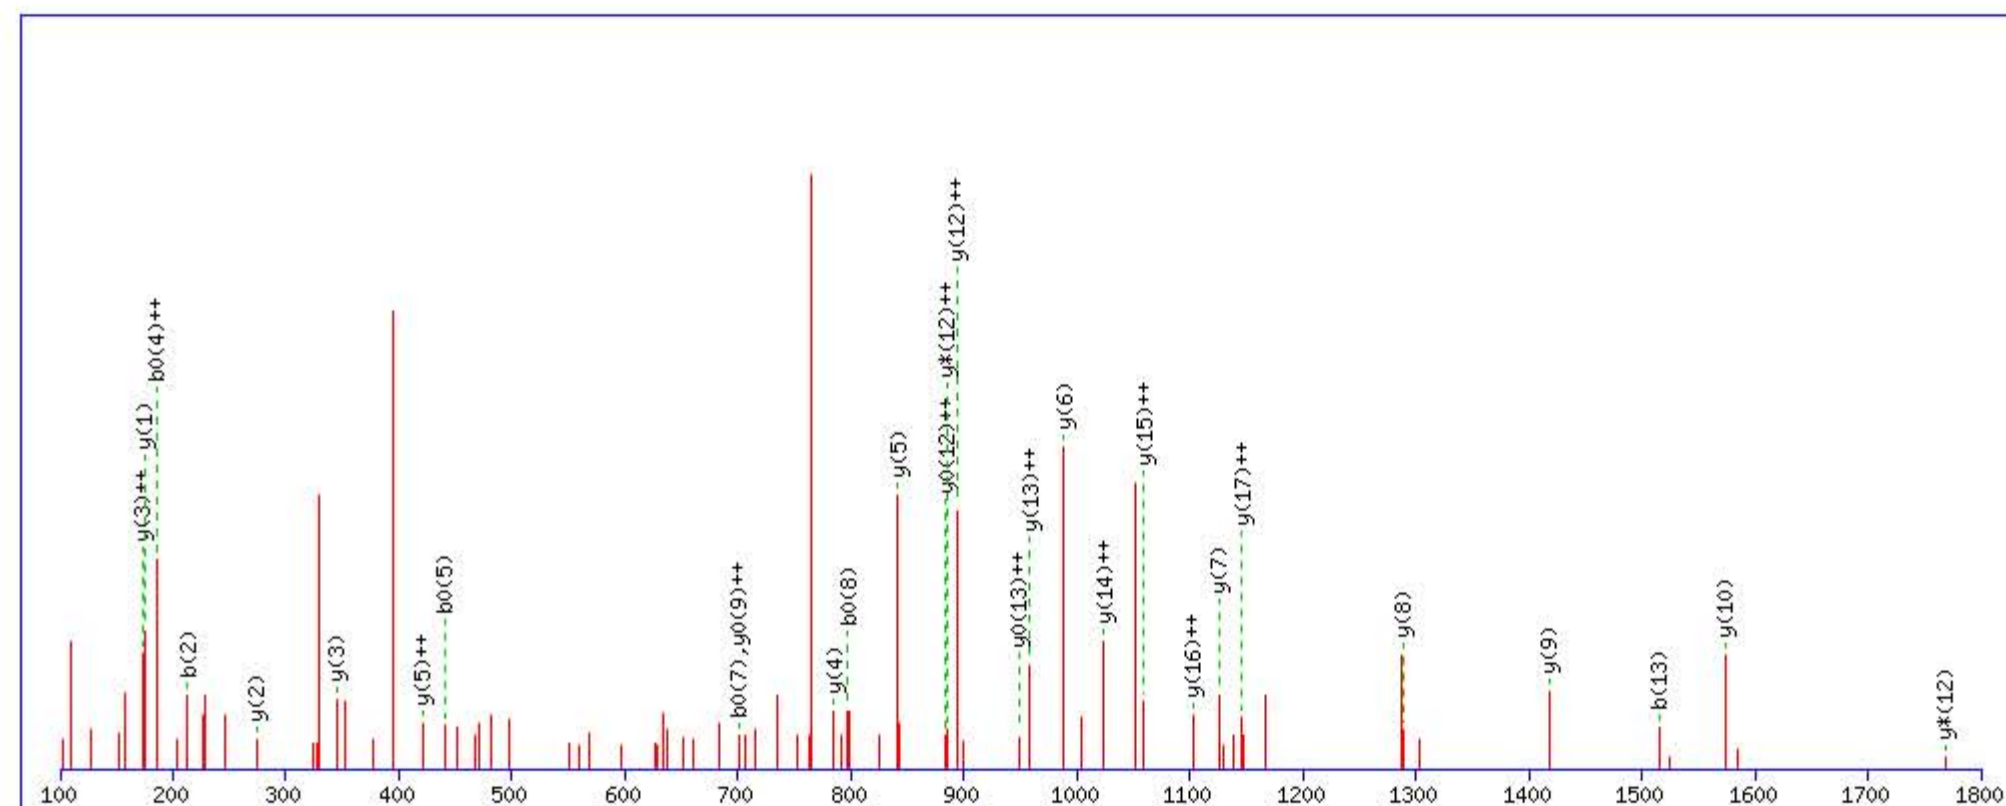

Monoisotopic mass of neutral peptide Mr(calc): 2502.214767

Fixed modifications: Carbamidomethyl (C) (apply to specified residues or termini only)

Variable modifications:

Q16 : Biotin:Thermo-21345 (Q)

Ions Score: 48 Expect: 0.00039

Matches : 29/178 fragment ions using 71 most intense peaks [\(help\)](#)

| #  | b                  | b <sup>++</sup> | b <sup>+</sup> | b <sup>+++</sup> | b <sup>0</sup>    | b <sup>0++</sup>  | Seq. | y                  | y <sup>++</sup>    | y <sup>+</sup>     | y <sup>+++</sup>  | y <sup>0</sup> | y <sup>0++</sup>  | #  |
|----|--------------------|-----------------|----------------|------------------|-------------------|-------------------|------|--------------------|--------------------|--------------------|-------------------|----------------|-------------------|----|
| 1  | 114.091340         | 57.549308       |                |                  |                   |                   | I    |                    |                    |                    |                   |                |                   | 19 |
| 2  | <b>213.159754</b>  | 107.083515      |                |                  |                   |                   | V    | 2390.137998        | 1195.572637        | 2373.111449        | 1187.059362       | 2372.127433    | 1186.567354       | 18 |
| 3  | 300.191782         | 150.599529      |                |                  | 282.181217        | 141.594247        | S    | 2291.069584        | <b>1146.038430</b> | 2274.043035        | 1137.525155       | 2273.059019    | 1137.033147       | 17 |
| 4  | 387.223810         | 194.115543      |                |                  | 369.213245        | <b>185.110261</b> | S    | 2204.037556        | <b>1102.522416</b> | 2187.011007        | 1094.009141       | 2186.026991    | 1093.517133       | 16 |
| 5  | 458.260924         | 229.634100      |                |                  | <b>440.250359</b> | 220.628818        | A    | 2117.005528        | <b>1059.006402</b> | 2099.978979        | 1050.493127       | 2098.994963    | 1050.001119       | 15 |
| 6  | 589.301409         | 295.154343      |                |                  | 571.290844        | 286.149060        | M    | 2045.968414        | <b>1023.487845</b> | 2028.941865        | 1014.974571       | 2027.957849    | 1014.482563       | 14 |
| 7  | 718.344002         | 359.675639      |                |                  | <b>700.333437</b> | 350.670357        | E    | 1914.927929        | <b>957.967603</b>  | 1897.901380        | 949.454328        | 1896.917364    | <b>948.962320</b> | 13 |
| 8  | 815.396766         | 408.202021      |                |                  | <b>797.386201</b> | 399.196739        | P    | 1785.885336        | <b>893.446306</b>  | <b>1768.858787</b> | <b>884.933032</b> | 1767.874771    | <b>884.441024</b> | 12 |
| 9  | 930.423709         | 465.715493      |                |                  | 912.413144        | 456.710210        | D    | 1688.832572        | 844.919924         | 1671.806023        | 836.406650        | 1670.822007    | 835.914642        | 11 |
| 10 | 1086.524820        | 543.766048      | 1069.498271    | 535.252774       | 1068.514255       | 534.760766        | R    | <b>1573.805629</b> | 787.406453         | 1556.779080        | 778.893178        | 1555.795064    | 778.401170        | 10 |
| 11 | 1215.567413        | 608.287345      | 1198.540864    | 599.774070       | 1197.556848       | 599.282062        | E    | <b>1417.704518</b> | 709.355897         | 1400.677969        | 700.842623        | 1399.693953    | <b>700.350615</b> | 9  |
| 12 | 1378.630742        | 689.819009      | 1361.604193    | 681.305735       | 1360.620177       | 680.813727        | Y    | <b>1288.661925</b> | 644.834601         | 1271.635376        | 636.321326        |                |                   | 8  |
| 13 | <b>1515.689654</b> | 758.348465      | 1498.663105    | 749.835191       | 1497.679089       | 749.343183        | H    | <b>1125.598596</b> | 563.302936         | 1108.572047        | 554.789662        |                |                   | 7  |
| 14 | 1662.758068        | 831.882672      | 1645.731519    | 823.369398       | 1644.747503       | 822.877390        | F    | <b>988.539684</b>  | 494.773480         | 971.513135         | 486.260206        |                |                   | 6  |
| 15 | 1719.779532        | 860.393404      | 1702.752983    | 851.880130       | 1701.768967       | 851.388122        | G    | <b>841.471270</b>  | <b>421.239273</b>  | 824.444721         | 412.725999        |                |                   | 5  |
| 16 | 2159.004858        | 1080.006067     | 2141.978309    | 1071.492792      | 2140.994293       | 1071.000784       | Q    | <b>784.449806</b>  | 392.728541         | 767.423257         | 384.215267        |                |                   | 4  |
| 17 | 2230.041972        | 1115.524624     | 2213.015423    | 1107.011349      | 2212.031407       | 1106.519341       | A    | <b>345.224480</b>  | <b>173.115878</b>  | 328.197931         | 164.602603        |                |                   | 3  |
| 18 | 2329.110386        | 1165.058831     | 2312.083837    | 1156.545556      | 2311.099821       | 1156.053548       | V    | <b>274.187366</b>  | 137.597321         | 257.160817         | 129.084046        |                |                   | 2  |
| 19 |                    |                 |                |                  |                   |                   | R    | <b>175.118952</b>  | 88.063114          | 158.092403         | 79.549839         |                |                   | 1  |

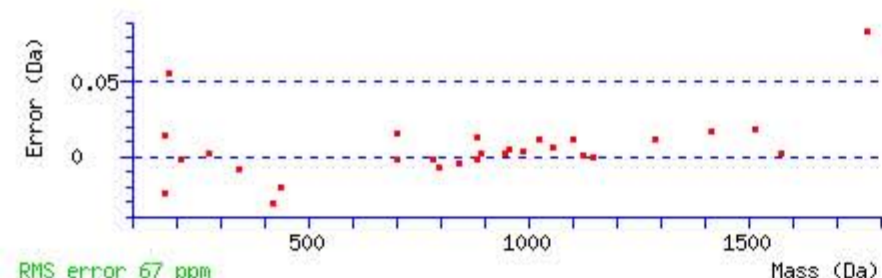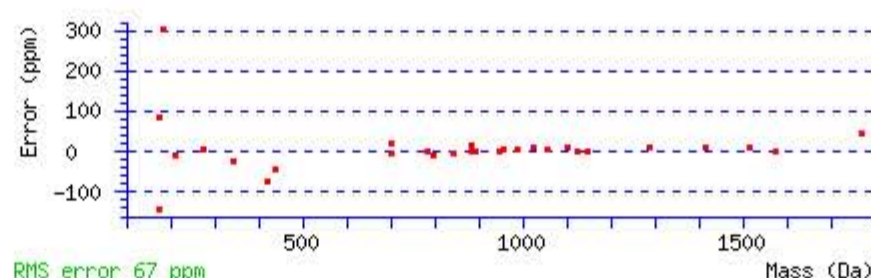

NCBI BLAST search of **IVSSAMEPDREYHFGQAVR**

(Parameters: blastp, nr protein database, expect=20000, no filter, PAM30)

Other BLAST [web gateways](#)

All matches to this query

| Score | Mr(calc):   | Delta    | Sequence                            |
|-------|-------------|----------|-------------------------------------|
| 47.7  | 2502.214767 | 0.001689 | <a href="#">IVSSAMEPDREYHFGQAVR</a> |

Mascot: <http://www.matrixscience.com/>



# MASCOT Search Results

## Peptide View

MS/MS Fragmentation of **SITCIHGVWTQLPQCVAIDK**

Found in **CFAH\_HUMAN**, Complement factor H OS=Homo sapiens GN=CFH PE=1 SV=4

Match to Query 57881: 2636.345712 from(879.789180,3+) rtinseconds(2379) index(23862)

Title: Locus:1.1.1.830.18 File:"2013-07-02 CLN FXIII 60 min 2nd F 2.wiff"

Data file C:\Program Files (x86)\Matrix Science\Mascot Daemon\mgf5 FXIII 60 min 2nd\mascot\_daemon\_merge.mgf

Click mouse within plot area to zoom in by factor of two about that point

Or, Plot from  to  Da

Label all possible matches  Label matches used for scoring

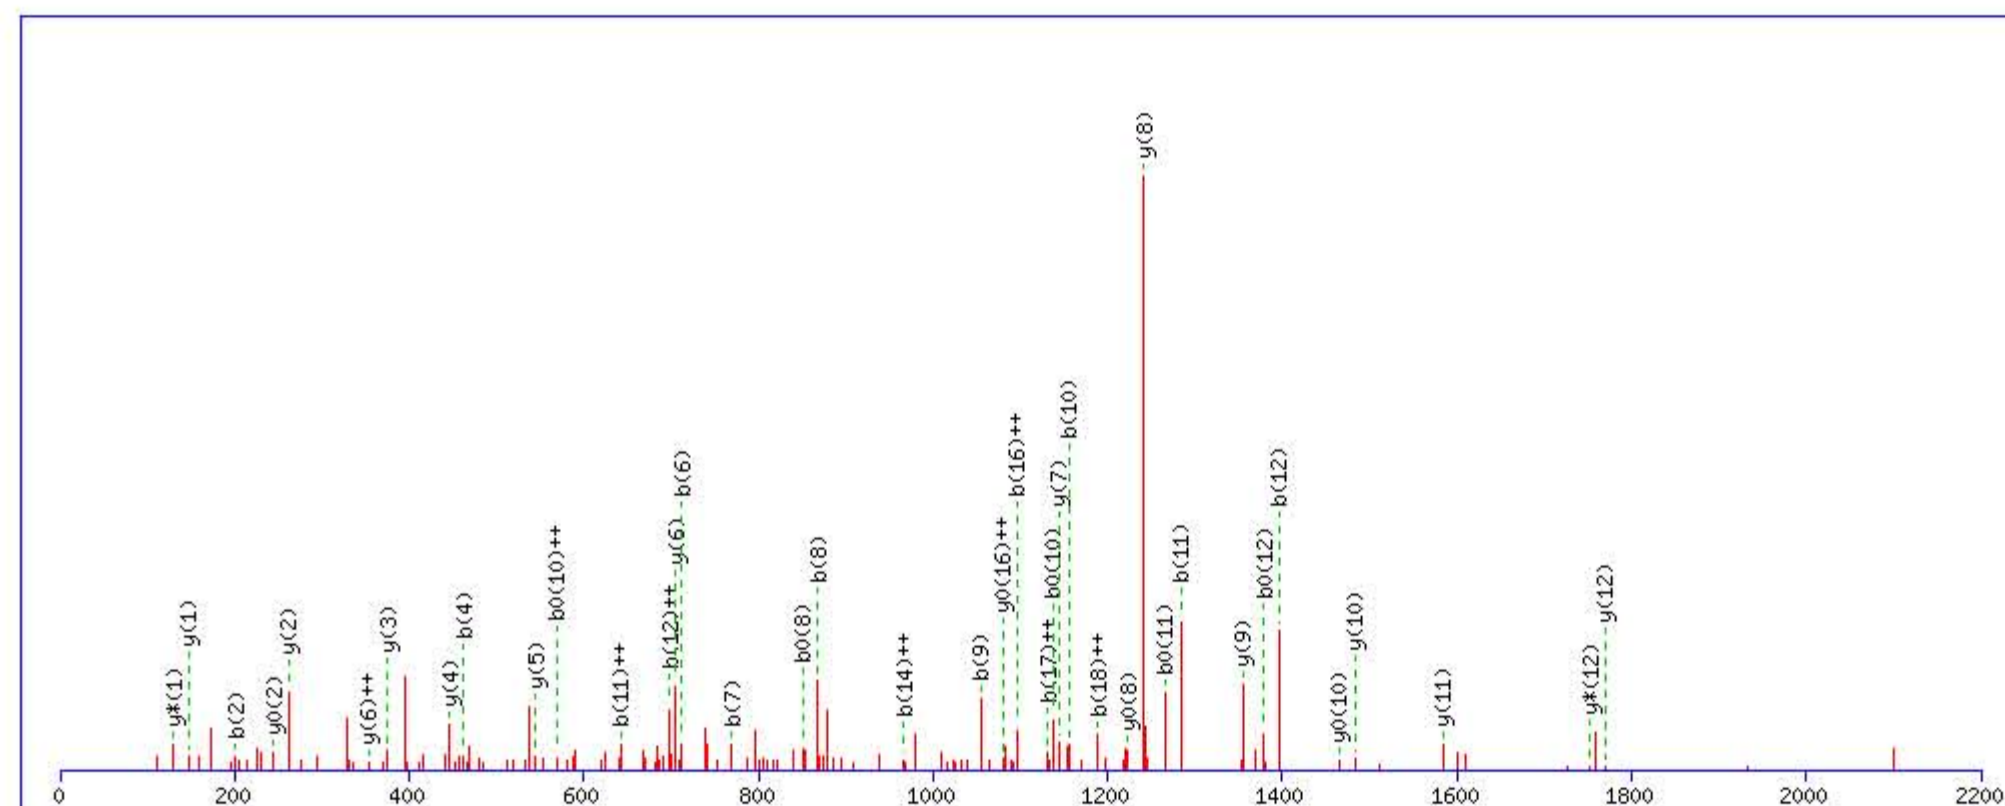

Monoisotopic mass of neutral peptide Mr(calc): 2636.327728

Fixed modifications: Carbamidomethyl (C) (apply to specified residues or termini only)

Variable modifications:

Q14 : Biotin:Thermo-21345 (Q)

Ions Score: 51 Expect: 1.7e-005

Matches : 39/206 fragment ions using 91 most intense peaks [\(help\)](#)

| #  | b                  | b <sup>++</sup>    | b <sup>*</sup> | b <sup>*++</sup> | b <sup>0</sup>     | b <sup>0++</sup>  | Seq. | y                  | y <sup>++</sup>   | y <sup>*</sup>     | y <sup>*++</sup> | y <sup>0</sup>     | y <sup>0++</sup>   | #  |
|----|--------------------|--------------------|----------------|------------------|--------------------|-------------------|------|--------------------|-------------------|--------------------|------------------|--------------------|--------------------|----|
| 1  | 88.039304          | 44.523290          |                |                  | 70.028739          | 35.518008         | S    |                    |                   |                    |                  |                    |                    | 20 |
| 2  | <b>201.123368</b>  | 101.065322         |                |                  | 183.112803         | 92.060039         | I    | 2550.302958        | 1275.655117       | 2533.276409        | 1267.141842      | 2532.292393        | 1266.649834        | 19 |
| 3  | 302.171047         | 151.589161         |                |                  | 284.160482         | 142.583879        | T    | 2437.218894        | 1219.113085       | 2420.192345        | 1210.599810      | 2419.208329        | 1210.107802        | 18 |
| 4  | <b>462.201696</b>  | 231.604486         |                |                  | 444.191131         | 222.599204        | C    | 2336.171215        | 1168.589245       | 2319.144666        | 1160.075971      | 2318.160650        | 1159.583963        | 17 |
| 5  | 575.285760         | 288.146518         |                |                  | 557.275195         | 279.141236        | I    | 2176.140566        | 1088.573921       | 2159.114017        | 1080.060646      | 2158.130001        | <b>1079.568638</b> | 16 |
| 6  | <b>712.344672</b>  | 356.675974         |                |                  | 694.334107         | 347.670692        | H    | 2063.056502        | 1032.031889       | 2046.029953        | 1023.518614      | 2045.045937        | 1023.026606        | 15 |
| 7  | <b>769.366136</b>  | 385.186706         |                |                  | 751.355571         | 376.181424        | G    | 1925.997590        | 963.502433        | 1908.971041        | 954.989159       | 1907.987025        | 954.497151         | 14 |
| 8  | <b>868.434550</b>  | 434.720913         |                |                  | <b>850.423985</b>  | 425.715631        | V    | 1868.976126        | 934.991701        | 1851.949577        | 926.478427       | 1850.965561        | 925.986419         | 13 |
| 9  | <b>1054.513863</b> | 527.760570         |                |                  | 1036.503298        | 518.755287        | W    | <b>1769.907712</b> | 885.457494        | <b>1752.881163</b> | 876.944220       | 1751.897147        | 876.452211         | 12 |
| 10 | <b>1155.561542</b> | 578.284409         |                |                  | <b>1137.550977</b> | <b>569.279127</b> | T    | <b>1583.828399</b> | 792.417838        | 1566.801850        | 783.904563       | 1565.817834        | 783.412555         | 11 |
| 11 | <b>1283.620120</b> | <b>642.313698</b>  | 1266.593571    | 633.800424       | <b>1265.609555</b> | 633.308416        | Q    | <b>1482.780720</b> | 741.893998        | 1465.754171        | 733.380724       | <b>1464.770155</b> | 732.888715         | 10 |
| 12 | <b>1396.704184</b> | <b>698.855730</b>  | 1379.677635    | 690.342456       | <b>1378.693619</b> | 689.850448        | L    | <b>1354.722142</b> | 677.864709        | 1337.695593        | 669.351434       | 1336.711577        | 668.859426         | 9  |
| 13 | 1493.756948        | 747.382112         | 1476.730399    | 738.868838       | 1475.746383        | 738.376830        | P    | <b>1241.638078</b> | 621.322677        | 1224.611529        | 612.809403       | <b>1223.627513</b> | 612.317394         | 8  |
| 14 | 1932.982274        | <b>966.994775</b>  | 1915.955725    | 958.481501       | 1914.971709        | 957.989493        | Q    | <b>1144.585314</b> | 572.796295        | 1127.558765        | 564.283021       | 1126.574749        | 563.791012         | 7  |
| 15 | 2093.012923        | 1047.010099        | 2075.986374    | 1038.496825      | 2075.002358        | 1038.004817       | C    | <b>705.359988</b>  | <b>353.183632</b> | 688.333439         | 344.670357       | 687.349423         | 344.178349         | 6  |
| 16 | 2192.081337        | <b>1096.544306</b> | 2175.054788    | 1088.031032      | 2174.070772        | 1087.539024       | V    | <b>545.329339</b>  | 273.168308        | 528.302790         | 264.655033       | 527.318774         | 264.163025         | 5  |
| 17 | 2263.118451        | <b>1132.062863</b> | 2246.091902    | 1123.549589      | 2245.107886        | 1123.057581       | A    | <b>446.260925</b>  | 223.634101        | 429.234376         | 215.120826       | 428.250360         | 214.628818         | 4  |
| 18 | 2376.202515        | <b>1188.604895</b> | 2359.175966    | 1180.091621      | 2358.191950        | 1179.599613       | I    | <b>375.223811</b>  | 188.115543        | 358.197262         | 179.602269       | 357.213246         | 179.110261         | 3  |
| 19 | 2491.229458        | 1246.118367        | 2474.202909    | 1237.605092      | 2473.218893        | 1237.113084       | D    | <b>262.139747</b>  | 131.573511        | 245.113198         | 123.060237       | <b>244.129182</b>  | 122.568229         | 2  |
| 20 |                    |                    |                |                  |                    |                   | K    | <b>147.112804</b>  | 74.060040         | <b>130.086255</b>  | 65.546765        |                    |                    | 1  |

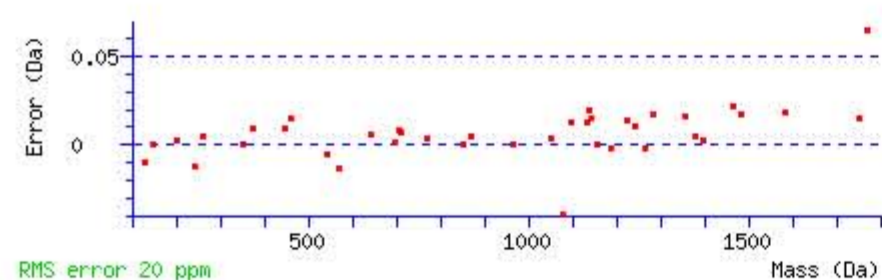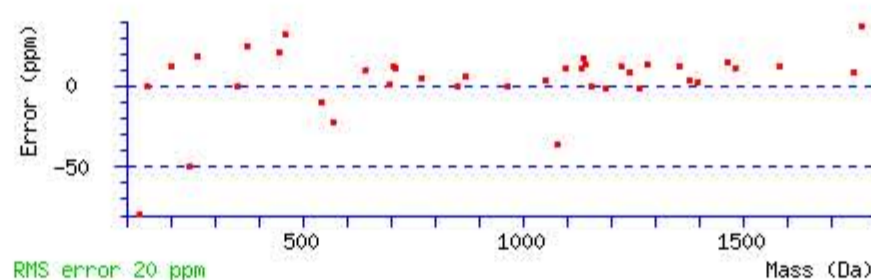

NCBI BLAST search of **SITCIHGVWTQLPQCVAIDK**

(Parameters: blastp, nr protein database, expect=20000, no filter, PAM30)

Other BLAST [web gateways](#)

All matches to this query

| Score | Mr(calc):   | Delta     | Sequence                               |
|-------|-------------|-----------|----------------------------------------|
| 51.0  | 2636.327728 | 0.017984  | <a href="#">SITCIHGVWTQLPQCVAIDK</a>   |
| 22.7  | 2636.327728 | 0.017984  | <a href="#">SITCIHGVWTQLPQCVAIDK</a>   |
| 0.1   | 2636.366592 | -0.020880 | <a href="#">ASKTTDLRIPASVCTMFNVLDK</a> |



**MASCOT** Mascot Search Results

**Peptide View**

MS/MS Fragmentation of **NTEILTGSWSDQTYPEGTQAIYK**  
 Found in **CFAH\_HUMAN**, Complement factor H OS=Homo sapiens GN=CFH PE=1 SV=4

Match to Query 60932: 2912.406852 from(971.809560,3+) rtinseconds(2376) index(23845)  
 Title: Locus:1.1.1.829.10 File:"2013-07-02 CLN FXIII 60 min 2nd F 2.wiff"  
 Data file C:\Program Files (x86)\Matrix Science\Mascot Daemon\mgf5 FXIII 60 min 2nd\mascot\_daemon\_merge.mgf

Click mouse within plot area to zoom in by factor of two about that point  
 Or, Plot from  to  Da   
 Label all possible matches  Label matches used for scoring

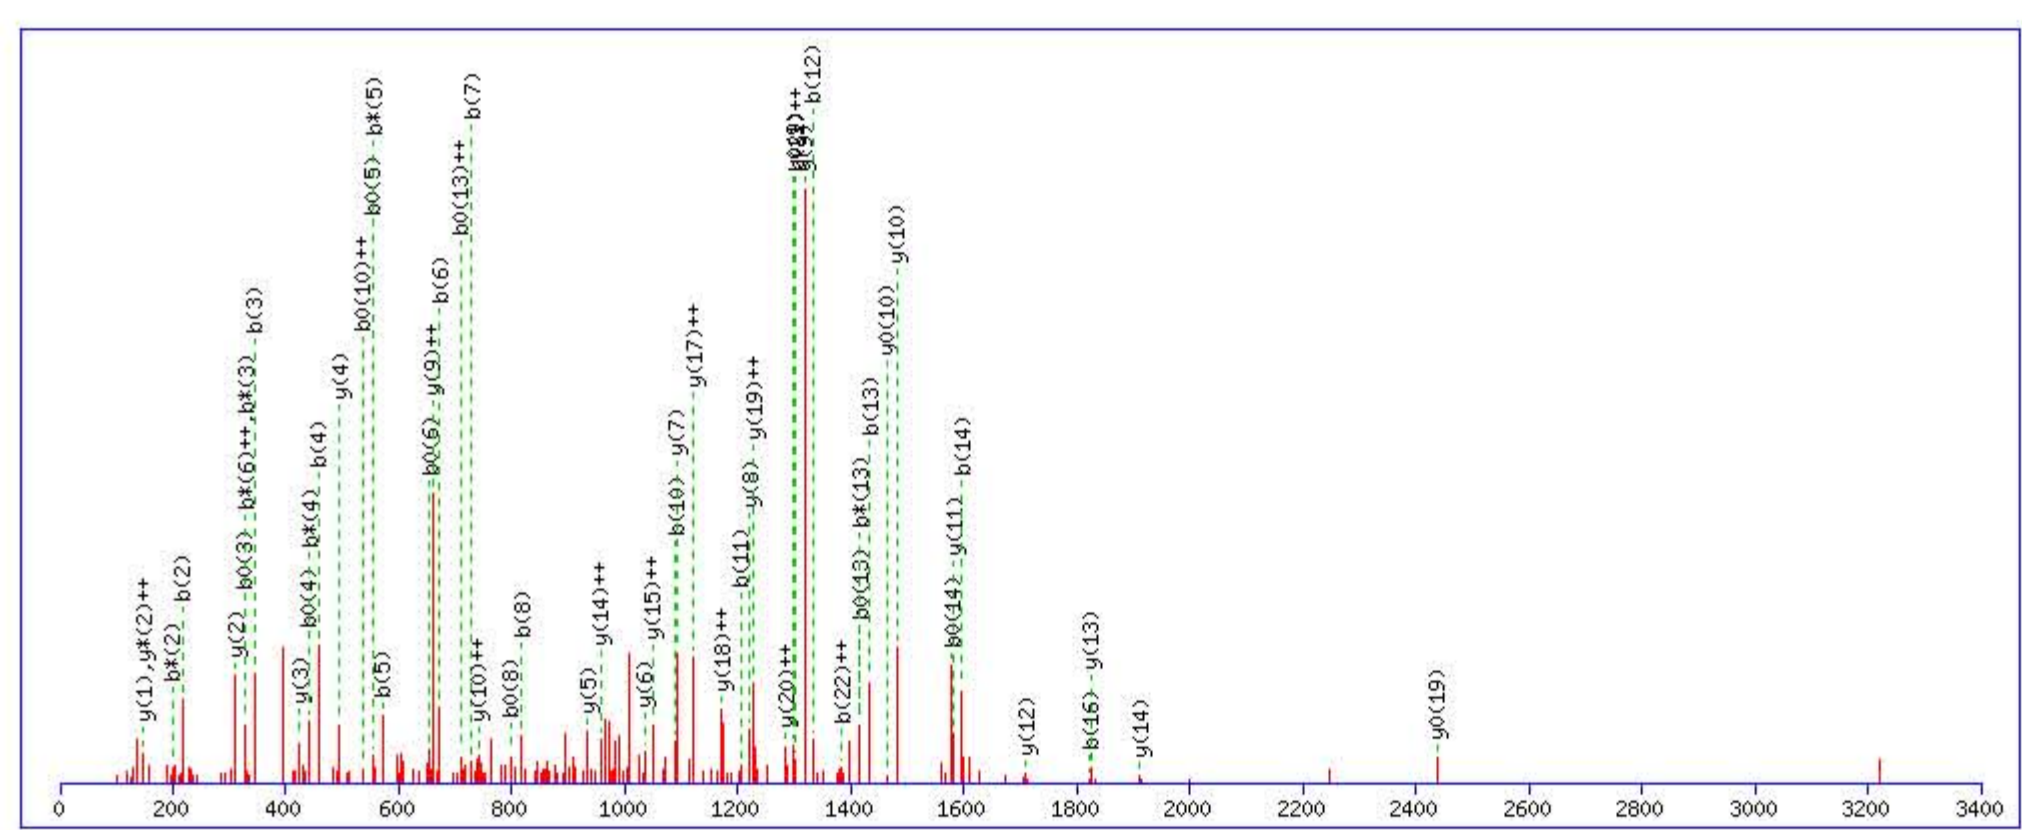

Monoisotopic mass of neutral peptide Mr(calc): 2912.390213  
 Fixed modifications: Carbamidomethyl (C) (apply to specified residues or termini only)  
 Variable modifications: Q19 : Biotin:Thermo-21345 (Q)  
 Ions Score: 86 Expect: 6.5e-008  
 Matches : 56/252 fragment ions using 105 most intense peaks [\(help\)](#)

| #  | b                  | b <sup>++</sup>    | b <sup>*</sup>     | b <sup>*++</sup>  | b <sup>0</sup>     | b <sup>0++</sup>  | Seq. | y                  | y <sup>++</sup>    | y <sup>*</sup> | y <sup>*++</sup>  | y <sup>0</sup>     | y <sup>0++</sup> | #  |
|----|--------------------|--------------------|--------------------|-------------------|--------------------|-------------------|------|--------------------|--------------------|----------------|-------------------|--------------------|------------------|----|
| 1  | 115.050203         | 58.028740          | 98.023654          | 49.515465         |                    |                   | N    |                    |                    |                |                   |                    |                  | 23 |
| 2  | <b>216.097882</b>  | 108.552579         | <b>199.071333</b>  | 100.039305        | 198.087317         | 99.547296         | T    | 2799.354578        | 1400.180927        | 2782.328029    | 1391.667652       | 2781.344013        | 1391.175644      | 22 |
| 3  | <b>345.140475</b>  | 173.073875         | <b>328.113926</b>  | 164.560601        | <b>327.129910</b>  | 164.068593        | E    | 2698.306899        | 1349.657087        | 2681.280350    | 1341.143813       | 2680.296334        | 1340.651805      | 21 |
| 4  | <b>458.224539</b>  | 229.615907         | <b>441.197990</b>  | 221.102633        | <b>440.213974</b>  | 220.610625        | I    | 2569.264306        | <b>1285.135791</b> | 2552.237757    | 1276.622516       | 2551.253741        | 1276.130508      | 20 |
| 5  | <b>571.308603</b>  | 286.157940         | <b>554.282054</b>  | 277.644665        | <b>553.298038</b>  | 277.152657        | L    | 2456.180242        | <b>1228.593759</b> | 2439.153693    | 1220.080484       | <b>2438.169677</b> | 1219.588476      | 19 |
| 6  | <b>672.356282</b>  | 336.681779         | 655.329733         | <b>328.168505</b> | <b>654.345717</b>  | 327.676497        | T    | 2343.096178        | <b>1172.051727</b> | 2326.069629    | 1163.538452       | 2325.085613        | 1163.046444      | 18 |
| 7  | <b>729.377746</b>  | 365.192511         | 712.351197         | 356.679237        | 711.367181         | 356.187229        | G    | 2242.048499        | <b>1121.527887</b> | 2225.021950    | 1113.014613       | 2224.037934        | 1112.522605      | 17 |
| 8  | <b>816.409774</b>  | 408.708525         | 799.383225         | 400.195251        | <b>798.399209</b>  | 399.703243        | S    | 2185.027035        | 1093.017155        | 2168.000486    | 1084.503881       | 2167.016470        | 1084.011873      | 16 |
| 9  | 1002.489087        | 501.748182         | 985.462538         | 493.234907        | 984.478522         | 492.742899        | W    | 2097.995007        | <b>1049.501141</b> | 2080.968458    | 1040.987867       | 2079.984442        | 1040.495859      | 15 |
| 10 | <b>1089.521115</b> | 545.264196         | 1072.494566        | 536.750921        | 1071.510550        | <b>536.258913</b> | S    | <b>1911.915694</b> | <b>956.461485</b>  | 1894.889145    | 947.948211        | 1893.905129        | 947.456203       | 14 |
| 11 | <b>1204.548058</b> | 602.777667         | 1187.521509        | 594.264393        | 1186.537493        | 593.772385        | D    | <b>1824.883666</b> | 912.945471         | 1807.857117    | 904.432197        | 1806.873101        | 903.940189       | 13 |
| 12 | <b>1332.606636</b> | 666.806956         | 1315.580087        | 658.293682        | 1314.596071        | 657.801674        | Q    | <b>1709.856723</b> | 855.432000         | 1692.830174    | 846.918725        | 1691.846158        | 846.426717       | 12 |
| 13 | <b>1433.654315</b> | 717.330796         | <b>1416.627766</b> | 708.817521        | <b>1415.643750</b> | <b>708.325513</b> | T    | <b>1581.798145</b> | 791.402711         | 1564.771596    | 782.889436        | 1563.787580        | 782.397428       | 11 |
| 14 | <b>1596.717644</b> | 798.862460         | 1579.691095        | 790.349186        | <b>1578.707079</b> | 789.857178        | Y    | <b>1480.750466</b> | <b>740.878871</b>  | 1463.723917    | 732.365597        | <b>1462.739901</b> | 731.873589       | 10 |
| 15 | 1693.770408        | 847.388842         | 1676.743859        | 838.875568        | 1675.759843        | 838.383560        | P    | <b>1317.687137</b> | <b>659.347207</b>  | 1300.660588    | 650.833932        | <b>1299.676572</b> | 650.341924       | 9  |
| 16 | <b>1822.813001</b> | 911.910139         | 1805.786452        | 903.396864        | 1804.802436        | 902.904856        | E    | <b>1220.634373</b> | 610.820825         | 1203.607824    | 602.307550        | 1202.623808        | 601.815542       | 8  |
| 17 | 1879.834465        | 940.420871         | 1862.807916        | 931.907596        | 1861.823900        | 931.415588        | G    | <b>1091.591780</b> | 546.299528         | 1074.565231    | 537.786254        | 1073.581215        | 537.294246       | 7  |
| 18 | 1980.882144        | 990.944710         | 1963.855595        | 982.431436        | 1962.871579        | 981.939428        | T    | <b>1034.570316</b> | 517.788796         | 1017.543767    | 509.275522        | 1016.559751        | 508.783514       | 6  |
| 19 | 2420.107470        | 1210.557373        | 2403.080921        | 1202.044098       | 2402.096905        | 1201.552090       | Q    | <b>933.522637</b>  | 467.264957         | 916.496088     | 458.751682        |                    |                  | 5  |
| 20 | 2491.144584        | 1246.075930        | 2474.118035        | 1237.562655       | 2473.134019        | 1237.070648       | A    | <b>494.297311</b>  | 247.652294         | 477.270762     | 239.139019        |                    |                  | 4  |
| 21 | 2604.228648        | <b>1302.617962</b> | 2587.202099        | 1294.104688       | 2586.218083        | 1293.612680       | I    | <b>423.260197</b>  | 212.133737         | 406.233648     | 203.620462        |                    |                  | 3  |
| 22 | 2767.291977        | <b>1384.149627</b> | 2750.265428        | 1375.636352       | 2749.281412        | 1375.144344       | Y    | <b>310.176133</b>  | 155.591705         | 293.149584     | <b>147.078430</b> |                    |                  | 2  |
| 23 |                    |                    |                    |                   |                    |                   | K    | <b>147.112804</b>  | 74.060040          | 130.086255     | 65.546765         |                    |                  | 1  |

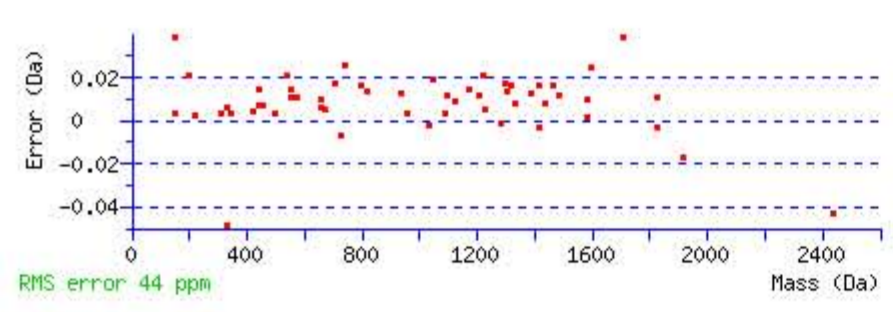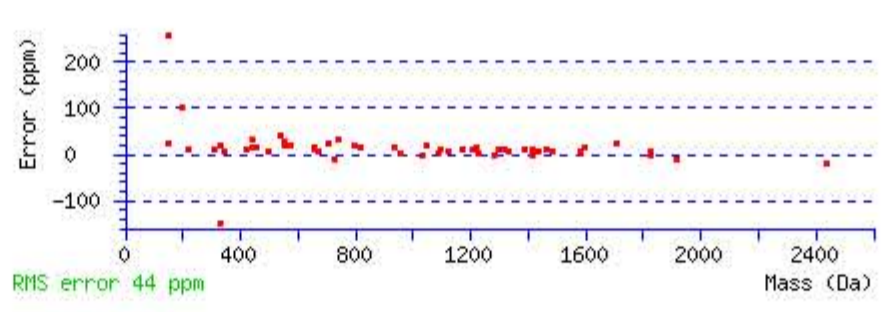

NCBI BLAST search of **NTEILTGSWSDQTYPEGTQAIYK**  
 (Parameters: blastp, nr protein database, expect=20000, no filter, PAM30)  
 Other BLAST [web gateways](#)

**All matches to this query**

| Score | Mr(calc):   | Delta    | Sequence                                |
|-------|-------------|----------|-----------------------------------------|
| 86.0  | 2912.390213 | 0.016639 | <a href="#">NTEILTGSWSDQTYPEGTQAIYK</a> |
| 23.0  | 2912.390213 | 0.016639 | <a href="#">NTEILTGSWSDQTYPEGTQAIYK</a> |



# **MASCOT** Mascot Search Results

## Peptide View

MS/MS Fragmentation of **VFCQPWQR**

Found in **CFAL\_HUMAN**, Complement factor I OS=Homo sapiens GN=CFI PE=1 SV=2

Match to Query 31931: 1430.693868 from(716.354210,2+) rtinseconds(2057) index(69149)

Title: Locus:1.1.1.1653.13 File:"2013-07-02 CLN FXIII 60 min 2nd FT.wiff"

Data file C:\Program Files (x86)\Matrix Science\Mascot Daemon\mgf\5 FXIII 60 min 2nd\mascot\_daemon\_merge.mgf

Click mouse within plot area to zoom in by factor of two about that point

Or, Plot from  to  Da

Label all possible matches  Label matches used for scoring

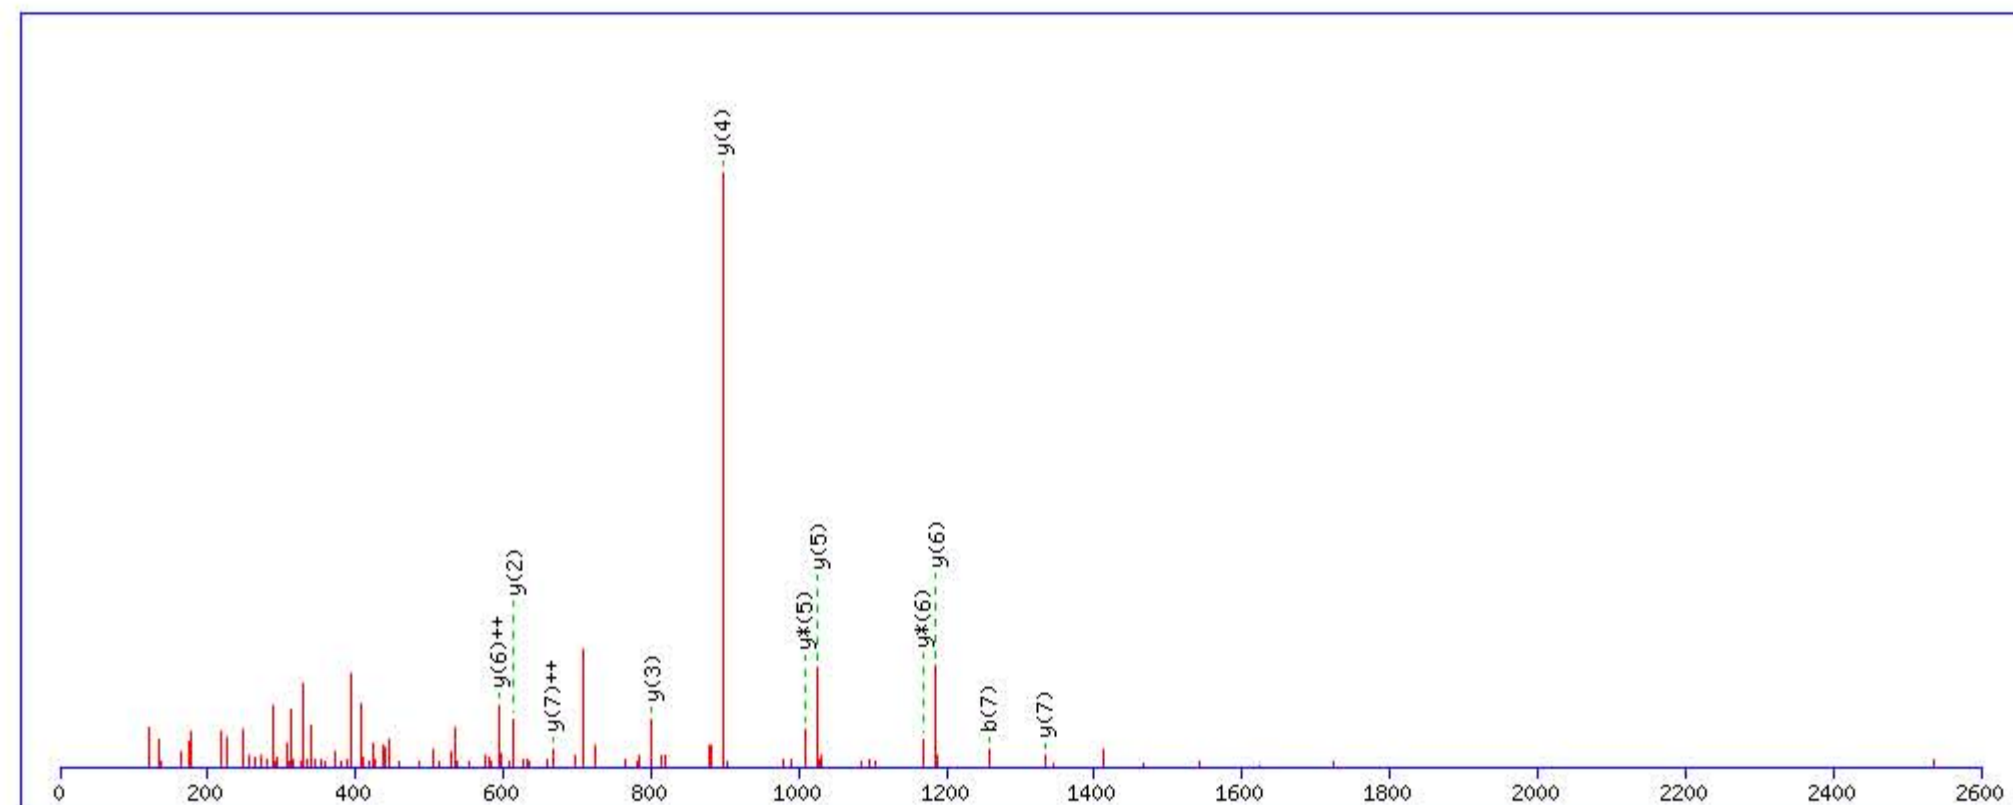

Monoisotopic mass of neutral peptide Mr(calc): 1430.695145

Fixed modifications: Carbamidomethyl (C) (apply to specified residues or termini only)

Variable modifications:

Q7 : Biotin:Thermo-21345 (Q)

Ions Score: 26 Expect: 0.01

Matches : 11/50 fragment ions using 25 most intense peaks [\(help\)](#)

| # | b           | b <sup>++</sup> | b <sup>+</sup> | b <sup>+++</sup> | Seq. | y           | y <sup>++</sup> | y <sup>+</sup> | y <sup>+++</sup> | # |
|---|-------------|-----------------|----------------|------------------|------|-------------|-----------------|----------------|------------------|---|
| 1 | 100.075690  | 50.541483       |                |                  | V    |             |                 |                |                  | 8 |
| 2 | 247.144104  | 124.075690      |                |                  | F    | 1332.633996 | 666.820636      | 1315.607447    | 658.307362       | 7 |
| 3 | 407.174753  | 204.091014      |                |                  | C    | 1185.565582 | 593.286429      | 1168.539033    | 584.773155       | 6 |
| 4 | 535.233331  | 268.120304      | 518.206782     | 259.607029       | Q    | 1025.534933 | 513.271105      | 1008.508384    | 504.757830       | 5 |
| 5 | 632.286095  | 316.646686      | 615.259546     | 308.133411       | P    | 897.476355  | 449.241816      | 880.449806     | 440.728541       | 4 |
| 6 | 818.365408  | 409.686342      | 801.338859     | 401.173068       | W    | 800.423591  | 400.715434      | 783.397042     | 392.202159       | 3 |
| 7 | 1257.590734 | 629.299005      | 1240.564185    | 620.785731       | Q    | 614.344278  | 307.675777      | 597.317729     | 299.162503       | 2 |
| 8 |             |                 |                |                  | R    | 175.118952  | 88.063114       | 158.092403     | 79.549839        | 1 |

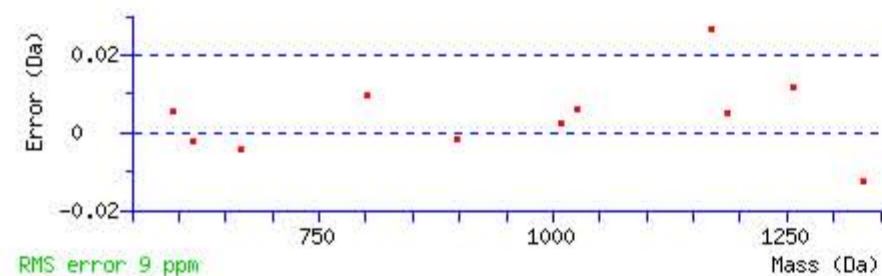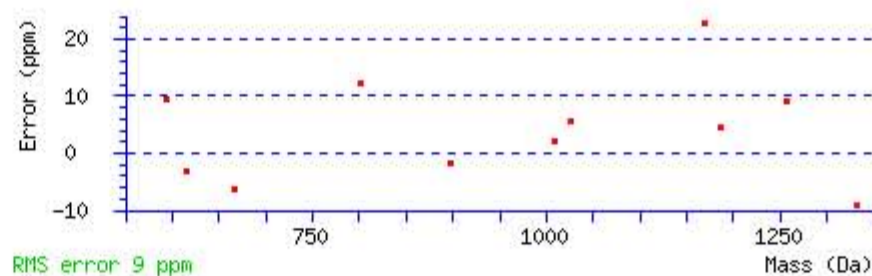

NCBI BLAST search of **VFCQPWQR**

(Parameters: blastp, nr protein database, expect=20000, no filter, PAM30)

Other BLAST [web gateways](#)

## All matches to this query

| Score | Mr(calc):   | Delta     | Sequence                      |
|-------|-------------|-----------|-------------------------------|
| 26.2  | 1430.695145 | -0.001277 | <a href="#">VFCQPWQR</a>      |
| 4.7   | 1430.700989 | -0.007121 | <a href="#">NMPQADAMVLVAR</a> |
| 2.1   | 1430.695145 | -0.001277 | <a href="#">VFCQPWQR</a>      |
| 0.5   | 1430.711319 | -0.017451 | <a href="#">RAKAEDENETLR</a>  |
| 0.2   | 1430.693619 | 0.000249  | <a href="#">QLQTLSPGGGGNR</a> |

Mascot: <http://www.matrixscience.com/>



# MASCOT SCIENCE Mascot Search Results

## Peptide View

MS/MS Fragmentation of **SFPTYCQQK**

Found in **CFAI\_HUMAN**, Complement factor I OS=Homo sapiens GN=CFI PE=1 SV=2

Match to Query 32978: 1468.681388 from(735.347970,2+) rtinseconds(1835) index(67639)

Title: Locus:1.1.1.1576.9 File:"2013-07-02 CLN FXIII 60 min 2nd FT.wiff"

Data file C:\Program Files (x86)\Matrix Science\Mascot Daemon\mgf5 FXIII 60 min 2nd\mascot\_daemon\_merge.mgf

Click mouse within plot area to zoom in by factor of two about that point

Or, Plot from  to  Da

Label all possible matches  Label matches used for scoring

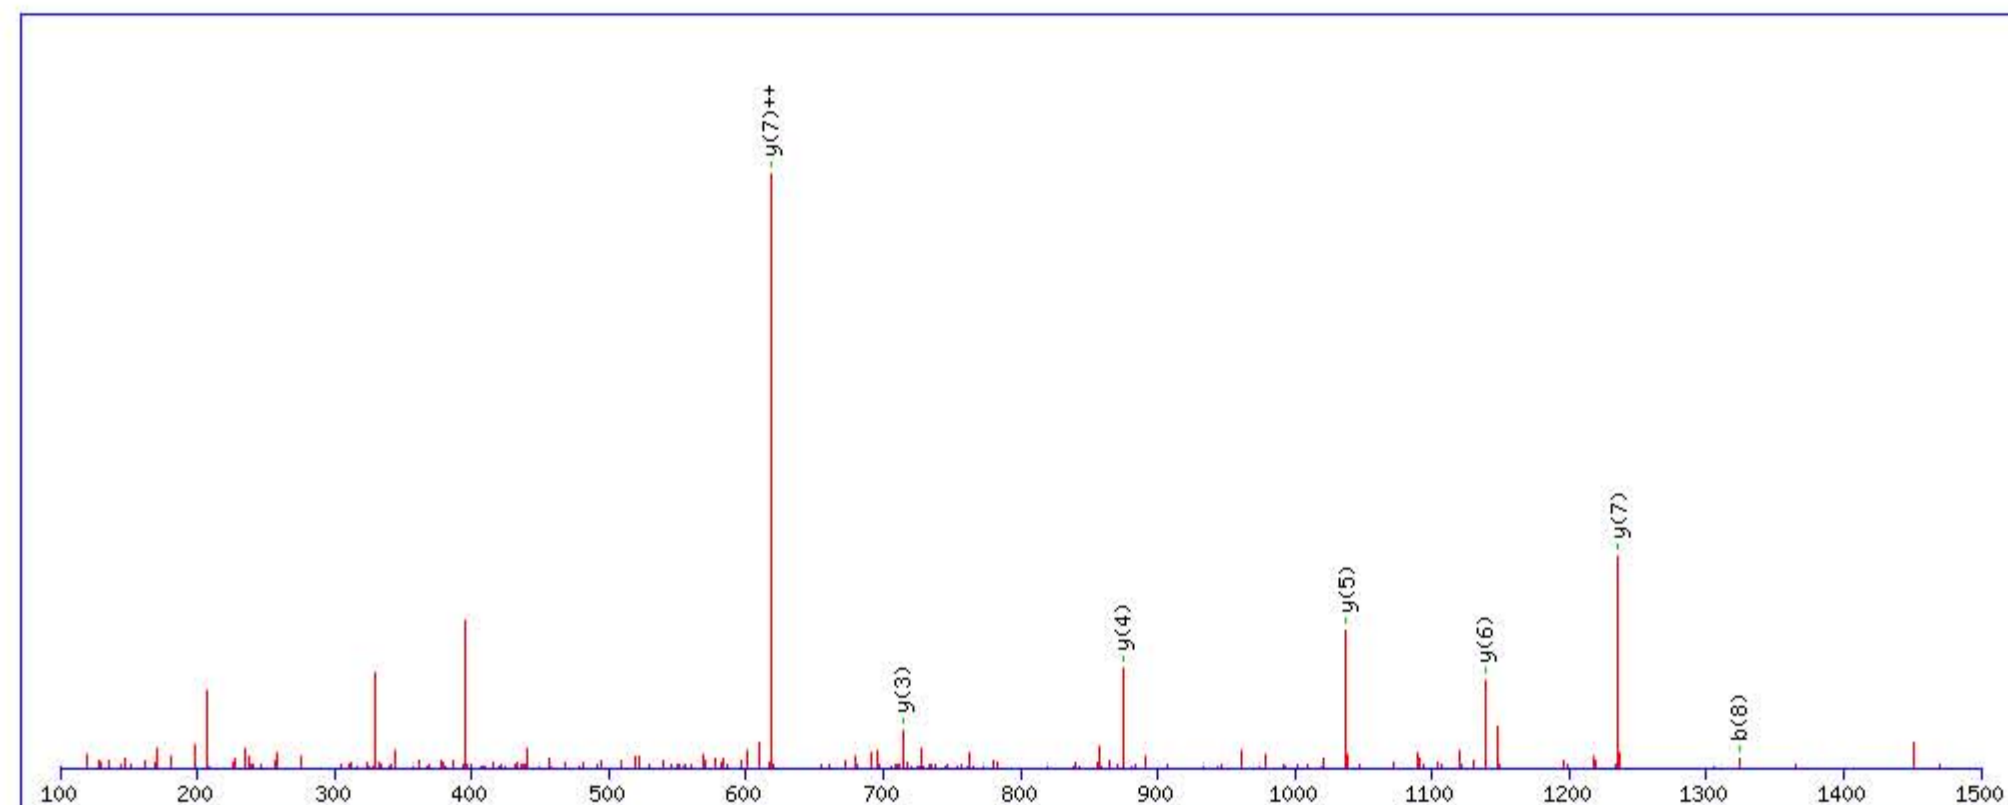

Monoisotopic mass of neutral peptide Mr(calc): 1468.684296

Fixed modifications: Carbamidomethyl (C) (apply to specified residues or termini only)

Variable modifications:

Q8 : Biotin:Thermo-21345 (Q)

Ions Score: 28 Expect: 0.0066

Matches : 7/74 fragment ions using 14 most intense peaks ([help](#))

| # | b                  | b <sup>++</sup> | b <sup>*</sup> | b <sup>*++</sup> | b <sup>0</sup> | b <sup>0++</sup> | Seq. | y                  | y <sup>++</sup>   | y <sup>*</sup> | y <sup>*++</sup> | y <sup>0</sup> | y <sup>0++</sup> | # |
|---|--------------------|-----------------|----------------|------------------|----------------|------------------|------|--------------------|-------------------|----------------|------------------|----------------|------------------|---|
| 1 | 88.039304          | 44.523290       |                |                  | 70.028739      | 35.518008        | S    |                    |                   |                |                  |                |                  | 9 |
| 2 | 235.107718         | 118.057497      |                |                  | 217.097153     | 109.052214       | F    | 1382.659543        | 691.833410        | 1365.632994    | 683.320135       | 1364.648978    | 682.828127       | 8 |
| 3 | 332.160482         | 166.583879      |                |                  | 314.149917     | 157.578596       | P    | <b>1235.591129</b> | <b>618.299203</b> | 1218.564580    | 609.785928       | 1217.580564    | 609.293920       | 7 |
| 4 | 433.208161         | 217.107718      |                |                  | 415.197596     | 208.102436       | T    | <b>1138.538365</b> | 569.772821        | 1121.511816    | 561.259546       | 1120.527800    | 560.767538       | 6 |
| 5 | 596.271490         | 298.639383      |                |                  | 578.260925     | 289.634101       | Y    | <b>1037.490686</b> | 519.248981        | 1020.464137    | 510.735707       |                |                  | 5 |
| 6 | 756.302139         | 378.654708      |                |                  | 738.291574     | 369.649425       | C    | <b>874.427357</b>  | 437.717317        | 857.400808     | 429.204042       |                |                  | 4 |
| 7 | 884.360717         | 442.683997      | 867.334168     | 434.170722       | 866.350152     | 433.678714       | Q    | <b>714.396708</b>  | 357.701992        | 697.370159     | 349.188718       |                |                  | 3 |
| 8 | <b>1323.586043</b> | 662.296660      | 1306.559494    | 653.783385       | 1305.575478    | 653.291377       | Q    | 586.338130         | 293.672703        | 569.311581     | 285.159428       |                |                  | 2 |
| 9 |                    |                 |                |                  |                |                  | K    | 147.112804         | 74.060040         | 130.086255     | 65.546765        |                |                  | 1 |

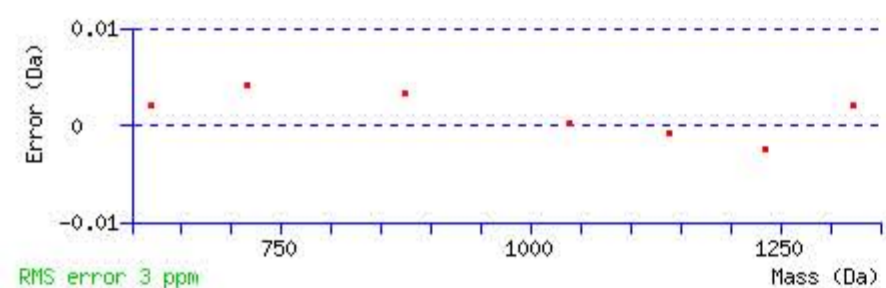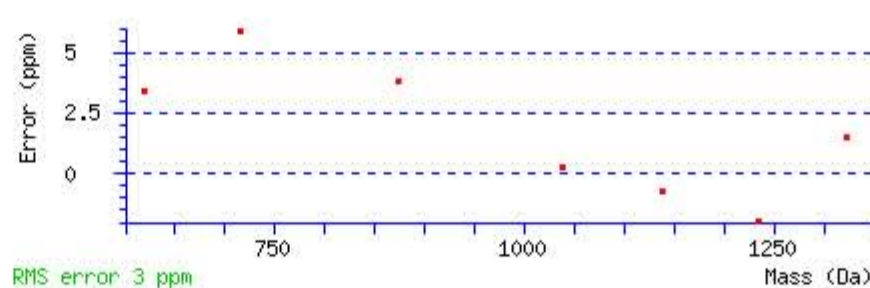

NCBI BLAST search of **SFPTYCQQK**

(Parameters: blastp, nr protein database, expect=20000, no filter, PAM30)

Other BLAST [web gateways](#)

All matches to this query

| Score | Mr(calc):   | Delta     | Sequence                       |
|-------|-------------|-----------|--------------------------------|
| 28.5  | 1468.684296 | -0.002908 | <a href="#">SFPTYCQQK</a>      |
| 28.5  | 1468.684296 | -0.002908 | <a href="#">SFPTYCQQK</a>      |
| 4.9   | 1468.671524 | 0.009864  | <a href="#">MEAETGSSVETGKK</a> |
| 1.4   | 1468.688126 | -0.006738 | <a href="#">FSIPSMTEHHAGR</a>  |
| 0.8   | 1468.680252 | 0.001136  | <a href="#">YAKGNDCALLCK</a>   |

Mascot: <http://www.matrixscience.com/>



# MASCOT Search Results

## Peptide View

MS/MS Fragmentation of **VTYTSQEDLVEK**

Found in **CFAI\_HUMAN**, Complement factor I OS=Homo sapiens GN=CFI PE=1 SV=2

Match to Query 40928: 1721.853882 from(574.958570,3+) rtinseconds(1894) index(67929)

Title: Locus:1.1.1.1597.19 File:"2013-07-02 CLN FXIII 60 min 2nd FT.wiff"

Data file C:\Program Files (x86)\Matrix Science\Mascot Daemon\mgf5 FXIII 60 min 2nd\mascot\_daemon\_merge.mgf

Click mouse within plot area to zoom in by factor of two about that point

Or, Plot from  to  Da

Label all possible matches  Label matches used for scoring

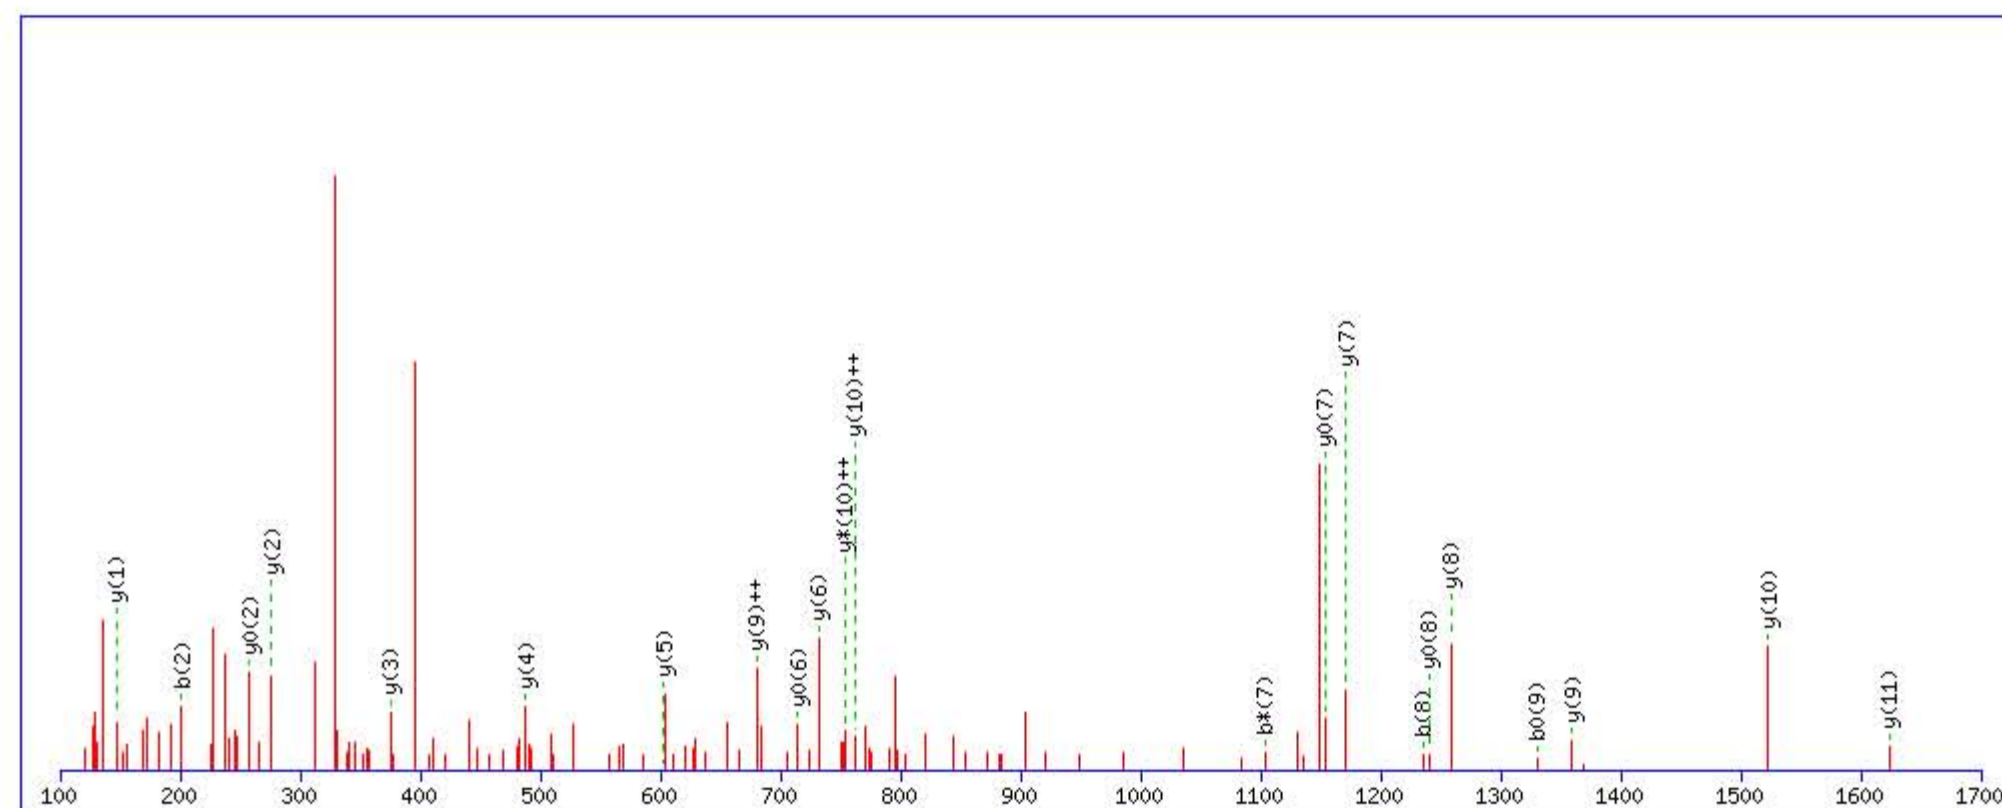

Monoisotopic mass of neutral peptide Mr(calc): 1721.854584

Fixed modifications: Carbamidomethyl (C) (apply to specified residues or termini only)

Variable modifications:

Q6 : Biotin:Thermo-21345 (Q)

Ions Score: 49 Expect: 0.00033

Matches : 22/118 fragment ions using 60 most intense peaks [\(help\)](#)

| #  | b                  | b <sup>++</sup> | b <sup>+</sup>     | b <sup>*++</sup>  | b <sup>0</sup>     | b <sup>0++</sup> | Seq. | y                  | y <sup>++</sup>   | y <sup>+</sup> | y <sup>*++</sup>  | y <sup>0</sup>     | y <sup>0++</sup> | #  |
|----|--------------------|-----------------|--------------------|-------------------|--------------------|------------------|------|--------------------|-------------------|----------------|-------------------|--------------------|------------------|----|
| 1  | 100.075690         | 50.541483       |                    |                   |                    |                  | V    |                    |                   |                |                   |                    |                  | 12 |
| 2  | <b>201.123369</b>  | 101.065322      |                    |                   | 183.112804         | 92.060040        | T    | <b>1623.793452</b> | 812.400364        | 1606.766903    | 803.887090        | 1605.782887        | 803.395081       | 11 |
| 3  | 364.186698         | 182.596987      |                    |                   | 346.176133         | 173.591705       | Y    | <b>1522.745773</b> | <b>761.876524</b> | 1505.719224    | <b>753.363250</b> | 1504.735208        | 752.871242       | 10 |
| 4  | 465.234377         | 233.120827      |                    |                   | 447.223812         | 224.115544       | T    | <b>1359.682444</b> | <b>680.344860</b> | 1342.655895    | 671.831585        | 1341.671879        | 671.339577       | 9  |
| 5  | 552.266405         | 276.636841      |                    |                   | 534.255840         | 267.631558       | S    | <b>1258.634765</b> | 629.821021        | 1241.608216    | 621.307746        | <b>1240.624200</b> | 620.815738       | 8  |
| 6  | 991.491731         | 496.249504      | 974.465182         | 487.736229        | 973.481166         | 487.244221       | Q    | <b>1171.602737</b> | 586.305006        | 1154.576188    | 577.791732        | <b>1153.592172</b> | 577.299724       | 7  |
| 7  | 1120.534324        | 560.770800      | <b>1103.507775</b> | <b>552.257526</b> | 1102.523759        | 551.765517       | E    | <b>732.377411</b>  | 366.692343        | 715.350862     | 358.179069        | <b>714.366846</b>  | 357.687061       | 6  |
| 8  | <b>1235.561267</b> | 618.284272      | 1218.534718        | 609.770997        | 1217.550702        | 609.278989       | D    | <b>603.334818</b>  | 302.171047        | 586.308269     | 293.657773        | 585.324253         | 293.165765       | 5  |
| 9  | 1348.645331        | 674.826303      | 1331.618782        | 666.313029        | <b>1330.634766</b> | 665.821021       | L    | <b>488.307875</b>  | 244.657575        | 471.281326     | 236.144301        | 470.297310         | 235.652293       | 4  |
| 10 | 1447.713745        | 724.360511      | 1430.687196        | 715.847236        | 1429.703180        | 715.355228       | V    | <b>375.223811</b>  | 188.115543        | 358.197262     | 179.602269        | 357.213246         | 179.110261       | 3  |
| 11 | 1576.756338        | 788.881807      | 1559.729789        | 780.368533        | 1558.745773        | 779.876524       | E    | <b>276.155397</b>  | 138.581336        | 259.128848     | 130.068062        | <b>258.144832</b>  | 129.576054       | 2  |
| 12 |                    |                 |                    |                   |                    |                  | K    | <b>147.112804</b>  | 74.060040         | 130.086255     | 65.546765         |                    |                  | 1  |

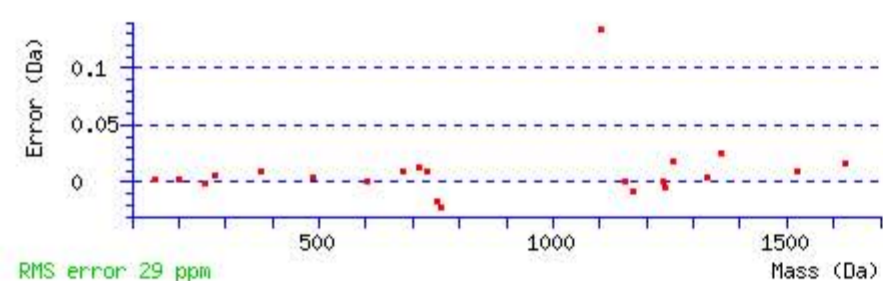

RMS error 29 ppm

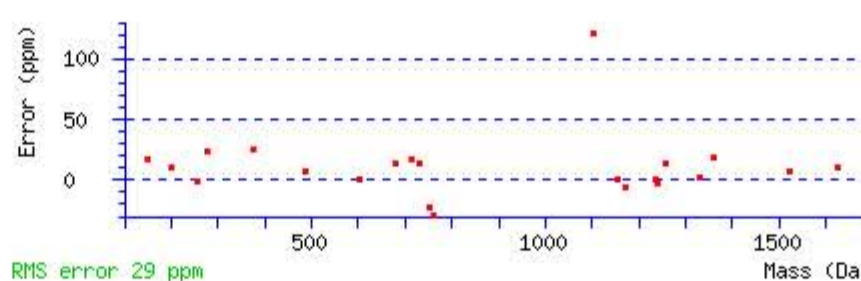

RMS error 29 ppm

NCBI BLAST search of [VTYTSQEDLVEK](#)

(Parameters: blastp, nr protein database, expect=20000, no filter, PAM30)

Other BLAST [web gateways](#)

All matches to this query

| Score | Mr(calc):   | Delta     | Sequence                     |
|-------|-------------|-----------|------------------------------|
| 48.6  | 1721.854584 | -0.000702 | <a href="#">VTYTSQEDLVEK</a> |

Mascot: <http://www.matrixscience.com/>







# MASCOT Search Results

## Peptide View

MS/MS Fragmentation of **EANVACLDLGFQQGADTQR**

Found in **CFAI\_HUMAN**, Complement factor I OS=Homo sapiens GN=CFI PE=1 SV=2

Match to Query 54461: 2403.146562 from(802.056130,3+) rtinseconds(2280) index(70432)

Title: Locus:1.1.1.1731.8 File:"2013-07-02 CLN FXIII 60 min 2nd FT.wiff"

Data file C:\Program Files (x86)\Matrix Science\Mascot Daemon\mgf5 FXIII 60 min 2nd\mascot\_daemon\_merge.mgf

Click mouse within plot area to zoom in by factor of two about that point

Or, Plot from  to  Da

Label all possible matches  Label matches used for scoring

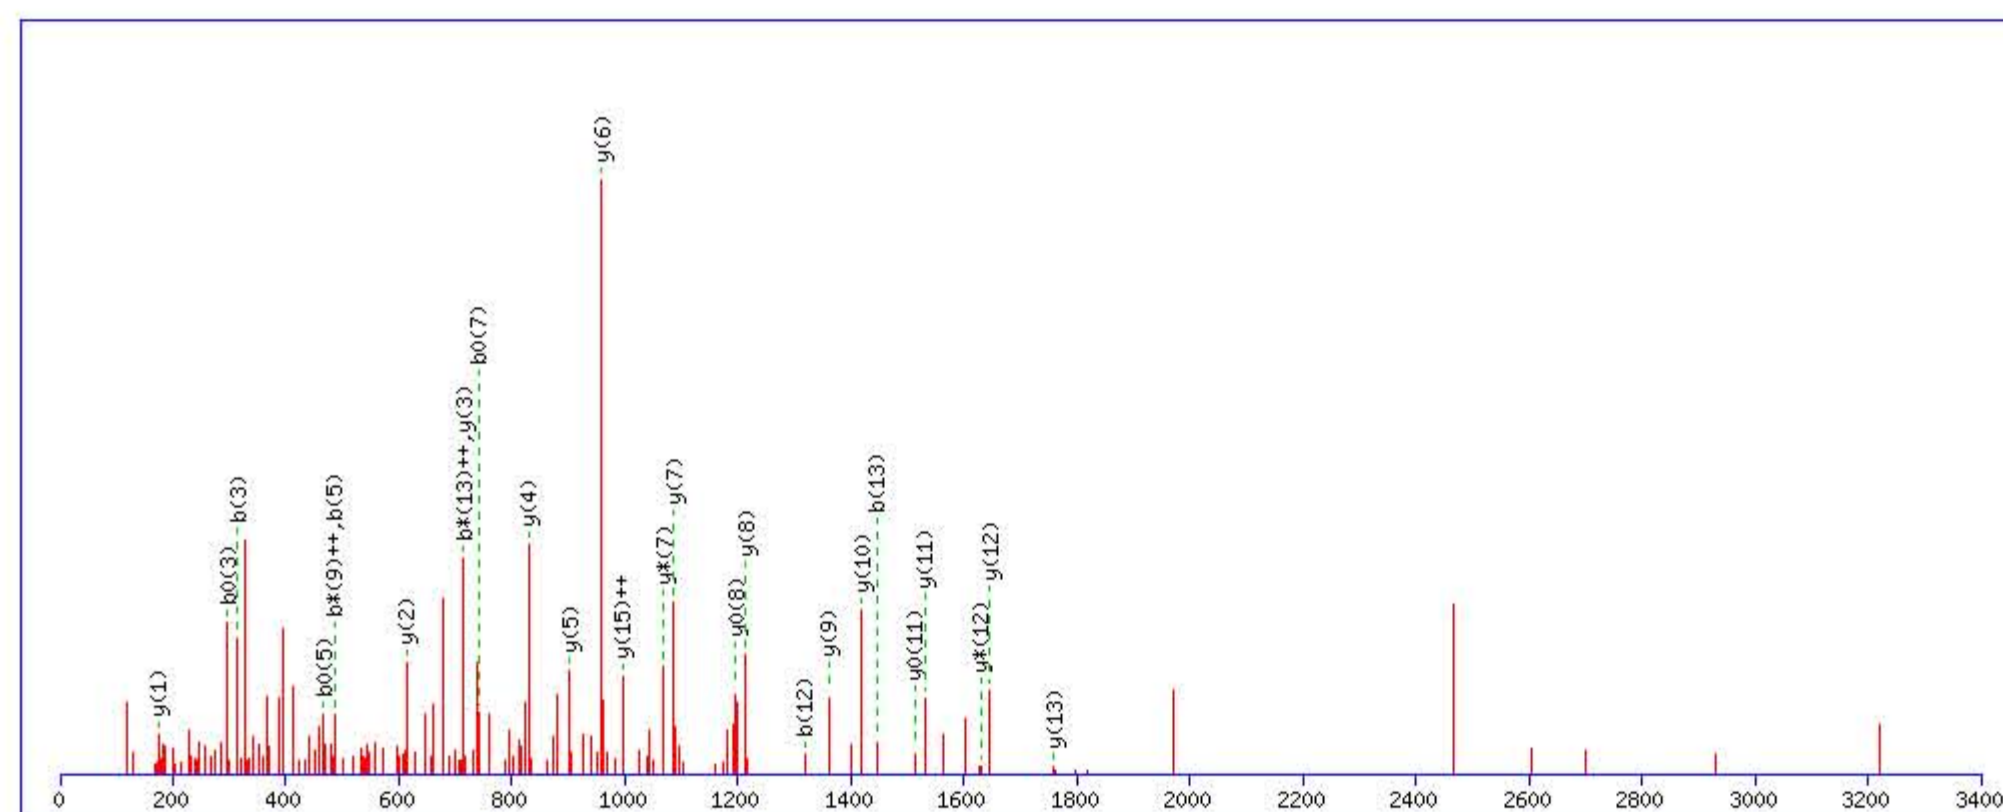

Monoisotopic mass of neutral peptide Mr(calc): 2403.131119

Fixed modifications: Carbamidomethyl (C) (apply to specified residues or termini only)

Variable modifications:

Q18 : Biotin:Thermo-21345 (Q)

Ions Score: 99 Expect: 7.5e-010

Matches : 27/208 fragment ions using 34 most intense peaks [\(help\)](#)

| #  | b                  | b <sup>++</sup> | b <sup>*</sup> | b <sup>*++</sup>  | b <sup>0</sup>    | b <sup>0++</sup> | Seq. | y                  | y <sup>++</sup>   | y <sup>*</sup>     | y <sup>*++</sup> | y <sup>0</sup>     | y <sup>0++</sup> | #  |
|----|--------------------|-----------------|----------------|-------------------|-------------------|------------------|------|--------------------|-------------------|--------------------|------------------|--------------------|------------------|----|
| 1  | 130.049869         | 65.528572       |                |                   | 112.039304        | 56.523290        | E    |                    |                   |                    |                  |                    |                  | 19 |
| 2  | 201.086983         | 101.047130      |                |                   | 183.076418        | 92.041847        | A    | 2275.095801        | 1138.051538       | 2258.069252        | 1129.538264      | 2257.085236        | 1129.046256      | 18 |
| 3  | <b>315.129910</b>  | 158.068593      | 298.103361     | 149.555319        | <b>297.119345</b> | 149.063311       | N    | 2204.058687        | 1102.532981       | 2187.032138        | 1094.019707      | 2186.048122        | 1093.527699      | 17 |
| 4  | 414.198324         | 207.602800      | 397.171775     | 199.089526        | 396.187759        | 198.597518       | V    | 2090.015760        | 1045.511518       | 2072.989211        | 1036.998243      | 2072.005195        | 1036.506235      | 16 |
| 5  | <b>485.235438</b>  | 243.121357      | 468.208889     | 234.608082        | <b>467.224873</b> | 234.116075       | A    | 1990.947346        | <b>995.977311</b> | 1973.920797        | 987.464037       | 1972.936781        | 986.972029       | 15 |
| 6  | 645.266087         | 323.136682      | 628.239538     | 314.623407        | 627.255522        | 314.131399       | C    | 1919.910232        | 960.458754        | 1902.883683        | 951.945480       | 1901.899667        | 951.453472       | 14 |
| 7  | 758.350151         | 379.678714      | 741.323602     | 371.165439        | <b>740.339586</b> | 370.673431       | L    | <b>1759.879583</b> | 880.443430        | 1742.853034        | 871.930155       | 1741.869018        | 871.438147       | 13 |
| 8  | 873.377094         | 437.192185      | 856.350545     | 428.678911        | 855.366529        | 428.186903       | D    | <b>1646.795519</b> | 823.901398        | <b>1629.768970</b> | 815.388123       | 1628.784954        | 814.896115       | 12 |
| 9  | 986.461158         | 493.734217      | 969.434609     | <b>485.220943</b> | 968.450593        | 484.728935       | L    | <b>1531.768576</b> | 766.387926        | 1514.742027        | 757.874652       | <b>1513.758011</b> | 757.382644       | 11 |
| 10 | 1043.482622        | 522.244949      | 1026.456073    | 513.731675        | 1025.472057       | 513.239667       | G    | <b>1418.684512</b> | 709.845894        | 1401.657963        | 701.332620       | 1400.673947        | 700.840612       | 10 |
| 11 | 1190.551036        | 595.779156      | 1173.524487    | 587.265882        | 1172.540471       | 586.773874       | F    | <b>1361.663048</b> | 681.335162        | 1344.636499        | 672.821888       | 1343.652483        | 672.329880       | 9  |
| 12 | <b>1318.609614</b> | 659.808445      | 1301.583065    | 651.295171        | 1300.599049       | 650.803163       | Q    | <b>1214.594634</b> | 607.800955        | 1197.568085        | 599.287681       | <b>1196.584069</b> | 598.795673       | 8  |
| 13 | <b>1446.668192</b> | 723.837734      | 1429.641643    | <b>715.324460</b> | 1428.657627       | 714.832452       | Q    | <b>1086.536056</b> | 543.771666        | <b>1069.509507</b> | 535.258392       | 1068.525491        | 534.766384       | 7  |
| 14 | 1503.689656        | 752.348466      | 1486.663107    | 743.835192        | 1485.679091       | 743.343184       | G    | <b>958.477478</b>  | 479.742377        | 941.450929         | 471.229103       | 940.466913         | 470.737095       | 6  |
| 15 | 1574.726770        | 787.867023      | 1557.700221    | 779.353749        | 1556.716205       | 778.861741       | A    | <b>901.456014</b>  | 451.231645        | 884.429465         | 442.718371       | 883.445449         | 442.226363       | 5  |
| 16 | 1689.753713        | 845.380495      | 1672.727164    | 836.867220        | 1671.743148       | 836.375212       | D    | <b>830.418900</b>  | 415.713088        | 813.392351         | 407.199814       | 812.408335         | 406.707806       | 4  |
| 17 | 1790.801392        | 895.904334      | 1773.774843    | 887.391060        | 1772.790827       | 886.899052       | T    | <b>715.391957</b>  | 358.199617        | 698.365408         | 349.686342       | 697.381392         | 349.194334       | 3  |
| 18 | 2230.026718        | 1115.516997     | 2213.000169    | 1107.003722       | 2212.016153       | 1106.511714      | Q    | <b>614.344278</b>  | 307.675777        | 597.317729         | 299.162503       |                    |                  | 2  |
| 19 |                    |                 |                |                   |                   |                  | R    | <b>175.118952</b>  | 88.063114         | 158.092403         | 79.549839        |                    |                  | 1  |

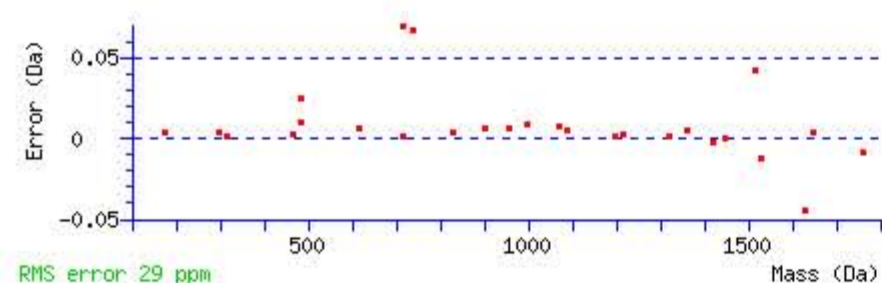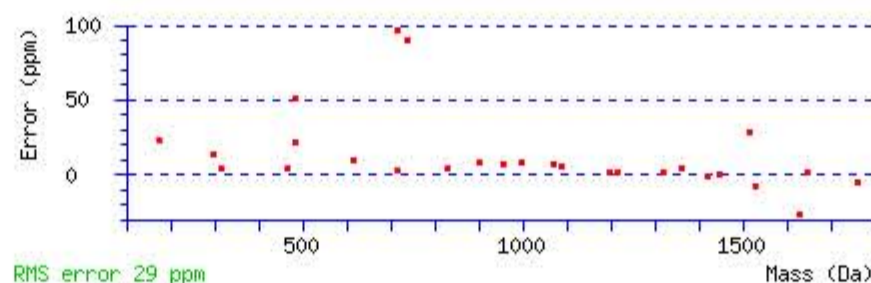

NCBI BLAST search of **EANVACLDLGFQQGADTQR**

(Parameters: blastp, nr protein database, expect=20000, no filter, PAM30)

Other BLAST [web gateways](#)

All matches to this query

| Score | Mr(calc):   | Delta     | Sequence                              |
|-------|-------------|-----------|---------------------------------------|
| 99.2  | 2403.131119 | 0.015443  | <a href="#">EANVACLDLGFQQGADTQR</a>   |
| 43.3  | 2403.131119 | 0.015443  | <a href="#">EANVACLDLGFQQGADTQR</a>   |
| 37.0  | 2403.131119 | 0.015443  | <a href="#">EANVACLDLGFQQGADTQR</a>   |
| 1.8   | 2403.157135 | -0.010573 | <a href="#">QAMMKTDFPGDLGSQR</a>      |
| 0.6   | 2403.175339 | -0.028777 | <a href="#">AAEPLVGQRWEAFDVADAMRR</a> |



# MASCOT SEARCH RESULTS

## Peptide View

MS/MS Fragmentation of **HLQEALGLPAGR**

Found in **CLC11\_HUMAN**, C-type lectin domain family 11 member A OS=Homo sapiens GN=CLEC11A PE=1 SV=1

Match to Query 35764: 1571.860902 from(524.960910,3+) rtinseconds(1972) index(52657)

Title: Locus:1.1.1.1302.7 File:"2013-07-02 CLN FXIII 60 min 2nd F 4.wiff"

Data file C:\Program Files (x86)\Matrix Science\Mascot Daemon\mgf5 FXIII 60 min 2nd\mascot\_daemon\_merge.mgf

Click mouse within plot area to zoom in by factor of two about that point

Or, Plot from  to  Da

Label all possible matches  Label matches used for scoring

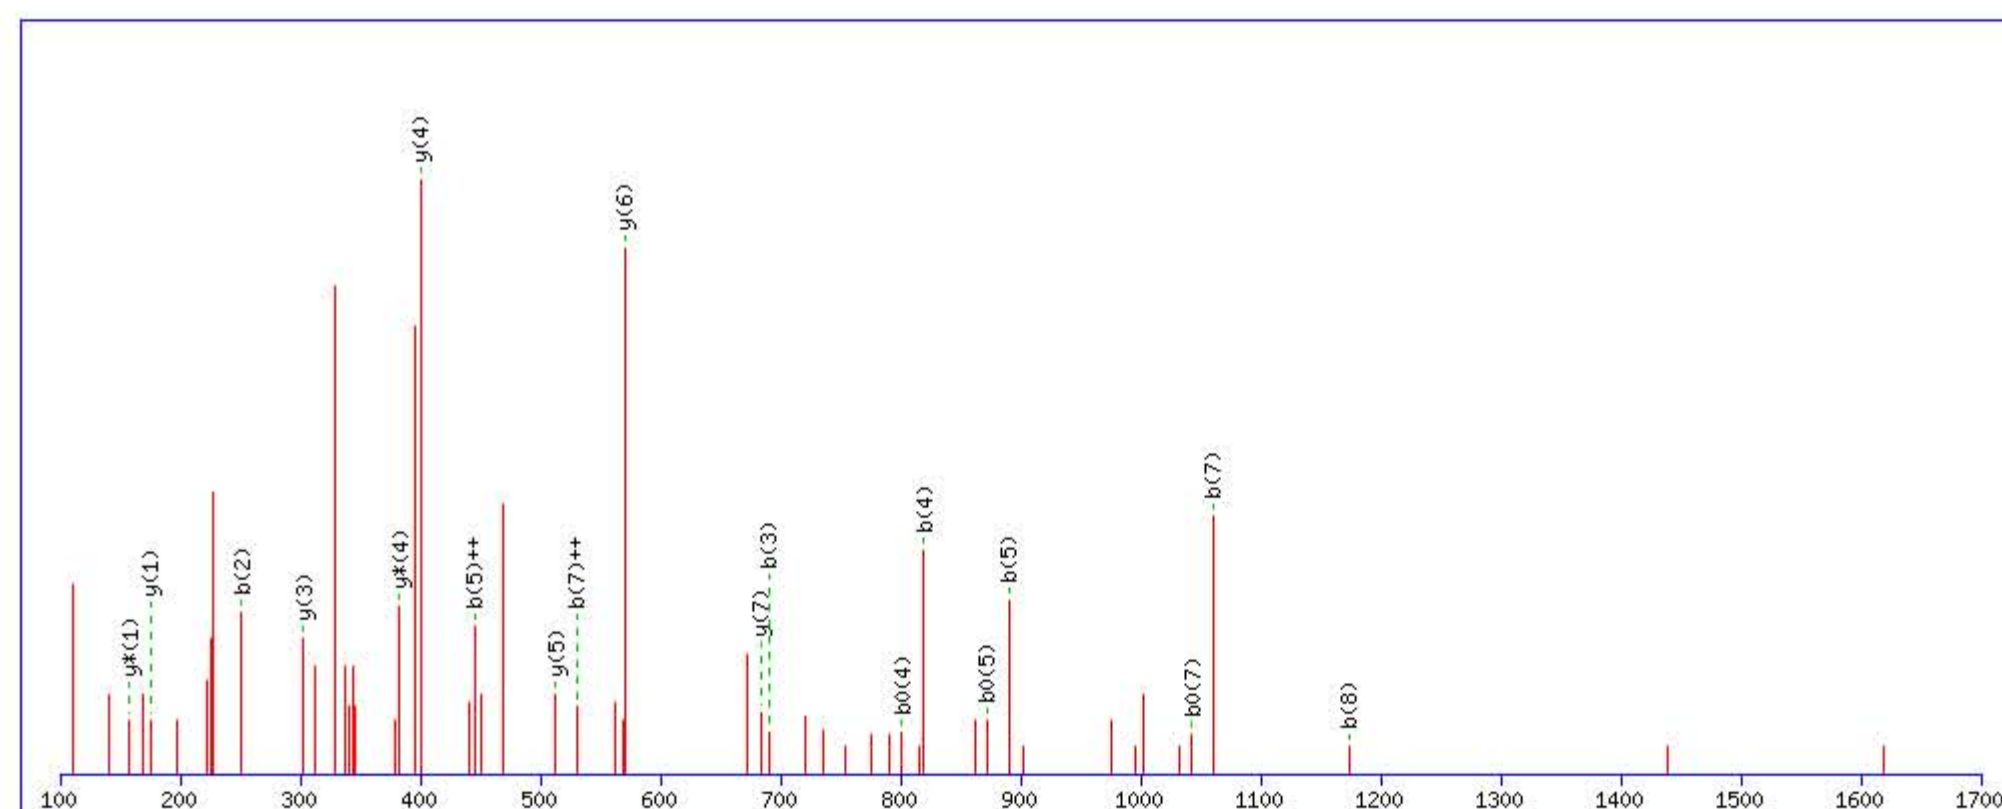

Monoisotopic mass of neutral peptide Mr(calc): 1571.860596

Fixed modifications: Carbamidomethyl (C) (apply to specified residues or termini only)

Variable modifications:

Q3 : Biotin:Thermo-21345 (Q)

Ions Score: 28 Expect: 0.0036

Matches : 19/106 fragment ions using 47 most intense peaks [\(help\)](#)

| #  | b                  | b <sup>++</sup>   | b <sup>*</sup> | b <sup>*++</sup> | b <sup>0</sup>     | b <sup>0++</sup> | Seq. | y                 | y <sup>++</sup> | y <sup>*</sup>    | y <sup>*++</sup> | y <sup>0</sup> | y <sup>0++</sup> | #  |
|----|--------------------|-------------------|----------------|------------------|--------------------|------------------|------|-------------------|-----------------|-------------------|------------------|----------------|------------------|----|
| 1  | 138.066188         | 69.536732         |                |                  |                    |                  | H    |                   |                 |                   |                  |                |                  | 12 |
| 2  | <b>251.150252</b>  | 126.078764        |                |                  |                    |                  | L    | 1435.808983       | 718.408129      | 1418.782434       | 709.894855       | 1417.798418    | 709.402847       | 11 |
| 3  | <b>690.375578</b>  | 345.691427        | 673.349029     | 337.178153       |                    |                  | Q    | 1322.724919       | 661.866098      | 1305.698370       | 653.352823       | 1304.714354    | 652.860815       | 10 |
| 4  | <b>819.418171</b>  | 410.212724        | 802.391622     | 401.699449       | <b>801.407606</b>  | 401.207441       | E    | 883.499593        | 442.253434      | 866.473044        | 433.740160       | 865.489028     | 433.248152       | 9  |
| 5  | <b>890.455285</b>  | <b>445.731281</b> | 873.428736     | 437.218006       | <b>872.444720</b>  | 436.725998       | A    | 754.457000        | 377.732138      | 737.430451        | 369.218863       |                |                  | 8  |
| 6  | 1003.539349        | 502.273313        | 986.512800     | 493.760038       | 985.528784         | 493.268030       | L    | <b>683.419886</b> | 342.213581      | 666.393337        | 333.700306       |                |                  | 7  |
| 7  | <b>1060.560813</b> | <b>530.784045</b> | 1043.534264    | 522.270770       | <b>1042.550248</b> | 521.778762       | G    | <b>570.335822</b> | 285.671549      | 553.309273        | 277.158274       |                |                  | 6  |
| 8  | <b>1173.644877</b> | 587.326077        | 1156.618328    | 578.812802       | 1155.634312        | 578.320794       | L    | <b>513.314358</b> | 257.160817      | 496.287809        | 248.647542       |                |                  | 5  |
| 9  | 1270.697641        | 635.852459        | 1253.671092    | 627.339184       | 1252.687076        | 626.847176       | P    | <b>400.230294</b> | 200.618785      | <b>383.203745</b> | 192.105510       |                |                  | 4  |
| 10 | 1341.734755        | 671.371016        | 1324.708206    | 662.857741       | 1323.724190        | 662.365733       | A    | <b>303.177530</b> | 152.092403      | 286.150981        | 143.579128       |                |                  | 3  |
| 11 | 1398.756219        | 699.881747        | 1381.729670    | 691.368473       | 1380.745654        | 690.876465       | G    | 232.140416        | 116.573846      | 215.113867        | 108.060571       |                |                  | 2  |
| 12 |                    |                   |                |                  |                    |                  | R    | <b>175.118952</b> | 88.063114       | <b>158.092403</b> | 79.549839        |                |                  | 1  |

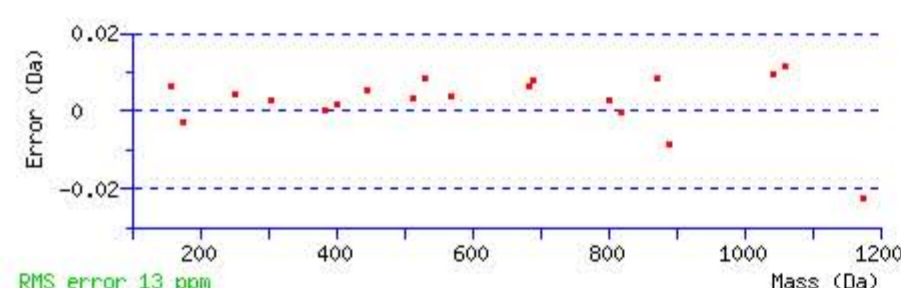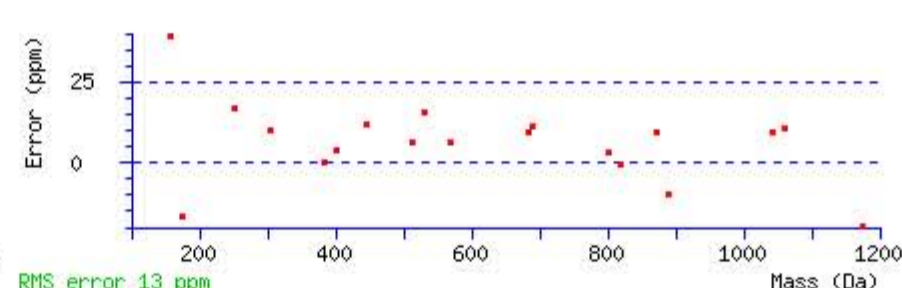

NCBI BLAST search of **HLQEALGLPAGR**

(Parameters: blastp, nr protein database, expect=20000, no filter, PAM30)

Other BLAST [web gateways](#)

All matches to this query

| Score | Mr(calc):   | Delta     | Sequence                        |
|-------|-------------|-----------|---------------------------------|
| 27.8  | 1571.860596 | 0.000306  | <a href="#">HLQEALGLPAGR</a>    |
| 1.6   | 1571.857224 | 0.003678  | <a href="#">VNWLGSKEGLRWK</a>   |
| 0.8   | 1571.863098 | -0.002196 | <a href="#">IQQLINGALNKTINK</a> |



# MASCOT Search Results

## Peptide View

MS/MS Fragmentation of **NEQESAVHPR**

Found in **DBNL\_HUMAN**, Drebrin-like protein OS=Homo sapiens GN=DBNL PE=1 SV=1

Match to Query 33212: 1476.719592 from(493.247140,3+) rtinseconds(1312) index(48324)

Title: Locus:1.1.1.1072.17 File:"2013-07-02 CLN FXIII 60 min 2nd F 4.wiff"

Data file C:\Program Files (x86)\Matrix Science\Mascot Daemon\mgf5 FXIII 60 min 2nd\mascot\_daemon\_merge.mgf

Click mouse within plot area to zoom in by factor of two about that point

Or, Plot from  to  Da

Label all possible matches  Label matches used for scoring

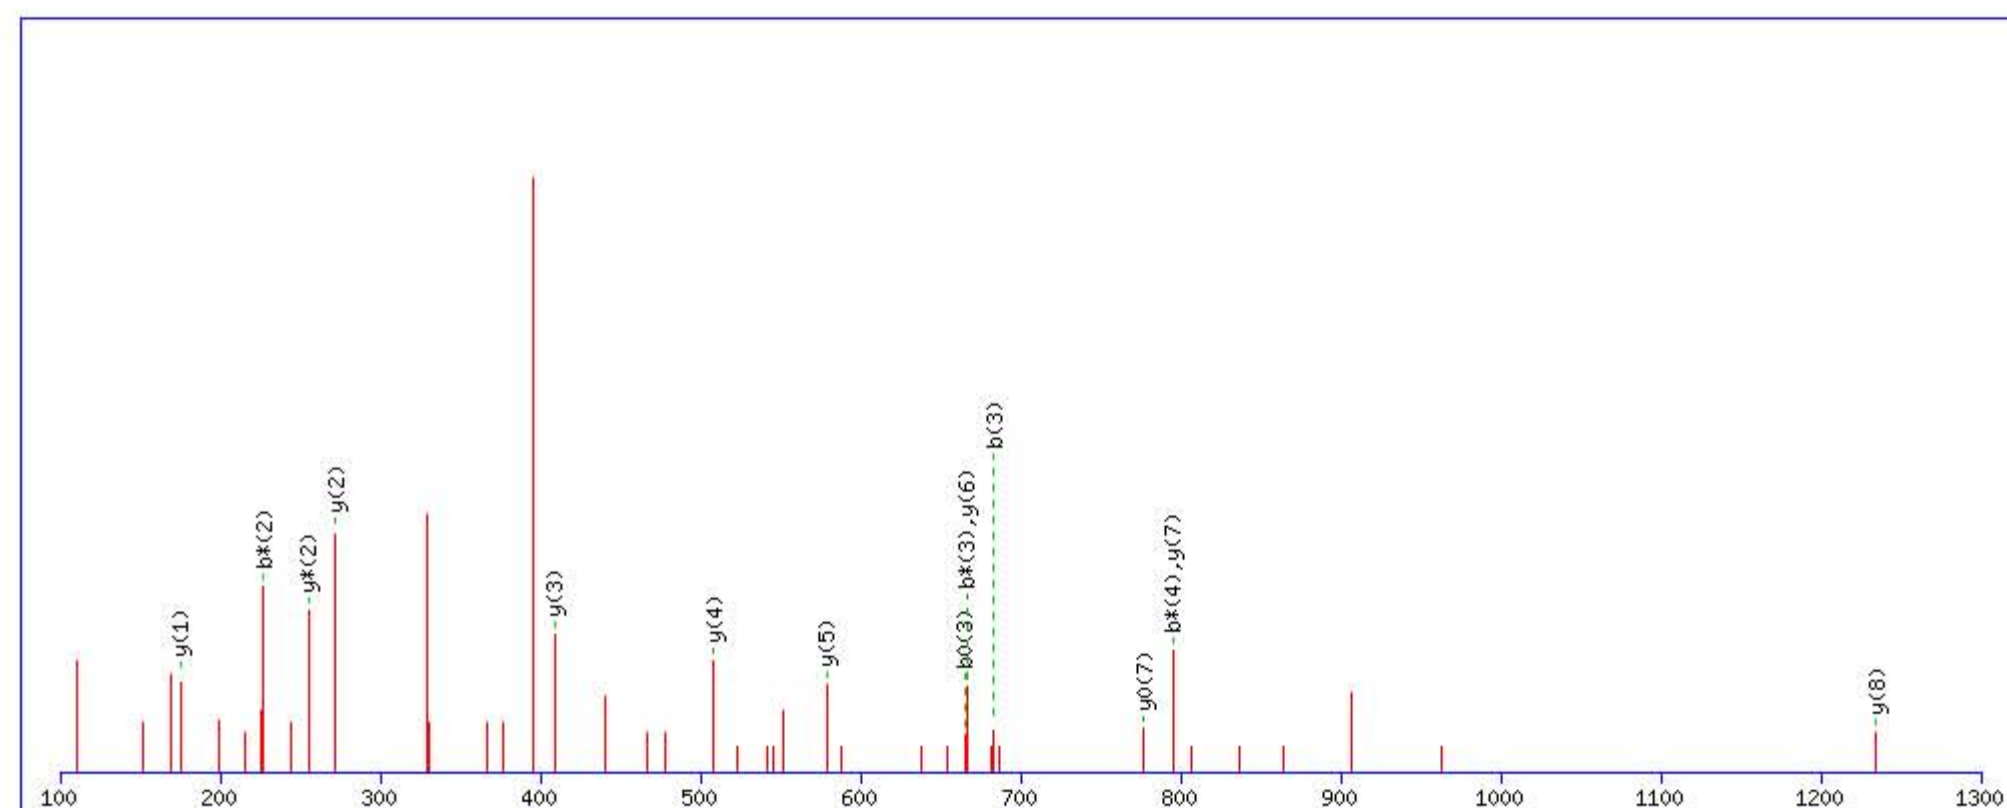

Monoisotopic mass of neutral peptide  $M_r(\text{calc})$ : 1476.714325

Fixed modifications: Carbamidomethyl (C) (apply to specified residues or termini only)

Variable modifications:

Q3 : Biotin:Thermo-21345 (Q)

Ions Score: 40 Expect: 0.0002

Matches : 15/96 fragment ions using 26 most intense peaks [\(help\)](#)

| #  | b           | b <sup>++</sup> | b <sup>*</sup> | b <sup>*++</sup> | b <sup>0</sup> | b <sup>0++</sup> | Seq. | y           | y <sup>++</sup> | y <sup>*</sup> | y <sup>*++</sup> | y <sup>0</sup> | y <sup>0++</sup> | #  |
|----|-------------|-----------------|----------------|------------------|----------------|------------------|------|-------------|-----------------|----------------|------------------|----------------|------------------|----|
| 1  | 115.050203  | 58.028740       | 98.023654      | 49.515465        |                |                  | N    |             |                 |                |                  |                |                  | 10 |
| 2  | 244.092796  | 122.550036      | 227.066247     | 114.036762       | 226.082231     | 113.544754       | E    | 1363.678696 | 682.342986      | 1346.652147    | 673.829712       | 1345.668131    | 673.337704       | 9  |
| 3  | 683.318122  | 342.162699      | 666.291573     | 333.649425       | 665.307557     | 333.157417       | Q    | 1234.636103 | 617.821690      | 1217.609554    | 609.308415       | 1216.625538    | 608.816407       | 8  |
| 4  | 812.360715  | 406.683996      | 795.334166     | 398.170721       | 794.350150     | 397.678713       | E    | 795.410777  | 398.209027      | 778.384228     | 389.695752       | 777.400212     | 389.203744       | 7  |
| 5  | 899.392743  | 450.200010      | 882.366194     | 441.686735       | 881.382178     | 441.194727       | S    | 666.368184  | 333.687730      | 649.341635     | 325.174456       | 648.357619     | 324.682448       | 6  |
| 6  | 970.429857  | 485.718567      | 953.403308     | 477.205292       | 952.419292     | 476.713284       | A    | 579.336156  | 290.171716      | 562.309607     | 281.658442       |                |                  | 5  |
| 7  | 1069.498271 | 535.252774      | 1052.471722    | 526.739499       | 1051.487706    | 526.247491       | V    | 508.299042  | 254.653159      | 491.272493     | 246.139884       |                |                  | 4  |
| 8  | 1206.557183 | 603.782230      | 1189.530634    | 595.268955       | 1188.546618    | 594.776947       | H    | 409.230628  | 205.118952      | 392.204079     | 196.605677       |                |                  | 3  |
| 9  | 1303.609947 | 652.308612      | 1286.583398    | 643.795337       | 1285.599382    | 643.303329       | P    | 272.171716  | 136.589496      | 255.145167     | 128.076221       |                |                  | 2  |
| 10 |             |                 |                |                  |                |                  | R    | 175.118952  | 88.063114       | 158.092403     | 79.549839        |                |                  | 1  |

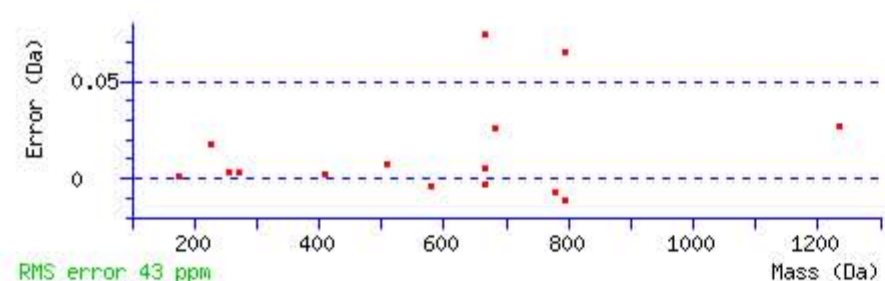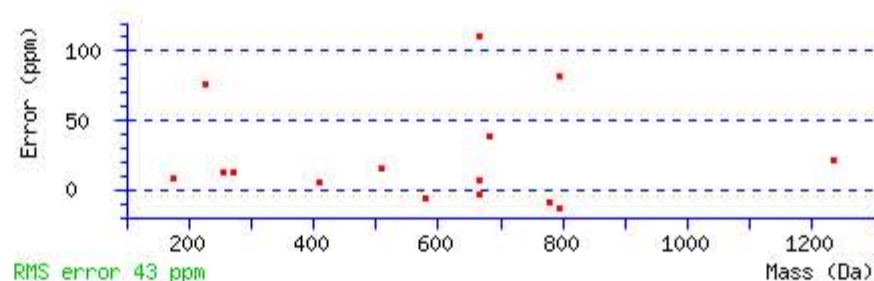

NCBI BLAST search of **NEQESAVHPR**

(Parameters: blastp, nr protein database, expect=20000, no filter, PAM30)

Other BLAST [web gateways](#)

All matches to this query

| Score | $M_r(\text{calc})$ : | Delta    | Sequence                      |
|-------|----------------------|----------|-------------------------------|
| 40.3  | 1476.714325          | 0.005267 | <a href="#">NEQESAVHPR</a>    |
| 0.9   | 1476.712982          | 0.006610 | <a href="#">DQDAIETDAMIKK</a> |



# MASCOT Search Results

## Peptide View

MS/MS Fragmentation of **RGEQCVDIDECTIPPYCHQR**

Found in **FBLN3\_HUMAN**, EGF-containing fibulin-like extracellular matrix protein 1 OS=Homo sapiens GN=EFEMP1 PE=1 SV=2

Match to Query 59972: 2843.261736 from(711.822710,4+) rtinseconds(1760) index(34832)

Title: Locus:1.1.1.3032.13 File:"2013-07-02 CLN FXIII 60 min 2nd F 3.wiff"

Data file C:\Program Files (x86)\Matrix Science\Mascot Daemon\mgf\5 FXIII 60 min 2nd\mascot\_daemon\_merge.mgf

Click mouse within plot area to zoom in by factor of two about that point

Or, Plot from  to  Da

Label all possible matches  Label matches used for scoring

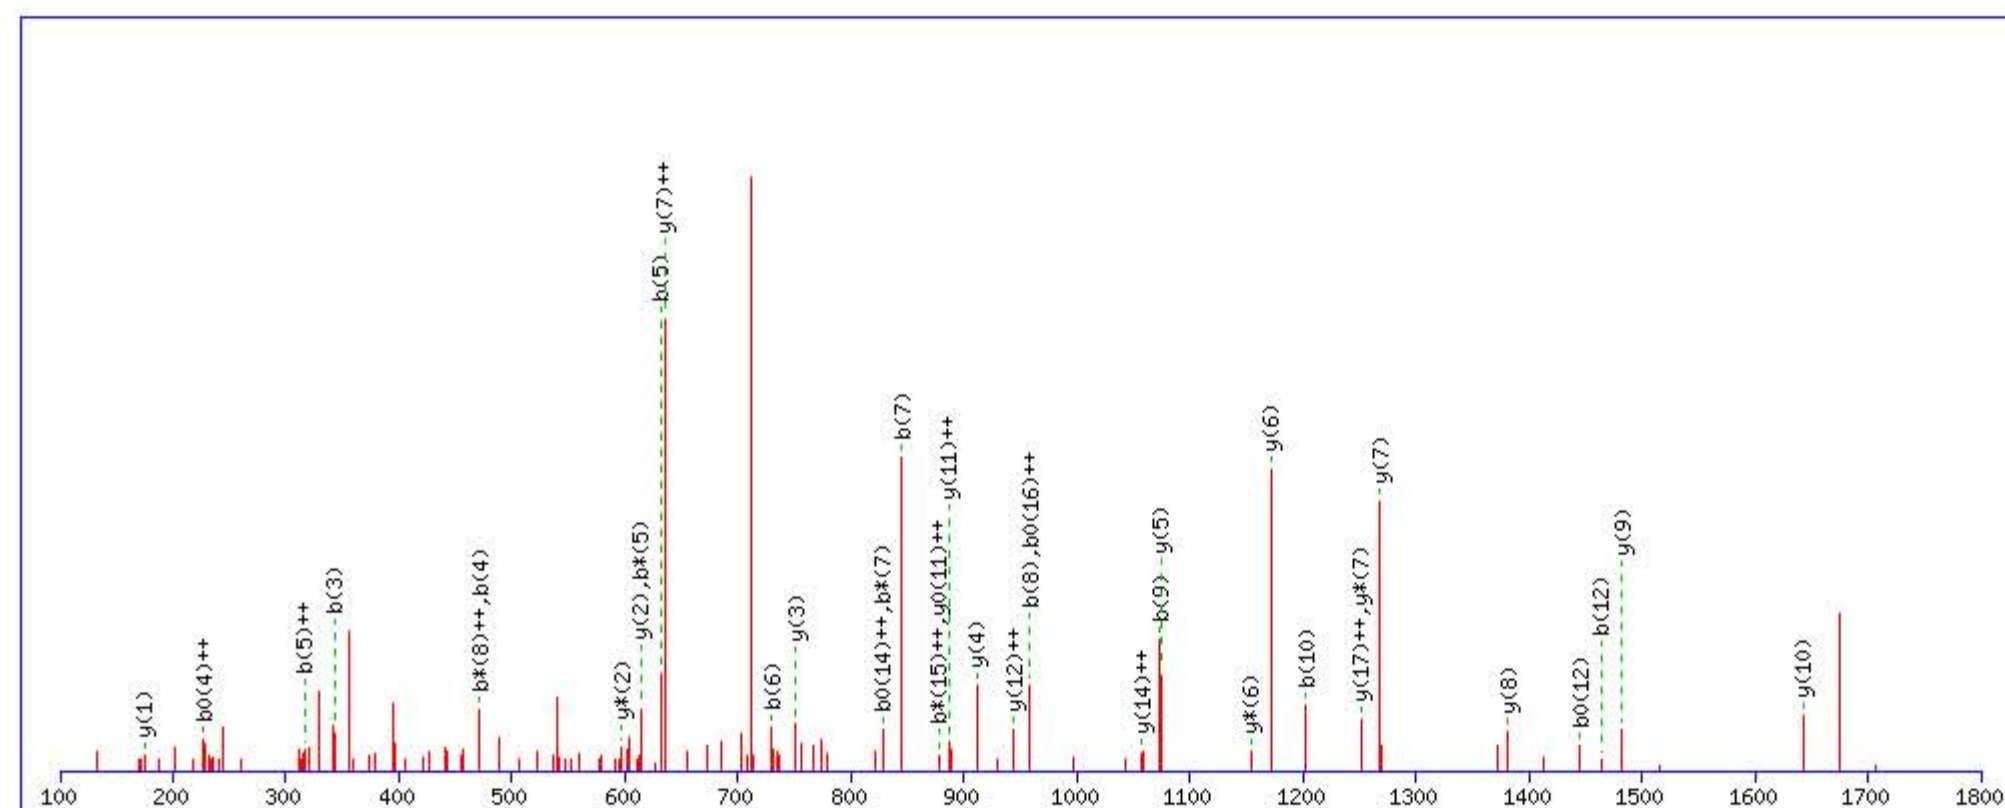

Monoisotopic mass of neutral peptide Mr(calc): 2843.261169

Fixed modifications: Carbamidomethyl (C) (apply to specified residues or termini only)

Variable modifications:

Q19 : Biotin:Thermo-21345 (Q)

Ions Score: 57 Expect: 1.1e-005

Matches : 37/208 fragment ions using 67 most intense peaks [\(help\)](#)

| #  | b                  | b <sup>++</sup>   | b <sup>+</sup>    | b <sup>+++</sup>  | b <sup>0</sup>     | b <sup>0++</sup>  | Seq. | y                  | y <sup>++</sup>    | y <sup>+</sup>     | y <sup>+++</sup> | y <sup>0</sup> | y <sup>0++</sup>  | #  |
|----|--------------------|-------------------|-------------------|-------------------|--------------------|-------------------|------|--------------------|--------------------|--------------------|------------------|----------------|-------------------|----|
| 1  | 157.108387         | 79.057831         | 140.081838        | 70.544557         |                    |                   | R    |                    |                    |                    |                  |                |                   | 20 |
| 2  | 214.129851         | 107.568564        | 197.103302        | 99.055289         |                    |                   | G    | 2688.167329        | 1344.587302        | 2671.140780        | 1336.074028      | 2670.156764    | 1335.582020       | 19 |
| 3  | <b>343.172444</b>  | 172.089860        | 326.145895        | 163.576585        | 325.161879         | 163.084577        | E    | 2631.145865        | 1316.076570        | 2614.119316        | 1307.563296      | 2613.135300    | 1307.071288       | 18 |
| 4  | <b>471.231022</b>  | 236.119149        | 454.204473        | 227.605875        | 453.220457         | <b>227.113867</b> | Q    | 2502.103272        | <b>1251.555274</b> | 2485.076723        | 1243.041999      | 2484.092707    | 1242.549991       | 17 |
| 5  | <b>631.261671</b>  | <b>316.134474</b> | <b>614.235122</b> | 307.621199        | 613.251106         | 307.129191        | C    | 2374.044694        | 1187.525985        | 2357.018145        | 1179.012710      | 2356.034129    | 1178.520702       | 16 |
| 6  | <b>730.330085</b>  | 365.668681        | 713.303536        | 357.155406        | 712.319520         | 356.663398        | V    | 2214.014045        | 1107.510660        | 2196.987496        | 1098.997386      | 2196.003480    | 1098.505378       | 15 |
| 7  | <b>845.357028</b>  | 423.182152        | <b>828.330479</b> | 414.668878        | 827.346463         | 414.176870        | D    | 2114.945631        | <b>1057.976453</b> | 2097.919082        | 1049.463179      | 2096.935066    | 1048.971171       | 14 |
| 8  | <b>958.441092</b>  | 479.724184        | 941.414543        | <b>471.210910</b> | 940.430527         | 470.718902        | I    | 1999.918688        | 1000.462982        | 1982.892139        | 991.949708       | 1981.908123    | 991.457700        | 13 |
| 9  | <b>1073.468035</b> | 537.237656        | 1056.441486       | 528.724381        | 1055.457470        | 528.232373        | D    | 1886.834624        | <b>943.920950</b>  | 1869.808075        | 935.407676       | 1868.824059    | 934.915668        | 12 |
| 10 | <b>1202.510628</b> | 601.758952        | 1185.484079       | 593.245678        | 1184.500063        | 592.753670        | E    | 1771.807681        | <b>886.407479</b>  | 1754.781132        | 877.894204       | 1753.797116    | <b>877.402196</b> | 11 |
| 11 | 1362.541277        | 681.774277        | 1345.514728       | 673.261002        | 1344.530712        | 672.768994        | C    | <b>1642.765088</b> | 821.886182         | 1625.738539        | 813.372908       | 1624.754523    | 812.880900        | 10 |
| 12 | <b>1463.588956</b> | 732.298116        | 1446.562407       | 723.784842        | <b>1445.578391</b> | 723.292834        | T    | <b>1482.734439</b> | 741.870858         | 1465.707890        | 733.357583       | 1464.723874    | 732.865575        | 9  |
| 13 | 1576.673020        | 788.840148        | 1559.646471       | 780.326874        | 1558.662455        | 779.834866        | I    | <b>1381.686760</b> | 691.347018         | 1364.660211        | 682.833744       |                |                   | 8  |
| 14 | 1673.725784        | 837.366530        | 1656.699235       | 828.853256        | 1655.715219        | <b>828.361248</b> | P    | <b>1268.602696</b> | <b>634.804986</b>  | <b>1251.576147</b> | 626.291712       |                |                   | 7  |
| 15 | 1770.778548        | 885.892912        | 1753.751999       | <b>877.379638</b> | 1752.767983        | 876.887630        | P    | <b>1171.549932</b> | 586.278604         | <b>1154.523383</b> | 577.765330       |                |                   | 6  |
| 16 | 1933.841877        | 967.424577        | 1916.815328       | 958.911302        | 1915.831312        | <b>958.419294</b> | Y    | <b>1074.497168</b> | 537.752222         | 1057.470619        | 529.238948       |                |                   | 5  |
| 17 | 2093.872526        | 1047.439901       | 2076.845977       | 1038.926626       | 2075.861961        | 1038.434618       | C    | <b>911.433839</b>  | 456.220558         | 894.407290         | 447.707283       |                |                   | 4  |
| 18 | 2230.931438        | 1115.969357       | 2213.904889       | 1107.456082       | 2212.920873        | 1106.964074       | H    | <b>751.403190</b>  | 376.205233         | 734.376641         | 367.691959       |                |                   | 3  |
| 19 | 2670.156764        | 1335.582020       | 2653.130215       | 1327.068746       | 2652.146199        | 1326.576738       | Q    | <b>614.344278</b>  | 307.675777         | <b>597.317729</b>  | 299.162503       |                |                   | 2  |
| 20 |                    |                   |                   |                   |                    |                   | R    | <b>175.118952</b>  | 88.063114          | 158.092403         | 79.549839        |                |                   | 1  |

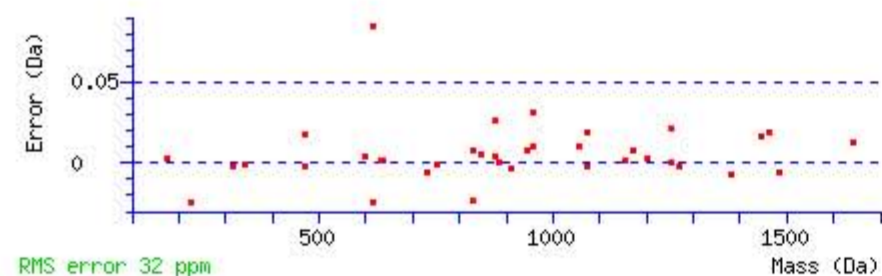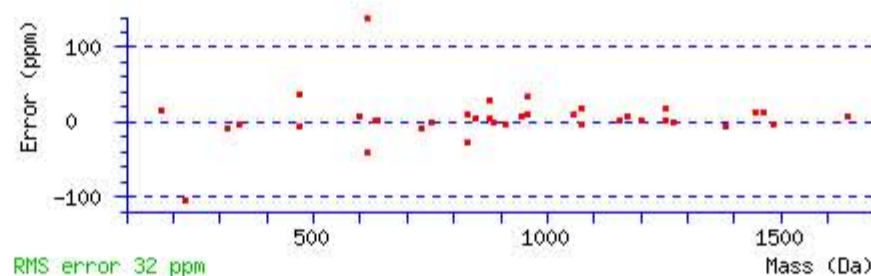

NCBI BLAST search of **RGEQCVDIDECTIPPYCHQR**

(Parameters: blastp, nr protein database, expect=20000, no filter, PAM30)

Other BLAST [web gateways](#)

All matches to this query

| Score | Mr(calc):   | Delta    | Sequence                             |
|-------|-------------|----------|--------------------------------------|
| 57.5  | 2843.261169 | 0.000567 | <a href="#">RGEQCVDIDECTIPPYCHQR</a> |

Mascot: <http://www.matrixscience.com/>



# MASCOT Search Results

## Peptide View

MS/MS Fragmentation of **IQCAAGYEQSEHNCQDIDECTAGTHNCR**

Found in **FBLN3\_HUMAN**, EGF-containing fibulin-like extracellular matrix protein 1 OS=Homo sapiens GN=EFEMP1 PE=1 SV=2

Match to Query 68555: 3733.547456 from(934.394140,4+) rtinseconds(1738) index(34682)

Title: Locus:1.1.1.3024.23 File:"2013-07-02 CLN FXIII 60 min 2nd F 3.wiff"

Data file C:\Program Files (x86)\Matrix Science\Mascot Daemon\mgf5 FXIII 60 min 2nd\mascot\_daemon\_merge.mgf

Click mouse within plot area to zoom in by factor of two about that point

Or, Plot from  to  Da

Label all possible matches  Label matches used for scoring

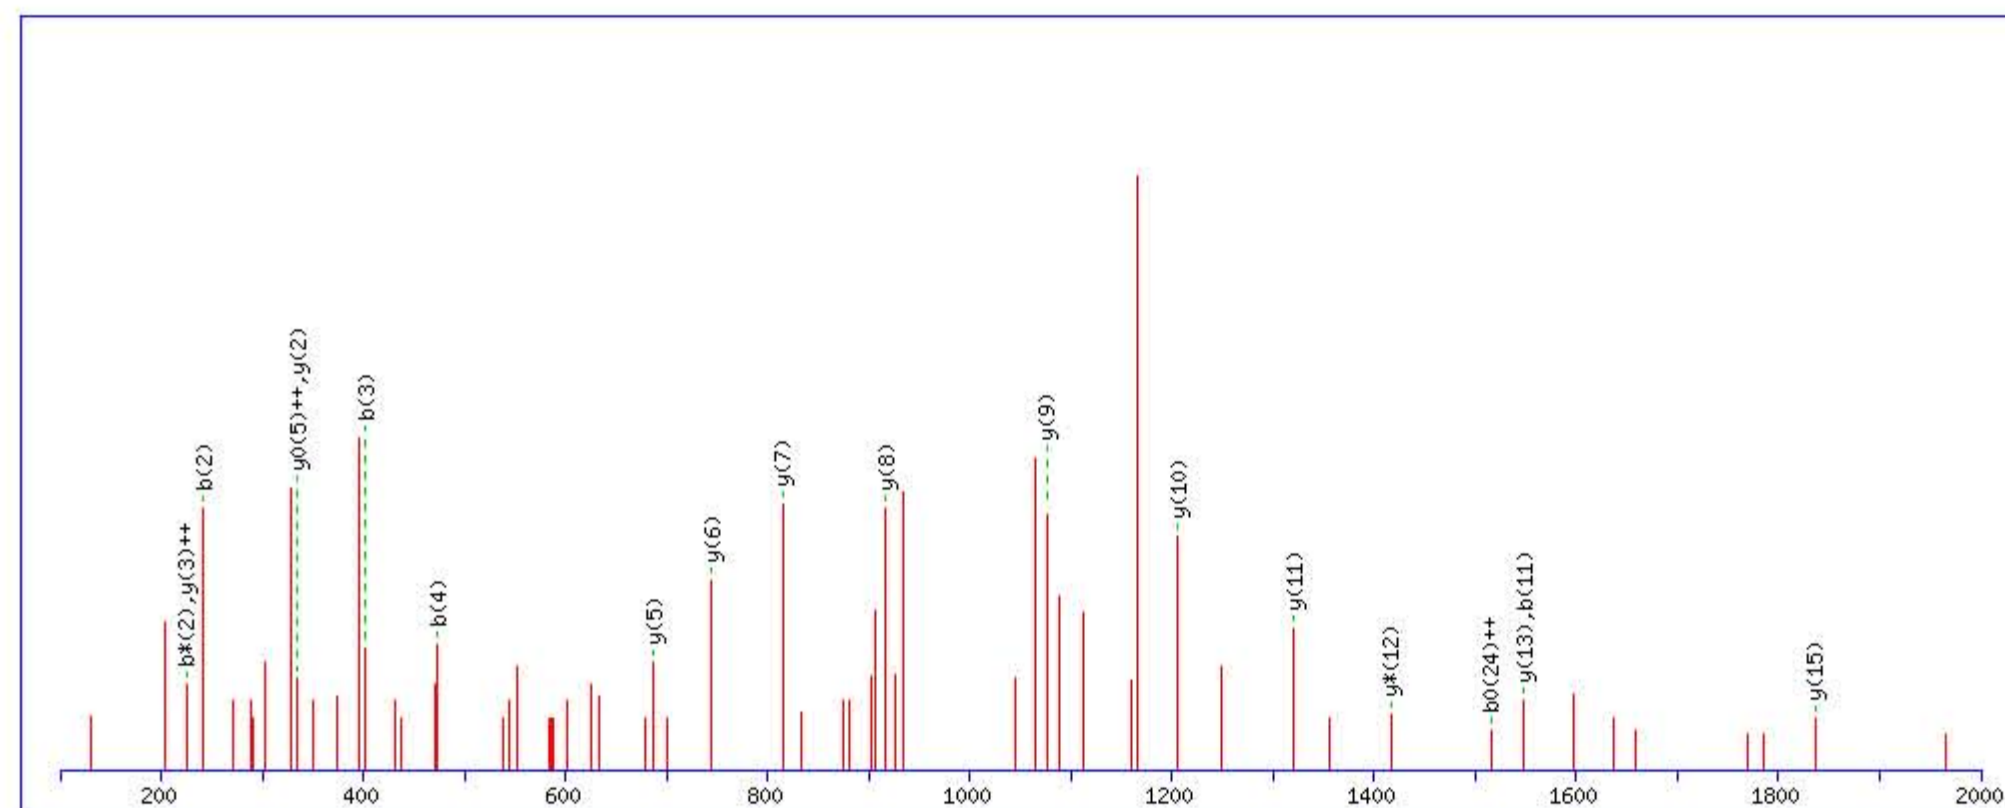

Monoisotopic mass of neutral peptide Mr(calc): 3733.543625

Fixed modifications: Carbamidomethyl (C) (apply to specified residues or termini only)

Variable modifications:

Q9 : Biotin:Thermo-21345 (Q)

Ions Score: 30 Expect: 0.0014

Matches : 19/312 fragment ions using 43 most intense peaks [\(help\)](#)

| #  | b                  | b <sup>++</sup> | b <sup>*</sup>    | b <sup>+++</sup> | b <sup>0</sup> | b <sup>0++</sup> | Seq. | y                  | y <sup>++</sup>   | y <sup>*</sup>     | y <sup>+++</sup> | y <sup>0</sup> | y <sup>0++</sup>  | #  |
|----|--------------------|-----------------|-------------------|------------------|----------------|------------------|------|--------------------|-------------------|--------------------|------------------|----------------|-------------------|----|
| 1  | 114.091340         | 57.549308       |                   |                  |                |                  | I    |                    |                   |                    |                  |                |                   | 29 |
| 2  | <b>242.149918</b>  | 121.578597      | <b>225.123369</b> | 113.065323       |                |                  | Q    | 3621.466836        | 1811.237056       | 3604.440287        | 1802.723781      | 3603.456271    | 1802.231773       | 28 |
| 3  | <b>402.180567</b>  | 201.593922      | 385.154018        | 193.080647       |                |                  | C    | 3493.408258        | 1747.207767       | 3476.381709        | 1738.694492      | 3475.397693    | 1738.202484       | 27 |
| 4  | <b>473.217681</b>  | 237.112479      | 456.191132        | 228.599204       |                |                  | A    | 3333.377609        | 1667.192442       | 3316.351060        | 1658.679168      | 3315.367044    | 1658.187160       | 26 |
| 5  | 544.254795         | 272.631036      | 527.228246        | 264.117761       |                |                  | A    | 3262.340495        | 1631.673885       | 3245.313946        | 1623.160611      | 3244.329930    | 1622.668603       | 25 |
| 6  | 601.276259         | 301.141768      | 584.249710        | 292.628493       |                |                  | G    | 3191.303381        | 1596.155328       | 3174.276832        | 1587.642054      | 3173.292816    | 1587.150046       | 24 |
| 7  | 764.339588         | 382.673432      | 747.313039        | 374.160158       |                |                  | Y    | 3134.281917        | 1567.644596       | 3117.255368        | 1559.131322      | 3116.271352    | 1558.639314       | 23 |
| 8  | 893.382181         | 447.194729      | 876.355632        | 438.681454       | 875.371616     | 438.189446       | E    | 2971.218588        | 1486.112932       | 2954.192039        | 1477.599657      | 2953.208023    | 1477.107649       | 22 |
| 9  | 1332.607507        | 666.807391      | 1315.580958       | 658.294117       | 1314.596942    | 657.802109       | Q    | 2842.175995        | 1421.591635       | 2825.149446        | 1413.078361      | 2824.165430    | 1412.586353       | 21 |
| 10 | 1419.639535        | 710.323406      | 1402.612986       | 701.810131       | 1401.628970    | 701.318123       | S    | 2402.950669        | 1201.978972       | 2385.924120        | 1193.465698      | 2384.940104    | 1192.973690       | 20 |
| 11 | <b>1548.682128</b> | 774.844702      | 1531.655579       | 766.331428       | 1530.671563    | 765.839420       | E    | 2315.918641        | 1158.462958       | 2298.892092        | 1149.949684      | 2297.908076    | 1149.457676       | 19 |
| 12 | 1685.741040        | 843.374158      | 1668.714491       | 834.860884       | 1667.730475    | 834.368876       | H    | 2186.876048        | 1093.941662       | 2169.849499        | 1085.428387      | 2168.865483    | 1084.936379       | 18 |
| 13 | 1799.783967        | 900.395622      | 1782.757418       | 891.882347       | 1781.773402    | 891.390339       | N    | 2049.817136        | 1025.412206       | 2032.790587        | 1016.898931      | 2031.806571    | 1016.406923       | 17 |
| 14 | 1898.852381        | 949.929829      | 1881.825832       | 941.416554       | 1880.841816    | 940.924546       | V    | 1935.774209        | 968.390742        | 1918.747660        | 959.877468       | 1917.763644    | 959.385460        | 16 |
| 15 | 2058.883030        | 1029.945153     | 2041.856481       | 1021.431879      | 2040.872465    | 1020.939871      | C    | <b>1836.705795</b> | 918.856535        | 1819.679246        | 910.343261       | 1818.695230    | 909.851253        | 15 |
| 16 | 2186.941608        | 1093.974442     | 2169.915059       | 1085.461167      | 2168.931043    | 1084.969159      | Q    | 1676.675146        | 838.841211        | 1659.648597        | 830.327936       | 1658.664581    | 829.835928        | 14 |
| 17 | 2301.968551        | 1151.487913     | 2284.942002       | 1142.974639      | 2283.957986    | 1142.482631      | D    | <b>1548.616568</b> | 774.811922        | 1531.590019        | 766.298647       | 1530.606003    | 765.806639        | 13 |
| 18 | 2415.052615        | 1208.029945     | 2398.026066       | 1199.516671      | 2397.042050    | 1199.024663      | I    | 1433.589625        | 717.298450        | <b>1416.563076</b> | 708.785176       | 1415.579060    | 708.293168        | 12 |
| 19 | 2530.079558        | 1265.543417     | 2513.053009       | 1257.030142      | 2512.068993    | 1256.538134      | D    | <b>1320.505561</b> | 660.756418        | 1303.479012        | 652.243144       | 1302.494996    | 651.751136        | 11 |
| 20 | 2659.122151        | 1330.064713     | 2642.095602       | 1321.551439      | 2641.111586    | 1321.059431      | E    | <b>1205.478618</b> | 603.242947        | 1188.452069        | 594.729672       | 1187.468053    | 594.237664        | 10 |
| 21 | 2819.152800        | 1410.080038     | 2802.126251       | 1401.566763      | 2801.142235    | 1401.074755      | C    | <b>1076.436025</b> | 538.721650        | 1059.409476        | 530.208376       | 1058.425460    | 529.716368        | 9  |
| 22 | 2920.200479        | 1460.603877     | 2903.173930       | 1452.090603      | 2902.189914    | 1451.598595      | T    | <b>916.405376</b>  | 458.706326        | 899.378827         | 450.193051       | 898.394811     | 449.701043        | 8  |
| 23 | 2991.237593        | 1496.122434     | 2974.211044       | 1487.609160      | 2973.227028    | 1487.117152      | A    | <b>815.357697</b>  | 408.182486        | 798.331148         | 399.669212       | 797.347132     | 399.177204        | 7  |
| 24 | 3048.259057        | 1524.633166     | 3031.232508       | 1516.119892      | 3030.248492    | 1515.627884      | G    | <b>744.320583</b>  | 372.663929        | 727.294034         | 364.150655       | 726.310018     | 363.658647        | 6  |
| 25 | 3149.306736        | 1575.157006     | 3132.280187       | 1566.643731      | 3131.296171    | 1566.151723      | T    | <b>687.299119</b>  | 344.153197        | 670.272570         | 335.639923       | 669.288554     | <b>335.147915</b> | 5  |
| 26 | 3286.365648        | 1643.686462     | 3269.339099       | 1635.173187      | 3268.355083    | 1634.681179      | H    | 586.251440         | 293.629358        | 569.224891         | 285.116083       |                |                   | 4  |
| 27 | 3400.408575        | 1700.707925     | 3383.382026       | 1692.194651      | 3382.398010    | 1691.702643      | N    | 449.192528         | <b>225.099902</b> | 432.165979         | 216.586627       |                |                   | 3  |
| 28 | 3560.439224        | 1780.723250     | 3543.412675       | 1772.209975      | 3542.428659    | 1771.717967      | C    | <b>335.149601</b>  | 168.078438        | 318.123052         | 159.565164       |                |                   | 2  |
| 29 |                    |                 |                   |                  |                |                  | R    | 175.118952         | 88.063114         | 158.092403         | 79.549839        |                |                   | 1  |

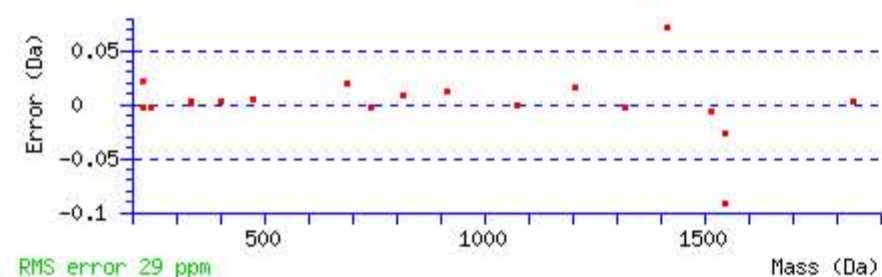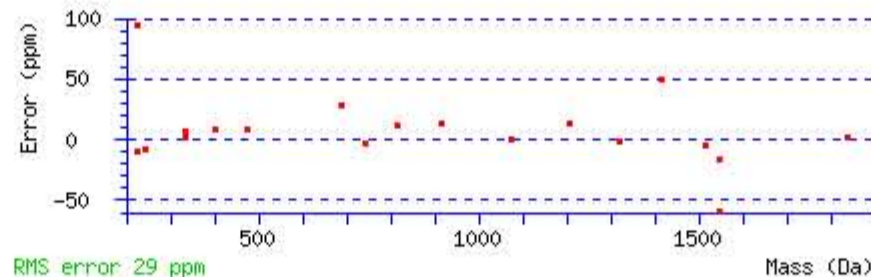

NCBI BLAST search of **IQCAAGYEQSEHNCQDIDECTAGTHNCR**

(Parameters: blastp, nr protein database, expect=20000, no filter, PAM30)

Other BLAST [web gateways](#)

All matches to this query

| Score | Mr(calc):   | Delta    | Sequence                                     |
|-------|-------------|----------|----------------------------------------------|
| 30.2  | 3733.543625 | 0.003831 | <a href="#">IQCAAGYEQSEHNCQDIDECTAGTHNCR</a> |
| 23.2  | 3733.543625 | 0.003831 | <a href="#">IQCAAGYEQSEHNCQDIDECTAGTHNCR</a> |
| 22.1  | 3733.543625 | 0.003831 | <a href="#">IQCAAGYEQSEHNCQDIDECTAGTHNCR</a> |



# MASCOT SCIENCE Mascot Search Results

## Peptide View

MS/MS Fragmentation of **NLPATDPLQR**

Found in **ECM1\_HUMAN**, Extracellular matrix protein 1 OS=Homo sapiens GN=ECM1 PE=1 SV=2

Match to Query 32096: 1434.769908 from(718.392230,2+) rtinseconds(1979) index(5751)

Title: Locus:1.1.1.1498.13 File:"2013-07-02 CLN FXIII 60 min 2nd F 1.wiff"

Data file C:\Program Files (x86)\Matrix Science\Mascot Daemon\mgf5 FXIII 60 min 2nd\mascot\_daemon\_merge.mgf

Click mouse within plot area to zoom in by factor of two about that point

Or, Plot from  to  Da

Label all possible matches  Label matches used for scoring

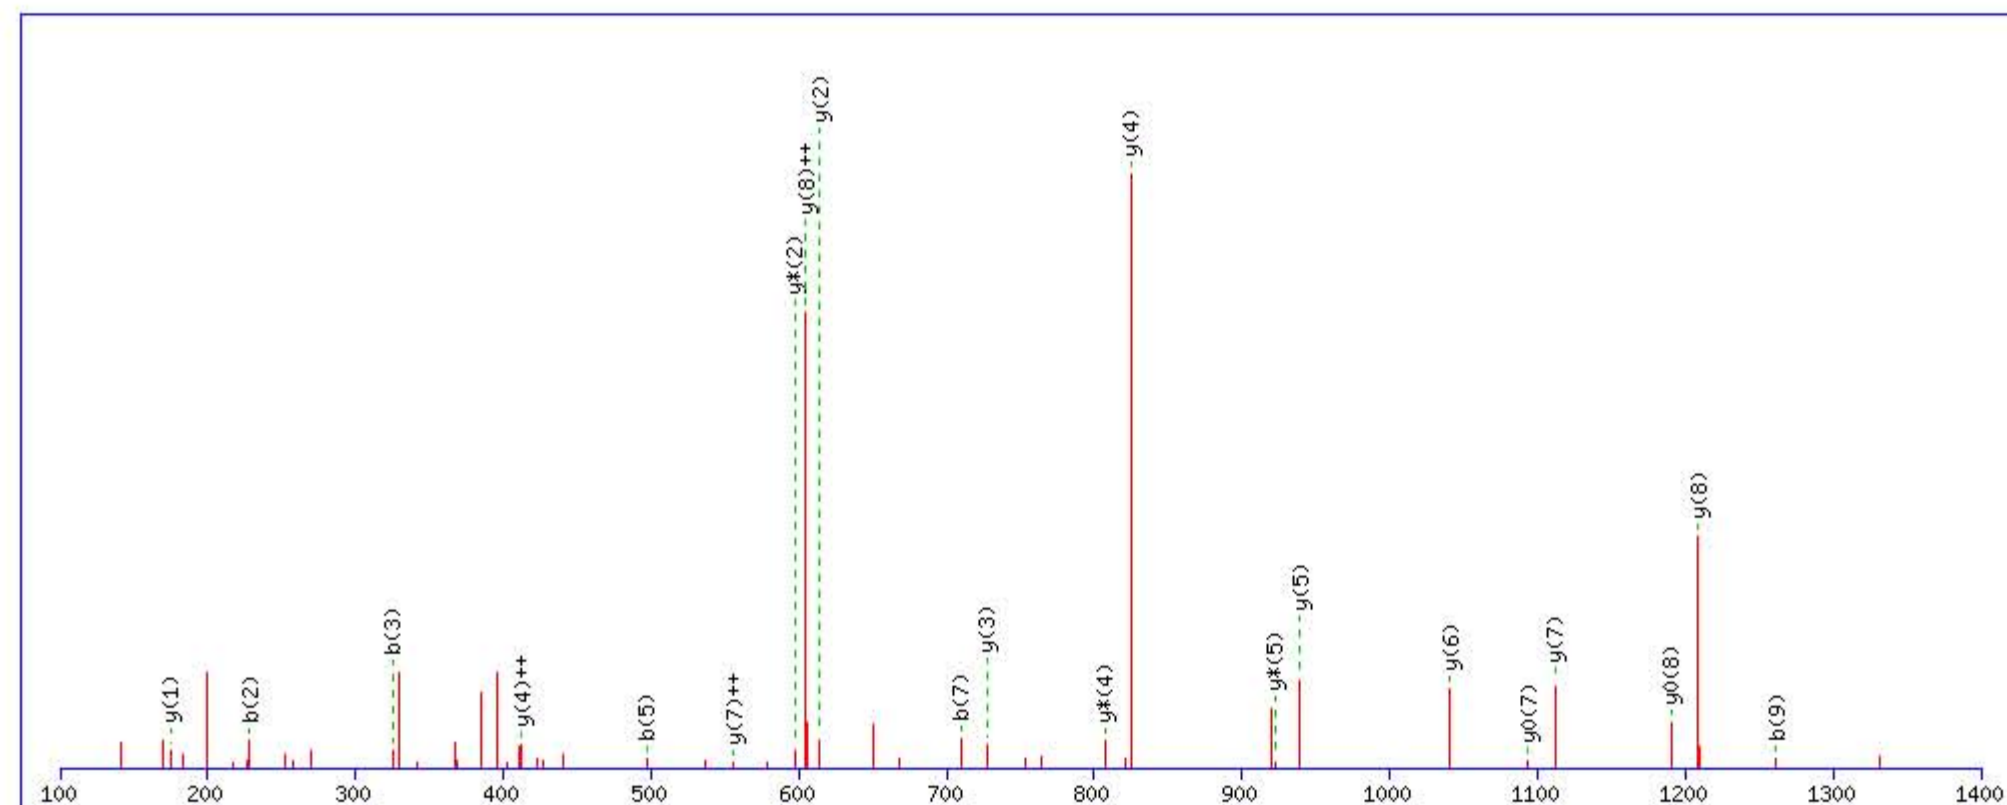

Monoisotopic mass of neutral peptide Mr(calc): 1434.765305

Fixed modifications: Carbamidomethyl (C) (apply to specified residues or termini only)

Variable modifications:

Q9 : Biotin:Thermo-21345 (Q)

Ions Score: 44 Expect: 0.00044

Matches : 21/92 fragment ions using 43 most intense peaks [\(help\)](#)

| #  | b                  | b <sup>++</sup> | b <sup>*</sup> | b <sup>*++</sup> | b <sup>0</sup> | b <sup>0++</sup> | Seq. | y                  | y <sup>++</sup>   | y <sup>*</sup>    | y <sup>*++</sup> | y <sup>0</sup>     | y <sup>0++</sup> | #  |
|----|--------------------|-----------------|----------------|------------------|----------------|------------------|------|--------------------|-------------------|-------------------|------------------|--------------------|------------------|----|
| 1  | 115.050203         | 58.028740       | 98.023654      | 49.515465        |                |                  | N    |                    |                   |                   |                  |                    |                  | 10 |
| 2  | <b>228.134267</b>  | 114.570771      | 211.107718     | 106.057497       |                |                  | L    | 1321.729670        | 661.368473        | 1304.703121       | 652.855199       | 1303.719105        | 652.363190       | 9  |
| 3  | <b>325.187031</b>  | 163.097153      | 308.160482     | 154.583879       |                |                  | P    | <b>1208.645606</b> | <b>604.826441</b> | 1191.619057       | 596.313166       | <b>1190.635041</b> | 595.821158       | 8  |
| 4  | 396.224145         | 198.615710      | 379.197596     | 190.102436       |                |                  | A    | <b>1111.592842</b> | <b>556.300059</b> | 1094.566293       | 547.786784       | <b>1093.582277</b> | 547.294776       | 7  |
| 5  | <b>497.271824</b>  | 249.139550      | 480.245275     | 240.626275       | 479.261259     | 240.134267       | T    | <b>1040.555728</b> | 520.781502        | 1023.529179       | 512.268227       | 1022.545163        | 511.776220       | 6  |
| 6  | 612.298767         | 306.653022      | 595.272218     | 298.139747       | 594.288202     | 297.647739       | D    | <b>939.508049</b>  | 470.257662        | <b>922.481500</b> | 461.744388       | 921.497484         | 461.252380       | 5  |
| 7  | <b>709.351531</b>  | 355.179404      | 692.324982     | 346.666129       | 691.340966     | 346.174121       | P    | <b>824.481106</b>  | <b>412.744191</b> | <b>807.454557</b> | 404.230916       |                    |                  | 4  |
| 8  | 822.435595         | 411.721436      | 805.409046     | 403.208161       | 804.425030     | 402.716153       | L    | <b>727.428342</b>  | 364.217809        | 710.401793        | 355.704534       |                    |                  | 3  |
| 9  | <b>1261.660921</b> | 631.334098      | 1244.634372    | 622.820824       | 1243.650356    | 622.328816       | Q    | <b>614.344278</b>  | 307.675777        | <b>597.317729</b> | 299.162502       |                    |                  | 2  |
| 10 |                    |                 |                |                  |                |                  | R    | <b>175.118952</b>  | 88.063114         | 158.092403        | 79.549839        |                    |                  | 1  |

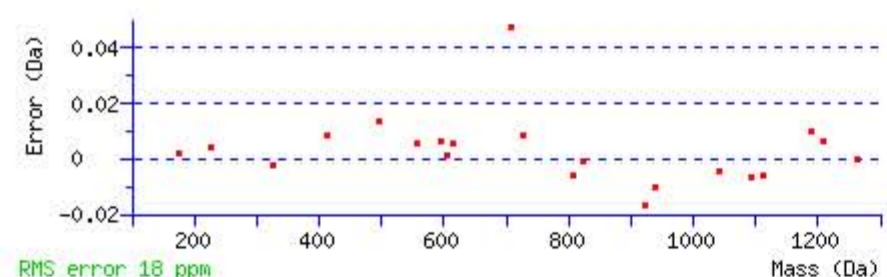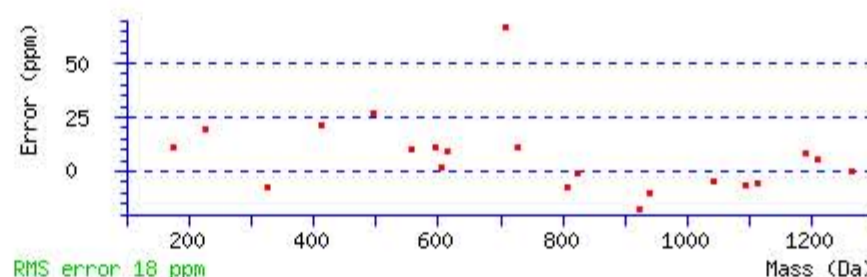

NCBI BLAST search of **NLPATDPLQR**

(Parameters: blastp, nr protein database, expect=20000, no filter, PAM30)

Other BLAST [web gateways](#)

All matches to this query

| Score | Mr(calc):   | Delta    | Sequence                      |
|-------|-------------|----------|-------------------------------|
| 44.1  | 1434.765305 | 0.004603 | <a href="#">NLPATDPLQR</a>    |
| 7.8   | 1434.757889 | 0.012019 | <a href="#">NLIRQISSGEYR</a>  |
| 4.2   | 1434.757919 | 0.011989 | <a href="#">VQQAELHTGSLPR</a> |
| 0.5   | 1434.754074 | 0.015834 | <a href="#">VKPFMTGAAEQIK</a> |

Mascot: <http://www.matrixscience.com/>



# MASCOT SEARCH RESULTS

## Peptide View

MS/MS Fragmentation of **VTPNLMGHLCGNQR**

Found in **ECM1\_HUMAN**, Extracellular matrix protein 1 OS=Homo sapiens GN=ECM1 PE=1 SV=2

Match to Query 44693: 1906.928322 from(636.650050,3+) rtinseconds(1892) index(35592)

Title: Locus:1.1.1.3078.19 File:"2013-07-02 CLN FXIII 60 min 2nd F 3.wiff"

Data file C:\Program Files (x86)\Matrix Science\Mascot Daemon\mgf5 FXIII 60 min 2nd\mascot\_daemon\_merge.mgf

Click mouse within plot area to zoom in by factor of two about that point

Or, Plot from  to  Da

Label all possible matches  Label matches used for scoring

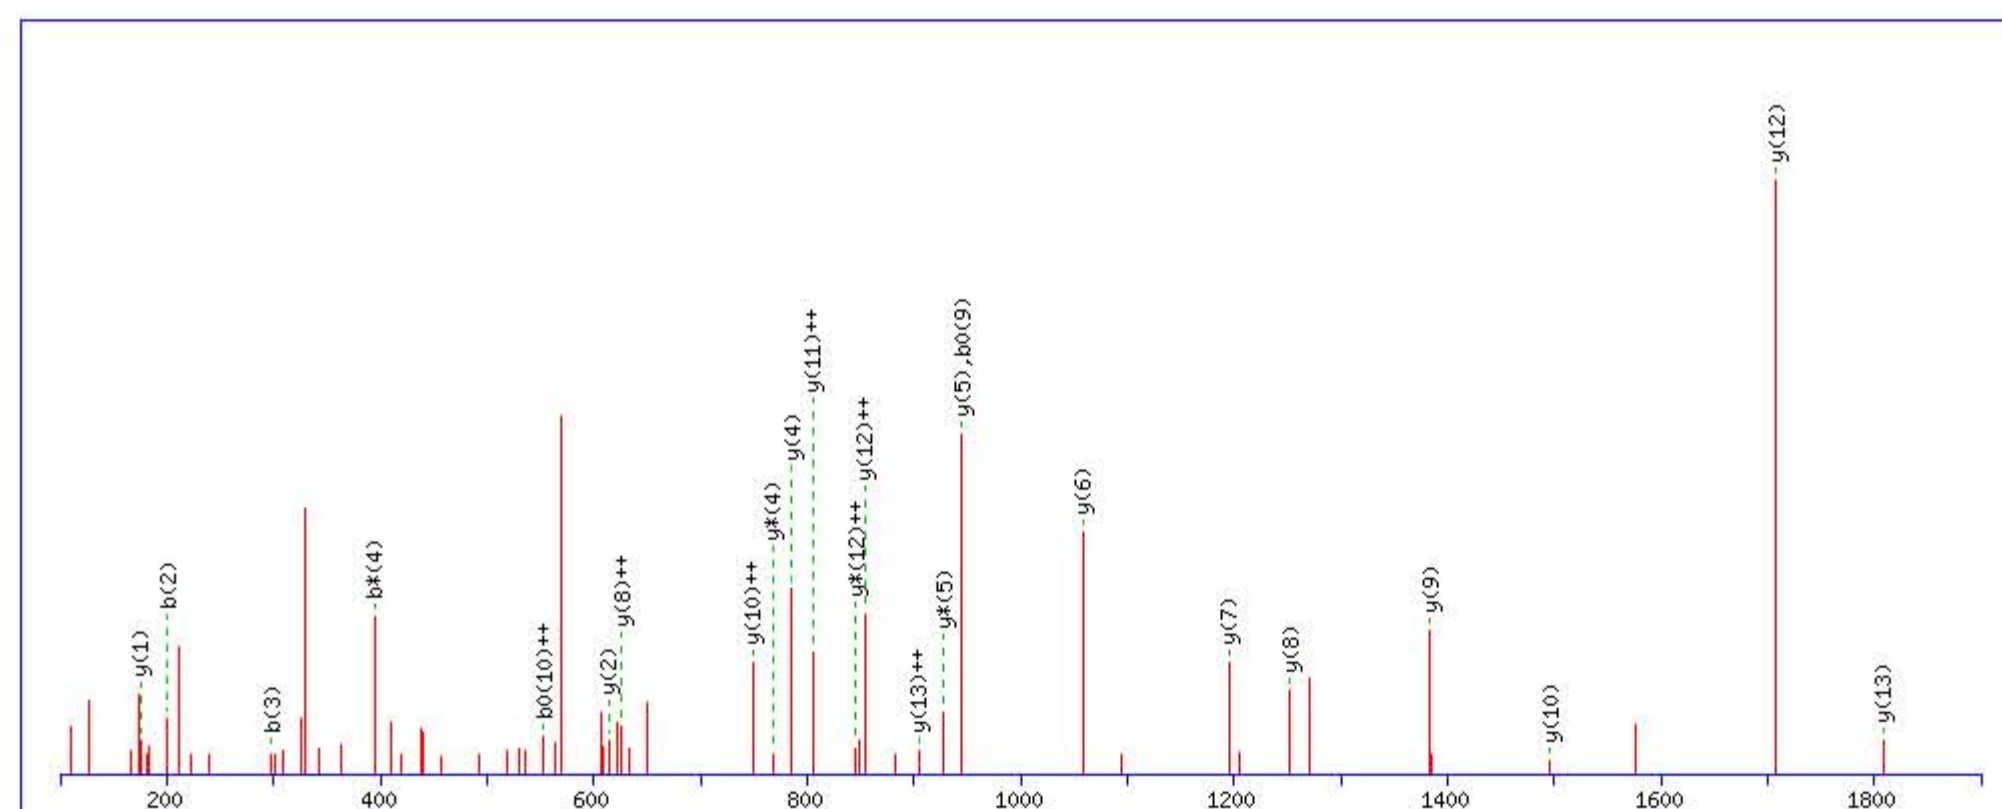

Monoisotopic mass of neutral peptide Mr(calc): 1906.932816

Fixed modifications: Carbamidomethyl (C) (apply to specified residues or termini only)

Variable modifications:

Q13 : Biotin:Thermo-21345 (Q)

Ions Score: 53 Expect: 0.00011

Matches : 24/124 fragment ions using 56 most intense peaks [\(help\)](#)

| #  | b                 | b <sup>++</sup> | b <sup>*</sup>    | b <sup>*++</sup> | b <sup>0</sup>    | b <sup>0++</sup>  | Seq. | y                  | y <sup>++</sup>   | y <sup>*</sup>    | y <sup>*++</sup>  | y <sup>0</sup> | y <sup>0++</sup> | #  |
|----|-------------------|-----------------|-------------------|------------------|-------------------|-------------------|------|--------------------|-------------------|-------------------|-------------------|----------------|------------------|----|
| 1  | 100.075690        | 50.541483       |                   |                  |                   |                   | V    |                    |                   |                   |                   |                |                  | 14 |
| 2  | <b>201.123369</b> | 101.065322      |                   |                  | 183.112804        | 92.060040         | T    | <b>1808.871677</b> | <b>904.939477</b> | 1791.845128       | 896.426202        | 1790.861112    | 895.934194       | 13 |
| 3  | <b>298.176133</b> | 149.591704      |                   |                  | 280.165568        | 140.586422        | P    | <b>1707.823998</b> | <b>854.415637</b> | 1690.797449       | <b>845.902363</b> |                |                  | 12 |
| 4  | 412.219060        | 206.613168      | <b>395.192511</b> | 198.099894       | 394.208495        | 197.607886        | N    | 1610.771234        | <b>805.889255</b> | 1593.744685       | 797.375981        |                |                  | 11 |
| 5  | 525.303124        | 263.155200      | 508.276575        | 254.641926       | 507.292559        | 254.149918        | L    | <b>1496.728307</b> | <b>748.867792</b> | 1479.701758       | 740.354517        |                |                  | 10 |
| 6  | 656.343609        | 328.675443      | 639.317060        | 320.162168       | 638.333044        | 319.670160        | M    | <b>1383.644243</b> | 692.325760        | 1366.617694       | 683.812485        |                |                  | 9  |
| 7  | 713.365073        | 357.186175      | 696.338524        | 348.672900       | 695.354508        | 348.180892        | G    | <b>1252.603758</b> | <b>626.805517</b> | 1235.577209       | 618.292243        |                |                  | 8  |
| 8  | 850.423985        | 425.715631      | 833.397436        | 417.202356       | 832.413420        | 416.710348        | H    | <b>1195.582294</b> | 598.294785        | 1178.555745       | 589.781511        |                |                  | 7  |
| 9  | 963.508049        | 482.257663      | 946.481500        | 473.744388       | <b>945.497484</b> | 473.252380        | L    | <b>1058.523382</b> | 529.765329        | 1041.496833       | 521.252055        |                |                  | 6  |
| 10 | 1123.538698       | 562.272987      | 1106.512149       | 553.759713       | 1105.528133       | <b>553.267705</b> | C    | <b>945.439318</b>  | 473.223297        | <b>928.412769</b> | 464.710023        |                |                  | 5  |
| 11 | 1180.560162       | 590.783719      | 1163.533613       | 582.270445       | 1162.549597       | 581.778437        | G    | <b>785.408669</b>  | 393.207973        | <b>768.382120</b> | 384.694698        |                |                  | 4  |
| 12 | 1294.603089       | 647.805183      | 1277.576540       | 639.291908       | 1276.592524       | 638.799900        | N    | 728.387205         | 364.697241        | 711.360656        | 356.183966        |                |                  | 3  |
| 13 | 1733.828415       | 867.417846      | 1716.801866       | 858.904571       | 1715.817850       | 858.412563        | Q    | <b>614.344278</b>  | 307.675777        | 597.317729        | 299.162503        |                |                  | 2  |
| 14 |                   |                 |                   |                  |                   |                   | R    | <b>175.118952</b>  | 88.063114         | 158.092403        | 79.549839         |                |                  | 1  |

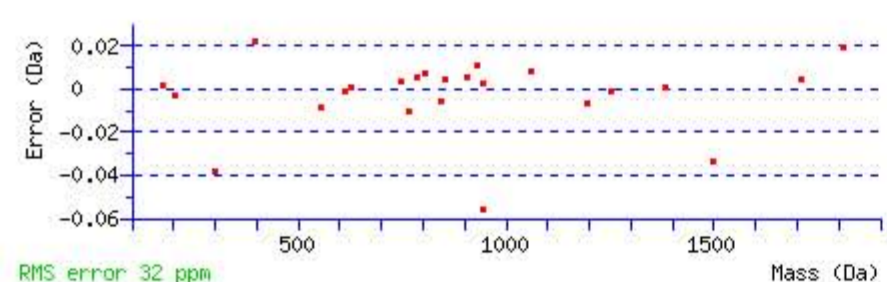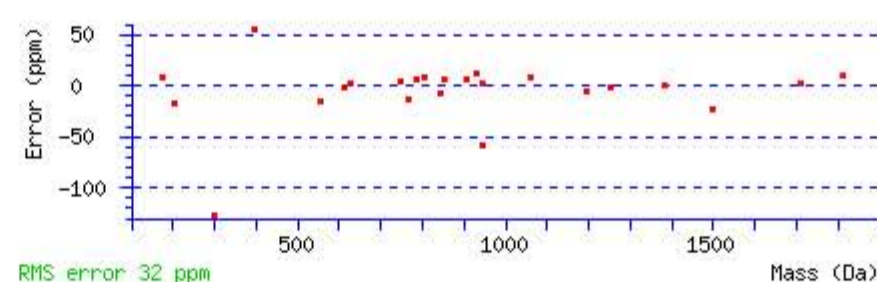

NCBI BLAST search of **VTPNLMGHLCGNQR**

(Parameters: blastp, nr protein database, expect=20000, no filter, PAM30)

Other BLAST [web gateways](#)

## All matches to this query

| Score | Mr(calc):   | Delta     | Sequence                       |
|-------|-------------|-----------|--------------------------------|
| 52.9  | 1906.932816 | -0.004494 | <a href="#">VTPNLMGHLCGNQR</a> |

Mascot: <http://www.matrixscience.com/>



# MASCOT Search Results

## Peptide View

MS/MS Fragmentation of **EVGPPLPQEAVPLQK**

Found in **ECM1\_HUMAN**, Extracellular matrix protein 1 OS=Homo sapiens GN=ECM1 PE=1 SV=2

Match to Query 44850: 1912.053552 from(638.358460,3+) rtinseconds(2213) index(7086)

Title: Locus:1.1.1.1580.7 File:"2013-07-02 CLN FXIII 60 min 2nd F 1.wiff"

Data file C:\Program Files (x86)\Matrix Science\Mascot Daemon\mgf5 FXIII 60 min 2nd\mascot\_daemon\_merge.mgf

Click mouse within plot area to zoom in by factor of two about that point

Or, Plot from  to  Da

Label all possible matches  Label matches used for scoring

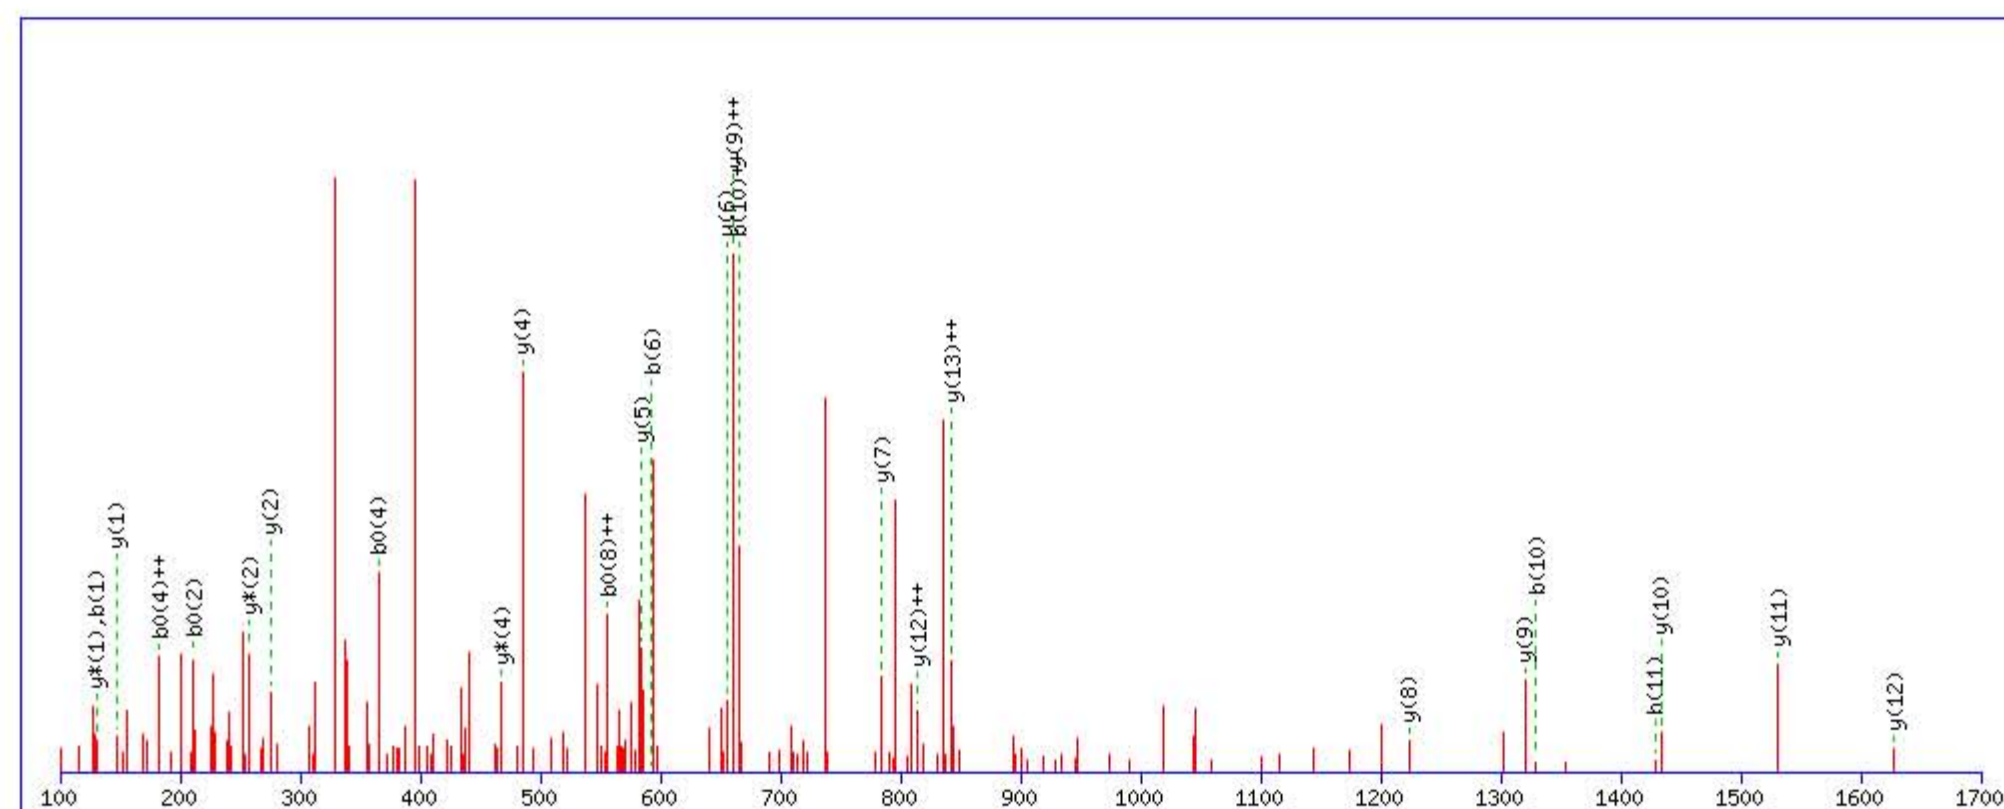

Monoisotopic mass of neutral peptide Mr(calc): 1912.049194

Fixed modifications: Carbamidomethyl (C) (apply to specified residues or termini only)

Variable modifications:

Q8 : Biotin:Thermo-21345 (Q)

Ions Score: 34 Expect: 0.0064

Matches : 26/142 fragment ions using 82 most intense peaks [\(help\)](#)

| #  | b                  | b <sup>++</sup>   | b <sup>+</sup> | b <sup>+++</sup> | b <sup>0</sup>    | b <sup>0++</sup>  | Seq. | y                  | y <sup>++</sup>   | y <sup>+</sup>    | y <sup>+++</sup> | y <sup>0</sup> | y <sup>0++</sup> | #  |
|----|--------------------|-------------------|----------------|------------------|-------------------|-------------------|------|--------------------|-------------------|-------------------|------------------|----------------|------------------|----|
| 1  | <b>130.049869</b>  | 65.528572         |                |                  | 112.039304        | 56.523290         | E    |                    |                   |                   |                  |                |                  | 15 |
| 2  | 229.118283         | 115.062780        |                |                  | <b>211.107718</b> | 106.057497        | V    | 1784.013891        | 892.510583        | 1766.987342       | 883.997309       | 1766.003326    | 883.505301       | 14 |
| 3  | 286.139747         | 143.573512        |                |                  | 268.129182        | 134.568229        | G    | 1684.945477        | <b>842.976377</b> | 1667.918928       | 834.463102       | 1666.934912    | 833.971094       | 13 |
| 4  | 383.192511         | 192.099894        |                |                  | <b>365.181946</b> | <b>183.094611</b> | P    | <b>1627.924013</b> | <b>814.465645</b> | 1610.897464       | 805.952370       | 1609.913448    | 805.460362       | 12 |
| 5  | 480.245275         | 240.626276        |                |                  | 462.234710        | 231.620993        | P    | <b>1530.871249</b> | 765.939263        | 1513.844700       | 757.425988       | 1512.860684    | 756.933980       | 11 |
| 6  | <b>593.329339</b>  | 297.168308        |                |                  | 575.318774        | 288.163025        | L    | <b>1433.818485</b> | 717.412881        | 1416.791936       | 708.899606       | 1415.807920    | 708.407598       | 10 |
| 7  | 690.382103         | 345.694690        |                |                  | 672.371538        | 336.689407        | P    | <b>1320.734421</b> | <b>660.870848</b> | 1303.707872       | 652.357574       | 1302.723856    | 651.865566       | 9  |
| 8  | 1129.607429        | 565.307353        | 1112.580880    | 556.794078       | 1111.596864       | <b>556.302070</b> | Q    | <b>1223.681657</b> | 612.344466        | 1206.655108       | 603.831192       | 1205.671092    | 603.339184       | 8  |
| 9  | 1258.650022        | 629.828649        | 1241.623473    | 621.315375       | 1240.639457       | 620.823367        | E    | <b>784.456331</b>  | 392.731803        | 767.429782        | 384.218529       | 766.445766     | 383.726521       | 7  |
| 10 | <b>1329.687136</b> | <b>665.347206</b> | 1312.660587    | 656.833932       | 1311.676571       | 656.341924        | A    | <b>655.413738</b>  | 328.210507        | 638.387189        | 319.697232       |                |                  | 6  |
| 11 | <b>1428.755550</b> | 714.881413        | 1411.729001    | 706.368139       | 1410.744985       | 705.876131        | V    | <b>584.376624</b>  | 292.691950        | 567.350075        | 284.178676       |                |                  | 5  |
| 12 | 1525.808314        | 763.407795        | 1508.781765    | 754.894521       | 1507.797749       | 754.402513        | P    | <b>485.308210</b>  | 243.157743        | <b>468.281661</b> | 234.644468       |                |                  | 4  |
| 13 | 1638.892378        | 819.949827        | 1621.865829    | 811.436553       | 1620.881813       | 810.944545        | L    | 388.255446         | 194.631361        | 371.228897        | 186.118086       |                |                  | 3  |
| 14 | 1766.950956        | 883.979116        | 1749.924407    | 875.465842       | 1748.940391       | 874.973833        | Q    | <b>275.171382</b>  | 138.089329        | <b>258.144833</b> | 129.576054       |                |                  | 2  |
| 15 |                    |                   |                |                  |                   |                   | K    | <b>147.112804</b>  | 74.060040         | <b>130.086255</b> | 65.546765        |                |                  | 1  |

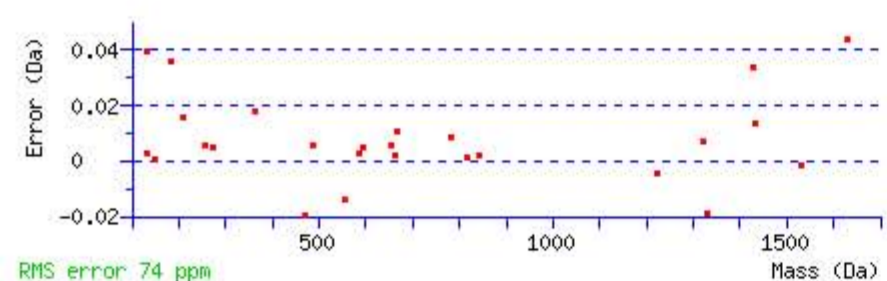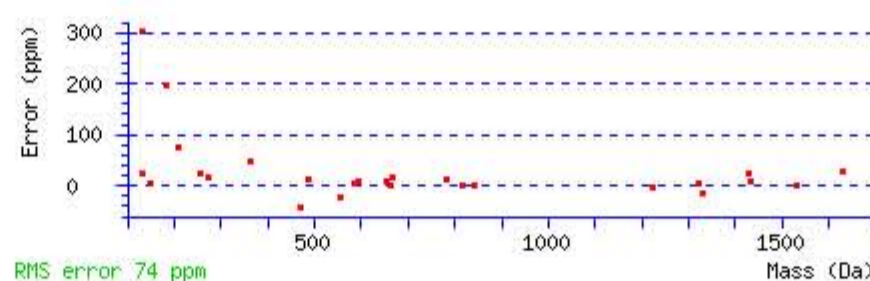

NCBI BLAST search of **EVGPPLPQEAVPLQK**

(Parameters: blastp, nr protein database, expect=20000, no filter, PAM30)

Other BLAST [web gateways](#)

All matches to this query

| Score | Mr(calc):   | Delta    | Sequence                        |
|-------|-------------|----------|---------------------------------|
| 34.2  | 1912.049194 | 0.004358 | <a href="#">EVGPPLPQEAVPLQK</a> |
| 21.6  | 1912.049194 | 0.004358 | <a href="#">EVGPPLPQEAVPLQK</a> |

Mascot: <http://www.matrixscience.com/>



# MASCOT Search Results

## Peptide View

MS/MS Fragmentation of **EVGPPLPQEAVPLQK**

Found in **ECM1\_HUMAN**, Extracellular matrix protein 1 OS=Homo sapiens GN=ECM1 PE=1 SV=2

Match to Query 51543: 2223.225068 from(1112.619810,2+) rtinseconds(2442) index(24155)

Title: Locus:1.1.1.852.8 File:"2013-07-02 CLN FXIII 60 min 2nd F 2.wiff"

Data file C:\Program Files (x86)\Matrix Science\Mascot Daemon\mgf5 FXIII 60 min 2nd\mascot\_daemon\_merge.mgf

Click mouse within plot area to zoom in by factor of two about that point

Or, Plot from  to  Da

Label all possible matches  Label matches used for scoring

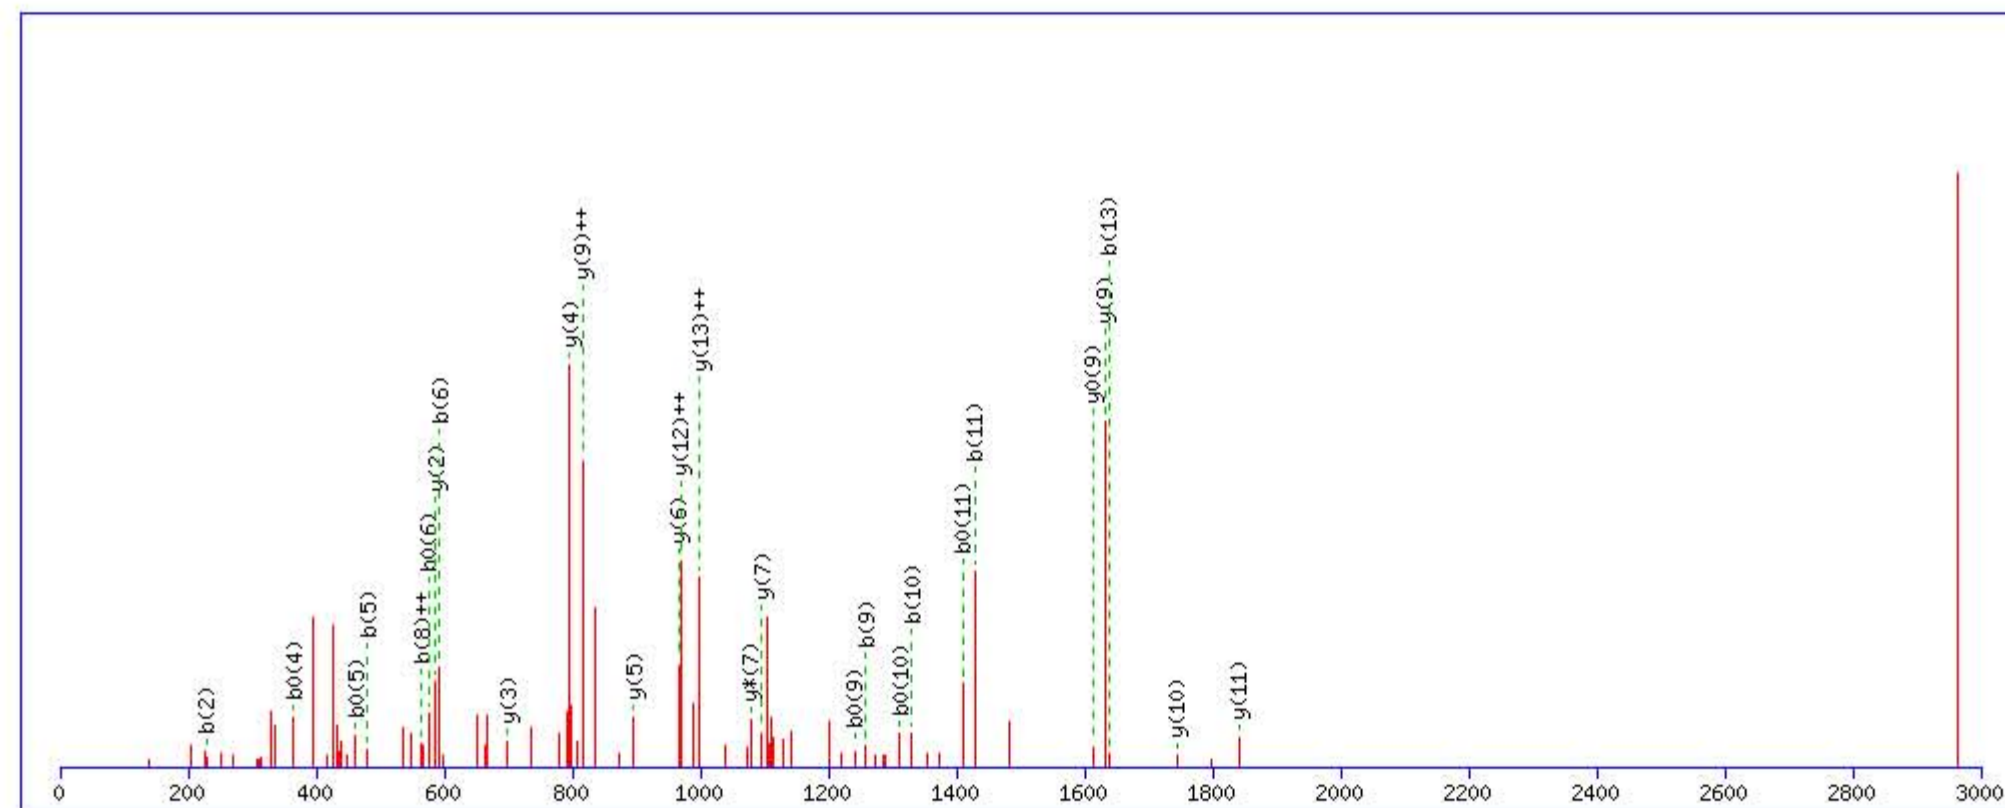

Monoisotopic mass of neutral peptide Mr(calc): 2223.215942

Fixed modifications: Carbamidomethyl (C) (apply to specified residues or termini only)

Variable modifications:

Q8 : Biotin:Thermo-21345 (Q)

Q14 : Biotin:Thermo-21345 (Q)

Ions Score: 33 Expect: 0.0081

Matches : 28/142 fragment ions using 67 most intense peaks [\(help\)](#)

| #  | b                  | b <sup>++</sup>   | b <sup>+</sup> | b <sup>+++</sup> | b <sup>0</sup>     | b <sup>0++</sup> | Seq. | y                  | y <sup>++</sup>   | y <sup>+</sup>     | y <sup>+++</sup> | y <sup>0</sup>     | y <sup>0++</sup> | #  |
|----|--------------------|-------------------|----------------|------------------|--------------------|------------------|------|--------------------|-------------------|--------------------|------------------|--------------------|------------------|----|
| 1  | 130.049869         | 65.528572         |                |                  | 112.039304         | 56.523290        | E    |                    |                   |                    |                  |                    |                  | 15 |
| 2  | <b>229.118283</b>  | 115.062780        |                |                  | 211.107718         | 106.057497       | V    | 2095.180639        | 1048.093957       | 2078.154090        | 1039.580683      | 2077.170074        | 1039.088675      | 14 |
| 3  | 286.139747         | 143.573512        |                |                  | 268.129182         | 134.568229       | G    | 1996.112225        | <b>998.559751</b> | 1979.085676        | 990.046476       | 1978.101660        | 989.554468       | 13 |
| 4  | 383.192511         | 192.099894        |                |                  | <b>365.181946</b>  | 183.094611       | P    | 1939.090761        | <b>970.049019</b> | 1922.064212        | 961.535744       | 1921.080196        | 961.043736       | 12 |
| 5  | <b>480.245275</b>  | 240.626276        |                |                  | <b>462.234710</b>  | 231.620993       | P    | <b>1842.037997</b> | 921.522637        | 1825.011448        | 913.009362       | 1824.027432        | 912.517354       | 11 |
| 6  | <b>593.329339</b>  | 297.168308        |                |                  | <b>575.318774</b>  | 288.163025       | L    | <b>1744.985233</b> | 872.996255        | 1727.958684        | 864.482980       | 1726.974668        | 863.990972       | 10 |
| 7  | 690.382103         | 345.694690        |                |                  | 672.371538         | 336.689407       | P    | <b>1631.901169</b> | <b>816.454223</b> | 1614.874620        | 807.940948       | <b>1613.890604</b> | 807.448940       | 9  |
| 8  | 1129.607429        | <b>565.307353</b> | 1112.580880    | 556.794078       | 1111.596864        | 556.302070       | Q    | 1534.848405        | 767.927841        | 1517.821856        | 759.414566       | 1516.837840        | 758.922558       | 8  |
| 9  | <b>1258.650022</b> | 629.828649        | 1241.623473    | 621.315375       | <b>1240.639457</b> | 620.823367       | E    | <b>1095.623079</b> | 548.315178        | <b>1078.596530</b> | 539.801903       | 1077.612514        | 539.309895       | 7  |
| 10 | <b>1329.687136</b> | 665.347206        | 1312.660587    | 656.833932       | <b>1311.676571</b> | 656.341924       | A    | <b>966.580486</b>  | 483.793881        | 949.553937         | 475.280607       |                    |                  | 6  |
| 11 | <b>1428.755550</b> | 714.881413        | 1411.729001    | 706.368139       | <b>1410.744985</b> | 705.876131       | V    | <b>895.543372</b>  | 448.275324        | 878.516823         | 439.762050       |                    |                  | 5  |
| 12 | 1525.808314        | 763.407795        | 1508.781765    | 754.894521       | 1507.797749        | 754.402513       | P    | <b>796.474958</b>  | 398.741117        | 779.448409         | 390.227843       |                    |                  | 4  |
| 13 | <b>1638.892378</b> | 819.949827        | 1621.865829    | 811.436553       | 1620.881813        | 810.944545       | L    | <b>699.422194</b>  | 350.214735        | 682.395645         | 341.701461       |                    |                  | 3  |
| 14 | 2078.117704        | 1039.562490       | 2061.091155    | 1031.049215      | 2060.107139        | 1030.557207      | Q    | <b>586.338130</b>  | 293.672703        | 569.311581         | 285.159429       |                    |                  | 2  |
| 15 |                    |                   |                |                  |                    |                  | K    | 147.112804         | 74.060040         | 130.086255         | 65.546765        |                    |                  | 1  |

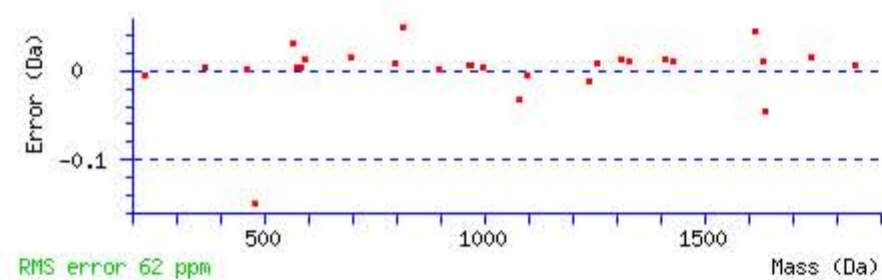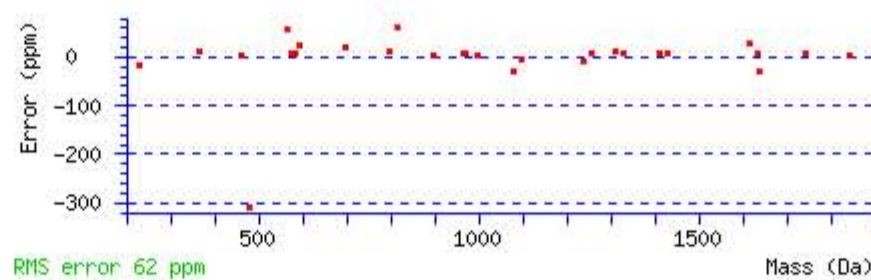

NCBI BLAST search of **EVGPPLPQEAVPLQK**

(Parameters: blastp, nr protein database, expect=20000, no filter, PAM30)

Other BLAST [web gateways](#)

All matches to this query

| Score | Mr(calc):   | Delta    | Sequence                        |
|-------|-------------|----------|---------------------------------|
| 32.6  | 2223.215942 | 0.009126 | <a href="#">EVGPPLPQEAVPLQK</a> |

Mascot: <http://www.matrixscience.com/>



# MASCOT Search Results

## Peptide View

MS/MS Fragmentation of **FSCFQEEAPQPHYQLR**

Found in **ECM1\_HUMAN**, Extracellular matrix protein 1 OS=Homo sapiens GN=ECM1 PE=1 SV=2

Match to Query 53728: 2347.088202 from(783.370010,3+) rtinseconds(1939) index(5537)

Title: Locus:1.1.1.1484.18 File:"2013-07-02 CLN FXIII 60 min 2nd F 1.wiff"

Data file C:\Program Files (x86)\Matrix Science\Mascot Daemon\mgf\5 FXIII 60 min 2nd\mascot\_daemon\_merge.mgf

Click mouse within plot area to zoom in by factor of two about that point

Or, Plot from  to  Da

Label all possible matches  Label matches used for scoring

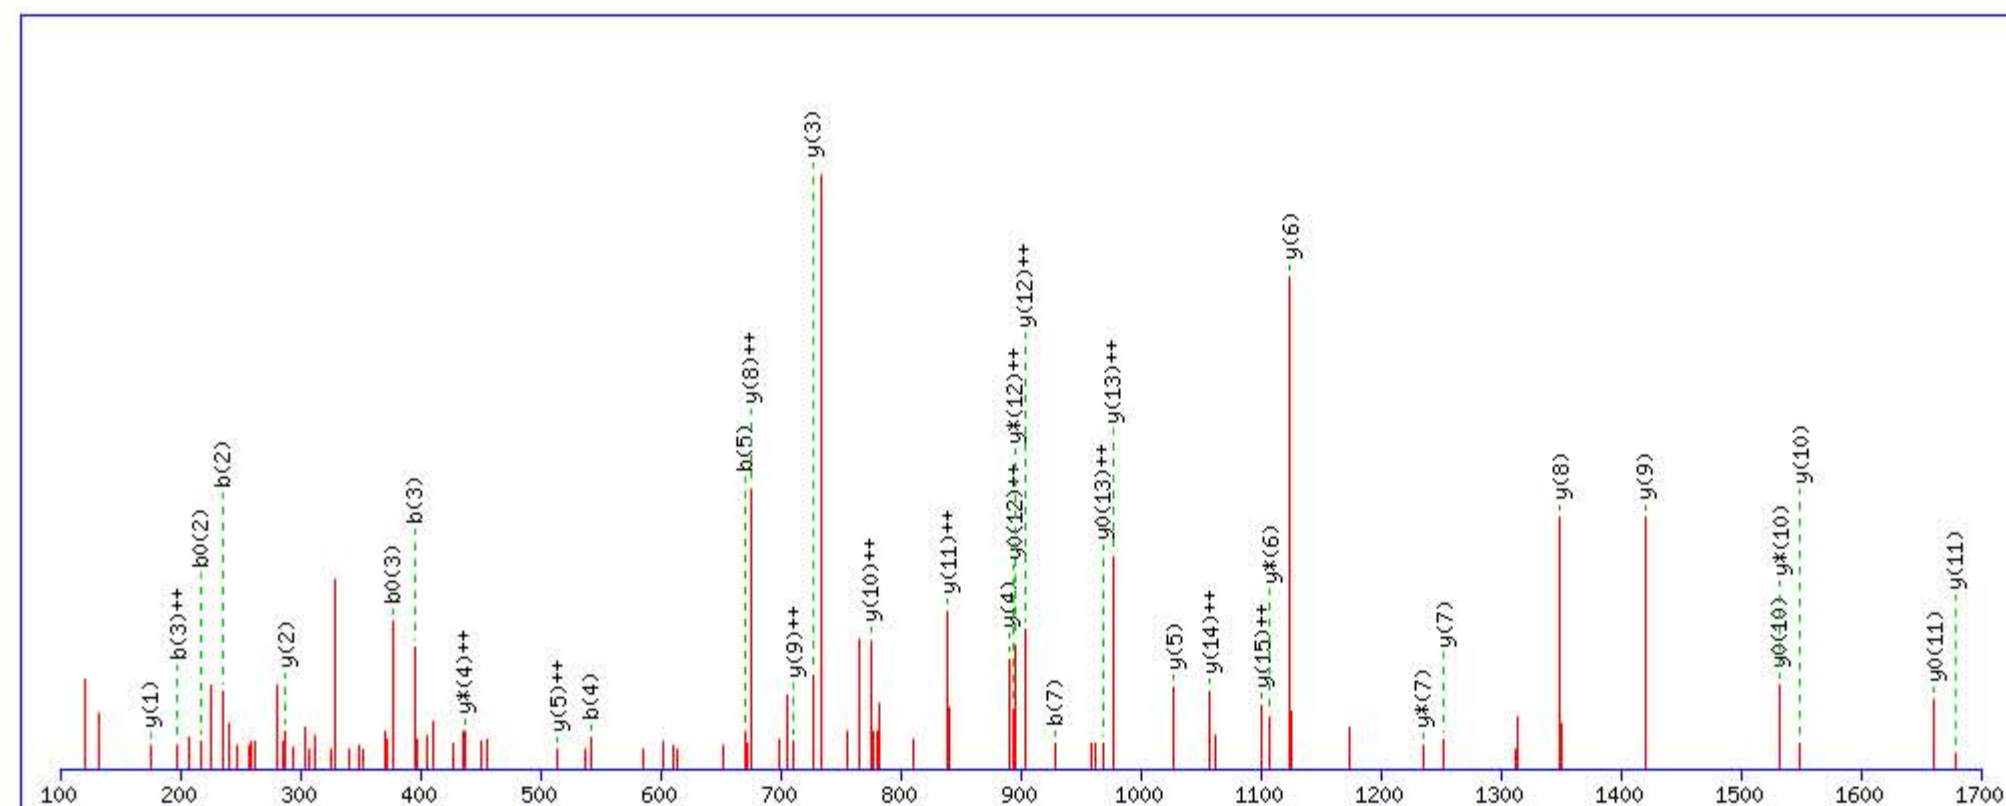

Monoisotopic mass of neutral peptide Mr(calc): 2347.087784

Fixed modifications: Carbamidomethyl (C) (apply to specified residues or termini only)

Variable modifications:

Q14 : Biotin:Thermo-21345 (Q)

Ions Score: 54 Expect: 9.8e-006

Matches : 37/152 fragment ions using 80 most intense peaks [\(help\)](#)

| #  | b                 | b <sup>++</sup>   | b <sup>+</sup> | b <sup>+++</sup> | b <sup>0</sup>    | b <sup>0++</sup> | Seq. | y                  | y <sup>++</sup>    | y <sup>+</sup>     | y <sup>+++</sup>  | y <sup>0</sup>     | y <sup>0++</sup>  | #  |
|----|-------------------|-------------------|----------------|------------------|-------------------|------------------|------|--------------------|--------------------|--------------------|-------------------|--------------------|-------------------|----|
| 1  | 148.075690        | 74.541483         |                |                  |                   |                  | F    |                    |                    |                    |                   |                    |                   | 16 |
| 2  | <b>235.107718</b> | 118.057497        |                |                  | <b>217.097153</b> | 109.052214       | S    | 2201.026658        | <b>1101.016967</b> | 2184.000109        | 1092.503692       | 2183.016093        | 1092.011684       | 15 |
| 3  | <b>395.138367</b> | <b>198.072821</b> |                |                  | <b>377.127802</b> | 189.067539       | C    | 2113.994630        | <b>1057.500953</b> | 2096.968081        | 1048.987678       | 2095.984065        | 1048.495670       | 14 |
| 4  | <b>542.206781</b> | 271.607029        |                |                  | 524.196216        | 262.601746       | F    | 1953.963981        | <b>977.485629</b>  | 1936.937432        | 968.972354        | 1935.953416        | <b>968.480346</b> | 13 |
| 5  | <b>670.265359</b> | 335.636318        | 653.238810     | 327.123043       | 652.254794        | 326.631035       | Q    | 1806.895567        | <b>903.951422</b>  | 1789.869018        | <b>895.438147</b> | 1788.885002        | <b>894.946139</b> | 12 |
| 6  | 799.307952        | 400.157614        | 782.281403     | 391.644340       | 781.297387        | 391.152332       | E    | <b>1678.836989</b> | <b>839.922133</b>  | 1661.810440        | 831.408858        | <b>1660.826424</b> | 830.916850        | 11 |
| 7  | <b>928.350545</b> | 464.678911        | 911.323996     | 456.165636       | 910.339980        | 455.673628       | E    | <b>1549.794396</b> | <b>775.400836</b>  | <b>1532.767847</b> | 766.887562        | <b>1531.783831</b> | 766.395554        | 10 |
| 8  | 999.387659        | 500.197468        | 982.361110     | 491.684193       | 981.377094        | 491.192185       | A    | <b>1420.751803</b> | <b>710.879540</b>  | 1403.725254        | 702.366265        |                    |                   | 9  |
| 9  | 1096.440423       | 548.723850        | 1079.413874    | 540.210575       | 1078.429858       | 539.718567       | P    | <b>1349.714689</b> | <b>675.360983</b>  | 1332.688140        | 666.847708        |                    |                   | 8  |
| 10 | 1224.499001       | 612.753138        | 1207.472452    | 604.239864       | 1206.488436       | 603.747856       | Q    | <b>1252.661925</b> | 626.834601         | <b>1235.635376</b> | 618.321326        |                    |                   | 7  |
| 11 | 1321.551765       | 661.279520        | 1304.525216    | 652.766246       | 1303.541200       | 652.274238       | P    | <b>1124.603347</b> | 562.805312         | <b>1107.576798</b> | 554.292037        |                    |                   | 6  |
| 12 | 1458.610677       | 729.808976        | 1441.584128    | 721.295702       | 1440.600112       | 720.803694       | H    | <b>1027.550583</b> | <b>514.278930</b>  | 1010.524034        | 505.765655        |                    |                   | 5  |
| 13 | 1621.674006       | 811.340641        | 1604.647457    | 802.827367       | 1603.663441       | 802.335358       | Y    | <b>890.491671</b>  | 445.749474         | 873.465122         | <b>437.236199</b> |                    |                   | 4  |
| 14 | 2060.899332       | 1030.953304       | 2043.872783    | 1022.440030      | 2042.888767       | 1021.948022      | Q    | <b>727.428342</b>  | 364.217809         | 710.401793         | 355.704535        |                    |                   | 3  |
| 15 | 2173.983396       | 1087.495336       | 2156.956847    | 1078.982061      | 2155.972831       | 1078.490053      | L    | <b>288.203016</b>  | 144.605146         | 271.176467         | 136.091872        |                    |                   | 2  |
| 16 |                   |                   |                |                  |                   |                  | R    | <b>175.118952</b>  | 88.063114          | 158.092403         | 79.549839         |                    |                   | 1  |

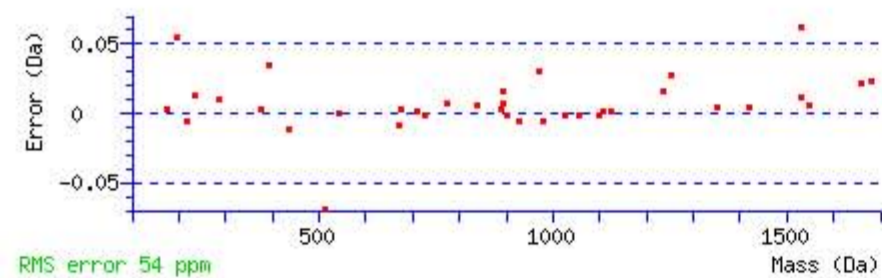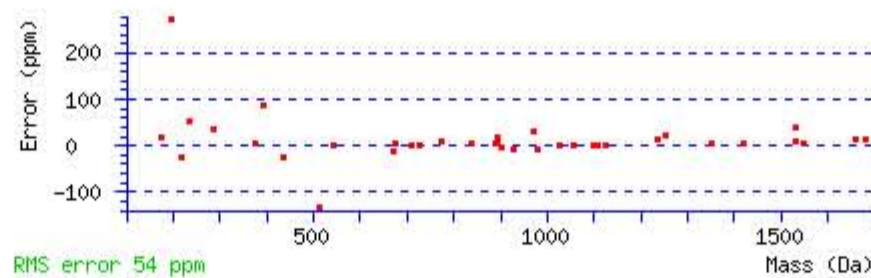

NCBI BLAST search of **FSCFQEEAPQPHYQLR**

(Parameters: blastp, nr protein database, expect=20000, no filter, PAM30)

Other BLAST [web gateways](#)

All matches to this query

| Score | Mr(calc):   | Delta    | Sequence                              |
|-------|-------------|----------|---------------------------------------|
| 53.9  | 2347.087784 | 0.000418 | <a href="#">FSCFQEEAPQPHYQLR</a>      |
| 26.8  | 2347.087784 | 0.000418 | <a href="#">FSCFQEEAPQPHYQLR</a>      |
| 0.5   | 2347.077271 | 0.010931 | <a href="#">RCPCCAVIDTTQAPGKVVWWR</a> |
| 0.2   | 2347.087784 | 0.000418 | <a href="#">FSCFQEEAPQPHYQLR</a>      |



# MASCOT Search Results

## Peptide View

MS/MS Fragmentation of **IFFESVYGQCK**

Found in **FETUB\_HUMAN**, Fetuin-B OS=Homo sapiens GN=FETUB PE=1 SV=2

Match to Query 40215: 1687.814788 from(844.914670,2+) rtinseconds(2332) index(70692)

Title: Locus:1.1.1.1749.18 File:"2013-07-02 CLN FXIII 60 min 2nd FT.wiff"

Data file C:\Program Files (x86)\Matrix Science\Mascot Daemon\mgf5 FXIII 60 min 2nd\mascot\_daemon\_merge.mgf

Click mouse within plot area to zoom in by factor of two about that point

Or, Plot from  to  Da

Label all possible matches  Label matches used for scoring

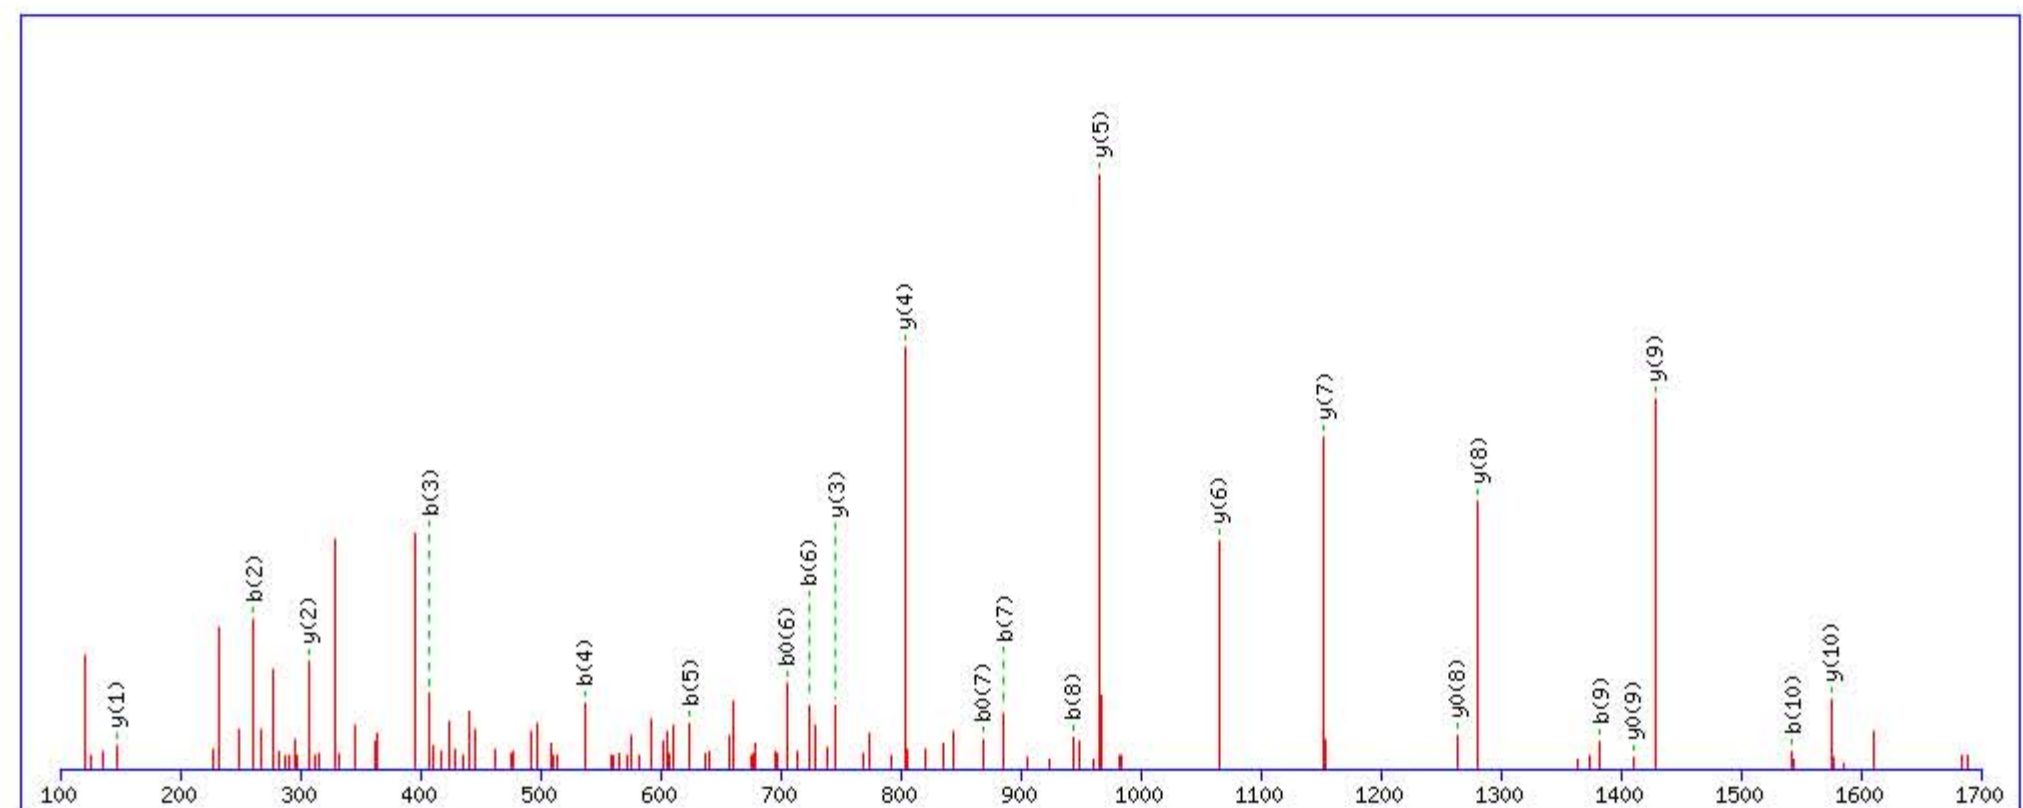

Monoisotopic mass of neutral peptide Mr(calc): 1687.810226

Fixed modifications: Carbamidomethyl (C) (apply to specified residues or termini only)

Variable modifications:

Q9 : Biotin:Thermo-21345 (Q)

Ions Score: 63 Expect: 1e-005

Matches : 23/86 fragment ions using 41 most intense peaks [\(help\)](#)

| #  | b                  | b <sup>++</sup> | b <sup>*</sup> | b <sup>*++</sup> | b <sup>0</sup>    | b <sup>0++</sup> | Seq. | y                  | y <sup>++</sup> | y <sup>*</sup> | y <sup>*++</sup> | y <sup>0</sup>     | y <sup>0++</sup> | #  |
|----|--------------------|-----------------|----------------|------------------|-------------------|------------------|------|--------------------|-----------------|----------------|------------------|--------------------|------------------|----|
| 1  | 114.091340         | 57.549308       |                |                  |                   |                  | I    |                    |                 |                |                  |                    |                  | 11 |
| 2  | <b>261.159754</b>  | 131.083515      |                |                  |                   |                  | F    | <b>1575.733435</b> | 788.370356      | 1558.706886    | 779.857081       | 1557.722870        | 779.365073       | 10 |
| 3  | <b>408.228168</b>  | 204.617722      |                |                  |                   |                  | F    | <b>1428.665021</b> | 714.836149      | 1411.638472    | 706.322874       | <b>1410.654456</b> | 705.830866       | 9  |
| 4  | <b>537.270761</b>  | 269.139019      |                |                  | 519.260196        | 260.133736       | E    | <b>1281.596607</b> | 641.301942      | 1264.570058    | 632.788667       | <b>1263.586042</b> | 632.296659       | 8  |
| 5  | <b>624.302789</b>  | 312.655033      |                |                  | 606.292224        | 303.649750       | S    | <b>1152.554014</b> | 576.780645      | 1135.527465    | 568.267371       | 1134.543449        | 567.775363       | 7  |
| 6  | <b>723.371203</b>  | 362.189239      |                |                  | <b>705.360638</b> | 353.183957       | V    | <b>1065.521986</b> | 533.264631      | 1048.495437    | 524.751357       |                    |                  | 6  |
| 7  | <b>886.434532</b>  | 443.720904      |                |                  | <b>868.423967</b> | 434.715622       | Y    | <b>966.453572</b>  | 483.730424      | 949.427023     | 475.217150       |                    |                  | 5  |
| 8  | <b>943.455996</b>  | 472.231636      |                |                  | 925.445431        | 463.226354       | G    | <b>803.390243</b>  | 402.198760      | 786.363694     | 393.685485       |                    |                  | 4  |
| 9  | <b>1382.681322</b> | 691.844299      | 1365.654773    | 683.331025       | 1364.670757       | 682.839017       | Q    | <b>746.368779</b>  | 373.688028      | 729.342230     | 365.174753       |                    |                  | 3  |
| 10 | <b>1542.711971</b> | 771.859624      | 1525.685422    | 763.346349       | 1524.701406       | 762.854341       | C    | <b>307.143453</b>  | 154.075365      | 290.116904     | 145.562090       |                    |                  | 2  |
| 11 |                    |                 |                |                  |                   |                  | K    | <b>147.112804</b>  | 74.060040       | 130.086255     | 65.546765        |                    |                  | 1  |

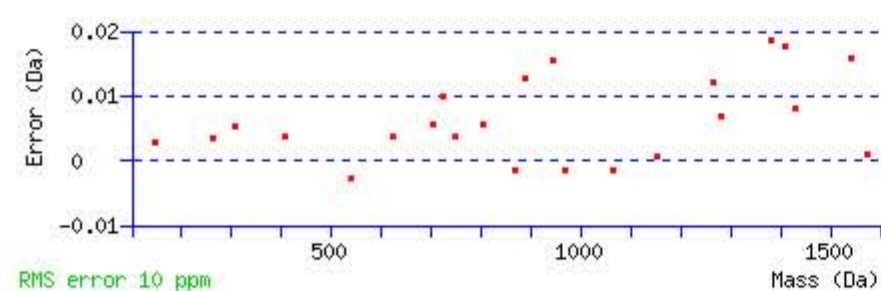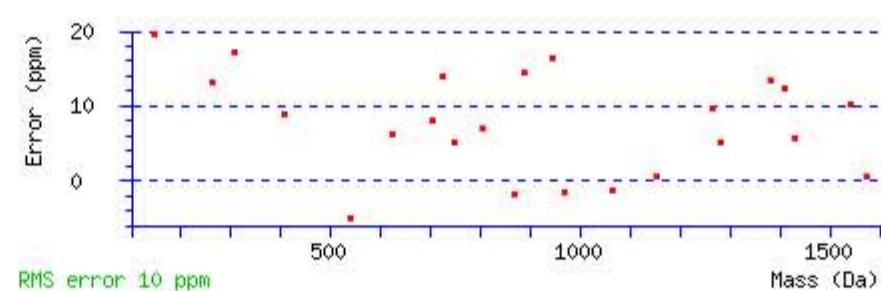

NCBI BLAST search of [IFFESVYGQCK](#)

(Parameters: blastp, nr protein database, expect=20000, no filter, PAM30)

Other BLAST [web gateways](#)

All matches to this query

| Score | Mr(calc):   | Delta    | Sequence                    |
|-------|-------------|----------|-----------------------------|
| 63.0  | 1687.810226 | 0.004562 | <a href="#">IFFESVYGQCK</a> |

Mascot: <http://www.matrixscience.com/>



# MASCOT SCIENCE Mascot Search Results

## Peptide View

MS/MS Fragmentation of **QLEQVIAK**

Found in **FIBA\_HUMAN**, Fibrinogen alpha chain OS=Homo sapiens GN=FGA PE=1 SV=2

Match to Query 24327: 1238.703788 from(620.359170,2+) rtinseconds(1748) index(20039)

Title: Locus:1.1.1.611.7 File:"2013-07-02 CLN FXIII 60 min 2nd F 2.wiff"

Data file C:\Program Files (x86)\Matrix Science\Mascot Daemon\mgf5 FXIII 60 min 2nd\mascot\_daemon\_merge.mgf

Click mouse within plot area to zoom in by factor of two about that point

Or, Plot from  to  Da

Label all possible matches  Label matches used for scoring

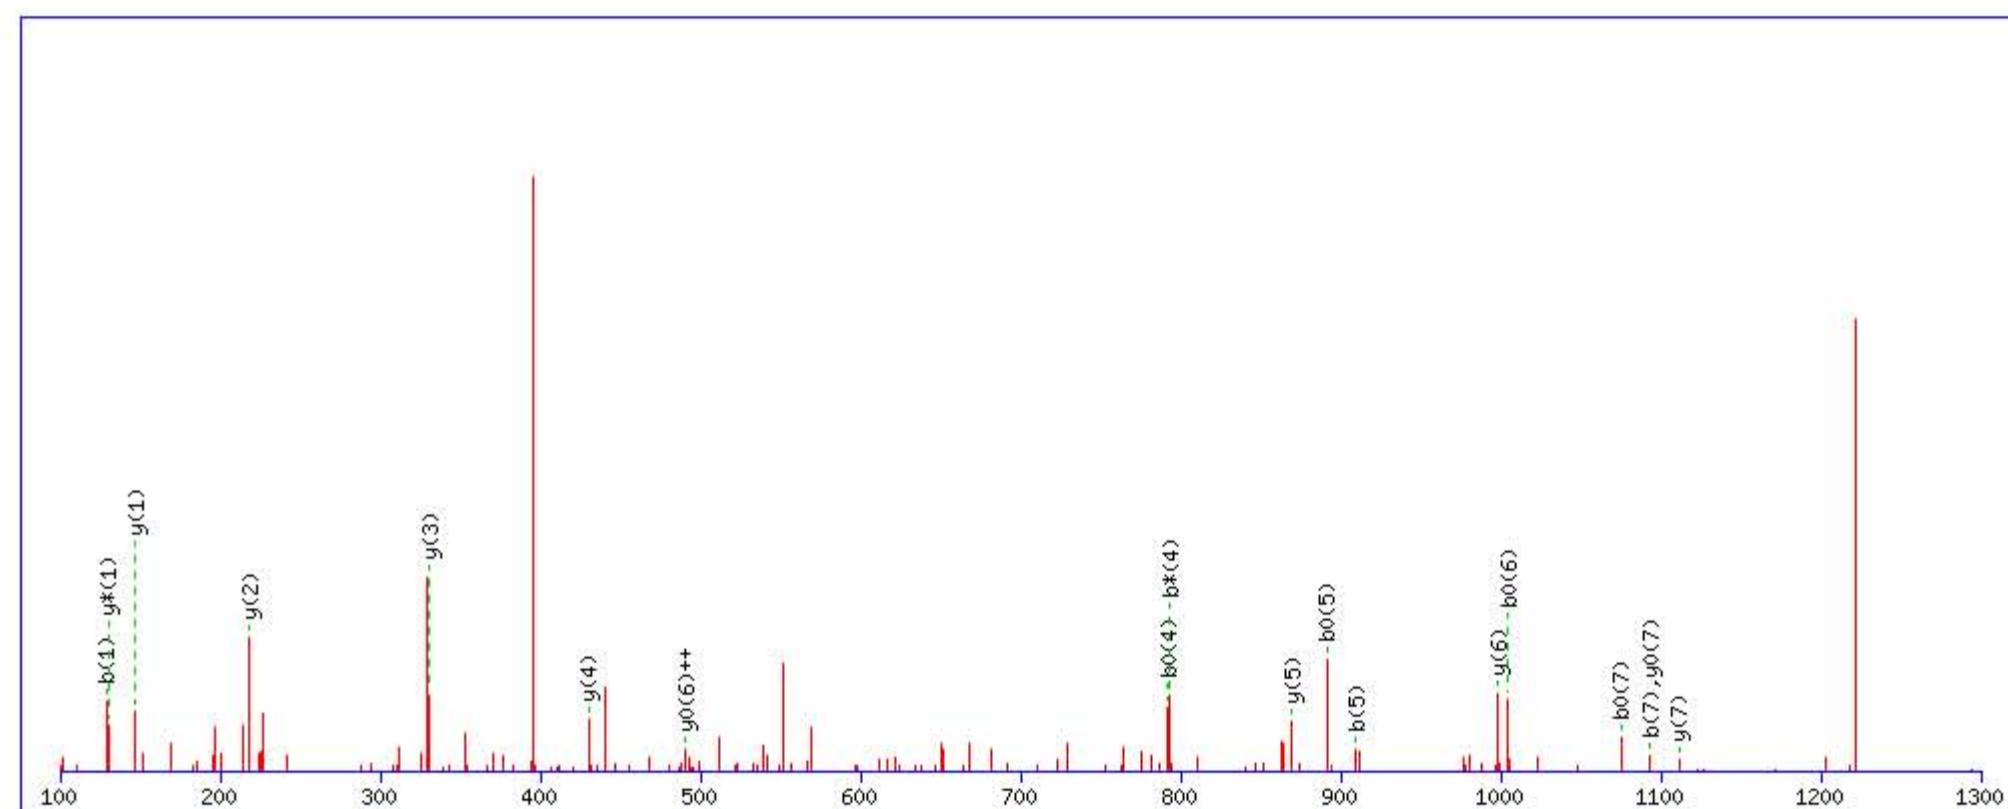

Monoisotopic mass of neutral peptide Mr(calc): 1238.705658

Fixed modifications: Carbamidomethyl (C) (apply to specified residues or termini only)

Variable modifications:

Q4 : Biotin:Thermo-21345 (Q)

Ions Score: 38 Expect: 0.0025

Matches : 18/70 fragment ions using 36 most intense peaks [\(help\)](#)

| # | b           | b <sup>++</sup> | b <sup>*</sup> | b <sup>*++</sup> | b <sup>0</sup> | b <sup>0++</sup> | Seq. | y           | y <sup>++</sup> | y <sup>*</sup> | y <sup>*++</sup> | y <sup>0</sup> | y <sup>0++</sup> | # |
|---|-------------|-----------------|----------------|------------------|----------------|------------------|------|-------------|-----------------|----------------|------------------|----------------|------------------|---|
| 1 | 129.065854  | 65.036565       | 112.039305     | 56.523291        |                |                  | Q    |             |                 |                |                  |                |                  | 8 |
| 2 | 242.149918  | 121.578597      | 225.123369     | 113.065323       |                |                  | L    | 1111.654379 | 556.330828      | 1094.627830    | 547.817553       | 1093.643814    | 547.325545       | 7 |
| 3 | 371.192511  | 186.099894      | 354.165962     | 177.586619       | 353.181946     | 177.094611       | E    | 998.570315  | 499.788796      | 981.543766     | 491.275521       | 980.559750     | 490.783513       | 6 |
| 4 | 810.417837  | 405.712557      | 793.391288     | 397.199282       | 792.407272     | 396.707274       | Q    | 869.527722  | 435.267499      | 852.501173     | 426.754225       |                |                  | 5 |
| 5 | 909.486251  | 455.246764      | 892.459702     | 446.733489       | 891.475686     | 446.241481       | V    | 430.302396  | 215.654836      | 413.275847     | 207.141562       |                |                  | 4 |
| 6 | 1022.570315 | 511.788796      | 1005.543766    | 503.275521       | 1004.559750    | 502.783513       | I    | 331.233982  | 166.120629      | 314.207433     | 157.607355       |                |                  | 3 |
| 7 | 1093.607429 | 547.307353      | 1076.580880    | 538.794078       | 1075.596864    | 538.302070       | A    | 218.149918  | 109.578597      | 201.123369     | 101.065323       |                |                  | 2 |
| 8 |             |                 |                |                  |                |                  | K    | 147.112804  | 74.060040       | 130.086255     | 65.546765        |                |                  | 1 |

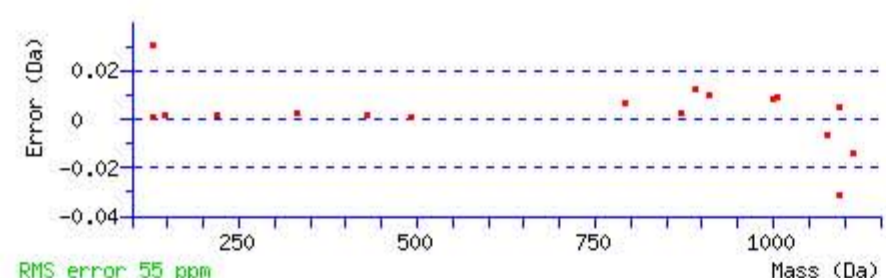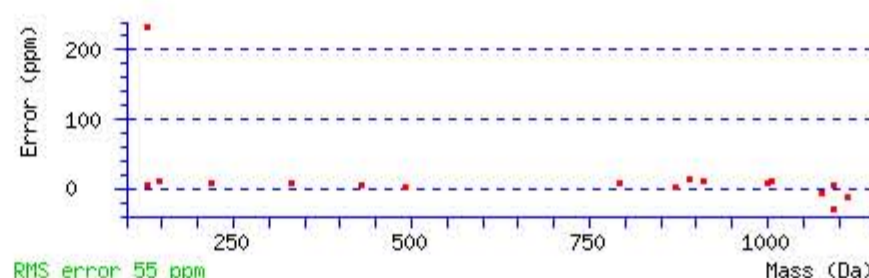

NCBI BLAST search of [QLEQVIAK](#)

(Parameters: blastp, nr protein database, expect=20000, no filter, PAM30)

Other BLAST [web gateways](#)

All matches to this query

| Score | Mr(calc):   | Delta     | Sequence                     |
|-------|-------------|-----------|------------------------------|
| 38.1  | 1238.705658 | -0.001870 | <a href="#">QLEQVIAK</a>     |
| 16.4  | 1238.698257 | 0.005531  | <a href="#">IHADASSKVLAK</a> |
| 14.8  | 1238.705658 | -0.001870 | <a href="#">QLEQVIAK</a>     |
| 13.1  | 1238.687027 | 0.016761  | <a href="#">KEETQPPVALK</a>  |
| 8.4   | 1238.716904 | -0.013116 | <a href="#">DRVQVAIK</a>     |
| 7.5   | 1238.691040 | 0.012748  | <a href="#">LYKEFIDLAK</a>   |
| 5.6   | 1238.702301 | 0.001487  | <a href="#">DVFKKGFSLAK</a>  |
| 5.2   | 1238.716888 | -0.013100 | <a href="#">KRILCPLDPK</a>   |
| 3.7   | 1238.695572 | 0.008216  | <a href="#">SHSRVRAIASR</a>  |
| 3.3   | 1238.709473 | -0.005685 | <a href="#">NDLRPANKLAK</a>  |



# MASCOT SEARCH RESULTS

## Peptide View

MS/MS Fragmentation of **NSLFEYQK**

Found in **FIBA\_HUMAN**, Fibrinogen alpha chain OS=Homo sapiens GN=FGA PE=1 SV=2

Match to Query 26939: 1338.666948 from(670.340750,2+) rtinseconds(2062) index(6226)

Title: Locus:1.1.1.1527.17 File:"2013-07-02 CLN FXIII 60 min 2nd F 1.wiff"

Data file C:\Program Files (x86)\Matrix Science\Mascot Daemon\mgf5 FXIII 60 min 2nd\mascot\_daemon\_merge.mgf

Click mouse within plot area to zoom in by factor of two about that point

Or, Plot from  to  Da

Label all possible matches  Label matches used for scoring

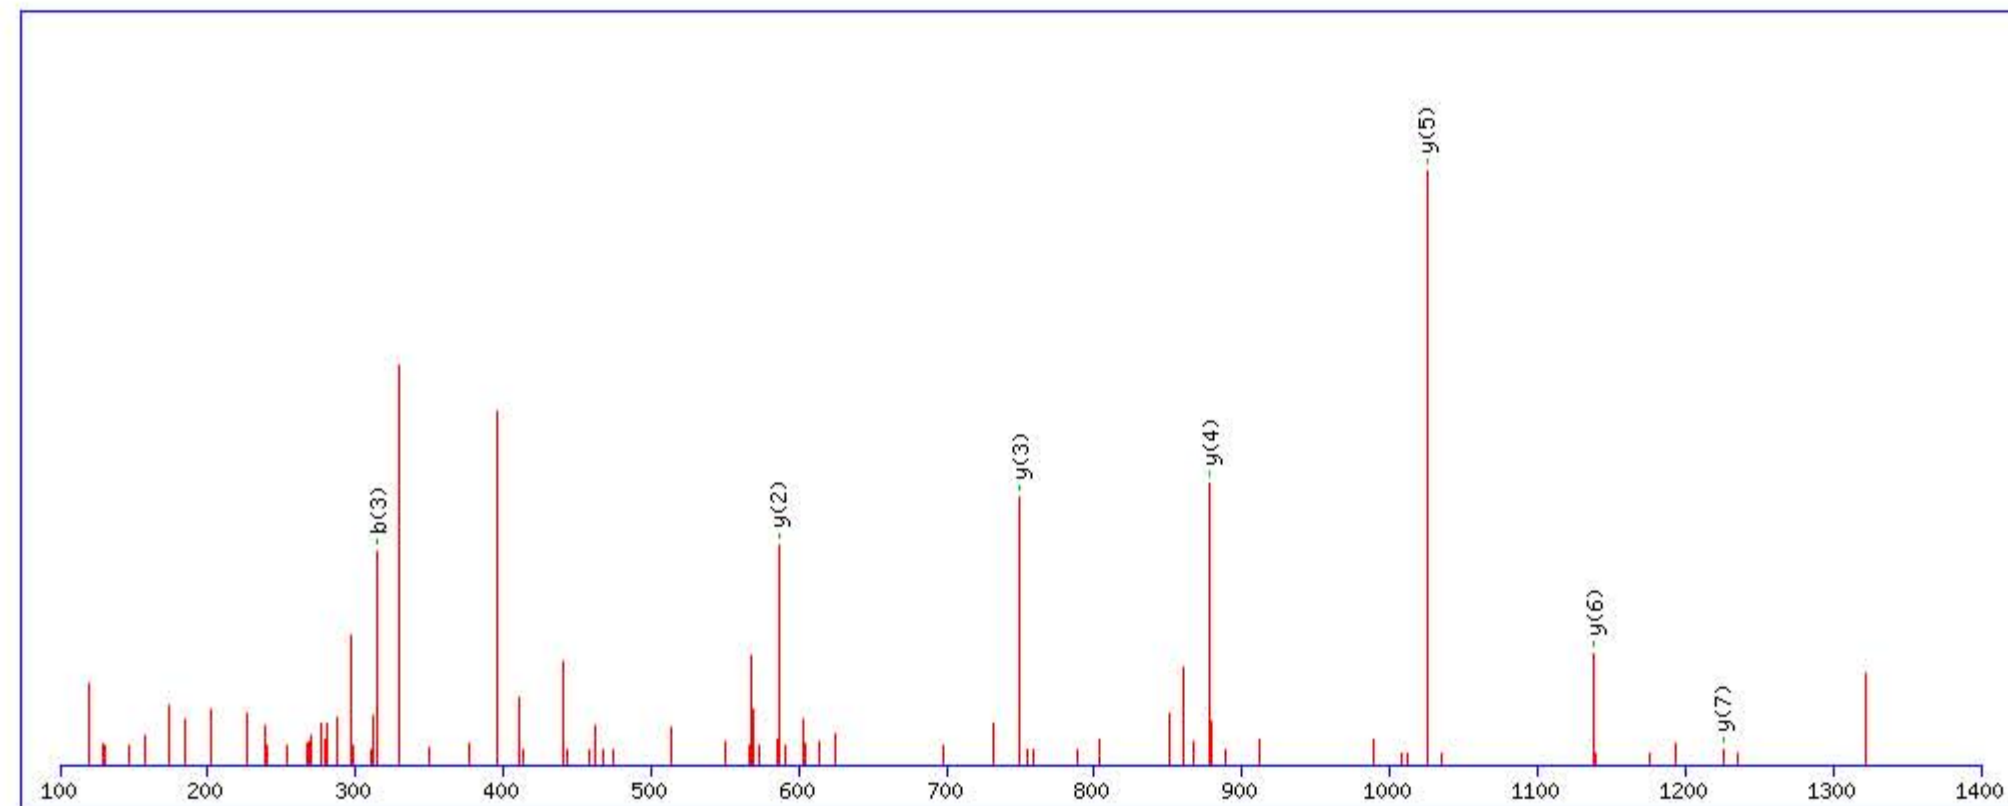

Monoisotopic mass of neutral peptide Mr(calc): 1338.664185

Fixed modifications: Carbamidomethyl (C) (apply to specified residues or termini only)

Variable modifications:

Q7 : Biotin:Thermo-21345 (Q)

Ions Score: 40 Expect: 0.0018

Matches : 7/76 fragment ions using 13 most intense peaks [\(help\)](#)

| # | b                 | b <sup>++</sup> | b <sup>+</sup> | b <sup>+++</sup> | b <sup>0</sup> | b <sup>0++</sup> | Seq. | y                  | y <sup>++</sup> | y <sup>+</sup> | y <sup>+++</sup> | y <sup>0</sup> | y <sup>0++</sup> | # |
|---|-------------------|-----------------|----------------|------------------|----------------|------------------|------|--------------------|-----------------|----------------|------------------|----------------|------------------|---|
| 1 | 115.050203        | 58.028740       | 98.023654      | 49.515465        |                |                  | N    |                    |                 |                |                  |                |                  | 8 |
| 2 | 202.082231        | 101.544753      | 185.055682     | 93.031479        | 184.071666     | 92.539471        | S    | <b>1225.628558</b> | 613.317917      | 1208.602009    | 604.804643       | 1207.617993    | 604.312635       | 7 |
| 3 | <b>315.166295</b> | 158.086785      | 298.139746     | 149.573511       | 297.155730     | 149.081503       | L    | <b>1138.596530</b> | 569.801903      | 1121.569981    | 561.288629       | 1120.585965    | 560.796621       | 6 |
| 4 | 462.234709        | 231.620993      | 445.208160     | 223.107718       | 444.224144     | 222.615710       | F    | <b>1025.512466</b> | 513.259871      | 1008.485917    | 504.746597       | 1007.501901    | 504.254589       | 5 |
| 5 | 591.277302        | 296.142289      | 574.250753     | 287.629015       | 573.266737     | 287.137007       | E    | <b>878.444052</b>  | 439.725664      | 861.417503     | 431.212390       | 860.433487     | 430.720382       | 4 |
| 6 | 754.340631        | 377.673954      | 737.314082     | 369.160679       | 736.330066     | 368.668671       | Y    | <b>749.401459</b>  | 375.204368      | 732.374910     | 366.691093       |                |                  | 3 |
| 7 | 1193.565957       | 597.286617      | 1176.539408    | 588.773342       | 1175.555392    | 588.281334       | Q    | <b>586.338130</b>  | 293.672703      | 569.311581     | 285.159429       |                |                  | 2 |
| 8 |                   |                 |                |                  |                |                  | K    | 147.112804         | 74.060040       | 130.086255     | 65.546765        |                |                  | 1 |

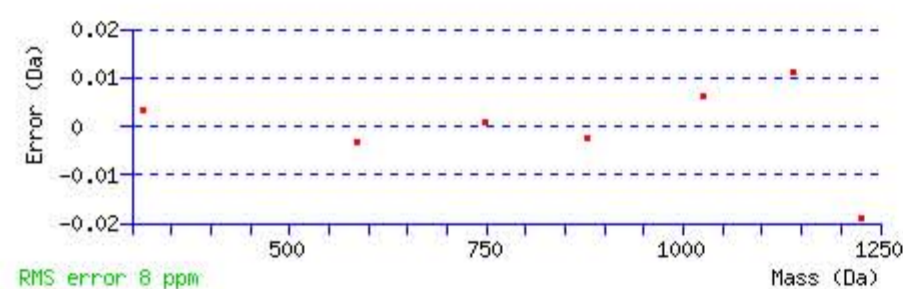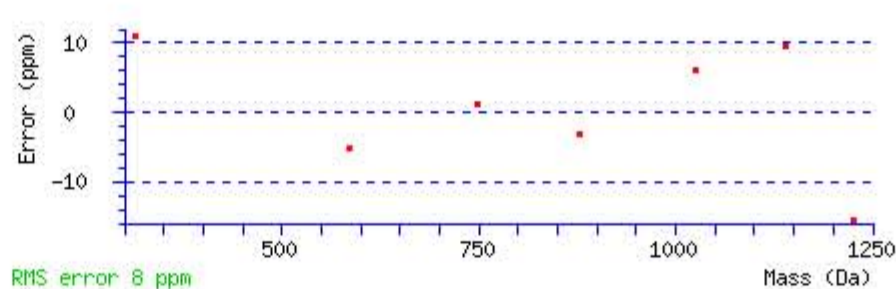

NCBI BLAST search of [NSLFEYQK](#)

(Parameters: blastp, nr protein database, expect=20000, no filter, PAM30)

Other BLAST [web gateways](#)

All matches to this query

| Score | Mr(calc):   | Delta     | Sequence                      |
|-------|-------------|-----------|-------------------------------|
| 39.9  | 1338.664185 | 0.002763  | <a href="#">NSLFEYQK</a>      |
| 12.3  | 1338.660172 | 0.006776  | <a href="#">NSMFTAGKGVAEK</a> |
| 7.4   | 1338.660172 | 0.006776  | <a href="#">BTVYVLQMBSLR</a>  |
| 5.3   | 1338.686188 | -0.019240 | <a href="#">TVKMMYQK</a>      |
| 3.8   | 1338.682632 | -0.015684 | <a href="#">NLSRMQSRFGK</a>   |
| 1.2   | 1338.666672 | 0.000276  | <a href="#">ESIKDLADYASK</a>  |
| 0.9   | 1338.652283 | 0.014665  | <a href="#">DAKSLAEMLSK</a>   |
| 0.8   | 1338.652283 | 0.014665  | <a href="#">DAKSLAEMLSK</a>   |



# MASCOT Search Results

## Peptide View

MS/MS Fragmentation of **ALTDMPQMR**

Found in **FIBA\_HUMAN**, Fibrinogen alpha chain OS=Homo sapiens GN=FGA PE=1 SV=2

Match to Query 29637: 1388.657228 from(695.335890,2+) rtinseconds(1677) index(3911)

Title: Locus:1.1.1.1393.9 File:"2013-07-02 CLN FXIII 60 min 2nd F 1.wiff"

Data file C:\Program Files (x86)\Matrix Science\Mascot Daemon\mgf5 FXIII 60 min 2nd\mascot\_daemon\_merge.mgf

Click mouse within plot area to zoom in by factor of two about that point

Or, Plot from  to  Da

Label all possible matches  Label matches used for scoring

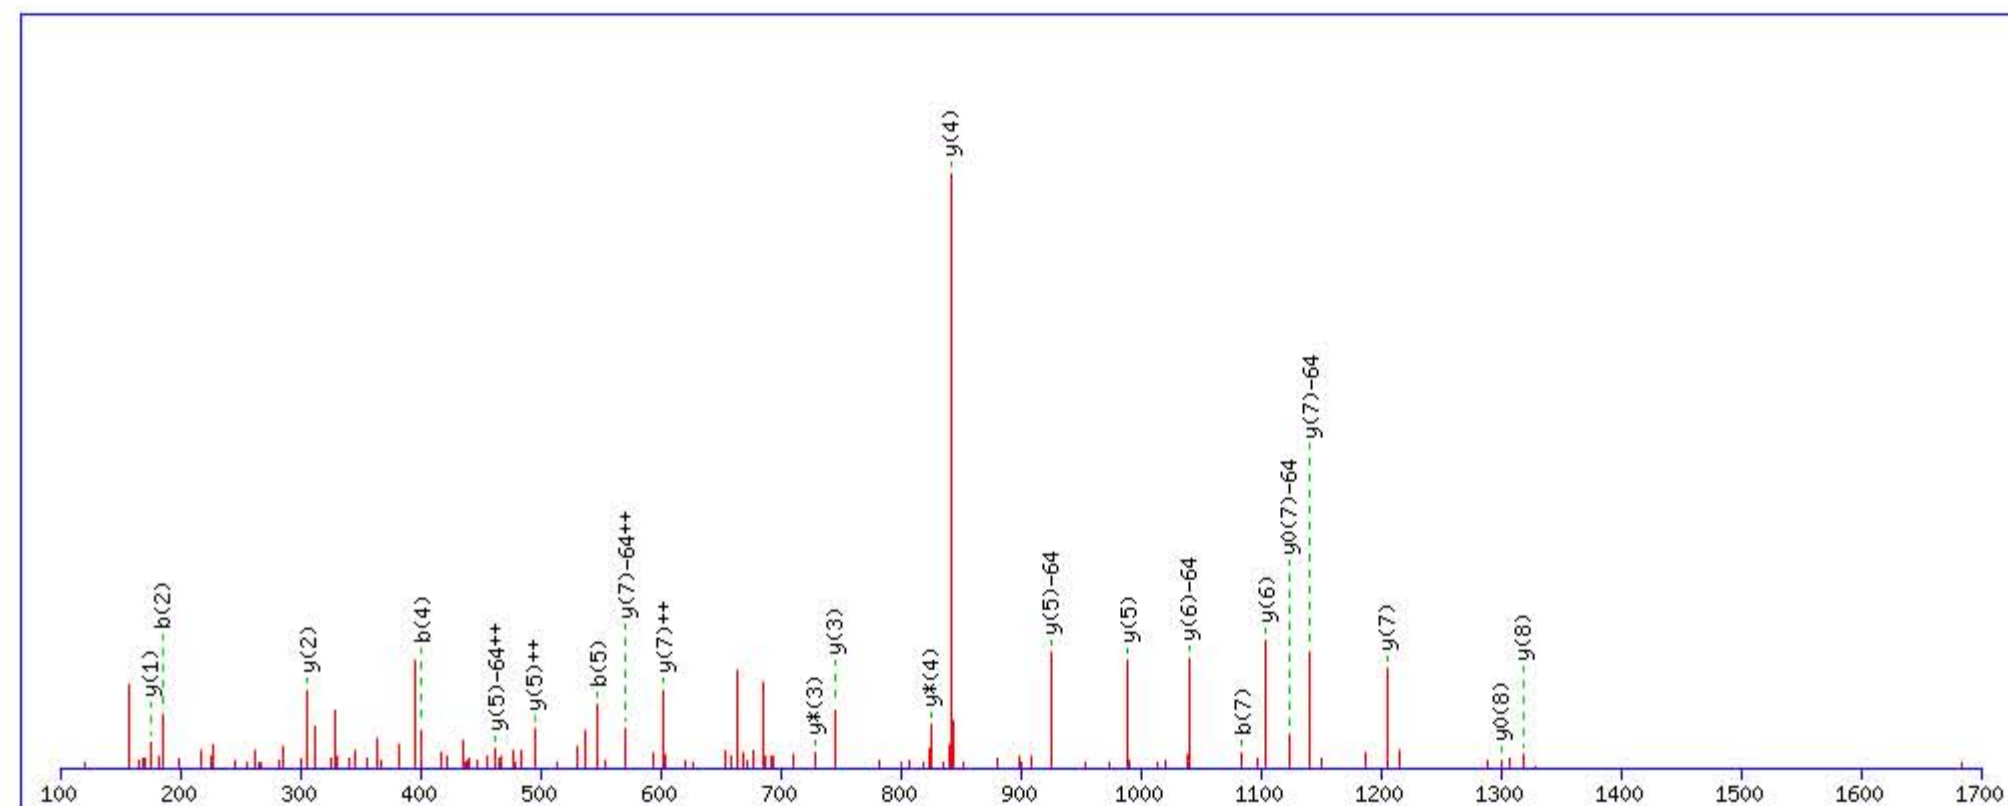

Monoisotopic mass of neutral peptide Mr(calc): 1388.661438

Fixed modifications: Carbamidomethyl (C) (apply to specified residues or termini only)

Variable modifications:

M5 : Oxidation (M), with neutral losses 0.000000 (shown in table), 63.998285

Q7 : Biotin:Thermo-21345 (Q)

Ions Score: 58 Expect: 1.1e-005

Matches : 23/112 fragment ions using 37 most intense peaks [\(help\)](#)

| # | b                  | b <sup>++</sup> | b <sup>+</sup> | b <sup>+++</sup> | b <sup>0</sup> | b <sup>0++</sup> | Seq. | y                  | y <sup>++</sup>   | y <sup>+</sup>    | y <sup>+++</sup> | y <sup>0</sup>     | y <sup>0++</sup> | # |
|---|--------------------|-----------------|----------------|------------------|----------------|------------------|------|--------------------|-------------------|-------------------|------------------|--------------------|------------------|---|
| 1 | 72.044390          | 36.525833       |                |                  |                |                  | A    |                    |                   |                   |                  |                    |                  | 9 |
| 2 | <b>185.128454</b>  | 93.067865       |                |                  |                |                  | L    | <b>1318.631613</b> | 659.819445        | 1301.605064       | 651.306170       | <b>1300.621048</b> | 650.814162       | 8 |
| 3 | 286.176133         | 143.591704      |                |                  | 268.165568     | 134.586422       | T    | <b>1205.547549</b> | <b>603.277413</b> | 1188.521000       | 594.764138       | 1187.536984        | 594.272130       | 7 |
| 4 | <b>401.203076</b>  | 201.105176      |                |                  | 383.192511     | 192.099894       | D    | <b>1104.499870</b> | 552.753573        | 1087.473321       | 544.240298       | 1086.489305        | 543.748290       | 6 |
| 5 | <b>548.238476</b>  | 274.622876      |                |                  | 530.227911     | 265.617594       | M    | <b>989.472927</b>  | <b>495.240102</b> | 972.446378        | 486.726827       |                    |                  | 5 |
| 6 | 645.291240         | 323.149258      |                |                  | 627.280675     | 314.143976       | P    | <b>842.437527</b>  | 421.722402        | <b>825.410978</b> | 413.209127       |                    |                  | 4 |
| 7 | <b>1084.516566</b> | 542.761921      | 1067.490017    | 534.248647       | 1066.506001    | 533.756639       | Q    | <b>745.384763</b>  | 373.196020        | <b>728.358214</b> | 364.682745       |                    |                  | 3 |
| 8 | 1215.557051        | 608.282164      | 1198.530502    | 599.768889       | 1197.546486    | 599.276881       | M    | <b>306.159437</b>  | 153.583356        | 289.132888        | 145.070082       |                    |                  | 2 |
| 9 |                    |                 |                |                  |                |                  | R    | <b>175.118952</b>  | 88.063114         | 158.092403        | 79.549839        |                    |                  | 1 |

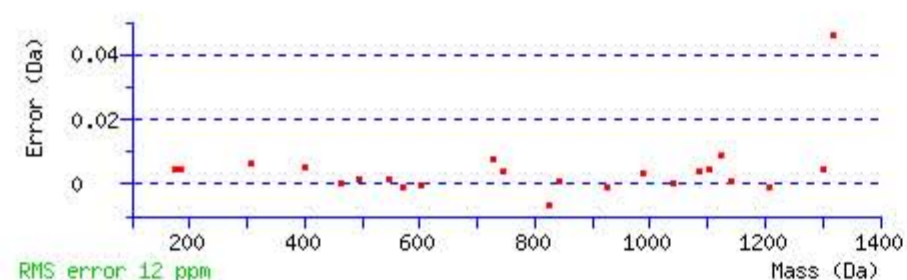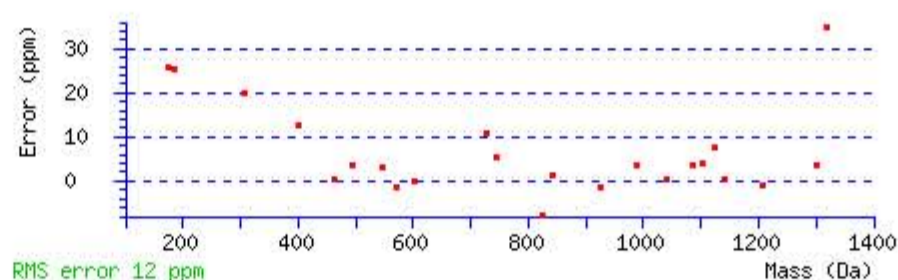

NCBI BLAST search of [ALTDMPQMR](#)

(Parameters: blastp, nr protein database, expect=20000, no filter, PAM30)

Other BLAST [web gateways](#)

## All matches to this query

| Score | Mr(calc):   | Delta     | Sequence                      |
|-------|-------------|-----------|-------------------------------|
| 58.0  | 1388.661438 | -0.004210 | <a href="#">ALTDMPQMR</a>     |
| 20.2  | 1388.661438 | -0.004210 | <a href="#">ALTDMPQMR</a>     |
| 4.8   | 1388.660568 | -0.003340 | <a href="#">SEMTASPLVGPER</a> |
| 0.8   | 1388.646637 | 0.010591  | <a href="#">DREAGSMLPAGNR</a> |



# MASCOT Search Results

## Peptide View

MS/MS Fragmentation of **QFTSSTSYNR**

Found in **FIBA\_HUMAN**, Fibrinogen alpha chain OS=Homo sapiens GN=FGA PE=1 SV=2

Match to Query 33800: 1500.697808 from(751.356180,2+) rtinseconds(1583) index(66376)

Title: Locus:1.1.1.1488.16 File:"2013-07-02 CLN FXIII 60 min 2nd FT.wiff"

Data file C:\Program Files (x86)\Matrix Science\Mascot Daemon\mgf5 FXIII 60 min 2nd\mascot\_daemon\_merge.mgf

Click mouse within plot area to zoom in by factor of two about that point

Or, Plot from  to  Da

Label all possible matches  Label matches used for scoring

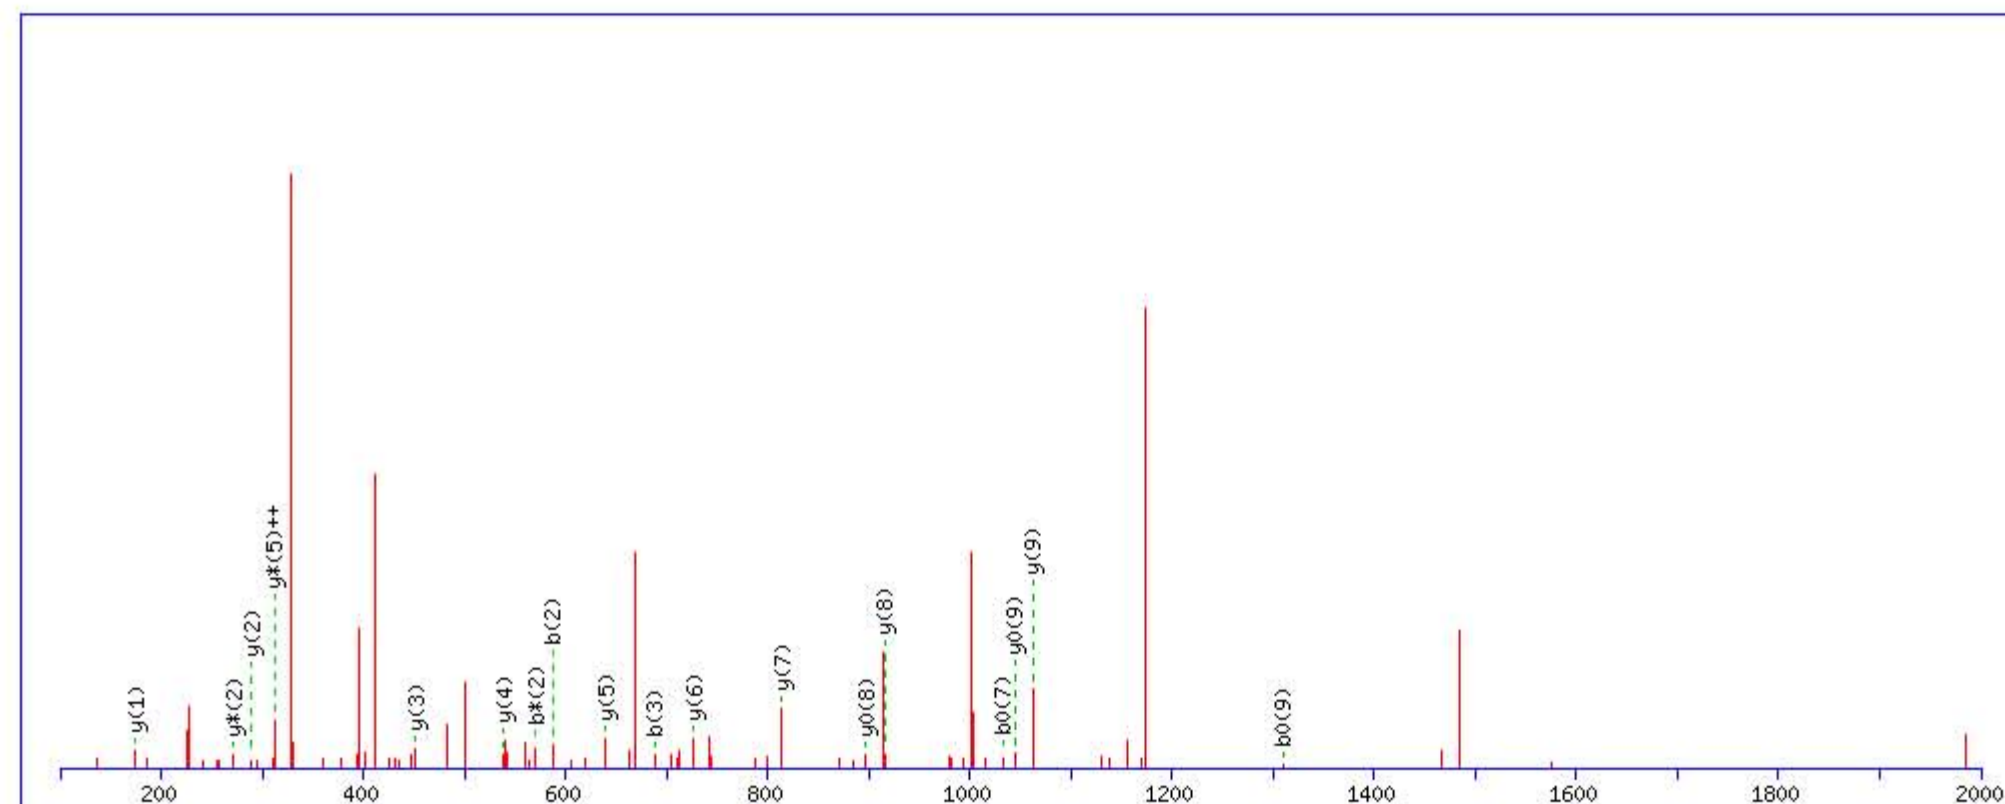

Monoisotopic mass of neutral peptide Mr(calc): 1500.703110

Fixed modifications: Carbamidomethyl (C) (apply to specified residues or termini only)

Variable modifications:

Q1 : Biotin:Thermo-21345 (Q)

Ions Score: 29 Expect: 0.017

Matches : 18/98 fragment ions using 70 most intense peaks [\(help\)](#)

| #  | b                 | b <sup>++</sup> | b <sup>*</sup>    | b <sup>*++</sup> | b <sup>0</sup>     | b <sup>0++</sup> | Seq. | y                  | y <sup>++</sup> | y <sup>*</sup>    | y <sup>*++</sup>  | y <sup>0</sup>     | y <sup>0++</sup> | #  |
|----|-------------------|-----------------|-------------------|------------------|--------------------|------------------|------|--------------------|-----------------|-------------------|-------------------|--------------------|------------------|----|
| 1  | 440.232602        | 220.619939      | 423.206053        | 212.106664       |                    |                  | Q    |                    |                 |                   |                   |                    |                  | 10 |
| 2  | <b>587.301016</b> | 294.154146      | <b>570.274467</b> | 285.640872       |                    |                  | F    | <b>1062.485064</b> | 531.746170      | 1045.458515       | 523.232896        | <b>1044.474499</b> | 522.740887       | 9  |
| 3  | <b>688.348695</b> | 344.677986      | 671.322146        | 336.164711       | 670.338130         | 335.672703       | T    | <b>915.416650</b>  | 458.211963      | 898.390101        | 449.698689        | <b>897.406085</b>  | 449.206681       | 8  |
| 4  | 775.380723        | 388.194000      | 758.354174        | 379.680725       | 757.370158         | 379.188717       | S    | <b>814.368971</b>  | 407.688124      | 797.342422        | 399.174849        | 796.358406         | 398.682841       | 7  |
| 5  | 862.412751        | 431.710014      | 845.386202        | 423.196739       | 844.402186         | 422.704731       | S    | <b>727.336943</b>  | 364.172110      | 710.310394        | 355.658835        | 709.326378         | 355.166827       | 6  |
| 6  | 963.460430        | 482.233853      | 946.433881        | 473.720578       | 945.449865         | 473.228570       | T    | <b>640.304915</b>  | 320.656096      | 623.278366        | <b>312.142821</b> | 622.294350         | 311.650813       | 5  |
| 7  | 1050.492458       | 525.749867      | 1033.465909       | 517.236593       | <b>1032.481893</b> | 516.744584       | S    | <b>539.257236</b>  | 270.132256      | 522.230687        | 261.618982        | 521.246671         | 261.126974       | 4  |
| 8  | 1213.555787       | 607.281532      | 1196.529238       | 598.768257       | 1195.545222        | 598.276249       | Y    | <b>452.225208</b>  | 226.616242      | 435.198659        | 218.102967        |                    |                  | 3  |
| 9  | 1327.598714       | 664.302995      | 1310.572165       | 655.789721       | <b>1309.588149</b> | 655.297712       | N    | <b>289.161879</b>  | 145.084577      | <b>272.135330</b> | 136.571303        |                    |                  | 2  |
| 10 |                   |                 |                   |                  |                    |                  | R    | <b>175.118952</b>  | 88.063114       | 158.092403        | 79.549839         |                    |                  | 1  |

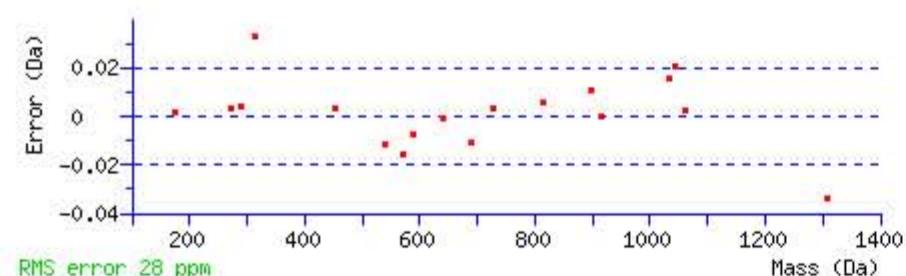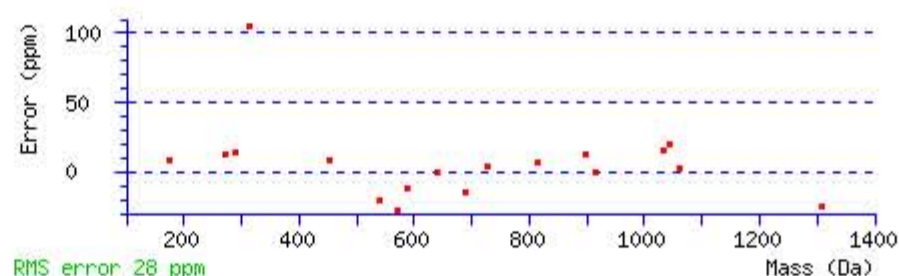

NCBI BLAST search of **QFTSSTSYNR**

(Parameters: blastp, nr protein database, expect=20000, no filter, PAM30)

Other BLAST [web gateways](#)

All matches to this query

| Score | Mr(calc):   | Delta     | Sequence                   |
|-------|-------------|-----------|----------------------------|
| 28.5  | 1500.703110 | -0.005302 | <a href="#">QFTSSTSYNR</a> |

Mascot: <http://www.matrixscience.com/>



# Mascot Search Results

## Peptide View

MS/MS Fragmentation of **NPSSSGTGGTATWKPSSSGPGSTGSWNSGSSGTGSGTGNQNPSPRPGSTGTWNPSSER**  
 Found in **FIBA\_HUMAN**, Fibrinogen alpha chain OS=Homo sapiens GN=FGA PE=1 SV=2

Match to Query 76594: 5844.577670 from(1169.922810,5+) rtinseconds(1798) index(4642)  
 Title: Locus:1.1.1.1435.11 File:"2013-07-02 CLN FXIII 60 min 2nd F 1.wiff"  
 Data file C:\Program Files (x86)\Matrix Science\Mascot Daemon\mgf5 FXIII 60 min 2nd\mascot\_daemon\_merge.mgf

Click mouse within plot area to zoom in by factor of two about that point  
 Or, Plot from  to  Da  Full range  
 Label all possible matches  Label matches used for scoring

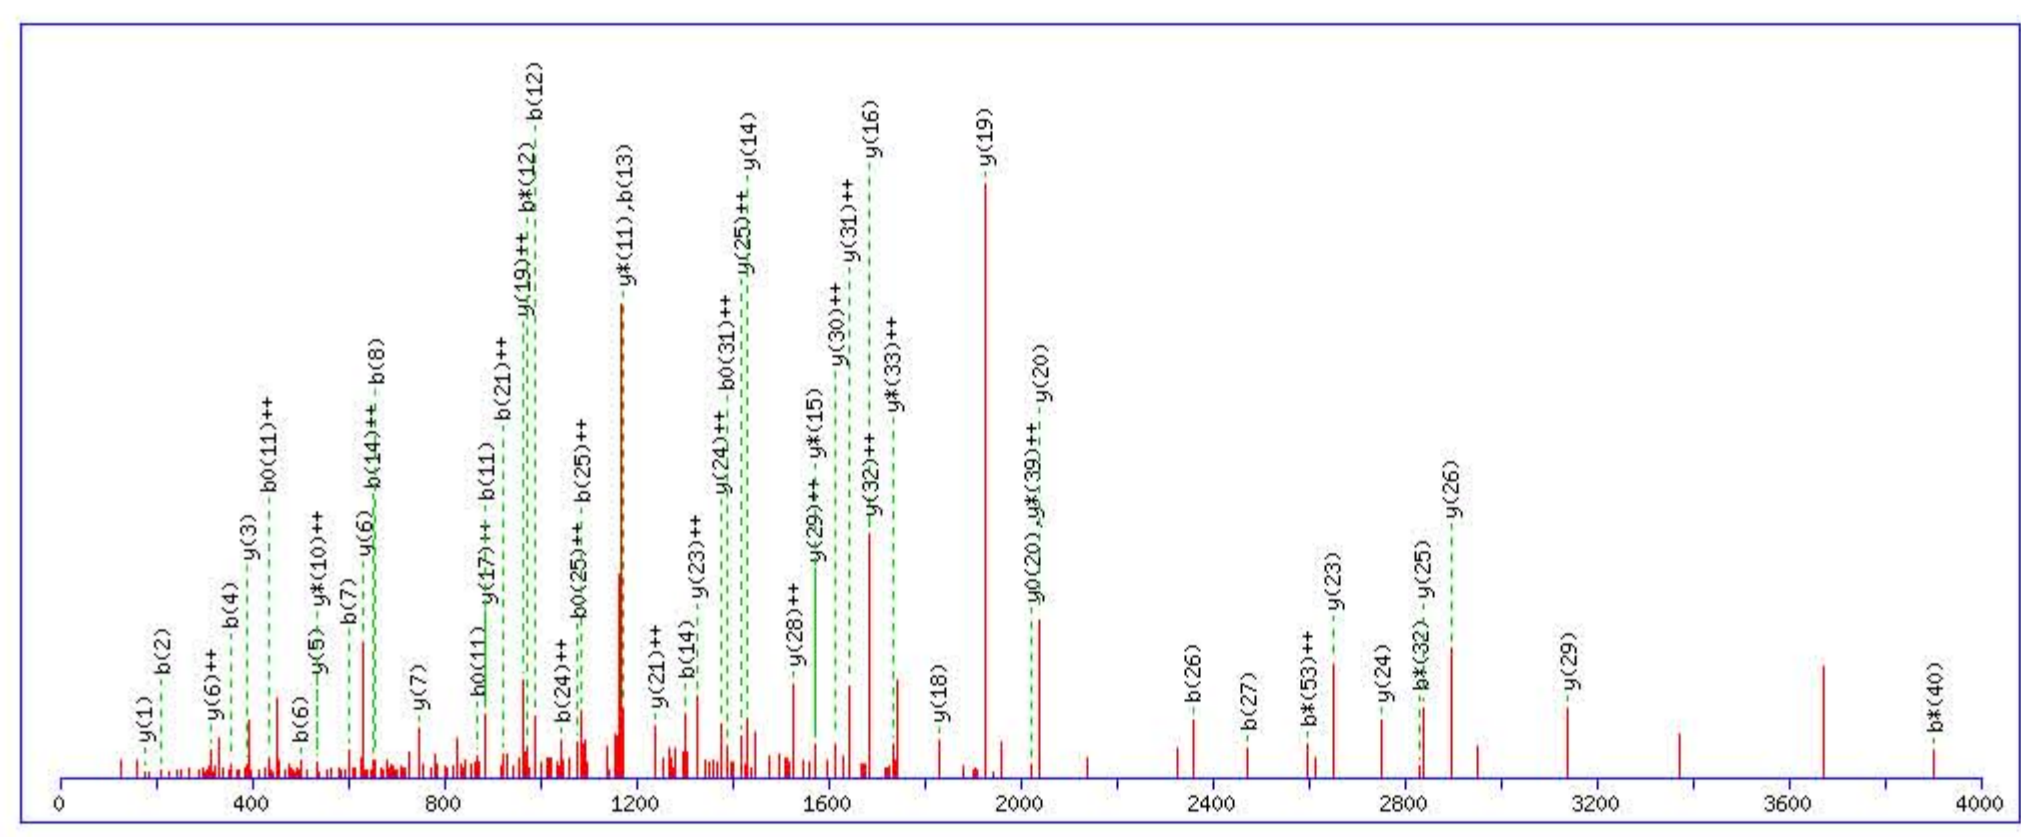

Monoisotopic mass of neutral peptide Mr(calc): 5844.608032  
 Fixed modifications: Carbamidomethyl (C) (apply to specified residues or termini only)  
 Variable modifications:  
 Q39 : Biotin:Thermo-21345 (Q)  
 Ions Score: 81 Expect: 2.3e-008  
 Matches : 56/688 fragment ions using 95 most intense peaks [\(help\)](#)

| #  | b                  | b <sup>++</sup>    | b <sup>+</sup>     | b <sup>+++</sup>   | b <sup>0</sup>    | b <sup>0++</sup>   | Seq. | y                  | y <sup>++</sup>    | y <sup>+</sup>     | y <sup>+++</sup>   | y <sup>0</sup>     | y <sup>0++</sup> | #  |
|----|--------------------|--------------------|--------------------|--------------------|-------------------|--------------------|------|--------------------|--------------------|--------------------|--------------------|--------------------|------------------|----|
| 1  | 115.050203         | 58.028740          | 98.023654          | 49.515465          |                   |                    | N    |                    |                    |                    |                    |                    |                  | 59 |
| 2  | <b>212.102967</b>  | 106.555121         | 195.076418         | 98.041847          |                   |                    | P    | 5731.572302        | 2866.289789        | 5714.545753        | 2857.776515        | 5713.561737        | 2857.284507      | 58 |
| 3  | 269.124431         | 135.065853         | 252.097882         | 126.552579         |                   |                    | G    | 5634.519538        | 2817.763407        | 5617.492989        | 2809.250133        | 5616.508973        | 2808.758125      | 57 |
| 4  | <b>356.156459</b>  | 178.581867         | 339.129910         | 170.068593         | 338.145894        | 169.576585         | S    | 5577.498074        | 2789.252675        | 5560.471525        | 2780.739401        | 5559.487509        | 2780.247393      | 56 |
| 5  | 443.188487         | 222.097881         | 426.161938         | 213.584607         | 425.177922        | 213.092599         | S    | 5490.466046        | 2745.736661        | 5473.439497        | 2737.223387        | 5472.455481        | 2736.731379      | 55 |
| 6  | <b>500.209951</b>  | 250.608613         | 483.183402         | 242.095339         | 482.199386        | 241.603331         | G    | 5403.434018        | 2702.220647        | 5386.407469        | 2693.707373        | 5385.423453        | 2693.215365      | 54 |
| 7  | <b>601.257630</b>  | 301.132453         | 584.231081         | 292.619178         | 583.247065        | 292.127170         | T    | 5346.412554        | 2673.709915        | 5329.386005        | 2665.196641        | 5328.401989        | 2664.704633      | 53 |
| 8  | <b>658.279094</b>  | 329.643185         | 641.252545         | 321.129910         | 640.268529        | 320.637903         | G    | 5245.364875        | 2623.186076        | 5228.338326        | 2614.672801        | 5227.354310        | 2614.180793      | 52 |
| 9  | 715.300558         | 358.153917         | 698.274009         | 349.640643         | 697.289993        | 349.148635         | G    | 5188.343411        | 2594.675344        | 5171.316862        | 2586.162069        | 5170.332846        | 2585.670061      | 51 |
| 10 | 816.348237         | 408.677757         | 799.321688         | 400.164482         | 798.337672        | 399.672474         | T    | 5131.321947        | 2566.164612        | 5114.295398        | 2557.651337        | 5113.311382        | 2557.159329      | 50 |
| 11 | <b>887.385351</b>  | 444.196314         | 870.358802         | 435.683039         | <b>869.374786</b> | <b>435.191031</b>  | A    | 5030.274268        | 2515.640772        | 5013.247719        | 2507.127498        | 5012.263703        | 2506.635490      | 49 |
| 12 | <b>988.433030</b>  | 494.720153         | <b>971.406481</b>  | 486.206879         | 970.422465        | 485.714871         | T    | 4959.237154        | 2480.122215        | 4942.210605        | 2471.608941        | 4941.226589        | 2471.116933      | 48 |
| 13 | <b>1174.512343</b> | 587.759810         | 1157.485794        | 579.246535         | 1156.501778       | 578.754527         | W    | 4858.189475        | 2429.598376        | 4841.162926        | 2421.085101        | 4840.178910        | 2420.593093      | 47 |
| 14 | <b>1302.607306</b> | <b>651.807291</b>  | 1285.580757        | 643.294017         | 1284.596741       | 642.802009         | K    | 4672.110162        | 2336.558719        | 4655.083613        | 2328.045445        | 4654.099597        | 2327.553437      | 46 |
| 15 | 1399.660070        | 700.333673         | 1382.633521        | 691.820399         | 1381.649505       | 691.328391         | P    | 4544.015199        | 2272.511238        | 4526.988650        | 2263.997963        | 4526.004634        | 2263.505955      | 45 |
| 16 | 1456.681534        | 728.844405         | 1439.654985        | 720.331131         | 1438.670969       | 719.839123         | G    | 4446.962435        | 2223.984856        | 4429.935886        | 2215.471581        | 4428.951870        | 2214.979573      | 44 |
| 17 | 1543.713562        | 772.360419         | 1526.687013        | 763.847145         | 1525.702997       | 763.355137         | S    | 4389.940971        | 2195.474124        | 4372.914422        | 2186.960849        | 4371.930406        | 2186.468841      | 43 |
| 18 | 1630.745590        | 815.876433         | 1613.719041        | 807.363159         | 1612.735025       | 806.871151         | S    | 4302.908943        | 2151.958110        | 4285.882394        | 2143.444835        | 4284.898378        | 2142.952827      | 42 |
| 19 | 1687.767054        | 844.387165         | 1670.740505        | 835.873891         | 1669.756489       | 835.381883         | G    | 4215.876915        | 2108.442096        | 4198.850366        | 2099.928821        | 4197.866350        | 2099.436813      | 41 |
| 20 | 1784.819818        | 892.913547         | 1767.793269        | 884.400273         | 1766.809253       | 883.908265         | P    | 4158.855451        | 2079.931364        | 4141.828902        | 2071.418089        | 4140.844886        | 2070.926081      | 40 |
| 21 | 1841.841282        | <b>921.424279</b>  | 1824.814733        | 912.911005         | 1823.830717       | 912.418997         | G    | 4061.802687        | 2031.404982        | 4044.776138        | <b>2022.891707</b> | 4043.792122        | 2022.399699      | 39 |
| 22 | 1928.873310        | 964.940293         | 1911.846761        | 956.427019         | 1910.862745       | 955.935011         | S    | 4004.781223        | 2002.894250        | 3987.754674        | 1994.380975        | 3986.770658        | 1993.888967      | 38 |
| 23 | 2029.920989        | 1015.464133        | 2012.894440        | 1006.950858        | 2011.910424       | 1006.458850        | T    | 3917.749195        | 1959.378236        | 3900.722646        | 1950.864961        | 3899.738630        | 1950.372953      | 37 |
| 24 | 2086.942453        | <b>1043.974865</b> | 2069.915904        | 1035.461590        | 2068.931888       | 1034.969582        | G    | 3816.701516        | 1908.854396        | 3799.674967        | 1900.341122        | 3798.690951        | 1899.849114      | 36 |
| 25 | 2173.974481        | <b>1087.490879</b> | 2156.947932        | 1078.977604        | 2155.963916       | <b>1078.485596</b> | S    | 3759.680052        | 1880.343664        | 3742.653503        | 1871.830389        | 3741.669487        | 1871.338382      | 35 |
| 26 | <b>2360.053794</b> | 1180.530535        | 2343.027245        | 1172.017261        | 2342.043229       | 1171.525253        | W    | 3672.648024        | 1836.827650        | 3655.621475        | 1828.314375        | 3654.637459        | 1827.822367      | 34 |
| 27 | <b>2474.096721</b> | 1237.551999        | 2457.070172        | 1229.038724        | 2456.086156       | 1228.546716        | N    | 3486.568711        | 1743.787993        | 3469.542162        | <b>1735.274719</b> | 3468.558146        | 1734.782711      | 33 |
| 28 | 2561.128749        | 1281.068013        | 2544.102200        | 1272.554738        | 2543.118184       | 1272.062730        | S    | 3372.525784        | <b>1686.766530</b> | 3355.499235        | 1678.253255        | 3354.515219        | 1677.761247      | 32 |
| 29 | 2618.150213        | 1309.578745        | 2601.123664        | 1301.065470        | 2600.139648       | 1300.573462        | G    | 3285.493756        | <b>1643.250516</b> | 3268.467207        | 1634.737241        | 3267.483191        | 1634.245233      | 31 |
| 30 | 2705.182241        | 1353.094759        | 2688.155692        | 1344.581484        | 2687.171676       | 1344.089476        | S    | 3228.472292        | <b>1614.739784</b> | 3211.445743        | 1606.226509        | 3210.461727        | 1605.734501      | 30 |
| 31 | 2792.214269        | 1396.610773        | 2775.187720        | 1388.097498        | 2774.203704       | <b>1387.605490</b> | S    | <b>3141.440264</b> | <b>1571.223770</b> | 3124.413715        | 1562.710495        | 3123.429699        | 1562.218487      | 29 |
| 32 | 2849.235733        | 1425.121505        | <b>2832.209184</b> | 1416.608230        | 2831.225168       | 1416.116222        | G    | 3054.408236        | <b>1527.707756</b> | 3037.381687        | 1519.194481        | 3036.397671        | 1518.702473      | 28 |
| 33 | 2950.283412        | 1475.645344        | 2933.256863        | 1467.132069        | 2932.272847       | 1466.640062        | T    | 2997.386772        | 1499.197024        | 2980.360223        | 1490.683749        | 2979.376207        | 1490.191741      | 27 |
| 34 | 3007.304876        | 1504.156076        | 2990.278327        | 1495.642801        | 2989.294311       | 1495.150794        | G    | <b>2896.339093</b> | 1448.673184        | 2879.312544        | 1440.159910        | 2878.328528        | 1439.667902      | 26 |
| 35 | 3094.336904        | 1547.672090        | 3077.310355        | 1539.158815        | 3076.326339       | 1538.666808        | S    | <b>2839.317629</b> | <b>1420.162453</b> | 2822.291080        | 1411.649178        | 2821.307064        | 1411.157170      | 25 |
| 36 | 3195.384583        | 1598.195929        | 3178.358034        | 1589.682655        | 3177.374018       | 1589.190647        | T    | <b>2752.285601</b> | <b>1376.646438</b> | 2735.259052        | 1368.133164        | 2734.275036        | 1367.641156      | 24 |
| 37 | 3252.406047        | 1626.706661        | 3235.379498        | 1618.193387        | 3234.395482       | 1617.701379        | G    | <b>2651.237922</b> | <b>1326.122599</b> | 2634.211373        | 1317.609325        | 2633.227357        | 1317.117317      | 23 |
| 38 | 3366.448974        | 1683.728125        | 3349.422425        | 1675.214850        | 3348.438409       | 1674.722842        | N    | 2594.216458        | 1297.611867        | 2577.189909        | 1289.098593        | 2576.205893        | 1288.606585      | 22 |
| 39 | 3805.674300        | 1903.340788        | 3788.647751        | 1894.827513        | 3787.663735       | 1894.335506        | Q    | 2480.173531        | <b>1240.590404</b> | 2463.146982        | 1232.077129        | 2462.162966        | 1231.585121      | 21 |
| 40 | 3919.717227        | 1960.362252        | <b>3902.690678</b> | 1951.848977        | 3901.706662       | 1951.356969        | N    | <b>2040.948205</b> | 1020.977741        | 2023.921656        | 1012.464466        | <b>2022.937640</b> | 1011.972458      | 20 |
| 41 | 4016.769991        | 2008.888634        | 3999.743442        | 2000.375359        | 3998.759426       | 1999.883351        | P    | <b>1926.905278</b> | <b>963.956277</b>  | 1909.878729        | 955.443003         | 1908.894713        | 954.950995       | 19 |
| 42 | 4073.791455        | 2037.399365        | 4056.764906        | 2028.886091        | 4055.780890       | 2028.394083        | G    | <b>1829.852514</b> | 915.429895         | 1812.825965        | 906.916621         | 1811.841949        | 906.424613       | 18 |
| 43 | 4160.823483        | 2080.915380        | 4143.796934        | 2072.402105        | 4142.812918       | 2071.910097        | S    | 1772.831050        | <b>886.919163</b>  | 1755.804501        | 878.405889         | 1754.820485        | 877.913881       | 17 |
| 44 | 4257.876247        | 2129.441762        | 4240.849698        | 2120.928487        | 4239.865682       | 2120.436479        | P    | <b>1685.799022</b> | 843.403149         | 1668.772473        | 834.889875         | 1667.788457        | 834.397867       | 16 |
| 45 | 4413.977358        | 2207.492317        | 4396.950809        | 2198.979043        | 4395.966793       | 2198.487035        | R    | 1588.746258        | 794.876767         | <b>1571.719709</b> | 786.363493         | 1570.735693        | 785.871485       | 15 |
| 46 | 4511.030122        | 2256.018699        | 4494.003573        | 2247.505425        | 4493.019557       | 2247.013417        | P    | <b>1432.645147</b> | 716.826212         | 1415.618598        | 708.312937         | 1414.634582        | 707.820929       | 14 |
| 47 | 4568.051586        | 2284.529431        | 4551.025037        | 2276.016157        | 4550.041021       | 2275.524149        | G    | 1335.592383        | 668.299830         | 1318.565834        | 659.786555         | 1317.581818        | 659.294547       | 13 |
| 48 | 4655.083614        | 2328.045445        | 4638.057065        | 2319.532171        | 4637.073049       | 2319.040163        | S    | 1278.570919        | 639.789098         | 1261.544370        | 631.275823         | 1260.560354        | 630.783815       | 12 |
| 49 | 4756.131293        | 2378.569285        | 4739.104744        | 2370.056010        | 4738.120728       | 2369.564002        | T    | 1191.538891        | 596.273084         | <b>1174.512342</b> | 587.759809         | 1173.528326        | 587.267801       | 11 |
| 50 | 4813.152757        | 2407.080017        | 4796.126208        | 2398.566742        | 4795.142192       | 2398.074734        | G    | 1090.491212        | 545.749244         | 1073.464663        | <b>537.235970</b>  | 1072.480647        | 536.743962       | 10 |
| 51 | 4914.200436        | 2457.603856        | 4897.173887        | 2449.090582        | 4896.189871       | 2448.598574        | T    | 1033.469748        | 517.238512         | 1016.443199        | 508.725238         | 1015.459183        | 508.233230       | 9  |
| 52 | 5100.279749        | 2550.643513        | 5083.253200        | 2542.130238        | 5082.269184       | 2541.638230        | W    | 932.422069         | 466.714673         | 915.395520         | 458.201398         | 914.411504         | 457.709390       | 8  |
| 53 | 5214.322676        | 2607.664976        | 5197.296127        | <b>2599.151702</b> | 5196.312111       | 2598.659694        | N    | <b>746.342756</b>  | 373.675016         | 729.316207         | 365.161742         |                    |                  |    |



**Peptide View**

MS/MS Fragmentation of **GSAGHWTSESSVSGSTGQWHSESGSFRPDSPGSGNARPNPDWGTFFEEVSGNVSPGTR**  
 Found in **FIBA\_HUMAN**, Fibrinogen alpha chain OS=Homo sapiens GN=FGA PE=1 SV=2

Match to Query 76912: 6284.810244 from(1048.475650,6+) rtinseconds(2112) index(6520)  
 Title: Locus:1.1.1.1544.26 File:"2013-07-02 CLN FXIII 60 min 2nd F 1.wiff"  
 Data file C:\Program Files (x86)\Matrix Science\Mascot Daemon\mgf5 FXIII 60 min 2nd\mascot\_daemon\_merge.mgf

Click mouse within plot area to zoom in by factor of two about that point  
 Or, Plot from  to  Da   
 Label all possible matches  Label matches used for scoring

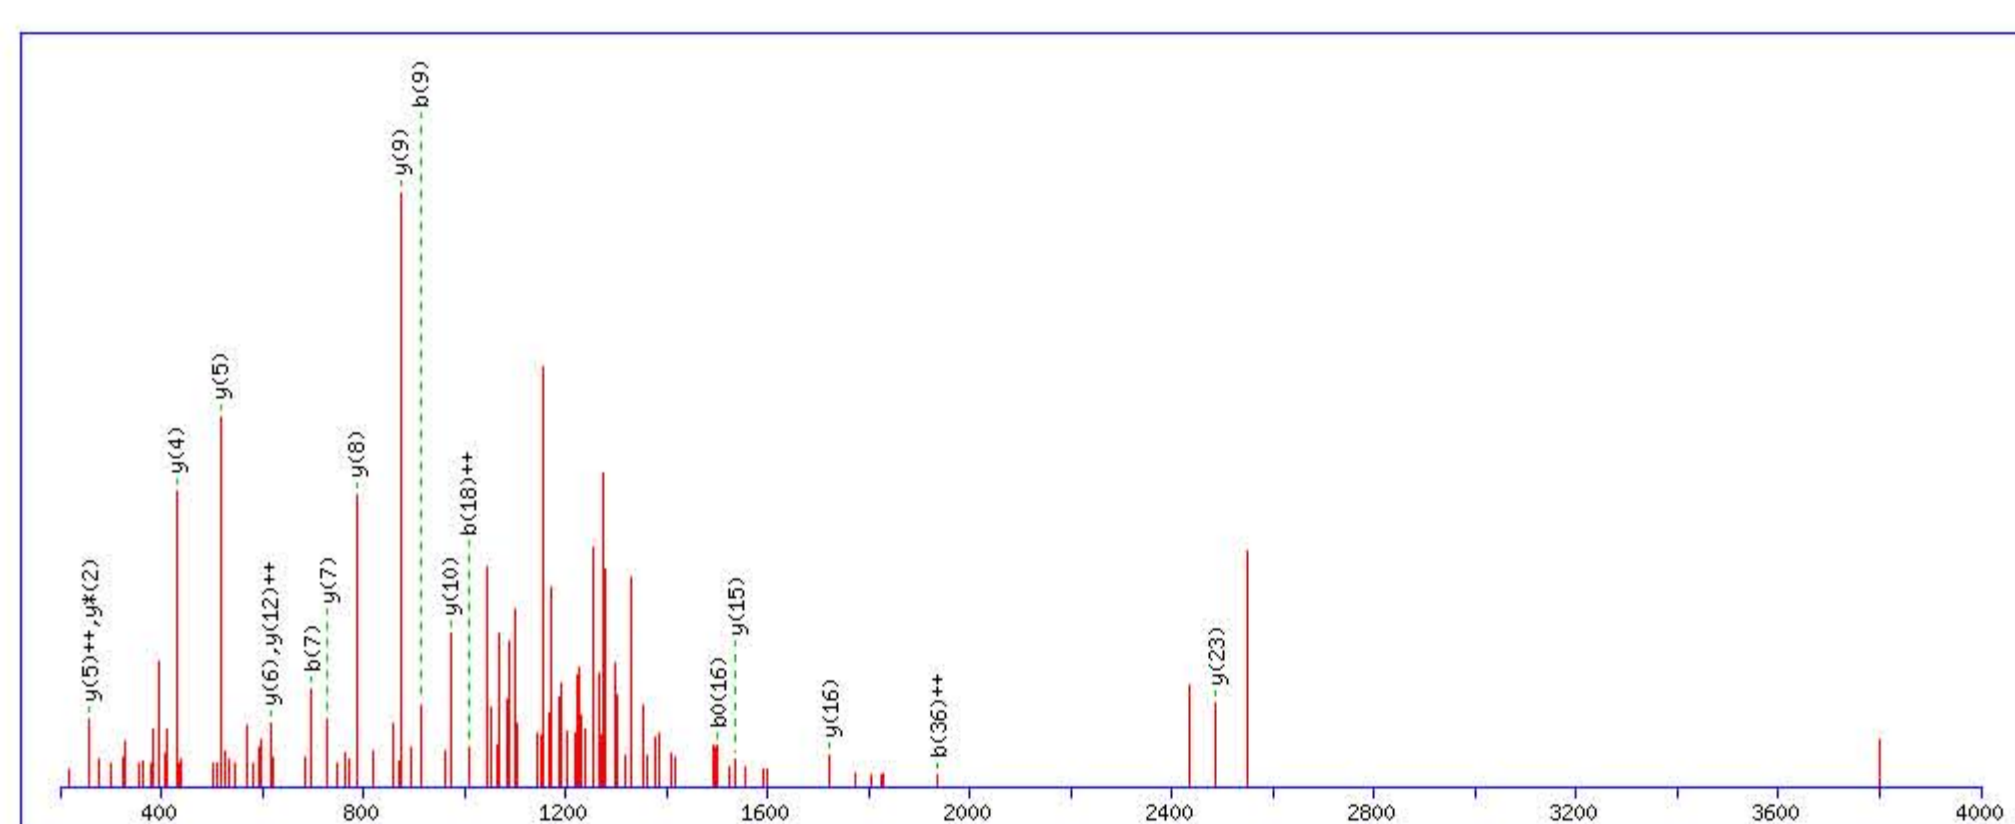

Monoisotopic mass of neutral peptide Mr(calc): 6284.792847  
 Fixed modifications: Carbamidomethyl (C) (apply to specified residues or termini only)  
 Variable modifications:  
 Q18 : Biotin:Thermo-21345 (Q)  
 Ions Score: 29 Expect: 0.0051  
 Matches : 18/646 fragment ions using 37 most intense peaks [\(help\)](#)

| #  | b                 | b <sup>++</sup>    | b <sup>*</sup> | b <sup>*++</sup> | b <sup>0</sup>     | b <sup>0++</sup> | Seq. | y                  | y <sup>++</sup>   | y <sup>*</sup> | y <sup>*++</sup> | y <sup>0</sup> | y <sup>0++</sup> | #  |
|----|-------------------|--------------------|----------------|------------------|--------------------|------------------|------|--------------------|-------------------|----------------|------------------|----------------|------------------|----|
| 1  | 58.028740         | 29.518008          |                |                  |                    |                  | G    |                    |                   |                |                  |                |                  | 58 |
| 2  | 145.060768        | 73.034022          |                |                  | 127.050203         | 64.028740        | S    | 6228.778603        | 3114.892940       | 6211.752054    | 3106.379665      | 6210.768038    | 3105.887657      | 57 |
| 3  | 216.097882        | 108.552579         |                |                  | 198.087317         | 99.547296        | A    | 6141.746575        | 3071.376926       | 6124.720026    | 3062.863651      | 6123.736010    | 3062.371643      | 56 |
| 4  | 273.119346        | 137.063311         |                |                  | 255.108781         | 128.058029       | G    | 6070.709461        | 3035.858369       | 6053.682912    | 3027.345094      | 6052.698896    | 3026.853086      | 55 |
| 5  | 410.178258        | 205.592767         |                |                  | 392.167693         | 196.587484       | H    | 6013.687997        | 3007.347637       | 5996.661448    | 2998.834362      | 5995.677432    | 2998.342354      | 54 |
| 6  | 596.257571        | 298.632424         |                |                  | 578.247006         | 289.627141       | W    | 5876.629085        | 2938.818181       | 5859.602536    | 2930.304906      | 5858.618520    | 2929.812898      | 53 |
| 7  | <b>697.305250</b> | 349.156263         |                |                  | 679.294685         | 340.150981       | T    | 5690.549772        | 2845.778524       | 5673.523223    | 2837.265250      | 5672.539207    | 2836.773242      | 52 |
| 8  | 784.337278        | 392.672277         |                |                  | 766.326713         | 383.666995       | S    | 5589.502093        | 2795.254685       | 5572.475544    | 2786.741410      | 5571.491528    | 2786.249402      | 51 |
| 9  | <b>913.379871</b> | 457.193574         |                |                  | 895.369306         | 448.188291       | E    | 5502.470065        | 2751.738671       | 5485.443516    | 2743.225396      | 5484.459500    | 2742.733388      | 50 |
| 10 | 1000.411899       | 500.709588         |                |                  | 982.401334         | 491.704305       | S    | 5373.427472        | 2687.217374       | 5356.400923    | 2678.704100      | 5355.416907    | 2678.212092      | 49 |
| 11 | 1087.443927       | 544.225602         |                |                  | 1069.433362        | 535.220319       | S    | 5286.395444        | 2643.701360       | 5269.368895    | 2635.188086      | 5268.384879    | 2634.696078      | 48 |
| 12 | 1186.512341       | 593.759809         |                |                  | 1168.501776        | 584.754526       | V    | 5199.363416        | 2600.185346       | 5182.336867    | 2591.672072      | 5181.352851    | 2591.180064      | 47 |
| 13 | 1273.544369       | 637.275823         |                |                  | 1255.533804        | 628.270540       | S    | 5100.295002        | 2550.651139       | 5083.268453    | 2542.137865      | 5082.284437    | 2541.645857      | 46 |
| 14 | 1330.565833       | 665.786555         |                |                  | 1312.555268        | 656.781272       | G    | 5013.262974        | 2507.135125       | 4996.236425    | 2498.621851      | 4995.252409    | 2498.129843      | 45 |
| 15 | 1417.597861       | 709.302569         |                |                  | 1399.587296        | 700.297286       | S    | 4956.241510        | 2478.624393       | 4939.214961    | 2470.111119      | 4938.230945    | 2469.619111      | 44 |
| 16 | 1518.645540       | 759.826408         |                |                  | <b>1500.634975</b> | 750.821126       | T    | 4869.209482        | 2435.108379       | 4852.182933    | 2426.595105      | 4851.198917    | 2426.103097      | 43 |
| 17 | 1575.667004       | 788.337140         |                |                  | 1557.656439        | 779.331858       | G    | 4768.161803        | 2384.584540       | 4751.135254    | 2376.071265      | 4750.151238    | 2375.579257      | 42 |
| 18 | 2014.892330       | <b>1007.949803</b> | 1997.865781    | 999.436529       | 1996.881765        | 998.944521       | Q    | 4711.140339        | 2356.073808       | 4694.113790    | 2347.560533      | 4693.129774    | 2347.068525      | 41 |
| 19 | 2200.971643       | 1100.989460        | 2183.945094    | 1092.476185      | 2182.961078        | 1091.984177      | W    | 4271.915013        | 2136.461145       | 4254.888464    | 2127.947870      | 4253.904448    | 2127.455862      | 40 |
| 20 | 2338.030555       | 1169.518916        | 2321.004006    | 1161.005641      | 2320.019990        | 1160.513633      | H    | 4085.835700        | 2043.421488       | 4068.809151    | 2034.908214      | 4067.825135    | 2034.416206      | 39 |
| 21 | 2425.062583       | 1213.034930        | 2408.036034    | 1204.521655      | 2407.052018        | 1204.029647      | S    | 3948.776788        | 1974.892032       | 3931.750239    | 1966.378758      | 3930.766223    | 1965.886750      | 38 |
| 22 | 2554.105176       | 1277.556226        | 2537.078627    | 1269.042952      | 2536.094611        | 1268.550944      | E    | 3861.744760        | 1931.376018       | 3844.718211    | 1922.862744      | 3843.734195    | 1922.370736      | 37 |
| 23 | 2641.137204       | 1321.072240        | 2624.110655    | 1312.558966      | 2623.126639        | 1312.066958      | S    | 3732.702167        | 1866.854722       | 3715.675618    | 1858.341447      | 3714.691602    | 1857.849439      | 36 |
| 24 | 2698.158668       | 1349.582972        | 2681.132119    | 1341.069698      | 2680.148103        | 1340.577690      | G    | 3645.670139        | 1823.338708       | 3628.643590    | 1814.825433      | 3627.659574    | 1814.333425      | 35 |
| 25 | 2785.190696       | 1393.098986        | 2768.164147    | 1384.585712      | 2767.180131        | 1384.093704      | S    | 3588.648675        | 1794.827976       | 3571.622126    | 1786.314701      | 3570.638110    | 1785.822693      | 34 |
| 26 | 2932.259110       | 1466.633193        | 2915.232561    | 1458.119919      | 2914.248545        | 1457.627911      | F    | 3501.616647        | 1751.311962       | 3484.590098    | 1742.798687      | 3483.606082    | 1742.306679      | 33 |
| 27 | 3088.360221       | 1544.683749        | 3071.333672    | 1536.170474      | 3070.349656        | 1535.678466      | R    | 3354.548233        | 1677.777755       | 3337.521684    | 1669.264480      | 3336.537668    | 1668.772472      | 32 |
| 28 | 3185.412985       | 1593.210131        | 3168.386436    | 1584.696856      | 3167.402420        | 1584.204848      | P    | 3198.447122        | 1599.727199       | 3181.420573    | 1591.213925      | 3180.436557    | 1590.721917      | 31 |
| 29 | 3300.439928       | 1650.723602        | 3283.413379    | 1642.210327      | 3282.429363        | 1641.718320      | D    | 3101.394358        | 1551.200817       | 3084.367809    | 1542.687543      | 3083.383793    | 1542.195535      | 30 |
| 30 | 3387.471956       | 1694.239616        | 3370.445407    | 1685.726342      | 3369.461391        | 1685.234334      | S    | 2986.367415        | 1493.687346       | 2969.340866    | 1485.174071      | 2968.356850    | 1484.682063      | 29 |
| 31 | 3484.524720       | 1742.765998        | 3467.498171    | 1734.252724      | 3466.514155        | 1733.760716      | P    | 2899.335387        | 1450.171332       | 2882.308838    | 1441.658057      | 2881.324822    | 1441.166049      | 28 |
| 32 | 3541.546184       | 1771.276730        | 3524.519635    | 1762.763456      | 3523.535619        | 1762.271448      | G    | 2802.282623        | 1401.644950       | 2785.256074    | 1393.131675      | 2784.272058    | 1392.639667      | 27 |
| 33 | 3628.578212       | 1814.792744        | 3611.551663    | 1806.279470      | 3610.567647        | 1805.787462      | S    | 2745.261159        | 1373.134218       | 2728.234610    | 1364.620943      | 2727.250594    | 1364.128935      | 26 |
| 34 | 3685.599676       | 1843.303476        | 3668.573127    | 1834.790202      | 3667.589111        | 1834.298194      | G    | 2658.229131        | 1329.618204       | 2641.202582    | 1321.104929      | 2640.218566    | 1320.612921      | 25 |
| 35 | 3799.642603       | 1900.324940        | 3782.616054    | 1891.811665      | 3781.632038        | 1891.319657      | N    | 2601.207667        | 1301.107472       | 2584.181118    | 1292.594197      | 2583.197102    | 1292.102189      | 24 |
| 36 | 3870.679717       | <b>1935.843497</b> | 3853.653168    | 1927.330222      | 3852.669152        | 1926.838214      | A    | <b>2487.164740</b> | 1244.086008       | 2470.138191    | 1235.572734      | 2469.154175    | 1235.080726      | 23 |
| 37 | 4026.780828       | 2013.894052        | 4009.754279    | 2005.380778      | 4008.770263        | 2004.888770      | R    | 2416.127626        | 1208.567451       | 2399.101077    | 1200.054177      | 2398.117061    | 1199.562169      | 22 |
| 38 | 4123.833592       | 2062.420434        | 4106.807043    | 2053.907160      | 4105.823027        | 2053.415152      | P    | 2260.026515        | 1130.516896       | 2242.999966    | 1122.003621      | 2242.015950    | 1121.511613      | 21 |
| 39 | 4237.876519       | 2119.441898        | 4220.849970    | 2110.928623      | 4219.865954        | 2110.436615      | N    | 2162.973751        | 1081.990514       | 2145.947202    | 1073.477239      | 2144.963186    | 1072.985231      | 20 |
| 40 | 4351.919446       | 2176.463361        | 4334.892897    | 2167.950087      | 4333.908881        | 2167.458079      | N    | 2048.930824        | 1024.969050       | 2031.904275    | 1016.455776      | 2030.920259    | 1015.963768      | 19 |
| 41 | 4448.972210       | 2224.989743        | 4431.945661    | 2216.476469      | 4430.961645        | 2215.984461      | P    | 1934.887897        | 967.947587        | 1917.861348    | 959.434312       | 1916.877332    | 958.942304       | 18 |
| 42 | 4563.999153       | 2282.503215        | 4546.972604    | 2273.989940      | 4545.988588        | 2273.497932      | D    | 1837.835133        | 919.421205        | 1820.808584    | 910.907930       | 1819.824568    | 910.415922       | 17 |
| 43 | 4750.078466       | 2375.542871        | 4733.051917    | 2367.029597      | 4732.067901        | 2366.537589      | W    | <b>1722.808190</b> | 861.907733        | 1705.781641    | 853.394459       | 1704.797625    | 852.902451       | 16 |
| 44 | 4807.099930       | 2404.053603        | 4790.073381    | 2395.540329      | 4789.089365        | 2395.048321      | G    | <b>1536.728877</b> | 768.868077        | 1519.702328    | 760.354802       | 1518.718312    | 759.862794       | 15 |
| 45 | 4908.147609       | 2454.577443        | 4891.121060    | 2446.064168      | 4890.137044        | 2445.572160      | T    | 1479.707413        | 740.357345        | 1462.680864    | 731.844070       | 1461.696848    | 731.352062       | 14 |
| 46 | 5055.216023       | 2528.111650        | 5038.189474    | 2519.598375      | 5037.205458        | 2519.106367      | F    | 1378.659734        | 689.833505        | 1361.633185    | 681.320231       | 1360.649169    | 680.828223       | 13 |
| 47 | 5184.258616       | 2592.632946        | 5167.232067    | 2584.119672      | 5166.248051        | 2583.627664      | E    | 1231.591320        | <b>616.299298</b> | 1214.564771    | 607.786024       | 1213.580755    | 607.294016       | 12 |
| 48 | 5313.301209       | 2657.154243        | 5296.274660    | 2648.640968      | 5295.290644        | 2648.148960      | E    | 1102.548727        | 551.778002        | 1085.522178    | 543.264727       | 1084.538162    | 542.772719       | 11 |
| 49 | 5412.369623       | 2706.688450        | 5395.343074    | 2698.175175      | 5394.359058        | 2697.683167      | V    | <b>973.506134</b>  | 487.256705        | 956.479585     | 478.743431       | 955.495569     | 478.251423       | 10 |
| 50 | 5499.401651       | 2750.204464        | 5482.375102    | 2741.691189      | 5481.391086        | 2741.199181      | S    | <b>874.437720</b>  | 437.722498        | 857.411171     | 429.209224       | 856.427155     | 428.717216       | 9  |
| 51 | 5556.423115       | 2778.715196        | 5539.396566    | 2770.201921      | 5538.412550        | 2769.709913      | G    | <b>787.405692</b>  | 394.206484        | 770.379143     | 385.693210       | 769.395127     | 385.201202       | 8  |
| 52 | 5670.466042       | 2835.736659        | 5653.439493    | 2827.223385      | 5652.455477        | 2826.731377      | N    | <b>730.384228</b>  | 365.695752        | 713.357679     | 357.182478       | 712.373663     | 356.690470       | 7  |
| 53 | 5769.534456       | 2885.270866        | 5752.507907    | 2876.757592      | 5751.523891        | 2876.265584      | V    | <b>616.341301</b>  | 308.674289        | 599.314752     | 300.161014       | 598.330736     | 299.669006       | 6  |
| 54 | 5856.566484       | 2928.786880        | 5839.539935    | 2920.273606      | 5838.555919        | 2919.781598      | S    | <b>517.272887</b>  | <b>259.140082</b> | 500.246338     | 250.626807       | 499.262322     | 250.134799       | 5  |
| 55 | 5953.619248       | 2977.313262        | 5936.592699    | 2968.799988      | 5935.608683        | 2968.307980      | P    | <b>430.240859</b>  | 215.624068        | 413.214310     | 207.110793       | 412.230294     | 206.618785       | 4  |
| 56 | 6010.640712       | 3005.823994        | 5993.614163    | 2997.310720      | 5992.630147        | 2996.818712      | G    | 333.188095         |                   |                |                  |                |                  |    |



# {MATRIX} SCIENCE Mascot Search Results

## Peptide View

MS/MS Fragmentation of **QDGSVDFGR**

Found in **FIBB\_HUMAN**, Fibrinogen beta chain OS=Homo sapiens GN=FGB PE=1 SV=2

Match to Query 26036: 1290.608908 from(646.311730,2+) rtinseconds(1802) index(51546)

Title: Locus:1.1.1.1243.12 File:"2013-07-02 CLN FXIII 60 min 2nd F 4.wiff"

Data file C:\Program Files (x86)\Matrix Science\Mascot Daemon\mgf\5 FXIII 60 min 2nd\mascot\_daemon\_merge.mgf

Click mouse within plot area to zoom in by factor of two about that point

Or, Plot from  to  Da

Label all possible matches  Label matches used for scoring

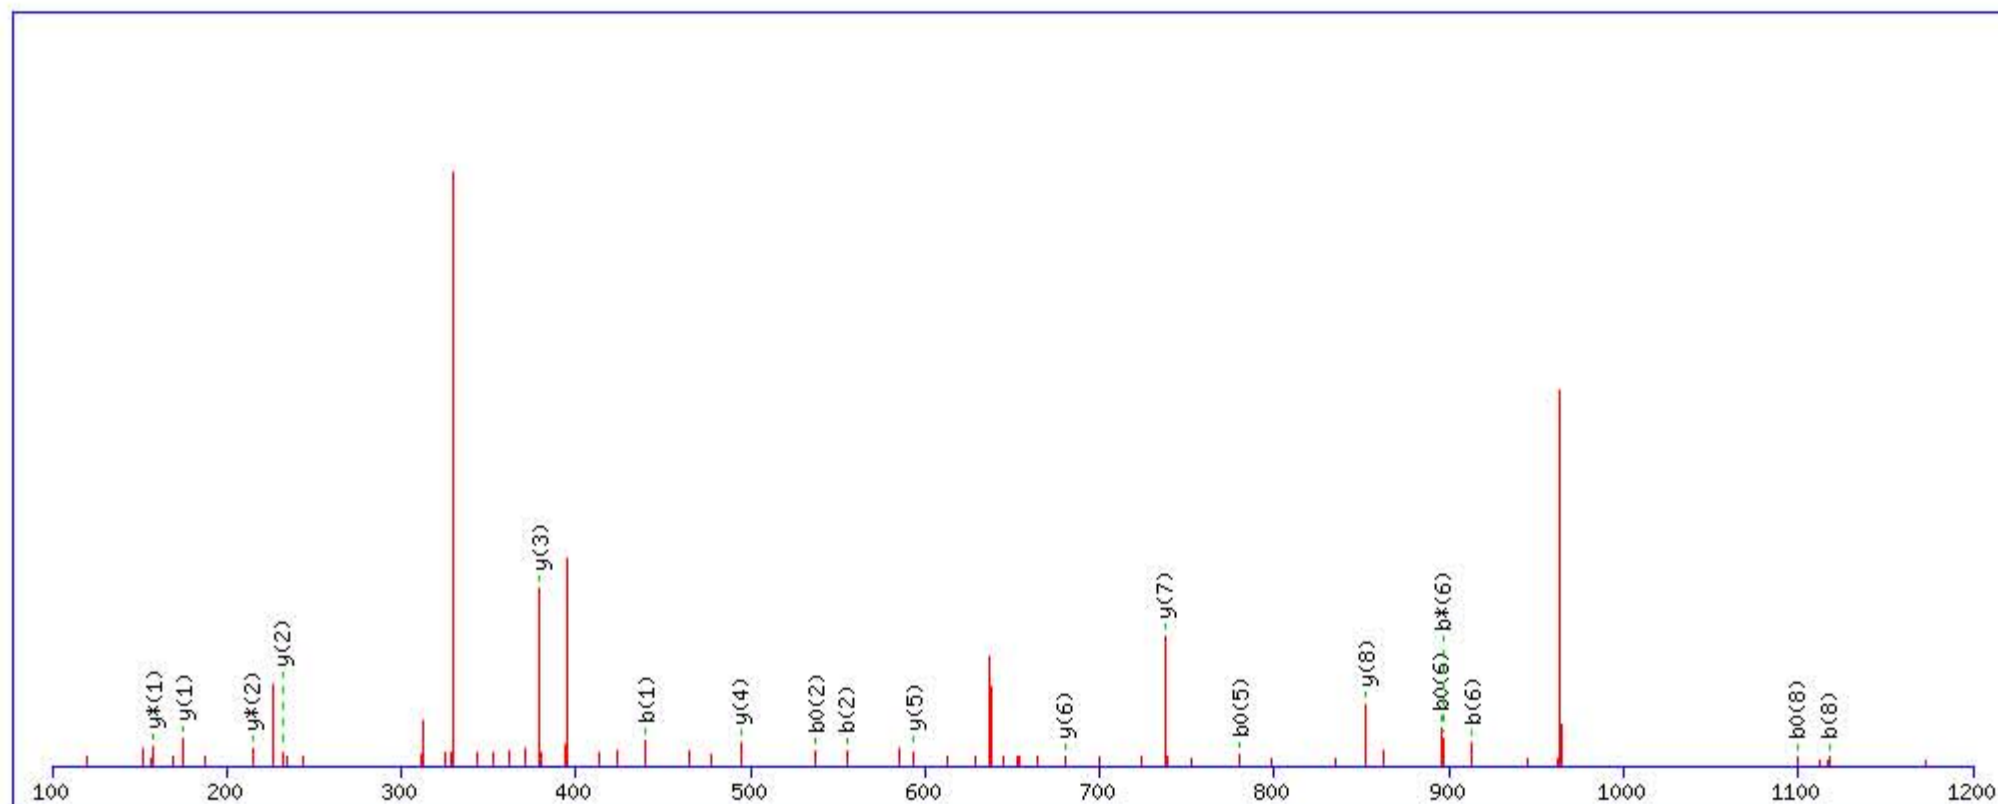

Monoisotopic mass of neutral peptide Mr(calc): 1290.602692

Fixed modifications: Carbamidomethyl (C) (apply to specified residues or termini only)

Variable modifications:

Q1 : Biotin:Thermo-21345 (Q)

Ions Score: 46 Expect: 0.00036

Matches : 19/88 fragment ions using 41 most intense peaks [\(help\)](#)

| # | b                  | b <sup>++</sup> | b <sup>*</sup>    | b <sup>*++</sup> | b <sup>0</sup>     | b <sup>0++</sup> | Seq. | y                 | y <sup>++</sup> | y <sup>*</sup>    | y <sup>*++</sup> | y <sup>0</sup> | y <sup>0++</sup> | # |
|---|--------------------|-----------------|-------------------|------------------|--------------------|------------------|------|-------------------|-----------------|-------------------|------------------|----------------|------------------|---|
| 1 | <b>440.232602</b>  | 220.619939      | 423.206053        | 212.106664       |                    |                  | Q    |                   |                 |                   |                  |                |                  | 9 |
| 2 | <b>555.259545</b>  | 278.133411      | 538.232996        | 269.620136       | <b>537.248980</b>  | 269.128128       | D    | <b>852.384622</b> | 426.695949      | 835.358073        | 418.182674       | 834.374057     | 417.690666       | 8 |
| 3 | 612.281009         | 306.644143      | 595.254460        | 298.130868       | 594.270444         | 297.638860       | G    | <b>737.357679</b> | 369.182477      | 720.331130        | 360.669203       | 719.347114     | 360.177195       | 7 |
| 4 | 699.313037         | 350.160157      | 682.286488        | 341.646882       | 681.302472         | 341.154874       | S    | <b>680.336215</b> | 340.671745      | 663.309666        | 332.158471       | 662.325650     | 331.666463       | 6 |
| 5 | 798.381451         | 399.694364      | 781.354902        | 391.181089       | <b>780.370886</b>  | 390.689081       | V    | <b>593.304187</b> | 297.155731      | 576.277638        | 288.642457       | 575.293622     | 288.150449       | 5 |
| 6 | <b>913.408394</b>  | 457.207835      | <b>896.381845</b> | 448.694560       | <b>895.397829</b>  | 448.202552       | D    | <b>494.235773</b> | 247.621524      | 477.209224        | 239.108250       | 476.225208     | 238.616242       | 4 |
| 7 | 1060.476808        | 530.742042      | 1043.450259       | 522.228768       | 1042.466243        | 521.736759       | F    | <b>379.208830</b> | 190.108053      | 362.182281        | 181.594778       |                |                  | 3 |
| 8 | <b>1117.498272</b> | 559.252774      | 1100.471723       | 550.739499       | <b>1099.487707</b> | 550.247491       | G    | <b>232.140416</b> | 116.573846      | <b>215.113867</b> | 108.060571       |                |                  | 2 |
| 9 |                    |                 |                   |                  |                    |                  | R    | <b>175.118952</b> | 88.063114       | <b>158.092403</b> | 79.549839        |                |                  | 1 |

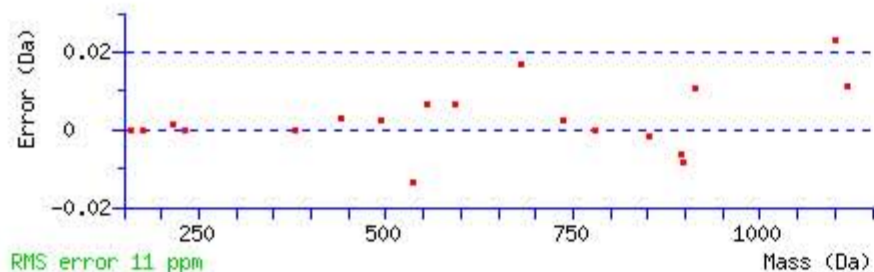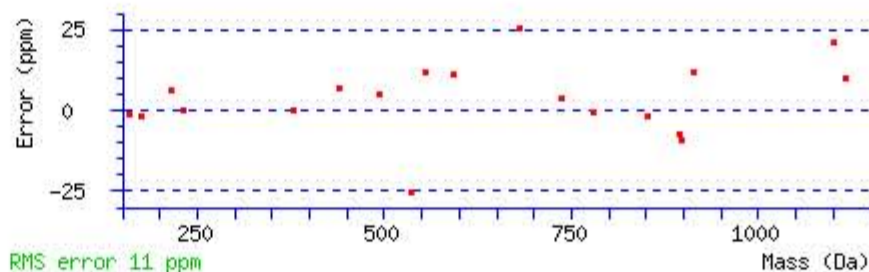

NCBI BLAST search of [QDGSVDFGR](#)

(Parameters: blastp, nr protein database, expect=20000, no filter, PAM30)

Other BLAST [web gateways](#)

All matches to this query

| Score | Mr(calc):   | Delta    | Sequence                  |
|-------|-------------|----------|---------------------------|
| 46.1  | 1290.602692 | 0.006216 | <a href="#">QDGSVDFGR</a> |

Mascot: <http://www.matrixscience.com/>



# MASCOT Search Results

## Peptide View

MS/MS Fragmentation of **YLQEIYNSNNQK**

Found in **FIBG\_HUMAN**, Fibrinogen gamma chain OS=Homo sapiens GN=FGG PE=1 SV=3

Match to Query 43235: 1823.893272 from(608.971700,3+) rtinseconds(1894) index(52045)

Title: Locus:1.1.1.1275.8 File:"2013-07-02 CLN FXIII 60 min 2nd F 4.wiff"

Data file C:\Program Files (x86)\Matrix Science\Mascot Daemon\mgf5 FXIII 60 min 2nd\mascot\_daemon\_merge.mgf

Click mouse within plot area to zoom in by factor of two about that point

Or, Plot from  to  Da

Label all possible matches  Label matches used for scoring

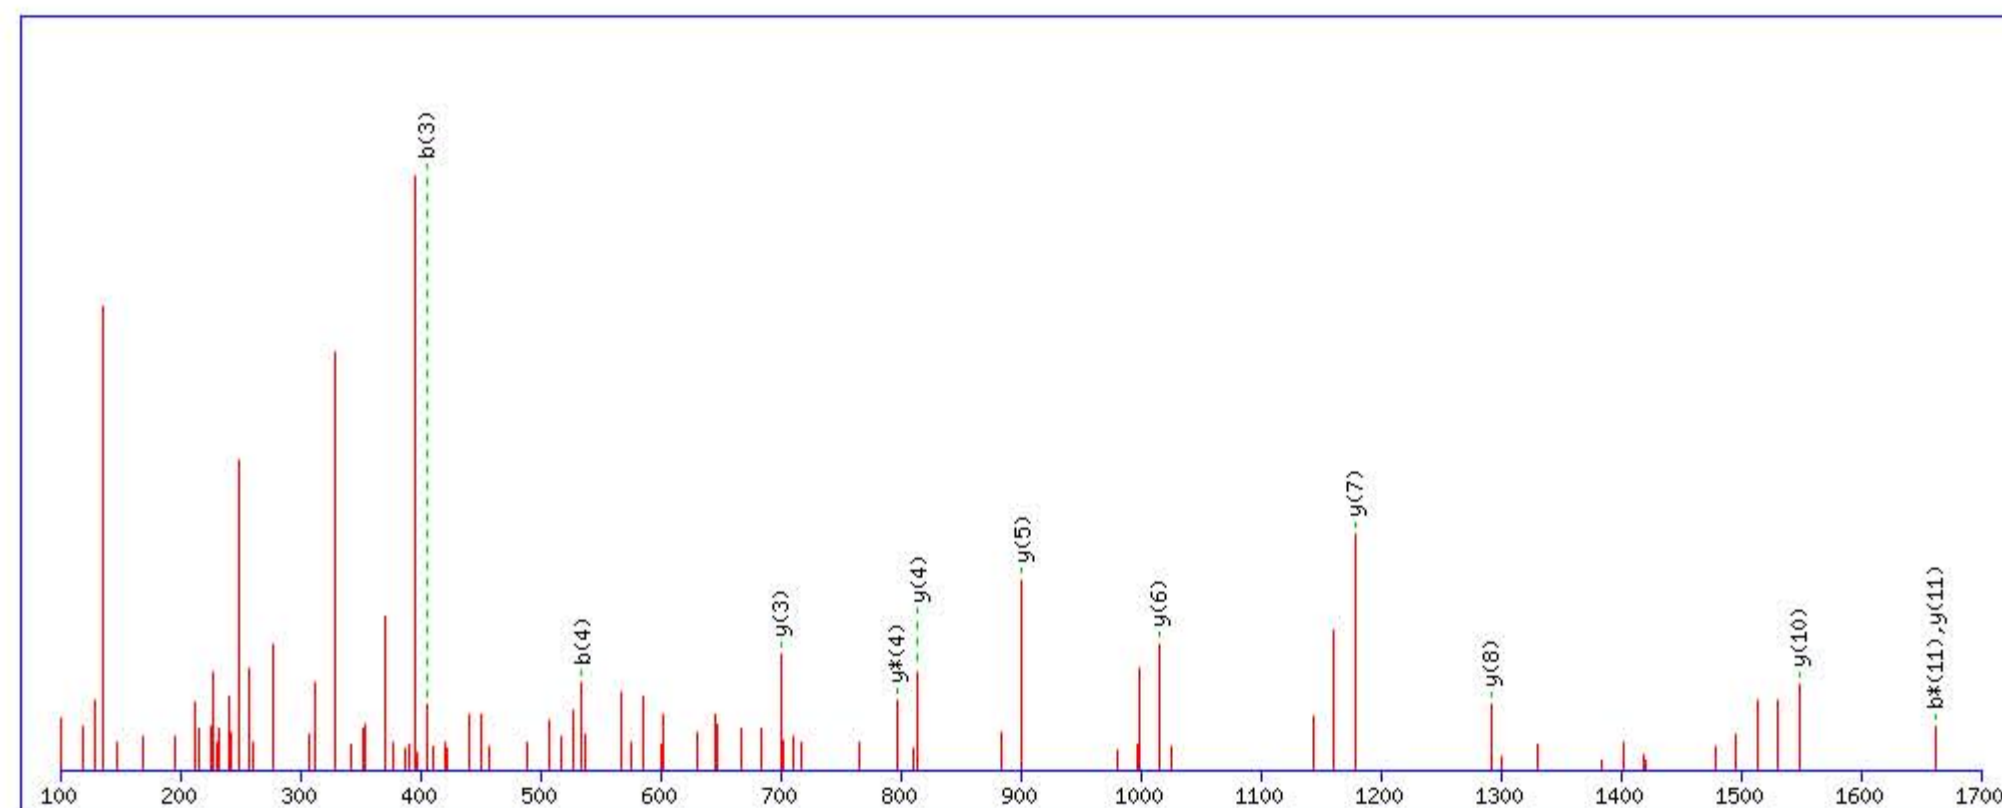

Monoisotopic mass of neutral peptide  $M_r(\text{calc})$ : 1823.887573

Fixed modifications: Carbamidomethyl (C) (apply to specified residues or termini only)

Variable modifications:

Q11 : Biotin:Thermo-21345 (Q)

Ions Score: 55 Expect: 7.1e-005

Matches : 12/114 fragment ions using 16 most intense peaks [\(help\)](#)

| #  | b           | b <sup>++</sup> | b <sup>+</sup> | b <sup>*++</sup> | b <sup>0</sup> | b <sup>0++</sup> | Seq. | y           | y <sup>++</sup> | y <sup>+</sup> | y <sup>*++</sup> | y <sup>0</sup> | y <sup>0++</sup> | #  |
|----|-------------|-----------------|----------------|------------------|----------------|------------------|------|-------------|-----------------|----------------|------------------|----------------|------------------|----|
| 1  | 164.070605  | 82.538940       |                |                  |                |                  | Y    |             |                 |                |                  |                |                  | 12 |
| 2  | 277.154669  | 139.080973      |                |                  |                |                  | L    | 1661.831567 | 831.419422      | 1644.805018    | 822.906147       | 1643.821002    | 822.414139       | 11 |
| 3  | 405.213247  | 203.110262      | 388.186698     | 194.596987       |                |                  | Q    | 1548.747503 | 774.877390      | 1531.720954    | 766.364115       | 1530.736938    | 765.872107       | 10 |
| 4  | 534.255840  | 267.631558      | 517.229291     | 259.118284       | 516.245275     | 258.626276       | E    | 1420.688925 | 710.848100      | 1403.662376    | 702.334826       | 1402.678360    | 701.842818       | 9  |
| 5  | 647.339904  | 324.173590      | 630.313355     | 315.660316       | 629.329339     | 315.168308       | I    | 1291.646332 | 646.326804      | 1274.619783    | 637.813530       | 1273.635767    | 637.321522       | 8  |
| 6  | 810.403233  | 405.705255      | 793.376684     | 397.191980       | 792.392668     | 396.699972       | Y    | 1178.562268 | 589.784772      | 1161.535719    | 581.271498       | 1160.551703    | 580.779489       | 7  |
| 7  | 924.446160  | 462.726718      | 907.419611     | 454.213443       | 906.435595     | 453.721435       | N    | 1015.498939 | 508.253108      | 998.472390     | 499.739833       | 997.488374     | 499.247825       | 6  |
| 8  | 1011.478188 | 506.242732      | 994.451639     | 497.729457       | 993.467623     | 497.237449       | S    | 901.456012  | 451.231644      | 884.429463     | 442.718370       | 883.445447     | 442.226362       | 5  |
| 9  | 1125.521115 | 563.264196      | 1108.494566    | 554.750921       | 1107.510550    | 554.258913       | N    | 814.423984  | 407.715630      | 797.397435     | 399.202356       |                |                  | 4  |
| 10 | 1239.564042 | 620.285659      | 1222.537493    | 611.772385       | 1221.553477    | 611.280376       | N    | 700.381057  | 350.694167      | 683.354508     | 342.180892       |                |                  | 3  |
| 11 | 1678.789368 | 839.898322      | 1661.762819    | 831.385048       | 1660.778803    | 830.893039       | Q    | 586.338130  | 293.672703      | 569.311581     | 285.159429       |                |                  | 2  |
| 12 |             |                 |                |                  |                |                  | K    | 147.112804  | 74.060040       | 130.086255     | 65.546765        |                |                  | 1  |

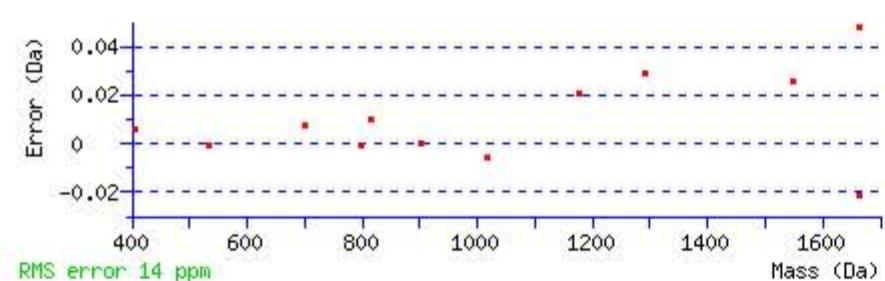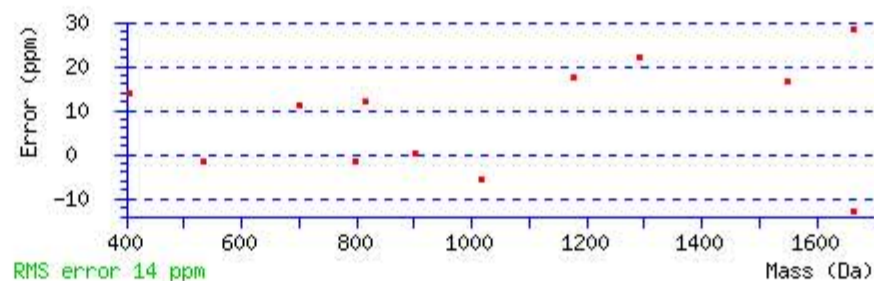

NCBI BLAST search of **YLQEIYNSNNQK**

(Parameters: blastp, nr protein database, expect=20000, no filter, PAM30)

Other BLAST [web gateways](#)

All matches to this query

| Score | $M_r(\text{calc})$ : | Delta    | Sequence                     |
|-------|----------------------|----------|------------------------------|
| 54.8  | 1823.887573          | 0.005699 | <a href="#">YLQEIYNSNNQK</a> |

Mascot: <http://www.matrixscience.com/>



# MASCOT Search Results

## Peptide View

MS/MS Fragmentation of **LTIGEGQQHHLGGAK**

Found in **FIBG\_HUMAN**, Fibrinogen gamma chain OS=Homo sapiens GN=FGG PE=1 SV=3

Match to Query 43917: 1855.966696 from(464.998950,4+) rtinseconds(1510) index(2980)

Title: Locus:1.1.1.1335.7 File:"2013-07-02 CLN FXIII 60 min 2nd F 1.wiff"

Data file C:\Program Files (x86)\Matrix Science\Mascot Daemon\mgf5 FXIII 60 min 2nd\mascot\_daemon\_merge.mgf

Click mouse within plot area to zoom in by factor of two about that point

Or, Plot from  to  Da

Label all possible matches  Label matches used for scoring

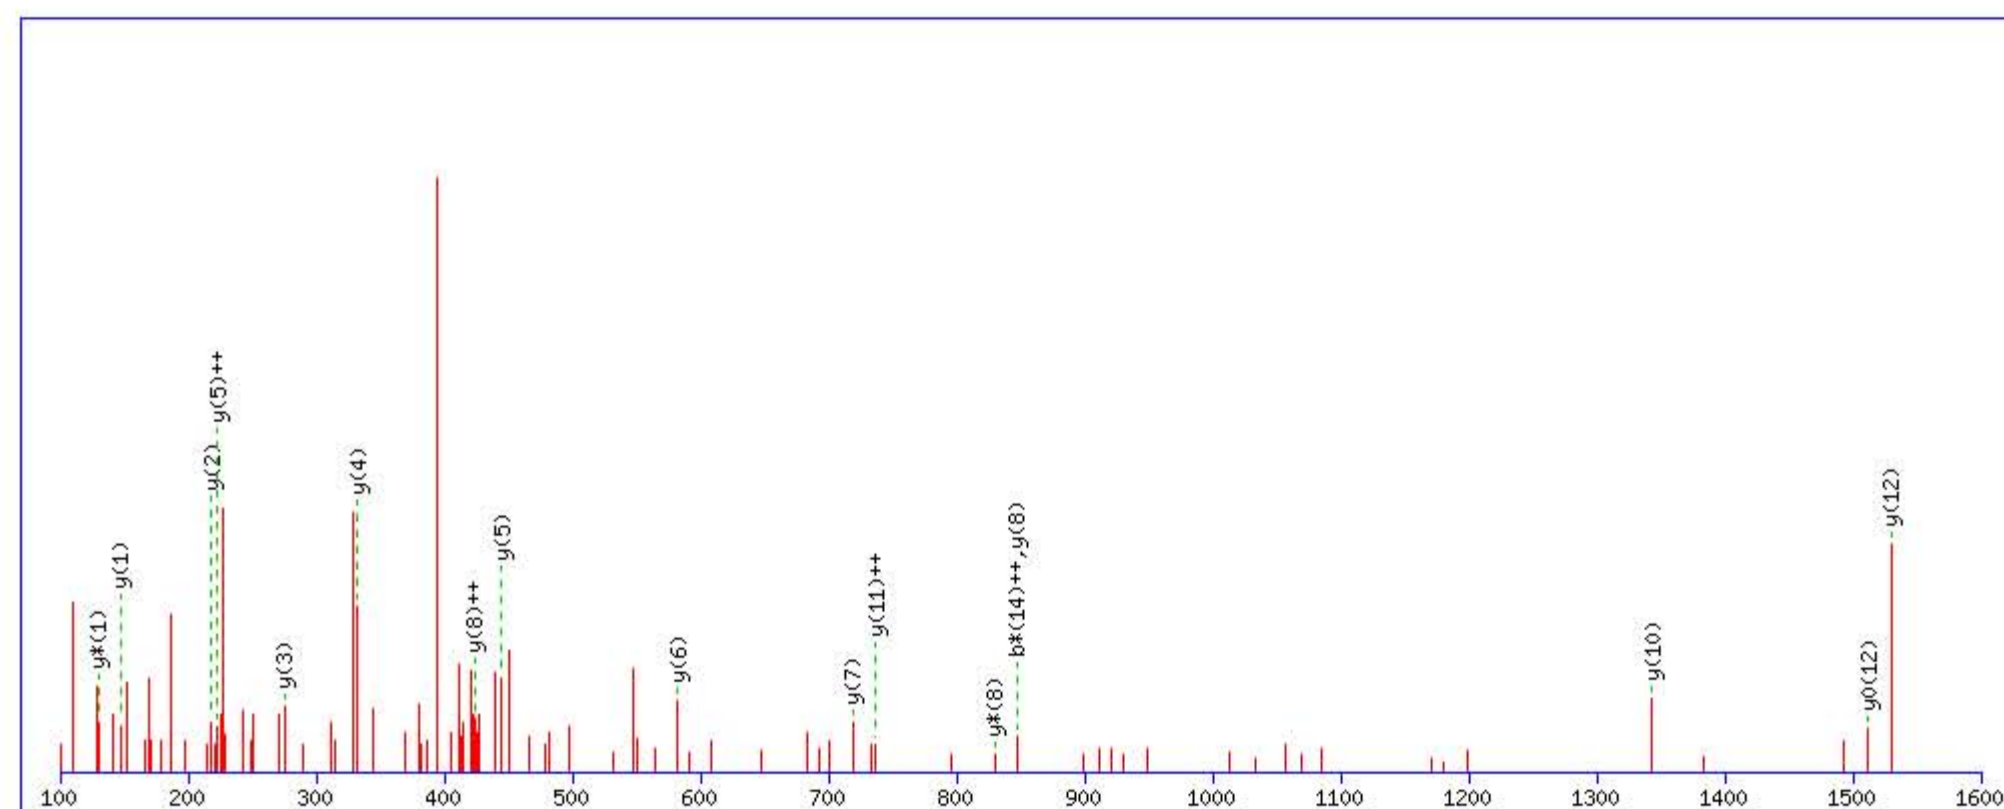

Monoisotopic mass of neutral peptide Mr(calc): 1855.972687

Fixed modifications: Carbamidomethyl (C) (apply to specified residues or termini only)

Variable modifications:

Q7 : Biotin:Thermo-21345 (Q)

Ions Score: 26 Expect: 0.064

Matches : 17/134 fragment ions using 68 most intense peaks [\(help\)](#)

| #  | b           | b <sup>++</sup> | b <sup>+</sup> | b <sup>+++</sup>  | b <sup>0</sup> | b <sup>0++</sup> | Seq. | y                  | y <sup>++</sup>   | y <sup>+</sup>    | y <sup>+++</sup> | y <sup>0</sup>     | y <sup>0++</sup> | #  |
|----|-------------|-----------------|----------------|-------------------|----------------|------------------|------|--------------------|-------------------|-------------------|------------------|--------------------|------------------|----|
| 1  | 114.091340  | 57.549308       |                |                   |                |                  | L    |                    |                   |                   |                  |                    |                  | 15 |
| 2  | 215.139019  | 108.073147      |                |                   | 197.128454     | 99.067865        | T    | 1743.895902        | 872.451589        | 1726.869353       | 863.938314       | 1725.885337        | 863.446306       | 14 |
| 3  | 328.223083  | 164.615179      |                |                   | 310.212518     | 155.609897       | I    | 1642.848223        | 821.927749        | 1625.821674       | 813.414475       | 1624.837658        | 812.922467       | 13 |
| 4  | 385.244547  | 193.125911      |                |                   | 367.233982     | 184.120629       | G    | <b>1529.764159</b> | 765.385717        | 1512.737610       | 756.872443       | <b>1511.753594</b> | 756.380435       | 12 |
| 5  | 514.287140  | 257.647208      |                |                   | 496.276575     | 248.641926       | E    | 1472.742695        | <b>736.874985</b> | 1455.716146       | 728.361711       | 1454.732130        | 727.869703       | 11 |
| 6  | 571.308604  | 286.157940      |                |                   | 553.298039     | 277.152658       | G    | <b>1343.700102</b> | 672.353689        | 1326.673553       | 663.840414       |                    |                  | 10 |
| 7  | 1010.533930 | 505.770603      | 993.507381     | 497.257329        | 992.523365     | 496.765321       | Q    | 1286.678638        | 643.842957        | 1269.652089       | 635.329682       |                    |                  | 9  |
| 8  | 1138.592508 | 569.799892      | 1121.565959    | 561.286618        | 1120.581943    | 560.794609       | Q    | <b>847.453312</b>  | <b>424.230294</b> | <b>830.426763</b> | 415.717019       |                    |                  | 8  |
| 9  | 1275.651420 | 638.329348      | 1258.624871    | 629.816074        | 1257.640855    | 629.324065       | H    | <b>719.394734</b>  | 360.201005        | 702.368185        | 351.687730       |                    |                  | 7  |
| 10 | 1412.710332 | 706.858804      | 1395.683783    | 698.345530        | 1394.699767    | 697.853521       | H    | <b>582.335822</b>  | 291.671549        | 565.309273        | 283.158274       |                    |                  | 6  |
| 11 | 1525.794396 | 763.400836      | 1508.767847    | 754.887561        | 1507.783831    | 754.395553       | L    | <b>445.276910</b>  | <b>223.142093</b> | 428.250361        | 214.628818       |                    |                  | 5  |
| 12 | 1582.815860 | 791.911568      | 1565.789311    | 783.398293        | 1564.805295    | 782.906285       | G    | <b>332.192846</b>  | 166.600061        | 315.166297        | 158.086786       |                    |                  | 4  |
| 13 | 1639.837324 | 820.422300      | 1622.810775    | 811.909025        | 1621.826759    | 811.417017       | G    | <b>275.171382</b>  | 138.089329        | 258.144833        | 129.576054       |                    |                  | 3  |
| 14 | 1710.874438 | 855.940857      | 1693.847889    | <b>847.427582</b> | 1692.863873    | 846.935574       | A    | <b>218.149918</b>  | 109.578597        | 201.123369        | 101.065322       |                    |                  | 2  |
| 15 |             |                 |                |                   |                |                  | K    | <b>147.112804</b>  | 74.060040         | <b>130.086255</b> | 65.546765        |                    |                  | 1  |

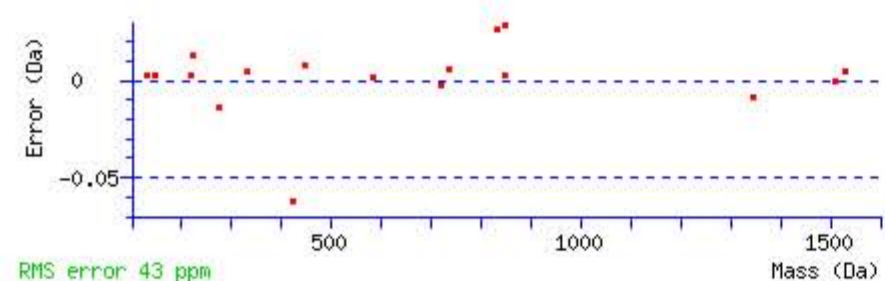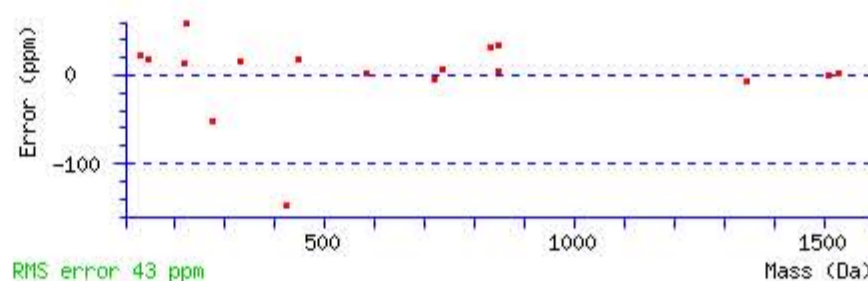

NCBI BLAST search of [LTIGEGQQHHLGGAK](#)

(Parameters: blastp, nr protein database, expect=20000, no filter, PAM30)

Other BLAST [web gateways](#)

All matches to this query

| Score | Mr(calc):   | Delta     | Sequence                        |
|-------|-------------|-----------|---------------------------------|
| 26.4  | 1855.972687 | -0.005991 | <a href="#">LTIGEGQQHHLGGAK</a> |
| 16.4  | 1855.972687 | -0.005991 | <a href="#">LTIGEGQQHHLGGAK</a> |

Mascot: <http://www.matrixscience.com/>



# MASCOT Search Results

## Peptide View

MS/MS Fragmentation of **LTIGEGQQHHLGGAK**

Found in **FIBG\_HUMAN**, Fibrinogen gamma chain OS=Homo sapiens GN=FGG PE=1 SV=3

Match to Query 43927: 1855.968132 from(619.663320,3+) rtinseconds(1466) index(33059)

Title: Locus:1.1.1.2929.25 File:"2013-07-02 CLN FXIII 60 min 2nd F 3.wiff"

Data file C:\Program Files (x86)\Matrix Science\Mascot Daemon\mgf\5 FXIII 60 min 2nd\mascot\_daemon\_merge.mgf

Click mouse within plot area to zoom in by factor of two about that point

Or, Plot from  to  Da

Label all possible matches  Label matches used for scoring

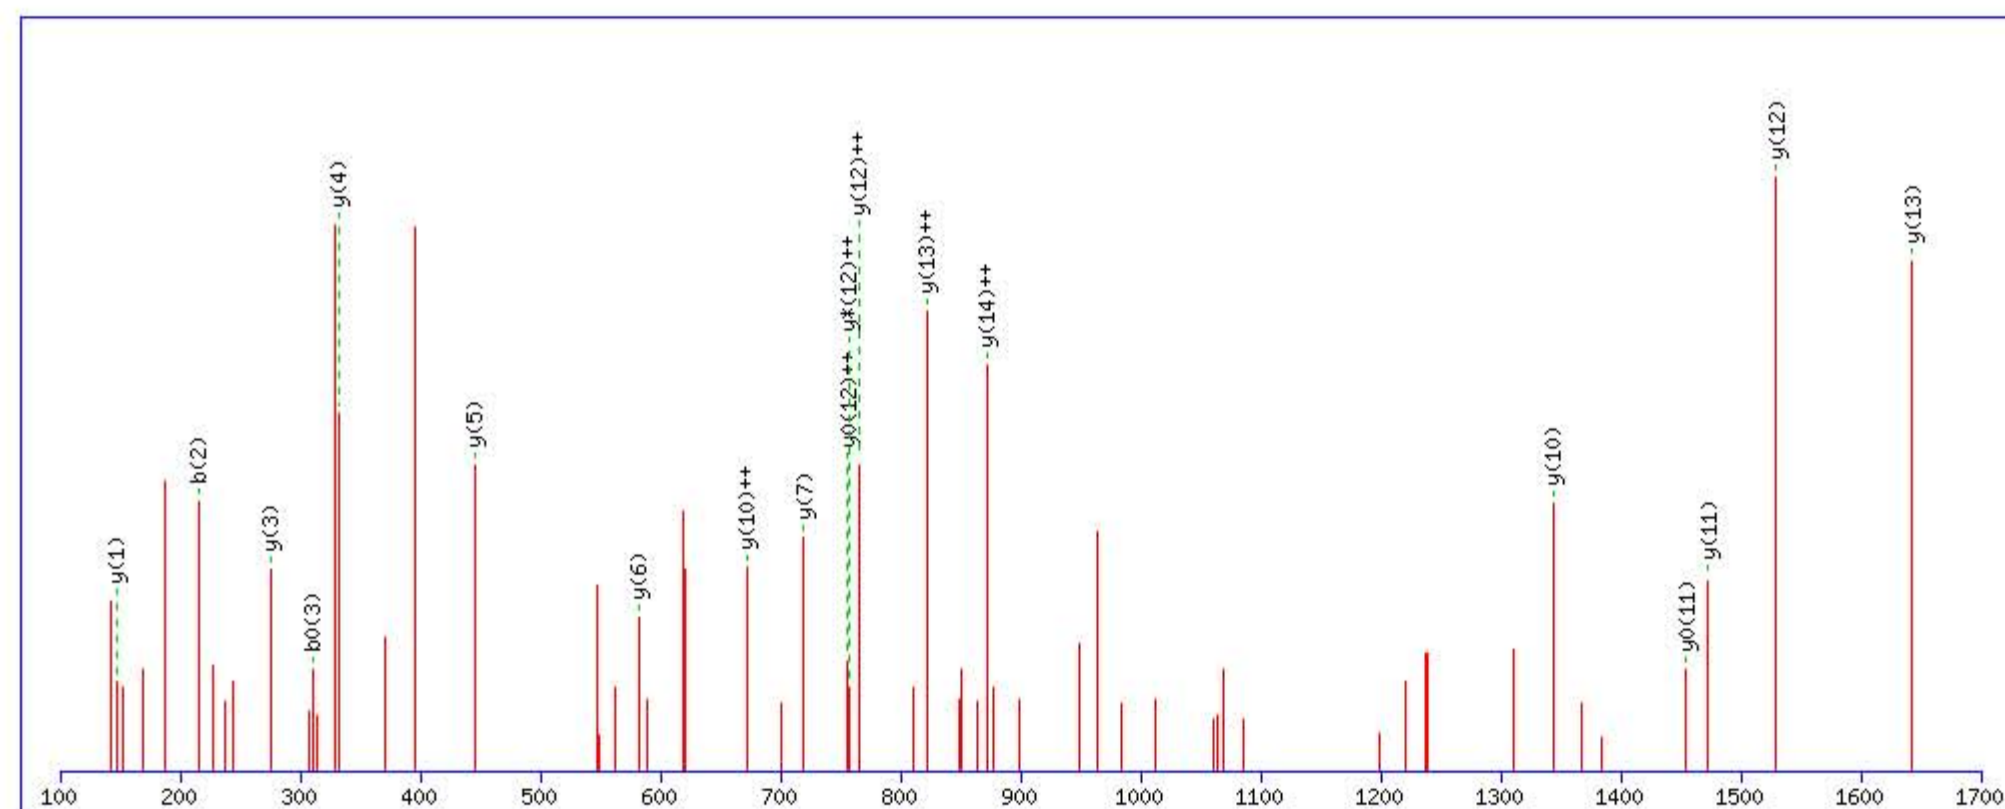

Monoisotopic mass of neutral peptide Mr(calc): 1855.972687

Fixed modifications: Carbamidomethyl (C) (apply to specified residues or termini only)

Variable modifications:

Q8 : Biotin:Thermo-21345 (Q)

Ions Score: 36 Expect: 0.0012

Matches : 19/134 fragment ions using 57 most intense peaks [\(help\)](#)

| #  | b           | b <sup>++</sup> | b <sup>*</sup> | b <sup>*++</sup> | b <sup>0</sup> | b <sup>0++</sup> | Seq. | y           | y <sup>++</sup> | y <sup>*</sup> | y <sup>*++</sup> | y <sup>0</sup> | y <sup>0++</sup> | #  |
|----|-------------|-----------------|----------------|------------------|----------------|------------------|------|-------------|-----------------|----------------|------------------|----------------|------------------|----|
| 1  | 114.091340  | 57.549308       |                |                  |                |                  | L    |             |                 |                |                  |                |                  | 15 |
| 2  | 215.139019  | 108.073147      |                |                  | 197.128454     | 99.067865        | T    | 1743.895902 | 872.451589      | 1726.869353    | 863.938314       | 1725.885337    | 863.446306       | 14 |
| 3  | 328.223083  | 164.615179      |                |                  | 310.212518     | 155.609897       | I    | 1642.848223 | 821.927749      | 1625.821674    | 813.414475       | 1624.837658    | 812.922467       | 13 |
| 4  | 385.244547  | 193.125911      |                |                  | 367.233982     | 184.120629       | G    | 1529.764159 | 765.385717      | 1512.737610    | 756.872443       | 1511.753594    | 756.380435       | 12 |
| 5  | 514.287140  | 257.647208      |                |                  | 496.276575     | 248.641926       | E    | 1472.742695 | 736.874985      | 1455.716146    | 728.361711       | 1454.732130    | 727.869703       | 11 |
| 6  | 571.308604  | 286.157940      |                |                  | 553.298039     | 277.152658       | G    | 1343.700102 | 672.353689      | 1326.673553    | 663.840414       |                |                  | 10 |
| 7  | 699.367182  | 350.187229      | 682.340633     | 341.673955       | 681.356617     | 341.181947       | Q    | 1286.678638 | 643.842957      | 1269.652089    | 635.329682       |                |                  | 9  |
| 8  | 1138.592508 | 569.799892      | 1121.565959    | 561.286618       | 1120.581943    | 560.794609       | Q    | 1158.620060 | 579.813668      | 1141.593511    | 571.300393       |                |                  | 8  |
| 9  | 1275.651420 | 638.329348      | 1258.624871    | 629.816074       | 1257.640855    | 629.324065       | H    | 719.394734  | 360.201005      | 702.368185     | 351.687730       |                |                  | 7  |
| 10 | 1412.710332 | 706.858804      | 1395.683783    | 698.345530       | 1394.699767    | 697.853521       | H    | 582.335822  | 291.671549      | 565.309273     | 283.158274       |                |                  | 6  |
| 11 | 1525.794396 | 763.400836      | 1508.767847    | 754.887561       | 1507.783831    | 754.395553       | L    | 445.276910  | 223.142093      | 428.250361     | 214.628818       |                |                  | 5  |
| 12 | 1582.815860 | 791.911568      | 1565.789311    | 783.398293       | 1564.805295    | 782.906285       | G    | 332.192846  | 166.600061      | 315.166297     | 158.086786       |                |                  | 4  |
| 13 | 1639.837324 | 820.422300      | 1622.810775    | 811.909025       | 1621.826759    | 811.417017       | G    | 275.171382  | 138.089329      | 258.144833     | 129.576054       |                |                  | 3  |
| 14 | 1710.874438 | 855.940857      | 1693.847889    | 847.427582       | 1692.863873    | 846.935574       | A    | 218.149918  | 109.578597      | 201.123369     | 101.065322       |                |                  | 2  |
| 15 |             |                 |                |                  |                |                  | K    | 147.112804  | 74.060040       | 130.086255     | 65.546765        |                |                  | 1  |

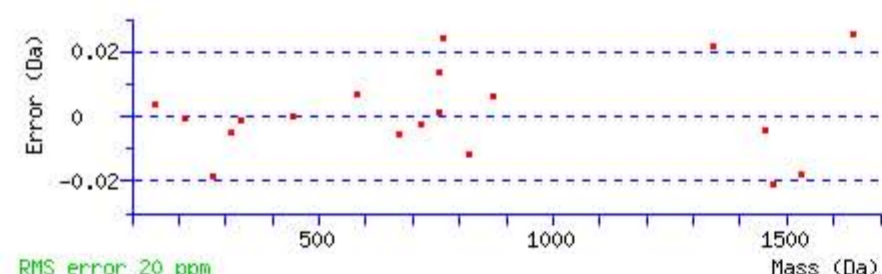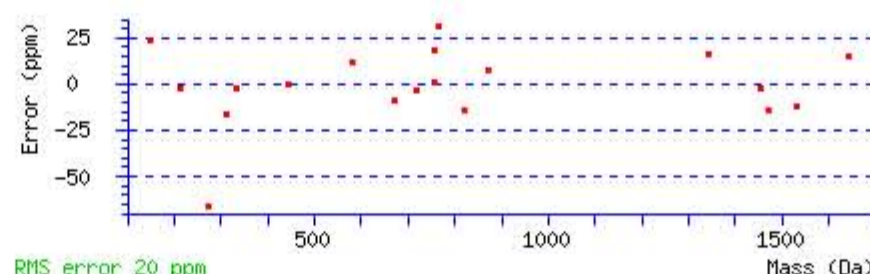

NCBI BLAST search of **LTIGEGQQHHLGGAK**

(Parameters: blastp, nr protein database, expect=20000, no filter, PAM30)

Other BLAST [web gateways](#)

All matches to this query

| Score | Mr(calc):   | Delta     | Sequence                          |
|-------|-------------|-----------|-----------------------------------|
| 36.2  | 1855.972687 | -0.004555 | <a href="#">LTIGEGQQHHLGGAK</a>   |
| 36.2  | 1855.972687 | -0.004555 | <a href="#">LTIGEGQQHHLGGAK</a>   |
| 5.2   | 1855.979202 | -0.011070 | <a href="#">ITIVENVGSVEGLAYHR</a> |

Mascot: <http://www.matrixscience.com/>



# MASCOT SCIENCE Mascot Search Results

## Peptide View

MS/MS Fragmentation of **LTIGEGQQHHLGGAK**

Found in **FIBG\_HUMAN**, Fibrinogen gamma chain OS=Homo sapiens GN=FGG PE=1 SV=3

Match to Query 50353: 2167.131896 from(542.790250,4+) rtinseconds(1777) index(34926)

Title: Locus:1.1.1.3038.16 File:"2013-07-02 CLN FXIII 60 min 2nd F 3.wiff"

Data file C:\Program Files (x86)\Matrix Science\Mascot Daemon\mgf5 FXIII 60 min 2nd\mascot\_daemon\_merge.mgf

Click mouse within plot area to zoom in by factor of two about that point

Or, Plot from  to  Da

Label all possible matches  Label matches used for scoring

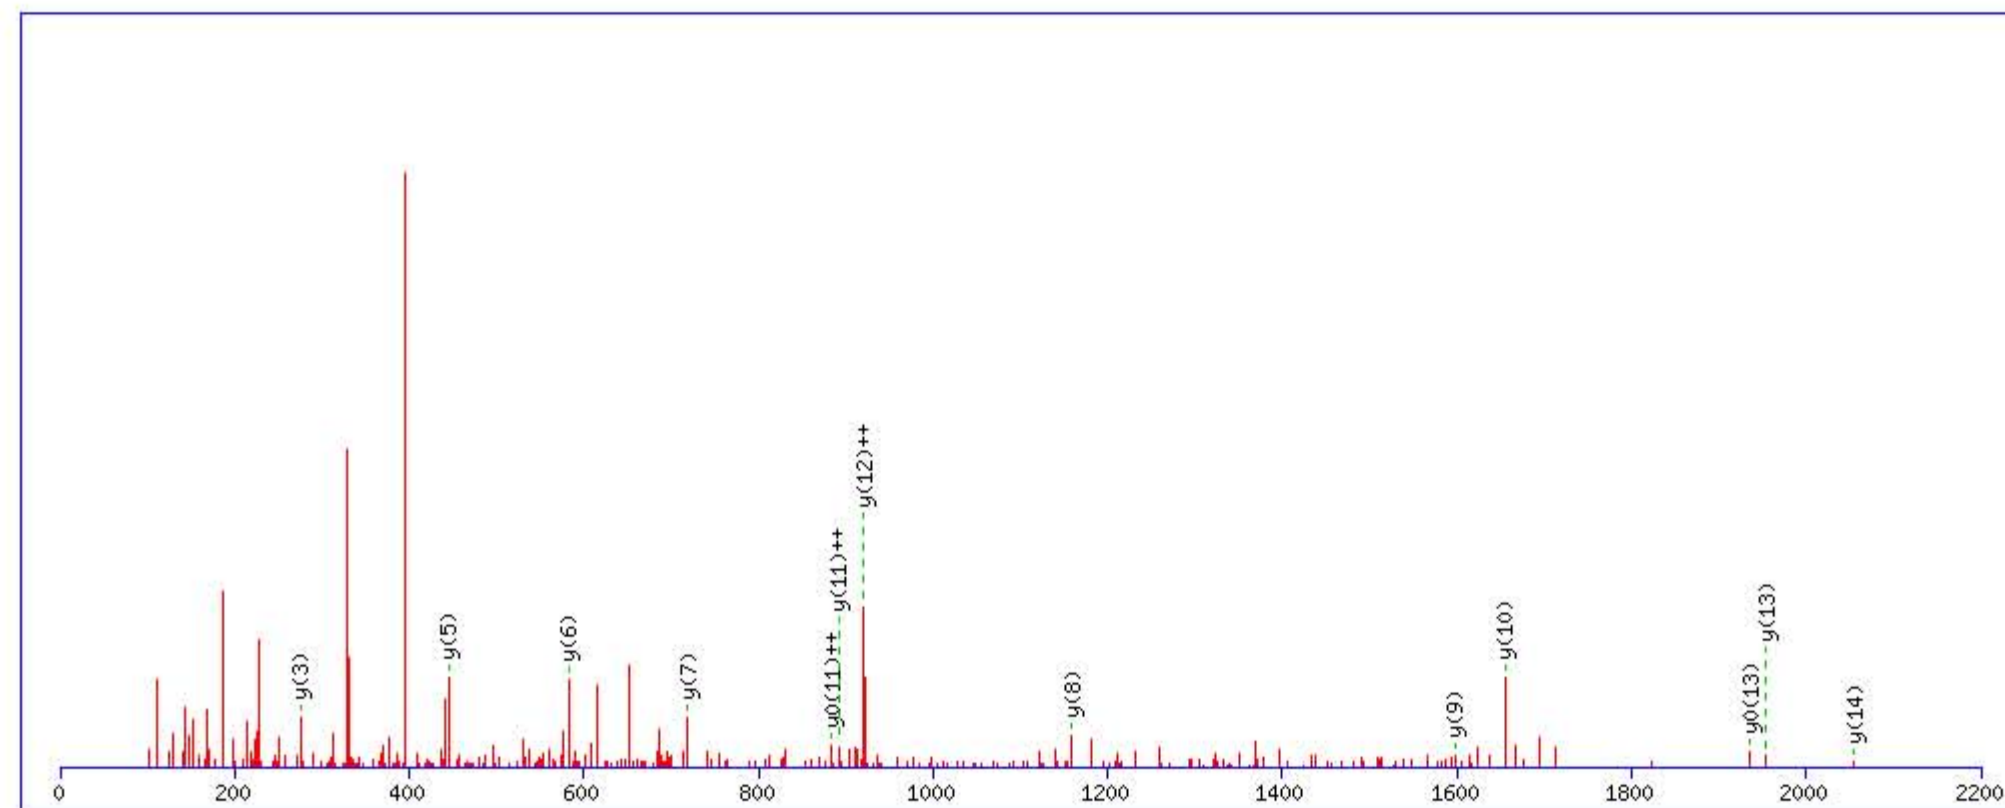

Monoisotopic mass of neutral peptide Mr(calc): 2167.139435

Fixed modifications: Carbamidomethyl (C) (apply to specified residues or termini only)

Variable modifications:

Q7 : Biotin:Thermo-21345 (Q)

Q8 : Biotin:Thermo-21345 (Q)

Ions Score: 31 Expect: 0.023

Matches : 13/134 fragment ions using 37 most intense peaks [\(help\)](#)

| #  | b           | b <sup>++</sup> | b <sup>+</sup> | b <sup>+++</sup> | b <sup>0</sup> | b <sup>0++</sup> | Seq. | y           | y <sup>++</sup> | y <sup>+</sup> | y <sup>+++</sup> | y <sup>0</sup> | y <sup>0++</sup> | #  |
|----|-------------|-----------------|----------------|------------------|----------------|------------------|------|-------------|-----------------|----------------|------------------|----------------|------------------|----|
| 1  | 114.091340  | 57.549308       |                |                  |                |                  | L    |             |                 |                |                  |                |                  | 15 |
| 2  | 215.139019  | 108.073147      |                |                  | 197.128454     | 99.067865        | T    | 2055.062650 | 1028.034963     | 2038.036101    | 1019.521688      | 2037.052085    | 1019.029680      | 14 |
| 3  | 328.223083  | 164.615179      |                |                  | 310.212518     | 155.609897       | I    | 1954.014971 | 977.511123      | 1936.988422    | 968.997849       | 1936.004406    | 968.505841       | 13 |
| 4  | 385.244547  | 193.125911      |                |                  | 367.233982     | 184.120629       | G    | 1840.930907 | 920.969091      | 1823.904358    | 912.455817       | 1822.920342    | 911.963809       | 12 |
| 5  | 514.287140  | 257.647208      |                |                  | 496.276575     | 248.641926       | E    | 1783.909443 | 892.458359      | 1766.882894    | 883.945085       | 1765.898878    | 883.453077       | 11 |
| 6  | 571.308604  | 286.157940      |                |                  | 553.298039     | 277.152658       | G    | 1654.866850 | 827.937063      | 1637.840301    | 819.423788       |                |                  | 10 |
| 7  | 1010.533930 | 505.770603      | 993.507381     | 497.257329       | 992.523365     | 496.765321       | Q    | 1597.845386 | 799.426331      | 1580.818837    | 790.913056       |                |                  | 9  |
| 8  | 1449.759256 | 725.383266      | 1432.732707    | 716.869992       | 1431.748691    | 716.377984       | Q    | 1158.620060 | 579.813668      | 1141.593511    | 571.300393       |                |                  | 8  |
| 9  | 1586.818168 | 793.912722      | 1569.791619    | 785.399448       | 1568.807603    | 784.907440       | H    | 719.394734  | 360.201005      | 702.368185     | 351.687730       |                |                  | 7  |
| 10 | 1723.877080 | 862.442178      | 1706.850531    | 853.928904       | 1705.866515    | 853.436895       | H    | 582.335822  | 291.671549      | 565.309273     | 283.158274       |                |                  | 6  |
| 11 | 1836.961144 | 918.984210      | 1819.934595    | 910.470936       | 1818.950579    | 909.978927       | L    | 445.276910  | 223.142093      | 428.250361     | 214.628818       |                |                  | 5  |
| 12 | 1893.982608 | 947.494942      | 1876.956059    | 938.981667       | 1875.972043    | 938.489659       | G    | 332.192846  | 166.600061      | 315.166297     | 158.086786       |                |                  | 4  |
| 13 | 1951.004072 | 976.005674      | 1933.977523    | 967.492399       | 1932.993507    | 967.000391       | G    | 275.171382  | 138.089329      | 258.144833     | 129.576054       |                |                  | 3  |
| 14 | 2022.041186 | 1011.524231     | 2005.014637    | 1003.010956      | 2004.030621    | 1002.518948      | A    | 218.149918  | 109.578597      | 201.123369     | 101.065322       |                |                  | 2  |
| 15 |             |                 |                |                  |                |                  | K    | 147.112804  | 74.060040       | 130.086255     | 65.546765        |                |                  | 1  |

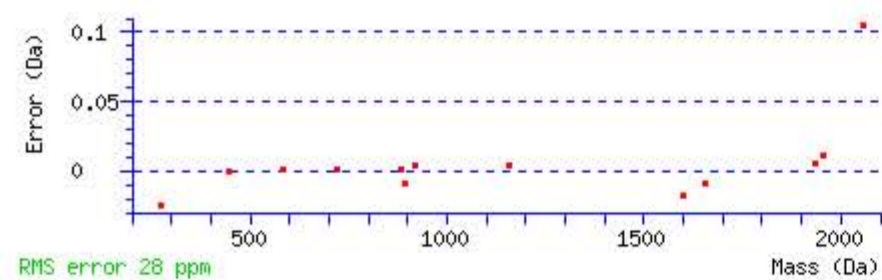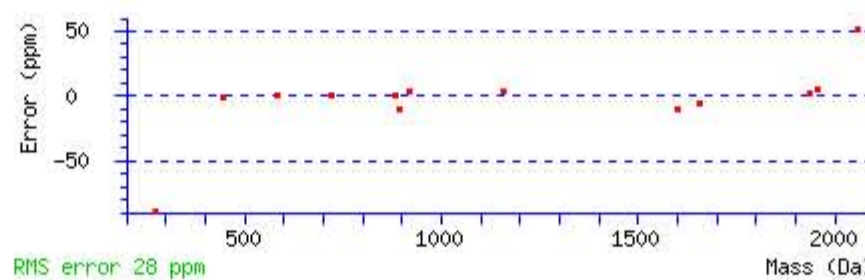

NCBI BLAST search of **LTIGEGQQHHLGGAK**

(Parameters: blastp, nr protein database, expect=20000, no filter, PAM30)

Other BLAST [web gateways](#)

All matches to this query

| Score | Mr(calc):   | Delta     | Sequence                        |
|-------|-------------|-----------|---------------------------------|
| 30.5  | 2167.139435 | -0.007539 | <a href="#">LTIGEGQQHHLGGAK</a> |

Mascot: <http://www.matrixscience.com/>



# MASCOT Search Results

## Peptide View

MS/MS Fragmentation of **VAQLEAQCQEPCKDTVQIHDITGK**

Found in **FIBG\_HUMAN**, Fibrinogen gamma chain OS=Homo sapiens GN=FGG PE=1 SV=3

Match to Query 62242: 3078.512536 from(770.635410,4+) rtinseconds(1903) index(52091)

Title: Locus:1.1.1.1278.18 File:"2013-07-02 CLN FXIII 60 min 2nd F 4.wiff"

Data file C:\Program Files (x86)\Matrix Science\Mascot Daemon\mgf5 FXIII 60 min 2nd\mascot\_daemon\_merge.mgf

Click mouse within plot area to zoom in by factor of two about that point

Or, Plot from  to  Da

Label all possible matches  Label matches used for scoring

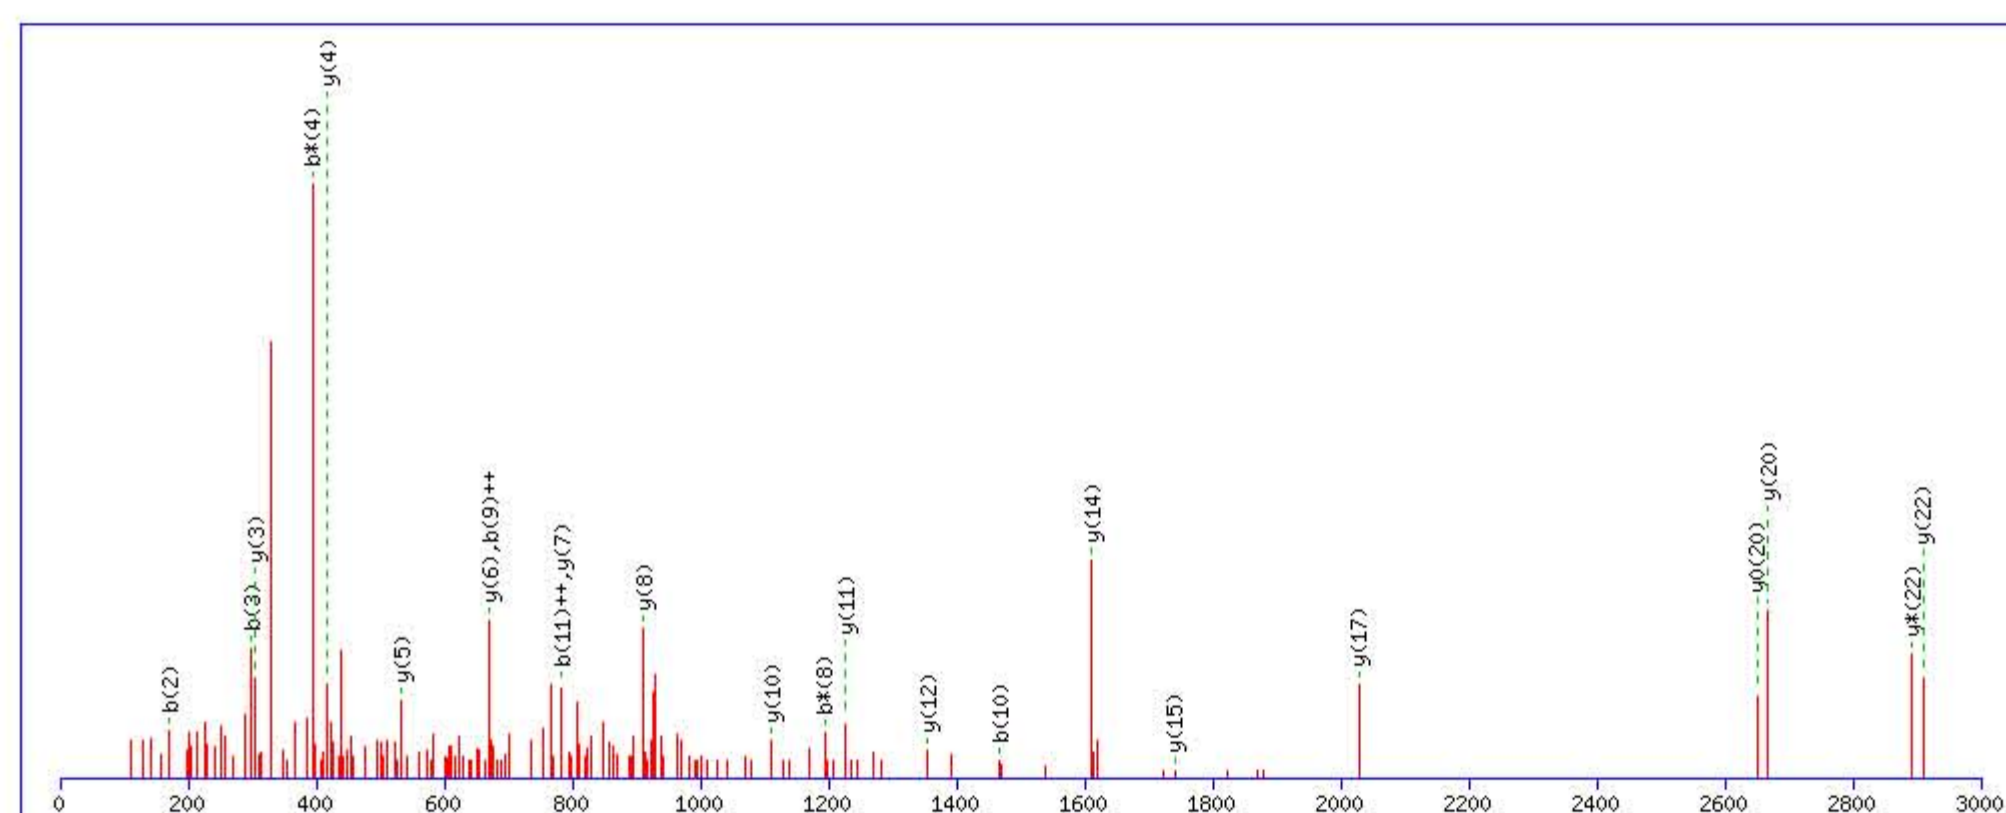

Monoisotopic mass of neutral peptide Mr(calc): 3078.493668

Fixed modifications: Carbamidomethyl (C) (apply to specified residues or termini only)

Variable modifications:

Q7 : Biotin:Thermo-21345 (Q)

Ions Score: 79 Expect: 3.8e-007

Matches : 23/260 fragment ions using 41 most intense peaks [\(help\)](#)

| #  | b                  | b <sup>++</sup>   | b <sup>*</sup>     | b <sup>*++</sup> | b <sup>0</sup> | b <sup>0++</sup> | Seq. | y                  | y <sup>++</sup> | y <sup>*</sup>     | y <sup>*++</sup> | y <sup>0</sup>     | y <sup>0++</sup> | #  |
|----|--------------------|-------------------|--------------------|------------------|----------------|------------------|------|--------------------|-----------------|--------------------|------------------|--------------------|------------------|----|
| 1  | 100.075690         | 50.541483         |                    |                  |                |                  | V    |                    |                 |                    |                  |                    |                  | 24 |
| 2  | <b>171.112804</b>  | 86.060040         |                    |                  |                |                  | A    | 2980.432529        | 1490.719902     | 2963.405980        | 1482.206628      | 2962.421964        | 1481.714620      | 23 |
| 3  | <b>299.171382</b>  | 150.089329        | 282.144833         | 141.576055       |                |                  | Q    | <b>2909.395415</b> | 1455.201345     | <b>2892.368866</b> | 1446.688071      | 2891.384850        | 1446.196063      | 22 |
| 4  | 412.255446         | 206.631361        | <b>395.228897</b>  | 198.118087       |                |                  | L    | 2781.336837        | 1391.172056     | 2764.310288        | 1382.658782      | 2763.326272        | 1382.166774      | 21 |
| 5  | 541.298039         | 271.152658        | 524.271490         | 262.639383       | 523.287474     | 262.147375       | E    | <b>2668.252773</b> | 1334.630024     | 2651.226224        | 1326.116750      | <b>2650.242208</b> | 1325.624742      | 20 |
| 6  | 612.335153         | 306.671215        | 595.308604         | 298.157940       | 594.324588     | 297.665932       | A    | 2539.210180        | 1270.108728     | 2522.183631        | 1261.595453      | 2521.199615        | 1261.103445      | 19 |
| 7  | 1051.560479        | 526.283878        | 1034.533930        | 517.770603       | 1033.549914    | 517.278595       | Q    | 2468.173066        | 1234.590171     | 2451.146517        | 1226.076896      | 2450.162501        | 1225.584888      | 18 |
| 8  | 1211.591128        | 606.299202        | <b>1194.564579</b> | 597.785928       | 1193.580563    | 597.293920       | C    | <b>2028.947740</b> | 1014.977508     | 2011.921191        | 1006.464234      | 2010.937175        | 1005.972225      | 17 |
| 9  | 1339.649706        | <b>670.328491</b> | 1322.623157        | 661.815217       | 1321.639141    | 661.323208       | Q    | 1868.917091        | 934.962183      | 1851.890542        | 926.448909       | 1850.906526        | 925.956901       | 16 |
| 10 | <b>1468.692299</b> | 734.849788        | 1451.665750        | 726.336513       | 1450.681734    | 725.844505       | E    | <b>1740.858513</b> | 870.932894      | 1723.831964        | 862.419620       | 1722.847948        | 861.927612       | 15 |
| 11 | 1565.745063        | <b>783.376170</b> | 1548.718514        | 774.862895       | 1547.734498    | 774.370887       | P    | <b>1611.815920</b> | 806.411598      | 1594.789371        | 797.898323       | 1593.805355        | 797.406315       | 14 |
| 12 | 1725.775712        | 863.391494        | 1708.749163        | 854.878220       | 1707.765147    | 854.386212       | C    | 1514.763156        | 757.885216      | 1497.736607        | 749.371941       | 1496.752591        | 748.879933       | 13 |
| 13 | 1853.870675        | 927.438976        | 1836.844126        | 918.925701       | 1835.860110    | 918.433693       | K    | <b>1354.732507</b> | 677.869891      | 1337.705958        | 669.356617       | 1336.721942        | 668.864609       | 12 |
| 14 | 1968.897618        | 984.952447        | 1951.871069        | 976.439173       | 1950.887053    | 975.947165       | D    | <b>1226.637544</b> | 613.822410      | 1209.610995        | 605.309135       | 1208.626979        | 604.817127       | 11 |
| 15 | 2069.945297        | 1035.476286       | 2052.918748        | 1026.963012      | 2051.934732    | 1026.471004      | T    | <b>1111.610601</b> | 556.308938      | 1094.584052        | 547.795664       | 1093.600036        | 547.303656       | 10 |
| 16 | 2169.013711        | 1085.010493       | 2151.987162        | 1076.497219      | 2151.003146    | 1076.005211      | V    | 1010.562922        | 505.785099      | 993.536373         | 497.271824       | 992.552357         | 496.779816       | 9  |
| 17 | 2297.072289        | 1149.039782       | 2280.045740        | 1140.526508      | 2279.061724    | 1140.034500      | Q    | <b>911.494508</b>  | 456.250892      | 894.467959         | 447.737618       | 893.483943         | 447.245610       | 8  |
| 18 | 2410.156353        | 1205.581814       | 2393.129804        | 1197.068540      | 2392.145788    | 1196.576532      | I    | <b>783.435930</b>  | 392.221603      | 766.409381         | 383.708328       | 765.425365         | 383.216320       | 7  |
| 19 | 2547.215265        | 1274.111270       | 2530.188716        | 1265.597996      | 2529.204700    | 1265.105988      | H    | <b>670.351866</b>  | 335.679571      | 653.325317         | 327.166296       | 652.341301         | 326.674288       | 6  |
| 20 | 2662.242208        | 1331.624742       | 2645.215659        | 1323.111467      | 2644.231643    | 1322.619459      | D    | <b>533.292954</b>  | 267.150115      | 516.266405         | 258.636840       | 515.282389         | 258.144832       | 5  |
| 21 | 2775.326272        | 1388.166774       | 2758.299723        | 1379.653499      | 2757.315707    | 1379.161491      | I    | <b>418.266011</b>  | 209.636643      | 401.239462         | 201.123369       | 400.255446         | 200.631361       | 4  |
| 22 | 2876.373951        | 1438.690613       | 2859.347402        | 1430.177339      | 2858.363386    | 1429.685331      | T    | <b>305.181947</b>  | 153.094611      | 288.155398         | 144.581337       | 287.171382         | 144.089329       | 3  |
| 23 | 2933.395415        | 1467.201345       | 2916.368866        | 1458.688071      | 2915.384850    | 1458.196063      | G    | 204.134268         | 102.570772      | 187.107719         | 94.057497        |                    |                  | 2  |
| 24 |                    |                   |                    |                  |                |                  | K    | 147.112804         | 74.060040       | 130.086255         | 65.546765        |                    |                  | 1  |

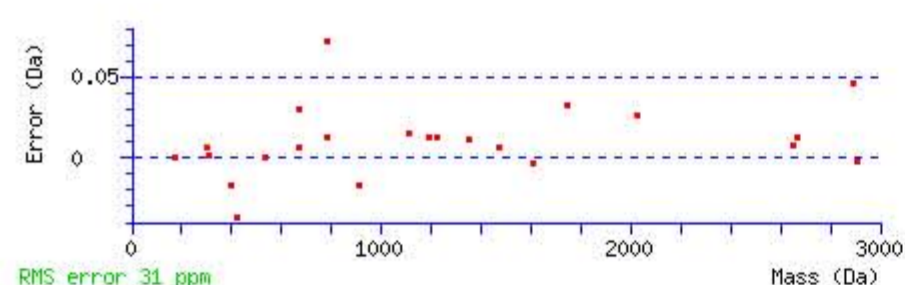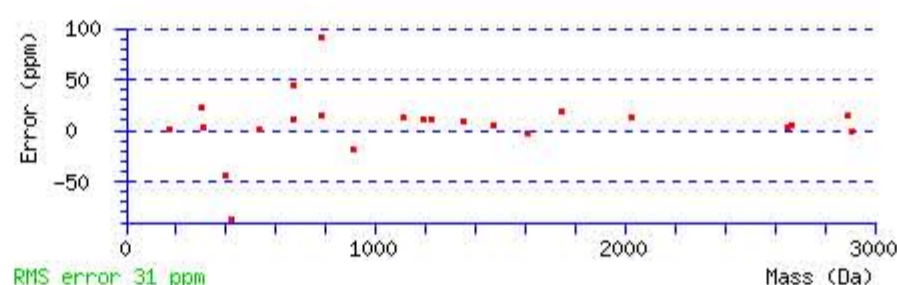

NCBI BLAST search of **VAQLEAQCQEPCKDTVQIHDITGK**

(Parameters: blastp, nr protein database, expect=20000, no filter, PAM30)

Other BLAST [web gateways](#)

All matches to this query

| Score | Mr(calc):   | Delta    | Sequence                                 |
|-------|-------------|----------|------------------------------------------|
| 78.9  | 3078.493668 | 0.018868 | <a href="#">VAQLEAQCQEPCKDTVQIHDITGK</a> |
| 65.1  | 3078.493668 | 0.018868 | <a href="#">VAQLEAQCQEPCKDTVQIHDITGK</a> |
| 61.0  | 3078.493668 | 0.018868 | <a href="#">VAQLEAQCQEPCKDTVQIHDITGK</a> |
| 15.2  | 3078.493668 | 0.018868 | <a href="#">VAQLEAQCQEPCKDTVQIHDITGK</a> |



# MASCOT Search Results

## Peptide View

MS/MS Fragmentation of **IGDQWDK**

Found in **FINC\_HUMAN**, Fibronectin OS=Homo sapiens GN=FN1 PE=1 SV=4

Match to Query 22388: 1171.566708 from(586.790630,2+) rtinseconds(1800) index(35054)

Title: Locus:1.1.1.3046.10 File:"2013-07-02 CLN FXIII 60 min 2nd F 3.wiff"

Data file C:\Program Files (x86)\Matrix Science\Mascot Daemon\mgf5 FXIII 60 min 2nd\mascot\_daemon\_merge.mgf

Click mouse within plot area to zoom in by factor of two about that point

Or, Plot from  to  Da

Label all possible matches  Label matches used for scoring

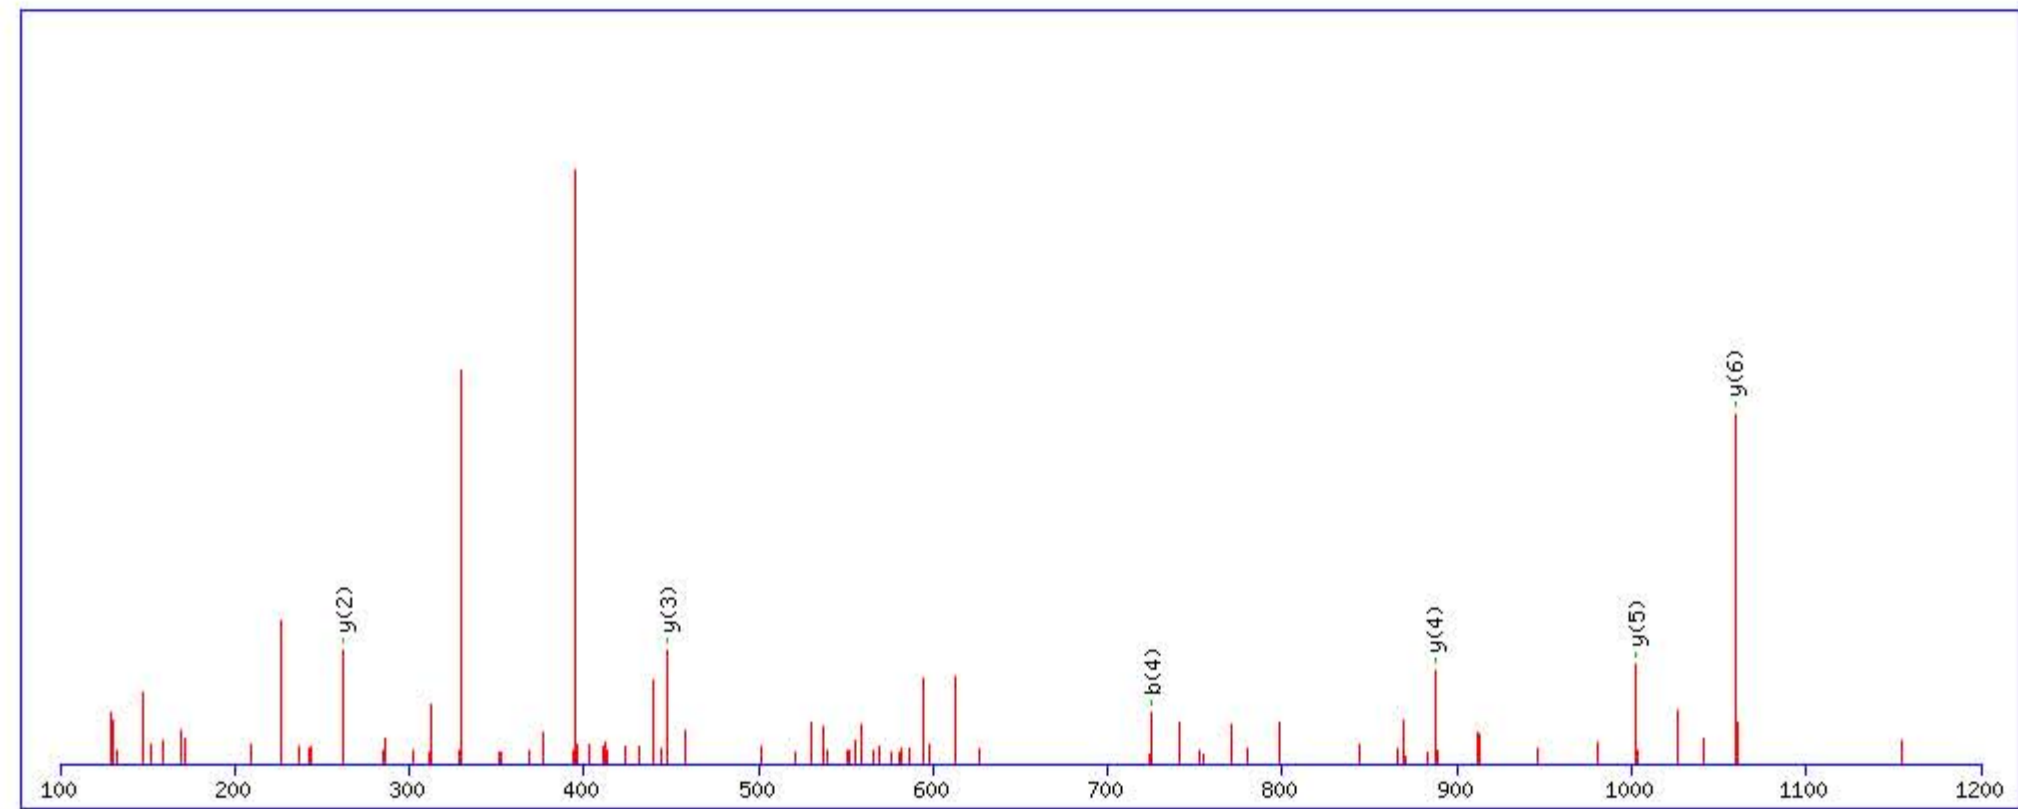

Monoisotopic mass of neutral peptide Mr(calc): 1171.569580

Fixed modifications: Carbamidomethyl (C) (apply to specified residues or termini only)

Variable modifications:

Q4 : Biotin:Thermo-21345 (Q)

Ions Score: 31 Expect: 0.006

Matches : 6/60 fragment ions using 11 most intense peaks [\(help\)](#)

| # | b           | b <sup>++</sup> | b <sup>*</sup> | b <sup>*++</sup> | b <sup>0</sup> | b <sup>0++</sup> | Seq. | y           | y <sup>++</sup> | y <sup>*</sup> | y <sup>*++</sup> | y <sup>0</sup> | y <sup>0++</sup> | # |
|---|-------------|-----------------|----------------|------------------|----------------|------------------|------|-------------|-----------------|----------------|------------------|----------------|------------------|---|
| 1 | 114.091340  | 57.549308       |                |                  |                |                  | I    |             |                 |                |                  |                |                  | 7 |
| 2 | 171.112804  | 86.060040       |                |                  |                |                  | G    | 1059.492793 | 530.250035      | 1042.466244    | 521.736760       | 1041.482228    | 521.244752       | 6 |
| 3 | 286.139747  | 143.573512      |                |                  | 268.129182     | 134.568229       | D    | 1002.471329 | 501.739303      | 985.444780     | 493.226028       | 984.460764     | 492.734020       | 5 |
| 4 | 725.365073  | 363.186175      | 708.338524     | 354.672900       | 707.354508     | 354.180892       | Q    | 887.444386  | 444.225831      | 870.417837     | 435.712557       | 869.433821     | 435.220549       | 4 |
| 5 | 911.444386  | 456.225831      | 894.417837     | 447.712557       | 893.433821     | 447.220549       | W    | 448.219060  | 224.613168      | 431.192511     | 216.099894       | 430.208495     | 215.607886       | 3 |
| 6 | 1026.471329 | 513.739303      | 1009.444780    | 505.226028       | 1008.460764    | 504.734020       | D    | 262.139747  | 131.573512      | 245.113198     | 123.060237       | 244.129182     | 122.568229       | 2 |
| 7 |             |                 |                |                  |                |                  | K    | 147.112804  | 74.060040       | 130.086255     | 65.546765        |                |                  | 1 |

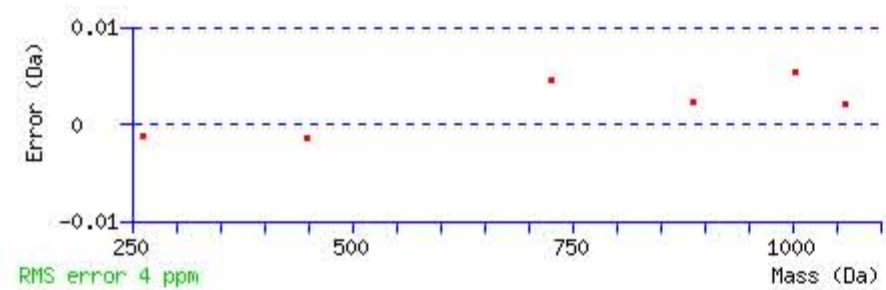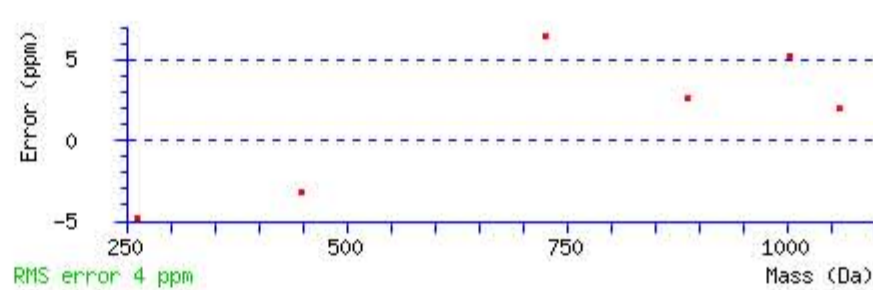

NCBI BLAST search of **IGDQWDK**

(Parameters: blastp, nr protein database, expect=20000, no filter, PAM30)

Other BLAST [web gateways](#)

## All matches to this query

| Score | Mr(calc):   | Delta     | Sequence                     |
|-------|-------------|-----------|------------------------------|
| 31.4  | 1171.569580 | -0.002872 | <a href="#">IGDQWDK</a>      |
| 7.2   | 1171.583328 | -0.016620 | <a href="#">GEVGDPGQKGTK</a> |
| 6.7   | 1171.572067 | -0.005359 | <a href="#">LGSGPDGAEIHK</a> |
| 6.2   | 1171.576096 | -0.009388 | <a href="#">LYFSDATLDK</a>   |
| 5.2   | 1171.569565 | -0.002857 | <a href="#">LGPEWSQPMK</a>   |
| 4.1   | 1171.573410 | -0.006702 | <a href="#">RAPDPGFQER</a>   |
| 1.9   | 1171.559021 | 0.007687  | <a href="#">SQLHCRMPK</a>    |
| 1.2   | 1171.554337 | 0.012371  | <a href="#">ALCDTPGVDPK</a>  |
| 0.4   | 1171.577438 | -0.010730 | <a href="#">NDVLHNFVK</a>    |
| 0.2   | 1171.562134 | 0.004574  | <a href="#">RYEEERK</a>      |



# MASCOT SEARCH RESULTS

## Peptide View

MS/MS Fragmentation of **WCGTTQNYDADQK**

Found in **FN1C\_HUMAN**, Fibronectin OS=Homo sapiens GN=FN1 PE=1 SV=4

Match to Query 44456: 1896.807132 from(633.276320,3+) rtinseconds(1654) index(34120)

Title: Locus:1.1.1.2995.13 File:"2013-07-02 CLN FXIII 60 min 2nd F 3.wiff"

Data file C:\Program Files (x86)\Matrix Science\Mascot Daemon\mgf\5 FXIII 60 min 2nd\mascot\_daemon\_merge.mgf

Click mouse within plot area to zoom in by factor of two about that point

Or, Plot from  to  Da

Label all possible matches  Label matches used for scoring

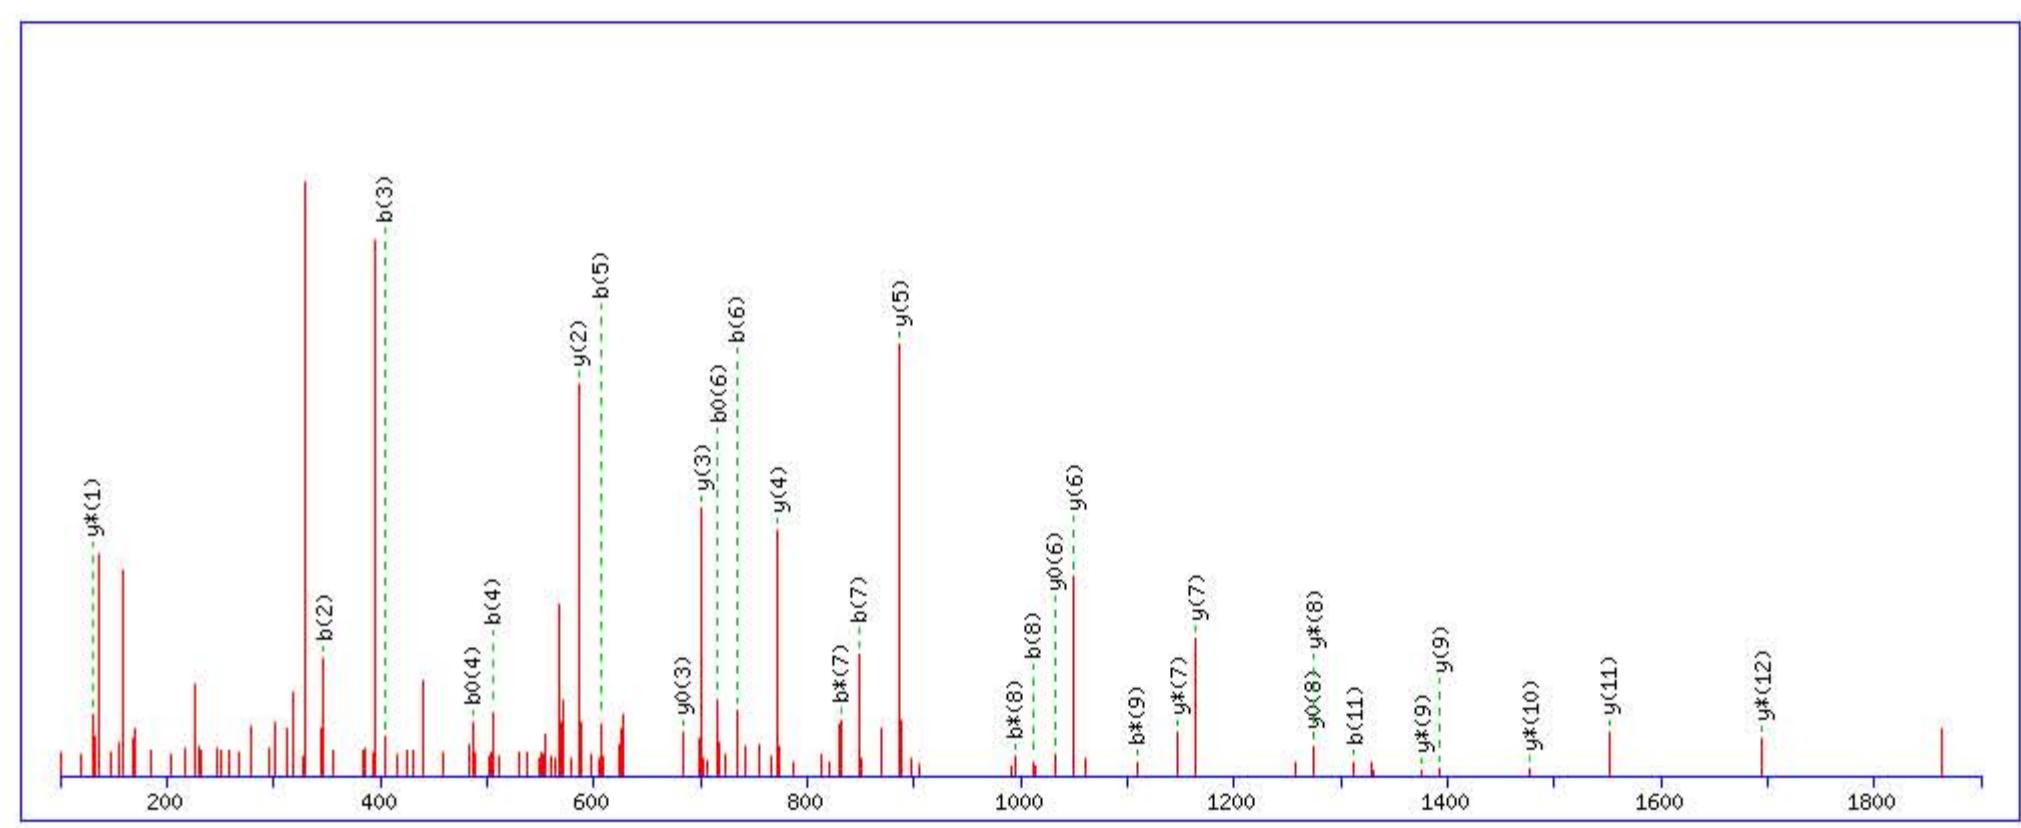

Monoisotopic mass of neutral peptide Mr(calc): 1896.813477

Fixed modifications: Carbamidomethyl (C) (apply to specified residues or termini only)

Variable modifications:

Q12 : Biotin:Thermo-21345 (Q)

Ions Score: 45 Expect: 0.00011

Matches : 30/124 fragment ions using 53 most intense peaks [\(help\)](#)

| #  | b                  | b <sup>++</sup> | b <sup>*</sup>     | b <sup>*++</sup> | b <sup>0</sup>    | b <sup>0++</sup> | Seq. | y                  | y <sup>++</sup> | y <sup>*</sup>     | y <sup>*++</sup> | y <sup>0</sup>     | y <sup>0++</sup> | #  |
|----|--------------------|-----------------|--------------------|------------------|-------------------|------------------|------|--------------------|-----------------|--------------------|------------------|--------------------|------------------|----|
| 1  | 187.086589         | 94.046932       |                    |                  |                   |                  | W    |                    |                 |                    |                  |                    |                  | 13 |
| 2  | <b>347.117238</b>  | 174.062257      |                    |                  |                   |                  | C    | 1711.741435        | 856.374356      | <b>1694.714886</b> | 847.861081       | 1693.730870        | 847.369073       | 12 |
| 3  | <b>404.138702</b>  | 202.572989      |                    |                  |                   |                  | G    | <b>1551.710786</b> | 776.359031      | 1534.684237        | 767.845757       | 1533.700221        | 767.353749       | 11 |
| 4  | <b>505.186381</b>  | 253.096828      |                    |                  | <b>487.175816</b> | 244.091546       | T    | 1494.689322        | 747.848299      | <b>1477.662773</b> | 739.335025       | 1476.678757        | 738.843017       | 10 |
| 5  | <b>606.234060</b>  | 303.620668      |                    |                  | 588.223495        | 294.615386       | T    | <b>1393.641643</b> | 697.324460      | <b>1376.615094</b> | 688.811185       | 1375.631078        | 688.319177       | 9  |
| 6  | <b>734.292638</b>  | 367.649957      | 717.266089         | 359.136683       | <b>716.282073</b> | 358.644675       | Q    | 1292.593964        | 646.800620      | <b>1275.567415</b> | 638.287346       | <b>1274.583399</b> | 637.795338       | 8  |
| 7  | <b>848.335565</b>  | 424.671421      | <b>831.309016</b>  | 416.158146       | 830.325000        | 415.666138       | N    | <b>1164.535386</b> | 582.771331      | <b>1147.508837</b> | 574.258057       | 1146.524821        | 573.766049       | 7  |
| 8  | <b>1011.398894</b> | 506.203085      | <b>994.372345</b>  | 497.689810       | 993.388329        | 497.197802       | Y    | <b>1050.492459</b> | 525.749868      | 1033.465910        | 517.236593       | <b>1032.481894</b> | 516.744585       | 6  |
| 9  | 1126.425837        | 563.716557      | <b>1109.399288</b> | 555.203282       | 1108.415272       | 554.711274       | D    | <b>887.429130</b>  | 444.218203      | 870.402581         | 435.704929       | 869.418565         | 435.212921       | 5  |
| 10 | 1197.462951        | 599.235114      | 1180.436402        | 590.721839       | 1179.452386       | 590.229831       | A    | <b>772.402187</b>  | 386.704732      | 755.375638         | 378.191457       | 754.391622         | 377.699449       | 4  |
| 11 | <b>1312.489894</b> | 656.748585      | 1295.463345        | 648.235311       | 1294.479329       | 647.743303       | D    | <b>701.365073</b>  | 351.186175      | 684.338524         | 342.672900       | <b>683.354508</b>  | 342.180892       | 3  |
| 12 | 1751.715220        | 876.361248      | 1734.688671        | 867.847974       | 1733.704655       | 867.355966       | Q    | <b>586.338130</b>  | 293.672703      | 569.311581         | 285.159429       |                    |                  | 2  |
| 13 |                    |                 |                    |                  |                   |                  | K    | 147.112804         | 74.060040       | <b>130.086255</b>  | 65.546765        |                    |                  | 1  |

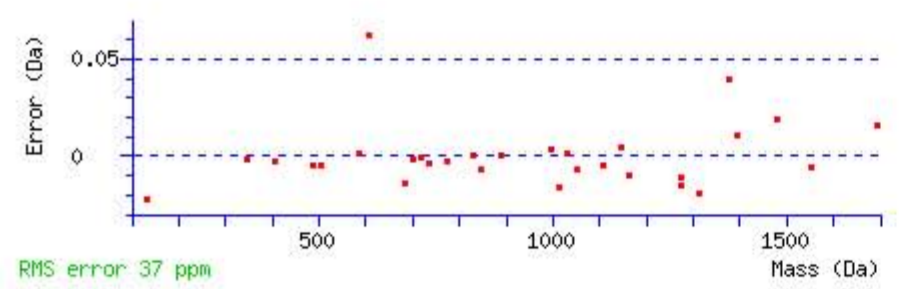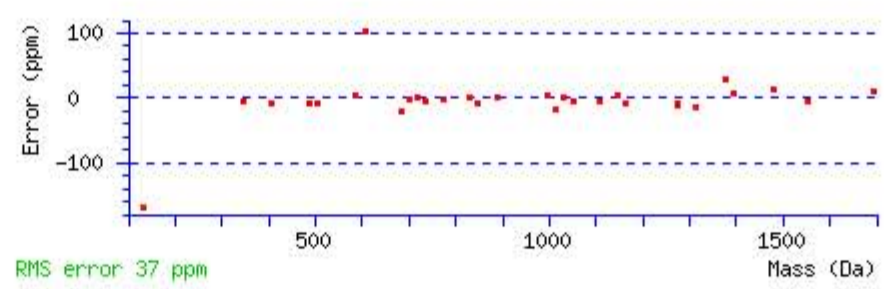

NCBI BLAST search of **WCGTTQNYDADQK**

(Parameters: blastp, nr protein database, expect=20000, no filter, PAM30)

Other BLAST [web gateways](#)

### All matches to this query

| Score | Mr(calc):   | Delta     | Sequence                      |
|-------|-------------|-----------|-------------------------------|
| 44.7  | 1896.813477 | -0.006345 | <a href="#">WCGTTQNYDADQK</a> |



# MASCOT Search Results

## Peptide View

MS/MS Fragmentation of **HTSVQTTSSGSGPFTDVR**

Found in **FINC\_HUMAN**, Fibronectin OS=Homo sapiens GN=FN1 PE=1 SV=4

Match to Query 50535: 2174.039652 from(725.687160,3+) rtinseconds(1662) index(34170)

Title: Locus:1.1.1.2998.11 File:"2013-07-02 CLN FXIII 60 min 2nd F 3.wiff"

Data file C:\Program Files (x86)\Matrix Science\Mascot Daemon\mgf5 FXIII 60 min 2nd\mascot\_daemon\_merge.mgf

Click mouse within plot area to zoom in by factor of two about that point

Or, Plot from  to  Da

Label all possible matches  Label matches used for scoring

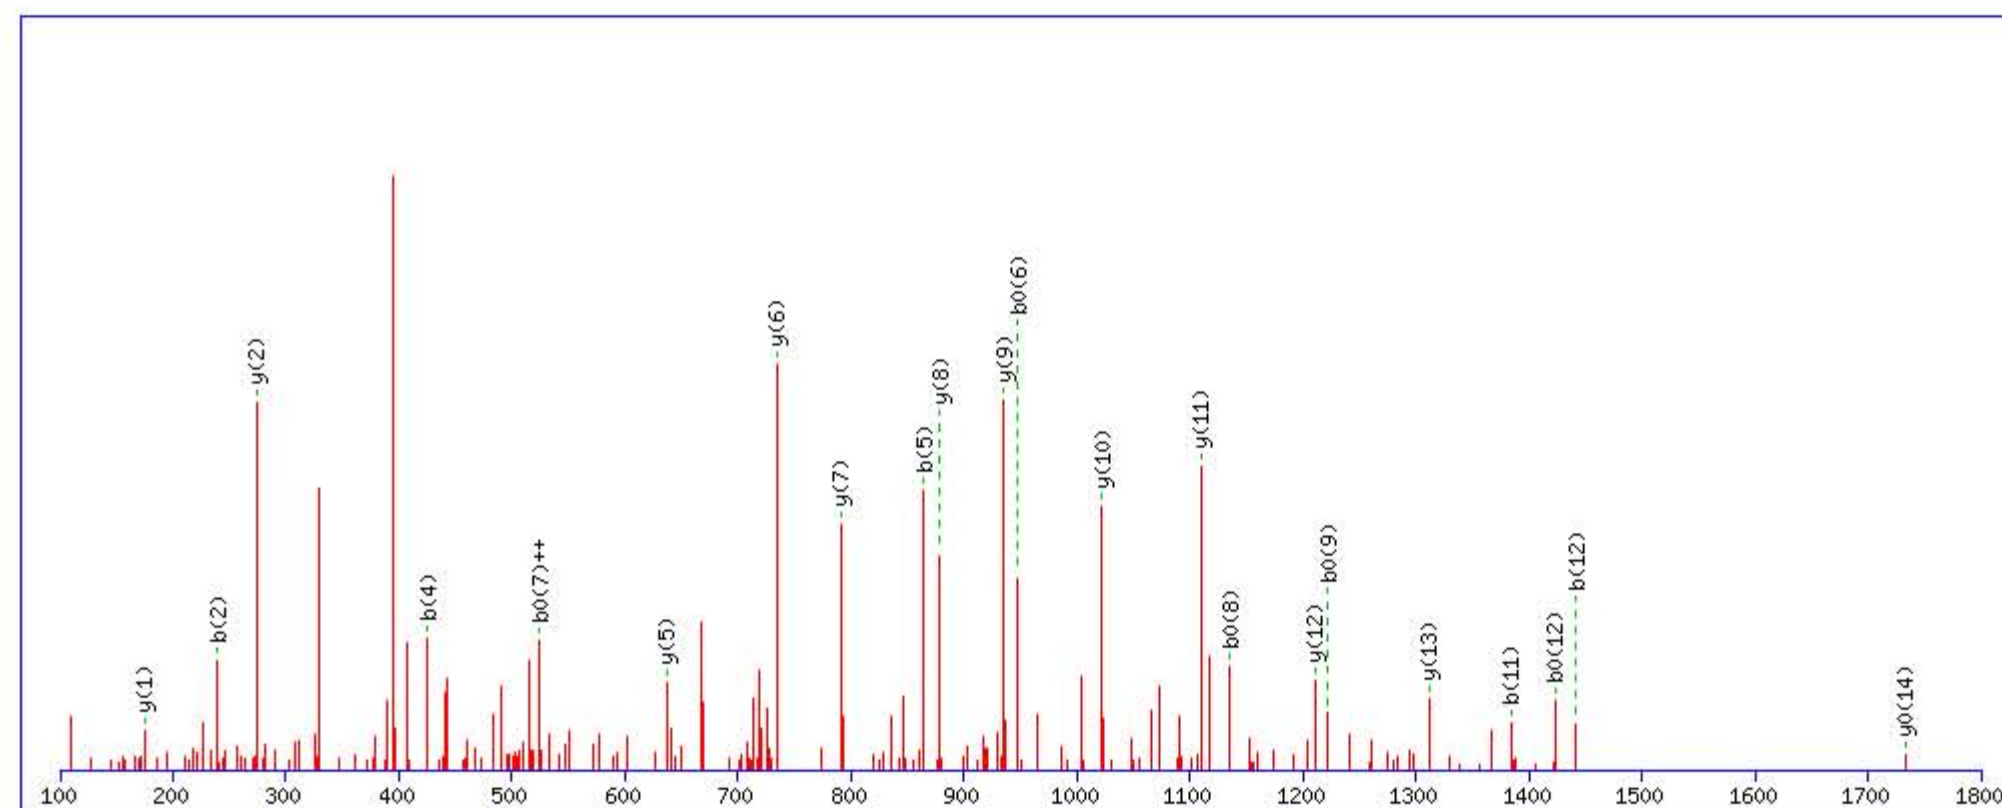

Monoisotopic mass of neutral peptide Mr(calc): 2174.042664

Fixed modifications: Carbamidomethyl (C) (apply to specified residues or termini only)

Variable modifications:

Q5 : Biotin:Thermo-21345 (Q)

Ions Score: 86 Expect: 4.6e-008

Matches : 22/190 fragment ions using 29 most intense peaks [\(help\)](#)

| #  | b                  | b <sup>++</sup> | b <sup>*</sup> | b <sup>***</sup> | b <sup>0</sup>     | b <sup>0++</sup>  | Seq. | y                  | y <sup>++</sup> | y <sup>*</sup> | y <sup>***</sup> | y <sup>0</sup>     | y <sup>0++</sup> | #  |
|----|--------------------|-----------------|----------------|------------------|--------------------|-------------------|------|--------------------|-----------------|----------------|------------------|--------------------|------------------|----|
| 1  | 138.066188         | 69.536732       |                |                  |                    |                   | H    |                    |                 |                |                  |                    |                  | 18 |
| 2  | <b>239.113867</b>  | 120.060571      |                |                  | 221.103302         | 111.055289        | T    | 2037.990983        | 1019.499130     | 2020.964434    | 1010.985855      | 2019.980418        | 1010.493847      | 17 |
| 3  | 326.145895         | 163.576585      |                |                  | 308.135330         | 154.571303        | S    | 1936.943304        | 968.975290      | 1919.916755    | 960.462016       | 1918.932739        | 959.970008       | 16 |
| 4  | <b>425.214309</b>  | 213.110792      |                |                  | 407.203744         | 204.105510        | V    | 1849.911276        | 925.459276      | 1832.884727    | 916.946002       | 1831.900711        | 916.453994       | 15 |
| 5  | <b>864.439635</b>  | 432.723456      | 847.413086     | 424.210181       | 846.429070         | 423.718173        | Q    | 1750.842862        | 875.925069      | 1733.816313    | 867.411795       | <b>1732.832297</b> | 866.919787       | 14 |
| 6  | 965.487314         | 483.247295      | 948.460765     | 474.734021       | <b>947.476749</b>  | 474.242013        | T    | <b>1311.617536</b> | 656.312406      | 1294.590987    | 647.799132       | 1293.606971        | 647.307124       | 13 |
| 7  | 1066.534993        | 533.771135      | 1049.508444    | 525.257860       | 1048.524428        | <b>524.765852</b> | T    | <b>1210.569857</b> | 605.788567      | 1193.543308    | 597.275292       | 1192.559292        | 596.783284       | 12 |
| 8  | 1153.567021        | 577.287149      | 1136.540472    | 568.773874       | <b>1135.556456</b> | 568.281866        | S    | <b>1109.522178</b> | 555.264727      | 1092.495629    | 546.751453       | 1091.511613        | 546.259445       | 11 |
| 9  | 1240.599049        | 620.803163      | 1223.572500    | 612.289888       | <b>1222.588484</b> | 611.797880        | S    | <b>1022.490150</b> | 511.748713      | 1005.463601    | 503.235439       | 1004.479585        | 502.743431       | 10 |
| 10 | 1297.620513        | 649.313895      | 1280.593964    | 640.800620       | 1279.609948        | 640.308612        | G    | <b>935.458122</b>  | 468.232699      | 918.431573     | 459.719425       | 917.447557         | 459.227417       | 9  |
| 11 | <b>1384.652541</b> | 692.829909      | 1367.625992    | 684.316634       | 1366.641976        | 683.824626        | S    | <b>878.436658</b>  | 439.721967      | 861.410109     | 431.208693       | 860.426093         | 430.716685       | 8  |
| 12 | <b>1441.674005</b> | 721.340641      | 1424.647456    | 712.827366       | <b>1423.663440</b> | 712.335358        | G    | <b>791.404630</b>  | 396.205953      | 774.378081     | 387.692679       | 773.394065         | 387.200671       | 7  |
| 13 | 1538.726769        | 769.867023      | 1521.700220    | 761.353748       | 1520.716204        | 760.861740        | P    | <b>734.383166</b>  | 367.695221      | 717.356617     | 359.181947       | 716.372601         | 358.689939       | 6  |
| 14 | 1685.795183        | 843.401230      | 1668.768634    | 834.887955       | 1667.784618        | 834.395947        | F    | <b>637.330402</b>  | 319.168839      | 620.303853     | 310.655565       | 619.319837         | 310.163557       | 5  |
| 15 | 1786.842862        | 893.925069      | 1769.816313    | 885.411795       | 1768.832297        | 884.919787        | T    | 490.261988         | 245.634632      | 473.235439     | 237.121358       | 472.251423         | 236.629350       | 4  |
| 16 | 1901.869805        | 951.438541      | 1884.843256    | 942.925266       | 1883.859240        | 942.433258        | D    | 389.214309         | 195.110793      | 372.187760     | 186.597518       | 371.203744         | 186.105510       | 3  |
| 17 | 2000.938219        | 1000.972748     | 1983.911670    | 992.459473       | 1982.927654        | 991.967465        | V    | <b>274.187366</b>  | 137.597321      | 257.160817     | 129.084047       |                    |                  | 2  |
| 18 |                    |                 |                |                  |                    |                   | R    | <b>175.118952</b>  | 88.063114       | 158.092403     | 79.549839        |                    |                  | 1  |

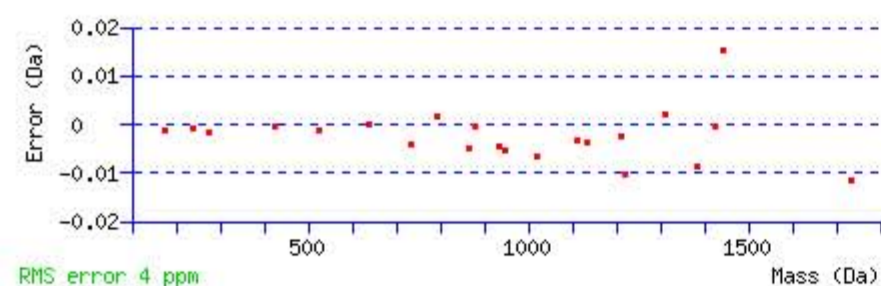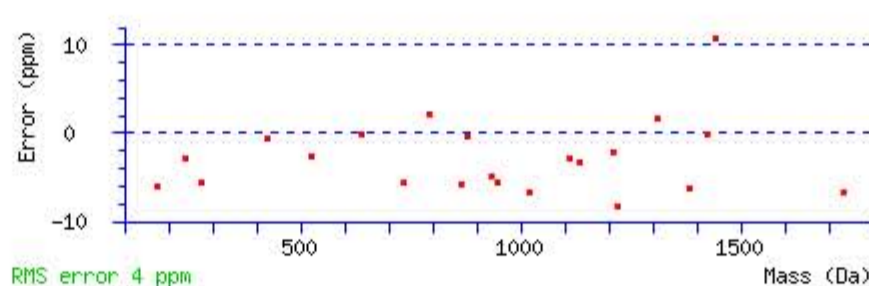

NCBI BLAST search of [HTSVQTTSSGSGPFTDVR](#)

(Parameters: blastp, nr protein database, expect=20000, no filter, PAM30)

Other BLAST [web gateways](#)

All matches to this query

| Score | Mr(calc):   | Delta     | Sequence                           |
|-------|-------------|-----------|------------------------------------|
| 86.3  | 2174.042664 | -0.003012 | <a href="#">HTSVQTTSSGSGPFTDVR</a> |

Mascot: <http://www.matrixscience.com/>



# MASCOT Search Results

## Peptide View

MS/MS Fragmentation of **QDGHLWCSTTSNYEQDQK**  
 Found in **FINC\_HUMAN**, Fibronectin OS=Homo sapiens GN=FN1 PE=1 SV=4

Match to Query 56805: 2507.089572 from(836.703800,3+) rtinseconds(1763) index(34845)  
 Title: Locus:1.1.1.3033.11 File:"2013-07-02 CLN FXIII 60 min 2nd F 3.wiff"  
 Data file C:\Program Files (x86)\Matrix Science\Mascot Daemon\mgf5 FXIII 60 min 2nd\mascot\_daemon\_merge.mgf

Click mouse within plot area to zoom in by factor of two about that point  
 Or, Plot from  to  Da   
 Label all possible matches  Label matches used for scoring

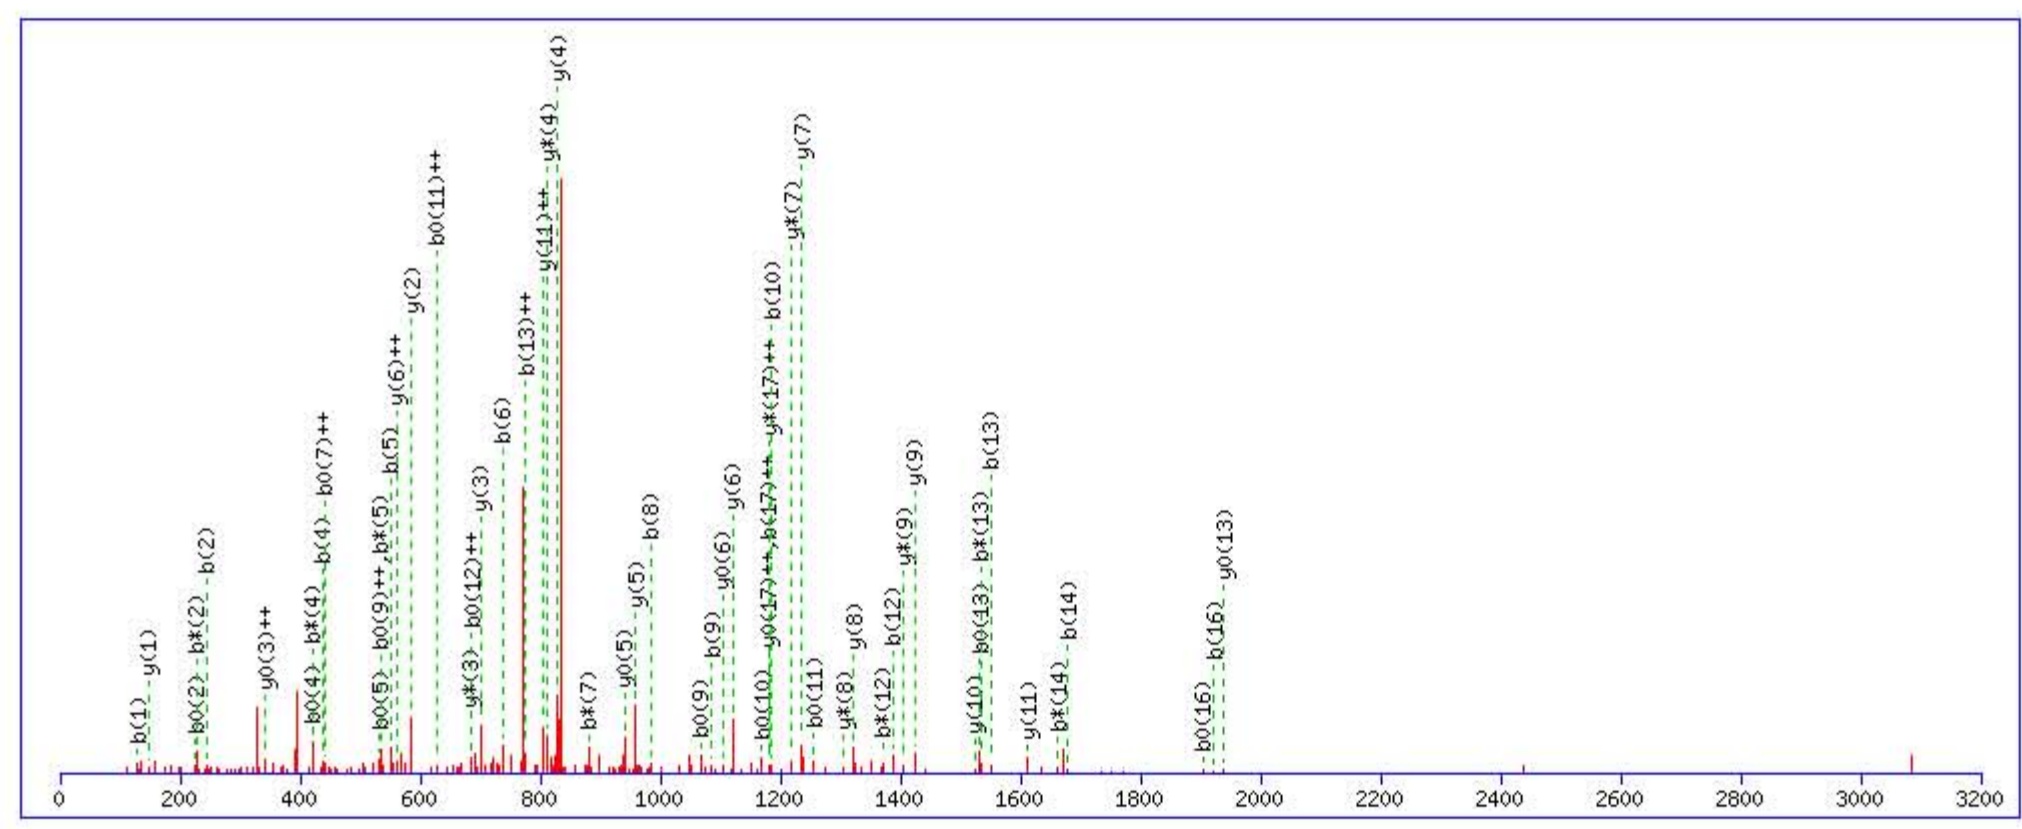

Monoisotopic mass of neutral peptide Mr(calc): 2507.084564  
 Fixed modifications: Carbamidomethyl (C) (apply to specified residues or termini only)  
 Variable modifications:  
 Q17 : Biotin:Thermo-21345 (Q)  
 Ions Score: 66 Expect: 1.3e-006  
 Matches : 57/198 fragment ions using 97 most intense peaks [\(help\)](#)

| #  | b                  | b <sup>++</sup>    | b <sup>+</sup>     | b <sup>+++</sup> | b <sup>0</sup>     | b <sup>0++</sup>  | Seq.     | y                  | y <sup>++</sup>   | y <sup>+</sup>     | y <sup>+++</sup>   | y <sup>0</sup>     | y <sup>0++</sup>   | #         |
|----|--------------------|--------------------|--------------------|------------------|--------------------|-------------------|----------|--------------------|-------------------|--------------------|--------------------|--------------------|--------------------|-----------|
| 1  | <b>129.065854</b>  | 65.036565          | 112.039305         | 56.523291        |                    |                   | <b>Q</b> |                    |                   |                    |                    |                    |                    | <b>18</b> |
| 2  | <b>244.092797</b>  | 122.550037         | <b>227.066248</b>  | 114.036762       | <b>226.082232</b>  | 113.544754        | <b>D</b> | 2380.033259        | 1190.520267       | 2363.006710        | <b>1182.006993</b> | 2362.022694        | <b>1181.514985</b> | <b>17</b> |
| 3  | 301.114261         | 151.060768         | 284.087712         | 142.547494       | 283.103696         | 142.055486        | <b>G</b> | 2265.006316        | 1133.006796       | 2247.979767        | 1124.493521        | 2246.995751        | 1124.001513        | <b>16</b> |
| 4  | <b>438.173173</b>  | 219.590224         | <b>421.146624</b>  | 211.076950       | <b>420.162608</b>  | 210.584942        | <b>H</b> | 2207.984852        | 1104.496064       | 2190.958303        | 1095.982789        | 2189.974287        | 1095.490781        | <b>15</b> |
| 5  | <b>551.257237</b>  | 276.132257         | <b>534.230688</b>  | 267.618982       | <b>533.246672</b>  | 267.126974        | <b>L</b> | 2070.925940        | 1035.966608       | 2053.899391        | 1027.453333        | 2052.915375        | 1026.961325        | <b>14</b> |
| 6  | <b>737.336550</b>  | 369.171913         | 720.310001         | 360.658639       | 719.325985         | 360.166631        | <b>W</b> | 1957.841876        | 979.424576        | 1940.815327        | 970.911302         | <b>1939.831311</b> | 970.419294         | <b>13</b> |
| 7  | 897.367199         | 449.187238         | <b>880.340650</b>  | 440.673963       | 879.356634         | <b>440.181955</b> | <b>C</b> | 1771.762563        | 886.384920        | 1754.736014        | 877.871645         | 1753.751998        | 877.379637         | <b>12</b> |
| 8  | <b>984.399227</b>  | 492.703252         | 967.372678         | 484.189977       | 966.388662         | 483.697969        | <b>S</b> | <b>1611.731914</b> | <b>806.369595</b> | 1594.705365        | 797.856321         | 1593.721349        | 797.364313         | <b>11</b> |
| 9  | <b>1085.446906</b> | 543.227091         | 1068.420357        | 534.713817       | <b>1067.436341</b> | <b>534.221808</b> | <b>T</b> | <b>1524.699886</b> | 762.853581        | 1507.673337        | 754.340307         | 1506.689321        | 753.848299         | <b>10</b> |
| 10 | <b>1186.494585</b> | 593.750930         | 1169.468036        | 585.237656       | <b>1168.484020</b> | 584.745648        | <b>T</b> | <b>1423.652207</b> | 712.329742        | <b>1406.625658</b> | 703.816467         | 1405.641642        | 703.324459         | <b>9</b>  |
| 11 | 1273.526613        | 637.266945         | 1256.500064        | 628.753670       | <b>1255.516048</b> | <b>628.261662</b> | <b>S</b> | <b>1322.604528</b> | 661.805902        | <b>1305.577979</b> | 653.292628         | 1304.593963        | 652.800620         | <b>8</b>  |
| 12 | <b>1387.569540</b> | 694.288408         | <b>1370.542991</b> | 685.775134       | 1369.558975        | <b>685.283125</b> | <b>N</b> | <b>1235.572500</b> | 618.289888        | <b>1218.545951</b> | 609.776614         | 1217.561935        | 609.284606         | <b>7</b>  |
| 13 | <b>1550.632869</b> | <b>775.820073</b>  | <b>1533.606320</b> | 767.306798       | <b>1532.622304</b> | 766.814790        | <b>Y</b> | <b>1121.529573</b> | <b>561.268425</b> | 1104.503024        | 552.755150         | <b>1103.519008</b> | 552.263142         | <b>6</b>  |
| 14 | <b>1679.675462</b> | 840.341369         | <b>1662.648913</b> | 831.828095       | 1661.664897        | 831.336086        | <b>E</b> | <b>958.466244</b>  | 479.736760        | 941.439695         | 471.223486         | <b>940.455679</b>  | 470.731478         | <b>5</b>  |
| 15 | 1807.734040        | 904.370658         | 1790.707491        | 895.857384       | 1789.723475        | 895.365376        | <b>Q</b> | <b>829.423651</b>  | 415.215464        | <b>812.397102</b>  | 406.702189         | 811.413086         | 406.210181         | <b>4</b>  |
| 16 | <b>1922.760983</b> | 961.884130         | 1905.734434        | 953.370855       | <b>1904.750418</b> | 952.878847        | <b>D</b> | <b>701.365073</b>  | 351.186175        | <b>684.338524</b>  | 342.672900         | 683.354508         | <b>342.180892</b>  | <b>3</b>  |
| 17 | 2361.986309        | <b>1181.496792</b> | 2344.959760        | 1172.983518      | 2343.975744        | 1172.491510       | <b>Q</b> | <b>586.338130</b>  | 293.672703        | 569.311581         | 285.159429         |                    |                    | <b>2</b>  |
| 18 |                    |                    |                    |                  |                    |                   | <b>K</b> | <b>147.112804</b>  | 74.060040         | 130.086255         | 65.546765          |                    |                    | <b>1</b>  |

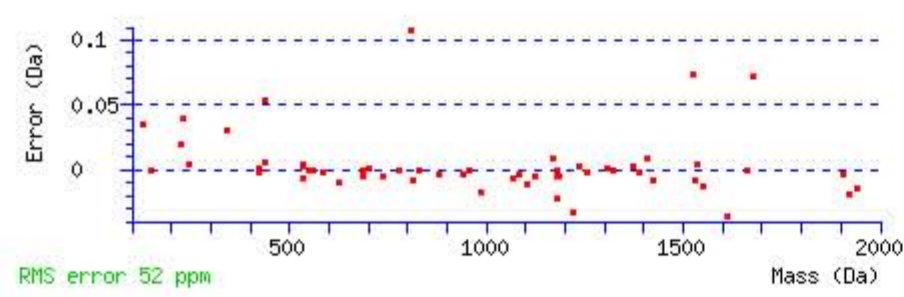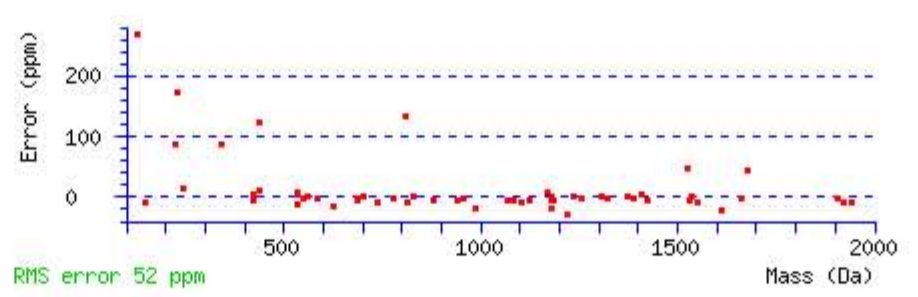

NCBI BLAST search of **QDGHLWCSTTSNYEQDQK**  
 (Parameters: blastp, nr protein database, expect=20000, no filter, PAM30)  
 Other BLAST [web gateways](#)

### All matches to this query

| Score | Mr(calc):   | Delta     | Sequence                               |
|-------|-------------|-----------|----------------------------------------|
| 65.8  | 2507.084564 | 0.005008  | <a href="#">QDGHLWCSTTSNYEQDQK</a>     |
| 47.4  | 2507.084564 | 0.005008  | <a href="#">QDGHLWCSTTSNYEQDQK</a>     |
| 0.1   | 2507.119598 | -0.030026 | <a href="#">KYGAAMVVMAFDEEGQATETDK</a> |



# MASCOT Search Results

## Peptide View

MS/MS Fragmentation of **RPGGEPSPGTTGQSYNQYSQR**

Found in **FINC\_HUMAN**, Fibronectin OS=Homo sapiens GN=FN1 PE=1 SV=4

Match to Query 58350: 2706.246372 from(903.089400,3+) rtinseconds(1488) index(33199)

Title: Locus:1.1.1.2937.15 File:"2013-07-02 CLN FXIII 60 min 2nd F 3.wiff"

Data file C:\Program Files (x86)\Matrix Science\Mascot Daemon\mgf5 FXIII 60 min 2nd\mascot\_daemon\_merge.mgf

Click mouse within plot area to zoom in by factor of two about that point

Or, Plot from  to  Da

Label all possible matches  Label matches used for scoring

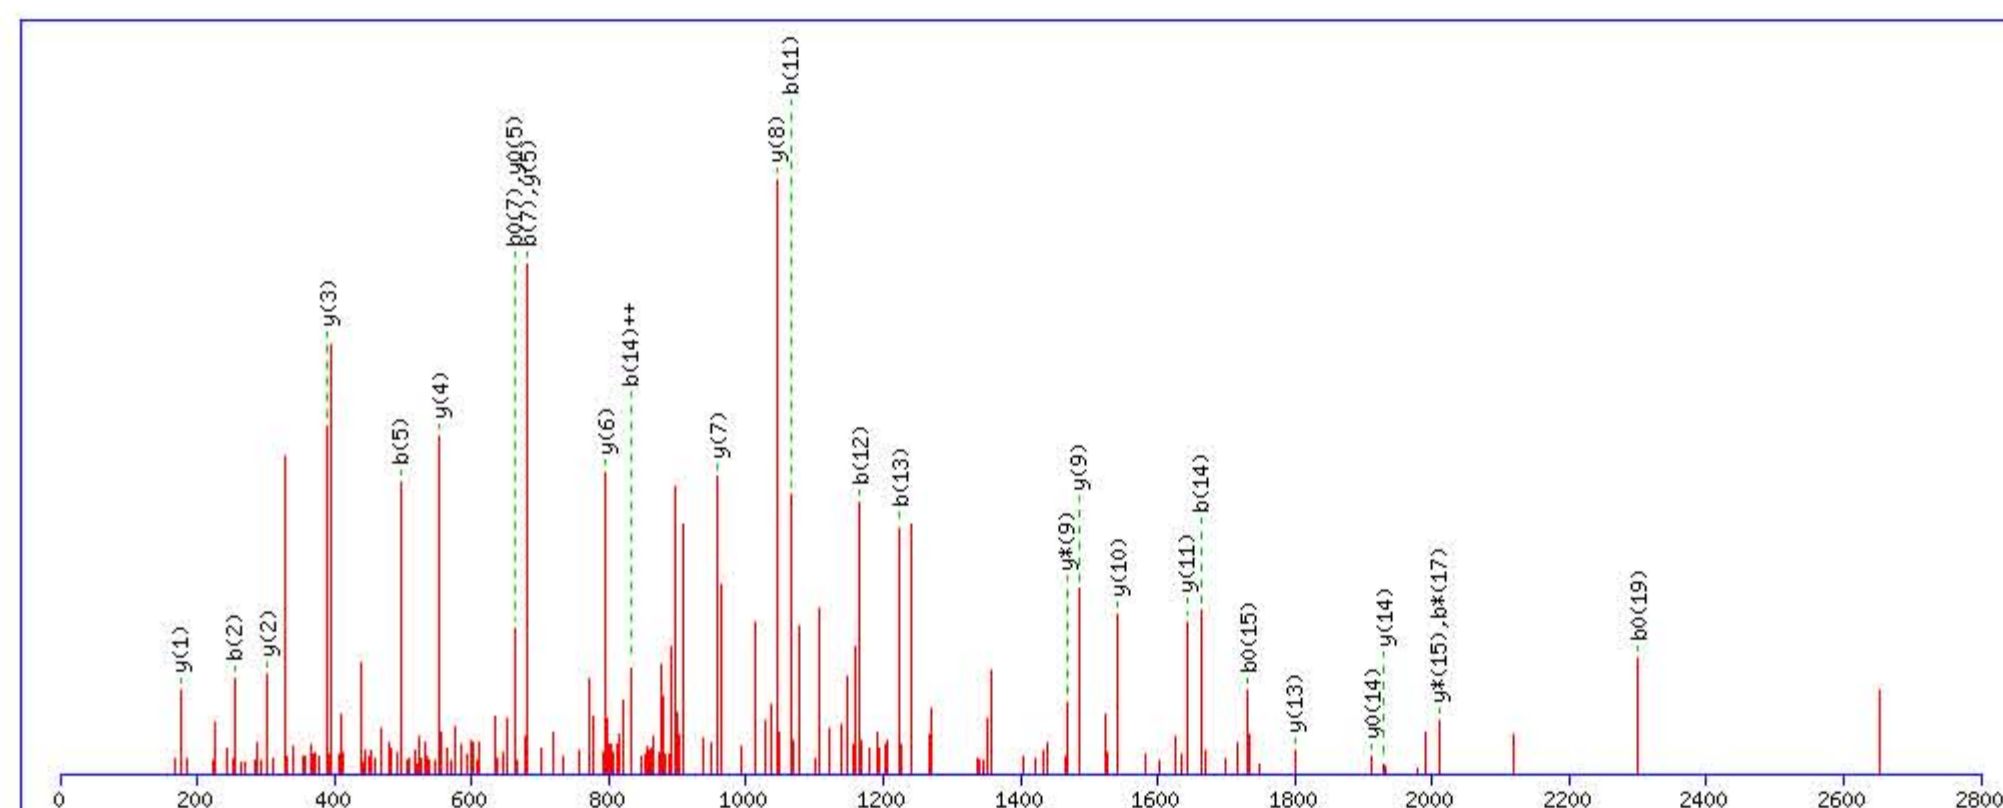

Monoisotopic mass of neutral peptide Mr(calc): 2706.245621

Fixed modifications: Carbamidomethyl (C) (apply to specified residues or termini only)

Variable modifications:

Q14 : Biotin:Thermo-21345 (Q)

Ions Score: 83 Expect: 7.6e-008

Matches : 29/240 fragment ions using 41 most intense peaks [\(help\)](#)

| #  | b                  | b <sup>++</sup>   | b <sup>*</sup>     | b <sup>*++</sup> | b <sup>0</sup>     | b <sup>0++</sup> | Seq. | y                  | y <sup>++</sup> | y <sup>*</sup>     | y <sup>*++</sup> | y <sup>0</sup>     | y <sup>0++</sup> | #  |
|----|--------------------|-------------------|--------------------|------------------|--------------------|------------------|------|--------------------|-----------------|--------------------|------------------|--------------------|------------------|----|
| 1  | 157.108387         | 79.057831         | 140.081838         | 70.544557        |                    |                  | R    |                    |                 |                    |                  |                    |                  | 22 |
| 2  | <b>254.161151</b>  | 127.584213        | 237.134602         | 119.070939       |                    |                  | P    | 2551.151795        | 1276.079535     | 2534.125246        | 1267.566261      | 2533.141230        | 1267.074253      | 21 |
| 3  | 311.182615         | 156.094945        | 294.156066         | 147.581671       |                    |                  | G    | 2454.099031        | 1227.553153     | 2437.072482        | 1219.039879      | 2436.088466        | 1218.547871      | 20 |
| 4  | 368.204079         | 184.605677        | 351.177530         | 176.092403       |                    |                  | G    | 2397.077567        | 1199.042421     | 2380.051018        | 1190.529147      | 2379.067002        | 1190.037139      | 19 |
| 5  | <b>497.246672</b>  | 249.126974        | 480.220123         | 240.613700       | 479.236107         | 240.121692       | E    | 2340.056103        | 1170.531689     | 2323.029554        | 1162.018415      | 2322.045538        | 1161.526407      | 18 |
| 6  | 594.299436         | 297.653356        | 577.272887         | 289.140082       | 576.288871         | 288.648074       | P    | 2211.013510        | 1106.010393     | 2193.986961        | 1097.497118      | 2193.002945        | 1097.005110      | 17 |
| 7  | <b>681.331464</b>  | 341.169370        | 664.304915         | 332.656095       | <b>663.320899</b>  | 332.164087       | S    | 2113.960746        | 1057.484011     | 2096.934197        | 1048.970736      | 2095.950181        | 1048.478728      | 16 |
| 8  | 778.384228         | 389.695752        | 761.357679         | 381.182478       | 760.373663         | 380.690470       | P    | 2026.928718        | 1013.967997     | <b>2009.902169</b> | 1005.454723      | 2008.918153        | 1004.962715      | 15 |
| 9  | 907.426821         | 454.217049        | 890.400272         | 445.703774       | 889.416256         | 445.211766       | E    | <b>1929.875954</b> | 965.441615      | 1912.849405        | 956.928341       | <b>1911.865389</b> | 956.436333       | 14 |
| 10 | 964.448285         | 482.727781        | 947.421736         | 474.214506       | 946.437720         | 473.722498       | G    | <b>1800.833361</b> | 900.920319      | 1783.806812        | 892.407044       | 1782.822796        | 891.915036       | 13 |
| 11 | <b>1065.495964</b> | 533.251620        | 1048.469415        | 524.738346       | 1047.485399        | 524.246337       | T    | 1743.811897        | 872.409587      | 1726.785348        | 863.896312       | 1725.801332        | 863.404304       | 12 |
| 12 | <b>1166.543643</b> | 583.775460        | 1149.517094        | 575.262185       | 1148.533078        | 574.770177       | T    | <b>1642.764218</b> | 821.885747      | 1625.737669        | 813.372473       | 1624.753653        | 812.880465       | 11 |
| 13 | <b>1223.565107</b> | 612.286191        | 1206.538558        | 603.772917       | 1205.554542        | 603.280909       | G    | <b>1541.716539</b> | 771.361908      | 1524.689990        | 762.848633       | 1523.705974        | 762.356625       | 10 |
| 14 | <b>1662.790433</b> | <b>831.898854</b> | 1645.763884        | 823.385580       | 1644.779868        | 822.893572       | Q    | <b>1484.695075</b> | 742.851176      | <b>1467.668526</b> | 734.337901       | 1466.684510        | 733.845893       | 9  |
| 15 | 1749.822461        | 875.414869        | 1732.795912        | 866.901594       | <b>1731.811896</b> | 866.409586       | S    | <b>1045.469749</b> | 523.238513      | 1028.443200        | 514.725238       | 1027.459184        | 514.233230       | 8  |
| 16 | 1912.885790        | 956.946533        | 1895.859241        | 948.433259       | 1894.875225        | 947.941251       | Y    | <b>958.437721</b>  | 479.722499      | 941.411172         | 471.209224       | 940.427156         | 470.717216       | 7  |
| 17 | 2026.928717        | 1013.967997       | <b>2009.902168</b> | 1005.454722      | 2008.918152        | 1004.962714      | N    | <b>795.374392</b>  | 398.190834      | 778.347843         | 389.677560       | 777.363827         | 389.185552       | 6  |
| 18 | 2154.987295        | 1077.997285       | 2137.960746        | 1069.484011      | 2136.976730        | 1068.992003      | Q    | <b>681.331465</b>  | 341.169371      | 664.304916         | 332.656096       | <b>663.320900</b>  | 332.164088       | 5  |
| 19 | 2318.050624        | 1159.528950       | 2301.024075        | 1151.015675      | <b>2300.040059</b> | 1150.523667      | Y    | <b>553.272887</b>  | 277.140082      | 536.246338         | 268.626807       | 535.262322         | 268.134799       | 4  |
| 20 | 2405.082652        | 1203.044964       | 2388.056103        | 1194.531689      | 2387.072087        | 1194.039681      | S    | <b>390.209558</b>  | 195.608417      | 373.183009         | 187.095143       | 372.198993         | 186.603135       | 3  |
| 21 | 2533.141230        | 1267.074253       | 2516.114681        | 1258.560978      | 2515.130665        | 1258.068971      | Q    | <b>303.177530</b>  | 152.092403      | 286.150981         | 143.579129       |                    |                  | 2  |
| 22 |                    |                   |                    |                  |                    |                  | R    | <b>175.118952</b>  | 88.063114       | 158.092403         | 79.549839        |                    |                  | 1  |

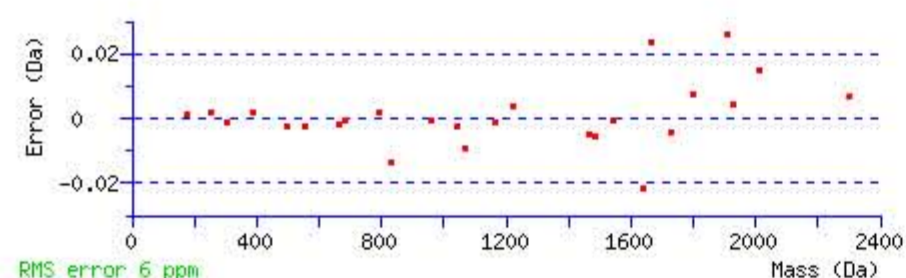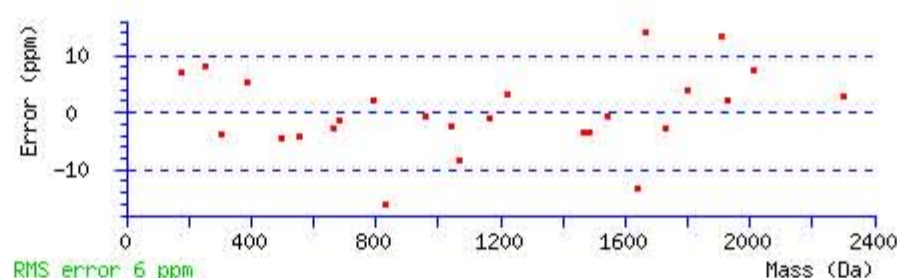

NCBI BLAST search of **RPGGEPSPGTTGQSYNQYSQR**

(Parameters: blastp, nr protein database, expect=20000, no filter, PAM30)

Other BLAST [web gateways](#)

All matches to this query

| Score | Mr(calc):   | Delta    | Sequence                              |
|-------|-------------|----------|---------------------------------------|
| 82.5  | 2706.245621 | 0.000751 | <a href="#">RPGGEPSPGTTGQSYNQYSQR</a> |
| 67.4  | 2706.245621 | 0.000751 | <a href="#">RPGGEPSPGTTGQSYNQYSQR</a> |
| 48.1  | 2706.245621 | 0.000751 | <a href="#">RPGGEPSPGTTGQSYNQYSQR</a> |



# MASCOT Search Results

## Peptide View

MS/MS Fragmentation of **RPGGEPSPGTTGQSYNQYSQR**

Found in **FINC\_HUMAN**, Fibronectin OS=Homo sapiens GN=FN1 PE=1 SV=4

Match to Query 58351: 2706.246372 from(903.089400,3+) rtinseconds(1480) index(33151)

Title: Locus:1.1.1.2934.13 File:"2013-07-02 CLN FXIII 60 min 2nd F 3.wiff"

Data file C:\Program Files (x86)\Matrix Science\Mascot Daemon\mgf5 FXIII 60 min 2nd\mascot\_daemon\_merge.mgf

Click mouse within plot area to zoom in by factor of two about that point

Or, Plot from  to  Da

Label all possible matches  Label matches used for scoring

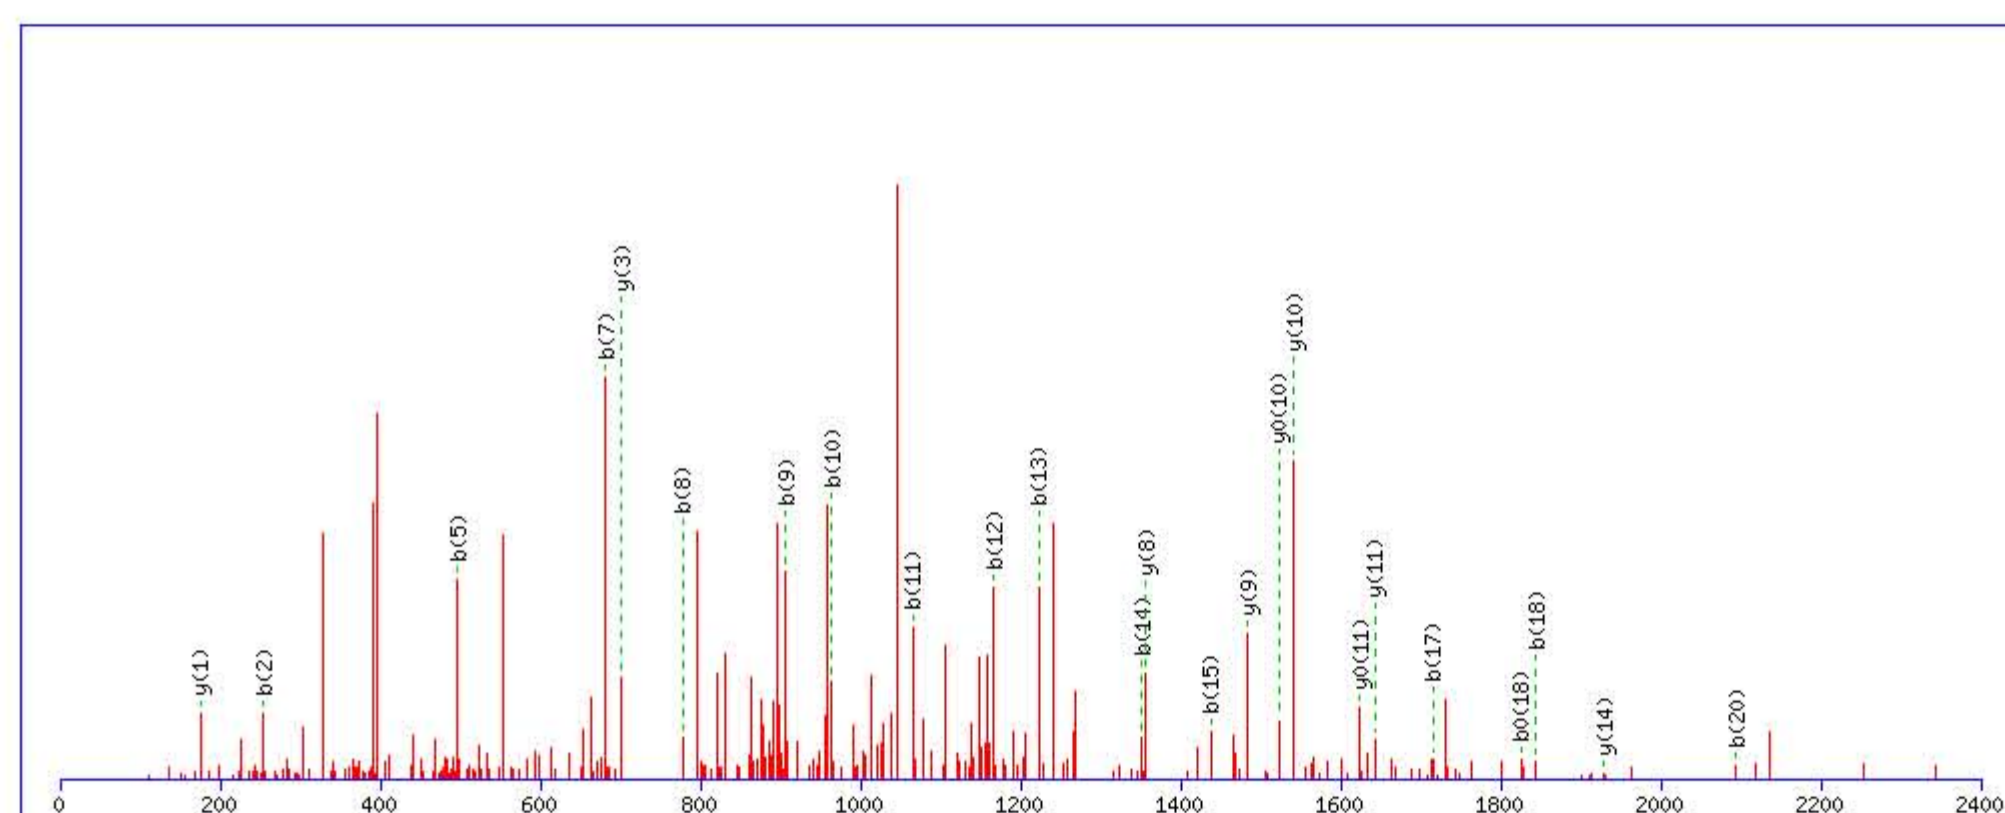

Monoisotopic mass of neutral peptide Mr(calc): 2706.245621

Fixed modifications: Carbamidomethyl (C) (apply to specified residues or termini only)

Variable modifications:

Q21 : Biotin:Thermo-21345 (Q)

Ions Score: 85 Expect: 4.1e-008

Matches : 24/240 fragment ions using 43 most intense peaks [\(help\)](#)

| #  | b                  | b <sup>++</sup> | b <sup>+</sup> | b <sup>*++</sup> | b <sup>0</sup>     | b <sup>0++</sup> | Seq. | y                  | y <sup>++</sup> | y <sup>+</sup> | y <sup>*++</sup> | y <sup>0</sup>     | y <sup>0++</sup> | #  |
|----|--------------------|-----------------|----------------|------------------|--------------------|------------------|------|--------------------|-----------------|----------------|------------------|--------------------|------------------|----|
| 1  | 157.108387         | 79.057831       | 140.081838     | 70.544557        |                    |                  | R    |                    |                 |                |                  |                    |                  | 22 |
| 2  | <b>254.161151</b>  | 127.584213      | 237.134602     | 119.070939       |                    |                  | P    | 2551.151795        | 1276.079535     | 2534.125246    | 1267.566261      | 2533.141230        | 1267.074253      | 21 |
| 3  | 311.182615         | 156.094945      | 294.156066     | 147.581671       |                    |                  | G    | 2454.099031        | 1227.553153     | 2437.072482    | 1219.039879      | 2436.088466        | 1218.547871      | 20 |
| 4  | 368.204079         | 184.605677      | 351.177530     | 176.092403       |                    |                  | G    | 2397.077567        | 1199.042421     | 2380.051018    | 1190.529147      | 2379.067002        | 1190.037139      | 19 |
| 5  | <b>497.246672</b>  | 249.126974      | 480.220123     | 240.613700       | 479.236107         | 240.121692       | E    | 2340.056103        | 1170.531689     | 2323.029554    | 1162.018415      | 2322.045538        | 1161.526407      | 18 |
| 6  | 594.299436         | 297.653356      | 577.272887     | 289.140082       | 576.288871         | 288.648074       | P    | 2211.013510        | 1106.010393     | 2193.986961    | 1097.497118      | 2193.002945        | 1097.005110      | 17 |
| 7  | <b>681.331464</b>  | 341.169370      | 664.304915     | 332.656095       | 663.320899         | 332.164087       | S    | 2113.960746        | 1057.484011     | 2096.934197    | 1048.970736      | 2095.950181        | 1048.478728      | 16 |
| 8  | <b>778.384228</b>  | 389.695752      | 761.357679     | 381.182478       | 760.373663         | 380.690470       | P    | 2026.928718        | 1013.967997     | 2009.902169    | 1005.454723      | 2008.918153        | 1004.962715      | 15 |
| 9  | <b>907.426821</b>  | 454.217049      | 890.400272     | 445.703774       | 889.416256         | 445.211766       | E    | <b>1929.875954</b> | 965.441615      | 1912.849405    | 956.928341       | 1911.865389        | 956.436333       | 14 |
| 10 | <b>964.448285</b>  | 482.727781      | 947.421736     | 474.214506       | 946.437720         | 473.722498       | G    | 1800.833361        | 900.920319      | 1783.806812    | 892.407044       | 1782.822796        | 891.915036       | 13 |
| 11 | <b>1065.495964</b> | 533.251620      | 1048.469415    | 524.738346       | 1047.485399        | 524.246337       | T    | 1743.811897        | 872.409587      | 1726.785348    | 863.896312       | 1725.801332        | 863.404304       | 12 |
| 12 | <b>1166.543643</b> | 583.775460      | 1149.517094    | 575.262185       | 1148.533078        | 574.770177       | T    | <b>1642.764218</b> | 821.885747      | 1625.737669    | 813.372473       | <b>1624.753653</b> | 812.880465       | 11 |
| 13 | <b>1223.565107</b> | 612.286191      | 1206.538558    | 603.772917       | 1205.554542        | 603.280909       | G    | <b>1541.716539</b> | 771.361908      | 1524.689990    | 762.848633       | <b>1523.705974</b> | 762.356625       | 10 |
| 14 | <b>1351.623685</b> | 676.315480      | 1334.597136    | 667.802206       | 1333.613120        | 667.310198       | Q    | <b>1484.695075</b> | 742.851176      | 1467.668526    | 734.337901       | 1466.684510        | 733.845893       | 9  |
| 15 | <b>1438.655713</b> | 719.831494      | 1421.629164    | 711.318220       | 1420.645148        | 710.826212       | S    | <b>1356.636497</b> | 678.821887      | 1339.609948    | 670.308612       | 1338.625932        | 669.816604       | 8  |
| 16 | 1601.719042        | 801.363159      | 1584.692493    | 792.849885       | 1583.708477        | 792.357876       | Y    | 1269.604469        | 635.305873      | 1252.577920    | 626.792598       | 1251.593904        | 626.300590       | 7  |
| 17 | <b>1715.761969</b> | 858.384622      | 1698.735420    | 849.871348       | 1697.751404        | 849.379340       | N    | 1106.541140        | 553.774208      | 1089.514591    | 545.260934       | 1088.530575        | 544.768926       | 6  |
| 18 | <b>1843.820547</b> | 922.413912      | 1826.793998    | 913.900637       | <b>1825.809982</b> | 913.408629       | Q    | 992.498213         | 496.752745      | 975.471664     | 488.239470       | 974.487648         | 487.747462       | 5  |
| 19 | 2006.883876        | 1003.945576     | 1989.857327    | 995.432302       | 1988.873311        | 994.940294       | Y    | 864.439635         | 432.723456      | 847.413086     | 424.210181       | 846.429070         | 423.718173       | 4  |
| 20 | <b>2093.915904</b> | 1047.461590     | 2076.889355    | 1038.948315      | 2075.905339        | 1038.456307      | S    | <b>701.376306</b>  | 351.191791      | 684.349757     | 342.678517       | 683.365741         | 342.186509       | 3  |
| 21 | 2533.141230        | 1267.074253     | 2516.114681    | 1258.560978      | 2515.130665        | 1258.068971      | Q    | 614.344278         | 307.675777      | 597.317729     | 299.162503       |                    |                  | 2  |
| 22 |                    |                 |                |                  |                    |                  | R    | <b>175.118952</b>  | 88.063114       | 158.092403     | 79.549839        |                    |                  | 1  |

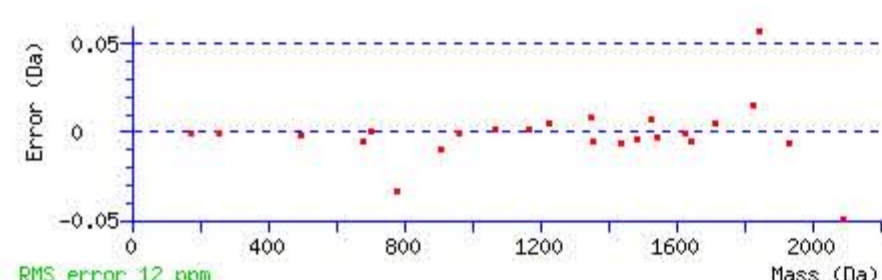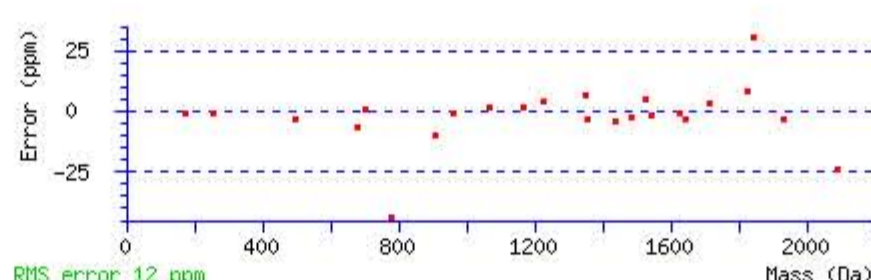

NCBI BLAST search of **RPGGEPSPGTTGQSYNQYSQR**

(Parameters: blastp, nr protein database, expect=20000, no filter, PAM30)

Other BLAST [web gateways](#)

All matches to this query

| Score | Mr(calc):   | Delta    | Sequence                              |
|-------|-------------|----------|---------------------------------------|
| 85.2  | 2706.245621 | 0.000751 | <a href="#">RPGGEPSPGTTGQSYNQYSQR</a> |
| 76.6  | 2706.245621 | 0.000751 | <a href="#">RPGGEPSPGTTGQSYNQYSQR</a> |
| 76.3  | 2706.245621 | 0.000751 | <a href="#">RPGGEPSPGTTGQSYNQYSQR</a> |

Mascot: <http://www.matrixscience.com/>



# Mascot Search Results

## Peptide View

MS/MS Fragmentation of **RPGGEPSPGTTGQSYNQYSQR**  
 Found in **FINC\_HUMAN**, Fibronectin OS=Homo sapiens GN=FN1 PE=1 SV=4

Match to Query 58352: 2706.246792 from(903.089540,3+) rtinseconds(1472) index(33109)  
 Title: Locus:1.1.1.2931.25 File:"2013-07-02 CLN FXIII 60 min 2nd F 3.wiff"  
 Data file C:\Program Files (x86)\Matrix Science\Mascot Daemon\mgf5 FXIII 60 min 2nd\mascot\_daemon\_merge.mgf

Click mouse within plot area to zoom in by factor of two about that point  
 Or, Plot from  to  Da   
 Label all possible matches  Label matches used for scoring

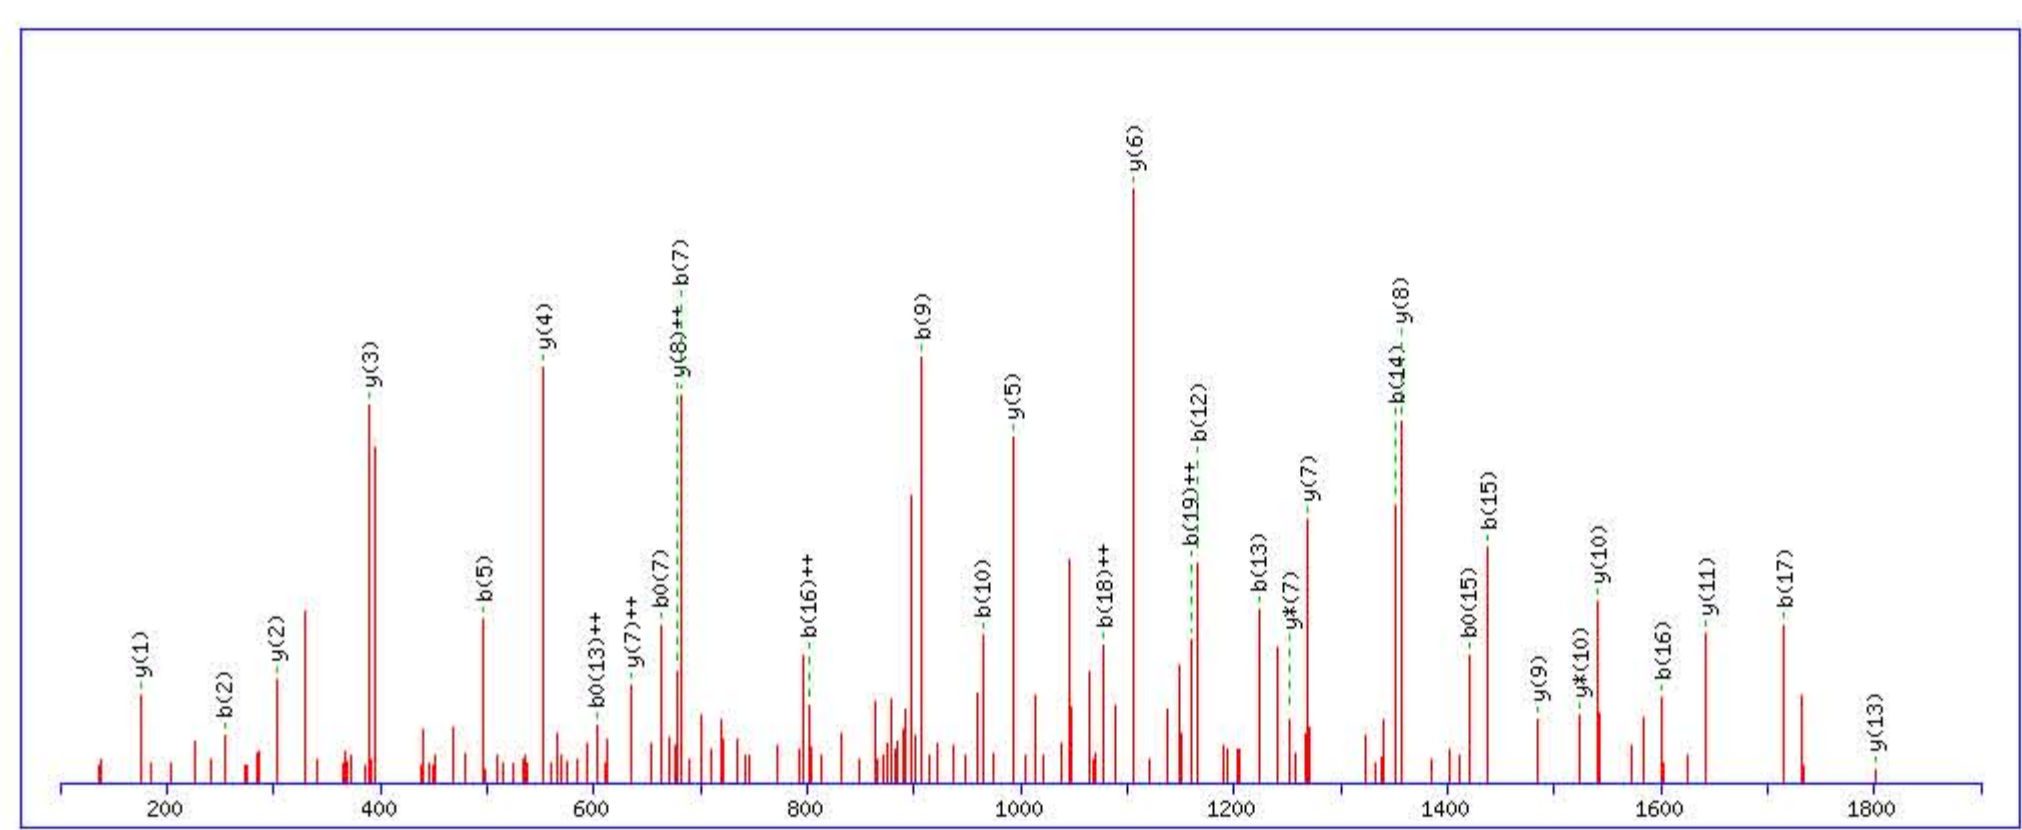

Monoisotopic mass of neutral peptide Mr(calc): 2706.245621  
 Fixed modifications: Carbamidomethyl (C) (apply to specified residues or termini only)  
 Variable modifications:  
 Q18 : Biotin:Thermo-21345 (Q)  
 Ions Score: 91 Expect: 1.1e-008  
 Matches : 33/240 fragment ions using 49 most intense peaks [\(help\)](#)

| #  | b                  | b <sup>++</sup>    | b <sup>*</sup> | b <sup>*++</sup> | b <sup>0</sup>     | b <sup>0++</sup>  | Seq. | y                  | y <sup>++</sup>   | y <sup>*</sup>     | y <sup>*++</sup> | y <sup>0</sup> | y <sup>0++</sup> | #  |
|----|--------------------|--------------------|----------------|------------------|--------------------|-------------------|------|--------------------|-------------------|--------------------|------------------|----------------|------------------|----|
| 1  | 157.108387         | 79.057831          | 140.081838     | 70.544557        |                    |                   | R    |                    |                   |                    |                  |                |                  | 22 |
| 2  | <b>254.161151</b>  | 127.584213         | 237.134602     | 119.070939       |                    |                   | P    | 2551.151795        | 1276.079535       | 2534.125246        | 1267.566261      | 2533.141230    | 1267.074253      | 21 |
| 3  | 311.182615         | 156.094945         | 294.156066     | 147.581671       |                    |                   | G    | 2454.099031        | 1227.553153       | 2437.072482        | 1219.039879      | 2436.088466    | 1218.547871      | 20 |
| 4  | 368.204079         | 184.605677         | 351.177530     | 176.092403       |                    |                   | G    | 2397.077567        | 1199.042421       | 2380.051018        | 1190.529147      | 2379.067002    | 1190.037139      | 19 |
| 5  | <b>497.246672</b>  | 249.126974         | 480.220123     | 240.613700       | 479.236107         | 240.121692        | E    | 2340.056103        | 1170.531689       | 2323.029554        | 1162.018415      | 2322.045538    | 1161.526407      | 18 |
| 6  | 594.299436         | 297.653356         | 577.272887     | 289.140082       | 576.288871         | 288.648074        | P    | 2211.013510        | 1106.010393       | 2193.986961        | 1097.497118      | 2193.002945    | 1097.005110      | 17 |
| 7  | <b>681.331464</b>  | 341.169370         | 664.304915     | 332.656095       | <b>663.320899</b>  | 332.164087        | S    | 2113.960746        | 1057.484011       | 2096.934197        | 1048.970736      | 2095.950181    | 1048.478728      | 16 |
| 8  | 778.384228         | 389.695752         | 761.357679     | 381.182478       | 760.373663         | 380.690470        | P    | 2026.928718        | 1013.967997       | 2009.902169        | 1005.454723      | 2008.918153    | 1004.962715      | 15 |
| 9  | <b>907.426821</b>  | 454.217049         | 890.400272     | 445.703774       | 889.416256         | 445.211766        | E    | 1929.875954        | 965.441615        | 1912.849405        | 956.928341       | 1911.865389    | 956.436333       | 14 |
| 10 | <b>964.448285</b>  | 482.727781         | 947.421736     | 474.214506       | 946.437720         | 473.722498        | G    | <b>1800.833361</b> | 900.920319        | 1783.806812        | 892.407044       | 1782.822796    | 891.915036       | 13 |
| 11 | 1065.495964        | 533.251620         | 1048.469415    | 524.738346       | 1047.485399        | 524.246337        | T    | 1743.811897        | 872.409587        | 1726.785348        | 863.896312       | 1725.801332    | 863.404304       | 12 |
| 12 | <b>1166.543643</b> | 583.775460         | 1149.517094    | 575.262185       | 1148.533078        | 574.770177        | T    | <b>1642.764218</b> | 821.885747        | 1625.737669        | 813.372473       | 1624.753653    | 812.880465       | 11 |
| 13 | <b>1223.565107</b> | 612.286191         | 1206.538558    | 603.772917       | 1205.554542        | <b>603.280909</b> | G    | <b>1541.716539</b> | 771.361908        | <b>1524.689990</b> | 762.848633       | 1523.705974    | 762.356625       | 10 |
| 14 | <b>1351.623685</b> | 676.315480         | 1334.597136    | 667.802206       | 1333.613120        | 667.310198        | Q    | <b>1484.695075</b> | 742.851176        | 1467.668526        | 734.337901       | 1466.684510    | 733.845893       | 9  |
| 15 | <b>1438.655713</b> | 719.831494         | 1421.629164    | 711.318220       | <b>1420.645148</b> | 710.826212        | S    | <b>1356.636497</b> | <b>678.821887</b> | 1339.609948        | 670.308612       | 1338.625932    | 669.816604       | 8  |
| 16 | <b>1601.719042</b> | <b>801.363159</b>  | 1584.692493    | 792.849885       | 1583.708477        | 792.357876        | Y    | <b>1269.604469</b> | <b>635.305873</b> | <b>1252.577920</b> | 626.792598       | 1251.593904    | 626.300590       | 7  |
| 17 | <b>1715.761969</b> | 858.384622         | 1698.735420    | 849.871348       | 1697.751404        | 849.379340        | N    | <b>1106.541140</b> | 553.774208        | 1089.514591        | 545.260934       | 1088.530575    | 544.768926       | 6  |
| 18 | 2154.987295        | <b>1077.997285</b> | 2137.960746    | 1069.484011      | 2136.976730        | 1068.992003       | Q    | <b>992.498213</b>  | 496.752745        | 975.471664         | 488.239470       | 974.487648     | 487.747462       | 5  |
| 19 | 2318.050624        | <b>1159.528950</b> | 2301.024075    | 1151.015675      | 2300.040059        | 1150.523667       | Y    | <b>553.272887</b>  | 277.140082        | 536.246338         | 268.626807       | 535.262322     | 268.134799       | 4  |
| 20 | 2405.082652        | 1203.044964        | 2388.056103    | 1194.531689      | 2387.072087        | 1194.039681       | S    | <b>390.209558</b>  | 195.608417        | 373.183009         | 187.095143       | 372.198993     | 186.603135       | 3  |
| 21 | 2533.141230        | 1267.074253        | 2516.114681    | 1258.560978      | 2515.130665        | 1258.068971       | Q    | <b>303.177530</b>  | 152.092403        | 286.150981         | 143.579129       |                |                  | 2  |
| 22 |                    |                    |                |                  |                    |                   | R    | <b>175.118952</b>  | 88.063114         | 158.092403         | 79.549839        |                |                  | 1  |

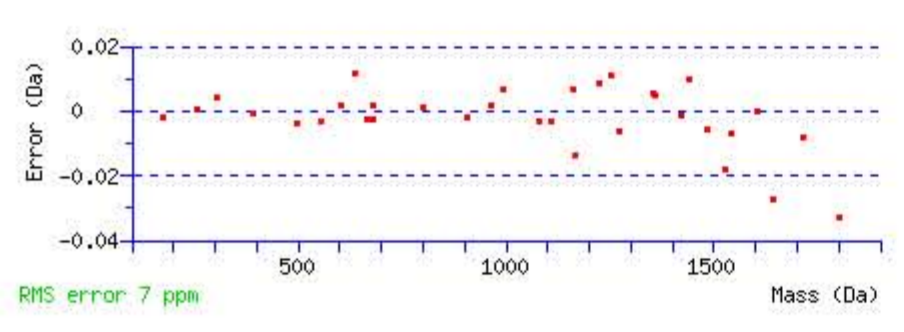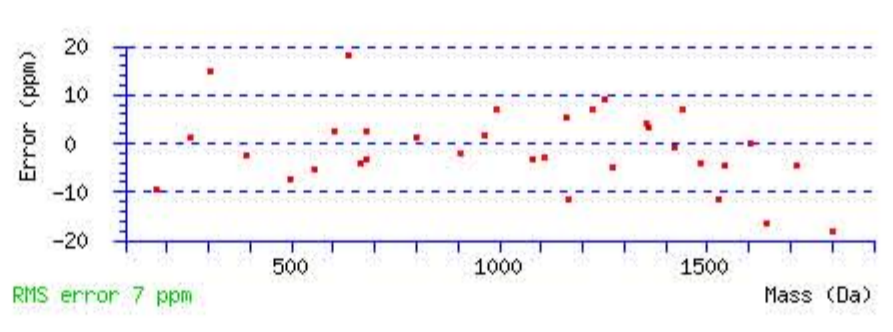

NCBI BLAST search of **RPGGEPSPGTTGQSYNQYSQR**  
 (Parameters: blastp, nr protein database, expect=20000, no filter, PAM30)  
 Other BLAST [web gateways](#)

### All matches to this query

| Score | Mr(calc):   | Delta    | Sequence                              |
|-------|-------------|----------|---------------------------------------|
| 90.8  | 2706.245621 | 0.001171 | <a href="#">RPGGEPSPGTTGQSYNQYSQR</a> |
| 63.5  | 2706.245621 | 0.001171 | <a href="#">RPGGEPSPGTTGQSYNQYSQR</a> |
| 37.1  | 2706.245621 | 0.001171 | <a href="#">RPGGEPSPGTTGQSYNQYSQR</a> |



# MASCOT Search Results

## Peptide View

MS/MS Fragmentation of **HRPRPYPPNVGEEIQIGHIPR**  
 Found in **FINC\_HUMAN**, Fibronectin OS=Homo sapiens GN=FN1 PE=1 SV=4

Match to Query 59121: 2772.465170 from(555.500310,5+) rtinseconds(1753) index(34787)  
 Title: Locus:1.1.1.3030.8 File:"2013-07-02 CLN FXIII 60 min 2nd F 3.wiff"  
 Data file C:\Program Files (x86)\Matrix Science\Mascot Daemon\mgf5 FXIII 60 min 2nd\mascot\_daemon\_merge.mgf

Click mouse within plot area to zoom in by factor of two about that point  
 Or, Plot from  to  Da   
 Label all possible matches  Label matches used for scoring

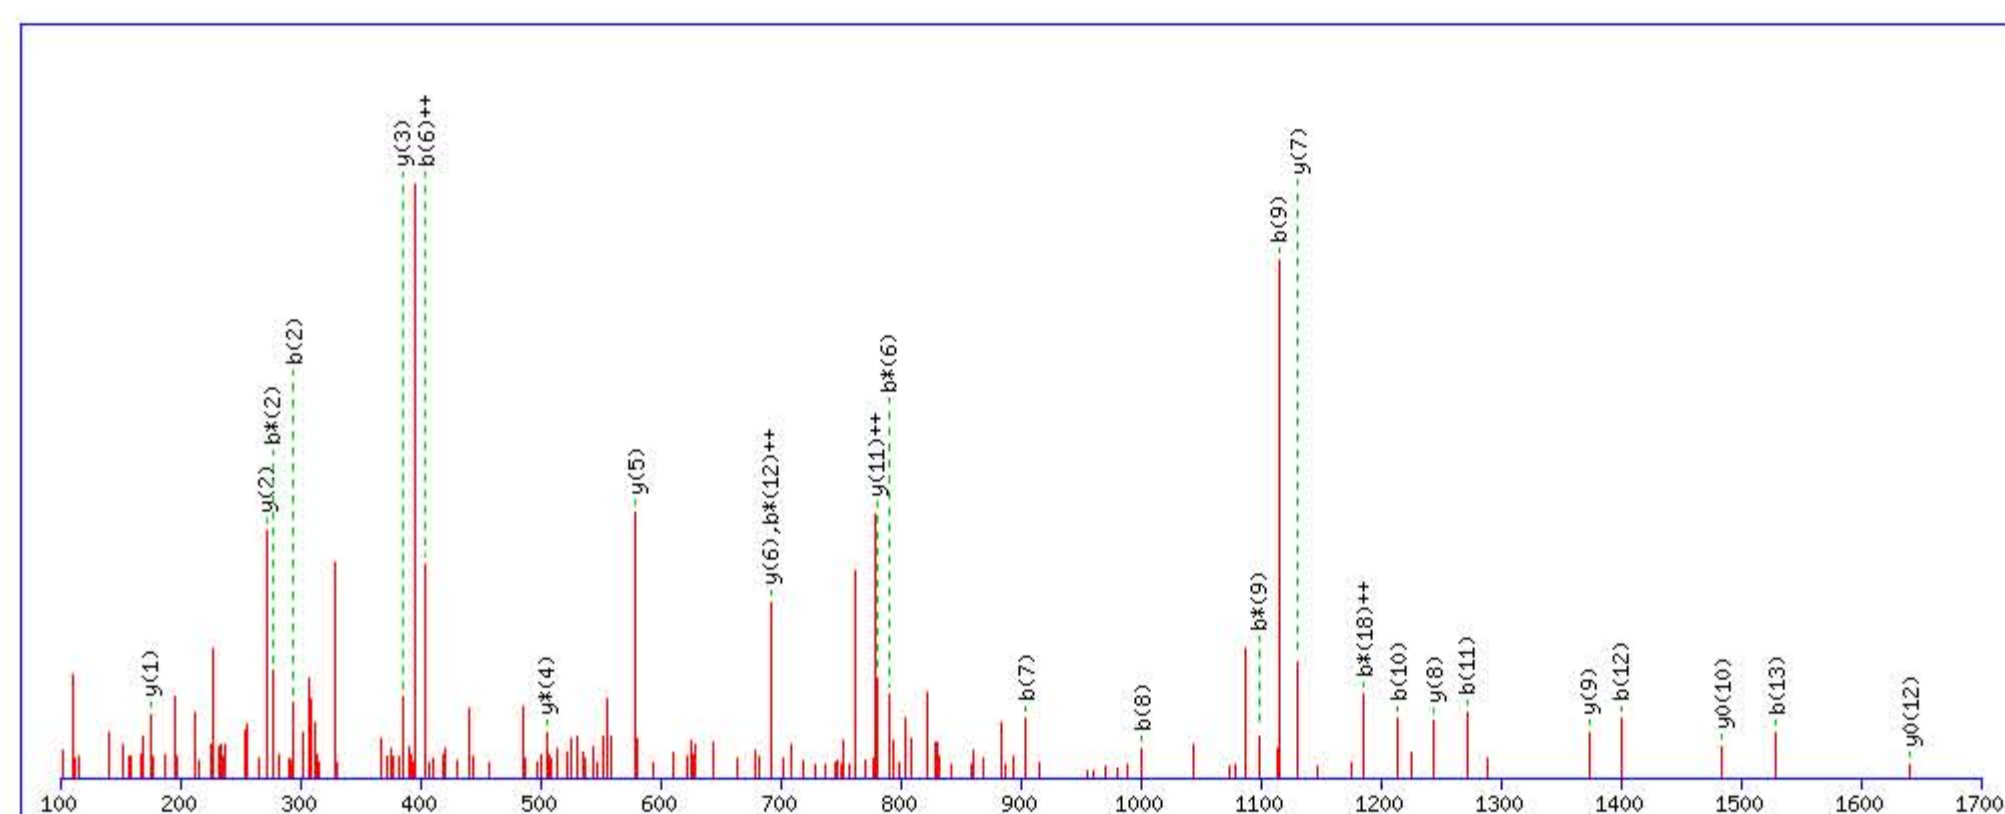

Monoisotopic mass of neutral peptide Mr(calc): 2772.475815  
 Fixed modifications: Carbamidomethyl (C) (apply to specified residues or termini only)  
 Variable modifications:  
 Q15 : Biotin:Thermo-21345 (Q)  
 Ions Score: 42 Expect: 0.00014  
 Matches : 26/200 fragment ions using 53 most intense peaks [\(help\)](#)

| #  | b                  | b <sup>++</sup>   | b <sup>*</sup>     | b <sup>*++</sup>   | b <sup>0</sup> | b <sup>0++</sup> | Seq. | y                  | y <sup>++</sup>   | y <sup>*</sup>    | y <sup>*++</sup> | y <sup>0</sup>     | y <sup>0++</sup> | #  |
|----|--------------------|-------------------|--------------------|--------------------|----------------|------------------|------|--------------------|-------------------|-------------------|------------------|--------------------|------------------|----|
| 1  | 138.066188         | 69.536732         |                    |                    |                |                  | H    |                    |                   |                   |                  |                    |                  | 21 |
| 2  | <b>294.167299</b>  | 147.587288        | <b>277.140750</b>  | 139.074013         |                |                  | R    | 2636.424208        | 1318.715742       | 2619.397659       | 1310.202467      | 2618.413643        | 1309.710459      | 20 |
| 3  | 391.220063         | 196.113670        | 374.193514         | 187.600395         |                |                  | P    | 2480.323097        | 1240.665186       | 2463.296548       | 1232.151912      | 2462.312532        | 1231.659904      | 19 |
| 4  | 547.321174         | 274.164225        | 530.294625         | 265.650951         |                |                  | R    | 2383.270333        | 1192.138804       | 2366.243784       | 1183.625530      | 2365.259768        | 1183.133522      | 18 |
| 5  | 644.373938         | 322.690607        | 627.347389         | 314.177333         |                |                  | P    | 2227.169222        | 1114.088249       | 2210.142673       | 1105.574974      | 2209.158657        | 1105.082966      | 17 |
| 6  | 807.437267         | <b>404.222272</b> | <b>790.410718</b>  | 395.708997         |                |                  | Y    | 2130.116458        | 1065.561867       | 2113.089909       | 1057.048592      | 2112.105893        | 1056.556584      | 16 |
| 7  | <b>904.490031</b>  | 452.748654        | 887.463482         | 444.235379         |                |                  | P    | 1967.053129        | 984.030203        | 1950.026580       | 975.516928       | 1949.042564        | 975.024920       | 15 |
| 8  | <b>1001.542795</b> | 501.275036        | 984.516246         | 492.761761         |                |                  | P    | 1870.000365        | 935.503821        | 1852.973816       | 926.990546       | 1851.989800        | 926.498538       | 14 |
| 9  | <b>1115.585722</b> | 558.296499        | <b>1098.559173</b> | 549.783225         |                |                  | N    | 1772.947601        | 886.977439        | 1755.921052       | 878.464164       | 1754.937036        | 877.972156       | 13 |
| 10 | <b>1214.654136</b> | 607.830706        | 1197.627587        | 599.317432         |                |                  | V    | 1658.904674        | 829.955975        | 1641.878125       | 821.442701       | <b>1640.894109</b> | 820.950693       | 12 |
| 11 | <b>1271.675600</b> | 636.341438        | 1254.649051        | 627.828164         |                |                  | G    | 1559.836260        | <b>780.421768</b> | 1542.809711       | 771.908494       | 1541.825695        | 771.416486       | 11 |
| 12 | <b>1400.718193</b> | 700.862735        | 1383.691644        | <b>692.349460</b>  | 1382.707628    | 691.857452       | E    | 1502.814796        | 751.911036        | 1485.788247       | 743.397762       | <b>1484.804231</b> | 742.905754       | 10 |
| 13 | <b>1529.760786</b> | 765.384031        | 1512.734237        | 756.870757         | 1511.750221    | 756.378749       | E    | <b>1373.772203</b> | 687.389740        | 1356.745654       | 678.876465       | 1355.761638        | 678.384457       | 9  |
| 14 | 1642.844850        | 821.926063        | 1625.818301        | 813.412789         | 1624.834285    | 812.920781       | I    | <b>1244.729610</b> | 622.868443        | 1227.703061       | 614.355169       |                    |                  | 8  |
| 15 | 2082.070176        | 1041.538726       | 2065.043627        | 1033.025451        | 2064.059611    | 1032.533444      | Q    | <b>1131.645546</b> | 566.326411        | 1114.618997       | 557.813137       |                    |                  | 7  |
| 16 | 2195.154240        | 1098.080758       | 2178.127691        | 1089.567484        | 2177.143675    | 1089.075476      | I    | <b>692.420220</b>  | 346.713748        | 675.393671        | 338.200474       |                    |                  | 6  |
| 17 | 2252.175704        | 1126.591490       | 2235.149155        | 1118.078215        | 2234.165139    | 1117.586208      | G    | <b>579.336156</b>  | 290.171716        | 562.309607        | 281.658442       |                    |                  | 5  |
| 18 | 2389.234616        | 1195.120946       | 2372.208067        | <b>1186.607671</b> | 2371.224051    | 1186.115664      | H    | 522.314692         | 261.660984        | <b>505.288143</b> | 253.147710       |                    |                  | 4  |
| 19 | 2502.318680        | 1251.662978       | 2485.292131        | 1243.149704        | 2484.308115    | 1242.657696      | I    | <b>385.255780</b>  | 193.131528        | 368.229231        | 184.618254       |                    |                  | 3  |
| 20 | 2599.371444        | 1300.189360       | 2582.344895        | 1291.676086        | 2581.360879    | 1291.184078      | P    | <b>272.171716</b>  | 136.589496        | 255.145167        | 128.076221       |                    |                  | 2  |
| 21 |                    |                   |                    |                    |                |                  | R    | <b>175.118952</b>  | 88.063114         | 158.092403        | 79.549839        |                    |                  | 1  |

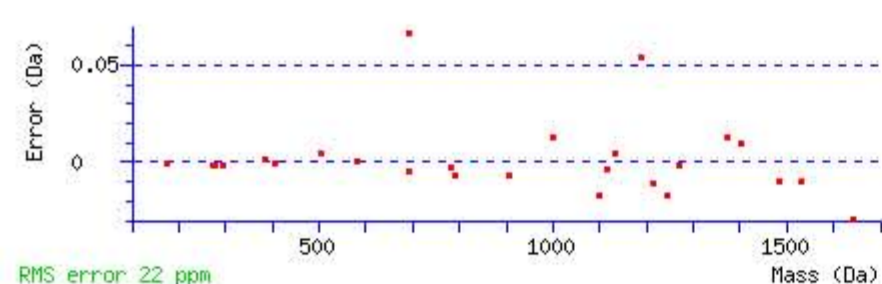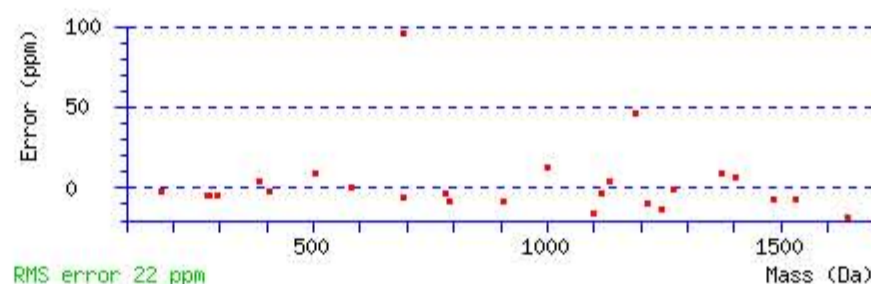

NCBI BLAST search of [HRPRPYPPNVGEEIQIGHIPR](#)  
 (Parameters: blastp, nr protein database, expect=20000, no filter, PAM30)  
 Other BLAST [web gateways](#)

### All matches to this query

| Score | Mr(calc):   | Delta     | Sequence                                 |
|-------|-------------|-----------|------------------------------------------|
| 41.9  | 2772.475815 | -0.010645 | <a href="#">HRPRPYPPNVGEEIQIGHIPR</a>    |
| 0.7   | 2772.429306 | 0.035864  | <a href="#">EKHLAILEKKNISEEVEAPEVEPR</a> |



**Mascot Search Results**

**Peptide View**

MS/MS Fragmentation of **RPGGEPSPGTTGQSYNQYSQR**  
 Found in **FINC\_HUMAN**, Fibronectin OS=Homo sapiens GN=FN1 PE=1 SV=4

Match to Query 61828: 3017.416936 from(755.361510,4+) rtinseconds(1798) index(35044)  
 Title: Locus:1.1.1.3045.13 File:"2013-07-02 CLN FXIII 60 min 2nd F 3.wiff"  
 Data file C:\Program Files (x86)\Matrix Science\Mascot Daemon\mgf5 FXIII 60 min 2nd\mascot\_daemon\_merge.mgf

Click mouse within plot area to zoom in by factor of two about that point  
 Or, Plot from  to  Da   
 Label all possible matches  Label matches used for scoring

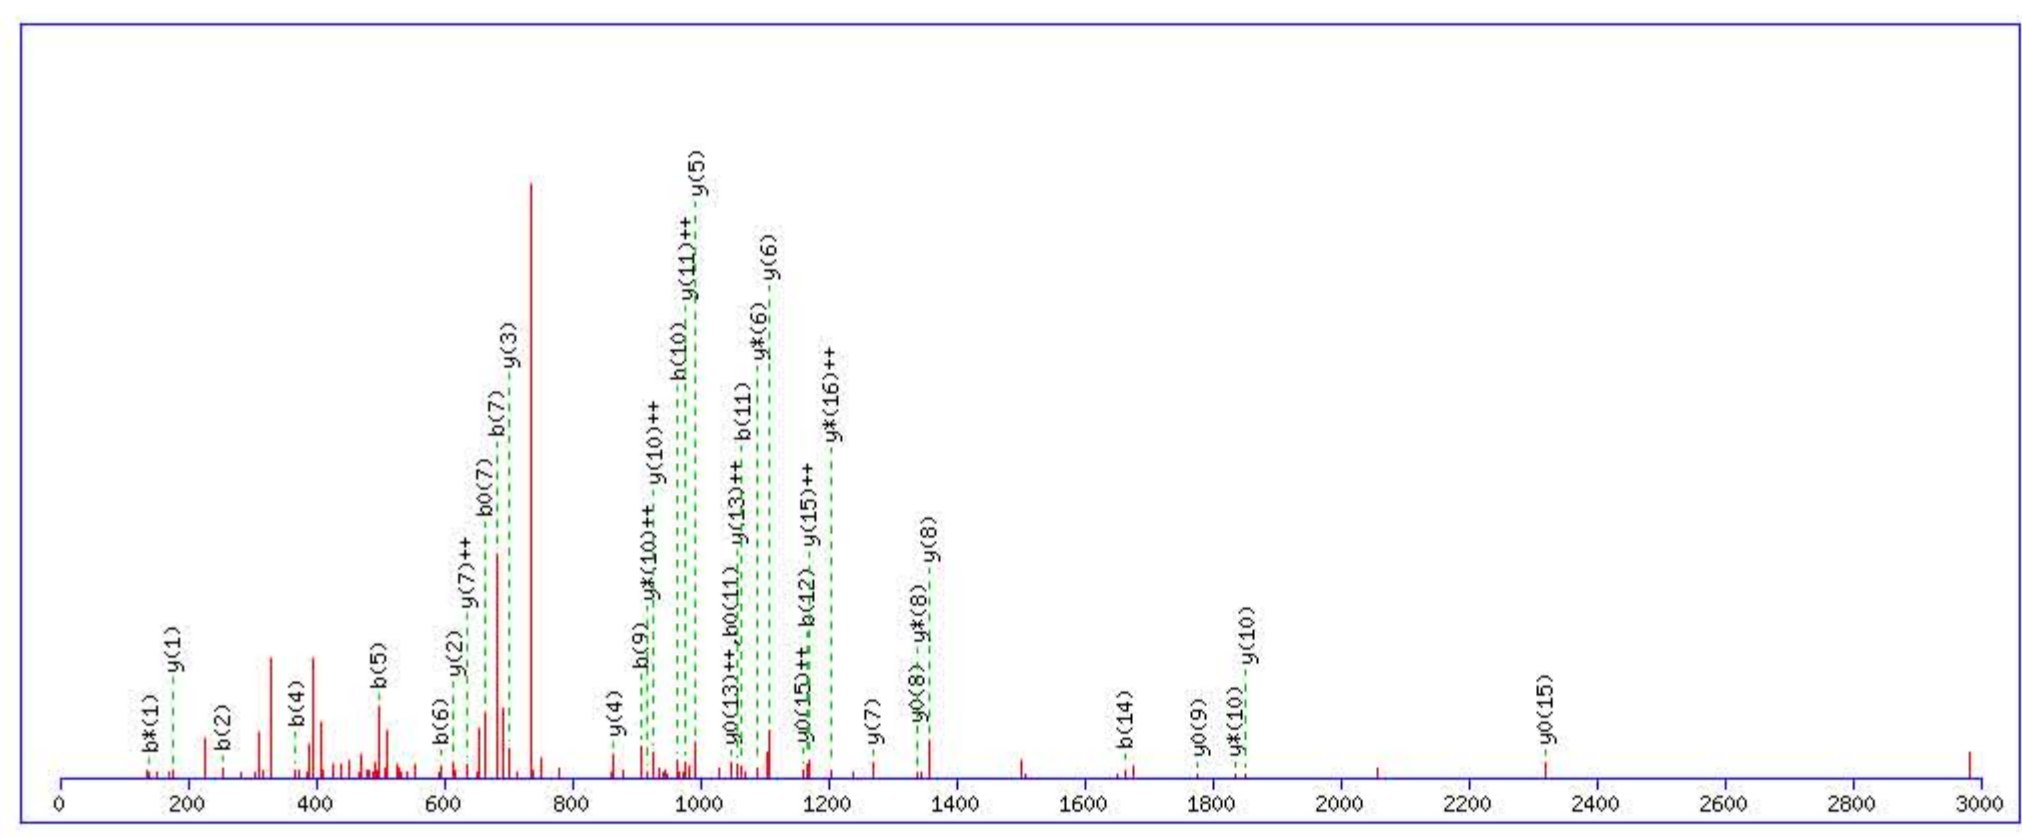

Monoisotopic mass of neutral peptide Mr(calc): 3017.412369  
 Fixed modifications: Carbamidomethyl (C) (apply to specified residues or termini only)  
 Variable modifications:  
 Q14 : Biotin:Thermo-21345 (Q)  
 Q21 : Biotin:Thermo-21345 (Q)  
 Ions Score: 50 Expect: 0.00019  
 Matches : 37/240 fragment ions using 82 most intense peaks [\(help\)](#)

| #  | b           | b <sup>++</sup> | b <sup>+</sup> | b <sup>*++</sup> | b <sup>0</sup> | b <sup>0++</sup> | Seq. | y           | y <sup>++</sup> | y <sup>+</sup> | y <sup>*++</sup> | y <sup>0</sup> | y <sup>0++</sup> | #  |
|----|-------------|-----------------|----------------|------------------|----------------|------------------|------|-------------|-----------------|----------------|------------------|----------------|------------------|----|
| 1  | 157.108387  | 79.057831       | 140.081838     | 70.544557        |                |                  | R    |             |                 |                |                  |                |                  | 22 |
| 2  | 254.161151  | 127.584213      | 237.134602     | 119.070939       |                |                  | P    | 2862.318543 | 1431.662909     | 2845.291994    | 1423.149635      | 2844.307978    | 1422.657627      | 21 |
| 3  | 311.182615  | 156.094945      | 294.156066     | 147.581671       |                |                  | G    | 2765.265779 | 1383.136527     | 2748.239230    | 1374.623253      | 2747.255214    | 1374.131245      | 20 |
| 4  | 368.204079  | 184.605677      | 351.177530     | 176.092403       |                |                  | G    | 2708.244315 | 1354.625795     | 2691.217766    | 1346.112521      | 2690.233750    | 1345.620513      | 19 |
| 5  | 497.246672  | 249.126974      | 480.220123     | 240.613700       | 479.236107     | 240.121692       | E    | 2651.222851 | 1326.115063     | 2634.196302    | 1317.601789      | 2633.212286    | 1317.109781      | 18 |
| 6  | 594.299436  | 297.653356      | 577.272887     | 289.140082       | 576.288871     | 288.648074       | P    | 2522.180258 | 1261.593767     | 2505.153709    | 1253.080492      | 2504.169693    | 1252.588484      | 17 |
| 7  | 681.331464  | 341.169370      | 664.304915     | 332.656095       | 663.320899     | 332.164087       | S    | 2425.127494 | 1213.067385     | 2408.100945    | 1204.554110      | 2407.116929    | 1204.062102      | 16 |
| 8  | 778.384228  | 389.695752      | 761.357679     | 381.182478       | 760.373663     | 380.690470       | P    | 2338.095466 | 1169.551371     | 2321.068917    | 1161.038096      | 2320.084901    | 1160.546088      | 15 |
| 9  | 907.426821  | 454.217049      | 890.400272     | 445.703774       | 889.416256     | 445.211766       | E    | 2241.042702 | 1121.024989     | 2224.016153    | 1112.511714      | 2223.032137    | 1112.019706      | 14 |
| 10 | 964.448285  | 482.727781      | 947.421736     | 474.214506       | 946.437720     | 473.722498       | G    | 2112.000109 | 1056.503692     | 2094.973560    | 1047.990418      | 2093.989544    | 1047.498410      | 13 |
| 11 | 1065.495964 | 533.251620      | 1048.469415    | 524.738346       | 1047.485399    | 524.246337       | T    | 2054.978645 | 1027.992960     | 2037.952096    | 1019.479686      | 2036.968080    | 1018.987678      | 12 |
| 12 | 1166.543643 | 583.775460      | 1149.517094    | 575.262185       | 1148.533078    | 574.770177       | T    | 1953.930966 | 977.469121      | 1936.904417    | 968.955847       | 1935.920401    | 968.463839       | 11 |
| 13 | 1223.565107 | 612.286191      | 1206.538558    | 603.772917       | 1205.554542    | 603.280909       | G    | 1852.883287 | 926.945282      | 1835.856738    | 918.432007       | 1834.872722    | 917.939999       | 10 |
| 14 | 1662.790433 | 831.898854      | 1645.763884    | 823.385580       | 1644.779868    | 822.893572       | Q    | 1795.861823 | 898.434550      | 1778.835274    | 889.921275       | 1777.851258    | 889.429267       | 9  |
| 15 | 1749.822461 | 875.414869      | 1732.795912    | 866.901594       | 1731.811896    | 866.409586       | S    | 1356.636497 | 678.821887      | 1339.609948    | 670.308612       | 1338.625932    | 669.816604       | 8  |
| 16 | 1912.885790 | 956.946533      | 1895.859241    | 948.433259       | 1894.875225    | 947.941251       | Y    | 1269.604469 | 635.305873      | 1252.577920    | 626.792598       | 1251.593904    | 626.300590       | 7  |
| 17 | 2026.928717 | 1013.967997     | 2009.902168    | 1005.454722      | 2008.918152    | 1004.962714      | N    | 1106.541140 | 553.774208      | 1089.514591    | 545.260934       | 1088.530575    | 544.768926       | 6  |
| 18 | 2154.987295 | 1077.997285     | 2137.960746    | 1069.484011      | 2136.976730    | 1068.992003      | Q    | 992.498213  | 496.752745      | 975.471664     | 488.239470       | 974.487648     | 487.747462       | 5  |
| 19 | 2318.050624 | 1159.528950     | 2301.024075    | 1151.015675      | 2300.040059    | 1150.523667      | Y    | 864.439635  | 432.723456      | 847.413086     | 424.210181       | 846.429070     | 423.718173       | 4  |
| 20 | 2405.082652 | 1203.044964     | 2388.056103    | 1194.531689      | 2387.072087    | 1194.039681      | S    | 701.376306  | 351.191791      | 684.349757     | 342.678517       | 683.365741     | 342.186509       | 3  |
| 21 | 2844.307978 | 1422.657627     | 2827.281429    | 1414.144353      | 2826.297413    | 1413.652345      | Q    | 614.344278  | 307.675777      | 597.317729     | 299.162503       |                |                  | 2  |
| 22 |             |                 |                |                  |                |                  | R    | 175.118952  | 88.063114       | 158.092403     | 79.549839        |                |                  | 1  |

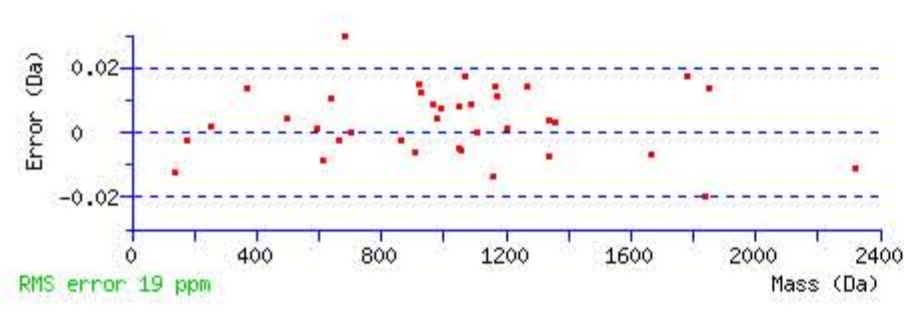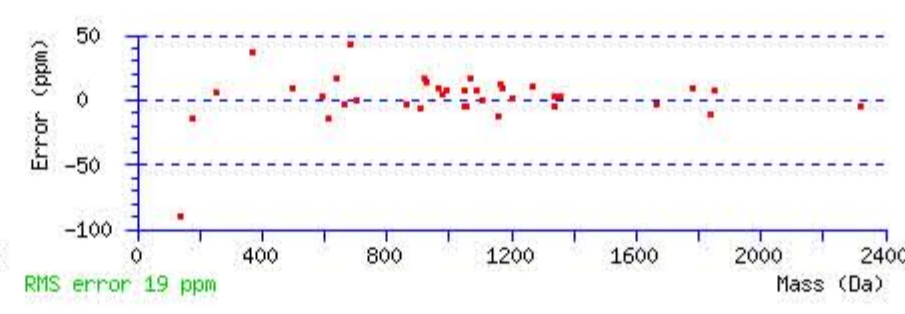

NCBI BLAST search of **RPGGEPSPGTTGQSYNQYSQR**  
 (Parameters: blastp, nr protein database, expect=20000, no filter, PAM30)  
 Other BLAST [web gateways](#)

**All matches to this query**

| Score | Mr(calc):   | Delta    | Sequence                              |
|-------|-------------|----------|---------------------------------------|
| 49.6  | 3017.412369 | 0.004567 | <a href="#">RPGGEPSPGTTGQSYNQYSQR</a> |
| 49.5  | 3017.412369 | 0.004567 | <a href="#">RPGGEPSPGTTGQSYNQYSQR</a> |
| 22.1  | 3017.412369 | 0.004567 | <a href="#">RPGGEPSPGTTGQSYNQYSQR</a> |



# MASCOT Search Results

## Peptide View

MS/MS Fragmentation of **RPGGEPSPGTTGQSYNQYSQR**

Found in **FINC\_HUMAN**, Fibronectin OS=Homo sapiens GN=FN1 PE=1 SV=4

Match to Query 61832: 3017.428182 from(1006.816670,3+) rtinseconds(1784) index(34978)

Title: Locus:1.1.1.3040.25 File:"2013-07-02 CLN FXIII 60 min 2nd F 3.wiff"

Data file C:\Program Files (x86)\Matrix Science\Mascot Daemon\mgf\5 FXIII 60 min 2nd\mascot\_daemon\_merge.mgf

Click mouse within plot area to zoom in by factor of two about that point

Or, Plot from  to  Da

Label all possible matches  Label matches used for scoring

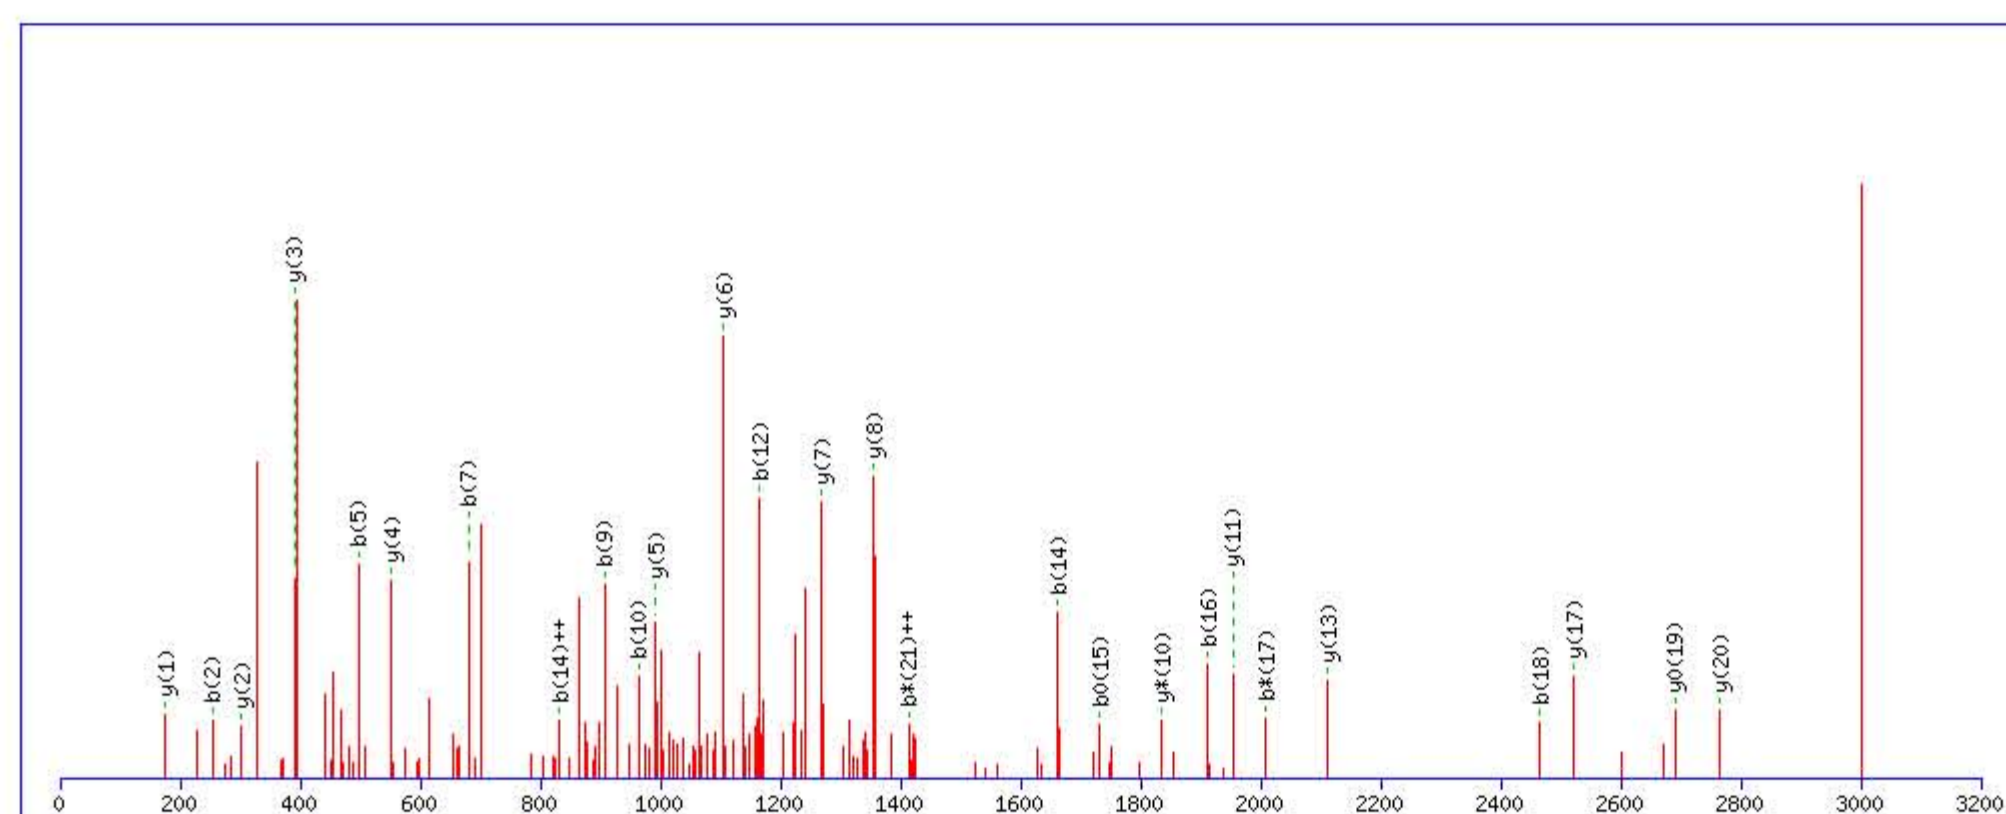

Monoisotopic mass of neutral peptide Mr(calc): 3017.412369

Fixed modifications: Carbamidomethyl (C) (apply to specified residues or termini only)

Variable modifications:

Q14 : Biotin:Thermo-21345 (Q)

Q18 : Biotin:Thermo-21345 (Q)

Ions Score: 72 Expect: 1.3e-006

Matches : 27/240 fragment ions using 45 most intense peaks [\(help\)](#)

| #  | b                  | b <sup>++</sup>   | b <sup>+</sup>     | b <sup>+++</sup>   | b <sup>0</sup>     | b <sup>0++</sup> | Seq. | y                  | y <sup>++</sup> | y <sup>+</sup>     | y <sup>+++</sup> | y <sup>0</sup>     | y <sup>0++</sup> | #  |
|----|--------------------|-------------------|--------------------|--------------------|--------------------|------------------|------|--------------------|-----------------|--------------------|------------------|--------------------|------------------|----|
| 1  | 157.108387         | 79.057831         | 140.081838         | 70.544557          |                    |                  | R    |                    |                 |                    |                  |                    |                  | 22 |
| 2  | <b>254.161151</b>  | 127.584213        | 237.134602         | 119.070939         |                    |                  | P    | 2862.318543        | 1431.662909     | 2845.291994        | 1423.149635      | 2844.307978        | 1422.657627      | 21 |
| 3  | 311.182615         | 156.094945        | 294.156066         | 147.581671         |                    |                  | G    | <b>2765.265779</b> | 1383.136527     | 2748.239230        | 1374.623253      | 2747.255214        | 1374.131245      | 20 |
| 4  | 368.204079         | 184.605677        | 351.177530         | 176.092403         |                    |                  | G    | 2708.244315        | 1354.625795     | 2691.217766        | 1346.112521      | <b>2690.233750</b> | 1345.620513      | 19 |
| 5  | <b>497.246672</b>  | 249.126974        | 480.220123         | 240.613700         | 479.236107         | 240.121692       | E    | 2651.222851        | 1326.115063     | 2634.196302        | 1317.601789      | 2633.212286        | 1317.109781      | 18 |
| 6  | 594.299436         | 297.653356        | 577.272887         | 289.140082         | 576.288871         | 288.648074       | P    | <b>2522.180258</b> | 1261.593767     | 2505.153709        | 1253.080492      | 2504.169693        | 1252.588484      | 17 |
| 7  | <b>681.331464</b>  | 341.169370        | 664.304915         | 332.656095         | 663.320899         | 332.164087       | S    | 2425.127494        | 1213.067385     | 2408.100945        | 1204.554110      | 2407.116929        | 1204.062102      | 16 |
| 8  | 778.384228         | 389.695752        | 761.357679         | 381.182478         | 760.373663         | 380.690470       | P    | 2338.095466        | 1169.551371     | 2321.068917        | 1161.038096      | 2320.084901        | 1160.546088      | 15 |
| 9  | <b>907.426821</b>  | 454.217049        | 890.400272         | 445.703774         | 889.416256         | 445.211766       | E    | 2241.042702        | 1121.024989     | 2224.016153        | 1112.511714      | 2223.032137        | 1112.019706      | 14 |
| 10 | <b>964.448285</b>  | 482.727781        | 947.421736         | 474.214506         | 946.437720         | 473.722498       | G    | <b>2112.000109</b> | 1056.503692     | 2094.973560        | 1047.990418      | 2093.989544        | 1047.498410      | 13 |
| 11 | 1065.495964        | 533.251620        | 1048.469415        | 524.738346         | 1047.485399        | 524.246337       | T    | 2054.978645        | 1027.992960     | 2037.952096        | 1019.479686      | 2036.968080        | 1018.987678      | 12 |
| 12 | <b>1166.543643</b> | 583.775460        | 1149.517094        | 575.262185         | 1148.533078        | 574.770177       | T    | <b>1953.930966</b> | 977.469121      | 1936.904417        | 968.955847       | 1935.920401        | 968.463839       | 11 |
| 13 | 1223.565107        | 612.286191        | 1206.538558        | 603.772917         | 1205.554542        | 603.280909       | G    | 1852.883287        | 926.945282      | <b>1835.856738</b> | 918.432007       | 1834.872722        | 917.939999       | 10 |
| 14 | <b>1662.790433</b> | <b>831.898854</b> | 1645.763884        | 823.385580         | 1644.779868        | 822.893572       | Q    | 1795.861823        | 898.434550      | 1778.835274        | 889.921275       | 1777.851258        | 889.429267       | 9  |
| 15 | 1749.822461        | 875.414869        | 1732.795912        | 866.901594         | <b>1731.811896</b> | 866.409586       | S    | <b>1356.636497</b> | 678.821887      | 1339.609948        | 670.308612       | 1338.625932        | 669.816604       | 8  |
| 16 | <b>1912.885790</b> | 956.946533        | 1895.859241        | 948.433259         | 1894.875225        | 947.941251       | Y    | <b>1269.604469</b> | 635.305873      | 1252.577920        | 626.792598       | 1251.593904        | 626.300590       | 7  |
| 17 | 2026.928717        | 1013.967997       | <b>2009.902168</b> | 1005.454722        | 2008.918152        | 1004.962714      | N    | <b>1106.541140</b> | 553.774208      | 1089.514591        | 545.260934       | 1088.530575        | 544.768926       | 6  |
| 18 | <b>2466.154043</b> | 1233.580659       | 2449.127494        | 1225.067385        | 2448.143478        | 1224.575377      | Q    | <b>992.498213</b>  | 496.752745      | 975.471664         | 488.239470       | 974.487648         | 487.747462       | 5  |
| 19 | 2629.217372        | 1315.112324       | 2612.190823        | 1306.599049        | 2611.206807        | 1306.107041      | Y    | <b>553.272887</b>  | 277.140082      | 536.246338         | 268.626807       | 535.262322         | 268.134799       | 4  |
| 20 | 2716.249400        | 1358.628338       | 2699.222851        | 1350.115063        | 2698.238835        | 1349.623056      | S    | <b>390.209558</b>  | 195.608417      | 373.183009         | 187.095143       | 372.198993         | 186.603135       | 3  |
| 21 | 2844.307978        | 1422.657627       | 2827.281429        | <b>1414.144353</b> | 2826.297413        | 1413.652345      | Q    | <b>303.177530</b>  | 152.092403      | 286.150981         | 143.579129       |                    |                  | 2  |
| 22 |                    |                   |                    |                    |                    |                  | R    | <b>175.118952</b>  | 88.063114       | 158.092403         | 79.549839        |                    |                  | 1  |

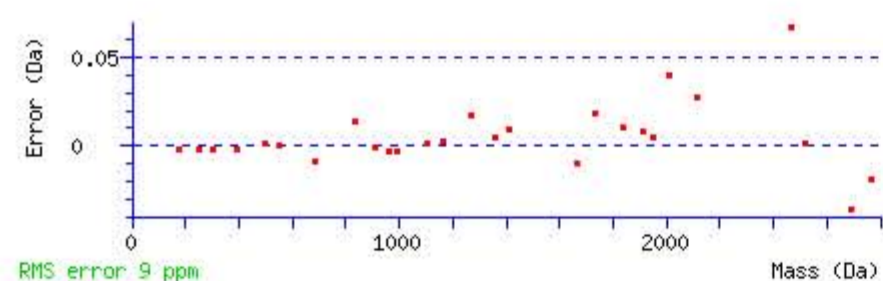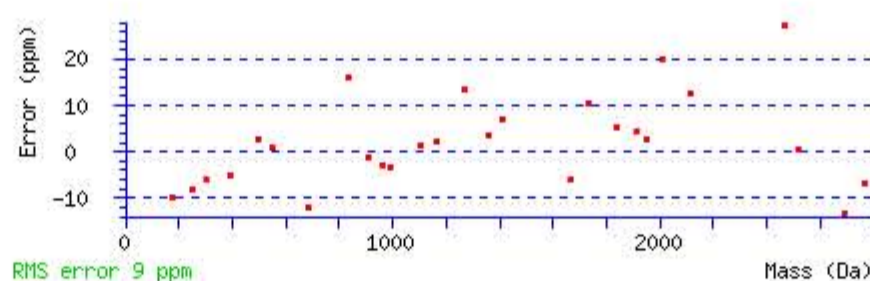

NCBI BLAST search of [RPGGEPSPGTTGQSYNQYSQR](#)

(Parameters: blastp, nr protein database, expect=20000, no filter, PAM30)

Other BLAST [web gateways](#)

## All matches to this query

| Score | Mr(calc):   | Delta    | Sequence                              |
|-------|-------------|----------|---------------------------------------|
| 71.8  | 3017.412369 | 0.015813 | <a href="#">RPGGEPSPGTTGQSYNQYSQR</a> |
| 70.8  | 3017.412369 | 0.015813 | <a href="#">RPGGEPSPGTTGQSYNQYSQR</a> |
| 26.4  | 3017.412369 | 0.015813 | <a href="#">RPGGEPSPGTTGQSYNQYSQR</a> |



# MASCOT Search Results

## Peptide View

MS/MS Fragmentation of **KKTDELPLQLVTLPHPNLHGPEILDVPSTVQK**  
 Found in **FINC\_HUMAN**, Fibronectin OS=Homo sapiens GN=FN1 PE=1 SV=4

Match to Query 68631: 3754.077420 from(751.822760,5+) rtinseconds(2331) index(38400)  
 Title: Locus:1.1.1.3231.15 File:"2013-07-02 CLN FXIII 60 min 2nd F 3.wiff"  
 Data file C:\Program Files (x86)\Matrix Science\Mascot Daemon\mgf5 FXIII 60 min 2nd\mascot\_daemon\_merge.mgf

Click mouse within plot area to zoom in by factor of two about that point

Or, Plot from  to  Da

Label all possible matches  Label matches used for scoring

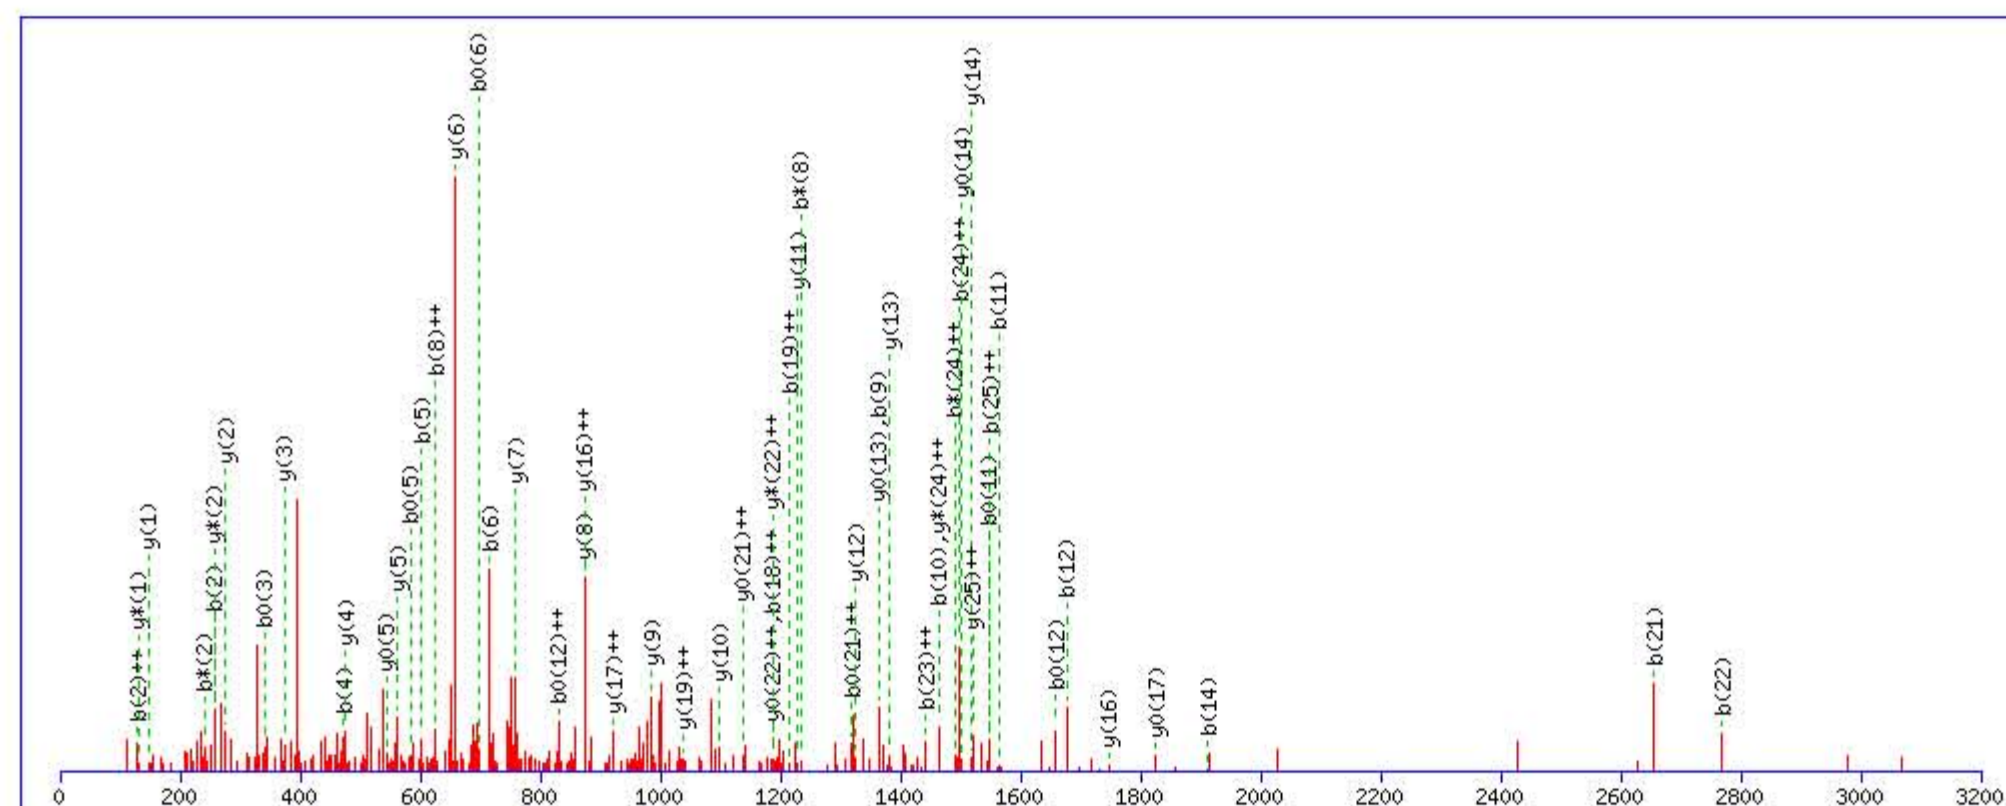

Monoisotopic mass of neutral peptide Mr(calc): 3754.049149  
 Fixed modifications: Carbamidomethyl (C) (apply to specified residues or termini only)  
 Variable modifications:  
 Q8 : Biotin:Thermo-21345 (Q)  
 Ions Score: 54 Expect: 1.9e-005  
 Matches : 58/350 fragment ions using 172 most intense peaks ([help](#))

| #  | b           | b <sup>++</sup> | b <sup>*</sup> | b <sup>+++</sup> | b <sup>0</sup> | b <sup>0++</sup> | Seq. | y           | y <sup>++</sup> | y <sup>*</sup> | y <sup>+++</sup> | y <sup>0</sup> | y <sup>0++</sup> | #  |
|----|-------------|-----------------|----------------|------------------|----------------|------------------|------|-------------|-----------------|----------------|------------------|----------------|------------------|----|
| 1  | 129.102239  | 65.054757       | 112.075690     | 56.541483        |                |                  | K    |             |                 |                |                  |                |                  | 31 |
| 2  | 257.197202  | 129.102239      | 240.170653     | 120.588965       |                |                  | K    | 3626.961469 | 1813.984372     | 3609.934920    | 1805.471098      | 3608.950904    | 1804.979090      | 30 |
| 3  | 358.244881  | 179.626079      | 341.218332     | 171.112804       | 340.234316     | 170.620796       | T    | 3498.866506 | 1749.936891     | 3481.839957    | 1741.423616      | 3480.855941    | 1740.931608      | 29 |
| 4  | 473.271824  | 237.139550      | 456.245275     | 228.626276       | 455.261259     | 228.134268       | D    | 3397.818827 | 1699.413051     | 3380.792278    | 1690.899777      | 3379.808262    | 1690.407769      | 28 |
| 5  | 602.314417  | 301.660847      | 585.287868     | 293.147572       | 584.303852     | 292.655564       | E    | 3282.791884 | 1641.899580     | 3265.765335    | 1633.386305      | 3264.781319    | 1632.894297      | 27 |
| 6  | 715.398481  | 358.202879      | 698.371932     | 349.689604       | 697.387916     | 349.197596       | L    | 3153.749291 | 1577.378283     | 3136.722742    | 1568.865009      | 3135.738726    | 1568.373001      | 26 |
| 7  | 812.451245  | 406.729261      | 795.424696     | 398.215986       | 794.440680     | 397.723978       | P    | 3040.665227 | 1520.836251     | 3023.638678    | 1512.322977      | 3022.654662    | 1511.830969      | 25 |
| 8  | 1251.676571 | 626.341924      | 1234.650022    | 617.828649       | 1233.666006    | 617.336641       | Q    | 2943.612463 | 1472.309869     | 2926.585914    | 1463.796595      | 2925.601898    | 1463.304587      | 24 |
| 9  | 1364.760635 | 682.883956      | 1347.734086    | 674.370681       | 1346.750070    | 673.878673       | L    | 2504.387137 | 1252.697206     | 2487.360588    | 1244.183932      | 2486.376572    | 1243.691924      | 23 |
| 10 | 1463.829049 | 732.418163      | 1446.802500    | 723.904888       | 1445.818484    | 723.412880       | V    | 2391.303073 | 1196.155174     | 2374.276524    | 1187.641900      | 2373.292508    | 1187.149892      | 22 |
| 11 | 1564.876728 | 782.942002      | 1547.850179    | 774.428728       | 1546.866163    | 773.936720       | T    | 2292.234659 | 1146.620967     | 2275.208110    | 1138.107693      | 2274.224094    | 1137.615685      | 21 |
| 12 | 1677.960792 | 839.484034      | 1660.934243    | 830.970760       | 1659.950227    | 830.478752       | L    | 2191.186980 | 1096.097128     | 2174.160431    | 1087.583853      | 2173.176415    | 1087.091845      | 20 |
| 13 | 1775.013556 | 888.010416      | 1757.987007    | 879.497142       | 1757.002991    | 879.005134       | P    | 2078.102916 | 1039.555096     | 2061.076367    | 1031.041821      | 2060.092351    | 1030.549813      | 19 |
| 14 | 1912.072468 | 956.539872      | 1895.045919    | 948.026598       | 1894.061903    | 947.534590       | H    | 1981.050152 | 991.028714      | 1964.023603    | 982.515440       | 1963.039587    | 982.023432       | 18 |
| 15 | 2009.125232 | 1005.066254     | 1992.098683    | 996.552980       | 1991.114667    | 996.060972       | P    | 1843.991240 | 922.499258      | 1826.964691    | 913.985984       | 1825.980675    | 913.493976       | 17 |
| 16 | 2123.168159 | 1062.087717     | 2106.141610    | 1053.574443      | 2105.157594    | 1053.082435      | N    | 1746.938476 | 873.972876      | 1729.911927    | 865.459602       | 1728.927911    | 864.967594       | 16 |
| 17 | 2236.252223 | 1118.629749     | 2219.225674    | 1110.116475      | 2218.241658    | 1109.624467      | L    | 1632.895549 | 816.951413      | 1615.869000    | 808.438138       | 1614.884984    | 807.946130       | 15 |
| 18 | 2373.311135 | 1187.159205     | 2356.284586    | 1178.645931      | 2355.300570    | 1178.153923      | H    | 1519.811485 | 760.409381      | 1502.784936    | 751.896106       | 1501.800920    | 751.404098       | 14 |
| 19 | 2430.332599 | 1215.669937     | 2413.306050    | 1207.156663      | 2412.322034    | 1206.664655      | G    | 1382.752573 | 691.879925      | 1365.726024    | 683.366650       | 1364.742008    | 682.874642       | 13 |
| 20 | 2527.385363 | 1264.196319     | 2510.358814    | 1255.683045      | 2509.374798    | 1255.191037      | P    | 1325.731109 | 663.369193      | 1308.704560    | 654.855918       | 1307.720544    | 654.363910       | 12 |
| 21 | 2656.427956 | 1328.717616     | 2639.401407    | 1320.204341      | 2638.417391    | 1319.712333      | E    | 1228.678345 | 614.842811      | 1211.651796    | 606.329536       | 1210.667780    | 605.837528       | 11 |
| 22 | 2769.512020 | 1385.259648     | 2752.485471    | 1376.746373      | 2751.501455    | 1376.254365      | I    | 1099.635752 | 550.321514      | 1082.609203    | 541.808240       | 1081.625187    | 541.316231       | 10 |
| 23 | 2882.596084 | 1441.801680     | 2865.569535    | 1433.288406      | 2864.585519    | 1432.796398      | L    | 986.551688  | 493.779482      | 969.525139     | 485.266207       | 968.541123     | 484.774199       | 9  |
| 24 | 2997.623027 | 1499.315152     | 2980.596478    | 1490.801877      | 2979.612462    | 1490.309869      | D    | 873.467624  | 437.237450      | 856.441075     | 428.724175       | 855.457059     | 428.232167       | 8  |
| 25 | 3096.691441 | 1548.849358     | 3079.664892    | 1540.336084      | 3078.680876    | 1539.844076      | V    | 758.440681  | 379.723978      | 741.414132     | 371.210704       | 740.430116     | 370.718696       | 7  |
| 26 | 3193.744205 | 1597.375740     | 3176.717656    | 1588.862466      | 3175.733640    | 1588.370458      | P    | 659.372267  | 330.189772      | 642.345718     | 321.676497       | 641.361702     | 321.184489       | 6  |
| 27 | 3280.776233 | 1640.891754     | 3263.749684    | 1632.378480      | 3262.765668    | 1631.886472      | S    | 562.319503  | 281.663389      | 545.292954     | 273.150115       | 544.308938     | 272.658107       | 5  |
| 28 | 3381.823912 | 1691.415594     | 3364.797363    | 1682.902319      | 3363.813347    | 1682.410311      | T    | 475.287475  | 238.147375      | 458.260926     | 229.634101       | 457.276910     | 229.142093       | 4  |
| 29 | 3480.892326 | 1740.949801     | 3463.865777    | 1732.436526      | 3462.881761    | 1731.944518      | V    | 374.239796  | 187.623536      | 357.213247     | 179.110261       |                |                  | 3  |
| 30 | 3608.950904 | 1804.979090     | 3591.924355    | 1796.465815      | 3590.940339    | 1795.973807      | Q    | 275.171382  | 138.089329      | 258.144833     | 129.576055       |                |                  | 2  |
| 31 |             |                 |                |                  |                |                  | K    | 147.112804  | 74.060040       | 130.086255     | 65.546765        |                |                  | 1  |

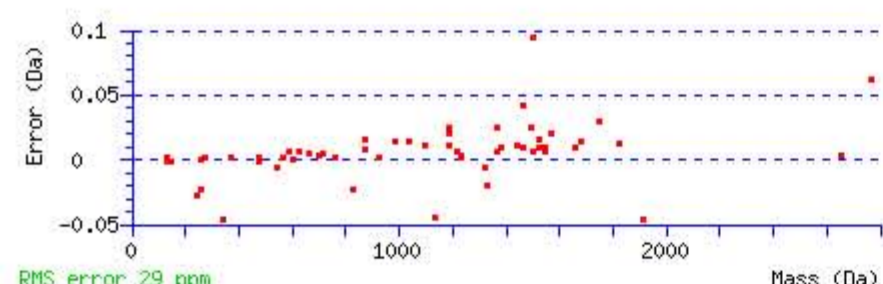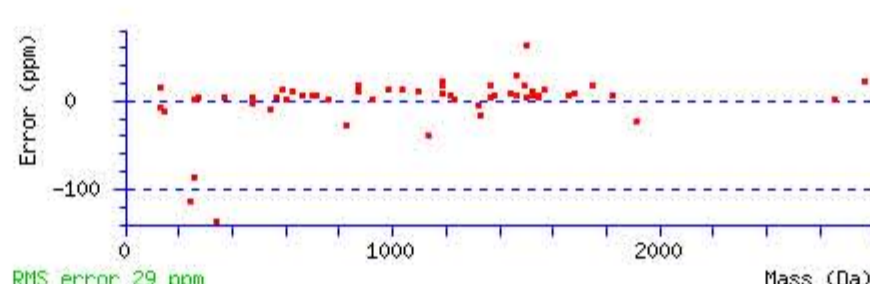

NCBI BLAST search of **KKTDELPLQLVTLPHPNLHGPEILDVPSTVQK**  
 (Parameters: blastp, nr protein database, expect=20000, no filter, PAM30)  
 Other BLAST [web gateways](#)

## All matches to this query

| Score | Mr(calc):   | Delta    | Sequence                                         |
|-------|-------------|----------|--------------------------------------------------|
| 54.4  | 3754.049149 | 0.028271 | <a href="#">KKTDELPLQLVTLPHPNLHGPEILDVPSTVQK</a> |

Mascot: <http://www.matrixscience.com/>



# MASCOT Search Results

## Peptide View

MS/MS Fragmentation of **SAATLQQEK**

Found in **FBLN1\_HUMAN**, Fibulin-1 OS=Homo sapiens GN=FBLN1 PE=1 SV=4

Match to Query 25910: 1285.668608 from(643.841580,2+) rtinseconds(1468) index(33079)

Title: Locus:1.1.1.2930.20 File:"2013-07-02 CLN FXIII 60 min 2nd F 3.wiff"

Data file C:\Program Files (x86)\Matrix Science\Mascot Daemon\mgf5 FXIII 60 min 2nd\mascot\_daemon\_merge.mgf

Click mouse within plot area to zoom in by factor of two about that point

Or, Plot from  to  Da

Label all possible matches  Label matches used for scoring

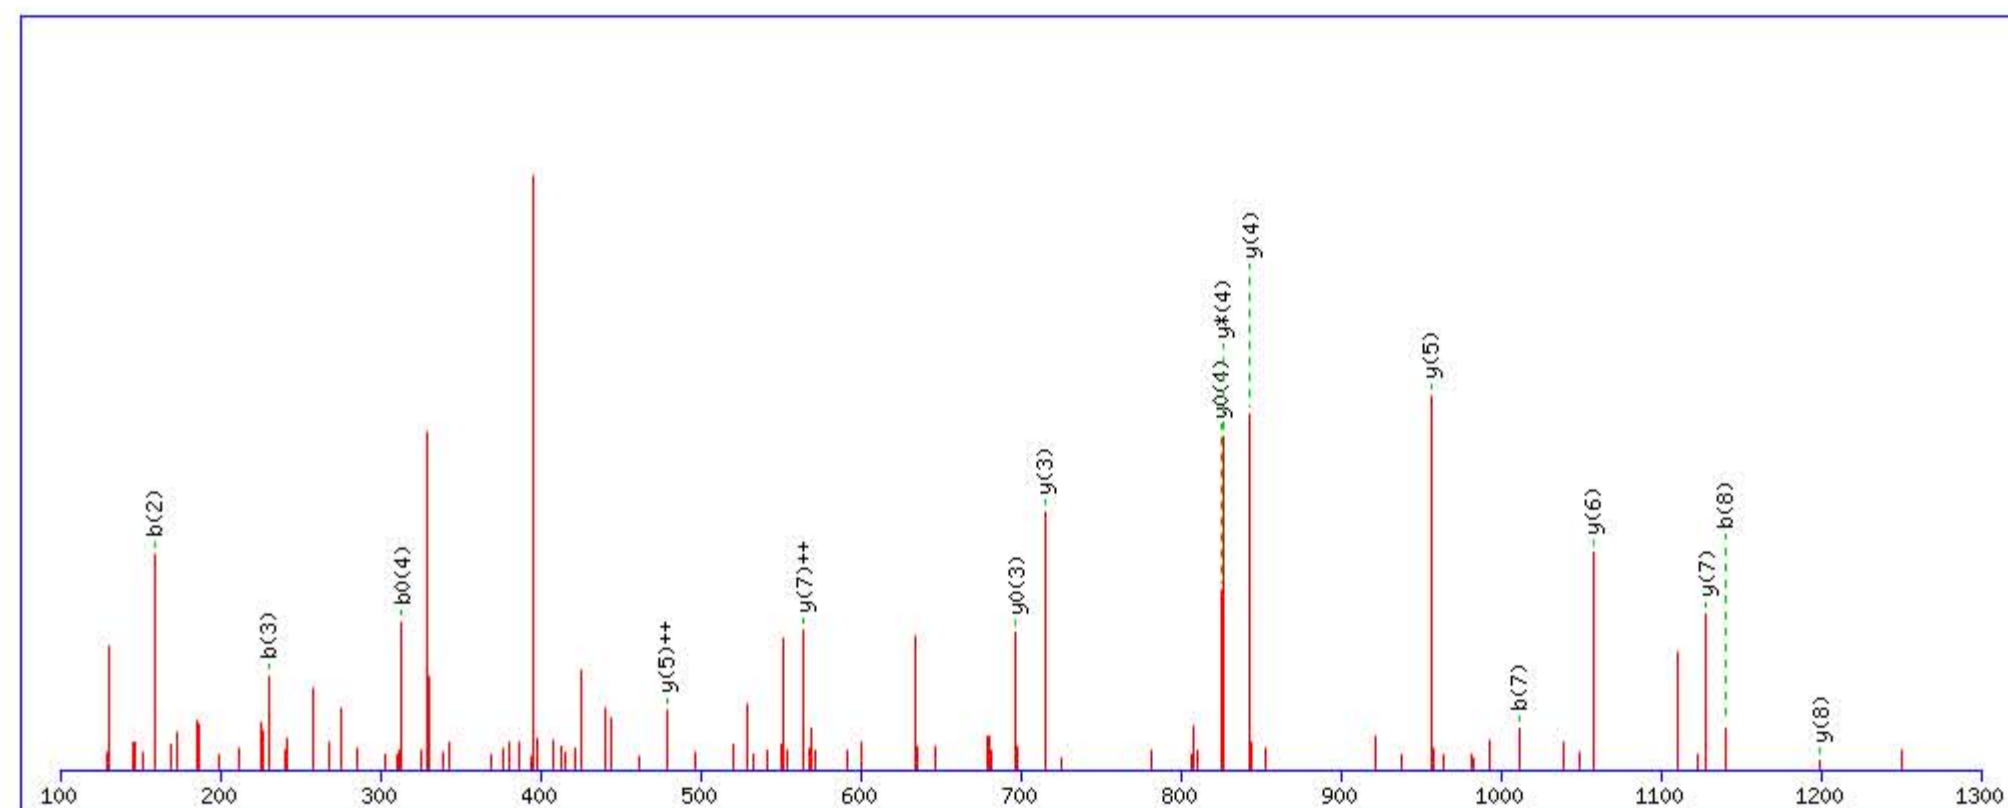

Monoisotopic mass of neutral peptide Mr(calc): 1285.669998

Fixed modifications: Carbamidomethyl (C) (apply to specified residues or termini only)

Variable modifications:

Q7 : Biotin:Thermo-21345 (Q)

Ions Score: 46 Expect: 0.00044

Matches : 16/84 fragment ions using 23 most intense peaks [\(help\)](#)

| # | b                  | b <sup>++</sup> | b <sup>*</sup> | b <sup>*++</sup> | b <sup>0</sup>    | b <sup>0++</sup> | Seq. | y                  | y <sup>++</sup>   | y <sup>*</sup>    | y <sup>*++</sup> | y <sup>0</sup>    | y <sup>0++</sup> | # |
|---|--------------------|-----------------|----------------|------------------|-------------------|------------------|------|--------------------|-------------------|-------------------|------------------|-------------------|------------------|---|
| 1 | 88.039304          | 44.523290       |                |                  | 70.028739         | 35.518008        | S    |                    |                   |                   |                  |                   |                  | 9 |
| 2 | <b>159.076418</b>  | 80.041847       |                |                  | 141.065853        | 71.036564        | A    | <b>1199.645272</b> | 600.326274        | 1182.618723       | 591.813000       | 1181.634707       | 591.320991       | 8 |
| 3 | <b>230.113532</b>  | 115.560404      |                |                  | 212.102967        | 106.555121       | A    | <b>1128.608158</b> | <b>564.807717</b> | 1111.581609       | 556.294443       | 1110.597593       | 555.802435       | 7 |
| 4 | 331.161211         | 166.084243      |                |                  | <b>313.150646</b> | 157.078961       | T    | <b>1057.571044</b> | 529.289160        | 1040.544495       | 520.775886       | 1039.560479       | 520.283878       | 6 |
| 5 | 444.245275         | 222.626275      |                |                  | 426.234710        | 213.620993       | L    | <b>956.523365</b>  | <b>478.765321</b> | 939.496816        | 470.252046       | 938.512800        | 469.760038       | 5 |
| 6 | 572.303853         | 286.655565      | 555.277304     | 278.142290       | 554.293288        | 277.650282       | Q    | <b>843.439301</b>  | 422.223289        | <b>826.412752</b> | 413.710014       | <b>825.428736</b> | 413.218006       | 4 |
| 7 | <b>1011.529179</b> | 506.268228      | 994.502630     | 497.754953       | 993.518614        | 497.262945       | Q    | <b>715.380723</b>  | 358.194000        | 698.354174        | 349.680725       | <b>697.370158</b> | 349.188717       | 3 |
| 8 | <b>1140.571772</b> | 570.789524      | 1123.545223    | 562.276250       | 1122.561207       | 561.784242       | E    | 276.155397         | 138.581336        | 259.128848        | 130.068062       | 258.144832        | 129.576054       | 2 |
| 9 |                    |                 |                |                  |                   |                  | K    | 147.112804         | 74.060040         | 130.086255        | 65.546765        |                   |                  | 1 |

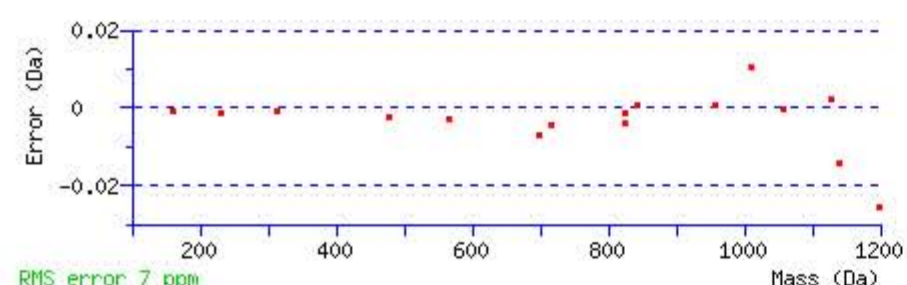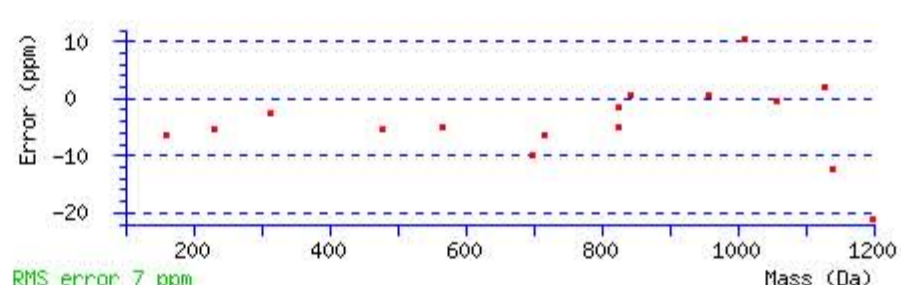

NCBI BLAST search of **SAATLQQEK**

(Parameters: blastp, nr protein database, expect=20000, no filter, PAM30)

Other BLAST [web gateways](#)

All matches to this query

| Score | Mr(calc):   | Delta     | Sequence                      |
|-------|-------------|-----------|-------------------------------|
| 45.8  | 1285.669998 | -0.001390 | <a href="#">SAATLQQEK</a>     |
| 34.7  | 1285.669998 | -0.001390 | <a href="#">SAATLQQEK</a>     |
| 9.4   | 1285.652237 | 0.016371  | <a href="#">AMQIQEQK</a>      |
| 6.8   | 1285.669998 | -0.001390 | <a href="#">ASLDQGKEK</a>     |
| 6.2   | 1285.651367 | 0.017241  | <a href="#">LLQAVENGDAEK</a>  |
| 4.9   | 1285.658752 | 0.009856  | <a href="#">IESLEQEK</a>      |
| 4.9   | 1285.658768 | 0.009840  | <a href="#">VTELEQEK</a>      |
| 4.2   | 1285.649582 | 0.019026  | <a href="#">SVPCPRCVR</a>     |
| 3.4   | 1285.673859 | -0.005251 | <a href="#">NDVGGQRSLV</a>    |
| 1.5   | 1285.687759 | -0.019151 | <a href="#">LKTGPEGALGSEK</a> |



# MASCOT Search Results

## Peptide View

MS/MS Fragmentation of **SQETGDLVGGGLQETDK**

Found in **FBLN1\_HUMAN**, Fibulin-1 OS=Homo sapiens GN=FBLN1 PE=1 SV=4

Match to Query 49236: 2101.994322 from(701.672050,3+) rtinseconds(2020) index(36509)

Title: Locus:1.1.1.3123.7 File:"2013-07-02 CLN FXIII 60 min 2nd F 3.wiff"

Data file C:\Program Files (x86)\Matrix Science\Mascot Daemon\mgf5 FXIII 60 min 2nd\mascot\_daemon\_merge.mgf

Click mouse within plot area to zoom in by factor of two about that point

Or, Plot from  to  Da

Label all possible matches  Label matches used for scoring

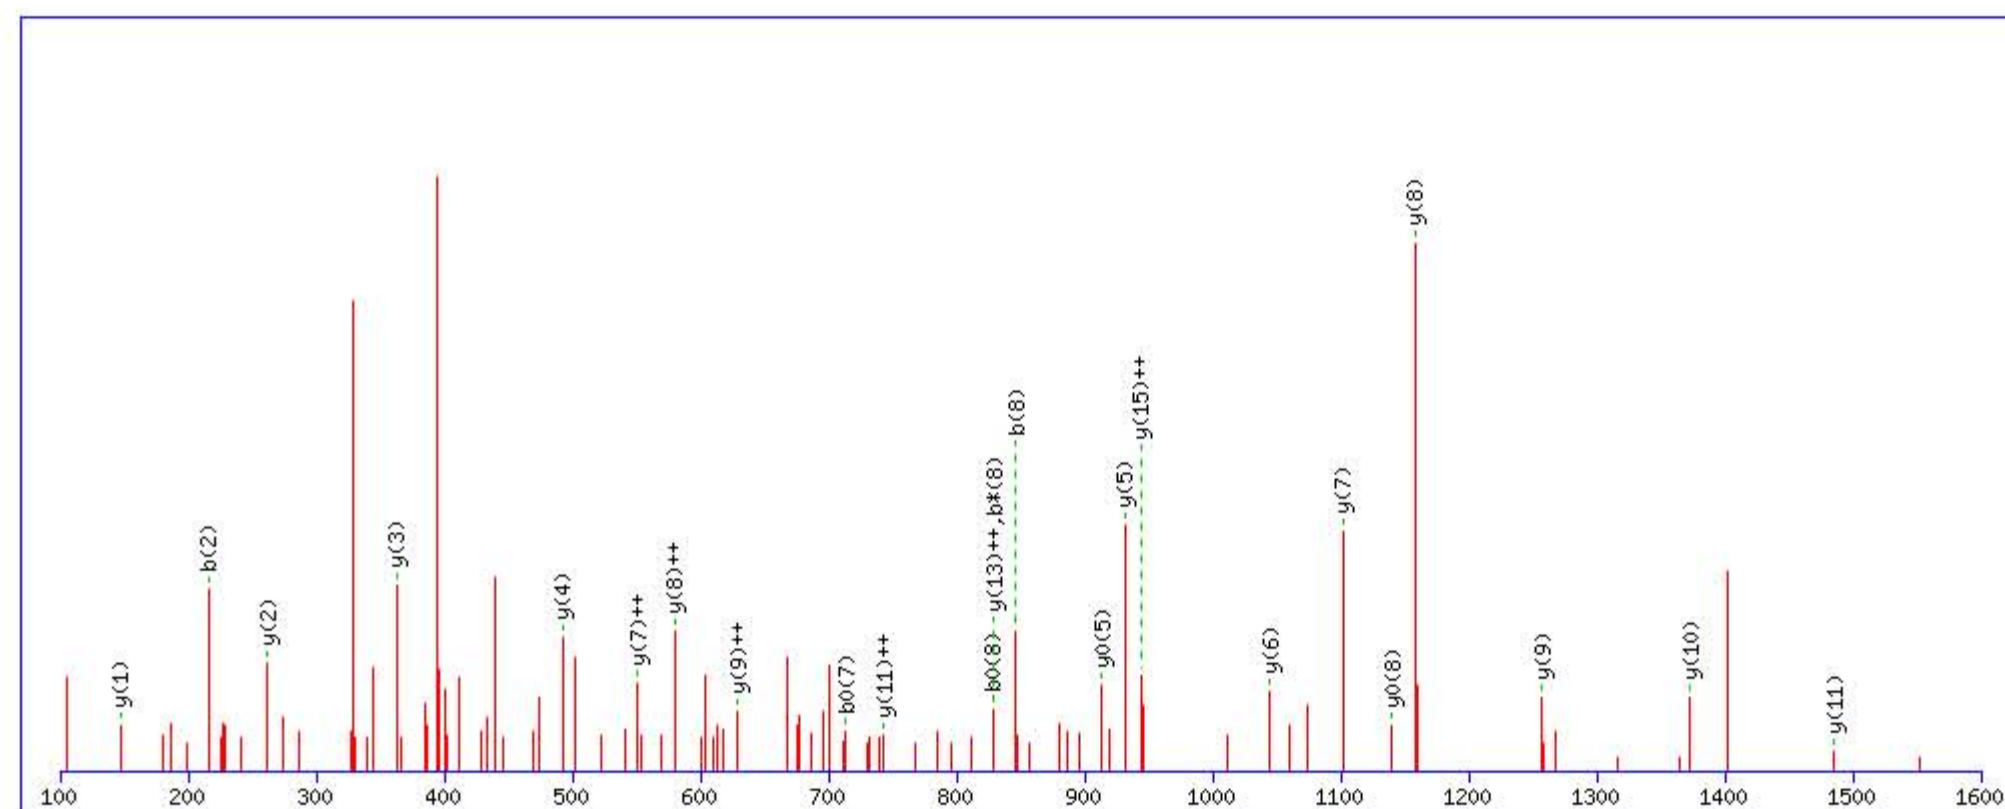

Monoisotopic mass of neutral peptide Mr(calc): 2101.983780

Fixed modifications: Carbamidomethyl (C) (apply to specified residues or termini only)

Variable modifications:

Q13 : Biotin:Thermo-21345 (Q)

Ions Score: 66 Expect: 4e-006

Matches : 24/188 fragment ions using 41 most intense peaks [\(help\)](#)

| #  | b                 | b <sup>++</sup> | b <sup>*</sup>    | b <sup>*++</sup> | b <sup>0</sup>    | b <sup>0++</sup> | Seq. | y                  | y <sup>++</sup>   | y <sup>*</sup> | y <sup>*++</sup> | y <sup>0</sup>     | y <sup>0++</sup> | #  |
|----|-------------------|-----------------|-------------------|------------------|-------------------|------------------|------|--------------------|-------------------|----------------|------------------|--------------------|------------------|----|
| 1  | 88.039304         | 44.523290       |                   |                  | 70.028739         | 35.518008        | S    |                    |                   |                |                  |                    |                  | 17 |
| 2  | <b>216.097882</b> | 108.552579      | 199.071333        | 100.039305       | 198.087317        | 99.547296        | Q    | 2015.959015        | 1008.483146       | 1998.932466    | 999.969871       | 1997.948450        | 999.477863       | 16 |
| 3  | 345.140475        | 173.073875      | 328.113926        | 164.560601       | 327.129910        | 164.068593       | E    | 1887.900437        | <b>944.453857</b> | 1870.873888    | 935.940582       | 1869.889872        | 935.448574       | 15 |
| 4  | 446.188154        | 223.597715      | 429.161605        | 215.084441       | 428.177589        | 214.592433       | T    | 1758.857844        | 879.932560        | 1741.831295    | 871.419286       | 1740.847279        | 870.927278       | 14 |
| 5  | 503.209618        | 252.108447      | 486.183069        | 243.595172       | 485.199053        | 243.103164       | G    | 1657.810165        | <b>829.408721</b> | 1640.783616    | 820.895446       | 1639.799600        | 820.403438       | 13 |
| 6  | 618.236561        | 309.621919      | 601.210012        | 301.108644       | 600.225996        | 300.616636       | D    | 1600.788701        | 800.897989        | 1583.762152    | 792.384714       | 1582.778136        | 791.892706       | 12 |
| 7  | 731.320625        | 366.163951      | 714.294076        | 357.650676       | <b>713.310060</b> | 357.158668       | L    | <b>1485.761758</b> | <b>743.384517</b> | 1468.735209    | 734.871243       | 1467.751193        | 734.379235       | 11 |
| 8  | <b>846.347568</b> | 423.677422      | <b>829.321019</b> | 415.164148       | <b>828.337003</b> | 414.672140       | D    | <b>1372.677694</b> | 686.842485        | 1355.651145    | 678.329211       | 1354.667129        | 677.837203       | 10 |
| 9  | 945.415982        | 473.211629      | 928.389433        | 464.698354       | 927.405417        | 464.206347       | V    | <b>1257.650751</b> | <b>629.329014</b> | 1240.624202    | 620.815739       | 1239.640186        | 620.323731       | 9  |
| 10 | 1002.437446       | 501.722361      | 985.410897        | 493.209087       | 984.426881        | 492.717079       | G    | <b>1158.582337</b> | <b>579.794807</b> | 1141.555788    | 571.281532       | <b>1140.571772</b> | 570.789524       | 8  |
| 11 | 1059.458910       | 530.233093      | 1042.432361       | 521.719819       | 1041.448345       | 521.227811       | G    | <b>1101.560873</b> | <b>551.284075</b> | 1084.534324    | 542.770800       | 1083.550308        | 542.278792       | 7  |
| 12 | 1172.542974       | 586.775125      | 1155.516425       | 578.261851       | 1154.532409       | 577.769842       | L    | <b>1044.539409</b> | 522.773343        | 1027.512860    | 514.260068       | 1026.528844        | 513.768060       | 6  |
| 13 | 1611.768300       | 806.387788      | 1594.741751       | 797.874514       | 1593.757735       | 797.382505       | Q    | <b>931.455345</b>  | 466.231311        | 914.428796     | 457.718036       | <b>913.444780</b>  | 457.226028       | 5  |
| 14 | 1740.810893       | 870.909085      | 1723.784344       | 862.395810       | 1722.800328       | 861.903802       | E    | <b>492.230019</b>  | 246.618648        | 475.203470     | 238.105373       | 474.219454         | 237.613365       | 4  |
| 15 | 1841.858572       | 921.432924      | 1824.832023       | 912.919650       | 1823.848007       | 912.427642       | T    | <b>363.187426</b>  | 182.097351        | 346.160877     | 173.584077       | 345.176861         | 173.092069       | 3  |
| 16 | 1956.885515       | 978.946396      | 1939.858966       | 970.433121       | 1938.874950       | 969.941113       | D    | <b>262.139747</b>  | 131.573512        | 245.113198     | 123.060237       | 244.129182         | 122.568229       | 2  |
| 17 |                   |                 |                   |                  |                   |                  | K    | <b>147.112804</b>  | 74.060040         | 130.086255     | 65.546765        |                    |                  | 1  |

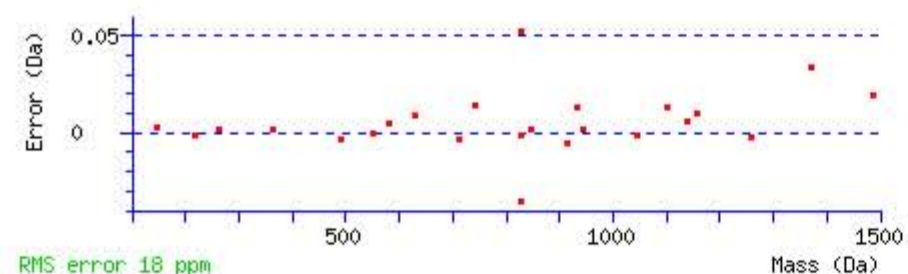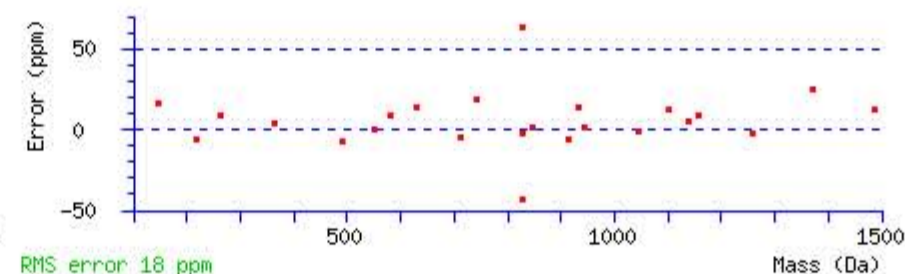

NCBI BLAST search of [SQETGDLVGGGLQETDK](#)

(Parameters: blastp, nr protein database, expect=20000, no filter, PAM30)

Other BLAST [web gateways](#)

## All matches to this query

| Score | Mr(calc):   | Delta    | Sequence                          |
|-------|-------------|----------|-----------------------------------|
| 66.5  | 2101.983780 | 0.010542 | <a href="#">SQETGDLVGGGLQETDK</a> |

Mascot: <http://www.matrixscience.com/>



# MASCOT Search Results

## Peptide View

MS/MS Fragmentation of **MVQEQCCHSQLEELHCATGISLANEQDR**  
 Found in **FBLN1\_HUMAN**, Fibulin-1 OS=Homo sapiens GN=FBLN1 PE=1 SV=4

Match to Query 68188: 3653.633456 from(914.415640,4+) rtinseconds(1976) index(36275)  
 Title: Locus:1.1.1.3107.13 File:"2013-07-02 CLN FXIII 60 min 2nd F 3.wiff"  
 Data file C:\Program Files (x86)\Matrix Science\Mascot Daemon\mgf\5 FXIII 60 min 2nd\mascot\_daemon\_merge.mgf

Click mouse within plot area to zoom in by factor of two about that point

Or, Plot from  to  Da

Label all possible matches  Label matches used for scoring

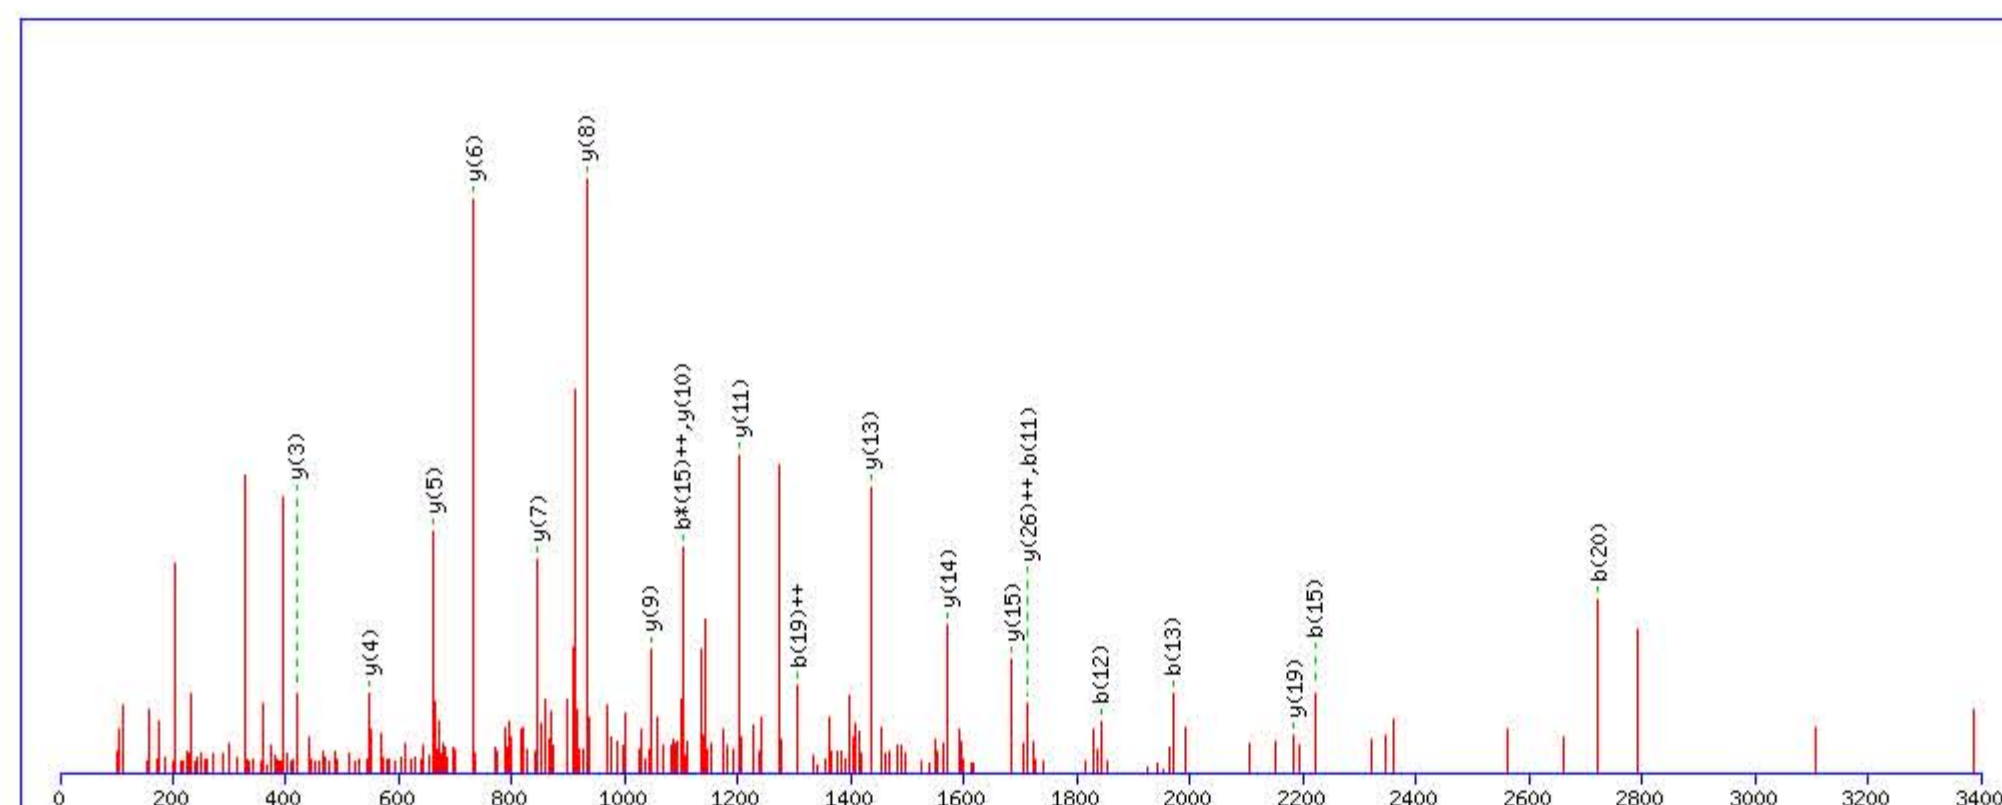

Monoisotopic mass of neutral peptide Mr(calc): 3653.615311  
 Fixed modifications: Carbamidomethyl (C) (apply to specified residues or termini only)  
 Variable modifications:  
 Q5 : Biotin:Thermo-21345 (Q)  
 Ions Score: 85 Expect: 2.9e-008  
 Matches : 21/312 fragment ions using 27 most intense peaks [\(help\)](#)

| #  | b                  | b <sup>++</sup>    | b*          | b <sup>*++</sup>   | b <sup>0</sup> | b <sup>0++</sup> | Seq. | y                  | y <sup>++</sup>    | y*          | y <sup>*++</sup> | y <sup>0</sup> | y <sup>0++</sup> | #  |
|----|--------------------|--------------------|-------------|--------------------|----------------|------------------|------|--------------------|--------------------|-------------|------------------|----------------|------------------|----|
| 1  | 132.047761         | 66.527518          |             |                    |                |                  | M    |                    |                    |             |                  |                |                  | 28 |
| 2  | 231.116175         | 116.061725         |             |                    |                |                  | V    | 3523.582122        | 1762.294699        | 3506.555573 | 1753.781424      | 3505.571557    | 1753.289416      | 27 |
| 3  | 359.174753         | 180.091015         | 342.148204  | 171.577740         |                |                  | Q    | 3424.513708        | <b>1712.760492</b> | 3407.487159 | 1704.247217      | 3406.503143    | 1703.755209      | 26 |
| 4  | 488.217346         | 244.612311         | 471.190797  | 236.099037         | 470.206781     | 235.607029       | E    | 3296.455130        | 1648.731203        | 3279.428581 | 1640.217928      | 3278.444565    | 1639.725920      | 25 |
| 5  | 927.442672         | 464.224974         | 910.416123  | 455.711700         | 909.432107     | 455.219692       | Q    | 3167.412537        | 1584.209906        | 3150.385988 | 1575.696632      | 3149.401972    | 1575.204624      | 24 |
| 6  | 1087.473321        | 544.240298         | 1070.446772 | 535.727024         | 1069.462756    | 535.235016       | C    | 2728.187211        | 1364.597243        | 2711.160662 | 1356.083969      | 2710.176646    | 1355.591961      | 23 |
| 7  | 1247.503970        | 624.255623         | 1230.477421 | 615.742349         | 1229.493405    | 615.250340       | C    | 2568.156562        | 1284.581919        | 2551.130013 | 1276.068644      | 2550.145997    | 1275.576636      | 22 |
| 8  | 1384.562882        | 692.785079         | 1367.536333 | 684.271805         | 1366.552317    | 683.779796       | H    | 2408.125913        | 1204.566594        | 2391.099364 | 1196.053320      | 2390.115348    | 1195.561312      | 21 |
| 9  | 1471.594910        | 736.301093         | 1454.568361 | 727.787819         | 1453.584345    | 727.295811       | S    | 2271.067001        | 1136.037138        | 2254.040452 | 1127.523864      | 2253.056436    | 1127.031856      | 20 |
| 10 | 1599.653488        | 800.330382         | 1582.626939 | 791.817108         | 1581.642923    | 791.325100       | Q    | <b>2184.034973</b> | 1092.521124        | 2167.008424 | 1084.007850      | 2166.024408    | 1083.515842      | 19 |
| 11 | <b>1712.737552</b> | 856.872414         | 1695.711003 | 848.359140         | 1694.726987    | 847.867132       | L    | 2055.976395        | 1028.491835        | 2038.949846 | 1019.978561      | 2037.965830    | 1019.486553      | 18 |
| 12 | <b>1841.780145</b> | 921.393711         | 1824.753596 | 912.880436         | 1823.769580    | 912.388428       | E    | 1942.892331        | 971.949804         | 1925.865782 | 963.436529       | 1924.881766    | 962.944521       | 17 |
| 13 | <b>1970.822738</b> | 985.915007         | 1953.796189 | 977.401733         | 1952.812173    | 976.909725       | E    | 1813.849738        | 907.428507         | 1796.823189 | 898.915233       | 1795.839173    | 898.423225       | 16 |
| 14 | 2083.906802        | 1042.457039        | 2066.880253 | 1033.943764        | 2065.896237    | 1033.451756      | L    | <b>1684.807145</b> | 842.907211         | 1667.780596 | 834.393936       | 1666.796580    | 833.901928       | 15 |
| 15 | <b>2220.965714</b> | 1110.986495        | 2203.939165 | <b>1102.473220</b> | 2202.955149    | 1101.981212      | H    | <b>1571.723081</b> | 786.365179         | 1554.696532 | 777.851904       | 1553.712516    | 777.359896       | 14 |
| 16 | 2380.996363        | 1191.001819        | 2363.969814 | 1182.488545        | 2362.985798    | 1181.996537      | C    | <b>1434.664169</b> | 717.835723         | 1417.637620 | 709.322448       | 1416.653604    | 708.830440       | 13 |
| 17 | 2452.033477        | 1226.520376        | 2435.006928 | 1218.007102        | 2434.022912    | 1217.515094      | A    | 1274.633520        | 637.820398         | 1257.606971 | 629.307124       | 1256.622955    | 628.815116       | 12 |
| 18 | 2553.081156        | 1277.044216        | 2536.054607 | 1268.530941        | 2535.070591    | 1268.038933      | T    | <b>1203.596406</b> | 602.301841         | 1186.569857 | 593.788567       | 1185.585841    | 593.296559       | 11 |
| 19 | 2610.102620        | <b>1305.554948</b> | 2593.076071 | 1297.041673        | 2592.092055    | 1296.549665      | G    | <b>1102.548727</b> | 551.778002         | 1085.522178 | 543.264727       | 1084.538162    | 542.772719       | 10 |
| 20 | <b>2723.186684</b> | 1362.096980        | 2706.160135 | 1353.583705        | 2705.176119    | 1353.091697      | I    | <b>1045.527263</b> | 523.267270         | 1028.500714 | 514.753995       | 1027.516698    | 514.261987       | 9  |
| 21 | 2810.218712        | 1405.612994        | 2793.192163 | 1397.099719        | 2792.208147    | 1396.607711      | S    | <b>932.443199</b>  | 466.725238         | 915.416650  | 458.211963       | 914.432634     | 457.719955       | 8  |
| 22 | 2923.302776        | 1462.155026        | 2906.276227 | 1453.641751        | 2905.292211    | 1453.149743      | L    | <b>845.411171</b>  | 423.209224         | 828.384622  | 414.695949       | 827.400606     | 414.203941       | 7  |
| 23 | 2994.339890        | 1497.673583        | 2977.313341 | 1489.160308        | 2976.329325    | 1488.668301      | A    | <b>732.327107</b>  | 366.667192         | 715.300558  | 358.153917       | 714.316542     | 357.661909       | 6  |
| 24 | 3108.382817        | 1554.695047        | 3091.356268 | 1546.181772        | 3090.372252    | 1545.689764      | N    | <b>661.289993</b>  | 331.148635         | 644.263444  | 322.635360       | 643.279428     | 322.143352       | 5  |
| 25 | 3237.425410        | 1619.216343        | 3220.398861 | 1610.703069        | 3219.414845    | 1610.211061      | E    | <b>547.247066</b>  | 274.127171         | 530.220517  | 265.613897       | 529.236501     | 265.121889       | 4  |
| 26 | 3365.483988        | 1683.245632        | 3348.457439 | 1674.732358        | 3347.473423    | 1674.240350      | Q    | <b>418.204473</b>  | 209.605874         | 401.177924  | 201.092600       | 400.193908     | 200.600592       | 3  |
| 27 | 3480.510931        | 1740.759104        | 3463.484382 | 1732.245829        | 3462.500366    | 1731.753821      | D    | 290.145895         | 145.576585         | 273.119346  | 137.063311       | 272.135330     | 136.571303       | 2  |
| 28 |                    |                    |             |                    |                |                  | R    | 175.118952         | 88.063114          | 158.092403  | 79.549839        |                |                  | 1  |

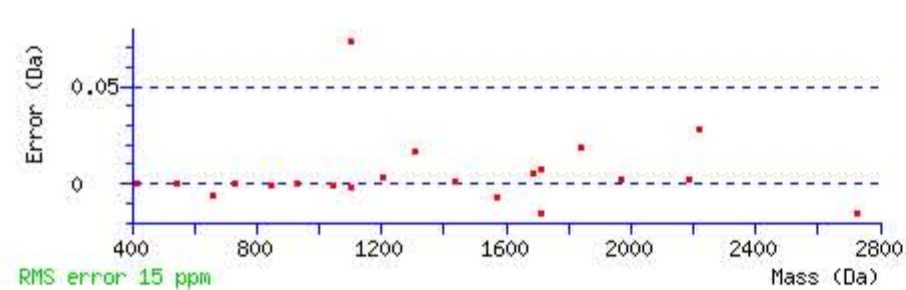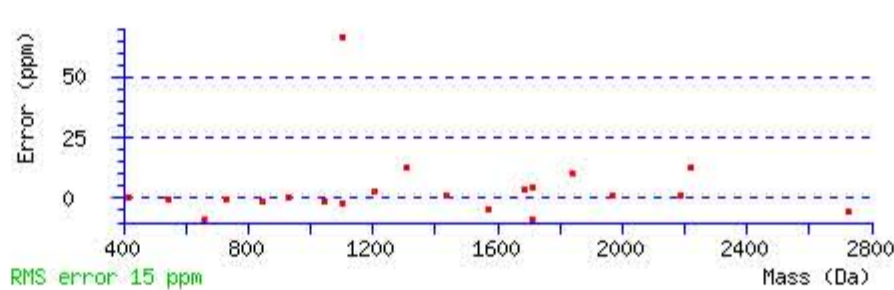

NCBI BLAST search of **MVQEQCCHSQLEELHCATGISLANEQDR**  
 (Parameters: blastp, nr protein database, expect=20000, no filter, PAM30)  
 Other BLAST [web gateways](#)

### All matches to this query

| Score | Mr(calc):   | Delta    | Sequence                                     |
|-------|-------------|----------|----------------------------------------------|
| 84.9  | 3653.615311 | 0.018145 | <a href="#">MVQEQCCHSQLEELHCATGISLANEQDR</a> |
| 84.9  | 3653.615311 | 0.018145 | <a href="#">MVQEQCCHSQLEELHCATGISLANEQDR</a> |
| 72.2  | 3653.615311 | 0.018145 | <a href="#">MVQEQCCHSQLEELHCATGISLANEQDR</a> |



# MASCOT Search Results

## Peptide View

MS/MS Fragmentation of **MVQEQCCHSQLEELHCATGISLANEQDR**  
 Found in **FBLN1\_HUMAN**, Fibulin-1 OS=Homo sapiens GN=FBLN1 PE=1 SV=4

Match to Query 68189: 3653.633456 from(914.415640,4+) rtinseconds(1985) index(36317)  
 Title: Locus:1.1.1.3110.9 File:"2013-07-02 CLN FXIII 60 min 2nd F 3.wiff"  
 Data file C:\Program Files (x86)\Matrix Science\Mascot Daemon\mgf\5 FXIII 60 min 2nd\mascot\_daemon\_merge.mgf

Click mouse within plot area to zoom in by factor of two about that point

Or, Plot from  to  Da

Label all possible matches  Label matches used for scoring

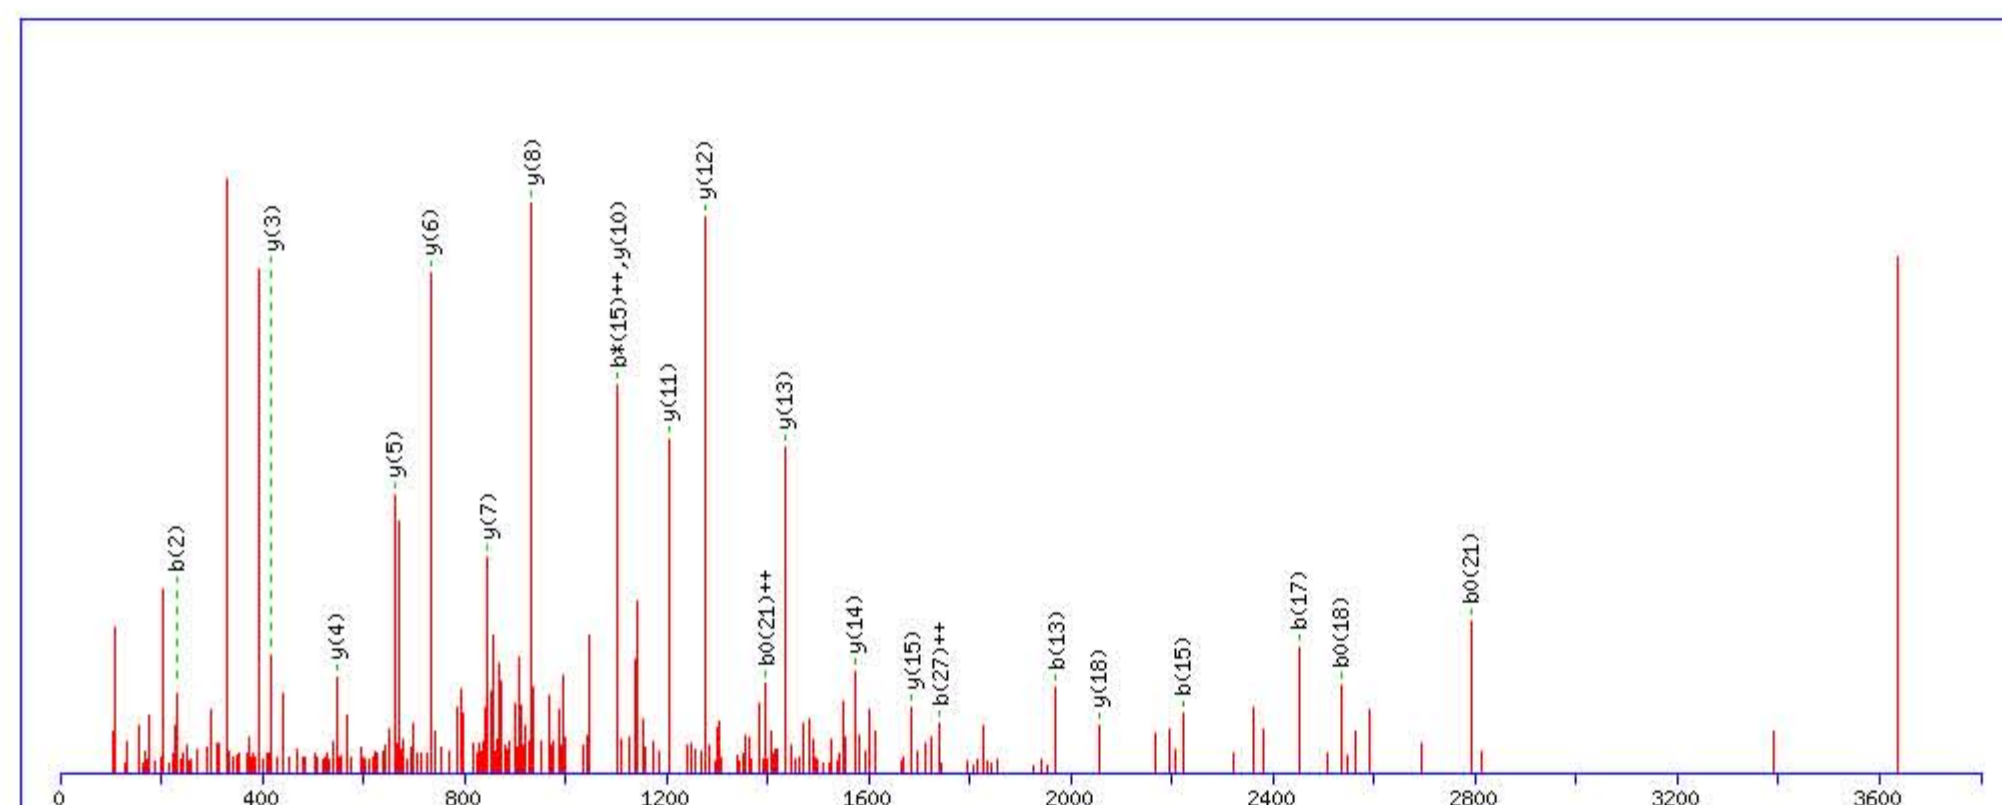

Monoisotopic mass of neutral peptide Mr(calc): 3653.615311  
 Fixed modifications: Carbamidomethyl (C) (apply to specified residues or termini only)  
 Variable modifications:  
 Q10 : Biotin:Thermo-21345 (Q)  
 Ions Score: 87 Expect: 2e-008  
 Matches : 22/312 fragment ions using 30 most intense peaks [\(help\)](#)

| #  | b                  | b <sup>++</sup>    | b <sup>*</sup> | b <sup>*++</sup>   | b <sup>0</sup>     | b <sup>0++</sup>   | Seq. | y                  | y <sup>++</sup> | y <sup>*</sup> | y <sup>*++</sup> | y <sup>0</sup> | y <sup>0++</sup> | #  |
|----|--------------------|--------------------|----------------|--------------------|--------------------|--------------------|------|--------------------|-----------------|----------------|------------------|----------------|------------------|----|
| 1  | 132.047761         | 66.527518          |                |                    |                    |                    | M    |                    |                 |                |                  |                |                  | 28 |
| 2  | <b>231.116175</b>  | 116.061725         |                |                    |                    |                    | V    | 3523.582122        | 1762.294699     | 3506.555573    | 1753.781424      | 3505.571557    | 1753.289416      | 27 |
| 3  | 359.174753         | 180.091015         | 342.148204     | 171.577740         |                    |                    | Q    | 3424.513708        | 1712.760492     | 3407.487159    | 1704.247217      | 3406.503143    | 1703.755209      | 26 |
| 4  | 488.217346         | 244.612311         | 471.190797     | 236.099037         | 470.206781         | 235.607029         | E    | 3296.455130        | 1648.731203     | 3279.428581    | 1640.217928      | 3278.444565    | 1639.725920      | 25 |
| 5  | 616.275924         | 308.641600         | 599.249375     | 300.128326         | 598.265359         | 299.636318         | Q    | 3167.412537        | 1584.209906     | 3150.385988    | 1575.696632      | 3149.401972    | 1575.204624      | 24 |
| 6  | 776.306573         | 388.656925         | 759.280024     | 380.143650         | 758.296008         | 379.651642         | C    | 3039.353959        | 1520.180617     | 3022.327410    | 1511.667343      | 3021.343394    | 1511.175335      | 23 |
| 7  | 936.337222         | 468.672249         | 919.310673     | 460.158975         | 918.326657         | 459.666967         | C    | 2879.323310        | 1440.165293     | 2862.296761    | 1431.652018      | 2861.312745    | 1431.160010      | 22 |
| 8  | 1073.396134        | 537.201705         | 1056.369585    | 528.688431         | 1055.385569        | 528.196423         | H    | 2719.292661        | 1360.149968     | 2702.266112    | 1351.636694      | 2701.282096    | 1351.144686      | 21 |
| 9  | 1160.428162        | 580.717719         | 1143.401613    | 572.204445         | 1142.417597        | 571.712437         | S    | 2582.233749        | 1291.620512     | 2565.207200    | 1283.107238      | 2564.223184    | 1282.615230      | 20 |
| 10 | 1599.653488        | 800.330382         | 1582.626939    | 791.817108         | 1581.642923        | 791.325100         | Q    | 2495.201721        | 1248.104498     | 2478.175172    | 1239.591224      | 2477.191156    | 1239.099216      | 19 |
| 11 | 1712.737552        | 856.872414         | 1695.711003    | 848.359140         | 1694.726987        | 847.867132         | L    | <b>2055.976395</b> | 1028.491835     | 2038.949846    | 1019.978561      | 2037.965830    | 1019.486553      | 18 |
| 12 | 1841.780145        | 921.393711         | 1824.753596    | 912.880436         | 1823.769580        | 912.388428         | E    | 1942.892331        | 971.949804      | 1925.865782    | 963.436529       | 1924.881766    | 962.944521       | 17 |
| 13 | <b>1970.822738</b> | 985.915007         | 1953.796189    | 977.401733         | 1952.812173        | 976.909725         | E    | 1813.849738        | 907.428507      | 1796.823189    | 898.915233       | 1795.839173    | 898.423225       | 16 |
| 14 | 2083.906802        | 1042.457039        | 2066.880253    | 1033.943764        | 2065.896237        | 1033.451756        | L    | <b>1684.807145</b> | 842.907211      | 1667.780596    | 834.393936       | 1666.796580    | 833.901928       | 15 |
| 15 | <b>2220.965714</b> | 1110.986495        | 2203.939165    | <b>1102.473220</b> | 2202.955149        | 1101.981212        | H    | <b>1571.723081</b> | 786.365179      | 1554.696532    | 777.851904       | 1553.712516    | 777.359896       | 14 |
| 16 | 2380.996363        | 1191.001819        | 2363.969814    | 1182.488545        | 2362.985798        | 1181.996537        | C    | <b>1434.664169</b> | 717.835723      | 1417.637620    | 709.322448       | 1416.653604    | 708.830440       | 13 |
| 17 | <b>2452.033477</b> | 1226.520376        | 2435.006928    | 1218.007102        | 2434.022912        | 1217.515094        | A    | <b>1274.633520</b> | 637.820398      | 1257.606971    | 629.307124       | 1256.622955    | 628.815116       | 12 |
| 18 | 2553.081156        | 1277.044216        | 2536.054607    | 1268.530941        | <b>2535.070591</b> | 1268.038933        | T    | <b>1203.596406</b> | 602.301841      | 1186.569857    | 593.788567       | 1185.585841    | 593.296559       | 11 |
| 19 | 2610.102620        | 1305.554948        | 2593.076071    | 1297.041673        | 2592.092055        | 1296.549665        | G    | <b>1102.548727</b> | 551.778002      | 1085.522178    | 543.264727       | 1084.538162    | 542.772719       | 10 |
| 20 | 2723.186684        | 1362.096980        | 2706.160135    | 1353.583705        | 2705.176119        | 1353.091697        | I    | 1045.527263        | 523.267270      | 1028.500714    | 514.753995       | 1027.516698    | 514.261987       | 9  |
| 21 | 2810.218712        | 1405.612994        | 2793.192163    | 1397.099719        | <b>2792.208147</b> | <b>1396.607711</b> | S    | <b>932.443199</b>  | 466.725238      | 915.416650     | 458.211963       | 914.432634     | 457.719955       | 8  |
| 22 | 2923.302776        | 1462.155026        | 2906.276227    | 1453.641751        | 2905.292211        | 1453.149743        | L    | <b>845.411171</b>  | 423.209224      | 828.384622     | 414.695949       | 827.400606     | 414.203941       | 7  |
| 23 | 2994.339890        | 1497.673583        | 2977.313341    | 1489.160308        | 2976.329325        | 1488.668301        | A    | <b>732.327107</b>  | 366.667192      | 715.300558     | 358.153917       | 714.316542     | 357.661909       | 6  |
| 24 | 3108.382817        | 1554.695047        | 3091.356268    | 1546.181772        | 3090.372252        | 1545.689764        | N    | <b>661.289993</b>  | 331.148635      | 644.263444     | 322.635360       | 643.279428     | 322.143352       | 5  |
| 25 | 3237.425410        | 1619.216343        | 3220.398861    | 1610.703069        | 3219.414845        | 1610.211061        | E    | <b>547.247066</b>  | 274.127171      | 530.220517     | 265.613897       | 529.236501     | 265.121889       | 4  |
| 26 | 3365.483988        | 1683.245632        | 3348.457439    | 1674.732358        | 3347.473423        | 1674.240350        | Q    | <b>418.204473</b>  | 209.605874      | 401.177924     | 201.092600       | 400.193908     | 200.600592       | 3  |
| 27 | 3480.510931        | <b>1740.759104</b> | 3463.484382    | 1732.245829        | 3462.500366        | 1731.753821        | D    | 290.145895         | 145.576585      | 273.119346     | 137.063311       | 272.135330     | 136.571303       | 2  |
| 28 |                    |                    |                |                    |                    |                    | R    | 175.118952         | 88.063114       | 158.092403     | 79.549839        |                |                  | 1  |

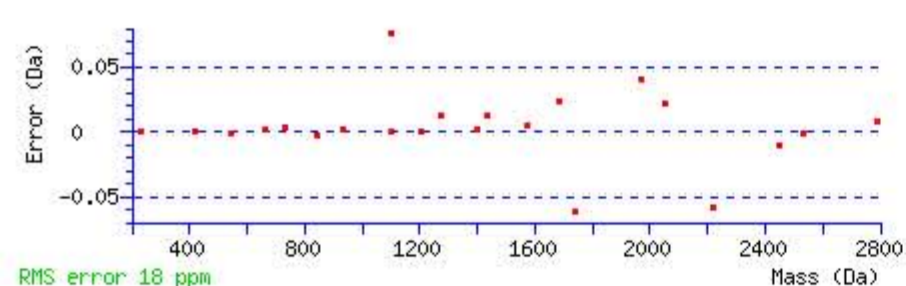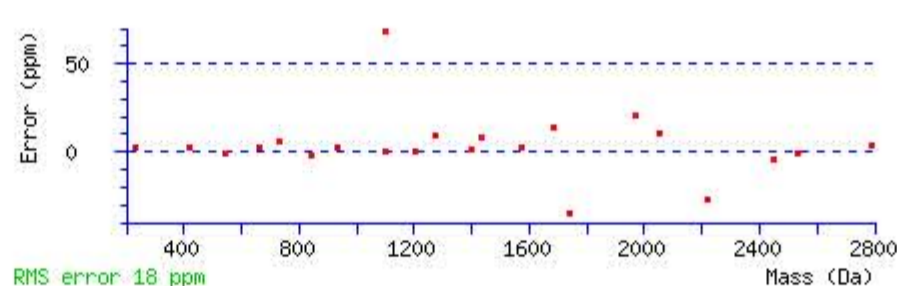

NCBI BLAST search of **MVQEQCCHSQLEELHCATGISLANEQDR**  
 (Parameters: blastp, nr protein database, expect=20000, no filter, PAM30)  
 Other BLAST [web gateways](#)

## All matches to this query

| Score | Mr(calc):   | Delta    | Sequence                                     |
|-------|-------------|----------|----------------------------------------------|
| 86.5  | 3653.615311 | 0.018145 | <a href="#">MVQEQCCHSQLEELHCATGISLANEQDR</a> |
| 86.5  | 3653.615311 | 0.018145 | <a href="#">MVQEQCCHSQLEELHCATGISLANEQDR</a> |
| 86.5  | 3653.615311 | 0.018145 | <a href="#">MVQEQCCHSQLEELHCATGISLANEQDR</a> |



# MASCOT Search Results

## Peptide View

MS/MS Fragmentation of **MVQEQCCHSQLEELHLCATGISLANEQDR**  
 Found in **FBLN1\_HUMAN**, Fibulin-1 OS=Homo sapiens GN=FBLN1 PE=1 SV=4

Match to Query 68294: 3669.620416 from(918.412380,4+) rtinseconds(1915) index(35793)  
 Title: Locus:1.1.1.3086.20 File:"2013-07-02 CLN FXIII 60 min 2nd F 3.wiff"  
 Data file C:\Program Files (x86)\Matrix Science\Mascot Daemon\mgf5 FXIII 60 min 2nd\mascot\_daemon\_merge.mgf

Click mouse within plot area to zoom in by factor of two about that point

Or, Plot from  to  Da

Label all possible matches  Label matches used for scoring

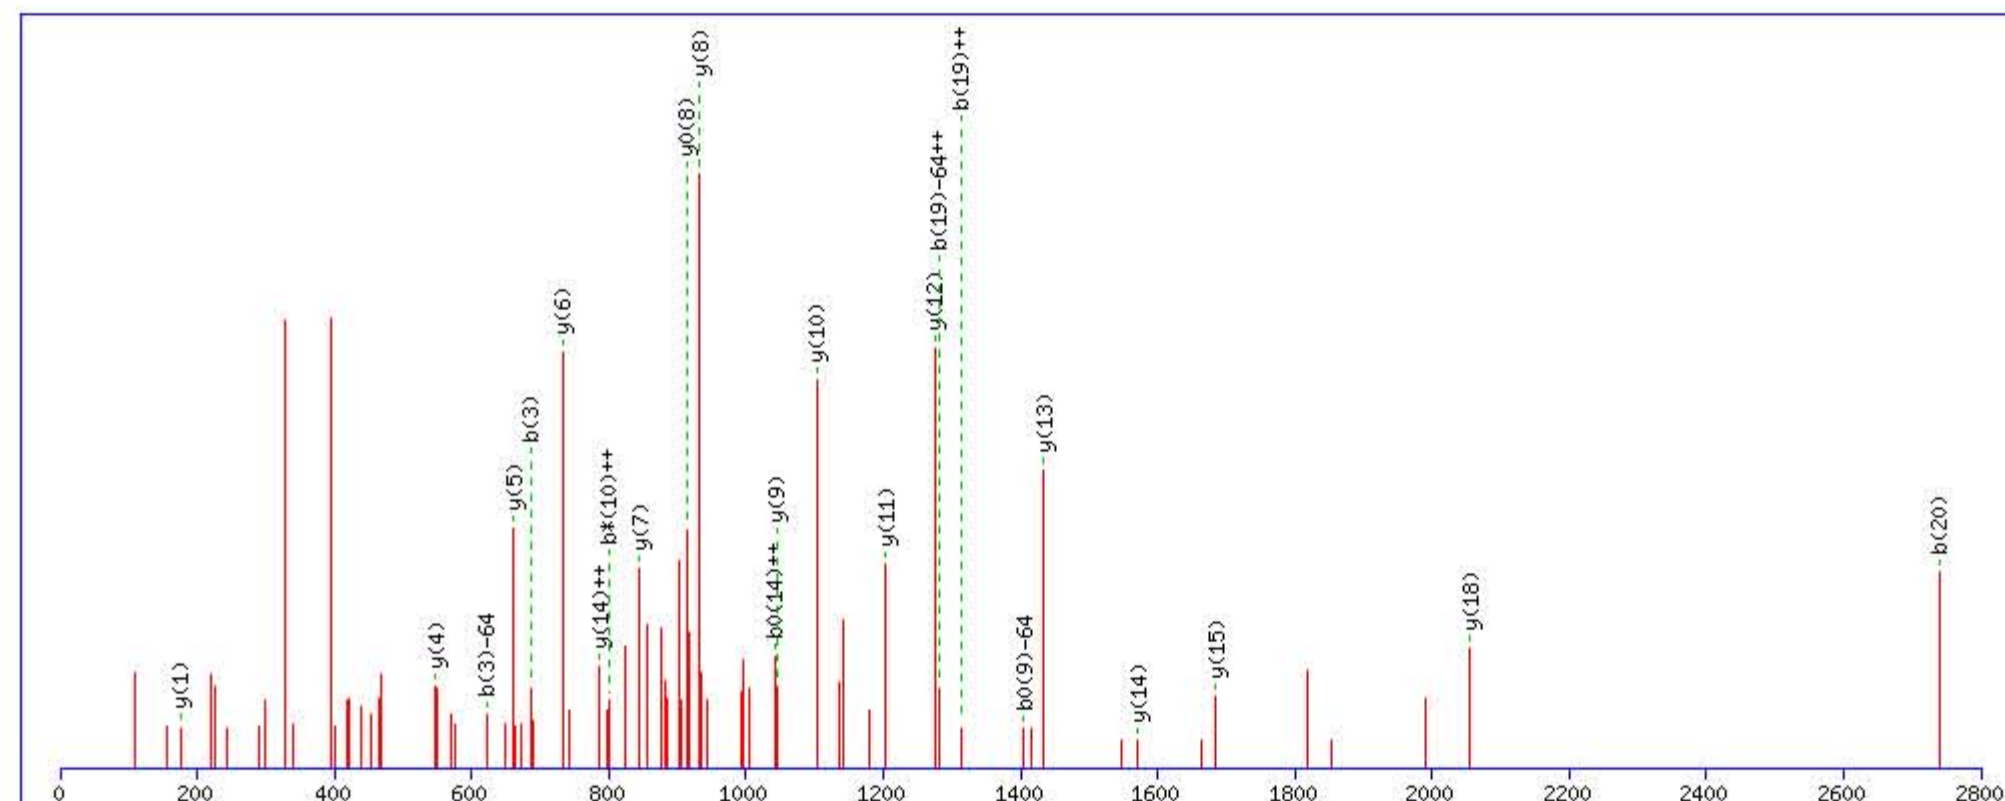

Monoisotopic mass of neutral peptide Mr(calc): 3669.610229  
 Fixed modifications: Carbamidomethyl (C) (apply to specified residues or termini only)  
 Variable modifications:  
 M1 : Oxidation (M), with neutral losses 0.000000 (shown in table), 63.998285  
 Q3 : Biotin:Thermo-21345 (Q)  
 Ions Score: 63 Expect: 2.6e-006  
 Matches : 24/464 fragment ions using 48 most intense peaks [\(help\)](#)

| #  | b                  | b <sup>++</sup>    | b <sup>*</sup> | b <sup>*++</sup>  | b <sup>0</sup> | b <sup>0++</sup>   | Seq. | y                  | y <sup>++</sup>   | y <sup>*</sup> | y <sup>*++</sup> | y <sup>0</sup>    | y <sup>0++</sup> | #  |
|----|--------------------|--------------------|----------------|-------------------|----------------|--------------------|------|--------------------|-------------------|----------------|------------------|-------------------|------------------|----|
| 1  | 148.042676         | 74.524976          |                |                   |                |                    | M    |                    |                   |                |                  |                   |                  | 28 |
| 2  | 247.111090         | 124.059183         |                |                   |                |                    | V    | 3523.582122        | 1762.294699       | 3506.555573    | 1753.781425      | 3505.571557       | 1753.289417      | 27 |
| 3  | <b>686.336416</b>  | 343.671846         | 669.309867     | 335.158572        |                |                    | Q    | 3424.513708        | 1712.760492       | 3407.487159    | 1704.247217      | 3406.503143       | 1703.755209      | 26 |
| 4  | 815.379009         | 408.193143         | 798.352460     | 399.679868        | 797.368444     | 399.187860         | E    | 2985.288382        | 1493.147829       | 2968.261833    | 1484.634554      | 2967.277817       | 1484.142547      | 25 |
| 5  | 943.437587         | 472.222432         | 926.411038     | 463.709157        | 925.427022     | 463.217149         | Q    | 2856.245789        | 1428.626532       | 2839.219240    | 1420.113258      | 2838.235224       | 1419.621250      | 24 |
| 6  | 1103.468236        | 552.237756         | 1086.441687    | 543.724482        | 1085.457671    | 543.232474         | C    | 2728.187211        | 1364.597243       | 2711.160662    | 1356.083969      | 2710.176646       | 1355.591961      | 23 |
| 7  | 1263.498885        | 632.253081         | 1246.472336    | 623.739806        | 1245.488320    | 623.247798         | C    | 2568.156562        | 1284.581919       | 2551.130013    | 1276.068644      | 2550.145997       | 1275.576636      | 22 |
| 8  | 1400.557797        | 700.782537         | 1383.531248    | 692.269262        | 1382.547232    | 691.777254         | H    | 2408.125913        | 1204.566594       | 2391.099364    | 1196.053320      | 2390.115348       | 1195.561312      | 21 |
| 9  | 1487.589825        | 744.298551         | 1470.563276    | 735.785276        | 1469.579260    | 735.293268         | S    | 2271.067001        | 1136.037138       | 2254.040452    | 1127.523864      | 2253.056436       | 1127.031856      | 20 |
| 10 | 1615.648403        | 808.327840         | 1598.621854    | <b>799.814565</b> | 1597.637838    | 799.322557         | Q    | 2184.034973        | 1092.521124       | 2167.008424    | 1084.007850      | 2166.024408       | 1083.515842      | 19 |
| 11 | 1728.732467        | 864.869872         | 1711.705918    | 856.356597        | 1710.721902    | 855.864589         | L    | <b>2055.976395</b> | 1028.491835       | 2038.949846    | 1019.978561      | 2037.965830       | 1019.486553      | 18 |
| 12 | 1857.775060        | 929.391168         | 1840.748511    | 920.877894        | 1839.764495    | 920.385886         | E    | 1942.892331        | 971.949804        | 1925.865782    | 963.436529       | 1924.881766       | 962.944521       | 17 |
| 13 | 1986.817653        | 993.912465         | 1969.791104    | 985.399190        | 1968.807088    | 984.907182         | E    | 1813.849738        | 907.428507        | 1796.823189    | 898.915233       | 1795.839173       | 898.423225       | 16 |
| 14 | 2099.901717        | 1050.454497        | 2082.875168    | 1041.941222       | 2081.891152    | <b>1041.449214</b> | L    | <b>1684.807145</b> | 842.907211        | 1667.780596    | 834.393936       | 1666.796580       | 833.901928       | 15 |
| 15 | 2236.960629        | 1118.983953        | 2219.934080    | 1110.470678       | 2218.950064    | 1109.978670        | H    | <b>1571.723081</b> | <b>786.365179</b> | 1554.696532    | 777.851904       | 1553.712516       | 777.359896       | 14 |
| 16 | 2396.991278        | 1198.999277        | 2379.964729    | 1190.486002       | 2378.980713    | 1189.993994        | C    | <b>1434.664169</b> | 717.835723        | 1417.637620    | 709.322448       | 1416.653604       | 708.830440       | 13 |
| 17 | 2468.028392        | 1234.517834        | 2451.001843    | 1226.004559       | 2450.017827    | 1225.512552        | A    | <b>1274.633520</b> | 637.820398        | 1257.606971    | 629.307124       | 1256.622955       | 628.815116       | 12 |
| 18 | 2569.076071        | 1285.041673        | 2552.049522    | 1276.528399       | 2551.065506    | 1276.036391        | T    | <b>1203.596406</b> | 602.301841        | 1186.569857    | 593.788567       | 1185.585841       | 593.296559       | 11 |
| 19 | 2626.097535        | <b>1313.552405</b> | 2609.070986    | 1305.039131       | 2608.086970    | 1304.547123        | G    | <b>1102.548727</b> | 551.778002        | 1085.522178    | 543.264727       | 1084.538162       | 542.772719       | 10 |
| 20 | <b>2739.181599</b> | 1370.094437        | 2722.155050    | 1361.581163       | 2721.171034    | 1361.089155        | I    | <b>1045.527263</b> | 523.267270        | 1028.500714    | 514.753995       | 1027.516698       | 514.261987       | 9  |
| 21 | 2826.213627        | 1413.610452        | 2809.187078    | 1405.097177       | 2808.203062    | 1404.605169        | S    | <b>932.443199</b>  | 466.725238        | 915.416650     | 458.211963       | <b>914.432634</b> | 457.719955       | 8  |
| 22 | 2939.297691        | 1470.152484        | 2922.271142    | 1461.639209       | 2921.287126    | 1461.147201        | L    | <b>845.411171</b>  | 423.209224        | 828.384622     | 414.695949       | 827.400606        | 414.203941       | 7  |
| 23 | 3010.334805        | 1505.671041        | 2993.308256    | 1497.157766       | 2992.324240    | 1496.665758        | A    | <b>732.327107</b>  | 366.667192        | 715.300558     | 358.153917       | 714.316542        | 357.661909       | 6  |
| 24 | 3124.377732        | 1562.692504        | 3107.351183    | 1554.179230       | 3106.367167    | 1553.687222        | N    | <b>661.289993</b>  | 331.148635        | 644.263444     | 322.635360       | 643.279428        | 322.143352       | 5  |
| 25 | 3253.420325        | 1627.213801        | 3236.393776    | 1618.700526       | 3235.409760    | 1618.208518        | E    | <b>547.247066</b>  | 274.127171        | 530.220517     | 265.613897       | 529.236501        | 265.121889       | 4  |
| 26 | 3381.478903        | 1691.243090        | 3364.452354    | 1682.729815       | 3363.468338    | 1682.237807        | Q    | 418.204473         | 209.605874        | 401.177924     | 201.092600       | 400.193908        | 200.600592       | 3  |
| 27 | 3496.505846        | 1748.756561        | 3479.479297    | 1740.243287       | 3478.495281    | 1739.751279        | D    | 290.145895         | 145.576585        | 273.119346     | 137.063311       | 272.135330        | 136.571303       | 2  |
| 28 |                    |                    |                |                   |                |                    | R    | <b>175.118952</b>  | 88.063114         | 158.092403     | 79.549839        |                   |                  | 1  |

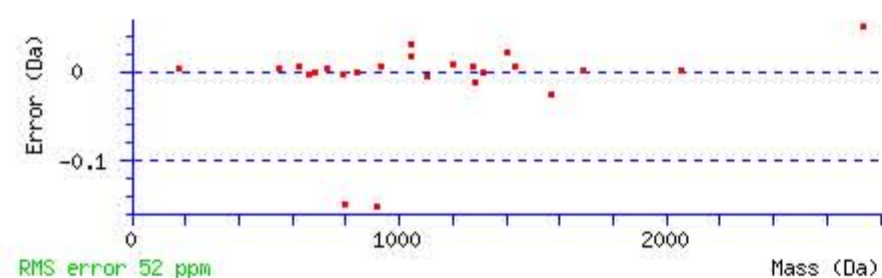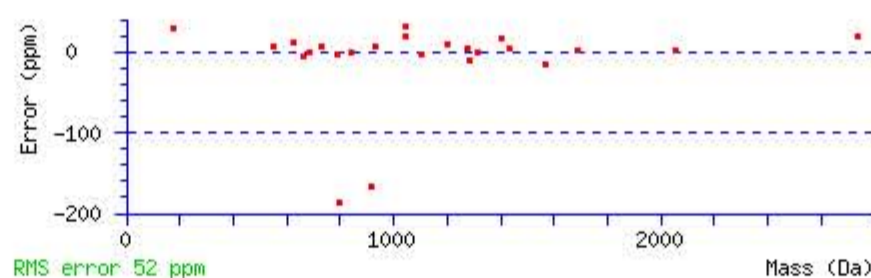

NCBI BLAST search of **MVQEQCCHSQLEELHLCATGISLANEQDR**  
 (Parameters: blastp, nr protein database, expect=20000, no filter, PAM30)  
 Other BLAST [web gateways](#)

### All matches to this query

| Score | Mr(calc):   | Delta    | Sequence                                      |
|-------|-------------|----------|-----------------------------------------------|
| 63.2  | 3669.610229 | 0.010187 | <a href="#">MVQEQCCHSQLEELHLCATGISLANEQDR</a> |
| 61.3  | 3669.610229 | 0.010187 | <a href="#">MVQEQCCHSQLEELHLCATGISLANEQDR</a> |
| 61.3  | 3669.610229 | 0.010187 | <a href="#">MVQEQCCHSQLEELHLCATGISLANEQDR</a> |



# MASCOT SCIENCE Mascot Search Results

## Peptide View

MS/MS Fragmentation of **ELSEALGQIFDSQR**

Found in **LG3BP\_HUMAN**, Galectin-3-binding protein OS=Homo sapiens GN=LGALS3BP PE=1 SV=1

Match to Query 25306: 1902.969342 from(635.330390,3+) rtinseconds(2718) index(57151)

Title: Locus:1.1.1.1561.6 File:"2013-07-02 CLN FXIII 60 min 2nd F 4.wiff"

Data file C:\Program Files (x86)\Matrix Science\Mascot Daemon\mgf\5 FXIII 60 min 2nd\mascot\_daemon\_merge.mgf

Click mouse within plot area to zoom in by factor of two about that point

Or, Plot from  to  Da

Label all possible matches  Label matches used for scoring

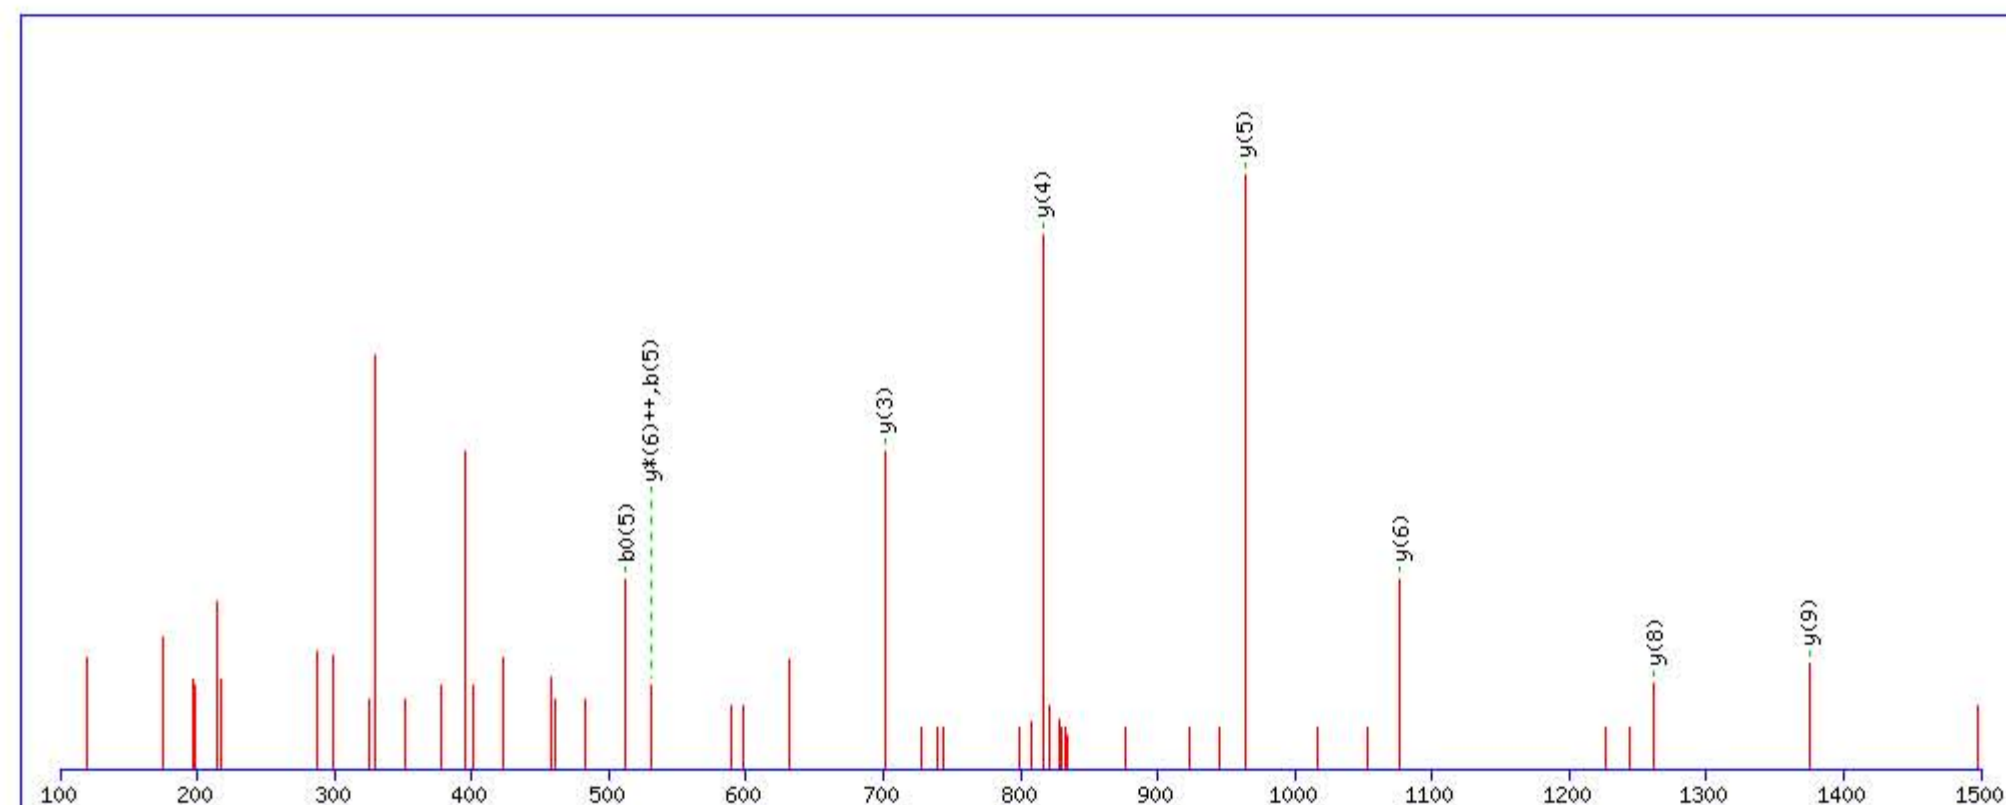

Monoisotopic mass of neutral peptide Mr(calc): 1902.950928

Fixed modifications: Carbamidomethyl (C) (apply to specified residues or termini only)

Variable modifications:

Q13 : Biotin:Thermo-21345 (Q)

Ions Score: 36 Expect: 0.017

Matches : 9/138 fragment ions using 13 most intense peaks [\(help\)](#)

| #  | b                 | b <sup>++</sup> | b <sup>+</sup> | b <sup>+++</sup> | b <sup>0</sup>    | b <sup>0++</sup> | Seq. | y                  | y <sup>++</sup> | y <sup>+</sup> | y <sup>+++</sup>  | y <sup>0</sup> | y <sup>0++</sup> | #  |
|----|-------------------|-----------------|----------------|------------------|-------------------|------------------|------|--------------------|-----------------|----------------|-------------------|----------------|------------------|----|
| 1  | 130.049869        | 65.528572       |                |                  | 112.039304        | 56.523290        | E    |                    |                 |                |                   |                |                  | 14 |
| 2  | 243.133933        | 122.070605      |                |                  | 225.123368        | 113.065322       | L    | 1774.915632        | 887.961454      | 1757.889083    | 879.448180        | 1756.905067    | 878.956172       | 13 |
| 3  | 330.165961        | 165.586618      |                |                  | 312.155396        | 156.581336       | S    | 1661.831568        | 831.419422      | 1644.805019    | 822.906148        | 1643.821003    | 822.414140       | 12 |
| 4  | 459.208554        | 230.107915      |                |                  | 441.197989        | 221.102633       | E    | 1574.799540        | 787.903408      | 1557.772991    | 779.390134        | 1556.788975    | 778.898126       | 11 |
| 5  | <b>530.245668</b> | 265.626472      |                |                  | <b>512.235103</b> | 256.621190       | A    | 1445.756947        | 723.382112      | 1428.730398    | 714.868837        | 1427.746382    | 714.376829       | 10 |
| 6  | 643.329732        | 322.168504      |                |                  | 625.319167        | 313.163222       | L    | <b>1374.719833</b> | 687.863555      | 1357.693284    | 679.350280        | 1356.709268    | 678.858272       | 9  |
| 7  | 700.351196        | 350.679236      |                |                  | 682.340631        | 341.673954       | G    | <b>1261.635769</b> | 631.321523      | 1244.609220    | 622.808248        | 1243.625204    | 622.316240       | 8  |
| 8  | 828.409774        | 414.708525      | 811.383225     | 406.195251       | 810.399209        | 405.703243       | Q    | 1204.614305        | 602.810791      | 1187.587756    | 594.297516        | 1186.603740    | 593.805508       | 7  |
| 9  | 941.493838        | 471.250557      | 924.467289     | 462.737283       | 923.483273        | 462.245275       | I    | <b>1076.555727</b> | 538.781502      | 1059.529178    | <b>530.268227</b> | 1058.545162    | 529.776219       | 6  |
| 10 | 1088.562252       | 544.784764      | 1071.535703    | 536.271490       | 1070.551687       | 535.779482       | F    | <b>963.471663</b>  | 482.239470      | 946.445114     | 473.726195        | 945.461098     | 473.234187       | 5  |
| 11 | 1203.589195       | 602.298236      | 1186.562646    | 593.784961       | 1185.578630       | 593.292953       | D    | <b>816.403249</b>  | 408.705263      | 799.376700     | 400.191988        | 798.392684     | 399.699980       | 4  |
| 12 | 1290.621223       | 645.814250      | 1273.594674    | 637.300975       | 1272.610658       | 636.808967       | S    | <b>701.376306</b>  | 351.191791      | 684.349757     | 342.678517        | 683.365741     | 342.186509       | 3  |
| 13 | 1729.846549       | 865.426913      | 1712.820000    | 856.913638       | 1711.835984       | 856.421630       | Q    | 614.344278         | 307.675777      | 597.317729     | 299.162503        |                |                  | 2  |
| 14 |                   |                 |                |                  |                   |                  | R    | 175.118952         | 88.063114       | 158.092403     | 79.549839         |                |                  | 1  |

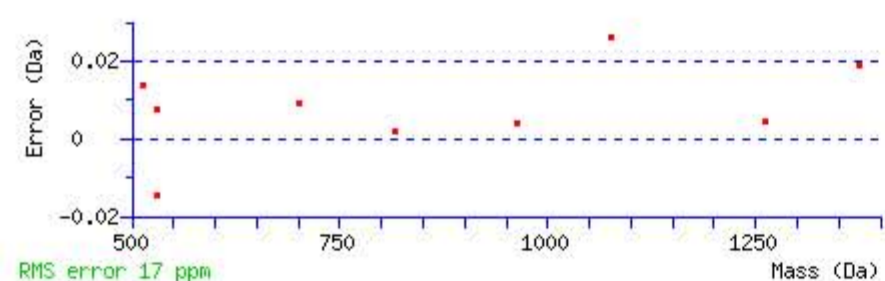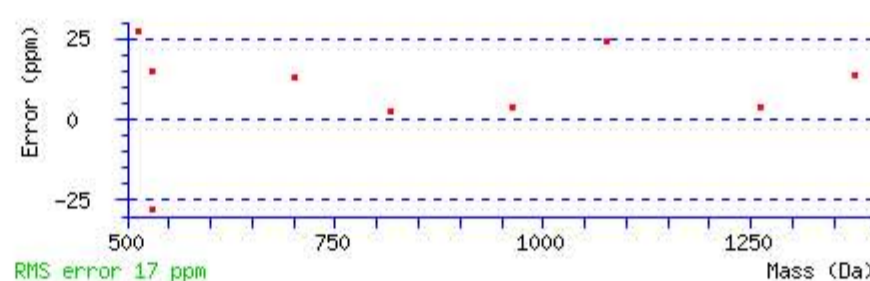

NCBI BLAST search of **ELSEALGQIFDSQR**

(Parameters: blastp, nr protein database, expect=20000, no filter, PAM30)

Other BLAST [web gateways](#)

All matches to this query

| Score | Mr(calc):   | Delta    | Sequence                       |
|-------|-------------|----------|--------------------------------|
| 35.6  | 1902.950928 | 0.018414 | <a href="#">ELSEALGQIFDSQR</a> |
| 16.8  | 1902.947739 | 0.021603 | <a href="#">MKEQLREMNLR</a>    |

Mascot: <http://www.matrixscience.com/>



# MASCOT Search Results

## Peptide View

MS/MS Fragmentation of **KSQLVYQSR**

Found in **LG3BP\_HUMAN**, Galectin-3-binding protein OS=Homo sapiens GN=LGALS3BP PE=1 SV=1

Match to Query 31206: 1418.773788 from(710.394170,2+) rtinseconds(1542) index(49818)

Title: Locus:1.1.1.1152.11 File:"2013-07-02 CLN FXIII 60 min 2nd F 4.wiff"

Data file C:\Program Files (x86)\Matrix Science\Mascot Daemon\mgf5 FXIII 60 min 2nd\mascot\_daemon\_merge.mgf

Click mouse within plot area to zoom in by factor of two about that point

Or, Plot from  to  Da

Label all possible matches  Label matches used for scoring

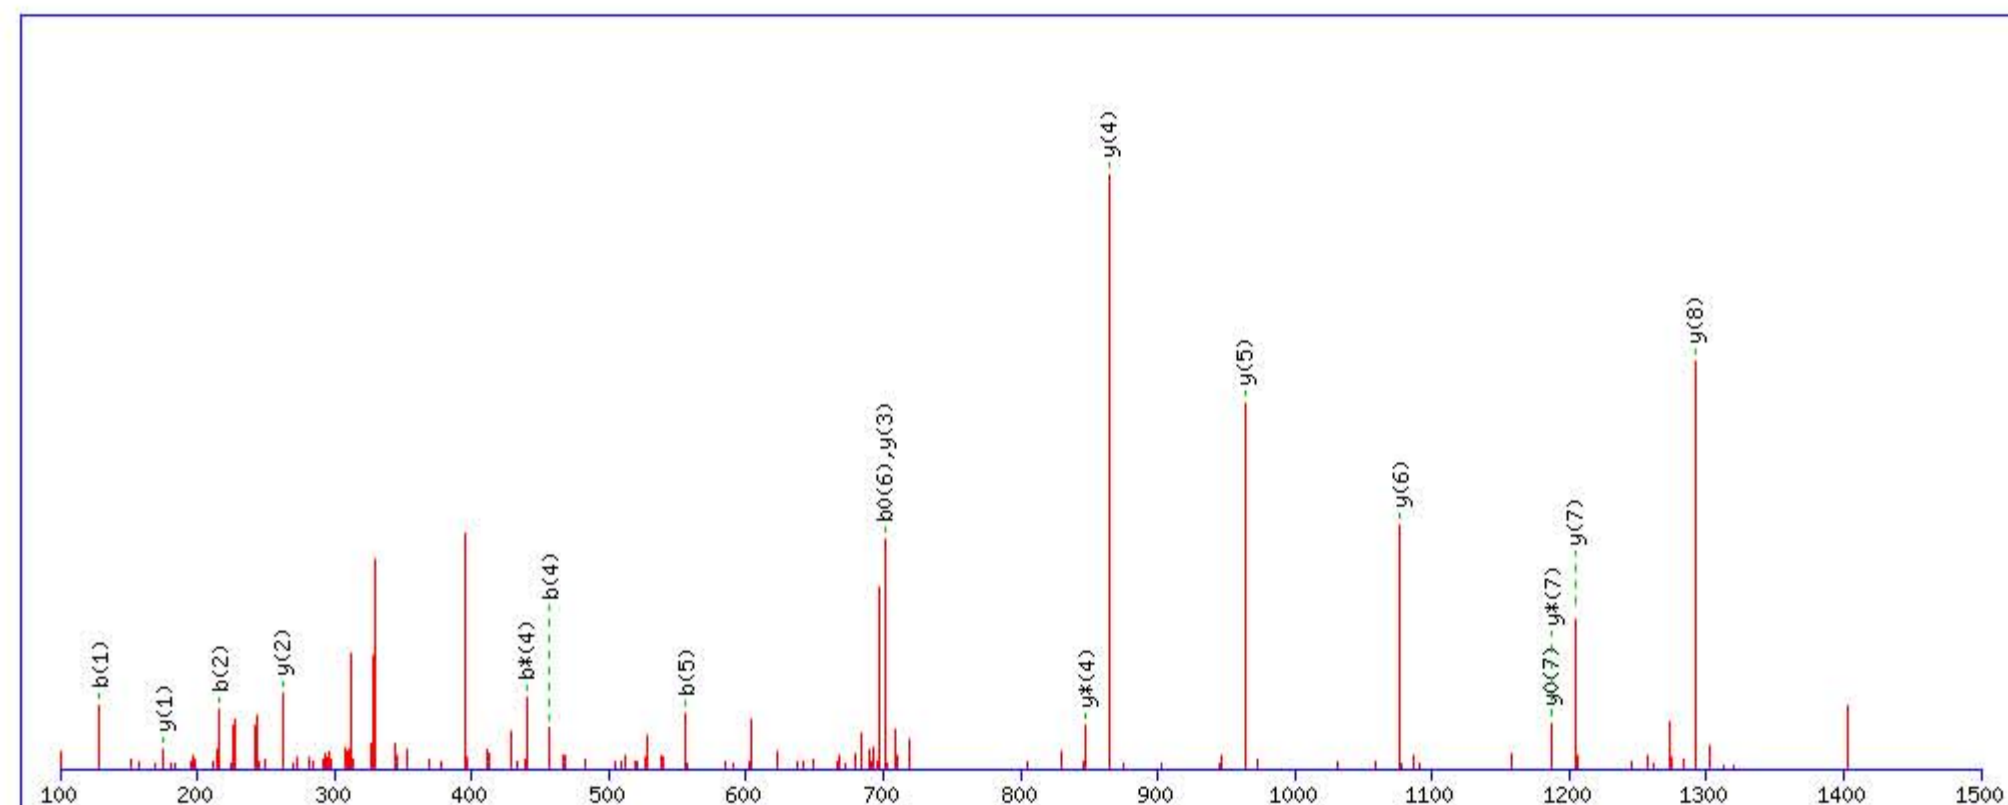

Monoisotopic mass of neutral peptide Mr(calc): 1418.770386

Fixed modifications: Carbamidomethyl (C) (apply to specified residues or termini only)

Variable modifications:

Q7 : Biotin:Thermo-21345 (Q)

Ions Score: 57 Expect: 4e-005

Matches : 17/92 fragment ions using 27 most intense peaks [\(help\)](#)

| # | b           | b <sup>++</sup> | b <sup>+</sup> | b <sup>*++</sup> | b <sup>0</sup> | b <sup>0++</sup> | Seq. | y           | y <sup>++</sup> | y <sup>+</sup> | y <sup>*++</sup> | y <sup>0</sup> | y <sup>0++</sup> | # |
|---|-------------|-----------------|----------------|------------------|----------------|------------------|------|-------------|-----------------|----------------|------------------|----------------|------------------|---|
| 1 | 129.102239  | 65.054757       | 112.075690     | 56.541483        |                |                  | K    |             |                 |                |                  |                |                  | 9 |
| 2 | 216.134267  | 108.570771      | 199.107718     | 100.057497       | 198.123702     | 99.565489        | S    | 1291.682719 | 646.344998      | 1274.656170    | 637.831723       | 1273.672154    | 637.339715       | 8 |
| 3 | 344.192845  | 172.600060      | 327.166296     | 164.086786       | 326.182280     | 163.594778       | Q    | 1204.650691 | 602.828984      | 1187.624142    | 594.315709       | 1186.640126    | 593.823701       | 7 |
| 4 | 457.276909  | 229.142092      | 440.250360     | 220.628818       | 439.266344     | 220.136810       | L    | 1076.592113 | 538.799695      | 1059.565564    | 530.286420       | 1058.581548    | 529.794412       | 6 |
| 5 | 556.345323  | 278.676300      | 539.318774     | 270.163025       | 538.334758     | 269.671017       | V    | 963.508049  | 482.257663      | 946.481500     | 473.744388       | 945.497484     | 473.252380       | 5 |
| 6 | 719.408652  | 360.207964      | 702.382103     | 351.694690       | 701.398087     | 351.202682       | Y    | 864.439635  | 432.723456      | 847.413086     | 424.210181       | 846.429070     | 423.718173       | 4 |
| 7 | 1158.633978 | 579.820627      | 1141.607429    | 571.307353       | 1140.623413    | 570.815345       | Q    | 701.376306  | 351.191791      | 684.349757     | 342.678517       | 683.365741     | 342.186509       | 3 |
| 8 | 1245.666006 | 623.336641      | 1228.639457    | 614.823367       | 1227.655441    | 614.331359       | S    | 262.150980  | 131.579128      | 245.124431     | 123.065854       | 244.140415     | 122.573846       | 2 |
| 9 |             |                 |                |                  |                |                  | R    | 175.118952  | 88.063114       | 158.092403     | 79.549839        |                |                  | 1 |

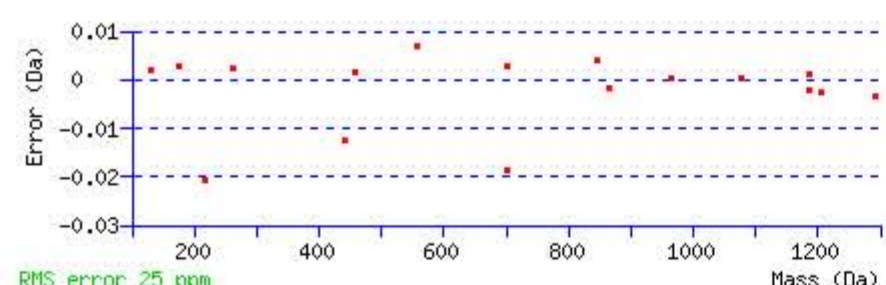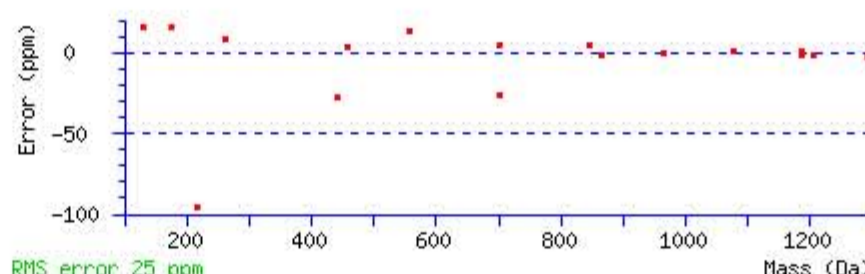

NCBI BLAST search of **KSQLVYQSR**

(Parameters: blastp, nr protein database, expect=20000, no filter, PAM30)

Other BLAST [web gateways](#)

All matches to this query

| Score | Mr(calc):   | Delta     | Sequence                      |
|-------|-------------|-----------|-------------------------------|
| 56.5  | 1418.770386 | 0.003402  | <a href="#">KSQLVYQSR</a>     |
| 9.2   | 1418.780273 | -0.006485 | <a href="#">TNQLMETLKTIK</a>  |
| 8.7   | 1418.770386 | 0.003402  | <a href="#">KSQLVYQSR</a>     |
| 4.9   | 1418.788147 | -0.014359 | <a href="#">QSQVDRLYVALK</a>  |
| 4.6   | 1418.787659 | -0.013871 | <a href="#">KEILLAMLVVDK</a>  |
| 2.6   | 1418.776886 | -0.003098 | <a href="#">EKAKALEDLAGFK</a> |
| 2.6   | 1418.787659 | -0.013871 | <a href="#">KEILLAMLVVDK</a>  |

Mascot: <http://www.matrixscience.com/>



# MASCOT SEARCH RESULTS

## Peptide View

MS/MS Fragmentation of **YSSDYFQAPSDYR**

Found in **LG3BP\_HUMAN**, Galectin-3-binding protein OS=Homo sapiens GN=LGALS3BP PE=1 SV=1

Match to Query 44729: 1908.850168 from(955.432360,2+) rtinseconds(2123) index(53719)

Title: Locus:1.1.1.1354.13 File:"2013-07-02 CLN FXIII 60 min 2nd F 4.wiff"

Data file C:\Program Files (x86)\Matrix Science\Mascot Daemon\mgf5 FXIII 60 min 2nd\mascot\_daemon\_merge.mgf

Click mouse within plot area to zoom in by factor of two about that point

Or, Plot from  to  Da

Label all possible matches  Label matches used for scoring

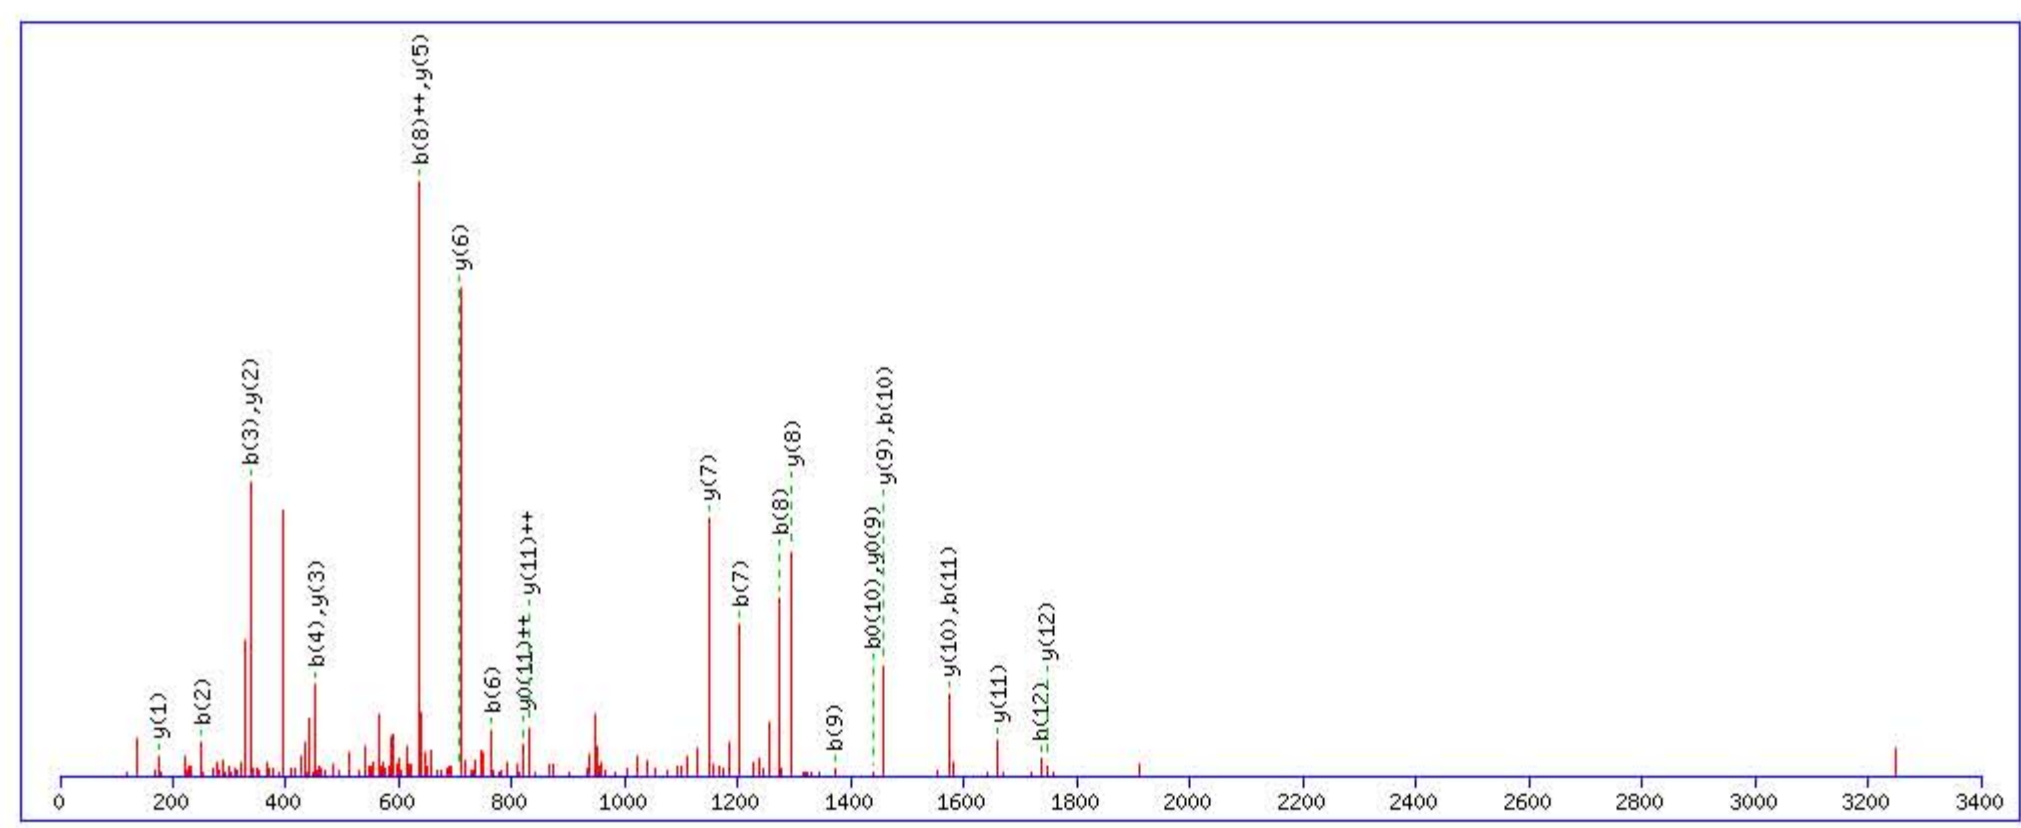

Monoisotopic mass of neutral peptide Mr(calc): 1908.835236

Fixed modifications: Carbamidomethyl (C) (apply to specified residues or termini only)

Variable modifications:

Q7 : Biotin:Thermo-21345 (Q)

Ions Score: 77 Expect: 1.5e-007

Matches : 26/126 fragment ions using 34 most intense peaks [\(help\)](#)

| #  | b                  | b <sup>++</sup>   | b <sup>*</sup> | b <sup>*++</sup> | b <sup>0</sup>     | b <sup>0++</sup> | Seq. | y                  | y <sup>++</sup>   | y <sup>*</sup> | y <sup>*++</sup> | y <sup>0</sup>     | y <sup>0++</sup>  | #  |
|----|--------------------|-------------------|----------------|------------------|--------------------|------------------|------|--------------------|-------------------|----------------|------------------|--------------------|-------------------|----|
| 1  | 164.070605         | 82.538940         |                |                  |                    |                  | Y    |                    |                   |                |                  |                    |                   | 13 |
| 2  | <b>251.102633</b>  | 126.054954        |                |                  | 233.092068         | 117.049672       | S    | <b>1746.779198</b> | 873.893237        | 1729.752649    | 865.379963       | 1728.768633        | 864.887955        | 12 |
| 3  | <b>338.134661</b>  | 169.570968        |                |                  | 320.124096         | 160.565686       | S    | <b>1659.747170</b> | <b>830.377223</b> | 1642.720621    | 821.863949       | 1641.736605        | <b>821.371941</b> | 11 |
| 4  | <b>453.161604</b>  | 227.084440        |                |                  | 435.151039         | 218.079158       | D    | <b>1572.715142</b> | 786.861209        | 1555.688593    | 778.347935       | 1554.704577        | 777.855927        | 10 |
| 5  | 616.224933         | 308.616105        |                |                  | 598.214368         | 299.610822       | Y    | <b>1457.688199</b> | 729.347738        | 1440.661650    | 720.834463       | <b>1439.677634</b> | 720.342455        | 9  |
| 6  | <b>763.293347</b>  | 382.150312        |                |                  | 745.282782         | 373.145029       | F    | <b>1294.624870</b> | 647.816073        | 1277.598321    | 639.302799       | 1276.614305        | 638.810791        | 8  |
| 7  | <b>1202.518673</b> | 601.762975        | 1185.492124    | 593.249700       | 1184.508108        | 592.757692       | Q    | <b>1147.556456</b> | 574.281866        | 1130.529907    | 565.768592       | 1129.545891        | 565.276584        | 7  |
| 8  | <b>1273.555787</b> | <b>637.281532</b> | 1256.529238    | 628.768257       | 1255.545222        | 628.276249       | A    | <b>708.331130</b>  | 354.669203        | 691.304581     | 346.155929       | 690.320565         | 345.663921        | 6  |
| 9  | <b>1370.608551</b> | 685.807914        | 1353.582002    | 677.294639       | 1352.597986        | 676.802631       | P    | <b>637.294016</b>  | 319.150646        | 620.267467     | 310.637372       | 619.283451         | 310.145364        | 5  |
| 10 | <b>1457.640579</b> | 729.323928        | 1440.614030    | 720.810653       | <b>1439.630014</b> | 720.318645       | S    | 540.241252         | 270.624264        | 523.214703     | 262.110990       | 522.230687         | 261.618982        | 4  |
| 11 | <b>1572.667522</b> | 786.837399        | 1555.640973    | 778.324125       | 1554.656957        | 777.832117       | D    | <b>453.209224</b>  | 227.108250        | 436.182675     | 218.594976       | 435.198659         | 218.102968        | 3  |
| 12 | <b>1735.730851</b> | 868.369064        | 1718.704302    | 859.855789       | 1717.720286        | 859.363781       | Y    | <b>338.182281</b>  | 169.594778        | 321.155732     | 161.081504       |                    |                   | 2  |
| 13 |                    |                   |                |                  |                    |                  | R    | <b>175.118952</b>  | 88.063114         | 158.092403     | 79.549839        |                    |                   | 1  |

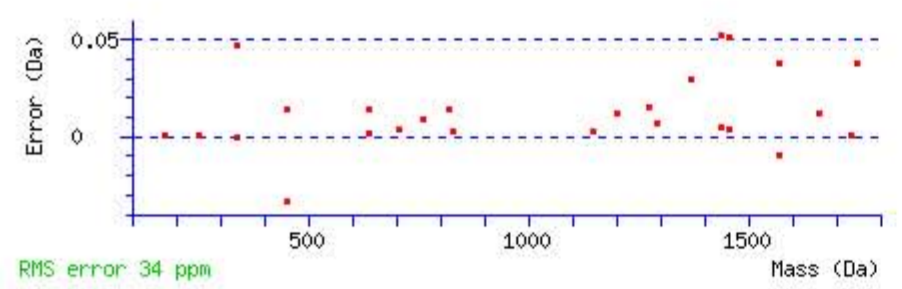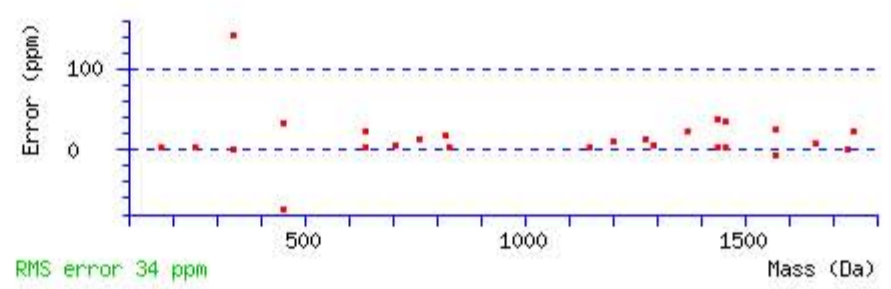

NCBI BLAST search of [YSSDYFQAPSDYR](#)

(Parameters: blastp, nr protein database, expect=20000, no filter, PAM30)

Other BLAST [web gateways](#)

All matches to this query

| Score | Mr(calc):   | Delta    | Sequence                      |
|-------|-------------|----------|-------------------------------|
| 76.9  | 1908.835236 | 0.014932 | <a href="#">YSSDYFQAPSDYR</a> |



# MASCOT SEARCH RESULTS

## Peptide View

MS/MS Fragmentation of **TGAQELLR**

Found in **GELS\_HUMAN**, Gelsolin OS=Homo sapiens GN=GSN PE=1 SV=1

Match to Query 23272: 1197.656788 from(599.835670,2+) rtinseconds(1892) index(5149)

Title: Locus:1.1.1.1468.20 File:"2013-07-02 CLN FXIII 60 min 2nd F 1.wiff"

Data file C:\Program Files (x86)\Matrix Science\Mascot Daemon\mgf5 FXIII 60 min 2nd\mascot\_daemon\_merge.mgf

Click mouse within plot area to zoom in by factor of two about that point

Or, Plot from  to  Da

Label all possible matches  Label matches used for scoring

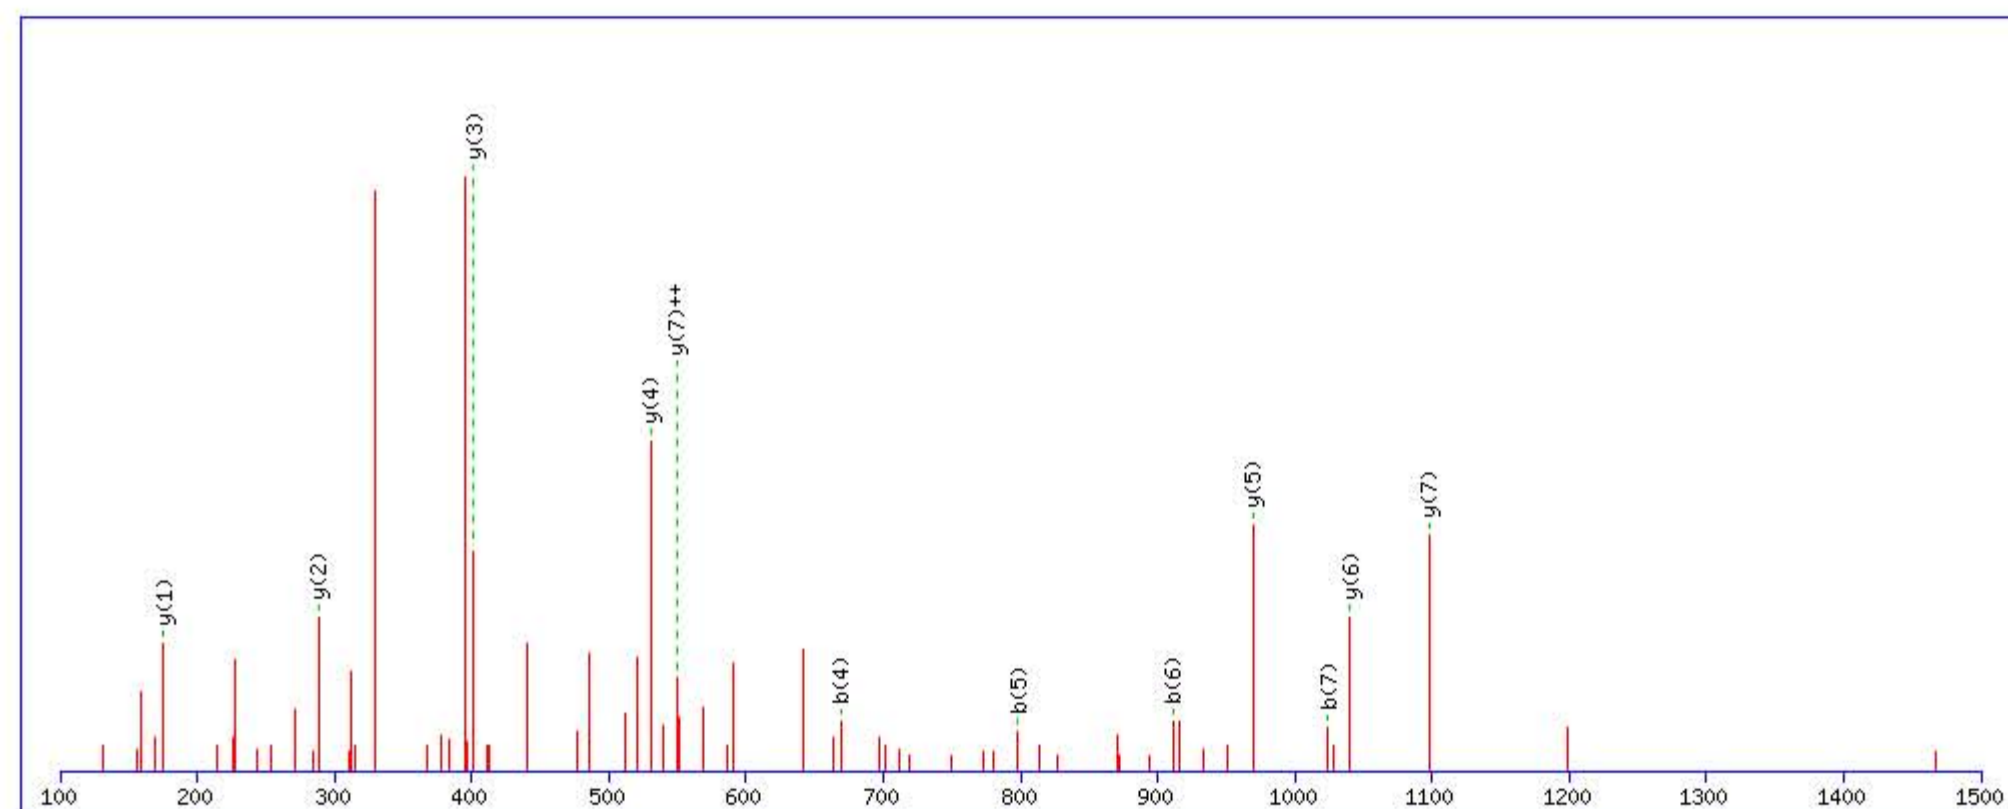

Monoisotopic mass of neutral peptide Mr(calc): 1197.653961

Fixed modifications: Carbamidomethyl (C) (apply to specified residues or termini only)

Variable modifications:

Q4 : Biotin:Thermo-21345 (Q)

Ions Score: 49 Expect: 0.00032

Matches : 12/72 fragment ions using 20 most intense peaks [\(help\)](#)

| # | b           | b <sup>++</sup> | b <sup>*</sup> | b <sup>+++</sup> | b <sup>0</sup> | b <sup>0++</sup> | Seq. | y           | y <sup>++</sup> | y <sup>*</sup> | y <sup>+++</sup> | y <sup>0</sup> | y <sup>0++</sup> | # |
|---|-------------|-----------------|----------------|------------------|----------------|------------------|------|-------------|-----------------|----------------|------------------|----------------|------------------|---|
| 1 | 102.054955  | 51.531116       |                |                  | 84.044390      | 42.525833        | T    |             |                 |                |                  |                |                  | 8 |
| 2 | 159.076419  | 80.041847       |                |                  | 141.065854     | 71.036565        | G    | 1097.613577 | 549.310427      | 1080.587028    | 540.797152       | 1079.603012    | 540.305144       | 7 |
| 3 | 230.113533  | 115.560404      |                |                  | 212.102968     | 106.555122       | A    | 1040.592113 | 520.799695      | 1023.565564    | 512.286420       | 1022.581548    | 511.794412       | 6 |
| 4 | 669.338859  | 335.173068      | 652.312310     | 326.659793       | 651.328294     | 326.167785       | Q    | 969.554999  | 485.281138      | 952.528450     | 476.767863       | 951.544434     | 476.275855       | 5 |
| 5 | 798.381452  | 399.694364      | 781.354903     | 391.181090       | 780.370887     | 390.689082       | E    | 530.329673  | 265.668475      | 513.303124     | 257.155200       | 512.319108     | 256.663192       | 4 |
| 6 | 911.465516  | 456.236396      | 894.438967     | 447.723122       | 893.454951     | 447.231114       | L    | 401.287080  | 201.147178      | 384.260531     | 192.633903       |                |                  | 3 |
| 7 | 1024.549580 | 512.778428      | 1007.523031    | 504.265153       | 1006.539015    | 503.773145       | L    | 288.203016  | 144.605146      | 271.176467     | 136.091871       |                |                  | 2 |
| 8 |             |                 |                |                  |                |                  | R    | 175.118952  | 88.063114       | 158.092403     | 79.549839        |                |                  | 1 |

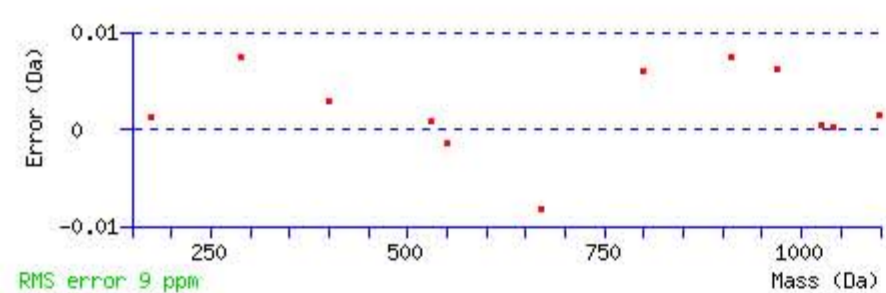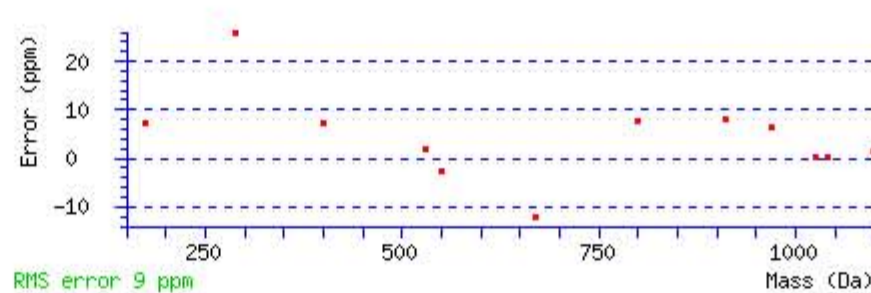

NCBI BLAST search of [TGAQELLR](#)

(Parameters: blastp, nr protein database, expect=20000, no filter, PAM30)

Other BLAST [web gateways](#)

All matches to this query

| Score | Mr(calc):   | Delta     | Sequence                    |
|-------|-------------|-----------|-----------------------------|
| 48.9  | 1197.653961 | 0.002827  | <a href="#">TGAQELLR</a>    |
| 25.2  | 1197.653961 | 0.002827  | <a href="#">QTQEILR</a>     |
| 23.5  | 1197.653961 | 0.002827  | <a href="#">QTQEILR</a>     |
| 18.2  | 1197.653961 | 0.002827  | <a href="#">TQQLLR</a>      |
| 16.0  | 1197.646545 | 0.010243  | <a href="#">RSPQAEILR</a>   |
| 15.6  | 1197.671692 | -0.014904 | <a href="#">LGLNAAEALIR</a> |
| 12.7  | 1197.653961 | 0.002827  | <a href="#">QTEQLLR</a>     |
| 11.8  | 1197.669220 | -0.012432 | <a href="#">TLWAQLR</a>     |
| 11.5  | 1197.640045 | 0.016743  | <a href="#">QCQLQRPLR</a>   |
| 11.4  | 1197.653961 | 0.002827  | <a href="#">QTEQLLR</a>     |



# MASCOT Search Results

## Peptide View

MS/MS Fragmentation of **GASQAGAPQGR**

Found in **GELS\_HUMAN**, Gelsolin OS=Homo sapiens GN=GSN PE=1 SV=1

Match to Query 26389: 1309.653792 from(437.558540,3+) rtinseconds(1258) index(1377)  
 Title: Locus:1.1.1.1247.7 File:"2013-07-02 CLN FXIII 60 min 2nd F 1.wiff"

Data file C:\Program Files (x86)\Matrix Science\Mascot Daemon\mgf\5 FXIII 60 min 2nd\mascot\_daemon\_merge.mgf

Click mouse within plot area to zoom in by factor of two about that point

Or, Plot from  to  Da

Label all possible matches  Label matches used for scoring

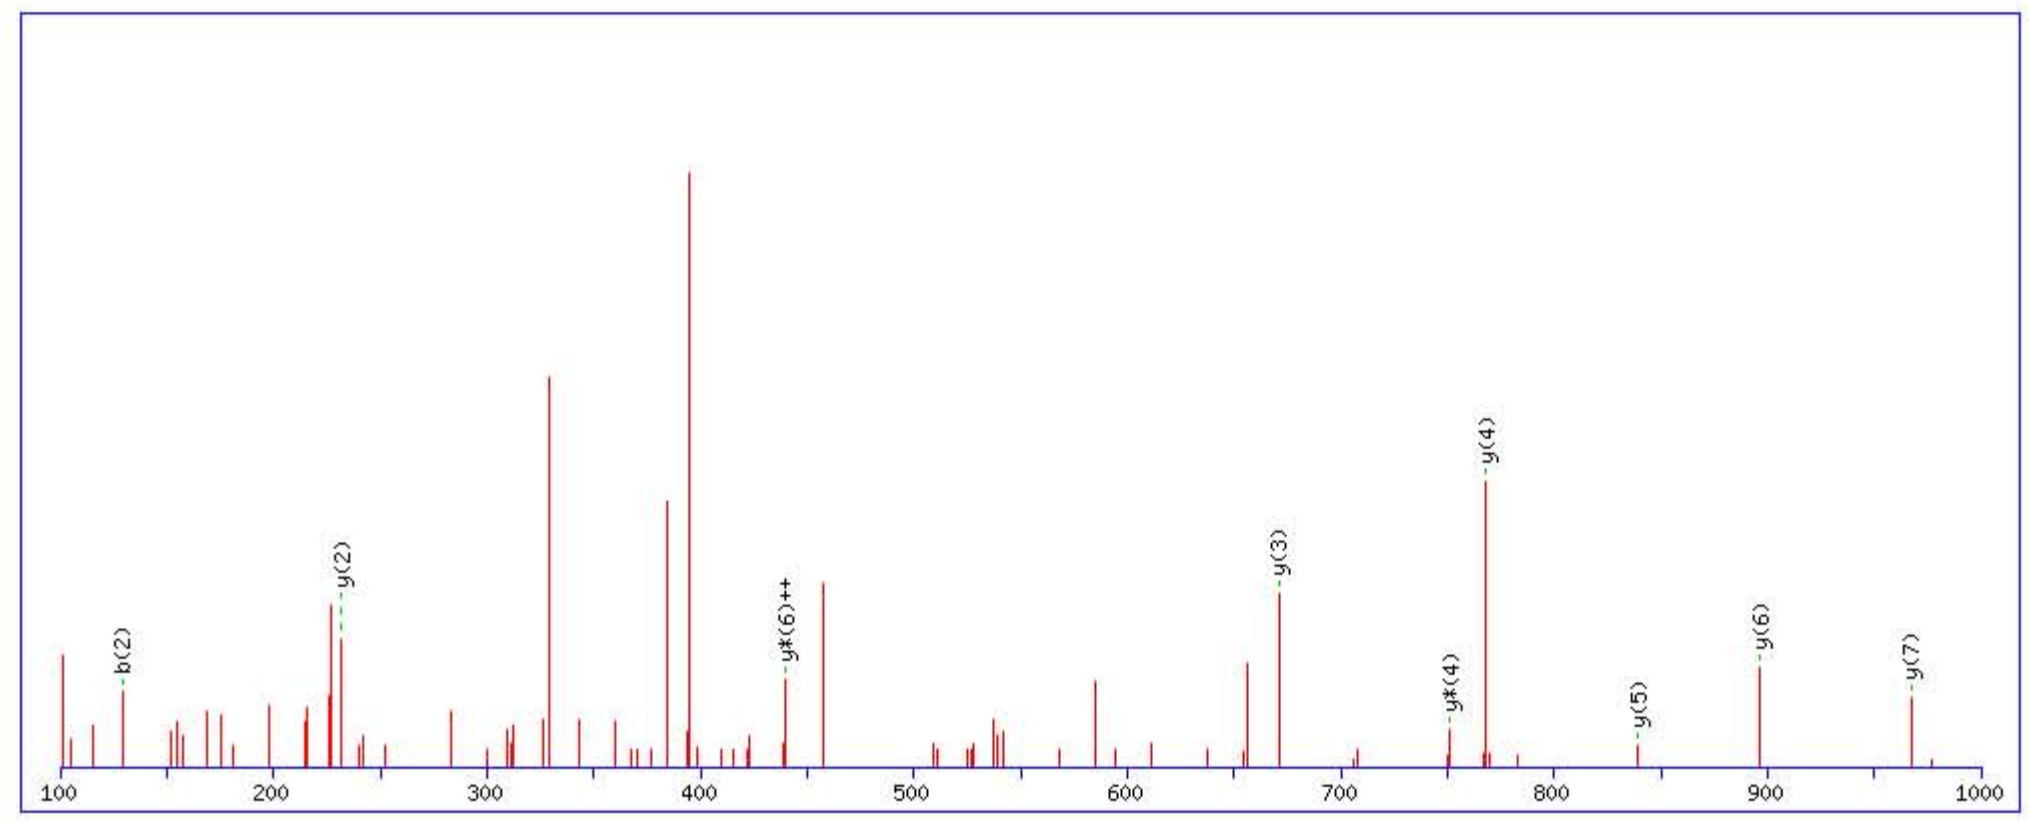

Monoisotopic mass of neutral peptide Mr(calc): 1309.656097

Fixed modifications: Carbamidomethyl (C) (apply to specified residues or termini only)

Variable modifications:

Q9 : Biotin:Thermo-21345 (Q)

Ions Score: 29 Expect: 0.0047

Matches : 9/94 fragment ions using 18 most intense peaks [\(help\)](#)

| #  | b                 | b <sup>++</sup> | b <sup>*</sup> | b <sup>*++</sup> | b <sup>0</sup> | b <sup>0++</sup> | Seq.     | y                 | y <sup>++</sup> | y <sup>*</sup>    | y <sup>*++</sup>  | y <sup>0</sup> | y <sup>0++</sup> | #         |
|----|-------------------|-----------------|----------------|------------------|----------------|------------------|----------|-------------------|-----------------|-------------------|-------------------|----------------|------------------|-----------|
| 1  | 58.028740         | 29.518008       |                |                  |                |                  | <b>G</b> |                   |                 |                   |                   |                |                  | <b>11</b> |
| 2  | <b>129.065854</b> | 65.036565       |                |                  |                |                  | <b>A</b> | 1253.641918       | 627.324597      | 1236.615369       | 618.811323        | 1235.631353    | 618.319315       | <b>10</b> |
| 3  | 216.097882        | 108.552579      |                |                  | 198.087317     | 99.547296        | <b>S</b> | 1182.604804       | 591.806040      | 1165.578255       | 583.292765        | 1164.594239    | 582.800757       | <b>9</b>  |
| 4  | 344.156460        | 172.581868      | 327.129911     | 164.068593       | 326.145895     | 163.576585       | <b>Q</b> | 1095.572776       | 548.290026      | 1078.546227       | 539.776752        |                |                  | <b>8</b>  |
| 5  | 415.193574        | 208.100425      | 398.167025     | 199.587150       | 397.183009     | 199.095142       | <b>A</b> | <b>967.514198</b> | 484.260737      | 950.487649        | 475.747462        |                |                  | <b>7</b>  |
| 6  | 472.215038        | 236.611157      | 455.188489     | 228.097882       | 454.204473     | 227.605874       | <b>G</b> | <b>896.477084</b> | 448.742180      | 879.450535        | <b>440.228906</b> |                |                  | <b>6</b>  |
| 7  | 543.252152        | 272.129714      | 526.225603     | 263.616440       | 525.241587     | 263.124432       | <b>A</b> | <b>839.455620</b> | 420.231448      | 822.429071        | 411.718173        |                |                  | <b>5</b>  |
| 8  | 640.304916        | 320.656096      | 623.278367     | 312.142822       | 622.294351     | 311.650814       | <b>P</b> | <b>768.418506</b> | 384.712891      | <b>751.391957</b> | 376.199616        |                |                  | <b>4</b>  |
| 9  | 1079.530242       | 540.268759      | 1062.503693    | 531.755485       | 1061.519677    | 531.263477       | <b>Q</b> | <b>671.365742</b> | 336.186509      | 654.339193        | 327.673234        |                |                  | <b>3</b>  |
| 10 | 1136.551706       | 568.779491      | 1119.525157    | 560.266217       | 1118.541141    | 559.774208       | <b>G</b> | <b>232.140416</b> | 116.573846      | 215.113867        | 108.060571        |                |                  | <b>2</b>  |
| 11 |                   |                 |                |                  |                |                  | <b>R</b> | 175.118952        | 88.063114       | 158.092403        | 79.549839         |                |                  | <b>1</b>  |

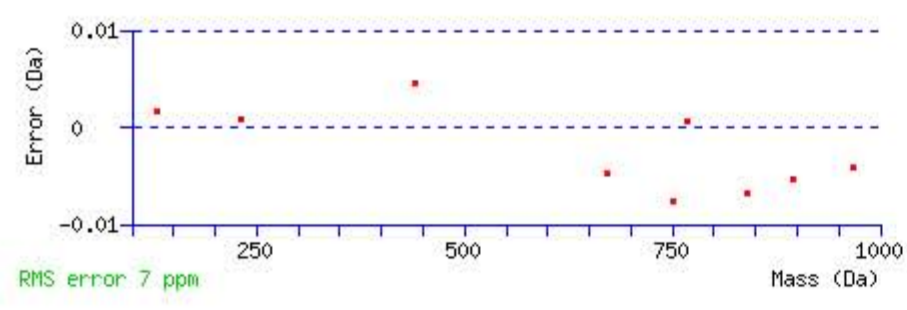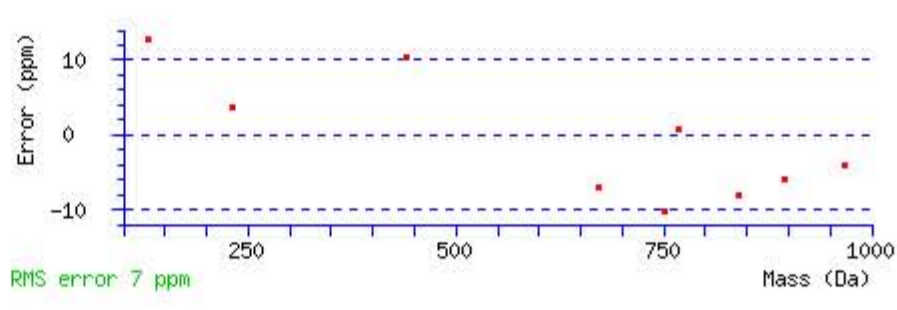

NCBI BLAST search of **GASQAGAPQGR**

(Parameters: blastp, nr protein database, expect=20000, no filter, PAM30)

Other BLAST [web gateways](#)

### All matches to this query

| Score | Mr(calc):   | Delta     | Sequence                    |
|-------|-------------|-----------|-----------------------------|
| 29.3  | 1309.656097 | -0.002305 | <a href="#">GASQAGAPQGR</a> |
| 23.7  | 1309.656097 | -0.002305 | <a href="#">GASQAGAPQGR</a> |
| 4.5   | 1309.648682 | 0.005110  | <a href="#">SLQAQEDARHR</a> |
| 4.4   | 1309.669998 | -0.016206 | <a href="#">LIETQMERFK</a>  |



# MASCOT Search Results

## Peptide View

MS/MS Fragmentation of **GASQAGAPQGR**

Found in **GELS\_HUMAN**, Gelsolin OS=Homo sapiens GN=GSN PE=1 SV=1

Match to Query 37959: 1620.817722 from(541.279850,3+) rtinseconds(1673) index(3883)

Title: Locus:1.1.1.1392.6 File:"2013-07-02 CLN FXIII 60 min 2nd F 1.wiff"

Data file C:\Program Files (x86)\Matrix Science\Mascot Daemon\mgf5 FXIII 60 min 2nd\mascot\_daemon\_merge.mgf

Click mouse within plot area to zoom in by factor of two about that point

Or, Plot from  to  Da

Label all possible matches  Label matches used for scoring

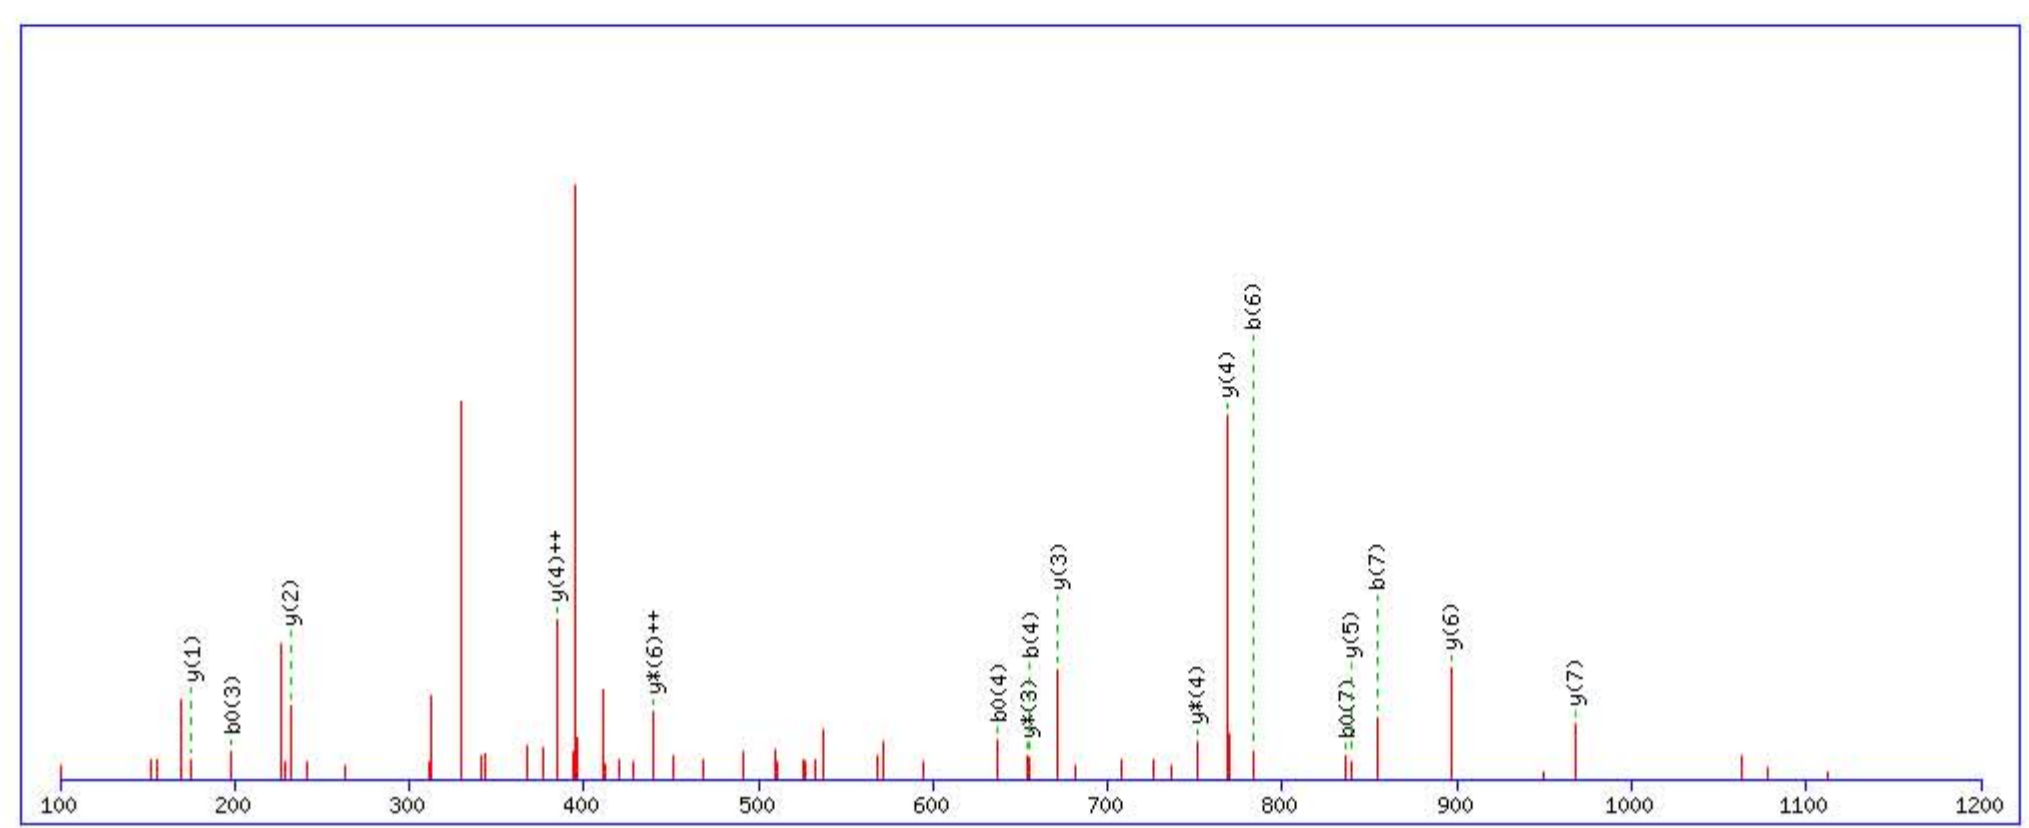

Monoisotopic mass of neutral peptide Mr(calc): 1620.822845

Fixed modifications: Carbamidomethyl (C) (apply to specified residues or termini only)

Variable modifications:

Q4 : Biotin:Thermo-21345 (Q)

Q9 : Biotin:Thermo-21345 (Q)

Ions Score: 29 Expect: 0.0074

Matches : 17/94 fragment ions using 37 most intense peaks [\(help\)](#)

| #  | b           | b <sup>++</sup> | b <sup>*</sup> | b <sup>*++</sup> | b <sup>0</sup> | b <sup>0++</sup> | Seq. | y           | y <sup>++</sup> | y <sup>*</sup> | y <sup>*++</sup> | y <sup>0</sup> | y <sup>0++</sup> | #  |
|----|-------------|-----------------|----------------|------------------|----------------|------------------|------|-------------|-----------------|----------------|------------------|----------------|------------------|----|
| 1  | 58.028740   | 29.518008       |                |                  |                |                  | G    |             |                 |                |                  |                |                  | 11 |
| 2  | 129.065854  | 65.036565       |                |                  |                |                  | A    | 1564.808666 | 782.907971      | 1547.782117    | 774.394697       | 1546.798101    | 773.902689       | 10 |
| 3  | 216.097882  | 108.552579      |                |                  | 198.087317     | 99.547296        | S    | 1493.771552 | 747.389414      | 1476.745003    | 738.876140       | 1475.760987    | 738.384131       | 9  |
| 4  | 655.323208  | 328.165242      | 638.296659     | 319.651968       | 637.312643     | 319.159960       | Q    | 1406.739524 | 703.873400      | 1389.712975    | 695.360126       |                |                  | 8  |
| 5  | 726.360322  | 363.683799      | 709.333773     | 355.170525       | 708.349757     | 354.678517       | A    | 967.514198  | 484.260737      | 950.487649     | 475.747463       |                |                  | 7  |
| 6  | 783.381786  | 392.194531      | 766.355237     | 383.681257       | 765.371221     | 383.189249       | G    | 896.477084  | 448.742180      | 879.450535     | 440.228906       |                |                  | 6  |
| 7  | 854.418900  | 427.713088      | 837.392351     | 419.199814       | 836.408335     | 418.707806       | A    | 839.455620  | 420.231448      | 822.429071     | 411.718174       |                |                  | 5  |
| 8  | 951.471664  | 476.239470      | 934.445115     | 467.726196       | 933.461099     | 467.234188       | P    | 768.418506  | 384.712891      | 751.391957     | 376.199617       |                |                  | 4  |
| 9  | 1390.696990 | 695.852133      | 1373.670441    | 687.338859       | 1372.686425    | 686.846851       | Q    | 671.365742  | 336.186509      | 654.339193     | 327.673235       |                |                  | 3  |
| 10 | 1447.718454 | 724.362865      | 1430.691905    | 715.849591       | 1429.707889    | 715.357583       | G    | 232.140416  | 116.573846      | 215.113867     | 108.060571       |                |                  | 2  |
| 11 |             |                 |                |                  |                |                  | R    | 175.118952  | 88.063114       | 158.092403     | 79.549839        |                |                  | 1  |

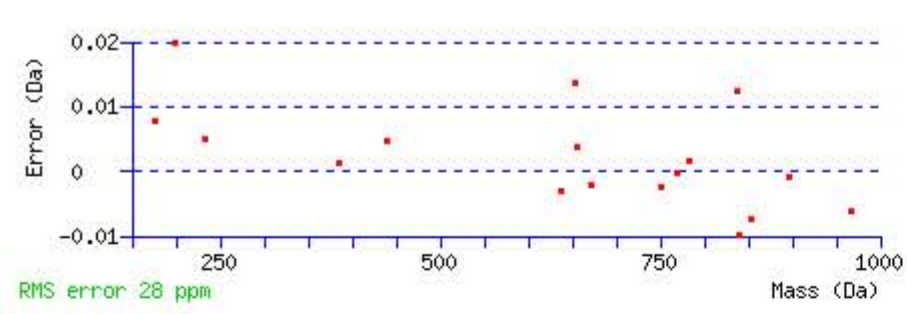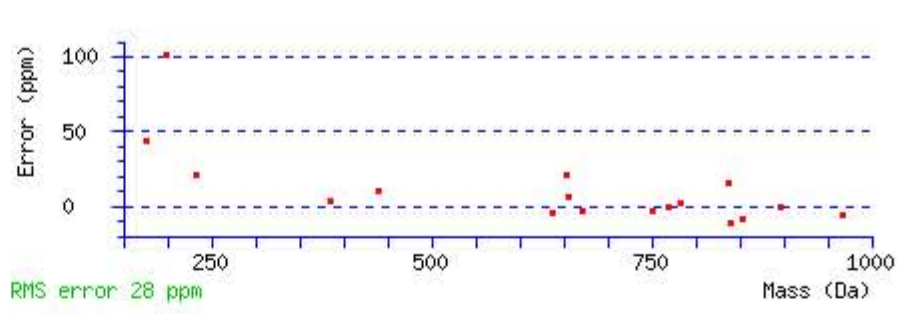

NCBI BLAST search of **GASQAGAPQGR**

(Parameters: blastp, nr protein database, expect=20000, no filter, PAM30)

Other BLAST [web gateways](#)

## All matches to this query

| Score | Mr(calc):   | Delta     | Sequence                      |
|-------|-------------|-----------|-------------------------------|
| 28.9  | 1620.822845 | -0.005123 | <a href="#">GASQAGAPQGR</a>   |
| 5.8   | 1620.815430 | 0.002292  | <a href="#">SLQAQEDARHR</a>   |
| 0.2   | 1620.815430 | 0.002292  | <a href="#">SLQAQEDARHR</a>   |
| 0.0   | 1620.841232 | -0.023510 | <a href="#">YYFAVRAKDIYGR</a> |



# MASCOT Search Results

## Peptide View

MS/MS Fragmentation of **QTQVSVLPEGGETPLFK**  
 Found in **GELS\_HUMAN**, Gelsolin OS=Homo sapiens GN=GSN PE=1 SV=1

Match to Query 55390: 2451.304362 from(818.108730,3+) rtinseconds(2612) index(40243)  
 Title: Locus:1.1.1.3328.21 File:"2013-07-02 CLN FXIII 60 min 2nd F 3.wiff"  
 Data file C:\Program Files (x86)\Matrix Science\Mascot Daemon\mgf\5 FXIII 60 min 2nd\mascot\_daemon\_merge.mgf

Click mouse within plot area to zoom in by factor of two about that point

Or, Plot from  to  Da

Label all possible matches  Label matches used for scoring

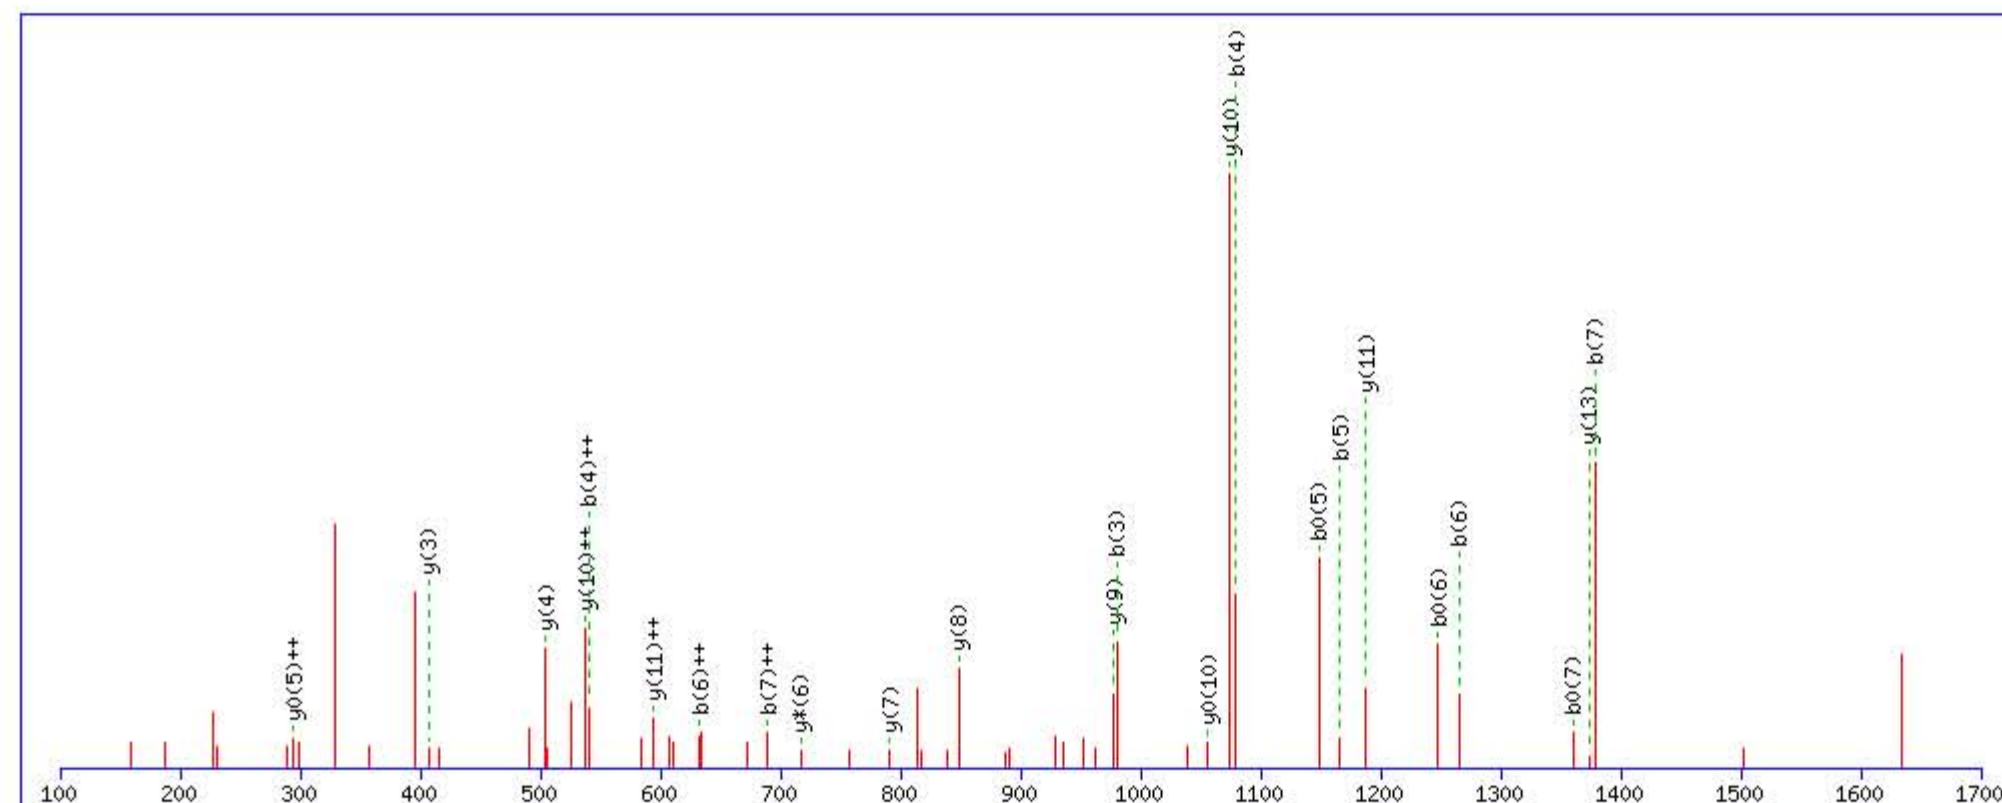

Monoisotopic mass of neutral peptide Mr(calc): 2451.290588  
 Fixed modifications: Carbamidomethyl (C) (apply to specified residues or termini only)  
 Variable modifications:  
 Q1 : Biotin:Thermo-21345 (Q)  
 Q3 : Biotin:Thermo-21345 (Q)  
 Ions Score: 41 Expect: 0.00076  
 Matches : 25/182 fragment ions using 47 most intense peaks [\(help\)](#)

| #  | b                  | b <sup>++</sup>   | b <sup>+</sup> | b <sup>+++</sup> | b <sup>0</sup>     | b <sup>0++</sup> | Seq. | y                  | y <sup>++</sup>   | y <sup>*</sup>    | y <sup>+++</sup> | y <sup>0</sup>     | y <sup>0++</sup>  | #  |
|----|--------------------|-------------------|----------------|------------------|--------------------|------------------|------|--------------------|-------------------|-------------------|------------------|--------------------|-------------------|----|
| 1  | 440.232602         | 220.619939        | 423.206053     | 212.106664       |                    |                  | Q    |                    |                   |                   |                  |                    |                   | 17 |
| 2  | 541.280281         | 271.143779        | 524.253732     | 262.630504       | 523.269716         | 262.138496       | T    | 2013.072528        | 1007.039902       | 1996.045979       | 998.526628       | 1995.061963        | 998.034620        | 16 |
| 3  | <b>980.505607</b>  | 490.756442        | 963.479058     | 482.243167       | 962.495042         | 481.751159       | Q    | 1912.024849        | 956.516063        | 1894.998300       | 948.002788       | 1894.014284        | 947.510780        | 15 |
| 4  | <b>1079.574021</b> | <b>540.290649</b> | 1062.547472    | 531.777374       | 1061.563456        | 531.285366       | V    | 1472.799523        | 736.903400        | 1455.772974       | 728.390125       | 1454.788958        | 727.898117        | 14 |
| 5  | <b>1166.606049</b> | 583.806663        | 1149.579500    | 575.293388       | <b>1148.595484</b> | 574.801380       | S    | <b>1373.731109</b> | 687.369193        | 1356.704560       | 678.855918       | 1355.720544        | 678.363910        | 13 |
| 6  | <b>1265.674463</b> | <b>633.340870</b> | 1248.647914    | 624.827595       | <b>1247.663898</b> | 624.335587       | V    | 1286.699081        | 643.853179        | 1269.672532       | 635.339904       | 1268.688516        | 634.847896        | 12 |
| 7  | <b>1378.758527</b> | <b>689.882902</b> | 1361.731978    | 681.369627       | <b>1360.747962</b> | 680.877619       | L    | <b>1187.630667</b> | <b>594.318971</b> | 1170.604118       | 585.805697       | 1169.620102        | 585.313689        | 11 |
| 8  | 1475.811291        | 738.409284        | 1458.784742    | 729.896009       | 1457.800726        | 729.404001       | P    | <b>1074.546603</b> | <b>537.776940</b> | 1057.520054       | 529.263665       | <b>1056.536038</b> | 528.771657        | 10 |
| 9  | 1604.853884        | 802.930580        | 1587.827335    | 794.417306       | 1586.843319        | 793.925298       | E    | <b>977.493839</b>  | 489.250558        | 960.467290        | 480.737283       | 959.483274         | 480.245275        | 9  |
| 10 | 1661.875348        | 831.441312        | 1644.848799    | 822.928038       | 1643.864783        | 822.436030       | G    | <b>848.451246</b>  | 424.729261        | 831.424697        | 416.215986       | 830.440681         | 415.723978        | 8  |
| 11 | 1718.896812        | 859.952044        | 1701.870263    | 851.438770       | 1700.886247        | 850.946762       | G    | <b>791.429782</b>  | 396.218529        | 774.403233        | 387.705254       | 773.419217         | 387.213246        | 7  |
| 12 | 1847.939405        | 924.473341        | 1830.912856    | 915.960066       | 1829.928840        | 915.468058       | E    | 734.408318         | 367.707797        | <b>717.381769</b> | 359.194523       | 716.397753         | 358.702515        | 6  |
| 13 | 1948.987084        | 974.997180        | 1931.960535    | 966.483906       | 1930.976519        | 965.991898       | T    | 605.365725         | 303.186500        | 588.339176        | 294.673226       | 587.355160         | <b>294.181218</b> | 5  |
| 14 | 2046.039848        | 1023.523562       | 2029.013299    | 1015.010288      | 2028.029283        | 1014.518280      | P    | <b>504.318046</b>  | 252.662661        | 487.291497        | 244.149386       |                    |                   | 4  |
| 15 | 2159.123912        | 1080.065594       | 2142.097363    | 1071.552319      | 2141.113347        | 1071.060311      | L    | <b>407.265282</b>  | 204.136279        | 390.238733        | 195.623004       |                    |                   | 3  |
| 16 | 2306.192326        | 1153.599801       | 2289.165777    | 1145.086526      | 2288.181761        | 1144.594518      | F    | <b>294.181218</b>  | 147.594247        | 277.154669        | 139.080972       |                    |                   | 2  |
| 17 |                    |                   |                |                  |                    |                  | K    | 147.112804         | 74.060040         | 130.086255        | 65.546765        |                    |                   | 1  |

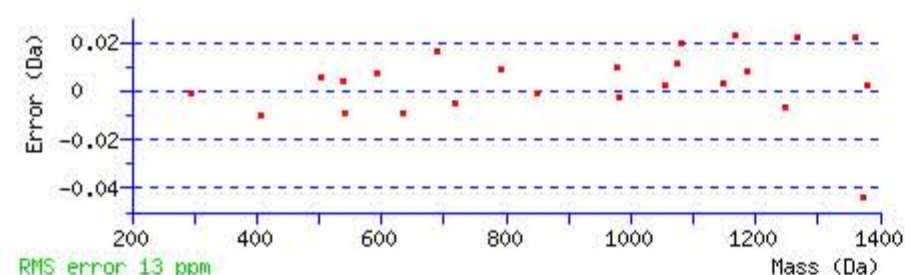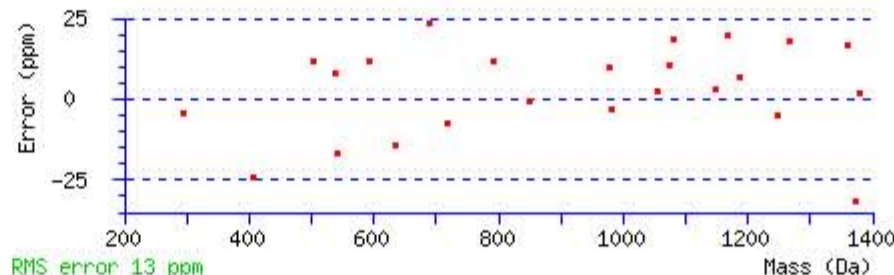

NCBI BLAST search of **QTQVSVLPEGGETPLFK**  
 (Parameters: blastp, nr protein database, expect=20000, no filter, PAM30)  
 Other BLAST [web gateways](#)

## All matches to this query

| Score | Mr(calc):   | Delta     | Sequence                              |
|-------|-------------|-----------|---------------------------------------|
| 40.9  | 2451.290588 | 0.013774  | <a href="#">QTQVSVLPEGGETPLFK</a>     |
| 7.3   | 2451.277130 | 0.027232  | <a href="#">GFPSDTQLLDLRRNHFPSVPR</a> |
| 2.4   | 2451.330780 | -0.026418 | <a href="#">RQFQSQLADLQQLPDILK</a>    |
| 2.4   | 2451.330780 | -0.026418 | <a href="#">RQFQSQLADLQQLPDILK</a>    |



# MASCOT Search Results

## Peptide View

MS/MS Fragmentation of **DPDQTDGLGLSYLSSHIANVER**  
 Found in **GELS\_HUMAN**, Gelsolin OS=Homo sapiens GN=GSN PE=1 SV=1

Match to Query 58320: 2697.322722 from(900.114850,3+) rtinseconds(2556) index(24804)  
 Title: Locus:1.1.1.892.7 File:"2013-07-02 CLN FXIII 60 min 2nd F 2.wiff"  
 Data file C:\Program Files (x86)\Matrix Science\Mascot Daemon\mgf5 FXIII 60 min 2nd\mascot\_daemon\_merge.mgf

Click mouse within plot area to zoom in by factor of two about that point

Or, Plot from  to  Da

Label all possible matches  Label matches used for scoring

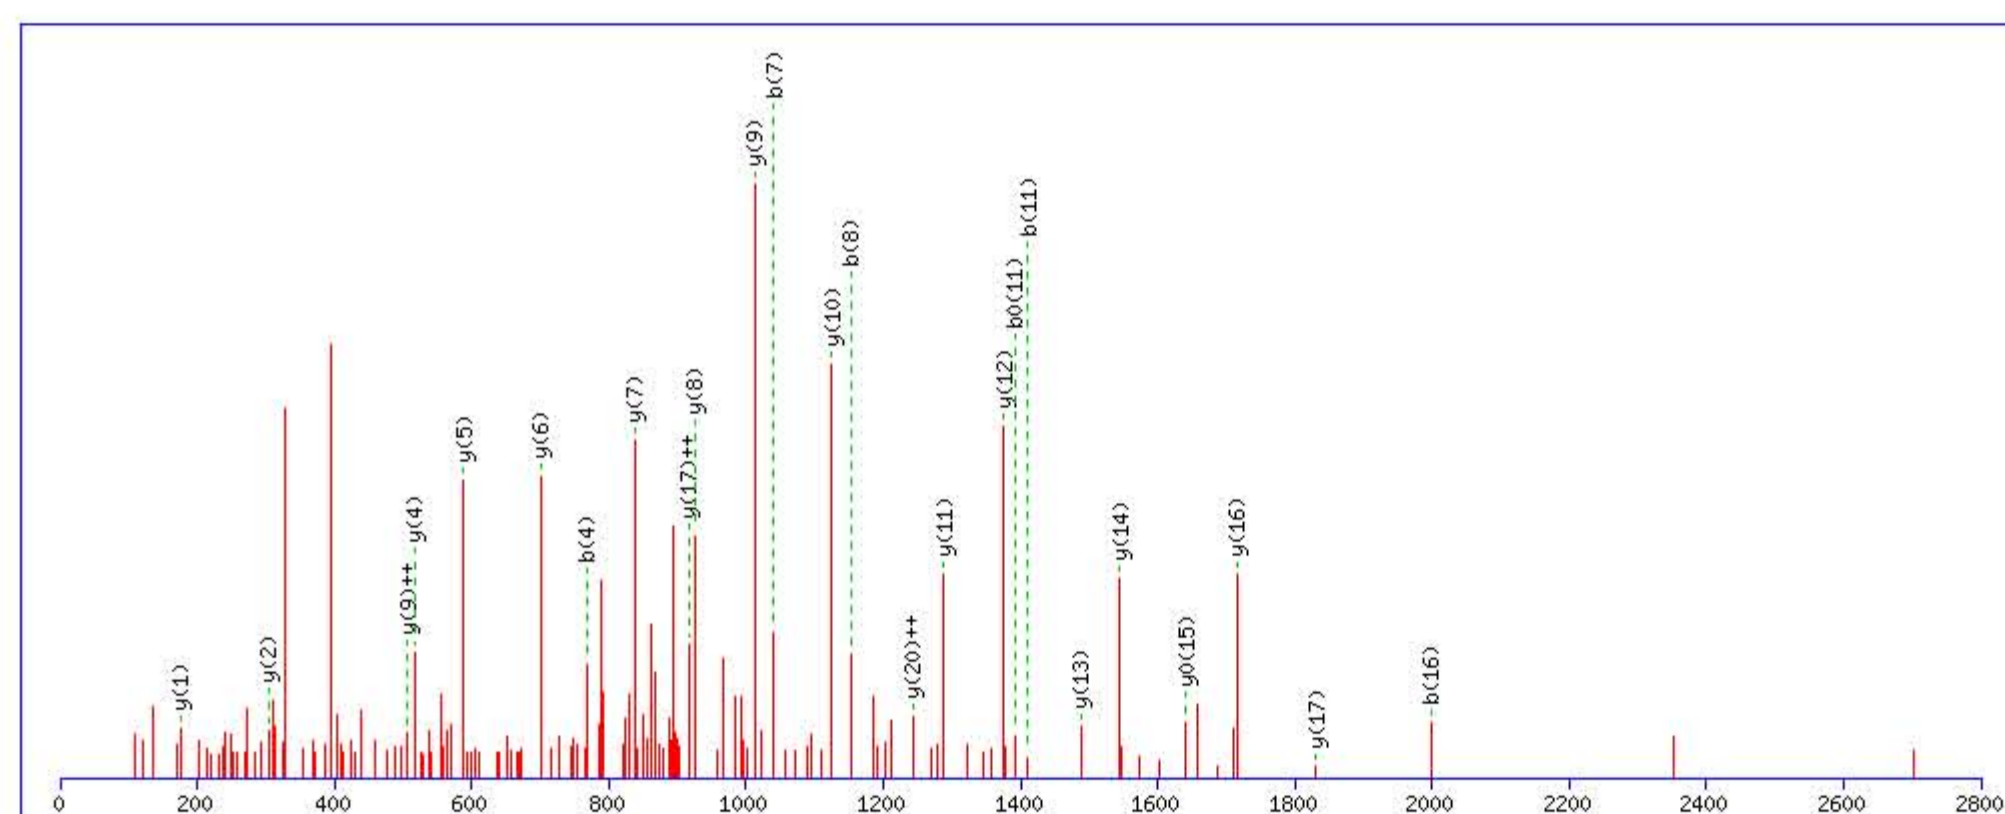

Monoisotopic mass of neutral peptide Mr(calc): 2697.306824  
 Fixed modifications: Carbamidomethyl (C) (apply to specified residues or termini only)  
 Variable modifications:  
 Q4 : Biotin:Thermo-21345 (Q)  
 Ions Score: 113 Expect: 1.5e-010  
 Matches : 25/244 fragment ions using 37 most intense peaks [\(help\)](#)

| #  | b                  | b <sup>++</sup> | b <sup>*</sup> | b <sup>*++</sup> | b <sup>0</sup>     | b <sup>0++</sup> | Seq. | y                  | y <sup>++</sup>    | y <sup>*</sup> | y <sup>*++</sup> | y <sup>0</sup>     | y <sup>0++</sup> | #  |
|----|--------------------|-----------------|----------------|------------------|--------------------|------------------|------|--------------------|--------------------|----------------|------------------|--------------------|------------------|----|
| 1  | 116.034219         | 58.520748       |                |                  | 98.023654          | 49.515465        | D    |                    |                    |                |                  |                    |                  | 22 |
| 2  | 213.086983         | 107.047129      |                |                  | 195.076418         | 98.041847        | P    | 2583.287164        | 1292.147220        | 2566.260615    | 1283.633945      | 2565.276599        | 1283.141937      | 21 |
| 3  | 328.113926         | 164.560601      |                |                  | 310.103361         | 155.555319       | D    | 2486.234400        | <b>1243.620838</b> | 2469.207851    | 1235.107563      | 2468.223835        | 1234.615555      | 20 |
| 4  | <b>767.339252</b>  | 384.173264      | 750.312703     | 375.659989       | 749.328687         | 375.167982       | Q    | 2371.207457        | 1186.107366        | 2354.180908    | 1177.594092      | 2353.196892        | 1177.102084      | 19 |
| 5  | 868.386931         | 434.697104      | 851.360382     | 426.183829       | 850.376366         | 425.691821       | T    | 1931.982131        | 966.494704         | 1914.955582    | 957.981429       | 1913.971566        | 957.489421       | 18 |
| 6  | 983.413874         | 492.210575      | 966.387325     | 483.697300       | 965.403309         | 483.205292       | D    | <b>1830.934452</b> | <b>915.970864</b>  | 1813.907903    | 907.457590       | 1812.923887        | 906.965581       | 17 |
| 7  | <b>1040.435338</b> | 520.721307      | 1023.408789    | 512.208032       | 1022.424773        | 511.716025       | G    | <b>1715.907509</b> | 858.457392         | 1698.880960    | 849.944118       | 1697.896944        | 849.452110       | 16 |
| 8  | <b>1153.519402</b> | 577.263339      | 1136.492853    | 568.750065       | 1135.508837        | 568.258056       | L    | 1658.886045        | 829.946661         | 1641.859496    | 821.433386       | <b>1640.875480</b> | 820.941378       | 15 |
| 9  | 1210.540866        | 605.774071      | 1193.514317    | 597.260796       | 1192.530301        | 596.768788       | G    | <b>1545.801981</b> | 773.404629         | 1528.775432    | 764.891354       | 1527.791416        | 764.399346       | 14 |
| 10 | 1323.624930        | 662.316103      | 1306.598381    | 653.802828       | 1305.614365        | 653.310820       | L    | <b>1488.780517</b> | 744.893897         | 1471.753968    | 736.380622       | 1470.769952        | 735.888614       | 13 |
| 11 | <b>1410.656958</b> | 705.832117      | 1393.630409    | 697.318842       | <b>1392.646393</b> | 696.826834       | S    | <b>1375.696453</b> | 688.351865         | 1358.669904    | 679.838590       | 1357.685888        | 679.346582       | 12 |
| 12 | 1573.720287        | 787.363781      | 1556.693738    | 778.850507       | 1555.709722        | 778.358499       | Y    | <b>1288.664425</b> | 644.835851         | 1271.637876    | 636.322576       | 1270.653860        | 635.830568       | 11 |
| 13 | 1686.804351        | 843.905813      | 1669.777802    | 835.392539       | 1668.793786        | 834.900531       | L    | <b>1125.601096</b> | 563.304186         | 1108.574547    | 554.790912       | 1107.590531        | 554.298904       | 10 |
| 14 | 1773.836379        | 887.421827      | 1756.809830    | 878.908553       | 1755.825814        | 878.416545       | S    | <b>1012.517032</b> | <b>506.762154</b>  | 995.490483     | 498.248880       | 994.506467         | 497.756872       | 9  |
| 15 | 1860.868407        | 930.937841      | 1843.841858    | 922.424567       | 1842.857842        | 921.932559       | S    | <b>925.485004</b>  | 463.246140         | 908.458455     | 454.732866       | 907.474439         | 454.240858       | 8  |
| 16 | <b>1997.927319</b> | 999.467297      | 1980.900770    | 990.954023       | 1979.916754        | 990.462015       | H    | <b>838.452976</b>  | 419.730126         | 821.426427     | 411.216852       | 820.442411         | 410.724844       | 7  |
| 17 | 2111.011383        | 1056.009329     | 2093.984834    | 1047.496055      | 2093.000818        | 1047.004047      | I    | <b>701.394064</b>  | 351.200670         | 684.367515     | 342.687396       | 683.383499         | 342.195388       | 6  |
| 18 | 2182.048497        | 1091.527886     | 2165.021948    | 1083.014612      | 2164.037932        | 1082.522604      | A    | <b>588.310000</b>  | 294.658638         | 571.283451     | 286.145364       | 570.299435         | 285.653356       | 5  |
| 19 | 2296.091424        | 1148.549350     | 2279.064875    | 1140.036075      | 2278.080859        | 1139.544067      | N    | <b>517.272886</b>  | 259.140081         | 500.246337     | 250.626806       | 499.262321         | 250.134798       | 4  |
| 20 | 2395.159838        | 1198.083557     | 2378.133289    | 1189.570282      | 2377.149273        | 1189.078274      | V    | 403.229959         | 202.118617         | 386.203410     | 193.605343       | 385.219394         | 193.113335       | 3  |
| 21 | 2524.202431        | 1262.604853     | 2507.175882    | 1254.091579      | 2506.191866        | 1253.599571      | E    | <b>304.161545</b>  | 152.584411         | 287.134996     | 144.071136       | 286.150980         | 143.579128       | 2  |
| 22 |                    |                 |                |                  |                    |                  | R    | <b>175.118952</b>  | 88.063114          | 158.092403     | 79.549839        |                    |                  | 1  |

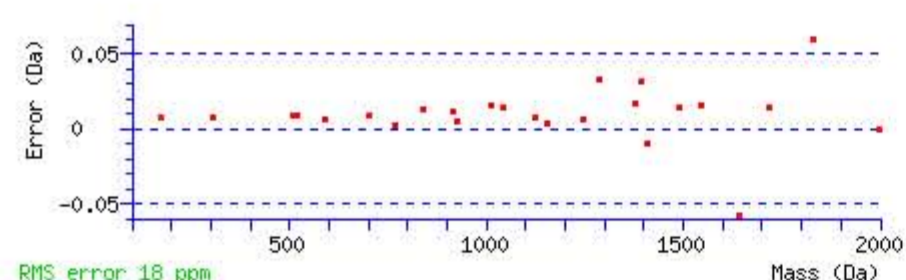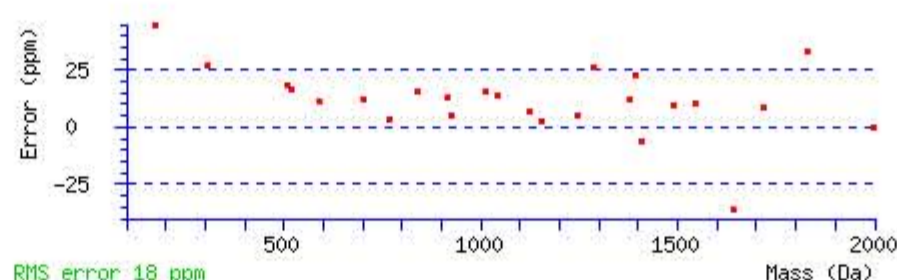

NCBI BLAST search of **DPDQTDGLGLSYLSSHIANVER**  
 (Parameters: blastp, nr protein database, expect=20000, no filter, PAM30)  
 Other BLAST [web gateways](#)

### All matches to this query

| Score | Mr(calc):   | Delta    | Sequence                               |
|-------|-------------|----------|----------------------------------------|
| 112.7 | 2697.306824 | 0.015898 | <a href="#">DPDQTDGLGLSYLSSHIANVER</a> |







# MASCOT Search Results

## Peptide View

MS/MS Fragmentation of **VIHDNFGIVEGLMTTVHAIATQK**  
 Found in **G3P\_HUMAN**, Glyceraldehyde-3-phosphate dehydrogenase OS=Homo sapiens GN=GAPDH PE=1 SV=3

Match to Query 60892: 2905.548856 from(727.394490,4+) rtinseconds(3124) index(60325)  
 Title: Locus:1.1.1.1699.12 File:"2013-07-02 CLN FXIII 60 min 2nd F 4.wiff"  
 Data file C:\Program Files (x86)\Matrix Science\Mascot Daemon\mgf5 FXIII 60 min 2nd\mascot\_daemon\_merge.mgf

Click mouse within plot area to zoom in by factor of two about that point  
 Or, Plot from  to  Da   
 Label all possible matches  Label matches used for scoring

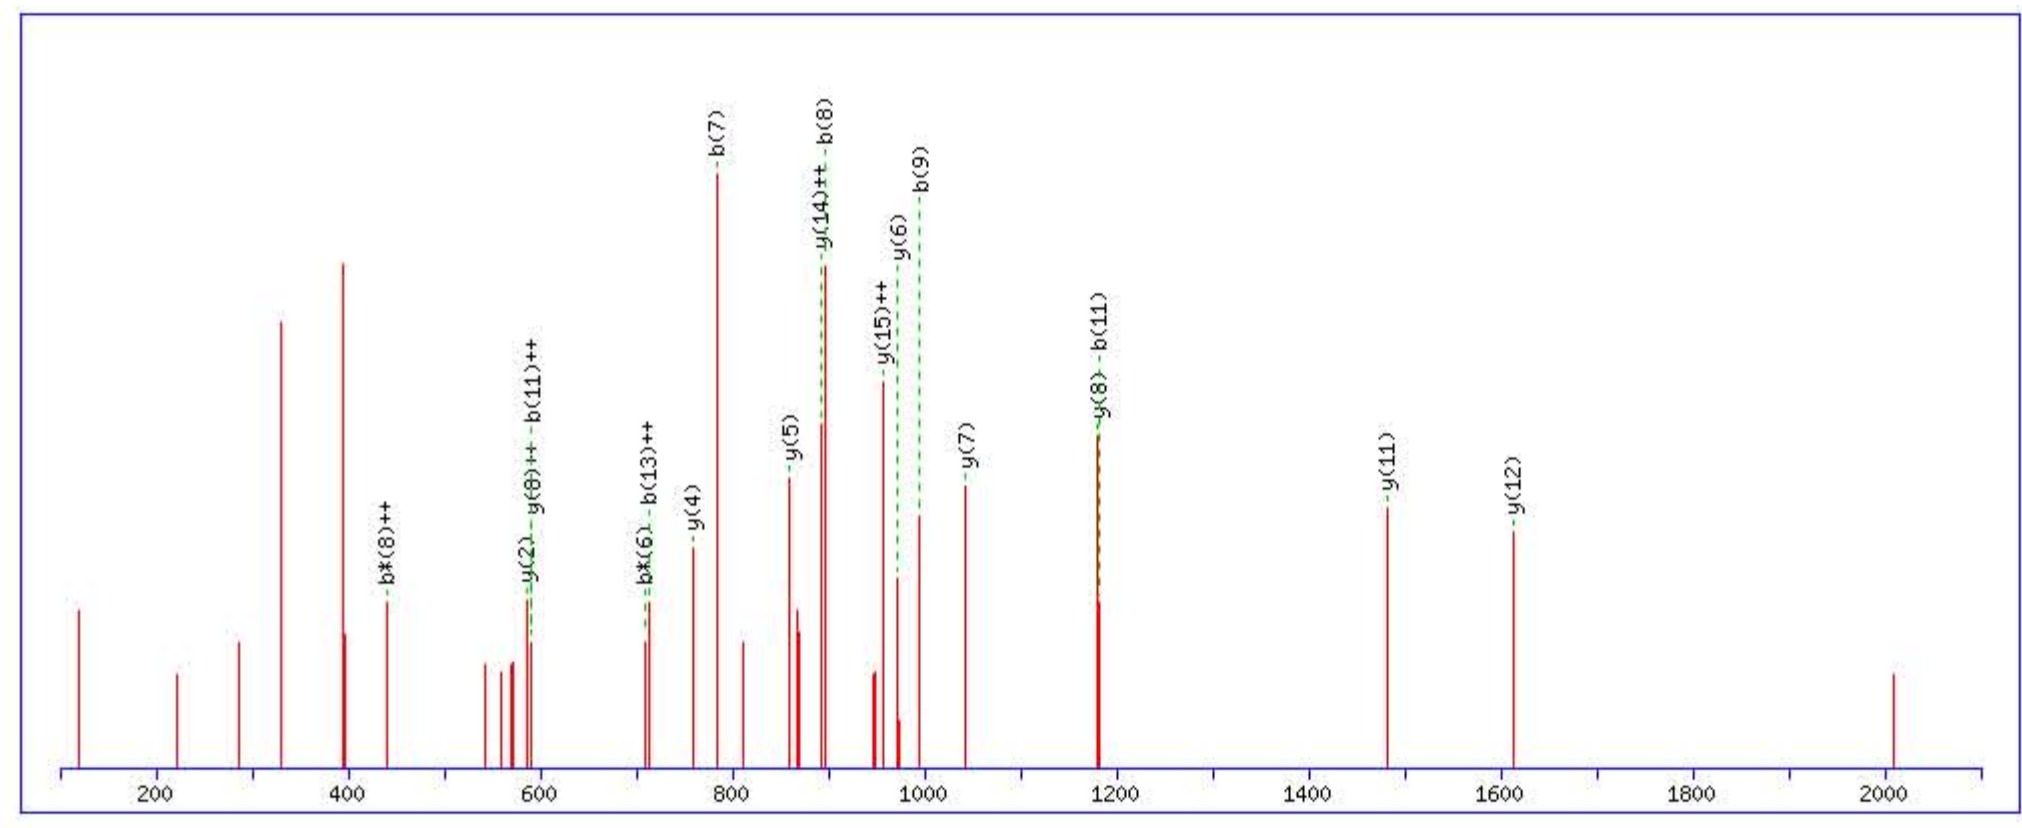

Monoisotopic mass of neutral peptide Mr(calc): 2905.519424  
 Fixed modifications: Carbamidomethyl (C) (apply to specified residues or termini only)  
 Variable modifications:  
 Q23 : Biotin:Thermo-21345 (Q)  
 Ions Score: 43 Expect: 0.00013  
 Matches : 19/258 fragment ions using 32 most intense peaks [\(help\)](#)

| #  | b           | b <sup>++</sup> | b <sup>+</sup> | b <sup>+++</sup> | b <sup>0</sup> | b <sup>0++</sup> | Seq. | y           | y <sup>++</sup> | y <sup>+</sup> | y <sup>+++</sup> | y <sup>0</sup> | y <sup>0++</sup> | #  |
|----|-------------|-----------------|----------------|------------------|----------------|------------------|------|-------------|-----------------|----------------|------------------|----------------|------------------|----|
| 1  | 100.075690  | 50.541483       |                |                  |                |                  | V    |             |                 |                |                  |                |                  | 24 |
| 2  | 213.159754  | 107.083515      |                |                  |                |                  | I    | 2807.458272 | 1404.232774     | 2790.431723    | 1395.719499      | 2789.447707    | 1395.227491      | 23 |
| 3  | 350.218666  | 175.612971      |                |                  |                |                  | H    | 2694.374208 | 1347.690742     | 2677.347659    | 1339.177467      | 2676.363643    | 1338.685459      | 22 |
| 4  | 465.245609  | 233.126443      |                |                  | 447.235044     | 224.121160       | D    | 2557.315296 | 1279.161286     | 2540.288747    | 1270.648011      | 2539.304731    | 1270.156003      | 21 |
| 5  | 579.288536  | 290.147906      | 562.261987     | 281.634632       | 561.277971     | 281.142624       | N    | 2442.288353 | 1221.647814     | 2425.261804    | 1213.134540      | 2424.277788    | 1212.642532      | 20 |
| 6  | 726.356950  | 363.682113      | 709.330401     | 355.168838       | 708.346385     | 354.676830       | F    | 2328.245426 | 1164.626351     | 2311.218877    | 1156.113076      | 2310.234861    | 1155.621068      | 19 |
| 7  | 783.378414  | 392.192845      | 766.351865     | 383.679571       | 765.367849     | 383.187563       | G    | 2181.177012 | 1091.092144     | 2164.150463    | 1082.578869      | 2163.166447    | 1082.086861      | 18 |
| 8  | 896.462478  | 448.734877      | 879.435929     | 440.221603       | 878.451913     | 439.729595       | I    | 2124.155548 | 1062.581412     | 2107.128999    | 1054.068137      | 2106.144983    | 1053.576129      | 17 |
| 9  | 995.530892  | 498.269084      | 978.504343     | 489.755810       | 977.520327     | 489.263802       | V    | 2011.071484 | 1006.039380     | 1994.044935    | 997.526105       | 1993.060919    | 997.034097       | 16 |
| 10 | 1124.573485 | 562.790381      | 1107.546936    | 554.277106       | 1106.562920    | 553.785098       | E    | 1912.003070 | 956.505173      | 1894.976521    | 947.991899       | 1893.992505    | 947.499890       | 15 |
| 11 | 1181.594949 | 591.301113      | 1164.568400    | 582.787838       | 1163.584384    | 582.295830       | G    | 1782.960477 | 891.983876      | 1765.933928    | 883.470602       | 1764.949912    | 882.978594       | 14 |
| 12 | 1294.679013 | 647.843144      | 1277.652464    | 639.329870       | 1276.668448    | 638.837862       | L    | 1725.939013 | 863.473144      | 1708.912464    | 854.959870       | 1707.928448    | 854.467862       | 13 |
| 13 | 1425.719498 | 713.363387      | 1408.692949    | 704.850113       | 1407.708933    | 704.358104       | M    | 1612.854949 | 806.931113      | 1595.828400    | 798.417838       | 1594.844384    | 797.925830       | 12 |
| 14 | 1526.767177 | 763.887227      | 1509.740628    | 755.373952       | 1508.756612    | 754.881944       | T    | 1481.814464 | 741.410870      | 1464.787915    | 732.897596       | 1463.803899    | 732.405588       | 11 |
| 15 | 1627.814856 | 814.411066      | 1610.788307    | 805.897792       | 1609.804291    | 805.405783       | T    | 1380.766785 | 690.887031      | 1363.740236    | 682.373756       | 1362.756220    | 681.881748       | 10 |
| 16 | 1726.883270 | 863.945273      | 1709.856721    | 855.431999       | 1708.872705    | 854.939991       | V    | 1279.719106 | 640.363191      | 1262.692557    | 631.849917       | 1261.708541    | 631.357909       | 9  |
| 17 | 1863.942182 | 932.474729      | 1846.915633    | 923.961455       | 1845.931617    | 923.469447       | H    | 1180.650692 | 590.828984      | 1163.624143    | 582.315710       | 1162.640127    | 581.823701       | 8  |
| 18 | 1934.979296 | 967.993286      | 1917.952747    | 959.480012       | 1916.968731    | 958.988003       | A    | 1043.591780 | 522.299528      | 1026.565231    | 513.786254       | 1025.581215    | 513.294245       | 7  |
| 19 | 2048.063360 | 1024.535318     | 2031.036811    | 1016.022044      | 2030.052795    | 1015.530036      | I    | 972.554666  | 486.780971      | 955.528117     | 478.267697       | 954.544101     | 477.775689       | 6  |
| 20 | 2149.111039 | 1075.059157     | 2132.084490    | 1066.545883      | 2131.100474    | 1066.053875      | T    | 859.470602  | 430.238939      | 842.444053     | 421.725665       | 841.460037     | 421.233657       | 5  |
| 21 | 2220.148153 | 1110.577714     | 2203.121604    | 1102.064440      | 2202.137588    | 1101.572432      | A    | 758.422923  | 379.715100      | 741.396374     | 371.201825       | 740.412358     | 370.709817       | 4  |
| 22 | 2321.195832 | 1161.101554     | 2304.169283    | 1152.588279      | 2303.185267    | 1152.096271      | T    | 687.385809  | 344.196543      | 670.359260     | 335.683268       | 669.375244     | 335.191260       | 3  |
| 23 | 2760.421158 | 1380.714217     | 2743.394609    | 1372.200942      | 2742.410593    | 1371.708934      | Q    | 586.338130  | 293.672703      | 569.311581     | 285.159429       |                |                  | 2  |
| 24 |             |                 |                |                  |                |                  | K    | 147.112804  | 74.060040       | 130.086255     | 65.546765        |                |                  | 1  |

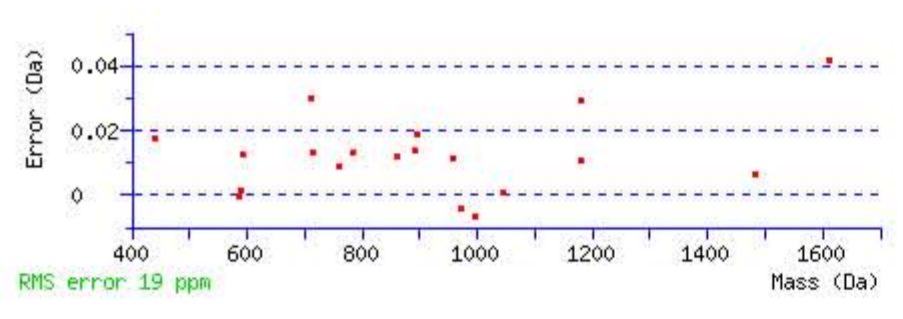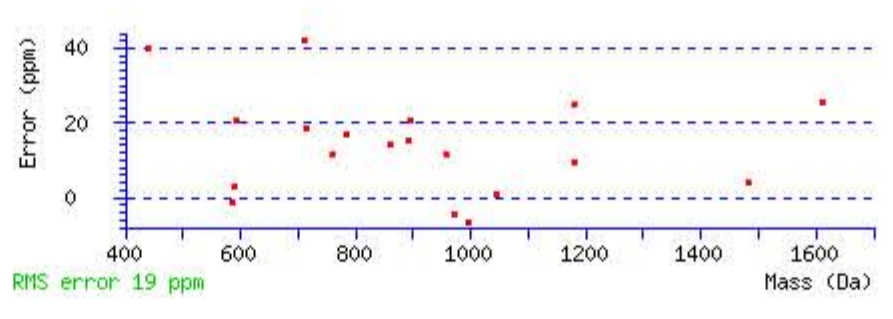

NCBI BLAST search of **VIHDNFGIVEGLMTTVHAIATQK**  
 (Parameters: blastp, nr protein database, expect=20000, no filter, PAM30)  
 Other BLAST [web gateways](#)

### All matches to this query

| Score | Mr(calc):   | Delta    | Sequence                                |
|-------|-------------|----------|-----------------------------------------|
| 43.4  | 2905.519424 | 0.029432 | <a href="#">VIHDNFGIVEGLMTTVHAIATQK</a> |
| 1.9   | 2905.511490 | 0.037366 | <a href="#">TLQEIFQAENTIMLLERSIMAK</a>  |
| 1.9   | 2905.511490 | 0.037366 | <a href="#">TLQEIFQAENTIMLLERSIMAK</a>  |



# MASCOT Search Results

## Peptide View

MS/MS Fragmentation of **YVMLPVADQYDCITHYEGSTCPK**  
 Found in **HPTR\_HUMAN**, Haptoglobin-related protein OS=Homo sapiens GN=HPR PE=1 SV=2

Match to Query 62112: 3057.388722 from(1020.136850,3+) rtinseconds(2453) index(24185)  
 Title: Locus:1.1.1.856.7 File:"2013-07-02 CLN FXIII 60 min 2nd F 2.wiff"  
 Data file C:\Program Files (x86)\Matrix Science\Mascot Daemon\mgf5 FXIII 60 min 2nd\mascot\_daemon\_merge.mgf

Click mouse within plot area to zoom in by factor of two about that point  
 Or, Plot from  to  Da   
 Label all possible matches  Label matches used for scoring

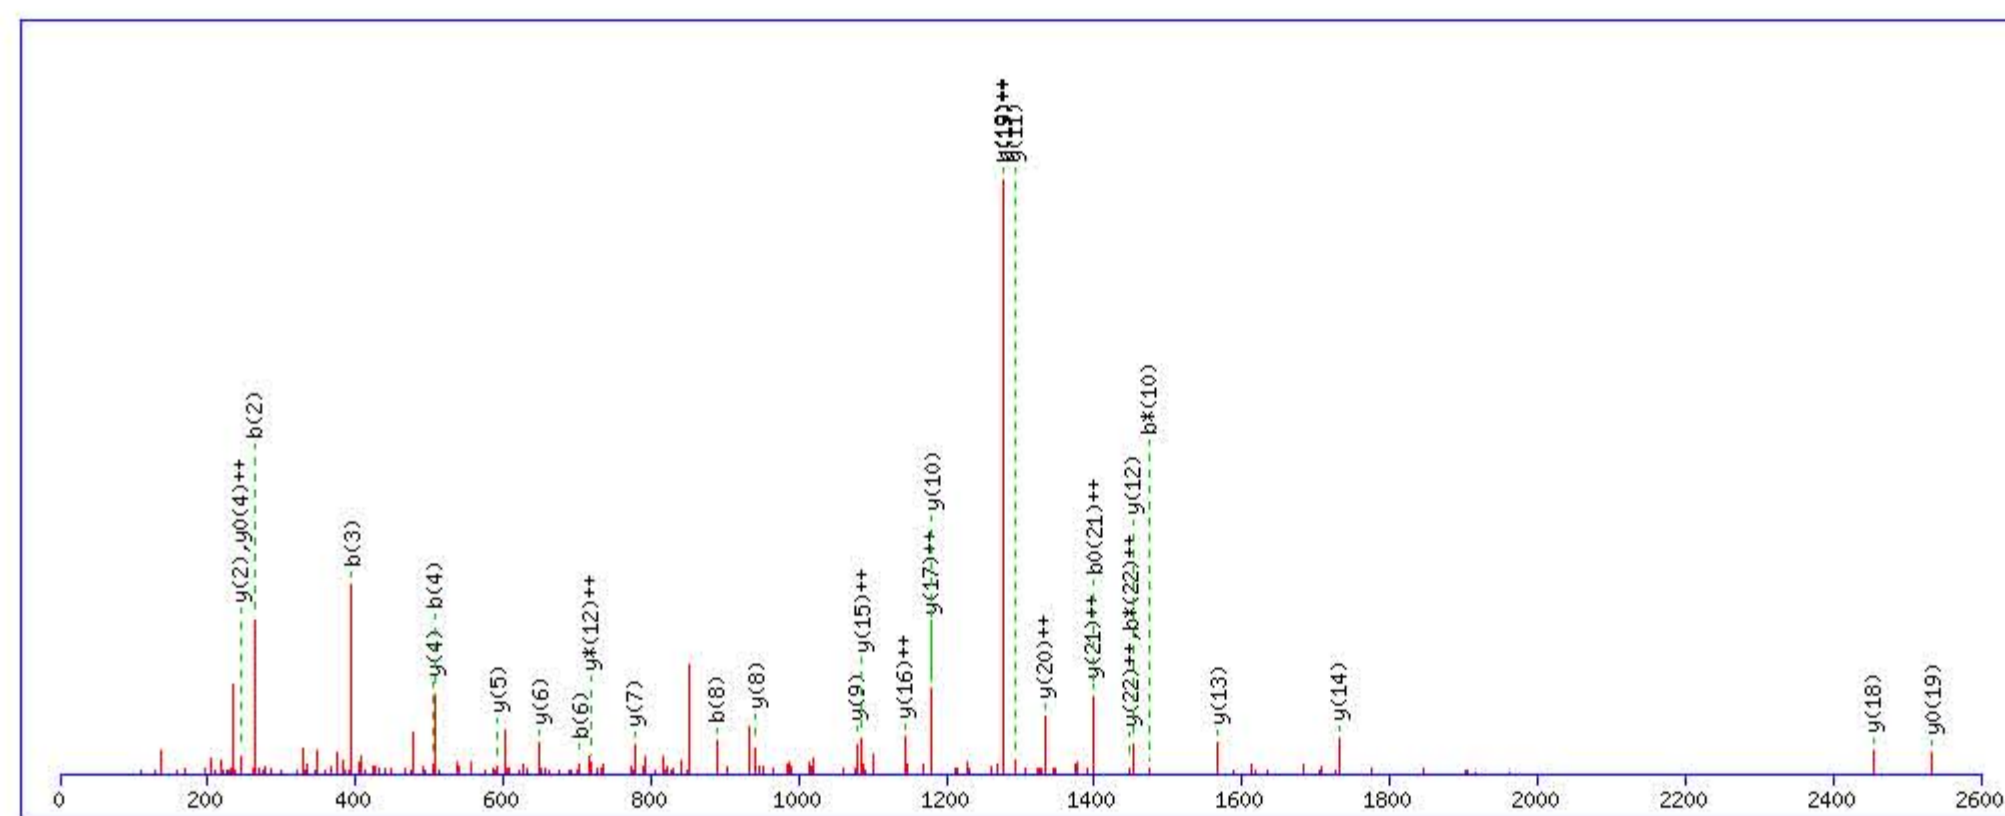

Monoisotopic mass of neutral peptide  $M_r(\text{calc})$ : 3057.374466  
 Fixed modifications: Carbamidomethyl (C) (apply to specified residues or termini only)  
 Variable modifications:  
 Q9 : Biotin:Thermo-21345 (Q)  
 Ions Score: 62 Expect: 6.9e-006  
 Matches : 32/228 fragment ions using 73 most intense peaks [\(help\)](#)

| #  | b                 | b <sup>++</sup>    | b <sup>*</sup>     | b <sup>*++</sup>   | b <sup>0</sup> | b <sup>0++</sup>   | Seq. | y                  | y <sup>++</sup>    | y <sup>*</sup> | y <sup>*++</sup>  | y <sup>0</sup>     | y <sup>0++</sup>  | #  |
|----|-------------------|--------------------|--------------------|--------------------|----------------|--------------------|------|--------------------|--------------------|----------------|-------------------|--------------------|-------------------|----|
| 1  | 164.070605        | 82.538940          |                    |                    |                |                    | Y    |                    |                    |                |                   |                    |                   | 23 |
| 2  | <b>263.139019</b> | 132.073148         |                    |                    |                |                    | V    | 2895.318410        | <b>1448.162843</b> | 2878.291861    | 1439.649568       | 2877.307845        | 1439.157560       | 22 |
| 3  | <b>394.179504</b> | 197.593390         |                    |                    |                |                    | M    | 2796.249996        | <b>1398.628636</b> | 2779.223447    | 1390.115361       | 2778.239431        | 1389.623353       | 21 |
| 4  | <b>507.263568</b> | 254.135422         |                    |                    |                |                    | L    | 2665.209511        | <b>1333.108393</b> | 2648.182962    | 1324.595119       | 2647.198946        | 1324.103111       | 20 |
| 5  | 604.316332        | 302.661804         |                    |                    |                |                    | P    | 2552.125447        | <b>1276.566361</b> | 2535.098898    | 1268.053087       | <b>2534.114882</b> | 1267.561079       | 19 |
| 6  | <b>703.384746</b> | 352.196011         |                    |                    |                |                    | V    | <b>2455.072683</b> | 1228.039979        | 2438.046134    | 1219.526705       | 2437.062118        | 1219.034697       | 18 |
| 7  | 774.421860        | 387.714568         |                    |                    |                |                    | A    | 2356.004269        | <b>1178.505772</b> | 2338.977720    | 1169.992498       | 2337.993704        | 1169.500490       | 17 |
| 8  | <b>889.448803</b> | 445.228040         |                    |                    | 871.438238     | 436.222757         | D    | 2284.967155        | <b>1142.987215</b> | 2267.940606    | 1134.473941       | 2266.956590        | 1133.981933       | 16 |
| 9  | 1328.674129       | 664.840703         | 1311.647580        | 656.327428         | 1310.663564    | 655.835420         | Q    | 2169.940212        | <b>1085.473744</b> | 2152.913663    | 1076.960469       | 2151.929647        | 1076.468461       | 15 |
| 10 | 1491.737458       | 746.372367         | <b>1474.710909</b> | 737.859093         | 1473.726893    | 737.367085         | Y    | <b>1730.714886</b> | 865.861081         | 1713.688337    | 857.347807        | 1712.704321        | 856.855799        | 14 |
| 11 | 1606.764401       | 803.885839         | 1589.737852        | 795.372564         | 1588.753836    | 794.880556         | D    | <b>1567.651557</b> | 784.329417         | 1550.625008    | 775.816142        | 1549.640992        | 775.324134        | 13 |
| 12 | 1766.795050       | 883.901163         | 1749.768501        | 875.387889         | 1748.784485    | 874.895881         | C    | <b>1452.624614</b> | 726.815945         | 1435.598065    | <b>718.302671</b> | 1434.614049        | 717.810663        | 12 |
| 13 | 1879.879114       | 940.443195         | 1862.852565        | 931.929921         | 1861.868549    | 931.437913         | I    | <b>1292.593965</b> | 646.800621         | 1275.567416    | 638.287346        | 1274.583400        | 637.795338        | 11 |
| 14 | 1980.926793       | 990.967035         | 1963.900244        | 982.453760         | 1962.916228    | 981.961752         | T    | <b>1179.509901</b> | 590.258589         | 1162.483352    | 581.745314        | 1161.499336        | 581.253306        | 10 |
| 15 | 2117.985705       | 1059.496490        | 2100.959156        | 1050.983216        | 2099.975140    | 1050.491208        | H    | <b>1078.462222</b> | 539.734749         | 1061.435673    | 531.221475        | 1060.451657        | 530.729467        | 9  |
| 16 | 2281.049034       | 1141.028155        | 2264.022485        | 1132.514880        | 2263.038469    | 1132.022872        | Y    | <b>941.403310</b>  | 471.205293         | 924.376761     | 462.692018        | 923.392745         | 462.200010        | 8  |
| 17 | 2410.091627       | 1205.549452        | 2393.065078        | 1197.036177        | 2392.081062    | 1196.544169        | E    | <b>778.339981</b>  | 389.673628         | 761.313432     | 381.160354        | 760.329416         | 380.668346        | 7  |
| 18 | 2467.113091       | 1234.060184        | 2450.086542        | 1225.546909        | 2449.102526    | 1225.054901        | G    | <b>649.297388</b>  | 325.152332         | 632.270839     | 316.639057        | 631.286823         | 316.147049        | 6  |
| 19 | 2554.145119       | <b>1277.576198</b> | 2537.118570        | 1269.062923        | 2536.134554    | 1268.570915        | S    | <b>592.275924</b>  | 296.641600         | 575.249375     | 288.128325        | 574.265359         | 287.636317        | 5  |
| 20 | 2655.192798       | 1328.100037        | 2638.166249        | 1319.586762        | 2637.182233    | 1319.094754        | T    | <b>505.243896</b>  | 253.125586         | 488.217347     | 244.612311        | 487.233331         | <b>244.120303</b> | 4  |
| 21 | 2815.223447       | 1408.115361        | 2798.196898        | 1399.602087        | 2797.212882    | <b>1399.110079</b> | C    | 404.196217         | 202.601746         | 387.169668     | 194.088472        |                    |                   | 3  |
| 22 | 2912.276211       | 1456.641743        | 2895.249662        | <b>1448.128469</b> | 2894.265646    | 1447.636461        | P    | <b>244.165568</b>  | 122.586422         | 227.139019     | 114.073148        |                    |                   | 2  |
| 23 |                   |                    |                    |                    |                |                    | K    | 147.112804         | 74.060040          | 130.086255     | 65.546765         |                    |                   | 1  |

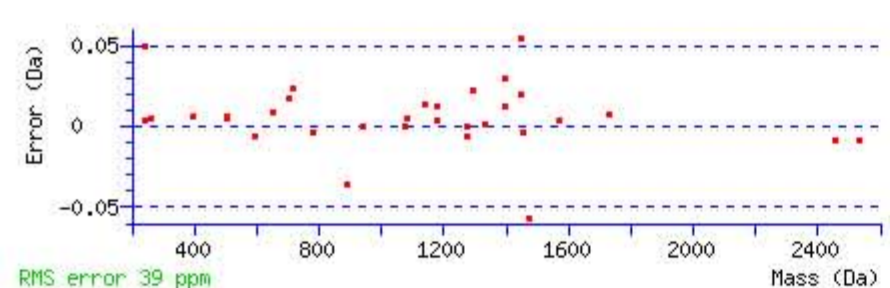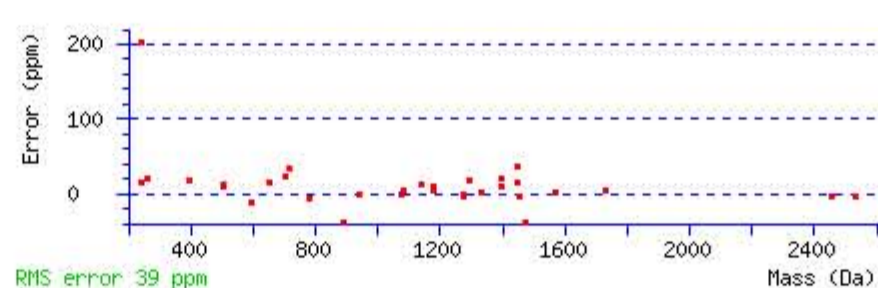

NCBI BLAST search of **YVMLPVADQYDCITHYEGSTCPK**  
 (Parameters: blastp, nr protein database, expect=20000, no filter, PAM30)  
 Other BLAST [web gateways](#)

### All matches to this query

| Score | $M_r(\text{calc})$ : | Delta    | Sequence                       |
|-------|----------------------|----------|--------------------------------|
| 61.8  | 3057.374466          | 0.014256 | <b>YVMLPVADQYDCITHYEGSTCPK</b> |



# MASCOT SCIENCE Mascot Search Results

## Peptide View

MS/MS Fragmentation of **TYFPHFDSLHGSAQVK**

Found in **HBA\_HUMAN**, Hemoglobin subunit alpha OS=Homo sapiens GN=HBA1 PE=1 SV=2

Match to Query 49864: 2144.050976 from(537.020020,4+) rtinseconds(2067) index(6251)

Title: Locus:1.1.1.1529.5 File:"2013-07-02 CLN FXIII 60 min 2nd F 1.wiff"

Data file C:\Program Files (x86)\Matrix Science\Mascot Daemon\mgf\5 FXIII 60 min 2nd\mascot\_daemon\_merge.mgf

Click mouse within plot area to zoom in by factor of two about that point

Or, Plot from  to  Da

Label all possible matches  Label matches used for scoring

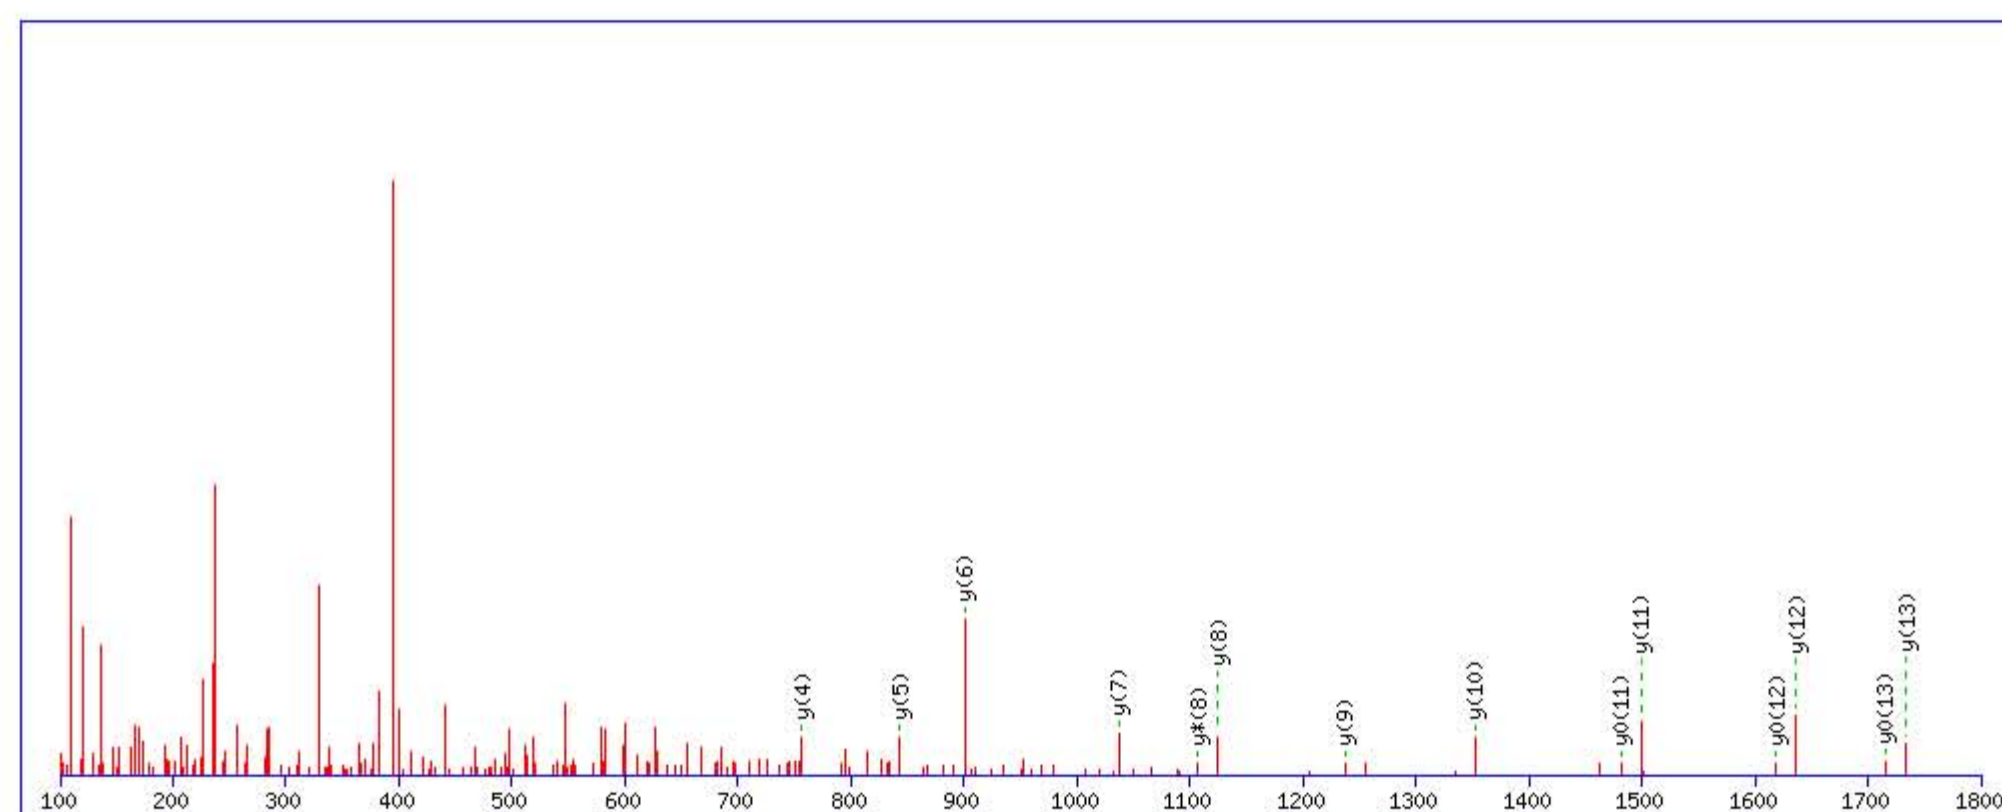

Monoisotopic mass of neutral peptide Mr(calc): 2144.051346

Fixed modifications: Carbamidomethyl (C) (apply to specified residues or termini only)

Variable modifications:

Q14 : Biotin:Thermo-21345 (Q)

Ions Score: 46 Expect: 0.00064

Matches : 14/146 fragment ions using 32 most intense peaks [\(help\)](#)

| #  | b           | b <sup>++</sup> | b <sup>*</sup> | b <sup>*++</sup> | b <sup>0</sup> | b <sup>0++</sup> | Seq. | y                  | y <sup>++</sup> | y <sup>*</sup>     | y <sup>*++</sup> | y <sup>0</sup>     | y <sup>0++</sup> | #  |
|----|-------------|-----------------|----------------|------------------|----------------|------------------|------|--------------------|-----------------|--------------------|------------------|--------------------|------------------|----|
| 1  | 102.054955  | 51.531116       |                |                  | 84.044390      | 42.525833        | T    |                    |                 |                    |                  |                    |                  | 16 |
| 2  | 265.118284  | 133.062780      |                |                  | 247.107719     | 124.057498       | Y    | 2044.010930        | 1022.509103     | 2026.984381        | 1013.995829      | 2026.000365        | 1013.503821      | 15 |
| 3  | 412.186698  | 206.596987      |                |                  | 394.176133     | 197.591705       | F    | 1880.947601        | 940.977438      | 1863.921052        | 932.464164       | 1862.937036        | 931.972156       | 14 |
| 4  | 509.239462  | 255.123369      |                |                  | 491.228897     | 246.118087       | P    | <b>1733.879187</b> | 867.443231      | 1716.852638        | 858.929957       | <b>1715.868622</b> | 858.437949       | 13 |
| 5  | 646.298374  | 323.652825      |                |                  | 628.287809     | 314.647543       | H    | <b>1636.826423</b> | 818.916849      | 1619.799874        | 810.403575       | <b>1618.815858</b> | 809.911567       | 12 |
| 6  | 793.366788  | 397.187032      |                |                  | 775.356223     | 388.181750       | F    | <b>1499.767511</b> | 750.387393      | 1482.740962        | 741.874119       | <b>1481.756946</b> | 741.382111       | 11 |
| 7  | 908.393731  | 454.700504      |                |                  | 890.383166     | 445.695221       | D    | <b>1352.699097</b> | 676.853186      | 1335.672548        | 668.339912       | 1334.688532        | 667.847904       | 10 |
| 8  | 1021.477795 | 511.242536      |                |                  | 1003.467230    | 502.237253       | L    | <b>1237.672154</b> | 619.339715      | 1220.645605        | 610.826441       | 1219.661589        | 610.334433       | 9  |
| 9  | 1108.509823 | 554.758550      |                |                  | 1090.499258    | 545.753267       | S    | <b>1124.588090</b> | 562.797683      | <b>1107.561541</b> | 554.284409       | 1106.577525        | 553.792400       | 8  |
| 10 | 1245.568735 | 623.288006      |                |                  | 1227.558170    | 614.282723       | H    | <b>1037.556062</b> | 519.281669      | 1020.529513        | 510.768394       | 1019.545497        | 510.276386       | 7  |
| 11 | 1302.590199 | 651.798738      |                |                  | 1284.579634    | 642.793455       | G    | <b>900.497150</b>  | 450.752213      | 883.470601         | 442.238938       | 882.486585         | 441.746930       | 6  |
| 12 | 1389.622227 | 695.314752      |                |                  | 1371.611662    | 686.309469       | S    | <b>843.475686</b>  | 422.241481      | 826.449137         | 413.728207       | 825.465121         | 413.236199       | 5  |
| 13 | 1460.659341 | 730.833309      |                |                  | 1442.648776    | 721.828026       | A    | <b>756.443658</b>  | 378.725467      | 739.417109         | 370.212192       |                    |                  | 4  |
| 14 | 1899.884667 | 950.445972      | 1882.858118    | 941.932697       | 1881.874102    | 941.440689       | Q    | 685.406544         | 343.206910      | 668.379995         | 334.693635       |                    |                  | 3  |
| 15 | 1998.953081 | 999.980179      | 1981.926532    | 991.466904       | 1980.942516    | 990.974896       | V    | 246.181218         | 123.594247      | 229.154669         | 115.080972       |                    |                  | 2  |
| 16 |             |                 |                |                  |                |                  | K    | 147.112804         | 74.060040       | 130.086255         | 65.546765        |                    |                  | 1  |

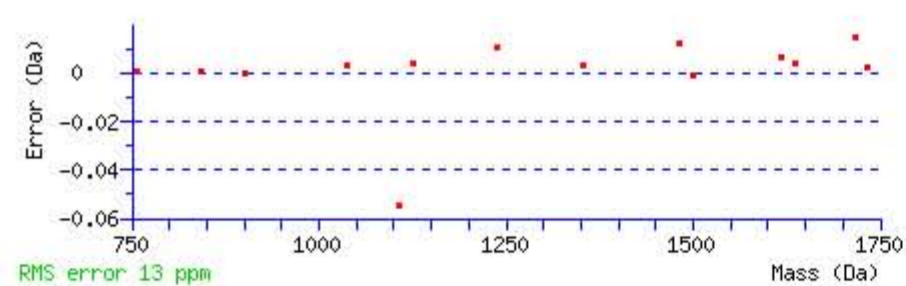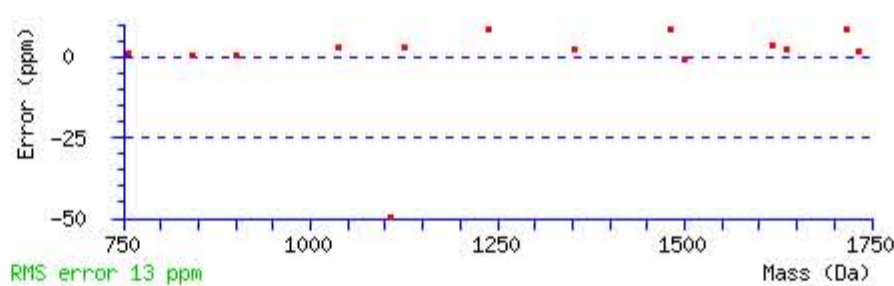

NCBI BLAST search of [TYFPHFDSLHGSAQVK](#)

(Parameters: blastp, nr protein database, expect=20000, no filter, PAM30)

Other BLAST [web gateways](#)

All matches to this query

| Score | Mr(calc):   | Delta     | Sequence                         |
|-------|-------------|-----------|----------------------------------|
| 45.7  | 2144.051346 | -0.000370 | <a href="#">TYFPHFDSLHGSAQVK</a> |

Mascot: <http://www.matrixscience.com/>



# MASCOT Search Results

## Peptide View

MS/MS Fragmentation of **YYCFQGNQFLR**

Found in **HEMO\_HUMAN**, Hemopexin OS=Homo sapiens GN=HPX PE=1 SV=2

Match to Query 42788: 1805.838108 from(903.926330,2+) rtinseconds(2306) index(70568)

Title: Locus:1.1.1.1740.14 File:"2013-07-02 CLN FXIII 60 min 2nd FT.wiff"

Data file C:\Program Files (x86)\Matrix Science\Mascot Daemon\mgf\5 FXIII 60 min 2nd\mascot\_daemon\_merge.mgf

Click mouse within plot area to zoom in by factor of two about that point

Or, Plot from  to  Da

Label all possible matches  Label matches used for scoring

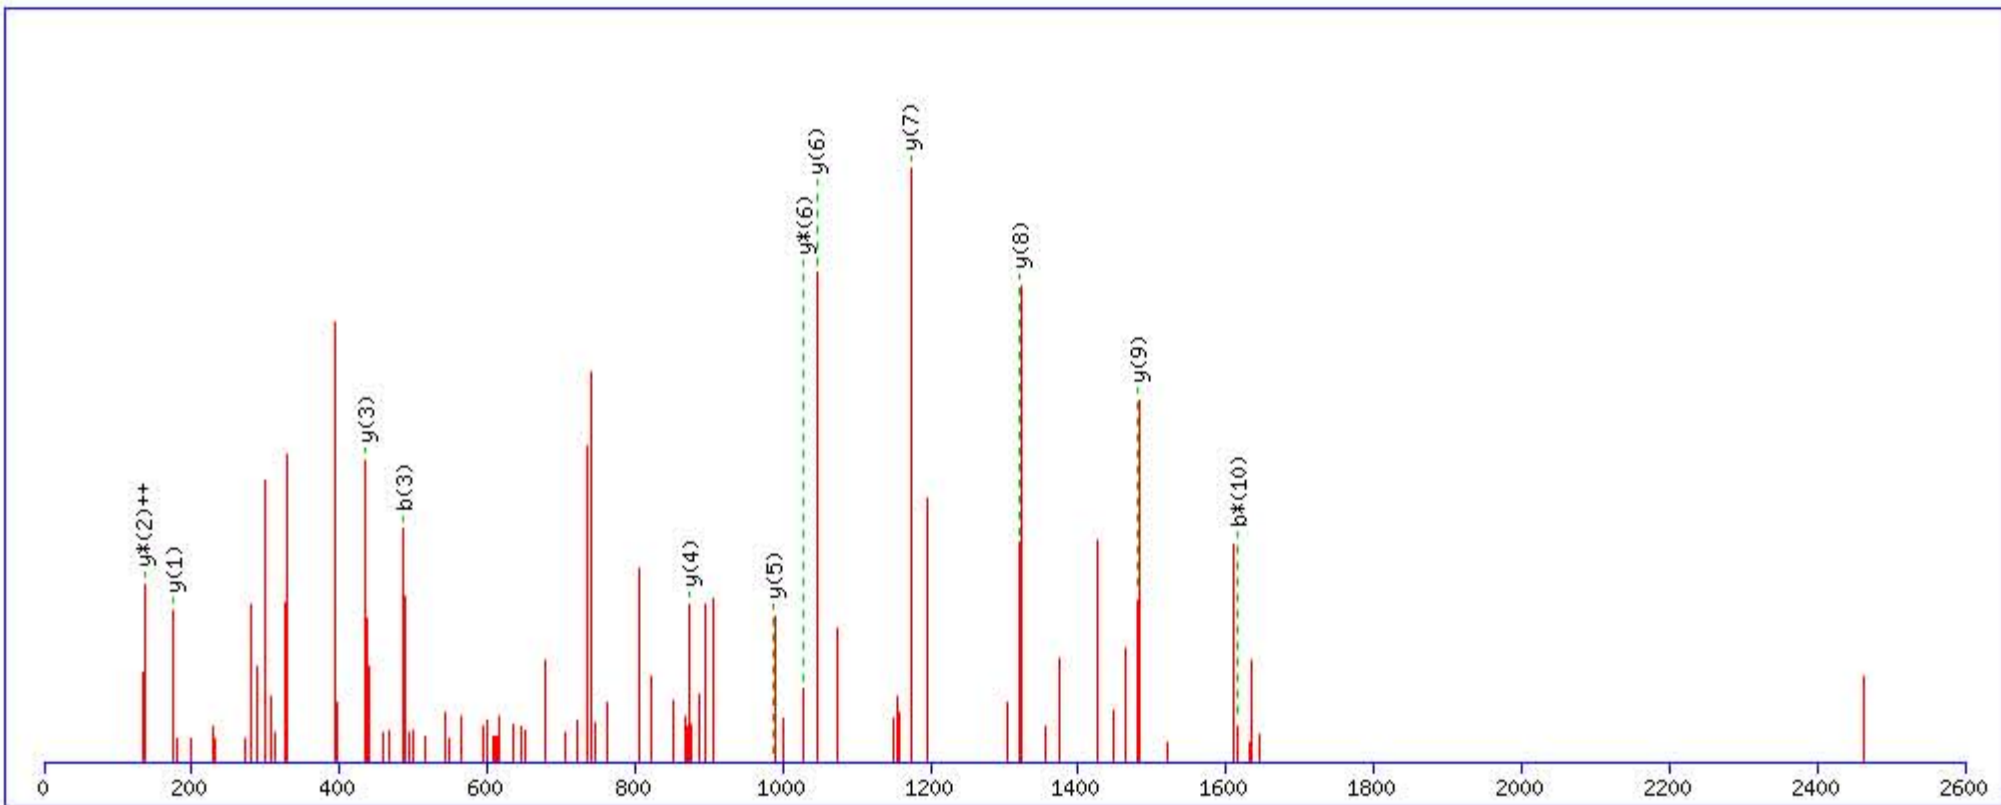

Monoisotopic mass of neutral peptide Mr(calc): 1805.838165

Fixed modifications: Carbamidomethyl (C) (apply to specified residues or termini only)

Variable modifications:

Q8 : Biotin:Thermo-21345 (Q)

Ions Score: 27 Expect: 0.031

Matches : 12/72 fragment ions using 32 most intense peaks [\(help\)](#)

| #  | b                 | b <sup>++</sup> | b <sup>+</sup>     | b <sup>+++</sup> | Seq. | y                  | y <sup>++</sup> | y <sup>+</sup>     | y <sup>+++</sup>  | #  |
|----|-------------------|-----------------|--------------------|------------------|------|--------------------|-----------------|--------------------|-------------------|----|
| 1  | 164.070605        | 82.538940       |                    |                  | Y    |                    |                 |                    |                   | 11 |
| 2  | 327.133934        | 164.070605      |                    |                  | Y    | 1643.782117        | 822.394697      | 1626.755568        | 813.881422        | 10 |
| 3  | <b>487.164583</b> | 244.085930      |                    |                  | C    | <b>1480.718788</b> | 740.863032      | 1463.692239        | 732.349758        | 9  |
| 4  | 634.232997        | 317.620137      |                    |                  | F    | <b>1320.688139</b> | 660.847708      | 1303.661590        | 652.334433        | 8  |
| 5  | 762.291575        | 381.649426      | 745.265026         | 373.136151       | Q    | <b>1173.619725</b> | 587.313501      | 1156.593176        | 578.800226        | 7  |
| 6  | 819.313039        | 410.160158      | 802.286490         | 401.646883       | G    | <b>1045.561147</b> | 523.284212      | <b>1028.534598</b> | 514.770937        | 6  |
| 7  | 933.355966        | 467.181621      | 916.329417         | 458.668347       | N    | <b>988.539683</b>  | 494.773480      | 971.513134         | 486.260205        | 5  |
| 8  | 1372.581292       | 686.794284      | 1355.554743        | 678.281010       | Q    | <b>874.496756</b>  | 437.752016      | 857.470207         | 429.238742        | 4  |
| 9  | 1519.649706       | 760.328491      | 1502.623157        | 751.815217       | F    | <b>435.271430</b>  | 218.139353      | 418.244881         | 209.626078        | 3  |
| 10 | 1632.733770       | 816.870523      | <b>1615.707221</b> | 808.357249       | L    | 288.203016         | 144.605146      | 271.176467         | <b>136.091871</b> | 2  |
| 11 |                   |                 |                    |                  | R    | <b>175.118952</b>  | 88.063114       | 158.092403         | 79.549839         | 1  |

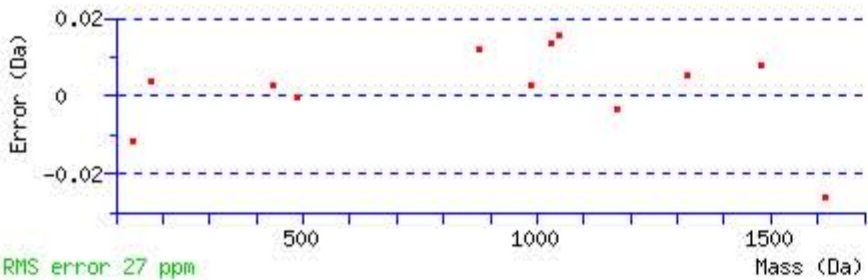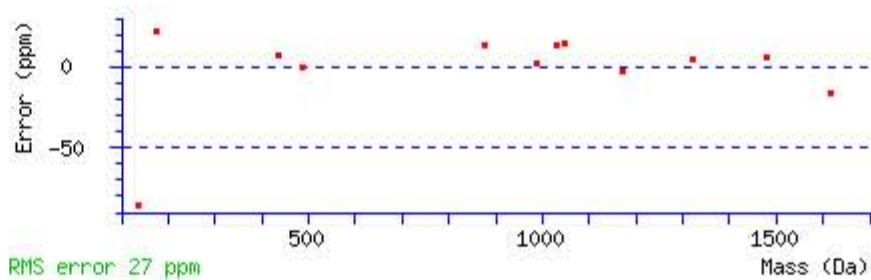

NCBI BLAST search of [YYCFQGNQFLR](#)

(Parameters: blastp, nr protein database, expect=20000, no filter, PAM30)

Other BLAST [web gateways](#)

### All matches to this query

| Score | Mr(calc):   | Delta     | Sequence                    |
|-------|-------------|-----------|-----------------------------|
| 27.0  | 1805.838165 | -0.000057 | <a href="#">YYCFQGNQFLR</a> |
| 24.4  | 1805.838165 | -0.000057 | <a href="#">YYCFQGNQFLR</a> |



# MASCOT SCIENCE Mascot Search Results

## Peptide View

MS/MS Fragmentation of **GECQAEGVLFFQGDR**

Found in **HEMO\_HUMAN**, Hemopexin OS=Homo sapiens GN=HPX PE=1 SV=2

Match to Query 47745: 2022.931888 from(1012.473220,2+) rtinseconds(2415) index(71158)

Title: Locus:1.1.1.1778.18 File:"2013-07-02 CLN FXIII 60 min 2nd FT.wiff"

Data file C:\Program Files (x86)\Matrix Science\Mascot Daemon\mgf5 FXIII 60 min 2nd\mascot\_daemon\_merge.mgf

Click mouse within plot area to zoom in by factor of two about that point

Or, Plot from  to  Da

Label all possible matches  Label matches used for scoring

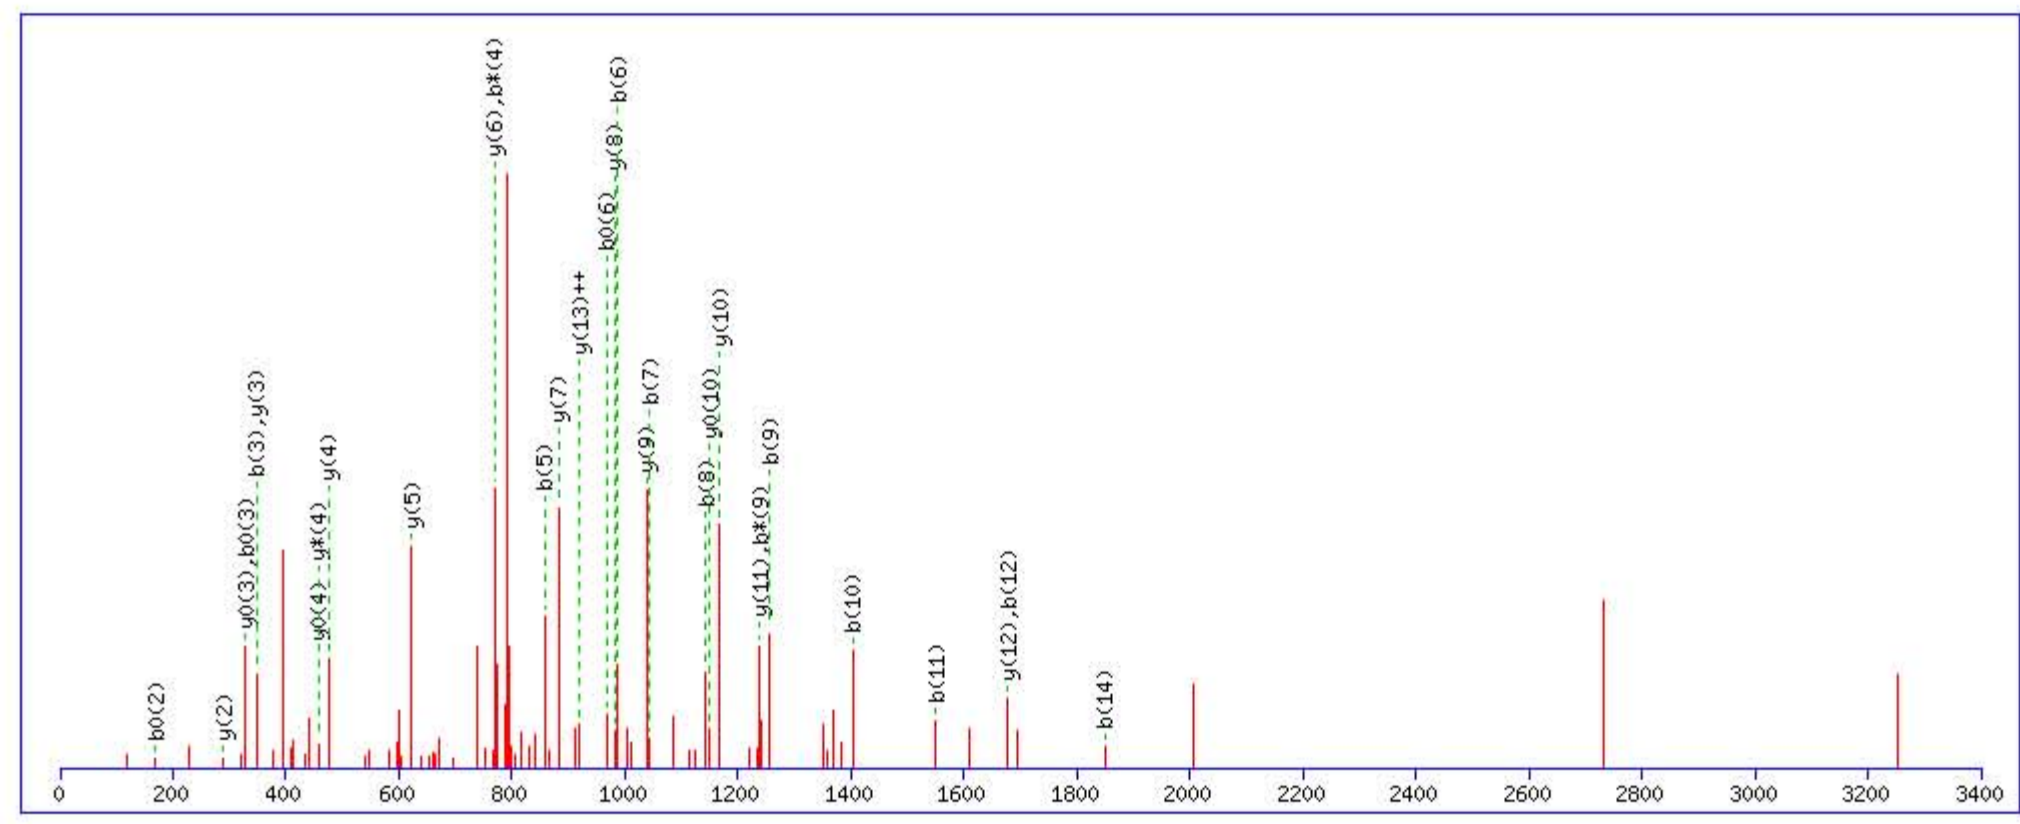

Monoisotopic mass of neutral peptide Mr(calc): 2022.929184

Fixed modifications: Carbamidomethyl (C) (apply to specified residues or termini only)

Variable modifications:

Q4 : Biotin:Thermo-21345 (Q)

Ions Score: 58 Expect: 2.3e-005

Matches : 31/158 fragment ions using 55 most intense peaks [\(help\)](#)

| #  | b                  | b <sup>++</sup> | b <sup>*</sup>     | b <sup>*++</sup> | b <sup>0</sup>    | b <sup>0++</sup> | Seq. | y                  | y <sup>++</sup>   | y <sup>*</sup>    | y <sup>*++</sup> | y <sup>0</sup>     | y <sup>0++</sup> | #  |
|----|--------------------|-----------------|--------------------|------------------|-------------------|------------------|------|--------------------|-------------------|-------------------|------------------|--------------------|------------------|----|
| 1  | 58.028740          | 29.518008       |                    |                  |                   |                  | G    |                    |                   |                   |                  |                    |                  | 15 |
| 2  | 187.071333         | 94.039305       |                    |                  | 169.060768        | 85.034022        | E    | 1966.914982        | 983.961129        | 1949.888433       | 975.447855       | 1948.904417        | 974.955847       | 14 |
| 3  | <b>347.101982</b>  | 174.054629      |                    |                  | <b>329.091417</b> | 165.049347       | C    | 1837.872389        | <b>919.439833</b> | 1820.845840       | 910.926558       | 1819.861824        | 910.434550       | 13 |
| 4  | 786.327308         | 393.667292      | <b>769.300759</b>  | 385.154018       | 768.316743        | 384.662010       | Q    | <b>1677.841740</b> | 839.424508        | 1660.815191       | 830.911234       | 1659.831175        | 830.419226       | 12 |
| 5  | <b>857.364422</b>  | 429.185849      | 840.337873         | 420.672575       | 839.353857        | 420.180567       | A    | <b>1238.616414</b> | 619.811845        | 1221.589865       | 611.298571       | 1220.605849        | 610.806563       | 11 |
| 6  | <b>986.407015</b>  | 493.707146      | 969.380466         | 485.193871       | <b>968.396450</b> | 484.701863       | E    | <b>1167.579300</b> | 584.293288        | 1150.552751       | 575.780014       | <b>1149.568735</b> | 575.288006       | 10 |
| 7  | <b>1043.428479</b> | 522.217878      | 1026.401930        | 513.704603       | 1025.417914       | 513.212595       | G    | <b>1038.536707</b> | 519.771992        | 1021.510158       | 511.258717       | 1020.526142        | 510.766709       | 9  |
| 8  | <b>1142.496893</b> | 571.752085      | 1125.470344        | 563.238810       | 1124.486328       | 562.746802       | V    | <b>981.515243</b>  | 491.261260        | 964.488694        | 482.747985       | 963.504678         | 482.255977       | 8  |
| 9  | <b>1255.580957</b> | 628.294117      | <b>1238.554408</b> | 619.780842       | 1237.570392       | 619.288834       | L    | <b>882.446829</b>  | 441.727053        | 865.420280        | 433.213778       | 864.436264         | 432.721770       | 7  |
| 10 | <b>1402.649371</b> | 701.828324      | 1385.622822        | 693.315049       | 1384.638806       | 692.823041       | F    | <b>769.362765</b>  | 385.185021        | 752.336216        | 376.671746       | 751.352200         | 376.179738       | 6  |
| 11 | <b>1549.717785</b> | 775.362531      | 1532.691236        | 766.849256       | 1531.707220       | 766.357248       | F    | <b>622.294351</b>  | 311.650814        | 605.267802        | 303.137539       | 604.283786         | 302.645531       | 5  |
| 12 | <b>1677.776363</b> | 839.391820      | 1660.749814        | 830.878545       | 1659.765798       | 830.386537       | Q    | <b>475.225937</b>  | 238.116606        | <b>458.199388</b> | 229.603332       | <b>457.215372</b>  | 229.111324       | 4  |
| 13 | 1734.797827        | 867.902552      | 1717.771278        | 859.389277       | 1716.787262       | 858.897269       | G    | <b>347.167359</b>  | 174.087317        | 330.140810        | 165.574043       | <b>329.156794</b>  | 165.082035       | 3  |
| 14 | <b>1849.824770</b> | 925.416023      | 1832.798221        | 916.902749       | 1831.814205       | 916.410741       | D    | <b>290.145895</b>  | 145.576585        | 273.119346        | 137.063311       | 272.135330         | 136.571303       | 2  |
| 15 |                    |                 |                    |                  |                   |                  | R    | 175.118952         | 88.063114         | 158.092403        | 79.549839        |                    |                  | 1  |

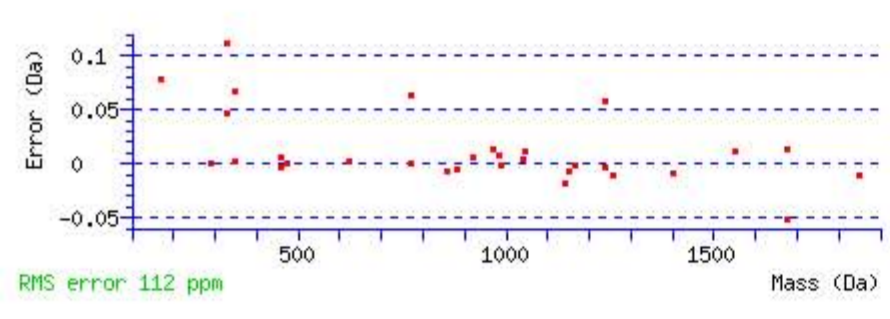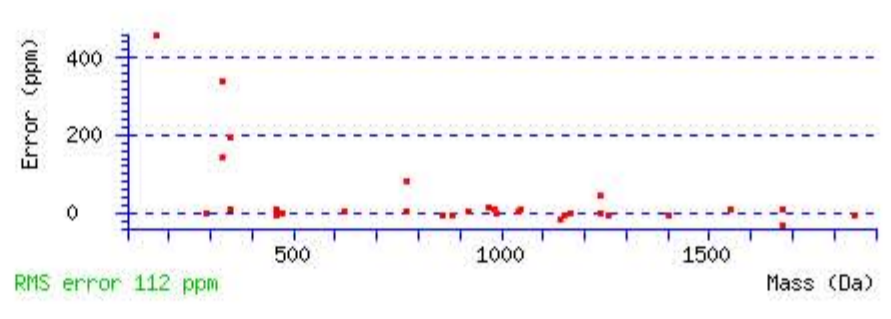

NCBI BLAST search of [GECQAEGVLFFQGDR](#)  
 (Parameters: blastp, nr protein database, expect=20000, no filter, PAM30)  
 Other BLAST [web gateways](#)

### All matches to this query

| Score | Mr(calc):   | Delta    | Sequence                        |
|-------|-------------|----------|---------------------------------|
| 57.8  | 2022.929184 | 0.002704 | <a href="#">GECQAEGVLFFQGDR</a> |
| 11.9  | 2022.929184 | 0.002704 | <a href="#">GECQAEGVLFFQGDR</a> |



# MASCOT Search Results

## Peptide View

MS/MS Fragmentation of **LLQDEFPGIPSPLDAAVECHR**

Found in **HEMO\_HUMAN**, Hemopexin OS=Homo sapiens GN=HPX PE=1 SV=2

Match to Query 58136: 2674.329492 from(892.450440,3+) rtinseconds(2665) index(72484)

Title: Locus:1.1.1.1865.13 File:"2013-07-02 CLN FXIII 60 min 2nd FT.wiff"

Data file C:\Program Files (x86)\Matrix Science\Mascot Daemon\mgf5 FXIII 60 min 2nd\mascot\_daemon\_merge.mgf

Click mouse within plot area to zoom in by factor of two about that point

Or, Plot from  to  Da

Label all possible matches  Label matches used for scoring

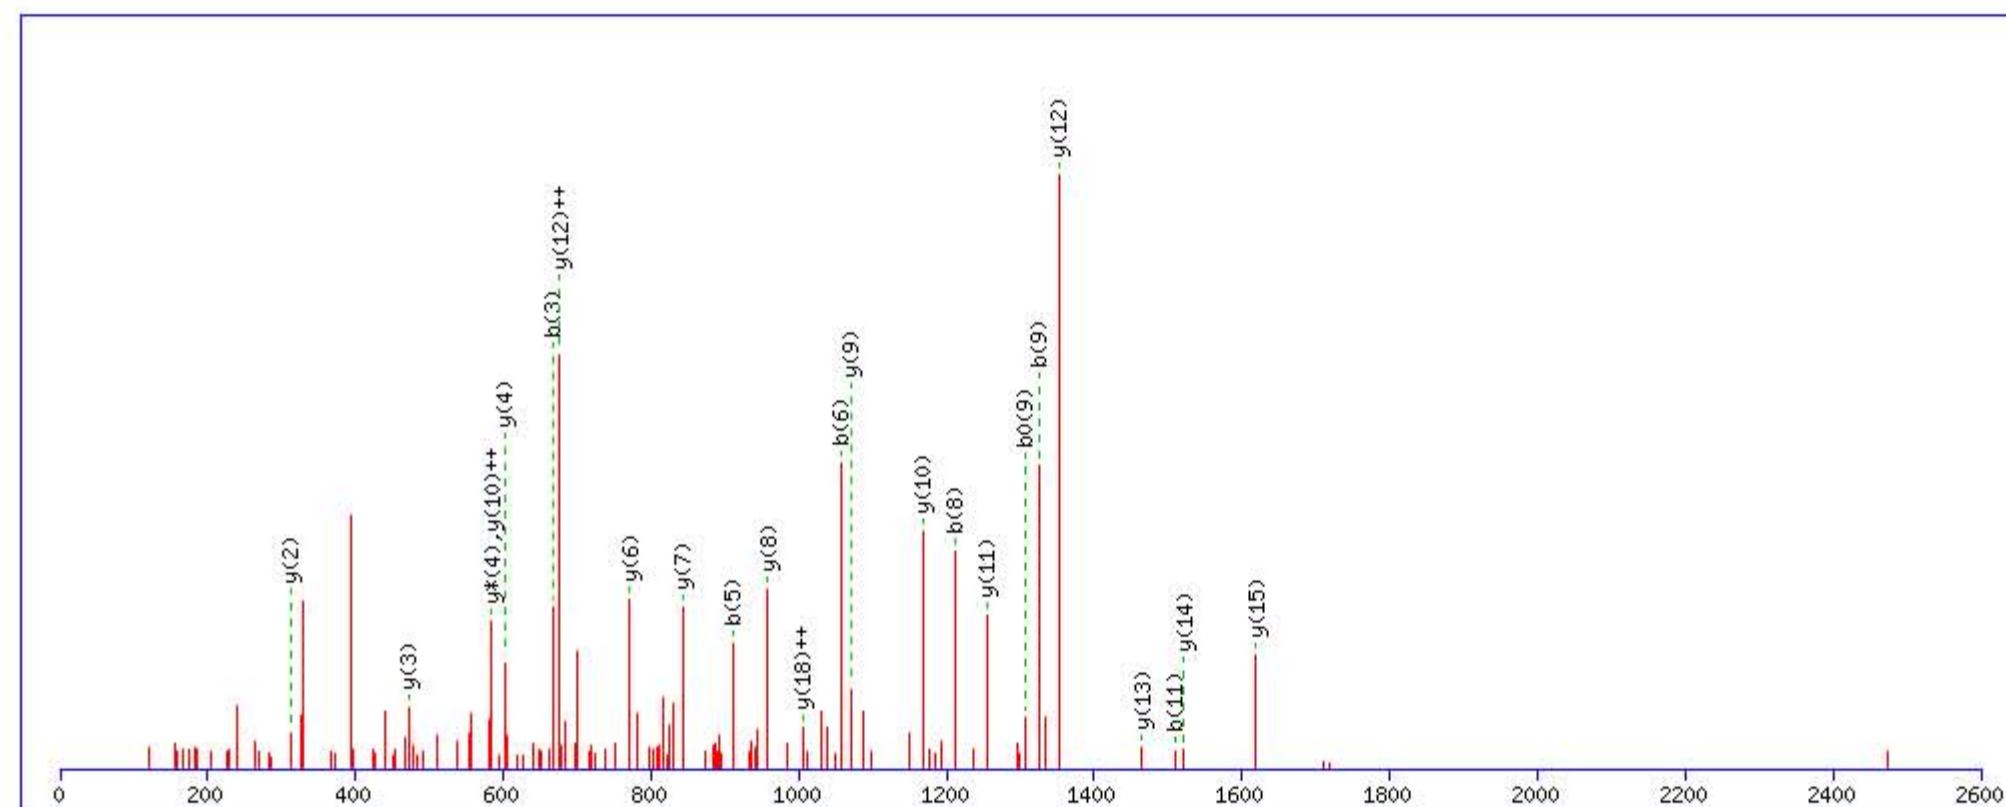

Monoisotopic mass of neutral peptide Mr(calc): 2674.324722

Fixed modifications: Carbamidomethyl (C) (apply to specified residues or termini only)

Variable modifications:

Q3 : Biotin:Thermo-21345 (Q)

Ions Score: 95 Expect: 7.9e-009

Matches : 24/224 fragment ions using 33 most intense peaks [\(help\)](#)

| #  | b                  | b <sup>++</sup> | b <sup>*</sup> | b <sup>*++</sup> | b <sup>0</sup>     | b <sup>0++</sup> | Seq. | y                  | y <sup>++</sup>    | y <sup>*</sup>    | y <sup>*++</sup> | y <sup>0</sup> | y <sup>0++</sup> | #  |
|----|--------------------|-----------------|----------------|------------------|--------------------|------------------|------|--------------------|--------------------|-------------------|------------------|----------------|------------------|----|
| 1  | 114.091340         | 57.549308       |                |                  |                    |                  | L    |                    |                    |                   |                  |                |                  | 21 |
| 2  | 227.175404         | 114.091340      |                |                  |                    |                  | L    | 2562.247943        | 1281.627609        | 2545.221394       | 1273.114335      | 2544.237378    | 1272.622327      | 20 |
| 3  | <b>666.400730</b>  | 333.704003      | 649.374181     | 325.190729       |                    |                  | Q    | 2449.163879        | 1225.085577        | 2432.137330       | 1216.572303      | 2431.153314    | 1216.080295      | 19 |
| 4  | 781.427673         | 391.217475      | 764.401124     | 382.704200       | 763.417108         | 382.212192       | D    | 2009.938553        | <b>1005.472914</b> | 1992.912004       | 996.959640       | 1991.927988    | 996.467632       | 18 |
| 5  | <b>910.470266</b>  | 455.738771      | 893.443717     | 447.225497       | 892.459701         | 446.733489       | E    | 1894.911610        | 947.959443         | 1877.885061       | 939.446169       | 1876.901045    | 938.954160       | 17 |
| 6  | <b>1057.538680</b> | 529.272978      | 1040.512131    | 520.759704       | 1039.528115        | 520.267696       | F    | 1765.869017        | 883.438146         | 1748.842468       | 874.924872       | 1747.858452    | 874.432864       | 16 |
| 7  | 1154.591444        | 577.799360      | 1137.564895    | 569.286086       | 1136.580879        | 568.794078       | P    | <b>1618.800603</b> | 809.903939         | 1601.774054       | 801.390665       | 1600.790038    | 800.898657       | 15 |
| 8  | <b>1211.612908</b> | 606.310092      | 1194.586359    | 597.796818       | 1193.602343        | 597.304810       | G    | <b>1521.747839</b> | 761.377557         | 1504.721290       | 752.864283       | 1503.737274    | 752.372275       | 14 |
| 9  | <b>1324.696972</b> | 662.852124      | 1307.670423    | 654.338850       | <b>1306.686407</b> | 653.846841       | I    | <b>1464.726375</b> | 732.866825         | 1447.699826       | 724.353551       | 1446.715810    | 723.861543       | 13 |
| 10 | 1421.749736        | 711.378506      | 1404.723187    | 702.865232       | 1403.739171        | 702.373223       | P    | <b>1351.642311</b> | <b>676.324793</b>  | 1334.615762       | 667.811519       | 1333.631746    | 667.319511       | 12 |
| 11 | <b>1508.781764</b> | 754.894520      | 1491.755215    | 746.381246       | 1490.771199        | 745.889238       | S    | <b>1254.589547</b> | 627.798411         | 1237.562998       | 619.285137       | 1236.578982    | 618.793129       | 11 |
| 12 | 1605.834528        | 803.420902      | 1588.807979    | 794.907628       | 1587.823963        | 794.415620       | P    | <b>1167.557519</b> | <b>584.282397</b>  | 1150.530970       | 575.769123       | 1149.546954    | 575.277115       | 10 |
| 13 | 1718.918592        | 859.962934      | 1701.892043    | 851.449660       | 1700.908027        | 850.957652       | L    | <b>1070.504755</b> | 535.756015         | 1053.478206       | 527.242741       | 1052.494190    | 526.750733       | 9  |
| 14 | 1833.945535        | 917.476406      | 1816.918986    | 908.963131       | 1815.934970        | 908.471123       | D    | <b>957.420691</b>  | 479.213983         | 940.394142        | 470.700709       | 939.410126     | 470.208701       | 8  |
| 15 | 1904.982649        | 952.994963      | 1887.956100    | 944.481688       | 1886.972084        | 943.989680       | A    | <b>842.393748</b>  | 421.700512         | 825.367199        | 413.187237       | 824.383183     | 412.695229       | 7  |
| 16 | 1976.019763        | 988.513520      | 1958.993214    | 980.000245       | 1958.009198        | 979.508237       | A    | <b>771.356634</b>  | 386.181955         | 754.330085        | 377.668680       | 753.346069     | 377.176672       | 6  |
| 17 | 2075.088177        | 1038.047726     | 2058.061628    | 1029.534452      | 2057.077612        | 1029.042444      | V    | 700.319520         | 350.663398         | 683.292971        | 342.150123       | 682.308955     | 341.658115       | 5  |
| 18 | 2204.130770        | 1102.569023     | 2187.104221    | 1094.055748      | 2186.120205        | 1093.563740      | E    | <b>601.251106</b>  | 301.129191         | <b>584.224557</b> | 292.615916       | 583.240541     | 292.123908       | 4  |
| 19 | 2364.161419        | 1182.584347     | 2347.134870    | 1174.071073      | 2346.150854        | 1173.579065      | C    | <b>472.208513</b>  | 236.607894         | 455.181964        | 228.094620       |                |                  | 3  |
| 20 | 2501.220331        | 1251.113803     | 2484.193782    | 1242.600529      | 2483.209766        | 1242.108521      | H    | <b>312.177864</b>  | 156.592570         | 295.151315        | 148.079295       |                |                  | 2  |
| 21 |                    |                 |                |                  |                    |                  | R    | 175.118952         | 88.063114          | 158.092403        | 79.549839        |                |                  | 1  |

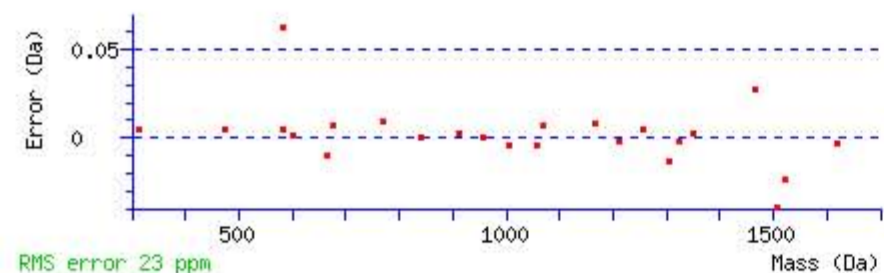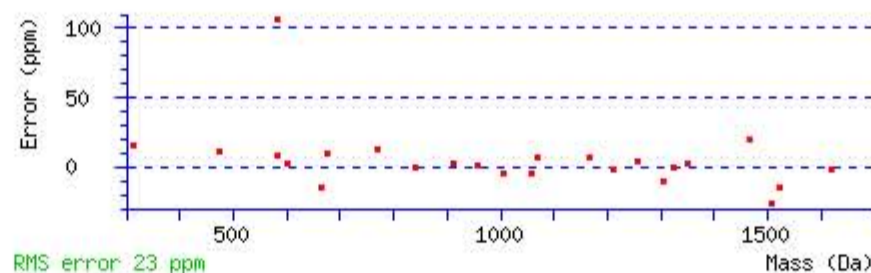

NCBI BLAST search of **LLQDEFPGIPSPLDAAVECHR**

(Parameters: blastp, nr protein database, expect=20000, no filter, PAM30)

Other BLAST [web gateways](#)

All matches to this query

| Score | Mr(calc):   | Delta    | Sequence                              |
|-------|-------------|----------|---------------------------------------|
| 95.4  | 2674.324722 | 0.004770 | <a href="#">LLQDEFPGIPSPLDAAVECHR</a> |



# MASCOT Search Results

## Peptide View

MS/MS Fragmentation of **TLEAQLTPR**

Found in **HEP2\_HUMAN**, Heparin cofactor 2 OS=Homo sapiens GN=SERPIND1 PE=1 SV=3

Match to Query 26949: 1338.735848 from(670.375200,2+) rtinseconds(1940) index(36007)

Title: Locus:1.1.1.3095.9 File:"2013-07-02 CLN FXIII 60 min 2nd F 3.wiff"

Data file C:\Program Files (x86)\Matrix Science\Mascot Daemon\mgf5 FXIII 60 min 2nd\mascot\_daemon\_merge.mgf

Click mouse within plot area to zoom in by factor of two about that point

Or, Plot from  to  Da

Label all possible matches  Label matches used for scoring

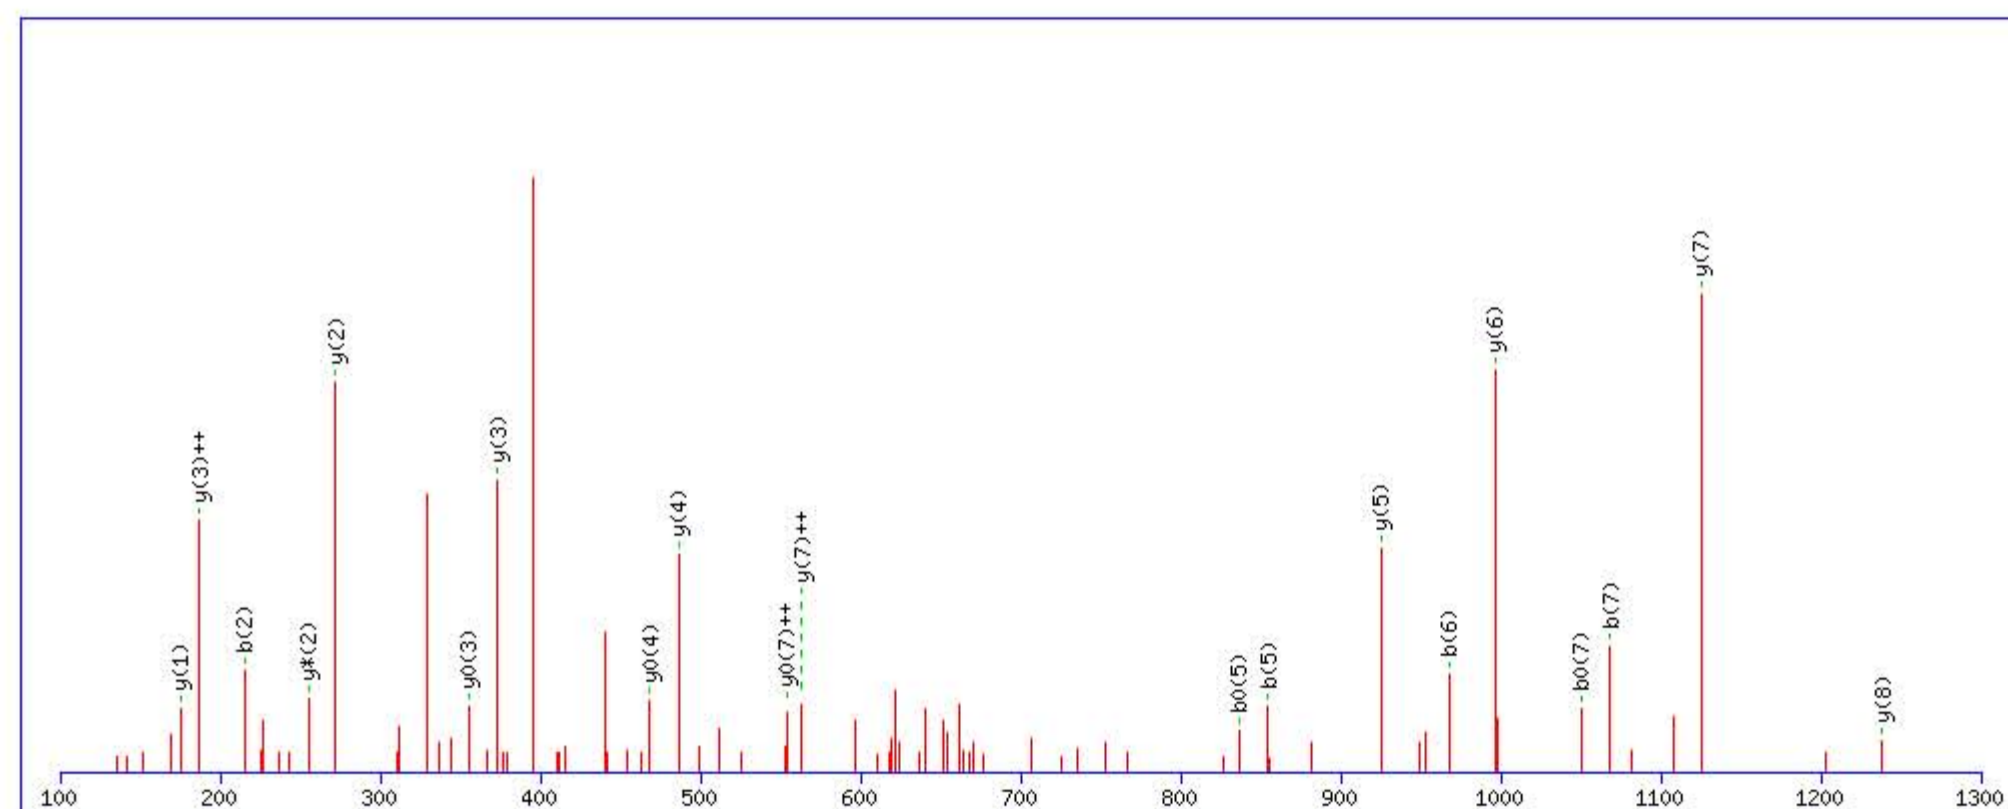

Monoisotopic mass of neutral peptide Mr(calc): 1338.732941

Fixed modifications: Carbamidomethyl (C) (apply to specified residues or termini only)

Variable modifications:

Q5 : Biotin:Thermo-21345 (Q)

Ions Score: 58 Expect: 2.7e-005

Matches : 20/84 fragment ions using 32 most intense peaks ([help](#))

| # | b                  | b <sup>++</sup> | b <sup>*</sup> | b <sup>*++</sup> | b <sup>0</sup>     | b <sup>0++</sup> | Seq. | y                  | y <sup>++</sup>   | y <sup>*</sup>    | y <sup>*++</sup> | y <sup>0</sup>    | y <sup>0++</sup>  | # |
|---|--------------------|-----------------|----------------|------------------|--------------------|------------------|------|--------------------|-------------------|-------------------|------------------|-------------------|-------------------|---|
| 1 | 102.054955         | 51.531116       |                |                  | 84.044390          | 42.525833        | T    |                    |                   |                   |                  |                   |                   | 9 |
| 2 | <b>215.139019</b>  | 108.073147      |                |                  | 197.128454         | 99.067865        | L    | <b>1238.692556</b> | 619.849916        | 1221.666007       | 611.336642       | 1220.681991       | 610.844633        | 8 |
| 3 | 344.181612         | 172.594444      |                |                  | 326.171047         | 163.589162       | E    | <b>1125.608492</b> | <b>563.307884</b> | 1108.581943       | 554.794610       | 1107.597927       | <b>554.302602</b> | 7 |
| 4 | 415.218726         | 208.113001      |                |                  | 397.208161         | 199.107719       | A    | <b>996.565899</b>  | 498.786588        | 979.539350        | 490.273313       | 978.555334        | 489.781305        | 6 |
| 5 | <b>854.444052</b>  | 427.725664      | 837.417503     | 419.212390       | <b>836.433487</b>  | 418.720382       | Q    | <b>925.528785</b>  | 463.268031        | 908.502236        | 454.754756       | 907.518220        | 454.262748        | 5 |
| 6 | <b>967.528116</b>  | 484.267696      | 950.501567     | 475.754422       | 949.517551         | 475.262414       | L    | <b>486.303459</b>  | 243.655367        | 469.276910        | 235.142093       | <b>468.292894</b> | 234.650085        | 4 |
| 7 | <b>1068.575795</b> | 534.791536      | 1051.549246    | 526.278261       | <b>1050.565230</b> | 525.786253       | T    | <b>373.219395</b>  | <b>187.113335</b> | 356.192846        | 178.600061       | <b>355.208830</b> | 178.108053        | 3 |
| 8 | 1165.628559        | 583.317918      | 1148.602010    | 574.804643       | 1147.617994        | 574.312635       | P    | <b>272.171716</b>  | 136.589496        | <b>255.145167</b> | 128.076221       |                   |                   | 2 |
| 9 |                    |                 |                |                  |                    |                  | R    | <b>175.118952</b>  | 88.063114         | 158.092403        | 79.549839        |                   |                   | 1 |

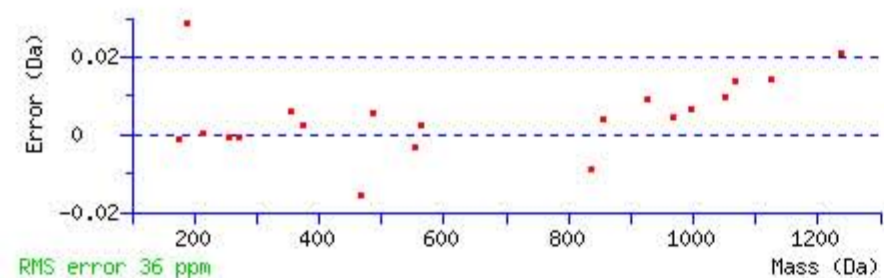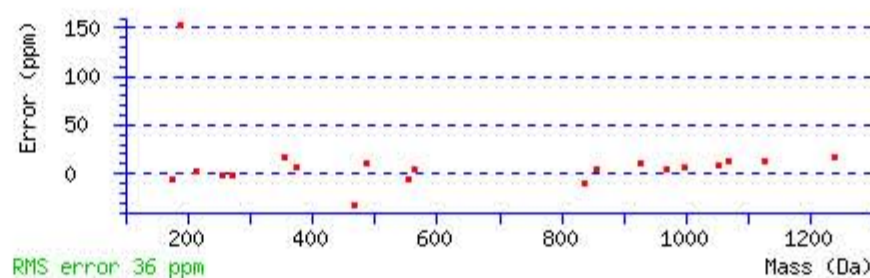

NCBI BLAST search of **TLEAQLTPR**

(Parameters: blastp, nr protein database, expect=20000, no filter, PAM30)

Other BLAST [web gateways](#)

All matches to this query

| Score | Mr(calc):   | Delta     | Sequence                     |
|-------|-------------|-----------|------------------------------|
| 58.3  | 1338.732941 | 0.002907  | <a href="#">TLEAQLTPR</a>    |
| 11.8  | 1338.732956 | 0.002892  | <a href="#">VDLQSLPTR</a>    |
| 5.9   | 1338.725555 | 0.010293  | <a href="#">VDTVAAEHLTRK</a> |
| 2.5   | 1338.744171 | -0.008323 | <a href="#">MKEALHQIVVR</a>  |
| 2.3   | 1338.725555 | 0.010293  | <a href="#">RSPTVEPSTLPR</a> |



# MASCOT Search Results

## Peptide View

MS/MS Fragmentation of **GGETAQSADPQWEQLNNK**  
 Found in **HEP2\_HUMAN**, Heparin cofactor 2 OS=Homo sapiens GN=SERPIND1 PE=1 SV=3

Match to Query 52730: 2283.056322 from(762.026050,3+) rtinseconds(1912) index(35769)  
 Title: Locus:1.1.1.3085.21 File:"2013-07-02 CLN FXIII 60 min 2nd F 3.wiff"  
 Data file C:\Program Files (x86)\Matrix Science\Mascot Daemon\mgf5 FXIII 60 min 2nd\mascot\_daemon\_merge.mgf

Click mouse within plot area to zoom in by factor of two about that point  
 Or, Plot from  to  Da   
 Label all possible matches  Label matches used for scoring

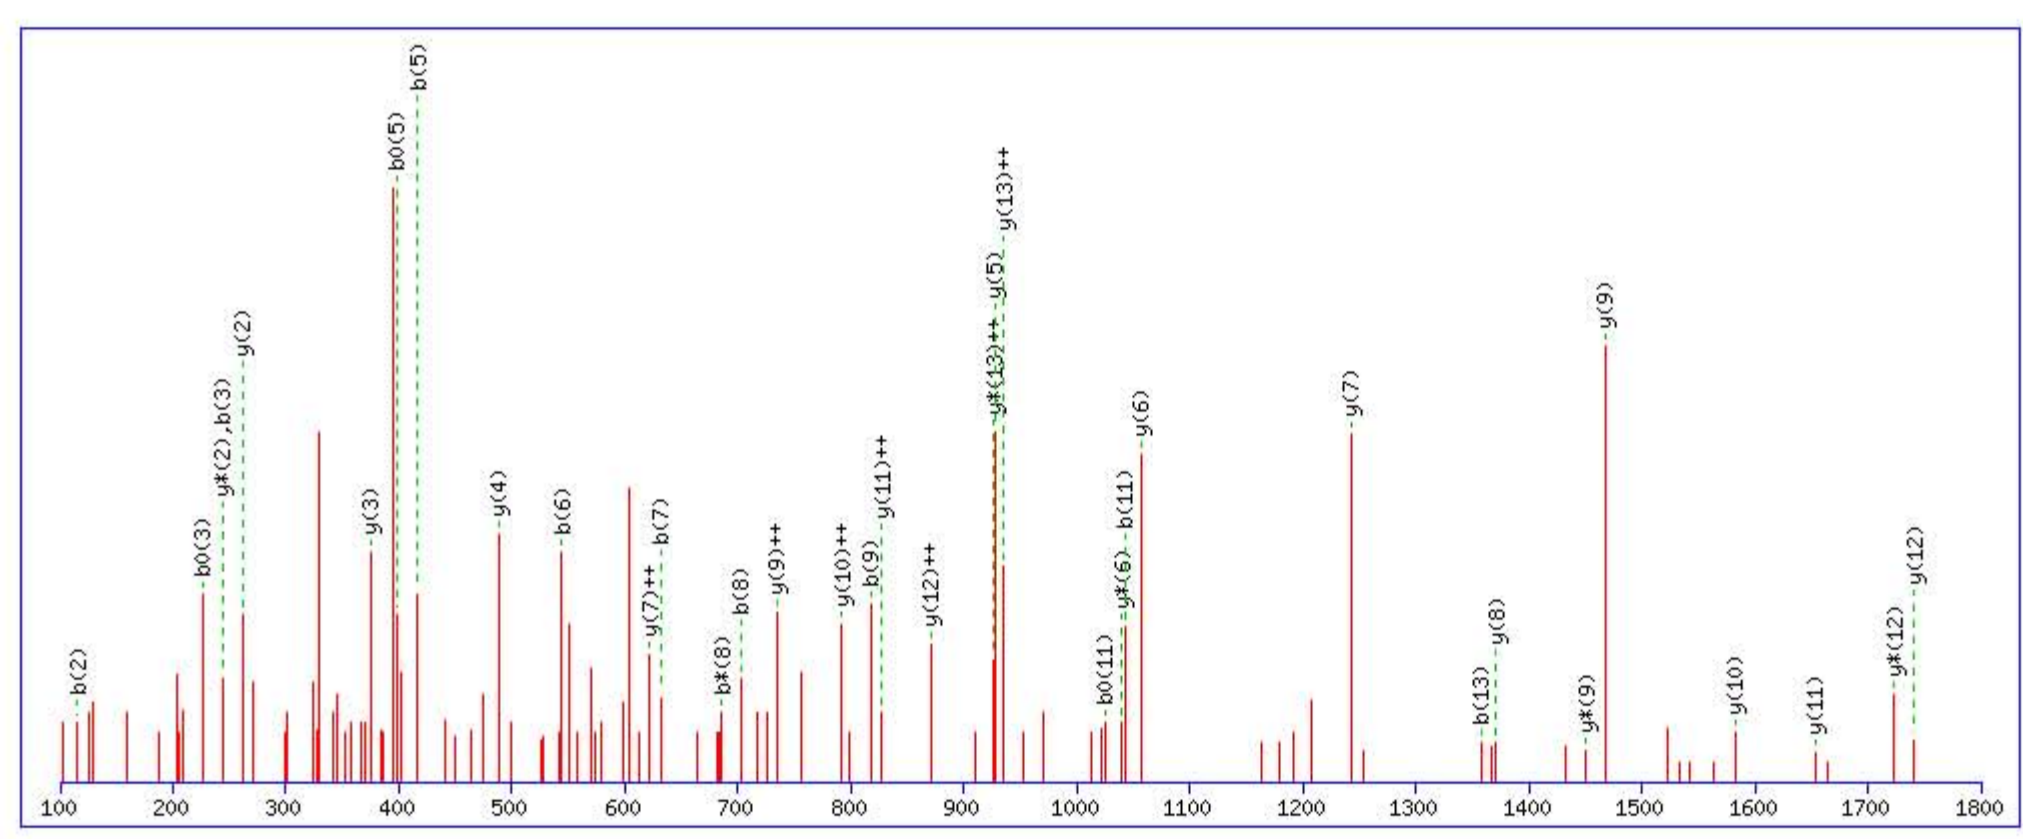

Monoisotopic mass of neutral peptide Mr(calc): 2283.058975  
 Fixed modifications: Carbamidomethyl (C) (apply to specified residues or termini only)  
 Variable modifications:  
 Q14 : Biotin:Thermo-21345 (Q)  
 Ions Score: 65 Expect: 4.1e-006  
 Matches : 35/180 fragment ions using 60 most intense peaks [\(help\)](#)

| #  | b                  | b <sup>++</sup> | b <sup>*</sup>    | b <sup>*++</sup> | b <sup>0</sup>     | b <sup>0++</sup> | Seq. | y                  | y <sup>++</sup>   | y <sup>*</sup>     | y <sup>*++</sup>  | y <sup>0</sup> | y <sup>0++</sup> | #  |
|----|--------------------|-----------------|-------------------|------------------|--------------------|------------------|------|--------------------|-------------------|--------------------|-------------------|----------------|------------------|----|
| 1  | 58.028740          | 29.518008       |                   |                  |                    |                  | G    |                    |                   |                    |                   |                |                  | 18 |
| 2  | <b>115.050204</b>  | 58.028740       |                   |                  |                    |                  | G    | 2227.044809        | 1114.026042       | 2210.018260        | 1105.512768       | 2209.034244    | 1105.020760      | 17 |
| 3  | <b>244.092797</b>  | 122.550037      |                   |                  | <b>226.082232</b>  | 113.544754       | E    | 2170.023345        | 1085.515310       | 2152.996796        | 1077.002036       | 2152.012780    | 1076.510028      | 16 |
| 4  | 345.140476         | 173.073876      |                   |                  | 327.129911         | 164.068594       | T    | 2040.980752        | 1020.994014       | 2023.954203        | 1012.480740       | 2022.970187    | 1011.988732      | 15 |
| 5  | <b>416.177590</b>  | 208.592433      |                   |                  | <b>398.167025</b>  | 199.587151       | A    | 1939.933073        | 970.470175        | 1922.906524        | 961.956900        | 1921.922508    | 961.464892       | 14 |
| 6  | <b>544.236168</b>  | 272.621722      | 527.209619        | 264.108448       | 526.225603         | 263.616440       | Q    | 1868.895959        | <b>934.951618</b> | 1851.869410        | <b>926.438343</b> | 1850.885394    | 925.946335       | 13 |
| 7  | <b>631.268196</b>  | 316.137736      | 614.241647        | 307.624462       | 613.257631         | 307.132454       | S    | <b>1740.837381</b> | <b>870.922329</b> | <b>1723.810832</b> | 862.409054        | 1722.826816    | 861.917046       | 12 |
| 8  | <b>702.305310</b>  | 351.656293      | <b>685.278761</b> | 343.143019       | 684.294745         | 342.651011       | A    | <b>1653.805353</b> | <b>827.406315</b> | 1636.778804        | 818.893040        | 1635.794788    | 818.401032       | 11 |
| 9  | <b>817.332253</b>  | 409.169765      | 800.305704        | 400.656490       | 799.321688         | 400.164482       | D    | <b>1582.768239</b> | <b>791.887758</b> | 1565.741690        | 783.374483        | 1564.757674    | 782.882475       | 10 |
| 10 | 914.385017         | 457.696147      | 897.358468        | 449.182872       | 896.374452         | 448.690864       | P    | <b>1467.741296</b> | <b>734.374286</b> | <b>1450.714747</b> | 725.861012        | 1449.730731    | 725.369004       | 9  |
| 11 | <b>1042.443595</b> | 521.725436      | 1025.417046       | 513.212161       | <b>1024.433030</b> | 512.720153       | Q    | <b>1370.688532</b> | 685.847904        | 1353.661983        | 677.334630        | 1352.677967    | 676.842622       | 8  |
| 12 | 1228.522908        | 614.765092      | 1211.496359       | 606.251818       | 1210.512343        | 605.759809       | W    | <b>1242.629954</b> | <b>621.818615</b> | 1225.603405        | 613.305341        | 1224.619389    | 612.813333       | 7  |
| 13 | <b>1357.565501</b> | 679.286388      | 1340.538952       | 670.773114       | 1339.554936        | 670.281106       | E    | <b>1056.550641</b> | 528.778959        | <b>1039.524092</b> | 520.265684        | 1038.540076    | 519.773676       | 6  |
| 14 | 1796.790827        | 898.899052      | 1779.764278       | 890.385777       | 1778.780262        | 889.893769       | Q    | <b>927.508048</b>  | 464.257662        | 910.481499         | 455.744388        |                |                  | 5  |
| 15 | 1909.874891        | 955.441083      | 1892.848342       | 946.927809       | 1891.864326        | 946.435801       | L    | <b>488.282722</b>  | 244.644999        | 471.256173         | 236.131725        |                |                  | 4  |
| 16 | 2023.917818        | 1012.462547     | 2006.891269       | 1003.949273      | 2005.907253        | 1003.457265      | N    | <b>375.198658</b>  | 188.102967        | 358.172109         | 179.589693        |                |                  | 3  |
| 17 | 2137.960745        | 1069.484010     | 2120.934196       | 1060.970736      | 2119.950180        | 1060.478728      | N    | <b>261.155731</b>  | 131.081504        | <b>244.129182</b>  | 122.568229        |                |                  | 2  |
| 18 |                    |                 |                   |                  |                    |                  | K    | 147.112804         | 74.060040         | 130.086255         | 65.546765         |                |                  | 1  |

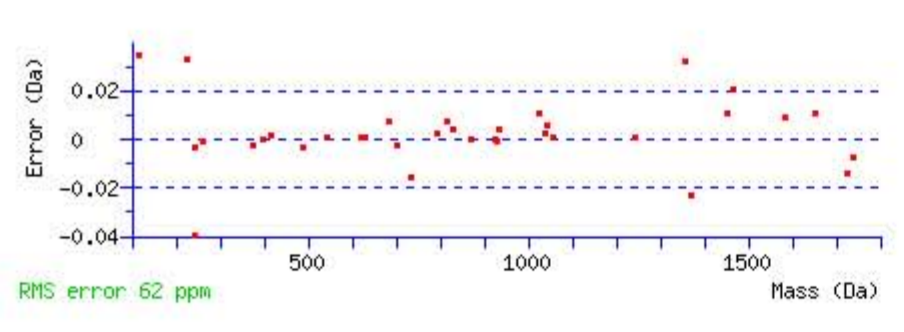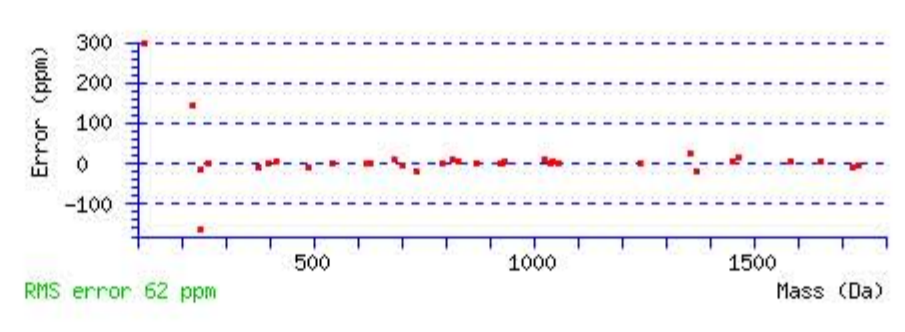

NCBI BLAST search of **GGETAQSADPQWEQLNNK**  
 (Parameters: blastp, nr protein database, expect=20000, no filter, PAM30)  
 Other BLAST [web gateways](#)

### All matches to this query

| Score | Mr(calc):   | Delta     | Sequence                           |
|-------|-------------|-----------|------------------------------------|
| 64.8  | 2283.058975 | -0.002653 | <a href="#">GGETAQSADPQWEQLNNK</a> |
| 32.9  | 2283.058975 | -0.002653 | <a href="#">GGETAQSADPQWEQLNNK</a> |



# MASCOT Search Results

## Peptide View

MS/MS Fragmentation of **GGETAQSADPQWEQLNKK**

Found in **HEP2\_HUMAN**, Heparin cofactor 2 OS=Homo sapiens GN=SERPIND1 PE=1 SV=3

Match to Query 52731: 2283.062952 from(762.028260,3+) rtinseconds(1890) index(35573)

Title: Locus:1.1.1.3077.25 File:"2013-07-02 CLN FXIII 60 min 2nd F 3.wiff"

Data file C:\Program Files (x86)\Matrix Science\Mascot Daemon\mgf5 FXIII 60 min 2nd\mascot\_daemon\_merge.mgf

Click mouse within plot area to zoom in by factor of two about that point

Or, Plot from  to  Da

Label all possible matches  Label matches used for scoring

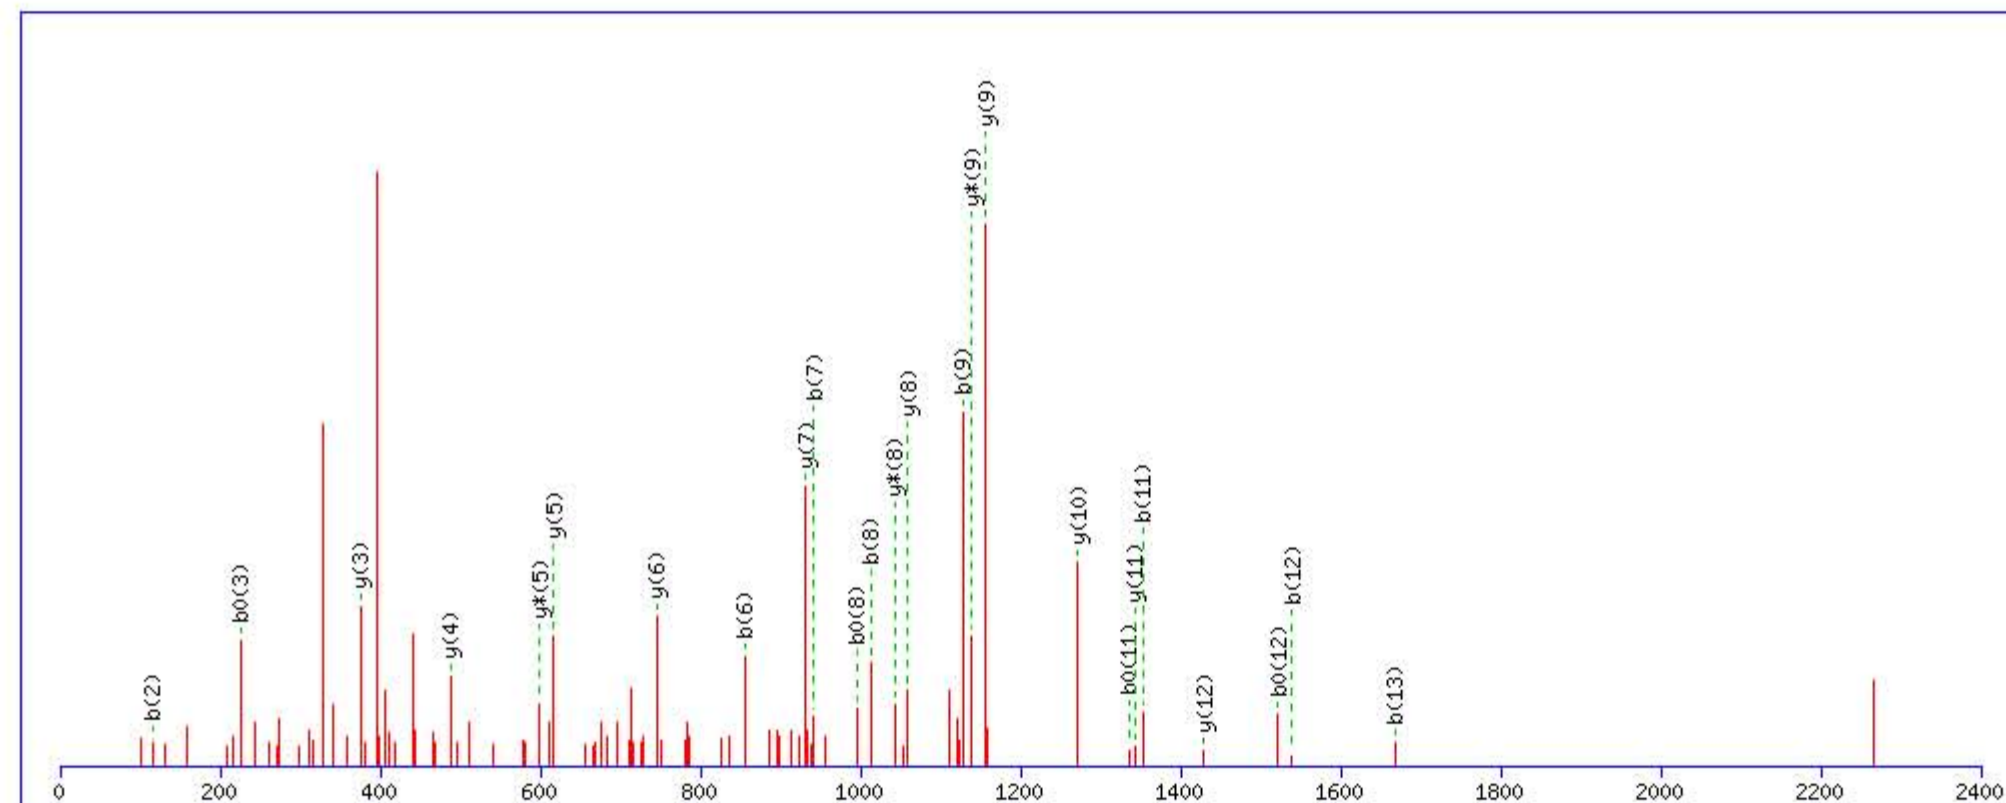

Monoisotopic mass of neutral peptide Mr(calc): 2283.058975

Fixed modifications: Carbamidomethyl (C) (apply to specified residues or termini only)

Variable modifications:

Q6 : Biotin:Thermo-21345 (Q)

Ions Score: 59 Expect: 1.8e-005

Matches : 25/180 fragment ions using 42 most intense peaks [\(help\)](#)

| #  | b                  | b <sup>++</sup> | b <sup>+</sup> | b <sup>+++</sup> | b <sup>0</sup>     | b <sup>0++</sup> | Seq.     | y                  | y <sup>++</sup> | y <sup>+</sup>     | y <sup>+++</sup> | y <sup>0</sup> | y <sup>0++</sup> | #  |
|----|--------------------|-----------------|----------------|------------------|--------------------|------------------|----------|--------------------|-----------------|--------------------|------------------|----------------|------------------|----|
| 1  | 58.028740          | 29.518008       |                |                  |                    |                  | <b>G</b> |                    |                 |                    |                  |                |                  | 18 |
| 2  | <b>115.050204</b>  | 58.028740       |                |                  |                    |                  | <b>G</b> | 2227.044809        | 1114.026042     | 2210.018260        | 1105.512768      | 2209.034244    | 1105.020760      | 17 |
| 3  | 244.092797         | 122.550037      |                |                  | <b>226.082232</b>  | 113.544754       | <b>E</b> | 2170.023345        | 1085.515310     | 2152.996796        | 1077.002036      | 2152.012780    | 1076.510028      | 16 |
| 4  | 345.140476         | 173.073876      |                |                  | 327.129911         | 164.068594       | <b>T</b> | 2040.980752        | 1020.994014     | 2023.954203        | 1012.480740      | 2022.970187    | 1011.988732      | 15 |
| 5  | 416.177590         | 208.592433      |                |                  | 398.167025         | 199.587151       | <b>A</b> | 1939.933073        | 970.470175      | 1922.906524        | 961.956900       | 1921.922508    | 961.464892       | 14 |
| 6  | <b>855.402916</b>  | 428.205096      | 838.376367     | 419.691822       | 837.392351         | 419.199814       | <b>Q</b> | 1868.895959        | 934.951618      | 1851.869410        | 926.438343       | 1850.885394    | 925.946335       | 13 |
| 7  | <b>942.434944</b>  | 471.721110      | 925.408395     | 463.207836       | 924.424379         | 462.715828       | <b>S</b> | <b>1429.670633</b> | 715.338955      | 1412.644084        | 706.825680       | 1411.660068    | 706.333672       | 12 |
| 8  | <b>1013.472058</b> | 507.239667      | 996.445509     | 498.726393       | <b>995.461493</b>  | 498.234385       | <b>A</b> | <b>1342.638605</b> | 671.822941      | 1325.612056        | 663.309666       | 1324.628040    | 662.817658       | 11 |
| 9  | <b>1128.499001</b> | 564.753139      | 1111.472452    | 556.239864       | 1110.488436        | 555.747856       | <b>D</b> | <b>1271.601491</b> | 636.304384      | 1254.574942        | 627.791109       | 1253.590926    | 627.299101       | 10 |
| 10 | 1225.551765        | 613.279521      | 1208.525216    | 604.766246       | 1207.541200        | 604.274238       | <b>P</b> | <b>1156.574548</b> | 578.790912      | <b>1139.547999</b> | 570.277638       | 1138.563983    | 569.785630       | 9  |
| 11 | <b>1353.610343</b> | 677.308810      | 1336.583794    | 668.795535       | <b>1335.599778</b> | 668.303527       | <b>Q</b> | <b>1059.521784</b> | 530.264530      | <b>1042.495235</b> | 521.751256       | 1041.511219    | 521.259248       | 8  |
| 12 | <b>1539.689656</b> | 770.348466      | 1522.663107    | 761.835192       | <b>1521.679091</b> | 761.343184       | <b>W</b> | <b>931.463206</b>  | 466.235241      | 914.436657         | 457.721967       | 913.452641     | 457.229959       | 7  |
| 13 | <b>1668.732249</b> | 834.869762      | 1651.705700    | 826.356488       | 1650.721684        | 825.864480       | <b>E</b> | <b>745.383893</b>  | 373.195585      | 728.357344         | 364.682310       | 727.373328     | 364.190302       | 6  |
| 14 | 1796.790827        | 898.899052      | 1779.764278    | 890.385777       | 1778.780262        | 889.893769       | <b>Q</b> | <b>616.341300</b>  | 308.674288      | <b>599.314751</b>  | 300.161014       |                |                  | 5  |
| 15 | 1909.874891        | 955.441083      | 1892.848342    | 946.927809       | 1891.864326        | 946.435801       | <b>L</b> | <b>488.282722</b>  | 244.644999      | 471.256173         | 236.131725       |                |                  | 4  |
| 16 | 2023.917818        | 1012.462547     | 2006.891269    | 1003.949273      | 2005.907253        | 1003.457265      | <b>N</b> | <b>375.198658</b>  | 188.102967      | 358.172109         | 179.589693       |                |                  | 3  |
| 17 | 2137.960745        | 1069.484010     | 2120.934196    | 1060.970736      | 2119.950180        | 1060.478728      | <b>N</b> | 261.155731         | 131.081504      | 244.129182         | 122.568229       |                |                  | 2  |
| 18 |                    |                 |                |                  |                    |                  | <b>K</b> | 147.112804         | 74.060040       | 130.086255         | 65.546765        |                |                  | 1  |

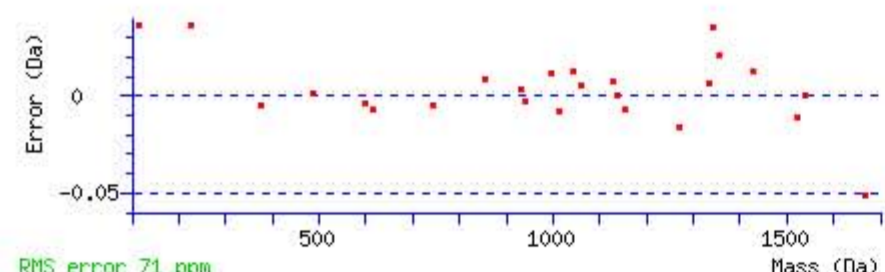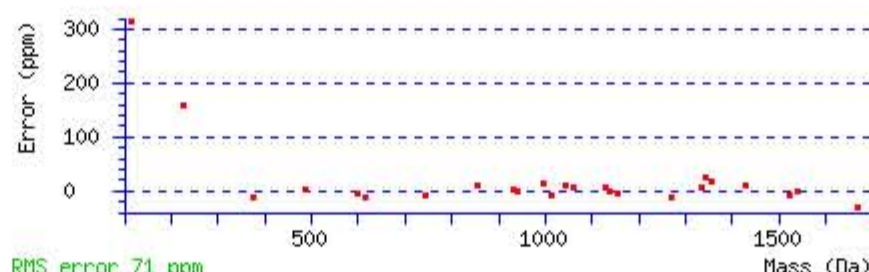

NCBI BLAST search of [GGETAQSADPQWEQLNKK](#)

(Parameters: blastp, nr protein database, expect=20000, no filter, PAM30)

Other BLAST [web gateways](#)

## All matches to this query

| Score | Mr(calc):   | Delta    | Sequence                           |
|-------|-------------|----------|------------------------------------|
| 58.9  | 2283.058975 | 0.003977 | <a href="#">GGETAQSADPQWEQLNKK</a> |
| 14.5  | 2283.058975 | 0.003977 | <a href="#">GGETAQSADPQWEQLNKK</a> |

Mascot: <http://www.matrixscience.com/>



# MASCOT Search Results

## Peptide View

MS/MS Fragmentation of **VQLSPDLLATLPEPASPGR**

Found in **HGFA\_HUMAN**, Hepatocyte growth factor activator OS=Homo sapiens GN=HGFAC PE=1 SV=1

Match to Query 52481: 2271.227832 from(758.083220,3+) rtinseconds(2669) index(9512)

Title: Locus:1.1.1.1738.23 File:"2013-07-02 CLN FXIII 60 min 2nd F 1.wiff"

Data file C:\Program Files (x86)\Matrix Science\Mascot Daemon\mgf5 FXIII 60 min 2nd\mascot\_daemon\_merge.mgf

Click mouse within plot area to zoom in by factor of two about that point

Or, Plot from  to  Da

Label all possible matches  Label matches used for scoring

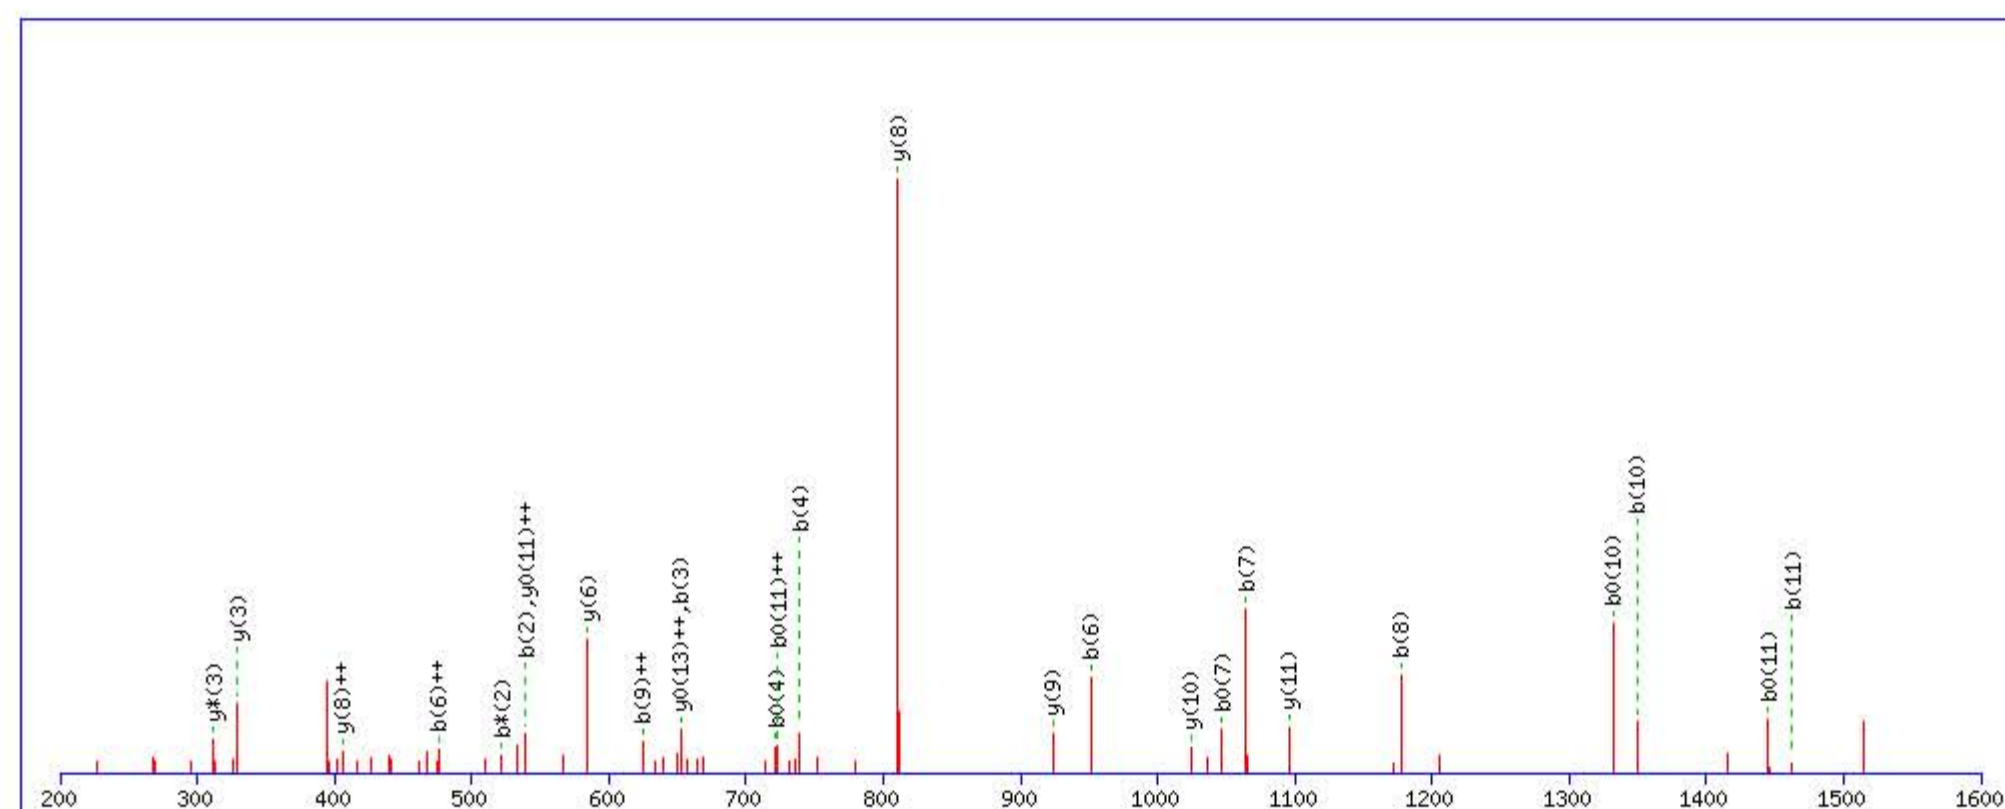

Monoisotopic mass of neutral peptide Mr(calc): 2271.229675

Fixed modifications: Carbamidomethyl (C) (apply to specified residues or termini only)

Variable modifications:

Q2 : Biotin:Thermo-21345 (Q)

Ions Score: 57 Expect: 1.4e-005

Matches : 26/202 fragment ions using 33 most intense peaks [\(help\)](#)

| #  | b                  | b <sup>++</sup>   | b <sup>+</sup>    | b <sup>+++</sup> | b <sup>0</sup>     | b <sup>0++</sup> | Seq. | y                  | y <sup>++</sup>   | y <sup>+</sup>    | y <sup>+++</sup> | y <sup>0</sup> | y <sup>0++</sup>  | #  |
|----|--------------------|-------------------|-------------------|------------------|--------------------|------------------|------|--------------------|-------------------|-------------------|------------------|----------------|-------------------|----|
| 1  | 100.075690         | 50.541483         |                   |                  |                    |                  | V    |                    |                   |                   |                  |                |                   | 19 |
| 2  | <b>539.301016</b>  | 270.154146        | <b>522.274467</b> | 261.640872       |                    |                  | Q    | 2173.168553        | 1087.087914       | 2156.142004       | 1078.574640      | 2155.157988    | 1078.082632       | 18 |
| 3  | <b>652.385080</b>  | 326.696178        | 635.358531        | 318.182904       |                    |                  | L    | 1733.943227        | 867.475252        | 1716.916678       | 858.961977       | 1715.932662    | 858.469969        | 17 |
| 4  | <b>739.417108</b>  | 370.212192        | 722.390559        | 361.698918       | <b>721.406543</b>  | 361.206910       | S    | 1620.859163        | 810.933219        | 1603.832614       | 802.419945       | 1602.848598    | 801.927937        | 16 |
| 5  | 836.469872         | 418.738574        | 819.443323        | 410.225300       | 818.459307         | 409.733292       | P    | 1533.827135        | 767.417206        | 1516.800586       | 758.903931       | 1515.816570    | 758.411923        | 15 |
| 6  | <b>951.496815</b>  | <b>476.252046</b> | 934.470266        | 467.738771       | 933.486250         | 467.246763       | D    | 1436.774371        | 718.890824        | 1419.747822       | 710.377549       | 1418.763806    | 709.885541        | 14 |
| 7  | <b>1064.580879</b> | 532.794078        | 1047.554330       | 524.280803       | <b>1046.570314</b> | 523.788795       | L    | 1321.747428        | 661.377352        | 1304.720879       | 652.864078       | 1303.736863    | <b>652.372069</b> | 13 |
| 8  | <b>1177.664943</b> | 589.336110        | 1160.638394       | 580.822835       | 1159.654378        | 580.330827       | L    | 1208.663364        | 604.835320        | 1191.636815       | 596.322046       | 1190.652799    | 595.830038        | 12 |
| 9  | 1248.702057        | <b>624.854667</b> | 1231.675508       | 616.341392       | 1230.691492        | 615.849384       | A    | <b>1095.579300</b> | 548.293288        | 1078.552751       | 539.780014       | 1077.568735    | <b>539.288006</b> | 11 |
| 10 | <b>1349.749736</b> | 675.378506        | 1332.723187       | 666.865232       | <b>1331.739171</b> | 666.373223       | T    | <b>1024.542186</b> | 512.774731        | 1007.515637       | 504.261456       | 1006.531621    | 503.769448        | 10 |
| 11 | <b>1462.833800</b> | 731.920538        | 1445.807251       | 723.407264       | <b>1444.823235</b> | 722.915255       | L    | <b>923.494507</b>  | 462.250892        | 906.467958        | 453.737617       | 905.483942     | 453.245609        | 9  |
| 12 | 1559.886564        | 780.446920        | 1542.860015       | 771.933646       | 1541.875999        | 771.441637       | P    | <b>810.410443</b>  | <b>405.708860</b> | 793.383894        | 397.195585       | 792.399878     | 396.703577        | 8  |
| 13 | 1688.929157        | 844.968216        | 1671.902608       | 836.454942       | 1670.918592        | 835.962934       | E    | 713.357679         | 357.182478        | 696.331130        | 348.669203       | 695.347114     | 348.177195        | 7  |
| 14 | 1785.981921        | 893.494598        | 1768.955372       | 884.981324       | 1767.971356        | 884.489316       | P    | <b>584.315086</b>  | 292.661181        | 567.288537        | 284.147907       | 566.304521     | 283.655899        | 6  |
| 15 | 1857.019035        | 929.013155        | 1839.992486       | 920.499881       | 1839.008470        | 920.007873       | A    | 487.262322         | 244.134799        | 470.235773        | 235.621525       | 469.251757     | 235.129517        | 5  |
| 16 | 1944.051063        | 972.529169        | 1927.024514       | 964.015895       | 1926.040498        | 963.523887       | S    | 416.225208         | 208.616242        | 399.198659        | 200.102968       | 398.214643     | 199.610960        | 4  |
| 17 | 2041.103827        | 1021.055552       | 2024.077278       | 1012.542277      | 2023.093262        | 1012.050269      | P    | <b>329.193180</b>  | 165.100228        | <b>312.166631</b> | 156.586954       |                |                   | 3  |
| 18 | 2098.125291        | 1049.566283       | 2081.098742       | 1041.053009      | 2080.114726        | 1040.561001      | G    | 232.140416         | 116.573846        | 215.113867        | 108.060572       |                |                   | 2  |
| 19 |                    |                   |                   |                  |                    |                  | R    | 175.118952         | 88.063114         | 158.092403        | 79.549839        |                |                   | 1  |

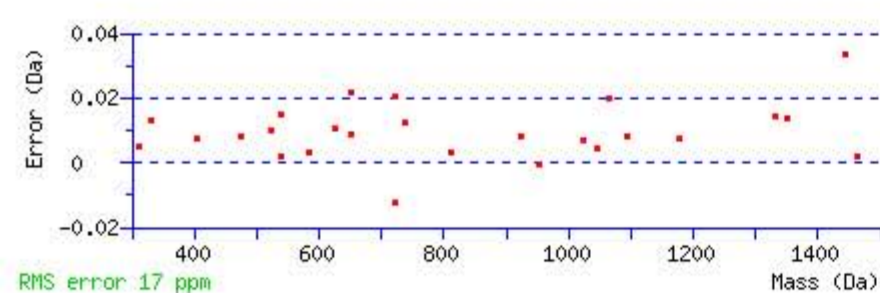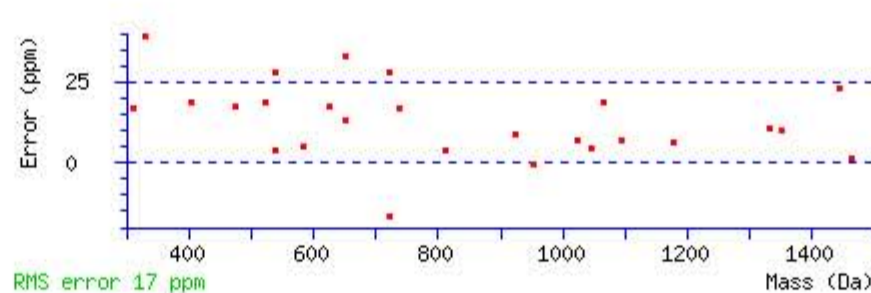

NCBI BLAST search of [VQLSPDLLATLPEPASPGR](#)

(Parameters: blastp, nr protein database, expect=20000, no filter, PAM30)

Other BLAST [web gateways](#)

All matches to this query

| Score | Mr(calc):   | Delta     | Sequence                             |
|-------|-------------|-----------|--------------------------------------|
| 56.8  | 2271.229675 | -0.001843 | <a href="#">VQLSPDLLATLPEPASPGR</a>  |
| 5.0   | 2271.226303 | 0.001529  | <a href="#">IAKSDPPTLLTPSKWSVEFR</a> |

Mascot: <http://www.matrixscience.com/>



# MASCOT Search Results

## Peptide View

MS/MS Fragmentation of **QEATTVSCFR**

Found in **HGFL\_HUMAN**, Hepatocyte growth factor-like protein OS=Homo sapiens GN=MST1 PE=1 SV=2

Match to Query 34167: 1508.710602 from(503.910810,3+) rtinseconds(1757) index(67243)

Title: Locus:1.1.1.1549.15 File:"2013-07-02 CLN FXIII 60 min 2nd FT.wiff"

Data file C:\Program Files (x86)\Matrix Science\Mascot Daemon\mgf5 FXIII 60 min 2nd\mascot\_daemon\_merge.mgf

Click mouse within plot area to zoom in by factor of two about that point

Or, Plot from  to  Da

Label all possible matches  Label matches used for scoring

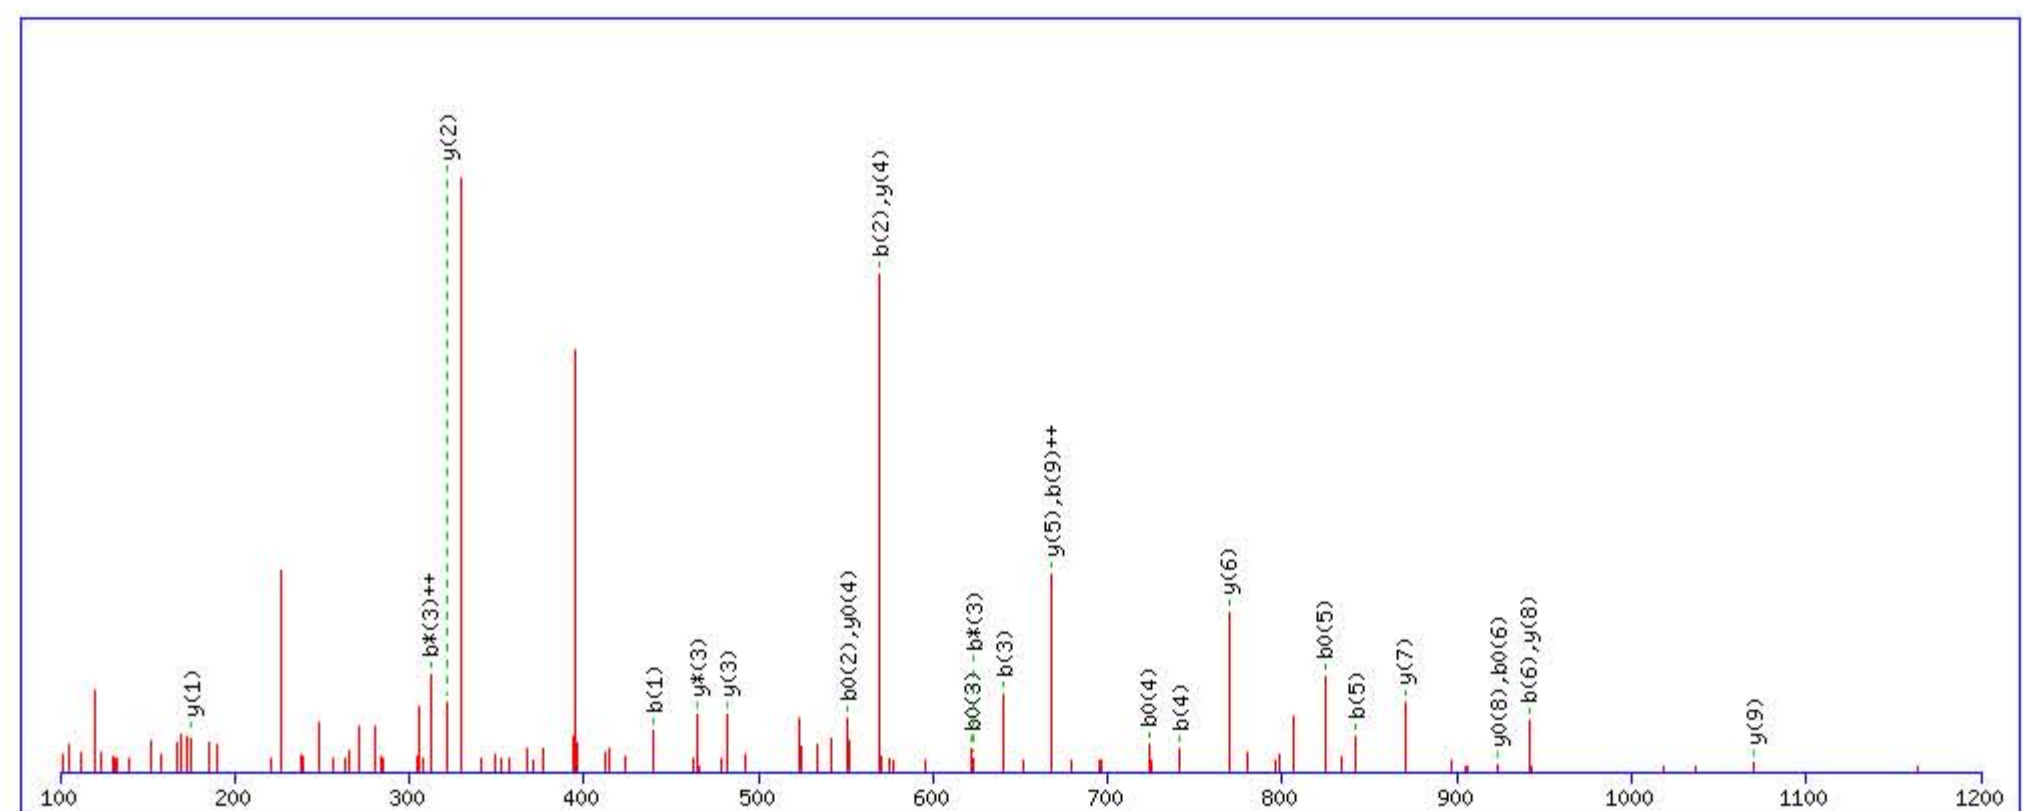

Monoisotopic mass of neutral peptide  $M_r(\text{calc})$ : 1508.711578

Fixed modifications: Carbamidomethyl (C) (apply to specified residues or termini only)

Variable modifications:

Q1 : Biotin:Thermo-21345 (Q)

Ions Score: 53 Expect: 1.2e-005

Matches : 26/100 fragment ions using 40 most intense peaks ([help](#))

| #  | b           | b <sup>++</sup> | b <sup>*</sup> | b <sup>*++</sup> | b <sup>0</sup> | b <sup>0++</sup> | Seq. | y           | y <sup>++</sup> | y <sup>*</sup> | y <sup>*++</sup> | y <sup>0</sup> | y <sup>0++</sup> | #  |
|----|-------------|-----------------|----------------|------------------|----------------|------------------|------|-------------|-----------------|----------------|------------------|----------------|------------------|----|
| 1  | 440.232602  | 220.619939      | 423.206053     | 212.106664       |                |                  | Q    |             |                 |                |                  |                |                  | 10 |
| 2  | 569.275195  | 285.141236      | 552.248646     | 276.627961       | 551.264630     | 276.135953       | E    | 1070.493522 | 535.750399      | 1053.466973    | 527.237125       | 1052.482957    | 526.745117       | 9  |
| 3  | 640.312309  | 320.659793      | 623.285760     | 312.146518       | 622.301744     | 311.654510       | A    | 941.450929  | 471.229103      | 924.424380     | 462.715828       | 923.440364     | 462.223820       | 8  |
| 4  | 741.359988  | 371.183632      | 724.333439     | 362.670358       | 723.349423     | 362.178350       | T    | 870.413815  | 435.710546      | 853.387266     | 427.197271       | 852.403250     | 426.705263       | 7  |
| 5  | 842.407667  | 421.707472      | 825.381118     | 413.194197       | 824.397102     | 412.702189       | T    | 769.366136  | 385.186706      | 752.339587     | 376.673432       | 751.355571     | 376.181424       | 6  |
| 6  | 941.476081  | 471.241679      | 924.449532     | 462.728404       | 923.465516     | 462.236396       | V    | 668.318457  | 334.662867      | 651.291908     | 326.149592       | 650.307892     | 325.657584       | 5  |
| 7  | 1028.508109 | 514.757693      | 1011.481560    | 506.244418       | 1010.497544    | 505.752410       | S    | 569.250043  | 285.128660      | 552.223494     | 276.615385       | 551.239478     | 276.123377       | 4  |
| 8  | 1188.538758 | 594.773017      | 1171.512209    | 586.259743       | 1170.528193    | 585.767735       | C    | 482.218015  | 241.612646      | 465.191466     | 233.099371       |                |                  | 3  |
| 9  | 1335.607172 | 668.307224      | 1318.580623    | 659.793950       | 1317.596607    | 659.301942       | F    | 322.187366  | 161.597321      | 305.160817     | 153.084047       |                |                  | 2  |
| 10 |             |                 |                |                  |                |                  | R    | 175.118952  | 88.063114       | 158.092403     | 79.549839        |                |                  | 1  |

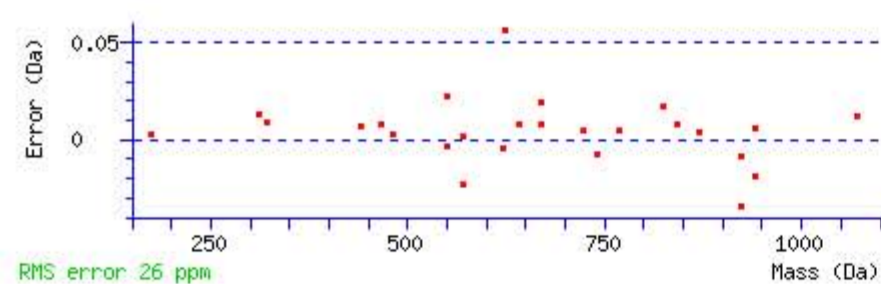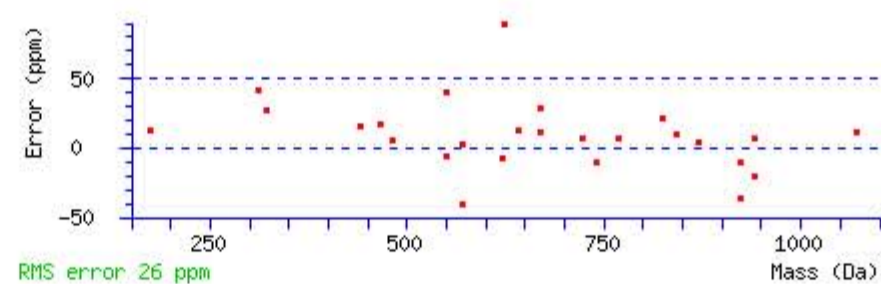

NCBI BLAST search of **QEATTVSCFR**

(Parameters: blastp, nr protein database, expect=20000, no filter, PAM30)

Other BLAST [web gateways](#)

All matches to this query

| Score | $M_r(\text{calc})$ : | Delta     | Sequence                     |
|-------|----------------------|-----------|------------------------------|
| 52.9  | 1508.711578          | -0.000976 | <a href="#">QEATTVSCFR</a>   |
| 0.5   | 1508.692932          | 0.017670  | <a href="#">THILSMEEDKFR</a> |



# MASCOT Search Results

## Peptide View

MS/MS Fragmentation of **GTELQHLLHAVVPGPWQEDVADAEECAGR**

Found in **HGFL\_HUMAN**, Hepatocyte growth factor-like protein OS=Homo sapiens GN=MST1 PE=1 SV=2

Match to Query 66936: 3494.682736 from(874.677960,4+) rtinseconds(2821) index(73773)

Title: Locus:1.1.1.1918.13 File:"2013-07-02 CLN FXIII 60 min 2nd FT.wiff"

Data file C:\Program Files (x86)\Matrix Science\Mascot Daemon\mgf\5 FXIII 60 min 2nd\mascot\_daemon\_merge.mgf

Click mouse within plot area to zoom in by factor of two about that point

Or, Plot from  to  Da

Label all possible matches  Label matches used for scoring

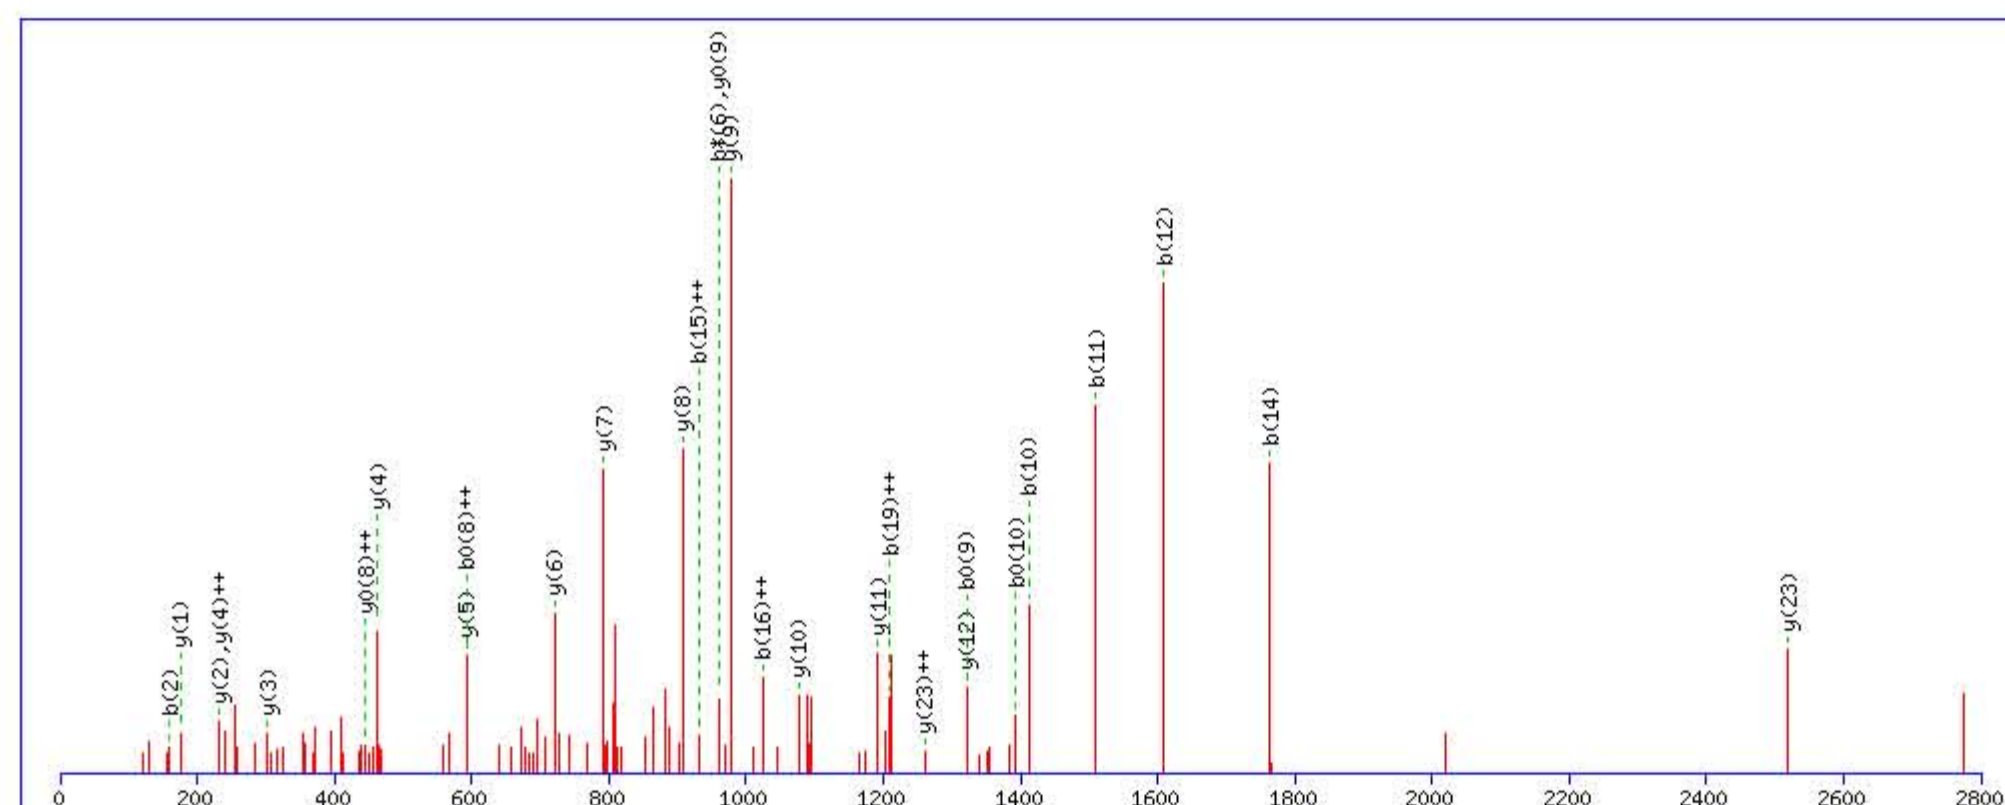

Monoisotopic mass of neutral peptide Mr(calc): 3494.671112

Fixed modifications: Carbamidomethyl (C) (apply to specified residues or termini only)

Variable modifications:

Q5 : Biotin:Thermo-21345 (Q)

Ions Score: 59 Expect: 2.7e-005

Matches : 29/318 fragment ions using 56 most intense peaks [\(help\)](#)

| #  | b                  | b <sup>++</sup>    | b <sup>*</sup>    | b <sup>*++</sup> | b <sup>0</sup>     | b <sup>0++</sup>  | Seq. | y                  | y <sup>++</sup>    | y <sup>*</sup> | y <sup>*++</sup> | y <sup>0</sup>    | y <sup>0++</sup>  | #  |
|----|--------------------|--------------------|-------------------|------------------|--------------------|-------------------|------|--------------------|--------------------|----------------|------------------|-------------------|-------------------|----|
| 1  | 58.028740          | 29.518008          |                   |                  |                    |                   | G    |                    |                    |                |                  |                   |                   | 29 |
| 2  | <b>159.076419</b>  | 80.041847          |                   |                  | 141.065854         | 71.036565         | T    | 3438.656925        | 1719.832100        | 3421.630376    | 1711.318826      | 3420.646360       | 1710.826818       | 28 |
| 3  | 288.119012         | 144.563144         |                   |                  | 270.108447         | 135.557862        | E    | 3337.609246        | 1669.308261        | 3320.582697    | 1660.794986      | 3319.598681       | 1660.302978       | 27 |
| 4  | 401.203076         | 201.105176         |                   |                  | 383.192511         | 192.099894        | L    | 3208.566653        | 1604.786964        | 3191.540104    | 1596.273690      | 3190.556088       | 1595.781682       | 26 |
| 5  | 840.428402         | 420.717839         | 823.401853        | 412.204565       | 822.417837         | 411.712557        | Q    | 3095.482589        | 1548.244932        | 3078.456040    | 1539.731658      | 3077.472024       | 1539.239650       | 25 |
| 6  | 977.487314         | 489.247295         | <b>960.460765</b> | 480.734021       | 959.476749         | 480.242013        | H    | 2656.257263        | 1328.632269        | 2639.230714    | 1320.118995      | 2638.246698       | 1319.626987       | 24 |
| 7  | 1090.571378        | 545.789327         | 1073.544829       | 537.276053       | 1072.560813        | 536.784045        | L    | <b>2519.198351</b> | <b>1260.102813</b> | 2502.171802    | 1251.589539      | 2501.187786       | 1251.097531       | 23 |
| 8  | 1203.655442        | 602.331359         | 1186.628893       | 593.818085       | 1185.644877        | <b>593.326077</b> | L    | 2406.114287        | 1203.560781        | 2389.087738    | 1195.047507      | 2388.103722       | 1194.555499       | 22 |
| 9  | 1340.714354        | 670.860815         | 1323.687805       | 662.347541       | <b>1322.703789</b> | 661.855532        | H    | 2293.030223        | 1147.018749        | 2276.003674    | 1138.505475      | 2275.019658       | 1138.013467       | 21 |
| 10 | <b>1411.751468</b> | 706.379372         | 1394.724919       | 697.866098       | <b>1393.740903</b> | 697.374089        | A    | 2155.971311        | 1078.489293        | 2138.944762    | 1069.976019      | 2137.960746       | 1069.484011       | 20 |
| 11 | <b>1510.819882</b> | 755.913579         | 1493.793333       | 747.400305       | 1492.809317        | 746.908297        | V    | 2084.934197        | 1042.970736        | 2067.907648    | 1034.457462      | 2066.923632       | 1033.965454       | 19 |
| 12 | <b>1609.888296</b> | 805.447786         | 1592.861747       | 796.934512       | 1591.877731        | 796.442504        | V    | 1985.865783        | 993.436530         | 1968.839234    | 984.923255       | 1967.855218       | 984.431247        | 18 |
| 13 | 1706.941060        | 853.974168         | 1689.914511       | 845.460894       | 1688.930495        | 844.968886        | P    | 1886.797369        | 943.902323         | 1869.770820    | 935.389048       | 1868.786804       | 934.897040        | 17 |
| 14 | <b>1763.962524</b> | 882.484900         | 1746.935975       | 873.971626       | 1745.951959        | 873.479618        | G    | 1789.744605        | 895.375941         | 1772.718056    | 886.862666       | 1771.734040       | 886.370658        | 16 |
| 15 | 1861.015288        | <b>931.011282</b>  | 1843.988739       | 922.498008       | 1843.004723        | 922.006000        | P    | 1732.723141        | 866.865209         | 1715.696592    | 858.351934       | 1714.712576       | 857.859926        | 15 |
| 16 | 2047.094601        | <b>1024.050939</b> | 2030.068052       | 1015.537664      | 2029.084036        | 1015.045656       | W    | 1635.670377        | 818.338827         | 1618.643828    | 809.825552       | 1617.659812       | 809.333544        | 14 |
| 17 | 2175.153179        | 1088.080227        | 2158.126630       | 1079.566953      | 2157.142614        | 1079.074945       | Q    | 1449.591064        | 725.299170         | 1432.564515    | 716.785896       | 1431.580499       | 716.293888        | 13 |
| 18 | 2304.195772        | 1152.601524        | 2287.169223       | 1144.088249      | 2286.185207        | 1143.596241       | E    | <b>1321.532486</b> | 661.269881         | 1304.505937    | 652.756607       | 1303.521921       | 652.264599        | 12 |
| 19 | 2419.222715        | <b>1210.114995</b> | 2402.196166       | 1201.601721      | 2401.212150        | 1201.109713       | D    | <b>1192.489893</b> | 596.748585         | 1175.463344    | 588.235310       | 1174.479328       | 587.743302        | 11 |
| 20 | 2518.291129        | 1259.649202        | 2501.264580       | 1251.135928      | 2500.280564        | 1250.643920       | V    | <b>1077.462950</b> | 539.235113         | 1060.436401    | 530.721839       | 1059.452385       | 530.229831        | 10 |
| 21 | 2589.328243        | 1295.167759        | 2572.301694       | 1286.654485      | 2571.317678        | 1286.162477       | A    | <b>978.394536</b>  | 489.700906         | 961.367987     | 481.187632       | <b>960.383971</b> | 480.695624        | 9  |
| 22 | 2704.355186        | 1352.681231        | 2687.328637       | 1344.167956      | 2686.344621        | 1343.675948       | D    | <b>907.357422</b>  | 454.182349         | 890.330873     | 445.669075       | 889.346857        | <b>445.177067</b> | 8  |
| 23 | 2775.392300        | 1388.199788        | 2758.365751       | 1379.686513      | 2757.381735        | 1379.194505       | A    | <b>792.330479</b>  | 396.668878         | 775.303930     | 388.155603       | 774.319914        | 387.663595        | 7  |
| 24 | 2904.434893        | 1452.721085        | 2887.408344       | 1444.207810      | 2886.424328        | 1443.715802       | E    | <b>721.293365</b>  | 361.150321         | 704.266816     | 352.637046       | 703.282800        | 352.145038        | 6  |
| 25 | 3033.477486        | 1517.242381        | 3016.450937       | 1508.729106      | 3015.466921        | 1508.237099       | E    | <b>592.250772</b>  | 296.629024         | 575.224223     | 288.115750       | 574.240207        | 287.623742        | 5  |
| 26 | 3193.508135        | 1597.257705        | 3176.481586       | 1588.744431      | 3175.497570        | 1588.252423       | C    | <b>463.208179</b>  | <b>232.107727</b>  | 446.181630     | 223.594453       |                   |                   | 4  |
| 27 | 3264.545249        | 1632.776263        | 3247.518700       | 1624.262988      | 3246.534684        | 1623.770980       | A    | <b>303.177530</b>  | 152.092403         | 286.150981     | 143.579129       |                   |                   | 3  |
| 28 | 3321.566713        | 1661.286995        | 3304.540164       | 1652.773720      | 3303.556148        | 1652.281712       | G    | <b>232.140416</b>  | 116.573846         | 215.113867     | 108.060571       |                   |                   | 2  |
| 29 |                    |                    |                   |                  |                    |                   | R    | <b>175.118952</b>  | 88.063114          | 158.092403     | 79.549839        |                   |                   | 1  |

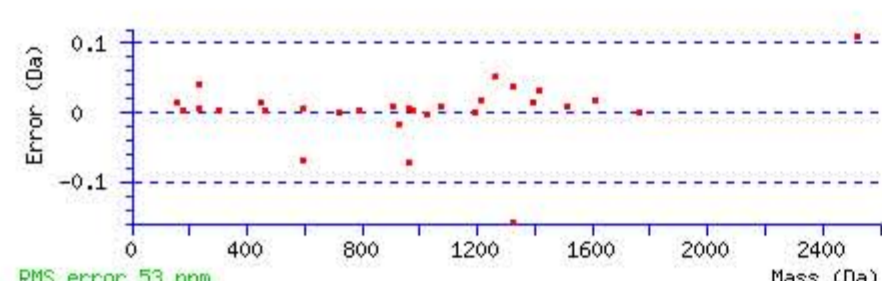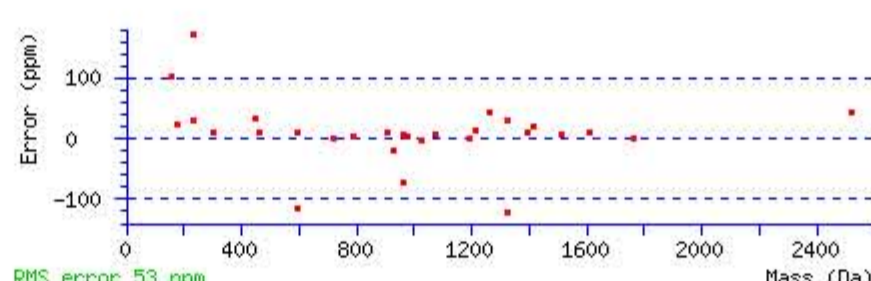

NCBI BLAST search of **GTELQHLLHAVVPGPWQEDVADAEECAGR**

(Parameters: blastp, nr protein database, expect=20000, no filter, PAM30)

Other BLAST [web gateways](#)

## All matches to this query

| Score | Mr(calc):   | Delta    | Sequence                                      |
|-------|-------------|----------|-----------------------------------------------|
| 59.0  | 3494.671112 | 0.011624 | <a href="#">GTELQHLLHAVVPGPWQEDVADAEECAGR</a> |
| 29.8  | 3494.671112 | 0.011624 | <a href="#">GTELQHLLHAVVPGPWQEDVADAEECAGR</a> |

Mascot: <http://www.matrixscience.com/>



# MASCOT Search Results

## Peptide View

MS/MS Fragmentation of **WSAETPHKQFTFTSEPHAQLEENFCR**

Found in **HGFL\_HUMAN**, Hepatocyte growth factor-like protein OS=Homo sapiens GN=MST1 PE=1 SV=2

Match to Query 67845: 3584.663820 from(717.940040,5+) rtinseconds(2036) index(69024)

Title: Locus:1.1.1.1646.10 File:"2013-07-02 CLN FXIII 60 min 2nd FT.wiff"

Data file C:\Program Files (x86)\Matrix Science\Mascot Daemon\mgf5 FXIII 60 min 2nd\mascot\_daemon\_merge.mgf

Click mouse within plot area to zoom in by factor of two about that point

Or, Plot from  to  Da

Label all possible matches  Label matches used for scoring

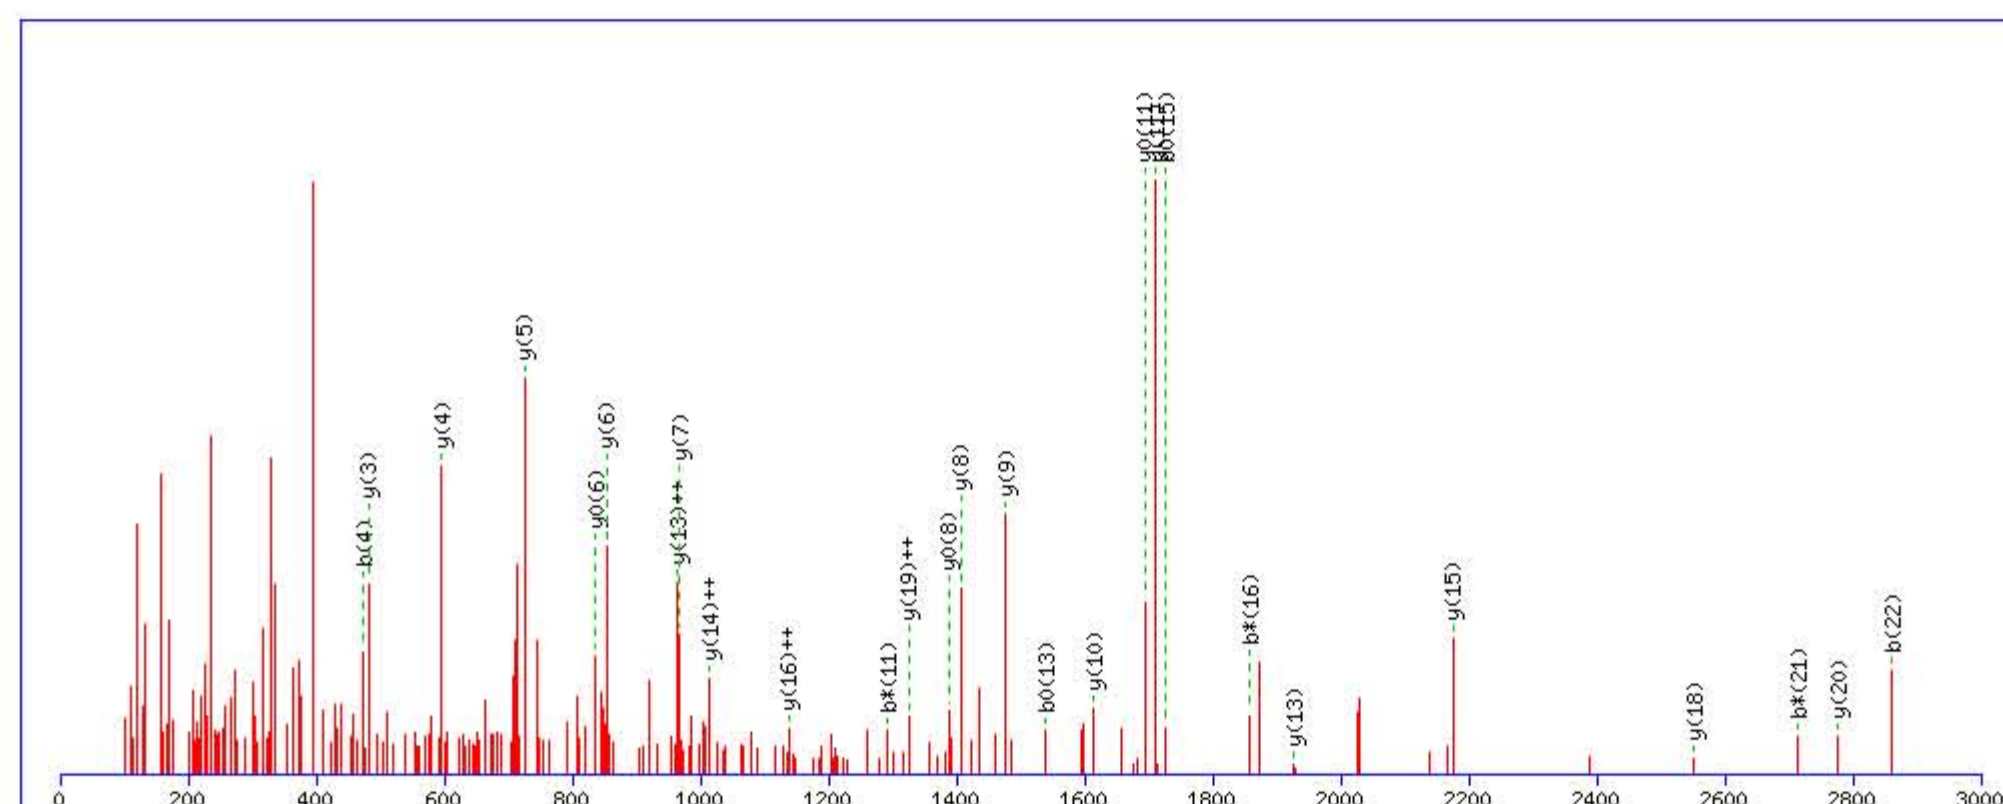

Monoisotopic mass of neutral peptide Mr(calc): 3584.660538

Fixed modifications: Carbamidomethyl (C) (apply to specified residues or termini only)

Variable modifications:

Q20 : Biotin:Thermo-21345 (Q)

Ions Score: 67 Expect: 3.1e-006

Matches : 27/288 fragment ions using 47 most intense peaks [\(help\)](#)

| #  | b                  | b <sup>++</sup> | b <sup>*</sup>     | b <sup>++</sup> | b <sup>0</sup>     | b <sup>0++</sup> | Seq. | y                  | y <sup>++</sup>    | y <sup>*</sup> | y <sup>++</sup> | y <sup>0</sup>     | y <sup>0++</sup> | #  |
|----|--------------------|-----------------|--------------------|-----------------|--------------------|------------------|------|--------------------|--------------------|----------------|-----------------|--------------------|------------------|----|
| 1  | 187.086589         | 94.046932       |                    |                 |                    |                  | W    |                    |                    |                |                 |                    |                  | 27 |
| 2  | 274.118617         | 137.562947      |                    |                 | 256.108052         | 128.557664       | S    | 3399.588510        | 1700.297893        | 3382.561961    | 1691.784618     | 3381.577945        | 1691.292610      | 26 |
| 3  | 345.155731         | 173.081504      |                    |                 | 327.145166         | 164.076221       | A    | 3312.556482        | 1656.781879        | 3295.529933    | 1648.268605     | 3294.545917        | 1647.776597      | 25 |
| 4  | <b>474.198324</b>  | 237.602800      |                    |                 | 456.187759         | 228.597518       | E    | 3241.519368        | 1621.263322        | 3224.492819    | 1612.750047     | 3223.508803        | 1612.258040      | 24 |
| 5  | 575.246003         | 288.126640      |                    |                 | 557.235438         | 279.121357       | T    | 3112.476775        | 1556.742026        | 3095.450226    | 1548.228751     | 3094.466210        | 1547.736743      | 23 |
| 6  | 672.298767         | 336.653022      |                    |                 | 654.288202         | 327.647739       | P    | 3011.429096        | 1506.218186        | 2994.402547    | 1497.704912     | 2993.418531        | 1497.212904      | 22 |
| 7  | 809.357679         | 405.182478      |                    |                 | 791.347114         | 396.177195       | H    | 2914.376332        | 1457.691804        | 2897.349783    | 1449.178530     | 2896.365767        | 1448.686522      | 21 |
| 8  | 937.452642         | 469.229959      | 920.426093         | 460.716685      | 919.442077         | 460.224677       | K    | <b>2777.317420</b> | 1389.162348        | 2760.290871    | 1380.649074     | 2759.306855        | 1380.157066      | 20 |
| 9  | 1034.505406        | 517.756341      | 1017.478857        | 509.243067      | 1016.494841        | 508.751059       | P    | 2649.222457        | <b>1325.114867</b> | 2632.195908    | 1316.601592     | 2631.211892        | 1316.109584      | 19 |
| 10 | 1162.563984        | 581.785630      | 1145.537435        | 573.272356      | 1144.553419        | 572.780348       | Q    | <b>2552.169693</b> | 1276.588485        | 2535.143144    | 1268.075210     | 2534.159128        | 1267.583202      | 18 |
| 11 | 1309.632398        | 655.319837      | <b>1292.605849</b> | 646.806563      | 1291.621833        | 646.314555       | F    | 2424.111115        | 1212.559196        | 2407.084566    | 1204.045921     | 2406.100550        | 1203.553913      | 17 |
| 12 | 1410.680077        | 705.843677      | 1393.653528        | 697.330402      | 1392.669512        | 696.838394       | T    | 2277.042701        | <b>1139.024988</b> | 2260.016152    | 1130.511714     | 2259.032136        | 1130.019706      | 16 |
| 13 | 1557.748491        | 779.377884      | 1540.721942        | 770.864609      | <b>1539.737926</b> | 770.372601       | F    | <b>2175.995022</b> | 1088.501149        | 2158.968473    | 1079.987874     | 2157.984457        | 1079.495866      | 15 |
| 14 | 1658.796170        | 829.901723      | 1641.769621        | 821.388449      | 1640.785605        | 820.896441       | T    | 2028.926608        | <b>1014.966942</b> | 2011.900059    | 1006.453668     | 2010.916043        | 1005.961660      | 14 |
| 15 | 1745.828198        | 873.417737      | 1728.801649        | 864.904463      | <b>1727.817633</b> | 864.412455       | S    | <b>1927.878929</b> | <b>964.443103</b>  | 1910.852380    | 955.929828      | 1909.868364        | 955.437820       | 13 |
| 16 | 1874.870791        | 937.939034      | <b>1857.844242</b> | 929.425759      | 1856.860226        | 928.933751       | E    | 1840.846901        | 920.927089         | 1823.820352    | 912.413814      | 1822.836336        | 911.921806       | 12 |
| 17 | 1971.923555        | 986.465416      | 1954.897006        | 977.952141      | 1953.912990        | 977.460133       | P    | <b>1711.804308</b> | 856.405792         | 1694.777759    | 847.892518      | <b>1693.793743</b> | 847.400510       | 11 |
| 18 | 2108.982467        | 1054.994872     | 2091.955918        | 1046.481597     | 2090.971902        | 1045.989589      | H    | <b>1614.751544</b> | 807.879410         | 1597.724995    | 799.366136      | 1596.740979        | 798.874128       | 10 |
| 19 | 2180.019581        | 1090.513429     | 2162.993032        | 1082.000154     | 2162.009016        | 1081.508146      | A    | <b>1477.692632</b> | 739.349954         | 1460.666083    | 730.836680      | 1459.682067        | 730.344672       | 9  |
| 20 | 2619.244907        | 1310.126092     | 2602.218358        | 1301.612817     | 2601.234342        | 1301.120809      | Q    | <b>1406.655518</b> | 703.831397         | 1389.628969    | 695.318123      | <b>1388.644953</b> | 694.826115       | 8  |
| 21 | 2732.328971        | 1366.668124     | <b>2715.302422</b> | 1358.154849     | 2714.318406        | 1357.662841      | L    | <b>967.430192</b>  | 484.218734         | 950.403643     | 475.705460      | 949.419627         | 475.213452       | 7  |
| 22 | <b>2861.371564</b> | 1431.189420     | 2844.345015        | 1422.676146     | 2843.360999        | 1422.184138      | E    | <b>854.346128</b>  | 427.676702         | 837.319579     | 419.163427      | <b>836.335563</b>  | 418.671419       | 6  |
| 23 | 2990.414157        | 1495.710717     | 2973.387608        | 1487.197442     | 2972.403592        | 1486.705434      | E    | <b>725.303535</b>  | 363.155405         | 708.276986     | 354.642131      | 707.292970         | 354.150123       | 5  |
| 24 | 3104.457084        | 1552.732180     | 3087.430535        | 1544.218906     | 3086.446519        | 1543.726898      | N    | <b>596.260942</b>  | 298.634109         | 579.234393     | 290.120834      |                    |                  | 4  |
| 25 | 3251.525498        | 1626.266387     | 3234.498949        | 1617.753113     | 3233.514933        | 1617.261105      | F    | <b>482.218015</b>  | 241.612645         | 465.191466     | 233.099371      |                    |                  | 3  |
| 26 | 3411.556147        | 1706.281712     | 3394.529598        | 1697.768437     | 3393.545582        | 1697.276429      | C    | 335.149601         | 168.078438         | 318.123052     | 159.565164      |                    |                  | 2  |
| 27 |                    |                 |                    |                 |                    |                  | R    | 175.118952         | 88.063114          | 158.092403     | 79.549839       |                    |                  | 1  |

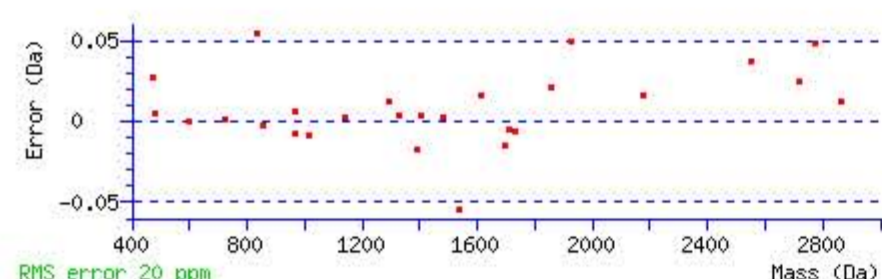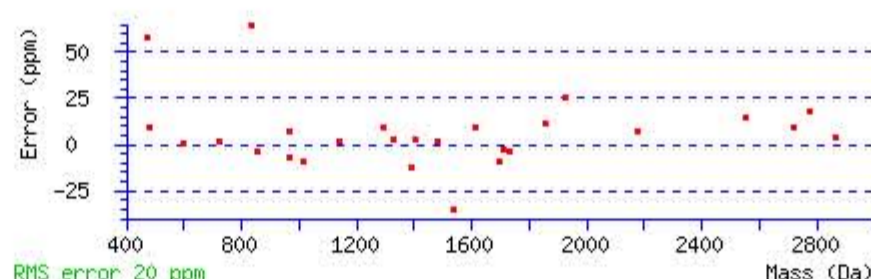

NCBI BLAST search of [WSAETPHKQFTFTSEPHAQLEENFCR](#)

(Parameters: blastp, nr protein database, expect=20000, no filter, PAM30)

Other BLAST [web gateways](#)

All matches to this query

| Score | Mr(calc):   | Delta    | Sequence                                   |
|-------|-------------|----------|--------------------------------------------|
| 66.8  | 3584.660538 | 0.003282 | <a href="#">WSAETPHKQFTFTSEPHAQLEENFCR</a> |
| 9.9   | 3584.660538 | 0.003282 | <a href="#">WSAETPHKQFTFTSEPHAQLEENFCR</a> |

Mascot: <http://www.matrixscience.com/>



# MASCOT Search Results

## Peptide View

MS/MS Fragmentation of **FTCACPDQFK**

Found in **HABP2\_HUMAN**, Hyaluronan-binding protein 2 OS=Homo sapiens GN=HABP2 PE=1 SV=1

Match to Query 36415: 1583.703568 from(792.859060,2+) rtinseconds(1921) index(52226)

Title: Locus:1.1.1.1284.22 File:"2013-07-02 CLN FXIII 60 min 2nd F 4.wiff"

Data file C:\Program Files (x86)\Matrix Science\Mascot Daemon\mgf5 FXIII 60 min 2nd\mascot\_daemon\_merge.mgf

Click mouse within plot area to zoom in by factor of two about that point

Or, Plot from  to  Da

Label all possible matches  Label matches used for scoring

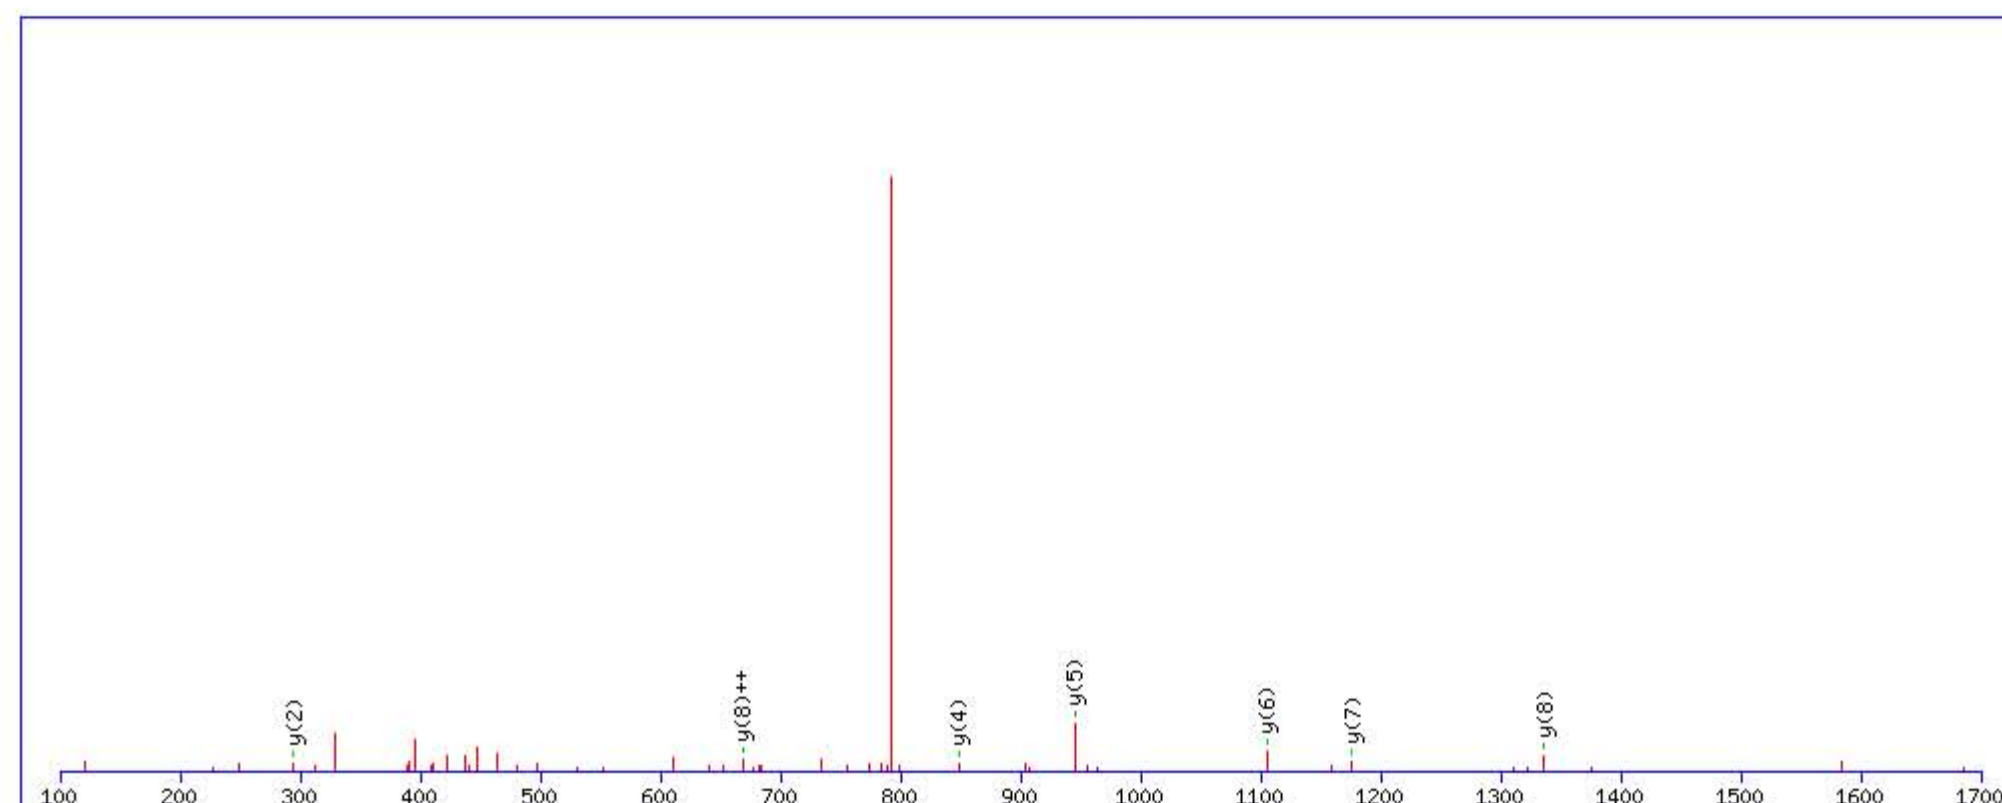

Monoisotopic mass of neutral peptide Mr(calc): 1583.693497

Fixed modifications: Carbamidomethyl (C) (apply to specified residues or termini only)

Variable modifications:

Q8 : Biotin:Thermo-21345 (Q)

Ions Score: 30 Expect: 0.0086

Matches : 7/86 fragment ions using 13 most intense peaks [\(help\)](#)

| #  | b           | b <sup>++</sup> | b <sup>*</sup> | b <sup>*++</sup> | b <sup>0</sup> | b <sup>0++</sup> | Seq. | y                  | y <sup>++</sup>   | y <sup>*</sup> | y <sup>*++</sup> | y <sup>0</sup> | y <sup>0++</sup> | #  |
|----|-------------|-----------------|----------------|------------------|----------------|------------------|------|--------------------|-------------------|----------------|------------------|----------------|------------------|----|
| 1  | 148.075690  | 74.541483       |                |                  |                |                  | F    |                    |                   |                |                  |                |                  | 10 |
| 2  | 249.123369  | 125.065322      |                |                  | 231.112804     | 116.060040       | T    | 1437.632342        | 719.319809        | 1420.605793    | 710.806535       | 1419.621777    | 710.314527       | 9  |
| 3  | 409.154018  | 205.080647      |                |                  | 391.143453     | 196.075365       | C    | <b>1336.584663</b> | <b>668.795970</b> | 1319.558114    | 660.282695       | 1318.574098    | 659.790687       | 8  |
| 4  | 480.191132  | 240.599204      |                |                  | 462.180567     | 231.593921       | A    | <b>1176.554014</b> | 588.780645        | 1159.527465    | 580.267371       | 1158.543449    | 579.775363       | 7  |
| 5  | 640.221781  | 320.614529      |                |                  | 622.211216     | 311.609246       | C    | <b>1105.516900</b> | 553.262088        | 1088.490351    | 544.748814       | 1087.506335    | 544.256806       | 6  |
| 6  | 737.274545  | 369.140911      |                |                  | 719.263980     | 360.135628       | P    | <b>945.486251</b>  | 473.246764        | 928.459702     | 464.733489       | 927.475686     | 464.241481       | 5  |
| 7  | 852.301488  | 426.654382      |                |                  | 834.290923     | 417.649100       | D    | <b>848.433487</b>  | 424.720382        | 831.406938     | 416.207107       | 830.422922     | 415.715099       | 4  |
| 8  | 1291.526814 | 646.267045      | 1274.500265    | 637.753771       | 1273.516249    | 637.261763       | Q    | 733.406544         | 367.206910        | 716.379995     | 358.693636       |                |                  | 3  |
| 9  | 1438.595228 | 719.801252      | 1421.568679    | 711.287978       | 1420.584663    | 710.795970       | F    | <b>294.181218</b>  | 147.594247        | 277.154669     | 139.080973       |                |                  | 2  |
| 10 |             |                 |                |                  |                |                  | K    | 147.112804         | 74.060040         | 130.086255     | 65.546765        |                |                  | 1  |

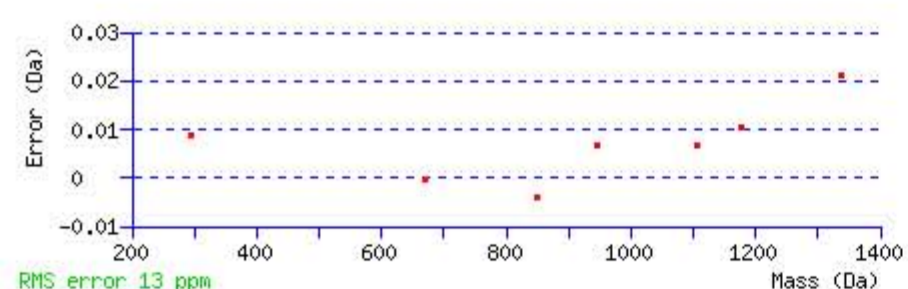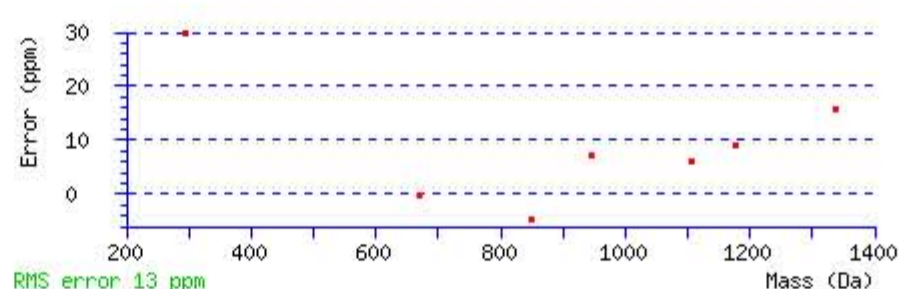

NCBI BLAST search of **FTCACPDQFK**

(Parameters: blastp, nr protein database, expect=20000, no filter, PAM30)

Other BLAST [web gateways](#)

All matches to this query

| Score | Mr(calc):   | Delta    | Sequence                   |
|-------|-------------|----------|----------------------------|
| 29.5  | 1583.693497 | 0.010071 | <a href="#">FTCACPDQFK</a> |

Mascot: <http://www.matrixscience.com/>



# MASCOT Search Results

## Peptide View

MS/MS Fragmentation of **GQCLITQSPYYR**

Found in **HABP2\_HUMAN**, Hyaluronan-binding protein 2 OS=Homo sapiens GN=HABP2 PE=1 SV=1

Match to Query 44417: 1892.934372 from(631.985400,3+) rtinseconds(2154) index(53925)

Title: Locus:1.1.1.1365.10 File:"2013-07-02 CLN FXIII 60 min 2nd F 4.wiff"

Data file C:\Program Files (x86)\Matrix Science\Mascot Daemon\mgf5 FXIII 60 min 2nd\mascot\_daemon\_merge.mgf

Click mouse within plot area to zoom in by factor of two about that point

Or, Plot from  to  Da

Label all possible matches  Label matches used for scoring

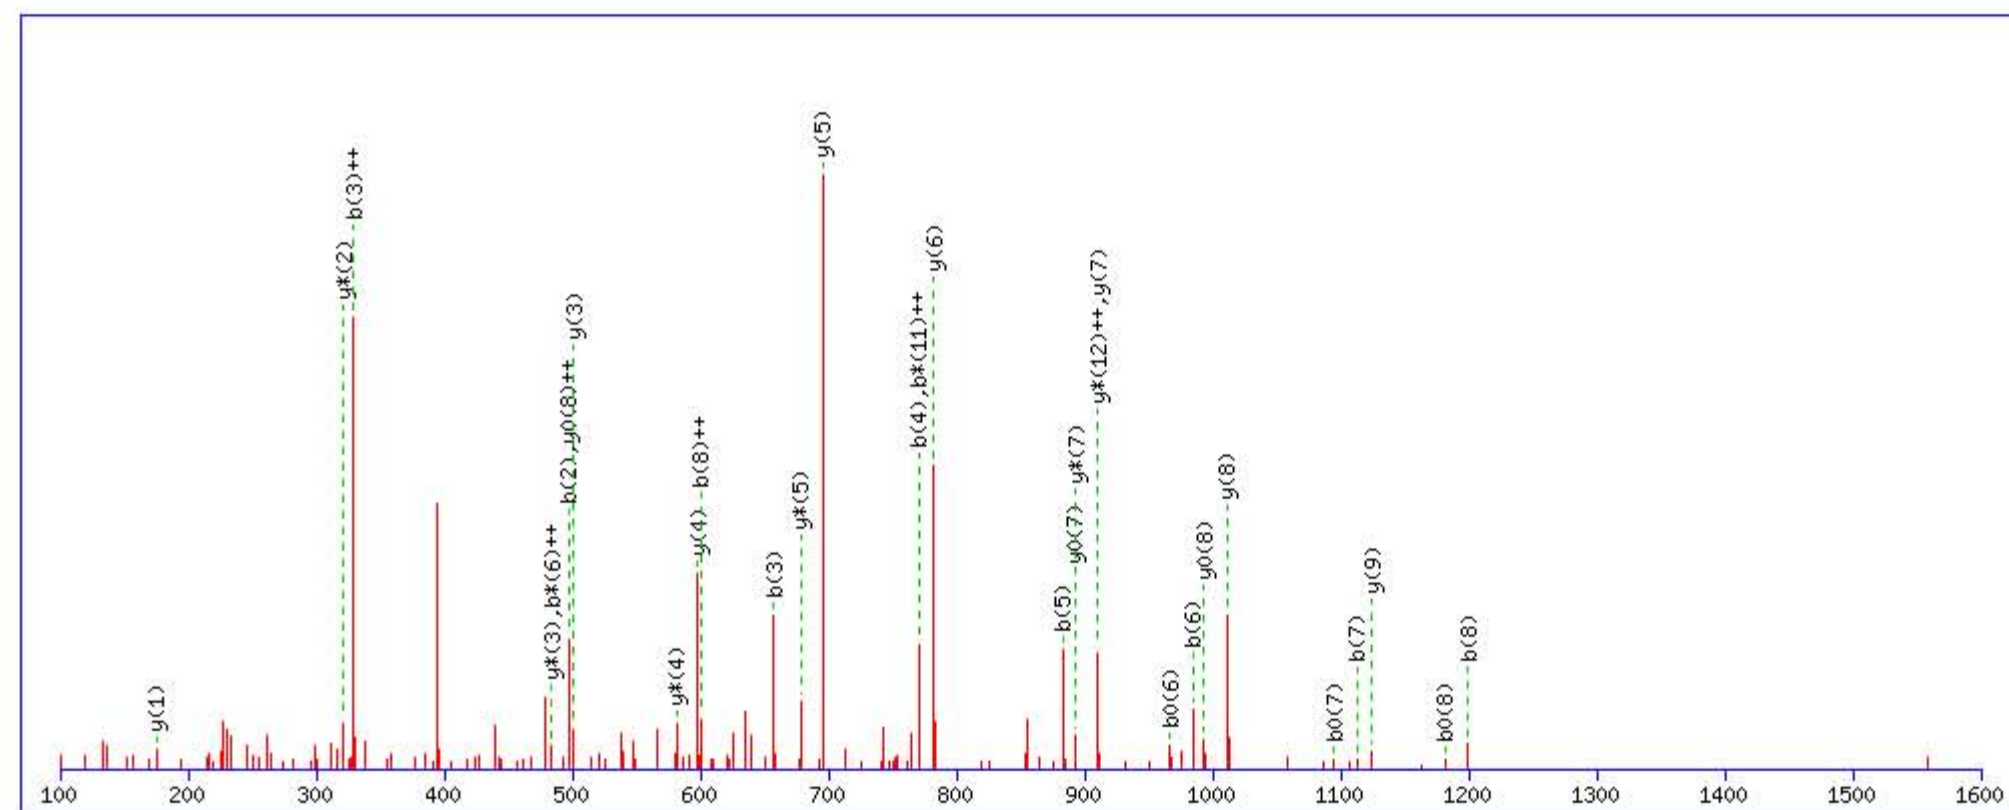

Monoisotopic mass of neutral peptide Mr(calc): 1892.927704

Fixed modifications: Carbamidomethyl (C) (apply to specified residues or termini only)

Variable modifications:

Q2 : Biotin:Thermo-21345 (Q)

Ions Score: 47 Expect: 6.5e-005

Matches : 31/122 fragment ions using 45 most intense peaks [\(help\)](#)

| #  | b                  | b <sup>++</sup>   | b <sup>*</sup> | b <sup>*++</sup>  | b <sup>0</sup>     | b <sup>0++</sup> | Seq. | y                  | y <sup>++</sup> | y <sup>*</sup>    | y <sup>*++</sup>  | y <sup>0</sup>    | y <sup>0++</sup>  | #  |
|----|--------------------|-------------------|----------------|-------------------|--------------------|------------------|------|--------------------|-----------------|-------------------|-------------------|-------------------|-------------------|----|
| 1  | 58.028740          | 29.518008         |                |                   |                    |                  | G    |                    |                 |                   |                   |                   |                   | 13 |
| 2  | <b>497.254066</b>  | 249.130671        | 480.227517     | 240.617397        |                    |                  | Q    | 1836.913526        | 918.960401      | 1819.886977       | <b>910.447127</b> | 1818.902961       | 909.955119        | 12 |
| 3  | <b>657.284715</b>  | <b>329.145996</b> | 640.258166     | 320.632721        |                    |                  | C    | 1397.688200        | 699.347738      | 1380.661651       | 690.834464        | 1379.677635       | 690.342456        | 11 |
| 4  | <b>770.368779</b>  | 385.688028        | 753.342230     | 377.174753        |                    |                  | L    | 1237.657551        | 619.332414      | 1220.631002       | 610.819139        | 1219.646986       | 610.327131        | 10 |
| 5  | <b>883.452843</b>  | 442.230060        | 866.426294     | 433.716785        |                    |                  | I    | <b>1124.573487</b> | 562.790382      | 1107.546938       | 554.277107        | 1106.562922       | 553.785099        | 9  |
| 6  | <b>984.500522</b>  | 492.753899        | 967.473973     | <b>484.240625</b> | <b>966.489957</b>  | 483.748617       | T    | <b>1011.489423</b> | 506.248350      | 994.462874        | 497.735075        | <b>993.478858</b> | <b>497.243067</b> | 8  |
| 7  | <b>1112.559100</b> | 556.783188        | 1095.532551    | 548.269914        | <b>1094.548535</b> | 547.777906       | Q    | <b>910.441744</b>  | 455.724510      | <b>893.415195</b> | 447.211236        | <b>892.431179</b> | 446.719228        | 7  |
| 8  | <b>1199.591128</b> | <b>600.299202</b> | 1182.564579    | 591.785928        | <b>1181.580563</b> | 591.293920       | S    | <b>782.383166</b>  | 391.695221      | 765.356617        | 383.181947        | 764.372601        | 382.689939        | 6  |
| 9  | 1296.643892        | 648.825584        | 1279.617343    | 640.312310        | 1278.633327        | 639.820302       | P    | <b>695.351138</b>  | 348.179207      | <b>678.324589</b> | 339.665933        |                   |                   | 5  |
| 10 | 1393.696656        | 697.351966        | 1376.670107    | 688.838692        | 1375.686091        | 688.346684       | P    | <b>598.298374</b>  | 299.652825      | <b>581.271825</b> | 291.139551        |                   |                   | 4  |
| 11 | 1556.759985        | 778.883631        | 1539.733436    | <b>770.370356</b> | 1538.749420        | 769.878348       | Y    | <b>501.245610</b>  | 251.126443      | <b>484.219061</b> | 242.613169        |                   |                   | 3  |
| 12 | 1719.823314        | 860.415295        | 1702.796765    | 851.902021        | 1701.812749        | 851.410013       | Y    | 338.182281         | 169.594778      | <b>321.155732</b> | 161.081504        |                   |                   | 2  |
| 13 |                    |                   |                |                   |                    |                  | R    | <b>175.118952</b>  | 88.063114       | 158.092403        | 79.549839         |                   |                   | 1  |

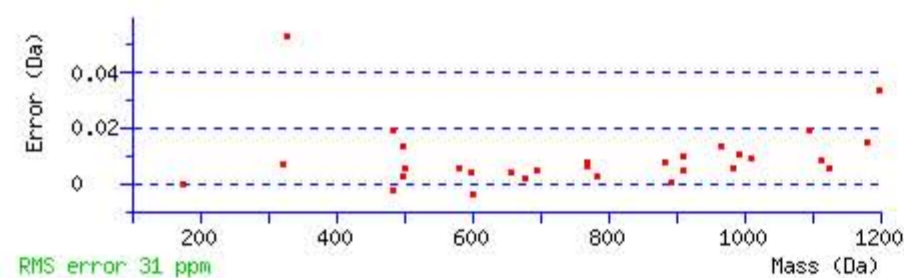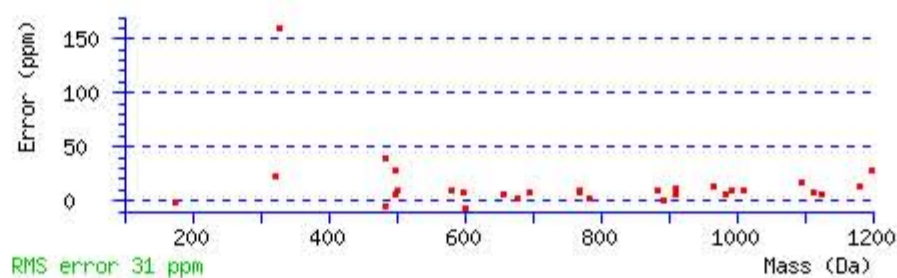

NCBI BLAST search of **GQCLITQSPYYR**

(Parameters: blastp, nr protein database, expect=20000, no filter, PAM30)

Other BLAST [web gateways](#)

All matches to this query

| Score | Mr(calc):   | Delta    | Sequence                          |
|-------|-------------|----------|-----------------------------------|
| 47.4  | 1892.927704 | 0.006668 | <a href="#">GQCLITQSPYYR</a>      |
| 14.4  | 1892.927704 | 0.006668 | <a href="#">GQCLITQSPYYR</a>      |
| 2.8   | 1892.912445 | 0.021927 | <a href="#">MAFAPPKNTDGPKMQTK</a> |

Mascot: <http://www.matrixscience.com/>



# Mascot Search Results

## Peptide View

MS/MS Fragmentation of **KGDTFSCMVGHEALPLAFTQK**

Found in **IGHA1\_HUMAN**, Ig alpha-1 chain C region OS=Homo sapiens GN=IGHA1 PE=1 SV=2

Match to Query 57961: 2647.304176 from(662.833320,4+) rtinseconds(2354) index(70792)

Title: Locus:1.1.1.1757.13 File:"2013-07-02 CLN FXIII 60 min 2nd FT.wiff"

Data file C:\Program Files (x86)\Matrix Science\Mascot Daemon\mgf5 FXIII 60 min 2nd\mascot\_daemon\_merge.mgf

Click mouse within plot area to zoom in by factor of two about that point

Or, Plot from  to  Da

Label all possible matches  Label matches used for scoring

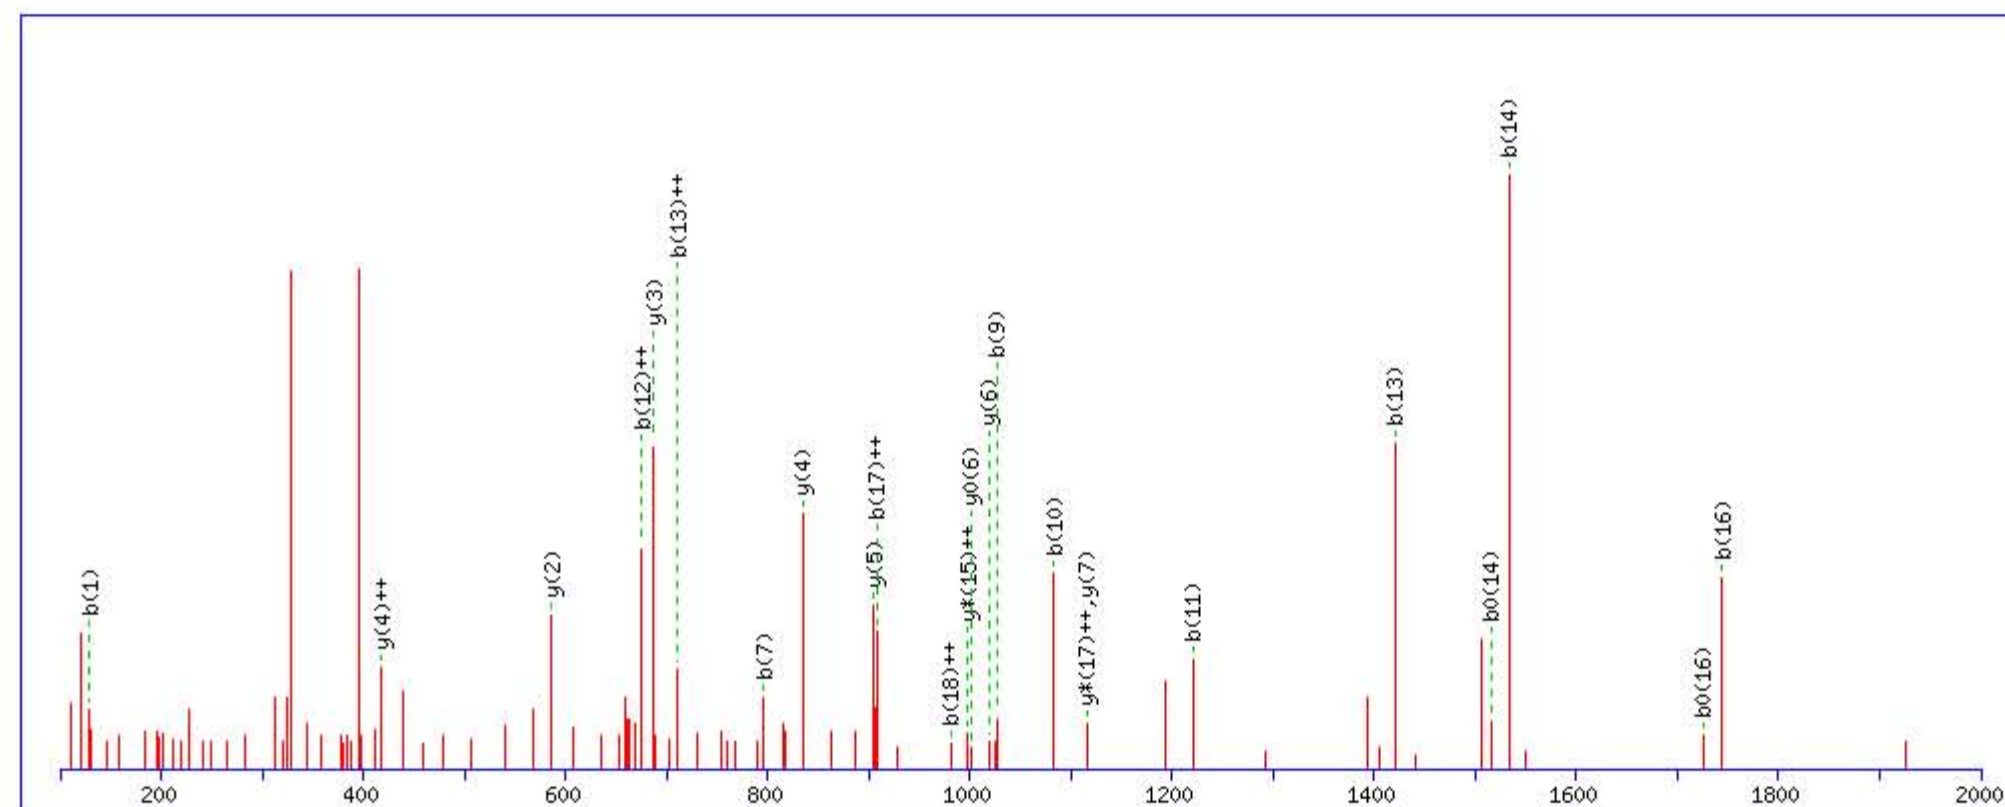

Monoisotopic mass of neutral peptide Mr(calc): 2647.296082

Fixed modifications: Carbamidomethyl (C) (apply to specified residues or termini only)

Variable modifications:

Q20 : Biotin:Thermo-21345 (Q)

Ions Score: 38 Expect: 0.0047

Matches : 24/232 fragment ions using 46 most intense peaks [\(help\)](#)

| #  | b                  | b <sup>++</sup>   | b <sup>*</sup> | b <sup>+++</sup> | b <sup>0</sup>     | b <sup>0++</sup> | Seq.     | y                  | y <sup>++</sup>   | y <sup>*</sup> | y <sup>+++</sup>   | y <sup>0</sup>     | y <sup>0++</sup> | #         |
|----|--------------------|-------------------|----------------|------------------|--------------------|------------------|----------|--------------------|-------------------|----------------|--------------------|--------------------|------------------|-----------|
| 1  | <b>129.102239</b>  | 65.054757         | 112.075690     | 56.541483        |                    |                  | <b>K</b> |                    |                   |                |                    |                    |                  | <b>21</b> |
| 2  | 186.123703         | 93.565489         | 169.097154     | 85.052215        |                    |                  | <b>G</b> | 2520.208388        | 1260.607832       | 2503.181839    | 1252.094557        | 2502.197823        | 1251.602549      | <b>20</b> |
| 3  | 301.150646         | 151.078961        | 284.124097     | 142.565687       | 283.140081         | 142.073679       | <b>D</b> | 2463.186924        | 1232.097100       | 2446.160375    | 1223.583825        | 2445.176359        | 1223.091817      | <b>19</b> |
| 4  | 402.198325         | 201.602801        | 385.171776     | 193.089526       | 384.187760         | 192.597518       | <b>T</b> | 2348.159981        | 1174.583628       | 2331.133432    | 1166.070354        | 2330.149416        | 1165.578346      | <b>18</b> |
| 5  | 549.266739         | 275.137008        | 532.240190     | 266.623733       | 531.256174         | 266.131725       | <b>F</b> | 2247.112302        | 1124.059789       | 2230.085753    | <b>1115.546514</b> | 2229.101737        | 1115.054506      | <b>17</b> |
| 6  | 636.298767         | 318.653022        | 619.272218     | 310.139747       | 618.288202         | 309.647739       | <b>S</b> | 2100.043888        | 1050.525582       | 2083.017339    | 1042.012307        | 2082.033323        | 1041.520299      | <b>16</b> |
| 7  | <b>796.329416</b>  | 398.668346        | 779.302867     | 390.155072       | 778.318851         | 389.663064       | <b>C</b> | 2013.011860        | 1007.009568       | 1995.985311    | <b>998.496294</b>  | 1995.001295        | 998.004286       | <b>15</b> |
| 8  | 927.369901         | 464.188589        | 910.343352     | 455.675314       | 909.359336         | 455.183306       | <b>M</b> | 1852.981211        | 926.994244        | 1835.954662    | 918.480969         | 1834.970646        | 917.988961       | <b>14</b> |
| 9  | <b>1026.438315</b> | 513.722796        | 1009.411766    | 505.209521       | 1008.427750        | 504.717513       | <b>V</b> | 1721.940726        | 861.474001        | 1704.914177    | 852.960727         | 1703.930161        | 852.468719       | <b>13</b> |
| 10 | <b>1083.459779</b> | 542.233528        | 1066.433230    | 533.720253       | 1065.449214        | 533.228245       | <b>G</b> | 1622.872312        | 811.939794        | 1605.845763    | 803.426520         | 1604.861747        | 802.934512       | <b>12</b> |
| 11 | <b>1220.518691</b> | 610.762984        | 1203.492142    | 602.249709       | 1202.508126        | 601.757701       | <b>H</b> | 1565.850848        | 783.429062        | 1548.824299    | 774.915788         | 1547.840283        | 774.423780       | <b>11</b> |
| 12 | 1349.561284        | <b>675.284280</b> | 1332.534735    | 666.771006       | 1331.550719        | 666.278998       | <b>E</b> | 1428.791936        | 714.899606        | 1411.765387    | 706.386332         | 1410.781371        | 705.894324       | <b>10</b> |
| 13 | <b>1420.598398</b> | <b>710.802837</b> | 1403.571849    | 702.289563       | 1402.587833        | 701.797555       | <b>A</b> | 1299.749343        | 650.378310        | 1282.722794    | 641.865035         | 1281.738778        | 641.373027       | <b>9</b>  |
| 14 | <b>1533.682462</b> | 767.344869        | 1516.655913    | 758.831595       | <b>1515.671897</b> | 758.339587       | <b>L</b> | 1228.712229        | 614.859753        | 1211.685680    | 606.346478         | 1210.701664        | 605.854470       | <b>8</b>  |
| 15 | 1630.735226        | 815.871251        | 1613.708677    | 807.357977       | 1612.724661        | 806.865969       | <b>P</b> | <b>1115.628165</b> | 558.317721        | 1098.601616    | 549.804446         | 1097.617600        | 549.312438       | <b>7</b>  |
| 16 | <b>1743.819290</b> | 872.413283        | 1726.792741    | 863.900009       | <b>1725.808725</b> | 863.408000       | <b>L</b> | <b>1018.575401</b> | 509.791339        | 1001.548852    | 501.278064         | <b>1000.564836</b> | 500.786056       | <b>6</b>  |
| 17 | 1814.856404        | <b>907.931840</b> | 1797.829855    | 899.418566       | 1796.845839        | 898.926557       | <b>A</b> | <b>905.491337</b>  | 453.249307        | 888.464788     | 444.736032         | 887.480772         | 444.244024       | <b>5</b>  |
| 18 | 1961.924818        | <b>981.466047</b> | 1944.898269    | 972.952773       | 1943.914253        | 972.460764       | <b>F</b> | <b>834.454223</b>  | <b>417.730750</b> | 817.427674     | 409.217475         | 816.443658         | 408.725467       | <b>4</b>  |
| 19 | 2062.972497        | 1031.989886       | 2045.945948    | 1023.476612      | 2044.961932        | 1022.984604      | <b>T</b> | <b>687.385809</b>  | 344.196543        | 670.359260     | 335.683268         | 669.375244         | 335.191260       | <b>3</b>  |
| 20 | 2502.197823        | 1251.602549       | 2485.171274    | 1243.089275      | 2484.187258        | 1242.597267      | <b>Q</b> | <b>586.338130</b>  | 293.672703        | 569.311581     | 285.159429         |                    |                  | <b>2</b>  |
| 21 |                    |                   |                |                  |                    |                  | <b>K</b> | 147.112804         | 74.060040         | 130.086255     | 65.546765          |                    |                  | <b>1</b>  |

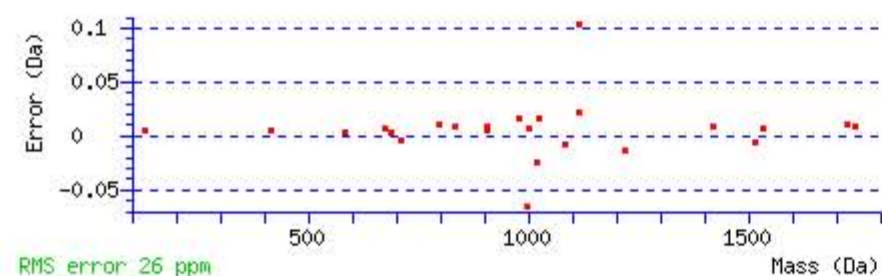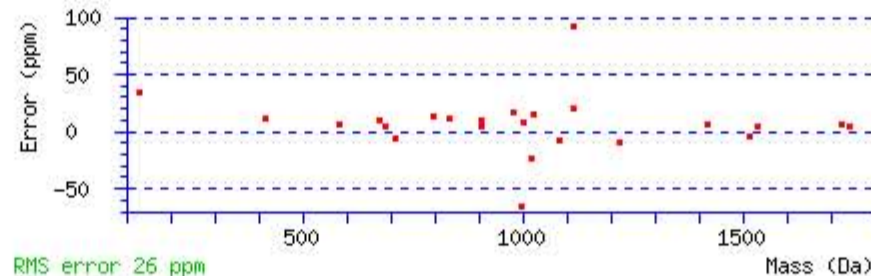

NCBI BLAST search of **KGDTFSCMVGHEALPLAFTQK**

(Parameters: blastp, nr protein database, expect=20000, no filter, PAM30)

Other BLAST [web gateways](#)

All matches to this query

| Score | Mr(calc):   | Delta    | Sequence                     |
|-------|-------------|----------|------------------------------|
| 37.9  | 2647.296082 | 0.008094 | <b>KGDTFSCMVGHEALPLAFTQK</b> |

Mascot: <http://www.matrixscience.com/>



# MASCOT Search Results

## Peptide View

MS/MS Fragmentation of **NFPPSQDASGDLYTTSSQLTLPATQCLAGK**  
 Found in **IGHA1\_HUMAN**, Ig alpha-1 chain C region OS=Homo sapiens GN=IGHA1 PE=1 SV=2

Match to Query 66792: 3478.695096 from(870.681050,4+) rtinseconds(2591) index(40067)  
 Title: Locus:1.1.1.3321.20 File:"2013-07-02 CLN FXIII 60 min 2nd F 3.wiff"  
 Data file C:\Program Files (x86)\Matrix Science\Mascot Daemon\mgf5 FXIII 60 min 2nd\mascot\_daemon\_merge.mgf

Click mouse within plot area to zoom in by factor of two about that point  
 Or, Plot from  to  Da   
 Label all possible matches  Label matches used for scoring

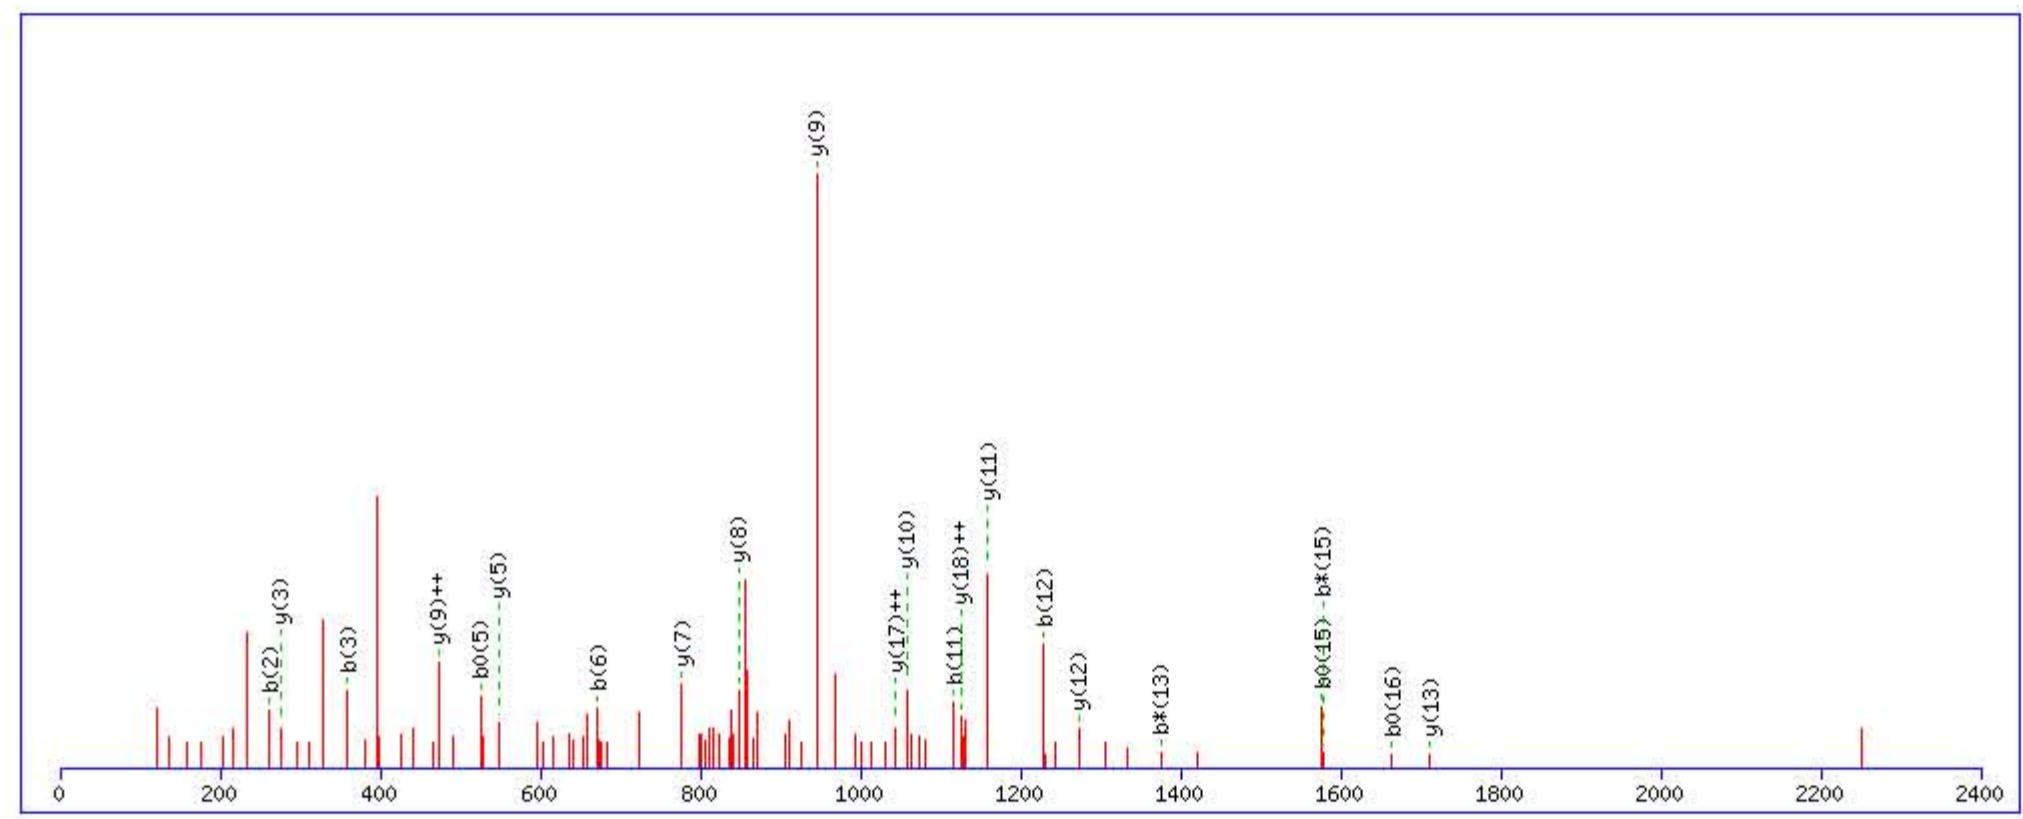

Monoisotopic mass of neutral peptide Mr(calc): 3478.674866  
 Fixed modifications: Carbamidomethyl (C) (apply to specified residues or termini only)  
 Variable modifications:  
 Q18 : Biotin:Thermo-21345 (Q)  
 Ions Score: 40 Expect: 0.0025  
 Matches : 22/328 fragment ions using 44 most intense peaks [\(help\)](#)

| #  | b                  | b <sup>++</sup> | b <sup>*</sup>     | b <sup>+++</sup> | b <sup>0</sup>     | b <sup>0++</sup> | Seq. | y                  | y <sup>++</sup>    | y <sup>*</sup> | y <sup>+++</sup> | y <sup>0</sup> | y <sup>0++</sup> | #  |
|----|--------------------|-----------------|--------------------|------------------|--------------------|------------------|------|--------------------|--------------------|----------------|------------------|----------------|------------------|----|
| 1  | 115.050203         | 58.028740       | 98.023654          | 49.515465        |                    |                  | N    |                    |                    |                |                  |                |                  | 30 |
| 2  | <b>262.118617</b>  | 131.562946      | 245.092068         | 123.049672       |                    |                  | F    | 3365.639210        | 1683.323243        | 3348.612661    | 1674.809968      | 3347.628645    | 1674.317960      | 29 |
| 3  | <b>359.171381</b>  | 180.089328      | 342.144832         | 171.576054       |                    |                  | P    | 3218.570796        | 1609.789036        | 3201.544247    | 1601.275761      | 3200.560231    | 1600.783753      | 28 |
| 4  | 456.224145         | 228.615710      | 439.197596         | 220.102436       |                    |                  | P    | 3121.518032        | 1561.262654        | 3104.491483    | 1552.749379      | 3103.507467    | 1552.257371      | 27 |
| 5  | 543.256173         | 272.131725      | 526.229624         | 263.618450       | <b>525.245608</b>  | 263.126442       | S    | 3024.465268        | 1512.736272        | 3007.438719    | 1504.222997      | 3006.454703    | 1503.730989      | 26 |
| 6  | <b>671.314751</b>  | 336.161014      | 654.288202         | 327.647739       | 653.304186         | 327.155731       | Q    | 2937.433240        | 1469.220258        | 2920.406691    | 1460.706983      | 2919.422675    | 1460.214975      | 25 |
| 7  | 786.341694         | 393.674485      | 769.315145         | 385.161210       | 768.331129         | 384.669202       | D    | 2809.374662        | 1405.190969        | 2792.348113    | 1396.677694      | 2791.364097    | 1396.185686      | 24 |
| 8  | 857.378808         | 429.193042      | 840.352259         | 420.679767       | 839.368243         | 420.187759       | A    | 2694.347719        | 1347.677497        | 2677.321170    | 1339.164223      | 2676.337154    | 1338.672215      | 23 |
| 9  | 944.410836         | 472.709056      | 927.384287         | 464.195781       | 926.400271         | 463.703773       | S    | 2623.310605        | 1312.158941        | 2606.284056    | 1303.645666      | 2605.300040    | 1303.153658      | 22 |
| 10 | 1001.432300        | 501.219788      | 984.405751         | 492.706513       | 983.421735         | 492.214505       | G    | 2536.278577        | 1268.642926        | 2519.252028    | 1260.129652      | 2518.268012    | 1259.637644      | 21 |
| 11 | <b>1116.459243</b> | 558.733260      | 1099.432694        | 550.219985       | 1098.448678        | 549.727977       | D    | 2479.257113        | 1240.132195        | 2462.230564    | 1231.618920      | 2461.246548    | 1231.126912      | 20 |
| 12 | <b>1229.543307</b> | 615.275291      | 1212.516758        | 606.762017       | 1211.532742        | 606.270009       | L    | 2364.230170        | 1182.618723        | 2347.203621    | 1174.105448      | 2346.219605    | 1173.613440      | 19 |
| 13 | 1392.606636        | 696.806956      | <b>1375.580087</b> | 688.293682       | 1374.596071        | 687.801673       | Y    | 2251.146106        | <b>1126.076691</b> | 2234.119557    | 1117.563416      | 2233.135541    | 1117.071408      | 18 |
| 14 | 1493.654315        | 747.330796      | 1476.627766        | 738.817521       | 1475.643750        | 738.325513       | T    | 2088.082777        | <b>1044.545026</b> | 2071.056228    | 1036.031752      | 2070.072212    | 1035.539744      | 17 |
| 15 | 1594.701994        | 797.854635      | <b>1577.675445</b> | 789.341361       | <b>1576.691429</b> | 788.849353       | T    | 1987.035098        | 994.021187         | 1970.008549    | 985.507913       | 1969.024533    | 985.015905       | 16 |
| 16 | 1681.734022        | 841.370649      | 1664.707473        | 832.857375       | <b>1663.723457</b> | 832.365367       | S    | 1885.987419        | 943.497348         | 1868.960870    | 934.984073       | 1867.976854    | 934.492065       | 15 |
| 17 | 1768.766050        | 884.886663      | 1751.739501        | 876.373389       | 1750.755485        | 875.881381       | S    | 1798.955391        | 899.981334         | 1781.928842    | 891.468059       | 1780.944826    | 890.976051       | 14 |
| 18 | 2207.991376        | 1104.499326     | 2190.964827        | 1095.986051      | 2189.980811        | 1095.494043      | Q    | <b>1711.923363</b> | 856.465320         | 1694.896814    | 847.952045       | 1693.912798    | 847.460037       | 13 |
| 19 | 2321.075440        | 1161.041358     | 2304.048891        | 1152.528083      | 2303.064875        | 1152.036075      | L    | <b>1272.698037</b> | 636.852657         | 1255.671488    | 628.339382       | 1254.687472    | 627.847374       | 12 |
| 20 | 2422.123119        | 1211.565197     | 2405.096570        | 1203.051923      | 2404.112554        | 1202.559915      | T    | <b>1159.613973</b> | 580.310625         | 1142.587424    | 571.797350       | 1141.603408    | 571.305342       | 11 |
| 21 | 2535.207183        | 1268.107229     | 2518.180634        | 1259.593955      | 2517.196618        | 1259.101947      | L    | <b>1058.566294</b> | 529.786785         | 1041.539745    | 521.273511       | 1040.555729    | 520.781503       | 10 |
| 22 | 2632.259947        | 1316.633611     | 2615.233398        | 1308.120337      | 2614.249382        | 1307.628329      | P    | <b>945.482230</b>  | <b>473.244753</b>  | 928.455681     | 464.731479       | 927.471665     | 464.239471       | 9  |
| 23 | 2703.297061        | 1352.152169     | 2686.270512        | 1343.638894      | 2685.286496        | 1343.146886      | A    | <b>848.429466</b>  | 424.718371         | 831.402917     | 416.205097       | 830.418901     | 415.713089       | 8  |
| 24 | 2804.344740        | 1402.676008     | 2787.318191        | 1394.162733      | 2786.334175        | 1393.670725      | T    | <b>777.392352</b>  | 389.199814         | 760.365803     | 380.686540       | 759.381787     | 380.194532       | 7  |
| 25 | 2932.403318        | 1466.705297     | 2915.376769        | 1458.192022      | 2914.392753        | 1457.700015      | Q    | 676.344673         | 338.675975         | 659.318124     | 330.162700       |                |                  | 6  |
| 26 | 3092.433967        | 1546.720621     | 3075.407418        | 1538.207347      | 3074.423402        | 1537.715339      | C    | <b>548.286095</b>  | 274.646686         | 531.259546     | 266.133411       |                |                  | 5  |
| 27 | 3205.518031        | 1603.262653     | 3188.491482        | 1594.749379      | 3187.507466        | 1594.257371      | L    | 388.255446         | 194.631361         | 371.228897     | 186.118087       |                |                  | 4  |
| 28 | 3276.555145        | 1638.781211     | 3259.528596        | 1630.267936      | 3258.544580        | 1629.775928      | A    | <b>275.171382</b>  | 138.089329         | 258.144833     | 129.576055       |                |                  | 3  |
| 29 | 3333.576609        | 1667.291943     | 3316.550060        | 1658.778668      | 3315.566044        | 1658.286660      | G    | 204.134268         | 102.570772         | 187.107719     | 94.057497        |                |                  | 2  |
| 30 |                    |                 |                    |                  |                    |                  | K    | 147.112804         | 74.060040          | 130.086255     | 65.546765        |                |                  | 1  |

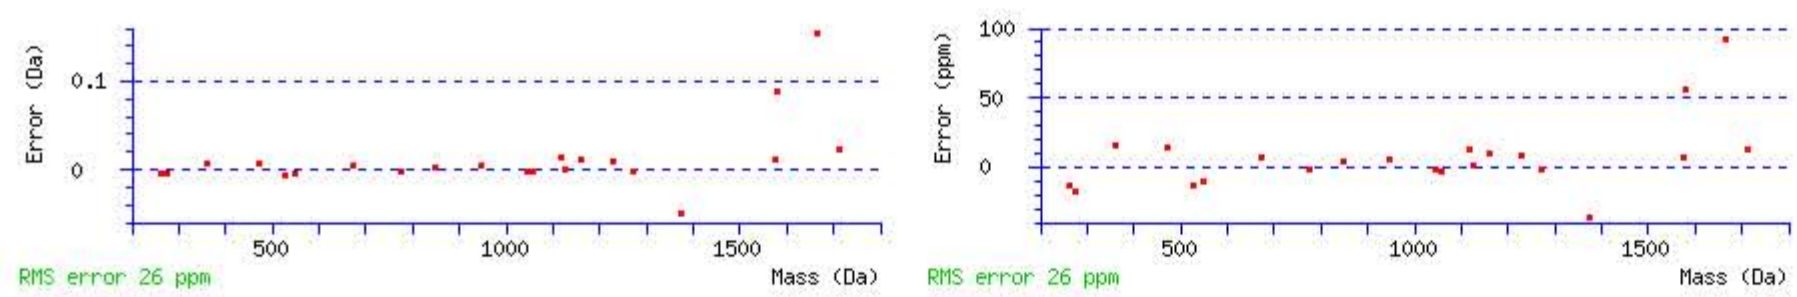

NCBI BLAST search of **NFPPSQDASGDLYTTSSQLTLPATQCLAGK**  
 (Parameters: blastp, nr protein database, expect=20000, no filter, PAM30)  
 Other BLAST [web gateways](#)

### All matches to this query

| Score | Mr(calc):   | Delta    | Sequence                                       |
|-------|-------------|----------|------------------------------------------------|
| 39.7  | 3478.674866 | 0.020230 | <a href="#">NFPPSQDASGDLYTTSSQLTLPATQCLAGK</a> |
| 16.1  | 3478.674866 | 0.020230 | <a href="#">NFPPSQDASGDLYTTSSQLTLPATQCLAGK</a> |
| 9.3   | 3478.674866 | 0.020230 | <a href="#">NFPPSQDASGDLYTTSSQLTLPATQCLAGK</a> |



# MASCOT Search Results

## Peptide View

MS/MS Fragmentation of **EPAAQAPVK**

Found in **IGHD\_HUMAN**, Ig delta chain C region OS=Homo sapiens GN=IGHD PE=1 SV=2

Match to Query 23790: 1220.655448 from(611.335000,2+) rtinseconds(1442) index(65416)

Title: Locus:1.1.1.1439.22 File:"2013-07-02 CLN FXIII 60 min 2nd FT.wiff"

Data file C:\Program Files (x86)\Matrix Science\Mascot Daemon\mgf5 FXIII 60 min 2nd\mascot\_daemon\_merge.mgf

Click mouse within plot area to zoom in by factor of two about that point

Or, Plot from  to  Da

Label all possible matches  Label matches used for scoring

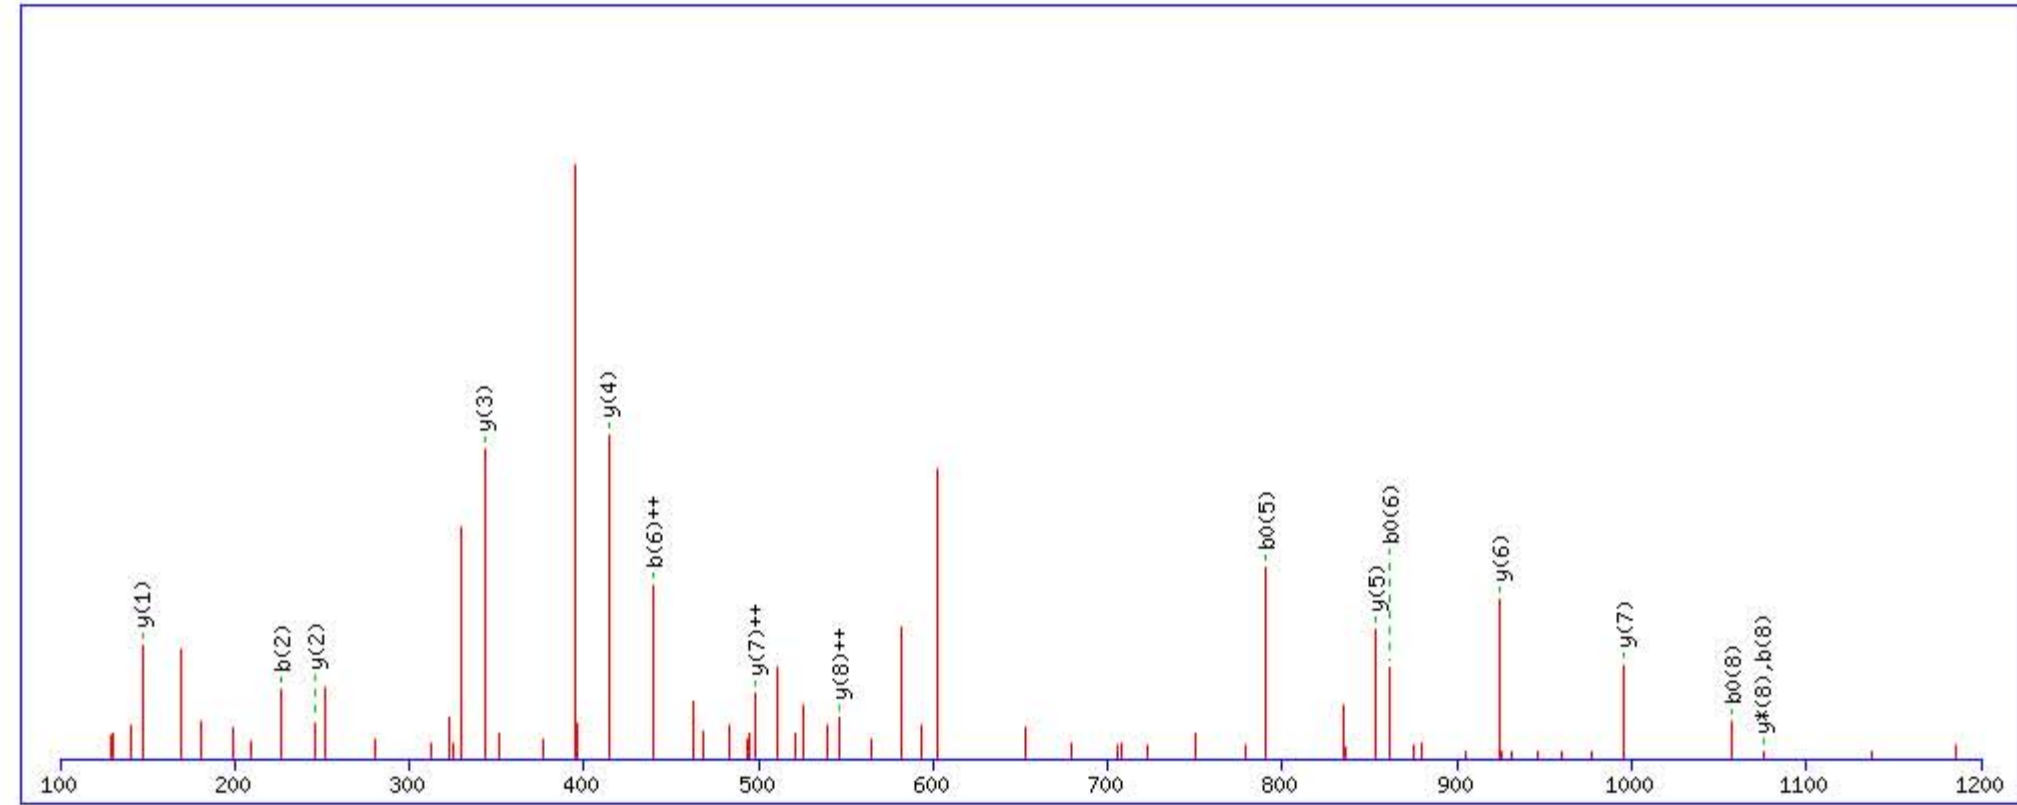

Monoisotopic mass of neutral peptide Mr(calc): 1220.658707

Fixed modifications: Carbamidomethyl (C) (apply to specified residues or termini only)

Variable modifications:

Q5 : Biotin:Thermo-21345 (Q)

Ions Score: 42 Expect: 0.0012

Matches : 16/72 fragment ions using 31 most intense peaks [\(help\)](#)

| # | b                  | b <sup>++</sup>   | b <sup>*</sup> | b <sup>*++</sup> | b <sup>0</sup>     | b <sup>0++</sup> | Seq. | y                 | y <sup>++</sup>   | y <sup>*</sup>     | y <sup>*++</sup> | # |
|---|--------------------|-------------------|----------------|------------------|--------------------|------------------|------|-------------------|-------------------|--------------------|------------------|---|
| 1 | 130.049869         | 65.528572         |                |                  | 112.039304         | 56.523290        | E    |                   |                   |                    |                  | 9 |
| 2 | <b>227.102633</b>  | 114.054954        |                |                  | 209.092068         | 105.049672       | P    | 1092.623414       | <b>546.815345</b> | <b>1075.596865</b> | 538.302071       | 8 |
| 3 | 298.139747         | 149.573512        |                |                  | 280.129182         | 140.568229       | A    | <b>995.570650</b> | <b>498.288963</b> | 978.544101         | 489.775689       | 7 |
| 4 | 369.176861         | 185.092068        |                |                  | 351.166296         | 176.086786       | A    | <b>924.533536</b> | 462.770406        | 907.506987         | 454.257132       | 6 |
| 5 | 808.402187         | 404.704732        | 791.375638     | 396.191457       | <b>790.391622</b>  | 395.699449       | Q    | <b>853.496422</b> | 427.251849        | 836.469873         | 418.738575       | 5 |
| 6 | 879.439301         | <b>440.223289</b> | 862.412752     | 431.710014       | <b>861.428736</b>  | 431.218006       | A    | <b>414.271096</b> | 207.639186        | 397.244547         | 199.125911       | 4 |
| 7 | 976.492065         | 488.749671        | 959.465516     | 480.236396       | 958.481500         | 479.744388       | P    | <b>343.233982</b> | 172.120629        | 326.207433         | 163.607354       | 3 |
| 8 | <b>1075.560479</b> | 538.283878        | 1058.533930    | 529.770603       | <b>1057.549914</b> | 529.278595       | V    | <b>246.181218</b> | 123.594247        | 229.154669         | 115.080972       | 2 |
| 9 |                    |                   |                |                  |                    |                  | K    | <b>147.112804</b> | 74.060040         | 130.086255         | 65.546765        | 1 |

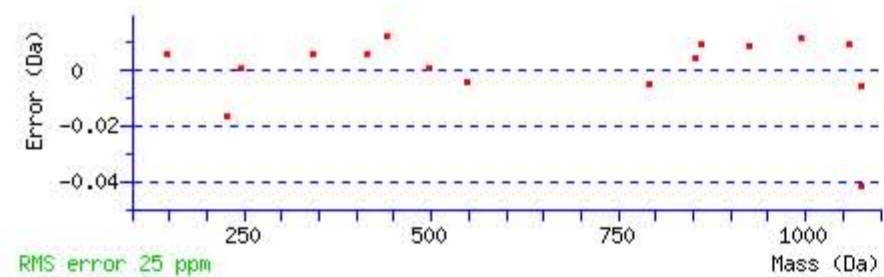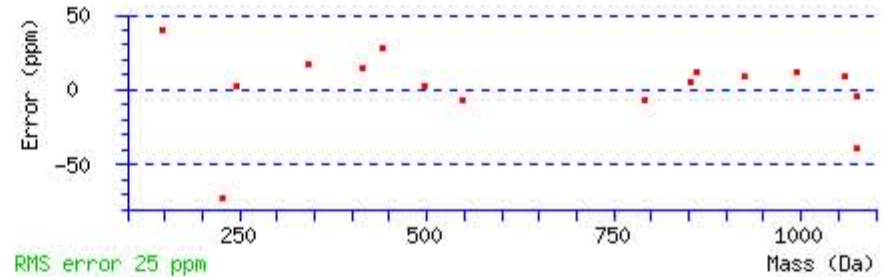

NCBI BLAST search of [EPAAQAPVK](#)

(Parameters: blastp, nr protein database, expect=20000, no filter, PAM30)

Other BLAST [web gateways](#)

## All matches to this query

| Score | Mr(calc):   | Delta     | Sequence                    |
|-------|-------------|-----------|-----------------------------|
| 41.7  | 1220.658707 | -0.003259 | <a href="#">EPAAQAPVK</a>   |
| 9.9   | 1220.658722 | -0.003274 | <a href="#">EQNVPPVK</a>    |
| 8.9   | 1220.644806 | 0.010642  | <a href="#">GGHVQREK</a>    |
| 6.4   | 1220.669937 | -0.014489 | <a href="#">IIAHSNQK</a>    |
| 6.4   | 1220.640076 | 0.015372  | <a href="#">LLAEYTGAAQK</a> |
| 6.1   | 1220.669937 | -0.014489 | <a href="#">QELKHAGK</a>    |
| 5.8   | 1220.637589 | 0.017859  | <a href="#">NHMFFIAITK</a>  |
| 3.3   | 1220.654678 | 0.000770  | <a href="#">SVRMLSGSKEK</a> |
| 2.7   | 1220.658722 | -0.003274 | <a href="#">QPNLPDVK</a>    |
| 2.0   | 1220.651306 | 0.004142  | <a href="#">TRSSWKSLEK</a>  |



# Mascot Search Results

## Peptide View

MS/MS Fragmentation of **SLWNAGTSVTCTLNHPSLPPQR**

Found in **IGHD\_HUMAN**, Ig delta chain C region OS=Homo sapiens GN=IGHD PE=1 SV=2

Match to Query 58820: 2746.371642 from(916.464490,3+) rtinseconds(2252) index(70287)

Title: Locus:1.1.1.1721.26 File:"2013-07-02 CLN FXIII 60 min 2nd FT.wiff"

Data file C:\Program Files (x86)\Matrix Science\Mascot Daemon\mgf5 FXIII 60 min 2nd\mascot\_daemon\_merge.mgf

Click mouse within plot area to zoom in by factor of two about that point

Or, Plot from  to  Da

Label all possible matches  Label matches used for scoring

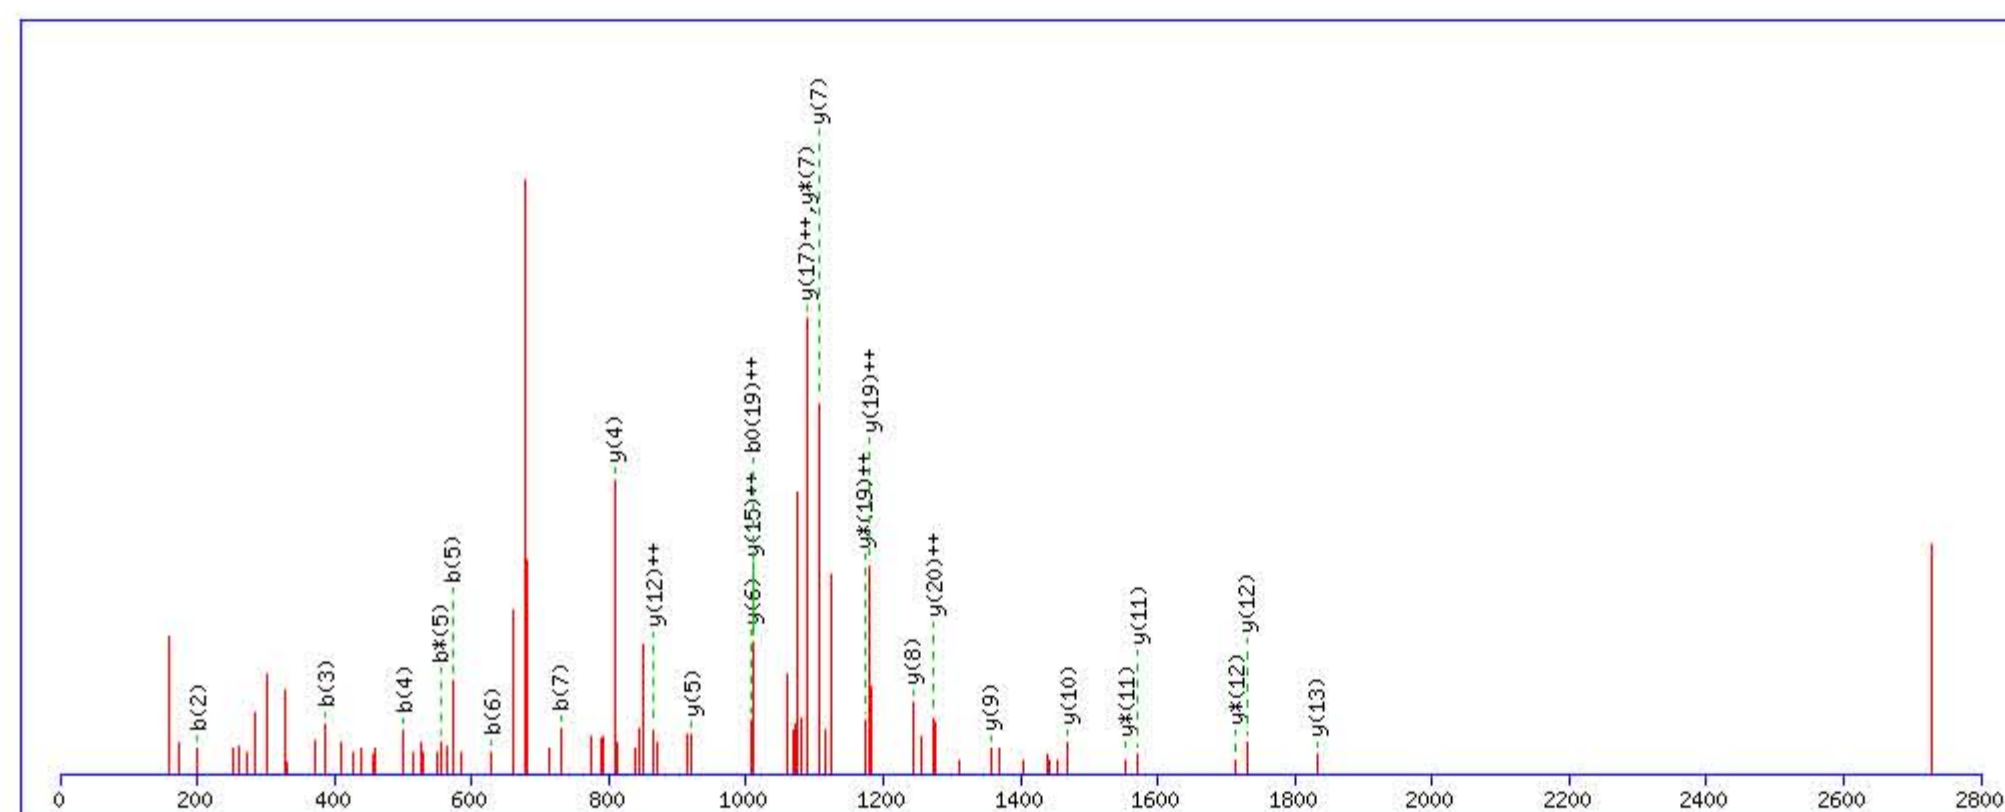

Monoisotopic mass of neutral peptide Mr(calc): 2746.368332

Fixed modifications: Carbamidomethyl (C) (apply to specified residues or termini only)

Variable modifications:

Q21 : Biotin:Thermo-21345 (Q)

Ions Score: 50 Expect: 2e-005

Matches : 27/236 fragment ions using 58 most intense peaks [\(help\)](#)

| #  | b                 | b <sup>++</sup> | b <sup>*</sup>    | b <sup>*++</sup> | b <sup>0</sup> | b <sup>0++</sup>   | Seq. | y                  | y <sup>++</sup>    | y <sup>*</sup>     | y <sup>*++</sup>   | y <sup>0</sup> | y <sup>0++</sup> | #  |
|----|-------------------|-----------------|-------------------|------------------|----------------|--------------------|------|--------------------|--------------------|--------------------|--------------------|----------------|------------------|----|
| 1  | 88.039304         | 44.523290       |                   |                  | 70.028739      | 35.518008          | S    |                    |                    |                    |                    |                |                  | 22 |
| 2  | <b>201.123368</b> | 101.065322      |                   |                  | 183.112803     | 92.060039          | L    | 2660.343575        | 1330.675425        | 2643.317026        | 1322.162151        | 2642.333010    | 1321.670143      | 21 |
| 3  | <b>387.202681</b> | 194.104978      |                   |                  | 369.192116     | 185.099696         | W    | 2547.259511        | <b>1274.133393</b> | 2530.232962        | 1265.620119        | 2529.248946    | 1265.128111      | 20 |
| 4  | <b>501.245608</b> | 251.126442      | 484.219059        | 242.613168       | 483.235043     | 242.121160         | N    | 2361.180198        | <b>1181.093737</b> | 2344.153649        | <b>1172.580462</b> | 2343.169633    | 1172.088454      | 19 |
| 5  | <b>572.282722</b> | 286.644999      | <b>555.256173</b> | 278.131725       | 554.272157     | 277.639717         | A    | 2247.137271        | 1124.072273        | 2230.110722        | 1115.558999        | 2229.126706    | 1115.066991      | 18 |
| 6  | <b>629.304186</b> | 315.155731      | 612.277637        | 306.642457       | 611.293621     | 306.150449         | G    | 2176.100157        | <b>1088.553716</b> | 2159.073608        | 1080.040442        | 2158.089592    | 1079.548434      | 17 |
| 7  | <b>730.351865</b> | 365.679571      | 713.325316        | 357.166296       | 712.341300     | 356.674288         | T    | 2119.078693        | 1060.042984        | 2102.052144        | 1051.529710        | 2101.068128    | 1051.037702      | 16 |
| 8  | 817.383893        | 409.195585      | 800.357344        | 400.682310       | 799.373328     | 400.190302         | S    | 2018.031014        | <b>1009.519145</b> | 2001.004465        | 1001.005871        | 2000.020449    | 1000.513863      | 15 |
| 9  | 916.452307        | 458.729792      | 899.425758        | 450.216517       | 898.441742     | 449.724509         | V    | 1930.998986        | 966.003131         | 1913.972437        | 957.489857         | 1912.988421    | 956.997849       | 14 |
| 10 | 1017.499986       | 509.253631      | 1000.473437       | 500.740357       | 999.489421     | 500.248349         | T    | <b>1831.930572</b> | 916.468924         | 1814.904023        | 907.955650         | 1813.920007    | 907.463642       | 13 |
| 11 | 1177.530635       | 589.268956      | 1160.504086       | 580.755681       | 1159.520070    | 580.263673         | C    | <b>1730.882893</b> | <b>865.945085</b>  | <b>1713.856344</b> | 857.431810         | 1712.872328    | 856.939802       | 12 |
| 12 | 1278.578314       | 639.792795      | 1261.551765       | 631.279521       | 1260.567749    | 630.787513         | T    | <b>1570.852244</b> | 785.929760         | <b>1553.825695</b> | 777.416486         | 1552.841679    | 776.924478       | 11 |
| 13 | 1391.662378       | 696.334827      | 1374.635829       | 687.821553       | 1373.651813    | 687.329545         | L    | <b>1469.804565</b> | 735.405921         | 1452.778016        | 726.892646         | 1451.794000    | 726.400638       | 10 |
| 14 | 1505.705305       | 753.356291      | 1488.678756       | 744.843016       | 1487.694740    | 744.351008         | N    | <b>1356.720501</b> | 678.863889         | 1339.693952        | 670.350614         | 1338.709936    | 669.858606       | 9  |
| 15 | 1642.764217       | 821.885746      | 1625.737668       | 813.372472       | 1624.753652    | 812.880464         | H    | <b>1242.677574</b> | 621.842425         | 1225.651025        | 613.329151         | 1224.667009    | 612.837143       | 8  |
| 16 | 1739.816981       | 870.412128      | 1722.790432       | 861.898854       | 1721.806416    | 861.406846         | P    | <b>1105.618662</b> | 553.312969         | <b>1088.592113</b> | 544.799695         | 1087.608097    | 544.307687       | 7  |
| 17 | 1826.849009       | 913.928143      | 1809.822460       | 905.414868       | 1808.838444    | 904.922860         | S    | <b>1008.565898</b> | 504.786587         | 991.539349         | 496.273313         | 990.555333     | 495.781305       | 6  |
| 18 | 1939.933073       | 970.470174      | 1922.906524       | 961.956900       | 1921.922508    | 961.464892         | L    | <b>921.533870</b>  | 461.270573         | 904.507321         | 452.757299         |                |                  | 5  |
| 19 | 2036.985837       | 1018.996557     | 2019.959288       | 1010.483282      | 2018.975272    | <b>1009.991274</b> | P    | <b>808.449806</b>  | 404.728541         | 791.423257         | 396.215267         |                |                  | 4  |
| 20 | 2134.038601       | 1067.522938     | 2117.012052       | 1059.009664      | 2116.028036    | 1058.517656        | P    | 711.397042         | 356.202159         | 694.370493         | 347.688885         |                |                  | 3  |
| 21 | 2573.263927       | 1287.135601     | 2556.237378       | 1278.622327      | 2555.253362    | 1278.130319        | Q    | 614.344278         | 307.675777         | 597.317729         | 299.162503         |                |                  | 2  |
| 22 |                   |                 |                   |                  |                |                    | R    | 175.118952         | 88.063114          | 158.092403         | 79.549839          |                |                  | 1  |

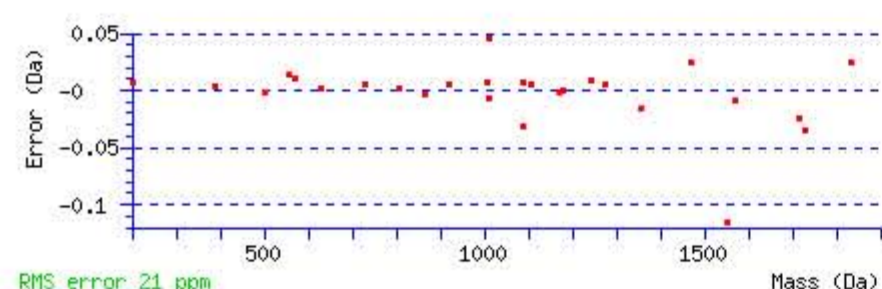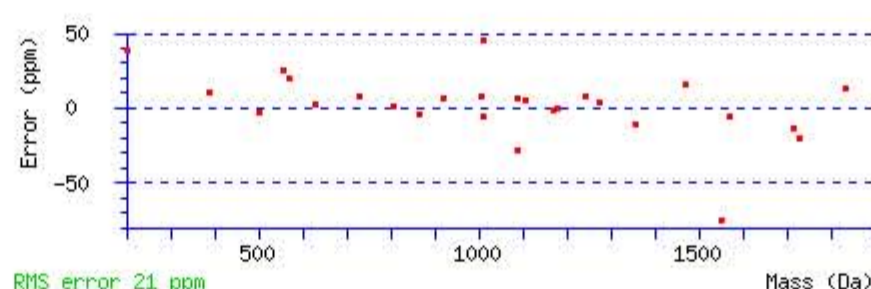

NCBI BLAST search of [SLWNAGTSVTCTLNHPSLPPQR](#)

(Parameters: blastp, nr protein database, expect=20000, no filter, PAM30)

Other BLAST [web gateways](#)

All matches to this query

| Score | Mr(calc):   | Delta     | Sequence                                  |
|-------|-------------|-----------|-------------------------------------------|
| 50.5  | 2746.368332 | 0.003310  | <a href="#">SLWNAGTSVTCTLNHPSLPPQR</a>    |
| 0.3   | 2746.402496 | -0.030854 | <a href="#">ESLKRVTFALPDDAETEDTGVLNVK</a> |



# MASCOT SEARCH RESULTS

## Peptide View

MS/MS Fragmentation of **NQVSLTCLVK**

Found in **IGHG1\_HUMAN**, Ig gamma-1 chain C region OS=Homo sapiens GN=IGHG1 PE=1 SV=1

Match to Query 33089: 1471.788588 from(736.901570,2+) rtinseconds(2245) index(70233)

Title: Locus:1.1.1.1719.17 File:"2013-07-02 CLN FXIII 60 min 2nd FT.wiff"

Data file C:\Program Files (x86)\Matrix Science\Mascot Daemon\mgf\5 FXIII 60 min 2nd\mascot\_daemon\_merge.mgf

Click mouse within plot area to zoom in by factor of two about that point

Or, Plot from  to  Da

Label all possible matches  Label matches used for scoring

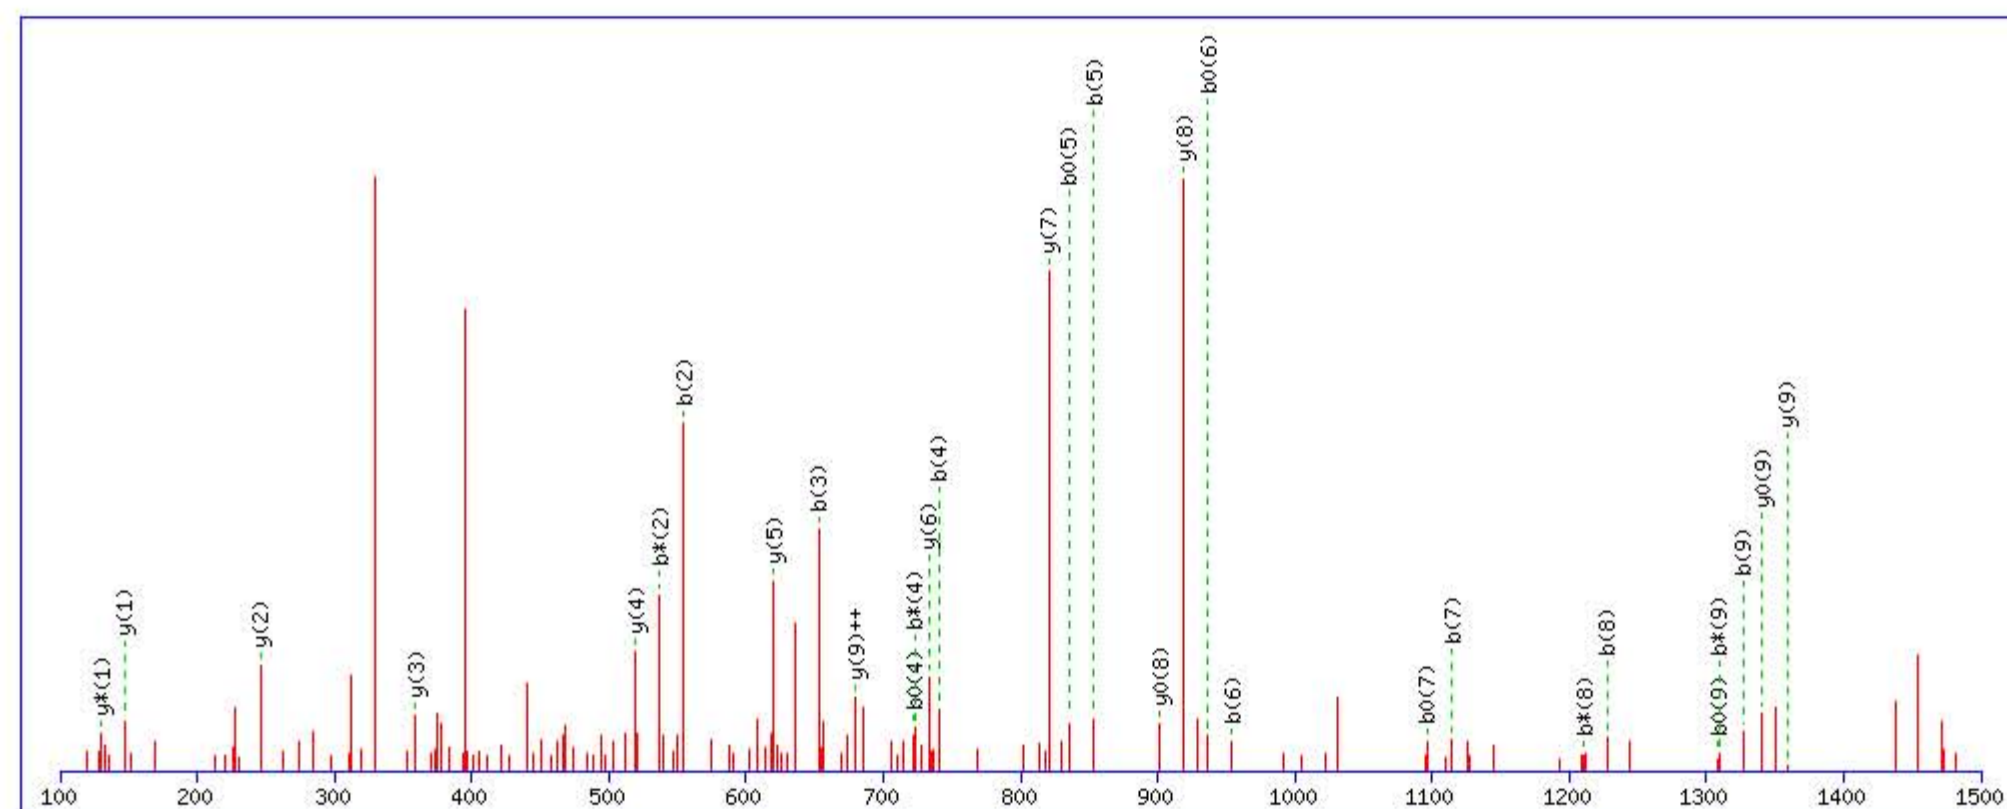

Monoisotopic mass of neutral peptide Mr(calc): 1471.789093

Fixed modifications: Carbamidomethyl (C) (apply to specified residues or termini only)

Variable modifications:

Q2 : Biotin:Thermo-21345 (Q)

Ions Score: 44 Expect: 0.00031

Matches : 30/94 fragment ions using 66 most intense peaks [\(help\)](#)

| #  | b           | b <sup>++</sup> | b <sup>*</sup> | b <sup>*++</sup> | b <sup>0</sup> | b <sup>0++</sup> | Seq. | y           | y <sup>++</sup> | y <sup>*</sup> | y <sup>*++</sup> | y <sup>0</sup> | y <sup>0++</sup> | #  |
|----|-------------|-----------------|----------------|------------------|----------------|------------------|------|-------------|-----------------|----------------|------------------|----------------|------------------|----|
| 1  | 115.050203  | 58.028740       | 98.023654      | 49.515465        |                |                  | N    |             |                 |                |                  |                |                  | 10 |
| 2  | 554.275529  | 277.641403      | 537.248980     | 269.128128       |                |                  | Q    | 1358.753442 | 679.880359      | 1341.726893    | 671.367085       | 1340.742877    | 670.875076       | 9  |
| 3  | 653.343943  | 327.175610      | 636.317394     | 318.662335       |                |                  | V    | 919.528116  | 460.267696      | 902.501567     | 451.754421       | 901.517551     | 451.262413       | 8  |
| 4  | 740.375971  | 370.691623      | 723.349422     | 362.178349       | 722.365406     | 361.686341       | S    | 820.459702  | 410.733489      | 803.433153     | 402.220215       | 802.449137     | 401.728207       | 7  |
| 5  | 853.460035  | 427.233656      | 836.433486     | 418.720381       | 835.449470     | 418.228373       | L    | 733.427674  | 367.217475      | 716.401125     | 358.704201       | 715.417109     | 358.212193       | 6  |
| 6  | 954.507714  | 477.757495      | 937.481165     | 469.244220       | 936.497149     | 468.752212       | T    | 620.343610  | 310.675443      | 603.317061     | 302.162169       | 602.333045     | 301.670161       | 5  |
| 7  | 1114.538363 | 557.772819      | 1097.511814    | 549.259545       | 1096.527798    | 548.767537       | C    | 519.295931  | 260.151604      | 502.269382     | 251.638329       |                |                  | 4  |
| 8  | 1227.622427 | 614.314851      | 1210.595878    | 605.801577       | 1209.611862    | 605.309569       | L    | 359.265282  | 180.136279      | 342.238733     | 171.623004       |                |                  | 3  |
| 9  | 1326.690841 | 663.849058      | 1309.664292    | 655.335784       | 1308.680276    | 654.843776       | V    | 246.181218  | 123.594247      | 229.154669     | 115.080973       |                |                  | 2  |
| 10 |             |                 |                |                  |                |                  | K    | 147.112804  | 74.060040       | 130.086255     | 65.546765        |                |                  | 1  |

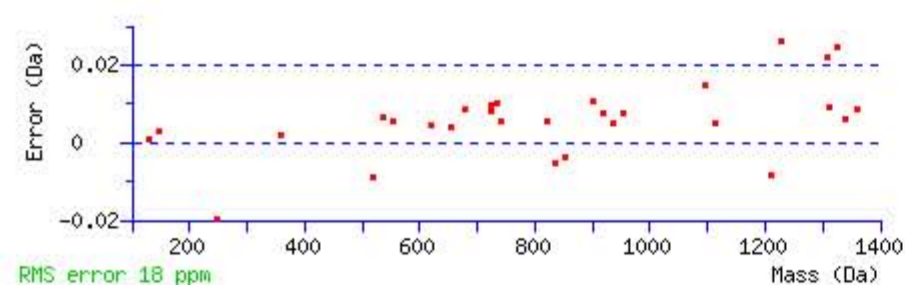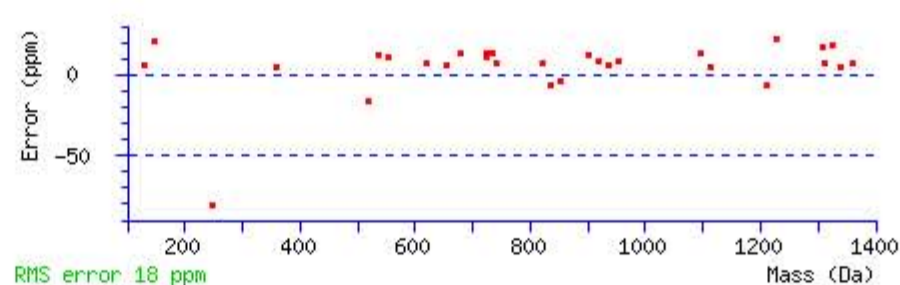

NCBI BLAST search of **NQVSLTCLVK**

(Parameters: blastp, nr protein database, expect=20000, no filter, PAM30)

Other BLAST [web gateways](#)

All matches to this query

| Score | Mr(calc):   | Delta     | Sequence                       |
|-------|-------------|-----------|--------------------------------|
| 43.5  | 1471.789093 | -0.000505 | <a href="#">NQVSLTCLVK</a>     |
| 5.8   | 1471.806793 | -0.018205 | <a href="#">AAALLAKQAEMEVK</a> |
| 4.4   | 1471.797592 | -0.009004 | <a href="#">KYFWDR AFLVK</a>   |
| 4.0   | 1471.803467 | -0.014879 | <a href="#">EKQG PLLDLFGQK</a> |
| 2.4   | 1471.799438 | -0.010850 | <a href="#">EVELDRLRDTVK</a>   |
| 1.9   | 1471.792908 | -0.004320 | <a href="#">NITINCVKGINAR</a>  |
| 1.9   | 1471.777847 | 0.010741  | <a href="#">QLDMELVSVK</a>     |
| 1.3   | 1471.792221 | -0.003633 | <a href="#">NESI IPLSPFEVK</a> |



# MASCOT Search Results

## Peptide View

MS/MS Fragmentation of **EPQVYTLPPSR**

Found in **IGHG1\_HUMAN**, Ig gamma-1 chain C region OS=Homo sapiens GN=IGHG1 PE=1 SV=1

Match to Query 37103: 1596.828222 from(533.283350,3+) rtinseconds(1978) index(68636)

Title: Locus:1.1.1.1626.17 File:"2013-07-02 CLN FXIII 60 min 2nd FT.wiff"

Data file C:\Program Files (x86)\Matrix Science\Mascot Daemon\mgf.5 FXIII 60 min 2nd\mascot\_daemon\_merge.mgf

Click mouse within plot area to zoom in by factor of two about that point

Or, Plot from  to  Da

Label all possible matches  Label matches used for scoring

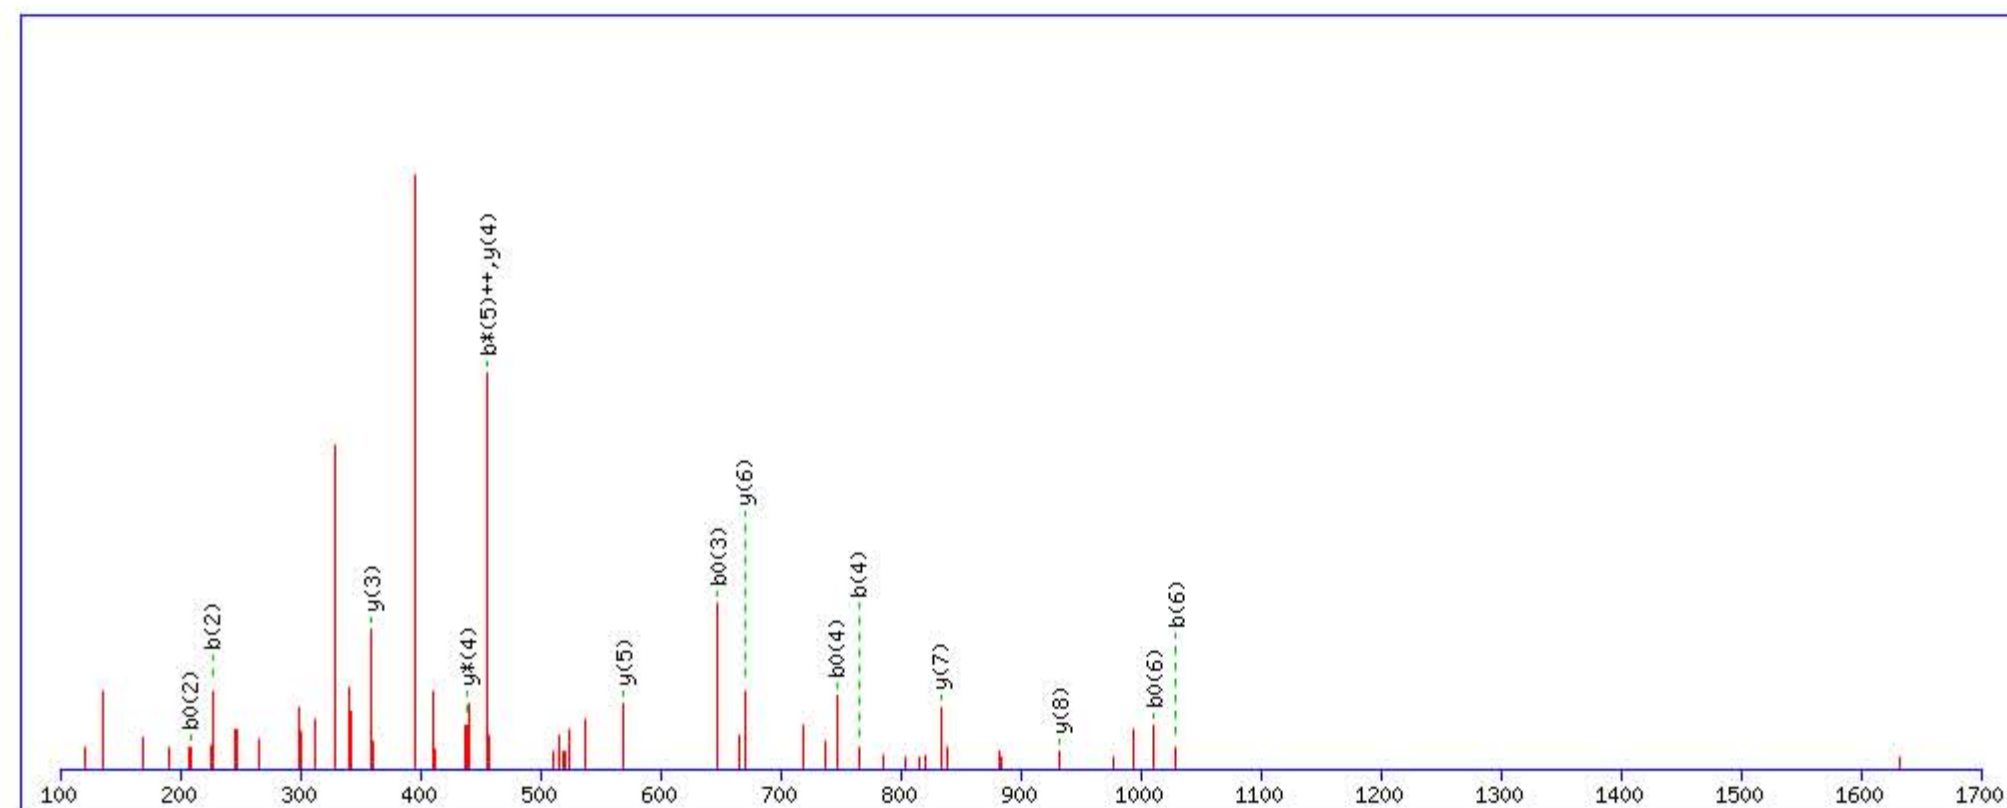

Monoisotopic mass of neutral peptide  $M_r(\text{calc})$ : 1596.833389

Fixed modifications: Carbamidomethyl (C) (apply to specified residues or termini only)

Variable modifications:

Q3 : Biotin:Thermo-21345 (Q)

Ions Score: 27 Expect: 0.058

Matches : 15/114 fragment ions using 28 most intense peaks [\(help\)](#)

| #  | b                  | b <sup>++</sup> | b <sup>*</sup> | b <sup>*++</sup>  | b <sup>0</sup>     | b <sup>0++</sup> | Seq. | y                 | y <sup>++</sup> | y <sup>*</sup>    | y <sup>*++</sup> | y <sup>0</sup> | y <sup>0++</sup> | #  |
|----|--------------------|-----------------|----------------|-------------------|--------------------|------------------|------|-------------------|-----------------|-------------------|------------------|----------------|------------------|----|
| 1  | 130.049869         | 65.528572       |                |                   | 112.039304         | 56.523290        | E    |                   |                 |                   |                  |                |                  | 11 |
| 2  | <b>227.102633</b>  | 114.054954      |                |                   | <b>209.092068</b>  | 105.049672       | P    | 1468.798084       | 734.902680      | 1451.771535       | 726.389406       | 1450.787519    | 725.897398       | 10 |
| 3  | 666.327959         | 333.667618      | 649.301410     | 325.154343        | <b>648.317394</b>  | 324.662335       | Q    | 1371.745320       | 686.376298      | 1354.718771       | 677.863024       | 1353.734755    | 677.371016       | 9  |
| 4  | <b>765.396373</b>  | 383.201825      | 748.369824     | 374.688550        | <b>747.385808</b>  | 374.196542       | V    | <b>932.519994</b> | 466.763635      | 915.493445        | 458.250361       | 914.509429     | 457.758353       | 8  |
| 5  | 928.459702         | 464.733489      | 911.433153     | <b>456.220215</b> | 910.449137         | 455.728207       | Y    | <b>833.451580</b> | 417.229428      | 816.425031        | 408.716154       | 815.441015     | 408.224146       | 7  |
| 6  | <b>1029.507381</b> | 515.257329      | 1012.480832    | 506.744054        | <b>1011.496816</b> | 506.252046       | T    | <b>670.388251</b> | 335.697764      | 653.361702        | 327.184489       | 652.377686     | 326.692481       | 6  |
| 7  | 1142.591445        | 571.799361      | 1125.564896    | 563.286086        | 1124.580880        | 562.794078       | L    | <b>569.340572</b> | 285.173924      | 552.314023        | 276.660650       | 551.330007     | 276.168642       | 5  |
| 8  | 1239.644209        | 620.325743      | 1222.617660    | 611.812468        | 1221.633644        | 611.320460       | P    | <b>456.256508</b> | 228.631892      | <b>439.229959</b> | 220.118618       | 438.245943     | 219.626610       | 4  |
| 9  | 1336.696973        | 668.852125      | 1319.670424    | 660.338850        | 1318.686408        | 659.846842       | P    | <b>359.203744</b> | 180.105510      | 342.177195        | 171.592236       | 341.193179     | 171.100228       | 3  |
| 10 | 1423.729001        | 712.368139      | 1406.702452    | 703.854864        | 1405.718436        | 703.362856       | S    | 262.150980        | 131.579128      | 245.124431        | 123.065854       | 244.140415     | 122.573846       | 2  |
| 11 |                    |                 |                |                   |                    |                  | R    | 175.118952        | 88.063114       | 158.092403        | 79.549839        |                |                  | 1  |

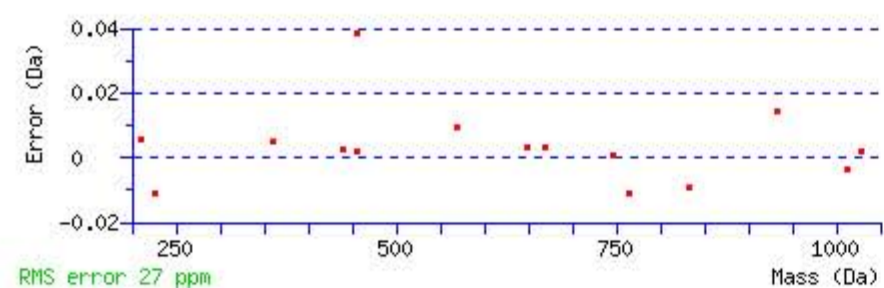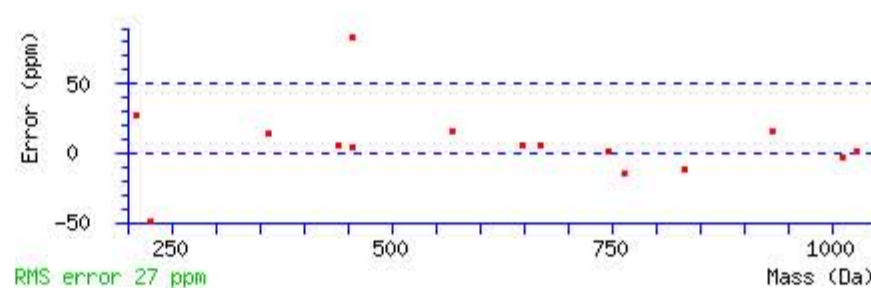

NCBI BLAST search of [EPQVYTLPPSR](#)

(Parameters: blastp, nr protein database, expect=20000, no filter, PAM30)

Other BLAST [web gateways](#)

All matches to this query

| Score | $M_r(\text{calc})$ : | Delta     | Sequence                    |
|-------|----------------------|-----------|-----------------------------|
| 26.7  | 1596.833389          | -0.005167 | <a href="#">EPQVYTLPPSR</a> |

Mascot: <http://www.matrixscience.com/>



# Mascot Search Results

## Peptide View

MS/MS Fragmentation of **WQQGNVFSCSVMEALHNHYTQK**

Found in **IGHG1\_HUMAN**, Ig gamma-1 chain C region OS=Homo sapiens GN=IGHG1 PE=1 SV=1

Match to Query 62423: 3111.433920 from(623.294060,5+) rtinseconds(2036) index(6027)

Title: Locus:1.1.1.1518.12 File:"2013-07-02 CLN FXIII 60 min 2nd F 1.wiff"

Data file C:\Program Files (x86)\Matrix Science\Mascot Daemon\mgf5 FXIII 60 min 2nd\mascot\_daemon\_merge.mgf

Click mouse within plot area to zoom in by factor of two about that point

Or, Plot from  to  Da

Label all possible matches  Label matches used for scoring

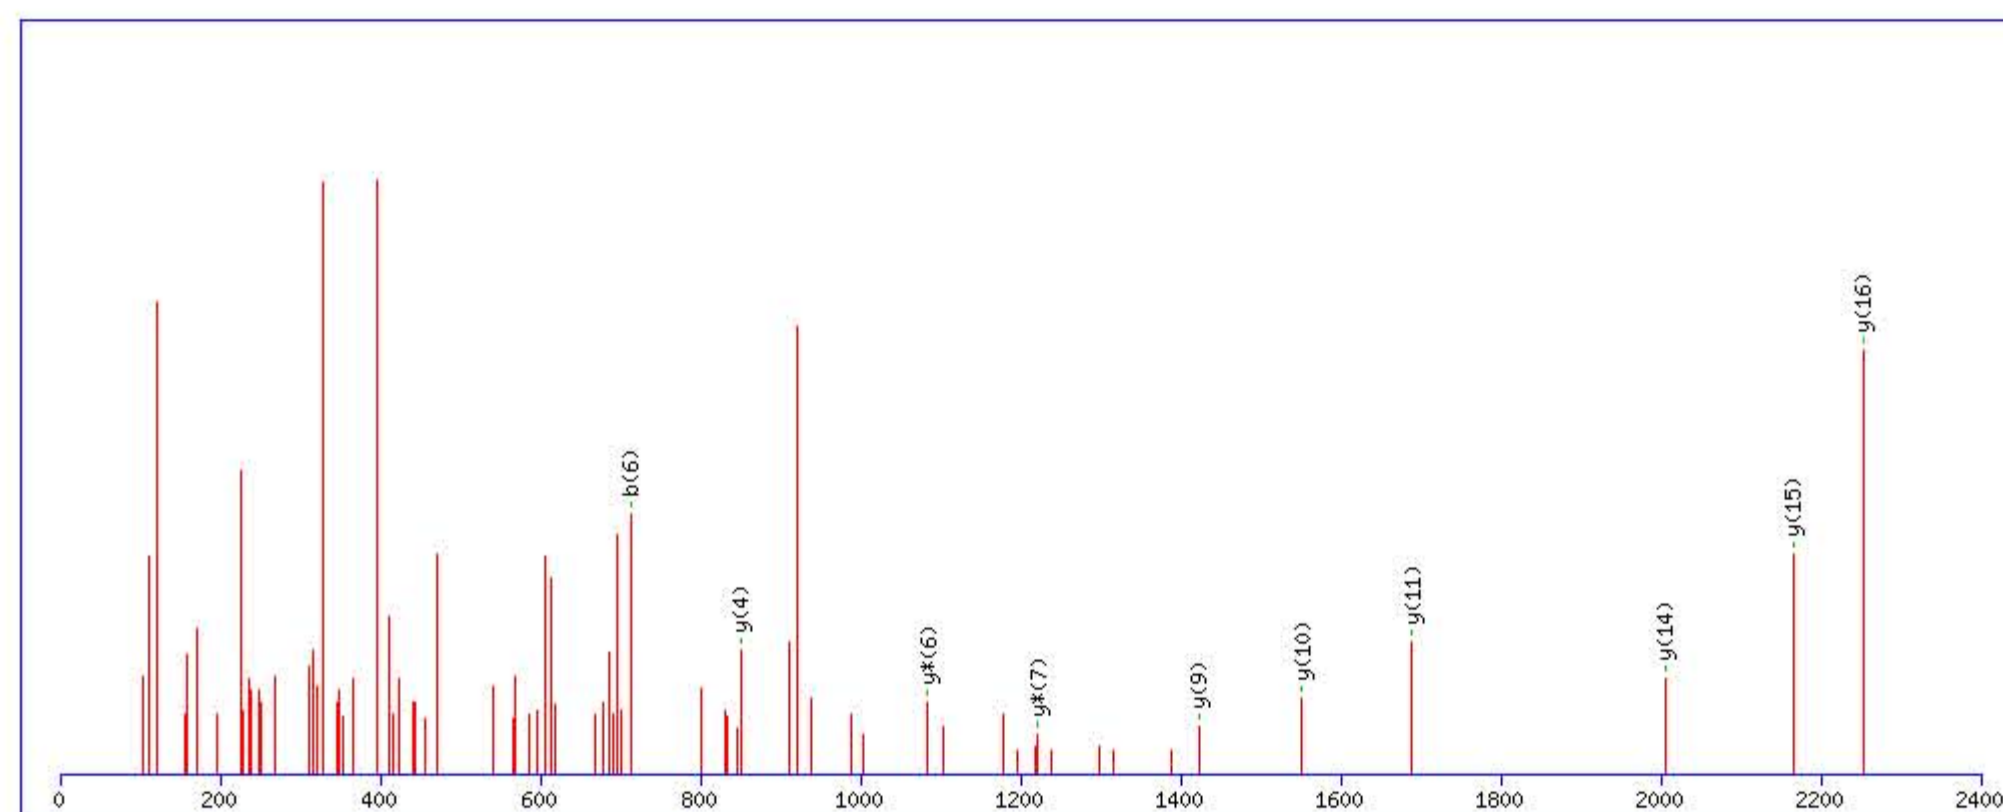

Monoisotopic mass of neutral peptide Mr(calc): 3111.426590

Fixed modifications: Carbamidomethyl (C) (apply to specified residues or termini only)

Variable modifications:

Q22 : Biotin:Thermo-21345 (Q)

Ions Score: 26 Expect: 0.038

Matches : 10/244 fragment ions using 19 most intense peaks [\(help\)](#)

| #  | b                 | b <sup>++</sup> | b <sup>*</sup> | b <sup>*++</sup> | b <sup>0</sup> | b <sup>0++</sup> | Seq. | y                  | y <sup>++</sup> | y <sup>*</sup>     | y <sup>*++</sup> | y <sup>0</sup> | y <sup>0++</sup> | #  |
|----|-------------------|-----------------|----------------|------------------|----------------|------------------|------|--------------------|-----------------|--------------------|------------------|----------------|------------------|----|
| 1  | 187.086589        | 94.046932       |                |                  |                |                  | W    |                    |                 |                    |                  |                |                  | 23 |
| 2  | 315.145167        | 158.076222      | 298.118618     | 149.562947       |                |                  | Q    | 2926.354551        | 1463.680913     | 2909.328002        | 1455.167639      | 2908.343986    | 1454.675631      | 22 |
| 3  | 443.203745        | 222.105511      | 426.177196     | 213.592236       |                |                  | Q    | 2798.295973        | 1399.651624     | 2781.269424        | 1391.138350      | 2780.285408    | 1390.646342      | 21 |
| 4  | 500.225209        | 250.616243      | 483.198660     | 242.102968       |                |                  | G    | 2670.237395        | 1335.622335     | 2653.210846        | 1327.109061      | 2652.226830    | 1326.617053      | 20 |
| 5  | 614.268136        | 307.637706      | 597.241587     | 299.124432       |                |                  | N    | 2613.215931        | 1307.111603     | 2596.189382        | 1298.598329      | 2595.205366    | 1298.106321      | 19 |
| 6  | <b>713.336550</b> | 357.171913      | 696.310001     | 348.658639       |                |                  | V    | 2499.173004        | 1250.090140     | 2482.146455        | 1241.576865      | 2481.162439    | 1241.084857      | 18 |
| 7  | 860.404964        | 430.706120      | 843.378415     | 422.192845       |                |                  | F    | 2400.104590        | 1200.555933     | 2383.078041        | 1192.042658      | 2382.094025    | 1191.550650      | 17 |
| 8  | 947.436992        | 474.222134      | 930.410443     | 465.708859       | 929.426427     | 465.216851       | S    | <b>2253.036176</b> | 1127.021726     | 2236.009627        | 1118.508451      | 2235.025611    | 1118.016443      | 16 |
| 9  | 1107.467641       | 554.237459      | 1090.441092    | 545.724184       | 1089.457076    | 545.232176       | C    | <b>2166.004148</b> | 1083.505712     | 2148.977599        | 1074.992437      | 2147.993583    | 1074.500429      | 15 |
| 10 | 1194.499669       | 597.753473      | 1177.473120    | 589.240198       | 1176.489104    | 588.748190       | S    | <b>2005.973499</b> | 1003.490388     | 1988.946950        | 994.977113       | 1987.962934    | 994.485105       | 14 |
| 11 | 1293.568083       | 647.287680      | 1276.541534    | 638.774405       | 1275.557518    | 638.282397       | V    | 1918.941471        | 959.974373      | 1901.914922        | 951.461099       | 1900.930906    | 950.969091       | 13 |
| 12 | 1424.608568       | 712.807922      | 1407.582019    | 704.294648       | 1406.598003    | 703.802640       | M    | 1819.873057        | 910.440166      | 1802.846508        | 901.926892       | 1801.862492    | 901.434884       | 12 |
| 13 | 1561.667480       | 781.337378      | 1544.640931    | 772.824104       | 1543.656915    | 772.332096       | H    | <b>1688.832572</b> | 844.919924      | 1671.806023        | 836.406649       | 1670.822007    | 835.914641       | 11 |
| 14 | 1690.710073       | 845.858675      | 1673.683524    | 837.345400       | 1672.699508    | 836.853392       | E    | <b>1551.773660</b> | 776.390468      | 1534.747111        | 767.877193       | 1533.763095    | 767.385185       | 10 |
| 15 | 1761.747187       | 881.377231      | 1744.720638    | 872.863957       | 1743.736622    | 872.371949       | A    | <b>1422.731067</b> | 711.869171      | 1405.704518        | 703.355897       | 1404.720502    | 702.863889       | 9  |
| 16 | 1874.831251       | 937.919263      | 1857.804702    | 929.405989       | 1856.820686    | 928.913981       | L    | 1351.693953        | 676.350615      | 1334.667404        | 667.837340       | 1333.683388    | 667.345332       | 8  |
| 17 | 2011.890163       | 1006.448719     | 1994.863614    | 997.935445       | 1993.879598    | 997.443437       | H    | 1238.609889        | 619.808583      | <b>1221.583340</b> | 611.295308       | 1220.599324    | 610.803300       | 7  |
| 18 | 2125.933090       | 1063.470183     | 2108.906541    | 1054.956908      | 2107.922525    | 1054.464900      | N    | 1101.550977        | 551.279127      | <b>1084.524428</b> | 542.765852       | 1083.540412    | 542.273844       | 6  |
| 19 | 2262.992002       | 1131.999639     | 2245.965453    | 1123.486364      | 2244.981437    | 1122.994356      | H    | 987.508050         | 494.257663      | 970.481501         | 485.744389       | 969.497485     | 485.252381       | 5  |
| 20 | 2426.055331       | 1213.531303     | 2409.028782    | 1205.018029      | 2408.044766    | 1204.526021      | Y    | <b>850.449138</b>  | 425.728207      | 833.422589         | 417.214933       | 832.438573     | 416.722925       | 4  |
| 21 | 2527.103010       | 1264.055143     | 2510.076461    | 1255.541868      | 2509.092445    | 1255.049860      | T    | 687.385809         | 344.196543      | 670.359260         | 335.683268       | 669.375244     | 335.191260       | 3  |
| 22 | 2966.328336       | 1483.667806     | 2949.301787    | 1475.154531      | 2948.317771    | 1474.662523      | Q    | 586.338130         | 293.672703      | 569.311581         | 285.159429       |                |                  | 2  |
| 23 |                   |                 |                |                  |                |                  | K    | 147.112804         | 74.060040       | 130.086255         | 65.546765        |                |                  | 1  |

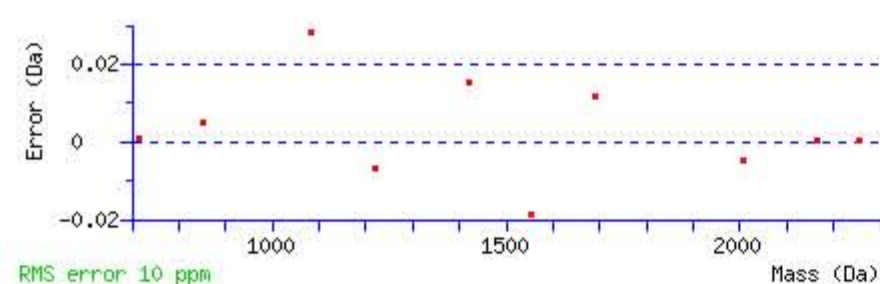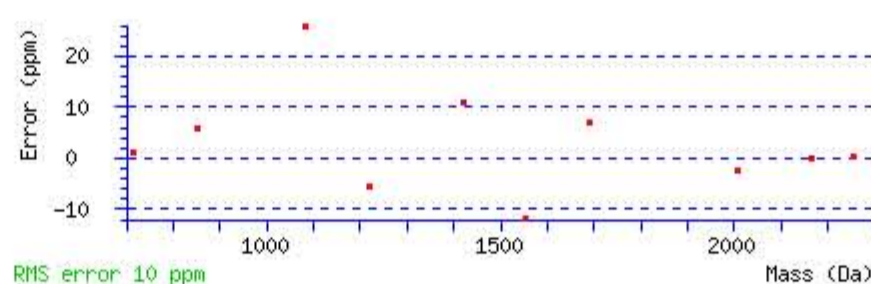

NCBI BLAST search of **WQQGNVFSCSVMEALHNHYTQK**

(Parameters: blastp, nr protein database, expect=20000, no filter, PAM30)

Other BLAST [web gateways](#)

All matches to this query

| Score | Mr(calc):   | Delta    | Sequence                               |
|-------|-------------|----------|----------------------------------------|
| 25.7  | 3111.426590 | 0.007330 | <a href="#">WQQGNVFSCSVMEALHNHYTQK</a> |



# MASCOT SEARCH RESULTS

## Peptide View

MS/MS Fragmentation of **NQVSLTCLVK**

Found in **IGHG1\_HUMAN**, Ig gamma-1 chain C region OS=Homo sapiens GN=IGHG1 PE=1 SV=1

Match to Query 33089: 1471.788588 from(736.901570,2+) rtinseconds(2245) index(70233)

Title: Locus:1.1.1.1719.17 File:"2013-07-02 CLN FXIII 60 min 2nd FT.wiff"

Data file C:\Program Files (x86)\Matrix Science\Mascot Daemon\mgf\5 FXIII 60 min 2nd\mascot\_daemon\_merge.mgf

Click mouse within plot area to zoom in by factor of two about that point

Or, Plot from  to  Da

Label all possible matches  Label matches used for scoring

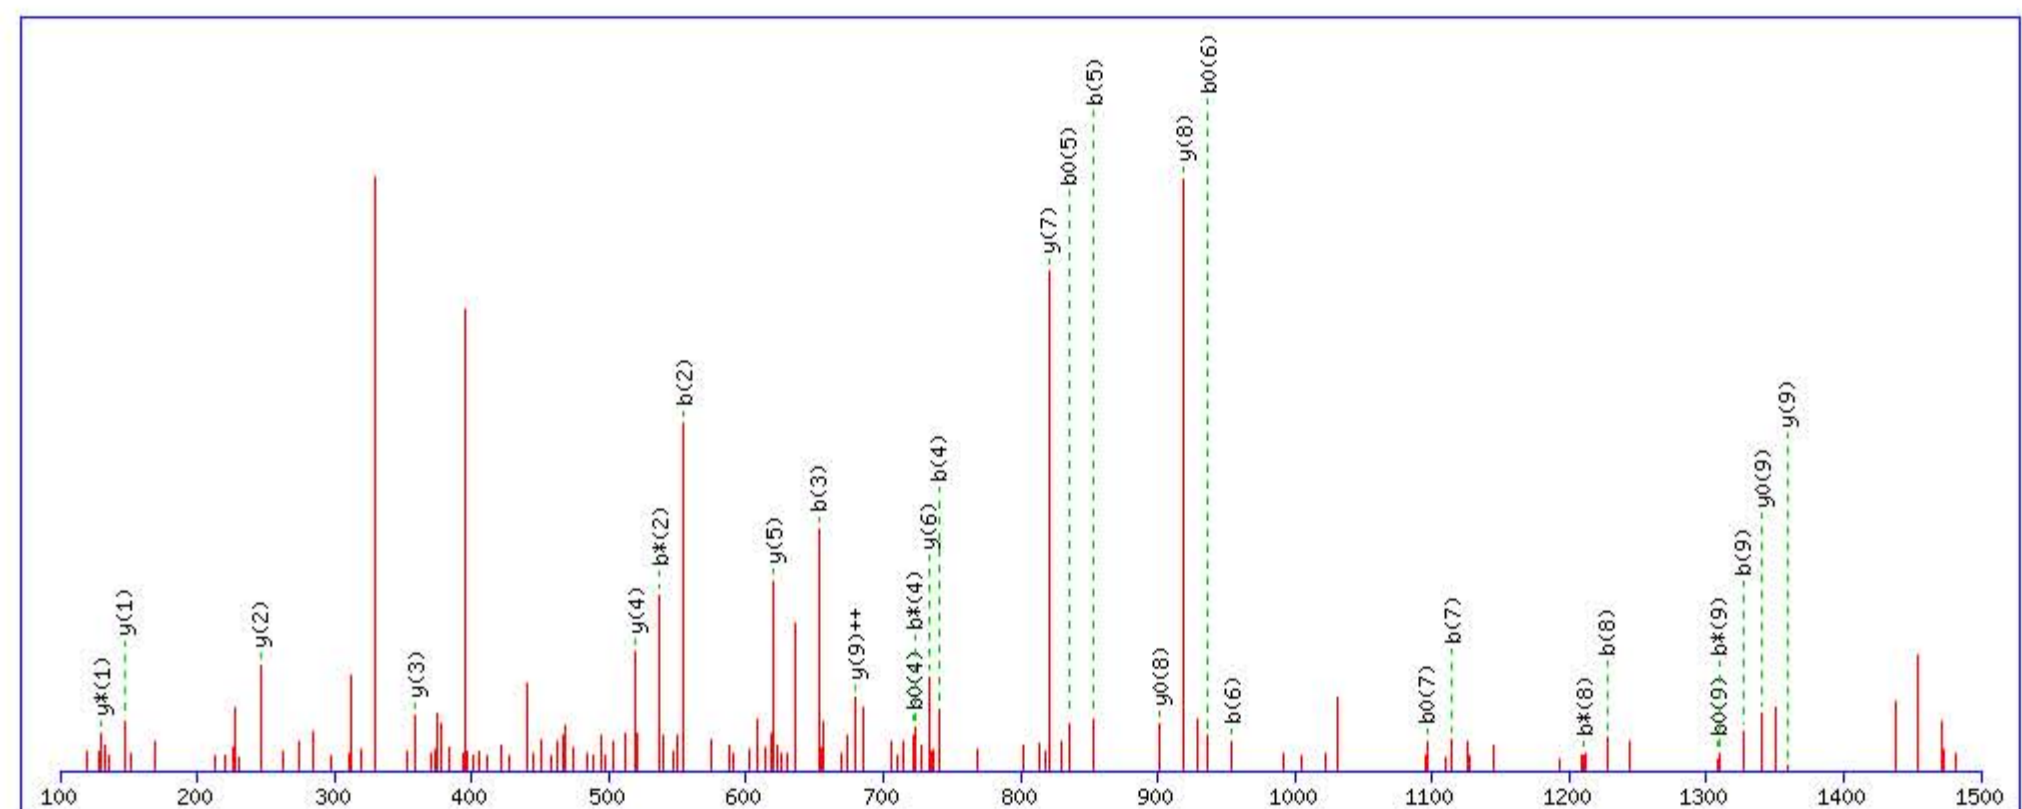

Monoisotopic mass of neutral peptide Mr(calc): 1471.789093

Fixed modifications: Carbamidomethyl (C) (apply to specified residues or termini only)

Variable modifications:

Q2 : Biotin:Thermo-21345 (Q)

Ions Score: 44 Expect: 0.00031

Matches : 30/94 fragment ions using 66 most intense peaks [\(help\)](#)

| #  | b           | b <sup>++</sup> | b <sup>*</sup> | b <sup>*++</sup> | b <sup>0</sup> | b <sup>0++</sup> | Seq. | y           | y <sup>++</sup> | y <sup>*</sup> | y <sup>*++</sup> | y <sup>0</sup> | y <sup>0++</sup> | #  |
|----|-------------|-----------------|----------------|------------------|----------------|------------------|------|-------------|-----------------|----------------|------------------|----------------|------------------|----|
| 1  | 115.050203  | 58.028740       | 98.023654      | 49.515465        |                |                  | N    |             |                 |                |                  |                |                  | 10 |
| 2  | 554.275529  | 277.641403      | 537.248980     | 269.128128       |                |                  | Q    | 1358.753442 | 679.880359      | 1341.726893    | 671.367085       | 1340.742877    | 670.875076       | 9  |
| 3  | 653.343943  | 327.175610      | 636.317394     | 318.662335       |                |                  | V    | 919.528116  | 460.267696      | 902.501567     | 451.754421       | 901.517551     | 451.262413       | 8  |
| 4  | 740.375971  | 370.691623      | 723.349422     | 362.178349       | 722.365406     | 361.686341       | S    | 820.459702  | 410.733489      | 803.433153     | 402.220215       | 802.449137     | 401.728207       | 7  |
| 5  | 853.460035  | 427.233656      | 836.433486     | 418.720381       | 835.449470     | 418.228373       | L    | 733.427674  | 367.217475      | 716.401125     | 358.704201       | 715.417109     | 358.212193       | 6  |
| 6  | 954.507714  | 477.757495      | 937.481165     | 469.244220       | 936.497149     | 468.752212       | T    | 620.343610  | 310.675443      | 603.317061     | 302.162169       | 602.333045     | 301.670161       | 5  |
| 7  | 1114.538363 | 557.772819      | 1097.511814    | 549.259545       | 1096.527798    | 548.767537       | C    | 519.295931  | 260.151604      | 502.269382     | 251.638329       |                |                  | 4  |
| 8  | 1227.622427 | 614.314851      | 1210.595878    | 605.801577       | 1209.611862    | 605.309569       | L    | 359.265282  | 180.136279      | 342.238733     | 171.623004       |                |                  | 3  |
| 9  | 1326.690841 | 663.849058      | 1309.664292    | 655.335784       | 1308.680276    | 654.843776       | V    | 246.181218  | 123.594247      | 229.154669     | 115.080973       |                |                  | 2  |
| 10 |             |                 |                |                  |                |                  | K    | 147.112804  | 74.060040       | 130.086255     | 65.546765        |                |                  | 1  |



NCBI BLAST search of **NQVSLTCLVK**

(Parameters: blastp, nr protein database, expect=20000, no filter, PAM30)

Other BLAST [web gateways](#)

All matches to this query

| Score | Mr(calc):   | Delta     | Sequence                       |
|-------|-------------|-----------|--------------------------------|
| 43.5  | 1471.789093 | -0.000505 | <a href="#">NQVSLTCLVK</a>     |
| 5.8   | 1471.806793 | -0.018205 | <a href="#">AAALLAKQAEMEVK</a> |
| 4.4   | 1471.797592 | -0.009004 | <a href="#">KYFWDR AFLVK</a>   |
| 4.0   | 1471.803467 | -0.014879 | <a href="#">EKQG PLLDLFGQK</a> |
| 2.4   | 1471.799438 | -0.010850 | <a href="#">EVELDRLRDTVK</a>   |
| 1.9   | 1471.792908 | -0.004320 | <a href="#">NITINCVKGINAR</a>  |
| 1.9   | 1471.777847 | 0.010741  | <a href="#">QLDMELVSVK</a>     |
| 1.3   | 1471.792221 | -0.003633 | <a href="#">NESI IPLSPFEVK</a> |



# MASCOT Search Results

## Peptide View

MS/MS Fragmentation of **EPQVYTLPPSR**

Found in **IGHG1\_HUMAN**, Ig gamma-1 chain C region OS=Homo sapiens GN=IGHG1 PE=1 SV=1

Match to Query 37103: 1596.828222 from(533.283350,3+) rtinseconds(1978) index(68636)

Title: Locus:1.1.1.1626.17 File:"2013-07-02 CLN FXIII 60 min 2nd FT.wiff"

Data file C:\Program Files (x86)\Matrix Science\Mascot Daemon\mgf.5 FXIII 60 min 2nd\mascot\_daemon\_merge.mgf

Click mouse within plot area to zoom in by factor of two about that point

Or, Plot from  to  Da

Label all possible matches  Label matches used for scoring



Monoisotopic mass of neutral peptide  $M_r(\text{calc})$ : 1596.833389

Fixed modifications: Carbamidomethyl (C) (apply to specified residues or termini only)

Variable modifications:

Q3 : Biotin:Thermo-21345 (Q)

Ions Score: 27 Expect: 0.058

Matches : 15/114 fragment ions using 28 most intense peaks [\(help\)](#)

| #  | b                  | b <sup>++</sup> | b <sup>*</sup> | b <sup>*++</sup>  | b <sup>0</sup>     | b <sup>0++</sup> | Seq. | y                 | y <sup>++</sup> | y <sup>*</sup>    | y <sup>*++</sup> | y <sup>0</sup> | y <sup>0++</sup> | #  |
|----|--------------------|-----------------|----------------|-------------------|--------------------|------------------|------|-------------------|-----------------|-------------------|------------------|----------------|------------------|----|
| 1  | 130.049869         | 65.528572       |                |                   | 112.039304         | 56.523290        | E    |                   |                 |                   |                  |                |                  | 11 |
| 2  | <b>227.102633</b>  | 114.054954      |                |                   | <b>209.092068</b>  | 105.049672       | P    | 1468.798084       | 734.902680      | 1451.771535       | 726.389406       | 1450.787519    | 725.897398       | 10 |
| 3  | 666.327959         | 333.667618      | 649.301410     | 325.154343        | <b>648.317394</b>  | 324.662335       | Q    | 1371.745320       | 686.376298      | 1354.718771       | 677.863024       | 1353.734755    | 677.371016       | 9  |
| 4  | <b>765.396373</b>  | 383.201825      | 748.369824     | 374.688550        | <b>747.385808</b>  | 374.196542       | V    | <b>932.519994</b> | 466.763635      | 915.493445        | 458.250361       | 914.509429     | 457.758353       | 8  |
| 5  | 928.459702         | 464.733489      | 911.433153     | <b>456.220215</b> | 910.449137         | 455.728207       | Y    | <b>833.451580</b> | 417.229428      | 816.425031        | 408.716154       | 815.441015     | 408.224146       | 7  |
| 6  | <b>1029.507381</b> | 515.257329      | 1012.480832    | 506.744054        | <b>1011.496816</b> | 506.252046       | T    | <b>670.388251</b> | 335.697764      | 653.361702        | 327.184489       | 652.377686     | 326.692481       | 6  |
| 7  | 1142.591445        | 571.799361      | 1125.564896    | 563.286086        | 1124.580880        | 562.794078       | L    | <b>569.340572</b> | 285.173924      | 552.314023        | 276.660650       | 551.330007     | 276.168642       | 5  |
| 8  | 1239.644209        | 620.325743      | 1222.617660    | 611.812468        | 1221.633644        | 611.320460       | P    | <b>456.256508</b> | 228.631892      | <b>439.229959</b> | 220.118618       | 438.245943     | 219.626610       | 4  |
| 9  | 1336.696973        | 668.852125      | 1319.670424    | 660.338850        | 1318.686408        | 659.846842       | P    | <b>359.203744</b> | 180.105510      | 342.177195        | 171.592236       | 341.193179     | 171.100228       | 3  |
| 10 | 1423.729001        | 712.368139      | 1406.702452    | 703.854864        | 1405.718436        | 703.362856       | S    | 262.150980        | 131.579128      | 245.124431        | 123.065854       | 244.140415     | 122.573846       | 2  |
| 11 |                    |                 |                |                   |                    |                  | R    | 175.118952        | 88.063114       | 158.092403        | 79.549839        |                |                  | 1  |

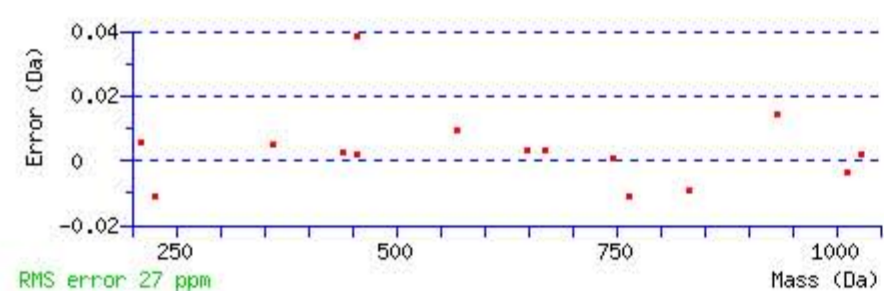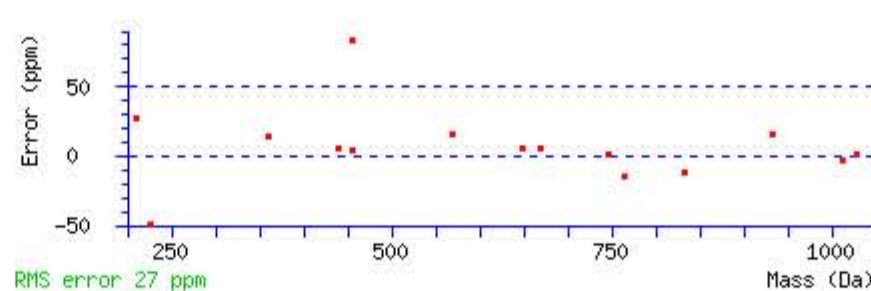

NCBI BLAST search of [EPQVYTLPPSR](#)

(Parameters: blastp, nr protein database, expect=20000, no filter, PAM30)

Other BLAST [web gateways](#)

All matches to this query

| Score | $M_r(\text{calc})$ : | Delta     | Sequence                    |
|-------|----------------------|-----------|-----------------------------|
| 26.7  | 1596.833389          | -0.005167 | <a href="#">EPQVYTLPPSR</a> |

Mascot: <http://www.matrixscience.com/>



# Mascot Search Results

## Peptide View

MS/MS Fragmentation of **WQQGNVFSCSVMEALHNHYTQK**

Found in **IGHG1\_HUMAN**, Ig gamma-1 chain C region OS=Homo sapiens GN=IGHG1 PE=1 SV=1

Match to Query 62423: 3111.433920 from(623.294060,5+) rtinseconds(2036) index(6027)

Title: Locus:1.1.1.1518.12 File:"2013-07-02 CLN FXIII 60 min 2nd F 1.wiff"

Data file C:\Program Files (x86)\Matrix Science\Mascot Daemon\mgf5 FXIII 60 min 2nd\mascot\_daemon\_merge.mgf

Click mouse within plot area to zoom in by factor of two about that point

Or, Plot from  to  Da

Label all possible matches  Label matches used for scoring



Monoisotopic mass of neutral peptide Mr(calc): 3111.426590

Fixed modifications: Carbamidomethyl (C) (apply to specified residues or termini only)

Variable modifications:

Q22 : Biotin:Thermo-21345 (Q)

Ions Score: 26 Expect: 0.038

Matches : 10/244 fragment ions using 19 most intense peaks [\(help\)](#)

| #  | b                 | b <sup>++</sup> | b <sup>*</sup> | b <sup>*++</sup> | b <sup>0</sup> | b <sup>0++</sup> | Seq. | y                  | y <sup>++</sup> | y <sup>*</sup>     | y <sup>*++</sup> | y <sup>0</sup> | y <sup>0++</sup> | #  |
|----|-------------------|-----------------|----------------|------------------|----------------|------------------|------|--------------------|-----------------|--------------------|------------------|----------------|------------------|----|
| 1  | 187.086589        | 94.046932       |                |                  |                |                  | W    |                    |                 |                    |                  |                |                  | 23 |
| 2  | 315.145167        | 158.076222      | 298.118618     | 149.562947       |                |                  | Q    | 2926.354551        | 1463.680913     | 2909.328002        | 1455.167639      | 2908.343986    | 1454.675631      | 22 |
| 3  | 443.203745        | 222.105511      | 426.177196     | 213.592236       |                |                  | Q    | 2798.295973        | 1399.651624     | 2781.269424        | 1391.138350      | 2780.285408    | 1390.646342      | 21 |
| 4  | 500.225209        | 250.616243      | 483.198660     | 242.102968       |                |                  | G    | 2670.237395        | 1335.622335     | 2653.210846        | 1327.109061      | 2652.226830    | 1326.617053      | 20 |
| 5  | 614.268136        | 307.637706      | 597.241587     | 299.124432       |                |                  | N    | 2613.215931        | 1307.111603     | 2596.189382        | 1298.598329      | 2595.205366    | 1298.106321      | 19 |
| 6  | <b>713.336550</b> | 357.171913      | 696.310001     | 348.658639       |                |                  | V    | 2499.173004        | 1250.090140     | 2482.146455        | 1241.576865      | 2481.162439    | 1241.084857      | 18 |
| 7  | 860.404964        | 430.706120      | 843.378415     | 422.192845       |                |                  | F    | 2400.104590        | 1200.555933     | 2383.078041        | 1192.042658      | 2382.094025    | 1191.550650      | 17 |
| 8  | 947.436992        | 474.222134      | 930.410443     | 465.708859       | 929.426427     | 465.216851       | S    | <b>2253.036176</b> | 1127.021726     | 2236.009627        | 1118.508451      | 2235.025611    | 1118.016443      | 16 |
| 9  | 1107.467641       | 554.237459      | 1090.441092    | 545.724184       | 1089.457076    | 545.232176       | C    | <b>2166.004148</b> | 1083.505712     | 2148.977599        | 1074.992437      | 2147.993583    | 1074.500429      | 15 |
| 10 | 1194.499669       | 597.753473      | 1177.473120    | 589.240198       | 1176.489104    | 588.748190       | S    | <b>2005.973499</b> | 1003.490388     | 1988.946950        | 994.977113       | 1987.962934    | 994.485105       | 14 |
| 11 | 1293.568083       | 647.287680      | 1276.541534    | 638.774405       | 1275.557518    | 638.282397       | V    | 1918.941471        | 959.974373      | 1901.914922        | 951.461099       | 1900.930906    | 950.969091       | 13 |
| 12 | 1424.608568       | 712.807922      | 1407.582019    | 704.294648       | 1406.598003    | 703.802640       | M    | 1819.873057        | 910.440166      | 1802.846508        | 901.926892       | 1801.862492    | 901.434884       | 12 |
| 13 | 1561.667480       | 781.337378      | 1544.640931    | 772.824104       | 1543.656915    | 772.332096       | H    | <b>1688.832572</b> | 844.919924      | 1671.806023        | 836.406649       | 1670.822007    | 835.914641       | 11 |
| 14 | 1690.710073       | 845.858675      | 1673.683524    | 837.345400       | 1672.699508    | 836.853392       | E    | <b>1551.773660</b> | 776.390468      | 1534.747111        | 767.877193       | 1533.763095    | 767.385185       | 10 |
| 15 | 1761.747187       | 881.377231      | 1744.720638    | 872.863957       | 1743.736622    | 872.371949       | A    | <b>1422.731067</b> | 711.869171      | 1405.704518        | 703.355897       | 1404.720502    | 702.863889       | 9  |
| 16 | 1874.831251       | 937.919263      | 1857.804702    | 929.405989       | 1856.820686    | 928.913981       | L    | 1351.693953        | 676.350615      | 1334.667404        | 667.837340       | 1333.683388    | 667.345332       | 8  |
| 17 | 2011.890163       | 1006.448719     | 1994.863614    | 997.935445       | 1993.879598    | 997.443437       | H    | 1238.609889        | 619.808583      | <b>1221.583340</b> | 611.295308       | 1220.599324    | 610.803300       | 7  |
| 18 | 2125.933090       | 1063.470183     | 2108.906541    | 1054.956908      | 2107.922525    | 1054.464900      | N    | 1101.550977        | 551.279127      | <b>1084.524428</b> | 542.765852       | 1083.540412    | 542.273844       | 6  |
| 19 | 2262.992002       | 1131.999639     | 2245.965453    | 1123.486364      | 2244.981437    | 1122.994356      | H    | 987.508050         | 494.257663      | 970.481501         | 485.744389       | 969.497485     | 485.252381       | 5  |
| 20 | 2426.055331       | 1213.531303     | 2409.028782    | 1205.018029      | 2408.044766    | 1204.526021      | Y    | <b>850.449138</b>  | 425.728207      | 833.422589         | 417.214933       | 832.438573     | 416.722925       | 4  |
| 21 | 2527.103010       | 1264.055143     | 2510.076461    | 1255.541868      | 2509.092445    | 1255.049860      | T    | 687.385809         | 344.196543      | 670.359260         | 335.683268       | 669.375244     | 335.191260       | 3  |
| 22 | 2966.328336       | 1483.667806     | 2949.301787    | 1475.154531      | 2948.317771    | 1474.662523      | Q    | 586.338130         | 293.672703      | 569.311581         | 285.159429       |                |                  | 2  |
| 23 |                   |                 |                |                  |                |                  | K    | 147.112804         | 74.060040       | 130.086255         | 65.546765        |                |                  | 1  |



NCBI BLAST search of **WQQGNVFSCSVMEALHNHYTQK**

(Parameters: blastp, nr protein database, expect=20000, no filter, PAM30)

Other BLAST [web gateways](#)

All matches to this query

| Score | Mr(calc):   | Delta    | Sequence                               |
|-------|-------------|----------|----------------------------------------|
| 25.7  | 3111.426590 | 0.007330 | <a href="#">WQQGNVFSCSVMEALHNHYTQK</a> |



# MASCOT Search Results

## Peptide View

MS/MS Fragmentation of **NQVSLTCLVK**

Found in **IGHG1\_HUMAN**, Ig gamma-1 chain C region OS=Homo sapiens GN=IGHG1 PE=1 SV=1

Match to Query 33089: 1471.788588 from(736.901570,2+) rtinseconds(2245) index(70233)

Title: Locus:1.1.1.1719.17 File:"2013-07-02 CLN FXIII 60 min 2nd FT.wiff"

Data file C:\Program Files (x86)\Matrix Science\Mascot Daemon\mgf\5 FXIII 60 min 2nd\mascot\_daemon\_merge.mgf

Click mouse within plot area to zoom in by factor of two about that point

Or, Plot from  to  Da

Label all possible matches  Label matches used for scoring



Monoisotopic mass of neutral peptide Mr(calc): 1471.789093

Fixed modifications: Carbamidomethyl (C) (apply to specified residues or termini only)

Variable modifications:

Q2 : Biotin:Thermo-21345 (Q)

Ions Score: 44 Expect: 0.00031

Matches : 30/94 fragment ions using 66 most intense peaks [\(help\)](#)

| #  | b                  | b <sup>++</sup> | b <sup>*</sup>     | b <sup>*++</sup> | b <sup>0</sup>     | b <sup>0++</sup> | Seq. | y                  | y <sup>++</sup>   | y <sup>*</sup>    | y <sup>*++</sup> | y <sup>0</sup>     | y <sup>0++</sup> | #  |
|----|--------------------|-----------------|--------------------|------------------|--------------------|------------------|------|--------------------|-------------------|-------------------|------------------|--------------------|------------------|----|
| 1  | 115.050203         | 58.028740       | 98.023654          | 49.515465        |                    |                  | N    |                    |                   |                   |                  |                    |                  | 10 |
| 2  | <b>554.275529</b>  | 277.641403      | <b>537.248980</b>  | 269.128128       |                    |                  | Q    | <b>1358.753442</b> | <b>679.880359</b> | 1341.726893       | 671.367085       | <b>1340.742877</b> | 670.875076       | 9  |
| 3  | <b>653.343943</b>  | 327.175610      | 636.317394         | 318.662335       |                    |                  | V    | <b>919.528116</b>  | 460.267696        | 902.501567        | 451.754421       | <b>901.517551</b>  | 451.262413       | 8  |
| 4  | <b>740.375971</b>  | 370.691623      | <b>723.349422</b>  | 362.178349       | <b>722.365406</b>  | 361.686341       | S    | <b>820.459702</b>  | 410.733489        | 803.433153        | 402.220215       | 802.449137         | 401.728207       | 7  |
| 5  | <b>853.460035</b>  | 427.233656      | 836.433486         | 418.720381       | <b>835.449470</b>  | 418.228373       | L    | <b>733.427674</b>  | 367.217475        | 716.401125        | 358.704201       | 715.417109         | 358.212193       | 6  |
| 6  | <b>954.507714</b>  | 477.757495      | 937.481165         | 469.244220       | <b>936.497149</b>  | 468.752212       | T    | <b>620.343610</b>  | 310.675443        | 603.317061        | 302.162169       | 602.333045         | 301.670161       | 5  |
| 7  | <b>1114.538363</b> | 557.772819      | 1097.511814        | 549.259545       | <b>1096.527798</b> | 548.767537       | C    | <b>519.295931</b>  | 260.151604        | 502.269382        | 251.638329       |                    |                  | 4  |
| 8  | <b>1227.622427</b> | 614.314851      | <b>1210.595878</b> | 605.801577       | 1209.611862        | 605.309569       | L    | <b>359.265282</b>  | 180.136279        | 342.238733        | 171.623004       |                    |                  | 3  |
| 9  | <b>1326.690841</b> | 663.849058      | <b>1309.664292</b> | 655.335784       | <b>1308.680276</b> | 654.843776       | V    | <b>246.181218</b>  | 123.594247        | 229.154669        | 115.080973       |                    |                  | 2  |
| 10 |                    |                 |                    |                  |                    |                  | K    | <b>147.112804</b>  | 74.060040         | <b>130.086255</b> | 65.546765        |                    |                  | 1  |



NCBI BLAST search of **NQVSLTCLVK**

(Parameters: blastp, nr protein database, expect=20000, no filter, PAM30)

Other BLAST [web gateways](#)

All matches to this query

| Score | Mr(calc):   | Delta     | Sequence                       |
|-------|-------------|-----------|--------------------------------|
| 43.5  | 1471.789093 | -0.000505 | <a href="#">NQVSLTCLVK</a>     |
| 5.8   | 1471.806793 | -0.018205 | <a href="#">AAALLAKQAEMEVK</a> |
| 4.4   | 1471.797592 | -0.009004 | <a href="#">KYFWDR AFLVK</a>   |
| 4.0   | 1471.803467 | -0.014879 | <a href="#">EKQG PLLDLFGQK</a> |
| 2.4   | 1471.799438 | -0.010850 | <a href="#">EVELDRLRDTVK</a>   |
| 1.9   | 1471.792908 | -0.004320 | <a href="#">NITINCVKGINAR</a>  |
| 1.9   | 1471.777847 | 0.010741  | <a href="#">QLDMELVSVK</a>     |
| 1.3   | 1471.792221 | -0.003633 | <a href="#">NESI IPLSPFEVK</a> |



# MASCOT Search Results

## Peptide View

MS/MS Fragmentation of **EPQVYTLPPSR**

Found in **IGHG1\_HUMAN**, Ig gamma-1 chain C region OS=Homo sapiens GN=IGHG1 PE=1 SV=1

Match to Query 37103: 1596.828222 from(533.283350,3+) rtinseconds(1978) index(68636)

Title: Locus:1.1.1.1626.17 File:"2013-07-02 CLN FXIII 60 min 2nd FT.wiff"

Data file C:\Program Files (x86)\Matrix Science\Mascot Daemon\mgf.5 FXIII 60 min 2nd\mascot\_daemon\_merge.mgf

Click mouse within plot area to zoom in by factor of two about that point

Or, Plot from  to  Da

Label all possible matches  Label matches used for scoring



Monoisotopic mass of neutral peptide  $M_r(\text{calc})$ : 1596.833389

Fixed modifications: Carbamidomethyl (C) (apply to specified residues or termini only)

Variable modifications:

Q3 : Biotin:Thermo-21345 (Q)

Ions Score: 27 Expect: 0.058

Matches : 15/114 fragment ions using 28 most intense peaks [\(help\)](#)

| #  | b                  | b <sup>++</sup> | b <sup>*</sup> | b <sup>*++</sup>  | b <sup>0</sup>     | b <sup>0++</sup> | Seq. | y                 | y <sup>++</sup> | y <sup>*</sup>    | y <sup>*++</sup> | y <sup>0</sup> | y <sup>0++</sup> | #  |
|----|--------------------|-----------------|----------------|-------------------|--------------------|------------------|------|-------------------|-----------------|-------------------|------------------|----------------|------------------|----|
| 1  | 130.049869         | 65.528572       |                |                   | 112.039304         | 56.523290        | E    |                   |                 |                   |                  |                |                  | 11 |
| 2  | <b>227.102633</b>  | 114.054954      |                |                   | <b>209.092068</b>  | 105.049672       | P    | 1468.798084       | 734.902680      | 1451.771535       | 726.389406       | 1450.787519    | 725.897398       | 10 |
| 3  | 666.327959         | 333.667618      | 649.301410     | 325.154343        | <b>648.317394</b>  | 324.662335       | Q    | 1371.745320       | 686.376298      | 1354.718771       | 677.863024       | 1353.734755    | 677.371016       | 9  |
| 4  | <b>765.396373</b>  | 383.201825      | 748.369824     | 374.688550        | <b>747.385808</b>  | 374.196542       | V    | <b>932.519994</b> | 466.763635      | 915.493445        | 458.250361       | 914.509429     | 457.758353       | 8  |
| 5  | 928.459702         | 464.733489      | 911.433153     | <b>456.220215</b> | 910.449137         | 455.728207       | Y    | <b>833.451580</b> | 417.229428      | 816.425031        | 408.716154       | 815.441015     | 408.224146       | 7  |
| 6  | <b>1029.507381</b> | 515.257329      | 1012.480832    | 506.744054        | <b>1011.496816</b> | 506.252046       | T    | <b>670.388251</b> | 335.697764      | 653.361702        | 327.184489       | 652.377686     | 326.692481       | 6  |
| 7  | 1142.591445        | 571.799361      | 1125.564896    | 563.286086        | 1124.580880        | 562.794078       | L    | <b>569.340572</b> | 285.173924      | 552.314023        | 276.660650       | 551.330007     | 276.168642       | 5  |
| 8  | 1239.644209        | 620.325743      | 1222.617660    | 611.812468        | 1221.633644        | 611.320460       | P    | <b>456.256508</b> | 228.631892      | <b>439.229959</b> | 220.118618       | 438.245943     | 219.626610       | 4  |
| 9  | 1336.696973        | 668.852125      | 1319.670424    | 660.338850        | 1318.686408        | 659.846842       | P    | <b>359.203744</b> | 180.105510      | 342.177195        | 171.592236       | 341.193179     | 171.100228       | 3  |
| 10 | 1423.729001        | 712.368139      | 1406.702452    | 703.854864        | 1405.718436        | 703.362856       | S    | 262.150980        | 131.579128      | 245.124431        | 123.065854       | 244.140415     | 122.573846       | 2  |
| 11 |                    |                 |                |                   |                    |                  | R    | 175.118952        | 88.063114       | 158.092403        | 79.549839        |                |                  | 1  |



NCBI BLAST search of [EPQVYTLPPSR](#)

(Parameters: blastp, nr protein database, expect=20000, no filter, PAM30)

Other BLAST [web gateways](#)

All matches to this query

| Score | $M_r(\text{calc})$ : | Delta     | Sequence                    |
|-------|----------------------|-----------|-----------------------------|
| 26.7  | 1596.833389          | -0.005167 | <a href="#">EPQVYTLPPSR</a> |

Mascot: <http://www.matrixscience.com/>



# MASCOT Search Results

## Peptide View

MS/MS Fragmentation of **VYACEVTHQGLSSPVTK**

Found in **IGKC\_HUMAN**, Ig kappa chain C region OS=Homo sapiens GN=IGKC PE=1 SV=1

Match to Query 50831: 2186.084112 from(729.701980,3+) rtinseconds(1774) index(67349)

Title: Locus:1.1.1.1555.12 File:"2013-07-02 CLN FXIII 60 min 2nd FT.wiff"

Data file C:\Program Files (x86)\Matrix Science\Mascot Daemon\mgf5 FXIII 60 min 2nd\mascot\_daemon\_merge.mgf

Click mouse within plot area to zoom in by factor of two about that point

Or, Plot from  to  Da

Label all possible matches  Label matches used for scoring

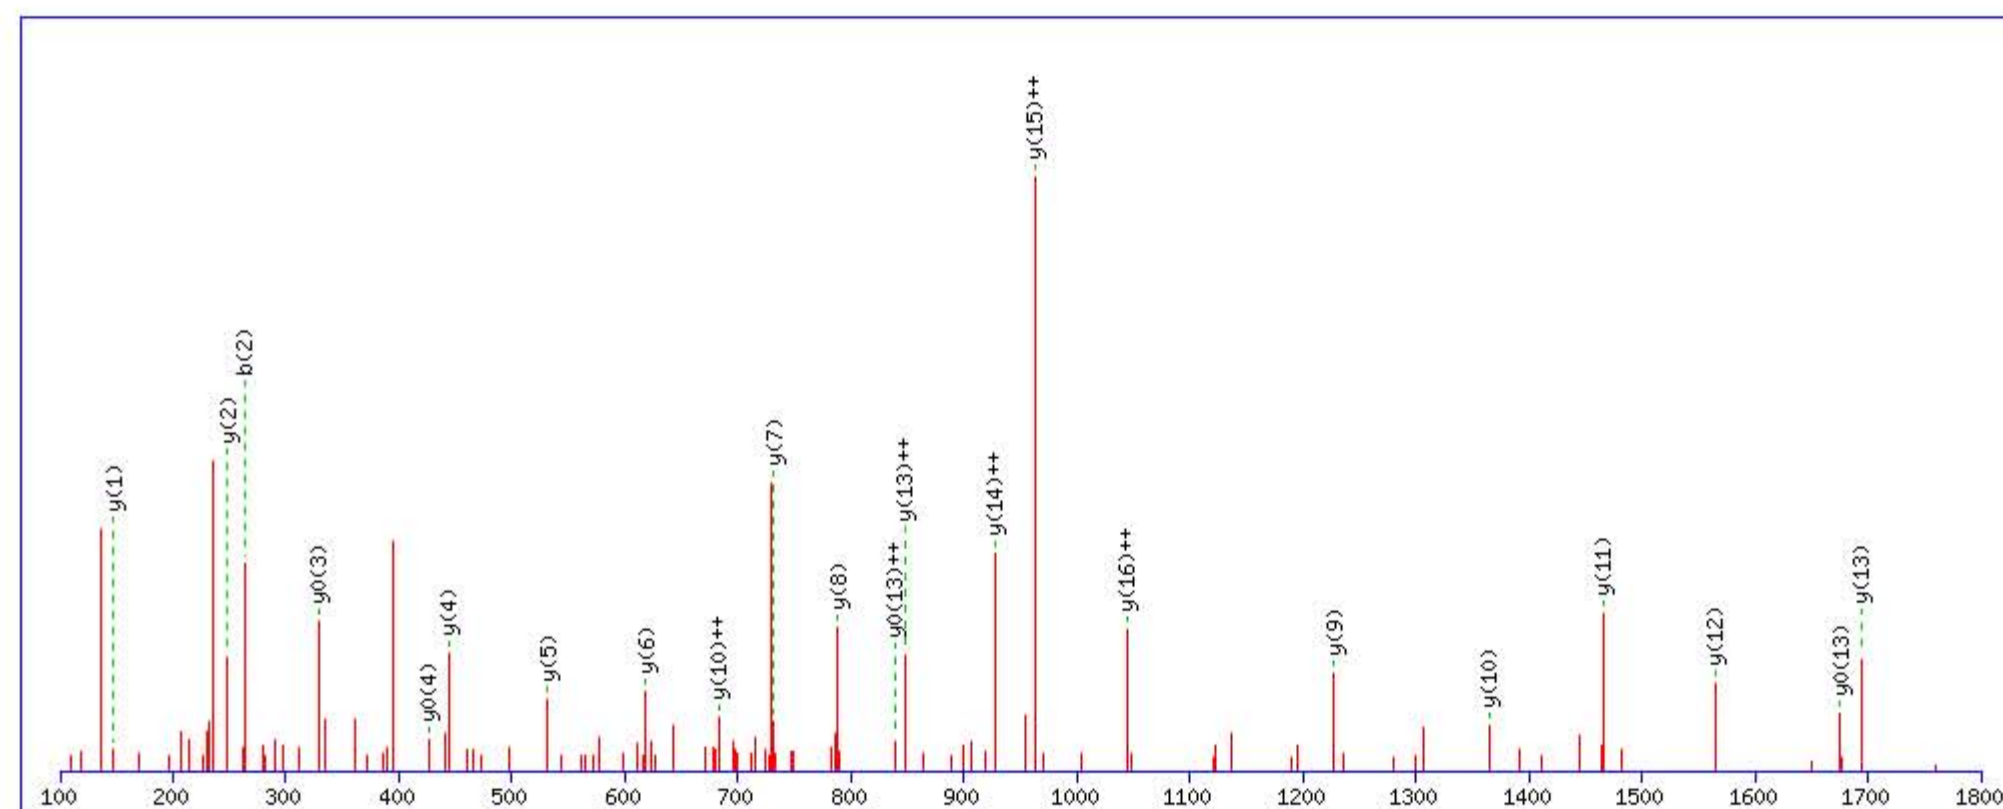

Monoisotopic mass of neutral peptide Mr(calc): 2186.086411

Fixed modifications: Carbamidomethyl (C) (apply to specified residues or termini only)

Variable modifications:

Q9 : Biotin:Thermo-21345 (Q)

Ions Score: 65 Expect: 8.3e-006

Matches : 22/166 fragment ions using 46 most intense peaks [\(help\)](#)

| #  | b           | b <sup>++</sup> | b <sup>*</sup> | b <sup>+++</sup> | b <sup>0</sup> | b <sup>0++</sup> | Seq. | y           | y <sup>++</sup> | y <sup>*</sup> | y <sup>+++</sup> | y <sup>0</sup> | y <sup>0++</sup> | #  |
|----|-------------|-----------------|----------------|------------------|----------------|------------------|------|-------------|-----------------|----------------|------------------|----------------|------------------|----|
| 1  | 100.075690  | 50.541483       |                |                  |                |                  | V    |             |                 |                |                  |                |                  | 17 |
| 2  | 263.139019  | 132.073148      |                |                  |                |                  | Y    | 2088.025261 | 1044.516268     | 2070.998712    | 1036.002994      | 2070.014696    | 1035.510986      | 16 |
| 3  | 334.176133  | 167.591704      |                |                  |                |                  | A    | 1924.961932 | 962.984604      | 1907.935383    | 954.471330       | 1906.951367    | 953.979322       | 15 |
| 4  | 494.206782  | 247.607029      |                |                  |                |                  | C    | 1853.924818 | 927.466047      | 1836.898269    | 918.952773       | 1835.914253    | 918.460765       | 14 |
| 5  | 623.249375  | 312.128326      |                |                  | 605.238810     | 303.123043       | E    | 1693.894169 | 847.450723      | 1676.867620    | 838.937448       | 1675.883604    | 838.445440       | 13 |
| 6  | 722.317789  | 361.662533      |                |                  | 704.307224     | 352.657250       | V    | 1564.851576 | 782.929426      | 1547.825027    | 774.416152       | 1546.841011    | 773.924144       | 12 |
| 7  | 823.365468  | 412.186372      |                |                  | 805.354903     | 403.181090       | T    | 1465.783162 | 733.395219      | 1448.756613    | 724.881945       | 1447.772597    | 724.389937       | 11 |
| 8  | 960.424380  | 480.715828      |                |                  | 942.413815     | 471.710546       | H    | 1364.735483 | 682.871380      | 1347.708934    | 674.358105       | 1346.724918    | 673.866097       | 10 |
| 9  | 1399.649706 | 700.328491      | 1382.623157    | 691.815217       | 1381.639141    | 691.323208       | Q    | 1227.676571 | 614.341924      | 1210.650022    | 605.828649       | 1209.666006    | 605.336641       | 9  |
| 10 | 1456.671170 | 728.839223      | 1439.644621    | 720.325948       | 1438.660605    | 719.833940       | G    | 788.451245  | 394.729261      | 771.424696     | 386.215986       | 770.440680     | 385.723978       | 8  |
| 11 | 1569.755234 | 785.381255      | 1552.728685    | 776.867980       | 1551.744669    | 776.375972       | L    | 731.429781  | 366.218529      | 714.403232     | 357.705254       | 713.419216     | 357.213246       | 7  |
| 12 | 1656.787262 | 828.897269      | 1639.760713    | 820.383994       | 1638.776697    | 819.891986       | S    | 618.345717  | 309.676497      | 601.319168     | 301.163222       | 600.335152     | 300.671214       | 6  |
| 13 | 1743.819290 | 872.413283      | 1726.792741    | 863.900009       | 1725.808725    | 863.408000       | S    | 531.313689  | 266.160483      | 514.287140     | 257.647208       | 513.303124     | 257.155200       | 5  |
| 14 | 1840.872054 | 920.939665      | 1823.845505    | 912.426391       | 1822.861489    | 911.934382       | P    | 444.281661  | 222.644469      | 427.255112     | 214.131194       | 426.271096     | 213.639186       | 4  |
| 15 | 1939.940468 | 970.473872      | 1922.913919    | 961.960598       | 1921.929903    | 961.468590       | V    | 347.228897  | 174.118087      | 330.202348     | 165.604812       | 329.218332     | 165.112804       | 3  |
| 16 | 2040.988147 | 1020.997712     | 2023.961598    | 1012.484437      | 2022.977582    | 1011.992429      | T    | 248.160483  | 124.583880      | 231.133934     | 116.070605       | 230.149918     | 115.578597       | 2  |
| 17 |             |                 |                |                  |                |                  | K    | 147.112804  | 74.060040       | 130.086255     | 65.546766        |                |                  | 1  |

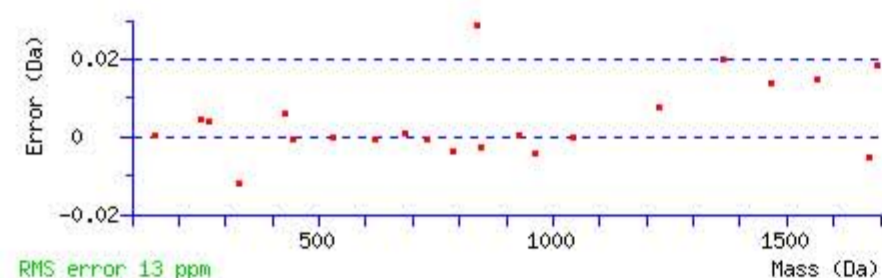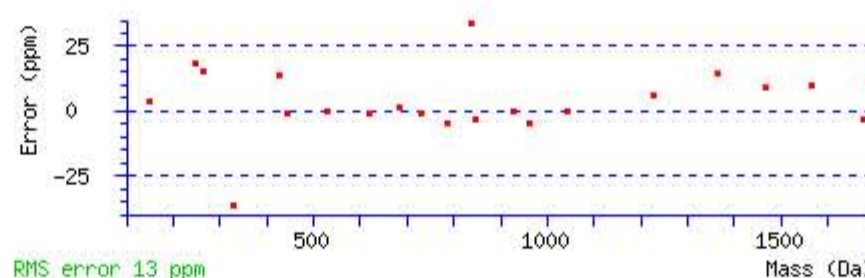

NCBI BLAST search of [VYACEVTHQGLSSPVTK](#)

(Parameters: blastp, nr protein database, expect=20000, no filter, PAM30)

Other BLAST [web gateways](#)

All matches to this query

| Score | Mr(calc):   | Delta     | Sequence                          |
|-------|-------------|-----------|-----------------------------------|
| 65.2  | 2186.086411 | -0.002299 | <a href="#">VYACEVTHQGLSSPVTK</a> |

Mascot: <http://www.matrixscience.com/>



# MASCOT Search Results

## Peptide View

MS/MS Fragmentation of **TVAAPSVFIFPPSDEQLK**

Found in **IGKC\_HUMAN**, Ig kappa chain C region OS=Homo sapiens GN=IGKC PE=1 SV=1

Match to Query 52106: 2256.193482 from(753.071770,3+) rtinseconds(2679) index(72593)

Title: Locus:1.1.1.1870.13 File:"2013-07-02 CLN FXIII 60 min 2nd FT.wiff"

Data file C:\Program Files (x86)\Matrix Science\Mascot Daemon\mgf\5 FXIII 60 min 2nd\mascot\_daemon\_merge.mgf

Click mouse within plot area to zoom in by factor of two about that point

Or, Plot from  to  Da

Label all possible matches  Label matches used for scoring

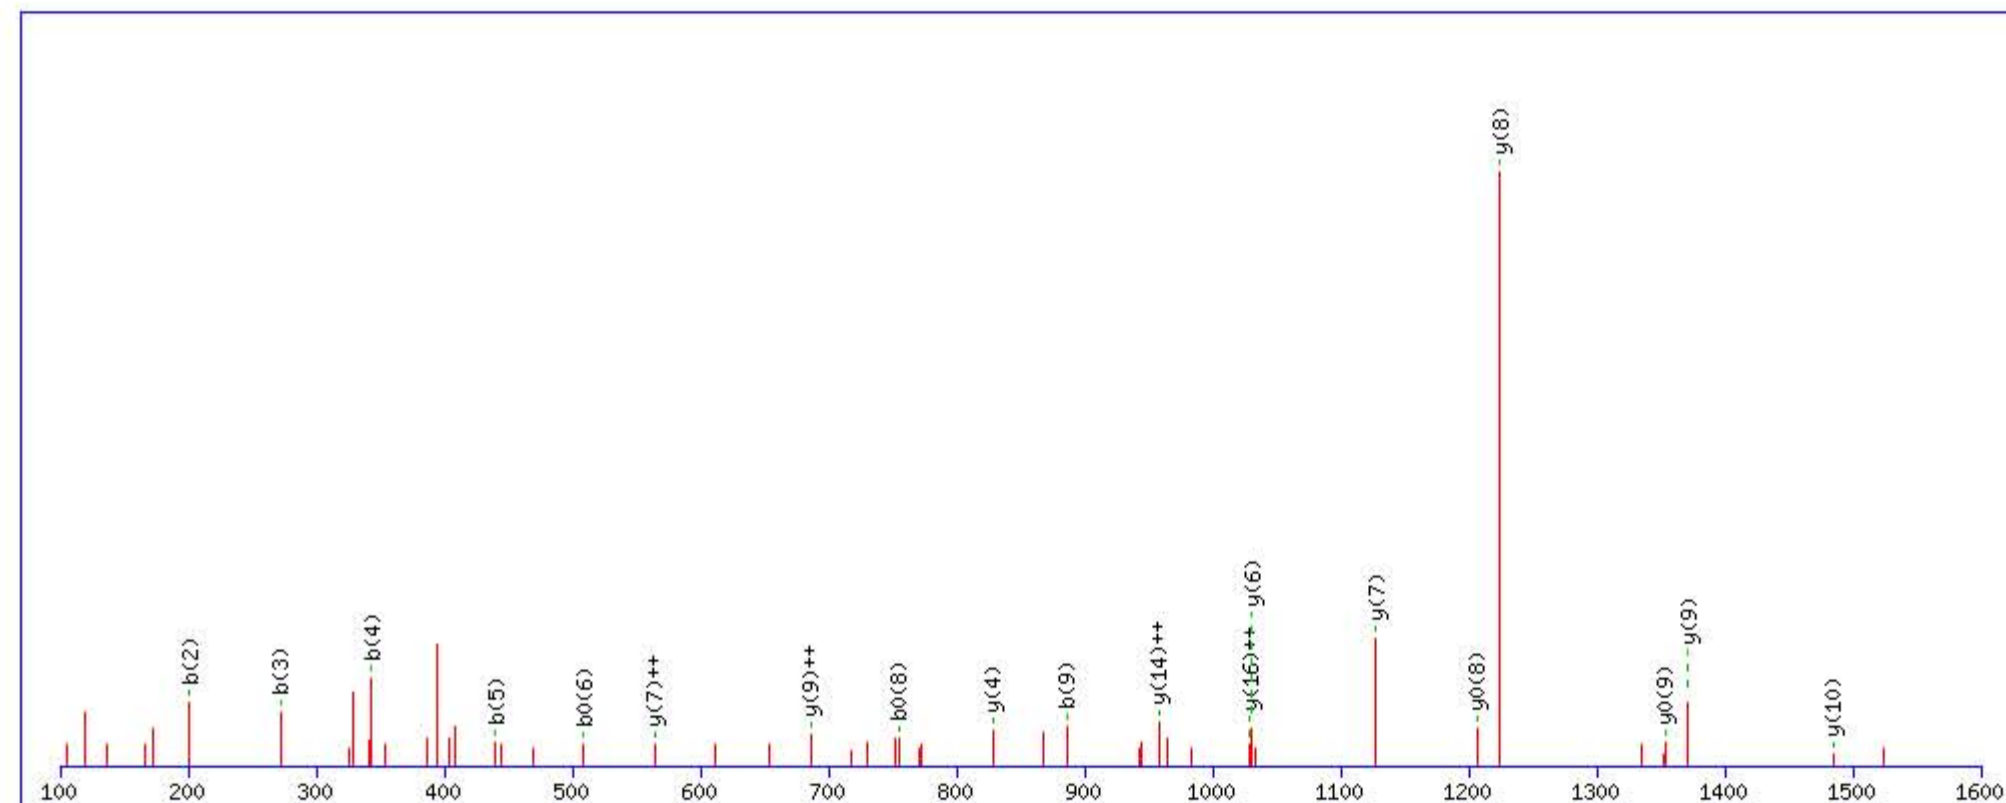

Monoisotopic mass of neutral peptide Mr(calc): 2256.186432

Fixed modifications: Carbamidomethyl (C) (apply to specified residues or termini only)

Variable modifications:

Q16 : Biotin:Thermo-21345 (Q)

Ions Score: 47 Expect: 7.5e-005

Matches : 19/168 fragment ions using 26 most intense peaks [\(help\)](#)

| #  | b                 | b <sup>++</sup> | b <sup>+</sup> | b <sup>+++</sup> | b <sup>0</sup>    | b <sup>0++</sup> | Seq. | y                  | y <sup>++</sup>    | y <sup>+</sup> | y <sup>+++</sup> | y <sup>0</sup>     | y <sup>0++</sup> | #  |
|----|-------------------|-----------------|----------------|------------------|-------------------|------------------|------|--------------------|--------------------|----------------|------------------|--------------------|------------------|----|
| 1  | 102.054955        | 51.531116       |                |                  | 84.044390         | 42.525833        | T    |                    |                    |                |                  |                    |                  | 18 |
| 2  | <b>201.123369</b> | 101.065322      |                |                  | 183.112804        | 92.060040        | V    | 2156.146026        | 1078.576651        | 2139.119477    | 1070.063377      | 2138.135461        | 1069.571369      | 17 |
| 3  | <b>272.160483</b> | 136.583879      |                |                  | 254.149918        | 127.578597       | A    | 2057.077612        | <b>1029.042444</b> | 2040.051063    | 1020.529170      | 2039.067047        | 1020.037162      | 16 |
| 4  | <b>343.197597</b> | 172.102437      |                |                  | 325.187032        | 163.097154       | A    | 1986.040498        | 993.523887         | 1969.013949    | 985.010613       | 1968.029933        | 984.518605       | 15 |
| 5  | <b>440.250361</b> | 220.628819      |                |                  | 422.239796        | 211.623536       | P    | 1915.003384        | <b>958.005330</b>  | 1897.976835    | 949.492056       | 1896.992819        | 949.000048       | 14 |
| 6  | 527.282389        | 264.144833      |                |                  | <b>509.271824</b> | 255.139550       | S    | 1817.950620        | 909.478948         | 1800.924071    | 900.965674       | 1799.940055        | 900.473666       | 13 |
| 7  | 626.350803        | 313.679040      |                |                  | 608.340238        | 304.673757       | V    | 1730.918592        | 865.962934         | 1713.892043    | 857.449660       | 1712.908027        | 856.957652       | 12 |
| 8  | 773.419217        | 387.213247      |                |                  | <b>755.408652</b> | 378.207964       | F    | 1631.850178        | 816.428727         | 1614.823629    | 807.915453       | 1613.839613        | 807.423445       | 11 |
| 9  | <b>886.503281</b> | 443.755279      |                |                  | 868.492716        | 434.749996       | I    | <b>1484.781764</b> | 742.894520         | 1467.755215    | 734.381246       | 1466.771199        | 733.889238       | 10 |
| 10 | 1033.571695       | 517.289486      |                |                  | 1015.561130       | 508.284203       | F    | <b>1371.697700</b> | <b>686.352488</b>  | 1354.671151    | 677.839214       | <b>1353.687135</b> | 677.347206       | 9  |
| 11 | 1130.624459       | 565.815868      |                |                  | 1112.613894       | 556.810585       | P    | <b>1224.629286</b> | 612.818281         | 1207.602737    | 604.305007       | <b>1206.618721</b> | 603.812999       | 8  |
| 12 | 1227.677223       | 614.342250      |                |                  | 1209.666658       | 605.336967       | P    | <b>1127.576522</b> | <b>564.291899</b>  | 1110.549973    | 555.778625       | 1109.565957        | 555.286617       | 7  |
| 13 | 1314.709251       | 657.858264      |                |                  | 1296.698686       | 648.852981       | S    | <b>1030.523758</b> | 515.765517         | 1013.497209    | 507.252243       | 1012.513193        | 506.760235       | 6  |
| 14 | 1429.736194       | 715.371735      |                |                  | 1411.725629       | 706.366453       | D    | 943.491730         | 472.249503         | 926.465181     | 463.736229       | 925.481165         | 463.244221       | 5  |
| 15 | 1558.778787       | 779.893032      |                |                  | 1540.768222       | 770.887749       | E    | <b>828.464787</b>  | 414.736032         | 811.438238     | 406.222757       | 810.454222         | 405.730749       | 4  |
| 16 | 1998.004113       | 999.505695      | 1980.977564    | 990.992420       | 1979.993548       | 990.500412       | Q    | 699.422194         | 350.214735         | 682.395645     | 341.701461       |                    |                  | 3  |
| 17 | 2111.088177       | 1056.047727     | 2094.061628    | 1047.534452      | 2093.077612       | 1047.042444      | L    | 260.196868         | 130.602072         | 243.170319     | 122.088798       |                    |                  | 2  |
| 18 |                   |                 |                |                  |                   |                  | K    | 147.112804         | 74.060040          | 130.086255     | 65.546765        |                    |                  | 1  |

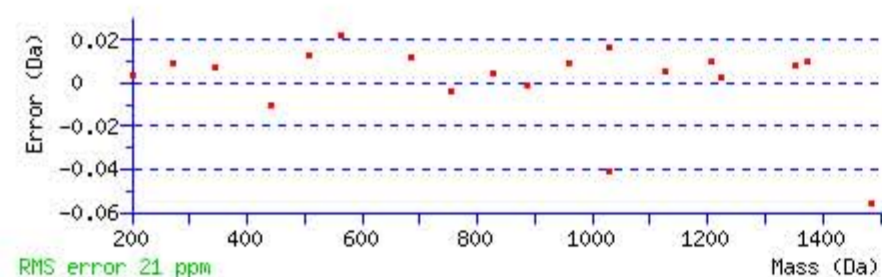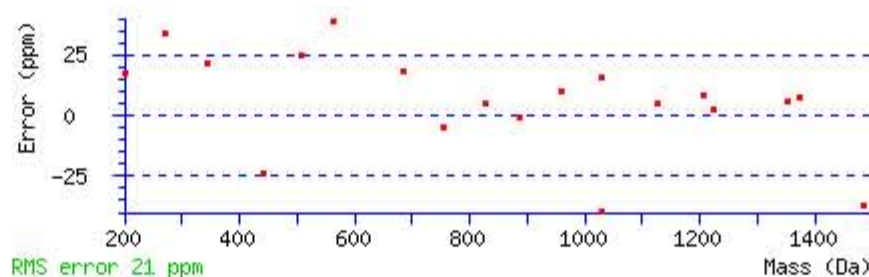

NCBI BLAST search of [TVAAPSVFIFPPSDEQLK](#)

(Parameters: blastp, nr protein database, expect=20000, no filter, PAM30)

Other BLAST [web gateways](#)

All matches to this query

| Score | Mr(calc):   | Delta    | Sequence                              |
|-------|-------------|----------|---------------------------------------|
| 47.4  | 2256.186432 | 0.007050 | <a href="#">TVAAPSVFIFPPSDEQLK</a>    |
| 3.5   | 2256.171860 | 0.021622 | <a href="#">QVVCDLGNPMKAGTQLLAGLR</a> |

Mascot: <http://www.matrixscience.com/>



# MASCOT SEARCH RESULTS

## Peptide View

MS/MS Fragmentation of **LICQATGFSPR**

Found in **IGHM\_HUMAN**, Ig mu chain C region OS=Homo sapiens GN=IGHM PE=1 SV=3

Match to Query 35292: 1559.799568 from(780.907060,2+) rtinseconds(1978) index(36286)

Title: Locus:1.1.1.3108.11 File:"2013-07-02 CLN FXIII 60 min 2nd F 3.wiff"

Data file C:\Program Files (x86)\Matrix Science\Mascot Daemon\mgf\5 FXIII 60 min 2nd\mascot\_daemon\_merge.mgf

Click mouse within plot area to zoom in by factor of two about that point

Or, Plot from  to  Da

Label all possible matches  Label matches used for scoring

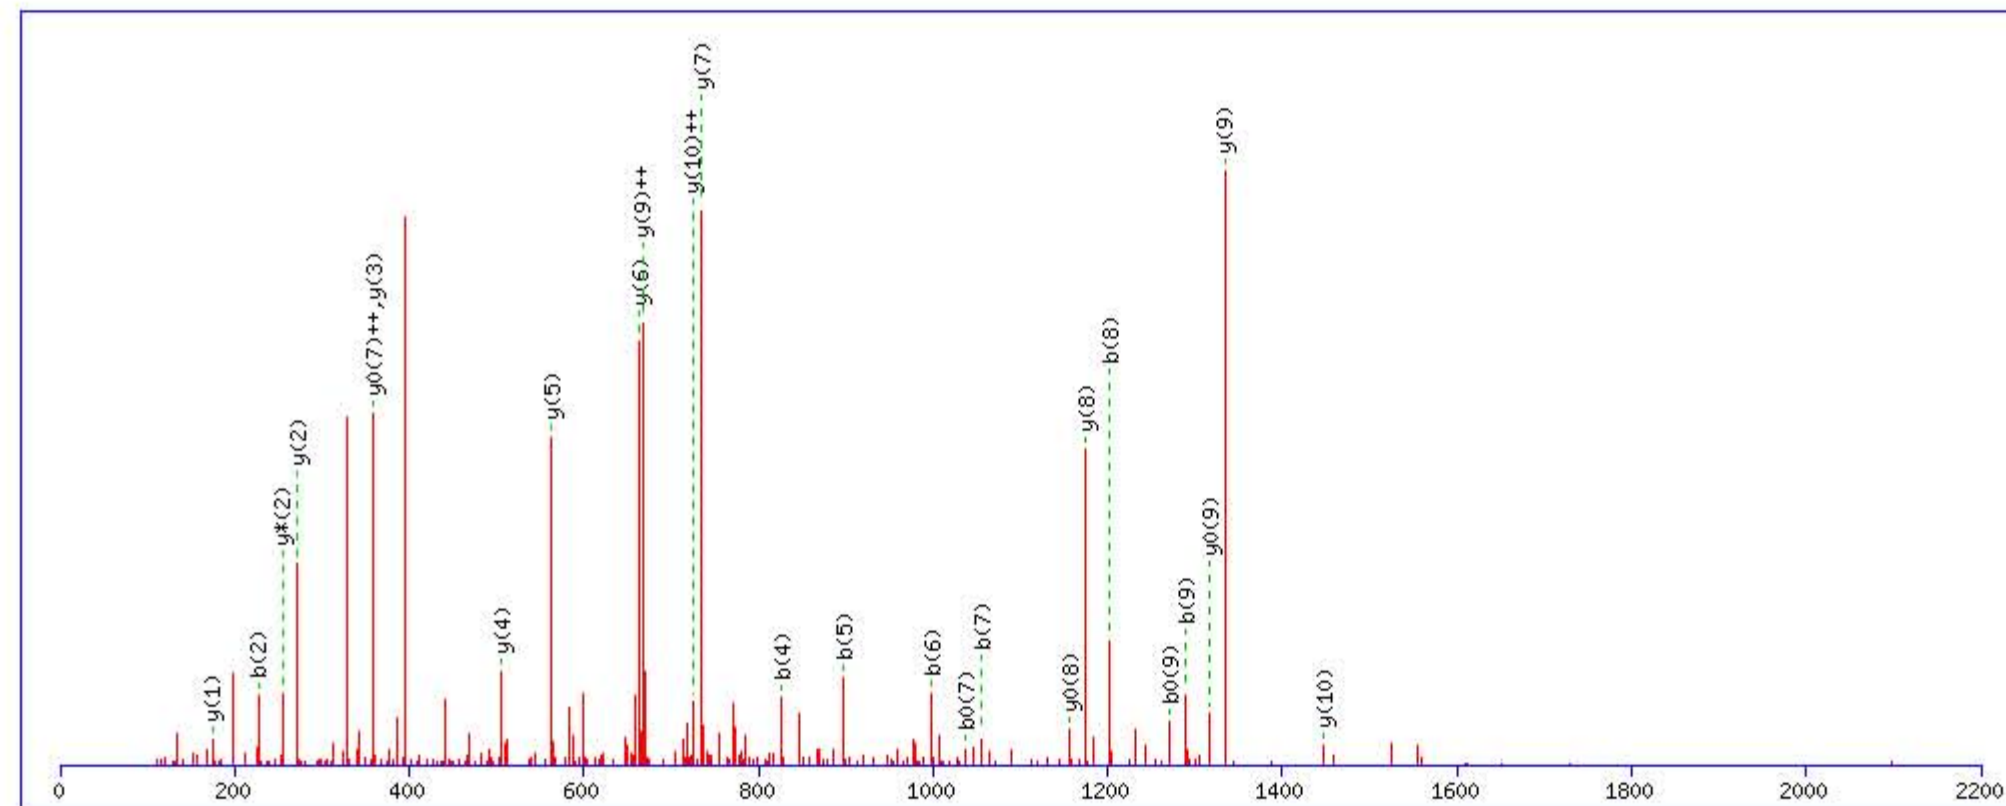

Monoisotopic mass of neutral peptide Mr(calc): 1559.795242

Fixed modifications: Carbamidomethyl (C) (apply to specified residues or termini only)

Variable modifications:

Q4 : Biotin:Thermo-21345 (Q)

Ions Score: 66 Expect: 6.5e-006

Matches : 25/100 fragment ions using 44 most intense peaks [\(help\)](#)

| #  | b                  | b <sup>++</sup> | b <sup>+</sup> | b <sup>+++</sup> | b <sup>0</sup>     | b <sup>0++</sup> | Seq. | y                  | y <sup>++</sup>   | y <sup>+</sup>    | y <sup>+++</sup> | y <sup>0</sup>     | y <sup>0++</sup>  | #  |
|----|--------------------|-----------------|----------------|------------------|--------------------|------------------|------|--------------------|-------------------|-------------------|------------------|--------------------|-------------------|----|
| 1  | 114.091340         | 57.549308       |                |                  |                    |                  | L    |                    |                   |                   |                  |                    |                   | 11 |
| 2  | <b>227.175404</b>  | 114.091340      |                |                  |                    |                  | I    | <b>1447.718454</b> | <b>724.362865</b> | 1430.691905       | 715.849591       | 1429.707889        | 715.357583        | 10 |
| 3  | 387.206053         | 194.106664      |                |                  |                    |                  | C    | <b>1334.634390</b> | <b>667.820833</b> | 1317.607841       | 659.307559       | <b>1316.623825</b> | 658.815551        | 9  |
| 4  | <b>826.431379</b>  | 413.719328      | 809.404830     | 405.206053       |                    |                  | Q    | <b>1174.603741</b> | 587.805509        | 1157.577192       | 579.292234       | <b>1156.593176</b> | 578.800226        | 8  |
| 5  | <b>897.468493</b>  | 449.237885      | 880.441944     | 440.724610       |                    |                  | A    | <b>735.378415</b>  | 368.192846        | 718.351866        | 359.679571       | 717.367850         | <b>359.187563</b> | 7  |
| 6  | <b>998.516172</b>  | 499.761724      | 981.489623     | 491.248449       | 980.505607         | 490.756441       | T    | <b>664.341301</b>  | 332.674289        | 647.314752        | 324.161014       | 646.330736         | 323.669006        | 6  |
| 7  | <b>1055.537636</b> | 528.272456      | 1038.511087    | 519.759182       | <b>1037.527071</b> | 519.267174       | G    | <b>563.293622</b>  | 282.150449        | 546.267073        | 273.637175       | 545.283057         | 273.145167        | 5  |
| 8  | <b>1202.606050</b> | 601.806663      | 1185.579501    | 593.293389       | 1184.595485        | 592.801381       | F    | <b>506.272158</b>  | 253.639717        | 489.245609        | 245.126443       | 488.261593         | 244.634435        | 4  |
| 9  | <b>1289.638078</b> | 645.322677      | 1272.611529    | 636.809403       | <b>1271.627513</b> | 636.317395       | S    | <b>359.203744</b>  | 180.105510        | 342.177195        | 171.592236       | 341.193179         | 171.100228        | 3  |
| 10 | 1386.690842        | 693.849059      | 1369.664293    | 685.335785       | 1368.680277        | 684.843777       | P    | <b>272.171716</b>  | 136.589496        | <b>255.145167</b> | 128.076221       |                    |                   | 2  |
| 11 |                    |                 |                |                  |                    |                  | R    | <b>175.118952</b>  | 88.063114         | 158.092403        | 79.549839        |                    |                   | 1  |

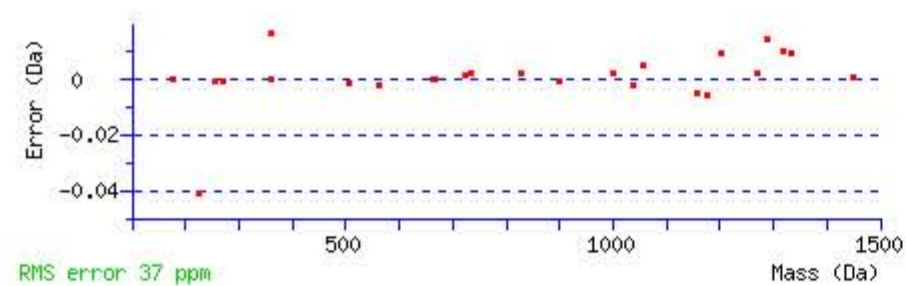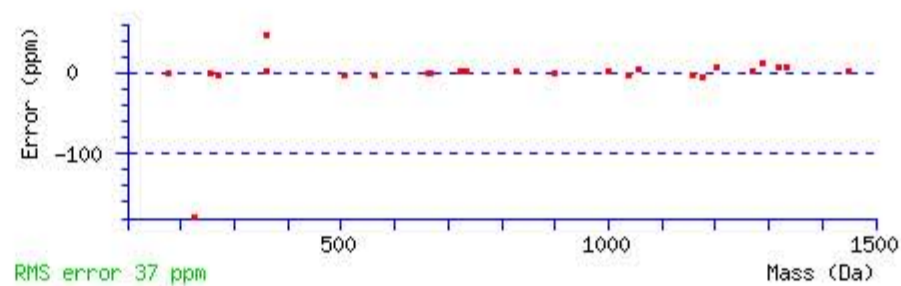

NCBI BLAST search of **LICQATGFSPR**

(Parameters: blastp, nr protein database, expect=20000, no filter, PAM30)

Other BLAST [web gateways](#)

All matches to this query

| Score | Mr(calc):   | Delta     | Sequence                          |
|-------|-------------|-----------|-----------------------------------|
| 66.3  | 1559.795242 | 0.004326  | <a href="#">LICQATGFSPR</a>       |
| 13.0  | 1559.808960 | -0.009392 | <a href="#">LDRLSGLADQMVAR</a>    |
| 8.8   | 1559.820190 | -0.020622 | <a href="#">MTRSATQAAKQVPR</a>    |
| 4.7   | 1559.808975 | -0.009407 | <a href="#">LLDRDACDTRVK</a>      |
| 1.6   | 1559.787827 | 0.011741  | <a href="#">SLHPAMPLPAADGAGPR</a> |

Mascot: <http://www.matrixscience.com/>



# MASCOT Search Results

## Peptide View

MS/MS Fragmentation of **YAATSQVLLPSK**

Found in **IGHM\_HUMAN**, Ig mu chain C region OS=Homo sapiens GN=IGHM PE=1 SV=3

Match to Query 36571: 1587.868092 from(530.296640,3+) rtinseconds(2041) index(36644)

Title: Locus:1.1.1.3130.12 File:"2013-07-02 CLN FXIII 60 min 2nd F 3.wiff"

Data file C:\Program Files (x86)\Matrix Science\Mascot Daemon\mgf\5 FXIII 60 min 2nd\mascot\_daemon\_merge.mgf

Click mouse within plot area to zoom in by factor of two about that point

Or, Plot from  to  Da

Label all possible matches  Label matches used for scoring

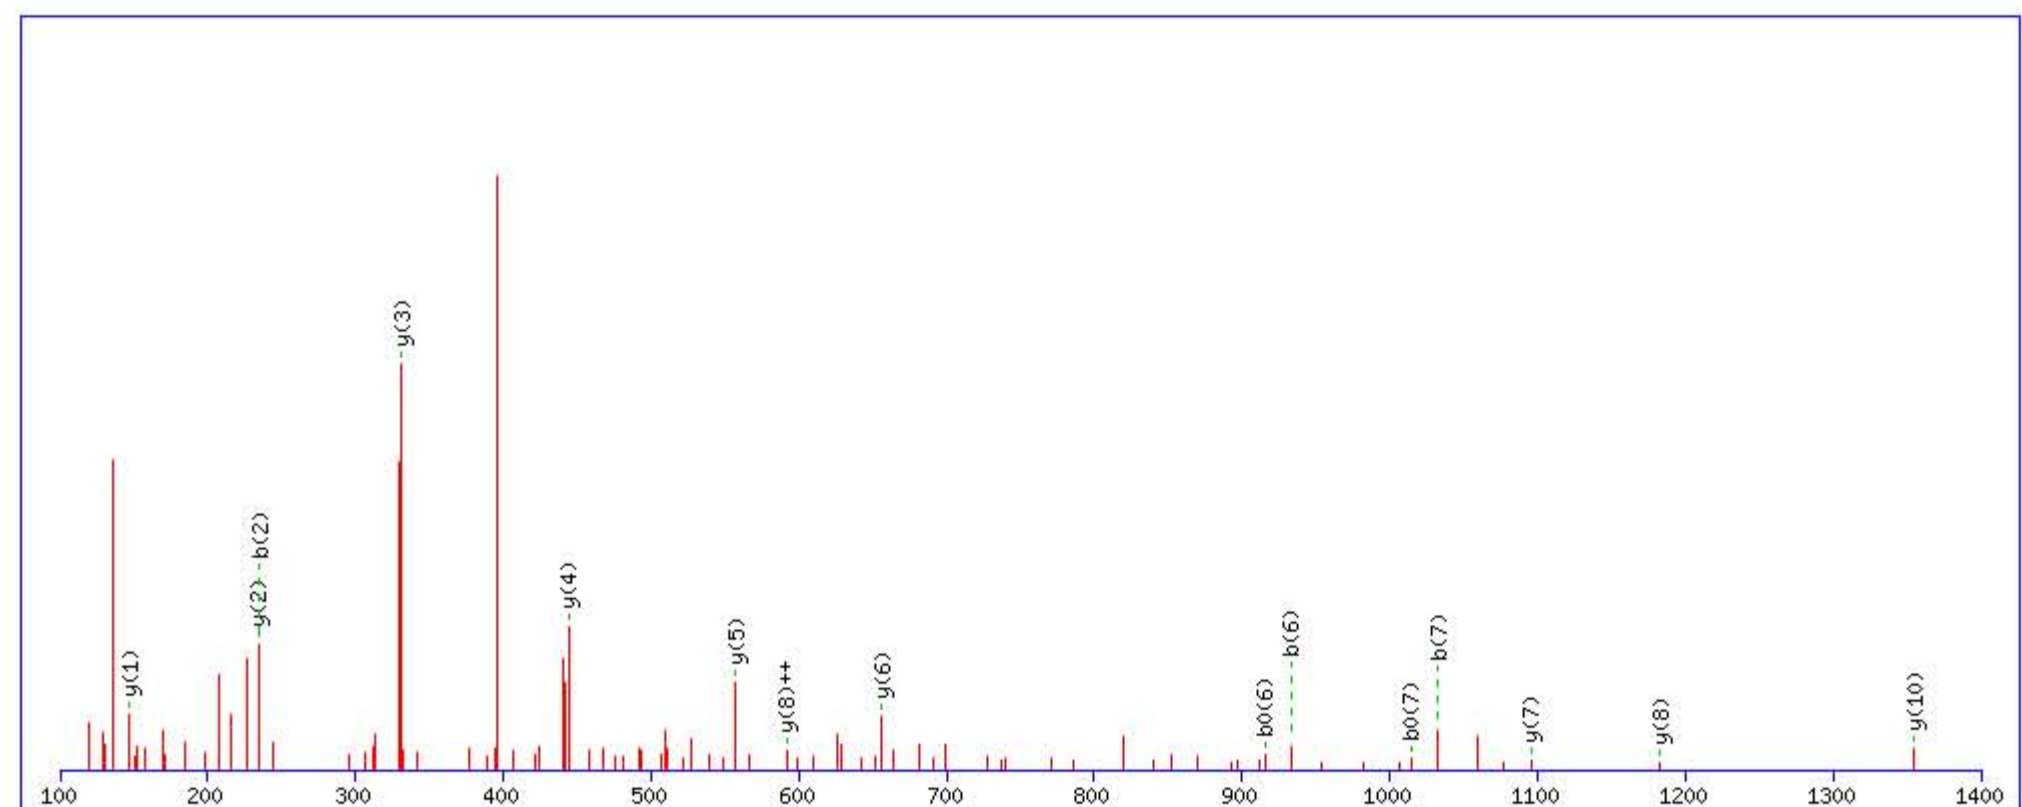

Monoisotopic mass of neutral peptide Mr(calc): 1587.869431

Fixed modifications: Carbamidomethyl (C) (apply to specified residues or termini only)

Variable modifications:

Q6 : Biotin:Thermo-21345 (Q)

Ions Score: 47 Expect: 0.00011

Matches : 15/114 fragment ions using 32 most intense peaks [\(help\)](#)

| #  | b                  | b <sup>++</sup> | b <sup>+</sup> | b <sup>+++</sup> | b <sup>0</sup>     | b <sup>0++</sup> | Seq. | y                  | y <sup>++</sup>   | y <sup>+</sup> | y <sup>+++</sup> | y <sup>0</sup> | y <sup>0++</sup> | #  |
|----|--------------------|-----------------|----------------|------------------|--------------------|------------------|------|--------------------|-------------------|----------------|------------------|----------------|------------------|----|
| 1  | 164.070605         | 82.538940       |                |                  |                    |                  | Y    |                    |                   |                |                  |                |                  | 12 |
| 2  | <b>235.107719</b>  | 118.057498      |                |                  |                    |                  | A    | 1425.813399        | 713.410337        | 1408.786850    | 704.897063       | 1407.802834    | 704.405055       | 11 |
| 3  | 306.144833         | 153.576055      |                |                  |                    |                  | A    | <b>1354.776285</b> | 677.891780        | 1337.749736    | 669.378506       | 1336.765720    | 668.886498       | 10 |
| 4  | 407.192512         | 204.099894      |                |                  | 389.181947         | 195.094612       | T    | 1283.739171        | 642.373223        | 1266.712622    | 633.859949       | 1265.728606    | 633.367941       | 9  |
| 5  | 494.224540         | 247.615908      |                |                  | 476.213975         | 238.610626       | S    | <b>1182.691492</b> | <b>591.849384</b> | 1165.664943    | 583.336110       | 1164.680927    | 582.844101       | 8  |
| 6  | <b>933.449866</b>  | 467.228571      | 916.423317     | 458.715297       | <b>915.439301</b>  | 458.223289       | Q    | <b>1095.659464</b> | 548.333370        | 1078.632915    | 539.820096       | 1077.648899    | 539.328088       | 7  |
| 7  | <b>1032.518280</b> | 516.762778      | 1015.491731    | 508.249504       | <b>1014.507715</b> | 507.757496       | V    | <b>656.434138</b>  | 328.720707        | 639.407589     | 320.207432       | 638.423573     | 319.715424       | 6  |
| 8  | 1145.602344        | 573.304810      | 1128.575795    | 564.791536       | 1127.591779        | 564.299527       | L    | <b>557.365724</b>  | 279.186500        | 540.339175     | 270.673226       | 539.355159     | 270.181218       | 5  |
| 9  | 1258.686408        | 629.846842      | 1241.659859    | 621.333567       | 1240.675843        | 620.841559       | L    | <b>444.281660</b>  | 222.644468        | 427.255111     | 214.131193       | 426.271095     | 213.639186       | 4  |
| 10 | 1355.739172        | 678.373224      | 1338.712623    | 669.859949       | 1337.728607        | 669.367941       | P    | <b>331.197596</b>  | 166.102436        | 314.171047     | 157.589162       | 313.187031     | 157.097154       | 3  |
| 11 | 1442.771200        | 721.889238      | 1425.744651    | 713.375964       | 1424.760635        | 712.883955       | S    | <b>234.144832</b>  | 117.576054        | 217.118283     | 109.062780       | 216.134267     | 108.570772       | 2  |
| 12 |                    |                 |                |                  |                    |                  | K    | <b>147.112804</b>  | 74.060040         | 130.086255     | 65.546765        |                |                  | 1  |

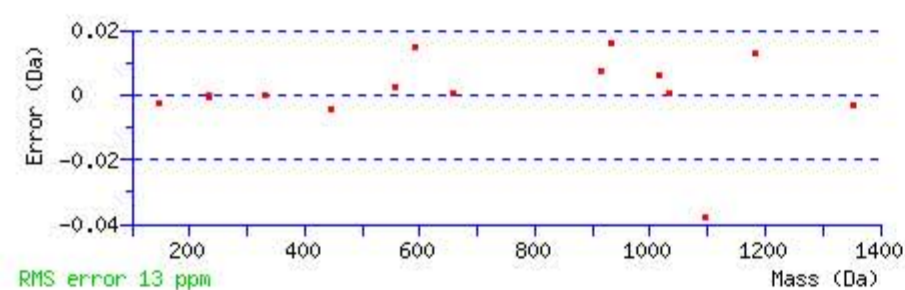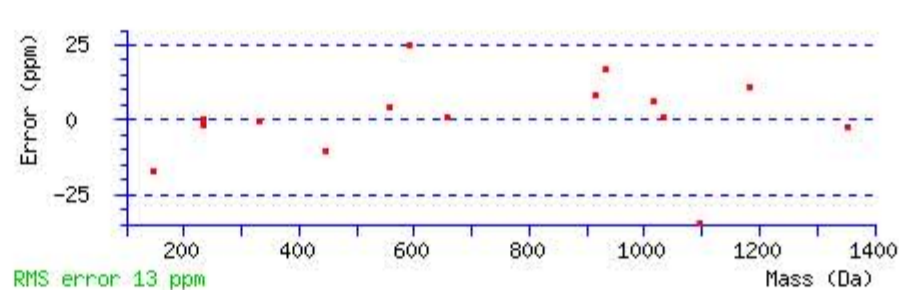

NCBI BLAST search of [YAATSQVLLPSK](#)

(Parameters: blastp, nr protein database, expect=20000, no filter, PAM30)

Other BLAST [web gateways](#)

All matches to this query

| Score | Mr(calc):   | Delta     | Sequence                        |
|-------|-------------|-----------|---------------------------------|
| 47.1  | 1587.869431 | -0.001339 | <a href="#">YAATSQVLLPSK</a>    |
| 4.4   | 1587.890533 | -0.022441 | <a href="#">EPTTKAEMLKIIISK</a> |
| 4.4   | 1587.862045 | 0.006047  | <a href="#">VTGQNQEQLLLAK</a>   |
| 4.1   | 1587.865402 | 0.002690  | <a href="#">ENGLRDILAVLTMK</a>  |
| 3.2   | 1587.891220 | -0.023128 | <a href="#">TIQTIVFLYSLYK</a>   |
| 2.0   | 1587.854187 | 0.013905  | <a href="#">VSPLQKSEVEMVK</a>   |
| 1.4   | 1587.862045 | 0.006047  | <a href="#">DGASLSPATLFIQIR</a> |
| 0.4   | 1587.858002 | 0.010090  | <a href="#">LSQEQTLQALRSSK</a>  |

Mascot: <http://www.matrixscience.com/>



# MASCOT Search Results

## Peptide View

MS/MS Fragmentation of **LICQATGFSPR**

Found in **IGHM\_HUMAN**, Ig mu chain C region OS=Homo sapiens GN=IGHM PE=1 SV=3

Match to Query 35292: 1559.799568 from(780.907060,2+) rtinseconds(1978) index(36286)

Title: Locus:1.1.1.3108.11 File:"2013-07-02 CLN FXIII 60 min 2nd F 3.wiff"

Data file C:\Program Files (x86)\Matrix Science\Mascot Daemon\mgf\5 FXIII 60 min 2nd\mascot\_daemon\_merge.mgf

Click mouse within plot area to zoom in by factor of two about that point

Or, Plot from  to  Da

Label all possible matches  Label matches used for scoring

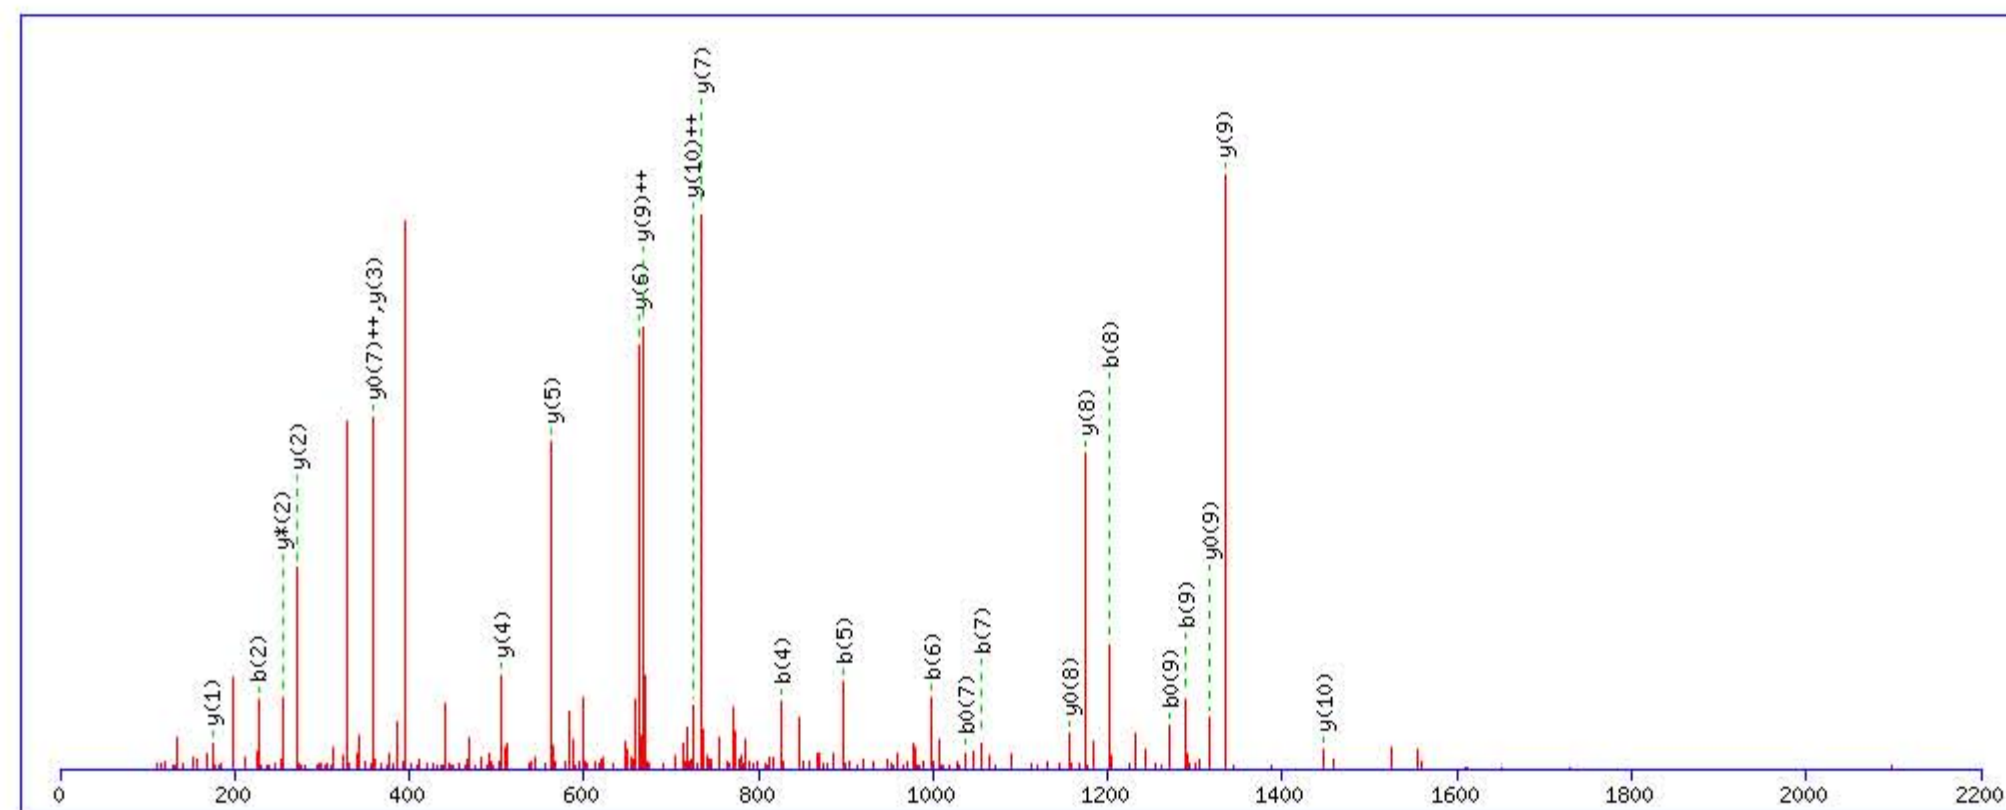

Monoisotopic mass of neutral peptide Mr(calc): 1559.795242

Fixed modifications: Carbamidomethyl (C) (apply to specified residues or termini only)

Variable modifications:

Q4 : Biotin:Thermo-21345 (Q)

Ions Score: 66 Expect: 6.5e-006

Matches : 25/100 fragment ions using 44 most intense peaks [\(help\)](#)

| #  | b                  | b <sup>++</sup> | b <sup>+</sup> | b <sup>+++</sup> | b <sup>0</sup>     | b <sup>0++</sup> | Seq. | y                  | y <sup>++</sup>   | y <sup>+</sup>    | y <sup>+++</sup> | y <sup>0</sup>     | y <sup>0++</sup>  | #  |
|----|--------------------|-----------------|----------------|------------------|--------------------|------------------|------|--------------------|-------------------|-------------------|------------------|--------------------|-------------------|----|
| 1  | 114.091340         | 57.549308       |                |                  |                    |                  | L    |                    |                   |                   |                  |                    |                   | 11 |
| 2  | <b>227.175404</b>  | 114.091340      |                |                  |                    |                  | I    | <b>1447.718454</b> | <b>724.362865</b> | 1430.691905       | 715.849591       | 1429.707889        | 715.357583        | 10 |
| 3  | 387.206053         | 194.106664      |                |                  |                    |                  | C    | <b>1334.634390</b> | <b>667.820833</b> | 1317.607841       | 659.307559       | <b>1316.623825</b> | 658.815551        | 9  |
| 4  | <b>826.431379</b>  | 413.719328      | 809.404830     | 405.206053       |                    |                  | Q    | <b>1174.603741</b> | 587.805509        | 1157.577192       | 579.292234       | <b>1156.593176</b> | 578.800226        | 8  |
| 5  | <b>897.468493</b>  | 449.237885      | 880.441944     | 440.724610       |                    |                  | A    | <b>735.378415</b>  | 368.192846        | 718.351866        | 359.679571       | 717.367850         | <b>359.187563</b> | 7  |
| 6  | <b>998.516172</b>  | 499.761724      | 981.489623     | 491.248449       | 980.505607         | 490.756441       | T    | <b>664.341301</b>  | 332.674289        | 647.314752        | 324.161014       | 646.330736         | 323.669006        | 6  |
| 7  | <b>1055.537636</b> | 528.272456      | 1038.511087    | 519.759182       | <b>1037.527071</b> | 519.267174       | G    | <b>563.293622</b>  | 282.150449        | 546.267073        | 273.637175       | 545.283057         | 273.145167        | 5  |
| 8  | <b>1202.606050</b> | 601.806663      | 1185.579501    | 593.293389       | 1184.595485        | 592.801381       | F    | <b>506.272158</b>  | 253.639717        | 489.245609        | 245.126443       | 488.261593         | 244.634435        | 4  |
| 9  | <b>1289.638078</b> | 645.322677      | 1272.611529    | 636.809403       | <b>1271.627513</b> | 636.317395       | S    | <b>359.203744</b>  | 180.105510        | 342.177195        | 171.592236       | 341.193179         | 171.100228        | 3  |
| 10 | 1386.690842        | 693.849059      | 1369.664293    | 685.335785       | 1368.680277        | 684.843777       | P    | <b>272.171716</b>  | 136.589496        | <b>255.145167</b> | 128.076221       |                    |                   | 2  |
| 11 |                    |                 |                |                  |                    |                  | R    | <b>175.118952</b>  | 88.063114         | 158.092403        | 79.549839        |                    |                   | 1  |

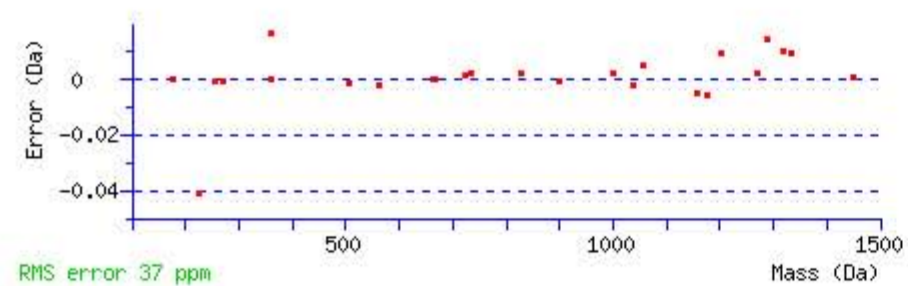

NCBI BLAST search of **LICQATGFSPR**

(Parameters: blastp, nr protein database, expect=20000, no filter, PAM30)

Other BLAST [web gateways](#)

All matches to this query

| Score | Mr(calc):   | Delta     | Sequence                         |
|-------|-------------|-----------|----------------------------------|
| 66.3  | 1559.795242 | 0.004326  | <a href="#">LICQATGFSPR</a>      |
| 13.0  | 1559.808960 | -0.009392 | <a href="#">LDRLSGLADQMVAR</a>   |
| 8.8   | 1559.820190 | -0.020622 | <a href="#">MTRSATQAAKQVPR</a>   |
| 4.7   | 1559.808975 | -0.009407 | <a href="#">LLDRDACDTRVK</a>     |
| 1.6   | 1559.787827 | 0.011741  | <a href="#">SLHPAMLPAADGAGPR</a> |

Mascot: <http://www.matrixscience.com/>



# MASCOT SEARCH RESULTS

## Peptide View

MS/MS Fragmentation of **LEQYEGPGFCGPLAPGTGGPFTTCHAHVPPESFFK**  
 Found in **FCGBP\_HUMAN**, IgGfC-binding protein OS=Homo sapiens GN=FCGBP PE=1 SV=3

Match to Query 71377: 4099.942456 from(1025.992890,4+) rtinseconds(2485) index(39361)  
 Title: Locus:1.1.1.3284.26 File:"2013-07-02 CLN FXIII 60 min 2nd F 3.wiff"  
 Data file C:\Program Files (x86)\Matrix Science\Mascot Daemon\mgf5 FXIII 60 min 2nd\mascot\_daemon\_merge.mgf

Click mouse within plot area to zoom in by factor of two about that point  
 Or, Plot from  to  Da   
 Label all possible matches  Label matches used for scoring

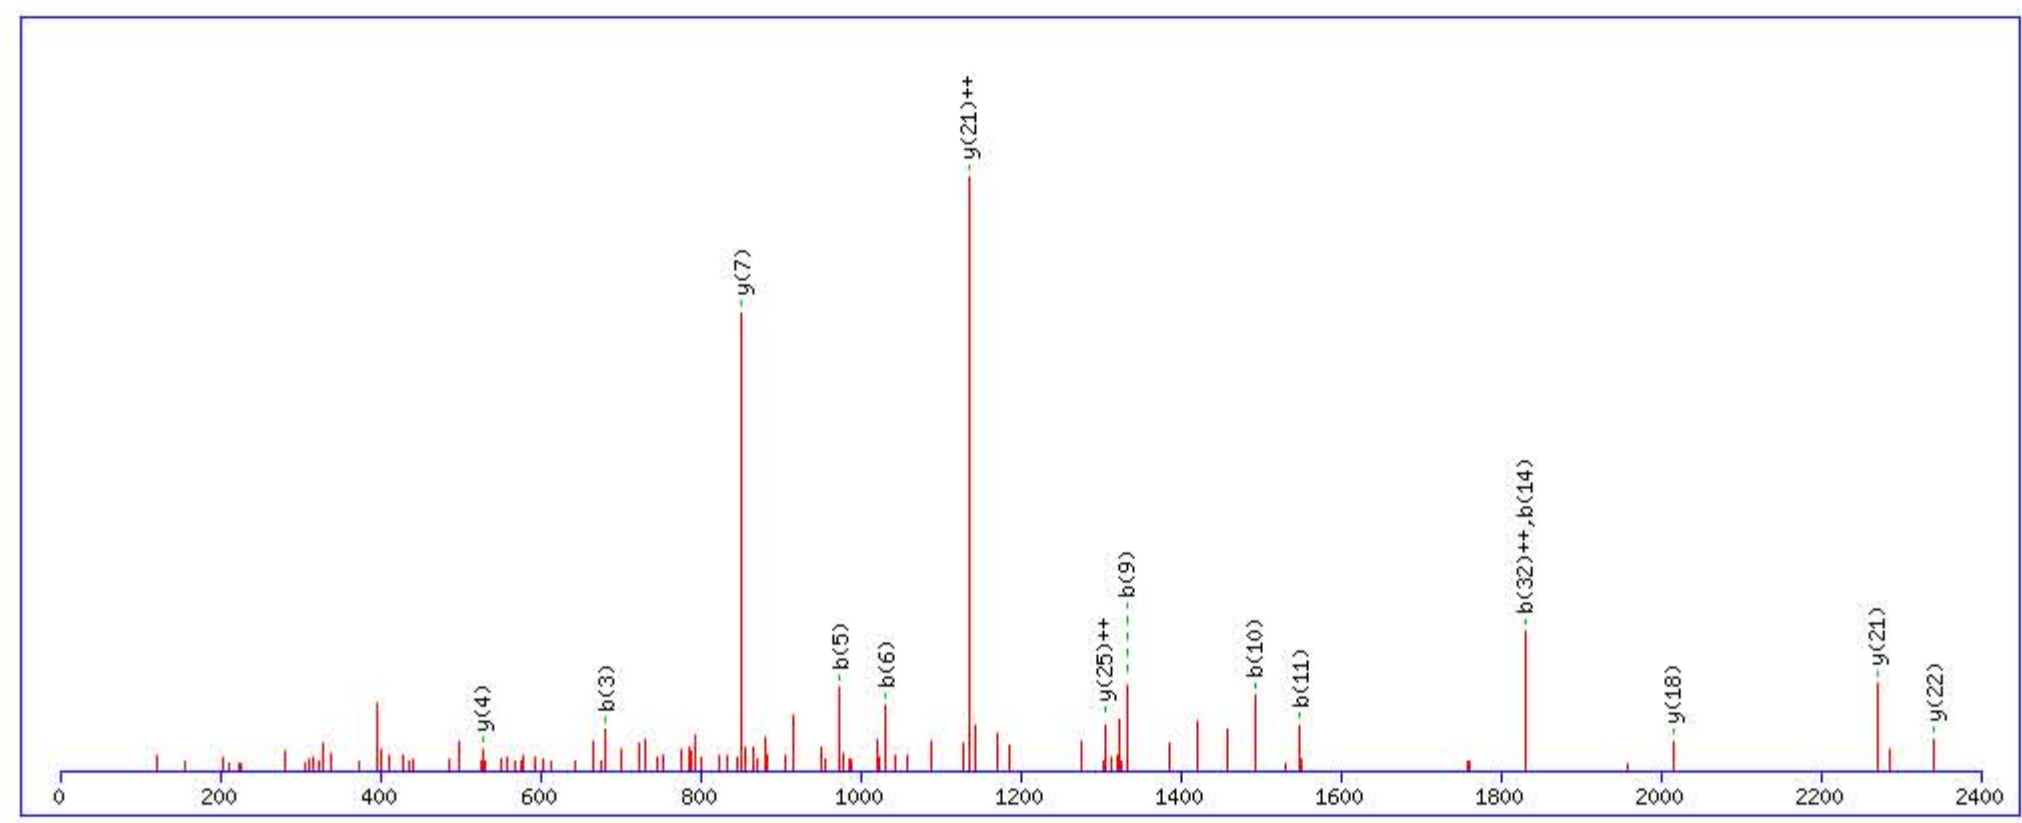

Monoisotopic mass of neutral peptide Mr(calc): 4099.905991  
 Fixed modifications: Carbamidomethyl (C) (apply to specified residues or termini only)  
 Variable modifications:  
 Q3 : Biotin:Thermo-21345 (Q)  
 Ions Score: 45 Expect: 0.00063  
 Matches : 15/396 fragment ions using 20 most intense peaks [\(help\)](#)

| #  | b                  | b <sup>++</sup>    | b <sup>*</sup> | b <sup>+++</sup> | b <sup>0</sup> | b <sup>0++</sup> | Seq. | y                  | y <sup>++</sup>    | y <sup>*</sup> | y <sup>+++</sup> | y <sup>0</sup> | y <sup>0++</sup> | #  |
|----|--------------------|--------------------|----------------|------------------|----------------|------------------|------|--------------------|--------------------|----------------|------------------|----------------|------------------|----|
| 1  | 114.091340         | 57.549308          |                |                  |                |                  | L    |                    |                    |                |                  |                |                  | 35 |
| 2  | 243.133933         | 122.070605         |                |                  | 225.123368     | 113.065322       | E    | 3987.829155        | 1994.418215        | 3970.802606    | 1985.904941      | 3969.818590    | 1985.412933      | 34 |
| 3  | <b>682.359259</b>  | 341.683268         | 665.332710     | 333.169993       | 664.348694     | 332.677985       | Q    | 3858.786562        | 1929.896919        | 3841.760013    | 1921.383644      | 3840.775997    | 1920.891636      | 33 |
| 4  | 845.422588         | 423.214932         | 828.396039     | 414.701658       | 827.412023     | 414.209650       | Y    | 3419.561236        | 1710.284256        | 3402.534687    | 1701.770981      | 3401.550671    | 1701.278973      | 32 |
| 5  | <b>974.465181</b>  | 487.736229         | 957.438632     | 479.222954       | 956.454616     | 478.730946       | E    | 3256.497907        | 1628.752591        | 3239.471358    | 1620.239317      | 3238.487342    | 1619.747309      | 31 |
| 6  | <b>1031.486645</b> | 516.246961         | 1014.460096    | 507.733686       | 1013.476080    | 507.241678       | G    | 3127.455314        | 1564.231295        | 3110.428765    | 1555.718020      | 3109.444749    | 1555.226012      | 30 |
| 7  | 1128.539409        | 564.773343         | 1111.512860    | 556.260068       | 1110.528844    | 555.768060       | P    | 3070.433850        | 1535.720563        | 3053.407301    | 1527.207288      | 3052.423285    | 1526.715280      | 29 |
| 8  | 1185.560873        | 593.284075         | 1168.534324    | 584.770800       | 1167.550308    | 584.278792       | G    | 2973.381086        | 1487.194181        | 2956.354537    | 1478.680906      | 2955.370521    | 1478.188898      | 28 |
| 9  | <b>1332.629287</b> | 666.818282         | 1315.602738    | 658.305007       | 1314.618722    | 657.812999       | F    | 2916.359622        | 1458.683449        | 2899.333073    | 1450.170174      | 2898.349057    | 1449.678166      | 27 |
| 10 | <b>1492.659936</b> | 746.833606         | 1475.633387    | 738.320332       | 1474.649371    | 737.828324       | C    | 2769.291208        | 1385.149242        | 2752.264659    | 1376.635967      | 2751.280643    | 1376.143959      | 26 |
| 11 | <b>1549.681400</b> | 775.344338         | 1532.654851    | 766.831064       | 1531.670835    | 766.339056       | G    | 2609.260559        | <b>1305.133917</b> | 2592.234010    | 1296.620643      | 2591.249994    | 1296.128635      | 25 |
| 12 | 1646.734164        | 823.870720         | 1629.707615    | 815.357446       | 1628.723599    | 814.865438       | P    | 2552.239095        | 1276.623185        | 2535.212546    | 1268.109911      | 2534.228530    | 1267.617903      | 24 |
| 13 | 1759.818228        | 880.412752         | 1742.791679    | 871.899478       | 1741.807663    | 871.407470       | L    | 2455.186331        | 1228.096803        | 2438.159782    | 1219.583529      | 2437.175766    | 1219.091521      | 23 |
| 14 | <b>1830.855342</b> | 915.931309         | 1813.828793    | 907.418035       | 1812.844777    | 906.926027       | A    | <b>2342.102267</b> | 1171.554771        | 2325.075718    | 1163.041497      | 2324.091702    | 1162.549489      | 22 |
| 15 | 1927.908106        | 964.457691         | 1910.881557    | 955.944417       | 1909.897541    | 955.452409       | P    | <b>2271.065153</b> | <b>1136.036214</b> | 2254.038604    | 1127.522940      | 2253.054588    | 1127.030932      | 21 |
| 16 | 1984.929570        | 992.968423         | 1967.903021    | 984.455149       | 1966.919005    | 983.963141       | G    | 2174.012389        | 1087.509832        | 2156.985840    | 1078.996558      | 2156.001824    | 1078.504550      | 20 |
| 17 | 2085.977249        | 1043.492262        | 2068.950700    | 1034.978988      | 2067.966684    | 1034.486980      | T    | 2116.990925        | 1058.999100        | 2099.964376    | 1050.485826      | 2098.980360    | 1049.993818      | 19 |
| 18 | 2142.998713        | 1072.002994        | 2125.972164    | 1063.489720      | 2124.988148    | 1062.997712      | G    | <b>2015.943246</b> | 1008.475261        | 1998.916697    | 999.961986       | 1997.932681    | 999.469978       | 18 |
| 19 | 2200.020177        | 1100.513726        | 2182.993628    | 1092.000452      | 2182.009612    | 1091.508444      | G    | 1958.921782        | 979.964529         | 1941.895233    | 971.451254       | 1940.911217    | 970.959246       | 17 |
| 20 | 2297.072941        | 1149.040108        | 2280.046392    | 1140.526834      | 2279.062376    | 1140.034826      | P    | 1901.900318        | 951.453797         | 1884.873769    | 942.940522       | 1883.889753    | 942.448514       | 16 |
| 21 | 2444.141355        | 1222.574315        | 2427.114806    | 1214.061041      | 2426.130790    | 1213.569033      | F    | 1804.847554        | 902.927415         | 1787.821005    | 894.414140       | 1786.836989    | 893.922132       | 15 |
| 22 | 2545.189034        | 1273.098155        | 2528.162485    | 1264.584880      | 2527.178469    | 1264.092872      | T    | 1657.779140        | 829.393208         | 1640.752591    | 820.879933       | 1639.768575    | 820.387925       | 14 |
| 23 | 2646.236713        | 1323.621994        | 2629.210164    | 1315.108720      | 2628.226148    | 1314.616712      | T    | 1556.731461        | 778.869368         | 1539.704912    | 770.356094       | 1538.720896    | 769.864086       | 13 |
| 24 | 2806.267362        | 1403.637319        | 2789.240813    | 1395.124044      | 2788.256797    | 1394.632036      | C    | 1455.683782        | 728.345529         | 1438.657233    | 719.832254       | 1437.673217    | 719.340246       | 12 |
| 25 | 2943.326274        | 1472.166775        | 2926.299725    | 1463.653500      | 2925.315709    | 1463.161492      | H    | 1295.653133        | 648.330205         | 1278.626584    | 639.816930       | 1277.642568    | 639.324922       | 11 |
| 26 | 3014.363388        | 1507.685332        | 2997.336839    | 1499.172057      | 2996.352823    | 1498.680049      | A    | 1158.594221        | 579.800749         | 1141.567672    | 571.287474       | 1140.583656    | 570.795466       | 10 |
| 27 | 3151.422300        | 1576.214788        | 3134.395751    | 1567.701513      | 3133.411735    | 1567.209505      | H    | 1087.557107        | 544.282191         | 1070.530558    | 535.768917       | 1069.546542    | 535.276909       | 9  |
| 28 | 3250.490714        | 1625.748995        | 3233.464165    | 1617.235720      | 3232.480149    | 1616.743712      | V    | 950.498195         | 475.752735         | 933.471646     | 467.239461       | 932.487630     | 466.747453       | 8  |
| 29 | 3347.543478        | 1674.275377        | 3330.516929    | 1665.762102      | 3329.532913    | 1665.270094      | P    | <b>851.429781</b>  | 426.218529         | 834.403232     | 417.705254       | 833.419216     | 417.213246       | 7  |
| 30 | 3444.596242        | 1722.801759        | 3427.569693    | 1714.288484      | 3426.585677    | 1713.796476      | P    | 754.377017         | 377.692147         | 737.350468     | 369.178872       | 736.366452     | 368.686864       | 6  |
| 31 | 3573.638835        | 1787.323055        | 3556.612286    | 1778.809781      | 3555.628270    | 1778.317773      | E    | 657.324253         | 329.165765         | 640.297704     | 320.652490       | 639.313688     | 320.160482       | 5  |
| 32 | 3660.670863        | <b>1830.839069</b> | 3643.644314    | 1822.325795      | 3642.660298    | 1821.833787      | S    | <b>528.281660</b>  | 264.644468         | 511.255111     | 256.131193       | 510.271095     | 255.639185       | 4  |
| 33 | 3807.739277        | 1904.373276        | 3790.712728    | 1895.860002      | 3789.728712    | 1895.367994      | F    | 441.249632         | 221.128454         | 424.223083     | 212.615179       |                |                  | 3  |
| 34 | 3954.807691        | 1977.907483        | 3937.781142    | 1969.394209      | 3936.797126    | 1968.902201      | F    | 294.181218         | 147.594247         | 277.154669     | 139.080972       |                |                  | 2  |
| 35 |                    |                    |                |                  |                |                  | K    | 147.112804         | 74.060040          | 130.086255     | 65.546765        |                |                  | 1  |

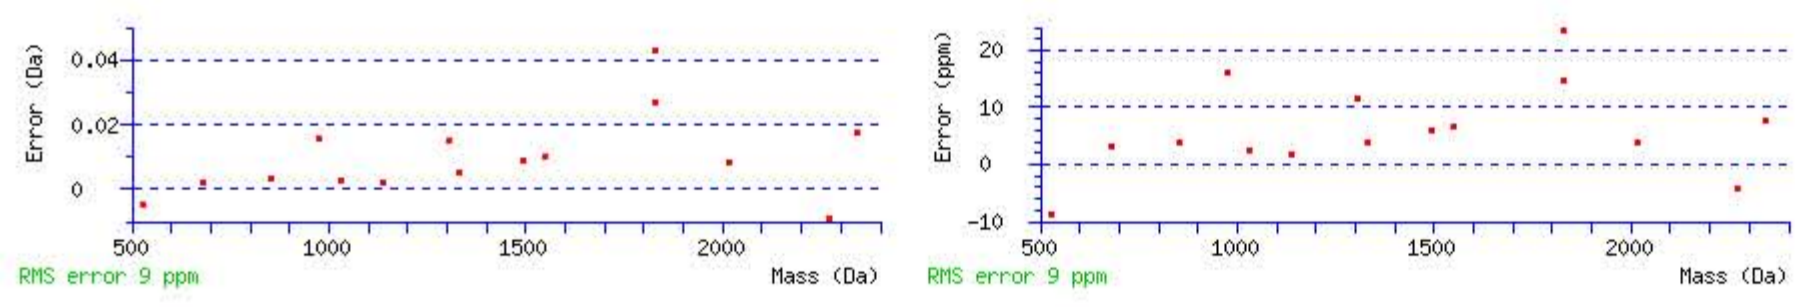

NCBI BLAST search of **LEQYEGPGFCGPLAPGTGGPFTTCHAHVPPESFFK**  
 (Parameters: blastp, nr protein database, expect=20000, no filter, PAM30)  
 Other BLAST [web gateways](#)

### All matches to this query

| Score | Mr(calc):   | Delta    | Sequence                                   |
|-------|-------------|----------|--------------------------------------------|
| 44.7  | 4099.905991 | 0.036465 | <b>LEQYEGPGFCGPLAPGTGGPFTTCHAHVPPESFFK</b> |



# MASCOT Search Results

## Peptide View

MS/MS Fragmentation of **GAQTLVVPNC DHR**

Found in **IBP6\_HUMAN**, Insulin-like growth factor-binding protein 6 OS=Homo sapiens GN=IGFBP6 PE=1 SV=1

Match to Query 43499: 1840.872012 from(614.631280,3+) rtinseconds(1751) index(67201)

Title: Locus:1.1.1.1547.18 File:"2013-07-02 CLN FXIII 60 min 2nd FT.wiff"

Data file C:\Program Files (x86)\Matrix Science\Mascot Daemon\mgf5 FXIII 60 min 2nd\mascot\_daemon\_merge.mgf

Click mouse within plot area to zoom in by factor of two about that point

Or, Plot from  to  Da

Label all possible matches  Label matches used for scoring

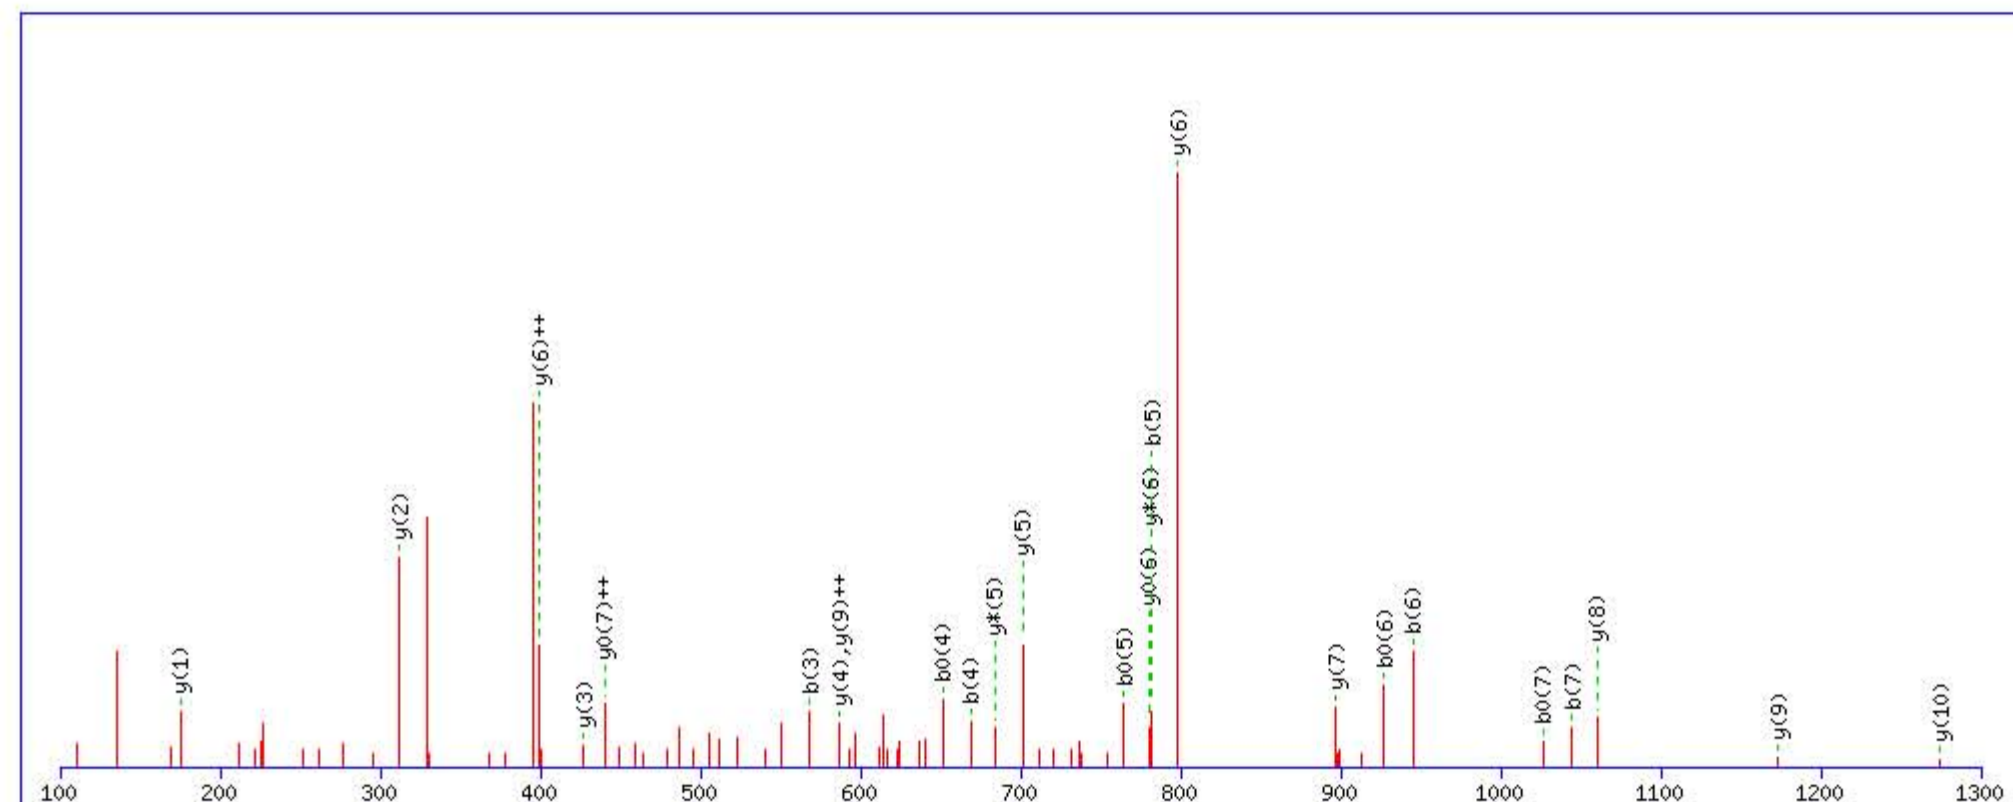

Monoisotopic mass of neutral peptide Mr(calc): 1840.871262

Fixed modifications: Carbamidomethyl (C) (apply to specified residues or termini only)

Variable modifications:

Q3 : Biotin:Thermo-21345 (Q)

Ions Score: 58 Expect: 2.5e-005

Matches : 25/130 fragment ions using 45 most intense peaks [\(help\)](#)

| #  | b                  | b <sup>++</sup> | b <sup>*</sup> | b <sup>*++</sup> | b <sup>0</sup>     | b <sup>0++</sup> | Seq. | y                  | y <sup>++</sup>   | y <sup>*</sup>    | y <sup>*++</sup> | y <sup>0</sup>    | y <sup>0++</sup>  | #  |
|----|--------------------|-----------------|----------------|------------------|--------------------|------------------|------|--------------------|-------------------|-------------------|------------------|-------------------|-------------------|----|
| 1  | 58.028740          | 29.518008       |                |                  |                    |                  | G    |                    |                   |                   |                  |                   |                   | 13 |
| 2  | 129.065854         | 65.036565       |                |                  |                    |                  | A    | 1784.857073        | 892.932175        | 1767.830524       | 884.418900       | 1766.846508       | 883.926892        | 12 |
| 3  | <b>568.291180</b>  | 284.649228      | 551.264631     | 276.135954       |                    |                  | Q    | 1713.819959        | 857.413618        | 1696.793410       | 848.900343       | 1695.809394       | 848.408335        | 11 |
| 4  | <b>669.338859</b>  | 335.173068      | 652.312310     | 326.659793       | <b>651.328294</b>  | 326.167785       | T    | <b>1274.594633</b> | 637.800955        | 1257.568084       | 629.287680       | 1256.584068       | 628.795672        | 10 |
| 5  | <b>782.422923</b>  | 391.715100      | 765.396374     | 383.201825       | <b>764.412358</b>  | 382.709817       | L    | <b>1173.546954</b> | <b>587.277115</b> | 1156.520405       | 578.763841       | 1155.536389       | 578.271833        | 9  |
| 6  | <b>945.486252</b>  | 473.246764      | 928.459703     | 464.733490       | <b>927.475687</b>  | 464.241482       | Y    | <b>1060.462890</b> | 530.735083        | 1043.436341       | 522.221809       | 1042.452325       | 521.729801        | 8  |
| 7  | <b>1044.554666</b> | 522.780971      | 1027.528117    | 514.267697       | <b>1026.544101</b> | 513.775689       | V    | <b>897.399561</b>  | 449.203419        | 880.373012        | 440.690144       | 879.388996        | <b>440.198136</b> | 7  |
| 8  | 1141.607430        | 571.307353      | 1124.580881    | 562.794079       | 1123.596865        | 562.302071       | P    | <b>798.331147</b>  | <b>399.669212</b> | <b>781.304598</b> | 391.155937       | <b>780.320582</b> | 390.663929        | 6  |
| 9  | 1255.650357        | 628.328817      | 1238.623808    | 619.815542       | 1237.639792        | 619.323534       | N    | <b>701.278383</b>  | 351.142830        | <b>684.251834</b> | 342.629555       | 683.267818        | 342.137547        | 5  |
| 10 | 1415.681006        | 708.344141      | 1398.654457    | 699.830867       | 1397.670441        | 699.338859       | C    | <b>587.235456</b>  | 294.121366        | 570.208907        | 285.608092       | 569.224891        | 285.116084        | 4  |
| 11 | 1530.707949        | 765.857613      | 1513.681400    | 757.344338       | 1512.697384        | 756.852330       | D    | <b>427.204807</b>  | 214.106041        | 410.178258        | 205.592767       | 409.194242        | 205.100759        | 3  |
| 12 | 1667.766861        | 834.387069      | 1650.740312    | 825.873794       | 1649.756296        | 825.381786       | H    | <b>312.177864</b>  | 156.592570        | 295.151315        | 148.079295       |                   |                   | 2  |
| 13 |                    |                 |                |                  |                    |                  | R    | <b>175.118952</b>  | 88.063114         | 158.092403        | 79.549839        |                   |                   | 1  |

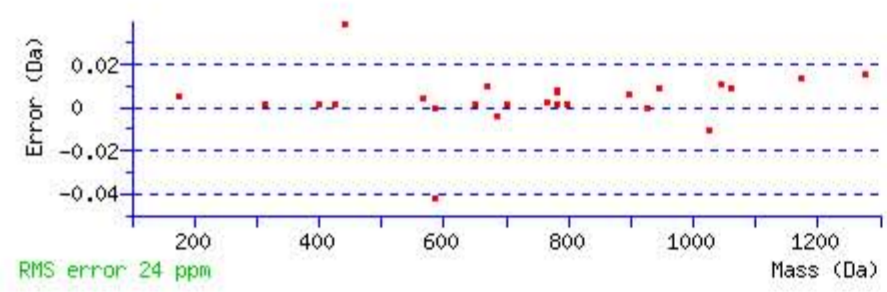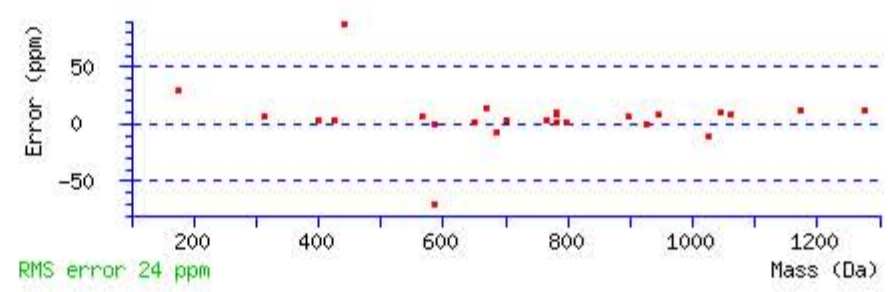

NCBI BLAST search of [GAQTLVVPNC DHR](#)

(Parameters: blastp, nr protein database, expect=20000, no filter, PAM30)

Other BLAST [web gateways](#)

All matches to this query

| Score | Mr(calc):   | Delta     | Sequence                        |
|-------|-------------|-----------|---------------------------------|
| 57.9  | 1840.871262 | 0.000750  | <a href="#">GAQTLVVPNC DHR</a>  |
| 8.9   | 1840.887650 | -0.015638 | <a href="#">AALSASEGEEVPQDK</a> |



# MASCOT Search Results

## Peptide View

MS/MS Fragmentation of **HLDSVLQQLQTEVYR**

Found in **IBP6\_HUMAN**, Insulin-like growth factor-binding protein 6 OS=Homo sapiens GN=IGFBP6 PE=1 SV=1

Match to Query 49817: 2139.118542 from(714.046790,3+) rtinseconds(2577) index(71950)

Title: Locus:1.1.1.1835.5 File:"2013-07-02 CLN FXIII 60 min 2nd FT.wiff"

Data file C:\Program Files (x86)\Matrix Science\Mascot Daemon\mgf5 FXIII 60 min 2nd\mascot\_daemon\_merge.mgf

Click mouse within plot area to zoom in by factor of two about that point

Or, Plot from  to  Da

Label all possible matches  Label matches used for scoring

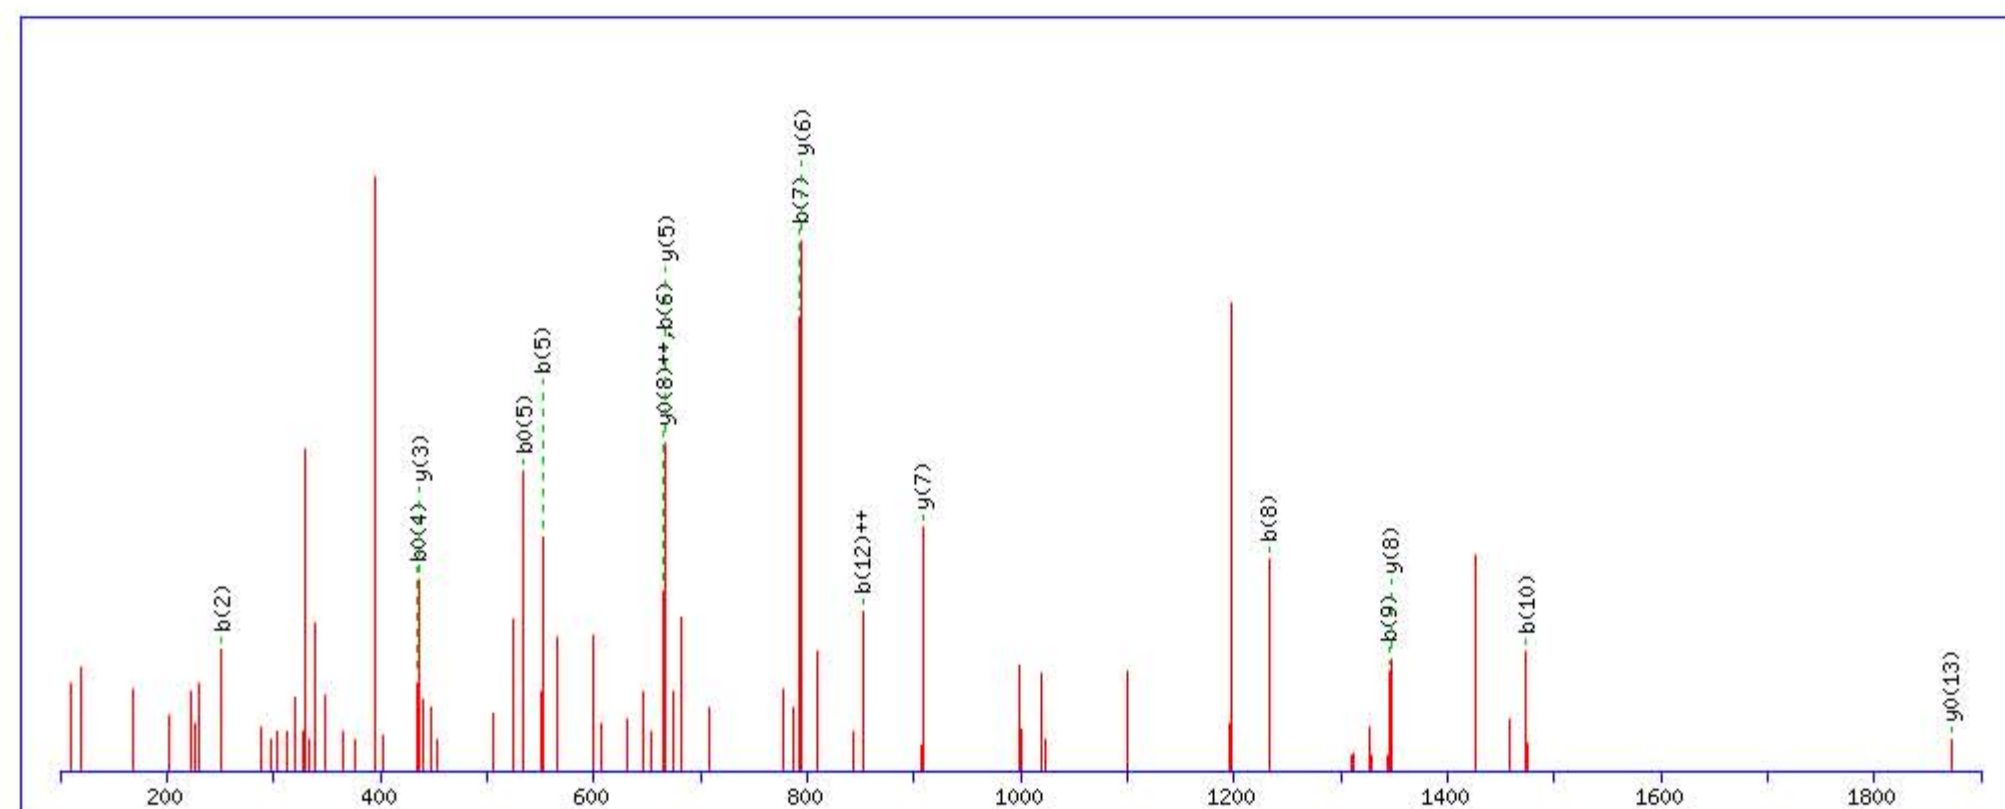

Monoisotopic mass of neutral peptide Mr(calc): 2139.114655

Fixed modifications: Carbamidomethyl (C) (apply to specified residues or termini only)

Variable modifications:

Q8 : Biotin:Thermo-21345 (Q)

Ions Score: 33 Expect: 0.00091

Matches : 17/146 fragment ions using 28 most intense peaks [\(help\)](#)

| #  | b                  | b <sup>++</sup>   | b <sup>+</sup> | b <sup>+++</sup> | b <sup>0</sup>    | b <sup>0++</sup> | Seq. | y                  | y <sup>++</sup> | y <sup>+</sup> | y <sup>+++</sup> | y <sup>0</sup>     | y <sup>0++</sup>  | #  |
|----|--------------------|-------------------|----------------|------------------|-------------------|------------------|------|--------------------|-----------------|----------------|------------------|--------------------|-------------------|----|
| 1  | 138.066188         | 69.536732         |                |                  |                   |                  | H    |                    |                 |                |                  |                    |                   | 15 |
| 2  | <b>251.150252</b>  | 126.078764        |                |                  |                   |                  | L    | 2003.063026        | 1002.035151     | 1986.036477    | 993.521877       | 1985.052461        | 993.029869        | 14 |
| 3  | 366.177195         | 183.592235        |                |                  | 348.166630        | 174.586953       | D    | 1889.978962        | 945.493119      | 1872.952413    | 936.979845       | <b>1871.968397</b> | 936.487836        | 13 |
| 4  | 453.209223         | 227.108250        |                |                  | <b>435.198658</b> | 218.102967       | S    | 1774.952019        | 887.979648      | 1757.925470    | 879.466373       | 1756.941454        | 878.974365        | 12 |
| 5  | <b>552.277637</b>  | 276.642457        |                |                  | <b>534.267072</b> | 267.637174       | V    | 1687.919991        | 844.463634      | 1670.893442    | 835.950359       | 1669.909426        | 835.458351        | 11 |
| 6  | <b>665.361701</b>  | 333.184489        |                |                  | 647.351136        | 324.179206       | L    | 1588.851577        | 794.929427      | 1571.825028    | 786.416152       | 1570.841012        | 785.924144        | 10 |
| 7  | <b>793.420279</b>  | 397.213778        | 776.393730     | 388.700503       | 775.409714        | 388.208495       | Q    | 1475.767513        | 738.387395      | 1458.740964    | 729.874120       | 1457.756948        | 729.382112        | 9  |
| 8  | <b>1232.645605</b> | 616.826440        | 1215.619056    | 608.313166       | 1214.635040       | 607.821158       | Q    | <b>1347.708935</b> | 674.358105      | 1330.682386    | 665.844831       | 1329.698370        | <b>665.352823</b> | 8  |
| 9  | <b>1345.729669</b> | 673.368472        | 1328.703120    | 664.855198       | 1327.719104       | 664.363190       | L    | <b>908.483609</b>  | 454.745443      | 891.457060     | 446.232168       | 890.473044         | 445.740160        | 7  |
| 10 | <b>1473.788247</b> | 737.397761        | 1456.761698    | 728.884487       | 1455.777682       | 728.392479       | Q    | <b>795.399545</b>  | 398.203411      | 778.372996     | 389.690136       | 777.388980         | 389.198128        | 6  |
| 11 | 1574.835926        | 787.921601        | 1557.809377    | 779.408326       | 1556.825361       | 778.916318       | T    | <b>667.340967</b>  | 334.174122      | 650.314418     | 325.660847       | 649.330402         | 325.168839        | 5  |
| 12 | 1703.878519        | <b>852.442897</b> | 1686.851970    | 843.929623       | 1685.867954       | 843.437615       | E    | 566.293288         | 283.650282      | 549.266739     | 275.137008       | 548.282723         | 274.645000        | 4  |
| 13 | 1802.946933        | 901.977104        | 1785.920384    | 893.463830       | 1784.936368       | 892.971822       | V    | <b>437.250695</b>  | 219.128986      | 420.224146     | 210.615711       |                    |                   | 3  |
| 14 | 1966.010262        | 983.508769        | 1948.983713    | 974.995494       | 1947.999697       | 974.503486       | Y    | 338.182281         | 169.594779      | 321.155732     | 161.081504       |                    |                   | 2  |
| 15 |                    |                   |                |                  |                   |                  | R    | 175.118952         | 88.063114       | 158.092403     | 79.549840        |                    |                   | 1  |

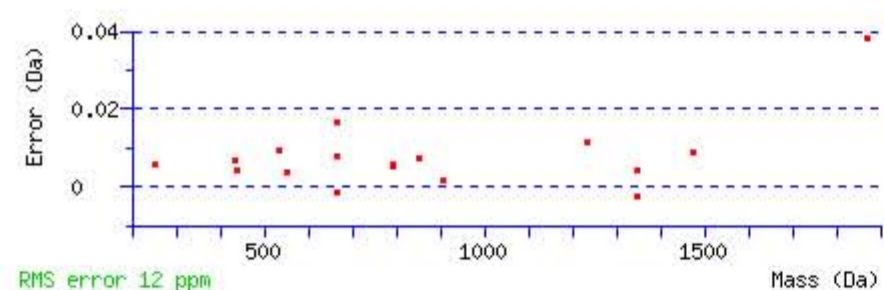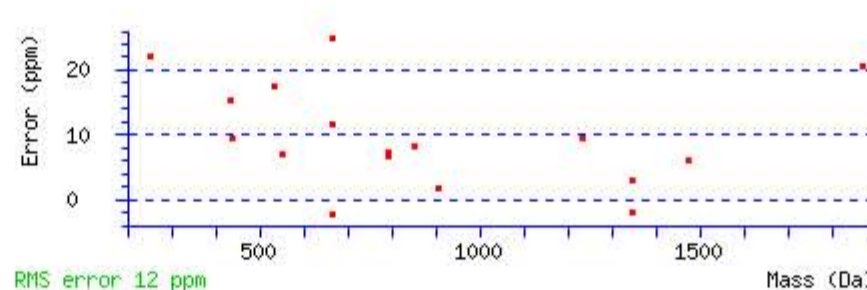

NCBI BLAST search of **HLDSVLQQLQTEVYR**

(Parameters: blastp, nr protein database, expect=20000, no filter, PAM30)

Other BLAST [web gateways](#)

### All matches to this query

| Score | Mr(calc):   | Delta     | Sequence                         |
|-------|-------------|-----------|----------------------------------|
| 32.7  | 2139.114655 | 0.003887  | <a href="#">HLDSVLQQLQTEVYR</a>  |
| 24.4  | 2139.114655 | 0.003887  | <a href="#">HLDSVLQQLQTEVYR</a>  |
| 13.9  | 2139.114655 | 0.003887  | <a href="#">HLDSVLQQLQTEVYR</a>  |
| 0.2   | 2139.122025 | -0.003483 | <a href="#">FNVETMAQLLNIPPNK</a> |



# MASCOT SEARCH RESULTS

## Peptide View

MS/MS Fragmentation of **LAELPADALGPLQR**

Found in **ALS\_HUMAN**, Insulin-like growth factor-binding protein complex acid labile subunit OS=Homo sapiens GN=IGFALS PE=1 SV=1

Match to Query 42262: 1773.994828 from(888.004690,2+) rtinseconds(2455) index(39149)

Title: Locus:1.1.1.3274.10 File:"2013-07-02 CLN FXIII 60 min 2nd F 3.wiff"

Data file C:\Program Files (x86)\Matrix Science\Mascot Daemon\mgf5 FXIII 60 min 2nd\mascot\_daemon\_merge.mgf

Click mouse within plot area to zoom in by factor of two about that point

Or, Plot from  to  Da

Label all possible matches  Label matches used for scoring

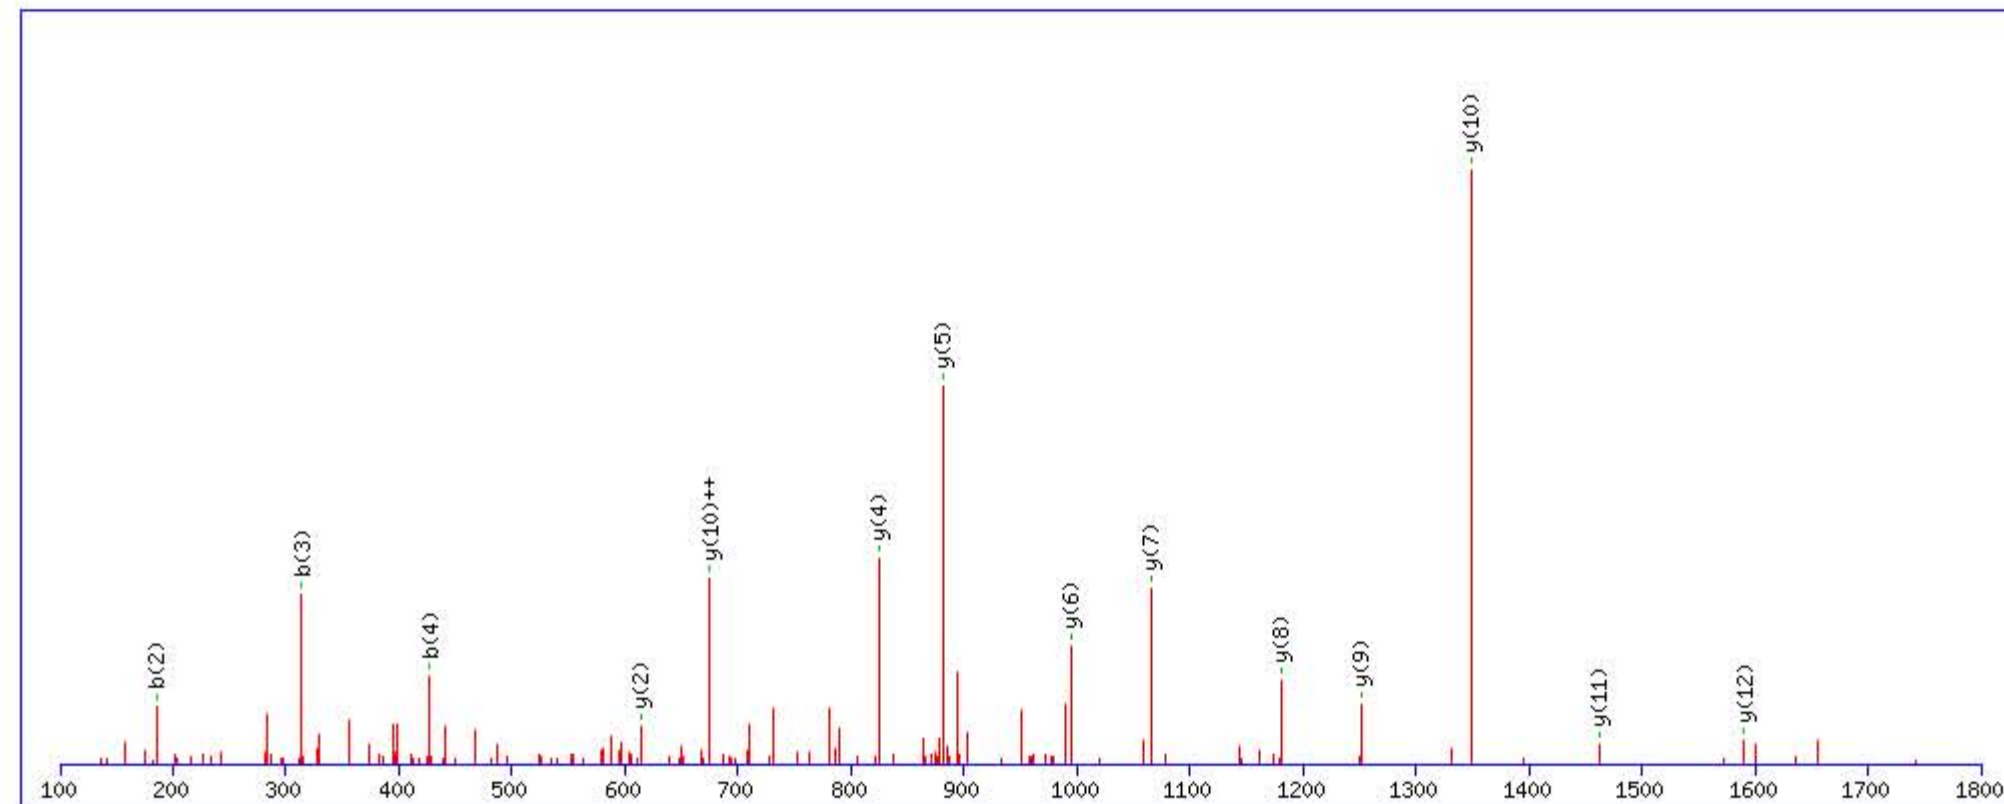

Monoisotopic mass of neutral peptide Mr(calc): 1773.981094

Fixed modifications: Carbamidomethyl (C) (apply to specified residues or termini only)

Variable modifications:

Q13 : Biotin:Thermo-21345 (Q)

Ions Score: 88 Expect: 1.8e-008

Matches : 14/114 fragment ions using 17 most intense peaks [\(help\)](#)

| #  | b                 | b <sup>++</sup> | b <sup>*</sup> | b <sup>+++</sup> | b <sup>0</sup> | b <sup>0++</sup> | Seq. | y                  | y <sup>++</sup>   | y <sup>*</sup> | y <sup>+++</sup> | y <sup>0</sup> | y <sup>0++</sup> | #  |
|----|-------------------|-----------------|----------------|------------------|----------------|------------------|------|--------------------|-------------------|----------------|------------------|----------------|------------------|----|
| 1  | 114.091340        | 57.549308       |                |                  |                |                  | L    |                    |                   |                |                  |                |                  | 14 |
| 2  | <b>185.128454</b> | 93.067865       |                |                  |                |                  | A    | 1661.904340        | 831.455808        | 1644.877791    | 822.942534       | 1643.893775    | 822.450526       | 13 |
| 3  | <b>314.171047</b> | 157.589161      |                |                  | 296.160482     | 148.583879       | E    | <b>1590.867226</b> | 795.937251        | 1573.840677    | 787.423977       | 1572.856661    | 786.931969       | 12 |
| 4  | <b>427.255111</b> | 214.131193      |                |                  | 409.244546     | 205.125911       | L    | <b>1461.824633</b> | 731.415955        | 1444.798084    | 722.902680       | 1443.814068    | 722.410672       | 11 |
| 5  | 524.307875        | 262.657576      |                |                  | 506.297310     | 253.652293       | P    | <b>1348.740569</b> | <b>674.873922</b> | 1331.714020    | 666.360648       | 1330.730004    | 665.868640       | 10 |
| 6  | 595.344989        | 298.176133      |                |                  | 577.334424     | 289.170850       | A    | <b>1251.687805</b> | 626.347540        | 1234.661256    | 617.834266       | 1233.677240    | 617.342258       | 9  |
| 7  | 710.371932        | 355.689604      |                |                  | 692.361367     | 346.684322       | D    | <b>1180.650691</b> | 590.828984        | 1163.624142    | 582.315709       | 1162.640126    | 581.823701       | 8  |
| 8  | 781.409046        | 391.208161      |                |                  | 763.398481     | 382.202879       | A    | <b>1065.623748</b> | 533.315512        | 1048.597199    | 524.802238       |                |                  | 7  |
| 9  | 894.493110        | 447.750193      |                |                  | 876.482545     | 438.744911       | L    | <b>994.586634</b>  | 497.796955        | 977.560085     | 489.283681       |                |                  | 6  |
| 10 | 951.514574        | 476.260925      |                |                  | 933.504009     | 467.255643       | G    | <b>881.502570</b>  | 441.254923        | 864.476021     | 432.741649       |                |                  | 5  |
| 11 | 1048.567338       | 524.787307      |                |                  | 1030.556773    | 515.782025       | P    | <b>824.481106</b>  | 412.744191        | 807.454557     | 404.230916       |                |                  | 4  |
| 12 | 1161.651402       | 581.329339      |                |                  | 1143.640837    | 572.324056       | L    | 727.428342         | 364.217809        | 710.401793     | 355.704534       |                |                  | 3  |
| 13 | 1600.876728       | 800.942002      | 1583.850179    | 792.428728       | 1582.866163    | 791.936719       | Q    | <b>614.344278</b>  | 307.675777        | 597.317729     | 299.162503       |                |                  | 2  |
| 14 |                   |                 |                |                  |                |                  | R    | 175.118952         | 88.063114         | 158.092403     | 79.549839        |                |                  | 1  |

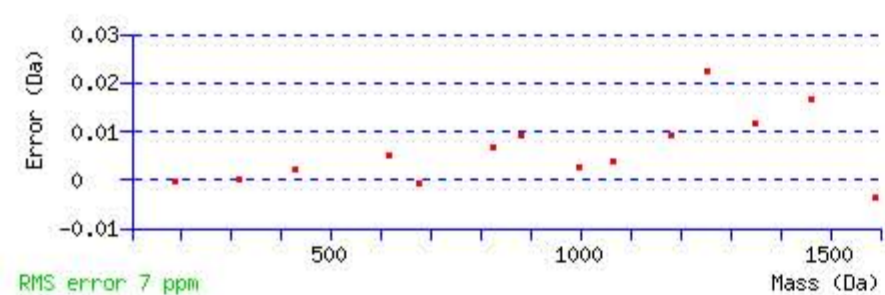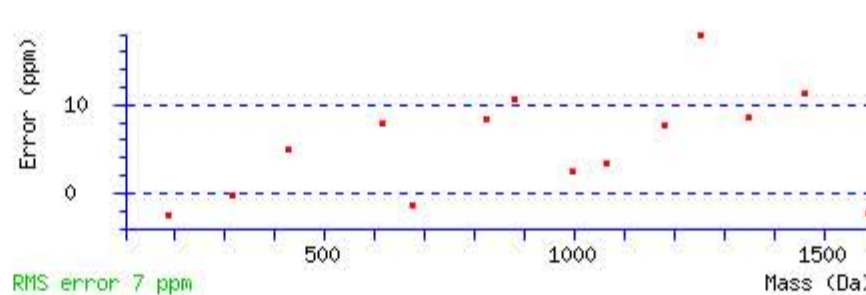

NCBI BLAST search of **LAELPADALGPLQR**

(Parameters: blastp, nr protein database, expect=20000, no filter, PAM30)

Other BLAST [web gateways](#)

All matches to this query

| Score | Mr(calc):   | Delta    | Sequence                       |
|-------|-------------|----------|--------------------------------|
| 88.4  | 1773.981094 | 0.013734 | <a href="#">LAELPADALGPLQR</a> |

Mascot: <http://www.matrixscience.com/>



# MASCOT Search Results

## Peptide View

MS/MS Fragmentation of **SFEGLGQLEVLTLTDHNLQEQVK**

Found in **ALS\_HUMAN**, Insulin-like growth factor-binding protein complex acid labile subunit OS=Homo sapiens GN=IGFALS PE=1 SV=1

Match to Query 59504: 2807.470812 from(936.830880,3+) rtinseconds(2708) index(40870)

Title: Locus:1.1.1.3361.22 File:"2013-07-02 CLN FXIII 60 min 2nd F 3.wiff"

Data file C:\Program Files (x86)\Matrix Science\Mascot Daemon\mgf5 FXIII 60 min 2nd\mascot\_daemon\_merge.mgf

Click mouse within plot area to zoom in by factor of two about that point

Or, Plot from  to  Da

Label all possible matches  Label matches used for scoring

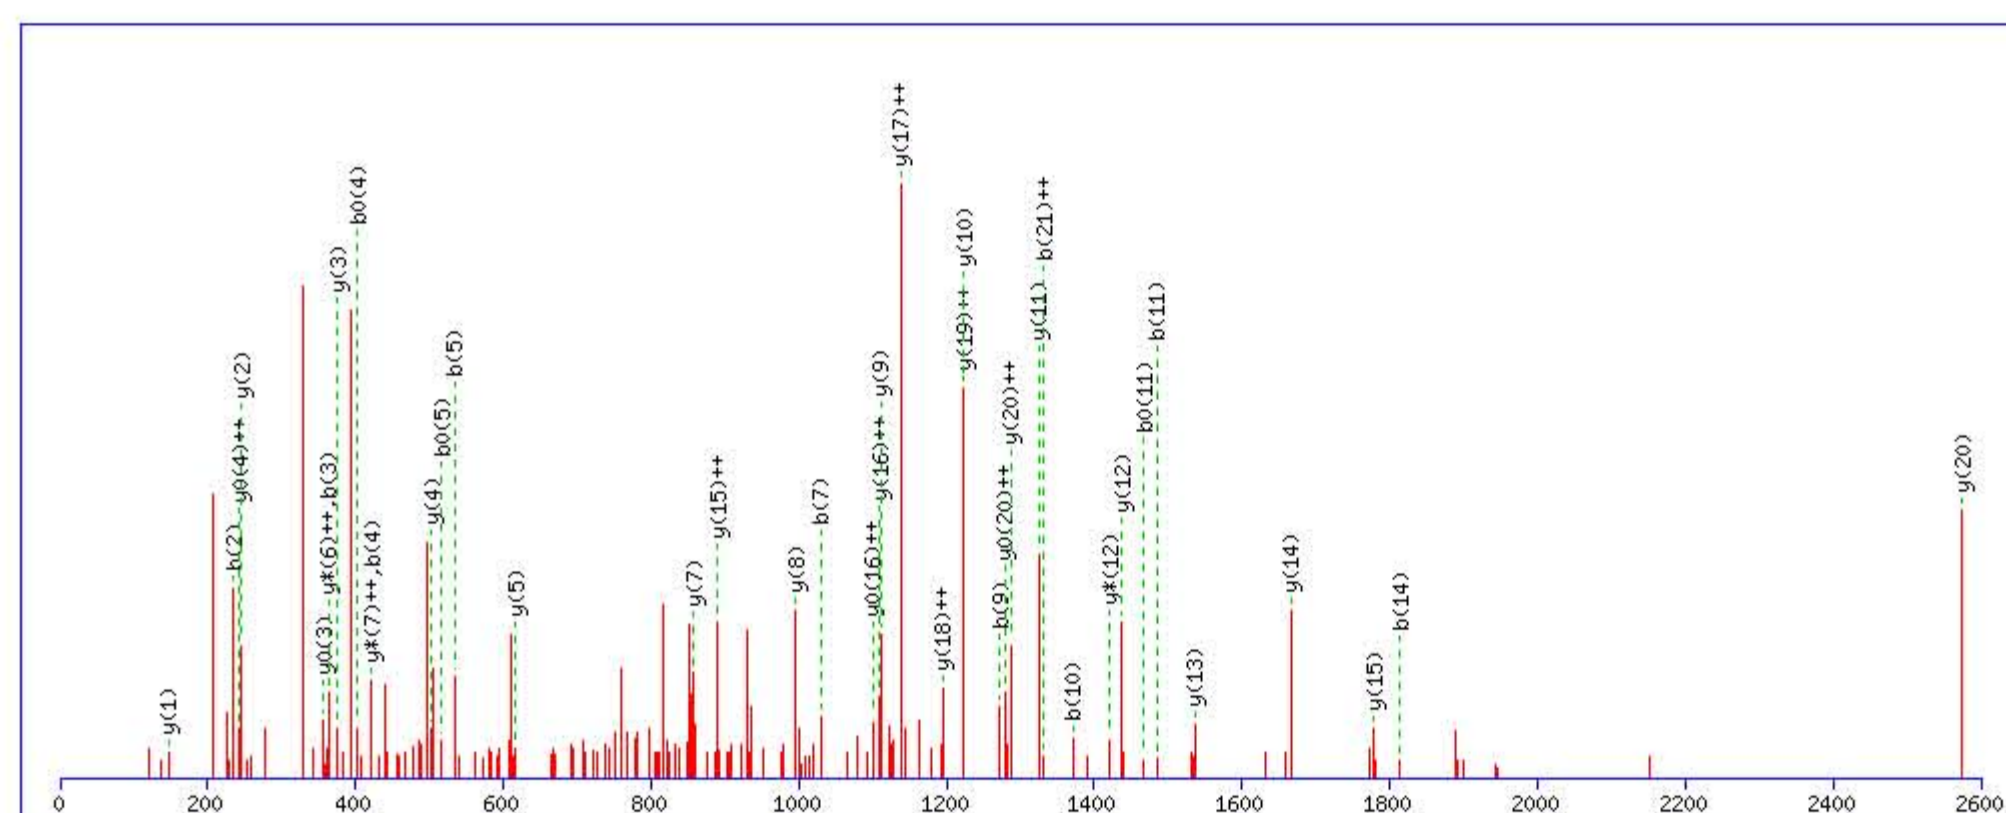

Monoisotopic mass of neutral peptide Mr(calc): 2807.452759

Fixed modifications: Carbamidomethyl (C) (apply to specified residues or termini only)

Variable modifications:

Q7 : Biotin:Thermo-21345 (Q)

Ions Score: 58 Expect: 3.8e-005

Matches : 41/236 fragment ions using 100 most intense peaks [\(help\)](#)

| #  | b                  | b <sup>++</sup>    | b <sup>*</sup> | b <sup>+++</sup> | b <sup>0</sup>     | b <sup>0++</sup> | Seq. | y                  | y <sup>++</sup>    | y <sup>*</sup>     | y <sup>+++</sup>  | y <sup>0</sup>    | y <sup>0++</sup>   | #  |
|----|--------------------|--------------------|----------------|------------------|--------------------|------------------|------|--------------------|--------------------|--------------------|-------------------|-------------------|--------------------|----|
| 1  | 88.039304          | 44.523290          |                |                  | 70.028739          | 35.518008        | S    |                    |                    |                    |                   |                   |                    | 22 |
| 2  | <b>235.107718</b>  | 118.057497         |                |                  | 217.097153         | 109.052214       | F    | 2721.428016        | 1361.217646        | 2704.401467        | 1352.704371       | 2703.417451       | 1352.212363        | 21 |
| 3  | <b>364.150311</b>  | 182.578793         |                |                  | 346.139746         | 173.573511       | E    | <b>2574.359602</b> | <b>1287.683439</b> | 2557.333053        | 1279.170164       | 2556.349037       | <b>1278.678156</b> | 20 |
| 4  | <b>421.171775</b>  | 211.089525         |                |                  | <b>403.161210</b>  | 202.084243       | G    | 2445.317009        | <b>1223.162142</b> | 2428.290460        | 1214.648868       | 2427.306444       | 1214.156860        | 19 |
| 5  | <b>534.255839</b>  | 267.631558         |                |                  | <b>516.245274</b>  | 258.626275       | L    | 2388.295545        | <b>1194.651410</b> | 2371.268996        | 1186.138136       | 2370.284980       | 1185.646128        | 18 |
| 6  | 591.277303         | 296.142290         |                |                  | 573.266738         | 287.137007       | G    | 2275.211481        | <b>1138.109378</b> | 2258.184932        | 1129.596104       | 2257.200916       | 1129.104096        | 17 |
| 7  | <b>1030.502629</b> | 515.754953         | 1013.476080    | 507.241678       | 1012.492064        | 506.749670       | Q    | 2218.190017        | <b>1109.598646</b> | 2201.163468        | 1101.085372       | 2200.179452       | <b>1100.593364</b> | 16 |
| 8  | 1143.586693        | 572.296985         | 1126.560144    | 563.783710       | 1125.576128        | 563.291702       | L    | <b>1778.964691</b> | <b>889.985984</b>  | 1761.938142        | 881.472709        | 1760.954126       | 880.980701         | 15 |
| 9  | <b>1272.629286</b> | 636.818281         | 1255.602737    | 628.305007       | 1254.618721        | 627.812999       | E    | <b>1665.880627</b> | 833.443952         | 1648.854078        | 824.930677        | 1647.870062       | 824.438669         | 14 |
| 10 | <b>1371.697700</b> | 686.352488         | 1354.671151    | 677.839214       | 1353.687135        | 677.347206       | V    | <b>1536.838034</b> | 768.922655         | 1519.811485        | 760.409381        | 1518.827469       | 759.917373         | 13 |
| 11 | <b>1484.781764</b> | 742.894520         | 1467.755215    | 734.381246       | <b>1466.771199</b> | 733.889238       | L    | <b>1437.769620</b> | 719.388448         | <b>1420.743071</b> | 710.875174        | 1419.759055       | 710.383166         | 12 |
| 12 | 1585.829443        | 793.418360         | 1568.802894    | 784.905085       | 1567.818878        | 784.413077       | T    | <b>1324.685556</b> | 662.846416         | 1307.659007        | 654.333142        | 1306.674991       | 653.841134         | 11 |
| 13 | 1698.913507        | 849.960392         | 1681.886958    | 841.447117       | 1680.902942        | 840.955109       | L    | <b>1223.637877</b> | 612.322577         | 1206.611328        | 603.809302        | 1205.627312       | 603.317294         | 10 |
| 14 | <b>1813.940450</b> | 907.473863         | 1796.913901    | 898.960589       | 1795.929885        | 898.468581       | D    | <b>1110.553813</b> | 555.780545         | 1093.527264        | 547.267270        | 1092.543248       | 546.775262         | 9  |
| 15 | 1950.999362        | 976.003319         | 1933.972813    | 967.490045       | 1932.988797        | 966.998037       | H    | <b>995.526870</b>  | 498.267073         | 978.500321         | 489.753799        | 977.516305        | 489.261791         | 8  |
| 16 | 2065.042289        | 1033.024782        | 2048.015740    | 1024.511508      | 2047.031724        | 1024.019500      | N    | <b>858.467958</b>  | 429.737617         | 841.441409         | <b>421.224343</b> | 840.457393        | 420.732335         | 7  |
| 17 | 2193.100867        | 1097.054072        | 2176.074318    | 1088.540797      | 2175.090302        | 1088.048789      | Q    | 744.425031         | 372.716154         | 727.398482         | <b>364.202879</b> | 726.414466        | 363.710871         | 6  |
| 18 | 2306.184931        | 1153.596104        | 2289.158382    | 1145.082829      | 2288.174366        | 1144.590821      | L    | <b>616.366453</b>  | 308.686865         | 599.339904         | 300.173590        | 598.355888        | 299.681582         | 5  |
| 19 | 2434.243509        | 1217.625393        | 2417.216960    | 1209.112118      | 2416.232944        | 1208.620110      | Q    | <b>503.282389</b>  | 252.144833         | 486.255840         | 243.631558        | 485.271824        | <b>243.139550</b>  | 4  |
| 20 | 2563.286102        | 1282.146689        | 2546.259553    | 1273.633415      | 2545.275537        | 1273.141407      | E    | <b>375.223811</b>  | 188.115543         | 358.197262         | 179.602269        | <b>357.213246</b> | 179.110261         | 3  |
| 21 | 2662.354516        | <b>1331.680896</b> | 2645.327967    | 1323.167622      | 2644.343951        | 1322.675614      | V    | <b>246.181218</b>  | 123.594247         | 229.154669         | 115.080972        |                   |                    | 2  |
| 22 |                    |                    |                |                  |                    |                  | K    | <b>147.112804</b>  | 74.060040          | 130.086255         | 65.546765         |                   |                    | 1  |

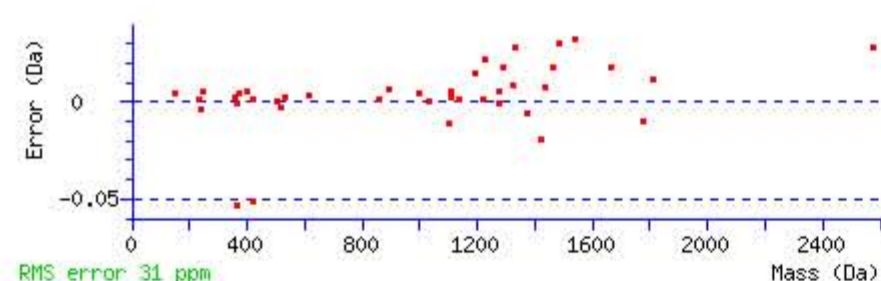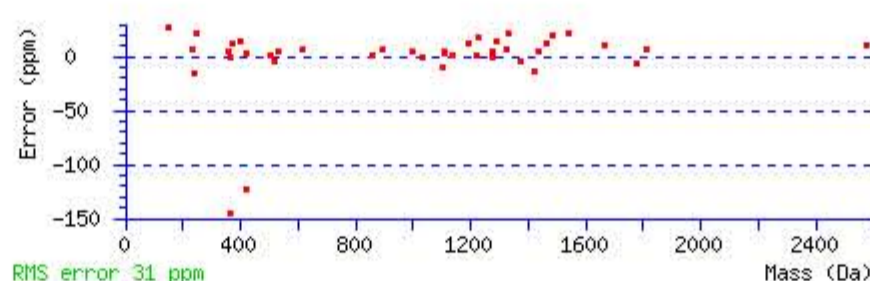

NCBI BLAST search of **SFEGLGQLEVLTLTDHNLQEQVK**

(Parameters: blastp, nr protein database, expect=20000, no filter, PAM30)

Other BLAST [web gateways](#)

All matches to this query

| Score | Mr(calc):   | Delta    | Sequence                                |
|-------|-------------|----------|-----------------------------------------|
| 57.9  | 2807.452759 | 0.018053 | <a href="#">SFEGLGQLEVLTLTDHNLQEQVK</a> |
| 9.4   | 2807.452759 | 0.018053 | <a href="#">SFEGLGQLEVLTLTDHNLQEQVK</a> |
| 0.3   | 2807.452759 | 0.018053 | <a href="#">SFEGLGQLEVLTLTDHNLQEQVK</a> |

Mascot: <http://www.matrixscience.com/>



# MASCOT SEARCH RESULTS

## Peptide View

MS/MS Fragmentation of **ELAAQTIK**

Found in **ITIH1\_HUMAN**, Inter-alpha-trypsin inhibitor heavy chain H1 OS=Homo sapiens GN=ITIH1 PE=1 SV=3

Match to Query 22876: 1183.664928 from(592.839740,2+) rtinseconds(1773) index(51327)

Title: Locus:1.1.1.1233.9 File:"2013-07-02 CLN FXIII 60 min 2nd F 4.wiff"

Data file C:\Program Files (x86)\Matrix Science\Mascot Daemon\mgf5 FXIII 60 min 2nd\mascot\_daemon\_merge.mgf

Click mouse within plot area to zoom in by factor of two about that point

Or, Plot from  to  Da

Label all possible matches  Label matches used for scoring

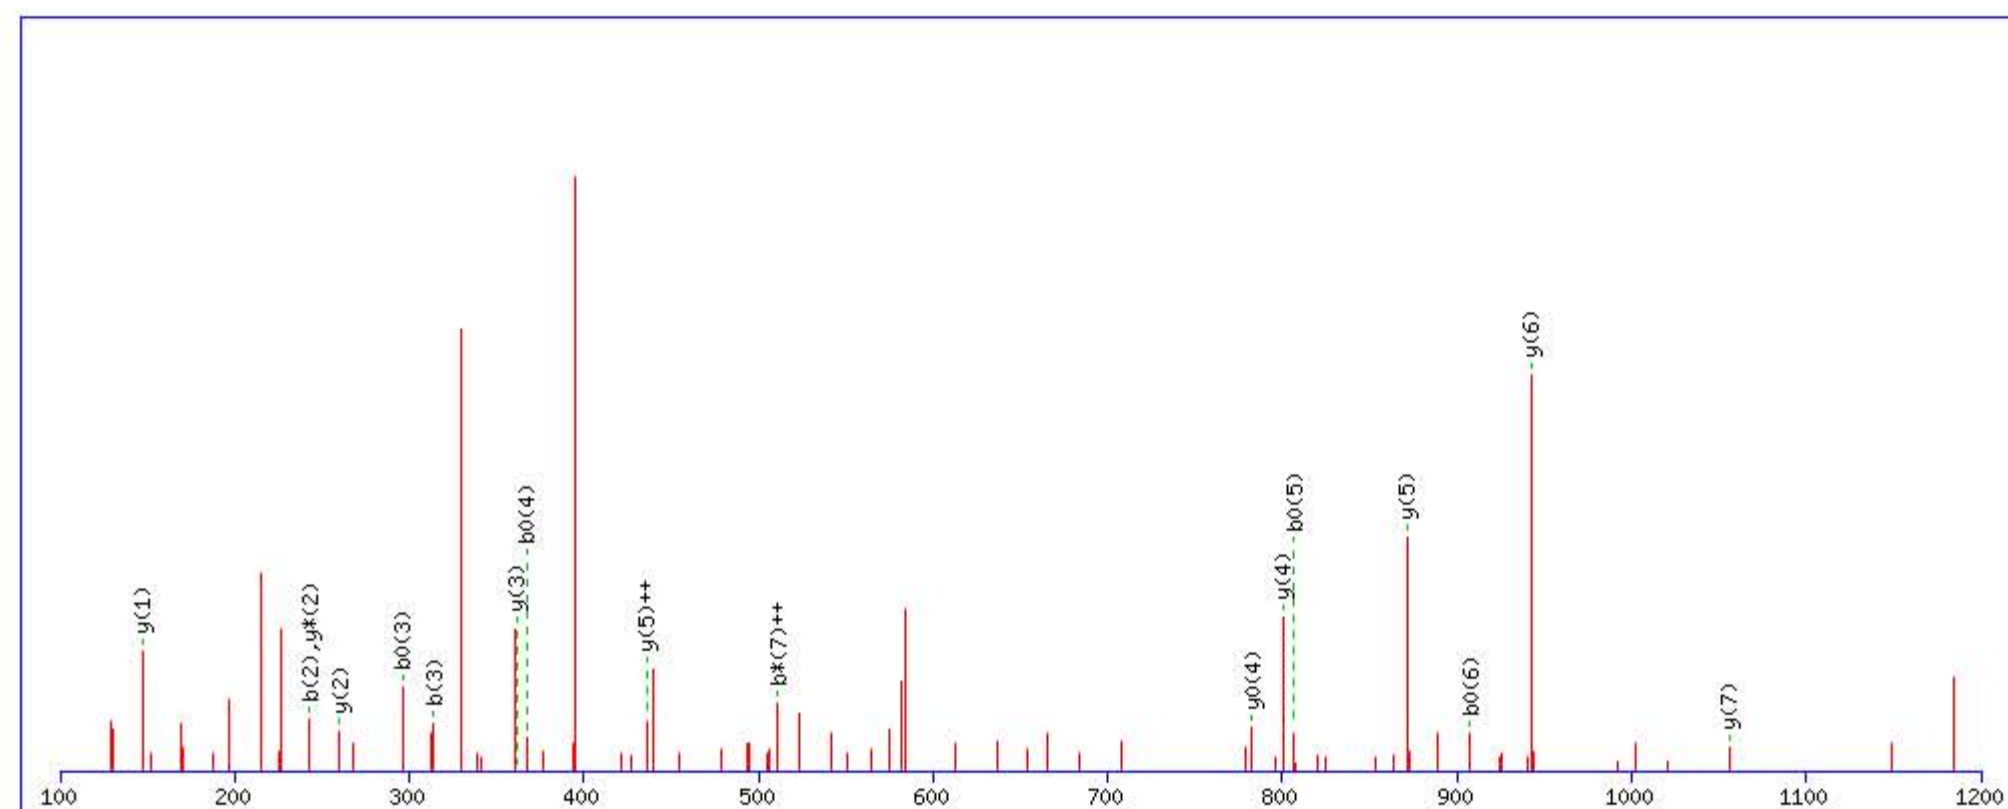

Monoisotopic mass of neutral peptide Mr(calc): 1183.663452

Fixed modifications: Carbamidomethyl (C) (apply to specified residues or termini only)

Variable modifications:

Q5 : Biotin:Thermo-21345 (Q)

Ions Score: 38 Expect: 0.0035

Matches : 17/72 fragment ions using 38 most intense peaks [\(help\)](#)

| # | b                 | b <sup>++</sup> | b <sup>*</sup> | b <sup>+++</sup>  | b <sup>0</sup>    | b <sup>0++</sup> | Seq. | y                  | y <sup>++</sup>   | y <sup>*</sup>    | y <sup>+++</sup> | y <sup>0</sup>    | y <sup>0++</sup> | # |
|---|-------------------|-----------------|----------------|-------------------|-------------------|------------------|------|--------------------|-------------------|-------------------|------------------|-------------------|------------------|---|
| 1 | 130.049869        | 65.528572       |                |                   | 112.039304        | 56.523290        | E    |                    |                   |                   |                  |                   |                  | 8 |
| 2 | <b>243.133933</b> | 122.070605      |                |                   | 225.123368        | 113.065322       | L    | <b>1055.628165</b> | 528.317720        | 1038.601616       | 519.804446       | 1037.617600       | 519.312438       | 7 |
| 3 | <b>314.171047</b> | 157.589161      |                |                   | <b>296.160482</b> | 148.583879       | A    | <b>942.544101</b>  | 471.775689        | 925.517552        | 463.262414       | 924.533536        | 462.770406       | 6 |
| 4 | 385.208161        | 193.107718      |                |                   | <b>367.197596</b> | 184.102436       | A    | <b>871.506987</b>  | <b>436.257132</b> | 854.480438        | 427.743857       | 853.496422        | 427.251849       | 5 |
| 5 | 824.433487        | 412.720382      | 807.406938     | 404.207107        | <b>806.422922</b> | 403.715099       | Q    | <b>800.469873</b>  | 400.738575        | 783.443324        | 392.225300       | <b>782.459308</b> | 391.733292       | 4 |
| 6 | 925.481166        | 463.244221      | 908.454617     | 454.730947        | <b>907.470601</b> | 454.238939       | T    | <b>361.244547</b>  | 181.125911        | 344.217998        | 172.612637       | 343.233982        | 172.120629       | 3 |
| 7 | 1038.565230       | 519.786253      | 1021.538681    | <b>511.272978</b> | 1020.554665       | 510.780970       | I    | <b>260.196868</b>  | 130.602072        | <b>243.170319</b> | 122.088797       |                   |                  | 2 |
| 8 |                   |                 |                |                   |                   |                  | K    | <b>147.112804</b>  | 74.060040         | 130.086255        | 65.546765        |                   |                  | 1 |

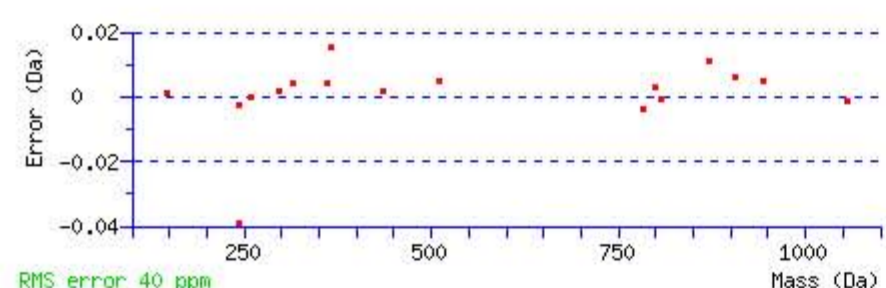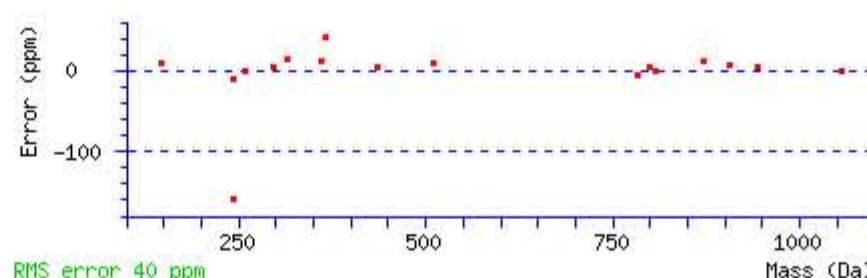

NCBI BLAST search of **ELAAQTIK**

(Parameters: blastp, nr protein database, expect=20000, no filter, PAM30)

Other BLAST [web gateways](#)

All matches to this query

| Score | Mr(calc):   | Delta     | Sequence                     |
|-------|-------------|-----------|------------------------------|
| 37.9  | 1183.663452 | 0.001476  | <a href="#">ELAAQTIK</a>     |
| 31.4  | 1183.663452 | 0.001476  | <a href="#">ELAAQTIK</a>     |
| 7.8   | 1183.667282 | -0.002354 | <a href="#">ELAERQGLLR</a>   |
| 6.1   | 1183.663452 | 0.001476  | <a href="#">LEQAATLK</a>     |
| 3.8   | 1183.667282 | -0.002354 | <a href="#">QLLRALLEGR</a>   |
| 3.7   | 1183.656937 | 0.007991  | <a href="#">MRPQTLK</a>      |
| 3.3   | 1183.663467 | 0.001461  | <a href="#">TQLSPSIK</a>     |
| 3.2   | 1183.681198 | -0.016270 | <a href="#">LEALLEAAGIGK</a> |
| 2.2   | 1183.667297 | -0.002369 | <a href="#">EPTGRVEIRK</a>   |
| 2.2   | 1183.649551 | 0.015377  | <a href="#">KVCGHKQSLK</a>   |



# MASCOT SEARCH RESULTS

## Peptide View

### MS/MS Fragmentation of **LDAQASFLPK**

Found in **ITIH1\_HUMAN**, Inter-alpha-trypsin inhibitor heavy chain H1 OS=Homo sapiens GN=ITIH1 PE=1 SV=3

Match to Query 30132: 1399.762468 from(700.888510,2+) rtinseconds(2232) index(54445)

Title: Locus:1.1.1.1392.9 File:"2013-07-02 CLN FXIII 60 min 2nd F 4.wiff"

Data file C:\Program Files (x86)\Matrix Science\Mascot Daemon\mgf5 FXIII 60 min 2nd\mascot\_daemon\_merge.mgf

Click mouse within plot area to zoom in by factor of two about that point

Or, Plot from  to  Da

Label all possible matches  Label matches used for scoring

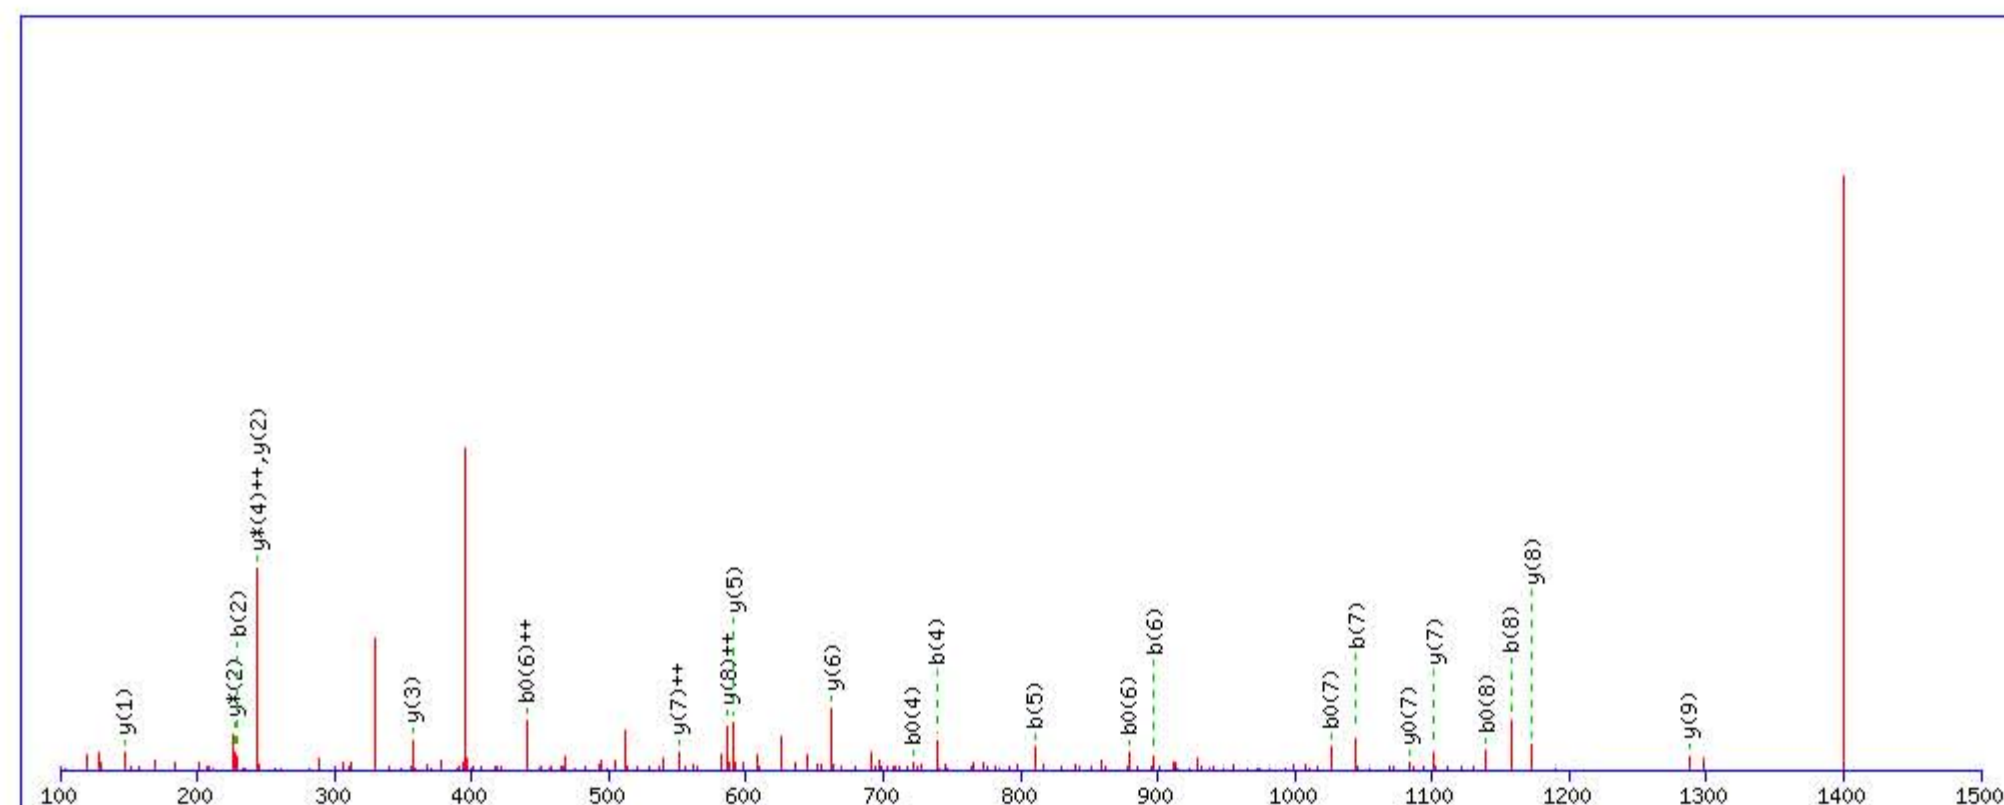

Monoisotopic mass of neutral peptide Mr(calc): 1399.753342

Fixed modifications: Carbamidomethyl (C) (apply to specified residues or termini only)

Variable modifications:

Q4 : Biotin:Thermo-21345 (Q)

Ions Score: 43 Expect: 0.00047

Matches : 24/92 fragment ions using 46 most intense peaks [\(help\)](#)

| #  | b                  | b <sup>++</sup> | b <sup>*</sup> | b <sup>*++</sup> | b <sup>0</sup>     | b <sup>0++</sup>  | Seq. | y                  | y <sup>++</sup>   | y <sup>*</sup>    | y <sup>*++</sup>  | y <sup>0</sup>     | y <sup>0++</sup> | #  |
|----|--------------------|-----------------|----------------|------------------|--------------------|-------------------|------|--------------------|-------------------|-------------------|-------------------|--------------------|------------------|----|
| 1  | 114.091340         | 57.549308       |                |                  |                    |                   | L    |                    |                   |                   |                   |                    |                  | 10 |
| 2  | <b>229.118283</b>  | 115.062779      |                |                  | 211.107718         | 106.057497        | D    | <b>1287.676571</b> | 644.341924        | 1270.650022       | 635.828649        | 1269.666006        | 635.336641       | 9  |
| 3  | 300.155397         | 150.581336      |                |                  | 282.144832         | 141.576054        | A    | <b>1172.649628</b> | <b>586.828452</b> | 1155.623079       | 578.315178        | 1154.639063        | 577.823169       | 8  |
| 4  | <b>739.380723</b>  | 370.194000      | 722.354174     | 361.680725       | <b>721.370158</b>  | 361.188717        | Q    | <b>1101.612514</b> | <b>551.309895</b> | 1084.585965       | 542.796621        | <b>1083.601949</b> | 542.304612       | 7  |
| 5  | <b>810.417837</b>  | 405.712557      | 793.391288     | 397.199282       | 792.407272         | 396.707274        | A    | <b>662.387188</b>  | 331.697232        | 645.360639        | 323.183957        | 644.376623         | 322.691949       | 6  |
| 6  | <b>897.449865</b>  | 449.228570      | 880.423316     | 440.715296       | <b>879.439300</b>  | <b>440.223288</b> | S    | <b>591.350074</b>  | 296.178675        | 574.323525        | 287.665400        | 573.339509         | 287.173392       | 5  |
| 7  | <b>1044.518279</b> | 522.762777      | 1027.491730    | 514.249503       | <b>1026.507714</b> | 513.757495        | F    | 504.318046         | 252.662661        | 487.291497        | <b>244.149386</b> |                    |                  | 4  |
| 8  | <b>1157.602343</b> | 579.304809      | 1140.575794    | 570.791535       | <b>1139.591778</b> | 570.299527        | L    | <b>357.249632</b>  | 179.128454        | 340.223083        | 170.615179        |                    |                  | 3  |
| 9  | 1254.655107        | 627.831191      | 1237.628558    | 619.317917       | 1236.644542        | 618.825909        | P    | <b>244.165568</b>  | 122.586422        | <b>227.139019</b> | 114.073148        |                    |                  | 2  |
| 10 |                    |                 |                |                  |                    |                   | K    | <b>147.112804</b>  | 74.060040         | 130.086255        | 65.546765         |                    |                  | 1  |

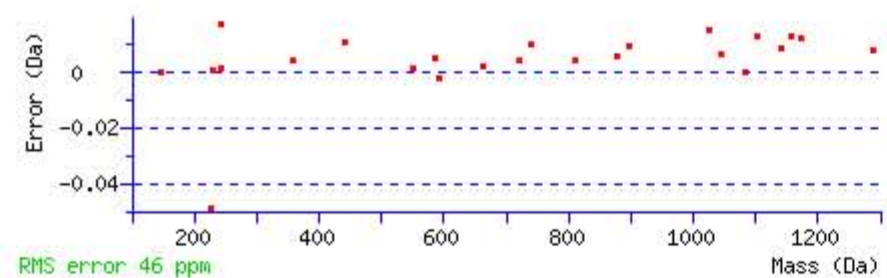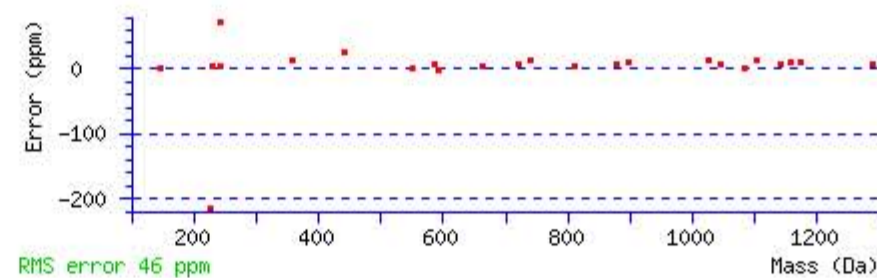

### NCBI BLAST search of **LDAQASFLPK**

(Parameters: blastp, nr protein database, expect=20000, no filter, PAM30)

Other BLAST [web gateways](#)

### All matches to this query

| Score | Mr(calc):   | Delta     | Sequence                      |
|-------|-------------|-----------|-------------------------------|
| 43.2  | 1399.753342 | 0.009126  | <a href="#">LDAQASFLPK</a>    |
| 7.3   | 1399.745972 | 0.016496  | <a href="#">IDAATGIPVTTWR</a> |
| 4.8   | 1399.771103 | -0.008635 | <a href="#">QKEPSVLFEVPK</a>  |
| 3.7   | 1399.755814 | 0.006654  | <a href="#">KTELGPLKEEEK</a>  |
| 0.7   | 1399.772430 | -0.009962 | <a href="#">QHAFKQAFKPK</a>   |



# MASCOT Search Results

## Peptide View

MS/MS Fragmentation of **GSLVQASEANLQAAQDFVR**

Found in **ITIH1\_HUMAN**, Inter-alpha-trypsin inhibitor heavy chain H1 OS=Homo sapiens GN=ITIH1 PE=1 SV=3

Match to Query 53224: 2314.183812 from(772.401880,3+) rtinseconds(2531) index(56101)

Title: Locus:1.1.1.1496.16 File:"2013-07-02 CLN FXIII 60 min 2nd F 4.wiff"

Data file C:\Program Files (x86)\Matrix Science\Mascot Daemon\mgf5 FXIII 60 min 2nd\mascot\_daemon\_merge.mgf

Click mouse within plot area to zoom in by factor of two about that point

Or, Plot from  to  Da

Label all possible matches  Label matches used for scoring

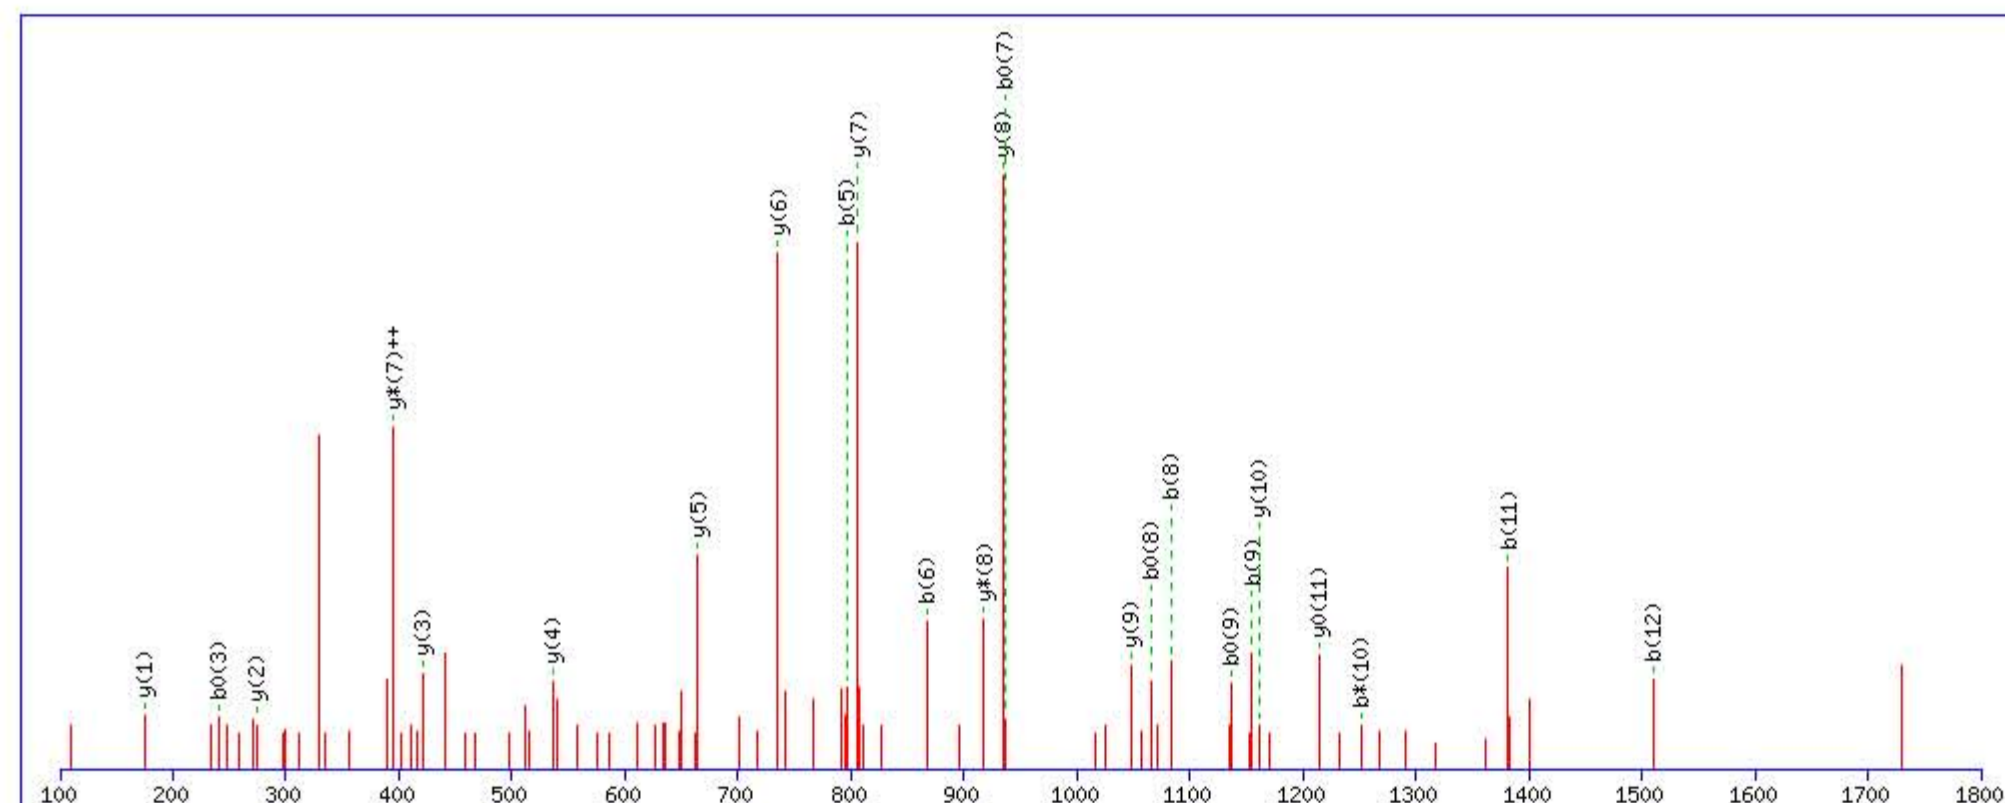

Monoisotopic mass of neutral peptide  $M_r(\text{calc})$ : 2314.173950

Fixed modifications: Carbamidomethyl (C) (apply to specified residues or termini only)

Variable modifications:

Q5 : Biotin:Thermo-21345 (Q)

Ions Score: 59 Expect: 3.8e-006

Matches : 24/200 fragment ions using 41 most intense peaks [\(help\)](#)

| #  | b           | b <sup>++</sup> | b <sup>*</sup> | b <sup>*++</sup> | b <sup>0</sup> | b <sup>0++</sup> | Seq. | y           | y <sup>++</sup> | y <sup>*</sup> | y <sup>*++</sup> | y <sup>0</sup> | y <sup>0++</sup> | #  |
|----|-------------|-----------------|----------------|------------------|----------------|------------------|------|-------------|-----------------|----------------|------------------|----------------|------------------|----|
| 1  | 58.028740   | 29.518008       |                |                  |                |                  | G    |             |                 |                |                  |                |                  | 19 |
| 2  | 145.060768  | 73.034022       |                |                  | 127.050203     | 64.028740        | S    | 2258.159779 | 1129.583527     | 2241.133230    | 1121.070253      | 2240.149214    | 1120.578245      | 18 |
| 3  | 258.144832  | 129.576054      |                |                  | 240.134267     | 120.570772       | L    | 2171.127751 | 1086.067513     | 2154.101202    | 1077.554239      | 2153.117186    | 1077.062231      | 17 |
| 4  | 357.213246  | 179.110261      |                |                  | 339.202681     | 170.104979       | V    | 2058.043687 | 1029.525481     | 2041.017138    | 1021.012207      | 2040.033122    | 1020.520199      | 16 |
| 5  | 796.438572  | 398.722924      | 779.412023     | 390.209650       | 778.428007     | 389.717642       | Q    | 1958.975273 | 979.991274      | 1941.948724    | 971.478000       | 1940.964708    | 970.985992       | 15 |
| 6  | 867.475686  | 434.241481      | 850.449137     | 425.728207       | 849.465121     | 425.236199       | A    | 1519.749947 | 760.378611      | 1502.723398    | 751.865337       | 1501.739382    | 751.373329       | 14 |
| 7  | 954.507714  | 477.757495      | 937.481165     | 469.244220       | 936.497149     | 468.752212       | S    | 1448.712833 | 724.860054      | 1431.686284    | 716.346780       | 1430.702268    | 715.854772       | 13 |
| 8  | 1083.550307 | 542.278792      | 1066.523758    | 533.765517       | 1065.539742    | 533.273509       | E    | 1361.680805 | 681.344040      | 1344.654256    | 672.830766       | 1343.670240    | 672.338758       | 12 |
| 9  | 1154.587421 | 577.797349      | 1137.560872    | 569.284074       | 1136.576856    | 568.792066       | A    | 1232.638212 | 616.822744      | 1215.611663    | 608.309469       | 1214.627647    | 607.817461       | 11 |
| 10 | 1268.630348 | 634.818812      | 1251.603799    | 626.305538       | 1250.619783    | 625.813529       | N    | 1161.601098 | 581.304187      | 1144.574549    | 572.790912       | 1143.590533    | 572.298904       | 10 |
| 11 | 1381.714412 | 691.360844      | 1364.687863    | 682.847569       | 1363.703847    | 682.355561       | L    | 1047.558171 | 524.282723      | 1030.531622    | 515.769449       | 1029.547606    | 515.277441       | 9  |
| 12 | 1509.772990 | 755.390133      | 1492.746441    | 746.876858       | 1491.762425    | 746.384850       | Q    | 934.474107  | 467.740692      | 917.447558     | 459.227417       | 916.463542     | 458.735409       | 8  |
| 13 | 1580.810104 | 790.908690      | 1563.783555    | 782.395415       | 1562.799539    | 781.903407       | A    | 806.415529  | 403.711403      | 789.388980     | 395.198128       | 788.404964     | 394.706120       | 7  |
| 14 | 1651.847218 | 826.427247      | 1634.820669    | 817.913972       | 1633.836653    | 817.421964       | A    | 735.378415  | 368.192846      | 718.351866     | 359.679571       | 717.367850     | 359.187563       | 6  |
| 15 | 1779.905796 | 890.456536      | 1762.879247    | 881.943261       | 1761.895231    | 881.451253       | Q    | 664.341301  | 332.674289      | 647.314752     | 324.161014       | 646.330736     | 323.669006       | 5  |
| 16 | 1894.932739 | 947.970007      | 1877.906190    | 939.456733       | 1876.922174    | 938.964725       | D    | 536.282723  | 268.645000      | 519.256174     | 260.131725       | 518.272158     | 259.639717       | 4  |
| 17 | 2042.001153 | 1021.504215     | 2024.974604    | 1012.990940      | 2023.990588    | 1012.498932      | F    | 421.255780  | 211.131528      | 404.229231     | 202.618253       |                |                  | 3  |
| 18 | 2141.069567 | 1071.038421     | 2124.043018    | 1062.525147      | 2123.059002    | 1062.033139      | V    | 274.187366  | 137.597321      | 257.160817     | 129.084046       |                |                  | 2  |
| 19 |             |                 |                |                  |                |                  | R    | 175.118952  | 88.063114       | 158.092403     | 79.549839        |                |                  | 1  |

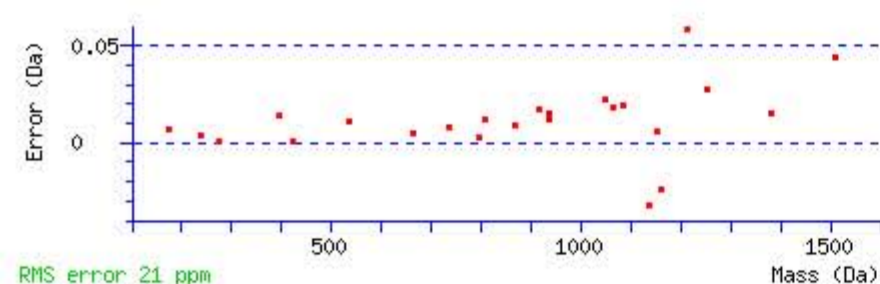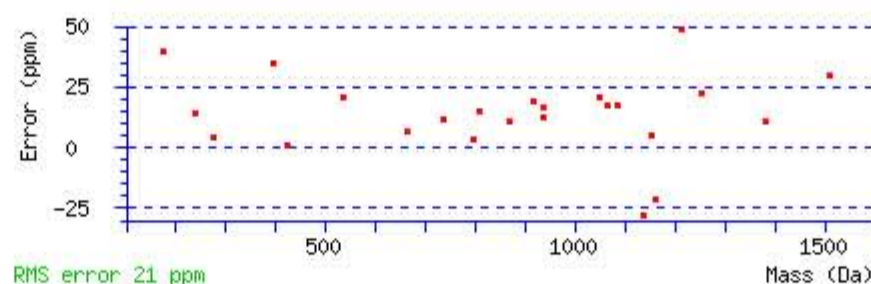

NCBI BLAST search of [GSLVQASEANLQAAQDFVR](#)

(Parameters: blastp, nr protein database, expect=20000, no filter, PAM30)

Other BLAST [web gateways](#)

### All matches to this query

| Score | $M_r(\text{calc})$ : | Delta    | Sequence                            |
|-------|----------------------|----------|-------------------------------------|
| 59.0  | 2314.173950          | 0.009862 | <a href="#">GSLVQASEANLQAAQDFVR</a> |
| 12.4  | 2314.173950          | 0.009862 | <a href="#">GSLVQASEANLQAAQDFVR</a> |
| 1.1   | 2314.170776          | 0.013036 | <a href="#">MADLRQLVTEHAQMMQRIK</a> |



# MASCOT Search Results

## Peptide View

MS/MS Fragmentation of **GSLVQASEANLQAAQDFVR**

Found in **ITIH1\_HUMAN**, Inter-alpha-trypsin inhibitor heavy chain H1 OS=Homo sapiens GN=ITIH1 PE=1 SV=3

Match to Query 53225: 2314.193412 from(772.405080,3+) rtinseconds(2577) index(56391)

Title: Locus:1.1.1.1512.8 File:"2013-07-02 CLN FXIII 60 min 2nd F 4.wiff"

Data file C:\Program Files (x86)\Matrix Science\Mascot Daemon\mgf5 FXIII 60 min 2nd\mascot\_daemon\_merge.mgf

Click mouse within plot area to zoom in by factor of two about that point

Or, Plot from  to  Da

Label all possible matches  Label matches used for scoring

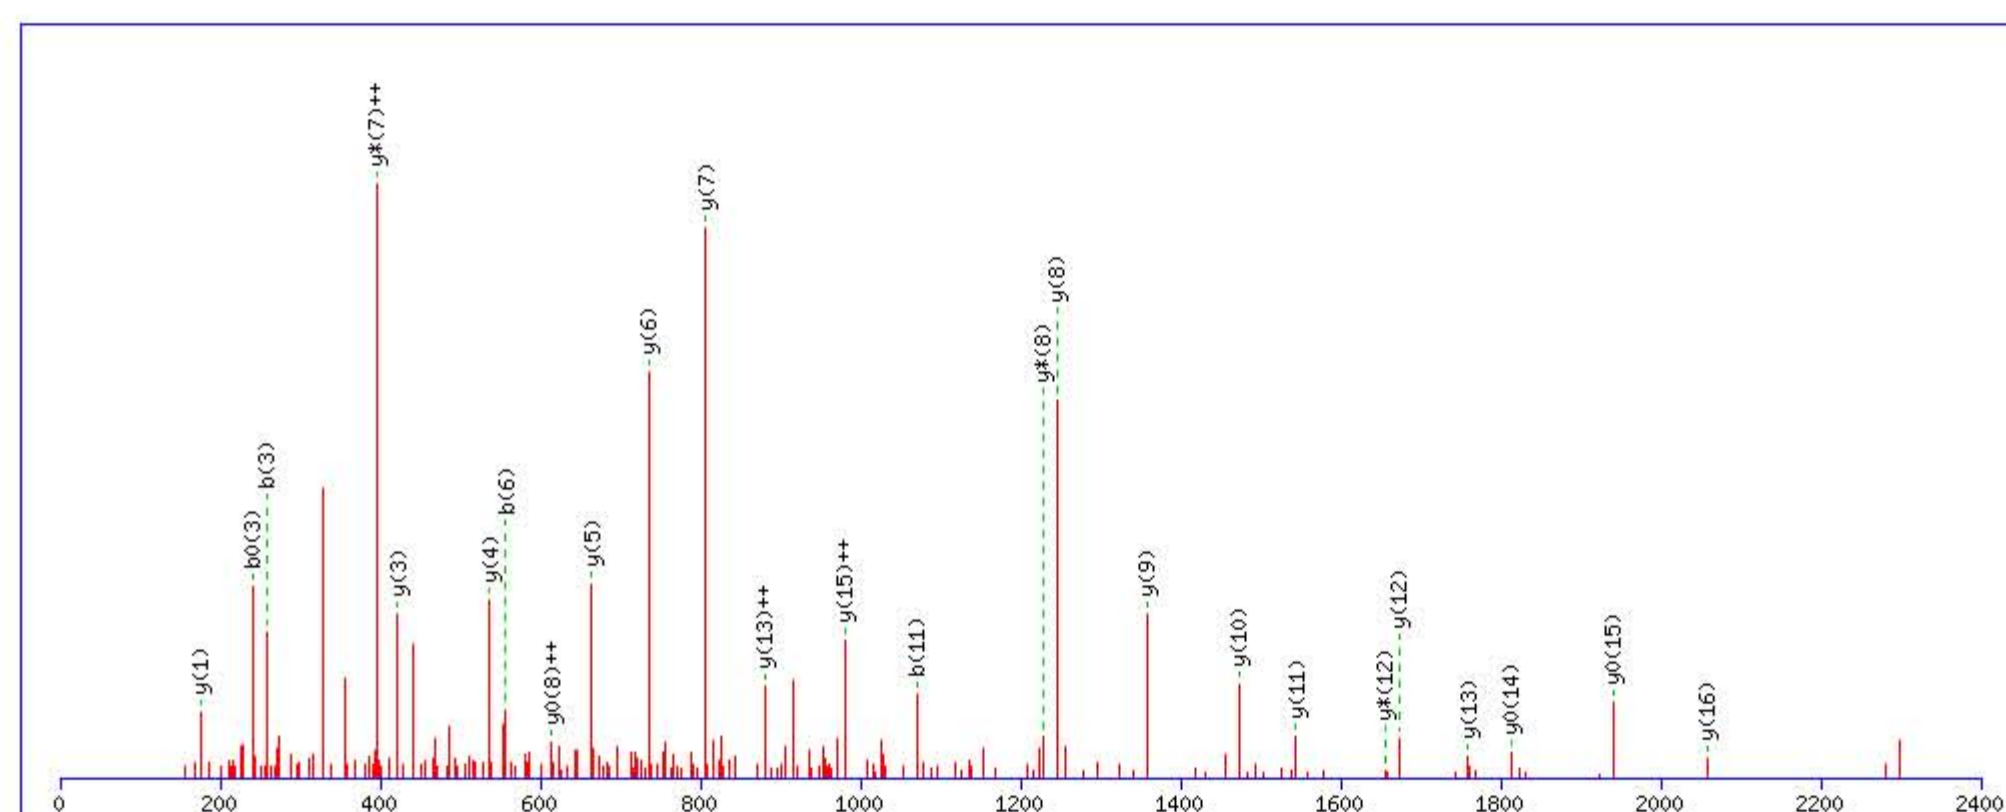

Monoisotopic mass of neutral peptide Mr(calc): 2314.173950

Fixed modifications: Carbamidomethyl (C) (apply to specified residues or termini only)

Variable modifications:

Q12 : Biotin:Thermo-21345 (Q)

Ions Score: 99 Expect: 3.9e-009

Matches : 25/200 fragment ions using 39 most intense peaks [\(help\)](#)

| #  | b                  | b <sup>++</sup> | b <sup>*</sup> | b <sup>*++</sup> | b <sup>0</sup>    | b <sup>0++</sup> | Seq. | y                  | y <sup>++</sup>   | y <sup>*</sup>     | y <sup>*++</sup>  | y <sup>0</sup>     | y <sup>0++</sup>  | #  |
|----|--------------------|-----------------|----------------|------------------|-------------------|------------------|------|--------------------|-------------------|--------------------|-------------------|--------------------|-------------------|----|
| 1  | 58.028740          | 29.518008       |                |                  |                   |                  | G    |                    |                   |                    |                   |                    |                   | 19 |
| 2  | 145.060768         | 73.034022       |                |                  | 127.050203        | 64.028740        | S    | 2258.159779        | 1129.583527       | 2241.133230        | 1121.070253       | 2240.149214        | 1120.578245       | 18 |
| 3  | <b>258.144832</b>  | 129.576054      |                |                  | <b>240.134267</b> | 120.570772       | L    | 2171.127751        | 1086.067513       | 2154.101202        | 1077.554239       | 2153.117186        | 1077.062231       | 17 |
| 4  | 357.213246         | 179.110261      |                |                  | 339.202681        | 170.104979       | V    | <b>2058.043687</b> | 1029.525481       | 2041.017138        | 1021.012207       | 2040.033122        | 1020.520199       | 16 |
| 5  | 485.271824         | 243.139550      | 468.245275     | 234.626276       | 467.261259        | 234.134268       | Q    | 1958.975273        | <b>979.991275</b> | 1941.948724        | 971.478000        | <b>1940.964708</b> | 970.985992        | 15 |
| 6  | <b>556.308938</b>  | 278.658107      | 539.282389     | 270.144833       | 538.298373        | 269.652825       | A    | 1830.916695        | 915.961986        | 1813.890146        | 907.448711        | <b>1812.906130</b> | 906.956703        | 14 |
| 7  | 643.340966         | 322.174121      | 626.314417     | 313.660847       | 625.330401        | 313.168839       | S    | <b>1759.879581</b> | <b>880.443429</b> | 1742.853032        | 871.930154        | 1741.869016        | 871.438146        | 13 |
| 8  | 772.383559         | 386.695418      | 755.357010     | 378.182143       | 754.372994        | 377.690135       | E    | <b>1672.847553</b> | 836.927415        | <b>1655.821004</b> | 828.414140        | 1654.836988        | 827.922132        | 12 |
| 9  | 843.420673         | 422.213975      | 826.394124     | 413.700700       | 825.410108        | 413.208692       | A    | <b>1543.804960</b> | 772.406118        | 1526.778411        | 763.892844        | 1525.794395        | 763.400836        | 11 |
| 10 | 957.463600         | 479.235438      | 940.437051     | 470.722164       | 939.453035        | 470.230156       | N    | <b>1472.767846</b> | 736.887561        | 1455.741297        | 728.374287        | 1454.757281        | 727.882279        | 10 |
| 11 | <b>1070.547664</b> | 535.777470      | 1053.521115    | 527.264196       | 1052.537099       | 526.772187       | L    | <b>1358.724919</b> | 679.866098        | 1341.698370        | 671.352823        | 1340.714354        | 670.860815        | 9  |
| 12 | 1509.772990        | 755.390133      | 1492.746441    | 746.876859       | 1491.762425       | 746.384851       | Q    | <b>1245.640855</b> | 623.324066        | <b>1228.614306</b> | 614.810791        | 1227.630290        | <b>614.318783</b> | 8  |
| 13 | 1580.810104        | 790.908690      | 1563.783555    | 782.395416       | 1562.799539       | 781.903408       | A    | <b>806.415529</b>  | 403.711403        | 789.388980         | <b>395.198128</b> | 788.404964         | 394.706120        | 7  |
| 14 | 1651.847218        | 826.427247      | 1634.820669    | 817.913973       | 1633.836653       | 817.421965       | A    | <b>735.378415</b>  | 368.192846        | 718.351866         | 359.679571        | 717.367850         | 359.187563        | 6  |
| 15 | 1779.905796        | 890.456536      | 1762.879247    | 881.943262       | 1761.895231       | 881.451254       | Q    | <b>664.341301</b>  | 332.674289        | 647.314752         | 324.161014        | 646.330736         | 323.669006        | 5  |
| 16 | 1894.932739        | 947.970008      | 1877.906190    | 939.456733       | 1876.922174       | 938.964725       | D    | <b>536.282723</b>  | 268.645000        | 519.256174         | 260.131725        | 518.272158         | 259.639717        | 4  |
| 17 | 2042.001153        | 1021.504215     | 2024.974604    | 1012.990940      | 2023.990588       | 1012.498932      | F    | <b>421.255780</b>  | 211.131528        | 404.229231         | 202.618253        |                    |                   | 3  |
| 18 | 2141.069567        | 1071.038421     | 2124.043018    | 1062.525147      | 2123.059002       | 1062.033139      | V    | 274.187366         | 137.597321        | 257.160817         | 129.084046        |                    |                   | 2  |
| 19 |                    |                 |                |                  |                   |                  | R    | <b>175.118952</b>  | 88.063114         | 158.092403         | 79.549839         |                    |                   | 1  |

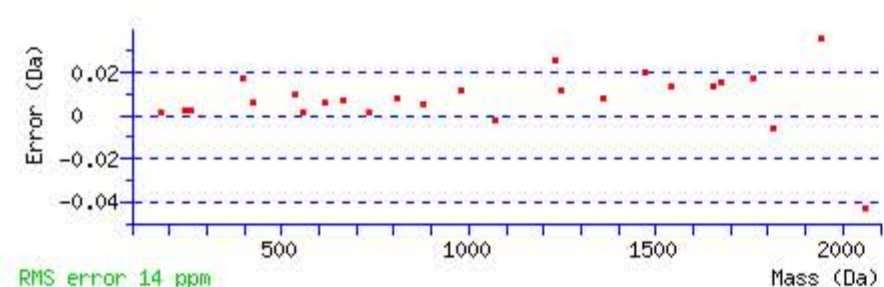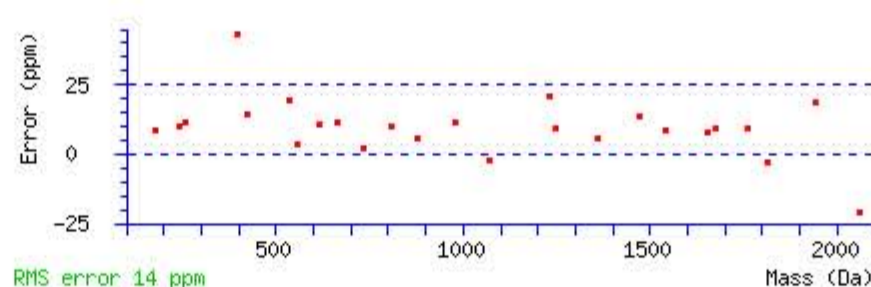

NCBI BLAST search of [GSLVQASEANLQAAQDFVR](#)

(Parameters: blastp, nr protein database, expect=20000, no filter, PAM30)

Other BLAST [web gateways](#)

All matches to this query

| Score | Mr(calc):   | Delta    | Sequence                            |
|-------|-------------|----------|-------------------------------------|
| 98.5  | 2314.173950 | 0.019462 | <a href="#">GSLVQASEANLQAAQDFVR</a> |
| 58.6  | 2314.173950 | 0.019462 | <a href="#">GSLVQASEANLQAAQDFVR</a> |
| 17.5  | 2314.173950 | 0.019462 | <a href="#">GSLVQASEANLQAAQDFVR</a> |

Mascot: <http://www.matrixscience.com/>



# MASCOT Search Results

## Peptide View

MS/MS Fragmentation of **FAHYVVTSQVVNTANEAR**

Found in **ITIH1\_HUMAN**, Inter-alpha-trypsin inhibitor heavy chain H1 OS=Homo sapiens GN=ITIH1 PE=1 SV=3

Match to Query 53259: 2316.178602 from(773.066810,3+) rtinseconds(1985) index(52769)  
 Title: Locus:1.1.1.1306.19 File:"2013-07-02 CLN FXIII 60 min 2nd F 4.wiff"  
 Data file C:\Program Files (x86)\Matrix Science\Mascot Daemon\mgf\5 FXIII 60 min 2nd\mascot\_daemon\_merge.mgf

Click mouse within plot area to zoom in by factor of two about that point

Or, Plot from  to  Da

Label all possible matches  Label matches used for scoring

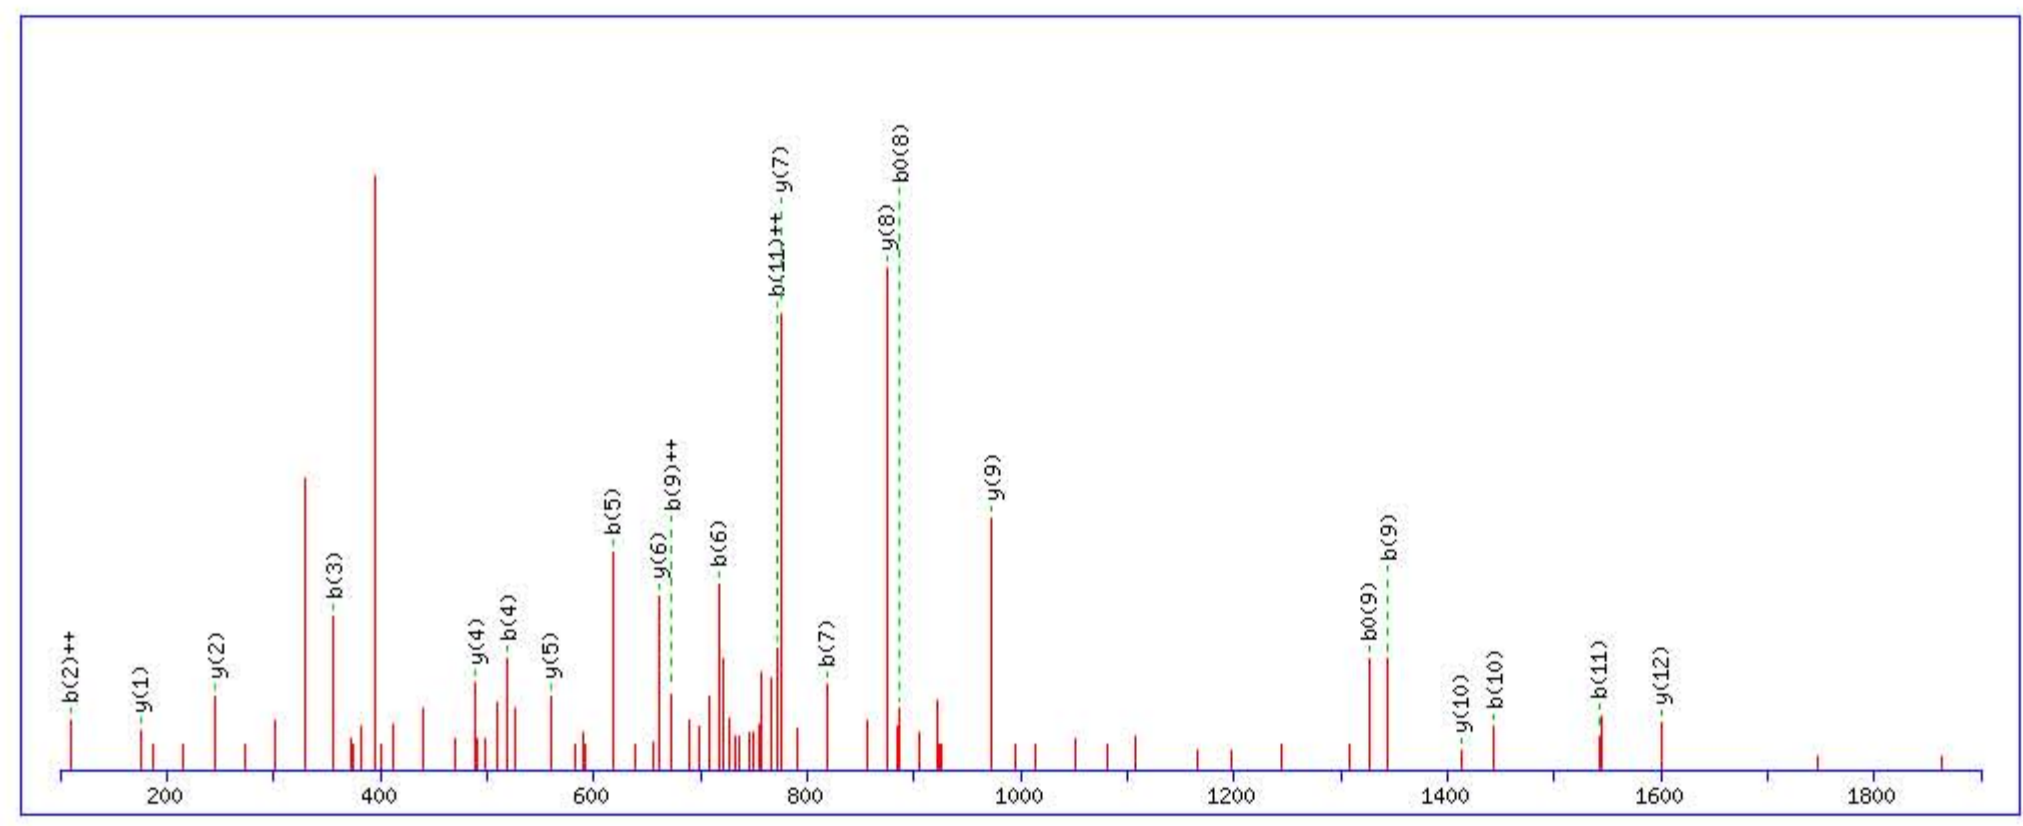

Monoisotopic mass of neutral peptide Mr(calc): 2316.168488  
 Fixed modifications: Carbamidomethyl (C) (apply to specified residues or termini only)  
 Variable modifications:  
 Q9 : Biotin:Thermo-21345 (Q)  
 Ions Score: 64 Expect: 1.1e-005  
 Matches : 23/172 fragment ions using 43 most intense peaks [\(help\)](#)

| #  | b                  | b <sup>++</sup>   | b <sup>*</sup> | b <sup>+++</sup> | b <sup>0</sup>     | b <sup>0++</sup> | Seq. | y                  | y <sup>++</sup> | y <sup>*</sup> | y <sup>+++</sup> | y <sup>0</sup> | y <sup>0++</sup> | #  |
|----|--------------------|-------------------|----------------|------------------|--------------------|------------------|------|--------------------|-----------------|----------------|------------------|----------------|------------------|----|
| 1  | 148.075690         | 74.541483         |                |                  |                    |                  | F    |                    |                 |                |                  |                |                  | 18 |
| 2  | 219.112804         | <b>110.060040</b> |                |                  |                    |                  | A    | 2170.107350        | 1085.557313     | 2153.080801    | 1077.044038      | 2152.096785    | 1076.552030      | 17 |
| 3  | <b>356.171716</b>  | 178.589496        |                |                  |                    |                  | H    | 2099.070236        | 1050.038756     | 2082.043687    | 1041.525481      | 2081.059671    | 1041.033473      | 16 |
| 4  | <b>519.235045</b>  | 260.121161        |                |                  |                    |                  | Y    | 1962.011324        | 981.509300      | 1944.984775    | 972.996026       | 1944.000759    | 972.504018       | 15 |
| 5  | <b>618.303459</b>  | 309.655368        |                |                  |                    |                  | V    | 1798.947995        | 899.977636      | 1781.921446    | 891.464361       | 1780.937430    | 890.972353       | 14 |
| 6  | <b>717.371873</b>  | 359.189575        |                |                  |                    |                  | V    | 1699.879581        | 850.443429      | 1682.853032    | 841.930154       | 1681.869016    | 841.438146       | 13 |
| 7  | <b>818.419552</b>  | 409.713414        |                |                  | 800.408987         | 400.708132       | T    | <b>1600.811167</b> | 800.909222      | 1583.784618    | 792.395947       | 1582.800602    | 791.903939       | 12 |
| 8  | 905.451580         | 453.229428        |                |                  | <b>887.441015</b>  | 444.224146       | S    | 1499.763488        | 750.385382      | 1482.736939    | 741.872108       | 1481.752923    | 741.380100       | 11 |
| 9  | <b>1344.676906</b> | <b>672.842091</b> | 1327.650357    | 664.328817       | <b>1326.666341</b> | 663.836808       | Q    | <b>1412.731460</b> | 706.869368      | 1395.704911    | 698.356094       | 1394.720895    | 697.864086       | 10 |
| 10 | <b>1443.745320</b> | 722.376298        | 1426.718771    | 713.863024       | 1425.734755        | 713.371016       | V    | <b>973.506134</b>  | 487.256705      | 956.479585     | 478.743431       | 955.495569     | 478.251423       | 9  |
| 11 | <b>1542.813734</b> | <b>771.910505</b> | 1525.787185    | 763.397231       | 1524.803169        | 762.905223       | V    | <b>874.437720</b>  | 437.722498      | 857.411171     | 429.209224       | 856.427155     | 428.717216       | 8  |
| 12 | 1656.856661        | 828.931969        | 1639.830112    | 820.418694       | 1638.846096        | 819.926686       | N    | <b>775.369306</b>  | 388.188291      | 758.342757     | 379.675017       | 757.358741     | 379.183009       | 7  |
| 13 | 1757.904340        | 879.455808        | 1740.877791    | 870.942534       | 1739.893775        | 870.450526       | T    | <b>661.326379</b>  | 331.166828      | 644.299830     | 322.653553       | 643.315814     | 322.161545       | 6  |
| 14 | 1828.941454        | 914.974365        | 1811.914905    | 906.461091       | 1810.930889        | 905.969083       | A    | <b>560.278700</b>  | 280.642988      | 543.252151     | 272.129714       | 542.268135     | 271.637706       | 5  |
| 15 | 1942.984381        | 971.995829        | 1925.957832    | 963.482554       | 1924.973816        | 962.990546       | N    | <b>489.241586</b>  | 245.124431      | 472.215037     | 236.611157       | 471.231021     | 236.119149       | 4  |
| 16 | 2072.026974        | 1036.517125       | 2055.000425    | 1028.003850      | 2054.016409        | 1027.511842      | E    | 375.198659         | 188.102968      | 358.172110     | 179.589693       | 357.188094     | 179.097685       | 3  |
| 17 | 2143.064088        | 1072.035682       | 2126.037539    | 1063.522407      | 2125.053523        | 1063.030399      | A    | <b>246.156066</b>  | 123.581671      | 229.129517     | 115.068397       |                |                  | 2  |
| 18 |                    |                   |                |                  |                    |                  | R    | <b>175.118952</b>  | 88.063114       | 158.092403     | 79.549839        |                |                  | 1  |

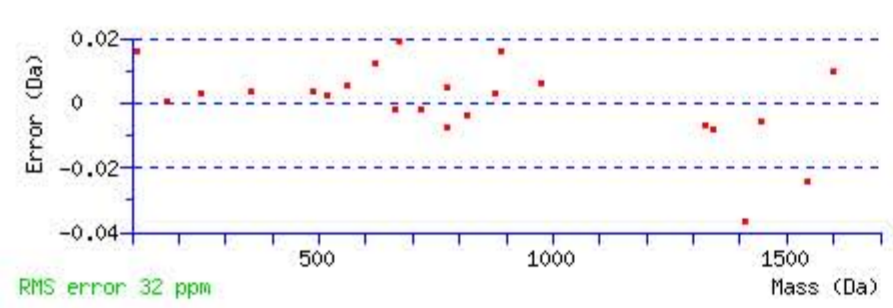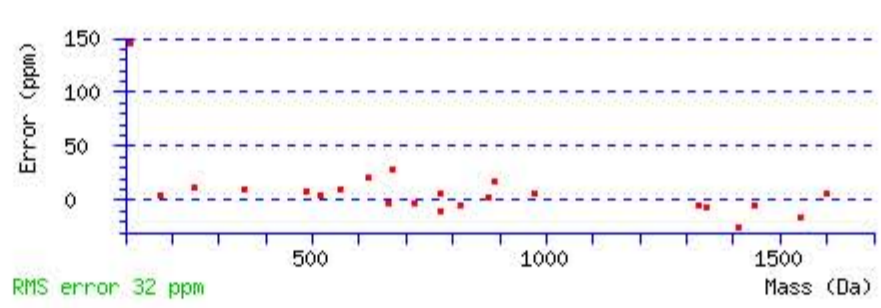

NCBI BLAST search of **FAHYVVTSQVVNTANEAR**  
 (Parameters: blastp, nr protein database, expect=20000, no filter, PAM30)  
 Other BLAST [web gateways](#)

### All matches to this query

| Score | Mr(calc):   | Delta    | Sequence                           |
|-------|-------------|----------|------------------------------------|
| 63.6  | 2316.168488 | 0.010114 | <a href="#">FAHYVVTSQVVNTANEAR</a> |



**MASCOT** Mascot Search Results

**Peptide View**

MS/MS Fragmentation of **ADVQAHGEGQEF SITCLVDEEEMK**  
 Found in **ITIH1\_HUMAN**, Inter-alpha-trypsin inhibitor heavy chain H1 OS=Homo sapiens GN=ITIH1 PE=1 SV=3

Match to Query 61928: 3032.393802 from(1011.805210,3+) rtinseconds(2544) index(56211)  
 Title: Locus:1.1.1.1500.26 File:"2013-07-02 CLN FXIII 60 min 2nd F 4.wiff"  
 Data file C:\Program Files (x86)\Matrix Science\Mascot Daemon\mgf5 FXIII 60 min 2nd\mascot\_daemon\_merge.mgf

Click mouse within plot area to zoom in by factor of two about that point  
 Or, Plot from  to  Da   
 Label all possible matches  Label matches used for scoring

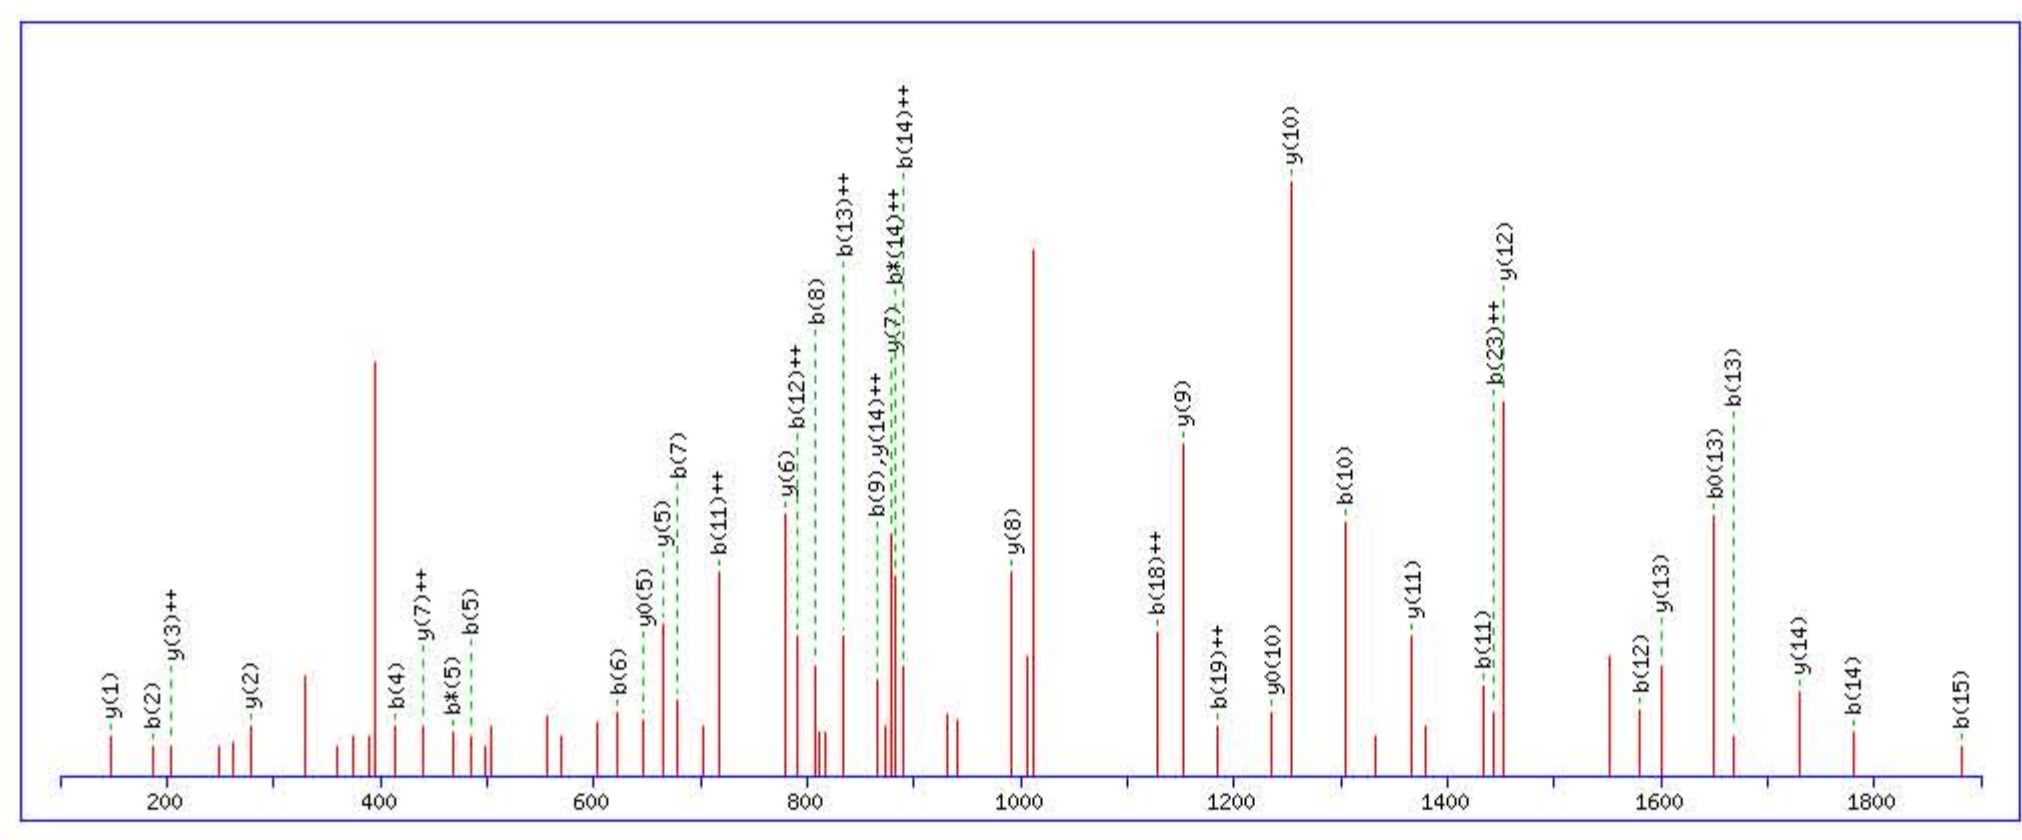

Monoisotopic mass of neutral peptide Mr(calc): 3032.356552  
 Fixed modifications: Carbamidomethyl (C) (apply to specified residues or termini only)  
 Variable modifications:  
 Q10 : Biotin:Thermo-21345 (Q)  
 Ions Score: 103 Expect: 6e-010  
 Matches : 40/264 fragment ions using 58 most intense peaks [\(help\)](#)

| #  | b                  | b <sup>++</sup>    | b <sup>+</sup>    | b <sup>+++</sup>  | b <sup>0</sup>     | b <sup>0++</sup> | Seq. | y                  | y <sup>++</sup>   | y <sup>+</sup> | y <sup>+++</sup> | y <sup>0</sup>     | y <sup>0++</sup> | #  |
|----|--------------------|--------------------|-------------------|-------------------|--------------------|------------------|------|--------------------|-------------------|----------------|------------------|--------------------|------------------|----|
| 1  | 72.044390          | 36.525833          |                   |                   |                    |                  | A    |                    |                   |                |                  |                    |                  | 24 |
| 2  | <b>187.071333</b>  | 94.039304          |                   |                   | 169.060768         | 85.034022        | D    | 2962.326724        | 1481.667000       | 2945.300175    | 1473.153725      | 2944.316159        | 1472.661717      | 23 |
| 3  | 286.139747         | 143.573512         |                   |                   | 268.129182         | 134.568229       | V    | 2847.299781        | 1424.153528       | 2830.273232    | 1415.640254      | 2829.289216        | 1415.148246      | 22 |
| 4  | <b>414.198325</b>  | 207.602801         | 397.171776        | 199.089526        | 396.187760         | 198.597518       | Q    | 2748.231367        | 1374.619321       | 2731.204818    | 1366.106047      | 2730.220802        | 1365.614039      | 21 |
| 5  | <b>485.235439</b>  | 243.121357         | <b>468.208890</b> | 234.608083        | 467.224874         | 234.116075       | A    | 2620.172789        | 1310.590032       | 2603.146240    | 1302.076758      | 2602.162224        | 1301.584750      | 20 |
| 6  | <b>622.294351</b>  | 311.650814         | 605.267802        | 303.137539        | 604.283786         | 302.645531       | H    | 2549.135675        | 1275.071475       | 2532.109126    | 1266.558201      | 2531.125110        | 1266.066193      | 19 |
| 7  | <b>679.315815</b>  | 340.161546         | 662.289266        | 331.648271        | 661.305250         | 331.156263       | G    | 2412.076763        | 1206.542019       | 2395.050214    | 1198.028745      | 2394.066198        | 1197.536737      | 18 |
| 8  | <b>808.358408</b>  | 404.682842         | 791.331859        | 396.169568        | 790.347843         | 395.677560       | E    | 2355.055299        | 1178.031287       | 2338.028750    | 1169.518013      | 2337.044734        | 1169.026005      | 17 |
| 9  | <b>865.379872</b>  | 433.193574         | 848.353323        | 424.680300        | 847.369307         | 424.188292       | G    | 2226.012706        | 1113.509991       | 2208.986157    | 1104.996716      | 2208.002141        | 1104.504708      | 16 |
| 10 | <b>1304.605198</b> | 652.806237         | 1287.578649       | 644.292963        | 1286.594633        | 643.800954       | Q    | 2168.991242        | 1084.999259       | 2151.964693    | 1076.485984      | 2150.980677        | 1075.993976      | 15 |
| 11 | <b>1433.647791</b> | <b>717.327534</b>  | 1416.621242       | 708.814259        | 1415.637226        | 708.322251       | E    | <b>1729.765916</b> | <b>865.386596</b> | 1712.739367    | 856.873322       | 1711.755351        | 856.381314       | 14 |
| 12 | <b>1580.716205</b> | <b>790.861741</b>  | 1563.689656       | 782.348466        | 1562.705640        | 781.856458       | F    | <b>1600.723323</b> | 800.865300        | 1583.696774    | 792.352025       | 1582.712758        | 791.860017       | 13 |
| 13 | <b>1667.748233</b> | <b>834.377755</b>  | 1650.721684       | 825.864480        | <b>1649.737668</b> | 825.372472       | S    | <b>1453.654909</b> | 727.331093        | 1436.628360    | 718.817818       | 1435.644344        | 718.325810       | 12 |
| 14 | <b>1780.832297</b> | <b>890.919787</b>  | 1763.805748       | <b>882.406512</b> | 1762.821732        | 881.914504       | I    | <b>1366.622881</b> | 683.815079        | 1349.596332    | 675.301804       | 1348.612316        | 674.809796       | 11 |
| 15 | <b>1881.879976</b> | 941.443626         | 1864.853427       | 932.930352        | 1863.869411        | 932.438344       | T    | <b>1253.538817</b> | 627.273047        | 1236.512268    | 618.759772       | <b>1235.528252</b> | 618.267764       | 10 |
| 16 | 2041.910625        | 1021.458951        | 2024.884076       | 1012.945676       | 2023.900060        | 1012.453668      | C    | <b>1152.491138</b> | 576.749207        | 1135.464589    | 568.235933       | 1134.480573        | 567.743925       | 9  |
| 17 | 2154.994689        | 1078.000983        | 2137.968140       | 1069.487708       | 2136.984124        | 1068.995700      | L    | <b>992.460489</b>  | 496.733883        | 975.433940     | 488.220608       | 974.449924         | 487.728600       | 8  |
| 18 | 2254.063103        | <b>1127.535189</b> | 2237.036554       | 1119.021915       | 2236.052538        | 1118.529907      | V    | <b>879.376425</b>  | <b>440.191851</b> | 862.349876     | 431.678576       | 861.365860         | 431.186568       | 7  |
| 19 | 2369.090046        | <b>1185.048661</b> | 2352.063497       | 1176.535386       | 2351.079481        | 1176.043378      | D    | <b>780.308011</b>  | 390.657644        | 763.281462     | 382.144369       | 762.297446         | 381.652361       | 6  |
| 20 | 2498.132639        | 1249.569957        | 2481.106090       | 1241.056683       | 2480.122074        | 1240.564675      | E    | <b>665.281068</b>  | 333.144172        | 648.254519     | 324.630898       | <b>647.270503</b>  | 324.138890       | 5  |
| 21 | 2627.175232        | 1314.091254        | 2610.148683       | 1305.577979       | 2609.164667        | 1305.085971      | E    | 536.238475         | 268.622876        | 519.211926     | 260.109601       | 518.227910         | 259.617593       | 4  |
| 22 | 2756.217825        | 1378.612551        | 2739.191276       | 1370.099276       | 2738.207260        | 1369.607268      | E    | 407.195882         | <b>204.101579</b> | 390.169333     | 195.588305       | 389.185317         | 195.096297       | 3  |
| 23 | 2887.258310        | <b>1444.132793</b> | 2870.231761       | 1435.619518       | 2869.247745        | 1435.127511      | M    | <b>278.153289</b>  | 139.580282        | 261.126740     | 131.067008       |                    |                  | 2  |
| 24 |                    |                    |                   |                   |                    |                  | K    | <b>147.112804</b>  | 74.060040         | 130.086255     | 65.546765        |                    |                  | 1  |

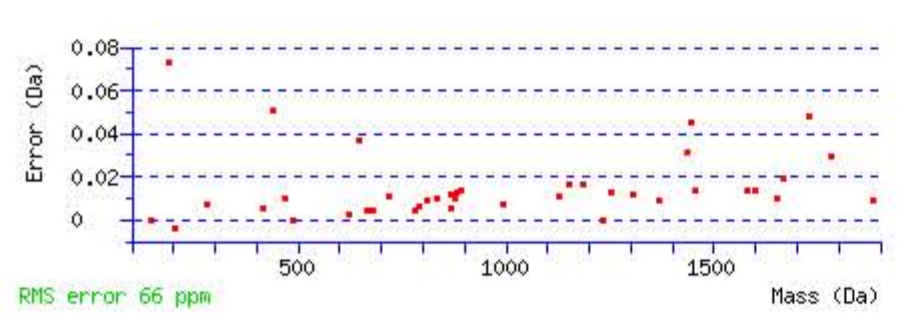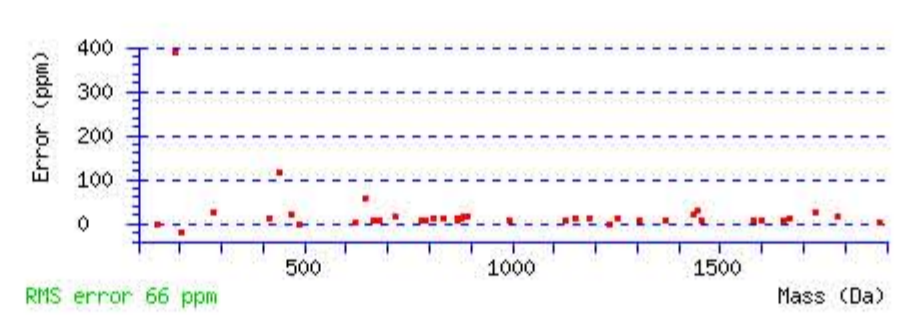

NCBI BLAST search of **ADVQAHGEGQEF SITCLVDEEEMK**  
 (Parameters: blastp, nr protein database, expect=20000, no filter, PAM30)  
 Other BLAST [web gateways](#)

**All matches to this query**

| Score | Mr(calc):   | Delta    | Sequence                                  |
|-------|-------------|----------|-------------------------------------------|
| 103.3 | 3032.356552 | 0.037250 | <a href="#">ADVQAHGEGQEF SITCLVDEEEMK</a> |
| 80.9  | 3032.356552 | 0.037250 | <a href="#">ADVQAHGEGQEF SITCLVDEEEMK</a> |



# MASCOT Search Results

## Peptide View

MS/MS Fragmentation of **GMADQDGLKPTIDKPSEDSPPLEMLGPR**  
 Found in **ITIH1\_HUMAN**, Inter-alpha-trypsin inhibitor heavy chain H1 OS=Homo sapiens GN=ITIH1 PE=1 SV=3

Match to Query 65781: 3320.644416 from(831.168380,4+) rtinseconds(2193) index(54171)  
 Title: Locus:1.1.1.1378.12 File:"2013-07-02 CLN FXIII 60 min 2nd F 4.wiff"  
 Data file C:\Program Files (x86)\Matrix Science\Mascot Daemon\mgf\5 FXIII 60 min 2nd\mascot\_daemon\_merge.mgf

Click mouse within plot area to zoom in by factor of two about that point

Or, Plot from  to  Da

Label all possible matches  Label matches used for scoring

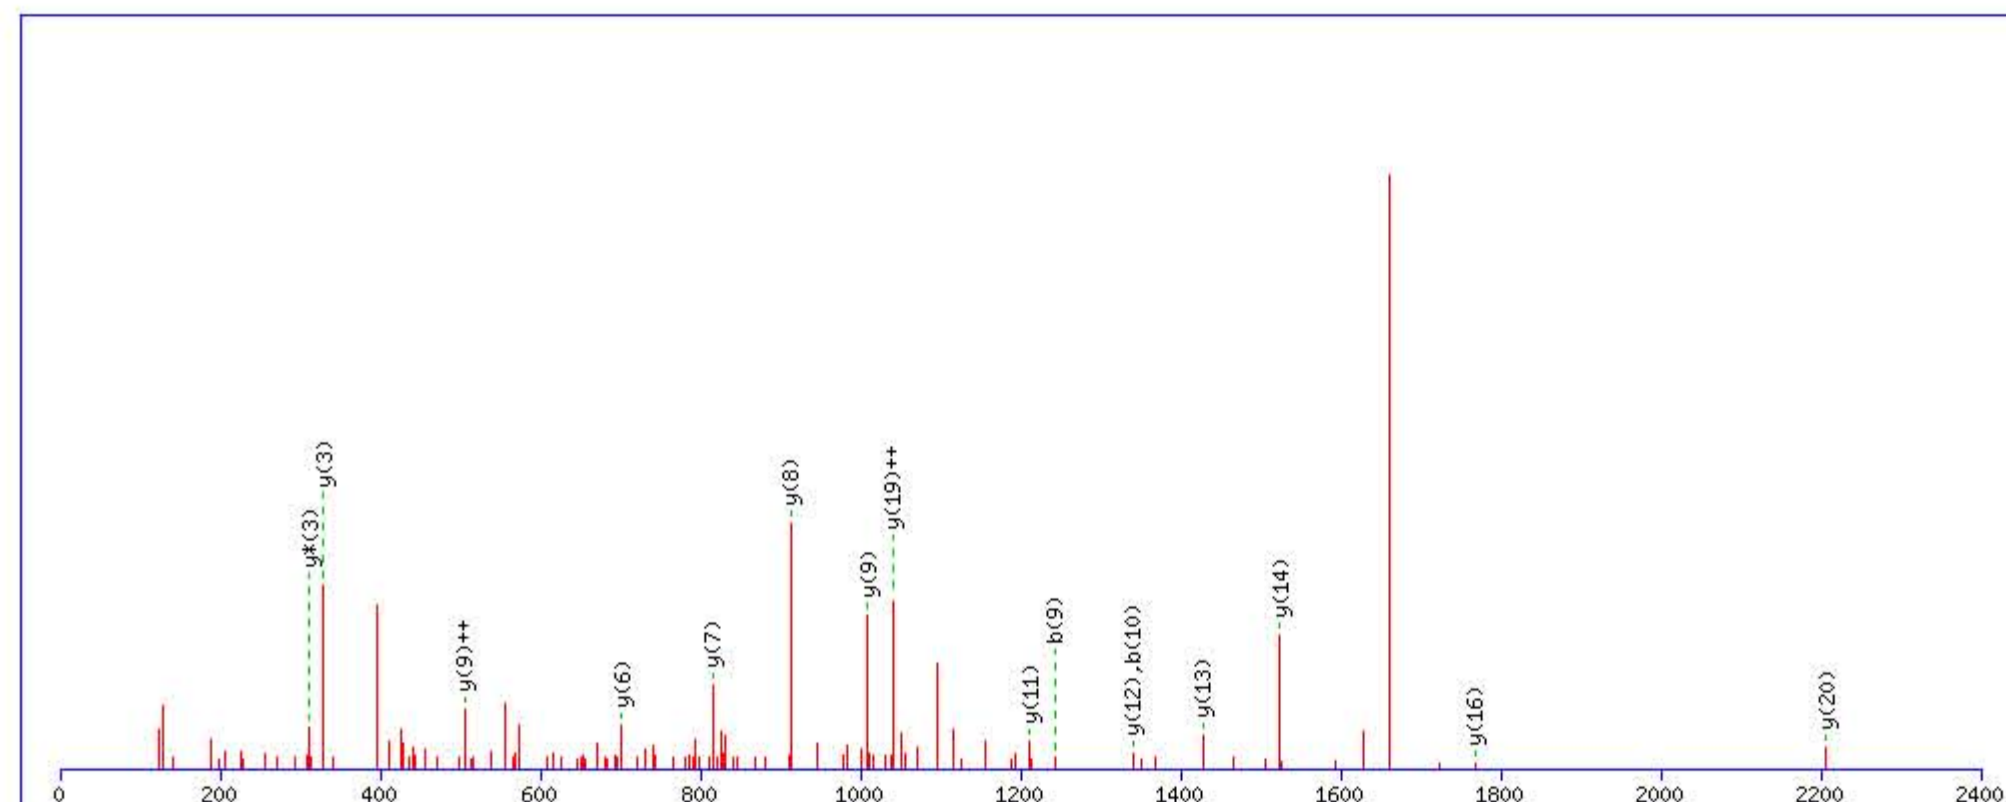

Monoisotopic mass of neutral peptide Mr(calc): 3320.609070  
 Fixed modifications: Carbamidomethyl (C) (apply to specified residues or termini only)  
 Variable modifications:  
 M2 : Oxidation (M), with neutral losses 0.000000 (shown in table), 63.998285  
 Q5 : Biotin:Thermo-21345 (Q)  
 Ions Score: 92 Expect: 3.9e-009  
 Matches : 16/452 fragment ions using 18 most intense peaks [\(help\)](#)

| #  | b                  | b <sup>++</sup> | b <sup>*</sup> | b <sup>+++</sup> | b <sup>0</sup> | b <sup>0++</sup> | Seq.     | y                  | y <sup>++</sup>    | y <sup>*</sup>    | y <sup>+++</sup> | y <sup>0</sup> | y <sup>0++</sup> | #  |
|----|--------------------|-----------------|----------------|------------------|----------------|------------------|----------|--------------------|--------------------|-------------------|------------------|----------------|------------------|----|
| 1  | 58.028740          | 29.518008       |                |                  |                |                  | <b>G</b> |                    |                    |                   |                  |                |                  | 28 |
| 2  | 205.064140         | 103.035708      |                |                  |                |                  | <b>M</b> | 3264.594900        | 1632.801088        | 3247.568351       | 1624.287813      | 3246.584335    | 1623.795805      | 27 |
| 3  | 276.101254         | 138.554265      |                |                  |                |                  | <b>A</b> | 3117.559500        | 1559.283388        | 3100.532951       | 1550.770113      | 3099.548935    | 1550.278105      | 26 |
| 4  | 391.128197         | 196.067737      |                |                  | 373.117632     | 187.062454       | <b>D</b> | 3046.522386        | 1523.764831        | 3029.495837       | 1515.251556      | 3028.511821    | 1514.759548      | 25 |
| 5  | 830.353523         | 415.680400      | 813.326974     | 407.167125       | 812.342958     | 406.675117       | <b>Q</b> | 2931.495443        | 1466.251359        | 2914.468894       | 1457.738085      | 2913.484878    | 1457.246077      | 24 |
| 6  | 945.380466         | 473.193871      | 928.353917     | 464.680597       | 927.369901     | 464.188589       | <b>D</b> | 2492.270117        | 1246.638696        | 2475.243568       | 1238.125422      | 2474.259552    | 1237.633414      | 23 |
| 7  | 1002.401930        | 501.704603      | 985.375381     | 493.191329       | 984.391365     | 492.699321       | <b>G</b> | 2377.243174        | 1189.125225        | 2360.216625       | 1180.611950      | 2359.232609    | 1180.119942      | 22 |
| 8  | 1115.485994        | 558.246635      | 1098.459445    | 549.733361       | 1097.475429    | 549.241353       | <b>L</b> | 2320.221710        | 1160.614493        | 2303.195161       | 1152.101218      | 2302.211145    | 1151.609210      | 21 |
| 9  | <b>1243.580957</b> | 622.294117      | 1226.554408    | 613.780842       | 1225.570392    | 613.288834       | <b>K</b> | <b>2207.137646</b> | 1104.072461        | 2190.111097       | 1095.559186      | 2189.127081    | 1095.067178      | 20 |
| 10 | <b>1340.633721</b> | 670.820499      | 1323.607172    | 662.307224       | 1322.623156    | 661.815216       | <b>P</b> | 2079.042683        | <b>1040.024980</b> | 2062.016134       | 1031.511705      | 2061.032118    | 1031.019697      | 19 |
| 11 | 1441.681400        | 721.344338      | 1424.654851    | 712.831064       | 1423.670835    | 712.339056       | <b>T</b> | 1981.989919        | 991.498598         | 1964.963370       | 982.985323       | 1963.979354    | 982.493315       | 18 |
| 12 | 1554.765464        | 777.886370      | 1537.738915    | 769.373096       | 1536.754899    | 768.881088       | <b>I</b> | 1880.942240        | 940.974758         | 1863.915691       | 932.461484       | 1862.931675    | 931.969476       | 17 |
| 13 | 1669.792407        | 835.399842      | 1652.765858    | 826.886567       | 1651.781842    | 826.394559       | <b>D</b> | <b>1767.858176</b> | 884.432726         | 1750.831627       | 875.919452       | 1749.847611    | 875.427444       | 16 |
| 14 | 1797.887370        | 899.447323      | 1780.860821    | 890.934049       | 1779.876805    | 890.442041       | <b>K</b> | 1652.831233        | 826.919255         | 1635.804684       | 818.405980       | 1634.820668    | 817.913972       | 15 |
| 15 | 1894.940134        | 947.973705      | 1877.913585    | 939.460431       | 1876.929569    | 938.968423       | <b>P</b> | <b>1524.736270</b> | 762.871773         | 1507.709721       | 754.358499       | 1506.725705    | 753.866491       | 14 |
| 16 | 1981.972162        | 991.489719      | 1964.945613    | 982.976445       | 1963.961597    | 982.484437       | <b>S</b> | <b>1427.683506</b> | 714.345391         | 1410.656957       | 705.832117       | 1409.672941    | 705.340109       | 13 |
| 17 | 2111.014755        | 1056.011016     | 2093.988206    | 1047.497741      | 2093.004190    | 1047.005733      | <b>E</b> | <b>1340.651478</b> | 670.829377         | 1323.624929       | 662.316103       | 1322.640913    | 661.824095       | 12 |
| 18 | 2226.041698        | 1113.524487     | 2209.015149    | 1105.011212      | 2208.031133    | 1104.519204      | <b>D</b> | <b>1211.608885</b> | 606.308081         | 1194.582336       | 597.794806       | 1193.598320    | 597.302798       | 11 |
| 19 | 2313.073726        | 1157.040501     | 2296.047177    | 1148.527226      | 2295.063161    | 1148.035218      | <b>S</b> | 1096.581942        | 548.794609         | 1079.555393       | 540.281335       | 1078.571377    | 539.789327       | 10 |
| 20 | 2410.126490        | 1205.566883     | 2393.099941    | 1197.053608      | 2392.115925    | 1196.561600      | <b>P</b> | <b>1009.549914</b> | <b>505.278595</b>  | 992.523365        | 496.765321       | 991.539349     | 496.273313       | 9  |
| 21 | 2507.179254        | 1254.093265     | 2490.152705    | 1245.579990      | 2489.168689    | 1245.087983      | <b>P</b> | <b>912.497150</b>  | 456.752213         | 895.470601        | 448.238939       | 894.486585     | 447.746931       | 8  |
| 22 | 2620.263318        | 1310.635297     | 2603.236769    | 1302.122023      | 2602.252753    | 1301.630015      | <b>L</b> | <b>815.444386</b>  | 408.225831         | 798.417837        | 399.712557       | 797.433821     | 399.220549       | 7  |
| 23 | 2749.305911        | 1375.156594     | 2732.279362    | 1366.643319      | 2731.295346    | 1366.151311      | <b>E</b> | <b>702.360322</b>  | 351.683799         | 685.333773        | 343.170525       | 684.349757     | 342.678517       | 6  |
| 24 | 2880.346396        | 1440.676836     | 2863.319847    | 1432.163562      | 2862.335831    | 1431.671554      | <b>M</b> | 573.317729         | 287.162503         | 556.291180        | 278.649228       |                |                  | 5  |
| 25 | 2993.430460        | 1497.218868     | 2976.403911    | 1488.705594      | 2975.419895    | 1488.213586      | <b>L</b> | 442.277244         | 221.642260         | 425.250695        | 213.128986       |                |                  | 4  |
| 26 | 3050.451924        | 1525.729600     | 3033.425375    | 1517.216326      | 3032.441359    | 1516.724318      | <b>G</b> | <b>329.193180</b>  | 165.100228         | <b>312.166631</b> | 156.586953       |                |                  | 3  |
| 27 | 3147.504688        | 1574.255982     | 3130.478139    | 1565.742708      | 3129.494123    | 1565.250700      | <b>P</b> | 272.171716         | 136.589496         | 255.145167        | 128.076221       |                |                  | 2  |
| 28 |                    |                 |                |                  |                |                  | <b>R</b> | 175.118952         | 88.063114          | 158.092403        | 79.549839        |                |                  | 1  |

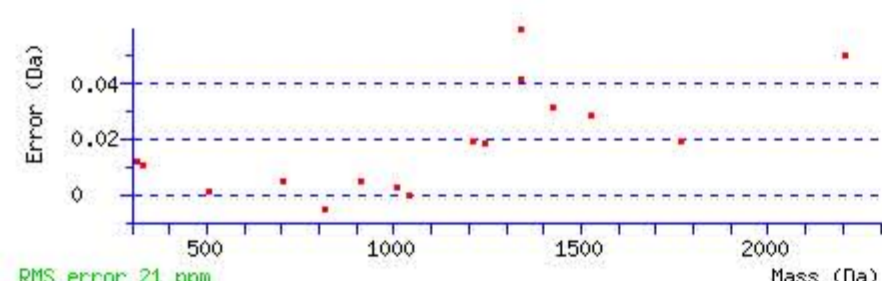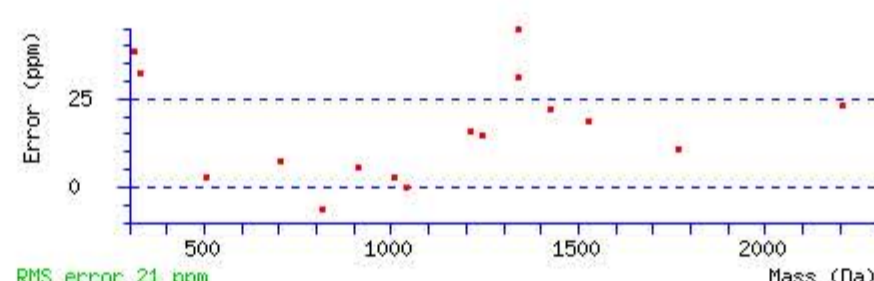

NCBI BLAST search of **GMADQDGLKPTIDKPSEDSPPLEMLGPR**  
 (Parameters: blastp, nr protein database, expect=20000, no filter, PAM30)  
 Other BLAST [web gateways](#)

### All matches to this query

| Score | Mr(calc):   | Delta     | Sequence                                     |
|-------|-------------|-----------|----------------------------------------------|
| 91.5  | 3320.609070 | 0.035346  | <a href="#">GMADQDGLKPTIDKPSEDSPPLEMLGPR</a> |
| 1.8   | 3320.689682 | -0.045266 | <a href="#">LLSQLPEVHEPPQEKQEPPCSQSPKK</a>   |
| 0.9   | 3320.645462 | -0.001046 | <a href="#">QDIGDILHQIMTITDQSLDEAQAQ</a>     |
| 0.2   | 3320.689682 | -0.045266 | <a href="#">LLSQLPEVHEPPQEKQEPPCSQSPKK</a>   |
| 0.2   | 3320.689682 | -0.045266 | <a href="#">LLSQLPEVHEPPQEKQEPPCSQSPKK</a>   |



# MASCOT Search Results

## Peptide View

### MS/MS Fragmentation of TQVADAK

Found in **ITIH2\_HUMAN**, Inter-alpha-trypsin inhibitor heavy chain H2 OS=Homo sapiens GN=ITIH2 PE=1 SV=2

Match to Query 17358: 1042.548268 from(522.281410,2+) rtinseconds(1332) index(48430)

Title: Locus:1.1.1.1079.16 File:"2013-07-02 CLN FXIII 60 min 2nd F 4.wiff"

Data file C:\Program Files (x86)\Matrix Science\Mascot Daemon\mgf\5 FXIII 60 min 2nd\mascot\_daemon\_merge.mgf

Click mouse within plot area to zoom in by factor of two about that point

Or, Plot from  to  Da

Label all possible matches  Label matches used for scoring

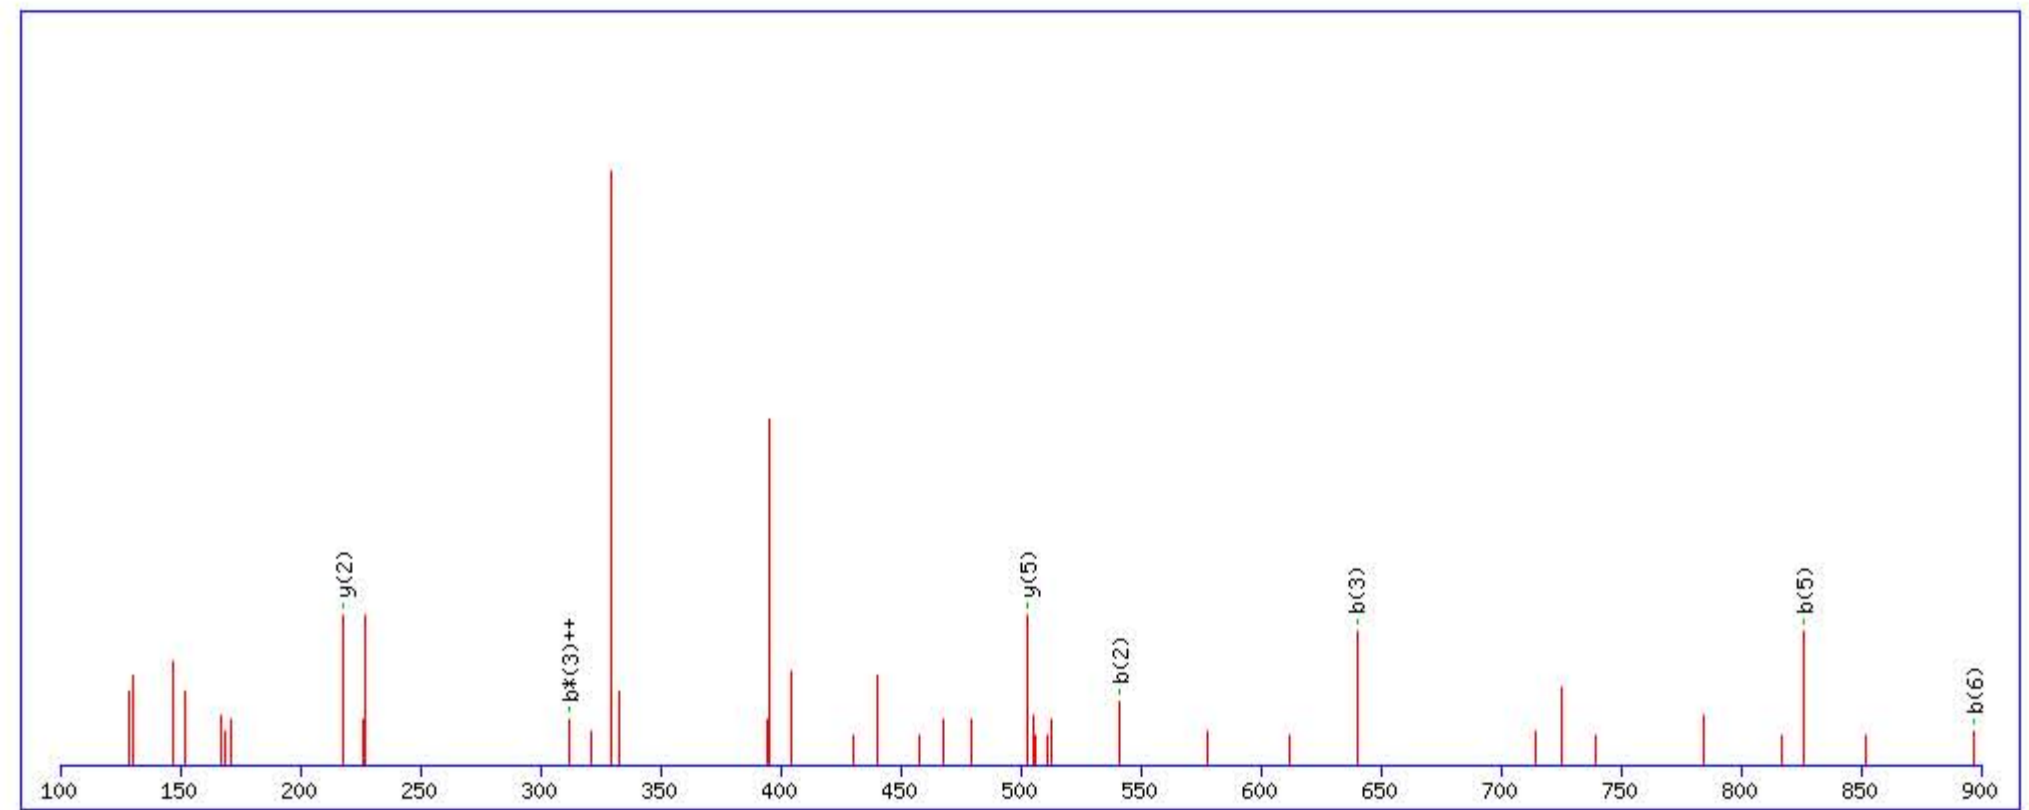

Monoisotopic mass of neutral peptide Mr(calc): 1042.548111

Fixed modifications: Carbamidomethyl (C) (apply to specified residues or termini only)

Variable modifications:

Q2 : Biotin:Thermo-21345 (Q)

Ions Score: 30 Expect: 0.027

Matches : 7/66 fragment ions using 8 most intense peaks [\(help\)](#)

| # | b                 | b <sup>++</sup> | b <sup>*</sup> | b <sup>*++</sup>  | b <sup>0</sup> | b <sup>0++</sup> | Seq. | y                 | y <sup>++</sup> | y <sup>*</sup> | y <sup>*++</sup> | y <sup>0</sup> | y <sup>0++</sup> | # |
|---|-------------------|-----------------|----------------|-------------------|----------------|------------------|------|-------------------|-----------------|----------------|------------------|----------------|------------------|---|
| 1 | 102.054955        | 51.531116       |                |                   | 84.044390      | 42.525833        | T    |                   |                 |                |                  |                |                  | 7 |
| 2 | <b>541.280281</b> | 271.143779      | 524.253732     | 262.630504        | 523.269716     | 262.138496       | Q    | 942.507715        | 471.757496      | 925.481166     | 463.244221       | 924.497150     | 462.752213       | 6 |
| 3 | <b>640.348695</b> | 320.677986      | 623.322146     | <b>312.164711</b> | 622.338130     | 311.672703       | V    | <b>503.282389</b> | 252.144832      | 486.255840     | 243.631558       | 485.271824     | 243.139550       | 5 |
| 4 | 711.385809        | 356.196543      | 694.359260     | 347.683268        | 693.375244     | 347.191260       | A    | 404.213975        | 202.610625      | 387.187426     | 194.097351       | 386.203410     | 193.605343       | 4 |
| 5 | <b>826.412752</b> | 413.710014      | 809.386203     | 405.196739        | 808.402187     | 404.704731       | D    | 333.176861        | 167.092068      | 316.150312     | 158.578794       | 315.166296     | 158.086786       | 3 |
| 6 | <b>897.449866</b> | 449.228571      | 880.423317     | 440.715296        | 879.439301     | 440.223288       | A    | <b>218.149918</b> | 109.578597      | 201.123369     | 101.065322       |                |                  | 2 |
| 7 |                   |                 |                |                   |                |                  | K    | 147.112804        | 74.060040       | 130.086255     | 65.546765        |                |                  | 1 |

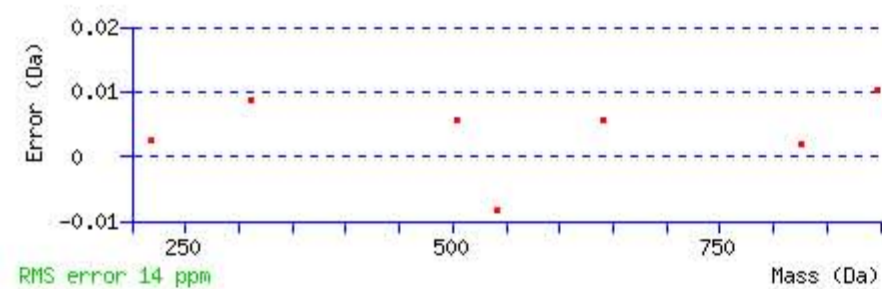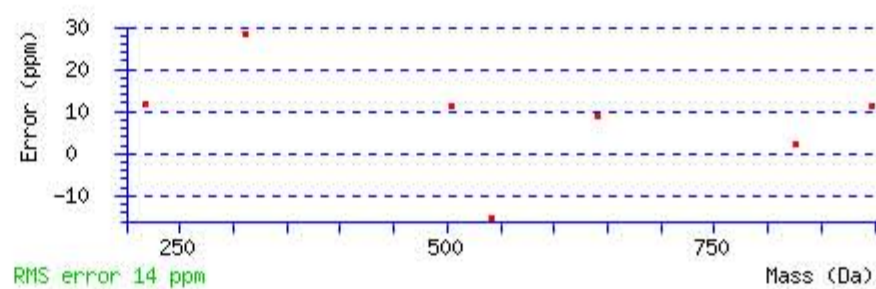

### NCBI BLAST search of TQVADAK

(Parameters: blastp, nr protein database, expect=20000, no filter, PAM30)

Other BLAST [web gateways](#)

### All matches to this query

| Score | Mr(calc):   | Delta     | Sequence                   |
|-------|-------------|-----------|----------------------------|
| 30.0  | 1042.548111 | 0.000157  | <a href="#">TQVADAK</a>    |
| 12.4  | 1042.548096 | 0.000172  | <a href="#">SLQADAK</a>    |
| 11.7  | 1042.540726 | 0.007542  | <a href="#">KPVSEVGDGR</a> |
| 10.0  | 1042.540680 | 0.007588  | <a href="#">EAEKRPADK</a>  |
| 8.7   | 1042.540695 | 0.007573  | <a href="#">GREPEASGLK</a> |
| 8.4   | 1042.540680 | 0.007588  | <a href="#">SLENPAERK</a>  |
| 7.5   | 1042.548080 | 0.000188  | <a href="#">EKEQAK</a>     |
| 7.0   | 1042.548096 | 0.000172  | <a href="#">QTENLK</a>     |
| 6.3   | 1042.554611 | -0.006343 | <a href="#">EPSEIVELK</a>  |
| 6.1   | 1042.548096 | 0.000172  | <a href="#">QEAGLSK</a>    |



# {MATRIX} {SCIENCE} Mascot Search Results

## Peptide View

MS/MS Fragmentation of **ALYAQAR**

Found in **ITIH2\_HUMAN**, Inter-alpha-trypsin inhibitor heavy chain H2 OS=Homo sapiens GN=ITIH2 PE=1 SV=2

Match to Query 18789: 1102.595728 from(552.305140,2+) rtinseconds(1681) index(50706)

Title: Locus:1.1.1.1201.3 File:"2013-07-02 CLN FXIII 60 min 2nd F 4.wiff"

Data file C:\Program Files (x86)\Matrix Science\Mascot Daemon\mgf\5 FXIII 60 min 2nd\mascot\_daemon\_merge.mgf

Click mouse within plot area to zoom in by factor of two about that point

Or, Plot from  to  Da

Label all possible matches  Label matches used for scoring

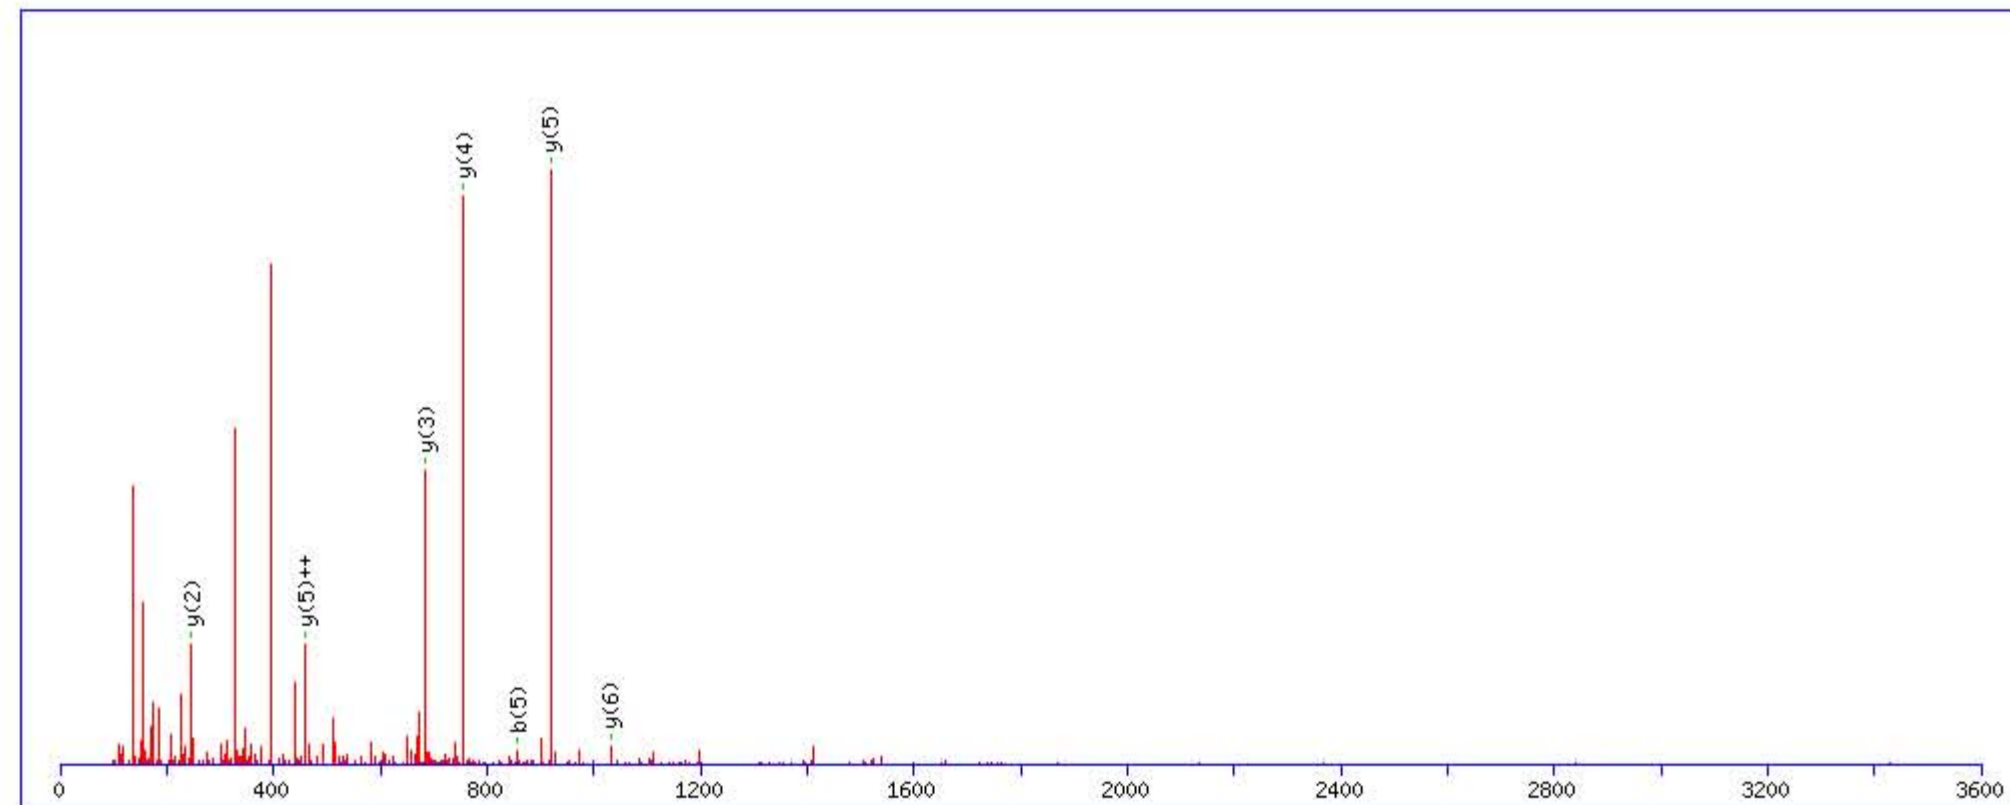

Monoisotopic mass of neutral peptide Mr(calc): 1102.595703

Fixed modifications: Carbamidomethyl (C) (apply to specified residues or termini only)

Variable modifications:

Q5 : Biotin:Thermo-21345 (Q)

Ions Score: 38 Expect: 0.0034

Matches : 7/40 fragment ions using 10 most intense peaks [\(help\)](#)

| # | b                 | b <sup>++</sup> | b <sup>*</sup> | b <sup>*++</sup> | Seq. | y                  | y <sup>++</sup>   | y <sup>*</sup> | y <sup>*++</sup> | # |
|---|-------------------|-----------------|----------------|------------------|------|--------------------|-------------------|----------------|------------------|---|
| 1 | 72.044390         | 36.525833       |                |                  | A    |                    |                   |                |                  | 7 |
| 2 | 185.128454        | 93.067865       |                |                  | L    | <b>1032.565899</b> | 516.786588        | 1015.539350    | 508.273313       | 6 |
| 3 | 348.191783        | 174.599529      |                |                  | Y    | <b>919.481835</b>  | <b>460.244556</b> | 902.455286     | 451.731281       | 5 |
| 4 | 419.228897        | 210.118087      |                |                  | A    | <b>756.418506</b>  | 378.712891        | 739.391957     | 370.199617       | 4 |
| 5 | <b>858.454223</b> | 429.730750      | 841.427674     | 421.217475       | Q    | <b>685.381392</b>  | 343.194334        | 668.354843     | 334.681060       | 3 |
| 6 | 929.491337        | 465.249307      | 912.464788     | 456.736032       | A    | <b>246.156066</b>  | 123.581671        | 229.129517     | 115.068397       | 2 |
| 7 |                   |                 |                |                  | R    | 175.118952         | 88.063114         | 158.092403     | 79.549840        | 1 |

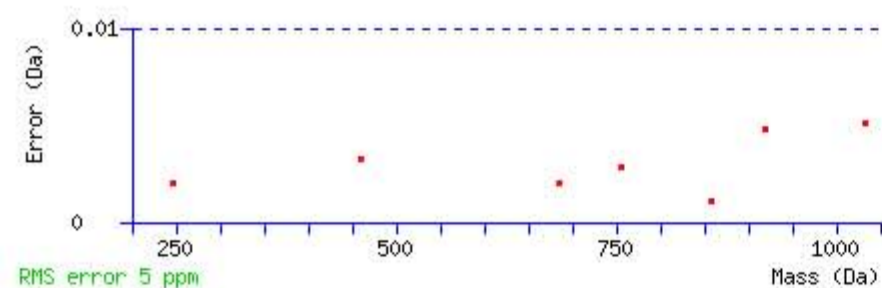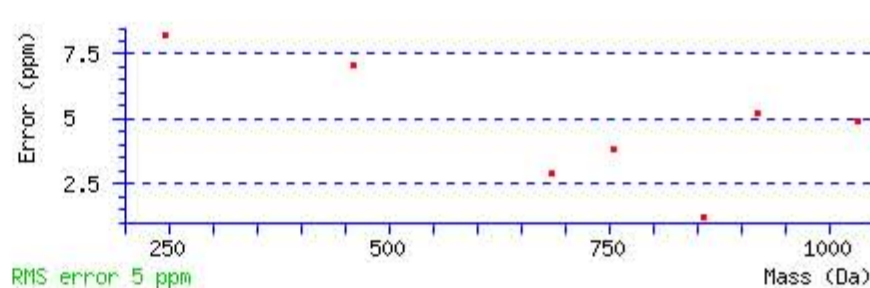

NCBI BLAST search of [ALYAQAR](#)

(Parameters: blastp, nr protein database, expect=20000, no filter, PAM30)

Other BLAST [web gateways](#)

## All matches to this query

| Score | Mr(calc):   | Delta     | Sequence                   |
|-------|-------------|-----------|----------------------------|
| 37.5  | 1102.595703 | 0.000025  | <a href="#">ALYAQAR</a>    |
| 10.5  | 1102.602234 | -0.006506 | <a href="#">AIELGYNPVK</a> |
| 3.6   | 1102.580460 | 0.015268  | <a href="#">AMVENVTLAR</a> |
| 1.6   | 1102.584305 | 0.011423  | <a href="#">QSSQRGLTAR</a> |
| 0.9   | 1102.598221 | -0.002493 | <a href="#">DDLKATLTAR</a> |
| 0.7   | 1102.588333 | 0.007395  | <a href="#">SPYGLTPRGR</a> |
| 0.3   | 1102.591660 | 0.004068  | <a href="#">KMREELAAR</a>  |

Mascot: <http://www.matrixscience.com/>



# MASCOT SCIENCE Mascot Search Results

## Peptide View

MS/MS Fragmentation of **VQSTITSR**

Found in **ITIH2\_HUMAN**, Inter-alpha-trypsin inhibitor heavy chain H2 OS=Homo sapiens GN=ITIH2 PE=1 SV=2

Match to Query 23336: 1201.649588 from(601.832070,2+) rtinseconds(1533) index(49759)

Title: Locus:1.1.1.1149.9 File:"2013-07-02 CLN FXIII 60 min 2nd F 4.wiff"

Data file C:\Program Files (x86)\Matrix Science\Mascot Daemon\mgf\5 FXIII 60 min 2nd\mascot\_daemon\_merge.mgf

Click mouse within plot area to zoom in by factor of two about that point

Or, Plot from  to  Da

Label all possible matches  Label matches used for scoring

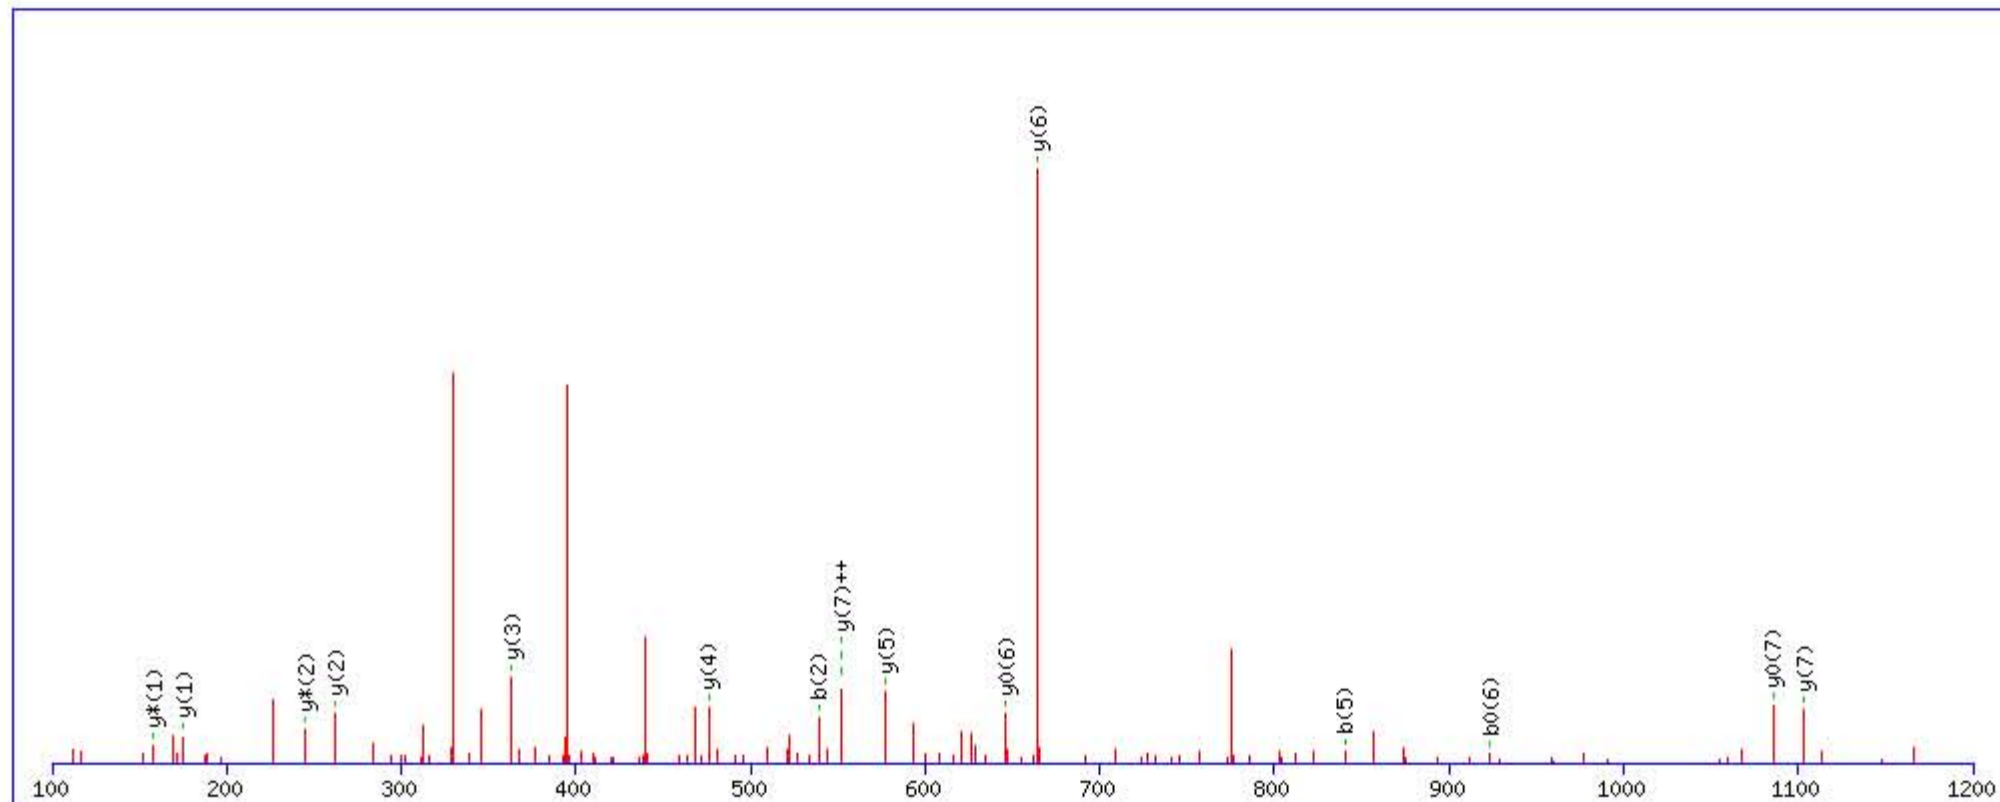

Monoisotopic mass of neutral peptide Mr(calc): 1201.648895

Fixed modifications: Carbamidomethyl (C) (apply to specified residues or termini only)

Variable modifications:

Q2 : Biotin:Thermo-21345 (Q)

Ions Score: 37 Expect: 0.00042

Matches : 15/76 fragment ions using 33 most intense peaks ([help](#))

| # | b                 | b <sup>++</sup> | b <sup>*</sup> | b <sup>+++</sup> | b <sup>0</sup>    | b <sup>0++</sup> | Seq. | y                  | y <sup>++</sup>   | y <sup>*</sup>    | y <sup>+++</sup> | y <sup>0</sup>     | y <sup>0++</sup> | # |
|---|-------------------|-----------------|----------------|------------------|-------------------|------------------|------|--------------------|-------------------|-------------------|------------------|--------------------|------------------|---|
| 1 | 100.075690        | 50.541483       |                |                  |                   |                  | V    |                    |                   |                   |                  |                    |                  | 8 |
| 2 | <b>539.301016</b> | 270.154146      | 522.274467     | 261.640872       |                   |                  | Q    | <b>1103.587756</b> | <b>552.297516</b> | 1086.561207       | 543.784242       | <b>1085.577191</b> | 543.292234       | 7 |
| 3 | 626.333044        | 313.670160      | 609.306495     | 305.156886       | 608.322479        | 304.664878       | S    | <b>664.362430</b>  | 332.684853        | 647.335881        | 324.171579       | <b>646.351865</b>  | 323.679571       | 6 |
| 4 | 727.380723        | 364.194000      | 710.354174     | 355.680725       | 709.370158        | 355.188717       | T    | <b>577.330402</b>  | 289.168839        | 560.303853        | 280.655565       | 559.319837         | 280.163557       | 5 |
| 5 | <b>840.464787</b> | 420.736032      | 823.438238     | 412.222757       | 822.454222        | 411.730749       | I    | <b>476.282723</b>  | 238.645000        | 459.256174        | 230.131725       | 458.272158         | 229.639717       | 4 |
| 6 | 941.512466        | 471.259871      | 924.485917     | 462.746597       | <b>923.501901</b> | 462.254589       | T    | <b>363.198659</b>  | 182.102968        | 346.172110        | 173.589693       | 345.188094         | 173.097685       | 3 |
| 7 | 1028.544494       | 514.775885      | 1011.517945    | 506.262611       | 1010.533929       | 505.770603       | S    | <b>262.150980</b>  | 131.579128        | <b>245.124431</b> | 123.065854       | 244.140415         | 122.573846       | 2 |
| 8 |                   |                 |                |                  |                   |                  | R    | <b>175.118952</b>  | 88.063114         | <b>158.092403</b> | 79.549839        |                    |                  | 1 |

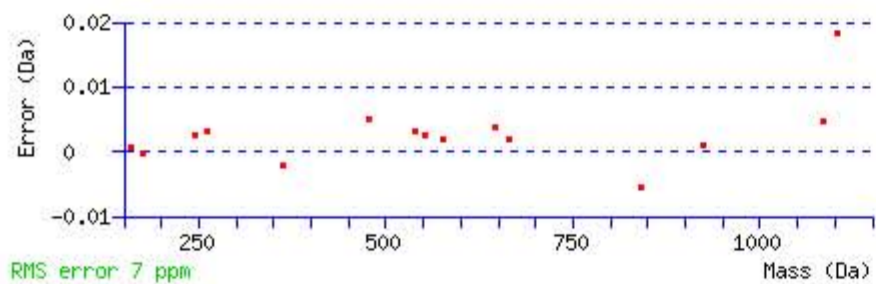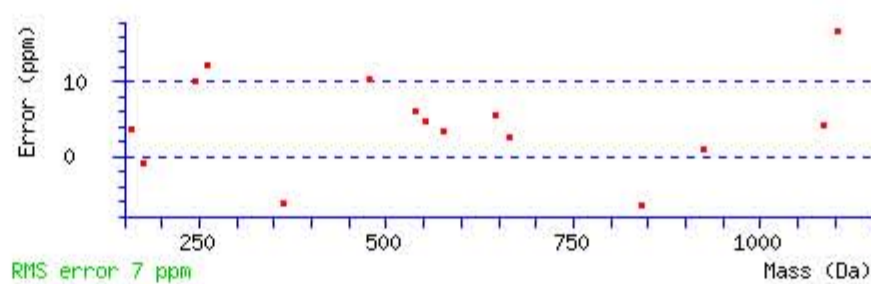

NCBI BLAST search of **VQSTITSR**

(Parameters: blastp, nr protein database, expect=20000, no filter, PAM30)

Other BLAST [web gateways](#)

All matches to this query

| Score | Mr(calc):   | Delta    | Sequence                 |
|-------|-------------|----------|--------------------------|
| 36.9  | 1201.648895 | 0.000693 | <a href="#">VQSTITSR</a> |
| 0.9   | 1201.638992 | 0.010596 | <a href="#">VQPPSHAR</a> |
| 0.3   | 1201.638992 | 0.010596 | <a href="#">VQGREFR</a>  |



# MASCOT Search Results

## Peptide View

MS/MS Fragmentation of **MATMIQSK**

Found in **ITIH2\_HUMAN**, Inter-alpha-trypsin inhibitor heavy chain H2 OS=Homo sapiens GN=ITIH2 PE=1 SV=2

Match to Query 26547: 1320.664428 from(661.339490,2+) rtinseconds(1776) index(51353)

Title: Locus:1.1.1.1234.11 File:"2013-07-02 CLN FXIII 60 min 2nd F 4.wiff"

Data file C:\Program Files (x86)\Matrix Science\Mascot Daemon\mgf5 FXIII 60 min 2nd\mascot\_daemon\_merge.mgf

Click mouse within plot area to zoom in by factor of two about that point

Or, Plot from  to  Da

Label all possible matches  Label matches used for scoring

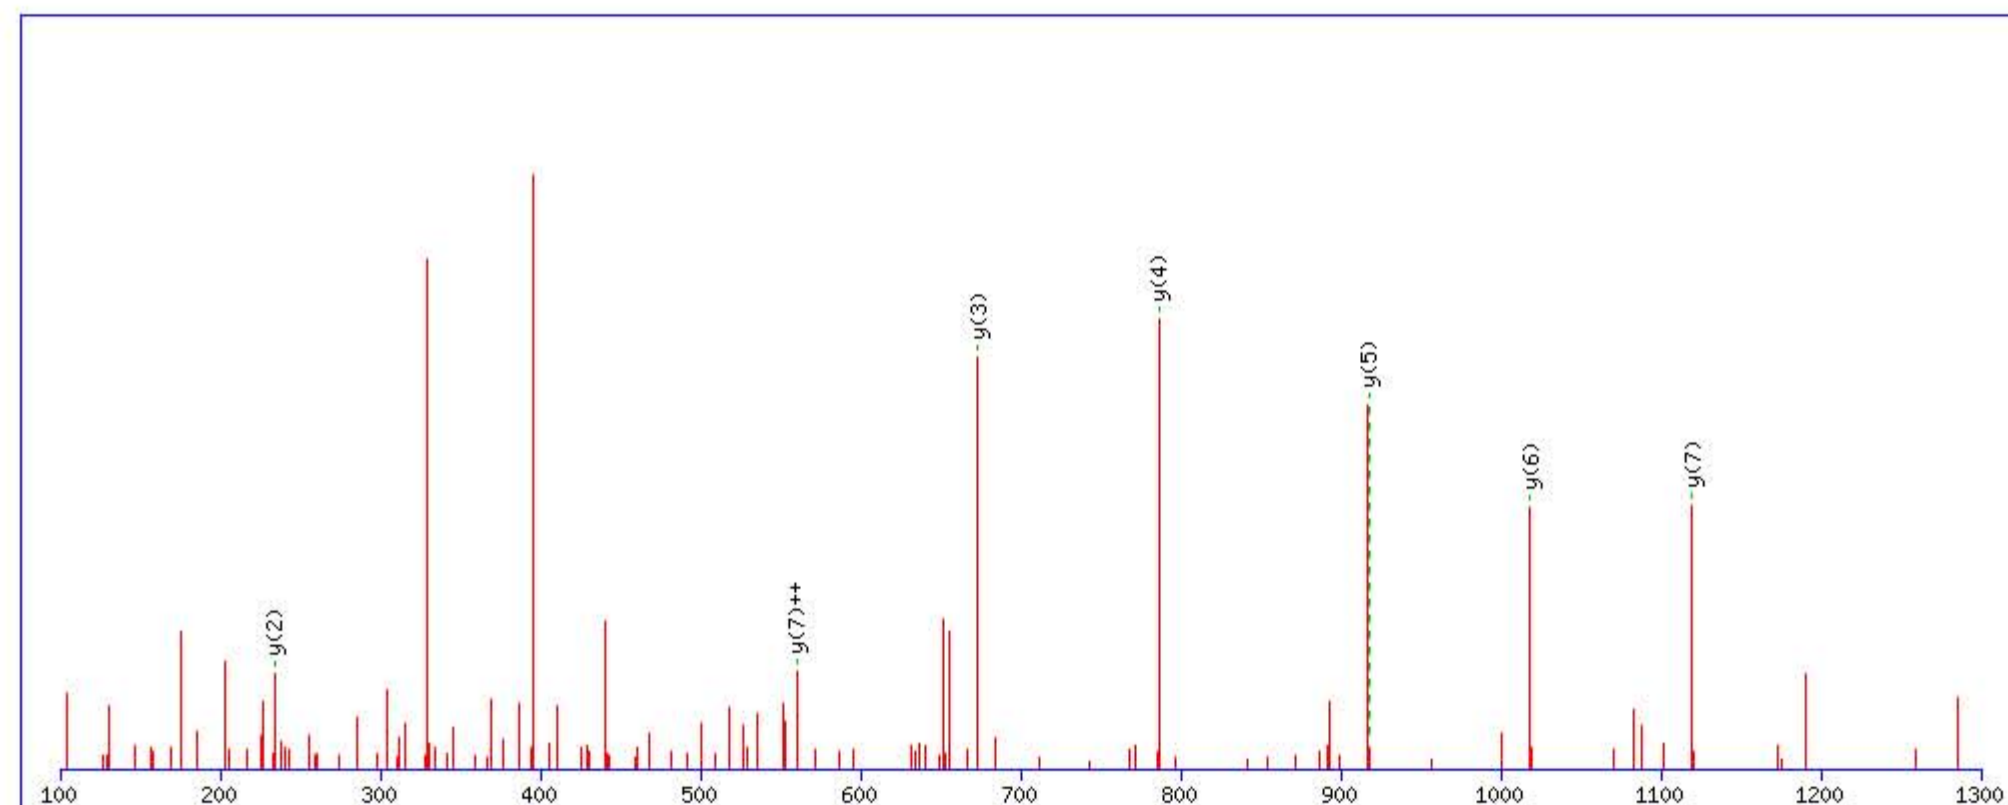

Monoisotopic mass of neutral peptide Mr(calc): 1320.660370

Fixed modifications: Carbamidomethyl (C) (apply to specified residues or termini only)

Variable modifications:

Q7 : Biotin:Thermo-21345 (Q)

Ions Score: 40 Expect: 0.00075

Matches : 7/78 fragment ions using 12 most intense peaks [\(help\)](#)

| # | b           | b <sup>++</sup> | b <sup>+</sup> | b <sup>+++</sup> | b <sup>0</sup> | b <sup>0++</sup> | Seq. | y                  | y <sup>++</sup>   | y <sup>+</sup> | y <sup>+++</sup> | y <sup>0</sup> | y <sup>0++</sup> | # |
|---|-------------|-----------------|----------------|------------------|----------------|------------------|------|--------------------|-------------------|----------------|------------------|----------------|------------------|---|
| 1 | 132.047761  | 66.527518       |                |                  |                |                  | M    |                    |                   |                |                  |                |                  | 9 |
| 2 | 203.084875  | 102.046075      |                |                  |                |                  | A    | 1190.627179        | 595.817228        | 1173.600630    | 587.303953       | 1172.616614    | 586.811945       | 8 |
| 3 | 304.132554  | 152.569915      |                |                  | 286.121989     | 143.564632       | T    | <b>1119.590065</b> | <b>560.298671</b> | 1102.563516    | 551.785396       | 1101.579500    | 551.293388       | 7 |
| 4 | 405.180233  | 203.093754      |                |                  | 387.169668     | 194.088472       | T    | <b>1018.542386</b> | 509.774831        | 1001.515837    | 501.261557       | 1000.531821    | 500.769549       | 6 |
| 5 | 536.220718  | 268.613997      |                |                  | 518.210153     | 259.608715       | M    | <b>917.494707</b>  | 459.250992        | 900.468158     | 450.737717       | 899.484142     | 450.245709       | 5 |
| 6 | 649.304782  | 325.156029      |                |                  | 631.294217     | 316.150747       | I    | <b>786.454222</b>  | 393.730749        | 769.427673     | 385.217475       | 768.443657     | 384.725467       | 4 |
| 7 | 1088.530108 | 544.768692      | 1071.503559    | 536.255418       | 1070.519543    | 535.763410       | Q    | <b>673.370158</b>  | 337.188717        | 656.343609     | 328.675443       | 655.359593     | 328.183435       | 3 |
| 8 | 1175.562136 | 588.284706      | 1158.535587    | 579.771432       | 1157.551571    | 579.279424       | S    | <b>234.144832</b>  | 117.576054        | 217.118283     | 109.062780       | 216.134267     | 108.570772       | 2 |
| 9 |             |                 |                |                  |                |                  | K    | 147.112804         | 74.060040         | 130.086255     | 65.546765        |                |                  | 1 |

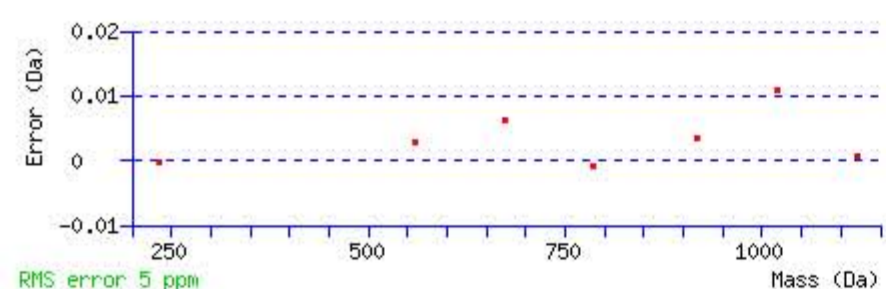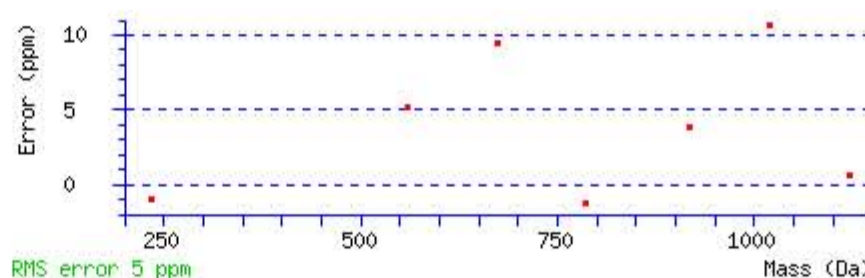

NCBI BLAST search of **MATMIQSK**

(Parameters: blastp, nr protein database, expect=20000, no filter, PAM30)

Other BLAST [web gateways](#)

All matches to this query

| Score | Mr(calc):   | Delta     | Sequence                       |
|-------|-------------|-----------|--------------------------------|
| 39.7  | 1320.660370 | 0.004058  | <a href="#">MATMIQSK</a>       |
| 6.0   | 1320.677292 | -0.012864 | <a href="#">LATTTTDTSSVPK</a>  |
| 4.6   | 1320.670715 | -0.006287 | <a href="#">IAPKASMAGASSSK</a> |
| 2.7   | 1320.675461 | -0.011033 | <a href="#">RMRLVVDGMGR</a>    |
| 1.8   | 1320.682816 | -0.018388 | <a href="#">RMKPLMDRDK</a>     |
| 0.9   | 1320.674759 | -0.010331 | <a href="#">QSTEFASK</a>       |
| 0.4   | 1320.678574 | -0.014146 | <a href="#">SFRAAAETLER</a>    |

Mascot: <http://www.matrixscience.com/>



# MASCOT SEARCH RESULTS

## Peptide View

MS/MS Fragmentation of **LSNENHGIAQR**

Found in **ITIH2\_HUMAN**, Inter-alpha-trypsin inhibitor heavy chain H2 OS=Homo sapiens GN=ITIH2 PE=1 SV=2

Match to Query 35026: 1548.764742 from(517.262190,3+) rtinseconds(1441) index(49103)

Title: Locus:1.1.1.1117.14 File:"2013-07-02 CLN FXIII 60 min 2nd F 4.wiff"

Data file C:\Program Files (x86)\Matrix Science\Mascot Daemon\mgf5 FXIII 60 min 2nd\mascot\_daemon\_merge.mgf

Click mouse within plot area to zoom in by factor of two about that point

Or, Plot from  to  Da

Label all possible matches  Label matches used for scoring

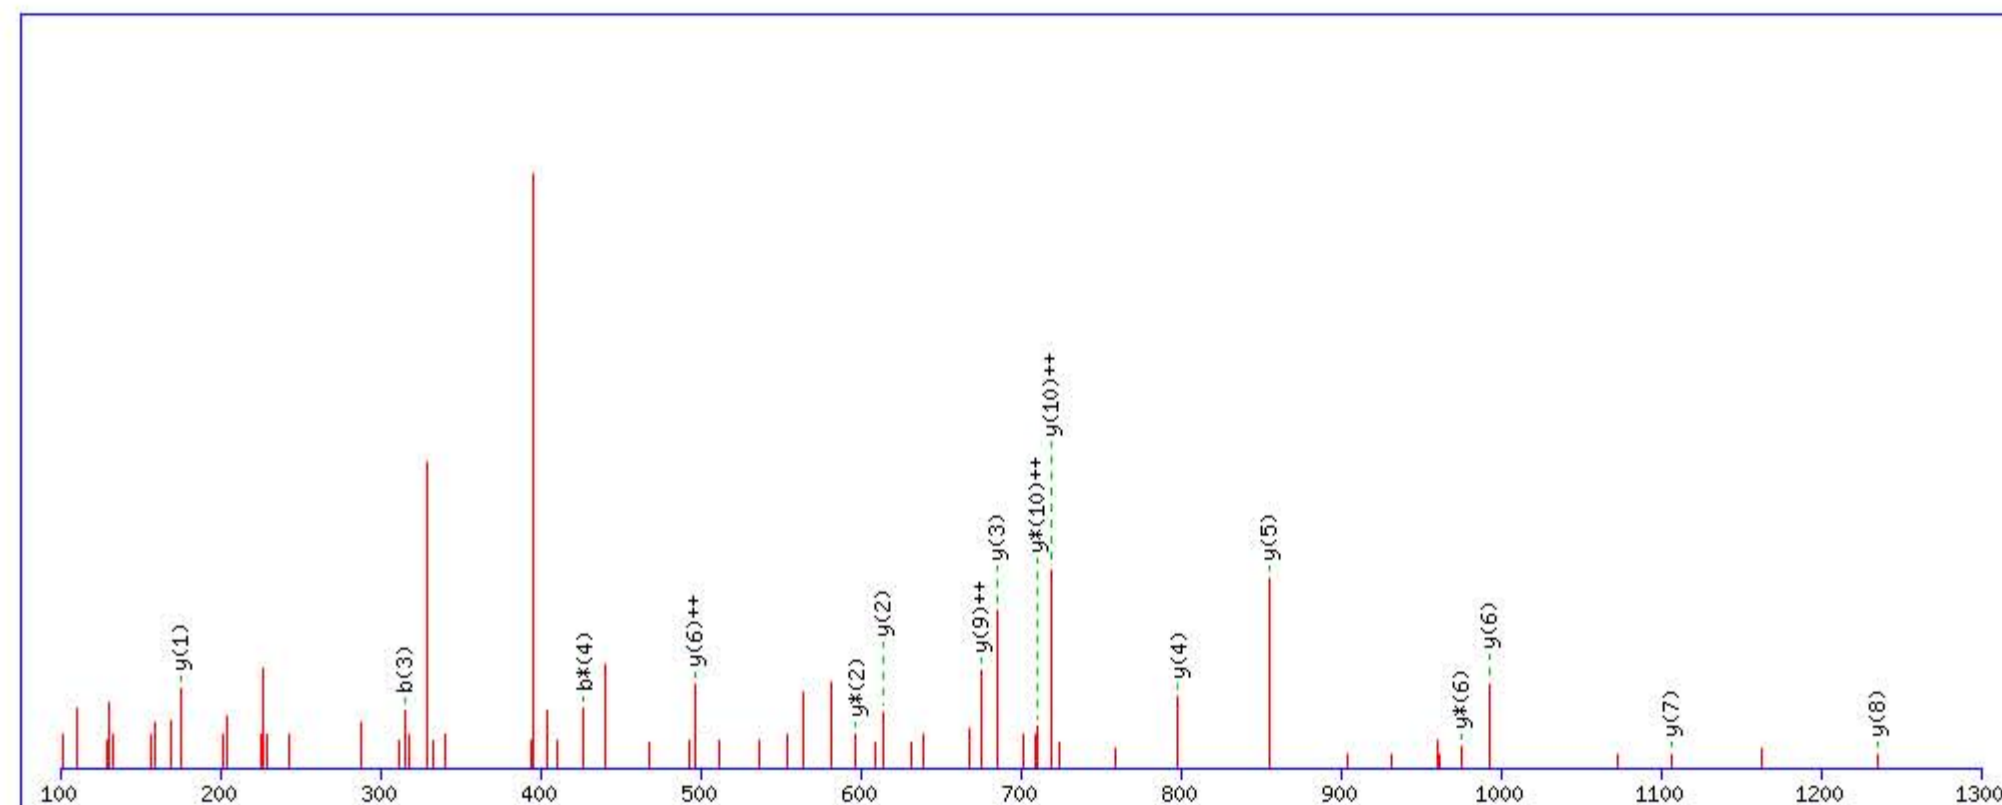

Monoisotopic mass of neutral peptide Mr(calc): 1548.783066

Fixed modifications: Carbamidomethyl (C) (apply to specified residues or termini only)

Variable modifications:

Q10 : Biotin:Thermo-21345 (Q)

Ions Score: 44 Expect: 0.00012

Matches : 16/100 fragment ions using 29 most intense peaks [\(help\)](#)

| #  | b           | b <sup>++</sup> | b <sup>*</sup> | b <sup>*++</sup> | b <sup>0</sup> | b <sup>0++</sup> | Seq. | y           | y <sup>++</sup> | y <sup>*</sup> | y <sup>*++</sup> | y <sup>0</sup> | y <sup>0++</sup> | #  |
|----|-------------|-----------------|----------------|------------------|----------------|------------------|------|-------------|-----------------|----------------|------------------|----------------|------------------|----|
| 1  | 114.091340  | 57.549308       |                |                  |                |                  | L    |             |                 |                |                  |                |                  | 11 |
| 2  | 201.123368  | 101.065322      |                |                  | 183.112803     | 92.060039        | S    | 1436.706307 | 718.856792      | 1419.679758    | 710.343517       | 1418.695742    | 709.851509       | 10 |
| 3  | 315.166295  | 158.086785      | 298.139746     | 149.573511       | 297.155730     | 149.081503       | N    | 1349.674279 | 675.340778      | 1332.647730    | 666.827503       | 1331.663714    | 666.335495       | 9  |
| 4  | 444.208888  | 222.608082      | 427.182339     | 214.094808       | 426.198323     | 213.602800       | E    | 1235.631352 | 618.319314      | 1218.604803    | 609.806040       | 1217.620787    | 609.314032       | 8  |
| 5  | 558.251815  | 279.629546      | 541.225266     | 271.116271       | 540.241250     | 270.624263       | N    | 1106.588759 | 553.798018      | 1089.562210    | 545.284743       |                |                  | 7  |
| 6  | 695.310727  | 348.159002      | 678.284178     | 339.645727       | 677.300162     | 339.153719       | H    | 992.545832  | 496.776554      | 975.519283     | 488.263280       |                |                  | 6  |
| 7  | 752.332191  | 376.669734      | 735.305642     | 368.156459       | 734.321626     | 367.664451       | G    | 855.486920  | 428.247098      | 838.460371     | 419.733824       |                |                  | 5  |
| 8  | 865.416255  | 433.211766      | 848.389706     | 424.698491       | 847.405690     | 424.206483       | I    | 798.465456  | 399.736366      | 781.438907     | 391.223092       |                |                  | 4  |
| 9  | 936.453369  | 468.730323      | 919.426820     | 460.217048       | 918.442804     | 459.725040       | A    | 685.381392  | 343.194334      | 668.354843     | 334.681060       |                |                  | 3  |
| 10 | 1375.678695 | 688.342986      | 1358.652146    | 679.829711       | 1357.668130    | 679.337703       | Q    | 614.344278  | 307.675777      | 597.317729     | 299.162503       |                |                  | 2  |
| 11 |             |                 |                |                  |                |                  | R    | 175.118952  | 88.063114       | 158.092403     | 79.549839        |                |                  | 1  |

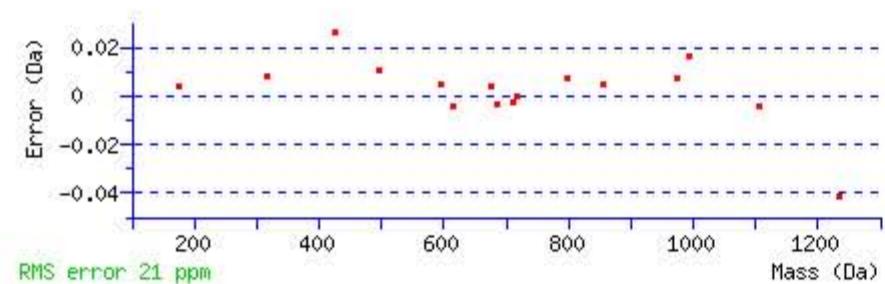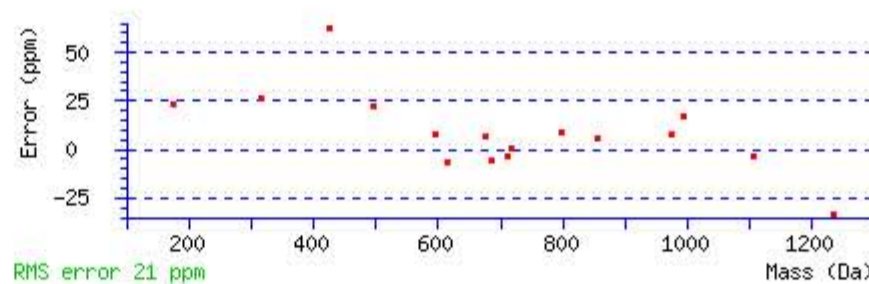

NCBI BLAST search of **LSNENHGIAQR**

(Parameters: blastp, nr protein database, expect=20000, no filter, PAM30)

Other BLAST [web gateways](#)

All matches to this query

| Score | Mr(calc):   | Delta     | Sequence                      |
|-------|-------------|-----------|-------------------------------|
| 43.6  | 1548.783066 | -0.018324 | <a href="#">LSNENHGIAQR</a>   |
| 1.7   | 1548.786438 | -0.021696 | <a href="#">MMQAQEAVSRVKR</a> |
| 1.7   | 1548.786438 | -0.021696 | <a href="#">MMQAQEAVSRVKR</a> |

Mascot: <http://www.matrixscience.com/>



# MASCOT Search Results

## Peptide View

MS/MS Fragmentation of **FYNQVSTPLLR**

Found in **ITIH2\_HUMAN**, Inter-alpha-trypsin inhibitor heavy chain H2 OS=Homo sapiens GN=ITIH2 PE=1 SV=2

Match to Query 39357: 1647.871848 from(824.943200,2+) rtinseconds(2394) index(55338)

Title: Locus:1.1.1.1448.18 File:"2013-07-02 CLN FXIII 60 min 2nd F 4.wiff"

Data file C:\Program Files (x86)\Matrix Science\Mascot Daemon\mgf5 FXIII 60 min 2nd\mascot\_daemon\_merge.mgf

Click mouse within plot area to zoom in by factor of two about that point

Or, Plot from  to  Da

Label all possible matches  Label matches used for scoring

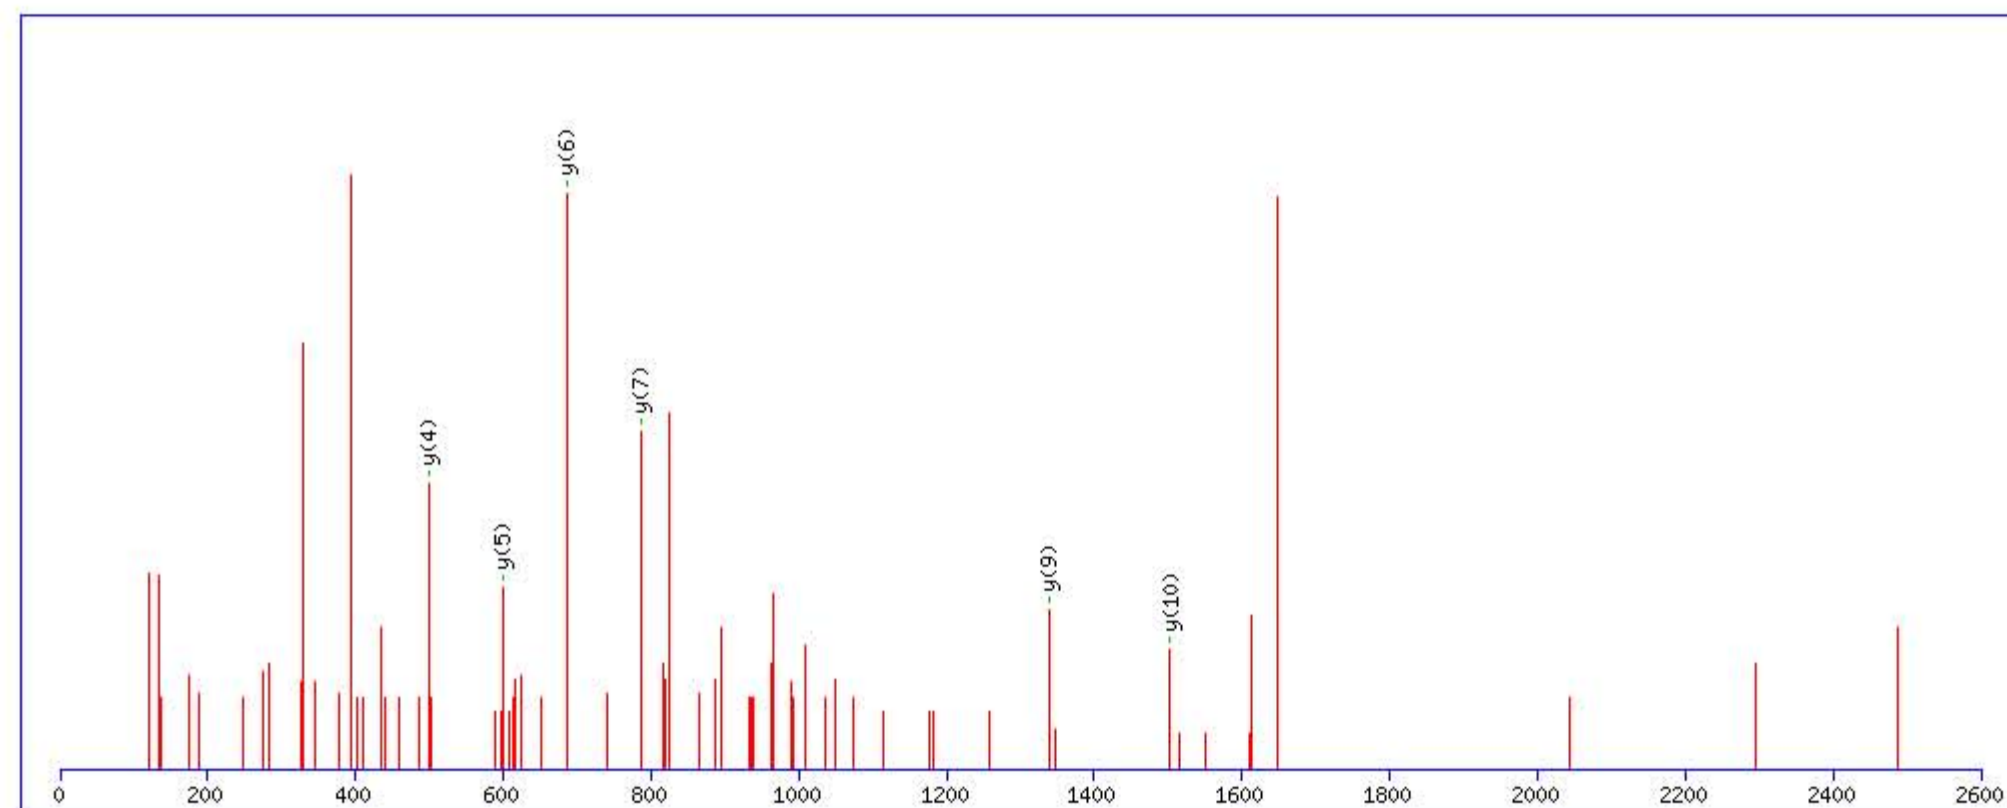

Monoisotopic mass of neutral peptide Mr(calc): 1647.880676

Fixed modifications: Carbamidomethyl (C) (apply to specified residues or termini only)

Variable modifications:

Q4 : Biotin:Thermo-21345 (Q)

Ions Score: 26 Expect: 0.066

Matches : 6/98 fragment ions using 15 most intense peaks [\(help\)](#)

| #  | b           | b <sup>++</sup> | b <sup>*</sup> | b <sup>***</sup> | b <sup>0</sup> | b <sup>0++</sup> | Seq. | y           | y <sup>++</sup> | y <sup>*</sup> | y <sup>***</sup> | y <sup>0</sup> | y <sup>0++</sup> | #  |
|----|-------------|-----------------|----------------|------------------|----------------|------------------|------|-------------|-----------------|----------------|------------------|----------------|------------------|----|
| 1  | 148.075690  | 74.541483       |                |                  |                |                  | F    |             |                 |                |                  |                |                  | 11 |
| 2  | 311.139019  | 156.073148      |                |                  |                |                  | Y    | 1501.819547 | 751.413411      | 1484.792998    | 742.900137       | 1483.808982    | 742.408129       | 10 |
| 3  | 425.181946  | 213.094611      | 408.155397     | 204.581337       |                |                  | N    | 1338.756218 | 669.881747      | 1321.729669    | 661.368472       | 1320.745653    | 660.876464       | 9  |
| 4  | 864.407272  | 432.707274      | 847.380723     | 424.194000       |                |                  | Q    | 1224.713291 | 612.860283      | 1207.686742    | 604.347009       | 1206.702726    | 603.855001       | 8  |
| 5  | 963.475686  | 482.241481      | 946.449137     | 473.728207       |                |                  | V    | 785.487965  | 393.247620      | 768.461416     | 384.734346       | 767.477400     | 384.242338       | 7  |
| 6  | 1050.507714 | 525.757495      | 1033.481165    | 517.244221       | 1032.497149    | 516.752213       | S    | 686.419551  | 343.713414      | 669.393002     | 335.200139       | 668.408986     | 334.708131       | 6  |
| 7  | 1151.555393 | 576.281335      | 1134.528844    | 567.768060       | 1133.544828    | 567.276052       | T    | 599.387523  | 300.197399      | 582.360974     | 291.684125       | 581.376958     | 291.192117       | 5  |
| 8  | 1248.608157 | 624.807717      | 1231.581608    | 616.294442       | 1230.597592    | 615.802434       | P    | 498.339844  | 249.673560      | 481.313295     | 241.160285       |                |                  | 4  |
| 9  | 1361.692221 | 681.349749      | 1344.665672    | 672.836474       | 1343.681656    | 672.344466       | L    | 401.287080  | 201.147178      | 384.260531     | 192.633903       |                |                  | 3  |
| 10 | 1474.776285 | 737.891780      | 1457.749736    | 729.378506       | 1456.765720    | 728.886498       | L    | 288.203016  | 144.605146      | 271.176467     | 136.091871       |                |                  | 2  |
| 11 |             |                 |                |                  |                |                  | R    | 175.118952  | 88.063114       | 158.092403     | 79.549839        |                |                  | 1  |

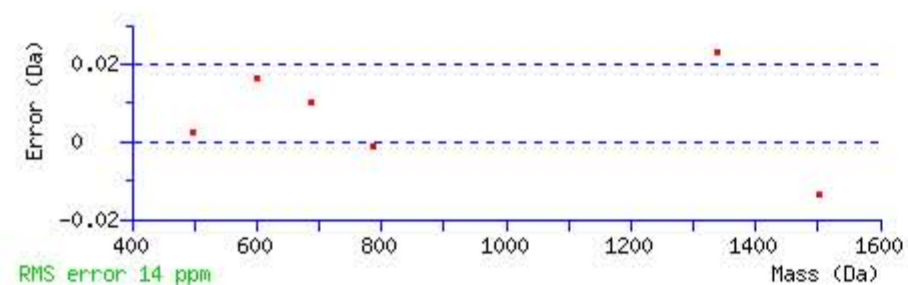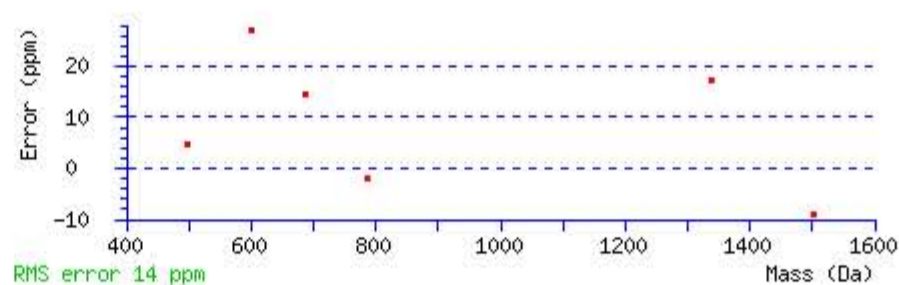

NCBI BLAST search of [FYNQVSTPLLR](#)

(Parameters: blastp, nr protein database, expect=20000, no filter, PAM30)

Other BLAST [web gateways](#)

All matches to this query

| Score | Mr(calc):   | Delta     | Sequence                    |
|-------|-------------|-----------|-----------------------------|
| 25.9  | 1647.880676 | -0.008828 | <a href="#">FYNQVSTPLLR</a> |

Mascot: <http://www.matrixscience.com/>



# MASCOT Search Results

## Peptide View

MS/MS Fragmentation of **IYGNQDTSSQLK**

Found in **ITIH2\_HUMAN**, Inter-alpha-trypsin inhibitor heavy chain H2 OS=Homo sapiens GN=ITIH2 PE=1 SV=2

Match to Query 39662: 1663.830888 from(832.922720,2+) rtinseconds(1688) index(50741)

Title: Locus:1.1.1.1203.9 File:"2013-07-02 CLN FXIII 60 min 2nd F 4.wiff"

Data file C:\Program Files (x86)\Matrix Science\Mascot Daemon\mgf\5 FXIII 60 min 2nd\mascot\_daemon\_merge.mgf

Click mouse within plot area to zoom in by factor of two about that point

Or, Plot from  to  Da

Label all possible matches  Label matches used for scoring

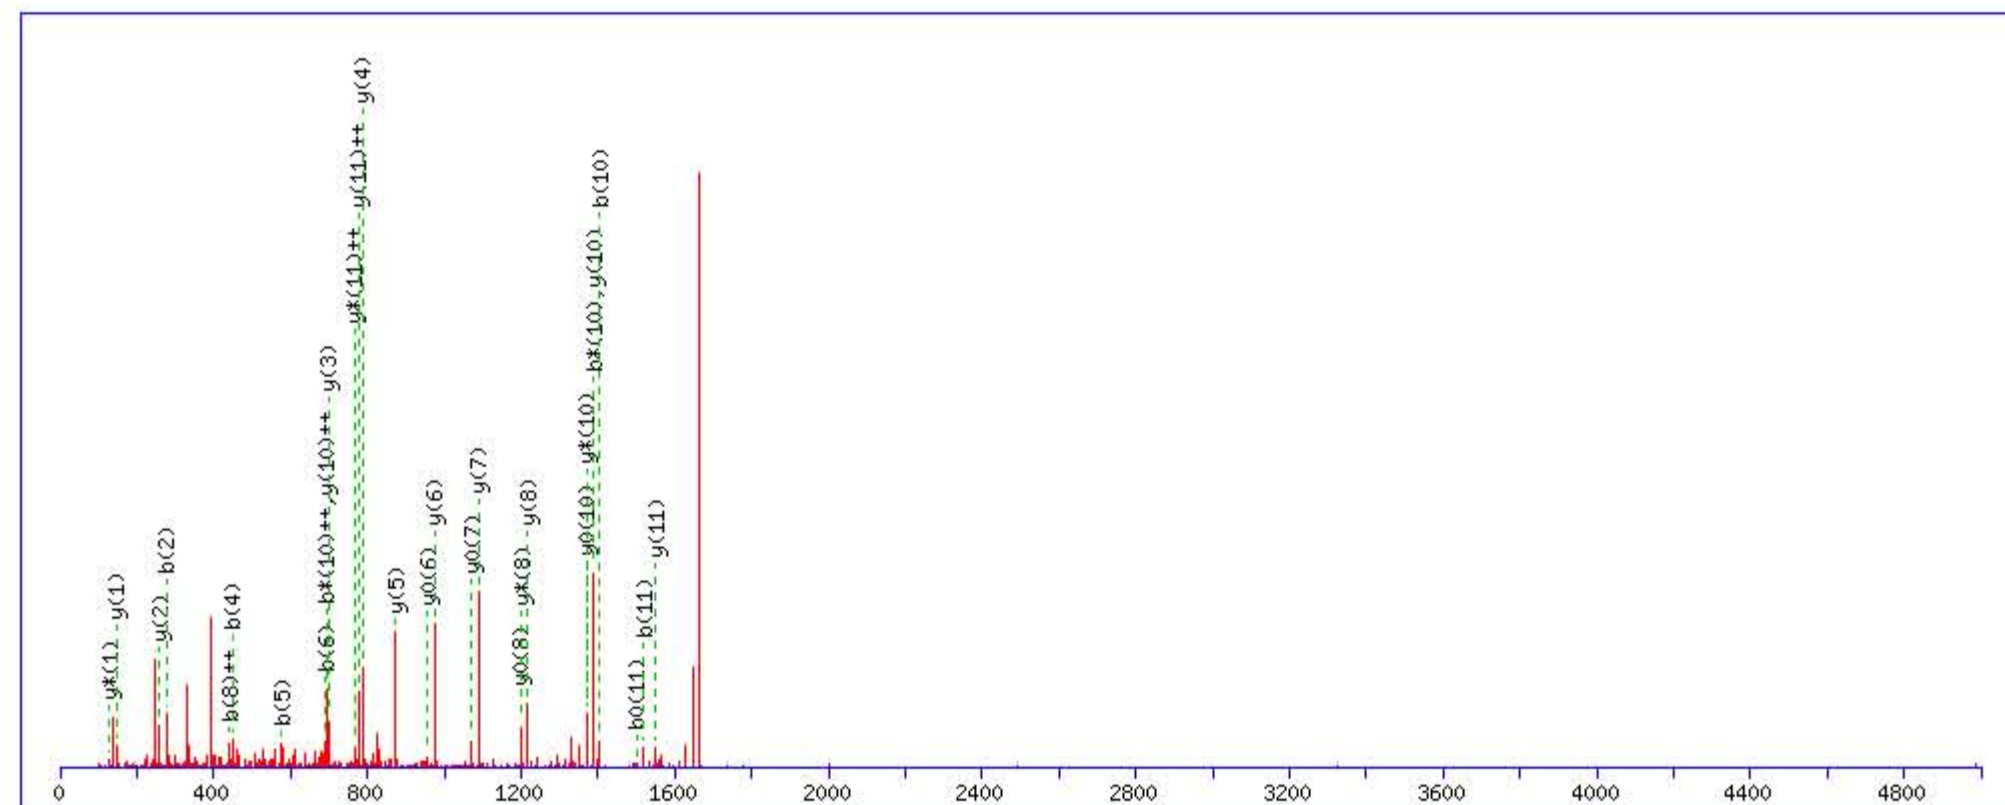

Monoisotopic mass of neutral peptide Mr(calc): 1663.823944

Fixed modifications: Carbamidomethyl (C) (apply to specified residues or termini only)

Variable modifications:

Q10 : Biotin:Thermo-21345 (Q)

Ions Score: 67 Expect: 9e-007

Matches : 30/110 fragment ions using 48 most intense peaks [\(help\)](#)

| #  | b                  | b <sup>++</sup>   | b <sup>*</sup>     | b <sup>*++</sup>  | b <sup>0</sup>     | b <sup>0++</sup> | Seq. | y                  | y <sup>++</sup>   | y <sup>*</sup>     | y <sup>*++</sup>  | y <sup>0</sup>     | y <sup>0++</sup> | #  |
|----|--------------------|-------------------|--------------------|-------------------|--------------------|------------------|------|--------------------|-------------------|--------------------|-------------------|--------------------|------------------|----|
| 1  | 114.091340         | 57.549308         |                    |                   |                    |                  | I    |                    |                   |                    |                   |                    |                  | 12 |
| 2  | <b>277.154669</b>  | 139.080973        |                    |                   |                    |                  | Y    | <b>1551.747170</b> | <b>776.377223</b> | 1534.720621        | <b>767.863948</b> | 1533.736605        | 767.371940       | 11 |
| 3  | 334.176133         | 167.591704        |                    |                   |                    |                  | G    | <b>1388.683841</b> | <b>694.845558</b> | <b>1371.657292</b> | 686.332284        | <b>1370.673276</b> | 685.840276       | 10 |
| 4  | <b>448.219060</b>  | 224.613168        | 431.192511         | 216.099894        |                    |                  | N    | 1331.662377        | 666.334826        | 1314.635828        | 657.821552        | 1313.651812        | 657.329544       | 9  |
| 5  | <b>576.277638</b>  | 288.642457        | 559.251089         | 280.129183        |                    |                  | Q    | <b>1217.619450</b> | 609.313363        | <b>1200.592901</b> | 600.800088        | <b>1199.608885</b> | 600.308080       | 8  |
| 6  | <b>691.304581</b>  | 346.155929        | 674.278032         | 337.642654        | 673.294016         | 337.150646       | D    | <b>1089.560872</b> | 545.284074        | 1072.534323        | 536.770799        | <b>1071.550307</b> | 536.278791       | 7  |
| 7  | 792.352260         | 396.679768        | 775.325711         | 388.166494        | 774.341695         | 387.674486       | T    | <b>974.533929</b>  | 487.770602        | 957.507380         | 479.257328        | <b>956.523364</b>  | 478.765320       | 6  |
| 8  | 879.384288         | <b>440.195782</b> | 862.357739         | 431.682507        | 861.373723         | 431.190499       | S    | <b>873.486250</b>  | 437.246763        | 856.459701         | 428.733488        | 855.475685         | 428.241480       | 5  |
| 9  | 966.416316         | 483.711796        | 949.389767         | 475.198521        | 948.405751         | 474.706513       | S    | <b>786.454222</b>  | 393.730749        | 769.427673         | 385.217474        | 768.443657         | 384.725466       | 4  |
| 10 | <b>1405.641642</b> | 703.324459        | <b>1388.615093</b> | <b>694.811184</b> | 1387.631077        | 694.319176       | Q    | <b>699.422194</b>  | 350.214735        | 682.395645         | 341.701460        |                    |                  | 3  |
| 11 | <b>1518.725706</b> | 759.866491        | 1501.699157        | 751.353216        | <b>1500.715141</b> | 750.861208       | L    | <b>260.196868</b>  | 130.602072        | 243.170319         | 122.088797        |                    |                  | 2  |
| 12 |                    |                   |                    |                   |                    |                  | K    | <b>147.112804</b>  | 74.060040         | <b>130.086255</b>  | 65.546765         |                    |                  | 1  |

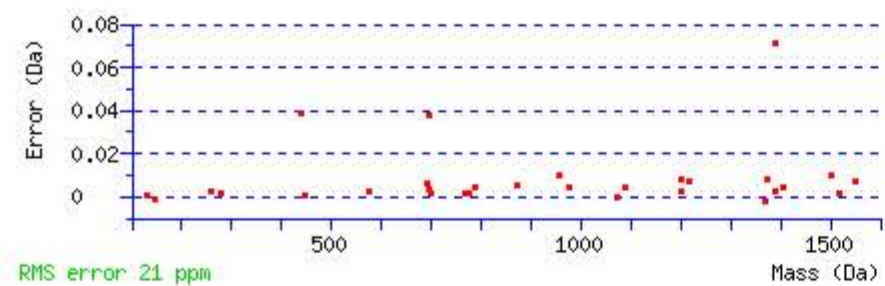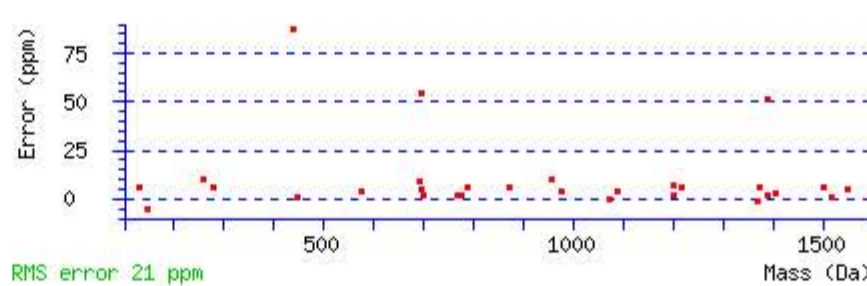

NCBI BLAST search of **IYGNQDTSSQLK**

(Parameters: blastp, nr protein database, expect=20000, no filter, PAM30)

Other BLAST [web gateways](#)

All matches to this query

| Score | Mr(calc):   | Delta     | Sequence                         |
|-------|-------------|-----------|----------------------------------|
| 67.2  | 1663.823944 | 0.006944  | <a href="#">IYGNQDTSSQLK</a>     |
| 13.6  | 1663.823944 | 0.006944  | <a href="#">IYGNQDTSSQLK</a>     |
| 2.6   | 1663.827957 | 0.002931  | <a href="#">EEAFLHVAVDMYLK</a>   |
| 2.4   | 1663.831345 | -0.000457 | <a href="#">QLTDCISEFLK</a>      |
| 2.1   | 1663.845078 | -0.014190 | <a href="#">LMSGVENSQKVDISTK</a> |
| 1.6   | 1663.806183 | 0.024705  | <a href="#">DLSMFSQNMTHIK</a>    |



# MASCOT SEARCH RESULTS

## Peptide View

MS/MS Fragmentation of **AHVSFKPTVAQQR**

Found in **ITIH2\_HUMAN**, Inter-alpha-trypsin inhibitor heavy chain H2 OS=Homo sapiens GN=ITIH2 PE=1 SV=2

Match to Query 42336: 1778.961732 from(593.994520,3+) rtinseconds(1556) index(49906)

Title: Locus:1.1.1.1157.9 File:"2013-07-02 CLN FXIII 60 min 2nd F 4.wiff"

Data file C:\Program Files (x86)\Matrix Science\Mascot Daemon\mgf5 FXIII 60 min 2nd\mascot\_daemon\_merge.mgf

Click mouse within plot area to zoom in by factor of two about that point

Or, Plot from  to  Da

Label all possible matches  Label matches used for scoring

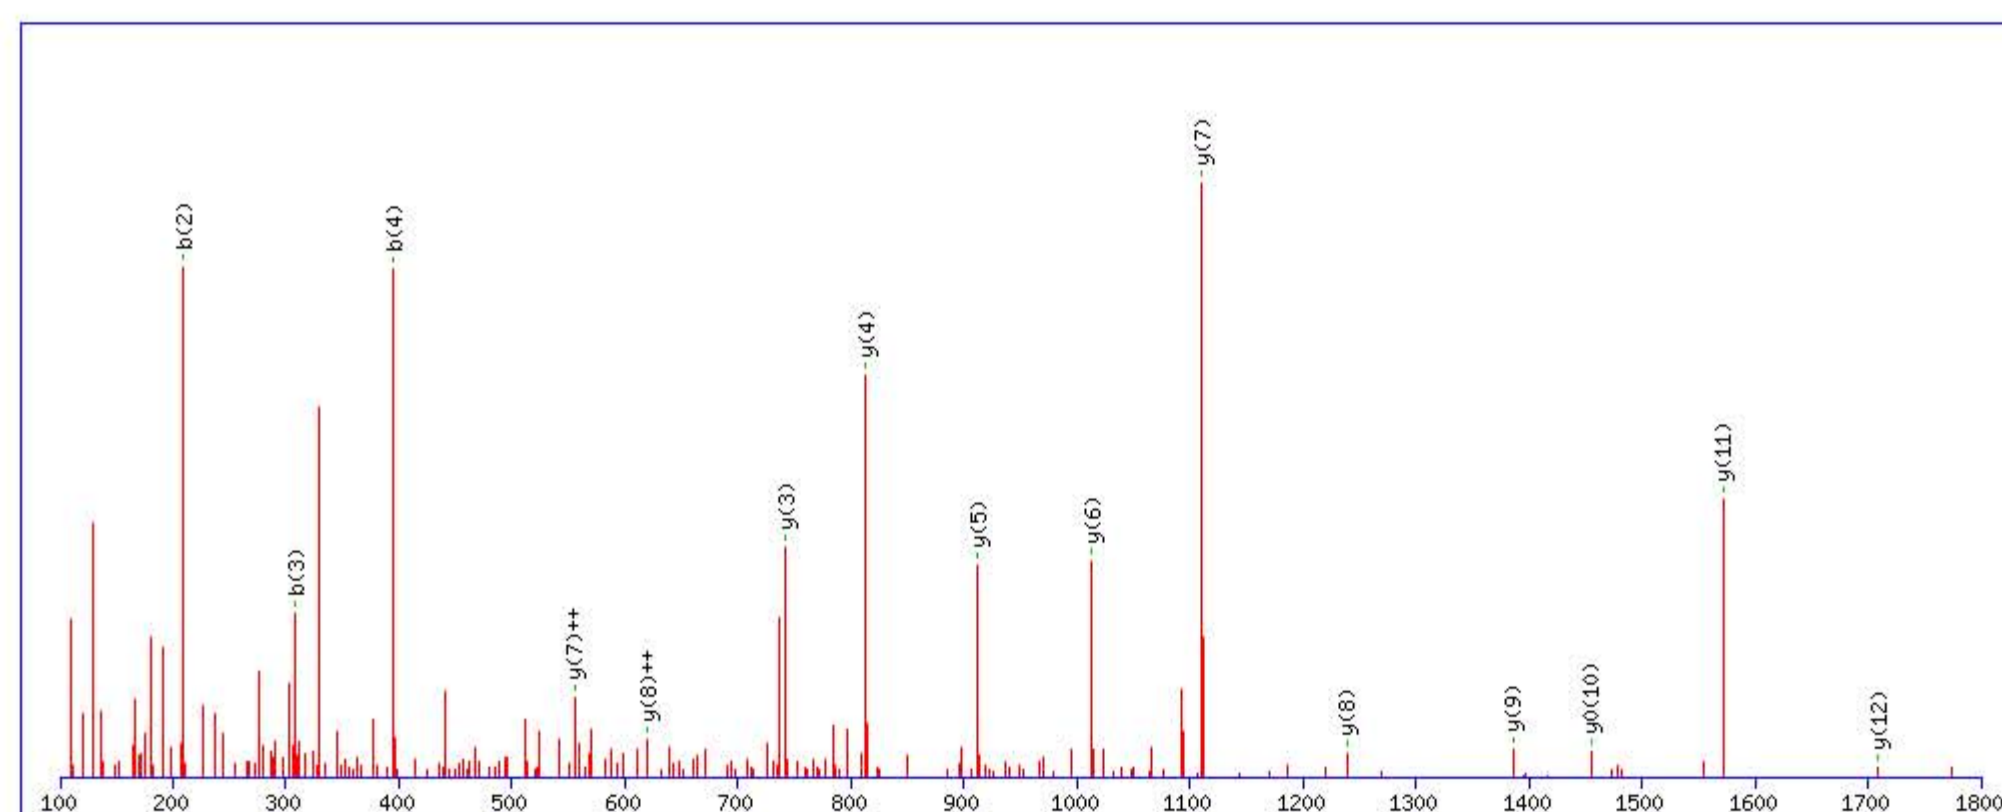

Monoisotopic mass of neutral peptide Mr(calc): 1778.961395

Fixed modifications: Carbamidomethyl (C) (apply to specified residues or termini only)

Variable modifications:

Q12 : Biotin:Thermo-21345 (Q)

Ions Score: 82 Expect: 1.3e-007

Matches : 15/118 fragment ions using 17 most intense peaks [\(help\)](#)

| #  | b                 | b <sup>++</sup> | b <sup>*</sup> | b <sup>*++</sup> | b <sup>0</sup> | b <sup>0++</sup> | Seq. | y                  | y <sup>++</sup>   | y <sup>*</sup> | y <sup>*++</sup> | y <sup>0</sup>     | y <sup>0++</sup> | #  |
|----|-------------------|-----------------|----------------|------------------|----------------|------------------|------|--------------------|-------------------|----------------|------------------|--------------------|------------------|----|
| 1  | 72.044390         | 36.525833       |                |                  |                |                  | A    |                    |                   |                |                  |                    |                  | 13 |
| 2  | <b>209.103302</b> | 105.055289      |                |                  |                |                  | H    | <b>1708.931558</b> | 854.969417        | 1691.905009    | 846.456143       | 1690.920993        | 845.964135       | 12 |
| 3  | <b>308.171716</b> | 154.589496      |                |                  |                |                  | V    | <b>1571.872646</b> | 786.439961        | 1554.846097    | 777.926687       | 1553.862081        | 777.434679       | 11 |
| 4  | <b>395.203744</b> | 198.105510      |                |                  | 377.193179     | 189.100227       | S    | 1472.804232        | 736.905754        | 1455.777683    | 728.392480       | <b>1454.793667</b> | 727.900472       | 10 |
| 5  | 542.272158        | 271.639717      |                |                  | 524.261593     | 262.634435       | F    | <b>1385.772204</b> | 693.389740        | 1368.745655    | 684.876466       | 1367.761639        | 684.384458       | 9  |
| 6  | 670.367121        | 335.687199      | 653.340572     | 327.173924       | 652.356556     | 326.681916       | K    | <b>1238.703790</b> | <b>619.855533</b> | 1221.677241    | 611.342259       | 1220.693225        | 610.850251       | 8  |
| 7  | 767.419885        | 384.213581      | 750.393336     | 375.700306       | 749.409320     | 375.208298       | P    | <b>1110.608827</b> | <b>555.808052</b> | 1093.582278    | 547.294777       | 1092.598262        | 546.802769       | 7  |
| 8  | 868.467564        | 434.737420      | 851.441015     | 426.224146       | 850.456999     | 425.732138       | T    | <b>1013.556063</b> | 507.281670        | 996.529514     | 498.768395       | 995.545498         | 498.276387       | 6  |
| 9  | 967.535978        | 484.271627      | 950.509429     | 475.758353       | 949.525413     | 475.266345       | V    | <b>912.508384</b>  | 456.757830        | 895.481835     | 448.244556       |                    |                  | 5  |
| 10 | 1038.573092       | 519.790184      | 1021.546543    | 511.276910       | 1020.562527    | 510.784902       | A    | <b>813.439970</b>  | 407.223623        | 796.413421     | 398.710349       |                    |                  | 4  |
| 11 | 1166.631670       | 583.819473      | 1149.605121    | 575.306199       | 1148.621105    | 574.814191       | Q    | <b>742.402856</b>  | 371.705066        | 725.376307     | 363.191792       |                    |                  | 3  |
| 12 | 1605.856996       | 803.432136      | 1588.830447    | 794.918862       | 1587.846431    | 794.426854       | Q    | 614.344278         | 307.675777        | 597.317729     | 299.162503       |                    |                  | 2  |
| 13 |                   |                 |                |                  |                |                  | R    | 175.118952         | 88.063114         | 158.092403     | 79.549839        |                    |                  | 1  |

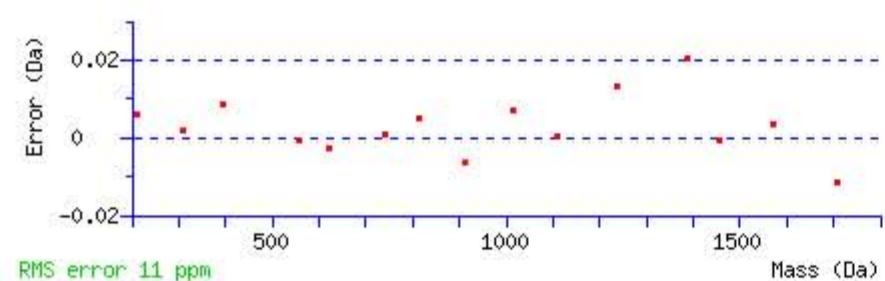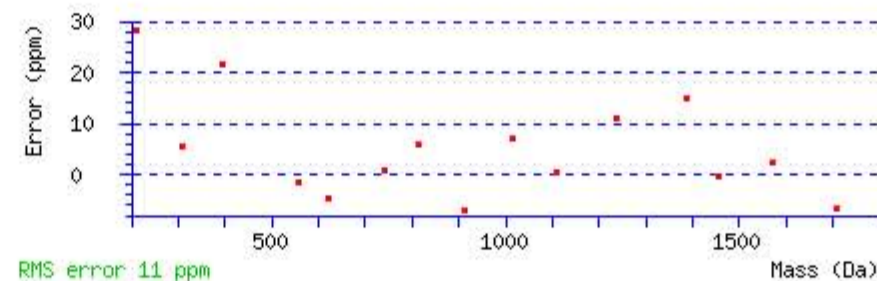

NCBI BLAST search of **AHVSFKPTVAQQR**

(Parameters: blastp, nr protein database, expect=20000, no filter, PAM30)

Other BLAST [web gateways](#)

All matches to this query

| Score | Mr(calc):   | Delta    | Sequence                      |
|-------|-------------|----------|-------------------------------|
| 81.7  | 1778.961395 | 0.000337 | <a href="#">AHVSFKPTVAQQR</a> |
| 81.7  | 1778.961395 | 0.000337 | <a href="#">AHVSFKPTVAQQR</a> |



# MASCOT SEARCH RESULTS

## Peptide View

MS/MS Fragmentation of **IYGNQDTSSQLK**

Found in **ITIH2\_HUMAN**, Inter-alpha-trypsin inhibitor heavy chain H2 OS=Homo sapiens GN=ITIH2 PE=1 SV=2

Match to Query 46034: 1974.996942 from(659.339590,3+) rtinseconds(2030) index(53152)

Title: Locus:1.1.1.1322.2 File:"2013-07-02 CLN FXIII 60 min 2nd F 4.wiff"

Data file C:\Program Files (x86)\Matrix Science\Mascot Daemon\mgf5 FXIII 60 min 2nd\mascot\_daemon\_merge.mgf

Click mouse within plot area to zoom in by factor of two about that point

Or, Plot from  to  Da

Label all possible matches  Label matches used for scoring

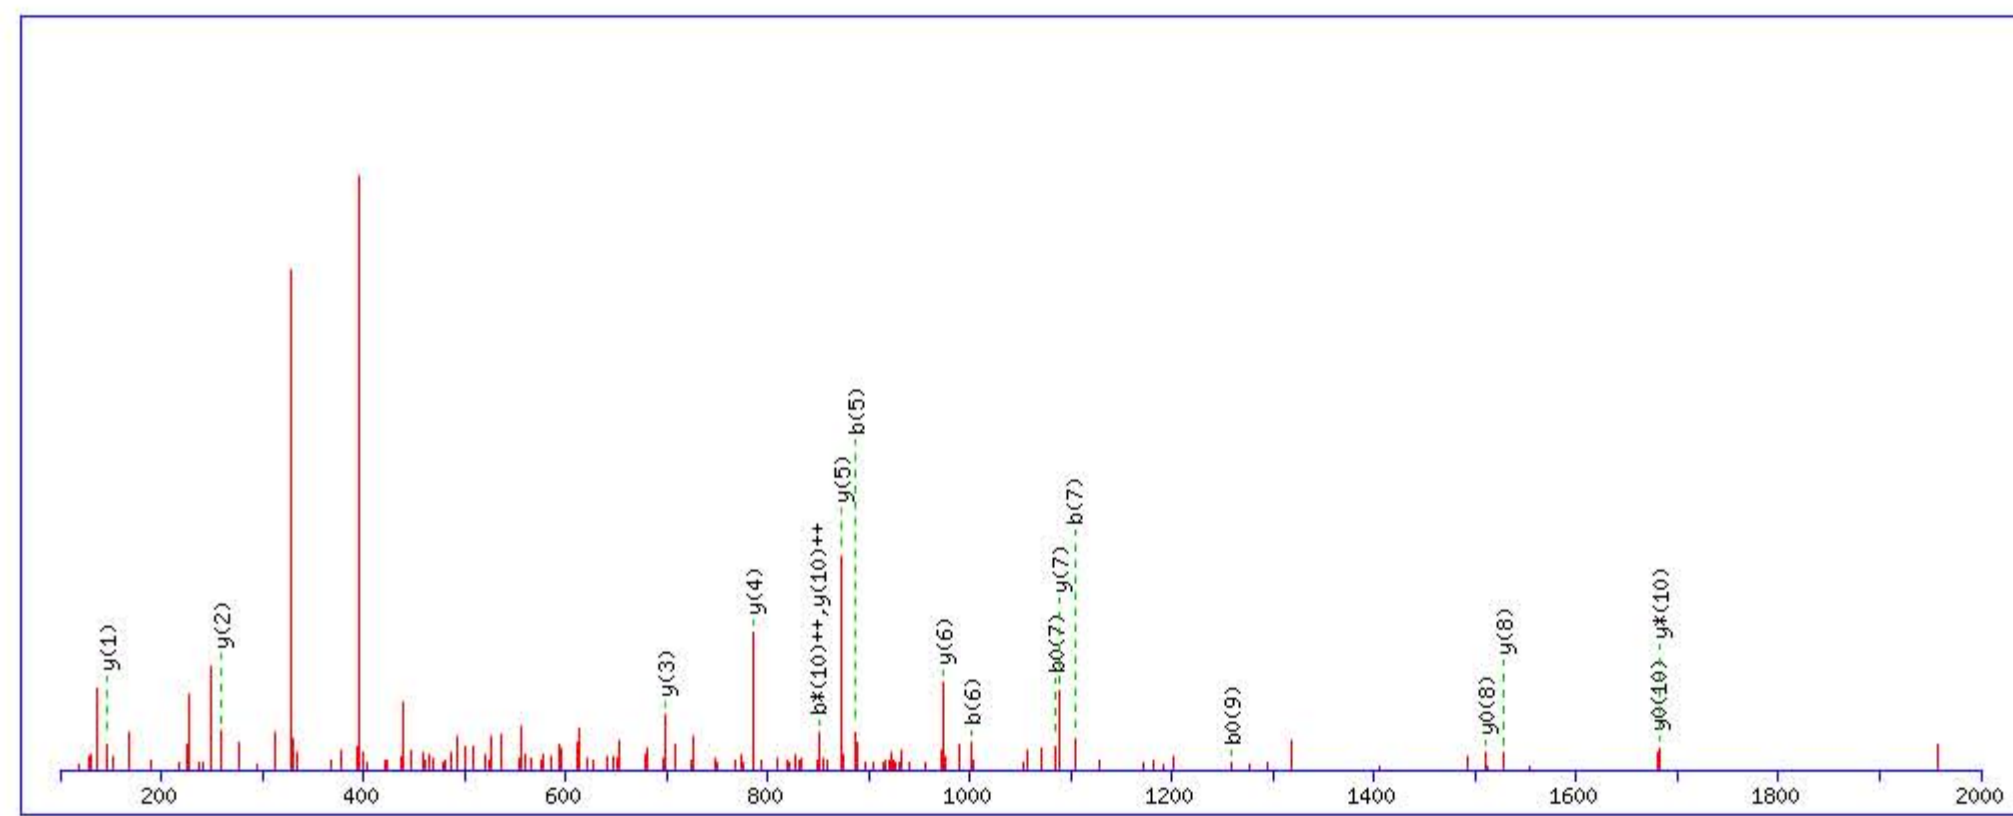

Monoisotopic mass of neutral peptide Mr(calc): 1974.990692

Fixed modifications: Carbamidomethyl (C) (apply to specified residues or termini only)

Variable modifications:

Q5 : Biotin:Thermo-21345 (Q)

Q10 : Biotin:Thermo-21345 (Q)

Ions Score: 27 Expect: 0.0047

Matches : 18/110 fragment ions using 46 most intense peaks [\(help\)](#)

| #  | b           | b <sup>++</sup> | b <sup>*</sup> | b <sup>*++</sup> | b <sup>0</sup> | b <sup>0++</sup> | Seq. | y           | y <sup>++</sup> | y <sup>*</sup> | y <sup>*++</sup> | y <sup>0</sup> | y <sup>0++</sup> | #  |
|----|-------------|-----------------|----------------|------------------|----------------|------------------|------|-------------|-----------------|----------------|------------------|----------------|------------------|----|
| 1  | 114.091340  | 57.549308       |                |                  |                |                  | I    |             |                 |                |                  |                |                  | 12 |
| 2  | 277.154669  | 139.080973      |                |                  |                |                  | Y    | 1862.913918 | 931.960597      | 1845.887369    | 923.447323       | 1844.903353    | 922.955315       | 11 |
| 3  | 334.176133  | 167.591704      |                |                  |                |                  | G    | 1699.850589 | 850.428933      | 1682.824040    | 841.915658       | 1681.840024    | 841.423650       | 10 |
| 4  | 448.219060  | 224.613168      | 431.192511     | 216.099894       |                |                  | N    | 1642.829125 | 821.918201      | 1625.802576    | 813.404926       | 1624.818560    | 812.912918       | 9  |
| 5  | 887.444386  | 444.225831      | 870.417837     | 435.712557       |                |                  | Q    | 1528.786198 | 764.896737      | 1511.759649    | 756.383463       | 1510.775633    | 755.891455       | 8  |
| 6  | 1002.471329 | 501.739303      | 985.444780     | 493.226028       | 984.460764     | 492.734020       | D    | 1089.560872 | 545.284074      | 1072.534323    | 536.770800       | 1071.550307    | 536.278792       | 7  |
| 7  | 1103.519008 | 552.263142      | 1086.492459    | 543.749868       | 1085.508443    | 543.257860       | T    | 974.533929  | 487.770603      | 957.507380     | 479.257328       | 956.523364     | 478.765320       | 6  |
| 8  | 1190.551036 | 595.779156      | 1173.524487    | 587.265882       | 1172.540471    | 586.773874       | S    | 873.486250  | 437.246763      | 856.459701     | 428.733489       | 855.475685     | 428.241481       | 5  |
| 9  | 1277.583064 | 639.295170      | 1260.556515    | 630.781896       | 1259.572499    | 630.289888       | S    | 786.454222  | 393.730749      | 769.427673     | 385.217475       | 768.443657     | 384.725467       | 4  |
| 10 | 1716.808390 | 858.907833      | 1699.781841    | 850.394559       | 1698.797825    | 849.902551       | Q    | 699.422194  | 350.214735      | 682.395645     | 341.701461       |                |                  | 3  |
| 11 | 1829.892454 | 915.449865      | 1812.865905    | 906.936591       | 1811.881889    | 906.444583       | L    | 260.196868  | 130.602072      | 243.170319     | 122.088797       |                |                  | 2  |
| 12 |             |                 |                |                  |                |                  | K    | 147.112804  | 74.060040       | 130.086255     | 65.546765        |                |                  | 1  |

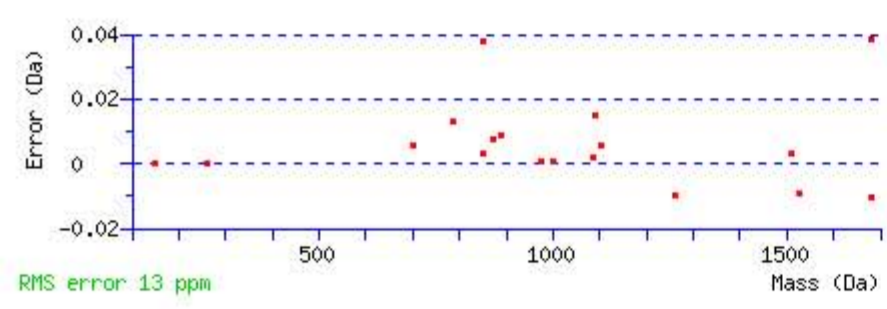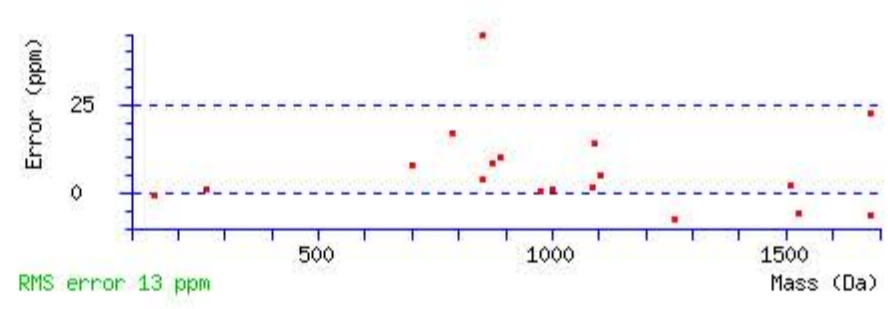

NCBI BLAST search of [IYGNQDTSSQLK](#)

(Parameters: blastp, nr protein database, expect=20000, no filter, PAM30)

Other BLAST [web gateways](#)

All matches to this query

| Score | Mr(calc):   | Delta     | Sequence                          |
|-------|-------------|-----------|-----------------------------------|
| 26.9  | 1974.990692 | 0.006250  | <a href="#">IYGNQDTSSQLK</a>      |
| 2.1   | 1975.019684 | -0.022742 | <a href="#">SMTQTHNGKLYKIVDPK</a> |



# MASCOT SEARCH RESULTS

## Peptide View

MS/MS Fragmentation of **AHVSFKPTVAQQR**

Found in **ITIH2\_HUMAN**, Inter-alpha-trypsin inhibitor heavy chain H2 OS=Homo sapiens GN=ITIH2 PE=1 SV=2

Match to Query 49079: 2090.132296 from(523.540350,4+) rtinseconds(1799) index(51516)

Title: Locus:1.1.1.1242.4 File:"2013-07-02 CLN FXIII 60 min 2nd F 4.wiff"

Data file C:\Program Files (x86)\Matrix Science\Mascot Daemon\mgf5 FXIII 60 min 2nd\mascot\_daemon\_merge.mgf

Click mouse within plot area to zoom in by factor of two about that point

Or, Plot from  to  Da

Label all possible matches  Label matches used for scoring

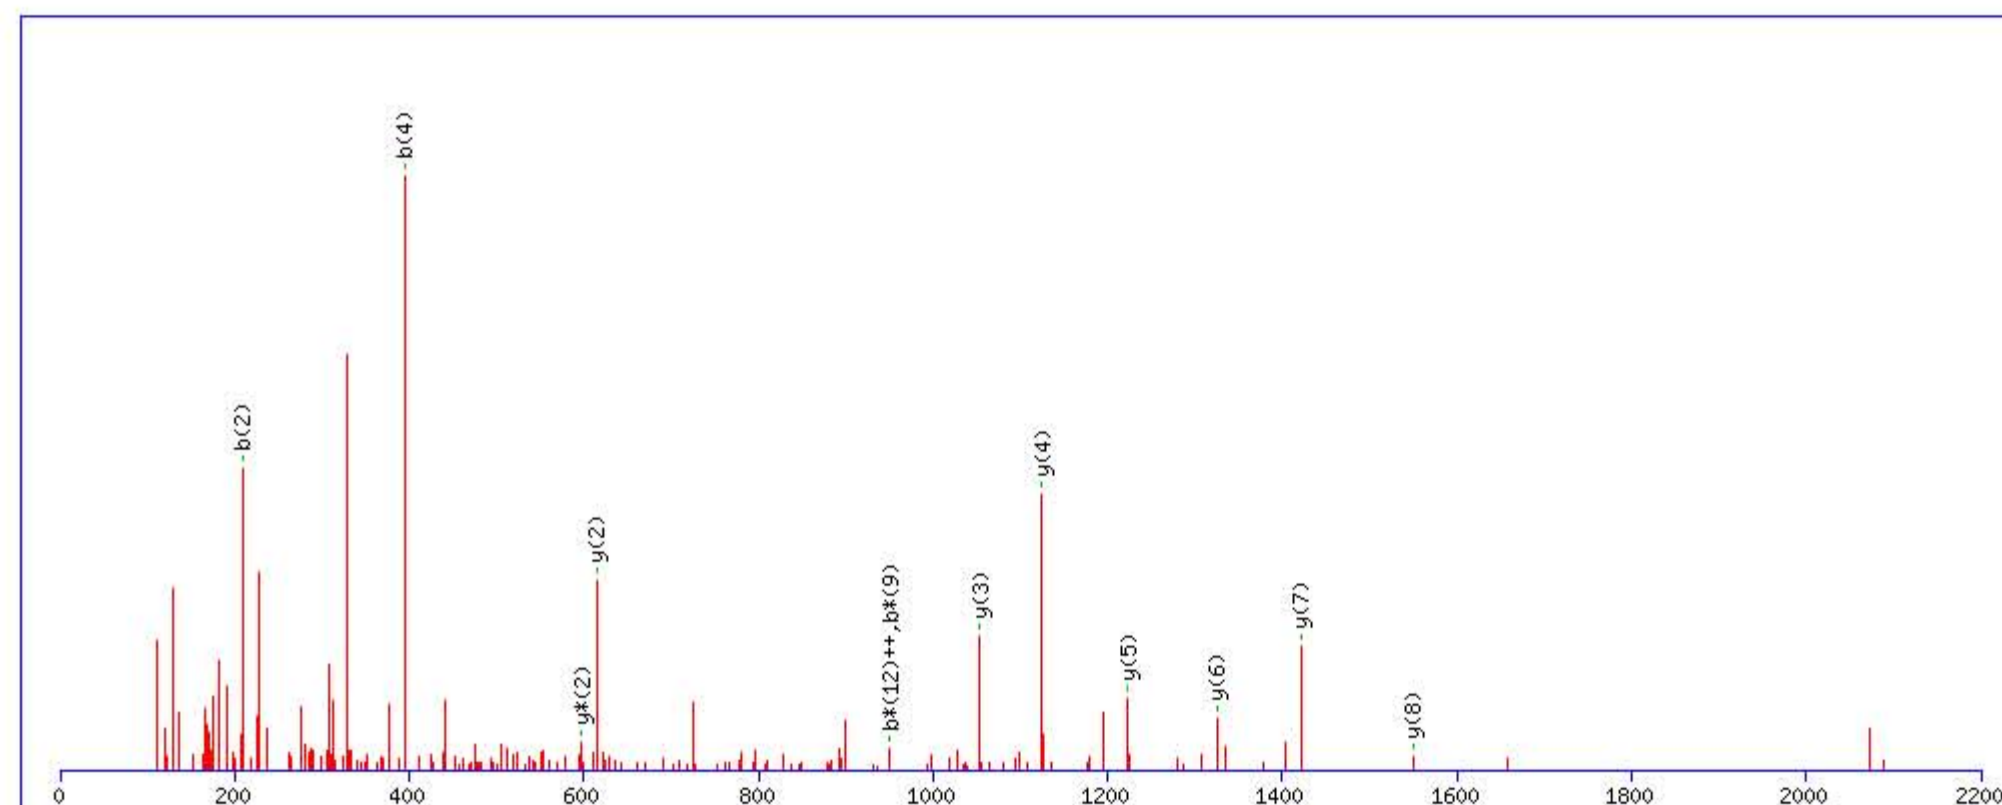

Monoisotopic mass of neutral peptide Mr(calc): 2090.128143

Fixed modifications: Carbamidomethyl (C) (apply to specified residues or termini only)

Variable modifications:

Q11 : Biotin:Thermo-21345 (Q)

Q12 : Biotin:Thermo-21345 (Q)

Ions Score: 43 Expect: 0.00097

Matches : 12/118 fragment ions using 17 most intense peaks ([help](#))

| #  | b                 | b <sup>++</sup> | b <sup>*</sup>    | b <sup>+++</sup>  | b <sup>0</sup> | b <sup>0++</sup> | Seq. | y                  | y <sup>++</sup> | y <sup>*</sup>    | y <sup>+++</sup> | y <sup>0</sup> | y <sup>0++</sup> | #  |
|----|-------------------|-----------------|-------------------|-------------------|----------------|------------------|------|--------------------|-----------------|-------------------|------------------|----------------|------------------|----|
| 1  | 72.044390         | 36.525833       |                   |                   |                |                  | A    |                    |                 |                   |                  |                |                  | 13 |
| 2  | <b>209.103302</b> | 105.055289      |                   |                   |                |                  | H    | 2020.098306        | 1010.552791     | 2003.071757       | 1002.039517      | 2002.087741    | 1001.547509      | 12 |
| 3  | 308.171716        | 154.589496      |                   |                   |                |                  | V    | 1883.039394        | 942.023335      | 1866.012845       | 933.510061       | 1865.028829    | 933.018053       | 11 |
| 4  | <b>395.203744</b> | 198.105510      |                   |                   | 377.193179     | 189.100227       | S    | 1783.970980        | 892.489128      | 1766.944431       | 883.975854       | 1765.960415    | 883.483846       | 10 |
| 5  | 542.272158        | 271.639717      |                   |                   | 524.261593     | 262.634435       | F    | 1696.938952        | 848.973114      | 1679.912403       | 840.459840       | 1678.928387    | 839.967832       | 9  |
| 6  | 670.367121        | 335.687199      | 653.340572        | 327.173924        | 652.356556     | 326.681916       | K    | <b>1549.870538</b> | 775.438907      | 1532.843989       | 766.925633       | 1531.859973    | 766.433625       | 8  |
| 7  | 767.419885        | 384.213581      | 750.393336        | 375.700306        | 749.409320     | 375.208298       | P    | <b>1421.775575</b> | 711.391426      | 1404.749026       | 702.878151       | 1403.765010    | 702.386143       | 7  |
| 8  | 868.467564        | 434.737420      | 851.441015        | 426.224146        | 850.456999     | 425.732138       | T    | <b>1324.722811</b> | 662.865044      | 1307.696262       | 654.351769       | 1306.712246    | 653.859761       | 6  |
| 9  | 967.535978        | 484.271627      | <b>950.509429</b> | 475.758353        | 949.525413     | 475.266345       | V    | <b>1223.675132</b> | 612.341204      | 1206.648583       | 603.827930       |                |                  | 5  |
| 10 | 1038.573092       | 519.790184      | 1021.546543       | 511.276910        | 1020.562527    | 510.784902       | A    | <b>1124.606718</b> | 562.806997      | 1107.580169       | 554.293723       |                |                  | 4  |
| 11 | 1477.798418       | 739.402847      | 1460.771869       | 730.889573        | 1459.787853    | 730.397565       | Q    | <b>1053.569604</b> | 527.288440      | 1036.543055       | 518.775166       |                |                  | 3  |
| 12 | 1917.023744       | 959.015510      | 1899.997195       | <b>950.502236</b> | 1899.013179    | 950.010228       | Q    | <b>614.344278</b>  | 307.675777      | <b>597.317729</b> | 299.162503       |                |                  | 2  |
| 13 |                   |                 |                   |                   |                |                  | R    | 175.118952         | 88.063114       | 158.092403        | 79.549839        |                |                  | 1  |

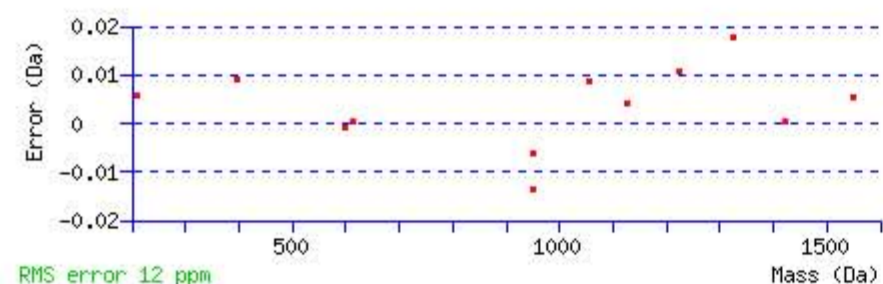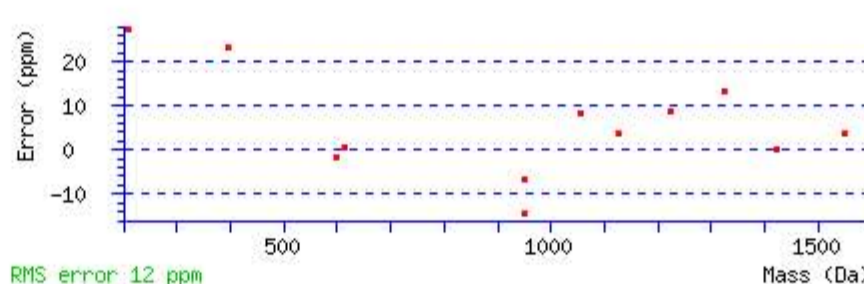

NCBI BLAST search of [AHVSFKPTVAQQR](#)

(Parameters: blastp, nr protein database, expect=20000, no filter, PAM30)

Other BLAST [web gateways](#)

All matches to this query

| Score | Mr(calc):   | Delta    | Sequence                      |
|-------|-------------|----------|-------------------------------|
| 43.0  | 2090.128143 | 0.004153 | <a href="#">AHVSFKPTVAQQR</a> |

Mascot: <http://www.matrixscience.com/>



# MASCOT Search Results

## Peptide View

MS/MS Fragmentation of **AEDHFSVIDFNQIR**

Found in **ITIH2\_HUMAN**, Inter-alpha-trypsin inhibitor heavy chain H2 OS=Homo sapiens GN=ITIH2 PE=1 SV=2

Match to Query 49452: 2115.032982 from(706.018270,3+) rtinseconds(2301) index(54854)

Title: Locus:1.1.1.1416.8 File:"2013-07-02 CLN FXIII 60 min 2nd F 4.wiff"

Data file C:\Program Files (x86)\Matrix Science\Mascot Daemon\mgf\5 FXIII 60 min 2nd\mascot\_daemon\_merge.mgf

Click mouse within plot area to zoom in by factor of two about that point

Or, Plot from  to  Da

Label all possible matches  Label matches used for scoring

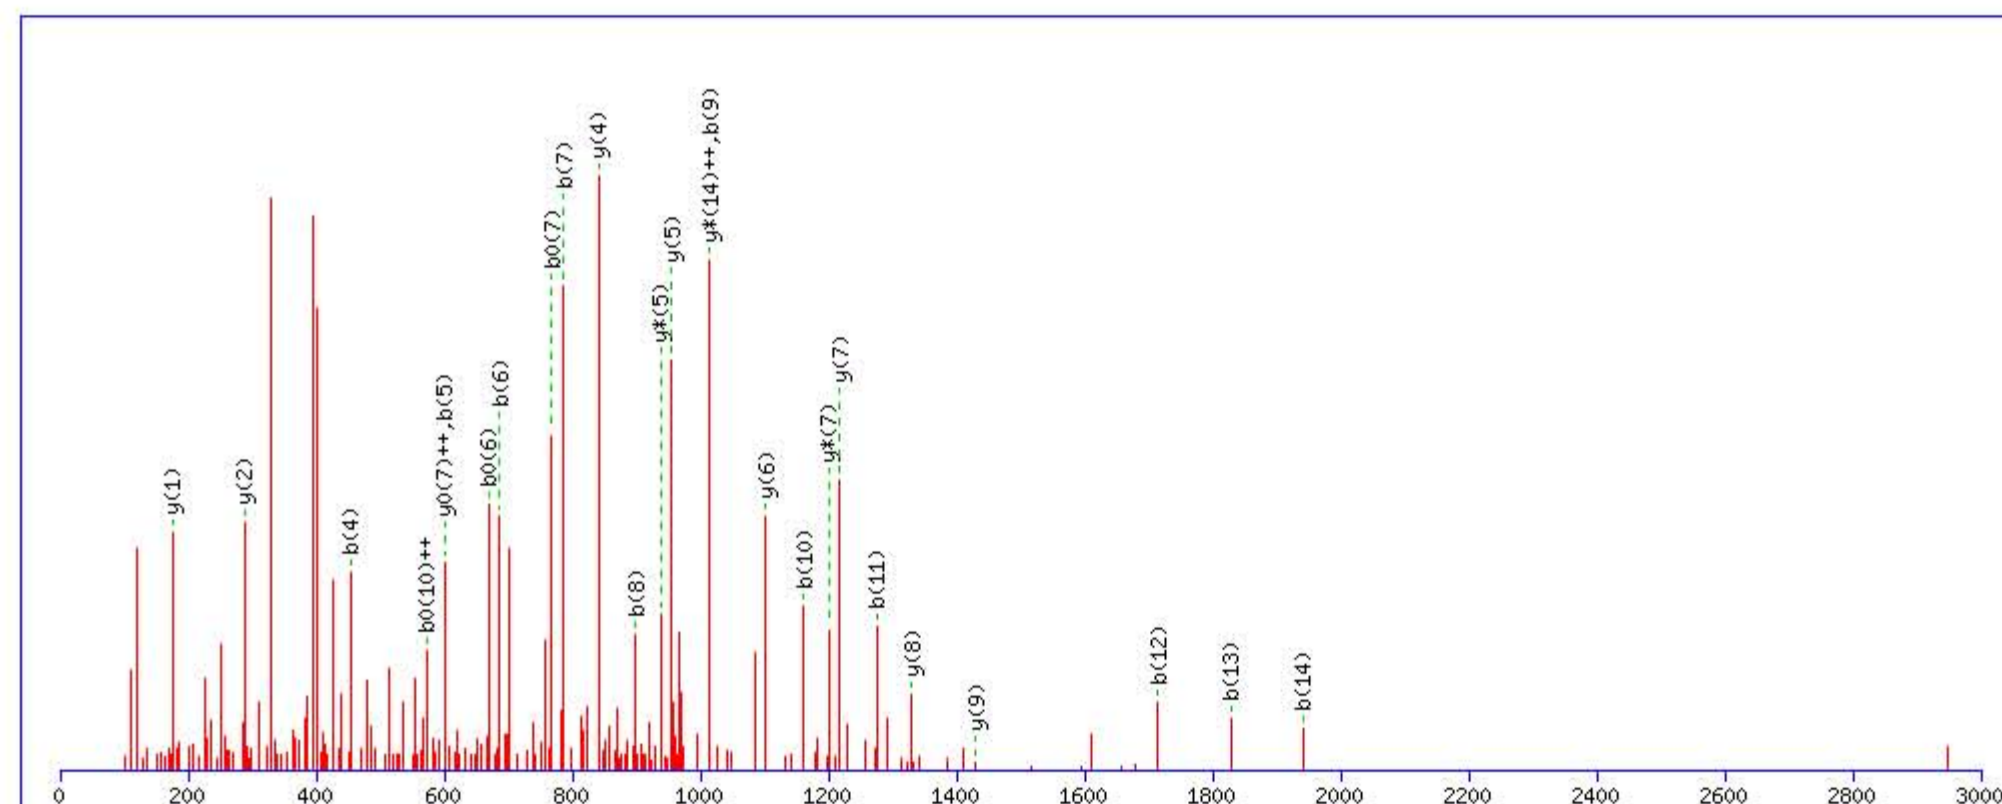

Monoisotopic mass of neutral peptide Mr(calc): 2115.020752

Fixed modifications: Carbamidomethyl (C) (apply to specified residues or termini only)

Variable modifications:

Q12 : Biotin:Thermo-21345 (Q)

Ions Score: 78 Expect: 1.7e-007

Matches : 26/134 fragment ions using 35 most intense peaks [\(help\)](#)

| #  | b           | b <sup>++</sup> | b <sup>*</sup> | b <sup>*++</sup> | b <sup>0</sup> | b <sup>0++</sup> | Seq. | y           | y <sup>++</sup> | y <sup>*</sup> | y <sup>*++</sup> | y <sup>0</sup> | y <sup>0++</sup> | #  |
|----|-------------|-----------------|----------------|------------------|----------------|------------------|------|-------------|-----------------|----------------|------------------|----------------|------------------|----|
| 1  | 72.044390   | 36.525833       |                |                  |                |                  | A    |             |                 |                |                  |                |                  | 15 |
| 2  | 201.086983  | 101.047130      |                |                  | 183.076418     | 92.041847        | E    | 2044.990921 | 1022.999099     | 2027.964372    | 1014.485824      | 2026.980356    | 1013.993816      | 14 |
| 3  | 316.113926  | 158.560601      |                |                  | 298.103361     | 149.555319       | D    | 1915.948328 | 958.477802      | 1898.921779    | 949.964528       | 1897.937763    | 949.472519       | 13 |
| 4  | 453.172838  | 227.090057      |                |                  | 435.162273     | 218.084775       | H    | 1800.921385 | 900.964331      | 1783.894836    | 892.451056       | 1782.910820    | 891.959048       | 12 |
| 5  | 600.241252  | 300.624264      |                |                  | 582.230687     | 291.618982       | F    | 1663.862473 | 832.434874      | 1646.835924    | 823.921600       | 1645.851908    | 823.429592       | 11 |
| 6  | 687.273280  | 344.140278      |                |                  | 669.262715     | 335.134996       | S    | 1516.794059 | 758.900668      | 1499.767510    | 750.387393       | 1498.783494    | 749.895385       | 10 |
| 7  | 786.341694  | 393.674485      |                |                  | 768.331129     | 384.669202       | V    | 1429.762031 | 715.384654      | 1412.735482    | 706.871379       | 1411.751466    | 706.379371       | 9  |
| 8  | 899.425758  | 450.216517      |                |                  | 881.415193     | 441.211234       | I    | 1330.693617 | 665.850447      | 1313.667068    | 657.337172       | 1312.683052    | 656.845164       | 8  |
| 9  | 1014.452701 | 507.729988      |                |                  | 996.442136     | 498.724706       | D    | 1217.609553 | 609.308415      | 1200.583004    | 600.795140       | 1199.598988    | 600.303132       | 7  |
| 10 | 1161.521115 | 581.264196      |                |                  | 1143.510550    | 572.258913       | F    | 1102.582610 | 551.794943      | 1085.556061    | 543.281669       |                |                  | 6  |
| 11 | 1275.564042 | 638.285659      | 1258.537493    | 629.772385       | 1257.553477    | 629.280376       | N    | 955.514196  | 478.260736      | 938.487647     | 469.747462       |                |                  | 5  |
| 12 | 1714.789368 | 857.898322      | 1697.762819    | 849.385048       | 1696.778803    | 848.893039       | Q    | 841.471269  | 421.239273      | 824.444720     | 412.725998       |                |                  | 4  |
| 13 | 1828.832295 | 914.919785      | 1811.805746    | 906.406511       | 1810.821730    | 905.914503       | N    | 402.245943  | 201.626610      | 385.219394     | 193.113335       |                |                  | 3  |
| 14 | 1941.916359 | 971.461817      | 1924.889810    | 962.948543       | 1923.905794    | 962.456535       | I    | 288.203016  | 144.605146      | 271.176467     | 136.091872       |                |                  | 2  |
| 15 |             |                 |                |                  |                |                  | R    | 175.118952  | 88.063114       | 158.092403     | 79.549840        |                |                  | 1  |

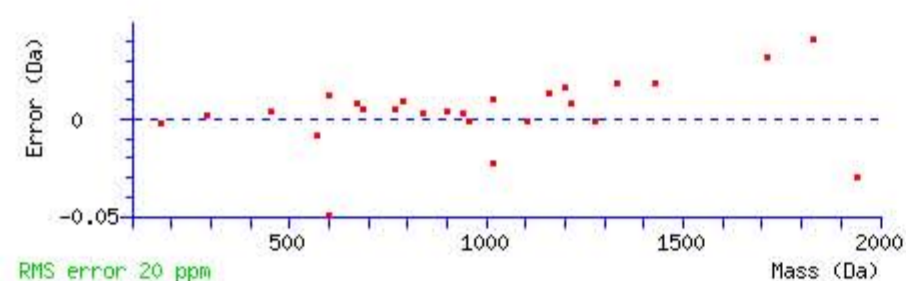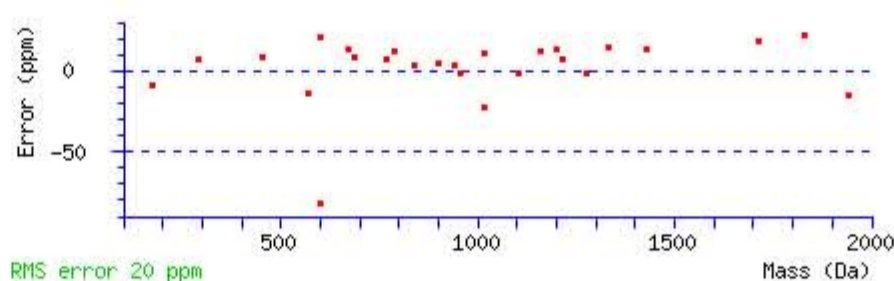

NCBI BLAST search of **AEDHFSVIDFNQIR**

(Parameters: blastp, nr protein database, expect=20000, no filter, PAM30)

Other BLAST [web gateways](#)

All matches to this query

| Score | Mr(calc):   | Delta     | Sequence                           |
|-------|-------------|-----------|------------------------------------|
| 77.9  | 2115.020752 | 0.012230  | <a href="#">AEDHFSVIDFNQIR</a>     |
| 5.5   | 2115.033981 | -0.000999 | <a href="#">ESADRQVLMQEEIK</a>     |
| 1.2   | 2115.008850 | 0.024132  | <a href="#">LTSDAEKESVMMFGRNLR</a> |

Mascot: <http://www.matrixscience.com/>







# MASCOT Search Results

## Peptide View

MS/MS Fragmentation of **SILQMSLDHHIVTPLTSLVIENEAGDER**  
 Found in **ITIH2\_HUMAN**, Inter-alpha-trypsin inhibitor heavy chain H2 OS=Homo sapiens GN=ITIH2 PE=1 SV=2

Match to Query 66512: 3427.779056 from(857.952040,4+) rtinseconds(2760) index(57514)  
 Title: Locus:1.1.1.1575.19 File:"2013-07-02 CLN FXIII 60 min 2nd F 4.wiff"  
 Data file C:\Program Files (x86)\Matrix Science\Mascot Daemon\mgf5 FXIII 60 min 2nd\mascot\_daemon\_merge.mgf

Click mouse within plot area to zoom in by factor of two about that point  
 Or, Plot from  to  Da   
 Label all possible matches  Label matches used for scoring

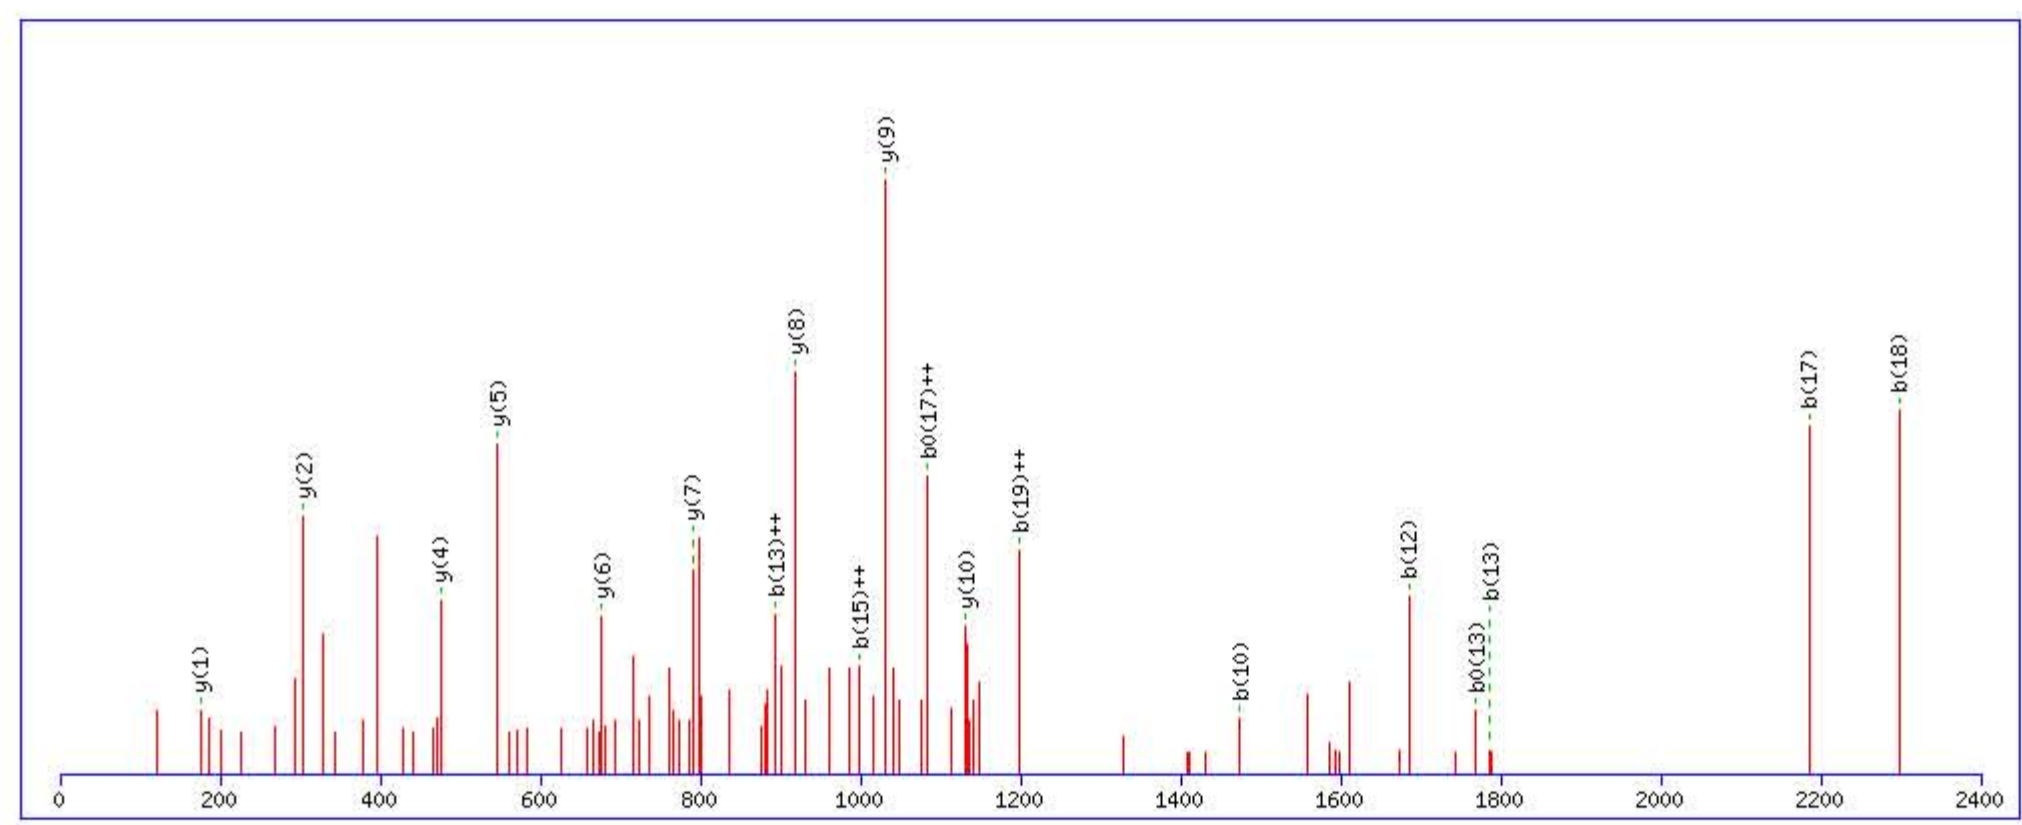

Monoisotopic mass of neutral peptide Mr(calc): 3427.747940  
 Fixed modifications: Carbamidomethyl (C) (apply to specified residues or termini only)  
 Variable modifications:  
 Q4 : Biotin:Thermo-21345 (Q)  
 Ions Score: 45 Expect: 0.00073  
 Matches : 19/316 fragment ions using 34 most intense peaks [\(help\)](#)

| #  | b                  | b <sup>++</sup>    | b <sup>+</sup> | b <sup>+++</sup> | b <sup>0</sup>     | b <sup>0++</sup>   | Seq. | y                  | y <sup>++</sup> | y <sup>*</sup> | y <sup>+++</sup> | y <sup>0</sup> | y <sup>0++</sup> | #  |
|----|--------------------|--------------------|----------------|------------------|--------------------|--------------------|------|--------------------|-----------------|----------------|------------------|----------------|------------------|----|
| 1  | 88.039304          | 44.523290          |                |                  | 70.028739          | 35.518008          | S    |                    |                 |                |                  |                |                  | 28 |
| 2  | 201.123368         | 101.065322         |                |                  | 183.112803         | 92.060039          | I    | 3341.723211        | 1671.365243     | 3324.696662    | 1662.851969      | 3323.712646    | 1662.359961      | 27 |
| 3  | 314.207432         | 157.607354         |                |                  | 296.196867         | 148.602071         | L    | 3228.639147        | 1614.823211     | 3211.612598    | 1606.309937      | 3210.628582    | 1605.817929      | 26 |
| 4  | 753.432758         | 377.220017         | 736.406209     | 368.706743       | 735.422193         | 368.214735         | Q    | 3115.555083        | 1558.281179     | 3098.528534    | 1549.767905      | 3097.544518    | 1549.275897      | 25 |
| 5  | 884.473243         | 442.740260         | 867.446694     | 434.226985       | 866.462678         | 433.734977         | M    | 2676.329757        | 1338.668516     | 2659.303208    | 1330.155242      | 2658.319192    | 1329.663234      | 24 |
| 6  | 971.505271         | 486.256274         | 954.478722     | 477.742999       | 953.494706         | 477.250991         | S    | 2545.289272        | 1273.148274     | 2528.262723    | 1264.634999      | 2527.278707    | 1264.142991      | 23 |
| 7  | 1084.589335        | 542.798305         | 1067.562786    | 534.285031       | 1066.578770        | 533.793023         | L    | 2458.257244        | 1229.632260     | 2441.230695    | 1221.118985      | 2440.246679    | 1220.626977      | 22 |
| 8  | 1199.616278        | 600.311777         | 1182.589729    | 591.798503       | 1181.605713        | 591.306494         | D    | 2345.173180        | 1173.090228     | 2328.146631    | 1164.576953      | 2327.162615    | 1164.084945      | 21 |
| 9  | 1336.675190        | 668.841233         | 1319.648641    | 660.327959       | 1318.664625        | 659.835950         | H    | 2230.146237        | 1115.576756     | 2213.119688    | 1107.063482      | 2212.135672    | 1106.571474      | 20 |
| 10 | <b>1473.734102</b> | 737.370689         | 1456.707553    | 728.857415       | 1455.723537        | 728.365406         | H    | 2093.087325        | 1047.047300     | 2076.060776    | 1038.534026      | 2075.076760    | 1038.042018      | 19 |
| 11 | 1586.818166        | 793.912721         | 1569.791617    | 785.399446       | 1568.807601        | 784.907438         | I    | 1956.028413        | 978.517845      | 1939.001864    | 970.004570       | 1938.017848    | 969.512562       | 18 |
| 12 | <b>1685.886580</b> | 843.446928         | 1668.860031    | 834.933653       | 1667.876015        | 834.441645         | V    | 1842.944349        | 921.975813      | 1825.917800    | 913.462538       | 1824.933784    | 912.970530       | 17 |
| 13 | <b>1786.934259</b> | <b>893.970767</b>  | 1769.907710    | 885.457493       | <b>1768.923694</b> | 884.965485         | T    | 1743.875935        | 872.441606      | 1726.849386    | 863.928331       | 1725.865370    | 863.436323       | 16 |
| 14 | 1883.987023        | 942.497149         | 1866.960474    | 933.983875       | 1865.976458        | 933.491867         | P    | 1642.828256        | 821.917766      | 1625.801707    | 813.404492       | 1624.817691    | 812.912484       | 15 |
| 15 | 1997.071087        | <b>999.039181</b>  | 1980.044538    | 990.525907       | 1979.060522        | 990.033899         | L    | 1545.775492        | 773.391384      | 1528.748943    | 764.878110       | 1527.764927    | 764.386102       | 14 |
| 16 | 2098.118766        | 1049.563021        | 2081.092217    | 1041.049746      | 2080.108201        | 1040.557738        | T    | 1432.691428        | 716.849352      | 1415.664879    | 708.336078       | 1414.680863    | 707.844070       | 13 |
| 17 | <b>2185.150794</b> | 1093.079035        | 2168.124245    | 1084.565760      | 2167.140229        | <b>1084.073752</b> | S    | 1331.643749        | 666.325513      | 1314.617200    | 657.812238       | 1313.633184    | 657.320230       | 12 |
| 18 | <b>2298.234858</b> | 1149.621067        | 2281.208309    | 1141.107792      | 2280.224293        | 1140.615784        | L    | 1244.611721        | 622.809499      | 1227.585172    | 614.296224       | 1226.601156    | 613.804216       | 11 |
| 19 | 2397.303272        | <b>1199.155274</b> | 2380.276723    | 1190.641999      | 2379.292707        | 1190.149991        | V    | <b>1131.527657</b> | 566.267467      | 1114.501108    | 557.754192       | 1113.517092    | 557.262184       | 10 |
| 20 | 2510.387336        | 1255.697306        | 2493.360787    | 1247.184031      | 2492.376771        | 1246.692023        | I    | <b>1032.459243</b> | 516.733260      | 1015.432694    | 508.219985       | 1014.448678    | 507.727977       | 9  |
| 21 | 2639.429929        | 1320.218602        | 2622.403380    | 1311.705328      | 2621.419364        | 1311.213320        | E    | <b>919.375179</b>  | 460.191228      | 902.348630     | 451.677953       | 901.364614     | 451.185945       | 8  |
| 22 | 2753.472856        | 1377.240066        | 2736.446307    | 1368.726791      | 2735.462291        | 1368.234783        | N    | <b>790.332586</b>  | 395.669931      | 773.306037     | 387.156657       | 772.322021     | 386.664649       | 7  |
| 23 | 2882.515449        | 1441.761362        | 2865.488900    | 1433.248088      | 2864.504884        | 1432.756080        | E    | <b>676.289659</b>  | 338.648468      | 659.263110     | 330.135193       | 658.279094     | 329.643185       | 6  |
| 24 | 2953.552563        | 1477.279920        | 2936.526014    | 1468.766645      | 2935.541998        | 1468.274637        | A    | <b>547.247066</b>  | 274.127171      | 530.220517     | 265.613897       | 529.236501     | 265.121889       | 5  |
| 25 | 3010.574027        | 1505.790652        | 2993.547478    | 1497.277377      | 2992.563462        | 1496.785369        | G    | <b>476.209952</b>  | 238.608614      | 459.183403     | 230.095339       | 458.199387     | 229.603331       | 4  |
| 26 | 3125.600970        | 1563.304123        | 3108.574421    | 1554.790848      | 3107.590405        | 1554.298840        | D    | 419.188488         | 210.097882      | 402.161939     | 201.584607       | 401.177923     | 201.092599       | 3  |
| 27 | 3254.643563        | 1627.825420        | 3237.617014    | 1619.312145      | 3236.632998        | 1618.820137        | E    | <b>304.161545</b>  | 152.584411      | 287.134996     | 144.071136       | 286.150980     | 143.579128       | 2  |
| 28 |                    |                    |                |                  |                    |                    | R    | <b>175.118952</b>  | 88.063114       | 158.092403     | 79.549839        |                |                  | 1  |

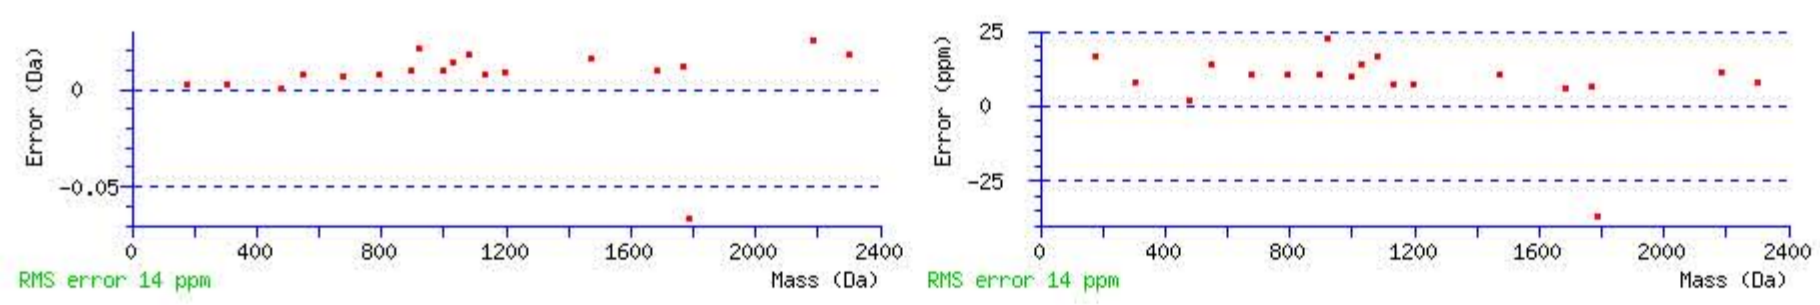

NCBI BLAST search of **SILQMSLDHHIVTPLTSLVIENEAGDER**  
 (Parameters: blastp, nr protein database, expect=20000, no filter, PAM30)  
 Other BLAST [web gateways](#)

### All matches to this query

| Score | Mr(calc):   | Delta    | Sequence                                     |
|-------|-------------|----------|----------------------------------------------|
| 45.1  | 3427.747940 | 0.031116 | <a href="#">SILQMSLDHHIVTPLTSLVIENEAGDER</a> |



# MASCOT Search Results

## Peptide View

MS/MS Fragmentation of **NVQFNYPHTSVTDVTDQNNFHNHYFGGSEIVVAGK**

Found in **ITIH2\_HUMAN**, Inter-alpha-trypsin inhibitor heavy chain H2 OS=Homo sapiens GN=ITIH2 PE=1 SV=2

Match to Query 69824: 3993.948016 from(999.494280,4+) rtinseconds(2411) index(55456)

Title: Locus:1.1.1.1454.20 File:"2013-07-02 CLN FXIII 60 min 2nd F 4.wiff"

Data file C:\Program Files (x86)\Matrix Science\Mascot Daemon\mgf\5 FXIII 60 min 2nd\mascot\_daemon\_merge.mgf

Click mouse within plot area to zoom in by factor of two about that point

Or, Plot from  to  Da

Label all possible matches  Label matches used for scoring

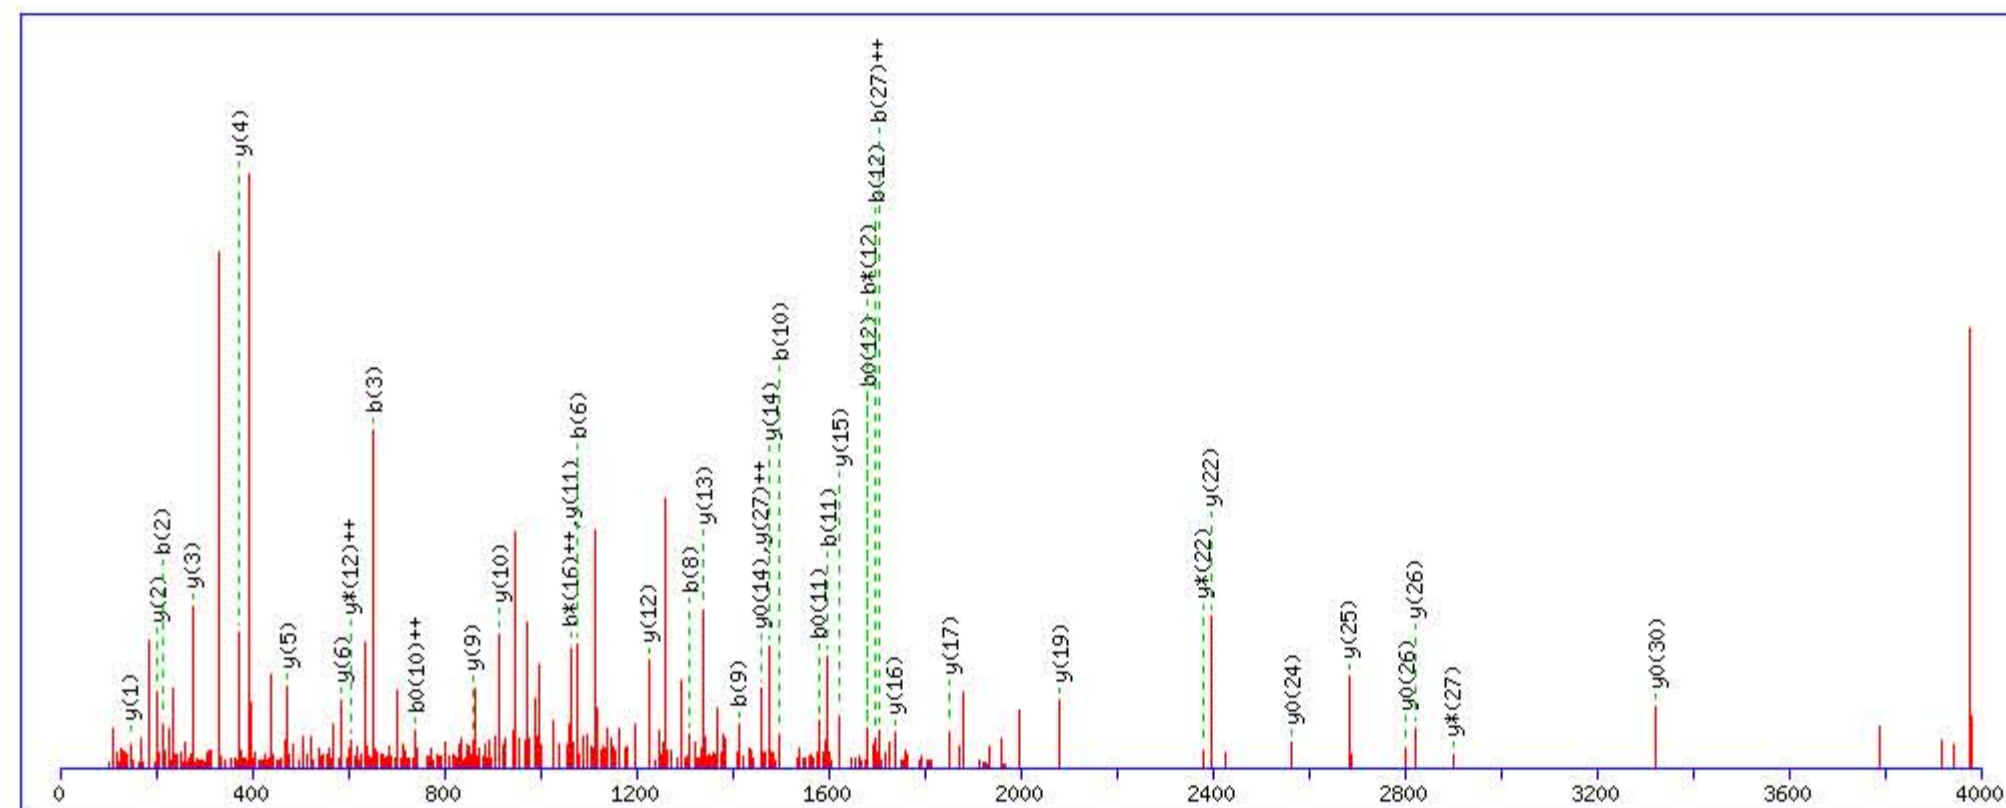

Monoisotopic mass of neutral peptide Mr(calc): 3993.910858

Fixed modifications: Carbamidomethyl (C) (apply to specified residues or termini only)

Variable modifications:

Q3 : Biotin:Thermo-21345 (Q)

Ions Score: 82 Expect: 1.4e-007

Matches : 41/356 fragment ions using 92 most intense peaks [\(help\)](#)

| #  | b                  | b <sup>++</sup>    | b <sup>*</sup>     | b <sup>*++</sup>   | b <sup>0</sup>     | b <sup>0++</sup>  | Seq. | y                  | y <sup>++</sup>    | y <sup>*</sup>     | y <sup>*++</sup>  | y <sup>0</sup>     | y <sup>0++</sup> | #  |
|----|--------------------|--------------------|--------------------|--------------------|--------------------|-------------------|------|--------------------|--------------------|--------------------|-------------------|--------------------|------------------|----|
| 1  | 115.050203         | 58.028740          | 98.023654          | 49.515465          |                    |                   | N    |                    |                    |                    |                   |                    |                  | 33 |
| 2  | <b>214.118617</b>  | 107.562947         | 197.092068         | 99.049672          |                    |                   | V    | 3880.875173        | 1940.941224        | 3863.848624        | 1932.427950       | 3862.864608        | 1931.935942      | 32 |
| 3  | <b>653.343943</b>  | 327.175610         | 636.317394         | 318.662335         |                    |                   | Q    | 3781.806759        | 1891.407017        | 3764.780210        | 1882.893743       | 3763.796194        | 1882.401735      | 31 |
| 4  | 800.412357         | 400.709817         | 783.385808         | 392.196542         |                    |                   | F    | 3342.581433        | 1671.794354        | 3325.554884        | 1663.281080       | <b>3324.570868</b> | 1662.789072      | 30 |
| 5  | 914.455284         | 457.731280         | 897.428735         | 449.218006         |                    |                   | N    | 3195.513019        | 1598.260147        | 3178.486470        | 1589.746873       | 3177.502454        | 1589.254865      | 29 |
| 6  | <b>1077.518613</b> | 539.262945         | 1060.492064        | 530.749670         |                    |                   | Y    | 3081.470092        | 1541.238684        | 3064.443543        | 1532.725409       | 3063.459527        | 1532.233401      | 28 |
| 7  | 1174.571377        | 587.789327         | 1157.544828        | 579.276052         |                    |                   | P    | 2918.406763        | <b>1459.707019</b> | <b>2901.380214</b> | 1451.193745       | 2900.396198        | 1450.701737      | 27 |
| 8  | <b>1311.630289</b> | 656.318783         | 1294.603740        | 647.805508         |                    |                   | H    | <b>2821.353999</b> | 1411.180637        | 2804.327450        | 1402.667363       | <b>2803.343434</b> | 1402.175355      | 26 |
| 9  | <b>1412.677968</b> | 706.842622         | 1395.651419        | 698.329348         | 1394.667403        | 697.837339        | T    | <b>2684.295087</b> | 1342.651181        | 2667.268538        | 1334.137907       | 2666.284522        | 1333.645899      | 25 |
| 10 | <b>1499.709996</b> | 750.358636         | 1482.683447        | 741.845362         | 1481.699431        | <b>741.353354</b> | S    | 2583.247408        | 1292.127342        | 2566.220859        | 1283.614067       | <b>2565.236843</b> | 1283.122059      | 24 |
| 11 | <b>1598.778410</b> | 799.892843         | 1581.751861        | 791.379569         | <b>1580.767845</b> | 790.887561        | V    | 2496.215380        | 1248.611328        | 2479.188831        | 1240.098053       | 2478.204815        | 1239.606045      | 23 |
| 12 | <b>1699.826089</b> | 850.416683         | <b>1682.799540</b> | 841.903408         | <b>1681.815524</b> | 841.411400        | T    | <b>2397.146966</b> | 1199.077121        | <b>2380.120417</b> | 1190.563846       | 2379.136401        | 1190.071838      | 22 |
| 13 | 1814.853032        | 907.930154         | 1797.826483        | 899.416880         | 1796.842467        | 898.924872        | D    | 2296.099287        | 1148.553281        | 2279.072738        | 1140.040007       | 2278.088722        | 1139.547999      | 21 |
| 14 | 1913.921446        | 957.464361         | 1896.894897        | 948.951087         | 1895.910881        | 948.459079        | V    | 2181.072344        | 1091.039810        | 2164.045795        | 1082.526535       | 2163.061779        | 1082.034527      | 20 |
| 15 | 2014.969125        | 1007.988201        | 1997.942576        | 999.474926         | 1996.958560        | 998.982918        | T    | <b>2082.003930</b> | 1041.505603        | 2064.977381        | 1032.992328       | 2063.993365        | 1032.500320      | 19 |
| 16 | 2143.027703        | 1072.017490        | 2126.001154        | <b>1063.504215</b> | 2125.017138        | 1063.012207       | Q    | 1980.956251        | 990.981763         | 1963.929702        | 982.468489        | 1962.945686        | 981.976481       | 18 |
| 17 | 2257.070630        | 1129.038953        | 2240.044081        | 1120.525678        | 2239.060065        | 1120.033671       | N    | <b>1852.897673</b> | 926.952474         | 1835.871124        | 918.439200        | 1834.887108        | 917.947192       | 17 |
| 18 | 2371.113557        | 1186.060417        | 2354.087008        | 1177.547142        | 2353.102992        | 1177.055134       | N    | <b>1738.854746</b> | 869.931011         | 1721.828197        | 861.417736        | 1720.844181        | 860.925728       | 16 |
| 19 | 2518.181971        | 1259.594623        | 2501.155422        | 1251.081349        | 2500.171406        | 1250.589341       | F    | <b>1624.811819</b> | 812.909547         | 1607.785270        | 804.396273        | 1606.801254        | 803.904265       | 15 |
| 20 | 2655.240883        | 1328.124079        | 2638.214334        | 1319.610805        | 2637.230318        | 1319.118797       | H    | <b>1477.743405</b> | 739.375340         | 1460.716856        | 730.862066        | <b>1459.732840</b> | 730.370058       | 14 |
| 21 | 2769.283810        | 1385.145543        | 2752.257261        | 1376.632268        | 2751.273245        | 1376.140260       | N    | <b>1340.684493</b> | 670.845885         | 1323.657944        | 662.332610        | 1322.673928        | 661.840602       | 13 |
| 22 | 2932.347139        | 1466.677207        | 2915.320590        | 1458.163933        | 2914.336574        | 1457.671925       | Y    | <b>1226.641566</b> | 613.824421         | 1209.615017        | <b>605.311147</b> | 1208.631001        | 604.819139       | 12 |
| 23 | 3079.415553        | 1540.211414        | 3062.389004        | 1531.698140        | 3061.404988        | 1531.206132       | F    | <b>1063.578237</b> | 532.292757         | 1046.551688        | 523.779482        | 1045.567672        | 523.287474       | 11 |
| 24 | 3136.437017        | 1568.722146        | 3119.410468        | 1560.208872        | 3118.426452        | 1559.716864       | G    | <b>916.509823</b>  | 458.758550         | 899.483274         | 450.245275        | 898.499258         | 449.753267       | 10 |
| 25 | 3193.458481        | 1597.232878        | 3176.431932        | 1588.719604        | 3175.447916        | 1588.227596       | G    | <b>859.488359</b>  | 430.247818         | 842.461810         | 421.734543        | 841.477794         | 421.242535       | 9  |
| 26 | 3280.490509        | 1640.748892        | 3263.463960        | 1632.235618        | 3262.479944        | 1631.743610       | S    | 802.466895         | 401.737086         | 785.440346         | 393.223811        | 784.456330         | 392.731803       | 8  |
| 27 | 3409.533102        | <b>1705.270189</b> | 3392.506553        | 1696.756914        | 3391.522537        | 1696.264906       | E    | 715.434867         | 358.221072         | 698.408318         | 349.707797        | 697.424302         | 349.215789       | 7  |
| 28 | 3522.617166        | 1761.812221        | 3505.590617        | 1753.298946        | 3504.606601        | 1752.806938       | I    | <b>586.392274</b>  | 293.699775         | 569.365725         | 285.186501        |                    |                  | 6  |
| 29 | 3621.685580        | 1811.346428        | 3604.659031        | 1802.833153        | 3603.675015        | 1802.341145       | V    | <b>473.308210</b>  | 237.157743         | 456.281661         | 228.644468        |                    |                  | 5  |
| 30 | 3720.753994        | 1860.880635        | 3703.727445        | 1852.367360        | 3702.743429        | 1851.875352       | V    | <b>374.239796</b>  | 187.623536         | 357.213247         | 179.110261        |                    |                  | 4  |
| 31 | 3791.791108        | 1896.399192        | 3774.764559        | 1887.885917        | 3773.780543        | 1887.393909       | A    | <b>275.171382</b>  | 138.089329         | 258.144833         | 129.576055        |                    |                  | 3  |
| 32 | 3848.812572        | 1924.909924        | 3831.786023        | 1916.396649        | 3830.802007        | 1915.904641       | G    | <b>204.134268</b>  | 102.570772         | 187.107719         | 94.057497         |                    |                  | 2  |
| 33 |                    |                    |                    |                    |                    |                   | K    | <b>147.112804</b>  | 74.060040          | 130.086255         | 65.546765         |                    |                  | 1  |

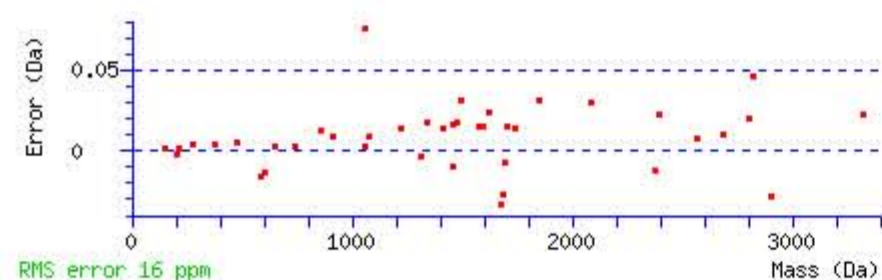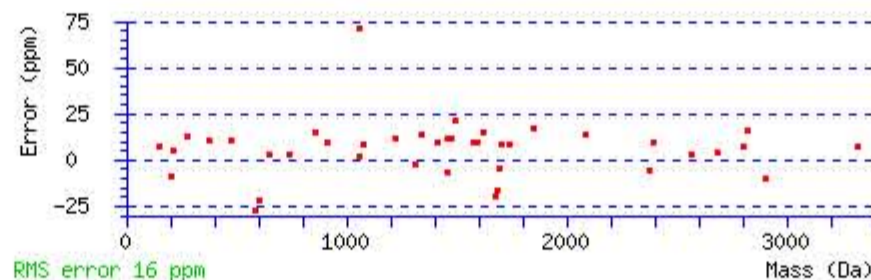

NCBI BLAST search of **NVQFNYPHTSVTDVTDQNNFHNHYFGGSEIVVAGK**

(Parameters: blastp, nr protein database, expect=20000, no filter, PAM30)

Other BLAST [web gateways](#)

All matches to this query

| Score | Mr(calc):   | Delta    | Sequence                                            |
|-------|-------------|----------|-----------------------------------------------------|
| 82.2  | 3993.910858 | 0.037158 | <a href="#">NVQFNYPHTSVTDVTDQNNFHNHYFGGSEIVVAGK</a> |
| 26.1  | 3993.910858 | 0.037158 | <a href="#">NVQFNYPHTSVTDVTDQNNFHNHYFGGSEIVVAGK</a> |



# MASCOT SEARCH RESULTS

## Peptide View

MS/MS Fragmentation of **GHVSFKPSLDQQR**

Found in **ITIH3\_HUMAN**, Inter-alpha-trypsin inhibitor heavy chain H3 OS=Homo sapiens GN=ITIH3 PE=1 SV=2

Match to Query 42894: 1808.937672 from(603.986500,3+) rtinseconds(1608) index(50300)

Title: Locus:1.1.1.1175.14 File:"2013-07-02 CLN FXIII 60 min 2nd F 4.wiff"

Data file C:\Program Files (x86)\Matrix Science\Mascot Daemon\mgf5 FXIII 60 min 2nd\mascot\_daemon\_merge.mgf

Click mouse within plot area to zoom in by factor of two about that point

Or, Plot from  to  Da

Label all possible matches  Label matches used for scoring

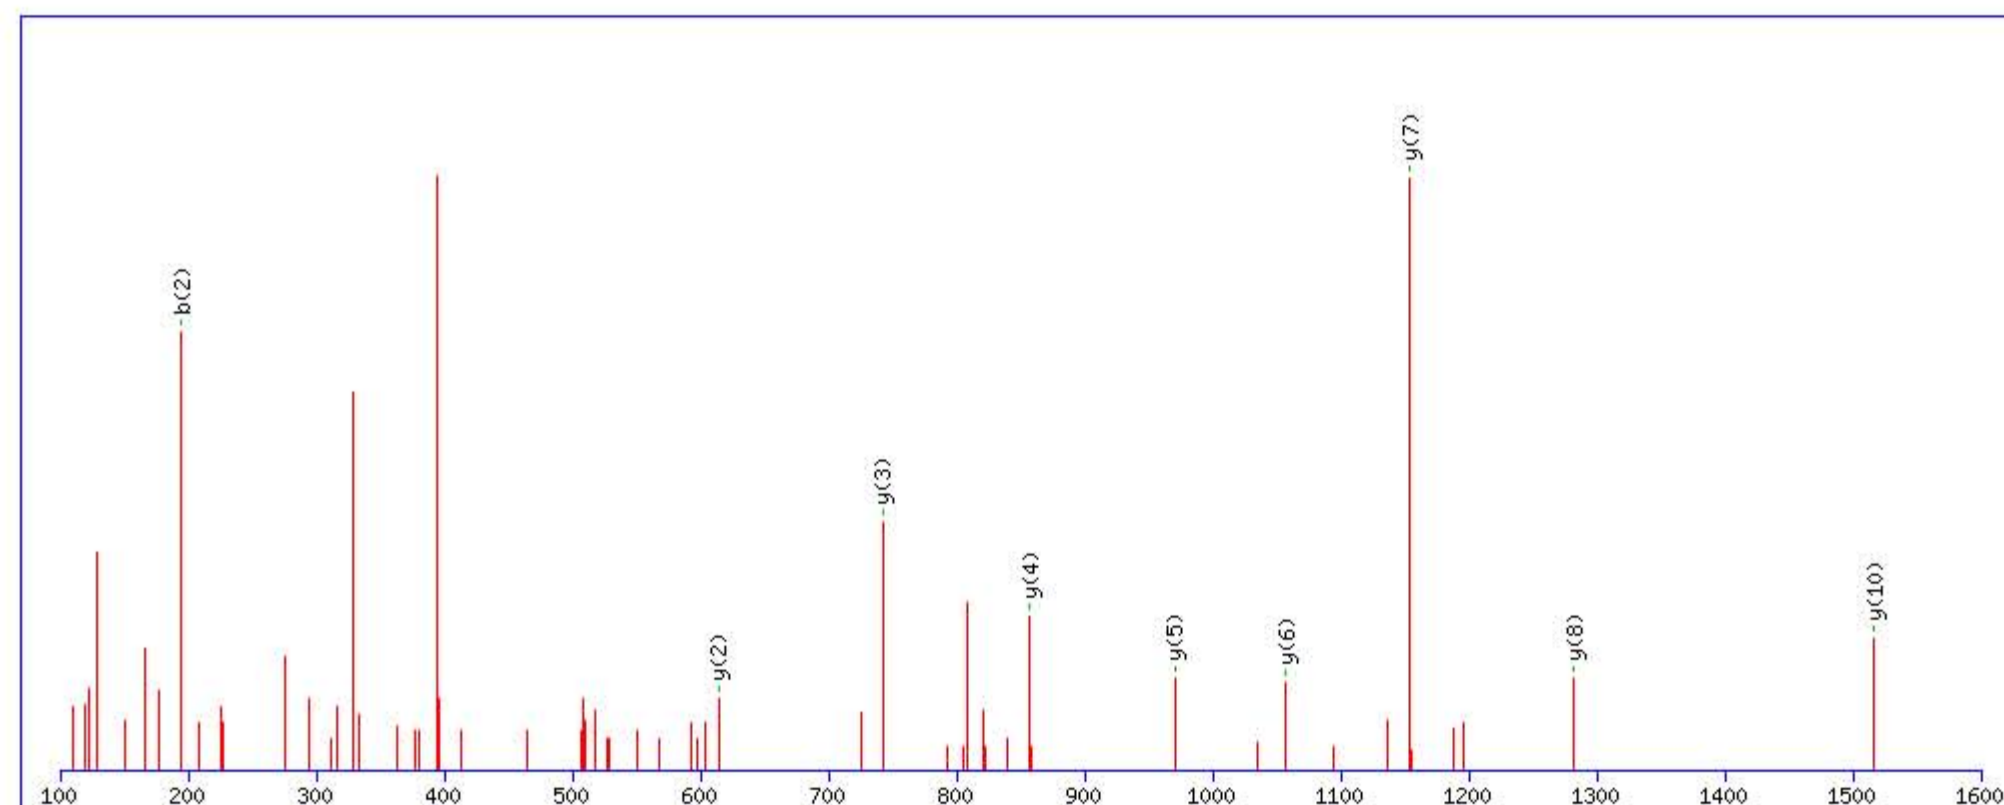

Monoisotopic mass of neutral peptide  $M_r(\text{calc})$ : 1808.935577

Fixed modifications: Carbamidomethyl (C) (apply to specified residues or termini only)

Variable modifications:

Q12 : Biotin:Thermo-21345 (Q)

Ions Score: 60 Expect: 2.9e-005

Matches : 9/122 fragment ions using 13 most intense peaks [\(help\)](#)

| #  | b                 | b <sup>++</sup> | b <sup>*</sup> | b <sup>*++</sup> | b <sup>0</sup> | b <sup>0++</sup> | Seq. | y                  | y <sup>++</sup> | y <sup>*</sup> | y <sup>*++</sup> | y <sup>0</sup> | y <sup>0++</sup> | #  |
|----|-------------------|-----------------|----------------|------------------|----------------|------------------|------|--------------------|-----------------|----------------|------------------|----------------|------------------|----|
| 1  | 58.028740         | 29.518008       |                |                  |                |                  | G    |                    |                 |                |                  |                |                  | 13 |
| 2  | <b>195.087652</b> | 98.047464       |                |                  |                |                  | H    | 1752.921386        | 876.964331      | 1735.894837    | 868.451057       | 1734.910821    | 867.959049       | 12 |
| 3  | 294.156066        | 147.581671      |                |                  |                |                  | V    | 1615.862474        | 808.434875      | 1598.835925    | 799.921601       | 1597.851909    | 799.429593       | 11 |
| 4  | 381.188094        | 191.097685      |                |                  | 363.177529     | 182.092403       | S    | <b>1516.794060</b> | 758.900668      | 1499.767511    | 750.387394       | 1498.783495    | 749.895386       | 10 |
| 5  | 528.256508        | 264.631892      |                |                  | 510.245943     | 255.626610       | F    | 1429.762032        | 715.384654      | 1412.735483    | 706.871380       | 1411.751467    | 706.379372       | 9  |
| 6  | 656.351471        | 328.679374      | 639.324922     | 320.166099       | 638.340906     | 319.674091       | K    | <b>1282.693618</b> | 641.850447      | 1265.667069    | 633.337173       | 1264.683053    | 632.845165       | 8  |
| 7  | 753.404235        | 377.205756      | 736.377686     | 368.692481       | 735.393670     | 368.200473       | P    | <b>1154.598655</b> | 577.802966      | 1137.572106    | 569.289691       | 1136.588090    | 568.797683       | 7  |
| 8  | 840.436263        | 420.721770      | 823.409714     | 412.208495       | 822.425698     | 411.716487       | S    | <b>1057.545891</b> | 529.276584      | 1040.519342    | 520.763309       | 1039.535326    | 520.271301       | 6  |
| 9  | 953.520327        | 477.263802      | 936.493778     | 468.750527       | 935.509762     | 468.258519       | L    | <b>970.513863</b>  | 485.760570      | 953.487314     | 477.247295       | 952.503298     | 476.755287       | 5  |
| 10 | 1068.547270       | 534.777273      | 1051.520721    | 526.263999       | 1050.536705    | 525.771991       | D    | <b>857.429799</b>  | 429.218538      | 840.403250     | 420.705263       | 839.419234     | 420.213255       | 4  |
| 11 | 1196.605848       | 598.806562      | 1179.579299    | 590.293288       | 1178.595283    | 589.801279       | Q    | <b>742.402856</b>  | 371.705066      | 725.376307     | 363.191792       |                |                  | 3  |
| 12 | 1635.831174       | 818.419225      | 1618.804625    | 809.905951       | 1617.820609    | 809.413943       | Q    | <b>614.344278</b>  | 307.675777      | 597.317729     | 299.162503       |                |                  | 2  |
| 13 |                   |                 |                |                  |                |                  | R    | 175.118952         | 88.063114       | 158.092403     | 79.549839        |                |                  | 1  |

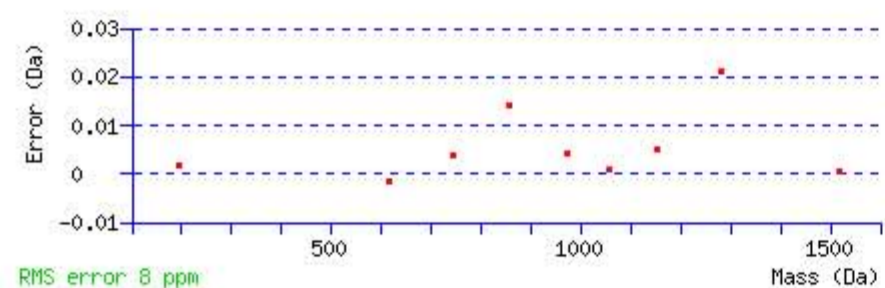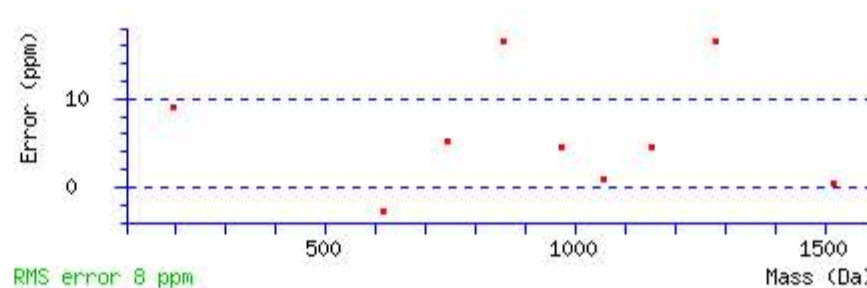

NCBI BLAST search of **GHVSFKPSLDQQR**

(Parameters: blastp, nr protein database, expect=20000, no filter, PAM30)

Other BLAST [web gateways](#)

All matches to this query

| Score | $M_r(\text{calc})$ : | Delta    | Sequence                      |
|-------|----------------------|----------|-------------------------------|
| 59.5  | 1808.935577          | 0.002095 | <a href="#">GHVSFKPSLDQQR</a> |
| 45.3  | 1808.935577          | 0.002095 | <a href="#">GHVSFKPSLDQQR</a> |

Mascot: <http://www.matrixscience.com/>



# MASCOT SCIENCE Mascot Search Results

## Peptide View

MS/MS Fragmentation of **KGHVSFKPSLDQQR**

Found in **ITIH3\_HUMAN**, Inter-alpha-trypsin inhibitor heavy chain H3 OS=Homo sapiens GN=ITIH3 PE=1 SV=2

Match to Query 45313: 1937.031456 from(485.265140,4+) rtinseconds(1532) index(49755)

Title: Locus:1.1.1.1149.5 File:"2013-07-02 CLN FXIII 60 min 2nd F 4.wiff"

Data file C:\Program Files (x86)\Matrix Science\Mascot Daemon\mgf\5 FXIII 60 min 2nd\mascot\_daemon\_merge.mgf

Click mouse within plot area to zoom in by factor of two about that point

Or, Plot from  to  Da

Label all possible matches  Label matches used for scoring

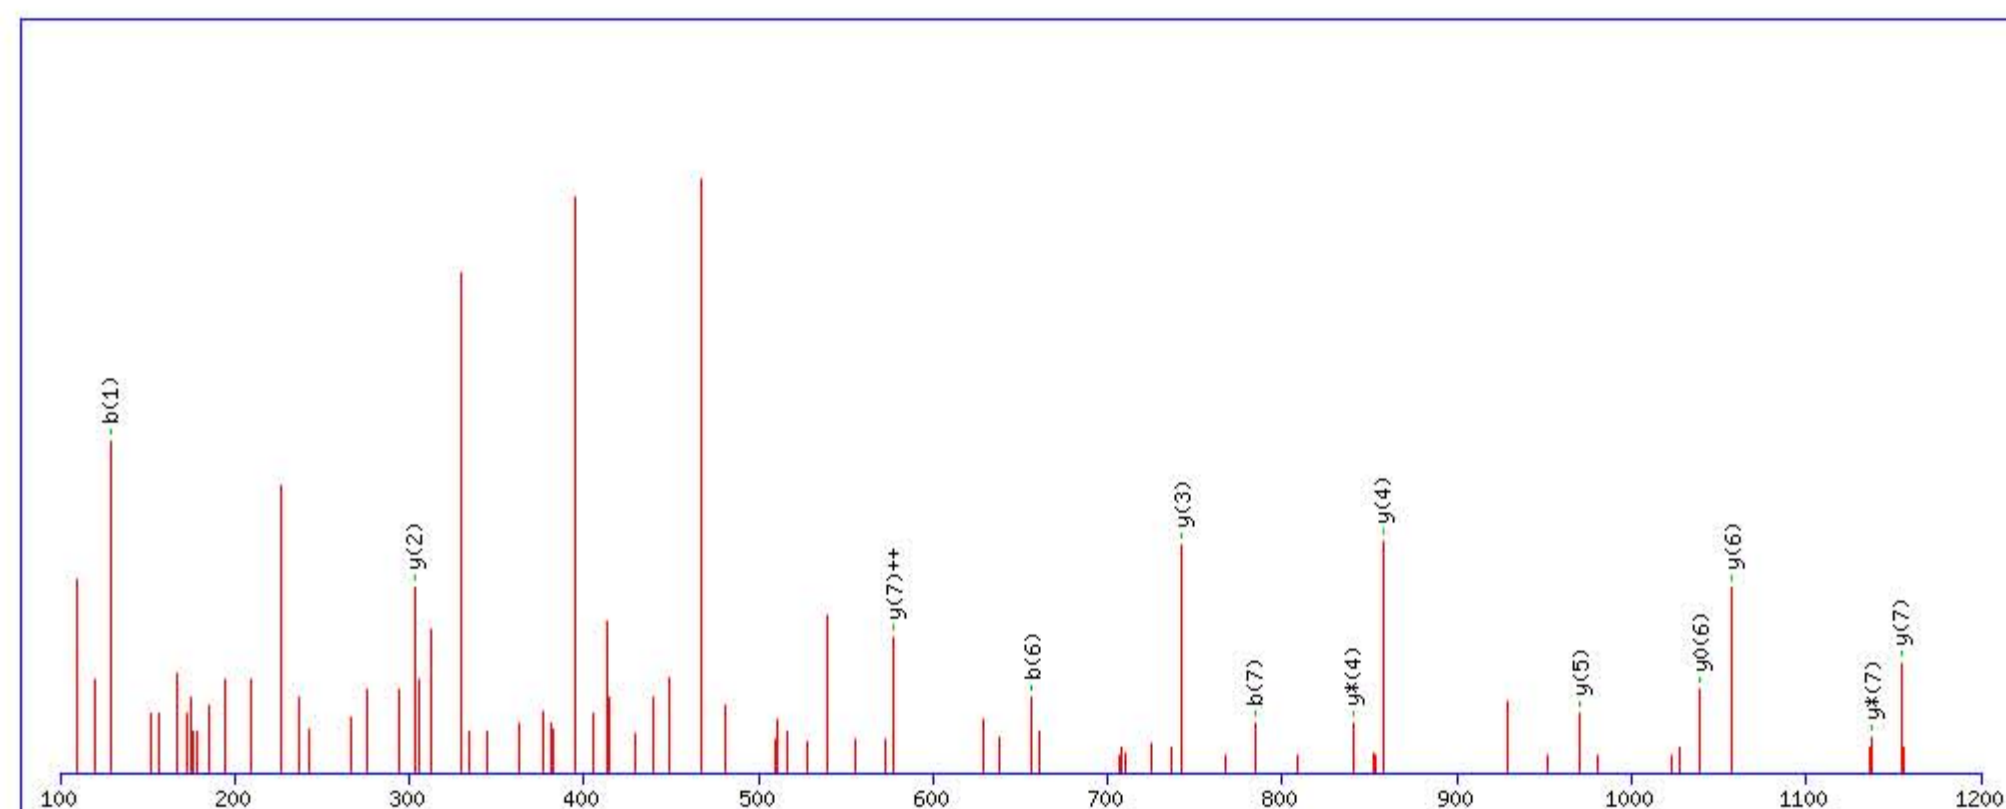

Monoisotopic mass of neutral peptide Mr(calc): 1937.030533

Fixed modifications: Carbamidomethyl (C) (apply to specified residues or termini only)

Variable modifications:

Q12 : Biotin:Thermo-21345 (Q)

Ions Score: 27 Expect: 0.048

Matches : 13/142 fragment ions using 22 most intense peaks [\(help\)](#)

| #  | b                 | b <sup>++</sup> | b <sup>+</sup> | b <sup>+++</sup> | b <sup>0</sup> | b <sup>0++</sup> | Seq.     | y                  | y <sup>++</sup>   | y <sup>+</sup>     | y <sup>+++</sup> | y <sup>0</sup>     | y <sup>0++</sup> | #         |
|----|-------------------|-----------------|----------------|------------------|----------------|------------------|----------|--------------------|-------------------|--------------------|------------------|--------------------|------------------|-----------|
| 1  | <b>129.102239</b> | 65.054757       | 112.075690     | 56.541483        |                |                  | <b>K</b> |                    |                   |                    |                  |                    |                  | <b>14</b> |
| 2  | 186.123703        | 93.565489       | 169.097154     | 85.052215        |                |                  | <b>G</b> | 1809.942850        | 905.475063        | 1792.916301        | 896.961789       | 1791.932285        | 896.469781       | <b>13</b> |
| 3  | 323.182615        | 162.094945      | 306.156066     | 153.581671       |                |                  | <b>H</b> | 1752.921386        | 876.964331        | 1735.894837        | 868.451057       | 1734.910821        | 867.959049       | <b>12</b> |
| 4  | 422.251029        | 211.629153      | 405.224480     | 203.115878       |                |                  | <b>V</b> | 1615.862474        | 808.434875        | 1598.835925        | 799.921601       | 1597.851909        | 799.429593       | <b>11</b> |
| 5  | 509.283057        | 255.145167      | 492.256508     | 246.631892       | 491.272492     | 246.139884       | <b>S</b> | 1516.794060        | 758.900668        | 1499.767511        | 750.387394       | 1498.783495        | 749.895386       | <b>10</b> |
| 6  | <b>656.351471</b> | 328.679374      | 639.324922     | 320.166099       | 638.340906     | 319.674091       | <b>F</b> | 1429.762032        | 715.384654        | 1412.735483        | 706.871380       | 1411.751467        | 706.379372       | <b>9</b>  |
| 7  | <b>784.446434</b> | 392.726855      | 767.419885     | 384.213581       | 766.435869     | 383.721573       | <b>K</b> | 1282.693618        | 641.850447        | 1265.667069        | 633.337173       | 1264.683053        | 632.845165       | <b>8</b>  |
| 8  | 881.499198        | 441.253237      | 864.472649     | 432.739963       | 863.488633     | 432.247955       | <b>P</b> | <b>1154.598655</b> | <b>577.802966</b> | <b>1137.572106</b> | 569.289691       | 1136.588090        | 568.797683       | <b>7</b>  |
| 9  | 968.531226        | 484.769251      | 951.504677     | 476.255977       | 950.520661     | 475.763969       | <b>S</b> | <b>1057.545891</b> | 529.276584        | 1040.519342        | 520.763309       | <b>1039.535326</b> | 520.271301       | <b>6</b>  |
| 10 | 1081.615290       | 541.311283      | 1064.588741    | 532.798009       | 1063.604725    | 532.306000       | <b>L</b> | <b>970.513863</b>  | 485.760570        | 953.487314         | 477.247295       | 952.503298         | 476.755287       | <b>5</b>  |
| 11 | 1196.642233       | 598.824755      | 1179.615684    | 590.311480       | 1178.631668    | 589.819472       | <b>D</b> | <b>857.429799</b>  | 429.218538        | <b>840.403250</b>  | 420.705263       | 839.419234         | 420.213255       | <b>4</b>  |
| 12 | 1635.867559       | 818.437418      | 1618.841010    | 809.924143       | 1617.856994    | 809.432135       | <b>Q</b> | <b>742.402856</b>  | 371.705066        | 725.376307         | 363.191792       |                    |                  | <b>3</b>  |
| 13 | 1763.926137       | 882.466707      | 1746.899588    | 873.953432       | 1745.915572    | 873.461424       | <b>Q</b> | <b>303.177530</b>  | 152.092403        | 286.150981         | 143.579129       |                    |                  | <b>2</b>  |
| 14 |                   |                 |                |                  |                |                  | <b>R</b> | 175.118952         | 88.063114         | 158.092403         | 79.549839        |                    |                  | <b>1</b>  |

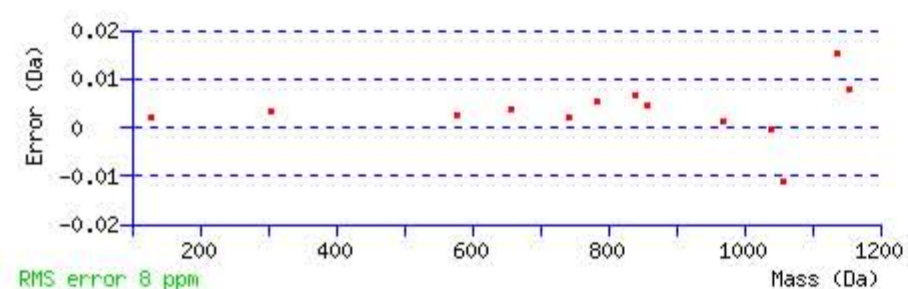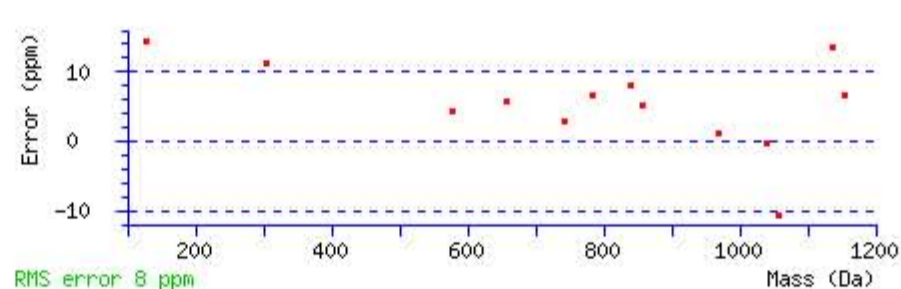

NCBI BLAST search of **KGHVSFKPSLDQQR**

(Parameters: blastp, nr protein database, expect=20000, no filter, PAM30)

Other BLAST [web gateways](#)

All matches to this query

| Score | Mr(calc):   | Delta    | Sequence                       |
|-------|-------------|----------|--------------------------------|
| 26.9  | 1937.030533 | 0.000923 | <a href="#">KGHVSFKPSLDQQR</a> |
| 19.1  | 1937.030533 | 0.000923 | <a href="#">KGHVSFKPSLDQQR</a> |

Mascot: <http://www.matrixscience.com/>



# MASCOT Search Results

## Peptide View

MS/MS Fragmentation of **EHLVQATPENLQEAR**

Found in **ITIH3\_HUMAN**, Inter-alpha-trypsin inhibitor heavy chain H3 OS=Homo sapiens GN=ITIH3 PE=1 SV=2

Match to Query 48259: 2045.046702 from(682.689510,3+) rtinseconds(1777) index(51354)

Title: Locus:1.1.1.1234.12 File:"2013-07-02 CLN FXIII 60 min 2nd F 4.wiff"

Data file C:\Program Files (x86)\Matrix Science\Mascot Daemon\mgf\5 FXIII 60 min 2nd\mascot\_daemon\_merge.mgf

Click mouse within plot area to zoom in by factor of two about that point

Or, Plot from  to  Da

Label all possible matches  Label matches used for scoring

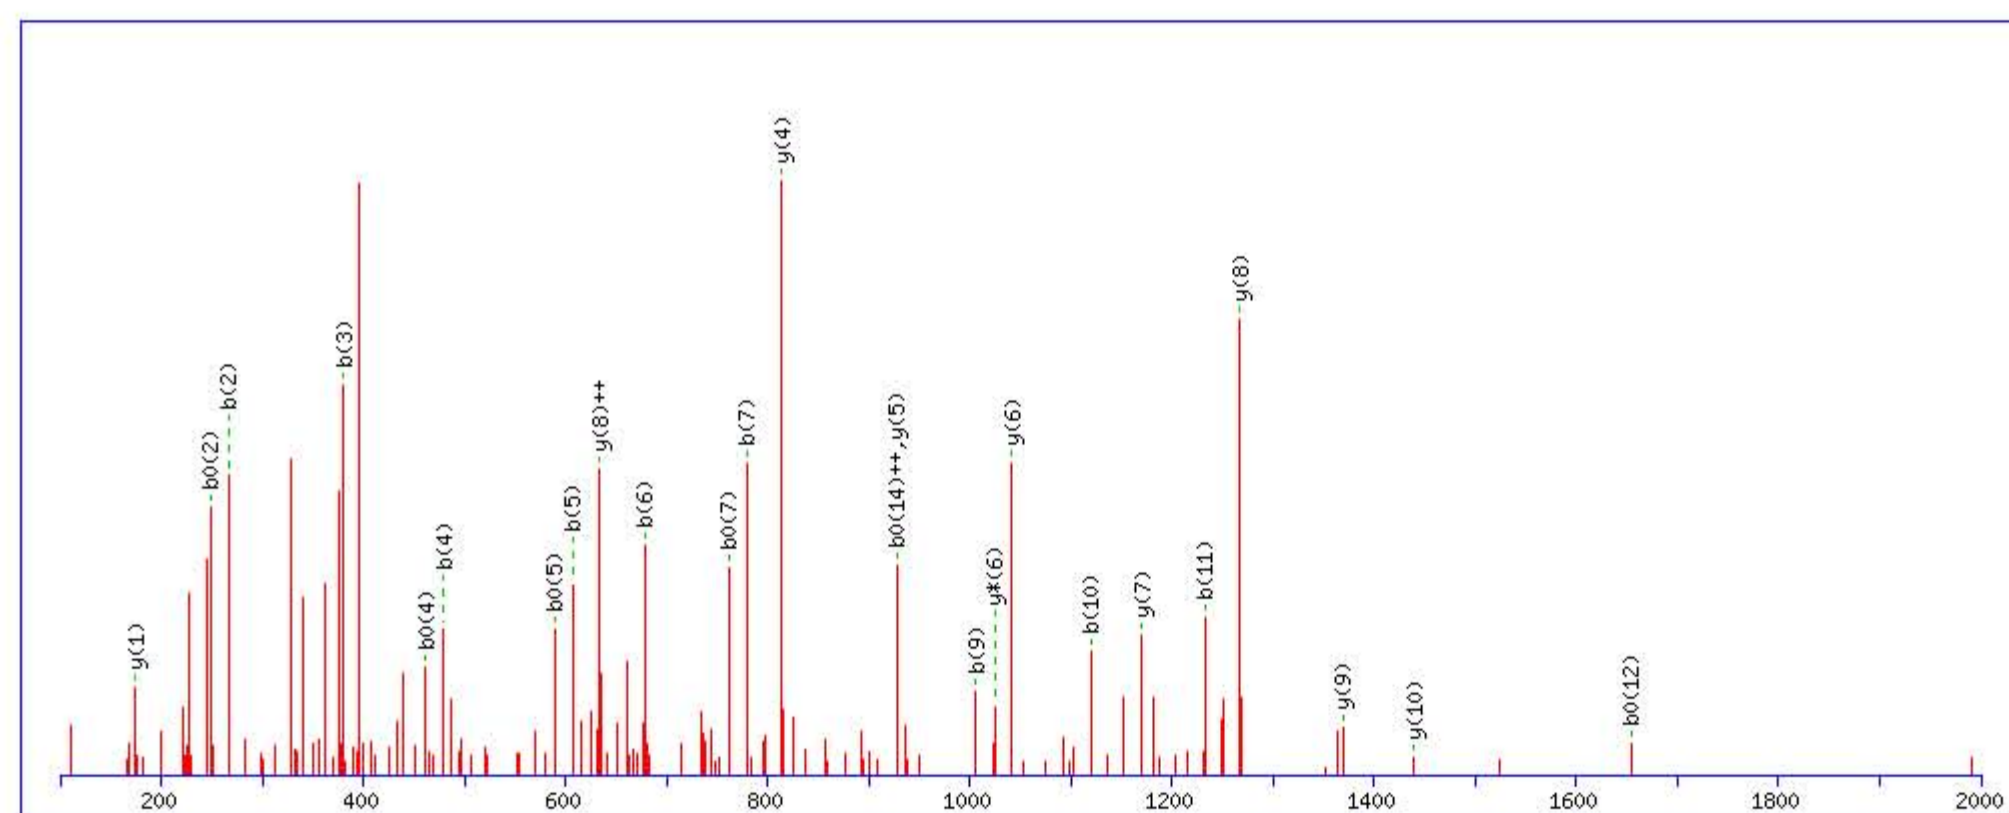

Monoisotopic mass of neutral peptide Mr(calc): 2045.036377

Fixed modifications: Carbamidomethyl (C) (apply to specified residues or termini only)

Variable modifications:

Q12 : Biotin:Thermo-21345 (Q)

Ions Score: 73 Expect: 3.9e-007

Matches : 25/156 fragment ions using 30 most intense peaks [\(help\)](#)

| #  | b                  | b <sup>++</sup> | b <sup>*</sup> | b <sup>*++</sup> | b <sup>0</sup>     | b <sup>0++</sup>  | Seq. | y                  | y <sup>++</sup>   | y <sup>*</sup>     | y <sup>*++</sup> | y <sup>0</sup> | y <sup>0++</sup> | #  |
|----|--------------------|-----------------|----------------|------------------|--------------------|-------------------|------|--------------------|-------------------|--------------------|------------------|----------------|------------------|----|
| 1  | 130.049869         | 65.528572       |                |                  | 112.039304         | 56.523290         | E    |                    |                   |                    |                  |                |                  | 15 |
| 2  | <b>267.108781</b>  | 134.058028      |                |                  | <b>249.098216</b>  | 125.052746        | H    | 1917.001094        | 959.004185        | 1899.974545        | 950.490911       | 1898.990529    | 949.998903       | 14 |
| 3  | <b>380.192845</b>  | 190.600060      |                |                  | 362.182280         | 181.594778        | L    | 1779.942182        | 890.474729        | 1762.915633        | 881.961455       | 1761.931617    | 881.469447       | 13 |
| 4  | <b>479.261259</b>  | 240.134267      |                |                  | <b>461.250694</b>  | 231.128985        | V    | 1666.858118        | 833.932697        | 1649.831569        | 825.419423       | 1648.847553    | 824.927415       | 12 |
| 5  | <b>607.319837</b>  | 304.163557      | 590.293288     | 295.650282       | <b>589.309272</b>  | 295.158274        | Q    | 1567.789704        | 784.398490        | 1550.763155        | 775.885216       | 1549.779139    | 775.393208       | 11 |
| 6  | <b>678.356951</b>  | 339.682114      | 661.330402     | 331.168839       | 660.346386         | 330.676831        | A    | <b>1439.731126</b> | 720.369201        | 1422.704577        | 711.855927       | 1421.720561    | 711.363919       | 10 |
| 7  | <b>779.404630</b>  | 390.205953      | 762.378081     | 381.692679       | <b>761.394065</b>  | 381.200671        | T    | <b>1368.694012</b> | 684.850644        | 1351.667463        | 676.337370       | 1350.683447    | 675.845362       | 9  |
| 8  | 876.457394         | 438.732335      | 859.430845     | 430.219061       | 858.446829         | 429.727053        | P    | <b>1267.646333</b> | <b>634.326805</b> | 1250.619784        | 625.813530       | 1249.635768    | 625.321522       | 8  |
| 9  | <b>1005.499987</b> | 503.253632      | 988.473438     | 494.740357       | 987.489422         | 494.248349        | E    | <b>1170.593569</b> | 585.800423        | 1153.567020        | 577.287148       | 1152.583004    | 576.795140       | 7  |
| 10 | <b>1119.542914</b> | 560.275095      | 1102.516365    | 551.761821       | 1101.532349        | 551.269813        | N    | <b>1041.550976</b> | 521.279126        | <b>1024.524427</b> | 512.765852       | 1023.540411    | 512.273844       | 6  |
| 11 | <b>1232.626978</b> | 616.817127      | 1215.600429    | 608.303853       | 1214.616413        | 607.811845        | L    | <b>927.508049</b>  | 464.257663        | 910.481500         | 455.744388       | 909.497484     | 455.252380       | 5  |
| 12 | 1671.852304        | 836.429790      | 1654.825755    | 827.916516       | <b>1653.841739</b> | 827.424508        | Q    | <b>814.423985</b>  | 407.715631        | 797.397436         | 399.202356       | 796.413420     | 398.710348       | 4  |
| 13 | 1800.894897        | 900.951087      | 1783.868348    | 892.437812       | 1782.884332        | 891.945804        | E    | 375.198659         | 188.102968        | 358.172110         | 179.589693       | 357.188094     | 179.097685       | 3  |
| 14 | 1871.932011        | 936.469644      | 1854.905462    | 927.956369       | 1853.921446        | <b>927.464361</b> | A    | 246.156066         | 123.581671        | 229.129517         | 115.068396       |                |                  | 2  |
| 15 |                    |                 |                |                  |                    |                   | R    | <b>175.118952</b>  | 88.063114         | 158.092403         | 79.549839        |                |                  | 1  |

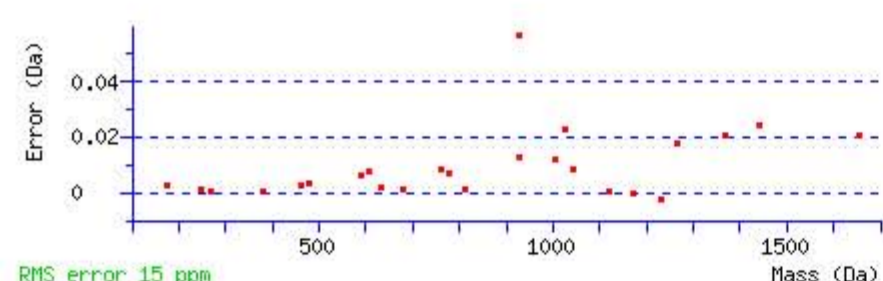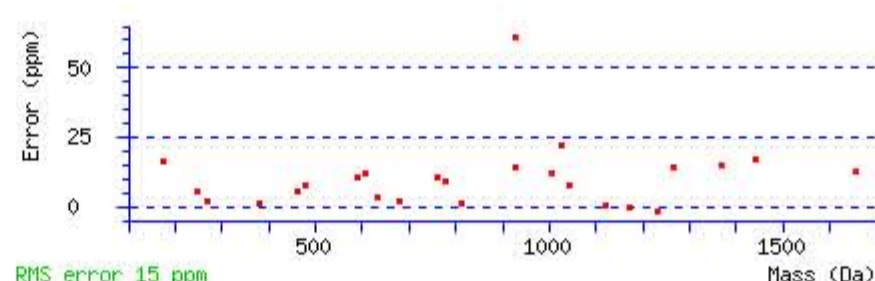

NCBI BLAST search of **EHLVQATPENLQEAR**

(Parameters: blastp, nr protein database, expect=20000, no filter, PAM30)

Other BLAST [web gateways](#)

All matches to this query

| Score | Mr(calc):   | Delta     | Sequence                           |
|-------|-------------|-----------|------------------------------------|
| 73.4  | 2045.036377 | 0.010325  | <a href="#">EHLVQATPENLQEAR</a>    |
| 4.9   | 2045.022446 | 0.024256  | <a href="#">EHNENMLRNILPSHVAR</a>  |
| 2.8   | 2045.051193 | -0.004491 | <a href="#">VVGGYLLMLAYACVTMLR</a> |

Mascot: <http://www.matrixscience.com/>



# MASCOT Search Results

## Peptide View

MS/MS Fragmentation of **AEAQAQYSAAVAK**

Found in **ITIH4\_HUMAN**, Inter-alpha-trypsin inhibitor heavy chain H4 OS=Homo sapiens GN=ITIH4 PE=1 SV=4

Match to Query 37884: 1617.820728 from(809.917640,2+) rtinseconds(1559) index(18889)

Title: Locus:1.1.1.545.12 File:"2013-07-02 CLN FXIII 60 min 2nd F 2.wiff"

Data file C:\Program Files (x86)\Matrix Science\Mascot Daemon\mgf5 FXIII 60 min 2nd\mascot\_daemon\_merge.mgf

Click mouse within plot area to zoom in by factor of two about that point

Or, Plot from  to  Da

Label all possible matches  Label matches used for scoring

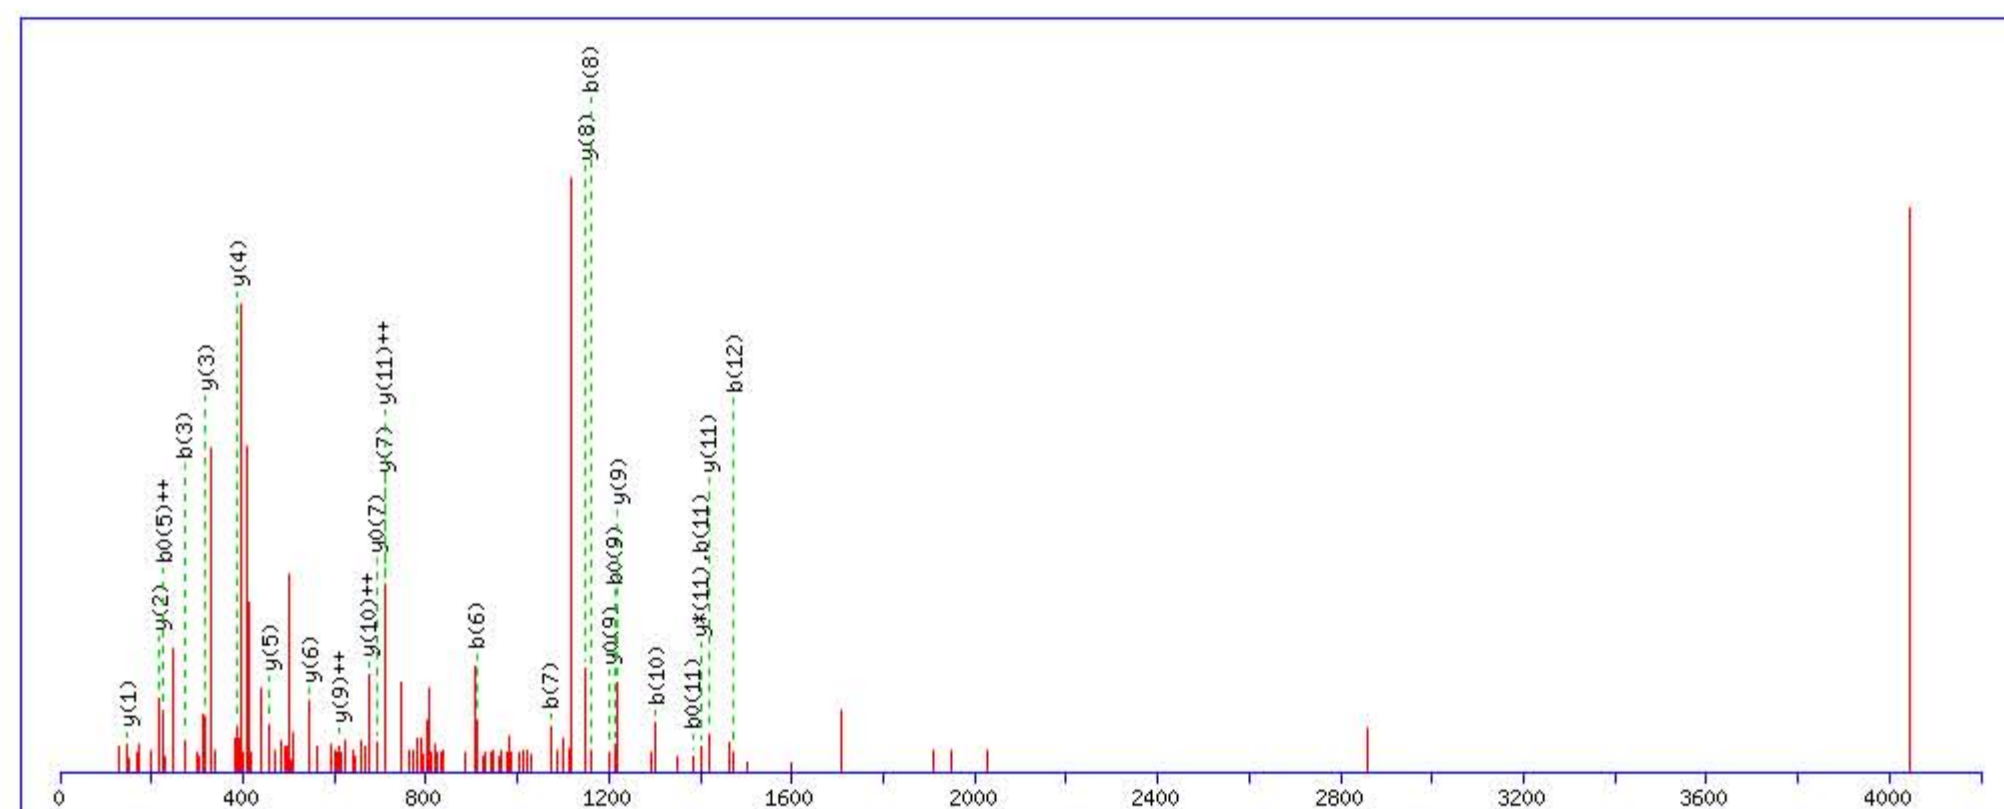

Monoisotopic mass of neutral peptide Mr(calc): 1617.818436

Fixed modifications: Carbamidomethyl (C) (apply to specified residues or termini only)

Variable modifications:

Q6 : Biotin:Thermo-21345 (Q)

Ions Score: 44 Expect: 0.00011

Matches : 26/126 fragment ions using 65 most intense peaks [\(help\)](#)

| #  | b                  | b <sup>++</sup> | b <sup>*</sup> | b <sup>*++</sup> | b <sup>0</sup>     | b <sup>0++</sup>  | Seq. | y                  | y <sup>++</sup>   | y <sup>*</sup>     | y <sup>*++</sup> | y <sup>0</sup>     | y <sup>0++</sup> | #  |
|----|--------------------|-----------------|----------------|------------------|--------------------|-------------------|------|--------------------|-------------------|--------------------|------------------|--------------------|------------------|----|
| 1  | 72.044390          | 36.525833       |                |                  |                    |                   | A    |                    |                   |                    |                  |                    |                  | 13 |
| 2  | 201.086983         | 101.047130      |                |                  | 183.076418         | 92.041847         | E    | 1547.788642        | 774.397959        | 1530.762093        | 765.884685       | 1529.778077        | 765.392677       | 12 |
| 3  | <b>272.124097</b>  | 136.565687      |                |                  | 254.113532         | 127.560404        | A    | <b>1418.746049</b> | <b>709.876663</b> | <b>1401.719500</b> | 701.363388       | 1400.735484        | 700.871380       | 11 |
| 4  | 400.182675         | 200.594976      | 383.156126     | 192.081701       | 382.172110         | 191.589693        | Q    | 1347.708935        | <b>674.358106</b> | 1330.682386        | 665.844831       | 1329.698370        | 665.352823       | 10 |
| 5  | 471.219789         | 236.113533      | 454.193240     | 227.600258       | 453.209224         | <b>227.108250</b> | A    | <b>1219.650357</b> | <b>610.328817</b> | 1202.623808        | 601.815542       | <b>1201.639792</b> | 601.323534       | 9  |
| 6  | <b>910.445115</b>  | 455.726196      | 893.418566     | 447.212921       | 892.434550         | 446.720913        | Q    | <b>1148.613243</b> | 574.810260        | 1131.586694        | 566.296985       | 1130.602678        | 565.804977       | 8  |
| 7  | <b>1073.508444</b> | 537.257860      | 1056.481895    | 528.744586       | 1055.497879        | 528.252578        | Y    | <b>709.387917</b>  | 355.197597        | 692.361368         | 346.684322       | <b>691.377352</b>  | 346.192314       | 7  |
| 8  | <b>1160.540472</b> | 580.773874      | 1143.513923    | 572.260600       | 1142.529907        | 571.768592        | S    | <b>546.324588</b>  | 273.665932        | 529.298039         | 265.152658       | 528.314023         | 264.660650       | 6  |
| 9  | 1231.577586        | 616.292431      | 1214.551037    | 607.779157       | <b>1213.567021</b> | 607.287149        | A    | <b>459.292560</b>  | 230.149918        | 442.266011         | 221.636643       |                    |                  | 5  |
| 10 | <b>1302.614700</b> | 651.810988      | 1285.588151    | 643.297714       | 1284.604135        | 642.805706        | A    | <b>388.255446</b>  | 194.631361        | 371.228897         | 186.118087       |                    |                  | 4  |
| 11 | <b>1401.683114</b> | 701.345195      | 1384.656565    | 692.831921       | <b>1383.672549</b> | 692.339913        | V    | <b>317.218332</b>  | 159.112804        | 300.191783         | 150.599530       |                    |                  | 3  |
| 12 | <b>1472.720228</b> | 736.863752      | 1455.693679    | 728.350478       | 1454.709663        | 727.858470        | A    | <b>218.149918</b>  | 109.578597        | 201.123369         | 101.065322       |                    |                  | 2  |
| 13 |                    |                 |                |                  |                    |                   | K    | <b>147.112804</b>  | 74.060040         | 130.086255         | 65.546765        |                    |                  | 1  |

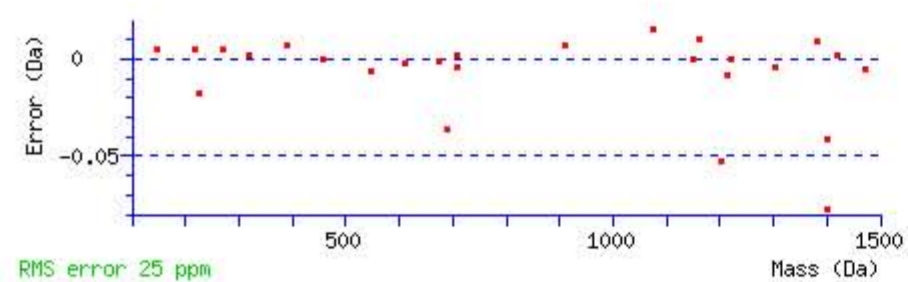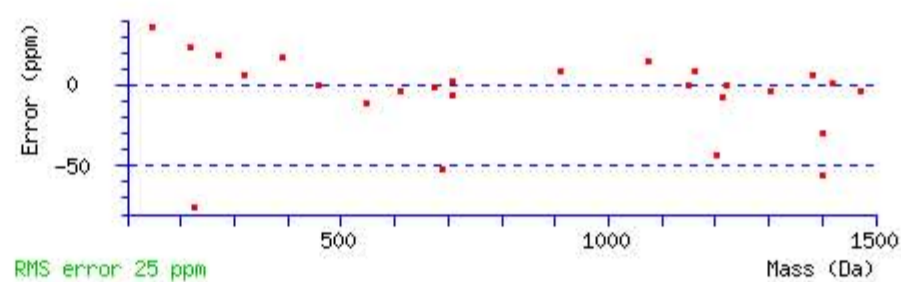

NCBI BLAST search of **AEAQAQYSAAVAK**

(Parameters: blastp, nr protein database, expect=20000, no filter, PAM30)

Other BLAST [web gateways](#)

## All matches to this query

| Score | Mr(calc):   | Delta     | Sequence                      |
|-------|-------------|-----------|-------------------------------|
| 44.0  | 1617.818436 | 0.002292  | <a href="#">AEAQAQYSAAVAK</a> |
| 41.2  | 1617.818436 | 0.002292  | <a href="#">AEAQAQYSAAVAK</a> |
| 1.7   | 1617.800690 | 0.020038  | <a href="#">EAAQAIFPSMAR</a>  |
| 1.0   | 1617.829681 | -0.008953 | <a href="#">NDVMIRKEAYVHK</a> |



# MASCOT Search Results

## Peptide View

MS/MS Fragmentation of **QLGLPGPPDVPDHAAYHPFR**

Found in **ITIH4\_HUMAN**, Inter-alpha-trypsin inhibitor heavy chain H4 OS=Homo sapiens GN=ITIH4 PE=1 SV=4

Match to Query 56565: 2494.251096 from(624.570050,4+) rtinseconds(2148) index(22577)

Title: Locus:1.1.1.750.12 File:"2013-07-02 CLN FXIII 60 min 2nd F 2.wiff"

Data file C:\Program Files (x86)\Matrix Science\Mascot Daemon\mgf5 FXIII 60 min 2nd\mascot\_daemon\_merge.mgf

Click mouse within plot area to zoom in by factor of two about that point

Or, Plot from  to  Da

Label all possible matches  Label matches used for scoring

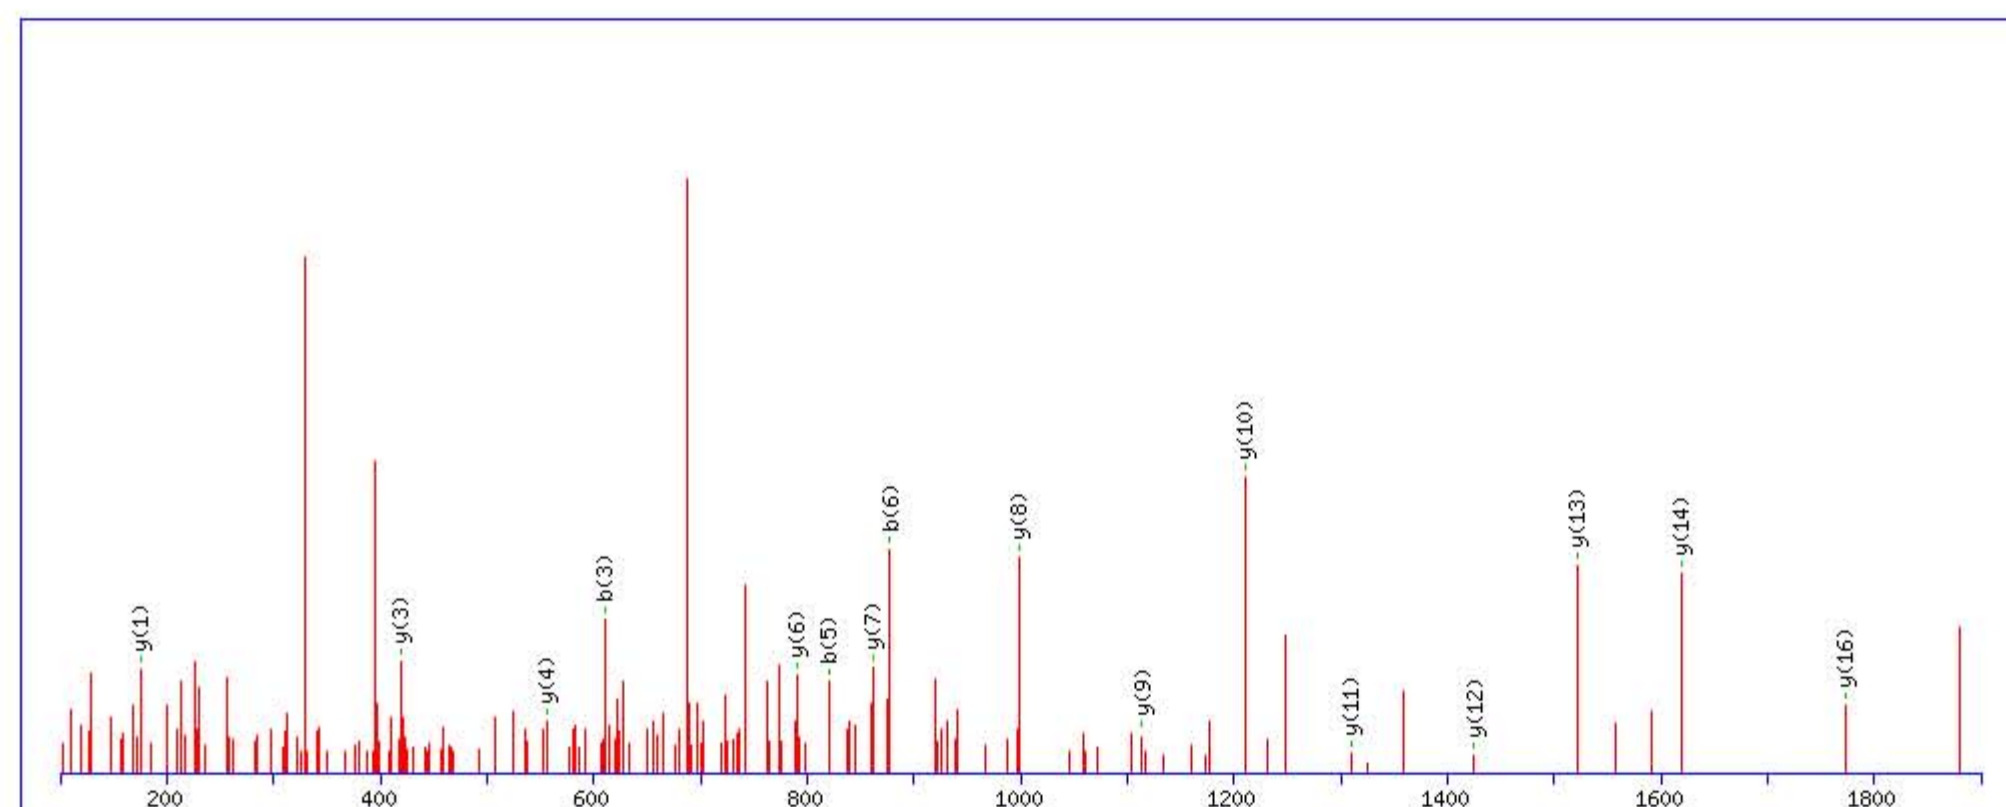

Monoisotopic mass of neutral peptide Mr(calc): 2494.257980

Fixed modifications: Carbamidomethyl (C) (apply to specified residues or termini only)

Variable modifications:

Q1 : Biotin:Thermo-21345 (Q)

Ions Score: 57 Expect: 7.2e-006

Matches : 16/196 fragment ions using 46 most intense peaks [\(help\)](#)

| #  | b                 | b <sup>++</sup> | b <sup>*</sup> | b <sup>*++</sup> | b <sup>0</sup> | b <sup>0++</sup> | Seq. | y                  | y <sup>++</sup> | y <sup>*</sup> | y <sup>*++</sup> | y <sup>0</sup> | y <sup>0++</sup> | #  |
|----|-------------------|-----------------|----------------|------------------|----------------|------------------|------|--------------------|-----------------|----------------|------------------|----------------|------------------|----|
| 1  | 440.232602        | 220.619939      | 423.206053     | 212.106664       |                |                  | Q    |                    |                 |                |                  |                |                  | 20 |
| 2  | 553.316666        | 277.161971      | 536.290117     | 268.648697       |                |                  | L    | 2056.039923        | 1028.523599     | 2039.013374    | 1020.010325      | 2038.029358    | 1019.518317      | 19 |
| 3  | <b>610.338130</b> | 305.672703      | 593.311581     | 297.159429       |                |                  | G    | 1942.955859        | 971.981568      | 1925.929310    | 963.468293       | 1924.945294    | 962.976285       | 18 |
| 4  | 723.422194        | 362.214735      | 706.395645     | 353.701461       |                |                  | L    | 1885.934395        | 943.470836      | 1868.907846    | 934.957561       | 1867.923830    | 934.465553       | 17 |
| 5  | <b>820.474958</b> | 410.741117      | 803.448409     | 402.227843       |                |                  | P    | <b>1772.850331</b> | 886.928804      | 1755.823782    | 878.415529       | 1754.839766    | 877.923521       | 16 |
| 6  | <b>877.496422</b> | 439.251849      | 860.469873     | 430.738575       |                |                  | G    | 1675.797567        | 838.402422      | 1658.771018    | 829.889147       | 1657.787002    | 829.397139       | 15 |
| 7  | 974.549186        | 487.778231      | 957.522637     | 479.264957       |                |                  | P    | <b>1618.776103</b> | 809.891690      | 1601.749554    | 801.378415       | 1600.765538    | 800.886407       | 14 |
| 8  | 1071.601950       | 536.304613      | 1054.575401    | 527.791339       |                |                  | P    | <b>1521.723339</b> | 761.365308      | 1504.696790    | 752.852033       | 1503.712774    | 752.360025       | 13 |
| 9  | 1186.628893       | 593.818085      | 1169.602344    | 585.304810       | 1168.618328    | 584.812802       | D    | <b>1424.670575</b> | 712.838926      | 1407.644026    | 704.325651       | 1406.660010    | 703.833643       | 12 |
| 10 | 1285.697307       | 643.352292      | 1268.670758    | 634.839017       | 1267.686742    | 634.347009       | V    | <b>1309.643632</b> | 655.325454      | 1292.617083    | 646.812180       | 1291.633067    | 646.320172       | 11 |
| 11 | 1382.750071       | 691.878674      | 1365.723522    | 683.365399       | 1364.739506    | 682.873391       | P    | <b>1210.575218</b> | 605.791247      | 1193.548669    | 597.277973       | 1192.564653    | 596.785964       | 10 |
| 12 | 1497.777014       | 749.392145      | 1480.750465    | 740.878871       | 1479.766449    | 740.386863       | D    | <b>1113.522454</b> | 557.264865      | 1096.495905    | 548.751591       | 1095.511889    | 548.259582       | 9  |
| 13 | 1634.835926       | 817.921601      | 1617.809377    | 809.408327       | 1616.825361    | 808.916319       | H    | <b>998.495511</b>  | 499.751393      | 981.468962     | 491.238119       |                |                  | 8  |
| 14 | 1705.873040       | 853.440158      | 1688.846491    | 844.926884       | 1687.862475    | 844.434876       | A    | <b>861.436599</b>  | 431.221937      | 844.410050     | 422.708663       |                |                  | 7  |
| 15 | 1776.910154       | 888.958715      | 1759.883605    | 880.445441       | 1758.899589    | 879.953433       | A    | <b>790.399485</b>  | 395.703380      | 773.372936     | 387.190106       |                |                  | 6  |
| 16 | 1939.973483       | 970.490380      | 1922.946934    | 961.977105       | 1921.962918    | 961.485097       | Y    | 719.362371         | 360.184823      | 702.335822     | 351.671549       |                |                  | 5  |
| 17 | 2077.032395       | 1039.019836     | 2060.005846    | 1030.506561      | 2059.021830    | 1030.014553      | H    | <b>556.299042</b>  | 278.653159      | 539.272493     | 270.139884       |                |                  | 4  |
| 18 | 2174.085159       | 1087.546218     | 2157.058610    | 1079.032943      | 2156.074594    | 1078.540935      | P    | <b>419.240130</b>  | 210.123703      | 402.213581     | 201.610428       |                |                  | 3  |
| 19 | 2321.153573       | 1161.080424     | 2304.127024    | 1152.567150      | 2303.143008    | 1152.075142      | F    | 322.187366         | 161.597321      | 305.160817     | 153.084046       |                |                  | 2  |
| 20 |                   |                 |                |                  |                |                  | R    | <b>175.118952</b>  | 88.063114       | 158.092403     | 79.549839        |                |                  | 1  |

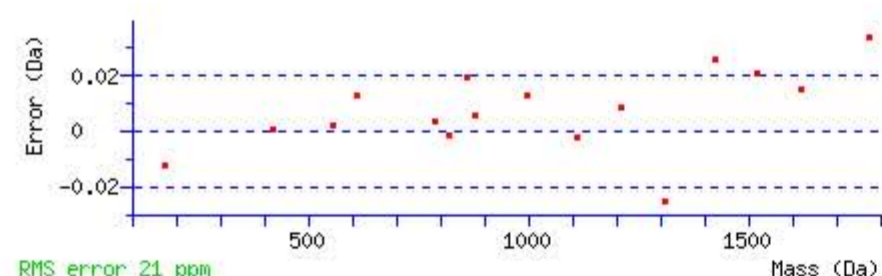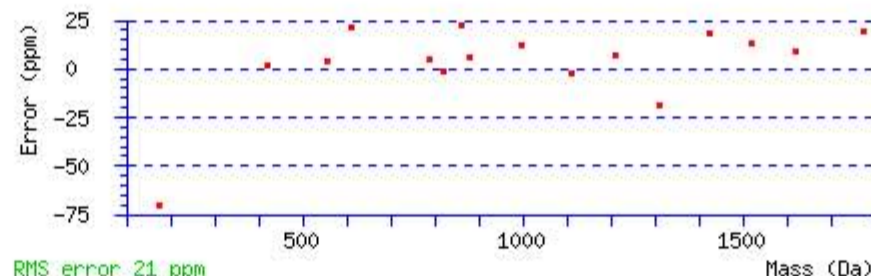

NCBI BLAST search of **QLGLPGPPDVPDHAAYHPFR**

(Parameters: blastp, nr protein database, expect=20000, no filter, PAM30)

Other BLAST [web gateways](#)

All matches to this query

| Score | Mr(calc):   | Delta     | Sequence                                 |
|-------|-------------|-----------|------------------------------------------|
| 56.6  | 2494.257980 | -0.006884 | <a href="#">QLGLPGPPDVPDHAAYHPFR</a>     |
| 1.8   | 2494.256424 | -0.005328 | <a href="#">SPHRESLPGLSSTATPGNPALYSR</a> |

Mascot: <http://www.matrixscience.com/>



# MASCOT Search Results

## Peptide View

MS/MS Fragmentation of **EGDCPVQSGK**

Found in **KNG1\_HUMAN**, Kininogen-1 OS=Homo sapiens GN=KNG1 PE=1 SV=2

Match to Query 29572: 1386.624508 from(694.319530,2+) rtinseconds(1360) index(32269)

Title: Locus:1.1.1.2892.26 File:"2013-07-02 CLN FXIII 60 min 2nd F 3.wiff"

Data file C:\Program Files (x86)\Matrix Science\Mascot Daemon\mgf5 FXIII 60 min 2nd\mascot\_daemon\_merge.mgf

Click mouse within plot area to zoom in by factor of two about that point

Or, Plot from  to  Da

Label all possible matches  Label matches used for scoring

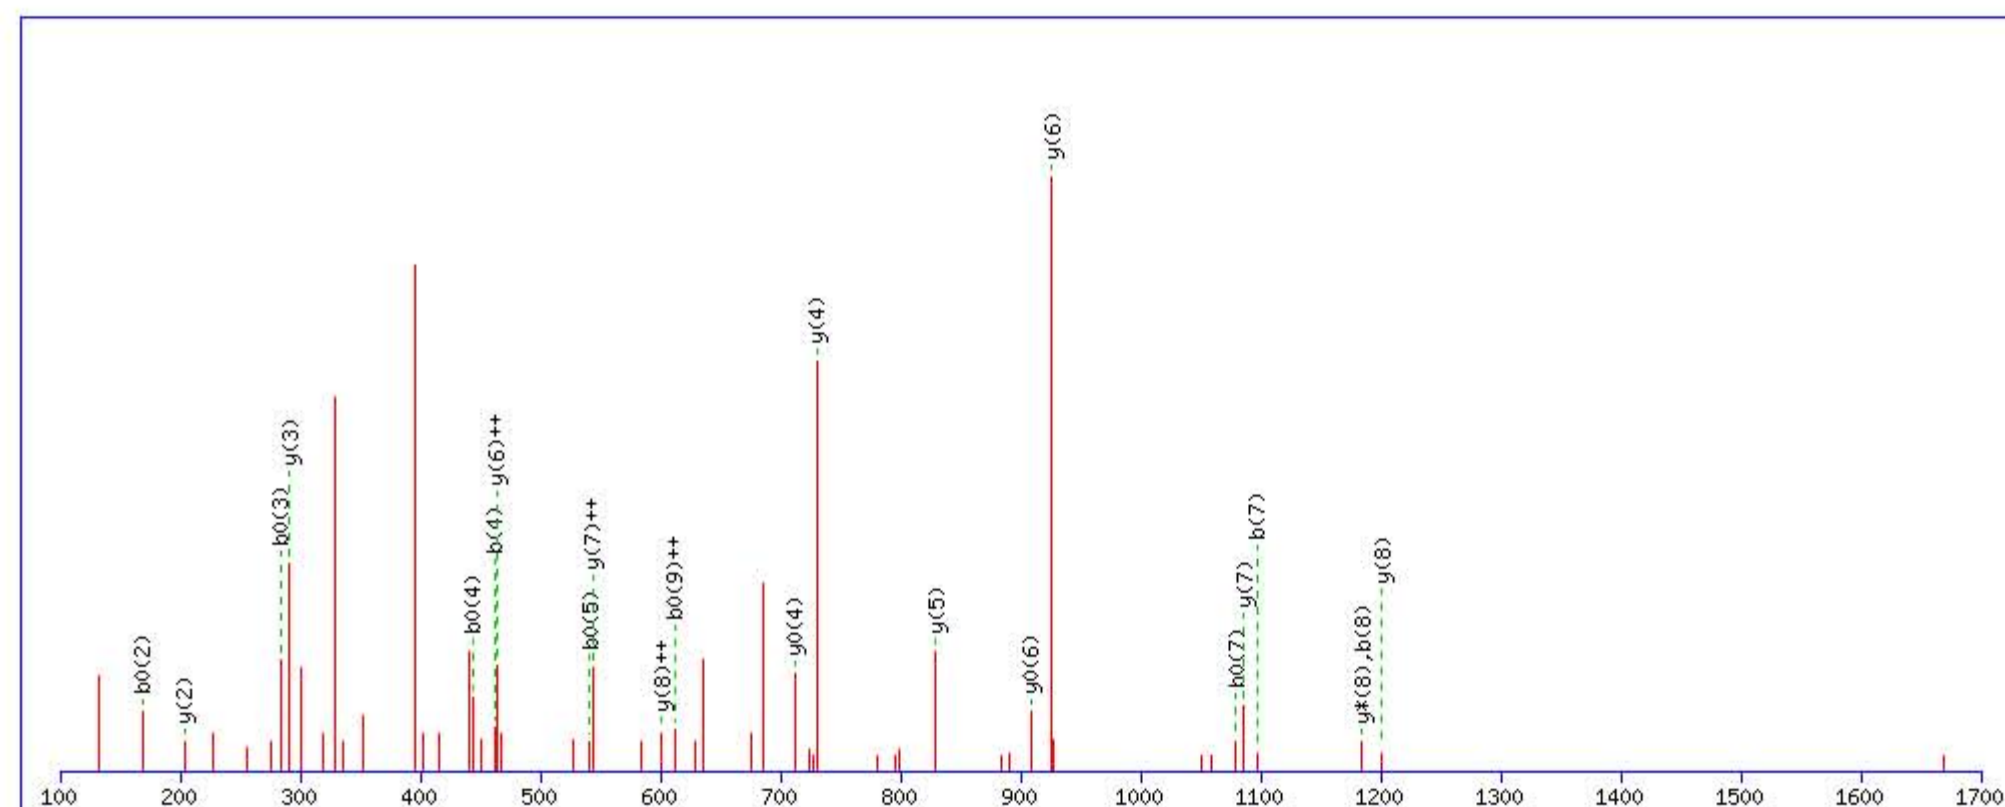

Monoisotopic mass of neutral peptide Mr(calc): 1386.627182

Fixed modifications: Carbamidomethyl (C) (apply to specified residues or termini only)

Variable modifications:

Q7 : Biotin:Thermo-21345 (Q)

Ions Score: 40 Expect: 0.00067

Matches : 22/92 fragment ions using 38 most intense peaks [\(help\)](#)

| #  | b           | b <sup>++</sup> | b <sup>*</sup> | b <sup>*++</sup> | b <sup>0</sup> | b <sup>0++</sup> | Seq. | y           | y <sup>++</sup> | y <sup>*</sup> | y <sup>*++</sup> | y <sup>0</sup> | y <sup>0++</sup> | #  |
|----|-------------|-----------------|----------------|------------------|----------------|------------------|------|-------------|-----------------|----------------|------------------|----------------|------------------|----|
| 1  | 130.049869  | 65.528572       |                |                  | 112.039304     | 56.523290        | E    |             |                 |                |                  |                |                  | 10 |
| 2  | 187.071333  | 94.039305       |                |                  | 169.060768     | 85.034022        | G    | 1258.591856 | 629.799566      | 1241.565307    | 621.286292       | 1240.581291    | 620.794284       | 9  |
| 3  | 302.098276  | 151.552776      |                |                  | 284.087711     | 142.547494       | D    | 1201.570392 | 601.288834      | 1184.543843    | 592.775560       | 1183.559827    | 592.283552       | 8  |
| 4  | 462.128925  | 231.568101      |                |                  | 444.118360     | 222.562818       | C    | 1086.543449 | 543.775363      | 1069.516900    | 535.262088       | 1068.532884    | 534.770080       | 7  |
| 5  | 559.181689  | 280.094483      |                |                  | 541.171124     | 271.089200       | P    | 926.512800  | 463.760038      | 909.486251     | 455.246764       | 908.502235     | 454.754756       | 6  |
| 6  | 658.250103  | 329.628690      |                |                  | 640.239538     | 320.623407       | V    | 829.460036  | 415.233656      | 812.433487     | 406.720382       | 811.449471     | 406.228374       | 5  |
| 7  | 1097.475429 | 549.241353      | 1080.448880    | 540.728078       | 1079.464864    | 540.236070       | Q    | 730.391622  | 365.699449      | 713.365073     | 357.186175       | 712.381057     | 356.694167       | 4  |
| 8  | 1184.507457 | 592.757367      | 1167.480908    | 584.244092       | 1166.496892    | 583.752084       | S    | 291.166296  | 146.086786      | 274.139747     | 137.573512       | 273.155731     | 137.081504       | 3  |
| 9  | 1241.528921 | 621.268099      | 1224.502372    | 612.754824       | 1223.518356    | 612.262816       | G    | 204.134268  | 102.570772      | 187.107719     | 94.057497        |                |                  | 2  |
| 10 |             |                 |                |                  |                |                  | K    | 147.112804  | 74.060040       | 130.086255     | 65.546765        |                |                  | 1  |

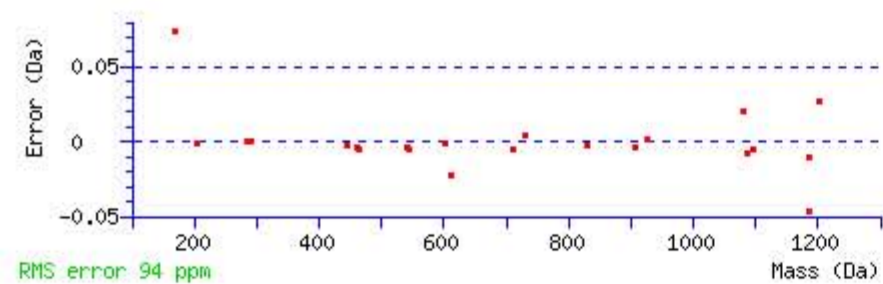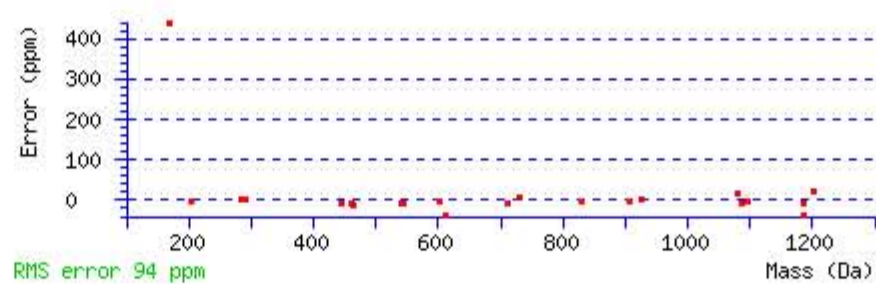

NCBI BLAST search of **EGDCPVQSGK**

(Parameters: blastp, nr protein database, expect=20000, no filter, PAM30)

Other BLAST [web gateways](#)

All matches to this query

| Score | Mr(calc):   | Delta     | Sequence                   |
|-------|-------------|-----------|----------------------------|
| 40.0  | 1386.627182 | -0.002674 | <a href="#">EGDCPVQSGK</a> |

Mascot: <http://www.matrixscience.com/>



# MASCOT Search Results

## Peptide View

MS/MS Fragmentation of **TWQDCEYK**

Found in **KNG1\_HUMAN**, Kininogen-1 OS=Homo sapiens GN=KNG1 PE=1 SV=2

Match to Query 32165: 1439.620668 from(720.817610,2+) rtinseconds(1778) index(34934)

Title: Locus:1.1.1.3038.24 File:"2013-07-02 CLN FXIII 60 min 2nd F 3.wiff"

Data file C:\Program Files (x86)\Matrix Science\Mascot Daemon\mgf\5 FXIII 60 min 2nd\mascot\_daemon\_merge.mgf

Click mouse within plot area to zoom in by factor of two about that point

Or, Plot from  to  Da

Label all possible matches  Label matches used for scoring

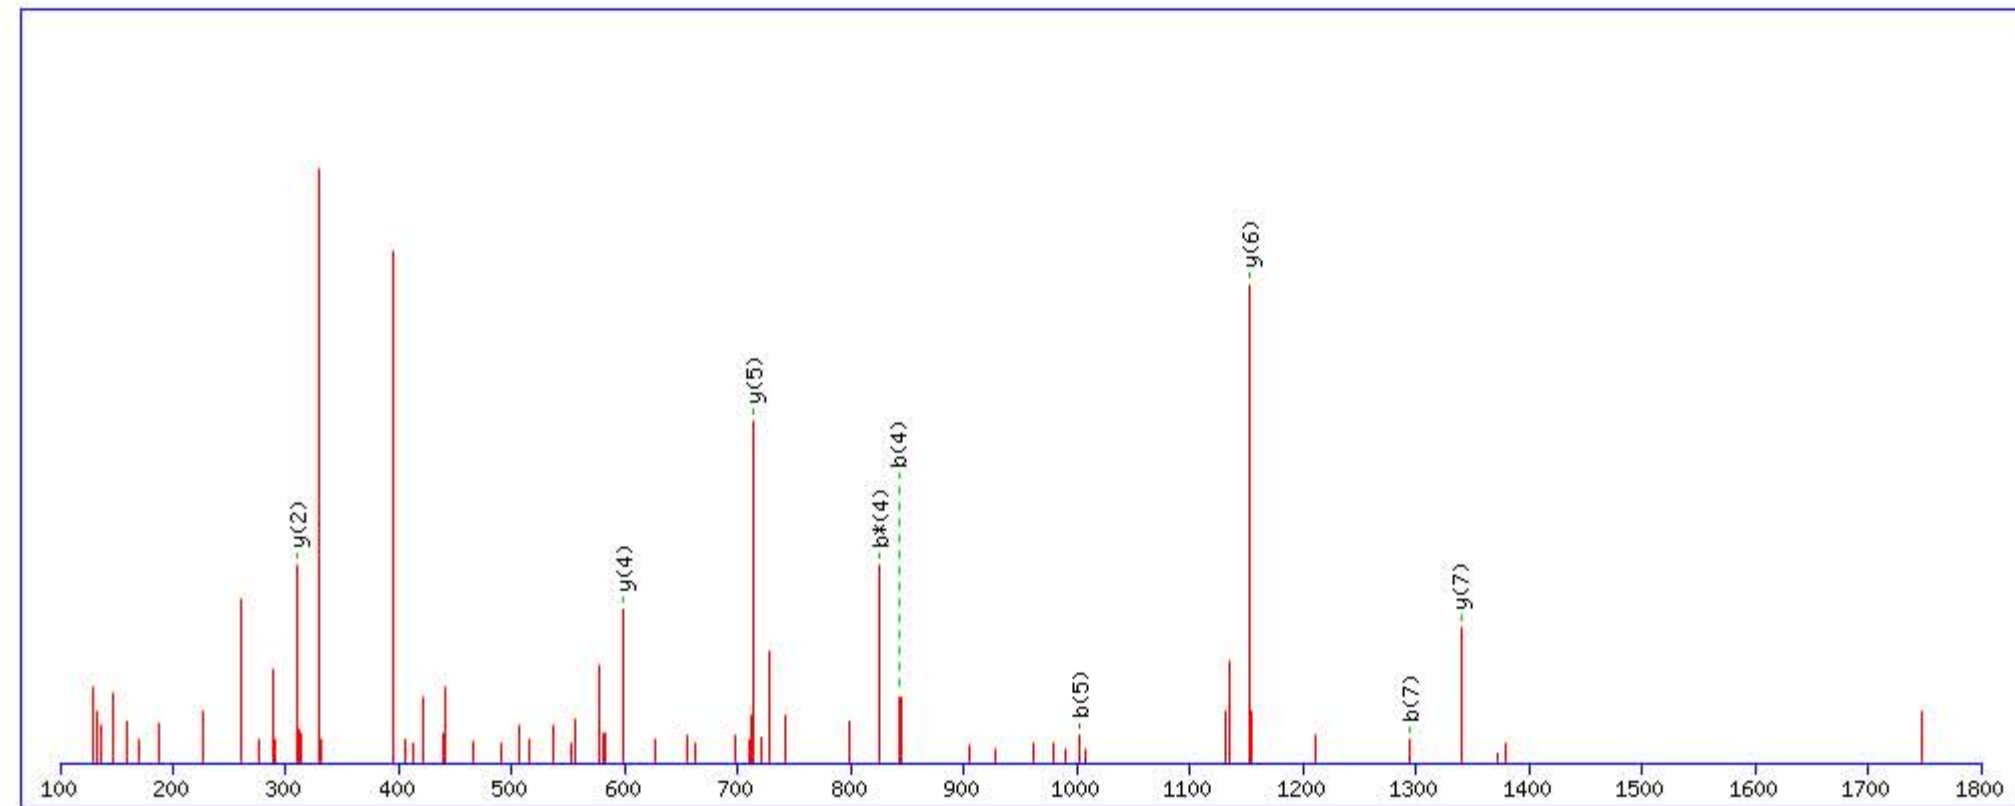

Monoisotopic mass of neutral peptide Mr(calc): 1439.621353

Fixed modifications: Carbamidomethyl (C) (apply to specified residues or termini only)

Variable modifications:

Q3 : Biotin:Thermo-21345 (Q)

Ions Score: 37 Expect: 0.00073

Matches : 9/76 fragment ions using 12 most intense peaks [\(help\)](#)

| # | b                  | b <sup>++</sup> | b*                | b <sup>*++</sup> | b <sup>0</sup> | b <sup>0++</sup> | Seq. | y                  | y <sup>++</sup> | y*          | y <sup>*++</sup> | y <sup>0</sup> | y <sup>0++</sup> | # |
|---|--------------------|-----------------|-------------------|------------------|----------------|------------------|------|--------------------|-----------------|-------------|------------------|----------------|------------------|---|
| 1 | 102.054955         | 51.531116       |                   |                  | 84.044390      | 42.525833        | T    |                    |                 |             |                  |                |                  | 8 |
| 2 | 288.134268         | 144.570772      |                   |                  | 270.123703     | 135.565490       | W    | <b>1339.580957</b> | 670.294117      | 1322.554408 | 661.780842       | 1321.570392    | 661.288834       | 7 |
| 3 | 727.359594         | 364.183435      | 710.333045        | 355.670161       | 709.349029     | 355.178153       | Q    | <b>1153.501644</b> | 577.254460      | 1136.475095 | 568.741186       | 1135.491079    | 568.249178       | 6 |
| 4 | <b>842.386537</b>  | 421.696907      | <b>825.359988</b> | 413.183632       | 824.375972     | 412.691624       | D    | <b>714.276318</b>  | 357.641797      | 697.249769  | 349.128523       | 696.265753     | 348.636515       | 5 |
| 5 | <b>1002.417186</b> | 501.712231      | 985.390637        | 493.198957       | 984.406621     | 492.706949       | C    | <b>599.249375</b>  | 300.128326      | 582.222826  | 291.615051       | 581.238810     | 291.123043       | 4 |
| 6 | 1131.459779        | 566.233528      | 1114.433230       | 557.720253       | 1113.449214    | 557.228245       | E    | 439.218726         | 220.113001      | 422.192177  | 211.599727       | 421.208161     | 211.107719       | 3 |
| 7 | <b>1294.523108</b> | 647.765192      | 1277.496559       | 639.251918       | 1276.512543    | 638.759910       | Y    | <b>310.176133</b>  | 155.591705      | 293.149584  | 147.078430       |                |                  | 2 |
| 8 |                    |                 |                   |                  |                |                  | K    | 147.112804         | 74.060040       | 130.086255  | 65.546765        |                |                  | 1 |

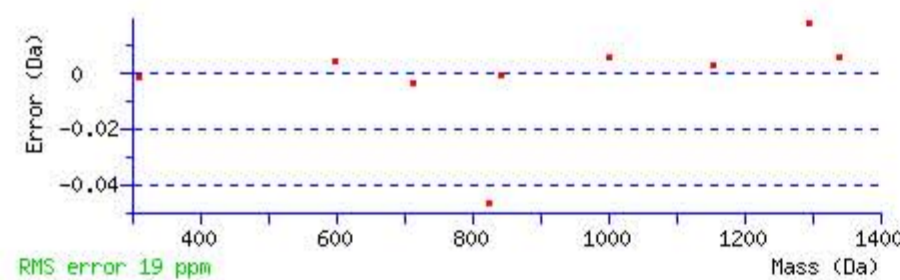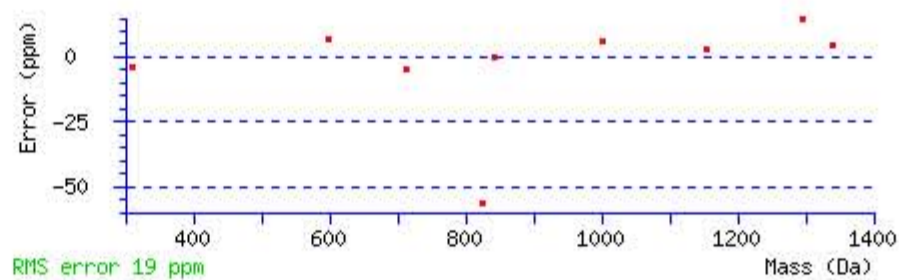

NCBI BLAST search of [TWQDCEYK](#)

(Parameters: blastp, nr protein database, expect=20000, no filter, PAM30)

Other BLAST [web gateways](#)

All matches to this query

| Score | Mr(calc):   | Delta     | Sequence                     |
|-------|-------------|-----------|------------------------------|
| 37.3  | 1439.621353 | -0.000685 | <a href="#">TWQDCEYK</a>     |
| 0.8   | 1439.602036 | 0.018632  | <a href="#">EQMEEEQKAMR</a>  |
| 0.3   | 1439.635056 | -0.014388 | <a href="#">MRAEDGENYDIK</a> |

Mascot: <http://www.matrixscience.com/>



# MASCOT Search Results

## Peptide View

MS/MS Fragmentation of **SVSEINPTTQMK**

Found in **KNG1\_HUMAN**, Kininogen-1 OS=Homo sapiens GN=KNG1 PE=1 SV=2

Match to Query 39291: 1644.825528 from(823.420040,2+) rtinseconds(1826) index(35184)

Title: Locus:1.1.1.3055.14 File:"2013-07-02 CLN FXIII 60 min 2nd F 3.wiff"

Data file C:\Program Files (x86)\Matrix Science\Mascot Daemon\mgf5 FXIII 60 min 2nd\mascot\_daemon\_merge.mgf

Click mouse within plot area to zoom in by factor of two about that point

Or, Plot from  to  Da

Label all possible matches  Label matches used for scoring

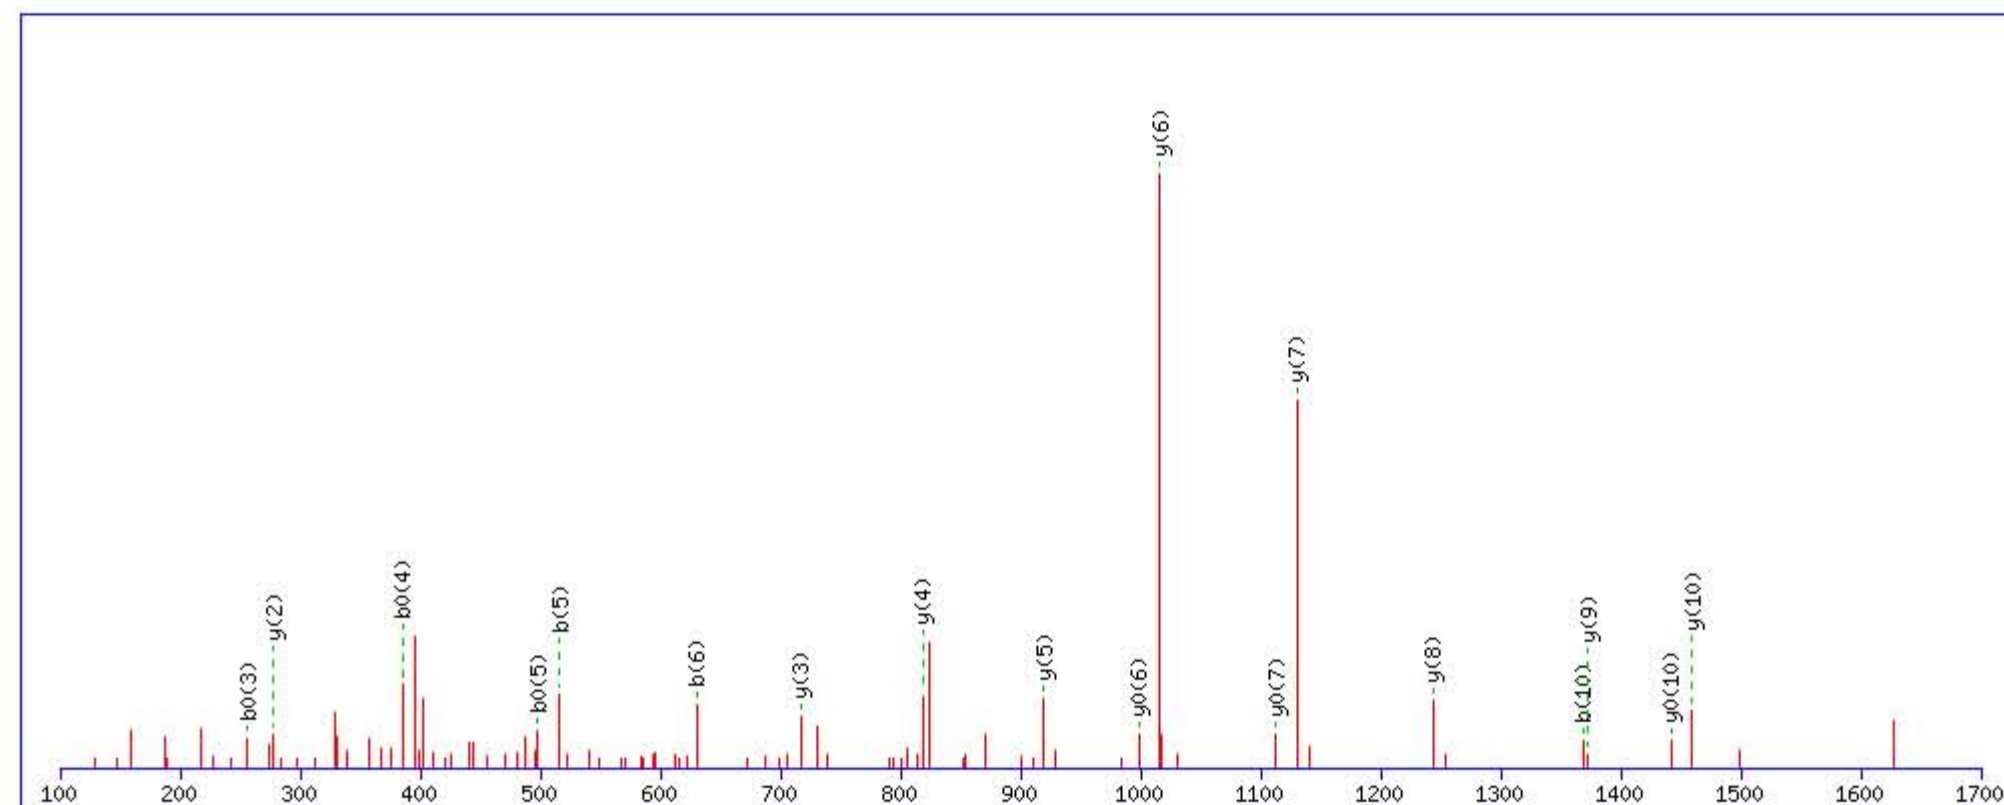

Monoisotopic mass of neutral peptide Mr(calc): 1644.821503

Fixed modifications: Carbamidomethyl (C) (apply to specified residues or termini only)

Variable modifications:

Q10 : Biotin:Thermo-21345 (Q)

Ions Score: 65 Expect: 2.3e-006

Matches : 18/116 fragment ions using 29 most intense peaks [\(help\)](#)

| #  | b           | b <sup>++</sup> | b <sup>*</sup> | b <sup>*++</sup> | b <sup>0</sup> | b <sup>0++</sup> | Seq. | y           | y <sup>++</sup> | y <sup>*</sup> | y <sup>*++</sup> | y <sup>0</sup> | y <sup>0++</sup> | #  |
|----|-------------|-----------------|----------------|------------------|----------------|------------------|------|-------------|-----------------|----------------|------------------|----------------|------------------|----|
| 1  | 88.039304   | 44.523290       |                |                  | 70.028739      | 35.518008        | S    |             |                 |                |                  |                |                  | 12 |
| 2  | 187.107718  | 94.057497       |                |                  | 169.097153     | 85.052214        | V    | 1558.796763 | 779.902020      | 1541.770214    | 771.388745       | 1540.786198    | 770.896737       | 11 |
| 3  | 274.139746  | 137.573511      |                |                  | 256.129181     | 128.568229       | S    | 1459.728349 | 730.367813      | 1442.701800    | 721.854538       | 1441.717784    | 721.362530       | 10 |
| 4  | 403.182339  | 202.094808      |                |                  | 385.171774     | 193.089525       | E    | 1372.696321 | 686.851799      | 1355.669772    | 678.338524       | 1354.685756    | 677.846516       | 9  |
| 5  | 516.266403  | 258.636840      |                |                  | 498.255838     | 249.631557       | I    | 1243.653728 | 622.330502      | 1226.627179    | 613.817228       | 1225.643163    | 613.325220       | 8  |
| 6  | 630.309330  | 315.658303      | 613.282781     | 307.145029       | 612.298765     | 306.653021       | N    | 1130.569664 | 565.788470      | 1113.543115    | 557.275196       | 1112.559099    | 556.783188       | 7  |
| 7  | 727.362094  | 364.184685      | 710.335545     | 355.671411       | 709.351529     | 355.179403       | P    | 1016.526737 | 508.767007      | 999.500188     | 500.253732       | 998.516172     | 499.761724       | 6  |
| 8  | 828.409773  | 414.708525      | 811.383224     | 406.195250       | 810.399208     | 405.703242       | T    | 919.473973  | 460.240625      | 902.447424     | 451.727350       | 901.463408     | 451.235342       | 5  |
| 9  | 929.457452  | 465.232364      | 912.430903     | 456.719090       | 911.446887     | 456.227082       | T    | 818.426294  | 409.716785      | 801.399745     | 401.203511       | 800.415729     | 400.711503       | 4  |
| 10 | 1368.682778 | 684.845027      | 1351.656229    | 676.331753       | 1350.672213    | 675.839745       | Q    | 717.378615  | 359.192946      | 700.352066     | 350.679671       |                |                  | 3  |
| 11 | 1499.723263 | 750.365270      | 1482.696714    | 741.851995       | 1481.712698    | 741.359987       | M    | 278.153289  | 139.580282      | 261.126740     | 131.067008       |                |                  | 2  |
| 12 |             |                 |                |                  |                |                  | K    | 147.112804  | 74.060040       | 130.086255     | 65.546765        |                |                  | 1  |

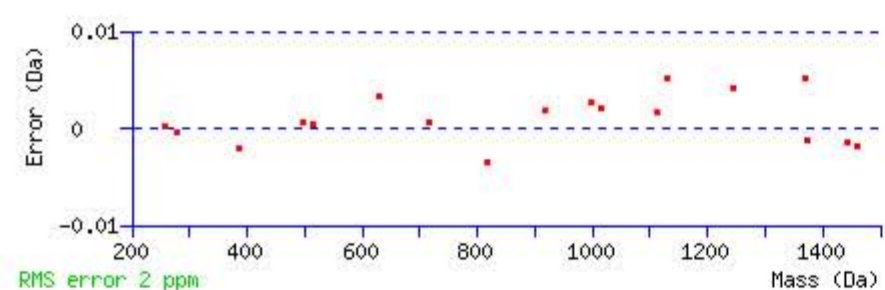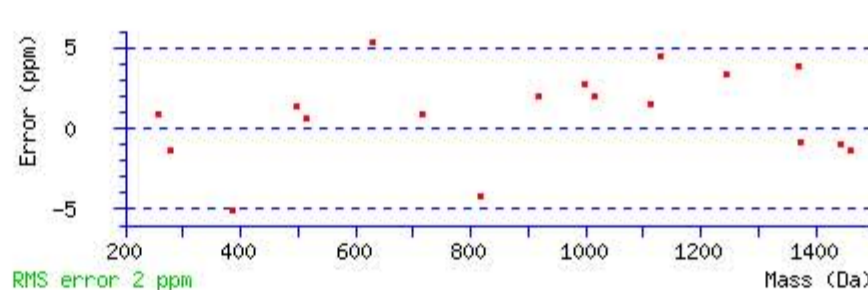

NCBI BLAST search of **SVSEINPTTQMK**

(Parameters: blastp, nr protein database, expect=20000, no filter, PAM30)

Other BLAST [web gateways](#)

## All matches to this query

| Score | Mr(calc):   | Delta     | Sequence                         |
|-------|-------------|-----------|----------------------------------|
| 65.1  | 1644.821503 | 0.004025  | <a href="#">SVSEINPTTQMK</a>     |
| 4.7   | 1644.840607 | -0.015079 | <a href="#">ESGRQFCIAVTHLK</a>   |
| 3.4   | 1644.814133 | 0.011395  | <a href="#">VTDQGSPPMSATAIVR</a> |
| 1.3   | 1644.803757 | 0.021771  | <a href="#">TISTMKVMQFQGMK</a>   |
| 0.5   | 1644.826889 | -0.001361 | <a href="#">VPHFCDIRPVMK</a>     |

Mascot: <http://www.matrixscience.com/>



# MASCOT Search Results

## Peptide View

MS/MS Fragmentation of **YNSQNQSNNQFVLYR**

Found in **KNG1\_HUMAN**, Kininogen-1 OS=Homo sapiens GN=KNG1 PE=1 SV=2

Match to Query 50804: 2185.047408 from(1093.530980,2+) rtinseconds(2026) index(21850)

Title: Locus:1.1.1.707.24 File:"2013-07-02 CLN FXIII 60 min 2nd F 2.wiff"

Data file C:\Program Files (x86)\Matrix Science\Mascot Daemon\mgf\5 FXIII 60 min 2nd\mascot\_daemon\_merge.mgf

Click mouse within plot area to zoom in by factor of two about that point

Or, Plot from  to  Da

Label all possible matches  Label matches used for scoring

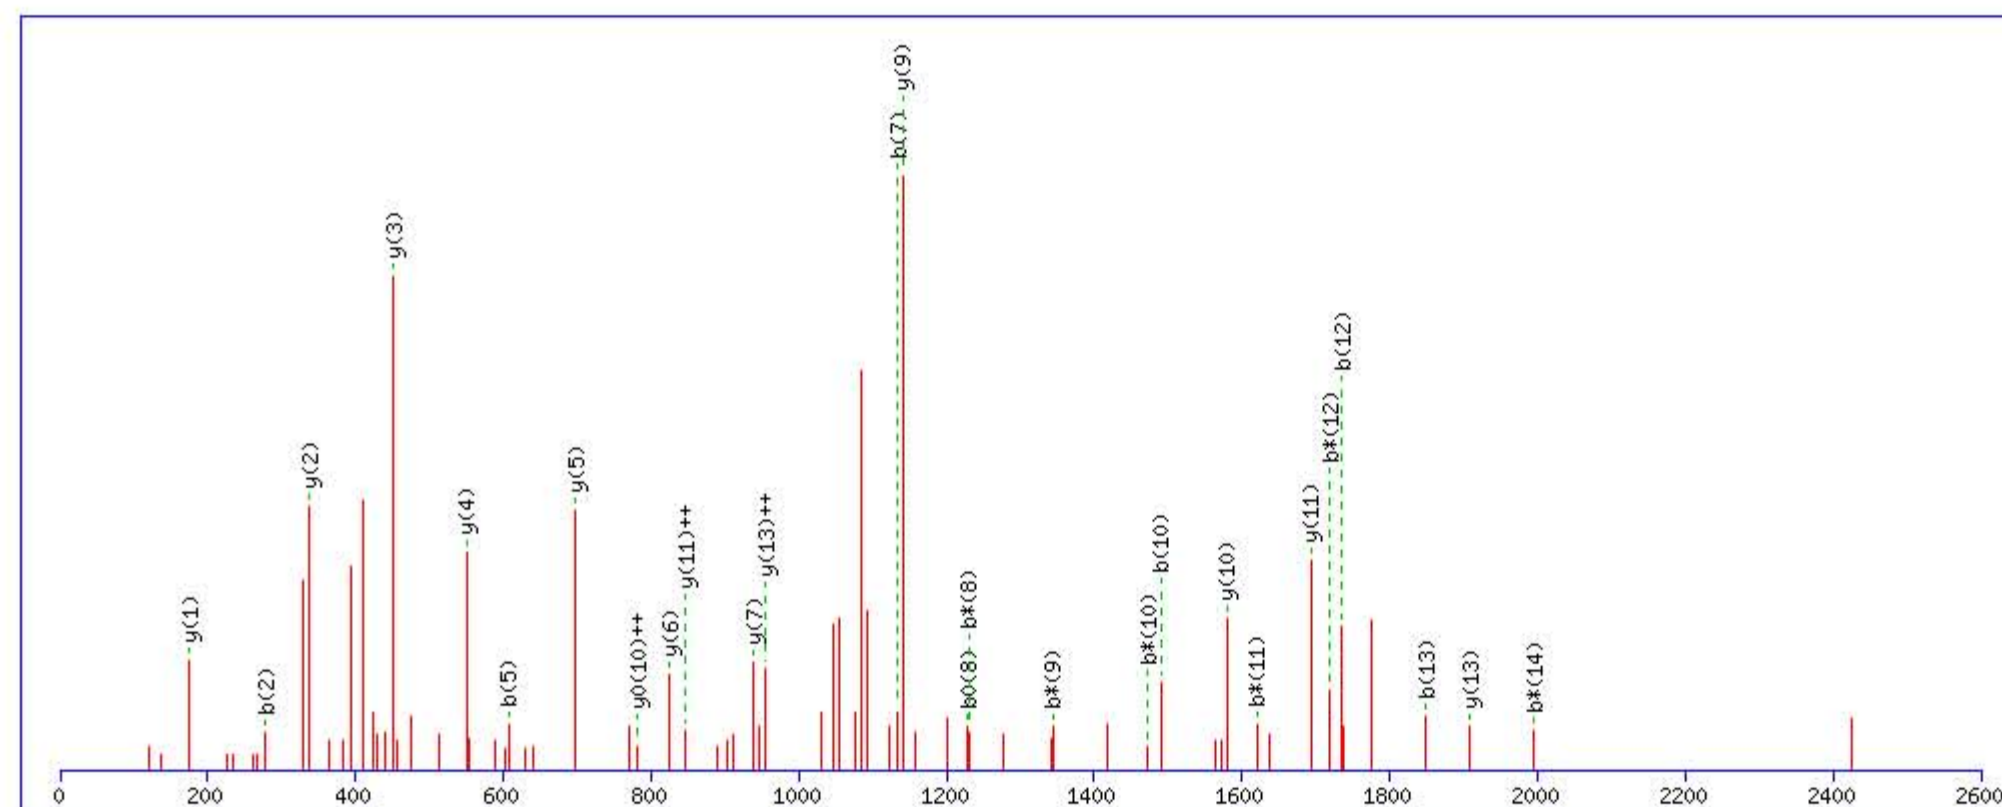

Monoisotopic mass of neutral peptide Mr(calc): 2185.037445

Fixed modifications: Carbamidomethyl (C) (apply to specified residues or termini only)

Variable modifications:

Q6 : Biotin:Thermo-21345 (Q)

Ions Score: 84 Expect: 1.7e-008

Matches : 27/146 fragment ions using 37 most intense peaks [\(help\)](#)

| #  | b                  | b <sup>++</sup> | b <sup>+</sup>     | b <sup>+++</sup> | b <sup>0</sup>     | b <sup>0++</sup> | Seq. | y                  | y <sup>++</sup>   | y <sup>+</sup> | y <sup>+++</sup> | y <sup>0</sup> | y <sup>0++</sup>  | #  |
|----|--------------------|-----------------|--------------------|------------------|--------------------|------------------|------|--------------------|-------------------|----------------|------------------|----------------|-------------------|----|
| 1  | 164.070605         | 82.538940       |                    |                  |                    |                  | Y    |                    |                   |                |                  |                |                   | 15 |
| 2  | <b>278.113532</b>  | 139.560404      | 261.086983         | 131.047130       |                    |                  | N    | 2022.981419        | 1011.994348       | 2005.954870    | 1003.481073      | 2004.970854    | 1002.989065       | 14 |
| 3  | 365.145560         | 183.076418      | 348.119011         | 174.563144       | 347.134995         | 174.071136       | S    | <b>1908.938492</b> | <b>954.972884</b> | 1891.911943    | 946.459610       | 1890.927927    | 945.967602        | 13 |
| 4  | 493.204138         | 247.105707      | 476.177589         | 238.592433       | 475.193573         | 238.100425       | Q    | 1821.906464        | 911.456870        | 1804.879915    | 902.943596       | 1803.895899    | 902.451588        | 12 |
| 5  | <b>607.247065</b>  | 304.127171      | 590.220516         | 295.613896       | 589.236500         | 295.121888       | N    | <b>1693.847886</b> | <b>847.427581</b> | 1676.821337    | 838.914307       | 1675.837321    | 838.422299        | 11 |
| 6  | 1046.472391        | 523.739834      | 1029.445842        | 515.226559       | 1028.461826        | 514.734551       | Q    | <b>1579.804959</b> | 790.406118        | 1562.778410    | 781.892843       | 1561.794394    | <b>781.400835</b> | 10 |
| 7  | <b>1133.504419</b> | 567.255848      | 1116.477870        | 558.742573       | 1115.493854        | 558.250565       | S    | <b>1140.579633</b> | 570.793455        | 1123.553084    | 562.280180       | 1122.569068    | 561.788172        | 9  |
| 8  | 1247.547346        | 624.277311      | <b>1230.520797</b> | 615.764037       | <b>1229.536781</b> | 615.272029       | N    | 1053.547605        | 527.277441        | 1036.521056    | 518.764166       |                |                   | 8  |
| 9  | 1361.590273        | 681.298775      | <b>1344.563724</b> | 672.785500       | 1343.579708        | 672.293492       | N    | <b>939.504678</b>  | 470.255977        | 922.478129     | 461.742703       |                |                   | 7  |
| 10 | <b>1489.648851</b> | 745.328064      | <b>1472.622302</b> | 736.814789       | 1471.638286        | 736.322781       | Q    | <b>825.461751</b>  | 413.234514        | 808.435202     | 404.721239       |                |                   | 6  |
| 11 | 1636.717265        | 818.862271      | <b>1619.690716</b> | 810.348996       | 1618.706700        | 809.856988       | F    | <b>697.403173</b>  | 349.205225        | 680.376624     | 340.691950       |                |                   | 5  |
| 12 | <b>1735.785679</b> | 868.396478      | <b>1718.759130</b> | 859.883203       | 1717.775114        | 859.391195       | V    | <b>550.334759</b>  | 275.671018        | 533.308210     | 267.157743       |                |                   | 4  |
| 13 | <b>1848.869743</b> | 924.938510      | 1831.843194        | 916.425235       | 1830.859178        | 915.933227       | L    | <b>451.266345</b>  | 226.136811        | 434.239796     | 217.623536       |                |                   | 3  |
| 14 | 2011.933072        | 1006.470174     | <b>1994.906523</b> | 997.956900       | 1993.922507        | 997.464892       | Y    | <b>338.182281</b>  | 169.594779        | 321.155732     | 161.081504       |                |                   | 2  |
| 15 |                    |                 |                    |                  |                    |                  | R    | <b>175.118952</b>  | 88.063114         | 158.092403     | 79.549840        |                |                   | 1  |

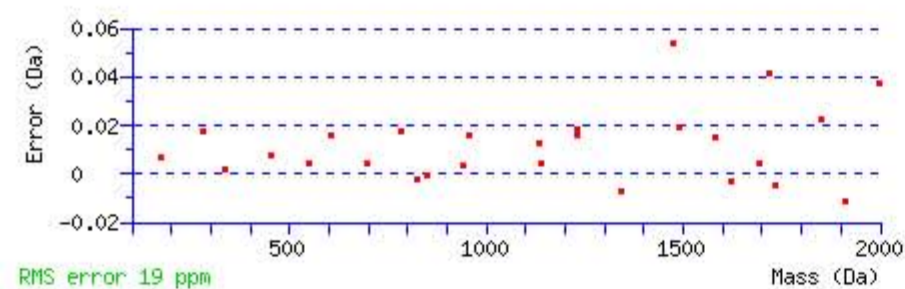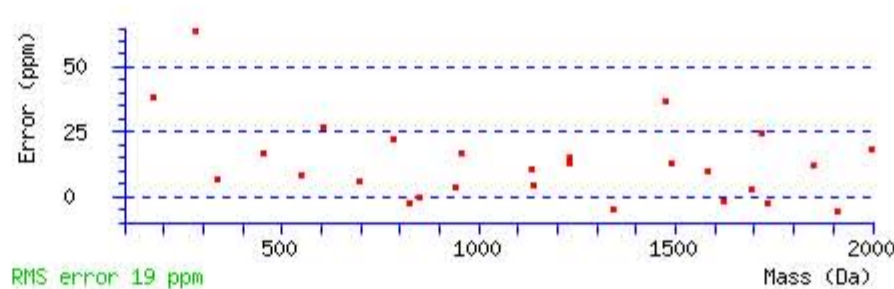

NCBI BLAST search of **YNSQNQSNNQFVLYR**

(Parameters: blastp, nr protein database, expect=20000, no filter, PAM30)

Other BLAST [web gateways](#)

### All matches to this query

| Score | Mr(calc):   | Delta    | Sequence                               |
|-------|-------------|----------|----------------------------------------|
| 83.8  | 2185.037445 | 0.009963 | <a href="#">YNSQNQSNNQFVLYR</a>        |
| 50.8  | 2185.037445 | 0.009963 | <a href="#">YNSQNQSNNQFVLYR</a>        |
| 39.6  | 2185.037445 | 0.009963 | <a href="#">YNSQNQSNNQFVLYR</a>        |
| 0.9   | 2185.040604 | 0.006804 | <a href="#">ERAAAAAAAAQMHAKNGGSSSR</a> |
| 0.1   | 2185.047348 | 0.000060 | <a href="#">HLSSLTDNEQADIFER</a>       |

Mascot: <http://www.matrixscience.com/>



# MASCOT Search Results

## Peptide View

MS/MS Fragmentation of **YNSQNQSNNQFVLYR**

Found in **KNG1\_HUMAN**, Kininogen-1 OS=Homo sapiens GN=KNG1 PE=1 SV=2

Match to Query 50808: 2185.051028 from(1093.532790,2+) rtinseconds(2123) index(22434)

Title: Locus:1.1.1.741.22 File:"2013-07-02 CLN FXIII 60 min 2nd F 2.wiff"

Data file C:\Program Files (x86)\Matrix Science\Mascot Daemon\mgf5 FXIII 60 min 2nd\mascot\_daemon\_merge.mgf

Click mouse within plot area to zoom in by factor of two about that point

Or, Plot from  to  Da

Label all possible matches  Label matches used for scoring

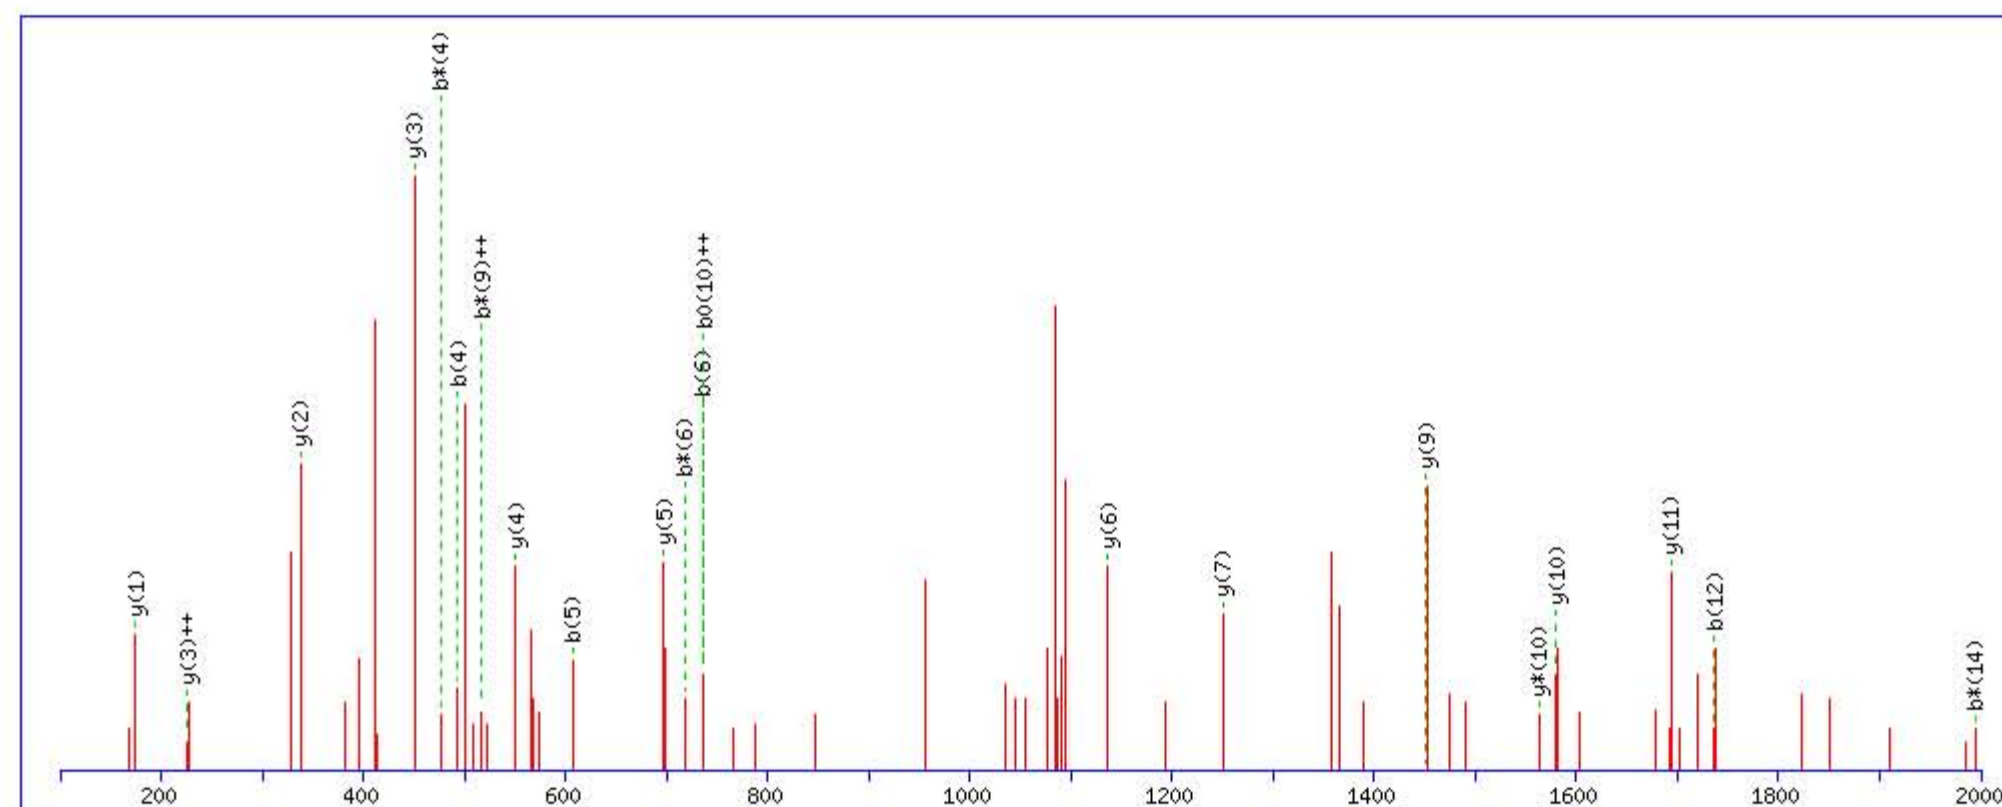

Monoisotopic mass of neutral peptide Mr(calc): 2185.037445

Fixed modifications: Carbamidomethyl (C) (apply to specified residues or termini only)

Variable modifications:

Q10 : Biotin:Thermo-21345 (Q)

Ions Score: 27 Expect: 0.036

Matches : 21/146 fragment ions using 69 most intense peaks [\(help\)](#)

| #  | b                  | b <sup>++</sup> | b <sup>*</sup>     | b <sup>***</sup>  | b <sup>0</sup> | b <sup>0++</sup>  | Seq. | y                  | y <sup>++</sup>   | y <sup>*</sup>     | y <sup>***</sup> | y <sup>0</sup> | y <sup>0++</sup> | #  |
|----|--------------------|-----------------|--------------------|-------------------|----------------|-------------------|------|--------------------|-------------------|--------------------|------------------|----------------|------------------|----|
| 1  | 164.070605         | 82.538940       |                    |                   |                |                   | Y    |                    |                   |                    |                  |                |                  | 15 |
| 2  | 278.113532         | 139.560404      | 261.086983         | 131.047130        |                |                   | N    | 2022.981419        | 1011.994348       | 2005.954870        | 1003.481073      | 2004.970854    | 1002.989065      | 14 |
| 3  | 365.145560         | 183.076418      | 348.119011         | 174.563144        | 347.134995     | 174.071136        | S    | 1908.938492        | 954.972884        | 1891.911943        | 946.459610       | 1890.927927    | 945.967602       | 13 |
| 4  | <b>493.204138</b>  | 247.105707      | <b>476.177589</b>  | 238.592433        | 475.193573     | 238.100425        | Q    | 1821.906464        | 911.456870        | 1804.879915        | 902.943596       | 1803.895899    | 902.451588       | 12 |
| 5  | <b>607.247065</b>  | 304.127171      | 590.220516         | 295.613896        | 589.236500     | 295.121888        | N    | <b>1693.847886</b> | 847.427581        | 1676.821337        | 838.914307       | 1675.837321    | 838.422299       | 11 |
| 6  | <b>735.305643</b>  | 368.156460      | <b>718.279094</b>  | 359.643185        | 717.295078     | 359.151177        | Q    | <b>1579.804959</b> | 790.406118        | <b>1562.778410</b> | 781.892843       | 1561.794394    | 781.400835       | 10 |
| 7  | 822.337671         | 411.672474      | 805.311122         | 403.159199        | 804.327106     | 402.667191        | S    | <b>1451.746381</b> | 726.376829        | 1434.719832        | 717.863554       | 1433.735816    | 717.371546       | 9  |
| 8  | 936.380598         | 468.693937      | 919.354049         | 460.180662        | 918.370033     | 459.688654        | N    | 1364.714353        | 682.860815        | 1347.687804        | 674.347540       |                |                  | 8  |
| 9  | 1050.423525        | 525.715400      | 1033.396976        | <b>517.202126</b> | 1032.412960    | 516.710118        | N    | <b>1250.671426</b> | 625.839351        | 1233.644877        | 617.326077       |                |                  | 7  |
| 10 | 1489.648851        | 745.328064      | 1472.622302        | 736.814789        | 1471.638286    | <b>736.322781</b> | Q    | <b>1136.628499</b> | 568.817888        | 1119.601950        | 560.304613       |                |                  | 6  |
| 11 | 1636.717265        | 818.862271      | 1619.690716        | 810.348996        | 1618.706700    | 809.856988        | F    | <b>697.403173</b>  | 349.205225        | 680.376624         | 340.691950       |                |                  | 5  |
| 12 | <b>1735.785679</b> | 868.396478      | 1718.759130        | 859.883203        | 1717.775114    | 859.391195        | V    | <b>550.334759</b>  | 275.671018        | 533.308210         | 267.157743       |                |                  | 4  |
| 13 | 1848.869743        | 924.938510      | 1831.843194        | 916.425235        | 1830.859178    | 915.933227        | L    | <b>451.266345</b>  | <b>226.136811</b> | 434.239796         | 217.623536       |                |                  | 3  |
| 14 | 2011.933072        | 1006.470174     | <b>1994.906523</b> | 997.956900        | 1993.922507    | 997.464892        | Y    | <b>338.182281</b>  | 169.594779        | 321.155732         | 161.081504       |                |                  | 2  |
| 15 |                    |                 |                    |                   |                |                   | R    | <b>175.118952</b>  | 88.063114         | 158.092403         | 79.549840        |                |                  | 1  |

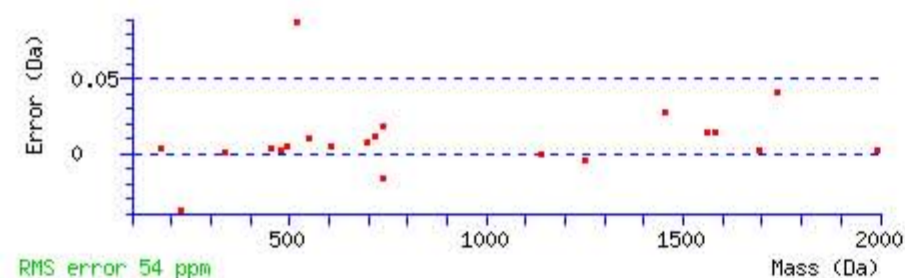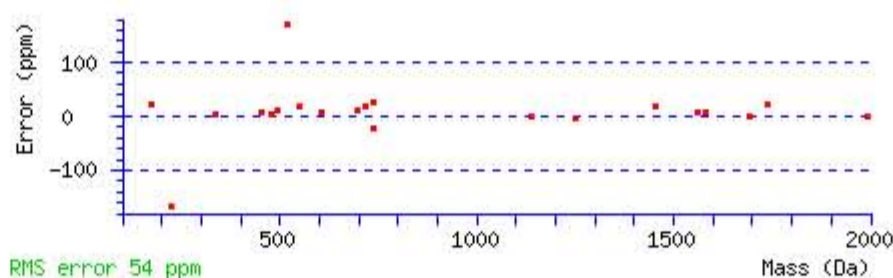

NCBI BLAST search of **YNSQNQSNNQFVLYR**

(Parameters: blastp, nr protein database, expect=20000, no filter, PAM30)

Other BLAST [web gateways](#)

All matches to this query

| Score | Mr(calc):   | Delta    | Sequence                        |
|-------|-------------|----------|---------------------------------|
| 27.4  | 2185.037445 | 0.013583 | <a href="#">YNSQNQSNNQFVLYR</a> |
| 7.9   | 2185.037445 | 0.013583 | <a href="#">YNSQNQSNNQFVLYR</a> |
| 2.1   | 2185.037445 | 0.013583 | <a href="#">YNSQNQSNNQFVLYR</a> |



# MASCOT Search Results

## Peptide View

MS/MS Fragmentation of **LDDDLHQGGHVLDPHGK**  
 Found in **KNG1\_HUMAN**, Kininogen-1 OS=Homo sapiens GN=KNG1 PE=1 SV=2

Match to Query 53579: 2332.097296 from(584.031600,4+) rtinseconds(1493) index(33236)  
 Title: Locus:1.1.1.2939.11 File:"2013-07-02 CLN FXIII 60 min 2nd F 3.wiff"  
 Data file C:\Program Files (x86)\Matrix Science\Mascot Daemon\mgf5 FXIII 60 min 2nd\mascot\_daemon\_merge.mgf

Click mouse within plot area to zoom in by factor of two about that point

Or, Plot from  to  Da

Label all possible matches  Label matches used for scoring

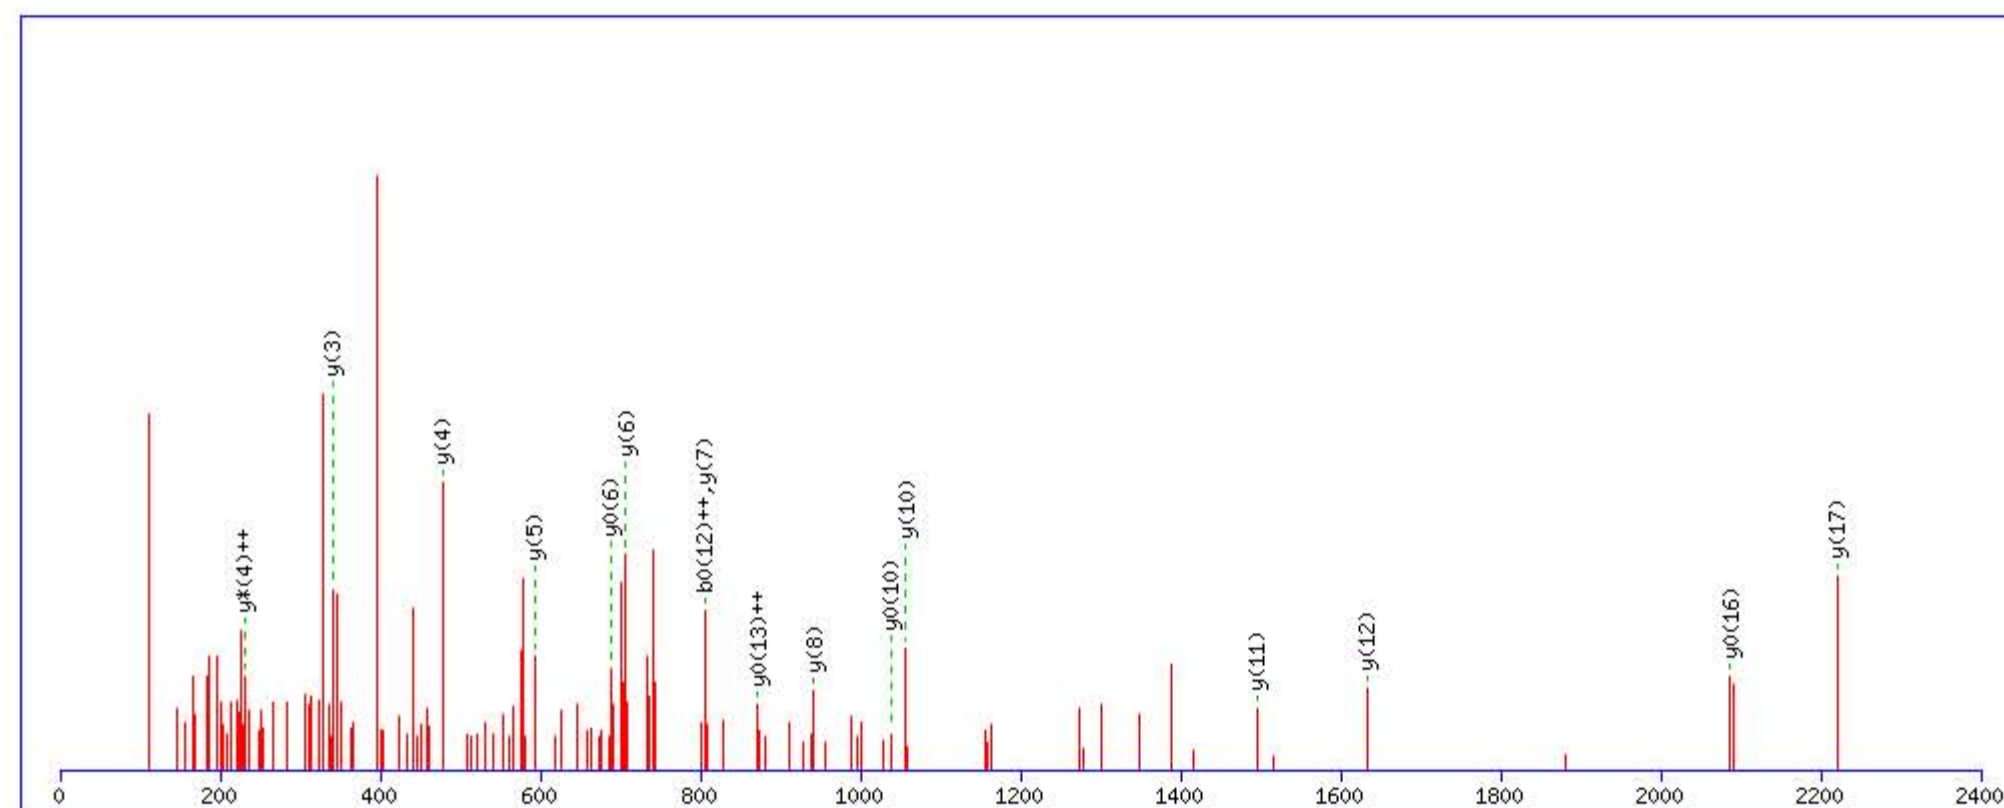

Monoisotopic mass of neutral peptide Mr(calc): 2332.101883  
 Fixed modifications: Carbamidomethyl (C) (apply to specified residues or termini only)  
 Variable modifications:  
 Q8 : Biotin:Thermo-21345 (Q)  
 Ions Score: 32 Expect: 0.01  
 Matches : 16/180 fragment ions using 46 most intense peaks [\(help\)](#)

| #  | b           | b <sup>++</sup> | b <sup>*</sup> | b <sup>*++</sup> | b <sup>0</sup> | b <sup>0++</sup> | Seq. | y           | y <sup>++</sup> | y <sup>*</sup> | y <sup>*++</sup> | y <sup>0</sup> | y <sup>0++</sup> | #  |
|----|-------------|-----------------|----------------|------------------|----------------|------------------|------|-------------|-----------------|----------------|------------------|----------------|------------------|----|
| 1  | 114.091340  | 57.549308       |                |                  |                |                  | L    |             |                 |                |                  |                |                  | 18 |
| 2  | 229.118283  | 115.062779      |                |                  | 211.107718     | 106.057497       | D    | 2220.025077 | 1110.516176     | 2202.998528    | 1102.002902      | 2202.014512    | 1101.510894      | 17 |
| 3  | 344.145226  | 172.576251      |                |                  | 326.134661     | 163.570968       | D    | 2104.998134 | 1053.002705     | 2087.971585    | 1044.489430      | 2086.987569    | 1043.997422      | 16 |
| 4  | 459.172169  | 230.089722      |                |                  | 441.161604     | 221.084440       | D    | 1989.971191 | 995.489234      | 1972.944642    | 986.975959       | 1971.960626    | 986.483951       | 15 |
| 5  | 572.256233  | 286.631755      |                |                  | 554.245668     | 277.626472       | L    | 1874.944248 | 937.975762      | 1857.917699    | 929.462488       | 1856.933683    | 928.970480       | 14 |
| 6  | 701.298826  | 351.153051      |                |                  | 683.288261     | 342.147769       | E    | 1761.860184 | 881.433730      | 1744.833635    | 872.920456       | 1743.849619    | 872.428448       | 13 |
| 7  | 838.357738  | 419.682507      |                |                  | 820.347173     | 410.677225       | H    | 1632.817591 | 816.912434      | 1615.791042    | 808.399159       | 1614.807026    | 807.907151       | 12 |
| 8  | 1277.583064 | 639.295170      | 1260.556515    | 630.781896       | 1259.572499    | 630.289888       | Q    | 1495.758679 | 748.382978      | 1478.732130    | 739.869703       | 1477.748114    | 739.377695       | 11 |
| 9  | 1334.604528 | 667.805902      | 1317.577979    | 659.292628       | 1316.593963    | 658.800620       | G    | 1056.533353 | 528.770315      | 1039.506804    | 520.257040       | 1038.522788    | 519.765032       | 10 |
| 10 | 1391.625992 | 696.316634      | 1374.599443    | 687.803360       | 1373.615427    | 687.311352       | G    | 999.511889  | 500.259583      | 982.485340     | 491.746308       | 981.501324     | 491.254300       | 9  |
| 11 | 1528.684904 | 764.846090      | 1511.658355    | 756.332816       | 1510.674339    | 755.840807       | H    | 942.490425  | 471.748851      | 925.463876     | 463.235576       | 924.479860     | 462.743568       | 8  |
| 12 | 1627.753318 | 814.380297      | 1610.726769    | 805.867023       | 1609.742753    | 805.375015       | V    | 805.431513  | 403.219395      | 788.404964     | 394.706120       | 787.420948     | 394.214112       | 7  |
| 13 | 1740.837382 | 870.922329      | 1723.810833    | 862.409055       | 1722.826817    | 861.917046       | L    | 706.363099  | 353.685188      | 689.336550     | 345.171913       | 688.352534     | 344.679905       | 6  |
| 14 | 1855.864325 | 928.435801      | 1838.837776    | 919.922526       | 1837.853760    | 919.430518       | D    | 593.279035  | 297.143156      | 576.252486     | 288.629881       | 575.268470     | 288.137873       | 5  |
| 15 | 1992.923237 | 996.965257      | 1975.896688    | 988.451982       | 1974.912672    | 987.959974       | H    | 478.252092  | 239.629684      | 461.225543     | 231.116410       |                |                  | 4  |
| 16 | 2049.944701 | 1025.475988     | 2032.918152    | 1016.962714      | 2031.934136    | 1016.470706      | G    | 341.193180  | 171.100228      | 324.166631     | 162.586954       |                |                  | 3  |
| 17 | 2187.003613 | 1094.005444     | 2169.977064    | 1085.492170      | 2168.993048    | 1085.000162      | H    | 284.171716  | 142.589496      | 267.145167     | 134.076221       |                |                  | 2  |
| 18 |             |                 |                |                  |                |                  | K    | 147.112804  | 74.060040       | 130.086255     | 65.546765        |                |                  | 1  |

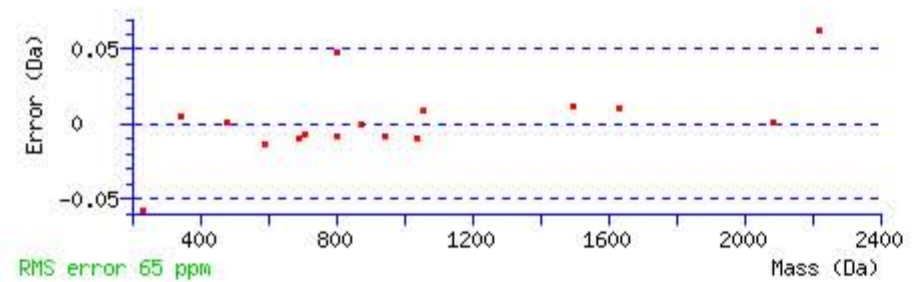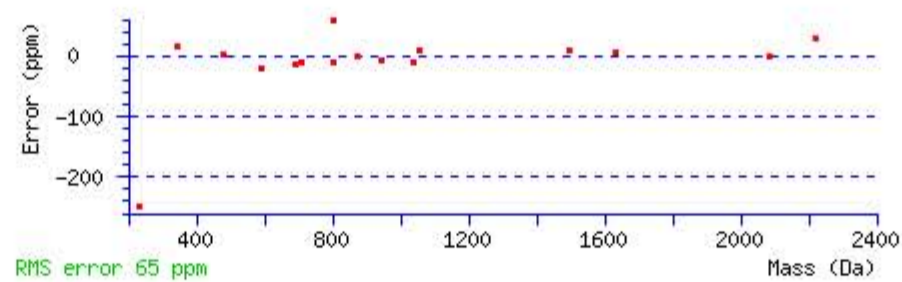

NCBI BLAST search of **LDDDLHQGGHVLDPHGK**  
 (Parameters: blastp, nr protein database, expect=20000, no filter, PAM30)  
 Other BLAST [web gateways](#)

### All matches to this query

| Score | Mr(calc):   | Delta     | Sequence                          |
|-------|-------------|-----------|-----------------------------------|
| 32.5  | 2332.101883 | -0.004587 | <a href="#">LDDDLHQGGHVLDPHGK</a> |



Peptide View

MS/MS Fragmentation of **FSVATQTCQITPAEGPVVTAQYDCLGCVHPISTQSPDLEPILR**  
 Found in **KNG1\_HUMAN**, Kininogen-1 OS=Homo sapiens GN=KNG1 PE=1 SV=2

Match to Query 75585: 5066.501220 from(1014.307520,5+) rtinseconds(2667) index(25496)  
 Title: Locus:1.1.1.930.23 File:"2013-07-02 CLN FXIII 60 min 2nd F 2.wiff"  
 Data file C:\Program Files (x86)\Matrix Science\Mascot Daemon\mgf5 FXIII 60 min 2nd\mascot\_daemon\_merge.mgf

Click mouse within plot area to zoom in by factor of two about that point  
 Or, Plot from  to  Da   
 Label all possible matches  Label matches used for scoring

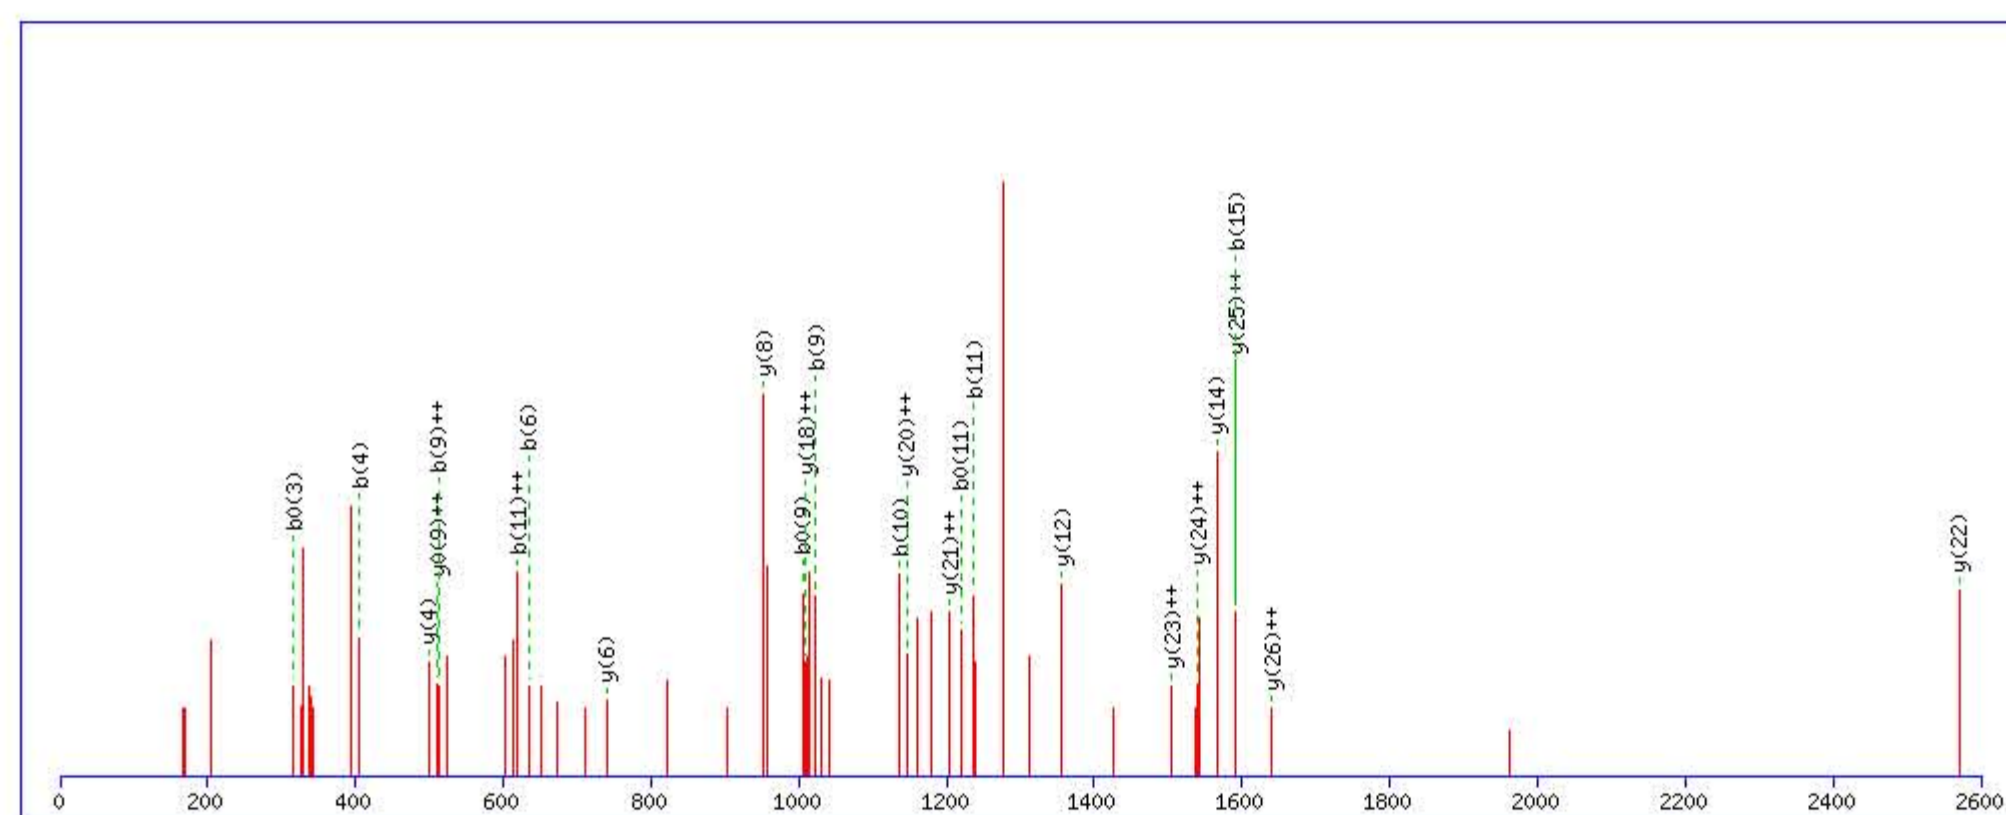

Monoisotopic mass of neutral peptide Mr(calc): 5066.465057  
 Fixed modifications: Carbamidomethyl (C) (apply to specified residues or termini only)  
 Variable modifications:  
 Q21 : Biotin:Thermo-21345 (Q)  
 Ions Score: 31 Expect: 0.017  
 Matches : 25/484 fragment ions using 56 most intense peaks [\(help\)](#)

| #  | b           | b <sup>++</sup> | b <sup>*</sup> | b <sup>++</sup> | b <sup>0</sup> | b <sup>0++</sup> | Seq. | y           | y <sup>++</sup> | y <sup>*</sup> | y <sup>++</sup> | y <sup>0</sup> | y <sup>0++</sup> | #  |
|----|-------------|-----------------|----------------|-----------------|----------------|------------------|------|-------------|-----------------|----------------|-----------------|----------------|------------------|----|
| 1  | 148.075690  | 74.541483       |                |                 |                |                  | F    |             |                 |                |                 |                |                  | 43 |
| 2  | 235.107718  | 118.057497      |                |                 | 217.097153     | 109.052214       | S    | 4920.403881 | 2460.705578     | 4903.377332    | 2452.192304     | 4902.393316    | 2451.700296      | 42 |
| 3  | 334.176132  | 167.591704      |                |                 | 316.165567     | 158.586422       | V    | 4833.371853 | 2417.189565     | 4816.345304    | 2408.676290     | 4815.361288    | 2408.184282      | 41 |
| 4  | 405.213246  | 203.110261      |                |                 | 387.202681     | 194.104978       | A    | 4734.303439 | 2367.655357     | 4717.276890    | 2359.142083     | 4716.292874    | 2358.650075      | 40 |
| 5  | 506.260925  | 253.634100      |                |                 | 488.250360     | 244.628818       | T    | 4663.266325 | 2332.136800     | 4646.239776    | 2323.623526     | 4645.255760    | 2323.131518      | 39 |
| 6  | 634.319503  | 317.663390      | 617.292954     | 309.150115      | 616.308938     | 308.658107       | Q    | 4562.218646 | 2281.612961     | 4545.192097    | 2273.099686     | 4544.208081    | 2272.607679      | 38 |
| 7  | 735.367182  | 368.187229      | 718.340633     | 359.673955      | 717.356617     | 359.181947       | T    | 4434.160068 | 2217.583672     | 4417.133519    | 2209.070397     | 4416.149503    | 2208.578390      | 37 |
| 8  | 895.397831  | 448.202554      | 878.371282     | 439.689279      | 877.387266     | 439.197271       | C    | 4333.112389 | 2167.059833     | 4316.085840    | 2158.546558     | 4315.101824    | 2158.054550      | 36 |
| 9  | 1023.456409 | 512.231843      | 1006.429860    | 503.718568      | 1005.445844    | 503.226560       | Q    | 4173.081740 | 2087.044508     | 4156.055191    | 2078.531233     | 4155.071175    | 2078.039226      | 35 |
| 10 | 1136.540473 | 568.773875      | 1119.513924    | 560.260600      | 1118.529908    | 559.768592       | I    | 4045.023162 | 2023.015219     | 4027.996613    | 2014.501944     | 4027.012597    | 2014.009936      | 34 |
| 11 | 1237.588152 | 619.297714      | 1220.561603    | 610.784440      | 1219.577587    | 610.292432       | T    | 3931.939098 | 1966.473187     | 3914.912549    | 1957.959912     | 3913.928533    | 1957.467904      | 33 |
| 12 | 1334.640916 | 667.824096      | 1317.614367    | 659.310822      | 1316.630351    | 658.818814       | P    | 3830.891419 | 1915.949347     | 3813.864870    | 1907.436073     | 3812.880854    | 1906.944065      | 32 |
| 13 | 1405.678030 | 703.342653      | 1388.651481    | 694.829379      | 1387.667465    | 694.337371       | A    | 3733.838655 | 1867.422965     | 3716.812106    | 1858.909691     | 3715.828090    | 1858.417683      | 31 |
| 14 | 1534.720623 | 767.863949      | 1517.694074    | 759.350675      | 1516.710058    | 758.858667       | E    | 3662.801541 | 1831.904408     | 3645.774992    | 1823.391134     | 3644.790976    | 1822.899126      | 30 |
| 15 | 1591.742087 | 796.374681      | 1574.715538    | 787.861407      | 1573.731522    | 787.369399       | G    | 3533.758948 | 1767.383112     | 3516.732399    | 1758.869837     | 3515.748383    | 1758.377829      | 29 |
| 16 | 1688.794851 | 844.901063      | 1671.768302    | 836.387789      | 1670.784286    | 835.895781       | P    | 3476.737484 | 1738.872380     | 3459.710935    | 1730.359105     | 3458.726919    | 1729.867097      | 28 |
| 17 | 1787.863265 | 894.435271      | 1770.836716    | 885.921996      | 1769.852700    | 885.429988       | V    | 3379.684720 | 1690.345998     | 3362.658171    | 1681.832723     | 3361.674155    | 1681.340715      | 27 |
| 18 | 1886.931679 | 943.969478      | 1869.905130    | 935.456203      | 1868.921114    | 934.964195       | V    | 3280.616306 | 1640.811791     | 3263.589757    | 1632.298516     | 3262.605741    | 1631.806508      | 26 |
| 19 | 1987.979358 | 994.493317      | 1970.952809    | 985.980043      | 1969.968793    | 985.488035       | T    | 3181.547892 | 1591.277584     | 3164.521343    | 1582.764309     | 3163.537327    | 1582.272301      | 25 |
| 20 | 2059.016472 | 1030.011874     | 2041.989923    | 1021.498600     | 2041.005907    | 1021.006591      | A    | 3080.500213 | 1540.753744     | 3063.473664    | 1532.240470     | 3062.489648    | 1531.748462      | 24 |
| 21 | 2498.241798 | 1249.624537     | 2481.215249    | 1241.111262     | 2480.231233    | 1240.619254      | Q    | 3009.463099 | 1505.235187     | 2992.436550    | 1496.721913     | 2991.452534    | 1496.229905      | 23 |
| 22 | 2661.305127 | 1331.156202     | 2644.278578    | 1322.642927     | 2643.294562    | 1322.150919      | Y    | 2570.237773 | 1285.622524     | 2553.211224    | 1277.109250     | 2552.227208    | 1276.617242      | 22 |
| 23 | 2776.332070 | 1388.669673     | 2759.305521    | 1380.156398     | 2758.321505    | 1379.664390      | D    | 2407.174444 | 1204.090860     | 2390.147895    | 1195.577585     | 2389.163879    | 1195.085577      | 21 |
| 24 | 2936.362719 | 1468.684997     | 2919.336170    | 1460.171723     | 2918.352154    | 1459.679715      | C    | 2292.147501 | 1146.577388     | 2275.120952    | 1138.064114     | 2274.136936    | 1137.572106      | 20 |
| 25 | 3049.446783 | 1525.227029     | 3032.420234    | 1516.713755     | 3031.436218    | 1516.221747      | L    | 2132.116852 | 1066.562064     | 2115.090303    | 1058.048789     | 2114.106287    | 1057.556781      | 19 |
| 26 | 3106.468247 | 1553.737761     | 3089.441698    | 1545.224487     | 3088.457682    | 1544.732479      | G    | 2019.032788 | 1010.020032     | 2002.006239    | 1001.506757     | 2001.022223    | 1001.014749      | 18 |
| 27 | 3266.498896 | 1633.753086     | 3249.472347    | 1625.239811     | 3248.488331    | 1624.747803      | C    | 1962.011324 | 981.509300      | 1944.984775    | 972.996025      | 1944.000759    | 972.504017       | 17 |
| 28 | 3365.567310 | 1683.287293     | 3348.540761    | 1674.774018     | 3347.556745    | 1674.282010      | V    | 1801.980675 | 901.493975      | 1784.954126    | 892.980701      | 1783.970110    | 892.488693       | 16 |
| 29 | 3502.626222 | 1751.816749     | 3485.599673    | 1743.303474     | 3484.615657    | 1742.811466      | H    | 1702.912261 | 851.959768      | 1685.885712    | 843.446494      | 1684.901696    | 842.954486       | 15 |
| 30 | 3599.678986 | 1800.343131     | 3582.652437    | 1791.829856     | 3581.668421    | 1791.337848      | P    | 1565.853349 | 783.430312      | 1548.826800    | 774.917038      | 1547.842784    | 774.425030       | 14 |
| 31 | 3712.763050 | 1856.885163     | 3695.736501    | 1848.371888     | 3694.752485    | 1847.879880      | I    | 1468.800585 | 734.903930      | 1451.774036    | 726.390656      | 1450.790020    | 725.898648       | 13 |
| 32 | 3799.795078 | 1900.401177     | 3782.768529    | 1891.887902     | 3781.784513    | 1891.395894      | S    | 1355.716521 | 678.361898      | 1338.689972    | 669.848624      | 1337.705956    | 669.356616       | 12 |
| 33 | 3900.842757 | 1950.925016     | 3883.816208    | 1942.411742     | 3882.832192    | 1941.919734      | T    | 1268.684493 | 634.845884      | 1251.657944    | 626.332610      | 1250.673928    | 625.840602       | 11 |
| 34 | 4028.901335 | 2014.954305     | 4011.874786    | 2006.441031     | 4010.890770    | 2005.949023      | Q    | 1167.636814 | 584.322045      | 1150.610265    | 575.808770      | 1149.626249    | 575.316762       | 10 |
| 35 | 4115.933363 | 2058.470320     | 4098.906814    | 2049.957045     | 4097.922798    | 2049.465037      | S    | 1039.578236 | 520.292756      | 1022.551687    | 511.779481      | 1021.567671    | 511.287473       | 9  |
| 36 | 4212.986127 | 2106.996702     | 4195.959578    | 2098.483427     | 4194.975562    | 2097.991419      | P    | 952.546208  | 476.776742      | 935.519659     | 468.263467      | 934.535643     | 467.771459       | 8  |
| 37 | 4328.013070 | 2164.510173     | 4310.986521    | 2155.996899     | 4310.002505    | 2155.504891      | D    | 855.493444  | 428.250360      | 838.466895     | 419.737085      | 837.482879     | 419.245077       | 7  |
| 38 | 4441.097134 | 2221.052205     | 4424.070585    | 2212.538930     | 4423.086569    | 2212.046923      | L    | 740.466501  | 370.736888      | 723.439952     | 362.223614      | 722.455936     | 361.731606       | 6  |
| 39 | 4570.139727 | 2285.573502     | 4553.113178    | 2277.060227     | 4552.129162    | 2276.568219      | E    | 627.382437  | 314.194856      | 610.355888     | 305.681582      | 609.371872     | 305.189574       | 5  |
| 40 | 4667.192491 | 2334.099884     | 4650.165942    | 2325.586609     | 4649.181926    | 2325.094601      | P    | 498.339844  | 249.673560      | 481.313295     | 241.160285      |                |                  | 4  |
| 41 | 4780.276555 | 2390.641915     | 4763.250006    | 2382.128641     | 4762.265990    | 2381.636633      | I    | 401.287080  | 201.147178      | 384.260531     | 192.633903      |                |                  | 3  |
| 42 | 4893.360619 | 2447.183947     | 4876.334070    | 2438.670673     | 4875.350054    | 2438.178665      | L    | 288.203016  | 144.605146      | 271.176467     | 136.091871      |                |                  | 2  |
| 43 |             |                 |                |                 |                |                  | R    | 175.118952  | 88.063114       | 158.092403     | 79.549839       |                |                  | 1  |

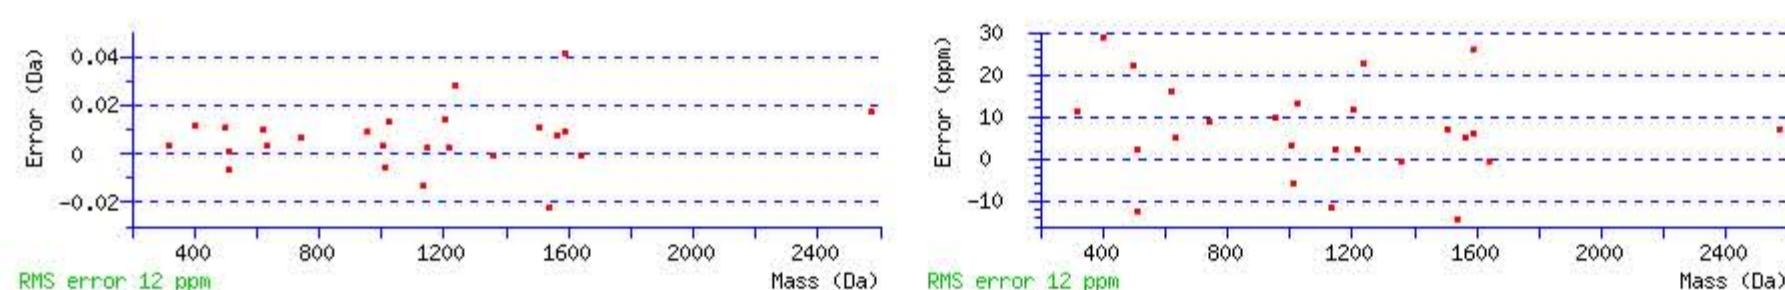

NCBI BLAST search of **FSVATQTCQITPAEGPVVTAQYDCLGCVHPISTQSPDLEPILR**  
 (Parameters: blastp, nr protein database, expect=20000, no filter, PAM30)  
 Other BLAST [web gateways](#)

All matches to this query

| Score | Mr(calc):   | Delta    | Sequence                                                    |
|-------|-------------|----------|-------------------------------------------------------------|
| 30.5  | 5066.465057 | 0.036163 | <a href="#">FSVATQTCQITPAEGPVVTAQYDCLGCVHPISTQSPDLEPILR</a> |
| 8.1   | 5066.465057 | 0.036163 | <a href="#">FSVATQTCQITPAEGPVVTAQYDCLGCVHPISTQSPDLEPILR</a> |
| 1.6   | 5066.465057 | 0.036163 | <a href="#">FSVATQTCQITPAEGPVVTAQYDCLGCVHPISTQSPDLEPILR</a> |
| 1.3   | 5066.465057 | 0.036163 | <a href="#">FSVATQTCQITPAEGPVVTAQYDCLGCVHPISTQSPDLEPILR</a> |



# MASCOT Search Results

## Peptide View

MS/MS Fragmentation of **NIPTVNENLENYYLEVNQLEK**

Found in **LUM\_HUMAN**, Lumican OS=Homo sapiens GN=LUM PE=1 SV=2

Match to Query 60037: 2846.446572 from(949.822800,3+) rtinseconds(2710) index(57093)

Title: Locus:1.1.1.1558.23 File:"2013-07-02 CLN FXIII 60 min 2nd F 4.wiff"

Data file C:\Program Files (x86)\Matrix Science\Mascot Daemon\mgf5 FXIII 60 min 2nd\mascot\_daemon\_merge.mgf

Click mouse within plot area to zoom in by factor of two about that point

Or, Plot from  to  Da

Label all possible matches  Label matches used for scoring

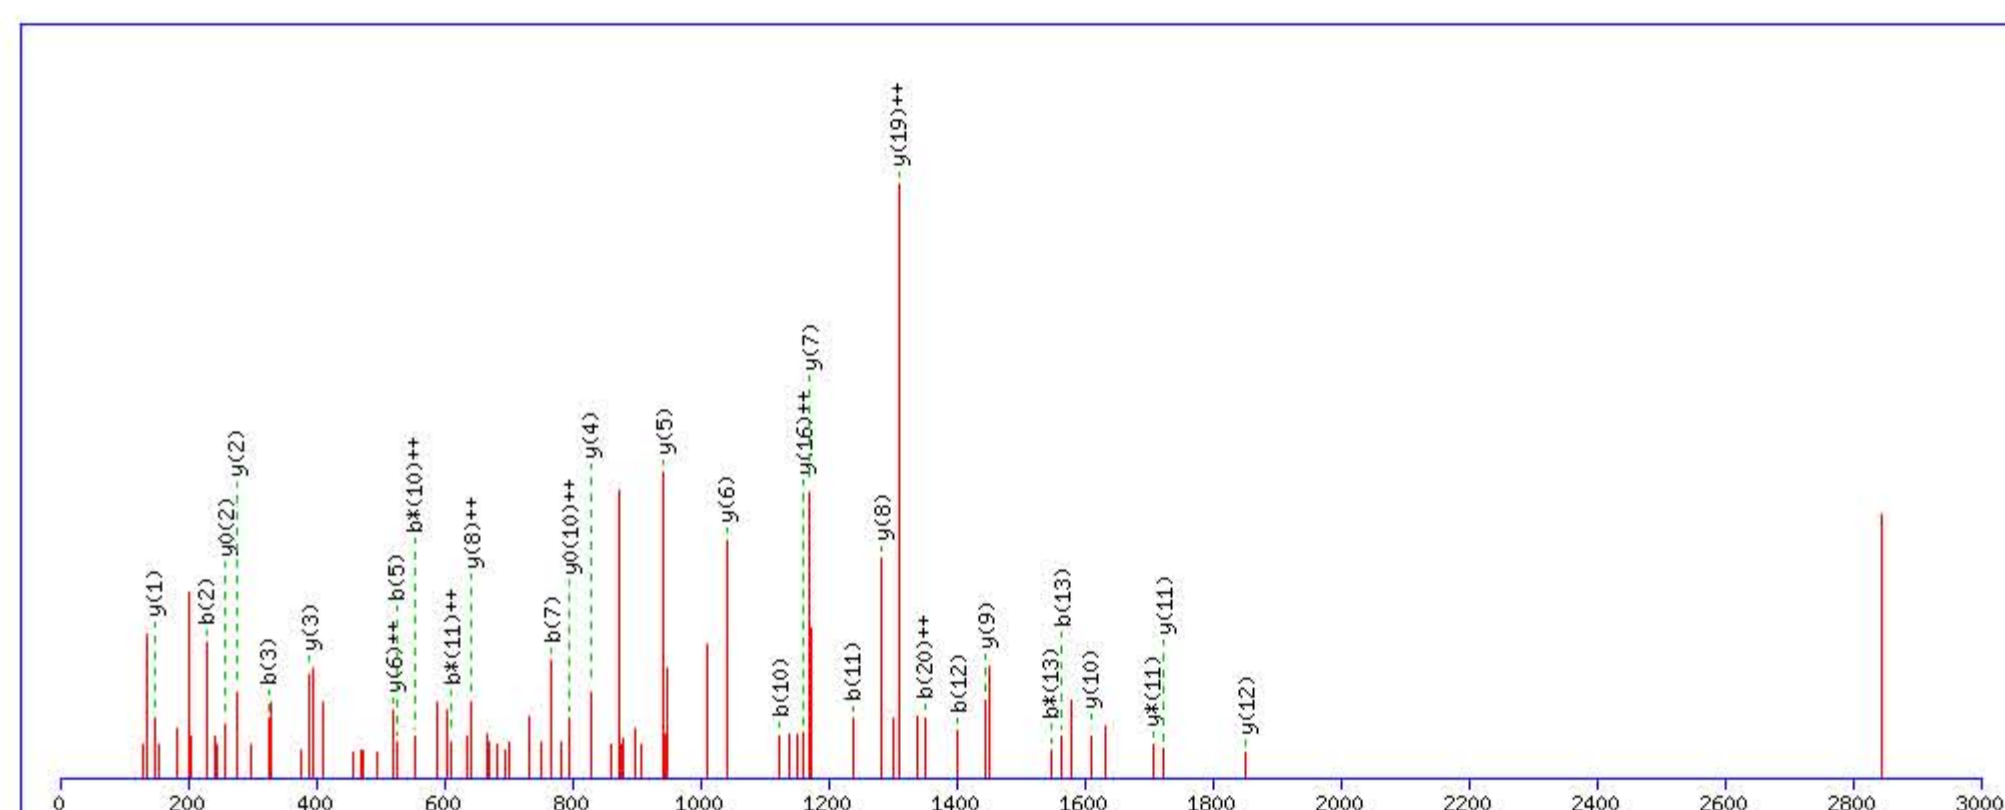

Monoisotopic mass of neutral peptide Mr(calc): 2846.415985

Fixed modifications: Carbamidomethyl (C) (apply to specified residues or termini only)

Variable modifications:

Q18 : Biotin:Thermo-21345 (Q)

Ions Score: 59 Expect: 3.1e-006

Matches : 31/232 fragment ions using 62 most intense peaks [\(help\)](#)

| #  | b                  | b <sup>++</sup>    | b <sup>*</sup>     | b <sup>*++</sup>  | b <sup>0</sup> | b <sup>0++</sup> | Seq. | y                  | y <sup>++</sup>    | y <sup>*</sup>     | y <sup>*++</sup> | y <sup>0</sup>    | y <sup>0++</sup>  | #  |
|----|--------------------|--------------------|--------------------|-------------------|----------------|------------------|------|--------------------|--------------------|--------------------|------------------|-------------------|-------------------|----|
| 1  | 115.050203         | 58.028740          | 98.023654          | 49.515465         |                |                  | N    |                    |                    |                    |                  |                   |                   | 21 |
| 2  | <b>228.134267</b>  | 114.570771         | 211.107718         | 106.057497        |                |                  | I    | 2733.380395        | 1367.193835        | 2716.353846        | 1358.680561      | 2715.369830       | 1358.188553       | 20 |
| 3  | <b>325.187031</b>  | 163.097153         | 308.160482         | 154.583879        |                |                  | P    | 2620.296331        | <b>1310.651803</b> | 2603.269782        | 1302.138529      | 2602.285766       | 1301.646521       | 19 |
| 4  | 426.234710         | 213.620993         | 409.208161         | 205.107719        | 408.224145     | 204.615711       | T    | 2523.243567        | 1262.125421        | 2506.217018        | 1253.612147      | 2505.233002       | 1253.120139       | 18 |
| 5  | <b>525.303124</b>  | 263.155200         | 508.276575         | 254.641926        | 507.292559     | 254.149918       | V    | 2422.195888        | 1211.601582        | 2405.169339        | 1203.088307      | 2404.185323       | 1202.596299       | 17 |
| 6  | 639.346051         | 320.176664         | 622.319502         | 311.663389        | 621.335486     | 311.171381       | N    | 2323.127474        | <b>1162.067375</b> | 2306.100925        | 1153.554100      | 2305.116909       | 1153.062092       | 16 |
| 7  | <b>768.388644</b>  | 384.697960         | 751.362095         | 376.184686        | 750.378079     | 375.692678       | E    | 2209.084547        | 1105.045911        | 2192.057998        | 1096.532637      | 2191.073982       | 1096.040629       | 15 |
| 8  | 882.431571         | 441.719424         | 865.405022         | 433.206149        | 864.421006     | 432.714141       | N    | 2080.041954        | 1040.524615        | 2063.015405        | 1032.011340      | 2062.031389       | 1031.519332       | 14 |
| 9  | 995.515635         | 498.261456         | 978.489086         | 489.748181        | 977.505070     | 489.256173       | L    | 1965.999027        | 983.503152         | 1948.972478        | 974.989877       | 1947.988462       | 974.497869        | 13 |
| 10 | <b>1124.558228</b> | 562.782752         | 1107.531679        | <b>554.269478</b> | 1106.547663    | 553.777470       | E    | <b>1852.914963</b> | 926.961120         | 1835.888414        | 918.447845       | 1834.904398       | 917.955837        | 12 |
| 11 | <b>1238.601155</b> | 619.804216         | 1221.574606        | <b>611.290941</b> | 1220.590590    | 610.798933       | N    | <b>1723.872370</b> | 862.439823         | <b>1706.845821</b> | 853.926549       | 1705.861805       | 853.434541        | 11 |
| 12 | <b>1401.664484</b> | 701.335880         | 1384.637935        | 692.822606        | 1383.653919    | 692.330598       | Y    | <b>1609.829443</b> | 805.418360         | 1592.802894        | 796.905085       | 1591.818878       | <b>796.413077</b> | 10 |
| 13 | <b>1564.727813</b> | 782.867545         | <b>1547.701264</b> | 774.354270        | 1546.717248    | 773.862262       | Y    | <b>1446.766114</b> | 723.886695         | 1429.739565        | 715.373421       | 1428.755549       | 714.881413        | 9  |
| 14 | 1677.811877        | 839.409577         | 1660.785328        | 830.896302        | 1659.801312    | 830.404294       | L    | <b>1283.702785</b> | <b>642.355031</b>  | 1266.676236        | 633.841756       | 1265.692220       | 633.349748        | 8  |
| 15 | 1806.854470        | 903.930873         | 1789.827921        | 895.417599        | 1788.843905    | 894.925591       | E    | <b>1170.618721</b> | 585.812999         | 1153.592172        | 577.299724       | 1152.608156       | 576.807716        | 7  |
| 16 | 1905.922884        | 953.465080         | 1888.896335        | 944.951806        | 1887.912319    | 944.459798       | V    | <b>1041.576128</b> | <b>521.291702</b>  | 1024.549579        | 512.778428       | 1023.565563       | 512.286420        | 6  |
| 17 | 2019.965811        | 1010.486544        | 2002.939262        | 1001.973269       | 2001.955246    | 1001.481261      | N    | <b>942.507714</b>  | 471.757495         | 925.481165         | 463.244221       | 924.497149        | 462.752213        | 5  |
| 18 | 2459.191137        | 1230.099206        | 2442.164588        | 1221.585932       | 2441.180572    | 1221.093924      | Q    | <b>828.464787</b>  | 414.736032         | 811.438238         | 406.222757       | 810.454222        | 405.730749        | 4  |
| 19 | 2572.275201        | 1286.641238        | 2555.248652        | 1278.127964       | 2554.264636    | 1277.635956      | L    | <b>389.239461</b>  | 195.123369         | 372.212912         | 186.610094       | 371.228896        | 186.118086        | 3  |
| 20 | 2701.317794        | <b>1351.162535</b> | 2684.291245        | 1342.649260       | 2683.307229    | 1342.157252      | E    | <b>276.155397</b>  | 138.581337         | 259.128848         | 130.068062       | <b>258.144832</b> | 129.576054        | 2  |
| 21 |                    |                    |                    |                   |                |                  | K    | <b>147.112804</b>  | 74.060040          | 130.086255         | 65.546765        |                   |                   | 1  |

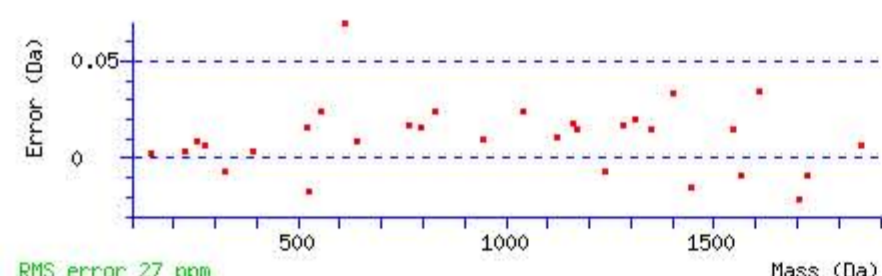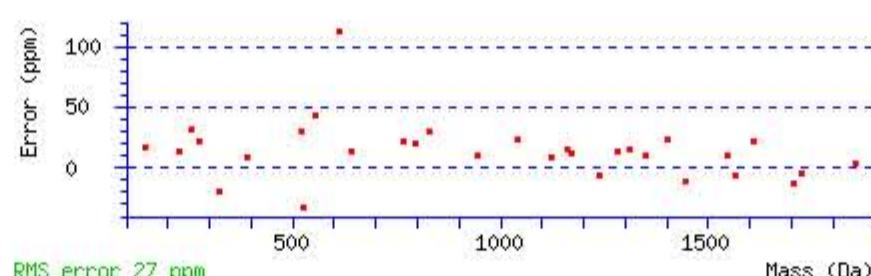

NCBI BLAST search of [NIPTVNENLENYYLEVNQLEK](#)

(Parameters: blastp, nr protein database, expect=20000, no filter, PAM30)

Other BLAST [web gateways](#)

## All matches to this query

| Score | Mr(calc):   | Delta    | Sequence                                 |
|-------|-------------|----------|------------------------------------------|
| 58.9  | 2846.415985 | 0.030587 | <a href="#">NIPTVNENLENYYLEVNQLEK</a>    |
| 0.2   | 2846.417358 | 0.029214 | <a href="#">NLLALDKDSFSDPYAHICFLHRSK</a> |



# MASCOT Search Results

## Peptide View

MS/MS Fragmentation of **VECSDNLFTQR**

Found in **MASP1\_HUMAN**, Mannan-binding lectin serine protease 1 OS=Homo sapiens GN=MASP1 PE=1 SV=3

Match to Query 40024: 1678.784532 from(560.602120,3+) rtinseconds(2136) index(53793)

Title: Locus:1.1.1.1359.2 File:"2013-07-02 CLN FXIII 60 min 2nd F 4.wiff"

Data file C:\Program Files (x86)\Matrix Science\Mascot Daemon\mgf5 FXIII 60 min 2nd\mascot\_daemon\_merge.mgf

Click mouse within plot area to zoom in by factor of two about that point

Or, Plot from  to  Da

Label all possible matches  Label matches used for scoring

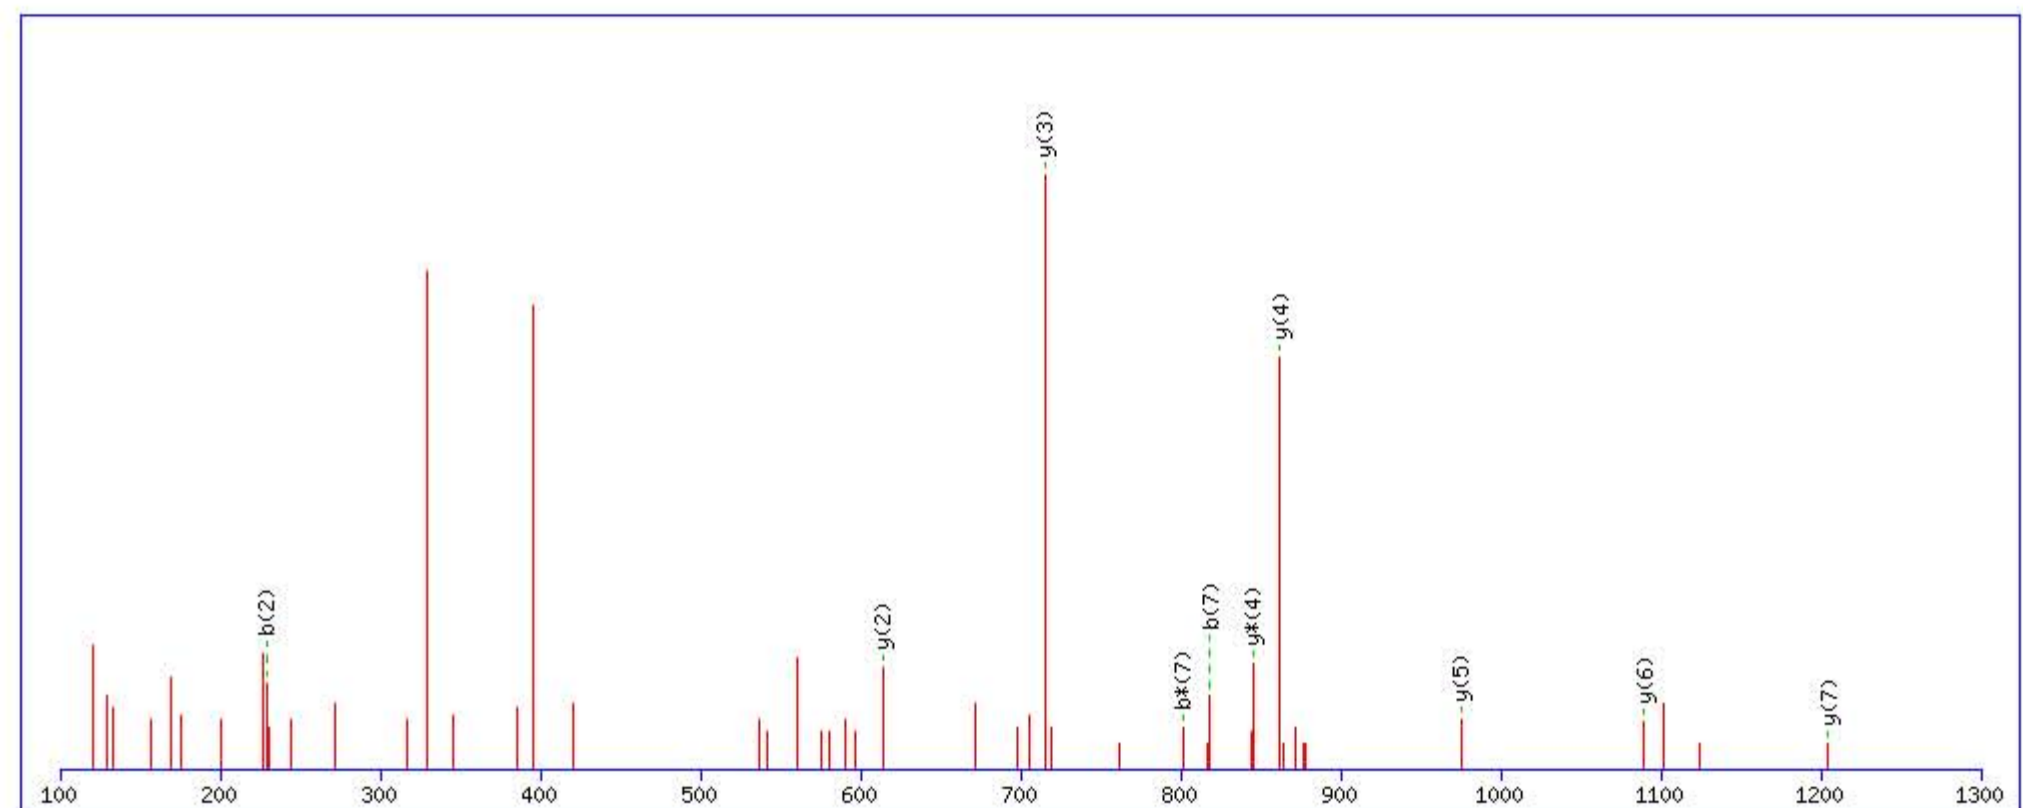

Monoisotopic mass of neutral peptide  $M_r(\text{calc})$ : 1678.780716

Fixed modifications: Carbamidomethyl (C) (apply to specified residues or termini only)

Variable modifications:

Q10 : Biotin:Thermo-21345 (Q)

Ions Score: 29 Expect: 0.019

Matches : 10/104 fragment ions using 20 most intense peaks [\(help\)](#)

| #  | b                 | b <sup>++</sup> | b <sup>*</sup>    | b <sup>*++</sup> | b <sup>0</sup> | b <sup>0++</sup> | Seq. | y                  | y <sup>++</sup> | y <sup>*</sup>    | y <sup>*++</sup> | y <sup>0</sup> | y <sup>0++</sup> | #  |
|----|-------------------|-----------------|-------------------|------------------|----------------|------------------|------|--------------------|-----------------|-------------------|------------------|----------------|------------------|----|
| 1  | 100.075690        | 50.541483       |                   |                  |                |                  | V    |                    |                 |                   |                  |                |                  | 11 |
| 2  | <b>229.118283</b> | 115.062780      |                   |                  | 211.107718     | 106.057497       | E    | 1580.719575        | 790.863426      | 1563.693026       | 782.350151       | 1562.709010    | 781.858143       | 10 |
| 3  | 389.148932        | 195.078104      |                   |                  | 371.138367     | 186.072822       | C    | 1451.676982        | 726.342129      | 1434.650433       | 717.828855       | 1433.666417    | 717.336847       | 9  |
| 4  | 476.180960        | 238.594118      |                   |                  | 458.170395     | 229.588835       | S    | 1291.646333        | 646.326805      | 1274.619784       | 637.813530       | 1273.635768    | 637.321522       | 8  |
| 5  | 591.207903        | 296.107590      |                   |                  | 573.197338     | 287.102307       | D    | <b>1204.614305</b> | 602.810791      | 1187.587756       | 594.297516       | 1186.603740    | 593.805508       | 7  |
| 6  | 705.250830        | 353.129053      | 688.224281        | 344.615778       | 687.240265     | 344.123770       | N    | <b>1089.587362</b> | 545.297319      | 1072.560813       | 536.784045       | 1071.576797    | 536.292037       | 6  |
| 7  | <b>818.334894</b> | 409.671085      | <b>801.308345</b> | 401.157810       | 800.324329     | 400.665802       | L    | <b>975.544435</b>  | 488.275856      | 958.517886        | 479.762581       | 957.533870     | 479.270573       | 5  |
| 8  | 965.403308        | 483.205292      | 948.376759        | 474.692017       | 947.392743     | 474.200009       | F    | <b>862.460371</b>  | 431.733824      | <b>845.433822</b> | 423.220549       | 844.449806     | 422.728541       | 4  |
| 9  | 1066.450987       | 533.729131      | 1049.424438       | 525.215857       | 1048.440422    | 524.723849       | T    | <b>715.391957</b>  | 358.199617      | 698.365408        | 349.686342       | 697.381392     | 349.194334       | 3  |
| 10 | 1505.676313       | 753.341795      | 1488.649764       | 744.828520       | 1487.665748    | 744.336512       | Q    | <b>614.344278</b>  | 307.675777      | 597.317729        | 299.162503       |                |                  | 2  |
| 11 |                   |                 |                   |                  |                |                  | R    | 175.118952         | 88.063114       | 158.092403        | 79.549839        |                |                  | 1  |

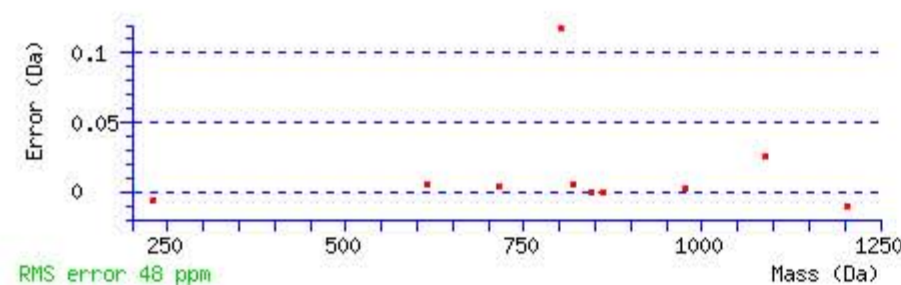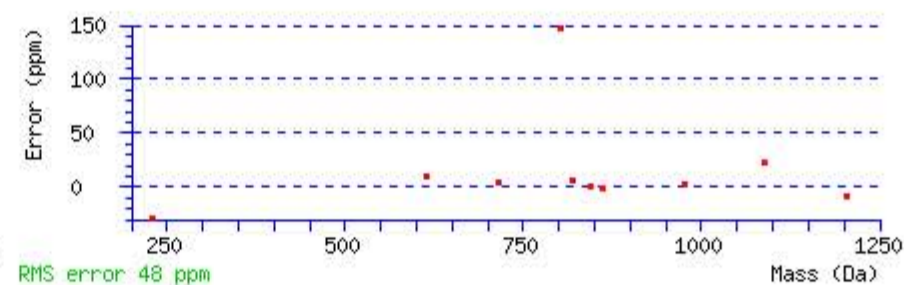

NCBI BLAST search of [VECSDNLFTQR](#)

(Parameters: blastp, nr protein database, expect=20000, no filter, PAM30)

Other BLAST [web gateways](#)

All matches to this query

| Score | $M_r(\text{calc})$ : | Delta    | Sequence                    |
|-------|----------------------|----------|-----------------------------|
| 28.8  | 1678.780716          | 0.003816 | <a href="#">VECSDNLFTQR</a> |

Mascot: <http://www.matrixscience.com/>



# MASCOT Search Results

## Peptide View

MS/MS Fragmentation of **FPETLMEIEIPIVDHSTCQK**

Found in **MASP1\_HUMAN**, Mannan-binding lectin serine protease 1 OS=Homo sapiens GN=MASP1 PE=1 SV=3

Match to Query 58324: 2697.347022 from(900.122950,3+) rtinseconds(2789) index(57762)

Title: Locus:1.1.1.1585.17 File:"2013-07-02 CLN FXIII 60 min 2nd F 4.wiff"

Data file C:\Program Files (x86)\Matrix Science\Mascot Daemon\mgf5 FXIII 60 min 2nd\mascot\_daemon\_merge.mgf

Click mouse within plot area to zoom in by factor of two about that point

Or, Plot from  to  Da

Label all possible matches  Label matches used for scoring

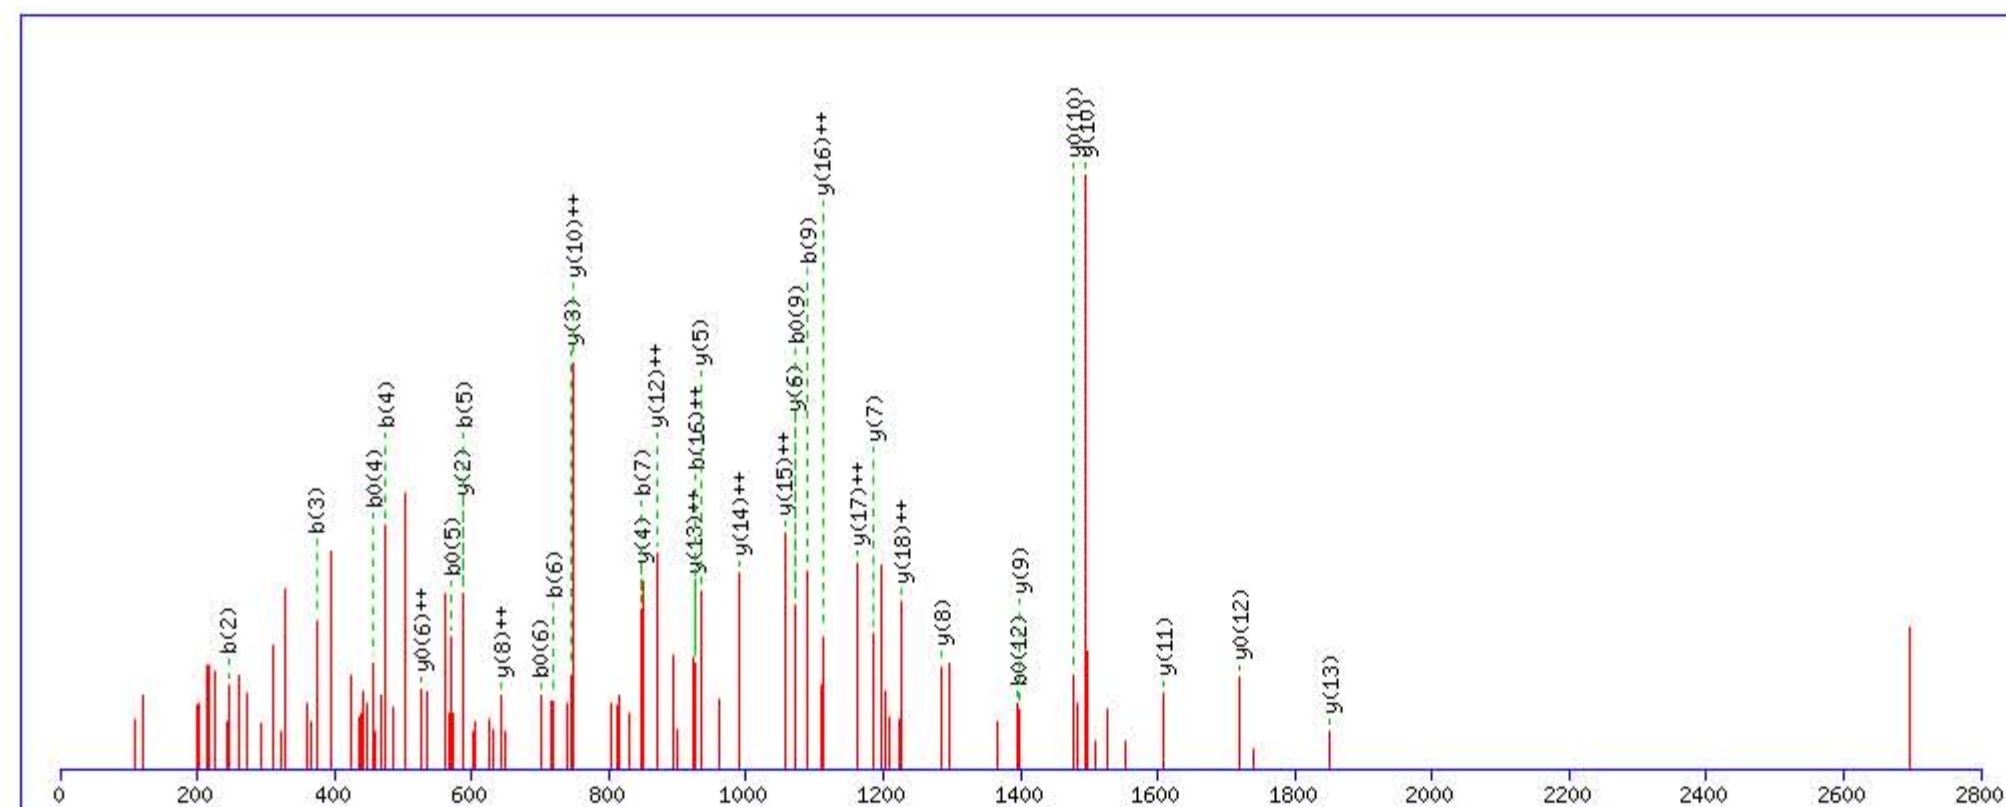

Monoisotopic mass of neutral peptide Mr(calc): 2697.321609

Fixed modifications: Carbamidomethyl (C) (apply to specified residues or termini only)

Variable modifications:

Q19 : Biotin:Thermo-21345 (Q)

Ions Score: 60 Expect: 2.7e-006

Matches : 36/182 fragment ions using 74 most intense peaks ([help](#))

| #  | b                  | b <sup>++</sup>   | b <sup>*</sup> | b <sup>*++</sup> | b <sup>0</sup>     | b <sup>0++</sup> | Seq. | y                  | y <sup>++</sup>    | y <sup>*</sup> | y <sup>*++</sup> | y <sup>0</sup>     | y <sup>0++</sup>  | #  |
|----|--------------------|-------------------|----------------|------------------|--------------------|------------------|------|--------------------|--------------------|----------------|------------------|--------------------|-------------------|----|
| 1  | 148.075690         | 74.541483         |                |                  |                    |                  | F    |                    |                    |                |                  |                    |                   | 20 |
| 2  | <b>245.128454</b>  | 123.067865        |                |                  |                    |                  | P    | 2551.260482        | 1276.133879        | 2534.233933    | 1267.620604      | 2533.249917        | 1267.128596       | 19 |
| 3  | <b>374.171047</b>  | 187.589161        |                |                  | 356.160482         | 178.583879       | E    | 2454.207718        | <b>1227.607497</b> | 2437.181169    | 1219.094222      | 2436.197153        | 1218.602214       | 18 |
| 4  | <b>475.218726</b>  | 238.113001        |                |                  | <b>457.208161</b>  | 229.107719       | T    | 2325.165125        | <b>1163.086200</b> | 2308.138576    | 1154.572926      | 2307.154560        | 1154.080918       | 17 |
| 5  | <b>588.302790</b>  | 294.655033        |                |                  | <b>570.292225</b>  | 285.649751       | L    | 2224.117446        | <b>1112.562361</b> | 2207.090897    | 1104.049086      | 2206.106881        | 1103.557078       | 16 |
| 6  | <b>719.343275</b>  | 360.175276        |                |                  | <b>701.332710</b>  | 351.169993       | M    | 2111.033382        | <b>1056.020329</b> | 2094.006833    | 1047.507054      | 2093.022817        | 1047.015046       | 15 |
| 7  | <b>848.385868</b>  | 424.696572        |                |                  | 830.375303         | 415.691290       | E    | 1979.992897        | <b>990.500087</b>  | 1962.966348    | 981.986812       | 1961.982332        | 981.494804        | 14 |
| 8  | 961.469932         | 481.238604        |                |                  | 943.459367         | 472.233322       | I    | <b>1850.950304</b> | <b>925.978790</b>  | 1833.923755    | 917.465516       | 1832.939739        | 916.973508        | 13 |
| 9  | <b>1090.512525</b> | 545.759901        |                |                  | <b>1072.501960</b> | 536.754618       | E    | 1737.866240        | <b>869.436758</b>  | 1720.839691    | 860.923484       | <b>1719.855675</b> | 860.431476        | 12 |
| 10 | 1203.596589        | 602.301933        |                |                  | 1185.586024        | 593.296650       | I    | <b>1608.823647</b> | 804.915462         | 1591.797098    | 796.402187       | 1590.813082        | 795.910179        | 11 |
| 11 | 1300.649353        | 650.828315        |                |                  | 1282.638788        | 641.823032       | P    | <b>1495.739583</b> | <b>748.373430</b>  | 1478.713034    | 739.860155       | <b>1477.729018</b> | 739.368147        | 10 |
| 12 | 1413.733417        | 707.370346        |                |                  | <b>1395.722852</b> | 698.365064       | I    | <b>1398.686819</b> | 699.847048         | 1381.660270    | 691.333773       | 1380.676254        | 690.841765        | 9  |
| 13 | 1512.801831        | 756.904554        |                |                  | 1494.791266        | 747.899271       | V    | <b>1285.602755</b> | <b>643.305016</b>  | 1268.576206    | 634.791741       | 1267.592190        | 634.299733        | 8  |
| 14 | 1627.828774        | 814.418025        |                |                  | 1609.818209        | 805.412743       | D    | <b>1186.534341</b> | 593.770809         | 1169.507792    | 585.257534       | 1168.523776        | 584.765526        | 7  |
| 15 | 1764.887686        | 882.947481        |                |                  | 1746.877121        | 873.942199       | H    | <b>1071.507398</b> | 536.257337         | 1054.480849    | 527.744063       | 1053.496833        | <b>527.252055</b> | 6  |
| 16 | 1851.919714        | <b>926.463495</b> |                |                  | 1833.909149        | 917.458213       | S    | <b>934.448486</b>  | 467.727881         | 917.421937     | 459.214607       | 916.437921         | 458.722599        | 5  |
| 17 | 1952.967393        | 976.987335        |                |                  | 1934.956828        | 967.982052       | T    | <b>847.416458</b>  | 424.211867         | 830.389909     | 415.698593       | 829.405893         | 415.206585        | 4  |
| 18 | 2112.998042        | 1057.002659       |                |                  | 2094.987477        | 1047.997376      | C    | <b>746.368779</b>  | 373.688028         | 729.342230     | 365.174753       |                    |                   | 3  |
| 19 | 2552.223368        | 1276.615322       | 2535.196819    | 1268.102047      | 2534.212803        | 1267.610039      | Q    | <b>586.338130</b>  | 293.672703         | 569.311581     | 285.159429       |                    |                   | 2  |
| 20 |                    |                   |                |                  |                    |                  | K    | 147.112804         | 74.060040          | 130.086255     | 65.546765        |                    |                   | 1  |

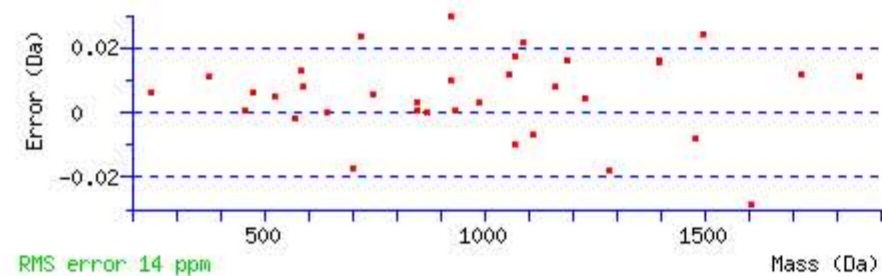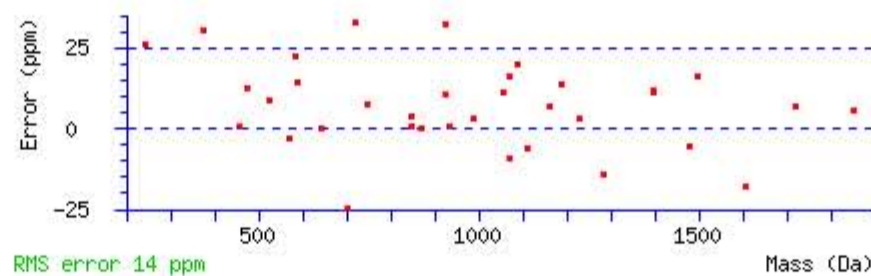

NCBI BLAST search of [FPETLMEIEIPIVDHSTCQK](#)

(Parameters: blastp, nr protein database, expect=20000, no filter, PAM30)

Other BLAST [web gateways](#)

All matches to this query

| Score | Mr(calc):   | Delta     | Sequence                                  |
|-------|-------------|-----------|-------------------------------------------|
| 59.6  | 2697.321609 | 0.025413  | <a href="#">FPETLMEIEIPIVDHSTCQK</a>      |
| 0.3   | 2697.379593 | -0.032571 | <a href="#">LVVLF SQMRLANFQTDSQESI QK</a> |

Mascot: <http://www.matrixscience.com/>



# Mascot Search Results

## Peptide View

MS/MS Fragmentation of **APEPISTQSHSVLILFHSDNSGENR**

Found in **MASPI\_HUMAN**, Mannan-binding lectin serine protease 1 OS=Homo sapiens GN=MASPI PE=1 SV=3

Match to Query 62047: 3045.518216 from(762.386830,4+) rtinseconds(2270) index(54676)

Title: Locus:1.1.1.1405.10 File:"2013-07-02 CLN FXIII 60 min 2nd F 4.wiff"

Data file C:\Program Files (x86)\Matrix Science\Mascot Daemon\mgf5 FXIII 60 min 2nd\mascot\_daemon\_merge.mgf

Click mouse within plot area to zoom in by factor of two about that point

Or, Plot from  to  Da

Label all possible matches  Label matches used for scoring

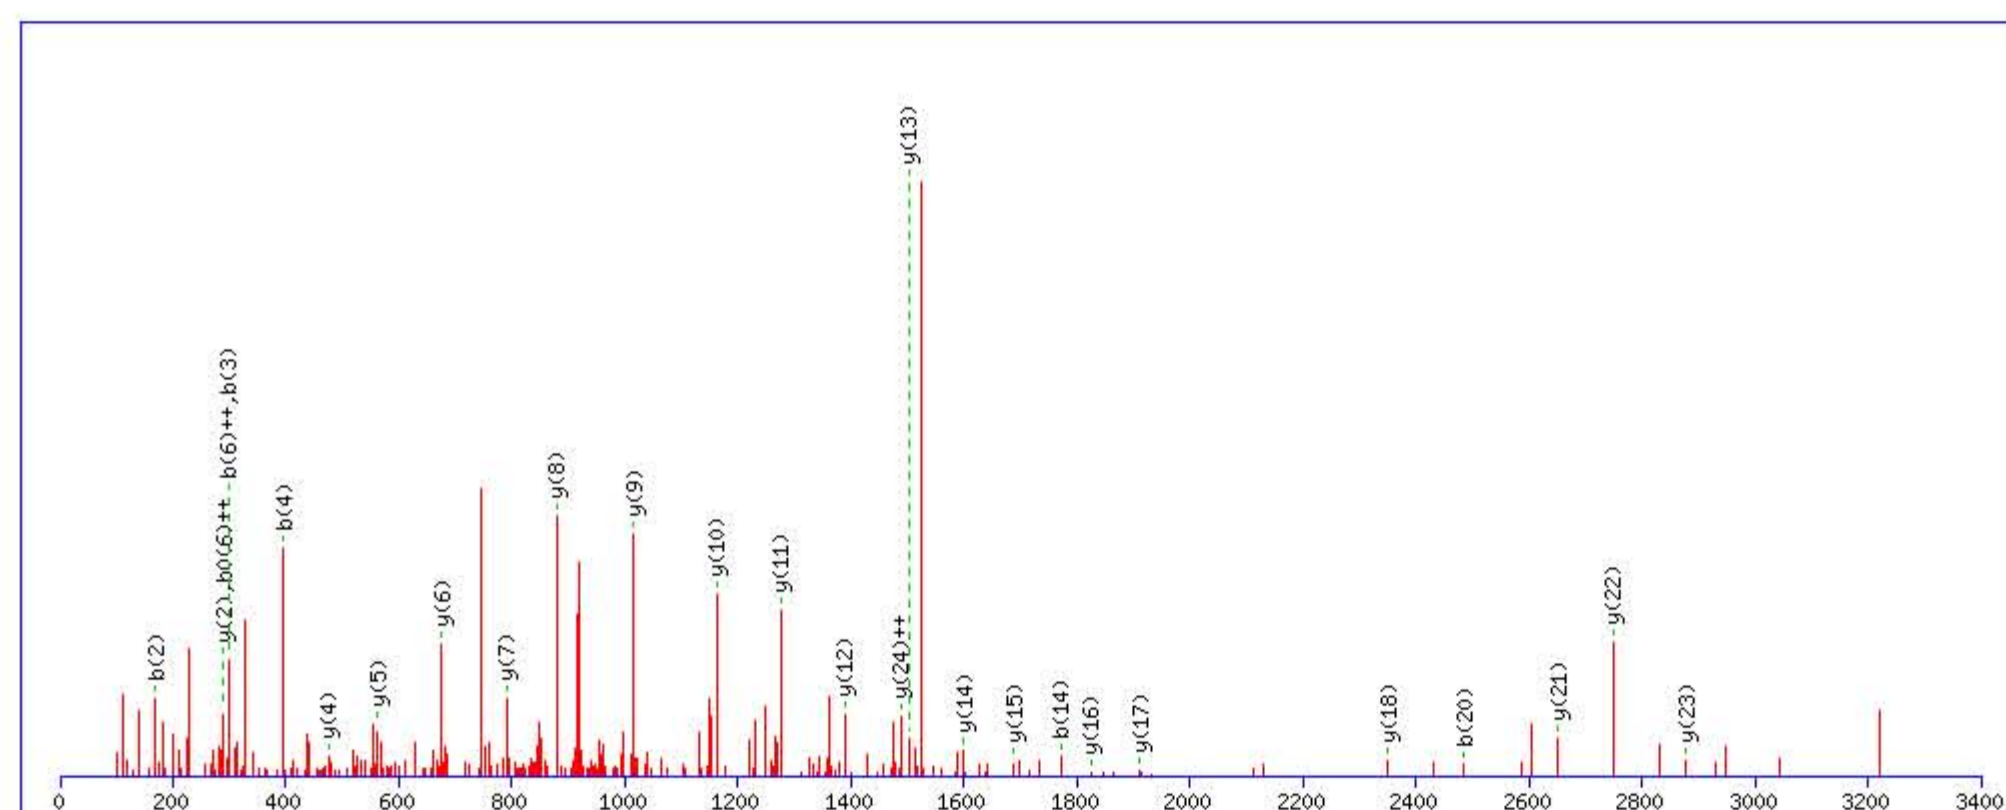

Monoisotopic mass of neutral peptide Mr(calc): 3045.497803

Fixed modifications: Carbamidomethyl (C) (apply to specified residues or termini only)

Variable modifications:

Q8 : Biotin:Thermo-21345 (Q)

Ions Score: 93 Expect: 1.3e-008

Matches : 27/266 fragment ions using 71 most intense peaks [\(help\)](#)

| #  | b                  | b <sup>++</sup>   | b <sup>+</sup> | b <sup>+++</sup> | b <sup>0</sup> | b <sup>0++</sup>  | Seq. | y                  | y <sup>++</sup>    | y <sup>+</sup> | y <sup>+++</sup> | y <sup>0</sup> | y <sup>0++</sup> | #  |
|----|--------------------|-------------------|----------------|------------------|----------------|-------------------|------|--------------------|--------------------|----------------|------------------|----------------|------------------|----|
| 1  | 72.044390          | 36.525833         |                |                  |                |                   | A    |                    |                    |                |                  |                |                  | 25 |
| 2  | <b>169.097154</b>  | 85.052215         |                |                  |                |                   | P    | 2975.467980        | <b>1488.237628</b> | 2958.441431    | 1479.724353      | 2957.457415    | 1479.232345      | 24 |
| 3  | <b>298.139747</b>  | 149.573512        |                |                  | 280.129182     | 140.568229        | E    | <b>2878.415216</b> | 1439.711246        | 2861.388667    | 1431.197971      | 2860.404651    | 1430.705963      | 23 |
| 4  | <b>395.192511</b>  | 198.099894        |                |                  | 377.181946     | 189.094611        | P    | <b>2749.372623</b> | 1375.189949        | 2732.346074    | 1366.676675      | 2731.362058    | 1366.184667      | 22 |
| 5  | 508.276575         | 254.641926        |                |                  | 490.266010     | 245.636643        | I    | <b>2652.319859</b> | 1326.663567        | 2635.293310    | 1318.150293      | 2634.309294    | 1317.658285      | 21 |
| 6  | 595.308603         | <b>298.157940</b> |                |                  | 577.298038     | <b>289.152657</b> | S    | 2539.235795        | 1270.121535        | 2522.209246    | 1261.608261      | 2521.225230    | 1261.116253      | 20 |
| 7  | 696.356282         | 348.681779        |                |                  | 678.345717     | 339.676497        | T    | 2452.203767        | 1226.605521        | 2435.177218    | 1218.092247      | 2434.193202    | 1217.600239      | 19 |
| 8  | 1135.581608        | 568.294442        | 1118.555059    | 559.781168       | 1117.571043    | 559.289160        | Q    | <b>2351.156088</b> | 1176.081682        | 2334.129539    | 1167.568407      | 2333.145523    | 1167.076399      | 18 |
| 9  | 1222.613636        | 611.810456        | 1205.587087    | 603.297182       | 1204.603071    | 602.805174        | S    | <b>1911.930762</b> | 956.469019         | 1894.904213    | 947.955745       | 1893.920197    | 947.463737       | 17 |
| 10 | 1359.672548        | 680.339912        | 1342.645999    | 671.826638       | 1341.661983    | 671.334630        | H    | <b>1824.898734</b> | 912.953005         | 1807.872185    | 904.439731       | 1806.888169    | 903.947723       | 16 |
| 11 | 1446.704576        | 723.855926        | 1429.678027    | 715.342652       | 1428.694011    | 714.850644        | S    | <b>1687.839822</b> | 844.423549         | 1670.813273    | 835.910275       | 1669.829257    | 835.418267       | 15 |
| 12 | 1545.772990        | 773.390133        | 1528.746441    | 764.876859       | 1527.762425    | 764.384851        | V    | <b>1600.807794</b> | 800.907535         | 1583.781245    | 792.394261       | 1582.797229    | 791.902253       | 14 |
| 13 | 1658.857054        | 829.932165        | 1641.830505    | 821.418891       | 1640.846489    | 820.926883        | L    | <b>1501.739380</b> | 751.373328         | 1484.712831    | 742.860054       | 1483.728815    | 742.368045       | 13 |
| 14 | <b>1771.941118</b> | 886.474197        | 1754.914569    | 877.960923       | 1753.930553    | 877.468915        | I    | <b>1388.655316</b> | 694.831296         | 1371.628767    | 686.318022       | 1370.644751    | 685.826014       | 12 |
| 15 | 1885.025182        | 943.016229        | 1867.998633    | 934.502955       | 1867.014617    | 934.010947        | L    | <b>1275.571252</b> | 638.289264         | 1258.544703    | 629.775990       | 1257.560687    | 629.283982       | 11 |
| 16 | 2032.093596        | 1016.550436       | 2015.067047    | 1008.037162      | 2014.083031    | 1007.545154       | F    | <b>1162.487188</b> | 581.747232         | 1145.460639    | 573.233958       | 1144.476623    | 572.741950       | 10 |
| 17 | 2169.152508        | 1085.079892       | 2152.125959    | 1076.566617      | 2151.141943    | 1076.074610       | H    | <b>1015.418774</b> | 508.213025         | 998.392225     | 499.699751       | 997.408209     | 499.207743       | 9  |
| 18 | 2256.184536        | 1128.595906       | 2239.157987    | 1120.082631      | 2238.173971    | 1119.590624       | S    | <b>878.359862</b>  | 439.683569         | 861.333313     | 431.170295       | 860.349297     | 430.678287       | 8  |
| 19 | 2371.211479        | 1186.109377       | 2354.184930    | 1177.596103      | 2353.200914    | 1177.104095       | D    | <b>791.327834</b>  | 396.167555         | 774.301285     | 387.654280       | 773.317269     | 387.162272       | 7  |
| 20 | <b>2485.254406</b> | 1243.130841       | 2468.227857    | 1234.617566      | 2467.243841    | 1234.125558       | N    | <b>676.300891</b>  | 338.654084         | 659.274342     | 330.140809       | 658.290326     | 329.648801       | 6  |
| 21 | 2572.286434        | 1286.646855       | 2555.259885    | 1278.133580      | 2554.275869    | 1277.641572       | S    | <b>562.257964</b>  | 281.632620         | 545.231415     | 273.119346       | 544.247399     | 272.627338       | 5  |
| 22 | 2629.307898        | 1315.157587       | 2612.281349    | 1306.644312      | 2611.297333    | 1306.152304       | G    | <b>475.225936</b>  | 238.116606         | 458.199387     | 229.603331       | 457.215371     | 229.111323       | 4  |
| 23 | 2758.350491        | 1379.678884       | 2741.323942    | 1371.165609      | 2740.339926    | 1370.673601       | E    | 418.204472         | 209.605874         | 401.177923     | 201.092600       | 400.193907     | 200.600592       | 3  |
| 24 | 2872.393418        | 1436.700347       | 2855.366869    | 1428.187072      | 2854.382853    | 1427.695064       | N    | <b>289.161879</b>  | 145.084577         | 272.135330     | 136.571303       |                |                  | 2  |
| 25 |                    |                   |                |                  |                |                   | R    | 175.118952         | 88.063114          | 158.092403     | 79.549839        |                |                  | 1  |

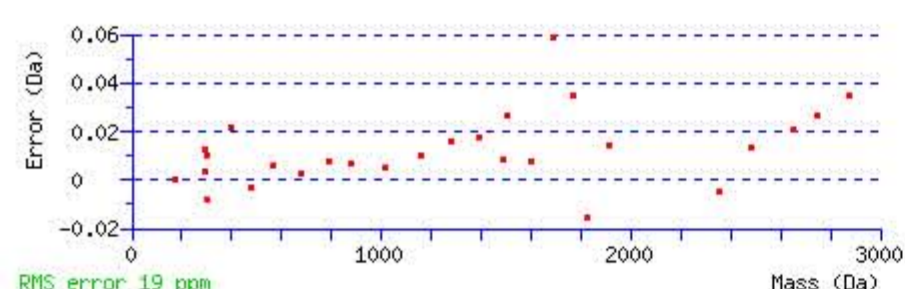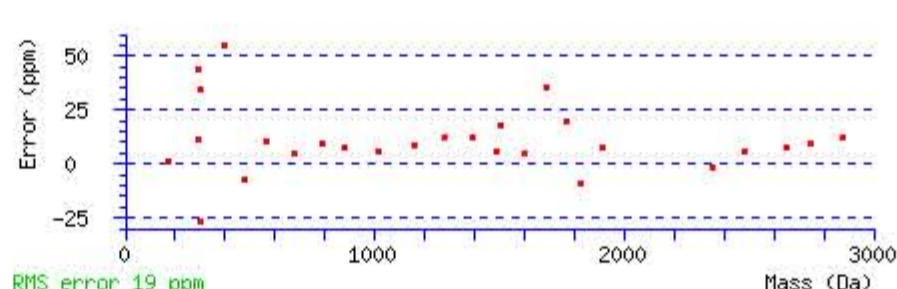

NCBI BLAST search of [APEPISTQSHSVLILFHSDNSGENR](#)

(Parameters: blastp, nr protein database, expect=20000, no filter, PAM30)

Other BLAST [web gateways](#)

All matches to this query

| Score | Mr(calc):   | Delta    | Sequence                                  |
|-------|-------------|----------|-------------------------------------------|
| 93.3  | 3045.497803 | 0.020413 | <a href="#">APEPISTQSHSVLILFHSDNSGENR</a> |

Mascot: <http://www.matrixscience.com/>



# MASCOT Search Results

## Peptide View

MS/MS Fragmentation of **VLSIAQAHSPAFSCEQVR**

Found in **CD14\_HUMAN**, Monocyte differentiation antigen CD14 OS=Homo sapiens GN=CD14 PE=1 SV=2

Match to Query 53176: 2310.166692 from(771.062840,3+) rtinseconds(1984) index(36314)

Title: Locus:1.1.1.3110.6 File:"2013-07-02 CLN FXIII 60 min 2nd F 3.wiff"

Data file C:\Program Files (x86)\Matrix Science\Mascot Daemon\mgf\5 FXIII 60 min 2nd\mascot\_daemon\_merge.mgf

Click mouse within plot area to zoom in by factor of two about that point

Or, Plot from  to  Da

Label all possible matches  Label matches used for scoring

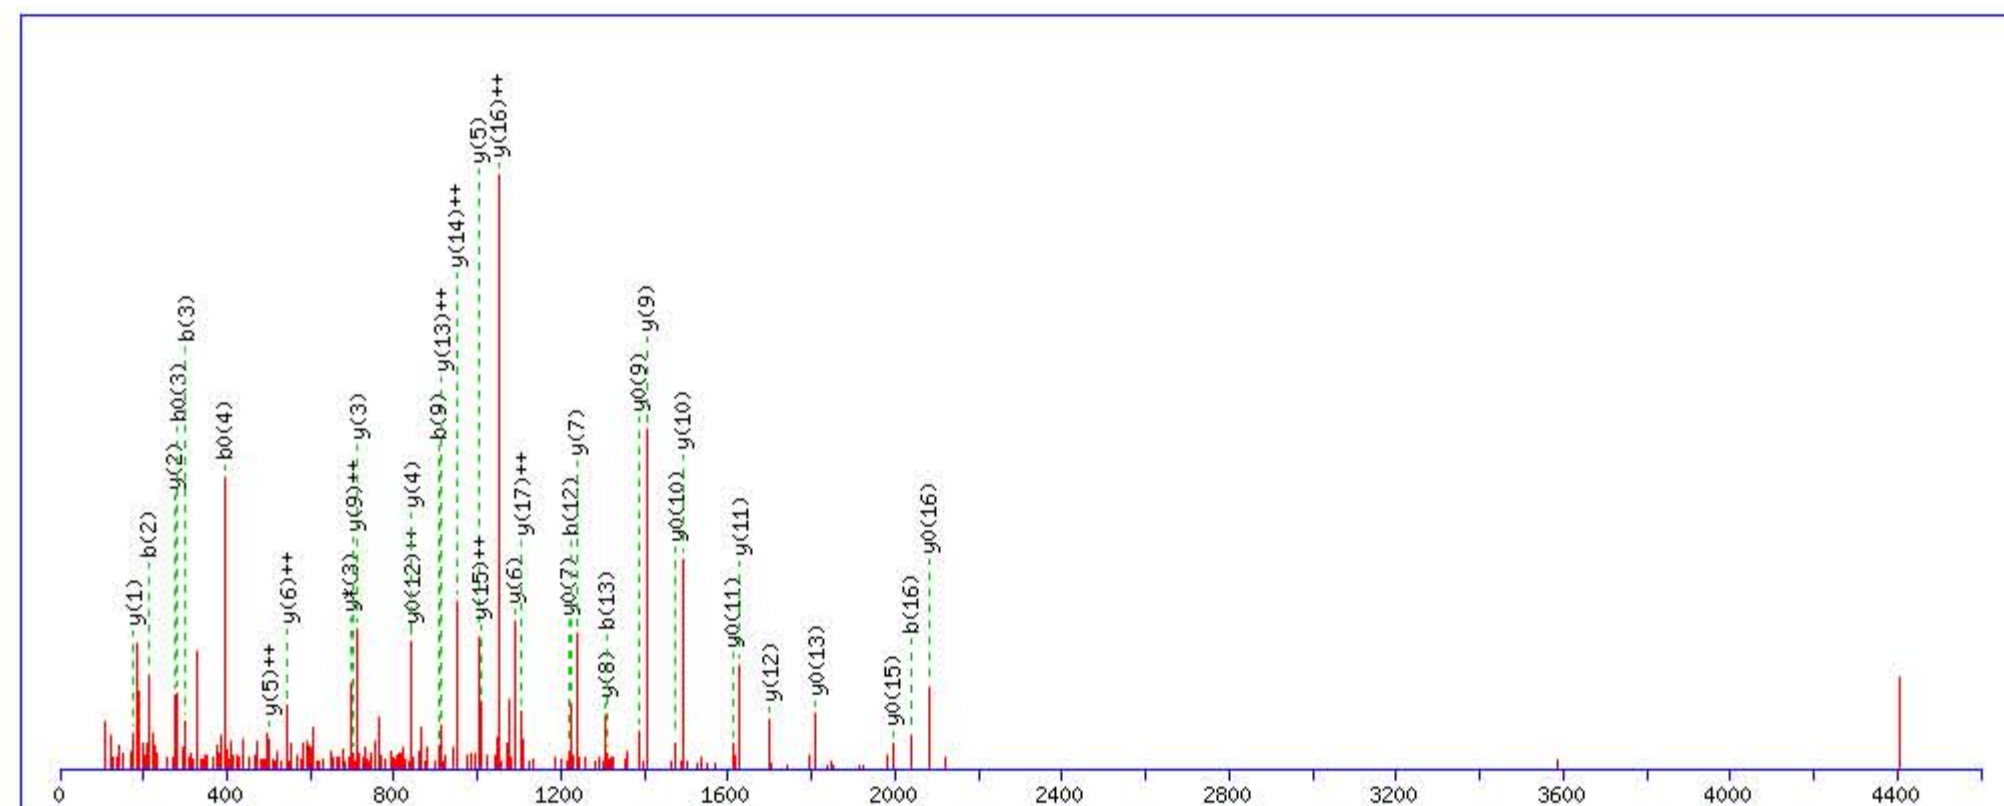

Monoisotopic mass of neutral peptide Mr(calc): 2310.161285

Fixed modifications: Carbamidomethyl (C) (apply to specified residues or termini only)

Variable modifications:

Q16 : Biotin:Thermo-21345 (Q)

Ions Score: 57 Expect: 6.2e-005

Matches : 37/184 fragment ions using 93 most intense peaks [\(help\)](#)

| #  | b                  | b <sup>++</sup> | b <sup>+</sup> | b <sup>+++</sup> | b <sup>0</sup>    | b <sup>0++</sup> | Seq. | y                  | y <sup>++</sup>    | y <sup>+</sup>    | y <sup>+++</sup> | y <sup>0</sup>     | y <sup>0++</sup>  | #  |
|----|--------------------|-----------------|----------------|------------------|-------------------|------------------|------|--------------------|--------------------|-------------------|------------------|--------------------|-------------------|----|
| 1  | 100.075690         | 50.541483       |                |                  |                   |                  | V    |                    |                    |                   |                  |                    |                   | 18 |
| 2  | <b>213.159754</b>  | 107.083515      |                |                  |                   |                  | L    | 2212.100156        | <b>1106.553716</b> | 2195.073607       | 1098.040441      | 2194.089591        | 1097.548433       | 17 |
| 3  | <b>300.191782</b>  | 150.599529      |                |                  | <b>282.181217</b> | 141.594247       | S    | 2099.016092        | <b>1050.011684</b> | 2081.989543       | 1041.498409      | <b>2081.005527</b> | 1041.006401       | 16 |
| 4  | 413.275846         | 207.141561      |                |                  | <b>395.265281</b> | 198.136279       | I    | 2011.984064        | <b>1006.495670</b> | 1994.957515       | 997.982396       | <b>1993.973499</b> | 997.490388        | 15 |
| 5  | 484.312960         | 242.660118      |                |                  | 466.302395        | 233.654836       | A    | 1898.900000        | <b>949.953638</b>  | 1881.873451       | 941.440364       | 1880.889435        | 940.948356        | 14 |
| 6  | 612.371538         | 306.689407      | 595.344989     | 298.176133       | 594.360973        | 297.684125       | Q    | 1827.862886        | <b>914.435081</b>  | 1810.836337       | 905.921807       | <b>1809.852321</b> | 905.429799        | 13 |
| 7  | 683.408652         | 342.207964      | 666.382103     | 333.694690       | 665.398087        | 333.202682       | A    | <b>1699.804308</b> | 850.405792         | 1682.777759       | 841.892518       | 1681.793743        | <b>841.400510</b> | 12 |
| 8  | 820.467564         | 410.737420      | 803.441015     | 402.224146       | 802.456999        | 401.732138       | H    | <b>1628.767194</b> | 814.887235         | 1611.740645       | 806.373961       | <b>1610.756629</b> | 805.881953        | 11 |
| 9  | <b>907.499592</b>  | 454.253434      | 890.473043     | 445.740160       | 889.489027        | 445.248152       | S    | <b>1491.708282</b> | 746.357779         | 1474.681733       | 737.844505       | <b>1473.697717</b> | 737.352497        | 10 |
| 10 | 1004.552356        | 502.779816      | 987.525807     | 494.266542       | 986.541791        | 493.774534       | P    | <b>1404.676254</b> | <b>702.841765</b>  | 1387.649705       | 694.328491       | <b>1386.665689</b> | 693.836483        | 9  |
| 11 | 1075.589470        | 538.298373      | 1058.562921    | 529.785099       | 1057.578905       | 529.293091       | A    | <b>1307.623490</b> | 654.315383         | 1290.596941       | 645.802109       | 1289.612925        | 645.310101        | 8  |
| 12 | <b>1222.657884</b> | 611.832580      | 1205.631335    | 603.319306       | 1204.647319       | 602.827298       | F    | <b>1236.586376</b> | 618.796826         | 1219.559827       | 610.283552       | <b>1218.575811</b> | 609.791544        | 7  |
| 13 | <b>1309.689912</b> | 655.348594      | 1292.663363    | 646.835320       | 1291.679347       | 646.343312       | S    | <b>1089.517962</b> | <b>545.262619</b>  | 1072.491413       | 536.749345       | 1071.507397        | 536.257337        | 6  |
| 14 | 1469.720561        | 735.363919      | 1452.694012    | 726.850644       | 1451.709996       | 726.358636       | C    | <b>1002.485934</b> | <b>501.746605</b>  | 985.459385        | 493.233331       | 984.475369         | 492.741323        | 5  |
| 15 | 1598.763154        | 799.885215      | 1581.736605    | 791.371941       | 1580.752589       | 790.879933       | E    | <b>842.455285</b>  | 421.731281         | 825.428736        | 413.218006       | 824.444720         | 412.725998        | 4  |
| 16 | <b>2037.988480</b> | 1019.497878     | 2020.961931    | 1010.984604      | 2019.977915       | 1010.492596      | Q    | <b>713.412692</b>  | 357.209984         | <b>696.386143</b> | 348.696710       |                    |                   | 3  |
| 17 | 2137.056894        | 1069.032085     | 2120.030345    | 1060.518811      | 2119.046329       | 1060.026803      | V    | <b>274.187366</b>  | 137.597321         | 257.160817        | 129.084046       |                    |                   | 2  |
| 18 |                    |                 |                |                  |                   |                  | R    | <b>175.118952</b>  | 88.063114          | 158.092403        | 79.549839        |                    |                   | 1  |

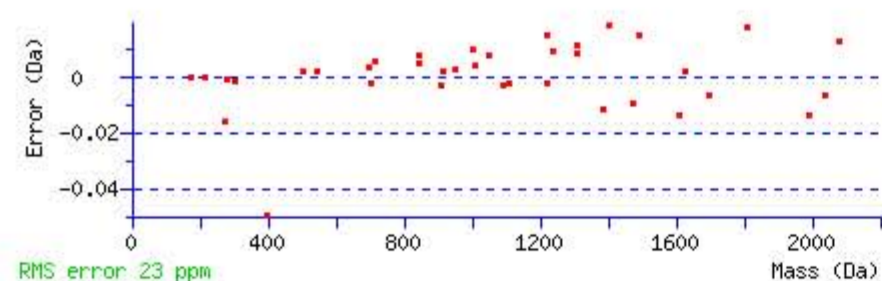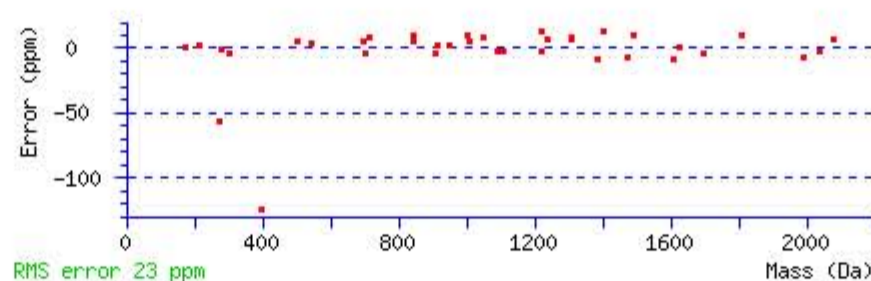

NCBI BLAST search of [VLSIAQAHSPAFSCEQVR](#)

(Parameters: blastp, nr protein database, expect=20000, no filter, PAM30)

Other BLAST [web gateways](#)

All matches to this query

| Score | Mr(calc):   | Delta    | Sequence                           |
|-------|-------------|----------|------------------------------------|
| 56.6  | 2310.161285 | 0.005407 | <a href="#">VLSIAQAHSPAFSCEQVR</a> |
| 7.0   | 2310.161285 | 0.005407 | <a href="#">VLSIAQAHSPAFSCEQVR</a> |

Mascot: <http://www.matrixscience.com/>



# Mascot Search Results

## Peptide View

MS/MS Fragmentation of **IIGLDQVAGMSETALPGAFK**

Found in **MYH9\_HUMAN**, Myosin-9 OS=Homo sapiens GN=MYH9 PE=1 SV=4

Match to Query 53495: 2328.229452 from(777.083760,3+) rtinseconds(2872) index(58462)

Title: Locus:1.1.1.1613.17 File:"2013-07-02 CLN FXIII 60 min 2nd F 4.wiff"

Data file C:\Program Files (x86)\Matrix Science\Mascot Daemon\mgf5 FXIII 60 min 2nd\mascot\_daemon\_merge.mgf

Click mouse within plot area to zoom in by factor of two about that point

Or, Plot from  to  Da

Label all possible matches  Label matches used for scoring

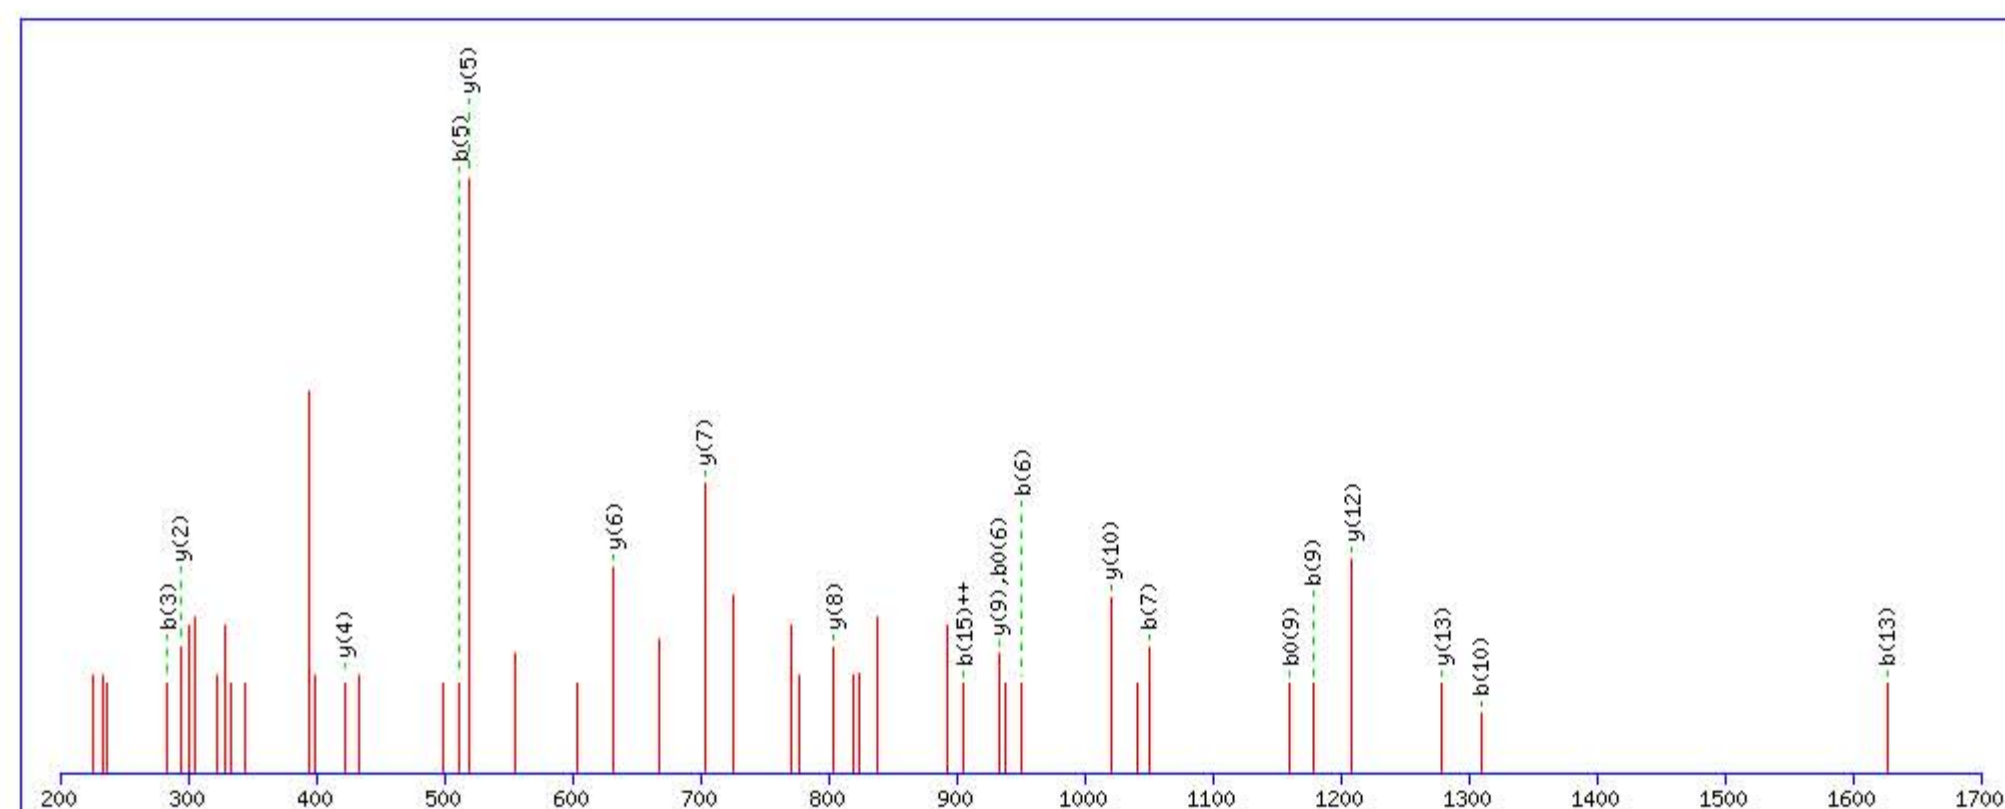

Monoisotopic mass of neutral peptide Mr(calc): 2328.222153

Fixed modifications: Carbamidomethyl (C) (apply to specified residues or termini only)

Variable modifications:

Q6 : Biotin:Thermo-21345 (Q)

Ions Score: 51 Expect: 0.00018

Matches : 20/196 fragment ions using 44 most intense peaks [\(help\)](#)

| #  | b                  | b <sup>++</sup>   | b <sup>+</sup> | b <sup>+++</sup> | b <sup>0</sup>     | b <sup>0++</sup> | Seq. | y                  | y <sup>++</sup> | y <sup>+</sup> | y <sup>+++</sup> | y <sup>0</sup> | y <sup>0++</sup> | #  |
|----|--------------------|-------------------|----------------|------------------|--------------------|------------------|------|--------------------|-----------------|----------------|------------------|----------------|------------------|----|
| 1  | 114.091340         | 57.549308         |                |                  |                    |                  | I    |                    |                 |                |                  |                |                  | 20 |
| 2  | 227.175404         | 114.091340        |                |                  |                    |                  | I    | 2216.145376        | 1108.576326     | 2199.118827    | 1100.063051      | 2198.134811    | 1099.571043      | 19 |
| 3  | <b>284.196868</b>  | 142.602072        |                |                  |                    |                  | G    | 2103.061312        | 1052.034294     | 2086.034763    | 1043.521019      | 2085.050747    | 1043.029011      | 18 |
| 4  | 397.280932         | 199.144104        |                |                  |                    |                  | L    | 2046.039848        | 1023.523562     | 2029.013299    | 1015.010288      | 2028.029283    | 1014.518279      | 17 |
| 5  | <b>512.307875</b>  | 256.657576        |                |                  | 494.297310         | 247.652293       | D    | 1932.955784        | 966.981530      | 1915.929235    | 958.468255       | 1914.945219    | 957.976247       | 16 |
| 6  | <b>951.533201</b>  | 476.270239        | 934.506652     | 467.756964       | <b>933.522636</b>  | 467.264956       | Q    | 1817.928841        | 909.468058      | 1800.902292    | 900.954784       | 1799.918276    | 900.462776       | 15 |
| 7  | <b>1050.601615</b> | 525.804446        | 1033.575066    | 517.291171       | 1032.591050        | 516.799163       | V    | 1378.703515        | 689.855395      | 1361.676966    | 681.342121       | 1360.692950    | 680.850113       | 14 |
| 8  | 1121.638729        | 561.323003        | 1104.612180    | 552.809728       | 1103.628164        | 552.317720       | A    | <b>1279.635101</b> | 640.321188      | 1262.608552    | 631.807914       | 1261.624536    | 631.315906       | 13 |
| 9  | <b>1178.660193</b> | 589.833734        | 1161.633644    | 581.320460       | <b>1160.649628</b> | 580.828452       | G    | <b>1208.597987</b> | 604.802631      | 1191.571438    | 596.289357       | 1190.587422    | 595.797349       | 12 |
| 10 | <b>1309.700678</b> | 655.353977        | 1292.674129    | 646.840703       | 1291.690113        | 646.348694       | M    | 1151.576523        | 576.291900      | 1134.549974    | 567.778625       | 1133.565958    | 567.286617       | 11 |
| 11 | 1396.732706        | 698.869991        | 1379.706157    | 690.356717       | 1378.722141        | 689.864709       | S    | <b>1020.536038</b> | 510.771657      | 1003.509489    | 502.258382       | 1002.525473    | 501.766374       | 10 |
| 12 | 1525.775299        | 763.391288        | 1508.748750    | 754.878013       | 1507.764734        | 754.386005       | E    | <b>933.504010</b>  | 467.255643      | 916.477461     | 458.742368       | 915.493445     | 458.250360       | 9  |
| 13 | <b>1626.822978</b> | 813.915127        | 1609.796429    | 805.401853       | 1608.812413        | 804.909845       | T    | <b>804.461417</b>  | 402.734346      | 787.434868     | 394.221072       | 786.450852     | 393.729064       | 8  |
| 14 | 1697.860092        | 849.433684        | 1680.833543    | 840.920410       | 1679.849527        | 840.428402       | A    | <b>703.413738</b>  | 352.210507      | 686.387189     | 343.697232       |                |                  | 7  |
| 15 | 1810.944156        | <b>905.975716</b> | 1793.917607    | 897.462442       | 1792.933591        | 896.970434       | L    | <b>632.376624</b>  | 316.691950      | 615.350075     | 308.178675       |                |                  | 6  |
| 16 | 1907.996920        | 954.502098        | 1890.970371    | 945.988824       | 1889.986355        | 945.496816       | P    | <b>519.292560</b>  | 260.149918      | 502.266011     | 251.636643       |                |                  | 5  |
| 17 | 1965.018384        | 983.012830        | 1947.991835    | 974.499556       | 1947.007819        | 974.007547       | G    | <b>422.239796</b>  | 211.623536      | 405.213247     | 203.110261       |                |                  | 4  |
| 18 | 2036.055498        | 1018.531387       | 2019.028949    | 1010.018113      | 2018.044933        | 1009.526105      | A    | 365.218332         | 183.112804      | 348.191783     | 174.599529       |                |                  | 3  |
| 19 | 2183.123912        | 1092.065594       | 2166.097363    | 1083.552319      | 2165.113347        | 1083.060311      | F    | <b>294.181218</b>  | 147.594247      | 277.154669     | 139.080972       |                |                  | 2  |
| 20 |                    |                   |                |                  |                    |                  | K    | 147.112804         | 74.060040       | 130.086255     | 65.546765        |                |                  | 1  |

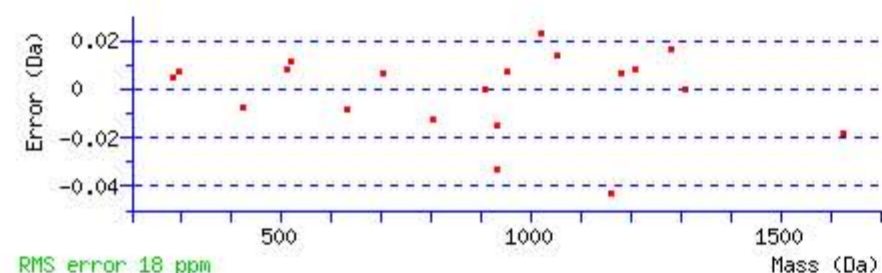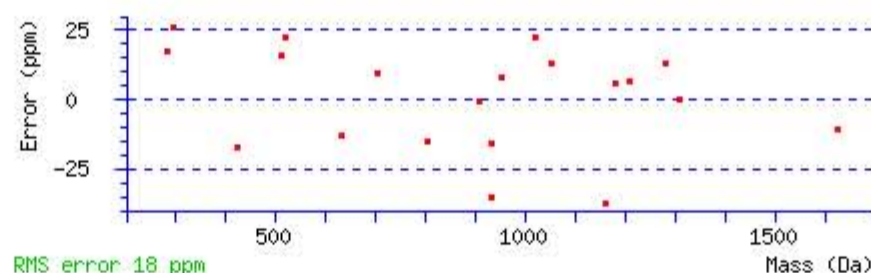

NCBI BLAST search of **IIGLDQVAGMSETALPGAFK**

(Parameters: blastp, nr protein database, expect=20000, no filter, PAM30)

Other BLAST [web gateways](#)

All matches to this query

| Score | Mr(calc):   | Delta    | Sequence                             |
|-------|-------------|----------|--------------------------------------|
| 51.2  | 2328.222153 | 0.007299 | <a href="#">IIGLDQVAGMSETALPGAFK</a> |



# MASCOT Search Results

## Peptide View

MS/MS Fragmentation of **SPEQLR**

Found in **GNPTG\_HUMAN**, N-acetylglucosamine-1-phosphotransferase subunit gamma OS=Homo sapiens GN=GNPTG PE=1 SV=1

Match to Query 17290: 1039.544788 from(520.779670,2+) rtinseconds(1465) index(33054)

Title: Locus:1.1.1.2929.20 File:"2013-07-02 CLN FXIII 60 min 2nd F 3.wiff"

Data file C:\Program Files (x86)\Matrix Science\Mascot Daemon\mgf5 FXIII 60 min 2nd\mascot\_daemon\_merge.mgf

Click mouse within plot area to zoom in by factor of two about that point

Or, Plot from  to  Da

Label all possible matches  Label matches used for scoring

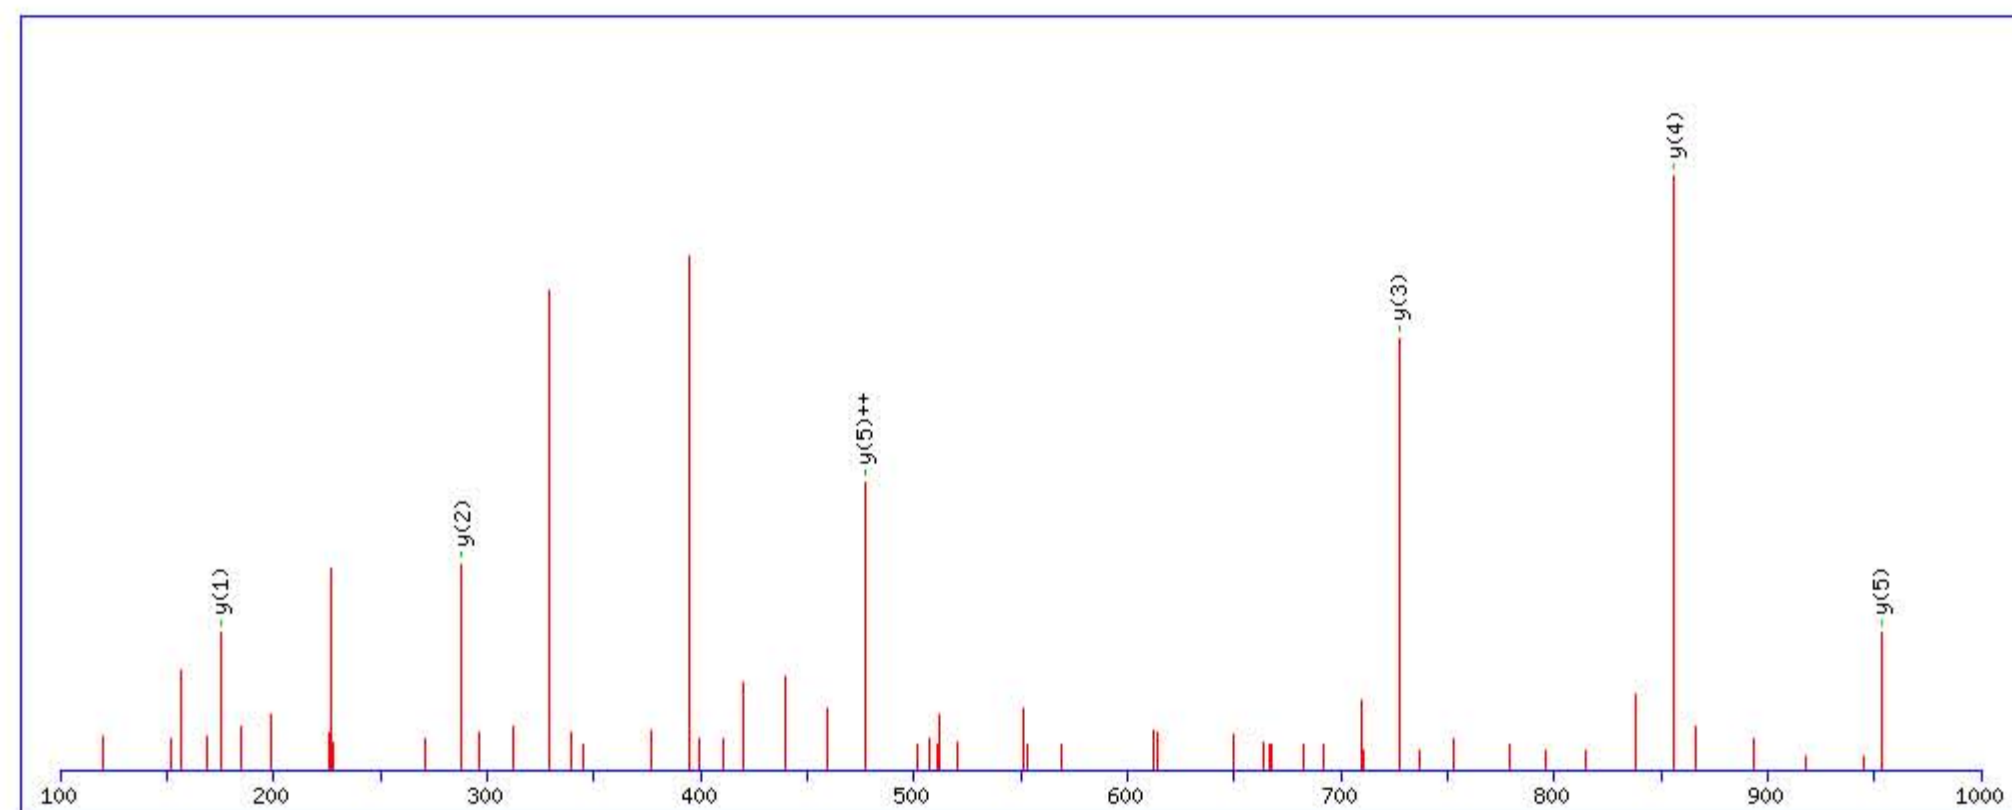

Monoisotopic mass of neutral peptide Mr(calc): 1039.548431

Fixed modifications: Carbamidomethyl (C) (apply to specified residues or termini only)

Variable modifications:

Q4 : Biotin:Thermo-21345 (Q)

Ions Score: 37 Expect: 0.0035

Matches : 6/48 fragment ions using 9 most intense peaks [\(help\)](#)

| # | b          | b <sup>++</sup> | b <sup>*</sup> | b <sup>+++</sup> | b <sup>0</sup> | b <sup>0++</sup> | Seq. | y                 | y <sup>++</sup>   | y <sup>*</sup> | y <sup>+++</sup> | y <sup>0</sup> | y <sup>0++</sup> | # |
|---|------------|-----------------|----------------|------------------|----------------|------------------|------|-------------------|-------------------|----------------|------------------|----------------|------------------|---|
| 1 | 88.039304  | 44.523290       |                |                  | 70.028739      | 35.518008        | S    |                   |                   |                |                  |                |                  | 6 |
| 2 | 185.092068 | 93.049672       |                |                  | 167.081503     | 84.044389        | P    | <b>953.523699</b> | <b>477.265488</b> | 936.497150     | 468.752213       | 935.513134     | 468.260205       | 5 |
| 3 | 314.134661 | 157.570968      |                |                  | 296.124096     | 148.565686       | E    | <b>856.470935</b> | 428.739106        | 839.444386     | 420.225831       | 838.460370     | 419.733823       | 4 |
| 4 | 753.359987 | 377.183632      | 736.333438     | 368.670357       | 735.349422     | 368.178349       | Q    | <b>727.428342</b> | 364.217809        | 710.401793     | 355.704535       |                |                  | 3 |
| 5 | 866.444051 | 433.725664      | 849.417502     | 425.212389       | 848.433486     | 424.720381       | L    | <b>288.203016</b> | 144.605146        | 271.176467     | 136.091872       |                |                  | 2 |
| 6 |            |                 |                |                  |                |                  | R    | <b>175.118952</b> | 88.063114         | 158.092403     | 79.549840        |                |                  | 1 |

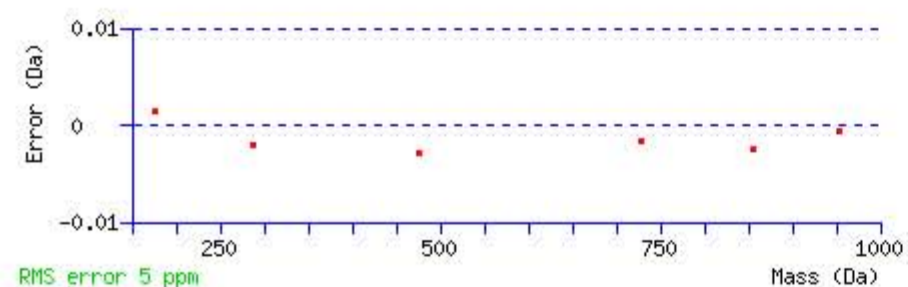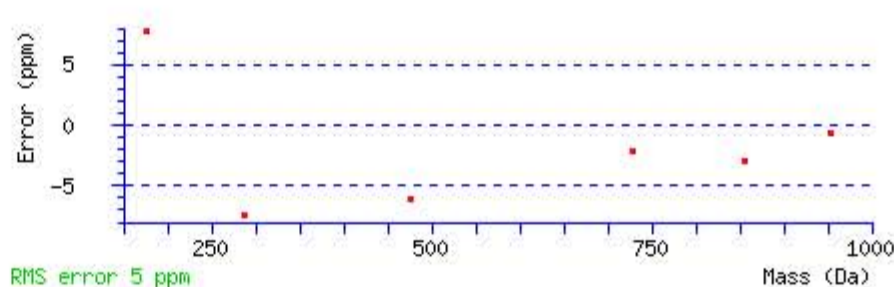

NCBI BLAST search of **SPEQLR**

(Parameters: blastp, nr protein database, expect=20000, no filter, PAM30)

Other BLAST [web gateways](#)

All matches to this query

| Score | Mr(calc):   | Delta     | Sequence                   |
|-------|-------------|-----------|----------------------------|
| 36.8  | 1039.548431 | -0.003643 | <a href="#">SPEQLR</a>     |
| 23.0  | 1039.548431 | -0.003643 | <a href="#">SPEIQR</a>     |
| 22.6  | 1039.541031 | 0.003757  | <a href="#">ALESNHILR</a>  |
| 9.5   | 1039.533813 | 0.010975  | <a href="#">EALFYELR</a>   |
| 3.8   | 1039.541046 | 0.003742  | <a href="#">ALQSGPPQSR</a> |
| 3.5   | 1039.556290 | -0.011502 | <a href="#">FPERAPAPR</a>  |
| 1.9   | 1039.529831 | 0.014957  | <a href="#">TTFVSKDSR</a>  |
| 0.8   | 1039.548447 | -0.003659 | <a href="#">MATATPVPPR</a> |
| 0.2   | 1039.541046 | 0.003742  | <a href="#">NLPADGQGLR</a> |
| 0.0   | 1039.552261 | -0.007473 | <a href="#">LRSDEKHR</a>   |

Mascot: <http://www.matrixscience.com/>



# MATRIX SCIENCE Mascot Search Results

## Peptide View

MS/MS Fragmentation of **KGEQCVHTASGPR**

Found in **NOTC2\_HUMAN**, Neurogenic locus notch homolog protein 2 OS=Homo sapiens GN=NOTCH2 PE=1 SV=3

Match to Query 41213: 1736.838496 from(435.216900,4+) rtinseconds(1070) index(30850)

Title: Locus:1.1.1.2792.2 File:"2013-07-02 CLN FXIII 60 min 2nd F 3.wiff"

Data file C:\Program Files (x86)\Matrix Science\Mascot Daemon\mgf5 FXIII 60 min 2nd\mascot\_daemon\_merge.mgf

Click mouse within plot area to zoom in by factor of two about that point

Or, Plot from  to  Da

Label all possible matches  Label matches used for scoring

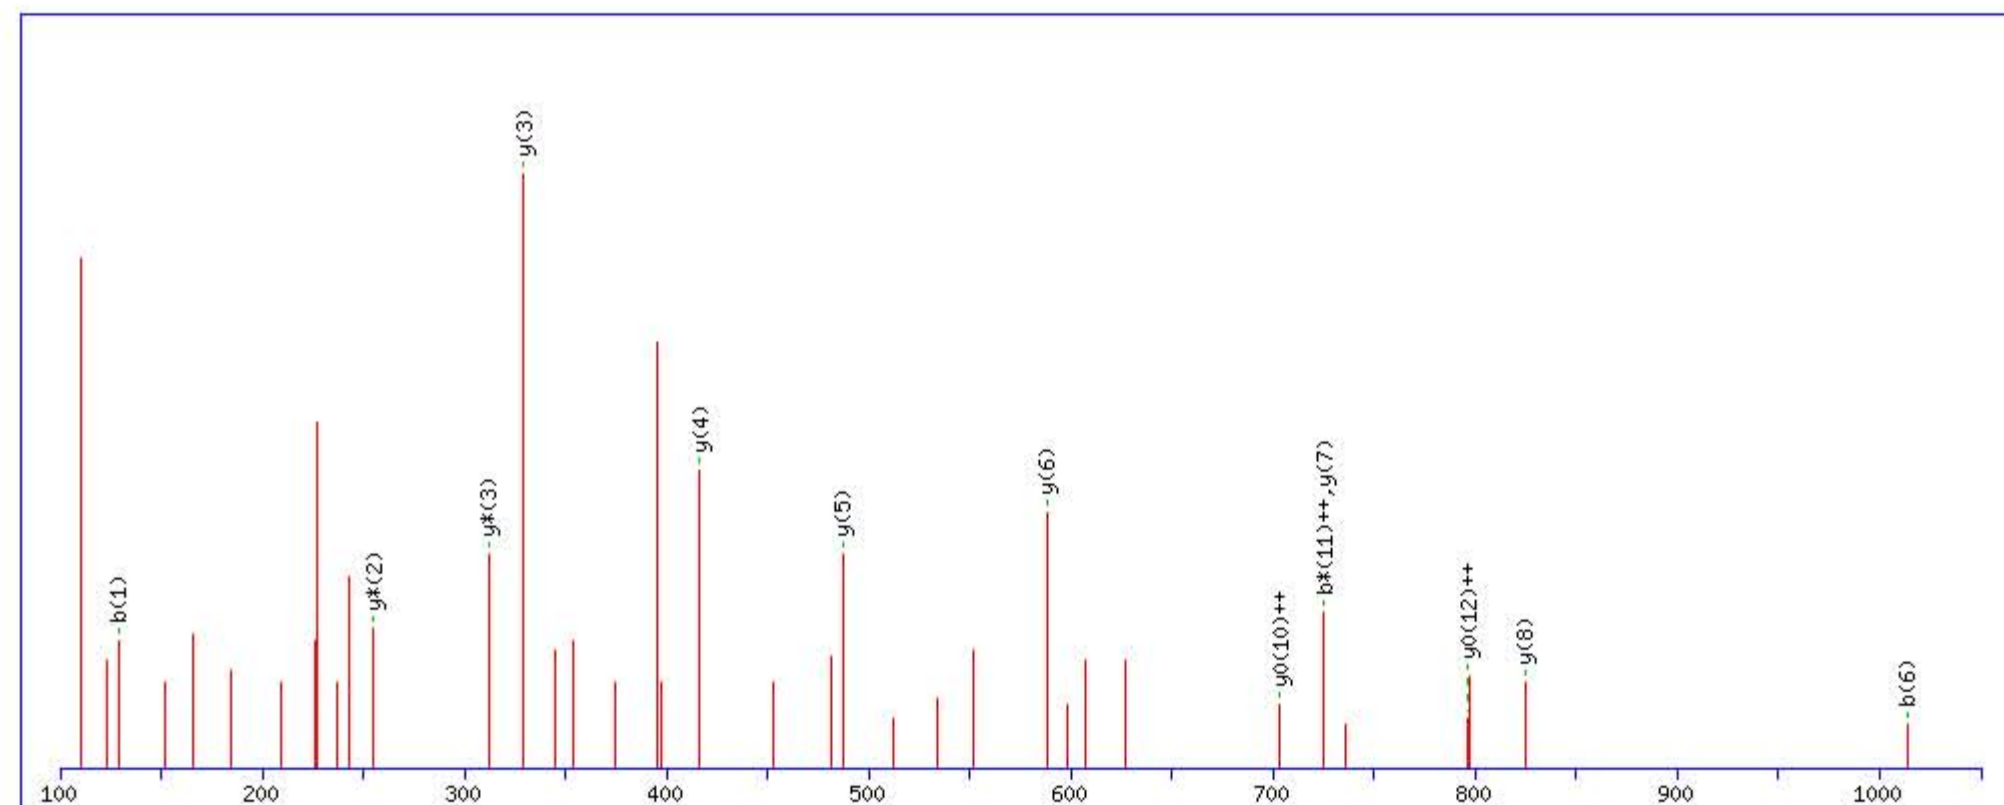

Monoisotopic mass of neutral peptide Mr(calc): 1736.845047

Fixed modifications: Carbamidomethyl (C) (apply to specified residues or termini only)

Variable modifications:

Q4 : Biotin:Thermo-21345 (Q)

Ions Score: 30 Expect: 0.018

Matches : 13/134 fragment ions using 22 most intense peaks [\(help\)](#)

| #  | b                  | b <sup>++</sup> | b <sup>*</sup> | b <sup>*++</sup>  | b <sup>0</sup> | b <sup>0++</sup> | Seq.     | y                 | y <sup>++</sup> | y <sup>*</sup>    | y <sup>*++</sup> | y <sup>0</sup> | y <sup>0++</sup>  | #         |
|----|--------------------|-----------------|----------------|-------------------|----------------|------------------|----------|-------------------|-----------------|-------------------|------------------|----------------|-------------------|-----------|
| 1  | <b>129.102239</b>  | 65.054757       | 112.075690     | 56.541483         |                |                  | <b>K</b> |                   |                 |                   |                  |                |                   | <b>13</b> |
| 2  | 186.123703         | 93.565489       | 169.097154     | 85.052215         |                |                  | <b>G</b> | 1609.757359       | 805.382318      | 1592.730810       | 796.869043       | 1591.746794    | <b>796.377035</b> | <b>12</b> |
| 3  | 315.166296         | 158.086786      | 298.139747     | 149.573512        | 297.155731     | 149.081504       | <b>E</b> | 1552.735895       | 776.871586      | 1535.709346       | 768.358311       | 1534.725330    | 767.866303        | <b>11</b> |
| 4  | 754.391622         | 377.699449      | 737.365073     | 369.186175        | 736.381057     | 368.694167       | <b>Q</b> | 1423.693302       | 712.350289      | 1406.666753       | 703.837015       | 1405.682737    | <b>703.345007</b> | <b>10</b> |
| 5  | 914.422271         | 457.714774      | 897.395722     | 449.201499        | 896.411706     | 448.709491       | <b>C</b> | 984.467976        | 492.737626      | 967.441427        | 484.224352       | 966.457411     | 483.732344        | <b>9</b>  |
| 6  | <b>1013.490685</b> | 507.248981      | 996.464136     | 498.735706        | 995.480120     | 498.243698       | <b>V</b> | <b>824.437327</b> | 412.722302      | 807.410778        | 404.209027       | 806.426762     | 403.717019        | <b>8</b>  |
| 7  | 1150.549597        | 575.778437      | 1133.523048    | 567.265162        | 1132.539032    | 566.773154       | <b>H</b> | <b>725.368913</b> | 363.188095      | 708.342364        | 354.674820       | 707.358348     | 354.182812        | <b>7</b>  |
| 8  | 1251.597276        | 626.302276      | 1234.570727    | 617.789002        | 1233.586711    | 617.296994       | <b>T</b> | <b>588.310001</b> | 294.658639      | 571.283452        | 286.145364       | 570.299436     | 285.653356        | <b>6</b>  |
| 9  | 1322.634390        | 661.820833      | 1305.607841    | 653.307559        | 1304.623825    | 652.815551       | <b>A</b> | <b>487.262322</b> | 244.134799      | 470.235773        | 235.621524       | 469.251757     | 235.129516        | <b>5</b>  |
| 10 | 1409.666418        | 705.336847      | 1392.639869    | 696.823573        | 1391.655853    | 696.331565       | <b>S</b> | <b>416.225208</b> | 208.616242      | 399.198659        | 200.102967       | 398.214643     | 199.610959        | <b>4</b>  |
| 11 | 1466.687882        | 733.847579      | 1449.661333    | <b>725.334305</b> | 1448.677317    | 724.842297       | <b>G</b> | <b>329.193180</b> | 165.100228      | <b>312.166631</b> | 156.586953       |                |                   | <b>3</b>  |
| 12 | 1563.740646        | 782.373961      | 1546.714097    | 773.860687        | 1545.730081    | 773.368679       | <b>P</b> | 272.171716        | 136.589496      | <b>255.145167</b> | 128.076221       |                |                   | <b>2</b>  |
| 13 |                    |                 |                |                   |                |                  | <b>R</b> | 175.118952        | 88.063114       | 158.092403        | 79.549839        |                |                   | <b>1</b>  |

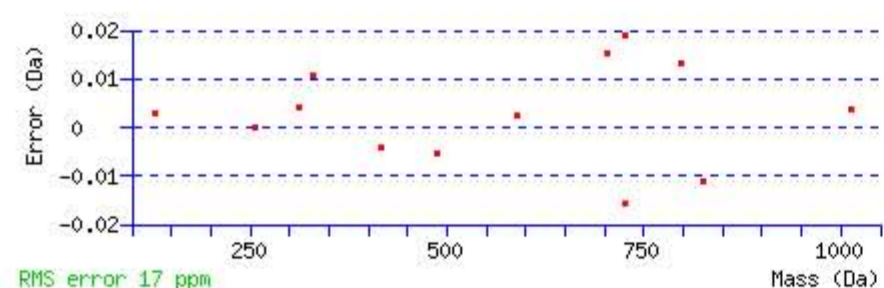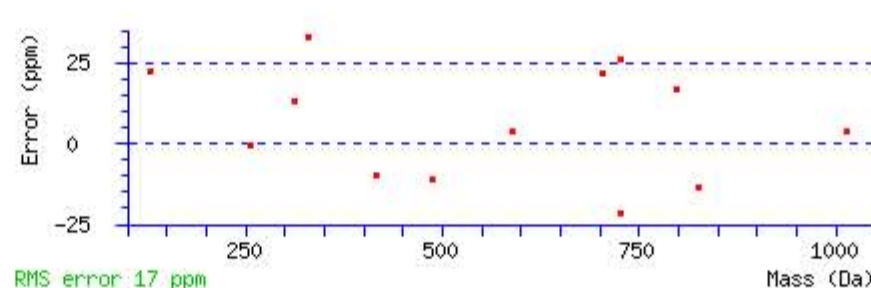

NCBI BLAST search of **KGEQCVHTASGPR**

(Parameters: blastp, nr protein database, expect=20000, no filter, PAM30)

Other BLAST [web gateways](#)

## All matches to this query

| Score | Mr(calc):   | Delta     | Sequence                      |
|-------|-------------|-----------|-------------------------------|
| 30.2  | 1736.845047 | -0.006551 | <a href="#">KGEQCVHTASGPR</a> |

Mascot: <http://www.matrixscience.com/>



# MASCOT Search Results

## Peptide View

MS/MS Fragmentation of **RPYQEGTPCSQCPSGYHCK**

Found in **PII6\_HUMAN**, Peptidase inhibitor 16 OS=Homo sapiens GN=PI16 PE=1 SV=1

Match to Query 57801: 2622.117336 from(656.536610,4+) rtinseconds(1287) index(31822)

Title: Locus:1.1.1.2867.15 File:"2013-07-02 CLN FXIII 60 min 2nd F 3.wiff"

Data file C:\Program Files (x86)\Matrix Science\Mascot Daemon\mgf\5 FXIII 60 min 2nd\mascot\_daemon\_merge.mgf

Click mouse within plot area to zoom in by factor of two about that point

Or, Plot from  to  Da

Label all possible matches  Label matches used for scoring

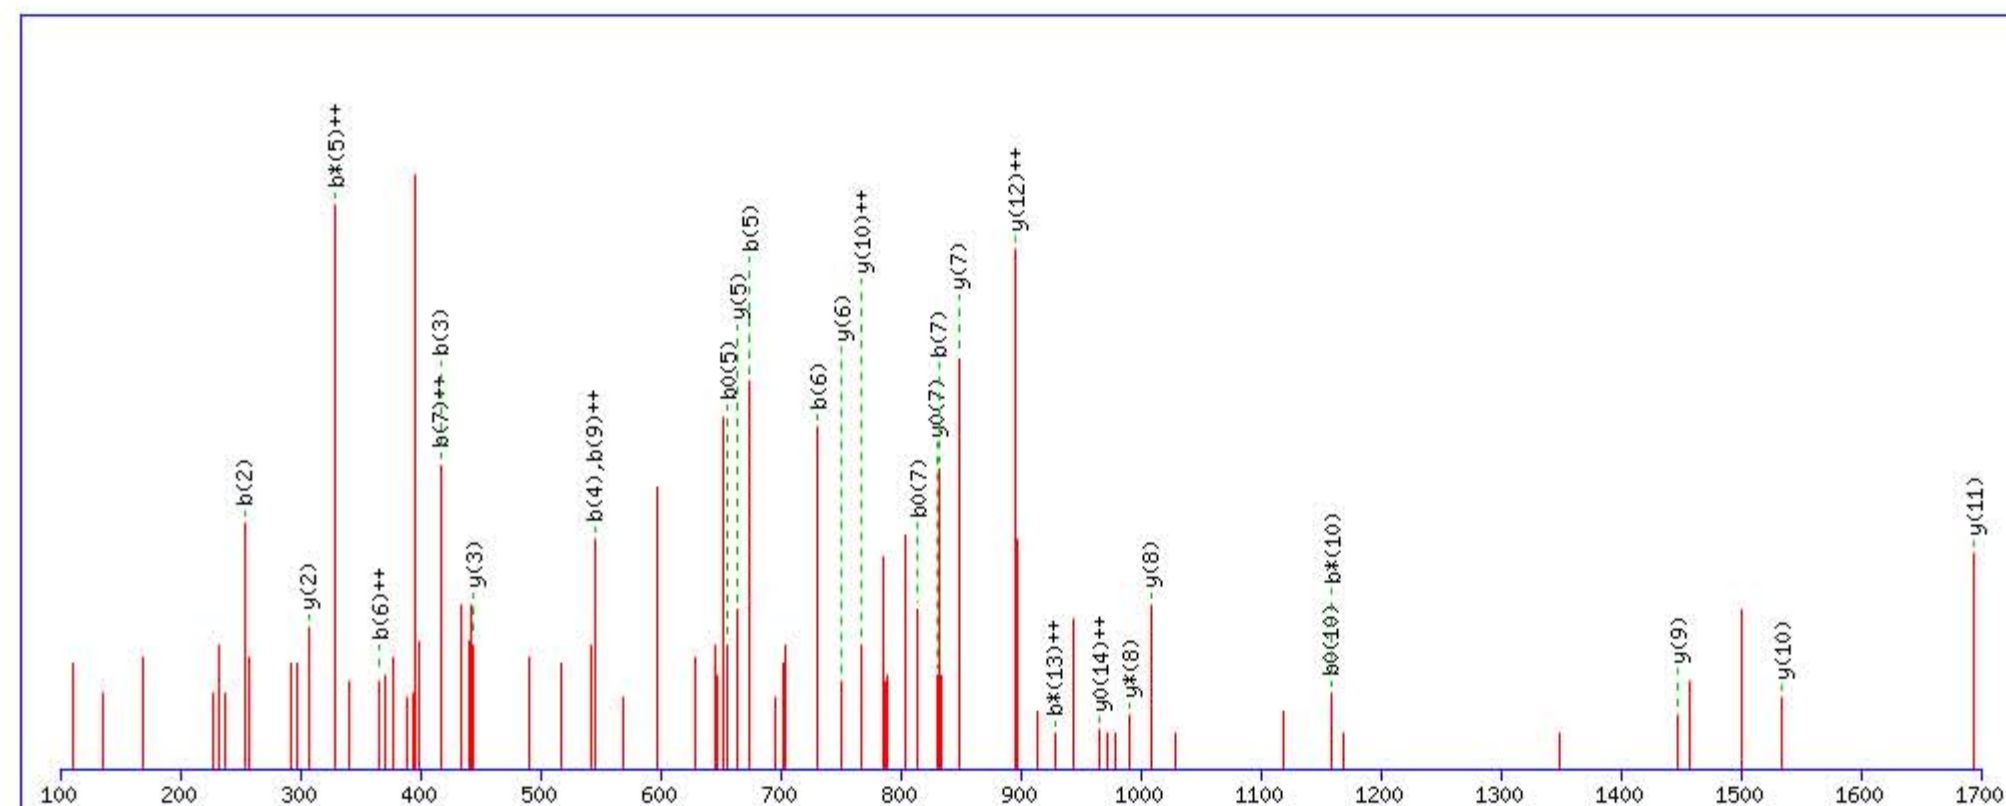

Monoisotopic mass of neutral peptide Mr(calc): 2622.123611

Fixed modifications: Carbamidomethyl (C) (apply to specified residues or termini only)

Variable modifications:

Q11 : Biotin:Thermo-21345 (Q)

Ions Score: 36 Expect: 0.00074

Matches : 29/198 fragment ions using 69 most intense peaks [\(help\)](#)

| #  | b                 | b <sup>++</sup>   | b <sup>+</sup>     | b <sup>+++</sup>  | b <sup>0</sup>     | b <sup>0++</sup> | Seq. | y                  | y <sup>++</sup>   | y <sup>+</sup>    | y <sup>+++</sup> | y <sup>0</sup>    | y <sup>0++</sup>  | #  |
|----|-------------------|-------------------|--------------------|-------------------|--------------------|------------------|------|--------------------|-------------------|-------------------|------------------|-------------------|-------------------|----|
| 1  | 157.108387        | 79.057831         | 140.081838         | 70.544557         |                    |                  | R    |                    |                   |                   |                  |                   |                   | 19 |
| 2  | <b>254.161151</b> | 127.584213        | 237.134602         | 119.070939        |                    |                  | P    | 2467.029773        | 1234.018524       | 2450.003224       | 1225.505250      | 2449.019208       | 1225.013242       | 18 |
| 3  | <b>417.224480</b> | 209.115878        | 400.197931         | 200.602604        |                    |                  | Y    | 2369.977009        | 1185.492142       | 2352.950460       | 1176.978868      | 2351.966444       | 1176.486860       | 17 |
| 4  | <b>545.283058</b> | 273.145167        | 528.256509         | 264.631893        |                    |                  | Q    | 2206.913680        | 1103.960478       | 2189.887131       | 1095.447203      | 2188.903115       | 1094.955195       | 16 |
| 5  | <b>674.325651</b> | 337.666464        | 657.299102         | <b>329.153189</b> | <b>656.315086</b>  | 328.661181       | E    | 2078.855102        | 1039.931189       | 2061.828553       | 1031.417914      | 2060.844537       | 1030.925906       | 15 |
| 6  | <b>731.347115</b> | <b>366.177196</b> | 714.320566         | 357.663921        | 713.336550         | 357.171913       | G    | 1949.812509        | 975.409892        | 1932.785960       | 966.896618       | 1931.801944       | <b>966.404610</b> | 14 |
| 7  | <b>832.394794</b> | <b>416.701035</b> | 815.368245         | 408.187761        | <b>814.384229</b>  | 407.695753       | T    | 1892.791045        | 946.899160        | 1875.764496       | 938.385886       | 1874.780480       | 937.893878        | 13 |
| 8  | 929.447558        | 465.227417        | 912.421009         | 456.714143        | 911.436993         | 456.222135       | P    | 1791.743366        | <b>896.375321</b> | 1774.716817       | 887.862047       | 1773.732801       | 887.370038        | 12 |
| 9  | 1089.478207       | <b>545.242742</b> | 1072.451658        | 536.729467        | 1071.467642        | 536.237459       | C    | <b>1694.690602</b> | 847.848939        | 1677.664053       | 839.335665       | 1676.680037       | 838.843656        | 11 |
| 10 | 1176.510235       | 588.758756        | <b>1159.483686</b> | 580.245481        | <b>1158.499670</b> | 579.753473       | S    | <b>1534.659953</b> | <b>767.833614</b> | 1517.633404       | 759.320340       | 1516.649388       | 758.828332        | 10 |
| 11 | 1615.735561       | 808.371419        | 1598.709012        | 799.858144        | 1597.724996        | 799.366136       | Q    | <b>1447.627925</b> | 724.317600        | 1430.601376       | 715.804326       | 1429.617360       | 715.312318        | 9  |
| 12 | 1775.766210       | 888.386743        | 1758.739661        | 879.873469        | 1757.755645        | 879.381461       | C    | <b>1008.402599</b> | 504.704937        | <b>991.376050</b> | 496.191663       | 990.392034        | 495.699655        | 8  |
| 13 | 1872.818974       | 936.913125        | 1855.792425        | <b>928.399851</b> | 1854.808409        | 927.907843       | P    | <b>848.371950</b>  | 424.689613        | 831.345401        | 416.176338       | <b>830.361385</b> | 415.684330        | 7  |
| 14 | 1959.851002       | 980.429139        | 1942.824453        | 971.915865        | 1941.840437        | 971.423857       | S    | <b>751.319186</b>  | 376.163231        | 734.292637        | 367.649956       | 733.308621        | 367.157948        | 6  |
| 15 | 2016.872466       | 1008.939871       | 1999.845917        | 1000.426597       | 1998.861901        | 999.934589       | G    | <b>664.287158</b>  | 332.647217        | 647.260609        | 324.133942       |                   |                   | 5  |
| 16 | 2179.935795       | 1090.471535       | 2162.909246        | 1081.958261       | 2161.925230        | 1081.466253      | Y    | 607.265694         | 304.136485        | 590.239145        | 295.623210       |                   |                   | 4  |
| 17 | 2316.994707       | 1159.000991       | 2299.968158        | 1150.487717       | 2298.984142        | 1149.995709      | H    | <b>444.202365</b>  | 222.604820        | 427.175816        | 214.091546       |                   |                   | 3  |
| 18 | 2477.025356       | 1239.016316       | 2459.998807        | 1230.503041       | 2459.014791        | 1230.011033      | C    | <b>307.143453</b>  | 154.075364        | 290.116904        | 145.562090       |                   |                   | 2  |
| 19 |                   |                   |                    |                   |                    |                  | K    | 147.112804         | 74.060040         | 130.086255        | 65.546765        |                   |                   | 1  |

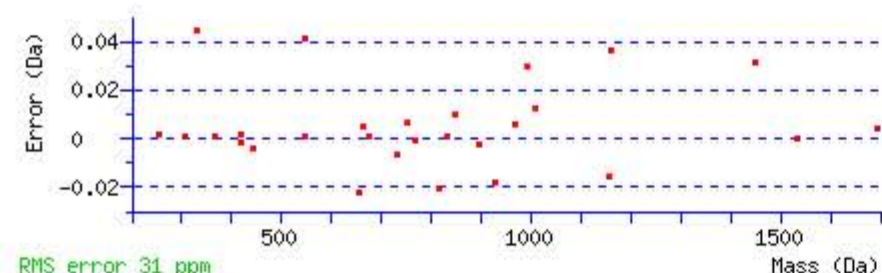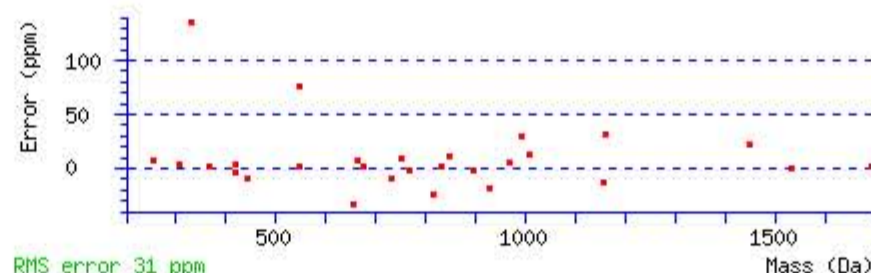

NCBI BLAST search of **RPYQEGTPCSQCPSGYHCK**

(Parameters: blastp, nr protein database, expect=20000, no filter, PAM30)

Other BLAST [web gateways](#)

All matches to this query

| Score | Mr(calc):   | Delta     | Sequence                            |
|-------|-------------|-----------|-------------------------------------|
| 36.3  | 2622.123611 | -0.006275 | <a href="#">RPYQEGTPCSQCPSGYHCK</a> |

Mascot: <http://www.matrixscience.com/>



# MASCOT Search Results

## Peptide View

MS/MS Fragmentation of **TMFIGGSQLSQK**

Found in **PHLD\_HUMAN**, Phosphatidylinositol-glycan-specific phospholipase D OS=Homo sapiens GN=GPLD1 PE=1 SV=3

Match to Query 37370: 1606.840608 from(804.427580,2+) rtinseconds(2155) index(53932)

Title: Locus:1.1.1.1365.17 File:"2013-07-02 CLN FXIII 60 min 2nd F 4.wiff"

Data file C:\Program Files (x86)\Matrix Science\Mascot Daemon\mgf\5 FXIII 60 min 2nd\mascot\_daemon\_merge.mgf

Click mouse within plot area to zoom in by factor of two about that point

Or, Plot from  to  Da

Label all possible matches  Label matches used for scoring

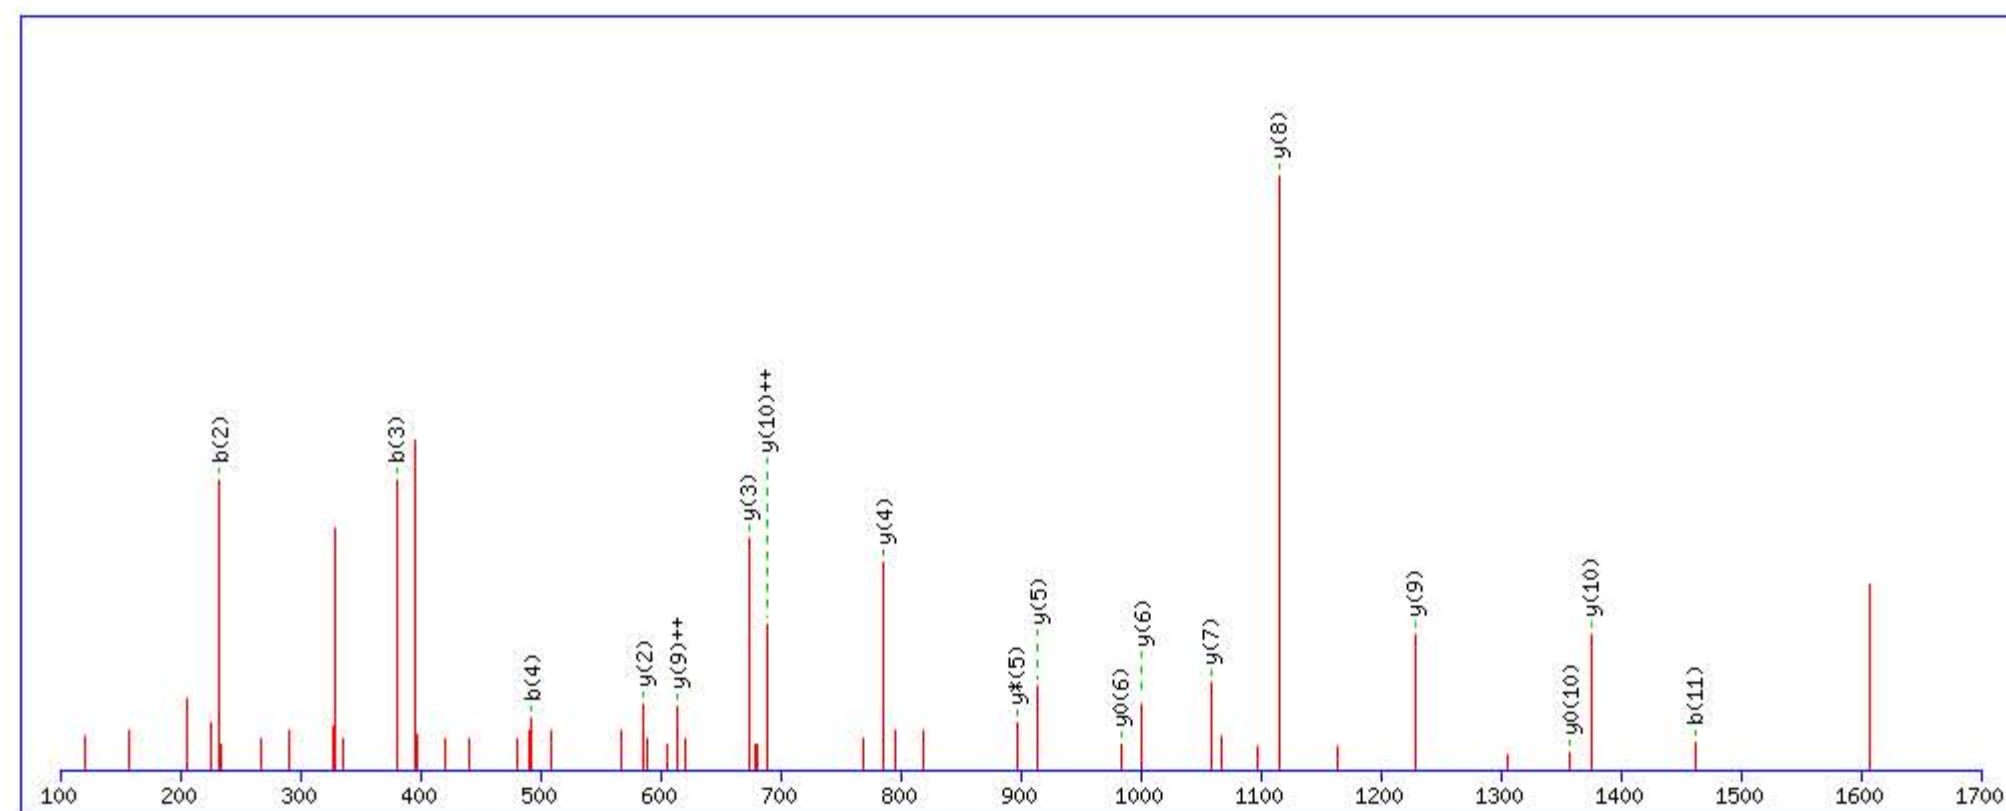

Monoisotopic mass of neutral peptide Mr(calc): 1606.821121

Fixed modifications: Carbamidomethyl (C) (apply to specified residues or termini only)

Variable modifications:

Q11 : Biotin:Thermo-21345 (Q)

Ions Score: 72 Expect: 2.6e-007

Matches : 18/114 fragment ions using 26 most intense peaks [\(help\)](#)

| #  | b                  | b <sup>++</sup> | b <sup>+</sup> | b <sup>+++</sup> | b <sup>0</sup> | b <sup>0++</sup> | Seq. | y                  | y <sup>++</sup>   | y <sup>+</sup>    | y <sup>+++</sup> | y <sup>0</sup>     | y <sup>0++</sup> | #  |
|----|--------------------|-----------------|----------------|------------------|----------------|------------------|------|--------------------|-------------------|-------------------|------------------|--------------------|------------------|----|
| 1  | 102.054955         | 51.531116       |                |                  | 84.044390      | 42.525833        | T    |                    |                   |                   |                  |                    |                  | 12 |
| 2  | <b>233.095440</b>  | 117.051358      |                |                  | 215.084875     | 108.046076       | M    | 1506.780719        | 753.893998        | 1489.754170       | 745.380723       | 1488.770154        | 744.888715       | 11 |
| 3  | <b>380.163854</b>  | 190.585565      |                |                  | 362.153289     | 181.580282       | F    | <b>1375.740234</b> | <b>688.373755</b> | 1358.713685       | 679.860481       | <b>1357.729669</b> | 679.368473       | 10 |
| 4  | <b>493.247918</b>  | 247.127597      |                |                  | 475.237353     | 238.122314       | I    | <b>1228.671820</b> | <b>614.839548</b> | 1211.645271       | 606.326274       | 1210.661255        | 605.834266       | 9  |
| 5  | 550.269382         | 275.638329      |                |                  | 532.258817     | 266.633047       | G    | <b>1115.587756</b> | 558.297516        | 1098.561207       | 549.784242       | 1097.577191        | 549.292234       | 8  |
| 6  | 607.290846         | 304.149061      |                |                  | 589.280281     | 295.143779       | G    | <b>1058.566292</b> | 529.786784        | 1041.539743       | 521.273510       | 1040.555727        | 520.781502       | 7  |
| 7  | 694.322874         | 347.665075      |                |                  | 676.312309     | 338.659793       | S    | <b>1001.544828</b> | 501.276052        | 984.518279        | 492.762778       | <b>983.534263</b>  | 492.270770       | 6  |
| 8  | 822.381452         | 411.694364      | 805.354903     | 403.181090       | 804.370887     | 402.689082       | Q    | <b>914.512800</b>  | 457.760038        | <b>897.486251</b> | 449.246764       | 896.502235         | 448.754756       | 5  |
| 9  | 935.465516         | 468.236396      | 918.438967     | 459.723122       | 917.454951     | 459.231114       | L    | <b>786.454222</b>  | 393.730749        | 769.427673        | 385.217475       | 768.443657         | 384.725467       | 4  |
| 10 | 1022.497544        | 511.752410      | 1005.470995    | 503.239136       | 1004.486979    | 502.747128       | S    | <b>673.370158</b>  | 337.188717        | 656.343609        | 328.675443       | 655.359593         | 328.183435       | 3  |
| 11 | <b>1461.722870</b> | 731.365073      | 1444.696321    | 722.851799       | 1443.712305    | 722.359791       | Q    | <b>586.338130</b>  | 293.672703        | 569.311581        | 285.159429       |                    |                  | 2  |
| 12 |                    |                 |                |                  |                |                  | K    | 147.112804         | 74.060040         | 130.086255        | 65.546765        |                    |                  | 1  |

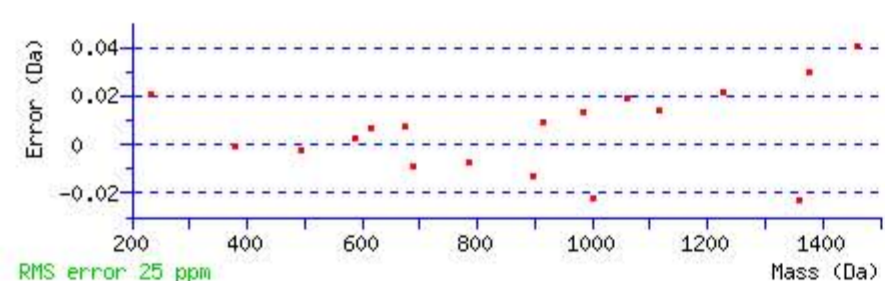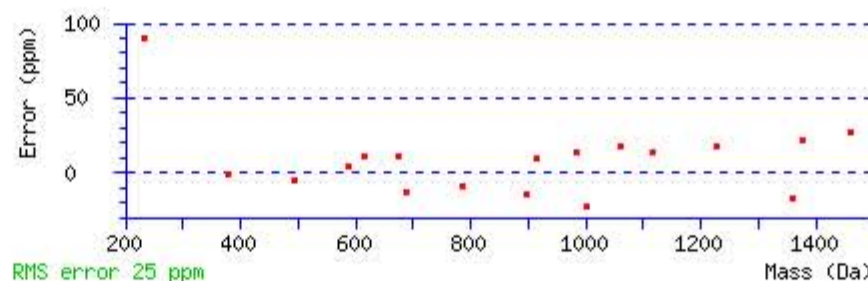

NCBI BLAST search of **TMFIGGSQLSQK**

(Parameters: blastp, nr protein database, expect=20000, no filter, PAM30)

Other BLAST [web gateways](#)

All matches to this query

| Score | Mr(calc):   | Delta     | Sequence                         |
|-------|-------------|-----------|----------------------------------|
| 71.8  | 1606.821121 | 0.019487  | <a href="#">TMFIGGSQLSQK</a>     |
| 35.5  | 1606.821121 | 0.019487  | <a href="#">TMFIGGSQLSQK</a>     |
| 1.5   | 1606.859970 | -0.019362 | <a href="#">TMLES LIADKSGSKK</a> |
| 1.2   | 1606.863998 | -0.023390 | <a href="#">SVLLMELEVNYGLK</a>   |

Mascot: <http://www.matrixscience.com/>



# MASCOT Search Results

## Peptide View

MS/MS Fragmentation of **QVLLVGAPTYDDVSK**

Found in **PHLD\_HUMAN**, Phosphatidylinositol-glycan-specific phospholipase D OS=Homo sapiens GN=GPLD1 PE=1 SV=3

Match to Query 44870: 1915.022688 from(958.518620,2+) rtinseconds(2300) index(38236)

Title: Locus:1.1.1.3220.8 File:"2013-07-02 CLN FXIII 60 min 2nd F 3.wiff"

Data file C:\Program Files (x86)\Matrix Science\Mascot Daemon\mgf5 FXIII 60 min 2nd\mascot\_daemon\_merge.mgf

Click mouse within plot area to zoom in by factor of two about that point

Or, Plot from  to  Da

Label all possible matches  Label matches used for scoring

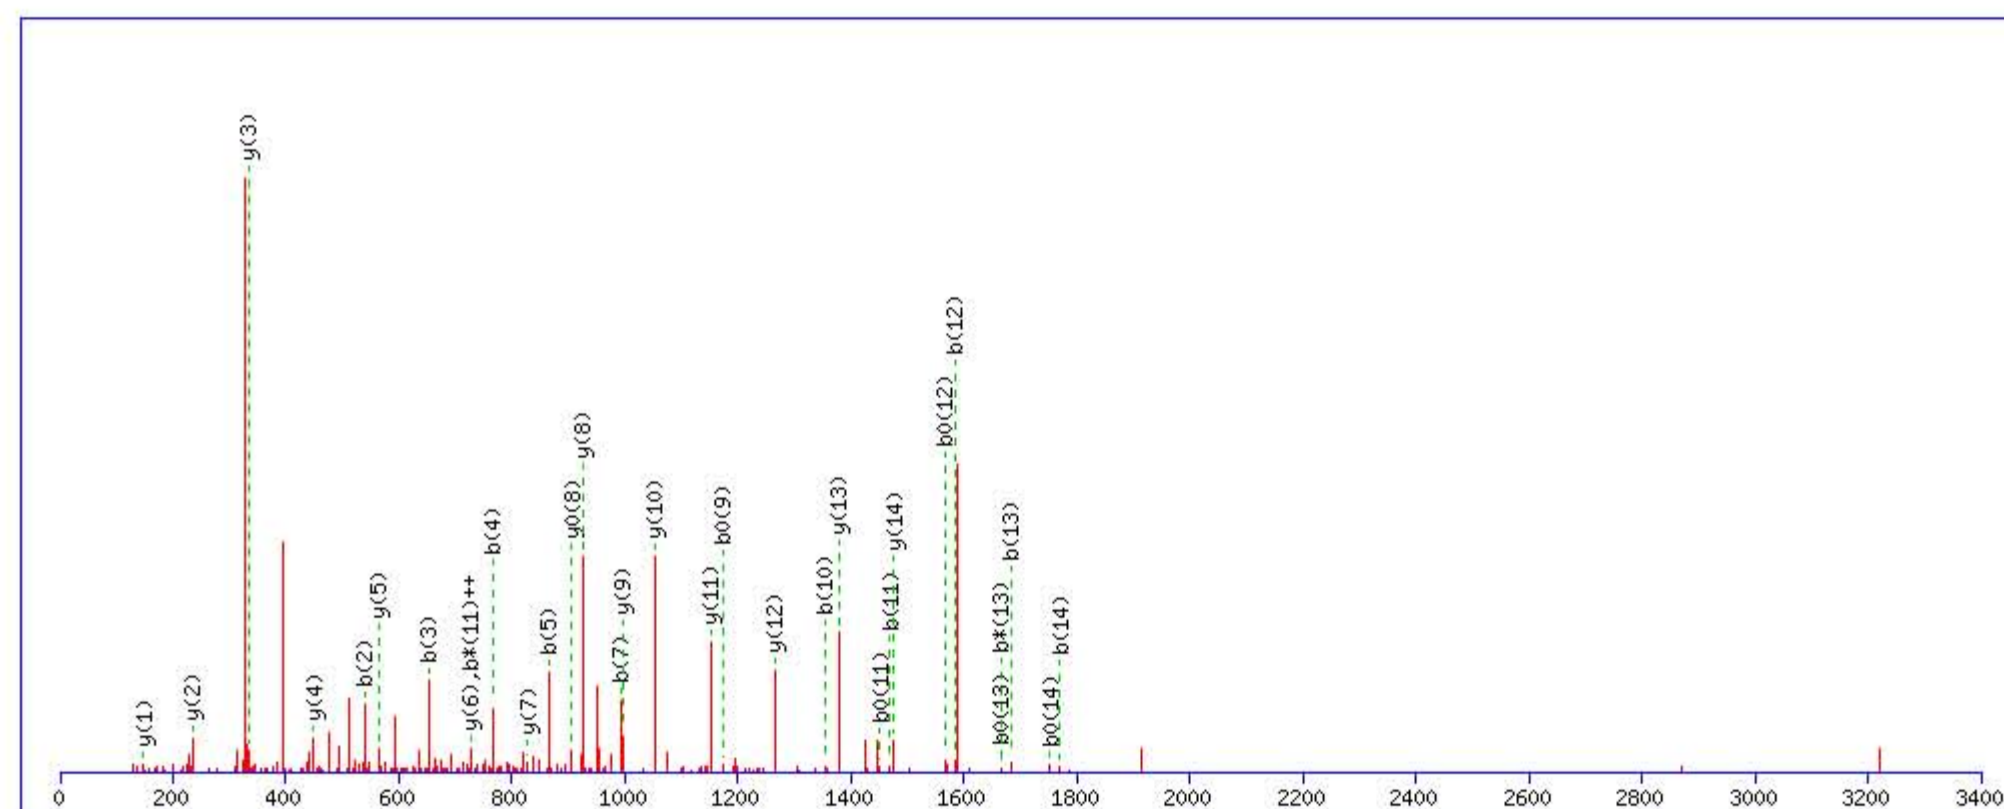

Monoisotopic mass of neutral peptide Mr(calc): 1915.012497

Fixed modifications: Carbamidomethyl (C) (apply to specified residues or termini only)

Variable modifications:

Q1 : Biotin:Thermo-21345 (Q)

Ions Score: 87 Expect: 5e-008

Matches : 32/150 fragment ions using 66 most intense peaks [\(help\)](#)

| #  | b                  | b <sup>++</sup> | b <sup>*</sup>     | b <sup>*++</sup>  | b <sup>0</sup>     | b <sup>0++</sup> | Seq. | y                  | y <sup>++</sup> | y <sup>*</sup> | y <sup>*++</sup> | y <sup>0</sup>    | y <sup>0++</sup> | #  |
|----|--------------------|-----------------|--------------------|-------------------|--------------------|------------------|------|--------------------|-----------------|----------------|------------------|-------------------|------------------|----|
| 1  | 440.232602         | 220.619939      | 423.206053         | 212.106664        |                    |                  | Q    |                    |                 |                |                  |                   |                  | 15 |
| 2  | <b>539.301016</b>  | 270.154146      | 522.274467         | 261.640872        |                    |                  | V    | <b>1476.794438</b> | 738.900857      | 1459.767889    | 730.387583       | 1458.783873       | 729.895575       | 14 |
| 3  | <b>652.385080</b>  | 326.696178      | 635.358531         | 318.182904        |                    |                  | L    | <b>1377.726024</b> | 689.366650      | 1360.699475    | 680.853376       | 1359.715459       | 680.361368       | 13 |
| 4  | <b>765.469144</b>  | 383.238210      | 748.442595         | 374.724936        |                    |                  | L    | <b>1264.641960</b> | 632.824618      | 1247.615411    | 624.311344       | 1246.631395       | 623.819336       | 12 |
| 5  | <b>864.537558</b>  | 432.772417      | 847.511009         | 424.259143        |                    |                  | V    | <b>1151.557896</b> | 576.282586      | 1134.531347    | 567.769312       | 1133.547331       | 567.277304       | 11 |
| 6  | 921.559022         | 461.283149      | 904.532473         | 452.769875        |                    |                  | G    | <b>1052.489482</b> | 526.748379      | 1035.462933    | 518.235105       | 1034.478917       | 517.743097       | 10 |
| 7  | <b>992.596136</b>  | 496.801706      | 975.569587         | 488.288432        |                    |                  | A    | <b>995.468018</b>  | 498.237647      | 978.441469     | 489.724373       | 977.457453        | 489.232365       | 9  |
| 8  | 1089.648900        | 545.328088      | 1072.622351        | 536.814814        |                    |                  | P    | <b>924.430904</b>  | 462.719090      | 907.404355     | 454.205816       | <b>906.420339</b> | 453.713808       | 8  |
| 9  | 1190.696579        | 595.851927      | 1173.670030        | 587.338653        | <b>1172.686014</b> | 586.846645       | T    | <b>827.378140</b>  | 414.192708      | 810.351591     | 405.679434       | 809.367575        | 405.187426       | 7  |
| 10 | <b>1353.759908</b> | 677.383592      | 1336.733359        | 668.870318        | 1335.749343        | 668.378310       | Y    | <b>726.330461</b>  | 363.668869      | 709.303912     | 355.155594       | 708.319896        | 354.663586       | 6  |
| 11 | <b>1468.786851</b> | 734.897064      | 1451.760302        | <b>726.383789</b> | <b>1450.776286</b> | 725.891781       | D    | <b>563.267132</b>  | 282.137204      | 546.240583     | 273.623930       | 545.256567        | 273.131922       | 5  |
| 12 | <b>1583.813794</b> | 792.410535      | 1566.787245        | 783.897261        | <b>1565.803229</b> | 783.405253       | D    | <b>448.240189</b>  | 224.623733      | 431.213640     | 216.110458       | 430.229624        | 215.618450       | 4  |
| 13 | <b>1682.882208</b> | 841.944742      | <b>1665.855659</b> | 833.431468        | <b>1664.871643</b> | 832.939460       | V    | <b>333.213246</b>  | 167.110261      | 316.186697     | 158.596987       | 315.202681        | 158.104979       | 3  |
| 14 | <b>1769.914236</b> | 885.460756      | 1752.887687        | 876.947482        | <b>1751.903671</b> | 876.455474       | S    | <b>234.144832</b>  | 117.576054      | 217.118283     | 109.062780       | 216.134267        | 108.570772       | 2  |
| 15 |                    |                 |                    |                   |                    |                  | K    | <b>147.112804</b>  | 74.060040       | 130.086255     | 65.546765        |                   |                  | 1  |

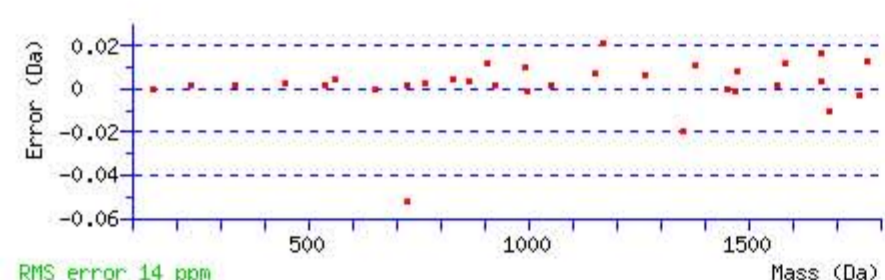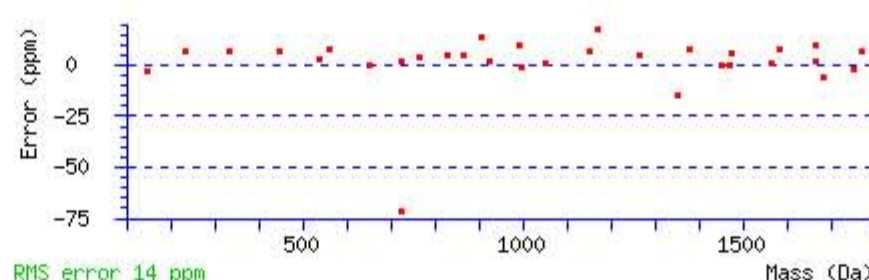

NCBI BLAST search of **QVLLVGAPTYDDVSK**

(Parameters: blastp, nr protein database, expect=20000, no filter, PAM30)

Other BLAST [web gateways](#)

All matches to this query

| Score | Mr(calc):   | Delta     | Sequence                        |
|-------|-------------|-----------|---------------------------------|
| 86.6  | 1915.012497 | 0.010191  | <a href="#">QVLLVGAPTYDDVSK</a> |
| 10.8  | 1915.027710 | -0.005022 | <a href="#">DYPIYLLKFKQLSK</a>  |
| 9.6   | 1915.008438 | 0.014250  | <a href="#">VIQKNQEETTSISK</a>  |
| 6.3   | 1915.008438 | 0.014250  | <a href="#">VIQKNQEETTSISK</a>  |

Mascot: <http://www.matrixscience.com/>



# MASCOT SCIENCE Mascot Search Results

## Peptide View

MS/MS Fragmentation of **VSSVEECQK**

Found in **KLKB1\_HUMAN**, Plasma kallikrein OS=Homo sapiens GN=KLKB1 PE=1 SV=1

Match to Query 29350: 1375.647068 from(688.830810,2+) rtinseconds(1373) index(32383)

Title: Locus:1.1.1.2897.15 File:"2013-07-02 CLN FXIII 60 min 2nd F 3.wiff"

Data file C:\Program Files (x86)\Matrix Science\Mascot Daemon\mgf\5 FXIII 60 min 2nd\mascot\_daemon\_merge.mgf

Click mouse within plot area to zoom in by factor of two about that point

Or, Plot from  to  Da

Label all possible matches  Label matches used for scoring

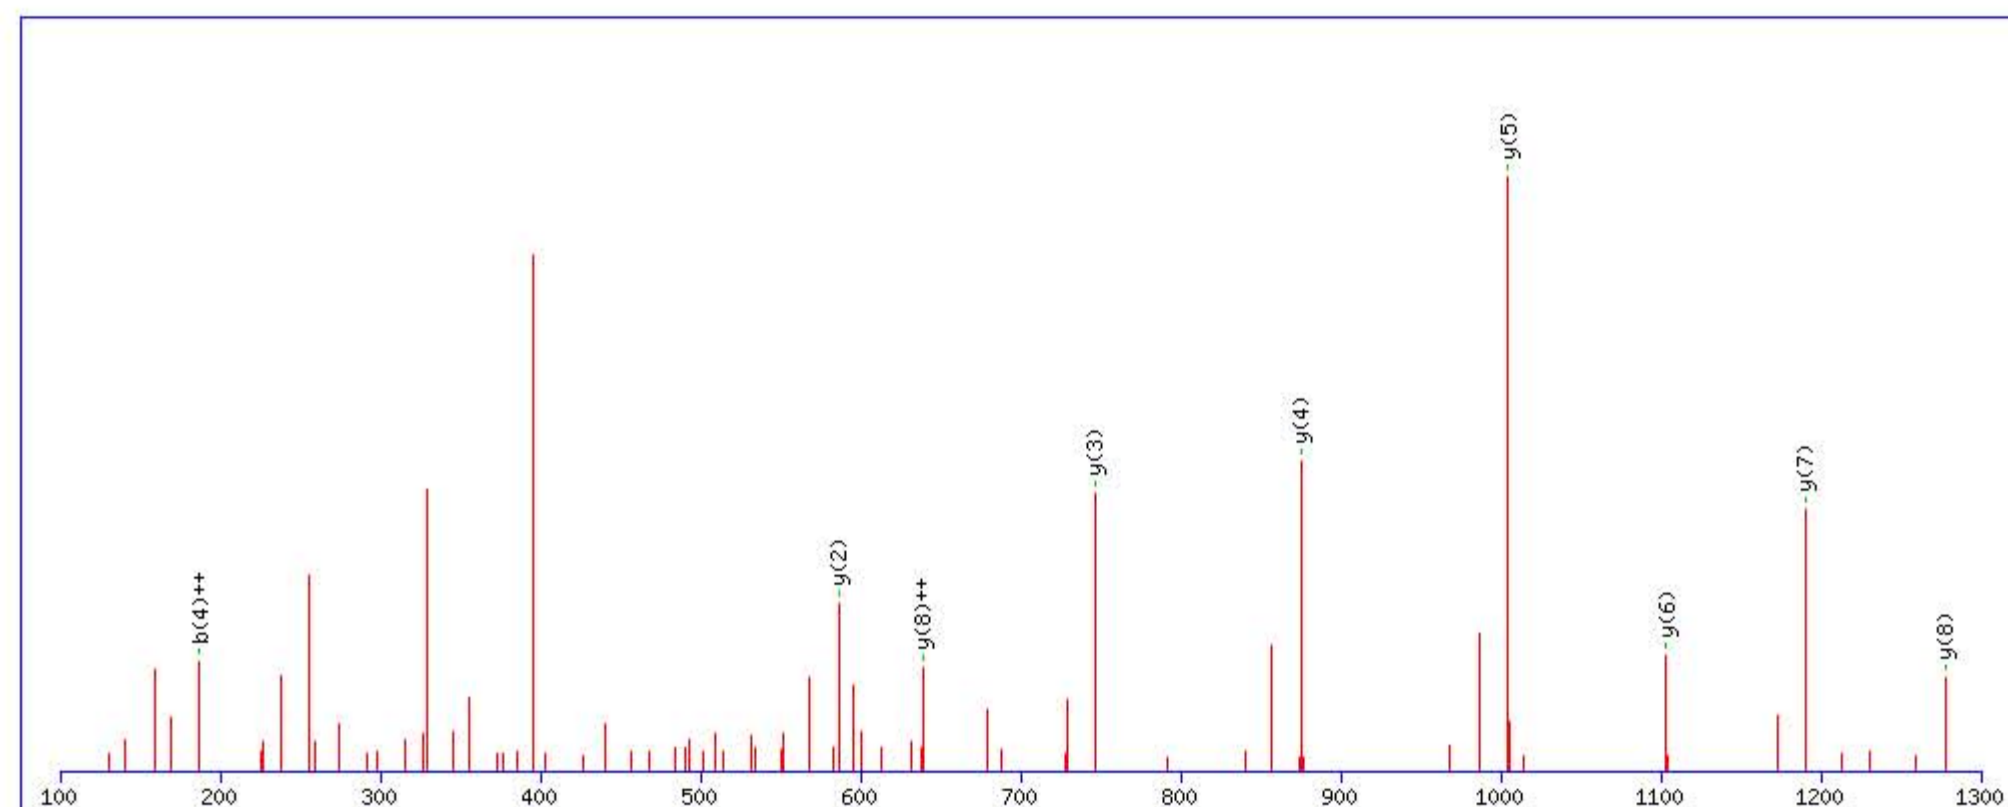

Monoisotopic mass of neutral peptide Mr(calc): 1375.647568

Fixed modifications: Carbamidomethyl (C) (apply to specified residues or termini only)

Variable modifications:

Q8 : Biotin:Thermo-21345 (Q)

Ions Score: 57 Expect: 1.9e-005

Matches : 10/74 fragment ions using 12 most intense peaks ([help](#))

| # | b                 | b <sup>++</sup>   | b <sup>*</sup> | b <sup>+++</sup> | b <sup>0</sup> | b <sup>0++</sup> | Seq. | y                  | y <sup>++</sup>   | y <sup>*</sup> | y <sup>+++</sup> | y <sup>0</sup> | y <sup>0++</sup> | # |
|---|-------------------|-------------------|----------------|------------------|----------------|------------------|------|--------------------|-------------------|----------------|------------------|----------------|------------------|---|
| 1 | 100.075690        | 50.541483         |                |                  |                |                  | V    |                    |                   |                |                  |                |                  | 9 |
| 2 | <b>187.107718</b> | 94.057497         |                |                  | 169.097153     | 85.052214        | S    | <b>1277.586435</b> | <b>639.296856</b> | 1260.559886    | 630.783581       | 1259.575870    | 630.291573       | 8 |
| 3 | 274.139746        | 137.573511        |                |                  | 256.129181     | 128.568229       | S    | <b>1190.554407</b> | 595.780842        | 1173.527858    | 587.267567       | 1172.543842    | 586.775559       | 7 |
| 4 | 373.208160        | <b>187.107718</b> |                |                  | 355.197595     | 178.102436       | V    | <b>1103.522379</b> | 552.264828        | 1086.495830    | 543.751553       | 1085.511814    | 543.259545       | 6 |
| 5 | 502.250753        | 251.629015        |                |                  | 484.240188     | 242.623732       | E    | <b>1004.453965</b> | 502.730621        | 987.427416     | 494.217346       | 986.443400     | 493.725338       | 5 |
| 6 | 631.293346        | 316.150311        |                |                  | 613.282781     | 307.145029       | E    | <b>875.411372</b>  | 438.209324        | 858.384823     | 429.696050       | 857.400807     | 429.204042       | 4 |
| 7 | 791.323995        | 396.165636        |                |                  | 773.313430     | 387.160353       | C    | <b>746.368779</b>  | 373.688028        | 729.342230     | 365.174753       |                |                  | 3 |
| 8 | 1230.549321       | 615.778299        | 1213.522772    | 607.265024       | 1212.538756    | 606.773016       | Q    | <b>586.338130</b>  | 293.672703        | 569.311581     | 285.159429       |                |                  | 2 |
| 9 |                   |                   |                |                  |                |                  | K    | 147.112804         | 74.060040         | 130.086255     | 65.546765        |                |                  | 1 |

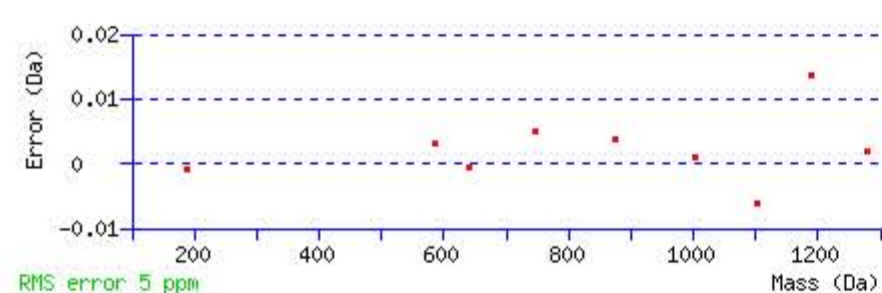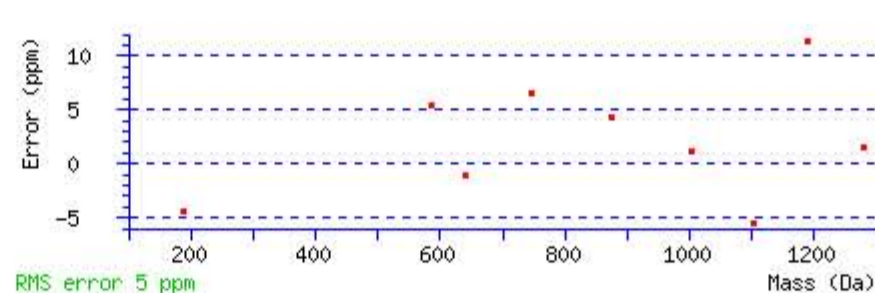

NCBI BLAST search of **VSSVEECQK**

(Parameters: blastp, nr protein database, expect=20000, no filter, PAM30)

Other BLAST [web gateways](#)

All matches to this query

| Score | Mr(calc):   | Delta     | Sequence                  |
|-------|-------------|-----------|---------------------------|
| 57.2  | 1375.647568 | -0.000500 | <a href="#">VSSVEECQK</a> |
| 6.8   | 1375.662827 | -0.015759 | <a href="#">GFSIPECQK</a> |

Mascot: <http://www.matrixscience.com/>



# MASCOT Search Results

## Peptide View

MS/MS Fragmentation of **GGDVASMYTPNAQYCQMR**  
 Found in **KLKB1\_HUMAN**, Plasma kallikrein OS=Homo sapiens GN=KLKB1 PE=1 SV=1

Match to Query 35770: 2359.026252 from(787.349360,3+) rtinseconds(2059) index(36777)  
 Title: Locus:1.1.1.3136.16 File:"2013-07-02 CLN FXIII 60 min 2nd F 3.wiff"  
 Data file C:\Program Files (x86)\Matrix Science\Mascot Daemon\mgf5 FXIII 60 min 2nd\mascot\_daemon\_merge.mgf

Click mouse within plot area to zoom in by factor of two about that point  
 Or, Plot from  to  Da   
 Label all possible matches  Label matches used for scoring

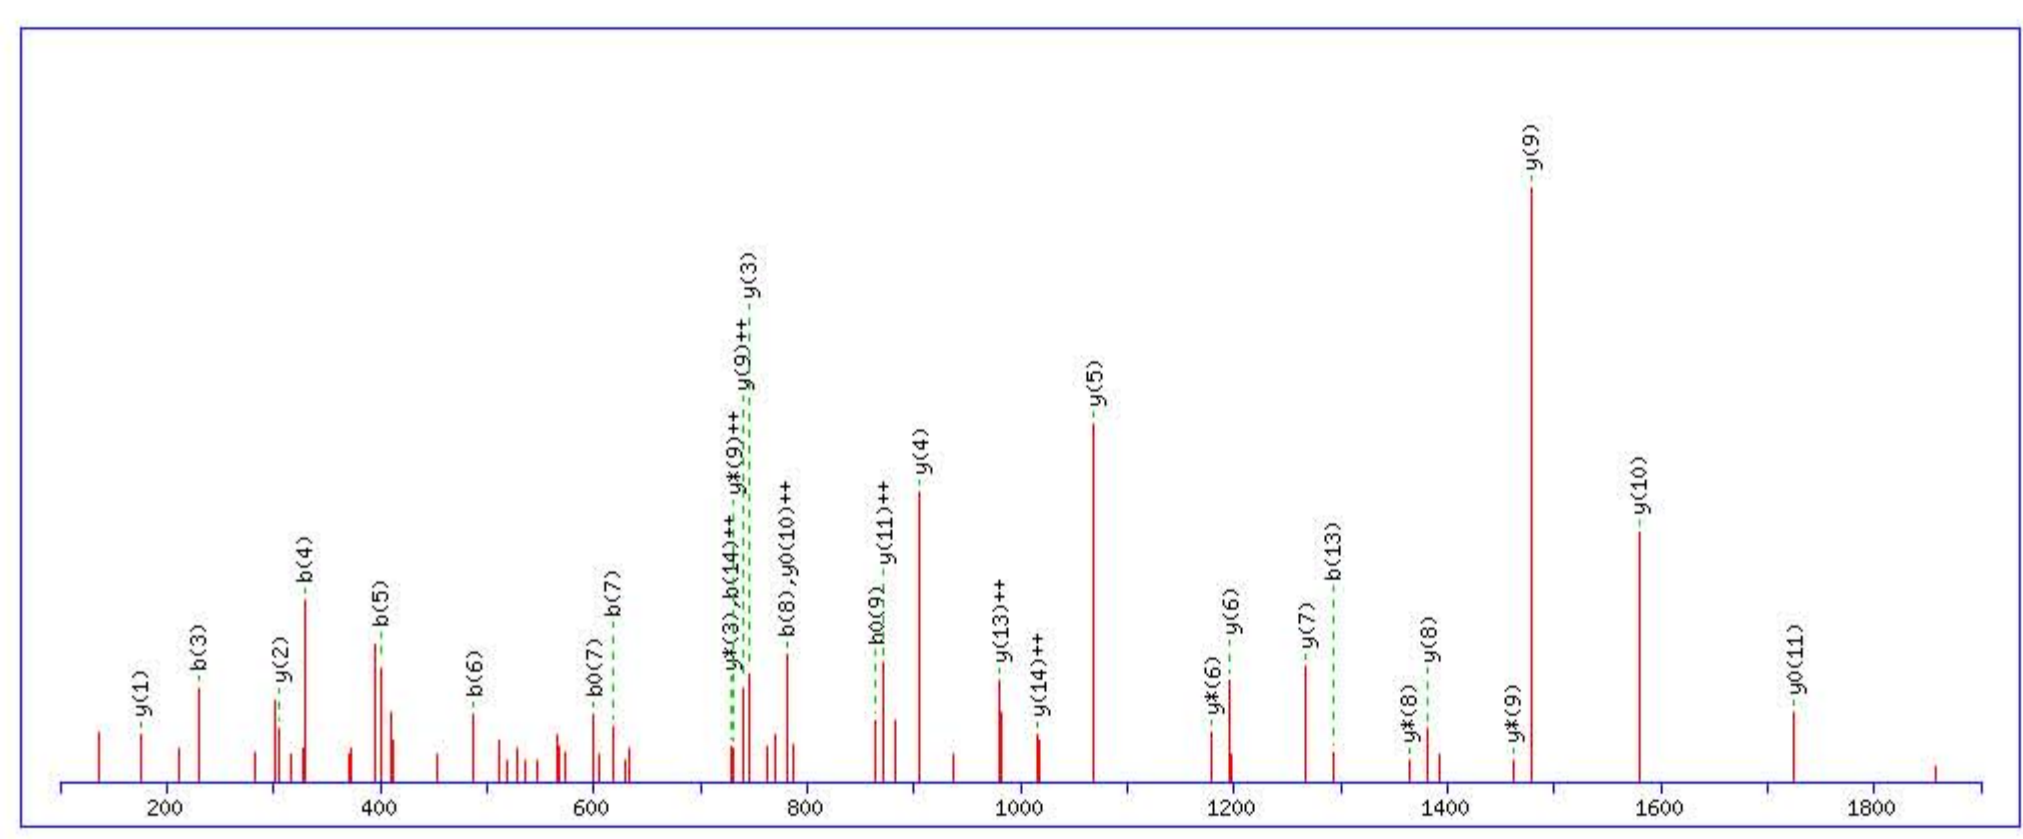

Monoisotopic mass of neutral peptide Mr(calc): 2359.021759  
 Fixed modifications: Carbamidomethyl (C) (apply to specified residues or termini only)  
 Variable modifications:  
 Q16 : Biotin:Thermo-21345 (Q)  
 Ions Score: 82 Expect: 1e-007  
 Matches : 31/162 fragment ions using 40 most intense peaks [\(help\)](#)

| #  | b                  | b <sup>++</sup>   | b <sup>*</sup> | b <sup>*++</sup> | b <sup>0</sup>    | b <sup>0++</sup> | Seq. | y                  | y <sup>++</sup>    | y <sup>*</sup>     | y <sup>*++</sup>  | y <sup>0</sup>     | y <sup>0++</sup>  | #  |
|----|--------------------|-------------------|----------------|------------------|-------------------|------------------|------|--------------------|--------------------|--------------------|-------------------|--------------------|-------------------|----|
| 1  | 58.028740          | 29.518008         |                |                  |                   |                  | G    |                    |                    |                    |                   |                    |                   | 18 |
| 2  | 115.050204         | 58.028740         |                |                  |                   |                  | G    | 2303.007580        | 1152.007428        | 2285.981031        | 1143.494153       | 2284.997015        | 1143.002145       | 17 |
| 3  | <b>230.077147</b>  | 115.542211        |                |                  | 212.066582        | 106.536929       | D    | 2245.986116        | 1123.496696        | 2228.959567        | 1114.983421       | 2227.975551        | 1114.491413       | 16 |
| 4  | <b>329.145561</b>  | 165.076418        |                |                  | 311.134996        | 156.071136       | V    | 2130.959173        | 1065.983224        | 2113.932624        | 1057.469950       | 2112.948608        | 1056.977942       | 15 |
| 5  | <b>400.182675</b>  | 200.594975        |                |                  | 382.172110        | 191.589693       | A    | 2031.890759        | <b>1016.449018</b> | 2014.864210        | 1007.935743       | 2013.880194        | 1007.443735       | 14 |
| 6  | <b>487.214703</b>  | 244.110989        |                |                  | 469.204138        | 235.105707       | S    | 1960.853645        | <b>980.930461</b>  | 1943.827096        | 972.417186        | 1942.843080        | 971.925178        | 13 |
| 7  | <b>618.255188</b>  | 309.631232        |                |                  | <b>600.244623</b> | 300.625949       | M    | 1873.821617        | 937.414447         | 1856.795068        | 928.901172        | 1855.811052        | 928.409164        | 12 |
| 8  | <b>781.318517</b>  | 391.162896        |                |                  | 763.307952        | 382.157614       | Y    | 1742.781132        | <b>871.894204</b>  | 1725.754583        | 863.380930        | <b>1724.770567</b> | 862.888922        | 11 |
| 9  | 882.366196         | 441.686736        |                |                  | <b>864.355631</b> | 432.681453       | T    | <b>1579.717803</b> | 790.362540         | 1562.691254        | 781.849265        | 1561.707238        | <b>781.357257</b> | 10 |
| 10 | 979.418960         | 490.213118        |                |                  | 961.408395        | 481.207835       | P    | <b>1478.670124</b> | <b>739.838700</b>  | <b>1461.643575</b> | <b>731.325426</b> |                    |                   | 9  |
| 11 | 1093.461887        | 547.234581        | 1076.435338    | 538.721307       | 1075.451322       | 538.229299       | N    | <b>1381.617360</b> | 691.312318         | <b>1364.590811</b> | 682.799044        |                    |                   | 8  |
| 12 | 1164.499001        | 582.753138        | 1147.472452    | 574.239864       | 1146.488436       | 573.747856       | A    | <b>1267.574433</b> | 634.290855         | 1250.547884        | 625.777580        |                    |                   | 7  |
| 13 | <b>1292.557579</b> | 646.782428        | 1275.531030    | 638.269153       | 1274.547014       | 637.777145       | Q    | <b>1196.537319</b> | 598.772298         | <b>1179.510770</b> | 590.259023        |                    |                   | 6  |
| 14 | 1455.620908        | <b>728.314092</b> | 1438.594359    | 719.800818       | 1437.610343       | 719.308810       | Y    | <b>1068.478741</b> | 534.743009         | 1051.452192        | 526.229734        |                    |                   | 5  |
| 15 | 1615.651557        | 808.329417        | 1598.625008    | 799.816142       | 1597.640992       | 799.324134       | C    | <b>905.415412</b>  | 453.211344         | 888.388863         | 444.698070        |                    |                   | 4  |
| 16 | 2054.876883        | 1027.942079       | 2037.850334    | 1019.428805      | 2036.866318       | 1018.936797      | Q    | <b>745.384763</b>  | 373.196020         | <b>728.358214</b>  | 364.682745        |                    |                   | 3  |
| 17 | 2185.917368        | 1093.462322       | 2168.890819    | 1084.949047      | 2167.906803       | 1084.457039      | M    | <b>306.159437</b>  | 153.583356         | 289.132888         | 145.070082        |                    |                   | 2  |
| 18 |                    |                   |                |                  |                   |                  | R    | <b>175.118952</b>  | 88.063114          | 158.092403         | 79.549839         |                    |                   | 1  |

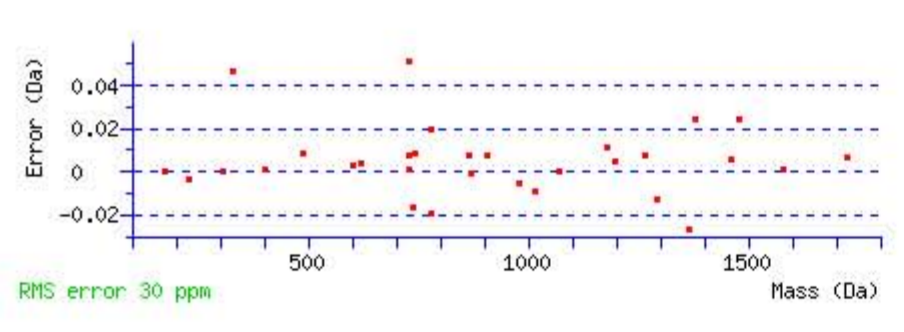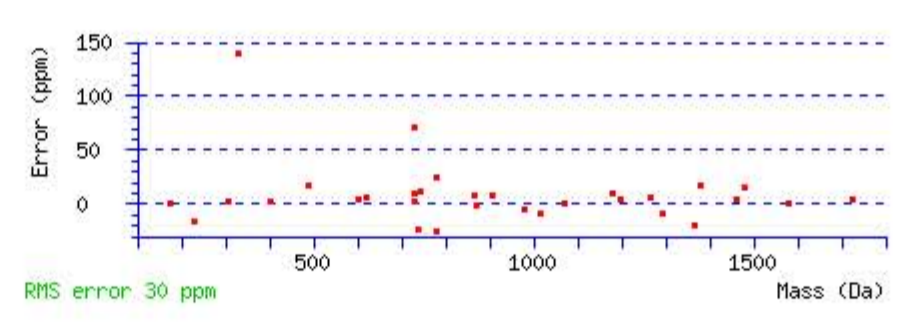

NCBI BLAST search of **GGDVASMYTPNAQYCQMR**  
 (Parameters: blastp, nr protein database, expect=20000, no filter, PAM30)  
 Other BLAST [web gateways](#)

### All matches to this query

| Score | Mr(calc):   | Delta    | Sequence                           |
|-------|-------------|----------|------------------------------------|
| 81.6  | 2359.021759 | 0.004493 | <a href="#">GGDVASMYTPNAQYCQMR</a> |
| 46.8  | 2359.021759 | 0.004493 | <a href="#">GGDVASMYTPNAQYCQMR</a> |



# MASCOT Search Results

## Peptide View

MS/MS Fragmentation of **QCGHQISACHR**

Found in **KLKB1\_HUMAN**, Plasma kallikrein OS=Homo sapiens GN=KLKB1 PE=1 SV=1

Match to Query 39649: 1663.748856 from(416.944490,4+) rtinseconds(1122) index(63679)

Title: Locus:1.1.1.1328.4 File:"2013-07-02 CLN FXIII 60 min 2nd FT.wiff"

Data file C:\Program Files (x86)\Matrix Science\Mascot Daemon\mgf5 FXIII 60 min 2nd\mascot\_daemon\_merge.mgf

Click mouse within plot area to zoom in by factor of two about that point

Or, Plot from  to  Da

Label all possible matches  Label matches used for scoring

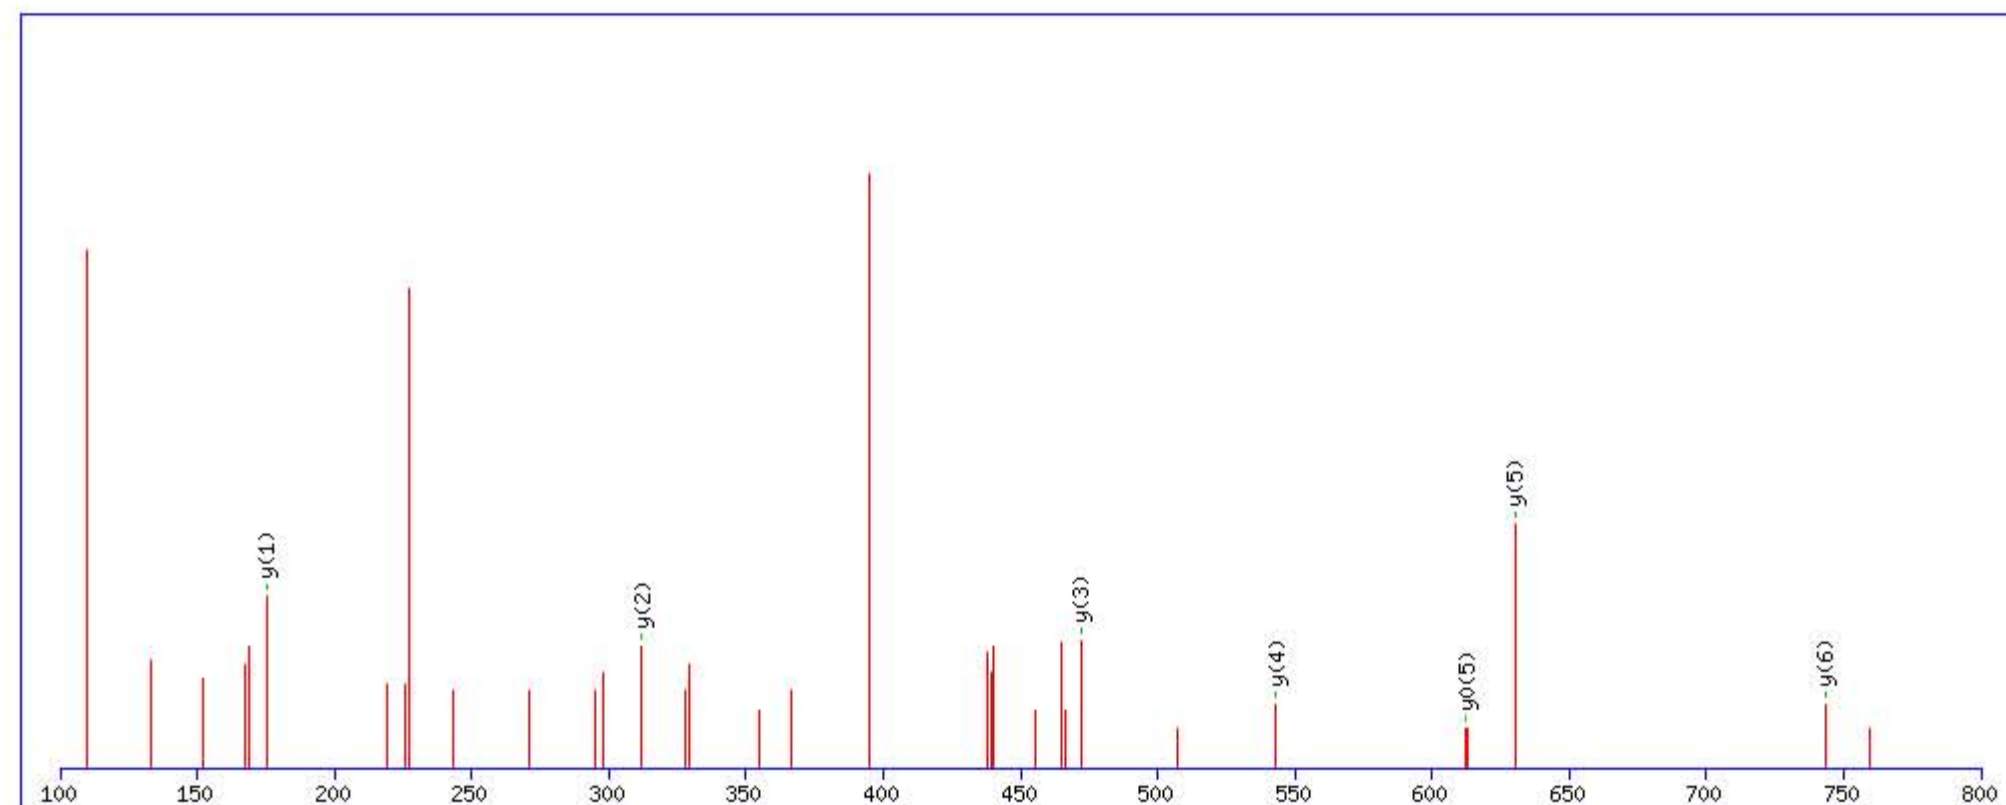

Monoisotopic mass of neutral peptide Mr(calc): 1663.749374

Fixed modifications: Carbamidomethyl (C) (apply to specified residues or termini only)

Variable modifications:

Q5 : Biotin:Thermo-21345 (Q)

Ions Score: 32 Expect: 0.004

Matches : 7/100 fragment ions using 13 most intense peaks [\(help\)](#)

| #  | b           | b <sup>++</sup> | b*          | b <sup>+++</sup> | b <sup>0</sup> | b <sup>0++</sup> | Seq. | y                 | y <sup>++</sup> | y*          | y <sup>+++</sup> | y <sup>0</sup>    | y <sup>0++</sup> | #  |
|----|-------------|-----------------|-------------|------------------|----------------|------------------|------|-------------------|-----------------|-------------|------------------|-------------------|------------------|----|
| 1  | 129.065854  | 65.036565       | 112.039305  | 56.523291        |                |                  | Q    |                   |                 |             |                  |                   |                  | 11 |
| 2  | 289.096503  | 145.051890      | 272.069954  | 136.538615       |                |                  | C    | 1536.698070       | 768.852673      | 1519.671521 | 760.339399       | 1518.687505       | 759.847391       | 10 |
| 3  | 346.117967  | 173.562622      | 329.091418  | 165.049347       |                |                  | G    | 1376.667421       | 688.837348      | 1359.640872 | 680.324074       | 1358.656856       | 679.832066       | 9  |
| 4  | 483.176879  | 242.092078      | 466.150330  | 233.578803       |                |                  | H    | 1319.645957       | 660.326617      | 1302.619408 | 651.813342       | 1301.635392       | 651.321334       | 8  |
| 5  | 922.402205  | 461.704741      | 905.375656  | 453.191466       |                |                  | Q    | 1182.587045       | 591.797161      | 1165.560496 | 583.283886       | 1164.576480       | 582.791878       | 7  |
| 6  | 1035.486269 | 518.246773      | 1018.459720 | 509.733498       |                |                  | I    | <b>743.361719</b> | 372.184498      | 726.335170  | 363.671223       | 725.351154        | 363.179215       | 6  |
| 7  | 1122.518297 | 561.762787      | 1105.491748 | 553.249512       | 1104.507732    | 552.757504       | S    | <b>630.277655</b> | 315.642466      | 613.251106  | 307.129191       | <b>612.267090</b> | 306.637183       | 5  |
| 8  | 1193.555411 | 597.281344      | 1176.528862 | 588.768069       | 1175.544846    | 588.276061       | A    | <b>543.245627</b> | 272.126452      | 526.219078  | 263.613177       |                   |                  | 4  |
| 9  | 1353.586060 | 677.296668      | 1336.559511 | 668.783394       | 1335.575495    | 668.291386       | C    | <b>472.208513</b> | 236.607894      | 455.181964  | 228.094620       |                   |                  | 3  |
| 10 | 1490.644972 | 745.826124      | 1473.618423 | 737.312850       | 1472.634407    | 736.820842       | H    | <b>312.177864</b> | 156.592570      | 295.151315  | 148.079295       |                   |                  | 2  |
| 11 |             |                 |             |                  |                |                  | R    | <b>175.118952</b> | 88.063114       | 158.092403  | 79.549839        |                   |                  | 1  |

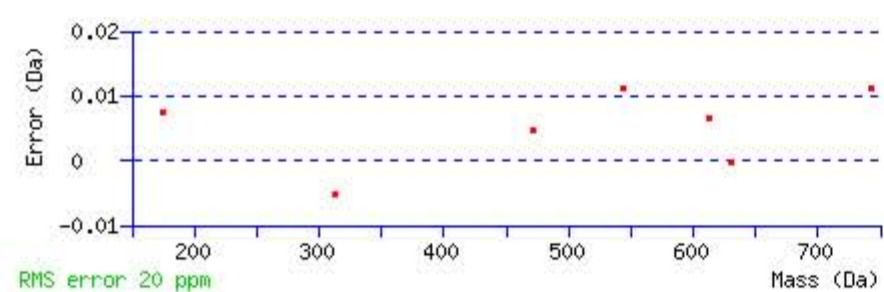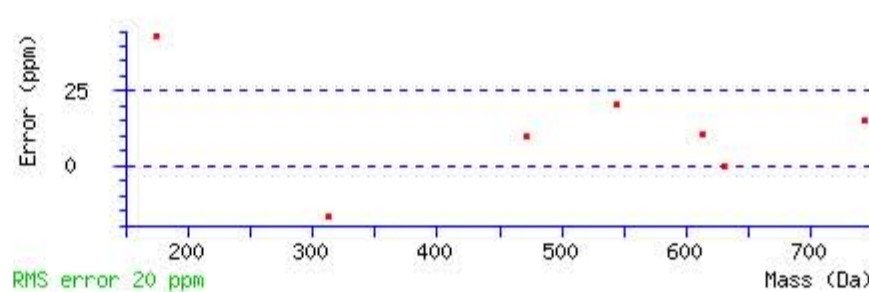

NCBI BLAST search of **QCGHQISACHR**

(Parameters: blastp, nr protein database, expect=20000, no filter, PAM30)

Other BLAST [web gateways](#)

All matches to this query

| Score | Mr(calc):   | Delta     | Sequence                        |
|-------|-------------|-----------|---------------------------------|
| 32.0  | 1663.749374 | -0.000518 | <a href="#">QCGHQISACHR</a>     |
| 32.0  | 1663.749374 | -0.000518 | <a href="#">QCGHQISACHR</a>     |
| 6.5   | 1663.755905 | -0.007049 | <a href="#">FASCVDASGGLKCHR</a> |

Mascot: <http://www.matrixscience.com/>



# MASCOT Search Results

## Peptide View

MS/MS Fragmentation of **VNIPLVTNEECQK**

Found in **KLKB1\_HUMAN**, Plasma kallikrein OS=Homo sapiens GN=KLKB1 PE=1 SV=1

Match to Query 43838: 1853.939532 from(618.987120,3+) rtinseconds(2151) index(69667)

Title: Locus:1.1.1.1686.20 File:"2013-07-02 CLN FXIII 60 min 2nd FT.wiff"

Data file C:\Program Files (x86)\Matrix Science\Mascot Daemon\mgf5 FXIII 60 min 2nd\mascot\_daemon\_merge.mgf

Click mouse within plot area to zoom in by factor of two about that point

Or, Plot from  to  Da

Label all possible matches  Label matches used for scoring

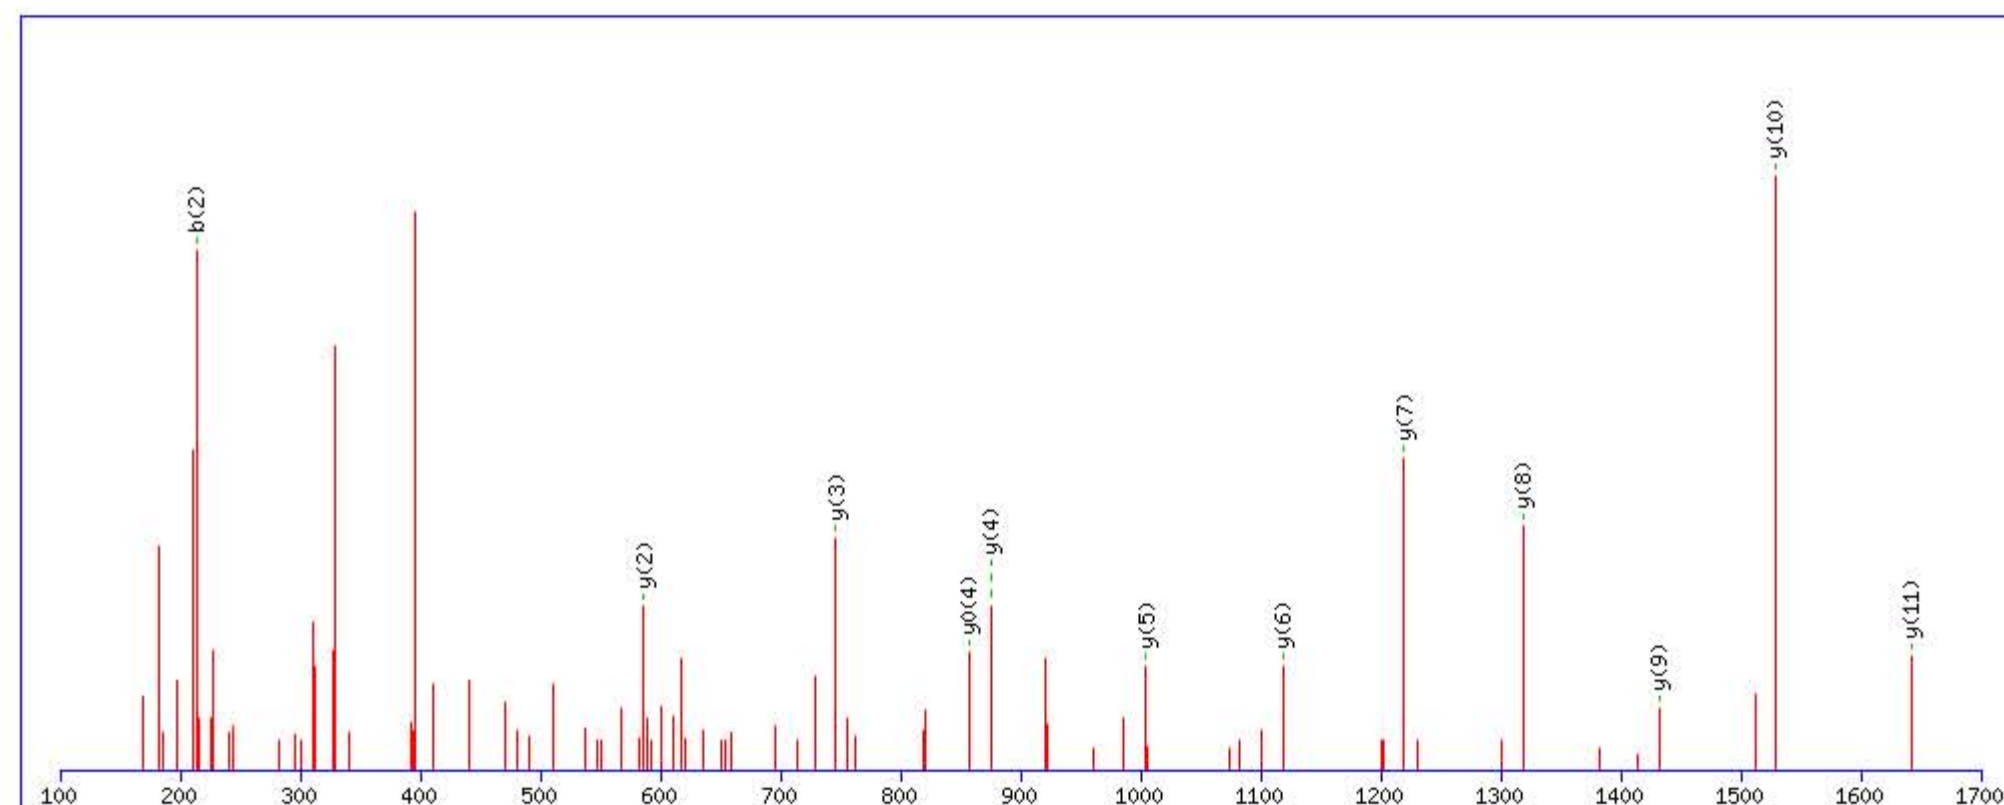

Monoisotopic mass of neutral peptide Mr(calc): 1853.937927

Fixed modifications: Carbamidomethyl (C) (apply to specified residues or termini only)

Variable modifications:

Q12 : Biotin:Thermo-21345 (Q)

Ions Score: 84 Expect: 3.8e-008

Matches : 12/124 fragment ions using 15 most intense peaks [\(help\)](#)

| #  | b                 | b <sup>++</sup> | b <sup>*</sup> | b <sup>*++</sup> | b <sup>0</sup> | b <sup>0++</sup> | Seq. | y                  | y <sup>++</sup> | y <sup>*</sup> | y <sup>*++</sup> | y <sup>0</sup>    | y <sup>0++</sup> | #  |
|----|-------------------|-----------------|----------------|------------------|----------------|------------------|------|--------------------|-----------------|----------------|------------------|-------------------|------------------|----|
| 1  | 100.075690        | 50.541483       |                |                  |                |                  | V    |                    |                 |                |                  |                   |                  | 13 |
| 2  | <b>214.118617</b> | 107.562947      | 197.092068     | 99.049672        |                |                  | N    | 1755.876804        | 878.442040      | 1738.850255    | 869.928766       | 1737.866239       | 869.436758       | 12 |
| 3  | 327.202681        | 164.104978      | 310.176132     | 155.591704       |                |                  | I    | <b>1641.833877</b> | 821.420577      | 1624.807328    | 812.907302       | 1623.823312       | 812.415294       | 11 |
| 4  | 424.255445        | 212.631360      | 407.228896     | 204.118086       |                |                  | P    | <b>1528.749813</b> | 764.878545      | 1511.723264    | 756.365270       | 1510.739248       | 755.873262       | 10 |
| 5  | 537.339509        | 269.173393      | 520.312960     | 260.660118       |                |                  | L    | <b>1431.697049</b> | 716.352163      | 1414.670500    | 707.838888       | 1413.686484       | 707.346880       | 9  |
| 6  | 636.407923        | 318.707600      | 619.381374     | 310.194325       |                |                  | V    | <b>1318.612985</b> | 659.810131      | 1301.586436    | 651.296856       | 1300.602420       | 650.804848       | 8  |
| 7  | 737.455602        | 369.231439      | 720.429053     | 360.718165       | 719.445037     | 360.226157       | T    | <b>1219.544571</b> | 610.275924      | 1202.518022    | 601.762649       | 1201.534006       | 601.270641       | 7  |
| 8  | 851.498529        | 426.252903      | 834.471980     | 417.739628       | 833.487964     | 417.247620       | N    | <b>1118.496892</b> | 559.752084      | 1101.470343    | 551.238810       | 1100.486327       | 550.746802       | 6  |
| 9  | 980.541122        | 490.774199      | 963.514573     | 482.260924       | 962.530557     | 481.768916       | E    | <b>1004.453965</b> | 502.730621      | 987.427416     | 494.217346       | 986.443400        | 493.725338       | 5  |
| 10 | 1109.583715       | 555.295496      | 1092.557166    | 546.782221       | 1091.573150    | 546.290213       | E    | <b>875.411372</b>  | 438.209324      | 858.384823     | 429.696050       | <b>857.400807</b> | 429.204042       | 4  |
| 11 | 1269.614364       | 635.310820      | 1252.587815    | 626.797546       | 1251.603799    | 626.305538       | C    | <b>746.368779</b>  | 373.688028      | 729.342230     | 365.174753       |                   |                  | 3  |
| 12 | 1708.839690       | 854.923483      | 1691.813141    | 846.410209       | 1690.829125    | 845.918201       | Q    | <b>586.338130</b>  | 293.672703      | 569.311581     | 285.159429       |                   |                  | 2  |
| 13 |                   |                 |                |                  |                |                  | K    | 147.112804         | 74.060040       | 130.086255     | 65.546765        |                   |                  | 1  |

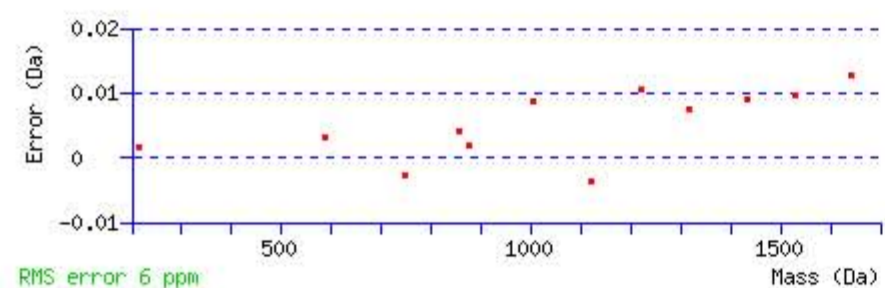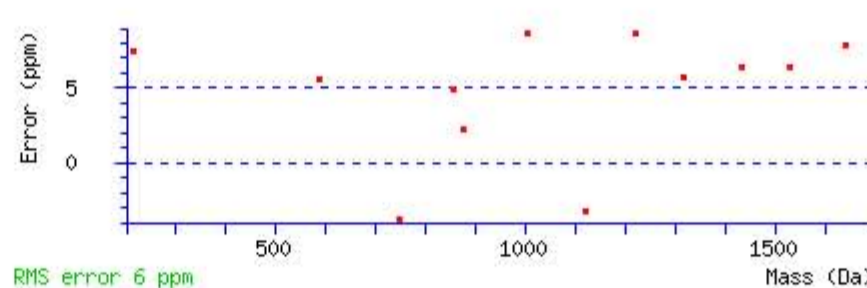

NCBI BLAST search of **VNIPLVTNEECQK**

(Parameters: blastp, nr protein database, expect=20000, no filter, PAM30)

Other BLAST [web gateways](#)

All matches to this query

| Score | Mr(calc):   | Delta    | Sequence                         |
|-------|-------------|----------|----------------------------------|
| 84.0  | 1853.937927 | 0.001605 | <a href="#">VNIPLVTNEECQK</a>    |
| 4.9   | 1853.934341 | 0.005191 | <a href="#">RGLSNPNELQAIDSNR</a> |

Mascot: <http://www.matrixscience.com/>



# MASCOT Search Results

## Peptide View

MS/MS Fragmentation of **QCGHQISACHR**

Found in **KLKB1\_HUMAN**, Plasma kallikrein OS=Homo sapiens GN=KLKB1 PE=1 SV=1

Match to Query 46028: 1974.911616 from(494.735180,4+) rtinseconds(1459) index(65560)

Title: Locus:1.1.1.1445.18 File:"2013-07-02 CLN FXIII 60 min 2nd FT.wiff"

Data file C:\Program Files (x86)\Matrix Science\Mascot Daemon\mgf5 FXIII 60 min 2nd\mascot\_daemon\_merge.mgf

Click mouse within plot area to zoom in by factor of two about that point

Or, Plot from  to  Da

Label all possible matches  Label matches used for scoring

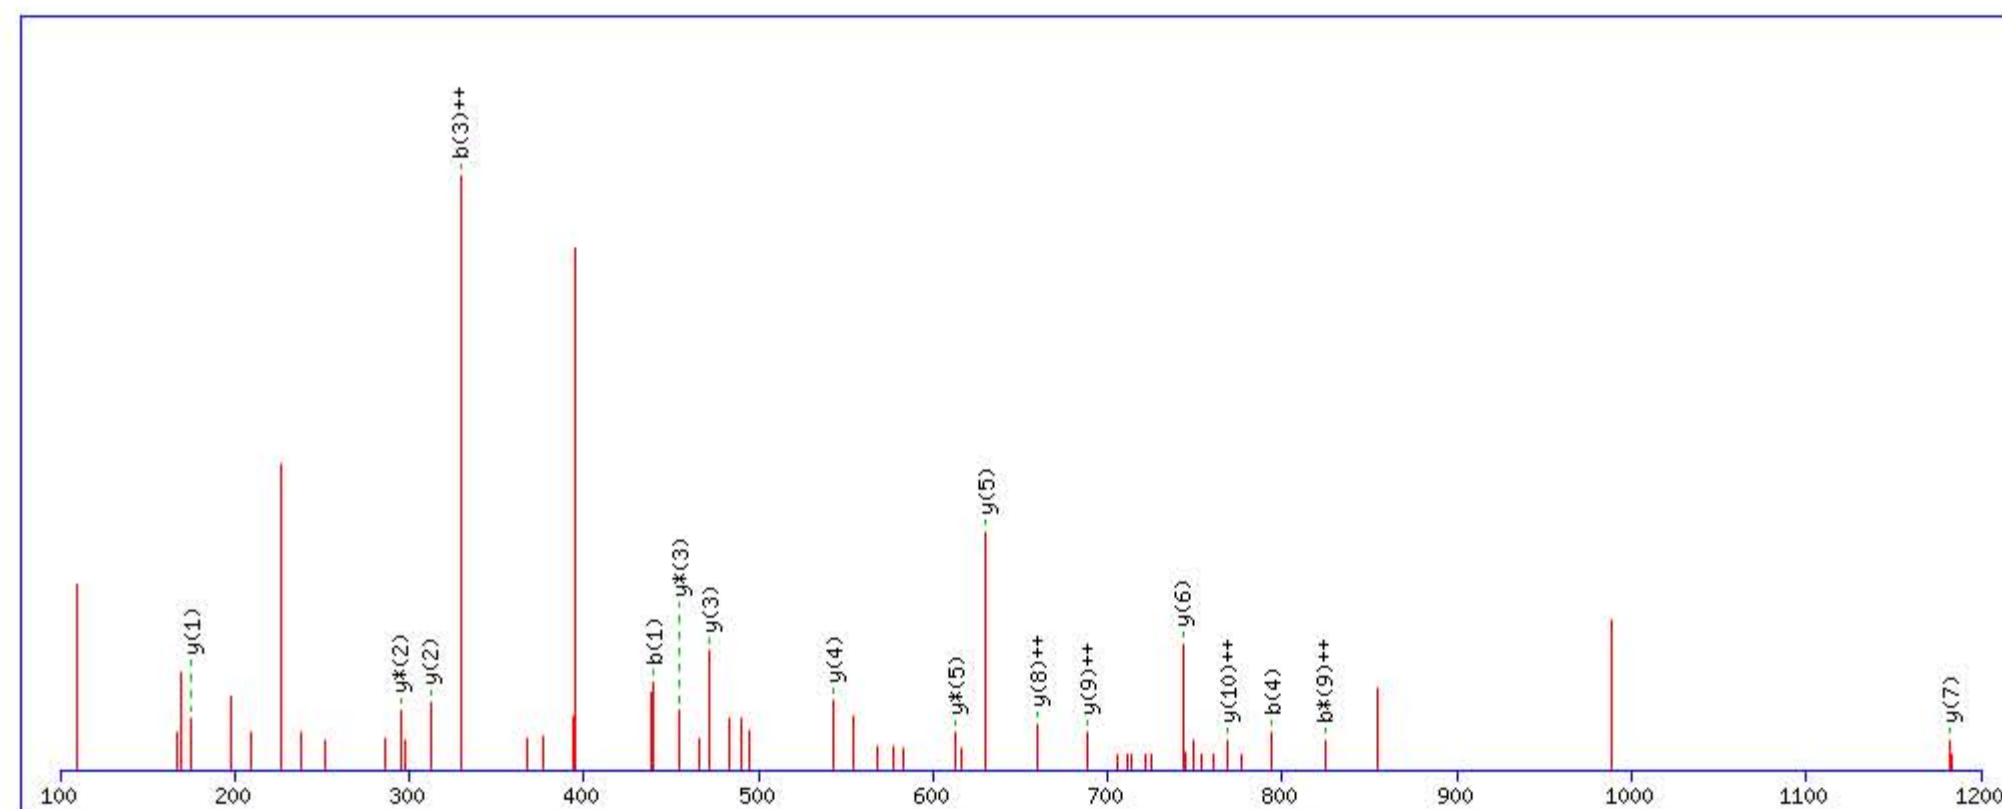

Monoisotopic mass of neutral peptide  $M_r(\text{calc})$ : 1974.916122

Fixed modifications: Carbamidomethyl (C) (apply to specified residues or termini only)

Variable modifications:

Q1 : Biotin:Thermo-21345 (Q)

Q5 : Biotin:Thermo-21345 (Q)

Ions Score: 34 Expect: 0.0054

Matches : 17/100 fragment ions using 33 most intense peaks [\(help\)](#)

| #  | b                 | b <sup>++</sup>   | b <sup>*</sup> | b <sup>*++</sup>  | b <sup>0</sup> | b <sup>0++</sup> | Seq. | y                  | y <sup>++</sup>   | y <sup>*</sup>    | y <sup>*++</sup> | y <sup>0</sup> | y <sup>0++</sup> | #  |
|----|-------------------|-------------------|----------------|-------------------|----------------|------------------|------|--------------------|-------------------|-------------------|------------------|----------------|------------------|----|
| 1  | <b>440.232602</b> | 220.619939        | 423.206053     | 212.106664        |                |                  | Q    |                    |                   |                   |                  |                |                  | 11 |
| 2  | 600.263251        | 300.635264        | 583.236702     | 292.121989        |                |                  | C    | 1536.698070        | <b>768.852673</b> | 1519.671521       | 760.339399       | 1518.687505    | 759.847391       | 10 |
| 3  | 657.284715        | <b>329.145996</b> | 640.258166     | 320.632721        |                |                  | G    | 1376.667421        | <b>688.837349</b> | 1359.640872       | 680.324074       | 1358.656856    | 679.832066       | 9  |
| 4  | <b>794.343627</b> | 397.675452        | 777.317078     | 389.162177        |                |                  | H    | 1319.645957        | <b>660.326617</b> | 1302.619408       | 651.813342       | 1301.635392    | 651.321334       | 8  |
| 5  | 1233.568953       | 617.288115        | 1216.542404    | 608.774840        |                |                  | Q    | <b>1182.587045</b> | 591.797161        | 1165.560496       | 583.283886       | 1164.576480    | 582.791878       | 7  |
| 6  | 1346.653017       | 673.830147        | 1329.626468    | 665.316872        |                |                  | I    | <b>743.361719</b>  | 372.184498        | 726.335170        | 363.671223       | 725.351154     | 363.179215       | 6  |
| 7  | 1433.685045       | 717.346161        | 1416.658496    | 708.832886        | 1415.674480    | 708.340878       | S    | <b>630.277655</b>  | 315.642466        | <b>613.251106</b> | 307.129191       | 612.267090     | 306.637183       | 5  |
| 8  | 1504.722159       | 752.864718        | 1487.695610    | 744.351443        | 1486.711594    | 743.859435       | A    | <b>543.245627</b>  | 272.126452        | 526.219078        | 263.613177       |                |                  | 4  |
| 9  | 1664.752808       | 832.880042        | 1647.726259    | <b>824.366768</b> | 1646.742243    | 823.874760       | C    | <b>472.208513</b>  | 236.607894        | <b>455.181964</b> | 228.094620       |                |                  | 3  |
| 10 | 1801.811720       | 901.409498        | 1784.785171    | 892.896224        | 1783.801155    | 892.404216       | H    | <b>312.177864</b>  | 156.592570        | <b>295.151315</b> | 148.079295       |                |                  | 2  |
| 11 |                   |                   |                |                   |                |                  | R    | <b>175.118952</b>  | 88.063114         | 158.092403        | 79.549839        |                |                  | 1  |

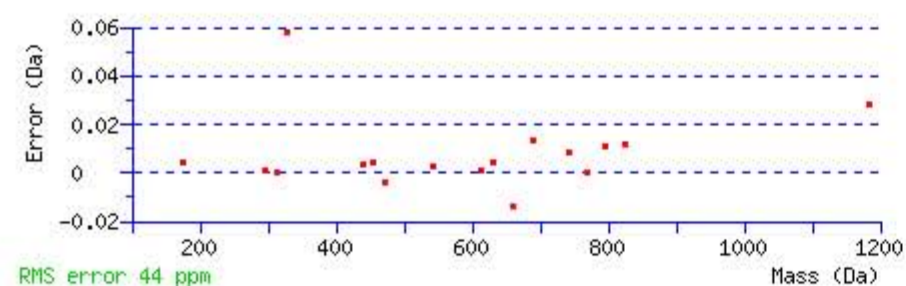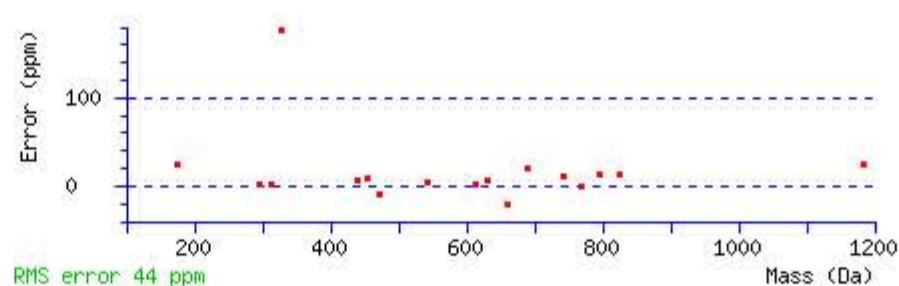

NCBI BLAST search of **QCGHQISACHR**

(Parameters: blastp, nr protein database, expect=20000, no filter, PAM30)

Other BLAST [web gateways](#)

All matches to this query

| Score | $M_r(\text{calc})$ : | Delta     | Sequence           |
|-------|----------------------|-----------|--------------------|
| 33.8  | 1974.916122          | -0.004506 | <b>QCGHQISACHR</b> |

Mascot: <http://www.matrixscience.com/>



# MASCOT Search Results

## Peptide View

MS/MS Fragmentation of **DFTCVHQALK**

Found in **IC1\_HUMAN**, Plasma protease C1 inhibitor OS=Homo sapiens GN=SERPING1 PE=1 SV=2

Match to Query 34641: 1528.765408 from(765.389980,2+) rtinseconds(1829) index(51724)

Title: Locus:1.1.1.1252.18 File:"2013-07-02 CLN FXIII 60 min 2nd F 4.wiff"

Data file C:\Program Files (x86)\Matrix Science\Mascot Daemon\mgf\5 FXIII 60 min 2nd\mascot\_daemon\_merge.mgf

Click mouse within plot area to zoom in by factor of two about that point

Or, Plot from  to  Da

Label all possible matches  Label matches used for scoring

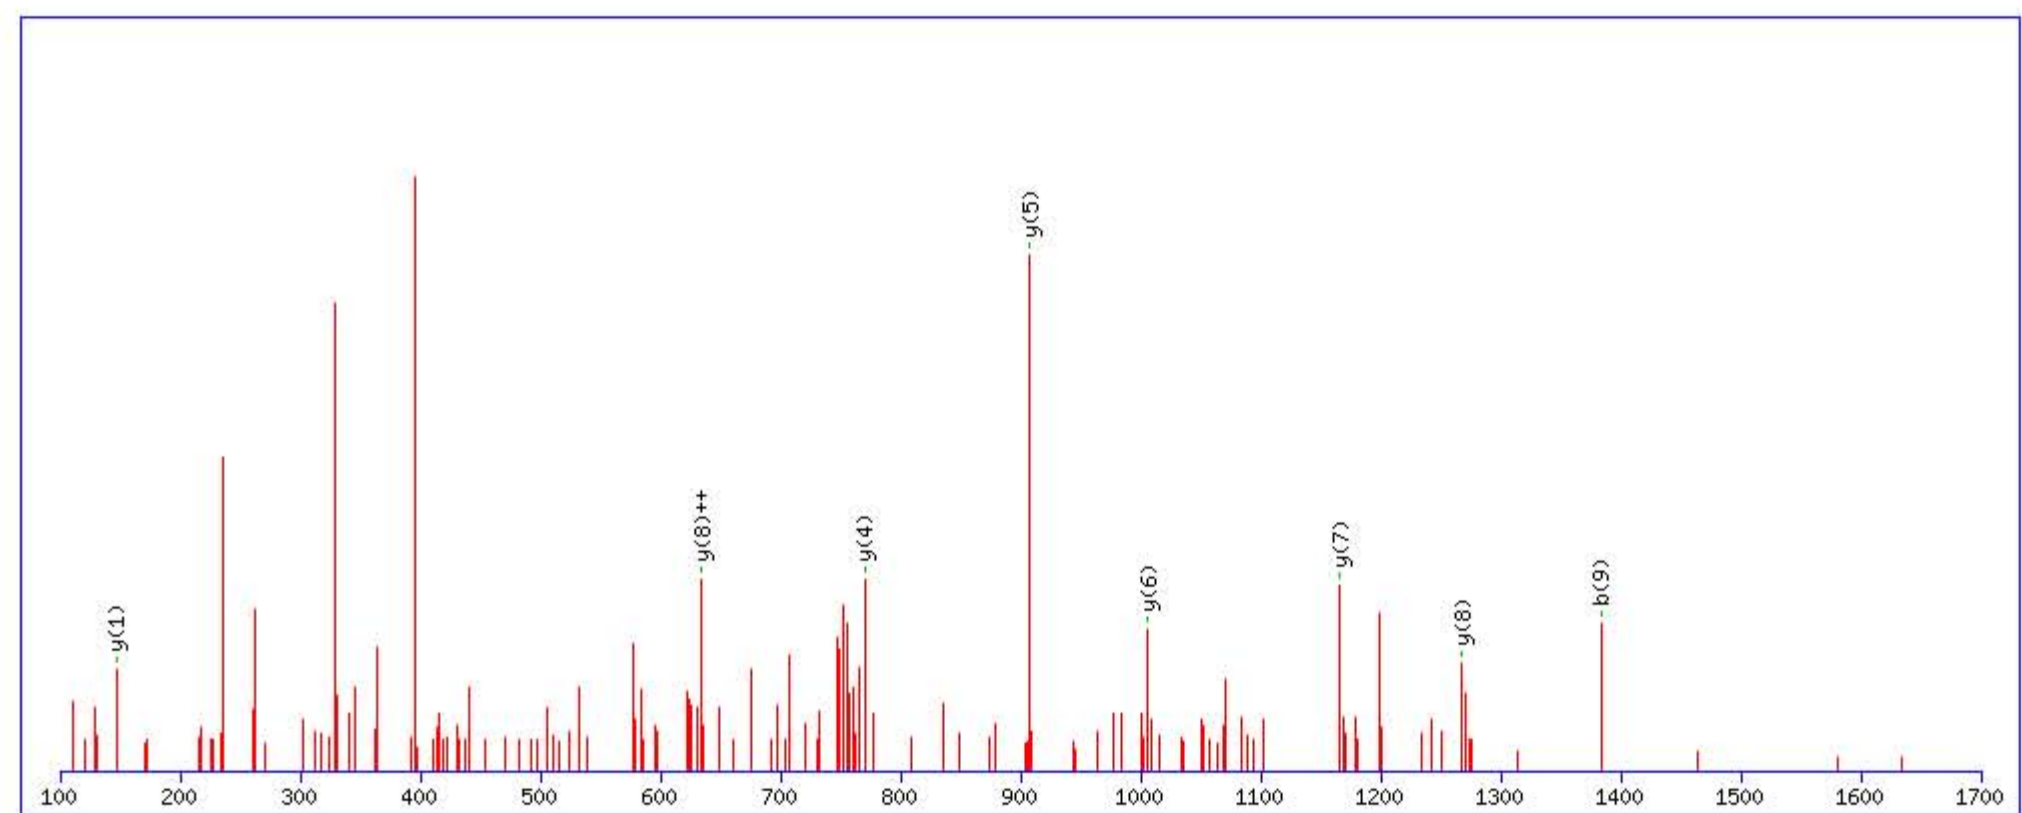

Monoisotopic mass of neutral peptide Mr(calc): 1528.753052

Fixed modifications: Carbamidomethyl (C) (apply to specified residues or termini only)

Variable modifications:

Q7 : Biotin:Thermo-21345 (Q)

Ions Score: 33 Expect: 0.0028

Matches : 8/82 fragment ions using 14 most intense peaks [\(help\)](#)

| #  | b                  | b <sup>++</sup> | b <sup>*</sup> | b <sup>*++</sup> | b <sup>0</sup> | b <sup>0++</sup> | Seq. | y                  | y <sup>++</sup>   | y <sup>*</sup> | y <sup>*++</sup> | y <sup>0</sup> | y <sup>0++</sup> | #  |
|----|--------------------|-----------------|----------------|------------------|----------------|------------------|------|--------------------|-------------------|----------------|------------------|----------------|------------------|----|
| 1  | 116.034219         | 58.520748       |                |                  | 98.023654      | 49.515465        | D    |                    |                   |                |                  |                |                  | 10 |
| 2  | 263.102633         | 132.054954      |                |                  | 245.092068     | 123.049672       | F    | 1414.733376        | 707.870326        | 1397.706827    | 699.357051       | 1396.722811    | 698.865043       | 9  |
| 3  | 364.150312         | 182.578794      |                |                  | 346.139747     | 173.573512       | T    | <b>1267.664962</b> | <b>634.336119</b> | 1250.638413    | 625.822844       | 1249.654397    | 625.330836       | 8  |
| 4  | 524.180961         | 262.594119      |                |                  | 506.170396     | 253.588836       | C    | <b>1166.617283</b> | 583.812279        | 1149.590734    | 575.299005       |                |                  | 7  |
| 5  | 623.249375         | 312.128326      |                |                  | 605.238810     | 303.123043       | V    | <b>1006.586634</b> | 503.796955        | 989.560085     | 495.283680       |                |                  | 6  |
| 6  | 760.308287         | 380.657782      |                |                  | 742.297722     | 371.652499       | H    | <b>907.518220</b>  | 454.262748        | 890.491671     | 445.749473       |                |                  | 5  |
| 7  | 1199.533613        | 600.270444      | 1182.507064    | 591.757170       | 1181.523048    | 591.265162       | Q    | <b>770.459308</b>  | 385.733292        | 753.432759     | 377.220017       |                |                  | 4  |
| 8  | 1270.570727        | 635.789001      | 1253.544178    | 627.275727       | 1252.560162    | 626.783719       | A    | 331.233982         | 166.120629        | 314.207433     | 157.607354       |                |                  | 3  |
| 9  | <b>1383.654791</b> | 692.331033      | 1366.628242    | 683.817759       | 1365.644226    | 683.325751       | L    | 260.196868         | 130.602072        | 243.170319     | 122.088797       |                |                  | 2  |
| 10 |                    |                 |                |                  |                |                  | K    | <b>147.112804</b>  | 74.060040         | 130.086255     | 65.546765        |                |                  | 1  |

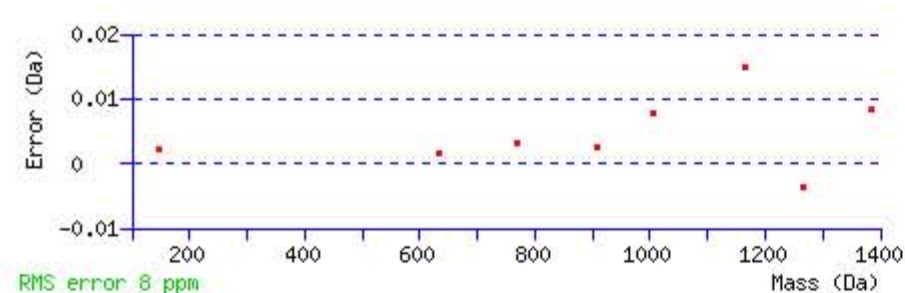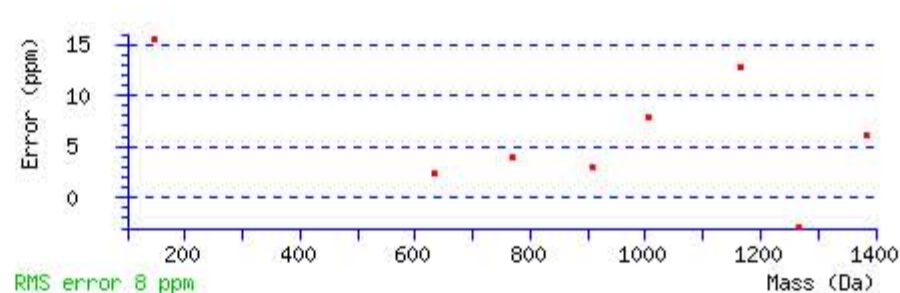

NCBI BLAST search of **DFTCVHQALK**

(Parameters: blastp, nr protein database, expect=20000, no filter, PAM30)

Other BLAST [web gateways](#)

All matches to this query

| Score | Mr(calc):   | Delta     | Sequence                           |
|-------|-------------|-----------|------------------------------------|
| 33.4  | 1528.753052 | 0.012356  | <a href="#">DFTCVHQALK</a>         |
| 5.8   | 1528.755524 | 0.009884  | <a href="#">MIQSDKGADPPDKK</a>     |
| 4.9   | 1528.752121 | 0.013287  | <a href="#">NRKEESYIFESK</a>       |
| 3.3   | 1528.780685 | -0.015277 | <a href="#">EVLDQGTEISK</a>        |
| 2.7   | 1528.744293 | 0.021115  | <a href="#">KDYTSGAMLTGELK</a>     |
| 0.9   | 1528.755524 | 0.009884  | <a href="#">QQNEGDSIISK</a>        |
| 0.4   | 1528.773254 | -0.007846 | <a href="#">ENLQLNQETEAIK</a>      |
| 0.1   | 1528.782043 | -0.016635 | <a href="#">GPMGPKGGPGAPGAPGPK</a> |



# MASCOT SEARCH RESULTS

## Peptide View

MS/MS Fragmentation of **LEDMEQALSPSVFK**

Found in **IC1\_HUMAN**, Plasma protease C1 inhibitor OS=Homo sapiens GN=SERPING1 PE=1 SV=2

Match to Query 44584: 1903.943502 from(635.655110,3+) rtinseconds(2437) index(39082)

Title: Locus:1.1.1.3268.5 File:"2013-07-02 CLN FXIII 60 min 2nd F 3.wiff"

Data file C:\Program Files (x86)\Matrix Science\Mascot Daemon\mgf5 FXIII 60 min 2nd\mascot\_daemon\_merge.mgf

Click mouse within plot area to zoom in by factor of two about that point

Or, Plot from  to  Da

Label all possible matches  Label matches used for scoring

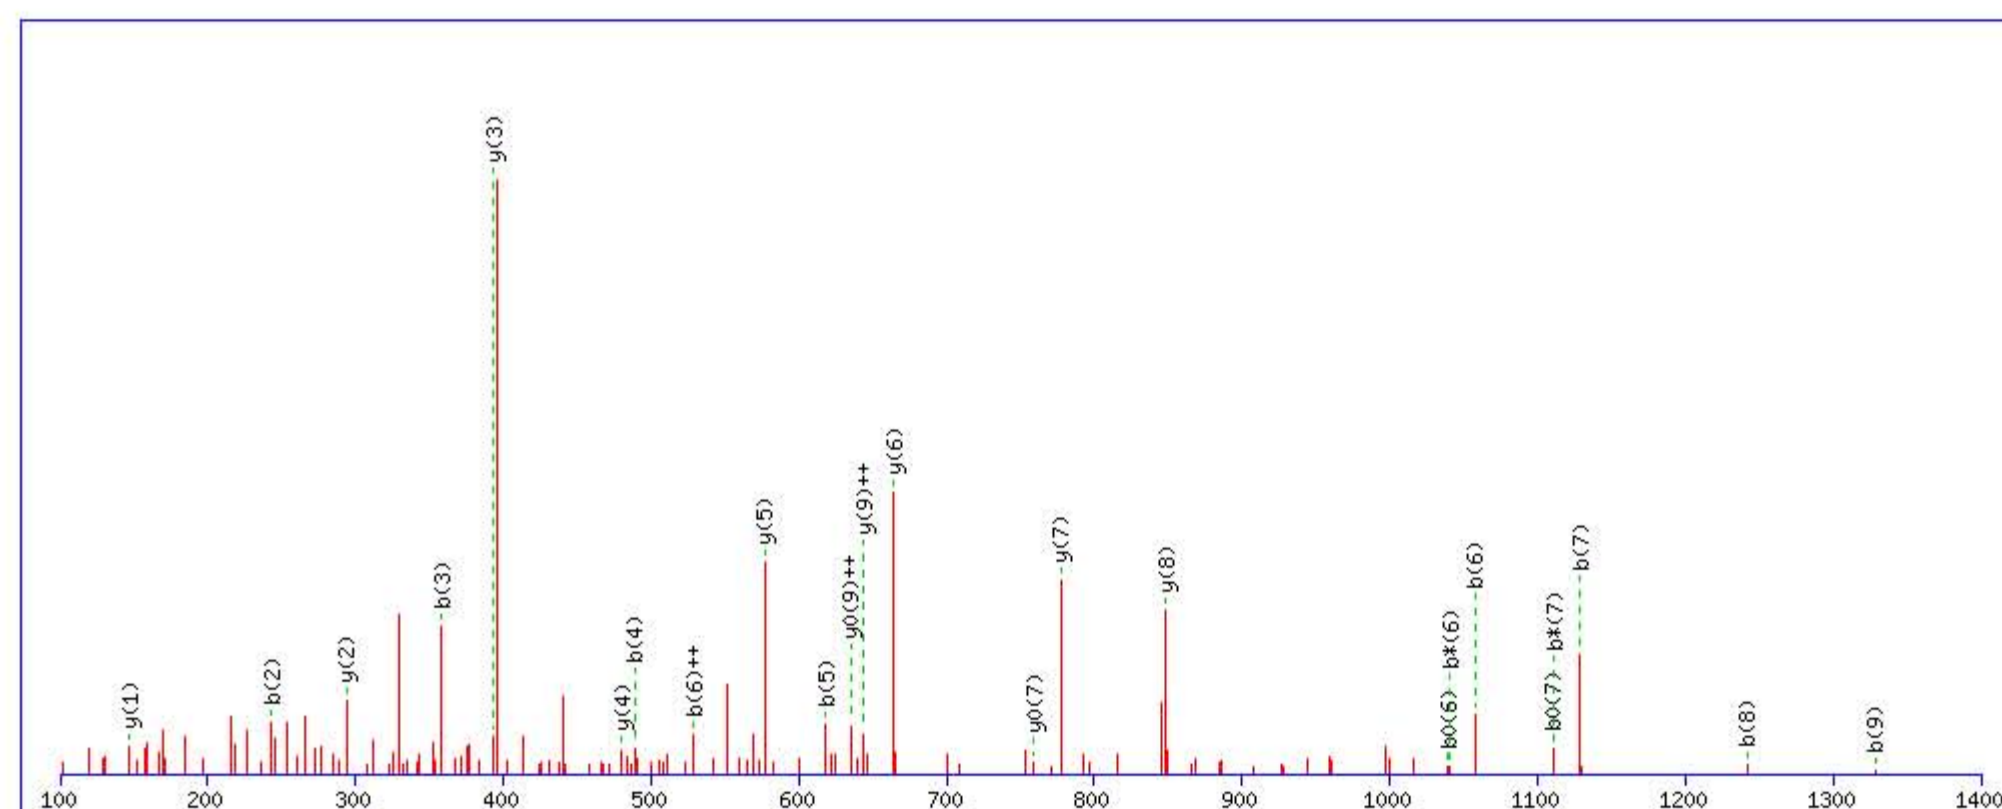

Monoisotopic mass of neutral peptide Mr(calc): 1903.942337

Fixed modifications: Carbamidomethyl (C) (apply to specified residues or termini only)

Variable modifications:

Q6 : Biotin:Thermo-21345 (Q)

Ions Score: 50 Expect: 0.00027

Matches : 24/138 fragment ions using 46 most intense peaks [\(help\)](#)

| #  | b                  | b <sup>++</sup>   | b <sup>*</sup>     | b <sup>*++</sup> | b <sup>0</sup>     | b <sup>0++</sup> | Seq. | y                 | y <sup>++</sup>   | y <sup>*</sup> | y <sup>*++</sup> | y <sup>0</sup>    | y <sup>0++</sup>  | #  |
|----|--------------------|-------------------|--------------------|------------------|--------------------|------------------|------|-------------------|-------------------|----------------|------------------|-------------------|-------------------|----|
| 1  | 114.091340         | 57.549308         |                    |                  |                    |                  | L    |                   |                   |                |                  |                   |                   | 14 |
| 2  | <b>243.133933</b>  | 122.070605        |                    |                  | 225.123368         | 113.065322       | E    | 1791.865570       | 896.436423        | 1774.839021    | 887.923149       | 1773.855005       | 887.431141        | 13 |
| 3  | <b>358.160876</b>  | 179.584076        |                    |                  | 340.150311         | 170.578794       | D    | 1662.822977       | 831.915127        | 1645.796428    | 823.401852       | 1644.812412       | 822.909844        | 12 |
| 4  | <b>489.201361</b>  | 245.104319        |                    |                  | 471.190796         | 236.099036       | M    | 1547.796034       | 774.401655        | 1530.769485    | 765.888381       | 1529.785469       | 765.396373        | 11 |
| 5  | <b>618.243954</b>  | 309.625615        |                    |                  | 600.233389         | 300.620333       | E    | 1416.755549       | 708.881413        | 1399.729000    | 700.368138       | 1398.744984       | 699.876130        | 10 |
| 6  | <b>1057.469280</b> | <b>529.238278</b> | <b>1040.442731</b> | 520.725004       | <b>1039.458715</b> | 520.232996       | Q    | 1287.712956       | <b>644.360116</b> | 1270.686407    | 635.846842       | 1269.702391       | <b>635.354834</b> | 9  |
| 7  | <b>1128.506394</b> | 564.756835        | <b>1111.479845</b> | 556.243561       | <b>1110.495829</b> | 555.751553       | A    | <b>848.487630</b> | 424.747453        | 831.461081     | 416.234179       | 830.477065        | 415.742171        | 8  |
| 8  | <b>1241.590458</b> | 621.298867        | 1224.563909        | 612.785593       | 1223.579893        | 612.293584       | L    | <b>777.450516</b> | 389.228896        | 760.423967     | 380.715622       | <b>759.439951</b> | 380.223614        | 7  |
| 9  | <b>1328.622486</b> | 664.814881        | 1311.595937        | 656.301607       | 1310.611921        | 655.809598       | S    | <b>664.366452</b> | 332.686864        | 647.339903     | 324.173590       | 646.355887        | 323.681582        | 6  |
| 10 | 1425.675250        | 713.341263        | 1408.648701        | 704.827989       | 1407.664685        | 704.335981       | P    | <b>577.334424</b> | 289.170850        | 560.307875     | 280.657576       | 559.323859        | 280.165568        | 5  |
| 11 | 1512.707278        | 756.857277        | 1495.680729        | 748.344003       | 1494.696713        | 747.851995       | S    | <b>480.281660</b> | 240.644468        | 463.255111     | 232.131194       | 462.271095        | 231.639186        | 4  |
| 12 | 1611.775692        | 806.391484        | 1594.749143        | 797.878210       | 1593.765127        | 797.386202       | V    | <b>393.249632</b> | 197.128454        | 376.223083     | 188.615180       |                   |                   | 3  |
| 13 | 1758.844106        | 879.925691        | 1741.817557        | 871.412417       | 1740.833541        | 870.920409       | F    | <b>294.181218</b> | 147.594247        | 277.154669     | 139.080973       |                   |                   | 2  |
| 14 |                    |                   |                    |                  |                    |                  | K    | <b>147.112804</b> | 74.060040         | 130.086255     | 65.546765        |                   |                   | 1  |

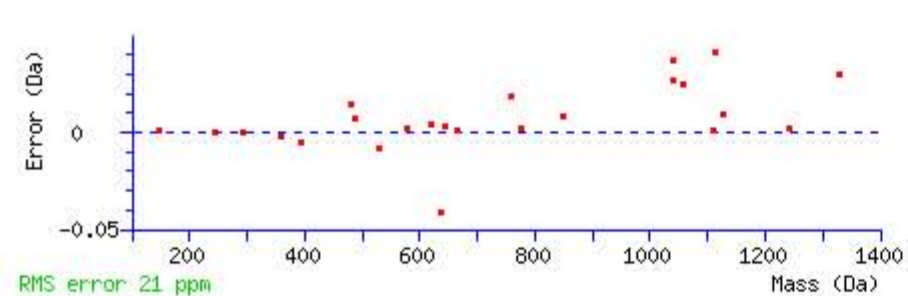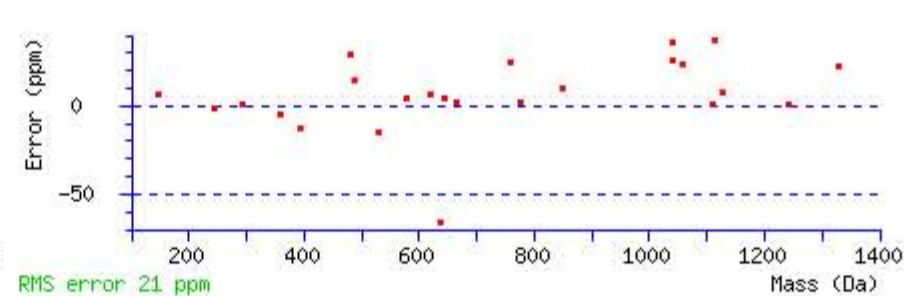

NCBI BLAST search of [LEDMEQALSPSVFK](#)

(Parameters: blastp, nr protein database, expect=20000, no filter, PAM30)

Other BLAST [web gateways](#)

All matches to this query

| Score | Mr(calc):   | Delta    | Sequence                       |
|-------|-------------|----------|--------------------------------|
| 49.6  | 1903.942337 | 0.001165 | <a href="#">LEDMEQALSPSVFK</a> |

Mascot: <http://www.matrixscience.com/>



# MASCOT Search Results

## Peptide View

MS/MS Fragmentation of **GVTSVSQIFHSPDLAIR**

Found in **IC1\_HUMAN**, Plasma protease C1 inhibitor OS=Homo sapiens GN=SERPING1 PE=1 SV=2

Match to Query 49793: 2137.158028 from(1069.586290,2+) rtinseconds(2341) index(38460)

Title: Locus:1.1.1.3234.24 File:"2013-07-02 CLN FXIII 60 min 2nd F 3.wiff"

Data file C:\Program Files (x86)\Matrix Science\Mascot Daemon\mgf5 FXIII 60 min 2nd\mascot\_daemon\_merge.mgf

Click mouse within plot area to zoom in by factor of two about that point

Or, Plot from  to  Da

Label all possible matches  Label matches used for scoring

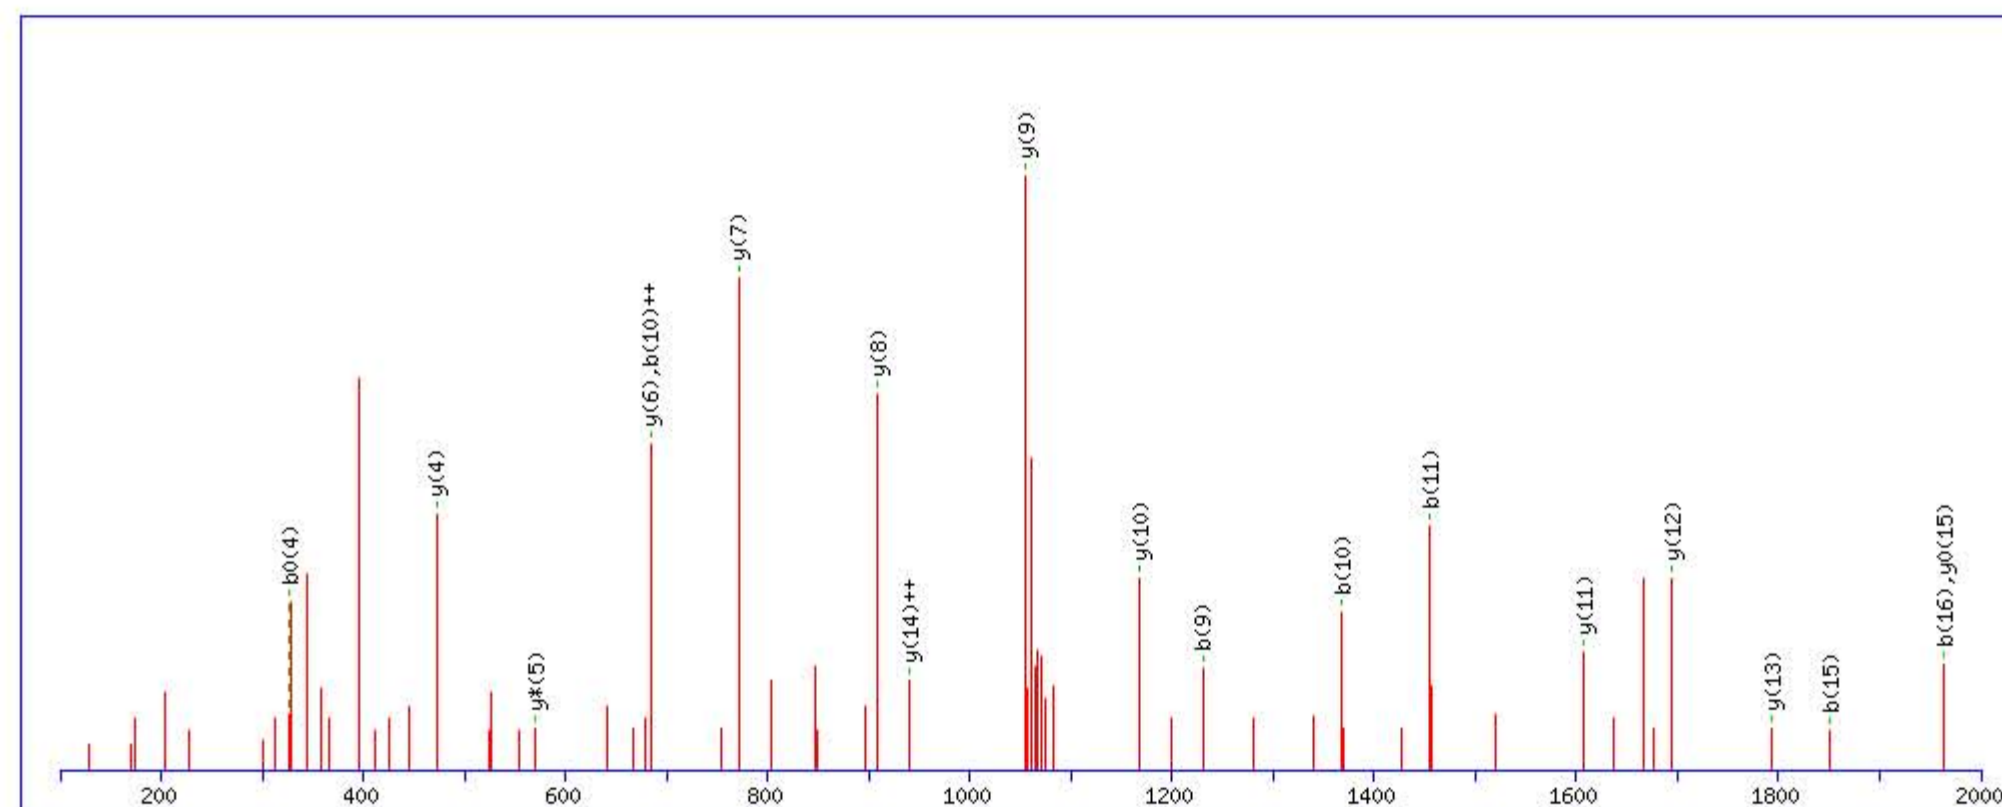

Monoisotopic mass of neutral peptide Mr(calc): 2137.135406

Fixed modifications: Carbamidomethyl (C) (apply to specified residues or termini only)

Variable modifications:

Q7 : Biotin:Thermo-21345 (Q)

Ions Score: 74 Expect: 1.4e-007

Matches : 19/168 fragment ions using 19 most intense peaks [\(help\)](#)

| #  | b           | b <sup>++</sup> | b <sup>*</sup> | b <sup>+++</sup> | b <sup>0</sup> | b <sup>0++</sup> | Seq.     | y           | y <sup>++</sup> | y <sup>*</sup> | y <sup>+++</sup> | y <sup>0</sup> | y <sup>0++</sup> | #  |
|----|-------------|-----------------|----------------|------------------|----------------|------------------|----------|-------------|-----------------|----------------|------------------|----------------|------------------|----|
| 1  | 58.028740   | 29.518008       |                |                  |                |                  | <b>G</b> |             |                 |                |                  |                |                  | 17 |
| 2  | 157.097154  | 79.052215       |                |                  |                |                  | <b>V</b> | 2081.121208 | 1041.064242     | 2064.094659    | 1032.550967      | 2063.110643    | 1032.058959      | 16 |
| 3  | 258.144833  | 129.576055      |                |                  | 240.134268     | 120.570772       | <b>T</b> | 1982.052794 | 991.530035      | 1965.026245    | 983.016761       | 1964.042229    | 982.524753       | 15 |
| 4  | 345.176861  | 173.092068      |                |                  | 327.166296     | 164.086786       | <b>S</b> | 1881.005115 | 941.006196      | 1863.978566    | 932.492921       | 1862.994550    | 932.000913       | 14 |
| 5  | 444.245275  | 222.626275      |                |                  | 426.234710     | 213.620993       | <b>V</b> | 1793.973087 | 897.490182      | 1776.946538    | 888.976907       | 1775.962522    | 888.484899       | 13 |
| 6  | 531.277303  | 266.142290      |                |                  | 513.266738     | 257.137007       | <b>S</b> | 1694.904673 | 847.955975      | 1677.878124    | 839.442700       | 1676.894108    | 838.950692       | 12 |
| 7  | 970.502629  | 485.754953      | 953.476080     | 477.241678       | 952.492064     | 476.749670       | <b>Q</b> | 1607.872645 | 804.439961      | 1590.846096    | 795.926686       | 1589.862080    | 795.434678       | 11 |
| 8  | 1083.586693 | 542.296985      | 1066.560144    | 533.783710       | 1065.576128    | 533.291702       | <b>I</b> | 1168.647319 | 584.827298      | 1151.620770    | 576.314023       | 1150.636754    | 575.822015       | 10 |
| 9  | 1230.655107 | 615.831192      | 1213.628558    | 607.317917       | 1212.644542    | 606.825909       | <b>F</b> | 1055.563255 | 528.285266      | 1038.536706    | 519.771991       | 1037.552690    | 519.279983       | 9  |
| 10 | 1367.714019 | 684.360648      | 1350.687470    | 675.847373       | 1349.703454    | 675.355365       | <b>H</b> | 908.494841  | 454.751059      | 891.468292     | 446.237784       | 890.484276     | 445.745776       | 8  |
| 11 | 1454.746047 | 727.876662      | 1437.719498    | 719.363387       | 1436.735482    | 718.871379       | <b>S</b> | 771.435929  | 386.221603      | 754.409380     | 377.708328       | 753.425364     | 377.216320       | 7  |
| 12 | 1551.798811 | 776.403044      | 1534.772262    | 767.889769       | 1533.788246    | 767.397761       | <b>P</b> | 684.403901  | 342.705589      | 667.377352     | 334.192314       | 666.393336     | 333.700306       | 6  |
| 13 | 1666.825754 | 833.916515      | 1649.799205    | 825.403241       | 1648.815189    | 824.911233       | <b>D</b> | 587.351137  | 294.179207      | 570.324588     | 285.665932       | 569.340572     | 285.173924       | 5  |
| 14 | 1779.909818 | 890.458547      | 1762.883269    | 881.945273       | 1761.899253    | 881.453265       | <b>L</b> | 472.324194  | 236.665735      | 455.297645     | 228.152460       |                |                  | 4  |
| 15 | 1850.946932 | 925.977104      | 1833.920383    | 917.463830       | 1832.936367    | 916.971822       | <b>A</b> | 359.240130  | 180.123703      | 342.213581     | 171.610429       |                |                  | 3  |
| 16 | 1964.030996 | 982.519136      | 1947.004447    | 974.005862       | 1946.020431    | 973.513853       | <b>I</b> | 288.203016  | 144.605146      | 271.176467     | 136.091872       |                |                  | 2  |
| 17 |             |                 |                |                  |                |                  | <b>R</b> | 175.118952  | 88.063114       | 158.092403     | 79.549840        |                |                  | 1  |

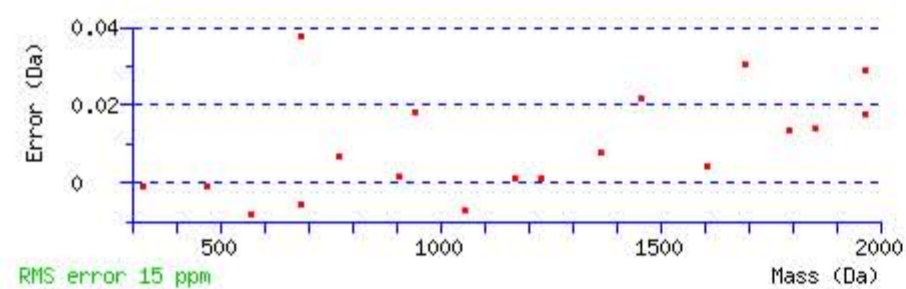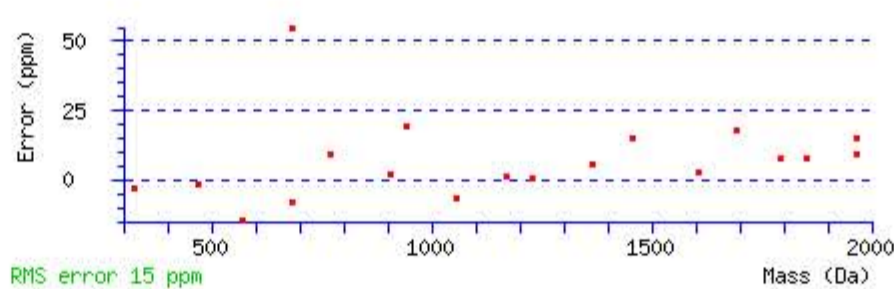

NCBI BLAST search of [GVTSVSQIFHSPDLAIR](#)

(Parameters: blastp, nr protein database, expect=20000, no filter, PAM30)

Other BLAST [web gateways](#)

All matches to this query

| Score | Mr(calc):   | Delta     | Sequence                             |
|-------|-------------|-----------|--------------------------------------|
| 74.4  | 2137.135406 | 0.022622  | <a href="#">GVTSVSQIFHSPDLAIR</a>    |
| 1.1   | 2137.185455 | -0.027427 | <a href="#">ISERTPSALAIENANVLAR</a>  |
| 0.2   | 2137.178955 | -0.020927 | <a href="#">VAEAMRLAGPLARTVADLQR</a> |

Mascot: <http://www.matrixscience.com/>



# MASCOT Search Results

## Peptide View

MS/MS Fragmentation of **EAQLPVIENK**

Found in **PLMN\_HUMAN**, Plasminogen OS=Homo sapiens GN=PLG PE=1 SV=2

Match to Query 32464: 1450.784868 from(726.399710,2+) rtinseconds(1964) index(5676)

Title: Locus:1.1.1.1493.10 File:"2013-07-02 CLN FXIII 60 min 2nd F 1.wiff"

Data file C:\Program Files (x86)\Matrix Science\Mascot Daemon\mgf5 FXIII 60 min 2nd\mascot\_daemon\_merge.mgf

Click mouse within plot area to zoom in by factor of two about that point

Or, Plot from  to  Da

Label all possible matches  Label matches used for scoring

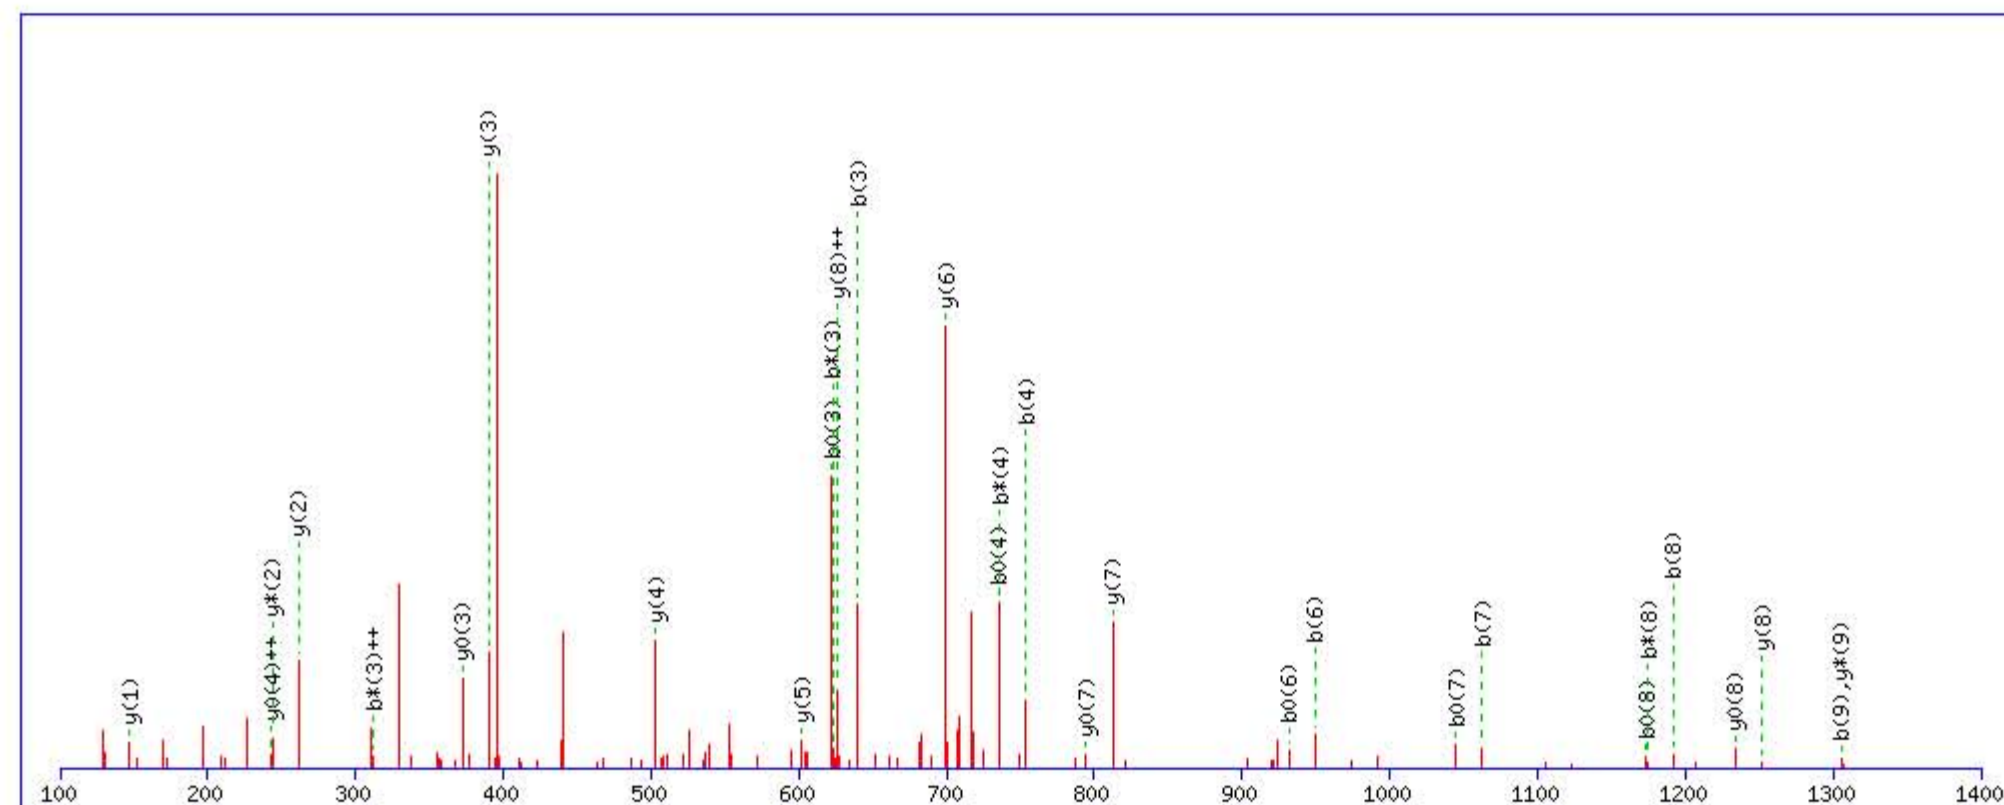

Monoisotopic mass of neutral peptide Mr(calc): 1450.785355

Fixed modifications: Carbamidomethyl (C) (apply to specified residues or termini only)

Variable modifications:

Q3 : Biotin:Thermo-21345 (Q)

Ions Score: 39 Expect: 0.00079

Matches : 30/100 fragment ions using 61 most intense peaks [\(help\)](#)

| #  | b           | b <sup>++</sup> | b <sup>+</sup> | b <sup>+++</sup> | b <sup>0</sup> | b <sup>0++</sup> | Seq. | y           | y <sup>++</sup> | y <sup>+</sup> | y <sup>+++</sup> | y <sup>0</sup> | y <sup>0++</sup> | #  |
|----|-------------|-----------------|----------------|------------------|----------------|------------------|------|-------------|-----------------|----------------|------------------|----------------|------------------|----|
| 1  | 130.049869  | 65.528572       |                |                  | 112.039304     | 56.523290        | E    |             |                 |                |                  |                |                  | 10 |
| 2  | 201.086983  | 101.047130      |                |                  | 183.076418     | 92.041847        | A    | 1322.750070 | 661.878673      | 1305.723521    | 653.365398       | 1304.739505    | 652.873390       | 9  |
| 3  | 640.312309  | 320.659793      | 623.285760     | 312.146518       | 622.301744     | 311.654510       | Q    | 1251.712956 | 626.360116      | 1234.686407    | 617.846841       | 1233.702391    | 617.354833       | 8  |
| 4  | 753.396373  | 377.201825      | 736.369824     | 368.688550       | 735.385808     | 368.196542       | L    | 812.487630  | 406.747453      | 795.461081     | 398.234178       | 794.477065     | 397.742170       | 7  |
| 5  | 850.449137  | 425.728207      | 833.422588     | 417.214932       | 832.438572     | 416.722924       | P    | 699.403566  | 350.205421      | 682.377017     | 341.692146       | 681.393001     | 341.200138       | 6  |
| 6  | 949.517551  | 475.262414      | 932.491002     | 466.749139       | 931.506986     | 466.257131       | V    | 602.350802  | 301.679039      | 585.324253     | 293.165764       | 584.340237     | 292.673756       | 5  |
| 7  | 1062.601615 | 531.804446      | 1045.575066    | 523.291171       | 1044.591050    | 522.799163       | I    | 503.282388  | 252.144832      | 486.255839     | 243.631557       | 485.271823     | 243.139549       | 4  |
| 8  | 1191.644208 | 596.325742      | 1174.617659    | 587.812468       | 1173.633643    | 587.320459       | E    | 390.198324  | 195.602800      | 373.171775     | 187.089525       | 372.187759     | 186.597517       | 3  |
| 9  | 1305.687135 | 653.347205      | 1288.660586    | 644.833931       | 1287.676570    | 644.341923       | N    | 261.155731  | 131.081503      | 244.129182     | 122.568229       |                |                  | 2  |
| 10 |             |                 |                |                  |                |                  | K    | 147.112804  | 74.060040       | 130.086255     | 65.546765        |                |                  | 1  |

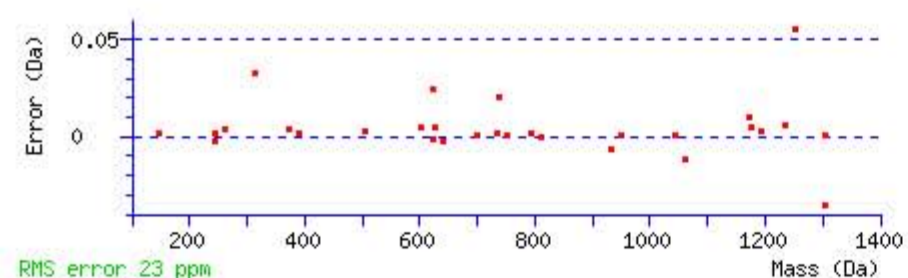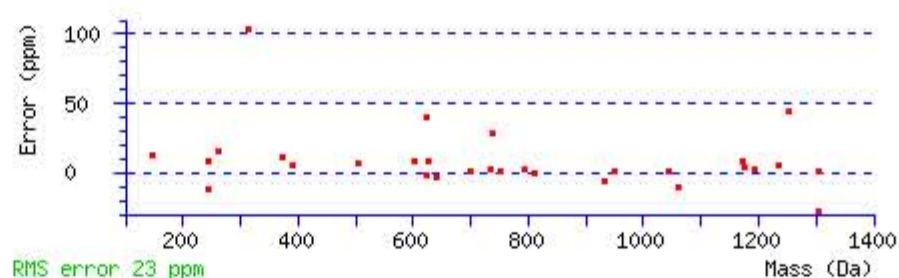

NCBI BLAST search of **EAQLPVIENK**

(Parameters: blastp, nr protein database, expect=20000, no filter, PAM30)

Other BLAST [web gateways](#)

## All matches to this query

| Score | Mr(calc):   | Delta     | Sequence                     |
|-------|-------------|-----------|------------------------------|
| 38.6  | 1450.785355 | -0.000487 | <a href="#">EAQLPVIENK</a>   |
| 5.3   | 1450.764236 | 0.020632  | <a href="#">EIFHPEIQK</a>    |
| 4.5   | 1450.790527 | -0.005659 | <a href="#">QNIWRHNRLSK</a>  |
| 3.9   | 1450.764236 | 0.020632  | <a href="#">AEPPTWAQLK</a>   |
| 2.5   | 1450.796600 | -0.011732 | <a href="#">QISAVHKETK</a>   |
| 0.9   | 1450.789429 | -0.004561 | <a href="#">VIAFGFMVPDVK</a> |
| 0.8   | 1450.775467 | 0.009401  | <a href="#">QAPPTKWNK</a>    |



# MASCOT Search Results

## Peptide View

MS/MS Fragmentation of **CQSWSSMTPHR**

Found in **PLMN\_HUMAN**, Plasminogen OS=Homo sapiens GN=PLG PE=1 SV=2

Match to Query 40196: 1686.740292 from(563.254040,3+) rtinseconds(1783) index(67397)

Title: Locus:1.1.1.1558.16 File:"2013-07-02 CLN FXIII 60 min 2nd FT.wiff"

Data file C:\Program Files (x86)\Matrix Science\Mascot Daemon\mgf5 FXIII 60 min 2nd\mascot\_daemon\_merge.mgf

Click mouse within plot area to zoom in by factor of two about that point

Or, Plot from  to  Da

Label all possible matches  Label matches used for scoring

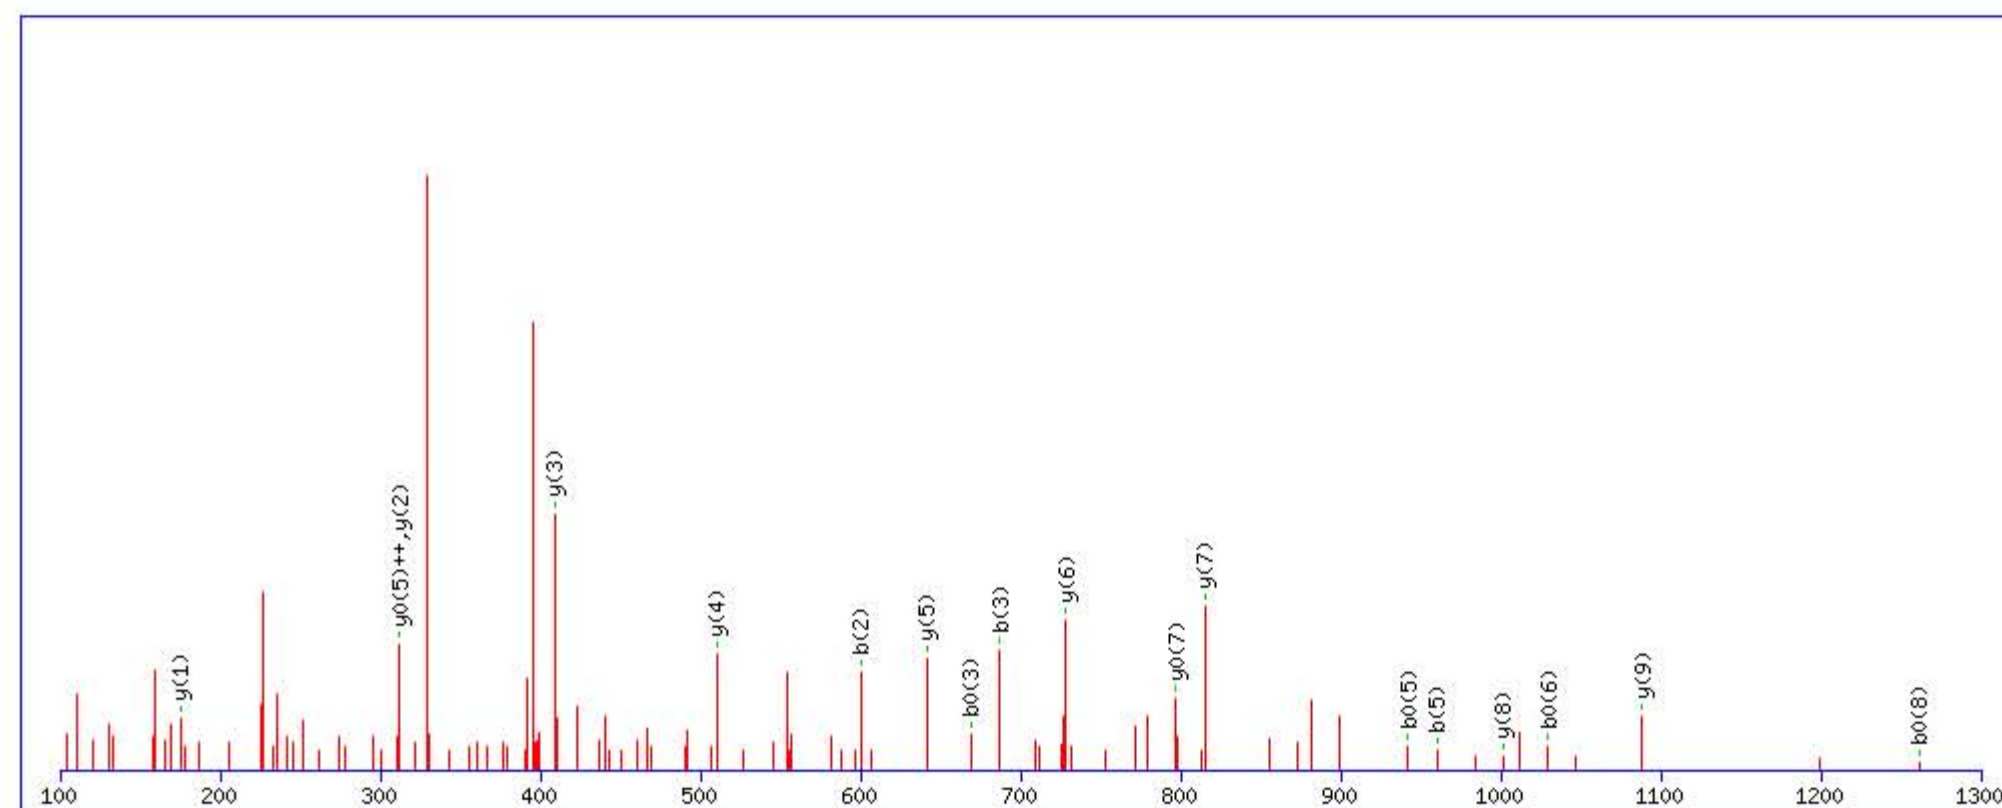

Monoisotopic mass of neutral peptide  $M_r(\text{calc})$ : 1686.742889

Fixed modifications: Carbamidomethyl (C) (apply to specified residues or termini only)

Variable modifications:

Q2 : Biotin:Thermo-21345 (Q)

Ions Score: 52 Expect: 4.1e-005

Matches : 18/108 fragment ions using 32 most intense peaks [\(help\)](#)

| #  | b                 | b <sup>++</sup> | b <sup>+</sup> | b <sup>*++</sup> | b <sup>0</sup>     | b <sup>0++</sup> | Seq. | y                  | y <sup>++</sup> | y <sup>+</sup> | y <sup>*++</sup> | y <sup>0</sup>    | y <sup>0++</sup>  | #  |
|----|-------------------|-----------------|----------------|------------------|--------------------|------------------|------|--------------------|-----------------|----------------|------------------|-------------------|-------------------|----|
| 1  | 161.037925        | 81.022600       |                |                  |                    |                  | C    |                    |                 |                |                  |                   |                   | 11 |
| 2  | <b>600.263251</b> | 300.635264      | 583.236702     | 292.121989       |                    |                  | Q    | 1527.719515        | 764.363396      | 1510.692966    | 755.850121       | 1509.708950       | 755.358113        | 10 |
| 3  | <b>687.295279</b> | 344.151278      | 670.268730     | 335.638003       | <b>669.284714</b>  | 335.145995       | S    | <b>1088.494189</b> | 544.750733      | 1071.467640    | 536.237458       | 1070.483624       | 535.745450        | 9  |
| 4  | 873.374592        | 437.190934      | 856.348043     | 428.677660       | 855.364027         | 428.185652       | W    | <b>1001.462161</b> | 501.234719      | 984.435612     | 492.721444       | 983.451596        | 492.229436        | 8  |
| 5  | <b>960.406620</b> | 480.706948      | 943.380071     | 472.193674       | <b>942.396055</b>  | 471.701666       | S    | <b>815.382848</b>  | 408.195062      | 798.356299     | 399.681787       | <b>797.372283</b> | 399.189779        | 7  |
| 6  | 1047.438648       | 524.222962      | 1030.412099    | 515.709688       | <b>1029.428083</b> | 515.217680       | S    | <b>728.350820</b>  | 364.679048      | 711.324271     | 356.165774       | 710.340255        | 355.673766        | 6  |
| 7  | 1178.479133       | 589.743205      | 1161.452584    | 581.229930       | 1160.468568        | 580.737922       | M    | <b>641.318792</b>  | 321.163034      | 624.292243     | 312.649760       | 623.308227        | <b>312.157752</b> | 5  |
| 8  | 1279.526812       | 640.267044      | 1262.500263    | 631.753770       | <b>1261.516247</b> | 631.261762       | T    | <b>510.278307</b>  | 255.642791      | 493.251758     | 247.129517       | 492.267742        | 246.637509        | 4  |
| 9  | 1376.579576       | 688.793426      | 1359.553027    | 680.280152       | 1358.569011        | 679.788144       | P    | <b>409.230628</b>  | 205.118952      | 392.204079     | 196.605677       |                   |                   | 3  |
| 10 | 1513.638488       | 757.322882      | 1496.611939    | 748.809608       | 1495.627923        | 748.317600       | H    | <b>312.177864</b>  | 156.592570      | 295.151315     | 148.079295       |                   |                   | 2  |
| 11 |                   |                 |                |                  |                    |                  | R    | <b>175.118952</b>  | 88.063114       | 158.092403     | 79.549839        |                   |                   | 1  |

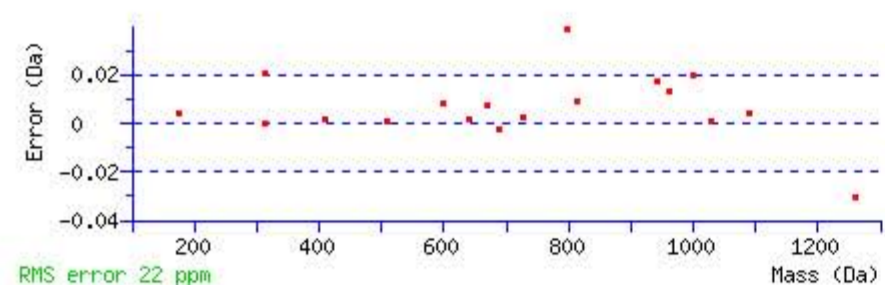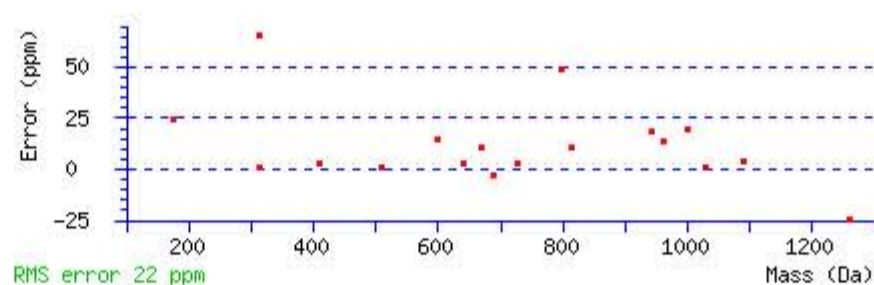

NCBI BLAST search of **CQSWSSMTPHR**

(Parameters: blastp, nr protein database, expect=20000, no filter, PAM30)

Other BLAST [web gateways](#)

All matches to this query

| Score | $M_r(\text{calc})$ : | Delta     | Sequence                        |
|-------|----------------------|-----------|---------------------------------|
| 51.6  | 1686.742889          | -0.002597 | <a href="#">CQSWSSMTPHR</a>     |
| 5.3   | 1686.759964          | -0.019672 | <a href="#">MAMAMSDSGASRLRR</a> |

Mascot: <http://www.matrixscience.com/>



# MASCOT Search Results

## Peptide View

MS/MS Fragmentation of **EQQCHEMAENR**

Found in **PLGB\_HUMAN**, Plasminogen-like protein B OS=Homo sapiens GN=PLGLB1 PE=1 SV=1

Match to Query 40212: 1687.782908 from(844.898730,2+) rtinseconds(1812) index(67558)

Title: Locus:1.1.1.1568.12 File:"2013-07-02 CLN FXIII 60 min 2nd FT.wiff"

Data file C:\Program Files (x86)\Matrix Science\Mascot Daemon\mgf\5 FXIII 60 min 2nd\mascot\_daemon\_merge.mgf

Click mouse within plot area to zoom in by factor of two about that point

Or, Plot from  to  Da

Label all possible matches  Label matches used for scoring

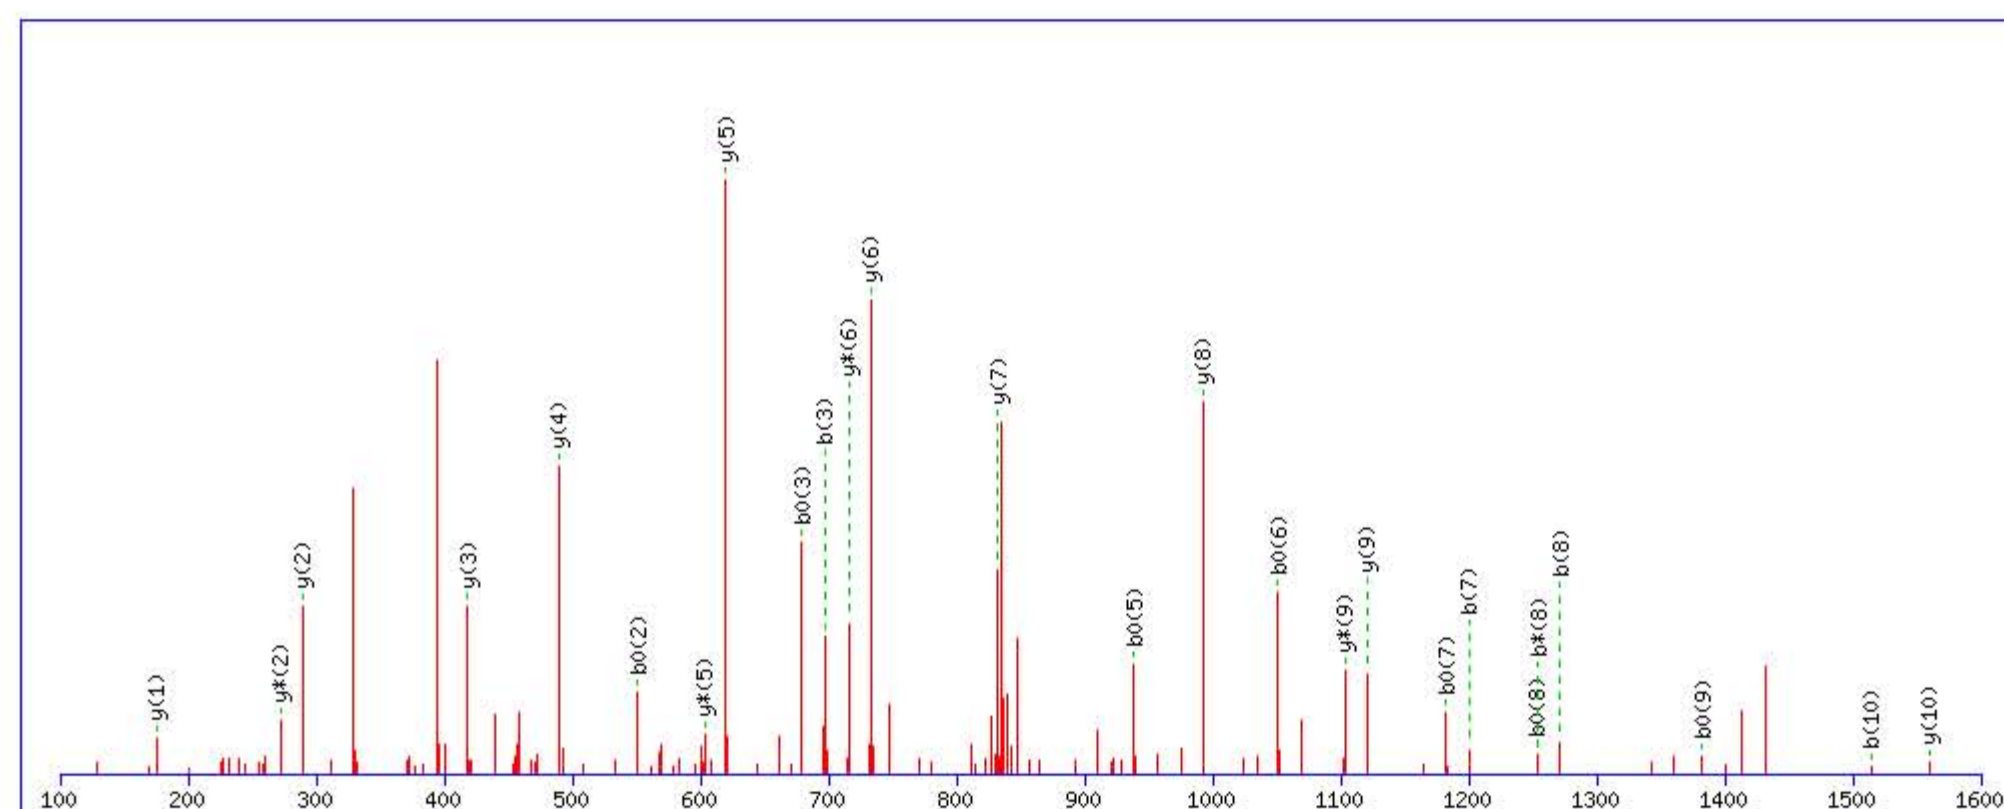

Monoisotopic mass of neutral peptide Mr(calc): 1687.784393

Fixed modifications: Carbamidomethyl (C) (apply to specified residues or termini only)

Variable modifications:

Q2 : Biotin:Thermo-21345 (Q)

Ions Score: 71 Expect: 1.1e-006

Matches : 26/114 fragment ions using 42 most intense peaks [\(help\)](#)

| #  | b           | b <sup>++</sup> | b <sup>*</sup> | b <sup>+++</sup> | b <sup>0</sup> | b <sup>0++</sup> | Seq. | y           | y <sup>++</sup> | y <sup>*</sup> | y <sup>+++</sup> | y <sup>0</sup> | y <sup>0++</sup> | #  |
|----|-------------|-----------------|----------------|------------------|----------------|------------------|------|-------------|-----------------|----------------|------------------|----------------|------------------|----|
| 1  | 130.049869  | 65.528572       |                |                  | 112.039304     | 56.523290        | E    |             |                 |                |                  |                |                  | 11 |
| 2  | 569.275195  | 285.141236      | 552.248646     | 276.627961       | 551.264630     | 276.135953       | Q    | 1559.749102 | 780.378189      | 1542.722553    | 771.864915       | 1541.738537    | 771.372907       | 10 |
| 3  | 697.333773  | 349.170525      | 680.307224     | 340.657250       | 679.323208     | 340.165242       | Q    | 1120.523776 | 560.765526      | 1103.497227    | 552.252252       | 1102.513211    | 551.760244       | 9  |
| 4  | 857.364422  | 429.185849      | 840.337873     | 420.672575       | 839.353857     | 420.180567       | C    | 992.465198  | 496.736237      | 975.438649     | 488.222963       | 974.454633     | 487.730955       | 8  |
| 5  | 956.432836  | 478.720056      | 939.406287     | 470.206782       | 938.422271     | 469.714774       | V    | 832.434549  | 416.720913      | 815.408000     | 408.207638       | 814.423984     | 407.715630       | 7  |
| 6  | 1069.516900 | 535.262088      | 1052.490351    | 526.748814       | 1051.506335    | 526.256806       | I    | 733.366135  | 367.186706      | 716.339586     | 358.673431       | 715.355570     | 358.181423       | 6  |
| 7  | 1200.557385 | 600.782331      | 1183.530836    | 592.269056       | 1182.546820    | 591.777048       | M    | 620.282071  | 310.644674      | 603.255522     | 302.131399       | 602.271506     | 301.639391       | 5  |
| 8  | 1271.594499 | 636.300888      | 1254.567950    | 627.787613       | 1253.583934    | 627.295605       | A    | 489.241586  | 245.124431      | 472.215037     | 236.611156       | 471.231021     | 236.119148       | 4  |
| 9  | 1400.637092 | 700.822184      | 1383.610543    | 692.308910       | 1382.626527    | 691.816902       | E    | 418.204472  | 209.605874      | 401.177923     | 201.092600       | 400.193907     | 200.600592       | 3  |
| 10 | 1514.680019 | 757.843648      | 1497.653470    | 749.330373       | 1496.669454    | 748.838365       | N    | 289.161879  | 145.084577      | 272.135330     | 136.571303       |                |                  | 2  |
| 11 |             |                 |                |                  |                |                  | R    | 175.118952  | 88.063114       | 158.092403     | 79.549839        |                |                  | 1  |

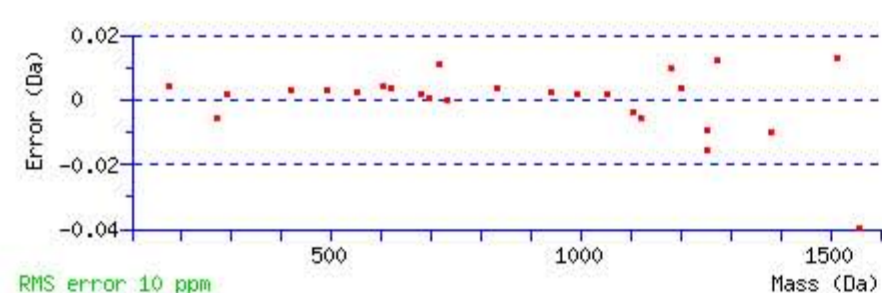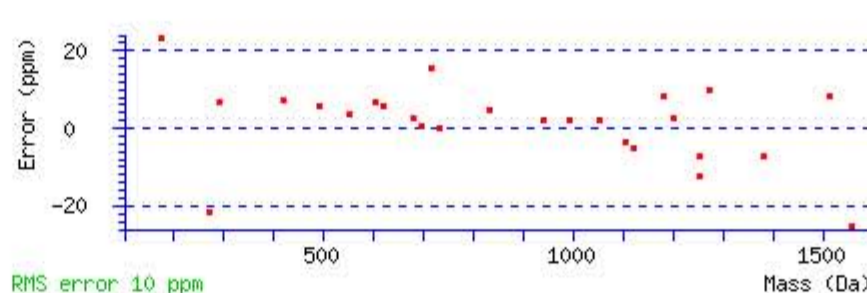

NCBI BLAST search of [EQQCHEMAENR](#)

(Parameters: blastp, nr protein database, expect=20000, no filter, PAM30)

Other BLAST [web gateways](#)

## All matches to this query

| Score | Mr(calc):   | Delta     | Sequence                          |
|-------|-------------|-----------|-----------------------------------|
| 70.6  | 1687.784393 | -0.001485 | <a href="#">EQQCHEMAENR</a>       |
| 68.7  | 1687.784393 | -0.001485 | <a href="#">EQQCHEMAENR</a>       |
| 10.7  | 1687.781006 | 0.001902  | <a href="#">ELMAWNQAENR</a>       |
| 7.0   | 1687.758408 | 0.024500  | <a href="#">ADGSCSTDFKTTRSR</a>   |
| 4.1   | 1687.763275 | 0.019633  | <a href="#">KMFQQTWMDNMGR</a>     |
| 3.6   | 1687.773666 | 0.009242  | <a href="#">TTGPPSGQMPDNPPHR</a>  |
| 3.6   | 1687.776093 | 0.006815  | <a href="#">QQEEAQAASAAASAESR</a> |
| 3.4   | 1687.791382 | -0.008474 | <a href="#">GAEDSLADQAANKWGR</a>  |
| 2.2   | 1687.773193 | 0.009715  | <a href="#">FGAVCTCMEKATGLK</a>   |
| 2.2   | 1687.773636 | 0.009272  | <a href="#">GSSLCSYYGRSAAGPR</a>  |



# MASCOT SCIENCE Mascot Search Results

## Peptide View

MS/MS Fragmentation of **APWCHTTNSQVR**

Found in **PLMN\_HUMAN**, Plasminogen OS=Homo sapiens GN=PLG PE=1 SV=2

Match to Query 42017: 1766.825622 from(589.949150,3+) rtinseconds(1498) index(18476)

Title: Locus:1.1.1.524.8 File:"2013-07-02 CLN FXIII 60 min 2nd F 2.wiff"

Data file C:\Program Files (x86)\Matrix Science\Mascot Daemon\mgf5 FXIII 60 min 2nd\mascot\_daemon\_merge.mgf

Click mouse within plot area to zoom in by factor of two about that point

Or, Plot from  to  Da

Label all possible matches  Label matches used for scoring

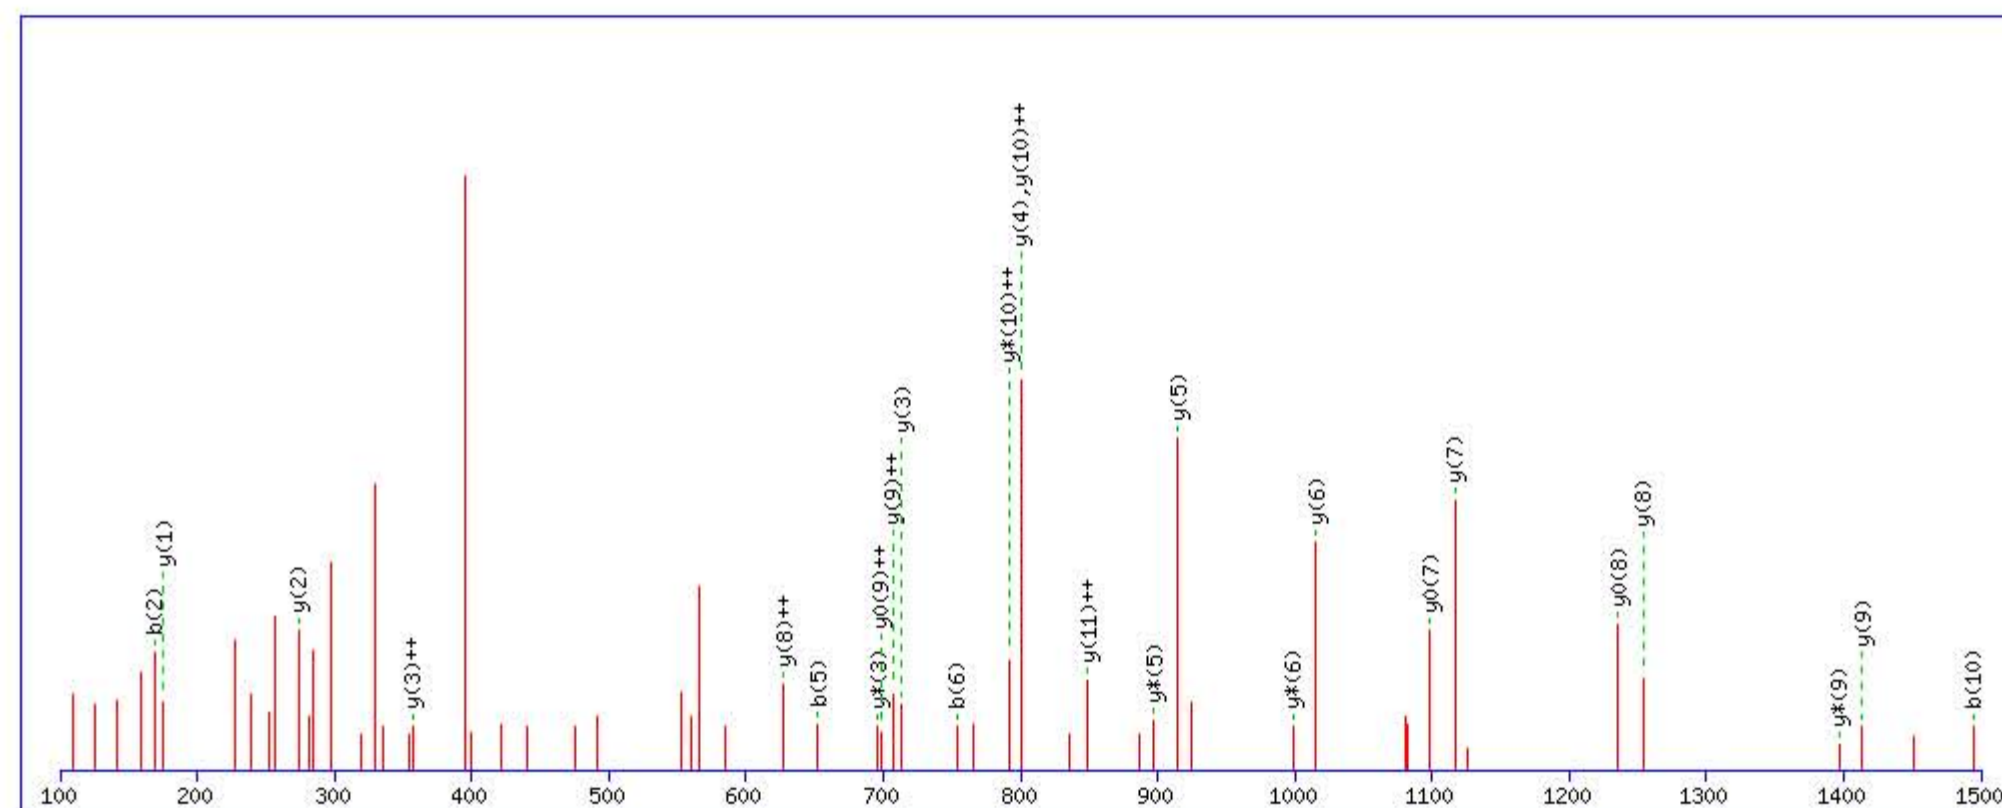

Monoisotopic mass of neutral peptide Mr(calc): 1766.834488

Fixed modifications: Carbamidomethyl (C) (apply to specified residues or termini only)

Variable modifications:

Q10 : Biotin:Thermo-21345 (Q)

Ions Score: 44 Expect: 0.00057

Matches : 26/102 fragment ions using 52 most intense peaks [\(help\)](#)

| #  | b                  | b <sup>++</sup> | b <sup>+</sup> | b <sup>*++</sup> | b <sup>0</sup> | b <sup>0++</sup> | Seq. | y                  | y <sup>++</sup>   | y <sup>+</sup>     | y <sup>*++</sup>  | y <sup>0</sup>     | y <sup>0++</sup>  | #  |
|----|--------------------|-----------------|----------------|------------------|----------------|------------------|------|--------------------|-------------------|--------------------|-------------------|--------------------|-------------------|----|
| 1  | 72.044390          | 36.525833       |                |                  |                |                  | A    |                    |                   |                    |                   |                    |                   | 12 |
| 2  | <b>169.097154</b>  | 85.052215       |                |                  |                |                  | P    | 1696.804643        | <b>848.905960</b> | 1679.778094        | 840.392685        | 1678.794078        | 839.900677        | 11 |
| 3  | 355.176467         | 178.091872      |                |                  |                |                  | W    | 1599.751879        | <b>800.379578</b> | 1582.725330        | <b>791.866303</b> | 1581.741314        | 791.374295        | 10 |
| 4  | 515.207116         | 258.107196      |                |                  |                |                  | C    | <b>1413.672566</b> | <b>707.339921</b> | <b>1396.646017</b> | 698.826647        | 1395.662001        | <b>698.334639</b> | 9  |
| 5  | <b>652.266028</b>  | 326.636652      |                |                  |                |                  | H    | <b>1253.641917</b> | <b>627.324597</b> | 1236.615368        | 618.811322        | <b>1235.631352</b> | 618.319314        | 8  |
| 6  | <b>753.313707</b>  | 377.160492      |                |                  | 735.303142     | 368.155209       | T    | <b>1116.583005</b> | 558.795141        | 1099.556456        | 550.281866        | <b>1098.572440</b> | 549.789858        | 7  |
| 7  | 854.361386         | 427.684331      |                |                  | 836.350821     | 418.679049       | T    | <b>1015.535326</b> | 508.271301        | <b>998.508777</b>  | 499.758027        | 997.524761         | 499.266019        | 6  |
| 8  | 968.404313         | 484.705795      | 951.377764     | 476.192520       | 950.393748     | 475.700512       | N    | <b>914.487647</b>  | 457.747462        | <b>897.461098</b>  | 449.234187        | 896.477082         | 448.742179        | 5  |
| 9  | 1055.436341        | 528.221809      | 1038.409792    | 519.708534       | 1037.425776    | 519.216526       | S    | <b>800.444720</b>  | 400.725998        | 783.418171         | 392.212724        | 782.434155         | 391.720716        | 4  |
| 10 | <b>1494.661667</b> | 747.834472      | 1477.635118    | 739.321197       | 1476.651102    | 738.829189       | Q    | <b>713.412692</b>  | <b>357.209984</b> | <b>696.386143</b>  | 348.696710        |                    |                   | 3  |
| 11 | 1593.730081        | 797.368679      | 1576.703532    | 788.855404       | 1575.719516    | 788.363396       | V    | <b>274.187366</b>  | 137.597321        | 257.160817         | 129.084047        |                    |                   | 2  |
| 12 |                    |                 |                |                  |                |                  | R    | <b>175.118952</b>  | 88.063114         | 158.092403         | 79.549839         |                    |                   | 1  |

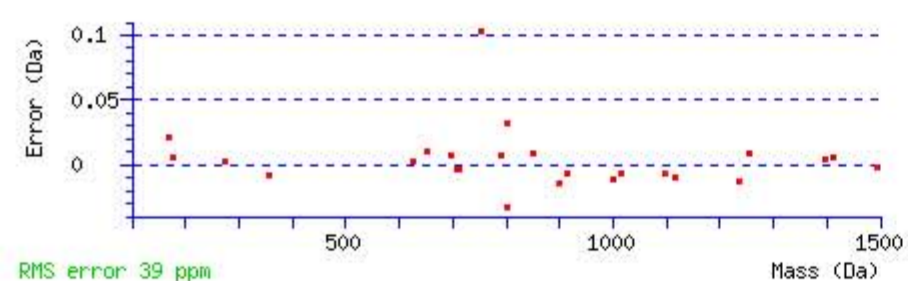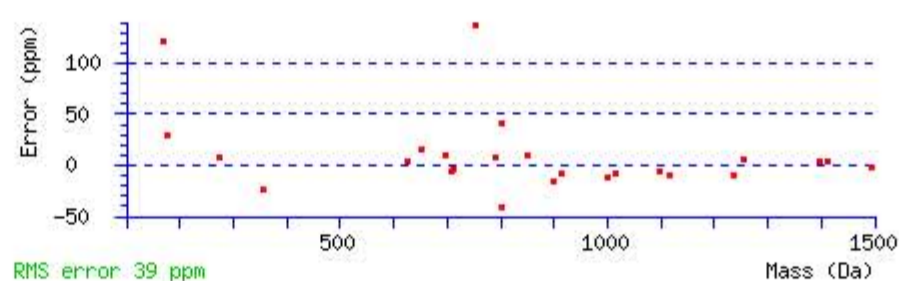

NCBI BLAST search of **APWCHTTNSQVR**

(Parameters: blastp, nr protein database, expect=20000, no filter, PAM30)

Other BLAST [web gateways](#)

All matches to this query

| Score | Mr(calc):   | Delta     | Sequence                     |
|-------|-------------|-----------|------------------------------|
| 44.0  | 1766.834488 | -0.008866 | <a href="#">APWCHTTNSQVR</a> |

Mascot: <http://www.matrixscience.com/>



# MASCOT SEARCH RESULTS

## Peptide View

MS/MS Fragmentation of **EQQCHEMAENR**

Found in **PLGB\_HUMAN**, Plasminogen-like protein B OS=Homo sapiens GN=PLGLB1 PE=1 SV=1

Match to Query 46476: 1998.951822 from(667.324550,3+) rtinseconds(2127) index(69541)

Title: Locus:1.1.1.1678.6 File:"2013-07-02 CLN FXIII 60 min 2nd FT.wiff"

Data file C:\Program Files (x86)\Matrix Science\Mascot Daemon\mgf5 FXIII 60 min 2nd\mascot\_daemon\_merge.mgf

Click mouse within plot area to zoom in by factor of two about that point

Or, Plot from  to  Da

Label all possible matches  Label matches used for scoring

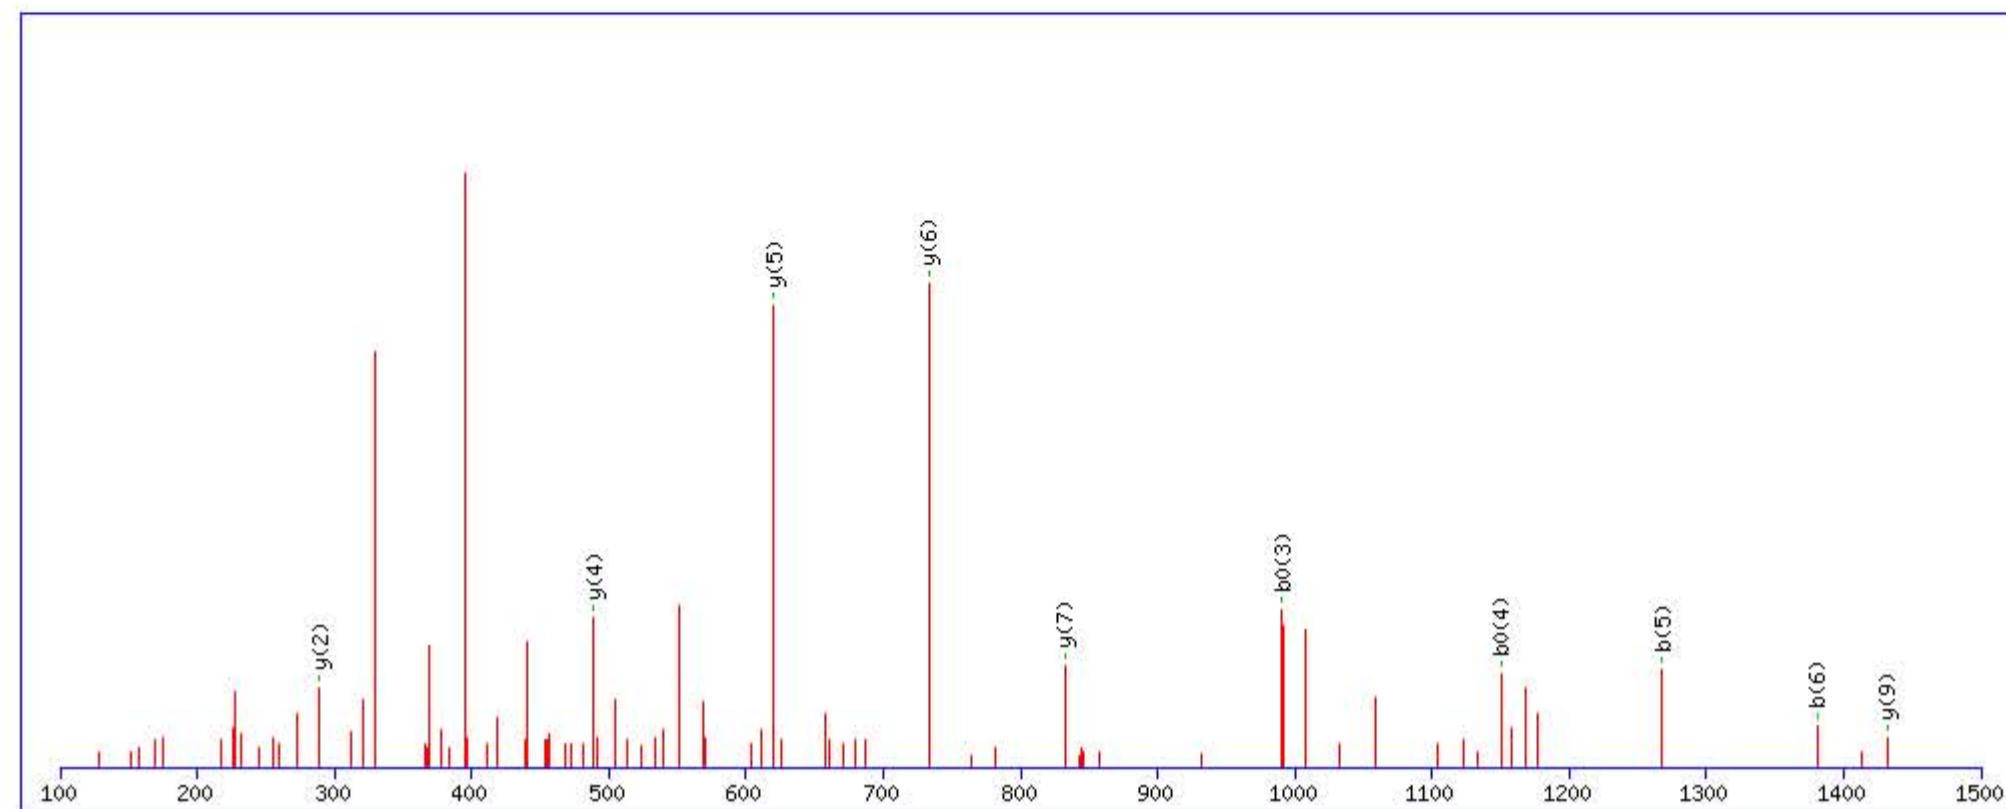

Monoisotopic mass of neutral peptide Mr(calc): 1998.951141

Fixed modifications: Carbamidomethyl (C) (apply to specified residues or termini only)

Variable modifications:

Q2 : Biotin:Thermo-21345 (Q)

Q3 : Biotin:Thermo-21345 (Q)

Ions Score: 37 Expect: 0.00068

Matches : 10/114 fragment ions using 14 most intense peaks [\(help\)](#)

| #  | b           | b <sup>++</sup> | b <sup>*</sup> | b <sup>+++</sup> | b <sup>0</sup> | b <sup>0++</sup> | Seq. | y           | y <sup>++</sup> | y <sup>*</sup> | y <sup>+++</sup> | y <sup>0</sup> | y <sup>0++</sup> | #  |
|----|-------------|-----------------|----------------|------------------|----------------|------------------|------|-------------|-----------------|----------------|------------------|----------------|------------------|----|
| 1  | 130.049869  | 65.528572       |                |                  | 112.039304     | 56.523290        | E    |             |                 |                |                  |                |                  | 11 |
| 2  | 569.275195  | 285.141236      | 552.248646     | 276.627961       | 551.264630     | 276.135953       | Q    | 1870.915850 | 935.961563      | 1853.889301    | 927.448288       | 1852.905285    | 926.956280       | 10 |
| 3  | 1008.500521 | 504.753899      | 991.473972     | 496.240624       | 990.489956     | 495.748616       | Q    | 1431.690524 | 716.348900      | 1414.663975    | 707.835625       | 1413.679959    | 707.343617       | 9  |
| 4  | 1168.531170 | 584.769223      | 1151.504621    | 576.255949       | 1150.520605    | 575.763940       | C    | 992.465198  | 496.736237      | 975.438649     | 488.222962       | 974.454633     | 487.730954       | 8  |
| 5  | 1267.599584 | 634.303430      | 1250.573035    | 625.790156       | 1249.589019    | 625.298148       | V    | 832.434549  | 416.720912      | 815.408000     | 408.207638       | 814.423984     | 407.715630       | 7  |
| 6  | 1380.683648 | 690.845462      | 1363.657099    | 682.332188       | 1362.673083    | 681.840179       | I    | 733.366135  | 367.186705      | 716.339586     | 358.673431       | 715.355570     | 358.181423       | 6  |
| 7  | 1511.724133 | 756.365704      | 1494.697584    | 747.852430       | 1493.713568    | 747.360422       | M    | 620.282071  | 310.644673      | 603.255522     | 302.131399       | 602.271506     | 301.639391       | 5  |
| 8  | 1582.761247 | 791.884261      | 1565.734698    | 783.370987       | 1564.750682    | 782.878979       | A    | 489.241586  | 245.124431      | 472.215037     | 236.611156       | 471.231021     | 236.119148       | 4  |
| 9  | 1711.803840 | 856.405558      | 1694.777291    | 847.892283       | 1693.793275    | 847.400275       | E    | 418.204472  | 209.605874      | 401.177923     | 201.092599       | 400.193907     | 200.600591       | 3  |
| 10 | 1825.846767 | 913.427021      | 1808.820218    | 904.913747       | 1807.836202    | 904.421739       | N    | 289.161879  | 145.084577      | 272.135330     | 136.571303       |                |                  | 2  |
| 11 |             |                 |                |                  |                |                  | R    | 175.118952  | 88.063114       | 158.092403     | 79.549839        |                |                  | 1  |

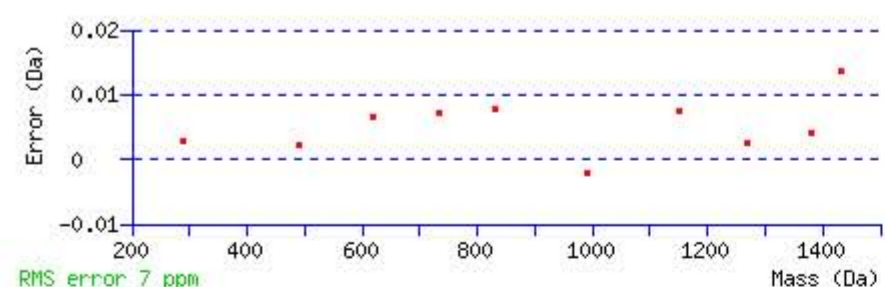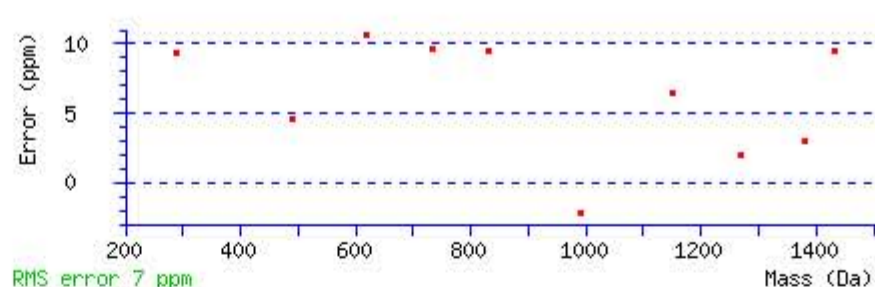

NCBI BLAST search of **EQQCHEMAENR**

(Parameters: blastp, nr protein database, expect=20000, no filter, PAM30)

Other BLAST [web gateways](#)

All matches to this query

| Score | Mr(calc):   | Delta     | Sequence                          |
|-------|-------------|-----------|-----------------------------------|
| 37.4  | 1998.951141 | 0.000681  | <a href="#">EQQCHEMAENR</a>       |
| 3.5   | 1998.979935 | -0.028113 | <a href="#">EYVLRPSYNGSFVTPDR</a> |
| 3.1   | 1998.942841 | 0.008981  | <a href="#">QEEEAQAAAAAASAESR</a> |
| 3.1   | 1998.950912 | 0.000910  | <a href="#">YEAQLRIFYQMYDK</a>    |



# MASCOT Search Results

## Peptide View

MS/MS Fragmentation of **CTTPPPSSGPTYQCLK**

Found in **PLMN\_HUMAN**, Plasminogen OS=Homo sapiens GN=PLG PE=1 SV=2

Match to Query 49314: 2103.978162 from(702.333330,3+) rtinseconds(1757) index(67249)

Title: Locus:1.1.1.1549.21 File:"2013-07-02 CLN FXIII 60 min 2nd FT.wiff"

Data file C:\Program Files (x86)\Matrix Science\Mascot Daemon\mgf\5 FXIII 60 min 2nd\mascot\_daemon\_merge.mgf

Click mouse within plot area to zoom in by factor of two about that point

Or, Plot from  to  Da

Label all possible matches  Label matches used for scoring

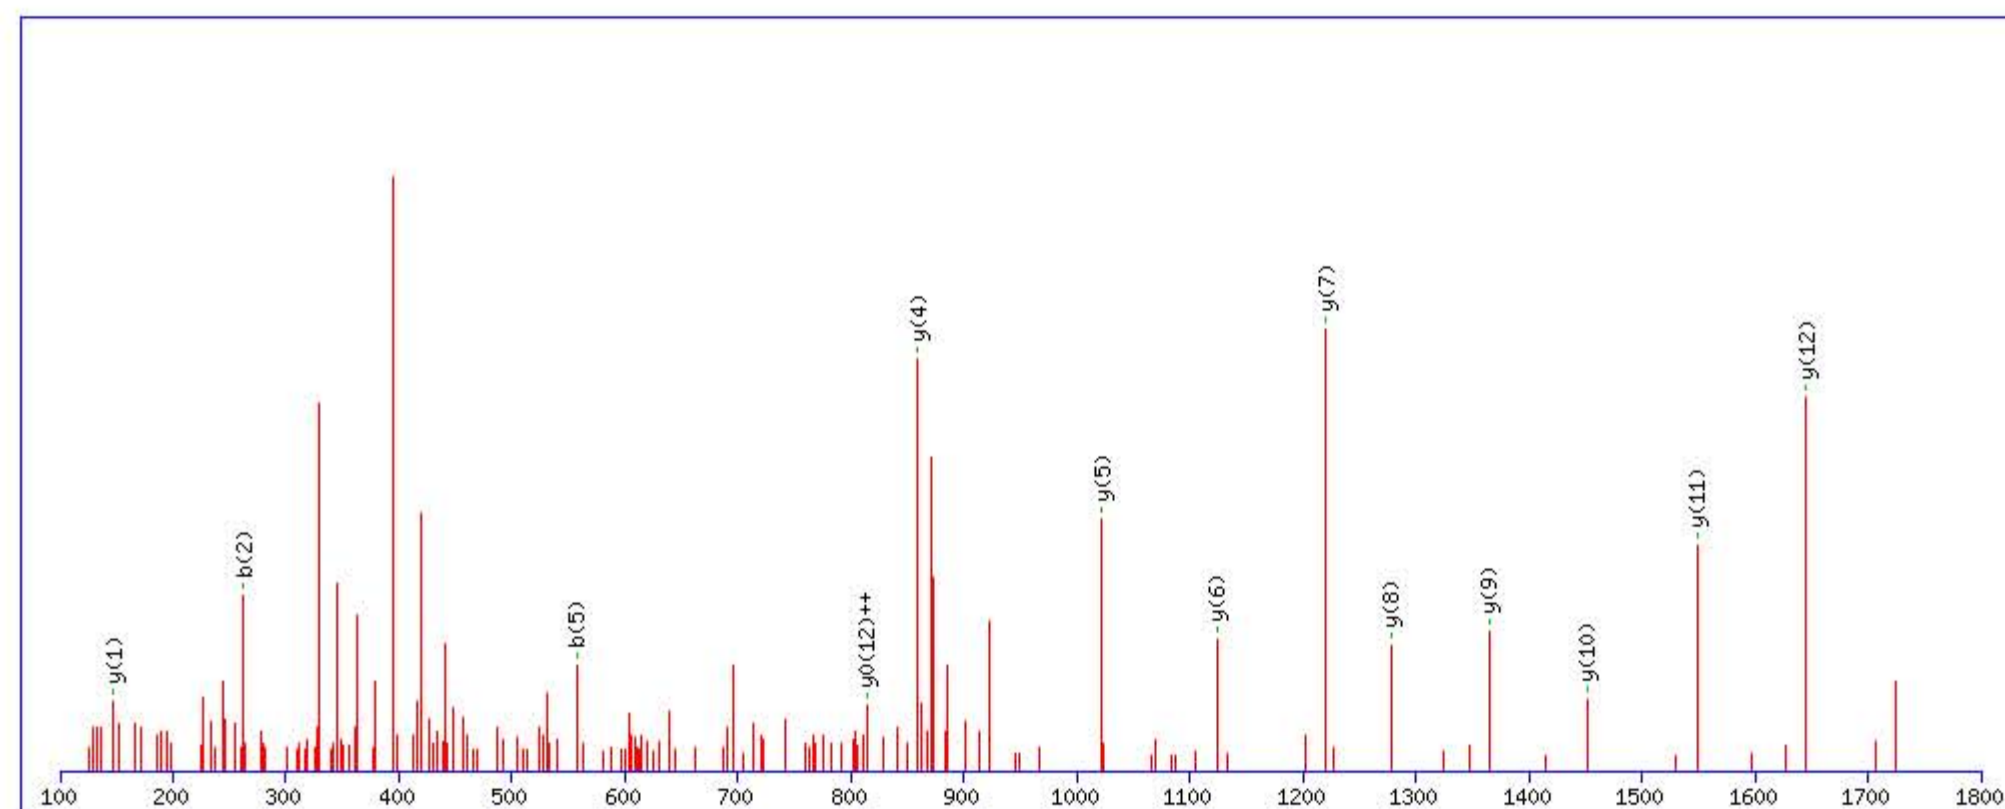

Monoisotopic mass of neutral peptide Mr(calc): 2103.979172

Fixed modifications: Carbamidomethyl (C) (apply to specified residues or termini only)

Variable modifications:

Q13 : Biotin:Thermo-21345 (Q)

Ions Score: 85 Expect: 5.1e-008

Matches : 13/144 fragment ions using 16 most intense peaks [\(help\)](#)

| #  | b                 | b <sup>++</sup> | b <sup>*</sup> | b <sup>*++</sup> | b <sup>0</sup> | b <sup>0++</sup> | Seq. | y                  | y <sup>++</sup> | y <sup>*</sup> | y <sup>*++</sup> | y <sup>0</sup> | y <sup>0++</sup>  | #  |
|----|-------------------|-----------------|----------------|------------------|----------------|------------------|------|--------------------|-----------------|----------------|------------------|----------------|-------------------|----|
| 1  | 161.037925        | 81.022600       |                |                  |                |                  | C    |                    |                 |                |                  |                |                   | 16 |
| 2  | <b>262.085604</b> | 131.546440      |                |                  | 244.075039     | 122.541158       | T    | 1944.955785        | 972.981531      | 1927.929236    | 964.468256       | 1926.945220    | 963.976248        | 15 |
| 3  | 363.133283        | 182.070280      |                |                  | 345.122718     | 173.064997       | T    | 1843.908106        | 922.457691      | 1826.881557    | 913.944417       | 1825.897541    | 913.452409        | 14 |
| 4  | 460.186047        | 230.596661      |                |                  | 442.175482     | 221.591379       | P    | 1742.860427        | 871.933852      | 1725.833878    | 863.420577       | 1724.849862    | 862.928569        | 13 |
| 5  | <b>557.238811</b> | 279.123044      |                |                  | 539.228246     | 270.117761       | P    | <b>1645.807663</b> | 823.407470      | 1628.781114    | 814.894195       | 1627.797098    | <b>814.402187</b> | 12 |
| 6  | 654.291575        | 327.649426      |                |                  | 636.281010     | 318.644143       | P    | <b>1548.754899</b> | 774.881088      | 1531.728350    | 766.367813       | 1530.744334    | 765.875805        | 11 |
| 7  | 741.323603        | 371.165440      |                |                  | 723.313038     | 362.160157       | S    | <b>1451.702135</b> | 726.354706      | 1434.675586    | 717.841431       | 1433.691570    | 717.349423        | 10 |
| 8  | 828.355631        | 414.681454      |                |                  | 810.345066     | 405.676171       | S    | <b>1364.670107</b> | 682.838692      | 1347.643558    | 674.325417       | 1346.659542    | 673.833409        | 9  |
| 9  | 885.377095        | 443.192186      |                |                  | 867.366530     | 434.186903       | G    | <b>1277.638079</b> | 639.322678      | 1260.611530    | 630.809403       | 1259.627514    | 630.317395        | 8  |
| 10 | 982.429859        | 491.718568      |                |                  | 964.419294     | 482.713285       | P    | <b>1220.616615</b> | 610.811946      | 1203.590066    | 602.298671       | 1202.606050    | 601.806663        | 7  |
| 11 | 1083.477538       | 542.242407      |                |                  | 1065.466973    | 533.237125       | T    | <b>1123.563851</b> | 562.285564      | 1106.537302    | 553.772289       | 1105.553286    | 553.280281        | 6  |
| 12 | 1246.540867       | 623.774072      |                |                  | 1228.530302    | 614.768789       | Y    | <b>1022.516172</b> | 511.761724      | 1005.489623    | 503.248450       |                |                   | 5  |
| 13 | 1685.766193       | 843.386735      | 1668.739644    | 834.873460       | 1667.755628    | 834.381452       | Q    | <b>859.452843</b>  | 430.230060      | 842.426294     | 421.716785       |                |                   | 4  |
| 14 | 1845.796842       | 923.402059      | 1828.770293    | 914.888785       | 1827.786277    | 914.396777       | C    | 420.227517         | 210.617396      | 403.200968     | 202.104122       |                |                   | 3  |
| 15 | 1958.880906       | 979.944091      | 1941.854357    | 971.430817       | 1940.870341    | 970.938809       | L    | 260.196868         | 130.602072      | 243.170319     | 122.088797       |                |                   | 2  |
| 16 |                   |                 |                |                  |                |                  | K    | <b>147.112804</b>  | 74.060040       | 130.086255     | 65.546765        |                |                   | 1  |

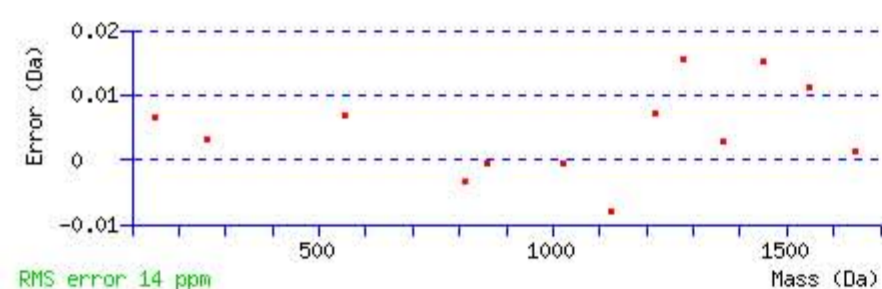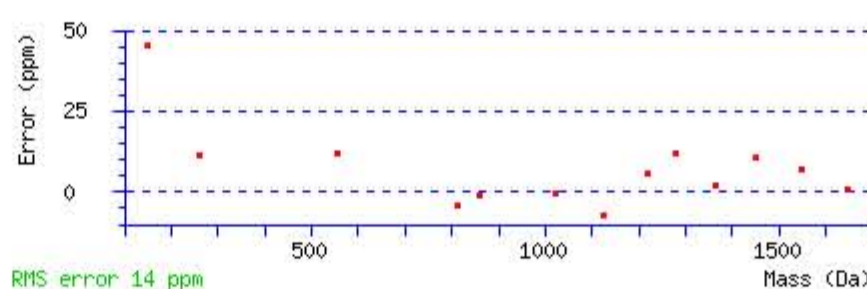

NCBI BLAST search of [CTTPPPSSGPTYQCLK](#)

(Parameters: blastp, nr protein database, expect=20000, no filter, PAM30)

Other BLAST [web gateways](#)

### All matches to this query

| Score | Mr(calc):   | Delta     | Sequence                           |
|-------|-------------|-----------|------------------------------------|
| 84.9  | 2103.979172 | -0.001010 | <a href="#">CTTPPPSSGPTYQCLK</a>   |
| 14.9  | 2103.964554 | 0.013608  | <a href="#">TAADTPAIMNWDLFFTMK</a> |



# MASCOT Search Results

## Peptide View

MS/MS Fragmentation of **VQSTELCAGHLAGGTDSCQGDSSGGPLVCFEK**  
 Found in **PLMN\_HUMAN**, Plasminogen OS=Homo sapiens GN=PLG PE=1 SV=2

Match to Query 53919: 3547.565772 from(1183.529200,3+) rtinseconds(2154) index(69692)  
 Title: Locus:1.1.1.1687.20 File:"2013-07-02 CLN FXIII 60 min 2nd FT.wiff"  
 Data file C:\Program Files (x86)\Matrix Science\Mascot Daemon\mgf5 FXIII 60 min 2nd\mascot\_daemon\_merge.mgf

Click mouse within plot area to zoom in by factor of two about that point

Or, Plot from  to  Da

Label all possible matches  Label matches used for scoring

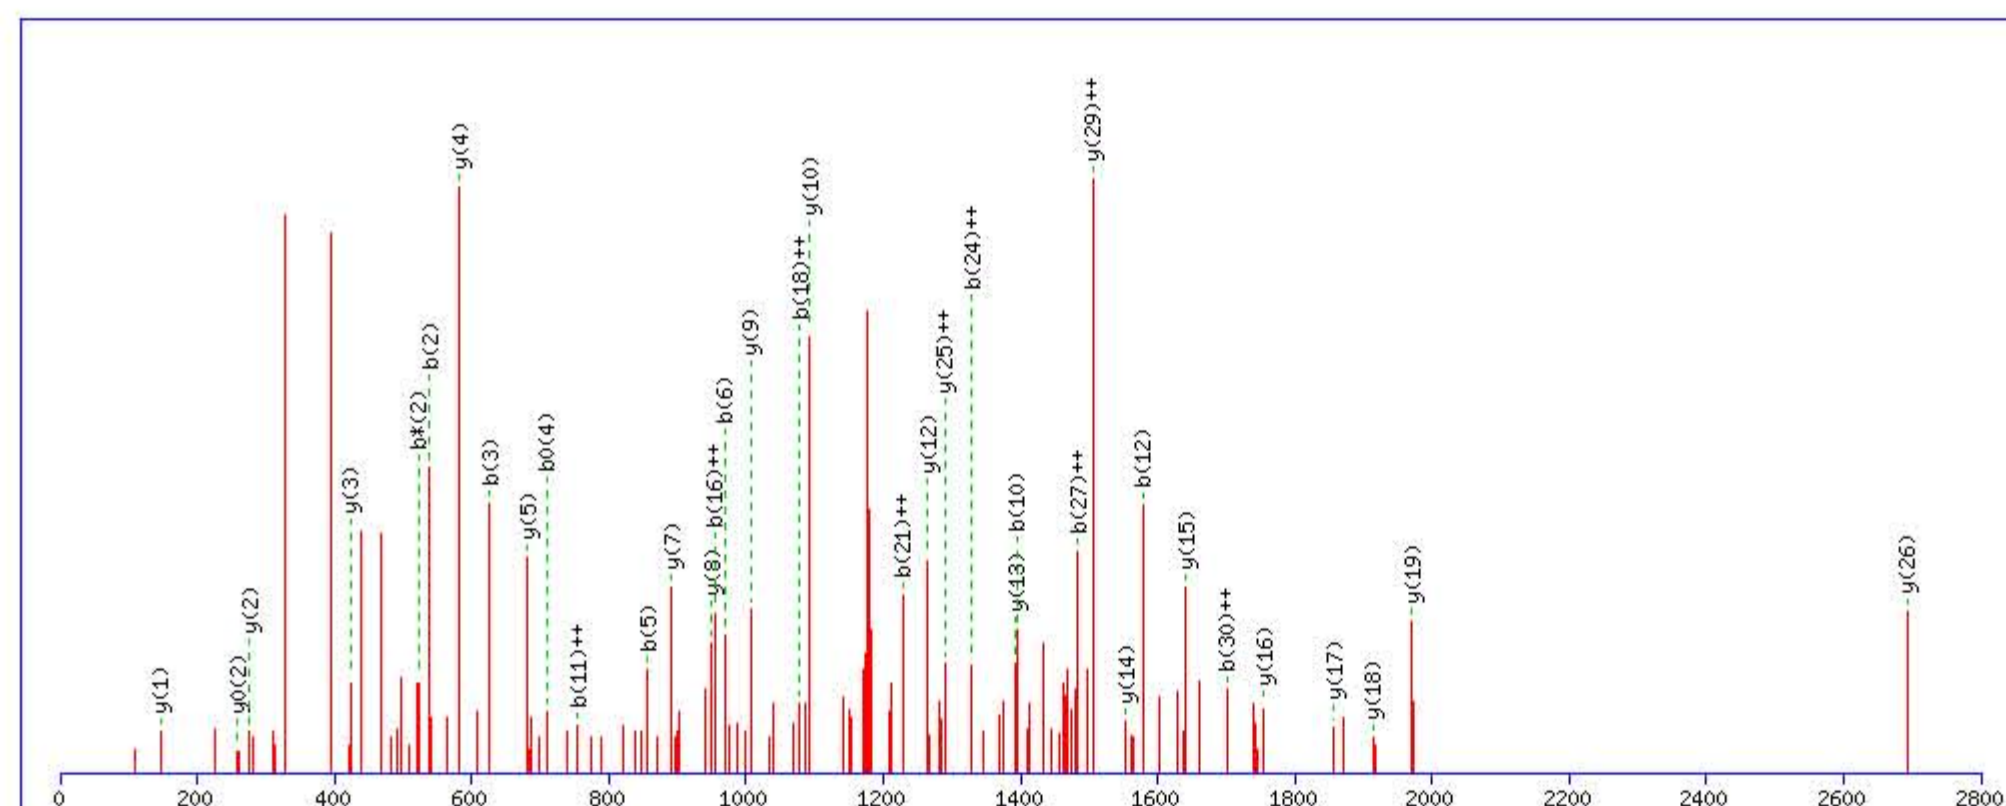

Monoisotopic mass of neutral peptide Mr(calc): 3547.584061  
 Fixed modifications: Carbamidomethyl (C) (apply to specified residues or termini only)  
 Variable modifications:  
 Q2 : Biotin:Thermo-21345 (Q)  
 Ions Score: 96 Expect: 3.8e-009  
 Matches : 36/352 fragment ions using 73 most intense peaks [\(help\)](#)

| #  | b                  | b <sup>++</sup>    | b <sup>*</sup>    | b <sup>***</sup> | b <sup>0</sup>    | b <sup>0++</sup> | Seq. | y                  | y <sup>++</sup>    | y <sup>*</sup> | y <sup>***</sup> | y <sup>0</sup>    | y <sup>0++</sup> | #  |
|----|--------------------|--------------------|-------------------|------------------|-------------------|------------------|------|--------------------|--------------------|----------------|------------------|-------------------|------------------|----|
| 1  | 100.075690         | 50.541483          |                   |                  |                   |                  | V    |                    |                    |                |                  |                   |                  | 31 |
| 2  | <b>539.301016</b>  | 270.154146         | <b>522.274467</b> | 261.640872       |                   |                  | Q    | 3449.522877        | 1725.265076        | 3432.496328    | 1716.751802      | 3431.512312       | 1716.259794      | 30 |
| 3  | <b>626.333044</b>  | 313.670160         | 609.306495        | 305.156886       | 608.322479        | 304.664878       | S    | 3010.297551        | <b>1505.652413</b> | 2993.271002    | 1497.139139      | 2992.286986       | 1496.647131      | 29 |
| 4  | 727.380723         | 364.194000         | 710.354174        | 355.680725       | <b>709.370158</b> | 355.188717       | T    | 2923.265523        | 1462.136399        | 2906.238974    | 1453.623125      | 2905.254958       | 1453.131117      | 28 |
| 5  | <b>856.423316</b>  | 428.715296         | 839.396767        | 420.202022       | 838.412751        | 419.710014       | E    | 2822.217844        | 1411.612560        | 2805.191295    | 1403.099285      | 2804.207279       | 1402.607277      | 27 |
| 6  | <b>969.507380</b>  | 485.257328         | 952.480831        | 476.744054       | 951.496815        | 476.252046       | L    | <b>2693.175251</b> | 1347.091263        | 2676.148702    | 1338.577989      | 2675.164686       | 1338.085981      | 26 |
| 7  | 1129.538029        | 565.272653         | 1112.511480       | 556.759378       | 1111.527464       | 556.267370       | C    | 2580.091187        | <b>1290.549231</b> | 2563.064638    | 1282.035957      | 2562.080622       | 1281.543949      | 25 |
| 8  | 1200.575143        | 600.791210         | 1183.548594       | 592.277935       | 1182.564578       | 591.785927       | A    | 2420.060538        | 1210.533907        | 2403.033989    | 1202.020632      | 2402.049973       | 1201.528624      | 24 |
| 9  | 1257.596607        | 629.301942         | 1240.570058       | 620.788667       | 1239.586042       | 620.296659       | G    | 2349.023424        | 1175.015350        | 2331.996875    | 1166.502075      | 2331.012859       | 1166.010067      | 23 |
| 10 | <b>1394.655519</b> | 697.831397         | 1377.628970       | 689.318123       | 1376.644954       | 688.826115       | H    | 2292.001960        | 1146.504618        | 2274.975411    | 1137.991343      | 2273.991395       | 1137.499335      | 22 |
| 11 | 1507.739583        | <b>754.373429</b>  | 1490.713034       | 745.860155       | 1489.729018       | 745.368147       | L    | 2154.943048        | 1077.975162        | 2137.916499    | 1069.461887      | 2136.932483       | 1068.969879      | 21 |
| 12 | <b>1578.776697</b> | 789.891986         | 1561.750148       | 781.378712       | 1560.766132       | 780.886704       | A    | 2041.858984        | 1021.433130        | 2024.832435    | 1012.919855      | 2023.848419       | 1012.427847      | 20 |
| 13 | 1635.798161        | 818.402718         | 1618.771612       | 809.889444       | 1617.787596       | 809.397436       | G    | <b>1970.821870</b> | 985.914573         | 1953.795321    | 977.401298       | 1952.811305       | 976.909290       | 19 |
| 14 | 1692.819625        | 846.913450         | 1675.793076       | 838.400176       | 1674.809060       | 837.908168       | G    | <b>1913.800406</b> | 957.403841         | 1896.773857    | 948.890566       | 1895.789841       | 948.398558       | 18 |
| 15 | 1793.867304        | 897.437290         | 1776.840755       | 888.924015       | 1775.856739       | 888.432007       | T    | <b>1856.778942</b> | 928.893109         | 1839.752393    | 920.379835       | 1838.768377       | 919.887826       | 17 |
| 16 | 1908.894247        | <b>954.950761</b>  | 1891.867698       | 946.437487       | 1890.883682       | 945.945479       | D    | <b>1755.731263</b> | 878.369269         | 1738.704714    | 869.855995       | 1737.720698       | 869.363987       | 16 |
| 17 | 1995.926275        | 998.466775         | 1978.899726       | 989.953501       | 1977.915710       | 989.461493       | S    | <b>1640.704320</b> | 820.855798         | 1623.677771    | 812.342523       | 1622.693755       | 811.850515       | 15 |
| 18 | 2155.956924        | <b>1078.482100</b> | 2138.930375       | 1069.968825      | 2137.946359       | 1069.476817      | C    | <b>1553.672292</b> | 777.339784         | 1536.645743    | 768.826509       | 1535.661727       | 768.334501       | 14 |
| 19 | 2284.015502        | 1142.511389        | 2266.988953       | 1133.998114      | 2266.004937       | 1133.506106      | Q    | <b>1393.641643</b> | 697.324459         | 1376.615094    | 688.811185       | 1375.631078       | 688.319177       | 13 |
| 20 | 2341.036966        | 1171.022121        | 2324.010417       | 1162.508846      | 2323.026401       | 1162.016838      | G    | <b>1265.583065</b> | 633.295170         | 1248.556516    | 624.781896       | 1247.572500       | 624.289888       | 12 |
| 21 | 2456.063909        | <b>1228.535592</b> | 2439.037360       | 1220.022318      | 2438.053344       | 1219.530310      | D    | 1208.561601        | 604.784438         | 1191.535052    | 596.271164       | 1190.551036       | 595.779156       | 11 |
| 22 | 2543.095937        | 1272.051606        | 2526.069388       | 1263.538332      | 2525.085372       | 1263.046324      | S    | <b>1093.534658</b> | 547.270967         | 1076.508109    | 538.757692       | 1075.524093       | 538.265684       | 10 |
| 23 | 2600.117401        | 1300.562338        | 2583.090852       | 1292.049064      | 2582.106836       | 1291.557056      | G    | <b>1006.502630</b> | 503.754953         | 989.476081     | 495.241678       | 988.492065        | 494.749670       | 9  |
| 24 | 2657.138865        | <b>1329.073070</b> | 2640.112316       | 1320.559796      | 2639.128300       | 1320.067788      | G    | <b>949.481166</b>  | 475.244221         | 932.454617     | 466.730946       | 931.470601        | 466.238938       | 8  |
| 25 | 2754.191629        | 1377.599452        | 2737.165080       | 1369.086178      | 2736.181064       | 1368.594170      | P    | <b>892.459702</b>  | 446.733489         | 875.433153     | 438.220214       | 874.449137        | 437.728206       | 7  |
| 26 | 2867.275693        | 1434.141484        | 2850.249144       | 1425.628210      | 2849.265128       | 1425.136202      | L    | 795.406938         | 398.207107         | 778.380389     | 389.693832       | 777.396373        | 389.201824       | 6  |
| 27 | 2966.344107        | <b>1483.675691</b> | 2949.317558       | 1475.162417      | 2948.333542       | 1474.670409      | V    | <b>682.322874</b>  | 341.665075         | 665.296325     | 333.151800       | 664.312309        | 332.659792       | 5  |
| 28 | 3126.374756        | 1563.691016        | 3109.348207       | 1555.177741      | 3108.364191       | 1554.685733      | C    | <b>583.254460</b>  | 292.130868         | 566.227911     | 283.617593       | 565.243895        | 283.125585       | 4  |
| 29 | 3273.443170        | 1637.225223        | 3256.416621       | 1628.711948      | 3255.432605       | 1628.219940      | F    | <b>423.223811</b>  | 212.115543         | 406.197262     | 203.602269       | 405.213246        | 203.110261       | 3  |
| 30 | 3402.485763        | <b>1701.746519</b> | 3385.459214       | 1693.233245      | 3384.475198       | 1692.741237      | E    | <b>276.155397</b>  | 138.581337         | 259.128848     | 130.068062       | <b>258.144832</b> | 129.576054       | 2  |
| 31 |                    |                    |                   |                  |                   |                  | K    | <b>147.112804</b>  | 74.060040          | 130.086255     | 65.546765        |                   |                  | 1  |

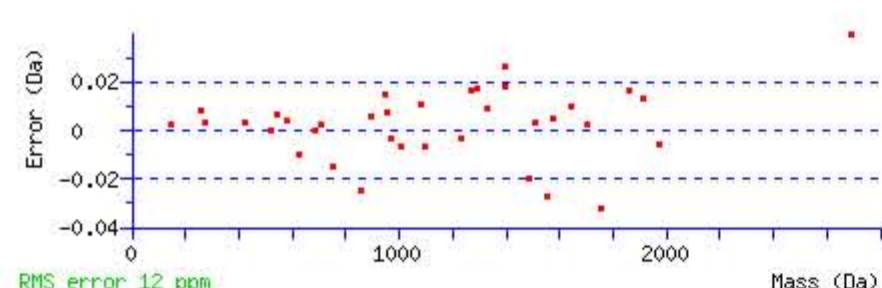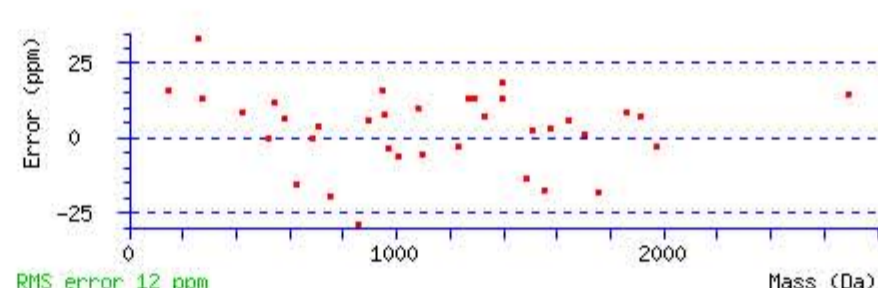

NCBI BLAST search of **VQSTELCAGHLAGGTDSCQGDSSGGPLVCFEK**  
 (Parameters: blastp, nr protein database, expect=20000, no filter, PAM30)  
 Other BLAST [web gateways](#)

### All matches to this query

| Score | Mr(calc):   | Delta     | Sequence                                         |
|-------|-------------|-----------|--------------------------------------------------|
| 95.7  | 3547.584061 | -0.018289 | <a href="#">VQSTELCAGHLAGGTDSCQGDSSGGPLVCFEK</a> |
| 11.9  | 3547.584061 | -0.018289 | <a href="#">VQSTELCAGHLAGGTDSCQGDSSGGPLVCFEK</a> |



# Mascot Search Results

## Peptide View

MS/MS Fragmentation of **ATTVTGTPCQDWAAQEPHR**

Found in **PLMN\_HUMAN**, Plasminogen OS=Homo sapiens GN=PLG PE=1 SV=2

Match to Query 55119: 2436.130242 from(813.050690,3+) rtinseconds(1869) index(67790)

Title: Locus:1.1.1.1588.17 File:"2013-07-02 CLN FXIII 60 min 2nd FT.wiff"

Data file C:\Program Files (x86)\Matrix Science\Mascot Daemon\mgf5 FXIII 60 min 2nd\mascot\_daemon\_merge.mgf

Click mouse within plot area to zoom in by factor of two about that point

Or, Plot from  to  Da

Label all possible matches  Label matches used for scoring

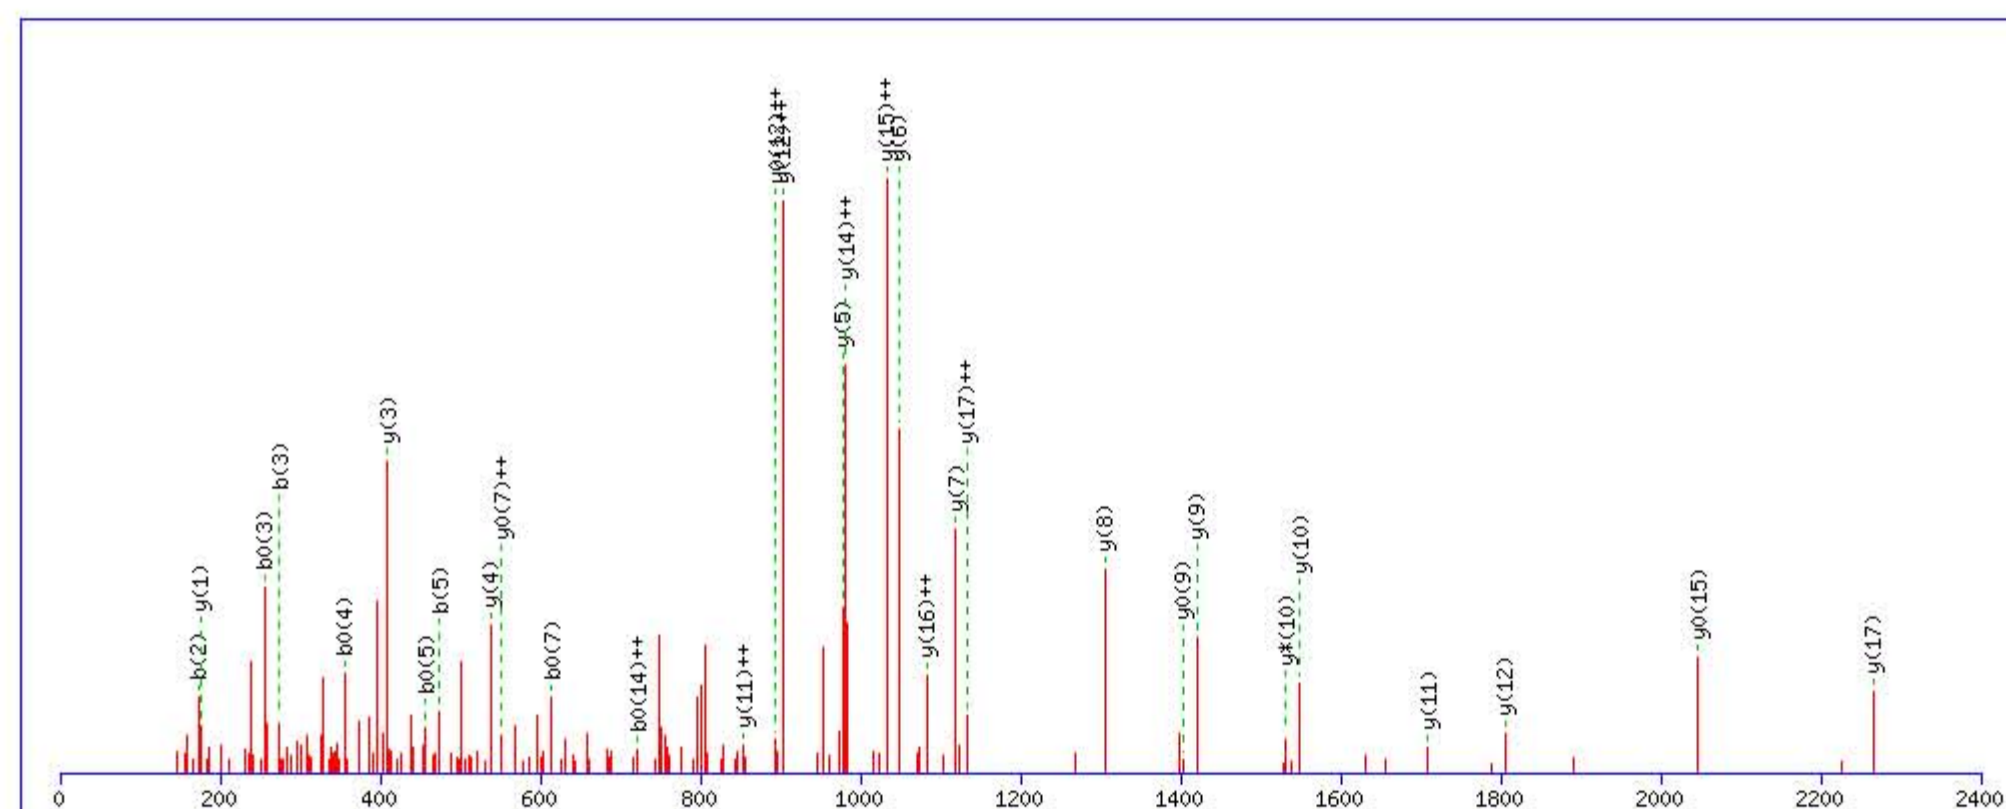

Monoisotopic mass of neutral peptide Mr(calc): 2436.131470

Fixed modifications: Carbamidomethyl (C) (apply to specified residues or termini only)

Variable modifications:

Q15 : Biotin:Thermo-21345 (Q)

Ions Score: 62 Expect: 8.9e-006

Matches : 31/190 fragment ions using 61 most intense peaks [\(help\)](#)

| #  | b                 | b <sup>++</sup> | b <sup>*</sup> | b <sup>*++</sup> | b <sup>0</sup>    | b <sup>0++</sup>  | Seq. | y                  | y <sup>++</sup>    | y <sup>*</sup>     | y <sup>*++</sup> | y <sup>0</sup>     | y <sup>0++</sup>  | #  |
|----|-------------------|-----------------|----------------|------------------|-------------------|-------------------|------|--------------------|--------------------|--------------------|------------------|--------------------|-------------------|----|
| 1  | 72.044390         | 36.525833       |                |                  |                   |                   | A    |                    |                    |                    |                  |                    |                   | 19 |
| 2  | <b>173.092069</b> | 87.049672       |                |                  | 155.081504        | 78.044390         | T    | 2366.101616        | 1183.554446        | 2349.075067        | 1175.041171      | 2348.091051        | 1174.549163       | 18 |
| 3  | <b>274.139748</b> | 137.573512      |                |                  | <b>256.129183</b> | 128.568230        | T    | <b>2265.053937</b> | <b>1133.030606</b> | 2248.027388        | 1124.517332      | 2247.043372        | 1124.025324       | 17 |
| 4  | 373.208162        | 187.107719      |                |                  | <b>355.197597</b> | 178.102437        | V    | 2164.006258        | <b>1082.506767</b> | 2146.979709        | 1073.993492      | 2145.995693        | 1073.501484       | 16 |
| 5  | <b>474.255841</b> | 237.631559      |                |                  | <b>456.245276</b> | 228.626276        | T    | 2064.937844        | <b>1032.972560</b> | 2047.911295        | 1024.459285      | <b>2046.927279</b> | 1023.967277       | 15 |
| 6  | 531.277305        | 266.142291      |                |                  | 513.266740        | 257.137008        | G    | 1963.890165        | <b>982.448721</b>  | 1946.863616        | 973.935446       | 1945.879600        | 973.443438        | 14 |
| 7  | 632.324984        | 316.666130      |                |                  | <b>614.314419</b> | 307.660848        | T    | 1906.868701        | 953.937989         | 1889.842152        | 945.424714       | 1888.858136        | 944.932706        | 13 |
| 8  | 729.377748        | 365.192512      |                |                  | 711.367183        | 356.187230        | P    | <b>1805.821022</b> | <b>903.414149</b>  | 1788.794473        | 894.900875       | 1787.810457        | <b>894.408867</b> | 12 |
| 9  | 889.408397        | 445.207837      |                |                  | 871.397832        | 436.202554        | C    | <b>1708.768258</b> | <b>854.887767</b>  | 1691.741709        | 846.374493       | 1690.757693        | 845.882485        | 11 |
| 10 | 1017.466975       | 509.237126      | 1000.440426    | 500.723851       | 999.456410        | 500.231843        | Q    | <b>1548.737609</b> | 774.872443         | <b>1531.711060</b> | 766.359168       | 1530.727044        | 765.867160        | 10 |
| 11 | 1132.493918       | 566.750597      | 1115.467369    | 558.237323       | 1114.483353       | 557.745315        | D    | <b>1420.679031</b> | 710.843154         | 1403.652482        | 702.329879       | <b>1402.668466</b> | 701.837871        | 9  |
| 12 | 1318.573231       | 659.790254      | 1301.546682    | 651.276979       | 1300.562666       | 650.784971        | W    | <b>1305.652088</b> | 653.329682         | 1288.625539        | 644.816408       | 1287.641523        | 644.324400        | 8  |
| 13 | 1389.610345       | 695.308811      | 1372.583796    | 686.795536       | 1371.599780       | 686.303528        | A    | <b>1119.572775</b> | 560.290026         | 1102.546226        | 551.776751       | 1101.562210        | <b>551.284743</b> | 7  |
| 14 | 1460.647459       | 730.827368      | 1443.620910    | 722.314093       | 1442.636894       | <b>721.822085</b> | A    | <b>1048.535661</b> | 524.771469         | 1031.509112        | 516.258194       | 1030.525096        | 515.766186        | 6  |
| 15 | 1899.872785       | 950.440031      | 1882.846236    | 941.926756       | 1881.862220       | 941.434748        | Q    | <b>977.498547</b>  | 489.252912         | 960.471998         | 480.739637       | 959.487982         | 480.247629        | 5  |
| 16 | 2028.915378       | 1014.961327     | 2011.888829    | 1006.448053      | 2010.904813       | 1005.956045       | E    | <b>538.273221</b>  | 269.640249         | 521.246672         | 261.126974       | 520.262656         | 260.634966        | 4  |
| 17 | 2125.968142       | 1063.487709     | 2108.941593    | 1054.974434      | 2107.957577       | 1054.482427       | P    | <b>409.230628</b>  | 205.118952         | 392.204079         | 196.605677       |                    |                   | 3  |
| 18 | 2263.027054       | 1132.017165     | 2246.000505    | 1123.503890      | 2245.016489       | 1123.011883       | H    | 312.177864         | 156.592570         | 295.151315         | 148.079295       |                    |                   | 2  |
| 19 |                   |                 |                |                  |                   |                   | R    | <b>175.118952</b>  | 88.063114          | 158.092403         | 79.549839        |                    |                   | 1  |

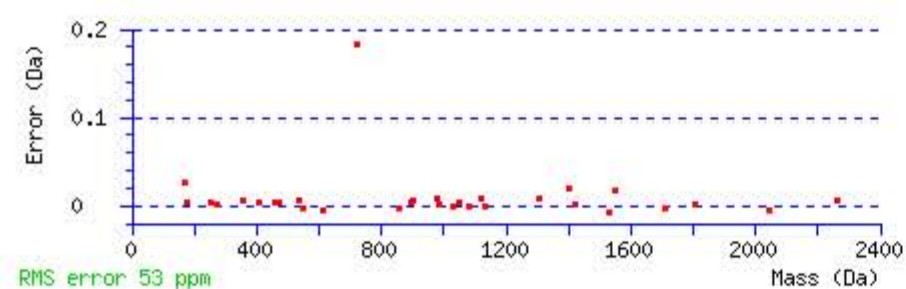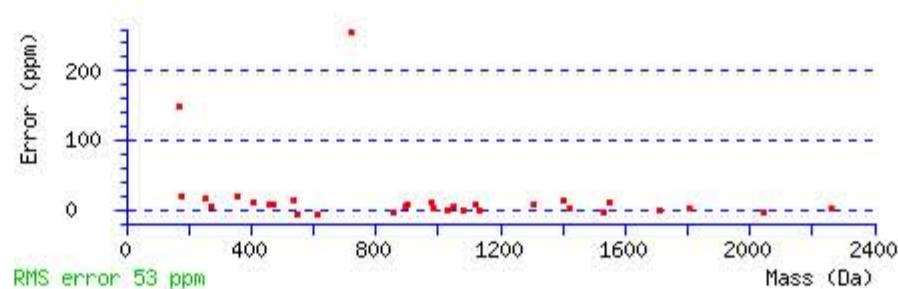

NCBI BLAST search of [ATTVTGTPCQDWAAQEPHR](#)

(Parameters: blastp, nr protein database, expect=20000, no filter, PAM30)

Other BLAST [web gateways](#)

All matches to this query

| Score | Mr(calc):   | Delta     | Sequence                            |
|-------|-------------|-----------|-------------------------------------|
| 62.1  | 2436.131470 | -0.001228 | <a href="#">ATTVTGTPCQDWAAQEPHR</a> |
| 24.3  | 2436.131470 | -0.001228 | <a href="#">ATTVTGTPCQDWAAQEPHR</a> |

Mascot: <http://www.matrixscience.com/>



# MASCOT Search Results

## Peptide View

MS/MS Fragmentation of **VVGGCVAHPHSWPWQVSLR**

Found in **PLMN\_HUMAN**, Plasminogen OS=Homo sapiens GN=PLG PE=1 SV=2

Match to Query 56154: 2482.252602 from(828.424810,3+) rtinseconds(2211) index(70029)

Title: Locus:1.1.1.1707.12 File:"2013-07-02 CLN FXIII 60 min 2nd FT.wiff"

Data file C:\Program Files (x86)\Matrix Science\Mascot Daemon\mgf\5 FXIII 60 min 2nd\mascot\_daemon\_merge.mgf

Click mouse within plot area to zoom in by factor of two about that point

Or, Plot from  to  Da

Label all possible matches  Label matches used for scoring

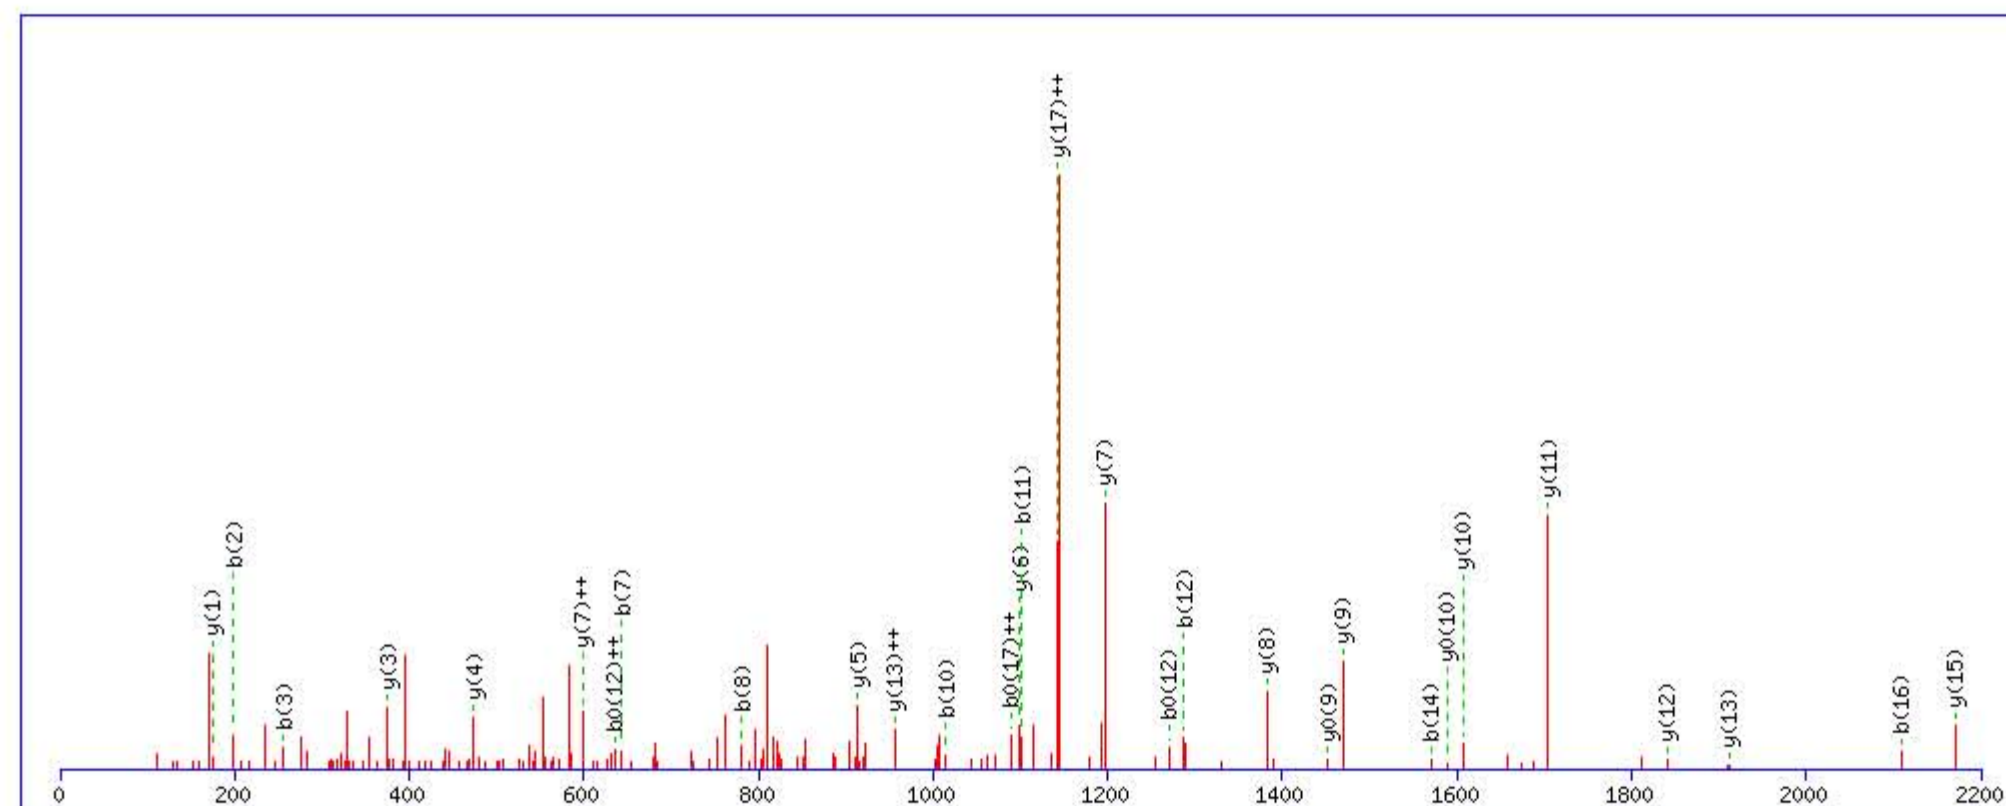

Monoisotopic mass of neutral peptide Mr(calc): 2482.251480

Fixed modifications: Carbamidomethyl (C) (apply to specified residues or termini only)

Variable modifications:

Q15 : Biotin:Thermo-21345 (Q)

Ions Score: 59 Expect: 4.3e-005

Matches : 30/164 fragment ions using 69 most intense peaks [\(help\)](#)

| #  | b                  | b <sup>++</sup> | b <sup>+</sup> | b <sup>+++</sup> | b <sup>0</sup>     | b <sup>0++</sup>   | Seq. | y                  | y <sup>++</sup>    | y <sup>+</sup> | y <sup>+++</sup> | y <sup>0</sup>     | y <sup>0++</sup> | #  |
|----|--------------------|-----------------|----------------|------------------|--------------------|--------------------|------|--------------------|--------------------|----------------|------------------|--------------------|------------------|----|
| 1  | 100.075690         | 50.541483       |                |                  |                    |                    | V    |                    |                    |                |                  |                    |                  | 19 |
| 2  | <b>199.144104</b>  | 100.075690      |                |                  |                    |                    | V    | 2384.190309        | 1192.598792        | 2367.163760    | 1184.085518      | 2366.179744        | 1183.593510      | 18 |
| 3  | <b>256.165568</b>  | 128.586422      |                |                  |                    |                    | G    | 2285.121895        | <b>1143.064585</b> | 2268.095346    | 1134.551311      | 2267.111330        | 1134.059303      | 17 |
| 4  | 313.187032         | 157.097154      |                |                  |                    |                    | G    | 2228.100431        | 1114.553853        | 2211.073882    | 1106.040579      | 2210.089866        | 1105.548571      | 16 |
| 5  | 473.217681         | 237.112479      |                |                  |                    |                    | C    | <b>2171.078967</b> | 1086.043121        | 2154.052418    | 1077.529847      | 2153.068402        | 1077.037839      | 15 |
| 6  | 572.286095         | 286.646686      |                |                  |                    |                    | V    | 2011.048318        | 1006.027797        | 1994.021769    | 997.514523       | 1993.037753        | 997.022515       | 14 |
| 7  | <b>643.323209</b>  | 322.165243      |                |                  |                    |                    | A    | <b>1911.979904</b> | <b>956.493590</b>  | 1894.953355    | 947.980316       | 1893.969339        | 947.488308       | 13 |
| 8  | <b>780.382121</b>  | 390.694699      |                |                  |                    |                    | H    | <b>1840.942790</b> | 920.975033         | 1823.916241    | 912.461759       | 1822.932225        | 911.969751       | 12 |
| 9  | 877.434885         | 439.221081      |                |                  |                    |                    | P    | <b>1703.883878</b> | 852.445577         | 1686.857329    | 843.932303       | 1685.873313        | 843.440295       | 11 |
| 10 | <b>1014.493797</b> | 507.750537      |                |                  |                    |                    | H    | <b>1606.831114</b> | 803.919195         | 1589.804565    | 795.405921       | <b>1588.820549</b> | 794.913913       | 10 |
| 11 | <b>1101.525825</b> | 551.266550      |                |                  | 1083.515260        | 542.261268         | S    | <b>1469.772202</b> | 735.389739         | 1452.745653    | 726.876465       | <b>1451.761637</b> | 726.384457       | 9  |
| 12 | <b>1287.605138</b> | 644.306207      |                |                  | <b>1269.594573</b> | <b>635.300924</b>  | W    | <b>1382.740174</b> | 691.873725         | 1365.713625    | 683.360451       | 1364.729609        | 682.868443       | 8  |
| 13 | 1384.657902        | 692.832589      |                |                  | 1366.647337        | 683.827306         | P    | <b>1196.660861</b> | <b>598.834069</b>  | 1179.634312    | 590.320794       | 1178.650296        | 589.828786       | 7  |
| 14 | <b>1570.737215</b> | 785.872245      |                |                  | 1552.726650        | 776.866963         | W    | <b>1099.608097</b> | 550.307687         | 1082.581548    | 541.794412       | 1081.597532        | 541.302404       | 6  |
| 15 | 2009.962541        | 1005.484909     | 1992.935992    | 996.971634       | 1991.951976        | 996.479626         | Q    | <b>913.528784</b>  | 457.268030         | 896.502235     | 448.754756       | 895.518219         | 448.262748       | 5  |
| 16 | <b>2109.030955</b> | 1055.019115     | 2092.004406    | 1046.505841      | 2091.020390        | 1046.013833        | V    | <b>474.303458</b>  | 237.655367         | 457.276909     | 229.142092       | 456.292893         | 228.650084       | 4  |
| 17 | 2196.062983        | 1098.535129     | 2179.036434    | 1090.021855      | 2178.052418        | <b>1089.529847</b> | S    | <b>375.235044</b>  | 188.121160         | 358.208495     | 179.607886       | 357.224479         | 179.115878       | 3  |
| 18 | 2309.147047        | 1155.077161     | 2292.120498    | 1146.563887      | 2291.136482        | 1146.071879        | L    | 288.203016         | 144.605146         | 271.176467     | 136.091872       |                    |                  | 2  |
| 19 |                    |                 |                |                  |                    |                    | R    | <b>175.118952</b>  | 88.063114          | 158.092403     | 79.549839        |                    |                  | 1  |

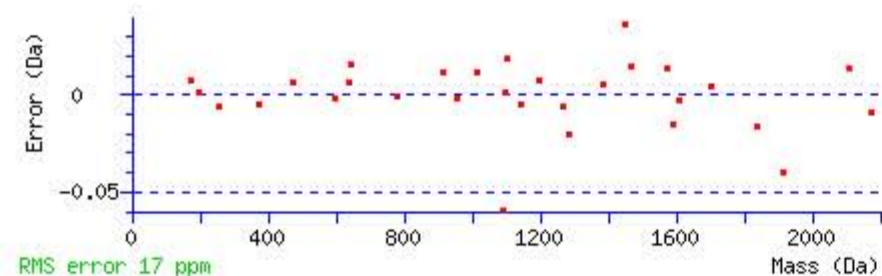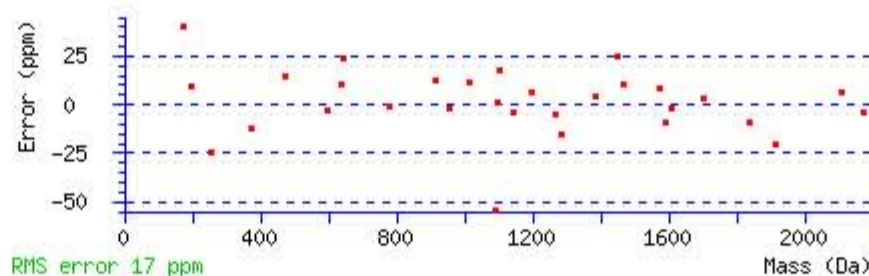

NCBI BLAST search of [VVGGCVAHPHSWPWQVSLR](#)

(Parameters: blastp, nr protein database, expect=20000, no filter, PAM30)

Other BLAST [web gateways](#)

All matches to this query

| Score | Mr(calc):   | Delta    | Sequence                            |
|-------|-------------|----------|-------------------------------------|
| 58.8  | 2482.251480 | 0.001122 | <a href="#">VVGGCVAHPHSWPWQVSLR</a> |

Mascot: <http://www.matrixscience.com/>



# MASCOT Search Results

## Peptide View

MS/MS Fragmentation of **NPDNDPQGPWCYTTDPEKR**

Found in **PLMN\_HUMAN**, Plasminogen OS=Homo sapiens GN=PLG PE=1 SV=2

Match to Query 57648: 2600.140332 from(867.720720,3+) rtinseconds(1971) index(68570)

Title: Locus:1.1.1.1623.26 File:"2013-07-02 CLN FXIII 60 min 2nd FT.wiff"

Data file C:\Program Files (x86)\Matrix Science\Mascot Daemon\mgf\5 FXIII 60 min 2nd\mascot\_daemon\_merge.mgf

Click mouse within plot area to zoom in by factor of two about that point

Or, Plot from  to  Da

Label all possible matches  Label matches used for scoring

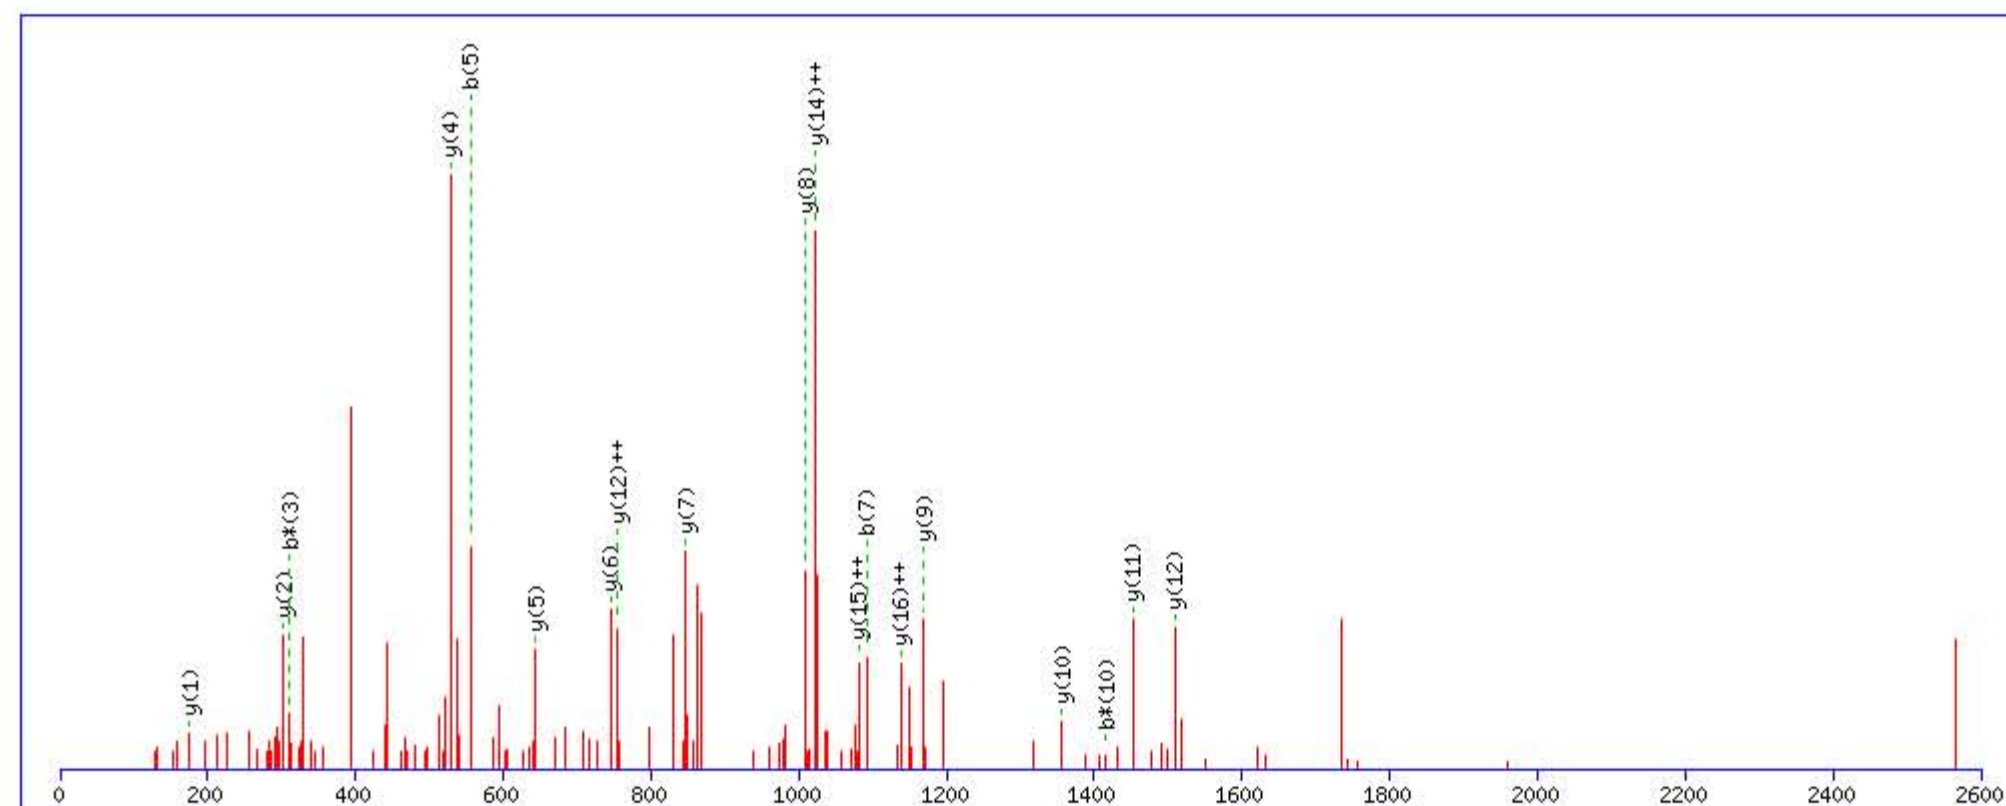

Monoisotopic mass of neutral peptide Mr(calc): 2600.142410

Fixed modifications: Carbamidomethyl (C) (apply to specified residues or termini only)

Variable modifications:

Q7 : Biotin:Thermo-21345 (Q)

Ions Score: 66 Expect: 1.6e-006

Matches : 19/208 fragment ions using 34 most intense peaks [\(help\)](#)

| #  | b                  | b <sup>++</sup> | b <sup>+</sup>     | b <sup>+++</sup> | b <sup>0</sup> | b <sup>0++</sup> | Seq. | y                  | y <sup>++</sup>    | y <sup>+</sup> | y <sup>+++</sup> | y <sup>0</sup> | y <sup>0++</sup> | #  |
|----|--------------------|-----------------|--------------------|------------------|----------------|------------------|------|--------------------|--------------------|----------------|------------------|----------------|------------------|----|
| 1  | 115.050203         | 58.028740       | 98.023654          | 49.515465        |                |                  | N    |                    |                    |                |                  |                |                  | 19 |
| 2  | 212.102967         | 106.555121      | 195.076418         | 98.041847        |                |                  | P    | 2487.106759        | 1244.057017        | 2470.080210    | 1235.543743      | 2469.096194    | 1235.051735      | 18 |
| 3  | 327.129910         | 164.068593      | <b>310.103361</b>  | 155.555319       | 309.119345     | 155.063311       | D    | 2390.053995        | 1195.530635        | 2373.027446    | 1187.017361      | 2372.043430    | 1186.525353      | 17 |
| 4  | 441.172837         | 221.090057      | 424.146288         | 212.576782       | 423.162272     | 212.084774       | N    | 2275.027052        | <b>1138.017164</b> | 2258.000503    | 1129.503889      | 2257.016487    | 1129.011881      | 16 |
| 5  | <b>556.199780</b>  | 278.603528      | 539.173231         | 270.090254       | 538.189215     | 269.598246       | D    | 2160.984125        | <b>1080.995700</b> | 2143.957576    | 1072.482426      | 2142.973560    | 1071.990418      | 15 |
| 6  | 653.252544         | 327.129910      | 636.225995         | 318.616636       | 635.241979     | 318.124628       | P    | 2045.957182        | <b>1023.482229</b> | 2028.930633    | 1014.968955      | 2027.946617    | 1014.476946      | 14 |
| 7  | <b>1092.477870</b> | 546.742573      | 1075.451321        | 538.229299       | 1074.467305    | 537.737290       | Q    | 1948.904418        | 974.955847         | 1931.877869    | 966.442572       | 1930.893853    | 965.950564       | 13 |
| 8  | 1149.499334        | 575.253305      | 1132.472785        | 566.740030       | 1131.488769    | 566.248022       | G    | <b>1509.679092</b> | <b>755.343184</b>  | 1492.652543    | 746.829910       | 1491.668527    | 746.337902       | 12 |
| 9  | 1246.552098        | 623.779687      | 1229.525549        | 615.266413       | 1228.541533    | 614.774404       | P    | <b>1452.657628</b> | 726.832452         | 1435.631079    | 718.319178       | 1434.647063    | 717.827170       | 11 |
| 10 | 1432.631411        | 716.819343      | <b>1415.604862</b> | 708.306069       | 1414.620846    | 707.814061       | W    | <b>1355.604864</b> | 678.306070         | 1338.578315    | 669.792796       | 1337.594299    | 669.300788       | 10 |
| 11 | 1592.662060        | 796.834668      | 1575.635511        | 788.321394       | 1574.651495    | 787.829385       | C    | <b>1169.525551</b> | 585.266414         | 1152.499002    | 576.753139       | 1151.514986    | 576.261131       | 9  |
| 12 | 1755.725389        | 878.366333      | 1738.698840        | 869.853058       | 1737.714824    | 869.361050       | Y    | <b>1009.494902</b> | 505.251089         | 992.468353     | 496.737815       | 991.484337     | 496.245807       | 8  |
| 13 | 1856.773068        | 928.890172      | 1839.746519        | 920.376898       | 1838.762503    | 919.884889       | T    | <b>846.431573</b>  | 423.719425         | 829.405024     | 415.206150       | 828.421008     | 414.714142       | 7  |
| 14 | 1957.820747        | 979.414012      | 1940.794198        | 970.900737       | 1939.810182    | 970.408729       | T    | <b>745.383894</b>  | 373.195585         | 728.357345     | 364.682311       | 727.373329     | 364.190303       | 6  |
| 15 | 2072.847690        | 1036.927483     | 2055.821141        | 1028.414208      | 2054.837125    | 1027.922200      | D    | <b>644.336215</b>  | 322.671746         | 627.309666     | 314.158471       | 626.325650     | 313.666463       | 5  |
| 16 | 2169.900454        | 1085.453865     | 2152.873905        | 1076.940590      | 2151.889889    | 1076.448582      | P    | <b>529.309272</b>  | 265.158274         | 512.282723     | 256.645000       | 511.298707     | 256.152992       | 4  |
| 17 | 2298.943047        | 1149.975161     | 2281.916498        | 1141.461887      | 2280.932482    | 1140.969879      | E    | 432.256508         | 216.631892         | 415.229959     | 208.118618       | 414.245943     | 207.626610       | 3  |
| 18 | 2427.038010        | 1214.022643     | 2410.011461        | 1205.509368      | 2409.027445    | 1205.017360      | K    | <b>303.213915</b>  | 152.110595         | 286.187366     | 143.597321       |                |                  | 2  |
| 19 |                    |                 |                    |                  |                |                  | R    | <b>175.118952</b>  | 88.063114          | 158.092403     | 79.549839        |                |                  | 1  |

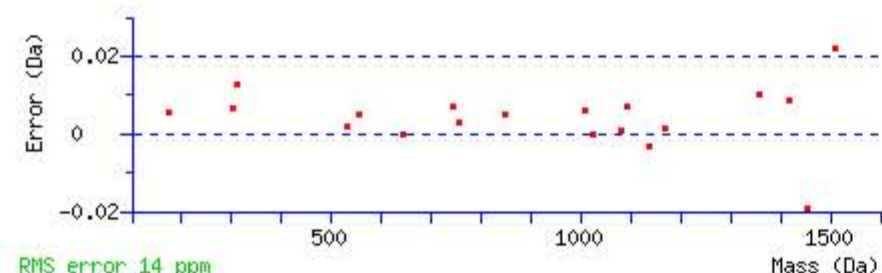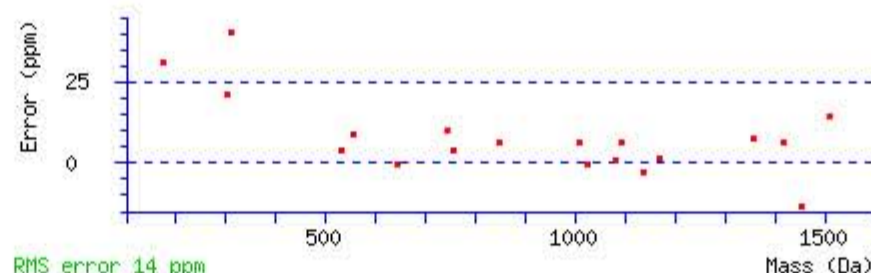

NCBI BLAST search of [NPDNDPQGPWCYTTDPEKR](#)

(Parameters: blastp, nr protein database, expect=20000, no filter, PAM30)

Other BLAST [web gateways](#)

All matches to this query

| Score | Mr(calc):   | Delta     | Sequence                            |
|-------|-------------|-----------|-------------------------------------|
| 65.5  | 2600.142410 | -0.002078 | <a href="#">NPDNDPQGPWCYTTDPEKR</a> |

Mascot: <http://www.matrixscience.com/>



**Peptide View**

MS/MS Fragmentation of **VILGAHQEVNLEPHVQEIEVSR**  
 Found in **PLMN\_HUMAN**, Plasminogen OS=Homo sapiens GN=PLG PE=1 SV=2

Match to Query 59495: 2806.475496 from(702.626150,4+) rtinseconds(2056) index(69147)  
 Title: Locus:1.1.1.1653.11 File:"2013-07-02 CLN FXIII 60 min 2nd FT.wiff"  
 Data file C:\Program Files (x86)\Matrix Science\Mascot Daemon\mgf5 FXIII 60 min 2nd\mascot\_daemon\_merge.mgf

Click mouse within plot area to zoom in by factor of two about that point

Or, Plot from  to  Da

Label all possible matches  Label matches used for scoring

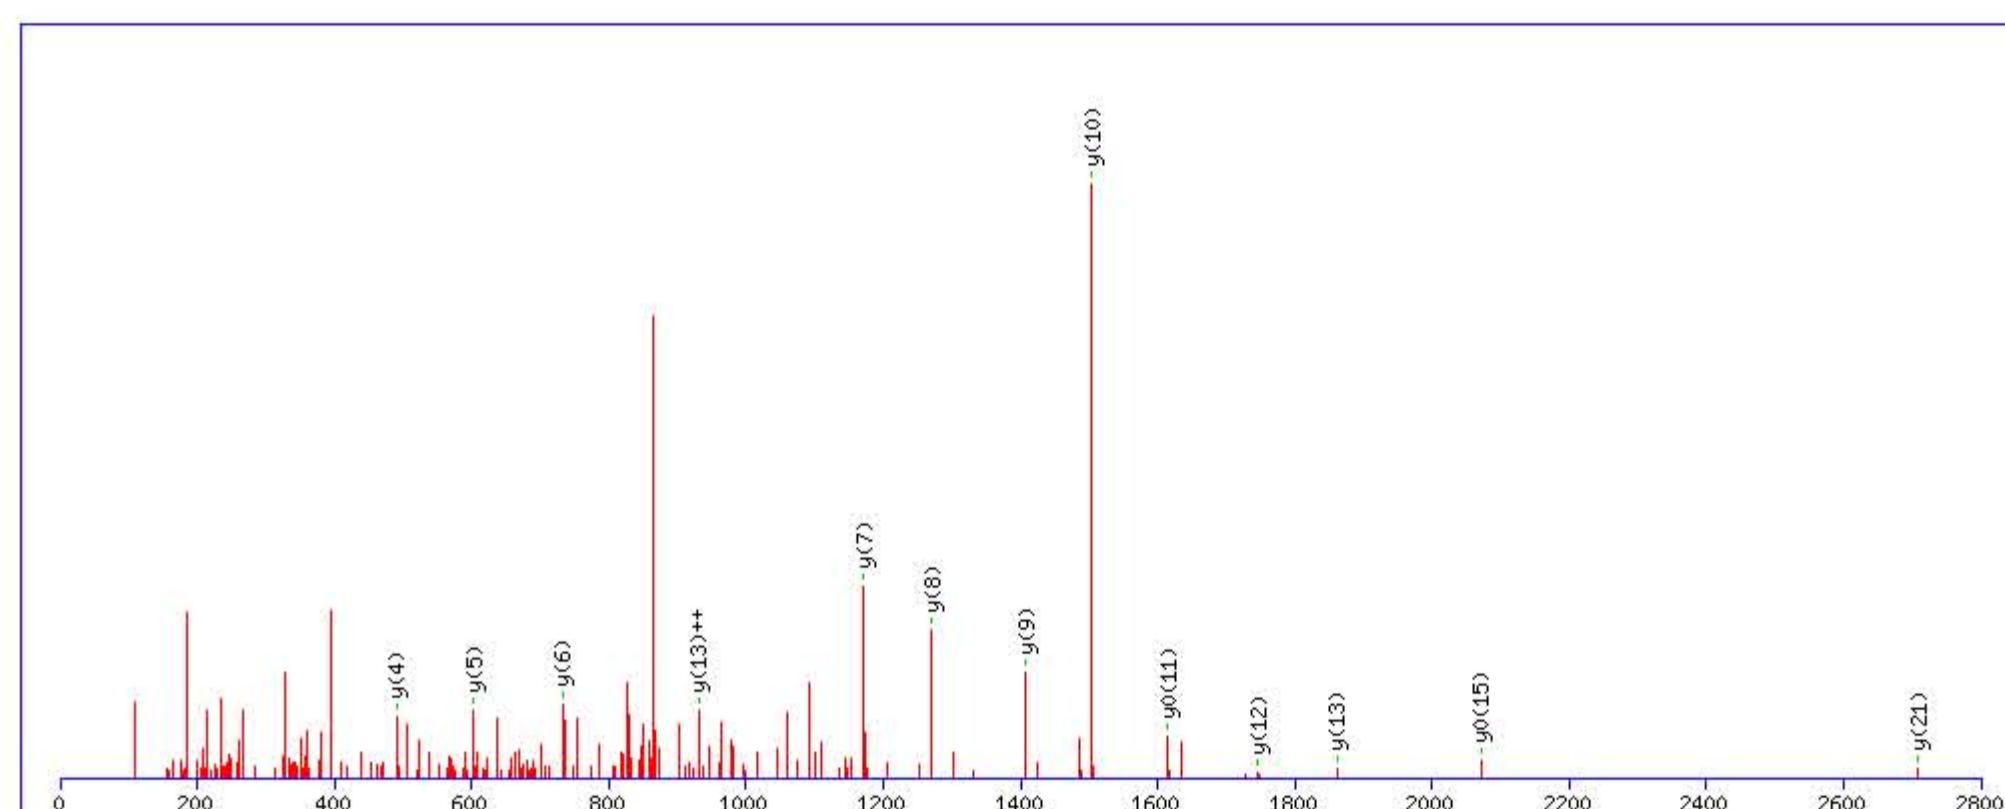

Monoisotopic mass of neutral peptide Mr(calc): 2806.479965  
 Fixed modifications: Carbamidomethyl (C) (apply to specified residues or termini only)  
 Variable modifications:  
 Q16 : Biotin:Thermo-21345 (Q)  
 Ions Score: 63 Expect: 1.3e-005  
 Matches : 13/224 fragment ions using 19 most intense peaks [\(help\)](#)

| #  | b           | b <sup>++</sup> | b <sup>*</sup> | b <sup>*++</sup> | b <sup>0</sup> | b <sup>0++</sup> | Seq. | y           | y <sup>++</sup> | y <sup>*</sup> | y <sup>*++</sup> | y <sup>0</sup> | y <sup>0++</sup> | #  |
|----|-------------|-----------------|----------------|------------------|----------------|------------------|------|-------------|-----------------|----------------|------------------|----------------|------------------|----|
| 1  | 100.075690  | 50.541483       |                |                  |                |                  | V    |             |                 |                |                  |                |                  | 22 |
| 2  | 213.159754  | 107.083515      |                |                  |                |                  | I    | 2708.418847 | 1354.713061     | 2691.392298    | 1346.199787      | 2690.408282    | 1345.707779      | 21 |
| 3  | 326.243818  | 163.625547      |                |                  |                |                  | L    | 2595.334783 | 1298.171029     | 2578.308234    | 1289.657755      | 2577.324218    | 1289.165747      | 20 |
| 4  | 383.265282  | 192.136279      |                |                  |                |                  | G    | 2482.250719 | 1241.628997     | 2465.224170    | 1233.115723      | 2464.240154    | 1232.623715      | 19 |
| 5  | 454.302396  | 227.654836      |                |                  |                |                  | A    | 2425.229255 | 1213.118265     | 2408.202706    | 1204.604991      | 2407.218690    | 1204.112983      | 18 |
| 6  | 591.361308  | 296.184292      |                |                  |                |                  | H    | 2354.192141 | 1177.599708     | 2337.165592    | 1169.086434      | 2336.181576    | 1168.594426      | 17 |
| 7  | 719.419886  | 360.213581      | 702.393337     | 351.700307       |                |                  | Q    | 2217.133229 | 1109.070252     | 2200.106680    | 1100.556978      | 2199.122664    | 1100.064970      | 16 |
| 8  | 848.462479  | 424.734878      | 831.435930     | 416.221603       | 830.451914     | 415.729595       | E    | 2089.074651 | 1045.040963     | 2072.048102    | 1036.527689      | 2071.064086    | 1036.035681      | 15 |
| 9  | 947.530893  | 474.269085      | 930.504344     | 465.755810       | 929.520328     | 465.263802       | V    | 1960.032058 | 980.519667      | 1943.005509    | 972.006393       | 1942.021493    | 971.514385       | 14 |
| 10 | 1061.573820 | 531.290548      | 1044.547271    | 522.777274       | 1043.563255    | 522.285266       | N    | 1860.963644 | 930.985460      | 1843.937095    | 922.472186       | 1842.953079    | 921.980178       | 13 |
| 11 | 1174.657884 | 587.832580      | 1157.631335    | 579.319306       | 1156.647319    | 578.827297       | L    | 1746.920717 | 873.963997      | 1729.894168    | 865.450722       | 1728.910152    | 864.958714       | 12 |
| 12 | 1303.700477 | 652.353877      | 1286.673928    | 643.840602       | 1285.689912    | 643.348594       | E    | 1633.836653 | 817.421965      | 1616.810104    | 808.908690       | 1615.826088    | 808.416682       | 11 |
| 13 | 1400.753241 | 700.880259      | 1383.726692    | 692.366984       | 1382.742676    | 691.874976       | P    | 1504.794060 | 752.900668      | 1487.767511    | 744.387394       | 1486.783495    | 743.895386       | 10 |
| 14 | 1537.812153 | 769.409715      | 1520.785604    | 760.896440       | 1519.801588    | 760.404432       | H    | 1407.741296 | 704.374286      | 1390.714747    | 695.861012       | 1389.730731    | 695.369004       | 9  |
| 15 | 1636.880567 | 818.943922      | 1619.854018    | 810.430647       | 1618.870002    | 809.938639       | V    | 1270.682384 | 635.844830      | 1253.655835    | 627.331556       | 1252.671819    | 626.839548       | 8  |
| 16 | 2076.105893 | 1038.556584     | 2059.079344    | 1030.043310      | 2058.095328    | 1029.551302      | Q    | 1171.613970 | 586.310623      | 1154.587421    | 577.797349       | 1153.603405    | 577.305341       | 7  |
| 17 | 2205.148486 | 1103.077881     | 2188.121937    | 1094.564606      | 2187.137921    | 1094.072598      | E    | 732.388644  | 366.697960      | 715.362095     | 358.184686       | 714.378079     | 357.692678       | 6  |
| 18 | 2318.232550 | 1159.619913     | 2301.206001    | 1151.106638      | 2300.221985    | 1150.614631      | I    | 603.346051  | 302.176664      | 586.319502     | 293.663389       | 585.335486     | 293.171381       | 5  |
| 19 | 2447.275143 | 1224.141210     | 2430.248594    | 1215.627935      | 2429.264578    | 1215.135927      | E    | 490.261987  | 245.634631      | 473.235438     | 237.121357       | 472.251422     | 236.629349       | 4  |
| 20 | 2546.343557 | 1273.675417     | 2529.317008    | 1265.162142      | 2528.332992    | 1264.670134      | V    | 361.219394  | 181.113335      | 344.192845     | 172.600060       | 343.208829     | 172.108052       | 3  |
| 21 | 2633.375585 | 1317.191431     | 2616.349036    | 1308.678156      | 2615.365020    | 1308.186148      | S    | 262.150980  | 131.579128      | 245.124431     | 123.065854       | 244.140415     | 122.573846       | 2  |
| 22 |             |                 |                |                  |                |                  | R    | 175.118952  | 88.063114       | 158.092403     | 79.549839        |                |                  | 1  |

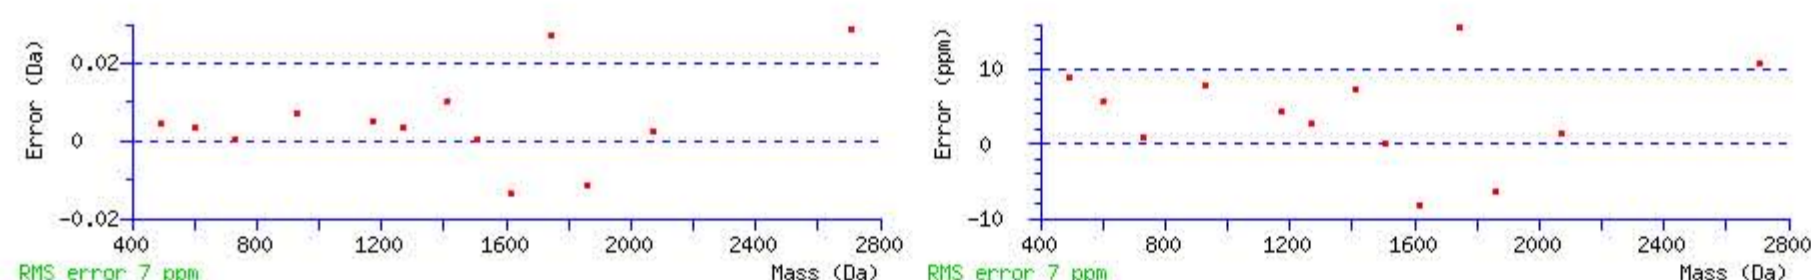

NCBI BLAST search of **VILGAHQEVNLEPHVQEIEVSR**  
 (Parameters: blastp, nr protein database, expect=20000, no filter, PAM30)  
 Other BLAST [web gateways](#)

**All matches to this query**

| Score | Mr(calc):   | Delta     | Sequence                               |
|-------|-------------|-----------|----------------------------------------|
| 62.6  | 2806.479965 | -0.004469 | <a href="#">VILGAHQEVNLEPHVQEIEVSR</a> |



# Mascot Search Results

## Peptide View

MS/MS Fragmentation of **VILGAHQEVNLEPHVQEIIEVSR**

Found in **PLMN\_HUMAN**, Plasminogen OS=Homo sapiens GN=PLG PE=1 SV=2

Match to Query 59497: 2806.477212 from(936.499680,3+) rtinseconds(2097) index(69351)

Title: Locus:1.1.1.1667.22 File:"2013-07-02 CLN FXIII 60 min 2nd FT.wiff"

Data file C:\Program Files (x86)\Matrix Science\Mascot Daemon\mgf5 FXIII 60 min 2nd\mascot\_daemon\_merge.mgf

Click mouse within plot area to zoom in by factor of two about that point

Or, Plot from  to  Da

Label all possible matches  Label matches used for scoring

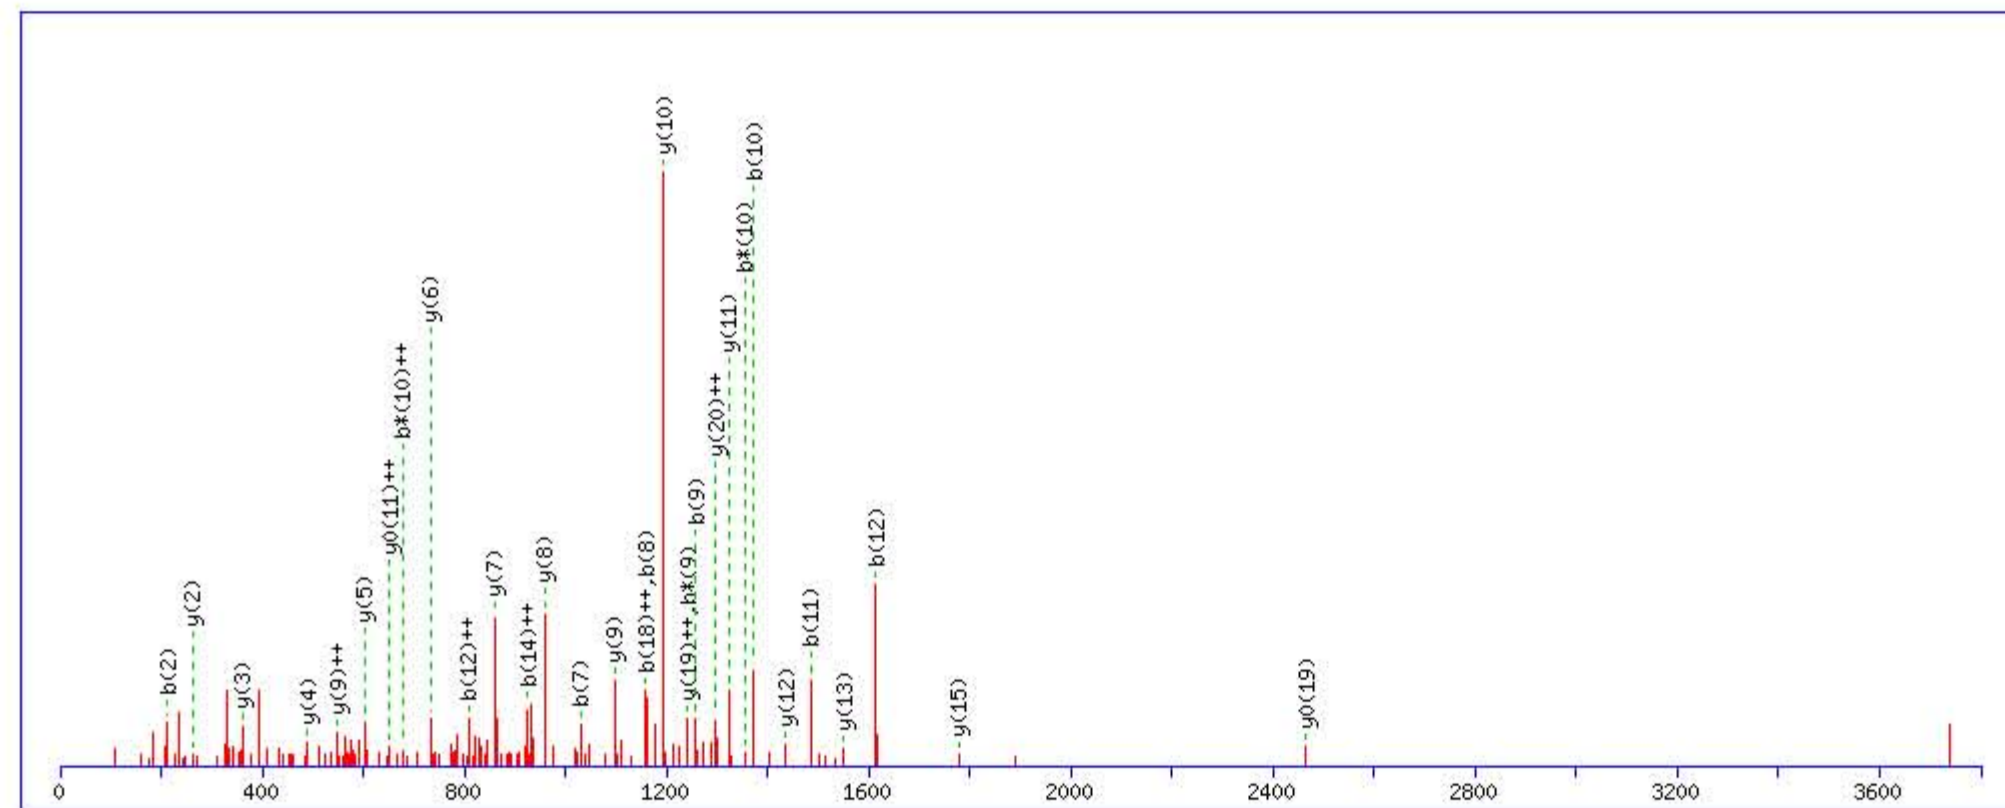

Monoisotopic mass of neutral peptide Mr(calc): 2806.479965

Fixed modifications: Carbamidomethyl (C) (apply to specified residues or termini only)

Variable modifications:

Q7 : Biotin:Thermo-21345 (Q)

Ions Score: 76 Expect: 6e-007

Matches : 31/224 fragment ions using 50 most intense peaks [\(help\)](#)

| #  | b                  | b <sup>++</sup>    | b <sup>*</sup>     | b <sup>*++</sup> | b <sup>0</sup> | b <sup>0++</sup> | Seq. | y                  | y <sup>++</sup>    | y <sup>*</sup> | y <sup>*++</sup> | y <sup>0</sup>     | y <sup>0++</sup>  | #  |
|----|--------------------|--------------------|--------------------|------------------|----------------|------------------|------|--------------------|--------------------|----------------|------------------|--------------------|-------------------|----|
| 1  | 100.075690         | 50.541483          |                    |                  |                |                  | V    |                    |                    |                |                  |                    |                   | 22 |
| 2  | <b>213.159754</b>  | 107.083515         |                    |                  |                |                  | I    | 2708.418847        | 1354.713061        | 2691.392298    | 1346.199787      | 2690.408282        | 1345.707779       | 21 |
| 3  | 326.243818         | 163.625547         |                    |                  |                |                  | L    | 2595.334783        | <b>1298.171029</b> | 2578.308234    | 1289.657755      | 2577.324218        | 1289.165747       | 20 |
| 4  | 383.265282         | 192.136279         |                    |                  |                |                  | G    | 2482.250719        | <b>1241.628997</b> | 2465.224170    | 1233.115723      | <b>2464.240154</b> | 1232.623715       | 19 |
| 5  | 454.302396         | 227.654836         |                    |                  |                |                  | A    | 2425.229255        | 1213.118265        | 2408.202706    | 1204.604991      | 2407.218690        | 1204.112983       | 18 |
| 6  | 591.361308         | 296.184292         |                    |                  |                |                  | H    | 2354.192141        | 1177.599708        | 2337.165592    | 1169.086434      | 2336.181576        | 1168.594426       | 17 |
| 7  | <b>1030.586634</b> | 515.796955         | 1013.560085        | 507.283681       |                |                  | Q    | 2217.133229        | 1109.070252        | 2200.106680    | 1100.556978      | 2199.122664        | 1100.064970       | 16 |
| 8  | <b>1159.629227</b> | 580.318252         | 1142.602678        | 571.804977       | 1141.618662    | 571.312969       | E    | <b>1777.907903</b> | 889.457590         | 1760.881354    | 880.944315       | 1759.897338        | 880.452307        | 15 |
| 9  | <b>1258.697641</b> | 629.852459         | <b>1241.671092</b> | 621.339184       | 1240.687076    | 620.847176       | V    | 1648.865310        | 824.936293         | 1631.838761    | 816.423019       | 1630.854745        | 815.931011        | 14 |
| 10 | <b>1372.740568</b> | 686.873922         | <b>1355.714019</b> | 678.360648       | 1354.730003    | 677.868640       | N    | <b>1549.796896</b> | 775.402086         | 1532.770347    | 766.888812       | 1531.786331        | 766.396804        | 13 |
| 11 | <b>1485.824632</b> | 743.415954         | 1468.798083        | 734.902680       | 1467.814067    | 734.410672       | L    | <b>1435.753969</b> | 718.380623         | 1418.727420    | 709.867348       | 1417.743404        | 709.375340        | 12 |
| 12 | <b>1614.867225</b> | <b>807.937251</b>  | 1597.840676        | 799.423976       | 1596.856660    | 798.931968       | E    | <b>1322.669905</b> | 661.838591         | 1305.643356    | 653.325316       | 1304.659340        | <b>652.833308</b> | 11 |
| 13 | 1711.919989        | 856.463633         | 1694.893440        | 847.950358       | 1693.909424    | 847.458350       | P    | <b>1193.627312</b> | 597.317294         | 1176.600763    | 588.804020       | 1175.616747        | 588.312012        | 10 |
| 14 | 1848.978901        | <b>924.993089</b>  | 1831.952352        | 916.479814       | 1830.968336    | 915.987806       | H    | <b>1096.574548</b> | <b>548.790912</b>  | 1079.547999    | 540.277638       | 1078.563983        | 539.785630        | 9  |
| 15 | 1948.047315        | 974.527296         | 1931.020766        | 966.014021       | 1930.036750    | 965.522013       | V    | <b>959.515636</b>  | 480.261456         | 942.489087     | 471.748182       | 941.505071         | 471.256174        | 8  |
| 16 | 2076.105893        | 1038.556584        | 2059.079344        | 1030.043310      | 2058.095328    | 1029.551302      | Q    | <b>860.447222</b>  | 430.727249         | 843.420673     | 422.213975       | 842.436657         | 421.721967        | 7  |
| 17 | 2205.148486        | 1103.077881        | 2188.121937        | 1094.564606      | 2187.137921    | 1094.072598      | E    | <b>732.388644</b>  | 366.697960         | 715.362095     | 358.184686       | 714.378079         | 357.692678        | 6  |
| 18 | 2318.232550        | <b>1159.619913</b> | 2301.206001        | 1151.106638      | 2300.221985    | 1150.614631      | I    | <b>603.346051</b>  | 302.176664         | 586.319502     | 293.663389       | 585.335486         | 293.171381        | 5  |
| 19 | 2447.275143        | 1224.141210        | 2430.248594        | 1215.627935      | 2429.264578    | 1215.135927      | E    | <b>490.261987</b>  | 245.634631         | 473.235438     | 237.121357       | 472.251422         | 236.629349        | 4  |
| 20 | 2546.343557        | 1273.675417        | 2529.317008        | 1265.162142      | 2528.332992    | 1264.670134      | V    | <b>361.219394</b>  | 181.113335         | 344.192845     | 172.600060       | 343.208829         | 172.108052        | 3  |
| 21 | 2633.375585        | 1317.191431        | 2616.349036        | 1308.678156      | 2615.365020    | 1308.186148      | S    | <b>262.150980</b>  | 131.579128         | 245.124431     | 123.065854       | 244.140415         | 122.573846        | 2  |
| 22 |                    |                    |                    |                  |                |                  | R    | 175.118952         | 88.063114          | 158.092403     | 79.549839        |                    |                   | 1  |

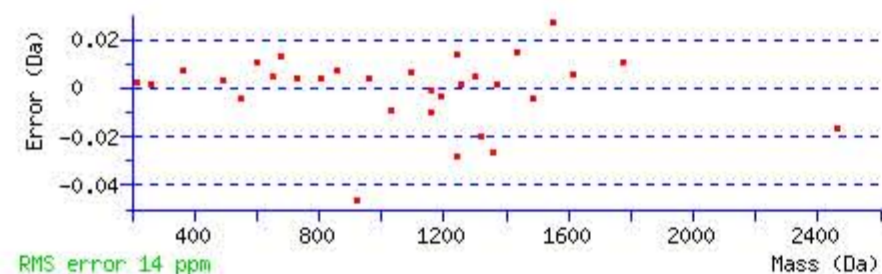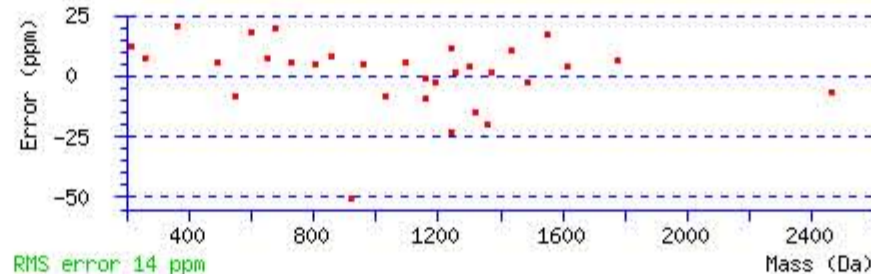

NCBI BLAST search of [VILGAHQEVNLEPHVQEIIEVSR](#)

(Parameters: blastp, nr protein database, expect=20000, no filter, PAM30)

Other BLAST [web gateways](#)

All matches to this query

| Score | Mr(calc):   | Delta     | Sequence                                |
|-------|-------------|-----------|-----------------------------------------|
| 75.7  | 2806.479965 | -0.002753 | <a href="#">VILGAHQEVNLEPHVQEIIEVSR</a> |
| 6.3   | 2806.479965 | -0.002753 | <a href="#">VILGAHQEVNLEPHVQEIIEVSR</a> |



# MASCOT Search Results

## Peptide View

MS/MS Fragmentation of **TMSGLECAWDSQSPHAHGYPISK**

Found in **PLMN\_HUMAN**, Plasminogen OS=Homo sapiens GN=PLG PE=1 SV=2

Match to Query 61677: 2997.356896 from(750.346500,4+) rtinseconds(1996) index(68772)

Title: Locus:1.1.1.1632.20 File:"2013-07-02 CLN FXIII 60 min 2nd FT.wiff"

Data file C:\Program Files (x86)\Matrix Science\Mascot Daemon\mgf5 FXIII 60 min 2nd\mascot\_daemon\_merge.mgf

Click mouse within plot area to zoom in by factor of two about that point

Or, Plot from  to  Da

Label all possible matches  Label matches used for scoring

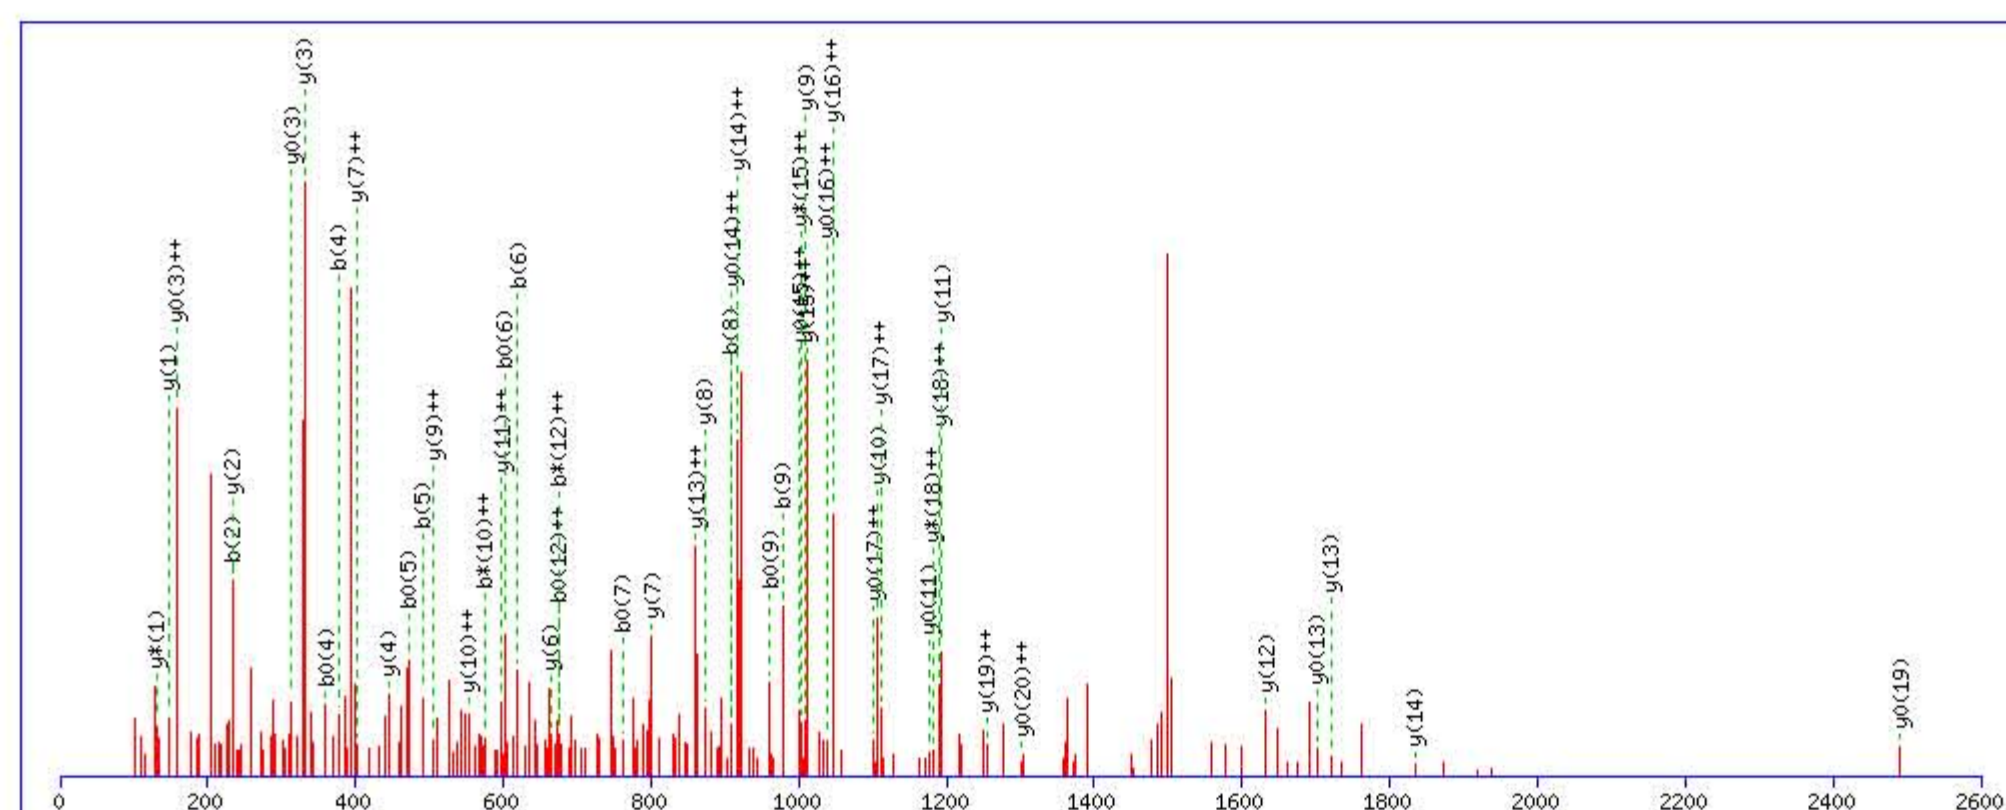

Monoisotopic mass of neutral peptide Mr(calc): 2997.357162

Fixed modifications: Carbamidomethyl (C) (apply to specified residues or termini only)

Variable modifications:

Q13 : Biotin:Thermo-21345 (Q)

Ions Score: 40 Expect: 0.001

Matches : 51/260 fragment ions using 154 most intense peaks [\(help\)](#)

| #  | b                 | b <sup>++</sup> | b <sup>+</sup> | b <sup>+++</sup>  | b <sup>0</sup>    | b <sup>0++</sup>  | Seq. | y                  | y <sup>++</sup>    | y <sup>+</sup>    | y <sup>+++</sup>   | y <sup>0</sup>     | y <sup>0++</sup>   | #  |
|----|-------------------|-----------------|----------------|-------------------|-------------------|-------------------|------|--------------------|--------------------|-------------------|--------------------|--------------------|--------------------|----|
| 1  | 102.054955        | 51.531116       |                |                   | 84.044390         | 42.525833         | T    |                    |                    |                   |                    |                    |                    | 24 |
| 2  | <b>233.095440</b> | 117.051358      |                |                   | 215.084875        | 108.046076        | M    | 2897.316768        | 1449.162022        | 2880.290219       | 1440.648748        | 2879.306203        | 1440.156740        | 23 |
| 3  | 320.127468        | 160.567372      |                |                   | 302.116903        | 151.562089        | S    | 2766.276283        | 1383.641780        | 2749.249734       | 1375.128505        | 2748.265718        | 1374.636497        | 22 |
| 4  | <b>377.148932</b> | 189.078104      |                |                   | <b>359.138367</b> | 180.072821        | G    | 2679.244255        | 1340.125766        | 2662.217706       | 1331.612491        | 2661.233690        | 1331.120483        | 21 |
| 5  | <b>490.232996</b> | 245.620136      |                |                   | <b>472.222431</b> | 236.614853        | L    | 2622.222791        | 1311.615034        | 2605.196242       | 1303.101759        | 2604.212226        | <b>1302.609751</b> | 20 |
| 6  | <b>619.275589</b> | 310.141433      |                |                   | <b>601.265024</b> | 301.136150        | E    | 2509.138727        | <b>1255.073002</b> | 2492.112178       | 1246.559727        | <b>2491.128162</b> | 1246.067719        | 19 |
| 7  | 779.306238        | 390.156757      |                |                   | <b>761.295673</b> | 381.151475        | C    | 2380.096134        | <b>1190.551705</b> | 2363.069585       | <b>1182.038431</b> | 2362.085569        | 1181.546423        | 18 |
| 8  | <b>907.364816</b> | 454.186046      | 890.338267     | 445.672772        | 889.354251        | 445.180764        | Q    | 2220.065485        | <b>1110.536381</b> | 2203.038936       | 1102.023106        | 2202.054920        | <b>1101.531098</b> | 17 |
| 9  | <b>978.401930</b> | 489.704603      | 961.375381     | 481.191329        | <b>960.391365</b> | 480.699321        | A    | 2092.006907        | <b>1046.507092</b> | 2074.980358       | 1037.993817        | 2073.996342        | <b>1037.501809</b> | 16 |
| 10 | 1164.481243       | 582.744260      | 1147.454694    | <b>574.230985</b> | 1146.470678       | 573.738977        | W    | 2020.969793        | <b>1010.988535</b> | 2003.943244       | <b>1002.475260</b> | 2002.959228        | <b>1001.983252</b> | 15 |
| 11 | 1279.508186       | 640.257731      | 1262.481637    | 631.744457        | 1261.497621       | 631.252449        | D    | <b>1834.890480</b> | <b>917.948878</b>  | 1817.863931       | 909.435604         | 1816.879915        | <b>908.943596</b>  | 14 |
| 12 | 1366.540214       | 683.773745      | 1349.513665    | <b>675.260471</b> | 1348.529649       | <b>674.768463</b> | S    | <b>1719.863537</b> | <b>860.435407</b>  | 1702.836988       | 851.922132         | <b>1701.852972</b> | 851.430124         | 13 |
| 13 | 1805.765540       | 903.386408      | 1788.738991    | 894.873134        | 1787.754975       | 894.381126        | Q    | <b>1632.831509</b> | 816.919393         | 1615.804960       | 808.406118         | 1614.820944        | 807.914110         | 12 |
| 14 | 1892.797568       | 946.902422      | 1875.771019    | 938.389148        | 1874.787003       | 937.897140        | S    | <b>1193.606183</b> | <b>597.306730</b>  | 1176.579634       | 588.793455         | <b>1175.595618</b> | 588.301447         | 11 |
| 15 | 1989.850332       | 995.428804      | 1972.823783    | 986.915530        | 1971.839767       | 986.423522        | P    | <b>1106.574155</b> | <b>553.790716</b>  | 1089.547606       | 545.277441         | 1088.563590        | 544.785433         | 10 |
| 16 | 2126.909244       | 1063.958260     | 2109.882695    | 1055.444986       | 2108.898679       | 1054.952978       | H    | <b>1009.521391</b> | <b>505.264334</b>  | 992.494842        | 496.751059         | 991.510826         | 496.259051         | 9  |
| 17 | 2197.946358       | 1099.476817     | 2180.919809    | 1090.963543       | 2179.935793       | 1090.471535       | A    | <b>872.462479</b>  | 436.734878         | 855.435930        | 428.221603         | 854.451914         | 427.729595         | 8  |
| 18 | 2335.005270       | 1168.006273     | 2317.978721    | 1159.492999       | 2316.994705       | 1159.000991       | H    | <b>801.425365</b>  | <b>401.216321</b>  | 784.398816        | 392.703046         | 783.414800         | 392.211038         | 7  |
| 19 | 2392.026734       | 1196.517005     | 2375.000185    | 1188.003731       | 2374.016169       | 1187.511723       | G    | <b>664.366453</b>  | 332.686865         | 647.339904        | 324.173590         | 646.355888         | 323.681582         | 6  |
| 20 | 2555.090063       | 1278.048670     | 2538.063514    | 1269.535395       | 2537.079498       | 1269.043387       | Y    | 607.344989         | 304.176133         | 590.318440        | 295.662858         | 589.334424         | 295.170850         | 5  |
| 21 | 2668.174127       | 1334.590702     | 2651.147578    | 1326.077427       | 2650.163562       | 1325.585419       | I    | <b>444.281660</b>  | 222.644468         | 427.255111        | 214.131194         | 426.271095         | 213.639186         | 4  |
| 22 | 2765.226891       | 1383.117084     | 2748.200342    | 1374.603809       | 2747.216326       | 1374.111801       | P    | <b>331.197596</b>  | 166.102436         | 314.171047        | 157.589162         | <b>313.187031</b>  | <b>157.097154</b>  | 3  |
| 23 | 2852.258919       | 1426.633098     | 2835.232370    | 1418.119823       | 2834.248354       | 1417.627815       | S    | <b>234.144832</b>  | 117.576054         | 217.118283        | 109.062780         | 216.134267         | 108.570772         | 2  |
| 24 |                   |                 |                |                   |                   |                   | K    | <b>147.112804</b>  | 74.060040          | <b>130.086255</b> | 65.546765          |                    |                    | 1  |

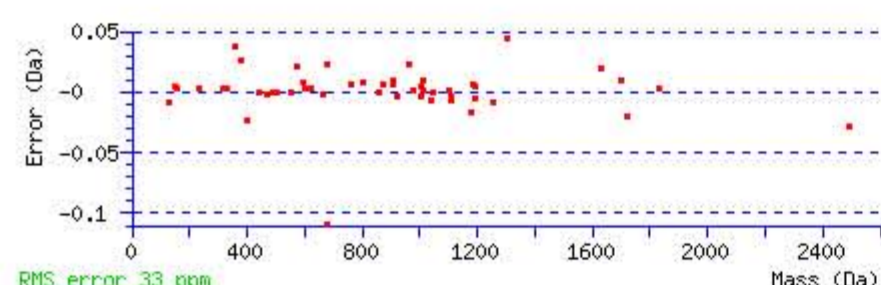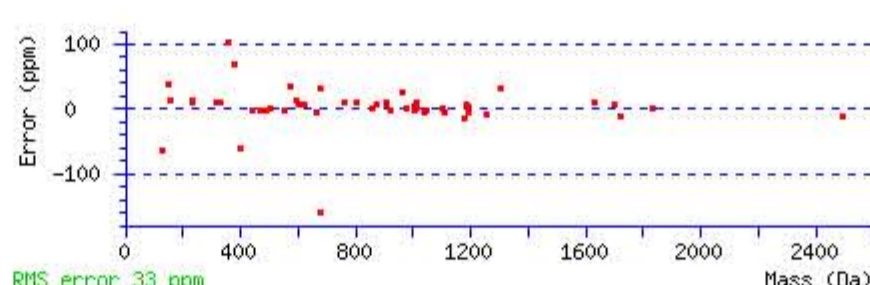

NCBI BLAST search of **TMSGLECAWDSQSPHAHGYPISK**

(Parameters: blastp, nr protein database, expect=20000, no filter, PAM30)

Other BLAST [web gateways](#)

All matches to this query

| Score | Mr(calc):   | Delta     | Sequence                                |
|-------|-------------|-----------|-----------------------------------------|
| 39.7  | 2997.357162 | -0.000266 | <a href="#">TMSGLECAWDSQSPHAHGYPISK</a> |
| 11.1  | 2997.357162 | -0.000266 | <a href="#">TMSGLECAWDSQSPHAHGYPISK</a> |



# Mascot Search Results

## Peptide View

MS/MS Fragmentation of **GNVAVTVSGHTCQHWSAQTPHTHNR**

Found in **PLMN\_HUMAN**, Plasminogen OS=Homo sapiens GN=PLG PE=1 SV=2

Match to Query 62322: 3092.446164 from(516.414970,6+) rtinseconds(1418) index(65249)

Title: Locus:1.1.1.1431.13 File:"2013-07-02 CLN FXIII 60 min 2nd FT.wiff"

Data file C:\Program Files (x86)\Matrix Science\Mascot Daemon\mgf5 FXIII 60 min 2nd\mascot\_daemon\_merge.mgf

Click mouse within plot area to zoom in by factor of two about that point

Or, Plot from  to  Da

Label all possible matches  Label matches used for scoring

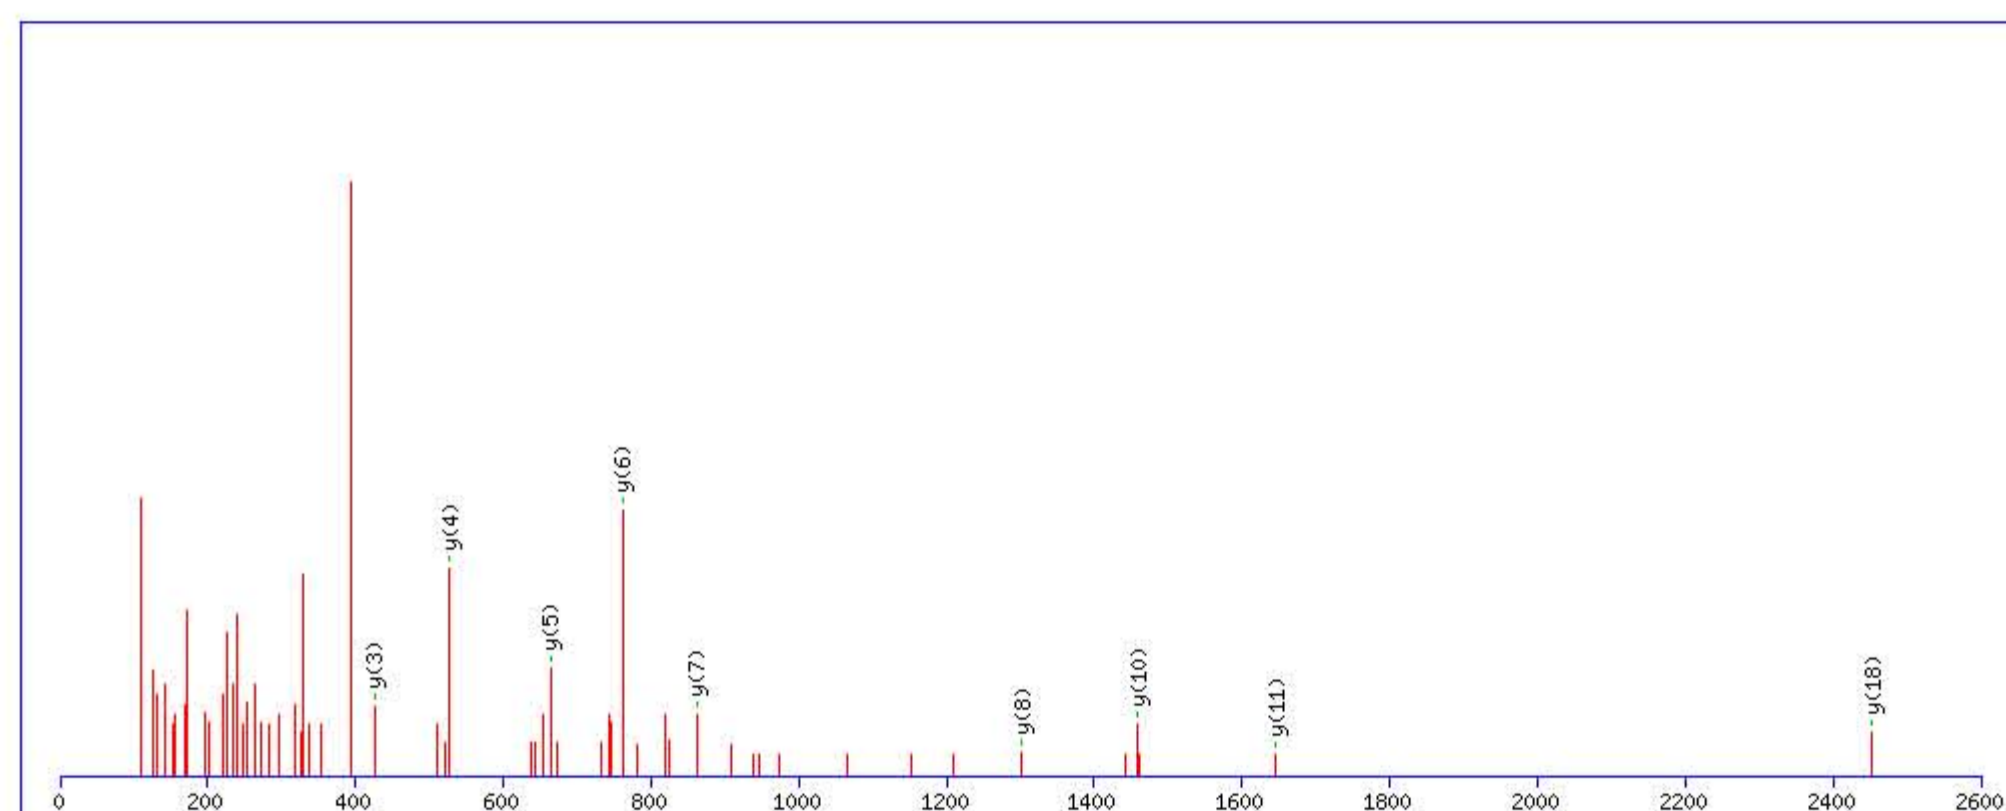

Monoisotopic mass of neutral peptide Mr(calc): 3092.457016

Fixed modifications: Carbamidomethyl (C) (apply to specified residues or termini only)

Variable modifications:

Q18 : Biotin:Thermo-21345 (Q)

Ions Score: 51 Expect: 0.00013

Matches : 9/270 fragment ions using 15 most intense peaks [\(help\)](#)

| #  | b           | b <sup>++</sup> | b <sup>+</sup> | b <sup>+++</sup> | b <sup>0</sup> | b <sup>0++</sup> | Seq. | y                  | y <sup>++</sup> | y <sup>+</sup> | y <sup>+++</sup> | y <sup>0</sup> | y <sup>0++</sup> | #  |
|----|-------------|-----------------|----------------|------------------|----------------|------------------|------|--------------------|-----------------|----------------|------------------|----------------|------------------|----|
| 1  | 58.028740   | 29.518008       |                |                  |                |                  | G    |                    |                 |                |                  |                |                  | 25 |
| 2  | 172.071667  | 86.539471       | 155.045118     | 78.026197        |                |                  | N    | 3036.442790        | 1518.725033     | 3019.416241    | 1510.211758      | 3018.432225    | 1509.719750      | 24 |
| 3  | 271.140081  | 136.073679      | 254.113532     | 127.560404       |                |                  | V    | 2922.399863        | 1461.703569     | 2905.373314    | 1453.190295      | 2904.389298    | 1452.698287      | 23 |
| 4  | 342.177195  | 171.592236      | 325.150646     | 163.078961       |                |                  | A    | 2823.331449        | 1412.169362     | 2806.304900    | 1403.656088      | 2805.320884    | 1403.164080      | 22 |
| 5  | 441.245609  | 221.126443      | 424.219060     | 212.613168       |                |                  | V    | 2752.294335        | 1376.650805     | 2735.267786    | 1368.137531      | 2734.283770    | 1367.645523      | 21 |
| 6  | 542.293288  | 271.650282      | 525.266739     | 263.137008       | 524.282723     | 262.645000       | T    | 2653.225921        | 1327.116598     | 2636.199372    | 1318.603324      | 2635.215356    | 1318.111316      | 20 |
| 7  | 641.361702  | 321.184489      | 624.335153     | 312.671215       | 623.351137     | 312.179207       | V    | 2552.178242        | 1276.592759     | 2535.151693    | 1268.079484      | 2534.167677    | 1267.587476      | 19 |
| 8  | 728.393730  | 364.700503      | 711.367181     | 356.187229       | 710.383165     | 355.695221       | S    | <b>2453.109828</b> | 1227.058552     | 2436.083279    | 1218.545277      | 2435.099263    | 1218.053269      | 18 |
| 9  | 785.415194  | 393.211235      | 768.388645     | 384.697961       | 767.404629     | 384.205953       | G    | 2366.077800        | 1183.542538     | 2349.051251    | 1175.029263      | 2348.067235    | 1174.537255      | 17 |
| 10 | 922.474106  | 461.740691      | 905.447557     | 453.227417       | 904.463541     | 452.735409       | H    | 2309.056336        | 1155.031806     | 2292.029787    | 1146.518531      | 2291.045771    | 1146.026523      | 16 |
| 11 | 1023.521785 | 512.264530      | 1006.495236    | 503.751256       | 1005.511220    | 503.259248       | T    | 2171.997424        | 1086.502350     | 2154.970875    | 1077.989075      | 2153.986859    | 1077.497067      | 15 |
| 12 | 1183.552434 | 592.279855      | 1166.525885    | 583.766581       | 1165.541869    | 583.274572       | C    | 2070.949745        | 1035.978510     | 2053.923196    | 1027.465236      | 2052.939180    | 1026.973228      | 14 |
| 13 | 1311.611012 | 656.309144      | 1294.584463    | 647.795870       | 1293.600447    | 647.303862       | Q    | 1910.919096        | 955.963186      | 1893.892547    | 947.449911       | 1892.908531    | 946.957903       | 13 |
| 14 | 1448.669924 | 724.838600      | 1431.643375    | 716.325326       | 1430.659359    | 715.833318       | H    | 1782.860518        | 891.933897      | 1765.833969    | 883.420622       | 1764.849953    | 882.928614       | 12 |
| 15 | 1634.749237 | 817.878257      | 1617.722688    | 809.364982       | 1616.738672    | 808.872974       | W    | <b>1645.801606</b> | 823.404441      | 1628.775057    | 814.891166       | 1627.791041    | 814.399158       | 11 |
| 16 | 1721.781265 | 861.394271      | 1704.754716    | 852.880996       | 1703.770700    | 852.388988       | S    | <b>1459.722293</b> | 730.364784      | 1442.695744    | 721.851510       | 1441.711728    | 721.359502       | 10 |
| 17 | 1792.818379 | 896.912828      | 1775.791830    | 888.399553       | 1774.807814    | 887.907545       | A    | 1372.690265        | 686.848770      | 1355.663716    | 678.335496       | 1354.679700    | 677.843488       | 9  |
| 18 | 2232.043705 | 1116.525490     | 2215.017156    | 1108.012216      | 2214.033140    | 1107.520208      | Q    | <b>1301.653151</b> | 651.330213      | 1284.626602    | 642.816939       | 1283.642586    | 642.324931       | 8  |
| 19 | 2333.091384 | 1167.049330     | 2316.064835    | 1158.536055      | 2315.080819    | 1158.044047      | T    | <b>862.427825</b>  | 431.717550      | 845.401276     | 423.204276       | 844.417260     | 422.712268       | 7  |
| 20 | 2430.144148 | 1215.575712     | 2413.117599    | 1207.062437      | 2412.133583    | 1206.570429      | P    | <b>761.380146</b>  | 381.193711      | 744.353597     | 372.680436       | 743.369581     | 372.188428       | 6  |
| 21 | 2567.203060 | 1284.105168     | 2550.176511    | 1275.591893      | 2549.192495    | 1275.099885      | H    | <b>664.327382</b>  | 332.667329      | 647.300833     | 324.154054       | 646.316817     | 323.662046       | 5  |
| 22 | 2668.250739 | 1334.629007     | 2651.224190    | 1326.115733      | 2650.240174    | 1325.623725      | T    | <b>527.268470</b>  | 264.137873      | 510.241921     | 255.624598       | 509.257905     | 255.132590       | 4  |
| 23 | 2805.309651 | 1403.158463     | 2788.283102    | 1394.645189      | 2787.299086    | 1394.153181      | H    | <b>426.220791</b>  | 213.614033      | 409.194242     | 205.100759       |                |                  | 3  |
| 24 | 2919.352578 | 1460.179927     | 2902.326029    | 1451.666652      | 2901.342013    | 1451.174644      | N    | 289.161879         | 145.084577      | 272.135330     | 136.571303       |                |                  | 2  |
| 25 |             |                 |                |                  |                |                  | R    | 175.118952         | 88.063114       | 158.092403     | 79.549839        |                |                  | 1  |

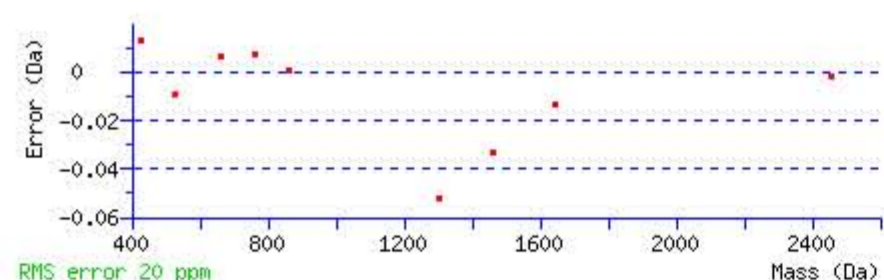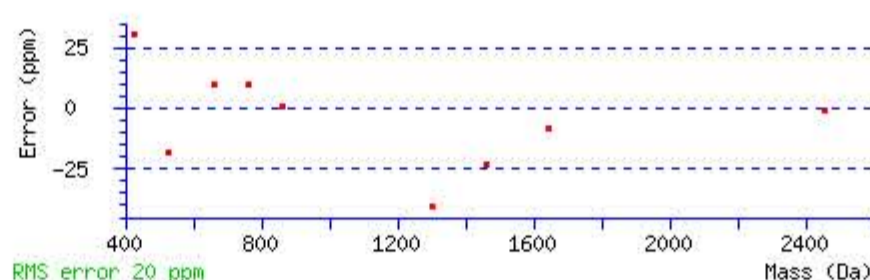

NCBI BLAST search of **GNVAVTVSGHTCQHWSAQTPHTHNR**

(Parameters: blastp, nr protein database, expect=20000, no filter, PAM30)

Other BLAST [web gateways](#)

All matches to this query

| Score | Mr(calc):   | Delta     | Sequence                                  |
|-------|-------------|-----------|-------------------------------------------|
| 51.0  | 3092.457016 | -0.010852 | <a href="#">GNVAVTVSGHTCQHWSAQTPHTHNR</a> |
| 21.1  | 3092.457016 | -0.010852 | <a href="#">GNVAVTVSGHTCQHWSAQTPHTHNR</a> |



# Mascot Search Results

## Peptide View

MS/MS Fragmentation of **GNVAVTVSGHTCQHWSAQTPHTHNR**  
 Found in **PLMN\_HUMAN**, Plasminogen OS=Homo sapiens GN=PLG PE=1 SV=2

Match to Query 62328: 3092.449044 from(516.415450,6+) rtinseconds(1453) index(65507)  
 Title: Locus:1.1.1.1443.15 File:"2013-07-02 CLN FXIII 60 min 2nd FT.wiff"  
 Data file C:\Program Files (x86)\Matrix Science\Mascot Daemon\mgf5 FXIII 60 min 2nd\mascot\_daemon\_merge.mgf

Click mouse within plot area to zoom in by factor of two about that point  
 Or, Plot from  to  Da   
 Label all possible matches  Label matches used for scoring

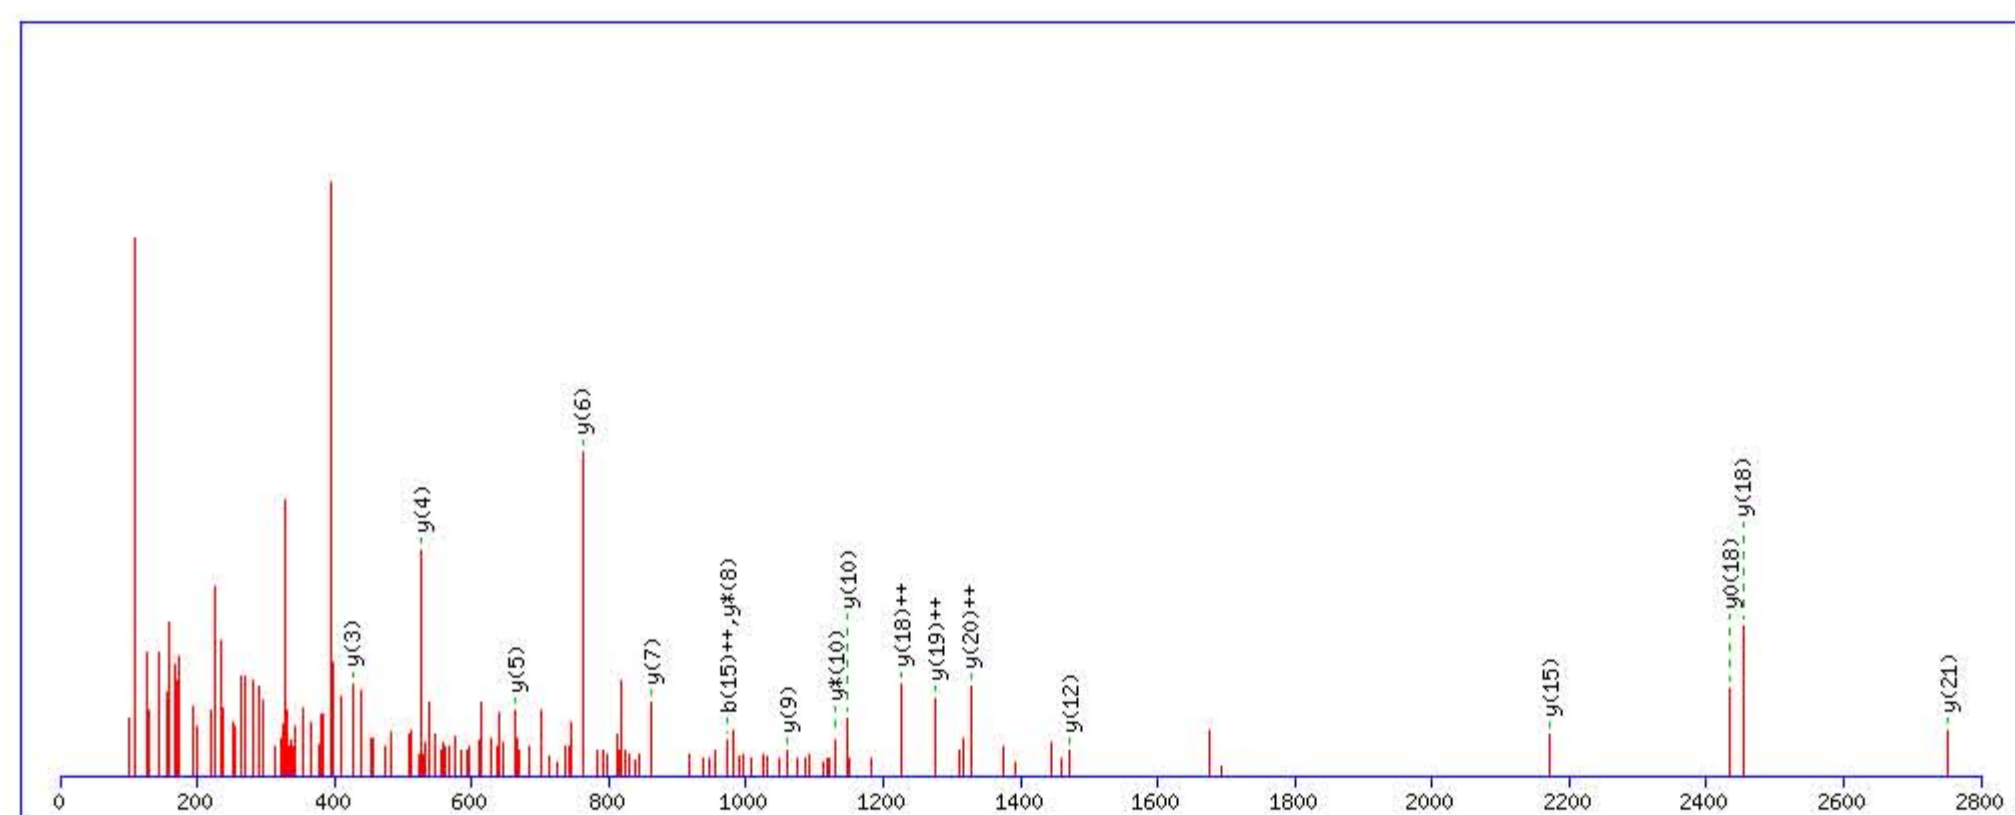

Monoisotopic mass of neutral peptide Mr(calc): 3092.457016  
 Fixed modifications: Carbamidomethyl (C) (apply to specified residues or termini only)  
 Variable modifications:  
 Q13 : Biotin:Thermo-21345 (Q)  
 Ions Score: 52 Expect: 0.00011  
 Matches : 18/270 fragment ions using 34 most intense peaks [\(help\)](#)

| #  | b           | b <sup>++</sup>   | b <sup>+</sup> | b <sup>+++</sup> | b <sup>0</sup> | b <sup>0++</sup> | Seq. | y                  | y <sup>++</sup>    | y <sup>+</sup>     | y <sup>+++</sup> | y <sup>0</sup>     | y <sup>0++</sup> | #  |
|----|-------------|-------------------|----------------|------------------|----------------|------------------|------|--------------------|--------------------|--------------------|------------------|--------------------|------------------|----|
| 1  | 58.028740   | 29.518008         |                |                  |                |                  | G    |                    |                    |                    |                  |                    |                  | 25 |
| 2  | 172.071667  | 86.539471         | 155.045118     | 78.026197        |                |                  | N    | 3036.442790        | 1518.725033        | 3019.416241        | 1510.211758      | 3018.432225        | 1509.719750      | 24 |
| 3  | 271.140081  | 136.073679        | 254.113532     | 127.560404       |                |                  | V    | 2922.399863        | 1461.703569        | 2905.373314        | 1453.190295      | 2904.389298        | 1452.698287      | 23 |
| 4  | 342.177195  | 171.592236        | 325.150646     | 163.078961       |                |                  | A    | 2823.331449        | 1412.169362        | 2806.304900        | 1403.656088      | 2805.320884        | 1403.164080      | 22 |
| 5  | 441.245609  | 221.126443        | 424.219060     | 212.613168       |                |                  | V    | <b>2752.294335</b> | 1376.650805        | 2735.267786        | 1368.137531      | 2734.283770        | 1367.645523      | 21 |
| 6  | 542.293288  | 271.650282        | 525.266739     | 263.137008       | 524.282723     | 262.645000       | T    | 2653.225921        | <b>1327.116598</b> | 2636.199372        | 1318.603324      | 2635.215356        | 1318.111316      | 20 |
| 7  | 641.361702  | 321.184489        | 624.335153     | 312.671215       | 623.351137     | 312.179207       | V    | 2552.178242        | <b>1276.592759</b> | 2535.151693        | 1268.079484      | 2534.167677        | 1267.587476      | 19 |
| 8  | 728.393730  | 364.700503        | 711.367181     | 356.187229       | 710.383165     | 355.695221       | S    | <b>2453.109828</b> | <b>1227.058552</b> | 2436.083279        | 1218.545277      | <b>2435.099263</b> | 1218.053269      | 18 |
| 9  | 785.415194  | 393.211235        | 768.388645     | 384.697961       | 767.404629     | 384.205953       | G    | 2366.077800        | 1183.542538        | 2349.051251        | 1175.029263      | 2348.067235        | 1174.537255      | 17 |
| 10 | 922.474106  | 461.740691        | 905.447557     | 453.227417       | 904.463541     | 452.735409       | H    | 2309.056336        | 1155.031806        | 2292.029787        | 1146.518531      | 2291.045771        | 1146.026523      | 16 |
| 11 | 1023.521785 | 512.264530        | 1006.495236    | 503.751256       | 1005.511220    | 503.259248       | T    | <b>2171.997424</b> | 1086.502350        | 2154.970875        | 1077.989075      | 2153.986859        | 1077.497067      | 15 |
| 12 | 1183.552434 | 592.279855        | 1166.525885    | 583.766581       | 1165.541869    | 583.274572       | C    | 2070.949745        | 1035.978510        | 2053.923196        | 1027.465236      | 2052.939180        | 1026.973228      | 14 |
| 13 | 1622.777760 | 811.892518        | 1605.751211    | 803.379244       | 1604.767195    | 802.887236       | Q    | 1910.919096        | 955.963186         | 1893.892547        | 947.449911       | 1892.908531        | 946.957903       | 13 |
| 14 | 1759.836672 | 880.421974        | 1742.810123    | 871.908700       | 1741.826107    | 871.416692       | H    | <b>1471.693770</b> | 736.350523         | 1454.667221        | 727.837248       | 1453.683205        | 727.345240       | 12 |
| 15 | 1945.915985 | <b>973.461631</b> | 1928.889436    | 964.948356       | 1927.905420    | 964.456348       | W    | 1334.634858        | 667.821067         | 1317.608309        | 659.307792       | 1316.624293        | 658.815784       | 11 |
| 16 | 2032.948013 | 1016.977645       | 2015.921464    | 1008.464370      | 2014.937448    | 1007.972362      | S    | <b>1148.555545</b> | 574.781410         | <b>1131.528996</b> | 566.268136       | 1130.544980        | 565.776128       | 10 |
| 17 | 2103.985127 | 1052.496201       | 2086.958578    | 1043.982927      | 2085.974562    | 1043.490919      | A    | <b>1061.523517</b> | 531.265396         | 1044.496968        | 522.752122       | 1043.512952        | 522.260114       | 9  |
| 18 | 2232.043705 | 1116.525490       | 2215.017156    | 1108.012216      | 2214.033140    | 1107.520208      | Q    | 990.486403         | 495.746839         | <b>973.459854</b>  | 487.233565       | 972.475838         | 486.741557       | 8  |
| 19 | 2333.091384 | 1167.049330       | 2316.064835    | 1158.536055      | 2315.080819    | 1158.044047      | T    | <b>862.427825</b>  | 431.717550         | 845.401276         | 423.204276       | 844.417260         | 422.712268       | 7  |
| 20 | 2430.144148 | 1215.575712       | 2413.117599    | 1207.062437      | 2412.133583    | 1206.570429      | P    | <b>761.380146</b>  | 381.193711         | 744.353597         | 372.680436       | 743.369581         | 372.188428       | 6  |
| 21 | 2567.203060 | 1284.105168       | 2550.176511    | 1275.591893      | 2549.192495    | 1275.099885      | H    | <b>664.327382</b>  | 332.667329         | 647.300833         | 324.154054       | 646.316817         | 323.662046       | 5  |
| 22 | 2668.250739 | 1334.629007       | 2651.224190    | 1326.115733      | 2650.240174    | 1325.623725      | T    | <b>527.268470</b>  | 264.137873         | 510.241921         | 255.624598       | 509.257905         | 255.132590       | 4  |
| 23 | 2805.309651 | 1403.158463       | 2788.283102    | 1394.645189      | 2787.299086    | 1394.153181      | H    | <b>426.220791</b>  | 213.614033         | 409.194242         | 205.100759       |                    |                  | 3  |
| 24 | 2919.352578 | 1460.179927       | 2902.326029    | 1451.666652      | 2901.342013    | 1451.174644      | N    | 289.161879         | 145.084577         | 272.135330         | 136.571303       |                    |                  | 2  |
| 25 |             |                   |                |                  |                |                  | R    | 175.118952         | 88.063114          | 158.092403         | 79.549839        |                    |                  | 1  |

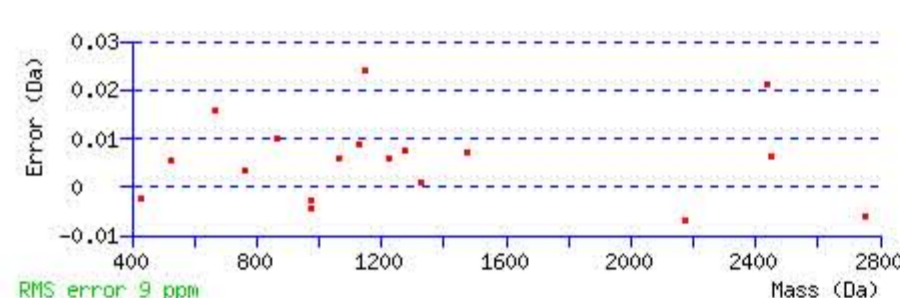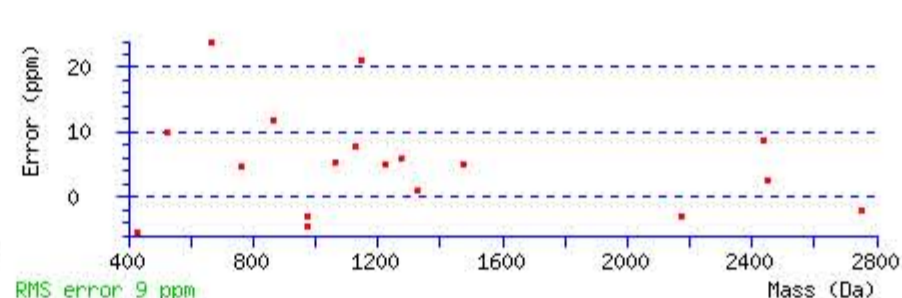

NCBI BLAST search of **GNVAVTVSGHTCQHWSAQTPHTHNR**  
 (Parameters: blastp, nr protein database, expect=20000, no filter, PAM30)  
 Other BLAST [web gateways](#)

### All matches to this query

| Score | Mr(calc):   | Delta     | Sequence                                  |
|-------|-------------|-----------|-------------------------------------------|
| 51.8  | 3092.457016 | -0.007972 | <a href="#">GNVAVTVSGHTCQHWSAQTPHTHNR</a> |
| 22.2  | 3092.457016 | -0.007972 | <a href="#">GNVAVTVSGHTCQHWSAQTPHTHNR</a> |



# Mascot Search Results

## Peptide View

MS/MS Fragmentation of **LYDYCDVPQCAAPSFDCGKQPVEPK**  
 Found in **PLMN\_HUMAN**, Plasminogen OS=Homo sapiens GN=PLG PE=1 SV=2

Match to Query 64976: 3254.446776 from(814.618970,4+) rtinseconds(2054) index(69136)  
 Title: Locus:1.1.1.1652.25 File:"2013-07-02 CLN FXIII 60 min 2nd FT.wiff"  
 Data file C:\Program Files (x86)\Matrix Science\Mascot Daemon\mgf5 FXIII 60 min 2nd\mascot\_daemon\_merge.mgf

Click mouse within plot area to zoom in by factor of two about that point  
 Or, Plot from  to  Da   
 Label all possible matches  Label matches used for scoring

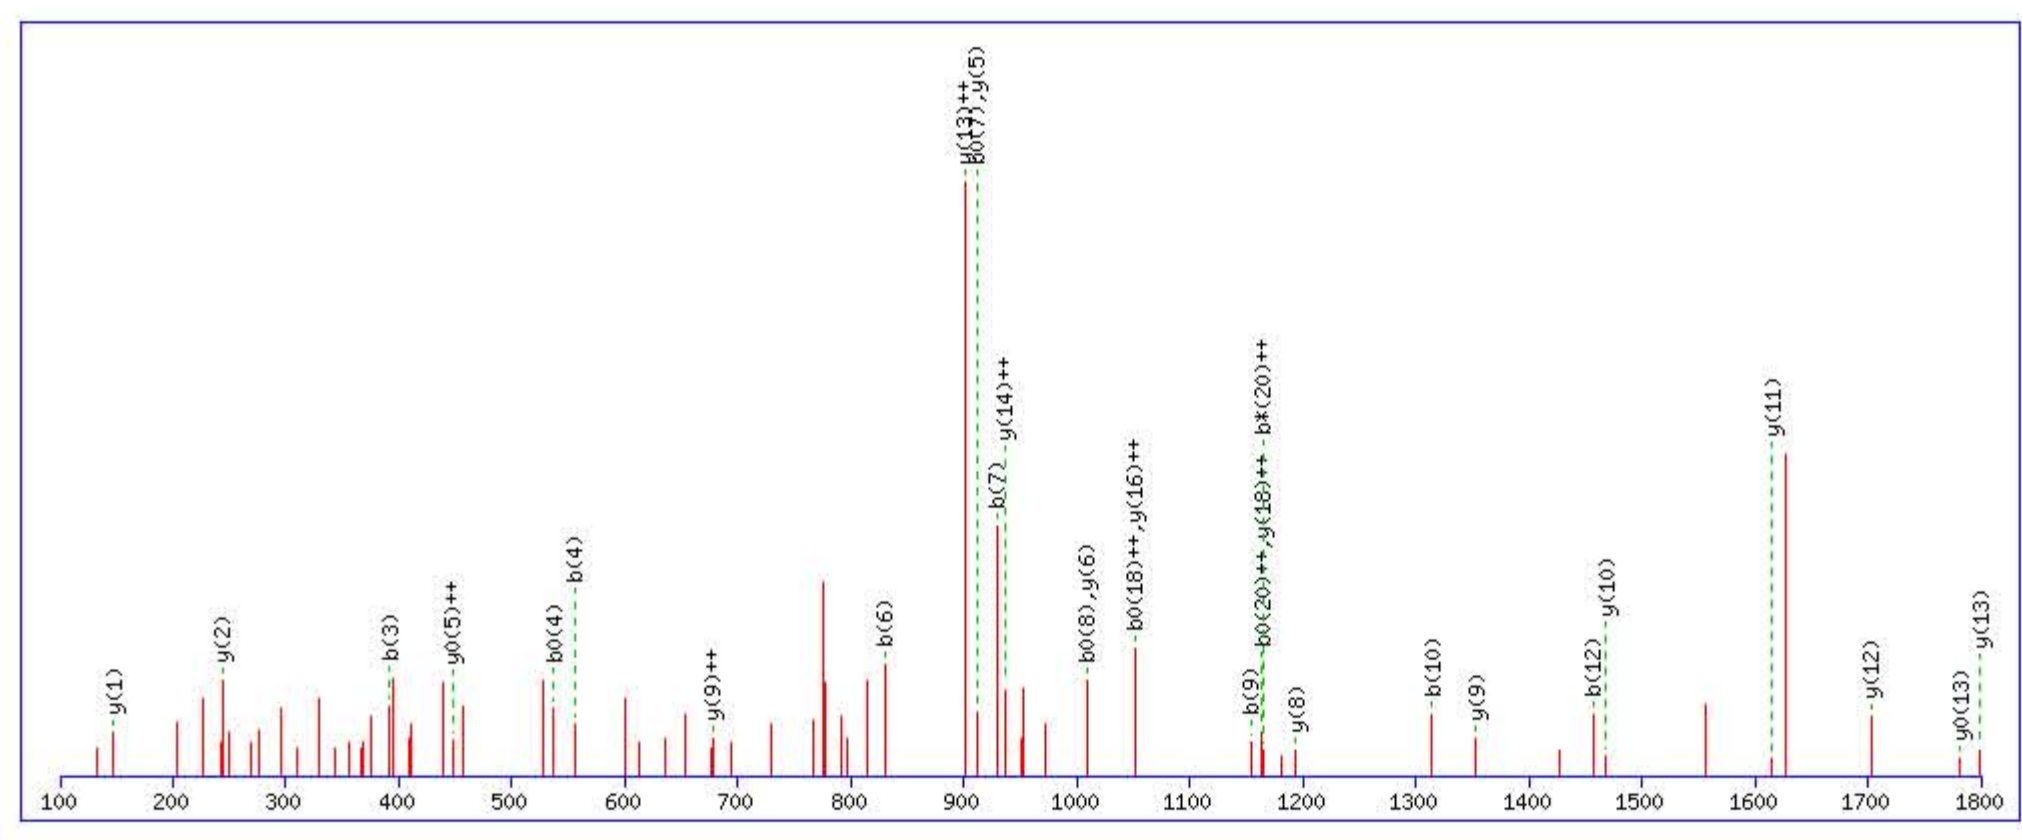

Monoisotopic mass of neutral peptide Mr(calc): 3254.454514  
 Fixed modifications: Carbamidomethyl (C) (apply to specified residues or termini only)  
 Variable modifications:  
 Q21 : Biotin:Thermo-21345 (Q)  
 Ions Score: 52 Expect: 4.8e-005  
 Matches : 30/264 fragment ions using 52 most intense peaks [\(help\)](#)

| #  | b                  | b <sup>++</sup> | b <sup>+</sup> | b <sup>+++</sup>   | b <sup>0</sup>     | b <sup>0++</sup>   | Seq. | y                  | y <sup>++</sup>    | y <sup>+</sup> | y <sup>+++</sup> | y <sup>0</sup>     | y <sup>0++</sup>  | #  |
|----|--------------------|-----------------|----------------|--------------------|--------------------|--------------------|------|--------------------|--------------------|----------------|------------------|--------------------|-------------------|----|
| 1  | 114.091340         | 57.549308       |                |                    |                    |                    | L    |                    |                    |                |                  |                    |                   | 25 |
| 2  | 277.154669         | 139.080973      |                |                    |                    |                    | Y    | 3142.377716        | 1571.692496        | 3125.351167    | 1563.179221      | 3124.367151        | 1562.687213       | 24 |
| 3  | <b>392.181612</b>  | 196.594444      |                |                    | 374.171047         | 187.589162         | D    | 2979.314387        | 1490.160831        | 2962.287838    | 1481.647557      | 2961.303822        | 1481.155549       | 23 |
| 4  | <b>555.244941</b>  | 278.126109      |                |                    | <b>537.234376</b>  | 269.120826         | Y    | 2864.287444        | 1432.647360        | 2847.260895    | 1424.134085      | 2846.276879        | 1423.642077       | 22 |
| 5  | 715.275590         | 358.141433      |                |                    | 697.265025         | 349.136151         | C    | 2701.224115        | 1351.115695        | 2684.197566    | 1342.602421      | 2683.213550        | 1342.110413       | 21 |
| 6  | <b>830.302533</b>  | 415.654905      |                |                    | 812.291968         | 406.649622         | D    | 2541.193466        | 1271.100371        | 2524.166917    | 1262.587096      | 2523.182901        | 1262.095089       | 20 |
| 7  | <b>929.370947</b>  | 465.189112      |                |                    | <b>911.360382</b>  | 456.183829         | V    | 2426.166523        | 1213.586899        | 2409.139974    | 1205.073625      | 2408.155958        | 1204.581617       | 19 |
| 8  | 1026.423711        | 513.715494      |                |                    | <b>1008.413146</b> | 504.710211         | P    | 2327.098109        | <b>1164.052692</b> | 2310.071560    | 1155.539418      | 2309.087544        | 1155.047410       | 18 |
| 9  | <b>1154.482289</b> | 577.744783      | 1137.455740    | 569.231508         | 1136.471724        | 568.739500         | Q    | 2230.045345        | 1115.526310        | 2213.018796    | 1107.013036      | 2212.034780        | 1106.521028       | 17 |
| 10 | <b>1314.512938</b> | 657.760107      | 1297.486389    | 649.246833         | 1296.502373        | 648.754825         | C    | 2101.986767        | <b>1051.497021</b> | 2084.960218    | 1042.983747      | 2083.976202        | 1042.491739       | 16 |
| 11 | 1385.550052        | 693.278664      | 1368.523503    | 684.765390         | 1367.539487        | 684.273382         | A    | 1941.956118        | 971.481697         | 1924.929569    | 962.968423       | 1923.945553        | 962.476415        | 15 |
| 12 | <b>1456.587166</b> | 728.797221      | 1439.560617    | 720.283947         | 1438.576601        | 719.791939         | A    | 1870.919004        | <b>935.963140</b>  | 1853.892455    | 927.449866       | 1852.908439        | 926.957858        | 14 |
| 13 | 1553.639930        | 777.323603      | 1536.613381    | 768.810329         | 1535.629365        | 768.318321         | P    | <b>1799.881890</b> | <b>900.444583</b>  | 1782.855341    | 891.931309       | <b>1781.871325</b> | 891.439301        | 13 |
| 14 | 1640.671958        | 820.839617      | 1623.645409    | 812.326343         | 1622.661393        | 811.834335         | S    | <b>1702.829126</b> | 851.918201         | 1685.802577    | 843.404927       | 1684.818561        | 842.912919        | 12 |
| 15 | 1787.740372        | 894.373824      | 1770.713823    | 885.860550         | 1769.729807        | 885.368542         | F    | <b>1615.797098</b> | 808.402187         | 1598.770549    | 799.888913       | 1597.786533        | 799.396905        | 11 |
| 16 | 1902.767315        | 951.887296      | 1885.740766    | 943.374021         | 1884.756750        | 942.882013         | D    | <b>1468.728684</b> | 734.867980         | 1451.702135    | 726.354706       | 1450.718119        | 725.862698        | 10 |
| 17 | 2062.797964        | 1031.902620     | 2045.771415    | 1023.389346        | 2044.787399        | 1022.897338        | C    | <b>1353.701741</b> | <b>677.354509</b>  | 1336.675192    | 668.841234       | 1335.691176        | 668.349226        | 9  |
| 18 | 2119.819428        | 1060.413352     | 2102.792879    | 1051.900078        | 2101.808863        | <b>1051.408070</b> | G    | <b>1193.671092</b> | 597.339184         | 1176.644543    | 588.825910       | 1175.660527        | 588.333902        | 8  |
| 19 | 2247.914391        | 1124.460834     | 2230.887842    | 1115.947559        | 2229.903826        | 1115.455551        | K    | 1136.649628        | 568.828452         | 1119.623079    | 560.315178       | 1118.639063        | 559.823170        | 7  |
| 20 | 2344.967155        | 1172.987216     | 2327.940606    | <b>1164.473941</b> | 2326.956590        | <b>1163.981933</b> | P    | <b>1008.554665</b> | 504.780971         | 991.528116     | 496.267696       | 990.544100         | 495.775688        | 6  |
| 21 | 2784.192481        | 1392.599879     | 2767.165932    | 1384.086604        | 2766.181916        | 1383.594596        | Q    | <b>911.501901</b>  | 456.254589         | 894.475352     | 447.741314       | 893.491336         | <b>447.249306</b> | 5  |
| 22 | 2883.260895        | 1442.134086     | 2866.234346    | 1433.620811        | 2865.250330        | 1433.128803        | V    | 472.276575         | 236.641925         | 455.250026     | 228.128651       | 454.266010         | 227.636643        | 4  |
| 23 | 3012.303488        | 1506.655382     | 2995.276939    | 1498.142108        | 2994.292923        | 1497.650100        | E    | 373.208161         | 187.107719         | 356.181612     | 178.594444       | 355.197596         | 178.102436        | 3  |
| 24 | 3109.356252        | 1555.181764     | 3092.329703    | 1546.668490        | 3091.345687        | 1546.176482        | P    | <b>244.165568</b>  | 122.586422         | 227.139019     | 114.073148       |                    |                   | 2  |
| 25 |                    |                 |                |                    |                    |                    | K    | <b>147.112804</b>  | 74.060040          | 130.086255     | 65.546765        |                    |                   | 1  |

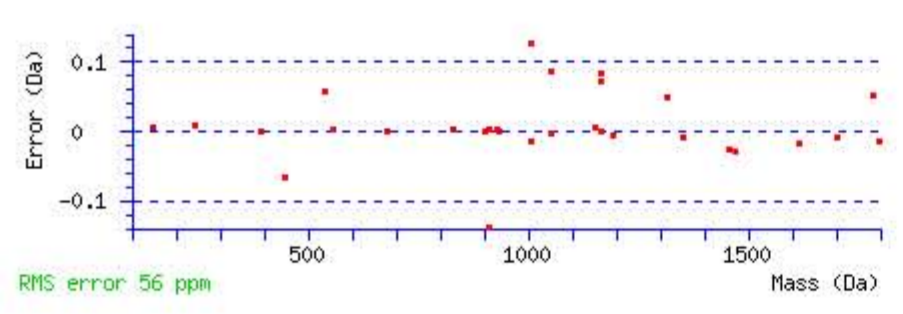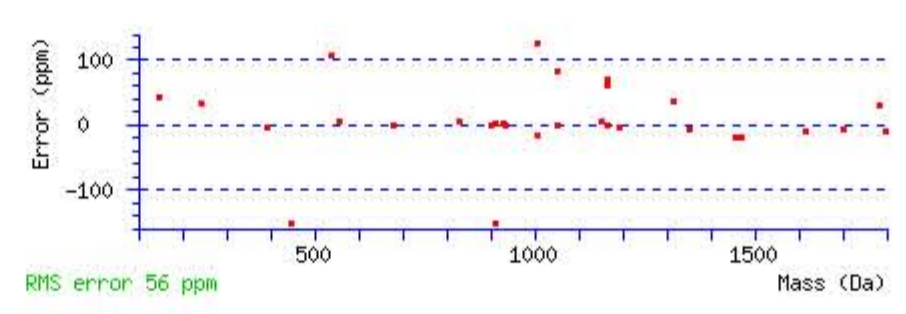

NCBI BLAST search of **LYDYCDVPQCAAPSFDCGKQPVEPK**  
 (Parameters: blastp, nr protein database, expect=20000, no filter, PAM30)  
 Other BLAST [web gateways](#)

### All matches to this query

| Score | Mr(calc):   | Delta     | Sequence                                  |
|-------|-------------|-----------|-------------------------------------------|
| 51.7  | 3254.454514 | -0.007738 | <a href="#">LYDYCDVPQCAAPSFDCGKQPVEPK</a> |



# MASCOT Search Results

## Peptide View

MS/MS Fragmentation of **KLYDYCDVPQCAAPSFDCGKQPVEPK**  
 Found in **PLMN\_HUMAN**, Plasminogen OS=Homo sapiens GN=PLG PE=1 SV=2

Match to Query 66110: 3382.550016 from(846.644780,4+) rtinseconds(1988) index(68710)  
 Title: Locus:1.1.1.1629.16 File:"2013-07-02 CLN FXIII 60 min 2nd FT.wiff"  
 Data file C:\Program Files (x86)\Matrix Science\Mascot Daemon\mgf5 FXIII 60 min 2nd\mascot\_daemon\_merge.mgf

Click mouse within plot area to zoom in by factor of two about that point  
 Or, Plot from  to  Da   
 Label all possible matches  Label matches used for scoring

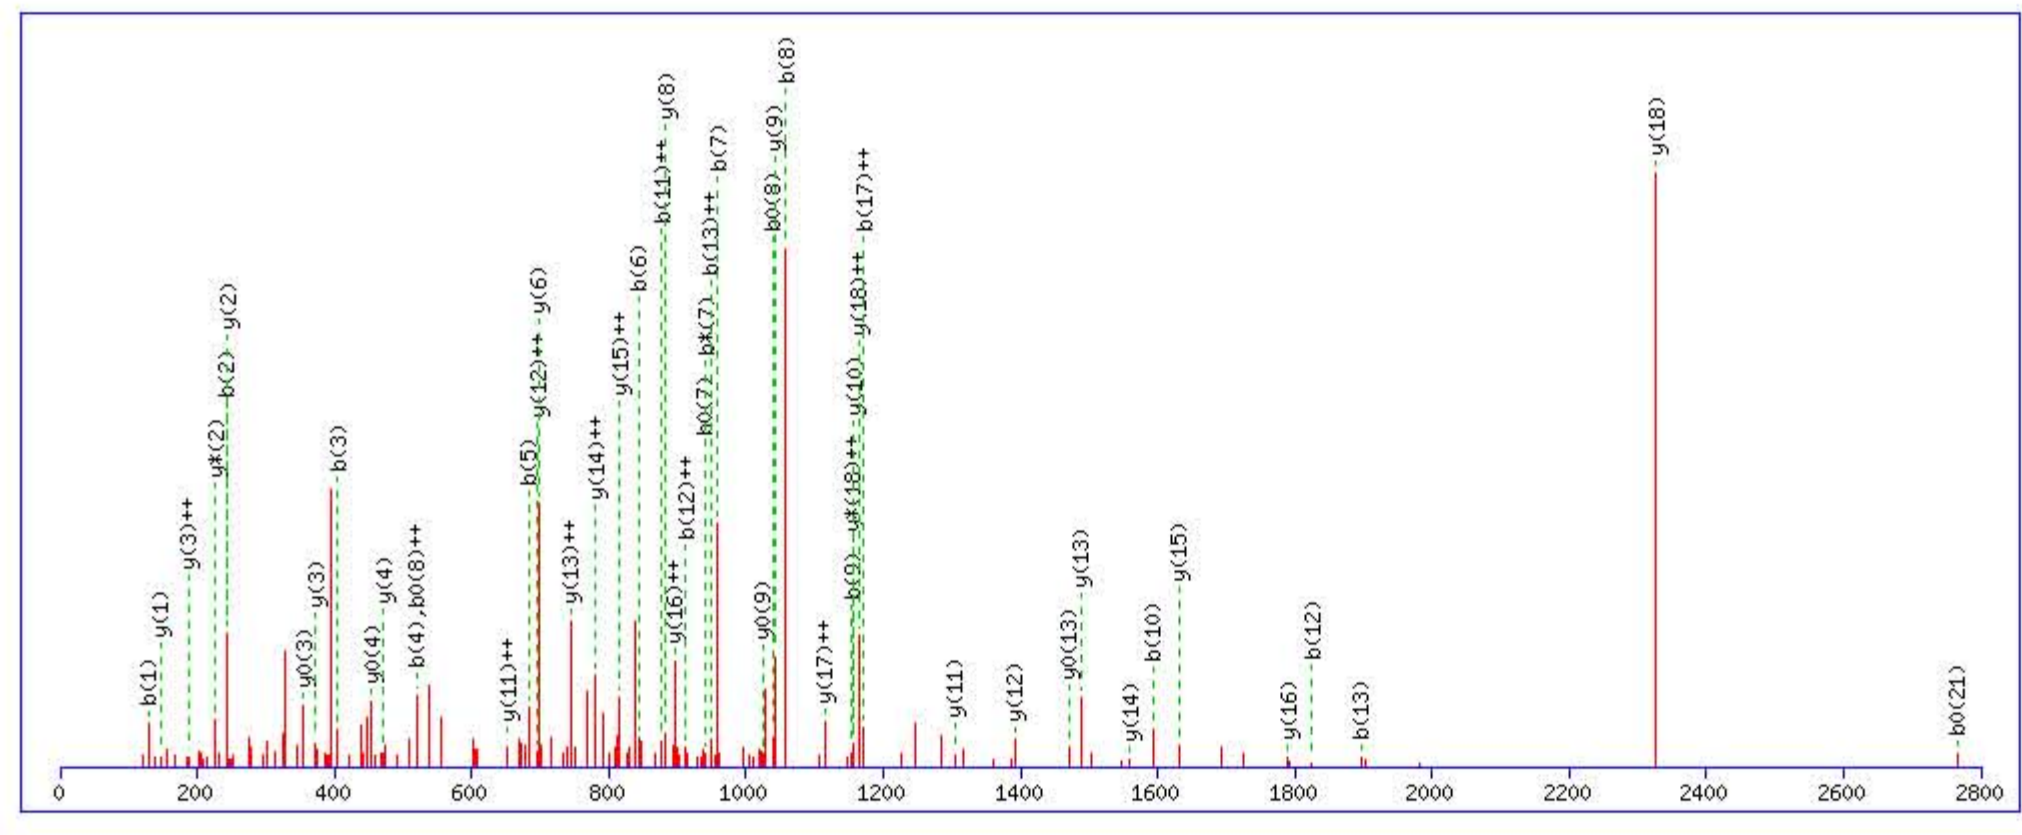

Monoisotopic mass of neutral peptide Mr(calc): 3382.549469  
 Fixed modifications: Carbamidomethyl (C) (apply to specified residues or termini only)  
 Variable modifications:  
 Q10 : Biotin:Thermo-21345 (Q)  
 Ions Score: 67 Expect: 5.4e-007  
 Matches : 51/290 fragment ions using 133 most intense peaks ([help](#))

| #  | b                  | b <sup>++</sup>    | b <sup>*</sup>    | b <sup>+++</sup> | b <sup>0</sup>     | b <sup>0++</sup>  | Seq.     | y                  | y <sup>++</sup>    | y <sup>*</sup>    | y <sup>+++</sup>   | y <sup>0</sup>     | y <sup>0++</sup> | #         |
|----|--------------------|--------------------|-------------------|------------------|--------------------|-------------------|----------|--------------------|--------------------|-------------------|--------------------|--------------------|------------------|-----------|
| 1  | <b>129.102239</b>  | 65.054757          | 112.075690        | 56.541483        |                    |                   | <b>K</b> |                    |                    |                   |                    |                    |                  | <b>26</b> |
| 2  | <b>242.186303</b>  | 121.596790         | 225.159754        | 113.083515       |                    |                   | <b>L</b> | 3255.461780        | 1628.234528        | 3238.435231       | 1619.721253        | 3237.451215        | 1619.229245      | <b>25</b> |
| 3  | <b>405.249632</b>  | 203.128454         | 388.223083        | 194.615180       |                    |                   | <b>Y</b> | 3142.377716        | 1571.692496        | 3125.351167       | 1563.179221        | 3124.367151        | 1562.687213      | <b>24</b> |
| 4  | <b>520.276575</b>  | 260.641926         | 503.250026        | 252.128651       | 502.266010         | 251.636643        | <b>D</b> | 2979.314387        | 1490.160831        | 2962.287838       | 1481.647557        | 2961.303822        | 1481.155549      | <b>23</b> |
| 5  | <b>683.339904</b>  | 342.173590         | 666.313355        | 333.660316       | 665.329339         | 333.168308        | <b>Y</b> | 2864.287444        | 1432.647360        | 2847.260895       | 1424.134085        | 2846.276879        | 1423.642077      | <b>22</b> |
| 6  | <b>843.370553</b>  | 422.188915         | 826.344004        | 413.675640       | 825.359988         | 413.183632        | <b>C</b> | 2701.224115        | 1351.115695        | 2684.197566       | 1342.602421        | 2683.213550        | 1342.110413      | <b>21</b> |
| 7  | <b>958.397496</b>  | 479.702386         | <b>941.370947</b> | 471.189112       | <b>940.386931</b>  | 470.697104        | <b>D</b> | 2541.193466        | 1271.100371        | 2524.166917       | 1262.587096        | 2523.182901        | 1262.095088      | <b>20</b> |
| 8  | <b>1057.465910</b> | 529.236593         | 1040.439361       | 520.723319       | <b>1039.455345</b> | <b>520.231311</b> | <b>V</b> | 2426.166523        | 1213.586899        | 2409.139974       | 1205.073625        | 2408.155958        | 1204.581617      | <b>19</b> |
| 9  | <b>1154.518674</b> | 577.762975         | 1137.492125       | 569.249701       | 1136.508109        | 568.757693        | <b>P</b> | <b>2327.098109</b> | <b>1164.052692</b> | 2310.071560       | <b>1155.539418</b> | 2309.087544        | 1155.047410      | <b>18</b> |
| 10 | <b>1593.744000</b> | 797.375638         | 1576.717451       | 788.862364       | 1575.733435        | 788.370356        | <b>Q</b> | 2230.045345        | <b>1115.526310</b> | 2213.018796       | 1107.013036        | 2212.034780        | 1106.521028      | <b>17</b> |
| 11 | 1753.774649        | <b>877.390963</b>  | 1736.748100       | 868.877688       | 1735.764084        | 868.385680        | <b>C</b> | <b>1790.820019</b> | <b>895.913647</b>  | 1773.793470       | 887.400373         | 1772.809454        | 886.908365       | <b>16</b> |
| 12 | <b>1824.811763</b> | <b>912.909520</b>  | 1807.785214       | 904.396245       | 1806.801198        | 903.904237        | <b>A</b> | <b>1630.789370</b> | <b>815.898323</b>  | 1613.762821       | 807.385048         | 1612.778805        | 806.893040       | <b>15</b> |
| 13 | <b>1895.848877</b> | <b>948.428077</b>  | 1878.822328       | 939.914802       | 1877.838312        | 939.422794        | <b>A</b> | <b>1559.752256</b> | <b>780.379766</b>  | 1542.725707       | 771.866491         | 1541.741691        | 771.374483       | <b>14</b> |
| 14 | 1992.901641        | 996.954459         | 1975.875092       | 988.441184       | 1974.891076        | 987.949176        | <b>P</b> | <b>1488.715142</b> | <b>744.861209</b>  | 1471.688593       | 736.347934         | <b>1470.704577</b> | 735.855926       | <b>13</b> |
| 15 | 2079.933669        | 1040.470472        | 2062.907120       | 1031.957198      | 2061.923104        | 1031.465190       | <b>S</b> | <b>1391.662378</b> | <b>696.334827</b>  | 1374.635829       | 687.821552         | 1373.651813        | 687.329544       | <b>12</b> |
| 16 | 2227.002083        | 1114.004679        | 2209.975534       | 1105.491405      | 2208.991518        | 1104.999397       | <b>F</b> | <b>1304.630350</b> | <b>652.818813</b>  | 1287.603801       | 644.305538         | 1286.619785        | 643.813530       | <b>11</b> |
| 17 | 2342.029026        | <b>1171.518151</b> | 2325.002477       | 1163.004876      | 2324.018461        | 1162.512868       | <b>D</b> | <b>1157.561936</b> | 579.284606         | 1140.535387       | 570.771331         | 1139.551371        | 570.279323       | <b>10</b> |
| 18 | 2502.059675        | 1251.533475        | 2485.033126       | 1243.020201      | 2484.049110        | 1242.528193       | <b>C</b> | <b>1042.534993</b> | 521.771135         | 1025.508444       | 513.257860         | <b>1024.524428</b> | 512.765852       | <b>9</b>  |
| 19 | 2559.081139        | 1280.044207        | 2542.054590       | 1271.530933      | 2541.070574        | 1271.038925       | <b>G</b> | <b>882.504344</b>  | 441.755810         | 865.477795        | 433.242536         | 864.493779         | 432.750528       | <b>8</b>  |
| 20 | 2687.176102        | 1344.091689        | 2670.149553       | 1335.578414      | 2669.165537        | 1335.086406       | <b>K</b> | 825.482880         | 413.245078         | 808.456331        | 404.731804         | 807.472315         | 404.239796       | <b>7</b>  |
| 21 | 2784.228866        | 1392.618071        | 2767.202317       | 1384.104796      | <b>2766.218301</b> | 1383.612788       | <b>P</b> | <b>697.387917</b>  | 349.197597         | 680.361368        | 340.684322         | 679.377352         | 340.192314       | <b>6</b>  |
| 22 | 2912.287444        | 1456.647360        | 2895.260895       | 1448.134085      | 2894.276879        | 1447.642077       | <b>Q</b> | 600.335153         | 300.671215         | 583.308604        | 292.157940         | 582.324588         | 291.665932       | <b>5</b>  |
| 23 | 3011.355858        | 1506.181567        | 2994.329309       | 1497.668292      | 2993.345293        | 1497.176284       | <b>V</b> | <b>472.276575</b>  | 236.641925         | 455.250026        | 228.128651         | <b>454.266010</b>  | 227.636643       | <b>4</b>  |
| 24 | 3140.398451        | 1570.702863        | 3123.371902       | 1562.189589      | 3122.387886        | 1561.697581       | <b>E</b> | <b>373.208161</b>  | <b>187.107719</b>  | 356.181612        | 178.594444         | <b>355.197596</b>  | 178.102436       | <b>3</b>  |
| 25 | 3237.451215        | 1619.229245        | 3220.424666       | 1610.715971      | 3219.440650        | 1610.223963       | <b>P</b> | <b>244.165568</b>  | 122.586422         | <b>227.139019</b> | 114.073148         |                    |                  | <b>2</b>  |
| 26 |                    |                    |                   |                  |                    |                   | <b>K</b> | <b>147.112804</b>  | 74.060040          | 130.086255        | 65.546765          |                    |                  | <b>1</b>  |

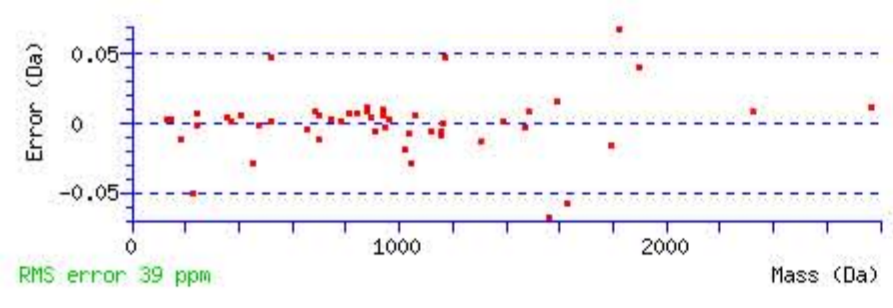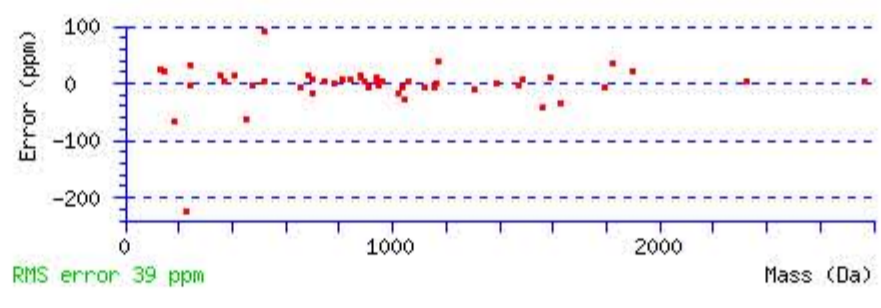

NCBI BLAST search of **KLYDYCDVPQCAAPSFDCGKQPVEPK**  
 (Parameters: blastp, nr protein database, expect=20000, no filter, PAM30)  
 Other BLAST [web gateways](#)

### All matches to this query

| Score | Mr(calc):   | Delta     | Sequence                                   |
|-------|-------------|-----------|--------------------------------------------|
| 66.9  | 3382.549469 | 0.000547  | <a href="#">KLYDYCDVPQCAAPSFDCGKQPVEPK</a> |
| 8.0   | 3382.549469 | 0.000547  | <a href="#">KLYDYCDVPQCAAPSFDCGKQPVEPK</a> |
| 0.1   | 3382.580414 | -0.030398 | <a href="#">HLYPNTPYAYTFWYMMNARSKNVGWR</a> |
| 0.1   | 3382.580414 | -0.030398 | <a href="#">HLYPNTPYAYTFWYMMNARSKNVGWR</a> |



# MASCOT Search Results

## Peptide View

MS/MS Fragmentation of **GNVAVTVSGHTCQHWSAQTPHITHNR**  
 Found in **PLMN\_HUMAN**, Plasminogen OS=Homo sapiens GN=PLG PE=1 SV=2

Match to Query 66349: 3403.614324 from(568.276330,6+) rtinseconds(1654) index(66674)  
 Title: Locus:1.1.1.1513.8 File:"2013-07-02 CLN FXIII 60 min 2nd FT.wiff"  
 Data file C:\Program Files (x86)\Matrix Science\Mascot Daemon\mgf5 FXIII 60 min 2nd\mascot\_daemon\_merge.mgf

Click mouse within plot area to zoom in by factor of two about that point

Or, Plot from  to  Da

Label all possible matches  Label matches used for scoring

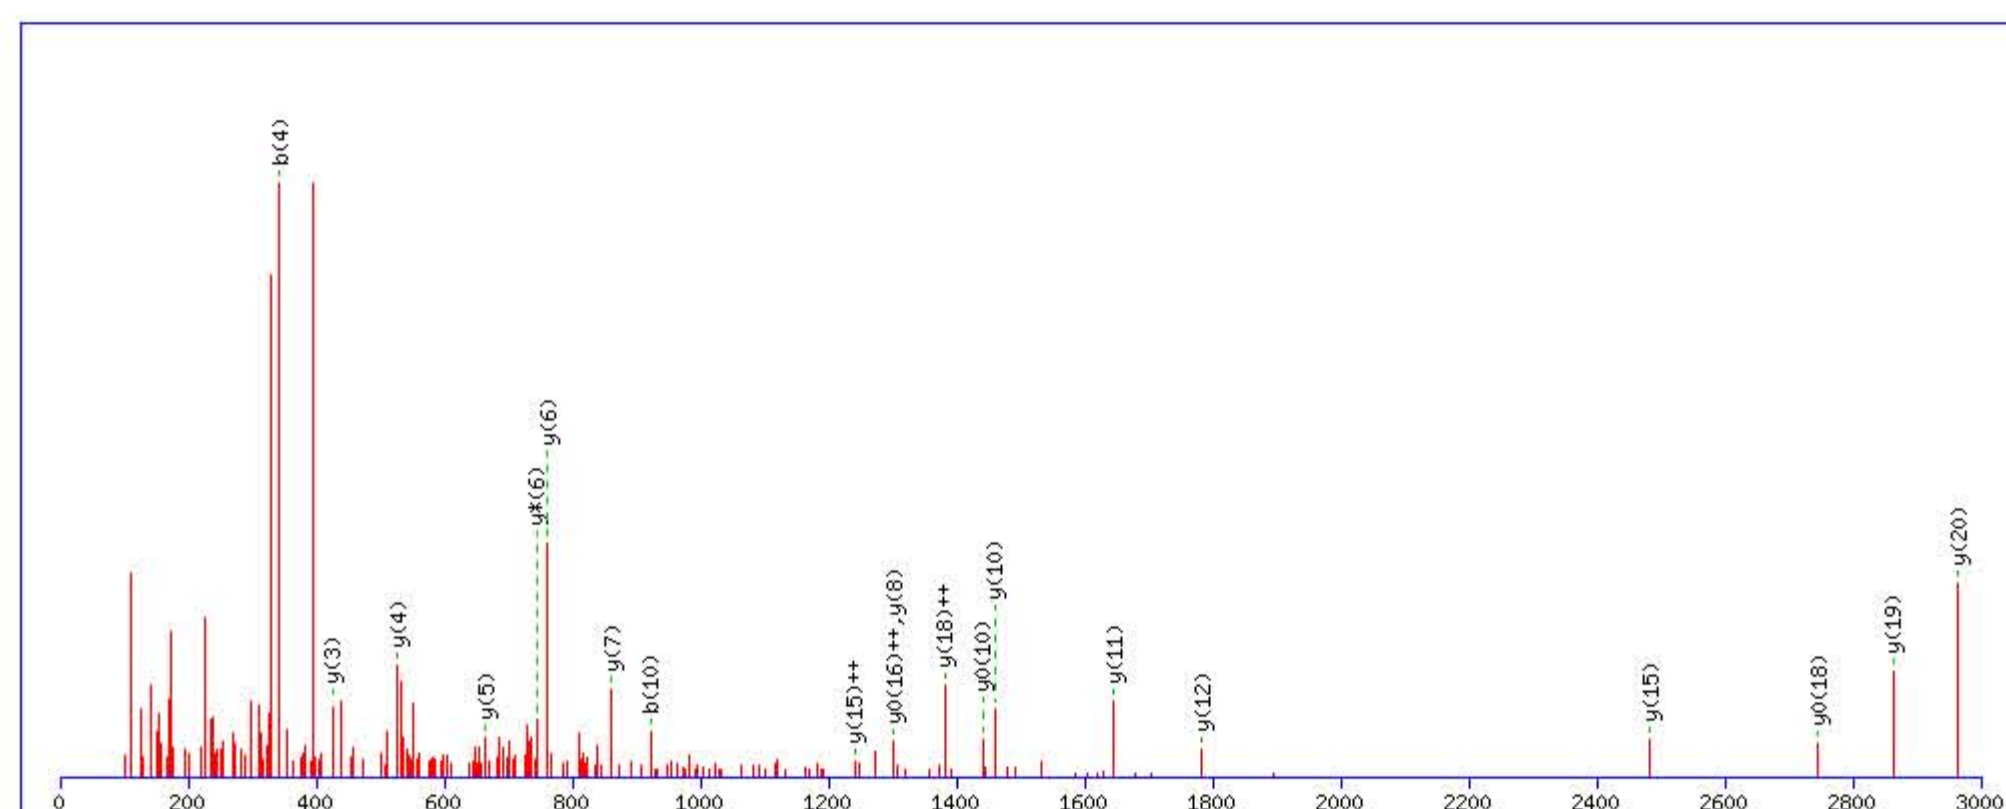

Monoisotopic mass of neutral peptide Mr(calc): 3403.623764  
 Fixed modifications: Carbamidomethyl (C) (apply to specified residues or termini only)  
 Variable modifications:  
 Q13 : Biotin:Thermo-21345 (Q)  
 Q18 : Biotin:Thermo-21345 (Q)  
 Ions Score: 56 Expect: 7.7e-006  
 Matches : 20/270 fragment ions using 39 most intense peaks [\(help\)](#)

| #  | b                 | b <sup>++</sup> | b <sup>*</sup> | b <sup>*++</sup> | b <sup>0</sup> | b <sup>0++</sup> | Seq. | y                  | y <sup>++</sup>    | y <sup>*</sup>    | y <sup>*++</sup> | y <sup>0</sup>     | y <sup>0++</sup>   | #  |
|----|-------------------|-----------------|----------------|------------------|----------------|------------------|------|--------------------|--------------------|-------------------|------------------|--------------------|--------------------|----|
| 1  | 58.028740         | 29.518008       |                |                  |                |                  | G    |                    |                    |                   |                  |                    |                    | 25 |
| 2  | 172.071667        | 86.539471       | 155.045118     | 78.026197        |                |                  | N    | 3347.609538        | 1674.308407        | 3330.582989       | 1665.795132      | 3329.598973        | 1665.303124        | 24 |
| 3  | 271.140081        | 136.073679      | 254.113532     | 127.560404       |                |                  | V    | 3233.566611        | 1617.286943        | 3216.540062       | 1608.773669      | 3215.556046        | 1608.281661        | 23 |
| 4  | <b>342.177195</b> | 171.592236      | 325.150646     | 163.078961       |                |                  | A    | 3134.498197        | 1567.752736        | 3117.471648       | 1559.239462      | 3116.487632        | 1558.747454        | 22 |
| 5  | 441.245609        | 221.126443      | 424.219060     | 212.613168       |                |                  | V    | 3063.461083        | 1532.234179        | 3046.434534       | 1523.720905      | 3045.450518        | 1523.228897        | 21 |
| 6  | 542.293288        | 271.650282      | 525.266739     | 263.137008       | 524.282723     | 262.645000       | T    | <b>2964.392669</b> | 1482.699972        | 2947.366120       | 1474.186698      | 2946.382104        | 1473.694690        | 20 |
| 7  | 641.361702        | 321.184489      | 624.335153     | 312.671215       | 623.351137     | 312.179207       | V    | <b>2863.344990</b> | 1432.176133        | 2846.318441       | 1423.662858      | 2845.334425        | 1423.170850        | 19 |
| 8  | 728.393730        | 364.700503      | 711.367181     | 356.187229       | 710.383165     | 355.695221       | S    | 2764.276576        | <b>1382.641926</b> | 2747.250027       | 1374.128651      | <b>2746.266011</b> | 1373.636643        | 18 |
| 9  | 785.415194        | 393.211235      | 768.388645     | 384.697961       | 767.404629     | 384.205953       | G    | 2677.244548        | 1339.125912        | 2660.217999       | 1330.612637      | 2659.233983        | 1330.120629        | 17 |
| 10 | <b>922.474106</b> | 461.740691      | 905.447557     | 453.227417       | 904.463541     | 452.735409       | H    | 2620.223084        | 1310.615180        | 2603.196535       | 1302.101905      | 2602.212519        | <b>1301.609897</b> | 16 |
| 11 | 1023.521785       | 512.264530      | 1006.495236    | 503.751256       | 1005.511220    | 503.259248       | T    | <b>2483.164172</b> | <b>1242.085724</b> | 2466.137623       | 1233.572449      | 2465.153607        | 1233.080441        | 15 |
| 12 | 1183.552434       | 592.279855      | 1166.525885    | 583.766581       | 1165.541869    | 583.274572       | C    | 2382.116493        | 1191.561884        | 2365.089944       | 1183.048610      | 2364.105928        | 1182.556602        | 14 |
| 13 | 1622.777760       | 811.892518      | 1605.751211    | 803.379244       | 1604.767195    | 802.887236       | Q    | 2222.085844        | 1111.546560        | 2205.059295       | 1103.033285      | 2204.075279        | 1102.541277        | 13 |
| 14 | 1759.836672       | 880.421974      | 1742.810123    | 871.908700       | 1741.826107    | 871.416692       | H    | <b>1782.860518</b> | 891.933897         | 1765.833969       | 883.420622       | 1764.849953        | 882.928614         | 12 |
| 15 | 1945.915985       | 973.461631      | 1928.889436    | 964.948356       | 1927.905420    | 964.456348       | W    | <b>1645.801606</b> | 823.404441         | 1628.775057       | 814.891166       | 1627.791041        | 814.399158         | 11 |
| 16 | 2032.948013       | 1016.977645     | 2015.921464    | 1008.464370      | 2014.937448    | 1007.972362      | S    | <b>1459.722293</b> | 730.364784         | 1442.695744       | 721.851510       | <b>1441.711728</b> | 721.359502         | 10 |
| 17 | 2103.985127       | 1052.496201     | 2086.958578    | 1043.982927      | 2085.974562    | 1043.490919      | A    | 1372.690265        | 686.848770         | 1355.663716       | 678.335496       | 1354.679700        | 677.843488         | 9  |
| 18 | 2543.210453       | 1272.108865     | 2526.183904    | 1263.595590      | 2525.199888    | 1263.103582      | Q    | <b>1301.653151</b> | 651.330213         | 1284.626602       | 642.816939       | 1283.642586        | 642.324931         | 8  |
| 19 | 2644.258132       | 1322.632704     | 2627.231583    | 1314.119429      | 2626.247567    | 1313.627421      | T    | <b>862.427825</b>  | 431.717550         | 845.401276        | 423.204276       | 844.417260         | 422.712268         | 7  |
| 20 | 2741.310896       | 1371.159086     | 2724.284347    | 1362.645811      | 2723.300331    | 1362.153803      | P    | <b>761.380146</b>  | 381.193711         | <b>744.353597</b> | 372.680436       | 743.369581         | 372.188428         | 6  |
| 21 | 2878.369808       | 1439.688542     | 2861.343259    | 1431.175267      | 2860.359243    | 1430.683259      | H    | <b>664.327382</b>  | 332.667329         | 647.300833        | 324.154054       | 646.316817         | 323.662046         | 5  |
| 22 | 2979.417487       | 1490.212381     | 2962.390938    | 1481.699107      | 2961.406922    | 1481.207099      | T    | <b>527.268470</b>  | 264.137873         | 510.241921        | 255.624598       | 509.257905         | 255.132590         | 4  |
| 23 | 3116.476399       | 1558.741837     | 3099.449850    | 1550.228563      | 3098.465834    | 1549.736555      | H    | <b>426.220791</b>  | 213.614033         | 409.194242        | 205.100759       |                    |                    | 3  |
| 24 | 3230.519326       | 1615.763301     | 3213.492777    | 1607.250026      | 3212.508761    | 1606.758018      | N    | 289.161879         | 145.084577         | 272.135330        | 136.571303       |                    |                    | 2  |
| 25 |                   |                 |                |                  |                |                  | R    | 175.118952         | 88.063114          | 158.092403        | 79.549839        |                    |                    | 1  |

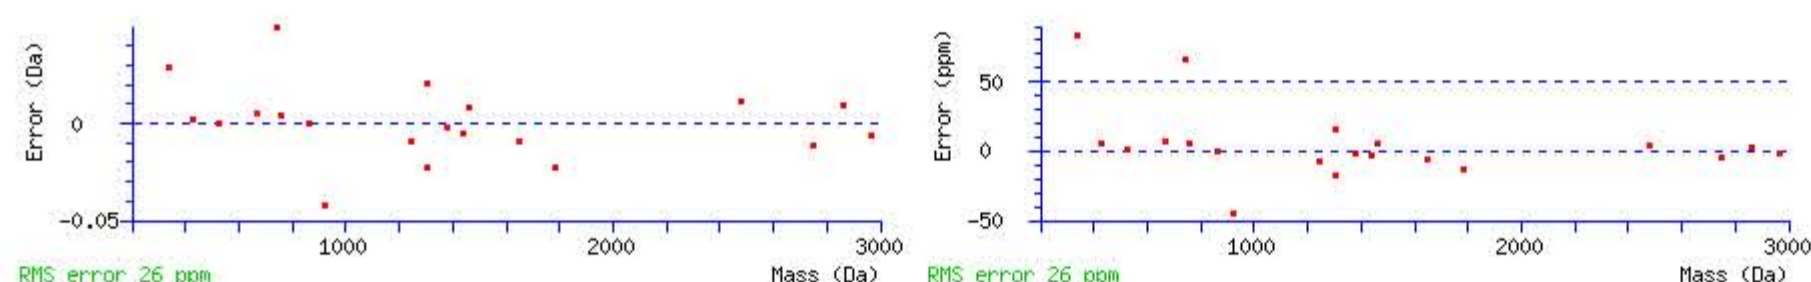

NCBI BLAST search of **GNVAVTVSGHTCQHWSAQTPHITHNR**  
 (Parameters: blastp, nr protein database, expect=20000, no filter, PAM30)  
 Other BLAST [web gateways](#)

### All matches to this query

| Score | Mr(calc):   | Delta     | Sequence                                       |
|-------|-------------|-----------|------------------------------------------------|
| 55.8  | 3403.623764 | -0.009440 | <a href="#">GNVAVTVSGHTCQHWSAQTPHITHNR</a>     |
| 1.3   | 3403.604858 | 0.009466  | <a href="#">TQVPMVVMPhGGPHSSFVTAWMLFPAMLCK</a> |
| 0.7   | 3403.604858 | 0.009466  | <a href="#">TQVPMVVMPhGGPHSSFVTAWMLFPAMLCK</a> |



# Mascot Search Results

## Peptide View

MS/MS Fragmentation of **KCSAPEPSQKPPGKPCPGLAYEQR**  
 Found in **PROP\_HUMAN**, Properdin OS=Homo sapiens GN=CFP PE=1 SV=2

Match to Query 61642: 2992.466020 from(599.500480,5+) rtinseconds(1445) index(65442)  
 Title: Locus:1.1.1.1440.23 File:"2013-07-02 CLN FXIII 60 min 2nd FT.wiff"  
 Data file C:\Program Files (x86)\Matrix Science\Mascot Daemon\mgf\5 FXIII 60 min 2nd\mascot\_daemon\_merge.mgf

Click mouse within plot area to zoom in by factor of two about that point  
 Or, Plot from  to  Da   
 Label all possible matches  Label matches used for scoring

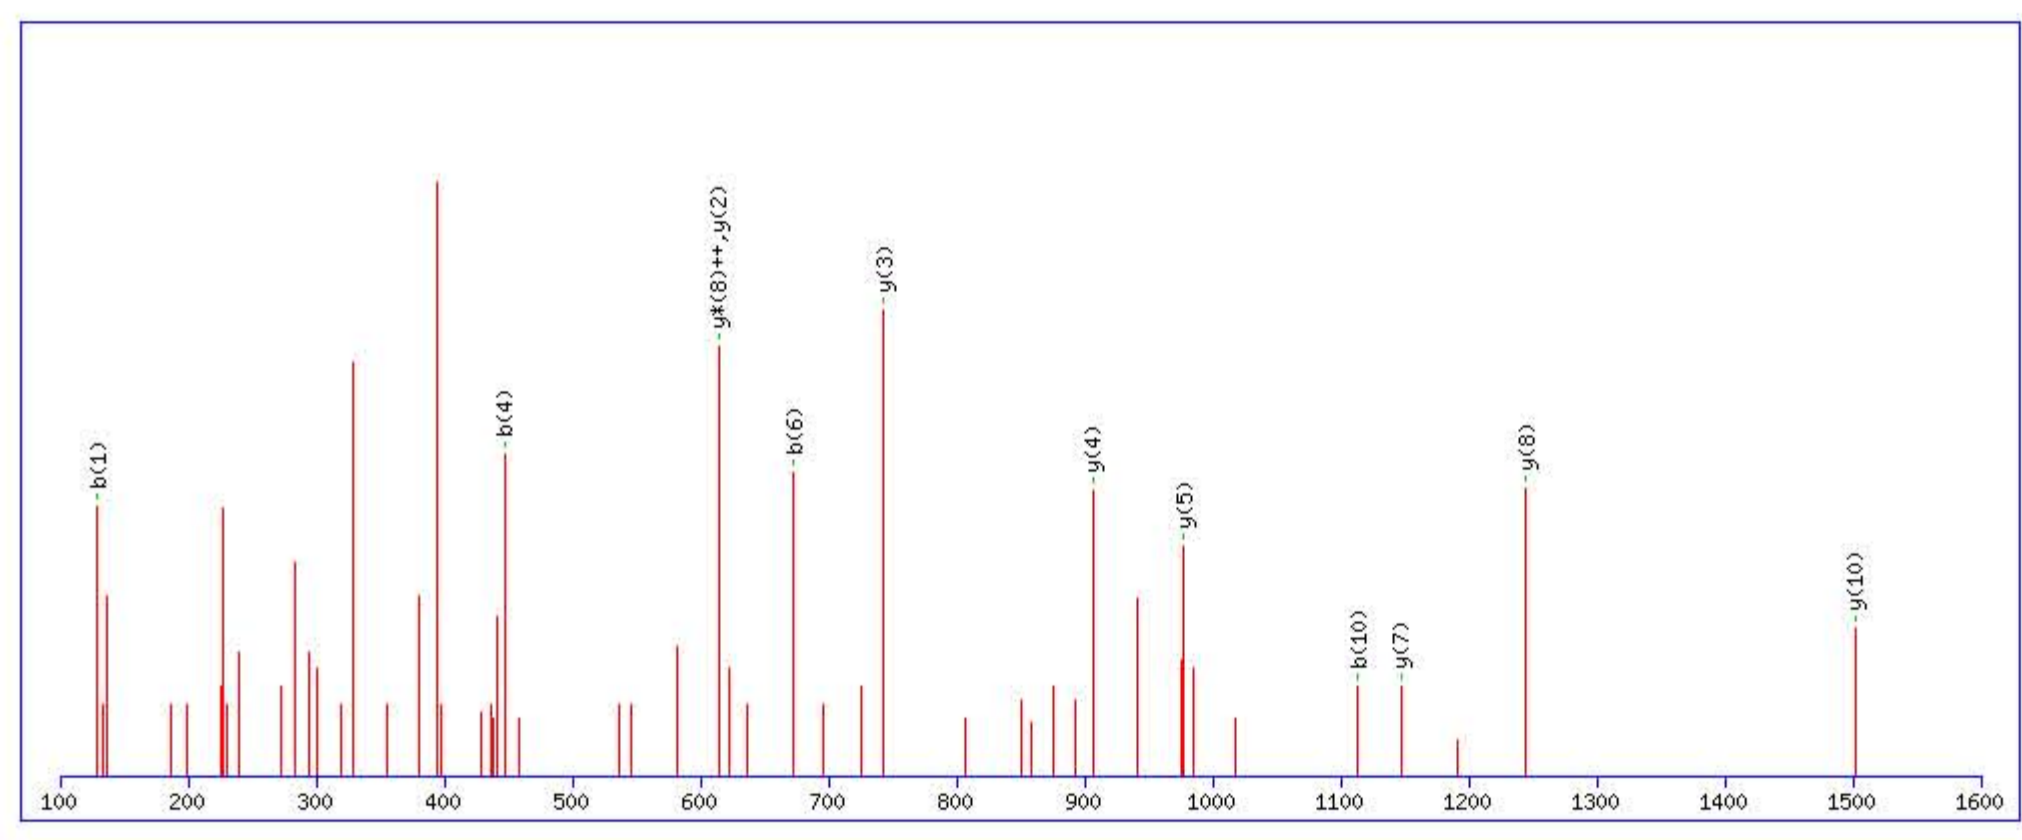

Monoisotopic mass of neutral peptide Mr(calc): 2992.472107  
 Fixed modifications: Carbamidomethyl (C) (apply to specified residues or termini only)  
 Variable modifications:  
 Q23 : Biotin:Thermo-21345 (Q)  
 Ions Score: 57 Expect: 4.7e-006  
 Matches : 12/268 fragment ions using 13 most intense peaks [\(help\)](#)

| #  | b                  | b <sup>++</sup> | b <sup>+</sup> | b <sup>+++</sup> | b <sup>0</sup> | b <sup>0++</sup> | Seq.     | y                  | y <sup>++</sup> | y <sup>+</sup> | y <sup>+++</sup>  | y <sup>0</sup> | y <sup>0++</sup> | #         |
|----|--------------------|-----------------|----------------|------------------|----------------|------------------|----------|--------------------|-----------------|----------------|-------------------|----------------|------------------|-----------|
| 1  | <b>129.102239</b>  | 65.054757       | 112.075690     | 56.541483        |                |                  | <b>K</b> |                    |                 |                |                   |                |                  | <b>24</b> |
| 2  | 289.132888         | 145.070082      | 272.106339     | 136.556808       |                |                  | <b>C</b> | 2865.384455        | 1433.195865     | 2848.357906    | 1424.682591       | 2847.373890    | 1424.190583      | <b>23</b> |
| 3  | 376.164916         | 188.586096      | 359.138367     | 180.072822       | 358.154351     | 179.580814       | <b>S</b> | 2705.353806        | 1353.180541     | 2688.327257    | 1344.667266       | 2687.343241    | 1344.175258      | <b>22</b> |
| 4  | <b>447.202030</b>  | 224.104653      | 430.175481     | 215.591378       | 429.191465     | 215.099370       | <b>A</b> | 2618.321778        | 1309.664527     | 2601.295229    | 1301.151252       | 2600.311213    | 1300.659244      | <b>21</b> |
| 5  | 544.254794         | 272.631035      | 527.228245     | 264.117761       | 526.244229     | 263.625753       | <b>P</b> | 2547.284664        | 1274.145970     | 2530.258115    | 1265.632695       | 2529.274099    | 1265.140687      | <b>20</b> |
| 6  | <b>673.297387</b>  | 337.152332      | 656.270838     | 328.639057       | 655.286822     | 328.147049       | <b>E</b> | 2450.231900        | 1225.619588     | 2433.205351    | 1217.106313       | 2432.221335    | 1216.614305      | <b>19</b> |
| 7  | 770.350151         | 385.678714      | 753.323602     | 377.165439       | 752.339586     | 376.673431       | <b>P</b> | 2321.189307        | 1161.098292     | 2304.162758    | 1152.585017       | 2303.178742    | 1152.093009      | <b>18</b> |
| 8  | 857.382179         | 429.194728      | 840.355630     | 420.681453       | 839.371614     | 420.189445       | <b>S</b> | 2224.136543        | 1112.571909     | 2207.109994    | 1104.058635       | 2206.125978    | 1103.566627      | <b>17</b> |
| 9  | 985.440757         | 493.224017      | 968.414208     | 484.710742       | 967.430192     | 484.218734       | <b>Q</b> | 2137.104515        | 1069.055895     | 2120.077966    | 1060.542621       | 2119.093950    | 1060.050613      | <b>16</b> |
| 10 | <b>1113.535720</b> | 557.271498      | 1096.509171    | 548.758224       | 1095.525155    | 548.266216       | <b>K</b> | 2009.045937        | 1005.026607     | 1992.019388    | 996.513332        | 1991.035372    | 996.021324       | <b>15</b> |
| 11 | 1210.588484        | 605.797880      | 1193.561935    | 597.284606       | 1192.577919    | 596.792598       | <b>P</b> | 1880.950974        | 940.979125      | 1863.924425    | 932.465851        | 1862.940409    | 931.973843       | <b>14</b> |
| 12 | 1307.641248        | 654.324262      | 1290.614699    | 645.810988       | 1289.630683    | 645.318980       | <b>P</b> | 1783.898210        | 892.452743      | 1766.871661    | 883.939469        | 1765.887645    | 883.447461       | <b>13</b> |
| 13 | 1364.662712        | 682.834994      | 1347.636163    | 674.321720       | 1346.652147    | 673.829712       | <b>G</b> | 1686.845446        | 843.926361      | 1669.818897    | 835.413087        | 1668.834881    | 834.921079       | <b>12</b> |
| 14 | 1492.757675        | 746.882476      | 1475.731126    | 738.369201       | 1474.747110    | 737.877193       | <b>K</b> | 1629.823982        | 815.415629      | 1612.797433    | 806.902355        | 1611.813417    | 806.410347       | <b>11</b> |
| 15 | 1589.810439        | 795.408858      | 1572.783890    | 786.895583       | 1571.799874    | 786.403575       | <b>P</b> | <b>1501.729019</b> | 751.368148      | 1484.702470    | 742.854873        | 1483.718454    | 742.362865       | <b>10</b> |
| 16 | 1749.841088        | 875.424182      | 1732.814539    | 866.910908       | 1731.830523    | 866.418900       | <b>C</b> | 1404.676255        | 702.841766      | 1387.649706    | 694.328491        | 1386.665690    | 693.836483       | <b>9</b>  |
| 17 | 1846.893852        | 923.950564      | 1829.867303    | 915.437290       | 1828.883287    | 914.945282       | <b>P</b> | <b>1244.645606</b> | 622.826441      | 1227.619057    | <b>614.313167</b> | 1226.635041    | 613.821159       | <b>8</b>  |
| 18 | 1903.915316        | 952.461296      | 1886.888767    | 943.948022       | 1885.904751    | 943.456014       | <b>G</b> | <b>1147.592842</b> | 574.300059      | 1130.566293    | 565.786785        | 1129.582277    | 565.294777       | <b>7</b>  |
| 19 | 2016.999380        | 1009.003328     | 1999.972831    | 1000.490054      | 1998.988815    | 999.998045       | <b>L</b> | 1090.571378        | 545.789327      | 1073.544829    | 537.276053        | 1072.560813    | 536.784045       | <b>6</b>  |
| 20 | 2088.036494        | 1044.521885     | 2071.009945    | 1036.008610      | 2070.025929    | 1035.516602      | <b>A</b> | <b>977.487314</b>  | 489.247295      | 960.460765     | 480.734021        | 959.476749     | 480.242013       | <b>5</b>  |
| 21 | 2251.099823        | 1126.053549     | 2234.073274    | 1117.540275      | 2233.089258    | 1117.048267      | <b>Y</b> | <b>906.450200</b>  | 453.728738      | 889.423651     | 445.215464        | 888.439635     | 444.723456       | <b>4</b>  |
| 22 | 2380.142416        | 1190.574846     | 2363.115867    | 1182.061571      | 2362.131851    | 1181.569564      | <b>E</b> | <b>743.386871</b>  | 372.197074      | 726.360322     | 363.683799        | 725.376306     | 363.191791       | <b>3</b>  |
| 23 | 2819.367742        | 1410.187509     | 2802.341193    | 1401.674235      | 2801.357177    | 1401.182227      | <b>Q</b> | <b>614.344278</b>  | 307.675777      | 597.317729     | 299.162503        |                |                  | <b>2</b>  |
| 24 |                    |                 |                |                  |                |                  | <b>R</b> | 175.118952         | 88.063114       | 158.092403     | 79.549839         |                |                  | <b>1</b>  |

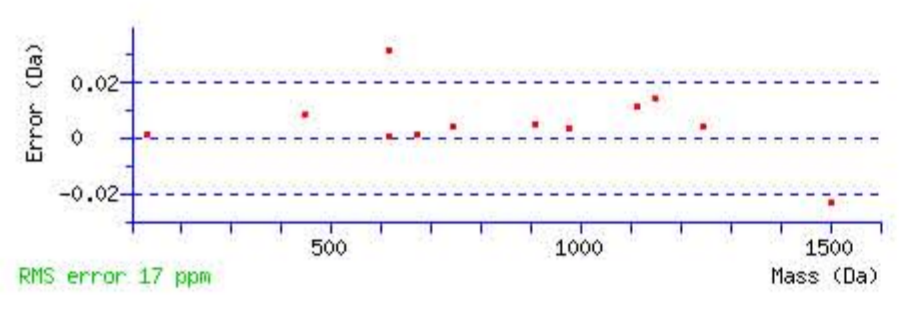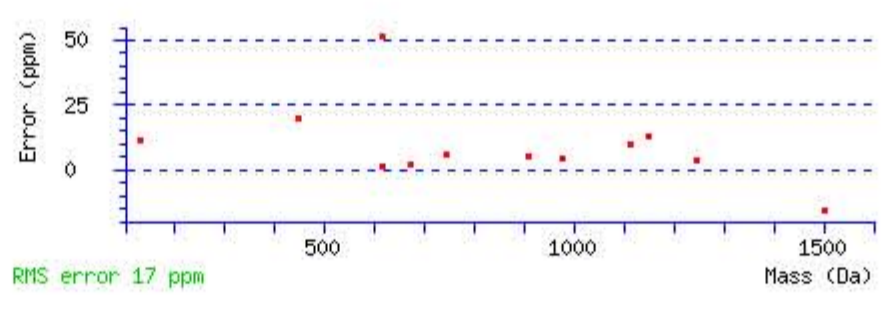

NCBI BLAST search of **KCSAPEPSQKPPGKPCPGLAYEQR**  
 (Parameters: blastp, nr protein database, expect=20000, no filter, PAM30)  
 Other BLAST [web gateways](#)

### All matches to this query

| Score | Mr(calc):   | Delta     | Sequence                                      |
|-------|-------------|-----------|-----------------------------------------------|
| 57.3  | 2992.472107 | -0.006087 | <a href="#">KCSAPEPSQKPPGKPCPGLAYEQR</a>      |
| 0.4   | 2992.422989 | 0.043031  | <a href="#">MPSTASLTRKSNVNNQQCPASTPSSEVIS</a> |



# MASCOT Search Results

## Peptide View

MS/MS Fragmentation of **ECLQTCR**

Found in **AMBP\_HUMAN**, Protein AMBP OS=Homo sapiens GN=AMBP PE=1 SV=1

Match to Query 25483: 1276.567968 from(639.291260,2+) rtinseconds(1454) index(32957)

Title: Locus:1.1.1.2925.23 File:"2013-07-02 CLN FXIII 60 min 2nd F 3.wiff"

Data file C:\Program Files (x86)\Matrix Science\Mascot Daemon\mgf5 FXIII 60 min 2nd\mascot\_daemon\_merge.mgf

Click mouse within plot area to zoom in by factor of two about that point

Or, Plot from  to  Da

Label all possible matches  Label matches used for scoring

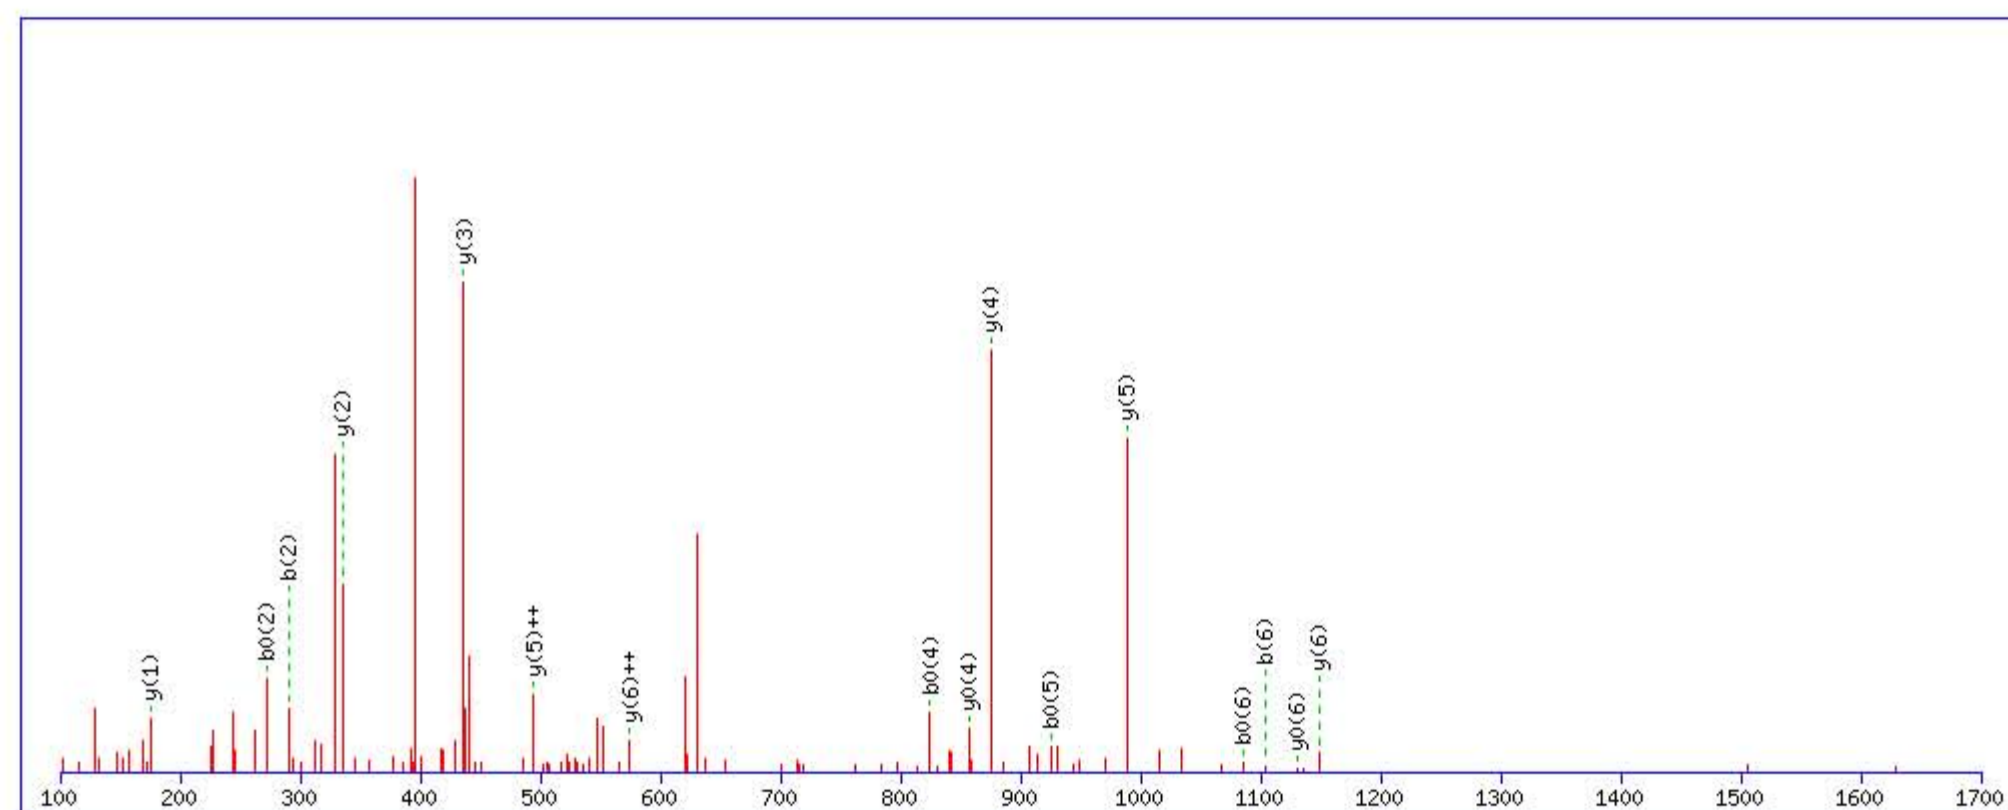

Monoisotopic mass of neutral peptide Mr(calc): 1276.572632

Fixed modifications: Carbamidomethyl (C) (apply to specified residues or termini only)

Variable modifications:

Q4 : Biotin:Thermo-21345 (Q)

Ions Score: 33 Expect: 0.0031

Matches : 16/62 fragment ions using 33 most intense peaks [\(help\)](#)

| # | b                  | b <sup>++</sup> | b <sup>*</sup> | b <sup>+++</sup> | b <sup>0</sup>     | b <sup>0++</sup> | Seq. | y                  | y <sup>++</sup>   | y <sup>*</sup> | y <sup>+++</sup> | y <sup>0</sup>     | y <sup>0++</sup> | # |
|---|--------------------|-----------------|----------------|------------------|--------------------|------------------|------|--------------------|-------------------|----------------|------------------|--------------------|------------------|---|
| 1 | 130.049869         | 65.528572       |                |                  | 112.039304         | 56.523290        | E    |                    |                   |                |                  |                    |                  | 7 |
| 2 | <b>290.080518</b>  | 145.543897      |                |                  | <b>272.069953</b>  | 136.538615       | C    | <b>1148.537319</b> | <b>574.772298</b> | 1131.510770    | 566.259023       | <b>1130.526754</b> | 565.767015       | 6 |
| 3 | 403.164582         | 202.085929      |                |                  | 385.154017         | 193.080647       | L    | <b>988.506670</b>  | <b>494.756973</b> | 971.480121     | 486.243699       | 970.496105         | 485.751691       | 5 |
| 4 | 842.389908         | 421.698592      | 825.363359     | 413.185318       | <b>824.379343</b>  | 412.693310       | Q    | <b>875.422606</b>  | 438.214941        | 858.396057     | 429.701667       | <b>857.412041</b>  | 429.209659       | 4 |
| 5 | 943.437587         | 472.222432      | 926.411038     | 463.709157       | <b>925.427022</b>  | 463.217149       | T    | <b>436.197280</b>  | 218.602278        | 419.170731     | 210.089003       | 418.186715         | 209.596995       | 3 |
| 6 | <b>1103.468236</b> | 552.237756      | 1086.441687    | 543.724482       | <b>1085.457671</b> | 543.232474       | C    | <b>335.149601</b>  | 168.078438        | 318.123052     | 159.565164       |                    |                  | 2 |
| 7 |                    |                 |                |                  |                    |                  | R    | <b>175.118952</b>  | 88.063114         | 158.092403     | 79.549839        |                    |                  | 1 |

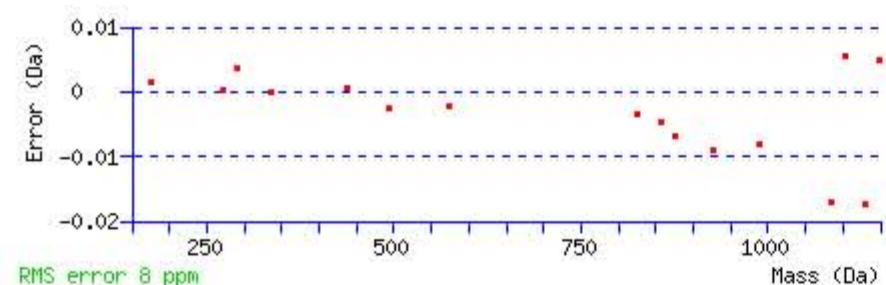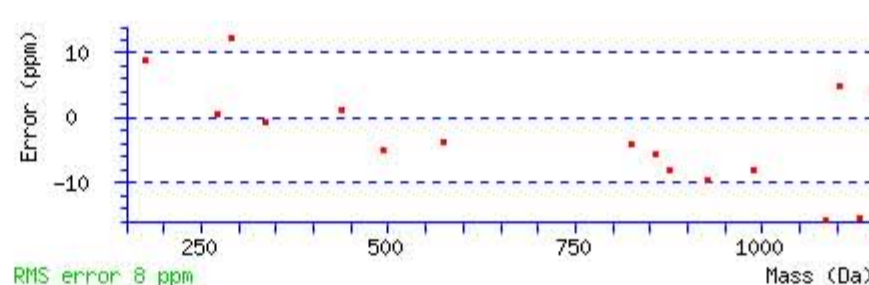

NCBI BLAST search of **ECLQTCR**

(Parameters: blastp, nr protein database, expect=20000, no filter, PAM30)

Other BLAST [web gateways](#)

All matches to this query

| Score | Mr(calc):   | Delta     | Sequence                      |
|-------|-------------|-----------|-------------------------------|
| 32.8  | 1276.572632 | -0.004664 | <a href="#">ECLQTCR</a>       |
| 11.9  | 1276.553116 | 0.014852  | <a href="#">EDLDNASKDDR</a>   |
| 7.1   | 1276.583862 | -0.015894 | <a href="#">KMSLSCHVCR</a>    |
| 6.4   | 1276.579605 | -0.011637 | <a href="#">EEQRSPFNDR</a>    |
| 5.8   | 1276.587006 | -0.019038 | <a href="#">EDGTWAPMRSK</a>   |
| 5.2   | 1276.571762 | -0.003794 | <a href="#">AGAESPTMSVDGR</a> |
| 3.8   | 1276.569275 | -0.001307 | <a href="#">MPMWAGGVGSPR</a>  |
| 3.0   | 1276.569229 | -0.001261 | <a href="#">MTGRYEMYAR</a>    |
| 0.5   | 1276.560516 | 0.007452  | <a href="#">DEAEMSPVVER</a>   |
| 0.3   | 1276.579132 | -0.011164 | <a href="#">MPMNAALGEPK</a>   |

Mascot: <http://www.matrixscience.com/>



# MASCOT Search Results

## Peptide View

MS/MS Fragmentation of **GECVPGEQEPEPILIPR**

Found in **AMBP\_HUMAN**, Protein AMBP OS=Homo sapiens GN=AMBP PE=1 SV=1

Match to Query 51672: 2230.117572 from(744.379800,3+) rtinseconds(2285) index(38156)

Title: Locus:1.1.1.3215.15 File:"2013-07-02 CLN FXIII 60 min 2nd F 3.wiff"

Data file C:\Program Files (x86)\Matrix Science\Mascot Daemon\mgf5 FXIII 60 min 2nd\mascot\_daemon\_merge.mgf

Click mouse within plot area to zoom in by factor of two about that point

Or, Plot from  to  Da

Label all possible matches  Label matches used for scoring

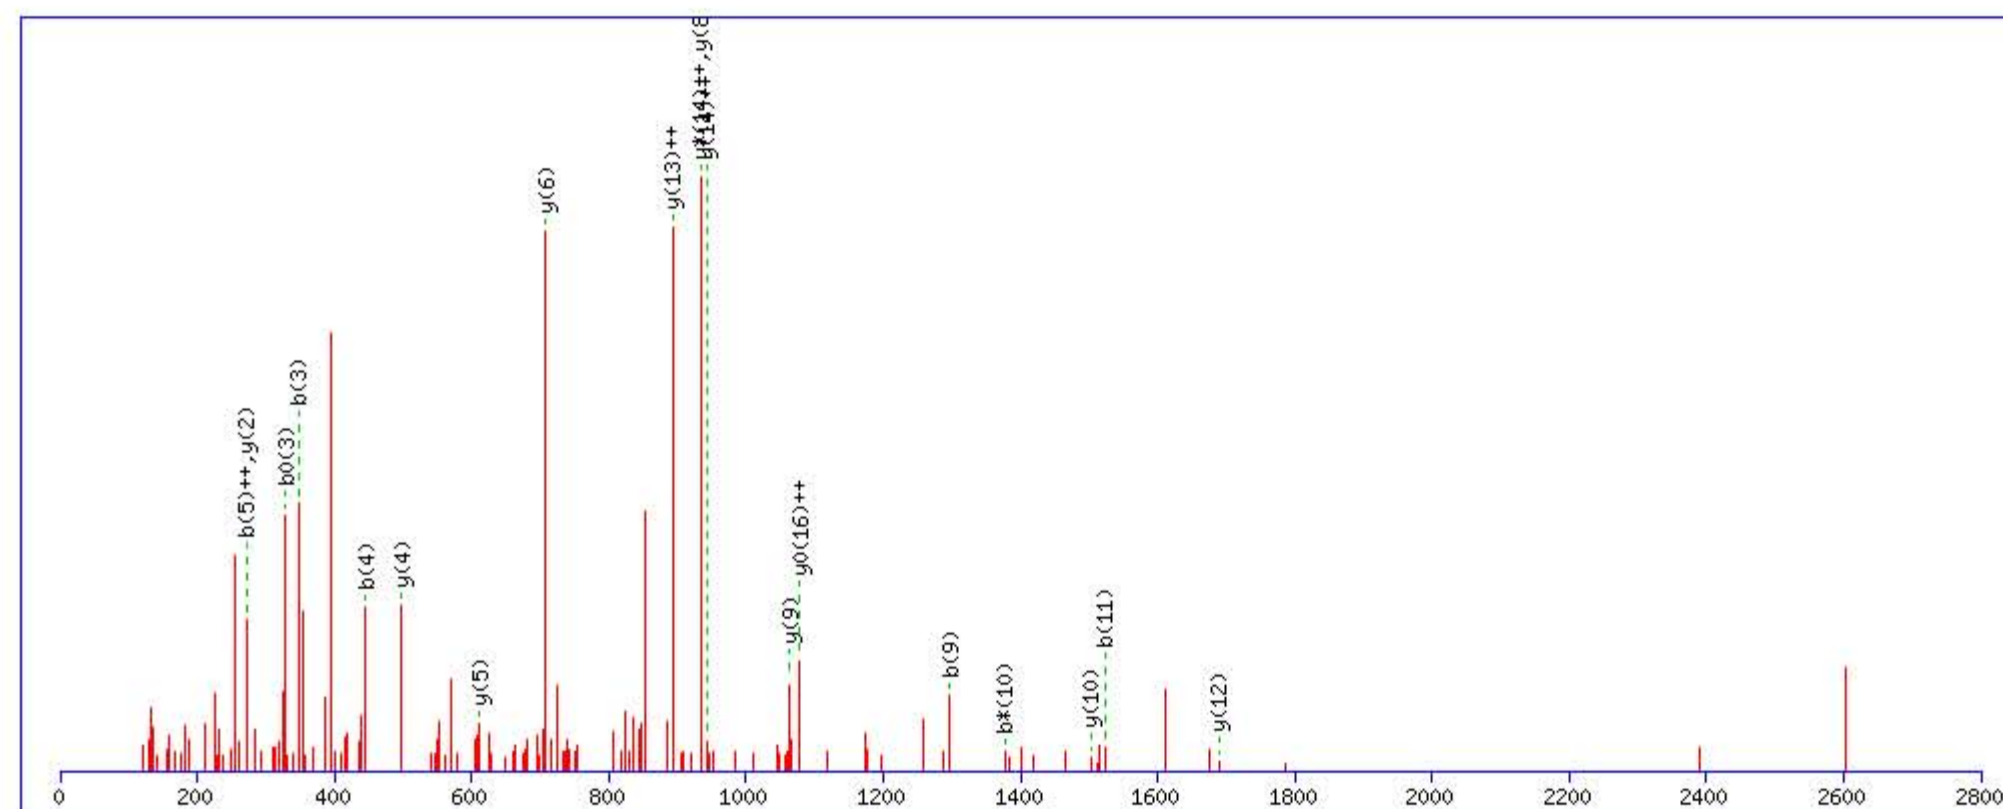

Monoisotopic mass of neutral peptide Mr(calc): 2230.112595

Fixed modifications: Carbamidomethyl (C) (apply to specified residues or termini only)

Variable modifications:

Q8 : Biotin:Thermo-21345 (Q)

Ions Score: 25 Expect: 0.093

Matches : 19/164 fragment ions using 47 most intense peaks [\(help\)](#)

| #  | b                  | b <sup>++</sup>   | b <sup>*</sup>     | b <sup>*++</sup> | b <sup>0</sup>    | b <sup>0++</sup> | Seq. | y                  | y <sup>++</sup>   | y <sup>*</sup> | y <sup>*++</sup>  | y <sup>0</sup> | y <sup>0++</sup> | #  |
|----|--------------------|-------------------|--------------------|------------------|-------------------|------------------|------|--------------------|-------------------|----------------|-------------------|----------------|------------------|----|
| 1  | 58.028740          | 29.518008         |                    |                  |                   |                  | G    |                    |                   |                |                   |                |                  | 17 |
| 2  | 187.071333         | 94.039305         |                    |                  | 169.060768        | 85.034022        | E    | 2174.098425        | 1087.552850       | 2157.071876    | 1079.039576       | 2156.087860    | 1078.547568      | 16 |
| 3  | <b>347.101982</b>  | 174.054629        |                    |                  | <b>329.091417</b> | 165.049347       | C    | 2045.055832        | 1023.031554       | 2028.029283    | 1014.518279       | 2027.045267    | 1014.026271      | 15 |
| 4  | <b>446.170396</b>  | 223.588836        |                    |                  | 428.159831        | 214.583554       | V    | 1885.025183        | <b>943.016229</b> | 1867.998634    | <b>934.502955</b> | 1867.014618    | 934.010947       | 14 |
| 5  | 543.223160         | <b>272.115218</b> |                    |                  | 525.212595        | 263.109936       | P    | 1785.956769        | <b>893.482022</b> | 1768.930220    | 884.968748        | 1767.946204    | 884.476740       | 13 |
| 6  | 600.244624         | 300.625950        |                    |                  | 582.234059        | 291.620668       | G    | <b>1688.904005</b> | 844.955640        | 1671.877456    | 836.442366        | 1670.893440    | 835.950358       | 12 |
| 7  | 729.287217         | 365.147247        |                    |                  | 711.276652        | 356.141964       | E    | 1631.882541        | 816.444908        | 1614.855992    | 807.931634        | 1613.871976    | 807.439626       | 11 |
| 8  | 1168.512543        | 584.759910        | 1151.485994        | 576.246635       | 1150.501978       | 575.754627       | Q    | <b>1502.839948</b> | 751.923612        | 1485.813399    | 743.410337        | 1484.829383    | 742.918329       | 10 |
| 9  | <b>1297.555136</b> | 649.281206        | 1280.528587        | 640.767932       | 1279.544571       | 640.275924       | E    | <b>1063.614622</b> | 532.310949        | 1046.588073    | 523.797674        | 1045.604057    | 523.305666       | 9  |
| 10 | 1394.607900        | 697.807588        | <b>1377.581351</b> | 689.294314       | 1376.597335       | 688.802306       | P    | <b>934.572029</b>  | 467.789652        | 917.545480     | 459.276378        | 916.561464     | 458.784370       | 8  |
| 11 | <b>1523.650493</b> | 762.328885        | 1506.623944        | 753.815610       | 1505.639928       | 753.323602       | E    | 837.519265         | 419.263270        | 820.492716     | 410.749996        | 819.508700     | 410.257988       | 7  |
| 12 | 1620.703257        | 810.855267        | 1603.676708        | 802.341992       | 1602.692692       | 801.849984       | P    | <b>708.476672</b>  | 354.741974        | 691.450123     | 346.228699        |                |                  | 6  |
| 13 | 1733.787321        | 867.397299        | 1716.760772        | 858.884024       | 1715.776756       | 858.392016       | I    | <b>611.423908</b>  | 306.215592        | 594.397359     | 297.702317        |                |                  | 5  |
| 14 | 1846.871385        | 923.939331        | 1829.844836        | 915.426056       | 1828.860820       | 914.934048       | L    | <b>498.339844</b>  | 249.673560        | 481.313295     | 241.160285        |                |                  | 4  |
| 15 | 1959.955449        | 980.481363        | 1942.928900        | 971.968088       | 1941.944884       | 971.476080       | I    | 385.255780         | 193.131528        | 368.229231     | 184.618253        |                |                  | 3  |
| 16 | 2057.008213        | 1029.007744       | 2039.981664        | 1020.494470      | 2038.997648       | 1020.002462      | P    | <b>272.171716</b>  | 136.589496        | 255.145167     | 128.076221        |                |                  | 2  |
| 17 |                    |                   |                    |                  |                   |                  | R    | 175.118952         | 88.063114         | 158.092403     | 79.549839         |                |                  | 1  |

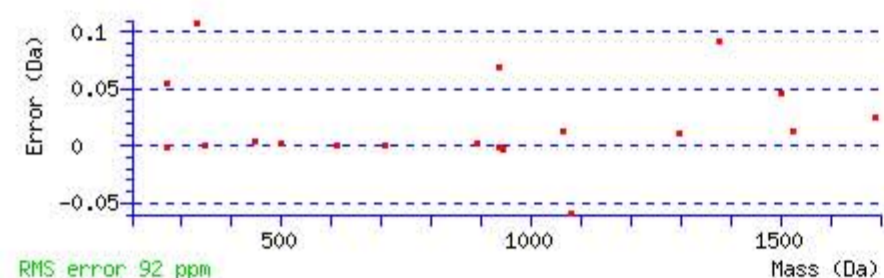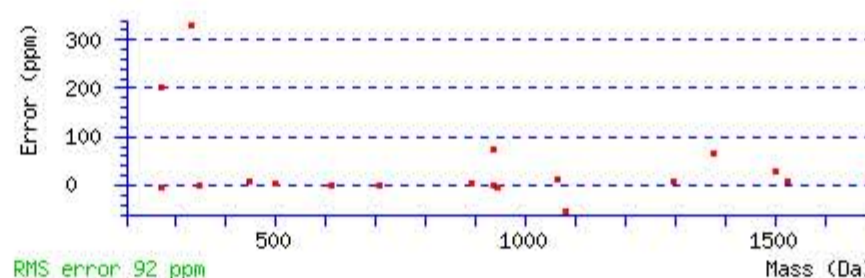

NCBI BLAST search of [GECVPGEQEPEPILIPR](#)

(Parameters: blastp, nr protein database, expect=20000, no filter, PAM30)

Other BLAST [web gateways](#)

## All matches to this query

| Score | Mr(calc):   | Delta    | Sequence                          |
|-------|-------------|----------|-----------------------------------|
| 25.1  | 2230.112595 | 0.004977 | <a href="#">GECVPGEQEPEPILIPR</a> |

Mascot: <http://www.matrixscience.com/>



**Peptide View**

MS/MS Fragmentation of **KEDSCQLGYSAGPCMGMTSR**  
 Found in **AMBP\_HUMAN**, Protein AMBP OS=Homo sapiens GN=AMBP PE=1 SV=1

Match to Query 57202: 2545.106742 from(849.376190,3+) rtinseconds(1926) index(52273)  
 Title: Locus:1.1.1.1286.19 File:"2013-07-02 CLN FXIII 60 min 2nd F 4.wiff"  
 Data file C:\Program Files (x86)\Matrix Science\Mascot Daemon\mgf5 FXIII 60 min 2nd\mascot\_daemon\_merge.mgf

Click mouse within plot area to zoom in by factor of two about that point  
 Or, Plot from 100 to 1800 Da Full range  
 Label all possible matches  Label matches used for scoring

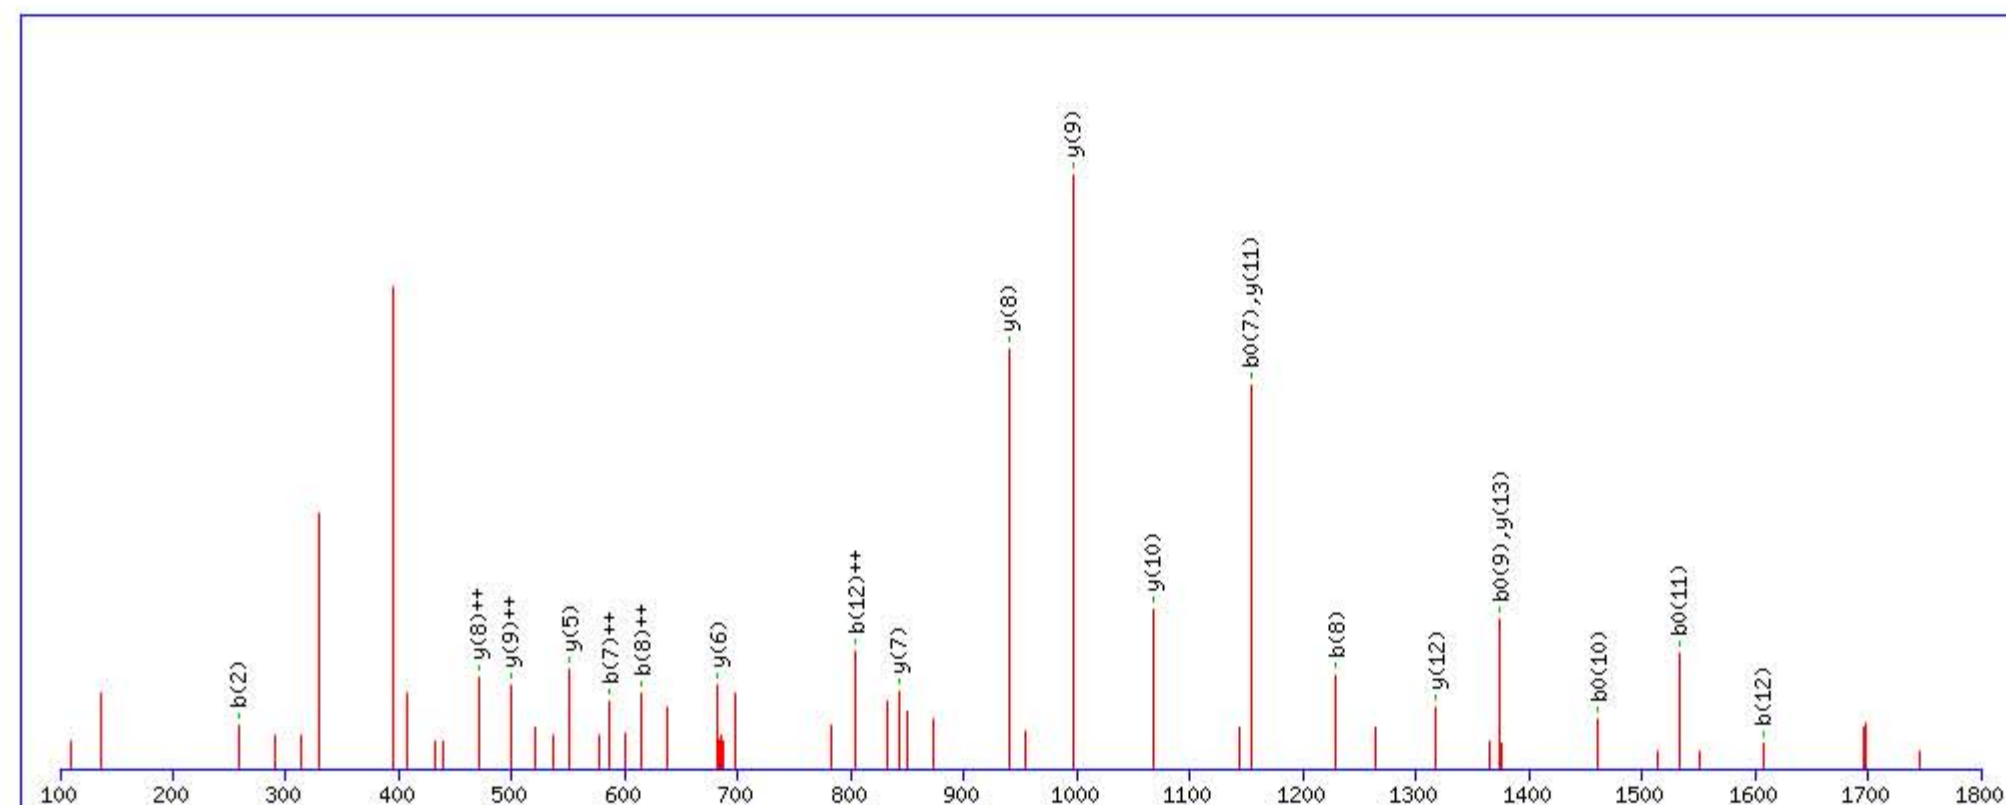

Monoisotopic mass of neutral peptide Mr(calc): 2545.089188  
 Fixed modifications: Carbamidomethyl (C) (apply to specified residues or termini only)  
 Variable modifications:  
 Q6 : Biotin:Thermo-21345 (Q)  
 Ions Score: 54 Expect: 1.9e-005  
 Matches : 21/224 fragment ions using 31 most intense peaks (help)

| #  | b                  | b <sup>++</sup>   | b <sup>*</sup> | b <sup>*++</sup> | b <sup>0</sup>     | b <sup>0++</sup> | Seq.     | y                  | y <sup>++</sup>   | y <sup>*</sup> | y <sup>*++</sup> | y <sup>0</sup> | y <sup>0++</sup> | #  |
|----|--------------------|-------------------|----------------|------------------|--------------------|------------------|----------|--------------------|-------------------|----------------|------------------|----------------|------------------|----|
| 1  | 129.102239         | 65.054757         | 112.075690     | 56.541483        |                    |                  | <b>K</b> |                    |                   |                |                  |                |                  | 20 |
| 2  | <b>258.144832</b>  | 129.576054        | 241.118283     | 121.062780       | 240.134267         | 120.570772       | <b>E</b> | 2418.001508        | 1209.504392       | 2400.974959    | 1200.991117      | 2399.990943    | 1200.499109      | 19 |
| 3  | 373.171775         | 187.089526        | 356.145226     | 178.576251       | 355.161210         | 178.084243       | <b>D</b> | 2288.958915        | 1144.983095       | 2271.932366    | 1136.469821      | 2270.948350    | 1135.977813      | 18 |
| 4  | 460.203803         | 230.605540        | 443.177254     | 222.092265       | 442.193238         | 221.600257       | <b>S</b> | 2173.931972        | 1087.469624       | 2156.905423    | 1078.956349      | 2155.921407    | 1078.464341      | 17 |
| 5  | 620.234452         | 310.620864        | 603.207903     | 302.107590       | 602.223887         | 301.615582       | <b>C</b> | 2086.899944        | 1043.953610       | 2069.873395    | 1035.440335      | 2068.889379    | 1034.948327      | 16 |
| 6  | 1059.459778        | 530.233527        | 1042.433229    | 521.720253       | 1041.449213        | 521.228245       | <b>Q</b> | 1926.869295        | 963.938286        | 1909.842746    | 955.425011       | 1908.858730    | 954.933003       | 15 |
| 7  | 1172.543842        | <b>586.775559</b> | 1155.517293    | 578.262285       | <b>1154.533277</b> | 577.770277       | <b>L</b> | 1487.643969        | 744.325623        | 1470.617420    | 735.812348       | 1469.633404    | 735.320340       | 14 |
| 8  | <b>1229.565306</b> | <b>615.286291</b> | 1212.538757    | 606.773017       | 1211.554741        | 606.281008       | <b>G</b> | <b>1374.559905</b> | 687.783591        | 1357.533356    | 679.270316       | 1356.549340    | 678.778308       | 13 |
| 9  | 1392.628635        | 696.817956        | 1375.602086    | 688.304681       | <b>1374.618070</b> | 687.812673       | <b>Y</b> | <b>1317.538441</b> | 659.272859        | 1300.511892    | 650.759584       | 1299.527876    | 650.267576       | 12 |
| 10 | 1479.660663        | 740.333970        | 1462.634114    | 731.820695       | <b>1461.650098</b> | 731.328687       | <b>S</b> | <b>1154.475112</b> | 577.741194        | 1137.448563    | 569.227920       | 1136.464547    | 568.735912       | 11 |
| 11 | 1550.697777        | 775.852527        | 1533.671228    | 767.339252       | <b>1532.687212</b> | 766.847244       | <b>A</b> | <b>1067.443084</b> | 534.225180        | 1050.416535    | 525.711906       | 1049.432519    | 525.219898       | 10 |
| 12 | <b>1607.719241</b> | <b>804.363259</b> | 1590.692692    | 795.849984       | 1589.708676        | 795.357976       | <b>G</b> | <b>996.405970</b>  | <b>498.706623</b> | 979.379421     | 490.193349       | 978.395405     | 489.701341       | 9  |
| 13 | 1704.772005        | 852.889641        | 1687.745456    | 844.376366       | 1686.761440        | 843.884358       | <b>P</b> | <b>939.384506</b>  | <b>470.195891</b> | 922.357957     | 461.682617       | 921.373941     | 461.190609       | 8  |
| 14 | 1864.802654        | 932.904965        | 1847.776105    | 924.391691       | 1846.792089        | 923.899683       | <b>C</b> | <b>842.331742</b>  | 421.669509        | 825.305193     | 413.156235       | 824.321177     | 412.664227       | 7  |
| 15 | 1995.843139        | 998.425208        | 1978.816590    | 989.911933       | 1977.832574        | 989.419925       | <b>M</b> | <b>682.301093</b>  | 341.654185        | 665.274544     | 333.140910       | 664.290528     | 332.648902       | 6  |
| 16 | 2052.864603        | 1026.935939       | 2035.838054    | 1018.422665      | 2034.854038        | 1017.930657      | <b>G</b> | <b>551.260608</b>  | 276.133942        | 534.234059     | 267.620668       | 533.250043     | 267.128660       | 5  |
| 17 | 2183.905088        | 1092.456182       | 2166.878539    | 1083.942907      | 2165.894523        | 1083.450899      | <b>M</b> | 494.239144         | 247.623210        | 477.212595     | 239.109935       | 476.228579     | 238.617927       | 4  |
| 18 | 2284.952767        | 1142.980021       | 2267.926218    | 1134.466747      | 2266.942202        | 1133.974739      | <b>T</b> | 363.198659         | 182.102967        | 346.172110     | 173.589693       | 345.188094     | 173.097685       | 3  |
| 19 | 2371.984795        | 1186.496035       | 2354.958246    | 1177.982761      | 2353.974230        | 1177.490753      | <b>S</b> | 262.150980         | 131.579128        | 245.124431     | 123.065854       | 244.140415     | 122.573846       | 2  |
| 20 |                    |                   |                |                  |                    |                  | <b>R</b> | 175.118952         | 88.063114         | 158.092403     | 79.549839        |                |                  | 1  |

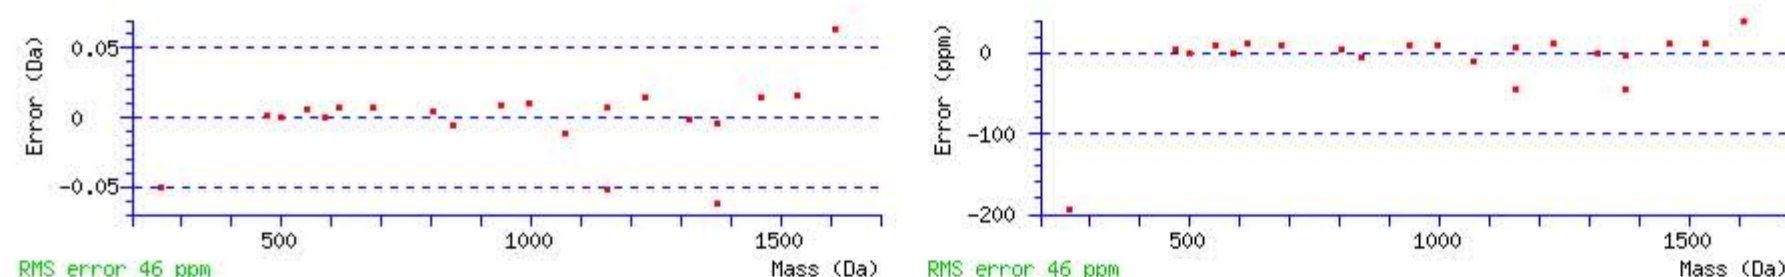

NCBI BLAST search of **KEDSCQLGYSAGPCMGMTSR**  
 (Parameters: blastp, nr protein database, expect=20000, no filter, PAM30)  
 Other BLAST [web gateways](#)

**All matches to this query**

| Score | Mr(calc):   | Delta    | Sequence                             |
|-------|-------------|----------|--------------------------------------|
| 54.1  | 2545.089188 | 0.017554 | <a href="#">KEDSCQLGYSAGPCMGMTSR</a> |



# MASCOT SCIENCE Mascot Search Results

## Peptide View

MS/MS Fragmentation of **VGALSQLR**

Found in **MENT\_HUMAN**, Protein MENT OS=Homo sapiens GN=MENT PE=2 SV=1

Match to Query 21773: 1153.660648 from(577.837600,2+) rtinseconds(1917) index(35812)

Title: Locus:1.1.1.3087.14 File:"2013-07-02 CLN FXIII 60 min 2nd F 3.wiff"

Data file C:\Program Files (x86)\Matrix Science\Mascot Daemon\mgf5 FXIII 60 min 2nd\mascot\_daemon\_merge.mgf

Click mouse within plot area to zoom in by factor of two about that point

Or, Plot from  to  Da

Label all possible matches  Label matches used for scoring

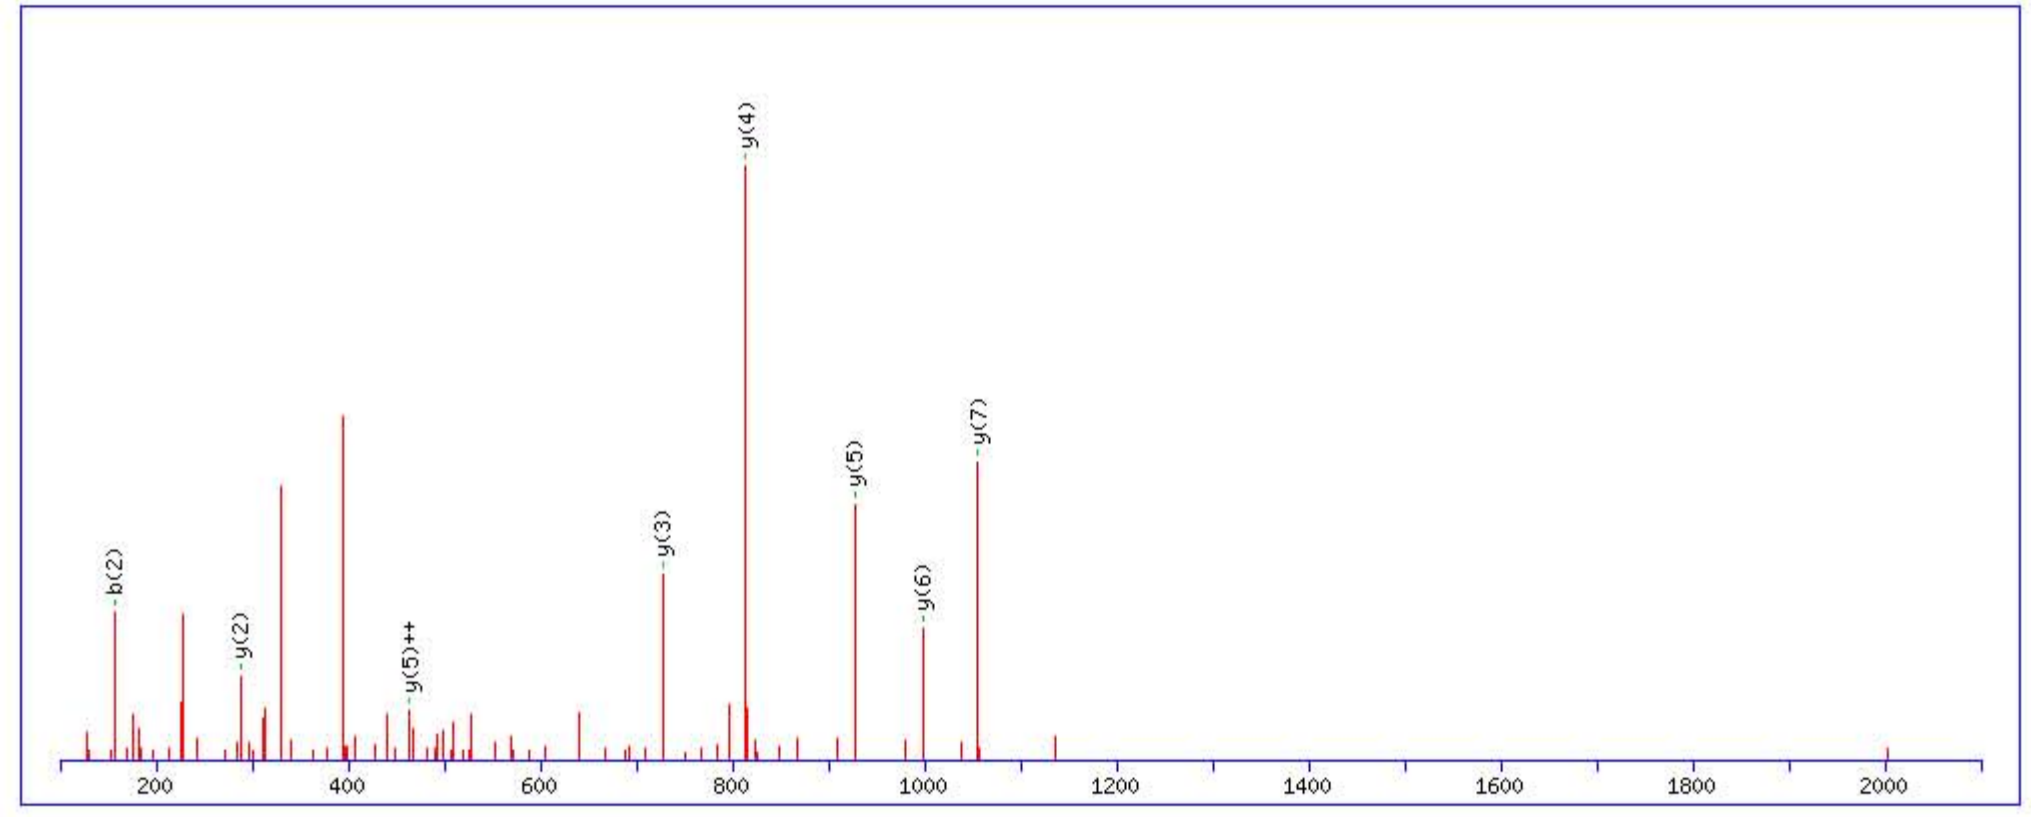

Monoisotopic mass of neutral peptide Mr(calc): 1153.664139

Fixed modifications: Carbamidomethyl (C) (apply to specified residues or termini only)

Variable modifications:

Q6 : Biotin:Thermo-21345 (Q)

Ions Score: 57 Expect: 3.3e-005

Matches : 8/60 fragment ions using 11 most intense peaks [\(help\)](#)

| # | b                 | b <sup>++</sup> | b <sup>*</sup> | b <sup>*++</sup> | b <sup>0</sup> | b <sup>0++</sup> | Seq. | y                  | y <sup>++</sup>   | y <sup>*</sup> | y <sup>*++</sup> | y <sup>0</sup> | y <sup>0++</sup> | # |
|---|-------------------|-----------------|----------------|------------------|----------------|------------------|------|--------------------|-------------------|----------------|------------------|----------------|------------------|---|
| 1 | 100.075690        | 50.541483       |                |                  |                |                  | V    |                    |                   |                |                  |                |                  | 8 |
| 2 | <b>157.097154</b> | 79.052215       |                |                  |                |                  | G    | <b>1055.603012</b> | 528.305144        | 1038.576463    | 519.791870       | 1037.592447    | 519.299862       | 7 |
| 3 | 228.134268        | 114.570772      |                |                  |                |                  | A    | <b>998.581548</b>  | 499.794412        | 981.554999     | 491.281138       | 980.570983     | 490.789130       | 6 |
| 4 | 341.218332        | 171.112804      |                |                  |                |                  | L    | <b>927.544434</b>  | <b>464.275855</b> | 910.517885     | 455.762581       | 909.533869     | 455.270573       | 5 |
| 5 | 428.250360        | 214.628818      |                |                  | 410.239795     | 205.623535       | S    | <b>814.460370</b>  | 407.733823        | 797.433821     | 399.220549       | 796.449805     | 398.728541       | 4 |
| 6 | 867.475686        | 434.241481      | 850.449137     | 425.728207       | 849.465121     | 425.236199       | Q    | <b>727.428342</b>  | 364.217809        | 710.401793     | 355.704535       |                |                  | 3 |
| 7 | 980.559750        | 490.783513      | 963.533201     | 482.270239       | 962.549185     | 481.778231       | L    | <b>288.203016</b>  | 144.605146        | 271.176467     | 136.091872       |                |                  | 2 |
| 8 |                   |                 |                |                  |                |                  | R    | 175.118952         | 88.063114         | 158.092403     | 79.549840        |                |                  | 1 |

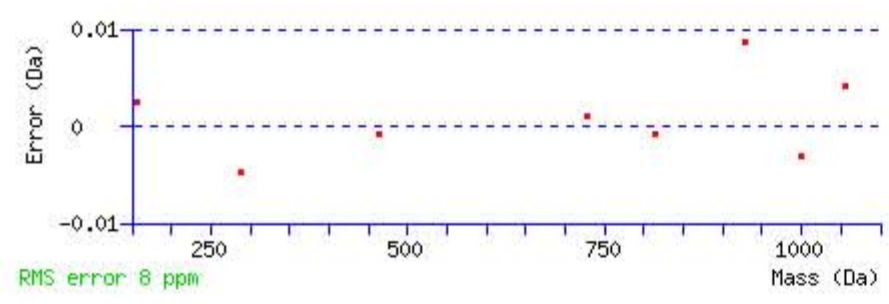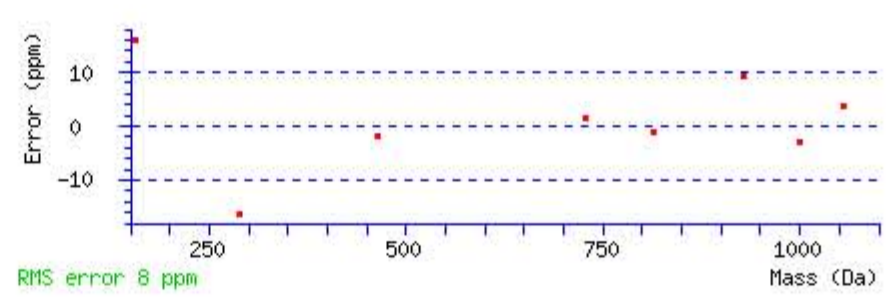

NCBI BLAST search of **VGALSQLR**

(Parameters: blastp, nr protein database, expect=20000, no filter, PAM30)

Other BLAST [web gateways](#)

### All matches to this query

| Score | Mr(calc):   | Delta     | Sequence                    |
|-------|-------------|-----------|-----------------------------|
| 56.7  | 1153.664139 | -0.003491 | <a href="#">VGALSQLR</a>    |
| 23.6  | 1153.667953 | -0.007305 | <a href="#">RANPNSIRVK</a>  |
| 20.9  | 1153.645477 | 0.015171  | <a href="#">RALAAPVAEEK</a> |
| 14.2  | 1153.675354 | -0.014706 | <a href="#">RALLSQR</a>     |
| 14.2  | 1153.675369 | -0.014721 | <a href="#">RALTVQR</a>     |
| 13.1  | 1153.664124 | -0.003476 | <a href="#">VKQEALR</a>     |
| 7.2   | 1153.675369 | -0.014721 | <a href="#">QTVRALR</a>     |
| 6.5   | 1153.656723 | 0.003925  | <a href="#">RPSADPGKKAK</a> |
| 4.3   | 1153.645493 | 0.015155  | <a href="#">NLLKLDAPDR</a>  |
| 3.1   | 1153.664124 | -0.003476 | <a href="#">LKVEQAR</a>     |



# MASCOT SEARCH RESULTS

## Peptide View

MS/MS Fragmentation of **ETAASLLQAGYK**

Found in **THRB\_HUMAN**, Prothrombin OS=Homo sapiens GN=F2 PE=1 SV=2

Match to Query 35366: 1561.829268 from(781.921910,2+) rtinseconds(2161) index(53983)

Title: Locus:1.1.1.1367.18 File:"2013-07-02 CLN FXIII 60 min 2nd F 4.wiff"

Data file C:\Program Files (x86)\Matrix Science\Mascot Daemon\mgf5 FXIII 60 min 2nd\mascot\_daemon\_merge.mgf

Click mouse within plot area to zoom in by factor of two about that point

Or, Plot from  to  Da

Label all possible matches  Label matches used for scoring

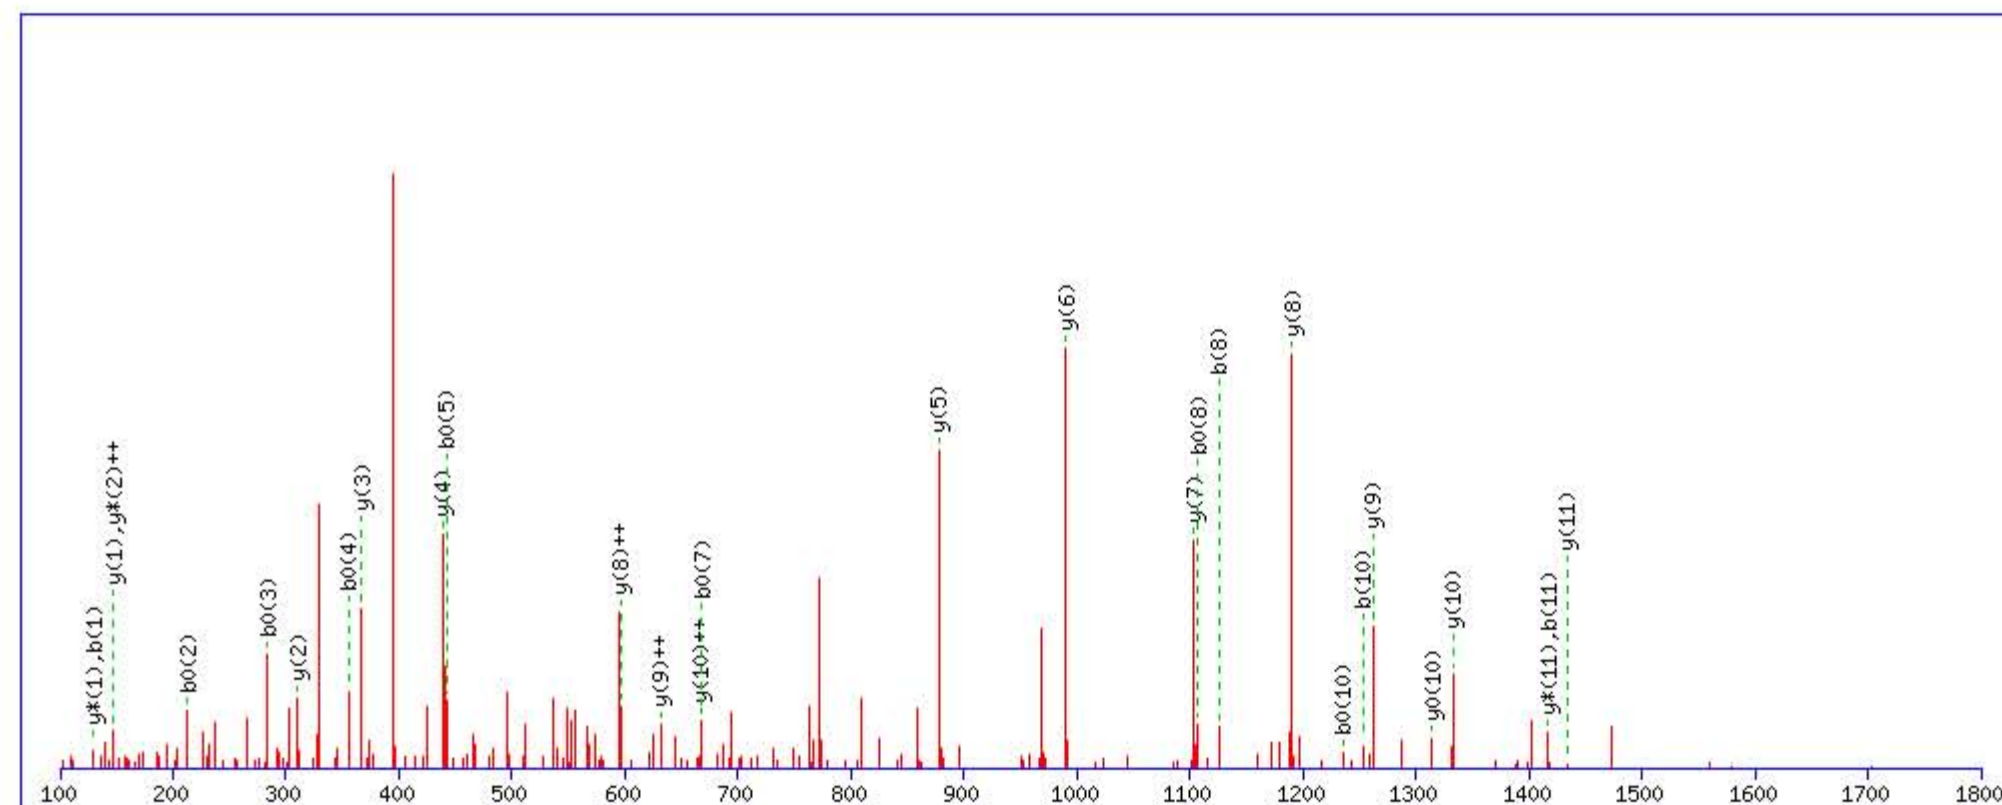

Monoisotopic mass of neutral peptide Mr(calc): 1561.817383

Fixed modifications: Carbamidomethyl (C) (apply to specified residues or termini only)

Variable modifications:

Q8 : Biotin:Thermo-21345 (Q)

Ions Score: 54 Expect: 1.8e-005

Matches : 29/104 fragment ions using 71 most intense peaks [\(help\)](#)

| #  | b           | b <sup>++</sup> | b <sup>*</sup> | b <sup>*++</sup> | b <sup>0</sup> | b <sup>0++</sup> | Seq. | y           | y <sup>++</sup> | y <sup>*</sup> | y <sup>*++</sup> | y <sup>0</sup> | y <sup>0++</sup> | #  |
|----|-------------|-----------------|----------------|------------------|----------------|------------------|------|-------------|-----------------|----------------|------------------|----------------|------------------|----|
| 1  | 130.049869  | 65.528572       |                |                  | 112.039304     | 56.523290        | E    |             |                 |                |                  |                |                  | 12 |
| 2  | 231.097548  | 116.052412      |                |                  | 213.086983     | 107.047130       | T    | 1433.782100 | 717.394688      | 1416.755551    | 708.881414       | 1415.771535    | 708.389406       | 11 |
| 3  | 302.134662  | 151.570969      |                |                  | 284.124097     | 142.565687       | A    | 1332.734421 | 666.870848      | 1315.707872    | 658.357574       | 1314.723856    | 657.865566       | 10 |
| 4  | 373.171776  | 187.089526      |                |                  | 355.161211     | 178.084243       | A    | 1261.697307 | 631.352292      | 1244.670758    | 622.839017       | 1243.686742    | 622.347009       | 9  |
| 5  | 460.203804  | 230.605540      |                |                  | 442.193239     | 221.600257       | S    | 1190.660193 | 595.833734      | 1173.633644    | 587.320460       | 1172.649628    | 586.828452       | 8  |
| 6  | 573.287868  | 287.147572      |                |                  | 555.277303     | 278.142290       | L    | 1103.628165 | 552.317721      | 1086.601616    | 543.804446       |                |                  | 7  |
| 7  | 686.371932  | 343.689604      |                |                  | 668.361367     | 334.684322       | L    | 990.544101  | 495.775689      | 973.517552     | 487.262414       |                |                  | 6  |
| 8  | 1125.597258 | 563.302267      | 1108.570709    | 554.788993       | 1107.586693    | 554.296985       | Q    | 877.460037  | 439.233657      | 860.433488     | 430.720382       |                |                  | 5  |
| 9  | 1196.634372 | 598.820824      | 1179.607823    | 590.307550       | 1178.623807    | 589.815541       | A    | 438.234711  | 219.620993      | 421.208162     | 211.107719       |                |                  | 4  |
| 10 | 1253.655836 | 627.331556      | 1236.629287    | 618.818282       | 1235.645271    | 618.326273       | G    | 367.197597  | 184.102436      | 350.171048     | 175.589162       |                |                  | 3  |
| 11 | 1416.719165 | 708.863221      | 1399.692616    | 700.349946       | 1398.708600    | 699.857938       | Y    | 310.176133  | 155.591705      | 293.149584     | 147.078430       |                |                  | 2  |
| 12 |             |                 |                |                  |                |                  | K    | 147.112804  | 74.060040       | 130.086255     | 65.546765        |                |                  | 1  |

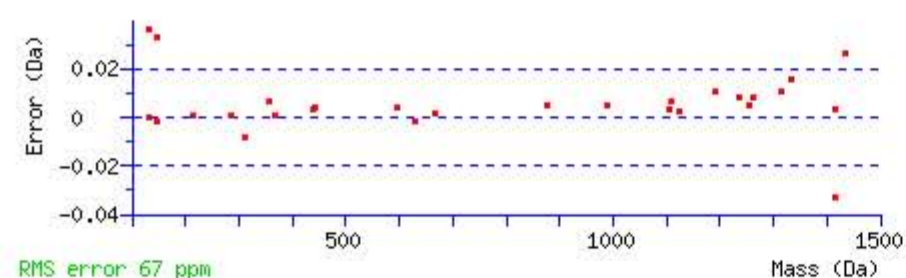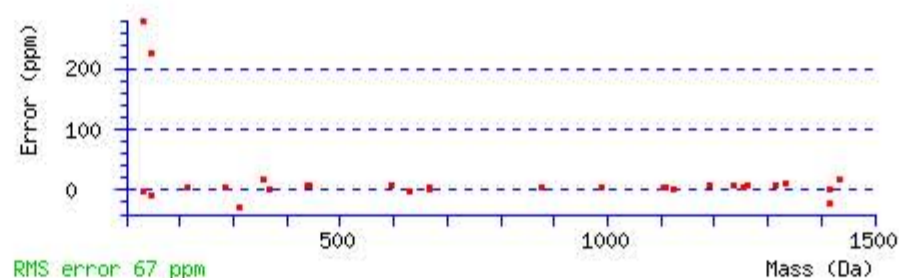

NCBI BLAST search of [ETAASLLQAGYK](#)

(Parameters: blastp, nr protein database, expect=20000, no filter, PAM30)

Other BLAST [web gateways](#)

All matches to this query

| Score | Mr(calc):   | Delta    | Sequence                      |
|-------|-------------|----------|-------------------------------|
| 54.0  | 1561.817383 | 0.011885 | <a href="#">ETAASLLQAGYK</a>  |
| 3.4   | 1561.817398 | 0.011870 | <a href="#">VLPEVLEKQCGYK</a> |

Mascot: <http://www.matrixscience.com/>



# MATRIX SCIENCE Mascot Search Results

## Peptide View

MS/MS Fragmentation of **TATSEYQTFNPR**

Found in **THRB\_HUMAN**, Prothrombin OS=Homo sapiens GN=F2 PE=1 SV=2

Match to Query 44163: 1871.894352 from(624.972060,3+) rtinseconds(2281) index(54733)

Title: Locus:1.1.1.1409.7 File:"2013-07-02 CLN FXIII 60 min 2nd F 4.wiff"

Data file C:\Program Files (x86)\Matrix Science\Mascot Daemon\mgf5 FXIII 60 min 2nd\mascot\_daemon\_merge.mgf

Click mouse within plot area to zoom in by factor of two about that point

Or, Plot from  to  Da

Label all possible matches  Label matches used for scoring

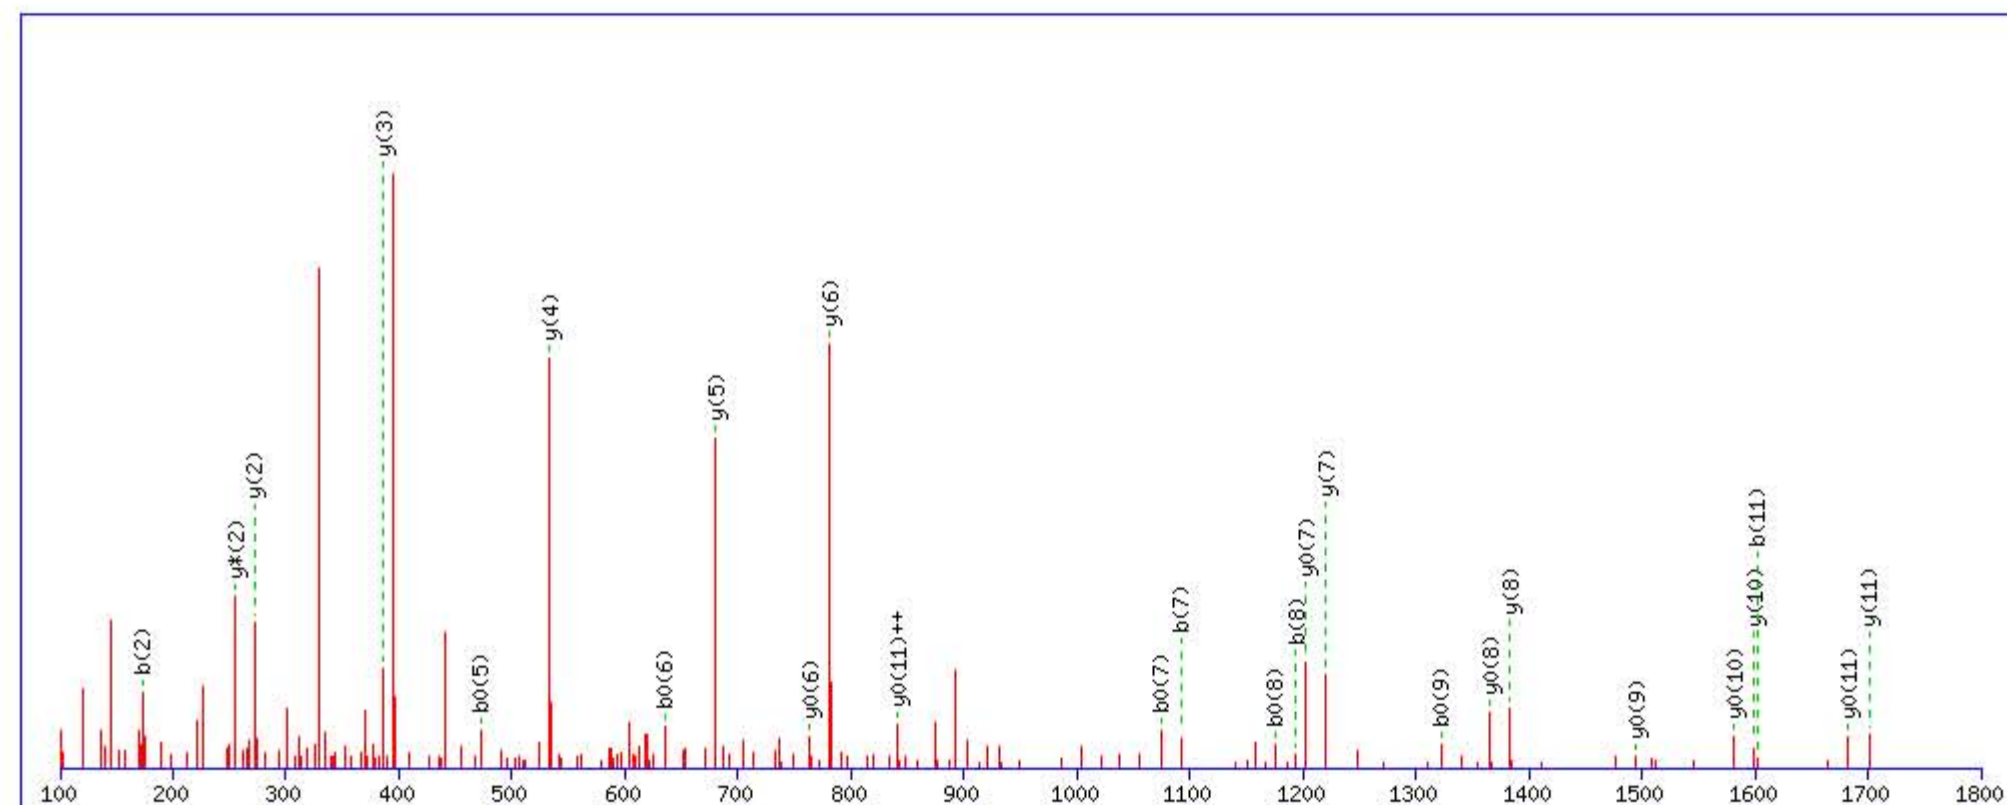

Monoisotopic mass of neutral peptide Mr(calc): 1871.887619

Fixed modifications: Carbamidomethyl (C) (apply to specified residues or termini only)

Variable modifications:

Q7 : Biotin:Thermo-21345 (Q)

Ions Score: 47 Expect: 0.00038

Matches : 26/122 fragment ions using 48 most intense peaks [\(help\)](#)

| #  | b                  | b <sup>++</sup> | b <sup>*</sup> | b <sup>*++</sup> | b <sup>0</sup>     | b <sup>0++</sup> | Seq. | y                  | y <sup>++</sup> | y <sup>*</sup>    | y <sup>*++</sup> | y <sup>0</sup>     | y <sup>0++</sup>  | #  |
|----|--------------------|-----------------|----------------|------------------|--------------------|------------------|------|--------------------|-----------------|-------------------|------------------|--------------------|-------------------|----|
| 1  | 102.054955         | 51.531116       |                |                  | 84.044390          | 42.525833        | T    |                    |                 |                   |                  |                    |                   | 13 |
| 2  | <b>173.092069</b>  | 87.049672       |                |                  | 155.081504         | 78.044390        | A    | 1771.847219        | 886.427248      | 1754.820670       | 877.913973       | 1753.836654        | 877.421965        | 12 |
| 3  | 274.139748         | 137.573512      |                |                  | 256.129183         | 128.568230       | T    | <b>1700.810105</b> | 850.908691      | 1683.783556       | 842.395416       | <b>1682.799540</b> | <b>841.903408</b> | 11 |
| 4  | 361.171776         | 181.089526      |                |                  | 343.161211         | 172.084243       | S    | <b>1599.762426</b> | 800.384851      | 1582.735877       | 791.871577       | <b>1581.751861</b> | 791.379569        | 10 |
| 5  | 490.214369         | 245.610822      |                |                  | <b>472.203804</b>  | 236.605540       | E    | 1512.730398        | 756.868837      | 1495.703849       | 748.355563       | <b>1494.719833</b> | 747.863555        | 9  |
| 6  | 653.277698         | 327.142487      |                |                  | <b>635.267133</b>  | 318.137205       | Y    | <b>1383.687805</b> | 692.347541      | 1366.661256       | 683.834266       | <b>1365.677240</b> | 683.342258        | 8  |
| 7  | <b>1092.503024</b> | 546.755150      | 1075.476475    | 538.241876       | <b>1074.492459</b> | 537.749868       | Q    | <b>1220.624476</b> | 610.815876      | 1203.597927       | 602.302602       | <b>1202.613911</b> | 601.810594        | 7  |
| 8  | <b>1193.550703</b> | 597.278990      | 1176.524154    | 588.765715       | <b>1175.540138</b> | 588.273707       | T    | <b>781.399150</b>  | 391.203213      | 764.372601        | 382.689939       | <b>763.388585</b>  | 382.197931        | 6  |
| 9  | 1340.619117        | 670.813197      | 1323.592568    | 662.299922       | <b>1322.608552</b> | 661.807914       | F    | <b>680.351471</b>  | 340.679374      | 663.324922        | 332.166099       |                    |                   | 5  |
| 10 | 1487.687531        | 744.347404      | 1470.660982    | 735.834129       | 1469.676966        | 735.342121       | F    | <b>533.283057</b>  | 267.145167      | 516.256508        | 258.631892       |                    |                   | 4  |
| 11 | <b>1601.730458</b> | 801.368867      | 1584.703909    | 792.855593       | 1583.719893        | 792.363585       | N    | <b>386.214643</b>  | 193.610959      | 369.188094        | 185.097685       |                    |                   | 3  |
| 12 | 1698.783222        | 849.895249      | 1681.756673    | 841.381975       | 1680.772657        | 840.889967       | P    | <b>272.171716</b>  | 136.589496      | <b>255.145167</b> | 128.076221       |                    |                   | 2  |
| 13 |                    |                 |                |                  |                    |                  | R    | 175.118952         | 88.063114       | 158.092403        | 79.549839        |                    |                   | 1  |

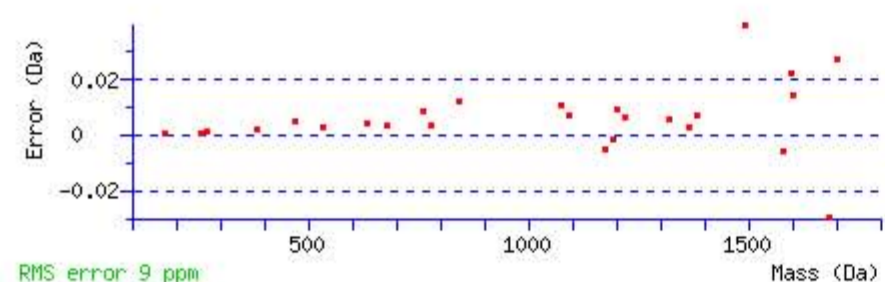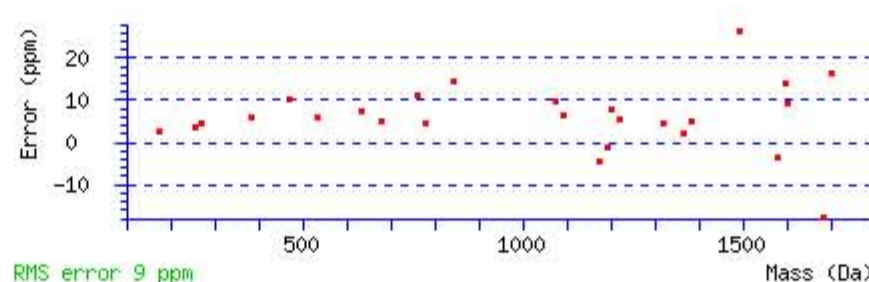

NCBI BLAST search of **TATSEYQTFNPR**

(Parameters: blastp, nr protein database, expect=20000, no filter, PAM30)

Other BLAST [web gateways](#)

All matches to this query

| Score | Mr(calc):   | Delta    | Sequence            |
|-------|-------------|----------|---------------------|
| 46.8  | 1871.887619 | 0.006733 | <b>TATSEYQTFNPR</b> |

Mascot: <http://www.matrixscience.com/>



# MASCOT Search Results

## Peptide View

MS/MS Fragmentation of **SPQELLCGASLISDR**

Found in **THRB\_HUMAN**, Prothrombin OS=Homo sapiens GN=F2 PE=1 SV=2

Match to Query 45649: 1956.003388 from(979.008970,2+) rtinseconds(2515) index(55984)

Title: Locus:1.1.1.1490.11 File:"2013-07-02 CLN FXIII 60 min 2nd F 4.wiff"

Data file C:\Program Files (x86)\Matrix Science\Mascot Daemon\mgf\5 FXIII 60 min 2nd\mascot\_daemon\_merge.mgf

Click mouse within plot area to zoom in by factor of two about that point

Or, Plot from  to  Da

Label all possible matches  Label matches used for scoring

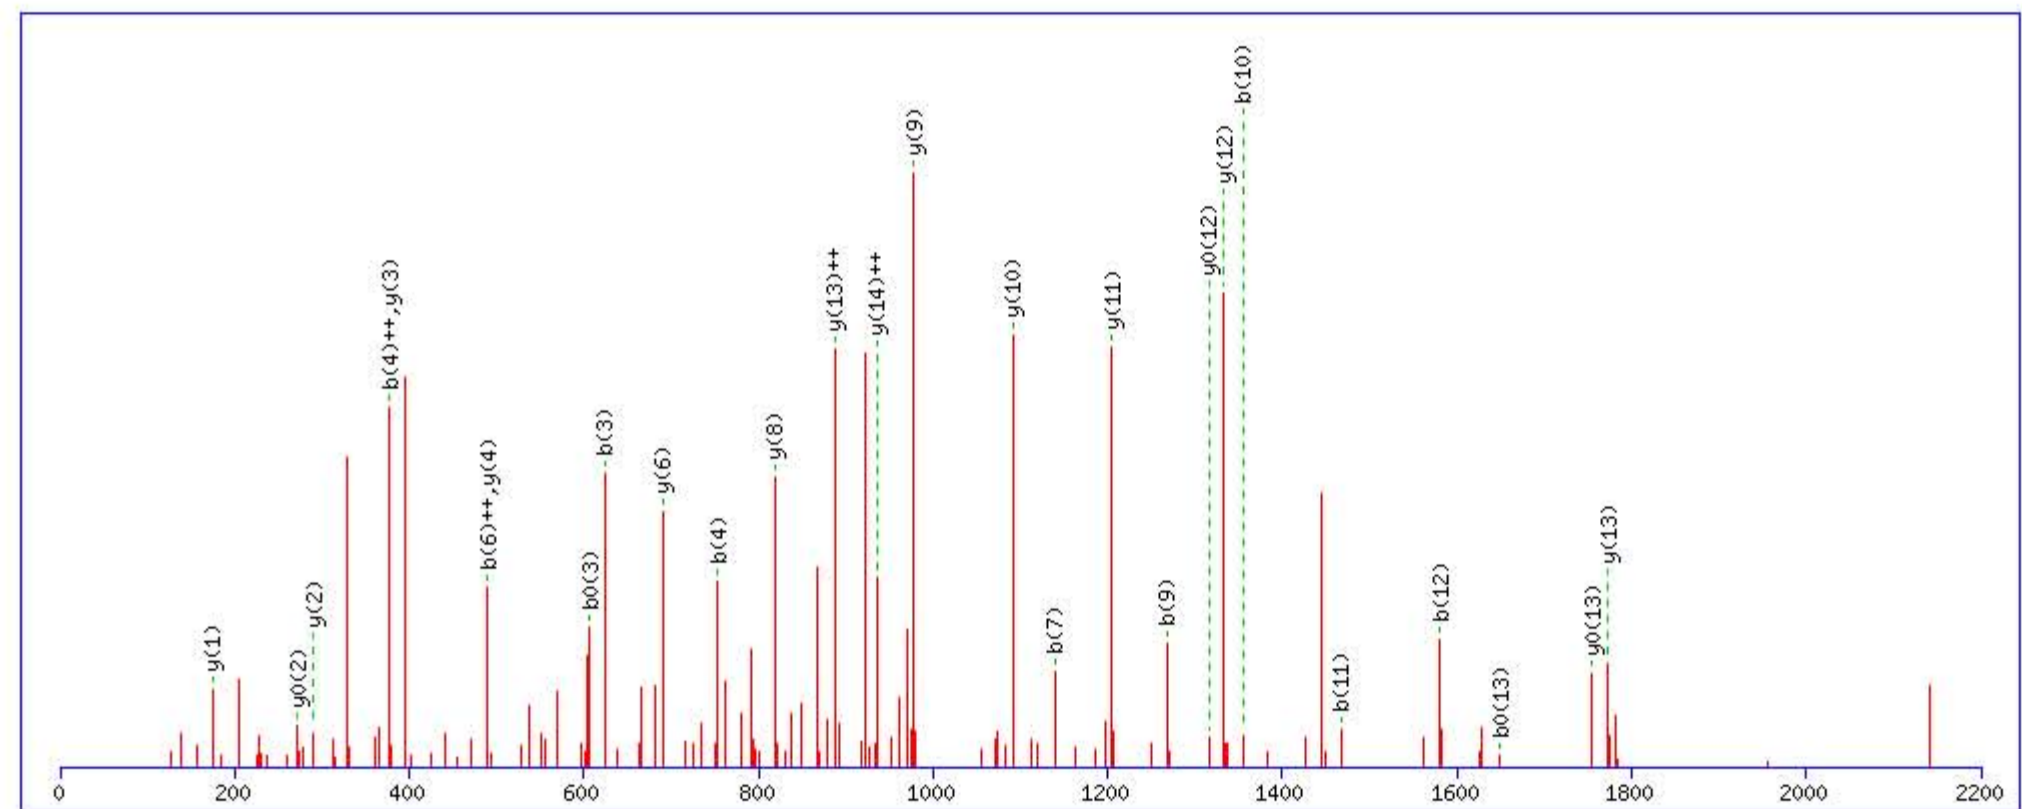

Monoisotopic mass of neutral peptide Mr(calc): 1955.980850

Fixed modifications: Carbamidomethyl (C) (apply to specified residues or termini only)

Variable modifications:

Q3 : Biotin:Thermo-21345 (Q)

Ions Score: 86 Expect: 6.9e-008

Matches : 27/162 fragment ions using 34 most intense peaks [\(help\)](#)

| #  | b                  | b <sup>++</sup>   | b <sup>*</sup> | b <sup>*++</sup> | b <sup>0</sup>     | b <sup>0++</sup> | Seq. | y                  | y <sup>++</sup>   | y <sup>*</sup> | y <sup>*++</sup> | y <sup>0</sup>     | y <sup>0++</sup> | #  |
|----|--------------------|-------------------|----------------|------------------|--------------------|------------------|------|--------------------|-------------------|----------------|------------------|--------------------|------------------|----|
| 1  | 88.039304          | 44.523290         |                |                  | 70.028739          | 35.518008        | S    |                    |                   |                |                  |                    |                  | 15 |
| 2  | 185.092068         | 93.049672         |                |                  | 167.081503         | 84.044389        | P    | 1869.956117        | 935.481697        | 1852.929568    | 926.968422       | 1851.945552        | 926.476414       | 14 |
| 3  | <b>624.317394</b>  | 312.662335        | 607.290845     | 304.149061       | <b>606.306829</b>  | 303.657053       | Q    | <b>1772.903353</b> | <b>886.955314</b> | 1755.876804    | 878.442040       | <b>1754.892788</b> | 877.950032       | 13 |
| 4  | <b>753.359987</b>  | <b>377.183632</b> | 736.333438     | 368.670357       | 735.349422         | 368.178349       | E    | <b>1333.678027</b> | 667.342652        | 1316.651478    | 658.829377       | <b>1315.667462</b> | 658.337369       | 12 |
| 5  | 866.444051         | 433.725664        | 849.417502     | 425.212389       | 848.433486         | 424.720381       | L    | <b>1204.635434</b> | 602.821355        | 1187.608885    | 594.308081       | 1186.624869        | 593.816073       | 11 |
| 6  | 979.528115         | <b>490.267696</b> | 962.501566     | 481.754421       | 961.517550         | 481.262413       | L    | <b>1091.551370</b> | 546.279323        | 1074.524821    | 537.766049       | 1073.540805        | 537.274040       | 10 |
| 7  | <b>1139.558764</b> | 570.283020        | 1122.532215    | 561.769746       | 1121.548199        | 561.277738       | C    | <b>978.467306</b>  | 489.737291        | 961.440757     | 481.224017       | 960.456741         | 480.732009       | 9  |
| 8  | 1196.580228        | 598.793752        | 1179.553679    | 590.280478       | 1178.569663        | 589.788470       | G    | <b>818.436657</b>  | 409.721967        | 801.410108     | 401.208692       | 800.426092         | 400.716684       | 8  |
| 9  | <b>1267.617342</b> | 634.312309        | 1250.590793    | 625.799035       | 1249.606777        | 625.307027       | A    | 761.415193         | 381.211235        | 744.388644     | 372.697960       | 743.404628         | 372.205952       | 7  |
| 10 | <b>1354.649370</b> | 677.828323        | 1337.622821    | 669.315049       | 1336.638805        | 668.823041       | S    | <b>690.378079</b>  | 345.692678        | 673.351530     | 337.179403       | 672.367514         | 336.687395       | 6  |
| 11 | <b>1467.733434</b> | 734.370355        | 1450.706885    | 725.857081       | 1449.722869        | 725.365073       | L    | 603.346051         | 302.176664        | 586.319502     | 293.663389       | 585.335486         | 293.171381       | 5  |
| 12 | <b>1580.817498</b> | 790.912387        | 1563.790949    | 782.399113       | 1562.806933        | 781.907104       | I    | <b>490.261987</b>  | 245.634631        | 473.235438     | 237.121357       | 472.251422         | 236.629349       | 4  |
| 13 | 1667.849526        | 834.428401        | 1650.822977    | 825.915127       | <b>1649.838961</b> | 825.423118       | S    | <b>377.177923</b>  | 189.092600        | 360.151374     | 180.579325       | 359.167358         | 180.087317       | 3  |
| 14 | 1782.876469        | 891.941873        | 1765.849920    | 883.428598       | 1764.865904        | 882.936590       | D    | <b>290.145895</b>  | 145.576585        | 273.119346     | 137.063311       | <b>272.135330</b>  | 136.571303       | 2  |
| 15 |                    |                   |                |                  |                    |                  | R    | <b>175.118952</b>  | 88.063114         | 158.092403     | 79.549839        |                    |                  | 1  |

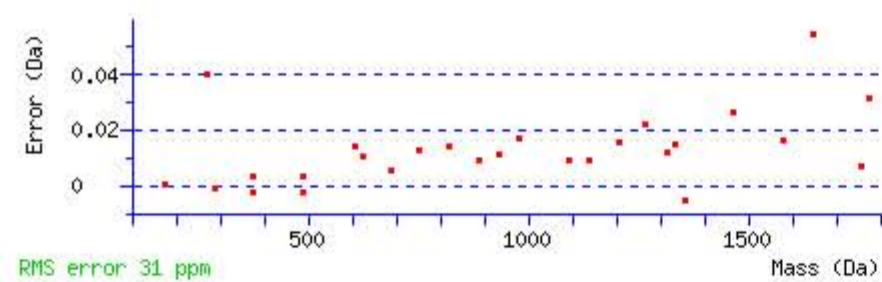

RMS error 31 ppm

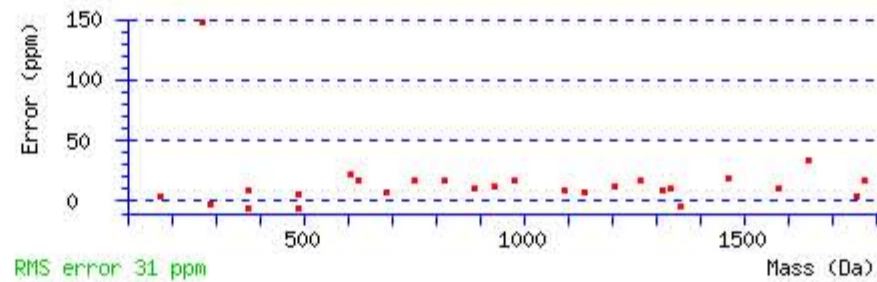

RMS error 31 ppm

NCBI BLAST search of [SPQELLCGASLISDR](#)

(Parameters: blastp, nr protein database, expect=20000, no filter, PAM30)

Other BLAST [web gateways](#)

All matches to this query

| Score | Mr(calc):   | Delta     | Sequence                          |
|-------|-------------|-----------|-----------------------------------|
| 86.2  | 1955.980850 | 0.022538  | <a href="#">SPQELLCGASLISDR</a>   |
| 17.8  | 1956.006470 | -0.003082 | <a href="#">AILRVAELSSDDFHLDR</a> |
| 2.4   | 1955.975464 | 0.027924  | <a href="#">QHSLHSAQWFAGAFILR</a> |

Mascot: <http://www.matrixscience.com/>



# MASCOT Search Results

## Peptide View

MS/MS Fragmentation of **HQDFNSAVQLVENFCR**

Found in **THRB\_HUMAN**, Prothrombin OS=Homo sapiens GN=F2 PE=1 SV=2

Match to Query 52519: 2274.074502 from(759.032110,3+) rtinseconds(2457) index(71300)

Title: Locus:1.1.1.1793.6 File:"2013-07-02 CLN FXIII 60 min 2nd FT.wiff"

Data file C:\Program Files (x86)\Matrix Science\Mascot Daemon\mgf5 FXIII 60 min 2nd\mascot\_daemon\_merge.mgf

Click mouse within plot area to zoom in by factor of two about that point

Or, Plot from  to  Da

Label all possible matches  Label matches used for scoring

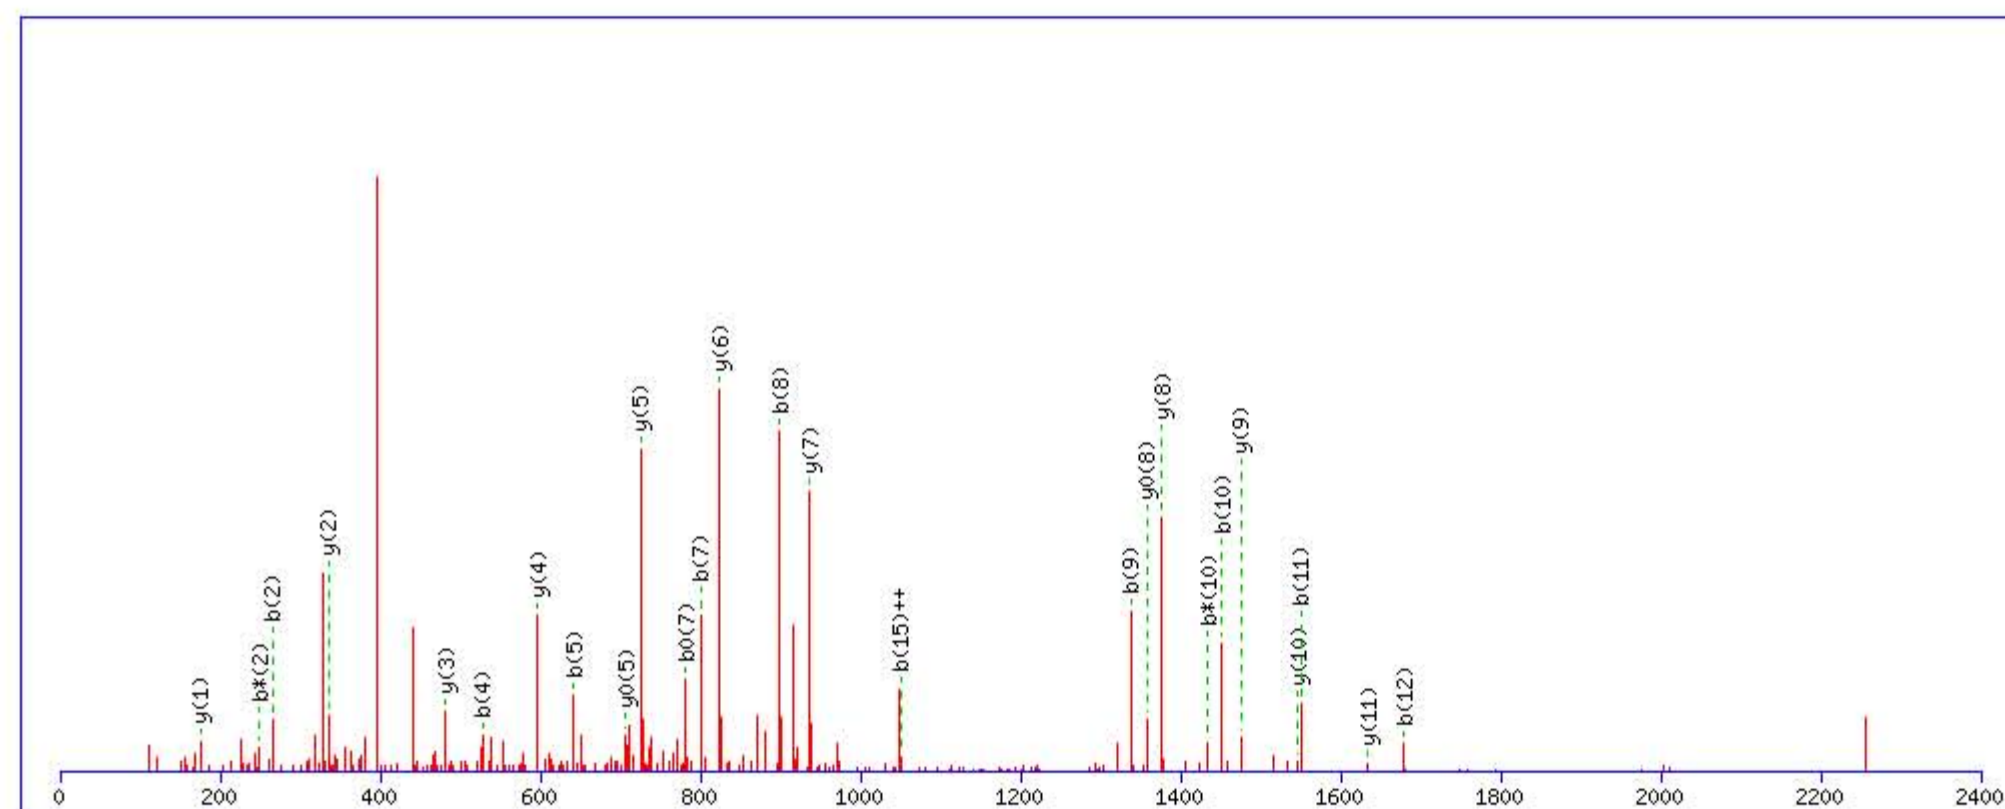

Monoisotopic mass of neutral peptide Mr(calc): 2274.067398

Fixed modifications: Carbamidomethyl (C) (apply to specified residues or termini only)

Variable modifications:

Q9 : Biotin:Thermo-21345 (Q)

Ions Score: 55 Expect: 5.7e-005

Matches : 26/166 fragment ions using 55 most intense peaks [\(help\)](#)

| #  | b                  | b <sup>++</sup>    | b <sup>*</sup>     | b <sup>*++</sup> | b <sup>0</sup>    | b <sup>0++</sup> | Seq. | y                  | y <sup>++</sup> | y <sup>*</sup> | y <sup>*++</sup> | y <sup>0</sup>     | y <sup>0++</sup> | #  |
|----|--------------------|--------------------|--------------------|------------------|-------------------|------------------|------|--------------------|-----------------|----------------|------------------|--------------------|------------------|----|
| 1  | 138.066188         | 69.536732          |                    |                  |                   |                  | H    |                    |                 |                |                  |                    |                  | 16 |
| 2  | <b>266.124766</b>  | 133.566021         | <b>249.098217</b>  | 125.052746       |                   |                  | Q    | 2138.015757        | 1069.511516     | 2120.989208    | 1060.998242      | 2120.005192        | 1060.506234      | 15 |
| 3  | 381.151709         | 191.079492         | 364.125160         | 182.566218       | 363.141144        | 182.074210       | D    | 2009.957179        | 1005.482228     | 1992.930630    | 996.968953       | 1991.946614        | 996.476945       | 14 |
| 4  | <b>528.220123</b>  | 264.613700         | 511.193574         | 256.100425       | 510.209558        | 255.608417       | F    | 1894.930236        | 947.968756      | 1877.903687    | 939.455482       | 1876.919671        | 938.963474       | 13 |
| 5  | <b>642.263050</b>  | 321.635163         | 625.236501         | 313.121889       | 624.252485        | 312.629881       | N    | 1747.861822        | 874.434549      | 1730.835273    | 865.921275       | 1729.851257        | 865.429267       | 12 |
| 6  | 729.295078         | 365.151177         | 712.268529         | 356.637903       | 711.284513        | 356.145895       | S    | <b>1633.818895</b> | 817.413086      | 1616.792346    | 808.899811       | 1615.808330        | 808.407803       | 11 |
| 7  | <b>800.332192</b>  | 400.669734         | 783.305643         | 392.156459       | <b>782.321627</b> | 391.664451       | A    | <b>1546.786867</b> | 773.897072      | 1529.760318    | 765.383797       | 1528.776302        | 764.891789       | 10 |
| 8  | <b>899.400606</b>  | 450.203941         | 882.374057         | 441.690666       | 881.390041        | 441.198658       | V    | <b>1475.749753</b> | 738.378515      | 1458.723204    | 729.865240       | 1457.739188        | 729.373232       | 9  |
| 9  | <b>1338.625932</b> | 669.816604         | 1321.599383        | 661.303330       | 1320.615367       | 660.811322       | Q    | <b>1376.681339</b> | 688.844308      | 1359.654790    | 680.331033       | <b>1358.670774</b> | 679.839025       | 8  |
| 10 | <b>1451.709996</b> | 726.358636         | <b>1434.683447</b> | 717.845362       | 1433.699431       | 717.353354       | L    | <b>937.456013</b>  | 469.231645      | 920.429464     | 460.718370       | 919.445448         | 460.226362       | 7  |
| 11 | <b>1550.778410</b> | 775.892843         | 1533.751861        | 767.379569       | 1532.767845       | 766.887561       | V    | <b>824.371949</b>  | 412.689613      | 807.345400     | 404.176338       | 806.361384         | 403.684330       | 6  |
| 12 | <b>1679.821003</b> | 840.414140         | 1662.794454        | 831.900865       | 1661.810438       | 831.408857       | E    | <b>725.303535</b>  | 363.155406      | 708.276986     | 354.642131       | <b>707.292970</b>  | 354.150123       | 5  |
| 13 | 1793.863930        | 897.435603         | 1776.837381        | 888.922329       | 1775.853365       | 888.430321       | N    | <b>596.260942</b>  | 298.634109      | 579.234393     | 290.120835       |                    |                  | 4  |
| 14 | 1940.932344        | 970.969810         | 1923.905795        | 962.456536       | 1922.921779       | 961.964528       | F    | <b>482.218015</b>  | 241.612646      | 465.191466     | 233.099371       |                    |                  | 3  |
| 15 | 2100.962993        | <b>1050.985135</b> | 2083.936444        | 1042.471860      | 2082.952428       | 1041.979852      | C    | <b>335.149601</b>  | 168.078438      | 318.123052     | 159.565164       |                    |                  | 2  |
| 16 |                    |                    |                    |                  |                   |                  | R    | <b>175.118952</b>  | 88.063114       | 158.092403     | 79.549839        |                    |                  | 1  |

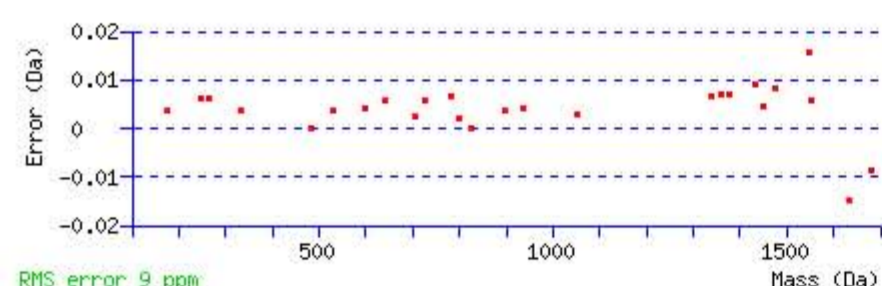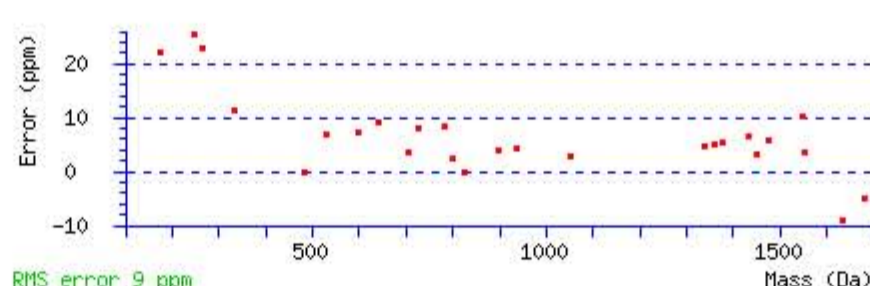

NCBI BLAST search of **HQDFNSAVQLVENFCR**  
 (Parameters: blastp, nr protein database, expect=20000, no filter, PAM30)  
 Other BLAST [web gateways](#)

### All matches to this query

| Score | Mr(calc):   | Delta    | Sequence                         |
|-------|-------------|----------|----------------------------------|
| 55.3  | 2274.067398 | 0.007104 | <a href="#">HQDFNSAVQLVENFCR</a> |
| 17.6  | 2274.067398 | 0.007104 | <a href="#">HQDFNSAVQLVENFCR</a> |



# MASCOT Search Results

## Peptide View

MS/MS Fragmentation of **LAVTTHGLPCLAWASAQAK**  
 Found in **THRB\_HUMAN**, Prothrombin OS=Homo sapiens GN=F2 PE=1 SV=2

Match to Query 53098: 2305.229082 from(769.416970,3+) rtinseconds(2417) index(55489)  
 Title: Locus:1.1.1.1456.19 File:"2013-07-02 CLN FXIII 60 min 2nd F 4.wiff"  
 Data file C:\Program Files (x86)\Matrix Science\Mascot Daemon\mgf5 FXIII 60 min 2nd\mascot\_daemon\_merge.mgf

Click mouse within plot area to zoom in by factor of two about that point  
 Or, Plot from  to  Da   
 Label all possible matches  Label matches used for scoring

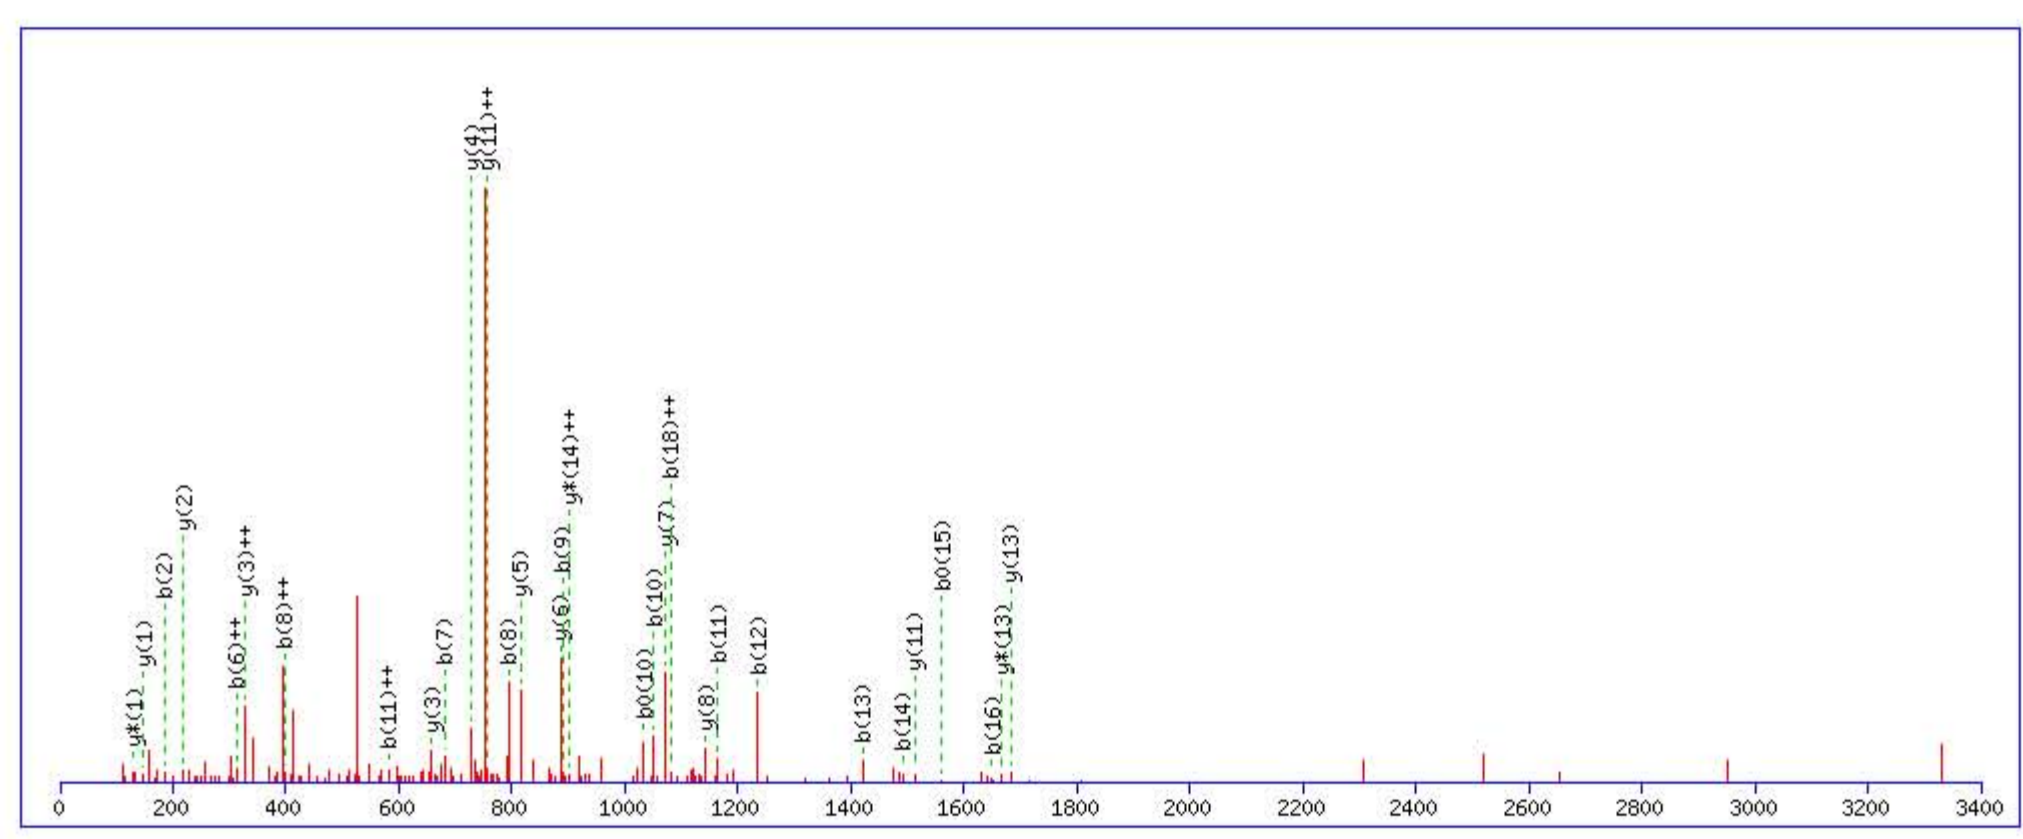

Monoisotopic mass of neutral peptide Mr(calc): 2305.207504  
 Fixed modifications: Carbamidomethyl (C) (apply to specified residues or termini only)  
 Variable modifications:  
 Q17 : Biotin:Thermo-21345 (Q)  
 Ions Score: 34 Expect: 0.009  
 Matches : 31/170 fragment ions using 98 most intense peaks [\(help\)](#)

| #  | b                  | b <sup>++</sup>    | b <sup>*</sup> | b <sup>*++</sup> | b <sup>0</sup>     | b <sup>0++</sup> | Seq. | y                  | y <sup>++</sup>   | y <sup>*</sup>     | y <sup>*++</sup>  | y <sup>0</sup> | y <sup>0++</sup> | #  |
|----|--------------------|--------------------|----------------|------------------|--------------------|------------------|------|--------------------|-------------------|--------------------|-------------------|----------------|------------------|----|
| 1  | 114.091340         | 57.549308          |                |                  |                    |                  | L    |                    |                   |                    |                   |                |                  | 19 |
| 2  | <b>185.128454</b>  | 93.067865          |                |                  |                    |                  | A    | 2193.130730        | 1097.069003       | 2176.104181        | 1088.555728       | 2175.120165    | 1088.063720      | 18 |
| 3  | 284.196868         | 142.602072         |                |                  |                    |                  | V    | 2122.093616        | 1061.550446       | 2105.067067        | 1053.037171       | 2104.083051    | 1052.545163      | 17 |
| 4  | 385.244547         | 193.125912         |                |                  | 367.233982         | 184.120629       | T    | 2023.025202        | 1012.016239       | 2005.998653        | 1003.502965       | 2005.014637    | 1003.010957      | 16 |
| 5  | 486.292226         | 243.649751         |                |                  | 468.281661         | 234.644469       | T    | 1921.977523        | 961.492400        | 1904.950974        | 952.979125        | 1903.966958    | 952.487117       | 15 |
| 6  | 623.351138         | <b>312.179207</b>  |                |                  | 605.340573         | 303.173925       | H    | 1820.929844        | 910.968560        | 1803.903295        | <b>902.455286</b> | 1802.919279    | 901.963278       | 14 |
| 7  | <b>680.372602</b>  | 340.689939         |                |                  | 662.362037         | 331.684657       | G    | <b>1683.870932</b> | 842.439104        | <b>1666.844383</b> | 833.925830        | 1665.860367    | 833.433822       | 13 |
| 8  | <b>793.456666</b>  | <b>397.231971</b>  |                |                  | 775.446101         | 388.226689       | L    | 1626.849468        | 813.928372        | 1609.822919        | 805.415098        | 1608.838903    | 804.923090       | 12 |
| 9  | <b>890.509430</b>  | 445.758353         |                |                  | 872.498865         | 436.753071       | P    | <b>1513.765404</b> | <b>757.386340</b> | 1496.738855        | 748.873066        | 1495.754839    | 748.381058       | 11 |
| 10 | <b>1050.540079</b> | 525.773678         |                |                  | <b>1032.529514</b> | 516.768395       | C    | 1416.712640        | 708.859958        | 1399.686091        | 700.346684        | 1398.702075    | 699.854675       | 10 |
| 11 | <b>1163.624143</b> | <b>582.315710</b>  |                |                  | 1145.613578        | 573.310427       | L    | 1256.681991        | 628.844634        | 1239.655442        | 620.331359        | 1238.671426    | 619.839351       | 9  |
| 12 | <b>1234.661257</b> | 617.834267         |                |                  | 1216.650692        | 608.828984       | A    | <b>1143.597927</b> | 572.302602        | 1126.571378        | 563.789327        | 1125.587362    | 563.297319       | 8  |
| 13 | <b>1420.740570</b> | 710.873923         |                |                  | 1402.730005        | 701.868640       | W    | <b>1072.560813</b> | 536.784045        | 1055.534264        | 528.270770        | 1054.550248    | 527.778762       | 7  |
| 14 | <b>1491.777684</b> | 746.392480         |                |                  | 1473.767119        | 737.387197       | A    | <b>886.481500</b>  | 443.744388        | 869.454951         | 435.231114        | 868.470935     | 434.739106       | 6  |
| 15 | 1578.809712        | 789.908494         |                |                  | <b>1560.799147</b> | 780.903212       | S    | <b>815.444386</b>  | 408.225831        | 798.417837         | 399.712557        | 797.433821     | 399.220549       | 5  |
| 16 | <b>1649.846826</b> | 825.427051         |                |                  | 1631.836261        | 816.421768       | A    | <b>728.412358</b>  | 364.709817        | 711.385809         | 356.196543        |                |                  | 4  |
| 17 | 2089.072152        | 1045.039714        | 2072.045603    | 1036.526439      | 2071.061587        | 1036.034431      | Q    | <b>657.375244</b>  | <b>329.191260</b> | 640.348695         | 320.677986        |                |                  | 3  |
| 18 | 2160.109266        | <b>1080.558271</b> | 2143.082717    | 1072.044996      | 2142.098701        | 1071.552988      | A    | <b>218.149918</b>  | 109.578597        | 201.123369         | 101.065323        |                |                  | 2  |
| 19 |                    |                    |                |                  |                    |                  | K    | <b>147.112804</b>  | 74.060040         | <b>130.086255</b>  | 65.546765         |                |                  | 1  |

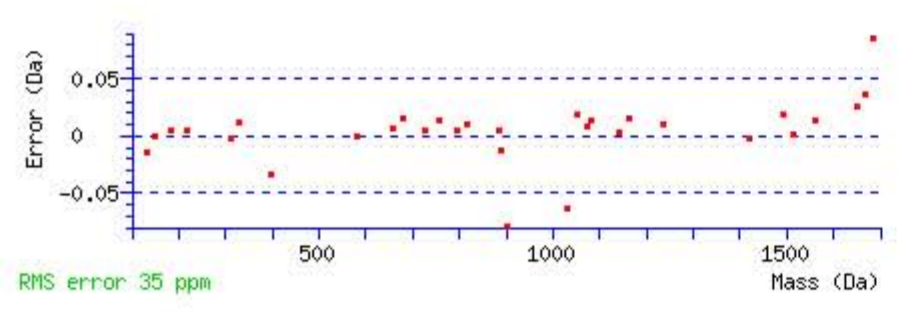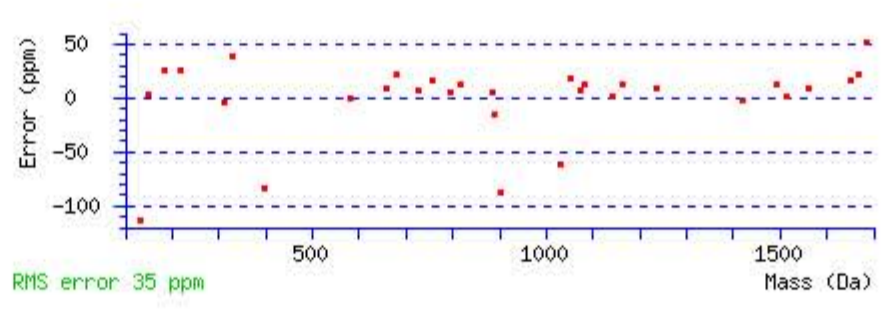

NCBI BLAST search of **LAVTTHGLPCLAWASAQAK**  
 (Parameters: blastp, nr protein database, expect=20000, no filter, PAM30)  
 Other BLAST [web gateways](#)

### All matches to this query

| Score | Mr(calc):   | Delta    | Sequence                            |
|-------|-------------|----------|-------------------------------------|
| 34.0  | 2305.207504 | 0.021578 | <a href="#">LAVTTHGLPCLAWASAQAK</a> |



# MASCOT Search Results

## Peptide View

MS/MS Fragmentation of **SEGSSVNLSPPLEQVPDR**

Found in **THRB\_HUMAN**, Prothrombin OS=Homo sapiens GN=F2 PE=1 SV=2

Match to Query 54037: 2381.154012 from(794.725280,3+) rtinseconds(2216) index(54364)

Title: Locus:1.1.1.1386.16 File:"2013-07-02 CLN FXIII 60 min 2nd F 4.wiff"

Data file C:\Program Files (x86)\Matrix Science\Mascot Daemon\mgf\5 FXIII 60 min 2nd\mascot\_daemon\_merge.mgf

Click mouse within plot area to zoom in by factor of two about that point

Or, Plot from  to  Da

Label all possible matches  Label matches used for scoring

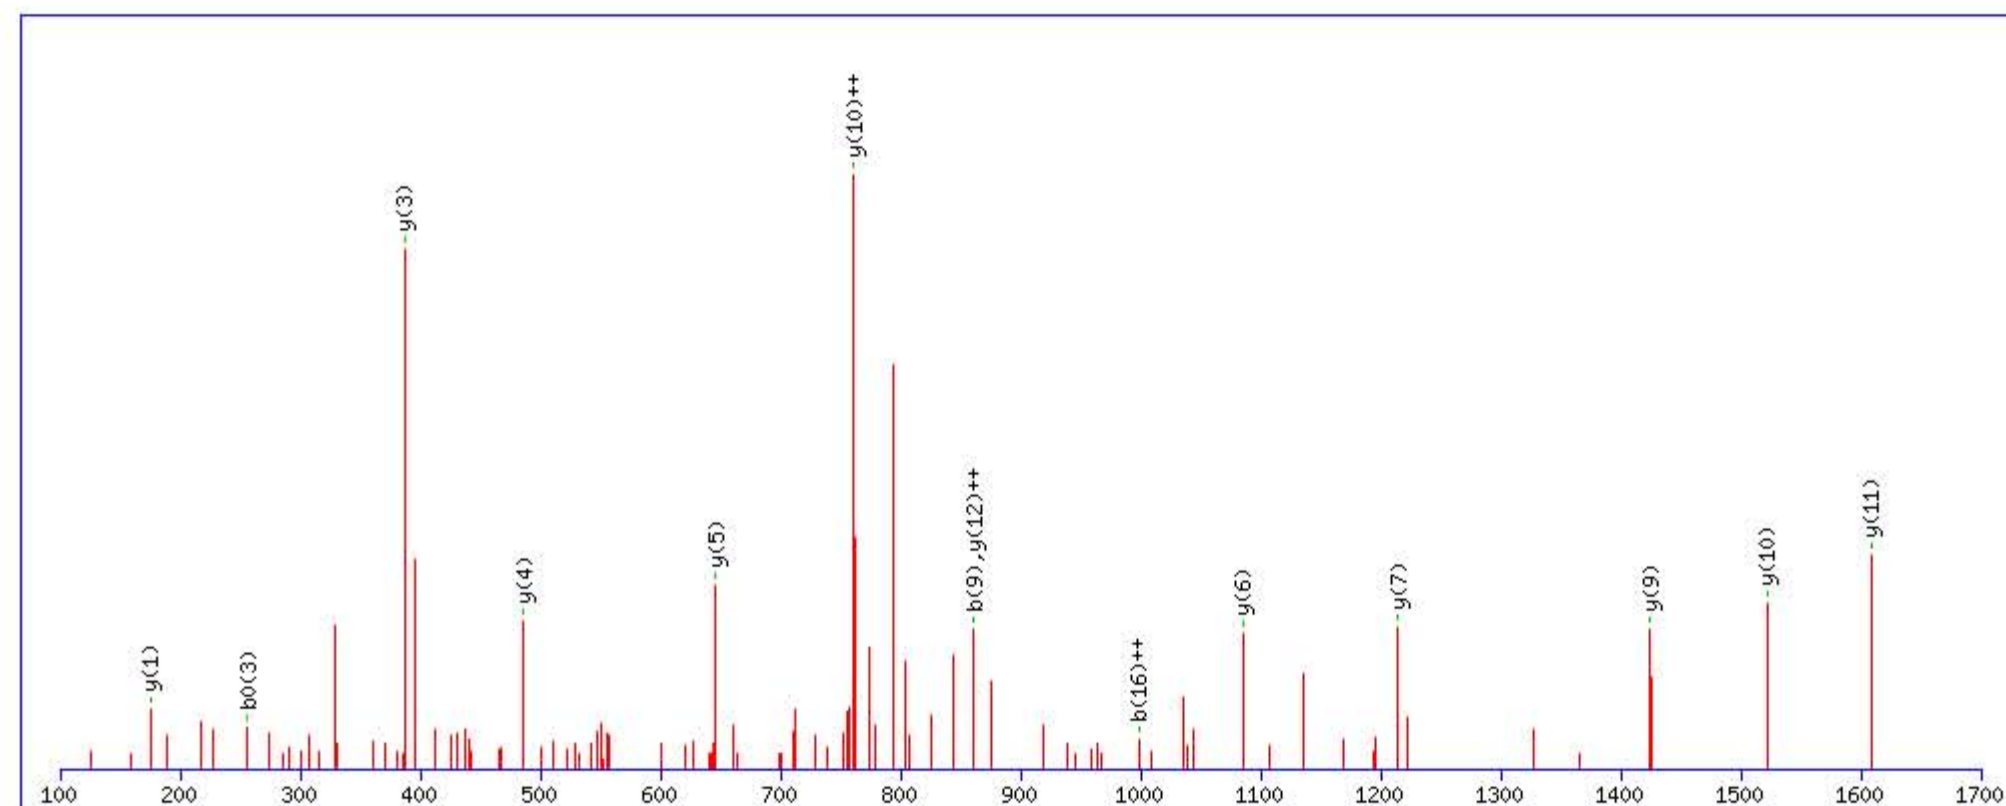

Monoisotopic mass of neutral peptide Mr(calc): 2381.135529

Fixed modifications: Carbamidomethyl (C) (apply to specified residues or termini only)

Variable modifications:

Q14 : Biotin:Thermo-21345 (Q)

Ions Score: 80 Expect: 2.5e-007

Matches : 14/202 fragment ions using 14 most intense peaks [\(help\)](#)

| #  | b           | b <sup>++</sup> | b <sup>+</sup> | b <sup>+++</sup> | b <sup>0</sup> | b <sup>0++</sup> | Seq. | y           | y <sup>++</sup> | y <sup>+</sup> | y <sup>+++</sup> | y <sup>0</sup> | y <sup>0++</sup> | #  |
|----|-------------|-----------------|----------------|------------------|----------------|------------------|------|-------------|-----------------|----------------|------------------|----------------|------------------|----|
| 1  | 88.039304   | 44.523290       |                |                  | 70.028739      | 35.518008        | S    |             |                 |                |                  |                |                  | 19 |
| 2  | 217.081897  | 109.044586      |                |                  | 199.071332     | 100.039304       | E    | 2295.110779 | 1148.059027     | 2278.084230    | 1139.545753      | 2277.100214    | 1139.053745      | 18 |
| 3  | 274.103361  | 137.555319      |                |                  | 256.092796     | 128.550036       | G    | 2166.068186 | 1083.537731     | 2149.041637    | 1075.024456      | 2148.057621    | 1074.532448      | 17 |
| 4  | 361.135389  | 181.071332      |                |                  | 343.124824     | 172.066050       | S    | 2109.046722 | 1055.026999     | 2092.020173    | 1046.513724      | 2091.036157    | 1046.021716      | 16 |
| 5  | 448.167417  | 224.587346      |                |                  | 430.156852     | 215.582064       | S    | 2022.014694 | 1011.510985     | 2004.988145    | 1002.997711      | 2004.004129    | 1002.505703      | 15 |
| 6  | 547.235831  | 274.121554      |                |                  | 529.225266     | 265.116271       | V    | 1934.982666 | 967.994971      | 1917.956117    | 959.481697       | 1916.972101    | 958.989689       | 14 |
| 7  | 661.278758  | 331.143017      | 644.252209     | 322.629742       | 643.268193     | 322.137734       | N    | 1835.914252 | 918.460764      | 1818.887703    | 909.947490       | 1817.903687    | 909.455482       | 13 |
| 8  | 774.362822  | 387.685049      | 757.336273     | 379.171774       | 756.352257     | 378.679766       | L    | 1721.871325 | 861.439301      | 1704.844776    | 852.926026       | 1703.860760    | 852.434018       | 12 |
| 9  | 861.394850  | 431.201063      | 844.368301     | 422.687788       | 843.384285     | 422.195780       | S    | 1608.787261 | 804.897269      | 1591.760712    | 796.383994       | 1590.776696    | 795.891986       | 11 |
| 10 | 958.447614  | 479.727445      | 941.421065     | 471.214170       | 940.437049     | 470.722162       | P    | 1521.755233 | 761.381255      | 1504.728684    | 752.867980       | 1503.744668    | 752.375972       | 10 |
| 11 | 1055.500378 | 528.253827      | 1038.473829    | 519.740553       | 1037.489813    | 519.248544       | P    | 1424.702469 | 712.854873      | 1407.675920    | 704.341598       | 1406.691904    | 703.849590       | 9  |
| 12 | 1168.584442 | 584.795859      | 1151.557893    | 576.282584       | 1150.573877    | 575.790576       | L    | 1327.649705 | 664.328491      | 1310.623156    | 655.815216       | 1309.639140    | 655.323208       | 8  |
| 13 | 1297.627035 | 649.317155      | 1280.600486    | 640.803881       | 1279.616470    | 640.311873       | E    | 1214.565641 | 607.786459      | 1197.539092    | 599.273184       | 1196.555076    | 598.781176       | 7  |
| 14 | 1736.852361 | 868.929819      | 1719.825812    | 860.416544       | 1718.841796    | 859.924536       | Q    | 1085.523048 | 543.265162      | 1068.496499    | 534.751888       | 1067.512483    | 534.259880       | 6  |
| 15 | 1896.883010 | 948.945143      | 1879.856461    | 940.431869       | 1878.872445    | 939.939861       | C    | 646.297722  | 323.652499      | 629.271173     | 315.139225       | 628.287157     | 314.647217       | 5  |
| 16 | 1995.951424 | 998.479350      | 1978.924875    | 989.966076       | 1977.940859    | 989.474068       | V    | 486.267073  | 243.637174      | 469.240524     | 235.123900       | 468.256508     | 234.631892       | 4  |
| 17 | 2093.004188 | 1047.005732     | 2075.977639    | 1038.492457      | 2074.993623    | 1038.000449      | P    | 387.198659  | 194.102967      | 370.172110     | 185.589693       | 369.188094     | 185.097685       | 3  |
| 18 | 2208.031131 | 1104.519203     | 2191.004582    | 1096.005929      | 2190.020566    | 1095.513921      | D    | 290.145895  | 145.576585      | 273.119346     | 137.063311       | 272.135330     | 136.571303       | 2  |
| 19 |             |                 |                |                  |                |                  | R    | 175.118952  | 88.063114       | 158.092403     | 79.549839        |                |                  | 1  |

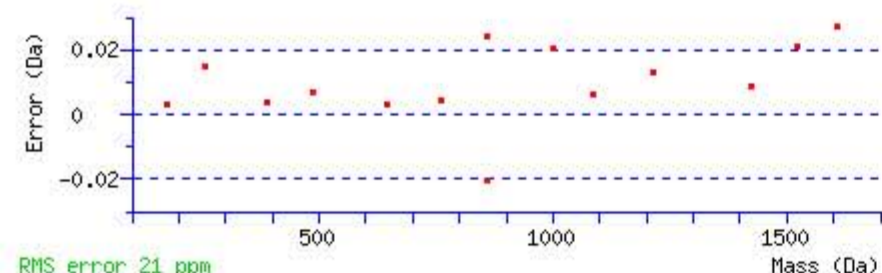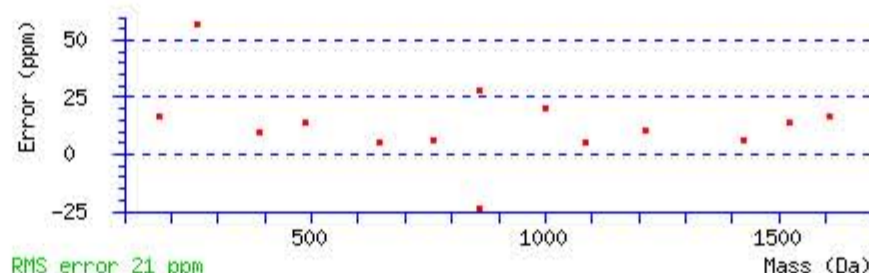

NCBI BLAST search of [SEGSSVNLSPPLEQVPDR](#)

(Parameters: blastp, nr protein database, expect=20000, no filter, PAM30)

Other BLAST [web gateways](#)

All matches to this query

| Score | Mr(calc):   | Delta    | Sequence                           |
|-------|-------------|----------|------------------------------------|
| 79.8  | 2381.135529 | 0.018483 | <a href="#">SEGSSVNLSPPLEQVPDR</a> |

Mascot: <http://www.matrixscience.com/>



# MASCOT Search Results

## Peptide View

MS/MS Fragmentation of **GQPSVLQVVNLPIVERPVCK**

Found in **THRB\_HUMAN**, Prothrombin OS=Homo sapiens GN=F2 PE=1 SV=2

Match to Query 57176: 2542.431656 from(636.615190,4+) rtinseconds(2562) index(56325)

Title: Locus:1.1.1.1507.4 File:"2013-07-02 CLN FXIII 60 min 2nd F 4.wiff"

Data file C:\Program Files (x86)\Matrix Science\Mascot Daemon\mgf5 FXIII 60 min 2nd\mascot\_daemon\_merge.mgf

Click mouse within plot area to zoom in by factor of two about that point

Or, Plot from  to  Da

Label all possible matches  Label matches used for scoring

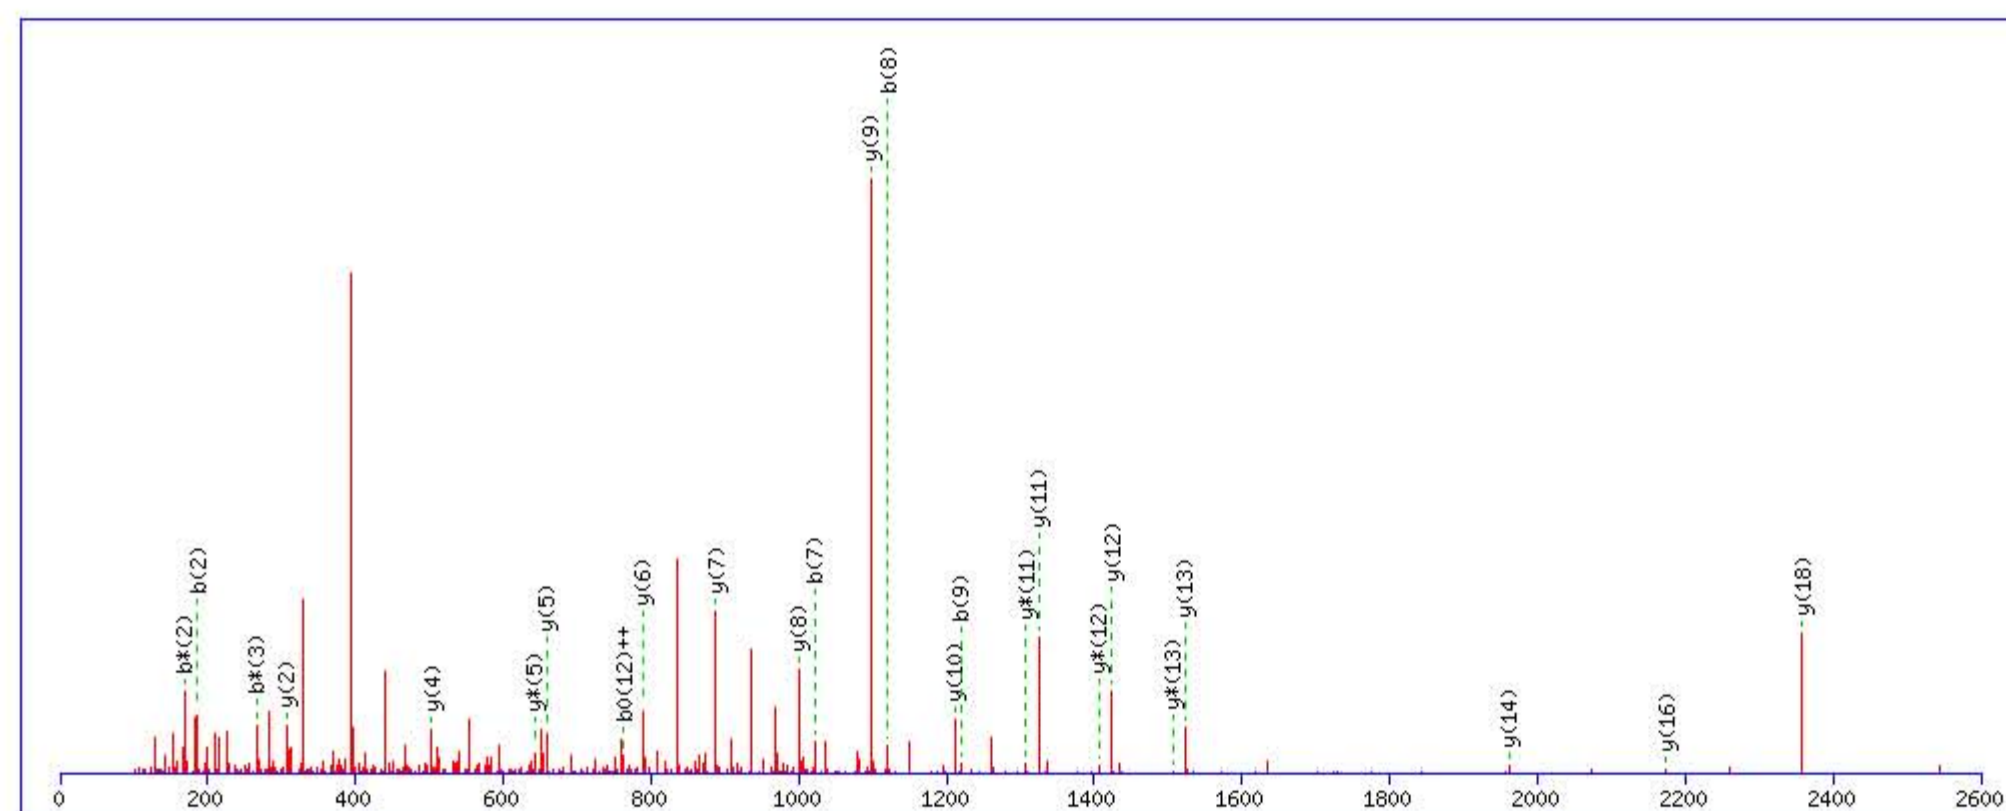

Monoisotopic mass of neutral peptide Mr(calc): 2542.412766

Fixed modifications: Carbamidomethyl (C) (apply to specified residues or termini only)

Variable modifications:

Q7 : Biotin:Thermo-21345 (Q)

Ions Score: 71 Expect: 5e-007

Matches : 25/210 fragment ions using 58 most intense peaks [\(help\)](#)

| #  | b                  | b <sup>++</sup> | b <sup>*</sup>    | b <sup>*++</sup> | b <sup>0</sup> | b <sup>0++</sup>  | Seq. | y                  | y <sup>++</sup> | y <sup>*</sup>     | y <sup>*++</sup> | y <sup>0</sup> | y <sup>0++</sup> | #  |
|----|--------------------|-----------------|-------------------|------------------|----------------|-------------------|------|--------------------|-----------------|--------------------|------------------|----------------|------------------|----|
| 1  | 58.028740          | 29.518008       |                   |                  |                |                   | G    |                    |                 |                    |                  |                |                  | 20 |
| 2  | <b>186.087318</b>  | 93.547297       | <b>169.060769</b> | 85.034023        |                |                   | Q    | 2486.398570        | 1243.702923     | 2469.372021        | 1235.189648      | 2468.388005    | 1234.697640      | 19 |
| 3  | 283.140082         | 142.073679      | <b>266.113533</b> | 133.560405       |                |                   | P    | <b>2358.339992</b> | 1179.673634     | 2341.313443        | 1171.160359      | 2340.329427    | 1170.668351      | 18 |
| 4  | 370.172110         | 185.589693      | 353.145561        | 177.076419       | 352.161545     | 176.584411        | S    | 2261.287228        | 1131.147252     | 2244.260679        | 1122.633977      | 2243.276663    | 1122.141969      | 17 |
| 5  | 469.240524         | 235.123900      | 452.213975        | 226.610626       | 451.229959     | 226.118618        | V    | <b>2174.255200</b> | 1087.631238     | 2157.228651        | 1079.117963      | 2156.244635    | 1078.625955      | 16 |
| 6  | 582.324588         | 291.665932      | 565.298039        | 283.152658       | 564.314023     | 282.660650        | L    | 2075.186786        | 1038.097031     | 2058.160237        | 1029.583756      | 2057.176221    | 1029.091748      | 15 |
| 7  | <b>1021.549914</b> | 511.278595      | 1004.523365       | 502.765321       | 1003.539349    | 502.273313        | Q    | <b>1962.102722</b> | 981.554999      | 1945.076173        | 973.041724       | 1944.092157    | 972.549716       | 14 |
| 8  | <b>1120.618328</b> | 560.812802      | 1103.591779       | 552.299528       | 1102.607763    | 551.807520        | V    | <b>1522.877396</b> | 761.942336      | <b>1505.850847</b> | 753.429061       | 1504.866831    | 752.937053       | 13 |
| 9  | <b>1219.686742</b> | 610.347009      | 1202.660193       | 601.833735       | 1201.676177    | 601.341727        | V    | <b>1423.808982</b> | 712.408129      | <b>1406.782433</b> | 703.894854       | 1405.798417    | 703.402846       | 12 |
| 10 | 1333.729669        | 667.368473      | 1316.703120       | 658.855198       | 1315.719104    | 658.363190        | N    | <b>1324.740568</b> | 662.873922      | <b>1307.714019</b> | 654.360647       | 1306.730003    | 653.868639       | 11 |
| 11 | 1446.813733        | 723.910505      | 1429.787184       | 715.397230       | 1428.803168    | 714.905222        | L    | <b>1210.697641</b> | 605.852458      | 1193.671092        | 597.339184       | 1192.687076    | 596.847176       | 10 |
| 12 | 1543.866497        | 772.436887      | 1526.839948       | 763.923612       | 1525.855932    | <b>763.431604</b> | P    | <b>1097.613577</b> | 549.310426      | 1080.587028        | 540.797152       | 1079.603012    | 540.305144       | 9  |
| 13 | 1656.950561        | 828.978918      | 1639.924012       | 820.465644       | 1638.939996    | 819.973636        | I    | <b>1000.560813</b> | 500.784044      | 983.534264         | 492.270770       | 982.550248     | 491.778762       | 8  |
| 14 | 1756.018975        | 878.513126      | 1738.992426       | 869.999851       | 1738.008410    | 869.507843        | V    | <b>887.476749</b>  | 444.242012      | 870.450200         | 435.728738       | 869.466184     | 435.236730       | 7  |
| 15 | 1885.061568        | 943.034422      | 1868.035019       | 934.521147       | 1867.051003    | 934.029139        | E    | <b>788.408335</b>  | 394.707805      | 771.381786         | 386.194531       | 770.397770     | 385.702523       | 6  |
| 16 | 2041.162679        | 1021.084977     | 2024.136130       | 1012.571703      | 2023.152114    | 1012.079695       | R    | <b>659.365742</b>  | 330.186509      | <b>642.339193</b>  | 321.673234       |                |                  | 5  |
| 17 | 2138.215443        | 1069.611359     | 2121.188894       | 1061.098085      | 2120.204878    | 1060.606077       | P    | <b>503.264631</b>  | 252.135953      | 486.238082         | 243.622679       |                |                  | 4  |
| 18 | 2237.283857        | 1119.145566     | 2220.257308       | 1110.632292      | 2219.273292    | 1110.140284       | V    | 406.211867         | 203.609571      | 389.185318         | 195.096297       |                |                  | 3  |
| 19 | 2397.314506        | 1199.160891     | 2380.287957       | 1190.647616      | 2379.303941    | 1190.155608       | C    | <b>307.143453</b>  | 154.075364      | 290.116904         | 145.562090       |                |                  | 2  |
| 20 |                    |                 |                   |                  |                |                   | K    | 147.112804         | 74.060040       | 130.086255         | 65.546765        |                |                  | 1  |

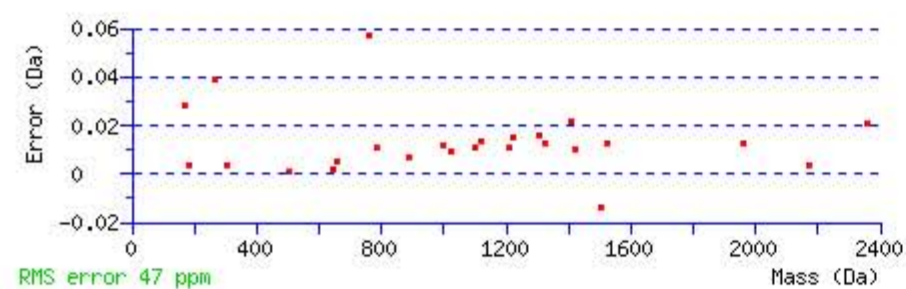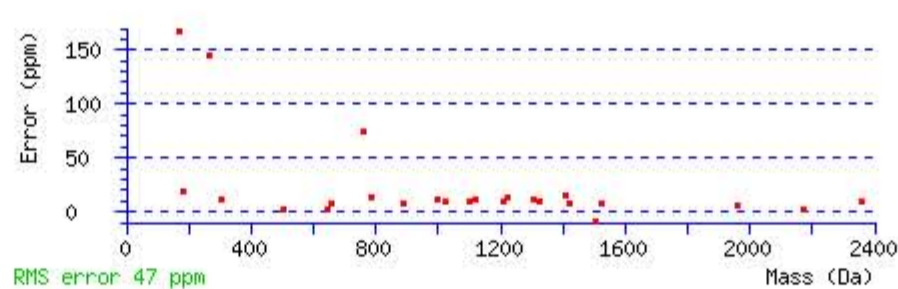

NCBI BLAST search of **GQPSVLQVVNLPIVERPVCK**

(Parameters: blastp, nr protein database, expect=20000, no filter, PAM30)

Other BLAST [web gateways](#)

All matches to this query

| Score | Mr(calc):   | Delta    | Sequence                             |
|-------|-------------|----------|--------------------------------------|
| 71.2  | 2542.412766 | 0.018890 | <a href="#">GQPSVLQVVNLPIVERPVCK</a> |
| 38.0  | 2542.412766 | 0.018890 | <a href="#">GQPSVLQVVNLPIVERPVCK</a> |



# MASCOT Search Results

## Peptide View

MS/MS Fragmentation of **IVEGSDAEIGMSPWQVMLFR**

Found in **THRB\_HUMAN**, Prothrombin OS=Homo sapiens GN=F2 PE=1 SV=2

Match to Query 57515: 2591.285442 from(864.769090,3+) rtinseconds(2882) index(58542)

Title: Locus:1.1.1.1616.22 File:"2013-07-02 CLN FXIII 60 min 2nd F 4.wiff"

Data file C:\Program Files (x86)\Matrix Science\Mascot Daemon\mgf5 FXIII 60 min 2nd\mascot\_daemon\_merge.mgf

Click mouse within plot area to zoom in by factor of two about that point

Or, Plot from  to  Da

Label all possible matches  Label matches used for scoring

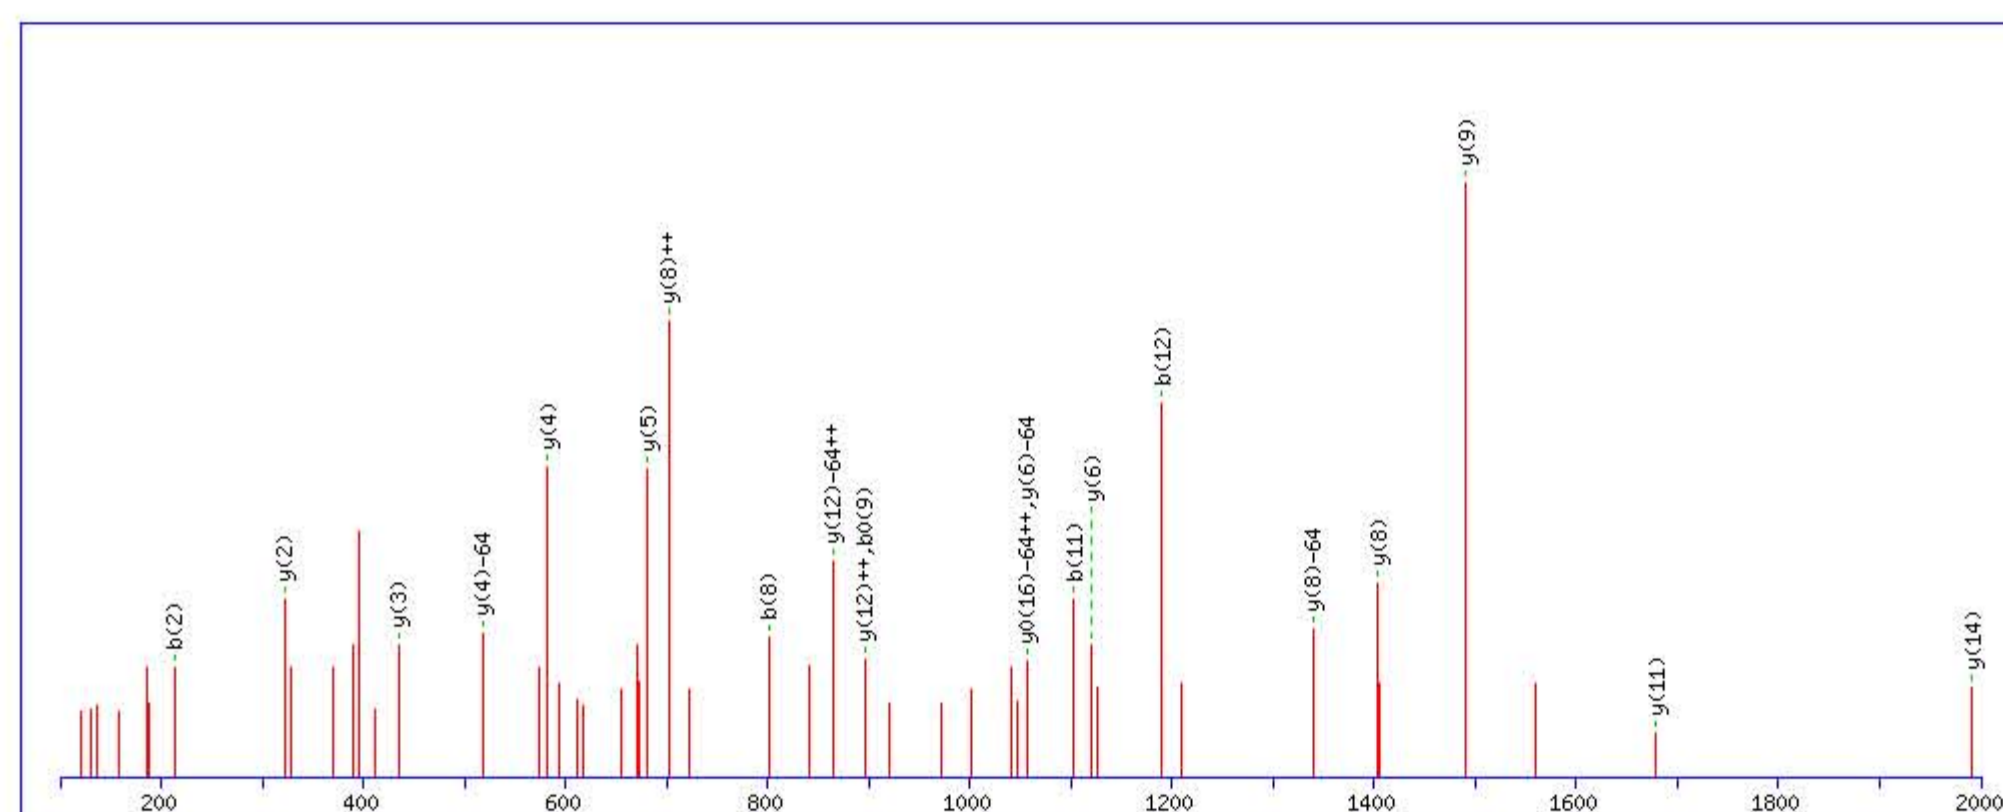

Monoisotopic mass of neutral peptide Mr(calc): 2591.258621

Fixed modifications: Carbamidomethyl (C) (apply to specified residues or termini only)

Variable modifications:

Q15 : Biotin:Thermo-21345 (Q)

M17 : Oxidation (M), with neutral losses 0.000000 (shown in table), 63.998285

Ions Score: 61 Expect: 2.6e-006

Matches : 21/284 fragment ions using 26 most intense peaks [\(help\)](#)

| #  | b                  | b <sup>++</sup> | b <sup>*</sup> | b <sup>+++</sup> | b <sup>0</sup>    | b <sup>0++</sup> | Seq. | y                  | y <sup>++</sup>   | y <sup>*</sup> | y <sup>+++</sup> | y <sup>0</sup> | y <sup>0++</sup> | #  |
|----|--------------------|-----------------|----------------|------------------|-------------------|------------------|------|--------------------|-------------------|----------------|------------------|----------------|------------------|----|
| 1  | 114.091340         | 57.549308       |                |                  |                   |                  | I    |                    |                   |                |                  |                |                  | 20 |
| 2  | <b>213.159754</b>  | 107.083515      |                |                  |                   |                  | V    | 2479.181837        | 1240.094556       | 2462.155288    | 1231.581282      | 2461.171272    | 1231.089274      | 19 |
| 3  | 342.202347         | 171.604811      |                |                  | 324.191782        | 162.599529       | E    | 2380.113423        | 1190.560349       | 2363.086874    | 1182.047075      | 2362.102858    | 1181.555067      | 18 |
| 4  | 399.223811         | 200.115543      |                |                  | 381.213246        | 191.110261       | G    | 2251.070830        | 1126.039053       | 2234.044281    | 1117.525778      | 2233.060265    | 1117.033770      | 17 |
| 5  | 486.255839         | 243.631557      |                |                  | 468.245274        | 234.626275       | S    | 2194.049366        | 1097.528321       | 2177.022817    | 1089.015046      | 2176.038801    | 1088.523038      | 16 |
| 6  | 601.282782         | 301.145029      |                |                  | 583.272217        | 292.139747       | D    | 2107.017338        | 1054.012307       | 2089.990789    | 1045.499032      | 2089.006773    | 1045.007024      | 15 |
| 7  | 672.319896         | 336.663586      |                |                  | 654.309331        | 327.658303       | A    | <b>1991.990395</b> | 996.498836        | 1974.963846    | 987.985561       | 1973.979830    | 987.493553       | 14 |
| 8  | <b>801.362489</b>  | 401.184883      |                |                  | 783.351924        | 392.179600       | E    | 1920.953281        | 960.980279        | 1903.926732    | 952.467004       | 1902.942716    | 951.974996       | 13 |
| 9  | 914.446553         | 457.726915      |                |                  | <b>896.435988</b> | 448.721632       | I    | 1791.910688        | <b>896.458982</b> | 1774.884139    | 887.945708       | 1773.900123    | 887.453700       | 12 |
| 10 | 971.468017         | 486.237647      |                |                  | 953.457452        | 477.232364       | G    | <b>1678.826624</b> | 839.916950        | 1661.800075    | 831.403676       | 1660.816059    | 830.911668       | 11 |
| 11 | <b>1102.508502</b> | 551.757889      |                |                  | 1084.497937       | 542.752606       | M    | 1621.805160        | 811.406218        | 1604.778611    | 802.892944       | 1603.794595    | 802.400936       | 10 |
| 12 | <b>1189.540530</b> | 595.273903      |                |                  | 1171.529965       | 586.268621       | S    | <b>1490.764675</b> | 745.885976        | 1473.738126    | 737.372701       | 1472.754110    | 736.880693       | 9  |
| 13 | 1286.593294        | 643.800285      |                |                  | 1268.582729       | 634.795003       | P    | <b>1403.732647</b> | <b>702.369962</b> | 1386.706098    | 693.856687       |                |                  | 8  |
| 14 | 1472.672607        | 736.839942      |                |                  | 1454.662042       | 727.834659       | W    | 1306.679883        | 653.843580        | 1289.653334    | 645.330305       |                |                  | 7  |
| 15 | 1911.897933        | 956.452605      | 1894.871384    | 947.939330       | 1893.887368       | 947.447322       | Q    | <b>1120.600570</b> | 560.803923        | 1103.574021    | 552.290649       |                |                  | 6  |
| 16 | 2010.966347        | 1005.986812     | 1993.939798    | 997.473537       | 1992.955782       | 996.981529       | V    | <b>681.375244</b>  | 341.191260        | 664.348695     | 332.677986       |                |                  | 5  |
| 17 | 2158.001747        | 1079.504511     | 2140.975198    | 1070.991237      | 2139.991182       | 1070.499229      | M    | <b>582.306830</b>  | 291.657053        | 565.280281     | 283.143779       |                |                  | 4  |
| 18 | 2271.085811        | 1136.046543     | 2254.059262    | 1127.533269      | 2253.075246       | 1127.041261      | L    | <b>435.271430</b>  | 218.139353        | 418.244881     | 209.626078       |                |                  | 3  |
| 19 | 2418.154225        | 1209.580750     | 2401.127676    | 1201.067476      | 2400.143660       | 1200.575468      | F    | <b>322.187366</b>  | 161.597321        | 305.160817     | 153.084046       |                |                  | 2  |
| 20 |                    |                 |                |                  |                   |                  | R    | 175.118952         | 88.063114         | 158.092403     | 79.549839        |                |                  | 1  |

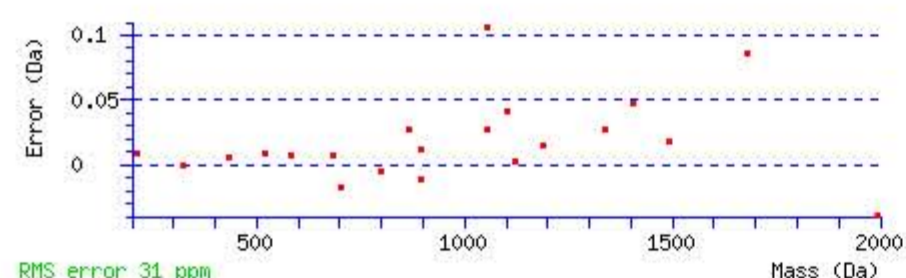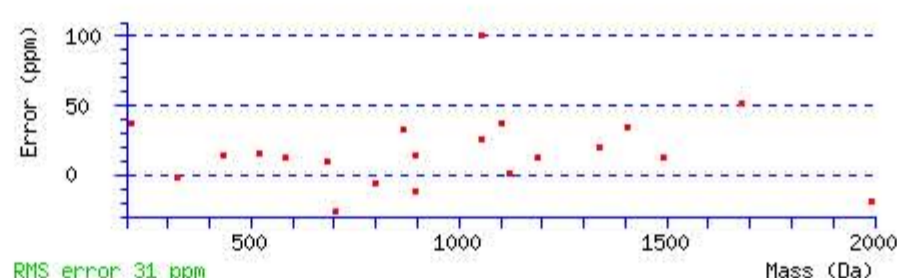

NCBI BLAST search of [IVEGSDAEIGMSPWQVMLFR](#)

(Parameters: blastp, nr protein database, expect=20000, no filter, PAM30)

Other BLAST [web gateways](#)

All matches to this query

| Score | Mr(calc):   | Delta     | Sequence                                 |
|-------|-------------|-----------|------------------------------------------|
| 60.8  | 2591.258621 | 0.026821  | <a href="#">IVEGSDAEIGMSPWQVMLFR</a>     |
| 3.5   | 2591.258621 | 0.026821  | <a href="#">IVEGSDAEIGMSPWQVMLFR</a>     |
| 1.2   | 2591.315231 | -0.029789 | <a href="#">FLASDKPQEMANASLTLETPLTSK</a> |



**Peptide View**

MS/MS Fragmentation of **RQECSIPVCGDQVTVAMTPR**  
 Found in **THRB\_HUMAN**, Prothrombin OS=Homo sapiens GN=F2 PE=1 SV=2

Match to Query 58963: 2758.319652 from(920.447160,3+) rtinseconds(1855) index(51875)  
 Title: Locus:1.1.1.1261.13 File:"2013-07-02 CLN FXIII 60 min 2nd F 4.wiff"  
 Data file C:\Program Files (x86)\Matrix Science\Mascot Daemon\mgf5 FXIII 60 min 2nd\mascot\_daemon\_merge.mgf

Click mouse within plot area to zoom in by factor of two about that point  
 Or, Plot from  to  Da   
 Label all possible matches  Label matches used for scoring

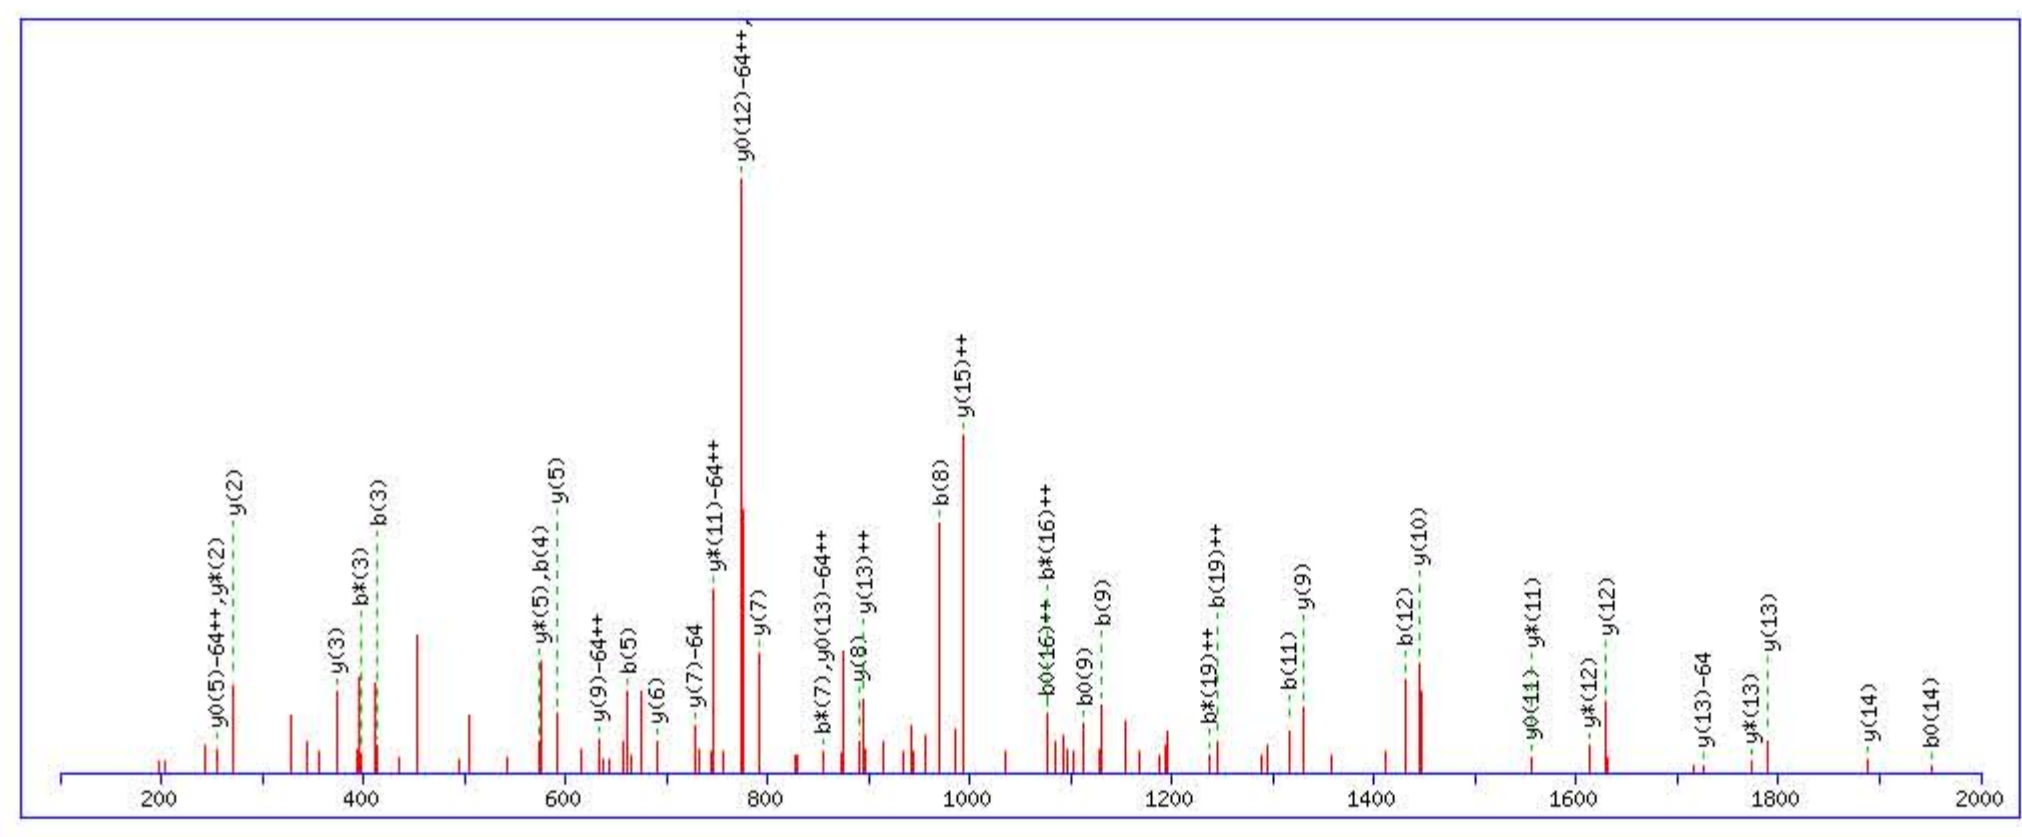

Monoisotopic mass of neutral peptide Mr(calc): 2758.302322  
 Fixed modifications: Carbamidomethyl (C) (apply to specified residues or termini only)  
 Variable modifications:  
 Q13 : Biotin:Thermo-21345 (Q)  
 M18 : Oxidation (M), with neutral losses 0.000000 (shown in table), 63.998285  
 Ions Score: 50 Expect: 0.0002  
 Matches : 43/352 fragment ions using 75 most intense peaks [\(help\)](#)

| #  | b                  | b <sup>++</sup>    | b <sup>*</sup>    | b <sup>*++</sup>   | b <sup>0</sup>     | b <sup>0++</sup>   | Seq. | y                  | y <sup>++</sup>   | y <sup>*</sup>     | y <sup>*++</sup> | y <sup>0</sup>     | y <sup>0++</sup> | #  |
|----|--------------------|--------------------|-------------------|--------------------|--------------------|--------------------|------|--------------------|-------------------|--------------------|------------------|--------------------|------------------|----|
| 1  | 157.108387         | 79.057831          | 140.081838        | 70.544557          |                    |                    | R    |                    |                   |                    |                  |                    |                  | 21 |
| 2  | 285.166965         | 143.087121         | 268.140416        | 134.573846         |                    |                    | Q    | 2603.208466        | 1302.107871       | 2586.181917        | 1293.594596      | 2585.197901        | 1293.102588      | 20 |
| 3  | <b>414.209558</b>  | 207.608417         | <b>397.183009</b> | 199.095143         | 396.198993         | 198.603135         | E    | 2475.149888        | 1238.078582       | 2458.123339        | 1229.565307      | 2457.139323        | 1229.073299      | 19 |
| 4  | <b>574.240207</b>  | 287.623742         | 557.213658        | 279.110467         | 556.229642         | 278.618459         | C    | 2346.107295        | 1173.557285       | 2329.080746        | 1165.044011      | 2328.096730        | 1164.552003      | 18 |
| 5  | <b>661.272235</b>  | 331.139756         | 644.245686        | 322.626481         | 643.261670         | 322.134473         | S    | 2186.076646        | 1093.541961       | 2169.050097        | 1085.028686      | 2168.066081        | 1084.536678      | 17 |
| 6  | <b>774.356299</b>  | 387.681788         | 757.329750        | 379.168513         | 756.345734         | 378.676505         | I    | 2099.044618        | 1050.025947       | 2082.018069        | 1041.512672      | 2081.034053        | 1041.020664      | 16 |
| 7  | 871.409063         | 436.208170         | <b>854.382514</b> | 427.694895         | 853.398498         | 427.202887         | P    | 1985.960554        | <b>993.483915</b> | 1968.934005        | 984.970641       | 1967.949989        | 984.478633       | 15 |
| 8  | <b>970.477477</b>  | 485.742377         | 953.450928        | 477.229102         | 952.466912         | 476.737094         | V    | <b>1888.907790</b> | 944.957533        | 1871.881241        | 936.444259       | 1870.897225        | 935.952251       | 14 |
| 9  | <b>1130.508126</b> | 565.757701         | 1113.481577       | 557.244427         | <b>1112.497561</b> | 556.752418         | C    | <b>1789.839376</b> | <b>895.423326</b> | <b>1772.812827</b> | 886.910052       | 1771.828811        | 886.418044       | 13 |
| 10 | 1187.529590        | 594.268433         | 1170.503041       | 585.755158         | 1169.519025        | 585.263150         | G    | <b>1629.808727</b> | 815.408002        | <b>1612.782178</b> | 806.894727       | 1611.798162        | 806.402719       | 12 |
| 11 | <b>1315.588168</b> | 658.297722         | 1298.561619       | 649.784448         | 1297.577603        | 649.292440         | Q    | 1572.787263        | 786.897270        | <b>1555.760714</b> | 778.383995       | <b>1554.776698</b> | 777.891987       | 11 |
| 12 | <b>1430.615111</b> | 715.811194         | 1413.588562       | 707.297919         | 1412.604546        | 706.805911         | D    | <b>1444.728685</b> | 722.867981        | 1427.702136        | 714.354706       | 1426.718120        | 713.862698       | 10 |
| 13 | 1869.840437        | 935.423857         | 1852.813888       | 926.910582         | 1851.829872        | 926.418574         | Q    | <b>1329.701742</b> | 665.354509        | 1312.675193        | 656.841235       | 1311.691177        | 656.349227       | 9  |
| 14 | 1968.908851        | 984.958064         | 1951.882302       | 976.444789         | <b>1950.898286</b> | 975.952781         | V    | <b>890.476416</b>  | 445.741846        | 873.449867         | 437.228572       | 872.465851         | 436.736564       | 8  |
| 15 | 2069.956530        | 1035.481903        | 2052.929981       | 1026.968628        | 2051.945965        | 1026.476620        | T    | <b>791.408002</b>  | 396.207639        | <b>774.381453</b>  | 387.694365       | 773.397437         | 387.202357       | 7  |
| 16 | 2169.024944        | 1085.016110        | 2151.998395       | <b>1076.502835</b> | 2151.014379        | <b>1076.010827</b> | V    | <b>690.360323</b>  | 345.683800        | 673.333774         | 337.170525       | 672.349758         | 336.678517       | 6  |
| 17 | 2240.062058        | 1120.534667        | 2223.035509       | 1112.021392        | 2222.051493        | 1111.529384        | A    | <b>591.291909</b>  | 296.149593        | <b>574.265360</b>  | 287.636318       | 573.281344         | 287.144310       | 5  |
| 18 | 2387.097458        | 1194.052367        | 2370.070909       | 1185.539092        | 2369.086893        | 1185.047085        | M    | 520.254795         | 260.631036        | 503.228246         | 252.117761       | 502.244230         | 251.625753       | 4  |
| 19 | 2488.145137        | <b>1244.576206</b> | 2471.118588       | <b>1236.062932</b> | 2470.134572        | 1235.570924        | T    | <b>373.219395</b>  | 187.113335        | 356.192846         | 178.600061       | 355.208830         | 178.108053       | 3  |
| 20 | 2585.197901        | 1293.102588        | 2568.171352       | 1284.589314        | 2567.187336        | 1284.097306        | P    | <b>272.171716</b>  | 136.589496        | <b>255.145167</b>  | 128.076221       |                    |                  | 2  |
| 21 |                    |                    |                   |                    |                    |                    | R    | 175.118952         | 88.063114         | 158.092403         | 79.549839        |                    |                  | 1  |

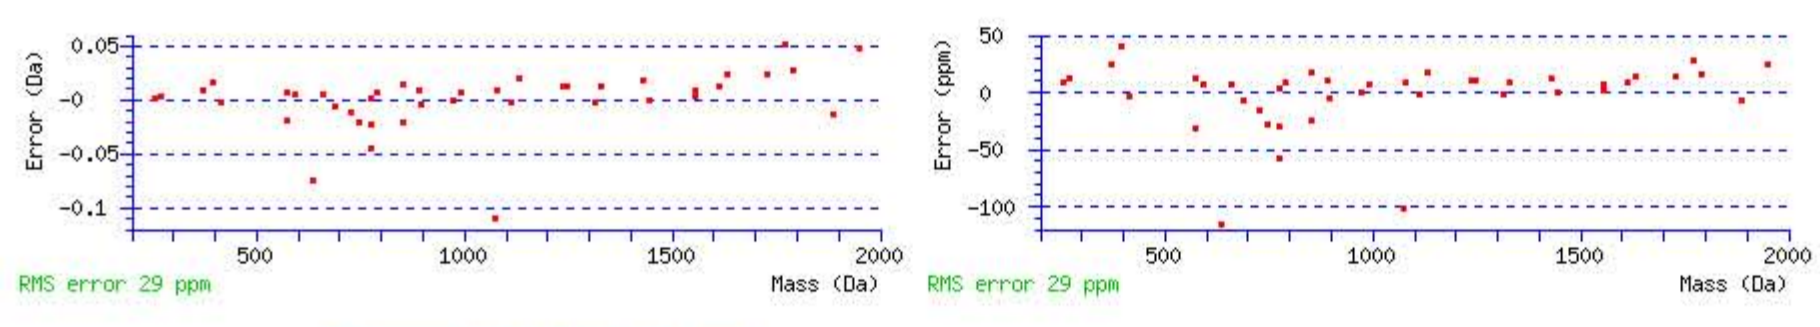

NCBI BLAST search of [RQECSIPVCGDQVTVAMTPR](#)  
 (Parameters: blastp, nr protein database, expect=20000, no filter, PAM30)  
 Other BLAST [web gateways](#)

**All matches to this query**

| Score | Mr(calc):   | Delta    | Sequence                             |
|-------|-------------|----------|--------------------------------------|
| 50.5  | 2758.302322 | 0.017330 | <a href="#">RQECSIPVCGDQVTVAMTPR</a> |
| 31.7  | 2758.302322 | 0.017330 | <a href="#">RQECSIPVCGDQVTVAMTPR</a> |



**Peptide View**

MS/MS Fragmentation of **RQECSIPVCGDQVTVAMTPR**

Found in **THRB\_HUMAN**, Prothrombin OS=Homo sapiens GN=F2 PE=1 SV=2

Match to Query 62077: 3053.508732 from(1018.843520,3+) rtinseconds(2233) index(54449)

Title: Locus:1.1.1.1392.13 File:"2013-07-02 CLN FXIII 60 min 2nd F 4.wiff"

Data file C:\Program Files (x86)\Matrix Science\Mascot Daemon\mgf5 FXIII 60 min 2nd\mascot\_daemon\_merge.mgf

Click mouse within plot area to zoom in by factor of two about that point

Or, Plot from  to  Da

Label all possible matches  Label matches used for scoring

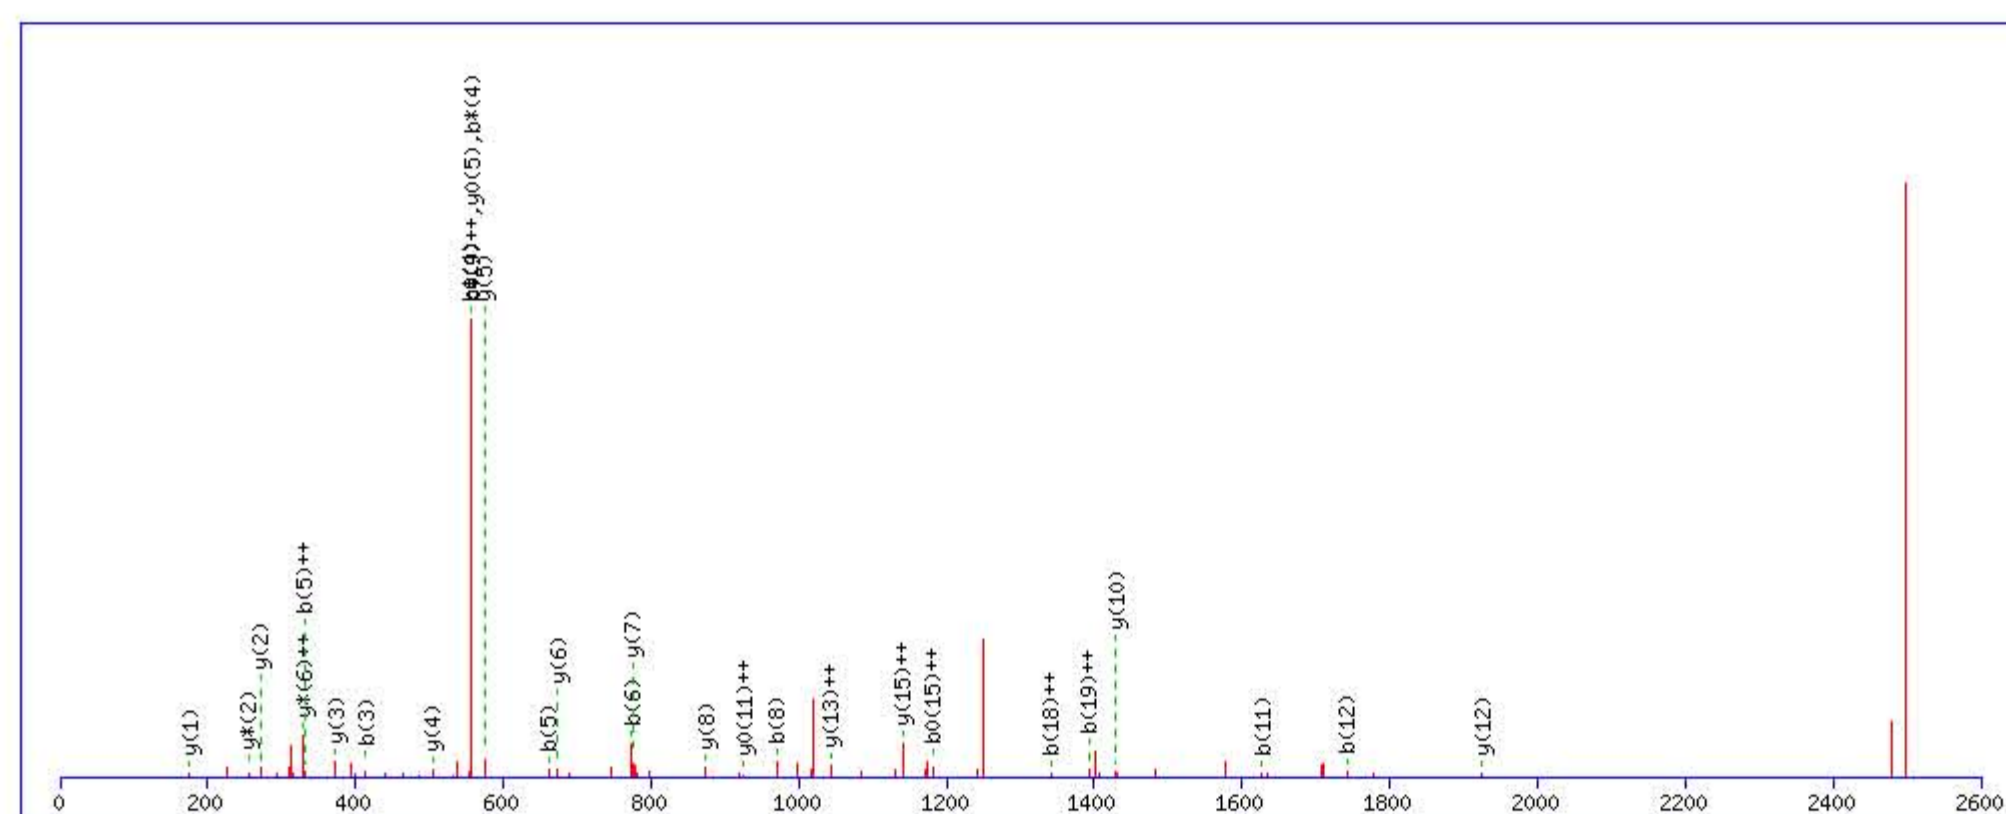

Monoisotopic mass of neutral peptide Mr(calc): 3053.474152

Fixed modifications: Carbamidomethyl (C) (apply to specified residues or termini only)

Variable modifications:

Q11 : Biotin:Thermo-21345 (Q)

Q13 : Biotin:Thermo-21345 (Q)

Ions Score: 34 Expect: 0.012

Matches : 29/232 fragment ions using 67 most intense peaks [\(help\)](#)

| #  | b                  | b <sup>++</sup>    | b <sup>+</sup>    | b <sup>+++</sup>  | b <sup>0</sup>    | b <sup>0++</sup>   | Seq. | y                  | y <sup>++</sup>    | y <sup>+</sup>    | y <sup>+++</sup>  | y <sup>0</sup>    | y <sup>0++</sup>  | #  |
|----|--------------------|--------------------|-------------------|-------------------|-------------------|--------------------|------|--------------------|--------------------|-------------------|-------------------|-------------------|-------------------|----|
| 1  | 157.108387         | 79.057831          | 140.081838        | 70.544557         |                   |                    | R    |                    |                    |                   |                   |                   |                   | 21 |
| 2  | 285.166965         | 143.087121         | 268.140416        | 134.573846        |                   |                    | Q    | 2898.380299        | 1449.693787        | 2881.353750       | 1441.180513       | 2880.369734       | 1440.688505       | 20 |
| 3  | <b>414.209558</b>  | 207.608417         | 397.183009        | 199.095143        | 396.198993        | 198.603135         | E    | 2770.321721        | 1385.664498        | 2753.295172       | 1377.151224       | 2752.311156       | 1376.659216       | 19 |
| 4  | 574.240207         | 287.623742         | <b>557.213658</b> | 279.110467        | <b>556.229642</b> | 278.618459         | C    | 2641.279128        | 1321.143202        | 2624.252579       | 1312.629927       | 2623.268563       | 1312.137919       | 18 |
| 5  | <b>661.272235</b>  | <b>331.139756</b>  | 644.245686        | 322.626481        | 643.261670        | 322.134473         | S    | 2481.248479        | 1241.127877        | 2464.221930       | 1232.614603       | 2463.237914       | 1232.122595       | 17 |
| 6  | <b>774.356299</b>  | 387.681788         | 757.329750        | 379.168513        | 756.345734        | 378.676505         | I    | 2394.216451        | 1197.611863        | 2377.189902       | 1189.098589       | 2376.205886       | 1188.606581       | 16 |
| 7  | 871.409063         | 436.208170         | 854.382514        | 427.694895        | 853.398498        | 427.202887         | P    | 2281.132387        | <b>1141.069831</b> | 2264.105838       | 1132.556557       | 2263.121822       | 1132.064549       | 15 |
| 8  | <b>970.477477</b>  | 485.742377         | 953.450928        | 477.229102        | 952.466912        | 476.737094         | V    | 2184.079623        | 1092.543449        | 2167.053074       | 1084.030175       | 2166.069058       | 1083.538167       | 14 |
| 9  | 1130.508126        | 565.757701         | 1113.481577       | <b>557.244427</b> | 1112.497561       | 556.752418         | C    | 2085.011209        | <b>1043.009242</b> | 2067.984660       | 1034.495968       | 2067.000644       | 1034.003960       | 13 |
| 10 | 1187.529590        | 594.268433         | 1170.503041       | 585.755158        | 1169.519025       | 585.263150         | G    | <b>1924.980560</b> | 962.993918         | 1907.954011       | 954.480643        | 1906.969995       | 953.988635        | 12 |
| 11 | <b>1626.754916</b> | 813.881096         | 1609.728367       | 805.367822        | 1608.744351       | 804.875814         | Q    | 1867.959096        | 934.483186         | 1850.932547       | 925.969911        | 1849.948531       | <b>925.477903</b> | 11 |
| 12 | <b>1741.781859</b> | 871.394568         | 1724.755310       | 862.881293        | 1723.771294       | 862.389285         | D    | <b>1428.733770</b> | 714.870523         | 1411.707221       | 706.357248        | 1410.723205       | 705.865240        | 10 |
| 13 | 2181.007185        | 1091.007230        | 2163.980636       | 1082.493956       | 2162.996620       | 1082.001948        | Q    | 1313.706827        | 657.357051         | 1296.680278       | 648.843777        | 1295.696262       | 648.351769        | 9  |
| 14 | 2280.075599        | 1140.541437        | 2263.049050       | 1132.028163       | 2262.065034       | 1131.536155        | V    | <b>874.481501</b>  | 437.744388         | 857.454952        | 429.231114        | 856.470936        | 428.739106        | 8  |
| 15 | 2381.123278        | 1191.065277        | 2364.096729       | 1182.552002       | 2363.112713       | <b>1182.059994</b> | T    | <b>775.413087</b>  | 388.210181         | 758.386538        | 379.696907        | 757.402522        | 379.204899        | 7  |
| 16 | 2480.191692        | 1240.599484        | 2463.165143       | 1232.086209       | 2462.181127       | 1231.594201        | V    | <b>674.365408</b>  | 337.686342         | 657.338859        | <b>329.173067</b> | 656.354843        | 328.681059        | 6  |
| 17 | 2551.228806        | 1276.118041        | 2534.202257       | 1267.604766       | 2533.218241       | 1267.112758        | A    | <b>575.296994</b>  | 288.152135         | 558.270445        | 279.638861        | <b>557.286429</b> | 279.146853        | 5  |
| 18 | 2682.269291        | <b>1341.638283</b> | 2665.242742       | 1333.125009       | 2664.258726       | 1332.633001        | M    | <b>504.259880</b>  | 252.633578         | 487.233331        | 244.120303        | 486.249315        | 243.628295        | 4  |
| 19 | 2783.316970        | <b>1392.162123</b> | 2766.290421       | 1383.648848       | 2765.306405       | 1383.156840        | T    | <b>373.219395</b>  | 187.113335         | 356.192846        | 178.600061        | 355.208830        | 178.108053        | 3  |
| 20 | 2880.369734        | 1440.688505        | 2863.343185       | 1432.175230       | 2862.359169       | 1431.683222        | P    | <b>272.171716</b>  | 136.589496         | <b>255.145167</b> | 128.076221        |                   |                   | 2  |
| 21 |                    |                    |                   |                   |                   |                    | R    | <b>175.118952</b>  | 88.063114          | 158.092403        | 79.549839         |                   |                   | 1  |

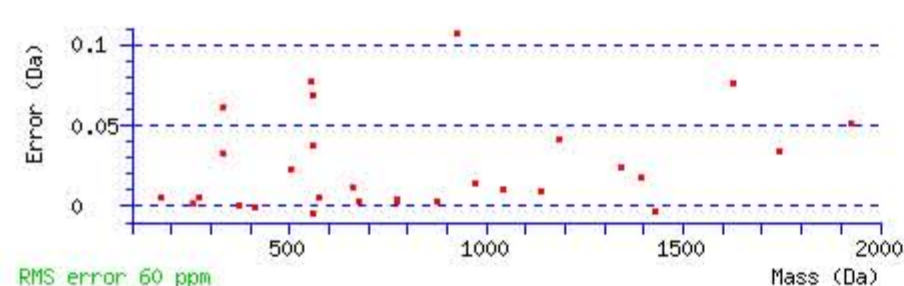

NCBI BLAST search of [RQECSIPVCGDQVTVAMTPR](#)

(Parameters: blastp, nr protein database, expect=20000, no filter, PAM30)

Other BLAST [web gateways](#)

**All matches to this query**

| Score | Mr(calc):   | Delta    | Sequence                             |
|-------|-------------|----------|--------------------------------------|
| 33.9  | 3053.474152 | 0.034580 | <a href="#">RQECSIPVCGDQVTVAMTPR</a> |
| 12.0  | 3053.474152 | 0.034580 | <a href="#">RQECSIPVCGDQVTVAMTPR</a> |
| 1.0   | 3053.474152 | 0.034580 | <a href="#">RQECSIPVCGDQVTVAMTPR</a> |



# MASCOT Search Results

## Peptide View

MS/MS Fragmentation of **CINQLLCK**

Found in **SEPP1\_HUMAN**, Selenoprotein P OS=Homo sapiens GN=SEPP1 PE=1 SV=3

Match to Query 28694: 1358.700428 from(680.357490,2+) rtinseconds(2019) index(53061)

Title: Locus:1.1.1.1318.11 File:"2013-07-02 CLN FXIII 60 min 2nd F 4.wiff"

Data file C:\Program Files (x86)\Matrix Science\Mascot Daemon\mgf5 FXIII 60 min 2nd\mascot\_daemon\_merge.mgf

Click mouse within plot area to zoom in by factor of two about that point

Or, Plot from  to  Da

Label all possible matches  Label matches used for scoring

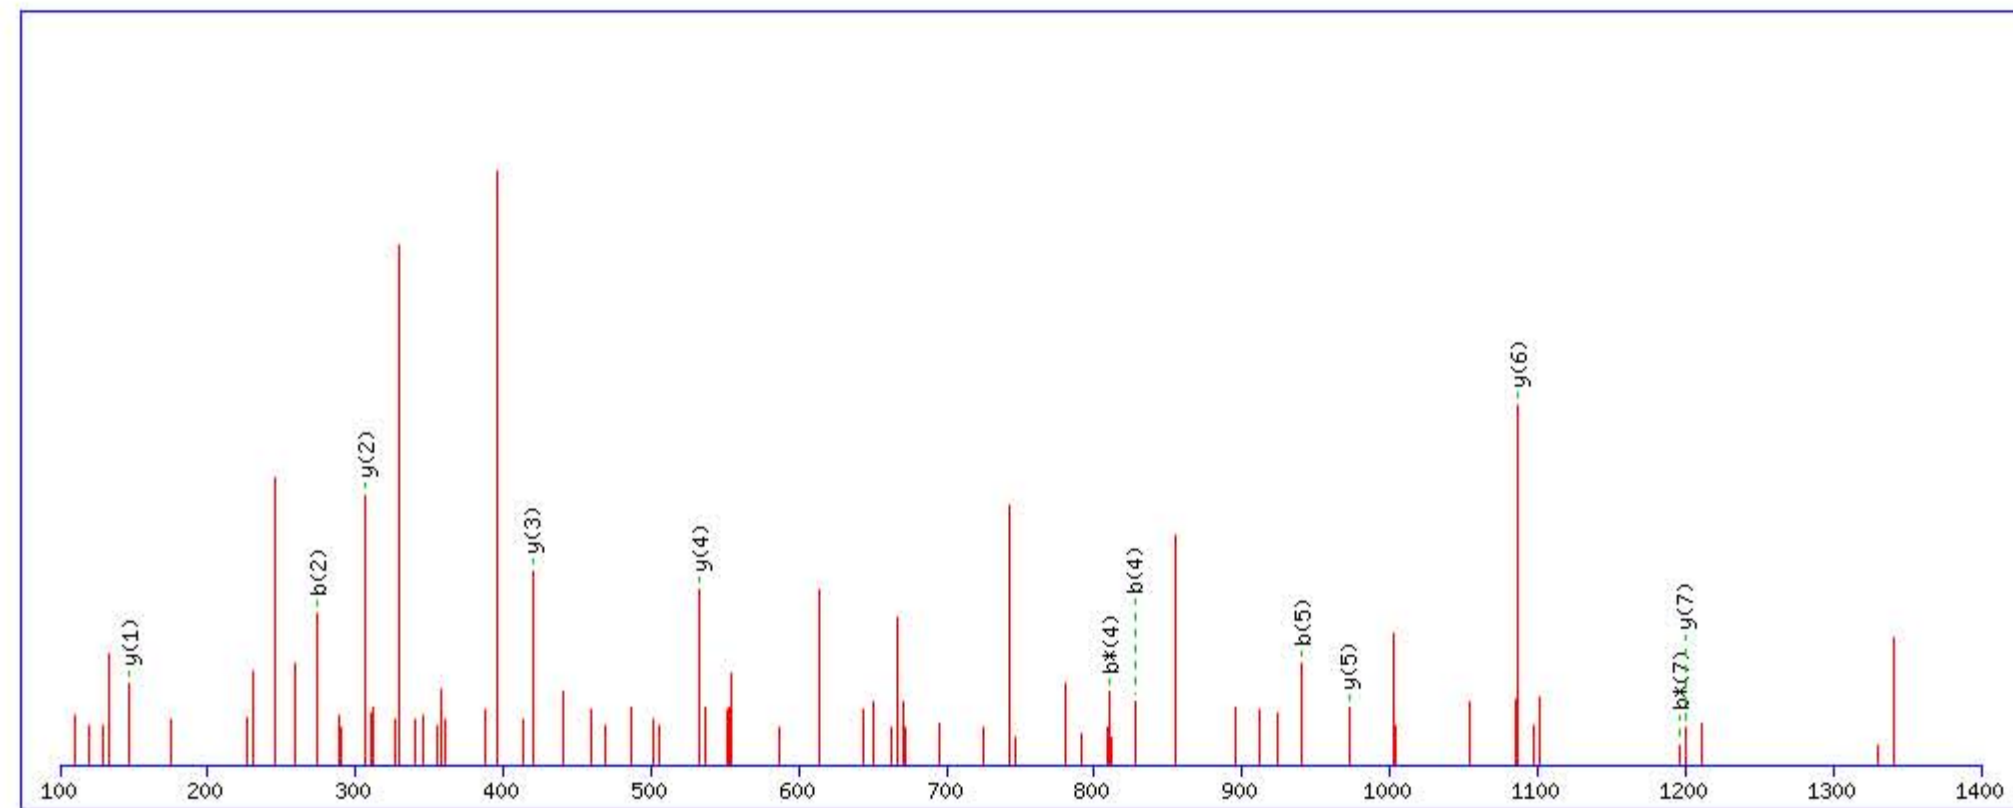

Monoisotopic mass of neutral peptide Mr(calc): 1358.687256

Fixed modifications: Carbamidomethyl (C) (apply to specified residues or termini only)

Variable modifications:

Q4 : Biotin:Thermo-21345 (Q)

Ions Score: 27 Expect: 0.043

Matches : 12/52 fragment ions using 35 most intense peaks [\(help\)](#)

| # | b                 | b <sup>++</sup> | b <sup>*</sup>     | b <sup>*++</sup> | Seq. | y                  | y <sup>++</sup> | y <sup>*</sup> | y <sup>*++</sup> | # |
|---|-------------------|-----------------|--------------------|------------------|------|--------------------|-----------------|----------------|------------------|---|
| 1 | 161.037925        | 81.022600       |                    |                  | C    |                    |                 |                |                  | 8 |
| 2 | <b>274.121989</b> | 137.564632      |                    |                  | I    | <b>1199.663898</b> | 600.335587      | 1182.637349    | 591.822313       | 7 |
| 3 | 388.164916        | 194.586096      | 371.138367         | 186.072822       | N    | <b>1086.579834</b> | 543.793555      | 1069.553285    | 535.280281       | 6 |
| 4 | <b>827.390242</b> | 414.198759      | <b>810.363693</b>  | 405.685485       | Q    | <b>972.536907</b>  | 486.772092      | 955.510358     | 478.258817       | 5 |
| 5 | <b>940.474306</b> | 470.740791      | 923.447757         | 462.227517       | L    | <b>533.311581</b>  | 267.159429      | 516.285032     | 258.646154       | 4 |
| 6 | 1053.558370       | 527.282823      | 1036.531821        | 518.769549       | L    | <b>420.227517</b>  | 210.617396      | 403.200968     | 202.104122       | 3 |
| 7 | 1213.589019       | 607.298148      | <b>1196.562470</b> | 598.784873       | C    | <b>307.143453</b>  | 154.075365      | 290.116904     | 145.562090       | 2 |
| 8 |                   |                 |                    |                  | K    | <b>147.112804</b>  | 74.060040       | 130.086255     | 65.546765        | 1 |

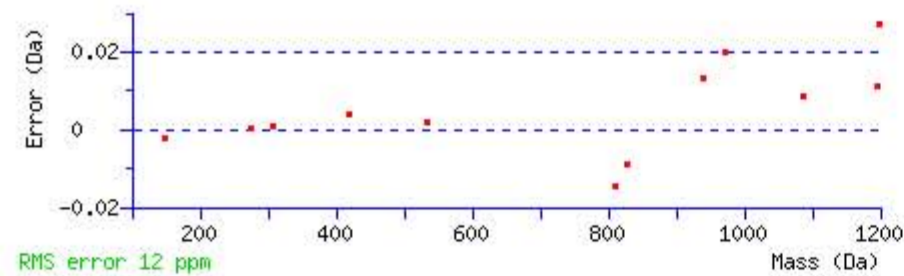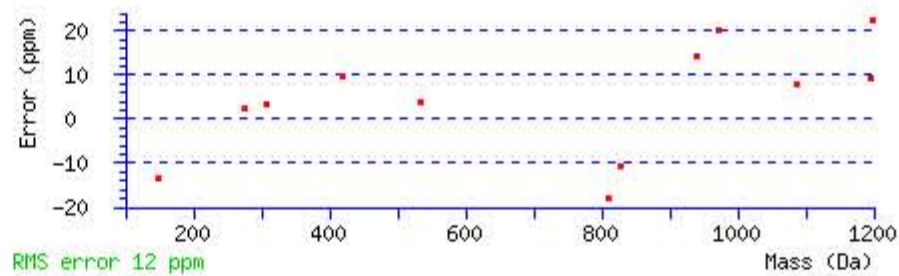

NCBI BLAST search of **CINQLLCK**

(Parameters: blastp, nr protein database, expect=20000, no filter, PAM30)

Other BLAST [web gateways](#)

All matches to this query

| Score | Mr(calc):   | Delta     | Sequence                    |
|-------|-------------|-----------|-----------------------------|
| 27.2  | 1358.687256 | 0.013172  | <a href="#">CINQLLCK</a>    |
| 11.9  | 1358.701645 | -0.001217 | <a href="#">EEVFIQQR</a>    |
| 5.6   | 1358.701645 | -0.001217 | <a href="#">EEVFIQQR</a>    |
| 2.7   | 1358.687744 | 0.012684  | <a href="#">FVKKDGHCNVR</a> |

Mascot: <http://www.matrixscience.com/>



# MASCOT SCIENCE Mascot Search Results

## Peptide View

MS/MS Fragmentation of **HQTVPQNTGGK**

Found in **TRFE\_HUMAN**, Serotransferrin OS=Homo sapiens GN=TF PE=1 SV=3

Match to Query 33219: 1476.747852 from(493.256560,3+) rtinseconds(1192) index(1133)

Title: Locus:1.1.1.1224.7 File:"2013-07-02 CLN FXIII 60 min 2nd F 1.wiff"

Data file C:\Program Files (x86)\Matrix Science\Mascot Daemon\mgf5 FXIII 60 min 2nd\mascot\_daemon\_merge.mgf

Click mouse within plot area to zoom in by factor of two about that point

Or, Plot from  to  Da

Label all possible matches  Label matches used for scoring

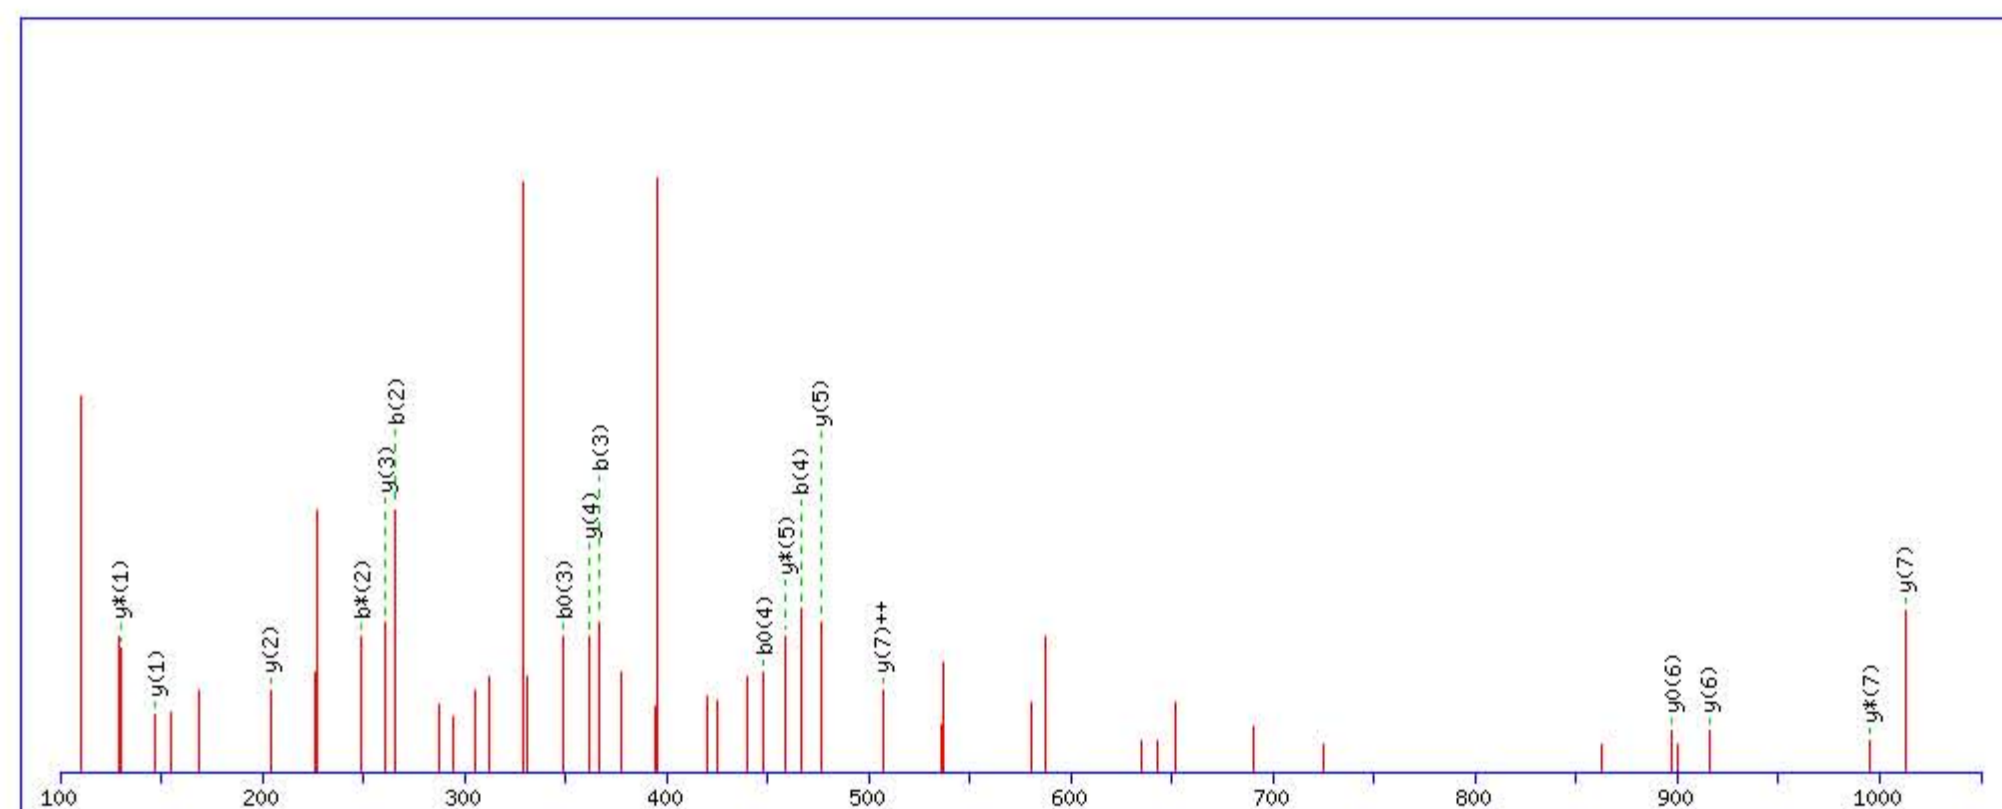

Monoisotopic mass of neutral peptide Mr(calc): 1476.750748

Fixed modifications: Carbamidomethyl (C) (apply to specified residues or termini only)

Variable modifications:

Q6 : Biotin:Thermo-21345 (Q)

Ions Score: 27 Expect: 0.017

Matches : 18/108 fragment ions using 43 most intense peaks [\(help\)](#)

| #  | b                 | b <sup>++</sup> | b <sup>*</sup>    | b <sup>*++</sup> | b <sup>0</sup>    | b <sup>0++</sup> | Seq. | y                  | y <sup>++</sup>   | y <sup>*</sup>    | y <sup>*++</sup> | y <sup>0</sup>    | y <sup>0++</sup> | #  |
|----|-------------------|-----------------|-------------------|------------------|-------------------|------------------|------|--------------------|-------------------|-------------------|------------------|-------------------|------------------|----|
| 1  | 138.066188        | 69.536732       |                   |                  |                   |                  | H    |                    |                   |                   |                  |                   |                  | 11 |
| 2  | <b>266.124766</b> | 133.566021      | <b>249.098217</b> | 125.052746       |                   |                  | Q    | 1340.699099        | 670.853187        | 1323.672550       | 662.339913       | 1322.688534       | 661.847905       | 10 |
| 3  | <b>367.172445</b> | 184.089860      | 350.145896        | 175.576586       | <b>349.161880</b> | 175.084578       | T    | 1212.640521        | 606.823899        | 1195.613972       | 598.310624       | 1194.629956       | 597.818616       | 9  |
| 4  | <b>466.240859</b> | 233.624068      | 449.214310        | 225.110793       | <b>448.230294</b> | 224.618785       | V    | 1111.592842        | 556.300059        | 1094.566293       | 547.786784       | 1093.582277       | 547.294776       | 8  |
| 5  | 563.293623        | 282.150450      | 546.267074        | 273.637175       | 545.283058        | 273.145167       | P    | <b>1012.524428</b> | <b>506.765852</b> | <b>995.497879</b> | 498.252577       | 994.513863        | 497.760569       | 7  |
| 6  | 1002.518949       | 501.763113      | 985.492400        | 493.249838       | 984.508384        | 492.757830       | Q    | <b>915.471664</b>  | 458.239470        | 898.445115        | 449.726195       | <b>897.461099</b> | 449.234187       | 6  |
| 7  | 1116.561876       | 558.784576      | 1099.535327       | 550.271302       | 1098.551311       | 549.779293       | N    | <b>476.246338</b>  | 238.626807        | <b>459.219789</b> | 230.113532       | 458.235773        | 229.621524       | 5  |
| 8  | 1217.609555       | 609.308416      | 1200.583006       | 600.795141       | 1199.598990       | 600.303133       | T    | <b>362.203411</b>  | 181.605343        | 345.176862        | 173.092069       | 344.192846        | 172.600061       | 4  |
| 9  | 1274.631019       | 637.819147      | 1257.604470       | 629.305873       | 1256.620454       | 628.813865       | G    | <b>261.155732</b>  | 131.081504        | 244.129183        | 122.568229       |                   |                  | 3  |
| 10 | 1331.652483       | 666.329879      | 1314.625934       | 657.816605       | 1313.641918       | 657.324597       | G    | <b>204.134268</b>  | 102.570772        | 187.107719        | 94.057497        |                   |                  | 2  |
| 11 |                   |                 |                   |                  |                   |                  | K    | <b>147.112804</b>  | 74.060040         | <b>130.086255</b> | 65.546765        |                   |                  | 1  |

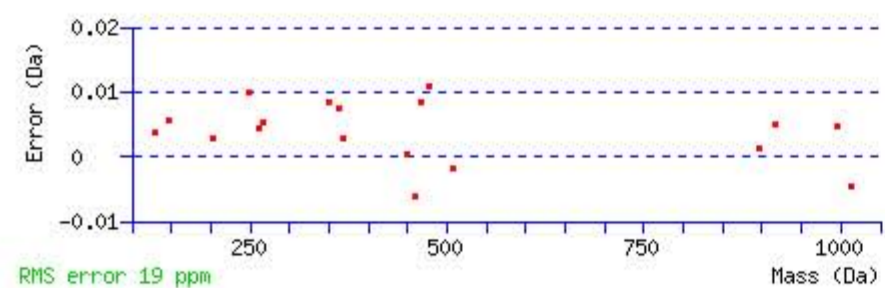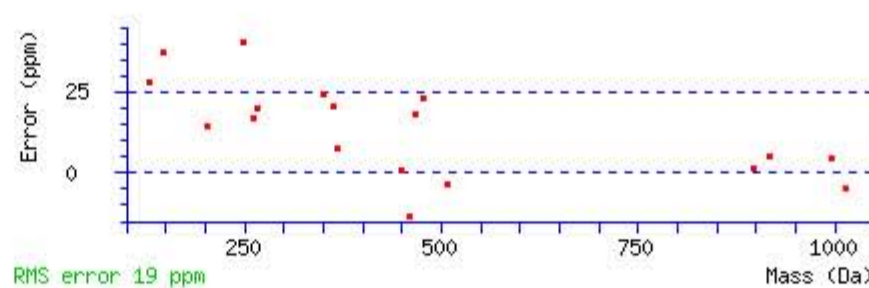

NCBI BLAST search of **HQTVPQNTGGK**

(Parameters: blastp, nr protein database, expect=20000, no filter, PAM30)

Other BLAST [web gateways](#)

All matches to this query

| Score | Mr(calc):   | Delta     | Sequence                      |
|-------|-------------|-----------|-------------------------------|
| 26.7  | 1476.750748 | -0.002896 | <a href="#">HQTVPQNTGGK</a>   |
| 7.7   | 1476.736115 | 0.011737  | <a href="#">HQEALIGQSFYFK</a> |
| 3.5   | 1476.750748 | -0.002896 | <a href="#">HQTVPQNTGGK</a>   |

Mascot: <http://www.matrixscience.com/>



# MASCOT SEARCH RESULTS

## Peptide View

MS/MS Fragmentation of **DSGFQMNQLR**

Found in **TRFE\_HUMAN**, Serotransferrin OS=Homo sapiens GN=TF PE=1 SV=3

Match to Query 34006: 1505.709588 from(753.862070,2+) rtinseconds(2054) index(69133)

Title: Locus:1.1.1.1652.22 File:"2013-07-02 CLN FXIII 60 min 2nd FT.wiff"

Data file C:\Program Files (x86)\Matrix Science\Mascot Daemon\mgf5 FXIII 60 min 2nd\mascot\_daemon\_merge.mgf

Click mouse within plot area to zoom in by factor of two about that point

Or, Plot from  to  Da

Label all possible matches  Label matches used for scoring

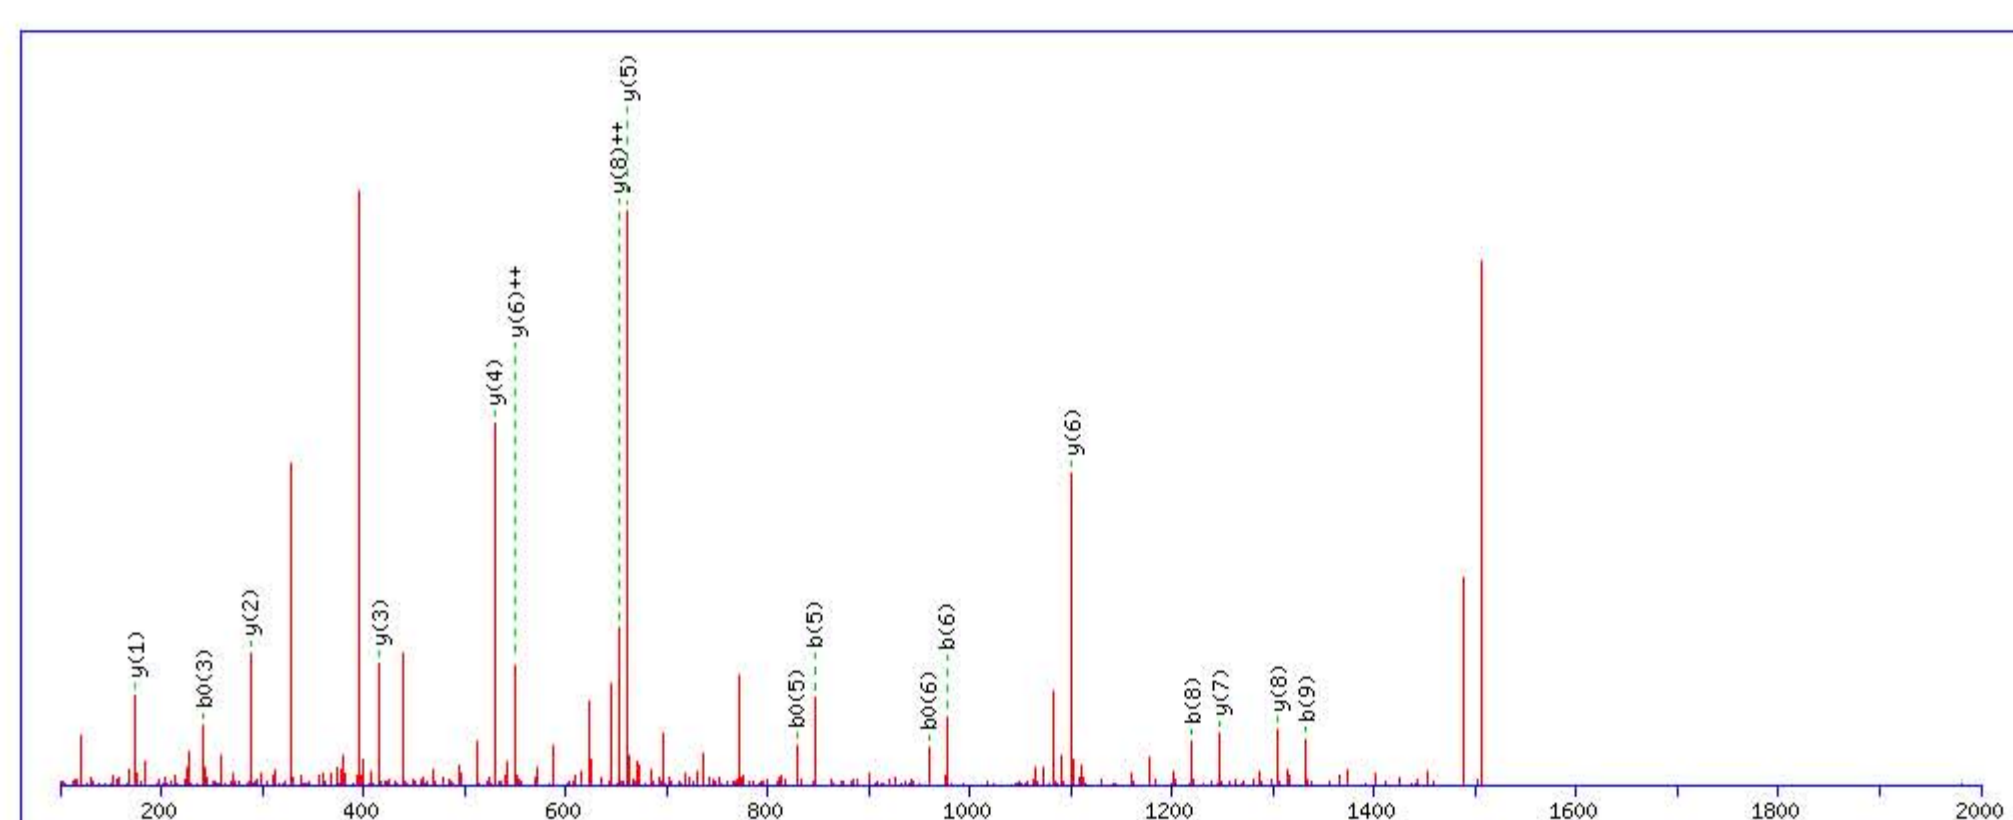

Monoisotopic mass of neutral peptide Mr(calc): 1505.711899

Fixed modifications: Carbamidomethyl (C) (apply to specified residues or termini only)

Variable modifications:

Q5 : Biotin:Thermo-21345 (Q)

Ions Score: 55 Expect: 4.6e-005

Matches : 17/84 fragment ions using 29 most intense peaks [\(help\)](#)

| #  | b           | b <sup>++</sup> | b <sup>*</sup> | b <sup>*++</sup> | b <sup>0</sup> | b <sup>0++</sup> | Seq. | y           | y <sup>++</sup> | y <sup>*</sup> | y <sup>*++</sup> | y <sup>0</sup> | y <sup>0++</sup> | #  |
|----|-------------|-----------------|----------------|------------------|----------------|------------------|------|-------------|-----------------|----------------|------------------|----------------|------------------|----|
| 1  | 116.034219  | 58.520748       |                |                  | 98.023654      | 49.515465        | D    |             |                 |                |                  |                |                  | 10 |
| 2  | 203.066247  | 102.036761      |                |                  | 185.055682     | 93.031479        | S    | 1391.692238 | 696.349757      | 1374.665689    | 687.836482       | 1373.681673    | 687.344474       | 9  |
| 3  | 260.087711  | 130.547493      |                |                  | 242.077146     | 121.542211       | G    | 1304.660210 | 652.833743      | 1287.633661    | 644.320469       |                |                  | 8  |
| 4  | 407.156125  | 204.081700      |                |                  | 389.145560     | 195.076418       | F    | 1247.638746 | 624.323011      | 1230.612197    | 615.809736       |                |                  | 7  |
| 5  | 846.381451  | 423.694364      | 829.354902     | 415.181089       | 828.370886     | 414.689081       | Q    | 1100.570332 | 550.788804      | 1083.543783    | 542.275530       |                |                  | 6  |
| 6  | 977.421936  | 489.214606      | 960.395387     | 480.701331       | 959.411371     | 480.209323       | M    | 661.345006  | 331.176141      | 644.318457     | 322.662867       |                |                  | 5  |
| 7  | 1091.464863 | 546.236069      | 1074.438314    | 537.722795       | 1073.454298    | 537.230787       | N    | 530.304521  | 265.655899      | 513.277972     | 257.142624       |                |                  | 4  |
| 8  | 1219.523441 | 610.265359      | 1202.496892    | 601.752084       | 1201.512876    | 601.260076       | Q    | 416.261594  | 208.634435      | 399.235045     | 200.121160       |                |                  | 3  |
| 9  | 1332.607505 | 666.807391      | 1315.580956    | 658.294116       | 1314.596940    | 657.802108       | L    | 288.203016  | 144.605146      | 271.176467     | 136.091871       |                |                  | 2  |
| 10 |             |                 |                |                  |                |                  | R    | 175.118952  | 88.063114       | 158.092403     | 79.549839        |                |                  | 1  |

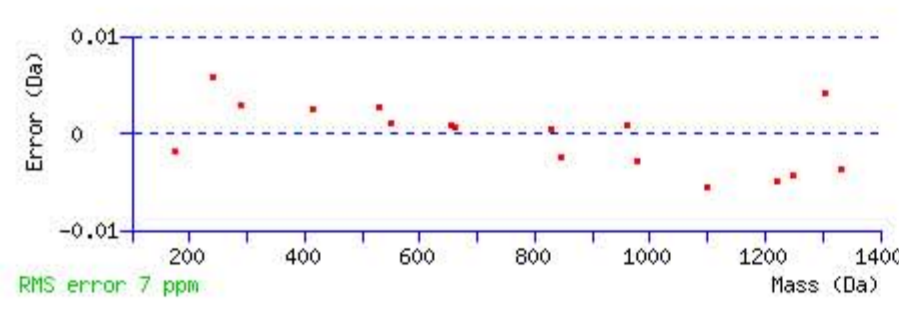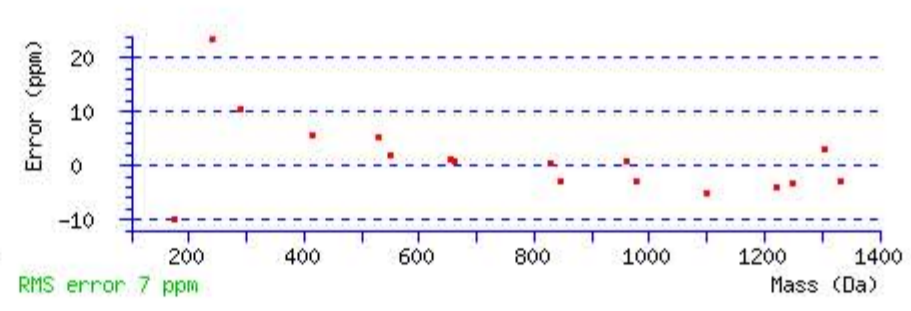

NCBI BLAST search of **DSGFQMNQLR**

(Parameters: blastp, nr protein database, expect=20000, no filter, PAM30)

Other BLAST [web gateways](#)

## All matches to this query

| Score | Mr(calc):   | Delta     | Sequence                     |
|-------|-------------|-----------|------------------------------|
| 55.0  | 1505.711899 | -0.002311 | <a href="#">DSGFQMNQLR</a>   |
| 17.6  | 1505.711899 | -0.002311 | <a href="#">DSGFQMNQLR</a>   |
| 15.0  | 1505.703140 | 0.006448  | <a href="#">DETMEEQDIKLR</a> |
| 7.1   | 1505.704025 | 0.005563  | <a href="#">MQMEIDQLR</a>    |
| 1.0   | 1505.691910 | 0.017678  | <a href="#">MEDLLDLDEELR</a> |



# MASCOT Search Results

## Peptide View

MS/MS Fragmentation of **KDSGFQMNQLR**

Found in **TRFE\_HUMAN**, Serotransferrin OS=Homo sapiens GN=TF PE=1 SV=3

Match to Query 38970: 1633.802428 from(817.908490,2+) rtinseconds(1858) index(67725)

Title: Locus:1.1.1.1584.9 File:"2013-07-02 CLN FXIII 60 min 2nd FT.wiff"

Data file C:\Program Files (x86)\Matrix Science\Mascot Daemon\mgf\5 FXIII 60 min 2nd\mascot\_daemon\_merge.mgf

Click mouse within plot area to zoom in by factor of two about that point

Or, Plot from  to  Da

Label all possible matches  Label matches used for scoring

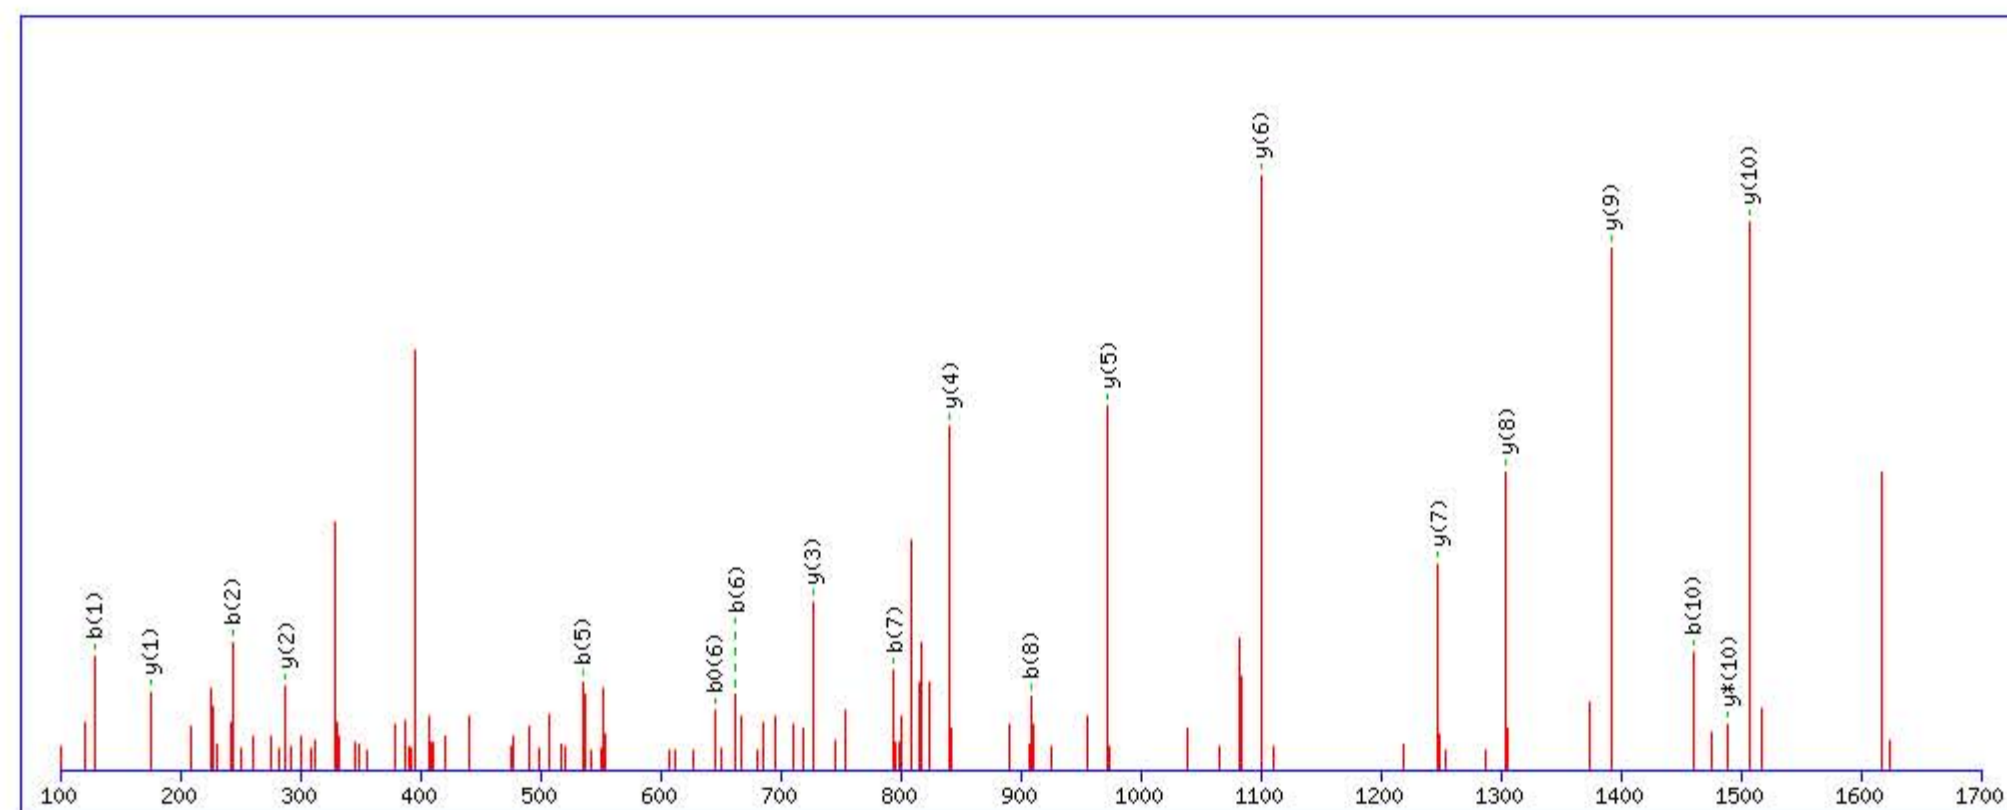

Monoisotopic mass of neutral peptide Mr(calc): 1633.806854

Fixed modifications: Carbamidomethyl (C) (apply to specified residues or termini only)

Variable modifications:

Q9 : Biotin:Thermo-21345 (Q)

Ions Score: 75 Expect: 7e-007

Matches : 19/102 fragment ions using 32 most intense peaks [\(help\)](#)

| #  | b                  | b <sup>++</sup> | b <sup>*</sup> | b <sup>+++</sup> | b <sup>0</sup>    | b <sup>0++</sup> | Seq.     | y                  | y <sup>++</sup> | y <sup>*</sup>     | y <sup>+++</sup> | y <sup>0</sup> | y <sup>0++</sup> | #         |
|----|--------------------|-----------------|----------------|------------------|-------------------|------------------|----------|--------------------|-----------------|--------------------|------------------|----------------|------------------|-----------|
| 1  | <b>129.102239</b>  | 65.054757       | 112.075690     | 56.541483        |                   |                  | <b>K</b> |                    |                 |                    |                  |                |                  | <b>11</b> |
| 2  | <b>244.129182</b>  | 122.568229      | 227.102633     | 114.054955       | 226.118617        | 113.562947       | <b>D</b> | <b>1506.719181</b> | 753.863228      | <b>1489.692632</b> | 745.349954       | 1488.708616    | 744.857946       | <b>10</b> |
| 3  | 331.161210         | 166.084243      | 314.134661     | 157.570969       | 313.150645        | 157.078961       | <b>S</b> | <b>1391.692238</b> | 696.349757      | 1374.665689        | 687.836482       | 1373.681673    | 687.344474       | <b>9</b>  |
| 4  | 388.182674         | 194.594975      | 371.156125     | 186.081701       | 370.172109        | 185.589693       | <b>G</b> | <b>1304.660210</b> | 652.833743      | 1287.633661        | 644.320468       |                |                  | <b>8</b>  |
| 5  | <b>535.251088</b>  | 268.129182      | 518.224539     | 259.615908       | 517.240523        | 259.123900       | <b>F</b> | <b>1247.638746</b> | 624.323011      | 1230.612197        | 615.809736       |                |                  | <b>7</b>  |
| 6  | <b>663.309666</b>  | 332.158471      | 646.283117     | 323.645197       | <b>645.299101</b> | 323.153189       | <b>Q</b> | <b>1100.570332</b> | 550.788804      | 1083.543783        | 542.275530       |                |                  | <b>6</b>  |
| 7  | <b>794.350151</b>  | 397.678714      | 777.323602     | 389.165439       | 776.339586        | 388.673431       | <b>M</b> | <b>972.511754</b>  | 486.759515      | 955.485205         | 478.246240       |                |                  | <b>5</b>  |
| 8  | <b>908.393078</b>  | 454.700177      | 891.366529     | 446.186903       | 890.382513        | 445.694895       | <b>N</b> | <b>841.471269</b>  | 421.239272      | 824.444720         | 412.725998       |                |                  | <b>4</b>  |
| 9  | 1347.618404        | 674.312840      | 1330.591855    | 665.799566       | 1329.607839       | 665.307558       | <b>Q</b> | <b>727.428342</b>  | 364.217809      | 710.401793         | 355.704534       |                |                  | <b>3</b>  |
| 10 | <b>1460.702468</b> | 730.854872      | 1443.675919    | 722.341598       | 1442.691903       | 721.849589       | <b>L</b> | <b>288.203016</b>  | 144.605146      | 271.176467         | 136.091871       |                |                  | <b>2</b>  |
| 11 |                    |                 |                |                  |                   |                  | <b>R</b> | <b>175.118952</b>  | 88.063114       | 158.092403         | 79.549839        |                |                  | <b>1</b>  |

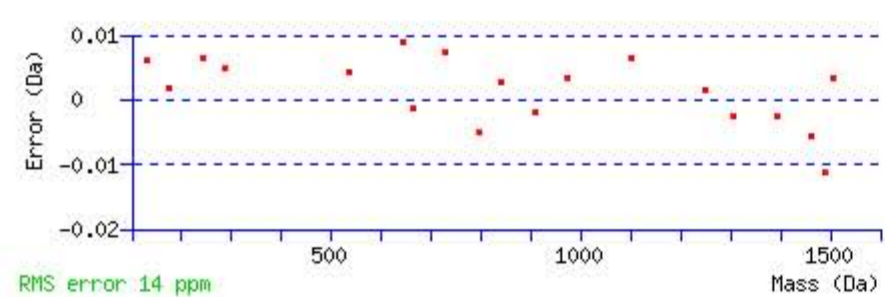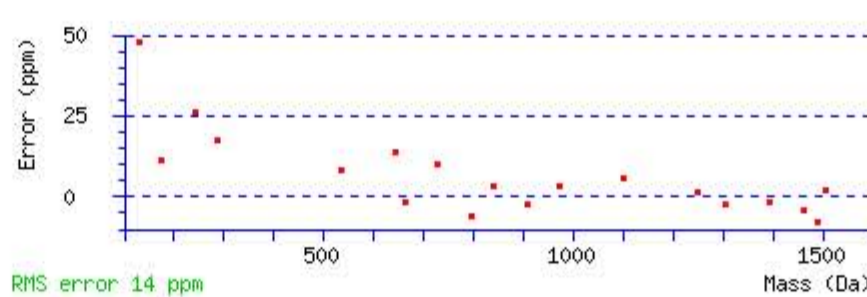

NCBI BLAST search of **KDSGFQMNQLR**

(Parameters: blastp, nr protein database, expect=20000, no filter, PAM30)

Other BLAST [web gateways](#)

### All matches to this query

| Score | Mr(calc):   | Delta     | Sequence                      |
|-------|-------------|-----------|-------------------------------|
| 74.9  | 1633.806854 | -0.004426 | <a href="#">KDSGFQMNQLR</a>   |
| 30.9  | 1633.806854 | -0.004426 | <a href="#">KDSGFQMNQLR</a>   |
| 13.7  | 1633.822128 | -0.019700 | <a href="#">QFMKGQVSWGR</a>   |
| 11.2  | 1633.798096 | 0.004332  | <a href="#">QDQEKDNMIEKLK</a> |
| 9.3   | 1633.795609 | 0.006819  | <a href="#">KFMEDEQQLR</a>    |
| 8.7   | 1633.799454 | 0.002974  | <a href="#">DANSFKSRDQR</a>   |
| 8.1   | 1633.810699 | -0.008271 | <a href="#">DQTIRIWSCSRGR</a> |
| 5.5   | 1633.784180 | 0.018248  | <a href="#">QEESVQKQAMRR</a>  |
| 3.6   | 1633.803482 | -0.001054 | <a href="#">QLFERDWSSR</a>    |
| 2.6   | 1633.795609 | 0.006819  | <a href="#">KFMEDEQQLR</a>    |



# MASCOT Search Results

## Peptide View

MS/MS Fragmentation of **HQTVPQNTGGK**

Found in **TRFE\_HUMAN**, Serotransferrin OS=Homo sapiens GN=TF PE=1 SV=3

Match to Query 42493: 1787.913972 from(596.978600,3+) rtinseconds(1583) index(66373)

Title: Locus:1.1.1.1488.13 File:"2013-07-02 CLN FXIII 60 min 2nd FT.wiff"

Data file C:\Program Files (x86)\Matrix Science\Mascot Daemon\mgf5 FXIII 60 min 2nd\mascot\_daemon\_merge.mgf

Click mouse within plot area to zoom in by factor of two about that point

Or, Plot from  to  Da

Label all possible matches  Label matches used for scoring

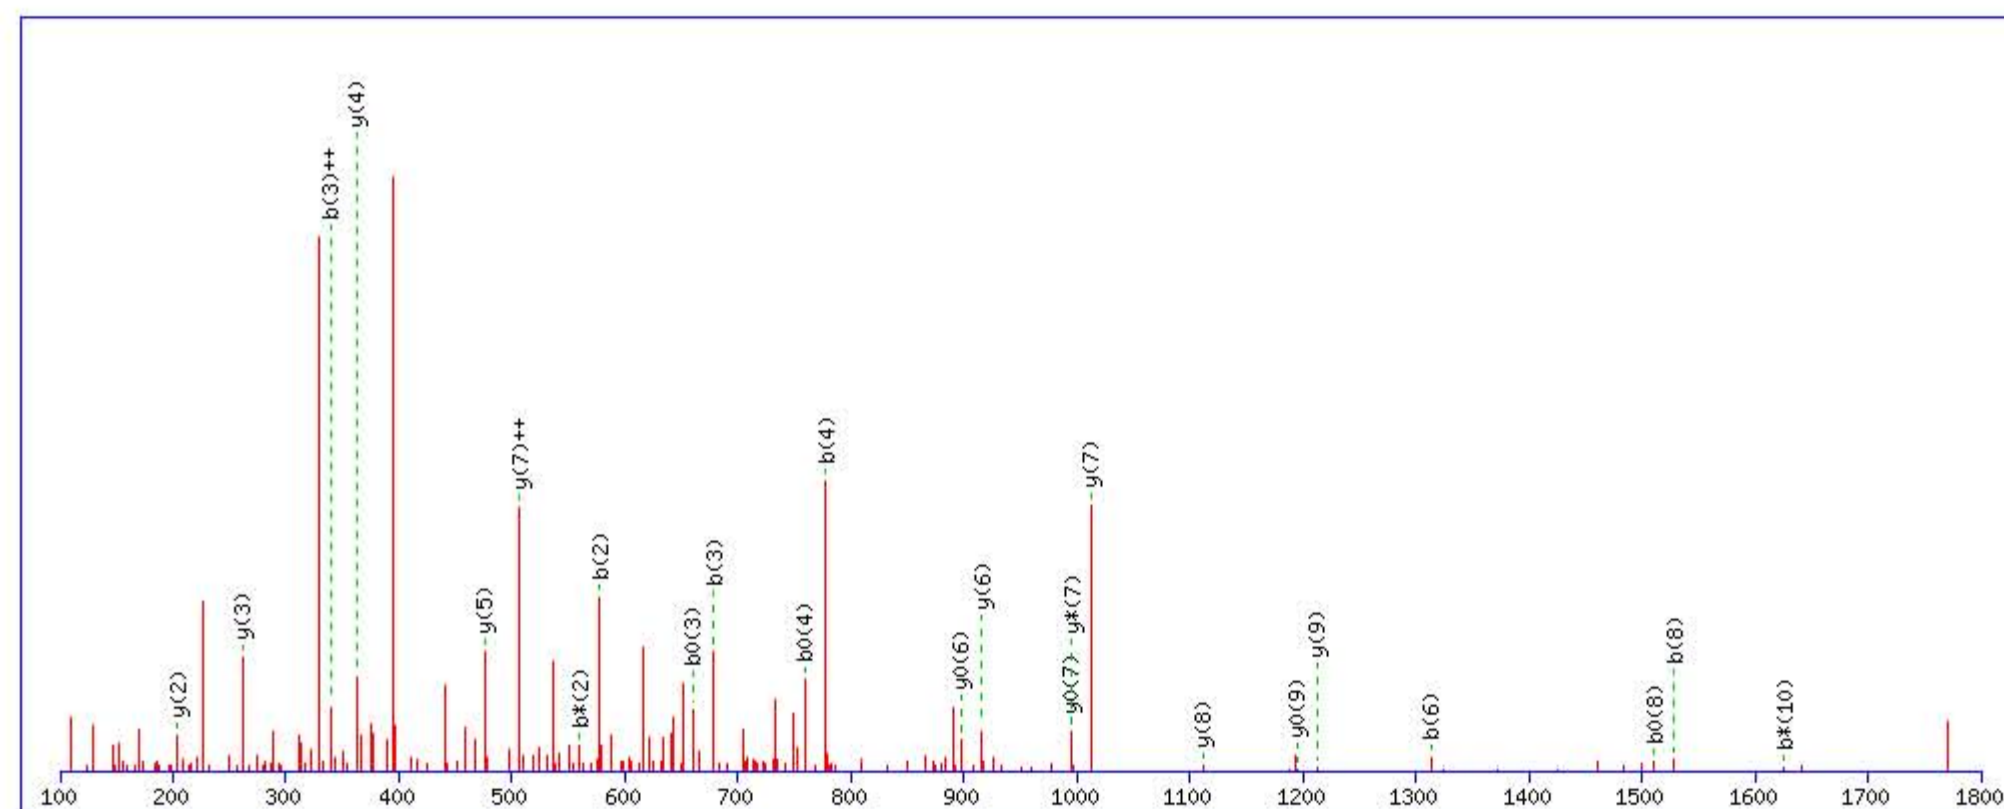

Monoisotopic mass of neutral peptide Mr(calc): 1787.917496

Fixed modifications: Carbamidomethyl (C) (apply to specified residues or termini only)

Variable modifications:

Q2 : Biotin:Thermo-21345 (Q)

Q6 : Biotin:Thermo-21345 (Q)

Ions Score: 28 Expect: 0.0057

Matches : 24/108 fragment ions using 57 most intense peaks [\(help\)](#)

| #  | b                  | b <sup>++</sup>   | b <sup>+</sup>     | b <sup>+++</sup> | b <sup>0</sup>     | b <sup>0++</sup> | Seq. | y                  | y <sup>++</sup>   | y <sup>+</sup>    | y <sup>+++</sup> | y <sup>0</sup>     | y <sup>0++</sup> | #  |
|----|--------------------|-------------------|--------------------|------------------|--------------------|------------------|------|--------------------|-------------------|-------------------|------------------|--------------------|------------------|----|
| 1  | 138.066188         | 69.536732         |                    |                  |                    |                  | H    |                    |                   |                   |                  |                    |                  | 11 |
| 2  | <b>577.291514</b>  | 289.149395        | <b>560.264965</b>  | 280.636121       |                    |                  | Q    | 1651.865847        | 826.436562        | 1634.839298       | 817.923287       | 1633.855282        | 817.431279       | 10 |
| 3  | <b>678.339193</b>  | <b>339.673235</b> | 661.312644         | 331.159960       | <b>660.328628</b>  | 330.667952       | T    | <b>1212.640521</b> | 606.823899        | 1195.613972       | 598.310624       | <b>1194.629956</b> | 597.818616       | 9  |
| 4  | <b>777.407607</b>  | 389.207442        | 760.381058         | 380.694167       | <b>759.397042</b>  | 380.202159       | V    | <b>1111.592842</b> | 556.300059        | 1094.566293       | 547.786785       | 1093.582277        | 547.294777       | 8  |
| 5  | 874.460371         | 437.733824        | 857.433822         | 429.220549       | 856.449806         | 428.728541       | P    | <b>1012.524428</b> | <b>506.765852</b> | <b>995.497879</b> | 498.252578       | <b>994.513863</b>  | 497.760570       | 7  |
| 6  | <b>1313.685697</b> | 657.346487        | 1296.659148        | 648.833212       | 1295.675132        | 648.341204       | Q    | <b>915.471664</b>  | 458.239470        | 898.445115        | 449.726196       | <b>897.461099</b>  | 449.234188       | 6  |
| 7  | 1427.728624        | 714.367950        | 1410.702075        | 705.854676       | 1409.718059        | 705.362668       | N    | <b>476.246338</b>  | 238.626807        | 459.219789        | 230.113532       | 458.235773         | 229.621524       | 5  |
| 8  | <b>1528.776303</b> | 764.891790        | 1511.749754        | 756.378515       | <b>1510.765738</b> | 755.886507       | T    | <b>362.203411</b>  | 181.605343        | 345.176862        | 173.092069       | 344.192846         | 172.600061       | 4  |
| 9  | 1585.797767        | 793.402522        | 1568.771218        | 784.889247       | 1567.787202        | 784.397239       | G    | <b>261.155732</b>  | 131.081504        | 244.129183        | 122.568229       |                    |                  | 3  |
| 10 | 1642.819231        | 821.913254        | <b>1625.792682</b> | 813.399979       | 1624.808666        | 812.907971       | G    | <b>204.134268</b>  | 102.570772        | 187.107719        | 94.057497        |                    |                  | 2  |
| 11 |                    |                   |                    |                  |                    |                  | K    | 147.112804         | 74.060040         | 130.086255        | 65.546765        |                    |                  | 1  |

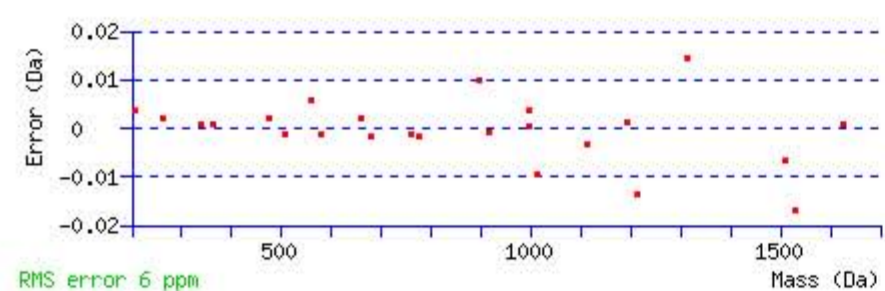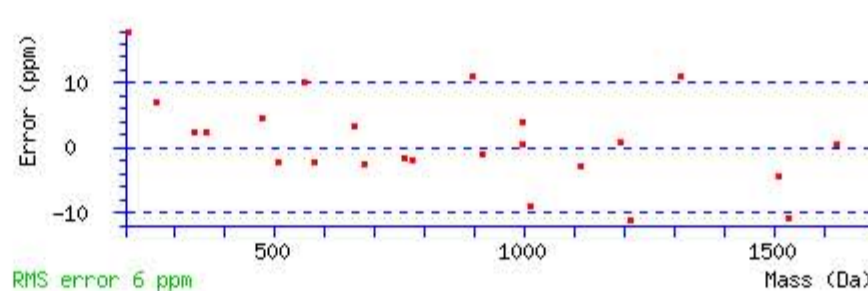

NCBI BLAST search of **HQTVPQNTGGK**

(Parameters: blastp, nr protein database, expect=20000, no filter, PAM30)

Other BLAST [web gateways](#)

All matches to this query

| Score | Mr(calc):   | Delta     | Sequence                          |
|-------|-------------|-----------|-----------------------------------|
| 27.9  | 1787.917496 | -0.003524 | <a href="#">HQTVPQNTGGK</a>       |
| 3.8   | 1787.923996 | -0.010024 | <a href="#">VPLQGFAALEGMNGIQK</a> |
| 2.1   | 1787.925323 | -0.011351 | <a href="#">THRAVLAACSHYFKK</a>   |
| 1.1   | 1787.935211 | -0.021239 | <a href="#">ARAYGPGIEPTGNMVKK</a> |
| 0.5   | 1787.912735 | 0.001237  | <a href="#">FLLEDEKHIQEMLK</a>    |



# MASCOT Search Results

## Peptide View

MS/MS Fragmentation of **SKEFQLFSSPHGK**

Found in **TRFE\_HUMAN**, Serotransferrin OS=Homo sapiens GN=TF PE=1 SV=3

Match to Query 42737: 1801.916862 from(601.646230,3+) rtinseconds(1757) index(67246)

Title: Locus:1.1.1.1549.18 File:"2013-07-02 CLN FXIII 60 min 2nd FT.wiff"

Data file C:\Program Files (x86)\Matrix Science\Mascot Daemon\mgf5 FXIII 60 min 2nd\mascot\_daemon\_merge.mgf

Click mouse within plot area to zoom in by factor of two about that point

Or, Plot from  to  Da

Label all possible matches  Label matches used for scoring

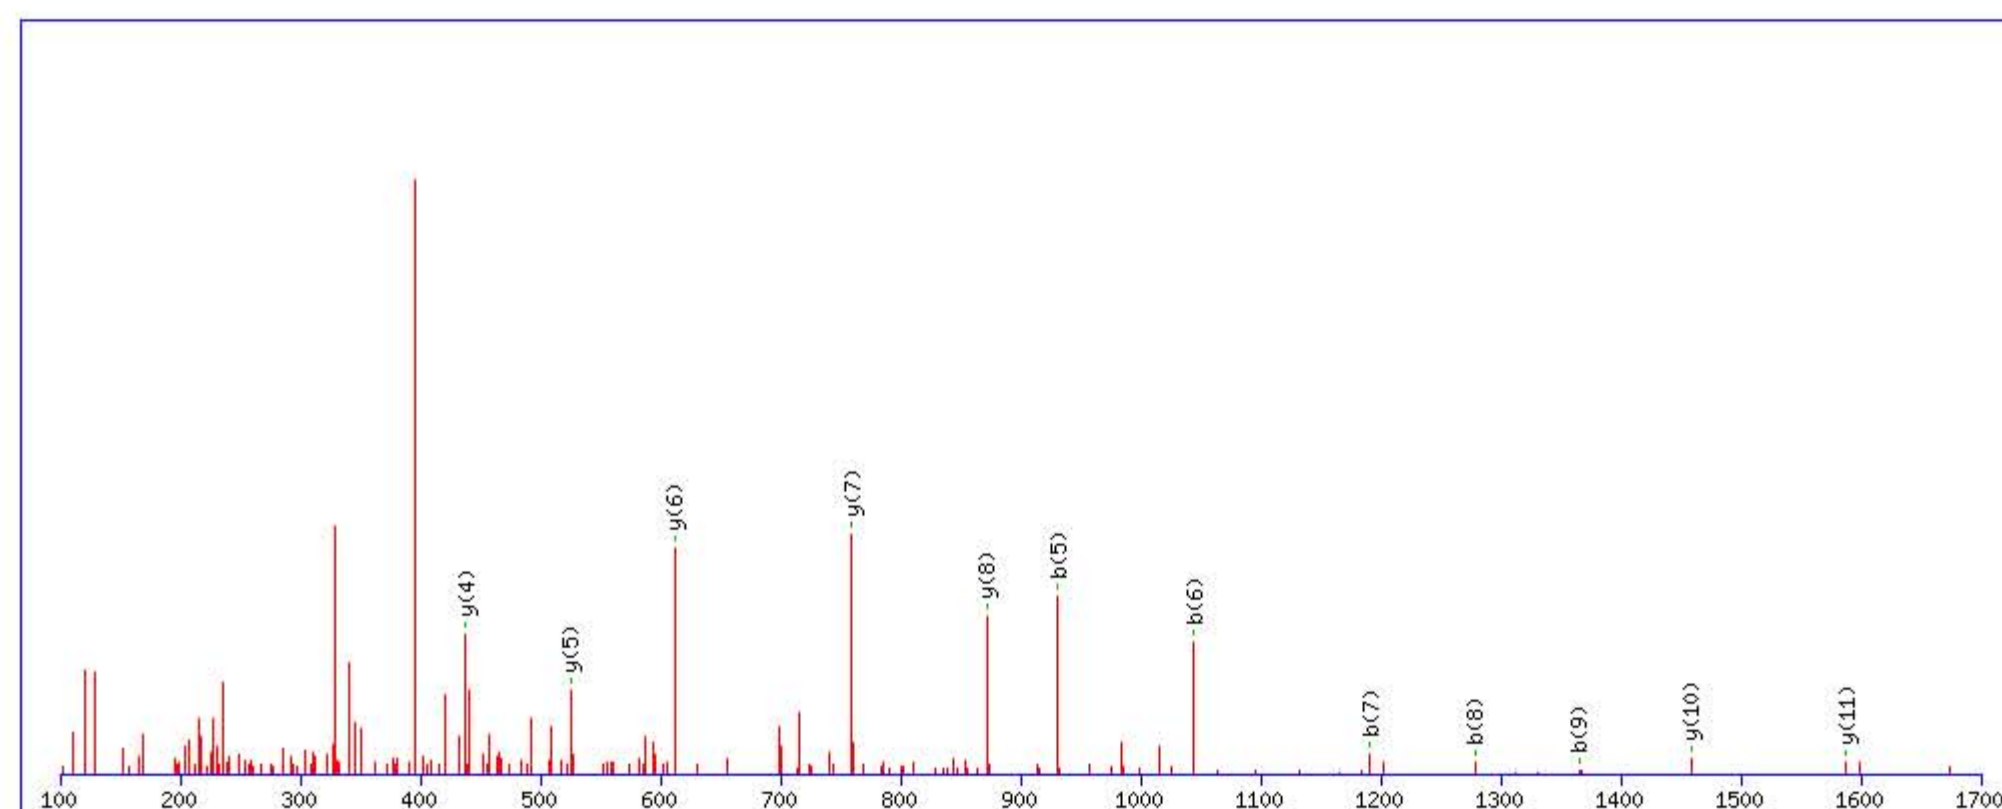

Monoisotopic mass of neutral peptide Mr(calc): 1801.918518

Fixed modifications: Carbamidomethyl (C) (apply to specified residues or termini only)

Variable modifications:

Q5 : Biotin:Thermo-21345 (Q)

Ions Score: 49 Expect: 3.9e-005

Matches : 12/134 fragment ions using 16 most intense peaks [\(help\)](#)

| #  | b                  | b <sup>++</sup> | b <sup>*</sup> | b <sup>*++</sup> | b <sup>0</sup> | b <sup>0++</sup> | Seq. | y                  | y <sup>++</sup> | y <sup>*</sup> | y <sup>*++</sup> | y <sup>0</sup> | y <sup>0++</sup> | #  |
|----|--------------------|-----------------|----------------|------------------|----------------|------------------|------|--------------------|-----------------|----------------|------------------|----------------|------------------|----|
| 1  | 88.039304          | 44.523290       |                |                  | 70.028739      | 35.518008        | S    |                    |                 |                |                  |                |                  | 13 |
| 2  | 216.134267         | 108.570771      | 199.107718     | 100.057497       | 198.123702     | 99.565489        | K    | 1715.893774        | 858.450525      | 1698.867225    | 849.937251       | 1697.883209    | 849.445243       | 12 |
| 3  | 345.176860         | 173.092068      | 328.150311     | 164.578793       | 327.166295     | 164.086785       | E    | <b>1587.798811</b> | 794.403044      | 1570.772262    | 785.889769       | 1569.788246    | 785.397761       | 11 |
| 4  | 492.245274         | 246.626275      | 475.218725     | 238.113000       | 474.234709     | 237.620992       | F    | <b>1458.756218</b> | 729.881747      | 1441.729669    | 721.368473       | 1440.745653    | 720.876465       | 10 |
| 5  | <b>931.470600</b>  | 466.238938      | 914.444051     | 457.725664       | 913.460035     | 457.233656       | Q    | 1311.687804        | 656.347540      | 1294.661255    | 647.834266       | 1293.677239    | 647.342258       | 9  |
| 6  | <b>1044.554664</b> | 522.780970      | 1027.528115    | 514.267696       | 1026.544099    | 513.775688       | L    | <b>872.462478</b>  | 436.734877      | 855.435929     | 428.221603       | 854.451913     | 427.729595       | 8  |
| 7  | <b>1191.623078</b> | 596.315177      | 1174.596529    | 587.801903       | 1173.612513    | 587.309895       | F    | <b>759.378414</b>  | 380.192845      | 742.351865     | 371.679571       | 741.367849     | 371.187563       | 7  |
| 8  | <b>1278.655106</b> | 639.831191      | 1261.628557    | 631.317917       | 1260.644541    | 630.825909       | S    | <b>612.310000</b>  | 306.658638      | 595.283451     | 298.145364       | 594.299435     | 297.653356       | 6  |
| 9  | <b>1365.687134</b> | 683.347205      | 1348.660585    | 674.833931       | 1347.676569    | 674.341923       | S    | <b>525.277972</b>  | 263.142624      | 508.251423     | 254.629350       | 507.267407     | 254.137342       | 5  |
| 10 | 1462.739898        | 731.873587      | 1445.713349    | 723.360313       | 1444.729333    | 722.868305       | P    | <b>438.245944</b>  | 219.626610      | 421.219395     | 211.113335       |                |                  | 4  |
| 11 | 1599.798810        | 800.403043      | 1582.772261    | 791.889769       | 1581.788245    | 791.397761       | H    | 341.193180         | 171.100228      | 324.166631     | 162.586953       |                |                  | 3  |
| 12 | 1656.820274        | 828.913775      | 1639.793725    | 820.400501       | 1638.809709    | 819.908493       | G    | 204.134268         | 102.570772      | 187.107719     | 94.057497        |                |                  | 2  |
| 13 |                    |                 |                |                  |                |                  | K    | 147.112804         | 74.060040       | 130.086255     | 65.546765        |                |                  | 1  |

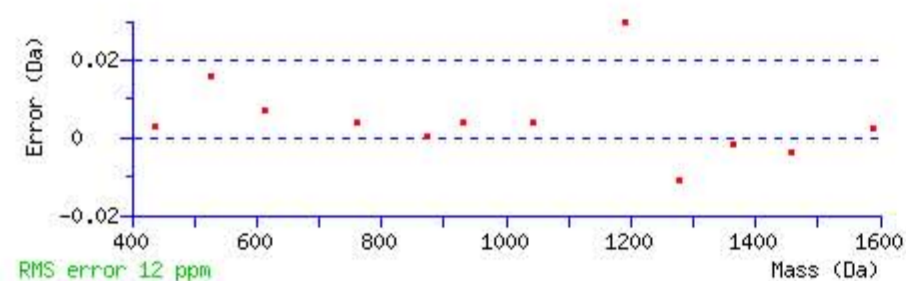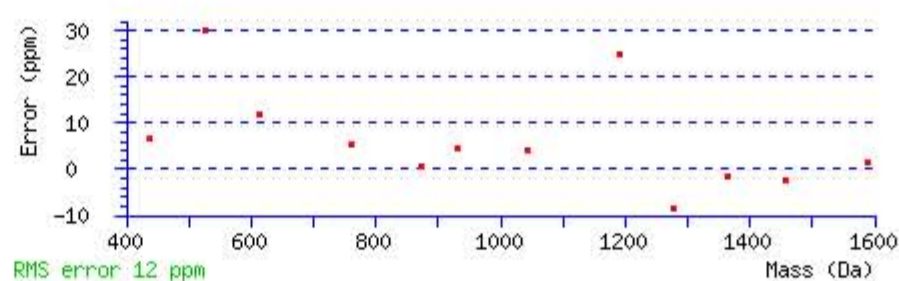

NCBI BLAST search of [SKEFQLFSSPHGK](#)

(Parameters: blastp, nr protein database, expect=20000, no filter, PAM30)

Other BLAST [web gateways](#)

All matches to this query

| Score | Mr(calc):   | Delta     | Sequence                        |
|-------|-------------|-----------|---------------------------------|
| 49.1  | 1801.918518 | -0.001656 | <a href="#">SKEFQLFSSPHGK</a>   |
| 2.1   | 1801.914536 | 0.002326  | <a href="#">QIVMTVVYGVIRYGR</a> |

Mascot: <http://www.matrixscience.com/>



# MASCOT Search Results

## Peptide View

MS/MS Fragmentation of **EDPQTFYYAVAVVK**

Found in **TRFE\_HUMAN**, Serotransferrin OS=Homo sapiens GN=TF PE=1 SV=3

Match to Query 45364: 1939.971748 from(970.993150,2+) rtinseconds(2564) index(71896)

Title: Locus:1.1.1.1830.9 File:"2013-07-02 CLN FXIII 60 min 2nd FT.wiff"

Data file C:\Program Files (x86)\Matrix Science\Mascot Daemon\mgf\5 FXIII 60 min 2nd\mascot\_daemon\_merge.mgf

Click mouse within plot area to zoom in by factor of two about that point

Or, Plot from  to  Da

Label all possible matches  Label matches used for scoring

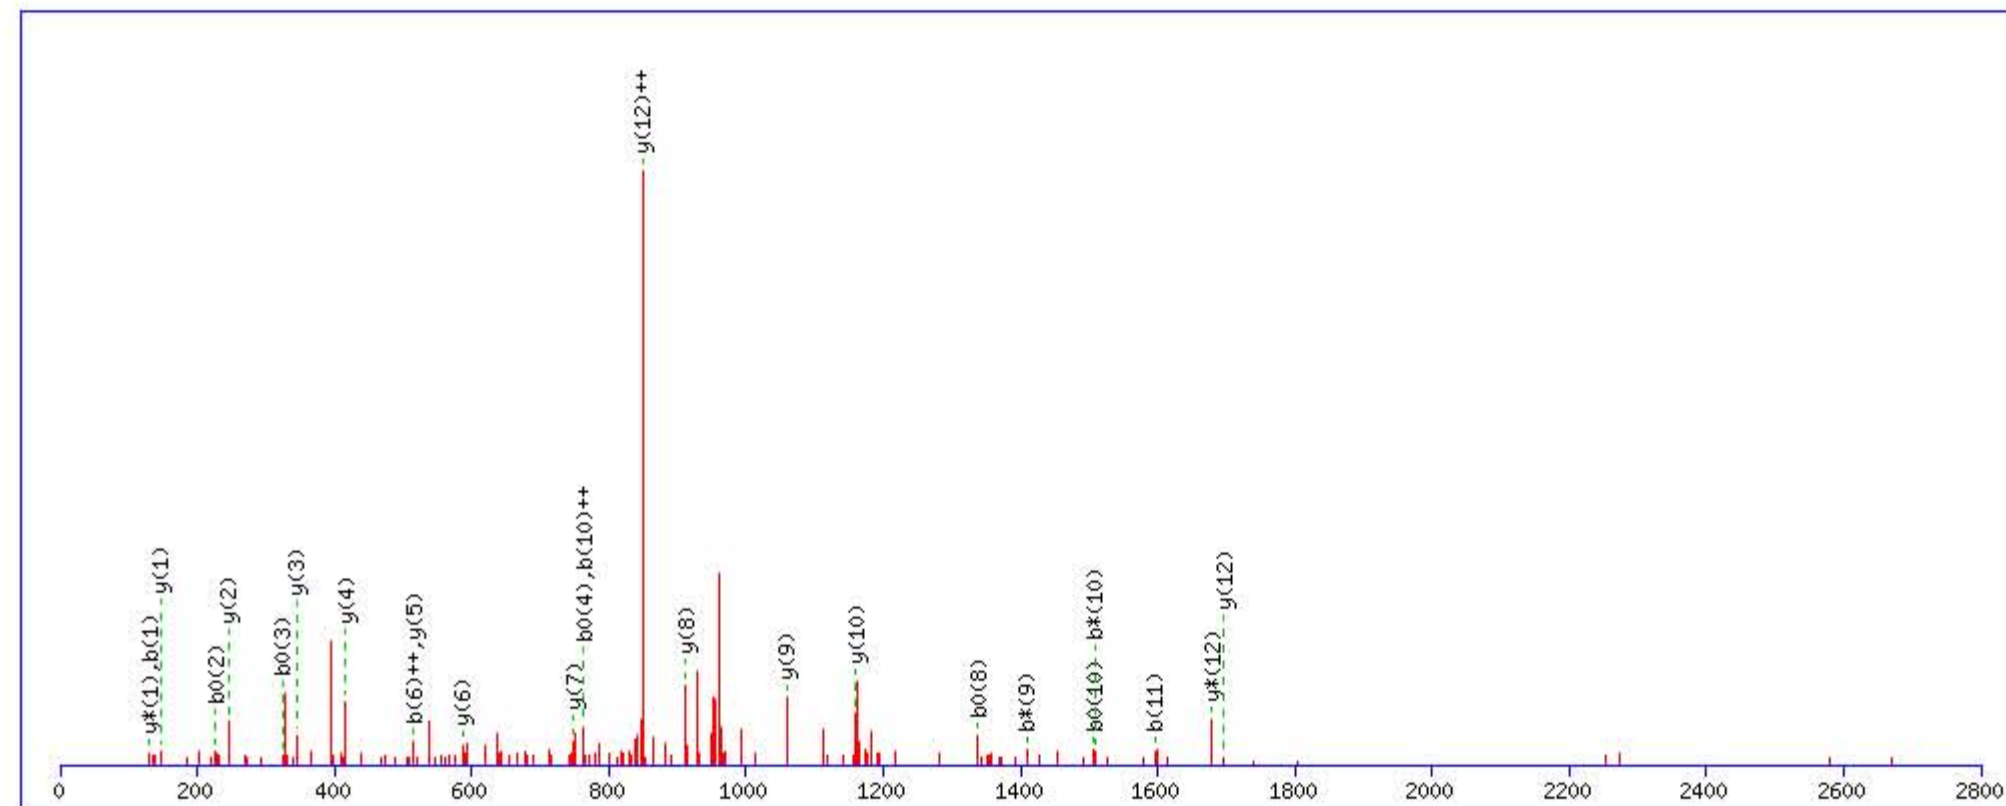

Monoisotopic mass of neutral peptide Mr(calc): 1939.975372

Fixed modifications: Carbamidomethyl (C) (apply to specified residues or termini only)

Variable modifications:

Q4 : Biotin:Thermo-21345 (Q)

Ions Score: 45 Expect: 8.9e-005

Matches : 25/132 fragment ions using 62 most intense peaks [\(help\)](#)

| #  | b           | b <sup>++</sup> | b <sup>+</sup> | b <sup>+++</sup> | b <sup>0</sup> | b <sup>0++</sup> | Seq. | y           | y <sup>++</sup> | y <sup>+</sup> | y <sup>+++</sup> | y <sup>0</sup> | y <sup>0++</sup> | #  |
|----|-------------|-----------------|----------------|------------------|----------------|------------------|------|-------------|-----------------|----------------|------------------|----------------|------------------|----|
| 1  | 130.049869  | 65.528572       |                |                  | 112.039304     | 56.523290        | E    |             |                 |                |                  |                |                  | 14 |
| 2  | 245.076812  | 123.042044      |                |                  | 227.066247     | 114.036762       | D    | 1811.940058 | 906.473667      | 1794.913509    | 897.960393       | 1793.929493    | 897.468385       | 13 |
| 3  | 342.129576  | 171.568426      |                |                  | 324.119011     | 162.563144       | P    | 1696.913115 | 848.960196      | 1679.886566    | 840.446921       | 1678.902550    | 839.954913       | 12 |
| 4  | 781.354902  | 391.181089      | 764.328353     | 382.667815       | 763.344337     | 382.175807       | Q    | 1599.860351 | 800.433814      | 1582.833802    | 791.920539       | 1581.849786    | 791.428531       | 11 |
| 5  | 882.402581  | 441.704929      | 865.376032     | 433.191654       | 864.392016     | 432.699646       | T    | 1160.635025 | 580.821151      | 1143.608476    | 572.307876       | 1142.624460    | 571.815868       | 10 |
| 6  | 1029.470995 | 515.239136      | 1012.444446    | 506.725861       | 1011.460430    | 506.233853       | F    | 1059.587346 | 530.297311      | 1042.560797    | 521.784037       |                |                  | 9  |
| 7  | 1192.534324 | 596.770800      | 1175.507775    | 588.257526       | 1174.523759    | 587.765518       | Y    | 912.518932  | 456.763104      | 895.492383     | 448.249830       |                |                  | 8  |
| 8  | 1355.597653 | 678.302465      | 1338.571104    | 669.789190       | 1337.587088    | 669.297182       | Y    | 749.455603  | 375.231440      | 732.429054     | 366.718165       |                |                  | 7  |
| 9  | 1426.634767 | 713.821022      | 1409.608218    | 705.307747       | 1408.624202    | 704.815739       | A    | 586.392274  | 293.699775      | 569.365725     | 285.186501       |                |                  | 6  |
| 10 | 1525.703181 | 763.355229      | 1508.676632    | 754.841954       | 1507.692616    | 754.349946       | V    | 515.355160  | 258.181218      | 498.328611     | 249.667944       |                |                  | 5  |
| 11 | 1596.740295 | 798.873786      | 1579.713746    | 790.360511       | 1578.729730    | 789.868503       | A    | 416.286746  | 208.647011      | 399.260197     | 200.133737       |                |                  | 4  |
| 12 | 1695.808709 | 848.407993      | 1678.782160    | 839.894718       | 1677.798144    | 839.402710       | V    | 345.249632  | 173.128454      | 328.223083     | 164.615180       |                |                  | 3  |
| 13 | 1794.877123 | 897.942200      | 1777.850574    | 889.428925       | 1776.866558    | 888.936917       | V    | 246.181218  | 123.594247      | 229.154669     | 115.080973       |                |                  | 2  |
| 14 |             |                 |                |                  |                |                  | K    | 147.112804  | 74.060040       | 130.086255     | 65.546765        |                |                  | 1  |

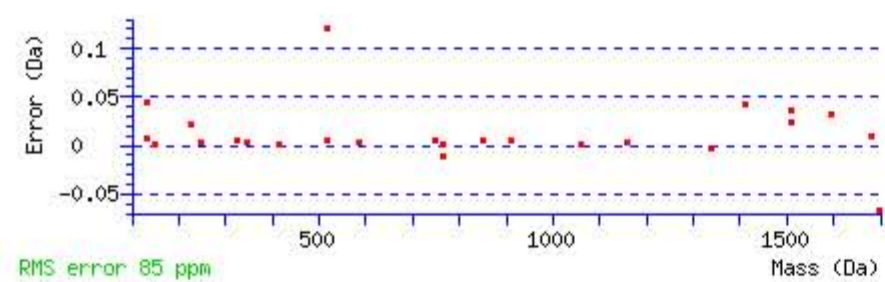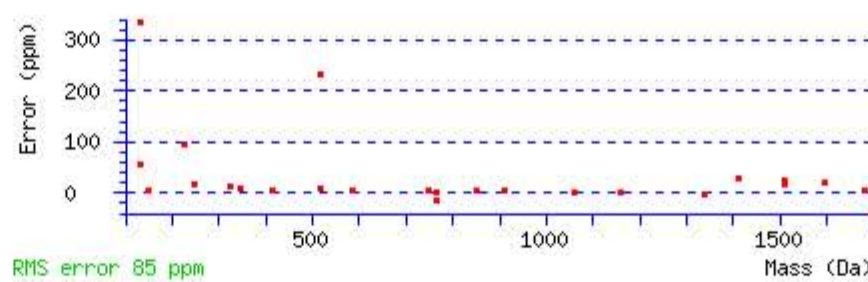

NCBI BLAST search of **EDPQTFYYAVAVVK**

(Parameters: blastp, nr protein database, expect=20000, no filter, PAM30)

Other BLAST [web gateways](#)

All matches to this query

| Score | Mr(calc):   | Delta     | Sequence                           |
|-------|-------------|-----------|------------------------------------|
| 45.2  | 1939.975372 | -0.003624 | <a href="#">EDPQTFYYAVAVVK</a>     |
| 2.0   | 1939.992477 | -0.020729 | <a href="#">TTIYEIQDKTGSMVAVGK</a> |

Mascot: <http://www.matrixscience.com/>



# MASCOT Search Results

## Peptide View

MS/MS Fragmentation of **KDSGFQMNQLR**

Found in **TRFE\_HUMAN**, Serotransferrin OS=Homo sapiens GN=TF PE=1 SV=3

Match to Query 45444: 1944.972162 from(649.331330,3+) rtinseconds(2085) index(69281)

Title: Locus:1.1.1.1663.10 File:"2013-07-02 CLN FXIII 60 min 2nd FT.wiff"

Data file C:\Program Files (x86)\Matrix Science\Mascot Daemon\mgf5 FXIII 60 min 2nd\mascot\_daemon\_merge.mgf

Click mouse within plot area to zoom in by factor of two about that point

Or, Plot from  to  Da

Label all possible matches  Label matches used for scoring

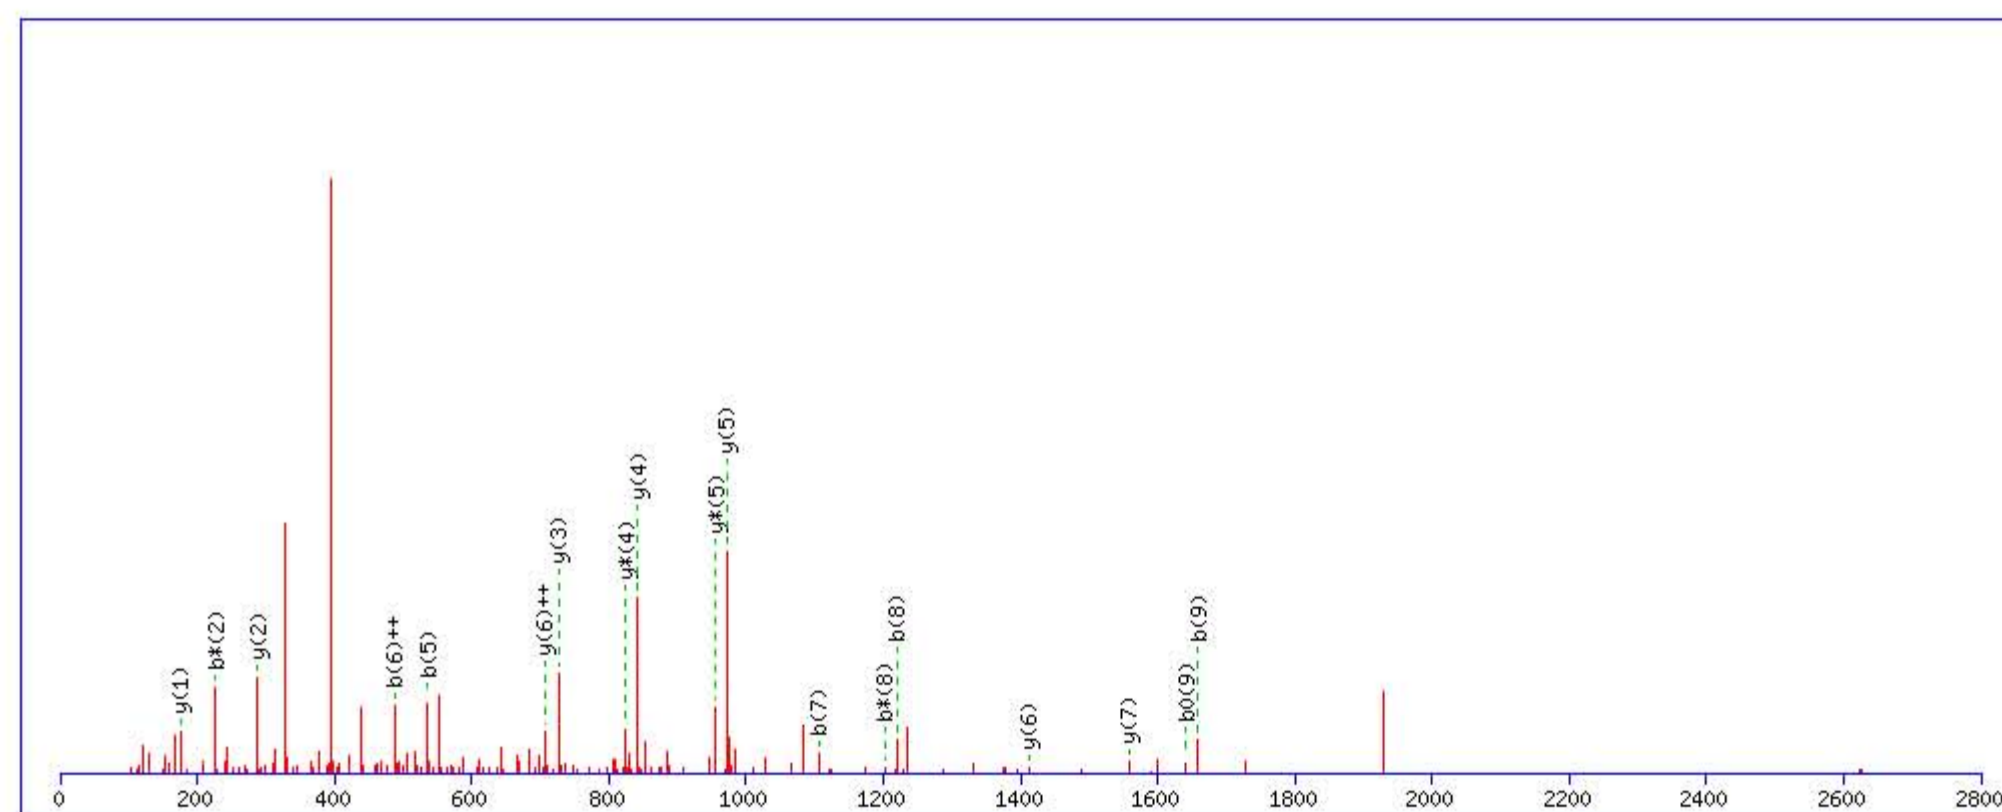

Monoisotopic mass of neutral peptide Mr(calc): 1944.973602

Fixed modifications: Carbamidomethyl (C) (apply to specified residues or termini only)

Variable modifications:

Q6 : Biotin:Thermo-21345 (Q)

Q9 : Biotin:Thermo-21345 (Q)

Ions Score: 30 Expect: 0.025

Matches : 18/102 fragment ions using 34 most intense peaks [\(help\)](#)

| #  | b                  | b <sup>++</sup>   | b <sup>*</sup>     | b <sup>*++</sup> | b <sup>0</sup>     | b <sup>0++</sup> | Seq.     | y                  | y <sup>++</sup>   | y <sup>*</sup>    | y <sup>*++</sup> | y <sup>0</sup> | y <sup>0++</sup> | #  |
|----|--------------------|-------------------|--------------------|------------------|--------------------|------------------|----------|--------------------|-------------------|-------------------|------------------|----------------|------------------|----|
| 1  | 129.102239         | 65.054757         | 112.075690         | 56.541483        |                    |                  | <b>K</b> |                    |                   |                   |                  |                |                  | 11 |
| 2  | 244.129182         | 122.568229        | <b>227.102633</b>  | 114.054955       | 226.118617         | 113.562947       | <b>D</b> | 1817.885929        | 909.446603        | 1800.859380       | 900.933328       | 1799.875364    | 900.441320       | 10 |
| 3  | 331.161210         | 166.084243        | 314.134661         | 157.570969       | 313.150645         | 157.078961       | <b>S</b> | 1702.858986        | 851.933131        | 1685.832437       | 843.419857       | 1684.848421    | 842.927848       | 9  |
| 4  | 388.182674         | 194.594975        | 371.156125         | 186.081701       | 370.172109         | 185.589693       | <b>G</b> | 1615.826958        | 808.417117        | 1598.800409       | 799.903843       |                |                  | 8  |
| 5  | <b>535.251088</b>  | 268.129182        | 518.224539         | 259.615908       | 517.240523         | 259.123900       | <b>F</b> | <b>1558.805494</b> | 779.906385        | 1541.778945       | 771.393111       |                |                  | 7  |
| 6  | 974.476414         | <b>487.741845</b> | 957.449865         | 479.228571       | 956.465849         | 478.736563       | <b>Q</b> | <b>1411.737080</b> | <b>706.372178</b> | 1394.710531       | 697.858904       |                |                  | 6  |
| 7  | <b>1105.516899</b> | 553.262088        | 1088.490350        | 544.748813       | 1087.506334        | 544.256805       | <b>M</b> | <b>972.511754</b>  | 486.759515        | <b>955.485205</b> | 478.246241       |                |                  | 5  |
| 8  | <b>1219.559826</b> | 610.283551        | <b>1202.533277</b> | 601.770277       | 1201.549261        | 601.278268       | <b>N</b> | <b>841.471269</b>  | 421.239273        | <b>824.444720</b> | 412.725998       |                |                  | 4  |
| 9  | <b>1658.785152</b> | 829.896214        | 1641.758603        | 821.382940       | <b>1640.774587</b> | 820.890932       | <b>Q</b> | <b>727.428342</b>  | 364.217809        | 710.401793        | 355.704535       |                |                  | 3  |
| 10 | 1771.869216        | 886.438246        | 1754.842667        | 877.924972       | 1753.858651        | 877.432964       | <b>L</b> | <b>288.203016</b>  | 144.605146        | 271.176467        | 136.091871       |                |                  | 2  |
| 11 |                    |                   |                    |                  |                    |                  | <b>R</b> | <b>175.118952</b>  | 88.063114         | 158.092403        | 79.549839        |                |                  | 1  |

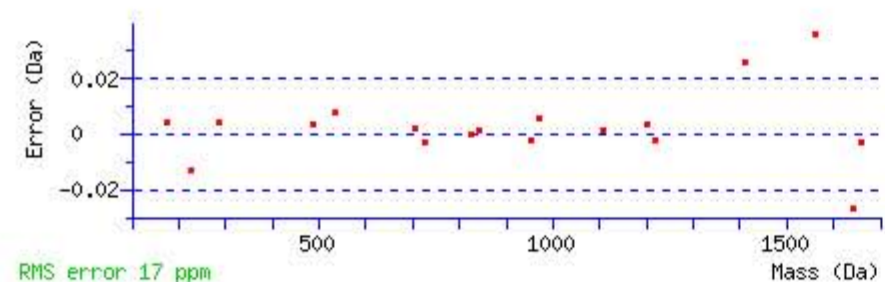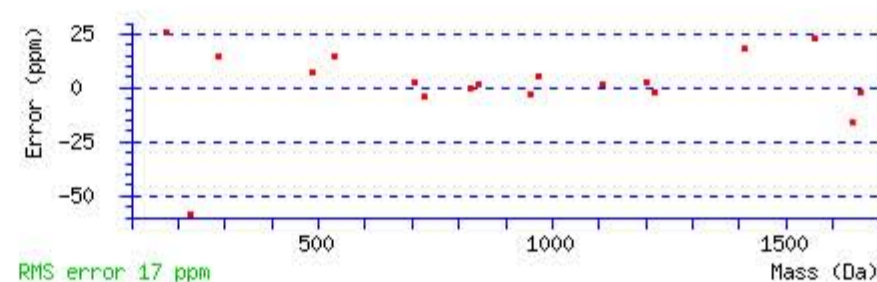

NCBI BLAST search of [KDSGFQMNQLR](#)

(Parameters: blastp, nr protein database, expect=20000, no filter, PAM30)

Other BLAST [web gateways](#)

All matches to this query

| Score | Mr(calc):   | Delta     | Sequence                    |
|-------|-------------|-----------|-----------------------------|
| 30.1  | 1944.973602 | -0.001440 | <a href="#">KDSGFQMNQLR</a> |

Mascot: <http://www.matrixscience.com/>



# MASCOT Search Results

## Peptide View

MS/MS Fragmentation of **ADRDQYELLCLDNTR**

Found in **TRFE\_HUMAN**, Serotransferrin OS=Homo sapiens GN=TF PE=1 SV=3

Match to Query 50929: 2192.037672 from(731.686500,3+) rtinseconds(2208) index(70015)

Title: Locus:1.1.1.1706.12 File:"2013-07-02 CLN FXIII 60 min 2nd FT.wiff"

Data file C:\Program Files (x86)\Matrix Science\Mascot Daemon\mgf5 FXIII 60 min 2nd\mascot\_daemon\_merge.mgf

Click mouse within plot area to zoom in by factor of two about that point

Or, Plot from  to  Da

Label all possible matches  Label matches used for scoring

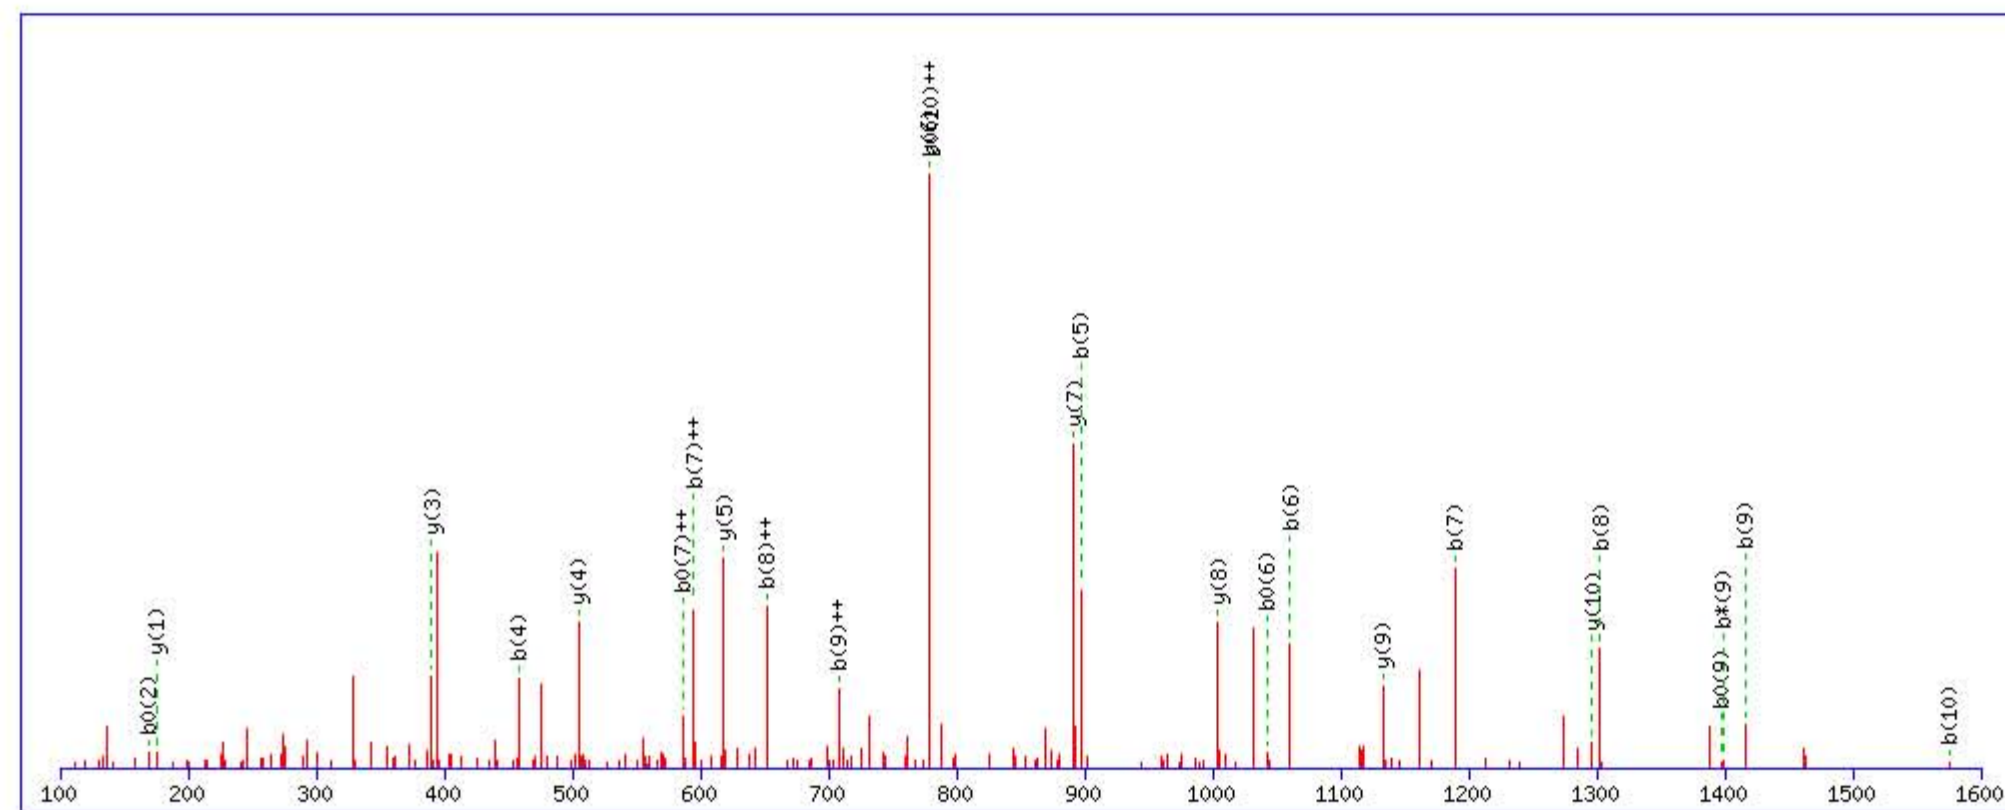

Monoisotopic mass of neutral peptide Mr(calc): 2192.035400

Fixed modifications: Carbamidomethyl (C) (apply to specified residues or termini only)

Variable modifications:

Q5 : Biotin:Thermo-21345 (Q)

Ions Score: 49 Expect: 3.7e-005

Matches : 25/160 fragment ions using 43 most intense peaks [\(help\)](#)

| #  | b           | b <sup>++</sup> | b <sup>*</sup> | b <sup>+++</sup> | b <sup>0</sup> | b <sup>0++</sup> | Seq. | y           | y <sup>++</sup> | y <sup>*</sup> | y <sup>+++</sup> | y <sup>0</sup> | y <sup>0++</sup> | #  |
|----|-------------|-----------------|----------------|------------------|----------------|------------------|------|-------------|-----------------|----------------|------------------|----------------|------------------|----|
| 1  | 72.044390   | 36.525833       |                |                  |                |                  | A    |             |                 |                |                  |                |                  | 15 |
| 2  | 187.071333  | 94.039304       |                |                  | 169.060768     | 85.034022        | D    | 2122.005587 | 1061.506431     | 2104.979038    | 1052.993157      | 2103.995022    | 1052.501149      | 14 |
| 3  | 343.172444  | 172.089860      | 326.145895     | 163.576585       | 325.161879     | 163.084577       | R    | 2006.978644 | 1003.992960     | 1989.952095    | 995.479685       | 1988.968079    | 994.987677       | 13 |
| 4  | 458.199387  | 229.603332      | 441.172838     | 221.090057       | 440.188822     | 220.598049       | D    | 1850.877533 | 925.942404      | 1833.850984    | 917.429130       | 1832.866968    | 916.937122       | 12 |
| 5  | 897.424713  | 449.215995      | 880.398164     | 440.702720       | 879.414148     | 440.210712       | Q    | 1735.850590 | 868.428933      | 1718.824041    | 859.915658       | 1717.840025    | 859.423650       | 11 |
| 6  | 1060.488042 | 530.747659      | 1043.461493    | 522.234385       | 1042.477477    | 521.742376       | Y    | 1296.625264 | 648.816270      | 1279.598715    | 640.302995       | 1278.614699    | 639.810987       | 10 |
| 7  | 1189.530635 | 595.268955      | 1172.504086    | 586.755681       | 1171.520070    | 586.263673       | E    | 1133.561935 | 567.284605      | 1116.535386    | 558.771331       | 1115.551370    | 558.279323       | 9  |
| 8  | 1302.614699 | 651.810987      | 1285.588150    | 643.297713       | 1284.604134    | 642.805705       | L    | 1004.519342 | 502.763309      | 987.492793     | 494.250034       | 986.508777     | 493.758026       | 8  |
| 9  | 1415.698763 | 708.353019      | 1398.672214    | 699.839745       | 1397.688198    | 699.347737       | L    | 891.435278  | 446.221277      | 874.408729     | 437.708002       | 873.424713     | 437.215994       | 7  |
| 10 | 1575.729412 | 788.368344      | 1558.702863    | 779.855069       | 1557.718847    | 779.363061       | C    | 778.351214  | 389.679245      | 761.324665     | 381.165971       | 760.340649     | 380.673963       | 6  |
| 11 | 1688.813476 | 844.910376      | 1671.786927    | 836.397101       | 1670.802911    | 835.905093       | L    | 618.320565  | 309.663921      | 601.294016     | 301.150646       | 600.310000     | 300.658638       | 5  |
| 12 | 1803.840419 | 902.423847      | 1786.813870    | 893.910573       | 1785.829854    | 893.418565       | D    | 505.236501  | 253.121888      | 488.209952     | 244.608614       | 487.225936     | 244.116606       | 4  |
| 13 | 1917.883346 | 959.445311      | 1900.856797    | 950.932036       | 1899.872781    | 950.440028       | N    | 390.209558  | 195.608417      | 373.183009     | 187.095142       | 372.198993     | 186.603134       | 3  |
| 14 | 2018.931025 | 1009.969150     | 2001.904476    | 1001.455876      | 2000.920460    | 1000.963868      | T    | 276.166631  | 138.586953      | 259.140082     | 130.073679       | 258.156066     | 129.581671       | 2  |
| 15 |             |                 |                |                  |                |                  | R    | 175.118952  | 88.063114       | 158.092403     | 79.549839        |                |                  | 1  |

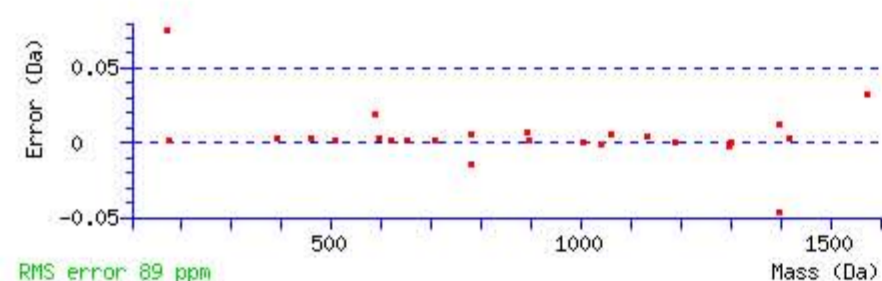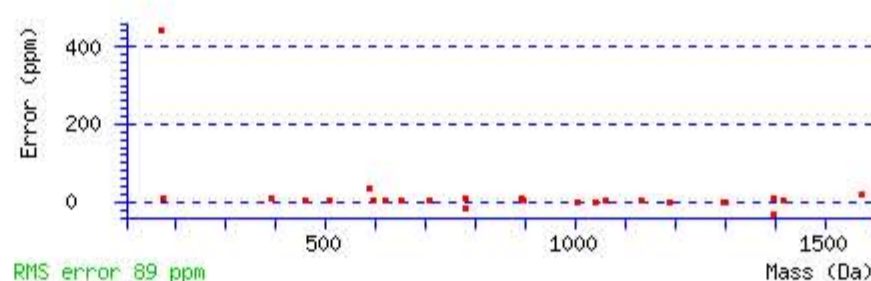

NCBI BLAST search of **ADRDQYELLCLDNTR**

(Parameters: blastp, nr protein database, expect=20000, no filter, PAM30)

Other BLAST [web gateways](#)

All matches to this query

| Score | Mr(calc):   | Delta     | Sequence                          |
|-------|-------------|-----------|-----------------------------------|
| 48.6  | 2192.035400 | 0.002272  | <a href="#">ADRDQYELLCLDNTR</a>   |
| 1.4   | 2192.049973 | -0.012301 | <a href="#">AQEQLGKEMRMNENLVR</a> |

Mascot: <http://www.matrixscience.com/>



**MASCOT** Mascot Search Results

**Peptide View**

MS/MS Fragmentation of **SMGGKEDLIWELLNQAQEHFGK**  
 Found in **TRFE\_HUMAN**, Serotransferrin OS=Homo sapiens GN=TF PE=1 SV=3

Match to Query 59908: 2840.397972 from(947.806600,3+) rtinseconds(2978) index(74988)  
 Title: Locus:1.1.1.1971.6 File:"2013-07-02 CLN FXIII 60 min 2nd FT.wiff"  
 Data file C:\Program Files (x86)\Matrix Science\Mascot Daemon\mgf5 FXIII 60 min 2nd\mascot\_daemon\_merge.mgf

Click mouse within plot area to zoom in by factor of two about that point  
 Or, Plot from  to  Da   
 Label all possible matches  Label matches used for scoring

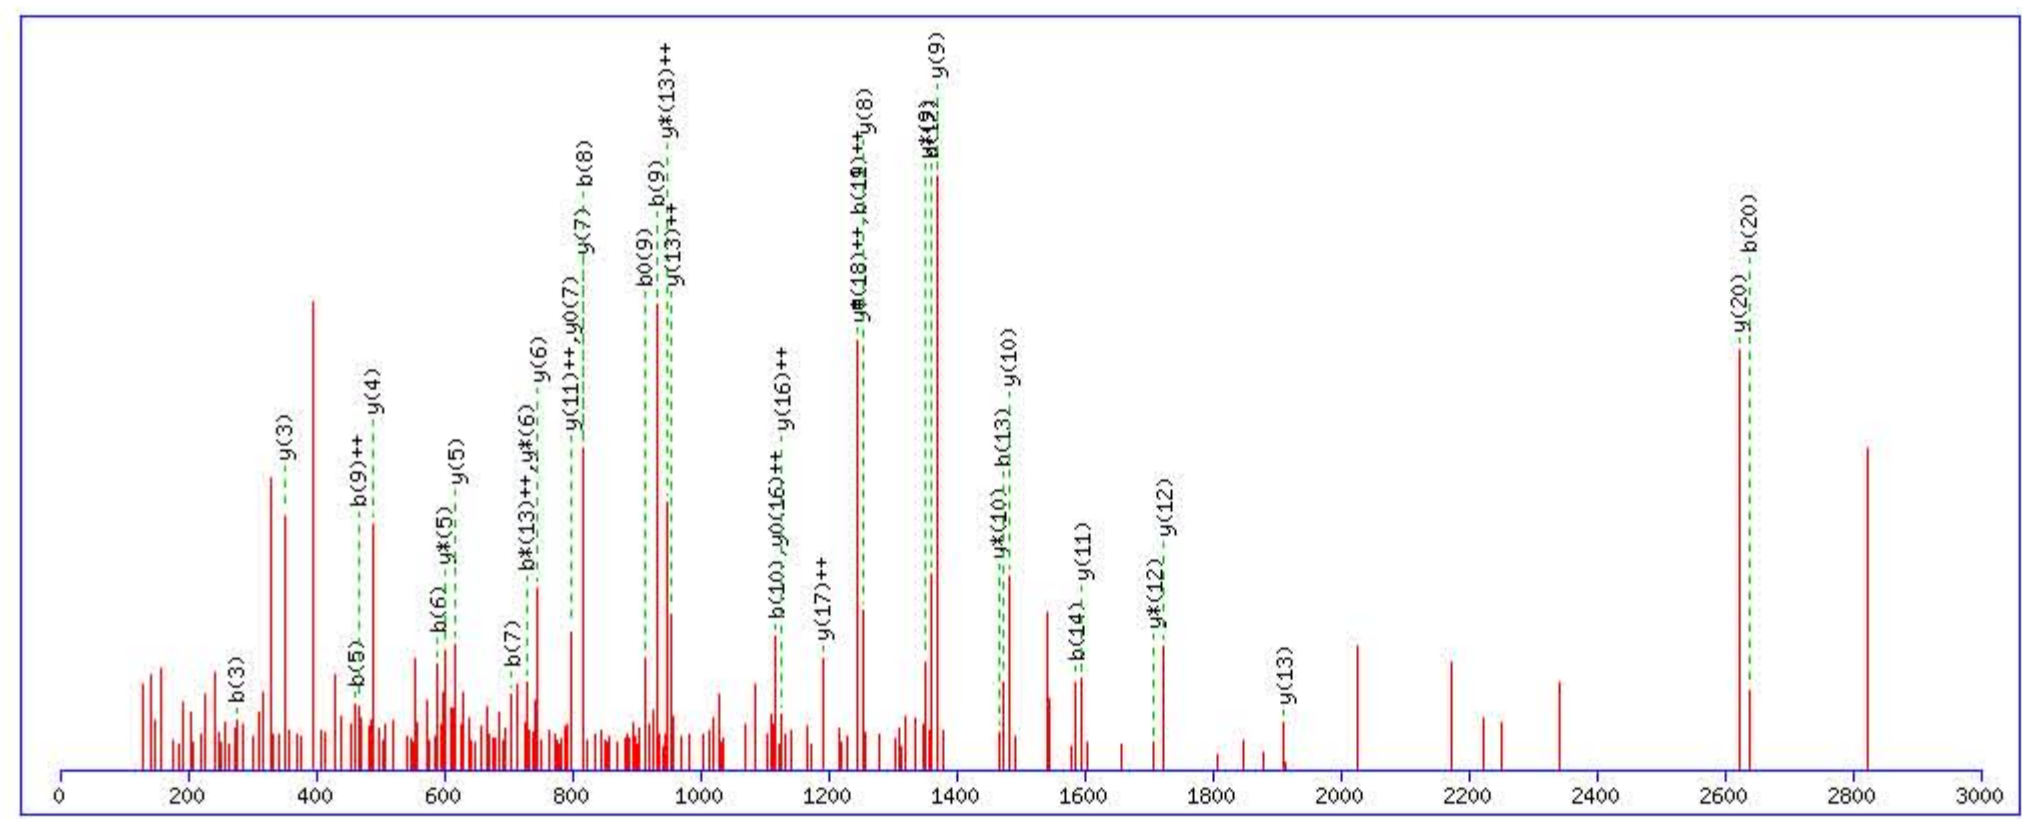



# MASCOT Search Results

## Peptide View

MS/MS Fragmentation of **KPVDEYKDCHLAQVPSHTVVAR**

Found in **TRFE\_HUMAN**, Serotransferrin OS=Homo sapiens GN=TF PE=1 SV=3

Match to Query 60386: 2859.446892 from(954.156240,3+) rtinseconds(1526) index(66017)

Title: Locus:1.1.1.1468.16 File:"2013-07-02 CLN FXIII 60 min 2nd FT.wiff"

Data file C:\Program Files (x86)\Matrix Science\Mascot Daemon\mgf5 FXIII 60 min 2nd\mascot\_daemon\_merge.mgf

Click mouse within plot area to zoom in by factor of two about that point

Or, Plot from  to  Da

Label all possible matches  Label matches used for scoring

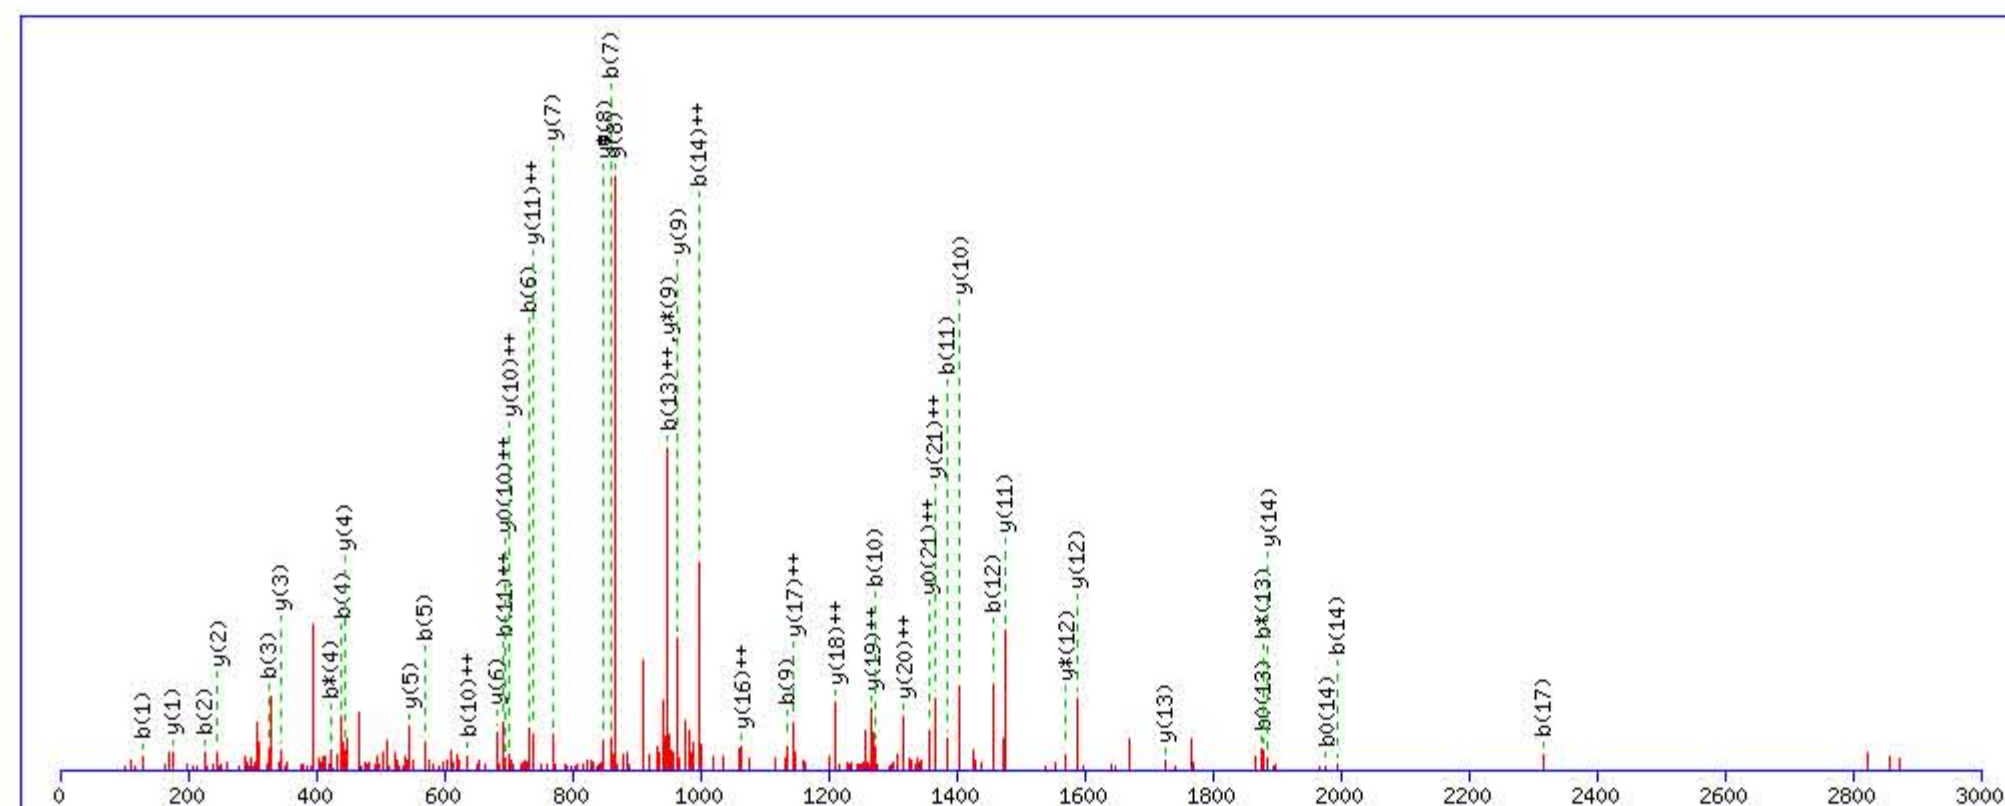

Monoisotopic mass of neutral peptide Mr(calc): 2859.452393

Fixed modifications: Carbamidomethyl (C) (apply to specified residues or termini only)

Variable modifications:

Q13 : Biotin:Thermo-21345 (Q)

Ions Score: 77 Expect: 5.5e-007

Matches : 49/238 fragment ions using 112 most intense peaks [\(help\)](#)

| #  | b                  | b <sup>++</sup>   | b <sup>*</sup>     | b <sup>*++</sup> | b <sup>0</sup>     | b <sup>0++</sup> | Seq.     | y                  | y <sup>++</sup>    | y <sup>*</sup>     | y <sup>*++</sup> | y <sup>0</sup>    | y <sup>0++</sup>   | #         |
|----|--------------------|-------------------|--------------------|------------------|--------------------|------------------|----------|--------------------|--------------------|--------------------|------------------|-------------------|--------------------|-----------|
| 1  | <b>129.102239</b>  | 65.054757         | 112.075690         | 56.541483        |                    |                  | <b>K</b> |                    |                    |                    |                  |                   |                    | <b>22</b> |
| 2  | <b>226.155003</b>  | 113.581139        | 209.128454         | 105.067865       |                    |                  | <b>P</b> | 2732.364705        | <b>1366.685990</b> | 2715.338156        | 1358.172716      | 2714.354140       | <b>1357.680708</b> | <b>21</b> |
| 3  | <b>325.223417</b>  | 163.115346        | 308.196868         | 154.602072       |                    |                  | <b>V</b> | 2635.311941        | <b>1318.159608</b> | 2618.285392        | 1309.646334      | 2617.301376       | 1309.154326        | <b>20</b> |
| 4  | <b>440.250360</b>  | 220.628818        | <b>423.223811</b>  | 212.115544       | 422.239795         | 211.623536       | <b>D</b> | 2536.243527        | <b>1268.625401</b> | 2519.216978        | 1260.112127      | 2518.232962       | 1259.620119        | <b>19</b> |
| 5  | <b>569.292953</b>  | 285.150115        | 552.266404         | 276.636840       | 551.282388         | 276.144832       | <b>E</b> | 2421.216584        | <b>1211.111930</b> | 2404.190035        | 1202.598655      | 2403.206019       | 1202.106647        | <b>18</b> |
| 6  | <b>732.356282</b>  | 366.681779        | 715.329733         | 358.168505       | 714.345717         | 357.676497       | <b>Y</b> | 2292.173991        | <b>1146.590633</b> | 2275.147442        | 1138.077359      | 2274.163426       | 1137.585351        | <b>17</b> |
| 7  | <b>860.451245</b>  | 430.729261        | 843.424696         | 422.215986       | 842.440680         | 421.723978       | <b>K</b> | 2129.110662        | <b>1065.058969</b> | 2112.084113        | 1056.545694      | 2111.100097       | 1056.053686        | <b>16</b> |
| 8  | 975.478188         | 488.242732        | 958.451639         | 479.729458       | 957.467623         | 479.237450       | <b>D</b> | 2001.015699        | 1001.011487        | 1983.989150        | 992.498213       | 1983.005134       | 992.006205         | <b>15</b> |
| 9  | <b>1135.508837</b> | 568.258057        | 1118.482288        | 559.744782       | 1117.498272        | 559.252774       | <b>C</b> | <b>1885.988756</b> | 943.498016         | 1868.962207        | 934.984741       | 1867.978191       | 934.492733         | <b>14</b> |
| 10 | <b>1272.567749</b> | <b>636.787513</b> | 1255.541200        | 628.274238       | 1254.557184        | 627.782230       | <b>H</b> | <b>1725.958107</b> | 863.482691         | 1708.931558        | 854.969417       | 1707.947542       | 854.477409         | <b>13</b> |
| 11 | <b>1385.651813</b> | <b>693.329545</b> | 1368.625264        | 684.816270       | 1367.641248        | 684.324262       | <b>L</b> | <b>1588.899195</b> | 794.953235         | <b>1571.872646</b> | 786.439961       | 1570.888630       | 785.947953         | <b>12</b> |
| 12 | <b>1456.688927</b> | 728.848101        | 1439.662378        | 720.334827       | 1438.678362        | 719.842819       | <b>A</b> | <b>1475.815131</b> | <b>738.411203</b>  | 1458.788582        | 729.897929       | 1457.804566       | 729.405921         | <b>11</b> |
| 13 | 1895.914253        | <b>948.460765</b> | <b>1878.887704</b> | 939.947490       | <b>1877.903688</b> | 939.455482       | <b>Q</b> | <b>1404.778017</b> | <b>702.892646</b>  | 1387.751468        | 694.379372       | 1386.767452       | <b>693.887364</b>  | <b>10</b> |
| 14 | <b>1994.982667</b> | <b>997.994972</b> | 1977.956118        | 989.481697       | <b>1976.972102</b> | 988.989689       | <b>V</b> | <b>965.552691</b>  | 483.279983         | <b>948.526142</b>  | 474.766709       | 947.542126        | 474.274701         | <b>9</b>  |
| 15 | 2092.035431        | 1046.521353       | 2075.008882        | 1038.008079      | 2074.024866        | 1037.516071      | <b>P</b> | <b>866.484277</b>  | 433.745776         | <b>849.457728</b>  | 425.232502       | <b>848.473712</b> | 424.740494         | <b>8</b>  |
| 16 | 2179.067459        | 1090.037367       | 2162.040910        | 1081.524093      | 2161.056894        | 1081.032085      | <b>S</b> | <b>769.431513</b>  | 385.219394         | 752.404964         | 376.706120       | 751.420948        | 376.214112         | <b>7</b>  |
| 17 | <b>2316.126371</b> | 1158.566823       | 2299.099822        | 1150.053549      | 2298.115806        | 1149.561541      | <b>H</b> | <b>682.399485</b>  | 341.703380         | 665.372936         | 333.190106       | 664.388920        | 332.698098         | <b>6</b>  |
| 18 | 2417.174050        | 1209.090663       | 2400.147501        | 1200.577388      | 2399.163485        | 1200.085380      | <b>T</b> | <b>545.340573</b>  | 273.173924         | 528.314024         | 264.660650       | 527.330008        | 264.168642         | <b>5</b>  |
| 19 | 2516.242464        | 1258.624870       | 2499.215915        | 1250.111595      | 2498.231899        | 1249.619587      | <b>V</b> | <b>444.292894</b>  | 222.650085         | 427.266345         | 214.136810       |                   |                    | <b>4</b>  |
| 20 | 2615.310878        | 1308.159077       | 2598.284329        | 1299.645802      | 2597.300313        | 1299.153794      | <b>V</b> | <b>345.224480</b>  | 173.115878         | 328.197931         | 164.602603       |                   |                    | <b>3</b>  |
| 21 | 2686.347992        | 1343.677634       | 2669.321443        | 1335.164359      | 2668.337427        | 1334.672351      | <b>A</b> | <b>246.156066</b>  | 123.581671         | 229.129517         | 115.068397       |                   |                    | <b>2</b>  |
| 22 |                    |                   |                    |                  |                    |                  | <b>R</b> | <b>175.118952</b>  | 88.063114          | 158.092403         | 79.549839        |                   |                    | <b>1</b>  |

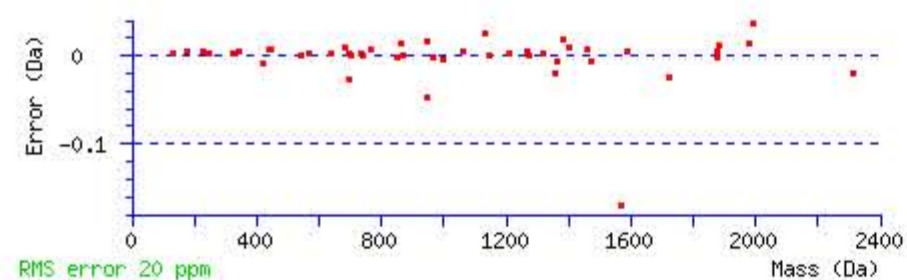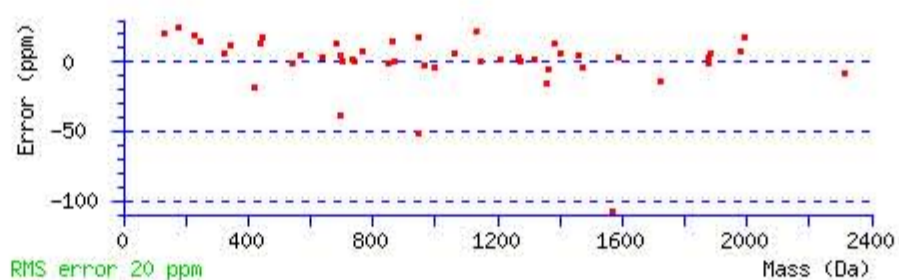

NCBI BLAST search of **KPVDEYKDCHLAQVPSHTVVAR**

(Parameters: blastp, nr protein database, expect=20000, no filter, PAM30)

Other BLAST [web gateways](#)

All matches to this query

| Score | Mr(calc):   | Delta     | Sequence                      |
|-------|-------------|-----------|-------------------------------|
| 77.3  | 2859.452393 | -0.005501 | <b>KPVDEYKDCHLAQVPSHTVVAR</b> |



# **MASCOT** Mascot Search Results

## Peptide View

MS/MS Fragmentation of **FQNALLVR**

Found in **ALBU\_HUMAN**, Serum albumin OS=Homo sapiens GN=ALB PE=1 SV=2

Match to Query 25354: 1270.723948 from(636.369250,2+) rtinseconds(2111) index(6516)

Title: Locus:1.1.1.1544.22 File:"2013-07-02 CLN FXIII 60 min 2nd F 1.wiff"

Data file C:\Program Files (x86)\Matrix Science\Mascot Daemon\mgf5 FXIII 60 min 2nd\mascot\_daemon\_merge.mgf

Click mouse within plot area to zoom in by factor of two about that point

Or, Plot from  to  Da

Label all possible matches  Label matches used for scoring

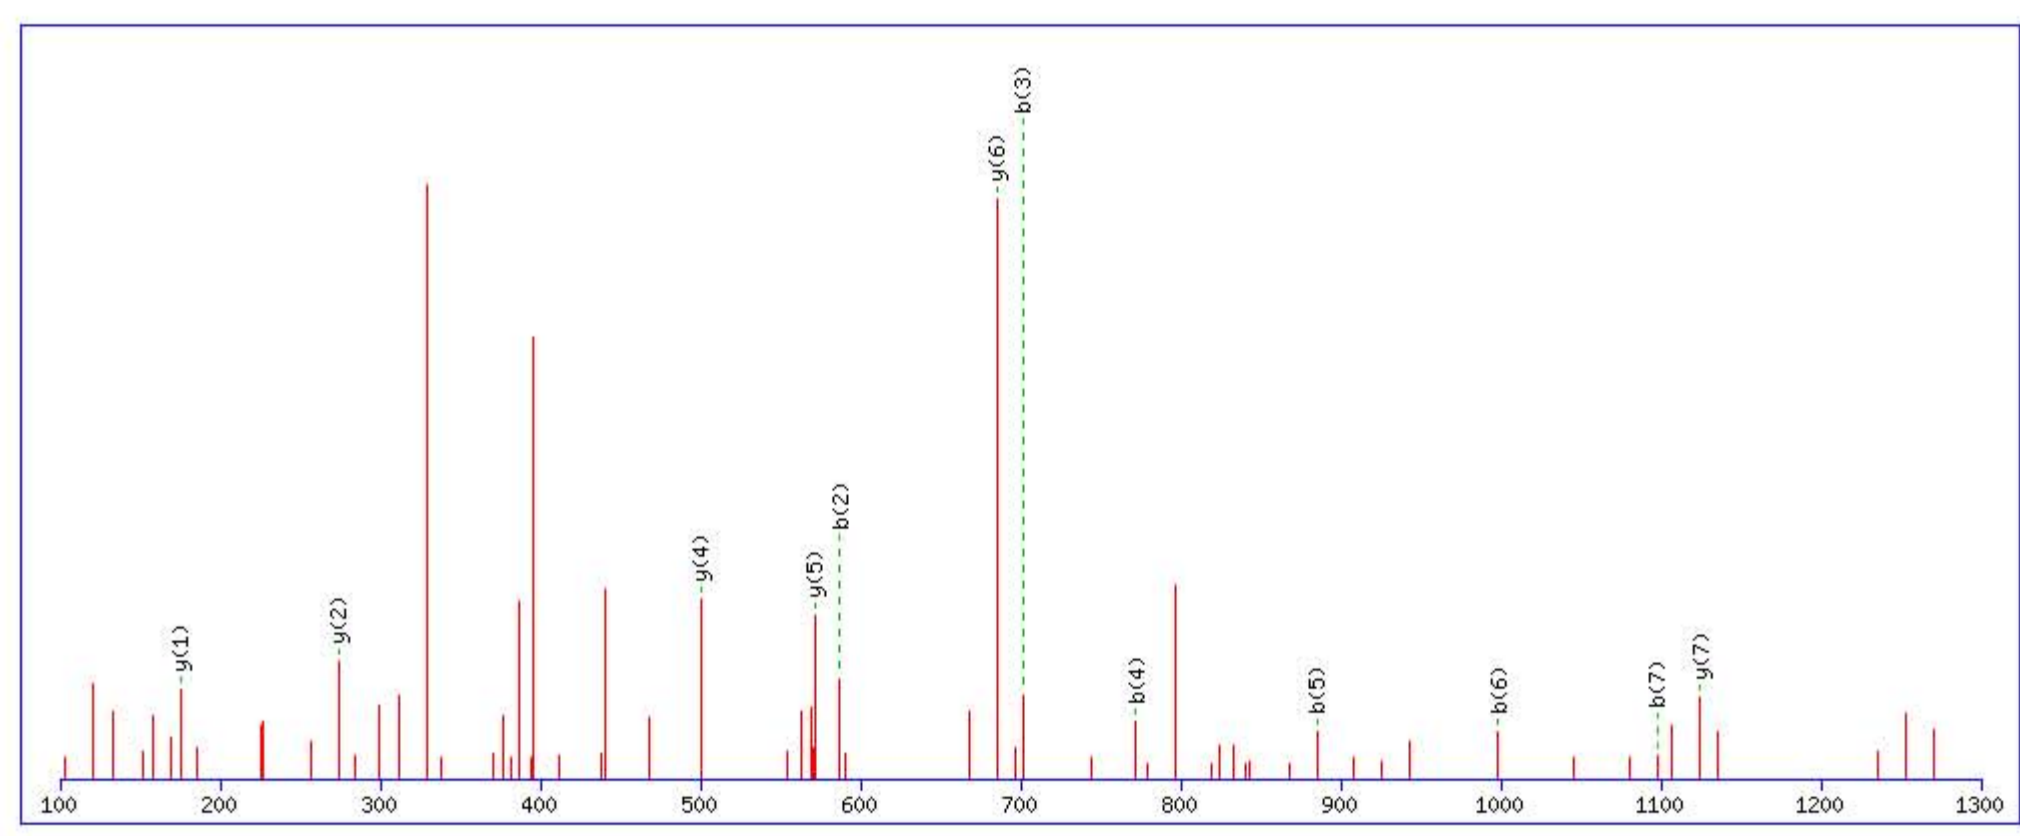

Monoisotopic mass of neutral peptide Mr(calc): 1270.721985

Fixed modifications: Carbamidomethyl (C) (apply to specified residues or termini only)

Variable modifications:

Q2 : Biotin:Thermo-21345 (Q)

Ions Score: 37 Expect: 0.0034

Matches : 12/54 fragment ions using 24 most intense peaks [\(help\)](#)

| # | b                  | b <sup>++</sup> | b <sup>*</sup> | b <sup>*++</sup> | Seq. | y                  | y <sup>++</sup> | y <sup>*</sup> | y <sup>*++</sup> | # |
|---|--------------------|-----------------|----------------|------------------|------|--------------------|-----------------|----------------|------------------|---|
| 1 | 148.075690         | 74.541483       |                |                  | F    |                    |                 |                |                  | 8 |
| 2 | <b>587.301016</b>  | 294.154146      | 570.274467     | 285.640872       | Q    | <b>1124.660861</b> | 562.834068      | 1107.634312    | 554.320794       | 7 |
| 3 | <b>701.343943</b>  | 351.175610      | 684.317394     | 342.662335       | N    | <b>685.435535</b>  | 343.221406      | 668.408986     | 334.708131       | 6 |
| 4 | <b>772.381057</b>  | 386.694166      | 755.354508     | 378.180892       | A    | <b>571.392608</b>  | 286.199942      | 554.366059     | 277.686668       | 5 |
| 5 | <b>885.465121</b>  | 443.236199      | 868.438572     | 434.722924       | L    | <b>500.355494</b>  | 250.681385      | 483.328945     | 242.168110       | 4 |
| 6 | <b>998.549185</b>  | 499.778231      | 981.522636     | 491.264956       | L    | 387.271430         | 194.139353      | 370.244881     | 185.626078       | 3 |
| 7 | <b>1097.617599</b> | 549.312437      | 1080.591050    | 540.799163       | V    | <b>274.187366</b>  | 137.597321      | 257.160817     | 129.084046       | 2 |
| 8 |                    |                 |                |                  | R    | <b>175.118952</b>  | 88.063114       | 158.092403     | 79.549839        | 1 |

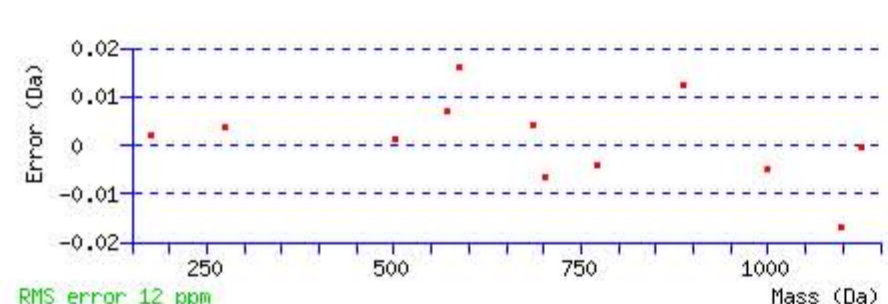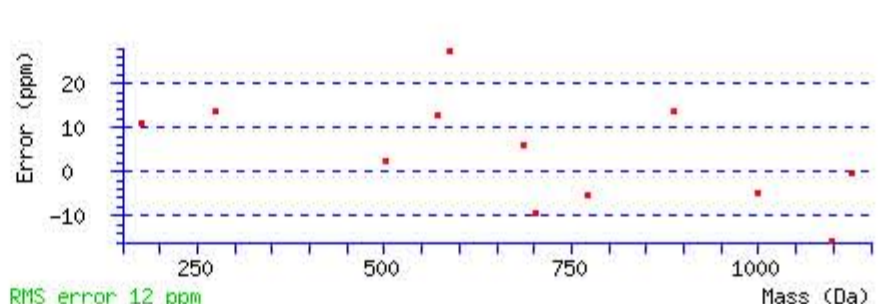

NCBI BLAST search of [FQNALLVR](#)

(Parameters: blastp, nr protein database, expect=20000, no filter, PAM30)

Other BLAST [web gateways](#)

### All matches to this query

| Score | Mr(calc):   | Delta     | Sequence                     |
|-------|-------------|-----------|------------------------------|
| 36.7  | 1270.721985 | 0.001963  | <a href="#">FQNALLVR</a>     |
| 13.3  | 1270.725357 | -0.001409 | <a href="#">QKVMAIVR</a>     |
| 9.8   | 1270.735687 | -0.011739 | <a href="#">KEAELRSGIIR</a>  |
| 9.5   | 1270.722000 | 0.001948  | <a href="#">FQIAQVVR</a>     |
| 6.9   | 1270.733215 | -0.009267 | <a href="#">MFHIRAVILR</a>   |
| 6.2   | 1270.706711 | 0.017237  | <a href="#">NMPAKTELIVR</a>  |
| 3.3   | 1270.735733 | -0.011785 | <a href="#">EILGRGVSSVVR</a> |
| 2.9   | 1270.717957 | 0.005991  | <a href="#">QLSRTLRSR</a>    |
| 2.3   | 1270.735703 | -0.011755 | <a href="#">ASSLLAGERLVR</a> |
| 2.3   | 1270.739761 | -0.015813 | <a href="#">QVVNIPSFIVR</a>  |



# MASCOT SEARCH RESULTS

## Peptide View

MS/MS Fragmentation of **KVPQVSTPTLVEVSR**

Found in **ALBU\_HUMAN**, Serum albumin OS=Homo sapiens GN=ALB PE=1 SV=2

Match to Query 45553: 1950.092952 from(651.038260,3+) rtinseconds(1958) index(21464)

Title: Locus:1.1.1.684.4 File:"2013-07-02 CLN FXIII 60 min 2nd F 2.wiff"

Data file C:\Program Files (x86)\Matrix Science\Mascot Daemon\mgf\5 FXIII 60 min 2nd\mascot\_daemon\_merge.mgf

Click mouse within plot area to zoom in by factor of two about that point

Or, Plot from  to  Da

Label all possible matches  Label matches used for scoring

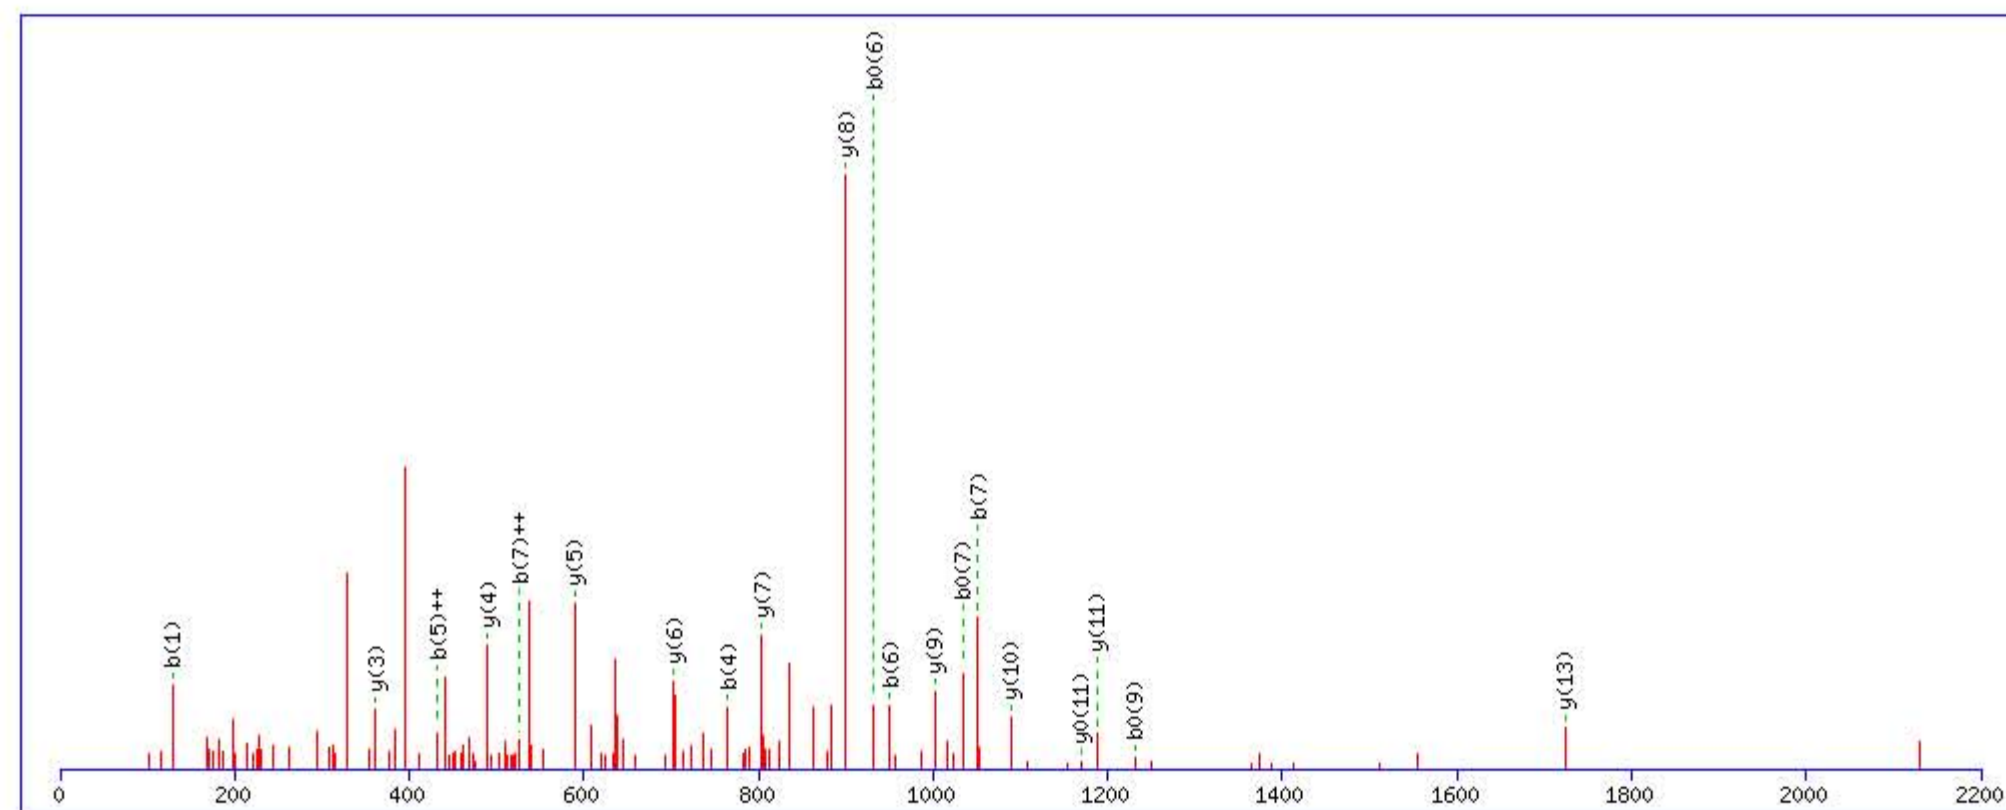

Monoisotopic mass of neutral peptide Mr(calc): 1950.097229

Fixed modifications: Carbamidomethyl (C) (apply to specified residues or termini only)

Variable modifications:

Q4 : Biotin:Thermo-21345 (Q)

Ions Score: 52 Expect: 7.1e-005

Matches : 20/156 fragment ions using 42 most intense peaks [\(help\)](#)

| #  | b                  | b <sup>++</sup>   | b <sup>+</sup> | b <sup>+++</sup> | b <sup>0</sup>     | b <sup>0++</sup> | Seq.     | y                  | y <sup>++</sup> | y <sup>+</sup> | y <sup>+++</sup> | y <sup>0</sup>     | y <sup>0++</sup> | #         |
|----|--------------------|-------------------|----------------|------------------|--------------------|------------------|----------|--------------------|-----------------|----------------|------------------|--------------------|------------------|-----------|
| 1  | <b>129.102239</b>  | 65.054757         | 112.075690     | 56.541483        |                    |                  | <b>K</b> |                    |                 |                |                  |                    |                  | <b>15</b> |
| 2  | 228.170653         | 114.588965        | 211.144104     | 106.075690       |                    |                  | <b>V</b> | 1823.009533        | 912.008404      | 1805.982984    | 903.495130       | 1804.998968        | 903.003122       | <b>14</b> |
| 3  | 325.223417         | 163.115346        | 308.196868     | 154.602072       |                    |                  | <b>P</b> | <b>1723.941119</b> | 862.474197      | 1706.914570    | 853.960923       | 1705.930554        | 853.468915       | <b>13</b> |
| 4  | <b>764.448743</b>  | 382.728010        | 747.422194     | 374.214735       |                    |                  | <b>Q</b> | 1626.888355        | 813.947815      | 1609.861806    | 805.434541       | 1608.877790        | 804.942533       | <b>12</b> |
| 5  | 863.517157         | <b>432.262217</b> | 846.490608     | 423.748942       |                    |                  | <b>V</b> | <b>1187.663029</b> | 594.335153      | 1170.636480    | 585.821878       | <b>1169.652464</b> | 585.329870       | <b>11</b> |
| 6  | <b>950.549185</b>  | 475.778231        | 933.522636     | 467.264956       | <b>932.538620</b>  | 466.772948       | <b>S</b> | <b>1088.594615</b> | 544.800946      | 1071.568066    | 536.287671       | 1070.584050        | 535.795663       | <b>10</b> |
| 7  | <b>1051.596864</b> | <b>526.302070</b> | 1034.570315    | 517.788795       | <b>1033.586299</b> | 517.296787       | <b>T</b> | <b>1001.562587</b> | 501.284932      | 984.536038     | 492.771657       | 983.552022         | 492.279649       | <b>9</b>  |
| 8  | 1148.649628        | 574.828452        | 1131.623079    | 566.315178       | 1130.639063        | 565.823169       | <b>P</b> | <b>900.514908</b>  | 450.761092      | 883.488359     | 442.247818       | 882.504343         | 441.755810       | <b>8</b>  |
| 9  | 1249.697307        | 625.352291        | 1232.670758    | 616.839017       | <b>1231.686742</b> | 616.347009       | <b>T</b> | <b>803.462144</b>  | 402.234710      | 786.435595     | 393.721436       | 785.451579         | 393.229428       | <b>7</b>  |
| 10 | 1362.781371        | 681.894323        | 1345.754822    | 673.381049       | 1344.770806        | 672.889041       | <b>L</b> | <b>702.414465</b>  | 351.710871      | 685.387916     | 343.197596       | 684.403900         | 342.705588       | <b>6</b>  |
| 11 | 1461.849785        | 731.428530        | 1444.823236    | 722.915256       | 1443.839220        | 722.423248       | <b>V</b> | <b>589.330401</b>  | 295.168839      | 572.303852     | 286.655564       | 571.319836         | 286.163556       | <b>5</b>  |
| 12 | 1590.892378        | 795.949827        | 1573.865829    | 787.436552       | 1572.881813        | 786.944544       | <b>E</b> | <b>490.261987</b>  | 245.634631      | 473.235438     | 237.121357       | 472.251422         | 236.629349       | <b>4</b>  |
| 13 | 1689.960792        | 845.484034        | 1672.934243    | 836.970759       | 1671.950227        | 836.478751       | <b>V</b> | <b>361.219394</b>  | 181.113335      | 344.192845     | 172.600061       | 343.208829         | 172.108053       | <b>3</b>  |
| 14 | 1776.992820        | 889.000048        | 1759.966271    | 880.486774       | 1758.982255        | 879.994765       | <b>S</b> | 262.150980         | 131.579128      | 245.124431     | 123.065854       | 244.140415         | 122.573846       | <b>2</b>  |
| 15 |                    |                   |                |                  |                    |                  | <b>R</b> | 175.118952         | 88.063114       | 158.092403     | 79.549839        |                    |                  | <b>1</b>  |

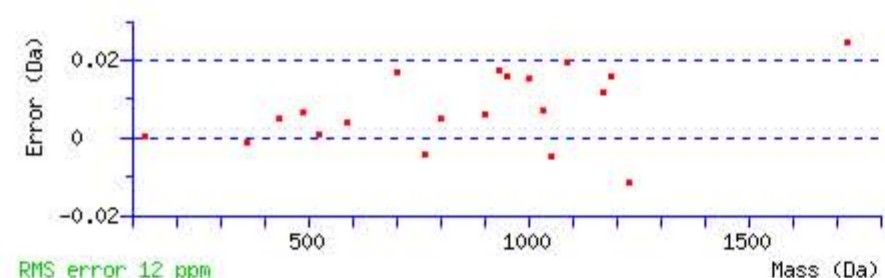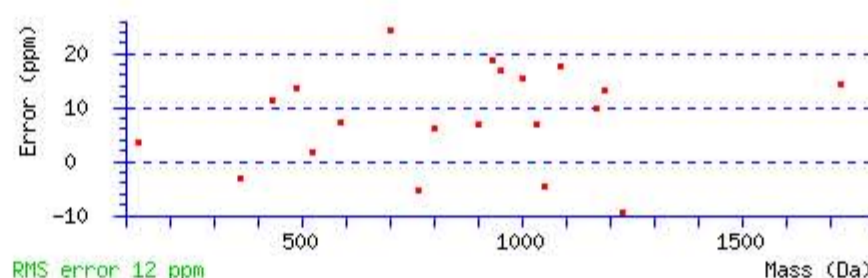

NCBI BLAST search of [KVPQVSTPTLVEVSR](#)

(Parameters: blastp, nr protein database, expect=20000, no filter, PAM30)

Other BLAST [web gateways](#)

All matches to this query

| Score | Mr(calc):   | Delta     | Sequence                        |
|-------|-------------|-----------|---------------------------------|
| 52.3  | 1950.097229 | -0.004277 | <a href="#">KVPQVSTPTLVEVSR</a> |

Mascot: <http://www.matrixscience.com/>



# MASCOT Search Results

## Peptide View

MS/MS Fragmentation of **NHQSSYQTR**

Found in **PON1\_HUMAN**, Serum paraoxonase/arylesterase 1 OS=Homo sapiens GN=PON1 PE=1 SV=3

Match to Query 31909: 1430.665782 from(477.895870,3+) rtinseconds(1148) index(31169)

Title: Locus:1.1.1.2819.9 File:"2013-07-02 CLN FXIII 60 min 2nd F 3.wiff"

Data file C:\Program Files (x86)\Matrix Science\Mascot Daemon\mgf\5 FXIII 60 min 2nd\mascot\_daemon\_merge.mgf

Click mouse within plot area to zoom in by factor of two about that point

Or, Plot from  to  Da

Label all possible matches  Label matches used for scoring

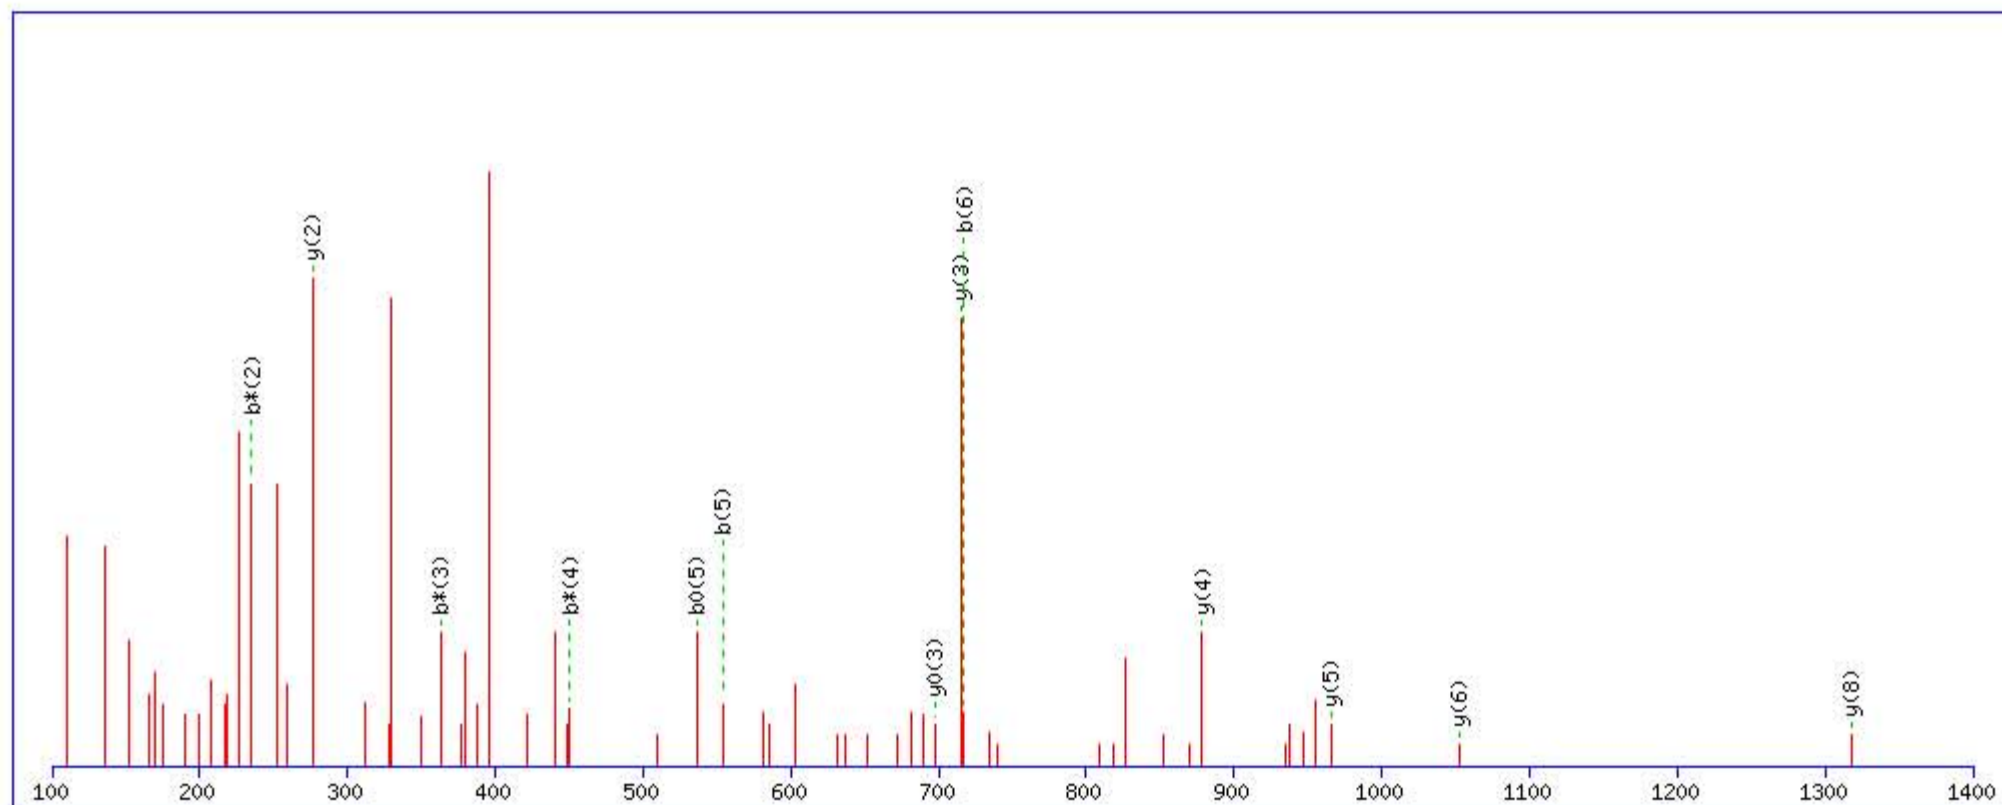

Monoisotopic mass of neutral peptide Mr(calc): 1430.672470

Fixed modifications: Carbamidomethyl (C) (apply to specified residues or termini only)

Variable modifications:

Q7 : Biotin:Thermo-21345 (Q)

Ions Score: 25 Expect: 0.036

Matches : 13/88 fragment ions using 29 most intense peaks [\(help\)](#)

| # | b           | b <sup>++</sup> | b <sup>*</sup> | b <sup>*++</sup> | b <sup>0</sup> | b <sup>0++</sup> | Seq. | y           | y <sup>++</sup> | y <sup>*</sup> | y <sup>*++</sup> | y <sup>0</sup> | y <sup>0++</sup> | # |
|---|-------------|-----------------|----------------|------------------|----------------|------------------|------|-------------|-----------------|----------------|------------------|----------------|------------------|---|
| 1 | 115.050203  | 58.028740       | 98.023654      | 49.515465        |                |                  | N    |             |                 |                |                  |                |                  | 9 |
| 2 | 252.109115  | 126.558195      | 235.082566     | 118.044921       |                |                  | H    | 1317.636832 | 659.322054      | 1300.610283    | 650.808780       | 1299.626267    | 650.316772       | 8 |
| 3 | 380.167693  | 190.587484      | 363.141144     | 182.074210       |                |                  | Q    | 1180.577920 | 590.792598      | 1163.551371    | 582.279324       | 1162.567355    | 581.787316       | 7 |
| 4 | 467.199721  | 234.103499      | 450.173172     | 225.590224       | 449.189156     | 225.098216       | S    | 1052.519342 | 526.763309      | 1035.492793    | 518.250035       | 1034.508777    | 517.758027       | 6 |
| 5 | 554.231749  | 277.619513      | 537.205200     | 269.106238       | 536.221184     | 268.614230       | S    | 965.487314  | 483.247295      | 948.460765     | 474.734021       | 947.476749     | 474.242013       | 5 |
| 6 | 717.295078  | 359.151177      | 700.268529     | 350.637903       | 699.284513     | 350.145895       | Y    | 878.455286  | 439.731281      | 861.428737     | 431.218007       | 860.444721     | 430.725999       | 4 |
| 7 | 1156.520404 | 578.763840      | 1139.493855    | 570.250566       | 1138.509839    | 569.758558       | Q    | 715.391957  | 358.199617      | 698.365408     | 349.686342       | 697.381392     | 349.194334       | 3 |
| 8 | 1257.568083 | 629.287680      | 1240.541534    | 620.774405       | 1239.557518    | 620.282397       | T    | 276.166631  | 138.586953      | 259.140082     | 130.073679       | 258.156066     | 129.581671       | 2 |
| 9 |             |                 |                |                  |                |                  | R    | 175.118952  | 88.063114       | 158.092403     | 79.549839        |                |                  | 1 |

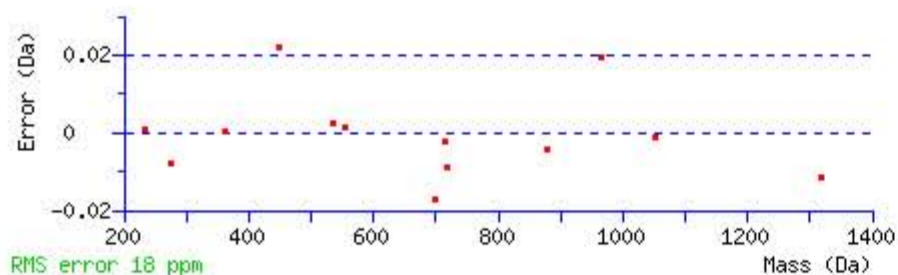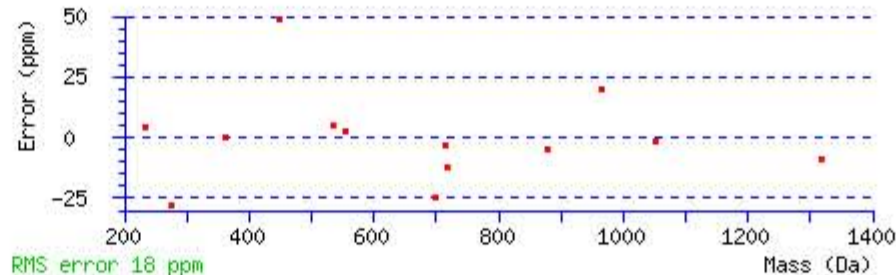

NCBI BLAST search of **NHQSSYQTR**

(Parameters: blastp, nr protein database, expect=20000, no filter, PAM30)

Other BLAST [web gateways](#)

All matches to this query

| Score | Mr(calc):   | Delta     | Sequence                  |
|-------|-------------|-----------|---------------------------|
| 25.4  | 1430.672470 | -0.006688 | <a href="#">NHQSSYQTR</a> |

Mascot: <http://www.matrixscience.com/>



# MASCOT Search Results

## Peptide View

MS/MS Fragmentation of **NHQSSYQTR**

Found in **PON1\_HUMAN**, Serum paraoxonase/arylesterase 1 OS=Homo sapiens GN=PON1 PE=1 SV=3

Match to Query 31911: 1430.670132 from(477.897320,3+) rtinseconds(1168) index(47659)

Title: Locus:1.1.1.1022.8 File:"2013-07-02 CLN FXIII 60 min 2nd F 4.wiff"

Data file C:\Program Files (x86)\Matrix Science\Mascot Daemon\mgf\5 FXIII 60 min 2nd\mascot\_daemon\_merge.mgf

Click mouse within plot area to zoom in by factor of two about that point

Or, Plot from  to  Da

Label all possible matches  Label matches used for scoring

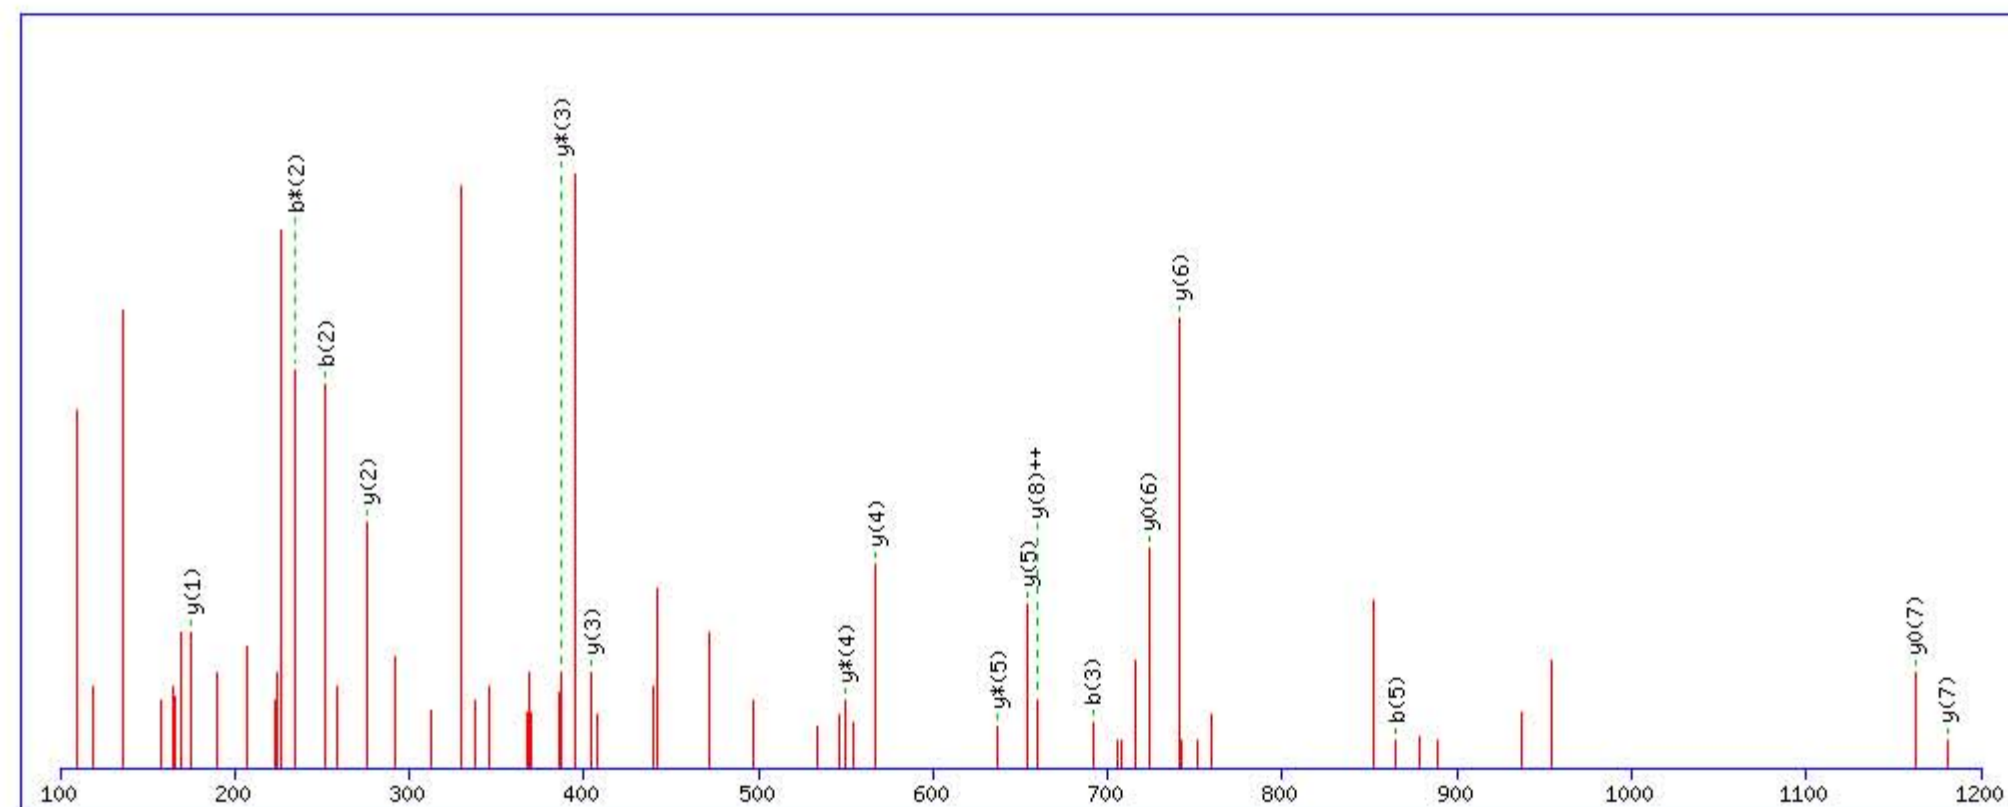

Monoisotopic mass of neutral peptide Mr(calc): 1430.672470

Fixed modifications: Carbamidomethyl (C) (apply to specified residues or termini only)

Variable modifications:

Q3 : Biotin:Thermo-21345 (Q)

Ions Score: 27 Expect: 0.027

Matches : 17/88 fragment ions using 42 most intense peaks ([help](#))

| # | b                 | b <sup>++</sup> | b <sup>*</sup>    | b <sup>+++</sup> | b <sup>0</sup> | b <sup>0++</sup> | Seq. | y                  | y <sup>++</sup>   | y <sup>*</sup>    | y <sup>+++</sup> | y <sup>0</sup>     | y <sup>0++</sup> | # |
|---|-------------------|-----------------|-------------------|------------------|----------------|------------------|------|--------------------|-------------------|-------------------|------------------|--------------------|------------------|---|
| 1 | 115.050203        | 58.028740       | 98.023654         | 49.515465        |                |                  | N    |                    |                   |                   |                  |                    |                  | 9 |
| 2 | <b>252.109115</b> | 126.558195      | <b>235.082566</b> | 118.044921       |                |                  | H    | 1317.636832        | <b>659.322054</b> | 1300.610283       | 650.808780       | 1299.626267        | 650.316772       | 8 |
| 3 | <b>691.334441</b> | 346.170859      | 674.307892        | 337.657584       |                |                  | Q    | <b>1180.577920</b> | 590.792598        | 1163.551371       | 582.279324       | <b>1162.567355</b> | 581.787316       | 7 |
| 4 | 778.366469        | 389.686872      | 761.339920        | 381.173598       | 760.355904     | 380.681590       | S    | <b>741.352594</b>  | 371.179935        | 724.326045        | 362.666661       | <b>723.342029</b>  | 362.174653       | 6 |
| 5 | <b>865.398497</b> | 433.202886      | 848.371948        | 424.689612       | 847.387932     | 424.197604       | S    | <b>654.320566</b>  | 327.663921        | <b>637.294017</b> | 319.150647       | 636.310001         | 318.658639       | 5 |
| 6 | 1028.461826       | 514.734551      | 1011.435277       | 506.221276       | 1010.451261    | 505.729268       | Y    | <b>567.288538</b>  | 284.147907        | <b>550.261989</b> | 275.634633       | 549.277973         | 275.142625       | 4 |
| 7 | 1156.520404       | 578.763840      | 1139.493855       | 570.250566       | 1138.509839    | 569.758558       | Q    | <b>404.225209</b>  | 202.616243        | <b>387.198660</b> | 194.102968       | 386.214644         | 193.610960       | 3 |
| 8 | 1257.568083       | 629.287680      | 1240.541534       | 620.774405       | 1239.557518    | 620.282397       | T    | <b>276.166631</b>  | 138.586953        | 259.140082        | 130.073679       | 258.156066         | 129.581671       | 2 |
| 9 |                   |                 |                   |                  |                |                  | R    | <b>175.118952</b>  | 88.063114         | 158.092403        | 79.549839        |                    |                  | 1 |

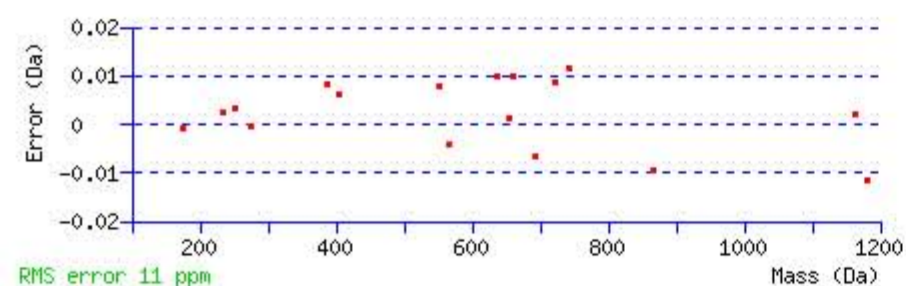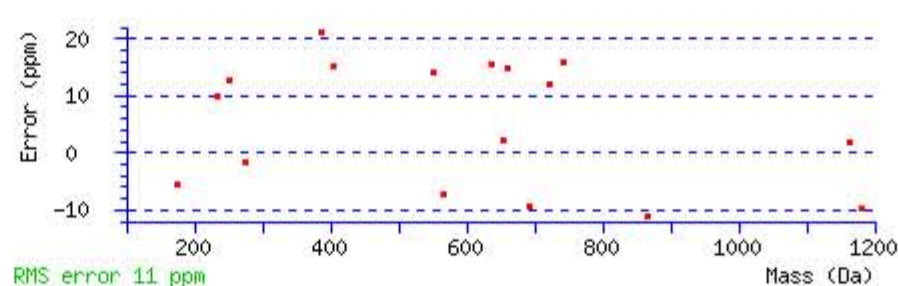

NCBI BLAST search of **NHQSSYQTR**

(Parameters: blastp, nr protein database, expect=20000, no filter, PAM30)

Other BLAST [web gateways](#)

All matches to this query

| Score | Mr(calc):   | Delta     | Sequence                  |
|-------|-------------|-----------|---------------------------|
| 27.1  | 1430.672470 | -0.002338 | <a href="#">NHQSSYQTR</a> |
| 7.6   | 1430.672470 | -0.002338 | <a href="#">NHQSSYQTR</a> |

Mascot: <http://www.matrixscience.com/>



# MASCOT SEARCH RESULTS

## Peptide View

MS/MS Fragmentation of **IQNILTEEPK**

Found in **PONI\_HUMAN**, Serum paraoxonase/arylesterase 1 OS=Homo sapiens GN=PON1 PE=1 SV=3

Match to Query 33703: 1494.801788 from(748.408170,2+) rtinseconds(2058) index(53303)

Title: Locus:1.1.1.1331.11 File:"2013-07-02 CLN FXIII 60 min 2nd F 4.wiff"

Data file C:\Program Files (x86)\Matrix Science\Mascot Daemon\mgf\5 FXIII 60 min 2nd\mascot\_daemon\_merge.mgf

Click mouse within plot area to zoom in by factor of two about that point

Or, Plot from  to  Da

Label all possible matches  Label matches used for scoring

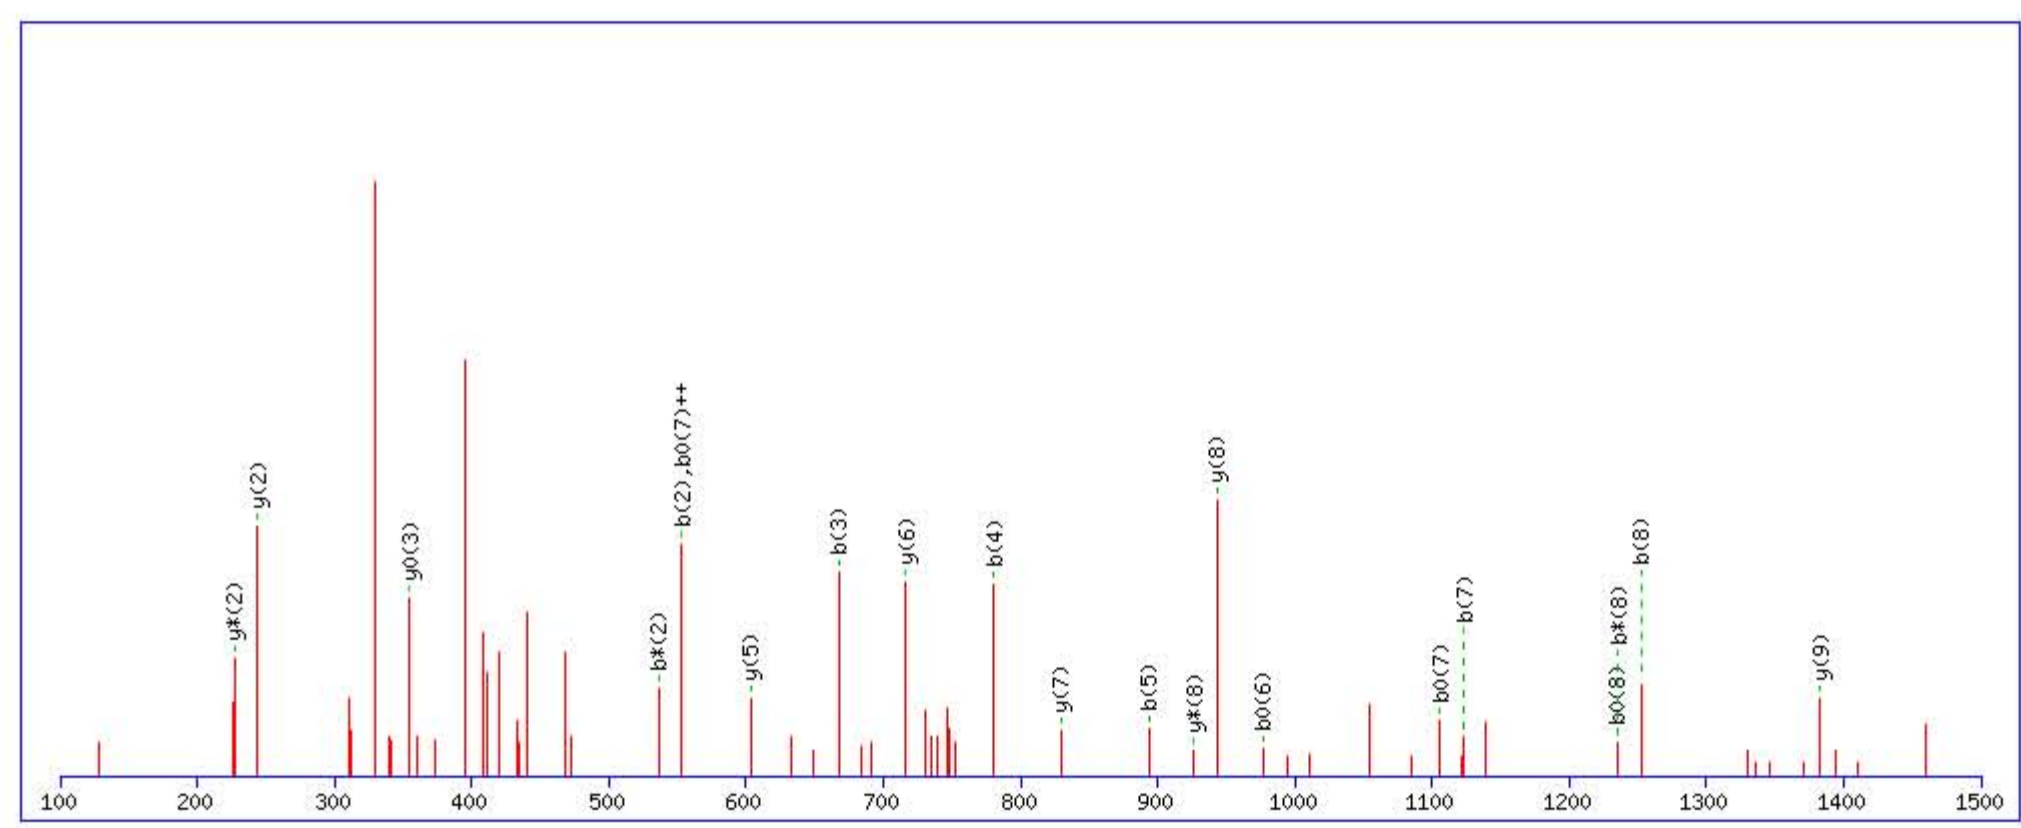

Monoisotopic mass of neutral peptide Mr(calc): 1494.811569

Fixed modifications: Carbamidomethyl (C) (apply to specified residues or termini only)

Variable modifications:

Q2 : Biotin:Thermo-21345 (Q)

Ions Score: 32 Expect: 0.0029

Matches : 21/92 fragment ions using 38 most intense peaks [\(help\)](#)

| #  | b                  | b <sup>++</sup> | b <sup>*</sup>     | b <sup>*++</sup> | b <sup>0</sup>     | b <sup>0++</sup>  | Seq. | y                  | y <sup>++</sup> | y <sup>*</sup>    | y <sup>*++</sup> | y <sup>0</sup>    | y <sup>0++</sup> | #  |
|----|--------------------|-----------------|--------------------|------------------|--------------------|-------------------|------|--------------------|-----------------|-------------------|------------------|-------------------|------------------|----|
| 1  | 114.091340         | 57.549308       |                    |                  |                    |                   | I    |                    |                 |                   |                  |                   |                  | 10 |
| 2  | <b>553.316666</b>  | 277.161971      | <b>536.290117</b>  | 268.648697       |                    |                   | Q    | <b>1382.734814</b> | 691.871045      | 1365.708265       | 683.357771       | 1364.724249       | 682.865763       | 9  |
| 3  | <b>667.359593</b>  | 334.183435      | 650.333044         | 325.670160       |                    |                   | N    | <b>943.509488</b>  | 472.258382      | <b>926.482939</b> | 463.745108       | 925.498923        | 463.253100       | 8  |
| 4  | <b>780.443657</b>  | 390.725467      | 763.417108         | 382.212192       |                    |                   | I    | <b>829.466561</b>  | 415.236919      | 812.440012        | 406.723644       | 811.455996        | 406.231636       | 7  |
| 5  | <b>893.527721</b>  | 447.267499      | 876.501172         | 438.754224       |                    |                   | L    | <b>716.382497</b>  | 358.694887      | 699.355948        | 350.181612       | 698.371932        | 349.689604       | 6  |
| 6  | 994.575400         | 497.791338      | 977.548851         | 489.278064       | <b>976.564835</b>  | 488.786056        | T    | <b>603.298433</b>  | 302.152855      | 586.271884        | 293.639580       | 585.287868        | 293.147572       | 5  |
| 7  | <b>1123.617993</b> | 562.312635      | 1106.591444        | 553.799360       | <b>1105.607428</b> | <b>553.307352</b> | E    | 502.250754         | 251.629015      | 485.224205        | 243.115741       | 484.240189        | 242.623733       | 4  |
| 8  | <b>1252.660586</b> | 626.833931      | <b>1235.634037</b> | 618.320657       | <b>1234.650021</b> | 617.828649        | E    | 373.208161         | 187.107719      | 356.181612        | 178.594444       | <b>355.197596</b> | 178.102436       | 3  |
| 9  | 1349.713350        | 675.360313      | 1332.686801        | 666.847039       | 1331.702785        | 666.355031        | P    | <b>244.165568</b>  | 122.586422      | <b>227.139019</b> | 114.073148       |                   |                  | 2  |
| 10 |                    |                 |                    |                  |                    |                   | K    | 147.112804         | 74.060040       | 130.086255        | 65.546765        |                   |                  | 1  |

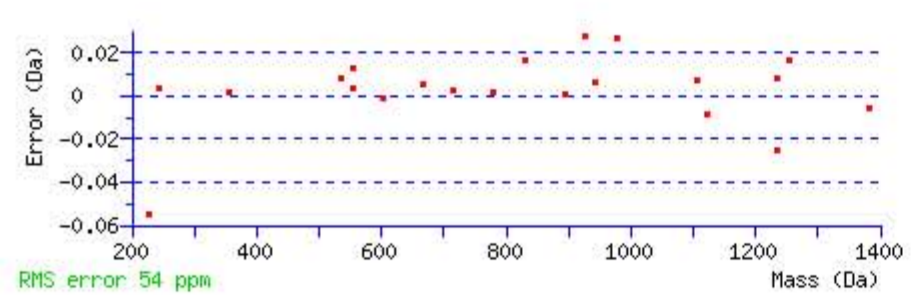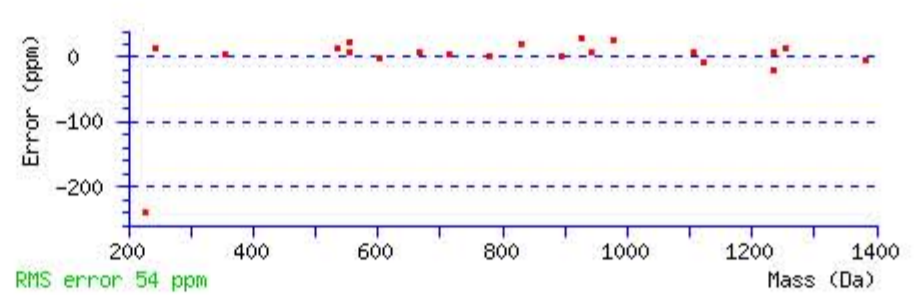

NCBI BLAST search of **IQNILTEEPK**

(Parameters: blastp, nr protein database, expect=20000, no filter, PAM30)

Other BLAST [web gateways](#)

### All matches to this query

| Score | Mr(calc):   | Delta     | Sequence                      |
|-------|-------------|-----------|-------------------------------|
| 32.4  | 1494.811569 | -0.009781 | <a href="#">IQNILTEEPK</a>    |
| 4.9   | 1494.809097 | -0.007309 | <a href="#">LQLYVFVMR</a>     |
| 4.8   | 1494.779907 | 0.021881  | <a href="#">QLKVMASDHR</a>    |
| 4.0   | 1494.780380 | 0.021408  | <a href="#">GFSHSSALRIHQK</a> |



# MASCOT Search Results

## Peptide View

MS/MS Fragmentation of **GHQLQLDYFGACK**

Found in **SPRL1\_HUMAN**, SPARC-like protein 1 OS=Homo sapiens GN=SPARCL1 PE=1 SV=2

Match to Query 43588: 1846.891752 from(616.637860,3+) rtinseconds(2151) index(53896)

Title: Locus:1.1.1.1364.6 File:"2013-07-02 CLN FXIII 60 min 2nd F 4.wiff"

Data file C:\Program Files (x86)\Matrix Science\Mascot Daemon\mgf\5 FXIII 60 min 2nd\mascot\_daemon\_merge.mgf

Click mouse within plot area to zoom in by factor of two about that point

Or, Plot from  to  Da

Label all possible matches  Label matches used for scoring

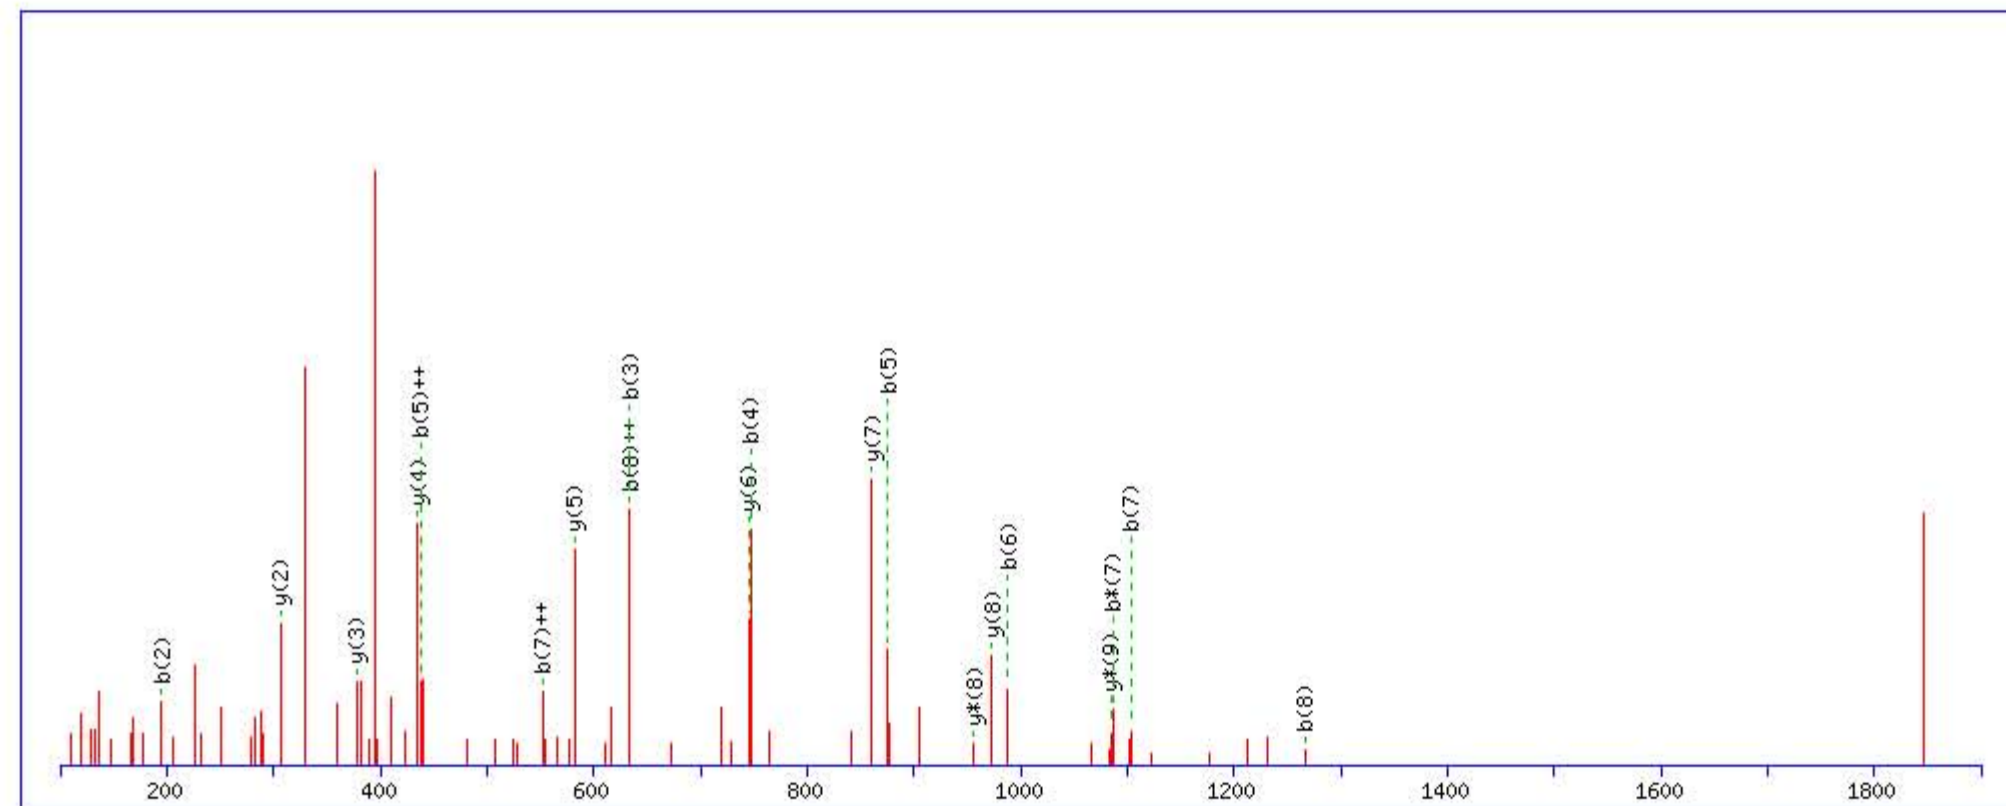

Monoisotopic mass of neutral peptide Mr(calc): 1846.885849

Fixed modifications: Carbamidomethyl (C) (apply to specified residues or termini only)

Variable modifications:

Q3 : Biotin:Thermo-21345 (Q)

Ions Score: 46 Expect: 5.9e-005

Matches : 20/116 fragment ions using 35 most intense peaks [\(help\)](#)

| #  | b                  | b <sup>++</sup>   | b <sup>+</sup>     | b <sup>+++</sup> | b <sup>0</sup> | b <sup>0++</sup> | Seq. | y                 | y <sup>++</sup> | y <sup>+</sup>     | y <sup>+++</sup> | y <sup>0</sup> | y <sup>0++</sup> | #  |
|----|--------------------|-------------------|--------------------|------------------|----------------|------------------|------|-------------------|-----------------|--------------------|------------------|----------------|------------------|----|
| 1  | 58.028740          | 29.518008         |                    |                  |                |                  | G    |                   |                 |                    |                  |                |                  | 13 |
| 2  | <b>195.087652</b>  | 98.047464         |                    |                  |                |                  | H    | 1790.871661       | 895.939469      | 1773.845112        | 887.426194       | 1772.861096    | 886.934186       | 12 |
| 3  | <b>634.312978</b>  | 317.660127        | 617.286429         | 309.146853       |                |                  | Q    | 1653.812749       | 827.410013      | 1636.786200        | 818.896738       | 1635.802184    | 818.404730       | 11 |
| 4  | <b>747.397042</b>  | 374.202159        | 730.370493         | 365.688885       |                |                  | L    | 1214.587423       | 607.797350      | 1197.560874        | 599.284075       | 1196.576858    | 598.792067       | 10 |
| 5  | <b>875.455620</b>  | <b>438.231448</b> | 858.429071         | 429.718174       |                |                  | Q    | 1101.503359       | 551.255318      | <b>1084.476810</b> | 542.742043       | 1083.492794    | 542.250035       | 9  |
| 6  | <b>988.539684</b>  | 494.773480        | 971.513135         | 486.260206       |                |                  | L    | <b>973.444781</b> | 487.226029      | <b>956.418232</b>  | 478.712754       | 955.434216     | 478.220746       | 8  |
| 7  | <b>1103.566627</b> | <b>552.286952</b> | <b>1086.540078</b> | 543.773677       | 1085.556062    | 543.281669       | D    | <b>860.360717</b> | 430.683997      | 843.334168         | 422.170722       | 842.350152     | 421.678714       | 7  |
| 8  | <b>1266.629956</b> | <b>633.818616</b> | 1249.603407        | 625.305342       | 1248.619391    | 624.813334       | Y    | <b>745.333774</b> | 373.170525      | 728.307225         | 364.657251       |                |                  | 6  |
| 9  | 1413.698370        | 707.352823        | 1396.671821        | 698.839549       | 1395.687805    | 698.347541       | F    | <b>582.270445</b> | 291.638861      | 565.243896         | 283.125586       |                |                  | 5  |
| 10 | 1470.719834        | 735.863555        | 1453.693285        | 727.350281       | 1452.709269    | 726.858273       | G    | <b>435.202031</b> | 218.104653      | 418.175482         | 209.591379       |                |                  | 4  |
| 11 | 1541.756948        | 771.382112        | 1524.730399        | 762.868838       | 1523.746383    | 762.376830       | A    | <b>378.180567</b> | 189.593921      | 361.154018         | 181.080647       |                |                  | 3  |
| 12 | 1701.787597        | 851.397437        | 1684.761048        | 842.884162       | 1683.777032    | 842.392154       | C    | <b>307.143453</b> | 154.075365      | 290.116904         | 145.562090       |                |                  | 2  |
| 13 |                    |                   |                    |                  |                |                  | K    | 147.112804        | 74.060040       | 130.086255         | 65.546765        |                |                  | 1  |

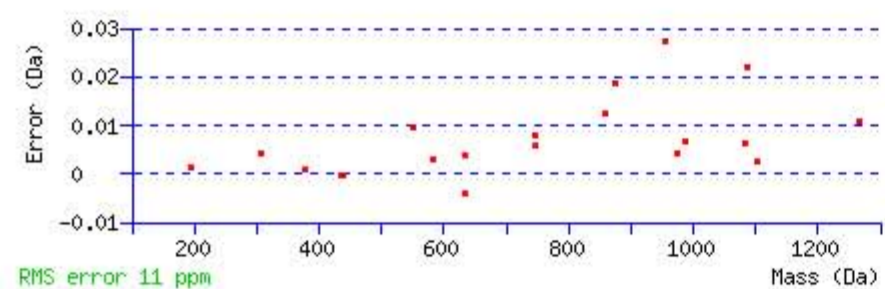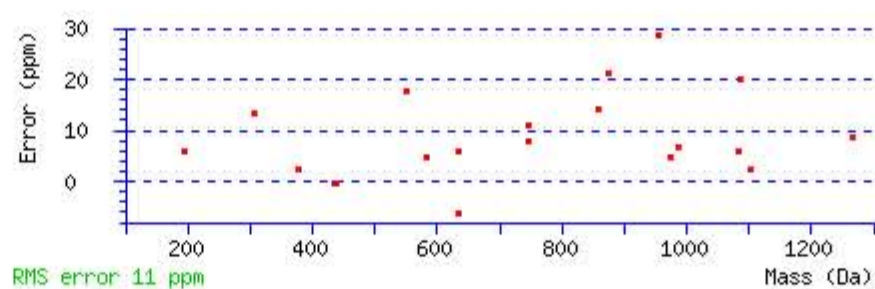

NCBI BLAST search of **GHQLQLDYFGACK**

(Parameters: blastp, nr protein database, expect=20000, no filter, PAM30)

Other BLAST [web gateways](#)

All matches to this query

| Score | Mr(calc):   | Delta     | Sequence                      |
|-------|-------------|-----------|-------------------------------|
| 46.4  | 1846.885849 | 0.005903  | <a href="#">GHQLQLDYFGACK</a> |
| 30.0  | 1846.885849 | 0.005903  | <a href="#">GHQLQLDYFGACK</a> |
| 1.3   | 1846.895721 | -0.003969 | <a href="#">LQLEETMPSYGR</a>  |



# MASCOT Search Results

## Peptide View

MS/MS Fragmentation of **GAAAHDPDSEEQQQR**

Found in **TLN1\_HUMAN**, Talin-1 OS=Homo sapiens GN=TLN1 PE=1 SV=3

Match to Query 43356: 1833.843882 from(612.288570,3+) rtinseconds(1152) index(47598)

Title: Locus:1.1.1.1016.11 File:"2013-07-02 CLN FXIII 60 min 2nd F 4.wiff"

Data file C:\Program Files (x86)\Matrix Science\Mascot Daemon\mgf5 FXIII 60 min 2nd\mascot\_daemon\_merge.mgf

Click mouse within plot area to zoom in by factor of two about that point

Or, Plot from  to  Da

Label all possible matches  Label matches used for scoring

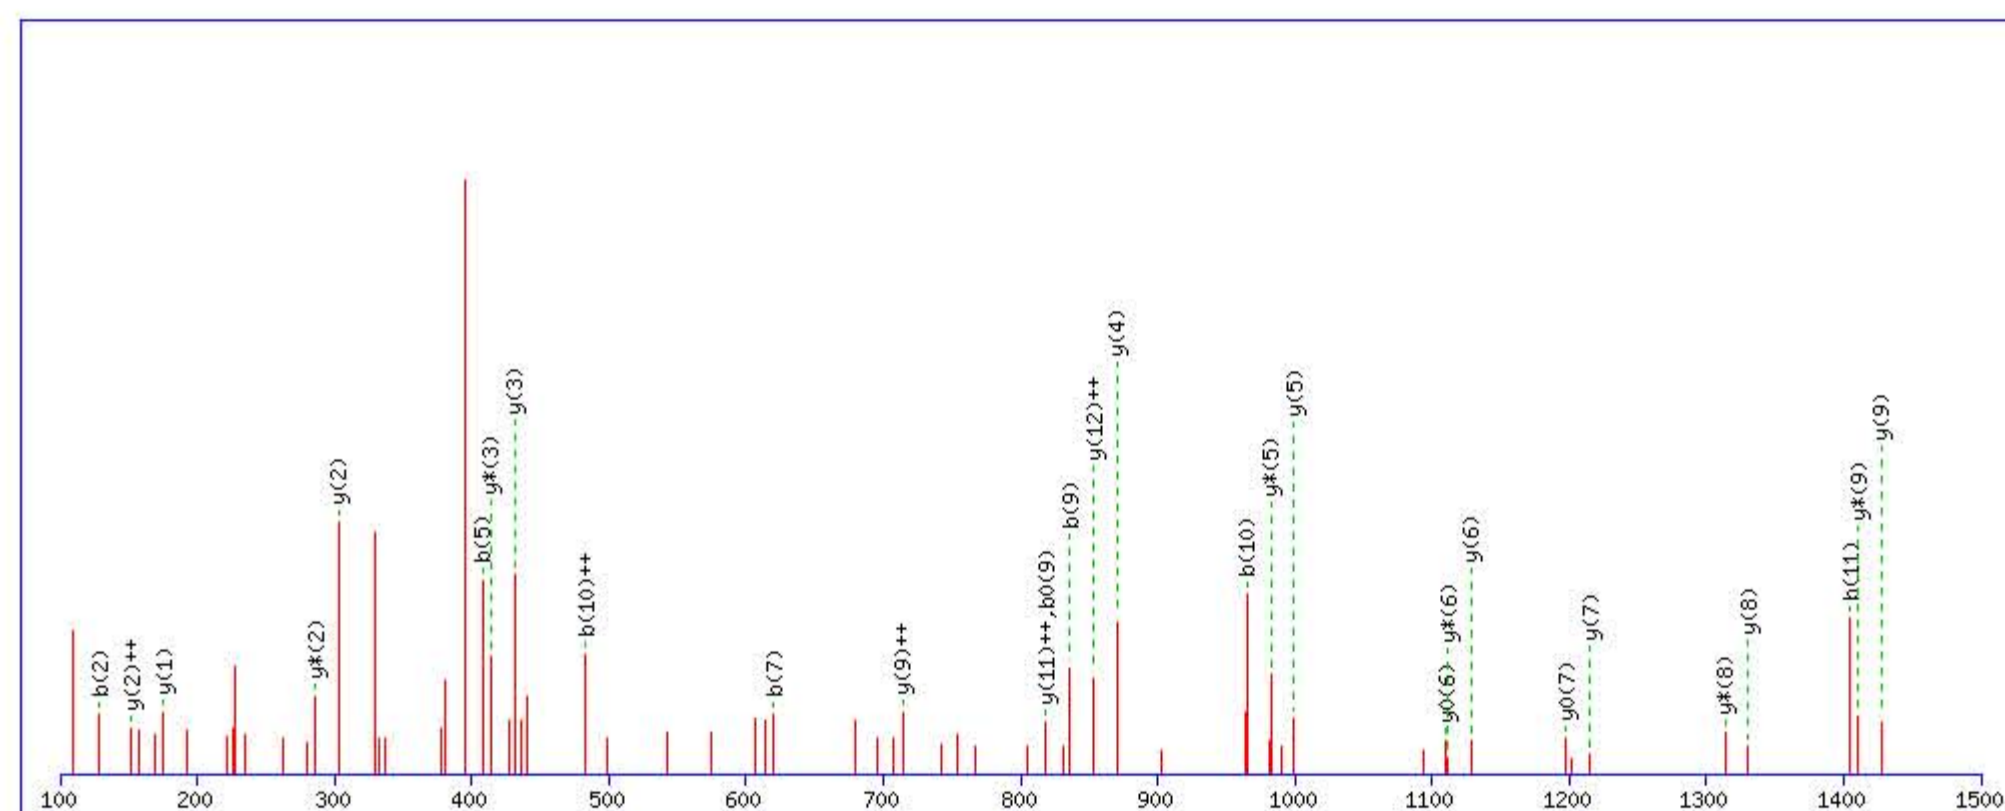

Monoisotopic mass of neutral peptide Mr(calc): 1833.842773

Fixed modifications: Carbamidomethyl (C) (apply to specified residues or termini only)

Variable modifications:

Q11 : Biotin:Thermo-21345 (Q)

Ions Score: 50 Expect: 0.00015

Matches : 29/116 fragment ions using 47 most intense peaks [\(help\)](#)

| #  | b                  | b <sup>++</sup>   | b <sup>+</sup> | b <sup>+++</sup> | b <sup>0</sup>    | b <sup>0++</sup> | Seq.     | y                  | y <sup>++</sup>   | y <sup>+</sup>     | y <sup>+++</sup> | y <sup>0</sup>     | y <sup>0++</sup> | #  |
|----|--------------------|-------------------|----------------|------------------|-------------------|------------------|----------|--------------------|-------------------|--------------------|------------------|--------------------|------------------|----|
| 1  | 58.028740          | 29.518008         |                |                  |                   |                  | <b>G</b> |                    |                   |                    |                  |                    |                  | 14 |
| 2  | <b>129.065854</b>  | 65.036565         |                |                  |                   |                  | <b>A</b> | 1777.828609        | 889.417943        | 1760.802060        | 880.904668       | 1759.818044        | 880.412660       | 13 |
| 3  | 200.102968         | 100.555122        |                |                  |                   |                  | <b>A</b> | 1706.791495        | <b>853.899386</b> | 1689.764946        | 845.386111       | 1688.780930        | 844.894103       | 12 |
| 4  | 271.140082         | 136.073679        |                |                  |                   |                  | <b>A</b> | 1635.754381        | <b>818.380829</b> | 1618.727832        | 809.867554       | 1617.743816        | 809.375546       | 11 |
| 5  | <b>408.198994</b>  | 204.603135        |                |                  |                   |                  | <b>H</b> | 1564.717267        | 782.862272        | 1547.690718        | 774.348997       | 1546.706702        | 773.856989       | 10 |
| 6  | 505.251758         | 253.129517        |                |                  |                   |                  | <b>P</b> | <b>1427.658355</b> | <b>714.332816</b> | <b>1410.631806</b> | 705.819541       | 1409.647790        | 705.327533       | 9  |
| 7  | <b>620.278701</b>  | 310.642989        |                |                  | 602.268136        | 301.637706       | <b>D</b> | <b>1330.605591</b> | 665.806434        | <b>1313.579042</b> | 657.293159       | 1312.595026        | 656.801151       | 8  |
| 8  | 707.310729         | 354.159003        |                |                  | 689.300164        | 345.153720       | <b>S</b> | <b>1215.578648</b> | 608.292962        | 1198.552099        | 599.779688       | <b>1197.568083</b> | 599.287680       | 7  |
| 9  | <b>836.353322</b>  | 418.680299        |                |                  | <b>818.342757</b> | 409.675017       | <b>E</b> | <b>1128.546620</b> | 564.776948        | <b>1111.520071</b> | 556.263674       | <b>1110.536055</b> | 555.771666       | 6  |
| 10 | <b>965.395915</b>  | <b>483.201596</b> |                |                  | 947.385350        | 474.196313       | <b>E</b> | <b>999.504027</b>  | 500.255652        | <b>982.477478</b>  | 491.742377       | 981.493462         | 491.250369       | 5  |
| 11 | <b>1404.621241</b> | 702.814259        | 1387.594692    | 694.300984       | 1386.610676       | 693.808976       | <b>Q</b> | <b>870.461434</b>  | 435.734355        | 853.434885         | 427.221081       |                    |                  | 4  |
| 12 | 1532.679819        | 766.843548        | 1515.653270    | 758.330273       | 1514.669254       | 757.838265       | <b>Q</b> | <b>431.236108</b>  | 216.121692        | <b>414.209559</b>  | 207.608418       |                    |                  | 3  |
| 13 | 1660.738397        | 830.872837        | 1643.711848    | 822.359562       | 1642.727832       | 821.867554       | <b>Q</b> | <b>303.177530</b>  | <b>152.092403</b> | <b>286.150981</b>  | 143.579129       |                    |                  | 2  |
| 14 |                    |                   |                |                  |                   |                  | <b>R</b> | <b>175.118952</b>  | 88.063114         | 158.092403         | 79.549839        |                    |                  | 1  |

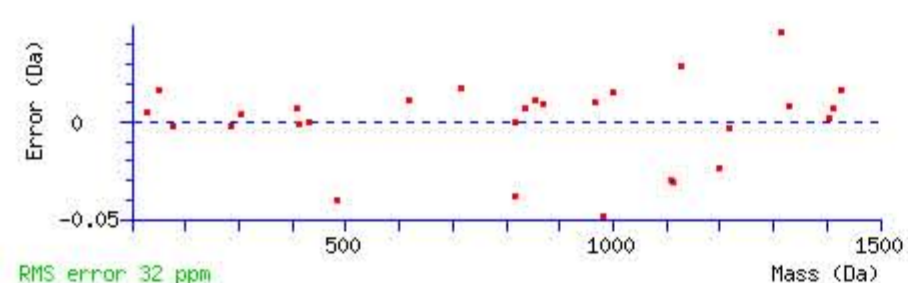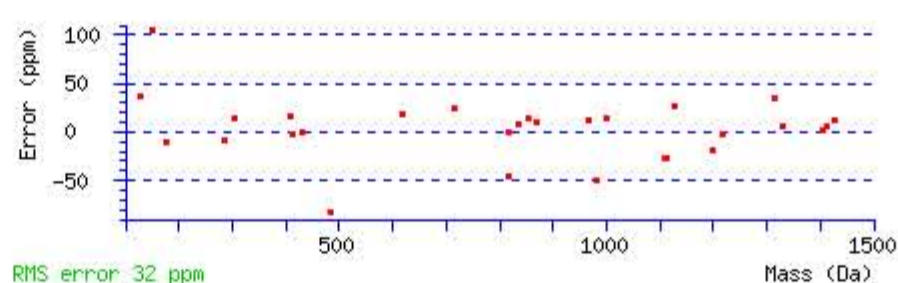

NCBI BLAST search of [GAAAHDPDSEEQQQR](#)

(Parameters: blastp, nr protein database, expect=20000, no filter, PAM30)

Other BLAST [web gateways](#)

## All matches to this query

| Score | Mr(calc):   | Delta     | Sequence                          |
|-------|-------------|-----------|-----------------------------------|
| 49.9  | 1833.842773 | 0.001109  | <a href="#">GAAAHDPDSEEQQQR</a>   |
| 47.7  | 1833.842773 | 0.001109  | <a href="#">GAAAHDPDSEEQQQR</a>   |
| 44.3  | 1833.842773 | 0.001109  | <a href="#">GAAAHDPDSEEQQQR</a>   |
| 11.5  | 1833.864761 | -0.020879 | <a href="#">QREQMEQMKQR</a>       |
| 9.5   | 1833.864761 | -0.020879 | <a href="#">QREQMEQMKQR</a>       |
| 8.3   | 1833.864761 | -0.020879 | <a href="#">QREQMEQMKQR</a>       |
| 7.6   | 1833.860077 | -0.016195 | <a href="#">EDVSPGTAIGKTPEMMR</a> |
| 7.6   | 1833.860077 | -0.016195 | <a href="#">EDVSPGTAIGKTPEMMR</a> |
| 7.4   | 1833.864761 | -0.020879 | <a href="#">QREQMEQMKQR</a>       |
| 5.0   | 1833.852676 | -0.008794 | <a href="#">MESSPIQSSGNSSTLGR</a> |



# MASCOT SEARCH RESULTS

## Peptide View

MS/MS Fragmentation of **LDTLAQEVALLK**

Found in **TETN\_HUMAN**, Tetranectin OS=Homo sapiens GN=CLEC3B PE=1 SV=3

Match to Query 38190: 1623.934408 from(812.974480,2+) rtinseconds(2582) index(9001)

Title: Locus:1.1.1.1708.23 File:"2013-07-02 CLN FXIII 60 min 2nd F 1.wiff"

Data file C:\Program Files (x86)\Matrix Science\Mascot Daemon\mgf5 FXIII 60 min 2nd\mascot\_daemon\_merge.mgf

Click mouse within plot area to zoom in by factor of two about that point

Or, Plot from  to  Da

Label all possible matches  Label matches used for scoring

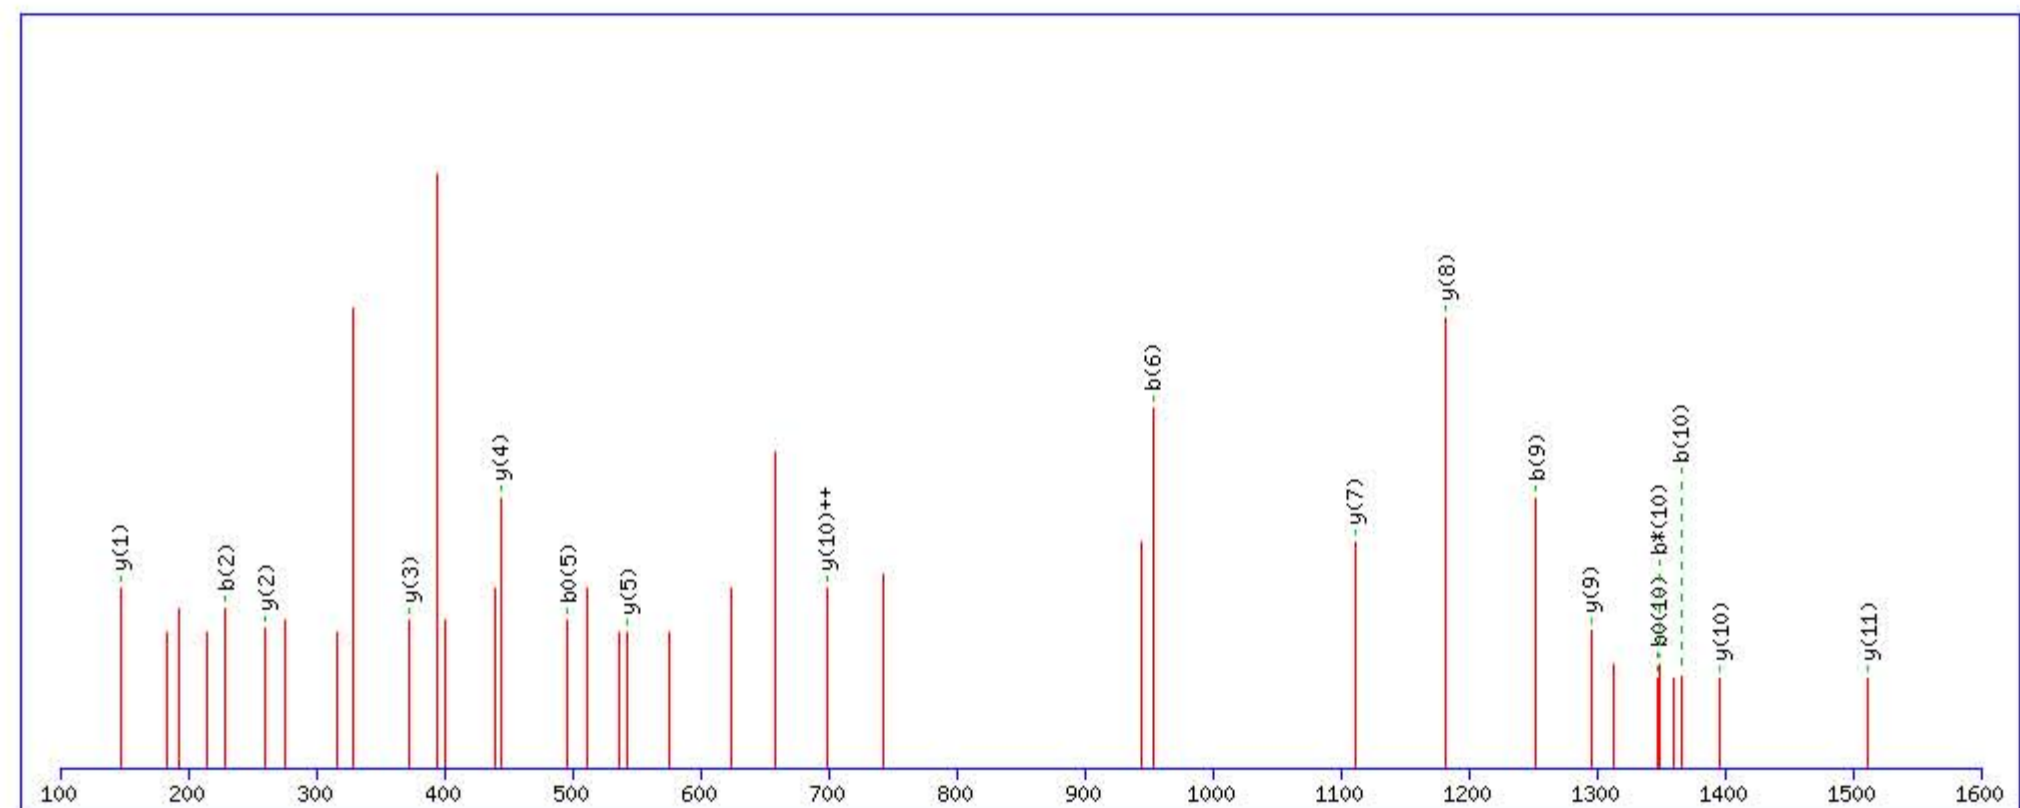

Monoisotopic mass of neutral peptide Mr(calc): 1623.926941

Fixed modifications: Carbamidomethyl (C) (apply to specified residues or termini only)

Variable modifications:

Q6 : Biotin:Thermo-21345 (Q)

Ions Score: 60 Expect: 5.7e-006

Matches : 18/110 fragment ions using 36 most intense peaks [\(help\)](#)

| #  | b                  | b <sup>++</sup> | b <sup>*</sup>     | b <sup>*++</sup> | b <sup>0</sup>     | b <sup>0++</sup> | Seq. | y                  | y <sup>++</sup>   | y <sup>*</sup> | y <sup>*++</sup> | y <sup>0</sup> | y <sup>0++</sup> | #  |
|----|--------------------|-----------------|--------------------|------------------|--------------------|------------------|------|--------------------|-------------------|----------------|------------------|----------------|------------------|----|
| 1  | 114.091340         | 57.549308       |                    |                  |                    |                  | L    |                    |                   |                |                  |                |                  | 12 |
| 2  | <b>229.118283</b>  | 115.062779      |                    |                  | 211.107718         | 106.057497       | D    | <b>1511.850179</b> | 756.428728        | 1494.823630    | 747.915453       | 1493.839614    | 747.423445       | 11 |
| 3  | 330.165962         | 165.586619      |                    |                  | 312.155397         | 156.581336       | T    | <b>1396.823236</b> | <b>698.915256</b> | 1379.796687    | 690.401982       | 1378.812671    | 689.909973       | 10 |
| 4  | 443.250026         | 222.128651      |                    |                  | 425.239461         | 213.123369       | L    | <b>1295.775557</b> | 648.391416        | 1278.749008    | 639.878142       | 1277.764992    | 639.386134       | 9  |
| 5  | 514.287140         | 257.647208      |                    |                  | <b>496.276575</b>  | 248.641926       | A    | <b>1182.691493</b> | 591.849385        | 1165.664944    | 583.336110       | 1164.680928    | 582.844102       | 8  |
| 6  | <b>953.512466</b>  | 477.259871      | 936.485917         | 468.746597       | 935.501901         | 468.254589       | Q    | <b>1111.654379</b> | 556.330827        | 1094.627830    | 547.817553       | 1093.643814    | 547.325545       | 7  |
| 7  | 1082.555059        | 541.781168      | 1065.528510        | 533.267893       | 1064.544494        | 532.775885       | E    | 672.429053         | 336.718165        | 655.402504     | 328.204890       | 654.418488     | 327.712882       | 6  |
| 8  | 1181.623473        | 591.315375      | 1164.596924        | 582.802100       | 1163.612908        | 582.310092       | V    | <b>543.386460</b>  | 272.196868        | 526.359911     | 263.683593       |                |                  | 5  |
| 9  | <b>1252.660587</b> | 626.833932      | 1235.634038        | 618.320657       | 1234.650022        | 617.828649       | A    | <b>444.318046</b>  | 222.662661        | 427.291497     | 214.149386       |                |                  | 4  |
| 10 | <b>1365.744651</b> | 683.375964      | <b>1348.718102</b> | 674.862689       | <b>1347.734086</b> | 674.370681       | L    | <b>373.280932</b>  | 187.144104        | 356.254383     | 178.630829       |                |                  | 3  |
| 11 | 1478.828715        | 739.917995      | 1461.802166        | 731.404721       | 1460.818150        | 730.912713       | L    | <b>260.196868</b>  | 130.602072        | 243.170319     | 122.088797       |                |                  | 2  |
| 12 |                    |                 |                    |                  |                    |                  | K    | <b>147.112804</b>  | 74.060040         | 130.086255     | 65.546765        |                |                  | 1  |

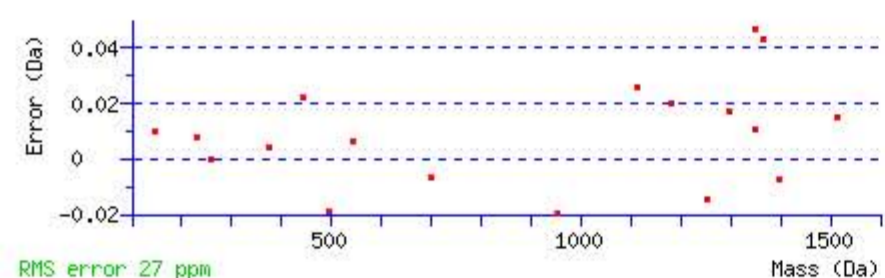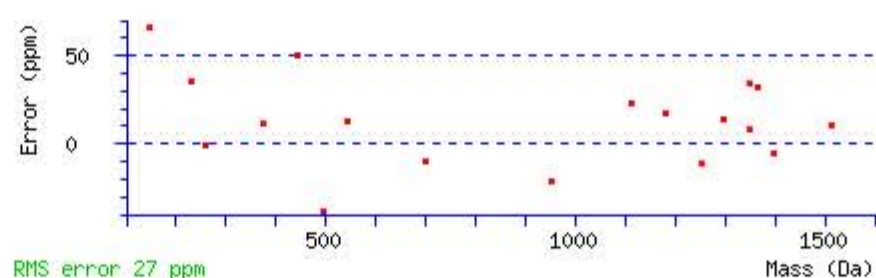

NCBI BLAST search of **LDTLAQEVALLK**

(Parameters: blastp, nr protein database, expect=20000, no filter, PAM30)

Other BLAST [web gateways](#)

All matches to this query

| Score | Mr(calc):   | Delta    | Sequence                        |
|-------|-------------|----------|---------------------------------|
| 59.9  | 1623.926941 | 0.007467 | <a href="#">LDTLAQEVALLK</a>    |
| 4.0   | 1623.919556 | 0.014852 | <a href="#">EVSPEPIVSTVARLK</a> |

Mascot: <http://www.matrixscience.com/>



# MASCOT SCIENCE Mascot Search Results

## Peptide View

MS/MS Fragmentation of **SPYQLVLQHSR**

Found in **BGH3\_HUMAN**, Transforming growth factor-beta-induced protein ig-h3 OS=Homo sapiens GN=TGFBI PE=1 SV=1

Match to Query 39089: 1637.866542 from(546.962790,3+) rtinseconds(1894) index(35610)

Title: Locus:1.1.1.3079.12 File:"2013-07-02 CLN FXIII 60 min 2nd F 3.wiff"

Data file C:\Program Files (x86)\Matrix Science\Mascot Daemon\mgf5 FXIII 60 min 2nd\mascot\_daemon\_merge.mgf

Click mouse within plot area to zoom in by factor of two about that point

Or, Plot from  to  Da

Label all possible matches  Label matches used for scoring

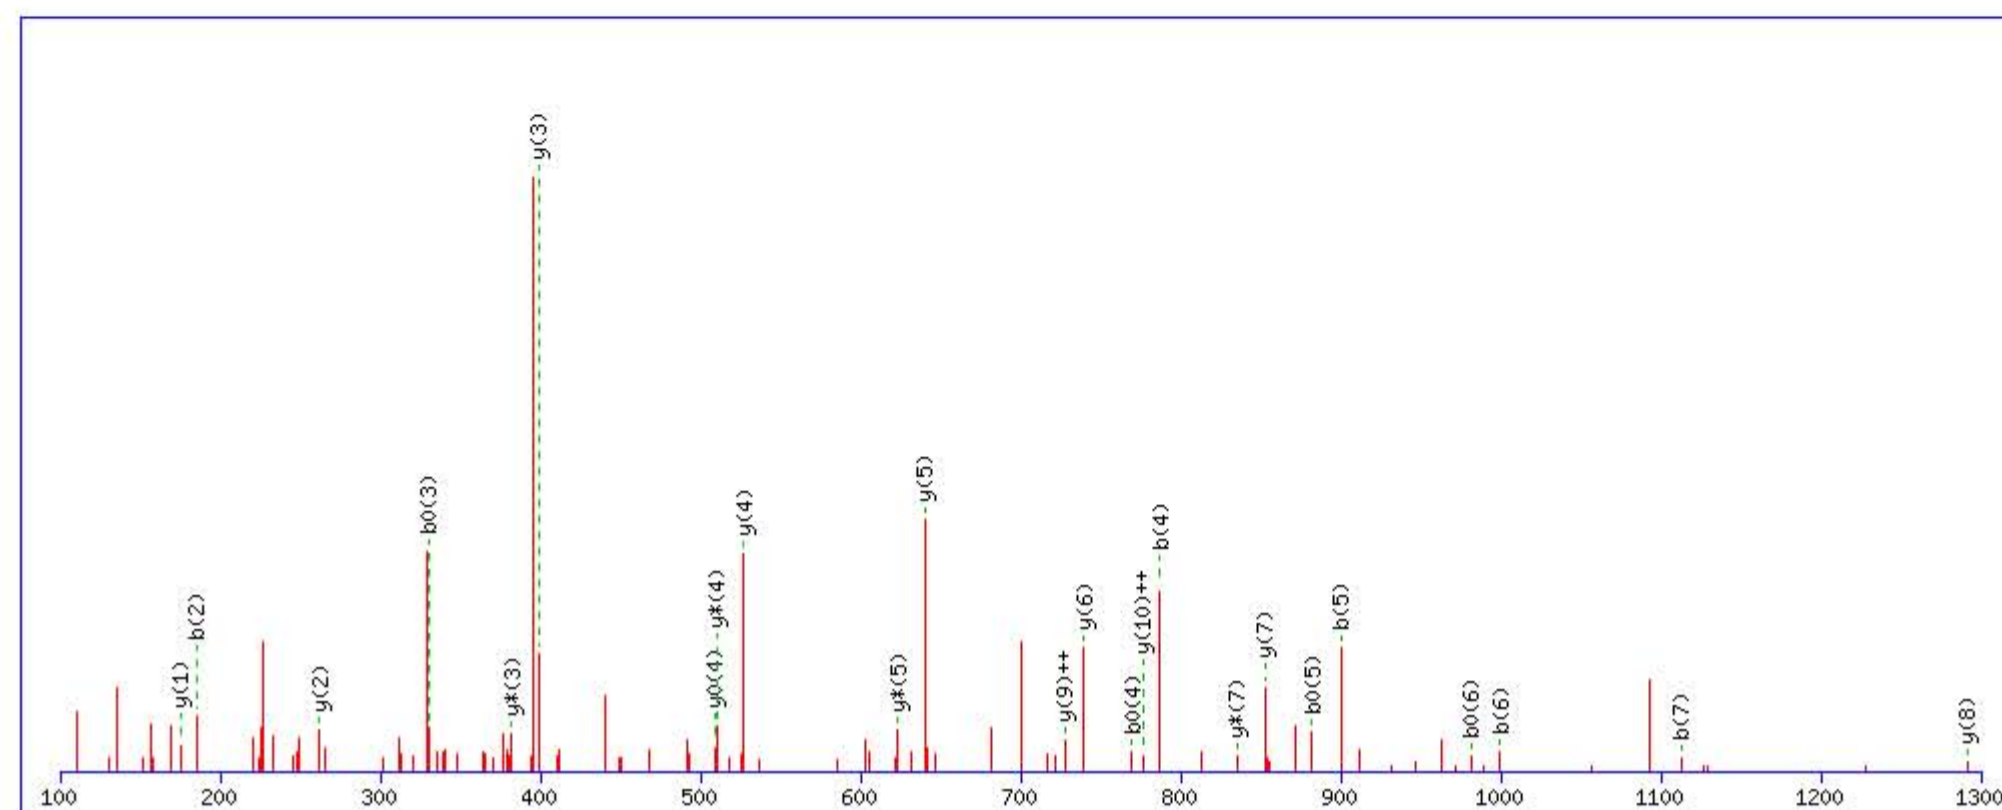

Monoisotopic mass of neutral peptide Mr(calc): 1637.871170

Fixed modifications: Carbamidomethyl (C) (apply to specified residues or termini only)

Variable modifications:

Q4 : Biotin:Thermo-21345 (Q)

Ions Score: 29 Expect: 0.025

Matches : 24/112 fragment ions using 61 most intense peaks [\(help\)](#)

| #  | b                  | b <sup>++</sup> | b <sup>*</sup> | b <sup>*++</sup> | b <sup>0</sup>    | b <sup>0++</sup> | Seq. | y                  | y <sup>++</sup>   | y <sup>*</sup>    | y <sup>*++</sup> | y <sup>0</sup>    | y <sup>0++</sup> | #  |
|----|--------------------|-----------------|----------------|------------------|-------------------|------------------|------|--------------------|-------------------|-------------------|------------------|-------------------|------------------|----|
| 1  | 88.039304          | 44.523290       |                |                  | 70.028739         | 35.518008        | S    |                    |                   |                   |                  |                   |                  | 11 |
| 2  | <b>185.092068</b>  | 93.049672       |                |                  | 167.081503        | 84.044389        | P    | 1551.846431        | <b>776.426853</b> | 1534.819882       | 767.913579       | 1533.835866       | 767.421571       | 10 |
| 3  | 348.155397         | 174.581336      |                |                  | <b>330.144832</b> | 165.576054       | Y    | 1454.793667        | <b>727.900471</b> | 1437.767118       | 719.387197       | 1436.783102       | 718.895189       | 9  |
| 4  | <b>787.380723</b>  | 394.194000      | 770.354174     | 385.680725       | <b>769.370158</b> | 385.188717       | Q    | <b>1291.730338</b> | 646.368807        | 1274.703789       | 637.855532       | 1273.719773       | 637.363524       | 8  |
| 5  | <b>900.464787</b>  | 450.736032      | 883.438238     | 442.222757       | <b>882.454222</b> | 441.730749       | L    | <b>852.505012</b>  | 426.756144        | <b>835.478463</b> | 418.242869       | 834.494447        | 417.750861       | 7  |
| 6  | <b>999.533201</b>  | 500.270239      | 982.506652     | 491.756964       | <b>981.522636</b> | 491.264956       | V    | <b>739.420948</b>  | 370.214112        | 722.394399        | 361.700837       | 721.410383        | 361.208829       | 6  |
| 7  | <b>1112.617265</b> | 556.812270      | 1095.590716    | 548.298996       | 1094.606700       | 547.806988       | L    | <b>640.352534</b>  | 320.679905        | <b>623.325985</b> | 312.166630       | 622.341969        | 311.674622       | 5  |
| 8  | 1240.675843        | 620.841559      | 1223.649294    | 612.328285       | 1222.665278       | 611.836277       | Q    | <b>527.268470</b>  | 264.137873        | <b>510.241921</b> | 255.624598       | <b>509.257905</b> | 255.132590       | 4  |
| 9  | 1377.734755        | 689.371015      | 1360.708206    | 680.857741       | 1359.724190       | 680.365733       | H    | <b>399.209892</b>  | 200.108584        | <b>382.183343</b> | 191.595309       | 381.199327        | 191.103301       | 3  |
| 10 | 1464.766783        | 732.887029      | 1447.740234    | 724.373755       | 1446.756218       | 723.881747       | S    | <b>262.150980</b>  | 131.579128        | 245.124431        | 123.065854       | 244.140415        | 122.573846       | 2  |
| 11 |                    |                 |                |                  |                   |                  | R    | <b>175.118952</b>  | 88.063114         | 158.092403        | 79.549839        |                   |                  | 1  |

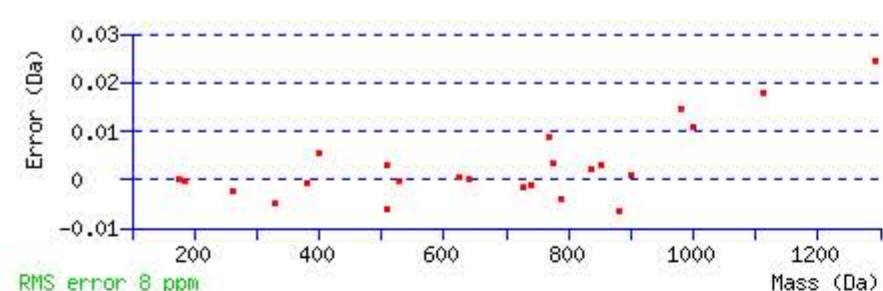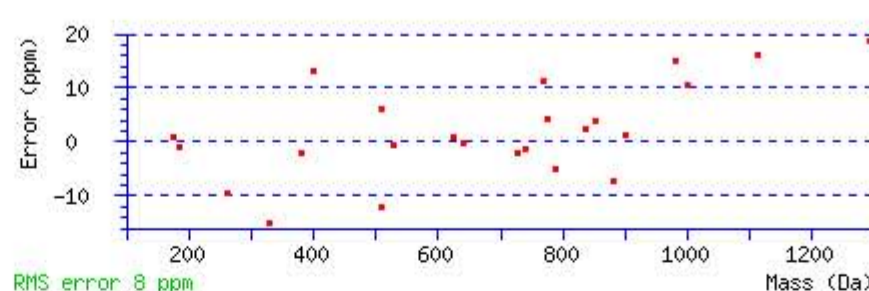

NCBI BLAST search of [SPYQLVLQHSR](#)

(Parameters: blastp, nr protein database, expect=20000, no filter, PAM30)

Other BLAST [web gateways](#)

All matches to this query

| Score | Mr(calc):   | Delta     | Sequence                    |
|-------|-------------|-----------|-----------------------------|
| 29.2  | 1637.871170 | -0.004628 | <a href="#">SPYQLVLQHSR</a> |

Mascot: <http://www.matrixscience.com/>



# MASCOT Search Results

## Peptide View

MS/MS Fragmentation of **ESELQWQEEER**

Found in **TRHY\_HUMAN**, Trichohyalin OS=Homo sapiens GN=TCHH PE=1 SV=2

Match to Query 42205: 1772.818908 from(887.416730,2+) rtinseconds(1835) index(20548)

Title: Locus:1.1.1.641.15 File:"2013-07-02 CLN FXIII 60 min 2nd F 2.wiff"

Data file C:\Program Files (x86)\Matrix Science\Mascot Daemon\mgf5 FXIII 60 min 2nd\mascot\_daemon\_merge.mgf

Click mouse within plot area to zoom in by factor of two about that point

Or, Plot from 100 to 1900 Da Full range

Label all possible matches  Label matches used for scoring

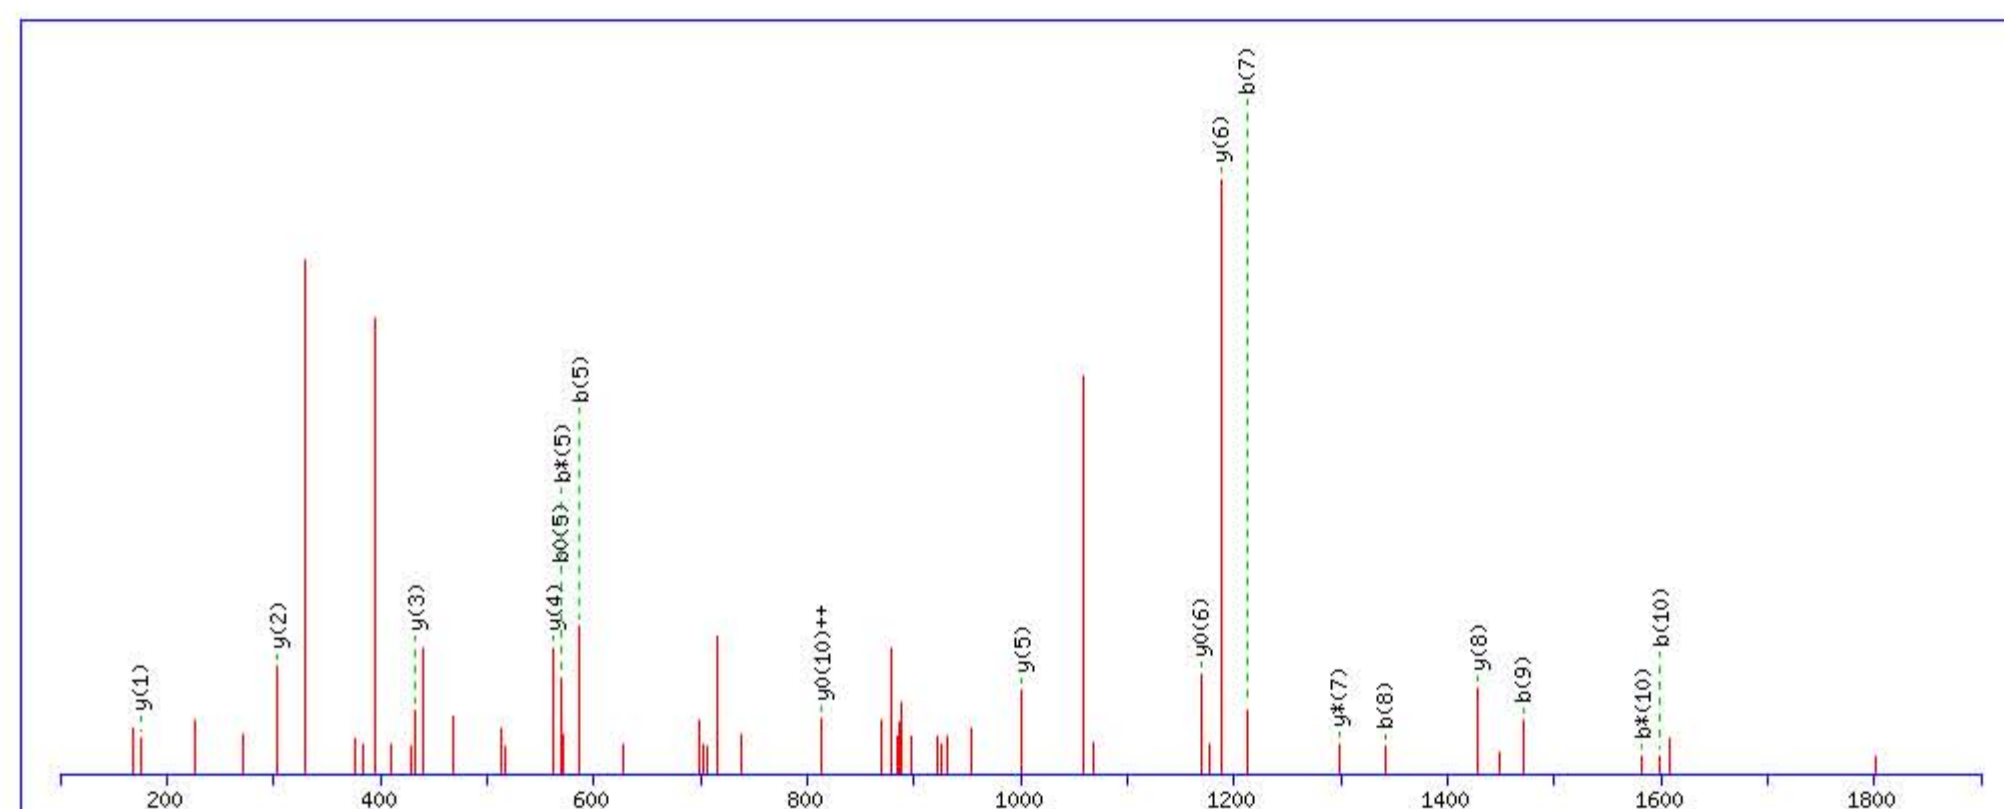

Monoisotopic mass of neutral peptide Mr(calc): 1772.803909

Fixed modifications: Carbamidomethyl (C) (apply to specified residues or termini only)

Variable modifications:

Q7 : Biotin:Thermo-21345 (Q)

Ions Score: 33 Expect: 0.0093

Matches : 18/110 fragment ions using 37 most intense peaks [\(help\)](#)

| #  | b           | b <sup>++</sup> | b <sup>*</sup> | b <sup>+++</sup> | b <sup>0</sup> | b <sup>0++</sup> | Seq. | y           | y <sup>++</sup> | y <sup>*</sup> | y <sup>+++</sup> | y <sup>0</sup> | y <sup>0++</sup> | #  |
|----|-------------|-----------------|----------------|------------------|----------------|------------------|------|-------------|-----------------|----------------|------------------|----------------|------------------|----|
| 1  | 130.049869  | 65.528572       |                |                  | 112.039304     | 56.523290        | E    |             |                 |                |                  |                |                  | 11 |
| 2  | 217.081897  | 109.044586      |                |                  | 199.071332     | 100.039304       | S    | 1644.768633 | 822.887955      | 1627.742084    | 814.374680       | 1626.758068    | 813.882672       | 10 |
| 3  | 346.124490  | 173.565883      |                |                  | 328.113925     | 164.560600       | E    | 1557.736605 | 779.371941      | 1540.710056    | 770.858666       | 1539.726040    | 770.366658       | 9  |
| 4  | 459.208554  | 230.107915      |                |                  | 441.197989     | 221.102633       | L    | 1428.694012 | 714.850644      | 1411.667463    | 706.337370       | 1410.683447    | 705.845362       | 8  |
| 5  | 587.267132  | 294.137204      | 570.240583     | 285.623930       | 569.256567     | 285.131922       | Q    | 1315.609948 | 658.308612      | 1298.583399    | 649.795338       | 1297.599383    | 649.303330       | 7  |
| 6  | 773.346445  | 387.176861      | 756.319896     | 378.663586       | 755.335880     | 378.171578       | W    | 1187.551370 | 594.279323      | 1170.524821    | 585.766049       | 1169.540805    | 585.274041       | 6  |
| 7  | 1212.571771 | 606.789524      | 1195.545222    | 598.276249       | 1194.561206    | 597.784241       | Q    | 1001.472057 | 501.239667      | 984.445508     | 492.726392       | 983.461492     | 492.234384       | 5  |
| 8  | 1341.614364 | 671.310820      | 1324.587815    | 662.797546       | 1323.603799    | 662.305538       | E    | 562.246731  | 281.627004      | 545.220182     | 273.113729       | 544.236166     | 272.621721       | 4  |
| 9  | 1470.656957 | 735.832117      | 1453.630408    | 727.318842       | 1452.646392    | 726.826834       | E    | 433.204138  | 217.105707      | 416.177589     | 208.592433       | 415.193573     | 208.100425       | 3  |
| 10 | 1599.699550 | 800.353413      | 1582.673001    | 791.840139       | 1581.688985    | 791.348131       | E    | 304.161545  | 152.584411      | 287.134996     | 144.071136       | 286.150980     | 143.579128       | 2  |
| 11 |             |                 |                |                  |                |                  | R    | 175.118952  | 88.063114       | 158.092403     | 79.549839        |                |                  | 1  |

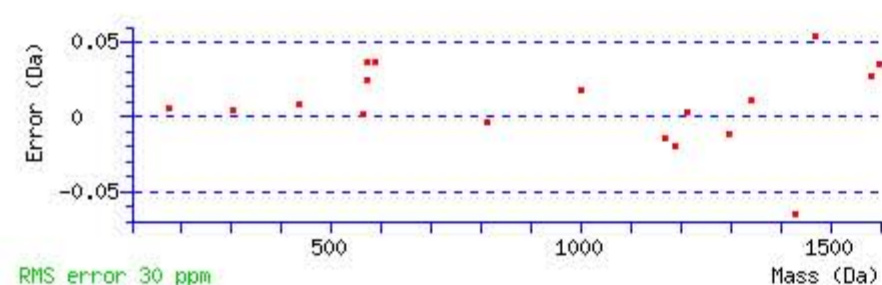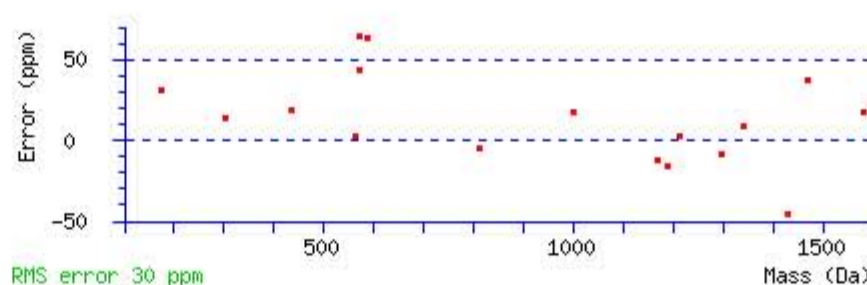

NCBI BLAST search of **ESELQWQEEER**

(Parameters: blastp, nr protein database, expect=20000, no filter, PAM30)

Other BLAST [web gateways](#)

## All matches to this query

| Score | Mr(calc):   | Delta     | Sequence                            |
|-------|-------------|-----------|-------------------------------------|
| 33.4  | 1772.803909 | 0.014999  | <a href="#">ESELQWQEEER</a>         |
| 33.1  | 1772.822556 | -0.003648 | <a href="#">FQEGQEEER</a>           |
| 11.1  | 1772.829727 | -0.010819 | <a href="#">QEEEEAMRRER</a>         |
| 9.5   | 1772.803909 | 0.014999  | <a href="#">ESELQWQEEER</a>         |
| 5.3   | 1772.798752 | 0.020156  | <a href="#">HISSCMRWPGHYSR</a>      |
| 3.7   | 1772.811798 | 0.007110  | <a href="#">YQTPPHQNFEDLER</a>      |
| 3.3   | 1772.803909 | 0.014999  | <a href="#">DMASPNWSILPEEER</a>     |
| 3.1   | 1772.828873 | -0.009965 | <a href="#">QAEQEATVAREEQER</a>     |
| 3.0   | 1772.819901 | -0.000993 | <a href="#">CGKSFSQSCHLVAHR</a>     |
| 1.3   | 1772.836288 | -0.017380 | <a href="#">ADGSLTGGGLEAAAMAPER</a> |



# MASCOT Search Results

## Peptide View

MS/MS Fragmentation of **NLHDLVDSDNQLER**

Found in **VASN\_HUMAN**, Vasorin OS=Homo sapiens GN=VASN PE=1 SV=1

Match to Query 46062: 1977.952632 from(660.324820,3+) rtinseconds(1938) index(35989)

Title: Locus:1.1.1.3094.16 File:"2013-07-02 CLN FXIII 60 min 2nd F 3.wiff"

Data file C:\Program Files (x86)\Matrix Science\Mascot Daemon\mgf\5 FXIII 60 min 2nd\mascot\_daemon\_merge.mgf

Click mouse within plot area to zoom in by factor of two about that point

Or, Plot from  to  Da

Label all possible matches  Label matches used for scoring

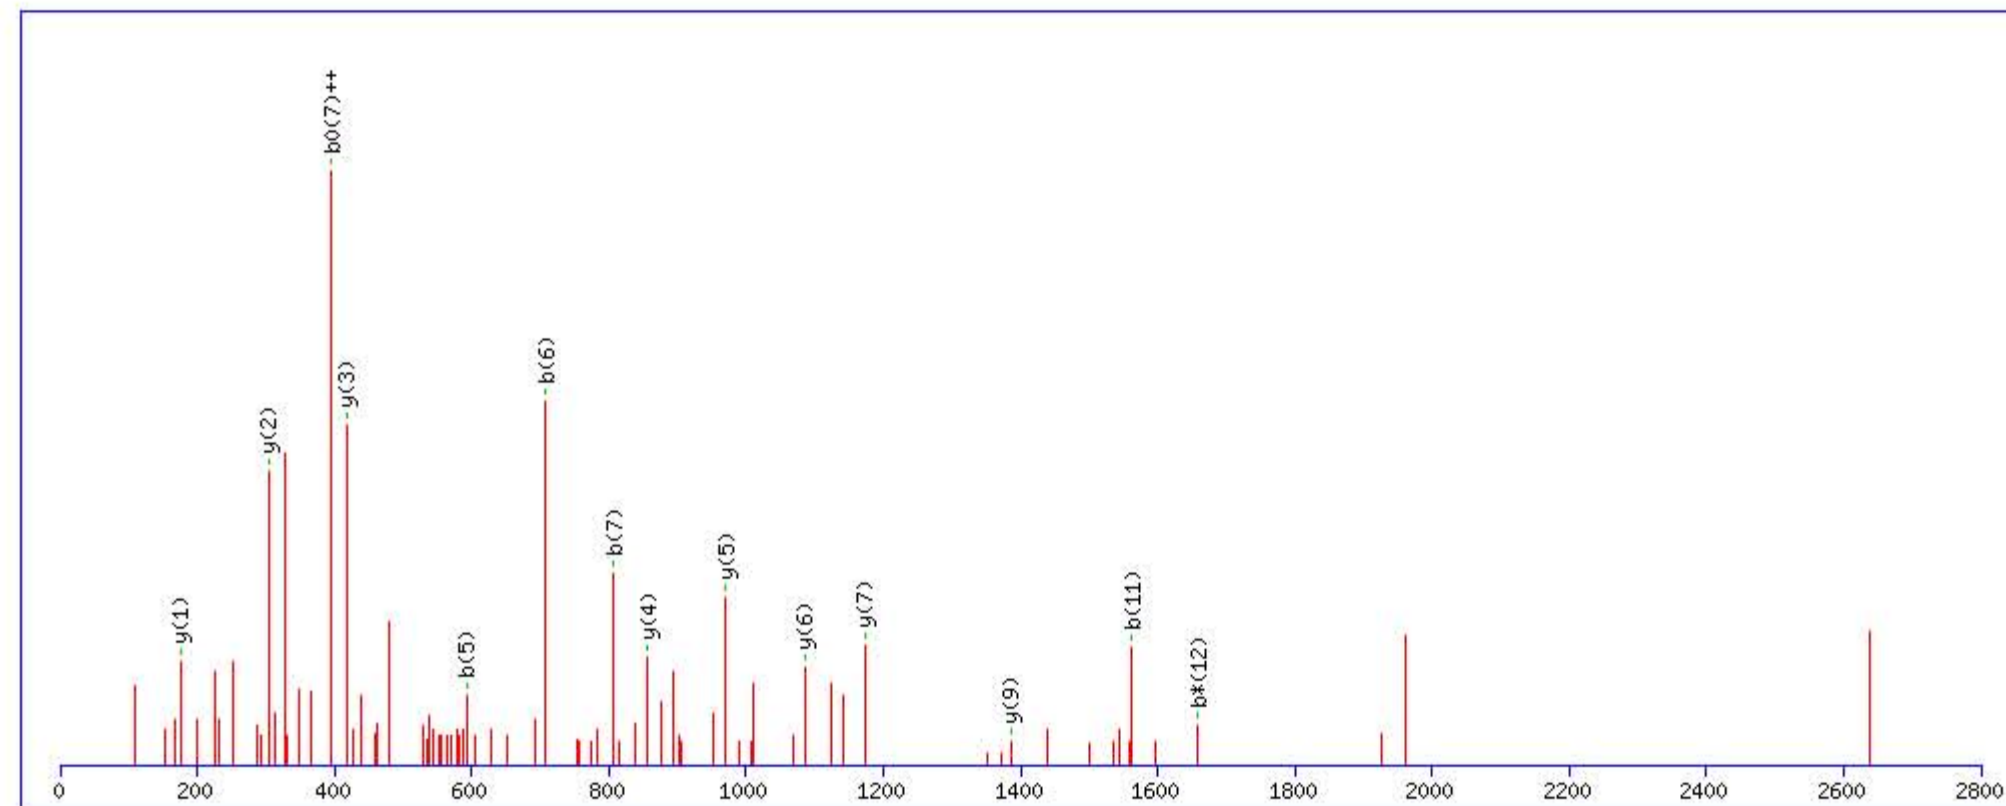

Monoisotopic mass of neutral peptide Mr(calc): 1977.957809

Fixed modifications: Carbamidomethyl (C) (apply to specified residues or termini only)

Variable modifications:

Q11 : Biotin:Thermo-21345 (Q)

Ions Score: 73 Expect: 2.8e-007

Matches : 14/148 fragment ions using 16 most intense peaks [\(help\)](#)

| #  | b                  | b <sup>++</sup> | b <sup>+</sup>     | b <sup>+++</sup> | b <sup>0</sup> | b <sup>0++</sup>  | Seq. | y                  | y <sup>++</sup> | y <sup>+</sup> | y <sup>+++</sup> | y <sup>0</sup> | y <sup>0++</sup> | #  |
|----|--------------------|-----------------|--------------------|------------------|----------------|-------------------|------|--------------------|-----------------|----------------|------------------|----------------|------------------|----|
| 1  | 115.050203         | 58.028740       | 98.023654          | 49.515465        |                |                   | N    |                    |                 |                |                  |                |                  | 14 |
| 2  | 228.134267         | 114.570771      | 211.107718         | 106.057497       |                |                   | L    | 1864.922173        | 932.964724      | 1847.895624    | 924.451450       | 1846.911608    | 923.959442       | 13 |
| 3  | 365.193179         | 183.100227      | 348.166630         | 174.586953       |                |                   | H    | 1751.838109        | 876.422692      | 1734.811560    | 867.909418       | 1733.827544    | 867.417410       | 12 |
| 4  | 480.220122         | 240.613699      | 463.193573         | 232.100425       | 462.209557     | 231.608417        | D    | 1614.779197        | 807.893236      | 1597.752648    | 799.379962       | 1596.768632    | 798.887954       | 11 |
| 5  | <b>593.304186</b>  | 297.155731      | 576.277637         | 288.642457       | 575.293621     | 288.150449        | L    | 1499.752254        | 750.379765      | 1482.725705    | 741.866490       | 1481.741689    | 741.374482       | 10 |
| 6  | <b>708.331129</b>  | 354.669203      | 691.304580         | 346.155928       | 690.320564     | 345.663920        | D    | <b>1386.668190</b> | 693.837733      | 1369.641641    | 685.324458       | 1368.657625    | 684.832450       | 9  |
| 7  | <b>807.399543</b>  | 404.203410      | 790.372994         | 395.690135       | 789.388978     | <b>395.198127</b> | V    | 1271.641247        | 636.324261      | 1254.614698    | 627.810987       | 1253.630682    | 627.318979       | 8  |
| 8  | 894.431571         | 447.719424      | 877.405022         | 439.206149       | 876.421006     | 438.714141        | S    | <b>1172.572833</b> | 586.790054      | 1155.546284    | 578.276780       | 1154.562268    | 577.784772       | 7  |
| 9  | 1009.458514        | 505.232895      | 992.431965         | 496.719620       | 991.447949     | 496.227612        | D    | <b>1085.540805</b> | 543.274040      | 1068.514256    | 534.760766       | 1067.530240    | 534.268758       | 6  |
| 10 | 1123.501441        | 562.254358      | 1106.474892        | 553.741084       | 1105.490876    | 553.249076        | N    | <b>970.513862</b>  | 485.760569      | 953.487313     | 477.247294       | 952.503297     | 476.755286       | 5  |
| 11 | <b>1562.726767</b> | 781.867021      | 1545.700218        | 773.353747       | 1544.716202    | 772.861739        | Q    | <b>856.470935</b>  | 428.739105      | 839.444386     | 420.225831       | 838.460370     | 419.733823       | 4  |
| 12 | 1675.810831        | 838.409053      | <b>1658.784282</b> | 829.895779       | 1657.800266    | 829.403771        | L    | <b>417.245609</b>  | 209.126442      | 400.219060     | 200.613168       | 399.235044     | 200.121160       | 3  |
| 13 | 1804.853424        | 902.930350      | 1787.826875        | 894.417075       | 1786.842859    | 893.925067        | E    | <b>304.161545</b>  | 152.584410      | 287.134996     | 144.071136       | 286.150980     | 143.579128       | 2  |
| 14 |                    |                 |                    |                  |                |                   | R    | <b>175.118952</b>  | 88.063114       | 158.092403     | 79.549839        |                |                  | 1  |

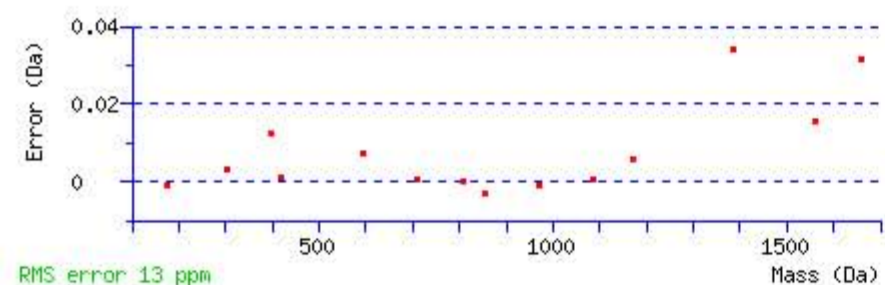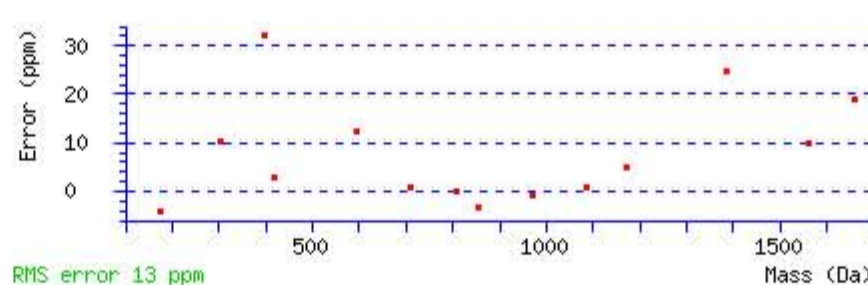

NCBI BLAST search of **NLHDLVDSDNQLER**

(Parameters: blastp, nr protein database, expect=20000, no filter, PAM30)

Other BLAST [web gateways](#)

All matches to this query

| Score | Mr(calc):   | Delta     | Sequence                           |
|-------|-------------|-----------|------------------------------------|
| 72.8  | 1977.957809 | -0.005177 | <a href="#">NLHDLVDSDNQLER</a>     |
| 2.9   | 1977.979813 | -0.027181 | <a href="#">TMPRTVPGSTMKMGSLER</a> |

Mascot: <http://www.matrixscience.com/>



# MASCOT Search Results

## Peptide View

MS/MS Fragmentation of **GQELCADYSENTFTEYK**  
 Found in **VTDB\_HUMAN**, Vitamin D-binding protein OS=Homo sapiens GN=GC PE=1 SV=1

Match to Query 53918: 2365.026612 from(789.349480,3+) rtinseconds(2151) index(69672)  
 Title: Locus:1.1.1.1686.25 File:"2013-07-02 CLN FXIII 60 min 2nd FT.wiff"  
 Data file C:\Program Files (x86)\Matrix Science\Mascot Daemon\mgf5 FXIII 60 min 2nd\mascot\_daemon\_merge.mgf

Click mouse within plot area to zoom in by factor of two about that point  
 Or, Plot from  to  Da   
 Label all possible matches  Label matches used for scoring

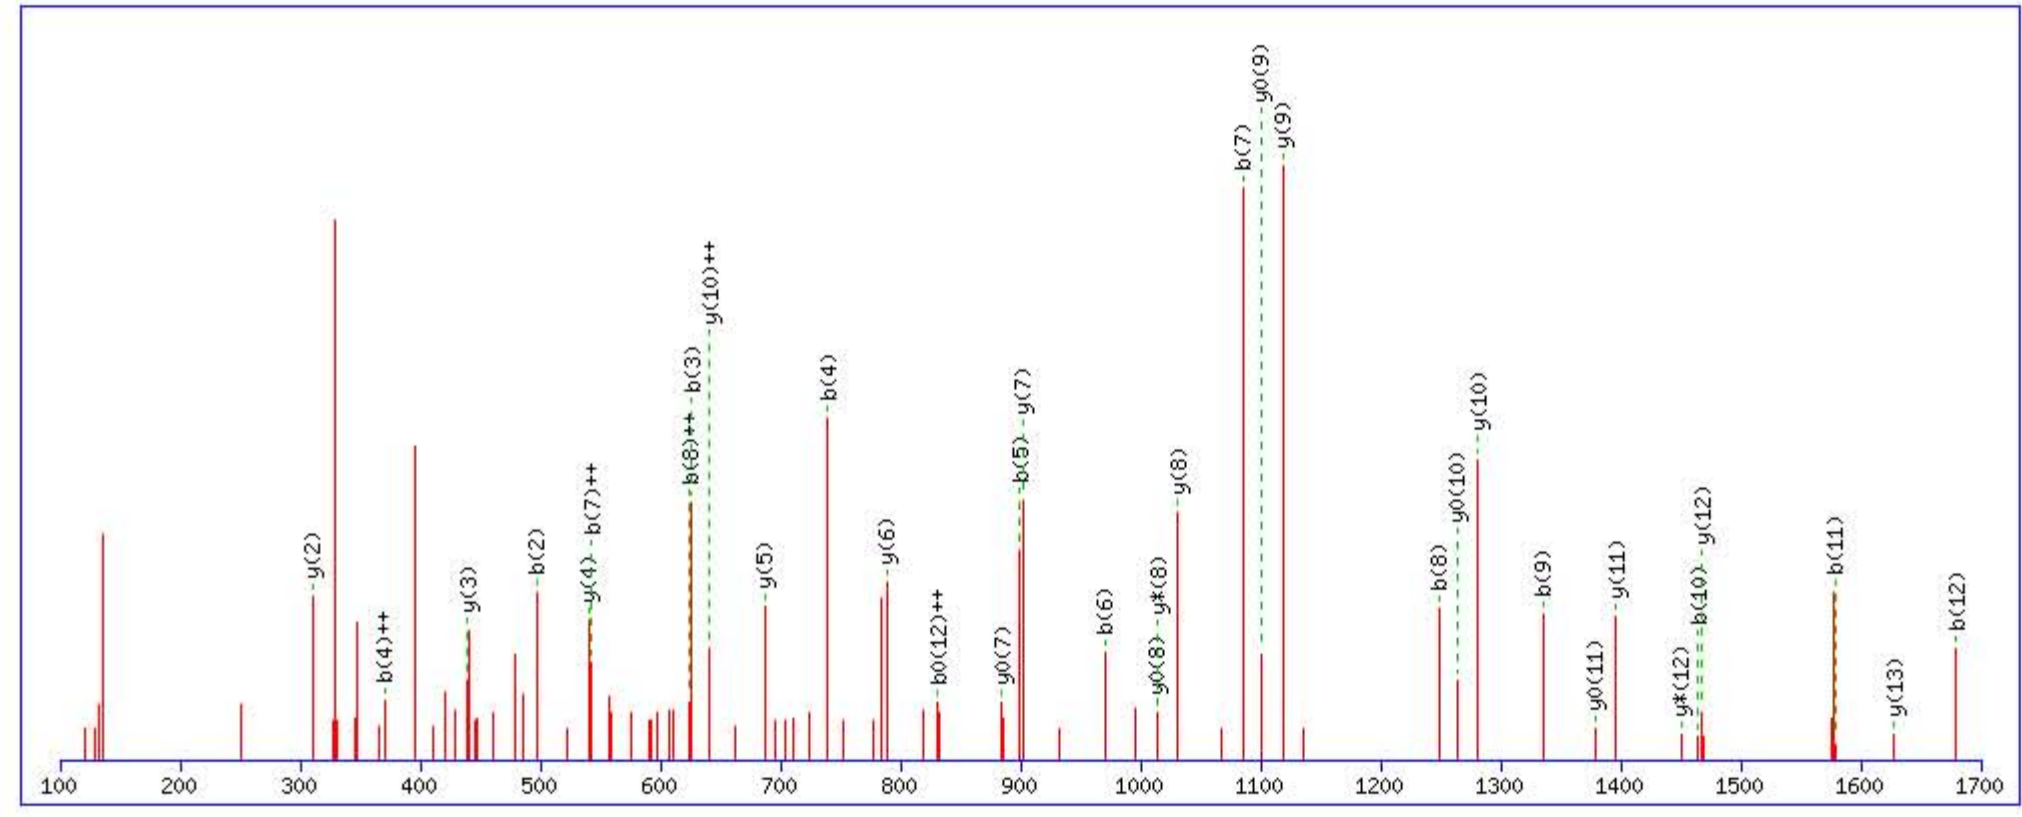

Monoisotopic mass of neutral peptide Mr(calc): 2365.024231  
 Fixed modifications: Carbamidomethyl (C) (apply to specified residues or termini only)  
 Variable modifications:  
 Q2 : Biotin:Thermo-21345 (Q)  
 Ions Score: 78 Expect: 5.3e-008  
 Matches : 35/182 fragment ions using 55 most intense peaks [\(help\)](#)

| #  | b                  | b <sup>++</sup>   | b <sup>*</sup> | b <sup>*++</sup> | b <sup>0</sup> | b <sup>0++</sup>  | Seq. | y                  | y <sup>++</sup>   | y <sup>*</sup>     | y <sup>*++</sup> | y <sup>0</sup>     | y <sup>0++</sup> | #  |
|----|--------------------|-------------------|----------------|------------------|----------------|-------------------|------|--------------------|-------------------|--------------------|------------------|--------------------|------------------|----|
| 1  | 58.028740          | 29.518008         |                |                  |                |                   | G    |                    |                   |                    |                  |                    |                  | 17 |
| 2  | <b>497.254066</b>  | 249.130671        | 480.227517     | 240.617397       |                |                   | Q    | 2309.010064        | 1155.008670       | 2291.983515        | 1146.495395      | 2290.999499        | 1146.003387      | 16 |
| 3  | <b>626.296659</b>  | 313.651968        | 609.270110     | 305.138693       | 608.286094     | 304.646685        | E    | 1869.784738        | 935.396007        | 1852.758189        | 926.882733       | 1851.774173        | 926.390725       | 15 |
| 4  | <b>739.380723</b>  | <b>370.194000</b> | 722.354174     | 361.680725       | 721.370158     | 361.188717        | L    | 1740.742145        | 870.874711        | 1723.715596        | 862.361436       | 1722.731580        | 861.869428       | 14 |
| 5  | <b>899.411372</b>  | 450.209324        | 882.384823     | 441.696050       | 881.400807     | 441.204042        | C    | <b>1627.658081</b> | 814.332679        | 1610.631532        | 805.819404       | 1609.647516        | 805.327396       | 13 |
| 6  | <b>970.448486</b>  | 485.727881        | 953.421937     | 477.214607       | 952.437921     | 476.722599        | A    | <b>1467.627432</b> | 734.317354        | <b>1450.600883</b> | 725.804080       | 1449.616867        | 725.312072       | 12 |
| 7  | <b>1085.475429</b> | <b>543.241353</b> | 1068.448880    | 534.728078       | 1067.464864    | 534.236070        | D    | <b>1396.590318</b> | 698.798797        | 1379.563769        | 690.285523       | <b>1378.579753</b> | 689.793515       | 11 |
| 8  | <b>1248.538758</b> | <b>624.773017</b> | 1231.512209    | 616.259743       | 1230.528193    | 615.767735        | Y    | <b>1281.563375</b> | <b>641.285326</b> | 1264.536826        | 632.772051       | <b>1263.552810</b> | 632.280043       | 10 |
| 9  | <b>1335.570786</b> | 668.289031        | 1318.544237    | 659.775757       | 1317.560221    | 659.283749        | S    | <b>1118.500046</b> | 559.753661        | 1101.473497        | 551.240387       | <b>1100.489481</b> | 550.748379       | 9  |
| 10 | <b>1464.613379</b> | 732.810328        | 1447.586830    | 724.297053       | 1446.602814    | 723.805045        | E    | <b>1031.468018</b> | 516.237647        | <b>1014.441469</b> | 507.724373       | <b>1013.457453</b> | 507.232365       | 8  |
| 11 | <b>1578.656306</b> | 789.831791        | 1561.629757    | 781.318517       | 1560.645741    | 780.826509        | N    | <b>902.425425</b>  | 451.716351        | 885.398876         | 443.203076       | <b>884.414860</b>  | 442.711068       | 7  |
| 12 | <b>1679.703985</b> | 840.355631        | 1662.677436    | 831.842356       | 1661.693420    | <b>831.350348</b> | T    | <b>788.382498</b>  | 394.694887        | 771.355949         | 386.181613       | 770.371933         | 385.689605       | 6  |
| 13 | 1826.772399        | 913.889838        | 1809.745850    | 905.376563       | 1808.761834    | 904.884555        | F    | <b>687.334819</b>  | 344.171048        | 670.308270         | 335.657773       | 669.324254         | 335.165765       | 5  |
| 14 | 1927.820078        | 964.413677        | 1910.793529    | 955.900403       | 1909.809513    | 955.408395        | T    | <b>540.266405</b>  | 270.636841        | 523.239856         | 262.123566       | 522.255840         | 261.631558       | 4  |
| 15 | 2056.862671        | 1028.934973       | 2039.836122    | 1020.421699      | 2038.852106    | 1019.929691       | E    | <b>439.218726</b>  | 220.113001        | 422.192177         | 211.599726       | 421.208161         | 211.107718       | 3  |
| 16 | 2219.926000        | 1110.466638       | 2202.899451    | 1101.953363      | 2201.915435    | 1101.461355       | Y    | <b>310.176133</b>  | 155.591705        | 293.149584         | 147.078430       |                    |                  | 2  |
| 17 |                    |                   |                |                  |                |                   | K    | 147.112804         | 74.060040         | 130.086255         | 65.546765        |                    |                  | 1  |

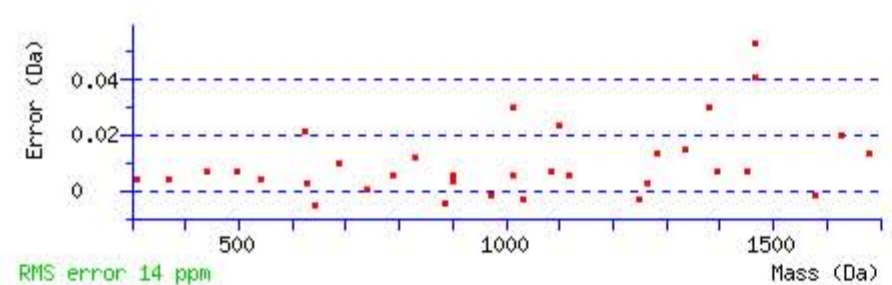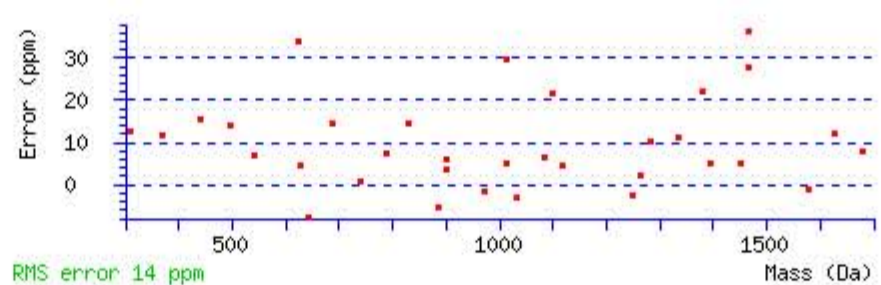

NCBI BLAST search of **GQELCADYSENTFTEYK**  
 (Parameters: blastp, nr protein database, expect=20000, no filter, PAM30)  
 Other BLAST [web gateways](#)

### All matches to this query

| Score | Mr(calc):   | Delta    | Sequence                          |
|-------|-------------|----------|-----------------------------------|
| 78.4  | 2365.024231 | 0.002381 | <a href="#">GQELCADYSENTFTEYK</a> |



# MATRIX SCIENCE Mascot Search Results

## Peptide View

MS/MS Fragmentation of **LGDDLLQCHPAVK**

Found in **PROC\_HUMAN**, Vitamin K-dependent protein C OS=Homo sapiens GN=PROC PE=1 SV=1

Match to Query 42289: 1775.911722 from(592.977850,3+) rtinseconds(1990) index(52811)

Title: Locus:1.1.1.1308.11 File:"2013-07-02 CLN FXIII 60 min 2nd F 4.wiff"

Data file C:\Program Files (x86)\Matrix Science\Mascot Daemon\mgf5 FXIII 60 min 2nd\mascot\_daemon\_merge.mgf

Click mouse within plot area to zoom in by factor of two about that point

Or, Plot from  to  Da

Label all possible matches  Label matches used for scoring

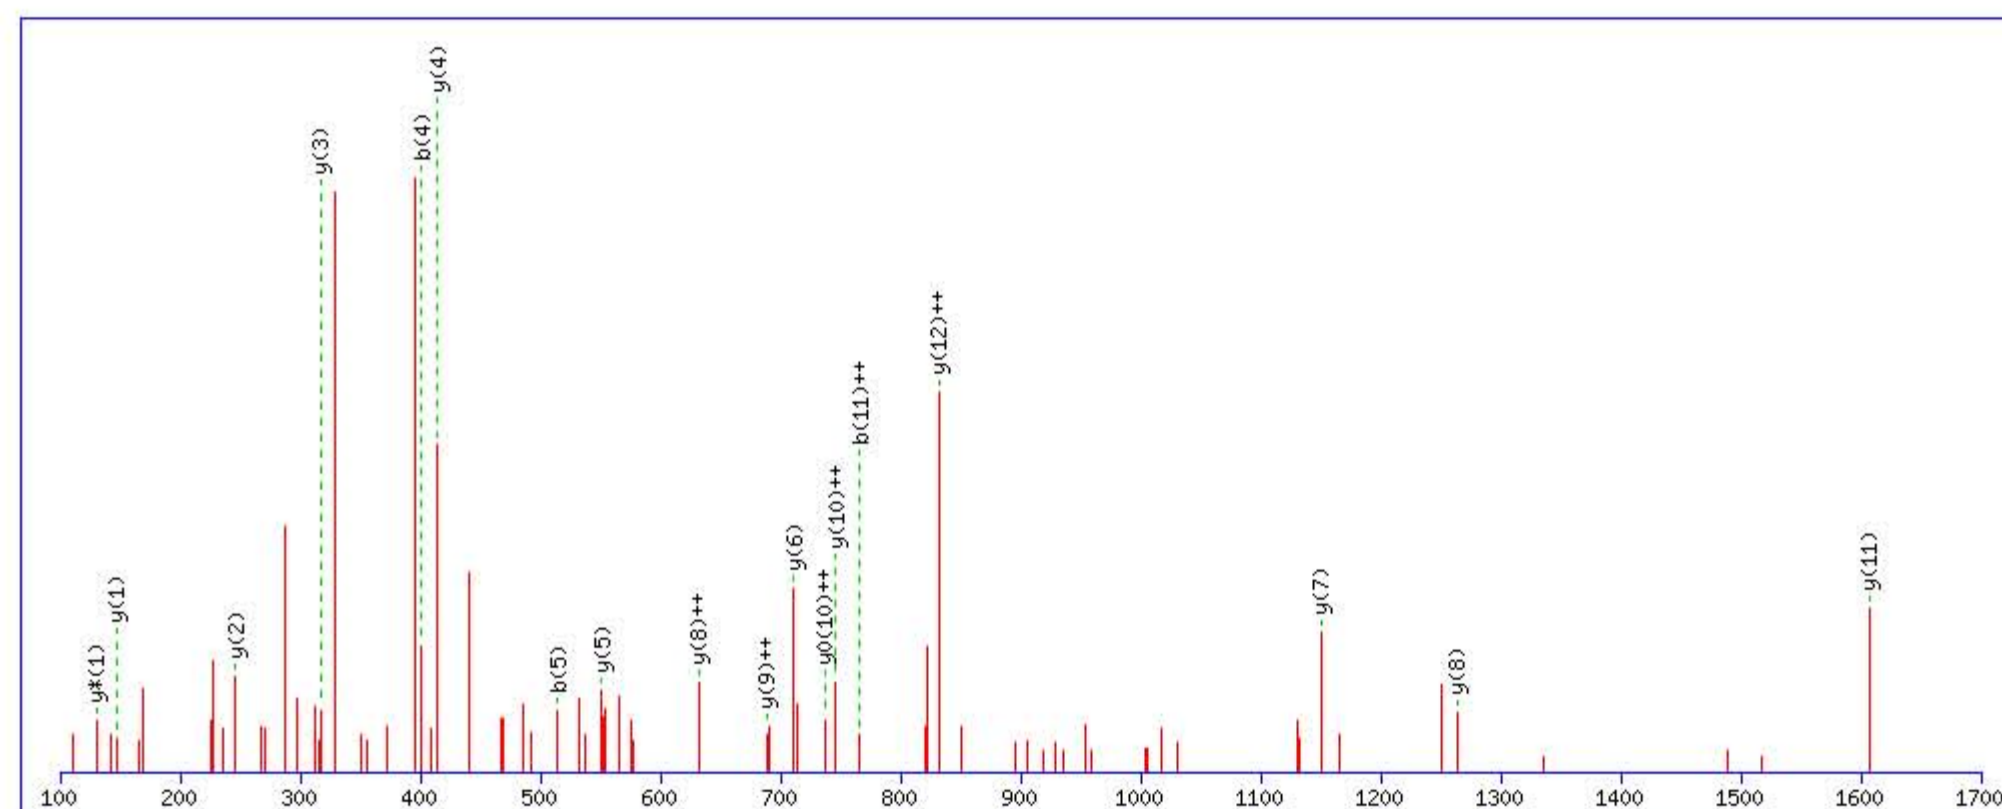

Monoisotopic mass of neutral peptide Mr(calc): 1775.906250

Fixed modifications: Carbamidomethyl (C) (apply to specified residues or termini only)

Variable modifications:

Q7 : Biotin:Thermo-21345 (Q)

Ions Score: 32 Expect: 0.017

Matches : 18/110 fragment ions using 55 most intense peaks [\(help\)](#)

| #  | b           | b <sup>++</sup> | b <sup>*</sup> | b <sup>+++</sup> | b <sup>0</sup> | b <sup>0++</sup> | Seq. | y           | y <sup>++</sup> | y <sup>*</sup> | y <sup>+++</sup> | y <sup>0</sup> | y <sup>0++</sup> | #  |
|----|-------------|-----------------|----------------|------------------|----------------|------------------|------|-------------|-----------------|----------------|------------------|----------------|------------------|----|
| 1  | 114.091340  | 57.549308       |                |                  |                |                  | L    |             |                 |                |                  |                |                  | 13 |
| 2  | 171.112804  | 86.060040       |                |                  |                |                  | G    | 1663.829461 | 832.418369      | 1646.802912    | 823.905094       | 1645.818896    | 823.413086       | 12 |
| 3  | 286.139747  | 143.573512      |                |                  | 268.129182     | 134.568229       | D    | 1606.807997 | 803.907637      | 1589.781448    | 795.394362       | 1588.797432    | 794.902354       | 11 |
| 4  | 401.166690  | 201.086983      |                |                  | 383.156125     | 192.081701       | D    | 1491.781054 | 746.394165      | 1474.754505    | 737.880891       | 1473.770489    | 737.388883       | 10 |
| 5  | 514.250754  | 257.629015      |                |                  | 496.240189     | 248.623733       | L    | 1376.754111 | 688.880694      | 1359.727562    | 680.367419       |                |                  | 9  |
| 6  | 627.334818  | 314.171047      |                |                  | 609.324253     | 305.165765       | L    | 1263.670047 | 632.338662      | 1246.643498    | 623.825387       |                |                  | 8  |
| 7  | 1066.560144 | 533.783710      | 1049.533595    | 525.270436       | 1048.549579    | 524.778428       | Q    | 1150.585983 | 575.796630      | 1133.559434    | 567.283355       |                |                  | 7  |
| 8  | 1226.590793 | 613.799035      | 1209.564244    | 605.285760       | 1208.580228    | 604.793752       | C    | 711.360657  | 356.183967      | 694.334108     | 347.670692       |                |                  | 6  |
| 9  | 1363.649705 | 682.328491      | 1346.623156    | 673.815216       | 1345.639140    | 673.323208       | H    | 551.330008  | 276.168642      | 534.303459     | 267.655368       |                |                  | 5  |
| 10 | 1460.702469 | 730.854873      | 1443.675920    | 722.341598       | 1442.691904    | 721.849590       | P    | 414.271096  | 207.639186      | 397.244547     | 199.125912       |                |                  | 4  |
| 11 | 1531.739583 | 766.373430      | 1514.713034    | 757.860155       | 1513.729018    | 757.368147       | A    | 317.218332  | 159.112804      | 300.191783     | 150.599530       |                |                  | 3  |
| 12 | 1630.807997 | 815.907637      | 1613.781448    | 807.394362       | 1612.797432    | 806.902354       | V    | 246.181218  | 123.594247      | 229.154669     | 115.080973       |                |                  | 2  |
| 13 |             |                 |                |                  |                |                  | K    | 147.112804  | 74.060040       | 130.086255     | 65.546765        |                |                  | 1  |

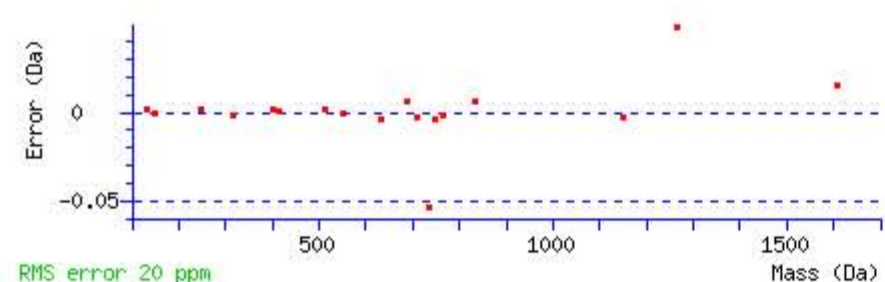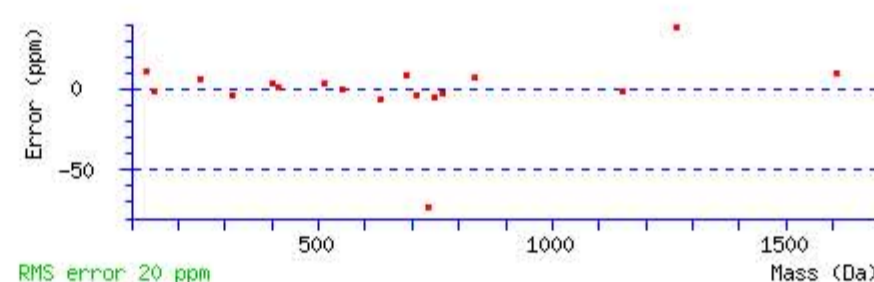

NCBI BLAST search of **LGDDLLQCHPAVK**

(Parameters: blastp, nr protein database, expect=20000, no filter, PAM30)

Other BLAST [web gateways](#)

## All matches to this query

| Score | Mr(calc):   | Delta    | Sequence                      |
|-------|-------------|----------|-------------------------------|
| 31.8  | 1775.906250 | 0.005472 | <a href="#">LGDDLLQCHPAVK</a> |

Mascot: <http://www.matrixscience.com/>



# MASCOT Search Results

## Peptide View

MS/MS Fragmentation of **ELNQAGQETLVTGWGYHSSR**

Found in **PROC\_HUMAN**, Vitamin K-dependent protein C OS=Homo sapiens GN=PROC PE=1 SV=1

Match to Query 57183: 2543.248152 from(848.756660,3+) rtinseconds(2199) index(54222)

Title: Locus:1.1.1.1380.24 File:"2013-07-02 CLN FXIII 60 min 2nd F 4.wiff"

Data file C:\Program Files (x86)\Matrix Science\Mascot Daemon\mgf5 FXIII 60 min 2nd\mascot\_daemon\_merge.mgf

Click mouse within plot area to zoom in by factor of two about that point

Or, Plot from  to  Da

Label all possible matches  Label matches used for scoring

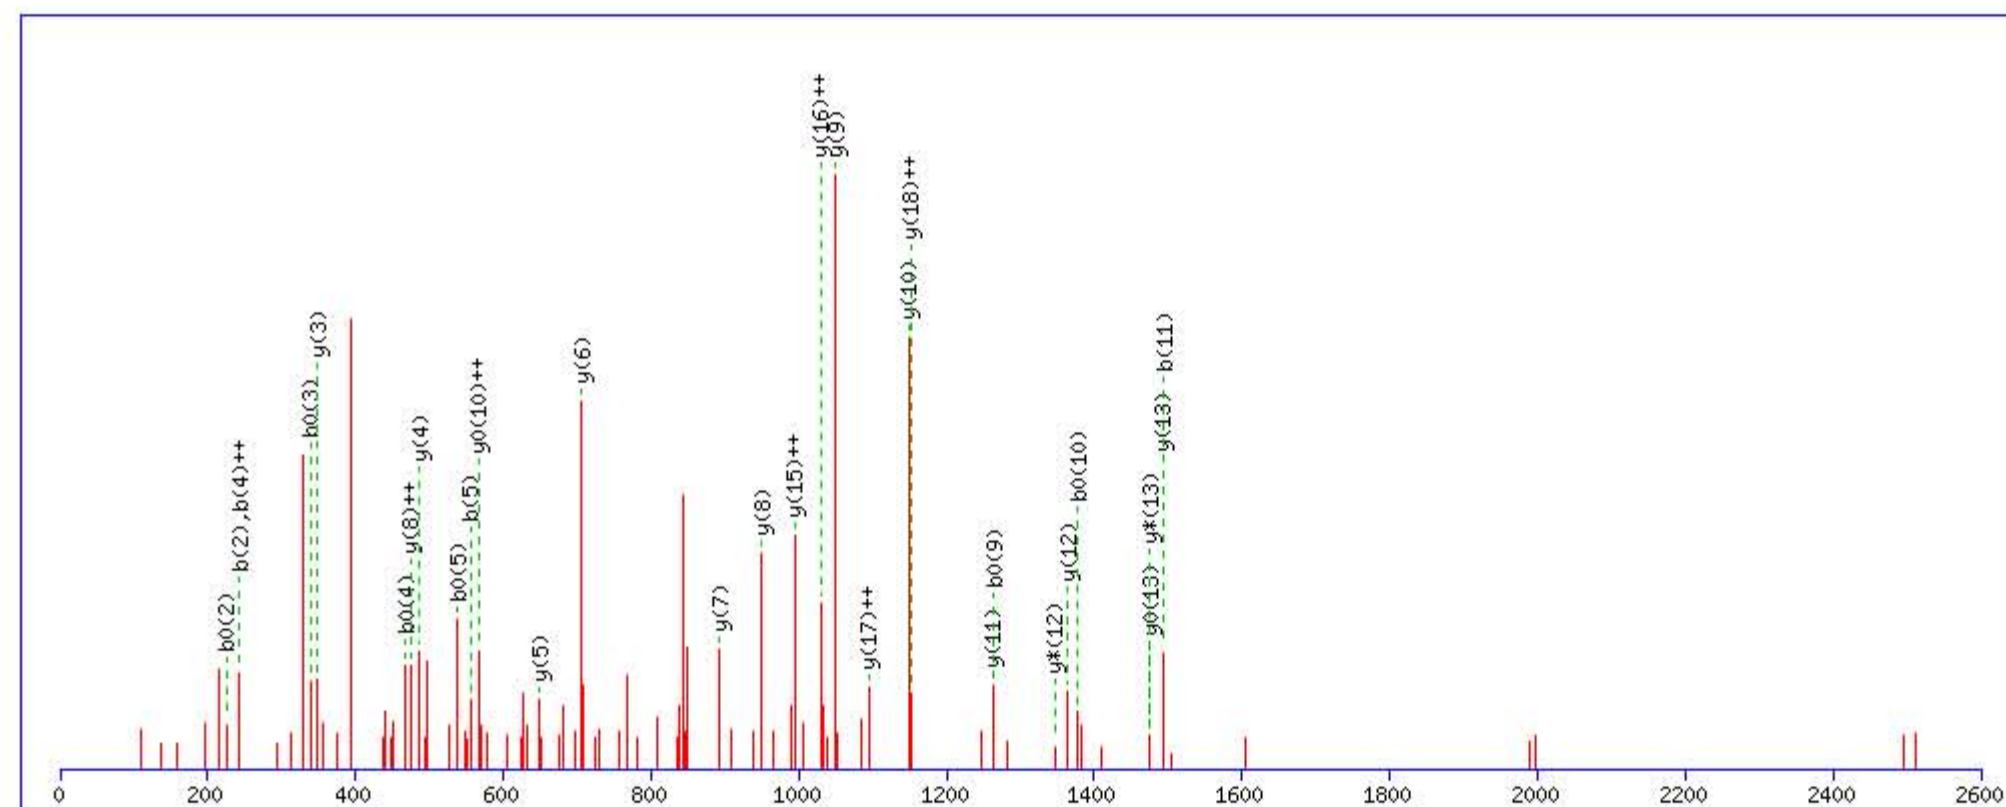

Monoisotopic mass of neutral peptide Mr(calc): 2543.222702

Fixed modifications: Carbamidomethyl (C) (apply to specified residues or termini only)

Variable modifications:

Q7 : Biotin:Thermo-21345 (Q)

Ions Score: 52 Expect: 0.00018

Matches : 30/222 fragment ions using 61 most intense peaks [\(help\)](#)

| #  | b                  | b <sup>++</sup>   | b <sup>*</sup> | b <sup>*++</sup> | b <sup>0</sup>     | b <sup>0++</sup> | Seq. | y                  | y <sup>++</sup>    | y <sup>*</sup>     | y <sup>*++</sup> | y <sup>0</sup>     | y <sup>0++</sup>  | #  |
|----|--------------------|-------------------|----------------|------------------|--------------------|------------------|------|--------------------|--------------------|--------------------|------------------|--------------------|-------------------|----|
| 1  | 130.049869         | 65.528572         |                |                  | 112.039304         | 56.523290        | E    |                    |                    |                    |                  |                    |                   | 20 |
| 2  | <b>243.133933</b>  | 122.070605        |                |                  | <b>225.123368</b>  | 113.065322       | L    | 2415.187392        | 1208.097334        | 2398.160843        | 1199.584059      | 2397.176827        | 1199.092051       | 19 |
| 3  | 357.176860         | 179.092068        | 340.150311     | 170.578794       | <b>339.166295</b>  | 170.086786       | N    | 2302.103328        | <b>1151.555302</b> | 2285.076779        | 1143.042027      | 2284.092763        | 1142.550019       | 18 |
| 4  | 485.235438         | <b>243.121357</b> | 468.208889     | 234.608083       | <b>467.224873</b>  | 234.116075       | Q    | 2188.060401        | <b>1094.533838</b> | 2171.033852        | 1086.020564      | 2170.049836        | 1085.528556       | 17 |
| 5  | <b>556.272552</b>  | 278.639914        | 539.246003     | 270.126640       | <b>538.261987</b>  | 269.634632       | A    | 2060.001823        | <b>1030.504549</b> | 2042.975274        | 1021.991275      | 2041.991258        | 1021.499267       | 16 |
| 6  | 613.294016         | 307.150646        | 596.267467     | 298.637372       | 595.283451         | 298.145364       | G    | 1988.964709        | <b>994.985993</b>  | 1971.938160        | 986.472718       | 1970.954144        | 985.980710        | 15 |
| 7  | 1052.519342        | 526.763309        | 1035.492793    | 518.250035       | 1034.508777        | 517.758027       | Q    | 1931.943245        | 966.475261         | 1914.916696        | 957.961986       | 1913.932680        | 957.469978        | 14 |
| 8  | 1181.561935        | 591.284606        | 1164.535386    | 582.771331       | 1163.551370        | 582.279323       | E    | <b>1492.717919</b> | 746.862597         | <b>1475.691370</b> | 738.349323       | <b>1474.707354</b> | 737.857315        | 13 |
| 9  | 1282.609614        | 641.808445        | 1265.583065    | 633.295171       | <b>1264.599049</b> | 632.803163       | T    | <b>1363.675326</b> | 682.341301         | <b>1346.648777</b> | 673.828026       | 1345.664761        | 673.336018        | 12 |
| 10 | 1395.693678        | 698.350477        | 1378.667129    | 689.837203       | <b>1377.683113</b> | 689.345195       | L    | <b>1262.627647</b> | 631.817461         | 1245.601098        | 623.304187       | 1244.617082        | 622.812179        | 11 |
| 11 | <b>1494.762092</b> | 747.884684        | 1477.735543    | 739.371410       | 1476.751527        | 738.879402       | V    | <b>1149.543583</b> | 575.275429         | 1132.517034        | 566.762155       | 1131.533018        | <b>566.270147</b> | 10 |
| 12 | 1595.809771        | 798.408524        | 1578.783222    | 789.895249       | 1577.799206        | 789.403241       | T    | <b>1050.475169</b> | 525.741222         | 1033.448620        | 517.227948       | 1032.464604        | 516.735940        | 9  |
| 13 | 1652.831235        | 826.919256        | 1635.804686    | 818.405981       | 1634.820670        | 817.913973       | G    | <b>949.427490</b>  | <b>475.217383</b>  | 932.400941         | 466.704108       | 931.416925         | 466.212100        | 8  |
| 14 | 1838.910548        | 919.958912        | 1821.883999    | 911.445638       | 1820.899983        | 910.953630       | W    | <b>892.406026</b>  | 446.706651         | 875.379477         | 438.193376       | 874.395461         | 437.701368        | 7  |
| 15 | 1895.932012        | 948.469644        | 1878.905463    | 939.956370       | 1877.921447        | 939.464362       | G    | <b>706.326713</b>  | 353.666994         | 689.300164         | 345.153720       | 688.316148         | 344.661712        | 6  |
| 16 | 2058.995341        | 1030.001308       | 2041.968792    | 1021.488034      | 2040.984776        | 1020.996026      | Y    | <b>649.305249</b>  | 325.156263         | 632.278700         | 316.642988       | 631.294684         | 316.150980        | 5  |
| 17 | 2196.054253        | 1098.530764       | 2179.027704    | 1090.017490      | 2178.043688        | 1089.525482      | H    | <b>486.241920</b>  | 243.624598         | 469.215371         | 235.111324       | 468.231355         | 234.619316        | 4  |
| 18 | 2283.086281        | 1142.046778       | 2266.059732    | 1133.533504      | 2265.075716        | 1133.041496      | S    | <b>349.183008</b>  | 175.095142         | 332.156459         | 166.581868       | 331.172443         | 166.089860        | 3  |
| 19 | 2370.118309        | 1185.562792       | 2353.091760    | 1177.049518      | 2352.107744        | 1176.557510      | S    | 262.150980         | 131.579128         | 245.124431         | 123.065854       | 244.140415         | 122.573846        | 2  |
| 20 |                    |                   |                |                  |                    |                  | R    | 175.118952         | 88.063114          | 158.092403         | 79.549839        |                    |                   | 1  |

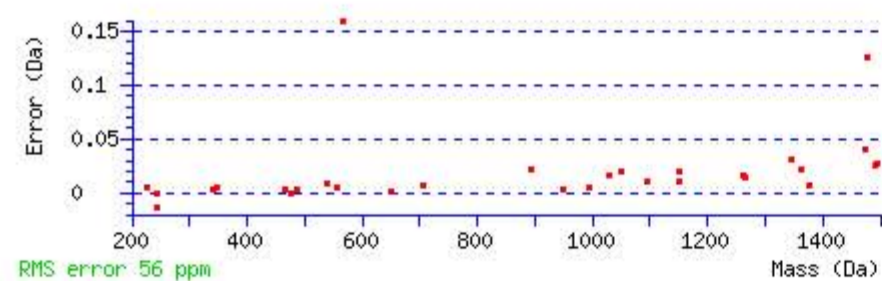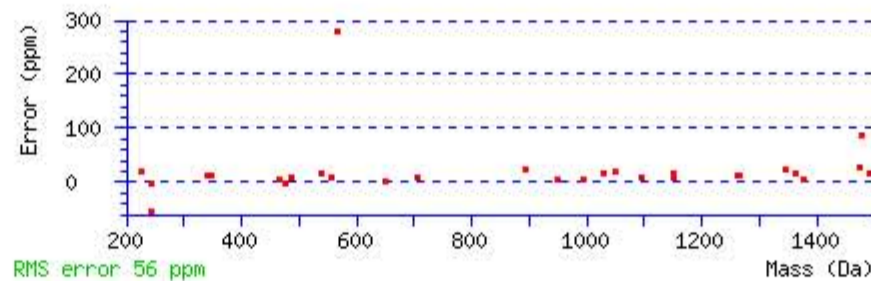

NCBI BLAST search of [ELNQAGQETLVTGWGYHSSR](#)

(Parameters: blastp, nr protein database, expect=20000, no filter, PAM30)

Other BLAST [web gateways](#)

All matches to this query

| Score | Mr(calc):   | Delta    | Sequence                             |
|-------|-------------|----------|--------------------------------------|
| 51.7  | 2543.222702 | 0.025450 | <a href="#">ELNQAGQETLVTGWGYHSSR</a> |
| 44.3  | 2543.222702 | 0.025450 | <a href="#">ELNQAGQETLVTGWGYHSSR</a> |



# Mascot Search Results

## Peptide View

MS/MS Fragmentation of **STTDNDIALHLHAQPATLSQTIVPICLPDSGLAER**  
 Found in **PROC\_HUMAN**, Vitamin K-dependent protein C OS=Homo sapiens GN=PROC PE=1 SV=1

Match to Query 70147: 4041.134736 from(1011.290960,4+) rtinseconds(2998) index(59517)  
 Title: Locus:1.1.1.1655.22 File:"2013-07-02 CLN FXIII 60 min 2nd F 4.wiff"  
 Data file C:\Program Files (x86)\Matrix Science\Mascot Daemon\mgf5 FXIII 60 min 2nd\mascot\_daemon\_merge.mgf

Click mouse within plot area to zoom in by factor of two about that point  
 Or, Plot from  to  Da   
 Label all possible matches  Label matches used for scoring

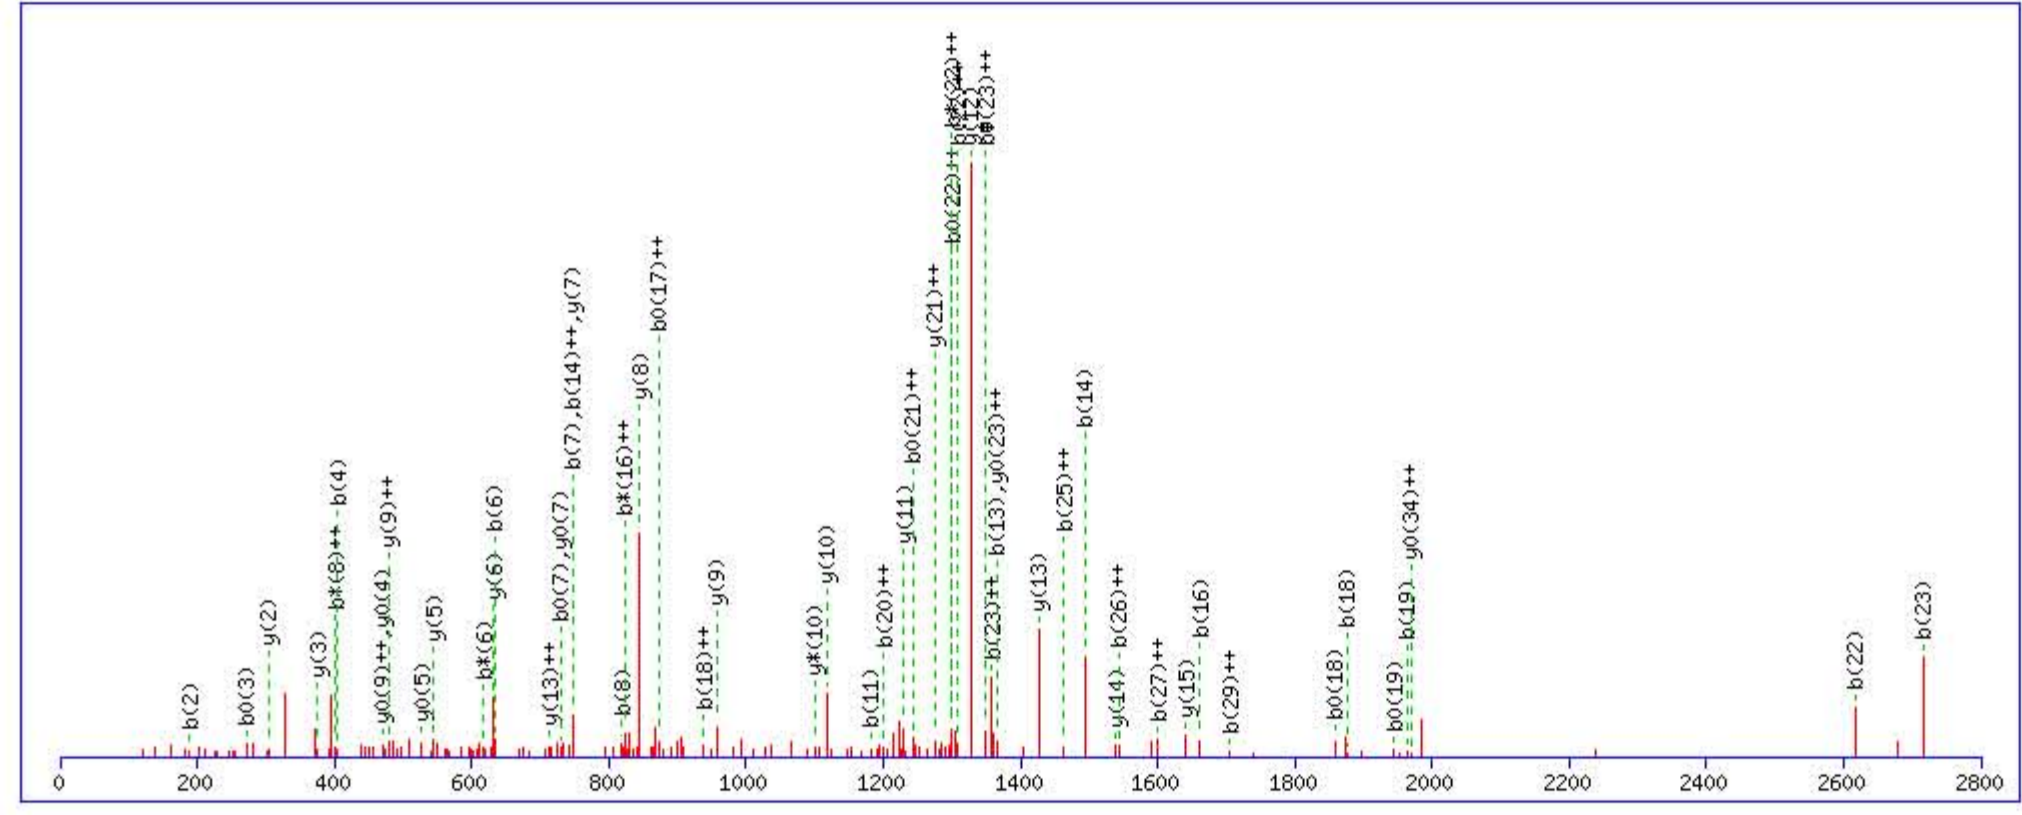

Monoisotopic mass of neutral peptide Mr(calc): 4041.091476  
 Fixed modifications: Carbamidomethyl (C) (apply to specified residues or termini only)  
 Variable modifications:  
 Q20 : Biotin:Thermo-21345 (Q)  
 Ions Score: 53 Expect: 2.6e-005  
 Matches : 58/398 fragment ions using 146 most intense peaks [\(help\)](#)

| #  | b                  | b <sup>++</sup>    | b <sup>*</sup>    | b <sup>++</sup>    | b <sup>0</sup>     | b <sup>0++</sup>   | Seq. | y                  | y <sup>++</sup>    | y <sup>*</sup>     | y <sup>++</sup> | y <sup>0</sup>    | y <sup>0++</sup>   | #  |
|----|--------------------|--------------------|-------------------|--------------------|--------------------|--------------------|------|--------------------|--------------------|--------------------|-----------------|-------------------|--------------------|----|
| 1  | 88.039304          | 44.523290          |                   |                    | 70.028739          | 35.518008          | S    |                    |                    |                    |                 |                   |                    | 35 |
| 2  | <b>189.086983</b>  | 95.047129          |                   |                    | 171.076418         | 86.041847          | T    | 3955.066740        | 1978.037008        | 3938.040191        | 1969.523733     | 3937.056175       | <b>1969.031725</b> | 34 |
| 3  | 290.134662         | 145.570969         |                   |                    | <b>272.124097</b>  | 136.565687         | T    | 3854.019061        | 1927.513168        | 3836.992512        | 1918.999894     | 3836.008496       | 1918.507886        | 33 |
| 4  | <b>405.161605</b>  | 203.084441         |                   |                    | 387.151040         | 194.079158         | D    | 3752.971382        | 1876.989329        | 3735.944833        | 1868.476054     | 3734.960817       | 1867.984046        | 32 |
| 5  | 519.204532         | 260.105904         | 502.177983        | 251.592630         | 501.193967         | 251.100622         | N    | 3637.944439        | 1819.475857        | 3620.917890        | 1810.962583     | 3619.933874       | 1810.470575        | 31 |
| 6  | <b>634.231475</b>  | 317.619376         | <b>617.204926</b> | 309.106101         | 616.220910         | 308.614093         | D    | 3523.901512        | 1762.454394        | 3506.874963        | 1753.941119     | 3505.890947       | 1753.449111        | 30 |
| 7  | <b>747.315539</b>  | 374.161408         | 730.288990        | 365.648133         | <b>729.304974</b>  | 365.156125         | I    | 3408.874569        | 1704.940922        | 3391.848020        | 1696.427648     | 3390.864004       | 1695.935640        | 29 |
| 8  | <b>818.352653</b>  | 409.679965         | 801.326104        | <b>401.166690</b>  | 800.342088         | 400.674682         | A    | 3295.790505        | 1648.398890        | 3278.763956        | 1639.885616     | 3277.779940       | 1639.393608        | 28 |
| 9  | 931.436717         | 466.221997         | 914.410168        | 457.708722         | 913.426152         | 457.216714         | L    | 3224.753391        | 1612.880333        | 3207.726842        | 1604.367059     | 3206.742826       | 1603.875051        | 27 |
| 10 | 1044.520781        | 522.764028         | 1027.494232       | 514.250754         | 1026.510216        | 513.758746         | L    | 3111.669327        | 1556.338301        | 3094.642778        | 1547.825027     | 3093.658762       | 1547.333019        | 26 |
| 11 | <b>1181.579693</b> | 591.293484         | 1164.553144       | 582.780210         | 1163.569128        | 582.288202         | H    | 2998.585263        | 1499.796269        | 2981.558714        | 1491.282995     | 2980.574698       | 1490.790987        | 25 |
| 12 | 1294.663757        | 647.835516         | 1277.637208       | 639.322242         | 1276.653192        | 638.830234         | L    | 2861.526351        | 1431.266813        | 2844.499802        | 1422.753539     | 2843.515786       | 1422.261531        | 24 |
| 13 | <b>1365.700871</b> | 683.354073         | 1348.674322       | 674.840799         | 1347.690306        | 674.348791         | A    | 2748.442287        | 1374.724781        | 2731.415738        | 1366.211507     | 2730.431722       | <b>1365.719499</b> | 23 |
| 14 | <b>1493.759449</b> | <b>747.383362</b>  | 1476.732900       | 738.870088         | 1475.748884        | 738.378080         | Q    | 2677.405173        | 1339.206224        | 2660.378624        | 1330.692950     | 2659.394608       | 1330.200942        | 22 |
| 15 | 1590.812213        | 795.909744         | 1573.785664       | 787.396470         | 1572.801648        | 786.904462         | P    | 2549.346595        | <b>1275.176935</b> | 2532.320046        | 1266.663661     | 2531.336030       | 1266.171653        | 21 |
| 16 | <b>1661.849327</b> | 831.428301         | 1644.822778       | <b>822.915027</b>  | 1643.838762        | 822.423019         | A    | 2452.293831        | 1226.650553        | 2435.267282        | 1218.137279     | 2434.283266       | 1217.645271        | 20 |
| 17 | 1762.897006        | 881.952141         | 1745.870457       | 873.438867         | 1744.886441        | <b>872.946858</b>  | T    | 2381.256717        | 1191.131996        | 2364.230168        | 1182.618722     | 2363.246152       | 1182.126714        | 19 |
| 18 | <b>1875.981070</b> | <b>938.494173</b>  | 1858.954521       | 929.980898         | <b>1857.970505</b> | 929.488890         | L    | 2280.209038        | 1140.608157        | 2263.182489        | 1132.094882     | 2262.198473       | 1131.602874        | 18 |
| 19 | <b>1963.013098</b> | 982.010187         | 1945.986549       | 973.496913         | <b>1945.002533</b> | 973.004904         | S    | 2167.124974        | 1084.066125        | 2150.098425        | 1075.552850     | 2149.114409       | 1075.060842        | 17 |
| 20 | 2402.238424        | <b>1201.622850</b> | 2385.211875       | 1193.109575        | 2384.227859        | 1192.617567        | Q    | 2080.092946        | 1040.550111        | 2063.066397        | 1032.036836     | 2062.082381       | 1031.544828        | 16 |
| 21 | 2503.286103        | 1252.146689        | 2486.259554       | 1243.633415        | 2485.275538        | <b>1243.141407</b> | T    | <b>1640.867620</b> | 820.937448         | 1623.841071        | 812.424174      | 1622.857055       | 811.932166         | 15 |
| 22 | <b>2616.370167</b> | <b>1308.688721</b> | 2599.343618       | <b>1300.175447</b> | 2598.359602        | <b>1299.683439</b> | I    | <b>1539.819941</b> | 770.413609         | 1522.793392        | 761.900334      | 1521.809376       | 761.408326         | 14 |
| 23 | <b>2715.438581</b> | <b>1358.222928</b> | 2698.412032       | <b>1349.709654</b> | 2697.428016        | <b>1349.217646</b> | V    | <b>1426.735877</b> | <b>713.871577</b>  | 1409.709328        | 705.358302      | 1408.725312       | 704.866294         | 13 |
| 24 | 2812.491345        | 1406.749310        | 2795.464796       | 1398.236036        | 2794.480780        | 1397.744028        | P    | <b>1327.667463</b> | 664.337370         | 1310.640914        | 655.824095      | 1309.656898       | 655.332087         | 12 |
| 25 | 2925.575409        | <b>1463.291342</b> | 2908.548860       | 1454.778068        | 2907.564844        | 1454.286060        | I    | <b>1230.614699</b> | 615.810988         | 1213.588150        | 607.297713      | 1212.604134       | 606.805705         | 11 |
| 26 | 3085.606058        | <b>1543.306667</b> | 3068.579509       | 1534.793392        | 3067.595493        | 1534.301384        | C    | <b>1117.530635</b> | 559.268956         | <b>1100.504086</b> | 550.755681      | 1099.520070       | 550.263673         | 10 |
| 27 | 3198.690122        | <b>1599.848699</b> | 3181.663573       | 1591.335424        | 3180.679557        | 1590.843416        | L    | <b>957.499986</b>  | <b>479.253631</b>  | 940.473437         | 470.740357      | 939.489421        | <b>470.248349</b>  | 9  |
| 28 | 3295.742886        | 1648.375081        | 3278.716337       | 1639.861806        | 3277.732321        | 1639.369798        | P    | <b>844.415922</b>  | 422.711599         | 827.389373         | 414.198325      | 826.405357        | 413.706317         | 8  |
| 29 | 3410.769829        | <b>1705.888552</b> | 3393.743280       | 1697.375278        | 3392.759264        | 1696.883270        | D    | <b>747.363158</b>  | 374.185217         | 730.336609         | 365.671943      | <b>729.352593</b> | 365.179935         | 7  |
| 30 | 3497.801857        | 1749.404566        | 3480.775308       | 1740.891292        | 3479.791292        | 1740.399284        | S    | <b>632.336215</b>  | 316.671746         | 615.309666         | 308.158471      | 614.325650        | 307.666463         | 6  |
| 31 | 3554.823321        | 1777.915298        | 3537.796772       | 1769.402024        | 3536.812756        | 1768.910016        | G    | <b>545.304187</b>  | 273.155732         | 528.277638         | 264.642457      | <b>527.293622</b> | 264.150449         | 5  |
| 32 | 3667.907385        | 1834.457330        | 3650.880836       | 1825.944056        | 3649.896820        | 1825.452048        | L    | 488.282723         | 244.645000         | 471.256174         | 236.131725      | <b>470.272158</b> | 235.639717         | 4  |
| 33 | 3738.944499        | 1869.975887        | 3721.917950       | 1861.462613        | 3720.933934        | 1860.970605        | A    | <b>375.198659</b>  | 188.102968         | 358.172110         | 179.589693      | 357.188094        | 179.097685         | 3  |
| 34 | 3867.987092        | 1934.497184        | 3850.960543       | 1925.983909        | 3849.976527        | 1925.491901        | E    | <b>304.161545</b>  | 152.584411         | 287.134996         | 144.071136      | 286.150980        | 143.579128         | 2  |
| 35 |                    |                    |                   |                    |                    |                    | R    | 175.118952         | 88.063114          | 158.092403         | 79.549839       |                   |                    | 1  |

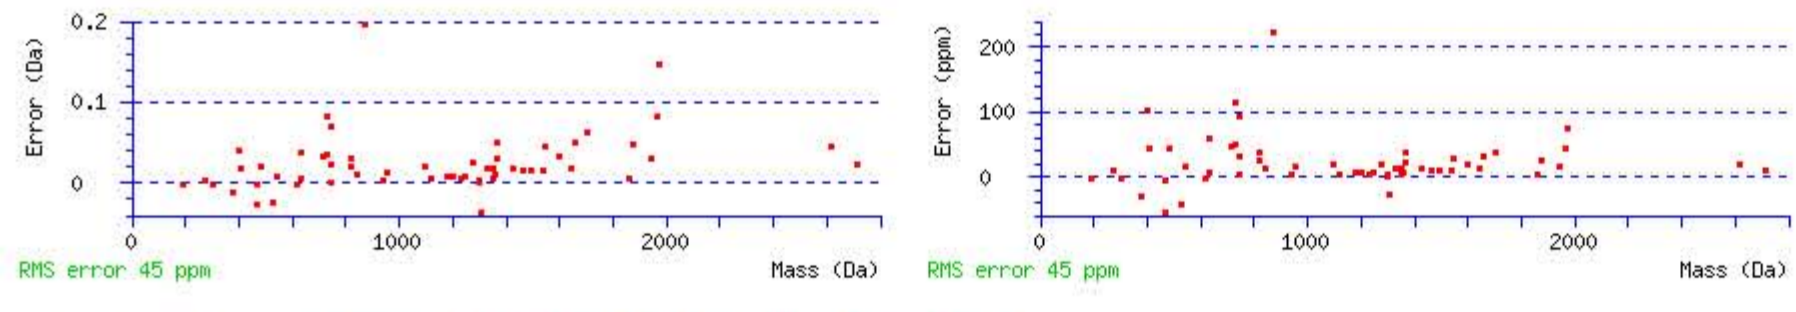

NCBI BLAST search of **STTDNDIALHLHAQPATLSQTIVPICLPDSGLAER**  
 (Parameters: blastp, nr protein database, expect=20000, no filter, PAM30)  
 Other BLAST [web gateways](#)

### All matches to this query

| Score | Mr(calc):   | Delta    | Sequence                                              |
|-------|-------------|----------|-------------------------------------------------------|
| 52.6  | 4041.091476 | 0.043260 | <a href="#">STTDNDIALHLHAQPATLSQTIVPICLPDSGLAER</a>   |
| 40.5  | 4041.091476 | 0.043260 | <a href="#">STTDNDIALHLHAQPATLSQTIVPICLPDSGLAER</a>   |
| 3.8   | 4041.127869 | 0.006867 | <a href="#">TTAIVEVKGTVDIVLTPLVAEALDRYIEAMVHCASTR</a> |



# MASCOT Search Results

## Peptide View

MS/MS Fragmentation of **QLAVLDK**

Found in **PROS\_HUMAN**, Vitamin K-dependent protein S OS=Homo sapiens GN=PROS1 PE=1 SV=1

Match to Query 18699: 1096.634328 from(549.324440,2+) rtinseconds(2001) index(52906)

Title: Locus:1.1.1.1312.6 File:"2013-07-02 CLN FXIII 60 min 2nd F 4.wiff"

Data file C:\Program Files (x86)\Matrix Science\Mascot Daemon\mgf5 FXIII 60 min 2nd\mascot\_daemon\_merge.mgf

Click mouse within plot area to zoom in by factor of two about that point

Or, Plot from  to  Da

Label all possible matches  Label matches used for scoring

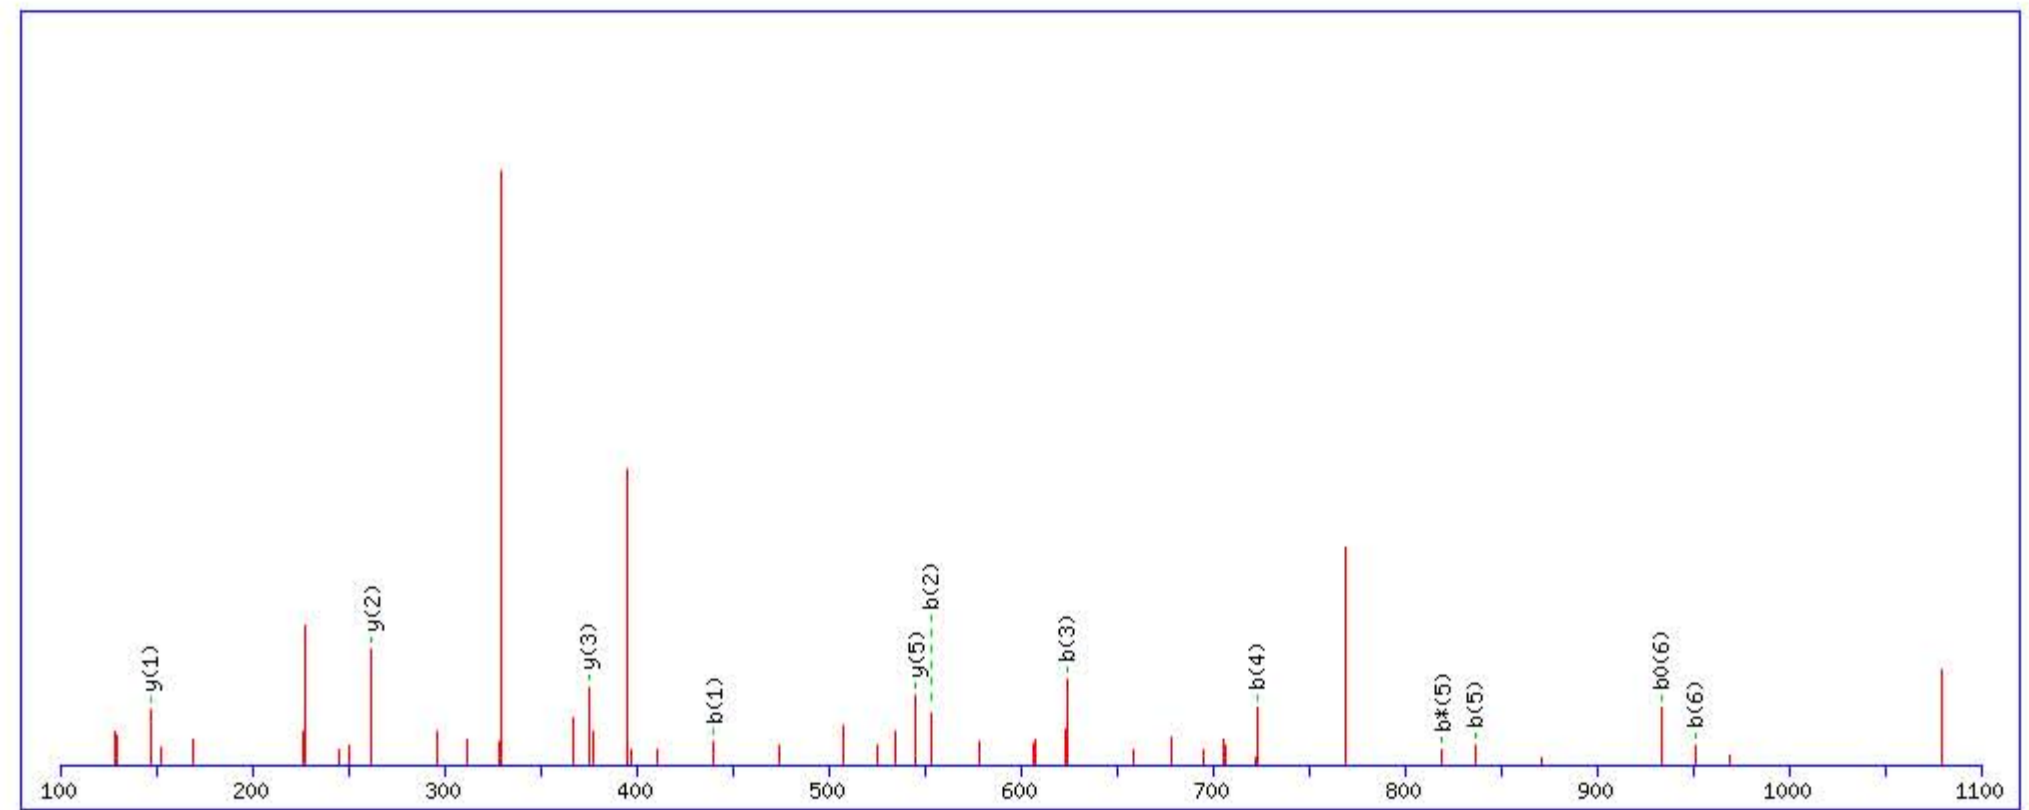

Monoisotopic mass of neutral peptide Mr(calc): 1096.631439

Fixed modifications: Carbamidomethyl (C) (apply to specified residues or termini only)

Variable modifications:

Q1 : Biotin:Thermo-21345 (Q)

Ions Score: 32 Expect: 0.0096

Matches : 12/60 fragment ions using 26 most intense peaks [\(help\)](#)

| # | b                 | b <sup>++</sup> | b <sup>*</sup>    | b <sup>*++</sup> | b <sup>0</sup>    | b <sup>0++</sup> | Seq.     | y                 | y <sup>++</sup> | y <sup>*</sup> | y <sup>*++</sup> | y <sup>0</sup> | y <sup>0++</sup> | # |
|---|-------------------|-----------------|-------------------|------------------|-------------------|------------------|----------|-------------------|-----------------|----------------|------------------|----------------|------------------|---|
| 1 | <b>440.232602</b> | 220.619939      | 423.206053        | 212.106664       |                   |                  | <b>Q</b> |                   |                 |                |                  |                |                  | 7 |
| 2 | <b>553.316666</b> | 277.161971      | 536.290117        | 268.648697       |                   |                  | <b>L</b> | 658.413403        | 329.710340      | 641.386854     | 321.197065       | 640.402838     | 320.705057       | 6 |
| 3 | <b>624.353780</b> | 312.680528      | 607.327231        | 304.167254       |                   |                  | <b>A</b> | <b>545.329339</b> | 273.168308      | 528.302790     | 264.655033       | 527.318774     | 264.163025       | 5 |
| 4 | <b>723.422194</b> | 362.214735      | 706.395645        | 353.701461       |                   |                  | <b>V</b> | 474.292225        | 237.649750      | 457.265676     | 229.136476       | 456.281660     | 228.644468       | 4 |
| 5 | <b>836.506258</b> | 418.756767      | <b>819.479709</b> | 410.243493       |                   |                  | <b>L</b> | <b>375.223811</b> | 188.115543      | 358.197262     | 179.602269       | 357.213246     | 179.110261       | 3 |
| 6 | <b>951.533201</b> | 476.270239      | 934.506652        | 467.756964       | <b>933.522636</b> | 467.264956       | <b>D</b> | <b>262.139747</b> | 131.573511      | 245.113198     | 123.060237       | 244.129182     | 122.568229       | 2 |
| 7 |                   |                 |                   |                  |                   |                  | <b>K</b> | <b>147.112804</b> | 74.060040       | 130.086255     | 65.546765        |                |                  | 1 |

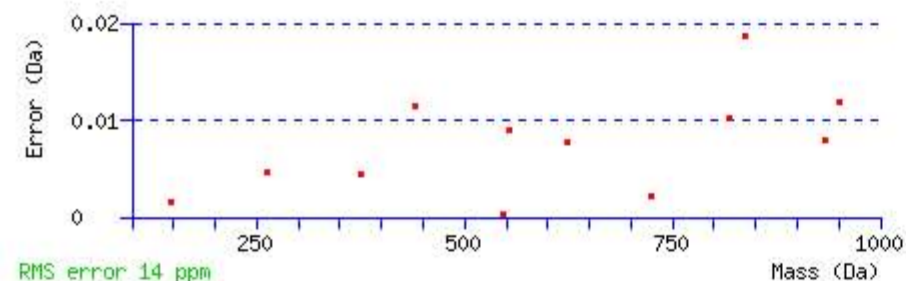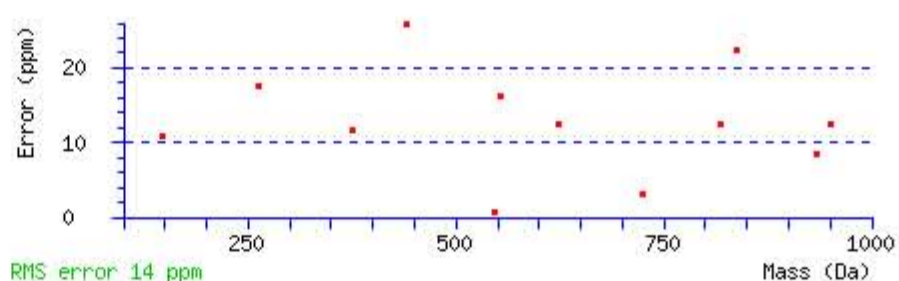

NCBI BLAST search of **QLAVLDK**

(Parameters: blastp, nr protein database, expect=20000, no filter, PAM30)

Other BLAST [web gateways](#)

All matches to this query

| Score | Mr(calc):   | Delta     | Sequence                   |
|-------|-------------|-----------|----------------------------|
| 31.9  | 1096.631439 | 0.002889  | <a href="#">QLAVLDK</a>    |
| 18.1  | 1096.624054 | 0.010274  | <a href="#">KPVDSVPLSR</a> |
| 9.3   | 1096.624023 | 0.010305  | <a href="#">IPRENLLDK</a>  |
| 8.8   | 1096.635269 | -0.000941 | <a href="#">SSSLVIHKAR</a> |
| 5.3   | 1096.631439 | 0.002889  | <a href="#">GILQLDK</a>    |
| 2.2   | 1096.631439 | 0.002889  | <a href="#">QIDVAIK</a>    |
| 2.0   | 1096.628067 | 0.006261  | <a href="#">YIFVSLLSR</a>  |
| 1.6   | 1096.642654 | -0.008326 | <a href="#">NITMHLK</a>    |
| 0.9   | 1096.646500 | -0.012172 | <a href="#">KPDQARVRK</a>  |
| 0.7   | 1096.631439 | 0.002889  | <a href="#">QIEGLVK</a>    |

Mascot: <http://www.matrixscience.com/>



# MASCOT Search Results

## Peptide View

MS/MS Fragmentation of **QSTNAYPDLR**

Found in **PROS\_HUMAN**, Vitamin K-dependent protein S OS=Homo sapiens GN=PROS1 PE=1 SV=1

Match to Query 33148: 1474.723168 from(738.368860,2+) rtinseconds(1754) index(34795)

Title: Locus:1.1.1.3030.16 File:"2013-07-02 CLN FXIII 60 min 2nd F 3.wiff"

Data file C:\Program Files (x86)\Matrix Science\Mascot Daemon\mgf\5 FXIII 60 min 2nd\mascot\_daemon\_merge.mgf

Click mouse within plot area to zoom in by factor of two about that point

Or, Plot from  to  Da

Label all possible matches  Label matches used for scoring

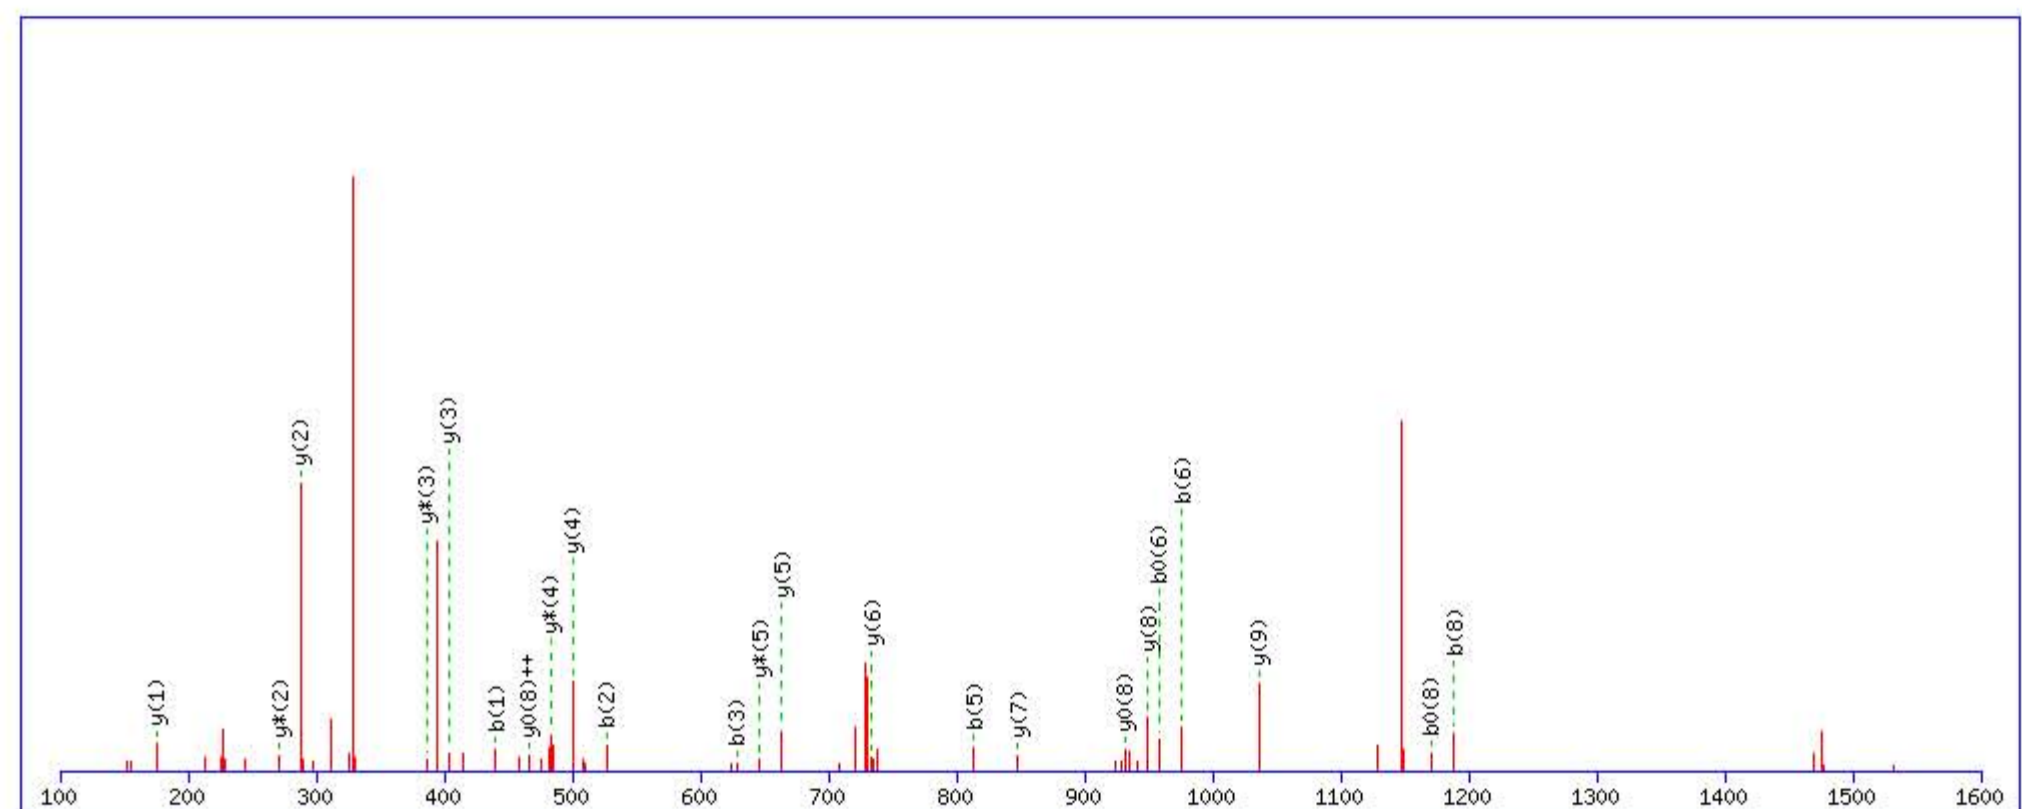

Monoisotopic mass of neutral peptide Mr(calc): 1474.723831

Fixed modifications: Carbamidomethyl (C) (apply to specified residues or termini only)

Variable modifications:

Q1 : Biotin:Thermo-21345 (Q)

Ions Score: 46 Expect: 0.00052

Matches : 23/102 fragment ions using 54 most intense peaks [\(help\)](#)

| #  | b                  | b <sup>++</sup> | b <sup>*</sup> | b <sup>*++</sup> | b <sup>0</sup>     | b <sup>0++</sup> | Seq. | y                  | y <sup>++</sup> | y <sup>*</sup>    | y <sup>*++</sup> | y <sup>0</sup>    | y <sup>0++</sup>  | #  |
|----|--------------------|-----------------|----------------|------------------|--------------------|------------------|------|--------------------|-----------------|-------------------|------------------|-------------------|-------------------|----|
| 1  | <b>440.232602</b>  | 220.619939      | 423.206053     | 212.106664       |                    |                  | Q    |                    |                 |                   |                  |                   |                   | 10 |
| 2  | <b>527.264630</b>  | 264.135953      | 510.238081     | 255.622679       | 509.254065         | 255.130671       | S    | <b>1036.505800</b> | 518.756538      | 1019.479251       | 510.243263       | 1018.495235       | 509.751255        | 9  |
| 3  | <b>628.312309</b>  | 314.659793      | 611.285760     | 306.146518       | 610.301744         | 305.654510       | T    | <b>949.473772</b>  | 475.240524      | 932.447223        | 466.727249       | <b>931.463207</b> | <b>466.235241</b> | 8  |
| 4  | 742.355236         | 371.681256      | 725.328687     | 363.167982       | 724.344671         | 362.675974       | N    | <b>848.426093</b>  | 424.716684      | 831.399544        | 416.203410       | 830.415528        | 415.711402        | 7  |
| 5  | <b>813.392350</b>  | 407.199813      | 796.365801     | 398.686538       | 795.381785         | 398.194530       | A    | <b>734.383166</b>  | 367.695221      | 717.356617        | 359.181946       | 716.372601        | 358.689938        | 6  |
| 6  | <b>976.455679</b>  | 488.731477      | 959.429130     | 480.218203       | <b>958.445114</b>  | 479.726195       | Y    | <b>663.346052</b>  | 332.176664      | <b>646.319503</b> | 323.663389       | 645.335487        | 323.171382        | 5  |
| 7  | 1073.508443        | 537.257860      | 1056.481894    | 528.744585       | 1055.497878        | 528.252577       | P    | <b>500.282723</b>  | 250.644999      | <b>483.256174</b> | 242.131725       | 482.272158        | 241.639717        | 4  |
| 8  | <b>1188.535386</b> | 594.771331      | 1171.508837    | 586.258057       | <b>1170.524821</b> | 585.766049       | D    | <b>403.229959</b>  | 202.118617      | <b>386.203410</b> | 193.605343       | 385.219394        | 193.113335        | 3  |
| 9  | 1301.619450        | 651.313363      | 1284.592901    | 642.800089       | 1283.608885        | 642.308080       | L    | <b>288.203016</b>  | 144.605146      | <b>271.176467</b> | 136.091871       |                   |                   | 2  |
| 10 |                    |                 |                |                  |                    |                  | R    | <b>175.118952</b>  | 88.063114       | 158.092403        | 79.549839        |                   |                   | 1  |

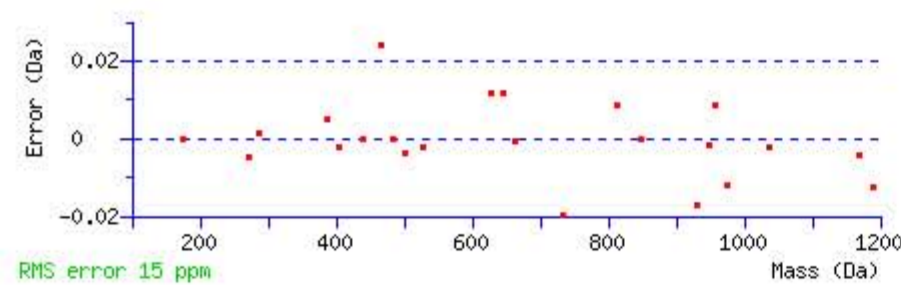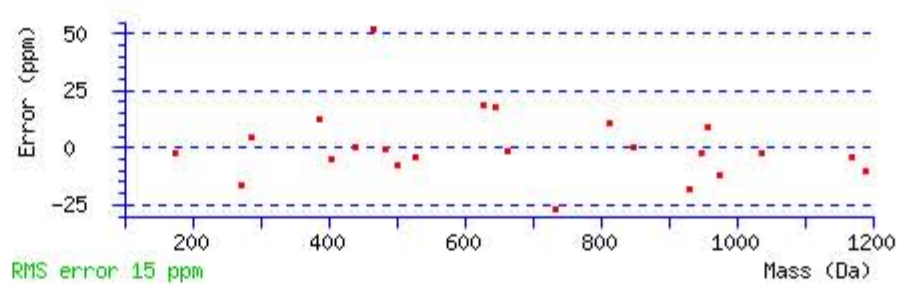

NCBI BLAST search of **QSTNAYPDLR**

(Parameters: blastp, nr protein database, expect=20000, no filter, PAM30)

Other BLAST [web gateways](#)

All matches to this query

| Score | Mr(calc):   | Delta     | Sequence                        |
|-------|-------------|-----------|---------------------------------|
| 46.1  | 1474.723831 | -0.000663 | <a href="#">QSTNAYPDLR</a>      |
| 15.1  | 1474.721161 | 0.002007  | <a href="#">QSTHGERGHR</a>      |
| 9.3   | 1474.741592 | -0.018424 | <a href="#">SSLEHGSDVYLLR</a>   |
| 6.4   | 1474.744934 | -0.021766 | <a href="#">LSKEELIQNMDR</a>    |
| 4.0   | 1474.727661 | -0.004493 | <a href="#">SSATLWNSPSRNR</a>   |
| 2.4   | 1474.731033 | -0.007865 | <a href="#">RGDGGKMAAAGALER</a> |
| 1.4   | 1474.719788 | 0.003380  | <a href="#">QQEELEQMRLR</a>     |
| 0.8   | 1474.742462 | -0.019294 | <a href="#">QCKSEFPPIR</a>      |
| 0.6   | 1474.735092 | -0.011924 | <a href="#">SFCVLSQLTQHR</a>    |



# MASCOT Search Results

## Peptide View

MS/MS Fragmentation of **SFQTGLFTAAR**

Found in **PROS\_HUMAN**, Vitamin K-dependent protein S OS=Homo sapiens GN=PROS1 PE=1 SV=1

Match to Query 34207: 1508.785028 from(755.399790,2+) rtinseconds(2294) index(38209)

Title: Locus:1.1.1.3218.15 File:"2013-07-02 CLN FXIII 60 min 2nd F 3.wiff"

Data file C:\Program Files (x86)\Matrix Science\Mascot Daemon\mgf5 FXIII 60 min 2nd\mascot\_daemon\_merge.mgf

Click mouse within plot area to zoom in by factor of two about that point

Or, Plot from  to  Da

Label all possible matches  Label matches used for scoring

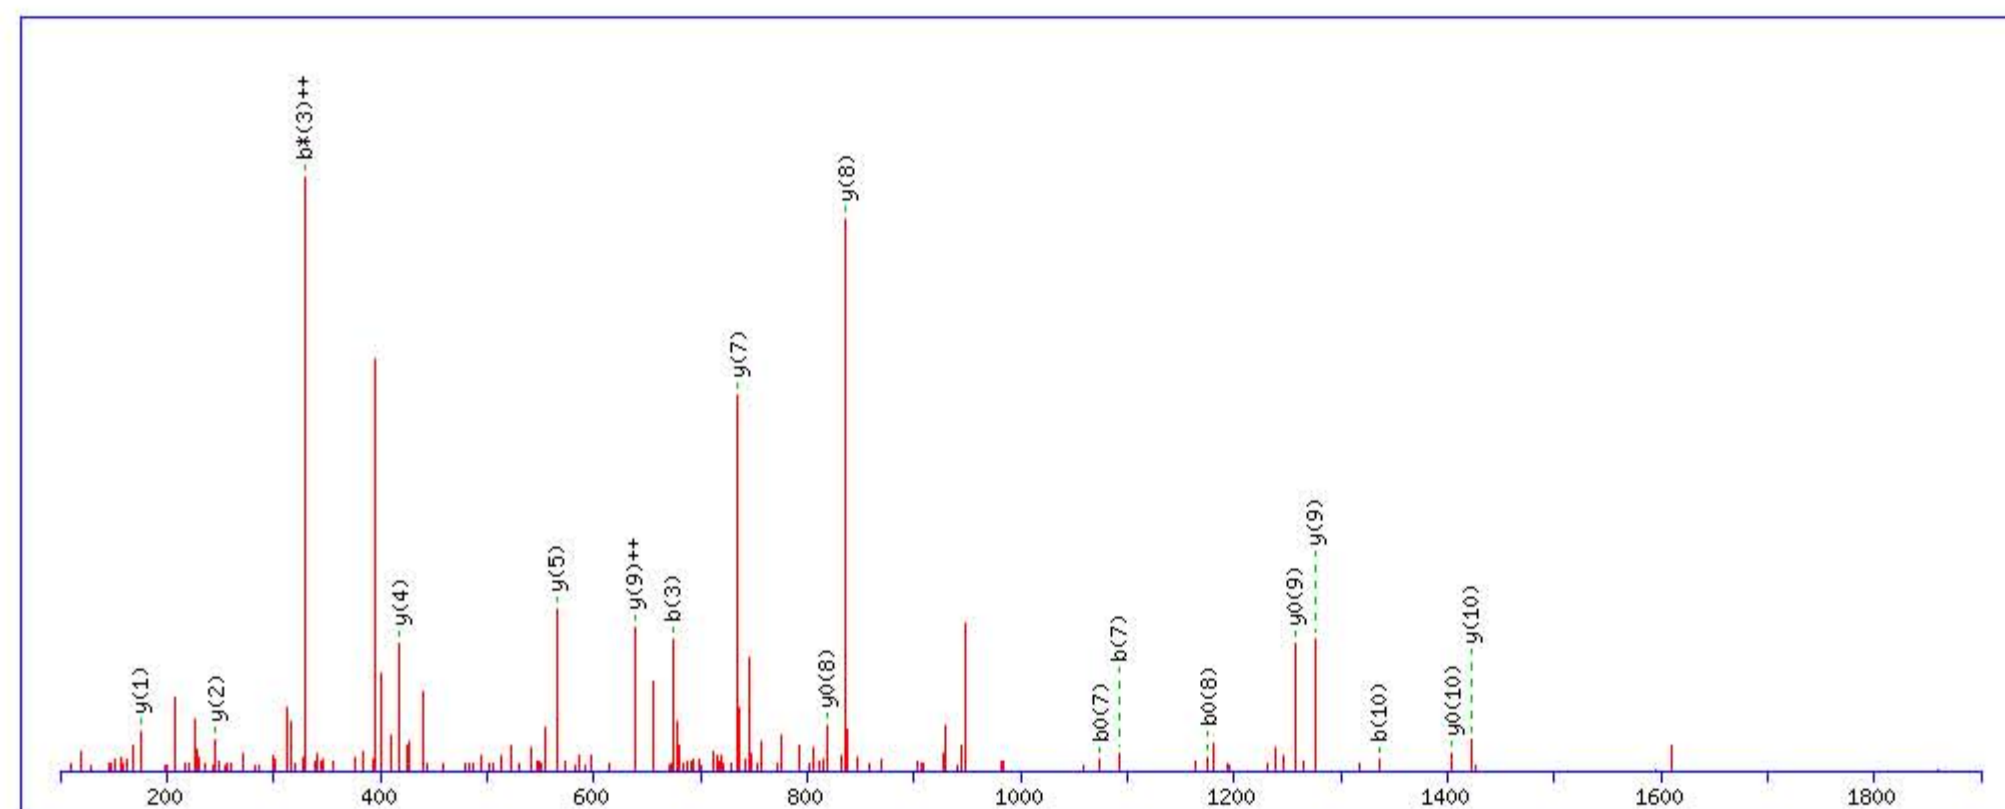

Monoisotopic mass of neutral peptide Mr(calc): 1508.780975

Fixed modifications: Carbamidomethyl (C) (apply to specified residues or termini only)

Variable modifications:

Q3 : Biotin:Thermo-21345 (Q)

Ions Score: 55 Expect: 3.5e-005

Matches : 18/110 fragment ions using 28 most intense peaks [\(help\)](#)

| #  | b           | b <sup>++</sup> | b <sup>*</sup> | b <sup>*++</sup> | b <sup>0</sup> | b <sup>0++</sup> | Seq. | y           | y <sup>++</sup> | y <sup>*</sup> | y <sup>*++</sup> | y <sup>0</sup> | y <sup>0++</sup> | #  |
|----|-------------|-----------------|----------------|------------------|----------------|------------------|------|-------------|-----------------|----------------|------------------|----------------|------------------|----|
| 1  | 88.039304   | 44.523290       |                |                  | 70.028739      | 35.518008        | S    |             |                 |                |                  |                |                  | 11 |
| 2  | 235.107718  | 118.057497      |                |                  | 217.097153     | 109.052214       | F    | 1422.756220 | 711.881748      | 1405.729671    | 703.368474       | 1404.745655    | 702.876465       | 10 |
| 3  | 674.333044  | 337.670160      | 657.306495     | 329.156885       | 656.322479     | 328.664877       | Q    | 1275.687806 | 638.347541      | 1258.661257    | 629.834267       | 1257.677241    | 629.342259       | 9  |
| 4  | 775.380723  | 388.194000      | 758.354174     | 379.680725       | 757.370158     | 379.188717       | T    | 836.462480  | 418.734878      | 819.435931     | 410.221604       | 818.451915     | 409.729596       | 8  |
| 5  | 832.402187  | 416.704732      | 815.375638     | 408.191457       | 814.391622     | 407.699449       | G    | 735.414801  | 368.211039      | 718.388252     | 359.697764       | 717.404236     | 359.205756       | 7  |
| 6  | 945.486251  | 473.246764      | 928.459702     | 464.733489       | 927.475686     | 464.241481       | L    | 678.393337  | 339.700307      | 661.366788     | 331.187032       | 660.382772     | 330.695024       | 6  |
| 7  | 1092.554665 | 546.780971      | 1075.528116    | 538.267696       | 1074.544100    | 537.775688       | F    | 565.309273  | 283.158275      | 548.282724     | 274.645000       | 547.298708     | 274.152992       | 5  |
| 8  | 1193.602344 | 597.304810      | 1176.575795    | 588.791536       | 1175.591779    | 588.299528       | T    | 418.240859  | 209.624067      | 401.214310     | 201.110793       | 400.230294     | 200.618785       | 4  |
| 9  | 1264.639458 | 632.823367      | 1247.612909    | 624.310093       | 1246.628893    | 623.818085       | A    | 317.193180  | 159.100228      | 300.166631     | 150.586953       |                |                  | 3  |
| 10 | 1335.676572 | 668.341924      | 1318.650023    | 659.828650       | 1317.666007    | 659.336642       | A    | 246.156066  | 123.581671      | 229.129517     | 115.068396       |                |                  | 2  |
| 11 |             |                 |                |                  |                |                  | R    | 175.118952  | 88.063114       | 158.092403     | 79.549839        |                |                  | 1  |

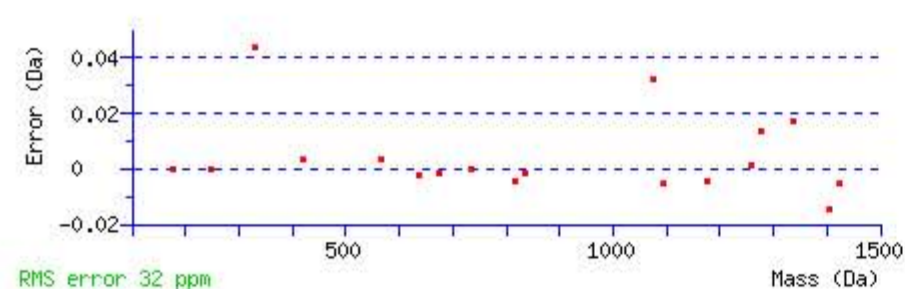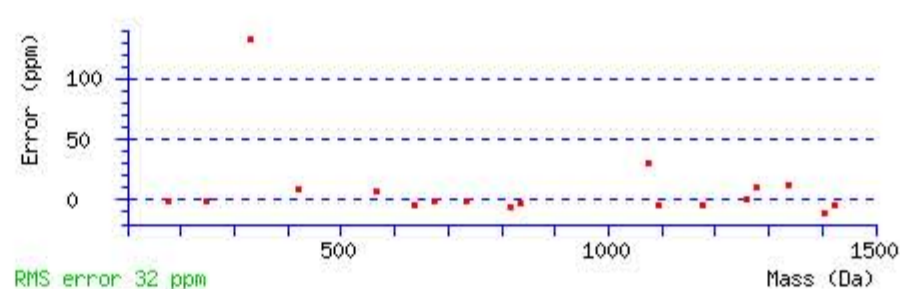

NCBI BLAST search of **SFQTGLFTAAR**

(Parameters: blastp, nr protein database, expect=20000, no filter, PAM30)

Other BLAST [web gateways](#)

All matches to this query

| Score | Mr(calc):   | Delta     | Sequence                        |
|-------|-------------|-----------|---------------------------------|
| 55.0  | 1508.780975 | 0.004053  | <a href="#">SFQTGLFTAAR</a>     |
| 7.1   | 1508.798721 | -0.013693 | <a href="#">SSYGVAAPVDFLRK</a>  |
| 5.2   | 1508.805893 | -0.020865 | <a href="#">RLELPRASDAEPR</a>   |
| 4.7   | 1508.780960 | 0.004068  | <a href="#">TQPPPENLFR</a>      |
| 4.6   | 1508.776932 | 0.008096  | <a href="#">LMGADSLQLFRSR</a>   |
| 2.1   | 1508.805939 | -0.020911 | <a href="#">SSPEHTTILRGGVR</a>  |
| 0.3   | 1508.765701 | 0.019327  | <a href="#">TKPLSMLYVDNGR</a>   |
| 0.0   | 1508.794708 | -0.009680 | <a href="#">SGKSGPSPTTPQPLR</a> |



# MASCOT SEARCH RESULTS

## Peptide View

MS/MS Fragmentation of **IETISHEDLQR**

Found in **PROS\_HUMAN**, Vitamin K-dependent protein S OS=Homo sapiens GN=PROS1 PE=1 SV=1

Match to Query 39436: 1650.846148 from(826.430350,2+) rtinseconds(1682) index(50712)

Title: Locus:1.1.1.1201.9 File:"2013-07-02 CLN FXIII 60 min 2nd F 4.wiff"

Data file C:\Program Files (x86)\Matrix Science\Mascot Daemon\mgf5 FXIII 60 min 2nd\mascot\_daemon\_merge.mgf

Click mouse within plot area to zoom in by factor of two about that point

Or, Plot from  to  Da

Label all possible matches  Label matches used for scoring

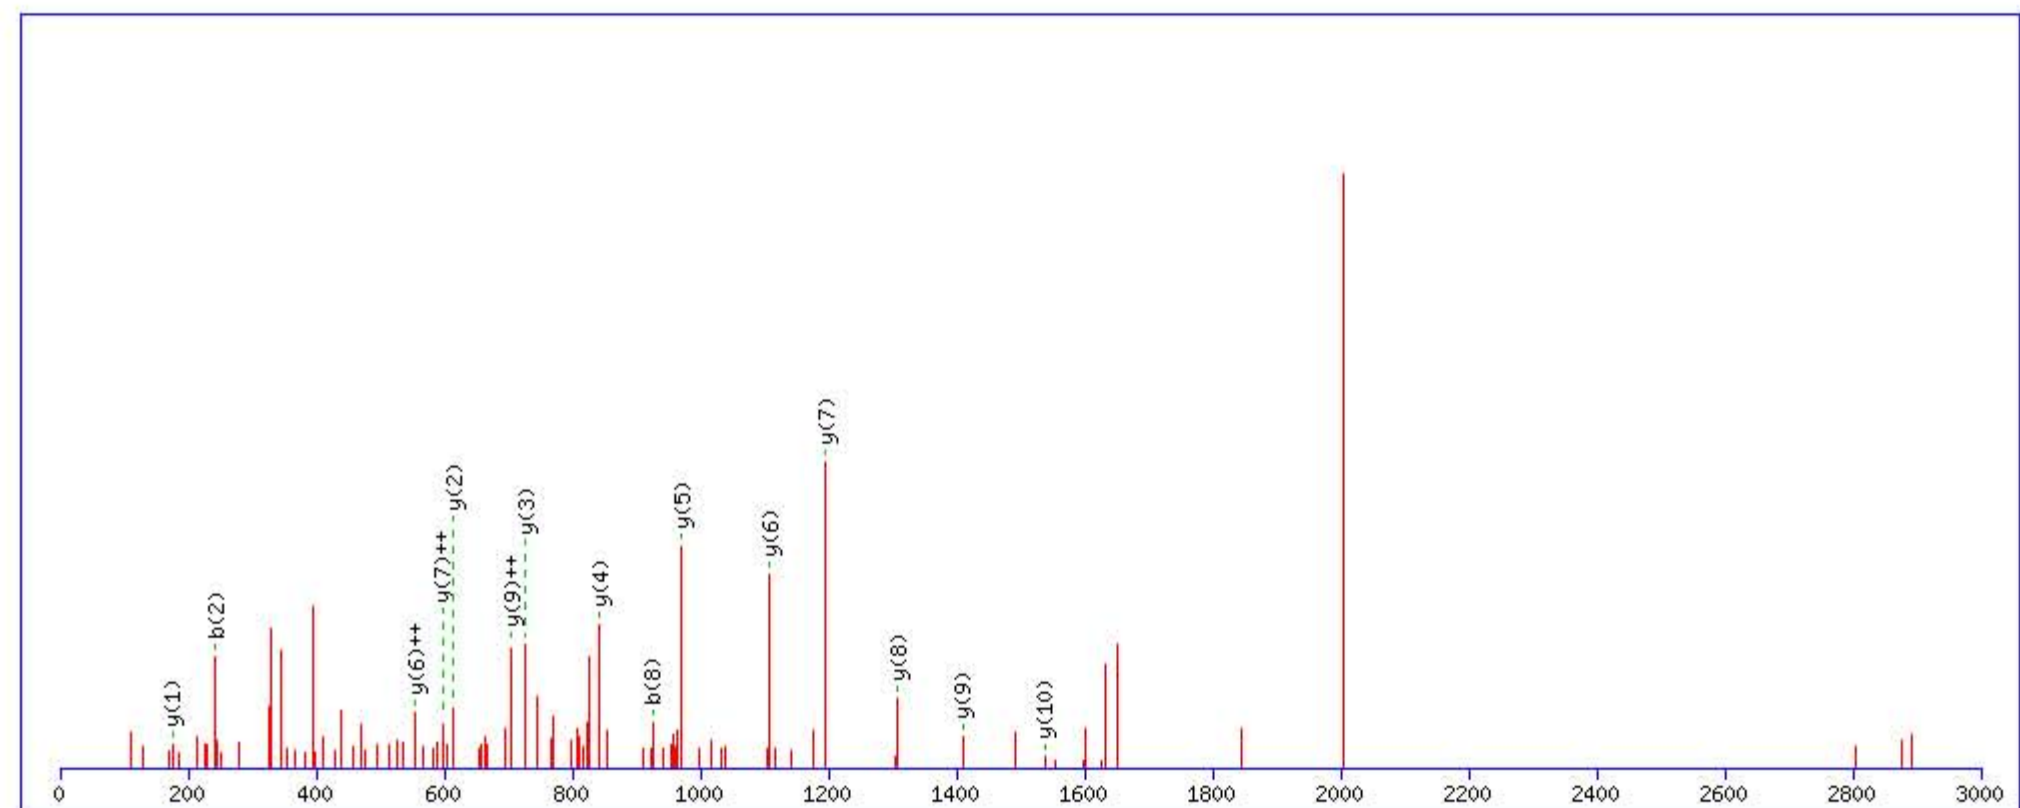

Monoisotopic mass of neutral peptide Mr(calc): 1650.839920

Fixed modifications: Carbamidomethyl (C) (apply to specified residues or termini only)

Variable modifications:

Q10 : Biotin:Thermo-21345 (Q)

Ions Score: 66 Expect: 8.8e-007

Matches : 15/94 fragment ions using 30 most intense peaks [\(help\)](#)

| #  | b                 | b <sup>++</sup> | b <sup>*</sup> | b <sup>+++</sup> | b <sup>0</sup> | b <sup>0++</sup> | Seq. | y                  | y <sup>++</sup>   | y <sup>*</sup> | y <sup>+++</sup> | y <sup>0</sup> | y <sup>0++</sup> | #  |
|----|-------------------|-----------------|----------------|------------------|----------------|------------------|------|--------------------|-------------------|----------------|------------------|----------------|------------------|----|
| 1  | 114.091340        | 57.549308       |                |                  |                |                  | I    |                    |                   |                |                  |                |                  | 11 |
| 2  | <b>243.133933</b> | 122.070605      |                |                  | 225.123368     | 113.065322       | E    | <b>1538.763154</b> | 769.885215        | 1521.736605    | 761.371941       | 1520.752589    | 760.879933       | 10 |
| 3  | 344.181612        | 172.594444      |                |                  | 326.171047     | 163.589162       | T    | <b>1409.720561</b> | <b>705.363919</b> | 1392.694012    | 696.850644       | 1391.709996    | 696.358636       | 9  |
| 4  | 457.265676        | 229.136476      |                |                  | 439.255111     | 220.131194       | I    | <b>1308.672882</b> | 654.840079        | 1291.646333    | 646.326805       | 1290.662317    | 645.834797       | 8  |
| 5  | 544.297704        | 272.652490      |                |                  | 526.287139     | 263.647208       | S    | <b>1195.588818</b> | <b>598.298047</b> | 1178.562269    | 589.784773       | 1177.578253    | 589.292764       | 7  |
| 6  | 681.356616        | 341.181946      |                |                  | 663.346051     | 332.176664       | H    | <b>1108.556790</b> | <b>554.782033</b> | 1091.530241    | 546.268759       | 1090.546225    | 545.776751       | 6  |
| 7  | 810.399209        | 405.703243      |                |                  | 792.388644     | 396.697960       | E    | <b>971.497878</b>  | 486.252577        | 954.471329     | 477.739303       | 953.487313     | 477.247295       | 5  |
| 8  | <b>925.426152</b> | 463.216714      |                |                  | 907.415587     | 454.211432       | D    | <b>842.455285</b>  | 421.731281        | 825.428736     | 413.218006       | 824.444720     | 412.725998       | 4  |
| 9  | 1038.510216       | 519.758746      |                |                  | 1020.499651    | 510.753463       | L    | <b>727.428342</b>  | 364.217809        | 710.401793     | 355.704535       |                |                  | 3  |
| 10 | 1477.735542       | 739.371409      | 1460.708993    | 730.858135       | 1459.724977    | 730.366127       | Q    | <b>614.344278</b>  | 307.675777        | 597.317729     | 299.162503       |                |                  | 2  |
| 11 |                   |                 |                |                  |                |                  | R    | <b>175.118952</b>  | 88.063114         | 158.092403     | 79.549839        |                |                  | 1  |

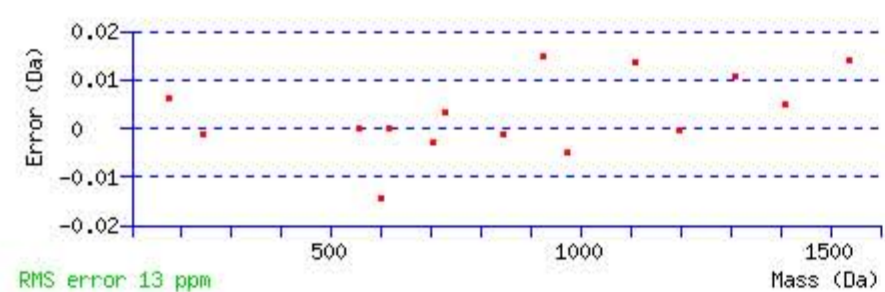

RMS error 13 ppm

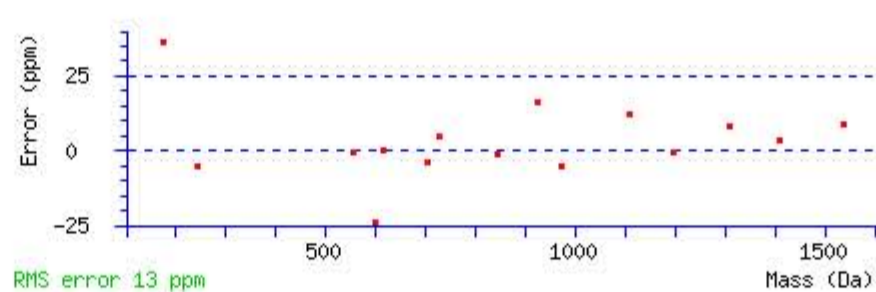

RMS error 13 ppm

NCBI BLAST search of **IETISHEDLQR**

(Parameters: blastp, nr protein database, expect=20000, no filter, PAM30)

Other BLAST [web gateways](#)

All matches to this query

| Score | Mr(calc):   | Delta     | Sequence                      |
|-------|-------------|-----------|-------------------------------|
| 66.1  | 1650.839920 | 0.006228  | <a href="#">IETISHEDLQR</a>   |
| 1.5   | 1650.833389 | 0.012759  | <a href="#">QQLEHIMATNR</a>   |
| 0.3   | 1650.868896 | -0.022748 | <a href="#">LELLELDHEQTRR</a> |

Mascot: <http://www.matrixscience.com/>



# MASCOT Search Results

## Peptide View

MS/MS Fragmentation of **IQALSLCSDQQSHLEFR**

Found in **PROS\_HUMAN**, Vitamin K-dependent protein S OS=Homo sapiens GN=PROS1 PE=1 SV=1

Match to Query 53679: 2342.164332 from(781.728720,3+) rtinseconds(2162) index(22699)

Title: Locus:1.1.1.755.9 File:"2013-07-02 CLN FXIII 60 min 2nd F 2.wiff"

Data file C:\Program Files (x86)\Matrix Science\Mascot Daemon\mgf5 FXIII 60 min 2nd\mascot\_daemon\_merge.mgf

Click mouse within plot area to zoom in by factor of two about that point

Or, Plot from  to  Da

Label all possible matches  Label matches used for scoring

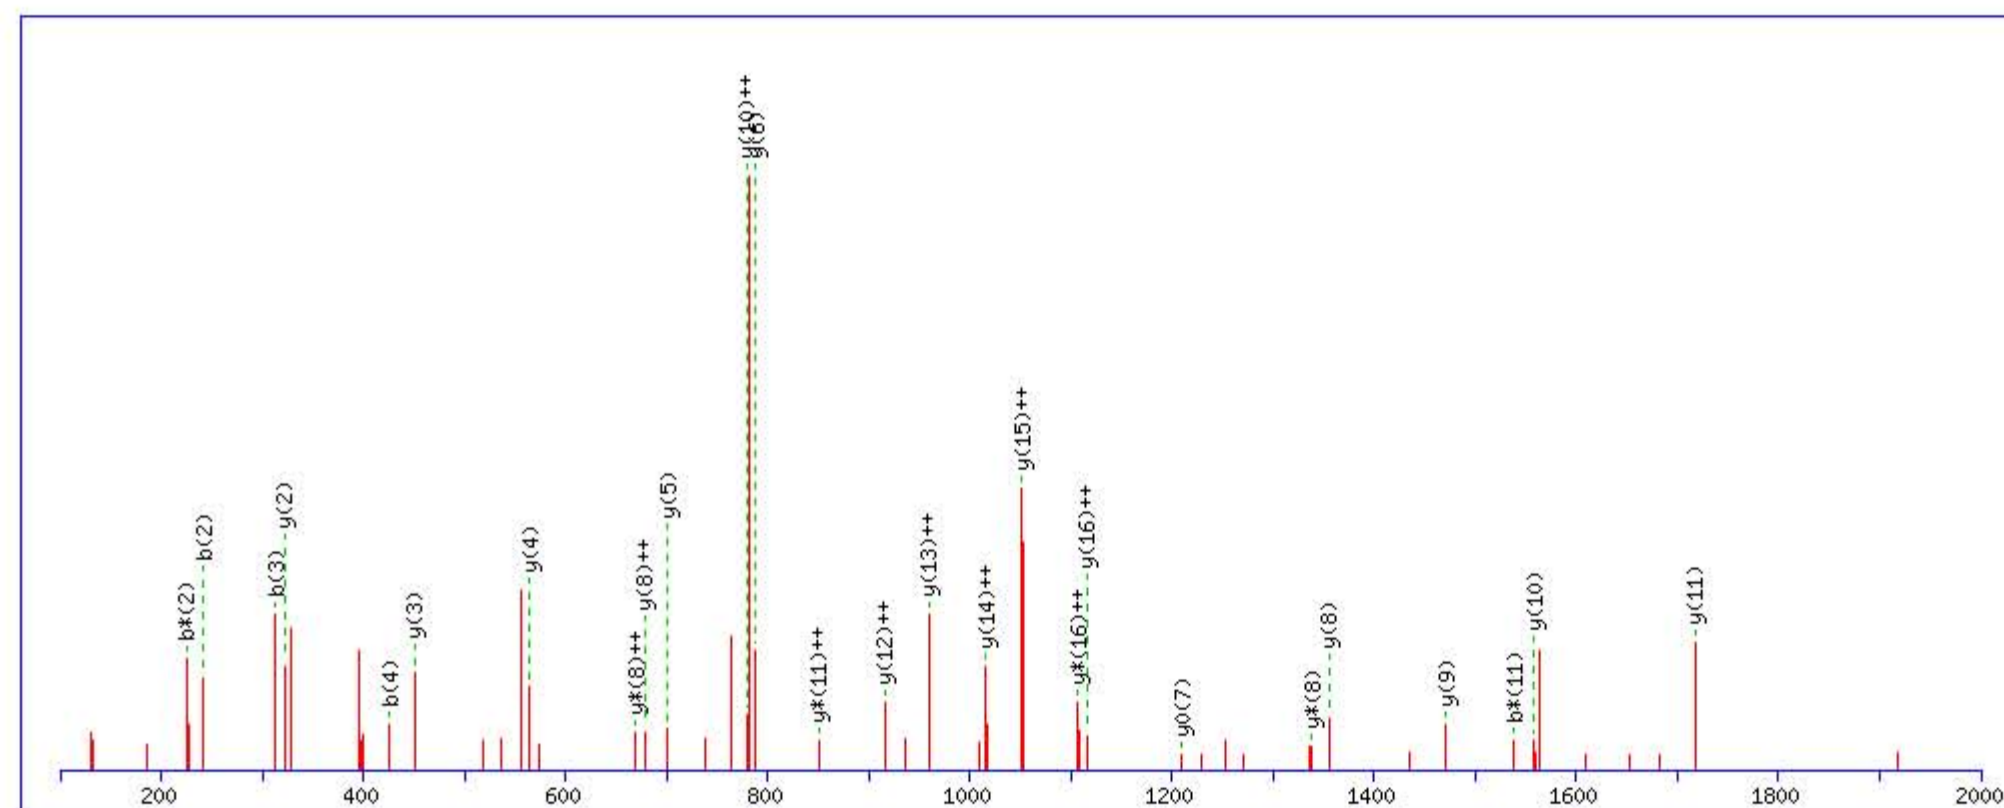

Monoisotopic mass of neutral peptide Mr(calc): 2342.151108

Fixed modifications: Carbamidomethyl (C) (apply to specified residues or termini only)

Variable modifications:

Q11 : Biotin:Thermo-21345 (Q)

Ions Score: 44 Expect: 0.0012

Matches : 26/178 fragment ions using 60 most intense peaks [\(help\)](#)

| #  | b                 | b <sup>++</sup> | b <sup>*</sup>     | b <sup>*++</sup> | b <sup>0</sup> | b <sup>0++</sup> | Seq. | y                  | y <sup>++</sup>    | y <sup>*</sup>     | y <sup>*++</sup>   | y <sup>0</sup>     | y <sup>0++</sup> | #  |
|----|-------------------|-----------------|--------------------|------------------|----------------|------------------|------|--------------------|--------------------|--------------------|--------------------|--------------------|------------------|----|
| 1  | 114.091340        | 57.549308       |                    |                  |                |                  | I    |                    |                    |                    |                    |                    |                  | 17 |
| 2  | <b>242.149918</b> | 121.578597      | <b>225.123369</b>  | 113.065323       |                |                  | Q    | 2230.074335        | <b>1115.540805</b> | 2213.047786        | <b>1107.027531</b> | 2212.063770        | 1106.535523      | 16 |
| 3  | <b>313.187032</b> | 157.097154      | 296.160483         | 148.583879       |                |                  | A    | 2102.015757        | <b>1051.511516</b> | 2084.989208        | 1042.998242        | 2084.005192        | 1042.506234      | 15 |
| 4  | <b>426.271096</b> | 213.639186      | 409.244547         | 205.125912       |                |                  | L    | 2030.978643        | <b>1015.992959</b> | 2013.952094        | 1007.479685        | 2012.968078        | 1006.987677      | 14 |
| 5  | 513.303124        | 257.155200      | 496.276575         | 248.641926       | 495.292559     | 248.149918       | S    | 1917.894579        | <b>959.450927</b>  | 1900.868030        | 950.937653         | 1899.884014        | 950.445645       | 13 |
| 6  | 626.387188        | 313.697232      | 609.360639         | 305.183958       | 608.376623     | 304.691950       | L    | 1830.862551        | <b>915.934913</b>  | 1813.836002        | 907.421639         | 1812.851986        | 906.929631       | 12 |
| 7  | 786.417837        | 393.712557      | 769.391288         | 385.199282       | 768.407272     | 384.707274       | C    | <b>1717.778487</b> | 859.392881         | 1700.751938        | <b>850.879607</b>  | 1699.767922        | 850.387599       | 11 |
| 8  | 873.449865        | 437.228571      | 856.423316         | 428.715296       | 855.439300     | 428.223288       | S    | <b>1557.747838</b> | <b>779.377557</b>  | 1540.721289        | 770.864282         | 1539.737273        | 770.372274       | 10 |
| 9  | 988.476808        | 494.742042      | 971.450259         | 486.228768       | 970.466243     | 485.736760       | D    | <b>1470.715810</b> | 735.861543         | 1453.689261        | 727.348268         | 1452.705245        | 726.856260       | 9  |
| 10 | 1116.535386       | 558.771331      | 1099.508837        | 550.258057       | 1098.524821    | 549.766049       | Q    | <b>1355.688867</b> | <b>678.348071</b>  | <b>1338.662318</b> | <b>669.834797</b>  | 1337.678302        | 669.342789       | 8  |
| 11 | 1555.760712       | 778.383994      | <b>1538.734163</b> | 769.870720       | 1537.750147    | 769.378712       | Q    | 1227.630289        | 614.318782         | 1210.603740        | 605.805508         | <b>1209.619724</b> | 605.313500       | 7  |
| 12 | 1642.792740       | 821.900008      | 1625.766191        | 813.386734       | 1624.782175    | 812.894726       | S    | <b>788.404963</b>  | 394.706119         | 771.378414         | 386.192845         | 770.394398         | 385.700837       | 6  |
| 13 | 1779.851652       | 890.429464      | 1762.825103        | 881.916190       | 1761.841087    | 881.424182       | H    | <b>701.372935</b>  | 351.190105         | 684.346386         | 342.676831         | 683.362370         | 342.184823       | 5  |
| 14 | 1892.935716       | 946.971496      | 1875.909167        | 938.458222       | 1874.925151    | 937.966213       | L    | <b>564.314023</b>  | 282.660649         | 547.287474         | 274.147375         | 546.303458         | 273.655367       | 4  |
| 15 | 2021.978309       | 1011.492793     | 2004.951760        | 1002.979518      | 2003.967744    | 1002.487510      | E    | <b>451.229959</b>  | 226.118617         | 434.203410         | 217.605343         | 433.219394         | 217.113335       | 3  |
| 16 | 2169.046723       | 1085.026999     | 2152.020174        | 1076.513725      | 2151.036158    | 1076.021717      | F    | <b>322.187366</b>  | 161.597321         | 305.160817         | 153.084046         |                    |                  | 2  |
| 17 |                   |                 |                    |                  |                |                  | R    | 175.118952         | 88.063114          | 158.092403         | 79.549839          |                    |                  | 1  |

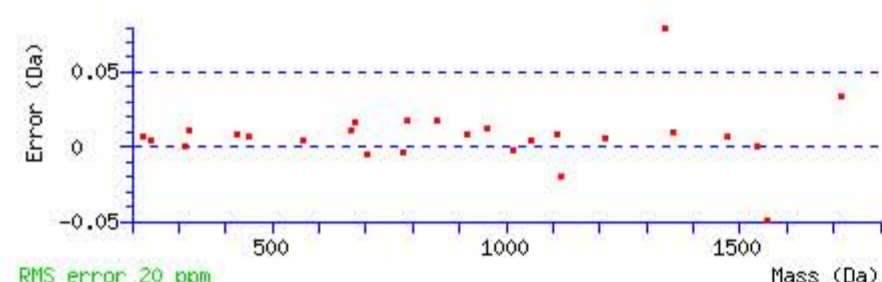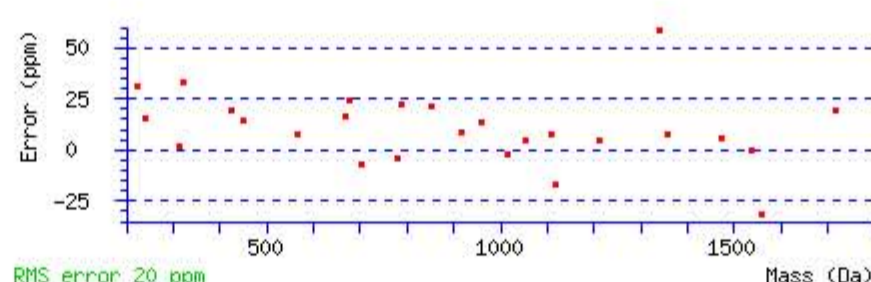

NCBI BLAST search of **IQALSLCSDQQSHLEFR**

(Parameters: blastp, nr protein database, expect=20000, no filter, PAM30)

Other BLAST [web gateways](#)

## All matches to this query

| Score | Mr(calc):   | Delta    | Sequence                          |
|-------|-------------|----------|-----------------------------------|
| 44.1  | 2342.151108 | 0.013224 | <a href="#">IQALSLCSDQQSHLEFR</a> |
| 42.9  | 2342.151108 | 0.013224 | <a href="#">IQALSLCSDQQSHLEFR</a> |



# MASCOT Search Results

## Peptide View

MS/MS Fragmentation of **TDGCQHFCLPGQESYTCSCAQGYR**

Found in **PROZ\_HUMAN**, Vitamin K-dependent protein Z OS=Homo sapiens GN=PROZ PE=1 SV=2

Match to Query 49654: 3192.327132 from(1065.116320,3+) rtinseconds(2067) index(53359)

Title: Locus:1.1.1.1334.13 File:"2013-07-02 CLN FXIII 60 min 2nd F 4.wiff"

Data file C:\Program Files (x86)\Matrix Science\Mascot Daemon\mgf5 FXIII 60 min 2nd\mascot\_daemon\_merge.mgf

Click mouse within plot area to zoom in by factor of two about that point

Or, Plot from  to  Da

Label all possible matches  Label matches used for scoring

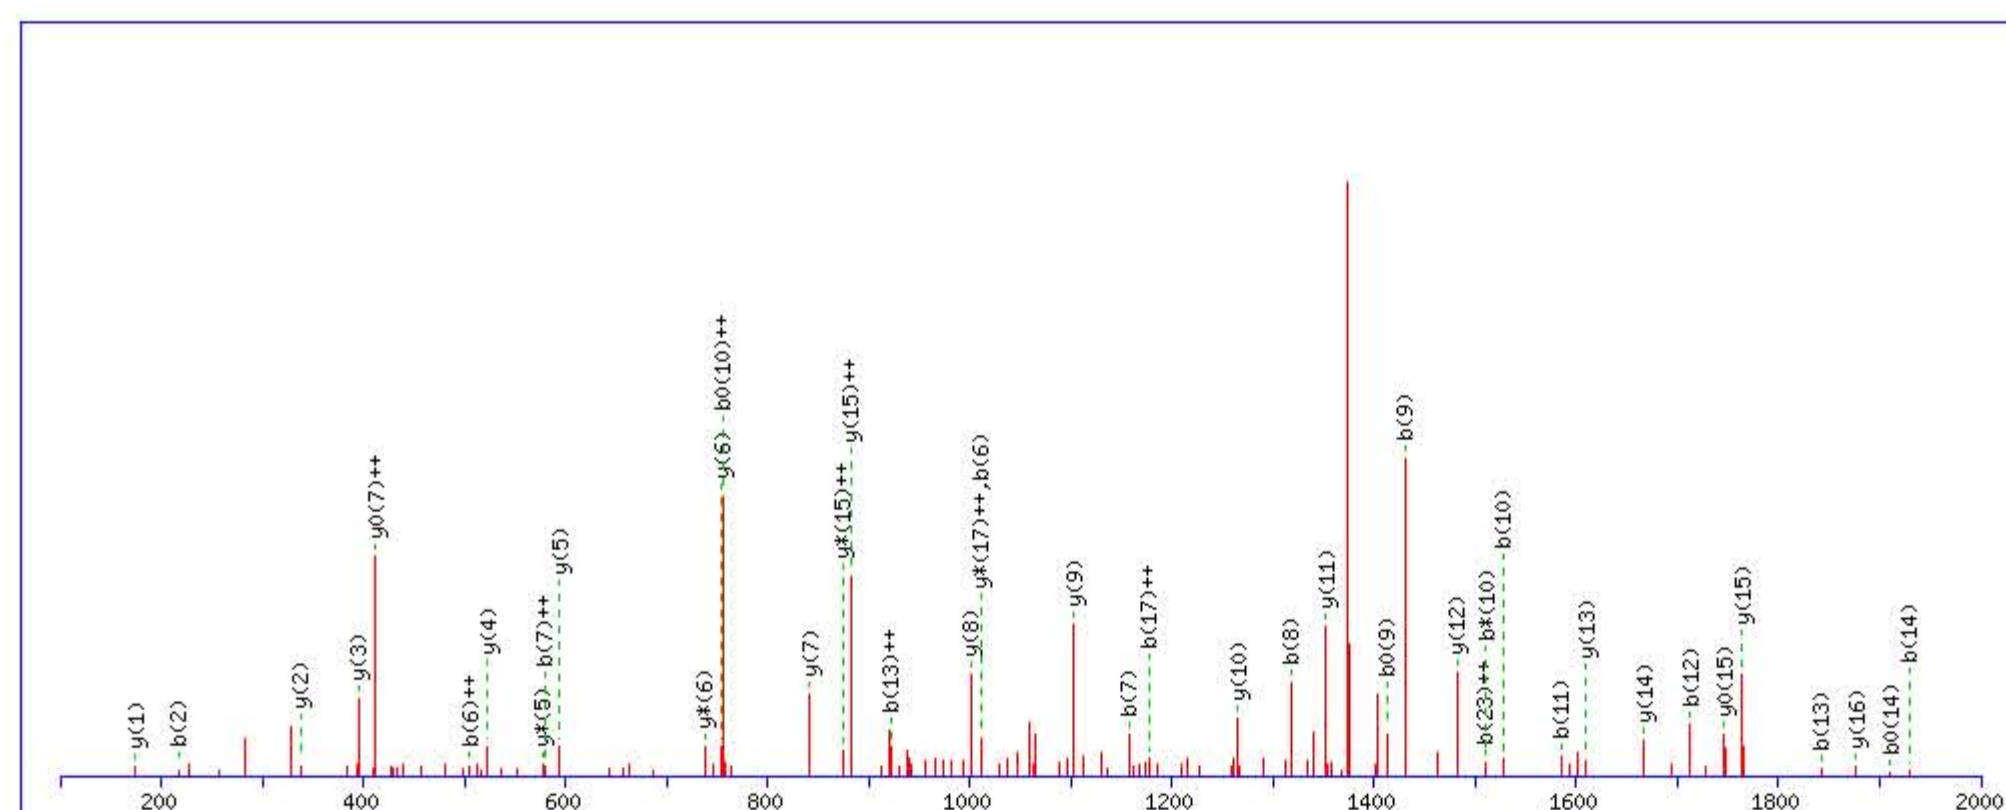

Monoisotopic mass of neutral peptide Mr(calc): 3192.298050

Fixed modifications: Carbamidomethyl (C) (apply to specified residues or termini only)

Variable modifications:

Q5 : Biotin:Thermo-21345 (Q)

Ions Score: 99 Expect: 1.1e-009

Matches : 42/256 fragment ions using 65 most intense peaks [\(help\)](#)

| #  | b                  | b <sup>++</sup>    | b <sup>+</sup>     | b <sup>+++</sup> | b <sup>0</sup>     | b <sup>0++</sup>  | Seq. | y                  | y <sup>++</sup>   | y <sup>+</sup>    | y <sup>+++</sup>   | y <sup>0</sup>     | y <sup>0++</sup>  | #  |
|----|--------------------|--------------------|--------------------|------------------|--------------------|-------------------|------|--------------------|-------------------|-------------------|--------------------|--------------------|-------------------|----|
| 1  | 102.054955         | 51.531116          |                    |                  | 84.044390          | 42.525833         | T    |                    |                   |                   |                    |                    |                   | 24 |
| 2  | <b>217.081898</b>  | 109.044587         |                    |                  | 199.071333         | 100.039304        | D    | 3092.257619        | 1546.632447       | 3075.231070       | 1538.119173        | 3074.247054        | 1537.627165       | 23 |
| 3  | 274.103362         | 137.555319         |                    |                  | 256.092797         | 128.550037        | G    | 2977.230676        | 1489.118976       | 2960.204127       | 1480.605701        | 2959.220111        | 1480.113693       | 22 |
| 4  | 434.134011         | 217.570644         |                    |                  | 416.123446         | 208.565361        | C    | 2920.209212        | 1460.608244       | 2903.182663       | 1452.094969        | 2902.198647        | 1451.602961       | 21 |
| 5  | 873.359337         | 437.183307         | 856.332788         | 428.670032       | 855.348772         | 428.178024        | Q    | 2760.178563        | 1380.592919       | 2743.152014       | 1372.079645        | 2742.167998        | 1371.587637       | 20 |
| 6  | <b>1010.418249</b> | <b>505.712763</b>  | 993.391700         | 497.199488       | 992.407684         | 496.707480        | H    | 2320.953237        | 1160.980256       | 2303.926688       | 1152.466982        | 2302.942672        | 1151.974974       | 19 |
| 7  | <b>1157.486663</b> | <b>579.246970</b>  | 1140.460114        | 570.733695       | 1139.476098        | 570.241687        | F    | 2183.894325        | 1092.450800       | 2166.867776       | 1083.937526        | 2165.883760        | 1083.445518       | 18 |
| 8  | <b>1317.517312</b> | 659.262294         | 1300.490763        | 650.749020       | 1299.506747        | 650.257012        | C    | 2036.825911        | 1018.916594       | 2019.799362       | <b>1010.403319</b> | 2018.815346        | 1009.911311       | 17 |
| 9  | <b>1430.601376</b> | 715.804326         | 1413.574827        | 707.291052       | <b>1412.590811</b> | 706.799044        | L    | <b>1876.795262</b> | 938.901269        | 1859.768713       | 930.387994         | 1858.784697        | 929.895986        | 16 |
| 10 | <b>1527.654140</b> | 764.330708         | <b>1510.627591</b> | 755.817434       | 1509.643575        | <b>755.325426</b> | P    | <b>1763.711198</b> | <b>882.359237</b> | 1746.684649       | <b>873.845963</b>  | <b>1745.700633</b> | 873.353954        | 15 |
| 11 | <b>1584.675604</b> | 792.841440         | 1567.649055        | 784.328166       | 1566.665039        | 783.836158        | G    | <b>1666.658434</b> | 833.832855        | 1649.631885       | 825.319581         | 1648.647869        | 824.827572        | 14 |
| 12 | <b>1712.734182</b> | 856.870729         | 1695.707633        | 848.357455       | 1694.723617        | 847.865446        | Q    | <b>1609.636970</b> | 805.322123        | 1592.610421       | 796.808849         | 1591.626405        | 796.316841        | 13 |
| 13 | <b>1841.776775</b> | <b>921.392026</b>  | 1824.750226        | 912.878751       | 1823.766210        | 912.386743        | E    | <b>1481.578392</b> | 741.292834        | 1464.551843       | 732.779560         | 1463.567827        | 732.287552        | 12 |
| 14 | <b>1928.808803</b> | 964.908040         | 1911.782254        | 956.394765       | <b>1910.798238</b> | 955.902757        | S    | <b>1352.535799</b> | 676.771538        | 1335.509250       | 668.258263         | 1334.525234        | 667.766255        | 11 |
| 15 | 2091.872132        | 1046.439704        | 2074.845583        | 1037.926429      | 2073.861567        | 1037.434421       | Y    | <b>1265.503771</b> | 633.255523        | 1248.477222       | 624.742249         | 1247.493206        | 624.250241        | 10 |
| 16 | 2192.919811        | 1096.963543        | 2175.893262        | 1088.450269      | 2174.909246        | 1087.958261       | T    | <b>1102.440442</b> | 551.723859        | 1085.413893       | 543.210584         | 1084.429877        | 542.718576        | 9  |
| 17 | 2352.950460        | <b>1176.978868</b> | 2335.923911        | 1168.465593      | 2334.939895        | 1167.973585       | C    | <b>1001.392763</b> | 501.200020        | 984.366214        | 492.686745         | 983.382198         | 492.194737        | 8  |
| 18 | 2439.982488        | 1220.494882        | 2422.955939        | 1211.981607      | 2421.971923        | 1211.489599       | S    | <b>841.362114</b>  | 421.184695        | 824.335565        | 412.671421         | 823.351549         | <b>412.179413</b> | 7  |
| 19 | 2600.013137        | 1300.510206        | 2582.986588        | 1291.996932      | 2582.002572        | 1291.504924       | C    | <b>754.330086</b>  | 377.668681        | <b>737.303537</b> | 369.155407         |                    |                   | 6  |
| 20 | 2671.050251        | 1336.028763        | 2654.023702        | 1327.515489      | 2653.039686        | 1327.023481       | A    | <b>594.299437</b>  | 297.653357        | <b>577.272888</b> | 289.140082         |                    |                   | 5  |
| 21 | 2799.108829        | 1400.058052        | 2782.082280        | 1391.544778      | 2781.098264        | 1391.052770       | Q    | <b>523.262323</b>  | 262.134800        | 506.235774        | 253.621525         |                    |                   | 4  |
| 22 | 2856.130293        | 1428.568784        | 2839.103744        | 1420.055510      | 2838.119728        | 1419.563502       | G    | <b>395.203745</b>  | 198.105510        | 378.177196        | 189.592236         |                    |                   | 3  |
| 23 | 3019.193622        | <b>1510.100449</b> | 3002.167073        | 1501.587174      | 3001.183057        | 1501.095166       | Y    | <b>338.182281</b>  | 169.594778        | 321.155732        | 161.081504         |                    |                   | 2  |
| 24 |                    |                    |                    |                  |                    |                   | R    | <b>175.118952</b>  | 88.063114         | 158.092403        | 79.549839          |                    |                   | 1  |

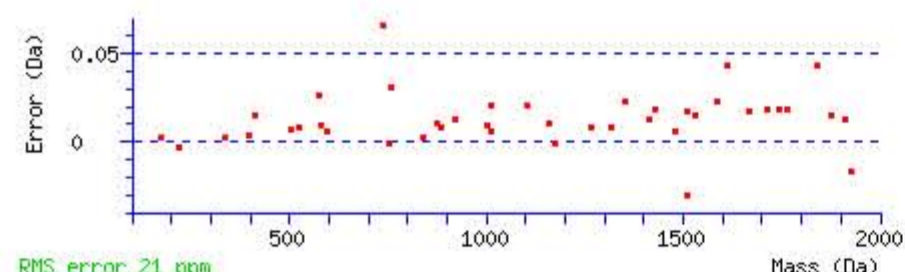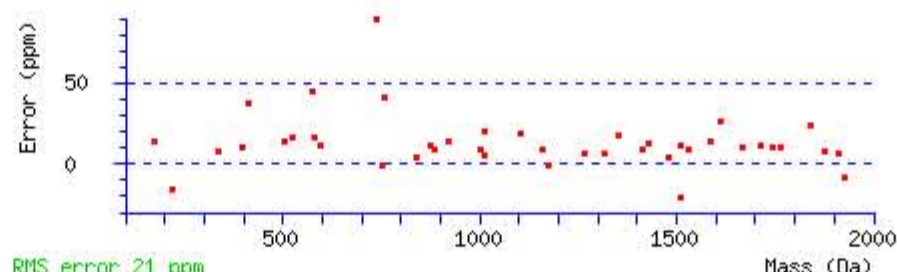

NCBI BLAST search of **TDGCQHFCLPGQESYTCSCAQGYR**

(Parameters: blastp, nr protein database, expect=20000, no filter, PAM30)

Other BLAST [web gateways](#)

## All matches to this query

| Score | Mr(calc):   | Delta    | Sequence                                 |
|-------|-------------|----------|------------------------------------------|
| 99.1  | 3192.298050 | 0.029082 | <a href="#">TDGCQHFCLPGQESYTCSCAQGYR</a> |
| 38.3  | 3192.298050 | 0.029082 | <a href="#">TDGCQHFCLPGQESYTCSCAQGYR</a> |



# MASCOT Search Results

## Peptide View

MS/MS Fragmentation of **GQYCYELDEK**

Found in **VTNC\_HUMAN**, Vitronectin OS=Homo sapiens GN=VTN PE=1 SV=1

Match to Query 37719: 1614.717088 from(808.365820,2+) rtinseconds(1921) index(52227)

Title: Locus:1.1.1.1284.23 File:"2013-07-02 CLN FXIII 60 min 2nd F 4.wiff"

Data file C:\Program Files (x86)\Matrix Science\Mascot Daemon\mgf\5 FXIII 60 min 2nd\mascot\_daemon\_merge.mgf

Click mouse within plot area to zoom in by factor of two about that point

Or, Plot from  to  Da

Label all possible matches  Label matches used for scoring

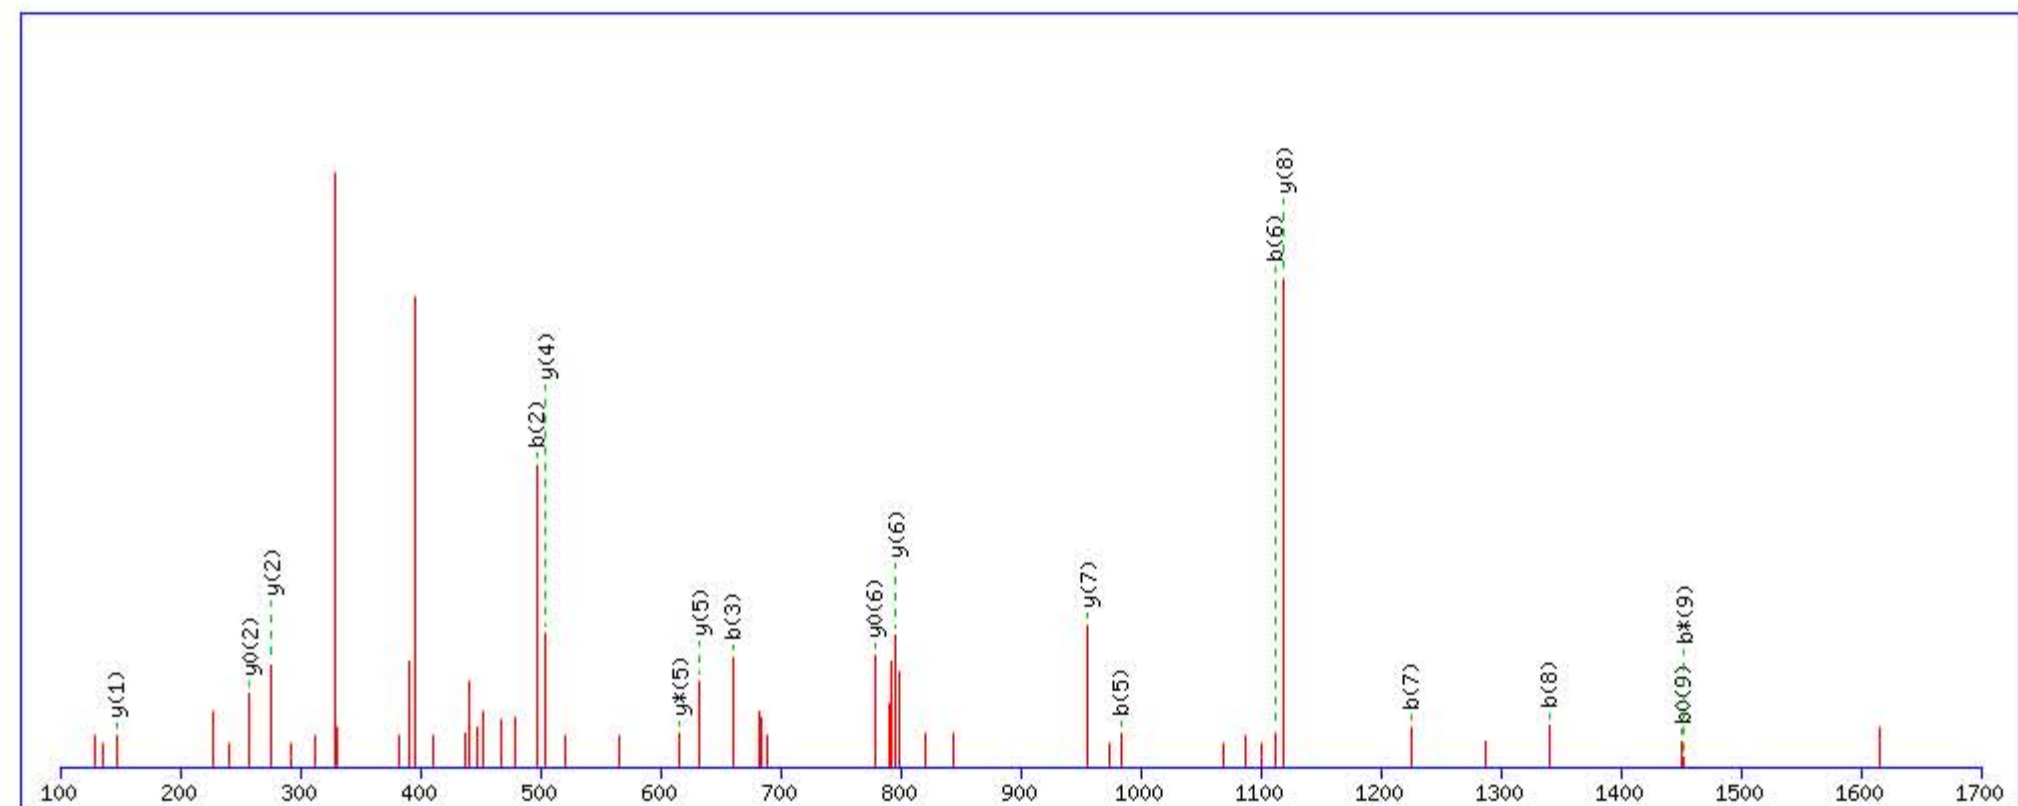

Monoisotopic mass of neutral peptide Mr(calc): 1614.705795

Fixed modifications: Carbamidomethyl (C) (apply to specified residues or termini only)

Variable modifications:

Q2 : Biotin:Thermo-21345 (Q)

Ions Score: 52 Expect: 3e-005

Matches : 18/94 fragment ions using 24 most intense peaks [\(help\)](#)

| #  | b                  | b <sup>++</sup> | b*                 | b <sup>+++</sup> | b <sup>0</sup>     | b <sup>0++</sup> | Seq. | y                  | y <sup>++</sup> | y*                | y <sup>+++</sup> | y <sup>0</sup>    | y <sup>0++</sup> | #  |
|----|--------------------|-----------------|--------------------|------------------|--------------------|------------------|------|--------------------|-----------------|-------------------|------------------|-------------------|------------------|----|
| 1  | 58.028740          | 29.518008       |                    |                  |                    |                  | G    |                    |                 |                   |                  |                   |                  | 10 |
| 2  | <b>497.254066</b>  | 249.130671      | 480.227517         | 240.617397       |                    |                  | Q    | 1558.691630        | 779.849453      | 1541.665081       | 771.336179       | 1540.681065       | 770.844171       | 9  |
| 3  | <b>660.317395</b>  | 330.662336      | 643.290846         | 322.149061       |                    |                  | Y    | <b>1119.466304</b> | 560.236790      | 1102.439755       | 551.723516       | 1101.455739       | 551.231508       | 8  |
| 4  | 820.348044         | 410.677660      | 803.321495         | 402.164386       |                    |                  | C    | <b>956.402975</b>  | 478.705126      | 939.376426        | 470.191851       | 938.392410        | 469.699843       | 7  |
| 5  | <b>983.411373</b>  | 492.209325      | 966.384824         | 483.696050       |                    |                  | Y    | <b>796.372326</b>  | 398.689801      | 779.345777        | 390.176527       | <b>778.361761</b> | 389.684519       | 6  |
| 6  | <b>1112.453966</b> | 556.730621      | 1095.427417        | 548.217347       | 1094.443401        | 547.725339       | E    | <b>633.308997</b>  | 317.158137      | <b>616.282448</b> | 308.644862       | 615.298432        | 308.152854       | 5  |
| 7  | <b>1225.538030</b> | 613.272653      | 1208.511481        | 604.759379       | 1207.527465        | 604.267371       | L    | <b>504.266404</b>  | 252.636840      | 487.239855        | 244.123566       | 486.255839        | 243.631558       | 4  |
| 8  | <b>1340.564973</b> | 670.786125      | 1323.538424        | 662.272850       | 1322.554408        | 661.780842       | D    | 391.182340         | 196.094808      | 374.155791        | 187.581534       | 373.171775        | 187.089526       | 3  |
| 9  | 1469.607566        | 735.307421      | <b>1452.581017</b> | 726.794147       | <b>1451.597001</b> | 726.302139       | E    | <b>276.155397</b>  | 138.581337      | 259.128848        | 130.068062       | <b>258.144832</b> | 129.576054       | 2  |
| 10 |                    |                 |                    |                  |                    |                  | K    | <b>147.112804</b>  | 74.060040       | 130.086255        | 65.546765        |                   |                  | 1  |

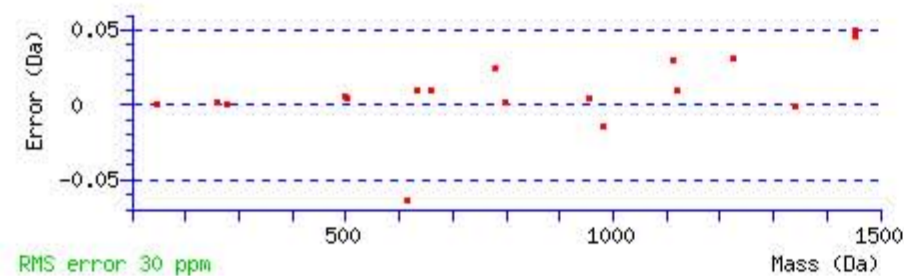

RMS error 30 ppm

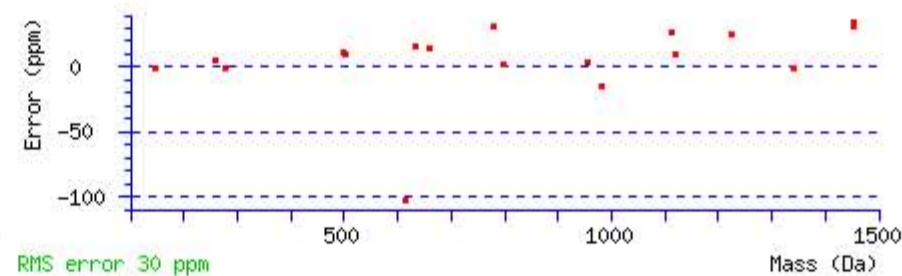

RMS error 30 ppm

NCBI BLAST search of **GQYCYELDEK**

(Parameters: blastp, nr protein database, expect=20000, no filter, PAM30)

Other BLAST [web gateways](#)

All matches to this query

| Score | Mr(calc):   | Delta    | Sequence          |
|-------|-------------|----------|-------------------|
| 52.2  | 1614.705795 | 0.011293 | <b>GQYCYELDEK</b> |

Mascot: <http://www.matrixscience.com/>



# MASCOT Search Results

## Peptide View

MS/MS Fragmentation of **DWHGVPGQVDAAMAGR**

Found in **VTNC\_HUMAN**, Vitronectin OS=Homo sapiens GN=VTN PE=1 SV=1

Match to Query 46051: 1976.941452 from(659.987760,3+) rtinseconds(2165) index(37424)

Title: Locus:1.1.1.3173.14 File:"2013-07-02 CLN FXIII 60 min 2nd F 3.wiff"

Data file C:\Program Files (x86)\Matrix Science\Mascot Daemon\mgf\5 FXIII 60 min 2nd\mascot\_daemon\_merge.mgf

Click mouse within plot area to zoom in by factor of two about that point

Or, Plot from  to  Da

Label all possible matches  Label matches used for scoring

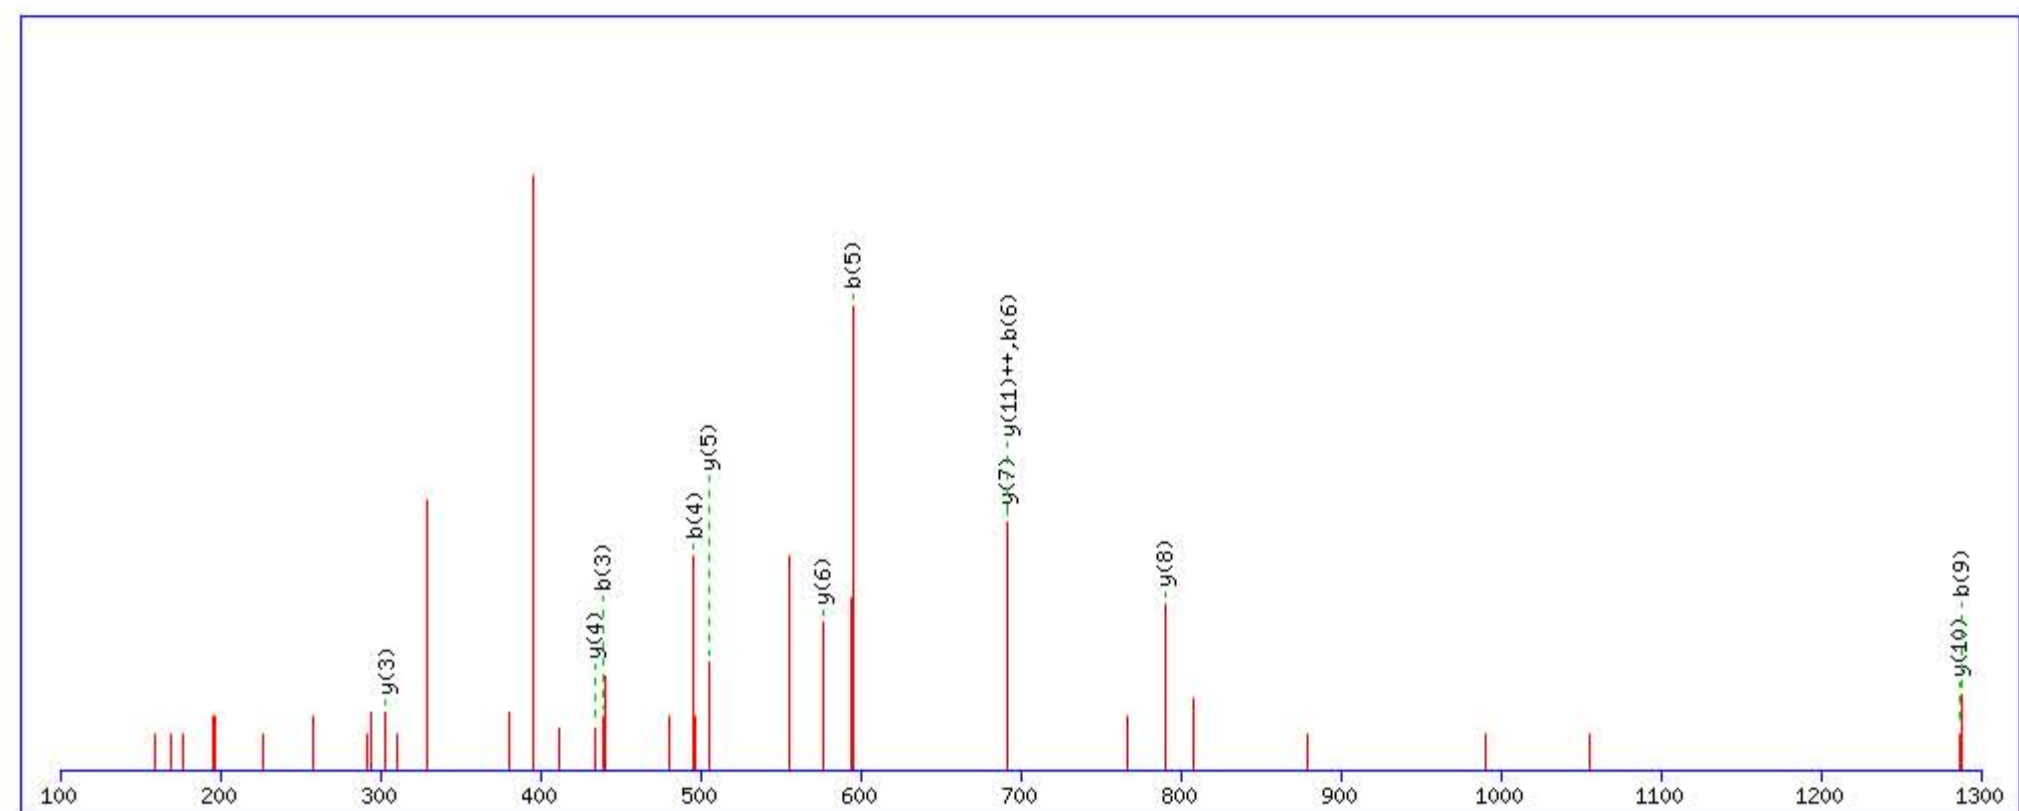

Monoisotopic mass of neutral peptide Mr(calc): 1976.934937

Fixed modifications: Carbamidomethyl (C) (apply to specified residues or termini only)

Variable modifications:

Q8 : Biotin:Thermo-21345 (Q)

Ions Score: 28 Expect: 0.021

Matches : 13/154 fragment ions using 36 most intense peaks [\(help\)](#)

| #  | b                  | b <sup>++</sup> | b <sup>+</sup> | b <sup>+++</sup> | b <sup>0</sup> | b <sup>0++</sup> | Seq. | y                  | y <sup>++</sup>   | y <sup>+</sup> | y <sup>+++</sup> | y <sup>0</sup> | y <sup>0++</sup> | #  |
|----|--------------------|-----------------|----------------|------------------|----------------|------------------|------|--------------------|-------------------|----------------|------------------|----------------|------------------|----|
| 1  | 116.034219         | 58.520748       |                |                  | 98.023654      | 49.515465        | D    |                    |                   |                |                  |                |                  | 16 |
| 2  | 302.113532         | 151.560404      |                |                  | 284.102967     | 142.555122       | W    | 1862.915257        | 931.961266        | 1845.888708    | 923.447992       | 1844.904692    | 922.955984       | 15 |
| 3  | <b>439.172444</b>  | 220.089860      |                |                  | 421.161879     | 211.084577       | H    | 1676.835944        | 838.921610        | 1659.809395    | 830.408336       | 1658.825379    | 829.916327       | 14 |
| 4  | <b>496.193908</b>  | 248.600592      |                |                  | 478.183343     | 239.595309       | G    | 1539.777032        | 770.392154        | 1522.750483    | 761.878880       | 1521.766467    | 761.386871       | 13 |
| 5  | <b>595.262322</b>  | 298.134799      |                |                  | 577.251757     | 289.129517       | V    | 1482.755568        | 741.881422        | 1465.729019    | 733.368148       | 1464.745003    | 732.876140       | 12 |
| 6  | <b>692.315086</b>  | 346.661181      |                |                  | 674.304521     | 337.655899       | P    | 1383.687154        | <b>692.347215</b> | 1366.660605    | 683.833941       | 1365.676589    | 683.341932       | 11 |
| 7  | 749.336550         | 375.171913      |                |                  | 731.325985     | 366.166631       | G    | <b>1286.634390</b> | 643.820833        | 1269.607841    | 635.307559       | 1268.623825    | 634.815550       | 10 |
| 8  | 1188.561876        | 594.784576      | 1171.535327    | 586.271302       | 1170.551311    | 585.779293       | Q    | 1229.612926        | 615.310101        | 1212.586377    | 606.796827       | 1211.602361    | 606.304819       | 9  |
| 9  | <b>1287.630290</b> | 644.318783      | 1270.603741    | 635.805509       | 1269.619725    | 635.313501       | V    | <b>790.387600</b>  | 395.697438        | 773.361051     | 387.184164       | 772.377035     | 386.692156       | 8  |
| 10 | 1402.657233        | 701.832255      | 1385.630684    | 693.318980       | 1384.646668    | 692.826972       | D    | <b>691.319186</b>  | 346.163231        | 674.292637     | 337.649956       | 673.308621     | 337.157948       | 7  |
| 11 | 1473.694347        | 737.350812      | 1456.667798    | 728.837537       | 1455.683782    | 728.345529       | A    | <b>576.292243</b>  | 288.649759        | 559.265694     | 280.136485       |                |                  | 6  |
| 12 | 1544.731461        | 772.869369      | 1527.704912    | 764.356094       | 1526.720896    | 763.864086       | A    | <b>505.255129</b>  | 253.131202        | 488.228580     | 244.617928       |                |                  | 5  |
| 13 | 1675.771946        | 838.389611      | 1658.745397    | 829.876337       | 1657.761381    | 829.384329       | M    | <b>434.218015</b>  | 217.612645        | 417.191466     | 209.099371       |                |                  | 4  |
| 14 | 1746.809060        | 873.908168      | 1729.782511    | 865.394894       | 1728.798495    | 864.902886       | A    | <b>303.177530</b>  | 152.092403        | 286.150981     | 143.579128       |                |                  | 3  |
| 15 | 1803.830524        | 902.418900      | 1786.803975    | 893.905626       | 1785.819959    | 893.413617       | G    | 232.140416         | 116.573846        | 215.113867     | 108.060571       |                |                  | 2  |
| 16 |                    |                 |                |                  |                |                  | R    | 175.118952         | 88.063114         | 158.092403     | 79.549839        |                |                  | 1  |

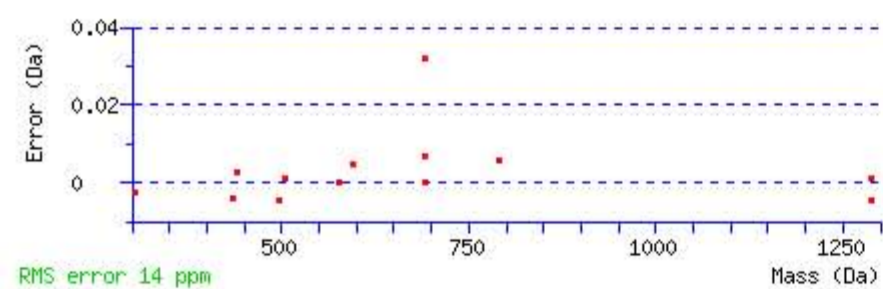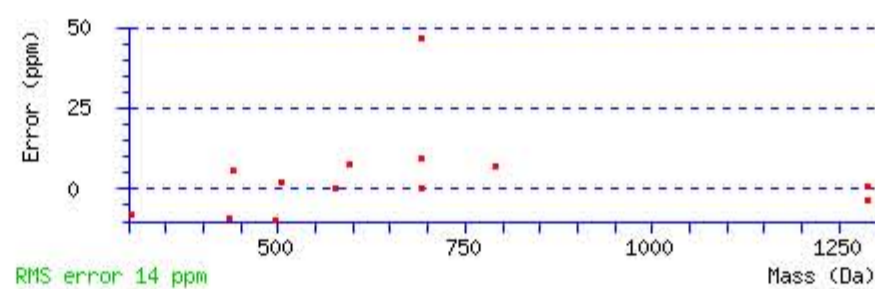

NCBI BLAST search of **DWHGVPGQVDAAMAGR**

(Parameters: blastp, nr protein database, expect=20000, no filter, PAM30)

Other BLAST [web gateways](#)

### All matches to this query

| Score | Mr(calc):   | Delta     | Sequence                              |
|-------|-------------|-----------|---------------------------------------|
| 27.6  | 1976.934937 | 0.006515  | <a href="#">DWHGVPGQVDAAMAGR</a>      |
| 9.3   | 1976.918793 | 0.022659  | <a href="#">DDGLQYRPDVKDASDQR</a>     |
| 1.7   | 1976.959854 | -0.018402 | <a href="#">HLTSRHQEAEMAQNAVR</a>     |
| 1.4   | 1976.918808 | 0.022644  | <a href="#">GSPGSDGPKGEKGDGPPEGPR</a> |



# MASCOT Search Results

## Peptide View

MS/MS Fragmentation of **CQCDELCSYYQSCCTDYTAECKPQVTR**  
 Found in **VTNC\_HUMAN**, Vitronectin OS=Homo sapiens GN=VTN PE=1 SV=1

Match to Query 68758: 3792.533416 from(949.140630,4+) rtinseconds(1980) index(52726)  
 Title: Locus:1.1.1.1304.26 File:"2013-07-02 CLN FXIII 60 min 2nd F 4.wiff"  
 Data file C:\Program Files (x86)\Matrix Science\Mascot Daemon\mgf5 FXIII 60 min 2nd\mascot\_daemon\_merge.mgf

Click mouse within plot area to zoom in by factor of two about that point  
 Or, Plot from  to  Da   
 Label all possible matches  Label matches used for scoring

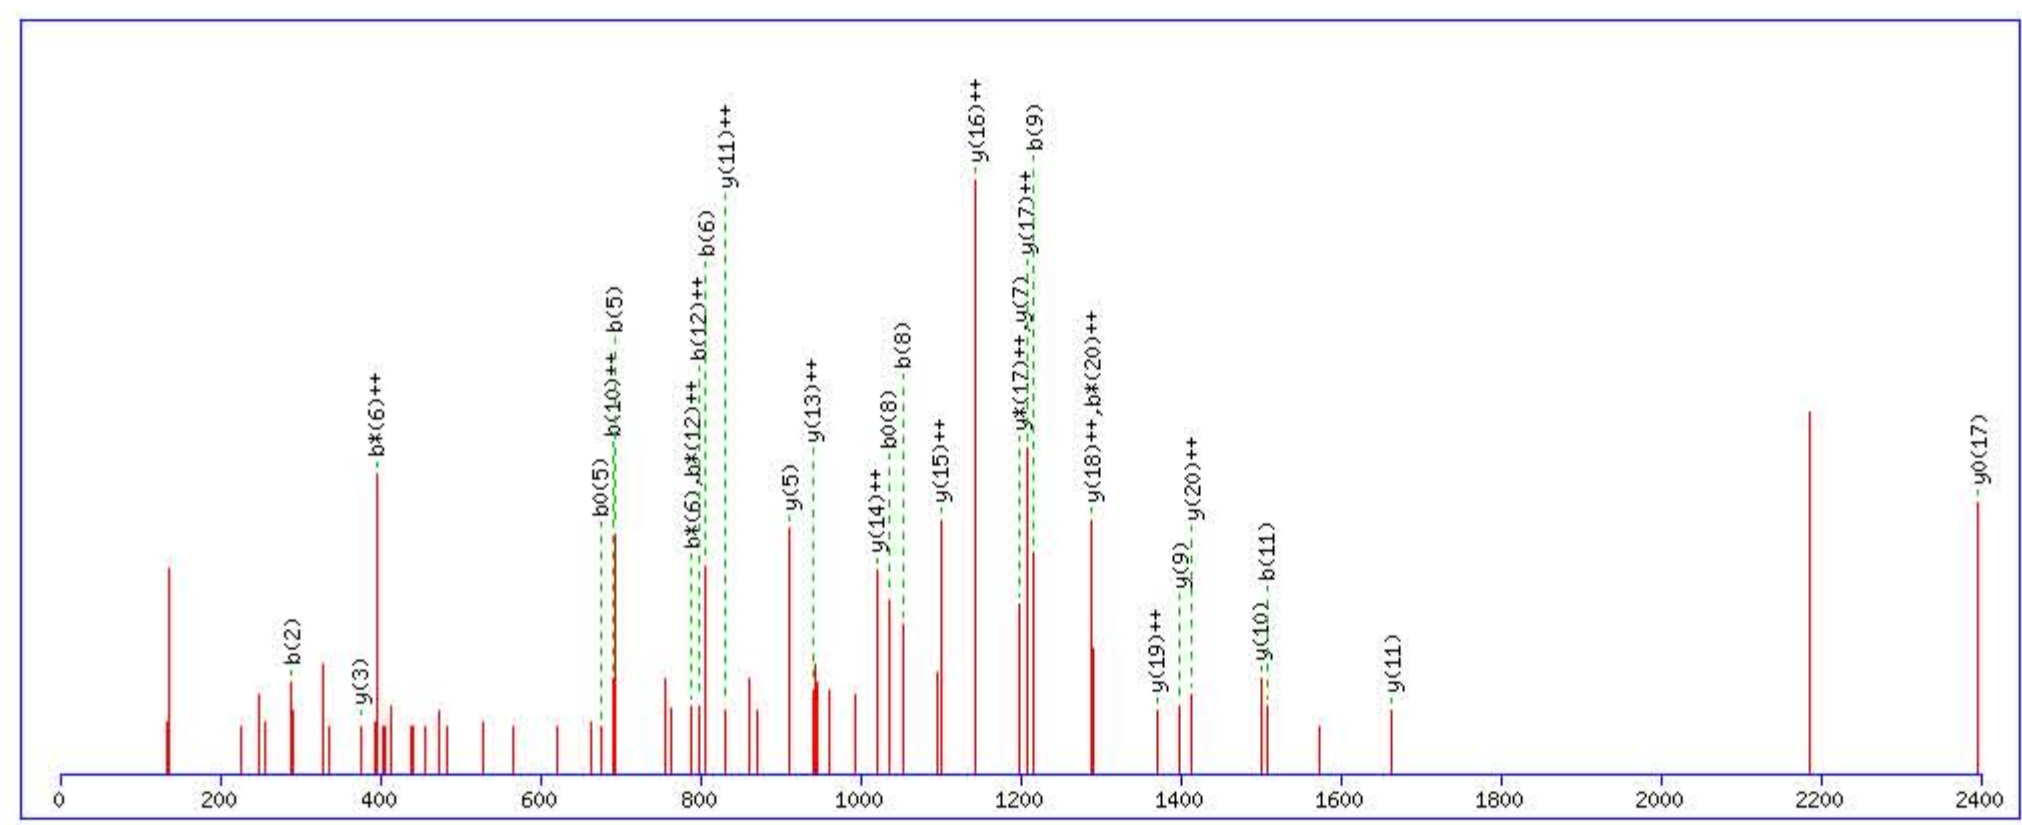

Monoisotopic mass of neutral peptide Mr(calc): 3792.511536  
 Fixed modifications: Carbamidomethyl (C) (apply to specified residues or termini only)  
 Variable modifications:  
 Q24 : Biotin:Thermo-21345 (Q)  
 Ions Score: 34 Expect: 0.00041  
 Matches : 31/302 fragment ions using 64 most intense peaks ([help](#))

| #  | b                  | b <sup>++</sup>   | b <sup>*</sup>    | b <sup>+++</sup>   | b <sup>0</sup>     | b <sup>0++</sup> | Seq. | y                  | y <sup>++</sup>    | y <sup>*</sup> | y <sup>+++</sup>   | y <sup>0</sup>     | y <sup>0++</sup> | #  |
|----|--------------------|-------------------|-------------------|--------------------|--------------------|------------------|------|--------------------|--------------------|----------------|--------------------|--------------------|------------------|----|
| 1  | 161.037925         | 81.022600         |                   |                    |                    |                  | C    |                    |                    |                |                    |                    |                  | 27 |
| 2  | <b>289.096503</b>  | 145.051890        | 272.069954        | 136.538615         |                    |                  | Q    | 3633.488150        | 1817.247713        | 3616.461601    | 1808.734438        | 3615.477585        | 1808.242431      | 26 |
| 3  | 449.127152         | 225.067214        | 432.100603        | 216.553940         |                    |                  | C    | 3505.429572        | 1753.218424        | 3488.403023    | 1744.705149        | 3487.419007        | 1744.213141      | 25 |
| 4  | 564.154095         | 282.580686        | 547.127546        | 274.067411         | 546.143530         | 273.575403       | D    | 3345.398923        | 1673.203099        | 3328.372374    | 1664.689825        | 3327.388358        | 1664.197817      | 24 |
| 5  | <b>693.196688</b>  | 347.101982        | 676.170139        | 338.588708         | <b>675.186123</b>  | 338.096700       | E    | 3230.371980        | 1615.689628        | 3213.345431    | 1607.176353        | 3212.361415        | 1606.684345      | 23 |
| 6  | <b>806.280752</b>  | 403.644014        | <b>789.254203</b> | <b>395.130740</b>  | 788.270187         | 394.638732       | L    | 3101.329387        | 1551.168331        | 3084.302838    | 1542.655057        | 3083.318822        | 1542.163049      | 22 |
| 7  | 966.311401         | 483.659339        | 949.284852        | 475.146064         | 948.300836         | 474.654056       | C    | 2988.245323        | 1494.626299        | 2971.218774    | 1486.113025        | 2970.234758        | 1485.621017      | 21 |
| 8  | <b>1053.343429</b> | 527.175353        | 1036.316880       | 518.662078         | <b>1035.332864</b> | 518.170070       | S    | 2828.214674        | <b>1414.610975</b> | 2811.188125    | 1406.097700        | 2810.204109        | 1405.605692      | 20 |
| 9  | <b>1216.406758</b> | 608.707017        | 1199.380209       | 600.193743         | 1198.396193        | 599.701735       | Y    | 2741.182646        | <b>1371.094961</b> | 2724.156097    | 1362.581686        | 2723.172081        | 1362.089678      | 19 |
| 10 | 1379.470087        | <b>690.238682</b> | 1362.443538       | 681.725407         | 1361.459522        | 681.233399       | Y    | 2578.119317        | <b>1289.563296</b> | 2561.092768    | 1281.050022        | 2560.108752        | 1280.558014      | 18 |
| 11 | <b>1507.528665</b> | 754.267971        | 1490.502116       | 745.754696         | 1489.518100        | 745.262688       | Q    | 2415.055988        | <b>1208.031632</b> | 2398.029439    | <b>1199.518357</b> | <b>2397.045423</b> | 1199.026349      | 17 |
| 12 | 1594.560693        | <b>797.783985</b> | 1577.534144       | <b>789.270710</b>  | 1576.550128        | 788.778702       | S    | 2286.997410        | <b>1144.002343</b> | 2269.970861    | 1135.489068        | 2268.986845        | 1134.997060      | 16 |
| 13 | 1754.591342        | 877.799309        | 1737.564793       | 869.286035         | 1736.580777        | 868.794027       | C    | 2199.965382        | <b>1100.486329</b> | 2182.938833    | 1091.973054        | 2181.954817        | 1091.481046      | 15 |
| 14 | 1914.621991        | 957.814634        | 1897.595442       | 949.301359         | 1896.611426        | 948.809351       | C    | 2039.934733        | <b>1020.471005</b> | 2022.908184    | 1011.957730        | 2021.924168        | 1011.465722      | 14 |
| 15 | 2015.669670        | 1008.338473       | 1998.643121       | 999.825199         | 1997.659105        | 999.333191       | T    | 1879.904084        | <b>940.455680</b>  | 1862.877535    | 931.942406         | 1861.893519        | 931.450398       | 13 |
| 16 | 2130.696613        | 1065.851945       | 2113.670064       | 1057.338670        | 2112.686048        | 1056.846662      | D    | 1778.856405        | 889.931841         | 1761.829856    | 881.418566         | 1760.845840        | 880.926558       | 12 |
| 17 | 2293.759942        | 1147.383609       | 2276.733393       | 1138.870335        | 2275.749377        | 1138.378327      | Y    | <b>1663.829462</b> | <b>832.418369</b>  | 1646.802913    | 823.905095         | 1645.818897        | 823.413086       | 11 |
| 18 | 2394.807621        | 1197.907449       | 2377.781072       | 1189.394174        | 2376.797056        | 1188.902166      | T    | <b>1500.766133</b> | 750.886704         | 1483.739584    | 742.373430         | 1482.755568        | 741.881422       | 10 |
| 19 | 2465.844735        | 1233.426006       | 2448.818186       | 1224.912731        | 2447.834170        | 1224.420723      | A    | <b>1399.718454</b> | 700.362865         | 1382.691905    | 691.849591         | 1381.707889        | 691.357583       | 9  |
| 20 | 2594.887328        | 1297.947302       | 2577.860779       | <b>1289.434028</b> | 2576.876763        | 1288.942020      | E    | 1328.681340        | 664.844308         | 1311.654791    | 656.331033         | 1310.670775        | 655.839025       | 8  |
| 21 | 2754.917977        | 1377.962627       | 2737.891428       | 1369.449352        | 2736.907412        | 1368.957344      | C    | <b>1199.638747</b> | 600.323011         | 1182.612198    | 591.809737         | 1181.628182        | 591.317729       | 7  |
| 22 | 2883.012940        | 1442.010108       | 2865.986391       | 1433.496834        | 2865.002375        | 1433.004826      | K    | 1039.608098        | 520.307687         | 1022.581549    | 511.794412         | 1021.597533        | 511.302404       | 6  |
| 23 | 2980.065704        | 1490.536490       | 2963.039155       | 1482.023216        | 2962.055139        | 1481.531208      | P    | <b>911.513135</b>  | 456.260205         | 894.486586     | 447.746931         | 893.502570         | 447.254923       | 5  |
| 24 | 3419.291030        | 1710.149153       | 3402.264481       | 1701.635879        | 3401.280465        | 1701.143871      | Q    | 814.460371         | 407.733823         | 797.433822     | 399.220549         | 796.449806         | 398.728541       | 4  |
| 25 | 3518.359444        | 1759.683360       | 3501.332895       | 1751.170086        | 3500.348879        | 1750.678078      | V    | <b>375.235045</b>  | 188.121160         | 358.208496     | 179.607886         | 357.224480         | 179.115878       | 3  |
| 26 | 3619.407123        | 1810.207200       | 3602.380574       | 1801.693925        | 3601.396558        | 1801.201917      | T    | 276.166631         | 138.586953         | 259.140082     | 130.073679         | 258.156066         | 129.581671       | 2  |
| 27 |                    |                   |                   |                    |                    |                  | R    | 175.118952         | 88.063114          | 158.092403     | 79.549839          |                    |                  | 1  |

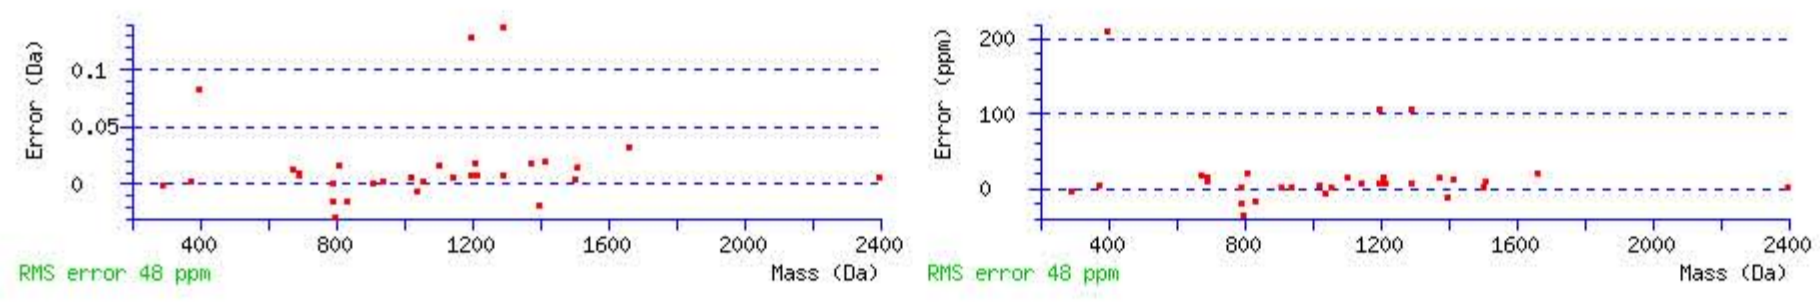

NCBI BLAST search of **CQCDELCSYYQSCCTDYTAECKPQVTR**  
 (Parameters: blastp, nr protein database, expect=20000, no filter, PAM30)  
 Other BLAST [web gateways](#)

### All matches to this query

| Score | Mr(calc):   | Delta    | Sequence                                    |
|-------|-------------|----------|---------------------------------------------|
| 33.9  | 3792.511536 | 0.021880 | <a href="#">CQCDELCSYYQSCCTDYTAECKPQVTR</a> |
| 4.8   | 3792.511536 | 0.021880 | <a href="#">CQCDELCSYYQSCCTDYTAECKPQVTR</a> |



# MASCOT Search Results

## Peptide View

MS/MS Fragmentation of **GNPEQTPVLKPEEEAPAVEVGASKPEGIDSRPETLHPGRPQPPAEELCSGKPFDAFTDLK**  
 Found in **VTNC\_HUMAN**, Vitronectin OS=Homo sapiens GN=VTN PE=1 SV=1

Match to Query 77390: 6883.432352 from(861.436320,8+) rtinseconds(2117) index(53682)  
 Title: Locus:1.1.1.1352.11 File:"2013-07-02 CLN FXIII 60 min 2nd F 4.wiff"  
 Data file C:\Program Files (x86)\Matrix Science\Mascot Daemon\mgf5 FXIII 60 min 2nd\mascot\_daemon\_merge.mgf

Click mouse within plot area to zoom in by factor of two about that point  
 Or, Plot from  to  Da  Full range  
 Label all possible matches  Label matches used for scoring

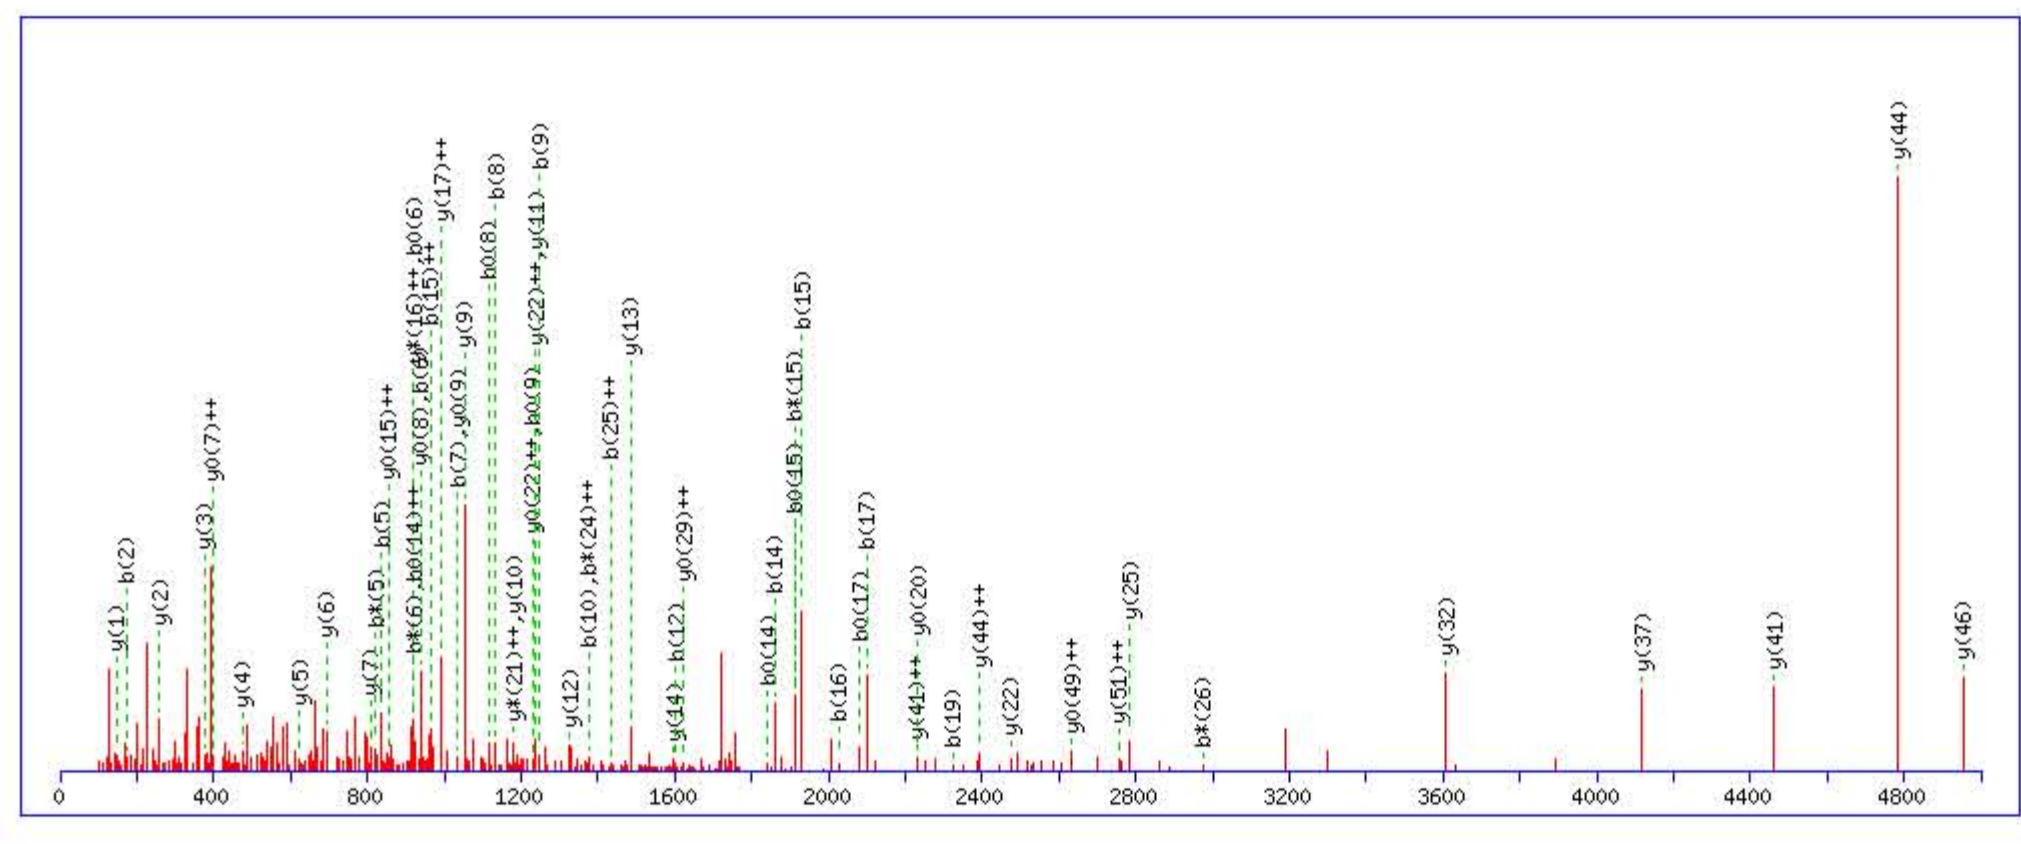

Monoisotopic mass of neutral peptide Mr(calc): 6883.374893  
 Fixed modifications: Carbamidomethyl (C) (apply to specified residues or termini only)  
 Variable modifications:  
 Q5 : Biotin:Thermo-21345 (Q)  
 Ions Score: 35 Expect: 0.0034  
 Matches : 62/708 fragment ions using 195 most intense peaks [\(help\)](#)

| #  | b                  | b <sup>++</sup>    | b <sup>+</sup>     | b <sup>++</sup>    | b <sup>0</sup>     | b <sup>0++</sup>  | Seq. | y                  | y <sup>++</sup>    | y <sup>*</sup> | y <sup>++</sup>    | y <sup>0</sup>     | y <sup>0++</sup>   | #  |
|----|--------------------|--------------------|--------------------|--------------------|--------------------|-------------------|------|--------------------|--------------------|----------------|--------------------|--------------------|--------------------|----|
| 1  | 58.028740          | 29.518008          |                    |                    |                    |                   | G    |                    |                    |                |                    |                    |                    | 61 |
| 2  | <b>172.071667</b>  | 86.539471          | 155.045118         | 78.026197          |                    |                   | N    | 6827.360757        | 3414.184017        | 6810.334208    | 3405.670742        | 6809.350192        | 3405.178734        | 60 |
| 3  | 269.124431         | 135.065854         | 252.097882         | 126.552579         |                    |                   | P    | 6713.317830        | 3357.162553        | 6696.291281    | 3348.649279        | 6695.307265        | 3348.157271        | 59 |
| 4  | 398.167024         | 199.587150         | 381.140475         | 191.073876         | 380.156459         | 190.581868        | E    | 6616.265066        | 3308.636171        | 6599.238517    | 3300.122897        | 6598.254501        | 3299.630889        | 58 |
| 5  | <b>837.392350</b>  | 419.199813         | <b>820.365801</b>  | 410.686539         | 819.381785         | 410.194531        | Q    | 6487.222473        | 3244.114875        | 6470.195924    | 3235.601600        | 6469.211908        | 3235.109592        | 57 |
| 6  | <b>938.440029</b>  | 469.723653         | <b>921.413480</b>  | 461.210378         | <b>920.429464</b>  | 460.718370        | T    | 6047.997147        | 3024.502212        | 6030.970598    | 3015.988937        | 6029.986582        | 3015.496929        | 56 |
| 7  | <b>1035.492793</b> | 518.250035         | 1018.466244        | 509.736760         | 1017.482228        | 509.244752        | P    | 5946.949468        | 2973.978372        | 5929.922919    | 2965.465098        | 5928.938903        | 2964.973090        | 55 |
| 8  | <b>1134.561207</b> | 567.784242         | 1117.534658        | 559.270967         | <b>1116.550642</b> | 558.778959        | V    | 5849.896704        | 2925.451990        | 5832.870155    | 2916.938716        | 5831.886139        | 2916.446708        | 54 |
| 9  | <b>1247.645271</b> | 624.326274         | 1230.618722        | 615.812999         | <b>1229.634706</b> | 615.320991        | L    | 5750.828290        | 2875.917783        | 5733.801741    | 2867.404509        | 5732.817725        | 2866.912501        | 53 |
| 10 | <b>1375.740234</b> | 688.373755         | 1358.713685        | 679.860481         | 1357.729669        | 679.368473        | K    | 5637.744226        | 2819.375751        | 5620.717677    | 2810.862477        | 5619.733661        | 2810.370469        | 52 |
| 11 | 1472.792998        | 736.900137         | 1455.766449        | 728.386863         | 1454.782433        | 727.894855        | P    | 5509.649263        | <b>2755.328270</b> | 5492.622714    | 2746.814995        | 5491.638698        | 2746.322987        | 51 |
| 12 | <b>1601.835591</b> | 801.421434         | 1584.809042        | 792.908159         | 1583.825026        | 792.416151        | E    | 5412.596499        | 2706.801888        | 5395.569950    | 2698.288613        | 5394.585934        | 2697.796605        | 50 |
| 13 | 1730.878184        | 865.942730         | 1713.851635        | 857.429456         | 1712.867619        | 856.937448        | E    | 5283.553906        | 2642.280591        | 5266.527357    | 2633.767317        | 5265.543341        | <b>2633.275309</b> | 49 |
| 14 | <b>1859.920777</b> | 930.464027         | 1842.894228        | 921.950752         | <b>1841.910212</b> | <b>921.458744</b> | E    | 5154.511313        | 2577.759295        | 5137.484764    | 2569.246020        | 5136.500748        | 2568.754012        | 48 |
| 15 | <b>1930.957891</b> | <b>965.982584</b>  | <b>1913.931342</b> | 957.469309         | <b>1912.947326</b> | 956.977301        | A    | 5025.468720        | 2513.237998        | 5008.442171    | 2504.724724        | 5007.458155        | 2504.232716        | 47 |
| 16 | <b>2028.010655</b> | 1014.508966        | 2010.984106        | 1005.995691        | 2010.000090        | 1005.503683       | P    | <b>4954.431606</b> | 2477.719441        | 4937.405057    | 2469.206167        | 4936.421041        | 2468.714159        | 46 |
| 17 | <b>2099.047769</b> | 1050.027523        | 2082.021220        | 1041.514248        | <b>2081.037204</b> | 1041.022240       | A    | 4857.378842        | 2429.193059        | 4840.352293    | 2420.679785        | 4839.368277        | 2420.187777        | 45 |
| 18 | 2196.100533        | 1098.553905        | 2179.073984        | 1090.040630        | 2178.089968        | 1089.548622       | P    | <b>4786.341728</b> | <b>2393.674502</b> | 4769.315179    | 2385.161228        | 4768.331163        | 2384.669220        | 44 |
| 19 | <b>2325.143126</b> | 1163.075201        | 2308.116577        | 1154.561927        | 2307.132561        | 1154.069919       | E    | 4689.288964        | 2345.148120        | 4672.262415    | 2336.634846        | 4671.278399        | 2336.142838        | 43 |
| 20 | 2424.211540        | 1212.609408        | 2407.184991        | 1204.096134        | 2406.200975        | 1203.604126       | V    | 4560.246371        | 2280.626824        | 4543.219822    | 2272.113549        | 4542.235806        | 2271.621541        | 42 |
| 21 | 2481.233004        | 1241.120140        | 2464.206455        | 1232.606865        | 2463.222439        | 1232.114858       | G    | <b>4461.177957</b> | <b>2231.092617</b> | 4444.151408    | 2222.579342        | 4443.167392        | 2222.087334        | 41 |
| 22 | 2552.270118        | 1276.638697        | 2535.243569        | 1268.125423        | 2534.259553        | 1267.633415       | A    | 4404.156493        | 2202.581885        | 4387.129944    | 2194.068610        | 4386.145928        | 2193.576602        | 40 |
| 23 | 2639.302146        | 1320.154711        | 2622.275597        | 1311.641437        | 2621.291581        | 1311.149429       | S    | 4333.119379        | 2167.063328        | 4316.092830    | 2158.550053        | 4315.108814        | 2158.058045        | 39 |
| 24 | 2767.397109        | 1384.202193        | 2750.370560        | <b>1375.688918</b> | 2749.386544        | 1375.196910       | K    | 4246.087351        | 2123.547314        | 4229.060802    | 2115.034039        | 4228.076786        | 2114.542031        | 38 |
| 25 | 2864.449873        | <b>1432.728575</b> | 2847.423324        | 1424.215300        | 2846.439308        | 1423.723292       | P    | <b>4117.992388</b> | 2059.499832        | 4100.965839    | 2050.986558        | 4099.981823        | 2050.494550        | 37 |
| 26 | 2993.492466        | 1497.249871        | <b>2976.465917</b> | 1488.736597        | 2975.481901        | 1488.244589       | E    | 4020.939624        | 2010.973450        | 4003.913075    | 2002.460176        | 4002.929059        | 2001.968168        | 36 |
| 27 | 3050.513930        | 1525.760603        | 3033.487381        | 1517.247329        | 3032.503365        | 1516.755321       | G    | 3891.897031        | 1946.452154        | 3874.870482    | 1937.938879        | 3873.886466        | 1937.446871        | 35 |
| 28 | 3163.597994        | 1582.302635        | 3146.571445        | 1573.789361        | 3145.587429        | 1573.297353       | I    | 3834.875567        | 1917.941422        | 3817.849018    | 1909.428147        | 3816.865002        | 1908.936139        | 34 |
| 29 | 3278.624937        | 1639.816107        | 3261.598388        | 1631.302832        | 3260.614372        | 1630.810824       | D    | 3721.791503        | 1861.399390        | 3704.764954    | 1852.886115        | 3703.780938        | 1852.394107        | 33 |
| 30 | 3365.656965        | 1683.332121        | 3348.630416        | 1674.818846        | 3347.646400        | 1674.326838       | S    | <b>3606.764560</b> | 1803.885918        | 3589.738011    | 1795.372644        | 3588.753995        | 1794.880636        | 32 |
| 31 | 3521.758076        | 1761.382676        | 3504.731527        | 1752.869402        | 3503.747511        | 1752.377394       | R    | 3519.732532        | 1760.369904        | 3502.705983    | 1751.856630        | 3501.721967        | 1751.364622        | 31 |
| 32 | 3618.810840        | 1809.909058        | 3601.784291        | 1801.395784        | 3600.800275        | 1800.903776       | P    | 3363.631421        | 1682.319349        | 3346.604872    | 1673.806074        | 3345.620856        | 1673.314066        | 30 |
| 33 | 3747.853433        | 1874.430355        | 3730.826884        | 1865.917080        | 3729.842868        | 1865.425072       | E    | 3266.578657        | 1633.792967        | 3249.552108    | 1625.279692        | 3248.568092        | <b>1624.787684</b> | 29 |
| 34 | 3848.901112        | 1924.954194        | 3831.874563        | 1916.440920        | 3830.890547        | 1915.948912       | T    | 3137.536064        | 1569.271670        | 3120.509515    | 1560.758396        | 3119.525499        | 1560.266388        | 28 |
| 35 | 3961.985176        | 1981.496226        | 3944.958627        | 1972.982952        | 3943.974611        | 1972.490944       | L    | 3036.488385        | 1518.747831        | 3019.461836    | 1510.234556        | 3018.477820        | 1509.742548        | 27 |
| 36 | 4099.044088        | 2050.025682        | 4082.017539        | 2041.512408        | 4081.033523        | 2041.020400       | H    | 2923.404321        | 1462.205799        | 2906.377772    | 1453.692524        | 2905.393756        | 1453.200516        | 26 |
| 37 | 4196.096852        | 2098.552064        | 4179.070303        | 2090.038790        | 4178.086287        | 2089.546782       | P    | <b>2786.345409</b> | 1393.676343        | 2769.318860    | 1385.163068        | 2768.334844        | 1384.671060        | 25 |
| 38 | 4253.118316        | 2127.062796        | 4236.091767        | 2118.549522        | 4235.107751        | 2118.057514       | G    | 2689.292645        | 1345.149961        | 2672.266096    | 1336.636686        | 2671.282080        | 1336.144678        | 24 |
| 39 | 4409.219427        | 2205.113352        | 4392.192878        | 2196.600077        | 4391.208862        | 2196.108069       | R    | 2632.271181        | 1316.639229        | 2615.244632    | 1308.125954        | 2614.260616        | 1307.633946        | 23 |
| 40 | 4506.272191        | 2253.639734        | 4489.245642        | 2245.126459        | 4488.261626        | 2244.634451       | P    | <b>2476.170070</b> | <b>1238.588673</b> | 2459.143521    | 1230.075399        | 2458.159505        | <b>1229.583391</b> | 22 |
| 41 | 4634.330769        | 2317.669023        | 4617.304220        | 2309.155748        | 4616.320204        | 2308.663740       | Q    | 2379.117306        | 1190.062291        | 2362.090757    | <b>1181.549017</b> | 2361.106741        | 1181.057009        | 21 |
| 42 | 4731.383533        | 2366.195405        | 4714.356984        | 2357.682130        | 4713.372968        | 2357.190122       | P    | 2251.058728        | 1126.033002        | 2234.032179    | 1117.519728        | <b>2233.048163</b> | 1117.027720        | 20 |
| 43 | 4828.436297        | 2414.721787        | 4811.409748        | 2406.208512        | 4810.425732        | 2405.716504       | P    | 2154.005964        | 1077.506620        | 2136.979415    | 1068.993346        | 2135.995399        | 1068.501338        | 19 |
| 44 | 4899.473411        | 2450.240344        | 4882.446862        | 2441.727069        | 4881.462846        | 2441.235061       | A    | 2056.953200        | 1028.980238        | 2039.926651    | 1020.466964        | 2038.942635        | 1019.974956        | 18 |
| 45 | 5028.516004        | 2514.761640        | 5011.489455        | 2506.248366        | 5010.505439        | 2505.756358       | E    | 1985.916086        | <b>993.461681</b>  | 1968.889537    | 984.948407         | 1967.905521        | 984.456399         | 17 |
| 46 | 5157.558597        | 2579.282937        | 5140.532048        | 2570.769662        | 5139.548032        | 2570.277654       | E    | 1856.873493        | 928.940385         | 1839.846944    | <b>920.427110</b>  | 1838.862928        | 919.935102         | 16 |
| 47 | 5286.601190        | 2643.804233        | 5269.574641        | 2635.290959        | 5268.590625        | 2634.798951       | E    | 1727.830900        | 864.419088         | 1710.804351    | 855.905814         | 1709.820335        | <b>855.413806</b>  | 15 |
| 48 | 5399.685254        | 2700.346265        | 5382.658705        | 2691.832991        | 5381.674689        | 2691.340983       | L    | <b>1598.788307</b> | 799.897792         | 1581.761758    | 791.384517         | 1580.777742        | 790.892509         | 14 |
| 49 | 5559.715903        | 2780.361590        | 5542.689354        | 2771.848315        | 5541.705338        | 2771.356307       | C    | <b>1485.704243</b> | 743.355760         | 1468.677694    | 734.842485         | 1467.693678        | 734.350477         | 13 |
| 50 | 5646.747931        | 2823.877604        | 5629.721382        | 2815.364329        | 5628.737366        | 2814.872321       | S    | <b>1325.673594</b> | 663.340435         | 1308.647045    | 654.827161         | 1307.663029        | 654.335153         | 12 |
| 51 | 5703.769395        | 2852.388336        | 5686.742846        | 2843.875061        | 5685.758830        | 2843.383053       | G    | <b>1238.641566</b> | 619.824421         | 1221.615017    | 611.311147         | 1220.631001        | 610.819139         | 11 |
| 52 | 5831.864358        | 2916.435817        | 5814.837809        | 2907.922543        | 5813.853793        | 2907.430535       | K    | <b>1181.620102</b> | 591.313689         | 1164.593553    | 582.800415         | 1163.609537        | 582.308407         | 10 |
| 53 | 5928.917122        | 2964.962199        | 5911.890573        | 2956.448925        | 5910.906557        | 2955.956917       | P</  |                    |                    |                |                    |                    |                    |    |



# MASCOT SEARCH RESULTS

## Peptide View

MS/MS Fragmentation of **GGQIMTLK**

Found in **VWF\_HUMAN**, von Willebrand factor OS=Homo sapiens GN=VWF PE=1 SV=4

Match to Query 21859: 1157.628448 from(579.821500,2+) rtinseconds(1906) index(35717)

Title: Locus:1.1.1.3083.19 File:"2013-07-02 CLN FXIII 60 min 2nd F 3.wiff"

Data file C:\Program Files (x86)\Matrix Science\Mascot Daemon\mgf5 FXIII 60 min 2nd\mascot\_daemon\_merge.mgf

Click mouse within plot area to zoom in by factor of two about that point

Or, Plot from  to  Da

Label all possible matches  Label matches used for scoring

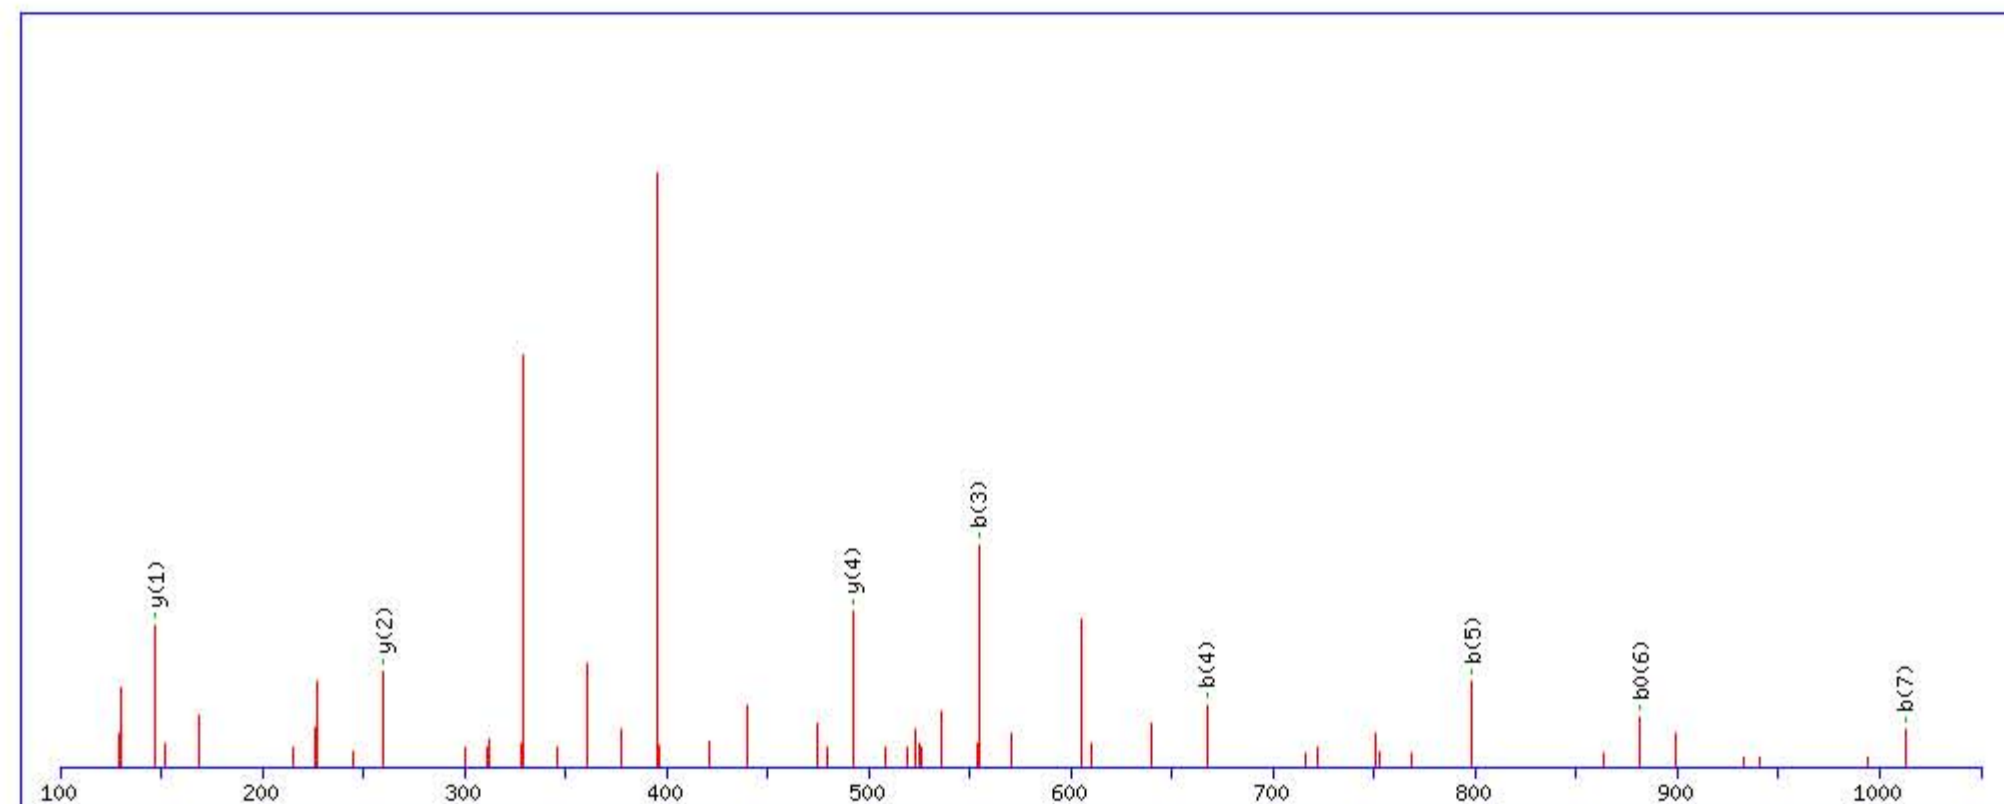

Monoisotopic mass of neutral peptide Mr(calc): 1157.630066

Fixed modifications: Carbamidomethyl (C) (apply to specified residues or termini only)

Variable modifications:

Q3 : Biotin:Thermo-21345 (Q)

Ions Score: 33 Expect: 0.015

Matches : 8/66 fragment ions using 9 most intense peaks [\(help\)](#)

| # | b                  | b <sup>++</sup> | b <sup>*</sup> | b <sup>*++</sup> | b <sup>0</sup>    | b <sup>0++</sup> | Seq.     | y                 | y <sup>++</sup> | y <sup>*</sup> | y <sup>*++</sup> | y <sup>0</sup> | y <sup>0++</sup> | #        |
|---|--------------------|-----------------|----------------|------------------|-------------------|------------------|----------|-------------------|-----------------|----------------|------------------|----------------|------------------|----------|
| 1 | 58.028740          | 29.518008       |                |                  |                   |                  | <b>G</b> |                   |                 |                |                  |                |                  | <b>8</b> |
| 2 | 115.050204         | 58.028740       |                |                  |                   |                  | <b>G</b> | 1101.615886       | 551.311581      | 1084.589337    | 542.798307       | 1083.605321    | 542.306299       | <b>7</b> |
| 3 | <b>554.275530</b>  | 277.641403      | 537.248981     | 269.128129       |                   |                  | <b>Q</b> | 1044.594422       | 522.800849      | 1027.567873    | 514.287575       | 1026.583857    | 513.795567       | <b>6</b> |
| 4 | <b>667.359594</b>  | 334.183435      | 650.333045     | 325.670161       |                   |                  | <b>I</b> | 605.369096        | 303.188186      | 588.342547     | 294.674912       | 587.358531     | 294.182904       | <b>5</b> |
| 5 | <b>798.400079</b>  | 399.703678      | 781.373530     | 391.190403       |                   |                  | <b>M</b> | <b>492.285032</b> | 246.646154      | 475.258483     | 238.132880       | 474.274467     | 237.640872       | <b>4</b> |
| 6 | 899.447758         | 450.227517      | 882.421209     | 441.714243       | <b>881.437193</b> | 441.222235       | <b>T</b> | 361.244547        | 181.125912      | 344.217998     | 172.612637       | 343.233982     | 172.120629       | <b>3</b> |
| 7 | <b>1012.531822</b> | 506.769549      | 995.505273     | 498.256275       | 994.521257        | 497.764267       | <b>L</b> | <b>260.196868</b> | 130.602072      | 243.170319     | 122.088798       |                |                  | <b>2</b> |
| 8 |                    |                 |                |                  |                   |                  | <b>K</b> | <b>147.112804</b> | 74.060040       | 130.086255     | 65.546765        |                |                  | <b>1</b> |

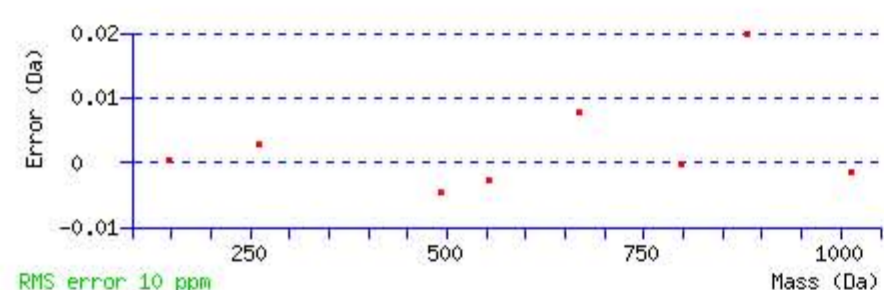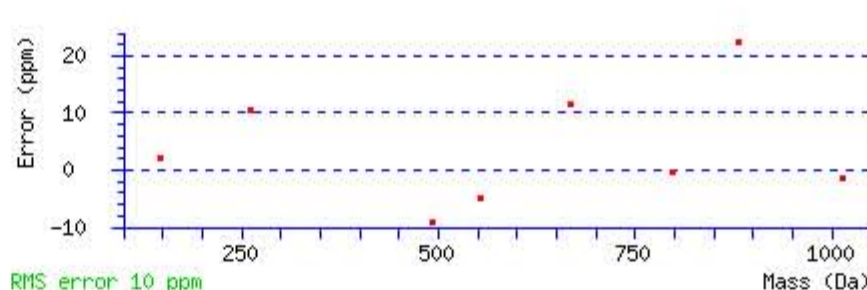

NCBI BLAST search of [GGQIMTLK](#)

(Parameters: blastp, nr protein database, expect=20000, no filter, PAM30)

Other BLAST [web gateways](#)

All matches to this query

| Score | Mr(calc):   | Delta     | Sequence                    |
|-------|-------------|-----------|-----------------------------|
| 32.8  | 1157.630066 | -0.001618 | <a href="#">GGQIMTLK</a>    |
| 12.7  | 1157.619293 | 0.009155  | <a href="#">TNFEGPPRLK</a>  |
| 12.4  | 1157.630051 | -0.001603 | <a href="#">QLSQMLK</a>     |
| 11.9  | 1157.630051 | -0.001603 | <a href="#">QLSQMLK</a>     |
| 11.3  | 1157.630051 | -0.001603 | <a href="#">QIKSMLQ</a>     |
| 10.2  | 1157.640411 | -0.011963 | <a href="#">AQQLSSGNLK</a>  |
| 8.4   | 1157.630051 | -0.001603 | <a href="#">QAGAMLLK</a>    |
| 8.2   | 1157.630081 | -0.001633 | <a href="#">CVTLVQK</a>     |
| 7.9   | 1157.640411 | -0.011963 | <a href="#">SPGKNSSIQLK</a> |
| 7.3   | 1157.633209 | -0.004761 | <a href="#">LLDPEPSFLK</a>  |



# Mascot Search Results

## Peptide View

MS/MS Fragmentation of **GDSQSSWK**

Found in **VWF\_HUMAN**, von Willebrand factor OS=Homo sapiens GN=VWF PE=1 SV=4

Match to Query 23399: 1204.553808 from(603.284180,2+) rtinseconds(1541) index(33557)

Title: Locus:1.1.1.2956.7 File:"2013-07-02 CLN FXIII 60 min 2nd F 3.wiff"

Data file C:\Program Files (x86)\Matrix Science\Mascot Daemon\mgf\5 FXIII 60 min 2nd\mascot\_daemon\_merge.mgf

Click mouse within plot area to zoom in by factor of two about that point

Or, Plot from  to  Da

Label all possible matches  Label matches used for scoring

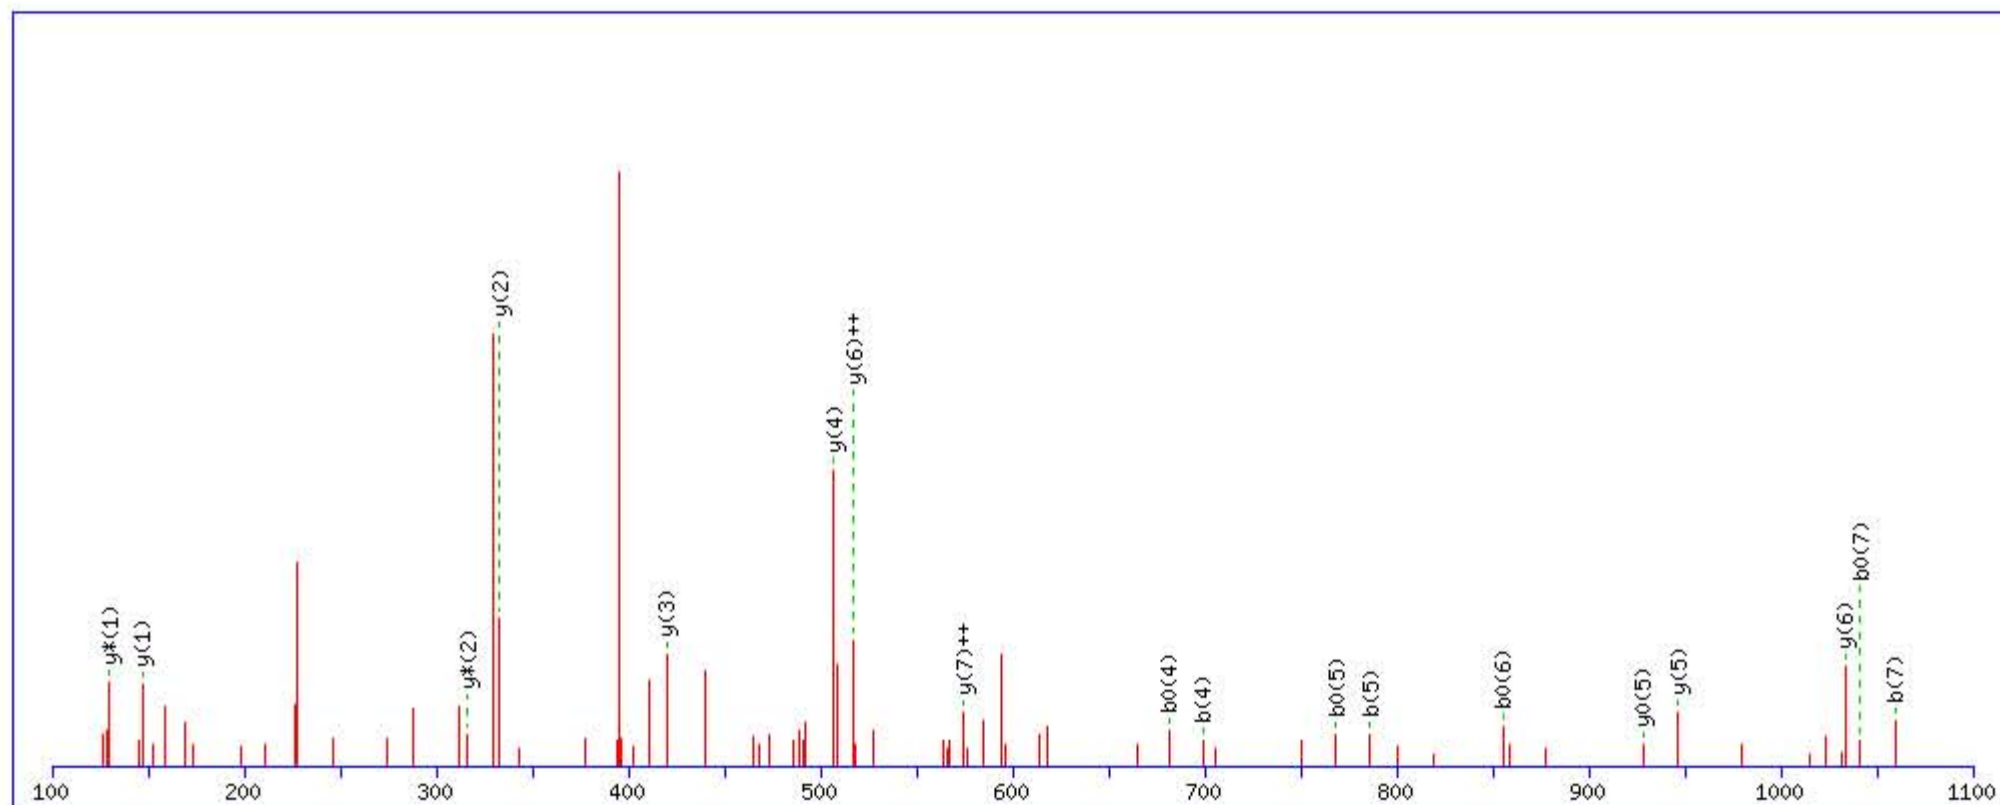

Monoisotopic mass of neutral peptide Mr(calc): 1204.554657

Fixed modifications: Carbamidomethyl (C) (apply to specified residues or termini only)

Variable modifications:

Q4 : Biotin:Thermo-21345 (Q)

Ions Score: 28 Expect: 0.0047

Matches : 18/72 fragment ions using 39 most intense peaks [\(help\)](#)

| # | b           | b <sup>++</sup> | b <sup>*</sup> | b <sup>*++</sup> | b <sup>0</sup> | b <sup>0++</sup> | Seq. | y           | y <sup>++</sup> | y <sup>*</sup> | y <sup>*++</sup> | y <sup>0</sup> | y <sup>0++</sup> | # |
|---|-------------|-----------------|----------------|------------------|----------------|------------------|------|-------------|-----------------|----------------|------------------|----------------|------------------|---|
| 1 | 58.028740   | 29.518008       |                |                  |                |                  | G    |             |                 |                |                  |                |                  | 8 |
| 2 | 173.055683  | 87.031479       |                |                  | 155.045118     | 78.026197        | D    | 1148.540470 | 574.773873      | 1131.513921    | 566.260599       | 1130.529905    | 565.768591       | 7 |
| 3 | 260.087711  | 130.547493      |                |                  | 242.077146     | 121.542211       | S    | 1033.513527 | 517.260402      | 1016.486978    | 508.747127       | 1015.502962    | 508.255119       | 6 |
| 4 | 699.313037  | 350.160157      | 682.286488     | 341.646882       | 681.302472     | 341.154874       | Q    | 946.481499  | 473.744388      | 929.454950     | 465.231113       | 928.470934     | 464.739105       | 5 |
| 5 | 786.345065  | 393.676171      | 769.318516     | 385.162896       | 768.334500     | 384.670888       | S    | 507.256173  | 254.131724      | 490.229624     | 245.618450       | 489.245608     | 245.126442       | 4 |
| 6 | 873.377093  | 437.192185      | 856.350544     | 428.678910       | 855.366528     | 428.186902       | S    | 420.224145  | 210.615711      | 403.197596     | 202.102436       | 402.213580     | 201.610428       | 3 |
| 7 | 1059.456406 | 530.231841      | 1042.429857    | 521.718567       | 1041.445841    | 521.226559       | W    | 333.192117  | 167.099697      | 316.165568     | 158.586422       |                |                  | 2 |
| 8 |             |                 |                |                  |                |                  | K    | 147.112804  | 74.060040       | 130.086255     | 65.546765        |                |                  | 1 |

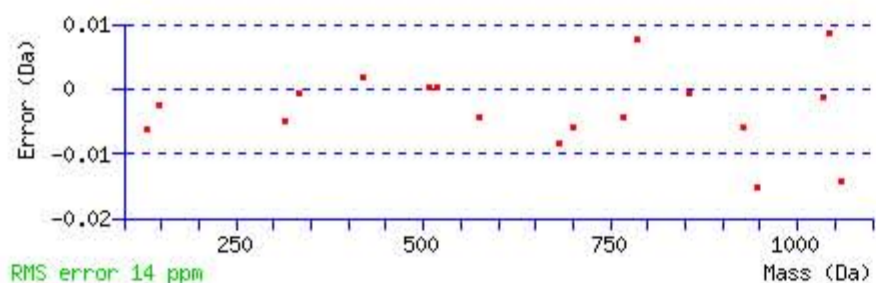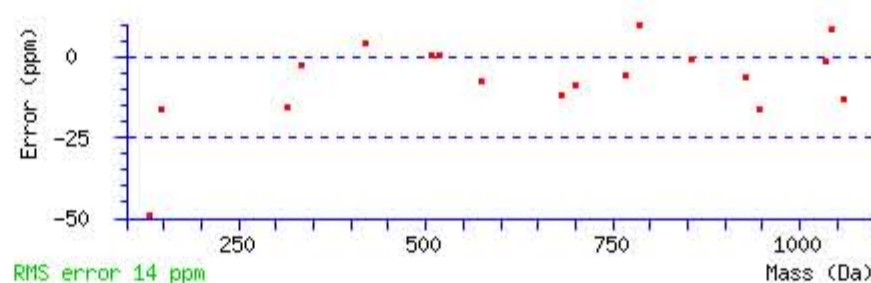

NCBI BLAST search of [GDSQSSWK](#)

(Parameters: blastp, nr protein database, expect=20000, no filter, PAM30)

Other BLAST [web gateways](#)

All matches to this query

| Score | Mr(calc):   | Delta     | Sequence                 |
|-------|-------------|-----------|--------------------------|
| 28.5  | 1204.554657 | -0.000849 | <a href="#">GDSQSSWK</a> |
| 3.7   | 1204.540253 | 0.013555  | <a href="#">QMQECAK</a>  |

Mascot: <http://www.matrixscience.com/>



# MASCOT Search Results

## Peptide View

MS/MS Fragmentation of **VSSQCADTR**

Found in **VWF\_HUMAN**, von Willebrand factor OS=Homo sapiens GN=VWF PE=1 SV=4

Match to Query 26804: 1333.612128 from(667.813340,2+) rtinseconds(1245) index(31560)

Title: Locus:1.1.1.2852.19 File:"2013-07-02 CLN FXIII 60 min 2nd F 3.wiff"

Data file C:\Program Files (x86)\Matrix Science\Mascot Daemon\mgf\5 FXIII 60 min 2nd\mascot\_daemon\_merge.mgf

Click mouse within plot area to zoom in by factor of two about that point

Or, Plot from  to  Da

Label all possible matches  Label matches used for scoring

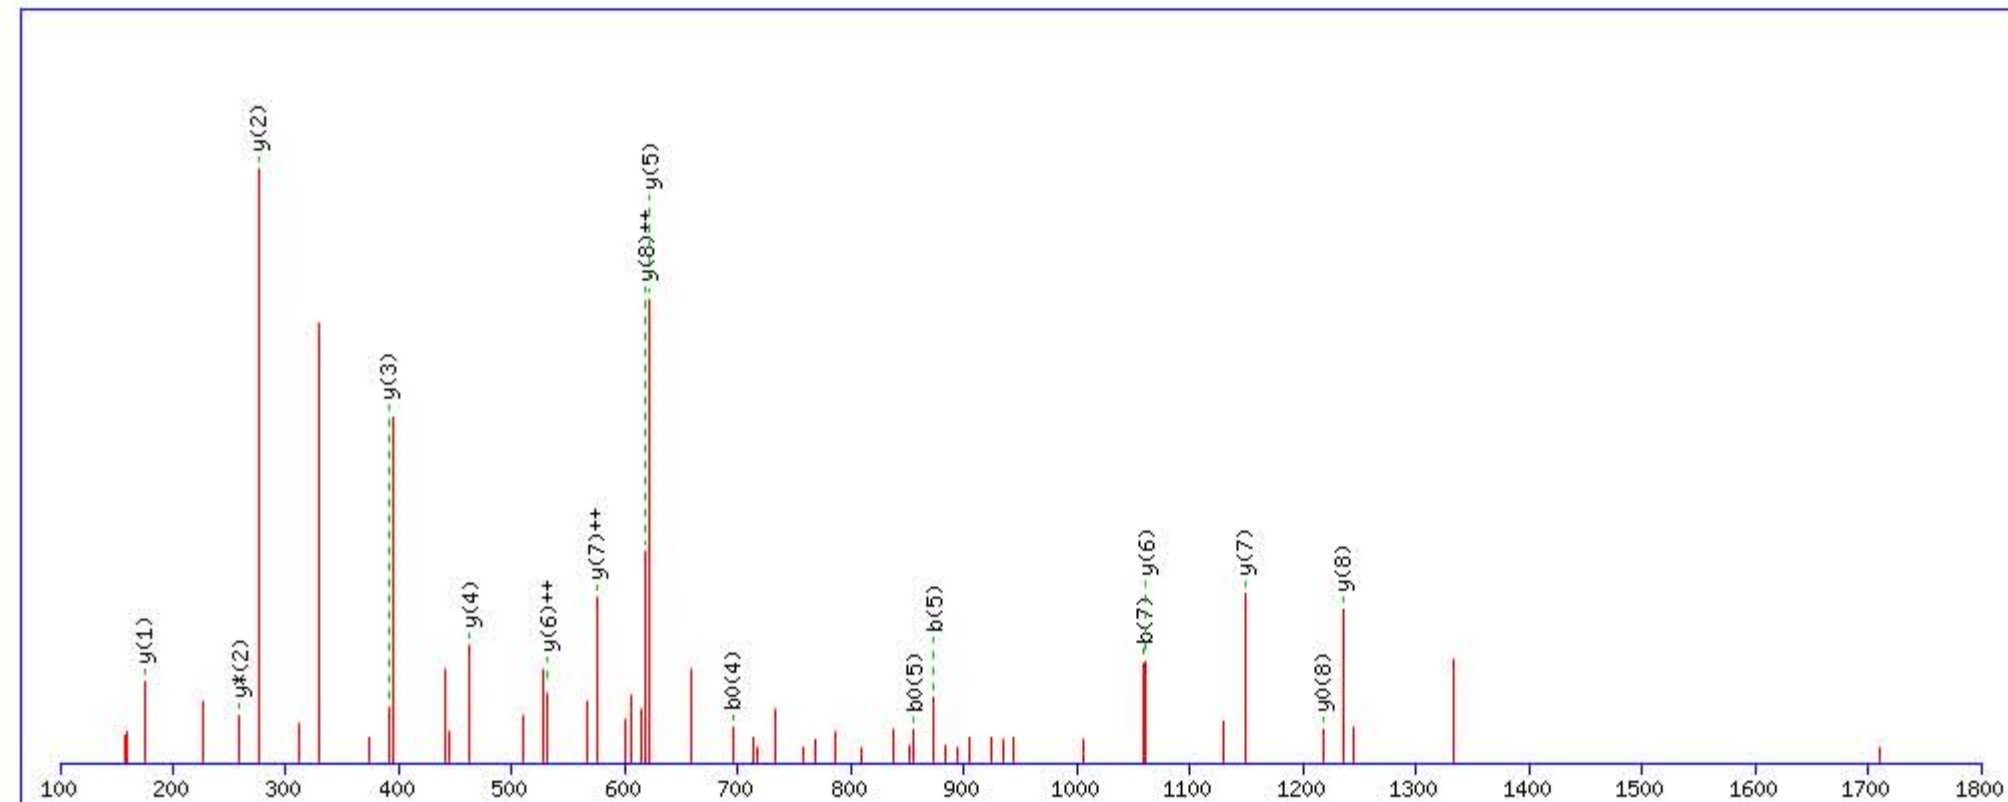

Monoisotopic mass of neutral peptide Mr(calc): 1333.611862

Fixed modifications: Carbamidomethyl (C) (apply to specified residues or termini only)

Variable modifications:

Q4 : Biotin:Thermo-21345 (Q)

Ions Score: 52 Expect: 2.1e-005

Matches : 17/86 fragment ions using 31 most intense peaks ([help](#))

| # | b           | b <sup>++</sup> | b <sup>*</sup> | b <sup>+++</sup> | b <sup>0</sup> | b <sup>0++</sup> | Seq. | y           | y <sup>++</sup> | y <sup>*</sup> | y <sup>+++</sup> | y <sup>0</sup> | y <sup>0++</sup> | # |
|---|-------------|-----------------|----------------|------------------|----------------|------------------|------|-------------|-----------------|----------------|------------------|----------------|------------------|---|
| 1 | 100.075690  | 50.541483       |                |                  |                |                  | V    |             |                 |                |                  |                |                  | 9 |
| 2 | 187.107718  | 94.057497       |                |                  | 169.097153     | 85.052214        | S    | 1235.550719 | 618.278998      | 1218.524170    | 609.765723       | 1217.540154    | 609.273715       | 8 |
| 3 | 274.139746  | 137.573511      |                |                  | 256.129181     | 128.568229       | S    | 1148.518691 | 574.762984      | 1131.492142    | 566.249709       | 1130.508126    | 565.757701       | 7 |
| 4 | 713.365072  | 357.186174      | 696.338523     | 348.672900       | 695.354507     | 348.180892       | Q    | 1061.486663 | 531.246970      | 1044.460114    | 522.733695       | 1043.476098    | 522.241687       | 6 |
| 5 | 873.395721  | 437.201499      | 856.369172     | 428.688224       | 855.385156     | 428.196216       | C    | 622.261337  | 311.634307      | 605.234788     | 303.121032       | 604.250772     | 302.629024       | 5 |
| 6 | 944.432835  | 472.720056      | 927.406286     | 464.206781       | 926.422270     | 463.714773       | A    | 462.230688  | 231.618982      | 445.204139     | 223.105707       | 444.220123     | 222.613700       | 4 |
| 7 | 1059.459778 | 530.233527      | 1042.433229    | 521.720253       | 1041.449213    | 521.228245       | D    | 391.193574  | 196.100425      | 374.167025     | 187.587151       | 373.183009     | 187.095143       | 3 |
| 8 | 1160.507457 | 580.757367      | 1143.480908    | 572.244092       | 1142.496892    | 571.752084       | T    | 276.166631  | 138.586953      | 259.140082     | 130.073679       | 258.156066     | 129.581671       | 2 |
| 9 |             |                 |                |                  |                |                  | R    | 175.118952  | 88.063114       | 158.092403     | 79.549839        |                |                  | 1 |

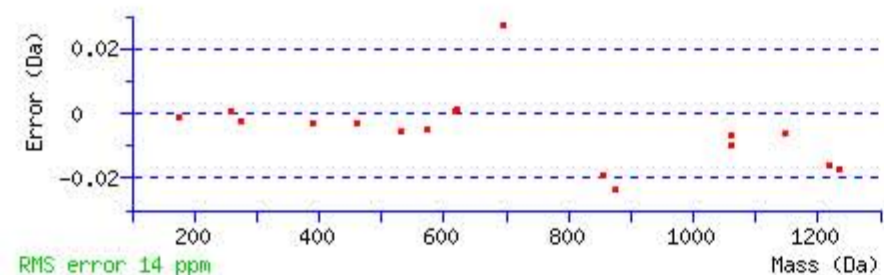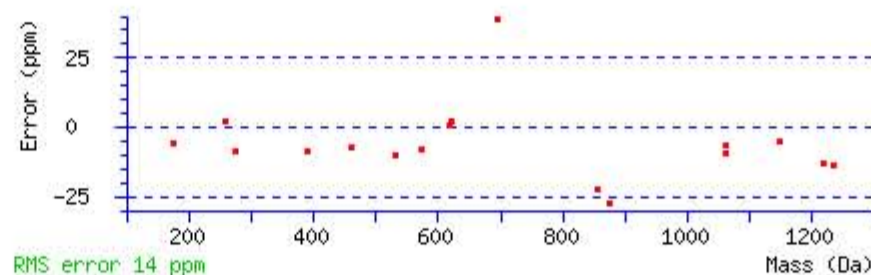

NCBI BLAST search of **VSSQCADTR**

(Parameters: blastp, nr protein database, expect=20000, no filter, PAM30)

Other BLAST [web gateways](#)

All matches to this query

| Score | Mr(calc):   | Delta    | Sequence                     |
|-------|-------------|----------|------------------------------|
| 52.5  | 1333.611862 | 0.000266 | <a href="#">VSSQCADTR</a>    |
| 2.6   | 1333.601105 | 0.011023 | <a href="#">VDNRPDGFGDSR</a> |

Mascot: <http://www.matrixscience.com/>



# MASCOT SEARCH RESULTS

## Peptide View

MS/MS Fragmentation of **VKEEVFIQQR**

Found in **VWF\_HUMAN**, von Willebrand factor OS=Homo sapiens GN=VWF PE=1 SV=4

Match to Query 36520: 1585.859472 from(529.627100,3+) rtinseconds(1765) index(34856)

Title: Locus:1.1.1.3034.11 File:"2013-07-02 CLN FXIII 60 min 2nd F 3.wiff"

Data file C:\Program Files (x86)\Matrix Science\Mascot Daemon\mgf\5 FXIII 60 min 2nd\mascot\_daemon\_merge.mgf

Click mouse within plot area to zoom in by factor of two about that point

Or, Plot from  to  Da

Label all possible matches  Label matches used for scoring

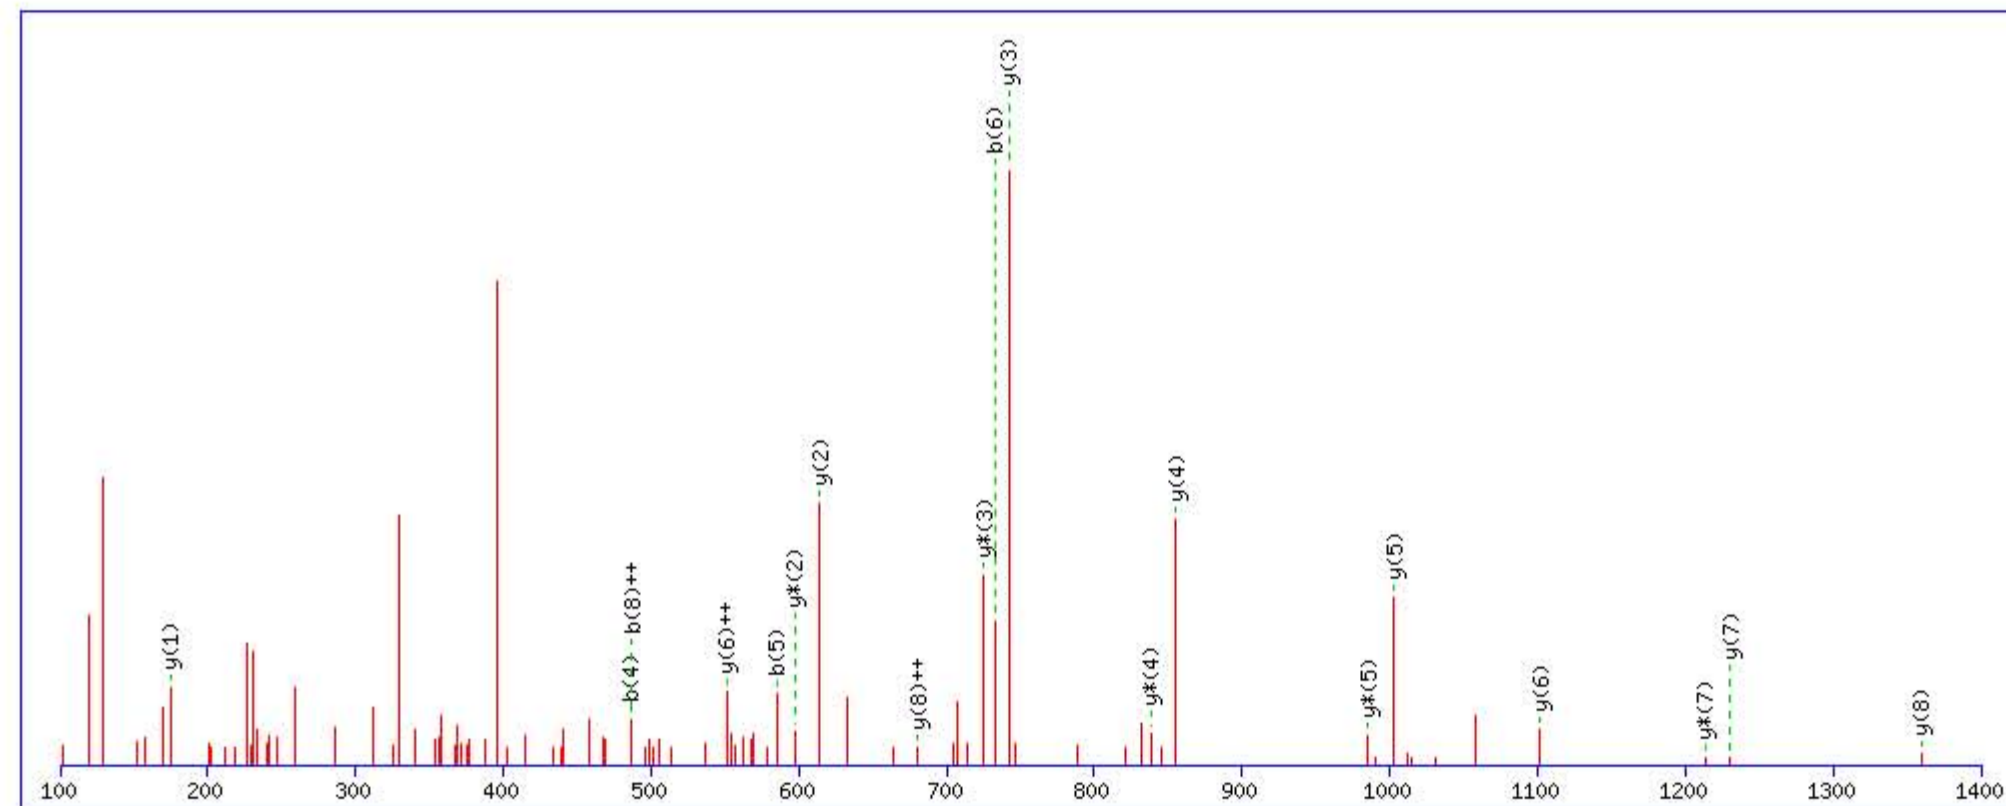

Monoisotopic mass of neutral peptide Mr(calc): 1585.865021

Fixed modifications: Carbamidomethyl (C) (apply to specified residues or termini only)

Variable modifications:

Q9 : Biotin:Thermo-21345 (Q)

Ions Score: 47 Expect: 0.00055

Matches : 19/90 fragment ions using 32 most intense peaks [\(help\)](#)

| #  | b                 | b <sup>++</sup>   | b <sup>*</sup> | b <sup>++</sup> | b <sup>0</sup> | b <sup>0++</sup> | Seq. | y                  | y <sup>++</sup>   | y <sup>*</sup>     | y <sup>++</sup> | y <sup>0</sup> | y <sup>0++</sup> | #  |
|----|-------------------|-------------------|----------------|-----------------|----------------|------------------|------|--------------------|-------------------|--------------------|-----------------|----------------|------------------|----|
| 1  | 100.075690        | 50.541483         |                |                 |                |                  | V    |                    |                   |                    |                 |                |                  | 10 |
| 2  | 228.170653        | 114.588965        | 211.144104     | 106.075690      |                |                  | K    | 1487.803897        | 744.405587        | 1470.777348        | 735.892312      | 1469.793332    | 735.400304       | 9  |
| 3  | 357.213246        | 179.110261        | 340.186697     | 170.596987      | 339.202681     | 170.104979       | E    | <b>1359.708934</b> | <b>680.358105</b> | 1342.682385        | 671.844831      | 1341.698369    | 671.352823       | 8  |
| 4  | <b>486.255839</b> | 243.631558        | 469.229290     | 235.118283      | 468.245274     | 234.626275       | E    | <b>1230.666341</b> | 615.836809        | <b>1213.639792</b> | 607.323534      | 1212.655776    | 606.831526       | 7  |
| 5  | <b>585.324253</b> | 293.165765        | 568.297704     | 284.652490      | 567.313688     | 284.160482       | V    | <b>1101.623748</b> | <b>551.315512</b> | 1084.597199        | 542.802238      |                |                  | 6  |
| 6  | <b>732.392667</b> | 366.699972        | 715.366118     | 358.186697      | 714.382102     | 357.694689       | F    | <b>1002.555334</b> | 501.781305        | <b>985.528785</b>  | 493.268031      |                |                  | 5  |
| 7  | 845.476731        | 423.242004        | 828.450182     | 414.728729      | 827.466166     | 414.236721       | I    | <b>855.486920</b>  | 428.247098        | <b>838.460371</b>  | 419.733824      |                |                  | 4  |
| 8  | 973.535309        | <b>487.271293</b> | 956.508760     | 478.758018      | 955.524744     | 478.266010       | Q    | <b>742.402856</b>  | 371.705066        | <b>725.376307</b>  | 363.191792      |                |                  | 3  |
| 9  | 1412.760635       | 706.883956        | 1395.734086    | 698.370681      | 1394.750070    | 697.878673       | Q    | <b>614.344278</b>  | 307.675777        | <b>597.317729</b>  | 299.162503      |                |                  | 2  |
| 10 |                   |                   |                |                 |                |                  | R    | <b>175.118952</b>  | 88.063114         | 158.092403         | 79.549839       |                |                  | 1  |

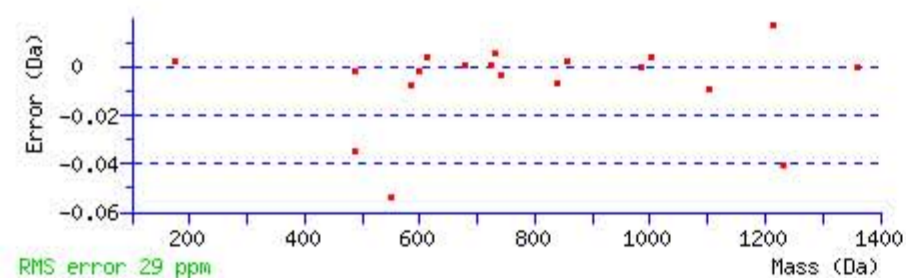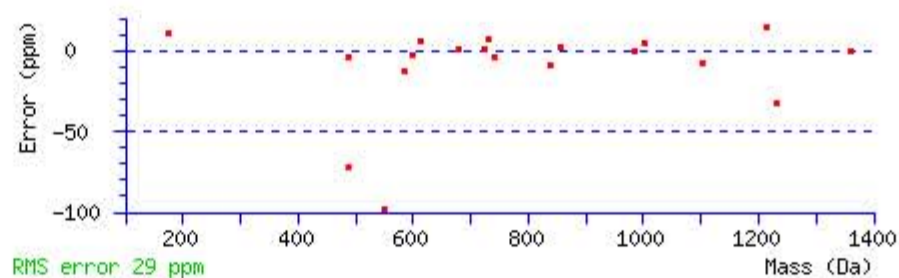

NCBI BLAST search of **VKEEVFIQQR**

(Parameters: blastp, nr protein database, expect=20000, no filter, PAM30)

Other BLAST [web gateways](#)

All matches to this query

| Score | Mr(calc):   | Delta     | Sequence                       |
|-------|-------------|-----------|--------------------------------|
| 46.5  | 1585.865021 | -0.005549 | <a href="#">VKEEVFIQQR</a>     |
| 33.5  | 1585.865021 | -0.005549 | <a href="#">VKEEVFIQQR</a>     |
| 11.6  | 1585.842392 | 0.017080  | <a href="#">EIQTITGNQQLVR</a>  |
| 10.3  | 1585.857605 | 0.001867  | <a href="#">QEEVAGIRAKFPNK</a> |
| 1.4   | 1585.842361 | 0.017111  | <a href="#">QSVLVKSNEEGIQR</a> |
| 0.6   | 1585.838531 | 0.020941  | <a href="#">DLKEVTPEGLQMVK</a> |

Mascot: <http://www.matrixscience.com/>



# MATRIX SCIENCE Mascot Search Results

## Peptide View

MS/MS Fragmentation of **QHSDPCALNPR**

Found in **VWF\_HUMAN**, von Willebrand factor OS=Homo sapiens GN=VWF PE=1 SV=4

Match to Query 37301: 1604.749152 from(535.923660,3+) rtinseconds(1402) index(32537)

Title: Locus:1.1.1.2907.18 File:"2013-07-02 CLN FXIII 60 min 2nd F 3.wiff"

Data file C:\Program Files (x86)\Matrix Science\Mascot Daemon\mgf\5 FXIII 60 min 2nd\mascot\_daemon\_merge.mgf

Click mouse within plot area to zoom in by factor of two about that point

Or, Plot from  to  Da

Label all possible matches  Label matches used for scoring

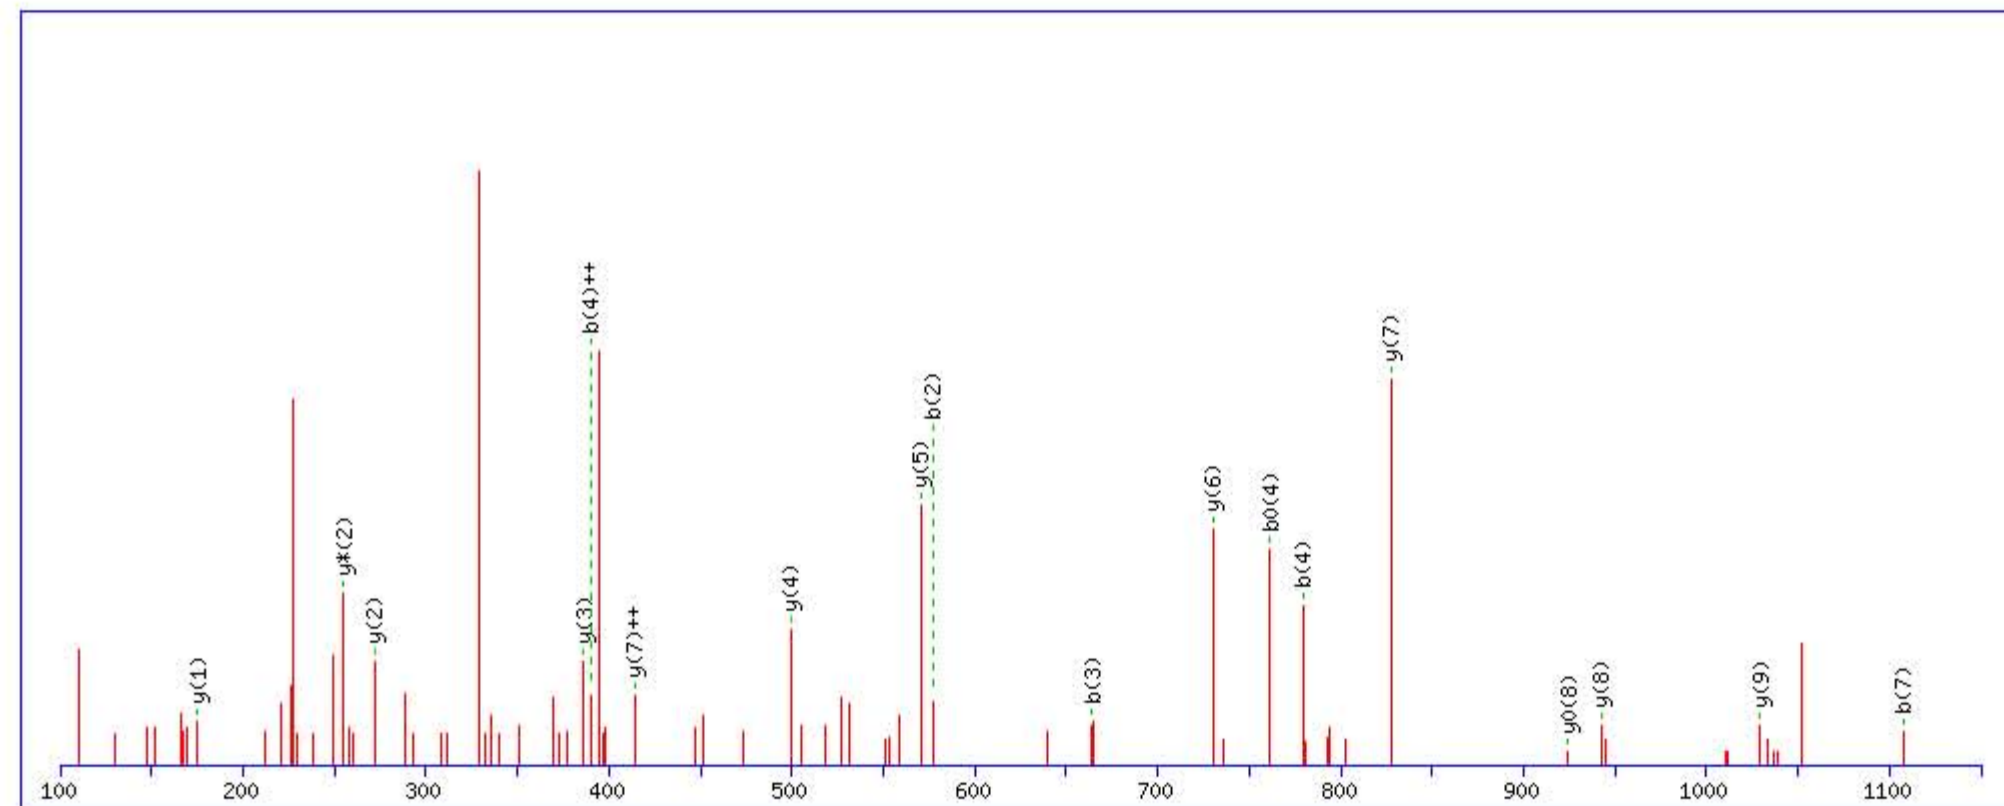

Monoisotopic mass of neutral peptide Mr(calc): 1604.755157

Fixed modifications: Carbamidomethyl (C) (apply to specified residues or termini only)

Variable modifications:

Q1 : Biotin:Thermo-21345 (Q)

Ions Score: 51 Expect: 6.7e-005

Matches : 18/102 fragment ions using 35 most intense peaks [\(help\)](#)

| #  | b                  | b <sup>++</sup>   | b <sup>+</sup> | b <sup>+++</sup> | b <sup>0</sup>    | b <sup>0++</sup> | Seq. | y                  | y <sup>++</sup>   | y <sup>+</sup>    | y <sup>+++</sup> | y <sup>0</sup>    | y <sup>0++</sup> | #  |
|----|--------------------|-------------------|----------------|------------------|-------------------|------------------|------|--------------------|-------------------|-------------------|------------------|-------------------|------------------|----|
| 1  | 440.232602         | 220.619939        | 423.206053     | 212.106664       |                   |                  | Q    |                    |                   |                   |                  |                   |                  | 11 |
| 2  | <b>577.291514</b>  | 289.149395        | 560.264965     | 280.636121       |                   |                  | H    | 1166.537117        | 583.772196        | 1149.510568       | 575.258922       | 1148.526552       | 574.766914       | 10 |
| 3  | <b>664.323542</b>  | 332.665409        | 647.296993     | 324.152134       | 646.312977        | 323.660126       | S    | <b>1029.478205</b> | 515.242740        | 1012.451656       | 506.729466       | 1011.467640       | 506.237458       | 9  |
| 4  | <b>779.350485</b>  | <b>390.178880</b> | 762.323936     | 381.665606       | <b>761.339920</b> | 381.173598       | D    | <b>942.446177</b>  | 471.726726        | 925.419628        | 463.213452       | <b>924.435612</b> | 462.721444       | 8  |
| 5  | 876.403249         | 438.705263        | 859.376700     | 430.191988       | 858.392684        | 429.699980       | P    | <b>827.419234</b>  | <b>414.213255</b> | 810.392685        | 405.699980       |                   |                  | 7  |
| 6  | 1036.433898        | 518.720587        | 1019.407349    | 510.207313       | 1018.423333       | 509.715305       | C    | <b>730.366470</b>  | 365.686873        | 713.339921        | 357.173598       |                   |                  | 6  |
| 7  | <b>1107.471012</b> | 554.239144        | 1090.444463    | 545.725870       | 1089.460447       | 545.233861       | A    | <b>570.335821</b>  | 285.671548        | 553.309272        | 277.158274       |                   |                  | 5  |
| 8  | 1220.555076        | 610.781176        | 1203.528527    | 602.267901       | 1202.544511       | 601.775893       | L    | <b>499.298707</b>  | 250.152991        | 482.272158        | 241.639717       |                   |                  | 4  |
| 9  | 1334.598003        | 667.802639        | 1317.571454    | 659.289365       | 1316.587438       | 658.797357       | N    | <b>386.214643</b>  | 193.610959        | 369.188094        | 185.097685       |                   |                  | 3  |
| 10 | 1431.650767        | 716.329021        | 1414.624218    | 707.815747       | 1413.640202       | 707.323739       | P    | <b>272.171716</b>  | 136.589496        | <b>255.145167</b> | 128.076221       |                   |                  | 2  |
| 11 |                    |                   |                |                  |                   |                  | R    | <b>175.118952</b>  | 88.063114         | 158.092403        | 79.549839        |                   |                  | 1  |

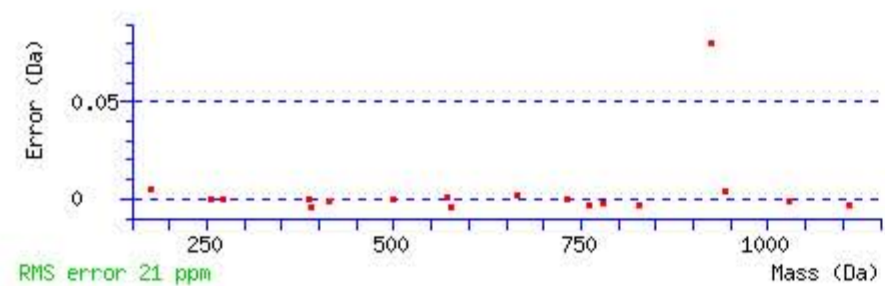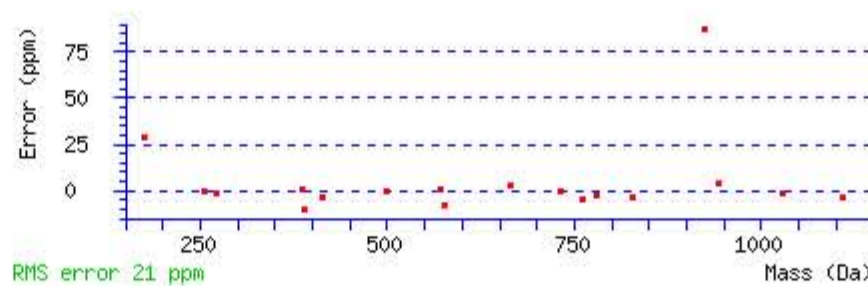

NCBI BLAST search of **QHSDPCALNPR**

(Parameters: blastp, nr protein database, expect=20000, no filter, PAM30)

Other BLAST [web gateways](#)

All matches to this query

| Score | Mr(calc):   | Delta     | Sequence                         |
|-------|-------------|-----------|----------------------------------|
| 50.6  | 1604.755157 | -0.006005 | <a href="#">QHSDPCALNPR</a>      |
| 5.7   | 1604.736725 | 0.012427  | <a href="#">EGMGWSYLVFLK</a>     |
| 4.2   | 1604.732529 | 0.016623  | <a href="#">GDVGDGRGDKQQGMAR</a> |
| 1.5   | 1604.772247 | -0.023095 | <a href="#">TDDIPVWDQEFLK</a>    |
| 0.4   | 1604.754288 | -0.005136 | <a href="#">GPSPASSSSSSPPAHR</a> |



# Mascot Search Results

## Peptide View

MS/MS Fragmentation of **ILDELLQTCVDPEDCPVCEVAGR**  
 Found in **VWF\_HUMAN**, von Willebrand factor OS=Homo sapiens GN=VWF PE=1 SV=4

Match to Query 46475: 2998.419972 from(1000.480600,3+) rtinseconds(2606) index(40196)  
 Title: Locus:1.1.1.3326.24 File:"2013-07-02 CLN FXIII 60 min 2nd F 3.wiff"  
 Data file C:\Program Files (x86)\Matrix Science\Mascot Daemon\mgf5 FXIII 60 min 2nd\mascot\_daemon\_merge.mgf

Click mouse within plot area to zoom in by factor of two about that point  
 Or, Plot from  to  Da   
 Label all possible matches  Label matches used for scoring

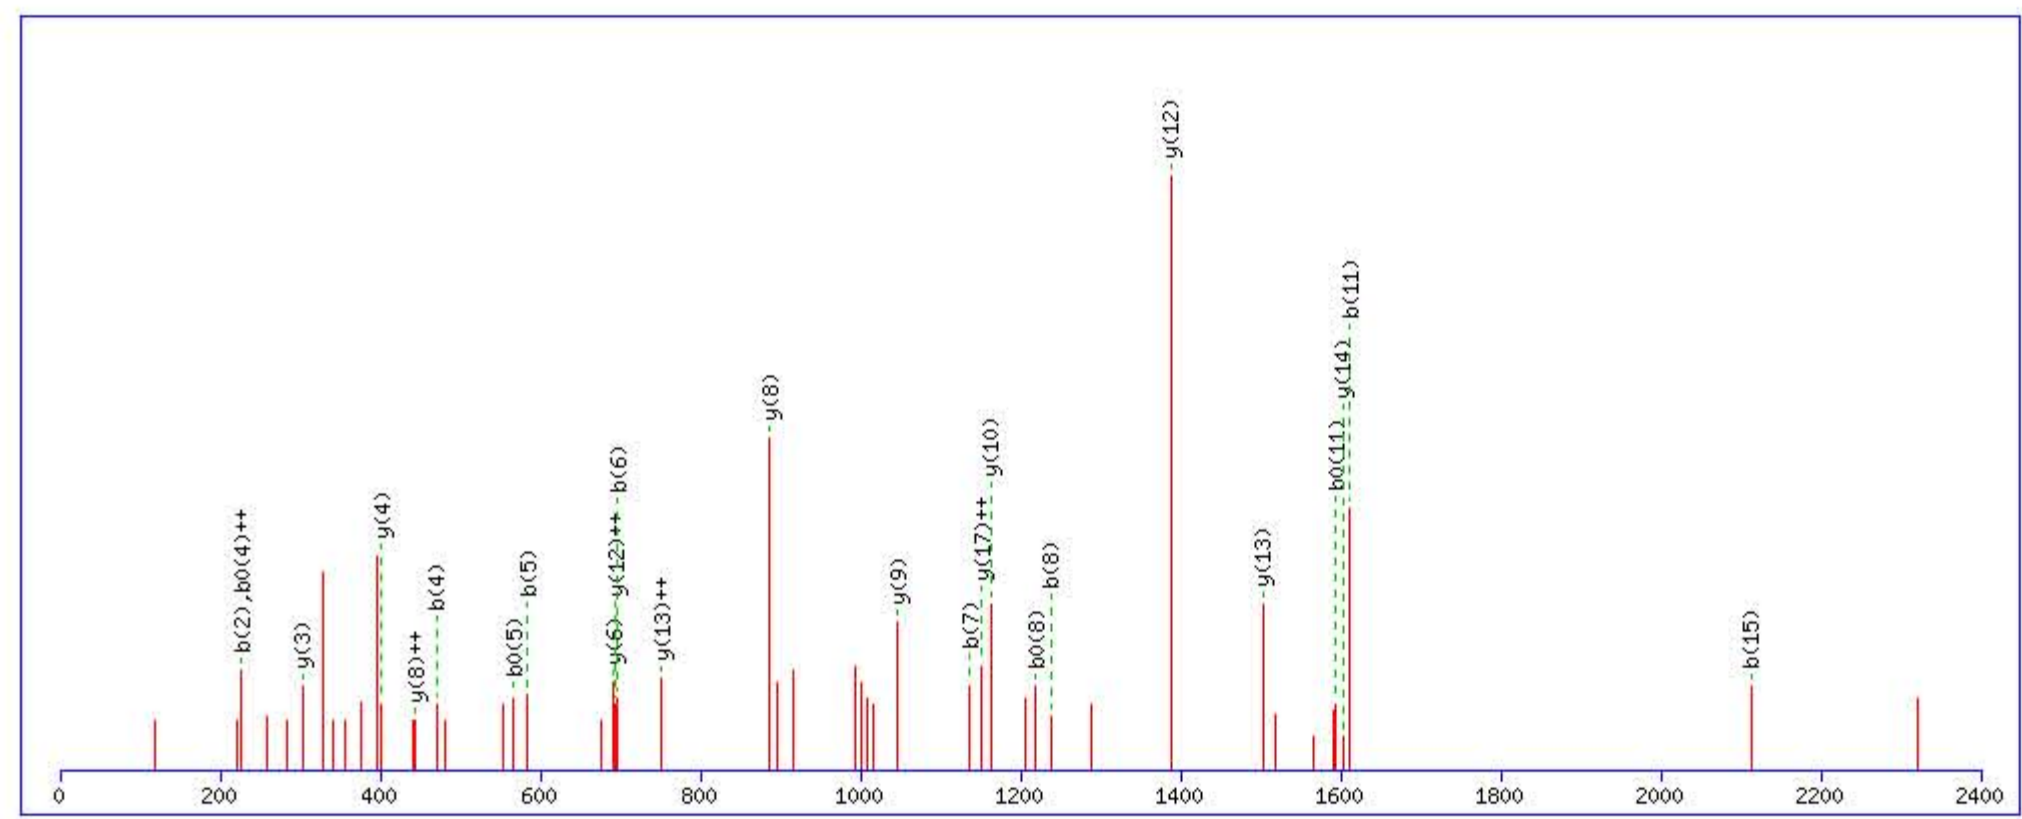

Monoisotopic mass of neutral peptide Mr(calc): 2998.390854  
 Fixed modifications: Carbamidomethyl (C) (apply to specified residues or termini only)  
 Variable modifications:  
 Q7 : Biotin:Thermo-21345 (Q)  
 Ions Score: 52 Expect: 0.00037  
 Matches : 25/240 fragment ions using 49 most intense peaks [\(help\)](#)

| #  | b                  | b <sup>++</sup> | b <sup>*</sup> | b <sup>***</sup> | b <sup>0</sup>     | b <sup>0++</sup>  | Seq. | y                  | y <sup>++</sup>    | y <sup>*</sup> | y <sup>***</sup> | y <sup>0</sup> | y <sup>0++</sup> | #  |
|----|--------------------|-----------------|----------------|------------------|--------------------|-------------------|------|--------------------|--------------------|----------------|------------------|----------------|------------------|----|
| 1  | 114.091340         | 57.549308       |                |                  |                    |                   | I    |                    |                    |                |                  |                |                  | 23 |
| 2  | <b>227.175404</b>  | 114.091340      |                |                  |                    |                   | L    | 2886.314052        | 1443.660664        | 2869.287503    | 1435.147389      | 2868.303487    | 1434.655381      | 22 |
| 3  | 342.202347         | 171.604811      |                |                  | 324.191782         | 162.599529        | D    | 2773.229988        | 1387.118632        | 2756.203439    | 1378.605357      | 2755.219423    | 1378.113349      | 21 |
| 4  | <b>471.244940</b>  | 236.126108      |                |                  | 453.234375         | <b>227.120826</b> | E    | 2658.203045        | 1329.605160        | 2641.176496    | 1321.091886      | 2640.192480    | 1320.599878      | 20 |
| 5  | <b>584.329004</b>  | 292.668140      |                |                  | <b>566.318439</b>  | 283.662858        | L    | 2529.160452        | 1265.083864        | 2512.133903    | 1256.570589      | 2511.149887    | 1256.078581      | 19 |
| 6  | <b>697.413068</b>  | 349.210172      |                |                  | 679.402503         | 340.204890        | L    | 2416.076388        | 1208.541832        | 2399.049839    | 1200.028557      | 2398.065823    | 1199.536549      | 18 |
| 7  | <b>1136.638394</b> | 568.822835      | 1119.611845    | 560.309561       | 1118.627829        | 559.817553        | Q    | 2302.992324        | <b>1151.999800</b> | 2285.965775    | 1143.486525      | 2284.981759    | 1142.994517      | 17 |
| 8  | <b>1237.686073</b> | 619.346675      | 1220.659524    | 610.833400       | <b>1219.675508</b> | 610.341392        | T    | 1863.766998        | 932.387137         | 1846.740449    | 923.873863       | 1845.756433    | 923.381855       | 16 |
| 9  | 1397.716722        | 699.361999      | 1380.690173    | 690.848725       | 1379.706157        | 690.356717        | C    | 1762.719319        | 881.863298         | 1745.692770    | 873.350023       | 1744.708754    | 872.858015       | 15 |
| 10 | 1496.785136        | 748.896206      | 1479.758587    | 740.382932       | 1478.774571        | 739.890924        | V    | <b>1602.688670</b> | 801.847973         | 1585.662121    | 793.334699       | 1584.678105    | 792.842691       | 14 |
| 11 | <b>1611.812079</b> | 806.409678      | 1594.785530    | 797.896403       | <b>1593.801514</b> | 797.404395        | D    | <b>1503.620256</b> | <b>752.313766</b>  | 1486.593707    | 743.800492       | 1485.609691    | 743.308483       | 13 |
| 12 | 1708.864843        | 854.936060      | 1691.838294    | 846.422785       | 1690.854278        | 845.930777        | P    | <b>1388.593313</b> | <b>694.800294</b>  | 1371.566764    | 686.287020       | 1370.582748    | 685.795012       | 12 |
| 13 | 1837.907436        | 919.457356      | 1820.880887    | 910.944082       | 1819.896871        | 910.452074        | E    | 1291.540549        | 646.273912         | 1274.514000    | 637.760638       | 1273.529984    | 637.268630       | 11 |
| 14 | 1952.934379        | 976.970828      | 1935.907830    | 968.457553       | 1934.923814        | 967.965545        | D    | <b>1162.497956</b> | 581.752616         | 1145.471407    | 573.239342       | 1144.487391    | 572.747333       | 10 |
| 15 | <b>2112.965028</b> | 1056.986152     | 2095.938479    | 1048.472877      | 2094.954463        | 1047.980869       | C    | <b>1047.471013</b> | 524.239144         | 1030.444464    | 515.725870       | 1029.460448    | 515.233862       | 9  |
| 16 | 2210.017792        | 1105.512534     | 2192.991243    | 1096.999259      | 2192.007227        | 1096.507251       | P    | <b>887.440364</b>  | <b>444.223820</b>  | 870.413815     | 435.710545       | 869.429799     | 435.218537       | 8  |
| 17 | 2309.086206        | 1155.046741     | 2292.059657    | 1146.533466      | 2291.075641        | 1146.041458       | V    | 790.387600         | 395.697438         | 773.361051     | 387.184163       | 772.377035     | 386.692155       | 7  |
| 18 | 2469.116855        | 1235.062065     | 2452.090306    | 1226.548791      | 2451.106290        | 1226.056783       | C    | <b>691.319186</b>  | 346.163231         | 674.292637     | 337.649956       | 673.308621     | 337.157948       | 6  |
| 19 | 2598.159448        | 1299.583362     | 2581.132899    | 1291.070087      | 2580.148883        | 1290.578079       | E    | 531.288537         | 266.147907         | 514.261988     | 257.634632       | 513.277972     | 257.142624       | 5  |
| 20 | 2697.227862        | 1349.117569     | 2680.201313    | 1340.604294      | 2679.217297        | 1340.112286       | V    | <b>402.245944</b>  | 201.626610         | 385.219395     | 193.113335       |                |                  | 4  |
| 21 | 2768.264976        | 1384.636126     | 2751.238427    | 1376.122851      | 2750.254411        | 1375.630843       | A    | <b>303.177530</b>  | 152.092403         | 286.150981     | 143.579129       |                |                  | 3  |
| 22 | 2825.286440        | 1413.146858     | 2808.259891    | 1404.633583      | 2807.275875        | 1404.141575       | G    | 232.140416         | 116.573846         | 215.113867     | 108.060571       |                |                  | 2  |
| 23 |                    |                 |                |                  |                    |                   | R    | 175.118952         | 88.063114          | 158.092403     | 79.549839        |                |                  | 1  |

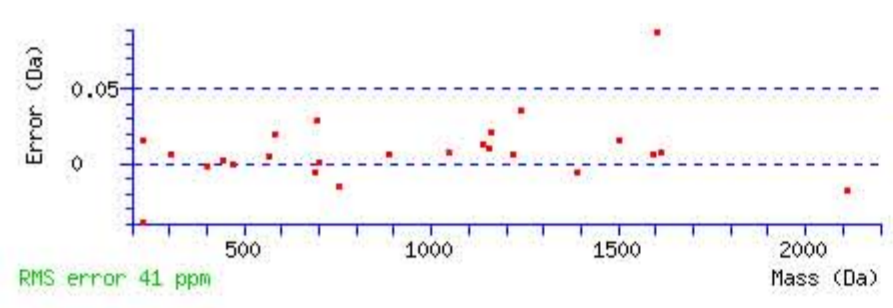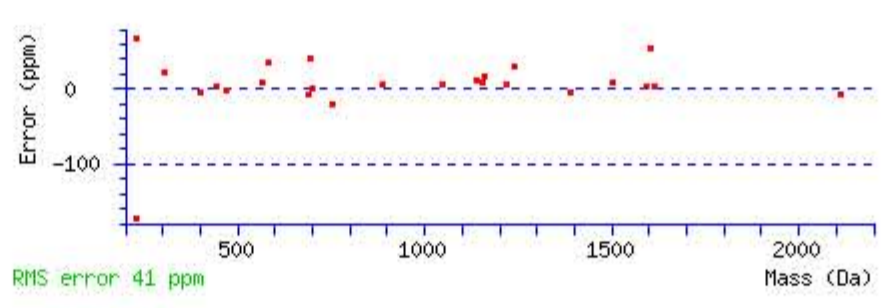

NCBI BLAST search of **ILDELLQTCVDPEDCPVCEVAGR**  
 (Parameters: blastp, nr protein database, expect=20000, no filter, PAM30)  
 Other BLAST [web gateways](#)

### All matches to this query

| Score | Mr(calc):   | Delta    | Sequence                                |
|-------|-------------|----------|-----------------------------------------|
| 52.0  | 2998.390854 | 0.029118 | <a href="#">ILDELLQTCVDPEDCPVCEVAGR</a> |



# MASCOT SCIENCE Mascot Search Results

## Peptide View

MS/MS Fragmentation of **VAQCSQKPCEDSCR**

Found in **VWF\_HUMAN**, von Willebrand factor OS=Homo sapiens GN=VWF PE=1 SV=4

Match to Query 47961: 2034.870492 from(679.297440,3+) rtinseconds(1158) index(31220)

Title: Locus:1.1.1.2822.18 File:"2013-07-02 CLN FXIII 60 min 2nd F 3.wiff"

Data file C:\Program Files (x86)\Matrix Science\Mascot Daemon\mgf\5 FXIII 60 min 2nd\mascot\_daemon\_merge.mgf

Click mouse within plot area to zoom in by factor of two about that point

Or, Plot from  to  Da

Label all possible matches  Label matches used for scoring

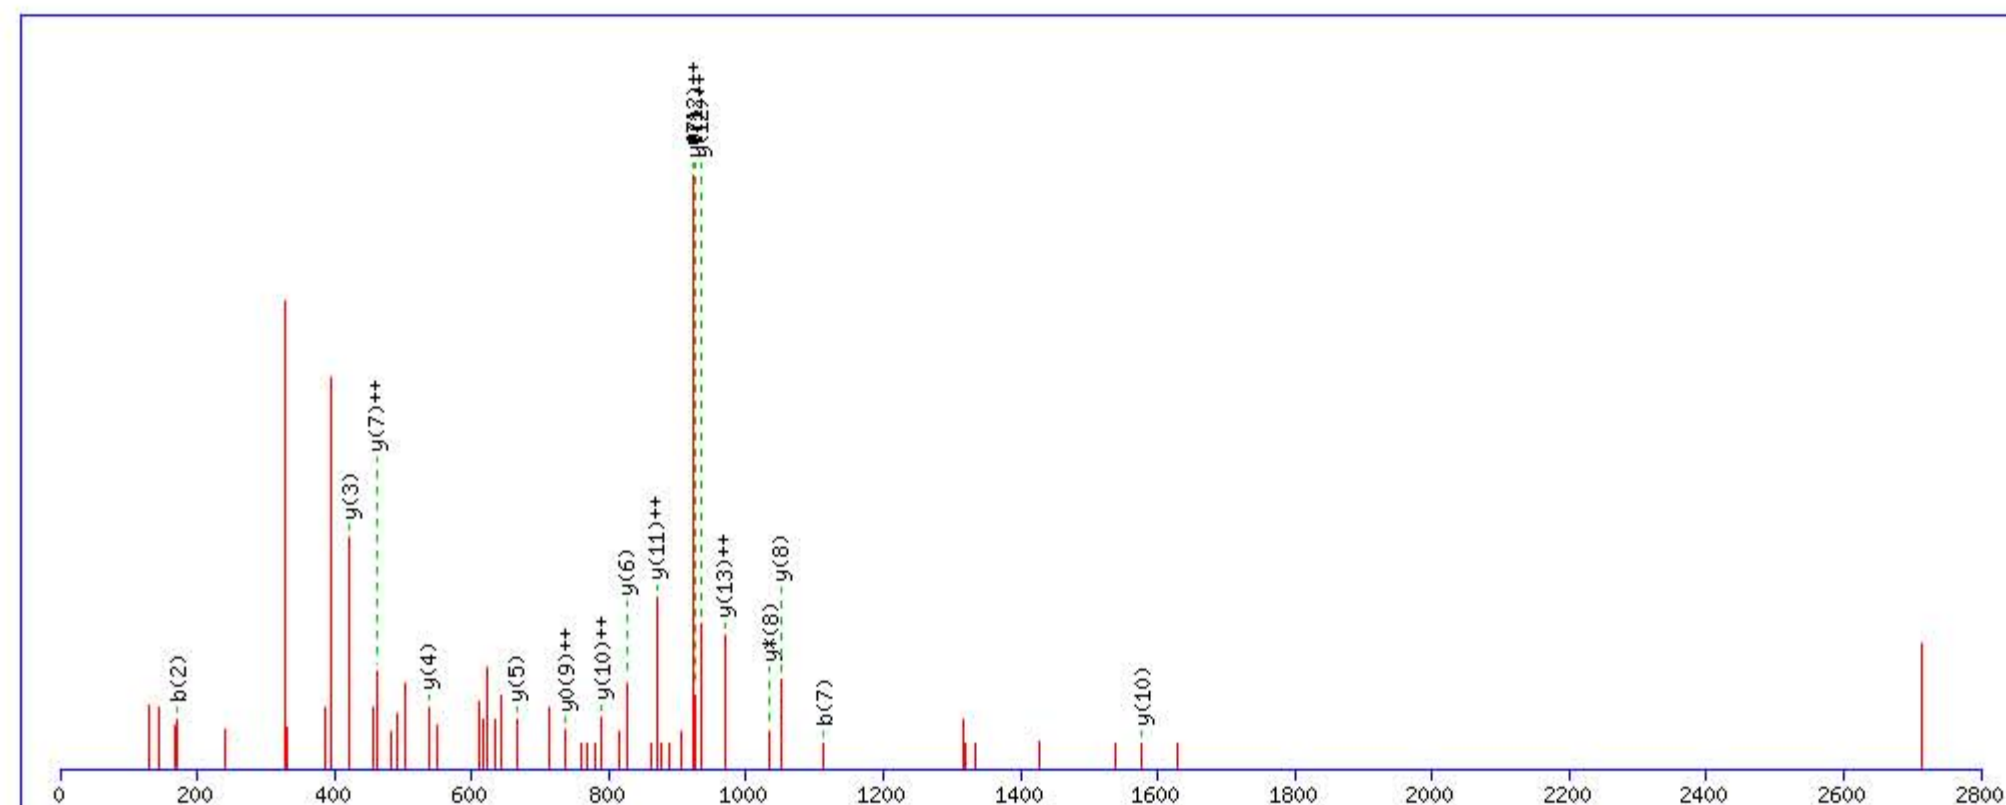

Monoisotopic mass of neutral peptide Mr(calc): 2034.874374

Fixed modifications: Carbamidomethyl (C) (apply to specified residues or termini only)

Variable modifications:

Q6 : Biotin:Thermo-21345 (Q)

Ions Score: 30 Expect: 0.0036

Matches : 18/140 fragment ions using 42 most intense peaks [\(help\)](#)

| #  | b                  | b <sup>++</sup> | b <sup>+</sup> | b <sup>+++</sup> | b <sup>0</sup> | b <sup>0++</sup> | Seq. | y                  | y <sup>++</sup>   | y <sup>+</sup>     | y <sup>+++</sup>  | y <sup>0</sup> | y <sup>0++</sup>  | #  |
|----|--------------------|-----------------|----------------|------------------|----------------|------------------|------|--------------------|-------------------|--------------------|-------------------|----------------|-------------------|----|
| 1  | 100.075690         | 50.541483       |                |                  |                |                  | V    |                    |                   |                    |                   |                |                   | 14 |
| 2  | <b>171.112804</b>  | 86.060040       |                |                  |                |                  | A    | 1936.813236        | <b>968.910256</b> | 1919.786687        | 960.396982        | 1918.802671    | 959.904973        | 13 |
| 3  | 299.171382         | 150.089329      | 282.144833     | 141.576055       |                |                  | Q    | 1865.776122        | <b>933.391699</b> | 1848.749573        | <b>924.878425</b> | 1847.765557    | <b>924.386417</b> | 12 |
| 4  | 459.202031         | 230.104653      | 442.175482     | 221.591379       |                |                  | C    | 1737.717544        | <b>869.362410</b> | 1720.690995        | 860.849136        | 1719.706979    | 860.357128        | 11 |
| 5  | 546.234059         | 273.620668      | 529.207510     | 265.107393       | 528.223494     | 264.615385       | S    | <b>1577.686895</b> | <b>789.347086</b> | 1560.660346        | 780.833811        | 1559.676330    | 780.341803        | 10 |
| 6  | 985.459385         | 493.233331      | 968.432836     | 484.720056       | 967.448820     | 484.228048       | Q    | 1490.654867        | 745.831072        | 1473.628318        | 737.317797        | 1472.644302    | <b>736.825789</b> | 9  |
| 7  | <b>1113.554348</b> | 557.280812      | 1096.527799    | 548.767538       | 1095.543783    | 548.275529       | K    | <b>1051.429541</b> | 526.218409        | <b>1034.402992</b> | 517.705134        | 1033.418976    | 517.213126        | 8  |
| 8  | 1210.607112        | 605.807194      | 1193.580563    | 597.293920       | 1192.596547    | 596.801911       | P    | <b>923.334578</b>  | <b>462.170927</b> | 906.308029         | 453.657653        | 905.324013     | 453.165645        | 7  |
| 9  | 1370.637761        | 685.822519      | 1353.611212    | 677.309244       | 1352.627196    | 676.817236       | C    | <b>826.281814</b>  | 413.644545        | 809.255265         | 405.131271        | 808.271249     | 404.639263        | 6  |
| 10 | 1499.680354        | 750.343815      | 1482.653805    | 741.830540       | 1481.669789    | 741.338532       | E    | <b>666.251165</b>  | 333.629221        | 649.224616         | 325.115946        | 648.240600     | 324.623938        | 5  |
| 11 | 1614.707297        | 807.857286      | 1597.680748    | 799.344012       | 1596.696732    | 798.852004       | D    | <b>537.208572</b>  | 269.107924        | 520.182023         | 260.594650        | 519.198007     | 260.102642        | 4  |
| 12 | 1701.739325        | 851.373301      | 1684.712776    | 842.860026       | 1683.728760    | 842.368018       | S    | <b>422.181629</b>  | 211.594453        | 405.155080         | 203.081178        | 404.171064     | 202.589170        | 3  |
| 13 | 1861.769974        | 931.388625      | 1844.743425    | 922.875351       | 1843.759409    | 922.383343       | C    | 335.149601         | 168.078438        | 318.123052         | 159.565164        |                |                   | 2  |
| 14 |                    |                 |                |                  |                |                  | R    | 175.118952         | 88.063114         | 158.092403         | 79.549839         |                |                   | 1  |

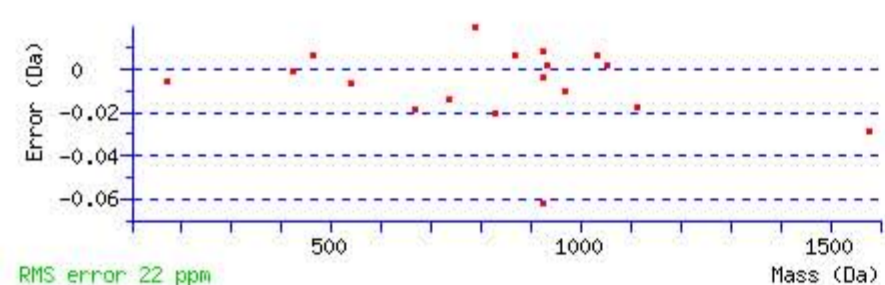

RMS error 22 ppm

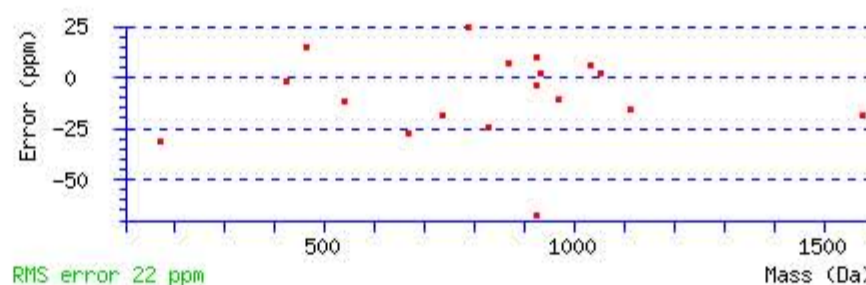

RMS error 22 ppm

NCBI BLAST search of **VAQCSQKPCEDSCR**

(Parameters: blastp, nr protein database, expect=20000, no filter, PAM30)

Other BLAST [web gateways](#)

All matches to this query

| Score | Mr(calc):   | Delta     | Sequence                       |
|-------|-------------|-----------|--------------------------------|
| 30.1  | 2034.874374 | -0.003882 | <a href="#">VAQCSQKPCEDSCR</a> |
| 24.1  | 2034.874374 | -0.003882 | <a href="#">VAQCSQKPCEDSCR</a> |

Mascot: <http://www.matrixscience.com/>



# Mascot Search Results

## Peptide View

MS/MS Fragmentation of **HGAGVAMDGQDVQLPLLK**

Found in **VWF\_HUMAN**, von Willebrand factor OS=Homo sapiens GN=VWF PE=1 SV=4

Match to Query 50130: 2159.133072 from(720.718300,3+) rtinseconds(2357) index(38595)

Title: Locus:1.1.1.3240.20 File:"2013-07-02 CLN FXIII 60 min 2nd F 3.wiff"

Data file C:\Program Files (x86)\Matrix Science\Mascot Daemon\mgf5 FXIII 60 min 2nd\mascot\_daemon\_merge.mgf

Click mouse within plot area to zoom in by factor of two about that point

Or, Plot from  to  Da

Label all possible matches  Label matches used for scoring

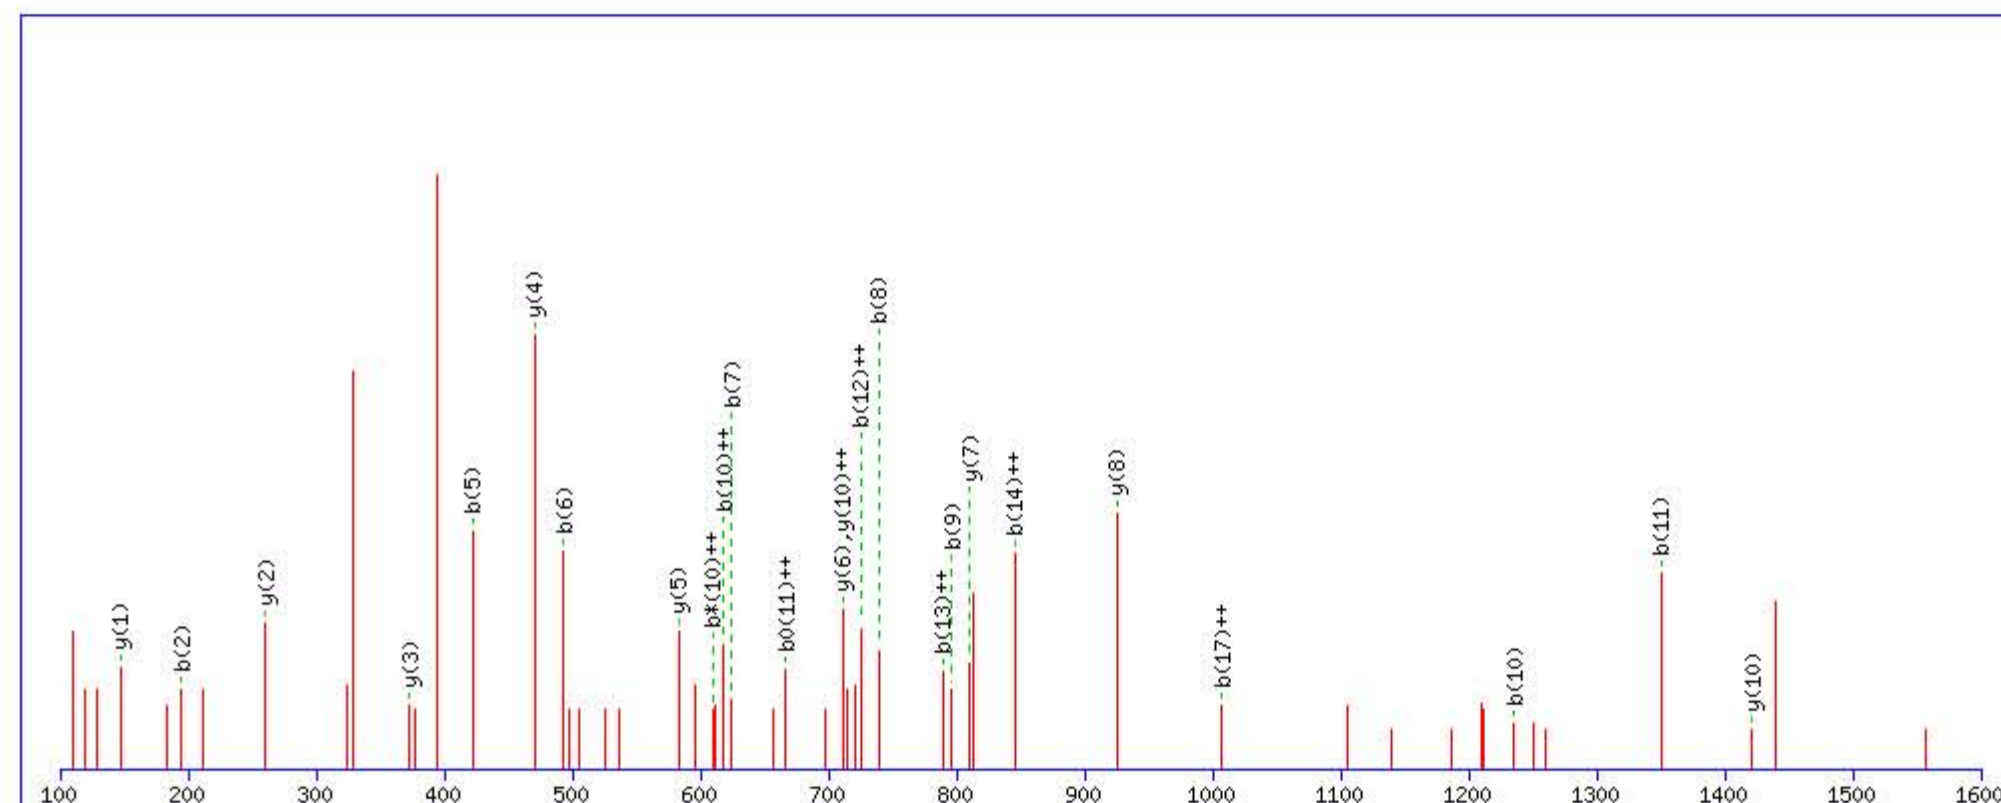

Monoisotopic mass of neutral peptide Mr(calc): 2159.123123

Fixed modifications: Carbamidomethyl (C) (apply to specified residues or termini only)

Variable modifications:

Q10 : Biotin:Thermo-21345 (Q)

Ions Score: 47 Expect: 5.6e-005

Matches : 25/158 fragment ions using 55 most intense peaks [\(help\)](#)

| #  | b                  | b <sup>++</sup>    | b <sup>*</sup> | b <sup>*++</sup>  | b <sup>0</sup> | b <sup>0++</sup>  | Seq. | y                  | y <sup>++</sup>   | y <sup>*</sup> | y <sup>*++</sup> | y <sup>0</sup> | y <sup>0++</sup> | #  |
|----|--------------------|--------------------|----------------|-------------------|----------------|-------------------|------|--------------------|-------------------|----------------|------------------|----------------|------------------|----|
| 1  | 138.066188         | 69.536732          |                |                   |                |                   | H    |                    |                   |                |                  |                |                  | 18 |
| 2  | <b>195.087652</b>  | 98.047464          |                |                   |                |                   | G    | 2023.071483        | 1012.039380       | 2006.044934    | 1003.526105      | 2005.060918    | 1003.034097      | 17 |
| 3  | 266.124766         | 133.566021         |                |                   |                |                   | A    | 1966.050019        | 983.528648        | 1949.023470    | 975.015373       | 1948.039454    | 974.523365       | 16 |
| 4  | 323.146230         | 162.076753         |                |                   |                |                   | G    | 1895.012905        | 948.010091        | 1877.986356    | 939.496816       | 1877.002340    | 939.004808       | 15 |
| 5  | <b>422.214644</b>  | 211.610960         |                |                   |                |                   | V    | 1837.991441        | 919.499359        | 1820.964892    | 910.986084       | 1819.980876    | 910.494076       | 14 |
| 6  | <b>493.251758</b>  | 247.129517         |                |                   |                |                   | A    | 1738.923027        | 869.965152        | 1721.896478    | 861.451877       | 1720.912462    | 860.959869       | 13 |
| 7  | <b>624.292243</b>  | 312.649760         |                |                   |                |                   | M    | 1667.885913        | 834.446595        | 1650.859364    | 825.933320       | 1649.875348    | 825.441312       | 12 |
| 8  | <b>739.319186</b>  | 370.163231         |                |                   | 721.308621     | 361.157948        | D    | 1536.845428        | 768.926352        | 1519.818879    | 760.413078       | 1518.834863    | 759.921070       | 11 |
| 9  | <b>796.340650</b>  | 398.673963         |                |                   | 778.330085     | 389.668680        | G    | <b>1421.818485</b> | <b>711.412881</b> | 1404.791936    | 702.899606       | 1403.807920    | 702.407598       | 10 |
| 10 | <b>1235.565976</b> | <b>618.286626</b>  | 1218.539427    | <b>609.773352</b> | 1217.555411    | 609.281344        | Q    | 1364.797021        | 682.902149        | 1347.770472    | 674.388874       | 1346.786456    | 673.896866       | 9  |
| 11 | <b>1350.592919</b> | 675.800098         | 1333.566370    | 667.286823        | 1332.582354    | <b>666.794815</b> | D    | <b>925.571695</b>  | 463.289486        | 908.545146     | 454.776211       | 907.561130     | 454.284203       | 8  |
| 12 | 1449.661333        | <b>725.334305</b>  | 1432.634784    | 716.821030        | 1431.650768    | 716.329022        | V    | <b>810.544752</b>  | 405.776014        | 793.518203     | 397.262740       |                |                  | 7  |
| 13 | 1577.719911        | <b>789.363594</b>  | 1560.693362    | 780.850319        | 1559.709346    | 780.358311        | Q    | <b>711.476338</b>  | 356.241807        | 694.449789     | 347.728533       |                |                  | 6  |
| 14 | 1690.803975        | <b>845.905626</b>  | 1673.777426    | 837.392351        | 1672.793410    | 836.900343        | L    | <b>583.417760</b>  | 292.212518        | 566.391211     | 283.699244       |                |                  | 5  |
| 15 | 1787.856739        | 894.432008         | 1770.830190    | 885.918733        | 1769.846174    | 885.426725        | P    | <b>470.333696</b>  | 235.670486        | 453.307147     | 227.157212       |                |                  | 4  |
| 16 | 1900.940803        | 950.974040         | 1883.914254    | 942.460765        | 1882.930238    | 941.968757        | L    | <b>373.280932</b>  | 187.144104        | 356.254383     | 178.630830       |                |                  | 3  |
| 17 | 2014.024867        | <b>1007.516072</b> | 1996.998318    | 999.002797        | 1996.014302    | 998.510789        | L    | <b>260.196868</b>  | 130.602072        | 243.170319     | 122.088798       |                |                  | 2  |
| 18 |                    |                    |                |                   |                |                   | K    | <b>147.112804</b>  | 74.060040         | 130.086255     | 65.546766        |                |                  | 1  |

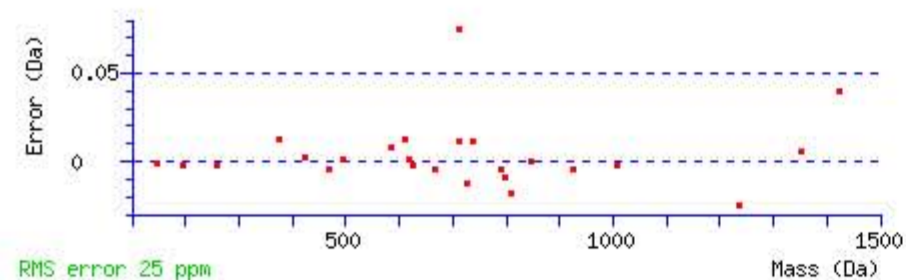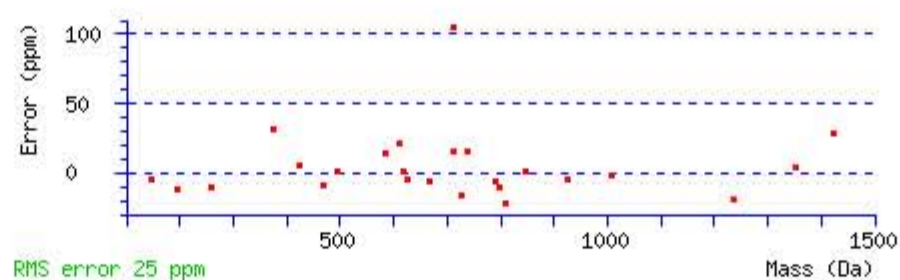

NCBI BLAST search of **HGAGVAMDGQDVQLPLLK**

(Parameters: blastp, nr protein database, expect=20000, no filter, PAM30)

Other BLAST [web gateways](#)

All matches to this query

| Score | Mr(calc):   | Delta     | Sequence                           |
|-------|-------------|-----------|------------------------------------|
| 47.0  | 2159.123123 | 0.009949  | <a href="#">HGAGVAMDGQDVQLPLLK</a> |
| 20.4  | 2159.123123 | 0.009949  | <a href="#">HGAGVAMDGQDVQLPLLK</a> |
| 1.6   | 2159.161957 | -0.028885 | <a href="#">ILQDQILTSKQKELEMAR</a> |
| 0.7   | 2159.112350 | 0.020722  | <a href="#">AAQATGEFEVFNGLVHSK</a> |

Mascot: <http://www.matrixscience.com/>
